# Supplementary material
Source: PubMed Central journal article supplement (PMC4256508)
Supplement: supp_M114.039081_mcp.M114.039081-7.pdf [file supp_M114.039081_mcp.M114.039081-7.pdf]

## Non-labeled samples (Target)

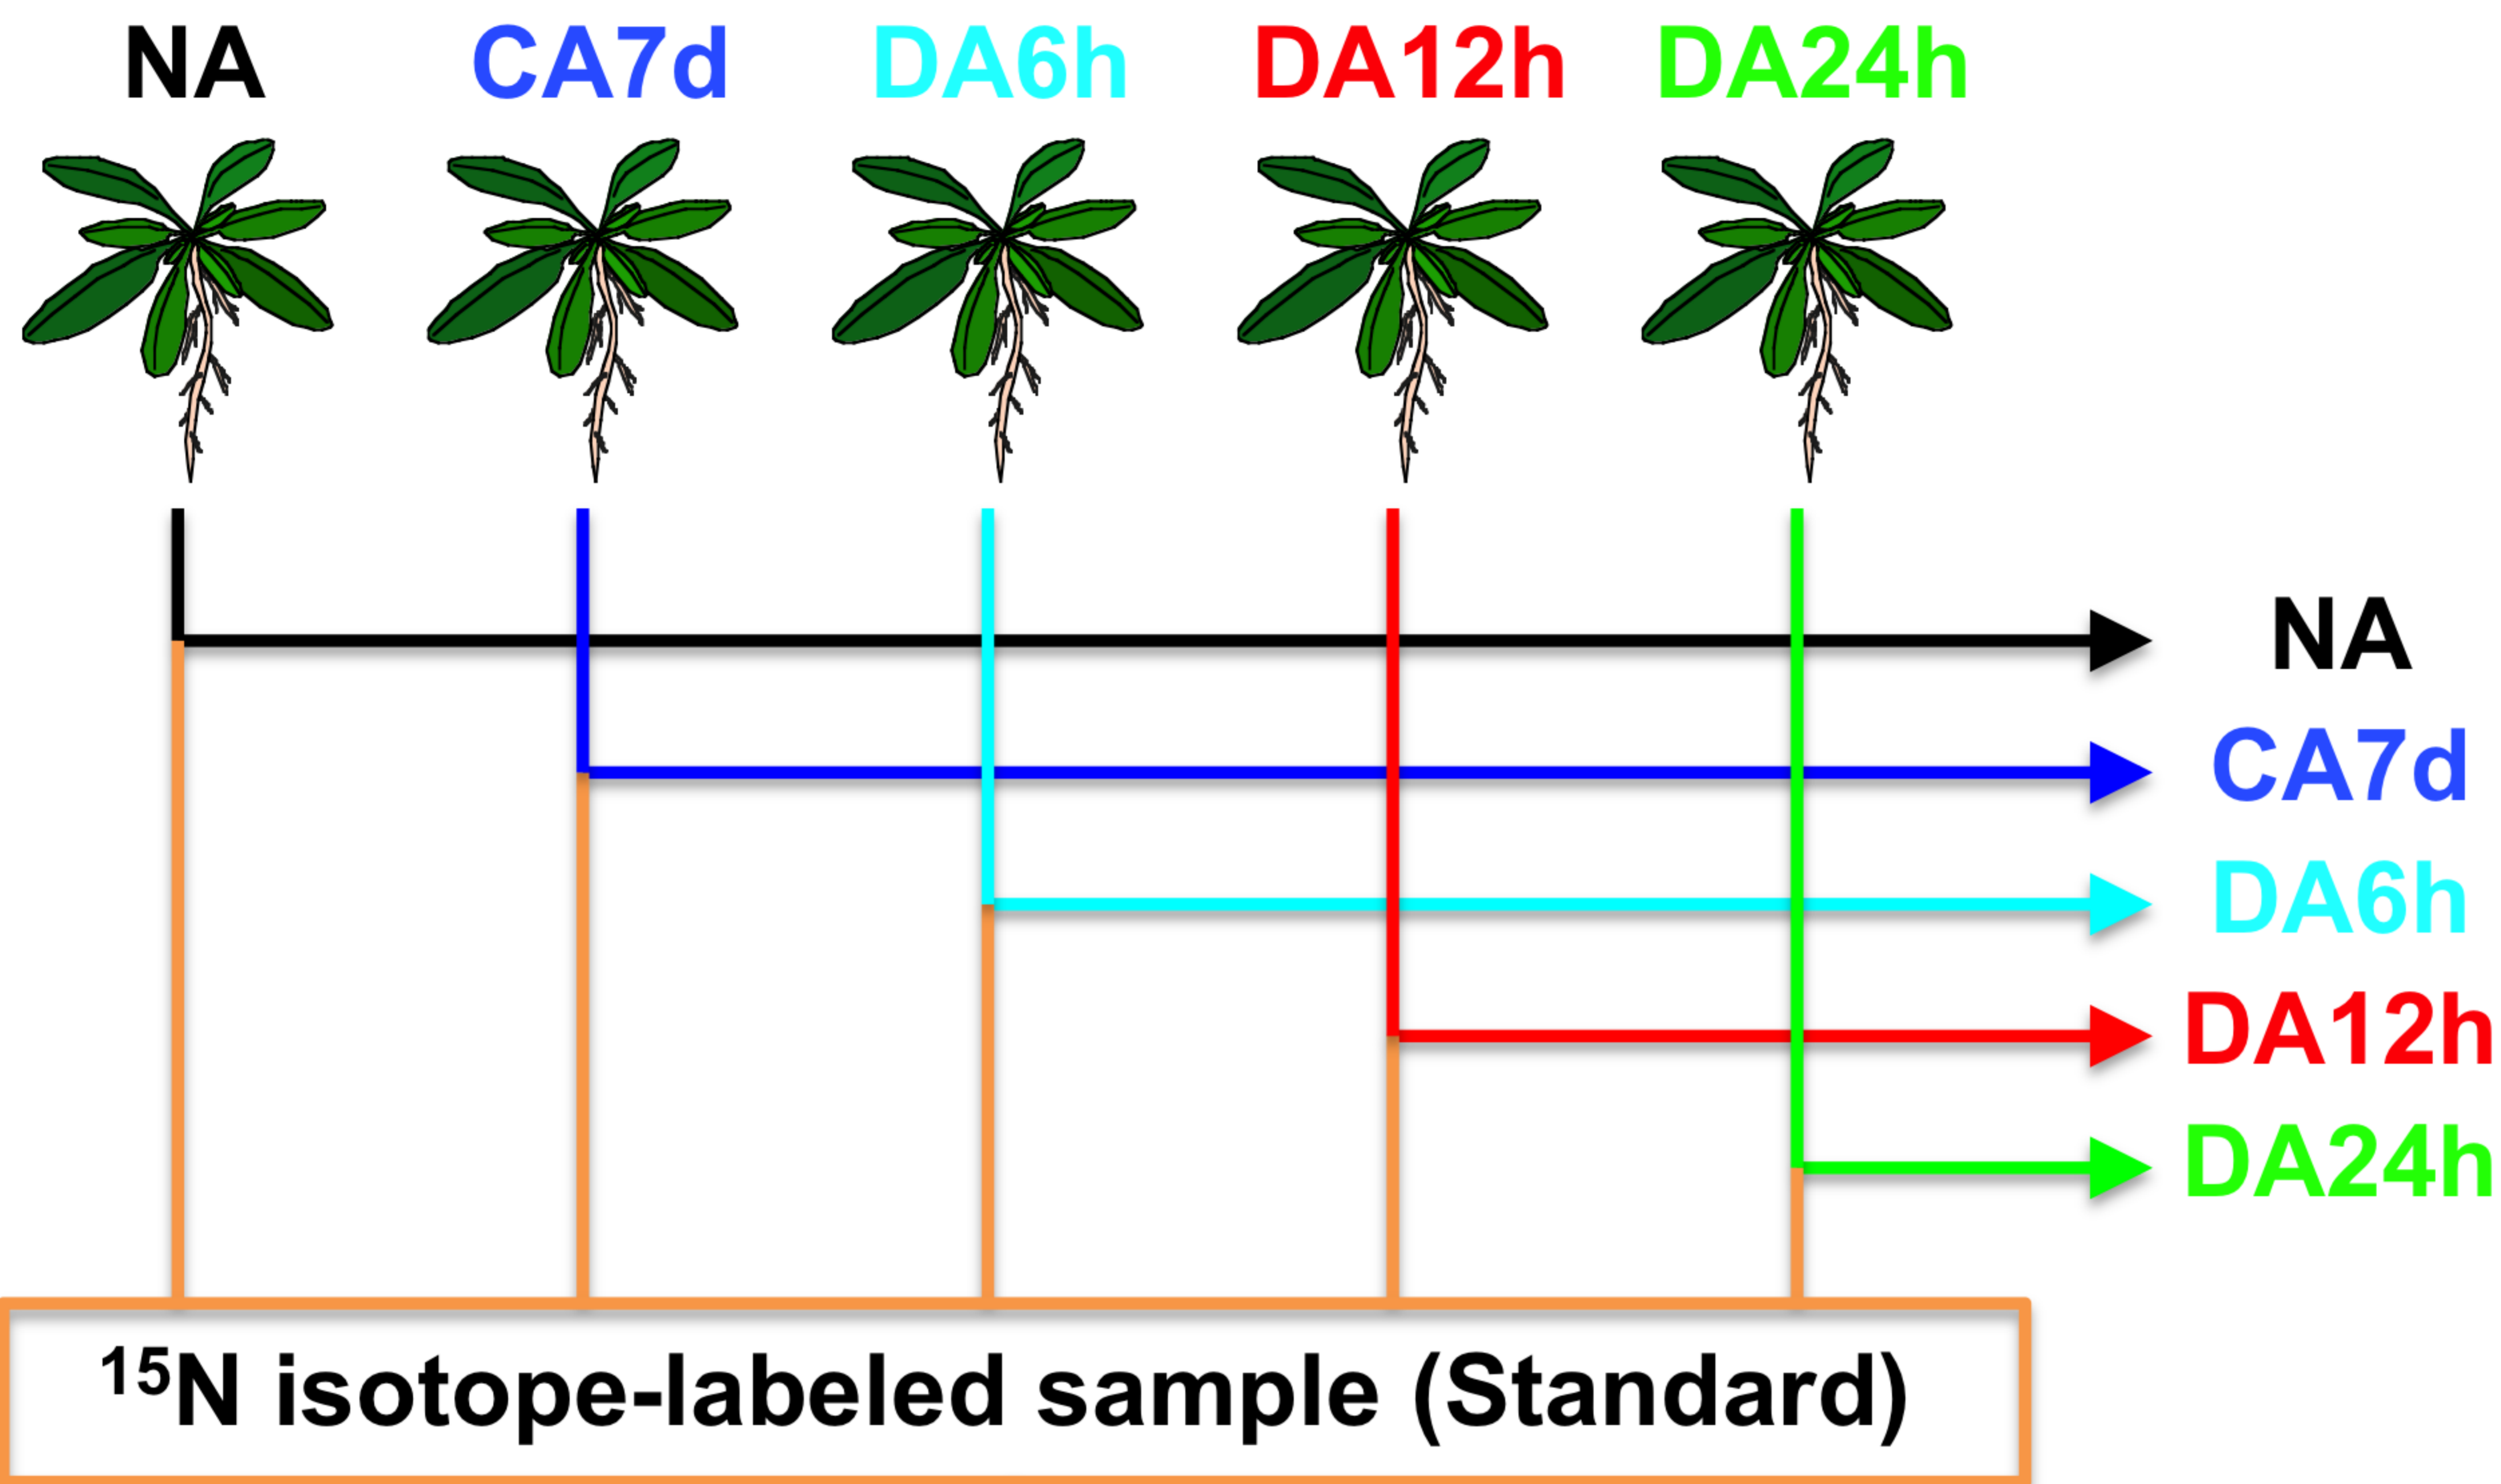

## LC-MS/MS

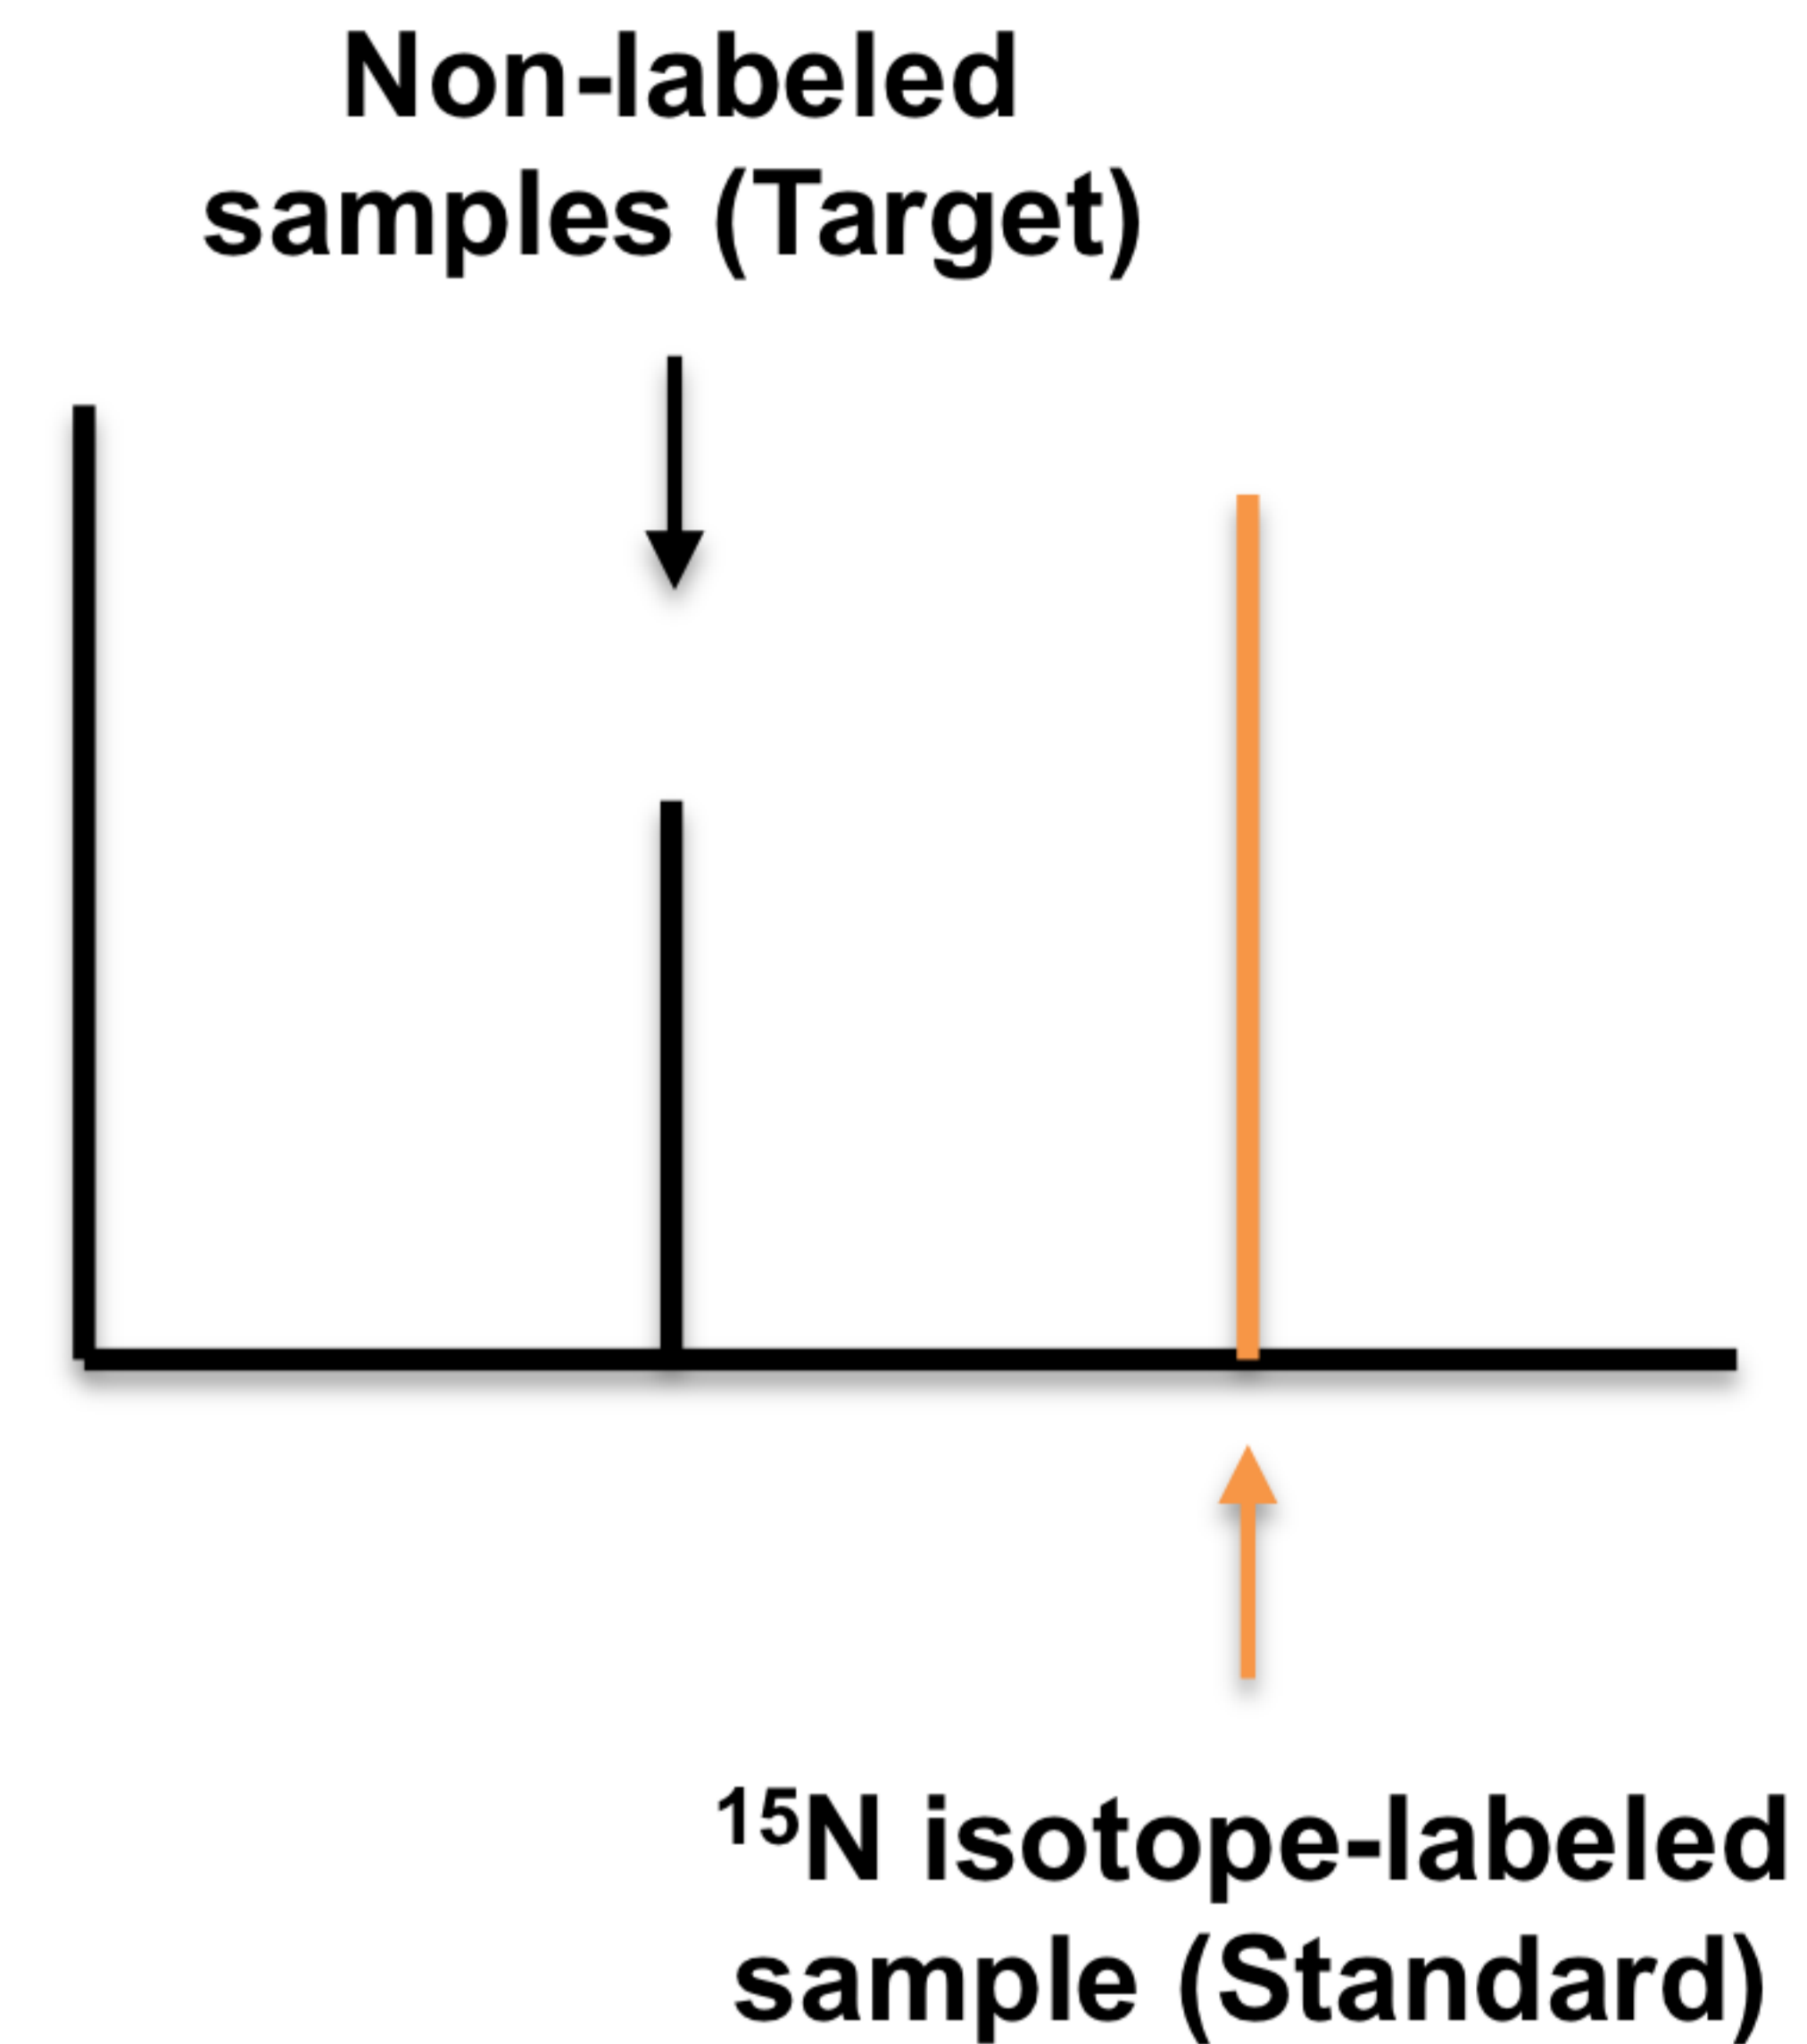

## $^{15}\text{N}$ isotope-labeled

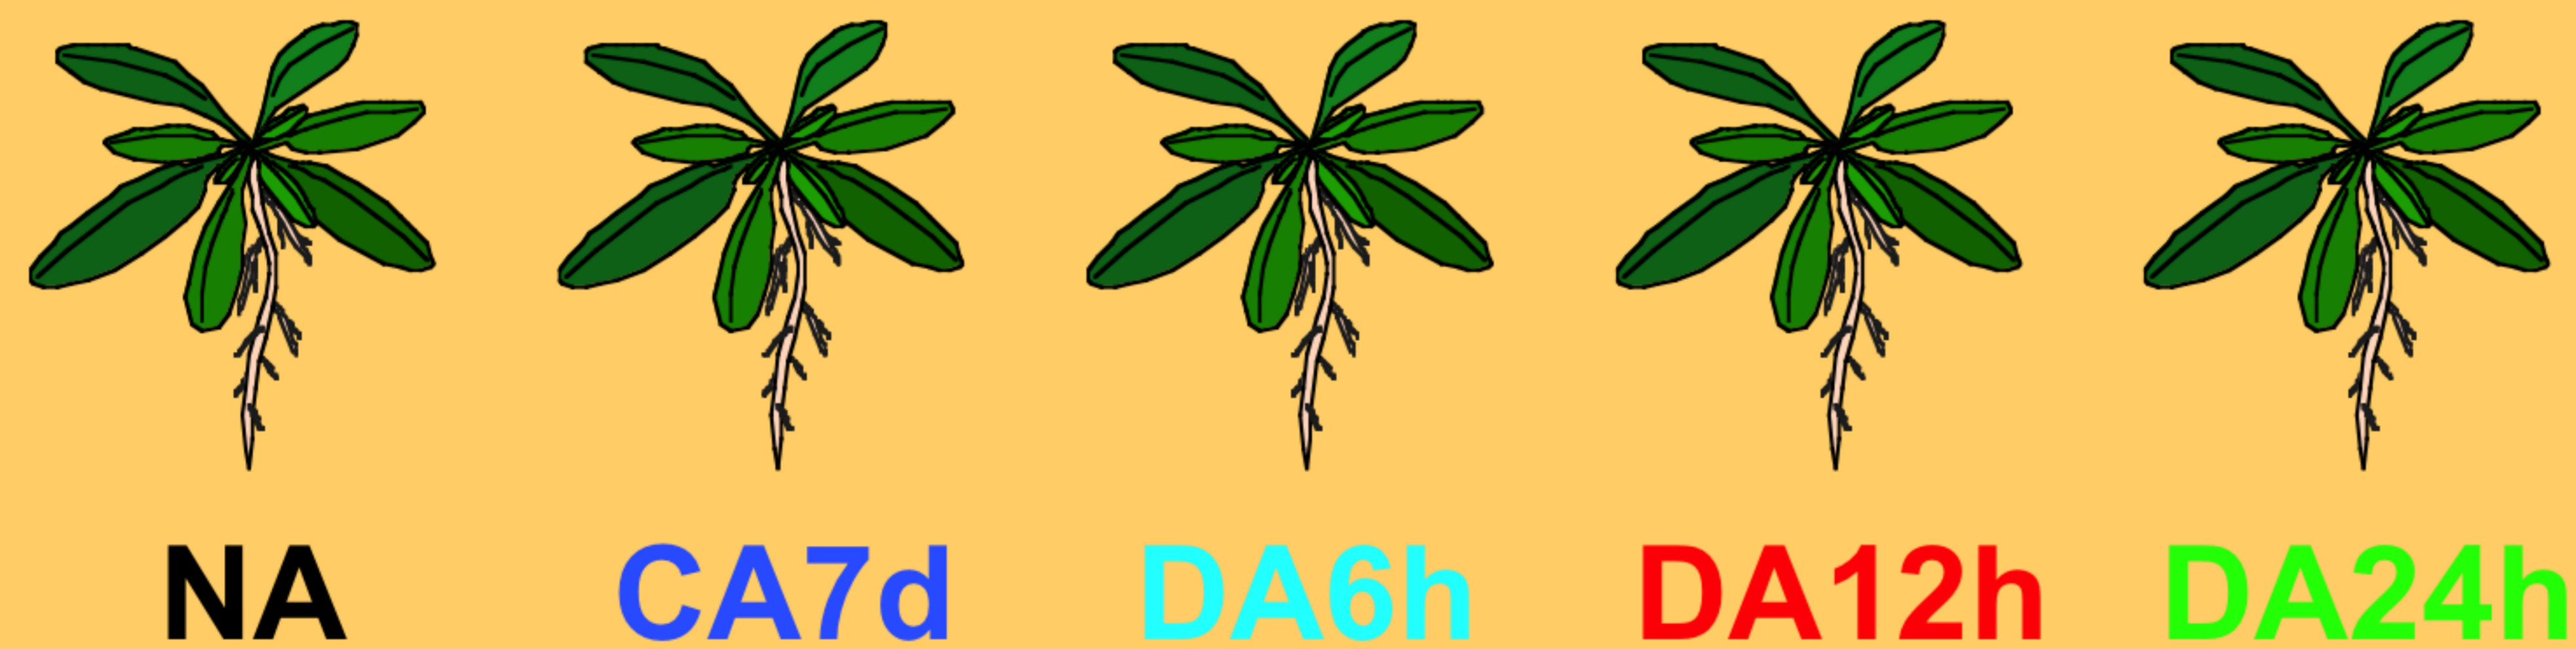

**Supplementary Figure S1.** Sample preparation scheme for quantitative shotgun proteomics.  $^{15}\text{N}$  isotope-labeled samples were prepared for all 5 points of time course, NA, CA7d, DA6h, DA12h and DA24h, as well as non-labeled samples. Equal amount of the  $^{15}\text{N}$  labeled-samples were mixed as a standard sample. The non-labeled samples were spiked with equal amount of the standard sample and analyzed by LC-MS/MS. Peptide peak areas were quantified and relative peptide abundances were calculated by using peak heights of corresponding  $^{15}\text{N}$  labeled peptides as standards.
