# Supplementary material
Source: PubMed Central journal article supplement (PMC4256508)
Supplement: supp_M114.039081_mcp.M114.039081-8.pdf [file supp_M114.039081_mcp.M114.039081-8.pdf]

**Peptide View**MS/MS Fragmentation of **IIAVCVDDPEYK**

Found in **AT1G01050.1** in **TAIR\_Arabidopsis**, Symbols: ATPPA1 | ATPPA1 (ARABIDOPSIS THALIANA PYROPHOSPHORYLASE 1); inorganic diphosphatase/ pyrophosphatase | chr1:31382-32670 REVERSE

Match to Query 5491: 1420.689784 from(711.352168,2+) index(4906)

Title: Elution from: 43.024 to 43.024 scan no 6142 cid35.00 polarity:+

Data file D1d-3\_3.mgf

Click mouse within plot area to zoom in by factor of two about that point

Or,   to  Da

Label all possible matches  Label matches used for scoring

Show Y-axis

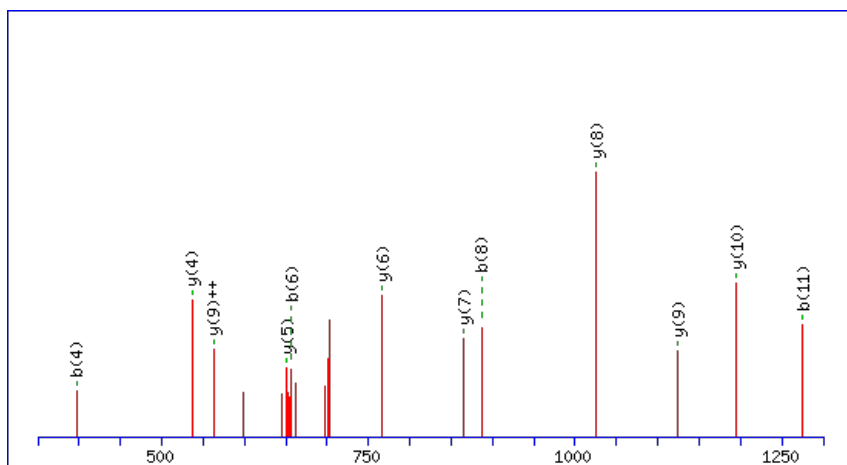

**Monoisotopic mass of neutral peptide Mr(calc):** 1420.6908

**Fixed modifications:** Carbamidomethyl (C) (apply to specified residues or termini only)

**Ions Score:** 68 **Expect:** 7e-007

**Matches:** 12/94 fragment ions using 13 most intense peaks ([help](#))

| #  | b                | b <sup>++</sup> | b <sup>0</sup> | b <sup>0++</sup> | Seq. | y                | y <sup>++</sup> | y*        | y <sup>*++</sup> | y <sup>0</sup> | y <sup>0++</sup> | #  |
|----|------------------|-----------------|----------------|------------------|------|------------------|-----------------|-----------|------------------|----------------|------------------|----|
| 1  | 114.0913         | 57.5493         |                |                  | I    |                  |                 |           |                  |                |                  | 12 |
| 2  | 227.1754         | 114.0913        |                |                  | I    | 1308.6140        | 654.8107        | 1291.5875 | 646.2974         | 1290.6035      | 645.8054         | 11 |
| 3  | 298.2125         | 149.6099        |                |                  | A    | <b>1195.5300</b> | 598.2686        | 1178.5034 | 589.7553         | 1177.5194      | 589.2633         | 10 |
| 4  | <b>397.2809</b>  | 199.1441        |                |                  | V    | <b>1124.4929</b> | <b>562.7501</b> | 1107.4663 | 554.2368         | 1106.4823      | 553.7448         | 9  |
| 5  | 557.3116         | 279.1594        |                |                  | C    | <b>1025.4244</b> | 513.2159        | 1008.3979 | 504.7026         | 1007.4139      | 504.2106         | 8  |
| 6  | <b>656.3800</b>  | 328.6936        |                |                  | V    | <b>865.3938</b>  | 433.2005        | 848.3672  | 424.6873         | 847.3832       | 424.1953         | 7  |
| 7  | 771.4069         | 386.2071        | 753.3964       | 377.2018         | D    | <b>766.3254</b>  | 383.6663        | 749.2988  | 375.1531         | 748.3148       | 374.6610         | 6  |
| 8  | <b>886.4339</b>  | 443.7206        | 868.4233       | 434.7153         | D    | <b>651.2984</b>  | 326.1529        | 634.2719  | 317.6396         | 633.2879       | 317.1476         | 5  |
| 9  | 983.4866         | 492.2470        | 965.4761       | 483.2417         | P    | <b>536.2715</b>  | 268.6394        | 519.2449  | 260.1261         | 518.2609       | 259.6341         | 4  |
| 10 | 1112.5292        | 556.7683        | 1094.5187      | 547.7630         | E    | 439.2187         | 220.1130        | 422.1922  | 211.5997         | 421.2082       | 211.1077         | 3  |
| 11 | <b>1275.5926</b> | 638.2999        | 1257.5820      | 629.2946         | Y    | 310.1761         | 155.5917        | 293.1496  | 147.0784         |                |                  | 2  |
| 12 |                  |                 |                |                  | K    | 147.1128         | 74.0600         | 130.0863  | 65.5468          |                |                  | 1  |

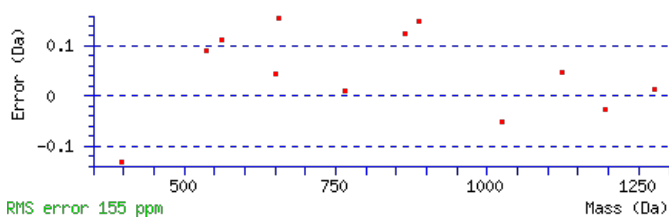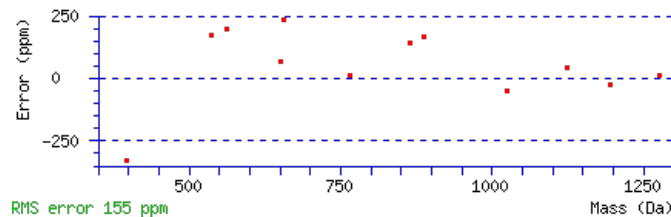

NCBI **BLAST** search of **IIAVCVDDPEYK**

(Parameters: blastp, nr protein database, expect=20000, no filter, PAM30)

Other BLAST [web gateways](#)

AT1G01050.1

All matches to this query

| Score | Mr(calc)  | Delta   | Sequence                       |
|-------|-----------|---------|--------------------------------|
| 67.8  | 1420.6908 | -0.0010 | <a href="#">IIAVCVDDPEYK</a>   |
| 6.8   | 1420.6868 | 0.0030  | <a href="#">LEPGCSVSSLSTGK</a> |

Mascot: <http://www.matrixscience.com/>


**Mascot Search Results**
**Peptide View**MS/MS Fragmentation of **AVMSELFGK**Found in **AT1G01090.1** in **TAIR\_Arabidopsis**, Symbols: PDH-E1 ALPHA | PDH-E1 ALPHA (PYRUVATE DEHYDROGENASE E1 ALPHA); pyruvate dehydrogenase (acetyl-transferring) | chr1:47705-49166 REVERSE

Match to Query 2427: 980.501622 from(491.258087,2+) index(6218)

Title: Elution from: 54.897 to 54.897 scan no 7874 cid35.00 polarity:+

Data file 0-2\_1.mgf

Click mouse within plot area to zoom in by factor of two about that point

Or,   to  Da Label all possible matches  Label matches used for scoring Show Y-axis 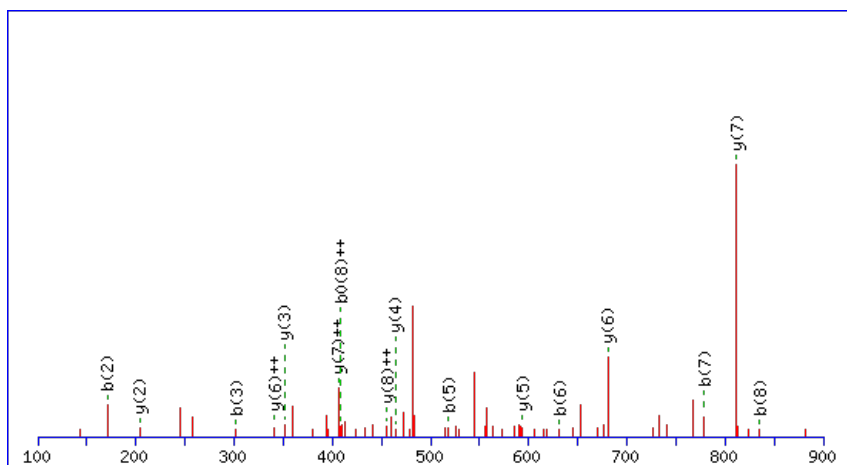

Monoisotopic mass of neutral peptide Mr(calc): 980.5001

Fixed modifications: Carbamidomethyl (C) (apply to specified residues or termini only)

Ions Score: 26 Expect: 0.015

Matches : 16/66 fragment ions using 52 most intense peaks ([help](#))

| # | b               | b <sup>++</sup> | b <sup>0</sup> | b <sup>0++</sup> | Seq. | y               | y <sup>++</sup> | y*       | y <sup>*++</sup> | y <sup>0</sup> | y <sup>0++</sup> | # |
|---|-----------------|-----------------|----------------|------------------|------|-----------------|-----------------|----------|------------------|----------------|------------------|---|
| 1 | 72.0444         | 36.5258         |                |                  | A    |                 |                 |          |                  |                |                  | 9 |
| 2 | <b>171.1128</b> | 86.0600         |                |                  | V    | 910.4703        | <b>455.7388</b> | 893.4437 | 447.2255         | 892.4597       | 446.7335         | 8 |
| 3 | <b>302.1533</b> | 151.5803        |                |                  | M    | <b>811.4019</b> | <b>406.2046</b> | 794.3753 | 397.6913         | 793.3913       | 397.1993         | 7 |
| 4 | 389.1853        | 195.0963        | 371.1748       | 186.0910         | S    | <b>680.3614</b> | <b>340.6843</b> | 663.3348 | 332.1710         | 662.3508       | 331.6790         | 6 |
| 5 | <b>518.2279</b> | 259.6176        | 500.2173       | 250.6123         | E    | <b>593.3293</b> | 297.1683        | 576.3028 | 288.6550         | 575.3188       | 288.1630         | 5 |
| 6 | <b>631.3120</b> | 316.1596        | 613.3014       | 307.1543         | L    | <b>464.2867</b> | 232.6470        | 447.2602 | 224.1337         |                |                  | 4 |
| 7 | <b>778.3804</b> | 389.6938        | 760.3698       | 380.6885         | F    | <b>351.2027</b> | 176.1050        | 334.1761 | 167.5917         |                |                  | 3 |
| 8 | <b>835.4019</b> | 418.2046        | 817.3913       | 409.1993         | G    | <b>204.1343</b> | 102.5708        | 187.1077 | 94.0575          |                |                  | 2 |
| 9 |                 |                 |                |                  | K    | 147.1128        | 74.0600         | 130.0863 | 65.5468          |                |                  | 1 |

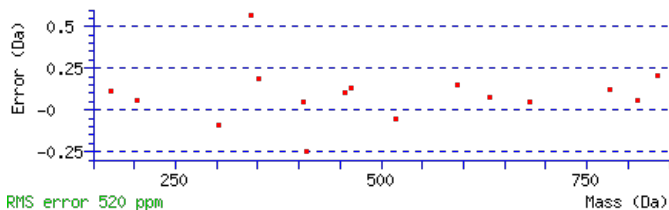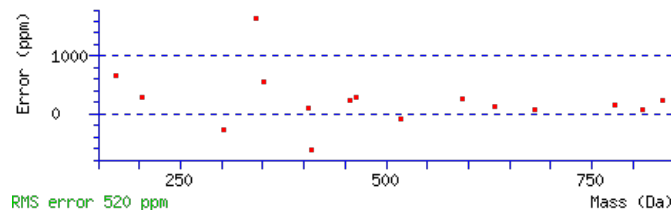NCBI **BLAST** search of [AVMSELFGK](#)

(Parameters: blastp, nr protein database, expect=20000, no filter, PAM30)

Other BLAST [web gateways](#)

All matches to this query

| Score | Mr(calc) | Delta | Sequence |
|-------|----------|-------|----------|
|       |          |       |          |

# AT1G01090.1

|      |          |        |                           |
|------|----------|--------|---------------------------|
| 25.6 | 980.5001 | 0.0015 | <a href="#">AVMSEFGK</a>  |
| 3.2  | 980.5001 | 0.0015 | <a href="#">AAVYLEMGK</a> |

**Mascot:** <http://www.matrixscience.com/>

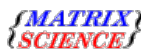

# Mascot Search Results

## Peptide View

MS/MS Fragmentation of **AAGVSIESYWPMLEAK**

Found in **AT1G01100.1** in **TAIR\_Arabidopsis**, Symbols: | 60S acidic ribosomal protein P1 (RPP1A) | chr1:50284-50954 REVERSE

Match to Query 8255: 1768.889628 from(885.452090,2+) index(10498)

Title: Elution from: 103.942 to 103.942 scan no 15310 cid35.00 polarity:+

Data file D12h-1\_3.mgf

Click mouse within plot area to zoom in by factor of two about that point

Or,  to  Da

Label all possible matches  Label matches used for scoring

Show Y-axis

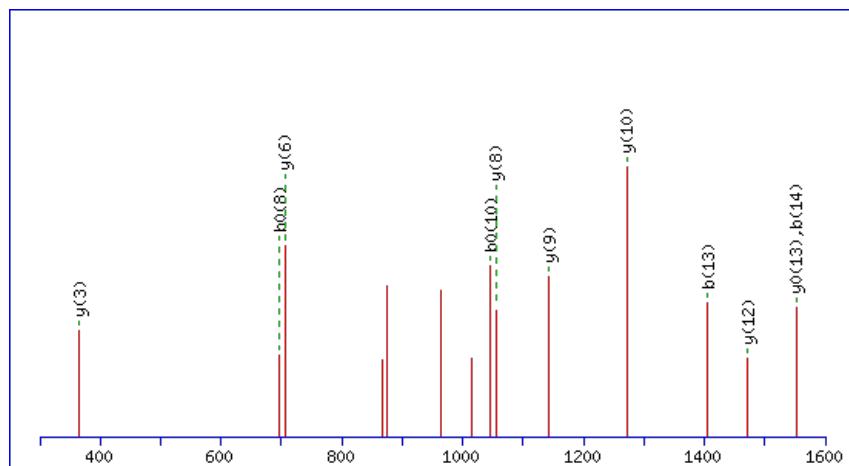

Monoisotopic mass of neutral peptide  $M_r(\text{calc})$ : 1768.8858

Fixed modifications: Carbamidomethyl (C) (apply to specified residues or termini only)

Ions Score: 48 Expect: 6e-005

Matches : 11/126 fragment ions using 12 most intense peaks [\(help\)](#)

| #  | b         | b <sup>++</sup> | b <sup>0</sup> | b <sup>0++</sup> | Seq. | y         | y <sup>++</sup> | y*        | y <sup>*++</sup> | y <sup>0</sup> | y <sup>0++</sup> | #  |
|----|-----------|-----------------|----------------|------------------|------|-----------|-----------------|-----------|------------------|----------------|------------------|----|
| 1  | 72.0444   | 36.5258         |                |                  | A    |           |                 |           |                  |                |                  | 16 |
| 2  | 143.0815  | 72.0444         |                |                  | A    | 1698.8560 | 849.9316        | 1681.8294 | 841.4184         | 1680.8454      | 840.9264         | 15 |
| 3  | 200.1030  | 100.5551        |                |                  | G    | 1627.8189 | 814.4131        | 1610.7923 | 805.8998         | 1609.8083      | 805.4078         | 14 |
| 4  | 299.1714  | 150.0893        |                |                  | V    | 1570.7974 | 785.9023        | 1553.7709 | 777.3891         | 1552.7868      | 776.8971         | 13 |
| 5  | 386.2034  | 193.6053        | 368.1928       | 184.6001         | S    | 1471.7290 | 736.3681        | 1454.7025 | 727.8549         | 1453.7184      | 727.3629         | 12 |
| 6  | 499.2875  | 250.1474        | 481.2769       | 241.1421         | I    | 1384.6970 | 692.8521        | 1367.6704 | 684.3388         | 1366.6864      | 683.8468         | 11 |
| 7  | 628.3301  | 314.6687        | 610.3195       | 305.6634         | E    | 1271.6129 | 636.3101        | 1254.5864 | 627.7968         | 1253.6023      | 627.3048         | 10 |
| 8  | 715.3621  | 358.1847        | 697.3515       | 349.1794         | S    | 1142.5703 | 571.7888        | 1125.5438 | 563.2755         | 1124.5597      | 562.7835         | 9  |
| 9  | 878.4254  | 439.7164        | 860.4149       | 430.7111         | Y    | 1055.5383 | 528.2728        | 1038.5117 | 519.7595         |                |                  | 8  |
| 10 | 1064.5047 | 532.7560        | 1046.4942      | 523.7507         | W    | 892.4750  | 446.7411        | 875.4484  | 438.2278         |                |                  | 7  |
| 11 | 1161.5575 | 581.2824        | 1143.5469      | 572.2771         | P    | 706.3956  | 353.7015        | 689.3691  | 345.1882         |                |                  | 6  |
| 12 | 1292.5980 | 646.8026        | 1274.5874      | 637.7973         | M    | 609.3429  | 305.1751        | 592.3163  | 296.6618         |                |                  | 5  |
| 13 | 1405.6820 | 703.3447        | 1387.6715      | 694.3394         | L    | 478.3024  | 239.6548        | 461.2758  | 231.1416         |                |                  | 4  |
| 14 | 1552.7505 | 776.8789        | 1534.7399      | 767.8736         | F    | 365.2183  | 183.1128        | 348.1918  | 174.5995         |                |                  | 3  |
| 15 | 1623.7876 | 812.3974        | 1605.7770      | 803.3921         | A    | 218.1499  | 109.5786        | 201.1234  | 101.0653         |                |                  | 2  |
| 16 |           |                 |                |                  | K    | 147.1128  | 74.0600         | 130.0863  | 65.5468          |                |                  | 1  |

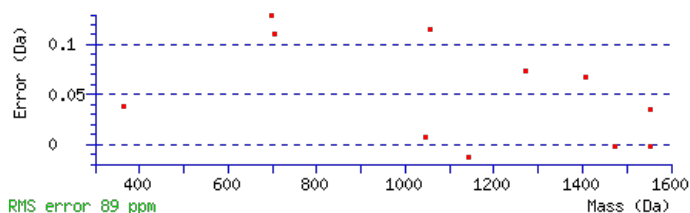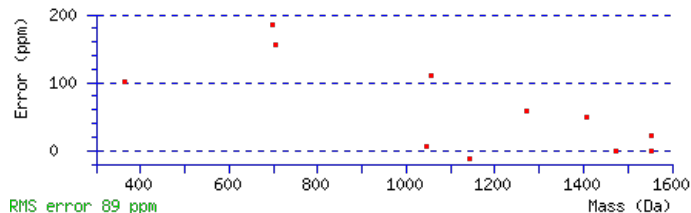

## AT1G01100.1

NCBI **BLAST** search of [AAGVSIESYWPLFAK](#)

(Parameters: blastp, nr protein database, expect=20000, no filter, PAM30)

Other BLAST [web gateways](#)

### All matches to this query

| Score | Mr(calc)  | Delta  | Sequence                        |
|-------|-----------|--------|---------------------------------|
| 48.4  | 1768.8858 | 0.0038 | <a href="#">AAGVSIESYWPLFAK</a> |

Mascot: <http://www.matrixscience.com/>

**Peptide View**MS/MS Fragmentation of **LVADFGSLELSPVDGR**Found in **AT1G01320.1** in **TAIR\_Arabidopsis**, Symbols: | tetratricopeptide repeat (TPR)-containing protein | chr1:121582-130099 REVERSE

Match to Query 7790: 1673.861286 from(837.937919,2+) index(8664)

Title: Elution from: 77.245 to 77.245 scan no 11584 cid35.00 polarity:+

Data file 0-3\_2.mgf

Click mouse within plot area to zoom in by factor of two about that point

Or,  to  Da Label all possible matches  Label matches used for scoring Show Y-axis 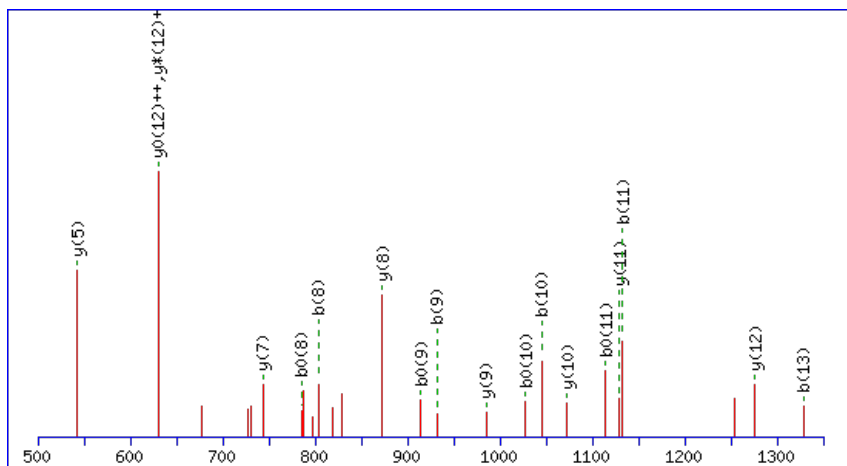**Monoisotopic mass of neutral peptide Mr(calc):** 1673.8625**Fixed modifications:** Carbamidomethyl (C) (apply to specified residues or termini only)**Ions Score:** 64 **Expect:** 1.6e-006**Matches:** 19/140 fragment ions using 24 most intense peaks ([help](#))

| #  | b                | b <sup>++</sup> | b <sup>0</sup>   | b <sup>0++</sup> | Seq. | y                | y <sup>++</sup> | y*        | y <sup>*++</sup> | y <sup>0</sup> | y <sup>0++</sup> | #  |
|----|------------------|-----------------|------------------|------------------|------|------------------|-----------------|-----------|------------------|----------------|------------------|----|
| 1  | 114.0913         | 57.5493         |                  |                  | L    |                  |                 |           |                  |                |                  | 16 |
| 2  | 213.1598         | 107.0835        |                  |                  | V    | 1561.7857        | 781.3965        | 1544.7591 | 772.8832         | 1543.7751      | 772.3912         | 15 |
| 3  | 284.1969         | 142.6021        |                  |                  | A    | 1462.7172        | 731.8623        | 1445.6907 | 723.3490         | 1444.7067      | 722.8570         | 14 |
| 4  | 399.2238         | 200.1155        | 381.2132         | 191.1103         | D    | 1391.6801        | 696.3437        | 1374.6536 | 687.8304         | 1373.6696      | 687.3384         | 13 |
| 5  | 546.2922         | 273.6498        | 528.2817         | 264.6445         | F    | <b>1276.6532</b> | 638.8302        | 1259.6266 | <b>630.3170</b>  | 1258.6426      | <b>629.8250</b>  | 12 |
| 6  | 603.3137         | 302.1605        | 585.3031         | 293.1552         | G    | <b>1129.5848</b> | 565.2960        | 1112.5582 | 556.7828         | 1111.5742      | 556.2907         | 11 |
| 7  | 690.3457         | 345.6765        | 672.3352         | 336.6712         | S    | <b>1072.5633</b> | 536.7853        | 1055.5368 | 528.2720         | 1054.5527      | 527.7800         | 10 |
| 8  | <b>803.4298</b>  | 402.2185        | <b>785.4192</b>  | 393.2132         | L    | <b>985.5313</b>  | 493.2693        | 968.5047  | 484.7560         | 967.5207       | 484.2640         | 9  |
| 9  | <b>932.4724</b>  | 466.7398        | <b>914.4618</b>  | 457.7345         | E    | <b>872.4472</b>  | 436.7272        | 855.4207  | 428.2140         | 854.4367       | 427.7220         | 8  |
| 10 | <b>1045.5564</b> | 523.2819        | <b>1027.5459</b> | 514.2766         | L    | <b>743.4046</b>  | 372.2060        | 726.3781  | 363.6927         | 725.3941       | 363.2007         | 7  |
| 11 | <b>1132.5885</b> | 566.7979        | <b>1114.5779</b> | 557.7926         | S    | <b>630.3206</b>  | 315.6639        | 613.2940  | 307.1506         | 612.3100       | 306.6586         | 6  |
| 12 | 1229.6412        | 615.3243        | 1211.6307        | 606.3190         | P    | <b>543.2885</b>  | 272.1479        | 526.2620  | 263.6346         | 525.2780       | 263.1426         | 5  |
| 13 | <b>1328.7096</b> | 664.8585        | 1310.6991        | 655.8532         | V    | 446.2358         | 223.6215        | 429.2092  | 215.1083         | 428.2252       | 214.6162         | 4  |
| 14 | 1443.7366        | 722.3719        | 1425.7260        | 713.3666         | D    | 347.1674         | 174.0873        | 330.1408  | 165.5740         | 329.1568       | 165.0820         | 3  |
| 15 | 1500.7581        | 750.8827        | 1482.7475        | 741.8774         | G    | 232.1404         | 116.5738        | 215.1139  | 108.0606         |                |                  | 2  |
| 16 |                  |                 |                  |                  | R    | 175.1190         | 88.0631         | 158.0924  | 79.5498          |                |                  | 1  |

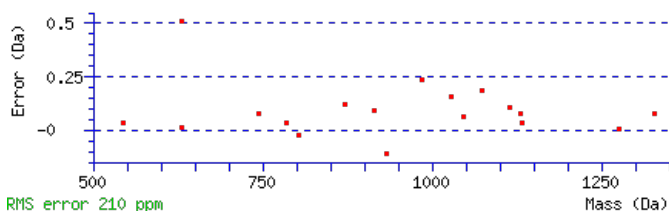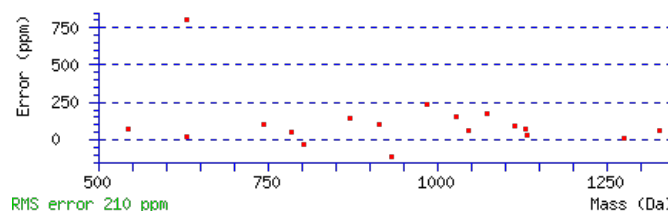

## AT1G01320.1

NCBI **BLAST** search of [LVADFGSLELSPVDGR](#)

(Parameters: blastp, nr protein database, expect=20000, no filter, PAM30)

Other BLAST [web gateways](#)

### All matches to this query

| Score | Mr(calc)  | Delta   | Sequence                         |
|-------|-----------|---------|----------------------------------|
| 63.7  | 1673.8625 | -0.0012 | <a href="#">LVADFGSLELSPVDGR</a> |
| 3.0   | 1673.8584 | 0.0029  | <a href="#">TDERQILKEANTEK</a>   |

**Mascot:** <http://www.matrixscience.com/>



**Peptide View**MS/MS Fragmentation of **IDEVINEYLK**Found in **AT1G01800.1** in **TAIR\_Arabidopsis**, Symbols: | short-chain dehydrogenase/reductase (SDR) family protein | chr1:293396-294888  
FORWARD

Match to Query 4319: 1246.610802 from(624.312677,2+) index(6509)

Title: Elution from: 58.152 to 58.152 scan no 8414 cid35.00 polarity:+

Data file D6h-1\_2.mgf

Click mouse within plot area to zoom in by factor of two about that point

Or,   to  Da Label all possible matches  Label matches used for scoring Show Y-axis 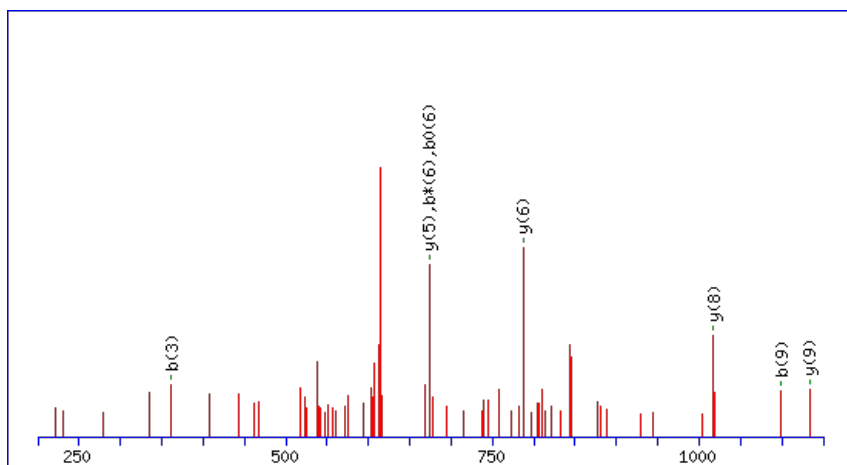Monoisotopic mass of neutral peptide  $M_r(\text{calc})$ : 1246.6089

Fixed modifications: Carbamidomethyl (C) (apply to specified residues or termini only)

Ions Score: 26 Expect: 0.025

Matches : 8/90 fragment ions using 10 most intense peaks ([help](#))

| #  | b                | b <sup>++</sup> | b*              | b <sup>*++</sup> | b <sup>0</sup>  | b <sup>0++</sup> | Seq. | y                | y <sup>++</sup> | y*        | y <sup>*++</sup> | y <sup>0</sup> | y <sup>0++</sup> | #  |
|----|------------------|-----------------|-----------------|------------------|-----------------|------------------|------|------------------|-----------------|-----------|------------------|----------------|------------------|----|
| 1  | 115.0884         | 58.0478         |                 |                  |                 |                  | I    |                  |                 |           |                  |                |                  | 10 |
| 2  | 231.1124         | 116.0598        |                 |                  | 213.1018        | 107.0545         | D    | <b>1133.5351</b> | 567.2712        | 1115.5115 | 558.2594         | 1115.5246      | 558.2659         | 9  |
| 3  | <b>361.1520</b>  | 181.0796        |                 |                  | 343.1414        | 172.0743         | E    | <b>1017.5111</b> | 509.2592        | 999.4876  | 500.2474         | 999.5006       | 500.2539         | 8  |
| 4  | 461.2174         | 231.1124        |                 |                  | 443.2069        | 222.1071         | V    | 887.4715         | 444.2394        | 869.4479  | 435.2276         | 869.4609       | 435.2341         | 7  |
| 5  | 575.2985         | 288.1529        |                 |                  | 557.2880        | 279.1476         | I    | <b>787.4061</b>  | 394.2067        | 769.3825  | 385.1949         | 769.3955       | 385.2014         | 6  |
| 6  | 691.3355         | 346.1714        | <b>673.3119</b> | 337.1596         | <b>673.3250</b> | 337.1661         | N    | <b>673.3250</b>  | 337.1661        | 655.3014  | 328.1543         | 655.3144       | 328.1608         | 5  |
| 7  | 821.3752         | 411.1912        | 803.3516        | 402.1794         | 803.3646        | 402.1859         | E    | 557.2880         | 279.1476        | 539.2644  | 270.1358         | 539.2774       | 270.1423         | 4  |
| 8  | 985.4355         | 493.2214        | 967.4119        | 484.2096         | 967.4250        | 484.2161         | Y    | 427.2483         | 214.1278        | 409.2248  | 205.1160         |                |                  | 3  |
| 9  | <b>1099.5166</b> | 550.2619        | 1081.4930       | 541.2502         | 1081.5061       | 541.2567         | L    | 263.1880         | 132.0976        | 245.1644  | 123.0858         |                |                  | 2  |
| 10 |                  |                 |                 |                  |                 |                  | K    | 149.1069         | 75.0571         | 131.0833  | 66.0453          |                |                  | 1  |

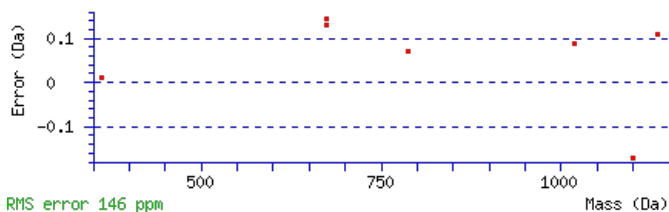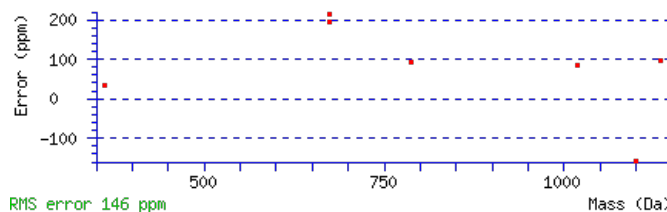NCBI BLAST search of **IDEVINEYLK**

(Parameters: blastp, nr protein database, expect=20000, no filter, PAM30)

Other BLAST [web gateways](#)**All matches to this query**

## AT1G01800.1

| Score | Mr(calc)  | Delta   | Sequence                     |
|-------|-----------|---------|------------------------------|
| 26.2  | 1246.6089 | 0.0019  | <a href="#">IDEVINEYLK</a>   |
| 8.2   | 1246.6116 | -0.0008 | <a href="#">IGGGNVITTSWK</a> |
| 7.3   | 1246.6120 | -0.0012 | <a href="#">LREERNVAK</a>    |
| 7.0   | 1246.6089 | 0.0019  | <a href="#">YIVEEAEALAK</a>  |
| 6.7   | 1246.6116 | -0.0008 | <a href="#">IGNAFGNIIDAK</a> |
| 6.4   | 1246.6094 | 0.0014  | <a href="#">EIDKNSEIRK</a>   |
| 4.2   | 1246.6120 | -0.0012 | <a href="#">EAQARAGIREK</a>  |
| 3.7   | 1246.6132 | -0.0024 | <a href="#">MMVIGLLMAPK</a>  |
| 2.7   | 1246.6089 | 0.0019  | <a href="#">EVSFEALIEK</a>   |
| 2.3   | 1246.6089 | 0.0019  | <a href="#">LELAYAIADEK</a>  |

Mascot: <http://www.matrixscience.com/>

**Peptide View**MS/MS Fragmentation of **MEAQILNVLK**

Found in **AT1G01990.1** in **TAIR\_Arabidopsis**, Symbols: | similar to chloroplast lumen common family protein [Arabidopsis thaliana] (TAIR:AT2G37400.1) | chr1:343462-344199 REVERSE

Match to Query 3485: 1170.612624 from(586.313588,2+) index(4133)

Title: Elution from: 39.675 to 39.675 scan no 5307 cid35.00 polarity:+

Data file D1d-2\_3.mgf

Click mouse within plot area to zoom in by factor of two about that point

Or,   to  Da

Label all possible matches  Label matches used for scoring

Show Y-axis

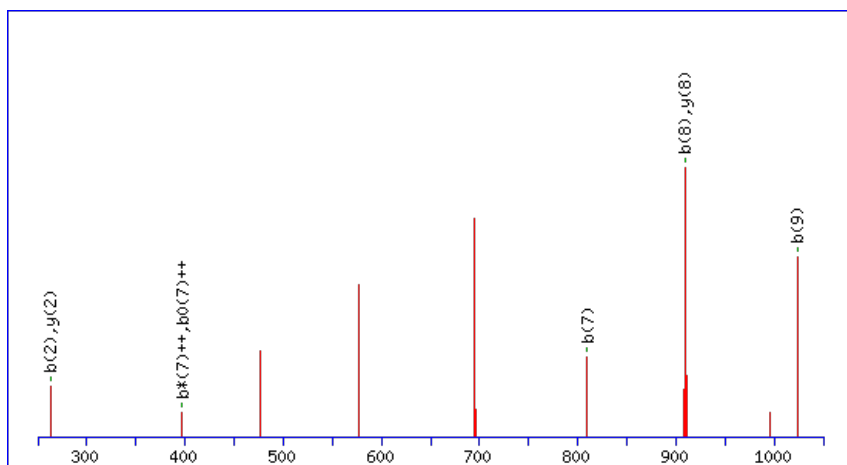

Monoisotopic mass of neutral peptide  $M_r(\text{calc})$ : 1170.6093

Fixed modifications: Carbamidomethyl (C) (apply to specified residues or termini only)

Ions Score: 30 Expect: 0.0032

Matches : 8/84 fragment ions using 8 most intense peaks ([help](#))

| #  | b                | b <sup>++</sup> | b*        | b <sup>*++</sup> | b <sup>0</sup> | b <sup>0++</sup> | Seq. | y               | y <sup>++</sup> | y*        | y <sup>*++</sup> | y <sup>0</sup> | y <sup>0++</sup> | #  |
|----|------------------|-----------------|-----------|------------------|----------------|------------------|------|-----------------|-----------------|-----------|------------------|----------------|------------------|----|
| 1  | 133.0448         | 67.0260         |           |                  |                |                  | M    |                 |                 |           |                  |                |                  | 10 |
| 2  | <b>263.0844</b>  | 132.0458        |           |                  | 245.0739       | 123.0406         | E    | 1039.5790       | 520.2932        | 1021.5555 | 511.2814         | 1021.5685      | 511.2879         | 9  |
| 3  | 335.1186         | 168.0629        |           |                  | 317.1080       | 159.0576         | A    | <b>909.5394</b> | 455.2733        | 891.5158  | 446.2616         |                |                  | 8  |
| 4  | 465.1712         | 233.0892        | 447.1476  | 224.0775         | 447.1607       | 224.0840         | Q    | 837.5053        | 419.2563        | 819.4817  | 410.2445         |                |                  | 7  |
| 5  | 579.2523         | 290.1298        | 561.2287  | 281.1180         | 561.2418       | 281.1245         | I    | 707.4526        | 354.2299        | 689.4290  | 345.2182         |                |                  | 6  |
| 6  | 693.3334         | 347.1703        | 675.3098  | 338.1586         | 675.3229       | 338.1651         | L    | 593.3715        | 297.1894        | 575.3479  | 288.1776         |                |                  | 5  |
| 7  | <b>809.3704</b>  | 405.1888        | 791.3468  | <b>396.1771</b>  | 791.3599       | <b>396.1836</b>  | N    | 479.2904        | 240.1488        | 461.2668  | 231.1371         |                |                  | 4  |
| 8  | <b>909.4359</b>  | 455.2216        | 891.4123  | 446.2098         | 891.4253       | 446.2163         | V    | 363.2534        | 182.1303        | 345.2298  | 173.1186         |                |                  | 3  |
| 9  | <b>1023.5170</b> | 512.2621        | 1005.4934 | 503.2503         | 1005.5064      | 503.2568         | L    | <b>263.1880</b> | 132.0976        | 245.1644  | 123.0858         |                |                  | 2  |
| 10 |                  |                 |           |                  |                |                  | K    | 149.1069        | 75.0571         | 131.0833  | 66.0453          |                |                  | 1  |

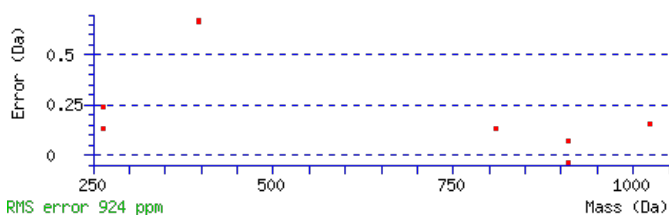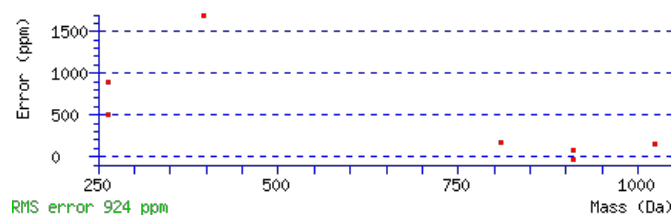

NCBI BLAST search of **MEAQILNVLK**

(Parameters: blastp, nr protein database, expect=20000, no filter, PAM30)

Other BLAST [web gateways](#)

All matches to this query

## AT1G01990.1

| Score | Mr(calc)  | Delta   | Sequence                   |
|-------|-----------|---------|----------------------------|
| 29.6  | 1170.6093 | 0.0033  | <a href="#">MEAQILNVLK</a> |
| 7.3   | 1170.6120 | 0.0007  | <a href="#">MKIVHRDLK</a>  |
| 4.1   | 1170.6140 | -0.0014 | <a href="#">SELKAELELK</a> |
| 3.8   | 1170.6093 | 0.0033  | <a href="#">MQIPDSLKVK</a> |
| 3.6   | 1170.6120 | 0.0007  | <a href="#">AHKKICGTK</a>  |
| 3.6   | 1170.6120 | 0.0007  | <a href="#">ASKKLHACIK</a> |
| 3.6   | 1170.6140 | -0.0014 | <a href="#">ELEADKLTIK</a> |
| 3.6   | 1170.6140 | -0.0014 | <a href="#">IVQLSETEIK</a> |
| 3.6   | 1170.6093 | 0.0033  | <a href="#">SCPVKVVEIK</a> |
| 3.6   | 1170.6140 | -0.0014 | <a href="#">SLSEOELLK</a>  |

Mascot: <http://www.matrixscience.com/>

**Peptide View**MS/MS Fragmentation of **TQVTVEYYNDK**

Found in **AT1G02500.1** in **TAIR\_Arabidopsis**, Symbols: SAM-1, MAT1, SAM1 | SAM1 (S-adenosylmethionine synthetase 1); methionine adenosyltransferase | chr1:519037-520218 FORWARD

Match to Query 4983: 1358.636682 from(680.325617,2+) index(2565)

Title: Elution from: 26.315 to 26.315 scan no 3208 cid35.00 polarity:+

Data file D12h-3\_3.mgf

Click mouse within plot area to zoom in by factor of two about that point

Or,   to  Da

Label all possible matches  Label matches used for scoring

Show Y-axis

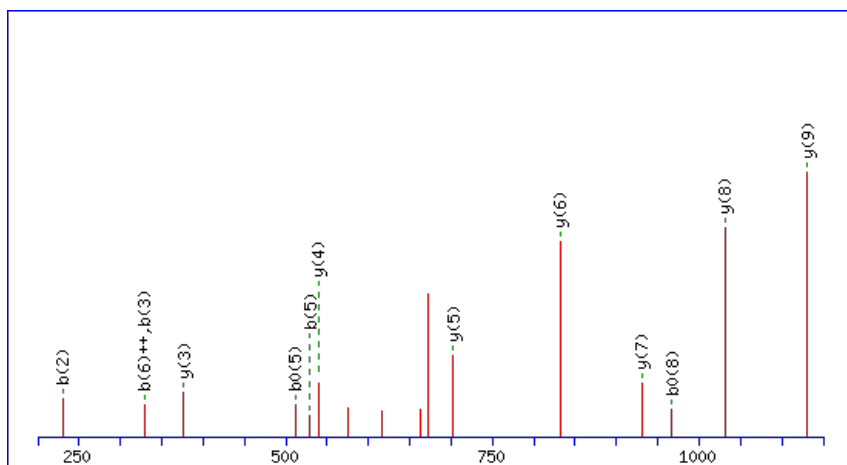

**Monoisotopic mass of neutral peptide Mr(calc):** 1358.6354

**Fixed modifications:** Carbamidomethyl (C) (apply to specified residues or termini only)

**Ions Score:** 69 **Expect:** 3e-007

**Matches:** 13/116 fragment ions using 14 most intense peaks ([help](#))

| #  | b               | b <sup>++</sup> | b <sup>*</sup> | b <sup>*++</sup> | b <sup>0</sup>  | b <sup>0++</sup> | Seq. | y                | y <sup>++</sup> | y <sup>*</sup> | y <sup>*++</sup> | y <sup>0</sup> | y <sup>0++</sup> | #  |
|----|-----------------|-----------------|----------------|------------------|-----------------|------------------|------|------------------|-----------------|----------------|------------------|----------------|------------------|----|
| 1  | 102.0550        | 51.5311         |                |                  | 84.0444         | 42.5258          | T    |                  |                 |                |                  |                |                  | 11 |
| 2  | <b>230.1135</b> | 115.5604        | 213.0870       | 107.0471         | 212.1030        | 106.5551         | Q    | 1258.5950        | 629.8011        | 1241.5685      | 621.2879         | 1240.5844      | 620.7959         | 10 |
| 3  | <b>329.1819</b> | 165.0946        | 312.1554       | 156.5813         | 311.1714        | 156.0893         | V    | <b>1130.5364</b> | 565.7719        | 1113.5099      | 557.2586         | 1112.5259      | 556.7666         | 9  |
| 4  | 430.2296        | 215.6185        | 413.2031       | 207.1052         | 412.2191        | 206.6132         | T    | <b>1031.4680</b> | 516.2376        | 1014.4415      | 507.7244         | 1013.4575      | 507.2324         | 8  |
| 5  | <b>529.2980</b> | 265.1527        | 512.2715       | 256.6394         | <b>511.2875</b> | 256.1474         | V    | <b>930.4203</b>  | 465.7138        | 913.3938       | 457.2005         | 912.4098       | 456.7085         | 7  |
| 6  | 658.3406        | <b>329.6740</b> | 641.3141       | 321.1607         | 640.3301        | 320.6687         | E    | <b>831.3519</b>  | 416.1796        | 814.3254       | 407.6663         | 813.3414       | 407.1743         | 6  |
| 7  | 821.4040        | 411.2056        | 804.3774       | 402.6923         | 803.3934        | 402.2003         | Y    | <b>702.3093</b>  | 351.6583        | 685.2828       | 343.1450         | 684.2988       | 342.6530         | 5  |
| 8  | 984.4673        | 492.7373        | 967.4407       | 484.2240         | <b>966.4567</b> | 483.7320         | Y    | <b>539.2460</b>  | 270.1266        | 522.2195       | 261.6134         | 521.2354       | 261.1214         | 4  |
| 9  | 1098.5102       | 549.7587        | 1081.4837      | 541.2455         | 1080.4997       | 540.7535         | N    | <b>376.1827</b>  | 188.5950        | 359.1561       | 180.0817         | 358.1721       | 179.5897         | 3  |
| 10 | 1213.5372       | 607.2722        | 1196.5106      | 598.7589         | 1195.5266       | 598.2669         | D    | 262.1397         | 131.5735        | 245.1132       | 123.0602         | 244.1292       | 122.5682         | 2  |
| 11 |                 |                 |                |                  |                 |                  | K    | 147.1128         | 74.0600         | 130.0863       | 65.5468          |                |                  | 1  |

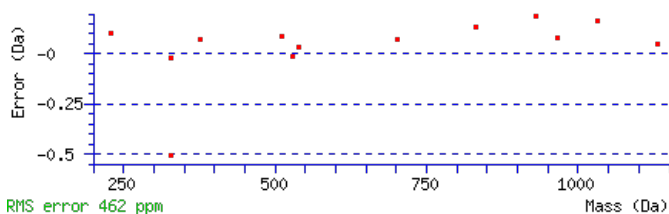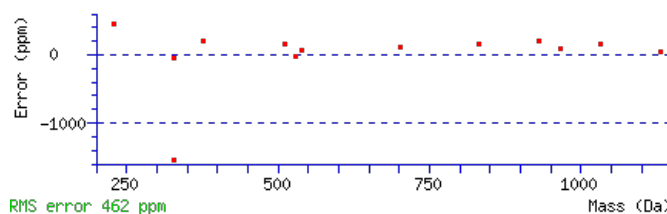

NCBI **BLAST** search of **TQVTVEYYNDK**

(Parameters: blastp, nr protein database, expect=20000, no filter, PAM30)

Other BLAST [web gateways](#)

**All matches to this query**

AT1G02500.1

| Score | Mr(calc)  | Delta  | Sequence                    |
|-------|-----------|--------|-----------------------------|
| 68.5  | 1358.6354 | 0.0013 | <a href="#">TQVTVEYYNDK</a> |
| 4.9   | 1358.6361 | 0.0006 | <a href="#">ERVDRDMGPR</a>  |

Mascot: <http://www.matrixscience.com/>

**Peptide View**MS/MS Fragmentation of **FQSIISQLFQYR**

Found in **AT1G02560.1** in **TAIR\_Arabidopsis**, Symbols: NCLPP1, NCLPP5, CLPP5 | CLPP5 (NUCLEAR ENCODED CLP PROTEASE 1); endopeptidase Clp | chr1:538000-539805 FORWARD

Match to Query 6818: 1546.753580 from(774.384066,2+) index(10657)

Title: Elution from: 102.636 to 102.636 scan no 15209 cid35.00 polarity:+

Data file D6h-2\_1.mgf

Click mouse within plot area to zoom in by factor of two about that point

Or,  to  Da

Label all possible matches  Label matches used for scoring

Show Y-axis

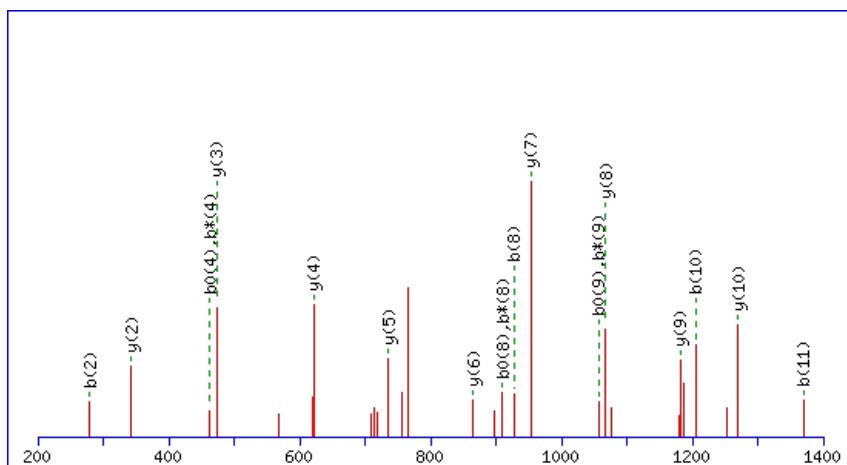

**Monoisotopic mass of neutral peptide Mr(calc):** 1546.7504

**Fixed modifications:** Carbamidomethyl (C) (apply to specified residues or termini only)

**Ions Score:** 93 **Expect:** 4.1e-009

**Matches:** 19/114 fragment ions using 21 most intense peaks ([help](#))

| #  | b                | b <sup>++</sup> | b*               | b <sup>*++</sup> | b <sup>0</sup>   | b <sup>0++</sup> | Seq. | y                | y <sup>++</sup> | y*        | y <sup>*++</sup> | y <sup>0</sup> | y <sup>0++</sup> | #  |
|----|------------------|-----------------|------------------|------------------|------------------|------------------|------|------------------|-----------------|-----------|------------------|----------------|------------------|----|
| 1  | 149.0727         | 75.0400         |                  |                  |                  |                  | F    |                  |                 |           |                  |                |                  | 12 |
| 2  | <b>279.1254</b>  | 140.0663        | 261.1018         | 131.0545         |                  |                  | Q    | 1399.6923        | 700.3498        | 1381.6687 | 691.3380         | 1381.6817      | 691.3445         | 11 |
| 3  | 367.1544         | 184.0809        | 349.1309         | 175.0691         | 349.1439         | 175.0756         | S    | <b>1269.6396</b> | 635.3234        | 1251.6160 | 626.3117         | 1251.6291      | 626.3182         | 10 |
| 4  | 481.2355         | 241.1214        | <b>463.2120</b>  | 232.1096         | <b>463.2250</b>  | 232.1161         | I    | <b>1181.6106</b> | 591.3089        | 1163.5870 | 582.2971         | 1163.6000      | 582.3036         | 9  |
| 5  | 595.3166         | 298.1620        | 577.2930         | 289.1502         | 577.3061         | 289.1567         | I    | <b>1067.5295</b> | 534.2684        | 1049.5059 | 525.2566         | 1049.5189      | 525.2631         | 8  |
| 6  | 683.3457         | 342.1765        | 665.3221         | 333.1647         | 665.3351         | 333.1712         | S    | <b>953.4484</b>  | 477.2278        | 935.4248  | 468.2160         | 935.4378       | 468.2225         | 7  |
| 7  | 813.3983         | 407.2028        | 795.3748         | 398.1910         | 795.3878         | 398.1975         | Q    | <b>865.4193</b>  | 433.2133        | 847.3957  | 424.2015         |                |                  | 6  |
| 8  | <b>927.4794</b>  | 464.2434        | <b>909.4559</b>  | 455.2316         | <b>909.4689</b>  | 455.2381         | L    | <b>735.3667</b>  | 368.1870        | 717.3431  | 359.1752         |                |                  | 5  |
| 9  | 1075.5449        | 538.2761        | <b>1057.5213</b> | 529.2643         | <b>1057.5343</b> | 529.2708         | F    | <b>621.2856</b>  | 311.1464        | 603.2620  | 302.1346         |                |                  | 4  |
| 10 | <b>1205.5975</b> | 603.3024        | 1187.5740        | 594.2906         | 1187.5870        | 594.2971         | Q    | <b>473.2201</b>  | 237.1137        | 455.1965  | 228.1019         |                |                  | 3  |
| 11 | <b>1369.6579</b> | 685.3326        | 1351.6343        | 676.3208         | 1351.6473        | 676.3273         | Y    | <b>343.1675</b>  | 172.0874        | 325.1439  | 163.0756         |                |                  | 2  |
| 12 |                  |                 |                  |                  |                  |                  | R    | 179.1071         | 90.0572         | 161.0835  | 81.0454          |                |                  | 1  |

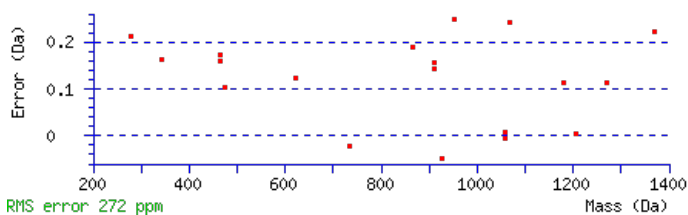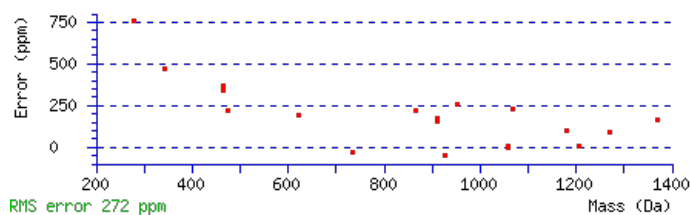

NCBI **BLAST** search of **FQSIISQLFQYR**

(Parameters: blastp, nr protein database, expect=20000, no filter, PAM30)

Other BLAST [web gateways](#)

# AT1G02560.1

All matches to this query

| Score | Mr(calc)  | Delta   | Sequence                       |
|-------|-----------|---------|--------------------------------|
| 93.0  | 1546.7504 | 0.0032  | <a href="#">FQSIISQLFQYR</a>   |
| 27.1  | 1546.7516 | 0.0020  | <a href="#">EMEPLQQALGKLR</a>  |
| 10.0  | 1546.7538 | -0.0002 | <a href="#">GCGLTFPLPEALVR</a> |
| 4.7   | 1546.7561 | -0.0025 | <a href="#">NQIPWMILFPQK</a>   |
| 3.4   | 1546.7516 | 0.0020  | <a href="#">IVVMANQEGPTTR</a>  |
| 3.4   | 1546.7560 | -0.0024 | <a href="#">YATLVKTFWMFVR</a>  |
| 2.6   | 1546.7516 | 0.0020  | <a href="#">DRPAIAMIADAEEK</a> |
| 1.6   | 1546.7563 | -0.0027 | <a href="#">IDLGALEETLNSVR</a> |
| 0.7   | 1546.7563 | -0.0027 | <a href="#">LEEDLGSAKGEILR</a> |
| 0.5   | 1546.7542 | -0.0007 | <a href="#">VTSNRILMGEIHR</a>  |

Mascot: <http://www.matrixscience.com/>





# Mascot Search Results

## Peptide View

MS/MS Fragmentation of **LIQDLQ GK**

Found in **AT1G02730.1** in **TAIR\_Arabidopsis**, Symbols: CSLD5, ATCSLD5 | ATCSLD5 (CELLULOSE SYNTHASE-LIKE D5); 1,4-beta-D-xylan synthase/ cellulose synthase | chr1:594697-598473 REVERSE

Match to Query 1712: 924.490540 from(463.252546,2+) index(1164)

Title: Elution from: 17.991 to 17.991 scan no 1638 cid35.00 polarity:+

Data file C7-1\_3.mgf

Click mouse within plot area to zoom in by factor of two about that point

Or,   to  Da

Label all possible matches  Label matches used for scoring

Show Y-axis

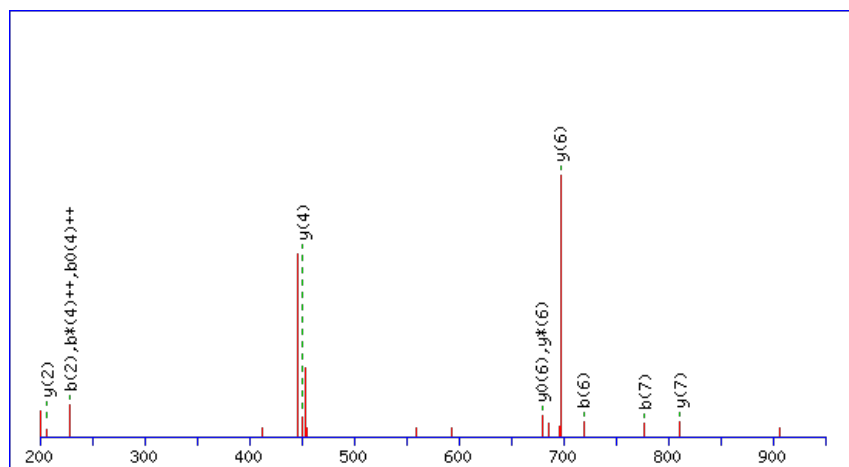

Monoisotopic mass of neutral peptide **Mr(calc)**: 924.4906

**Fixed modifications:** Carbamidomethyl (C) (apply to specified residues or termini only)

**Ions Score:** 29 **Expect:** 0.0053

**Matches** : 11/66 fragment ions using 15 most intense peaks ([help](#))

| # | b               | b <sup>++</sup> | b*       | b <sup>*++</sup> | b <sup>0</sup> | b <sup>0++</sup> | Seq. | y               | y <sup>++</sup> | y*              | y <sup>*++</sup> | y <sup>0</sup>  | y <sup>0++</sup> | # |
|---|-----------------|-----------------|----------|------------------|----------------|------------------|------|-----------------|-----------------|-----------------|------------------|-----------------|------------------|---|
| 1 | 115.0884        | 58.0478         |          |                  |                |                  | L    |                 |                 |                 |                  |                 |                  | 8 |
| 2 | <b>229.1695</b> | 115.0884        |          |                  |                |                  | I    | <b>811.4168</b> | 406.2121        | 793.3933        | 397.2003         | 793.4063        | 397.2068         | 7 |
| 3 | 359.2221        | 180.1147        | 341.1985 | 171.1029         |                |                  | Q    | <b>697.3357</b> | 349.1715        | <b>679.3122</b> | 340.1597         | <b>679.3252</b> | 340.1662         | 6 |
| 4 | 475.2461        | 238.1267        | 457.2225 | <b>229.1149</b>  | 457.2355       | <b>229.1214</b>  | D    | 567.2831        | 284.1452        | 549.2595        | 275.1334         | 549.2725        | 275.1399         | 5 |
| 5 | 589.3272        | 295.1672        | 571.3036 | 286.1554         | 571.3166       | 286.1620         | L    | <b>451.2591</b> | 226.1332        | 433.2355        | 217.1214         |                 |                  | 4 |
| 6 | <b>719.3798</b> | 360.1936        | 701.3563 | 351.1818         | 701.3693       | 351.1883         | Q    | 337.1780        | 169.0926        | 319.1544        | 160.0809         |                 |                  | 3 |
| 7 | <b>777.3983</b> | 389.2028        | 759.3748 | 380.1910         | 759.3878       | 380.1975         | G    | <b>207.1254</b> | 104.0663        | 189.1018        | 95.0545          |                 |                  | 2 |
| 8 |                 |                 |          |                  |                |                  | K    | 149.1069        | 75.0571         | 131.0833        | 66.0453          |                 |                  | 1 |

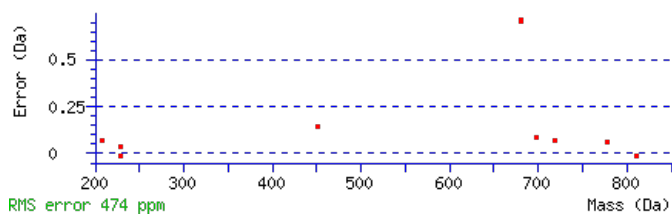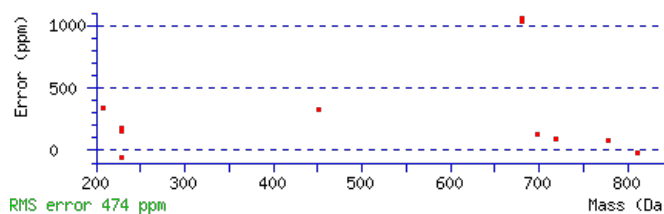

NCBI **BLAST** search of **LIQDLQ GK**

(Parameters: blastp, nr protein database, expect=20000, no filter, PAM30)

Other BLAST [web gateways](#)

### All matches to this query

| Score | Mr(calc) | Delta   | Sequence                 |
|-------|----------|---------|--------------------------|
| 28.8  | 924.4907 | -0.0001 | <a href="#">IINEQLGK</a> |

# AT1G02730.1

|      |          |         |                           |
|------|----------|---------|---------------------------|
| 28.8 | 924.4906 | -0.0001 | <a href="#">LIQDLOGK</a>  |
| 13.6 | 924.4907 | -0.0001 | <a href="#">LLITDPSR</a>  |
| 11.3 | 924.4907 | -0.0001 | <a href="#">ILDLAQNK</a>  |
| 10.0 | 924.4906 | -0.0001 | <a href="#">LLEDLVGR</a>  |
| 7.8  | 924.4907 | -0.0001 | <a href="#">NQELLLGK</a>  |
| 3.6  | 924.4907 | -0.0001 | <a href="#">KPAEDKVK</a>  |
| 2.7  | 924.4906 | -0.0001 | <a href="#">LLAVDDR</a>   |
| 2.7  | 924.4907 | -0.0001 | <a href="#">LLPTSDLR</a>  |
| 0.6  | 924.4907 | -0.0001 | <a href="#">ALELAVNGK</a> |

Mascot: <http://www.matrixscience.com/>

**Peptide View**MS/MS Fragmentation of **DGFIIR**

Found in **AT1G02780.1** in **TAIR\_Arabidopsis**, Symbols: EMB2386 | EMB2386 (EMBRYO DEFECTIVE 2386); structural constituent of ribosome | chr1:608120-609391 REVERSE

Match to Query 663: 719.396338 from(360.705445,2+) index(3975)

Title: Elution from: 38.274 to 38.274 scan no 5043 cid35.00 polarity:+

Data file 0-1\_2.mgf

Click mouse within plot area to zoom in by factor of two about that point

Or,   to  Da

Label all possible matches  Label matches used for scoring

Show Y-axis

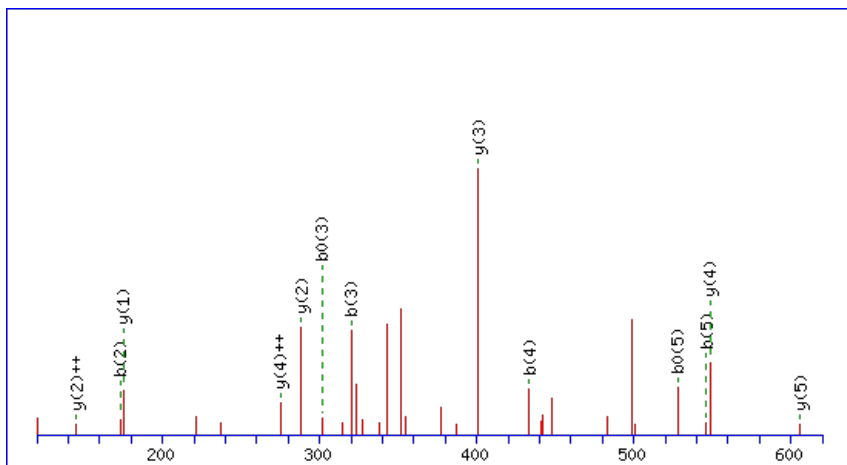

**Monoisotopic mass of neutral peptide Mr(calc):** 719.3966

**Fixed modifications:** Carbamidomethyl (C) (apply to specified residues or termini only)

**Ions Score:** 36 **Expect:** 0.001

**Matches:** 13/40 fragment ions using 24 most intense peaks ([help](#))

| # | b               | b <sup>++</sup> | b <sup>0</sup>  | b <sup>0++</sup> | Seq.     | y               | y <sup>++</sup> | y*       | y <sup>*++</sup> | #        |
|---|-----------------|-----------------|-----------------|------------------|----------|-----------------|-----------------|----------|------------------|----------|
| 1 | 116.0342        | 58.5207         | 98.0237         | 49.5155          | <b>D</b> |                 |                 |          |                  | <b>6</b> |
| 2 | <b>173.0557</b> | 87.0315         | 155.0451        | 78.0262          | <b>G</b> | <b>605.3770</b> | 303.1921        | 588.3504 | 294.6788         | <b>5</b> |
| 3 | <b>320.1241</b> | 160.5657        | <b>302.1135</b> | 151.5604         | <b>F</b> | <b>548.3555</b> | <b>274.6814</b> | 531.3289 | 266.1681         | <b>4</b> |
| 4 | <b>433.2082</b> | 217.1077        | 415.1976        | 208.1024         | <b>I</b> | <b>401.2871</b> | 201.1472        | 384.2605 | 192.6339         | <b>3</b> |
| 5 | <b>546.2922</b> | 273.6498        | <b>528.2817</b> | 264.6445         | <b>I</b> | <b>288.2030</b> | <b>144.6051</b> | 271.1765 | 136.0919         | <b>2</b> |
| 6 |                 |                 |                 |                  | <b>R</b> | <b>175.1190</b> | 88.0631         | 158.0924 | 79.5498          | <b>1</b> |

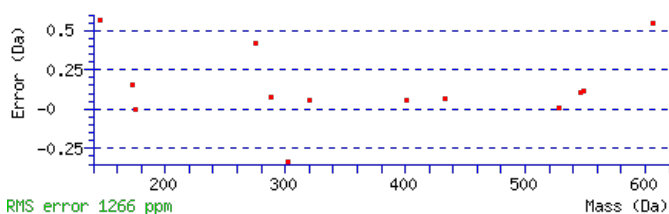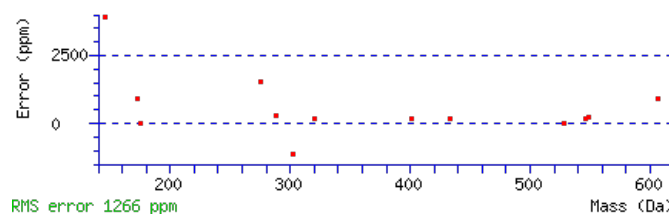NCBI **BLAST** search of **DGFIIR**

(Parameters: blastp, nr protein database, expect=20000, no filter, PAM30)

Other BLAST [web gateways](#)

**All matches to this query**

| Score | Mr(calc) | Delta   | Sequence               |
|-------|----------|---------|------------------------|
| 35.9  | 719.3966 | -0.0003 | <a href="#">DGFIIR</a> |
| 22.7  | 719.3966 | -0.0003 | <a href="#">GFDLLR</a> |
| 11.3  | 719.3966 | -0.0003 | <a href="#">DFLGLR</a> |

## AT1G02780.1

|     |          |         |                        |
|-----|----------|---------|------------------------|
| 7.6 | 719.3966 | -0.0003 | <a href="#">DAFVLR</a> |
| 6.8 | 719.3966 | -0.0003 | <a href="#">LGFDLR</a> |
| 4.7 | 719.3966 | -0.0003 | <a href="#">YPATLR</a> |
| 3.6 | 719.3966 | -0.0003 | <a href="#">TAIPYR</a> |
| 2.2 | 719.3966 | -0.0003 | <a href="#">FSPTLR</a> |
| 2.2 | 719.3966 | -0.0003 | <a href="#">GEVFIR</a> |
| 2.2 | 719.3966 | -0.0003 | <a href="#">GEVFLR</a> |

**Mascot:** <http://www.matrixscience.com/>

**Peptide View**MS/MS Fragmentation of **NLDFEFVHIELK**Found in **AT1G02920.1** in **TAIR\_Arabidopsis**, Symbols: GST11, ATGSTF8, GSTF7, ATGSTF7 | ATGSTF7 (GLUTATHIONE S-TRANSFERASE 11); glutathione transferase | chr1:658886-659705 REVERSE

Match to Query 5836: 1502.776074 from(501.932634,3+) index(8977)

Title: Elution from: 85.595 to 85.595 scan no 12470 cid35.00 polarity:+

Data file D1d-1-2.mgf

Click mouse within plot area to zoom in by factor of two about that point

Or,   to  Da Label all possible matches  Label matches used for scoring Show Y-axis 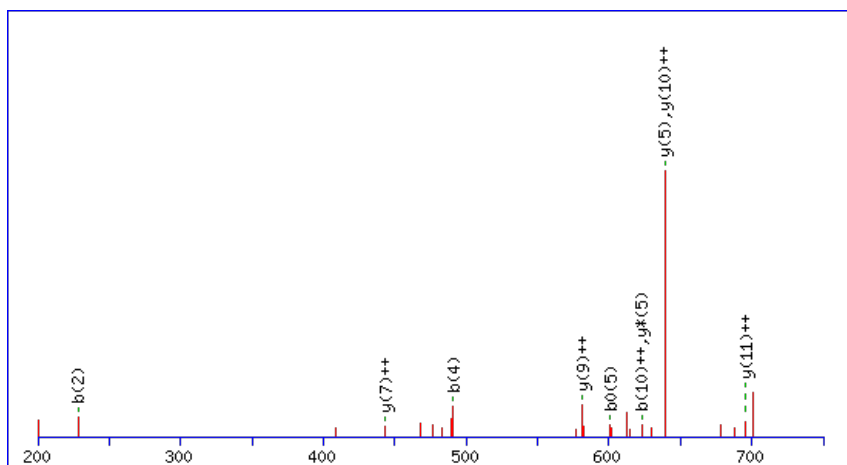Monoisotopic mass of neutral peptide  $M_r(\text{calc})$ : 1502.7769

Fixed modifications: Carbamidomethyl (C) (apply to specified residues or termini only)

Ions Score: 20 Expect: 0.044

Matches : 10/124 fragment ions using 16 most intense peaks ([help](#))

| #  | b               | b <sup>++</sup> | b*        | b <sup>*++</sup> | b <sup>0</sup>  | b <sup>0++</sup> | Seq. | y               | y <sup>++</sup> | y*              | y <sup>*++</sup> | y <sup>0</sup> | y <sup>0++</sup> | #  |
|----|-----------------|-----------------|-----------|------------------|-----------------|------------------|------|-----------------|-----------------|-----------------|------------------|----------------|------------------|----|
| 1  | 115.0502        | 58.0287         | 98.0237   | 49.5155          |                 |                  | N    |                 |                 |                 |                  |                |                  | 12 |
| 2  | <b>228.1343</b> | 114.5708        | 211.1077  | 106.0575         |                 |                  | L    | 1389.7413       | <b>695.3743</b> | 1372.7147       | 686.8610         | 1371.7307      | 686.3690         | 11 |
| 3  | 343.1612        | 172.0842        | 326.1347  | 163.5710         | 325.1506        | 163.0790         | D    | 1276.6572       | <b>638.8322</b> | 1259.6307       | 630.3190         | 1258.6466      | 629.8270         | 10 |
| 4  | <b>490.2296</b> | 245.6185        | 473.2031  | 237.1052         | 472.2191        | 236.6132         | F    | 1161.6303       | <b>581.3188</b> | 1144.6037       | 572.8055         | 1143.6197      | 572.3135         | 9  |
| 5  | 619.2722        | 310.1397        | 602.2457  | 301.6265         | <b>601.2617</b> | 301.1345         | E    | 1014.5619       | 507.7846        | 997.5353        | 499.2713         | 996.5513       | 498.7793         | 8  |
| 6  | 766.3406        | 383.6740        | 749.3141  | 375.1607         | 748.3301        | 374.6687         | F    | 885.5193        | <b>443.2633</b> | 868.4927        | 434.7500         | 867.5087       | 434.2580         | 7  |
| 7  | 865.4090        | 433.2082        | 848.3825  | 424.6949         | 847.3985        | 424.2029         | V    | 738.4509        | 369.7291        | 721.4243        | 361.2158         | 720.4403       | 360.7238         | 6  |
| 8  | 1002.4680       | 501.7376        | 985.4414  | 493.2243         | 984.4574        | 492.7323         | H    | <b>639.3824</b> | 320.1949        | <b>622.3559</b> | 311.6816         | 621.3719       | 311.1896         | 5  |
| 9  | 1115.5520       | 558.2796        | 1098.5255 | 549.7664         | 1097.5415       | 549.2744         | I    | 502.3235        | 251.6654        | 485.2970        | 243.1521         | 484.3130       | 242.6601         | 4  |
| 10 | 1244.5946       | <b>622.8009</b> | 1227.5681 | 614.2877         | 1226.5840       | 613.7957         | E    | 389.2395        | 195.1234        | 372.2129        | 186.6101         | 371.2289       | 186.1181         | 3  |
| 11 | 1357.6787       | 679.3430        | 1340.6521 | 670.8297         | 1339.6681       | 670.3377         | L    | 260.1969        | 130.6021        | 243.1703        | 122.0888         |                |                  | 2  |
| 12 |                 |                 |           |                  |                 |                  | K    | 147.1128        | 74.0600         | 130.0863        | 65.5468          |                |                  | 1  |

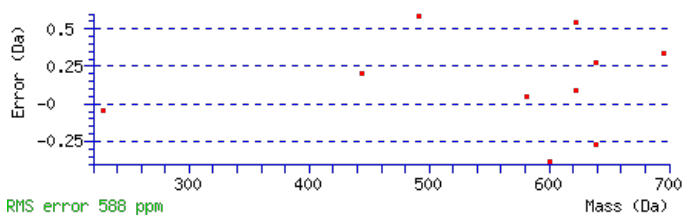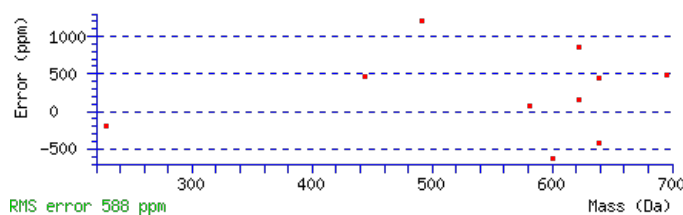NCBI BLAST search of [NLDFEFVHIELK](#)

(Parameters: blastp, nr protein database, expect=20000, no filter, PAM30)

Other BLAST [web gateways](#)

# AT1G02920.1

All matches to this query

| Score | Mr(calc)  | Delta   | Sequence                       |
|-------|-----------|---------|--------------------------------|
| 20.2  | 1502.7769 | -0.0008 | <a href="#">NLDFEFVHIELK</a>   |
| 6.0   | 1502.7803 | -0.0042 | <a href="#">IVMKEVWGADVEK</a>  |
| 6.0   | 1502.7801 | -0.0040 | <a href="#">LNIGAESSSSNRLR</a> |
| 5.8   | 1502.7742 | 0.0018  | <a href="#">KPDPHLWDRSPR</a>   |
| 5.6   | 1502.7778 | -0.0017 | <a href="#">LMPFTVMPPWIR</a>   |
| 2.1   | 1502.7762 | -0.0002 | <a href="#">LGGAAITCKNELEK</a> |
| 1.9   | 1502.7769 | -0.0008 | <a href="#">NLVDWAIPYLGDK</a>  |
| 1.9   | 1502.7769 | -0.0008 | <a href="#">EIFVTKFATEYR</a>   |

Mascot: <http://www.matrixscience.com/>

**Peptide View**MS/MS Fragmentation of **NVDFEFVHVELK**Found in **AT1G02930.1** in **TAIR\_Arabidopsis**, Symbols: GST1, ERD11, ATGSTF3, GSTF6, ATGSTF6 | ATGSTF6 (EARLY RESPONSIVE TO DEHYDRATION 11); glutathione transferase | chr1:661363-662191 REVERSE

Match to Query 6049: 1474.746573 from(492.589467,3+) index(8057)

Title: Elution from: 71.956 to 71.956 scan no 10673 cid35.00 polarity:+

Data file D6h-1\_2.mgf

Click mouse within plot area to zoom in by factor of two about that point

Or,   to  Da Label all possible matches  Label matches used for scoring Show Y-axis 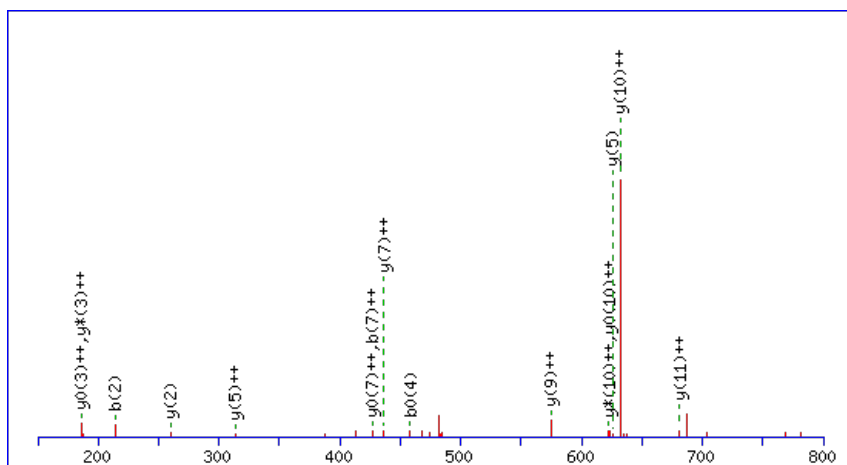Monoisotopic mass of neutral peptide  $M_r(\text{calc})$ : 1474.7456

Fixed modifications: Carbamidomethyl (C) (apply to specified residues or termini only)

Ions Score: 28 Expect: 0.0072

Matches : 15/124 fragment ions using 20 most intense peaks ([help](#))

| #  | b         | b <sup>++</sup> | b*        | b <sup>*++</sup> | b <sup>0</sup> | b <sup>0++</sup> | Seq. | y         | y <sup>++</sup> | y*        | y <sup>*++</sup> | y <sup>0</sup> | y <sup>0++</sup> | #  |
|----|-----------|-----------------|-----------|------------------|----------------|------------------|------|-----------|-----------------|-----------|------------------|----------------|------------------|----|
| 1  | 115.0502  | 58.0287         | 98.0237   | 49.5155          |                |                  | N    |           |                 |           |                  |                |                  | 12 |
| 2  | 214.1186  | 107.5629        | 197.0921  | 99.0497          |                |                  | V    | 1361.7100 | 681.3586        | 1344.6834 | 672.8454         | 1343.6994      | 672.3533         | 11 |
| 3  | 329.1456  | 165.0764        | 312.1190  | 156.5631         | 311.1350       | 156.0711         | D    | 1262.6416 | 631.8244        | 1245.6150 | 623.3111         | 1244.6310      | 622.8191         | 10 |
| 4  | 476.2140  | 238.6106        | 459.1874  | 230.0974         | 458.2034       | 229.6053         | F    | 1147.6146 | 574.3109        | 1130.5881 | 565.7977         | 1129.6041      | 565.3057         | 9  |
| 5  | 605.2566  | 303.1319        | 588.2300  | 294.6186         | 587.2460       | 294.1266         | E    | 1000.5462 | 500.7767        | 983.5197  | 492.2635         | 982.5356       | 491.7715         | 8  |
| 6  | 752.3250  | 376.6661        | 735.2984  | 368.1529         | 734.3144       | 367.6608         | F    | 871.5036  | 436.2554        | 854.4771  | 427.7422         | 853.4930       | 427.2502         | 7  |
| 7  | 851.3934  | 426.2003        | 834.3668  | 417.6871         | 833.3828       | 417.1951         | V    | 724.4352  | 362.7212        | 707.4087  | 354.2080         | 706.4246       | 353.7160         | 6  |
| 8  | 988.4523  | 494.7298        | 971.4258  | 486.2165         | 970.4417       | 485.7245         | H    | 625.3668  | 313.1870        | 608.3402  | 304.6738         | 607.3562       | 304.1817         | 5  |
| 9  | 1087.5207 | 544.2640        | 1070.4942 | 535.7507         | 1069.5102      | 535.2587         | V    | 488.3079  | 244.6576        | 471.2813  | 236.1443         | 470.2973       | 235.6523         | 4  |
| 10 | 1216.5633 | 608.7853        | 1199.5368 | 600.2720         | 1198.5527      | 599.7800         | E    | 389.2395  | 195.1234        | 372.2129  | 186.6101         | 371.2289       | 186.1181         | 3  |
| 11 | 1329.6474 | 665.3273        | 1312.6208 | 656.8141         | 1311.6368      | 656.3220         | L    | 260.1969  | 130.6021        | 243.1703  | 122.0888         |                |                  | 2  |
| 12 |           |                 |           |                  |                |                  | K    | 147.1128  | 74.0600         | 130.0863  | 65.5468          |                |                  | 1  |

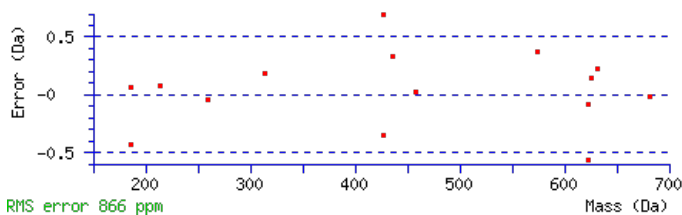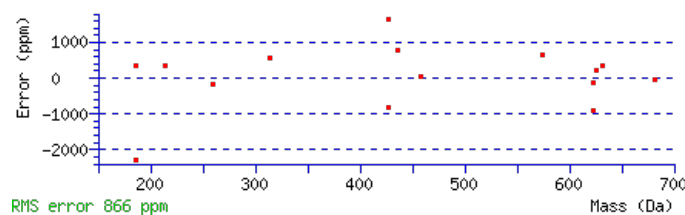NCBI BLAST search of **NVDFEFVHVELK**

(Parameters: blastp, nr protein database, expect=20000, no filter, PAM30)

Other BLAST [web gateways](#)

# AT1G02930.1

All matches to this query

| Score | Mr(calc)  | Delta   | Sequence                        |
|-------|-----------|---------|---------------------------------|
| 28.3  | 1474.7456 | 0.0009  | <a href="#">NVDFEFVHVELK</a>    |
| 5.5   | 1474.7450 | 0.0016  | <a href="#">DVLMEEGGDKVRK</a>   |
| 5.5   | 1474.7463 | 0.0003  | <a href="#">MRILQWGEDRR</a>     |
| 4.4   | 1474.7450 | 0.0016  | <a href="#">LTMRTAQDSVPK</a>    |
| 3.9   | 1474.7450 | 0.0016  | <a href="#">MGAVDVLTGSAGEIR</a> |
| 2.9   | 1474.7449 | 0.0017  | <a href="#">AAMVAEEAAEKSLR</a>  |
| 1.7   | 1474.7490 | -0.0024 | <a href="#">DPKPTSMWSSIVK</a>   |

Mascot: <http://www.matrixscience.com/>




**Mascot Search Results**
**Peptide View**MS/MS Fragmentation of **NQLASLLR**Found in **AT1G03020.1** in **TAIR\_Arabidopsis**, Symbols: | glutaredoxin family protein | chr1:698207-698515 REVERSE

Match to Query 1805:926.495682 from(309.839170,3+) index(3304)

Title: Elution from: 32.216 to 32.216 scan no 4084 cid35.00 polarity:+

Data file D12h-3\_2.mgf

Click mouse within plot area to zoom in by factor of two about that point

Or,   to  Da Label all possible matches  Label matches used for scoring Show Y-axis 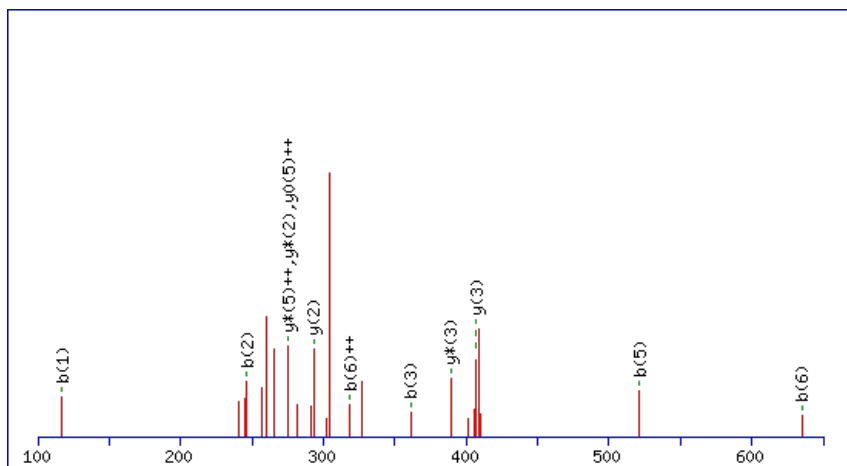Monoisotopic mass of neutral peptide  $M_r(\text{calc})$ : 926.4960

Fixed modifications: Carbamidomethyl (C) (apply to specified residues or termini only)

Ions Score: 26 Expect: 0.036

Matches : 12/70 fragment ions using 19 most intense peaks ([help](#))

| # | b               | b <sup>++</sup> | b*       | b <sup>*++</sup> | b <sup>0</sup> | b <sup>0++</sup> | Seq. | y               | y <sup>++</sup> | y*              | y <sup>*++</sup> | y <sup>0</sup> | y <sup>0++</sup> | # |
|---|-----------------|-----------------|----------|------------------|----------------|------------------|------|-----------------|-----------------|-----------------|------------------|----------------|------------------|---|
| 1 | <b>117.0443</b> | 59.0258         | 99.0207  | 50.0140          |                |                  | N    |                 |                 |                 |                  |                |                  | 8 |
| 2 | <b>247.0969</b> | 124.0521        | 229.0733 | 115.0403         |                |                  | Q    | 811.4662        | 406.2368        | 793.4427        | 397.2250         | 793.4557       | 397.2315         | 7 |
| 3 | <b>361.1780</b> | 181.0926        | 343.1544 | 172.0809         |                |                  | L    | 681.4136        | 341.2104        | 663.3900        | 332.1986         | 663.4030       | 332.2052         | 6 |
| 4 | 433.2122        | 217.1097        | 415.1886 | 208.0979         |                |                  | A    | 567.3325        | 284.1699        | 549.3089        | <b>275.1581</b>  | 549.3219       | <b>275.1646</b>  | 5 |
| 5 | <b>521.2412</b> | 261.1243        | 503.2176 | 252.1125         | 503.2307       | 252.1190         | S    | 495.2984        | 248.1528        | 477.2748        | 239.1410         | 477.2878       | 239.1475         | 4 |
| 6 | <b>635.3223</b> | <b>318.1648</b> | 617.2987 | 309.1530         | 617.3118       | 309.1595         | L    | <b>407.2693</b> | 204.1383        | <b>389.2457</b> | 195.1265         |                |                  | 3 |
| 7 | 749.4034        | 375.2054        | 731.3798 | 366.1936         | 731.3929       | 366.2001         | L    | <b>293.1882</b> | 147.0977        | <b>275.1646</b> | 138.0859         |                |                  | 2 |
| 8 |                 |                 |          |                  |                |                  | R    | 179.1071        | 90.0572         | 161.0835        | 81.0454          |                |                  | 1 |

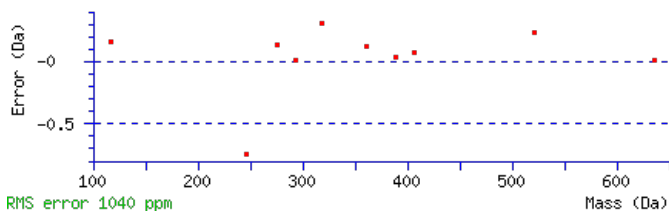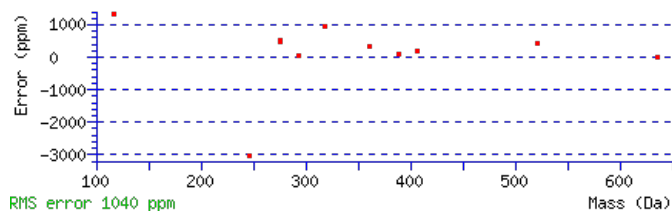NCBI **BLAST** search of [NQLASLLR](#)

(Parameters: blastp, nr protein database, expect=20000, no filter, PAM30)

Other BLAST [web gateways](#)**All matches to this query**

| Score | $M_r(\text{calc})$ | Delta   | Sequence                 |
|-------|--------------------|---------|--------------------------|
| 26.1  | 926.4960           | -0.0003 | <a href="#">NQLASLLR</a> |
| 16.3  | 926.4960           | -0.0003 | <a href="#">RLLEDLR</a>  |

## AT1G03020.1

|      |          |         |                           |
|------|----------|---------|---------------------------|
| 15.6 | 926.4960 | -0.0003 | <a href="#">AGLNSAIR</a>  |
| 12.4 | 926.4982 | -0.0025 | <a href="#">ALSGWLLR</a>  |
| 9.4  | 926.4982 | -0.0025 | <a href="#">LWSQLLR</a>   |
| 8.4  | 926.4960 | -0.0003 | <a href="#">LREEVIR</a>   |
| 7.4  | 926.4933 | 0.0024  | <a href="#">TSTLSALPK</a> |
| 6.8  | 926.4960 | -0.0003 | <a href="#">GTQLNLR</a>   |
| 6.8  | 926.4982 | -0.0025 | <a href="#">EAWKLLR</a>   |
| 6.8  | 926.4960 | -0.0003 | <a href="#">IDREILR</a>   |

Mascot: <http://www.matrixscience.com/>

## Peptide View

MS/MS Fragmentation of **TPLVPASVFDLGGR**

Found in **AT1G03220.1** in **TAIR\_Arabidopsis**, Symbols: | extracellular dermal glycoprotein, putative / EDGP, putative | chr1:787143-788444  
FORWARD

Match to Query 6784: 1544.787674 from(773.401113,2+) index(9587)

Title: Elution from: 86.709 to 86.709 scan no 13135 cid35.00 polarity:+

Data file C7-3\_2.mgf

Click mouse within plot area to zoom in by factor of two about that point

Or,   to  Da

Label all possible matches  Label matches used for scoring

Show Y-axis

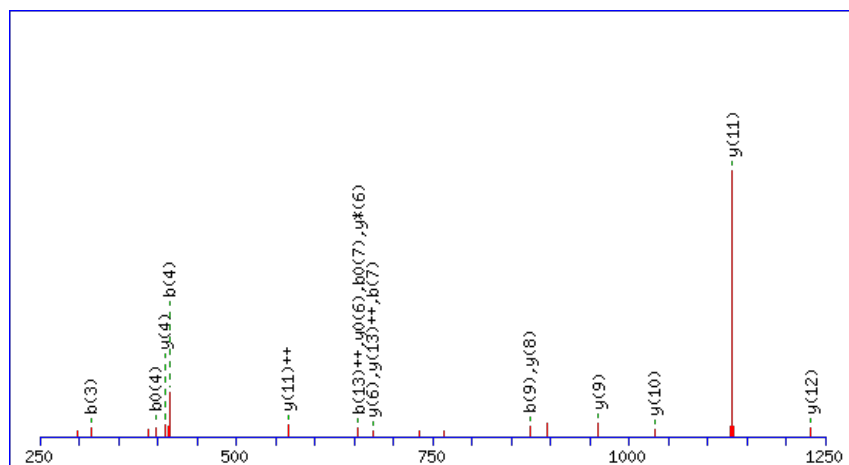

Monoisotopic mass of neutral peptide  $M_r(\text{calc})$ : 1544.7923

Fixed modifications: Carbamidomethyl (C) (apply to specified residues or termini only)

Ions Score: 57 Expect: 9.3e-006

Matches : 18/132 fragment ions using 16 most intense peaks ([help](#))

| #  | b               | b <sup>++</sup> | b <sup>0</sup>  | b <sup>0++</sup> | Seq. | y                | y <sup>++</sup> | y*              | y <sup>*++</sup> | y <sup>0</sup>  | y <sup>0++</sup> | #  |
|----|-----------------|-----------------|-----------------|------------------|------|------------------|-----------------|-----------------|------------------|-----------------|------------------|----|
| 1  | 103.0520        | 52.0296         | 85.0414         | 43.0244          | T    |                  |                 |                 |                  |                 |                  | 15 |
| 2  | 201.1018        | 101.0545        | 183.0912        | 92.0492          | P    | 1443.7549        | 722.3811        | 1425.7313       | 713.3693         | 1425.7443       | 713.3758         | 14 |
| 3  | <b>315.1829</b> | 158.0951        | 297.1723        | 149.0898         | L    | 1345.7051        | <b>673.3562</b> | 1327.6815       | 664.3444         | 1327.6945       | 664.3509         | 13 |
| 4  | <b>415.2483</b> | 208.1278        | <b>397.2378</b> | 199.1225         | V    | <b>1231.6240</b> | 616.3156        | 1213.6004       | 607.3038         | 1213.6134       | 607.3103         | 12 |
| 5  | 513.2981        | 257.1527        | 495.2876        | 248.1474         | P    | <b>1131.5585</b> | <b>566.2829</b> | 1113.5349       | 557.2711         | 1113.5480       | 557.2776         | 11 |
| 6  | 585.3323        | 293.1698        | 567.3217        | 284.1645         | A    | <b>1033.5087</b> | 517.2580        | 1015.4851       | 508.2462         | 1015.4982       | 508.2527         | 10 |
| 7  | <b>673.3613</b> | 337.1843        | <b>655.3508</b> | 328.1790         | S    | <b>961.4746</b>  | 481.2409        | 943.4510        | 472.2291         | 943.4640        | 472.2356         | 9  |
| 8  | 773.4268        | 387.2170        | 755.4162        | 378.2118         | V    | <b>873.4455</b>  | 437.2264        | 855.4219        | 428.2146         | 855.4349        | 428.2211         | 8  |
| 9  | <b>873.4922</b> | 437.2498        | 855.4817        | 428.2445         | V    | 773.3801         | 387.1937        | 755.3565        | 378.1819         | 755.3695        | 378.1884         | 7  |
| 10 | 1021.5577       | 511.2825        | 1003.5471       | 502.2772         | F    | <b>673.3146</b>  | 337.1609        | <b>655.2910</b> | 328.1492         | <b>655.3041</b> | 328.1557         | 6  |
| 11 | 1137.5817       | 569.2945        | 1119.5711       | 560.2892         | D    | 525.2492         | 263.1282        | 507.2256        | 254.1164         | 507.2386        | 254.1229         | 5  |
| 12 | 1251.6628       | 626.3350        | 1233.6522       | 617.3297         | L    | <b>409.2252</b>  | 205.1162        | 391.2016        | 196.1044         |                 |                  | 4  |
| 13 | 1309.6813       | <b>655.3443</b> | 1291.6707       | 646.3390         | G    | 295.1441         | 148.0757        | 277.1205        | 139.0639         |                 |                  | 3  |
| 14 | 1367.6998       | 684.3535        | 1349.6892       | 675.3482         | G    | 237.1256         | 119.0664        | 219.1020        | 110.0546         |                 |                  | 2  |
| 15 |                 |                 |                 |                  | R    | 179.1071         | 90.0572         | 161.0835        | 81.0454          |                 |                  | 1  |

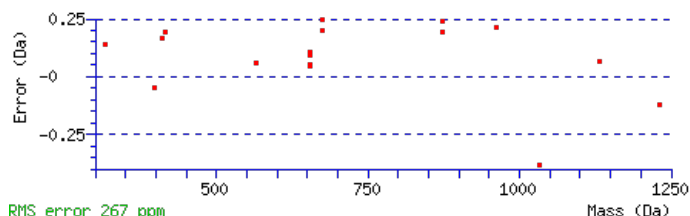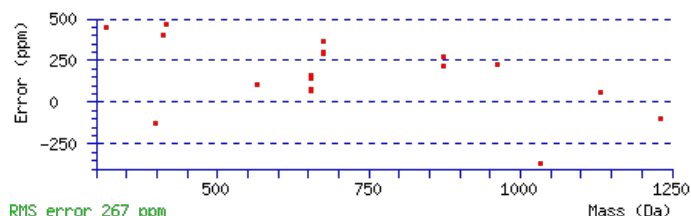

## AT1G03220.1

NCBI **BLAST** search of [TPLVPASVVFDLGGR](#)

(Parameters: blastp, nr protein database, expect=20000, no filter, PAM30)

Other BLAST [web gateways](#)

### All matches to this query

| Score | Mr(calc)  | Delta   | Sequence                        |
|-------|-----------|---------|---------------------------------|
| 57.4  | 1544.7923 | -0.0046 | <a href="#">TPLVPASVVFDLGGR</a> |
| 10.0  | 1544.7880 | -0.0003 | <a href="#">AQKMHRLPLSVAR</a>   |
| 5.0   | 1544.7923 | -0.0046 | <a href="#">LLPSNVPEGSEIVR</a>  |
| 2.4   | 1544.7883 | -0.0006 | <a href="#">ESPPMIIMPVKKK</a>   |

Mascot: <http://www.matrixscience.com/>

## Peptide View

### MS/MS Fragmentation of **VLQDGNVFEK**

Found in **AT1G03475.1** in **TAIR\_Arabidopsis**, Symbols: HEMF1, ATCPO-I, LIN2 | LIN2 (LESION INITIATION 2); coproporphyrinogen oxidase | chr1:869458-871176 REVERSE

Match to Query 3507: 1147.584486 from(574.799519,2+) index(3242)

Title: Elution from: 34.022 to 34.022 scan no 4111 cid35.00 polarity:+

Data file D1d-2\_1.mgf

Click mouse within plot area to zoom in by factor of two about that point

Or,   to  Da

Label all possible matches  Label matches used for scoring

Show Y-axis

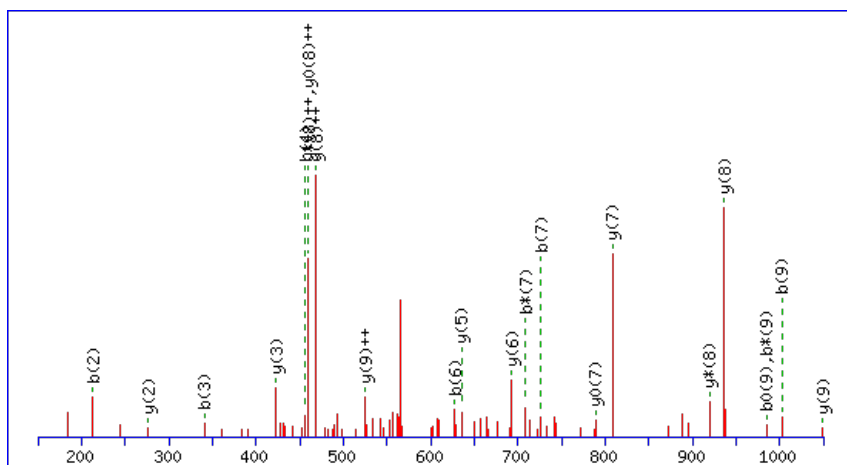

**Monoisotopic mass of neutral peptide Mr(calc):** 1147.5873

**Fixed modifications:** Carbamidomethyl (C) (apply to specified residues or termini only)

**Ions Score:** 51 **Expect:** 4.1e-005

**Matches:** 22/96 fragment ions using 35 most intense peaks ([help](#))

| #  | b                | b <sup>++</sup> | b*              | b <sup>*++</sup> | b <sup>0</sup>  | b <sup>0++</sup> | Seq. | y                | y <sup>++</sup> | y*              | y <sup>*++</sup> | y <sup>0</sup>  | y <sup>0++</sup> | #  |
|----|------------------|-----------------|-----------------|------------------|-----------------|------------------|------|------------------|-----------------|-----------------|------------------|-----------------|------------------|----|
| 1  | 100.0757         | 50.5415         |                 |                  |                 |                  | V    |                  |                 |                 |                  |                 |                  | 10 |
| 2  | <b>213.1598</b>  | 107.0835        |                 |                  |                 |                  | L    | <b>1049.5262</b> | <b>525.2667</b> | 1032.4997       | 516.7535         | 1031.5156       | 516.2615         | 9  |
| 3  | <b>341.2183</b>  | 171.1128        | 324.1918        | 162.5995         |                 |                  | Q    | <b>936.4421</b>  | <b>468.7247</b> | <b>919.4156</b> | <b>460.2114</b>  | 918.4316        | <b>459.7194</b>  | 8  |
| 4  | <b>456.2453</b>  | 228.6263        | 439.2187        | 220.1130         | 438.2347        | 219.6210         | D    | <b>808.3836</b>  | 404.6954        | 791.3570        | 396.1821         | <b>790.3730</b> | 395.6901         | 7  |
| 5  | 513.2667         | 257.1370        | 496.2402        | 248.6237         | 495.2562        | 248.1317         | G    | <b>693.3566</b>  | 347.1819        | 676.3301        | 338.6687         | 675.3461        | 338.1767         | 6  |
| 6  | <b>627.3097</b>  | 314.1585        | 610.2831        | 305.6452         | 609.2991        | 305.1532         | N    | <b>636.3352</b>  | 318.6712        | 619.3086        | 310.1579         | 618.3246        | 309.6659         | 5  |
| 7  | <b>726.3781</b>  | 363.6927        | <b>709.3515</b> | 355.1794         | 708.3675        | 354.6874         | V    | 522.2922         | 261.6498        | 505.2657        | 253.1365         | 504.2817        | 252.6445         | 4  |
| 8  | 873.4465         | 437.2269        | 856.4199        | 428.7136         | 855.4359        | 428.2216         | F    | <b>423.2238</b>  | 212.1155        | 406.1973        | 203.6023         | 405.2132        | 203.1103         | 3  |
| 9  | <b>1002.4891</b> | 501.7482        | <b>985.4625</b> | 493.2349         | <b>984.4785</b> | 492.7429         | E    | <b>276.1554</b>  | 138.5813        | 259.1288        | 130.0681         | 258.1448        | 129.5761         | 2  |
| 10 |                  |                 |                 |                  |                 |                  | K    | 147.1128         | 74.0600         | 130.0863        | 65.5468          |                 |                  | 1  |

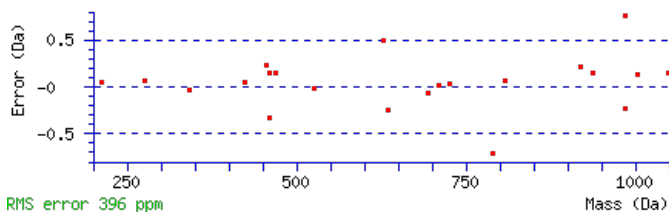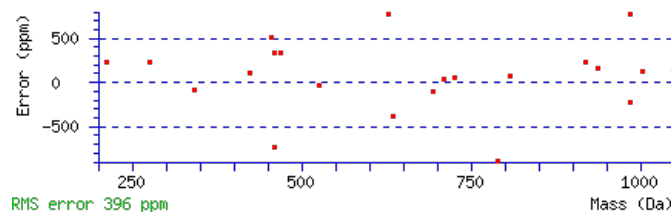

### NCBI BLAST search of **VLQDGNVFEK**

(Parameters: blastp, nr protein database, expect=20000, no filter, PAM30)

Other BLAST [web gateways](#)

All matches to this query

AT1G03475.1

| Score | Mr(calc)  | Delta   | Sequence                   |
|-------|-----------|---------|----------------------------|
| 50.6  | 1147.5873 | -0.0029 | <a href="#">VLQDGNVFEK</a> |

Mascot: <http://www.matrixscience.com/>

### Peptide View

 MS/MS Fragmentation of **DIYSALNAVSGHYVSFGPTAPIPAK**

 Found in **AT1G03600.1** in **TAIR\_Arabidopsis**, Symbols: | photosystem II family protein | chr1:898915-899439 FORWARD

Match to Query 10313: 2603.228754 from(868.750194,3+) index(9913)

Title: Elution from: 93.536 to 93.536 scan no 14004 cid35.00 polarity:+

Data file C7-1\_3.mgf

Click mouse within plot area to zoom in by factor of two about that point

 Or, Plot from  to  Da 

 Label all possible matches  Label matches used for scoring 

 Show Y-axis 
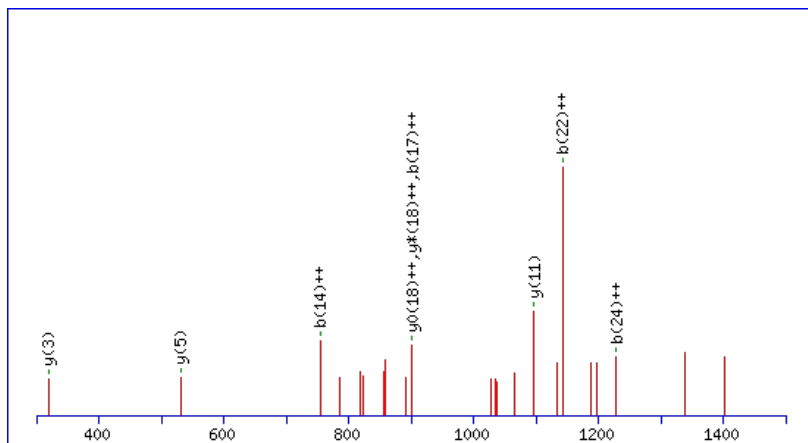
 Monoisotopic mass of neutral peptide **Mr(calc)**: 2603.2259

Fixed modifications: Carbamidomethyl (C) (apply to specified residues or termini only)

Ions Score: 28 Expect: 0.011

 Matches : 9/264 fragment ions using 8 most intense peaks ([help](#))

| #  | b         | b <sup>++</sup>  | b <sup>*</sup> | b <sup>*++</sup> | b <sup>0</sup> | b <sup>0++</sup> | Seq. | y                | y <sup>++</sup> | y <sup>*</sup> | y <sup>*++</sup> | y <sup>0</sup> | y <sup>0++</sup> | #  |
|----|-----------|------------------|----------------|------------------|----------------|------------------|------|------------------|-----------------|----------------|------------------|----------------|------------------|----|
| 1  | 117.0313  | 59.0193          |                |                  | 99.0207        | 50.0140          | D    |                  |                 |                |                  |                |                  | 25 |
| 2  | 231.1124  | 116.0598         |                |                  | 213.1018       | 107.0545         | I    | 2488.2092        | 1244.6082       | 2470.1856      | 1235.5964        | 2470.1986      | 1235.6029        | 24 |
| 3  | 395.1727  | 198.0900         |                |                  | 377.1622       | 189.0847         | Y    | 2374.1281        | 1187.5677       | 2356.1045      | 1178.5559        | 2356.1175      | 1178.5624        | 23 |
| 4  | 483.2018  | 242.1045         |                |                  | 465.1912       | 233.0992         | S    | 2210.0677        | 1105.5375       | 2192.0441      | 1096.5257        | 2192.0571      | 1096.5322        | 22 |
| 5  | 555.2359  | 278.1216         |                |                  | 537.2254       | 269.1163         | A    | 2122.0386        | 1061.5230       | 2104.0150      | 1052.5112        | 2104.0281      | 1052.5177        | 21 |
| 6  | 669.3170  | 335.1622         |                |                  | 651.3065       | 326.1569         | L    | 2050.0045        | 1025.5059       | 2031.9809      | 1016.4941        | 2031.9939      | 1016.5006        | 20 |
| 7  | 785.3540  | 393.1807         | 767.3304       | 384.1689         | 767.3435       | 384.1754         | N    | 1935.9234        | 968.4653        | 1917.8998      | 959.4535         | 1917.9128      | 959.4600         | 19 |
| 8  | 857.3882  | 429.1977         | 839.3646       | 420.1859         | 839.3776       | 420.1924         | A    | 1819.8864        | 910.4468        | 1801.8628      | 901.4350         | 1801.8758      | 901.4415         | 18 |
| 9  | 957.4536  | 479.2304         | 939.4300       | 470.2187         | 939.4431       | 470.2252         | V    | 1747.8522        | 874.4298        | 1729.8286      | 865.4180         | 1729.8417      | 865.4245         | 17 |
| 10 | 1045.4827 | 523.2450         | 1027.4591      | 514.2332         | 1027.4721      | 514.2397         | S    | 1647.7868        | 824.3970        | 1629.7632      | 815.3852         | 1629.7762      | 815.3917         | 16 |
| 11 | 1103.5012 | 552.2542         | 1085.4776      | 543.2424         | 1085.4906      | 543.2489         | G    | 1559.7577        | 780.3825        | 1541.7341      | 771.3707         | 1541.7472      | 771.3772         | 15 |
| 12 | 1243.5512 | 622.2792         | 1225.5276      | 613.2674         | 1225.5406      | 613.2740         | H    | 1501.7392        | 751.3732        | 1483.7156      | 742.3615         | 1483.7287      | 742.3680         | 14 |
| 13 | 1407.6116 | 704.3094         | 1389.5880      | 695.2976         | 1389.6010      | 695.3041         | Y    | 1361.6892        | 681.3482        | 1343.6656      | 672.3364         | 1343.6786      | 672.3430         | 13 |
| 14 | 1507.6770 | <b>754.3421</b>  | 1489.6534      | 745.3304         | 1489.6664      | 745.3369         | V    | 1197.6288        | 599.3181        | 1179.6053      | 590.3063         | 1179.6183      | 590.3128         | 12 |
| 15 | 1595.7061 | 798.3567         | 1577.6825      | 789.3449         | 1577.6955      | 789.3514         | S    | <b>1097.5634</b> | 549.2853        | 1079.5398      | 540.2735         | 1079.5528      | 540.2801         | 11 |
| 16 | 1743.7715 | 872.3894         | 1725.7479      | 863.3776         | 1725.7610      | 863.3841         | F    | 1009.5343        | 505.2708        | 991.5107       | 496.2590         | 991.5238       | 496.2655         | 10 |
| 17 | 1801.7900 | <b>901.3987</b>  | 1783.7664      | 892.3869         | 1783.7795      | 892.3934         | G    | 861.4689         | 431.2381        | 843.4453       | 422.2263         | 843.4583       | 422.2328         | 9  |
| 18 | 1899.8398 | 950.4236         | 1881.8162      | 941.4118         | 1881.8293      | 941.4183         | P    | 803.4504         | 402.2288        | 785.4268       | 393.2170         | 785.4398       | 393.2235         | 8  |
| 19 | 2001.8845 | 1001.4459        | 1983.8610      | 992.4341         | 1983.8740      | 992.4406         | T    | 705.4006         | 353.2039        | 687.3770       | 344.1921         | 687.3900       | 344.1986         | 7  |
| 20 | 2073.9187 | 1037.4630        | 2055.8951      | 1028.4512        | 2055.9081      | 1028.4577        | A    | 603.3559         | 302.1816        | 585.3323       | 293.1698         |                |                  | 6  |
| 21 | 2171.9685 | 1086.4879        | 2153.9449      | 1077.4761        | 2153.9579      | 1077.4826        | P    | <b>531.3217</b>  | 266.1645        | 513.2981       | 257.1527         |                |                  | 5  |
| 22 | 2286.0496 | <b>1143.5284</b> | 2268.0260      | 1134.5166        | 2268.0390      | 1134.5231        | I    | 433.2719         | 217.1396        | 415.2483       | 208.1278         |                |                  | 4  |
| 23 | 2384.0994 | 1192.5533        | 2366.0758      | 1183.5415        | 2366.0888      | 1183.5480        | P    | <b>319.1908</b>  | 160.0990        | 301.1672       | 151.0873         |                |                  | 3  |
| 24 | 2456.1335 | <b>1228.5704</b> | 2438.1099      | 1219.5586        | 2438.1230      | 1219.5651        | A    | 221.1410         | 111.0741        | 203.1174       | 102.0624         |                |                  | 2  |
| 25 |           |                  |                |                  |                |                  | K    | 149.1069         | 75.0571         | 131.0833       | 66.0453          |                |                  | 1  |

# AT1G03600.1

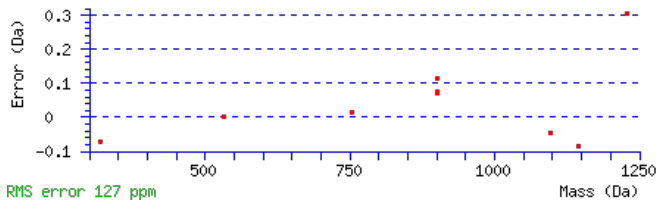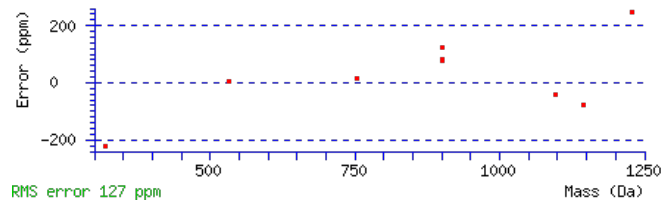

NCBI **BLAST** search of [DIYSALNAVSGHYVSGPTAPIPAK](#)  
(Parameters: blastp, nr protein database, expect=20000, no filter, PAM30)  
Other BLAST [web gateways](#)

## All matches to this query

| Score | Mr(calc)  | Delta   | Sequence                                 |
|-------|-----------|---------|------------------------------------------|
| 28.5  | 2603.2259 | 0.0029  | <a href="#">DIYSALNAVSGHYVSGPTAPIPAK</a> |
| 13.8  | 2603.2333 | -0.0045 | <a href="#">APLDLITVLDVSGSMDGVKMELMK</a> |
| 8.0   | 2603.2323 | -0.0036 | <a href="#">EMERLQKPIYNLSRQAAEVHR</a>    |
| 7.2   | 2603.2346 | -0.0058 | <a href="#">IAQGAAKGLLYLHEGCDPHILHR</a>  |
| 3.8   | 2603.2305 | -0.0017 | <a href="#">SIGGILGKWSMLVLVGDMDHRDMR</a> |
| 1.5   | 2603.2333 | -0.0045 | <a href="#">APLDLITVLDVSGSMDGVKMELMK</a> |

Mascot: <http://www.matrixscience.com>



**Peptide View**MS/MS Fragmentation of **ADEPVFVDFWAPWCGPCK**Found in **AT1G03680.1** in **TAIR\_Arabidopsis**, Symbols: ATM1, TRX-M1, ATHM1 | ATHM1 (Arabidopsis thioredoxin M-type 1); thiol-disulfide exchange intermediate | chr1:916989-917864 REVERSE

Match to Query 9813: 2179.952354 from(1090.983453,2+) index(10805)

Title: Elution from: 110.381 to 110.381 scan no 15798 cid35.00 polarity:+

Data file C7-3\_2.mgf

Click mouse within plot area to zoom in by factor of two about that point

Or,  to  Da Label all possible matches  Label matches used for scoring Show Y-axis 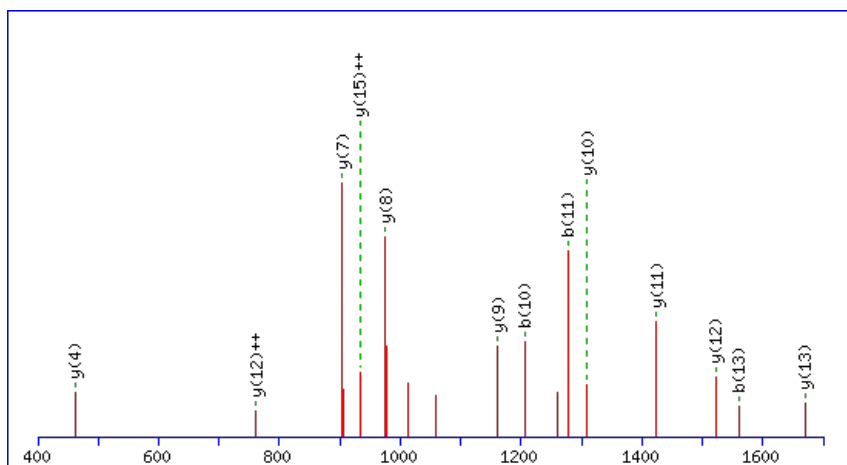Monoisotopic mass of neutral peptide  $M_r(\text{calc})$ : 2179.9496

Fixed modifications: Carbamidomethyl (C) (apply to specified residues or termini only)

Ions Score: 67 Expect: 1.9e-007

Matches : 13/148 fragment ions using 15 most intense peaks ([help](#))

| #  | b         | b <sup>++</sup> | b <sup>0</sup> | b <sup>0++</sup> | Seq. | y         | y <sup>++</sup> | y <sup>*</sup> | y <sup>*++</sup> | y <sup>0</sup> | y <sup>0++</sup> | #  |
|----|-----------|-----------------|----------------|------------------|------|-----------|-----------------|----------------|------------------|----------------|------------------|----|
| 1  | 72.0444   | 36.5258         |                |                  | A    |           |                 |                |                  |                |                  | 18 |
| 2  | 187.0713  | 94.0393         | 169.0608       | 85.0340          | D    | 2109.9197 | 1055.4635       | 2092.8932      | 1046.9502        | 2091.9092      | 1046.4582        | 17 |
| 3  | 316.1139  | 158.5606        | 298.1034       | 149.5553         | E    | 1994.8928 | 997.9500        | 1977.8662      | 989.4368         | 1976.8822      | 988.9448         | 16 |
| 4  | 413.1667  | 207.0870        | 395.1561       | 198.0817         | P    | 1865.8502 | 933.4287        | 1848.8236      | 924.9155         | 1847.8396      | 924.4235         | 15 |
| 5  | 512.2351  | 256.6212        | 494.2245       | 247.6159         | V    | 1768.7974 | 884.9024        | 1751.7709      | 876.3891         | 1750.7869      | 875.8971         | 14 |
| 6  | 659.3035  | 330.1554        | 641.2930       | 321.1501         | F    | 1669.7290 | 835.3681        | 1652.7025      | 826.8549         | 1651.7185      | 826.3629         | 13 |
| 7  | 758.3719  | 379.6896        | 740.3614       | 370.6843         | V    | 1522.6606 | 761.8339        | 1505.6341      | 753.3207         | 1504.6500      | 752.8287         | 12 |
| 8  | 873.3989  | 437.2031        | 855.3883       | 428.1978         | D    | 1423.5922 | 712.2997        | 1406.5656      | 703.7865         | 1405.5816      | 703.2945         | 11 |
| 9  | 1020.4673 | 510.7373        | 1002.4567      | 501.7320         | F    | 1308.5652 | 654.7863        | 1291.5387      | 646.2730         |                |                  | 10 |
| 10 | 1206.5466 | 603.7769        | 1188.5360      | 594.7717         | W    | 1161.4968 | 581.2521        | 1144.4703      | 572.7388         |                |                  | 9  |
| 11 | 1277.5837 | 639.2955        | 1259.5732      | 630.2902         | A    | 975.4175  | 488.2124        | 958.3910       | 479.6991         |                |                  | 8  |
| 12 | 1374.6365 | 687.8219        | 1356.6259      | 678.8166         | P    | 904.3804  | 452.6938        | 887.3539       | 444.1806         |                |                  | 7  |
| 13 | 1560.7158 | 780.8615        | 1542.7052      | 771.8563         | W    | 807.3276  | 404.1675        | 790.3011       | 395.6542         |                |                  | 6  |
| 14 | 1720.7464 | 860.8769        | 1702.7359      | 851.8716         | C    | 621.2483  | 311.1278        | 604.2218       | 302.6145         |                |                  | 5  |
| 15 | 1777.7679 | 889.3876        | 1759.7573      | 880.3823         | G    | 461.2177  | 231.1125        | 444.1911       | 222.5992         |                |                  | 4  |
| 16 | 1874.8207 | 937.9140        | 1856.8101      | 928.9087         | P    | 404.1962  | 202.6017        | 387.1697       | 194.0885         |                |                  | 3  |
| 17 | 2034.8513 | 1017.9293       | 2016.8408      | 1008.9240        | C    | 307.1435  | 154.0754        | 290.1169       | 145.5621         |                |                  | 2  |
| 18 |           |                 |                |                  | K    | 147.1128  | 74.0600         | 130.0863       | 65.5468          |                |                  | 1  |

AT1G03680.1

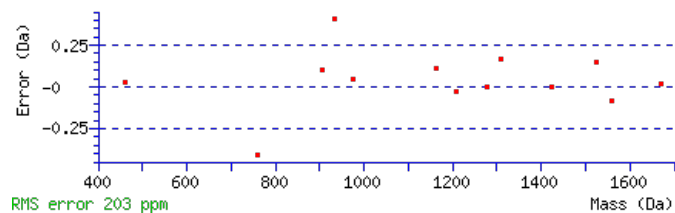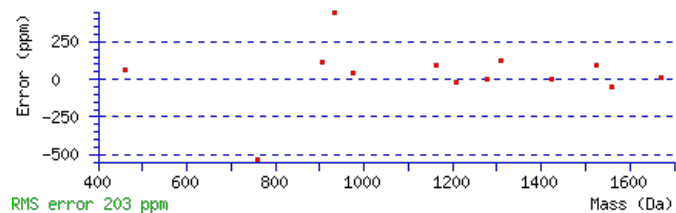

NCBI **BLAST** search of [ADEPVFVDFWAPWCGPCK](#)  
(Parameters: blastp, nr protein database, expect=20000, no filter, PAM30)

Other BLAST [web gateways](#)

**All matches to this query**

| Score | Mr(calc)  | Delta  | Sequence                           |
|-------|-----------|--------|------------------------------------|
| 67.1  | 2179.9496 | 0.0028 | <a href="#">ADEPVFVDFWAPWCGPCK</a> |

Mascot: <http://www.matrixscience.com/>



# Mascot Search Results

## Peptide View

MS/MS Fragmentation of **YYSMDLLSVSNPVR**

Found in **AT1G03870.1** in **TAIR\_Arabidopsis**, Symbols: FLA9 | FLA9 | chr1:982624-983367 REVERSE

Match to Query 8694: 1757.827458 from(879.921005,2+) index(9508)

Title: Elution from: 85.028 to 85.028 scan no 12795 cid35.00 polarity:+

Data file 0-2\_1.mgf

Click mouse within plot area to zoom in by factor of two about that point

Or,   to  Da

Label all possible matches  Label matches used for scoring

Show Y-axis

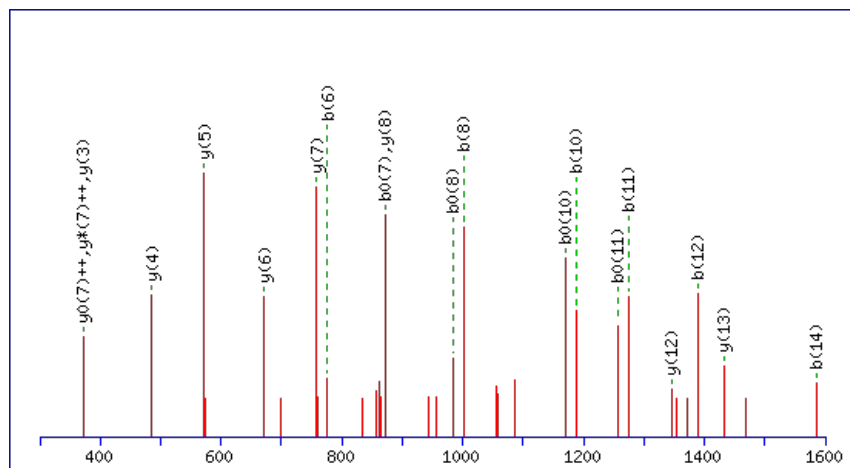

**Monoisotopic mass of neutral peptide Mr(calc):** 1757.8294

**Fixed modifications:** Carbamidomethyl (C) (apply to specified residues or termini only)

**Ions Score:** 73 **Expect:** 1.2e-007

**Matches:** 20/134 fragment ions using 21 most intense peaks ([help](#))

| #  | b                | b <sup>++</sup> | b*        | b <sup>*++</sup> | b <sup>0</sup>   | b <sup>0++</sup> | Seq. | y                | y <sup>++</sup> | y*        | y <sup>*++</sup> | y <sup>0</sup> | y <sup>0++</sup> | #  |
|----|------------------|-----------------|-----------|------------------|------------------|------------------|------|------------------|-----------------|-----------|------------------|----------------|------------------|----|
| 1  | 164.0706         | 82.5389         |           |                  |                  |                  | Y    |                  |                 |           |                  |                |                  | 15 |
| 2  | 327.1339         | 164.0706        |           |                  |                  |                  | Y    | 1595.7734        | 798.3903        | 1578.7468 | 789.8771         | 1577.7628      | 789.3850         | 14 |
| 3  | 414.1660         | 207.5866        |           |                  | 396.1554         | 198.5813         | S    | <b>1432.7101</b> | 716.8587        | 1415.6835 | 708.3454         | 1414.6995      | 707.8534         | 13 |
| 4  | 545.2064         | 273.1069        |           |                  | 527.1959         | 264.1016         | M    | <b>1345.6780</b> | 673.3427        | 1328.6515 | 664.8294         | 1327.6675      | 664.3374         | 12 |
| 5  | 660.2334         | 330.6203        |           |                  | 642.2228         | 321.6151         | D    | 1214.6375        | 607.8224        | 1197.6110 | 599.3091         | 1196.6270      | 598.8171         | 11 |
| 6  | <b>775.2603</b>  | 388.1338        |           |                  | 757.2498         | 379.1285         | D    | 1099.6106        | 550.3089        | 1082.5840 | 541.7957         | 1081.6000      | 541.3037         | 10 |
| 7  | 888.3444         | 444.6758        |           |                  | <b>870.3338</b>  | 435.6706         | L    | 984.5837         | 492.7955        | 967.5571  | 484.2822         | 966.5731       | 483.7902         | 9  |
| 8  | <b>1001.4285</b> | 501.2179        |           |                  | <b>983.4179</b>  | 492.2126         | L    | <b>871.4996</b>  | 436.2534        | 854.4730  | 427.7402         | 853.4890       | 427.2482         | 8  |
| 9  | 1088.4605        | 544.7339        |           |                  | 1070.4499        | 535.7286         | S    | <b>758.4155</b>  | 379.7114        | 741.3890  | <b>371.1981</b>  | 740.4050       | <b>370.7061</b>  | 7  |
| 10 | <b>1187.5289</b> | 594.2681        |           |                  | <b>1169.5183</b> | 585.2628         | V    | <b>671.3835</b>  | 336.1954        | 654.3570  | 327.6821         | 653.3729       | 327.1901         | 6  |
| 11 | <b>1274.5609</b> | 637.7841        |           |                  | <b>1256.5504</b> | 628.7788         | S    | <b>572.3151</b>  | 286.6612        | 555.2885  | 278.1479         | 554.3045       | 277.6559         | 5  |
| 12 | <b>1388.6039</b> | 694.8056        | 1371.5773 | 686.2923         | 1370.5933        | 685.8003         | N    | <b>485.2831</b>  | 243.1452        | 468.2565  | 234.6319         |                |                  | 4  |
| 13 | 1485.6566        | 743.3319        | 1468.6301 | 734.8187         | 1467.6461        | 734.3267         | P    | <b>371.2401</b>  | 186.1237        | 354.2136  | 177.6104         |                |                  | 3  |
| 14 | <b>1584.7250</b> | 792.8662        | 1567.6985 | 784.3529         | 1566.7145        | 783.8609         | V    | 274.1874         | 137.5973        | 257.1608  | 129.0840         |                |                  | 2  |
| 15 |                  |                 |           |                  |                  |                  | R    | 175.1190         | 88.0631         | 158.0924  | 79.5498          |                |                  | 1  |

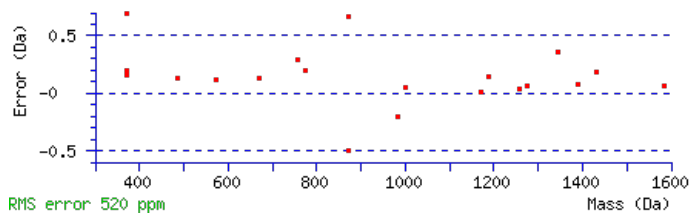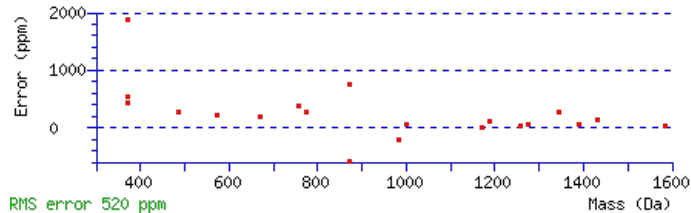

NCBI **BLAST** search of [YYSMDLLSVSNPVR](#)

## AT1G03870.1

(Parameters: blastp, nr protein database, expect=20000, no filter, PAM30)

Other BLAST [web gateways](#)

### All matches to this query

| Score | Mr(calc)  | Delta   | Sequence                         |
|-------|-----------|---------|----------------------------------|
| 73.4  | 1757.8294 | -0.0020 | <a href="#">YYSMDLLSVSNPVR</a>   |
| 1.9   | 1757.8254 | 0.0021  | <a href="#">ENASMGYTSKLLSDAR</a> |

Mascot: <http://www.matrixscience.com/>

**Peptide View**MS/MS Fragmentation of **AEKLILADNDANK**Found in **AT1G03990.1** in **TAIR\_Arabidopsis**, Symbols: | alcohol oxidase-related | chr1:1024846-1027615 FORWARD

Match to Query 5867: 1430.697286 from(716.355919,2+) index(8297)

Title: Elution from: 73.071 to 73.071 scan no 10850 cid35.00 polarity:+

Data file C7-3\_1.mgf

Click mouse within plot area to zoom in by factor of two about that point

Or,   to  Da Label all possible matches  Label matches used for scoring Show Y-axis 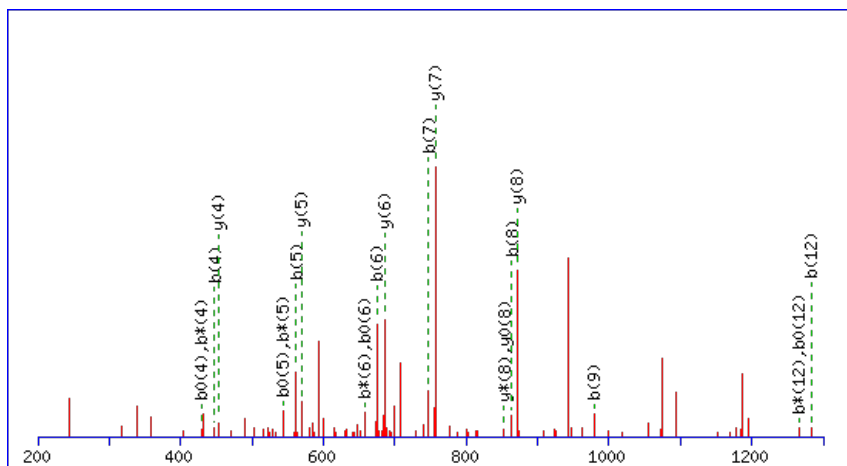Monoisotopic mass of neutral peptide  $M_r(\text{calc})$ : 1430.6960

Fixed modifications: Carbamidomethyl (C) (apply to specified residues or termini only)

Ions Score: 29 Expect: 0.01

Matches : 22/132 fragment ions using 49 most intense peaks ([help](#))

| #  | b                | b <sup>++</sup> | b*               | b <sup>*++</sup> | b <sup>0</sup>   | b <sup>0++</sup> | Seq. | y               | y <sup>++</sup> | y*              | y <sup>*++</sup> | y <sup>0</sup>  | y <sup>0++</sup> | #  |
|----|------------------|-----------------|------------------|------------------|------------------|------------------|------|-----------------|-----------------|-----------------|------------------|-----------------|------------------|----|
| 1  | 73.0414          | 37.0244         |                  |                  |                  |                  | A    |                 |                 |                 |                  |                 |                  | 13 |
| 2  | 203.0811         | 102.0442        |                  |                  | 185.0705         | 93.0389          | E    | 1359.6691       | 680.3382        | 1341.6455       | 671.3264         | 1341.6585       | 671.3329         | 12 |
| 3  | 333.1701         | 167.0887        | 315.1465         | 158.0769         | 315.1595         | 158.0834         | K    | 1229.6295       | 615.3184        | 1211.6059       | 606.3066         | 1211.6189       | 606.3131         | 11 |
| 4  | <b>447.2512</b>  | 224.1292        | <b>429.2276</b>  | 215.1174         | <b>429.2406</b>  | 215.1239         | L    | 1099.5404       | 550.2738        | 1081.5168       | 541.2621         | 1081.5299       | 541.2686         | 10 |
| 5  | <b>561.3323</b>  | 281.1698        | <b>543.3087</b>  | 272.1580         | <b>543.3217</b>  | 272.1645         | I    | 985.4593        | 493.2333        | 967.4357        | 484.2215         | 967.4488        | 484.2280         | 9  |
| 6  | <b>675.4134</b>  | 338.2103        | <b>657.3898</b>  | 329.1985         | <b>657.4028</b>  | 329.2050         | L    | <b>871.3782</b> | 436.1927        | <b>853.3546</b> | 427.1810         | <b>853.3677</b> | 427.1875         | 8  |
| 7  | <b>747.4475</b>  | 374.2274        | 729.4239         | 365.2156         | 729.4370         | 365.2221         | A    | <b>757.2971</b> | 379.1522        | 739.2735        | 370.1404         | 739.2866        | 370.1469         | 7  |
| 8  | <b>863.4715</b>  | 432.2394        | 845.4479         | 423.2276         | 845.4609         | 423.2341         | D    | <b>685.2630</b> | 343.1351        | 667.2394        | 334.1233         | 667.2524        | 334.1298         | 6  |
| 9  | <b>979.5085</b>  | 490.2579        | 961.4849         | 481.2461         | 961.4979         | 481.2526         | N    | <b>569.2390</b> | 285.1231        | 551.2154        | 276.1113         | 551.2284        | 276.1179         | 5  |
| 10 | 1095.5325        | 548.2699        | 1077.5089        | 539.2581         | 1077.5219        | 539.2646         | D    | <b>453.2020</b> | 227.1046        | 435.1784        | 218.0928         | 435.1914        | 218.0994         | 4  |
| 11 | 1167.5666        | 584.2870        | 1149.5431        | 575.2752         | 1149.5561        | 575.2817         | A    | 337.1780        | 169.0926        | 319.1544        | 160.0809         |                 |                  | 3  |
| 12 | <b>1283.6036</b> | 642.3055        | <b>1265.5800</b> | 633.2937         | <b>1265.5931</b> | 633.3002         | N    | 265.1439        | 133.0756        | 247.1203        | 124.0638         |                 |                  | 2  |
| 13 |                  |                 |                  |                  |                  |                  | K    | 149.1069        | 75.0571         | 131.0833        | 66.0453          |                 |                  | 1  |

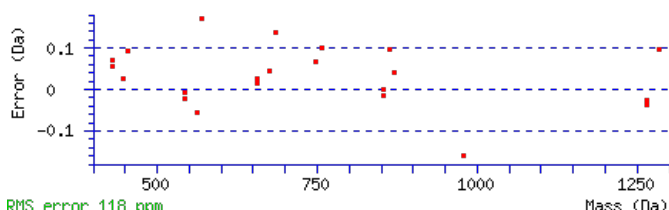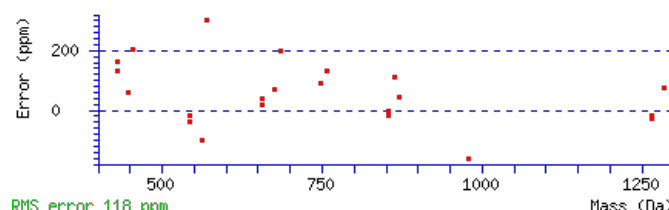NCBI **BLAST** search of **AEKLILADNDANK**

(Parameters: blastp, nr protein database, expect=20000, no filter, PAM30)

Other BLAST [web gateways](#)

AT1G03990.1

All matches to this query

| Score | Mr(calc)  | Delta   | Sequence                      |
|-------|-----------|---------|-------------------------------|
| 28.8  | 1430.6960 | 0.0013  | <a href="#">AEKLILADNDANK</a> |
| 0.0   | 1430.6982 | -0.0009 | <a href="#">KALQLPDYPDQK</a>  |

Mascot: <http://www.matrixscience.com/>

**Peptide View**MS/MS Fragmentation of **KNISFYKPK**

Found in **AT1G04090.1** in **TAIR\_Arabidopsis**, Symbols: | similar to unknown protein [Arabidopsis thaliana] (TAIR:AT5G18490.1); similar to unknown protein [Arabidopsis thaliana] (TAIR:AT5G43950.1); similar to unknown protein [Arabidopsis thaliana] (TAIR:AT3G04350.1); similar to hypothetical pr

Match to Query 3940: 1136.601326 from(569.307939,2+) index(5500)

Title: Elution from: 48.777 to 48.777 scan no 6807 cid35.00 polarity:+

Data file 0-1\_1.mgf

Click mouse within plot area to zoom in by factor of two about that point

Or,   to  Da

Label all possible matches  Label matches used for scoring

Show Y-axis

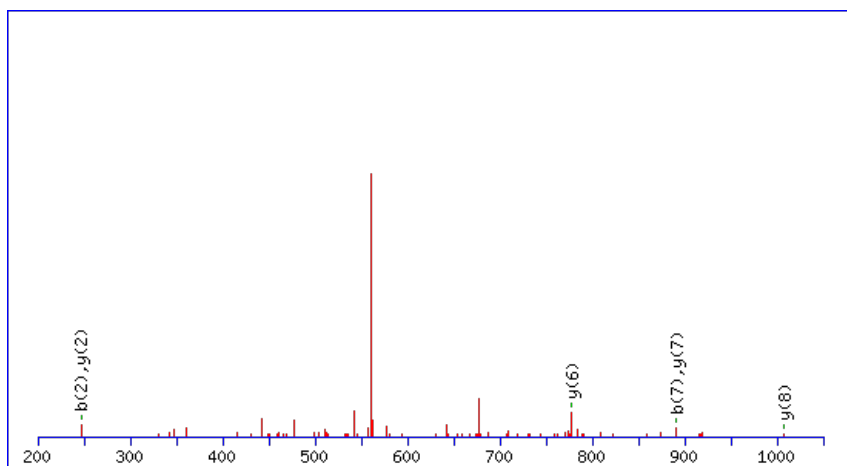

**Monoisotopic mass of neutral peptide Mr(calc):** 1136.6004

**Fixed modifications:** Carbamidomethyl (C) (apply to specified residues or termini only)

**Ions Score:** 26 **Expect:** 0.0098

**Matches:** 6/80 fragment ions using 8 most intense peaks ([help](#))

| # | b               | b <sup>++</sup> | b*       | b <sup>+++</sup> | b <sup>0</sup> | b <sup>0++</sup> | Seq. | y                | y <sup>++</sup> | y*       | y <sup>+++</sup> | y <sup>0</sup> | y <sup>0++</sup> | # |
|---|-----------------|-----------------|----------|------------------|----------------|------------------|------|------------------|-----------------|----------|------------------|----------------|------------------|---|
| 1 | 131.0963        | 66.0518         | 113.0727 | 57.0400          |                |                  | K    |                  |                 |          |                  |                |                  | 9 |
| 2 | <b>247.1333</b> | 124.0703        | 229.1097 | 115.0585         |                |                  | N    | <b>1007.5187</b> | 504.2630        | 989.4951 | 495.2512         | 989.5081       | 495.2577         | 8 |
| 3 | 361.2144        | 181.1108        | 343.1908 | 172.0990         |                |                  | I    | <b>891.4817</b>  | 446.2445        | 873.4581 | 437.2327         | 873.4711       | 437.2392         | 7 |
| 4 | 449.2435        | 225.1254        | 431.2199 | 216.1136         | 431.2329       | 216.1201         | S    | <b>777.4006</b>  | 389.2039        | 759.3770 | 380.1921         | 759.3900       | 380.1986         | 6 |
| 5 | 597.3089        | 299.1581        | 579.2853 | 290.1463         | 579.2984       | 290.1528         | F    | 689.3715         | 345.1894        | 671.3479 | 336.1776         |                |                  | 5 |
| 6 | 761.3693        | 381.1883        | 743.3457 | 372.1765         | 743.3587       | 372.1830         | Y    | 541.3061         | 271.1567        | 523.2825 | 262.1449         |                |                  | 4 |
| 7 | <b>891.4583</b> | 446.2328        | 873.4347 | 437.2210         | 873.4477       | 437.2275         | K    | 377.2457         | 189.1265        | 359.2221 | 180.1147         |                |                  | 3 |
| 8 | 989.5081        | 495.2577        | 971.4845 | 486.2459         | 971.4975       | 486.2524         | P    | <b>247.1567</b>  | 124.0820        | 229.1331 | 115.0702         |                |                  | 2 |
| 9 |                 |                 |          |                  |                |                  | K    | 149.1069         | 75.0571         | 131.0833 | 66.0453          |                |                  | 1 |

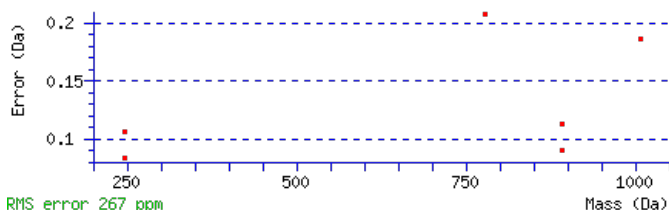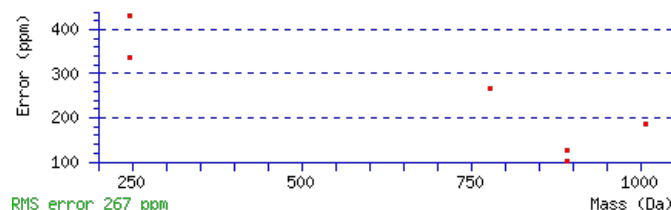

NCBI **BLAST** search of **KNISFYKPK**

(Parameters: blastp, nr protein database, expect=20000, no filter, PAM30)

Other BLAST [web gateways](#)

**All matches to this query**

## AT1G04090.1

| Score | Mr(calc)  | Delta  | Sequence                    |
|-------|-----------|--------|-----------------------------|
| 25.7  | 1136.6004 | 0.0009 | <a href="#">KNISFYKPK</a>   |
| 12.4  | 1136.6004 | 0.0009 | <a href="#">AGKWEVPLPK</a>  |
| 7.6   | 1136.6004 | 0.0009 | <a href="#">FPDPLPILGR</a>  |
| 5.5   | 1136.5982 | 0.0032 | <a href="#">TVVGDVAPIPR</a> |
| 3.3   | 1136.6004 | 0.0009 | <a href="#">HWIVSEIHK</a>   |
| 3.1   | 1136.5982 | 0.0031 | <a href="#">VKELGELAHK</a>  |
| 1.4   | 1136.6004 | 0.0009 | <a href="#">AVERVIFYK</a>   |
| 1.2   | 1136.6009 | 0.0005 | <a href="#">VKNLRTFSR</a>   |
| 0.9   | 1136.6004 | 0.0009 | <a href="#">KALPIYTYR</a>   |

Mascot: <http://www.matrixscience.com/>




**Mascot Search Results**
**Peptide View**MS/MS Fragmentation of **FMELPKLK**

Found in **AT1G04300.1** in **TAIR\_Arabidopsis**, Symbols: | similar to meprin and TRAF homology domain-containing protein / MATH domain-containing protein [Arabidopsis thaliana] (TAIR:AT5G43560.1); similar to meprin and TRAF homology domain-containing protein / MATH domain-containing protein [Ar

Match to Query 2817: 1014.541144 from(508.277848,2+) index(6541)

Title: Elution from: 56.531 to 56.531 scan no 8268 cid35.00 polarity:+

Data file D1d-3\_1.mgf

Click mouse within plot area to zoom in by factor of two about that point

Or,   to  Da

Label all possible matches  Label matches used for scoring

Show Y-axis

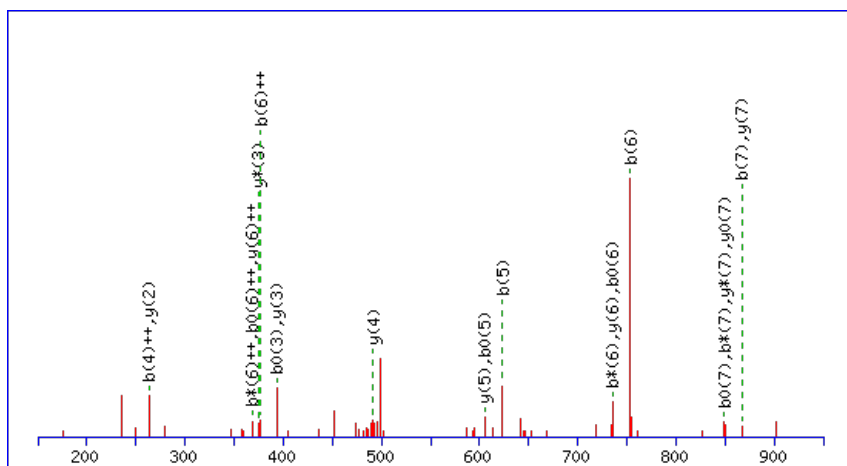

**Monoisotopic mass of neutral peptide Mr(calc)**: 1014.5432

**Fixed modifications**: Carbamidomethyl (C) (apply to specified residues or termini only)

**Ions Score**: 42 **Expect**: 0.0004

**Matches**: 23/60 fragment ions using 22 most intense peaks ([help](#))

| # | b        | b <sup>++</sup> | b*       | b <sup>+++</sup> | b <sup>0</sup> | b <sup>0++</sup> | Seq. | y        | y <sup>++</sup> | y*       | y <sup>+++</sup> | y <sup>0</sup> | y <sup>0++</sup> | # |
|---|----------|-----------------|----------|------------------|----------------|------------------|------|----------|-----------------|----------|------------------|----------------|------------------|---|
| 1 | 149.0727 | 75.0400         |          |                  |                |                  | F    |          |                 |          |                  |                |                  | 8 |
| 2 | 281.1102 | 141.0588        |          |                  |                |                  | M    | 867.4851 | 434.2462        | 849.4615 | 425.2344         | 849.4745       | 425.2409         | 7 |
| 3 | 411.1499 | 206.0786        |          |                  | 393.1393       | 197.0733         | E    | 735.4475 | 368.2274        | 717.4239 | 359.2156         | 717.4370       | 359.2221         | 6 |
| 4 | 525.2310 | 263.1191        |          |                  | 507.2204       | 254.1138         | L    | 605.4079 | 303.2076        | 587.3843 | 294.1958         |                |                  | 5 |
| 5 | 623.2808 | 312.1440        |          |                  | 605.2702       | 303.1387         | P    | 491.3268 | 246.1670        | 473.3032 | 237.1552         |                |                  | 4 |
| 6 | 753.3698 | 377.1885        | 735.3462 | 368.1767         | 735.3592       | 368.1833         | K    | 393.2770 | 197.1421        | 375.2534 | 188.1303         |                |                  | 3 |
| 7 | 867.4509 | 434.2291        | 849.4273 | 425.2173         | 849.4403       | 425.2238         | L    | 263.1880 | 132.0976        | 245.1644 | 123.0858         |                |                  | 2 |
| 8 |          |                 |          |                  |                |                  | K    | 149.1069 | 75.0571         | 131.0833 | 66.0453          |                |                  | 1 |

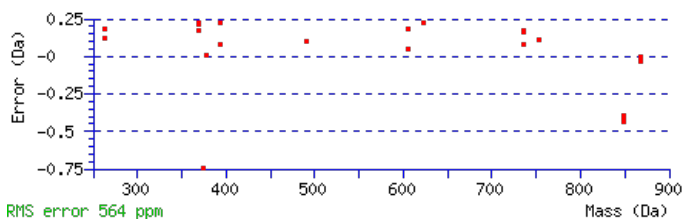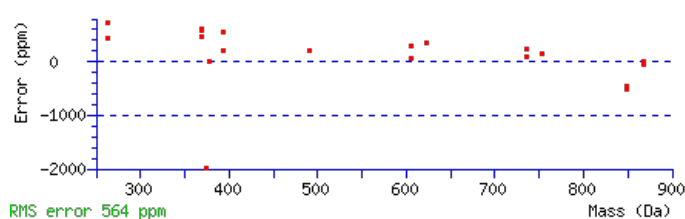NCBI BLAST search of **FMELPKLK**

(Parameters: blastp, nr protein database, expect=20000, no filter, PAM30)

Other BLAST [web gateways](#)

**All matches to this query**

| Score | Mr(calc) | Delta | Sequence |
|-------|----------|-------|----------|
|       |          |       |          |

**AT1G04300.1**

|      |           |         |                           |
|------|-----------|---------|---------------------------|
| 41.8 | 1014.5432 | -0.0021 | <a href="#">FMELPKLK</a>  |
| 29.9 | 1014.5410 | 0.0002  | <a href="#">KMLEVQLK</a>  |
| 24.7 | 1014.5403 | 0.0009  | <a href="#">RTFLSHIK</a>  |
| 20.3 | 1014.5403 | 0.0008  | <a href="#">LFNNPRIK</a>  |
| 19.8 | 1014.5410 | 0.0002  | <a href="#">LSGKVLEMK</a> |
| 19.5 | 1014.5432 | -0.0021 | <a href="#">LLYCVPLK</a>  |
| 14.5 | 1014.5410 | 0.0002  | <a href="#">KVMEKEIK</a>  |
| 11.4 | 1014.5410 | 0.0002  | <a href="#">KMQDLLIK</a>  |
| 10.8 | 1014.5403 | 0.0009  | <a href="#">FLPKANGVR</a> |
| 10.5 | 1014.5410 | 0.0002  | <a href="#">LMKIEDKK</a>  |

**Mascot:** <http://www.matrixscience.com/>

## Peptide View

MS/MS Fragmentation of **GVVATIDAVEGCTGVNVAVMVGGFPR**

Found in **AT1G04410.1** in **TAIR\_Arabidopsis**, Symbols: | malate dehydrogenase, cytosolic, putative | chr1:1189417-1191266 REVERSE

Match to Query 10296: 2578.252845 from(860.424891,3+) index(4693)

Title: Elution from 43.192 to 43.192 scan no 5910 cid35.00 polarity:+

Data file C7-1\_3.mgf

Click mouse within plot area to zoom in by factor of two about that point

Or,   to  Da

Label all possible matches  Label matches used for scoring

Show Y-axis

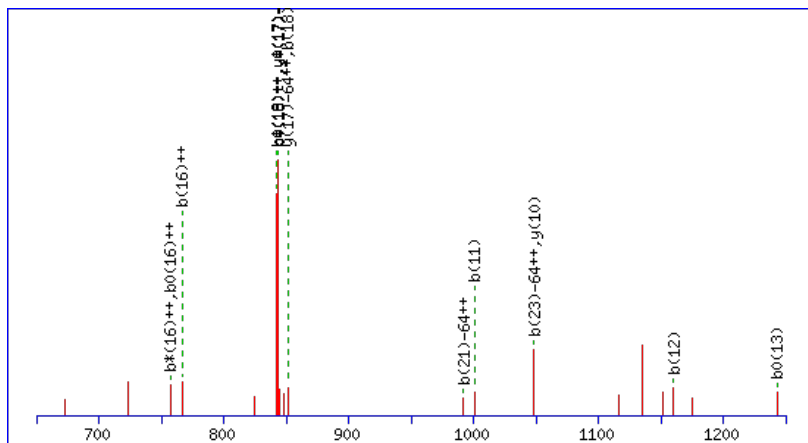

Monoisotopic mass of neutral peptide  $M_r(\text{calc})$ : 2578.2520

Fixed modifications: Carbamidomethyl (C) (apply to specified residues or termini only)

Variable modifications:

M20 : Oxidation (M), with neutral losses 63.9983 (shown in table), 0.0000

Ions Score: 22 Expect: 0.022

Matches : 15/372 fragment ions using 14 most intense peaks ([help](#))

| #  | b         | b <sup>++</sup> | b*        | b <sup>*++</sup> | b <sup>0</sup> | b <sup>0++</sup> | Seq. | y         | y <sup>++</sup> | y*        | y <sup>*++</sup> | y <sup>0</sup> | y <sup>0++</sup> | #  |
|----|-----------|-----------------|-----------|------------------|----------------|------------------|------|-----------|-----------------|-----------|------------------|----------------|------------------|----|
| 1  | 58.0287   | 29.5180         |           |                  |                |                  | G    |           |                 |           |                  |                |                  | 26 |
| 2  | 157.0972  | 79.0522         |           |                  |                |                  | V    | 2458.2395 | 1229.6234       | 2441.2129 | 1221.1101        | 2440.2289      | 1220.6181        | 25 |
| 3  | 256.1656  | 128.5864        |           |                  |                |                  | V    | 2359.1711 | 1180.0892       | 2342.1445 | 1171.5759        | 2341.1605      | 1171.0839        | 24 |
| 4  | 327.2027  | 164.1050        |           |                  |                |                  | A    | 2260.1027 | 1130.5550       | 2243.0761 | 1122.0417        | 2242.0921      | 1121.5497        | 23 |
| 5  | 428.2504  | 214.6288        |           |                  | 410.2398       | 205.6235         | T    | 2189.0655 | 1095.0364       | 2172.0390 | 1086.5231        | 2171.0550      | 1086.0311        | 22 |
| 6  | 529.2980  | 265.1527        |           |                  | 511.2875       | 256.1474         | T    | 2088.0179 | 1044.5126       | 2070.9913 | 1035.9993        | 2070.0073      | 1035.5073        | 21 |
| 7  | 644.3250  | 322.6661        |           |                  | 626.3144       | 313.6608         | D    | 1986.9702 | 993.9887        | 1969.9436 | 985.4755         | 1968.9596      | 984.9835         | 20 |
| 8  | 715.3621  | 358.1847        |           |                  | 697.3515       | 349.1794         | A    | 1871.9432 | 936.4753        | 1854.9167 | 927.9620         | 1853.9327      | 927.4700         | 19 |
| 9  | 814.4305  | 407.7189        |           |                  | 796.4199       | 398.7136         | V    | 1800.9061 | 900.9567        | 1783.8796 | 892.4434         | 1782.8956      | 891.9514         | 18 |
| 10 | 943.4731  | 472.2402        |           |                  | 925.4625       | 463.2349         | E    | 1701.8377 | 851.4225        | 1684.8112 | 842.9092         | 1683.8272      | 842.4172         | 17 |
| 11 | 1000.4946 | 500.7509        |           |                  | 982.4840       | 491.7456         | G    | 1572.7951 | 786.9012        | 1555.7686 | 778.3879         | 1554.7846      | 777.8959         | 16 |
| 12 | 1160.5252 | 580.7662        |           |                  | 1142.5147      | 571.7610         | C    | 1515.7737 | 758.3905        | 1498.7471 | 749.8772         | 1497.7631      | 749.3852         | 15 |
| 13 | 1261.5729 | 631.2901        |           |                  | 1243.5623      | 622.2848         | T    | 1355.7430 | 678.3751        | 1338.7165 | 669.8619         | 1337.7324      | 669.3699         | 14 |
| 14 | 1318.5944 | 659.8008        |           |                  | 1300.5838      | 650.7955         | G    | 1254.6953 | 627.8513        | 1237.6688 | 619.3380         |                |                  | 13 |
| 15 | 1417.6628 | 709.3350        |           |                  | 1399.6522      | 700.3297         | V    | 1197.6739 | 599.3406        | 1180.6473 | 590.8273         |                |                  | 12 |
| 16 | 1531.7057 | 766.3565        | 1514.6792 | 757.8432         | 1513.6951      | 757.3512         | N    | 1098.6055 | 549.8064        | 1081.5789 | 541.2931         |                |                  | 11 |
| 17 | 1630.7741 | 815.8907        | 1613.7476 | 807.3774         | 1612.7636      | 806.8854         | V    | 984.5625  | 492.7849        | 967.5360  | 484.2716         |                |                  | 10 |
| 18 | 1701.8112 | 851.4093        | 1684.7847 | 842.8960         | 1683.8007      | 842.4040         | A    | 885.4941  | 443.2507        | 868.4676  | 434.7374         |                |                  | 9  |
| 19 | 1800.8796 | 900.9435        | 1783.8531 | 892.4302         | 1782.8691      | 891.9382         | V    | 814.4570  | 407.7321        | 797.4305  | 399.2189         |                |                  | 8  |
| 20 | 1883.9168 | 942.4620        | 1866.8902 | 933.9487         | 1865.9062      | 933.4567         | M    | 715.3886  | 358.1979        | 698.3620  | 349.6847         |                |                  | 7  |
| 21 | 1982.9852 | 991.9962        | 1965.9586 | 983.4829         | 1964.9746      | 982.9909         | V    | 632.3515  | 316.6794        | 615.3249  | 308.1661         |                |                  | 6  |
| 22 | 2040.0066 | 1020.5070       | 2022.9801 | 1011.9937        | 2021.9961      | 1011.5017        | G    | 533.2831  | 267.1452        | 516.2565  | 258.6319         |                |                  | 5  |
| 23 | 2097.0281 | 1049.0177       | 2080.0016 | 1040.5044        | 2079.0175      | 1040.0124        | G    | 476.2616  | 238.6344        | 459.2350  | 230.1212         |                |                  | 4  |
| 24 | 2244.0965 | 1122.5519       | 2227.0700 | 1114.0386        | 2226.0859      | 1113.5466        | F    | 419.2401  | 210.1237        | 402.2136  | 201.6104         |                |                  | 3  |

# AT1G04410.1

|    |           |           |           |           |           |           |   |          |          |          |          |  |  |   |
|----|-----------|-----------|-----------|-----------|-----------|-----------|---|----------|----------|----------|----------|--|--|---|
| 25 | 2341.1493 | 1171.0783 | 2324.1227 | 1162.5650 | 2323.1387 | 1162.0730 | P | 272.1717 | 136.5895 | 255.1452 | 128.0762 |  |  | 2 |
| 26 |           |           |           |           |           |           | R | 175.1190 | 88.0631  | 158.0924 | 79.5498  |  |  | 1 |

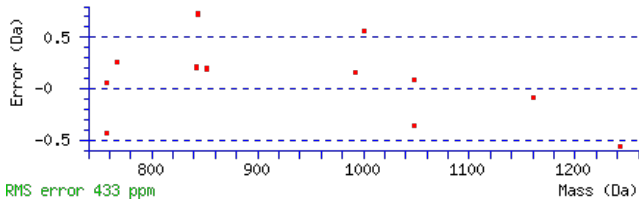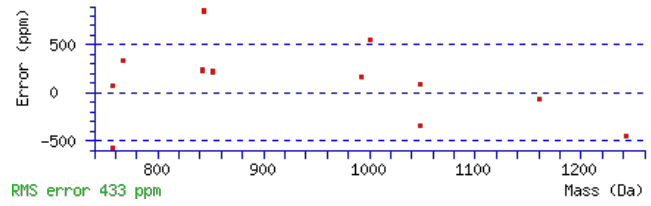

NCBI BLAST search of [GVVATTDAVEGCTGVNVAVMVGGFPR](#)  
 (Parameters: blastp, nr protein database, expect=20000, no filter, PAM30)  
 Other BLAST [web gateways](#)

## All matches to this query

| Score | Mr(calc)  | Delta   | Sequence                                     |
|-------|-----------|---------|----------------------------------------------|
| 22.0  | 2578.2520 | 0.0008  | <a href="#">GVVATTDAVEGCTGVNVAVMVGGFPR</a>   |
| 2.1   | 2578.2499 | 0.0029  | <a href="#">QALSREGGVPQMQNIGQDFGSWR</a>      |
| 1.2   | 2578.2558 | -0.0030 | <a href="#">SPHGSMDANGVPATAPAAVGGGGTLSRK</a> |

Mascot: <http://www.matrixscience.com/>

## Peptide View

MS/MS Fragmentation of **YVPLFGDFYYETSK**Found in **AT1G04420.1** in **TAIR\_Arabidopsis**, Symbols: | aldo/keto reductase family protein | chr1:1191633-1193698 FORWARD

Match to Query 8593: 1727.808112 from(864.911332,2+) index(10099)

Title: Elution from: 91.710 to 91.710 scan no 13884 cid35.00 polarity:+

Data file D1d-3\_1.mgf

Click mouse within plot area to zoom in by factor of two about that point

Or,  to  Da Label all possible matches  Label matches used for scoring Show Y-axis 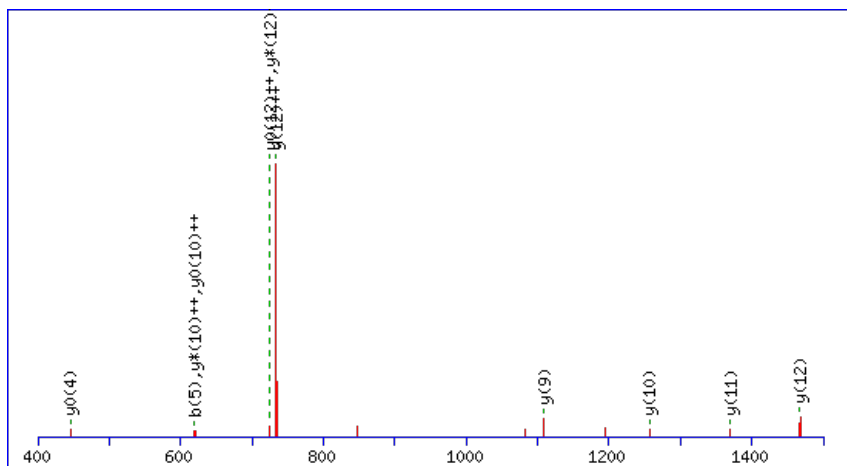Monoisotopic mass of neutral peptide  $M_r(\text{calc})$ : 1727.8083

Fixed modifications: Carbamidomethyl (C) (apply to specified residues or termini only)

Ions Score: 21 Expect: 0.027

Matches : 11/116 fragment ions using 14 most intense peaks ([help](#))

| #  | b               | b <sup>++</sup> | b <sup>0</sup> | b <sup>0++</sup> | Seq. | y                | y <sup>++</sup> | y*        | y* <sup>++</sup> | y <sup>0</sup>  | y <sup>0++</sup> | #  |
|----|-----------------|-----------------|----------------|------------------|------|------------------|-----------------|-----------|------------------|-----------------|------------------|----|
| 1  | 164.0706        | 82.5389         |                |                  | Y    |                  |                 |           |                  |                 |                  | 14 |
| 2  | 263.1390        | 132.0731        |                |                  | V    | 1565.7522        | 783.3798        | 1548.7257 | 774.8665         | 1547.7417       | 774.3745         | 13 |
| 3  | 360.1918        | 180.5995        |                |                  | P    | <b>1466.6838</b> | <b>733.8456</b> | 1449.6573 | <b>725.3323</b>  | 1448.6733       | <b>724.8403</b>  | 12 |
| 4  | 473.2758        | 237.1416        |                |                  | L    | <b>1369.6311</b> | 685.3192        | 1352.6045 | 676.8059         | 1351.6205       | 676.3139         | 11 |
| 5  | <b>620.3443</b> | 310.6758        |                |                  | F    | <b>1256.5470</b> | 628.7771        | 1239.5204 | <b>620.2639</b>  | 1238.5364       | <b>619.7719</b>  | 10 |
| 6  | 677.3657        | 339.1865        |                |                  | G    | <b>1109.4786</b> | 555.2429        | 1092.4520 | 546.7297         | 1091.4680       | 546.2376         | 9  |
| 7  | 792.3927        | 396.7000        | 774.3821       | 387.6947         | D    | 1052.4571        | 526.7322        | 1035.4306 | 518.2189         | 1034.4466       | 517.7269         | 8  |
| 8  | 939.4611        | 470.2342        | 921.4505       | 461.2289         | F    | 937.4302         | 469.2187        | 920.4036  | 460.7055         | 919.4196        | 460.2134         | 7  |
| 9  | 1102.5244       | 551.7658        | 1084.5138      | 542.7606         | Y    | 790.3618         | 395.6845        | 773.3352  | 387.1712         | 772.3512        | 386.6792         | 6  |
| 10 | 1265.5877       | 633.2975        | 1247.5772      | 624.2922         | Y    | 627.2984         | 314.1529        | 610.2719  | 305.6396         | 609.2879        | 305.1476         | 5  |
| 11 | 1394.6303       | 697.8188        | 1376.6198      | 688.8135         | E    | 464.2351         | 232.6212        | 447.2086  | 224.1079         | <b>446.2245</b> | 223.6159         | 4  |
| 12 | 1495.6780       | 748.3426        | 1477.6674      | 739.3374         | T    | 335.1925         | 168.0999        | 318.1660  | 159.5866         | 317.1819        | 159.0946         | 3  |
| 13 | 1582.7100       | 791.8587        | 1564.6995      | 782.8534         | S    | 234.1448         | 117.5761        | 217.1183  | 109.0628         | 216.1343        | 108.5708         | 2  |
| 14 |                 |                 |                |                  | K    | 147.1128         | 74.0600         | 130.0863  | 65.5468          |                 |                  | 1  |

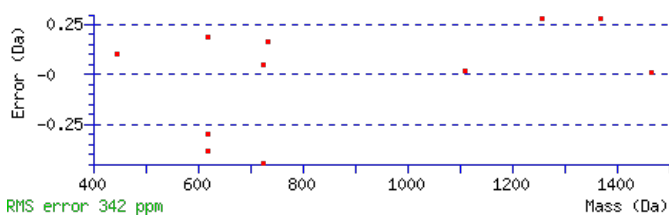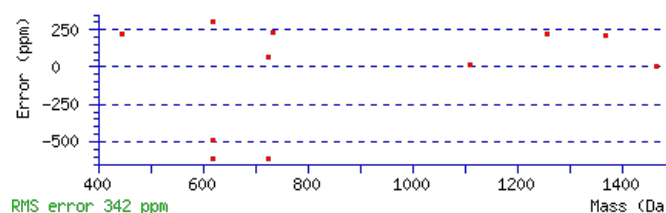NCBI BLAST search of [YVPLFGDFYYETSK](#)

(Parameters: blastp, nr protein database, expect=20000, no filter, PAM30)

AT1G04420.1

Other BLAST [web gateways](#)

**All matches to this query**

| Score | Mr(calc)  | Delta   | Sequence                        |
|-------|-----------|---------|---------------------------------|
| 21.2  | 1727.8083 | -0.0002 | <a href="#">YVPLFGDFYYETSK</a>  |
| 9.8   | 1727.8036 | 0.0045  | <a href="#">ATMEDAHAAILDLDK</a> |
| 9.8   | 1727.8121 | -0.0040 | <a href="#">RNNDHSMNANSIISR</a> |
| 4.3   | 1727.8110 | -0.0029 | <a href="#">DMIPILNKMDSEYK</a>  |

**Mascot:** <http://www.matrixscience.com/>

**Peptide View**MS/MS Fragmentation of **DKQSVVESIK**Found in **AT1G04430.1** in **TAIR\_Arabidopsis**, Symbols: | dehydration-responsive protein-related | chr1:1198859-1201300 FORWARD

Match to Query 3629: 1144.574276 from(573.294414,2+) index(1335)

Title: Elution from: 19.310 to 19.310 scan no 1834 cid35.00 polarity:+

Data file C7-1\_3.mgf

Click mouse within plot area to zoom in by factor of two about that point

Or,   to  Da Label all possible matches  Label matches used for scoring Show Y-axis 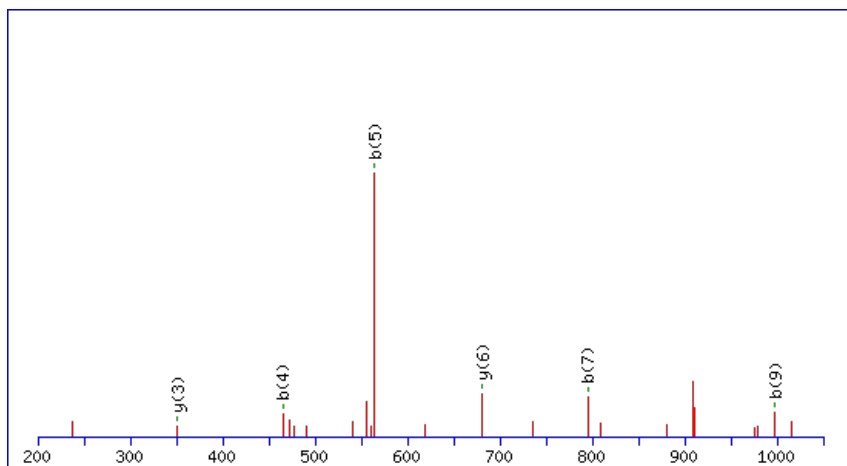Monoisotopic mass of neutral peptide **Mr(calc)**: 1144.5750**Fixed modifications**: Carbamidomethyl (C) (apply to specified residues or termini only)**Ions Score**: 29 **Expect**: 0.011**Matches**: 6/102 fragment ions using 8 most intense peaks ([help](#))

| #  | b               | b <sup>++</sup> | b*       | b <sup>*++</sup> | b <sup>0</sup> | b <sup>0++</sup> | Seq.     | y               | y <sup>++</sup> | y*        | y <sup>*++</sup> | y <sup>0</sup> | y <sup>0++</sup> | #         |
|----|-----------------|-----------------|----------|------------------|----------------|------------------|----------|-----------------|-----------------|-----------|------------------|----------------|------------------|-----------|
| 1  | 117.0313        | 59.0193         |          |                  | 99.0207        | 50.0140          | <b>D</b> |                 |                 |           |                  |                |                  | <b>10</b> |
| 2  | 247.1203        | 124.0638        | 229.0967 | 115.0520         | 229.1097       | 115.0585         | <b>K</b> | 1029.5583       | 515.2828        | 1011.5347 | 506.2710         | 1011.5477      | 506.2775         | <b>9</b>  |
| 3  | 377.1729        | 189.0901        | 359.1494 | 180.0783         | 359.1624       | 180.0848         | <b>Q</b> | 899.4693        | 450.2383        | 881.4457  | 441.2265         | 881.4587       | 441.2330         | <b>8</b>  |
| 4  | <b>465.2020</b> | 233.1046        | 447.1784 | 224.0928         | 447.1914       | 224.0994         | <b>S</b> | 769.4166        | 385.2120        | 751.3930  | 376.2002         | 751.4061       | 376.2067         | <b>7</b>  |
| 5  | <b>565.2674</b> | 283.1374        | 547.2439 | 274.1256         | 547.2569       | 274.1321         | <b>V</b> | <b>681.3876</b> | 341.1974        | 663.3640  | 332.1856         | 663.3770       | 332.1921         | <b>6</b>  |
| 6  | 665.3329        | 333.1701        | 647.3093 | 324.1583         | 647.3223       | 324.1648         | <b>V</b> | 581.3221        | 291.1647        | 563.2985  | 282.1529         | 563.3115       | 282.1594         | <b>5</b>  |
| 7  | <b>795.3725</b> | 398.1899        | 777.3489 | 389.1781         | 777.3620       | 389.1846         | <b>E</b> | 481.2567        | 241.1320        | 463.2331  | 232.1202         | 463.2461       | 232.1267         | <b>4</b>  |
| 8  | 883.4016        | 442.2044        | 865.3780 | 433.1926         | 865.3910       | 433.1991         | <b>S</b> | <b>351.2170</b> | 176.1122        | 333.1935  | 167.1004         | 333.2065       | 167.1069         | <b>3</b>  |
| 9  | <b>997.4827</b> | 499.2450        | 979.4591 | 490.2332         | 979.4721       | 490.2397         | <b>I</b> | 263.1880        | 132.0976        | 245.1644  | 123.0858         |                |                  | <b>2</b>  |
| 10 |                 |                 |          |                  |                |                  | <b>K</b> | 149.1069        | 75.0571         | 131.0833  | 66.0453          |                |                  | <b>1</b>  |

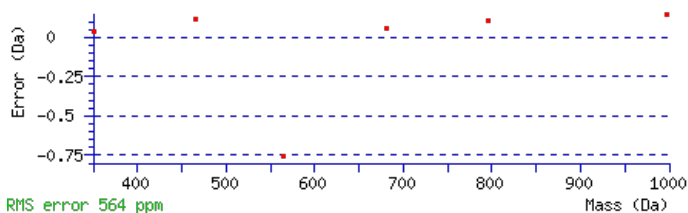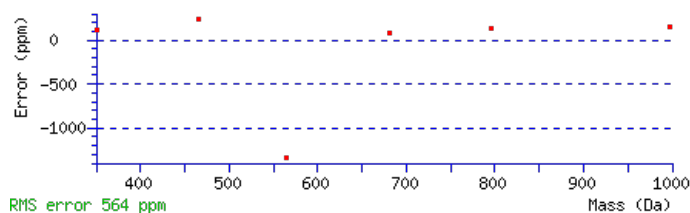NCBI **BLAST** search of **DKQSVVESIK**

(Parameters: blastp, nr protein database, expect=20000, no filter, PAM30)

Other BLAST [web gateways](#)**All matches to this query**

| Score | Mr(calc) | Delta | Sequence |
|-------|----------|-------|----------|
|       |          |       |          |

**AT1G04430.1**

|      |           |         |                             |
|------|-----------|---------|-----------------------------|
| 29.2 | 1144.5750 | -0.0007 | <a href="#">DKQSVVESIK</a>  |
| 19.6 | 1144.5773 | -0.0030 | <a href="#">KPSPTFELSK</a>  |
| 19.6 | 1144.5730 | 0.0013  | <a href="#">MSLSHLLRR</a>   |
| 14.6 | 1144.5777 | -0.0034 | <a href="#">ARAEKLANK</a>   |
| 12.4 | 1144.5750 | -0.0007 | <a href="#">TQKSLDEIAK</a>  |
| 10.7 | 1144.5750 | -0.0007 | <a href="#">QSELESALKK</a>  |
| 10.7 | 1144.5777 | -0.0034 | <a href="#">GKDGQLSVLGR</a> |
| 10.0 | 1144.5750 | -0.0007 | <a href="#">QLETTNVSILK</a> |
| 9.0  | 1144.5777 | -0.0034 | <a href="#">GKLEGRGVEGK</a> |
| 8.6  | 1144.5772 | -0.0030 | <a href="#">LGIQPYEVSK</a>  |

**Mascot:** <http://www.matrixscience.com/>



**Peptide View**MS/MS Fragmentation of **NLYIISVK**Found in **AT1G04480.1** in **TAIR\_Arabidopsis**, Symbols: | 60S ribosomal protein L23 (RPL23A) | chr1:1216109-1217256 FORWARD

Match to Query 2208: 948.564186 from(475.289369,2+) index(5867)

Title: Elution from: 50.928 to 50.928 scan no 7334 cid35.00 polarity:+

Data file D1d-3\_1.mgf

Click mouse within plot area to zoom in by factor of two about that point

Or,  to  Da Label all possible matches  Label matches used for scoring Show Y-axis 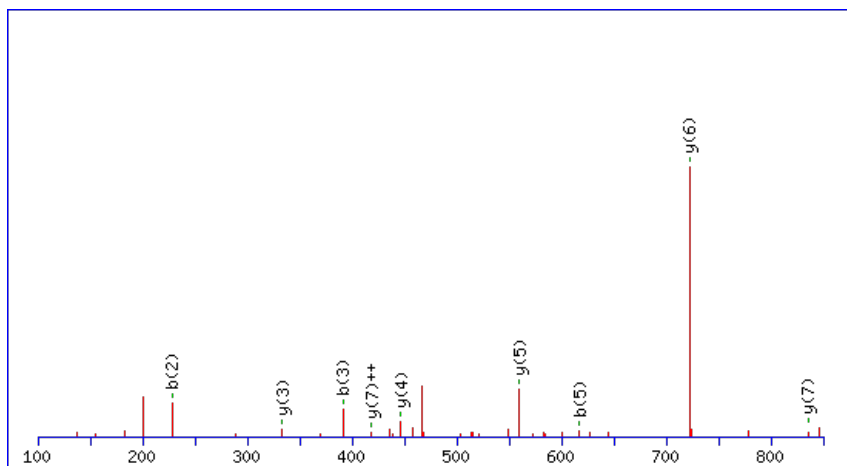Monoisotopic mass of neutral peptide **Mr(calc)**: 948.5644

Fixed modifications: Carbamidomethyl (C) (apply to specified residues or termini only)

Ions Score: 30 Expect: 0.0031

Matches : 9/70 fragment ions using 20 most intense peaks ([help](#))

| # | b               | b <sup>++</sup> | b*       | b <sup>*++</sup> | b <sup>0</sup> | b <sup>0++</sup> | Seq. | y               | y <sup>++</sup> | y*       | y <sup>*++</sup> | y <sup>0</sup> | y <sup>0++</sup> | # |
|---|-----------------|-----------------|----------|------------------|----------------|------------------|------|-----------------|-----------------|----------|------------------|----------------|------------------|---|
| 1 | 115.0502        | 58.0287         | 98.0237  | 49.5155          |                |                  | N    |                 |                 |          |                  |                |                  | 8 |
| 2 | <b>228.1343</b> | 114.5708        | 211.1077 | 106.0575         |                |                  | L    | <b>835.5288</b> | <b>418.2680</b> | 818.5022 | 409.7547         | 817.5182       | 409.2627         | 7 |
| 3 | <b>391.1976</b> | 196.1024        | 374.1710 | 187.5892         |                |                  | Y    | <b>722.4447</b> | 361.7260        | 705.4182 | 353.2127         | 704.4341       | 352.7207         | 6 |
| 4 | 504.2817        | 252.6445        | 487.2551 | 244.1312         |                |                  | I    | <b>559.3814</b> | 280.1943        | 542.3548 | 271.6811         | 541.3708       | 271.1890         | 5 |
| 5 | <b>617.3657</b> | 309.1865        | 600.3392 | 300.6732         |                |                  | I    | <b>446.2973</b> | 223.6523        | 429.2708 | 215.1390         | 428.2867       | 214.6470         | 4 |
| 6 | 704.3978        | 352.7025        | 687.3712 | 344.1892         | 686.3872       | 343.6972         | S    | <b>333.2132</b> | 167.1103        | 316.1867 | 158.5970         | 315.2027       | 158.1050         | 3 |
| 7 | 803.4662        | 402.2367        | 786.4396 | 393.7234         | 785.4556       | 393.2314         | V    | 246.1812        | 123.5942        | 229.1547 | 115.0810         |                |                  | 2 |
| 8 |                 |                 |          |                  |                |                  | K    | 147.1128        | 74.0600         | 130.0863 | 65.5468          |                |                  | 1 |

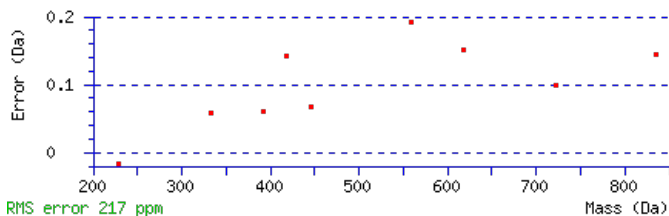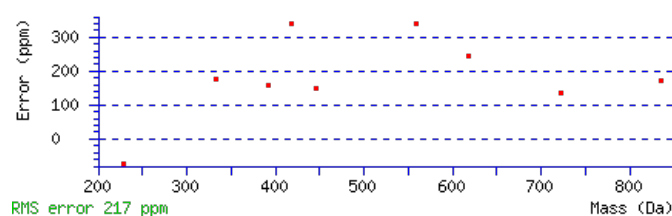NCBI **BLAST** search of [NLYIISVK](#)

(Parameters: blastp, nr protein database, expect=20000, no filter, PAM30)

Other BLAST [web gateways](#)**All matches to this query**

| Score | Mr(calc) | Delta   | Sequence                 |
|-------|----------|---------|--------------------------|
| 29.8  | 948.5644 | -0.0002 | <a href="#">NLYIISVK</a> |



**Peptide View**MS/MS Fragmentation of **KIVEMYNK**

Found in **AT1G04620.1** in **TAIR\_Arabidopsis**, Symbols: | coenzyme F420 hydrogenase family / dehydrogenase, beta subunit family | chr1:1282868-1286491 REVERSE

Match to Query 2720: 1039.534440 from(347.518756,3+) index(2125)

Title: Elution from: 23.926 to 23.926 scan no 2702 cid35.00 polarity:+

Data file D6h-2\_3.mgf

Click mouse within plot area to zoom in by factor of two about that point

Or,   to  Da

Label all possible matches  Label matches used for scoring

Show Y-axis

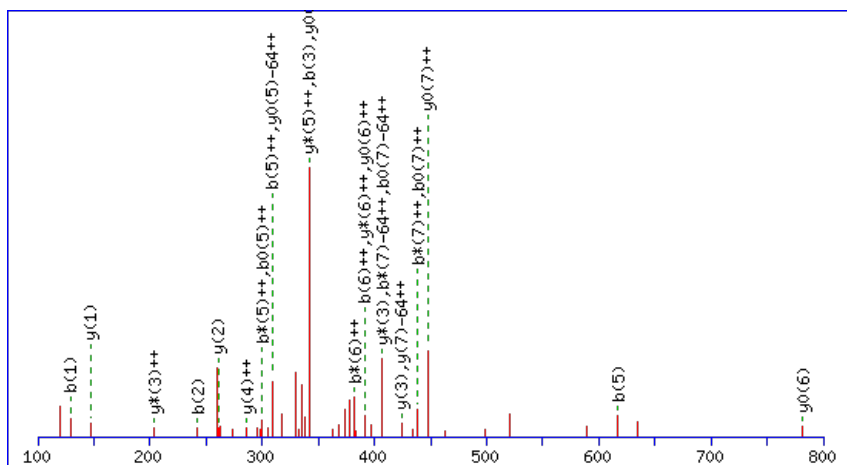

Monoisotopic mass of neutral peptide  $M_r(\text{calc})$ : 1039.5372

Fixed modifications: Carbamidomethyl (C) (apply to specified residues or termini only)

Variable modifications:

M5 : Oxidation (M), with neutral losses 0.0000 (shown in table), 63.9983

Ions Score: 19 Expect: 0.035

Matches : 28/110 fragment ions using 35 most intense peaks ([help](#))

| # | b               | b <sup>++</sup> | b*       | b <sup>*++</sup> | b <sup>0</sup> | b <sup>0++</sup> | Seq.     | y               | y <sup>++</sup> | y*              | y <sup>*++</sup> | y <sup>0</sup>  | y <sup>0++</sup> | #        |
|---|-----------------|-----------------|----------|------------------|----------------|------------------|----------|-----------------|-----------------|-----------------|------------------|-----------------|------------------|----------|
| 1 | <b>129.1022</b> | 65.0548         | 112.0757 | 56.5415          |                |                  | <b>K</b> |                 |                 |                 |                  |                 |                  | <b>8</b> |
| 2 | <b>242.1863</b> | 121.5968        | 225.1598 | 113.0835         |                |                  | <b>I</b> | 912.4495        | 456.7284        | 895.4230        | 448.2151         | 894.4390        | <b>447.7231</b>  | <b>7</b> |
| 3 | <b>341.2547</b> | 171.1310        | 324.2282 | 162.6177         |                |                  | <b>V</b> | 799.3655        | 400.1864        | 782.3389        | <b>391.6731</b>  | <b>781.3549</b> | <b>391.1811</b>  | <b>6</b> |
| 4 | 470.2973        | 235.6523        | 453.2708 | 227.1390         | 452.2867       | 226.6470         | <b>E</b> | 700.2971        | 350.6522        | 683.2705        | <b>342.1389</b>  | 682.2865        | <b>341.6469</b>  | <b>5</b> |
| 5 | <b>617.3327</b> | <b>309.1700</b> | 600.3062 | <b>300.6567</b>  | 599.3221       | <b>300.1647</b>  | <b>M</b> | 571.2545        | <b>286.1309</b> | 554.2279        | 277.6176         |                 |                  | <b>4</b> |
| 6 | 780.3960        | <b>390.7017</b> | 763.3695 | <b>382.1884</b>  | 762.3855       | 381.6964         | <b>Y</b> | <b>424.2191</b> | 212.6132        | <b>407.1925</b> | <b>204.0999</b>  |                 |                  | <b>3</b> |
| 7 | 894.4390        | <b>447.7231</b> | 877.4124 | <b>439.2098</b>  | 876.4284       | <b>438.7178</b>  | <b>N</b> | <b>261.1557</b> | 131.0815        | 244.1292        | 122.5682         |                 |                  | <b>2</b> |
| 8 |                 |                 |          |                  |                |                  | <b>K</b> | <b>147.1128</b> | 74.0600         | 130.0863        | 65.5468          |                 |                  | <b>1</b> |

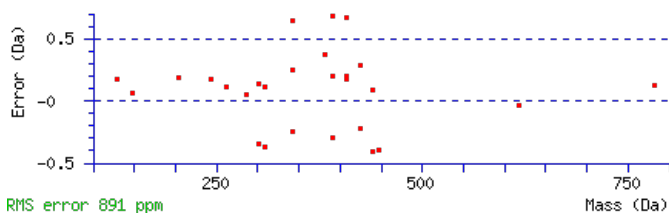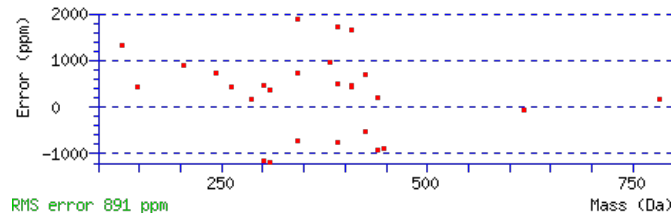

NCBI **BLAST** search of **KIVEMYNK**

(Parameters: blastp, nr protein database, expect=20000, no filter, PAM30)

Other BLAST [web gateways](#)

All matches to this query

| Score | $M_r(\text{calc})$ | Delta | Sequence |
|-------|--------------------|-------|----------|
|       |                    |       |          |

**AT1G04620.1**

|      |           |         |                           |
|------|-----------|---------|---------------------------|
| 19.0 | 1039.5372 | -0.0027 | <a href="#">KIVEMYNK</a>  |
| 17.8 | 1039.5372 | -0.0027 | <a href="#">KSAMEAIFK</a> |
| 17.6 | 1039.5338 | 0.0006  | <a href="#">FKDENFIK</a>  |
| 14.6 | 1039.5338 | 0.0006  | <a href="#">STFPSLNFK</a> |
| 7.9  | 1039.5338 | 0.0006  | <a href="#">YIFDKNQL</a>  |
| 7.1  | 1039.5372 | -0.0028 | <a href="#">SALSYLCVK</a> |
| 5.8  | 1039.5338 | 0.0006  | <a href="#">FDLQNYLK</a>  |
| 2.8  | 1039.5372 | -0.0028 | <a href="#">FQLEKTMK</a>  |
| 2.2  | 1039.5338 | 0.0006  | <a href="#">NELKDFFK</a>  |
| 1.5  | 1039.5372 | -0.0028 | <a href="#">MSSVTQLFK</a> |

**Mascot:** <http://www.matrixscience.com/>

**Peptide View**MS/MS Fragmentation of **RSDIVISTK**

Found in **AT1G04690.1** in **TAIR\_Arabidopsis**, Symbols: KV-BETA1, KAB1 | KAB1 (POTASSIUM CHANNEL BETA SUBUNIT); potassium channel | chr1:1313661-1315419 FORWARD

Match to Query 2653: 1017.582502 from(509.798527,2+) index(791)

Title: Elution from: 13.685 to 13.685 scan no 1146 cid35.00 polarity:+

Data file D12h-1\_2.mgf

Click mouse within plot area to zoom in by factor of two about that point

Or,   to  Da

Label all possible matches  Label matches used for scoring

Show Y-axis

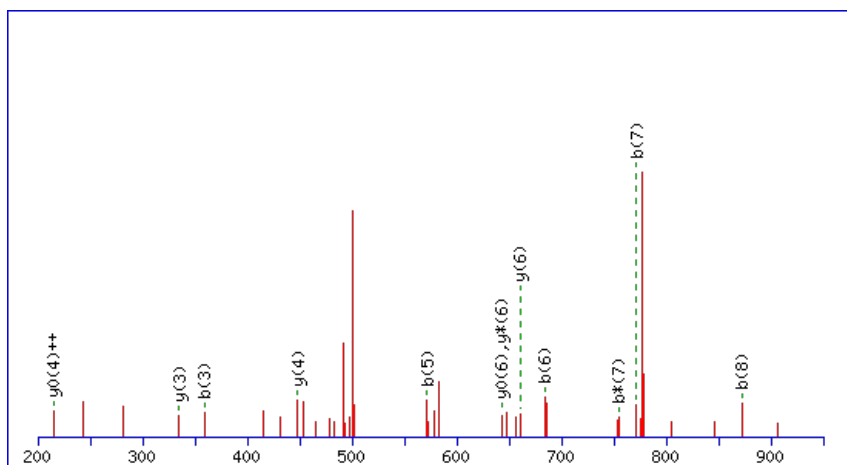

Monoisotopic mass of neutral peptide  $M_r(\text{calc})$ : 1017.5818

Fixed modifications: Carbamidomethyl (C) (apply to specified residues or termini only)

Ions Score: 24 Expect: 0.0099

Matches : 12/92 fragment ions using 27 most intense peaks ([help](#))

| # | b               | b <sup>++</sup> | b*              | b <sup>*++</sup> | b <sup>0</sup> | b <sup>0++</sup> | Seq. | y               | y <sup>++</sup> | y*              | y <sup>*++</sup> | y <sup>0</sup>  | y <sup>0++</sup> | # |
|---|-----------------|-----------------|-----------------|------------------|----------------|------------------|------|-----------------|-----------------|-----------------|------------------|-----------------|------------------|---|
| 1 | 157.1084        | 79.0578         | 140.0818        | 70.5446          |                |                  | R    |                 |                 |                 |                  |                 |                  | 9 |
| 2 | 244.1404        | 122.5738        | 227.1139        | 114.0606         | 226.1298       | 113.5686         | S    | 862.4880        | 431.7477        | 845.4615        | 423.2344         | 844.4775        | 422.7424         | 8 |
| 3 | <b>359.1674</b> | 180.0873        | 342.1408        | 171.5740         | 341.1568       | 171.0820         | D    | 775.4560        | 388.2316        | 758.4294        | 379.7184         | 757.4454        | 379.2264         | 7 |
| 4 | 472.2514        | 236.6293        | 455.2249        | 228.1161         | 454.2409       | 227.6241         | I    | <b>660.4291</b> | 330.7182        | <b>643.4025</b> | 322.2049         | <b>642.4185</b> | 321.7129         | 6 |
| 5 | <b>571.3198</b> | 286.1636        | 554.2933        | 277.6503         | 553.3093       | 277.1583         | V    | 547.3450        | 274.1761        | 530.3184        | 265.6629         | 529.3344        | 265.1709         | 5 |
| 6 | <b>684.4039</b> | 342.7056        | 667.3774        | 334.1923         | 666.3933       | 333.7003         | I    | <b>448.2766</b> | 224.6419        | 431.2500        | 216.1287         | 430.2660        | <b>215.6366</b>  | 4 |
| 7 | <b>771.4359</b> | 386.2216        | <b>754.4094</b> | 377.7083         | 753.4254       | 377.2163         | S    | <b>335.1925</b> | 168.0999        | 318.1660        | 159.5866         | 317.1819        | 159.0946         | 3 |
| 8 | <b>872.4836</b> | 436.7454        | 855.4571        | 428.2322         | 854.4730       | 427.7402         | T    | 248.1605        | 124.5839        | 231.1339        | 116.0706         | 230.1499        | 115.5786         | 2 |
| 9 |                 |                 |                 |                  |                |                  | K    | 147.1128        | 74.0600         | 130.0863        | 65.5468          |                 |                  | 1 |

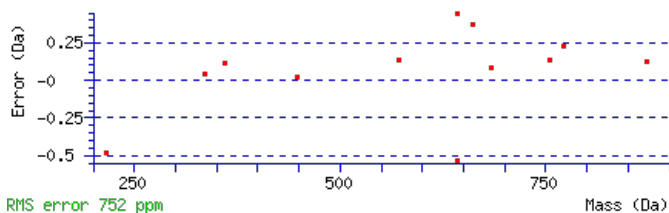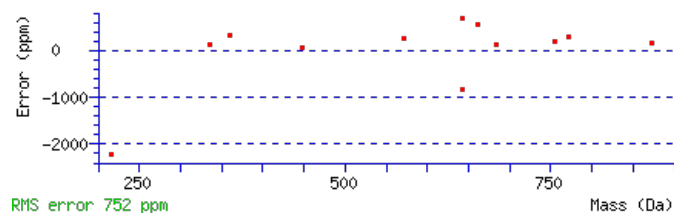

NCBI **BLAST** search of [RSDIVISTK](#)

(Parameters: blastp, nr protein database, expect=20000, no filter, PAM30)

Other BLAST [web gateways](#)

All matches to this query

| Score | $M_r(\text{calc})$ | Delta | Sequence |
|-------|--------------------|-------|----------|
|       |                    |       |          |

## AT1G04690.1

|      |           |        |                           |
|------|-----------|--------|---------------------------|
| 24.4 | 1017.5818 | 0.0007 | <a href="#">RSDIVISTK</a> |
| 1.8  | 1017.5818 | 0.0007 | <a href="#">QLKSGKETK</a> |
| 0.3  | 1017.5818 | 0.0007 | <a href="#">KNLKESATK</a> |

**Mascot:** <http://www.matrixscience.com/>

**Peptide View**MS/MS Fragmentation of **FDLMYAK**Found in **AT1G04820.1** in **TAIR\_Arabidopsis**, Symbols: TUA4 | TUA4 (tubulin alpha-4 chain) | chr1:1356420-1358265 REVERSE

Match to Query 1635: 902.423104 from(452.218828,2+) index(3629)

Title: Elution from: 34.592 to 34.592 scan no 4524 cid35.00 polarity:+

Data file 0-1\_3.mgf

Click mouse within plot area to zoom in by factor of two about that point

Or,   to  Da Label all possible matches  Label matches used for scoring Show Y-axis 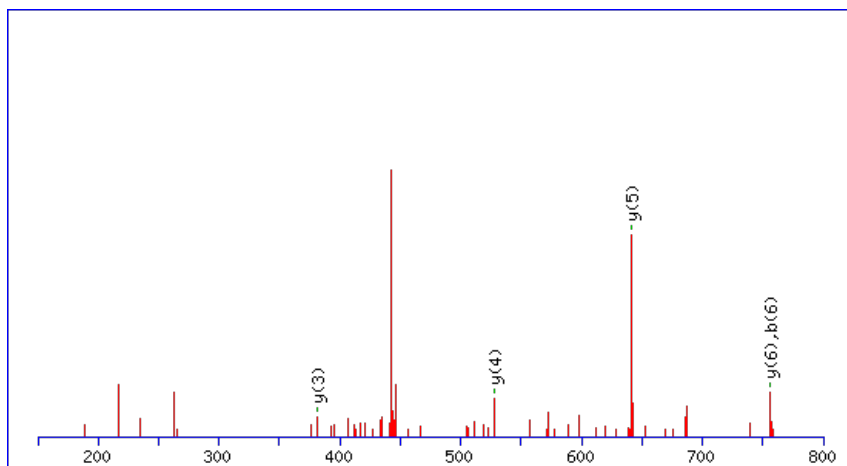Monoisotopic mass of neutral peptide **Mr(calc)**: 902.4208

Fixed modifications: Carbamidomethyl (C) (apply to specified residues or termini only)

**Variable modifications:****M4** : Oxidation (M), with neutral losses 0.0000 (shown in table), 63.9983**Ions Score**: 33 **Expect**: 0.0009**Matches** : 5/74 fragment ions using 6 most intense peaks ([help](#))

| # | b               | b <sup>++</sup> | b <sup>0</sup> | b <sup>0++</sup> | Seq. | y               | y <sup>++</sup> | y*       | y <sup>*++</sup> | y <sup>0</sup> | y <sup>0++</sup> | # |
|---|-----------------|-----------------|----------------|------------------|------|-----------------|-----------------|----------|------------------|----------------|------------------|---|
| 1 | 148.0757        | 74.5415         |                |                  | F    |                 |                 |          |                  |                |                  | 7 |
| 2 | 263.1026        | 132.0550        | 245.0921       | 123.0497         | D    | <b>756.3597</b> | 378.6835        | 739.3331 | 370.1702         | 738.3491       | 369.6782         | 6 |
| 3 | 376.1867        | 188.5970        | 358.1761       | 179.5917         | L    | <b>641.3327</b> | 321.1700        | 624.3062 | 312.6567         |                |                  | 5 |
| 4 | 523.2221        | 262.1147        | 505.2115       | 253.1094         | M    | <b>528.2486</b> | 264.6280        | 511.2221 | 256.1147         |                |                  | 4 |
| 5 | 686.2854        | 343.6464        | 668.2749       | 334.6411         | Y    | <b>381.2132</b> | 191.1103        | 364.1867 | 182.5970         |                |                  | 3 |
| 6 | <b>757.3225</b> | 379.1649        | 739.3120       | 370.1596         | A    | 218.1499        | 109.5786        | 201.1234 | 101.0653         |                |                  | 2 |
| 7 |                 |                 |                |                  | K    | 147.1128        | 74.0600         | 130.0863 | 65.5468          |                |                  | 1 |

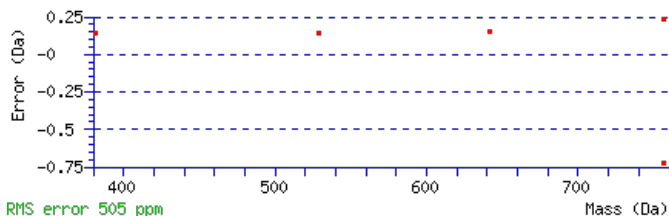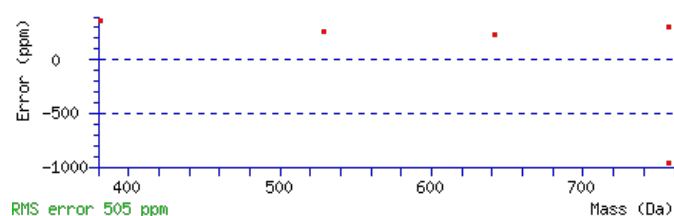NCBI **BLAST** search of [FDLMYAK](#)

(Parameters: blastp, nr protein database, expect=20000, no filter, PAM30)

Other BLAST [web gateways](#)**All matches to this query**

| Score | Mr(calc) | Delta  | Sequence                |
|-------|----------|--------|-------------------------|
| 33.2  | 902.4208 | 0.0023 | <a href="#">FDLMYAK</a> |
| 22.5  | 902.4208 | 0.0023 | <a href="#">FDLMYSK</a> |

## AT1G04820.1

|     |          |         |                          |
|-----|----------|---------|--------------------------|
| 8.1 | 902.4208 | 0.0023  | <a href="#">MDAIYFK</a>  |
| 6.5 | 902.4208 | 0.0023  | <a href="#">FFMDSIK</a>  |
| 1.0 | 902.4246 | -0.0015 | <a href="#">HSDNGFVK</a> |
| 0.3 | 902.4246 | -0.0015 | <a href="#">HNKDFDK</a>  |
| 0.1 | 902.4208 | 0.0023  | <a href="#">ISMFYDK</a>  |

**Mascot:** <http://www.matrixscience.com/>



**Peptide View**MS/MS Fragmentation of **MRTPEIK**

Found in **AT1G04920.1** in **TAIR\_Arabidopsis**, Symbols: ATSPS3F | ATSPS3F (sucrose phosphate synthase 3F); sucrose-phosphate synthase/transferase, transferring glycosyl groups | chr1:1391673-1395755 REVERSE

Match to Query 1402: 873.475162 from(437.744857,2+) index(2354)

Title: Elution from: 26.603 to 26.603 scan no 3026 cid35.00 polarity:+

Data file 0-1\_2.mgf

Click mouse within plot area to zoom in by factor of two about that point

Or,   to  Da

Label all possible matches  Label matches used for scoring

Show Y-axis

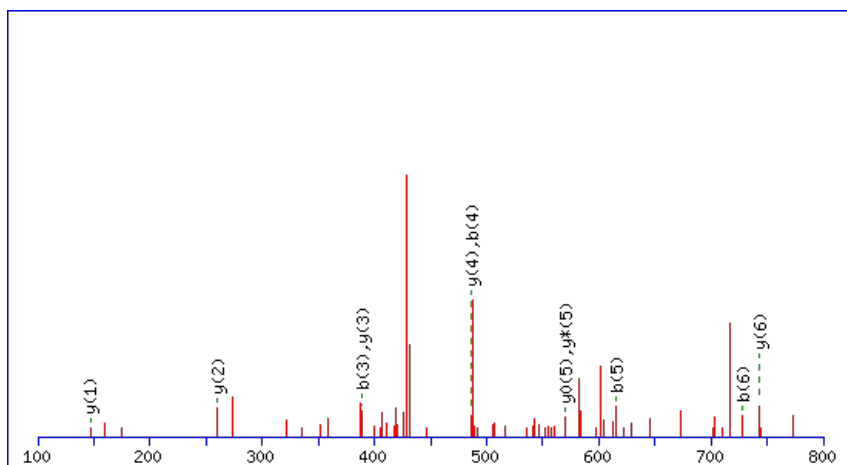

**Monoisotopic mass of neutral peptide Mr(calc):** 873.4742

**Fixed modifications:** Carbamidomethyl (C) (apply to specified residues or termini only)

**Ions Score:** 19 **Expect:** 0.04

**Matches:** 11/62 fragment ions using 32 most intense peaks ([help](#))

| # | b        | b <sup>++</sup> | b*       | b <sup>*++</sup> | b <sup>0</sup> | b <sup>0++</sup> | Seq. | y        | y <sup>++</sup> | y*       | y <sup>*++</sup> | y <sup>0</sup> | y <sup>0++</sup> | # |
|---|----------|-----------------|----------|------------------|----------------|------------------|------|----------|-----------------|----------|------------------|----------------|------------------|---|
| 1 | 132.0478 | 66.5275         |          |                  |                |                  | M    |          |                 |          |                  |                |                  | 7 |
| 2 | 288.1489 | 144.5781        | 271.1223 | 136.0648         |                |                  | R    | 743.4410 | 372.2241        | 726.4145 | 363.7109         | 725.4305       | 363.2189         | 6 |
| 3 | 389.1966 | 195.1019        | 372.1700 | 186.5886         | 371.1860       | 186.0966         | T    | 587.3399 | 294.1736        | 570.3134 | 285.6603         | 569.3293       | 285.1683         | 5 |
| 4 | 486.2493 | 243.6283        | 469.2228 | 235.1150         | 468.2387       | 234.6230         | P    | 486.2922 | 243.6498        | 469.2657 | 235.1365         | 468.2817       | 234.6445         | 4 |
| 5 | 615.2919 | 308.1496        | 598.2654 | 299.6363         | 597.2813       | 299.1443         | E    | 389.2395 | 195.1234        | 372.2129 | 186.6101         | 371.2289       | 186.1181         | 3 |
| 6 | 728.3760 | 364.6916        | 711.3494 | 356.1783         | 710.3654       | 355.6863         | I    | 260.1969 | 130.6021        | 243.1703 | 122.0888         |                |                  | 2 |
| 7 |          |                 |          |                  |                |                  | K    | 147.1128 | 74.0600         | 130.0863 | 65.5468          |                |                  | 1 |

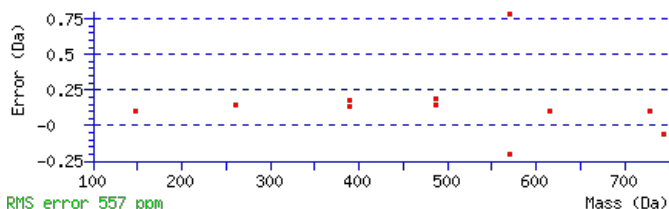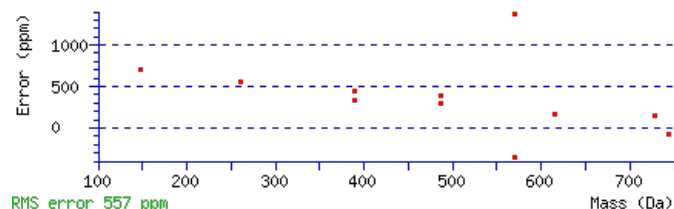

NCBI **BLAST** search of [MRTPEIK](#)

(Parameters: blastp, nr protein database, expect=20000, no filter, PAM30)

Other BLAST [web gateways](#)

**All matches to this query**

| Score | Mr(calc) | Delta  | Sequence                 |
|-------|----------|--------|--------------------------|
| 18.7  | 873.4742 | 0.0010 | <a href="#">MRTPEIK</a>  |
| 10.2  | 873.4742 | 0.0009 | <a href="#">GVAMELVR</a> |

# AT1G04920.1

|     |          |        |                         |
|-----|----------|--------|-------------------------|
| 8.6 | 873.4742 | 0.0010 | <a href="#">MKNPEKK</a> |
| 4.3 | 873.4742 | 0.0009 | <a href="#">MIQDVLK</a> |

**Mascot:** <http://www.matrixscience.com/>

**Peptide View**MS/MS Fragmentation of **VSGLQLLK**

Found in **AT1G05010.1** in **TAIR\_Arabidopsis**, Symbols: ACO4, EAT1, EFE | EFE (ETHYLENE FORMING ENZYME) | chr1:1431418-1432694 REVERSE

Match to Query 1467: 866.508486 from(434.261519,2+) index(4776)

Title: Elution from: 43.781 to 43.781 scan no 5995 cid35.00 polarity:+

Data file 0-2\_1.mgf

Click mouse within plot area to zoom in by factor of two about that point

Or,   to  Da

Label all possible matches  Label matches used for scoring

Show Y-axis

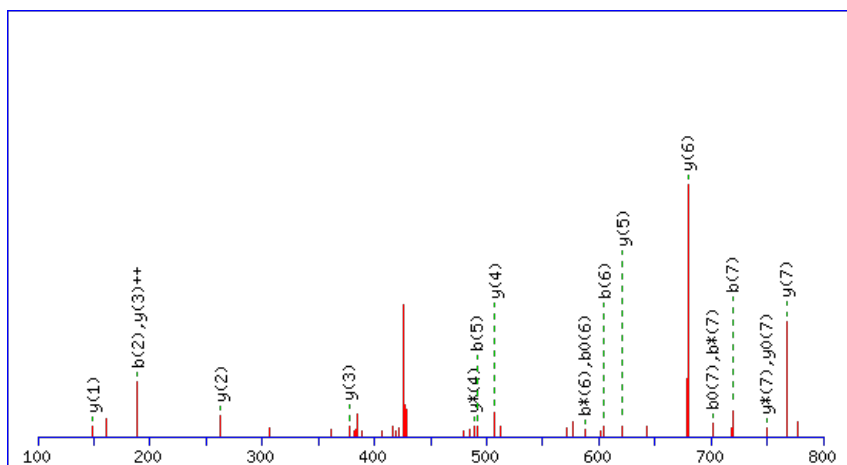

**Monoisotopic mass of neutral peptide Mr(calc):** 866.5085

**Fixed modifications:** Carbamidomethyl (C) (apply to specified residues or termini only)

**Ions Score:** 54 **Expect:** 2.1e-005

**Matches:** 19/62 fragment ions using 32 most intense peaks ([help](#))

| # | b               | b <sup>++</sup> | b*              | b <sup>*++</sup> | b <sup>0</sup>  | b <sup>0++</sup> | Seq. | y               | y <sup>++</sup> | y*              | y <sup>*++</sup> | y <sup>0</sup>  | y <sup>0++</sup> | # |
|---|-----------------|-----------------|-----------------|------------------|-----------------|------------------|------|-----------------|-----------------|-----------------|------------------|-----------------|------------------|---|
| 1 | 101.0727        | 51.0400         |                 |                  |                 |                  | V    |                 |                 |                 |                  |                 |                  | 8 |
| 2 | <b>189.1018</b> | 95.0545         |                 |                  | 171.0912        | 86.0492          | S    | <b>767.4504</b> | 384.2288        | <b>749.4268</b> | 375.2170         | <b>749.4398</b> | 375.2235         | 7 |
| 3 | 247.1203        | 124.0638        |                 |                  | 229.1097        | 115.0585         | G    | <b>679.4213</b> | 340.2143        | 661.3977        | 331.2025         |                 |                  | 6 |
| 4 | 361.2014        | 181.1043        |                 |                  | 343.1908        | 172.0990         | L    | <b>621.4028</b> | 311.2050        | 603.3792        | 302.1933         |                 |                  | 5 |
| 5 | <b>491.2540</b> | 246.1307        | 473.2304        | 237.1189         | 473.2435        | 237.1254         | Q    | <b>507.3217</b> | 254.1645        | <b>489.2981</b> | 245.1527         |                 |                  | 4 |
| 6 | <b>605.3351</b> | 303.1712        | <b>587.3115</b> | 294.1594         | <b>587.3246</b> | 294.1659         | L    | <b>377.2691</b> | <b>189.1382</b> | 359.2455        | 180.1264         |                 |                  | 3 |
| 7 | <b>719.4162</b> | 360.2118        | <b>701.3926</b> | 351.2000         | <b>701.4057</b> | 351.2065         | L    | <b>263.1880</b> | 132.0976        | 245.1644        | 123.0858         |                 |                  | 2 |
| 8 |                 |                 |                 |                  |                 |                  | K    | <b>149.1069</b> | 75.0571         | 131.0833        | 66.0453          |                 |                  | 1 |

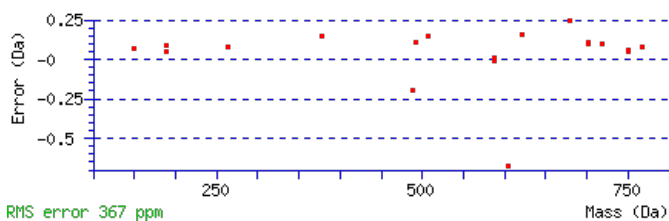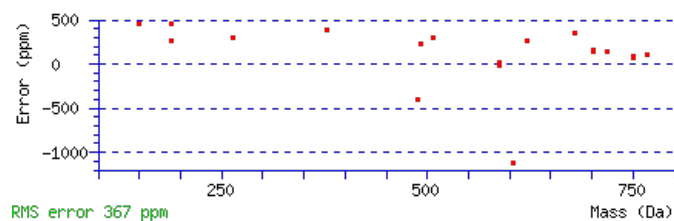

NCBI **BLAST** search of **VSGLQLLK**

(Parameters: blastp, nr protein database, expect=20000, no filter, PAM30)

Other BLAST [web gateways](#)

**All matches to this query**

| Score | Mr(calc) | Delta   | Sequence        |
|-------|----------|---------|-----------------|
| 53.6  | 866.5085 | -0.0001 | <b>VSGLQLLK</b> |

## AT1G05010.1

|      |          |         |                          |
|------|----------|---------|--------------------------|
| 38.2 | 866.5085 | -0.0001 | <a href="#">GEGKLLK</a>  |
| 31.4 | 866.5108 | -0.0023 | <a href="#">FLLQLPK</a>  |
| 28.2 | 866.5085 | -0.0001 | <a href="#">ADVAKLLK</a> |
| 22.2 | 866.5085 | -0.0001 | <a href="#">DKLQLLK</a>  |
| 21.5 | 866.5085 | -0.0001 | <a href="#">VSLAQVIK</a> |
| 14.3 | 866.5108 | -0.0023 | <a href="#">VLSWLLK</a>  |
| 14.2 | 866.5085 | -0.0001 | <a href="#">KDLLQIK</a>  |
| 13.3 | 866.5085 | -0.0001 | <a href="#">QKVEILK</a>  |
| 11.3 | 866.5085 | -0.0001 | <a href="#">GEALVKLK</a> |

Mascot: <http://www.matrixscience.com/>

**Peptide View**MS/MS Fragmentation of **SEIGQFAATVR**

Found in **AT1G05190.1** in **TAIR\_Arabidopsis**, Symbols: EMB2394 | EMB2394 (EMBRYO DEFECTIVE 2394); structural constituent of ribosome | chr1:1502514-1503737 REVERSE

Match to Query 4269: 1177.606228 from(589.810390,2+) index(5064)

Title: Elution from: 45.354 to 45.354 scan no 6275 cid35.00 polarity:+

Data file D12h-1\_1.mgf

Click mouse within plot area to zoom in by factor of two about that point

Or,   to  Da

Label all possible matches  Label matches used for scoring

Show Y-axis

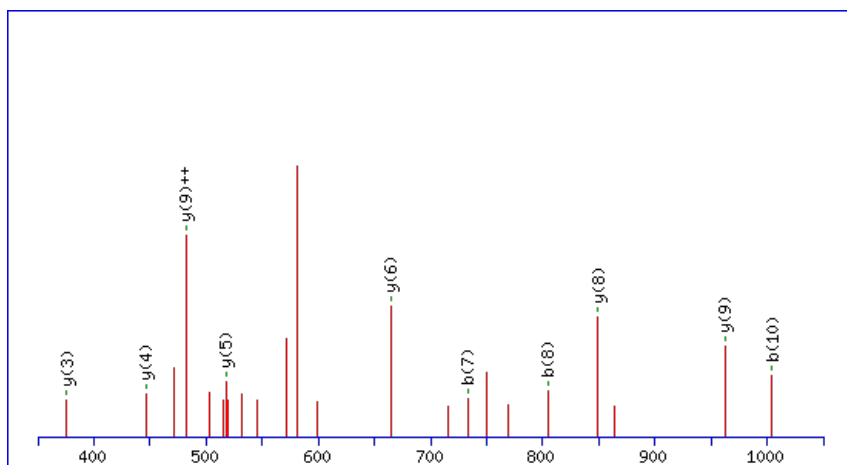

Monoisotopic mass of neutral peptide  $M_r(\text{calc})$ : 1177.6091

Fixed modifications: Carbamidomethyl (C) (apply to specified residues or termini only)

Ions Score: 41 Expect: 0.00034

Matches : 10/108 fragment ions using 18 most intense peaks ([help](#))

| #  | b                | b <sup>++</sup> | b*       | b <sup>*++</sup> | b <sup>0</sup> | b <sup>0++</sup> | Seq. | y               | y <sup>++</sup> | y*        | y <sup>*++</sup> | y <sup>0</sup> | y <sup>0++</sup> | #  |
|----|------------------|-----------------|----------|------------------|----------------|------------------|------|-----------------|-----------------|-----------|------------------|----------------|------------------|----|
| 1  | 88.0393          | 44.5233         |          |                  | 70.0287        | 35.5180          | S    |                 |                 |           |                  |                |                  | 11 |
| 2  | 217.0819         | 109.0446        |          |                  | 199.0713       | 100.0393         | E    | 1091.5844       | 546.2958        | 1074.5578 | 537.7826         | 1073.5738      | 537.2905         | 10 |
| 3  | 330.1660         | 165.5866        |          |                  | 312.1554       | 156.5813         | I    | <b>962.5418</b> | <b>481.7745</b> | 945.5152  | 473.2613         | 944.5312       | 472.7693         | 9  |
| 4  | 387.1874         | 194.0974        |          |                  | 369.1769       | 185.0921         | G    | <b>849.4577</b> | 425.2325        | 832.4312  | 416.7192         | 831.4472       | 416.2272         | 8  |
| 5  | 515.2460         | 258.1266        | 498.2195 | 249.6134         | 497.2354       | 249.1214         | Q    | 792.4363        | 396.7218        | 775.4097  | 388.2085         | 774.4257       | 387.7165         | 7  |
| 6  | 662.3144         | 331.6608        | 645.2879 | 323.1476         | 644.3039       | 322.6556         | F    | <b>664.3777</b> | 332.6925        | 647.3511  | 324.1792         | 646.3671       | 323.6872         | 6  |
| 7  | <b>733.3515</b>  | 367.1794        | 716.3250 | 358.6661         | 715.3410       | 358.1741         | A    | <b>517.3093</b> | 259.1583        | 500.2827  | 250.6450         | 499.2987       | 250.1530         | 5  |
| 8  | <b>804.3886</b>  | 402.6980        | 787.3621 | 394.1847         | 786.3781       | 393.6927         | A    | <b>446.2722</b> | 223.6397        | 429.2456  | 215.1264         | 428.2616       | 214.6344         | 4  |
| 9  | 905.4363         | 453.2218        | 888.4098 | 444.7085         | 887.4258       | 444.2165         | T    | <b>375.2350</b> | 188.1212        | 358.2085  | 179.6079         | 357.2245       | 179.1159         | 3  |
| 10 | <b>1004.5047</b> | 502.7560        | 987.4782 | 494.2427         | 986.4942       | 493.7507         | V    | 274.1874        | 137.5973        | 257.1608  | 129.0840         |                |                  | 2  |
| 11 |                  |                 |          |                  |                |                  | R    | 175.1190        | 88.0631         | 158.0924  | 79.5498          |                |                  | 1  |

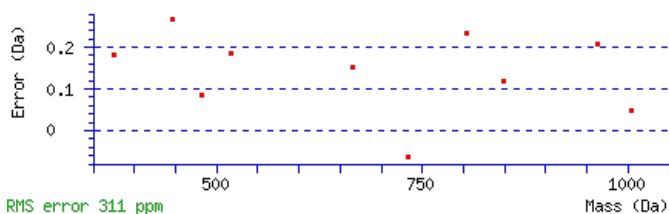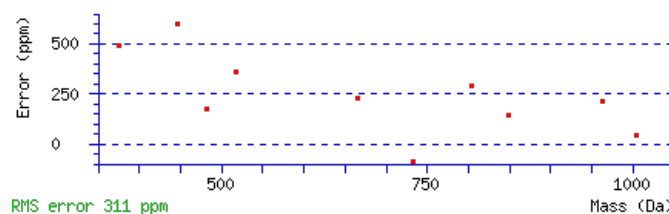

NCBI **BLAST** search of **SEIGQFAATVR**

(Parameters: blastp, nr protein database, expect=20000, no filter, PAM30)

Other BLAST [web gateways](#)

All matches to this query

## AT1G05190.1

| Score | Mr(calc)  | Delta   | Sequence                    |
|-------|-----------|---------|-----------------------------|
| 41.4  | 1177.6091 | -0.0029 | <a href="#">SEIGQFAATVR</a> |
| 9.5   | 1177.6091 | -0.0029 | <a href="#">HPGTKIDDPK</a>  |
| 7.2   | 1177.6051 | 0.0011  | <a href="#">KSTRSDELSR</a>  |
| 4.8   | 1177.6091 | -0.0029 | <a href="#">KFEEAQGTIR</a>  |
| 3.4   | 1177.6091 | -0.0029 | <a href="#">VELNNSFSLR</a>  |
| 3.3   | 1177.6033 | 0.0030  | <a href="#">WLYFHGLSR</a>   |
| 2.4   | 1177.6091 | -0.0029 | <a href="#">EDNFRSLVAK</a>  |
| 1.8   | 1177.6067 | -0.0004 | <a href="#">TLVHFVCFR</a>   |

Mascot: <http://www.matrixscience.com/>

**Peptide View**MS/MS Fragmentation of **LTSTLK**

Found in **AT1G05490.1** in **TAIR\_Arabidopsis**, Symbols: CHR31 | CHR31 (chromatin remodeling 31); ATP binding / DNA binding / helicase / nucleic acid binding | chr1:1618794-1623194 REVERSE

Match to Query 550: 668.378332 from(335.196442,2+) index(636)

Title: Elution from: 12.991 to 12.991 scan no 984 cid35.00 polarity:+

Data file D6h-2\_2.mgf

Click mouse within plot area to zoom in by factor of two about that point

Or,   to  Da

Label all possible matches  Label matches used for scoring

Show Y-axis

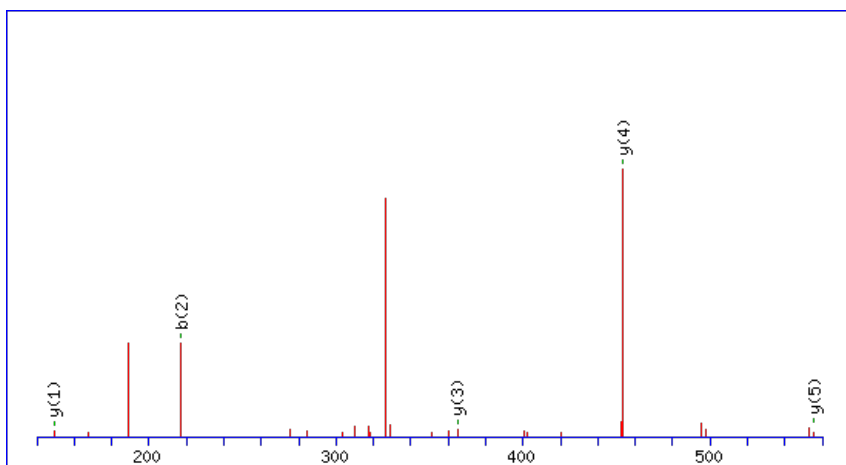

**Monoisotopic mass of neutral peptide Mr(calc):** 668.3803

**Fixed modifications:** Carbamidomethyl (C) (apply to specified residues or termini only)

**Ions Score:** 21 **Expect:** 0.012

**Matches:** 5/44 fragment ions using 14 most intense peaks ([help](#))

| # | b        | b <sup>++</sup> | b <sup>0</sup> | b <sup>0++</sup> | Seq. | y        | y <sup>++</sup> | y*       | y* <sup>++</sup> | y <sup>0</sup> | y <sup>0++</sup> | # |
|---|----------|-----------------|----------------|------------------|------|----------|-----------------|----------|------------------|----------------|------------------|---|
| 1 | 115.0884 | 58.0478         |                |                  | L    |          |                 |          |                  |                |                  | 6 |
| 2 | 217.1331 | 109.0702        | 199.1225       | 100.0649         | T    | 555.3065 | 278.1569        | 537.2829 | 269.1451         | 537.2959       | 269.1516         | 5 |
| 3 | 305.1622 | 153.0847        | 287.1516       | 144.0794         | S    | 453.2617 | 227.1345        | 435.2382 | 218.1227         | 435.2512       | 218.1292         | 4 |
| 4 | 407.2069 | 204.1071        | 389.1963       | 195.1018         | T    | 365.2327 | 183.1200        | 347.2091 | 174.1082         | 347.2221       | 174.1147         | 3 |
| 5 | 521.2880 | 261.1476        | 503.2774       | 252.1423         | L    | 263.1880 | 132.0976        | 245.1644 | 123.0858         |                |                  | 2 |
| 6 |          |                 |                |                  | K    | 149.1069 | 75.0571         | 131.0833 | 66.0453          |                |                  | 1 |

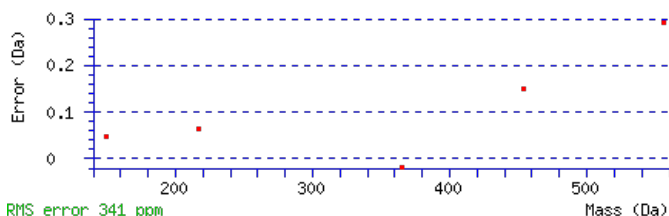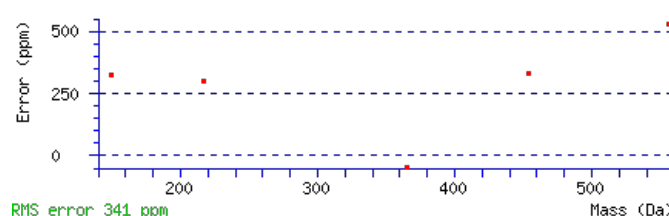NCBI **BLAST** search of **LTSTLK**

(Parameters: blastp, nr protein database, expect=20000, no filter, PAM30)

Other BLAST [web gateways](#)

**All matches to this query**

| Score | Mr(calc) | Delta   | Sequence               |
|-------|----------|---------|------------------------|
| 21.2  | 668.3803 | -0.0019 | <a href="#">LTSTLK</a> |
| 21.2  | 668.3803 | -0.0019 | <a href="#">LTSTLK</a> |
| 19.0  | 668.3803 | -0.0019 | <a href="#">ITTISK</a> |

# AT1G05490.1

|      |          |         |                        |
|------|----------|---------|------------------------|
| 19.0 | 668.3803 | -0.0019 | <a href="#">TTIVTK</a> |
| 11.9 | 668.3803 | -0.0019 | <a href="#">LTLSTK</a> |
| 10.8 | 668.3803 | -0.0019 | <a href="#">TIVTK</a>  |
| 10.8 | 668.3803 | -0.0019 | <a href="#">TLTSLK</a> |
| 10.8 | 668.3803 | -0.0019 | <a href="#">TLTSLK</a> |
| 10.7 | 668.3803 | -0.0019 | <a href="#">LTTSKL</a> |
| 3.3  | 668.3803 | -0.0019 | <a href="#">TLITSK</a> |

**Mascot:** <http://www.matrixscience.com/>



## Peptide View

MS/MS Fragmentation of **FGFPSGGLTTVSNK**

Found in **AT1G06500.1** in **TAIR\_Arabidopsis**, Symbols: | similar to unknown [Populus trichocarpa x Populus deltoides] (GB:ABK96557.1) | chr1:1990175-1990585 FORWARD

Match to Query 5406: 1410.710640 from(706.362596,2+) index(6742)

Title: Elution from: 60.065 to 60.065 scan no 8750 cid35.00 polarity:+

Data file D6h-1\_3.mgf

Click mouse within plot area to zoom in by factor of two about that point

Or,  to  Da

Label all possible matches  Label matches used for scoring

Show Y-axis

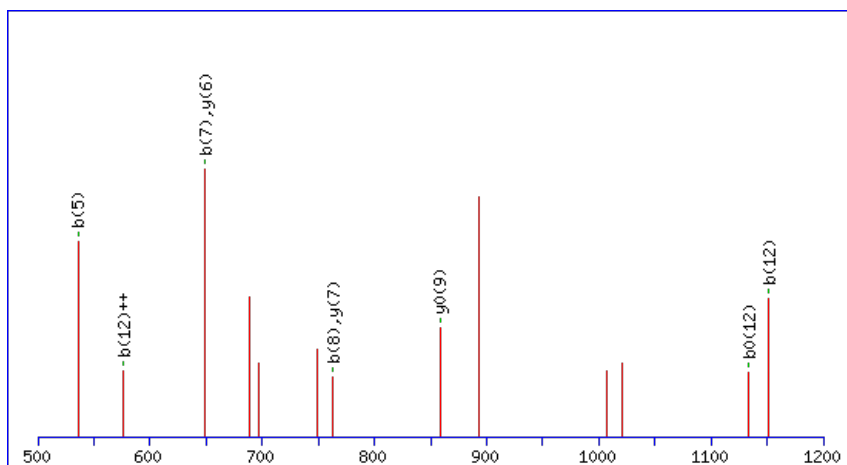

Monoisotopic mass of neutral peptide  $M_r(\text{calc})$ : 1410.7144

Fixed modifications: Carbamidomethyl (C) (apply to specified residues or termini only)

Ions Score: 23 Expect: 0.028

Matches : 9/120 fragment ions using 13 most intense peaks ([help](#))

| #  | b                | b <sup>++</sup> | b*        | b <sup>*++</sup> | b <sup>0</sup>   | b <sup>0++</sup> | Seq. | y               | y <sup>++</sup> | y*        | y <sup>*++</sup> | y <sup>0</sup>  | y <sup>0++</sup> | #  |
|----|------------------|-----------------|-----------|------------------|------------------|------------------|------|-----------------|-----------------|-----------|------------------|-----------------|------------------|----|
| 1  | 148.0757         | 74.5415         |           |                  |                  |                  | F    |                 |                 |           |                  |                 |                  | 14 |
| 2  | 205.0972         | 103.0522        |           |                  |                  |                  | G    | 1264.6532       | 632.8302        | 1247.6266 | 624.3170         | 1246.6426       | 623.8250         | 13 |
| 3  | 352.1656         | 176.5864        |           |                  |                  |                  | F    | 1207.6317       | 604.3195        | 1190.6052 | 595.8062         | 1189.6212       | 595.3142         | 12 |
| 4  | 449.2183         | 225.1128        |           |                  |                  |                  | P    | 1060.5633       | 530.7853        | 1043.5368 | 522.2720         | 1042.5528       | 521.7800         | 11 |
| 5  | <b>536.2504</b>  | 268.6288        |           |                  | 518.2398         | 259.6235         | S    | 963.5106        | 482.2589        | 946.4840  | 473.7456         | 945.5000        | 473.2536         | 10 |
| 6  | 593.2718         | 297.1396        |           |                  | 575.2613         | 288.1343         | G    | 876.4785        | 438.7429        | 859.4520  | 430.2296         | <b>858.4680</b> | 429.7376         | 9  |
| 7  | <b>650.2933</b>  | 325.6503        |           |                  | 632.2827         | 316.6450         | G    | 819.4571        | 410.2322        | 802.4305  | 401.7189         | 801.4465        | 401.2269         | 8  |
| 8  | <b>763.3774</b>  | 382.1923        |           |                  | 745.3668         | 373.1870         | L    | <b>762.4356</b> | 381.7214        | 745.4090  | 373.2082         | 744.4250        | 372.7162         | 7  |
| 9  | 864.4250         | 432.7162        |           |                  | 846.4145         | 423.7109         | T    | <b>649.3515</b> | 325.1794        | 632.3250  | 316.6661         | 631.3410        | 316.1741         | 6  |
| 10 | 965.4727         | 483.2400        |           |                  | 947.4621         | 474.2347         | T    | 548.3039        | 274.6556        | 531.2773  | 266.1423         | 530.2933        | 265.6503         | 5  |
| 11 | 1064.5411        | 532.7742        |           |                  | 1046.5306        | 523.7689         | V    | 447.2562        | 224.1317        | 430.2296  | 215.6185         | 429.2456        | 215.1264         | 4  |
| 12 | <b>1151.5732</b> | <b>576.2902</b> |           |                  | <b>1133.5626</b> | 567.2849         | S    | 348.1878        | 174.5975        | 331.1612  | 166.0842         | 330.1772        | 165.5922         | 3  |
| 13 | 1265.6161        | 633.3117        | 1248.5895 | 624.7984         | 1247.6055        | 624.3064         | N    | 261.1557        | 131.0815        | 244.1292  | 122.5682         |                 |                  | 2  |
| 14 |                  |                 |           |                  |                  |                  | K    | 147.1128        | 74.0600         | 130.0863  | 65.5468          |                 |                  | 1  |

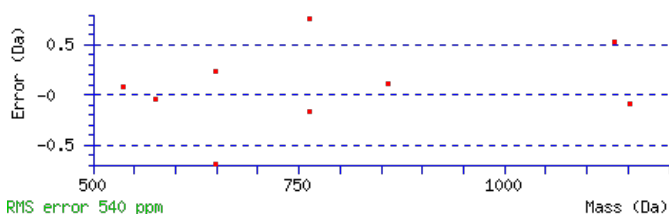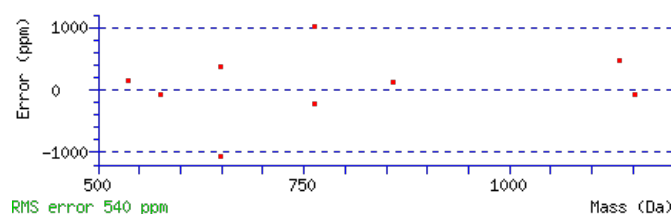

NCBI BLAST search of [FGFPSGGLTTVSNK](#)

## AT1G06500.1

(Parameters: blastp, nr protein database, expect=20000, no filter, PAM30)

Other BLAST [web gateways](#)

### All matches to this query

| Score | Mr(calc)  | Delta   | Sequence                       |
|-------|-----------|---------|--------------------------------|
| 22.6  | 1410.7144 | -0.0037 | <a href="#">FGFPSGGLTTVSNK</a> |
| 2.8   | 1410.7064 | 0.0042  | <a href="#">LYDEVKAGELMK</a>   |
| 1.5   | 1410.7116 | -0.0010 | <a href="#">NILLEDHHHQ</a>     |
| 1.4   | 1410.7143 | -0.0037 | <a href="#">FITGEAKEFDVR</a>   |
| 0.8   | 1410.7143 | -0.0037 | <a href="#">LFPEIEEEHIR</a>    |
| 0.6   | 1410.7064 | 0.0042  | <a href="#">DQVLEYIKMEK</a>    |

Mascot: <http://www.matrixscience.com/>

**Peptide View**MS/MS Fragmentation of **NVVEEPLNGIEFK**Found in **AT1G06530.1** in **TAIR\_Arabidopsis**, Symbols: | myosin heavy chain-related | chr1:2001624-2002595 FORWARD

Match to Query 6570: 1502.714958 from(752.364755,2+) index(7194)

Title: Elution from: 63.088 to 63.088 scan no 9223 cid35.00 polarity:+

Data file C7-3\_1.mgf

Click mouse within plot area to zoom in by factor of two about that point

Or,   to  Da Label all possible matches  Label matches used for scoring Show Y-axis 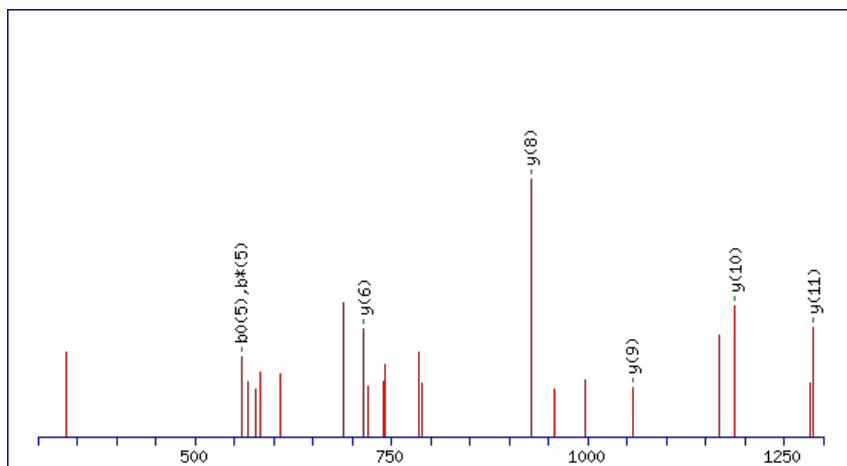Monoisotopic mass of neutral peptide  $M_r(\text{calc})$ : 1502.7193

Fixed modifications: Carbamidomethyl (C) (apply to specified residues or termini only)

Ions Score: 21 Expect: 0.041

Matches : 7/134 fragment ions using 15 most intense peaks ([help](#))

| #  | b         | b <sup>++</sup> | b*              | b <sup>*++</sup> | b <sup>0</sup>  | b <sup>0++</sup> | Seq. | y                | y <sup>++</sup> | y*        | y <sup>*++</sup> | y <sup>0</sup> | y <sup>0++</sup> | #  |
|----|-----------|-----------------|-----------------|------------------|-----------------|------------------|------|------------------|-----------------|-----------|------------------|----------------|------------------|----|
| 1  | 117.0443  | 59.0258         | 99.0207         | 50.0140          |                 |                  | N    |                  |                 |           |                  |                |                  | 13 |
| 2  | 217.1097  | 109.0585        | 199.0861        | 100.0467         |                 |                  | V    | 1387.6896        | 694.3484        | 1369.6660 | 685.3366         | 1369.6790      | 685.3432         | 12 |
| 3  | 317.1752  | 159.0912        | 299.1516        | 150.0794         |                 |                  | V    | <b>1287.6241</b> | 644.3157        | 1269.6006 | 635.3039         | 1269.6136      | 635.3104         | 11 |
| 4  | 447.2148  | 224.1110        | 429.1912        | 215.0992         | 429.2042        | 215.1058         | E    | <b>1187.5587</b> | 594.2830        | 1169.5351 | 585.2712         | 1169.5481      | 585.2777         | 10 |
| 5  | 577.2544  | 289.1309        | <b>559.2308</b> | 280.1191         | <b>559.2439</b> | 280.1256         | E    | <b>1057.5191</b> | 529.2632        | 1039.4955 | 520.2514         | 1039.5085      | 520.2579         | 9  |
| 6  | 675.3042  | 338.1558        | 657.2806        | 329.1440         | 657.2937        | 329.1505         | P    | <b>927.4794</b>  | 464.2434        | 909.4559  | 455.2316         | 909.4689       | 455.2381         | 8  |
| 7  | 789.3853  | 395.1963        | 771.3617        | 386.1845         | 771.3748        | 386.1910         | L    | 829.4296         | 415.2185        | 811.4061  | 406.2067         | 811.4191       | 406.2132         | 7  |
| 8  | 905.4223  | 453.2148        | 887.3987        | 444.2030         | 887.4118        | 444.2095         | N    | <b>715.3485</b>  | 358.1779        | 697.3250  | 349.1661         | 697.3380       | 349.1726         | 6  |
| 9  | 963.4408  | 482.2240        | 945.4172        | 473.2123         | 945.4303        | 473.2188         | G    | 599.3115         | 300.1594        | 581.2880  | 291.1476         | 581.3010       | 291.1541         | 5  |
| 10 | 1077.5219 | 539.2646        | 1059.4983       | 530.2528         | 1059.5114       | 530.2593         | I    | 541.2930         | 271.1502        | 523.2695  | 262.1384         | 523.2825       | 262.1449         | 4  |
| 11 | 1207.5615 | 604.2844        | 1189.5380       | 595.2726         | 1189.5510       | 595.2791         | E    | 427.2120         | 214.1096        | 409.1884  | 205.0978         | 409.2014       | 205.1043         | 3  |
| 12 | 1355.6270 | 678.3171        | 1337.6034       | 669.3053         | 1337.6164       | 669.3119         | F    | 297.1723         | 149.0898        | 279.1487  | 140.0780         |                |                  | 2  |
| 13 |           |                 |                 |                  |                 |                  | K    | 149.1069         | 75.0571         | 131.0833  | 66.0453          |                |                  | 1  |

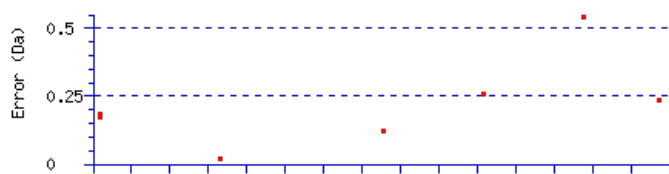

RMS error 272 ppm

Mass (Da)

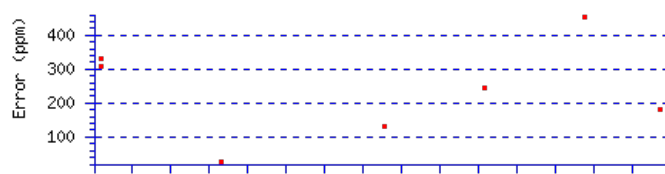

RMS error 272 ppm

Mass (Da)

NCBI **BLAST** search of **NVVEEPLNGIEFK**

(Parameters: blastp, nr protein database, expect=20000, no filter, PAM30)

Other BLAST [web gateways](#)

AT1G06530.1

All matches to this query

| Score | Mr(calc)  | Delta   | Sequence                       |
|-------|-----------|---------|--------------------------------|
| 21.4  | 1502.7193 | -0.0044 | <a href="#">NVVVEPLNGIEFK</a>  |
| 2.8   | 1502.7171 | -0.0021 | <a href="#">LTVGPEITSEEVGR</a> |
| 1.9   | 1502.7171 | -0.0021 | <a href="#">ESELIEENVLGVR</a>  |

Mascot: <http://www.matrixscience.com/>

**Peptide View**MS/MS Fragmentation of **FQKAGGIR**Found in **AT1G06670.1** in **TAIR\_Arabidopsis**, Symbols: NIH | NIH (NUCLEAR DEIH-BOXHELICASE) | chr1:2040566-2047332 FORWARD

Match to Query 1402: 875.495614 from(438.755083,2+) index(2838)

Title: Elution from: 29.662 to 29.662 scan no 3584 cid35.00 polarity:+

Data file D6h-1\_2.mgf

Click mouse within plot area to zoom in by factor of two about that point

Or,   to  Da Label all possible matches  Label matches used for scoring Show Y-axis 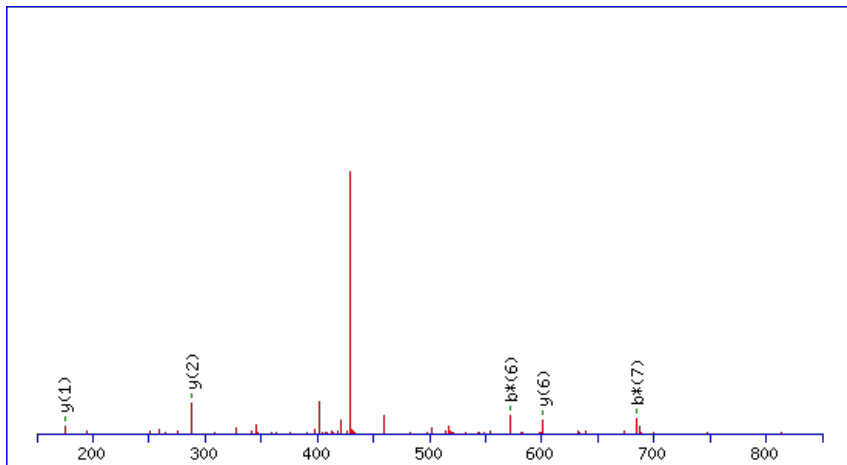Monoisotopic mass of neutral peptide **Mr(calc)**: 875.4977

Fixed modifications: Carbamidomethyl (C) (apply to specified residues or termini only)

Ions Score: 19 **Expect**: 0.045Matches : 5/54 fragment ions using 7 most intense peaks ([help](#))

| # | b        | b <sup>++</sup> | b*              | b <sup>+++</sup> | Seq. | y               | y <sup>++</sup> | y*       | y <sup>+++</sup> | # |
|---|----------|-----------------|-----------------|------------------|------|-----------------|-----------------|----------|------------------|---|
| 1 | 148.0757 | 74.5415         |                 |                  | F    |                 |                 |          |                  | 8 |
| 2 | 276.1343 | 138.5708        | 259.1077        | 130.0575         | Q    | 729.4366        | 365.2219        | 712.4101 | 356.7087         | 7 |
| 3 | 404.2292 | 202.6183        | 387.2027        | 194.1050         | K    | <b>601.3780</b> | 301.1926        | 584.3515 | 292.6794         | 6 |
| 4 | 475.2663 | 238.1368        | 458.2398        | 229.6235         | A    | 473.2831        | 237.1452        | 456.2565 | 228.6319         | 5 |
| 5 | 532.2878 | 266.6475        | 515.2613        | 258.1343         | G    | 402.2459        | 201.6266        | 385.2194 | 193.1133         | 4 |
| 6 | 589.3093 | 295.1583        | <b>572.2827</b> | 286.6450         | G    | 345.2245        | 173.1159        | 328.1979 | 164.6026         | 3 |
| 7 | 702.3933 | 351.7003        | <b>685.3668</b> | 343.1870         | I    | <b>288.2030</b> | 144.6051        | 271.1765 | 136.0919         | 2 |
| 8 |          |                 |                 |                  | R    | <b>175.1190</b> | 88.0631         | 158.0924 | 79.5498          | 1 |

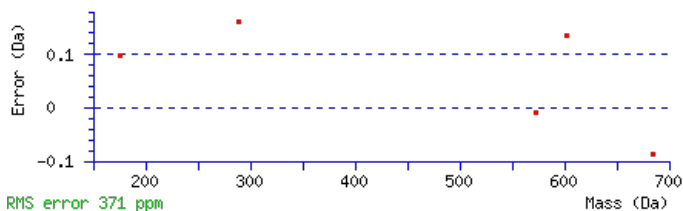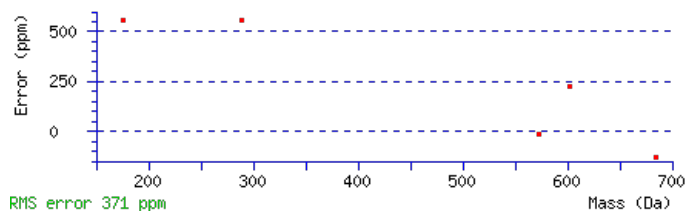NCBI **BLAST** search of **FQKAGGIR**

(Parameters: blastp, nr protein database, expect=20000, no filter, PAM30)

Other BLAST [web gateways](#)**All matches to this query**

| Score | Mr(calc) | Delta   | Sequence                 |
|-------|----------|---------|--------------------------|
| 18.9  | 875.4977 | -0.0021 | <a href="#">FKGQQLR</a>  |
| 18.9  | 875.4977 | -0.0021 | <a href="#">FOKAGGIR</a> |

# AT1G06670.1

|      |          |         |                          |
|------|----------|---------|--------------------------|
| 10.7 | 875.4977 | -0.0021 | <a href="#">TWTKRGK</a>  |
| 8.8  | 875.4977 | -0.0021 | <a href="#">VKFNVNR</a>  |
| 5.7  | 875.4977 | -0.0021 | <a href="#">FVLERGR</a>  |
| 2.7  | 875.4964 | -0.0008 | <a href="#">TSVLESIK</a> |
| 2.5  | 875.4964 | -0.0008 | <a href="#">TLVSSIEK</a> |
| 2.1  | 875.4977 | -0.0021 | <a href="#">FGRGPSKK</a> |
| 2.1  | 875.4937 | 0.0019  | <a href="#">VSGKRSSR</a> |
| 1.1  | 875.4977 | -0.0021 | <a href="#">HDHKVLK</a>  |

Mascot: <http://www.matrixscience.com/>

### Peptide View

 MS/MS Fragmentation of **FEDNFDATSNLNVMTPTDKK**

 Found in **AT1G06680.1** in **TAIR\_Arabidopsis**, Symbols: OEE2, PSII-P, PSBP-1 | PSBP-1 (OXYGEN-EVOLVING ENHANCER PROTEIN 2); poly(U) binding | chr1:2047939-2049185 FORWARD

Match to Query 10269: 2401.112205 from(801.378011,3+) index(5914)

Title: Elution from: 53.024 to 53.024 scan no 7559 cid35.00 polarity:+

Data file D6h-1\_2.mgf

Click mouse within plot area to zoom in by factor of two about that point

 Or,   to  Da 

 Label all possible matches  Label matches used for scoring 

 Show Y-axis 
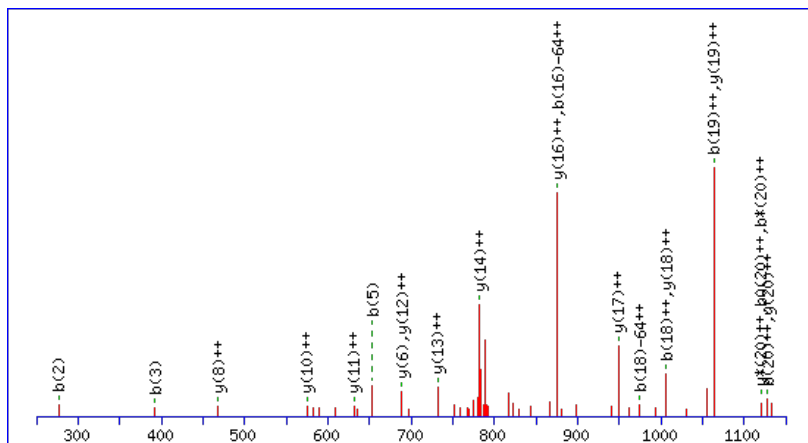
 Monoisotopic mass of neutral peptide **Mr(calc)**: 2401.1108

Fixed modifications: Carbamidomethyl (C) (apply to specified residues or termini only)

Variable modifications:

M14 : Oxidation (M), with neutral losses 0.0000 (shown in table), 63.9983

 Ions Score: 111 **Expect**: 1.8e-011

 Matches : 23/348 fragment ions using 16 most intense peaks ([help](#))

| #  | b               | b <sup>++</sup>  | b*        | b* <sup>++</sup> | b <sup>0</sup> | b <sup>0</sup> <sup>++</sup> | Seq | y               | y <sup>++</sup>  | y*        | y* <sup>++</sup> | y <sup>0</sup> | y <sup>0</sup> <sup>++</sup> | #  |
|----|-----------------|------------------|-----------|------------------|----------------|------------------------------|-----|-----------------|------------------|-----------|------------------|----------------|------------------------------|----|
| 1  | 148.0757        | 74.5415          |           |                  |                |                              | F   |                 |                  |           |                  |                |                              | 21 |
| 2  | <b>277.1183</b> | 139.0628         |           |                  | 259.1077       | 130.0575                     | E   | 2255.0496       | <b>1128.0284</b> | 2238.0231 | <b>1119.5152</b> | 2237.0391      | 1119.0232                    | 20 |
| 3  | <b>392.1452</b> | 196.5763         |           |                  | 374.1347       | 187.5710                     | D   | 2126.0070       | <b>1063.5072</b> | 2108.9805 | 1054.9939        | 2107.9965      | 1054.5019                    | 19 |
| 4  | 506.1882        | 253.5977         | 489.1616  | 245.0844         | 488.1776       | 244.5924                     | N   | 2010.9801       | <b>1005.9937</b> | 1993.9535 | 997.4804         | 1992.9695      | 996.9884                     | 18 |
| 5  | <b>653.2566</b> | 327.1319         | 636.2300  | 318.6186         | 635.2460       | 318.1266                     | F   | 1896.9372       | <b>948.9722</b>  | 1879.9106 | 940.4589         | 1878.9266      | 939.9669                     | 17 |
| 6  | 768.2835        | 384.6454         | 751.2570  | 376.1321         | 750.2729       | 375.6401                     | D   | 1749.8687       | <b>875.4380</b>  | 1732.8422 | 866.9247         | 1731.8582      | 866.4327                     | 16 |
| 7  | 839.3206        | 420.1640         | 822.2941  | 411.6507         | 821.3101       | 411.1587                     | A   | 1634.8418       | 817.9245         | 1617.8153 | 809.4113         | 1616.8312      | 808.9193                     | 15 |
| 8  | 940.3683        | 470.6878         | 923.3418  | 462.1745         | 922.3577       | 461.6825                     | T   | 1563.8047       | <b>782.4060</b>  | 1546.7781 | 773.8927         | 1545.7941      | 773.4007                     | 14 |
| 9  | 1027.4003       | 514.2038         | 1010.3738 | 505.6905         | 1009.3898      | 505.1985                     | S   | 1462.7570       | <b>731.8821</b>  | 1445.7305 | 723.3689         | 1444.7464      | 722.8769                     | 13 |
| 10 | 1141.4433       | 571.2253         | 1124.4167 | 562.7120         | 1123.4327      | 562.2200                     | N   | 1375.7250       | <b>688.3661</b>  | 1358.6984 | 679.8529         | 1357.7144      | 679.3608                     | 12 |
| 11 | 1254.5273       | 627.7673         | 1237.5008 | 619.2540         | 1236.5168      | 618.7620                     | L   | 1261.6821       | <b>631.3447</b>  | 1244.6555 | 622.8314         | 1243.6715      | 622.3394                     | 11 |
| 12 | 1368.5702       | 684.7888         | 1351.5437 | 676.2755         | 1350.5597      | 675.7835                     | N   | 1148.5980       | <b>574.8026</b>  | 1131.5714 | 566.2894         | 1130.5874      | 565.7973                     | 10 |
| 13 | 1467.6387       | 734.3230         | 1450.6121 | 725.8097         | 1449.6281      | 725.3177                     | V   | 1034.5551       | 517.7812         | 1017.5285 | 509.2679         | 1016.5445      | 508.7759                     | 9  |
| 14 | 1614.6741       | 807.8407         | 1597.6475 | 799.3274         | 1596.6635      | 798.8354                     | M   | 935.4866        | <b>468.2470</b>  | 918.4601  | 459.7337         | 917.4761       | 459.2417                     | 8  |
| 15 | 1713.7425       | 857.3749         | 1696.7159 | 848.8616         | 1695.7319      | 848.3696                     | V   | 788.4512        | 394.7293         | 771.4247  | 386.2160         | 770.4407       | 385.7240                     | 7  |
| 16 | 1814.7902       | 907.8987         | 1797.7636 | 899.3854         | 1796.7796      | 898.8934                     | T   | <b>689.3828</b> | 345.1951         | 672.3563  | 336.6818         | 671.3723       | 336.1898                     | 6  |
| 17 | 1911.8429       | 956.4251         | 1894.8164 | 947.9118         | 1893.8324      | 947.4198                     | P   | 588.3352        | 294.6712         | 571.3086  | 286.1579         | 570.3246       | 285.6659                     | 5  |
| 18 | 2012.8906       | <b>1006.9489</b> | 1995.8641 | 998.4357         | 1994.8800      | 997.9437                     | T   | 491.2824        | 246.1448         | 474.2558  | 237.6316         | 473.2718       | 237.1395                     | 4  |
| 19 | 2127.9175       | <b>1064.4624</b> | 2110.8910 | 1055.9491        | 2109.9070      | 1055.4571                    | D   | 390.2347        | 195.6210         | 373.2082  | 187.1077         | 372.2241       | 186.6157                     | 3  |
| 20 | 2256.0125       | <b>1128.5099</b> | 2238.9860 | <b>1119.9966</b> | 2238.0019      | <b>1119.5046</b>             | K   | 275.2078        | 138.1075         | 258.1812  | 129.5942         |                |                              | 2  |
| 21 |                 |                  |           |                  |                |                              | K   | 147.1128        | 74.0600          | 130.0863  | 65.5468          |                |                              | 1  |

# AT1G06680.1

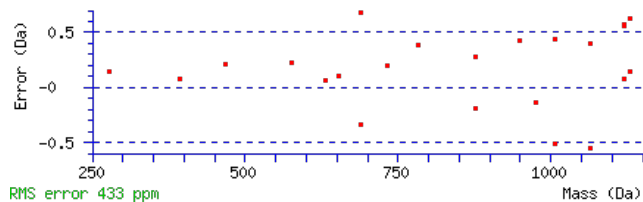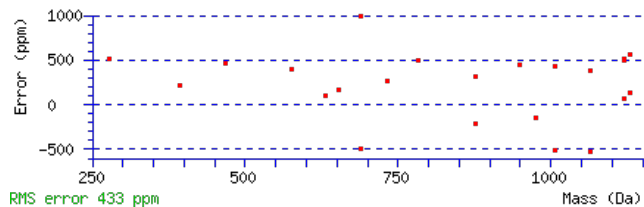

NCBI **BLAST** search of [FEDNFDATSNLNVMTPTDKK](#)  
 (Parameters: blastp, nr protein database, expect=20000, no filter, PAM30)  
 Other BLAST [web gateways](#)

## All matches to this query

| Score | Mr(calc)  | Delta   | Sequence                                 |
|-------|-----------|---------|------------------------------------------|
| 111.5 | 2401.1108 | 0.0014  | <a href="#">FEDNFDATSNLNVMTPTDKK</a>     |
| 13.7  | 2401.1089 | 0.0033  | <a href="#">CRSFTGFHNMVDRSLMTAQK</a>     |
| 7.1   | 2401.1132 | -0.0010 | <a href="#">KKPDDVAVPESTEGDDEAEDKK</a>   |
| 2.4   | 2401.1067 | 0.0055  | <a href="#">LNMVSATSFDS SSPSVSPSSDKR</a> |
| 1.7   | 2401.1141 | -0.0019 | <a href="#">VKGNGEADIMTFKLDNEMK</a>      |
| 1.6   | 2401.1089 | 0.0033  | <a href="#">CRSFTGFHNMVDRSLMTAQK</a>     |
| 0.8   | 2401.1121 | 0.0001  | <a href="#">YLAMLARDNDWASKEFGDQR</a>     |
| 0.4   | 2401.1076 | 0.0046  | <a href="#">MIPMDNHCLPTVDASGSVAAGVK</a>  |

Mascot: <http://www.matrixscience.com/>



**Peptide View**MS/MS Fragmentation of **ESVVTALK**Found in **AT1G06690.1** in **TAIR\_Arabidopsis**, Symbols: | aldo/keto reductase family protein | chr1:2049741-2052038 REVERSE

Match to Query 1328: 854.458772 from(428.236662,2+) index(2983)

Title: Elution from: 28.883 to 28.883 scan no 3679 cid35.00 polarity:+

Data file C7-2\_3.mgf

Click mouse within plot area to zoom in by factor of two about that point

Or,  to  Da Label all possible matches  Label matches used for scoring Show Y-axis 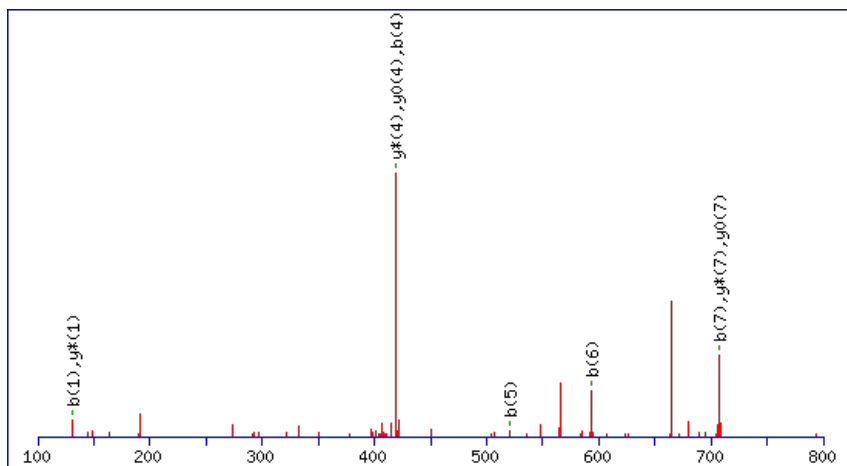Monoisotopic mass of neutral peptide **Mr(calc)**: 854.4591

Fixed modifications: Carbamidomethyl (C) (apply to specified residues or termini only)

Ions Score: 32 Expect: 0.0035

Matches : 10/64 fragment ions using 13 most intense peaks ([help](#))

| # | b               | b <sup>++</sup> | b <sup>0</sup> | b <sup>0++</sup> | Seq.     | y        | y <sup>++</sup> | y*              | y <sup>*++</sup> | y <sup>0</sup>  | y <sup>0++</sup> | # |
|---|-----------------|-----------------|----------------|------------------|----------|----------|-----------------|-----------------|------------------|-----------------|------------------|---|
| 1 | <b>131.0469</b> | 66.0271         | 113.0363       | 57.0218          | <b>E</b> |          |                 |                 |                  |                 |                  | 8 |
| 2 | 219.0760        | 110.0416        | 201.0654       | 101.0363         | <b>S</b> | 725.4268 | 363.2170        | <b>707.4032</b> | 354.2052         | <b>707.4162</b> | 354.2118         | 7 |
| 3 | 319.1414        | 160.0743        | 301.1309       | 151.0691         | <b>V</b> | 637.3977 | 319.2025        | 619.3741        | 310.1907         | 619.3872        | 310.1972         | 6 |
| 4 | <b>419.2069</b> | 210.1071        | 401.1963       | 201.1018         | <b>V</b> | 537.3323 | 269.1698        | 519.3087        | 260.1580         | 519.3217        | 260.1645         | 5 |
| 5 | <b>521.2516</b> | 261.1294        | 503.2410       | 252.1241         | <b>T</b> | 437.2668 | 219.1371        | <b>419.2433</b> | 210.1253         | <b>419.2563</b> | 210.1318         | 4 |
| 6 | <b>593.2857</b> | 297.1465        | 575.2752       | 288.1412         | <b>A</b> | 335.2221 | 168.1147        | 317.1985        | 159.1029         |                 |                  | 3 |
| 7 | <b>707.3668</b> | 354.1871        | 689.3563       | 345.1818         | <b>L</b> | 263.1880 | 132.0976        | 245.1644        | 123.0858         |                 |                  | 2 |
| 8 |                 |                 |                |                  | <b>K</b> | 149.1069 | 75.0571         | <b>131.0833</b> | 66.0453          |                 |                  | 1 |

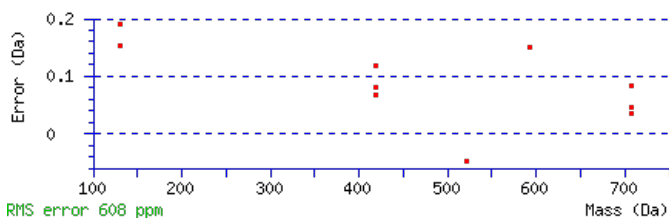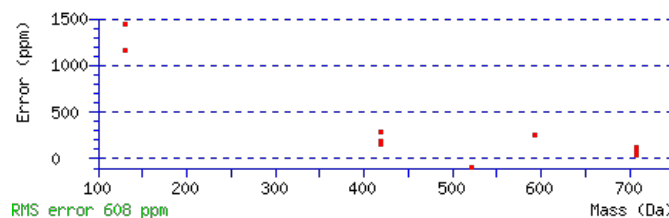NCBI **BLAST** search of [ESVVTALK](#)

(Parameters: blastp, nr protein database, expect=20000, no filter, PAM30)

Other BLAST [web gateways](#)**All matches to this query**

| Score | Mr(calc) | Delta   | Sequence                 |
|-------|----------|---------|--------------------------|
| 31.6  | 854.4591 | -0.0004 | <a href="#">ESVVTALK</a> |
| 29.8  | 854.4592 | -0.0004 | <a href="#">SSILEVAK</a> |

# AT1G06690.1

|      |          |         |                          |
|------|----------|---------|--------------------------|
| 21.2 | 854.4591 | -0.0004 | <a href="#">TSEIVAVK</a> |
| 12.5 | 854.4592 | -0.0004 | <a href="#">EALSSVIK</a> |
| 11.4 | 854.4592 | -0.0004 | <a href="#">EESIKIK</a>  |
| 11.4 | 854.4592 | -0.0004 | <a href="#">ESELKIK</a>  |
| 10.4 | 854.4591 | -0.0004 | <a href="#">SIVDTLAK</a> |
| 9.3  | 854.4591 | -0.0004 | <a href="#">LVGDITLK</a> |
| 9.3  | 854.4592 | -0.0004 | <a href="#">EAVSSLIK</a> |
| 9.3  | 854.4592 | -0.0004 | <a href="#">EEKSLK</a>   |

Mascot: <http://www.matrixscience.com/>

## Peptide View

### MS/MS Fragmentation of **EAQEITKQR**

Found in **AT1G06720.1** in **TAIR\_Arabidopsis**, Symbols: | similar to unknown protein [Arabidopsis thaliana] (TAIR:AT1G42440.1); similar to hypothetical protein OsJ\_010296 [Oryza sativa (japonica cultivar-group)] (GB:EAZ26813.1); similar to hypothetical protein OsI\_011117 [Oryza sativa (indica)]

Match to Query 3422: 1116.532332 from(559.273442,2+) index(1597)

Title: Elution from: 19.631 to 19.631 scan no 2082 cid35.00 polarity:+

Data file 0-2\_3.mgf

Click mouse within plot area to zoom in by factor of two about that point

Or,   to  Da

Label all possible matches  Label matches used for scoring

Show Y-axis

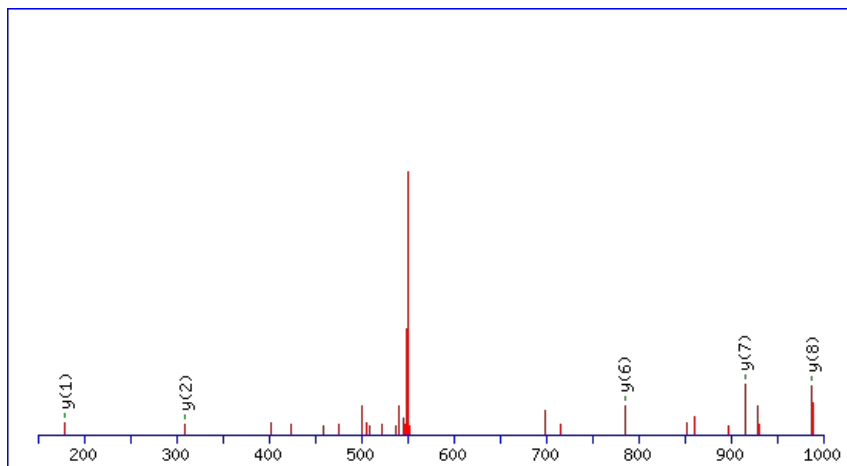

**Monoisotopic mass of neutral peptide Mr(calc):** 1116.5333

**Fixed modifications:** Carbamidomethyl (C) (apply to specified residues or termini only)

**Ions Score:** 39 **Expect:** 0.0012

**Matches:** 5/86 fragment ions using 8 most intense peaks ([help](#))

| # | b        | b <sup>++</sup> | b*       | b <sup>*++</sup> | b <sup>0</sup> | b <sup>0++</sup> | Seq. | y               | y <sup>++</sup> | y*       | y <sup>*++</sup> | y <sup>0</sup> | y <sup>0++</sup> | # |
|---|----------|-----------------|----------|------------------|----------------|------------------|------|-----------------|-----------------|----------|------------------|----------------|------------------|---|
| 1 | 131.0469 | 66.0271         |          |                  | 113.0363       | 57.0218          | E    |                 |                 |          |                  |                |                  | 9 |
| 2 | 203.0811 | 102.0442        |          |                  | 185.0705       | 93.0389          | A    | <b>987.5010</b> | 494.2541        | 969.4774 | 485.2423         | 969.4904       | 485.2489         | 8 |
| 3 | 333.1337 | 167.0705        | 315.1101 | 158.0587         | 315.1231       | 158.0652         | Q    | <b>915.4669</b> | 458.2371        | 897.4433 | 449.2253         | 897.4563       | 449.2318         | 7 |
| 4 | 463.1733 | 232.0903        | 445.1497 | 223.0785         | 445.1628       | 223.0850         | E    | <b>785.4142</b> | 393.2107        | 767.3906 | 384.1990         | 767.4036       | 384.2055         | 6 |
| 5 | 577.2544 | 289.1309        | 559.2308 | 280.1191         | 559.2439       | 280.1256         | I    | 655.3746        | 328.1909        | 637.3510 | 319.1791         | 637.3640       | 319.1856         | 5 |
| 6 | 679.2991 | 340.1532        | 661.2756 | 331.1414         | 661.2886       | 331.1479         | T    | 541.2935        | 271.1504        | 523.2699 | 262.1386         | 523.2829       | 262.1451         | 4 |
| 7 | 809.3882 | 405.1977        | 791.3646 | 396.1859         | 791.3776       | 396.1924         | K    | 439.2488        | 220.1280        | 421.2252 | 211.1162         |                |                  | 3 |
| 8 | 939.4408 | 470.2240        | 921.4172 | 461.2123         | 921.4303       | 461.2188         | Q    | <b>309.1597</b> | 155.0835        | 291.1362 | 146.0717         |                |                  | 2 |
| 9 |          |                 |          |                  |                |                  | R    | <b>179.1071</b> | 90.0572         | 161.0835 | 81.0454          |                |                  | 1 |

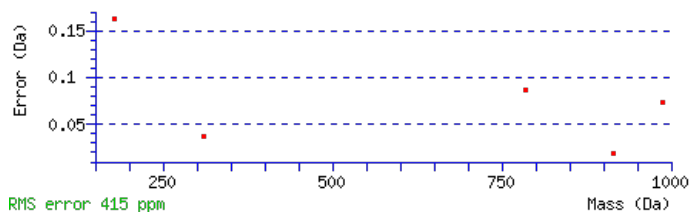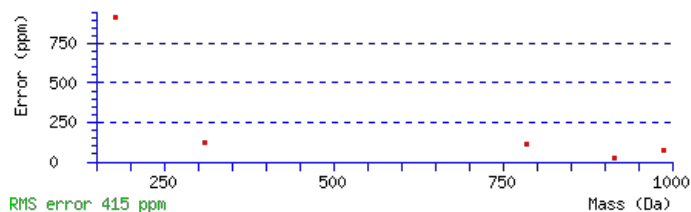

NCBI **BLAST** search of **EAQEITKQR**

(Parameters: blastp, nr protein database, expect=20000, no filter, PAM30)

Other BLAST [web gateways](#)

All matches to this query

## AT1G06720.1

| Score | Mr(calc)  | Delta   | Sequence                   |
|-------|-----------|---------|----------------------------|
| 39.1  | 1116.5333 | -0.0010 | <a href="#">EAQEITKQR</a>  |
| 14.1  | 1116.5333 | -0.0010 | <a href="#">KAKEQODQK</a>  |
| 13.4  | 1116.5334 | -0.0010 | <a href="#">LSNEELNKR</a>  |
| 13.4  | 1116.5334 | -0.0010 | <a href="#">EDLKKANER</a>  |
| 13.4  | 1116.5356 | -0.0033 | <a href="#">EPSLTWSKR</a>  |
| 13.4  | 1116.5334 | -0.0010 | <a href="#">EVNSLKQER</a>  |
| 13.4  | 1116.5333 | -0.0010 | <a href="#">QQEVVESKR</a>  |
| 10.2  | 1116.5334 | -0.0010 | <a href="#">KAAEEREAAK</a> |
| 10.0  | 1116.5333 | -0.0010 | <a href="#">LSVVEEDRR</a>  |
| 9.4   | 1116.5356 | -0.0033 | <a href="#">IWTAQSIER</a>  |

Mascot: <http://www.matrixscience.com/>


**Mascot Search Results**
**Peptide View**MS/MS Fragmentation of **VAADIGLEK**

Found in **AT1G06820.1** in **TAIR\_Arabidopsis**, Symbols: CCR2, CRTISO | CRTISO (CAROTENOID ISOMERASE); carotenoid isomerase | chr1:2093144-2096219 REVERSE

Match to Query 1620: 914.505272 from(458.259912,2+) index(3009)

Title: Elution from: 29.239 to 29.239 scan no 3720 cid35.00 polarity:+

Data file D6h-3\_3.mgf

Click mouse within plot area to zoom in by factor of two about that point

Or,   to  Da

Label all possible matches  Label matches used for scoring

Show Y-axis

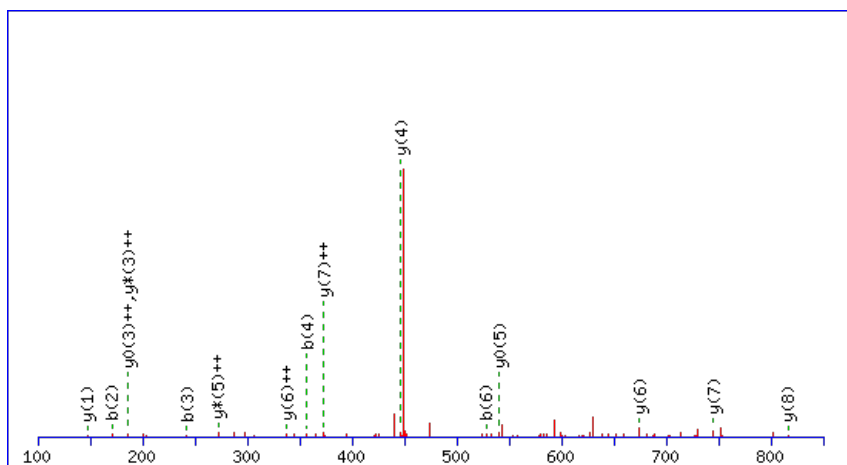

**Monoisotopic mass of neutral peptide Mr(calc):** 914.5073

**Fixed modifications:** Carbamidomethyl (C) (apply to specified residues or termini only)

**Ions Score:** 24 **Expect:** 0.018

**Matches:** 15/72 fragment ions using 40 most intense peaks ([help](#))

| # | b               | b <sup>++</sup> | b <sup>0</sup> | b <sup>0++</sup> | Seq. | y               | y <sup>++</sup> | y*       | y <sup>*++</sup> | y <sup>0</sup>  | y <sup>0++</sup> | # |
|---|-----------------|-----------------|----------------|------------------|------|-----------------|-----------------|----------|------------------|-----------------|------------------|---|
| 1 | 100.0757        | 50.5415         |                |                  | V    |                 |                 |          |                  |                 |                  | 9 |
| 2 | <b>171.1128</b> | 86.0600         |                |                  | A    | <b>816.4462</b> | 408.7267        | 799.4196 | 400.2134         | 798.4356        | 399.7214         | 8 |
| 3 | <b>242.1499</b> | 121.5786        |                |                  | A    | <b>745.4090</b> | <b>373.2082</b> | 728.3825 | 364.6949         | 727.3985        | 364.2029         | 7 |
| 4 | <b>357.1769</b> | 179.0921        | 339.1663       | 170.0868         | D    | <b>674.3719</b> | <b>337.6896</b> | 657.3454 | 329.1763         | 656.3614        | 328.6843         | 6 |
| 5 | 470.2609        | 235.6341        | 452.2504       | 226.6288         | I    | 559.3450        | 280.1761        | 542.3184 | <b>271.6629</b>  | <b>541.3344</b> | 271.1709         | 5 |
| 6 | <b>527.2824</b> | 264.1448        | 509.2718       | 255.1396         | G    | <b>446.2609</b> | 223.6341        | 429.2344 | 215.1208         | 428.2504        | 214.6288         | 4 |
| 7 | 640.3665        | 320.6869        | 622.3559       | 311.6816         | L    | 389.2395        | 195.1234        | 372.2129 | <b>186.6101</b>  | 371.2289        | <b>186.1181</b>  | 3 |
| 8 | 769.4090        | 385.2082        | 751.3985       | 376.2029         | E    | 276.1554        | 138.5813        | 259.1288 | 130.0681         | 258.1448        | 129.5761         | 2 |
| 9 |                 |                 |                |                  | K    | <b>147.1128</b> | 74.0600         | 130.0863 | 65.5468          |                 |                  | 1 |

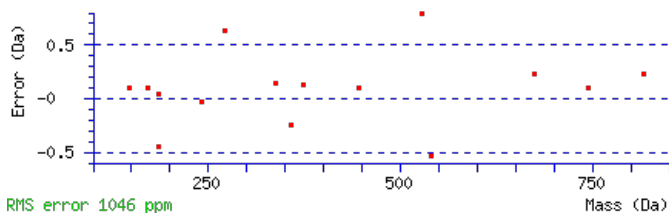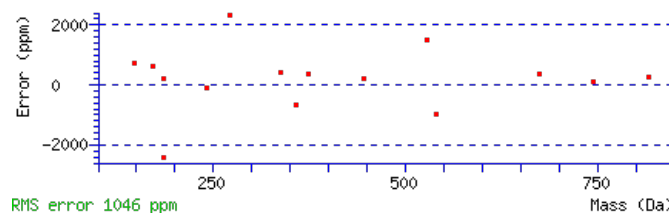

NCBI **BLAST** search of **VAADIGLEK**

(Parameters: blastp, nr protein database, expect=20000, no filter, PAM30)

Other BLAST [web gateways](#)

All matches to this query

| Score | Mr(calc) | Delta | Sequence |
|-------|----------|-------|----------|
|       |          |       |          |

**AT1G06820.1**

|      |          |         |                           |
|------|----------|---------|---------------------------|
| 24.3 | 914.5073 | -0.0020 | <a href="#">VAADIGLEK</a> |
| 12.3 | 914.5073 | -0.0020 | <a href="#">LQIDDAIK</a>  |
| 5.5  | 914.5046 | 0.0007  | <a href="#">GKTPNSRR</a>  |
| 5.2  | 914.5073 | -0.0020 | <a href="#">AIGEGDLK</a>  |
| 2.7  | 914.5073 | -0.0020 | <a href="#">LQPLSTEK</a>  |
| 2.7  | 914.5073 | -0.0020 | <a href="#">DEKPIVSK</a>  |
| 2.6  | 914.5073 | -0.0020 | <a href="#">ILNEEGLK</a>  |
| 2.6  | 914.5073 | -0.0020 | <a href="#">LQELGDLK</a>  |
| 2.5  | 914.5046 | 0.0007  | <a href="#">QGORSALR</a>  |
| 2.5  | 914.5073 | -0.0020 | <a href="#">LVQEALDK</a>  |

**Mascot:** <http://www.matrixscience.com/>

**Peptide View**MS/MS Fragmentation of **GVGPISLIGDESDFER**

Found in **AT1G06950.1** in **TAIR\_Arabidopsis**, Symbols: ATTIC110, TIC110 | ATTIC110/TIC110 (TRANSLOCON AT THE INNER ENVELOPE MEMBRANE OF CHLOROPLASTS 110) | chr1:2130302-2135562 REVERSE

Match to Query 7801: 1708.763110 from(855.388831,2+) index(8277)

Title: Elution from: 73.662 to 73.662 scan no 11100 cid35.00 polarity:+

Data file 0-3\_3.mgf

Click mouse within plot area to zoom in by factor of two about that point

Or,  to  Da

Label all possible matches  Label matches used for scoring

Show Y-axis

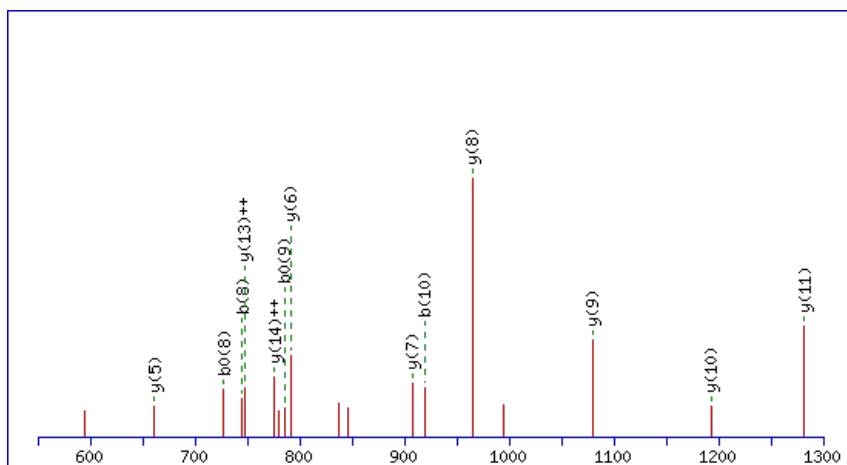

**Monoisotopic mass of neutral peptide Mr(calc):** 1708.7646

**Fixed modifications:** Carbamidomethyl (C) (apply to specified residues or termini only)

**Ions Score:** 61 **Expect:** 6e-006

**Matches:** 13/138 fragment ions using 18 most intense peaks ([help](#))

| #  | b               | b <sup>++</sup> | b <sup>0</sup>  | b <sup>0++</sup> | Seq.     | y                | y <sup>++</sup> | y*        | y <sup>*++</sup> | y <sup>0</sup> | y <sup>0++</sup> | #  |
|----|-----------------|-----------------|-----------------|------------------|----------|------------------|-----------------|-----------|------------------|----------------|------------------|----|
| 1  | 59.0258         | 30.0165         |                 |                  | <b>G</b> |                  |                 |           |                  |                |                  | 16 |
| 2  | 159.0912        | 80.0492         |                 |                  | <b>V</b> | 1651.7534        | 826.3803        | 1633.7298 | 817.3686         | 1633.7429      | 817.3751         | 15 |
| 3  | 217.1097        | 109.0585        |                 |                  | <b>G</b> | 1551.6880        | <b>776.3476</b> | 1533.6644 | 767.3358         | 1533.6774      | 767.3423         | 14 |
| 4  | 315.1595        | 158.0834        |                 |                  | <b>P</b> | 1493.6695        | <b>747.3384</b> | 1475.6459 | 738.3266         | 1475.6589      | 738.3331         | 13 |
| 5  | 429.2406        | 215.1239        |                 |                  | <b>I</b> | 1395.6197        | 698.3135        | 1377.5961 | 689.3017         | 1377.6091      | 689.3082         | 12 |
| 6  | 517.2697        | 259.1385        | 499.2591        | 250.1332         | <b>S</b> | <b>1281.5386</b> | 641.2729        | 1263.5150 | 632.2611         | 1263.5280      | 632.2676         | 11 |
| 7  | 631.3508        | 316.1790        | 613.3402        | 307.1737         | <b>L</b> | <b>1193.5095</b> | 597.2584        | 1175.4859 | 588.2466         | 1175.4989      | 588.2531         | 10 |
| 8  | <b>745.4319</b> | 373.2196        | <b>727.4213</b> | 364.2143         | <b>I</b> | <b>1079.4284</b> | 540.2178        | 1061.4048 | 531.2061         | 1061.4178      | 531.2126         | 9  |
| 9  | 803.4504        | 402.2288        | <b>785.4398</b> | 393.2235         | <b>G</b> | <b>965.3473</b>  | 483.1773        | 947.3237  | 474.1655         | 947.3367       | 474.1720         | 8  |
| 10 | <b>919.4744</b> | 460.2408        | 901.4638        | 451.2355         | <b>D</b> | <b>907.3288</b>  | 454.1680        | 889.3052  | 445.1563         | 889.3183       | 445.1628         | 7  |
| 11 | 1049.5140       | 525.2606        | 1031.5034       | 516.2553         | <b>E</b> | <b>791.3048</b>  | 396.1561        | 773.2813  | 387.1443         | 773.2943       | 387.1508         | 6  |
| 12 | 1137.5431       | 569.2752        | 1119.5325       | 560.2699         | <b>S</b> | <b>661.2652</b>  | 331.1362        | 643.2416  | 322.1245         | 643.2546       | 322.1310         | 5  |
| 13 | 1253.5670       | 627.2872        | 1235.5565       | 618.2819         | <b>D</b> | 573.2361         | 287.1217        | 555.2126  | 278.1099         | 555.2256       | 278.1164         | 4  |
| 14 | 1401.6325       | 701.3199        | 1383.6219       | 692.3146         | <b>F</b> | 457.2122         | 229.1097        | 439.1886  | 220.0979         | 439.2016       | 220.1044         | 3  |
| 15 | 1531.6721       | 766.3397        | 1513.6615       | 757.3344         | <b>E</b> | 309.1467         | 155.0770        | 291.1231  | 146.0652         | 291.1362       | 146.0717         | 2  |
| 16 |                 |                 |                 |                  | <b>R</b> | 179.1071         | 90.0572         | 161.0835  | 81.0454          |                |                  | 1  |

# AT1G06950.1

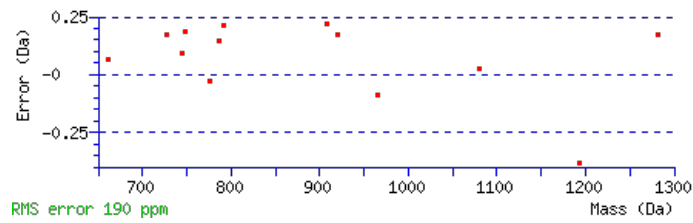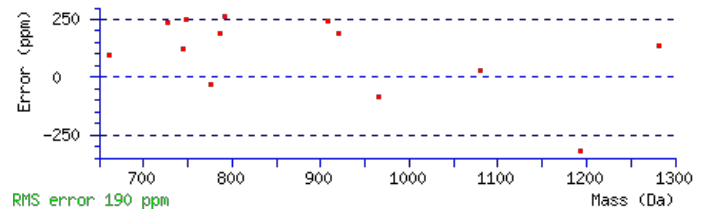

NCBI **BLAST** search of [GVGPISLIGDESDFER](#)

(Parameters: blastp, nr protein database, expect=20000, no filter, PAM30)

Other BLAST [web gateways](#)

## All matches to this query

| Score | Mr(calc)  | Delta   | Sequence                         |
|-------|-----------|---------|----------------------------------|
| 61.1  | 1708.7646 | -0.0015 | <a href="#">GVGPISLIGDESDFER</a> |
| 2.5   | 1708.7633 | -0.0001 | <a href="#">MEIPDEALGCGLTRK</a>  |

Mascot: <http://www.matrixscience.com/>



**Peptide View**MS/MS Fragmentation of **FASIENCK**

Found in **AT1G07140.1** in **TAIR\_Arabidopsis**, Symbols: SIRANBP | SIRANBP (Ran-binding protein 1a); Ran GTPase binding | chr1:2192359-2193687 REVERSE

Match to Query 2312: 967.443388 from(484.728970,2+) index(1185)

Title: Elution from: 18.268 to 18.268 scan no 1675 cid35.00 polarity:+

Data file C7-3\_1.mgf

Click mouse within plot area to zoom in by factor of two about that point

Or,   to  Da

Label all possible matches  Label matches used for scoring

Show Y-axis

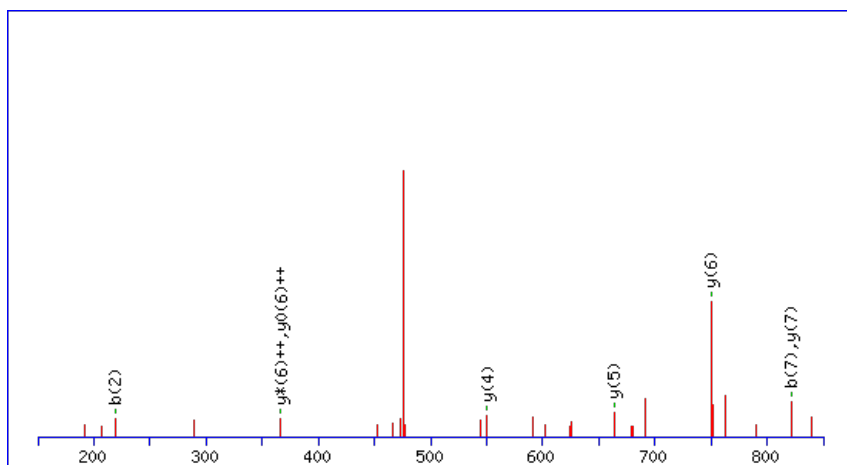

Monoisotopic mass of neutral peptide  $M_r(\text{calc})$ : 967.4433

Fixed modifications: Carbamidomethyl (C) (apply to specified residues or termini only)

Ions Score: 39 Expect: 0.00027

Matches : 8/64 fragment ions using 7 most intense peaks ([help](#))

| # | b               | b <sup>++</sup> | b*       | b <sup>*++</sup> | b <sup>0</sup> | b <sup>0++</sup> | Seq. | y               | y <sup>++</sup> | y*       | y <sup>*++</sup> | y <sup>0</sup> | y <sup>0++</sup> | # |
|---|-----------------|-----------------|----------|------------------|----------------|------------------|------|-----------------|-----------------|----------|------------------|----------------|------------------|---|
| 1 | 148.0757        | 74.5415         |          |                  |                |                  | F    |                 |                 |          |                  |                |                  | 8 |
| 2 | <b>219.1128</b> | 110.0600        |          |                  |                |                  | A    | <b>821.3822</b> | 411.1947        | 804.3556 | 402.6815         | 803.3716       | 402.1894         | 7 |
| 3 | 306.1448        | 153.5761        |          |                  | 288.1343       | 144.5708         | S    | <b>750.3451</b> | 375.6762        | 733.3185 | <b>367.1629</b>  | 732.3345       | <b>366.6709</b>  | 6 |
| 4 | 419.2289        | 210.1181        |          |                  | 401.2183       | 201.1128         | I    | <b>663.3130</b> | 332.1602        | 646.2865 | 323.6469         | 645.3025       | 323.1549         | 5 |
| 5 | 548.2715        | 274.6394        |          |                  | 530.2609       | 265.6341         | E    | <b>550.2290</b> | 275.6181        | 533.2024 | 267.1049         | 532.2184       | 266.6128         | 4 |
| 6 | 662.3144        | 331.6608        | 645.2879 | 323.1476         | 644.3039       | 322.6556         | N    | 421.1864        | 211.0968        | 404.1598 | 202.5836         |                |                  | 3 |
| 7 | <b>822.3451</b> | 411.6762        | 805.3185 | 403.1629         | 804.3345       | 402.6709         | C    | 307.1435        | 154.0754        | 290.1169 | 145.5621         |                |                  | 2 |
| 8 |                 |                 |          |                  |                |                  | K    | 147.1128        | 74.0600         | 130.0863 | 65.5468          |                |                  | 1 |

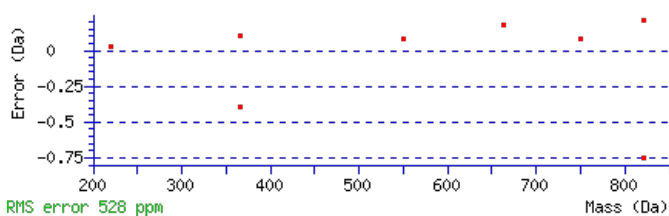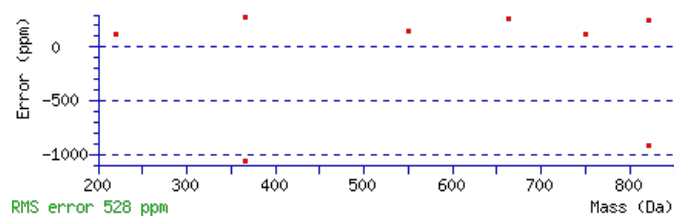

NCBI BLAST search of [FASIENCK](#)

(Parameters: blastp, nr protein database, expect=20000, no filter, PAM30)

Other BLAST [web gateways](#)

**All matches to this query**

| Score | $M_r(\text{calc})$ | Delta  | Sequence                 |
|-------|--------------------|--------|--------------------------|
| 39.3  | 967.4433           | 0.0001 | <a href="#">FASIENCK</a> |

# AT1G07140.1

|     |          |        |                           |
|-----|----------|--------|---------------------------|
| 0.8 | 967.4433 | 0.0001 | <a href="#">IGGFNSDMK</a> |
| 0.2 | 967.4433 | 0.0001 | <a href="#">ELGMAEYR</a>  |

**Mascot:** <http://www.matrixscience.com/>

**Peptide View**MS/MS Fragmentation of **YLANLFNVMGK**Found in **AT1G07180.1** in **TAIR\_Arabidopsis**, Symbols: ATNDI1, NDA1 | ATNDI1/NDA1 (ALTERNATIVE NAD(P)H DEHYDROGENASE 1); NADH dehydrogenase | chr1:2204413-2206772 FORWARD

Match to Query 4703: 1284.654132 from(643.334342,2+) index(7436)

Title: Elution from: 65.622 to 65.622 scan no 9699 cid35.00 polarity:+

Data file D12h-1\_2.mgf

Click mouse within plot area to zoom in by factor of two about that point

Or,   to  Da Label all possible matches  Label matches used for scoring Show Y-axis 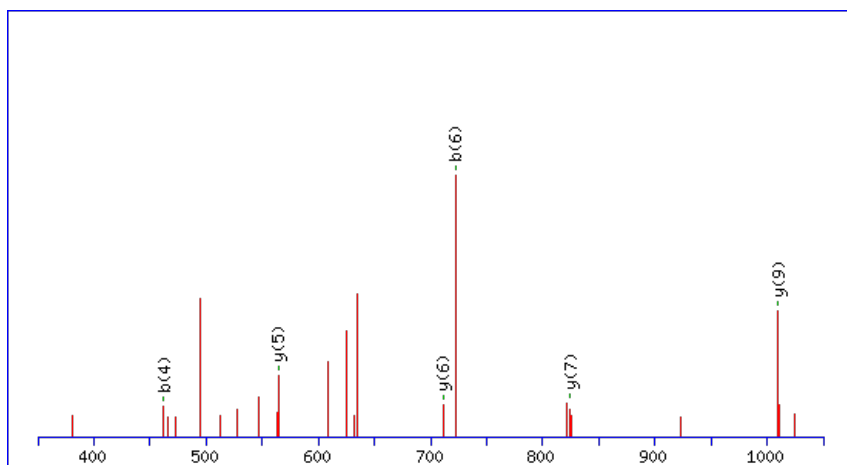Monoisotopic mass of neutral peptide  $M_r(\text{calc})$ : 1284.6536

Fixed modifications: Carbamidomethyl (C) (apply to specified residues or termini only)

Variable modifications:

M9 : Oxidation (M), with neutral losses 0.0000 (shown in table), 63.9983

Ions Score: 23 Expect: 0.013

Matches : 6/114 fragment ions using 13 most intense peaks ([help](#))

| #  | b               | b <sup>++</sup> | b <sup>*</sup> | b <sup>*++</sup> | Seq. | y                | y <sup>++</sup> | y <sup>*</sup> | y <sup>*++</sup> | #  |
|----|-----------------|-----------------|----------------|------------------|------|------------------|-----------------|----------------|------------------|----|
| 1  | 164.0706        | 82.5389         |                |                  | Y    |                  |                 |                |                  | 11 |
| 2  | 277.1547        | 139.0810        |                |                  | L    | 1122.5976        | 561.8024        | 1105.5710      | 553.2892         | 10 |
| 3  | 348.1918        | 174.5995        |                |                  | A    | <b>1009.5135</b> | 505.2604        | 992.4870       | 496.7471         | 9  |
| 4  | <b>462.2347</b> | 231.6210        | 445.2082       | 223.1077         | N    | 938.4764         | 469.7418        | 921.4499       | 461.2286         | 8  |
| 5  | 575.3188        | 288.1630        | 558.2922       | 279.6498         | L    | <b>824.4335</b>  | 412.7204        | 807.4069       | 404.2071         | 7  |
| 6  | <b>722.3872</b> | 361.6972        | 705.3606       | 353.1840         | F    | <b>711.3494</b>  | 356.1783        | 694.3229       | 347.6651         | 6  |
| 7  | 836.4301        | 418.7187        | 819.4036       | 410.2054         | N    | <b>564.2810</b>  | 282.6441        | 547.2545       | 274.1309         | 5  |
| 8  | 935.4985        | 468.2529        | 918.4720       | 459.7396         | V    | 450.2381         | 225.6227        | 433.2115       | 217.1094         | 4  |
| 9  | 1082.5339       | 541.7706        | 1065.5074      | 533.2573         | M    | 351.1697         | 176.0885        | 334.1431       | 167.5752         | 3  |
| 10 | 1139.5554       | 570.2813        | 1122.5288      | 561.7681         | G    | 204.1343         | 102.5708        | 187.1077       | 94.0575          | 2  |
| 11 |                 |                 |                |                  | K    | 147.1128         | 74.0600         | 130.0863       | 65.5468          | 1  |

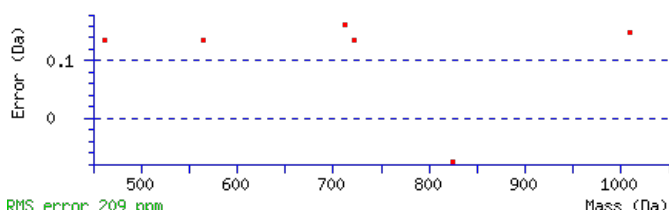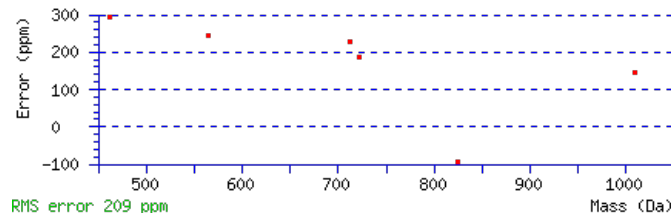NCBI BLAST search of [YLANLFNVMGK](#)

(Parameters: blastp, nr protein database, expect=20000, no filter, PAM30)

Other BLAST [web gateways](#)

AT1G07180.1

All matches to this query

| Score | Mr(calc)  | Delta   | Sequence                     |
|-------|-----------|---------|------------------------------|
| 22.9  | 1284.6536 | 0.0005  | <a href="#">YLANLFNVMGK</a>  |
| 1.1   | 1284.6575 | -0.0034 | <a href="#">SVFHGPSNIATR</a> |

Mascot: <http://www.matrixscience.com/>



# Mascot Search Results

## Peptide View

MS/MS Fragmentation of **LVLTPAAVEFLNAR**

Found in **AT1G07320.1** in **TAIR\_Arabidopsis**, Symbols: RPL4 | RPL4 (ribosomal protein L4); poly(U) binding / structural constituent of ribosome | chr1:2249189-2250188 FORWARD

Match to Query 6617: 1530.809084 from(766.411818,2+) index(9324)

Title: Elution from: 83.903 to 83.903 scan no 12641 cid35.00 polarity:+

Data file D12h-1\_2.mgf

Click mouse within plot area to zoom in by factor of two about that point

Or,   to  Da

Label all possible matches  Label matches used for scoring

Show Y-axis

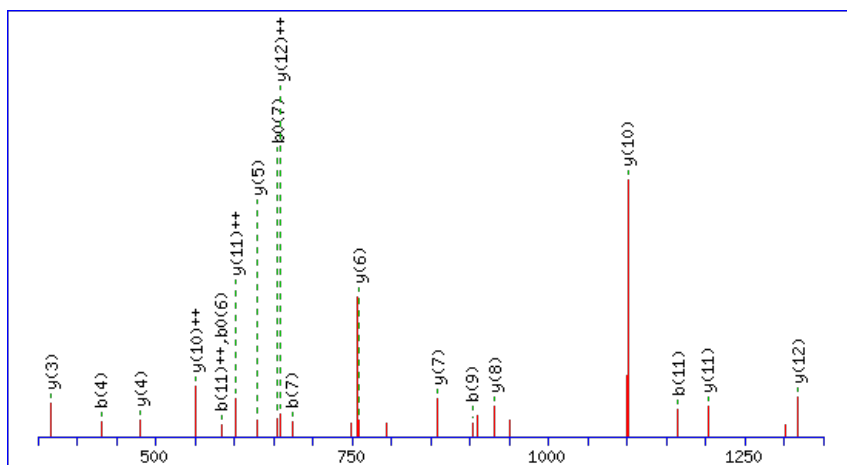

Monoisotopic mass of neutral peptide  $M_r(\text{calc})$ : 1530.8130

Fixed modifications: Carbamidomethyl (C) (apply to specified residues or termini only)

Ions Score: 82 Expect: 2.1e-008

Matches : 19/118 fragment ions using 26 most intense peaks [\(help\)](#)

| #  | b         | b <sup>++</sup> | b*        | b <sup>*++</sup> | b <sup>0</sup> | b <sup>0++</sup> | Seq. | y         | y <sup>++</sup> | y*        | y <sup>*++</sup> | y <sup>0</sup> | y <sup>0++</sup> | #  |
|----|-----------|-----------------|-----------|------------------|----------------|------------------|------|-----------|-----------------|-----------|------------------|----------------|------------------|----|
| 1  | 115.0884  | 58.0478         |           |                  |                |                  | L    |           |                 |           |                  |                |                  | 14 |
| 2  | 215.1538  | 108.0805        |           |                  |                |                  | V    | 1417.7392 | 709.3732        | 1399.7156 | 700.3615         | 1399.7287      | 700.3680         | 13 |
| 3  | 329.2349  | 165.1211        |           |                  |                |                  | L    | 1317.6738 | 659.3405        | 1299.6502 | 650.3287         | 1299.6632      | 650.3352         | 12 |
| 4  | 431.2796  | 216.1435        |           |                  | 413.2691       | 207.1382         | T    | 1203.5927 | 602.3000        | 1185.5691 | 593.2882         | 1185.5821      | 593.2947         | 11 |
| 5  | 529.3294  | 265.1684        |           |                  | 511.3189       | 256.1631         | P    | 1101.5480 | 551.2776        | 1083.5244 | 542.2658         | 1083.5374      | 542.2723         | 10 |
| 6  | 601.3636  | 301.1854        |           |                  | 583.3530       | 292.1801         | A    | 1003.4982 | 502.2527        | 985.4746  | 493.2409         | 985.4876       | 493.2474         | 9  |
| 7  | 673.3977  | 337.2025        |           |                  | 655.3872       | 328.1972         | A    | 931.4640  | 466.2356        | 913.4404  | 457.2239         | 913.4534       | 457.2304         | 8  |
| 8  | 773.4632  | 387.2352        |           |                  | 755.4526       | 378.2299         | V    | 859.4299  | 430.2186        | 841.4063  | 421.2068         | 841.4193       | 421.2133         | 7  |
| 9  | 903.5028  | 452.2550        |           |                  | 885.4922       | 443.2498         | E    | 759.3644  | 380.1858        | 741.3408  | 371.1741         | 741.3538       | 371.1806         | 6  |
| 10 | 1051.5683 | 526.2878        |           |                  | 1033.5577      | 517.2825         | F    | 629.3248  | 315.1660        | 611.3012  | 306.1542         |                |                  | 5  |
| 11 | 1165.6494 | 583.3283        |           |                  | 1147.6388      | 574.3230         | L    | 481.2593  | 241.1333        | 463.2358  | 232.1215         |                |                  | 4  |
| 12 | 1281.6864 | 641.3468        | 1263.6628 | 632.3350         | 1263.6758      | 632.3415         | N    | 367.1782  | 184.0928        | 349.1547  | 175.0810         |                |                  | 3  |
| 13 | 1353.7205 | 677.3639        | 1335.6969 | 668.3521         | 1335.7099      | 668.3586         | A    | 251.1412  | 126.0743        | 233.1177  | 117.0625         |                |                  | 2  |
| 14 |           |                 |           |                  |                |                  | R    | 179.1071  | 90.0572         | 161.0835  | 81.0454          |                |                  | 1  |

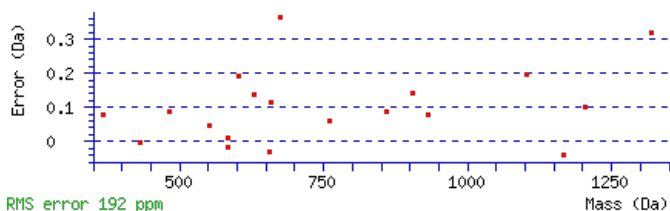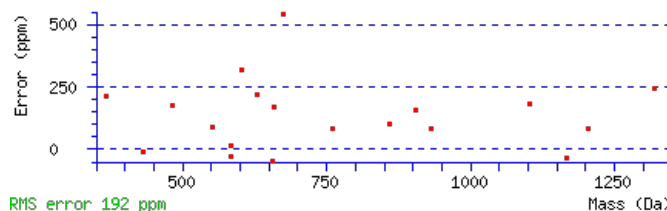

NCBI BLAST search of [LVLTPAAVEFLNAR](#)

## AT1G07320.1

(Parameters: blastp, nr protein database, expect=20000, no filter, PAM30)

Other BLAST [web gateways](#)

### All matches to this query

| Score | Mr(calc)  | Delta   | Sequence                        |
|-------|-----------|---------|---------------------------------|
| 82.4  | 1530.8130 | -0.0040 | <a href="#">LVLTPAAVEFLNAR</a>  |
| 2.9   | 1530.8108 | -0.0017 | <a href="#">VTILGDGNAKAVINK</a> |
| 0.8   | 1530.8061 | 0.0030  | <a href="#">NPLQRKLAEIMAK</a>   |

Mascot: <http://www.matrixscience.com/>

**Peptide View**MS/MS Fragmentation of **LSSRSQATVEWR**Found in **AT1G07380.1** in **TAIR\_Arabidopsis**, Symbols: | ceramidase family protein | chr1:2264827-2268304 REVERSE

Match to Query 5661: 1438.667850 from(720.341201,2+) index(5195)

Title: Elution from: 47.614 to 47.614 scan no 6515 cid35.00 polarity:+

Data file D6h-2\_2.mgf

Click mouse within plot area to zoom in by factor of two about that point

Or,  to  Da Label all possible matches  Label matches used for scoring Show Y-axis 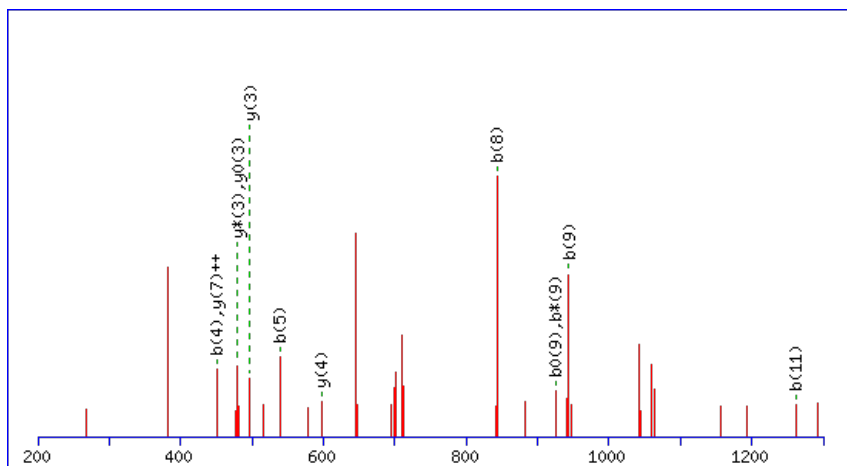Monoisotopic mass of neutral peptide  $M_r(\text{calc})$ : 1438.6673

Fixed modifications: Carbamidomethyl (C) (apply to specified residues or termini only)

Ions Score: 25 Expect: 0.031

Matches : 12/120 fragment ions using 24 most intense peaks ([help](#))

| #  | b                | b <sup>++</sup> | b <sup>*</sup>  | b <sup>*++</sup> | b <sup>0</sup>  | b <sup>0++</sup> | Seq. | y               | y <sup>++</sup> | y <sup>*</sup>  | y <sup>*++</sup> | y <sup>0</sup>  | y <sup>0++</sup> | #  |
|----|------------------|-----------------|-----------------|------------------|-----------------|------------------|------|-----------------|-----------------|-----------------|------------------|-----------------|------------------|----|
| 1  | 115.0884         | 58.0478         |                 |                  |                 |                  | L    |                 |                 |                 |                  |                 |                  | 12 |
| 2  | 203.1174         | 102.0624        |                 |                  | 185.1069        | 93.0571          | S    | 1325.5935       | 663.3004        | 1307.5699       | 654.2886         | 1307.5829       | 654.2951         | 11 |
| 3  | 291.1465         | 146.0769        |                 |                  | 273.1359        | 137.0716         | S    | 1237.5644       | 619.2859        | 1219.5409       | 610.2741         | 1219.5539       | 610.2806         | 10 |
| 4  | <b>451.2358</b>  | 226.1215        | 433.2122        | 217.1097         | 433.2252        | 217.1162         | R    | 1149.5354       | 575.2713        | 1131.5118       | 566.2595         | 1131.5248       | 566.2660         | 9  |
| 5  | <b>539.2648</b>  | 270.1360        | 521.2412        | 261.1243         | 521.2542        | 261.1308         | S    | 989.4461        | 495.2267        | 971.4225        | 486.2149         | 971.4356        | 486.2214         | 8  |
| 6  | 669.3175         | 335.1624        | 651.2939        | 326.1506         | 651.3069        | 326.1571         | Q    | 901.4171        | <b>451.2122</b> | 883.3935        | 442.2004         | 883.4065        | 442.2069         | 7  |
| 7  | 741.3516         | 371.1794        | 723.3280        | 362.1677         | 723.3410        | 362.1742         | A    | 771.3644        | 386.1858        | 753.3408        | 377.1741         | 753.3538        | 377.1806         | 6  |
| 8  | <b>843.3963</b>  | 422.2018        | 825.3727        | 413.1900         | 825.3858        | 413.1965         | T    | 699.3303        | 350.1688        | 681.3067        | 341.1570         | 681.3197        | 341.1635         | 5  |
| 9  | <b>943.4618</b>  | 472.2345        | <b>925.4382</b> | 463.2227         | <b>925.4512</b> | 463.2292         | V    | <b>597.2856</b> | 299.1464        | 579.2620        | 290.1346         | 579.2750        | 290.1411         | 4  |
| 10 | 1073.5014        | 537.2543        | 1055.4778       | 528.2425         | 1055.4908       | 528.2491         | E    | <b>497.2201</b> | 249.1137        | <b>479.1965</b> | 240.1019         | <b>479.2095</b> | 240.1084         | 3  |
| 11 | <b>1261.5748</b> | 631.2910        | 1243.5512       | 622.2792         | 1243.5642       | 622.2857         | W    | 367.1805        | 184.0939        | 349.1569        | 175.0821         |                 |                  | 2  |
| 12 |                  |                 |                 |                  |                 |                  | R    | 179.1071        | 90.0572         | 161.0835        | 81.0454          |                 |                  | 1  |

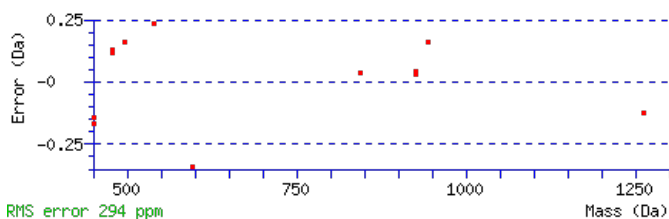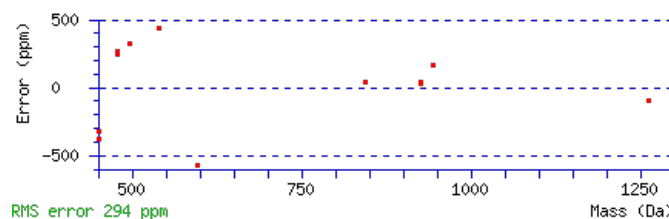NCBI BLAST search of **LSSRSQATVEWR**

(Parameters: blastp, nr protein database, expect=20000, no filter, PAM30)

Other BLAST [web gateways](#)**All matches to this query**

## AT1G07380.1

| Score | Mr(calc)  | Delta   | Sequence                      |
|-------|-----------|---------|-------------------------------|
| 25.1  | 1438.6673 | 0.0005  | <a href="#">LSSRSQATVEWR</a>  |
| 15.9  | 1438.6646 | 0.0032  | <a href="#">KFESVEGVDIGSR</a> |
| 14.9  | 1438.6695 | -0.0017 | <a href="#">QDAEFKVNWKR</a>   |
| 13.2  | 1438.6703 | -0.0024 | <a href="#">GTIGYIAPEMISR</a> |
| 13.2  | 1438.6673 | 0.0005  | <a href="#">HHQVIVSEDLSR</a>  |
| 11.1  | 1438.6646 | 0.0032  | <a href="#">LGFQSKASDLNKG</a> |
| 9.3   | 1438.6680 | -0.0002 | <a href="#">KADKENSGLTMK</a>  |
| 9.3   | 1438.6646 | 0.0032  | <a href="#">ENQFGVEKESKK</a>  |
| 7.4   | 1438.6707 | -0.0028 | <a href="#">DTQSRIMTQALR</a>  |
| 4.9   | 1438.6669 | 0.0010  | <a href="#">EDGLNYIKWASK</a>  |

Mascot: <http://www.matrixscience.com/>



**Peptide View**MS/MS Fragmentation of **DNIQGITKPAIR**Found in **AT1G07660.1** in **TAIR\_Arabidopsis**, Symbols: | histone H4 | chr1:2369209-2369520 FORWARD

Match to Query 4971: 1324.746651 from(442.589493,3+) index(2719)

Title: Elution from: 28.360 to 28.360 scan no 3400 cid35.00 polarity:+

Data file D6h-3\_1.mgf

Click mouse within plot area to zoom in by factor of two about that point

Or,   to  Da Label all possible matches  Label matches used for scoring Show Y-axis 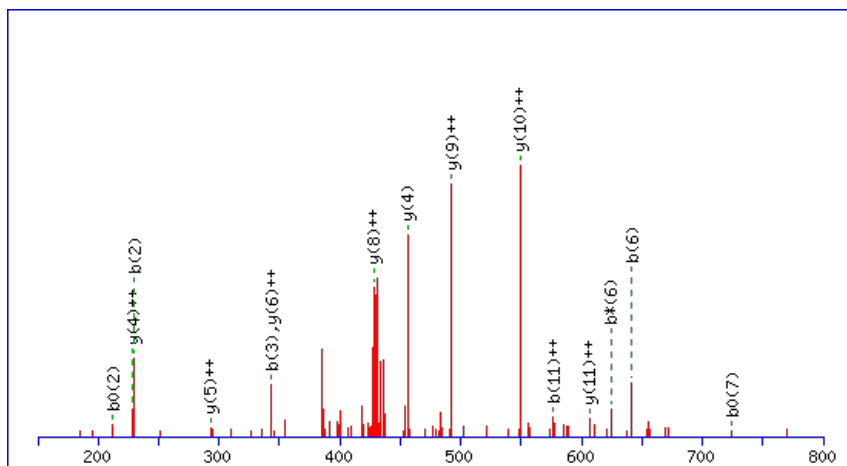Monoisotopic mass of neutral peptide  $M_r(\text{calc})$ : 1324.7463

Fixed modifications: Carbamidomethyl (C) (apply to specified residues or termini only)

Ions Score: 55 Expect: 1.1e-005

Matches : 15/120 fragment ions using 17 most intense peaks ([help](#))

| #  | b               | b <sup>++</sup> | b*              | b <sup>*++</sup> | b <sup>0</sup>  | b <sup>0++</sup> | Seq. | y               | y <sup>++</sup> | y*        | y <sup>*++</sup> | y <sup>0</sup> | y <sup>0++</sup> | #  |
|----|-----------------|-----------------|-----------------|------------------|-----------------|------------------|------|-----------------|-----------------|-----------|------------------|----------------|------------------|----|
| 1  | 116.0342        | 58.5207         |                 |                  | 98.0237         | 49.5155          | D    |                 |                 |           |                  |                |                  | 12 |
| 2  | <b>230.0771</b> | 115.5422        | 213.0506        | 107.0289         | <b>212.0666</b> | 106.5369         | N    | 1210.7266       | <b>605.8670</b> | 1193.7001 | 597.3537         | 1192.7161      | 596.8617         | 11 |
| 3  | <b>343.1612</b> | 172.0842        | 326.1347        | 163.5710         | 325.1506        | 163.0790         | I    | 1096.6837       | <b>548.8455</b> | 1079.6572 | 540.3322         | 1078.6731      | 539.8402         | 10 |
| 4  | 471.2198        | 236.1135        | 454.1932        | 227.6003         | 453.2092        | 227.1082         | Q    | 983.5996        | <b>492.3035</b> | 966.5731  | 483.7902         | 965.5891       | 483.2982         | 9  |
| 5  | 528.2413        | 264.6243        | 511.2147        | 256.1110         | 510.2307        | 255.6190         | G    | 855.5411        | <b>428.2742</b> | 838.5145  | 419.7609         | 837.5305       | 419.2689         | 8  |
| 6  | <b>641.3253</b> | 321.1663        | <b>624.2988</b> | 312.6530         | 623.3148        | 312.1610         | I    | 798.5196        | 399.7634        | 781.4931  | 391.2502         | 780.5090       | 390.7582         | 7  |
| 7  | 742.3730        | 371.6901        | 725.3464        | 363.1769         | <b>724.3624</b> | 362.6849         | T    | 685.4355        | <b>343.2214</b> | 668.4090  | 334.7081         | 667.4250       | 334.2161         | 6  |
| 8  | 870.4680        | 435.7376        | 853.4414        | 427.2243         | 852.4574        | 426.7323         | K    | 584.3879        | <b>292.6976</b> | 567.3613  | 284.1843         |                |                  | 5  |
| 9  | 967.5207        | 484.2640        | 950.4942        | 475.7507         | 949.5102        | 475.2587         | P    | <b>456.2929</b> | <b>228.6501</b> | 439.2663  | 220.1368         |                |                  | 4  |
| 10 | 1038.5578       | 519.7826        | 1021.5313       | 511.2693         | 1020.5473       | 510.7773         | A    | 359.2401        | 180.1237        | 342.2136  | 171.6104         |                |                  | 3  |
| 11 | 1151.6419       | <b>576.3246</b> | 1134.6154       | 567.8113         | 1133.6313       | 567.3193         | I    | 288.2030        | 144.6051        | 271.1765  | 136.0919         |                |                  | 2  |
| 12 |                 |                 |                 |                  |                 |                  | R    | 175.1190        | 88.0631         | 158.0924  | 79.5498          |                |                  | 1  |

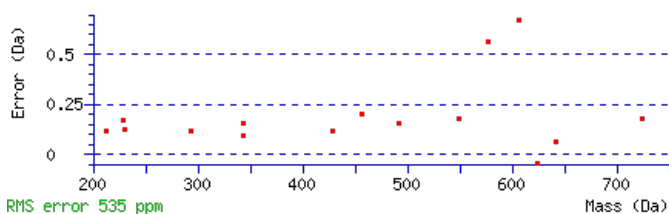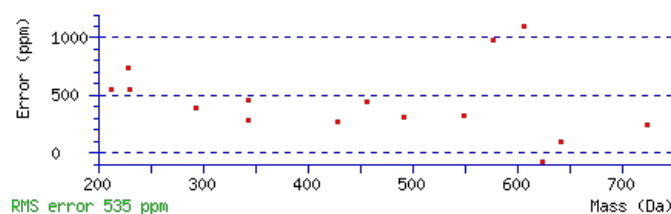NCBI BLAST search of **DNIQGITKPAIR**

(Parameters: blastp, nr protein database, expect=20000, no filter, PAM30)

Other BLAST [web gateways](#)**All matches to this query**

**AT1G07660.1**

| <b>Score</b> | <b>Mr(calc)</b> | <b>Delta</b> | <b>Sequence</b>              |
|--------------|-----------------|--------------|------------------------------|
| 54.5         | 1324.7463       | 0.0004       | <a href="#">DNIQGITKPAIR</a> |
| 5.9          | 1324.7462       | 0.0004       | <a href="#">NIKNKPEINQK</a>  |
| 0.6          | 1324.7463       | 0.0004       | <a href="#">NLPLREEVSR</a>   |
| 0.2          | 1324.7463       | 0.0004       | <a href="#">NLRSPVPEKTGK</a> |
| 0.2          | 1324.7463       | 0.0004       | <a href="#">ENVDLRLPTR</a>   |

**Mascot:** <http://www.matrixscience.com/>

**Peptide View**MS/MS Fragmentation of **RISGLIYEETR**Found in **AT1G07660.2** in **TAIR\_Arabidopsis**, Symbols: | histone H4 | chr1:2369209-2369520 FORWARD

Match to Query 4938: 1352.663982 from(451.895270,3+) index(3146)

Title: Elution from: 30.385 to 30.385 scan no 3912 cid35.00 polarity:+

Data file D12h-3\_3.mgf

Click mouse within plot area to zoom in by factor of two about that point

Or,   to  Da Label all possible matches  Label matches used for scoring Show Y-axis 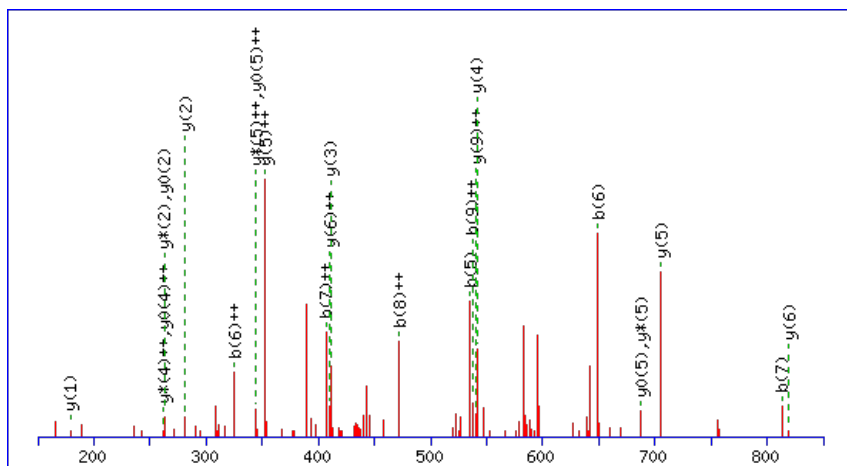**Monoisotopic mass of neutral peptide Mr(calc):** 1352.6642**Fixed modifications:** Carbamidomethyl (C) (apply to specified residues or termini only)**Ions Score:** 32 **Expect:** 0.0054**Matches:** 24/114 fragment ions using 39 most intense peaks ([help](#))

| #  | b               | b <sup>++</sup> | b*        | b <sup>*++</sup> | b <sup>0</sup> | b <sup>0++</sup> | Seq.     | y               | y <sup>++</sup> | y*              | y <sup>*++</sup> | y <sup>0</sup>  | y <sup>0++</sup> | #         |
|----|-----------------|-----------------|-----------|------------------|----------------|------------------|----------|-----------------|-----------------|-----------------|------------------|-----------------|------------------|-----------|
| 1  | 161.0965        | 81.0519         | 143.0729  | 72.0401          |                |                  | <b>R</b> |                 |                 |                 |                  |                 |                  | <b>11</b> |
| 2  | 275.1776        | 138.0925        | 257.1540  | 129.0807         |                |                  | <b>I</b> | 1193.5823       | 597.2948        | 1175.5587       | 588.2830         | 1175.5717       | 588.2895         | <b>10</b> |
| 3  | 363.2067        | 182.1070        | 345.1831  | 173.0952         | 345.1961       | 173.1017         | <b>S</b> | 1079.5012       | <b>540.2542</b> | 1061.4776       | 531.2424         | 1061.4906       | 531.2489         | <b>9</b>  |
| 4  | 421.2252        | 211.1162        | 403.2016  | 202.1044         | 403.2146       | 202.1109         | <b>G</b> | 991.4721        | 496.2397        | 973.4485        | 487.2279         | 973.4616        | 487.2344         | <b>8</b>  |
| 5  | <b>535.3063</b> | 268.1568        | 517.2827  | 259.1450         | 517.2957       | 259.1515         | <b>L</b> | 933.4536        | 467.2304        | 915.4300        | 458.2187         | 915.4431        | 458.2252         | <b>7</b>  |
| 6  | <b>649.3874</b> | <b>325.1973</b> | 631.3638  | 316.1855         | 631.3768       | 316.1920         | <b>I</b> | <b>819.3725</b> | <b>410.1899</b> | 801.3489        | 401.1781         | 801.3620        | 401.1846         | <b>6</b>  |
| 7  | <b>813.4478</b> | <b>407.2275</b> | 795.4242  | 398.2157         | 795.4372       | 398.2222         | <b>Y</b> | <b>705.2914</b> | <b>353.1494</b> | <b>687.2678</b> | <b>344.1376</b>  | <b>687.2809</b> | <b>344.1441</b>  | <b>5</b>  |
| 8  | 943.4874        | <b>472.2473</b> | 925.4638  | 463.2355         | 925.4768       | 463.2420         | <b>E</b> | <b>541.2311</b> | 271.1192        | 523.2075        | <b>262.1074</b>  | 523.2205        | <b>262.1139</b>  | <b>4</b>  |
| 9  | 1073.5270       | <b>537.2671</b> | 1055.5034 | 528.2553         | 1055.5164      | 528.2619         | <b>E</b> | <b>411.1914</b> | 206.0994        | 393.1678        | 197.0876         | 393.1809        | 197.0941         | <b>3</b>  |
| 10 | 1175.5717       | 588.2895        | 1157.5481 | 579.2777         | 1157.5612      | 579.2842         | <b>T</b> | <b>281.1518</b> | 141.0795        | <b>263.1282</b> | 132.0677         | <b>263.1412</b> | 132.0743         | <b>2</b>  |
| 11 |                 |                 |           |                  |                |                  | <b>R</b> | <b>179.1071</b> | 90.0572         | 161.0835        | 81.0454          |                 |                  | <b>1</b>  |

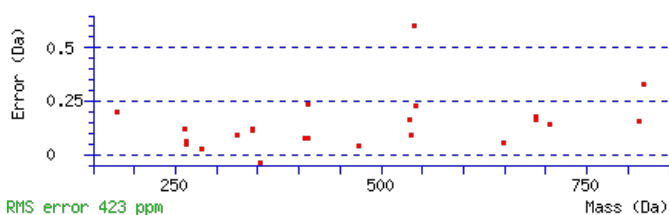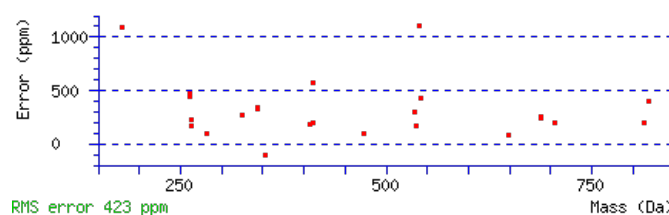NCBI **BLAST** search of **RISGLIYEETR**

(Parameters: blastp, nr protein database, expect=20000, no filter, PAM30)

Other BLAST [web gateways](#)**All matches to this query**

## AT1G07660.2

| Score | Mr(calc)  | Delta   | Sequence                      |
|-------|-----------|---------|-------------------------------|
| 31.9  | 1352.6642 | -0.0003 | <a href="#">RISGLIYEETR</a>   |
| 11.8  | 1352.6642 | -0.0003 | <a href="#">YILEKREETR</a>    |
| 5.5   | 1352.6665 | -0.0025 | <a href="#">FGPPKDAPNPLGK</a> |
| 4.7   | 1352.6616 | 0.0024  | <a href="#">KYDKESTVELK</a>   |
| 4.7   | 1352.6616 | 0.0024  | <a href="#">YGKVDIETSSLK</a>  |
| 3.3   | 1352.6642 | -0.0003 | <a href="#">GKDGSFLLSVSAR</a> |
| 1.8   | 1352.6643 | -0.0003 | <a href="#">LANNNLPPDIQK</a>  |
| 1.7   | 1352.6642 | -0.0003 | <a href="#">VSGVELGAARSYK</a> |
| 0.9   | 1352.6616 | 0.0024  | <a href="#">EFSITDLKSATK</a>  |
| 0.4   | 1352.6642 | -0.0002 | <a href="#">KGSQEGFTVQKK</a>  |

Mascot: <http://www.matrixscience.com/>

**Peptide View**MS/MS Fragmentation of **HGYIGEFYVDDHR**

Found in **AT1G07770.1** in **TAIR\_Arabidopsis**, Symbols: RPS15A | RPS15A (RIBOSOMAL PROTEIN S15A); structural constituent of ribosome | chr1:2408410-2409062 REVERSE

Match to Query 8296: 1735.763808 from(579.595212,3+) index(4438)

Title: Elution from: 40.793 to 40.793 scan no 5554 cid35.00 polarity:+

Data file D12h-1\_2.mgf

Click mouse within plot area to zoom in by factor of two about that point

Or,   to  Da

Label all possible matches  Label matches used for scoring

Show Y-axis

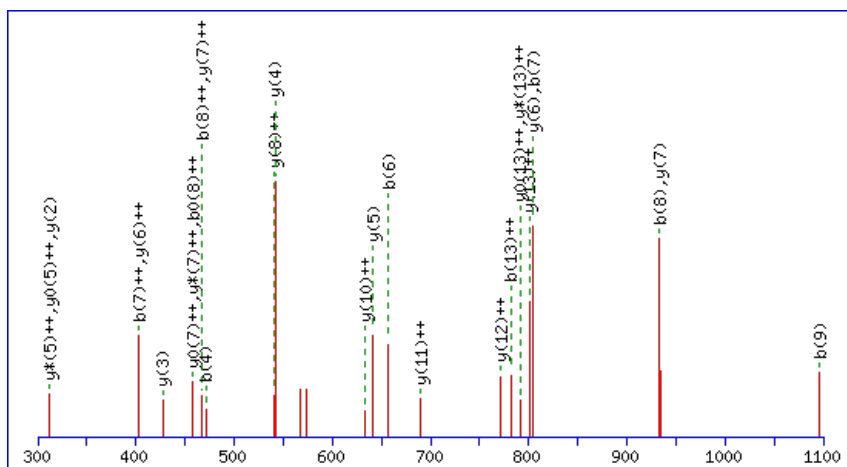

Monoisotopic mass of neutral peptide  $M_r(\text{calc})$ : 1735.7590

Fixed modifications: Carbamidomethyl (C) (apply to specified residues or termini only)

Ions Score: 70 Expect: 1.5e-007

Matches : 28/116 fragment ions using 22 most intense peaks ([help](#))

| #  | b         | b <sup>++</sup> | b <sup>0</sup> | b <sup>0++</sup> | Seq. | y         | y <sup>++</sup> | y <sup>*</sup> | y <sup>*++</sup> | y <sup>0</sup> | y <sup>0++</sup> | #  |
|----|-----------|-----------------|----------------|------------------|------|-----------|-----------------|----------------|------------------|----------------|------------------|----|
| 1  | 138.0662  | 69.5367         |                |                  | H    |           |                 |                |                  |                |                  | 14 |
| 2  | 195.0877  | 98.0475         |                |                  | G    | 1599.7074 | 800.3573        | 1582.6809      | 791.8441         | 1581.6968      | 791.3521         | 13 |
| 3  | 358.1510  | 179.5791        |                |                  | Y    | 1542.6860 | 771.8466        | 1525.6594      | 763.3333         | 1524.6754      | 762.8413         | 12 |
| 4  | 471.2350  | 236.1212        |                |                  | I    | 1379.6226 | 690.3149        | 1362.5961      | 681.8017         | 1361.6121      | 681.3097         | 11 |
| 5  | 528.2565  | 264.6319        |                |                  | G    | 1266.5386 | 633.7729        | 1249.5120      | 625.2596         | 1248.5280      | 624.7676         | 10 |
| 6  | 657.2991  | 329.1532        | 639.2885       | 320.1479         | E    | 1209.5171 | 605.2622        | 1192.4905      | 596.7489         | 1191.5065      | 596.2569         | 9  |
| 7  | 804.3675  | 402.6874        | 786.3570       | 393.6821         | F    | 1080.4745 | 540.7409        | 1063.4480      | 532.2276         | 1062.4639      | 531.7356         | 8  |
| 8  | 933.4101  | 467.2087        | 915.3995       | 458.2034         | E    | 933.4061  | 467.2067        | 916.3795       | 458.6934         | 915.3955       | 458.2014         | 7  |
| 9  | 1096.4734 | 548.7404        | 1078.4629      | 539.7351         | Y    | 804.3635  | 402.6854        | 787.3369       | 394.1721         | 786.3529       | 393.6801         | 6  |
| 10 | 1195.5419 | 598.2746        | 1177.5313      | 589.2693         | V    | 641.3002  | 321.1537        | 624.2736       | 312.6404         | 623.2896       | 312.1484         | 5  |
| 11 | 1310.5688 | 655.7880        | 1292.5582      | 646.7828         | D    | 542.2318  | 271.6195        | 525.2052       | 263.1062         | 524.2212       | 262.6142         | 4  |
| 12 | 1425.5957 | 713.3015        | 1407.5852      | 704.2962         | D    | 427.2048  | 214.1060        | 410.1783       | 205.5928         | 409.1942       | 205.1008         | 3  |
| 13 | 1562.6547 | 781.8310        | 1544.6441      | 772.8257         | H    | 312.1779  | 156.5926        | 295.1513       | 148.0793         |                |                  | 2  |
| 14 |           |                 |                |                  | R    | 175.1190  | 88.0631         | 158.0924       | 79.5498          |                |                  | 1  |

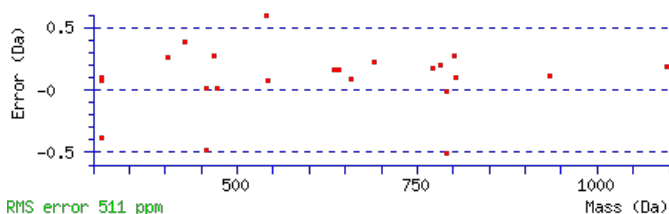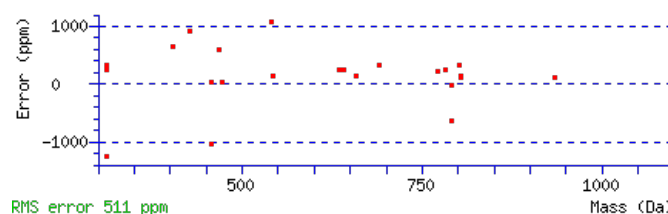

## AT1G07770.1

(Parameters: blastp, nr protein database, expect=20000, no filter, PAM30)

Other BLAST [web gateways](#)

### All matches to this query

| Score | Mr(calc)  | Delta   | Sequence                       |
|-------|-----------|---------|--------------------------------|
| 70.5  | 1735.7590 | 0.0048  | <a href="#">HGYIGEFYVDDHR</a>  |
| 12.7  | 1735.7658 | -0.0020 | <a href="#">FDQVEAPKTMMDHR</a> |

Mascot: <http://www.matrixscience.com/>

**Peptide View**MS/MS Fragmentation of **LVLPGELAK**Found in **AT1G07790.1** in **TAIR\_Arabidopsis**, Symbols: HTB1 | HTB1; DNA binding | chr1:2413046-2413492 FORWARD

Match to Query 1653: 948.549952 from(475.282252,2+) index(4729)

Title: Elution from: 45.606 to 45.606 scan no 6024 cid35.00 polarity:+

Data file D12h-2\_2.mgf

Click mouse within plot area to zoom in by factor of two about that point

Or,   to  Da Label all possible matches  Label matches used for scoring Show Y-axis 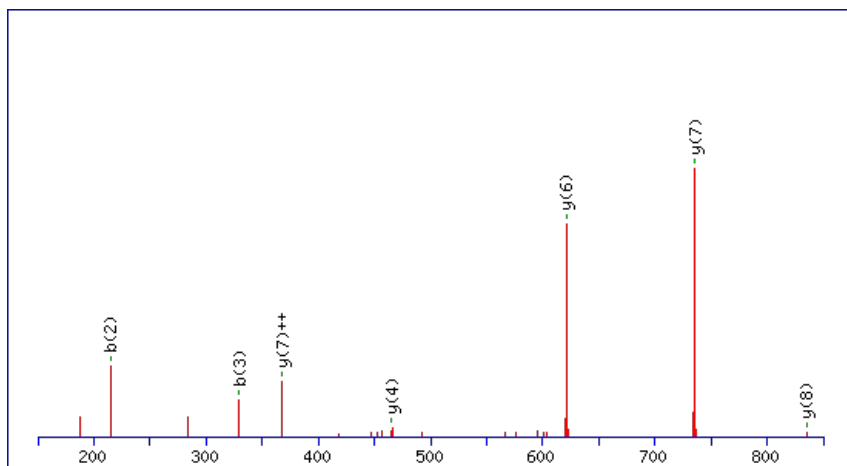Monoisotopic mass of neutral peptide **Mr(calc)**: 948.5504**Fixed modifications**: Carbamidomethyl (C) (apply to specified residues or termini only)**Ions Score**: 21 **Expect**: 0.0088**Matches** : 7/64 fragment ions using 18 most intense peaks ([help](#))

| # | b               | b <sup>++</sup> | b <sup>0</sup> | b <sup>0++</sup> | Seq. | y               | y <sup>++</sup> | y*       | y <sup>*++</sup> | y <sup>0</sup> | y <sup>0++</sup> | # |
|---|-----------------|-----------------|----------------|------------------|------|-----------------|-----------------|----------|------------------|----------------|------------------|---|
| 1 | 115.0884        | 58.0478         |                |                  | L    |                 |                 |          |                  |                |                  | 9 |
| 2 | <b>215.1538</b> | 108.0805        |                |                  | V    | <b>835.4766</b> | 418.2419        | 817.4530 | 409.2301         | 817.4660       | 409.2367         | 8 |
| 3 | <b>329.2349</b> | 165.1211        |                |                  | L    | <b>735.4111</b> | <b>368.2092</b> | 717.3876 | 359.1974         | 717.4006       | 359.2039         | 7 |
| 4 | 427.2847        | 214.1460        |                |                  | P    | <b>621.3300</b> | 311.1687        | 603.3065 | 302.1569         | 603.3195       | 302.1634         | 6 |
| 5 | 485.3032        | 243.1552        |                |                  | G    | 523.2802        | 262.1438        | 505.2567 | 253.1320         | 505.2697       | 253.1385         | 5 |
| 6 | 615.3428        | 308.1751        | 597.3323       | 299.1698         | E    | <b>465.2617</b> | 233.1345        | 447.2382 | 224.1227         | 447.2512       | 224.1292         | 4 |
| 7 | 729.4239        | 365.2156        | 711.4134       | 356.2103         | L    | 335.2221        | 168.1147        | 317.1985 | 159.1029         |                |                  | 3 |
| 8 | 801.4581        | 401.2327        | 783.4475       | 392.2274         | A    | 221.1410        | 111.0741        | 203.1174 | 102.0624         |                |                  | 2 |
| 9 |                 |                 |                |                  | K    | 149.1069        | 75.0571         | 131.0833 | 66.0453          |                |                  | 1 |

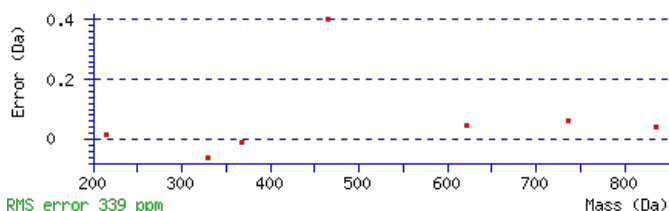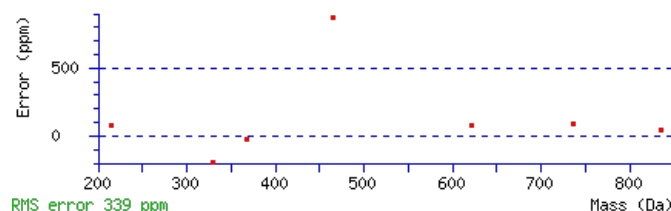NCBI **BLAST** search of **LVLPGELAK**

(Parameters: blastp, nr protein database, expect=20000, no filter, PAM30)

Other BLAST [web gateways](#)**All matches to this query**

| Score | Mr(calc) | Delta   | Sequence                  |
|-------|----------|---------|---------------------------|
| 20.5  | 948.5504 | -0.0005 | <a href="#">LVLPGELAK</a> |

AT1G07790.1

|     |          |         |                         |
|-----|----------|---------|-------------------------|
| 1.9 | 948.5504 | -0.0005 | <a href="#">INPELIK</a> |
|-----|----------|---------|-------------------------|

**Mascot:** <http://www.matrixscience.com/>



Peptide View

MS/MS Fragmentation of **DRSGFEGAWTSNPLIFDNSYFK**

Found in **AT1G07890.1** in **TAIR\_Arabidopsis**, Symbols: MEE6, CS1, APX1 | APX1 (ASCORBATE PEROXIDASE 1); L-ascorbate peroxidase | chr1:2438002-2439432 FORWARD

Match to Query 10432: 2579.097873 from(860.706567,3+) index(10215)  
 Title: Elution from: 96.214 to 96.214 scan no 14462 cid35.00 polarity:+  
 Data file 0-3\_2.mgf

Click mouse within plot area to zoom in by factor of two about that point

Or, Plot from  to  Da

Label all possible matches  Label matches used for scoring

Show Y-axis

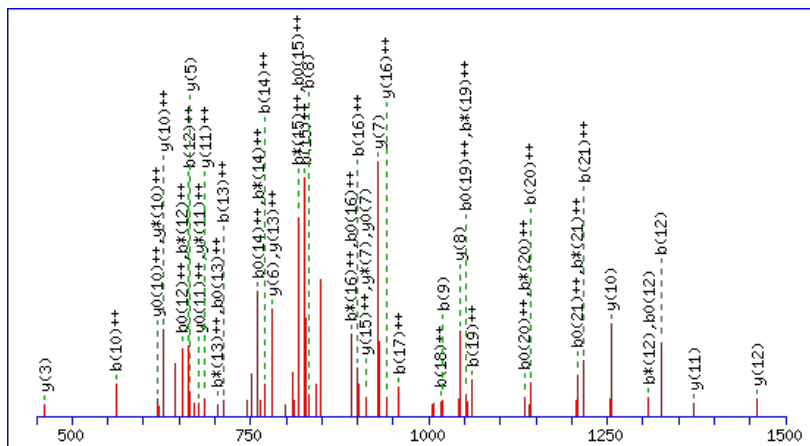

Monoisotopic mass of neutral peptide  $M_r(\text{calc})$ : 2579.0956

Fixed modifications: Carbamidomethyl (C) (apply to specified residues or termini only)

Ions Score: 71 Expect: 4.5e-007

Matches : 51/244 fragment ions using 60 most intense peaks ([help](#))

| #  | b                | b <sup>++</sup>  | b*               | b <sup>*++</sup> | b <sup>0</sup>   | b <sup>0++</sup> | Seq. | y                | y <sup>++</sup> | y*              | y <sup>*++</sup> | y <sup>0</sup>  | y <sup>0++</sup> | #  |
|----|------------------|------------------|------------------|------------------|------------------|------------------|------|------------------|-----------------|-----------------|------------------|-----------------|------------------|----|
| 1  | 117.0313         | 59.0193          |                  |                  | 99.0207          | 50.0140          | D    |                  |                 |                 |                  |                 |                  | 22 |
| 2  | 277.1205         | 139.0639         | 259.0969         | 130.0521         | 259.1099         | 130.0586         | R    | 2464.0789        | 1232.5431       | 2446.0553       | 1223.5313        | 2446.0683       | 1223.5378        | 21 |
| 3  | 365.1496         | 183.0784         | 347.1260         | 174.0666         | 347.1390         | 174.0731         | S    | 2303.9896        | 1152.4984       | 2285.9660       | 1143.4867        | 2285.9790       | 1143.4932        | 20 |
| 4  | 423.1681         | 212.0877         | 405.1445         | 203.0759         | 405.1575         | 203.0824         | G    | 2215.9606        | 1108.4839       | 2197.9370       | 1099.4721        | 2197.9500       | 1099.4786        | 19 |
| 5  | 571.2335         | 286.1204         | 553.2099         | 277.1086         | 553.2230         | 277.1151         | F    | 2157.9421        | 1079.4747       | 2139.9185       | 1070.4629        | 2139.9315       | 1070.4694        | 18 |
| 6  | 701.2731         | 351.1402         | 683.2496         | 342.1284         | 683.2626         | 342.1349         | E    | 2009.8766        | 1005.4419       | 1991.8530       | 996.4301         | 1991.8660       | 996.4367         | 17 |
| 7  | 759.2916         | 380.1495         | 741.2681         | 371.1377         | 741.2811         | 371.1442         | G    | 1879.8370        | 940.4221        | 1861.8134       | 931.4103         | 1861.8264       | 931.4168         | 16 |
| 8  | <b>831.3258</b>  | 416.1665         | 813.3022         | 407.1547         | 813.3152         | 407.1613         | A    | 1821.8185        | <b>911.4129</b> | 1803.7949       | 902.4011         | 1803.8079       | 902.4076         | 15 |
| 9  | <b>1019.3992</b> | 510.2032         | 1001.3756        | 501.1914         | 1001.3886        | 501.1979         | W    | 1749.7843        | 875.3958        | 1731.7607       | 866.3840         | 1731.7738       | 866.3905         | 14 |
| 10 | 1121.4439        | <b>561.2256</b>  | 1103.4203        | 552.2138         | 1103.4333        | 552.2203         | T    | 1561.7109        | <b>781.3591</b> | 1543.6874       | 772.3473         | 1543.7004       | 772.3538         | 13 |
| 11 | 1209.4730        | 605.2401         | 1191.4494        | 596.2283         | 1191.4624        | 596.2348         | S    | <b>1459.6662</b> | 730.3368        | 1441.6426       | 721.3250         | 1441.6557       | 721.3315         | 12 |
| 12 | <b>1325.5099</b> | <b>663.2586</b>  | <b>1307.4864</b> | <b>654.2468</b>  | <b>1307.4994</b> | <b>654.2533</b>  | N    | <b>1371.6372</b> | <b>686.3222</b> | 1353.6136       | <b>677.3104</b>  | 1353.6266       | <b>677.3169</b>  | 11 |
| 13 | 1423.5597        | <b>712.2835</b>  | 1405.5362        | <b>703.2717</b>  | 1405.5492        | <b>703.2782</b>  | P    | <b>1255.6002</b> | <b>628.3037</b> | 1237.5766       | <b>619.2919</b>  | 1237.5896       | <b>619.2984</b>  | 10 |
| 14 | 1537.6408        | <b>769.3241</b>  | 1519.6173        | <b>760.3123</b>  | 1519.6303        | <b>760.3188</b>  | L    | 1157.5504        | 579.2788        | 1139.5268       | 570.2670         | 1139.5398       | 570.2735         | 9  |
| 15 | 1651.7219        | <b>826.3646</b>  | 1633.6984        | <b>817.3528</b>  | 1633.7114        | <b>817.3593</b>  | I    | <b>1043.4693</b> | 522.2383        | 1025.4457       | 513.2265         | 1025.4587       | 513.2330         | 8  |
| 16 | 1799.7874        | <b>900.3973</b>  | 1781.7638        | <b>891.3855</b>  | 1781.7768        | <b>891.3921</b>  | F    | <b>929.3882</b>  | 465.1977        | <b>911.3646</b> | 456.1859         | <b>911.3776</b> | 456.1924         | 7  |
| 17 | 1915.8114        | <b>958.4093</b>  | 1897.7878        | 949.3975         | 1897.8008        | 949.4040         | D    | <b>781.3227</b>  | 391.1650        | 763.2991        | 382.1532         | 763.3122        | 382.1597         | 6  |
| 18 | 2031.8484        | <b>1016.4278</b> | 2013.8248        | 1007.4160        | 2013.8378        | 1007.4225        | N    | <b>665.2987</b>  | 333.1530        | 647.2752        | 324.1412         | 647.2882        | 324.1477         | 5  |
| 19 | 2119.8774        | <b>1060.4424</b> | 2101.8538        | <b>1051.4306</b> | 2101.8669        | <b>1051.4371</b> | S    | 549.2618         | 275.1345        | 531.2382        | 266.1227         | 531.2512        | 266.1292         | 4  |
| 20 | 2283.9378        | <b>1142.4725</b> | 2265.9142        | <b>1133.4607</b> | 2265.9272        | <b>1133.4673</b> | Y    | <b>461.2327</b>  | 231.1200        | 443.2091        | 222.1082         |                 |                  | 3  |
| 21 | 2432.0032        | <b>1216.5053</b> | 2413.9797        | <b>1207.4935</b> | 2413.9927        | <b>1207.5000</b> | F    | 297.1723         | 149.0898        | 279.1487        | 140.0780         |                 |                  | 2  |
| 22 |                  |                  |                  |                  |                  |                  | K    | 149.1069         | 75.0571         | 131.0833        | 66.0453          |                 |                  | 1  |

# AT1G07890.1

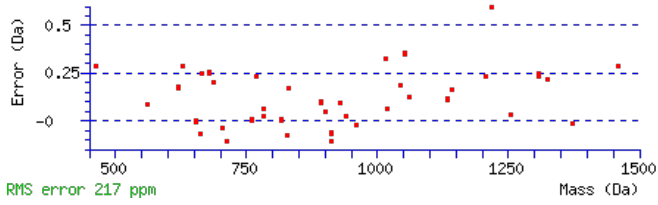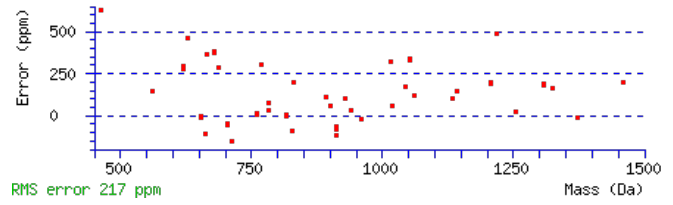

NCBI **BLAST** search of [DRSGFEGAWTSNPLIFDNSYFK](#)  
(Parameters: blastp, nr protein database, expect=20000, no filter, PAM30)  
Other BLAST [web gateways](#)

## All matches to this query

| Score | Mr(calc)  | Delta  | Sequence                               |
|-------|-----------|--------|----------------------------------------|
| 70.7  | 2579.0956 | 0.0023 | <a href="#">DRSGFEGAWTSNPLIFDNSYFK</a> |

Mascot: <http://www.matrixscience.com/>

**Peptide View**MS/MS Fragmentation of **YDEIHK**Found in **AT1G07920.1** in **TAIR\_Arabidopsis**, Symbols: | elongation factor 1-alpha / EF-1-alpha | chr1:2455556-2456998 FORWARD

Match to Query 876: 779.407940 from(390.711246,2+) index(1736)

Title: Elution from: 21.868 to 21.868 scan no 2283 cid35.00 polarity:+

Data file D6h-1\_3.mgf

Click mouse within plot area to zoom in by factor of two about that point

Or,  to  Da Label all possible matches  Label matches used for scoring Show Y-axis 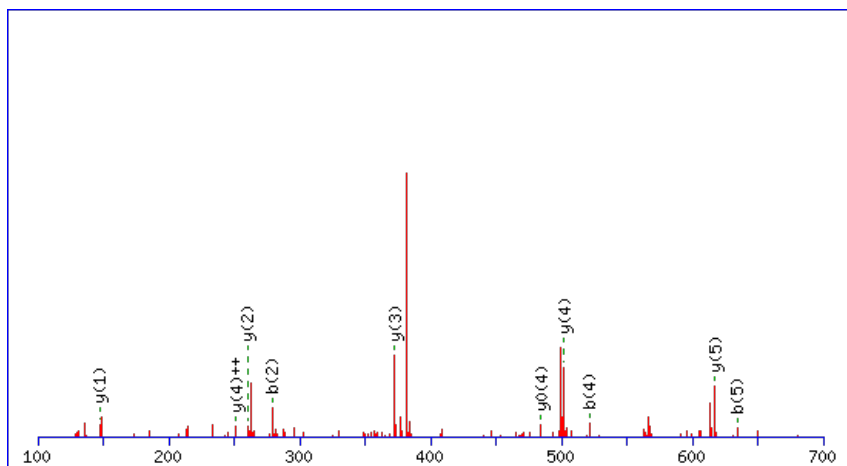Monoisotopic mass of neutral peptide **Mr(calc)**: 779.4065

Fixed modifications: Carbamidomethyl (C) (apply to specified residues or termini only)

Ions Score: 23 **Expect**: 0.019Matches : 10/42 fragment ions using 29 most intense peaks ([help](#))

| # | b               | b <sup>++</sup> | b <sup>0</sup> | b <sup>0++</sup> | Seq. | y               | y <sup>++</sup> | y*       | y <sup>*++</sup> | y <sup>0</sup>  | y <sup>0++</sup> | # |
|---|-----------------|-----------------|----------------|------------------|------|-----------------|-----------------|----------|------------------|-----------------|------------------|---|
| 1 | 164.0706        | 82.5389         |                |                  | Y    |                 |                 |          |                  |                 |                  | 6 |
| 2 | <b>279.0975</b> | 140.0524        | 261.0870       | 131.0471         | D    | <b>617.3505</b> | 309.1789        | 600.3239 | 300.6656         | 599.3399        | 300.1736         | 5 |
| 3 | 408.1401        | 204.5737        | 390.1296       | 195.5684         | E    | <b>502.3235</b> | <b>251.6654</b> | 485.2970 | 243.1521         | <b>484.3130</b> | 242.6601         | 4 |
| 4 | <b>521.2242</b> | 261.1157        | 503.2136       | 252.1105         | I    | <b>373.2809</b> | 187.1441        | 356.2544 | 178.6308         |                 |                  | 3 |
| 5 | <b>634.3083</b> | 317.6578        | 616.2977       | 308.6525         | I    | <b>260.1969</b> | 130.6021        | 243.1703 | 122.0888         |                 |                  | 2 |
| 6 |                 |                 |                |                  | K    | <b>147.1128</b> | 74.0600         | 130.0863 | 65.5468          |                 |                  | 1 |

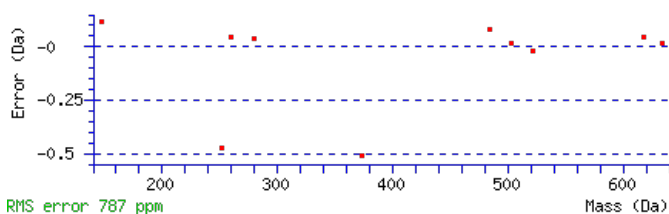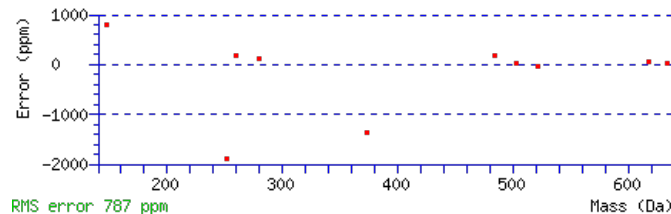NCBI **BLAST** search of **YDEIHK**

(Parameters: blastp, nr protein database, expect=20000, no filter, PAM30)

Other BLAST [web gateways](#)**All matches to this query**

| Score | Mr(calc) | Delta  | Sequence               |
|-------|----------|--------|------------------------|
| 22.7  | 779.4065 | 0.0014 | <a href="#">YDEIHK</a> |
| 5.9   | 779.4065 | 0.0014 | <a href="#">YLLEDK</a> |
| 5.3   | 779.4065 | 0.0014 | <a href="#">VYEELK</a> |
| 0.5   | 779.4065 | 0.0014 | <a href="#">LYDEIK</a> |

# AT1G07920.1

|     |          |        |                        |
|-----|----------|--------|------------------------|
| 0.4 | 779.4065 | 0.0014 | <a href="#">YEVIK</a>  |
| 0.4 | 779.4065 | 0.0014 | <a href="#">YEVLEK</a> |
| 0.1 | 779.4065 | 0.0014 | <a href="#">EIEVYK</a> |
| 0.1 | 779.4065 | 0.0014 | <a href="#">ELEVYK</a> |

**Mascot:** <http://www.matrixscience.com/>

## Peptide View

### MS/MS Fragmentation of VLALDVYNDK

Found in **AT1G08200.1** in **TAIR\_Arabidopsis**, Symbols: AXS2 | AXS2 (UDP-D-APIOSE/UDP-D-XYLOSE SYNTHASE 2) | chr1:2574256-2576606 REVERSE

Match to Query 4092: 1148.604698 from(575.309625,2+) index(5618)

Title: Elution from: 49.577 to 49.577 scan no 6985 cid35.00 polarity:+

Data file D12h-1\_1.mgf

Click mouse within plot area to zoom in by factor of two about that point

Or,   to  Da

Label all possible matches  Label matches used for scoring

Show Y-axis

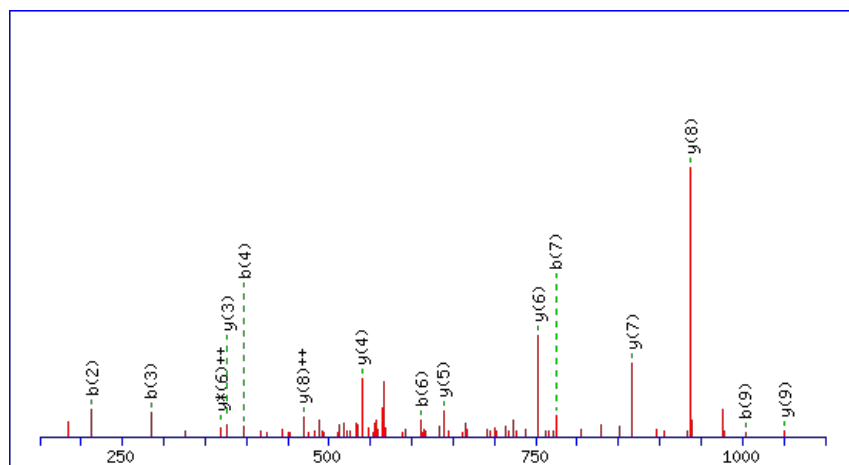

Monoisotopic mass of neutral peptide  $M_r(\text{calc})$ : 1148.6077

Fixed modifications: Carbamidomethyl (C) (apply to specified residues or termini only)

Ions Score: 66 Expect: 1.2e-006

Matches : 15/84 fragment ions using 18 most intense peaks ([help](#))

| #  | b                | b <sup>++</sup> | b*       | b <sup>*++</sup> | b <sup>0</sup> | b <sup>0++</sup> | Seq. | y                | y <sup>++</sup> | y*        | y <sup>*++</sup> | y <sup>0</sup> | y <sup>0++</sup> | #  |
|----|------------------|-----------------|----------|------------------|----------------|------------------|------|------------------|-----------------|-----------|------------------|----------------|------------------|----|
| 1  | 100.0757         | 50.5415         |          |                  |                |                  | V    |                  |                 |           |                  |                |                  | 10 |
| 2  | <b>213.1598</b>  | 107.0835        |          |                  |                |                  | L    | <b>1050.5466</b> | 525.7769        | 1033.5201 | 517.2637         | 1032.5360      | 516.7717         | 9  |
| 3  | <b>284.1969</b>  | 142.6021        |          |                  |                |                  | A    | <b>937.4625</b>  | <b>469.2349</b> | 920.4360  | 460.7216         | 919.4520       | 460.2296         | 8  |
| 4  | <b>397.2809</b>  | 199.1441        |          |                  |                |                  | L    | <b>866.4254</b>  | 433.7164        | 849.3989  | 425.2031         | 848.4149       | 424.7111         | 7  |
| 5  | 512.3079         | 256.6576        |          |                  | 494.2973       | 247.6523         | D    | <b>753.3414</b>  | 377.1743        | 736.3148  | <b>368.6610</b>  | 735.3308       | 368.1690         | 6  |
| 6  | <b>611.3763</b>  | 306.1918        |          |                  | 593.3657       | 297.1865         | V    | <b>638.3144</b>  | 319.6608        | 621.2879  | 311.1476         | 620.3039       | 310.6556         | 5  |
| 7  | <b>774.4396</b>  | 387.7234        |          |                  | 756.4291       | 378.7182         | Y    | <b>539.2460</b>  | 270.1266        | 522.2195  | 261.6134         | 521.2354       | 261.1214         | 4  |
| 8  | 888.4825         | 444.7449        | 871.4560 | 436.2316         | 870.4720       | 435.7396         | N    | <b>376.1827</b>  | 188.5950        | 359.1561  | 180.0817         | 358.1721       | 179.5897         | 3  |
| 9  | <b>1003.5095</b> | 502.2584        | 986.4829 | 493.7451         | 985.4989       | 493.2531         | D    | 262.1397         | 131.5735        | 245.1132  | 123.0602         | 244.1292       | 122.5682         | 2  |
| 10 |                  |                 |          |                  |                |                  | K    | 147.1128         | 74.0600         | 130.0863  | 65.5468          |                |                  | 1  |

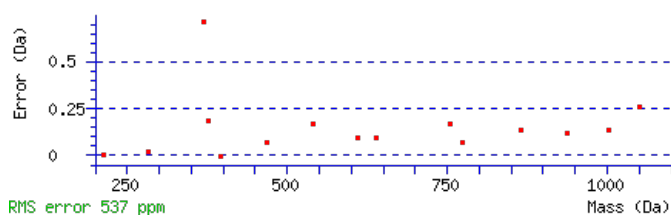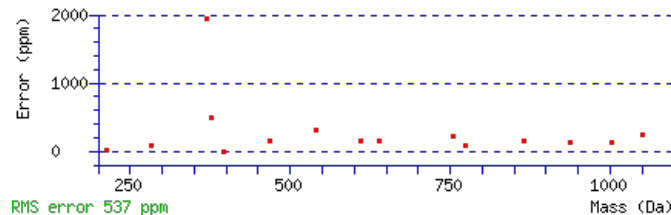

### NCBI BLAST search of VLALDVYNDK

(Parameters: blastp, nr protein database, expect=20000, no filter, PAM30)

Other BLAST [web gateways](#)

All matches to this query

**AT1G08200.1**

| <b>Score</b> | <b>Mr(calc)</b> | <b>Delta</b> | <b>Sequence</b>             |
|--------------|-----------------|--------------|-----------------------------|
| 65.7         | 1148.6077       | -0.0030      | <a href="#">VLALDVYNDK</a>  |
| 6.8          | 1148.6077       | -0.0030      | <a href="#">VLVQDGIYDK</a>  |
| 1.9          | 1148.6050       | -0.0003      | <a href="#">AIGRNGSGYVR</a> |
| 0.8          | 1148.6077       | -0.0030      | <a href="#">VIDNYVGEIK</a>  |

**Mascot:** <http://www.matrixscience.com/>

## Peptide View

MS/MS Fragmentation of **ICMLGDAQHVVEAEK**Found in **AT1G08360.1** in **TAIR\_Arabidopsis**, Symbols: | 60S ribosomal protein L10A (RPL10aA) | chr1:2636228-2637691 FORWARD

Match to Query 8372: 1728.780624 from(577,267484,3+) index(3863)

Title: Elution from: 36.752 to 36.752 scan no 4842 cid35.00 polarity:+

Data file D6h-3\_1.mgf

Click mouse within plot area to zoom in by factor of two about that point

Or,  to  Da Label all possible matches  Label matches used for scoring Show Y-axis 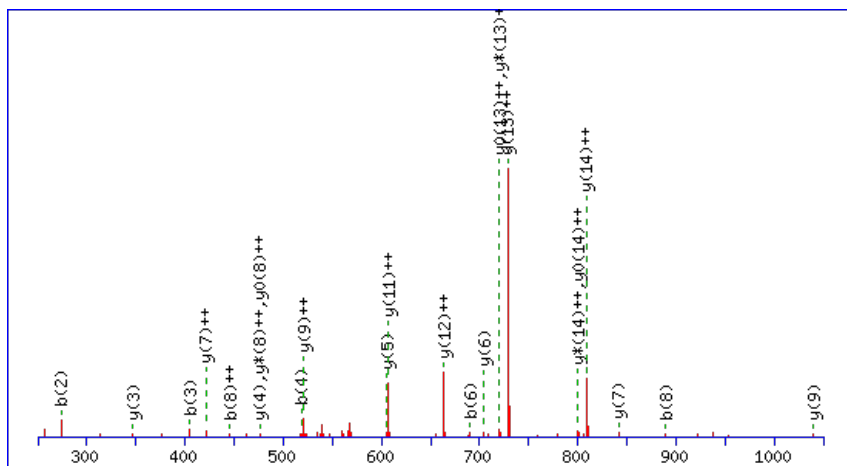Monoisotopic mass of neutral peptide  $M_r(\text{calc})$ : 1728.7811

Fixed modifications: Carbamidomethyl (C) (apply to specified residues or termini only)

Ions Score: 37 Expect: 0.00048

Matches : 24/142 fragment ions using 42 most intense peaks ([help](#))

| #  | b               | b <sup>++</sup> | b <sup>*</sup> | b <sup>*++</sup> | b <sup>0</sup> | b <sup>0++</sup> | Seq. | y                | y <sup>++</sup> | y <sup>*</sup> | y <sup>*++</sup> | y <sup>0</sup> | y <sup>0++</sup> | #  |
|----|-----------------|-----------------|----------------|------------------|----------------|------------------|------|------------------|-----------------|----------------|------------------|----------------|------------------|----|
| 1  | 114.0913        | 57.5493         |                |                  |                |                  | I    |                  |                 |                |                  |                |                  | 15 |
| 2  | <b>274.1220</b> | 137.5646        |                |                  |                |                  | C    | 1616.7043        | <b>808.8558</b> | 1599.6778      | <b>800.3425</b>  | 1598.6938      | <b>799.8505</b>  | 14 |
| 3  | <b>405.1625</b> | 203.0849        |                |                  |                |                  | M    | 1456.6737        | <b>728.8405</b> | 1439.6471      | <b>720.3272</b>  | 1438.6631      | <b>719.8352</b>  | 13 |
| 4  | <b>518.2465</b> | 259.6269        |                |                  |                |                  | L    | 1325.6332        | <b>663.3202</b> | 1308.6066      | 654.8070         | 1307.6226      | 654.3149         | 12 |
| 5  | 575.2680        | 288.1376        |                |                  |                |                  | G    | 1212.5491        | <b>606.7782</b> | 1195.5226      | 598.2649         | 1194.5386      | 597.7729         | 11 |
| 6  | <b>690.2949</b> | 345.6511        |                |                  | 672.2844       | 336.6458         | D    | 1155.5277        | 578.2675        | 1138.5011      | 569.7542         | 1137.5171      | 569.2622         | 10 |
| 7  | 761.3321        | 381.1697        |                |                  | 743.3215       | 372.1644         | A    | <b>1040.5007</b> | <b>520.7540</b> | 1023.4742      | 512.2407         | 1022.4902      | 511.7487         | 9  |
| 8  | <b>889.3906</b> | <b>445.1990</b> | 872.3641       | 436.6857         | 871.3801       | 436.1937         | Q    | 969.4636         | 485.2354        | 952.4371       | <b>476.7222</b>  | 951.4530       | <b>476.2302</b>  | 8  |
| 9  | 1026.4495       | 513.7284        | 1009.4230      | 505.2151         | 1008.4390      | 504.7231         | H    | <b>841.4050</b>  | <b>421.2061</b> | 824.3785       | 412.6929         | 823.3945       | 412.2009         | 7  |
| 10 | 1125.5180       | 563.2626        | 1108.4914      | 554.7493         | 1107.5074      | 554.2573         | V    | <b>704.3461</b>  | 352.6767        | 687.3196       | 344.1634         | 686.3355       | 343.6714         | 6  |
| 11 | 1254.5606       | 627.7839        | 1237.5340      | 619.2706         | 1236.5500      | 618.7786         | E    | <b>605.2777</b>  | 303.1425        | 588.2511       | 294.6292         | 587.2671       | 294.1372         | 5  |
| 12 | 1383.6031       | 692.3052        | 1366.5766      | 683.7919         | 1365.5926      | 683.2999         | E    | <b>476.2351</b>  | 238.6212        | 459.2086       | 230.1079         | 458.2245       | 229.6159         | 4  |
| 13 | 1454.6403       | 727.8238        | 1437.6137      | 719.3105         | 1436.6297      | 718.8185         | A    | <b>347.1925</b>  | 174.0999        | 330.1660       | 165.5866         | 329.1819       | 165.0946         | 3  |
| 14 | 1583.6829       | 792.3451        | 1566.6563      | 783.8318         | 1565.6723      | 783.3398         | E    | 276.1554         | 138.5813        | 259.1288       | 130.0681         | 258.1448       | 129.5761         | 2  |
| 15 |                 |                 |                |                  |                |                  | K    | 147.1128         | 74.0600         | 130.0863       | 65.5468          |                |                  | 1  |

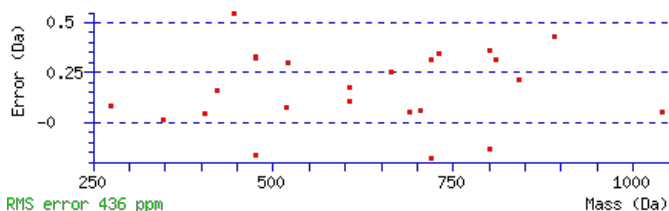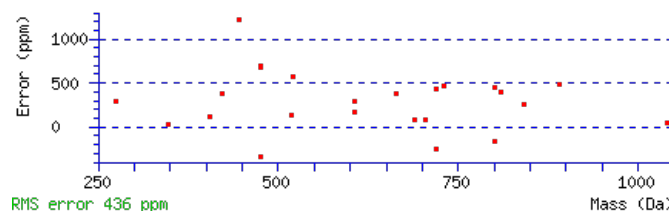NCBI BLAST search of [ICMLGDAQHVVEAEK](#)

## AT1G08360.1

(Parameters: blastp, nr protein database, expect=20000, no filter, PAM30)

Other BLAST [web gateways](#)

### All matches to this query

| Score | Mr(calc)  | Delta   | Sequence                         |
|-------|-----------|---------|----------------------------------|
| 36.6  | 1728.7811 | -0.0005 | <a href="#">ICMLGDAQHVVEAEK</a>  |
| 5.2   | 1728.7771 | 0.0035  | <a href="#">DRKSMGVMVDSSSGNK</a> |
| 3.5   | 1728.7844 | -0.0038 | <a href="#">KGSAGLMEEMTRMEK</a>  |
| 2.7   | 1728.7844 | -0.0038 | <a href="#">KGSAGLMEEMTRMEK</a>  |
| 2.7   | 1728.7844 | -0.0038 | <a href="#">KGSAGLMEEMTRMEK</a>  |

Mascot: <http://www.matrixscience.com/>



**Peptide View**MS/MS Fragmentation of **QMSINSVPKK**

Found in **AT1G08420.1** in **TAIR\_Arabidopsis**, Symbols: | kelch repeat-containing protein / serine/threonine phosphoesterase family protein | chr1:2649956-2656561 FORWARD

Match to Query 3927: 1144.571264 from(573.292908,2+) index(1356)

Title: Elution from: 19.798 to 19.798 scan no 1871 cid35.00 polarity:+

Data file D12h-3\_1.mgf

Click mouse within plot area to zoom in by factor of two about that point

Or,   to  Da

Label all possible matches  Label matches used for scoring

Show Y-axis

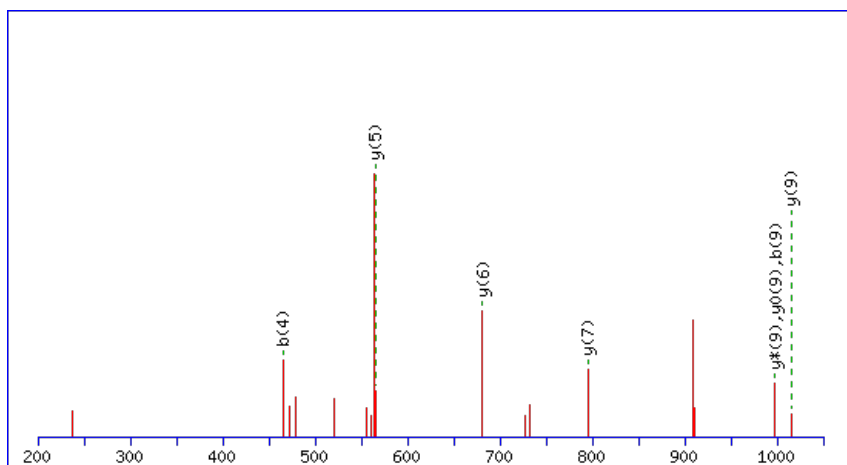

**Monoisotopic mass of neutral peptide Mr(calc):** 1144.5703

**Fixed modifications:** Carbamidomethyl (C) (apply to specified residues or termini only)

**Ions Score:** 22 **Expect:** 0.037

**Matches:** 8/96 fragment ions using 13 most intense peaks ([help](#))

| #  | b        | b <sup>++</sup> | b*       | b <sup>*++</sup> | b <sup>0</sup> | b <sup>0++</sup> | Seq. | y         | y <sup>++</sup> | y*       | y <sup>*++</sup> | y <sup>0</sup> | y <sup>0++</sup> | #  |
|----|----------|-----------------|----------|------------------|----------------|------------------|------|-----------|-----------------|----------|------------------|----------------|------------------|----|
| 1  | 131.0599 | 66.0336         | 113.0363 | 57.0218          |                |                  | Q    |           |                 |          |                  |                |                  | 10 |
| 2  | 263.0974 | 132.0524        | 245.0739 | 123.0406         |                |                  | M    | 1015.5249 | 508.2661        | 997.5013 | 499.2543         | 997.5143       | 499.2608         | 9  |
| 3  | 351.1265 | 176.0669        | 333.1029 | 167.0551         | 333.1159       | 167.0616         | S    | 883.4874  | 442.2473        | 865.4638 | 433.2355         | 865.4768       | 433.2420         | 8  |
| 4  | 465.2076 | 233.1074        | 447.1840 | 224.0956         | 447.1970       | 224.1022         | I    | 795.4583  | 398.2328        | 777.4347 | 389.2210         | 777.4477       | 389.2275         | 7  |
| 5  | 581.2446 | 291.1259        | 563.2210 | 282.1141         | 563.2340       | 282.1207         | N    | 681.3772  | 341.1922        | 663.3536 | 332.1805         | 663.3667       | 332.1870         | 6  |
| 6  | 669.2737 | 335.1405        | 651.2501 | 326.1287         | 651.2631       | 326.1352         | S    | 565.3402  | 283.1737        | 547.3166 | 274.1620         | 547.3297       | 274.1685         | 5  |
| 7  | 769.3391 | 385.1732        | 751.3155 | 376.1614         | 751.3285       | 376.1679         | V    | 477.3112  | 239.1592        | 459.2876 | 230.1474         |                |                  | 4  |
| 8  | 867.3889 | 434.1981        | 849.3653 | 425.1863         | 849.3783       | 425.1928         | P    | 377.2457  | 189.1265        | 359.2221 | 180.1147         |                |                  | 3  |
| 9  | 997.4779 | 499.2426        | 979.4544 | 490.2308         | 979.4674       | 490.2373         | K    | 279.1959  | 140.1016        | 261.1723 | 131.0898         |                |                  | 2  |
| 10 |          |                 |          |                  |                |                  | K    | 149.1069  | 75.0571         | 131.0833 | 66.0453          |                |                  | 1  |

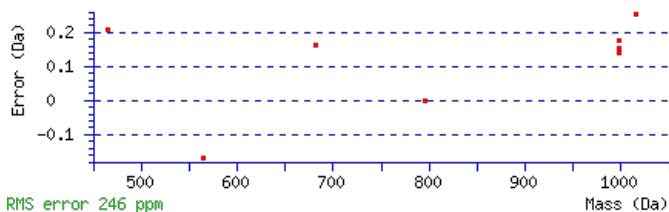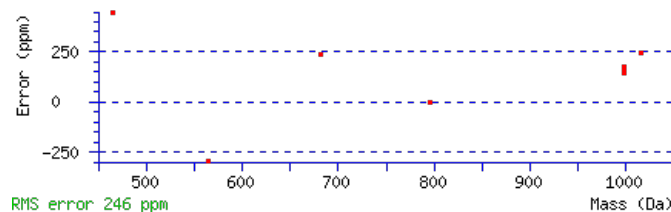NCBI BLAST search of **QMSINSVPKK**

(Parameters: blastp, nr protein database, expect=20000, no filter, PAM30)

Other BLAST [web gateways](#)

All matches to this query

## AT1G08420.1

| Score | Mr(calc)  | Delta   | Sequence                    |
|-------|-----------|---------|-----------------------------|
| 21.8  | 1144.5703 | 0.0010  | <a href="#">QMSINSVPKK</a>  |
| 16.1  | 1144.5730 | -0.0017 | <a href="#">MSLSHLLRR</a>   |
| 9.1   | 1144.5703 | 0.0010  | <a href="#">RPSMVEVYSK</a>  |
| 8.7   | 1144.5703 | 0.0010  | <a href="#">KMGEVEIAVR</a>  |
| 8.3   | 1144.5703 | 0.0010  | <a href="#">EANVMLVLAR</a>  |
| 6.5   | 1144.5695 | 0.0017  | <a href="#">IWDVRLNGR</a>   |
| 3.5   | 1144.5703 | 0.0010  | <a href="#">LAKMPENK GK</a> |
| 3.0   | 1144.5703 | 0.0010  | <a href="#">LMISEARPSK</a>  |
| 3.0   | 1144.5703 | 0.0010  | <a href="#">VLRMAPDVSK</a>  |
| 2.9   | 1144.5703 | 0.0010  | <a href="#">MVTVDGRPIK</a>  |

Mascot: <http://www.matrixscience.com/>

**Peptide View**MS/MS Fragmentation of **SPFIQIPLGVTEDR**

Found in **AT1G08520.1** in **TAIR\_Arabidopsis**, Symbols: PDE166, CHLD | CHLD/PDE166 (PIGMENT DEFECTIVE 166); magnesium chelatase/nucleoside-triphosphatase/ nucleotide binding | chr1:2696541-2700822 FORWARD

Match to Query 6805: 1570.835074 from(786.424813,2+) index(8633)

Title: Elution from: 77.419 to 77.419 scan no 11607 cid35.00 polarity:+

Data file D12h-3\_2.mgf

Click mouse within plot area to zoom in by factor of two about that point

Or,  to  Da

Label all possible matches  Label matches used for scoring

Show Y-axis

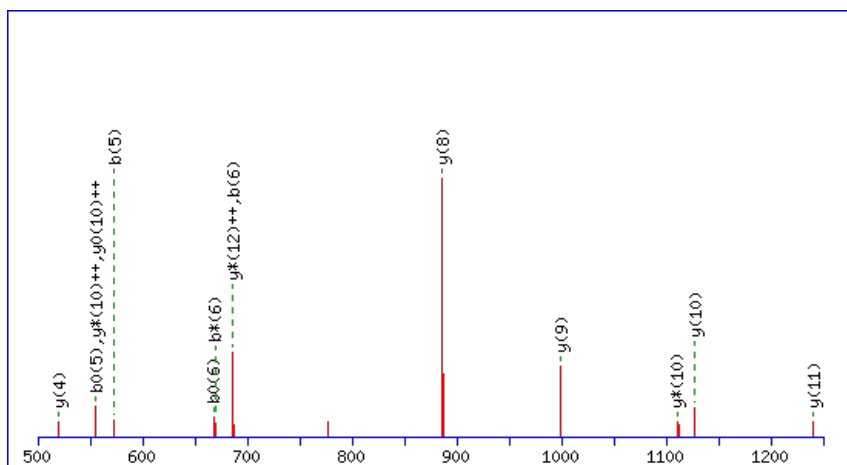

Monoisotopic mass of neutral peptide  $M_r(\text{calc})$ : 1570.8355

**Fixed modifications:** Carbamidomethyl (C) (apply to specified residues or termini only)

**Ions Score:** 40 **Expect:** 0.00055

**Matches:** 14/146 fragment ions using 14 most intense peaks ([help](#))

| #  | b         | b <sup>++</sup> | b*        | b <sup>*++</sup> | b <sup>0</sup> | b <sup>0++</sup> | Seq. | y         | y <sup>++</sup> | y*        | y <sup>*++</sup> | y <sup>0</sup> | y <sup>0++</sup> | #  |
|----|-----------|-----------------|-----------|------------------|----------------|------------------|------|-----------|-----------------|-----------|------------------|----------------|------------------|----|
| 1  | 88.0393   | 44.5233         |           |                  | 70.0287        | 35.5180          | S    |           |                 |           |                  |                |                  | 14 |
| 2  | 185.0921  | 93.0497         |           |                  | 167.0815       | 84.0444          | P    | 1484.8108 | 742.9090        | 1467.7842 | 734.3957         | 1466.8002      | 733.9037         | 13 |
| 3  | 332.1605  | 166.5839        |           |                  | 314.1499       | 157.5786         | F    | 1387.7580 | 694.3826        | 1370.7314 | 685.8694         | 1369.7474      | 685.3774         | 12 |
| 4  | 445.2445  | 223.1259        |           |                  | 427.2340       | 214.1206         | I    | 1240.6896 | 620.8484        | 1223.6630 | 612.3352         | 1222.6790      | 611.8431         | 11 |
| 5  | 573.3031  | 287.1552        | 556.2766  | 278.6419         | 555.2926       | 278.1499         | Q    | 1127.6055 | 564.3064        | 1110.5790 | 555.7931         | 1109.5950      | 555.3011         | 10 |
| 6  | 686.3872  | 343.6972        | 669.3606  | 335.1840         | 668.3766       | 334.6919         | I    | 999.5469  | 500.2771        | 982.5204  | 491.7638         | 981.5364       | 491.2718         | 9  |
| 7  | 783.4400  | 392.2236        | 766.4134  | 383.7103         | 765.4294       | 383.2183         | P    | 886.4629  | 443.7351        | 869.4363  | 435.2218         | 868.4523       | 434.7298         | 8  |
| 8  | 896.5240  | 448.7656        | 879.4975  | 440.2524         | 878.5135       | 439.7604         | L    | 789.4101  | 395.2087        | 772.3836  | 386.6954         | 771.3995       | 386.2034         | 7  |
| 9  | 953.5455  | 477.2764        | 936.5189  | 468.7631         | 935.5349       | 468.2711         | G    | 676.3260  | 338.6667        | 659.2995  | 330.1534         | 658.3155       | 329.6614         | 6  |
| 10 | 1052.6139 | 526.8106        | 1035.5873 | 518.2973         | 1034.6033      | 517.8053         | V    | 619.3046  | 310.1559        | 602.2780  | 301.6427         | 601.2940       | 301.1506         | 5  |
| 11 | 1153.6616 | 577.3344        | 1136.6350 | 568.8212         | 1135.6510      | 568.3291         | T    | 520.2362  | 260.6217        | 503.2096  | 252.1084         | 502.2256       | 251.6164         | 4  |
| 12 | 1282.7042 | 641.8557        | 1265.6776 | 633.3424         | 1264.6936      | 632.8504         | E    | 419.1885  | 210.0979        | 402.1619  | 201.5846         | 401.1779       | 201.0926         | 3  |
| 13 | 1397.7311 | 699.3692        | 1380.7046 | 690.8559         | 1379.7205      | 690.3639         | D    | 290.1459  | 145.5766        | 273.1193  | 137.0633         | 272.1353       | 136.5713         | 2  |
| 14 |           |                 |           |                  |                |                  | R    | 175.1190  | 88.0631         | 158.0924  | 79.5498          |                |                  | 1  |

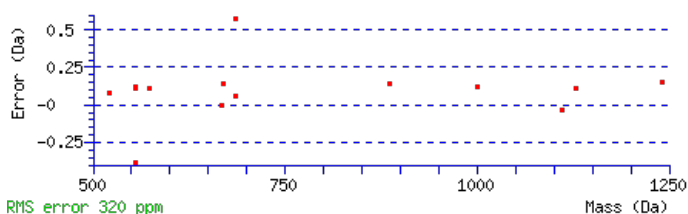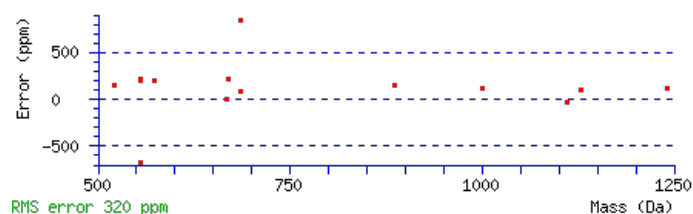

NCBI BLAST search of [SPFIQIPLGVTEDR](#)

## AT1G08520.1

(Parameters: blastp, nr protein database, expect=20000, no filter, PAM30)

Other BLAST [web gateways](#)

### All matches to this query

| Score | Mr(calc)  | Delta   | Sequence                       |
|-------|-----------|---------|--------------------------------|
| 39.5  | 1570.8355 | -0.0004 | <a href="#">SPFIQIPLGVTEDR</a> |

Mascot: <http://www.matrixscience.com/>

**Peptide View**MS/MS Fragmentation of **MDMNVVKKDLPPK**Found in **AT1G08600.1** in **TAIR\_Arabidopsis**, Symbols: ATRX, CHR20 | ATRX/CHR20; ATP binding / DNA binding / helicase | chr1:2724565-2733434 FORWARD

Match to Query 6962: 1530.745332 from(766.379942,2+) index(6954)

Title: Elution from: 60.156 to 60.156 scan no 8868 cid35.00 polarity:+

Data file D1d-3\_1.mgf

Click mouse within plot area to zoom in by factor of two about that point

Or,  to  Da Label all possible matches  Label matches used for scoring Show Y-axis 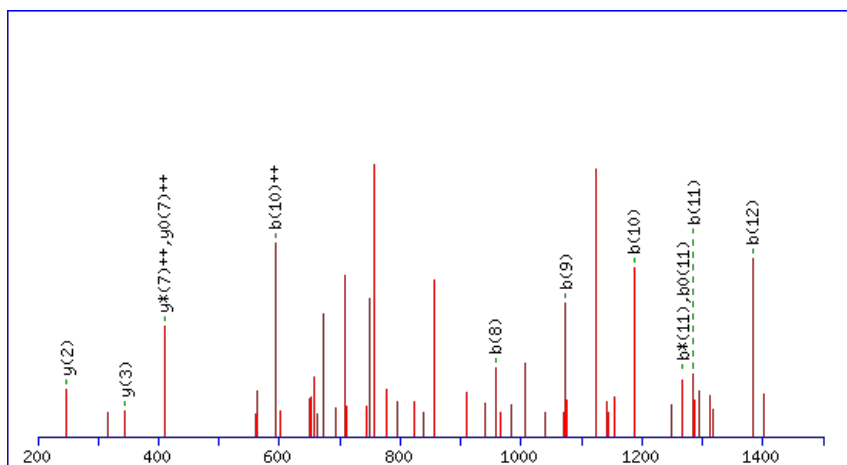Monoisotopic mass of neutral peptide  $M_r(\text{calc})$ : 1530.7493

Fixed modifications: Carbamidomethyl (C) (apply to specified residues or termini only)

Ions Score: 24 Expect: 0.02

Matches : 12/128 fragment ions using 21 most intense peaks ([help](#))

| #  | b                | b <sup>++</sup> | b*               | b <sup>*++</sup> | b <sup>0</sup>   | b <sup>0++</sup> | Seq. | y               | y <sup>++</sup> | y*        | y <sup>*++</sup> | y <sup>0</sup> | y <sup>0++</sup> | #  |
|----|------------------|-----------------|------------------|------------------|------------------|------------------|------|-----------------|-----------------|-----------|------------------|----------------|------------------|----|
| 1  | 133.0448         | 67.0260         |                  |                  |                  |                  | M    |                 |                 |           |                  |                |                  | 13 |
| 2  | 249.0688         | 125.0380        |                  |                  | 231.0582         | 116.0327         | D    | 1399.7190       | 700.3631        | 1381.6954 | 691.3513         | 1381.7084      | 691.3579         | 12 |
| 3  | 381.1063         | 191.0568        |                  |                  | 363.0957         | 182.0515         | M    | 1283.6950       | 642.3512        | 1265.6714 | 633.3394         | 1265.6845      | 633.3459         | 11 |
| 4  | 497.1433         | 249.0753        | 479.1197         | 240.0635         | 479.1327         | 240.0700         | N    | 1151.6575       | 576.3324        | 1133.6339 | 567.3206         | 1133.6469      | 567.3271         | 10 |
| 5  | 597.2087         | 299.1080        | 579.1852         | 290.0962         | 579.1982         | 290.1027         | V    | 1035.6205       | 518.3139        | 1017.5969 | 509.3021         | 1017.6099      | 509.3086         | 9  |
| 6  | 697.2742         | 349.1407        | 679.2506         | 340.1289         | 679.2636         | 340.1354         | V    | 935.5551        | 468.2812        | 917.5315  | 459.2694         | 917.5445       | 459.2759         | 8  |
| 7  | 827.3632         | 414.1852        | 809.3396         | 405.1735         | 809.3527         | 405.1800         | K    | 835.4896        | 418.2484        | 817.4660  | 409.2367         | 817.4790       | 409.2432         | 7  |
| 8  | <b>957.4523</b>  | 479.2298        | 939.4287         | 470.2180         | 939.4417         | 470.2245         | K    | 705.4006        | 353.2039        | 687.3770  | 344.1921         | 687.3900       | 344.1986         | 6  |
| 9  | <b>1073.4762</b> | 537.2418        | 1055.4526        | 528.2300         | 1055.4657        | 528.2365         | D    | 575.3115        | 288.1594        | 557.2880  | 279.1476         | 557.3010       | 279.1541         | 5  |
| 10 | <b>1187.5573</b> | <b>594.2823</b> | 1169.5337        | 585.2705         | 1169.5468        | 585.2770         | L    | 459.2876        | 230.1474        | 441.2640  | 221.1356         |                |                  | 4  |
| 11 | <b>1285.6071</b> | 643.3072        | <b>1267.5835</b> | 634.2954         | <b>1267.5966</b> | 634.3019         | P    | <b>345.2065</b> | 173.1069        | 327.1829  | 164.0951         |                |                  | 3  |
| 12 | <b>1383.6569</b> | 692.3321        | 1365.6333        | 683.3203         | 1365.6464        | 683.3268         | P    | <b>247.1567</b> | 124.0820        | 229.1331  | 115.0702         |                |                  | 2  |
| 13 |                  |                 |                  |                  |                  |                  | K    | 149.1069        | 75.0571         | 131.0833  | 66.0453          |                |                  | 1  |

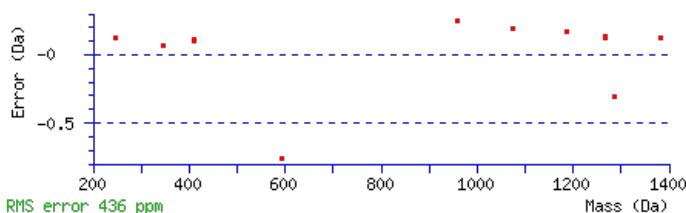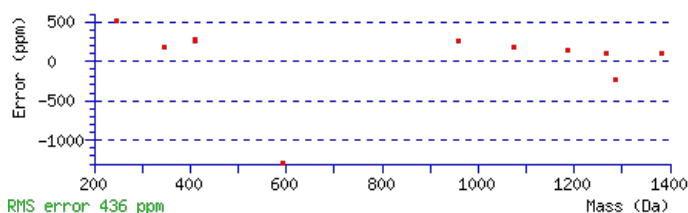NCBI BLAST search of **MDMNVVKKDLPPK**

(Parameters: blastp, nr protein database, expect=20000, no filter, PAM30)

# AT1G08600.1

Other BLAST [web gateways](#)

## All matches to this query

| Score | Mr(calc)  | Delta   | Sequence                       |
|-------|-----------|---------|--------------------------------|
| 24.0  | 1530.7493 | -0.0039 | <a href="#">MDMNVVKKDLPPK</a>  |
| 7.4   | 1530.7481 | -0.0028 | <a href="#">NQIPWLIMFPEK</a>   |
| 3.1   | 1530.7436 | 0.0017  | <a href="#">LMEGDIRNIIDPK</a>  |
| 2.9   | 1530.7410 | 0.0044  | <a href="#">MAEISGLPDDLKVK</a> |
| 2.3   | 1530.7437 | 0.0017  | <a href="#">MDLEARTLPPNLK</a>  |
| 1.4   | 1530.7436 | 0.0017  | <a href="#">QGLIKENLCVDPK</a>  |
| 0.9   | 1530.7484 | -0.0031 | <a href="#">LEAEIRELESTPK</a>  |
| 0.8   | 1530.7484 | -0.0030 | <a href="#">LVVSSATPQEVQK</a>  |
| 0.8   | 1530.7432 | 0.0021  | <a href="#">MISIISSTYFDLK</a>  |
| 0.1   | 1530.7493 | -0.0039 | <a href="#">ALEMLEKGVMHLK</a>  |

Mascot: <http://www.matrixscience.com/>

## Peptide View

### MS/MS Fragmentation of **LLQHMNTDVK**

Found in **AT1G08760.1** in **TAIR\_Arabidopsis**, Symbols: | similar to unknown protein [Arabidopsis thaliana] (TAIR:AT4G13370.1); similar to hypothetical protein [Vitis vinifera] (GB:CAN75715.1); contains InterPro domain Protein of unknown function DUF936, plant (InterPro:IPR010341) | chr1:28054

Match to Query 4074: 1228.571012 from(615.292782,2+) index(3169)

Title: Elution from: 30.701 to 30.701 scan no 3927 cid35.00 polarity:+

Data file 0-3\_3.mgf

Click mouse within plot area to zoom in by factor of two about that point

Or,  to  Da

Label all possible matches  Label matches used for scoring

Show Y-axis

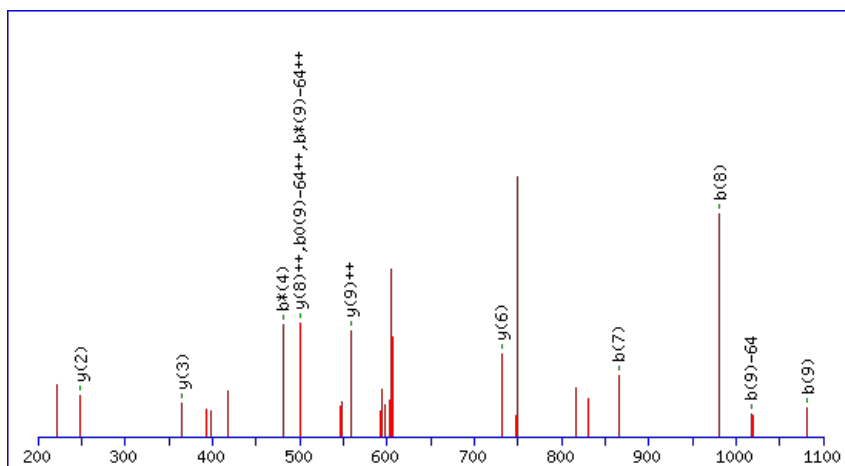

Monoisotopic mass of neutral peptide  $M_r(\text{calc})$ : 1228.5680

**Fixed modifications:** Carbamidomethyl (C) (apply to specified residues or termini only)

**Variable modifications:**

**M5** : Oxidation (M), with neutral losses 0.0000 (shown in table), 63.9983

**Ions Score:** 23 **Expect:** 0.021

**Matches** : 12/138 fragment ions using 15 most intense peaks ([help](#))

| #  | b         | b <sup>++</sup> | b*        | b <sup>*++</sup> | b <sup>0</sup> | b <sup>0++</sup> | Seq. | y         | y <sup>++</sup> | y*        | y <sup>*++</sup> | y <sup>0</sup> | y <sup>0++</sup> | #  |
|----|-----------|-----------------|-----------|------------------|----------------|------------------|------|-----------|-----------------|-----------|------------------|----------------|------------------|----|
| 1  | 115.0884  | 58.0478         |           |                  |                |                  | L    |           |                 |           |                  |                |                  | 10 |
| 2  | 229.1695  | 115.0884        |           |                  |                |                  | L    | 1115.4942 | 558.2507        | 1097.4706 | 549.2390         | 1097.4836      | 549.2455         | 9  |
| 3  | 359.2221  | 180.1147        | 341.1985  | 171.1029         |                |                  | Q    | 1001.4131 | 501.2102        | 983.3895  | 492.1984         | 983.4025       | 492.2049         | 8  |
| 4  | 499.2721  | 250.1397        | 481.2486  | 241.1279         |                |                  | H    | 871.3605  | 436.1839        | 853.3369  | 427.1721         | 853.3499       | 427.1786         | 7  |
| 5  | 647.3046  | 324.1559        | 629.2810  | 315.1441         |                |                  | M    | 731.3104  | 366.1589        | 713.2869  | 357.1471         | 713.2999       | 357.1536         | 6  |
| 6  | 763.3416  | 382.1744        | 745.3180  | 373.1626         |                |                  | N    | 583.2780  | 292.1426        | 565.2544  | 283.1309         | 565.2674       | 283.1374         | 5  |
| 7  | 865.3863  | 433.1968        | 847.3627  | 424.1850         | 847.3757       | 424.1915         | T    | 467.2410  | 234.1241        | 449.2174  | 225.1124         | 449.2304       | 225.1189         | 4  |
| 8  | 981.4103  | 491.2088        | 963.3867  | 482.1970         | 963.3997       | 482.2035         | D    | 365.1963  | 183.1018        | 347.1727  | 174.0900         | 347.1857       | 174.0965         | 3  |
| 9  | 1081.4757 | 541.2415        | 1063.4521 | 532.2297         | 1063.4651      | 532.2362         | V    | 249.1723  | 125.0898        | 231.1487  | 116.0780         |                |                  | 2  |
| 10 |           |                 |           |                  |                |                  | K    | 149.1069  | 75.0571         | 131.0833  | 66.0453          |                |                  | 1  |

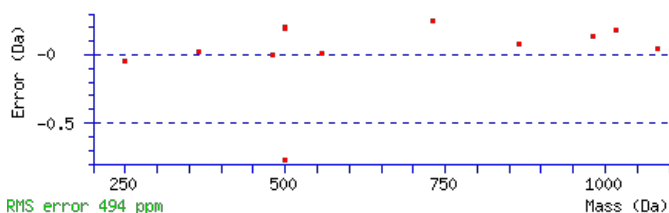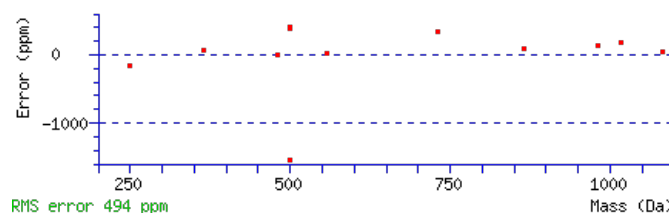

NCBI **BLAST** search of **LLQHMNTDVK**

(Parameters: blastp, nr protein database, expect=20000, no filter, PAM30)

Other BLAST [web gateways](#)

AT1G08760.1

All matches to this query

| Score | Mr(calc)  | Delta   | Sequence                    |
|-------|-----------|---------|-----------------------------|
| 23.1  | 1228.5680 | 0.0030  | <a href="#">LLQHMNTDVK</a>  |
| 11.9  | 1228.5729 | -0.0019 | <a href="#">FRGLFVGNMR</a>  |
| 0.4   | 1228.5736 | -0.0026 | <a href="#">MKQYKCLTK</a>   |
| 0.1   | 1228.5728 | -0.0017 | <a href="#">DPTPQTALSGK</a> |

Mascot: <http://www.matrixscience.com/>



**Peptide View**MS/MS Fragmentation of **MGAKSKSSSTR**

Found in **AT1G08990.1** in **TAIR\_Arabidopsis**, Symbols: PGSIP5 | PGSIP5 (PLANT GLYCOGENIN-LIKE STARCH INITIATION PROTEIN 5); transférase, transferring glycosyl groups | chr1:2888756-2890756 FORWARD

Match to Query 4131: 1170.520882 from(586.267717,2+) index(8414)

Title: Elution from: 73.641 to 73.641 scan no 11139 cid35.00 polarity:+

Data file D1d-3\_2.mgf

Click mouse within plot area to zoom in by factor of two about that point

Or,   to  Da

Label all possible matches  Label matches used for scoring

Show Y-axis

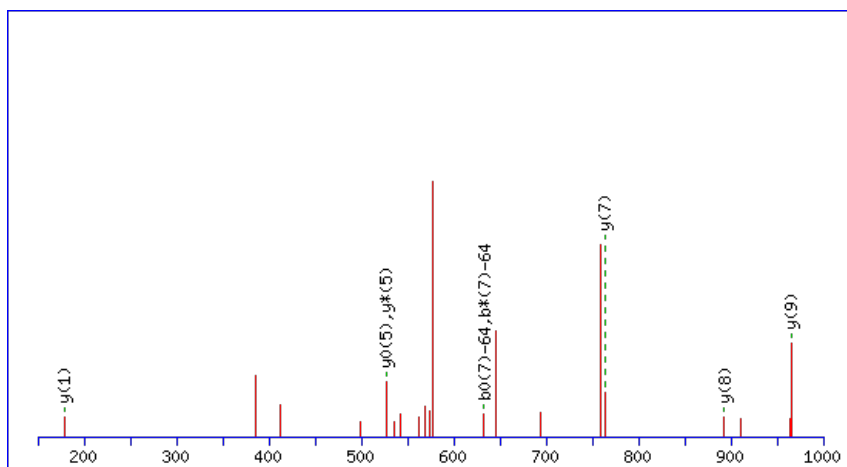

Monoisotopic mass of neutral peptide  $M_r(\text{calc})$ : 1170.5239

Fixed modifications: Carbamidomethyl (C) (apply to specified residues or termini only)

Variable modifications:

M1 : Oxidation (M), with neutral losses 0.0000 (shown in table), 63.9983

Ions Score: 22 Expect: 0.033

Matches : 8/150 fragment ions using 11 most intense peaks ([help](#))

| #  | b        | b <sup>++</sup> | b <sup>*</sup> | b <sup>*++</sup> | b <sup>0</sup> | b <sup>0++</sup> | Seq. | y               | y <sup>++</sup> | y <sup>*</sup>  | y <sup>*++</sup> | y <sup>0</sup>  | y <sup>0++</sup> | #  |
|----|----------|-----------------|----------------|------------------|----------------|------------------|------|-----------------|-----------------|-----------------|------------------|-----------------|------------------|----|
| 1  | 149.0397 | 75.0235         |                |                  |                |                  | M    |                 |                 |                 |                  |                 |                  | 11 |
| 2  | 207.0582 | 104.0327        |                |                  |                |                  | G    | 1023.4988       | 512.2530        | 1005.4752       | 503.2412         | 1005.4882       | 503.2477         | 10 |
| 3  | 279.0924 | 140.0498        |                |                  |                |                  | A    | <b>965.4803</b> | 483.2438        | 947.4567        | 474.2320         | 947.4697        | 474.2385         | 9  |
| 4  | 409.1814 | 205.0943        | 391.1578       | 196.0825         |                |                  | K    | <b>893.4461</b> | 447.2267        | 875.4225        | 438.2149         | 875.4356        | 438.2214         | 8  |
| 5  | 497.2105 | 249.1089        | 479.1869       | 240.0971         | 479.1999       | 240.1036         | S    | <b>763.3571</b> | 382.1822        | 745.3335        | 373.1704         | 745.3465        | 373.1769         | 7  |
| 6  | 627.2995 | 314.1534        | 609.2759       | 305.1416         | 609.2889       | 305.1481         | K    | 675.3280        | 338.1677        | 657.3044        | 329.1559         | 657.3175        | 329.1624         | 6  |
| 7  | 715.3286 | 358.1679        | 697.3050       | 349.1561         | 697.3180       | 349.1626         | S    | 545.2390        | 273.1231        | <b>527.2154</b> | 264.1113         | <b>527.2284</b> | 264.1179         | 5  |
| 8  | 803.3576 | 402.1824        | 785.3340       | 393.1707         | 785.3470       | 393.1772         | S    | 457.2099        | 229.1086        | 439.1863        | 220.0968         | 439.1994        | 220.1033         | 4  |
| 9  | 891.3867 | 446.1970        | 873.3631       | 437.1852         | 873.3761       | 437.1917         | S    | 369.1809        | 185.0941        | 351.1573        | 176.0823         | 351.1703        | 176.0888         | 3  |
| 10 | 993.4314 | 497.2193        | 975.4078       | 488.2075         | 975.4208       | 488.2141         | T    | 281.1518        | 141.0795        | 263.1282        | 132.0677         | 263.1412        | 132.0743         | 2  |
| 11 |          |                 |                |                  |                |                  | R    | <b>179.1071</b> | 90.0572         | 161.0835        | 81.0454          |                 |                  | 1  |

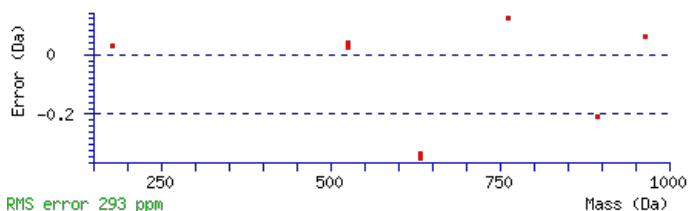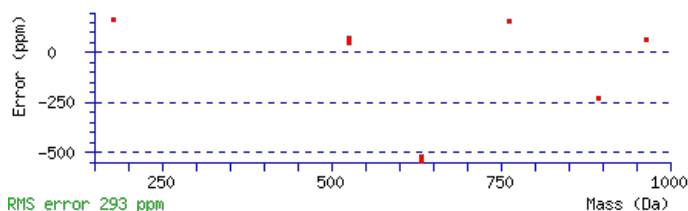

NCBI **BLAST** search of **MGAKSKSSSTR**

(Parameters: blastp, nr protein database, expect=20000, no filter, PAM30)

Other BLAST [web gateways](#)

# AT1G08990.1

All matches to this query

| Score | Mr(calc)  | Delta   | Sequence                     |
|-------|-----------|---------|------------------------------|
| 21.6  | 1170.5239 | -0.0031 | <a href="#">MGAKSKSSSTR</a>  |
| 21.3  | 1170.5223 | -0.0014 | <a href="#">GFGFIIFDEK</a>   |
| 9.5   | 1170.5192 | 0.0017  | <a href="#">NTMMKRSVR</a>    |
| 5.7   | 1170.5201 | 0.0007  | <a href="#">FSSSYSEPKK</a>   |
| 2.2   | 1170.5235 | -0.0026 | <a href="#">STSEVYAMKK</a>   |
| 1.6   | 1170.5206 | 0.0003  | <a href="#">HGNSSELNSIGK</a> |
| 1.5   | 1170.5228 | -0.0019 | <a href="#">AGSFFQDKTR</a>   |
| 0.1   | 1170.5188 | 0.0021  | <a href="#">YLQMMNSKK</a>    |
| 0.1   | 1170.5188 | 0.0021  | <a href="#">YLQMMNSKK</a>    |

Mascot: <http://www.matrixscience.com/>

**Peptide View**MS/MS Fragmentation of **LAGPQLVQMFIGDGAK**

Found in **AT1G09100.1** in **TAIR\_Arabidopsis**, Symbols: RPT5B | RPT5B (26S PROTEASOME AAA-ATPASE SUBUNIT RPT5B); ATPase/calmodulin binding | chr1:2936677-2939260 REVERSE

Match to Query 6974: 1643.866430 from(822.940491,2+) index(9580)

Title: Elution from: 91.937 to 91.937 scan no 13655 cid35.00 polarity:+

Data file D1d-1\_3.mgf

Click mouse within plot area to zoom in by factor of two about that point

Or,   to  Da

Label all possible matches  Label matches used for scoring

Show Y-axis

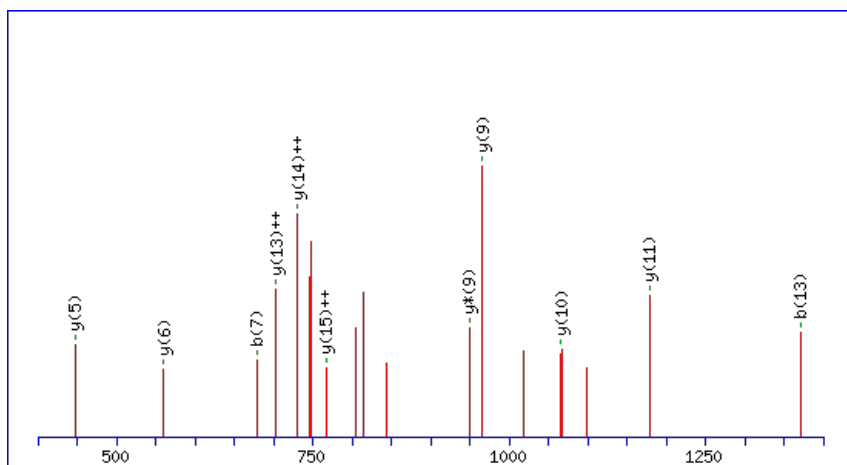

**Monoisotopic mass of neutral peptide Mr(calc):** 1643.8705

**Fixed modifications:** Carbamidomethyl (C) (apply to specified residues or termini only)

**Ions Score:** 36 **Expect:** 0.0014

**Matches:** 11/142 fragment ions using 20 most intense peaks ([help](#))

| #  | b         | b <sup>++</sup> | b <sup>*</sup> | b <sup>*++</sup> | b <sup>0</sup> | b <sup>0++</sup> | Seq. | y         | y <sup>++</sup> | y <sup>*</sup> | y <sup>*++</sup> | y <sup>0</sup> | y <sup>0++</sup> | #  |
|----|-----------|-----------------|----------------|------------------|----------------|------------------|------|-----------|-----------------|----------------|------------------|----------------|------------------|----|
| 1  | 114.0913  | 57.5493         |                |                  |                |                  | L    |           |                 |                |                  |                |                  | 16 |
| 2  | 185.1285  | 93.0679         |                |                  |                |                  | A    | 1531.7937 | 766.4005        | 1514.7672      | 757.8872         | 1513.7832      | 757.3952         | 15 |
| 3  | 242.1499  | 121.5786        |                |                  |                |                  | G    | 1460.7566 | 730.8819        | 1443.7301      | 722.3687         | 1442.7460      | 721.8767         | 14 |
| 4  | 339.2027  | 170.1050        |                |                  |                |                  | P    | 1403.7351 | 702.3712        | 1386.7086      | 693.8579         | 1385.7246      | 693.3659         | 13 |
| 5  | 467.2613  | 234.1343        | 450.2347       | 225.6210         |                |                  | Q    | 1306.6824 | 653.8448        | 1289.6558      | 645.3316         | 1288.6718      | 644.8395         | 12 |
| 6  | 580.3453  | 290.6763        | 563.3188       | 282.1630         |                |                  | L    | 1178.6238 | 589.8155        | 1161.5973      | 581.3023         | 1160.6132      | 580.8103         | 11 |
| 7  | 679.4137  | 340.2105        | 662.3872       | 331.6972         |                |                  | V    | 1065.5397 | 533.2735        | 1048.5132      | 524.7602         | 1047.5292      | 524.2682         | 10 |
| 8  | 807.4723  | 404.2398        | 790.4458       | 395.7265         |                |                  | Q    | 966.4713  | 483.7393        | 949.4448       | 475.2260         | 948.4608       | 474.7340         | 9  |
| 9  | 938.5128  | 469.7600        | 921.4863       | 461.2468         |                |                  | M    | 838.4128  | 419.7100        | 821.3862       | 411.1967         | 820.4022       | 410.7047         | 8  |
| 10 | 1085.5812 | 543.2942        | 1068.5547      | 534.7810         |                |                  | F    | 707.3723  | 354.1898        | 690.3457       | 345.6765         | 689.3617       | 345.1845         | 7  |
| 11 | 1198.6653 | 599.8363        | 1181.6387      | 591.3230         |                |                  | I    | 560.3039  | 280.6556        | 543.2773       | 272.1423         | 542.2933       | 271.6503         | 6  |
| 12 | 1255.6867 | 628.3470        | 1238.6602      | 619.8337         |                |                  | G    | 447.2198  | 224.1135        | 430.1932       | 215.6003         | 429.2092       | 215.1082         | 5  |
| 13 | 1370.7137 | 685.8605        | 1353.6871      | 677.3472         | 1352.7031      | 676.8552         | D    | 390.1983  | 195.6028        | 373.1718       | 187.0895         | 372.1878       | 186.5975         | 4  |
| 14 | 1427.7351 | 714.3712        | 1410.7086      | 705.8579         | 1409.7246      | 705.3659         | G    | 275.1714  | 138.0893        | 258.1448       | 129.5761         |                |                  | 3  |
| 15 | 1498.7723 | 749.8898        | 1481.7457      | 741.3765         | 1480.7617      | 740.8845         | A    | 218.1499  | 109.5786        | 201.1234       | 101.0653         |                |                  | 2  |
| 16 |           |                 |                |                  |                |                  | K    | 147.1128  | 74.0600         | 130.0863       | 65.5468          |                |                  | 1  |

# AT1G09100.1

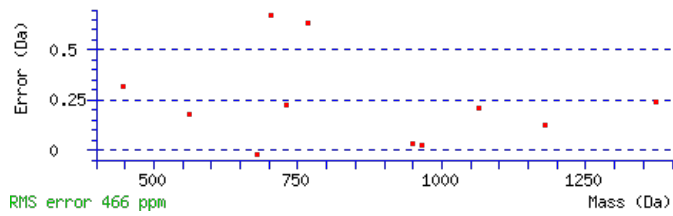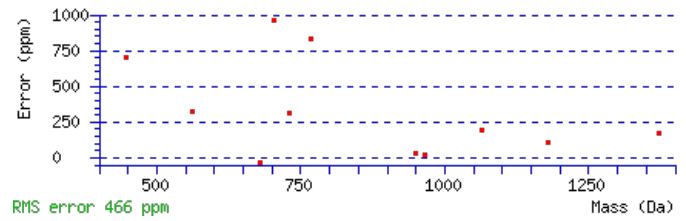

NCBI **BLAST** search of [LAGPQLVQMFIGDGAK](#)  
(Parameters: blastp, nr protein database, expect=20000, no filter, PAM30)  
Other BLAST [web gateways](#)

## All matches to this query

| Score | Mr(calc)  | Delta   | Sequence                         |
|-------|-----------|---------|----------------------------------|
| 35.7  | 1643.8705 | -0.0041 | <a href="#">LAGPQLVQMFIGDGAK</a> |
| 7.9   | 1643.8671 | -0.0007 | <a href="#">FGLVYVDYKGNLTR</a>   |
| 0.9   | 1643.8631 | 0.0033  | <a href="#">LAGNRLPSFTPEQSK</a>  |
| 0.3   | 1643.8712 | -0.0048 | <a href="#">RQLLARLDVCMGGR</a>   |

Mascot: <http://www.matrixscience.com/>

## Peptide View

MS/MS Fragmentation of **VPSSGLMPASDVLIR**

Found in **AT1G09130.1** in **TAIR\_Arabidopsis**, Symbols: | ATP-dependent Clp protease proteolytic subunit, putative | chr1:2940065-2942219 REVERSE

Match to Query 6700: 1558.776590 from(780.395571,2+) index(7051)

Title: Elution from: 62.335 to 62.335 scan no 9167 cid35.00 polarity:+

Data file 0-3\_2.mgf

Click mouse within plot area to zoom in by factor of two about that point

Or,   to  Da

Label all possible matches  Label matches used for scoring

Show Y-axis

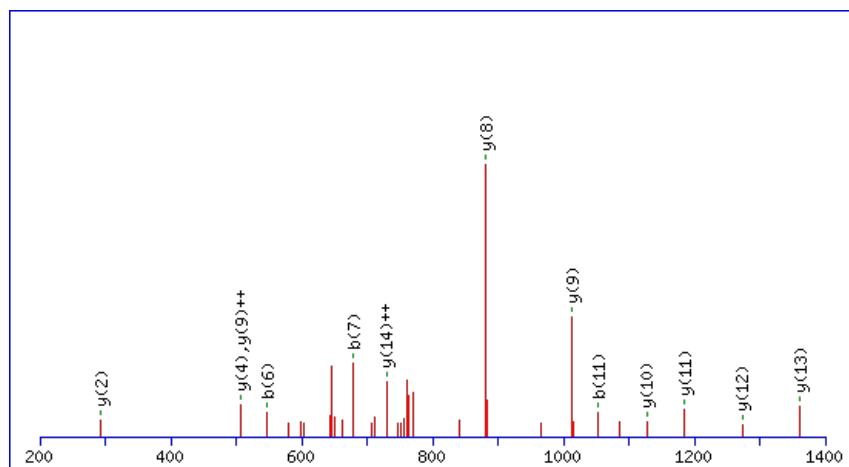

Monoisotopic mass of neutral peptide  $M_r(\text{calc})$ : 1558.7749

Fixed modifications: Carbamidomethyl (C) (apply to specified residues or termini only)

Ions Score: 68 Expect: 7.3e-007

Matches : 13/128 fragment ions using 16 most intense peaks ([help](#))

| #  | b         | b <sup>++</sup> | b <sup>0</sup> | b <sup>0++</sup> | Seq. | y         | y <sup>++</sup> | y*        | y <sup>*++</sup> | y <sup>0</sup> | y <sup>0++</sup> | #  |
|----|-----------|-----------------|----------------|------------------|------|-----------|-----------------|-----------|------------------|----------------|------------------|----|
| 1  | 101.0727  | 51.0400         |                |                  | V    |           |                 |           |                  |                |                  | 15 |
| 2  | 199.1225  | 100.0649        |                |                  | P    | 1459.7168 | 730.3620        | 1441.6932 | 721.3502         | 1441.7062      | 721.3567         | 14 |
| 3  | 287.1516  | 144.0794        | 269.1410       | 135.0741         | S    | 1361.6670 | 681.3371        | 1343.6434 | 672.3253         | 1343.6564      | 672.3318         | 13 |
| 4  | 375.1807  | 188.0940        | 357.1701       | 179.0887         | S    | 1273.6379 | 637.3226        | 1255.6143 | 628.3108         | 1255.6273      | 628.3173         | 12 |
| 5  | 433.1991  | 217.1032        | 415.1886       | 208.0979         | G    | 1185.6088 | 593.3081        | 1167.5853 | 584.2963         | 1167.5983      | 584.3028         | 11 |
| 6  | 547.2802  | 274.1438        | 529.2697       | 265.1385         | L    | 1127.5903 | 564.2988        | 1109.5668 | 555.2870         | 1109.5798      | 555.2935         | 10 |
| 7  | 679.3178  | 340.1625        | 661.3072       | 331.1572         | M    | 1013.5092 | 507.2583        | 995.4857  | 498.2465         | 995.4987       | 498.2530         | 9  |
| 8  | 777.3676  | 389.1874        | 759.3570       | 380.1821         | P    | 881.4717  | 441.2395        | 863.4481  | 432.2277         | 863.4612       | 432.2342         | 8  |
| 9  | 849.4017  | 425.2045        | 831.3912       | 416.1992         | A    | 783.4219  | 392.2146        | 765.3983  | 383.2028         | 765.4114       | 383.2093         | 7  |
| 10 | 937.4308  | 469.2190        | 919.4202       | 460.2137         | S    | 711.3878  | 356.1975        | 693.3642  | 347.1857         | 693.3772       | 347.1922         | 6  |
| 11 | 1053.4548 | 527.2310        | 1035.4442      | 518.2257         | D    | 623.3587  | 312.1830        | 605.3351  | 303.1712         | 605.3482       | 303.1777         | 5  |
| 12 | 1153.5202 | 577.2637        | 1135.5096      | 568.2585         | V    | 507.3347  | 254.1710        | 489.3112  | 245.1592         |                |                  | 4  |
| 13 | 1267.6013 | 634.3043        | 1249.5907      | 625.2990         | L    | 407.2693  | 204.1383        | 389.2457  | 195.1265         |                |                  | 3  |
| 14 | 1381.6824 | 691.3448        | 1363.6718      | 682.3396         | I    | 293.1882  | 147.0977        | 275.1646  | 138.0859         |                |                  | 2  |
| 15 |           |                 |                |                  | R    | 179.1071  | 90.0572         | 161.0835  | 81.0454          |                |                  | 1  |

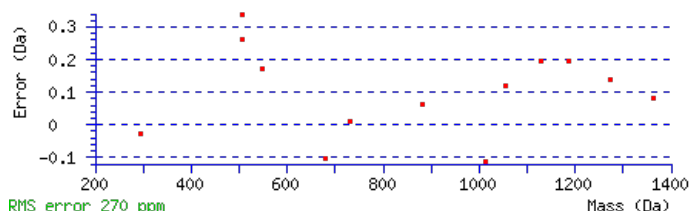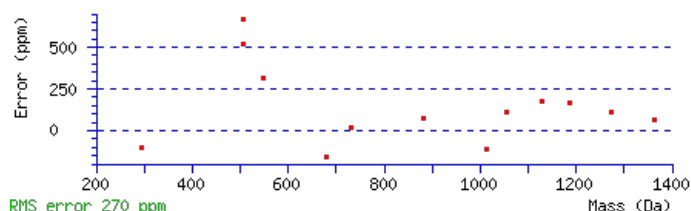

## AT1G09130.1

NCBI **BLAST** search of [VPSSGLMPASDVLIR](#)

(Parameters: blastp, nr protein database, expect=20000, no filter, PAM30)

Other BLAST [web gateways](#)

### All matches to this query

| Score | Mr(calc)  | Delta   | Sequence                        |
|-------|-----------|---------|---------------------------------|
| 68.2  | 1558.7749 | 0.0016  | <a href="#">VPSSGLMPASDVLIR</a> |
| 7.7   | 1558.7805 | -0.0040 | <a href="#">DLIPRMLVVDPK</a>    |

**Mascot:** <http://www.matrixscience.com/>

**Peptide View**

MS/MS Fragmentation of **GKWEAPLIDNPDFKDDPELYVFPK**

Found in **AT1G09210.1** in **TAIR\_Arabidopsis**, Symbols: | calreticulin 2 (CRT2) | chr1:2973219-2976657 REVERSE

Match to Query 10983: 2832.404056 from(709.108290,4+) index(9625)

Title: Elution from: 87.368 to 87.368 scan no 13191 cid35.00 polarity:+

Data file D6h-3\_1.mgf

Click mouse within plot area to zoom in by factor of two about that point

Or, Plot from  to  Da

Label all possible matches  Label matches used for scoring

Show Y-axis

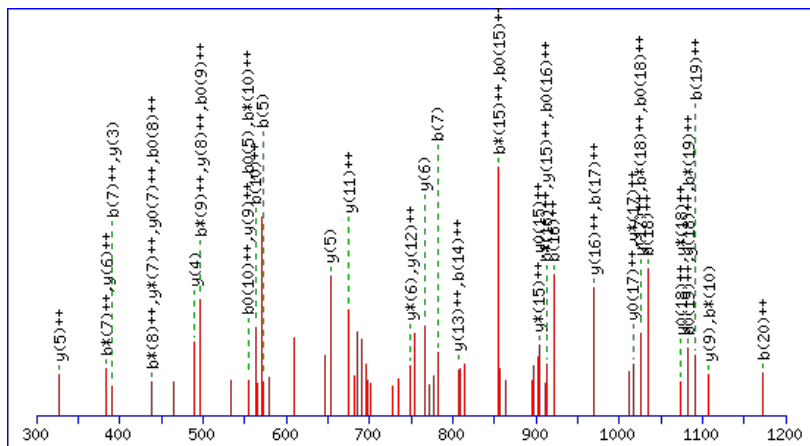

**Monoisotopic mass of neutral peptide Mr(calc):** 2832.4010

**Fixed modifications:** Carbamidomethyl (C) (apply to specified residues or termini only)

**Ions Score:** 67 **Expect:** 5.8e-007

**Matches :** 53/256 fragment ions using 46 most intense peaks ([help](#))

| #  | b         | b <sup>++</sup> | b <sup>*</sup> | b <sup>*++</sup> | b <sup>0</sup> | b <sup>0++</sup> | Seq. | y         | y <sup>++</sup> | y <sup>*</sup> | y <sup>*++</sup> | y <sup>0</sup> | y <sup>0++</sup> | #  |
|----|-----------|-----------------|----------------|------------------|----------------|------------------|------|-----------|-----------------|----------------|------------------|----------------|------------------|----|
| 1  | 58.0287   | 29.5180         |                |                  |                |                  | G    |           |                 |                |                  |                |                  | 24 |
| 2  | 186.1237  | 93.5655         | 169.0972       | 85.0522          |                |                  | K    | 2776.3869 | 1388.6971       | 2759.3603      | 1380.1838        | 2758.3763      | 1379.6918        | 23 |
| 3  | 372.2030  | 186.6051        | 355.1765       | 178.0919         |                |                  | W    | 2648.2919 | 1324.6496       | 2631.2653      | 1316.1363        | 2630.2813      | 1315.6443        | 22 |
| 4  | 501.2456  | 251.1264        | 484.2191       | 242.6132         | 483.2350       | 242.1212         | E    | 2462.2126 | 1231.6099       | 2445.1860      | 1223.0967        | 2444.2020      | 1222.6046        | 21 |
| 5  | 572.2827  | 286.6450        | 555.2562       | 278.1317         | 554.2722       | 277.6397         | A    | 2333.1700 | 1167.0886       | 2316.1434      | 1158.5754        | 2315.1594      | 1158.0834        | 20 |
| 6  | 669.3355  | 335.1714        | 652.3089       | 326.6581         | 651.3249       | 326.1661         | P    | 2262.1329 | 1131.5701       | 2245.1063      | 1123.0568        | 2244.1223      | 1122.5648        | 19 |
| 7  | 782.4196  | 391.7134        | 765.3930       | 383.2001         | 764.4090       | 382.7081         | L    | 2165.0801 | 1083.0437       | 2148.0536      | 1074.5304        | 2147.0695      | 1074.0384        | 18 |
| 8  | 895.5036  | 448.2554        | 878.4771       | 439.7422         | 877.4931       | 439.2502         | I    | 2051.9960 | 1026.5017       | 2034.9695      | 1017.9884        | 2033.9855      | 1017.4964        | 17 |
| 9  | 1010.5306 | 505.7689        | 993.5040       | 497.2556         | 992.5200       | 496.7636         | D    | 1938.9120 | 969.9596        | 1921.8854      | 961.4464         | 1920.9014      | 960.9543         | 16 |
| 10 | 1124.5735 | 562.7904        | 1107.5469      | 554.2771         | 1106.5629      | 553.7851         | N    | 1823.8850 | 912.4462        | 1806.8585      | 903.9329         | 1805.8745      | 903.4409         | 15 |
| 11 | 1221.6262 | 611.3168        | 1204.5997      | 602.8035         | 1203.6157      | 602.3115         | P    | 1709.8421 | 855.4247        | 1692.8156      | 846.9114         | 1691.8316      | 846.4194         | 14 |
| 12 | 1336.6532 | 668.8302        | 1319.6266      | 660.3170         | 1318.6426      | 659.8250         | D    | 1612.7894 | 806.8983        | 1595.7628      | 798.3850         | 1594.7788      | 797.8930         | 13 |
| 13 | 1483.7216 | 742.3644        | 1466.6951      | 733.8512         | 1465.7110      | 733.3592         | F    | 1497.7624 | 749.3848        | 1480.7359      | 740.8716         | 1479.7518      | 740.3796         | 12 |
| 14 | 1611.8166 | 806.4119        | 1594.7900      | 797.8986         | 1593.8060      | 797.4066         | K    | 1350.6940 | 675.8506        | 1333.6674      | 667.3374         | 1332.6834      | 666.8454         | 11 |
| 15 | 1726.8435 | 863.9254        | 1709.8170      | 855.4121         | 1708.8329      | 854.9201         | D    | 1222.5990 | 611.8032        | 1205.5725      | 603.2899         | 1204.5885      | 602.7979         | 10 |
| 16 | 1841.8705 | 921.4389        | 1824.8439      | 912.9256         | 1823.8599      | 912.4336         | D    | 1107.5721 | 554.2897        | 1090.5455      | 545.7764         | 1089.5615      | 545.2844         | 9  |
| 17 | 1938.9232 | 969.9652        | 1921.8967      | 961.4520         | 1920.9127      | 960.9600         | P    | 992.5451  | 496.7762        | 975.5186       | 488.2629         | 974.5346       | 487.7709         | 8  |
| 18 | 2067.9658 | 1034.4865       | 2050.9393      | 1025.9733        | 2049.9552      | 1025.4813        | E    | 895.4924  | 448.2498        | 878.4658       | 439.7366         | 877.4818       | 439.2445         | 7  |
| 19 | 2181.0499 | 1091.0286       | 2164.0233      | 1082.5153        | 2163.0393      | 1082.0233        | L    | 766.4498  | 383.7285        | 749.4232       | 375.2153         |                |                  | 6  |
| 20 | 2344.1132 | 1172.5602       | 2327.0867      | 1164.0470        | 2326.1026      | 1163.5550        | Y    | 653.3657  | 327.1865        | 636.3392       | 318.6732         |                |                  | 5  |
| 21 | 2443.1816 | 1222.0944       | 2426.1551      | 1213.5812        | 2425.1711      | 1213.0892        | V    | 490.3024  | 245.6548        | 473.2758       | 237.1416         |                |                  | 4  |
| 22 | 2590.2500 | 1295.6287       | 2573.2235      | 1287.1154        | 2572.2395      | 1286.6234        | F    | 391.2340  | 196.1206        | 374.2074       | 187.6074         |                |                  | 3  |
| 23 | 2687.3028 | 1344.1550       | 2670.2762      | 1335.6418        | 2669.2922      | 1335.1498        | P    | 244.1656  | 122.5864        | 227.1390       | 114.0731         |                |                  | 2  |
| 24 |           |                 |                |                  |                |                  | K    | 147.1128  | 74.0600         | 130.0863       | 65.5468          |                |                  | 1  |

# AT1G09210.1

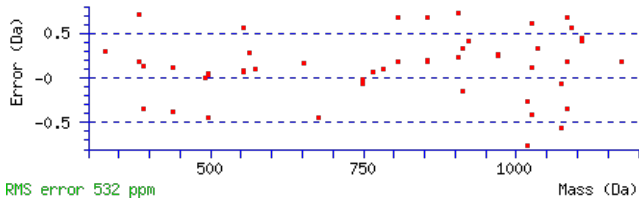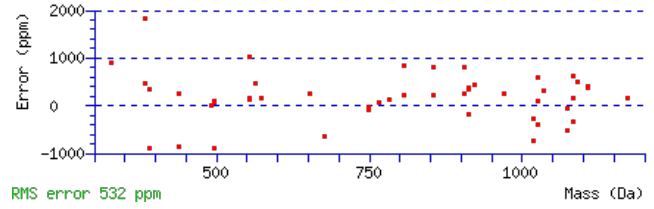

NCBI **BLAST** search of [GKWEAPLIDNPDFKDDPELYVFPK](#)  
(Parameters: blastp, nr protein database, expect=20000, no filter, PAM30)  
Other BLAST [web gateways](#)

## All matches to this query

| Score | Mr(calc)  | Delta  | Sequence                                 |
|-------|-----------|--------|------------------------------------------|
| 67.4  | 2832.4010 | 0.0030 | <a href="#">GKWEAPLIDNPDFKDDPELYVFPK</a> |

Mascot: <http://www.matrixscience.com/>



**Peptide View**MS/MS Fragmentation of **LSMLRNATWILSNFCR**Found in **AT1G09270.1** in **TAIR\_Arabidopsis**, Symbols: | importin alpha-1 subunit, putative (IMPA4) | chr1:2994508-2997835 FORWARD

Match to Query 9051: 2010.883521 from(671.301783,3+) index(4383)

Title: Elution from: 40.798 to 40.798 scan no 5505 cid35.00 polarity:+

Data file C7-1\_3.mgf

Click mouse within plot area to zoom in by factor of two about that point

Or,   to  Da Label all possible matches  Label matches used for scoring Show Y-axis 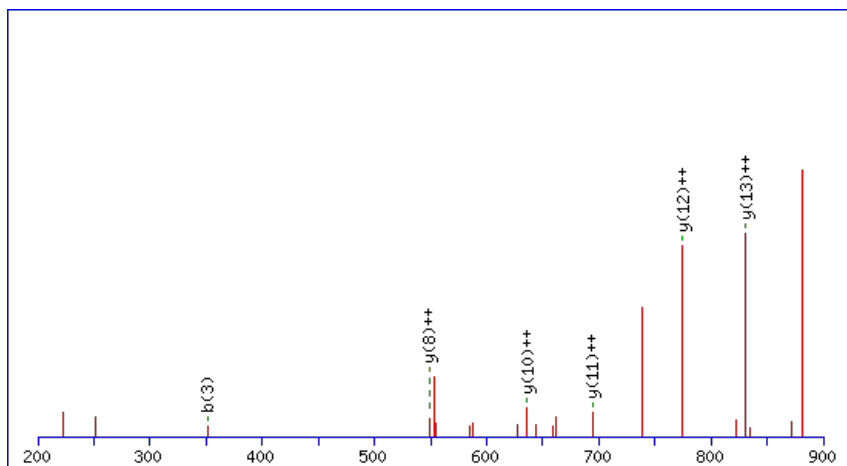**Monoisotopic mass of neutral peptide Mr(calc):** 2010.8840**Fixed modifications:** Carbamidomethyl (C) (apply to specified residues or termini only)**Variable modifications:****M3** : Oxidation (M), with neutral losses 0.0000 (shown in table), 63.9983**Ions Score:** 23 **Expect:** 0.035**Matches** : 6/248 fragment ions using 11 most intense peaks ([help](#))

| #  | b         | b <sup>++</sup> | b <sup>*</sup> | b <sup>*++</sup> | b <sup>0</sup> | b <sup>0++</sup> | Seq. | y         | y <sup>++</sup> | y <sup>*</sup> | y <sup>*++</sup> | y <sup>0</sup> | y <sup>0++</sup> | #  |
|----|-----------|-----------------|----------------|------------------|----------------|------------------|------|-----------|-----------------|----------------|------------------|----------------|------------------|----|
| 1  | 115.0884  | 58.0478         |                |                  |                |                  | L    |           |                 |                |                  |                |                  | 16 |
| 2  | 203.1174  | 102.0624        |                |                  | 185.1069       | 93.0571          | S    | 1897.8102 | 949.4087        | 1879.7866      | 940.3970         | 1879.7997      | 940.4035         | 15 |
| 3  | 351.1499  | 176.0786        |                |                  | 333.1393       | 167.0733         | M    | 1809.7812 | 905.3942        | 1791.7576      | 896.3824         | 1791.7706      | 896.3889         | 14 |
| 4  | 465.2310  | 233.1191        |                |                  | 447.2204       | 224.1138         | L    | 1661.7487 | 831.3780        | 1643.7251      | 822.3662         | 1643.7382      | 822.3727         | 13 |
| 5  | 625.3202  | 313.1637        | 607.2966       | 304.1520         | 607.3097       | 304.1585         | R    | 1547.6676 | 774.3374        | 1529.6440      | 765.3257         | 1529.6571      | 765.3322         | 12 |
| 6  | 741.3572  | 371.1822        | 723.3336       | 362.1705         | 723.3467       | 362.1770         | N    | 1387.5784 | 694.2928        | 1369.5548      | 685.2810         | 1369.5678      | 685.2875         | 11 |
| 7  | 813.3914  | 407.1993        | 795.3678       | 398.1875         | 795.3808       | 398.1940         | A    | 1271.5414 | 636.2743        | 1253.5178      | 627.2625         | 1253.5308      | 627.2690         | 10 |
| 8  | 915.4361  | 458.2217        | 897.4125       | 449.2099         | 897.4255       | 449.2164         | T    | 1199.5072 | 600.2573        | 1181.4836      | 591.2455         | 1181.4967      | 591.2520         | 9  |
| 9  | 1103.5095 | 552.2584        | 1085.4859      | 543.2466         | 1085.4989      | 543.2531         | W    | 1097.4625 | 549.2349        | 1079.4389      | 540.2231         | 1079.4519      | 540.2296         | 8  |
| 10 | 1205.5542 | 603.2807        | 1187.5306      | 594.2689         | 1187.5436      | 594.2754         | T    | 909.3891  | 455.1982        | 891.3655       | 446.1864         | 891.3786       | 446.1929         | 7  |
| 11 | 1319.6353 | 660.3213        | 1301.6117      | 651.3095         | 1301.6247      | 651.3160         | L    | 807.3444  | 404.1758        | 789.3208       | 395.1641         | 789.3339       | 395.1706         | 6  |
| 12 | 1407.6643 | 704.3358        | 1389.6408      | 695.3240         | 1389.6538      | 695.3305         | S    | 693.2633  | 347.1353        | 675.2397       | 338.1235         | 675.2528       | 338.1300         | 5  |
| 13 | 1523.7013 | 762.3543        | 1505.6778      | 753.3425         | 1505.6908      | 753.3490         | N    | 605.2343  | 303.1208        | 587.2107       | 294.1090         |                |                  | 4  |
| 14 | 1671.7668 | 836.3870        | 1653.7432      | 827.3752         | 1653.7562      | 827.3817         | F    | 489.1973  | 245.1023        | 471.1737       | 236.0905         |                |                  | 3  |
| 15 | 1833.7915 | 917.3994        | 1815.7679      | 908.3876         | 1815.7809      | 908.3941         | C    | 341.1318  | 171.0695        | 323.1082       | 162.0578         |                |                  | 2  |
| 16 |           |                 |                |                  |                |                  | R    | 179.1071  | 90.0572         | 161.0835       | 81.0454          |                |                  | 1  |

AT1G09270.1

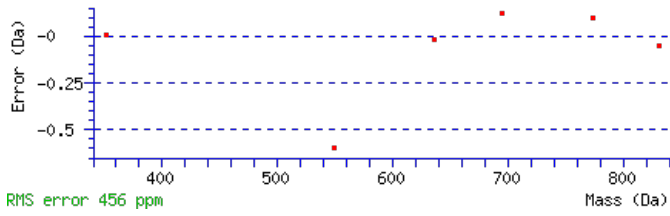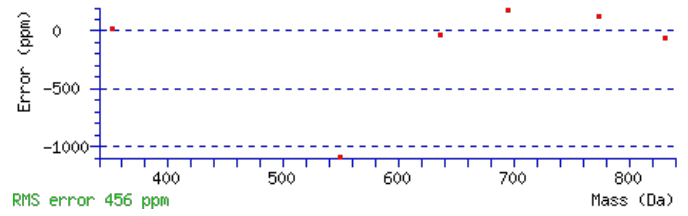

NCBI **BLAST** search of [LSMLRNATWTLSNFCR](#)

(Parameters: blastp, nr protein database, expect=20000, no filter, PAM30)

Other BLAST [web gateways](#)

**All matches to this query**

| Score | Mr(calc)  | Delta   | Sequence                          |
|-------|-----------|---------|-----------------------------------|
| 22.6  | 2010.8840 | -0.0005 | <a href="#">LSMLRNATWTLSNFCR</a>  |
| 4.2   | 2010.8861 | -0.0026 | <a href="#">RSLMSFDLSSEEFNVTK</a> |
| 2.0   | 2010.8888 | -0.0052 | <a href="#">DGSSLVRDMNRLDAFYK</a> |
| 1.3   | 2010.8840 | -0.0005 | <a href="#">VRFVNMDPESVRFMAR</a>  |
| 0.7   | 2010.8813 | 0.0022  | <a href="#">VEPTIEHYGCMVDLLGR</a> |

Mascot: <http://www.matrixscience.com/>

**Peptide View**MS/MS Fragmentation of **SPYIDEIK**

Found in **AT1G09280.1** in **TAIR\_Arabidopsis**, Symbols: | similar to rhodanese-like domain-containing protein [Arabidopsis thaliana] (TAIR:AT2G40760.1); similar to Os12g0563400 [Oryza sativa (japonica cultivar-group)] (GB:NP\_001067036.1); similar to hypothetical protein [Vitis vinifera] (GB:CA

Match to Query 2180: 972.466086 from(487.240319,2+) index(1201)

Title: Elution from: 16.675 to 16.675 scan no 1626 cid35.00 polarity:+

Data file D12h-3\_3.mgf

Click mouse within plot area to zoom in by factor of two about that point

Or,   to  Da

Label all possible matches  Label matches used for scoring

Show Y-axis

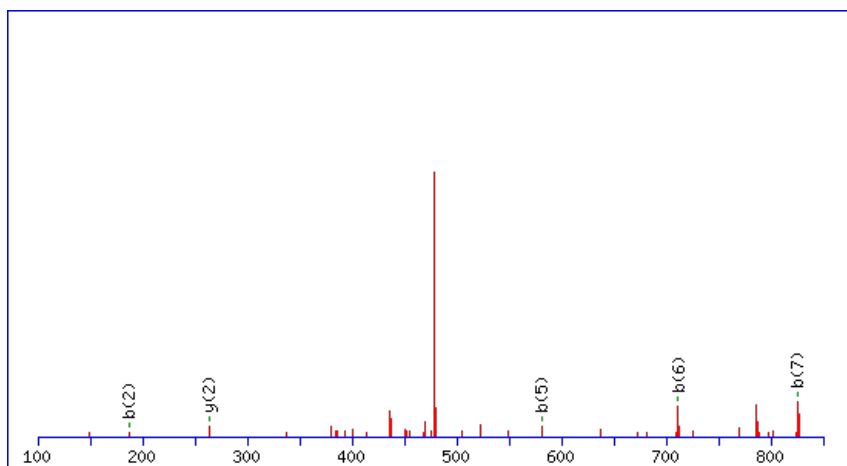

**Monoisotopic mass of neutral peptide Mr(calc):** 972.4646

**Fixed modifications:** Carbamidomethyl (C) (apply to specified residues or termini only)

**Ions Score:** 27 **Expect:** 0.026

**Matches:** 5/66 fragment ions using 7 most intense peaks ([help](#))

| # | b               | b <sup>++</sup> | b <sup>0</sup> | b <sup>0++</sup> | Seq. | y               | y <sup>++</sup> | y*       | y <sup>*++</sup> | y <sup>0</sup> | y <sup>0++</sup> | # |
|---|-----------------|-----------------|----------------|------------------|------|-----------------|-----------------|----------|------------------|----------------|------------------|---|
| 1 | 89.0363         | 45.0218         | 71.0258        | 36.0165          | S    |                 |                 |          |                  |                |                  | 8 |
| 2 | <b>187.0861</b> | 94.0467         | 169.0756       | 85.0414          | P    | 885.4428        | 443.2251        | 867.4193 | 434.2133         | 867.4323       | 434.2198         | 7 |
| 3 | 351.1465        | 176.0769        | 333.1359       | 167.0716         | Y    | 787.3930        | 394.2002        | 769.3695 | 385.1884         | 769.3825       | 385.1949         | 6 |
| 4 | 465.2276        | 233.1174        | 447.2170       | 224.1122         | I    | 623.3327        | 312.1700        | 605.3091 | 303.1582         | 605.3221       | 303.1647         | 5 |
| 5 | <b>581.2516</b> | 291.1294        | 563.2410       | 282.1241         | D    | 509.2516        | 255.1294        | 491.2280 | 246.1176         | 491.2410       | 246.1241         | 4 |
| 6 | <b>711.2912</b> | 356.1492        | 693.2806       | 347.1440         | E    | 393.2276        | 197.1174        | 375.2040 | 188.1056         | 375.2170       | 188.1122         | 3 |
| 7 | <b>825.3723</b> | 413.1898        | 807.3617       | 404.1845         | I    | <b>263.1880</b> | 132.0976        | 245.1644 | 123.0858         |                |                  | 2 |
| 8 |                 |                 |                |                  | K    | 149.1069        | 75.0571         | 131.0833 | 66.0453          |                |                  | 1 |

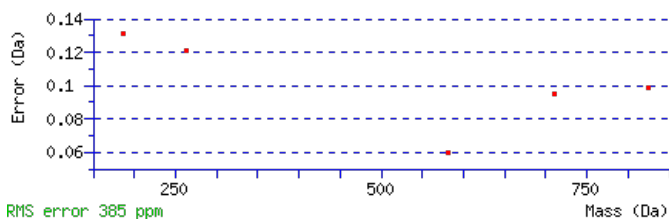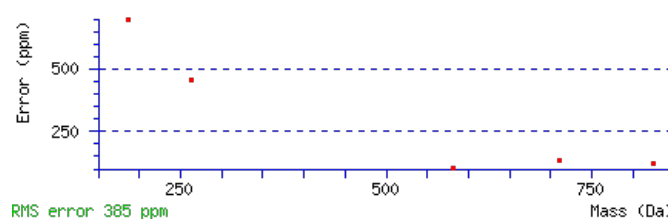NCBI BLAST search of **SPYIDEIK**

(Parameters: blastp, nr protein database, expect=20000, no filter, PAM30)

Other BLAST [web gateways](#)

**All matches to this query**

| Score | Mr(calc) | Delta | Sequence |
|-------|----------|-------|----------|
|       |          |       |          |

**AT1G09280.1**

|      |          |         |                           |
|------|----------|---------|---------------------------|
| 26.6 | 972.4646 | 0.0015  | <a href="#">SPYIDEIK</a>  |
| 17.6 | 972.4633 | 0.0028  | <a href="#">MVCLPSLK</a>  |
| 14.7 | 972.4651 | 0.0010  | <a href="#">DKNSQGALK</a> |
| 14.3 | 972.4646 | 0.0015  | <a href="#">EFGHEELK</a>  |
| 13.2 | 972.4646 | 0.0015  | <a href="#">LEFLEGEK</a>  |
| 12.1 | 972.4651 | 0.0010  | <a href="#">AAERGESLK</a> |
| 12.1 | 972.4673 | -0.0012 | <a href="#">FINLPDSR</a>  |
| 12.1 | 972.4651 | 0.0010  | <a href="#">QNENKSLK</a>  |
| 11.8 | 972.4633 | 0.0028  | <a href="#">VLSMCPLK</a>  |
| 10.4 | 972.4633 | 0.0028  | <a href="#">MNLTLPK</a>   |

**Mascot:** <http://www.matrixscience.com/>

## Peptide View

### MS/MS Fragmentation of **LVSYGTEVTAIVETGK**

Found in **AT1G09310.1** in **TAIR Arabidopsis**, Symbols: | similar to unknown protein [Arabidopsis thaliana] (TAIR:AT1G56580.1); similar to unknown [Populus trichocarpa] (GB:ABK94207.1); contains InterPro domain Protein of unknown function DUF538 (InterPro:IPR007493) | chr1:3009111-3009650 FORW

Match to Query 7644: 1682.832628 from(842.423590,2+) index(7116)

Title: Elution from: 62.853 to 62.853 scan no 9342 cid35.00 polarity:+

Data file 0-3\_3.mgf

Click mouse within plot area to zoom in by factor of two about that point

Or,   to  Da

Label all possible matches  Label matches used for scoring

Show Y-axis

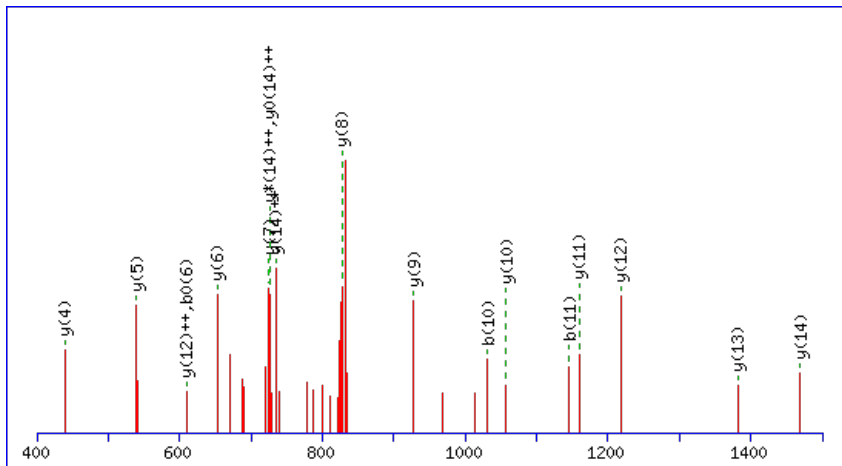

**Monoisotopic mass of neutral peptide Mr(calc):** 1682.8321

**Fixed modifications:** Carbamidomethyl (C) (apply to specified residues or termini only)

**Ions Score:** 103 **Expect:** 3.4e-010

**Matches:** 18/142 fragment ions using 23 most intense peaks ([help](#))

| #  | b                | b <sup>++</sup> | b <sup>0</sup>  | b <sup>0++</sup> | Seq. | y                | y <sup>++</sup> | y <sup>*</sup> | y <sup>*++</sup> | y <sup>0</sup> | y <sup>0++</sup> | #  |
|----|------------------|-----------------|-----------------|------------------|------|------------------|-----------------|----------------|------------------|----------------|------------------|----|
| 1  | 115.0884         | 58.0478         |                 |                  | L    |                  |                 |                |                  |                |                  | 16 |
| 2  | 215.1538         | 108.0805        |                 |                  | V    | 1569.7583        | 785.3828        | 1551.7347      | 776.3710         | 1551.7477      | 776.3775         | 15 |
| 3  | 303.1829         | 152.0951        | 285.1723        | 143.0898         | S    | <b>1469.6928</b> | <b>735.3501</b> | 1451.6693      | <b>726.3383</b>  | 1451.6823      | <b>726.3448</b>  | 14 |
| 4  | 467.2433         | 234.1253        | 449.2327        | 225.1200         | Y    | <b>1381.6638</b> | 691.3355        | 1363.6402      | 682.3237         | 1363.6532      | 682.3302         | 13 |
| 5  | 525.2618         | 263.1345        | 507.2512        | 254.1292         | G    | <b>1217.6034</b> | <b>609.3053</b> | 1199.5798      | 600.2936         | 1199.5928      | 600.3001         | 12 |
| 6  | 627.3065         | 314.1569        | <b>609.2959</b> | 305.1516         | T    | <b>1159.5849</b> | 580.2961        | 1141.5613      | 571.2843         | 1141.5743      | 571.2908         | 11 |
| 7  | 757.3461         | 379.1767        | 739.3355        | 370.1714         | E    | <b>1057.5402</b> | 529.2737        | 1039.5166      | 520.2619         | 1039.5296      | 520.2685         | 10 |
| 8  | 857.4115         | 429.2094        | 839.4010        | 420.2041         | V    | <b>927.5006</b>  | 464.2539        | 909.4770       | 455.2421         | 909.4900       | 455.2486         | 9  |
| 9  | 959.4563         | 480.2318        | 941.4457        | 471.2265         | T    | <b>827.4351</b>  | 414.2212        | 809.4115       | 405.2094         | 809.4246       | 405.2159         | 8  |
| 10 | <b>1031.4904</b> | 516.2488        | 1013.4798       | 507.2436         | A    | <b>725.3904</b>  | 363.1988        | 707.3668       | 354.1871         | 707.3798       | 354.1936         | 7  |
| 11 | <b>1145.5715</b> | 573.2894        | 1127.5609       | 564.2841         | I    | <b>653.3563</b>  | 327.1818        | 635.3327       | 318.1700         | 635.3457       | 318.1765         | 6  |
| 12 | 1245.6370        | 623.3221        | 1227.6264       | 614.3168         | V    | <b>539.2752</b>  | 270.1412        | 521.2516       | 261.1294         | 521.2646       | 261.1359         | 5  |
| 13 | 1375.6766        | 688.3419        | 1357.6660       | 679.3366         | E    | <b>439.2097</b>  | 220.1085        | 421.1861       | 211.0967         | 421.1991       | 211.1032         | 4  |
| 14 | 1477.7213        | 739.3643        | 1459.7107       | 730.3590         | T    | 309.1701         | 155.0887        | 291.1465       | 146.0769         | 291.1595       | 146.0834         | 3  |
| 15 | 1535.7398        | 768.3735        | 1517.7292       | 759.3683         | G    | 207.1254         | 104.0663        | 189.1018       | 95.0545          |                |                  | 2  |
| 16 |                  |                 |                 |                  | K    | 149.1069         | 75.0571         | 131.0833       | 66.0453          |                |                  | 1  |

# AT1G09310.1

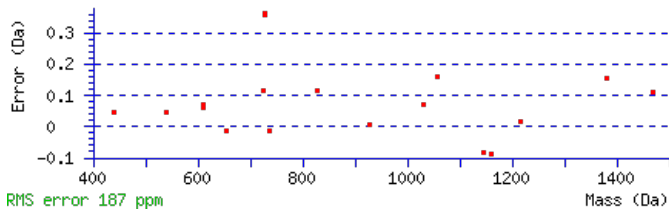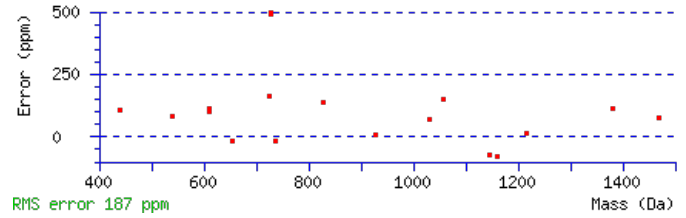

NCBI **BLAST** search of [LVSYGTEVTAIVETGK](#)

(Parameters: blastp, nr protein database, expect=20000, no filter, PAM30)

Other BLAST [web gateways](#)

## All matches to this query

| Score | Mr(calc)  | Delta   | Sequence                         |
|-------|-----------|---------|----------------------------------|
| 102.6 | 1682.8321 | 0.0006  | <a href="#">LVSYGTEVTAIVETGK</a> |
| 6.4   | 1682.8300 | 0.0026  | <a href="#">YRVLOGGIGIPNMK</a>   |
| 3.7   | 1682.8352 | -0.0026 | <a href="#">SVTSSRARIETSIPR</a>  |
| 3.5   | 1682.8293 | 0.0033  | <a href="#">TLTRFQTVSKHWR</a>    |
| 3.1   | 1682.8278 | 0.0048  | <a href="#">LKLSCNVTD SKLQR</a>  |
| 1.8   | 1682.8357 | -0.0030 | <a href="#">MRALEKLMASWISK</a>   |
| 0.8   | 1682.8278 | 0.0048  | <a href="#">LDGTMSLIARDRAVK</a>  |
| 0.8   | 1682.8370 | -0.0044 | <a href="#">LFLETFR L PGESQK</a> |
| 0.4   | 1682.8348 | -0.0022 | <a href="#">NPPLVEKAPSQNI EK</a> |

Mascot: <http://www.matrixscience.com/>

## Peptide View

MS/MS Fragmentation of **LEQYIYCSSAGVYLK**

Found in **AT1G09340.1** in **TAIR\_Arabidopsis**, Symbols: CRB | CRB; binding / catalytic / coenzyme binding | chr1:3015475-3018037 FORWARD

Match to Query 8487: 1792.866192 from(897.440372,2+) index(6731)

Title: Elution from: 60.467 to 60.467 scan no 8654 cid35.00 polarity:+

Data file D6h-2\_2.mgf

Click mouse within plot area to zoom in by factor of two about that point

Or,   to  Da

Label all possible matches  Label matches used for scoring

Show Y-axis

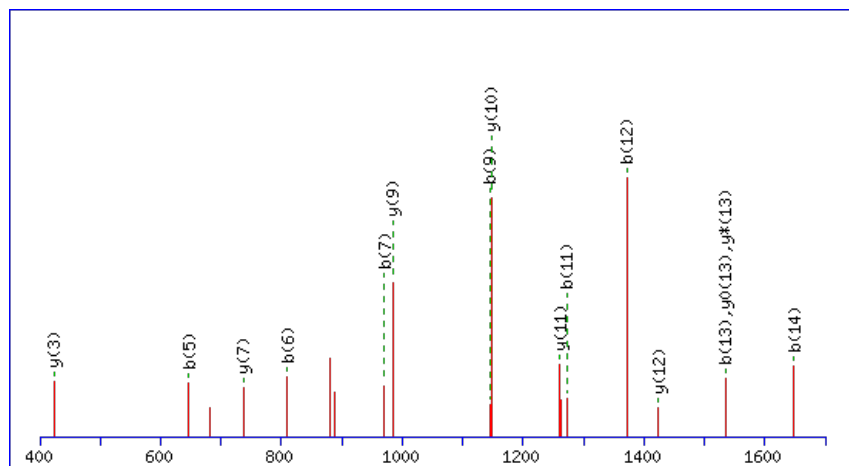

Monoisotopic mass of neutral peptide  $M_r(\text{calc})$ : 1792.8705

Fixed modifications: Carbamidomethyl (C) (apply to specified residues or termini only)

Ions Score: 87 Expect: 8.2e-009

Matches : 16/150 fragment ions using 17 most intense peaks ([help](#))

| #  | b         | b <sup>++</sup> | b*        | b <sup>*++</sup> | b <sup>0</sup> | b <sup>0++</sup> | Seq. | y         | y <sup>++</sup> | y*        | y <sup>*++</sup> | y <sup>0</sup> | y <sup>0++</sup> | #  |
|----|-----------|-----------------|-----------|------------------|----------------|------------------|------|-----------|-----------------|-----------|------------------|----------------|------------------|----|
| 1  | 114.0913  | 57.5493         |           |                  |                |                  | L    |           |                 |           |                  |                |                  | 15 |
| 2  | 243.1339  | 122.0706        |           |                  | 225.1234       | 113.0653         | E    | 1680.7938 | 840.9005        | 1663.7672 | 832.3873         | 1662.7832      | 831.8952         | 14 |
| 3  | 371.1925  | 186.0999        | 354.1660  | 177.5866         | 353.1819       | 177.0946         | Q    | 1551.7512 | 776.3792        | 1534.7246 | 767.8660         | 1533.7406      | 767.3740         | 13 |
| 4  | 534.2558  | 267.6316        | 517.2293  | 259.1183         | 516.2453       | 258.6263         | Y    | 1423.6926 | 712.3499        | 1406.6661 | 703.8367         | 1405.6821      | 703.3447         | 12 |
| 5  | 647.3399  | 324.1736        | 630.3134  | 315.6603         | 629.3293       | 315.1683         | I    | 1260.6293 | 630.8183        | 1243.6027 | 622.3050         | 1242.6187      | 621.8130         | 11 |
| 6  | 810.4032  | 405.7053        | 793.3767  | 397.1920         | 792.3927       | 396.7000         | Y    | 1147.5452 | 574.2762        | 1130.5187 | 565.7630         | 1129.5347      | 565.2710         | 10 |
| 7  | 970.4339  | 485.7206        | 953.4073  | 477.2073         | 952.4233       | 476.7153         | C    | 984.4819  | 492.7446        | 967.4553  | 484.2313         | 966.4713       | 483.7393         | 9  |
| 8  | 1057.4659 | 529.2366        | 1040.4394 | 520.7233         | 1039.4553      | 520.2313         | S    | 824.4512  | 412.7293        | 807.4247  | 404.2160         | 806.4407       | 403.7240         | 8  |
| 9  | 1144.4979 | 572.7526        | 1127.4714 | 564.2393         | 1126.4874      | 563.7473         | S    | 737.4192  | 369.2132        | 720.3927  | 360.7000         | 719.4087       | 360.2080         | 7  |
| 10 | 1215.5351 | 608.2712        | 1198.5085 | 599.7579         | 1197.5245      | 599.2659         | A    | 650.3872  | 325.6972        | 633.3606  | 317.1840         |                |                  | 6  |
| 11 | 1272.5565 | 636.7819        | 1255.5300 | 628.2686         | 1254.5460      | 627.7766         | G    | 579.3501  | 290.1787        | 562.3235  | 281.6654         |                |                  | 5  |
| 12 | 1371.6249 | 686.3161        | 1354.5984 | 677.8028         | 1353.6144      | 677.3108         | V    | 522.3286  | 261.6679        | 505.3021  | 253.1547         |                |                  | 4  |
| 13 | 1534.6883 | 767.8478        | 1517.6617 | 759.3345         | 1516.6777      | 758.8425         | Y    | 423.2602  | 212.1337        | 406.2336  | 203.6205         |                |                  | 3  |
| 14 | 1647.7723 | 824.3898        | 1630.7458 | 815.8765         | 1629.7618      | 815.3845         | L    | 260.1969  | 130.6021        | 243.1703  | 122.0888         |                |                  | 2  |
| 15 |           |                 |           |                  |                |                  | K    | 147.1128  | 74.0600         | 130.0863  | 65.5468          |                |                  | 1  |

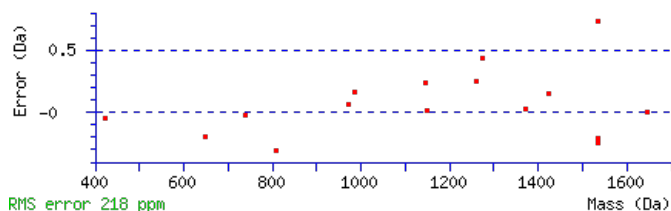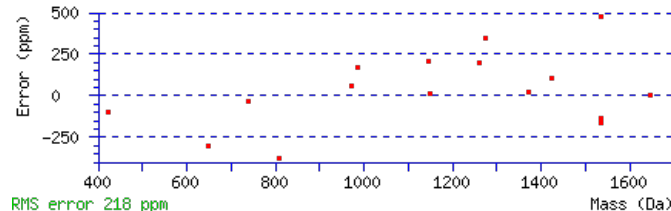

NCBI BLAST search of [LEQYIYCSSAGVYLK](#)

## AT1G09340.1

(Parameters: blastp, nr protein database, expect=20000, no filter, PAM30)

Other BLAST [web gateways](#)

### All matches to this query

| Score | Mr(calc)  | Delta   | Sequence                           |
|-------|-----------|---------|------------------------------------|
| 86.8  | 1792.8705 | -0.0044 | <a href="#">LEQYIYCSSAGVYLK</a>    |
| 6.3   | 1792.8699 | -0.0037 | <a href="#">MEAMNTINLLQSVGEK</a>   |
| 0.8   | 1792.8625 | 0.0037  | <a href="#">MISDSITNASATSAPTAR</a> |
| 0.5   | 1792.8699 | -0.0037 | <a href="#">MEAMNTINLLQSVGEK</a>   |

Mascot: <http://www.matrixscience.com/>



**Peptide View**MS/MS Fragmentation of **VG DYVDVK**Found in **AT1G09590.1** in **TAIR\_Arabidopsis**, Symbols: | 60S ribosomal protein L21 (RPL21A) | chr1:3106551-3107608 FORWARD

Match to Query 1492: 893.448626 from(447.731589,2+) index(1770)

Title: Elution from: 20.778 to 20.778 scan no 2275 cid35.00 polarity:+

Data file 0-2\_3.mgf

Click mouse within plot area to zoom in by factor of two about that point

Or,  to  Da Label all possible matches  Label matches used for scoring Show Y-axis 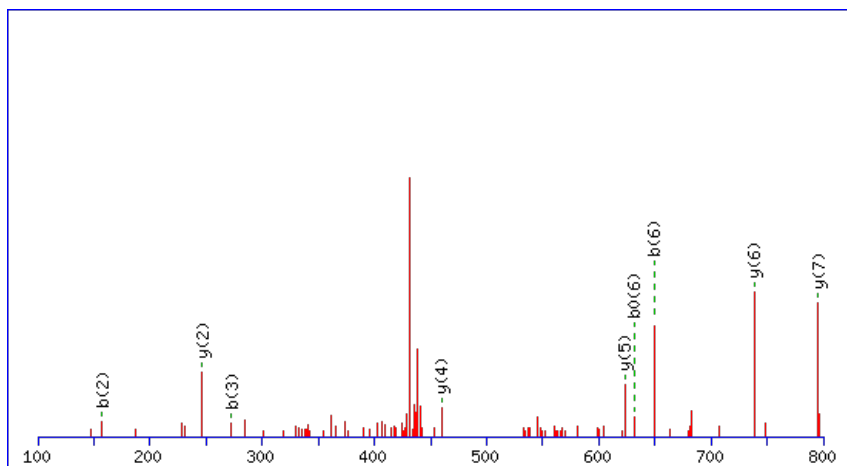Monoisotopic mass of neutral peptide **Mr(calc)**: 893.4495

Fixed modifications: Carbamidomethyl (C) (apply to specified residues or termini only)

Ions Score: 41 **Expect**: 0.00052Matches : 9/62 fragment ions using 14 most intense peaks ([help](#))

| # | b               | b <sup>++</sup> | b <sup>0</sup>  | b <sup>0++</sup> | Seq. | y               | y <sup>++</sup> | y*       | y <sup>*++</sup> | y <sup>0</sup> | y <sup>0++</sup> | # |
|---|-----------------|-----------------|-----------------|------------------|------|-----------------|-----------------|----------|------------------|----------------|------------------|---|
| 1 | 100.0757        | 50.5415         |                 |                  | V    |                 |                 |          |                  |                |                  | 8 |
| 2 | <b>157.0972</b> | 79.0522         |                 |                  | G    | <b>795.3883</b> | 398.1978        | 778.3618 | 389.6845         | 777.3777       | 389.1925         | 7 |
| 3 | <b>272.1241</b> | 136.5657        | 254.1135        | 127.5604         | D    | <b>738.3668</b> | 369.6871        | 721.3403 | 361.1738         | 720.3563       | 360.6818         | 6 |
| 4 | 435.1874        | 218.0974        | 417.1769        | 209.0921         | Y    | <b>623.3399</b> | 312.1736        | 606.3134 | 303.6603         | 605.3293       | 303.1683         | 5 |
| 5 | 534.2558        | 267.6316        | 516.2453        | 258.6263         | V    | <b>460.2766</b> | 230.6419        | 443.2500 | 222.1287         | 442.2660       | 221.6366         | 4 |
| 6 | <b>649.2828</b> | 325.1450        | <b>631.2722</b> | 316.1397         | D    | 361.2082        | 181.1077        | 344.1816 | 172.5944         | 343.1976       | 172.1024         | 3 |
| 7 | 748.3512        | 374.6792        | 730.3406        | 365.6740         | V    | <b>246.1812</b> | 123.5942        | 229.1547 | 115.0810         |                |                  | 2 |
| 8 |                 |                 |                 |                  | K    | 147.1128        | 74.0600         | 130.0863 | 65.5468          |                |                  | 1 |

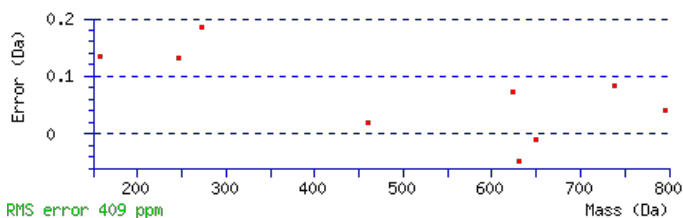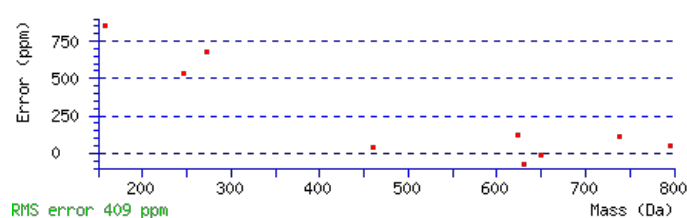NCBI **BLAST** search of **VG DYVDVK**

(Parameters: blastp, nr protein database, expect=20000, no filter, PAM30)

Other BLAST [web gateways](#)**All matches to this query**

| Score | Mr(calc) | Delta   | Sequence                  |
|-------|----------|---------|---------------------------|
| 41.2  | 893.4495 | -0.0008 | <a href="#">VG DYVDVK</a> |
| 21.5  | 893.4494 | -0.0008 | <a href="#">VGFEESVK</a>  |

## AT1G09590.1

|     |          |         |                          |
|-----|----------|---------|--------------------------|
| 6.3 | 893.4494 | -0.0008 | <a href="#">LNEEYVK</a>  |
| 5.3 | 893.4494 | -0.0008 | <a href="#">VGESDFLK</a> |
| 3.1 | 893.4508 | -0.0022 | <a href="#">RDFPGFR</a>  |

**Mascot:** <http://www.matrixscience.com/>

**Peptide View**MS/MS Fragmentation of **MTAIYTAGMMAR**

Found in **AT1G09610.1** in **TAIR\_Arabidopsis**, Symbols: | similar to unknown protein [Arabidopsis thaliana] (TAIR:AT4G09990.1); similar to hypothetical protein [Vitis vinifera] (GB:CAN78768.1); contains InterPro domain Protein of unknown function DUF579, plant (InterPro:IPR006514) | chr1:31117

Match to Query 4956: 1346.561892 from(674.288222,2+) index(9726)

Title: Elution from: 90.633 to 90.633 scan no 13630 cid35.00 polarity:+

Data file D6h-1\_3.mgf

Click mouse within plot area to zoom in by factor of two about that point

Or,   to  Da

Label all possible matches  Label matches used for scoring

Show Y-axis

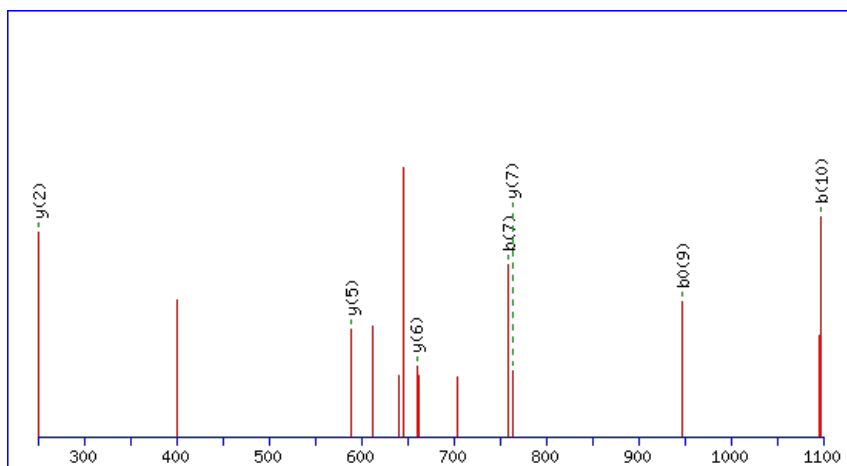

**Monoisotopic mass of neutral peptide Mr(calc):** 1346.5591

**Fixed modifications:** Carbamidomethyl (C) (apply to specified residues or termini only)

**Variable modifications:**

**M9** : Oxidation (M), with neutral losses 0.0000 (shown in table), 63.9983

**Ions Score:** 22 **Expect:** 0.022

**Matches** : 7/150 fragment ions using 13 most intense peaks ([help](#))

| #  | b                | b <sup>++</sup> | b <sup>0</sup>  | b <sup>0++</sup> | Seq. | y               | y <sup>++</sup> | y <sup>*</sup> | y <sup>*++</sup> | y <sup>0</sup> | y <sup>0++</sup> | #  |
|----|------------------|-----------------|-----------------|------------------|------|-----------------|-----------------|----------------|------------------|----------------|------------------|----|
| 1  | 133.0448         | 67.0260         |                 |                  | M    |                 |                 |                |                  |                |                  | 12 |
| 2  | 235.0895         | 118.0484        | 217.0789        | 109.0431         | T    | 1215.5289       | 608.2681        | 1197.5053      | 599.2563         | 1197.5183      | 599.2628         | 11 |
| 3  | 307.1237         | 154.0655        | 289.1131        | 145.0602         | A    | 1113.4842       | 557.2457        | 1095.4606      | 548.2339         | 1095.4736      | 548.2404         | 10 |
| 4  | 421.2048         | 211.1060        | 403.1942        | 202.1007         | I    | 1041.4500       | 521.2286        | 1023.4264      | 512.2169         | 1023.4395      | 512.2234         | 9  |
| 5  | 585.2651         | 293.1362        | 567.2546        | 284.1309         | Y    | 927.3689        | 464.1881        | 909.3453       | 455.1763         | 909.3584       | 455.1828         | 8  |
| 6  | 687.3098         | 344.1586        | 669.2993        | 335.1533         | T    | <b>763.3086</b> | 382.1579        | 745.2850       | 373.1461         | 745.2980       | 373.1526         | 7  |
| 7  | <b>759.3440</b>  | 380.1756        | 741.3334        | 371.1703         | A    | <b>661.2638</b> | 331.1356        | 643.2403       | 322.1238         |                |                  | 6  |
| 8  | 817.3625         | 409.1849        | 799.3519        | 400.1796         | G    | <b>589.2297</b> | 295.1185        | 571.2061       | 286.1067         |                |                  | 5  |
| 9  | 965.3949         | 483.2011        | <b>947.3844</b> | 474.1958         | M    | 531.2112        | 266.1092        | 513.1876       | 257.0974         |                |                  | 4  |
| 10 | <b>1097.4324</b> | 549.2199        | 1079.4219       | 540.2146         | M    | 383.1788        | 192.0930        | 365.1552       | 183.0812         |                |                  | 3  |
| 11 | 1169.4666        | 585.2369        | 1151.4560       | 576.2316         | A    | <b>251.1412</b> | 126.0743        | 233.1177       | 117.0625         |                |                  | 2  |
| 12 |                  |                 |                 |                  | R    | 179.1071        | 90.0572         | 161.0835       | 81.0454          |                |                  | 1  |

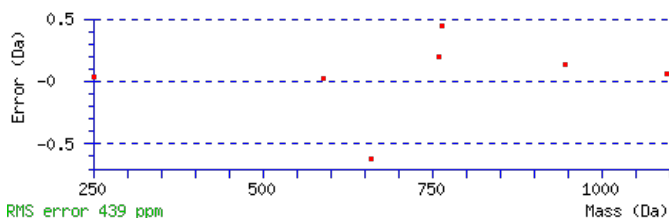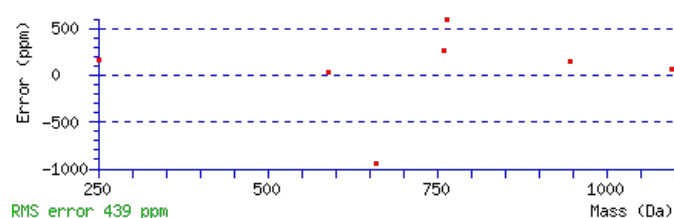

NCBI BLAST search of [MTAIYTAGMMAR](#)

## AT1G09610.1

(Parameters: blastp, nr protein database, expect=20000, no filter, PAM30)

Other BLAST [web gateways](#)

### All matches to this query

| Score | Mr(calc)  | Delta  | Sequence                      | Site Analysis        |
|-------|-----------|--------|-------------------------------|----------------------|
| 22.3  | 1346.5591 | 0.0028 | <a href="#">MTAIYTAGMMAR</a>  | Oxidation M9 56.95%  |
| 19.8  | 1346.5591 | 0.0028 | <a href="#">MTAIYTAGMMAR</a>  | Oxidation M10 32.02% |
| 15.2  | 1346.5591 | 0.0028 | <a href="#">MTAIYTAGMMAR</a>  | Oxidation M1 11.03%  |
| 3.5   | 1346.5583 | 0.0036 | <a href="#">SSAASSMISSEFK</a> |                      |
| 2.9   | 1346.5618 | 0.0001 | <a href="#">CKFMGCVKGAR</a>   |                      |
| 0.4   | 1346.5609 | 0.0010 | <a href="#">ERQSEMRSYK</a>    |                      |

Mascot: <http://www.matrixscience.com/>

**Peptide View**MS/MS Fragmentation of **ATGEGVQPQEYTLIK**Found in **AT1G09620.1** in **TAIR\_Arabidopsis**, Symbols: | ATP binding / aminoacyl-tRNA ligase | chr1:3113079-3116457 REVERSE

Match to Query 7157: 1650.786016 from(826.400284,2+) index(4477)

Title: Elution from: 42.187 to 42.187 scan no 5733 cid35.00 polarity:+

Data file D1d-2\_3.mgf

Click mouse within plot area to zoom in by factor of two about that point

Or,  to  Da Label all possible matches  Label matches used for scoring Show Y-axis 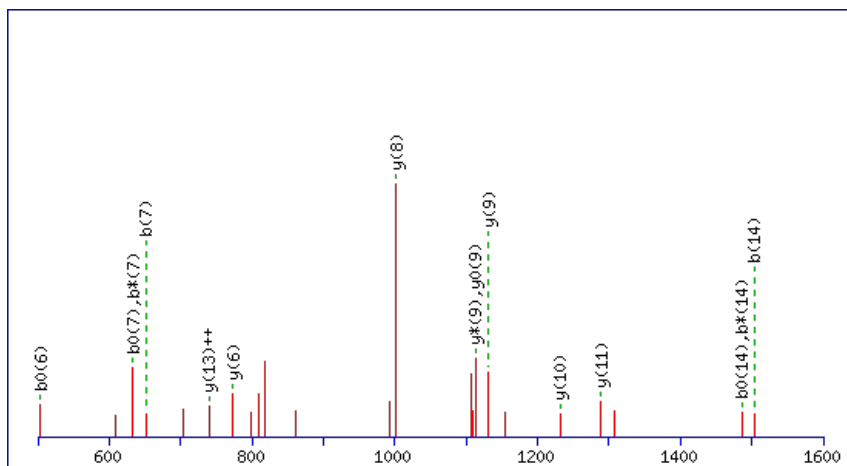**Monoisotopic mass of neutral peptide Mr(calc):** 1650.7825**Fixed modifications:** Carbamidomethyl (C) (apply to specified residues or termini only)**Ions Score:** 39 **Expect:** 0.0013**Matches:** 15/148 fragment ions using 16 most intense peaks ([help](#))

| #  | b         | b <sup>++</sup> | b*        | b <sup>*++</sup> | b <sup>0</sup> | b <sup>0++</sup> | Seq. | y         | y <sup>++</sup> | y*        | y <sup>*++</sup> | y <sup>0</sup> | y <sup>0++</sup> | #  |
|----|-----------|-----------------|-----------|------------------|----------------|------------------|------|-----------|-----------------|-----------|------------------|----------------|------------------|----|
| 1  | 73.0414   | 37.0244         |           |                  |                |                  | A    |           |                 |           |                  |                |                  | 15 |
| 2  | 175.0861  | 88.0467         |           |                  | 157.0756       | 79.0414          | T    | 1579.7557 | 790.3815        | 1561.7321 | 781.3697         | 1561.7451      | 781.3762         | 14 |
| 3  | 233.1046  | 117.0560        |           |                  | 215.0941       | 108.0507         | G    | 1477.7109 | 739.3591        | 1459.6874 | 730.3473         | 1459.7004      | 730.3538         | 13 |
| 4  | 363.1443  | 182.0758        |           |                  | 345.1337       | 173.0705         | E    | 1419.6924 | 710.3499        | 1401.6689 | 701.3381         | 1401.6819      | 701.3446         | 12 |
| 5  | 421.1628  | 211.0850        |           |                  | 403.1522       | 202.0797         | G    | 1289.6528 | 645.3300        | 1271.6292 | 636.3183         | 1271.6423      | 636.3248         | 11 |
| 6  | 521.2282  | 261.1177        |           |                  | 503.2176       | 252.1125         | V    | 1231.6343 | 616.3208        | 1213.6107 | 607.3090         | 1213.6238      | 607.3155         | 10 |
| 7  | 651.2809  | 326.1441        | 633.2573  | 317.1323         | 633.2703       | 317.1388         | Q    | 1131.5689 | 566.2881        | 1113.5453 | 557.2763         | 1113.5583      | 557.2828         | 9  |
| 8  | 749.3307  | 375.1690        | 731.3071  | 366.1572         | 731.3201       | 366.1637         | P    | 1001.5162 | 501.2617        | 983.4926  | 492.2500         | 983.5057       | 492.2565         | 8  |
| 9  | 879.3833  | 440.1953        | 861.3597  | 431.1835         | 861.3727       | 431.1900         | Q    | 903.4664  | 452.2369        | 885.4428  | 443.2251         | 885.4559       | 443.2316         | 7  |
| 10 | 1009.4229 | 505.2151        | 991.3994  | 496.2033         | 991.4124       | 496.2098         | E    | 773.4138  | 387.2105        | 755.3902  | 378.1987         | 755.4032       | 378.2052         | 6  |
| 11 | 1173.4833 | 587.2453        | 1155.4597 | 578.2335         | 1155.4727      | 578.2400         | Y    | 643.3741  | 322.1907        | 625.3506  | 313.1789         | 625.3636       | 313.1854         | 5  |
| 12 | 1275.5280 | 638.2676        | 1257.5044 | 629.2559         | 1257.5174      | 629.2624         | T    | 479.3138  | 240.1605        | 461.2902  | 231.1487         | 461.3032       | 231.1552         | 4  |
| 13 | 1389.6091 | 695.3082        | 1371.5855 | 686.2964         | 1371.5985      | 686.3029         | L    | 377.2691  | 189.1382        | 359.2455  | 180.1264         |                |                  | 3  |
| 14 | 1503.6902 | 752.3487        | 1485.6666 | 743.3370         | 1485.6796      | 743.3435         | I    | 263.1880  | 132.0976        | 245.1644  | 123.0858         |                |                  | 2  |
| 15 |           |                 |           |                  |                |                  | K    | 149.1069  | 75.0571         | 131.0833  | 66.0453          |                |                  | 1  |

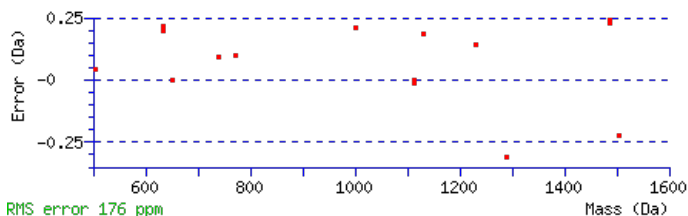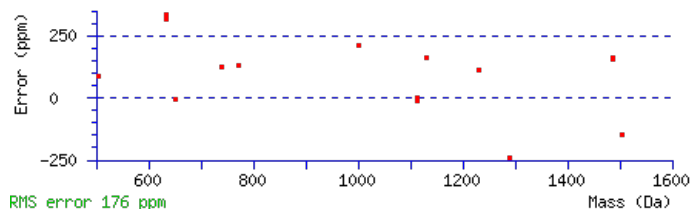NCBI **BLAST** search of **ATGEGVQPQEYTLIK**

## AT1G09620.1

(Parameters: blastp, nr protein database, expect=20000, no filter, PAM30)

Other BLAST [web gateways](#)

### All matches to this query

| Score | Mr(calc)  | Delta   | Sequence                        |
|-------|-----------|---------|---------------------------------|
| 38.7  | 1650.7825 | 0.0035  | <a href="#">ATGEGVQPQEYTLIK</a> |
| 11.8  | 1650.7906 | -0.0046 | <a href="#">LDTVSKELSSLDEAK</a> |
| 4.0   | 1650.7908 | -0.0048 | <a href="#">FVKSLVADMGNHVSK</a> |
| 1.8   | 1650.7881 | -0.0021 | <a href="#">ESIEWLVGVMEKSK</a>  |
| 1.2   | 1650.7852 | 0.0008  | <a href="#">TGINKGAIWDEISAR</a> |

Mascot: <http://www.matrixscience.com/>

## Peptide View

MS/MS Fragmentation of **VPVLETPEGSVVFESNAIAR**

Found in **AT1G09640.1** in **TAIR\_Arabidopsis**, Symbols: | elongation factor 1B-gamma, putative / eEF-1B gamma, putative | chr1:3120164-3122154  
FORWARD

Match to Query 9328: 2014.041088 from(1008.027820,2+) index(7862)

Title: Elution from: 70.045 to 70.045 scan no 10366 cid35.00 polarity:+

Data file D6h-1\_2.mgf

Click mouse within plot area to zoom in by factor of two about that point

Or,   to  Da

Label all possible matches  Label matches used for scoring

Show Y-axis

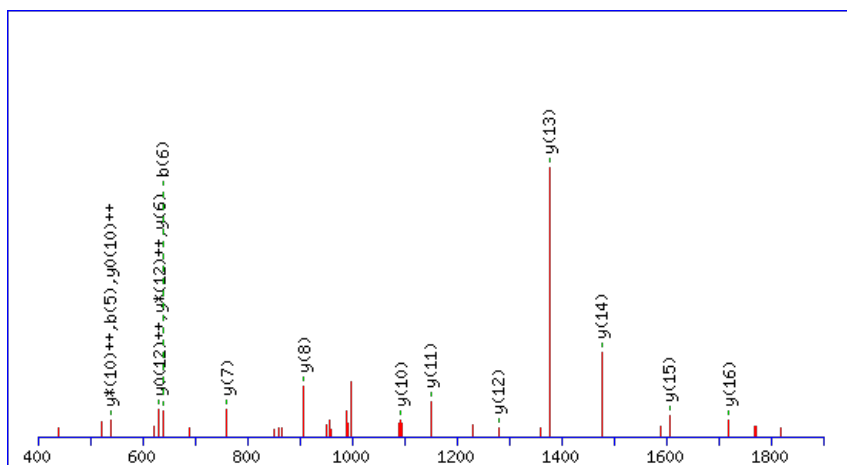

Monoisotopic mass of neutral peptide  $M_r(\text{calc})$ : 2014.0371

Fixed modifications: Carbamidomethyl (C) (apply to specified residues or termini only)

Ions Score: 96 Expect: 8.3e-010

Matches : 16/170 fragment ions using 14 most intense peaks ([help](#))

| #  | b         | b <sup>++</sup> | b*        | b <sup>*++</sup> | b <sup>0</sup> | b <sup>0++</sup> | Seq. | y         | y <sup>++</sup> | y*        | y <sup>*++</sup> | y <sup>0</sup> | y <sup>0++</sup> | #  |
|----|-----------|-----------------|-----------|------------------|----------------|------------------|------|-----------|-----------------|-----------|------------------|----------------|------------------|----|
| 1  | 100.0757  | 50.5415         |           |                  |                |                  | V    |           |                 |           |                  |                |                  | 19 |
| 2  | 197.1285  | 99.0679         |           |                  |                |                  | P    | 1915.9760 | 958.4916        | 1898.9494 | 949.9784         | 1897.9654      | 949.4863         | 18 |
| 3  | 296.1969  | 148.6021        |           |                  |                |                  | V    | 1818.9232 | 909.9652        | 1801.8967 | 901.4520         | 1800.9127      | 900.9600         | 17 |
| 4  | 409.2809  | 205.1441        |           |                  |                |                  | L    | 1719.8548 | 860.4310        | 1702.8283 | 851.9178         | 1701.8442      | 851.4258         | 16 |
| 5  | 538.3235  | 269.6654        |           |                  | 520.3130       | 260.6601         | E    | 1606.7707 | 803.8890        | 1589.7442 | 795.3757         | 1588.7602      | 794.8837         | 15 |
| 6  | 639.3712  | 320.1892        |           |                  | 621.3606       | 311.1840         | T    | 1477.7281 | 739.3677        | 1460.7016 | 730.8544         | 1459.7176      | 730.3624         | 14 |
| 7  | 736.4240  | 368.7156        |           |                  | 718.4134       | 359.7103         | P    | 1376.6805 | 688.8439        | 1359.6539 | 680.3306         | 1358.6699      | 679.8386         | 13 |
| 8  | 865.4666  | 433.2369        |           |                  | 847.4560       | 424.2316         | E    | 1279.6277 | 640.3175        | 1262.6012 | 631.8042         | 1261.6171      | 631.3122         | 12 |
| 9  | 922.4880  | 461.7477        |           |                  | 904.4775       | 452.7424         | G    | 1150.5851 | 575.7962        | 1133.5586 | 567.2829         | 1132.5745      | 566.7909         | 11 |
| 10 | 1009.5201 | 505.2637        |           |                  | 991.5095       | 496.2584         | S    | 1093.5636 | 547.2855        | 1076.5371 | 538.7722         | 1075.5531      | 538.2802         | 10 |
| 11 | 1108.5885 | 554.7979        |           |                  | 1090.5779      | 545.7926         | V    | 1006.5316 | 503.7694        | 989.5051  | 495.2562         | 988.5211       | 494.7642         | 9  |
| 12 | 1255.6569 | 628.3321        |           |                  | 1237.6463      | 619.3268         | F    | 907.4632  | 454.2352        | 890.4367  | 445.7220         | 889.4526       | 445.2300         | 8  |
| 13 | 1384.6995 | 692.8534        |           |                  | 1366.6889      | 683.8481         | E    | 760.3948  | 380.7010        | 743.3682  | 372.1878         | 742.3842       | 371.6958         | 7  |
| 14 | 1471.7315 | 736.3694        |           |                  | 1453.7209      | 727.3641         | S    | 631.3522  | 316.1797        | 614.3256  | 307.6665         | 613.3416       | 307.1745         | 6  |
| 15 | 1585.7744 | 793.3909        | 1568.7479 | 784.8776         | 1567.7639      | 784.3856         | N    | 544.3202  | 272.6637        | 527.2936  | 264.1504         |                |                  | 5  |
| 16 | 1656.8115 | 828.9094        | 1639.7850 | 820.3961         | 1638.8010      | 819.9041         | A    | 430.2772  | 215.6423        | 413.2507  | 207.1290         |                |                  | 4  |
| 17 | 1769.8956 | 885.4514        | 1752.8691 | 876.9382         | 1751.8850      | 876.4462         | I    | 359.2401  | 180.1237        | 342.2136  | 171.6104         |                |                  | 3  |
| 18 | 1840.9327 | 920.9700        | 1823.9062 | 912.4567         | 1822.9222      | 911.9647         | A    | 246.1561  | 123.5817        | 229.1295  | 115.0684         |                |                  | 2  |
| 19 |           |                 |           |                  |                |                  | R    | 175.1190  | 88.0631         | 158.0924  | 79.5498          |                |                  | 1  |

AT1G09640.1

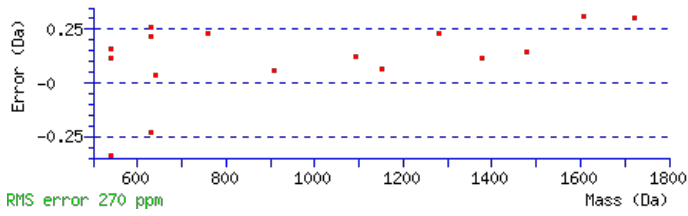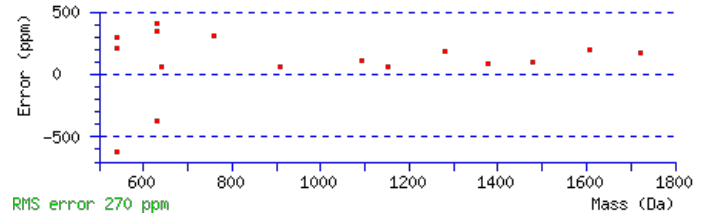

NCBI **BLAST** search of [VPVLETPEGSVFESNAIAR](#)  
(Parameters: blastp, nr protein database, expect=20000, no filter, PAM30)  
Other BLAST [web gateways](#)

**All matches to this query**

| Score | Mr(calc)  | Delta  | Sequence                            |
|-------|-----------|--------|-------------------------------------|
| 95.7  | 2014.0371 | 0.0040 | <a href="#">VPVLETPEGSVFESNAIAR</a> |

Mascot: <http://www.matrixscience.com/>



**Peptide View**MS/MS Fragmentation of **ITLHMTSLDLK**Found in **AT1G09750.1** in **TAIR\_Arabidopsis**, Symbols: | chloroplast nucleoid DNA-binding protein-related | chr1:3157543-3158962 FORWARD

Match to Query 4510: 1270.694895 from(424.572241,3+) index(5796)

Title: Elution from: 51.410 to 51.410 scan no 7367 cid35.00 polarity:+

Data file 0-1\_3.mgf

Click mouse within plot area to zoom in by factor of two about that point

Or,   to  Da Label all possible matches  Label matches used for scoring Show Y-axis 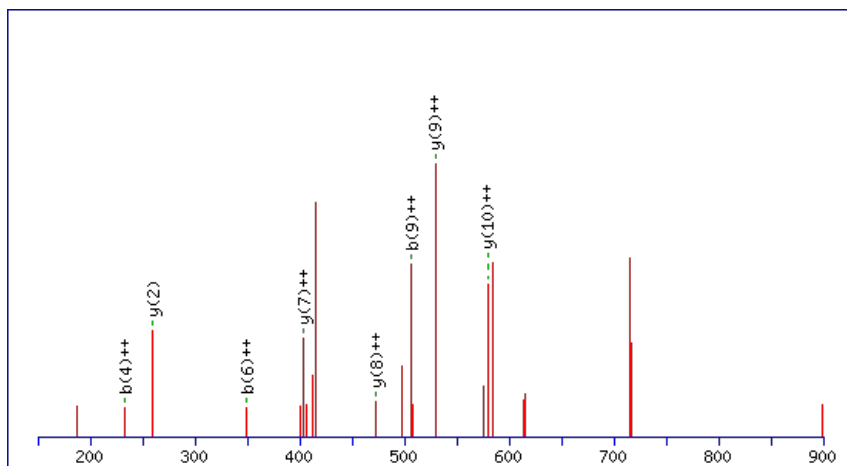Monoisotopic mass of neutral peptide  $M_r(\text{calc})$ : 1270.6955

Fixed modifications: Carbamidomethyl (C) (apply to specified residues or termini only)

Ions Score: 19 Expect: 0.028

Matches : 8/94 fragment ions using 17 most intense peaks ([help](#))

| #  | b         | b <sup>++</sup> | b <sup>0</sup> | b <sup>0++</sup> | Seq. | y         | y <sup>++</sup> | y*        | y <sup>*++</sup> | y <sup>0</sup> | y <sup>0++</sup> | #  |
|----|-----------|-----------------|----------------|------------------|------|-----------|-----------------|-----------|------------------|----------------|------------------|----|
| 1  | 114.0913  | 57.5493         |                |                  | I    |           |                 |           |                  |                |                  | 11 |
| 2  | 215.1390  | 108.0731        | 197.1285       | 99.0679          | T    | 1158.6187 | 579.8130        | 1141.5922 | 571.2997         | 1140.6082      | 570.8077         | 10 |
| 3  | 328.2231  | 164.6152        | 310.2125       | 155.6099         | L    | 1057.5710 | 529.2892        | 1040.5445 | 520.7759         | 1039.5605      | 520.2839         | 9  |
| 4  | 465.2820  | 233.1446        | 447.2714       | 224.1394         | H    | 944.4870  | 472.7471        | 927.4604  | 464.2339         | 926.4764       | 463.7418         | 8  |
| 5  | 596.3225  | 298.6649        | 578.3119       | 289.6596         | M    | 807.4281  | 404.2177        | 790.4015  | 395.7044         | 789.4175       | 395.2124         | 7  |
| 6  | 697.3702  | 349.1887        | 679.3596       | 340.1834         | T    | 676.3876  | 338.6974        | 659.3610  | 330.1842         | 658.3770       | 329.6921         | 6  |
| 7  | 784.4022  | 392.7047        | 766.3916       | 383.6994         | S    | 575.3399  | 288.1736        | 558.3134  | 279.6603         | 557.3293       | 279.1683         | 5  |
| 8  | 897.4863  | 449.2468        | 879.4757       | 440.2415         | L    | 488.3079  | 244.6576        | 471.2813  | 236.1443         | 470.2973       | 235.6523         | 4  |
| 9  | 1012.5132 | 506.7602        | 994.5026       | 497.7550         | D    | 375.2238  | 188.1155        | 358.1973  | 179.6023         | 357.2132       | 179.1103         | 3  |
| 10 | 1125.5973 | 563.3023        | 1107.5867      | 554.2970         | L    | 260.1969  | 130.6021        | 243.1703  | 122.0888         |                |                  | 2  |
| 11 |           |                 |                |                  | K    | 147.1128  | 74.0600         | 130.0863  | 65.5468          |                |                  | 1  |

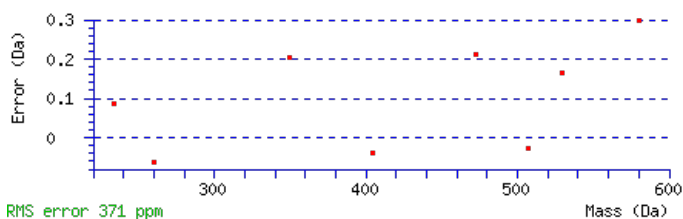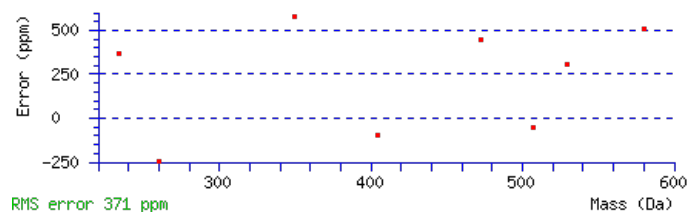NCBI BLAST search of **ITLHMTSLDLK**

(Parameters: blastp, nr protein database, expect=20000, no filter, PAM30)

Other BLAST [web gateways](#)

All matches to this query

AT1G09750.1

| Score | Mr(calc)  | Delta   | Sequence                    |
|-------|-----------|---------|-----------------------------|
| 19.1  | 1270.6955 | -0.0006 | <a href="#">ITLHMTSLDLK</a> |
| 0.7   | 1270.6962 | -0.0013 | <a href="#">VNTFESLIAFI</a> |

Mascot: <http://www.matrixscience.com/>


**Mascot Search Results**
**Peptide View**MS/MS Fragmentation of **MIFDAIEQVK**

Found in **AT1G09780.1** in **TAIR\_Arabidopsis**, Symbols: | 2,3-biphosphoglycerate-independent phosphoglycerate mutase, putative / phosphoglyceromutase, putative | chr1:3165552-3167814 REVERSE

Match to Query 4124: 1192.616488 from(597.315520,2+) index(7725)

Title: Elution from: 69.479 to 69.479 scan no 10134 cid35.00 polarity:+

Data file D6h-2\_1.mgf

Click mouse within plot area to zoom in by factor of two about that point

Or,   to  Da

Label all possible matches  Label matches used for scoring

Show Y-axis

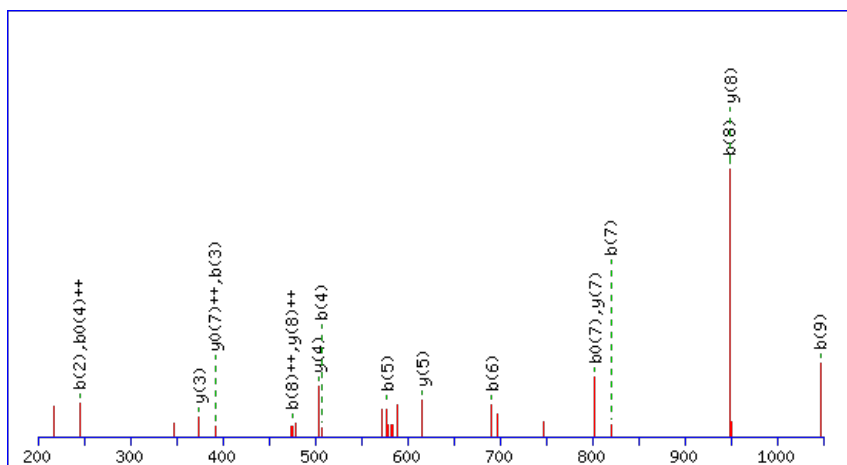

Monoisotopic mass of neutral peptide  $M_r(\text{calc})$ : 1192.6162

Fixed modifications: Carbamidomethyl (C) (apply to specified residues or termini only)

Ions Score: 62 Expect: 3e-006

Matches : 18/82 fragment ions using 24 most intense peaks ([help](#))

| #  | b                | b <sup>++</sup> | b*        | b <sup>*++</sup> | b <sup>0</sup>  | b <sup>0++</sup> | Seq. | y               | y <sup>++</sup> | y*        | y <sup>*++</sup> | y <sup>0</sup> | y <sup>0++</sup> | #  |
|----|------------------|-----------------|-----------|------------------|-----------------|------------------|------|-----------------|-----------------|-----------|------------------|----------------|------------------|----|
| 1  | 132.0478         | 66.5275         |           |                  |                 |                  | M    |                 |                 |           |                  |                |                  | 10 |
| 2  | <b>245.1318</b>  | 123.0696        |           |                  |                 |                  | I    | 1062.5830       | 531.7951        | 1045.5564 | 523.2819         | 1044.5724      | 522.7898         | 9  |
| 3  | <b>392.2002</b>  | 196.6038        |           |                  |                 |                  | F    | <b>949.4989</b> | <b>475.2531</b> | 932.4724  | 466.7398         | 931.4884       | 466.2478         | 8  |
| 4  | <b>507.2272</b>  | 254.1172        |           |                  | 489.2166        | <b>245.1119</b>  | D    | <b>802.4305</b> | 401.7189        | 785.4040  | 393.2056         | 784.4199       | <b>392.7136</b>  | 7  |
| 5  | <b>578.2643</b>  | 289.6358        |           |                  | 560.2537        | 280.6305         | A    | 687.4036        | 344.2054        | 670.3770  | 335.6921         | 669.3930       | 335.2001         | 6  |
| 6  | <b>691.3484</b>  | 346.1778        |           |                  | 673.3378        | 337.1725         | I    | <b>616.3665</b> | 308.6869        | 599.3399  | 300.1736         | 598.3559       | 299.6816         | 5  |
| 7  | <b>820.3910</b>  | 410.6991        |           |                  | <b>802.3804</b> | 401.6938         | E    | <b>503.2824</b> | 252.1448        | 486.2558  | 243.6316         | 485.2718       | 243.1395         | 4  |
| 8  | <b>948.4495</b>  | <b>474.7284</b> | 931.4230  | 466.2151         | 930.4390        | 465.7231         | Q    | <b>374.2398</b> | 187.6235        | 357.2132  | 179.1103         |                |                  | 3  |
| 9  | <b>1047.5179</b> | 524.2626        | 1030.4914 | 515.7493         | 1029.5074       | 515.2573         | V    | 246.1812        | 123.5942        | 229.1547  | 115.0810         |                |                  | 2  |
| 10 |                  |                 |           |                  |                 |                  | K    | 147.1128        | 74.0600         | 130.0863  | 65.5468          |                |                  | 1  |

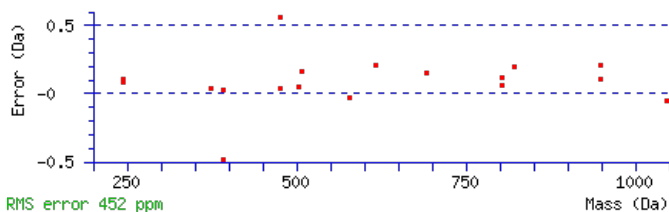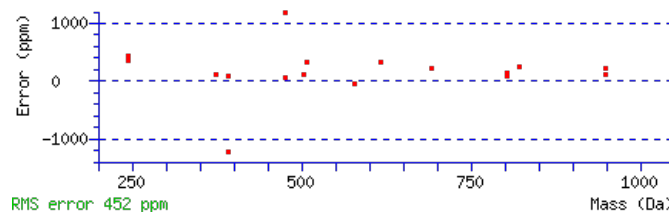

NCBI BLAST search of **MIFDAIEQVK**

(Parameters: blastp, nr protein database, expect=20000, no filter, PAM30)

Other BLAST [web gateways](#)

All matches to this query

## AT1G09780.1

| Score | Mr(calc)  | Delta   | Sequence                     |
|-------|-----------|---------|------------------------------|
| 62.2  | 1192.6162 | 0.0003  | <a href="#">MIFDAIEQVK</a>   |
| 14.8  | 1192.6196 | -0.0031 | <a href="#">LMLEVL MAGGK</a> |
| 11.1  | 1192.6200 | -0.0035 | <a href="#">DEFRETRLK</a>    |
| 7.8   | 1192.6200 | -0.0035 | <a href="#">ESDRFOGVKK</a>   |
| 6.5   | 1192.6162 | 0.0003  | <a href="#">EPFNIMSIVK</a>   |
| 3.7   | 1192.6160 | 0.0005  | <a href="#">VDTRRSSASK</a>   |
| 3.5   | 1192.6160 | 0.0005  | <a href="#">GGRKTGASSASK</a> |
| 2.1   | 1192.6187 | -0.0022 | <a href="#">ATTGLSESTLI</a>  |

Mascot: <http://www.matrixscience.com/>


**Mascot Search Results**
**Peptide View**MS/MS Fragmentation of **EEKLPPGSYEKAR**Found in **AT1G09870.1** in **TAIR\_Arabidopsis**, Symbols: | histidine acid phosphatase family protein | chr1:3205819-3208446 FORWARD

Match to Query 6686: 1520.721488 from(761.368020,2+) index(6132)

Title: Elution from: 54.573 to 54.573 scan no 7774 cid35.00 polarity:+

Data file D12h-3\_1.mgf

Click mouse within plot area to zoom in by factor of two about that point

Or,   to  Da Label all possible matches  Label matches used for scoring Show Y-axis 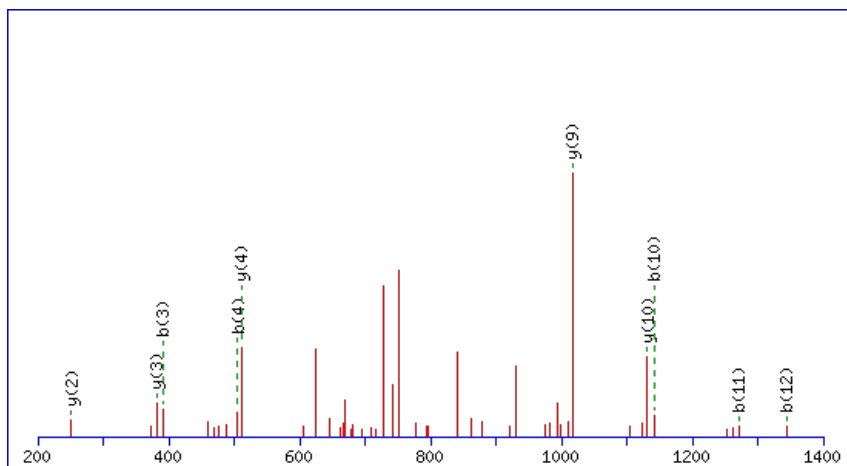Monoisotopic mass of neutral peptide  $M_r(\text{calc})$ : 1520.7195

Fixed modifications: Carbamidomethyl (C) (apply to specified residues or termini only)

Ions Score: 35 Expect: 0.0036

Matches : 10/134 fragment ions using 19 most intense peaks ([help](#))

| #  | b                | b <sup>++</sup> | b*        | b <sup>*++</sup> | b <sup>0</sup> | b <sup>0++</sup> | Seq. | y                | y <sup>++</sup> | y*        | y <sup>*++</sup> | y <sup>0</sup> | y <sup>0++</sup> | #  |
|----|------------------|-----------------|-----------|------------------|----------------|------------------|------|------------------|-----------------|-----------|------------------|----------------|------------------|----|
| 1  | 131.0469         | 66.0271         |           |                  | 113.0363       | 57.0218          | E    |                  |                 |           |                  |                |                  | 13 |
| 2  | 261.0865         | 131.0469        |           |                  | 243.0760       | 122.0416         | E    | 1391.6872        | 696.3472        | 1373.6636 | 687.3354         | 1373.6766      | 687.3419         | 12 |
| 3  | <b>391.1756</b>  | 196.0914        | 373.1520  | 187.0796         | 373.1650       | 187.0861         | K    | 1261.6476        | 631.3274        | 1243.6240 | 622.3156         | 1243.6370      | 622.3221         | 11 |
| 4  | <b>505.2567</b>  | 253.1320        | 487.2331  | 244.1202         | 487.2461       | 244.1267         | L    | <b>1131.5585</b> | 566.2829        | 1113.5349 | 557.2711         | 1113.5480      | 557.2776         | 10 |
| 5  | 603.3065         | 302.1569        | 585.2829  | 293.1451         | 585.2959       | 293.1516         | P    | <b>1017.4774</b> | 509.2424        | 999.4538  | 500.2306         | 999.4669       | 500.2371         | 9  |
| 6  | 701.3563         | 351.1818        | 683.3327  | 342.1700         | 683.3457       | 342.1765         | P    | 919.4276         | 460.2175        | 901.4040  | 451.2057         | 901.4171       | 451.2122         | 8  |
| 7  | 759.3748         | 380.1910        | 741.3512  | 371.1792         | 741.3642       | 371.1857         | G    | 821.3778         | 411.1926        | 803.3542  | 402.1808         | 803.3673       | 402.1873         | 7  |
| 8  | 847.4038         | 424.2056        | 829.3802  | 415.1938         | 829.3933       | 415.2003         | S    | 763.3593         | 382.1833        | 745.3357  | 373.1715         | 745.3488       | 373.1780         | 6  |
| 9  | 1011.4642        | 506.2357        | 993.4406  | 497.2239         | 993.4536       | 497.2304         | Y    | 675.3303         | 338.1688        | 657.3067  | 329.1570         | 657.3197       | 329.1635         | 5  |
| 10 | <b>1141.5038</b> | 571.2555        | 1123.4802 | 562.2438         | 1123.4933      | 562.2503         | E    | <b>511.2699</b>  | 256.1386        | 493.2463  | 247.1268         | 493.2593       | 247.1333         | 4  |
| 11 | <b>1271.5928</b> | 636.3001        | 1253.5693 | 627.2883         | 1253.5823      | 627.2948         | K    | <b>381.2303</b>  | 191.1188        | 363.2067  | 182.1070         |                |                  | 3  |
| 12 | <b>1343.6270</b> | 672.3171        | 1325.6034 | 663.3053         | 1325.6164      | 663.3119         | A    | <b>251.1412</b>  | 126.0743        | 233.1177  | 117.0625         |                |                  | 2  |
| 13 |                  |                 |           |                  |                |                  | R    | 179.1071         | 90.0572         | 161.0835  | 81.0454          |                |                  | 1  |

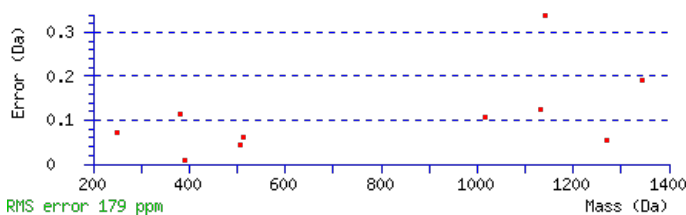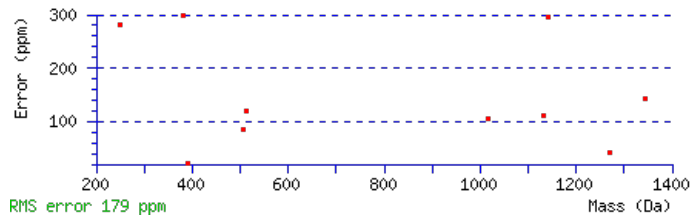NCBI **BLAST** search of **EEKLPPGSYEKAR**

(Parameters: blastp, nr protein database, expect=20000, no filter, PAM30)

Other BLAST [web gateways](#)

**AT1G09870.1**

All matches to this query

| Score | Mr(calc)  | Delta   | Sequence                       |
|-------|-----------|---------|--------------------------------|
| 34.7  | 1520.7195 | 0.0019  | <a href="#">EEKLPPGSYEKAR</a>  |
| 24.9  | 1520.7252 | -0.0037 | <a href="#">EAWLSSINLAICK</a>  |
| 18.4  | 1520.7240 | -0.0025 | <a href="#">FTHLSPVWYDLK</a>   |
| 13.4  | 1520.7222 | -0.0007 | <a href="#">DGPTYLSHKKGAAR</a> |
| 8.9   | 1520.7195 | 0.0020  | <a href="#">RPDLNSTLFDPK</a>   |
| 7.7   | 1520.7200 | 0.0015  | <a href="#">EGNRIQNAIESLR</a>  |
| 7.6   | 1520.7256 | -0.0041 | <a href="#">CSIREHLTKQK</a>    |
| 5.8   | 1520.7229 | -0.0014 | <a href="#">EKSLPKLSMEAR</a>   |
| 5.5   | 1520.7249 | -0.0034 | <a href="#">RGFATHPRSAER</a>   |
| 5.0   | 1520.7218 | -0.0003 | <a href="#">YAEAFPLQLSHTK</a>  |

Mascot: <http://www.matrixscience.com/>

## Peptide View

MS/MS Fragmentation of **VPYKTVLK**

Found in **AT1G10290.1** in **TAIR\_Arabidopsis**, Symbols: DRP2A, ADL6 | ADL6 (DYNAMIN-LIKE PROTEIN 6) | chr1:3370776-3377122  
FORWARD

Match to Query 2240: 956.553294 from(479.283923,2+) index(5285)

Title: Elution from: 47.486 to 47.486 scan no 6616 cid35.00 polarity:+

Data file C7-2\_1.mgf

Click mouse within plot area to zoom in by factor of two about that point

Or,   to  Da

Label all possible matches  Label matches used for scoring

Show Y-axis

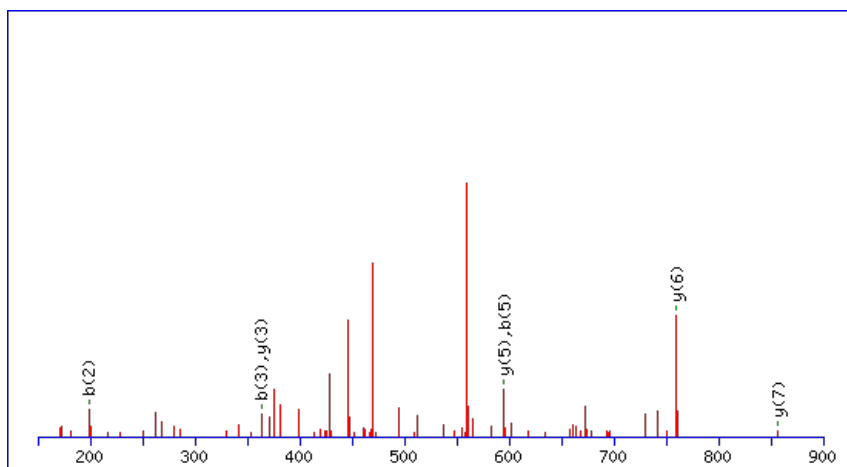

Monoisotopic mass of neutral peptide  $M_r(\text{calc})$ : 956.5555

Fixed modifications: Carbamidomethyl (C) (apply to specified residues or termini only)

Ions Score: 31 Expect: 0.0036

Matches : 7/64 fragment ions using 7 most intense peaks ([help](#))

| # | b               | b <sup>++</sup> | b*       | b <sup>*++</sup> | b <sup>0</sup> | b <sup>0++</sup> | Seq. | y               | y <sup>++</sup> | y*       | y <sup>*++</sup> | y <sup>0</sup> | y <sup>0++</sup> | # |
|---|-----------------|-----------------|----------|------------------|----------------|------------------|------|-----------------|-----------------|----------|------------------|----------------|------------------|---|
| 1 | 101.0727        | 51.0400         |          |                  |                |                  | V    |                 |                 |          |                  |                |                  | 8 |
| 2 | <b>199.1225</b> | 100.0649        |          |                  |                |                  | P    | <b>857.4973</b> | 429.2523        | 839.4737 | 420.2405         | 839.4868       | 420.2470         | 7 |
| 3 | <b>363.1829</b> | 182.0951        |          |                  |                |                  | Y    | <b>759.4475</b> | 380.2274        | 741.4239 | 371.2156         | 741.4370       | 371.2221         | 6 |
| 4 | 493.2719        | 247.1396        | 475.2483 | 238.1278         |                |                  | K    | <b>595.3872</b> | 298.1972        | 577.3636 | 289.1854         | 577.3766       | 289.1919         | 5 |
| 5 | <b>595.3166</b> | 298.1620        | 577.2930 | 289.1502         | 577.3061       | 289.1567         | T    | 465.2981        | 233.1527        | 447.2746 | 224.1409         | 447.2876       | 224.1474         | 4 |
| 6 | 695.3821        | 348.1947        | 677.3585 | 339.1829         | 677.3715       | 339.1894         | V    | <b>363.2534</b> | 182.1303        | 345.2298 | 173.1186         |                |                  | 3 |
| 7 | 809.4632        | 405.2352        | 791.4396 | 396.2234         | 791.4526       | 396.2299         | L    | 263.1880        | 132.0976        | 245.1644 | 123.0858         |                |                  | 2 |
| 8 |                 |                 |          |                  |                |                  | K    | 149.1069        | 75.0571         | 131.0833 | 66.0453          |                |                  | 1 |

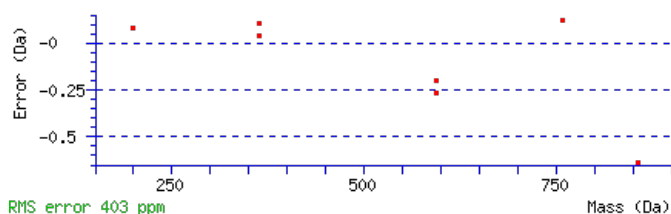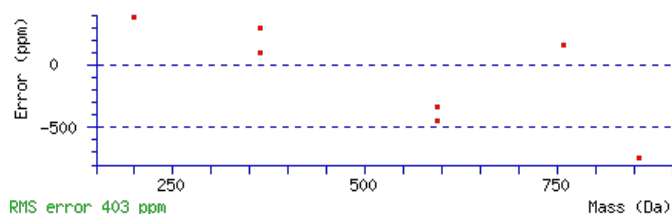

NCBI BLAST search of [VPYKTVLK](#)

(Parameters: blastp, nr protein database, expect=20000, no filter, PAM30)

Other BLAST [web gateways](#)

All matches to this query

| Score | $M_r(\text{calc})$ | Delta   | Sequence                 |
|-------|--------------------|---------|--------------------------|
| 30.9  | 956.5555           | -0.0022 | <a href="#">VPYKTVLK</a> |





**Peptide View**MS/MS Fragmentation of **LNDPAEQER**Found in **AT1G10320.1** in **TAIR\_Arabidopsis**, Symbols: | U2 snRNP auxiliary factor-related | chr1:3384166-3388375 REVERSE

Match to Query 3180: 1070.500914 from(536.257733,2+) index(3214)

Title: Elution from: 32.367 to 32.367 scan no 4008 cid35.00 polarity:+

Data file D12h-3\_1.mgf

Click mouse within plot area to zoom in by factor of two about that point

Or,   to  Da Label all possible matches  Label matches used for scoring Show Y-axis 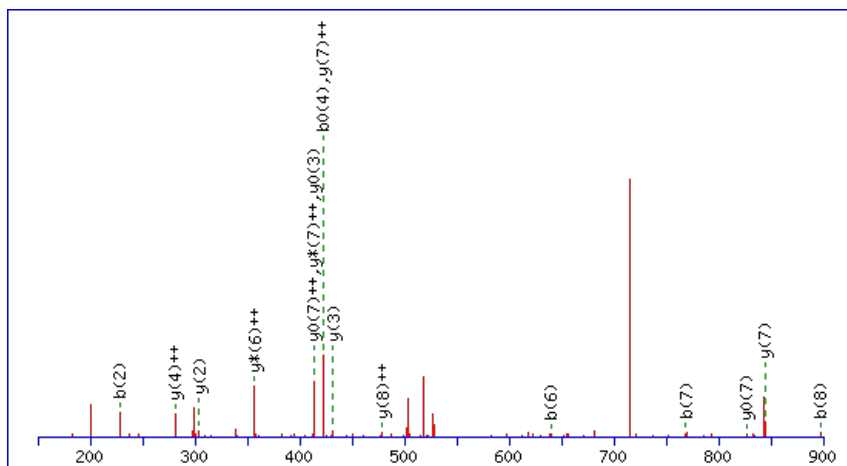

Monoisotopic mass of neutral peptide Mr(calc): 1070.4992

Fixed modifications: Carbamidomethyl (C) (apply to specified residues or termini only)

Ions Score: 17 Expect: 0.046

Matches : 16/88 fragment ions using 36 most intense peaks ([help](#))

| # | b               | b <sup>++</sup> | b*       | b <sup>*++</sup> | b <sup>0</sup>  | b <sup>0++</sup> | Seq. | y               | y <sup>++</sup> | y*       | y <sup>*++</sup> | y <sup>0</sup>  | y <sup>0++</sup> | # |
|---|-----------------|-----------------|----------|------------------|-----------------|------------------|------|-----------------|-----------------|----------|------------------|-----------------|------------------|---|
| 1 | 114.0913        | 57.5493         |          |                  |                 |                  | L    |                 |                 |          |                  |                 |                  | 9 |
| 2 | <b>228.1343</b> | 114.5708        | 211.1077 | 106.0575         |                 |                  | N    | 958.4225        | <b>479.7149</b> | 941.3959 | 471.2016         | 940.4119        | 470.7096         | 8 |
| 3 | 343.1612        | 172.0842        | 326.1347 | 163.5710         | 325.1506        | 163.0790         | D    | <b>844.3795</b> | <b>422.6934</b> | 827.3530 | <b>414.1801</b>  | <b>826.3690</b> | <b>413.6881</b>  | 7 |
| 4 | 440.2140        | 220.6106        | 423.1874 | 212.0974         | <b>422.2034</b> | 211.6053         | P    | 729.3526        | 365.1799        | 712.3260 | <b>356.6667</b>  | 711.3420        | 356.1747         | 6 |
| 5 | 511.2511        | 256.1292        | 494.2245 | 247.6159         | 493.2405        | 247.1239         | A    | 632.2998        | 316.6536        | 615.2733 | 308.1403         | 614.2893        | 307.6483         | 5 |
| 6 | <b>640.2937</b> | 320.6505        | 623.2671 | 312.1372         | 622.2831        | 311.6452         | E    | 561.2627        | <b>281.1350</b> | 544.2362 | 272.6217         | 543.2522        | 272.1297         | 4 |
| 7 | <b>768.3523</b> | 384.6798        | 751.3257 | 376.1665         | 750.3417        | 375.6745         | Q    | <b>432.2201</b> | 216.6137        | 415.1936 | 208.1004         | <b>414.2096</b> | 207.6084         | 3 |
| 8 | <b>897.3949</b> | 449.2011        | 880.3683 | 440.6878         | 879.3843        | 440.1958         | E    | <b>304.1615</b> | 152.5844        | 287.1350 | 144.0711         | 286.1510        | 143.5791         | 2 |
| 9 |                 |                 |          |                  |                 |                  | R    | 175.1190        | 88.0631         | 158.0924 | 79.5498          |                 |                  | 1 |

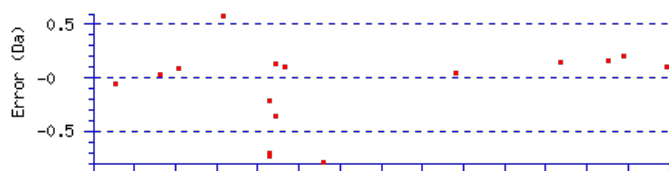

RMS error 902 ppm

Mass (Da)

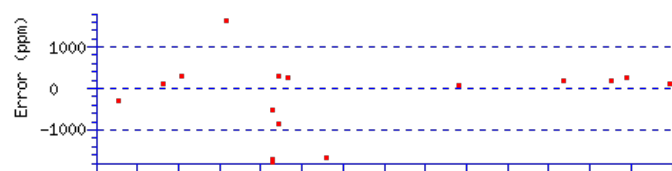

RMS error 902 ppm

Mass (Da)

NCBI BLAST search of [LNDPAEQER](#)

(Parameters: blastp, nr protein database, expect=20000, no filter, PAM30)

Other BLAST [web gateways](#)**All matches to this query**

| Score | Mr(calc)  | Delta  | Sequence                  |
|-------|-----------|--------|---------------------------|
| 17.4  | 1070.4992 | 0.0017 | <a href="#">LNDPAEQER</a> |

AT1G10320.1

|     |           |         |                          |
|-----|-----------|---------|--------------------------|
| 3.1 | 1070.5033 | -0.0024 | <a href="#">DQIYDVYR</a> |
|-----|-----------|---------|--------------------------|

**Mascot:** <http://www.matrixscience.com/>

**Peptide View**MS/MS Fragmentation of **AVIAQLEEGNAFLEK**

Found in **AT1G10370.1** in **TAIR\_Arabidopsis**, Symbols: GST30, ATGSTU17, GST30B, ERD9 | ATGSTU17/ERD9/GST30/GST30B (EARLY-RESPONSIVE TO DEHYDRATION 9); glutathione transferase | chr1:3397446-3398274 REVERSE

Match to Query 7531: 1630.858772 from(816.436662,2+) index(7703)

Title: Elution from: 66.804 to 66.804 scan no 10028 cid35.00 polarity:+

Data file D1d-3\_2.mgf

Click mouse within plot area to zoom in by factor of two about that point

Or,  to  Da

Label all possible matches  Label matches used for scoring

Show Y-axis

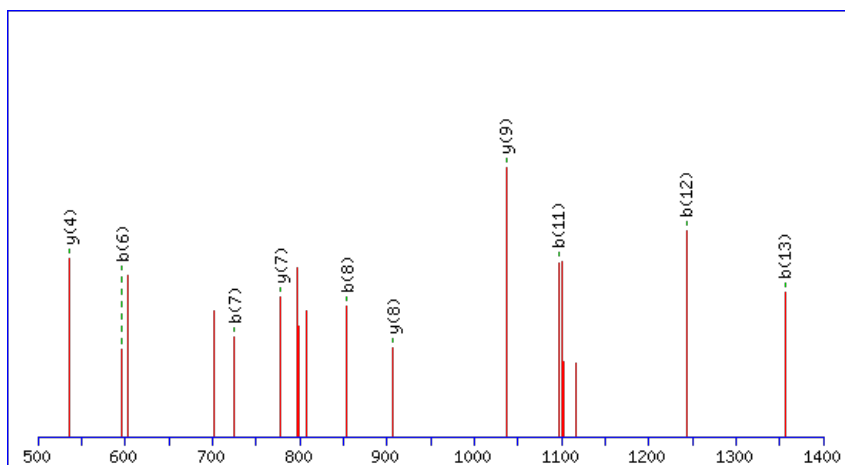

Monoisotopic mass of neutral peptide  $M_r(\text{calc})$ : 1630.8566

Fixed modifications: Carbamidomethyl (C) (apply to specified residues or termini only)

Ions Score: 46 Expect: 9.2e-005

Matches : 10/146 fragment ions using 15 most intense peaks [\(help\)](#)

| #  | b                | b <sup>++</sup> | b*        | b <sup>*++</sup> | b <sup>0</sup> | b <sup>0++</sup> | Seq. | y                | y <sup>++</sup> | y*        | y <sup>*++</sup> | y <sup>0</sup> | y <sup>0++</sup> | #  |
|----|------------------|-----------------|-----------|------------------|----------------|------------------|------|------------------|-----------------|-----------|------------------|----------------|------------------|----|
| 1  | 72.0444          | 36.5258         |           |                  |                |                  | A    |                  |                 |           |                  |                |                  | 15 |
| 2  | 171.1128         | 86.0600         |           |                  |                |                  | V    | 1560.8268        | 780.9170        | 1543.8003 | 772.4038         | 1542.8162      | 771.9118         | 14 |
| 3  | 284.1969         | 142.6021        |           |                  |                |                  | I    | 1461.7584        | 731.3828        | 1444.7318 | 722.8696         | 1443.7478      | 722.3775         | 13 |
| 4  | 355.2340         | 178.1206        |           |                  |                |                  | A    | 1348.6743        | 674.8408        | 1331.6478 | 666.3275         | 1330.6638      | 665.8355         | 12 |
| 5  | 483.2926         | 242.1499        | 466.2660  | 233.6366         |                |                  | Q    | 1277.6372        | 639.3222        | 1260.6107 | 630.8090         | 1259.6266      | 630.3170         | 11 |
| 6  | <b>596.3766</b>  | 298.6920        | 579.3501  | 290.1787         |                |                  | L    | 1149.5786        | 575.2930        | 1132.5521 | 566.7797         | 1131.5681      | 566.2877         | 10 |
| 7  | <b>725.4192</b>  | 363.2132        | 708.3927  | 354.7000         | 707.4087       | 354.2080         | E    | <b>1036.4946</b> | 518.7509        | 1019.4680 | 510.2376         | 1018.4840      | 509.7456         | 9  |
| 8  | <b>854.4618</b>  | 427.7345        | 837.4353  | 419.2213         | 836.4512       | 418.7293         | E    | <b>907.4520</b>  | 454.2296        | 890.4254  | 445.7164         | 889.4414       | 445.2243         | 8  |
| 9  | 911.4833         | 456.2453        | 894.4567  | 447.7320         | 893.4727       | 447.2400         | G    | <b>778.4094</b>  | 389.7083        | 761.3828  | 381.1951         | 760.3988       | 380.7030         | 7  |
| 10 | 1025.5262        | 513.2667        | 1008.4997 | 504.7535         | 1007.5156      | 504.2615         | N    | 721.3879         | 361.1976        | 704.3614  | 352.6843         | 703.3774       | 352.1923         | 6  |
| 11 | <b>1096.5633</b> | 548.7853        | 1079.5368 | 540.2720         | 1078.5528      | 539.7800         | A    | 607.3450         | 304.1761        | 590.3184  | 295.6629         | 589.3344       | 295.1709         | 5  |
| 12 | <b>1243.6317</b> | 622.3195        | 1226.6052 | 613.8062         | 1225.6212      | 613.3142         | F    | <b>536.3079</b>  | 268.6576        | 519.2813  | 260.1443         | 518.2973       | 259.6523         | 4  |
| 13 | <b>1356.7158</b> | 678.8615        | 1339.6892 | 670.3483         | 1338.7052      | 669.8563         | L    | 389.2395         | 195.1234        | 372.2129  | 186.6101         | 371.2289       | 186.1181         | 3  |
| 14 | 1485.7584        | 743.3828        | 1468.7318 | 734.8696         | 1467.7478      | 734.3775         | E    | 276.1554         | 138.5813        | 259.1288  | 130.0681         | 258.1448       | 129.5761         | 2  |
| 15 |                  |                 |           |                  |                |                  | K    | 147.1128         | 74.0600         | 130.0863  | 65.5468          |                |                  | 1  |

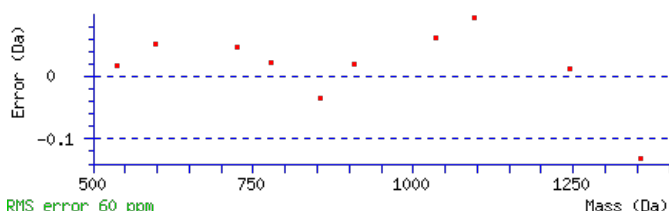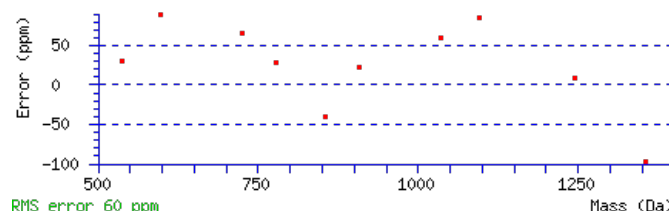

## AT1G10370.1

NCBI **BLAST** search of [AVIAQLEEGNAFLEK](#)

(Parameters: blastp, nr protein database, expect=20000, no filter, PAM30)

Other BLAST [web gateways](#)

### All matches to this query

| Score | Mr(calc)  | Delta   | Sequence                        |
|-------|-----------|---------|---------------------------------|
| 46.2  | 1630.8566 | 0.0022  | <a href="#">AVIAQLEEGNAFLEK</a> |
| 12.0  | 1630.8600 | -0.0012 | <a href="#">QLQEKINMLELEK</a>   |

**Mascot:** <http://www.matrixscience.com/>

**Peptide View**MS/MS Fragmentation of **DAVLLVFANK**

Found in **AT1G10630.1** in **TAIR\_Arabidopsis**, Symbols: ATARFA1F | ATARFA1F; GTP binding / phospholipase activator / protein binding | chr1:3513190-3514231 REVERSE

Match to Query 3491: 1088.625486 from(545.320019,2+) index(8277)

Title: Elution from: 72.113 to 72.113 scan no 10817 cid35.00 polarity:+

Data file D6h-1\_1.mgf

Click mouse within plot area to zoom in by factor of two about that point

Or,   to  Da

Label all possible matches  Label matches used for scoring

Show Y-axis

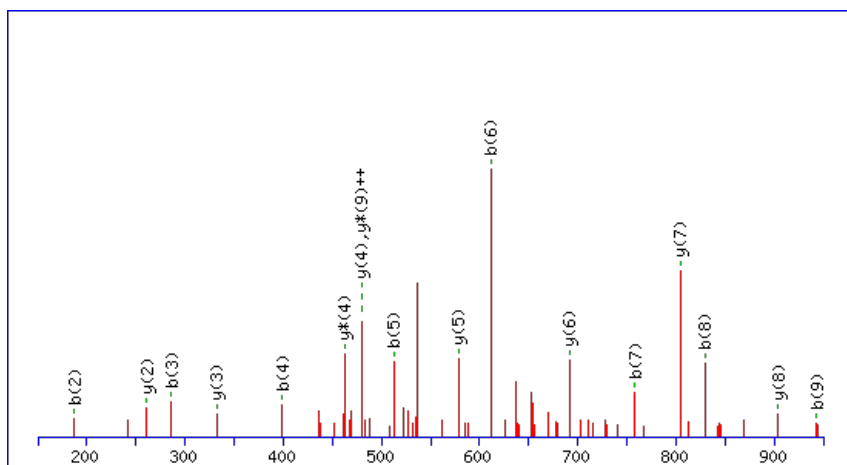

**Monoisotopic mass of neutral peptide Mr(calc):** 1088.6230

**Fixed modifications:** Carbamidomethyl (C) (apply to specified residues or termini only)

**Ions Score:** 73 **Expect:** 1.6e-007

**Matches:** 17/74 fragment ions using 22 most intense peaks ([help](#))

| #  | b               | b <sup>++</sup> | b*       | b <sup>*++</sup> | b <sup>0</sup> | b <sup>0++</sup> | Seq.     | y               | y <sup>++</sup> | y*              | y <sup>*++</sup> | #         |
|----|-----------------|-----------------|----------|------------------|----------------|------------------|----------|-----------------|-----------------|-----------------|------------------|-----------|
| 1  | 116.0342        | 58.5207         |          |                  | 98.0237        | 49.5155          | <b>D</b> |                 |                 |                 |                  | <b>10</b> |
| 2  | <b>187.0713</b> | 94.0393         |          |                  | 169.0608       | 85.0340          | <b>A</b> | 974.6033        | 487.8053        | 957.5768        | <b>479.2920</b>  | <b>9</b>  |
| 3  | <b>286.1397</b> | 143.5735        |          |                  | 268.1292       | 134.5682         | <b>V</b> | <b>903.5662</b> | 452.2867        | 886.5397        | 443.7735         | <b>8</b>  |
| 4  | <b>399.2238</b> | 200.1155        |          |                  | 381.2132       | 191.1103         | <b>L</b> | <b>804.4978</b> | 402.7525        | 787.4713        | 394.2393         | <b>7</b>  |
| 5  | <b>512.3079</b> | 256.6576        |          |                  | 494.2973       | 247.6523         | <b>L</b> | <b>691.4137</b> | 346.2105        | 674.3872        | 337.6972         | <b>6</b>  |
| 6  | <b>611.3763</b> | 306.1918        |          |                  | 593.3657       | 297.1865         | <b>V</b> | <b>578.3297</b> | 289.6685        | 561.3031        | 281.1552         | <b>5</b>  |
| 7  | <b>758.4447</b> | 379.7260        |          |                  | 740.4341       | 370.7207         | <b>F</b> | <b>479.2613</b> | 240.1343        | <b>462.2347</b> | 231.6210         | <b>4</b>  |
| 8  | <b>829.4818</b> | 415.2445        |          |                  | 811.4713       | 406.2393         | <b>A</b> | <b>332.1928</b> | 166.6001        | 315.1663        | 158.0868         | <b>3</b>  |
| 9  | <b>943.5247</b> | 472.2660        | 926.4982 | 463.7527         | 925.5142       | 463.2607         | <b>N</b> | <b>261.1557</b> | 131.0815        | 244.1292        | 122.5682         | <b>2</b>  |
| 10 |                 |                 |          |                  |                |                  | <b>K</b> | 147.1128        | 74.0600         | 130.0863        | 65.5468          | <b>1</b>  |

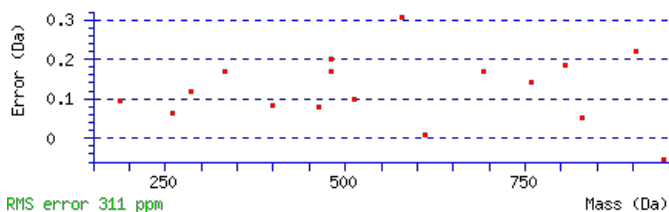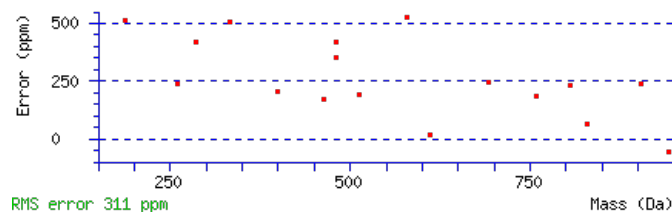NCBI BLAST search of **DAVLLVFANK**

(Parameters: blastp, nr protein database, expect=20000, no filter, PAM30)

Other BLAST [web gateways](#)

**All matches to this query**

AT1G10630.1

| Score | Mr(calc)  | Delta  | Sequence                   |
|-------|-----------|--------|----------------------------|
| 73.3  | 1088.6230 | 0.0025 | <a href="#">DAVLLVFANK</a> |

Mascot: <http://www.matrixscience.com/>

## Peptide View

MS/MS Fragmentation of **LDFADVATFVK**

Found in **AT1G10670.1** in **TAIR\_Arabidopsis**, Symbols: ACLA-1 | ACLA-1 (ATP-citrate lyase A-1) | chr1:3535788-3538099 FORWARD

Match to Query 4042: 1224.640120 from(613.327336,2+) index(9153)

Title: Elution from: 84.030 to 84.030 scan no 12666 cid35.00 polarity:+

Data file D6h-2\_3.mgf

Click mouse within plot area to zoom in by factor of two about that point

Or,  to  Da

Label all possible matches  Label matches used for scoring

Show Y-axis

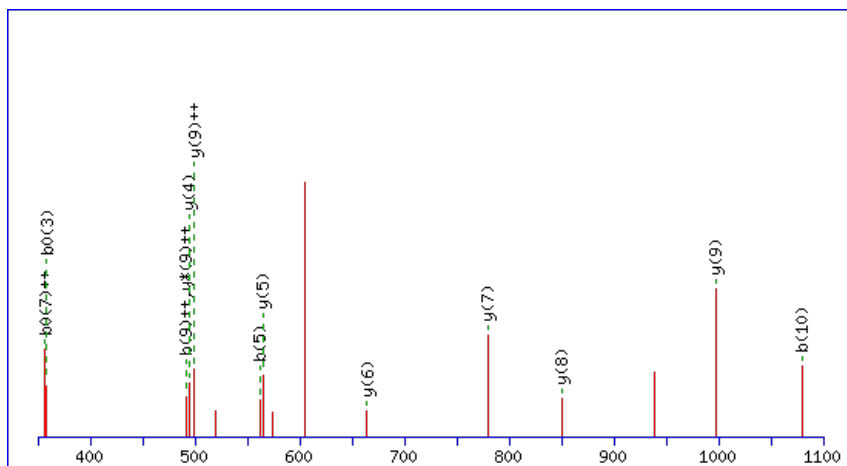

Monoisotopic mass of neutral peptide  $M_r(\text{calc})$ : 1224.6391

Fixed modifications: Carbamidomethyl (C) (apply to specified residues or termini only)

Ions Score: 50 Expect: 2.4e-005

Matches : 13/92 fragment ions using 15 most intense peaks ([help](#))

| #  | b         | b <sup>++</sup> | b <sup>0</sup> | b <sup>0++</sup> | Seq. | y         | y <sup>++</sup> | y*        | y <sup>*++</sup> | y <sup>0</sup> | y <sup>0++</sup> | #  |
|----|-----------|-----------------|----------------|------------------|------|-----------|-----------------|-----------|------------------|----------------|------------------|----|
| 1  | 114.0913  | 57.5493         |                |                  | L    |           |                 |           |                  |                |                  | 11 |
| 2  | 229.1183  | 115.0628        | 211.1077       | 106.0575         | D    | 1112.5623 | 556.7848        | 1095.5357 | 548.2715         | 1094.5517      | 547.7795         | 10 |
| 3  | 376.1867  | 188.5970        | 358.1761       | 179.5917         | F    | 997.5353  | 499.2713        | 980.5088  | 490.7580         | 979.5247       | 490.2660         | 9  |
| 4  | 447.2238  | 224.1155        | 429.2132       | 215.1103         | A    | 850.4669  | 425.7371        | 833.4403  | 417.2238         | 832.4563       | 416.7318         | 8  |
| 5  | 562.2508  | 281.6290        | 544.2402       | 272.6237         | D    | 779.4298  | 390.2185        | 762.4032  | 381.7053         | 761.4192       | 381.2132         | 7  |
| 6  | 661.3192  | 331.1632        | 643.3086       | 322.1579         | V    | 664.4028  | 332.7051        | 647.3763  | 324.1918         | 646.3923       | 323.6998         | 6  |
| 7  | 732.3563  | 366.6818        | 714.3457       | 357.6765         | A    | 565.3344  | 283.1709        | 548.3079  | 274.6576         | 547.3239       | 274.1656         | 5  |
| 8  | 833.4040  | 417.2056        | 815.3934       | 408.2003         | T    | 494.2973  | 247.6523        | 477.2708  | 239.1390         | 476.2867       | 238.6470         | 4  |
| 9  | 980.4724  | 490.7398        | 962.4618       | 481.7345         | F    | 393.2496  | 197.1285        | 376.2231  | 188.6152         |                |                  | 3  |
| 10 | 1079.5408 | 540.2740        | 1061.5302      | 531.2687         | V    | 246.1812  | 123.5942        | 229.1547  | 115.0810         |                |                  | 2  |
| 11 |           |                 |                |                  | K    | 147.1128  | 74.0600         | 130.0863  | 65.5468          |                |                  | 1  |

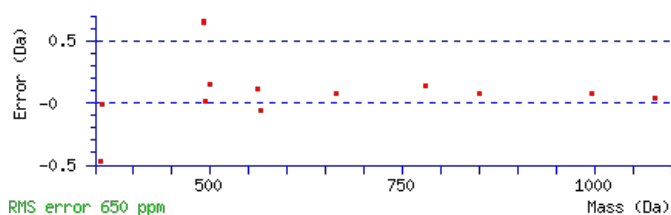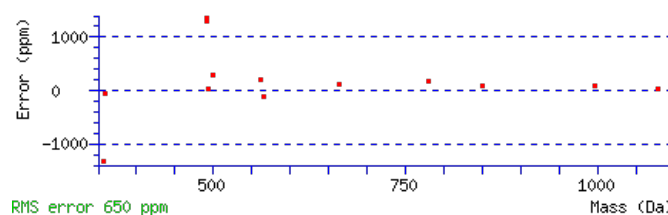

NCBI BLAST search of **LDFADVATFVK**

(Parameters: blastp, nr protein database, expect=20000, no filter, PAM30)

Other BLAST [web gateways](#)

All matches to this query

**AT1G10670.1**

| <b>Score</b> | <b>Mr(calc)</b> | <b>Delta</b> | <b>Sequence</b>             |
|--------------|-----------------|--------------|-----------------------------|
| 50.2         | 1224.6391       | 0.0011       | <a href="#">LDFADVATFVK</a> |
| 10.4         | 1224.6390       | 0.0011       | <a href="#">LDQVFESLFK</a>  |
| 7.0          | 1224.6424       | -0.0023      | <a href="#">IDMTTIVLGFK</a> |
| 2.4          | 1224.6424       | -0.0023      | <a href="#">EVILYNVTMK</a>  |
| 1.4          | 1224.6397       | 0.0004       | <a href="#">VSRRVFCSSK</a>  |

**Mascot:** <http://www.matrixscience.com/>



**Peptide View**MS/MS Fragmentation of **LYGTAQDIEGVIR**Found in **AT1G10760.1** in **TAIR\_Arabidopsis**, Symbols: SOP1, SOP, GWD1, GWD, SEX1 | SEX1 (STARCH EXCESS 1) | chr1:3581211-3590044 REVERSE

Match to Query 5818: 1433.750598 from(717.882575,2+) index(6444)

Title: Elution from: 55.857 to 55.857 scan no 8228 cid35.00 polarity:+

Data file D1d-3\_2.mgf

Click mouse within plot area to zoom in by factor of two about that point

Or,  250 to  Da Label all possible matches  Label matches used for scoring Show Y-axis 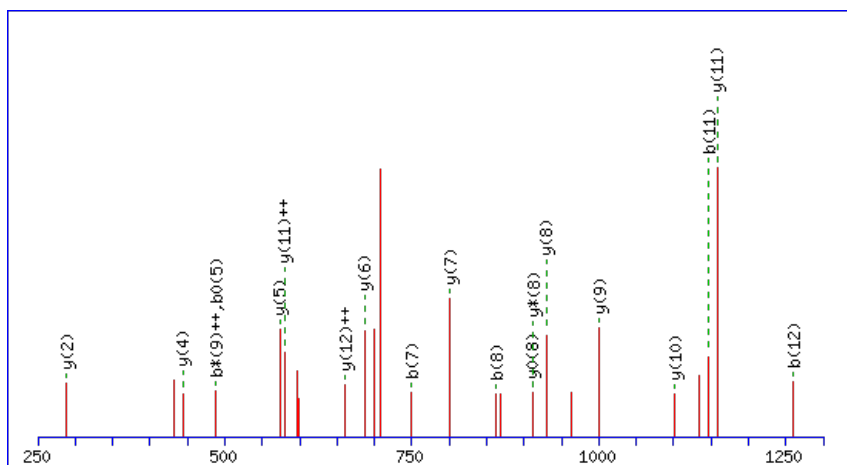Monoisotopic mass of neutral peptide  $M_r(\text{calc})$ : 1433.7514

Fixed modifications: Carbamidomethyl (C) (apply to specified residues or termini only)

Ions Score: 74 Expect: 2.3e-007

Matches : 19/120 fragment ions using 30 most intense peaks ([help](#))

| #  | b         | b <sup>++</sup> | b*        | b <sup>*++</sup> | b <sup>0</sup> | b <sup>0++</sup> | Seq. | y         | y <sup>++</sup> | y*        | y <sup>*++</sup> | y <sup>0</sup> | y <sup>0++</sup> | #  |
|----|-----------|-----------------|-----------|------------------|----------------|------------------|------|-----------|-----------------|-----------|------------------|----------------|------------------|----|
| 1  | 114.0913  | 57.5493         |           |                  |                |                  | L    |           |                 |           |                  |                |                  | 13 |
| 2  | 277.1547  | 139.0810        |           |                  |                |                  | Y    | 1321.6747 | 661.3410        | 1304.6481 | 652.8277         | 1303.6641      | 652.3357         | 12 |
| 3  | 334.1761  | 167.5917        |           |                  |                |                  | G    | 1158.6113 | 579.8093        | 1141.5848 | 571.2960         | 1140.6008      | 570.8040         | 11 |
| 4  | 435.2238  | 218.1155        |           |                  | 417.2132       | 209.1103         | T    | 1101.5899 | 551.2986        | 1084.5633 | 542.7853         | 1083.5793      | 542.2933         | 10 |
| 5  | 506.2609  | 253.6341        |           |                  | 488.2504       | 244.6288         | A    | 1000.5422 | 500.7747        | 983.5156  | 492.2615         | 982.5316       | 491.7694         | 9  |
| 6  | 634.3195  | 317.6634        | 617.2930  | 309.1501         | 616.3089       | 308.6581         | Q    | 929.5051  | 465.2562        | 912.4785  | 456.7429         | 911.4945       | 456.2509         | 8  |
| 7  | 749.3464  | 375.1769        | 732.3199  | 366.6636         | 731.3359       | 366.1716         | D    | 801.4465  | 401.2269        | 784.4199  | 392.7136         | 783.4359       | 392.2216         | 7  |
| 8  | 862.4305  | 431.7189        | 845.4040  | 423.2056         | 844.4199       | 422.7136         | I    | 686.4196  | 343.7134        | 669.3930  | 335.2001         | 668.4090       | 334.7081         | 6  |
| 9  | 991.4731  | 496.2402        | 974.4466  | 487.7269         | 973.4625       | 487.2349         | E    | 573.3355  | 287.1714        | 556.3089  | 278.6581         | 555.3249       | 278.1661         | 5  |
| 10 | 1048.4946 | 524.7509        | 1031.4680 | 516.2376         | 1030.4840      | 515.7456         | G    | 444.2929  | 222.6501        | 427.2663  | 214.1368         |                |                  | 4  |
| 11 | 1147.5630 | 574.2851        | 1130.5364 | 565.7719         | 1129.5524      | 565.2798         | V    | 387.2714  | 194.1394        | 370.2449  | 185.6261         |                |                  | 3  |
| 12 | 1260.6470 | 630.8272        | 1243.6205 | 622.3139         | 1242.6365      | 621.8219         | I    | 288.2030  | 144.6051        | 271.1765  | 136.0919         |                |                  | 2  |
| 13 |           |                 |           |                  |                |                  | R    | 175.1190  | 88.0631         | 158.0924  | 79.5498          |                |                  | 1  |

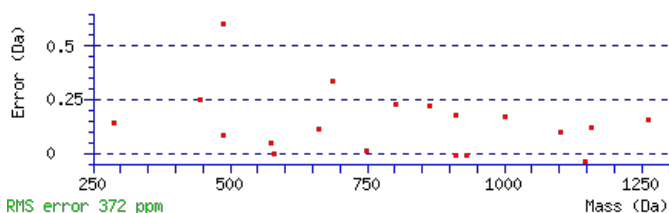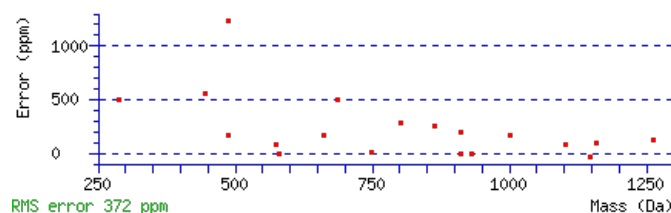NCBI **BLAST** search of **LYGTAQDIEGVIR**

(Parameters: blastp, nr protein database, expect=20000, no filter, PAM30)

AT1G10760.1

Other BLAST [web gateways](#)

**All matches to this query**

| Score | Mr(calc)  | Delta   | Sequence                       |
|-------|-----------|---------|--------------------------------|
| 74.2  | 1433.7514 | -0.0008 | <a href="#">LYGTAQDIEGVIR</a>  |
| 6.9   | 1433.7487 | 0.0019  | <a href="#">HDENGNPVKRLR</a>   |
| 0.3   | 1433.7514 | -0.0008 | <a href="#">IYVGQGENGIASVK</a> |

Mascot: <http://www.matrixscience.com/>

**Peptide View**MS/MS Fragmentation of **KMISSRR**Found in **AT1G10780.1** in **TAIR\_Arabidopsis**, Symbols: | F-box family protein | chr1:3592876-3594311 REVERSE

Match to Query 2389: 994.481460 from(498.248006,2+) index(1112)

Title: Elution from: 17.424 to 17.424 scan no 1572 cid35.00 polarity:+

Data file D6h-1\_3.mgf

Click mouse within plot area to zoom in by factor of two about that point

Or,   to  Da Label all possible matches  Label matches used for scoring Show Y-axis 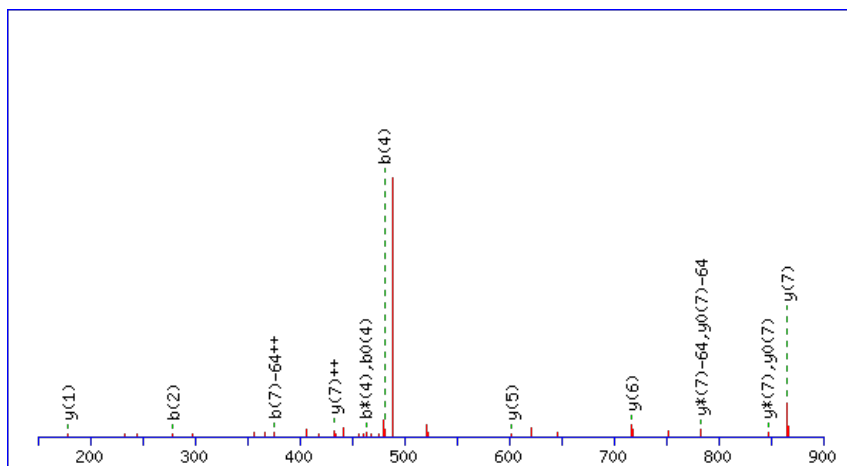Monoisotopic mass of neutral peptide  $M_r(\text{calc})$ : 994.4788

Fixed modifications: Carbamidomethyl (C) (apply to specified residues or termini only)

Variable modifications:

M2 : Oxidation (M), with neutral losses 0.0000 (shown in table), 63.9983

Ions Score: 17 Expect: 0.036

Matches : 14/112 fragment ions using 26 most intense peaks ([help](#))

| # | b               | b <sup>++</sup> | b*              | b* <sup>++</sup> | b <sup>0</sup>  | b <sup>0</sup> <sup>++</sup> | Seq. | y               | y <sup>++</sup> | y*              | y* <sup>++</sup> | y <sup>0</sup>  | y <sup>0</sup> <sup>++</sup> | # |
|---|-----------------|-----------------|-----------------|------------------|-----------------|------------------------------|------|-----------------|-----------------|-----------------|------------------|-----------------|------------------------------|---|
| 1 | 131.0963        | 66.0518         | 113.0727        | 57.0400          |                 |                              | K    |                 |                 |                 |                  |                 |                              | 8 |
| 2 | <b>279.1287</b> | 140.0680        | 261.1052        | 131.0562         |                 |                              | M    | <b>865.3971</b> | <b>433.2022</b> | <b>847.3735</b> | 424.1904         | <b>847.3865</b> | 424.1969                     | 7 |
| 3 | 393.2098        | 197.1086        | 375.1863        | 188.0968         |                 |                              | I    | <b>717.3646</b> | 359.1860        | 699.3410        | 350.1742         | 699.3541        | 350.1807                     | 6 |
| 4 | <b>481.2389</b> | 241.1231        | <b>463.2153</b> | 232.1113         | <b>463.2283</b> | 232.1178                     | S    | <b>603.2835</b> | 302.1454        | 585.2599        | 293.1336         | 585.2730        | 293.1401                     | 5 |
| 5 | 569.2680        | 285.1376        | 551.2444        | 276.1258         | 551.2574        | 276.1323                     | S    | 515.2545        | 258.1309        | 497.2309        | 249.1191         | 497.2439        | 249.1256                     | 4 |
| 6 | 657.2970        | 329.1522        | 639.2734        | 320.1404         | 639.2865        | 320.1469                     | S    | 427.2254        | 214.1163        | 409.2018        | 205.1045         | 409.2148        | 205.1111                     | 3 |
| 7 | 817.3863        | 409.1968        | 799.3627        | 400.1850         | 799.3757        | 400.1915                     | R    | 339.1963        | 170.1018        | 321.1728        | 161.0900         |                 |                              | 2 |
| 8 |                 |                 |                 |                  |                 |                              | R    | <b>179.1071</b> | 90.0572         | 161.0835        | 81.0454          |                 |                              | 1 |

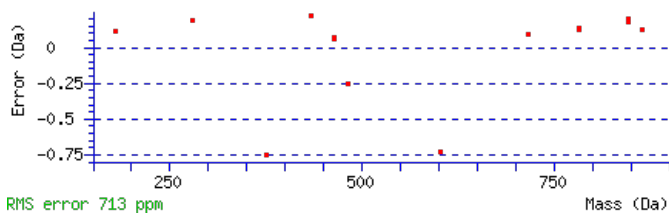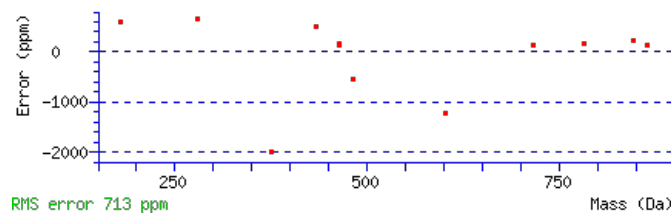NCBI BLAST search of **KMISSRR**

(Parameters: blastp, nr protein database, expect=20000, no filter, PAM30)

Other BLAST [web gateways](#)**All matches to this query**

| Score | $M_r(\text{calc})$ | Delta  | Sequence                |
|-------|--------------------|--------|-------------------------|
| 17.4  | 994.4788           | 0.0026 | <a href="#">KMISSRR</a> |

## AT1G10780.1

|     |          |         |                          |
|-----|----------|---------|--------------------------|
| 8.3 | 994.4810 | 0.0004  | <a href="#">VMRYREK</a>  |
| 4.5 | 994.4810 | 0.0004  | <a href="#">LMRDFKR</a>  |
| 3.4 | 994.4806 | 0.0009  | <a href="#">GMFDFLKK</a> |
| 2.7 | 994.4833 | -0.0018 | <a href="#">KWMAFKR</a>  |
| 2.7 | 994.4788 | 0.0026  | <a href="#">MTKRSVSR</a> |
| 2.5 | 994.4810 | 0.0004  | <a href="#">RMYQKQK</a>  |

**Mascot:** <http://www.matrixscience.com/>

## Peptide View

### MS/MS Fragmentation of **GGNFTGEKLR**

Found in **AT1G10840.1** in **TAIR\_Arabidopsis**, Symbols: TIF3H1 | TIF3H1 (EUKARYOTIC TRANSLATION INITIATION FACTOR 3 SUBUNIT H1); translation initiation factor | chr1:3607886-3610300 REVERSE

Match to Query 3147: 1077.557434 from(539.785993,2+) index(2604)

Title: Elution from: 27.590 to 27.590 scan no 3270 cid35.00 polarity:+

Data file D6h-3\_1.mgf

Click mouse within plot area to zoom in by factor of two about that point

Or,   to  Da

Label all possible matches  Label matches used for scoring

Show Y-axis

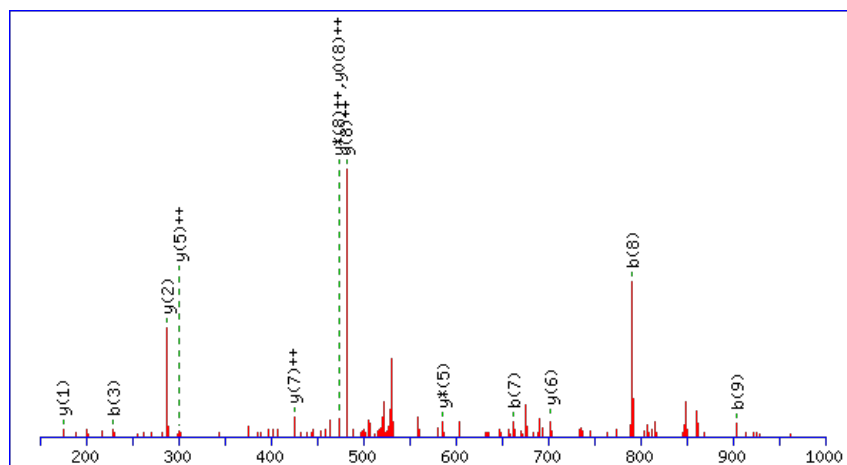

Monoisotopic mass of neutral peptide  $M_r(\text{calc})$ : 1077.5567

Fixed modifications: Carbamidomethyl (C) (apply to specified residues or termini only)

Ions Score: 25 Expect: 0.015

Matches : 13/90 fragment ions using 24 most intense peaks ([help](#))

| #  | b               | b <sup>++</sup> | b*       | b <sup>*++</sup> | b <sup>0</sup> | b <sup>0++</sup> | Seq. | y               | y <sup>++</sup> | y*              | y <sup>*++</sup> | y <sup>0</sup> | y <sup>0++</sup> | #  |
|----|-----------------|-----------------|----------|------------------|----------------|------------------|------|-----------------|-----------------|-----------------|------------------|----------------|------------------|----|
| 1  | 58.0287         | 29.5180         |          |                  |                |                  | G    |                 |                 |                 |                  |                |                  | 10 |
| 2  | 115.0502        | 58.0287         |          |                  |                |                  | G    | 1021.5425       | 511.2749        | 1004.5160       | 502.7616         | 1003.5320      | 502.2696         | 9  |
| 3  | <b>229.0931</b> | 115.0502        | 212.0666 | 106.5369         |                |                  | N    | 964.5211        | <b>482.7642</b> | 947.4945        | <b>474.2509</b>  | 946.5105       | <b>473.7589</b>  | 8  |
| 4  | 376.1615        | 188.5844        | 359.1350 | 180.0711         |                |                  | F    | 850.4781        | <b>425.7427</b> | 833.4516        | 417.2294         | 832.4676       | 416.7374         | 7  |
| 5  | 477.2092        | 239.1083        | 460.1827 | 230.5950         | 459.1987       | 230.1030         | T    | <b>703.4097</b> | 352.2085        | 686.3832        | 343.6952         | 685.3992       | 343.2032         | 6  |
| 6  | 534.2307        | 267.6190        | 517.2041 | 259.1057         | 516.2201       | 258.6137         | G    | 602.3620        | <b>301.6847</b> | <b>585.3355</b> | 293.1714         | 584.3515       | 292.6794         | 5  |
| 7  | <b>663.2733</b> | 332.1403        | 646.2467 | 323.6270         | 645.2627       | 323.1350         | E    | 545.3406        | 273.1739        | 528.3140        | 264.6606         | 527.3300       | 264.1686         | 4  |
| 8  | <b>791.3682</b> | 396.1878        | 774.3417 | 387.6745         | 773.3577       | 387.1825         | K    | 416.2980        | 208.6526        | 399.2714        | 200.1394         |                |                  | 3  |
| 9  | <b>904.4523</b> | 452.7298        | 887.4258 | 444.2165         | 886.4417       | 443.7245         | L    | <b>288.2030</b> | 144.6051        | 271.1765        | 136.0919         |                |                  | 2  |
| 10 |                 |                 |          |                  |                |                  | R    | <b>175.1190</b> | 88.0631         | 158.0924        | 79.5498          |                |                  | 1  |

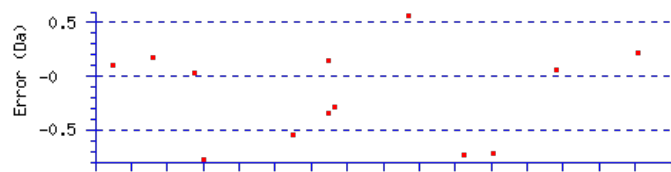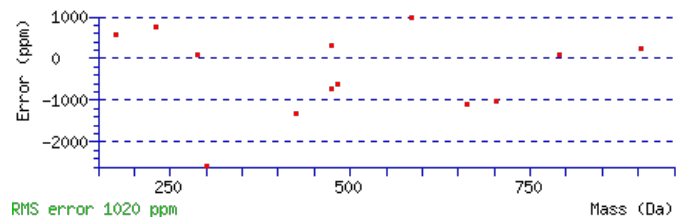

### NCBI BLAST search of **GGNFTGEKLR**

(Parameters: blastp, nr protein database, expect=20000, no filter, PAM30)

Other BLAST [web gateways](#)

All matches to this query

## AT1G10840.1

| Score | Mr(calc)  | Delta   | Sequence                   |
|-------|-----------|---------|----------------------------|
| 25.0  | 1077.5567 | 0.0007  | <a href="#">GGNFTGEKLR</a> |
| 13.1  | 1077.5567 | 0.0008  | <a href="#">DRNLYELR</a>   |
| 9.1   | 1077.5567 | 0.0008  | <a href="#">EVNYERLR</a>   |
| 8.0   | 1077.5601 | -0.0026 | <a href="#">TKGAQALSMR</a> |
| 7.5   | 1077.5567 | 0.0007  | <a href="#">LGYTNQLNR</a>  |
| 5.8   | 1077.5600 | -0.0026 | <a href="#">SNNKSMLLR</a>  |
| 0.8   | 1077.5576 | -0.0001 | <a href="#">VMCLPFRR</a>   |
| 0.8   | 1077.5567 | 0.0007  | <a href="#">GERDSVFLR</a>  |
| 0.8   | 1077.5601 | -0.0026 | <a href="#">MERVSTLSR</a>  |
| 0.2   | 1077.5567 | 0.0008  | <a href="#">AREASEFLR</a>  |

Mascot: <http://www.matrixscience.com/>

**Peptide View**MS/MS Fragmentation of **AKEAILEK**Found in **AT1G11070.1** in **TAIR\_Arabidopsis**, Symbols: | hydroxyproline-rich glycoprotein family protein | chr1:3690406-3692826 REVERSE

Match to Query 1658: 910.496940 from(456.255746,2+) index(1563)

Title: Elution from: 20.272 to 20.272 scan no 2073 cid35.00 polarity:+

Data file D6h-3\_2.mgf

Click mouse within plot area to zoom in by factor of two about that point

Or,  to  Da Label all possible matches  Label matches used for scoring Show Y-axis 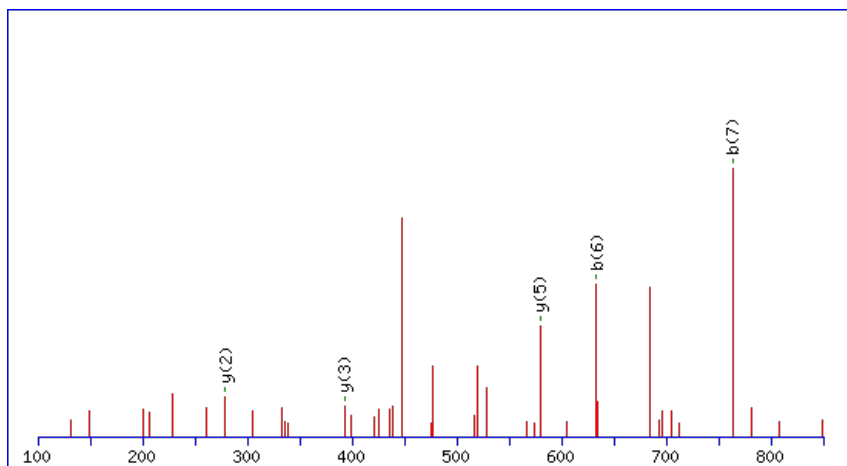

Monoisotopic mass of neutral peptide Mr(calc): 910.4984

Fixed modifications: Carbamidomethyl (C) (apply to specified residues or termini only)

Ions Score: 21 Expect: 0.045

Matches : 5/76 fragment ions using 8 most intense peaks ([help](#))

| # | b               | b <sup>++</sup> | b*       | b <sup>*++</sup> | b <sup>0</sup> | b <sup>0++</sup> | Seq. | y               | y <sup>++</sup> | y*       | y <sup>*++</sup> | y <sup>0</sup> | y <sup>0++</sup> | # |
|---|-----------------|-----------------|----------|------------------|----------------|------------------|------|-----------------|-----------------|----------|------------------|----------------|------------------|---|
| 1 | 73.0414         | 37.0244         |          |                  |                |                  | A    |                 |                 |          |                  |                |                  | 8 |
| 2 | 203.1305        | 102.0689        | 185.1069 | 93.0571          |                |                  | K    | 839.4715        | 420.2394        | 821.4479 | 411.2276         | 821.4609       | 411.2341         | 7 |
| 3 | 333.1701        | 167.0887        | 315.1465 | 158.0769         | 315.1595       | 158.0834         | E    | 709.3825        | 355.1949        | 691.3589 | 346.1831         | 691.3719       | 346.1896         | 6 |
| 4 | 405.2042        | 203.1058        | 387.1807 | 194.0940         | 387.1937       | 194.1005         | A    | <b>579.3428</b> | 290.1751        | 561.3193 | 281.1633         | 561.3323       | 281.1698         | 5 |
| 5 | 519.2853        | 260.1463        | 501.2618 | 251.1345         | 501.2748       | 251.1410         | I    | 507.3087        | 254.1580        | 489.2851 | 245.1462         | 489.2981       | 245.1527         | 4 |
| 6 | <b>633.3664</b> | 317.1869        | 615.3428 | 308.1751         | 615.3559       | 308.1816         | L    | <b>393.2276</b> | 197.1174        | 375.2040 | 188.1056         | 375.2170       | 188.1122         | 3 |
| 7 | <b>763.4061</b> | 382.2067        | 745.3825 | 373.1949         | 745.3955       | 373.2014         | E    | <b>279.1465</b> | 140.0769        | 261.1229 | 131.0651         | 261.1359       | 131.0716         | 2 |
| 8 |                 |                 |          |                  |                |                  | K    | 149.1069        | 75.0571         | 131.0833 | 66.0453          |                |                  | 1 |

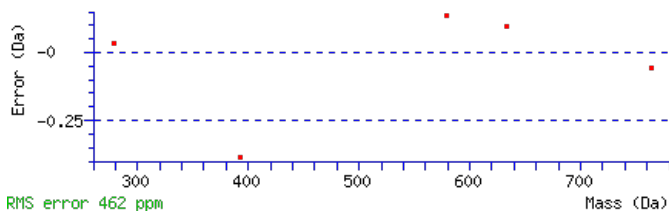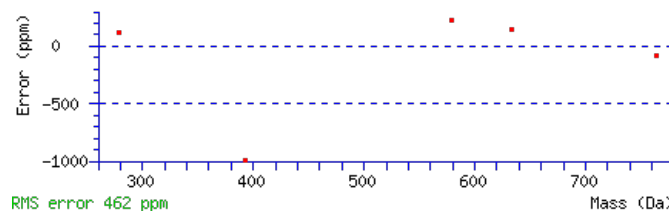NCBI **BLAST** search of [AKEAILEK](#)

(Parameters: blastp, nr protein database, expect=20000, no filter, PAM30)

Other BLAST [web gateways](#)**All matches to this query**

| Score | Mr(calc) | Delta   | Sequence                 |
|-------|----------|---------|--------------------------|
| 20.9  | 910.4984 | -0.0014 | <a href="#">AKEAILEK</a> |
| 16.9  | 910.4984 | -0.0014 | <a href="#">KVGVEIEK</a> |

# AT1G11070.1

|      |          |         |                           |
|------|----------|---------|---------------------------|
| 13.6 | 910.4984 | -0.0014 | <a href="#">GAVLATELK</a> |
| 12.0 | 910.4984 | -0.0014 | <a href="#">EKAELALK</a>  |
| 12.0 | 910.4984 | -0.0014 | <a href="#">KEAAEIIK</a>  |
| 11.6 | 910.4984 | -0.0014 | <a href="#">AGLLSLAEK</a> |
| 11.5 | 910.4984 | -0.0014 | <a href="#">AALEELKK</a>  |
| 11.5 | 910.4984 | -0.0014 | <a href="#">IGIDDIKK</a>  |
| 11.5 | 910.4984 | -0.0014 | <a href="#">LDGIDLKK</a>  |
| 11.5 | 910.4984 | -0.0014 | <a href="#">LSAELIQK</a>  |

Mascot: <http://www.matrixscience.com/>



**Peptide View**MS/MS Fragmentation of **FGWFSMKLK**

Found in **AT1G11545.1** in **TAIR\_Arabidopsis**, Symbols: | xyloglucan:xyloglucosyl transferase, putative / xyloglucan endotransglycosylase, putative / endo-xyloglucan transferase, putative | chr1:3878689-3880286 REVERSE

Match to Query 3844: 1154.559008 from(578.286780,2+) index(7223)

Title: Elution from: 64.831 to 64.831 scan no 9487 cid35.00 polarity:+

Data file 0-1\_2.mgf

Click mouse within plot area to zoom in by factor of two about that point

Or,   to  Da

Label all possible matches  Label matches used for scoring

Show Y-axis

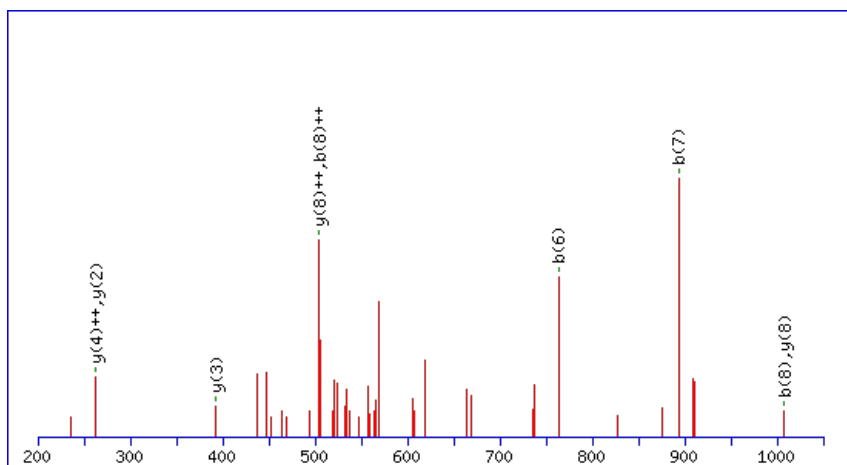

**Monoisotopic mass of neutral peptide Mr(calc):** 1154.5591

**Fixed modifications:** Carbamidomethyl (C) (apply to specified residues or termini only)

**Ions Score:** 27 **Expect:** 0.0072

**Matches:** 9/68 fragment ions using 8 most intense peaks ([help](#))

| # | b                | b <sup>++</sup> | b*       | b <sup>*++</sup> | b <sup>0</sup> | b <sup>0++</sup> | Seq. | y                | y <sup>++</sup> | y*       | y <sup>*++</sup> | y <sup>0</sup> | y <sup>0++</sup> | # |
|---|------------------|-----------------|----------|------------------|----------------|------------------|------|------------------|-----------------|----------|------------------|----------------|------------------|---|
| 1 | 149.0727         | 75.0400         |          |                  |                |                  | F    |                  |                 |          |                  |                |                  | 9 |
| 2 | 207.0912         | 104.0492        |          |                  |                |                  | G    | <b>1007.5009</b> | <b>504.2541</b> | 989.4773 | 495.2423         | 989.4904       | 495.2488         | 8 |
| 3 | 395.1646         | 198.0859        |          |                  |                |                  | W    | 949.4824         | 475.2448        | 931.4588 | 466.2331         | 931.4719       | 466.2396         | 7 |
| 4 | 543.2301         | 272.1187        |          |                  |                |                  | F    | 761.4090         | 381.2082        | 743.3855 | 372.1964         | 743.3985       | 372.2029         | 6 |
| 5 | 631.2591         | 316.1332        |          |                  | 613.2486       | 307.1279         | S    | 613.3436         | 307.1754        | 595.3200 | 298.1636         | 595.3330       | 298.1702         | 5 |
| 6 | <b>763.2966</b>  | 382.1520        |          |                  | 745.2861       | 373.1467         | M    | 525.3145         | <b>263.1609</b> | 507.2909 | 254.1491         |                |                  | 4 |
| 7 | <b>893.3857</b>  | 447.1965        | 875.3621 | 438.1847         | 875.3751       | 438.1912         | K    | <b>393.2770</b>  | 197.1421        | 375.2534 | 188.1303         |                |                  | 3 |
| 8 | <b>1007.4668</b> | <b>504.2370</b> | 989.4432 | 495.2252         | 989.4562       | 495.2317         | L    | <b>263.1880</b>  | 132.0976        | 245.1644 | 123.0858         |                |                  | 2 |
| 9 |                  |                 |          |                  |                |                  | K    | 149.1069         | 75.0571         | 131.0833 | 66.0453          |                |                  | 1 |

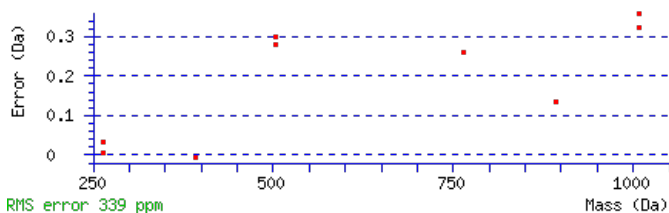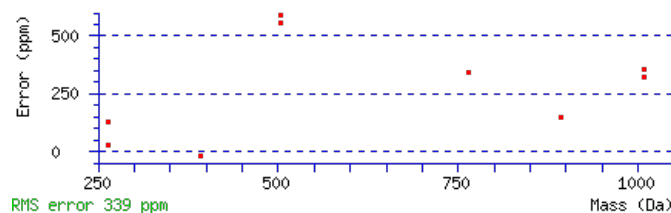

NCBI **BLAST** search of [FGWFSMKLK](#)

(Parameters: blastp, nr protein database, expect=20000, no filter, PAM30)

Other BLAST [web gateways](#)

**All matches to this query**

| Score | Mr(calc) | Delta | Sequence |
|-------|----------|-------|----------|
|       |          |       |          |

**AT1G11545.1**

|      |           |         |                              |
|------|-----------|---------|------------------------------|
| 26.9 | 1154.5591 | -0.0001 | <a href="#">FGWFSMKLIK</a>   |
| 20.9 | 1154.5569 | 0.0022  | <a href="#">ELHMFPOIK</a>    |
| 10.8 | 1154.5620 | -0.0030 | <a href="#">DSLGDRHVLK</a>   |
| 5.0  | 1154.5616 | -0.0026 | <a href="#">FATKFSDSIK</a>   |
| 3.7  | 1154.5620 | -0.0030 | <a href="#">DAHESRAIK</a>    |
| 1.6  | 1154.5620 | -0.0030 | <a href="#">NTKNPTSHLK</a>   |
| 1.5  | 1154.5593 | -0.0003 | <a href="#">GGDDSAPAIVLK</a> |
| 1.5  | 1154.5593 | -0.0003 | <a href="#">QEQGITEPIK</a>   |
| 1.5  | 1154.5620 | -0.0030 | <a href="#">TLREHAGDLK</a>   |
| 1.1  | 1154.5593 | -0.0003 | <a href="#">TDPEAIGALQK</a>  |

**Mascot:** <http://www.matrixscience.com/>

## Peptide View

MS/MS Fragmentation of **FLIYK**Found in **AT1G11655.1** in **TAIR\_Arabidopsis**

Match to Query 588: 682.404804 from(342.209678,2+) index(3109)

Title: Elution from: 29.936 to 29.936 scan no 3840 cid35.00 polarity:+

Data file D6h-3\_3.mgf

Click mouse within plot area to zoom in by factor of two about that point

Or,   to  Da Label all possible matches  Label matches used for scoring Show Y-axis 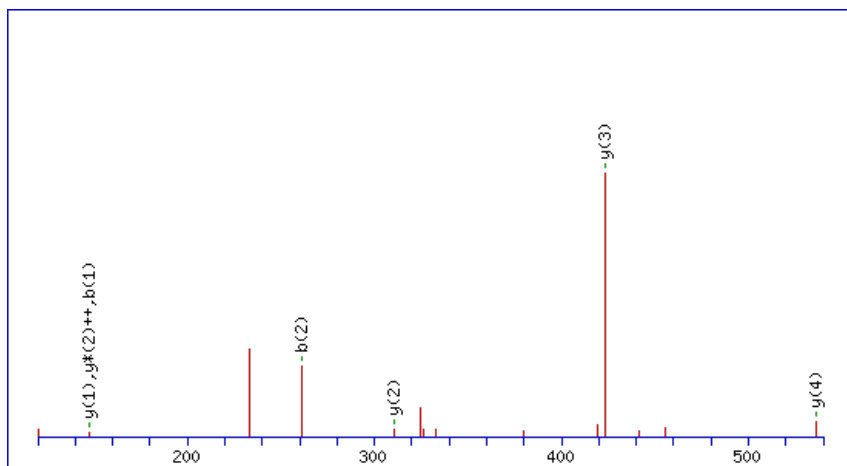Monoisotopic mass of neutral peptide **Mr(calc)**: 682.4054

Fixed modifications: Carbamidomethyl (C) (apply to specified residues or termini only)

Ions Score: 28 **Expect**: 0.0017Matches : 7/24 fragment ions using 12 most intense peaks ([help](#))

| # | b               | b <sup>++</sup> | Seq.     | y               | y <sup>++</sup> | y*       | y <sup>*++</sup> | #        |
|---|-----------------|-----------------|----------|-----------------|-----------------|----------|------------------|----------|
| 1 | <b>148.0757</b> | 74.5415         | <b>F</b> |                 |                 |          |                  | <b>5</b> |
| 2 | <b>261.1598</b> | 131.0835        | <b>L</b> | <b>536.3443</b> | 268.6758        | 519.3177 | 260.1625         | <b>4</b> |
| 3 | 374.2438        | 187.6255        | <b>I</b> | <b>423.2602</b> | 212.1337        | 406.2336 | 203.6205         | <b>3</b> |
| 4 | 537.3071        | 269.1572        | <b>Y</b> | <b>310.1761</b> | 155.5917        | 293.1496 | <b>147.0784</b>  | <b>2</b> |
| 5 |                 |                 | <b>K</b> | <b>147.1128</b> | 74.0600         | 130.0863 | 65.5468          | <b>1</b> |

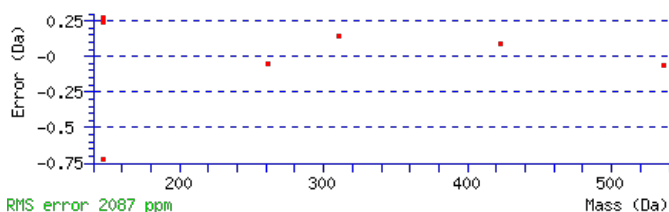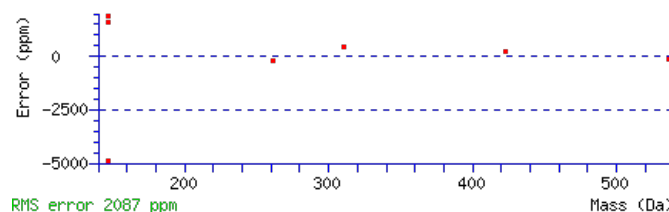NCBI **BLAST** search of [FLIYK](#)

(Parameters: blastp, nr protein database, expect=20000, no filter, PAM30)

Other BLAST [web gateways](#)

### All matches to this query

| Score | Mr(calc) | Delta   | Sequence              |
|-------|----------|---------|-----------------------|
| 28.4  | 682.4054 | -0.0006 | <a href="#">FLIYK</a> |
| 28.4  | 682.4054 | -0.0006 | <a href="#">FLIYK</a> |
| 28.4  | 682.4054 | -0.0006 | <a href="#">FLLYK</a> |
| 19.2  | 682.4054 | -0.0006 | <a href="#">FLYLK</a> |
| 13.2  | 682.4054 | -0.0006 | <a href="#">IFLYK</a> |

AT1G11655.1

|     |          |         |                        |
|-----|----------|---------|------------------------|
| 8.8 | 682.4054 | -0.0006 | <a href="#">IFPPLP</a> |
|-----|----------|---------|------------------------|

**Mascot:** <http://www.matrixscience.com/>

**Peptide View**MS/MS Fragmentation of **MYAAFTGQPLEK**Found in **AT1G11750.1** in **TAIR\_Arabidopsis**, Symbols: NCLPP1, NCLPP6, CLPP6 | CLPP6 (Clp protease proteolytic subunit 6); endopeptidase Clp | chr1:3967609-3969535 FORWARD

Match to Query 5193: 1368.621148 from(685.317850,2+) index(5125)

Title: Elution from: 46.049 to 46.049 scan no 6456 cid35.00 polarity:+

Data file C7-1\_2.mgf

Click mouse within plot area to zoom in by factor of two about that point

Or,   to  Da Label all possible matches  Label matches used for scoring Show Y-axis 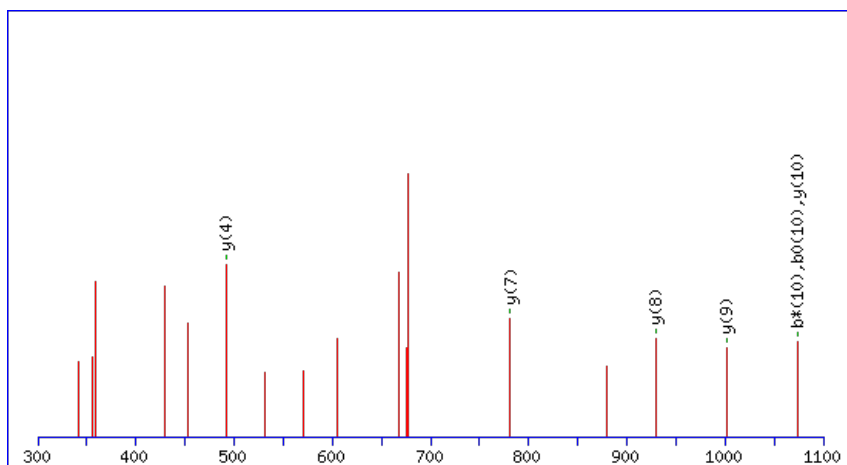Monoisotopic mass of neutral peptide  $M_r(\text{calc})$ : 1368.6176

Fixed modifications: Carbamidomethyl (C) (apply to specified residues or termini only)

Ions Score: 36 Expect: 0.002

Matches : 7/106 fragment ions using 8 most intense peaks ([help](#))

| #  | b         | b <sup>++</sup> | b*        | b <sup>*++</sup> | b <sup>0</sup> | b <sup>0++</sup> | Seq. | y         | y <sup>++</sup> | y*        | y <sup>*++</sup> | y <sup>0</sup> | y <sup>0++</sup> | #  |
|----|-----------|-----------------|-----------|------------------|----------------|------------------|------|-----------|-----------------|-----------|------------------|----------------|------------------|----|
| 1  | 133.0448  | 67.0260         |           |                  |                |                  | M    |           |                 |           |                  |                |                  | 12 |
| 2  | 297.1052  | 149.0562        |           |                  |                |                  | Y    | 1237.5874 | 619.2973        | 1219.5638 | 610.2855         | 1219.5768      | 610.2920         | 11 |
| 3  | 369.1393  | 185.0733        |           |                  |                |                  | A    | 1073.5270 | 537.2671        | 1055.5034 | 528.2553         | 1055.5164      | 528.2619         | 10 |
| 4  | 441.1735  | 221.0904        |           |                  |                |                  | A    | 1001.4929 | 501.2501        | 983.4693  | 492.2383         | 983.4823       | 492.2448         | 9  |
| 5  | 589.2389  | 295.1231        |           |                  |                |                  | F    | 929.4587  | 465.2330        | 911.4351  | 456.2212         | 911.4481       | 456.2277         | 8  |
| 6  | 691.2836  | 346.1454        |           |                  | 673.2731       | 337.1402         | T    | 781.3933  | 391.2003        | 763.3697  | 382.1885         | 763.3827       | 382.1950         | 7  |
| 7  | 749.3021  | 375.1547        |           |                  | 731.2916       | 366.1494         | G    | 679.3485  | 340.1779        | 661.3250  | 331.1661         | 661.3380       | 331.1726         | 6  |
| 8  | 879.3548  | 440.1810        | 861.3312  | 431.1692         | 861.3442       | 431.1757         | Q    | 621.3300  | 311.1687        | 603.3065  | 302.1569         | 603.3195       | 302.1634         | 5  |
| 9  | 977.4046  | 489.2059        | 959.3810  | 480.1941         | 959.3940       | 480.2006         | P    | 491.2774  | 246.1423        | 473.2538  | 237.1305         | 473.2668       | 237.1371         | 4  |
| 10 | 1091.4857 | 546.2465        | 1073.4621 | 537.2347         | 1073.4751      | 537.2412         | L    | 393.2276  | 197.1174        | 375.2040  | 188.1056         | 375.2170       | 188.1122         | 3  |
| 11 | 1221.5253 | 611.2663        | 1203.5017 | 602.2545         | 1203.5147      | 602.2610         | E    | 279.1465  | 140.0769        | 261.1229  | 131.0651         | 261.1359       | 131.0716         | 2  |
| 12 |           |                 |           |                  |                |                  | K    | 149.1069  | 75.0571         | 131.0833  | 66.0453          |                |                  | 1  |

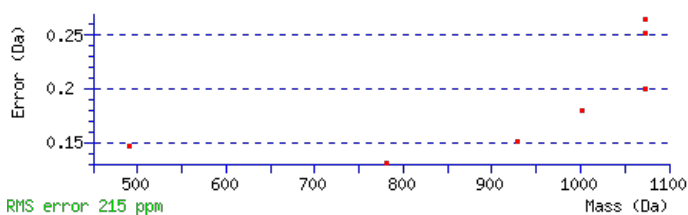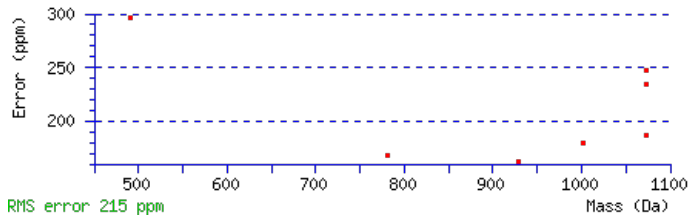NCBI BLAST search of **MYAAFTGQPLEK**

(Parameters: blastp, nr protein database, expect=20000, no filter, PAM30)

Other BLAST [web gateways](#)

# AT1G11750.1

All matches to this query

| Score | Mr(calc)  | Delta   | Sequence                     |
|-------|-----------|---------|------------------------------|
| 36.4  | 1368.6176 | 0.0035  | <a href="#">MYAAFTGQPLEK</a> |
| 1.2   | 1368.6250 | -0.0039 | <a href="#">AYLSAYNSHSLK</a> |
| 0.9   | 1368.6237 | -0.0025 | <a href="#">CGNLKAAMNVFK</a> |
| 0.2   | 1368.6214 | -0.0003 | <a href="#">RVLQMMSLDAR</a>  |

Mascot: <http://www.matrixscience.com/>

**Peptide View**MS/MS Fragmentation of **TDPGLFMRIILLPVTRNK**Found in **AT1G11770.1** in **TAIR\_Arabidopsis**, Symbols: | electron carrier | chr1:3975678-3977288 FORWARD

Match to Query 9608: 2141.086356 from(714.702728,3+) index(10237)

Title: Elution from: 96.557 to 96.557 scan no 14290 cid35.00 polarity:+

Data file D6h-2\_2.mgf

Click mouse within plot area to zoom in by factor of two about that point

Or, Plot from  to  Da Label all possible matches  Label matches used for scoring Show Y-axis 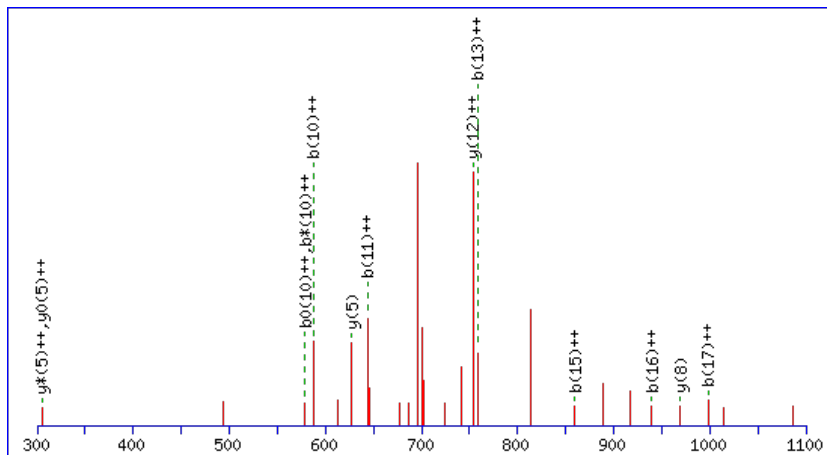

Monoisotopic mass of neutral peptide Mr(calc): 2141.0870

Fixed modifications: Carbamidomethyl (C) (apply to specified residues or termini only)

Variable modifications:

M7 : Oxidation (M), with neutral losses 0.0000 (shown in table), 63.9983

Ions Score: 21 Expect: 0.031

Matches : 13/284 fragment ions using 23 most intense peaks ([help](#))

| #  | b         | b <sup>++</sup> | b*        | b <sup>*++</sup> | b <sup>0</sup> | b <sup>0++</sup> | Seq. | y               | y <sup>++</sup> | y*        | y <sup>*++</sup> | y <sup>0</sup> | y <sup>0++</sup> | #  |
|----|-----------|-----------------|-----------|------------------|----------------|------------------|------|-----------------|-----------------|-----------|------------------|----------------|------------------|----|
| 1  | 103.0520  | 52.0296         |           |                  | 85.0414        | 43.0244          | T    |                 |                 |           |                  |                |                  | 18 |
| 2  | 219.0760  | 110.0416        |           |                  | 201.0654       | 101.0363         | D    | 2040.0495       | 1020.5284       | 2022.0260 | 1011.5166        | 2022.0390      | 1011.5231        | 17 |
| 3  | 317.1258  | 159.0665        |           |                  | 299.1152       | 150.0612         | P    | 1924.0256       | 962.5164        | 1906.0020 | 953.5046         | 1906.0150      | 953.5111         | 16 |
| 4  | 375.1443  | 188.0758        |           |                  | 357.1337       | 179.0705         | G    | 1825.9758       | 913.4915        | 1807.9522 | 904.4797         | 1807.9652      | 904.4862         | 15 |
| 5  | 489.2254  | 245.1163        |           |                  | 471.2148       | 236.1110         | L    | 1767.9573       | 884.4823        | 1749.9337 | 875.4705         | 1749.9467      | 875.4770         | 14 |
| 6  | 637.2908  | 319.1490        |           |                  | 619.2802       | 310.1438         | F    | 1653.8762       | 827.4417        | 1635.8526 | 818.4299         | 1635.8656      | 818.4364         | 13 |
| 7  | 785.3232  | 393.1653        |           |                  | 767.3127       | 384.1600         | M    | 1505.8107       | <b>753.4090</b> | 1487.7871 | 744.3972         | 1487.8001      | 744.4037         | 12 |
| 8  | 945.4125  | 473.2099        | 927.3889  | 464.1981         | 927.4019       | 464.2046         | R    | 1357.7783       | 679.3928        | 1339.7547 | 670.3810         | 1339.7677      | 670.3875         | 11 |
| 9  | 1059.4936 | 530.2504        | 1041.4700 | 521.2386         | 1041.4830      | 521.2452         | L    | 1197.6890       | 599.3482        | 1179.6654 | 590.3364         | 1179.6785      | 590.3429         | 10 |
| 10 | 1173.5747 | <b>587.2910</b> | 1155.5511 | <b>578.2792</b>  | 1155.5641      | <b>578.2857</b>  | L    | 1083.6079       | 542.3076        | 1065.5843 | 533.2958         | 1065.5974      | 533.3023         | 9  |
| 11 | 1287.6558 | <b>644.3315</b> | 1269.6322 | 635.3197         | 1269.6452      | 635.3263         | L    | <b>969.5268</b> | 485.2671        | 951.5032  | 476.2553         | 951.5163       | 476.2618         | 8  |
| 12 | 1417.7084 | 709.3579        | 1399.6849 | 700.3461         | 1399.6979      | 700.3526         | Q    | 855.4457        | 428.2265        | 837.4221  | 419.2147         | 837.4352       | 419.2212         | 7  |
| 13 | 1515.7582 | <b>758.3828</b> | 1497.7347 | 749.3710         | 1497.7477      | 749.3775         | P    | 725.3931        | 363.2002        | 707.3695  | 354.1884         | 707.3825       | 354.1949         | 6  |
| 14 | 1615.8237 | 808.4155        | 1597.8001 | 799.4037         | 1597.8131      | 799.4102         | V    | <b>627.3433</b> | 314.1753        | 609.3197  | <b>305.1635</b>  | 609.3327       | <b>305.1700</b>  | 5  |
| 15 | 1717.8684 | <b>859.4378</b> | 1699.8448 | 850.4260         | 1699.8578      | 850.4326         | T    | 527.2778        | 264.1426        | 509.2543  | 255.1308         | 509.2673       | 255.1373         | 4  |
| 16 | 1877.9577 | <b>939.4825</b> | 1859.9341 | 930.4707         | 1859.9471      | 930.4772         | R    | 425.2331        | 213.1202        | 407.2095  | 204.1084         |                |                  | 3  |
| 17 | 1993.9947 | <b>997.5010</b> | 1975.9711 | 988.4892         | 1975.9841      | 988.4957         | N    | 265.1439        | 133.0756        | 247.1203  | 124.0638         |                |                  | 2  |
| 18 |           |                 |           |                  |                |                  | K    | 149.1069        | 75.0571         | 131.0833  | 66.0453          |                |                  | 1  |

# AT1G11770.1

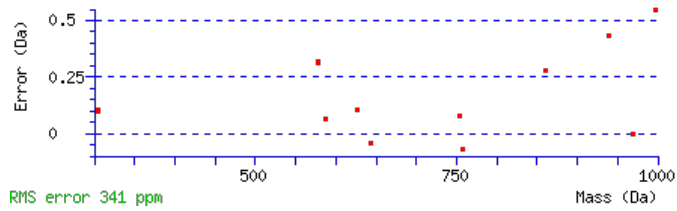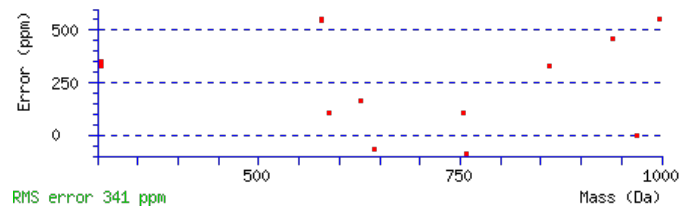

NCBI **BLAST** search of [TDPGLFMRLLLQPVTRNK](#)  
(Parameters: blastp, nr protein database, expect=20000, no filter, PAM30)  
Other BLAST [web gateways](#)

## All matches to this query

| Score | Mr(calc)  | Delta   | Sequence                             |
|-------|-----------|---------|--------------------------------------|
| 20.8  | 2141.0870 | -0.0006 | <a href="#">TDPGLFMRLLLQPVTRNK</a>   |
| 17.6  | 2141.0924 | -0.0061 | <a href="#">GSLDIKETTSKIIIIECLAK</a> |
| 1.9   | 2141.0890 | -0.0027 | <a href="#">LLEYLGKNLNVKELDETK</a>   |
| 1.1   | 2141.0892 | -0.0028 | <a href="#">QGLCVSVLNLWISKKWK</a>    |
| 0.8   | 2141.0877 | -0.0013 | <a href="#">TLTDCNTIKKLSILCPLK</a>   |

Mascot: <http://www.matrixscience.com/>



**Peptide View**MS/MS Fragmentation of **TIEFYTEVFGMK**Found in **AT1G11840.1** in **TAIR\_Arabidopsis**, Symbols: ATGLX1 | ATGLX1 (GLYOXALASE I HOMOLOG); lactoylglutathione lyase | chr1:3996044-3997517 FORWARD

Match to Query 5544: 1476.660532 from(739.337542,2+) index(9011)

Title: Elution from: 84.374 to 84.374 scan no 12505 cid35.00 polarity:+

Data file D1d-1\_3.mgf

Click mouse within plot area to zoom in by factor of two about that point

Or,   to  Da Label all possible matches  Label matches used for scoring Show Y-axis 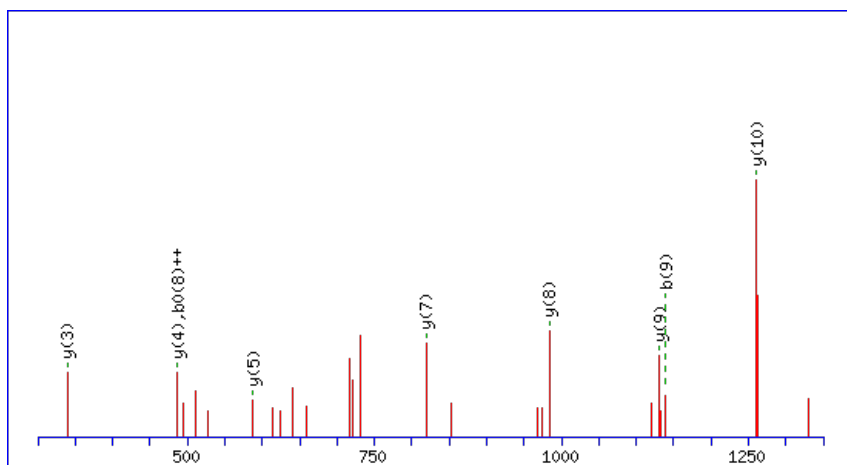

Monoisotopic mass of neutral peptide Mr(calc): 1476.6621

Fixed modifications: Carbamidomethyl (C) (apply to specified residues or termini only)

Ions Score: 59 Expect: 8.4e-006

Matches : 9/100 fragment ions using 10 most intense peaks ([help](#))

| #  | b                | b <sup>++</sup> | b <sup>0</sup> | b <sup>0++</sup> | Seq. | y                | y <sup>++</sup> | y*        | y <sup>*++</sup> | y <sup>0</sup> | y <sup>0++</sup> | #  |
|----|------------------|-----------------|----------------|------------------|------|------------------|-----------------|-----------|------------------|----------------|------------------|----|
| 1  | 103.0520         | 52.0296         | 85.0414        | 43.0244          | T    |                  |                 |           |                  |                |                  | 12 |
| 2  | 217.1331         | 109.0702        | 199.1225       | 100.0649         | I    | 1375.6247        | 688.3160        | 1357.6011 | 679.3042         | 1357.6141      | 679.3107         | 11 |
| 3  | 347.1727         | 174.0900        | 329.1622       | 165.0847         | E    | <b>1261.5436</b> | 631.2754        | 1243.5200 | 622.2636         | 1243.5330      | 622.2701         | 10 |
| 4  | 495.2382         | 248.1227        | 477.2276       | 239.1174         | F    | <b>1131.5039</b> | 566.2556        | 1113.4804 | 557.2438         | 1113.4934      | 557.2503         | 9  |
| 5  | 659.2985         | 330.1529        | 641.2880       | 321.1476         | Y    | <b>983.4385</b>  | 492.2229        | 965.4149  | 483.2111         | 965.4279       | 483.2176         | 8  |
| 6  | 761.3432         | 381.1753        | 743.3327       | 372.1700         | T    | <b>819.3781</b>  | 410.1927        | 801.3545  | 401.1809         | 801.3676       | 401.1874         | 7  |
| 7  | 891.3829         | 446.1951        | 873.3723       | 437.1898         | E    | 717.3334         | 359.1703        | 699.3098  | 350.1586         | 699.3229       | 350.1651         | 6  |
| 8  | 991.4483         | 496.2278        | 973.4378       | 487.2225         | V    | <b>587.2938</b>  | 294.1505        | 569.2702  | 285.1387         |                |                  | 5  |
| 9  | <b>1139.5138</b> | 570.2605        | 1121.5032      | 561.2552         | F    | <b>487.2283</b>  | 244.1178        | 469.2048  | 235.1060         |                |                  | 4  |
| 10 | 1197.5323        | 599.2698        | 1179.5217      | 590.2645         | G    | <b>339.1629</b>  | 170.0851        | 321.1393  | 161.0733         |                |                  | 3  |
| 11 | 1329.5698        | 665.2885        | 1311.5592      | 656.2832         | M    | 281.1444         | 141.0758        | 263.1208  | 132.0640         |                |                  | 2  |
| 12 |                  |                 |                |                  | K    | 149.1069         | 75.0571         | 131.0833  | 66.0453          |                |                  | 1  |

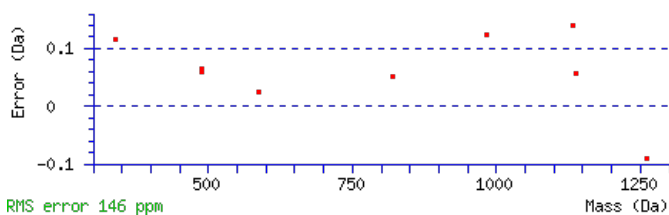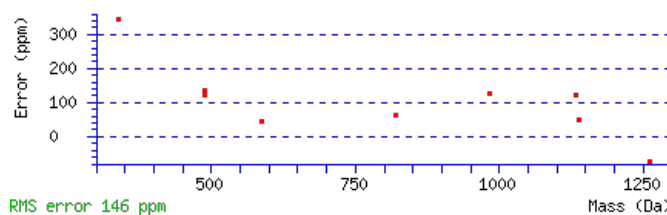NCBI BLAST search of [TIEFYTEVFGMK](#)

(Parameters: blastp, nr protein database, expect=20000, no filter, PAM30)

Other BLAST [web gateways](#)

AT1G11840.1

All matches to this query

| Score | Mr(calc)  | Delta   | Sequence                     |
|-------|-----------|---------|------------------------------|
| 59.1  | 1476.6621 | -0.0015 | <a href="#">TIEFYTEVFGMK</a> |

Mascot: <http://www.matrixscience.com/>

**Peptide View**MS/MS Fragmentation of **IGEITSGGFSPNLKK**Found in **AT1G11860.1** in **TAIR\_Arabidopsis**, Symbols: | aminomethyltransferase, putative | chr1:4001800-4003244 FORWARD

Match to Query 6711: 1546.834650 from(516.618826,3+) index(3965)

Title: Elution from: 37.560 to 37.560 scan no 4990 cid35.00 polarity:+

Data file 0-2\_2.mgf

Click mouse within plot area to zoom in by factor of two about that point

Or,   to  Da Label all possible matches  Label matches used for scoring Show Y-axis 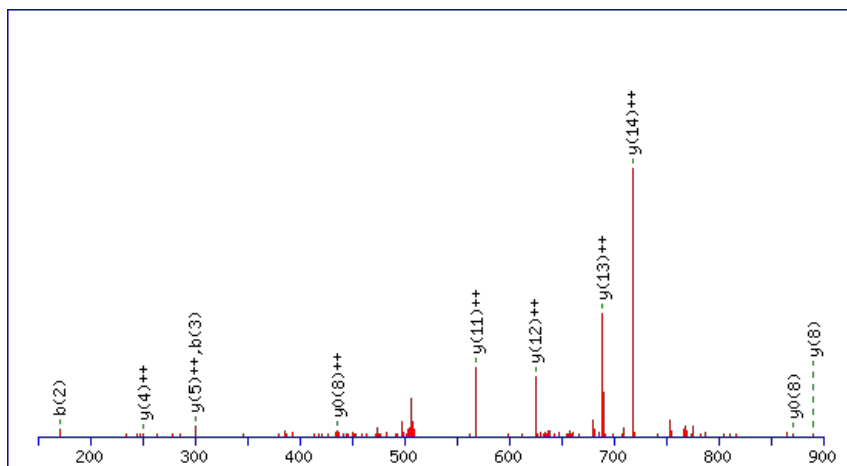Monoisotopic mass of neutral peptide **Mr(calc)**: 1546.8355

Fixed modifications: Carbamidomethyl (C) (apply to specified residues or termini only)

Ions Score: 31 Expect: 0.0039

Matches : 11/132 fragment ions using 16 most intense peaks ([help](#))

| #  | b               | b <sup>++</sup> | b*        | b <sup>*++</sup> | b <sup>0</sup> | b <sup>0++</sup> | Seq. | y               | y <sup>++</sup> | y*        | y <sup>*++</sup> | y <sup>0</sup>  | y <sup>0++</sup> | #  |
|----|-----------------|-----------------|-----------|------------------|----------------|------------------|------|-----------------|-----------------|-----------|------------------|-----------------|------------------|----|
| 1  | 114.0913        | 57.5493         |           |                  |                |                  | I    |                 |                 |           |                  |                 |                  | 15 |
| 2  | <b>171.1128</b> | 86.0600         |           |                  |                |                  | G    | 1434.7587       | <b>717.8830</b> | 1417.7322 | 709.3697         | 1416.7482       | 708.8777         | 14 |
| 3  | <b>300.1554</b> | 150.5813        |           |                  | 282.1448       | 141.5761         | E    | 1377.7373       | <b>689.3723</b> | 1360.7107 | 680.8590         | 1359.7267       | 680.3670         | 13 |
| 4  | 413.2395        | 207.1234        |           |                  | 395.2289       | 198.1181         | I    | 1248.6947       | <b>624.8510</b> | 1231.6681 | 616.3377         | 1230.6841       | 615.8457         | 12 |
| 5  | 514.2871        | 257.6472        |           |                  | 496.2766       | 248.6419         | T    | 1135.6106       | <b>568.3089</b> | 1118.5840 | 559.7957         | 1117.6000       | 559.3037         | 11 |
| 6  | 601.3192        | 301.1632        |           |                  | 583.3086       | 292.1579         | S    | 1034.5629       | 517.7851        | 1017.5364 | 509.2718         | 1016.5524       | 508.7798         | 10 |
| 7  | 658.3406        | 329.6740        |           |                  | 640.3301       | 320.6687         | G    | 947.5309        | 474.2691        | 930.5043  | 465.7558         | 929.5203        | 465.2638         | 9  |
| 8  | 715.3621        | 358.1847        |           |                  | 697.3515       | 349.1794         | G    | <b>890.5094</b> | 445.7584        | 873.4829  | 437.2451         | <b>872.4989</b> | <b>436.7531</b>  | 8  |
| 9  | 862.4305        | 431.7189        |           |                  | 844.4199       | 422.7136         | F    | 833.4880        | 417.2476        | 816.4614  | 408.7343         | 815.4774        | 408.2423         | 7  |
| 10 | 949.4625        | 475.2349        |           |                  | 931.4520       | 466.2296         | S    | 686.4195        | 343.7134        | 669.3930  | 335.2001         | 668.4090        | 334.7081         | 6  |
| 11 | 1046.5153       | 523.7613        |           |                  | 1028.5047      | 514.7560         | P    | 599.3875        | <b>300.1974</b> | 582.3610  | 291.6841         |                 |                  | 5  |
| 12 | 1160.5582       | 580.7828        | 1143.5317 | 572.2695         | 1142.5477      | 571.7775         | N    | 502.3348        | <b>251.6710</b> | 485.3082  | 243.1577         |                 |                  | 4  |
| 13 | 1273.6423       | 637.3248        | 1256.6157 | 628.8115         | 1255.6317      | 628.3195         | L    | 388.2918        | 194.6496        | 371.2653  | 186.1363         |                 |                  | 3  |
| 14 | 1401.7373       | 701.3723        | 1384.7107 | 692.8590         | 1383.7267      | 692.3670         | K    | 275.2078        | 138.1075        | 258.1812  | 129.5942         |                 |                  | 2  |
| 15 |                 |                 |           |                  |                |                  | K    | 147.1128        | 74.0600         | 130.0863  | 65.5468          |                 |                  | 1  |

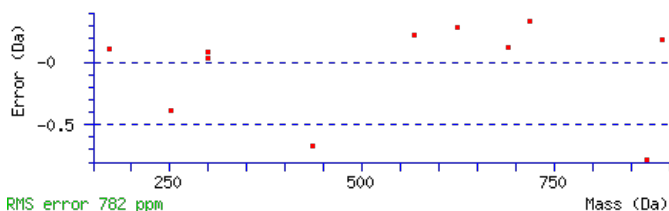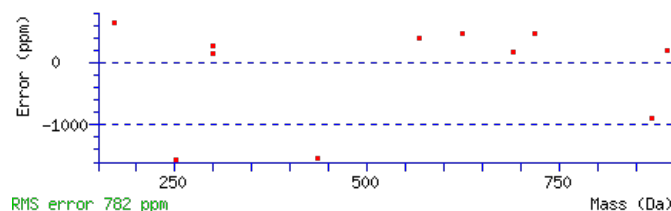NCBI **BLAST** search of [IGEITSGGFSPNLKK](#)

## AT1G11860.1

(Parameters: blastp, nr protein database, expect=20000, no filter, PAM30)

Other BLAST [web gateways](#)

### All matches to this query

| Score | Mr(calc)  | Delta   | Sequence                        |
|-------|-----------|---------|---------------------------------|
| 30.6  | 1546.8355 | -0.0008 | <a href="#">IGEITSGGFSPNLKK</a> |
| 2.1   | 1546.8355 | -0.0008 | <a href="#">LENGIGLDLHLSLGP</a> |
| 1.9   | 1546.8355 | -0.0008 | <a href="#">IGDLELFRTVQEK</a>   |
| 1.4   | 1546.8389 | -0.0042 | <a href="#">IVNELSMVLKETR</a>   |
| 1.2   | 1546.8388 | -0.0042 | <a href="#">LSCVSENKKLEK</a>    |

Mascot: <http://www.matrixscience.com/>

## Peptide View

MS/MS Fragmentation of **GPLWILGDVFMGK**

Found in **AT1G11910.1** in **TAIR\_Arabidopsis**, Symbols: | aspartyl protease family protein | chr1:4017117-4019872 REVERSE

Match to Query 6269: 1462.711860 from(732.363206,2+) index(11215)

Title: Elution from: 109.253 to 109.253 scan no 16058 cid35.00 polarity:+

Data file C7-1\_1.mgf

Click mouse within plot area to zoom in by factor of two about that point

Or,  to  Da

Label all possible matches  Label matches used for scoring

Show Y-axis

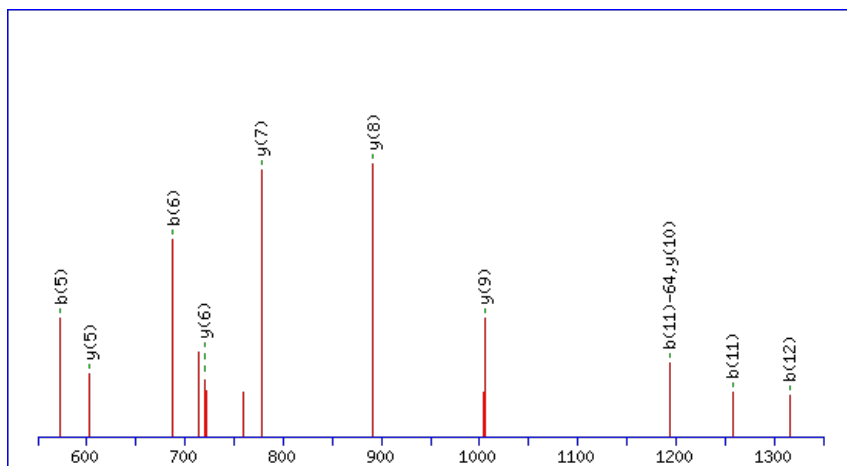

**Monoisotopic mass of neutral peptide Mr(calc):** 1462.7089

**Fixed modifications:** Carbamidomethyl (C) (apply to specified residues or termini only)

**Variable modifications:**

**M11** : Oxidation (M), with neutral losses 0.0000 (shown in table), 63.9983

**Ions Score:** 60 **Expect:** 9.8e-006

**Matches** : 11/158 fragment ions using 12 most intense peaks ([help](#))

| #  | b                | b <sup>++</sup> | b <sup>0</sup> | b <sup>0++</sup> | Seq. | y                | y <sup>++</sup> | y <sup>*</sup> | y <sup>*++</sup> | y <sup>0</sup> | y <sup>0++</sup> | #  |
|----|------------------|-----------------|----------------|------------------|------|------------------|-----------------|----------------|------------------|----------------|------------------|----|
| 1  | 59.0258          | 30.0165         |                |                  | G    |                  |                 |                |                  |                |                  | 13 |
| 2  | 157.0756         | 79.0414         |                |                  | P    | 1405.6977        | 703.3525        | 1387.6741      | 694.3407         | 1387.6871      | 694.3472         | 12 |
| 3  | 271.1567         | 136.0820        |                |                  | L    | 1307.6479        | 654.3276        | 1289.6243      | 645.3158         | 1289.6373      | 645.3223         | 11 |
| 4  | 459.2301         | 230.1187        |                |                  | W    | <b>1193.5668</b> | 597.2870        | 1175.5432      | 588.2752         | 1175.5562      | 588.2817         | 10 |
| 5  | <b>573.3112</b>  | 287.1592        |                |                  | I    | <b>1005.4934</b> | 503.2503        | 987.4698       | 494.2385         | 987.4828       | 494.2450         | 9  |
| 6  | <b>687.3923</b>  | 344.1998        |                |                  | L    | <b>891.4123</b>  | 446.2098        | 873.3887       | 437.1980         | 873.4017       | 437.2045         | 8  |
| 7  | 745.4108         | 373.2090        |                |                  | G    | <b>777.3312</b>  | 389.1692        | 759.3076       | 380.1574         | 759.3206       | 380.1639         | 7  |
| 8  | 861.4347         | 431.2210        | 843.4242       | 422.2157         | D    | <b>719.3127</b>  | 360.1600        | 701.2891       | 351.1482         | 701.3021       | 351.1547         | 6  |
| 9  | 961.5002         | 481.2537        | 943.4896       | 472.2484         | V    | <b>603.2887</b>  | 302.1480        | 585.2651       | 293.1362         |                |                  | 5  |
| 10 | 1109.5656        | 555.2865        | 1091.5551      | 546.2812         | F    | 503.2233         | 252.1153        | 485.1997       | 243.1035         |                |                  | 4  |
| 11 | <b>1257.5981</b> | 629.3027        | 1239.5875      | 620.2974         | M    | 355.1578         | 178.0825        | 337.1342       | 169.0708         |                |                  | 3  |
| 12 | <b>1315.6166</b> | 658.3119        | 1297.6060      | 649.3066         | G    | 207.1254         | 104.0663        | 189.1018       | 95.0545          |                |                  | 2  |
| 13 |                  |                 |                |                  | K    | 149.1069         | 75.0571         | 131.0833       | 66.0453          |                |                  | 1  |

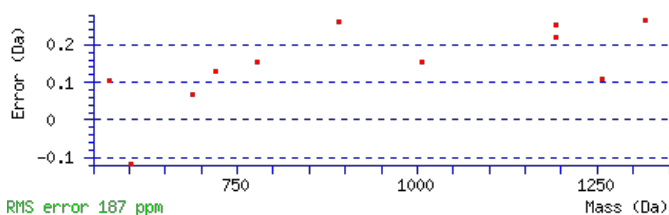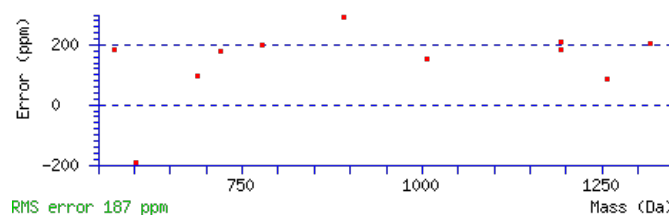

NCBI **BLAST** search of **GPLWILGDVFMGK**

(Parameters: blastp, nr protein database, expect=20000, no filter, PAM30)

# AT1G11910.1

Other BLAST [web gateways](#)

## All matches to this query

| Score | Mr(calc)  | Delta   | Sequence                      |
|-------|-----------|---------|-------------------------------|
| 59.5  | 1462.7089 | 0.0030  | <a href="#">GPLWILGDVFMGK</a> |
| 3.1   | 1462.7140 | -0.0022 | <a href="#">GOEEQVPRVYIK</a>  |
| 2.2   | 1462.7093 | 0.0025  | <a href="#">LLNLCAHSFTR</a>   |
| 2.2   | 1462.7118 | 0.0001  | <a href="#">EGVELELERRSK</a>  |
| 1.0   | 1462.7089 | 0.0030  | <a href="#">CSFVSGLFPLPK</a>  |

Mascot: <http://www.matrixscience.com/>

**Peptide View**MS/MS Fragmentation of **IVEGPASSAAGNPDEIAK**Found in **AT1G12000.1** in **TAIR\_Arabidopsis**, Symbols: | pyrophosphate--fructose-6-phosphate 1-phosphotransferase beta subunit, putative / pyrophosphate-dependent 6-phosphofructose-1-kinase, putative | chr1:4050157-4053725 REVERSE

Match to Query 7762: 1724.855596 from(863.435074,2+) index(2465)

Title: Elution from: 29.275 to 29.275 scan no 3232 cid35.00 polarity:+

Data file D1d-2\_2.mgf

Click mouse within plot area to zoom in by factor of two about that point

Or,   to  Da Label all possible matches  Label matches used for scoring Show Y-axis 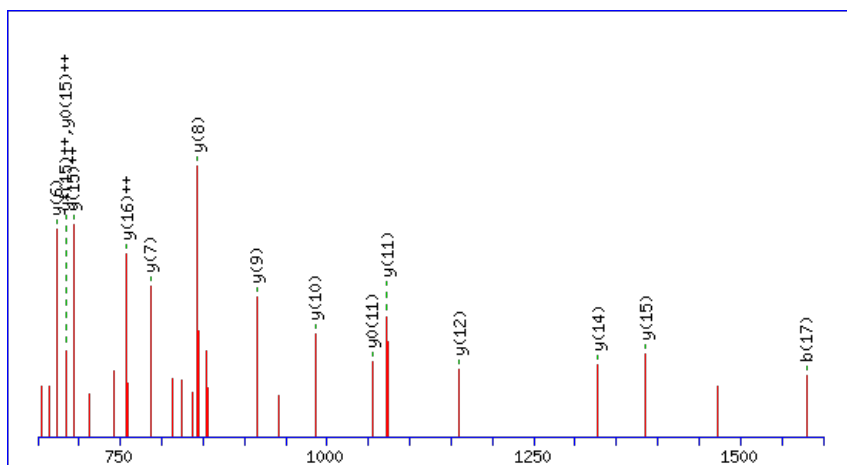Monoisotopic mass of neutral peptide  $M_r(\text{calc})$ : 1724.8581

Fixed modifications: Carbamidomethyl (C) (apply to specified residues or termini only)

Ions Score: 73 Expect: 2e-007

Matches : 16/172 fragment ions using 19 most intense peaks ([help](#))

| #  | b         | b <sup>++</sup> | b <sup>*</sup> | b <sup>*++</sup> | b <sup>0</sup> | b <sup>0++</sup> | Seq. | y         | y <sup>++</sup> | y <sup>*</sup> | y <sup>*++</sup> | y <sup>0</sup> | y <sup>0++</sup> | #  |
|----|-----------|-----------------|----------------|------------------|----------------|------------------|------|-----------|-----------------|----------------|------------------|----------------|------------------|----|
| 1  | 114.0913  | 57.5493         |                |                  |                |                  | I    |           |                 |                |                  |                |                  | 18 |
| 2  | 213.1598  | 107.0835        |                |                  |                |                  | V    | 1612.7813 | 806.8943        | 1595.7548      | 798.3810         | 1594.7707      | 797.8890         | 17 |
| 3  | 342.2023  | 171.6048        |                |                  | 324.1918       | 162.5995         | E    | 1513.7129 | 757.3601        | 1496.6863      | 748.8468         | 1495.7023      | 748.3548         | 16 |
| 4  | 399.2238  | 200.1155        |                |                  | 381.2132       | 191.1103         | G    | 1384.6703 | 692.8388        | 1367.6437      | 684.3255         | 1366.6597      | 683.8335         | 15 |
| 5  | 496.2766  | 248.6419        |                |                  | 478.2660       | 239.6366         | P    | 1327.6488 | 664.3281        | 1310.6223      | 655.8148         | 1309.6383      | 655.3228         | 14 |
| 6  | 567.3137  | 284.1605        |                |                  | 549.3031       | 275.1552         | A    | 1230.5961 | 615.8017        | 1213.5695      | 607.2884         | 1212.5855      | 606.7964         | 13 |
| 7  | 654.3457  | 327.6765        |                |                  | 636.3352       | 318.6712         | S    | 1159.5590 | 580.2831        | 1142.5324      | 571.7698         | 1141.5484      | 571.2778         | 12 |
| 8  | 741.3777  | 371.1925        |                |                  | 723.3672       | 362.1872         | S    | 1072.5269 | 536.7671        | 1055.5004      | 528.2538         | 1054.5164      | 527.7618         | 11 |
| 9  | 812.4149  | 406.7111        |                |                  | 794.4043       | 397.7058         | A    | 985.4949  | 493.2511        | 968.4684       | 484.7378         | 967.4843       | 484.2458         | 10 |
| 10 | 883.4520  | 442.2296        |                |                  | 865.4414       | 433.2243         | A    | 914.4578  | 457.7325        | 897.4312       | 449.2193         | 896.4472       | 448.7272         | 9  |
| 11 | 940.4734  | 470.7404        |                |                  | 922.4629       | 461.7351         | G    | 843.4207  | 422.2140        | 826.3941       | 413.7007         | 825.4101       | 413.2087         | 8  |
| 12 | 1054.5164 | 527.7618        | 1037.4898      | 519.2485         | 1036.5058      | 518.7565         | N    | 786.3992  | 393.7032        | 769.3727       | 385.1900         | 768.3886       | 384.6980         | 7  |
| 13 | 1151.5691 | 576.2882        | 1134.5426      | 567.7749         | 1133.5586      | 567.2829         | P    | 672.3563  | 336.6818        | 655.3297       | 328.1685         | 654.3457       | 327.6765         | 6  |
| 14 | 1266.5961 | 633.8017        | 1249.5695      | 625.2884         | 1248.5855      | 624.7964         | D    | 575.3035  | 288.1554        | 558.2770       | 279.6421         | 557.2930       | 279.1501         | 5  |
| 15 | 1395.6387 | 698.3230        | 1378.6121      | 689.8097         | 1377.6281      | 689.3177         | E    | 460.2766  | 230.6419        | 443.2500       | 222.1287         | 442.2660       | 221.6366         | 4  |
| 16 | 1508.7227 | 754.8650        | 1491.6962      | 746.3517         | 1490.7122      | 745.8597         | I    | 331.2340  | 166.1206        | 314.2074       | 157.6074         |                |                  | 3  |
| 17 | 1579.7598 | 790.3836        | 1562.7333      | 781.8703         | 1561.7493      | 781.3783         | A    | 218.1499  | 109.5786        | 201.1234       | 101.0653         |                |                  | 2  |
| 18 |           |                 |                |                  |                |                  | K    | 147.1128  | 74.0600         | 130.0863       | 65.5468          |                |                  | 1  |

# AT1G12000.1

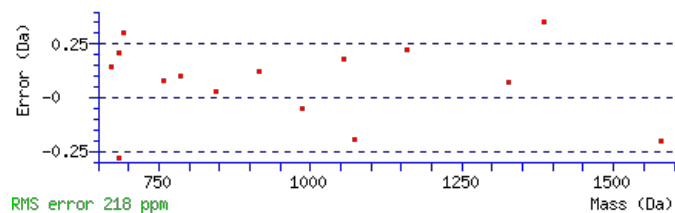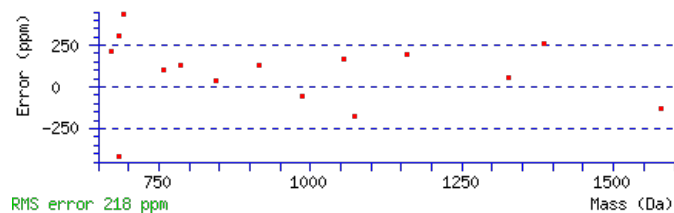

NCBI **BLAST** search of [IVEGPASSAAGNPDEIAK](#)

(Parameters: blastp, nr protein database, expect=20000, no filter, PAM30)

Other BLAST [web gateways](#)

## All matches to this query

| Score | Mr(calc)  | Delta   | Sequence                           |
|-------|-----------|---------|------------------------------------|
| 73.1  | 1724.8581 | -0.0025 | <a href="#">IVEGPASSAAGNPDEIAK</a> |
| 8.9   | 1724.8515 | 0.0041  | <a href="#">HGMGGAKENELLSAAPK</a>  |
| 1.1   | 1724.8569 | -0.0013 | <a href="#">GROGCGIPFYWTKR</a>     |
| 0.9   | 1724.8549 | 0.0007  | <a href="#">EMVTLMEQTRTAK</a>      |

Mascot: <http://www.matrixscience.com/>



**Peptide View**MS/MS Fragmentation of **IPATWQIEAAR**Found in **AT1G12230.1** in **TAIR\_Arabidopsis**, Symbols: | transaldolase, putative | chr1:4148048-4150706 FORWARD

Match to Query 4287: 1311.694048 from(656.854300,2+) index(4927)

Title: Elution from: 46.765 to 46.765 scan no 6348 cid35.00 polarity:+

Data file D1d-1\_3.mgf

Click mouse within plot area to zoom in by factor of two about that point

Or,   to  Da Label all possible matches  Label matches used for scoring Show Y-axis 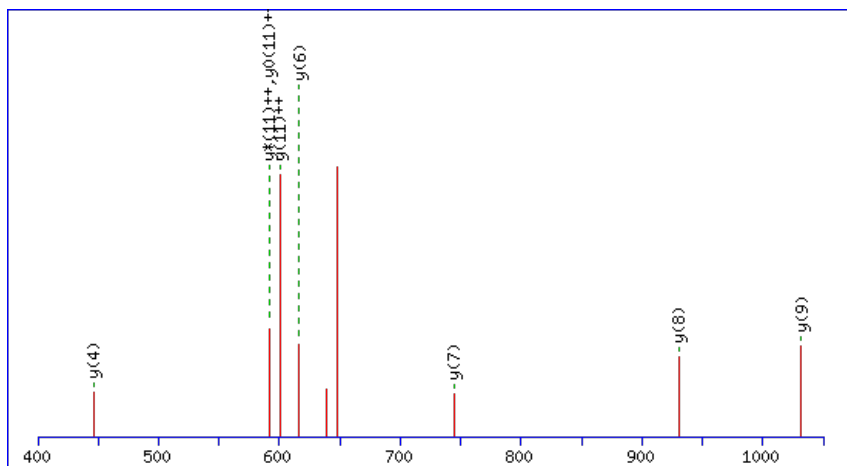**Monoisotopic mass of neutral peptide Mr(calc):** 1311.6935**Fixed modifications:** Carbamidomethyl (C) (apply to specified residues or termini only)**Ions Score:** 45 **Expect:** 9.9e-005**Matches:** 8/110 fragment ions using 9 most intense peaks ([help](#))

| #  | b         | b <sup>++</sup> | b*        | b <sup>*++</sup> | b <sup>0</sup> | b <sup>0++</sup> | Seq. | y         | y <sup>++</sup> | y*        | y <sup>*++</sup> | y <sup>0</sup> | y <sup>0++</sup> | #  |
|----|-----------|-----------------|-----------|------------------|----------------|------------------|------|-----------|-----------------|-----------|------------------|----------------|------------------|----|
| 1  | 114.0913  | 57.5493         |           |                  |                |                  | I    |           |                 |           |                  |                |                  | 12 |
| 2  | 211.1441  | 106.0757        |           |                  |                |                  | P    | 1199.6167 | 600.3120        | 1182.5902 | 591.7987         | 1181.6062      | 591.3067         | 11 |
| 3  | 282.1812  | 141.5942        |           |                  |                |                  | A    | 1102.5640 | 551.7856        | 1085.5374 | 543.2724         | 1084.5534      | 542.7803         | 10 |
| 4  | 383.2289  | 192.1181        |           |                  | 365.2183       | 183.1128         | T    | 1031.5269 | 516.2671        | 1014.5003 | 507.7538         | 1013.5163      | 507.2618         | 9  |
| 5  | 569.3082  | 285.1577        |           |                  | 551.2976       | 276.1525         | W    | 930.4792  | 465.7432        | 913.4526  | 457.2300         | 912.4686       | 456.7380         | 8  |
| 6  | 697.3668  | 349.1870        | 680.3402  | 340.6738         | 679.3562       | 340.1817         | Q    | 744.3999  | 372.7036        | 727.3733  | 364.1903         | 726.3893       | 363.6983         | 7  |
| 7  | 754.3883  | 377.6978        | 737.3617  | 369.1845         | 736.3777       | 368.6925         | G    | 616.3413  | 308.6743        | 599.3148  | 300.1610         | 598.3307       | 299.6690         | 6  |
| 8  | 867.4723  | 434.2398        | 850.4458  | 425.7265         | 849.4618       | 425.2345         | I    | 559.3198  | 280.1636        | 542.2933  | 271.6503         | 541.3093       | 271.1583         | 5  |
| 9  | 996.5149  | 498.7611        | 979.4884  | 490.2478         | 978.5043       | 489.7558         | E    | 446.2358  | 223.6215        | 429.2092  | 215.1082         | 428.2252       | 214.6162         | 4  |
| 10 | 1067.5520 | 534.2796        | 1050.5255 | 525.7664         | 1049.5415      | 525.2744         | A    | 317.1932  | 159.1002        | 300.1666  | 150.5870         |                |                  | 3  |
| 11 | 1138.5891 | 569.7982        | 1121.5626 | 561.2849         | 1120.5786      | 560.7929         | A    | 246.1561  | 123.5817        | 229.1295  | 115.0684         |                |                  | 2  |
| 12 |           |                 |           |                  |                |                  | R    | 175.1190  | 88.0631         | 158.0924  | 79.5498          |                |                  | 1  |

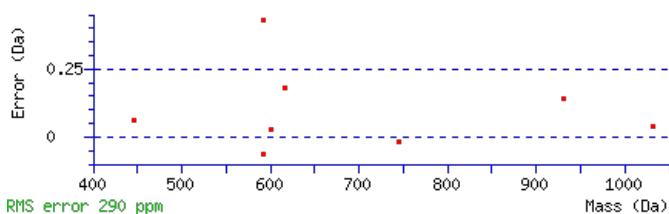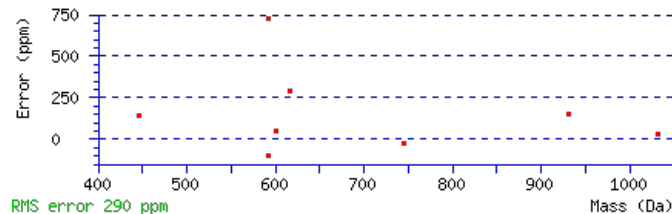NCBI **BLAST** search of **IPATWQIEAAR**

(Parameters: blastp, nr protein database, expect=20000, no filter, PAM30)

Other BLAST [web gateways](#)**All matches to this query**

AT1G12230.1

| Score | Mr(calc)  | Delta  | Sequence                     |
|-------|-----------|--------|------------------------------|
| 45.4  | 1311.6935 | 0.0005 | <a href="#">IPATWQGIEAAR</a> |

Mascot: <http://www.matrixscience.com/>

**Peptide View**MS/MS Fragmentation of **IAPSELGILMR**Found in **AT1G12310.1** in **TAIR\_Arabidopsis**, Symbols: | calmodulin, putative | chr1:4187498-4187944 REVERSE

Match to Query 3912: 1212.630858 from(607.322705,2+) index(7651)

Title: Elution from: 69.638 to 69.638 scan no 10088 cid35.00 polarity:+

Data file D1d-2\_1.mgf

Click mouse within plot area to zoom in by factor of two about that point

Or,   to  Da Label all possible matches  Label matches used for scoring Show Y-axis 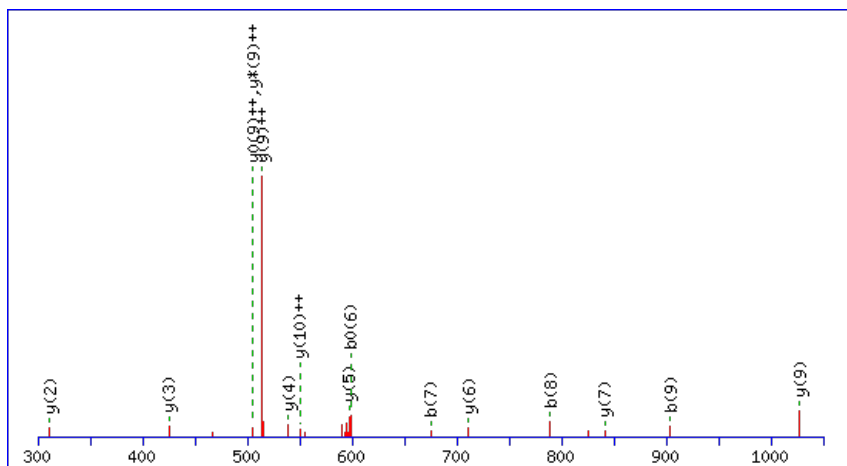Monoisotopic mass of neutral peptide  $M_r(\text{calc})$ : 1212.6329

Fixed modifications: Carbamidomethyl (C) (apply to specified residues or termini only)

Ions Score: 62 Expect: 4.1e-006

Matches : 15/82 fragment ions using 19 most intense peaks ([help](#))

| #  | b         | b <sup>++</sup> | b <sup>0</sup> | b <sup>0++</sup> | Seq. | y         | y <sup>++</sup> | y <sup>*</sup> | y <sup>*++</sup> | y <sup>0</sup> | y <sup>0++</sup> | #  |
|----|-----------|-----------------|----------------|------------------|------|-----------|-----------------|----------------|------------------|----------------|------------------|----|
| 1  | 115.0884  | 58.0478         |                |                  | I    |           |                 |                |                  |                |                  | 11 |
| 2  | 187.1225  | 94.0649         |                |                  | A    | 1099.5590 | 550.2832        | 1081.5355      | 541.2714         | 1081.5485      | 541.2779         | 10 |
| 3  | 285.1723  | 143.0898        |                |                  | P    | 1027.5249 | 514.2661        | 1009.5013      | 505.2543         | 1009.5143      | 505.2608         | 9  |
| 4  | 373.2014  | 187.1043        | 355.1908       | 178.0990         | S    | 929.4751  | 465.2412        | 911.4515       | 456.2294         | 911.4645       | 456.2359         | 8  |
| 5  | 503.2410  | 252.1241        | 485.2304       | 243.1189         | E    | 841.4460  | 421.2267        | 823.4225       | 412.2149         | 823.4355       | 412.2214         | 7  |
| 6  | 617.3221  | 309.1647        | 599.3115       | 300.1594         | L    | 711.4064  | 356.2068        | 693.3828       | 347.1950         |                |                  | 6  |
| 7  | 675.3406  | 338.1739        | 657.3300       | 329.1687         | G    | 597.3253  | 299.1663        | 579.3017       | 290.1545         |                |                  | 5  |
| 8  | 789.4217  | 395.2145        | 771.4111       | 386.2092         | I    | 539.3068  | 270.1570        | 521.2832       | 261.1453         |                |                  | 4  |
| 9  | 903.5028  | 452.2550        | 885.4922       | 443.2498         | L    | 425.2257  | 213.1165        | 407.2021       | 204.1047         |                |                  | 3  |
| 10 | 1035.5403 | 518.2738        | 1017.5298      | 509.2685         | M    | 311.1446  | 156.0759        | 293.1210       | 147.0642         |                |                  | 2  |
| 11 |           |                 |                |                  | R    | 179.1071  | 90.0572         | 161.0835       | 81.0454          |                |                  | 1  |

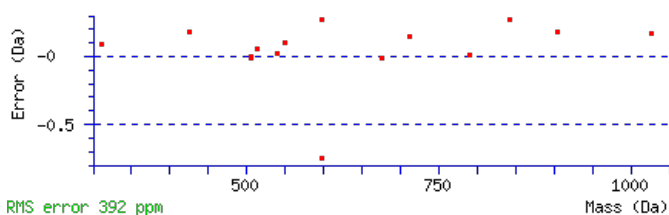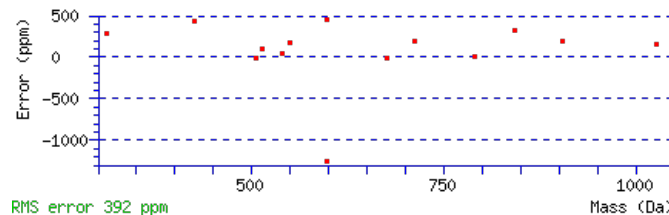NCBI BLAST search of **IAPSELGILMR**

(Parameters: blastp, nr protein database, expect=20000, no filter, PAM30)

Other BLAST [web gateways](#)

All matches to this query

**AT1G12310.1**

| <b>Score</b> | <b>Mr(calc)</b> | <b>Delta</b> | <b>Sequence</b>              |
|--------------|-----------------|--------------|------------------------------|
| 61.7         | 1212.6329       | -0.0020      | <a href="#">IAPSELGILMR</a>  |
| 13.1         | 1212.6273       | 0.0036       | <a href="#">IASIDIGSPAVR</a> |
| 4.5          | 1212.6272       | 0.0036       | <a href="#">TSVPVLALAGDR</a> |
| 2.4          | 1212.6273       | 0.0036       | <a href="#">IALVPOQSQSK</a>  |
| 0.9          | 1212.6329       | -0.0020      | <a href="#">ILSEALGPIMR</a>  |

**Mascot:** <http://www.matrixscience.com/>

## Peptide View

### MS/MS Fragmentation of LIATILK

Found in **AT1G12350.1** in **TAIR\_Arabidopsis**, Symbols: ATCOAB | ATCOAB (4-PHOSPHO-PANTO-THENOYL-CYSTEINE SYNTHETASE); catalytic/ phosphopantothenate--cysteine ligase | chr1:4198868-4200631 FORWARD

Match to Query 840: 770.526414 from(386.270483,2+) index(4736)

Title: Elution from: 43.873 to 43.873 scan no 6001 cid35.00 polarity:+

Data file 0-1\_2.mgf

Click mouse within plot area to zoom in by factor of two about that point

Or,   to  Da

Label all possible matches  Label matches used for scoring

Show Y-axis

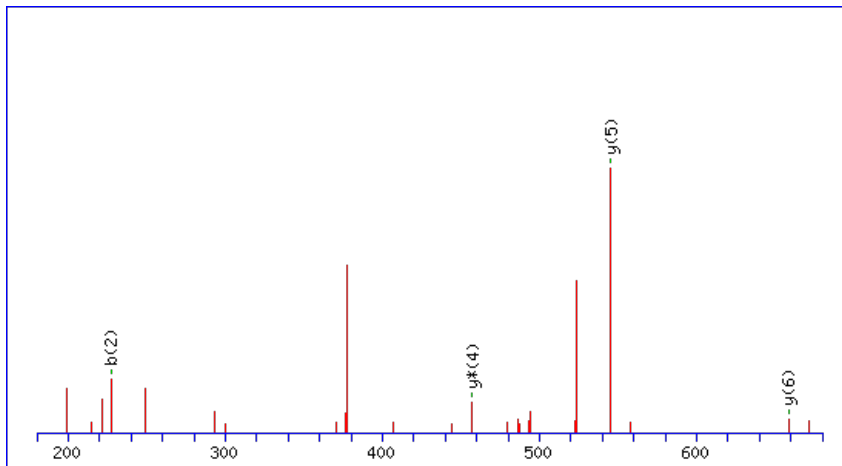

Monoisotopic mass of neutral peptide Mr(calc): 770.5266

Fixed modifications: Carbamidomethyl (C) (apply to specified residues or termini only)

Ions Score: 14 Expect: 0.041

Matches : 4/48 fragment ions using 5 most intense peaks ([help](#))

| # | b        | b <sup>++</sup> | b <sup>0</sup> | b <sup>0++</sup> | Seq. | y        | y <sup>++</sup> | y*       | y <sup>*++</sup> | y <sup>0</sup> | y <sup>0++</sup> | # |
|---|----------|-----------------|----------------|------------------|------|----------|-----------------|----------|------------------|----------------|------------------|---|
| 1 | 114.0913 | 57.5493         |                |                  | L    |          |                 |          |                  |                |                  | 7 |
| 2 | 227.1754 | 114.0913        |                |                  | I    | 658.4498 | 329.7285        | 641.4232 | 321.2153         | 640.4392       | 320.7233         | 6 |
| 3 | 298.2125 | 149.6099        |                |                  | A    | 545.3657 | 273.1865        | 528.3392 | 264.6732         | 527.3552       | 264.1812         | 5 |
| 4 | 399.2602 | 200.1337        | 381.2496       | 191.1285         | T    | 474.3286 | 237.6679        | 457.3021 | 229.1547         | 456.3180       | 228.6627         | 4 |
| 5 | 512.3443 | 256.6758        | 494.3337       | 247.6705         | I    | 373.2809 | 187.1441        | 356.2544 | 178.6308         |                |                  | 3 |
| 6 | 625.4283 | 313.2178        | 607.4178       | 304.2125         | L    | 260.1969 | 130.6021        | 243.1703 | 122.0888         |                |                  | 2 |
| 7 |          |                 |                |                  | K    | 147.1128 | 74.0600         | 130.0863 | 65.5468          |                |                  | 1 |

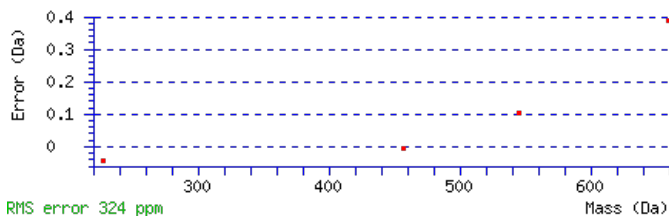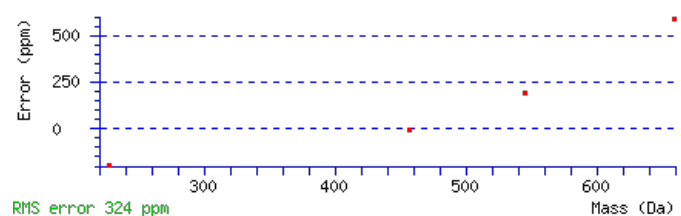

### NCBI BLAST search of LIATILK

(Parameters: blastp, nr protein database, expect=20000, no filter, PAM30)

Other BLAST [web gateways](#)

### All matches to this query

| Score | Mr(calc) | Delta   | Sequence                |
|-------|----------|---------|-------------------------|
| 13.8  | 770.5266 | -0.0001 | <a href="#">LIATILK</a> |
| 11.2  | 770.5266 | -0.0002 | <a href="#">IIVVTVK</a> |

## AT1G12350.1

|      |          |         |                         |
|------|----------|---------|-------------------------|
| 11.2 | 770.5266 | -0.0002 | <a href="#">LISVVIK</a> |
| 11.2 | 770.5266 | -0.0001 | <a href="#">LITIAIK</a> |
| 11.2 | 770.5266 | -0.0002 | <a href="#">LIVTVVK</a> |

**Mascot:** <http://www.matrixscience.com/>

**Peptide View**MS/MS Fragmentation of **IRDYLFNELAK**

Found in **AT1G12410.1** in **TAIR\_Arabidopsis**, Symbols: CLPP2, NCLPP2, CLPR2 | CLPR2 (Clp protease proteolytic subunit 2); endopeptidase Clp | chr1:4223097-4224952 FORWARD

Match to Query 5459: 1396.692528 from(466.571452,3+) index(6166)

Title: Elution from: 54.876 to 54.876 scan no 7904 cid35.00 polarity:+

Data file D6h-3\_1.mgf

Click mouse within plot area to zoom in by factor of two about that point

Or,   to  Da

Label all possible matches  Label matches used for scoring

Show Y-axis

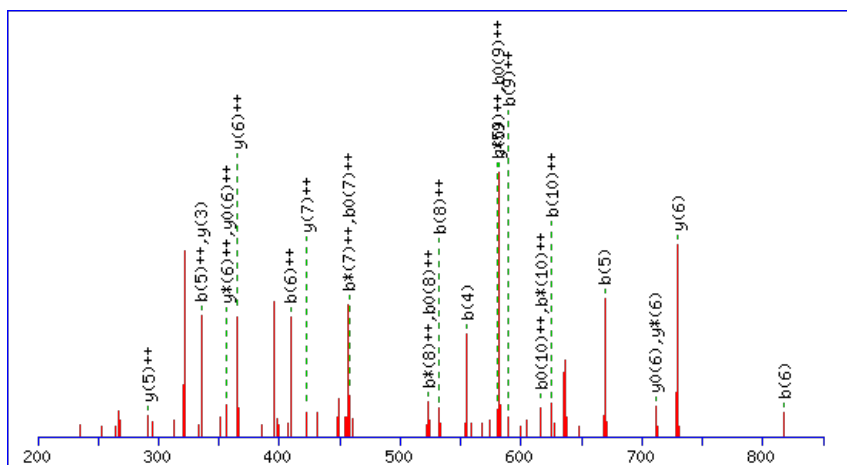

Monoisotopic mass of neutral peptide  $M_r(\text{calc})$ : 1396.6927

Fixed modifications: Carbamidomethyl (C) (apply to specified residues or termini only)

Ions Score: 24 Expect: 0.035

Matches : 26/108 fragment ions using 36 most intense peaks ([help](#))

| #  | b               | b <sup>++</sup> | b*        | b <sup>*++</sup> | b <sup>0</sup> | b <sup>0++</sup> | Seq. | y               | y <sup>++</sup> | y*              | y <sup>*++</sup> | y <sup>0</sup>  | y <sup>0++</sup> | #  |
|----|-----------------|-----------------|-----------|------------------|----------------|------------------|------|-----------------|-----------------|-----------------|------------------|-----------------|------------------|----|
| 1  | 115.0884        | 58.0478         |           |                  |                |                  | I    |                 |                 |                 |                  |                 |                  | 11 |
| 2  | 275.1776        | 138.0925        | 257.1540  | 129.0807         |                |                  | R    | 1283.6189       | 642.3131        | 1265.5953       | 633.3013         | 1265.6083       | 633.3078         | 10 |
| 3  | 391.2016        | 196.1044        | 373.1780  | 187.0926         | 373.1910       | 187.0992         | D    | 1123.5296       | 562.2685        | 1105.5061       | 553.2567         | 1105.5191       | 553.2632         | 9  |
| 4  | <b>555.2620</b> | 278.1346        | 537.2384  | 269.1228         | 537.2514       | 269.1293         | Y    | 1007.5057       | 504.2565        | 989.4821        | 495.2447         | 989.4951        | 495.2512         | 8  |
| 5  | <b>669.3431</b> | <b>335.1752</b> | 651.3195  | 326.1634         | 651.3325       | 326.1699         | L    | 843.4453        | <b>422.2263</b> | 825.4217        | 413.2145         | 825.4347        | 413.2210         | 7  |
| 6  | <b>817.4085</b> | <b>409.2079</b> | 799.3849  | 400.1961         | 799.3980       | 400.2026         | F    | <b>729.3642</b> | <b>365.1857</b> | <b>711.3406</b> | <b>356.1739</b>  | <b>711.3536</b> | <b>356.1805</b>  | 6  |
| 7  | 933.4455        | 467.2264        | 915.4219  | <b>458.2146</b>  | 915.4349       | <b>458.2211</b>  | N    | <b>581.2987</b> | <b>291.1530</b> | 563.2752        | 282.1412         | 563.2882        | 282.1477         | 5  |
| 8  | 1063.4851       | <b>532.2462</b> | 1045.4616 | <b>523.2344</b>  | 1045.4746      | <b>523.2409</b>  | E    | 465.2617        | 233.1345        | 447.2382        | 224.1227         | 447.2512        | 224.1292         | 4  |
| 9  | 1177.5662       | <b>589.2868</b> | 1159.5427 | <b>580.2750</b>  | 1159.5557      | <b>580.2815</b>  | L    | <b>335.2221</b> | 168.1147        | 317.1985        | 159.1029         |                 |                  | 3  |
| 10 | 1249.6004       | <b>625.3038</b> | 1231.5768 | <b>616.2920</b>  | 1231.5898      | <b>616.2985</b>  | A    | 221.1410        | 111.0741        | 203.1174        | 102.0624         |                 |                  | 2  |
| 11 |                 |                 |           |                  |                |                  | K    | 149.1069        | 75.0571         | 131.0833        | 66.0453          |                 |                  | 1  |

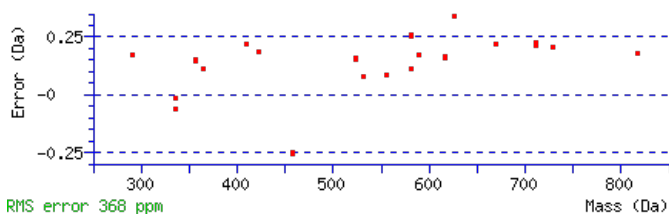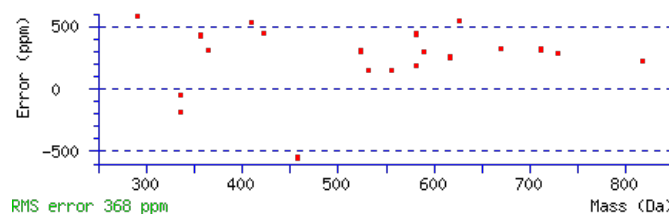

NCBI **BLAST** search of **IRDYLFNELAK**

(Parameters: blastp, nr protein database, expect=20000, no filter, PAM30)

Other BLAST [web gateways](#)

All matches to this query

## AT1G12410.1

| Score | Mr(calc)  | Delta   | Sequence                     |
|-------|-----------|---------|------------------------------|
| 23.8  | 1396.6927 | -0.0002 | <a href="#">IRDYLFNELAK</a>  |
| 18.8  | 1396.6905 | 0.0021  | <a href="#">NLSTRESVEVTK</a> |
| 13.3  | 1396.6961 | -0.0035 | <a href="#">SKVVMTFDLIGR</a> |
| 3.5   | 1396.6913 | 0.0012  | <a href="#">EGVMRKFCIK</a>   |
| 2.2   | 1396.6931 | -0.0006 | <a href="#">QRRQEVSSLFK</a>  |
| 1.2   | 1396.6934 | -0.0009 | <a href="#">MSFTELTISVIK</a> |
| 1.1   | 1396.6905 | 0.0021  | <a href="#">DLVEFAKTRSSK</a> |
| 0.3   | 1396.6927 | -0.0002 | <a href="#">KSFWLETASGKK</a> |
| 0.1   | 1396.6949 | -0.0024 | <a href="#">GFISLSVPYFPR</a> |

Mascot: <http://www.matrixscience.com/>



**Peptide View**MS/MS Fragmentation of **MQEWLKK**

Found in **AT1G12450.1** in **TAIR\_Arabidopsis**, Symbols: | similar to unknown protein [Arabidopsis thaliana] (TAIR:AT4G22850.1); similar to unnamed protein product [Vitis vinifera] (GB:CAO63604.1); contains InterPro domain SNARE associated Golgi protein (InterPro:IPR015414) | chr1:4244494-42458

Match to Query 2180: 972.473158 from(487.243855,2+) index(1195)

Title: Elution from: 17.494 to 17.494 scan no 1654 cid35.00 polarity:+

Data file C7-3\_3.mgf

Click mouse within plot area to zoom in by factor of two about that point

Or,   to  Da

Label all possible matches  Label matches used for scoring

Show Y-axis

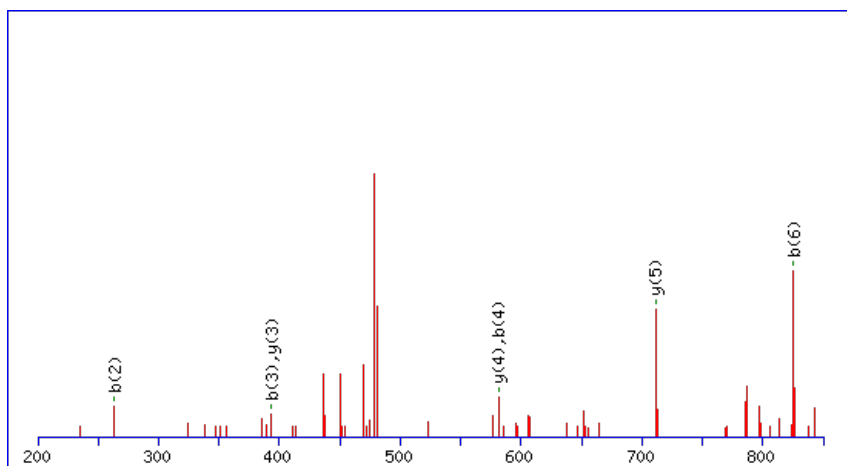

**Monoisotopic mass of neutral peptide Mr(calc):** 972.4729

**Fixed modifications:** Carbamidomethyl (C) (apply to specified residues or termini only)

**Ions Score:** 32 **Expect:** 0.0065

**Matches:** 7/58 fragment ions using 7 most intense peaks ([help](#))

| # | b               | b <sup>++</sup> | b*       | b <sup>*++</sup> | b <sup>0</sup> | b <sup>0++</sup> | Seq.     | y               | y <sup>++</sup> | y*       | y <sup>*++</sup> | y <sup>0</sup> | y <sup>0++</sup> | # |
|---|-----------------|-----------------|----------|------------------|----------------|------------------|----------|-----------------|-----------------|----------|------------------|----------------|------------------|---|
| 1 | 133.0448        | 67.0260         |          |                  |                |                  | <b>M</b> |                 |                 |          |                  |                |                  | 7 |
| 2 | <b>263.0974</b> | 132.0524        | 245.0739 | 123.0406         |                |                  | <b>Q</b> | 841.4427        | 421.2250        | 823.4191 | 412.2132         | 823.4321       | 412.2197         | 6 |
| 3 | <b>393.1371</b> | 197.0722        | 375.1135 | 188.0604         | 375.1265       | 188.0669         | <b>E</b> | <b>711.3900</b> | 356.1986        | 693.3664 | 347.1869         | 693.3795       | 347.1934         | 5 |
| 4 | <b>581.2105</b> | 291.1089        | 563.1869 | 282.0971         | 563.1999       | 282.1036         | <b>W</b> | <b>581.3504</b> | 291.1788        | 563.3268 | 282.1670         |                |                  | 4 |
| 5 | 695.2916        | 348.1494        | 677.2680 | 339.1376         | 677.2810       | 339.1441         | <b>L</b> | <b>393.2770</b> | 197.1421        | 375.2534 | 188.1303         |                |                  | 3 |
| 6 | <b>825.3806</b> | 413.1939        | 807.3570 | 404.1821         | 807.3700       | 404.1886         | <b>K</b> | 279.1959        | 140.1016        | 261.1723 | 131.0898         |                |                  | 2 |
| 7 |                 |                 |          |                  |                |                  | <b>K</b> | 149.1069        | 75.0571         | 131.0833 | 66.0453          |                |                  | 1 |

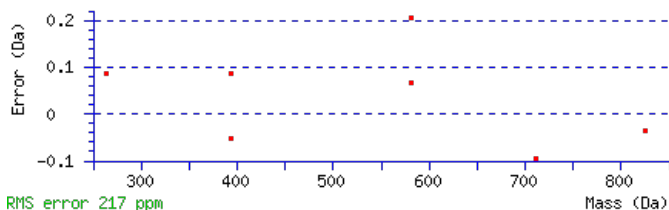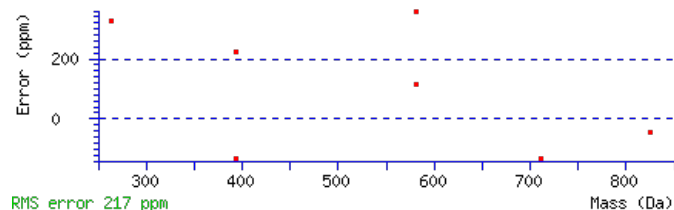

NCBI **BLAST** search of **MQEWLKK**

(Parameters: blastp, nr protein database, expect=20000, no filter, PAM30)

Other BLAST [web gateways](#)

**All matches to this query**

| Score | Mr(calc) | Delta  | Sequence                |
|-------|----------|--------|-------------------------|
| 32.3  | 972.4729 | 0.0003 | <a href="#">MQEWLKK</a> |

## AT1G12450.1

|      |          |         |                           |
|------|----------|---------|---------------------------|
| 21.3 | 972.4754 | -0.0022 | <a href="#">DSKDKELK</a>  |
| 21.3 | 972.4707 | 0.0025  | <a href="#">RVMDEALK</a>  |
| 19.7 | 972.4754 | -0.0022 | <a href="#">EEKSATGLK</a> |
| 15.4 | 972.4707 | 0.0025  | <a href="#">VCNTNILK</a>  |
| 13.5 | 972.4754 | -0.0023 | <a href="#">GSSSLPSLK</a> |
| 13.1 | 972.4754 | -0.0022 | <a href="#">ELTNGTSLK</a> |
| 9.6  | 972.4707 | 0.0025  | <a href="#">MEELGVKR</a>  |
| 9.6  | 972.4707 | 0.0025  | <a href="#">MKESPTLR</a>  |
| 9.4  | 972.4707 | 0.0025  | <a href="#">ELGMOQVR</a>  |

Mascot: <http://www.matrixscience.com/>

**Peptide View**MS/MS Fragmentation of **MEERKIK**Found in **AT1G12620.1** in **TAIR\_Arabidopsis**, Symbols: | pentatricopeptide (PPR) repeat-containing protein | chr1:4294881-4296746 REVERSE

Match to Query 2159: 960.472500 from(481.243526,2+) index(2309)

Title: Elution from: 25.177 to 25.177 scan no 2916 cid35.00 polarity:+

Data file C7-1\_1.mgf

Click mouse within plot area to zoom in by factor of two about that point

Or,   to  Da Label all possible matches  Label matches used for scoring Show Y-axis 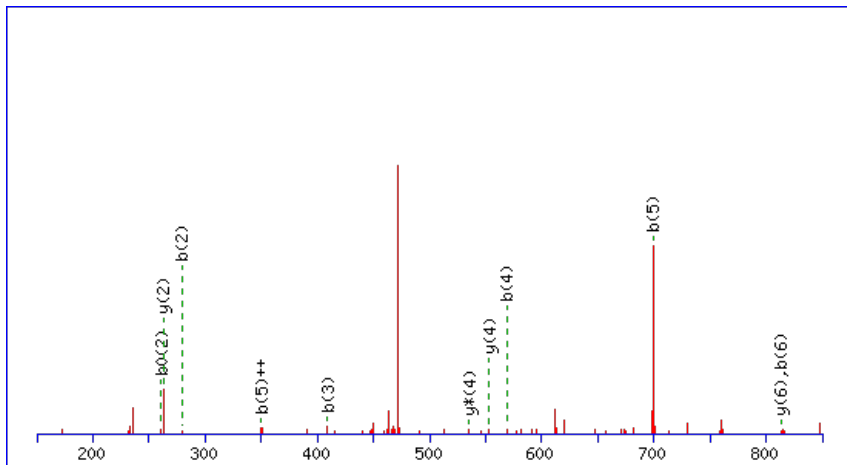Monoisotopic mass of neutral peptide  $M_r(\text{calc})$ : 960.4707

Fixed modifications: Carbamidomethyl (C) (apply to specified residues or termini only)

Variable modifications:

M1 : Oxidation (M), with neutral losses 0.0000 (shown in table), 63.9983

Ions Score: 25 Expect: 0.034

Matches : 11/84 fragment ions using 27 most intense peaks ([help](#))

| # | b               | b <sup>++</sup> | b*       | b <sup>*++</sup> | b <sup>0</sup>  | b <sup>0++</sup> | Seq. | y               | y <sup>++</sup> | y*              | y <sup>*++</sup> | y <sup>0</sup> | y <sup>0++</sup> | # |
|---|-----------------|-----------------|----------|------------------|-----------------|------------------|------|-----------------|-----------------|-----------------|------------------|----------------|------------------|---|
| 1 | 149.0397        | 75.0235         |          |                  |                 |                  | M    |                 |                 |                 |                  |                |                  | 7 |
| 2 | <b>279.0793</b> | 140.0433        |          |                  | <b>261.0688</b> | 131.0380         | E    | <b>813.4455</b> | 407.2264        | 795.4219        | 398.2146         | 795.4349       | 398.2211         | 6 |
| 3 | <b>409.1190</b> | 205.0631        |          |                  | 391.1084        | 196.0578         | E    | 683.4059        | 342.2066        | 665.3823        | 333.1948         | 665.3953       | 333.2013         | 5 |
| 4 | <b>569.2082</b> | 285.1077        | 551.1846 | 276.0960         | 551.1977        | 276.1025         | R    | <b>553.3663</b> | 277.1868        | <b>535.3427</b> | 268.1750         |                |                  | 4 |
| 5 | <b>699.2973</b> | <b>350.1523</b> | 681.2737 | 341.1405         | 681.2867        | 341.1470         | K    | 393.2770        | 197.1421        | 375.2534        | 188.1303         |                |                  | 3 |
| 6 | <b>813.3783</b> | 407.1928        | 795.3548 | 398.1810         | 795.3678        | 398.1875         | I    | <b>263.1880</b> | 132.0976        | 245.1644        | 123.0858         |                |                  | 2 |
| 7 |                 |                 |          |                  |                 |                  | K    | 149.1069        | 75.0571         | 131.0833        | 66.0453          |                |                  | 1 |

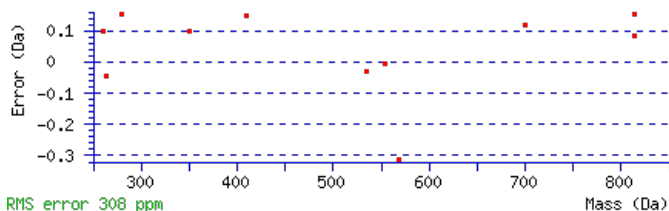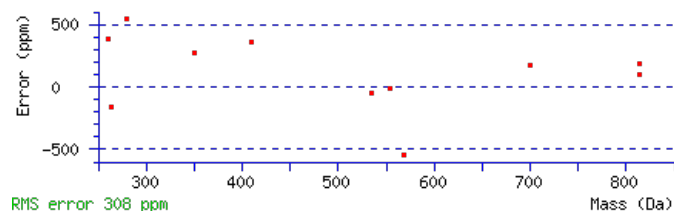NCBI **BLAST** search of [MEERKIK](#)

(Parameters: blastp, nr protein database, expect=20000, no filter, PAM30)

Other BLAST [web gateways](#)**All matches to this query**

| Score | $M_r(\text{calc})$ | Delta  | Sequence                  |
|-------|--------------------|--------|---------------------------|
| 25.2  | 960.4707           | 0.0018 | <a href="#">MEERKIK</a>   |
| 15.5  | 960.4707           | 0.0018 | <a href="#">AMGKKAEEK</a> |

## AT1G12620.1

|      |          |         |                          |
|------|----------|---------|--------------------------|
| 14.2 | 960.4707 | 0.0018  | <a href="#">MKERLEK</a>  |
| 14.2 | 960.4707 | 0.0018  | <a href="#">KKMAAQEK</a> |
| 14.1 | 960.4707 | 0.0018  | <a href="#">LEKSMAVR</a> |
| 13.5 | 960.4707 | 0.0018  | <a href="#">MQSLTLTR</a> |
| 13.5 | 960.4707 | 0.0018  | <a href="#">MVEARSLK</a> |
| 13.5 | 960.4707 | 0.0018  | <a href="#">RSEVMSLK</a> |
| 13.5 | 960.4700 | 0.0025  | <a href="#">TRSQWIR</a>  |
| 11.1 | 960.4733 | -0.0008 | <a href="#">VRMRQEK</a>  |

**Mascot:** <http://www.matrixscience.com/>

## Peptide View

MS/MS Fragmentation of **DLSNLVKPEDIVESEHLVTLAVVPK**

Found in **AT1G12840.1** in **TAIR\_Arabidopsis**, Symbols: ATVHA-C, DET3 | DET3 (DE-ETIOLATED 3) | chr1:4375582-4378218 FORWARD

Match to Query 10696: 2887.488176 from(722.879320,4+) index(10883)

Title: Elution from: 115.518 to 115.518 scan no 16118 cid35.00 polarity:+

Data file D12h-1\_2.mgf

Click mouse within plot area to zoom in by factor of two about that point

Or, Plot from  to  Da

Label all possible matches  Label matches used for scoring

Show Y-axis

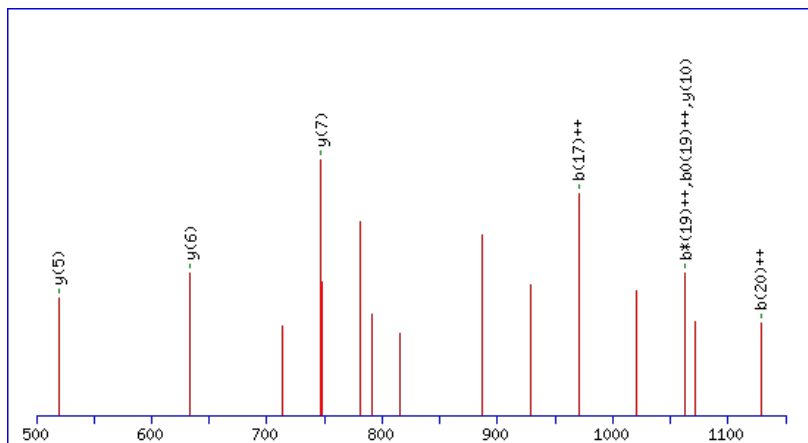

Monoisotopic mass of neutral peptide **Mr(calc)**: 2887.4929

**Fixed modifications**: Carbamidomethyl (C) (apply to specified residues or termini only)

**Ions Score**: 25 **Expect**: 0.0067

**Matches**: 8/280 fragment ions using 7 most intense peaks ([help](#))

| #  | b         | b <sup>++</sup>  | b <sup>*</sup> | b <sup>*++</sup> | b <sup>0</sup> | b <sup>0++</sup> | Seq. | y                | y <sup>++</sup> | y <sup>*</sup> | y <sup>*++</sup> | y <sup>0</sup> | y <sup>0++</sup> | #  |
|----|-----------|------------------|----------------|------------------|----------------|------------------|------|------------------|-----------------|----------------|------------------|----------------|------------------|----|
| 1  | 117.0313  | 59.0193          |                |                  | 99.0207        | 50.0140          | D    |                  |                 |                |                  |                |                  | 26 |
| 2  | 231.1124  | 116.0598         |                |                  | 213.1018       | 107.0545         | L    | 2772.4762        | 1386.7417       | 2754.4526      | 1377.7299        | 2754.4656      | 1377.7365        | 25 |
| 3  | 319.1414  | 160.0743         |                |                  | 301.1309       | 151.0691         | S    | 2658.3951        | 1329.7012       | 2640.3715      | 1320.6894        | 2640.3845      | 1320.6959        | 24 |
| 4  | 435.1784  | 218.0928         | 417.1548       | 209.0811         | 417.1678       | 209.0876         | N    | 2570.3660        | 1285.6867       | 2552.3425      | 1276.6749        | 2552.3555      | 1276.6814        | 23 |
| 5  | 549.2595  | 275.1334         | 531.2359       | 266.1216         | 531.2489       | 266.1281         | L    | 2454.3290        | 1227.6682       | 2436.3055      | 1218.6564        | 2436.3185      | 1218.6629        | 22 |
| 6  | 649.3250  | 325.1661         | 631.3014       | 316.1543         | 631.3144       | 316.1608         | V    | 2340.2479        | 1170.6276       | 2322.2244      | 1161.6158        | 2322.2374      | 1161.6223        | 21 |
| 7  | 779.4140  | 390.2106         | 761.3904       | 381.1988         | 761.4034       | 381.2054         | K    | 2240.1825        | 1120.5949       | 2222.1589      | 1111.5831        | 2222.1719      | 1111.5896        | 20 |
| 8  | 877.4638  | 439.2355         | 859.4402       | 430.2237         | 859.4532       | 430.2303         | P    | 2110.0935        | 1055.5504       | 2092.0699      | 1046.5386        | 2092.0829      | 1046.5451        | 19 |
| 9  | 1007.5034 | 504.2553         | 989.4798       | 495.2436         | 989.4929       | 495.2501         | E    | 2012.0437        | 1006.5255       | 1994.0201      | 997.5137         | 1994.0331      | 997.5202         | 18 |
| 10 | 1123.5274 | 562.2673         | 1105.5038      | 553.2555         | 1105.5168      | 553.2621         | D    | 1882.0040        | 941.5057        | 1863.9805      | 932.4939         | 1863.9935      | 932.5004         | 17 |
| 11 | 1237.6085 | 619.3079         | 1219.5849      | 610.2961         | 1219.5979      | 610.3026         | I    | 1765.9801        | 883.4937        | 1747.9565      | 874.4819         | 1747.9695      | 874.4884         | 16 |
| 12 | 1337.6739 | 669.3406         | 1319.6504      | 660.3288         | 1319.6634      | 660.3353         | V    | 1651.8990        | 826.4531        | 1633.8754      | 817.4413         | 1633.8884      | 817.4478         | 15 |
| 13 | 1467.7136 | 734.3604         | 1449.6900      | 725.3486         | 1449.7030      | 725.3551         | E    | 1551.8335        | 776.4204        | 1533.8099      | 767.4086         | 1533.8230      | 767.4151         | 14 |
| 14 | 1555.7426 | 778.3750         | 1537.7191      | 769.3632         | 1537.7321      | 769.3697         | S    | 1421.7939        | 711.4006        | 1403.7703      | 702.3888         | 1403.7833      | 702.3953         | 13 |
| 15 | 1685.7823 | 843.3948         | 1667.7587      | 834.3830         | 1667.7717      | 834.3895         | E    | 1333.7648        | 667.3861        | 1315.7412      | 658.3743         | 1315.7543      | 658.3808         | 12 |
| 16 | 1825.8323 | 913.4198         | 1807.8087      | 904.4080         | 1807.8217      | 904.4145         | H    | 1203.7252        | 602.3662        | 1185.7016      | 593.3544         | 1185.7146      | 593.3610         | 11 |
| 17 | 1939.9134 | <b>970.4603</b>  | 1921.8898      | 961.4485         | 1921.9028      | 961.4550         | L    | <b>1063.6752</b> | 532.3412        | 1045.6516      | 523.3294         | 1045.6646      | 523.3359         | 10 |
| 18 | 2039.9788 | 1020.4931        | 2021.9552      | 1011.4813        | 2021.9683      | 1011.4878        | V    | 949.5941         | 475.3007        | 931.5705       | 466.2889         | 931.5835       | 466.2954         | 9  |
| 19 | 2142.0235 | 1071.5154        | 2124.0000      | <b>1062.5036</b> | 2124.0130      | <b>1062.5101</b> | T    | 849.5286         | 425.2680        | 831.5050       | 416.2562         | 831.5181       | 416.2627         | 8  |
| 20 | 2256.1046 | <b>1128.5560</b> | 2238.0811      | 1119.5442        | 2238.0941      | 1119.5507        | L    | <b>747.4839</b>  | 374.2456        | 729.4603       | 365.2338         |                |                  | 7  |
| 21 | 2370.1857 | 1185.5965        | 2352.1622      | 1176.5847        | 2352.1752      | 1176.5912        | L    | <b>633.4028</b>  | 317.2050        | 615.3792       | 308.1933         |                |                  | 6  |
| 22 | 2442.2199 | 1221.6136        | 2424.1963      | 1212.6018        | 2424.2093      | 1212.6083        | A    | <b>519.3217</b>  | 260.1645        | 501.2981       | 251.1527         |                |                  | 5  |
| 23 | 2542.2853 | 1271.6463        | 2524.2618      | 1262.6345        | 2524.2748      | 1262.6410        | V    | 447.2876         | 224.1474        | 429.2640       | 215.1356         |                |                  | 4  |
| 24 | 2642.3508 | 1321.6790        | 2624.3272      | 1312.6672        | 2624.3402      | 1312.6737        | V    | 347.2221         | 174.1147        | 329.1985       | 165.1029         |                |                  | 3  |
| 25 | 2740.4006 | 1370.7039        | 2722.3770      | 1361.6921        | 2722.3900      | 1361.6986        | P    | 247.1567         | 124.0820        | 229.1331       | 115.0702         |                |                  | 2  |

|    |  |  |  |  |  |  |   |          |         |          |         |  |  |  |   |
|----|--|--|--|--|--|--|---|----------|---------|----------|---------|--|--|--|---|
| 26 |  |  |  |  |  |  | K | 149.1069 | 75.0571 | 131.0833 | 66.0453 |  |  |  | 1 |
|----|--|--|--|--|--|--|---|----------|---------|----------|---------|--|--|--|---|

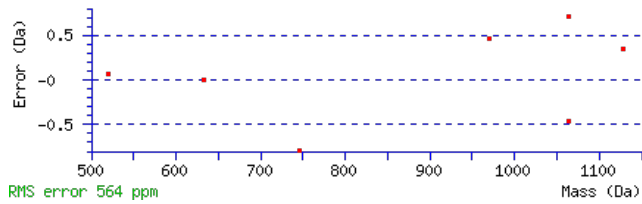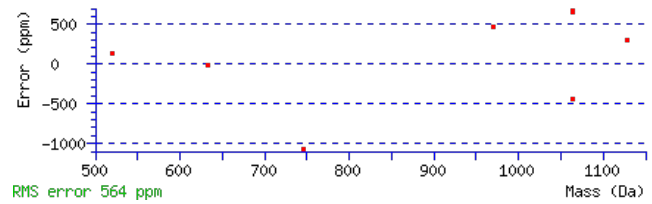

NCBI BLAST search of [DLSNLVKPEDIVESEHLVTLAVVPK](#)  
 (Parameters: blastp, nr protein database, expect=20000, no filter, PAM30)  
 Other BLAST [web gateways](#)

#### All matches to this query

| Score | Mr(calc)  | Delta   | Sequence                                  |
|-------|-----------|---------|-------------------------------------------|
| 24.8  | 2887.4929 | -0.0047 | <a href="#">DLSNLVKPEDIVESEHLVTLAVVPK</a> |
| 2.9   | 2887.4879 | 0.0003  | <a href="#">VTFQLAAFRLFNLMGIPVLSMFLTK</a> |

Mascot: <http://www.matrixscience.com/>

### Peptide View

 MS/MS Fragmentation of **YDSTLGIFDADVKPSGDSALSVDGK**

 Found in **AT1G12900.1** in **TAIR\_Arabidopsis**, Symbols: GAPA-2 | GAPA-2; glyceraldehyde-3-phosphate dehydrogenase | chr1.4392632-4394281  
 REVERSE

Match to Query 10050: 2556.222624 from(853.081484,3+) index(7761)

Title: Elution from: 70.915 to 70.915 scan no 10345 cid35.00 polarity:+

Data file D1d-1\_3.mgf

Click mouse within plot area to zoom in by factor of two about that point

 Or, Plot from  to  Da 

 Label all possible matches  Label matches used for scoring 

 Show Y-axis 
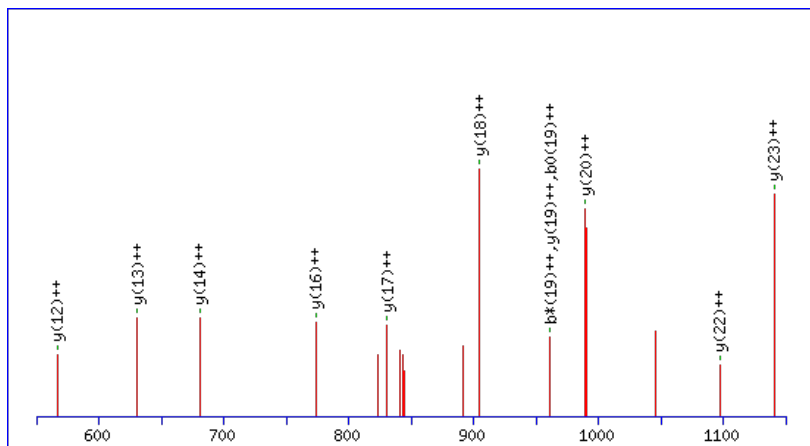
 Monoisotopic mass of neutral peptide  $M_r(\text{calc})$ : 2556.2232

Fixed modifications: Carbamidomethyl (C) (apply to specified residues or termini only)

Ions Score: 97 Expect: 6.3e-010

 Matches : 12/258 fragment ions using 11 most intense peaks ([help](#))

| #  | b         | b <sup>++</sup> | b <sup>*</sup> | b <sup>*++</sup> | b <sup>0</sup> | b <sup>0++</sup> | Seq | y         | y <sup>++</sup> | y <sup>*</sup> | y <sup>*++</sup> | y <sup>0</sup> | y <sup>0++</sup> | #  |
|----|-----------|-----------------|----------------|------------------|----------------|------------------|-----|-----------|-----------------|----------------|------------------|----------------|------------------|----|
| 1  | 164.0706  | 82.5389         |                |                  |                |                  | Y   |           |                 |                |                  |                |                  | 25 |
| 2  | 279.0975  | 140.0524        |                |                  | 261.0870       | 131.0471         | D   | 2394.1671 | 1197.5872       | 2377.1405      | 1189.0739        | 2376.1565      | 1188.5819        | 24 |
| 3  | 366.1296  | 183.5684        |                |                  | 348.1190       | 174.5631         | S   | 2279.1401 | 1140.0737       | 2262.1136      | 1131.5604        | 2261.1296      | 1131.0684        | 23 |
| 4  | 467.1773  | 234.0923        |                |                  | 449.1667       | 225.0870         | T   | 2192.1081 | 1096.5577       | 2175.0816      | 1088.0444        | 2174.0976      | 1087.5524        | 22 |
| 5  | 580.2613  | 290.6343        |                |                  | 562.2508       | 281.6290         | L   | 2091.0604 | 1046.0339       | 2074.0339      | 1037.5206        | 2073.0499      | 1037.0286        | 21 |
| 6  | 637.2828  | 319.1450        |                |                  | 619.2722       | 310.1397         | G   | 1977.9764 | 989.4918        | 1960.9498      | 980.9786         | 1959.9658      | 980.4865         | 20 |
| 7  | 750.3668  | 375.6871        |                |                  | 732.3563       | 366.6818         | I   | 1920.9549 | 960.9811        | 1903.9284      | 952.4678         | 1902.9443      | 951.9758         | 19 |
| 8  | 897.4353  | 449.2213        |                |                  | 879.4247       | 440.2160         | F   | 1807.8708 | 904.4391        | 1790.8443      | 895.9258         | 1789.8603      | 895.4338         | 18 |
| 9  | 1012.4622 | 506.7347        |                |                  | 994.4516       | 497.7295         | D   | 1660.8024 | 830.9049        | 1643.7759      | 822.3916         | 1642.7919      | 821.8996         | 17 |
| 10 | 1083.4993 | 542.2533        |                |                  | 1065.4888      | 533.2480         | A   | 1545.7755 | 773.3914        | 1528.7489      | 764.8781         | 1527.7649      | 764.3861         | 16 |
| 11 | 1198.5263 | 599.7668        |                |                  | 1180.5157      | 590.7615         | D   | 1474.7384 | 737.8728        | 1457.7118      | 729.3596         | 1456.7278      | 728.8675         | 15 |
| 12 | 1297.5947 | 649.3010        |                |                  | 1279.5841      | 640.2957         | V   | 1359.7114 | 680.3594        | 1342.6849      | 671.8461         | 1341.7009      | 671.3541         | 14 |
| 13 | 1425.6896 | 713.3485        | 1408.6631      | 704.8352         | 1407.6791      | 704.3432         | K   | 1260.6430 | 630.8251        | 1243.6165      | 622.3119         | 1242.6325      | 621.8199         | 13 |
| 14 | 1522.7424 | 761.8748        | 1505.7159      | 753.3616         | 1504.7318      | 752.8696         | P   | 1132.5481 | 566.7777        | 1115.5215      | 558.2644         | 1114.5375      | 557.7724         | 12 |
| 15 | 1609.7744 | 805.3909        | 1592.7479      | 796.8776         | 1591.7639      | 796.3856         | S   | 1035.4953 | 518.2513        | 1018.4687      | 509.7380         | 1017.4847      | 509.2460         | 11 |
| 16 | 1666.7959 | 833.9016        | 1649.7693      | 825.3883         | 1648.7853      | 824.8963         | G   | 948.4633  | 474.7353        | 931.4367       | 466.2220         | 930.4527       | 465.7300         | 10 |
| 17 | 1781.8228 | 891.4151        | 1764.7963      | 882.9018         | 1763.8123      | 882.4098         | D   | 891.4418  | 446.2245        | 874.4153       | 437.7113         | 873.4312       | 437.2193         | 9  |
| 18 | 1868.8549 | 934.9311        | 1851.8283      | 926.4178         | 1850.8443      | 925.9258         | S   | 776.4149  | 388.7111        | 759.3883       | 380.1978         | 758.4043       | 379.7058         | 8  |
| 19 | 1939.8920 | 970.4496        | 1922.8654      | 961.9364         | 1921.8814      | 961.4443         | A   | 689.3828  | 345.1951        | 672.3563       | 336.6818         | 671.3723       | 336.1898         | 7  |
| 20 | 2052.9760 | 1026.9917       | 2035.9495      | 1018.4784        | 2034.9655      | 1017.9864        | L   | 618.3457  | 309.6765        | 601.3192       | 301.1632         | 600.3352       | 300.6712         | 6  |
| 21 | 2140.0081 | 1070.5077       | 2122.9815      | 1061.9944        | 2121.9975      | 1061.5024        | S   | 505.2617  | 253.1345        | 488.2351       | 244.6212         | 487.2511       | 244.1292         | 5  |
| 22 | 2239.0765 | 1120.0419       | 2222.0499      | 1111.5286        | 2221.0659      | 1111.0366        | V   | 418.2296  | 209.6185        | 401.2031       | 201.1052         | 400.2191       | 200.6132         | 4  |
| 23 | 2354.1034 | 1177.5554       | 2337.0769      | 1169.0421        | 2336.0929      | 1168.5501        | D   | 319.1612  | 160.0842        | 302.1347       | 151.5710         | 301.1506       | 151.0790         | 3  |
| 24 | 2411.1249 | 1206.0661       | 2394.0983      | 1197.5528        | 2393.1143      | 1197.0608        | G   | 204.1343  | 102.5708        | 187.1077       | 94.0575          |                |                  | 2  |

|    |  |  |  |  |  |   |          |         |          |         |  |  |  |   |
|----|--|--|--|--|--|---|----------|---------|----------|---------|--|--|--|---|
| 25 |  |  |  |  |  | K | 147.1128 | 74.0600 | 130.0863 | 65.5468 |  |  |  | 1 |
|----|--|--|--|--|--|---|----------|---------|----------|---------|--|--|--|---|

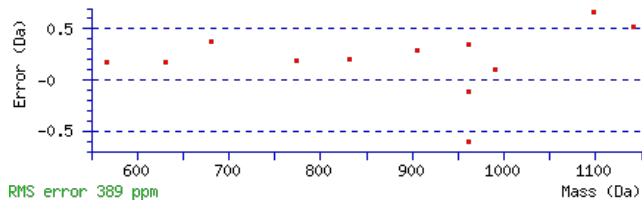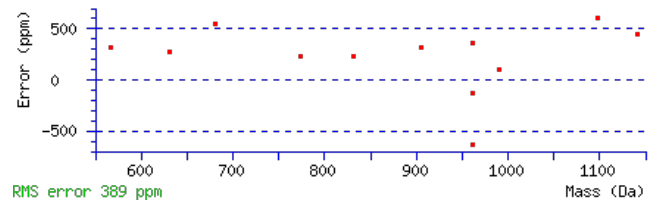

NCBI BLAST search of [YDSTLGIFDADVKPSGDSALSVDGK](#)  
 (Parameters: blastp, nr protein database, expect=20000, no filter, PAM30)  
 Other BLAST [web gateways](#)

#### All matches to this query

| Score | Mr(calc)  | Delta   | Sequence                                  |
|-------|-----------|---------|-------------------------------------------|
| 96.5  | 2556.2232 | -0.0005 | <a href="#">YDSTLGIFDADVKPSGDSALSVDGK</a> |
| 1.5   | 2556.2229 | -0.0002 | <a href="#">VYCCRNPKDAFVSLWHFMK</a>       |
| 0.0   | 2556.2258 | -0.0032 | <a href="#">LYHENVIDHFENPRNVGSFNR</a>     |

Mascot: <http://www.matrixscience.com/>



## Peptide View

### MS/MS Fragmentation of **LFEDMKGK**

Found in **AT1G13040.1** in **TAIR\_Arabidopsis**, Symbols: | pentatricopeptide (PPR) repeat-containing protein | chr1:4447645-4449198 FORWARD

Match to Query 2328:992.448028 from(497.231290,2+) index(6565)

Title: Elution from: 58.206 to 58.206 scan no 8517 cid35.00 polarity:+

Data file D6h-2\_3.mgf

Click mouse within plot area to zoom in by factor of two about that point

Or,   to  Da

Label all possible matches  Label matches used for scoring

Show Y-axis

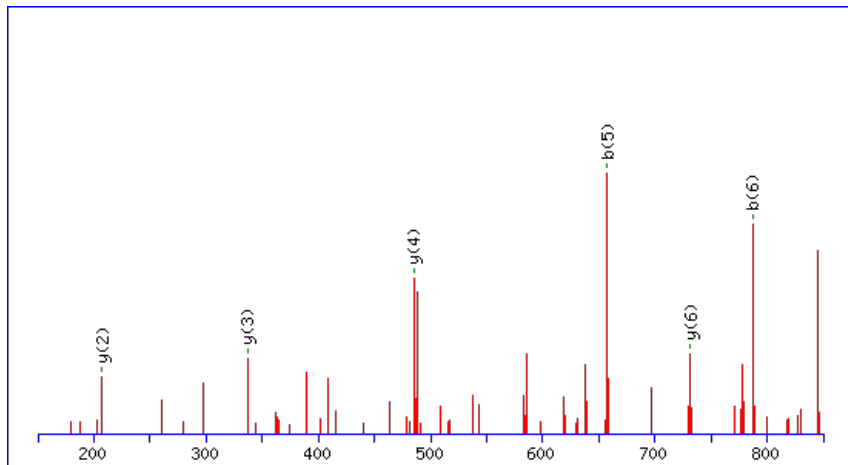

**Monoisotopic mass of neutral peptide Mr(calc):** 992.4497

**Fixed modifications:** Carbamidomethyl (C) (apply to specified residues or termini only)

**Variable modifications:**

**M5** : Oxidation (M), with neutral losses 0.0000 (shown in table), 63.9983

**Ions Score:** 32 **Expect:** 0.0052

**Matches** : 6/100 fragment ions using 7 most intense peaks ([help](#))

| # | b               | b <sup>++</sup> | b*       | b <sup>*++</sup> | b <sup>0</sup> | b <sup>0++</sup> | Seq. | y               | y <sup>++</sup> | y*       | y <sup>*++</sup> | y <sup>0</sup> | y <sup>0++</sup> | # |
|---|-----------------|-----------------|----------|------------------|----------------|------------------|------|-----------------|-----------------|----------|------------------|----------------|------------------|---|
| 1 | 115.0884        | 58.0478         |          |                  |                |                  | L    |                 |                 |          |                  |                |                  | 8 |
| 2 | 263.1538        | 132.0805        |          |                  |                |                  | F    | 879.3759        | 440.1916        | 861.3523 | 431.1798         | 861.3653       | 431.1863         | 7 |
| 3 | 393.1935        | 197.1004        |          |                  | 375.1829       | 188.0951         | E    | <b>731.3104</b> | 366.1589        | 713.2869 | 357.1471         | 713.2999       | 357.1536         | 6 |
| 4 | 509.2174        | 255.1124        |          |                  | 491.2069       | 246.1071         | D    | 601.2708        | 301.1390        | 583.2472 | 292.1273         | 583.2603       | 292.1338         | 5 |
| 5 | <b>657.2499</b> | 329.1286        |          |                  | 639.2393       | 320.1233         | M    | <b>485.2468</b> | 243.1271        | 467.2233 | 234.1153         |                |                  | 4 |
| 6 | <b>787.3389</b> | 394.1731        | 769.3153 | 385.1613         | 769.3283       | 385.1678         | K    | <b>337.2144</b> | 169.1108        | 319.1908 | 160.0990         |                |                  | 3 |
| 7 | 845.3574        | 423.1823        | 827.3338 | 414.1705         | 827.3468       | 414.1771         | G    | <b>207.1254</b> | 104.0663        | 189.1018 | 95.0545          |                |                  | 2 |
| 8 |                 |                 |          |                  |                |                  | K    | 149.1069        | 75.0571         | 131.0833 | 66.0453          |                |                  | 1 |

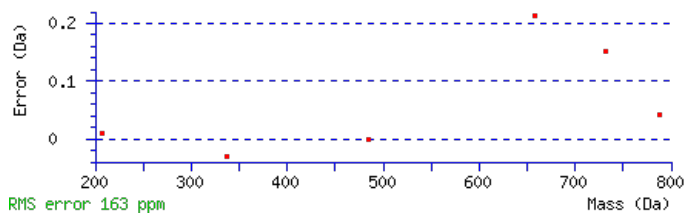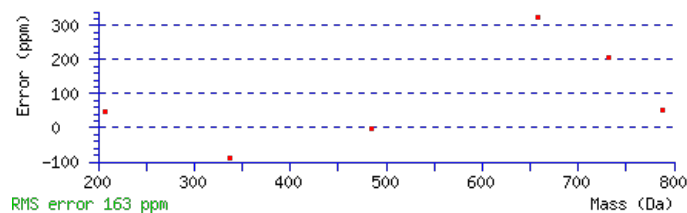

NCBI **BLAST** search of **LFEDMKGK**

(Parameters: blastp, nr protein database, expect=20000, no filter, PAM30)

Other BLAST [web gateways](#)

### All matches to this query

| Score | Mr(calc) | Delta   | Sequence                 |
|-------|----------|---------|--------------------------|
| 32.0  | 992.4497 | -0.0017 | <a href="#">LFEDMKGK</a> |

## AT1G13040.1

|      |          |         |                           |
|------|----------|---------|---------------------------|
| 19.0 | 992.4501 | -0.0021 | <a href="#">KEMTRGGGK</a> |
| 13.2 | 992.4502 | -0.0021 | <a href="#">MSREKQ GK</a> |
| 9.7  | 992.4486 | -0.0005 | <a href="#">FWDIEFK</a>   |
| 5.3  | 992.4463 | 0.0017  | <a href="#">DKYPFDAK</a>  |
| 5.3  | 992.4497 | -0.0017 | <a href="#">KEMVGSFGL</a> |
| 5.1  | 992.4497 | -0.0017 | <a href="#">MYLATQEK</a>  |
| 4.9  | 992.4501 | -0.0021 | <a href="#">DTKRMGSGK</a> |
| 4.8  | 992.4463 | 0.0017  | <a href="#">LFDGFQEK</a>  |
| 3.8  | 992.4501 | -0.0021 | <a href="#">MIARDTTR</a>  |

Mascot: <http://www.matrixscience.com/>


**Mascot Search Results**
**Peptide View**MS/MS Fragmentation of **LFYTFYLK**Found in **AT1G13280.1** in **TAIR\_Arabidopsis**, Symbols: AOC4 | AOC4 (ALLENE OXIDE CYCLASE 4) | chr1:4547621-4548549 FORWARD

Match to Query 2889: 1102.556244 from(552.285398,2+) index(8020)

Title: Elution from: 71.826 to 71.826 scan no 10630 cid35.00 polarity:+

Data file D12h-2\_3.mgf

Click mouse within plot area to zoom in by factor of two about that point

Or,   to  Da Label all possible matches  Label matches used for scoring Show Y-axis 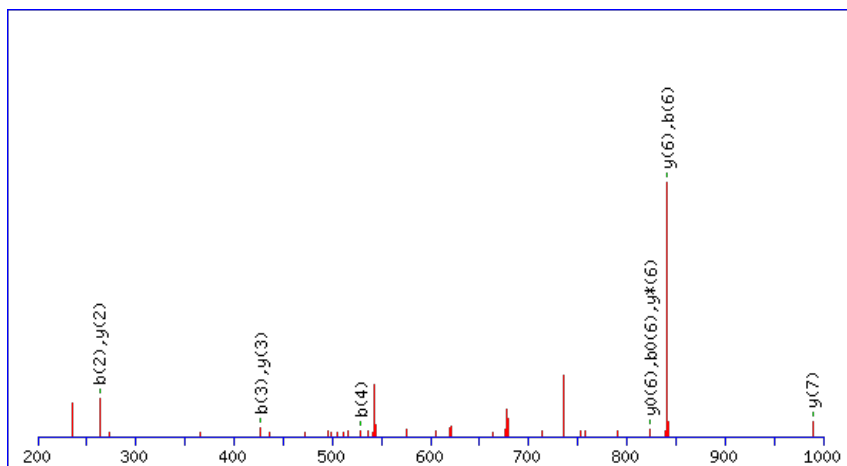Monoisotopic mass of neutral peptide **Mr(calc)**: 1102.5581**Fixed modifications**: Carbamidomethyl (C) (apply to specified residues or termini only)**Ions Score**: 40 **Expect**: 0.0012**Matches**: 11/56 fragment ions using 8 most intense peaks ([help](#))

| # | b               | b <sup>++</sup> | b <sup>0</sup>  | b <sup>0++</sup> | Seq. | y               | y <sup>++</sup> | y*              | y <sup>*++</sup> | y <sup>0</sup>  | y <sup>0++</sup> | # |
|---|-----------------|-----------------|-----------------|------------------|------|-----------------|-----------------|-----------------|------------------|-----------------|------------------|---|
| 1 | 115.0884        | 58.0478         |                 |                  | L    |                 |                 |                 |                  |                 |                  | 8 |
| 2 | <b>263.1538</b> | 132.0805        |                 |                  | F    | <b>989.4843</b> | 495.2458        | 971.4607        | 486.2340         | 971.4737        | 486.2405         | 7 |
| 3 | <b>427.2142</b> | 214.1107        |                 |                  | Y    | <b>841.4189</b> | 421.2131        | <b>823.3953</b> | 412.2013         | <b>823.4083</b> | 412.2078         | 6 |
| 4 | <b>529.2589</b> | 265.1331        | 511.2483        | 256.1278         | T    | 677.3585        | 339.1829        | 659.3349        | 330.1711         | 659.3479        | 330.1776         | 5 |
| 5 | 677.3244        | 339.1658        | 659.3138        | 330.1605         | F    | 575.3138        | 288.1605        | 557.2902        | 279.1487         |                 |                  | 4 |
| 6 | <b>841.3847</b> | 421.1960        | <b>823.3741</b> | 412.1907         | Y    | <b>427.2483</b> | 214.1278        | 409.2248        | 205.1160         |                 |                  | 3 |
| 7 | 955.4658        | 478.2365        | 937.4552        | 469.2313         | L    | <b>263.1880</b> | 132.0976        | 245.1644        | 123.0858         |                 |                  | 2 |
| 8 |                 |                 |                 |                  | K    | 149.1069        | 75.0571         | 131.0833        | 66.0453          |                 |                  | 1 |

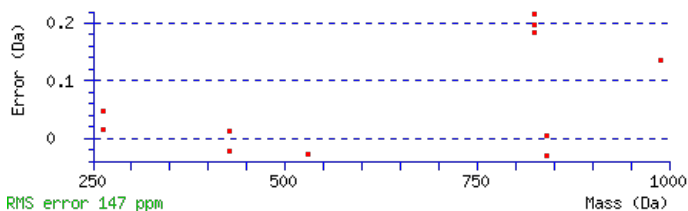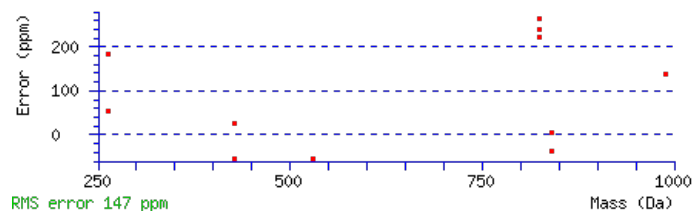NCBI **BLAST** search of [LFYTFYLK](#)

(Parameters: blastp, nr protein database, expect=20000, no filter, PAM30)

Other BLAST [web gateways](#)**All matches to this query**

| Score | Mr(calc)  | Delta   | Sequence                  |
|-------|-----------|---------|---------------------------|
| 40.1  | 1102.5581 | -0.0019 | <a href="#">LFYTFYLK</a>  |
| 17.6  | 1102.5570 | -0.0008 | <a href="#">IMDEKSLIK</a> |

**AT1G13280.1**

|     |           |         |                           |
|-----|-----------|---------|---------------------------|
| 7.1 | 1102.5564 | -0.0001 | <a href="#">LKHSYNSLK</a> |
| 7.1 | 1102.5559 | 0.0003  | <a href="#">YPFESPLK</a>  |
| 6.3 | 1102.5537 | 0.0026  | <a href="#">AELGDAYLK</a> |
| 5.8 | 1102.5537 | 0.0026  | <a href="#">LQEAYDLK</a>  |
| 4.9 | 1102.5570 | -0.0008 | <a href="#">LMATTLPTK</a> |
| 4.1 | 1102.5537 | 0.0026  | <a href="#">INEAYEILK</a> |
| 4.1 | 1102.5593 | -0.0030 | <a href="#">LVTMYPELK</a> |
| 3.4 | 1102.5590 | -0.0028 | <a href="#">QHKRYNLK</a>  |

**Mascot:** <http://www.matrixscience.com/>

### Peptide View

 MS/MS Fragmentation of **IDNDDKGDVVVWEVEQEDELNLIESR**

 Found in **AT1G13350.1** in **TAIR\_Arabidopsis**, Symbols: | protein kinase family protein | chr1:4572499-4576544 REVERSE

Match to Query 10975: 3315.522232 from(829.887834,4+) index(10152)

Title: Elution from 94.189 to 94.189 scan no 14246 cid35.00 polarity:+

Data file C7-1\_2.mgf

Click mouse within plot area to zoom in by factor of two about that point

 Or, Plot from  to  Da 

 Label all possible matches  Label matches used for scoring 

 Show Y-axis 
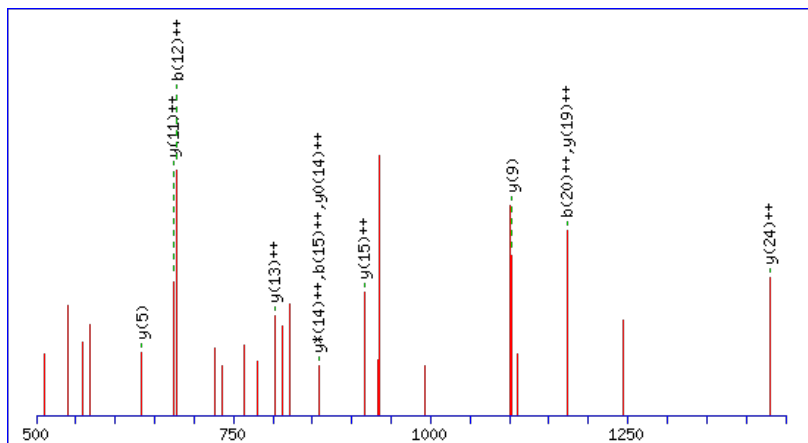
 Monoisotopic mass of neutral peptide  $M_r(\text{calc})$ : 3315.5266

Fixed modifications: Carbamidomethyl (C) (apply to specified residues or termini only)

Ions Score: 18 Expect: 0.026

 Matches : 12/316 fragment ions using 23 most intense peaks ([help](#))

| #  | b         | b <sup>++</sup> | b <sup>*</sup> | b <sup>*++</sup> | b <sup>0</sup> | b <sup>0++</sup> | Seq. | y         | y <sup>++</sup> | y <sup>*</sup> | y <sup>*++</sup> | y <sup>0</sup> | y <sup>0++</sup> | #  |
|----|-----------|-----------------|----------------|------------------|----------------|------------------|------|-----------|-----------------|----------------|------------------|----------------|------------------|----|
| 1  | 114.0913  | 57.5493         |                |                  |                |                  | I    |           |                 |                |                  |                |                  | 28 |
| 2  | 229.1183  | 115.0628        |                |                  | 211.1077       | 106.0575         | D    | 3203.4499 | 1602.2286       | 3186.4233      | 1593.7153        | 3185.4393      | 1593.2233        | 27 |
| 3  | 343.1612  | 172.0842        | 326.1347       | 163.5710         | 325.1506       | 163.0790         | N    | 3088.4229 | 1544.7151       | 3071.3964      | 1536.2018        | 3070.4124      | 1535.7098        | 26 |
| 4  | 458.1882  | 229.5977        | 441.1616       | 221.0844         | 440.1776       | 220.5924         | D    | 2974.3800 | 1487.6936       | 2957.3534      | 1479.1804        | 2956.3694      | 1478.6884        | 25 |
| 5  | 573.2151  | 287.1112        | 556.1885       | 278.5979         | 555.2045       | 278.1059         | D    | 2859.3531 | 1430.1802       | 2842.3265      | 1421.6669        | 2841.3425      | 1421.1749        | 24 |
| 6  | 701.3101  | 351.1587        | 684.2835       | 342.6454         | 683.2995       | 342.1534         | K    | 2744.3261 | 1372.6667       | 2727.2996      | 1364.1534        | 2726.3155      | 1363.6614        | 23 |
| 7  | 758.3315  | 379.6694        | 741.3050       | 371.1561         | 740.3210       | 370.6641         | G    | 2616.2311 | 1308.6192       | 2599.2046      | 1300.1059        | 2598.2206      | 1299.6139        | 22 |
| 8  | 873.3585  | 437.1829        | 856.3319       | 428.6696         | 855.3479       | 428.1776         | D    | 2559.2097 | 1280.1085       | 2542.1831      | 1271.5952        | 2541.1991      | 1271.1032        | 21 |
| 9  | 972.4269  | 486.7171        | 955.4003       | 478.2038         | 954.4163       | 477.7118         | V    | 2444.1827 | 1222.5950       | 2427.1562      | 1214.0817        | 2426.1722      | 1213.5897        | 20 |
| 10 | 1071.4953 | 536.2513        | 1054.4687      | 527.7380         | 1053.4847      | 527.2460         | V    | 2345.1143 | 1173.0608       | 2328.0878      | 1164.5475        | 2327.1038      | 1164.0555        | 19 |
| 11 | 1170.5637 | 585.7855        | 1153.5372      | 577.2722         | 1152.5531      | 576.7802         | V    | 2246.0459 | 1123.5266       | 2229.0194      | 1115.0133        | 2228.0353      | 1114.5213        | 18 |
| 12 | 1356.6430 | 678.8251        | 1339.6165      | 670.3119         | 1338.6325      | 669.8199         | W    | 2146.9775 | 1073.9924       | 2129.9509      | 1065.4791        | 2128.9669      | 1064.9871        | 17 |
| 13 | 1485.6856 | 743.3464        | 1468.6591      | 734.8332         | 1467.6750      | 734.3412         | E    | 1960.8982 | 980.9527        | 1943.8716      | 972.4395         | 1942.8876      | 971.9474         | 16 |
| 14 | 1584.7540 | 792.8807        | 1567.7275      | 784.3674         | 1566.7435      | 783.8754         | V    | 1831.8556 | 916.4314        | 1814.8290      | 907.9182         | 1813.8450      | 907.4262         | 15 |
| 15 | 1713.7966 | 857.4019        | 1696.7701      | 848.8887         | 1695.7861      | 848.3967         | E    | 1732.7872 | 866.8972        | 1715.7606      | 858.3840         | 1714.7766      | 857.8919         | 14 |
| 16 | 1841.8552 | 921.4312        | 1824.8287      | 912.9180         | 1823.8446      | 912.4260         | Q    | 1603.7446 | 802.3759        | 1586.7180      | 793.8627         | 1585.7340      | 793.3706         | 13 |
| 17 | 1970.8978 | 985.9525        | 1953.8712      | 977.4393         | 1952.8872      | 976.9473         | E    | 1475.6860 | 738.3466        | 1458.6595      | 729.8334         | 1457.6754      | 729.3414         | 12 |
| 18 | 2085.9247 | 1043.4660       | 2068.8982      | 1034.9527        | 2067.9142      | 1034.4607        | D    | 1346.6434 | 673.8253        | 1329.6169      | 665.3121         | 1328.6328      | 664.8201         | 11 |
| 19 | 2214.9673 | 1107.9873       | 2197.9408      | 1099.4740        | 2196.9568      | 1098.9820        | E    | 1231.6165 | 616.3119        | 1214.5899      | 607.7986         | 1213.6059      | 607.3066         | 10 |
| 20 | 2344.0099 | 1172.5086       | 2326.9834      | 1163.9953        | 2325.9994      | 1163.5033        | E    | 1102.5739 | 551.7906        | 1085.5473      | 543.2773         | 1084.5633      | 542.7853         | 9  |
| 21 | 2457.0940 | 1229.0506       | 2440.0674      | 1220.5374        | 2439.0834      | 1220.0453        | L    | 973.5313  | 487.2693        | 956.5047       | 478.7560         | 955.5207       | 478.2640         | 8  |
| 22 | 2571.1369 | 1286.0721       | 2554.1104      | 1277.5588        | 2553.1263      | 1277.0668        | N    | 860.4472  | 430.7272        | 843.4207       | 422.2140         | 842.4367       | 421.7220         | 7  |
| 23 | 2684.2210 | 1342.6141       | 2667.1944      | 1334.1009        | 2666.2104      | 1333.6088        | L    | 746.4043  | 373.7058        | 729.3777       | 365.1925         | 728.3937       | 364.7005         | 6  |
| 24 | 2797.3050 | 1399.1562       | 2780.2785      | 1390.6429        | 2779.2945      | 1390.1509        | I    | 633.3202  | 317.1638        | 616.2937       | 308.6505         | 615.3097       | 308.1585         | 5  |
| 25 | 2926.3476 | 1463.6775       | 2909.3211      | 1455.1642        | 2908.3371      | 1454.6722        | E    | 520.2362  | 260.6217        | 503.2096       | 252.1084         | 502.2256       | 251.6164         | 4  |

# AT1G13350.1

|    |           |           |           |           |           |           |   |          |          |          |          |          |          |   |
|----|-----------|-----------|-----------|-----------|-----------|-----------|---|----------|----------|----------|----------|----------|----------|---|
| 26 | 3055.3902 | 1528.1988 | 3038.3637 | 1519.6855 | 3037.3797 | 1519.1935 | E | 391.1936 | 196.1004 | 374.1670 | 187.5872 | 373.1830 | 187.0951 | 3 |
| 27 | 3142.4223 | 1571.7148 | 3125.3957 | 1563.2015 | 3124.4117 | 1562.7095 | S | 262.1510 | 131.5791 | 245.1244 | 123.0659 | 244.1404 | 122.5738 | 2 |
| 28 |           |           |           |           |           |           | R | 175.1190 | 88.0631  | 158.0924 | 79.5498  |          |          | 1 |

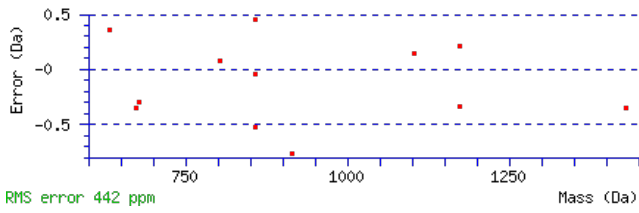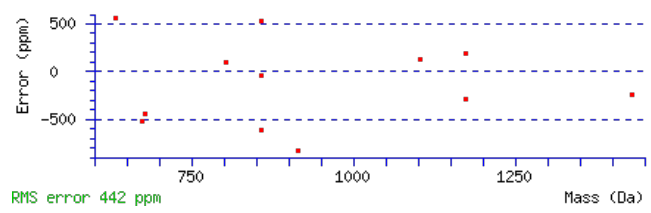

NCBI BLAST search of [IDNDDKGDVVVWEVEQEDELNLIIESR](#)  
 (Parameters: blastp, nr protein database, expect=20000, no filter, PAM30)  
 Other BLAST [web gateways](#)

## All matches to this query

| Score | Mr(calc)  | Delta   | Sequence                                      |
|-------|-----------|---------|-----------------------------------------------|
| 18.0  | 3315.5266 | -0.0044 | <a href="#">IDNDDKGDVVVWEVEQEDELNLIIESR</a>   |
| 0.4   | 3315.5170 | 0.0053  | <a href="#">MRDLVSCFSENSINVTHPLSISSSSSCSK</a> |

Mascot: <http://www.matrixscience.com/>

## Peptide View

MS/MS Fragmentation of **FGIVEGLMTTVHSITATQK**

Found in **AT1G13440.1** in **TAIR\_Arabidopsis**, Symbols: GAPC-2 | GAPC-2; glyceraldehyde-3-phosphate dehydrogenase | chr1:4608462-4610491 REVERSE

Match to Query 9393: 2032.068546 from(678.363458,3+) index(10505)

Title: Elution from: 100.495 to 100.495 scan no 15012 cid35.00 polarity:+

Data file D12h-1\_2.mgf

Click mouse within plot area to zoom in by factor of two about that point

Or,   to  Da

Label all possible matches  Label matches used for scoring

Show Y-axis

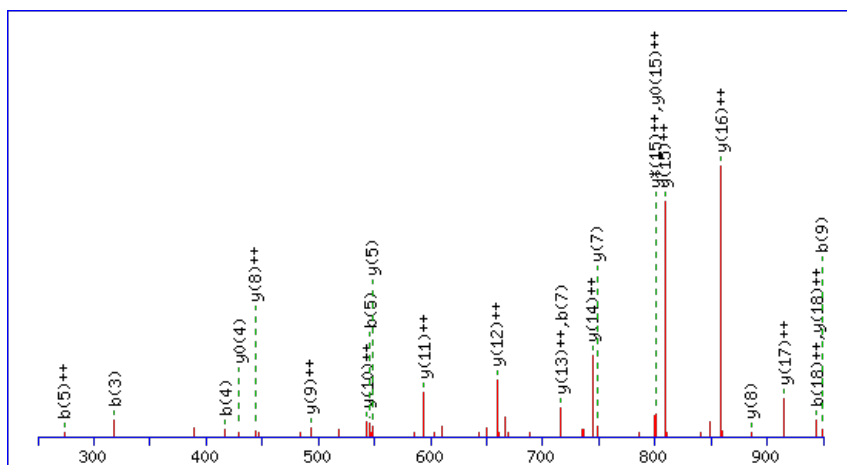

Monoisotopic mass of neutral peptide  $M_r(\text{calc})$ : 2032.0663

Fixed modifications: Carbamidomethyl (C) (apply to specified residues or termini only)

Ions Score: 102 Expect: 2.2e-010

Matches : 24/170 fragment ions using 26 most intense peaks ([help](#))

| #  | b         | b <sup>++</sup> | b*        | b <sup>*++</sup> | b <sup>0</sup> | b <sup>0++</sup> | Seq. | y         | y <sup>++</sup> | y*        | y <sup>*++</sup> | y <sup>0</sup> | y <sup>0++</sup> | #  |
|----|-----------|-----------------|-----------|------------------|----------------|------------------|------|-----------|-----------------|-----------|------------------|----------------|------------------|----|
| 1  | 148.0757  | 74.5415         |           |                  |                |                  | F    |           |                 |           |                  |                |                  | 19 |
| 2  | 205.0972  | 103.0522        |           |                  |                |                  | G    | 1886.0052 | 943.5062        | 1868.9786 | 934.9930         | 1867.9946      | 934.5009         | 18 |
| 3  | 318.1812  | 159.5942        |           |                  |                |                  | I    | 1828.9837 | 914.9955        | 1811.9572 | 906.4822         | 1810.9731      | 905.9902         | 17 |
| 4  | 417.2496  | 209.1285        |           |                  |                |                  | V    | 1715.8997 | 858.4535        | 1698.8731 | 849.9402         | 1697.8891      | 849.4482         | 16 |
| 5  | 546.2922  | 273.6498        |           |                  | 528.2817       | 264.6445         | E    | 1616.8312 | 808.9193        | 1599.8047 | 800.4060         | 1598.8207      | 799.9140         | 15 |
| 6  | 603.3137  | 302.1605        |           |                  | 585.3031       | 293.1552         | G    | 1487.7886 | 744.3980        | 1470.7621 | 735.8847         | 1469.7781      | 735.3927         | 14 |
| 7  | 716.3978  | 358.7025        |           |                  | 698.3872       | 349.6972         | L    | 1430.7672 | 715.8872        | 1413.7406 | 707.3740         | 1412.7566      | 706.8819         | 13 |
| 8  | 847.4382  | 424.2228        |           |                  | 829.4277       | 415.2175         | M    | 1317.6831 | 659.3452        | 1300.6566 | 650.8319         | 1299.6726      | 650.3399         | 12 |
| 9  | 948.4859  | 474.7466        |           |                  | 930.4754       | 465.7413         | T    | 1186.6426 | 593.8250        | 1169.6161 | 585.3117         | 1168.6321      | 584.8197         | 11 |
| 10 | 1049.5336 | 525.2704        |           |                  | 1031.5230      | 516.2652         | T    | 1085.5950 | 543.3011        | 1068.5684 | 534.7878         | 1067.5844      | 534.2958         | 10 |
| 11 | 1148.6020 | 574.8046        |           |                  | 1130.5914      | 565.7994         | V    | 984.5473  | 492.7773        | 967.5207  | 484.2640         | 966.5367       | 483.7720         | 9  |
| 12 | 1285.6609 | 643.3341        |           |                  | 1267.6504      | 634.3288         | H    | 885.4789  | 443.2431        | 868.4523  | 434.7298         | 867.4683       | 434.2378         | 8  |
| 13 | 1372.6930 | 686.8501        |           |                  | 1354.6824      | 677.8448         | S    | 748.4199  | 374.7136        | 731.3934  | 366.2003         | 730.4094       | 365.7083         | 7  |
| 14 | 1485.7770 | 743.3921        |           |                  | 1467.7664      | 734.3869         | I    | 661.3879  | 331.1976        | 644.3614  | 322.6843         | 643.3774       | 322.1923         | 6  |
| 15 | 1586.8247 | 793.9160        |           |                  | 1568.8141      | 784.9107         | T    | 548.3039  | 274.6556        | 531.2773  | 266.1423         | 530.2933       | 265.6503         | 5  |
| 16 | 1657.8618 | 829.4345        |           |                  | 1639.8512      | 820.4293         | A    | 447.2562  | 224.1317        | 430.2296  | 215.6185         | 429.2456       | 215.1264         | 4  |
| 17 | 1758.9095 | 879.9584        |           |                  | 1740.8989      | 870.9531         | T    | 376.2191  | 188.6132        | 359.1925  | 180.0999         | 358.2085       | 179.6079         | 3  |
| 18 | 1886.9681 | 943.9877        | 1869.9415 | 935.4744         | 1868.9575      | 934.9824         | Q    | 275.1714  | 138.0893        | 258.1448  | 129.5761         |                |                  | 2  |
| 19 |           |                 |           |                  |                |                  | K    | 147.1128  | 74.0600         | 130.0863  | 65.5468          |                |                  | 1  |

# AT1G13440.1

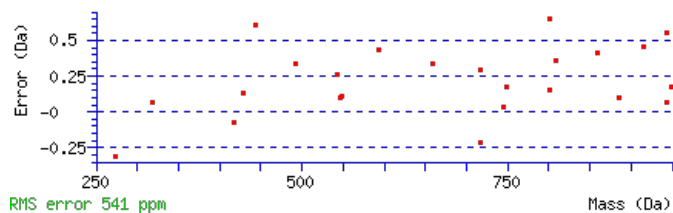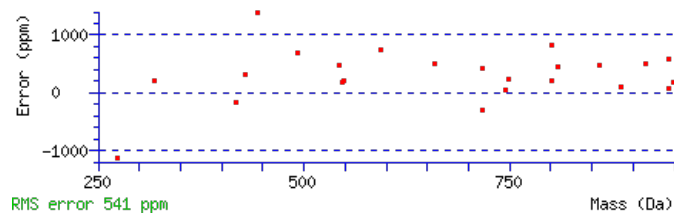

NCBI **BLAST** search of [FGIVEGLMTTVHSITATQK](#)

(Parameters: blastp, nr protein database, expect=20000, no filter, PAM30)

Other BLAST [web gateways](#)

## All matches to this query

| Score | Mr(calc)  | Delta   | Sequence                              |
|-------|-----------|---------|---------------------------------------|
| 101.9 | 2032.0663 | 0.0022  | <a href="#">FGIVEGLMTTVHSITATQK</a>   |
| 17.4  | 2032.0663 | 0.0022  | <a href="#">MAVGIFGLIPSSSPDELRK</a>   |
| 4.8   | 2032.0697 | -0.0011 | <a href="#">MSLSTIASGIGVLELPCLR</a>   |
| 2.5   | 2032.0663 | 0.0022  | <a href="#">ISVGDVLGPLKVMDFSGNGK</a>  |
| 2.2   | 2032.0636 | 0.0049  | <a href="#">MANFGGKLVILGGNQRDR</a>    |
| 2.2   | 2032.0701 | -0.0016 | <a href="#">FRLTVVNQLSDELSQQR</a>     |
| 1.6   | 2032.0716 | -0.0031 | <a href="#">FRISEMLPNAWFHKLK</a>      |
| 1.1   | 2032.0710 | -0.0024 | <a href="#">HLADHMKPMLINSLKER</a>     |
| 0.5   | 2032.0661 | 0.0025  | <a href="#">KARVSSASASAATGAAAAVTR</a> |
| 0.4   | 2032.0728 | -0.0043 | <a href="#">DVKFILVDVSEEEIELR</a>     |

Mascot: <http://www.matrixscience.com/>



**Peptide View**MS/MS Fragmentation of **VMYPVK**

Found in **AT1G13610.1** in **TAIR\_Arabidopsis**, Symbols: | similar to unknown protein [Arabidopsis thaliana] (TAIR:AT3G30380.1); similar to unnamed protein product [Vitis vinifera] (GB:CAO15341.1); contains InterPro domain Alpha/beta hydrolase fold-1 (InterPro:IPR000073) | chr1:4664005-4665972

Match to Query 857: 758.372672 from(380.193612,2+) index(4971)

Title: Elution from: 44.887 to 44.887 scan no 6153 cid35.00 polarity:+

Data file 0-1\_1.mgf

Click mouse within plot area to zoom in by factor of two about that point

Or,  to  Da

Label all possible matches  Label matches used for scoring

Show Y-axis

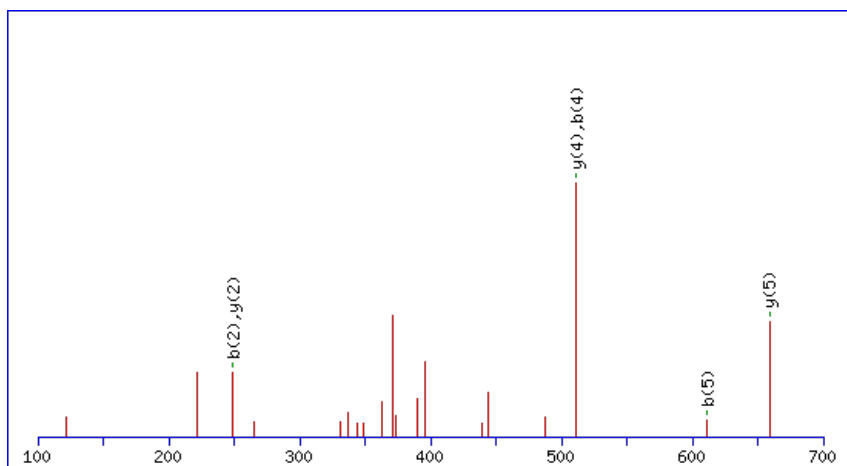

**Monoisotopic mass of neutral peptide Mr(calc):** 758.3731

**Fixed modifications:** Carbamidomethyl (C) (apply to specified residues or termini only)

**Variable modifications:**

**M2** : Oxidation (M), with neutral losses 0.0000 (shown in table), 63.9983

**Ions Score:** 31 **Expect:** 0.0086

**Matches** : 6/42 fragment ions using 6 most intense peaks ([help](#))

| # | b               | b <sup>++</sup> | Seq. | y               | y <sup>++</sup> | y*       | y* <sup>++</sup> | # |
|---|-----------------|-----------------|------|-----------------|-----------------|----------|------------------|---|
| 1 | 101.0727        | 51.0400         | V    |                 |                 |          |                  | 6 |
| 2 | <b>249.1052</b> | 125.0562        | M    | <b>659.3149</b> | 330.1611        | 641.2913 | 321.1493         | 5 |
| 3 | 413.1655        | 207.0864        | Y    | <b>511.2825</b> | 256.1449        | 493.2589 | 247.1331         | 4 |
| 4 | <b>511.2153</b> | 256.1113        | P    | 347.2221        | 174.1147        | 329.1985 | 165.1029         | 3 |
| 5 | <b>611.2808</b> | 306.1440        | V    | <b>249.1723</b> | 125.0898        | 231.1487 | 116.0780         | 2 |
| 6 |                 |                 | K    | 149.1069        | 75.0571         | 131.0833 | 66.0453          | 1 |

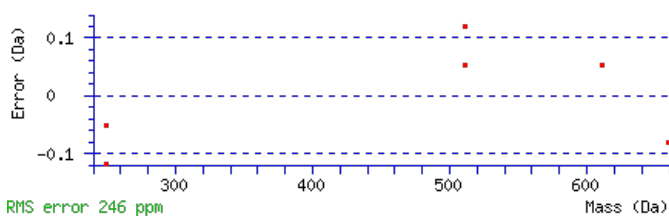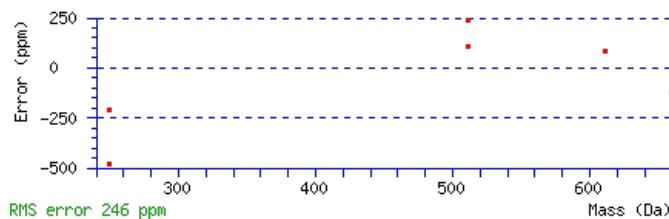

NCBI **BLAST** search of [VMYPVK](#)

(Parameters: blastp, nr protein database, expect=20000, no filter, PAM30)

Other BLAST [web gateways](#)

**All matches to this query**

| Score | Mr(calc) | Delta   | Sequence               |
|-------|----------|---------|------------------------|
| 30.7  | 758.3731 | -0.0004 | <a href="#">VMYPVK</a> |

**AT1G13610.1**

|      |          |         |                         |
|------|----------|---------|-------------------------|
| 20.8 | 758.3735 | -0.0008 | <a href="#">SRMAGVK</a> |
| 20.6 | 758.3731 | -0.0004 | <a href="#">VFDMLK</a>  |
| 19.0 | 758.3709 | 0.0018  | <a href="#">VMKETK</a>  |
| 18.3 | 758.3709 | 0.0018  | <a href="#">MSSSIVK</a> |
| 17.3 | 758.3731 | -0.0004 | <a href="#">YVPMVK</a>  |
| 12.5 | 758.3709 | 0.0018  | <a href="#">MVEKTK</a>  |
| 12.5 | 758.3709 | 0.0018  | <a href="#">MVTEKK</a>  |
| 11.8 | 758.3731 | -0.0004 | <a href="#">DFLMVK</a>  |
| 9.7  | 758.3735 | -0.0009 | <a href="#">NMSLRK</a>  |

**Mascot:** <http://www.matrixscience.com/>

**Peptide View**MS/MS Fragmentation of **LFFNK**Found in **AT1G13650.1** in **TAIR\_Arabidopsis**

Match to Query 534: 667.369172 from(334.691862,2+) index(4147)

Title: Elution from: 39.804 to 39.804 scan no 5249 cid35.00 polarity:+

Data file 0-3\_1.mgf

Click mouse within plot area to zoom in by factor of two about that point

Or,   to  Da Label all possible matches  Label matches used for scoring Show Y-axis 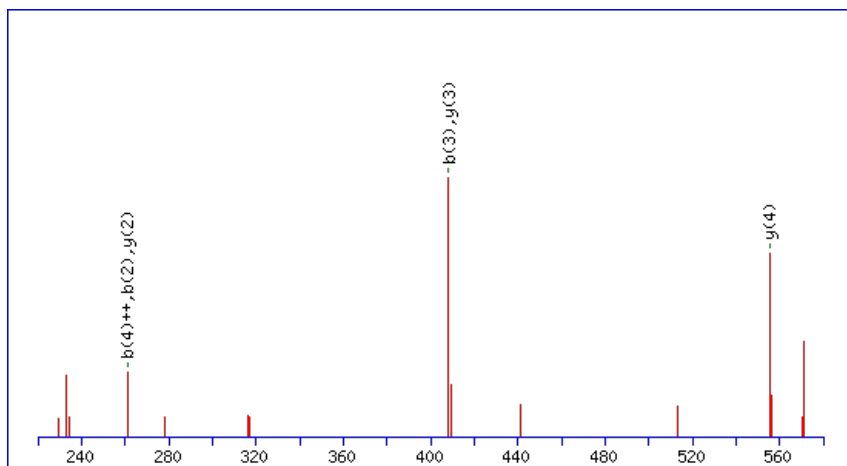Monoisotopic mass of neutral peptide **Mr(calc)**: 667.3693**Fixed modifications**: Carbamidomethyl (C) (apply to specified residues or termini only)**Ions Score**: 24 **Expect**: 0.007**Matches** : 6/26 fragment ions using 4 most intense peaks ([help](#))

| # | b               | b <sup>++</sup> | b*       | b <sup>+++</sup> | Seq. | y               | y <sup>++</sup> | y*       | y <sup>+++</sup> | # |
|---|-----------------|-----------------|----------|------------------|------|-----------------|-----------------|----------|------------------|---|
| 1 | 114.0913        | 57.5493         |          |                  | L    |                 |                 |          |                  | 5 |
| 2 | <b>261.1598</b> | 131.0835        |          |                  | F    | <b>555.2926</b> | 278.1499        | 538.2660 | 269.6366         | 4 |
| 3 | <b>408.2282</b> | 204.6177        |          |                  | F    | <b>408.2241</b> | 204.6157        | 391.1976 | 196.1024         | 3 |
| 4 | 522.2711        | <b>261.6392</b> | 505.2445 | 253.1259         | N    | <b>261.1557</b> | 131.0815        | 244.1292 | 122.5682         | 2 |
| 5 |                 |                 |          |                  | K    | 147.1128        | 74.0600         | 130.0863 | 65.5468          | 1 |

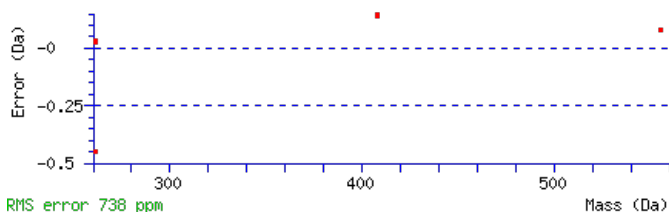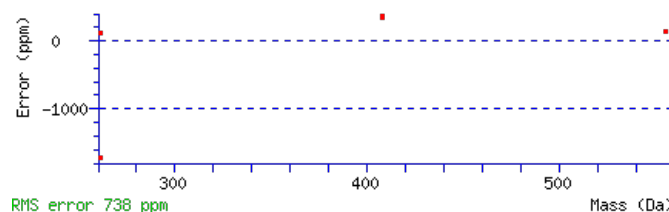NCBI **BLAST** search of [LFFNK](#)

(Parameters: blastp, nr protein database, expect=20000, no filter, PAM30)

Other BLAST [web gateways](#)**All matches to this query**

| Score | Mr(calc) | Delta   | Sequence               |
|-------|----------|---------|------------------------|
| 24.0  | 667.3693 | -0.0002 | <a href="#">LFFNK</a>  |
| 13.1  | 667.3694 | -0.0002 | <a href="#">LFGFGK</a> |
| 10.9  | 667.3693 | -0.0002 | <a href="#">IFNEFK</a> |
| 10.9  | 667.3693 | -0.0002 | <a href="#">LFNEFK</a> |
| 10.6  | 667.3693 | -0.0002 | <a href="#">FLNEFK</a> |



**Peptide View**MS/MS Fragmentation of **MAQGFLK**

Found in **AT1G13930.1** in **TAIR\_Arabidopsis**, Symbols: | similar to nodulin-related [Arabidopsis thaliana] (TAIR:AT2G03440.1); similar to hypothetical protein [Vitis vinifera] (GB:CAN63832.1) | chr1:4761088-4761555 FORWARD

Match to Query 958: 793.414032 from(397.714292,2+) index(2553)

Title: Elution from: 26.898 to 26.898 scan no 3183 cid35.00 polarity:+

Data file 0-3\_2.mgf

Click mouse within plot area to zoom in by factor of two about that point

Or,   to  Da

Label all possible matches  Label matches used for scoring

Show Y-axis

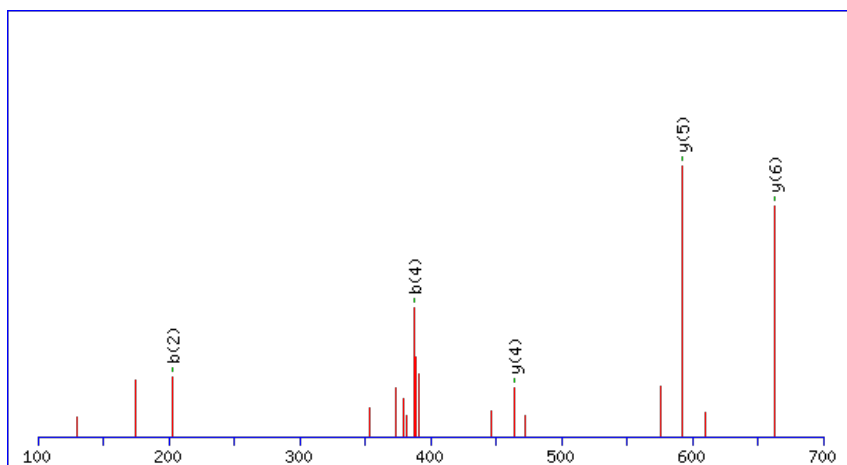

Monoisotopic mass of neutral peptide  $M_r(\text{calc})$ : 793.4156

Fixed modifications: Carbamidomethyl (C) (apply to specified residues or termini only)

Ions Score: 31 Expect: 0.002

Matches : 5/44 fragment ions using 5 most intense peaks ([help](#))

| # | b               | b <sup>++</sup> | b*       | b <sup>*++</sup> | Seq. | y               | y <sup>++</sup> | y*       | y <sup>*++</sup> | # |
|---|-----------------|-----------------|----------|------------------|------|-----------------|-----------------|----------|------------------|---|
| 1 | 132.0478        | 66.5275         |          |                  | M    |                 |                 |          |                  | 7 |
| 2 | <b>203.0849</b> | 102.0461        |          |                  | A    | <b>663.3824</b> | 332.1949        | 646.3559 | 323.6816         | 6 |
| 3 | 331.1435        | 166.0754        | 314.1169 | 157.5621         | Q    | <b>592.3453</b> | 296.6763        | 575.3188 | 288.1630         | 5 |
| 4 | <b>388.1649</b> | 194.5861        | 371.1384 | 186.0728         | G    | <b>464.2867</b> | 232.6470        | 447.2602 | 224.1337         | 4 |
| 5 | 535.2333        | 268.1203        | 518.2068 | 259.6070         | F    | 407.2653        | 204.1363        | 390.2387 | 195.6230         | 3 |
| 6 | 648.3174        | 324.6623        | 631.2908 | 316.1491         | L    | 260.1969        | 130.6021        | 243.1703 | 122.0888         | 2 |
| 7 |                 |                 |          |                  | K    | 147.1128        | 74.0600         | 130.0863 | 65.5468          | 1 |

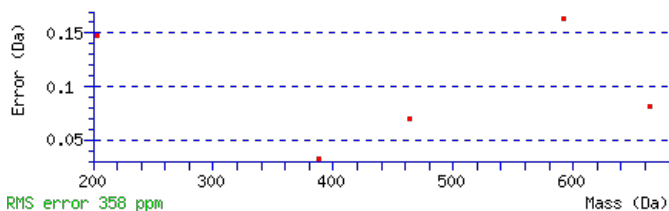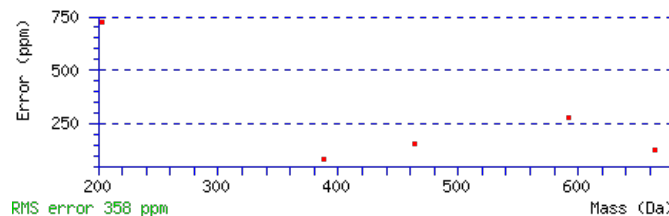

NCBI **BLAST** search of [MAQGFLK](#)

(Parameters: blastp, nr protein database, expect=20000, no filter, PAM30)

Other BLAST [web gateways](#)

**All matches to this query**

| Score | $M_r(\text{calc})$ | Delta   | Sequence                |
|-------|--------------------|---------|-------------------------|
| 30.5  | 793.4156           | -0.0016 | <a href="#">MAQGFLK</a> |



**Peptide View**MS/MS Fragmentation of **VLGSSAINGGFYSR**Found in **AT1G14185.1** in **TAIR\_Arabidopsis**, Symbols: | glucose-methanol-choline (GMC) oxidoreductase family protein | chr1:4850279-4851880  
FORWARD

Match to Query 6789: 1502.688338 from(752.351445,2+) index(6371)

Title: Elution from: 55.515 to 55.515 scan no 8072 cid35.00 polarity:+

Data file D6h-1\_1.mgf

Click mouse within plot area to zoom in by factor of two about that point

Or,  to  Da Label all possible matches  Label matches used for scoring Show Y-axis 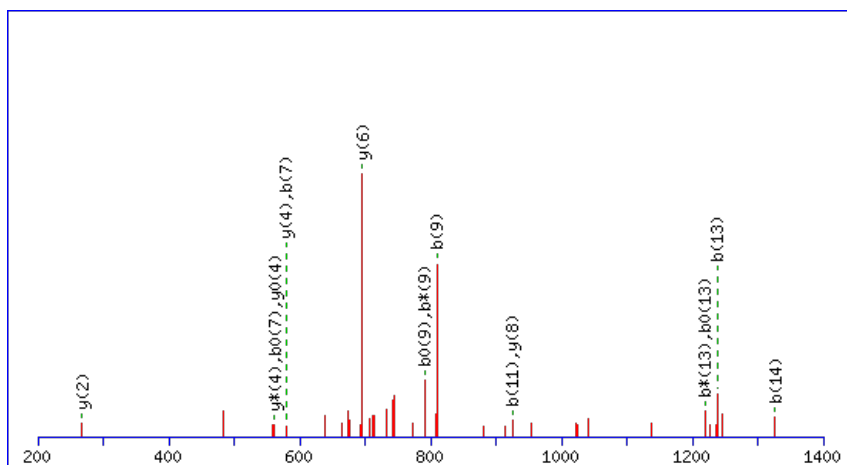Monoisotopic mass of neutral peptide  $M_r(\text{calc})$ : 1502.6856

Fixed modifications: Carbamidomethyl (C) (apply to specified residues or termini only)

Ions Score: 22 Expect: 0.043

Matches : 16/142 fragment ions using 24 most intense peaks ([help](#))

| #  | b                | b <sup>++</sup> | b*               | b <sup>*++</sup> | b <sup>0</sup>   | b <sup>0++</sup> | Seq. | y               | y <sup>++</sup> | y*              | y <sup>*++</sup> | y <sup>0</sup>  | y <sup>0++</sup> | #  |
|----|------------------|-----------------|------------------|------------------|------------------|------------------|------|-----------------|-----------------|-----------------|------------------|-----------------|------------------|----|
| 1  | 101.0727         | 51.0400         |                  |                  |                  |                  | V    |                 |                 |                 |                  |                 |                  | 15 |
| 2  | 215.1538         | 108.0805        |                  |                  |                  |                  | L    | 1403.6274       | 702.3174        | 1385.6039       | 693.3056         | 1385.6169       | 693.3121         | 14 |
| 3  | 273.1723         | 137.0898        |                  |                  |                  |                  | G    | 1289.5463       | 645.2768        | 1271.5228       | 636.2650         | 1271.5358       | 636.2715         | 13 |
| 4  | 331.1908         | 166.0990        |                  |                  |                  |                  | G    | 1231.5278       | 616.2676        | 1213.5043       | 607.2558         | 1213.5173       | 607.2623         | 12 |
| 5  | 419.2199         | 210.1136        |                  |                  | 401.2093         | 201.1083         | S    | 1173.5093       | 587.2583        | 1155.4858       | 578.2465         | 1155.4988       | 578.2530         | 11 |
| 6  | 507.2489         | 254.1281        |                  |                  | 489.2384         | 245.1228         | S    | 1085.4803       | 543.2438        | 1067.4567       | 534.2320         | 1067.4697       | 534.2385         | 10 |
| 7  | <b>579.2831</b>  | 290.1452        |                  |                  | <b>561.2725</b>  | 281.1399         | A    | 997.4512        | 499.2292        | 979.4276        | 490.2175         | 979.4406        | 490.2240         | 9  |
| 8  | 693.3642         | 347.1857        |                  |                  | 675.3536         | 338.1805         | I    | <b>925.4171</b> | 463.2122        | 907.3935        | 454.2004         | 907.4065        | 454.2069         | 8  |
| 9  | <b>809.4012</b>  | 405.2042        | <b>791.3776</b>  | 396.1924         | <b>791.3906</b>  | 396.1990         | N    | 811.3360        | 406.1716        | 793.3124        | 397.1598         | 793.3254        | 397.1663         | 7  |
| 10 | 867.4197         | 434.2135        | 849.3961         | 425.2017         | 849.4091         | 425.2082         | G    | <b>695.2990</b> | 348.1531        | 677.2754        | 339.1413         | 677.2884        | 339.1478         | 6  |
| 11 | <b>925.4382</b>  | 463.2227        | 907.4146         | 454.2109         | 907.4276         | 454.2175         | G    | 637.2805        | 319.1439        | 619.2569        | 310.1321         | 619.2699        | 310.1386         | 5  |
| 12 | 1073.5036        | 537.2555        | 1055.4801        | 528.2437         | 1055.4931        | 528.2502         | F    | <b>579.2620</b> | 290.1346        | <b>561.2384</b> | 281.1228         | <b>561.2514</b> | 281.1293         | 4  |
| 13 | <b>1237.5640</b> | 619.2856        | <b>1219.5404</b> | 610.2738         | <b>1219.5534</b> | 610.2804         | Y    | 431.1965        | 216.1019        | 413.1729        | 207.0901         | 413.1860        | 207.0966         | 3  |
| 14 | <b>1325.5931</b> | 663.3002        | 1307.5695        | 654.2884         | 1307.5825        | 654.2949         | S    | <b>267.1362</b> | 134.0717        | 249.1126        | 125.0599         | 249.1256        | 125.0664         | 2  |
| 15 |                  |                 |                  |                  |                  |                  | R    | 179.1071        | 90.0572         | 161.0835        | 81.0454          |                 |                  | 1  |

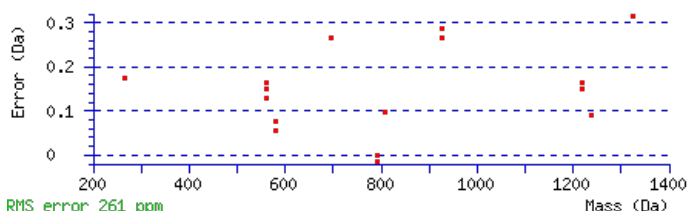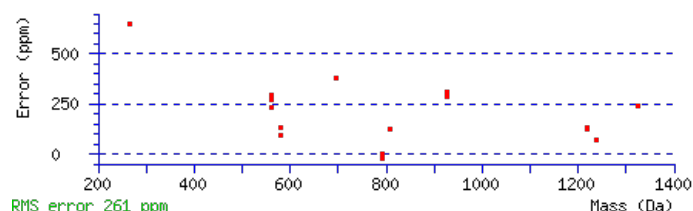

## AT1G14185.1

NCBI BLAST search of [VLGGSSAINGGFYSR](#)

(Parameters: blastp, nr protein database, expect=20000, no filter, PAM30)

Other BLAST [web gateways](#)

### All matches to this query

| Score | Mr(calc)  | Delta   | Sequence                         |
|-------|-----------|---------|----------------------------------|
| 22.1  | 1502.6856 | 0.0027  | <a href="#">VLGGSSAINGGFYSR</a>  |
| 7.1   | 1502.6860 | 0.0023  | <a href="#">LKAGSGSGSGRGFGSR</a> |
| 6.1   | 1502.6879 | 0.0005  | <a href="#">YYESKLNLNWR</a>      |
| 0.3   | 1502.6852 | 0.0032  | <a href="#">ILAGEELFYDYR</a>     |
| 0.3   | 1502.6890 | -0.0006 | <a href="#">LNAGDLHEMILSR</a>    |
| 0.1   | 1502.6883 | 0.0001  | <a href="#">NANQTHLVFANPR</a>    |

Mascot: <http://www.matrixscience.com/>



**Peptide View**MS/MS Fragmentation of **FLSCHGPLANR**

Found in **AT1G14320.1** in **TAIR\_Arabidopsis**, Symbols: | 60S ribosomal protein L10 (RPL10A) / Wilm's tumor suppressor protein-related | chr1:4888265-4889403 FORWARD

Match to Query 4021: 1270.624656 from(424.548828,3+) index(1818)

Title: Elution from: 25.326 to 25.326 scan no 2464 cid35.00 polarity:+

Data file D1d-1-2.mgf

Click mouse within plot area to zoom in by factor of two about that point

Or,   to  Da

Label all possible matches  Label matches used for scoring

Show Y-axis

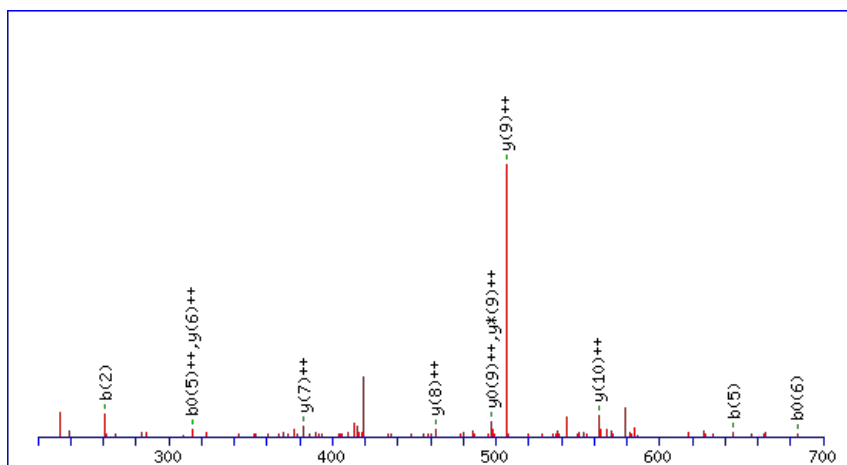

**Monoisotopic mass of neutral peptide Mr(calc):** 1270.6241

**Fixed modifications:** Carbamidomethyl (C) (apply to specified residues or termini only)

**Ions Score:** 22 **Expect:** 0.019

**Matches:** 11/82 fragment ions using 20 most intense peaks ([help](#))

| #  | b               | b <sup>++</sup> | b*        | b <sup>*++</sup> | b <sup>0</sup>  | b <sup>0++</sup> | Seq. | y         | y <sup>++</sup> | y*        | y <sup>*++</sup> | y <sup>0</sup> | y <sup>0++</sup> | #  |
|----|-----------------|-----------------|-----------|------------------|-----------------|------------------|------|-----------|-----------------|-----------|------------------|----------------|------------------|----|
| 1  | 148.0757        | 74.5415         |           |                  |                 |                  | F    |           |                 |           |                  |                |                  | 11 |
| 2  | <b>261.1598</b> | 131.0835        |           |                  |                 |                  | L    | 1124.5629 | <b>562.7851</b> | 1107.5364 | 554.2718         | 1106.5524      | 553.7798         | 10 |
| 3  | 348.1918        | 174.5995        |           |                  | 330.1812        | 165.5942         | S    | 1011.4789 | <b>506.2431</b> | 994.4523  | <b>497.7298</b>  | 993.4683       | <b>497.2378</b>  | 9  |
| 4  | 508.2224        | 254.6149        |           |                  | 490.2119        | 245.6096         | C    | 924.4468  | <b>462.7271</b> | 907.4203  | 454.2138         |                |                  | 8  |
| 5  | <b>645.2813</b> | 323.1443        |           |                  | 627.2708        | <b>314.1390</b>  | H    | 764.4162  | <b>382.7117</b> | 747.3896  | 374.1985         |                |                  | 7  |
| 6  | 702.3028        | 351.6550        |           |                  | <b>684.2922</b> | 342.6498         | G    | 627.3573  | <b>314.1823</b> | 610.3307  | 305.6690         |                |                  | 6  |
| 7  | 799.3556        | 400.1814        |           |                  | 781.3450        | 391.1761         | P    | 570.3358  | 285.6715        | 553.3093  | 277.1583         |                |                  | 5  |
| 8  | 912.4396        | 456.7235        |           |                  | 894.4291        | 447.7182         | L    | 473.2831  | 237.1452        | 456.2565  | 228.6319         |                |                  | 4  |
| 9  | 983.4767        | 492.2420        |           |                  | 965.4662        | 483.2367         | A    | 360.1990  | 180.6031        | 343.1724  | 172.0899         |                |                  | 3  |
| 10 | 1097.5197       | 549.2635        | 1080.4931 | 540.7502         | 1079.5091       | 540.2582         | N    | 289.1619  | 145.0846        | 272.1353  | 136.5713         |                |                  | 2  |
| 11 |                 |                 |           |                  |                 |                  | R    | 175.1190  | 88.0631         | 158.0924  | 79.5498          |                |                  | 1  |

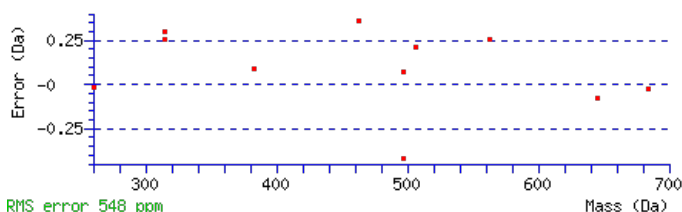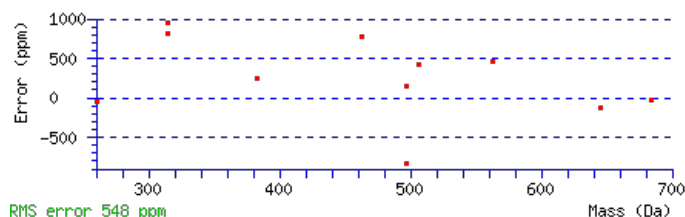

NCBI **BLAST** search of **FLSCHGPLANR**

(Parameters: blastp, nr protein database, expect=20000, no filter, PAM30)

Other BLAST [web gateways](#)

**All matches to this query**

## AT1G14320.1

| Score | Mr(calc)  | Delta   | Sequence                    |
|-------|-----------|---------|-----------------------------|
| 21.6  | 1270.6241 | 0.0006  | <a href="#">FLSCHGPLANR</a> |
| 4.9   | 1270.6267 | -0.0021 | <a href="#">LFEAMSPYVSK</a> |
| 4.9   | 1270.6241 | 0.0006  | <a href="#">NFSTLAFCCR</a>  |
| 4.5   | 1270.6227 | 0.0019  | <a href="#">DDVVLSLMHDK</a> |
| 3.1   | 1270.6268 | -0.0021 | <a href="#">LQIFFDMVDK</a>  |
| 2.9   | 1270.6281 | -0.0034 | <a href="#">FNFHKYLMR</a>   |
| 2.5   | 1270.6268 | -0.0021 | <a href="#">IDFYVCLVDK</a>  |

Mascot: <http://www.matrixscience.com/>

## Peptide View

### MS/MS Fragmentation of **NLVTW**NAMISGYTR

Found in **AT1G14470.1** in **TAIR\_Arabidopsis**, Symbols: | pentatricopeptide (PPR) repeat-containing protein | chr1:4954075-4955697 FORWARD

Match to Query 7262: 1660.742286 from(831.378419,2+) index(9863)

Title: Elution from: 97.313 to 97.313 scan no 14232 cid35.00 polarity:+

Data file D1d-1-2.mgf

Click mouse within plot area to zoom in by factor of two about that point

Or,   to  Da

Label all possible matches  Label matches used for scoring

Show Y-axis

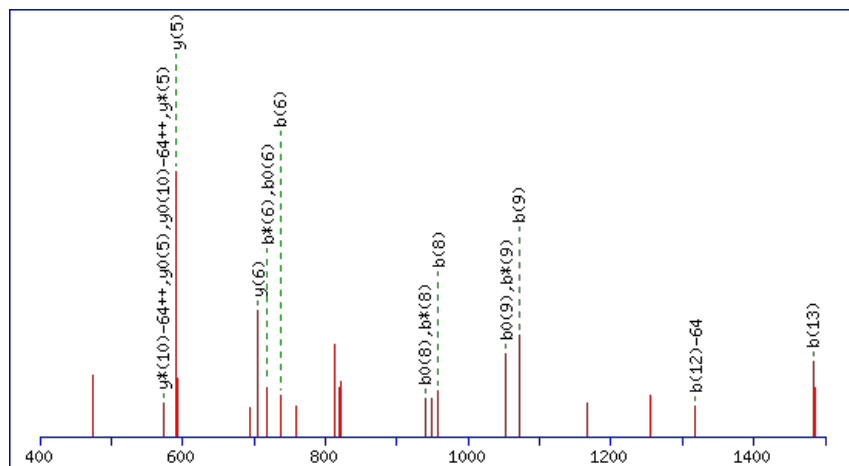

**Monoisotopic mass of neutral peptide Mr(calc):** 1660.7388

**Fixed modifications:** Carbamidomethyl (C) (apply to specified residues or termini only)

**Variable modifications:**

**M8** : Oxidation (M), with neutral losses 0.0000 (shown in table), 63.9983

**Ions Score:** 22 **Expect:** 0.036

**Matches** : 17/226 fragment ions using 20 most intense peaks ([help](#))

| #  | b                | b <sup>++</sup> | b*               | b <sup>*++</sup> | b <sup>0</sup>   | b <sup>0++</sup> | Seq. | y               | y <sup>++</sup> | y*              | y <sup>*++</sup> | y <sup>0</sup>  | y <sup>0++</sup> | #  |
|----|------------------|-----------------|------------------|------------------|------------------|------------------|------|-----------------|-----------------|-----------------|------------------|-----------------|------------------|----|
| 1  | 117.0443         | 59.0258         | 99.0207          | 50.0140          |                  |                  | N    |                 |                 |                 |                  |                 |                  | 14 |
| 2  | 231.1254         | 116.0663        | 213.1018         | 107.0545         |                  |                  | L    | 1545.7091       | 773.3582        | 1527.6855       | 764.3464         | 1527.6985       | 764.3529         | 13 |
| 3  | 331.1908         | 166.0990        | 313.1672         | 157.0873         |                  |                  | V    | 1431.6280       | 716.3176        | 1413.6044       | 707.3058         | 1413.6174       | 707.3123         | 12 |
| 4  | 433.2355         | 217.1214        | 415.2120         | 208.1096         | 415.2250         | 208.1161         | T    | 1331.5625       | 666.2849        | 1313.5389       | 657.2731         | 1313.5519       | 657.2796         | 11 |
| 5  | 621.3089         | 311.1581        | 603.2853         | 302.1463         | 603.2984         | 302.1528         | W    | 1229.5178       | 615.2625        | 1211.4942       | 606.2507         | 1211.5072       | 606.2573         | 10 |
| 6  | <b>737.3459</b>  | 369.1766        | <b>719.3223</b>  | 360.1648         | <b>719.3353</b>  | 360.1713         | N    | 1041.4444       | 521.2258        | 1023.4208       | 512.2141         | 1023.4338       | 512.2206         | 9  |
| 7  | 809.3801         | 405.1937        | 791.3565         | 396.1819         | 791.3695         | 396.1884         | A    | 925.4074        | 463.2073        | 907.3838        | 454.1956         | 907.3968        | 454.2021         | 8  |
| 8  | <b>957.4125</b>  | 479.2099        | <b>939.3889</b>  | 470.1981         | <b>939.4019</b>  | 470.2046         | M    | 853.3733        | 427.1903        | 835.3497        | 418.1785         | 835.3627        | 418.1850         | 7  |
| 9  | <b>1071.4936</b> | 536.2504        | <b>1053.4700</b> | 527.2386         | <b>1053.4830</b> | 527.2452         | I    | <b>705.3408</b> | 353.1741        | 687.3172        | 344.1623         | 687.3303        | 344.1688         | 6  |
| 10 | 1159.5227        | 580.2650        | 1141.4991        | 571.2532         | 1141.5121        | 571.2597         | S    | <b>591.2597</b> | 296.1335        | <b>573.2361</b> | 287.1217         | <b>573.2492</b> | 287.1282         | 5  |
| 11 | 1217.5412        | 609.2742        | 1199.5176        | 600.2624         | 1199.5306        | 600.2689         | G    | 503.2307        | 252.1190        | 485.2071        | 243.1072         | 485.2201        | 243.1137         | 4  |
| 12 | 1381.6015        | 691.3044        | 1363.5779        | 682.2926         | 1363.5910        | 682.2991         | Y    | 445.2122        | 223.1097        | 427.1886        | 214.0979         | 427.2016        | 214.1044         | 3  |
| 13 | <b>1483.6462</b> | 742.3268        | 1465.6227        | 733.3150         | 1465.6357        | 733.3215         | T    | 281.1518        | 141.0795        | 263.1282        | 132.0677         | 263.1412        | 132.0743         | 2  |
| 14 |                  |                 |                  |                  |                  |                  | R    | 179.1071        | 90.0572         | 161.0835        | 81.0454          |                 |                  | 1  |

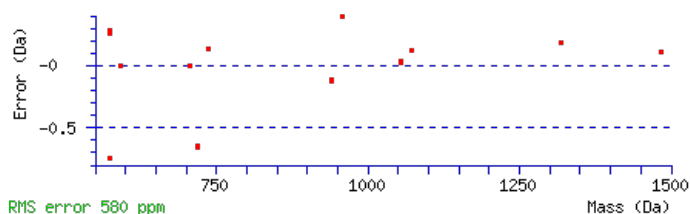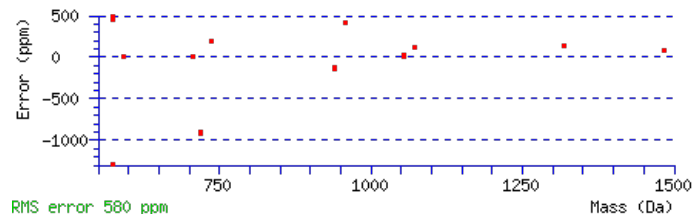

## AT1G14470.1

NCBI **BLAST** search of [NLVTWNAMISGYTR](#)

(Parameters: blastp, nr protein database, expect=20000, no filter, PAM30)

Other BLAST [web gateways](#)

### All matches to this query

| Score | Mr(calc)  | Delta   | Sequence                         |
|-------|-----------|---------|----------------------------------|
| 22.2  | 1660.7388 | 0.0035  | <a href="#">NLVTWNAMISGYTR</a>   |
| 8.3   | 1660.7444 | -0.0021 | <a href="#">LLENMPMPWEQVR</a>    |
| 2.4   | 1660.7469 | -0.0046 | <a href="#">TDVTLGTDYLNMR</a>    |
| 0.9   | 1660.7417 | 0.0006  | <a href="#">STKETAVNGGSSRSTR</a> |

**Mascot:** <http://www.matrixscience.com/>

**Peptide View**MS/MS Fragmentation of **KMREEYEK**Found in **AT1G14520.1** in **TAIR\_Arabidopsis**, Symbols: MIOX1 | MIOX1 (MYO-INISITOL OXYGENASE); oxidoreductase | chr1:4968371-4969949 REVERSE

Match to Query 3773: 1140.490460 from(571.252506,2+) index(2635)

Title: Elution from: 25.943 to 25.943 scan no 3220 cid35.00 polarity:+

Data file D1d-3\_3.mgf

Click mouse within plot area to zoom in by factor of two about that point

Or,   to  Da Label all possible matches  Label matches used for scoring Show Y-axis 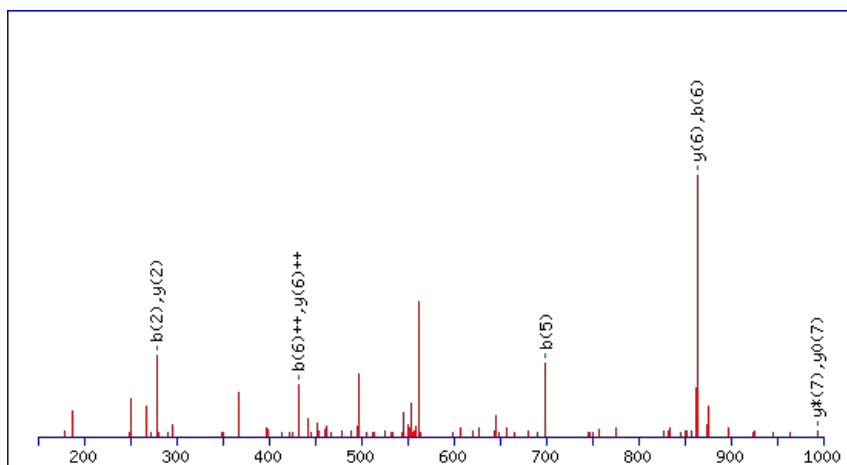

Monoisotopic mass of neutral peptide Mr(calc): 1140.4896

Fixed modifications: Carbamidomethyl (C) (apply to specified residues or termini only)

Variable modifications:

M2 : Oxidation (M), with neutral losses 0.0000 (shown in table), 63.9983

Ions Score: 23 Expect: 0.021

Matches : 10/114 fragment ions using 9 most intense peaks ([help](#))

| # | b               | b <sup>++</sup> | b <sup>*</sup> | b <sup>*++</sup> | b <sup>0</sup> | b <sup>0++</sup> | Seq. | y               | y <sup>++</sup> | y <sup>*</sup>  | y <sup>*++</sup> | y <sup>0</sup>  | y <sup>0++</sup> | # |
|---|-----------------|-----------------|----------------|------------------|----------------|------------------|------|-----------------|-----------------|-----------------|------------------|-----------------|------------------|---|
| 1 | 131.0963        | 66.0518         | 113.0727       | 57.0400          |                |                  | K    |                 |                 |                 |                  |                 |                  | 8 |
| 2 | <b>279.1287</b> | 140.0680        | 261.1052       | 131.0562         |                |                  | M    | 1011.4078       | 506.2075        | <b>993.3842</b> | 497.1957         | <b>993.3972</b> | 497.2023         | 7 |
| 3 | 439.2180        | 220.1126        | 421.1944       | 211.1008         |                |                  | R    | <b>863.3754</b> | <b>432.1913</b> | 845.3518        | 423.1795         | 845.3648        | 423.1860         | 6 |
| 4 | 569.2576        | 285.1324        | 551.2340       | 276.1207         | 551.2471       | 276.1272         | E    | 703.2861        | 352.1467        | 685.2625        | 343.1349         | 685.2756        | 343.1414         | 5 |
| 5 | <b>699.2973</b> | 350.1523        | 681.2737       | 341.1405         | 681.2867       | 341.1470         | E    | 573.2465        | 287.1269        | 555.2229        | 278.1151         | 555.2359        | 278.1216         | 4 |
| 6 | <b>863.3576</b> | <b>432.1824</b> | 845.3340       | 423.1707         | 845.3470       | 423.1772         | Y    | 443.2069        | 222.1071        | 425.1833        | 213.0953         | 425.1963        | 213.1018         | 3 |
| 7 | <b>993.3972</b> | 497.2023        | 975.3737       | 488.1905         | 975.3867       | 488.1970         | E    | <b>279.1465</b> | 140.0769        | 261.1229        | 131.0651         | 261.1359        | 131.0716         | 2 |
| 8 |                 |                 |                |                  |                |                  | K    | 149.1069        | 75.0571         | 131.0833        | 66.0453          |                 |                  | 1 |

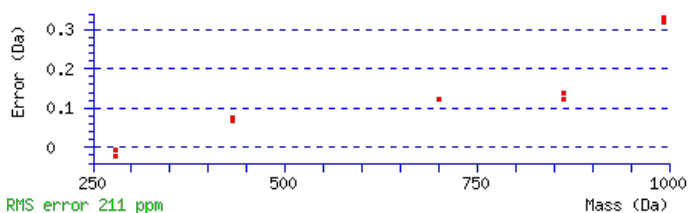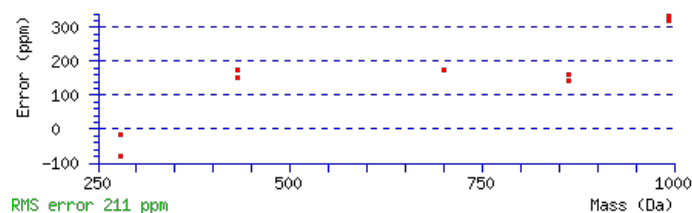NCBI BLAST search of **KMREEYEK**

(Parameters: blastp, nr protein database, expect=20000, no filter, PAM30)

Other BLAST [web gateways](#)**All matches to this query**

| Score | Mr(calc) | Delta | Sequence |
|-------|----------|-------|----------|
|       |          |       |          |

**AT1G14520.1**

|      |           |         |                           |
|------|-----------|---------|---------------------------|
| 23.0 | 1140.4896 | 0.0009  | <a href="#">KMREEYEK</a>  |
| 18.4 | 1140.4922 | -0.0018 | <a href="#">CNSFLKNSR</a> |
| 18.1 | 1140.4896 | 0.0009  | <a href="#">NFSMTQKEK</a> |
| 11.0 | 1140.4895 | 0.0009  | <a href="#">TYVDMEKSR</a> |
| 10.9 | 1140.4927 | -0.0022 | <a href="#">MQRSNARSR</a> |
| 10.1 | 1140.4895 | 0.0009  | <a href="#">DHLEMDIQK</a> |
| 7.7  | 1140.4896 | 0.0009  | <a href="#">MAKEEYVSR</a> |
| 7.5  | 1140.4895 | 0.0009  | <a href="#">MTEFNITLR</a> |
| 7.4  | 1140.4911 | -0.0007 | <a href="#">MTIMTMIMK</a> |
| 6.0  | 1140.4911 | -0.0007 | <a href="#">MTIMTMIMK</a> |

**Mascot:** <http://www.matrixscience.com/>


**Mascot Search Results**
**Peptide View**MS/MS Fragmentation of **GTIVVDNSSAFR**Found in **AT1G14810.1** in **TAIR\_Arabidopsis**, Symbols: | senialdehyde dehydrogenase family protein | chr1:5102679-5104628 REVERSE

Match to Query 4414: 1280.593212 from(641.303882,2+) index(3542)

Title: Elution from: 33.900 to 33.900 scan no 4423 cid35.00 polarity:+

Data file C7-3\_3.mgf

Click mouse within plot area to zoom in by factor of two about that point

Or,   to  Da Label all possible matches  Label matches used for scoring Show Y-axis 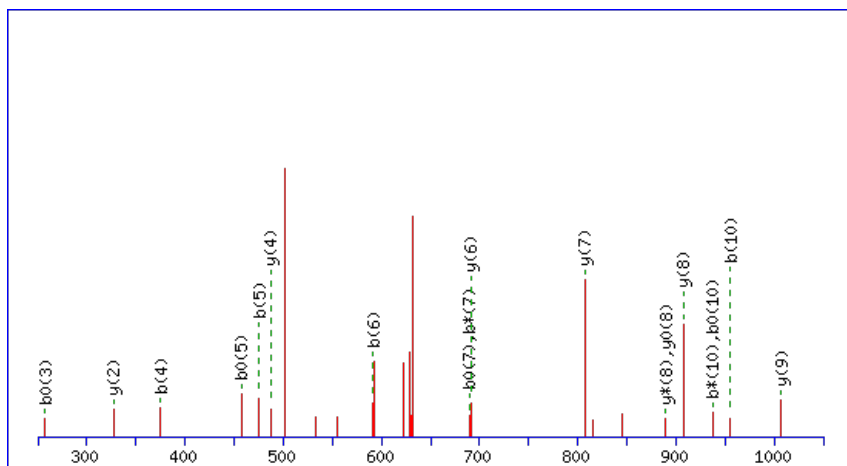Monoisotopic mass of neutral peptide **Mr(calc)**: 1280.5937

Fixed modifications: Carbamidomethyl (C) (apply to specified residues or termini only)

Ions Score: 43 Expect: 0.0005

Matches : 18/112 fragment ions using 23 most intense peaks ([help](#))

| #  | b               | b <sup>++</sup> | b <sup>*</sup>  | b <sup>*++</sup> | b <sup>0</sup>  | b <sup>0++</sup> | Seq.     | y                | y <sup>++</sup> | y <sup>*</sup>  | y <sup>*++</sup> | y <sup>0</sup>  | y <sup>0++</sup> | #  |
|----|-----------------|-----------------|-----------------|------------------|-----------------|------------------|----------|------------------|-----------------|-----------------|------------------|-----------------|------------------|----|
| 1  | 59.0258         | 30.0165         |                 |                  |                 |                  | <b>G</b> |                  |                 |                 |                  |                 |                  | 12 |
| 2  | 161.0705        | 81.0389         |                 |                  | 143.0599        | 72.0336          | <b>T</b> | 1223.5825        | 612.2949        | 1205.5589       | 603.2831         | 1205.5719       | 603.2896         | 11 |
| 3  | 275.1516        | 138.0794        |                 |                  | 257.1410        | 129.0741         | <b>I</b> | 1121.5378        | 561.2725        | 1103.5142       | 552.2607         | 1103.5272       | 552.2672         | 10 |
| 4  | <b>375.2170</b> | 188.1122        |                 |                  | 357.2065        | 179.1069         | <b>V</b> | <b>1007.4567</b> | 504.2320        | 989.4331        | 495.2202         | 989.4461        | 495.2267         | 9  |
| 5  | <b>475.2825</b> | 238.1449        |                 |                  | <b>457.2719</b> | 229.1396         | <b>V</b> | <b>907.3912</b>  | 454.1993        | <b>889.3677</b> | 445.1875         | <b>889.3807</b> | 445.1940         | 8  |
| 6  | <b>591.3065</b> | 296.1569        |                 |                  | 573.2959        | 287.1516         | <b>D</b> | <b>807.3258</b>  | 404.1665        | 789.3022        | 395.1547         | 789.3152        | 395.1613         | 7  |
| 7  | 707.3435        | 354.1754        | <b>689.3199</b> | 345.1636         | <b>689.3329</b> | 345.1701         | <b>N</b> | <b>691.3018</b>  | 346.1545        | 673.2782        | 337.1428         | 673.2912        | 337.1493         | 6  |
| 8  | 795.3725        | 398.1899        | 777.3489        | 389.1781         | 777.3620        | 389.1846         | <b>S</b> | 575.2648         | 288.1360        | 557.2412        | 279.1243         | 557.2543        | 279.1308         | 5  |
| 9  | 883.4016        | 442.2044        | 865.3780        | 433.1926         | 865.3910        | 433.1991         | <b>S</b> | <b>487.2358</b>  | 244.1215        | 469.2122        | 235.1097         | 469.2252        | 235.1162         | 4  |
| 10 | <b>955.4357</b> | 478.2215        | <b>937.4122</b> | 469.2097         | <b>937.4252</b> | 469.2162         | <b>A</b> | 399.2067         | 200.1070        | 381.1831        | 191.0952         |                 |                  | 3  |
| 11 | 1103.5012       | 552.2542        | 1085.4776       | 543.2424         | 1085.4906       | 543.2489         | <b>F</b> | <b>327.1725</b>  | 164.0899        | 309.1490        | 155.0781         |                 |                  | 2  |
| 12 |                 |                 |                 |                  |                 |                  | <b>R</b> | 179.1071         | 90.0572         | 161.0835        | 81.0454          |                 |                  | 1  |

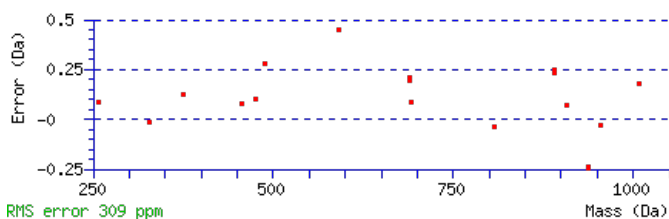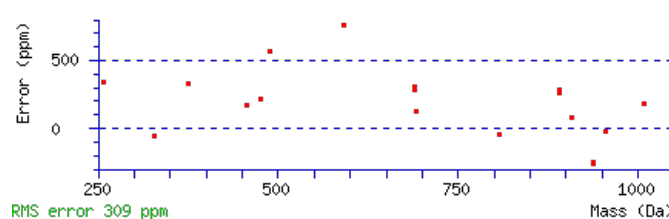NCBI **BLAST** search of **GTIVVDNSSAFR**

(Parameters: blastp, nr protein database, expect=20000, no filter, PAM30)

Other BLAST [web gateways](#)**All matches to this query**

## AT1G14810.1

| Score | Mr(calc)  | Delta   | Sequence                     |
|-------|-----------|---------|------------------------------|
| 43.0  | 1280.5937 | -0.0005 | <a href="#">GTIVVDNSSAFR</a> |
| 12.8  | 1280.5946 | -0.0014 | <a href="#">VLTGWMQKMR</a>   |
| 10.8  | 1280.5897 | 0.0035  | <a href="#">IVGTVGSSMLCK</a> |
| 7.1   | 1280.5924 | 0.0009  | <a href="#">RLENMNTMKK</a>   |
| 6.6   | 1280.5923 | 0.0009  | <a href="#">MQRIVDSLMLR</a>  |
| 2.3   | 1280.5937 | -0.0005 | <a href="#">TGIEVNRDFSK</a>  |
| 2.1   | 1280.5924 | 0.0009  | <a href="#">SVVPSVRMSMR</a>  |
| 1.7   | 1280.5912 | 0.0020  | <a href="#">MFYSHQLLAR</a>   |
| 0.7   | 1280.5946 | -0.0014 | <a href="#">VLTGWMQKMR</a>   |

Mascot: <http://www.matrixscience.com/>



## Peptide View

### MS/MS Fragmentation of SKSSSVSGQQSR

Found in **AT1G14970.1** in **TAIR\_Arabidopsis**, Symbols: | similar to unknown protein [Arabidopsis thaliana] (TAIR:AT2G01480.1); similar to hypothetical protein [Vitis vinifera] (GB:CAN77011.1); similar to unnamed protein product [Vitis vinifera] (GB:CAO42288.1); contains InterPro domain Protei

Match to Query 5246: 1384.603134 from(693.308843,2+) index(3253)

Title: Elution from: 32.463 to 32.463 scan no 4063 cid35.00 polarity:+

Data file D6h-1\_2.mgf

Click mouse within plot area to zoom in by factor of two about that point

Or,   to  Da

Label all possible matches  Label matches used for scoring

Show Y-axis

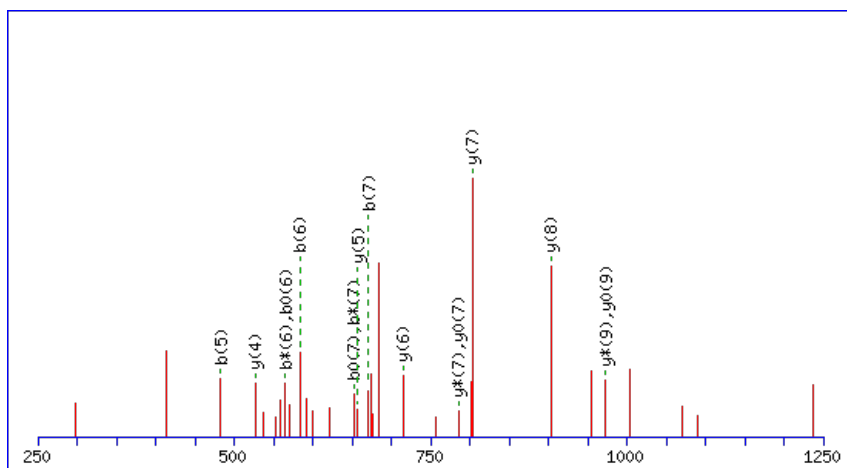

Monoisotopic mass of neutral peptide  $M_r(\text{calc})$ : 1384.6051

Fixed modifications: Carbamidomethyl (C) (apply to specified residues or termini only)

Ions Score: 24 Expect: 0.03

Matches : 16/140 fragment ions using 29 most intense peaks ([help](#))

| #  | b               | b <sup>++</sup> | b*              | b <sup>*++</sup> | b <sup>0</sup>  | b <sup>0++</sup> | Seq. | y               | y <sup>++</sup> | y*              | y <sup>*++</sup> | y <sup>0</sup>  | y <sup>0++</sup> | #  |
|----|-----------------|-----------------|-----------------|------------------|-----------------|------------------|------|-----------------|-----------------|-----------------|------------------|-----------------|------------------|----|
| 1  | 89.0363         | 45.0218         |                 |                  | 71.0258         | 36.0165          | S    |                 |                 |                 |                  |                 |                  | 13 |
| 2  | 219.1254        | 110.0663        | 201.1018        | 101.0545         | 201.1148        | 101.0610         | K    | 1297.5833       | 649.2953        | 1279.5597       | 640.2835         | 1279.5728       | 640.2900         | 12 |
| 3  | 307.1544        | 154.0809        | 289.1309        | 145.0691         | 289.1439        | 145.0756         | S    | 1167.4943       | 584.2508        | 1149.4707       | 575.2390         | 1149.4837       | 575.2455         | 11 |
| 4  | 395.1835        | 198.0954        | 377.1599        | 189.0836         | 377.1729        | 189.0901         | S    | 1079.4652       | 540.2363        | 1061.4416       | 531.2245         | 1061.4547       | 531.2310         | 10 |
| 5  | <b>483.2126</b> | 242.1099        | 465.1890        | 233.0981         | 465.2020        | 233.1046         | S    | 991.4362        | 496.2217        | <b>973.4126</b> | 487.2099         | <b>973.4256</b> | 487.2164         | 9  |
| 6  | <b>583.2780</b> | 292.1426        | <b>565.2544</b> | 283.1309         | <b>565.2674</b> | 283.1374         | V    | <b>903.4071</b> | 452.2072        | 885.3835        | 443.1954         | 885.3965        | 443.2019         | 8  |
| 7  | <b>671.3071</b> | 336.1572        | <b>653.2835</b> | 327.1454         | <b>653.2965</b> | 327.1519         | S    | <b>803.3417</b> | 402.1745        | <b>785.3181</b> | 393.1627         | <b>785.3311</b> | 393.1692         | 7  |
| 8  | 729.3256        | 365.1664        | 711.3020        | 356.1546         | 711.3150        | 356.1611         | G    | <b>715.3126</b> | 358.1599        | 697.2890        | 349.1481         | 697.3020        | 349.1547         | 6  |
| 9  | 859.3782        | 430.1927        | 841.3546        | 421.1810         | 841.3677        | 421.1875         | Q    | <b>657.2941</b> | 329.1507        | 639.2705        | 320.1389         | 639.2835        | 320.1454         | 5  |
| 10 | 989.4309        | 495.2191        | 971.4073        | 486.2073         | 971.4203        | 486.2138         | Q    | <b>527.2414</b> | 264.1244        | 509.2179        | 255.1126         | 509.2309        | 255.1191         | 4  |
| 11 | 1119.4835       | 560.2454        | 1101.4599       | 551.2336         | 1101.4729       | 551.2401         | Q    | 397.1888        | 199.0980        | 379.1652        | 190.0862         | 379.1782        | 190.0928         | 3  |
| 12 | 1207.5126       | 604.2599        | 1189.4890       | 595.2481         | 1189.5020       | 595.2546         | S    | 267.1362        | 134.0717        | 249.1126        | 125.0599         | 249.1256        | 125.0664         | 2  |
| 13 |                 |                 |                 |                  |                 |                  | R    | 179.1071        | 90.0572         | 161.0835        | 81.0454          |                 |                  | 1  |

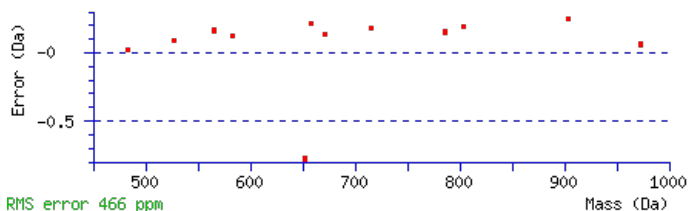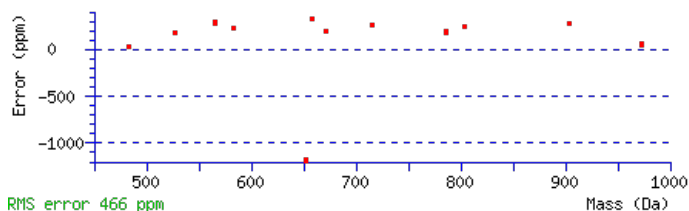

NCBI BLAST search of [SKSSSVSGQQSR](#)

## AT1G14970.1

(Parameters: blastp, nr protein database, expect=20000, no filter, PAM30)

Other BLAST [web gateways](#)

### All matches to this query

| Score | Mr(calc)  | Delta   | Sequence                      |
|-------|-----------|---------|-------------------------------|
| 23.9  | 1384.6051 | -0.0020 | <a href="#">SKSSSVSGQQQSR</a> |
| 18.9  | 1384.6069 | -0.0038 | <a href="#">DFKSVSSTEGWK</a>  |
| 13.6  | 1384.6033 | -0.0002 | <a href="#">IGRSSCMTIDLK</a>  |
| 12.9  | 1384.6055 | -0.0024 | <a href="#">MFLDLCGVKDR</a>   |
| 12.5  | 1384.6029 | 0.0003  | <a href="#">YLEMLDKGMK</a>    |
| 8.0   | 1384.6029 | 0.0003  | <a href="#">DMESKLDMLFK</a>   |
| 5.0   | 1384.6055 | -0.0024 | <a href="#">MVDEGMKLFQR</a>   |
| 2.7   | 1384.6055 | -0.0024 | <a href="#">VMESMAFNITAR</a>  |
| 1.0   | 1384.6060 | -0.0028 | <a href="#">MAKDGGVSLRR</a>   |

Mascot: <http://www.matrixscience.com/>

## Peptide View

MS/MS Fragmentation of **LGENEYHLFRDEEDVLGTLHED**

Found in **AT1G14980.1** in **TAIR\_Arabidopsis**, Symbols: CPN10 | CPN10 (CHAPERONIN 10) | chr1:5165925-5166649 REVERSE

Match to Query 10676: 2500.150544 from(626.044912,4+) index(8262)

Title: Elution from: 74.976 to 74.976 scan no 10957 cid35.00 polarity:+

Data file D1d-2\_1.mgf

Click mouse within plot area to zoom in by factor of two about that point

Or, Plot from  to  Da

Label all possible matches  Label matches used for scoring

Show Y-axis

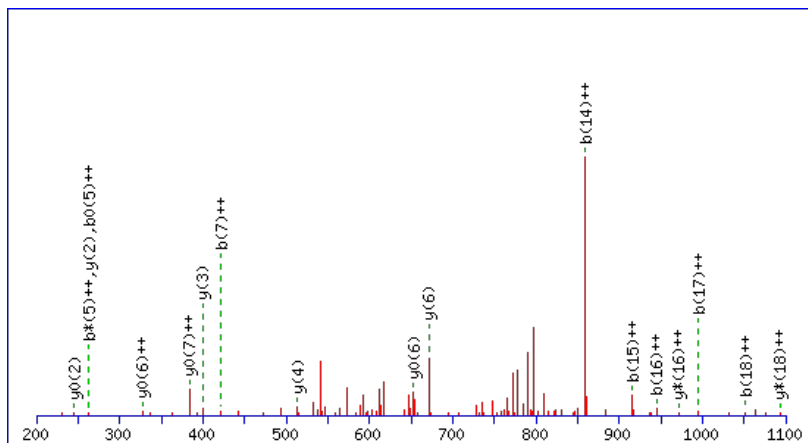

Monoisotopic mass of neutral peptide Mr(calc): 2500.1506

Fixed modifications: Carbamidomethyl (C) (apply to specified residues or termini only)

Ions Score: 25 Expect: 0.0065

Matches : 18/208 fragment ions using 27 most intense peaks ([help](#))

| #  | b         | b <sup>++</sup> | b <sup>*</sup> | b <sup>*++</sup> | b <sup>0</sup> | b <sup>0++</sup> | Seq. | y         | y <sup>++</sup> | y <sup>*</sup> | y <sup>*++</sup> | y <sup>0</sup> | y <sup>0++</sup> | #  |
|----|-----------|-----------------|----------------|------------------|----------------|------------------|------|-----------|-----------------|----------------|------------------|----------------|------------------|----|
| 1  | 114.0913  | 57.5493         |                |                  |                |                  | L    |           |                 |                |                  |                |                  | 21 |
| 2  | 171.1128  | 86.0600         |                |                  |                |                  | G    | 2388.0739 | 1194.5406       | 2371.0473      | 1186.0273        | 2370.0633      | 1185.5353        | 20 |
| 3  | 300.1554  | 150.5813        |                |                  | 282.1448       | 141.5761         | E    | 2331.0524 | 1166.0298       | 2314.0258      | 1157.5166        | 2313.0418      | 1157.0246        | 19 |
| 4  | 414.1983  | 207.6028        | 397.1718       | 199.0895         | 396.1878       | 198.5975         | N    | 2202.0098 | 1101.5085       | 2184.9833      | 1092.9953        | 2183.9992      | 1092.5033        | 18 |
| 5  | 543.2409  | 272.1241        | 526.2144       | 263.6108         | 525.2304       | 263.1188         | E    | 2087.9669 | 1044.4871       | 2070.9403      | 1035.9738        | 2069.9563      | 1035.4818        | 17 |
| 6  | 706.3042  | 353.6558        | 689.2777       | 345.1425         | 688.2937       | 344.6505         | Y    | 1958.9243 | 979.9658        | 1941.8977      | 971.4525         | 1940.9137      | 970.9605         | 16 |
| 7  | 843.3632  | 422.1852        | 826.3366       | 413.6719         | 825.3526       | 413.1799         | H    | 1795.8610 | 898.4341        | 1778.8344      | 889.9208         | 1777.8504      | 889.4288         | 15 |
| 8  | 956.4472  | 478.7272        | 939.4207       | 470.2140         | 938.4367       | 469.7220         | L    | 1658.8020 | 829.9047        | 1641.7755      | 821.3914         | 1640.7915      | 820.8994         | 14 |
| 9  | 1103.5156 | 552.2615        | 1086.4891      | 543.7482         | 1085.5051      | 543.2562         | F    | 1545.7180 | 773.3626        | 1528.6914      | 764.8494         | 1527.7074      | 764.3573         | 13 |
| 10 | 1259.6167 | 630.3120        | 1242.5902      | 621.7987         | 1241.6062      | 621.3067         | R    | 1398.6496 | 699.8284        | 1381.6230      | 691.3151         | 1380.6390      | 690.8231         | 12 |
| 11 | 1374.6437 | 687.8255        | 1357.6171      | 679.3122         | 1356.6331      | 678.8202         | D    | 1242.5485 | 621.7779        |                |                  | 1224.5379      | 612.7726         | 11 |
| 12 | 1503.6863 | 752.3468        | 1486.6597      | 743.8335         | 1485.6757      | 743.3415         | E    | 1127.5215 | 564.2644        |                |                  | 1109.5109      | 555.2591         | 10 |
| 13 | 1618.7132 | 809.8603        | 1601.6867      | 801.3470         | 1600.7027      | 800.8550         | D    | 998.4789  | 499.7431        |                |                  | 980.4684       | 490.7378         | 9  |
| 14 | 1717.7816 | 859.3945        | 1700.7551      | 850.8812         | 1699.7711      | 850.3892         | V    | 883.4520  | 442.2296        |                |                  | 865.4414       | 433.2243         | 8  |
| 15 | 1830.8657 | 915.9365        | 1813.8392      | 907.4232         | 1812.8551      | 906.9312         | L    | 784.3836  | 392.6954        |                |                  | 766.3730       | 383.6901         | 7  |
| 16 | 1887.8872 | 944.4472        | 1870.8606      | 935.9339         | 1869.8766      | 935.4419         | G    | 671.2995  | 336.1534        |                |                  | 653.2889       | 327.1481         | 6  |
| 17 | 1988.9348 | 994.9711        | 1971.9083      | 986.4578         | 1970.9243      | 985.9658         | T    | 614.2780  | 307.6427        |                |                  | 596.2675       | 298.6374         | 5  |
| 18 | 2102.0189 | 1051.5131       | 2084.9924      | 1042.9998        | 2084.0083      | 1042.5078        | L    | 513.2304  | 257.1188        |                |                  | 495.2198       | 248.1135         | 4  |
| 19 | 2239.0778 | 1120.0425       | 2222.0513      | 1111.5293        | 2221.0673      | 1111.0373        | H    | 400.1463  | 200.5768        |                |                  | 382.1357       | 191.5715         | 3  |
| 20 | 2368.1204 | 1184.5638       | 2351.0939      | 1176.0506        | 2350.1099      | 1175.5586        | E    | 263.0874  | 132.0473        |                |                  | 245.0768       | 123.0420         | 2  |
| 21 |           |                 |                |                  |                |                  | D    | 134.0448  | 67.5260         |                |                  | 116.0342       | 58.5207          | 1  |

# AT1G14980.1

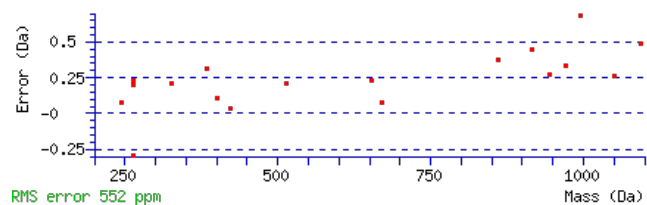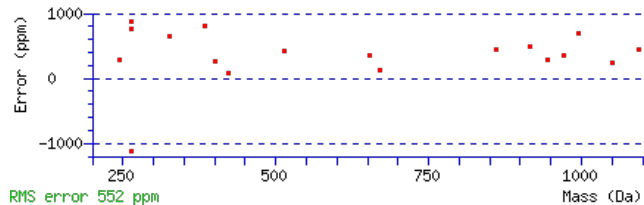

NCBI **BLAST** search of [LGENEYHLFRDEDVLGTLHED](#)  
(Parameters: blastp, nr protein database, expect=20000, no filter, PAM30)  
Other BLAST [web gateways](#)

## All matches to this query

| Score | Mr(calc)  | Delta   | Sequence                              |
|-------|-----------|---------|---------------------------------------|
| 25.2  | 2500.1506 | -0.0001 | <a href="#">LGENEYHLFRDEDVLGTLHED</a> |
| 0.4   | 2500.1535 | -0.0030 | <a href="#">AQDLPEVCGEIMLEYSKEVMK</a> |

Mascot: <http://www.matrixscience.com/>

**Peptide View**MS/MS Fragmentation of **GAFEFLVK**

Found in **AT1G15140.1** in **TAIR\_Arabidopsis**, Symbols: | oxidoreductase NAD-binding domain-containing protein | chr1:5210398-5212132  
REVERSE

Match to Query 1416: 909.496396 from(455.755474,2+) index(6606)

Title: Elution from: 61.940 to 61.940 scan no 8733 cid35.00 polarity:+

Data file D1d-2\_2.mgf

Click mouse within plot area to zoom in by factor of two about that point

Or,   to  Da

Label all possible matches  Label matches used for scoring

Show Y-axis

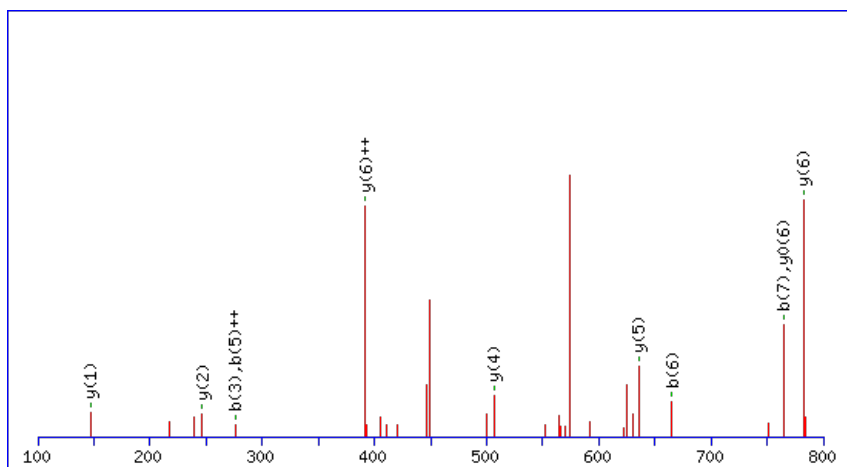

Monoisotopic mass of neutral peptide **Mr(calc)**: 909.4960

**Fixed modifications**: Carbamidomethyl (C) (apply to specified residues or termini only)

**Ions Score**: 40 **Expect**: 0.00011

**Matches** : 11/56 fragment ions using 12 most intense peaks ([help](#))

| # | b               | b <sup>++</sup> | b <sup>0</sup> | b <sup>0++</sup> | Seq.     | y               | y <sup>++</sup> | y*       | y <sup>*++</sup> | y <sup>0</sup>  | y <sup>0++</sup> | # |
|---|-----------------|-----------------|----------------|------------------|----------|-----------------|-----------------|----------|------------------|-----------------|------------------|---|
| 1 | 58.0287         | 29.5180         |                |                  | <b>G</b> |                 |                 |          |                  |                 |                  | 8 |
| 2 | 129.0659        | 65.0366         |                |                  | <b>A</b> | 853.4818        | 427.2445        | 836.4553 | 418.7313         | 835.4713        | 418.2393         | 7 |
| 3 | <b>276.1343</b> | 138.5708        |                |                  | <b>F</b> | <b>782.4447</b> | <b>391.7260</b> | 765.4182 | 383.2127         | <b>764.4341</b> | 382.7207         | 6 |
| 4 | 405.1769        | 203.0921        | 387.1663       | 194.0868         | <b>E</b> | <b>635.3763</b> | 318.1918        | 618.3497 | 309.6785         | 617.3657        | 309.1865         | 5 |
| 5 | 552.2453        | <b>276.6263</b> | 534.2347       | 267.6210         | <b>F</b> | <b>506.3337</b> | 253.6705        | 489.3071 | 245.1572         |                 |                  | 4 |
| 6 | <b>665.3293</b> | 333.1683        | 647.3188       | 324.1630         | <b>L</b> | 359.2653        | 180.1363        | 342.2387 | 171.6230         |                 |                  | 3 |
| 7 | <b>764.3978</b> | 382.7025        | 746.3872       | 373.6972         | <b>V</b> | <b>246.1812</b> | 123.5942        | 229.1547 | 115.0810         |                 |                  | 2 |
| 8 |                 |                 |                |                  | <b>K</b> | <b>147.1128</b> | 74.0600         | 130.0863 | 65.5468          |                 |                  | 1 |

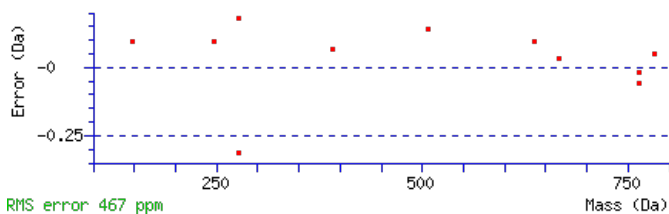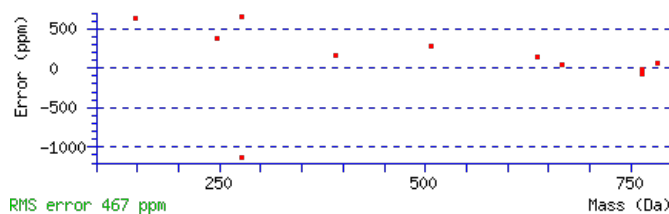NCBI **BLAST** search of **GAFEFLVK**

(Parameters: blastp, nr protein database, expect=20000, no filter, PAM30)

Other BLAST [web gateways](#)

**All matches to this query**

| Score | Mr(calc) | Delta  | Sequence        |
|-------|----------|--------|-----------------|
| 40.1  | 909.4960 | 0.0004 | <b>GAFEFLVK</b> |

## AT1G15140.1

|      |          |        |                          |
|------|----------|--------|--------------------------|
| 12.0 | 909.4960 | 0.0004 | <a href="#">AFGDFLLK</a> |
| 5.3  | 909.4960 | 0.0004 | <a href="#">FTAISPFK</a> |
| 0.2  | 909.4960 | 0.0004 | <a href="#">GFFGLEK</a>  |

**Mascot:** <http://www.matrixscience.com/>

**Peptide View**MS/MS Fragmentation of **EAQEVVTEADVEK**Found in **AT1G15340.1** in **TAIR\_Arabidopsis**, Symbols: MBD10 | MBD10 (methyl-CpG-binding domain 10); DNA binding | chr1:5275890-5277469 REVERSE

Match to Query 6028: 1460.641688 from(731.328120,2+) index(2267)

Title: Elution from: 26.376 to 26.376 scan no 2938 cid35.00 polarity:+

Data file 0-3\_1.mgf

Click mouse within plot area to zoom in by factor of two about that point

Or,   to  Da Label all possible matches  Label matches used for scoring Show Y-axis 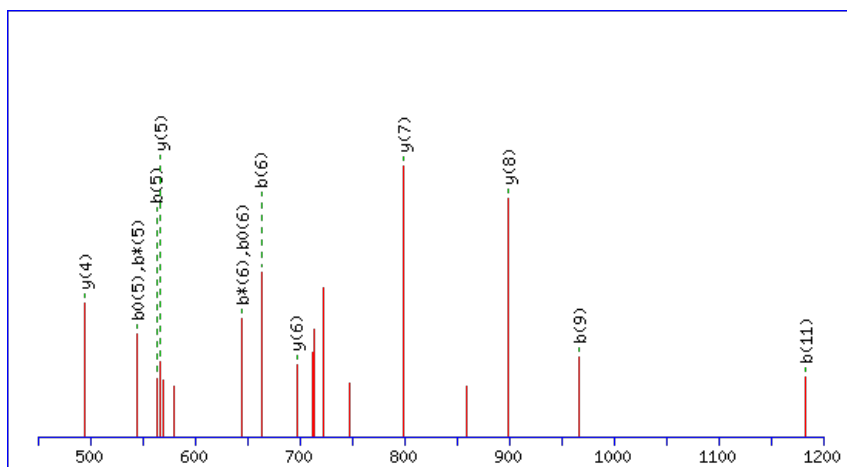Monoisotopic mass of neutral peptide  $M_r(\text{calc})$ : 1460.6441

Fixed modifications: Carbamidomethyl (C) (apply to specified residues or termini only)

Ions Score: 47 Expect: 8e-005

Matches : 13/138 fragment ions using 15 most intense peaks ([help](#))

| #  | b                | b <sup>++</sup> | b*              | b <sup>*++</sup> | b <sup>0</sup>  | b <sup>0++</sup> | Seq. | y               | y <sup>++</sup> | y*        | y <sup>*++</sup> | y <sup>0</sup> | y <sup>0++</sup> | #  |
|----|------------------|-----------------|-----------------|------------------|-----------------|------------------|------|-----------------|-----------------|-----------|------------------|----------------|------------------|----|
| 1  | 131.0469         | 66.0271         |                 |                  | 113.0363        | 57.0218          | E    |                 |                 |           |                  |                |                  | 13 |
| 2  | 203.0811         | 102.0442        |                 |                  | 185.0705        | 93.0389          | A    | 1331.6117       | 666.3095        | 1313.5882 | 657.2977         | 1313.6012      | 657.3042         | 12 |
| 3  | 333.1337         | 167.0705        | 315.1101        | 158.0587         | 315.1231        | 158.0652         | Q    | 1259.5776       | 630.2924        | 1241.5540 | 621.2806         | 1241.5670      | 621.2872         | 11 |
| 4  | 463.1733         | 232.0903        | 445.1497        | 223.0785         | 445.1628        | 223.0850         | E    | 1129.5249       | 565.2661        | 1111.5014 | 556.2543         | 1111.5144      | 556.2608         | 10 |
| 5  | <b>563.2388</b>  | 282.1230        | <b>545.2152</b> | 273.1112         | <b>545.2282</b> | 273.1177         | V    | 999.4853        | 500.2463        | 981.4617  | 491.2345         | 981.4748       | 491.2410         | 9  |
| 6  | <b>663.3042</b>  | 332.1558        | <b>645.2806</b> | 323.1440         | <b>645.2937</b> | 323.1505         | V    | <b>899.4199</b> | 450.2136        | 881.3963  | 441.2018         | 881.4093       | 441.2083         | 8  |
| 7  | 765.3489         | 383.1781        | 747.3254        | 374.1663         | 747.3384        | 374.1728         | T    | <b>799.3544</b> | 400.1808        | 781.3308  | 391.1691         | 781.3439       | 391.1756         | 7  |
| 8  | 895.3886         | 448.1979        | 877.3650        | 439.1861         | 877.3780        | 439.1926         | E    | <b>697.3097</b> | 349.1585        | 679.2861  | 340.1467         | 679.2991       | 340.1532         | 6  |
| 9  | <b>967.4227</b>  | 484.2150        | 949.3991        | 475.2032         | 949.4122        | 475.2097         | A    | <b>567.2701</b> | 284.1387        | 549.2465  | 275.1269         | 549.2595       | 275.1334         | 5  |
| 10 | 1083.4467        | 542.2270        | 1065.4231       | 533.2152         | 1065.4361       | 533.2217         | D    | <b>495.2359</b> | 248.1216        | 477.2123  | 239.1098         | 477.2254       | 239.1163         | 4  |
| 11 | <b>1183.5121</b> | 592.2597        | 1165.4886       | 583.2479         | 1165.5016       | 583.2544         | V    | 379.2120        | 190.1096        | 361.1884  | 181.0978         | 361.2014       | 181.1043         | 3  |
| 12 | 1313.5518        | 657.2795        | 1295.5282       | 648.2677         | 1295.5412       | 648.2742         | E    | 279.1465        | 140.0769        | 261.1229  | 131.0651         | 261.1359       | 131.0716         | 2  |
| 13 |                  |                 |                 |                  |                 |                  | K    | 149.1069        | 75.0571         | 131.0833  | 66.0453          |                |                  | 1  |

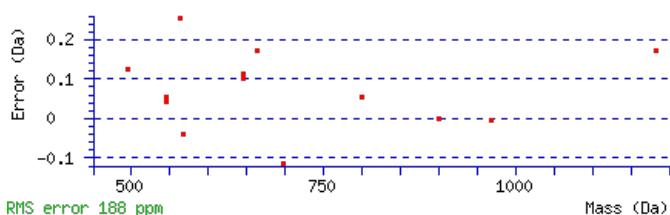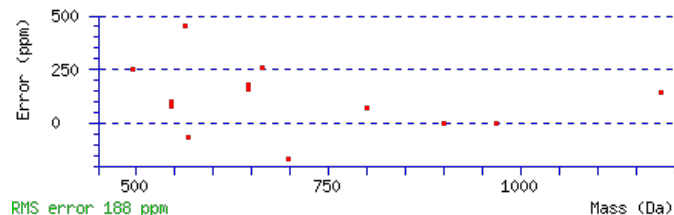NCBI **BLAST** search of **EAQEVVTEADVEK**

(Parameters: blastp, nr protein database, expect=20000, no filter, PAM30)

# AT1G15340.1

Other BLAST [web gateways](#)

## All matches to this query

| Score | Mr(calc)  | Delta   | Sequence                      |
|-------|-----------|---------|-------------------------------|
| 47.4  | 1460.6441 | -0.0024 | <a href="#">EAQEVVTEADVEK</a> |
| 0.2   | 1460.6382 | 0.0035  | <a href="#">QVYEGFFSGGVEK</a> |

Mascot: <http://www.matrixscience.com/>



**Peptide View**MS/MS Fragmentation of **RLAAQLAK**Found in **AT1G15480.1** in **TAIR\_Arabidopsis**, Symbols: | DNA binding | chr1:5318302-5320417 FORWARD

Match to Query 1378: 869.543420 from(435.778986,2+) index(508)

Title: Elution from: 10.804 to 10.804 scan no 780 cid35.00 polarity:+

Data file 0-3\_2.mgf

Click mouse within plot area to zoom in by factor of two about that point

Or,  to  Da Label all possible matches  Label matches used for scoring Show Y-axis 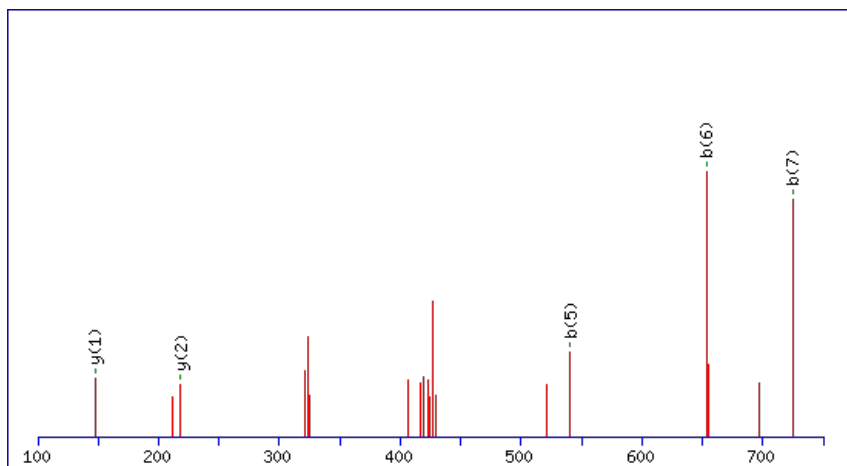Monoisotopic mass of neutral peptide **Mr(calc)**: 869.5446

Fixed modifications: Carbamidomethyl (C) (apply to specified residues or termini only)

Ions Score: 19 Expect: 0.049

Matches : 5/56 fragment ions using 10 most intense peaks ([help](#))

| # | b               | b <sup>++</sup> | b*       | b <sup>*++</sup> | Seq. | y               | y <sup>++</sup> | y*       | y <sup>*++</sup> | # |
|---|-----------------|-----------------|----------|------------------|------|-----------------|-----------------|----------|------------------|---|
| 1 | 157.1084        | 79.0578         | 140.0818 | 70.5446          | R    |                 |                 |          |                  | 8 |
| 2 | 270.1925        | 135.5999        | 253.1659 | 127.0866         | L    | 714.4509        | 357.7291        | 697.4243 | 349.2158         | 7 |
| 3 | 341.2296        | 171.1184        | 324.2030 | 162.6051         | A    | 601.3668        | 301.1870        | 584.3402 | 292.6738         | 6 |
| 4 | 412.2667        | 206.6370        | 395.2401 | 198.1237         | A    | 530.3297        | 265.6685        | 513.3031 | 257.1552         | 5 |
| 5 | <b>540.3253</b> | 270.6663        | 523.2987 | 262.1530         | Q    | 459.2926        | 230.1499        | 442.2660 | 221.6366         | 4 |
| 6 | <b>653.4093</b> | 327.2083        | 636.3828 | 318.6950         | L    | 331.2340        | 166.1206        | 314.2074 | 157.6074         | 3 |
| 7 | <b>724.4464</b> | 362.7269        | 707.4199 | 354.2136         | A    | <b>218.1499</b> | 109.5786        | 201.1234 | 101.0653         | 2 |
| 8 |                 |                 |          |                  | K    | <b>147.1128</b> | 74.0600         | 130.0863 | 65.5468          | 1 |

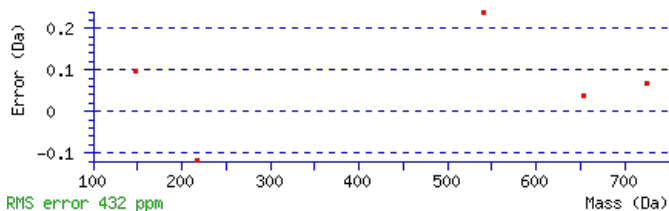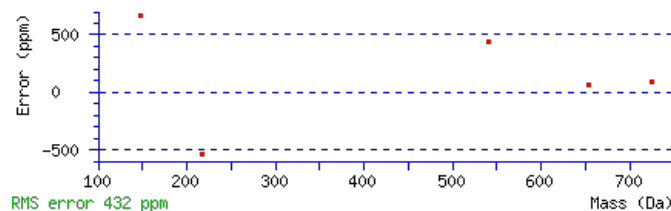NCBI **BLAST** search of [RLAAQLAK](#)

(Parameters: blastp, nr protein database, expect=20000, no filter, PAM30)

Other BLAST [web gateways](#)**All matches to this query**

| Score | Mr(calc) | Delta   | Sequence                 |
|-------|----------|---------|--------------------------|
| 19.3  | 869.5446 | -0.0012 | <a href="#">RAQLALAK</a> |
| 19.3  | 869.5446 | -0.0012 | <a href="#">RLAAQLAK</a> |

# AT1G15480.1

|     |          |         |                         |
|-----|----------|---------|-------------------------|
| 4.8 | 869.5446 | -0.0012 | <a href="#">AIEILRR</a> |
| 4.8 | 869.5447 | -0.0013 | <a href="#">VVDLIRR</a> |

**Mascot:** <http://www.matrixscience.com/>

**Peptide View**MS/MS Fragmentation of **TDALDAAGNTTAAIGK**

Found in **AT1G15690.1** in **TAIR\_Arabidopsis**, Symbols: ATAVP3, AVP-3, AVP1 | AVP1 (vacuolar-type H<sup>+</sup>-pumping pyrophosphatase 1); ATPase | chr1:5399110-5402180 FORWARD

Match to Query 6113: 1506.688536 from(754.351544,2+) index(3814)

Title: Elution from: 36.474 to 36.474 scan no 4763 cid35.00 polarity:+

Data file C7-1\_3.mgf

Click mouse within plot area to zoom in by factor of two about that point

Or,   to  Da

Label all possible matches  Label matches used for scoring

Show Y-axis

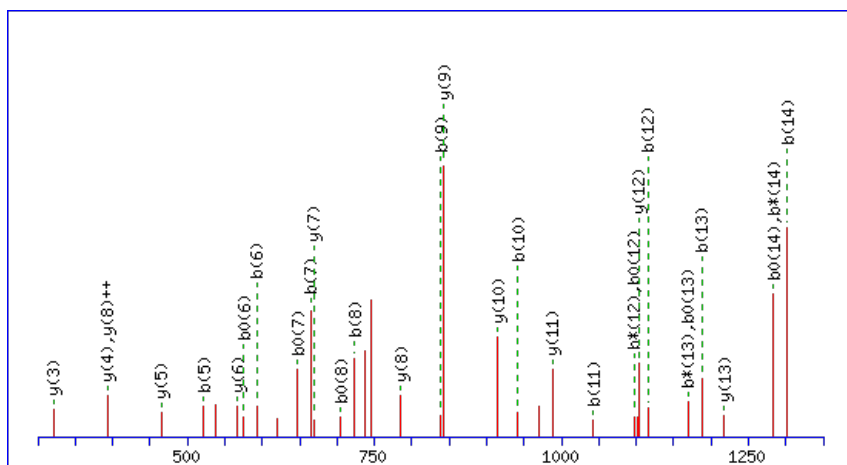

**Monoisotopic mass of neutral peptide Mr(calc):** 1506.6886

**Fixed modifications:** Carbamidomethyl (C) (apply to specified residues or termini only)

**Ions Score:** 108 **Expect:** 9.3e-011

**Matches:** 31/154 fragment ions using 34 most intense peaks ([help](#))

| #  | b                | b <sup>++</sup> | b <sup>*</sup>   | b <sup>*++</sup> | b <sup>0</sup>   | b <sup>0++</sup> | Seq. | y                | y <sup>++</sup> | y <sup>*</sup> | y <sup>*++</sup> | y <sup>0</sup> | y <sup>0++</sup> | #  |
|----|------------------|-----------------|------------------|------------------|------------------|------------------|------|------------------|-----------------|----------------|------------------|----------------|------------------|----|
| 1  | 103.0520         | 52.0296         |                  |                  | 85.0414          | 43.0244          | T    |                  |                 |                |                  |                |                  | 16 |
| 2  | 219.0760         | 110.0416        |                  |                  | 201.0654         | 101.0363         | D    | 1405.6512        | 703.3292        | 1387.6276      | 694.3174         | 1387.6406      | 694.3240         | 15 |
| 3  | 291.1101         | 146.0587        |                  |                  | 273.0996         | 137.0534         | A    | 1289.6272        | 645.3172        | 1271.6036      | 636.3055         | 1271.6167      | 636.3120         | 14 |
| 4  | 405.1912         | 203.0992        |                  |                  | 387.1807         | 194.0940         | L    | <b>1217.5931</b> | 609.3002        | 1199.5695      | 600.2884         | 1199.5825      | 600.2949         | 13 |
| 5  | <b>521.2152</b>  | 261.1112        |                  |                  | 503.2046         | 252.1060         | D    | <b>1103.5120</b> | 552.2596        | 1085.4884      | 543.2478         | 1085.5014      | 543.2543         | 12 |
| 6  | <b>593.2493</b>  | 297.1283        |                  |                  | <b>575.2388</b>  | 288.1230         | A    | <b>987.4880</b>  | 494.2476        | 969.4644       | 485.2358         | 969.4774       | 485.2424         | 11 |
| 7  | <b>665.2835</b>  | 333.1454        |                  |                  | <b>647.2729</b>  | 324.1401         | A    | <b>915.4538</b>  | 458.2306        | 897.4303       | 449.2188         | 897.4433       | 449.2253         | 10 |
| 8  | <b>723.3020</b>  | 362.1546        |                  |                  | <b>705.2914</b>  | 353.1494         | G    | <b>843.4197</b>  | 422.2135        | 825.3961       | 413.2017         | 825.4091       | 413.2082         | 9  |
| 9  | <b>839.3390</b>  | 420.1731        | 821.3154         | 411.1613         | 821.3284         | 411.1678         | N    | <b>785.4012</b>  | <b>393.2042</b> | 767.3776       | 384.1924         | 767.3906       | 384.1990         | 8  |
| 10 | <b>941.3837</b>  | 471.1955        | 923.3601         | 462.1837         | 923.3731         | 462.1902         | T    | <b>669.3642</b>  | 335.1857        | 651.3406       | 326.1739         | 651.3536       | 326.1805         | 7  |
| 11 | <b>1043.4284</b> | 522.2178        | 1025.4048        | 513.2061         | 1025.4178        | 513.2126         | T    | <b>567.3195</b>  | 284.1634        | 549.2959       | 275.1516         | 549.3089       | 275.1581         | 6  |
| 12 | <b>1115.4626</b> | 558.2349        | <b>1097.4390</b> | 549.2231         | <b>1097.4520</b> | 549.2296         | A    | <b>465.2748</b>  | 233.1410        | 447.2512       | 224.1292         |                |                  | 5  |
| 13 | <b>1187.4967</b> | 594.2520        | <b>1169.4731</b> | 585.2402         | <b>1169.4861</b> | 585.2467         | A    | <b>393.2406</b>  | 197.1239        | 375.2170       | 188.1122         |                |                  | 4  |
| 14 | <b>1301.5778</b> | 651.2925        | <b>1283.5542</b> | 642.2808         | <b>1283.5672</b> | 642.2873         | I    | <b>321.2065</b>  | 161.1069        | 303.1829       | 152.0951         |                |                  | 3  |
| 15 | 1359.5963        | 680.3018        | 1341.5727        | 671.2900         | 1341.5857        | 671.2965         | G    | 207.1254         | 104.0663        | 189.1018       | 95.0545          |                |                  | 2  |
| 16 |                  |                 |                  |                  |                  |                  | K    | 149.1069         | 75.0571         | 131.0833       | 66.0453          |                |                  | 1  |

# AT1G15690.1

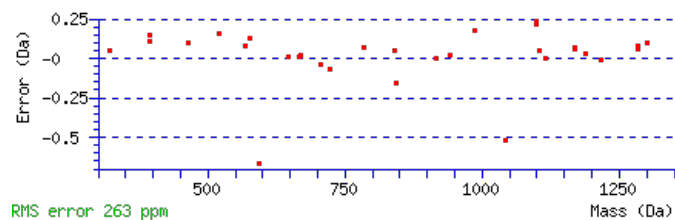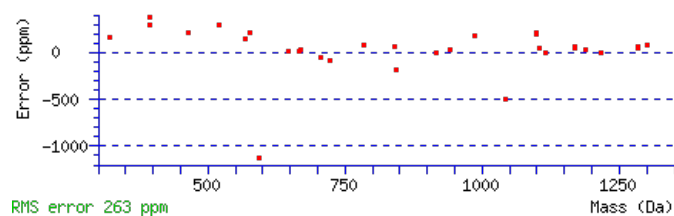

NCBI **BLAST** search of [TDALDAAGNTTAAIGK](#)

(Parameters: blastp, nr protein database, expect=20000, no filter, PAM30)

Other BLAST [web gateways](#)

## All matches to this query

| Score | Mr(calc)  | Delta   | Sequence                         |
|-------|-----------|---------|----------------------------------|
| 108.4 | 1506.6886 | -0.0001 | <a href="#">TDALDAAGNTTAAIGK</a> |
| 7.9   | 1506.6895 | -0.0010 | <a href="#">MEAALAACALPSLR</a>   |
| 7.7   | 1506.6909 | -0.0023 | <a href="#">TSESNQWLLPSTK</a>    |
| 2.2   | 1506.6854 | 0.0031  | <a href="#">DAGRVEFKGWHEGK</a>   |
| 0.7   | 1506.6886 | -0.0001 | <a href="#">SADDALEKEDKLR</a>    |
| 0.6   | 1506.6886 | -0.0000 | <a href="#">TQDGGTEVVEAKAGK</a>  |

Mascot: <http://www.matrixscience.com/>

**Peptide View**MS/MS Fragmentation of **SWIPAVK**

Found in **AT1G15820.1** in **TAIR\_Arabidopsis**, Symbols: CP24, LHCB6 | LHCB6 (LIGHT HARVESTING COMPLEX PSII); chlorophyll binding | chr1:5446680-5447671 REVERSE

Match to Query 1060: 799.460104 from(400.737328,2+) index(4884)

Title: Elution from: 44.428 to 44.428 scan no 6099 cid35.00 polarity:+

Data file C7-2\_1.mgf

Click mouse within plot area to zoom in by factor of two about that point

Or,  to  Da

Label all possible matches  Label matches used for scoring

Show Y-axis

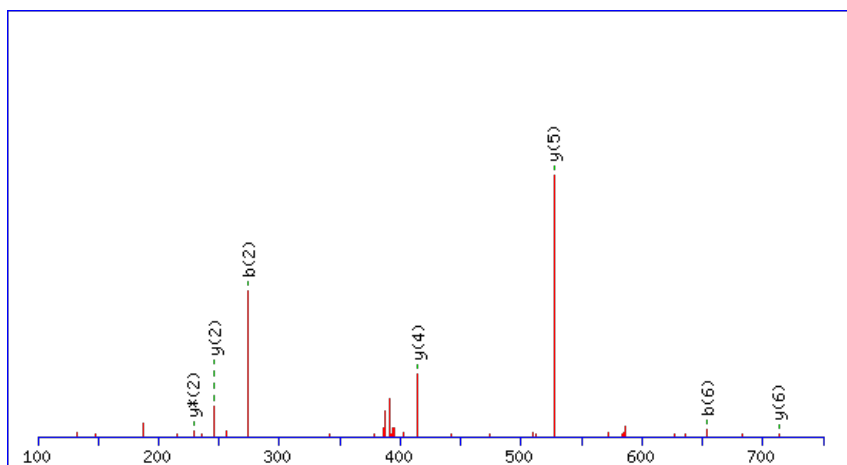

Monoisotopic mass of neutral peptide  $M_r(\text{calc})$ : 799.4592

Fixed modifications: Carbamidomethyl (C) (apply to specified residues or termini only)

Ions Score: 30 Expect: 0.0011

Matches : 7/48 fragment ions using 12 most intense peaks ([help](#))

| # | b               | b <sup>++</sup> | b <sup>0</sup> | b <sup>0++</sup> | Seq. | y               | y <sup>++</sup> | y*              | y <sup>*++</sup> | # |
|---|-----------------|-----------------|----------------|------------------|------|-----------------|-----------------|-----------------|------------------|---|
| 1 | 88.0393         | 44.5233         | 70.0287        | 35.5180          | S    |                 |                 |                 |                  | 7 |
| 2 | <b>274.1186</b> | 137.5629        | 256.1081       | 128.5577         | W    | <b>713.4345</b> | 357.2209        | 696.4079        | 348.7076         | 6 |
| 3 | 387.2027        | 194.1050        | 369.1921       | 185.0997         | I    | <b>527.3552</b> | 264.1812        | 510.3286        | 255.6679         | 5 |
| 4 | 484.2554        | 242.6314        | 466.2449       | 233.6261         | P    | <b>414.2711</b> | 207.6392        | 397.2445        | 199.1259         | 4 |
| 5 | 555.2926        | 278.1499        | 537.2820       | 269.1446         | A    | 317.2183        | 159.1128        | 300.1918        | 150.5995         | 3 |
| 6 | <b>654.3610</b> | 327.6841        | 636.3504       | 318.6788         | V    | <b>246.1812</b> | 123.5942        | <b>229.1547</b> | 115.0810         | 2 |
| 7 |                 |                 |                |                  | K    | 147.1128        | 74.0600         | 130.0863        | 65.5468          | 1 |

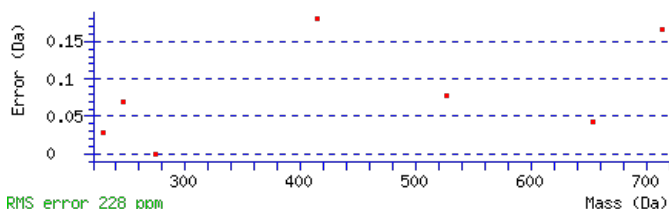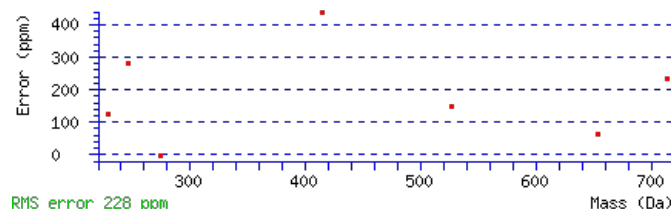

NCBI BLAST search of [SWIPAVK](#)

(Parameters: blastp, nr protein database, expect=20000, no filter, PAM30)

Other BLAST [web gateways](#)

**All matches to this query**

| Score | $M_r(\text{calc})$ | Delta  | Sequence                |
|-------|--------------------|--------|-------------------------|
| 29.6  | 799.4592           | 0.0009 | <a href="#">SWIPAVK</a> |



## Peptide View

MS/MS Fragmentation of **TLGEWAGLCK**Found in **AT1G15930.1** in **TAIR\_Arabidopsis**, Symbols: | 40S ribosomal protein S12 (RPS12A) | chr1:5471696-5472735 FORWARD

Match to Query 3165: 1133.553534 from(567.784043,2+) index(5409)

Title: Elution from: 49.780 to 49.780 scan no 6981 cid35.00 polarity:+

Data file D12h-2\_3.mgf

Click mouse within plot area to zoom in by factor of two about that point

Or,   to  Da Label all possible matches  Label matches used for scoring Show Y-axis 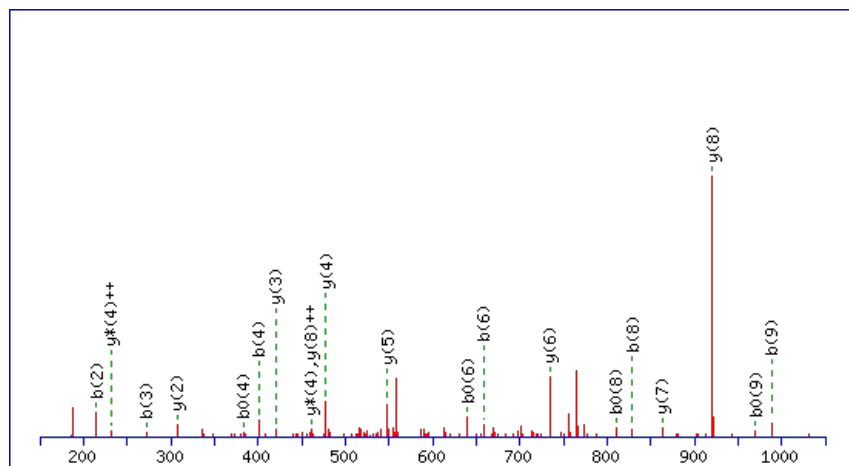Monoisotopic mass of neutral peptide **Mr(calc)**: 1133.5539

Fixed modifications: Carbamidomethyl (C) (apply to specified residues or termini only)

Ions Score: 46 **Expect**: 7.7e-005Matches : 20/78 fragment ions using 34 most intense peaks ([help](#))

| #  | b               | b <sup>++</sup> | b <sup>0</sup>  | b <sup>0++</sup> | Seq. | y               | y <sup>++</sup> | y*              | y <sup>*++</sup> | y <sup>0</sup> | y <sup>0++</sup> | #  |
|----|-----------------|-----------------|-----------------|------------------|------|-----------------|-----------------|-----------------|------------------|----------------|------------------|----|
| 1  | 102.0550        | 51.5311         | 84.0444         | 42.5258          | T    |                 |                 |                 |                  |                |                  | 10 |
| 2  | <b>215.1390</b> | 108.0731        | 197.1285        | 99.0679          | L    | 1033.5135       | 517.2604        | 1016.4870       | 508.7471         | 1015.5030      | 508.2551         | 9  |
| 3  | <b>272.1605</b> | 136.5839        | 254.1499        | 127.5786         | G    | <b>920.4295</b> | <b>460.7184</b> | 903.4029        | 452.2051         | 902.4189       | 451.7131         | 8  |
| 4  | <b>401.2031</b> | 201.1052        | <b>383.1925</b> | 192.0999         | E    | <b>863.4080</b> | 432.2076        | 846.3815        | 423.6944         | 845.3974       | 423.2024         | 7  |
| 5  | 587.2824        | 294.1448        | 569.2718        | 285.1396         | W    | <b>734.3654</b> | 367.6863        | 717.3389        | 359.1731         |                |                  | 6  |
| 6  | <b>658.3195</b> | 329.6634        | <b>640.3089</b> | 320.6581         | A    | <b>548.2861</b> | 274.6467        | 531.2595        | 266.1334         |                |                  | 5  |
| 7  | 715.3410        | 358.1741        | 697.3304        | 349.1688         | G    | <b>477.2490</b> | 239.1281        | <b>460.2224</b> | <b>230.6149</b>  |                |                  | 4  |
| 8  | <b>828.4250</b> | 414.7162        | <b>810.4145</b> | 405.7109         | L    | <b>420.2275</b> | 210.6174        | 403.2010        | 202.1041         |                |                  | 3  |
| 9  | <b>988.4557</b> | 494.7315        | <b>970.4451</b> | 485.7262         | C    | <b>307.1435</b> | 154.0754        | 290.1169        | 145.5621         |                |                  | 2  |
| 10 |                 |                 |                 |                  | K    | 147.1128        | 74.0600         | 130.0863        | 65.5468          |                |                  | 1  |

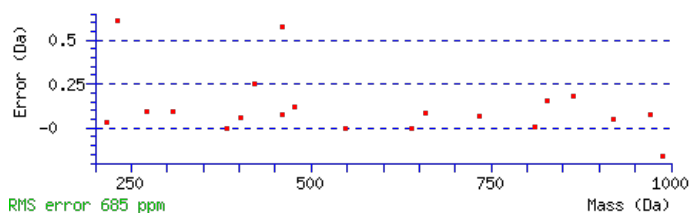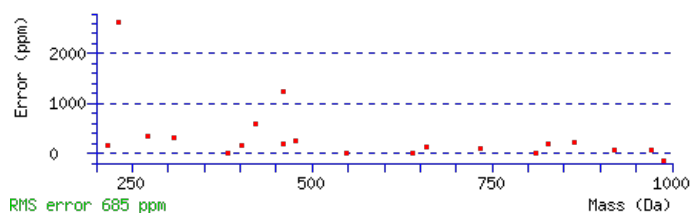NCBI **BLAST** search of **TLGEWAGLCK**

(Parameters: blastp, nr protein database, expect=20000, no filter, PAM30)

Other BLAST [web gateways](#)

### All matches to this query

| Score | Mr(calc) | Delta | Sequence |
|-------|----------|-------|----------|
|       |          |       |          |

## AT1G15930.1

|      |           |         |                             |
|------|-----------|---------|-----------------------------|
| 46.1 | 1133.5539 | -0.0004 | <a href="#">TLGEWAGLCK</a>  |
| 13.4 | 1133.5564 | -0.0029 | <a href="#">TLADASTAEQK</a> |
| 3.6  | 1133.5539 | -0.0004 | <a href="#">LASECLOWK</a>   |

**Mascot:** <http://www.matrixscience.com/>



**Peptide View**MS/MS Fragmentation of **NVEPSSSPEVR**Found in **AT1G15940.1** in **TAIR\_Arabidopsis**, Symbols: | binding | chr1:5473666-5478044 FORWARD

Match to Query 3669: 1214.533484 from(608.274018,2+) index(2846)

Title: Elution from: 30.762 to 30.762 scan no 3626 cid35.00 polarity:+

Data file D1d-1\_3.mgf

Click mouse within plot area to zoom in by factor of two about that point

Or,   to  Da Label all possible matches  Label matches used for scoring Show Y-axis 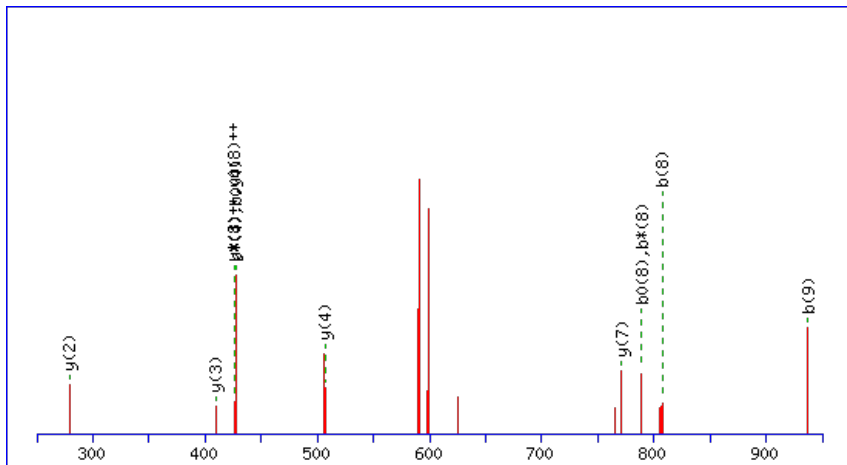Monoisotopic mass of neutral peptide  $M_r(\text{calc})$ : 1214.5338

Fixed modifications: Carbamidomethyl (C) (apply to specified residues or termini only)

Ions Score: 29 Expect: 0.0066

Matches : 12/112 fragment ions using 15 most intense peaks ([help](#))

| #  | b         | b <sup>++</sup> | b*        | b <sup>*++</sup> | b <sup>0</sup> | b <sup>0++</sup> | Seq. | y         | y <sup>++</sup> | y*        | y <sup>*++</sup> | y <sup>0</sup> | y <sup>0++</sup> | #  |
|----|-----------|-----------------|-----------|------------------|----------------|------------------|------|-----------|-----------------|-----------|------------------|----------------|------------------|----|
| 1  | 117.0443  | 59.0258         | 99.0207   | 50.0140          |                |                  | N    |           |                 |           |                  |                |                  | 11 |
| 2  | 217.1097  | 109.0585        | 199.0861  | 100.0467         |                |                  | V    | 1099.5040 | 550.2557        | 1081.4804 | 541.2439         | 1081.4935      | 541.2504         | 10 |
| 3  | 347.1493  | 174.0783        | 329.1258  | 165.0665         | 329.1388       | 165.0730         | E    | 999.4386  | 500.2229        | 981.4150  | 491.2111         | 981.4280       | 491.2176         | 9  |
| 4  | 445.1991  | 223.1032        | 427.1756  | 214.0914         | 427.1886       | 214.0979         | P    | 869.3990  | 435.2031        | 851.3754  | 426.1913         | 851.3884       | 426.1978         | 8  |
| 5  | 533.2282  | 267.1177        | 515.2046  | 258.1060         | 515.2176       | 258.1125         | S    | 771.3492  | 386.1782        | 753.3256  | 377.1664         | 753.3386       | 377.1729         | 7  |
| 6  | 621.2573  | 311.1323        | 603.2337  | 302.1205         | 603.2467       | 302.1270         | S    | 683.3201  | 342.1637        | 665.2965  | 333.1519         | 665.3095       | 333.1584         | 6  |
| 7  | 709.2863  | 355.1468        | 691.2628  | 346.1350         | 691.2758       | 346.1415         | S    | 595.2910  | 298.1492        | 577.2674  | 289.1374         | 577.2805       | 289.1439         | 5  |
| 8  | 807.3361  | 404.1717        | 789.3126  | 395.1599         | 789.3256       | 395.1664         | P    | 507.2620  | 254.1346        | 489.2384  | 245.1228         | 489.2514       | 245.1293         | 4  |
| 9  | 937.3758  | 469.1915        | 919.3522  | 460.1797         | 919.3652       | 460.1862         | E    | 409.2122  | 205.1097        | 391.1886  | 196.0979         | 391.2016       | 196.1044         | 3  |
| 10 | 1037.4412 | 519.2242        | 1019.4176 | 510.2125         | 1019.4306      | 510.2190         | V    | 279.1725  | 140.0899        | 261.1490  | 131.0781         |                |                  | 2  |
| 11 |           |                 |           |                  |                |                  | R    | 179.1071  | 90.0572         | 161.0835  | 81.0454          |                |                  | 1  |

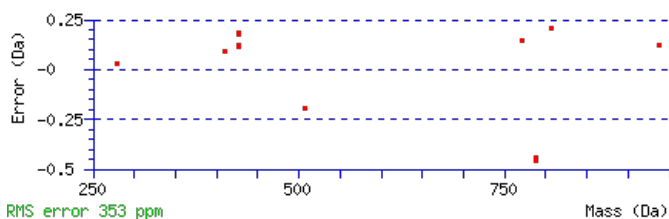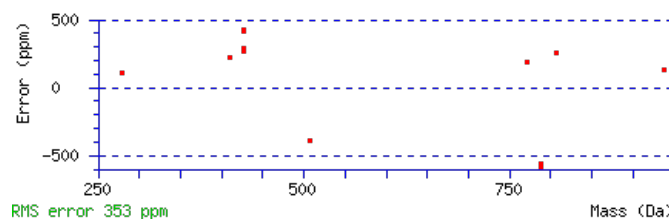NCBI BLAST search of **NVEPSSSPEVR**

(Parameters: blastp, nr protein database, expect=20000, no filter, PAM30)

Other BLAST [web gateways](#)

All matches to this query

## AT1G15940.1

| Score | Mr(calc)  | Delta   | Sequence                    |
|-------|-----------|---------|-----------------------------|
| 28.7  | 1214.5338 | -0.0003 | <a href="#">NVEPSSSPEVR</a> |
| 17.5  | 1214.5360 | -0.0025 | <a href="#">ENVPPGFGEQK</a> |
| 9.9   | 1214.5335 | 0.0000  | <a href="#">KFFGWMQNK</a>   |
| 4.9   | 1214.5311 | 0.0024  | <a href="#">LDDELDNIEK</a>  |
| 4.4   | 1214.5364 | -0.0029 | <a href="#">HERQDQKEK</a>   |
| 4.4   | 1214.5311 | 0.0024  | <a href="#">KDETPVEEEK</a>  |
| 2.3   | 1214.5360 | -0.0025 | <a href="#">KFDYSDATVR</a>  |

Mascot: <http://www.matrixscience.com/>

**Peptide View**MS/MS Fragmentation of **MVQDAEKYKAEDEQVK**Found in **AT1G16030.1** in **TAIR\_Arabidopsis**, Symbols: HSP70B | HSP70B (heat shock protein 70B); ATP binding | chr1:5502380-5504320  
REVERSE

Match to Query 8810: 1946.838534 from(974.426543,2+) index(7509)

Title: Elution from: 67.180 to 67.180 scan no 9875 cid35.00 polarity:+

Data file D12h-2\_3.mgf

Click mouse within plot area to zoom in by factor of two about that point

Or,   to  Da Label all possible matches  Label matches used for scoring Show Y-axis 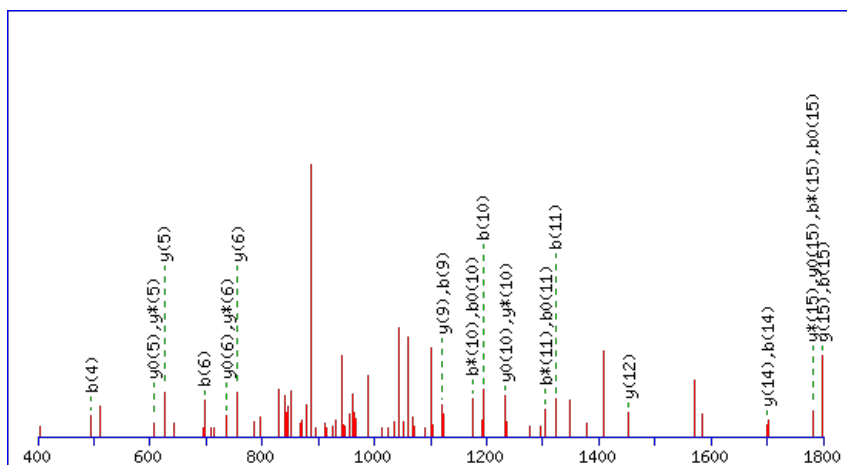Monoisotopic mass of neutral peptide  $M_r(\text{calc})$ : 1946.8418

Fixed modifications: Carbamidomethyl (C) (apply to specified residues or termini only)

Variable modifications:

M1 : Oxidation (M), with neutral losses 0.0000 (shown in table), 63.9983

Ions Score: 26 Expect: 0.016

Matches : 27/244 fragment ions using 36 most intense peaks ([help](#))

| #  | b         | b <sup>++</sup> | b*        | b <sup>*++</sup> | b <sup>0</sup> | b <sup>0++</sup> | Seq. | y         | y <sup>++</sup> | y*        | y <sup>*++</sup> | y <sup>0</sup> | y <sup>0++</sup> | #  |
|----|-----------|-----------------|-----------|------------------|----------------|------------------|------|-----------|-----------------|-----------|------------------|----------------|------------------|----|
| 1  | 149.0397  | 75.0235         |           |                  |                |                  | M    |           |                 |           |                  |                |                  | 16 |
| 2  | 249.1052  | 125.0562        |           |                  |                |                  | V    | 1799.8166 | 900.4120        | 1781.7930 | 891.4002         | 1781.8061      | 891.4067         | 15 |
| 3  | 379.1578  | 190.0825        | 361.1342  | 181.0707         |                |                  | Q    | 1699.7512 | 850.3792        | 1681.7276 | 841.3674         | 1681.7406      | 841.3739         | 14 |
| 4  | 495.1818  | 248.0945        | 477.1582  | 239.0827         | 477.1712       | 239.0892         | D    | 1569.6985 | 785.3529        | 1551.6750 | 776.3411         | 1551.6880      | 776.3476         | 13 |
| 5  | 567.2159  | 284.1116        | 549.1924  | 275.0998         | 549.2054       | 275.1063         | A    | 1453.6746 | 727.3409        | 1435.6510 | 718.3291         | 1435.6640      | 718.3356         | 12 |
| 6  | 697.2556  | 349.1314        | 679.2320  | 340.1196         | 679.2450       | 340.1261         | E    | 1381.6404 | 691.3238        | 1363.6168 | 682.3121         | 1363.6298      | 682.3186         | 11 |
| 7  | 827.3446  | 414.1759        | 809.3210  | 405.1641         | 809.3340       | 405.1707         | K    | 1251.6008 | 626.3040        | 1233.5772 | 617.2922         | 1233.5902      | 617.2987         | 10 |
| 8  | 991.4050  | 496.2061        | 973.3814  | 487.1943         | 973.3944       | 487.2008         | Y    | 1121.5117 | 561.2595        | 1103.4882 | 552.2477         | 1103.5012      | 552.2542         | 9  |
| 9  | 1121.4940 | 561.2506        | 1103.4704 | 552.2388         | 1103.4834      | 552.2454         | K    | 957.4514  | 479.2293        | 939.4278  | 470.2175         | 939.4408       | 470.2240         | 8  |
| 10 | 1193.5281 | 597.2677        | 1175.5046 | 588.2559         | 1175.5176      | 588.2624         | A    | 827.3624  | 414.1848        | 809.3388  | 405.1730         | 809.3518       | 405.1795         | 7  |
| 11 | 1323.5678 | 662.2875        | 1305.5442 | 653.2757         | 1305.5572      | 653.2822         | E    | 755.3282  | 378.1677        | 737.3046  | 369.1559         | 737.3176       | 369.1625         | 6  |
| 12 | 1439.5917 | 720.2995        | 1421.5682 | 711.2877         | 1421.5812      | 711.2942         | D    | 625.2886  | 313.1479        | 607.2650  | 304.1361         | 607.2780       | 304.1426         | 5  |
| 13 | 1569.6314 | 785.3193        | 1551.6078 | 776.3075         | 1551.6208      | 776.3140         | E    | 509.2646  | 255.1359        | 491.2410  | 246.1241         | 491.2540       | 246.1307         | 4  |
| 14 | 1699.6840 | 850.3456        | 1681.6604 | 841.3339         | 1681.6735      | 841.3404         | Q    | 379.2250  | 190.1161        | 361.2014  | 181.1043         |                |                  | 3  |
| 15 | 1799.7495 | 900.3784        | 1781.7259 | 891.3666         | 1781.7389      | 891.3731         | V    | 249.1723  | 125.0898        | 231.1487  | 116.0780         |                |                  | 2  |
| 16 |           |                 |           |                  |                |                  | K    | 149.1069  | 75.0571         | 131.0833  | 66.0453          |                |                  | 1  |

# AT1G16030.1

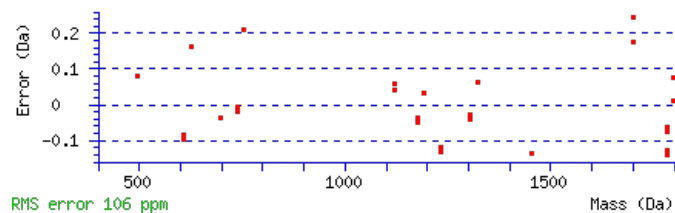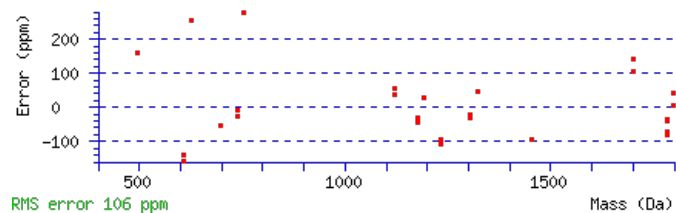

NCBI **BLAST** search of [MVQDAEKYKAEDEQVK](#)  
 (Parameters: blastp, nr protein database, expect=20000, no filter, PAM30)  
 Other BLAST [web gateways](#)

## All matches to this query

| Score | Mr(calc)  | Delta   | Sequence                          |
|-------|-----------|---------|-----------------------------------|
| 25.7  | 1946.8418 | -0.0032 | <a href="#">MVQDAEKYKAEDEQVK</a>  |
| 6.8   | 1946.8341 | 0.0044  | <a href="#">QIRCNWATKGATSGEDK</a> |
| 3.2   | 1946.8404 | -0.0019 | <a href="#">TMTELDGMICSQLGTLR</a> |
| 2.2   | 1946.8418 | -0.0033 | <a href="#">YONGILSDSAILNMDEK</a> |
| 0.2   | 1946.8348 | 0.0037  | <a href="#">GVCSKTDEVCIKAESNK</a> |

Mascot: <http://www.matrixscience.com/>



# Mascot Search Results

## Peptide View

MS/MS Fragmentation of **ALQEMGNGEDLLVK**

Found in **AT1G16080.1** in **TAIR\_Arabidopsis**, Symbols: | similar to unknown [Populus trichocarpa] (GB:ABK94042.1) | chr1:5514388-5515755  
FORWARD

Match to Query 6331: 1532.707580 from(767.361066,2+) index(5462)

Title: Elution from: 48.256 to 48.256 scan no 6962 cid35.00 polarity:+

Data file D6h-3\_3.mgf

Click mouse within plot area to zoom in by factor of two about that point

Or,  to  Da

Label all possible matches  Label matches used for scoring

Show Y-axis

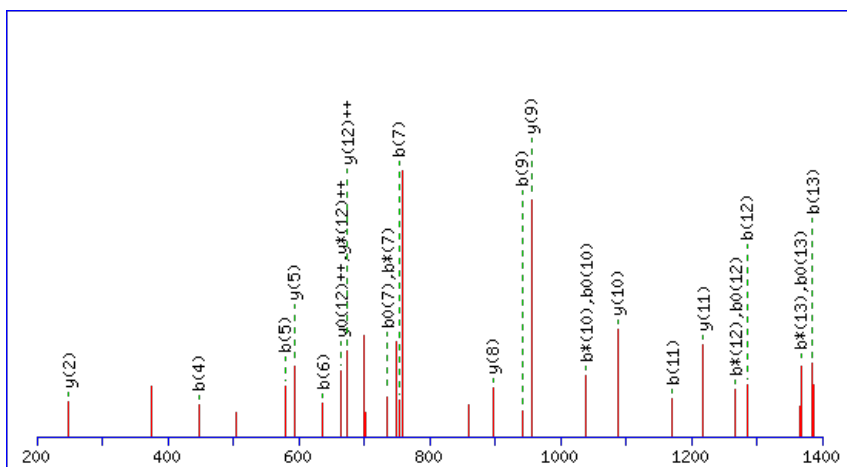

Monoisotopic mass of neutral peptide  $M_r(\text{calc})$ : 1532.7099

Fixed modifications: Carbamidomethyl (C) (apply to specified residues or termini only)

Ions Score: 67 Expect: 1.3e-006

Matches : 25/138 fragment ions using 30 most intense peaks [\(help\)](#)

| #  | b         | b <sup>++</sup> | b*        | b <sup>*++</sup> | b <sup>0</sup> | b <sup>0++</sup> | Seq. | y         | y <sup>++</sup> | y*        | y <sup>*++</sup> | y <sup>0</sup> | y <sup>0++</sup> | #  |
|----|-----------|-----------------|-----------|------------------|----------------|------------------|------|-----------|-----------------|-----------|------------------|----------------|------------------|----|
| 1  | 73.0414   | 37.0244         |           |                  |                |                  | A    |           |                 |           |                  |                |                  | 14 |
| 2  | 187.1225  | 94.0649         |           |                  |                |                  | L    | 1461.6830 | 731.3451        | 1443.6594 | 722.3334         | 1443.6725      | 722.3399         | 13 |
| 3  | 317.1752  | 159.0912        | 299.1516  | 150.0794         |                |                  | Q    | 1347.6019 | 674.3046        | 1329.5783 | 665.2928         | 1329.5914      | 665.2993         | 12 |
| 4  | 447.2148  | 224.1110        | 429.1912  | 215.0992         | 429.2042       | 215.1058         | E    | 1217.5493 | 609.2783        | 1199.5257 | 600.2665         | 1199.5387      | 600.2730         | 11 |
| 5  | 579.2523  | 290.1298        | 561.2287  | 281.1180         | 561.2418       | 281.1245         | M    | 1087.5096 | 544.2585        | 1069.4861 | 535.2467         | 1069.4991      | 535.2532         | 10 |
| 6  | 637.2708  | 319.1390        | 619.2472  | 310.1273         | 619.2603       | 310.1338         | G    | 955.4721  | 478.2397        | 937.4485  | 469.2279         | 937.4616       | 469.2344         | 9  |
| 7  | 753.3078  | 377.1575        | 735.2842  | 368.1458         | 735.2973       | 368.1523         | N    | 897.4536  | 449.2304        | 879.4300  | 440.2187         | 879.4431       | 440.2252         | 8  |
| 8  | 811.3263  | 406.1668        | 793.3027  | 397.1550         | 793.3157       | 397.1615         | G    | 781.4166  | 391.2120        | 763.3930  | 382.2002         | 763.4061       | 382.2067         | 7  |
| 9  | 941.3659  | 471.1866        | 923.3424  | 462.1748         | 923.3554       | 462.1813         | E    | 723.3981  | 362.2027        | 705.3745  | 353.1909         | 705.3876       | 353.1974         | 6  |
| 10 | 1057.3899 | 529.1986        | 1039.3663 | 520.1868         | 1039.3794      | 520.1933         | D    | 593.3585  | 297.1829        | 575.3349  | 288.1711         | 575.3479       | 288.1776         | 5  |
| 11 | 1171.4710 | 586.2391        | 1153.4474 | 577.2274         | 1153.4605      | 577.2339         | L    | 477.3345  | 239.1709        | 459.3109  | 230.1591         |                |                  | 4  |
| 12 | 1285.5521 | 643.2797        | 1267.5285 | 634.2679         | 1267.5416      | 634.2744         | L    | 363.2534  | 182.1303        | 345.2298  | 173.1186         |                |                  | 3  |
| 13 | 1385.6176 | 693.3124        | 1367.5940 | 684.3006         | 1367.6070      | 684.3071         | V    | 249.1723  | 125.0898        | 231.1487  | 116.0780         |                |                  | 2  |
| 14 |           |                 |           |                  |                |                  | K    | 149.1069  | 75.0571         | 131.0833  | 66.0453          |                |                  | 1  |

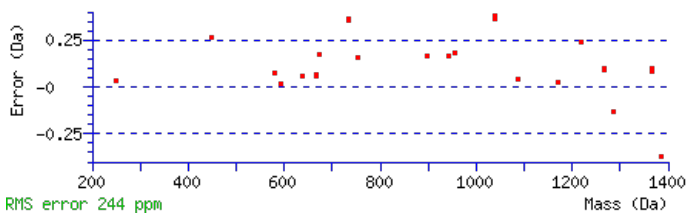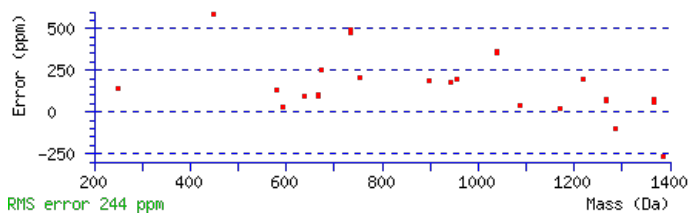

NCBI BLAST search of [ALQEMGNGEDLLVK](#)

## AT1G16080.1

(Parameters: blastp, nr protein database, expect=20000, no filter, PAM30)

Other BLAST [web gateways](#)

### All matches to this query

| Score | Mr(calc)  | Delta   | Sequence                       |
|-------|-----------|---------|--------------------------------|
| 67.4  | 1532.7099 | -0.0023 | <a href="#">ALQEMGNGEDLLVK</a> |
| 8.3   | 1532.7099 | -0.0023 | <a href="#">QLAEEVDMIPTVR</a>  |
| 8.2   | 1532.7092 | -0.0016 | <a href="#">RSLYDRYGEAGVK</a>  |
| 3.9   | 1532.7070 | 0.0006  | <a href="#">LLSEVAGSHSRDNK</a> |
| 0.9   | 1532.7110 | -0.0034 | <a href="#">KAFFSFFGFDPIDK</a> |
| 0.6   | 1532.7099 | -0.0023 | <a href="#">IEIEMEKSGHVTK</a>  |
| 0.4   | 1532.7087 | -0.0011 | <a href="#">AYVTFLAGNGDYVK</a> |
| 0.4   | 1532.7043 | 0.0033  | <a href="#">DKSTHSATVVDDLK</a> |

Mascot: <http://www.matrixscience.com/>

**Peptide View**MS/MS Fragmentation of **LFSSEELK**

Found in **AT1G16160.1** in **TAIR\_Arabidopsis**, Symbols: WAKL5 | WAKL5 (WALL ASSOCIATED KINASE-LIKE 5); kinase | chr1:5535967-5538263 FORWARD

Match to Query 1886: 960.466110 from(481.240331,2+) index(1888)

Title: Elution from: 25.323 to 25.323 scan no 2547 cid35.00 polarity:+

Data file D12h-2\_1.mgf

Click mouse within plot area to zoom in by factor of two about that point

Or,   to  Da

Label all possible matches  Label matches used for scoring

Show Y-axis

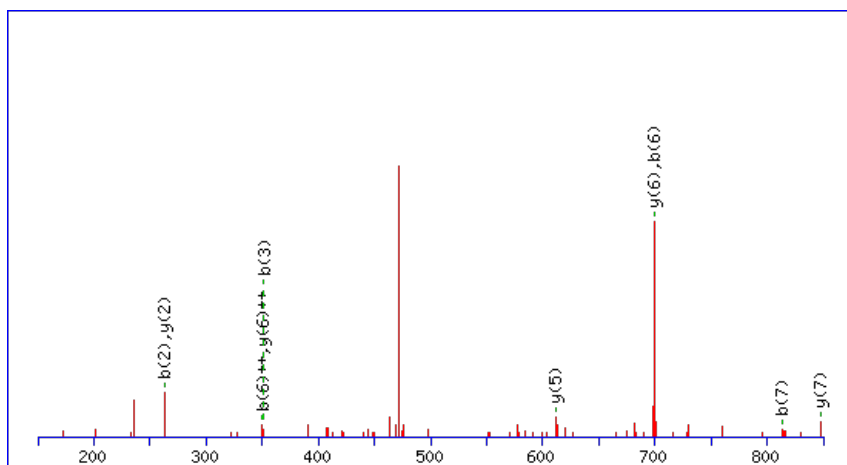

**Monoisotopic mass of neutral peptide Mr(calc):** 960.4646

**Fixed modifications:** Carbamidomethyl (C) (apply to specified residues or termini only)

**Ions Score:** 31 **Expect:** 0.0095

**Matches:** 10/62 fragment ions using 14 most intense peaks ([help](#))

| # | b               | b <sup>++</sup> | b <sup>0</sup> | b <sup>0++</sup> | Seq. | y               | y <sup>++</sup> | y*       | y <sup>*++</sup> | y <sup>0</sup> | y <sup>0++</sup> | # |
|---|-----------------|-----------------|----------------|------------------|------|-----------------|-----------------|----------|------------------|----------------|------------------|---|
| 1 | 115.0884        | 58.0478         |                |                  | L    |                 |                 |          |                  |                |                  | 8 |
| 2 | <b>263.1538</b> | 132.0805        |                |                  | F    | <b>847.3908</b> | 424.1990        | 829.3672 | 415.1872         | 829.3802       | 415.1938         | 7 |
| 3 | <b>351.1829</b> | 176.0951        | 333.1723       | 167.0898         | S    | <b>699.3254</b> | <b>350.1663</b> | 681.3018 | 341.1545         | 681.3148       | 341.1610         | 6 |
| 4 | 439.2120        | 220.1096        | 421.2014       | 211.1043         | S    | <b>611.2963</b> | 306.1518        | 593.2727 | 297.1400         | 593.2857       | 297.1465         | 5 |
| 5 | 569.2516        | 285.1294        | 551.2410       | 276.1241         | E    | 523.2672        | 262.1373        | 505.2436 | 253.1255         | 505.2567       | 253.1320         | 4 |
| 6 | <b>699.2912</b> | <b>350.1492</b> | 681.2806       | 341.1440         | E    | 393.2276        | 197.1174        | 375.2040 | 188.1056         | 375.2170       | 188.1122         | 3 |
| 7 | <b>813.3723</b> | 407.1898        | 795.3617       | 398.1845         | L    | <b>263.1880</b> | 132.0976        | 245.1644 | 123.0858         |                |                  | 2 |
| 8 |                 |                 |                |                  | K    | 149.1069        | 75.0571         | 131.0833 | 66.0453          |                |                  | 1 |

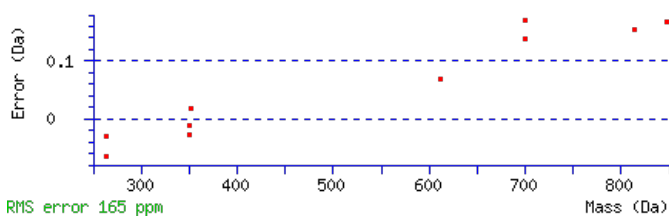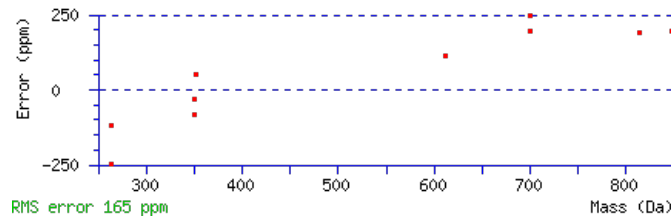

NCBI BLAST search of [LFSSEELK](#)

(Parameters: blastp, nr protein database, expect=20000, no filter, PAM30)

Other BLAST [web gateways](#)

**All matches to this query**

| Score | Mr(calc) | Delta  | Sequence                 |
|-------|----------|--------|--------------------------|
| 31.0  | 960.4646 | 0.0015 | <a href="#">LFSSEELK</a> |

## AT1G16160.1

|      |          |         |                           |
|------|----------|---------|---------------------------|
| 25.5 | 960.4646 | 0.0015  | <a href="#">FITDESLK</a>  |
| 15.8 | 960.4651 | 0.0010  | <a href="#">RSSAAESLK</a> |
| 12.6 | 960.4673 | -0.0012 | <a href="#">FLDLQGTR</a>  |
| 10.4 | 960.4673 | -0.0012 | <a href="#">IFGASNVNK</a> |
| 10.4 | 960.4673 | -0.0012 | <a href="#">LFEQREK</a>   |
| 10.4 | 960.4633 | 0.0028  | <a href="#">LMPAMTKK</a>  |
| 9.7  | 960.4633 | 0.0029  | <a href="#">MVCSTIK</a>   |
| 8.5  | 960.4650 | 0.0011  | <a href="#">TTGSTLVNR</a> |
| 8.2  | 960.4673 | -0.0012 | <a href="#">LTGNAFAQK</a> |

Mascot: <http://www.matrixscience.com/>



**Peptide View**MS/MS Fragmentation of **FDPFKK**Found in **AT1G16250.1** in **TAIR\_Arabidopsis**, Symbols: | kelch repeat-containing F-box family protein | chr1:5557208-5558691 FORWARD

Match to Query 770: 788.395384 from(395.204968,2+) index(1213)

Title: Elution from: 20.793 to 20.793 scan no 1784 cid35.00 polarity:+

Data file D1d-2\_2.mgf

Click mouse within plot area to zoom in by factor of two about that point

Or,   to  Da Label all possible matches  Label matches used for scoring Show Y-axis 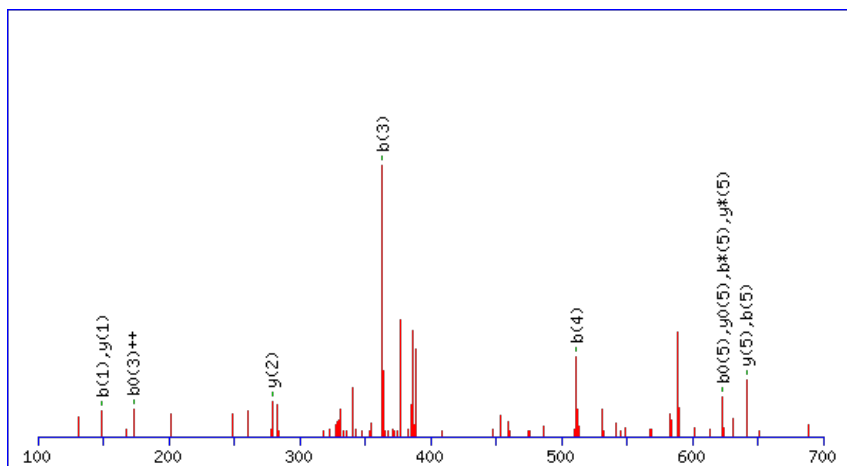Monoisotopic mass of neutral peptide **Mr(calc)**: 788.3933**Fixed modifications**: Carbamidomethyl (C) (apply to specified residues or termini only)**Ions Score**: 27 **Expect**: 0.025**Matches** : 12/42 fragment ions using 12 most intense peaks ([help](#))

| # | b               | b <sup>++</sup> | b*              | b <sup>*++</sup> | b <sup>0</sup>  | b <sup>0++</sup> | Seq.     | y               | y <sup>++</sup> | y*              | y <sup>*++</sup> | y <sup>0</sup>  | y <sup>0++</sup> | #        |
|---|-----------------|-----------------|-----------------|------------------|-----------------|------------------|----------|-----------------|-----------------|-----------------|------------------|-----------------|------------------|----------|
| 1 | <b>149.0727</b> | 75.0400         |                 |                  |                 |                  | <b>F</b> |                 |                 |                 |                  |                 |                  | <b>6</b> |
| 2 | 265.0967        | 133.0520        |                 |                  | 247.0861        | 124.0467         | <b>D</b> | <b>641.3351</b> | 321.1712        | <b>623.3115</b> | 312.1594         | <b>623.3246</b> | 312.1659         | <b>5</b> |
| 3 | <b>363.1465</b> | 182.0769        |                 |                  | 345.1359        | <b>173.0716</b>  | <b>P</b> | 525.3112        | 263.1592        | 507.2876        | 254.1474         |                 |                  | <b>4</b> |
| 4 | <b>511.2120</b> | 256.1096        |                 |                  | 493.2014        | 247.1043         | <b>F</b> | 427.2614        | 214.1343        | 409.2378        | 205.1225         |                 |                  | <b>3</b> |
| 5 | <b>641.3010</b> | 321.1541        | <b>623.2774</b> | 312.1423         | <b>623.2904</b> | 312.1488         | <b>K</b> | <b>279.1959</b> | 140.1016        | 261.1723        | 131.0898         |                 |                  | <b>2</b> |
| 6 |                 |                 |                 |                  |                 |                  | <b>K</b> | <b>149.1069</b> | 75.0571         | 131.0833        | 66.0453          |                 |                  | <b>1</b> |

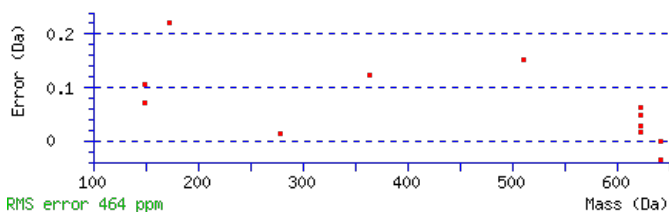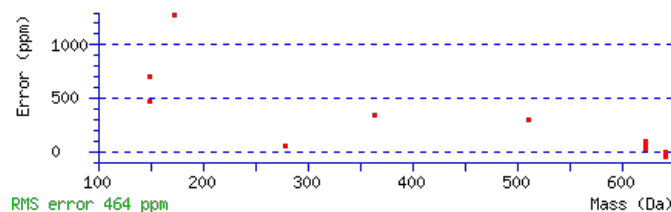NCBI **BLAST** search of **FDPFKK**

(Parameters: blastp, nr protein database, expect=20000, no filter, PAM30)

Other BLAST [web gateways](#)**All matches to this query**

| Score | Mr(calc) | Delta  | Sequence               |
|-------|----------|--------|------------------------|
| 26.6  | 788.3933 | 0.0021 | <a href="#">FDPFKK</a> |
| 24.2  | 788.3944 | 0.0009 | <a href="#">MKTEKK</a> |
| 21.0  | 788.3944 | 0.0009 | <a href="#">KMKTEK</a> |
| 18.7  | 788.3933 | 0.0021 | <a href="#">VFYPOK</a> |

## AT1G16250.1

|      |          |         |                        |
|------|----------|---------|------------------------|
| 18.0 | 788.3944 | 0.0009  | <a href="#">ETKMKK</a> |
| 17.9 | 788.3967 | -0.0013 | <a href="#">MQIFVK</a> |
| 17.9 | 788.3944 | 0.0009  | <a href="#">MEKKTk</a> |
| 17.9 | 788.3971 | -0.0017 | <a href="#">ARQMkK</a> |
| 17.9 | 788.3944 | 0.0009  | <a href="#">TEKMkK</a> |
| 16.8 | 788.3933 | 0.0021  | <a href="#">YLFNPK</a> |

Mascot: <http://www.matrixscience.com/>

**Peptide View**MS/MS Fragmentation of **VEIWR**Found in **AT1G16400.1** in **TAIR\_Arabidopsis**

Match to Query 561: 701.388130 from(351.701341,2+) index(2474)

Title: Elution from: 29.334 to 29.334 scan no 3242 cid35.00 polarity:+

Data file D1d-2\_2.mgf

Click mouse within plot area to zoom in by factor of two about that point

Or,   to  Da Label all possible matches  Label matches used for scoring Show Y-axis 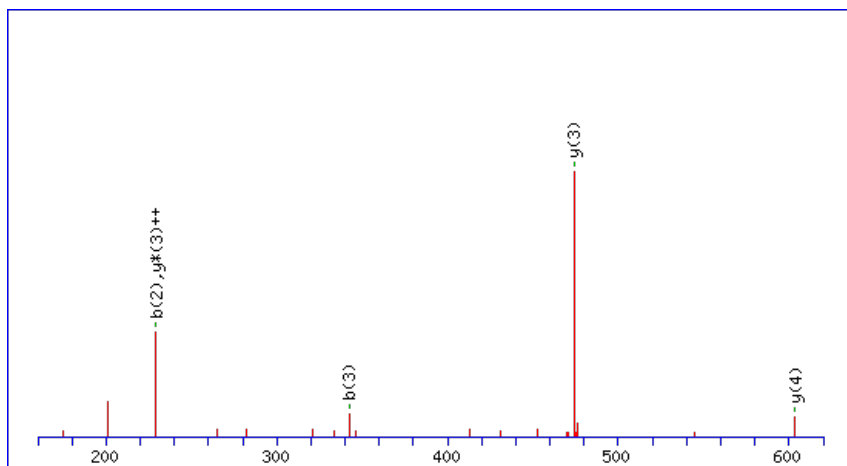Monoisotopic mass of neutral peptide **Mr(calc)**: 701.3860

Fixed modifications: Carbamidomethyl (C) (apply to specified residues or termini only)

Ions Score: 20 **Expect**: 0.049Matches : 5/32 fragment ions using 5 most intense peaks ([help](#))

| # | b               | b <sup>++</sup> | b <sup>0</sup> | b <sup>0++</sup> | Seq. | y               | y <sup>++</sup> | y*       | y <sup>*++</sup> | y <sup>0</sup> | y <sup>0++</sup> | # |
|---|-----------------|-----------------|----------------|------------------|------|-----------------|-----------------|----------|------------------|----------------|------------------|---|
| 1 | 100.0757        | 50.5415         |                |                  | V    |                 |                 |          |                  |                |                  | 5 |
| 2 | <b>229.1183</b> | 115.0628        | 211.1077       | 106.0575         | E    | <b>603.3249</b> | 302.1661        | 586.2984 | 293.6528         | 585.3144       | 293.1608         | 4 |
| 3 | <b>342.2023</b> | 171.6048        | 324.1918       | 162.5995         | I    | <b>474.2823</b> | 237.6448        | 457.2558 | <b>229.1315</b>  |                |                  | 3 |
| 4 | 528.2817        | 264.6445        | 510.2711       | 255.6392         | W    | 361.1983        | 181.1028        | 344.1717 | 172.5895         |                |                  | 2 |
| 5 |                 |                 |                |                  | R    | 175.1190        | 88.0631         | 158.0924 | 79.5498          |                |                  | 1 |

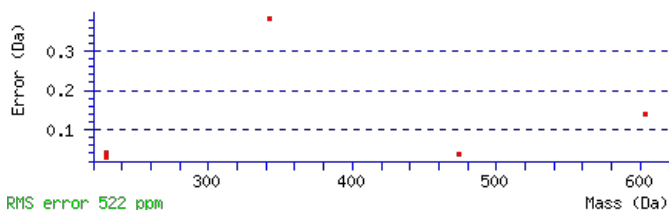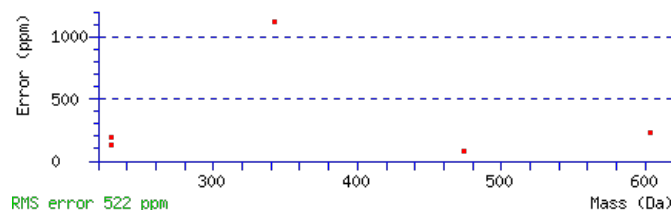NCBI **BLAST** search of **VEIWR**

(Parameters: blastp, nr protein database, expect=20000, no filter, PAM30)

Other BLAST [web gateways](#)**All matches to this query**

| Score | Mr(calc) | Delta  | Sequence              |
|-------|----------|--------|-----------------------|
| 20.1  | 701.3860 | 0.0021 | <a href="#">VEIWR</a> |
| 15.4  | 701.3860 | 0.0021 | <a href="#">VEWIR</a> |
| 10.6  | 701.3860 | 0.0021 | <a href="#">EVLWR</a> |
| 10.6  | 701.3860 | 0.0021 | <a href="#">LDLWR</a> |
| 3.5   | 701.3860 | 0.0021 | <a href="#">DIWLR</a> |

AT1G16400.1

|     |          |         |                        |
|-----|----------|---------|------------------------|
| 3.5 | 701.3894 | -0.0013 | <a href="#">MPVVTR</a> |
|-----|----------|---------|------------------------|

**Mascot:** <http://www.matrixscience.com/>



# Mascot Search Results

## Peptide View

MS/MS Fragmentation of **KLPSILVDEASVQK**

Found in **AT1G16470.1** in **TAIR\_Arabidopsis**, Symbols: PAB1 | PAB1 (PROTEASOME SUBUNIT PAB1); peptidase | chr1:5623116-5625433  
FORWARD

Match to Query 6733: 1525.870566 from(509.630798,3+) index(5426)

Title: Elution from: 48.801 to 48.801 scan no 6804 cid35.00 polarity:+

Data file D12h-3\_1.mgf

Click mouse within plot area to zoom in by factor of two about that point

Or,   to  Da

Label all possible matches  Label matches used for scoring

Show Y-axis

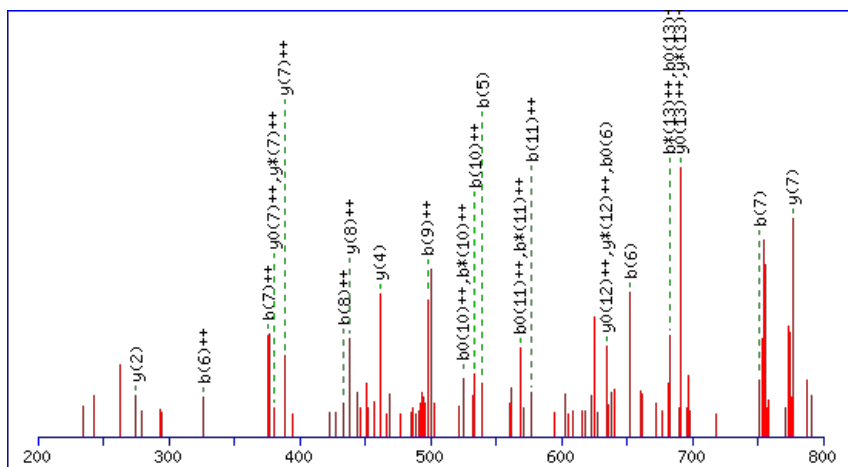

Monoisotopic mass of neutral peptide  $M_r(\text{calc})$ : 1525.8715

Fixed modifications: Carbamidomethyl (C) (apply to specified residues or termini only)

Ions Score: 34 Expect: 0.00082

Matches : 28/144 fragment ions using 42 most intense peaks [\(help\)](#)

| #  | b         | b <sup>++</sup> | b*        | b <sup>*++</sup> | b <sup>0</sup> | b <sup>0++</sup> | Seq. | y         | y <sup>++</sup> | y*        | y <sup>*++</sup> | y <sup>0</sup> | y <sup>0++</sup> | #  |
|----|-----------|-----------------|-----------|------------------|----------------|------------------|------|-----------|-----------------|-----------|------------------|----------------|------------------|----|
| 1  | 129.1022  | 65.0548         | 112.0757  | 56.5415          |                |                  | K    |           |                 |           |                  |                |                  | 14 |
| 2  | 242.1863  | 121.5968        | 225.1598  | 113.0835         |                |                  | L    | 1398.7839 | 699.8956        | 1381.7573 | 691.3823         | 1380.7733      | 690.8903         | 13 |
| 3  | 339.2391  | 170.1232        | 322.2125  | 161.6099         |                |                  | P    | 1285.6998 | 643.3535        | 1268.6733 | 634.8403         | 1267.6892      | 634.3483         | 12 |
| 4  | 426.2711  | 213.6392        | 409.2445  | 205.1259         | 408.2605       | 204.6339         | S    | 1188.6470 | 594.8272        | 1171.6205 | 586.3139         | 1170.6365      | 585.8219         | 11 |
| 5  | 539.3552  | 270.1812        | 522.3286  | 261.6679         | 521.3446       | 261.1759         | I    | 1101.6150 | 551.3111        | 1084.5885 | 542.7979         | 1083.6045      | 542.3059         | 10 |
| 6  | 652.4392  | 326.7232        | 635.4127  | 318.2100         | 634.4287       | 317.7180         | L    | 988.5310  | 494.7691        | 971.5044  | 486.2558         | 970.5204       | 485.7638         | 9  |
| 7  | 751.5076  | 376.2575        | 734.4811  | 367.7442         | 733.4971       | 367.2522         | V    | 875.4469  | 438.2271        | 858.4203  | 429.7138         | 857.4363       | 429.2218         | 8  |
| 8  | 866.5346  | 433.7709        | 849.5080  | 425.2577         | 848.5240       | 424.7656         | D    | 776.3785  | 388.6929        | 759.3519  | 380.1796         | 758.3679       | 379.6876         | 7  |
| 9  | 995.5772  | 498.2922        | 978.5506  | 489.7790         | 977.5666       | 489.2869         | E    | 661.3515  | 331.1794        | 644.3250  | 322.6661         | 643.3410       | 322.1741         | 6  |
| 10 | 1066.6143 | 533.8108        | 1049.5877 | 525.2975         | 1048.6037      | 524.8055         | A    | 532.3089  | 266.6581        | 515.2824  | 258.1448         | 514.2984       | 257.6528         | 5  |
| 11 | 1153.6463 | 577.3268        | 1136.6198 | 568.8135         | 1135.6358      | 568.3215         | S    | 461.2718  | 231.1396        | 444.2453  | 222.6263         | 443.2613       | 222.1343         | 4  |
| 12 | 1252.7147 | 626.8610        | 1235.6882 | 618.3477         | 1234.7042      | 617.8557         | V    | 374.2398  | 187.6235        | 357.2132  | 179.1103         |                |                  | 3  |
| 13 | 1380.7733 | 690.8903        | 1363.7468 | 682.3770         | 1362.7627      | 681.8850         | Q    | 275.1714  | 138.0893        | 258.1448  | 129.5761         |                |                  | 2  |
| 14 |           |                 |           |                  |                |                  | K    | 147.1128  | 74.0600         | 130.0863  | 65.5468          |                |                  | 1  |

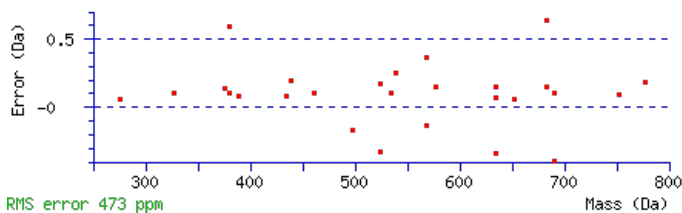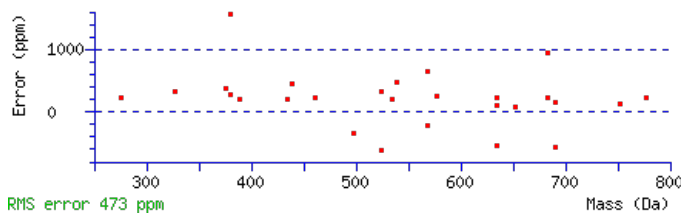

NCBI BLAST search of [KLPSILVDEASVQK](#)

## AT1G16470.1

(Parameters: blastp, nr protein database, expect=20000, no filter, PAM30)

Other BLAST [web gateways](#)

### All matches to this query

| Score | Mr(calc)  | Delta   | Sequence                        |
|-------|-----------|---------|---------------------------------|
| 34.1  | 1525.8715 | -0.0010 | <a href="#">KLPSILVDEASVQK</a>  |
| 17.4  | 1525.8690 | 0.0015  | <a href="#">FLTVIAMAPPKPGGK</a> |
| 5.0   | 1525.8690 | 0.0015  | <a href="#">SLQSLLMFHILPK</a>   |
| 1.4   | 1525.8729 | -0.0023 | <a href="#">AAPNGVSRWKSILK</a>  |
| 0.3   | 1525.8689 | 0.0017  | <a href="#">VERRNPLVLSSTR</a>   |

Mascot: <http://www.matrixscience.com/>

## Peptide View

### MS/MS Fragmentation of **SGPIVPK**

Found in **AT1G16800.1** in **TAIR\_Arabidopsis**, Symbols: | tRNA-splicing endonuclease positive effector-related | chr1:5745516-5755256 REVERSE

Match to Query 649: 704.392196 from(353.203374,2+) index(1575)

Title: Elution from: 19.440 to 19.440 scan no 2048 cid35.00 polarity:+

Data file C7-2\_3.mgf

Click mouse within plot area to zoom in by factor of two about that point

Or,   to  Da

Label all possible matches  Label matches used for scoring

Show Y-axis

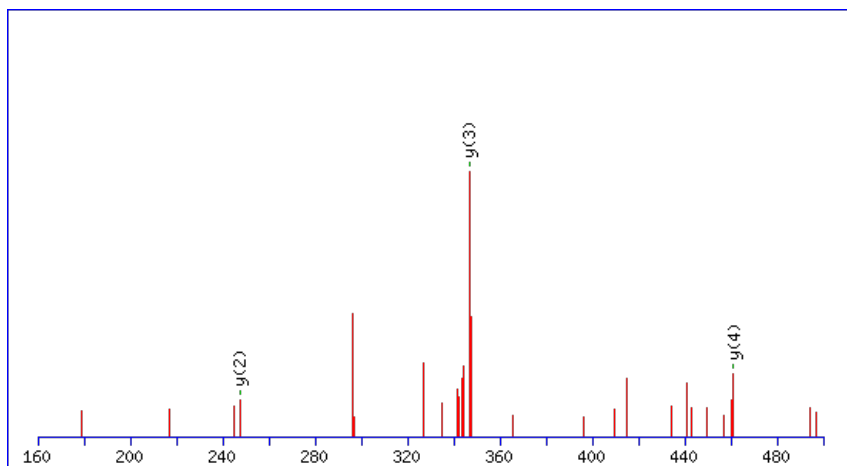

Monoisotopic mass of neutral peptide **Mr(calc)**: 704.3933

**Fixed modifications**: Carbamidomethyl (C) (apply to specified residues or termini only)

**Ions Score**: 21 **Expect**: 0.0083

**Matches**: 3/48 fragment ions using 4 most intense peaks ([help](#))

| # | b        | b <sup>++</sup> | b <sup>0</sup> | b <sup>0++</sup> | Seq. | y               | y <sup>++</sup> | y*       | y <sup>*++</sup> | # |
|---|----------|-----------------|----------------|------------------|------|-----------------|-----------------|----------|------------------|---|
| 1 | 89.0363  | 45.0218         | 71.0258        | 36.0165          | S    |                 |                 |          |                  | 7 |
| 2 | 147.0548 | 74.0311         | 129.0443       | 65.0258          | G    | 617.3715        | 309.1894        | 599.3479 | 300.1776         | 6 |
| 3 | 245.1046 | 123.0560        | 227.0941       | 114.0507         | P    | 559.3530        | 280.1801        | 541.3294 | 271.1684         | 5 |
| 4 | 359.1857 | 180.0965        | 341.1752       | 171.0912         | I    | <b>461.3032</b> | 231.1552        | 443.2796 | 222.1435         | 4 |
| 5 | 459.2512 | 230.1292        | 441.2406       | 221.1239         | V    | <b>347.2221</b> | 174.1147        | 329.1985 | 165.1029         | 3 |
| 6 | 557.3010 | 279.1541        | 539.2904       | 270.1488         | P    | <b>247.1567</b> | 124.0820        | 229.1331 | 115.0702         | 2 |
| 7 |          |                 |                |                  | K    | 149.1069        | 75.0571         | 131.0833 | 66.0453          | 1 |

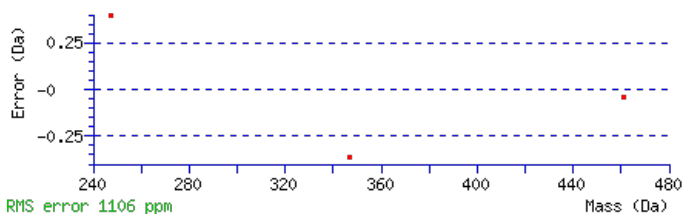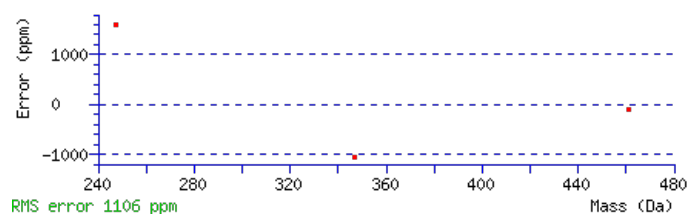

### NCBI BLAST search of [SGPIVPK](#)

(Parameters: blastp, nr protein database, expect=20000, no filter, PAM30)

Other BLAST [web gateways](#)

### All matches to this query

| Score | Mr(calc) | Delta   | Sequence                |
|-------|----------|---------|-------------------------|
| 20.8  | 704.3933 | -0.0011 | <a href="#">SGPIVPK</a> |

**Peptide View**MS/MS Fragmentation of **SAAEVVSDTAEAVK**Found in **AT1G16850.1** in **TAIR\_Arabidopsis**, Symbols: | unknown protein | chr1:5765055-5765611 REVERSE

Match to Query 5401: 1375.682442 from(688.848497,2+) index(4119)

Title: Elution from: 37.323 to 37.323 scan no 5100 cid35.00 polarity:+

Data file D1d-3\_2.mgf

Click mouse within plot area to zoom in by factor of two about that point

Or,   to  Da Label all possible matches  Label matches used for scoring Show Y-axis 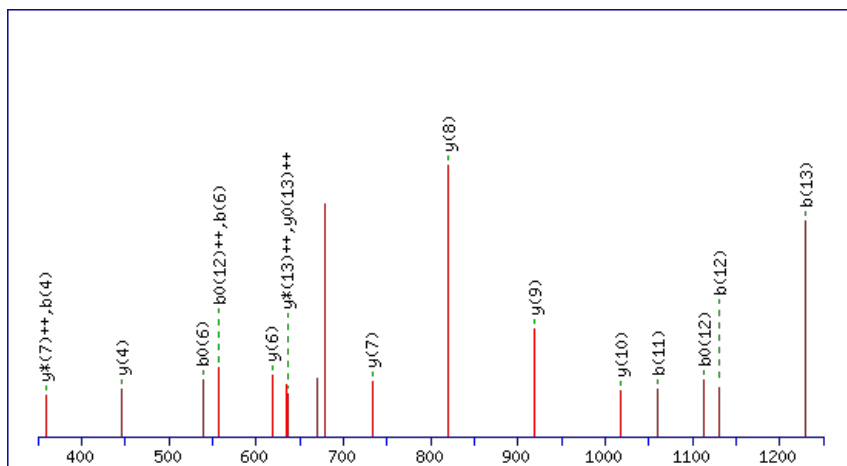**Monoisotopic mass of neutral peptide Mr(calc):** 1375.6831**Fixed modifications:** Carbamidomethyl (C) (apply to specified residues or termini only)**Ions Score:** 69 **Expect:** 3.9e-007**Matches:** 17/124 fragment ions using 17 most intense peaks ([help](#))

| #  | b         | b <sup>++</sup> | b <sup>0</sup> | b <sup>0++</sup> | Seq. | y         | y <sup>++</sup> | y*        | y <sup>*++</sup> | y <sup>0</sup> | y <sup>0++</sup> | #  |
|----|-----------|-----------------|----------------|------------------|------|-----------|-----------------|-----------|------------------|----------------|------------------|----|
| 1  | 88.0393   | 44.5233         | 70.0287        | 35.5180          | S    |           |                 |           |                  |                |                  | 14 |
| 2  | 159.0764  | 80.0418         | 141.0659       | 71.0366          | A    | 1289.6583 | 645.3328        | 1272.6318 | 636.8195         | 1271.6478      | 636.3275         | 13 |
| 3  | 230.1135  | 115.5604        | 212.1030       | 106.5551         | A    | 1218.6212 | 609.8143        | 1201.5947 | 601.3010         | 1200.6107      | 600.8090         | 12 |
| 4  | 359.1561  | 180.0817        | 341.1456       | 171.0764         | E    | 1147.5841 | 574.2957        | 1130.5576 | 565.7824         | 1129.5735      | 565.2904         | 11 |
| 5  | 458.2245  | 229.6159        | 440.2140       | 220.6106         | V    | 1018.5415 | 509.7744        | 1001.5150 | 501.2611         | 1000.5310      | 500.7691         | 10 |
| 6  | 557.2930  | 279.1501        | 539.2824       | 270.1448         | V    | 919.4731  | 460.2402        | 902.4466  | 451.7269         | 901.4625       | 451.2349         | 9  |
| 7  | 644.3250  | 322.6661        | 626.3144       | 313.6608         | S    | 820.4047  | 410.7060        | 803.3781  | 402.1927         | 802.3941       | 401.7007         | 8  |
| 8  | 759.3519  | 380.1796        | 741.3414       | 371.1743         | D    | 733.3727  | 367.1900        | 716.3461  | 358.6767         | 715.3621       | 358.1847         | 7  |
| 9  | 860.3996  | 430.7034        | 842.3890       | 421.6982         | T    | 618.3457  | 309.6765        | 601.3192  | 301.1632         | 600.3352       | 300.6712         | 6  |
| 10 | 931.4367  | 466.2220        | 913.4262       | 457.2167         | A    | 517.2980  | 259.1527        | 500.2715  | 250.6394         | 499.2875       | 250.1474         | 5  |
| 11 | 1060.4793 | 530.7433        | 1042.4687      | 521.7380         | E    | 446.2609  | 223.6341        | 429.2344  | 215.1208         | 428.2504       | 214.6288         | 4  |
| 12 | 1131.5164 | 566.2618        | 1113.5059      | 557.2566         | A    | 317.2183  | 159.1128        | 300.1918  | 150.5995         |                |                  | 3  |
| 13 | 1230.5848 | 615.7961        | 1212.5743      | 606.7908         | V    | 246.1812  | 123.5942        | 229.1547  | 115.0810         |                |                  | 2  |
| 14 |           |                 |                |                  | K    | 147.1128  | 74.0600         | 130.0863  | 65.5468          |                |                  | 1  |

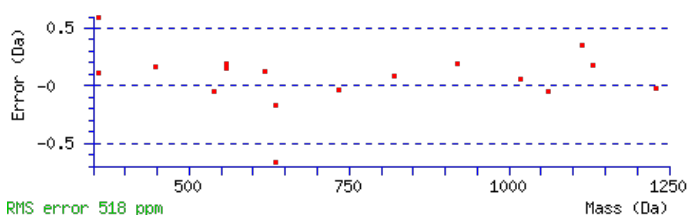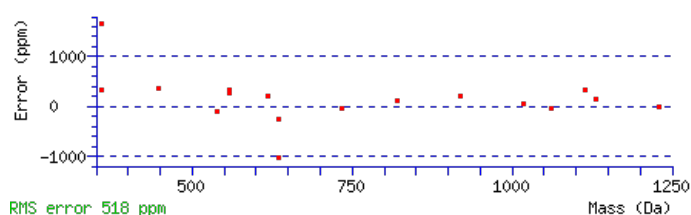NCBI **BLAST** search of [SAAEVVSDTAEAVK](#)

(Parameters: blastp, nr protein database, expect=20000, no filter, PAM30)



# AT1G16850.1

Other BLAST [web gateways](#)

## All matches to this query

| Score | Mr(calc)  | Delta   | Sequence                       |
|-------|-----------|---------|--------------------------------|
| 68.8  | 1375.6831 | -0.0006 | <a href="#">SAAEVVSDTAEAVK</a> |
| 11.8  | 1375.6844 | -0.0020 | <a href="#">IDGRDSFINPSR</a>   |
| 5.9   | 1375.6844 | -0.0020 | <a href="#">DPQESNRKFQK</a>    |
| 2.0   | 1375.6806 | 0.0019  | <a href="#">MDDENLWKVVK</a>    |
| 1.7   | 1375.6819 | 0.0005  | <a href="#">DAMWHKAGHPVK</a>   |
| 1.4   | 1375.6840 | -0.0015 | <a href="#">EMVGTCLVKDPK</a>   |
| 1.0   | 1375.6831 | -0.0006 | <a href="#">KGSSSEILSPDEK</a>  |
| 1.0   | 1375.6806 | 0.0019  | <a href="#">EMQOKPLFDPK</a>    |

Mascot: <http://www.matrixscience.com/>

**Peptide View**MS/MS Fragmentation of **NLGLNVVK**Found in **AT1G16880.1** in **TAIR\_Arabidopsis**, Symbols: | uridylyltransferase-related | chr1:5773789-5776118 FORWARD

Match to Query 1386: 866.483012 from(434.248782,2+) index(3318)

Title: Elution from: 33.576 to 33.576 scan no 4174 cid35.00 polarity:+

Data file 0-3\_1.mgf

Click mouse within plot area to zoom in by factor of two about that point

Or,   to  Da Label all possible matches  Label matches used for scoring Show Y-axis 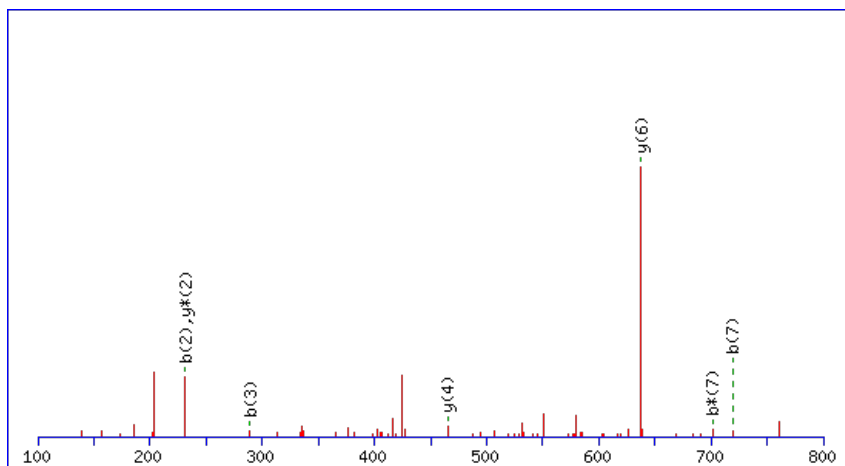Monoisotopic mass of neutral peptide **Mr(calc)**: 866.4852**Fixed modifications**: Carbamidomethyl (C) (apply to specified residues or termini only)**Ions Score**: 20 **Expect**: 0.048**Matches** : 7/56 fragment ions using 13 most intense peaks ([help](#))

| # | b               | b <sup>++</sup> | b*              | b <sup>+++</sup> | Seq. | y               | y <sup>++</sup> | y*              | y <sup>+++</sup> | # |
|---|-----------------|-----------------|-----------------|------------------|------|-----------------|-----------------|-----------------|------------------|---|
| 1 | 117.0443        | 59.0258         | 99.0207         | 50.0140          | N    |                 |                 |                 |                  | 8 |
| 2 | <b>231.1254</b> | 116.0663        | 213.1018        | 107.0545         | L    | 751.4555        | 376.2314        | 733.4319        | 367.2196         | 7 |
| 3 | <b>289.1439</b> | 145.0756        | 271.1203        | 136.0638         | G    | <b>637.3744</b> | 319.1908        | 619.3508        | 310.1790         | 6 |
| 4 | 403.2250        | 202.1161        | 385.2014        | 193.1043         | L    | 579.3559        | 290.1816        | 561.3323        | 281.1698         | 5 |
| 5 | 519.2620        | 260.1346        | 501.2384        | 251.1228         | N    | <b>465.2748</b> | 233.1410        | 447.2512        | 224.1292         | 4 |
| 6 | 619.3274        | 310.1673        | 601.3038        | 301.1556         | V    | 349.2378        | 175.1225        | 331.2142        | 166.1107         | 3 |
| 7 | <b>719.3929</b> | 360.2001        | <b>701.3693</b> | 351.1883         | V    | 249.1723        | 125.0898        | <b>231.1487</b> | 116.0780         | 2 |
| 8 |                 |                 |                 |                  | K    | 149.1069        | 75.0571         | 131.0833        | 66.0453          | 1 |

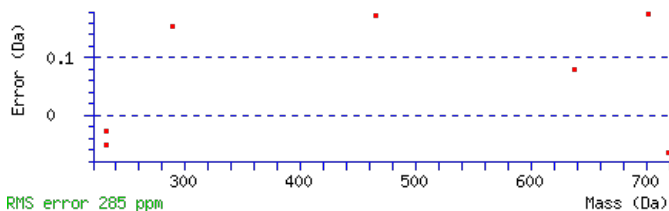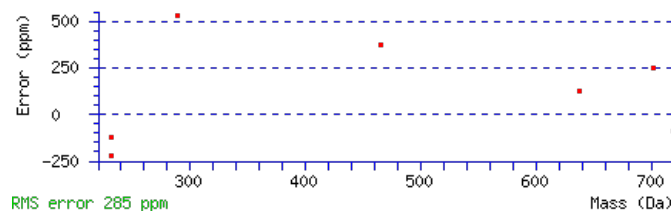NCBI **BLAST** search of [NLGLNVVK](#)

(Parameters: blastp, nr protein database, expect=20000, no filter, PAM30)

Other BLAST [web gateways](#)**All matches to this query**

| Score | Mr(calc) | Delta   | Sequence                 |
|-------|----------|---------|--------------------------|
| 20.1  | 866.4852 | -0.0022 | <a href="#">NLGLNVVK</a> |
| 12.4  | 866.4852 | -0.0022 | <a href="#">NLVKAPSK</a> |

## AT1G16880.1

|     |          |         |                            |
|-----|----------|---------|----------------------------|
| 6.6 | 866.4852 | -0.0022 | <a href="#">NLKPEKK</a>    |
| 5.9 | 866.4852 | -0.0022 | <a href="#">GNLLQAK</a>    |
| 2.9 | 866.4852 | -0.0022 | <a href="#">INPEKKK</a>    |
| 2.5 | 866.4852 | -0.0022 | <a href="#">AGVAALGLGK</a> |
| 1.3 | 866.4805 | 0.0026  | <a href="#">LAKKMHK</a>    |

**Mascot:** <http://www.matrixscience.com/>

**Peptide View**MS/MS Fragmentation of **STIGVEFATR**

Found in **AT1G16920.1** in **TAIR\_Arabidopsis**, Symbols: ATRABA4B, ATRABA1B, RAB11 | RAB11 (ARABIDOPSIS RAB GTPASE HOMOLOG A1B); GTP binding | chr1:5787482-5789140 REVERSE

Match to Query 2753: 1092.523498 from(547.269025,2+) index(3594)

Title: Elution from: 36.525 to 36.525 scan no 4611 cid35.00 polarity:+

Data file D1d-1\_3.mgf

Click mouse within plot area to zoom in by factor of two about that point

Or,   to  Da

Label all possible matches  Label matches used for scoring

Show Y-axis

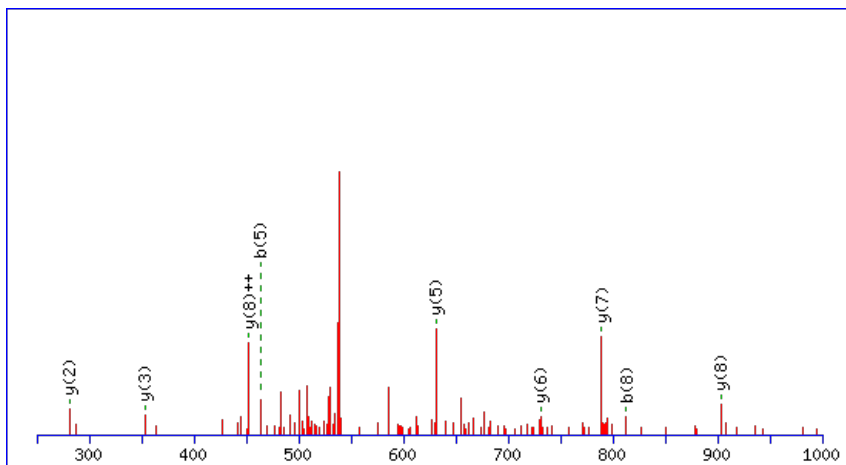

**Monoisotopic mass of neutral peptide Mr(calc):** 1092.5226

**Fixed modifications:** Carbamidomethyl (C) (apply to specified residues or termini only)

**Ions Score:** 46 **Expect:** 0.00032

**Matches:** 9/88 fragment ions using 16 most intense peaks ([help](#))

| #  | b               | b <sup>++</sup> | b <sup>0</sup> | b <sup>0++</sup> | Seq. | y               | y <sup>++</sup> | y*       | y <sup>*++</sup> | y <sup>0</sup> | y <sup>0++</sup> | #  |
|----|-----------------|-----------------|----------------|------------------|------|-----------------|-----------------|----------|------------------|----------------|------------------|----|
| 1  | 89.0363         | 45.0218         | 71.0258        | 36.0165          | S    |                 |                 |          |                  |                |                  | 10 |
| 2  | 191.0811        | 96.0442         | 173.0705       | 87.0389          | T    | 1005.5008       | 503.2540        | 987.4772 | 494.2422         | 987.4902       | 494.2488         | 9  |
| 3  | 305.1622        | 153.0847        | 287.1516       | 144.0794         | I    | <b>903.4561</b> | <b>452.2317</b> | 885.4325 | 443.2199         | 885.4455       | 443.2264         | 8  |
| 4  | 363.1807        | 182.0940        | 345.1701       | 173.0887         | G    | <b>789.3750</b> | 395.1911        | 771.3514 | 386.1793         | 771.3644       | 386.1858         | 7  |
| 5  | <b>463.2461</b> | 232.1267        | 445.2355       | 223.1214         | V    | <b>731.3565</b> | 366.1819        | 713.3329 | 357.1701         | 713.3459       | 357.1766         | 6  |
| 6  | 593.2857        | 297.1465        | 575.2752       | 288.1412         | E    | <b>631.2910</b> | 316.1492        | 613.2674 | 307.1374         | 613.2805       | 307.1439         | 5  |
| 7  | 741.3512        | 371.1792        | 723.3406       | 362.1739         | F    | 501.2514        | 251.1293        | 483.2278 | 242.1175         | 483.2408       | 242.1241         | 4  |
| 8  | <b>813.3853</b> | 407.1963        | 795.3748       | 398.1910         | A    | <b>353.1860</b> | 177.0966        | 335.1624 | 168.0848         | 335.1754       | 168.0913         | 3  |
| 9  | 915.4300        | 458.2187        | 897.4195       | 449.2134         | T    | <b>281.1518</b> | 141.0795        | 263.1282 | 132.0677         | 263.1412       | 132.0743         | 2  |
| 10 |                 |                 |                |                  | R    | 179.1071        | 90.0572         | 161.0835 | 81.0454          |                |                  | 1  |

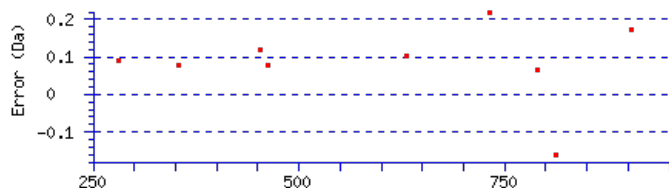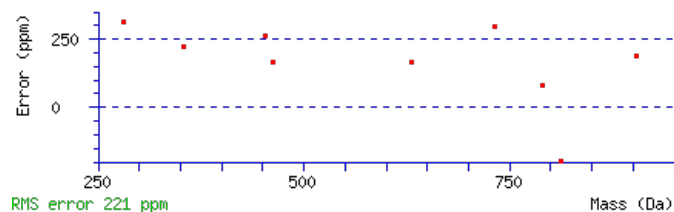NCBI BLAST search of **STIGVEFATR**

(Parameters: blastp, nr protein database, expect=20000, no filter, PAM30)

Other BLAST [web gateways](#)

**All matches to this query**

AT1G16920.1

| Score | Mr(calc)  | Delta  | Sequence                   |
|-------|-----------|--------|----------------------------|
| 45.6  | 1092.5226 | 0.0009 | <a href="#">STIGVEFATR</a> |
| 0.7   | 1092.5226 | 0.0009 | <a href="#">TKQVNEFSK</a>  |

Mascot: <http://www.matrixscience.com/>



# Mascot Search Results

## Peptide View

MS/MS Fragmentation of **EKAELALK**

Found in **AT1G17050.1** in **TAIR\_Arabidopsis**, Symbols: SPS2 | SPS2 (SOLANESYL DIPHOSPHATE SYNTHASE 2); dimethylallyltranstransferase/ trans-octaprenyltranstransferase | chr1:5829282-5831208 FORWARD

Match to Query 1800: 910.497112 from(456.255832,2+) index(1521)

Title: Elution from: 20.758 to 20.758 scan no 2065 cid35.00 polarity:+

Data file C7-3\_1.mgf

Click mouse within plot area to zoom in by factor of two about that point

Or,  to  Da

Label all possible matches  Label matches used for scoring

Show Y-axis

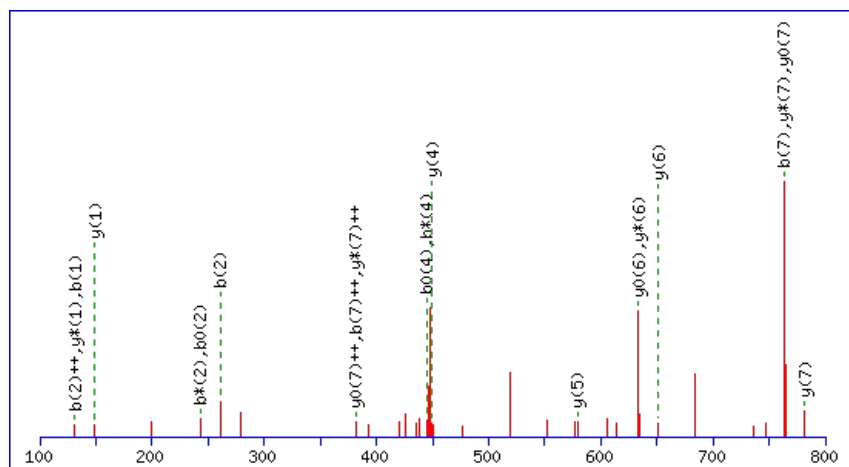

Monoisotopic mass of neutral peptide  $M_r(\text{calc})$ : 910.4984

Fixed modifications: Carbamidomethyl (C) (apply to specified residues or termini only)

Ions Score: 25 Expect: 0.016

Matches : 21/74 fragment ions using 32 most intense peaks [\(help\)](#)

| # | b               | b <sup>++</sup> | b*              | b <sup>*++</sup> | b <sup>0</sup>  | b <sup>0++</sup> | Seq.     | y               | y <sup>++</sup> | y*              | y <sup>*++</sup> | y <sup>0</sup>  | y <sup>0++</sup> | #        |
|---|-----------------|-----------------|-----------------|------------------|-----------------|------------------|----------|-----------------|-----------------|-----------------|------------------|-----------------|------------------|----------|
| 1 | <b>131.0469</b> | 66.0271         |                 |                  | 113.0363        | 57.0218          | <b>E</b> |                 |                 |                 |                  |                 |                  | <b>8</b> |
| 2 | <b>261.1359</b> | <b>131.0716</b> | <b>243.1124</b> | 122.0598         | <b>243.1254</b> | 122.0663         | <b>K</b> | <b>781.4660</b> | 391.2367        | <b>763.4424</b> | <b>382.2249</b>  | <b>763.4555</b> | <b>382.2314</b>  | <b>7</b> |
| 3 | 333.1701        | 167.0887        | 315.1465        | 158.0769         | 315.1595        | 158.0834         | <b>A</b> | <b>651.3770</b> | 326.1921        | <b>633.3534</b> | 317.1803         | <b>633.3664</b> | 317.1869         | <b>6</b> |
| 4 | 463.2097        | 232.1085        | <b>445.1861</b> | 223.0967         | <b>445.1991</b> | 223.1032         | <b>E</b> | <b>579.3428</b> | 290.1751        | 561.3193        | 281.1633         | 561.3323        | 281.1698         | <b>5</b> |
| 5 | 577.2908        | 289.1490        | 559.2672        | 280.1373         | 559.2802        | 280.1438         | <b>L</b> | <b>449.3032</b> | 225.1552        | 431.2796        | 216.1435         |                 |                  | <b>4</b> |
| 6 | 649.3250        | 325.1661        | 631.3014        | 316.1543         | 631.3144        | 316.1608         | <b>A</b> | 335.2221        | 168.1147        | 317.1985        | 159.1029         |                 |                  | <b>3</b> |
| 7 | <b>763.4061</b> | <b>382.2067</b> | 745.3825        | 373.1949         | 745.3955        | 373.2014         | <b>L</b> | 263.1880        | 132.0976        | 245.1644        | 123.0858         |                 |                  | <b>2</b> |
| 8 |                 |                 |                 |                  |                 |                  | <b>K</b> | <b>149.1069</b> | 75.0571         | <b>131.0833</b> | 66.0453          |                 |                  | <b>1</b> |

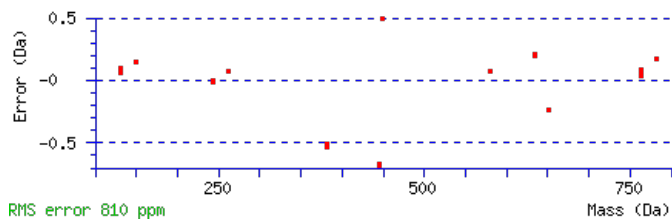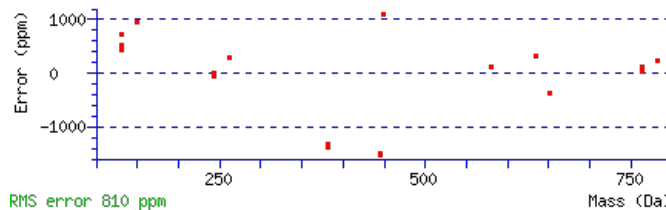

NCBI BLAST search of **EKAELALK**

(Parameters: blastp, nr protein database, expect=20000, no filter, PAM30)

Other BLAST [web gateways](#)

All matches to this query

| Score | $M_r(\text{calc})$ | Delta   | Sequence                 |
|-------|--------------------|---------|--------------------------|
| 25.5  | 910.4984           | -0.0013 | <a href="#">EKAELALK</a> |

# AT1G17050.1

|      |          |         |                           |
|------|----------|---------|---------------------------|
| 23.2 | 910.4984 | -0.0013 | <a href="#">KVGEVIEK</a>  |
| 20.3 | 910.4984 | -0.0013 | <a href="#">AGLLSLAEK</a> |
| 18.9 | 910.4984 | -0.0013 | <a href="#">EDIVGKIK</a>  |
| 18.9 | 910.4984 | -0.0013 | <a href="#">AKEAILEK</a>  |
| 16.8 | 910.4984 | -0.0013 | <a href="#">KEAAEIIK</a>  |
| 16.6 | 910.4984 | -0.0013 | <a href="#">EKEALALK</a>  |
| 14.1 | 910.4984 | -0.0013 | <a href="#">VLDEGLKK</a>  |
| 13.8 | 910.4984 | -0.0013 | <a href="#">EKLVDVAVK</a> |
| 12.9 | 910.4984 | -0.0013 | <a href="#">LDGIDLKK</a>  |

Mascot: <http://www.matrixscience.com/>

## Peptide View

MS/MS Fragmentation of **TAFFQLFAYIQGK**

Found in **AT1G17100.1** in **TAIR\_Arabidopsis**, Symbols: | SOUL heme-binding family protein | chr1:5844759-5845532 FORWARD

Match to Query 6719: 1548.758798 from(775.386675,2+) index(10983)

Title: Elution from: 111.081 to 111.081 scan no 16078 cid35.00 polarity:+

Data file D12h-2\_1.mgf

Click mouse within plot area to zoom in by factor of two about that point

Or,   to  Da

Label all possible matches  Label matches used for scoring

Show Y-axis

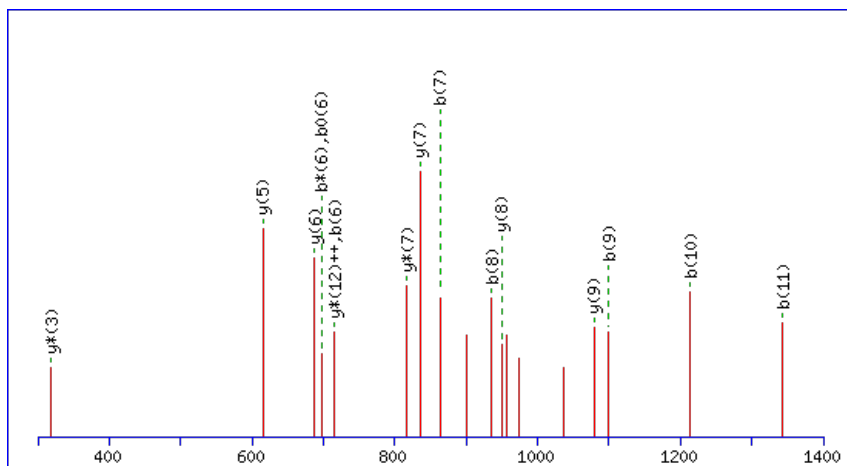

Monoisotopic mass of neutral peptide **Mr(calc)**: 1548.7553

**Fixed modifications**: Carbamidomethyl (C) (apply to specified residues or termini only)

**Ions Score**: 56 **Expect**: 2.4e-005

**Matches**: 16/112 fragment ions using 17 most intense peaks ([help](#))

| #  | b         | b <sup>++</sup> | b*        | b <sup>*++</sup> | b <sup>0</sup> | b <sup>0++</sup> | Seq. | y         | y <sup>++</sup> | y*        | y <sup>*++</sup> | #  |
|----|-----------|-----------------|-----------|------------------|----------------|------------------|------|-----------|-----------------|-----------|------------------|----|
| 1  | 103.0520  | 52.0296         |           |                  | 85.0414        | 43.0244          | T    |           |                 |           |                  | 13 |
| 2  | 175.0861  | 88.0467         |           |                  | 157.0756       | 79.0414          | A    | 1447.7179 | 724.3626        | 1429.6943 | 715.3508         | 12 |
| 3  | 323.1516  | 162.0794        |           |                  | 305.1410       | 153.0741         | F    | 1375.6837 | 688.3455        | 1357.6601 | 679.3337         | 11 |
| 4  | 471.2170  | 236.1122        |           |                  | 453.2065       | 227.1069         | F    | 1227.6183 | 614.3128        | 1209.5947 | 605.3010         | 10 |
| 5  | 601.2697  | 301.1385        | 583.2461  | 292.1267         | 583.2591       | 292.1332         | Q    | 1079.5528 | 540.2801        | 1061.5292 | 531.2683         | 9  |
| 6  | 715.3508  | 358.1790        | 697.3272  | 349.1672         | 697.3402       | 349.1737         | L    | 949.5002  | 475.2537        | 931.4766  | 466.2419         | 8  |
| 7  | 863.4162  | 432.2118        | 845.3926  | 423.2000         | 845.4057       | 423.2065         | F    | 835.4191  | 418.2132        | 817.3955  | 409.2014         | 7  |
| 8  | 935.4504  | 468.2288        | 917.4268  | 459.2170         | 917.4398       | 459.2235         | A    | 687.3536  | 344.1805        | 669.3300  | 335.1687         | 6  |
| 9  | 1099.5107 | 550.2590        | 1081.4872 | 541.2472         | 1081.5002      | 541.2537         | Y    | 615.3195  | 308.1634        | 597.2959  | 299.1516         | 5  |
| 10 | 1213.5918 | 607.2996        | 1195.5683 | 598.2878         | 1195.5813      | 598.2943         | I    | 451.2591  | 226.1332        | 433.2355  | 217.1214         | 4  |
| 11 | 1343.6445 | 672.3259        | 1325.6209 | 663.3141         | 1325.6339      | 663.3206         | Q    | 337.1780  | 169.0926        | 319.1544  | 160.0809         | 3  |
| 12 | 1401.6630 | 701.3351        | 1383.6394 | 692.3233         | 1383.6524      | 692.3299         | G    | 207.1254  | 104.0663        | 189.1018  | 95.0545          | 2  |
| 13 |           |                 |           |                  |                |                  | K    | 149.1069  | 75.0571         | 131.0833  | 66.0453          | 1  |

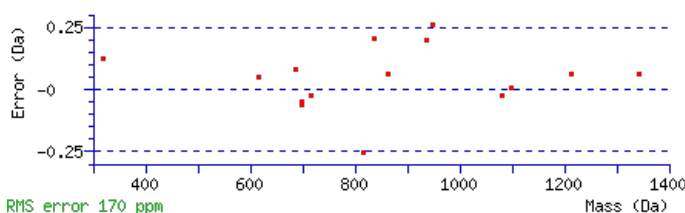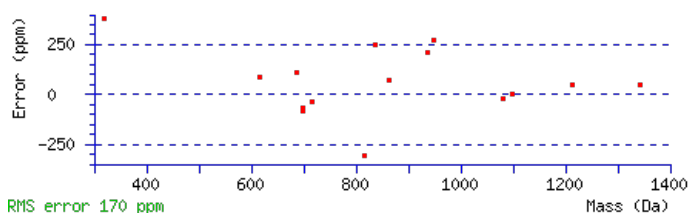

NCBI **BLAST** search of [TAFFQLFAYIQGK](#)

(Parameters: blastp, nr protein database, expect=20000, no filter, PAM30)

Other BLAST [web gateways](#)



AT1G17100.1

All matches to this query

| Score | Mr(calc)  | Delta  | Sequence                       |
|-------|-----------|--------|--------------------------------|
| 55.5  | 1548.7553 | 0.0035 | <a href="#">TAFQQLFAYIQGK</a>  |
| 2.3   | 1548.7542 | 0.0046 | <a href="#">MTIPITGKNPVTGK</a> |

Mascot: <http://www.matrixscience.com/>

**Peptide View**MS/MS Fragmentation of **KSKKPNPLAR**Found in **AT1G17140.1** in **TAIR\_Arabidopsis**, Symbols: | tropomyosin-related | chr1:5856733-5857854 REVERSE

Match to Query 3301: 1154.646796 from(578.330674,2+) index(7027)

Title: Elution from: 64.572 to 64.572 scan no 9310 cid35.00 polarity:+

Data file D1d-1\_3.mgf

Click mouse within plot area to zoom in by factor of two about that point

Or,   to  Da Label all possible matches  Label matches used for scoring Show Y-axis 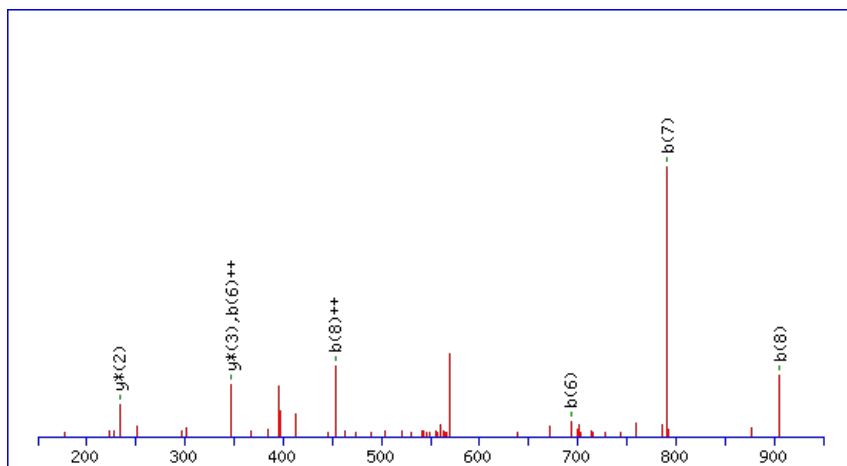Monoisotopic mass of neutral peptide **Mr(calc)**: 1154.6478**Fixed modifications:** Carbamidomethyl (C) (apply to specified residues or termini only)**Ions Score:** 20 **Expect:** 0.048**Matches** : 7/90 fragment ions using 8 most intense peaks ([help](#))

| #  | b               | b <sup>++</sup> | b <sup>*</sup> | b <sup>*++</sup> | b <sup>0</sup> | b <sup>0++</sup> | Seq.     | y         | y <sup>++</sup> | y <sup>*</sup>  | y <sup>*++</sup> | y <sup>0</sup> | y <sup>0++</sup> | #  |
|----|-----------------|-----------------|----------------|------------------|----------------|------------------|----------|-----------|-----------------|-----------------|------------------|----------------|------------------|----|
| 1  | 131.0963        | 66.0518         | 113.0727       | 57.0400          |                |                  | <b>K</b> |           |                 |                 |                  |                |                  | 10 |
| 2  | 219.1254        | 110.0663        | 201.1018       | 101.0545         | 201.1148       | 101.0610         | <b>S</b> | 1025.5661 | 513.2867        | 1007.5425       | 504.2749         | 1007.5555      | 504.2814         | 9  |
| 3  | 349.2144        | 175.1108        | 331.1908       | 166.0990         | 331.2038       | 166.1056         | <b>K</b> | 937.5370  | 469.2721        | 919.5134        | 460.2603         |                |                  | 8  |
| 4  | 479.3034        | 240.1554        | 461.2799       | 231.1436         | 461.2929       | 231.1501         | <b>K</b> | 807.4480  | 404.2276        | 789.4244        | 395.2158         |                |                  | 7  |
| 5  | 577.3532        | 289.1803        | 559.3297       | 280.1685         | 559.3427       | 280.1750         | <b>P</b> | 677.3589  | 339.1831        | 659.3354        | 330.1713         |                |                  | 6  |
| 6  | <b>693.3902</b> | <b>347.1988</b> | 675.3667       | 338.1870         | 675.3797       | 338.1935         | <b>N</b> | 579.3091  | 290.1582        | 561.2856        | 281.1464         |                |                  | 5  |
| 7  | <b>791.4400</b> | 396.2237        | 773.4164       | 387.2119         | 773.4295       | 387.2184         | <b>P</b> | 463.2721  | 232.1397        | 445.2486        | 223.1279         |                |                  | 4  |
| 8  | <b>905.5211</b> | <b>453.2642</b> | 887.4975       | 444.2524         | 887.5106       | 444.2589         | <b>L</b> | 365.2223  | 183.1148        | <b>347.1988</b> | 174.1030         |                |                  | 3  |
| 9  | 977.5553        | 489.2813        | 959.5317       | 480.2695         | 959.5447       | 480.2760         | <b>A</b> | 251.1412  | 126.0743        | <b>233.1177</b> | 117.0625         |                |                  | 2  |
| 10 |                 |                 |                |                  |                |                  | <b>R</b> | 179.1071  | 90.0572         | 161.0835        | 81.0454          |                |                  | 1  |

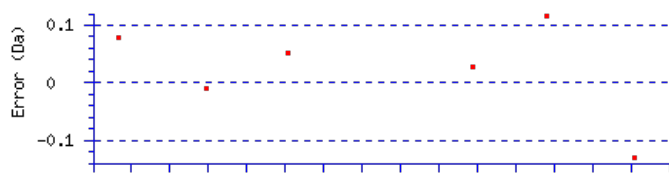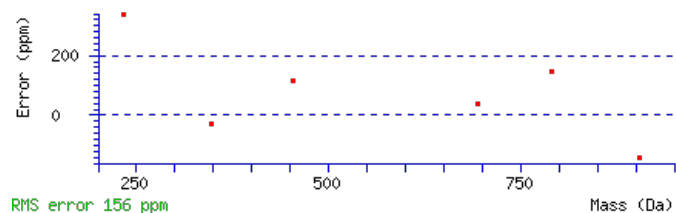NCBI **BLAST** search of **KSKKPNPLAR**

(Parameters: blastp, nr protein database, expect=20000, no filter, PAM30)

Other BLAST [web gateways](#)**All matches to this query**

| Score | Mr(calc) | Delta | Sequence |
|-------|----------|-------|----------|
|       |          |       |          |

## AT1G17140.1

|      |           |         |                            |
|------|-----------|---------|----------------------------|
| 19.8 | 1154.6478 | -0.0010 | <a href="#">KSKKPNPLAR</a> |
| 3.5  | 1154.6451 | 0.0017  | <a href="#">KLADLLELAR</a> |
| 3.5  | 1154.6452 | 0.0016  | <a href="#">NLLNVNLITK</a> |
| 0.6  | 1154.6452 | 0.0016  | <a href="#">KPLITLNNTK</a> |

**Mascot:** <http://www.matrixscience.com/>

**Peptide View**MS/MS Fragmentation of **SPILLEMNPVHK**

Found in **AT1G17180.1** in **TAIR\_Arabidopsis**, Symbols: ATGSTU25 | ATGSTU25 (Arabidopsis thaliana Glutathione S-transferase (class tau) 25); glutathione transferase | chr1:5872201-5872951 FORWARD

Match to Query 5087: 1376.748060 from(459.923296,3+) index(5511)

Title: Elution from: 48.966 to 48.966 scan no 6986 cid35.00 polarity:+

Data file D12h-1\_3.mgf

Click mouse within plot area to zoom in by factor of two about that point

Or,   to  Da

Label all possible matches  Label matches used for scoring

Show Y-axis

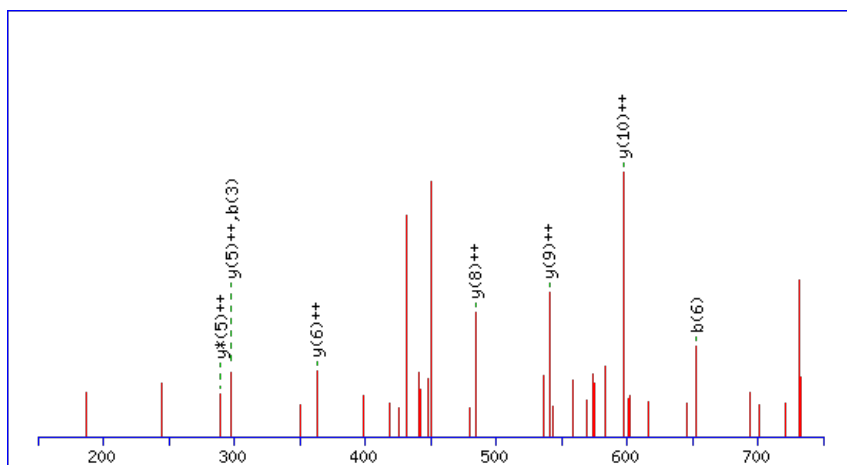

**Monoisotopic mass of neutral peptide Mr(calc):** 1376.7486

**Fixed modifications:** Carbamidomethyl (C) (apply to specified residues or termini only)

**Ions Score:** 18 **Expect:** 0.049

**Matches:** 8/106 fragment ions using 17 most intense peaks ([help](#))

| #  | b               | b <sup>++</sup> | b*        | b <sup>*++</sup> | b <sup>0</sup> | b <sup>0++</sup> | Seq. | y         | y <sup>++</sup> | y*        | y <sup>*++</sup> | y <sup>0</sup> | y <sup>0++</sup> | #  |
|----|-----------------|-----------------|-----------|------------------|----------------|------------------|------|-----------|-----------------|-----------|------------------|----------------|------------------|----|
| 1  | 88.0393         | 44.5233         |           |                  | 70.0287        | 35.5180          | S    |           |                 |           |                  |                |                  | 12 |
| 2  | 185.0921        | 93.0497         |           |                  | 167.0815       | 84.0444          | P    | 1290.7239 | 645.8656        | 1273.6973 | 637.3523         | 1272.7133      | 636.8603         | 11 |
| 3  | <b>298.1761</b> | 149.5917        |           |                  | 280.1656       | 140.5864         | I    | 1193.6711 | <b>597.3392</b> | 1176.6445 | 588.8259         | 1175.6605      | 588.3339         | 10 |
| 4  | 411.2602        | 206.1337        |           |                  | 393.2496       | 197.1285         | L    | 1080.5870 | <b>540.7972</b> | 1063.5605 | 532.2839         | 1062.5765      | 531.7919         | 9  |
| 5  | 524.3443        | 262.6758        |           |                  | 506.3337       | 253.6705         | L    | 967.5030  | <b>484.2551</b> | 950.4764  | 475.7418         | 949.4924       | 475.2498         | 8  |
| 6  | <b>653.3869</b> | 327.1971        |           |                  | 635.3763       | 318.1918         | E    | 854.4189  | 427.7131        | 837.3923  | 419.1998         | 836.4083       | 418.7078         | 7  |
| 7  | 784.4273        | 392.7173        |           |                  | 766.4168       | 383.7120         | M    | 725.3763  | <b>363.1918</b> | 708.3498  | 354.6785         |                |                  | 6  |
| 8  | 898.4703        | 449.7388        | 881.4437  | 441.2255         | 880.4597       | 440.7335         | N    | 594.3358  | <b>297.6715</b> | 577.3093  | <b>289.1583</b>  |                |                  | 5  |
| 9  | 995.5230        | 498.2652        | 978.4965  | 489.7519         | 977.5125       | 489.2599         | P    | 480.2929  | 240.6501        | 463.2663  | 232.1368         |                |                  | 4  |
| 10 | 1094.5914       | 547.7994        | 1077.5649 | 539.2861         | 1076.5809      | 538.7941         | V    | 383.2401  | 192.1237        | 366.2136  | 183.6104         |                |                  | 3  |
| 11 | 1231.6504       | 616.3288        | 1214.6238 | 607.8155         | 1213.6398      | 607.3235         | H    | 284.1717  | 142.5895        | 267.1452  | 134.0762         |                |                  | 2  |
| 12 |                 |                 |           |                  |                |                  | K    | 147.1128  | 74.0600         | 130.0863  | 65.5468          |                |                  | 1  |

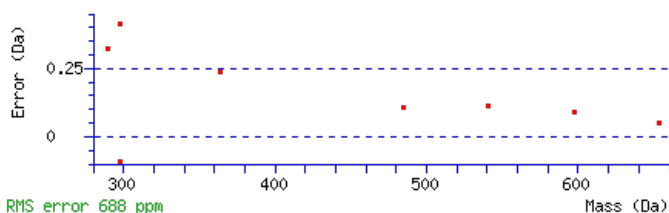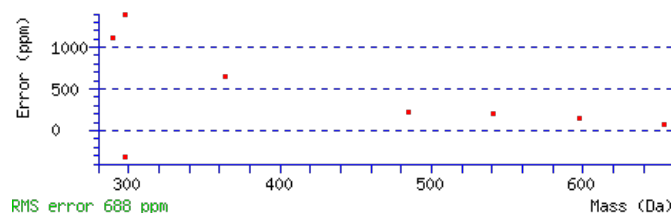

NCBI **BLAST** search of **SPILLEMNPVHK**

(Parameters: blastp, nr protein database, expect=20000, no filter, PAM30)

Other BLAST [web gateways](#)

# AT1G17180.1

All matches to this query

| Score | Mr(calc)  | Delta   | Sequence                     |
|-------|-----------|---------|------------------------------|
| 17.8  | 1376.7486 | -0.0005 | <a href="#">SPILLEMNPVHK</a> |
| 1.6   | 1376.7520 | -0.0039 | <a href="#">KLMGVTMLDVVR</a> |
| 0.0   | 1376.7459 | 0.0022  | <a href="#">AEPQKPKHMRR</a>  |

Mascot: <http://www.matrixscience.com/>

**Peptide View**MS/MS Fragmentation of **TLLDYIR**

Found in **AT1G17220.1** in **TAIR\_Arabidopsis**, Symbols: FUG1 | FUG1 (FU-GAER1); translation initiation factor | chr1:5885376-5890158  
FORWARD

Match to Query 2360: 993.547766 from(497.781159,2+) index(8343)

Title: Elution from: 73.499 to 73.499 scan no 11005 cid35.00 polarity:+

Data file C7-1\_2.mgf

Click mouse within plot area to zoom in by factor of two about that point

Or,   to  Da

Label all possible matches  Label matches used for scoring

Show Y-axis

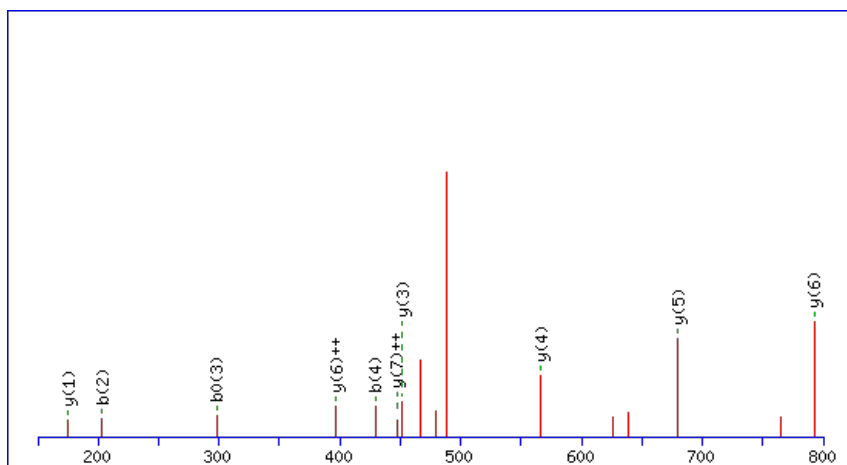

**Monoisotopic mass of neutral peptide Mr(calc):** 993.5495

**Fixed modifications:** Carbamidomethyl (C) (apply to specified residues or termini only)

**Ions Score:** 41 **Expect:** 0.00034

**Matches:** 10/64 fragment ions using 17 most intense peaks ([help](#))

| # | b               | b <sup>++</sup> | b <sup>0</sup>  | b <sup>0++</sup> | Seq. | y               | y <sup>++</sup> | y*       | y <sup>*++</sup> | y <sup>0</sup> | y <sup>0++</sup> | # |
|---|-----------------|-----------------|-----------------|------------------|------|-----------------|-----------------|----------|------------------|----------------|------------------|---|
| 1 | 102.0550        | 51.5311         | 84.0444         | 42.5258          | T    |                 |                 |          |                  |                |                  | 8 |
| 2 | <b>203.1026</b> | 102.0550        | 185.0921        | 93.0497          | T    | 893.5091        | <b>447.2582</b> | 876.4825 | 438.7449         | 875.4985       | 438.2529         | 7 |
| 3 | 316.1867        | 158.5970        | <b>298.1761</b> | 149.5917         | L    | <b>792.4614</b> | <b>396.7343</b> | 775.4349 | 388.2211         | 774.4509       | 387.7291         | 6 |
| 4 | <b>429.2708</b> | 215.1390        | 411.2602        | 206.1337         | L    | <b>679.3774</b> | 340.1923        | 662.3508 | 331.6790         | 661.3668       | 331.1870         | 5 |
| 5 | 544.2977        | 272.6525        | 526.2871        | 263.6472         | D    | <b>566.2933</b> | 283.6503        | 549.2667 | 275.1370         | 548.2827       | 274.6450         | 4 |
| 6 | 707.3610        | 354.1842        | 689.3505        | 345.1789         | Y    | <b>451.2663</b> | 226.1368        | 434.2398 | 217.6235         |                |                  | 3 |
| 7 | 820.4451        | 410.7262        | 802.4345        | 401.7209         | I    | 288.2030        | 144.6051        | 271.1765 | 136.0919         |                |                  | 2 |
| 8 |                 |                 |                 |                  | R    | <b>175.1190</b> | 88.0631         | 158.0924 | 79.5498          |                |                  | 1 |

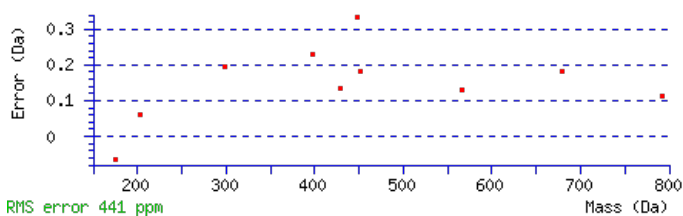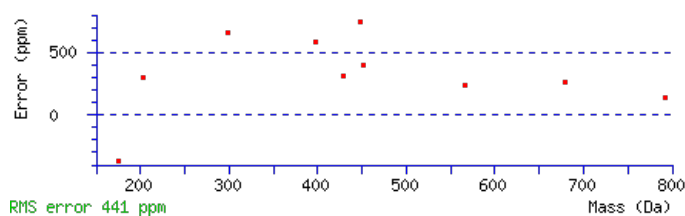

NCBI **BLAST** search of **TLLDYIR**

(Parameters: blastp, nr protein database, expect=20000, no filter, PAM30)

Other BLAST [web gateways](#)

All matches to this query

| Score | Mr(calc) | Delta   | Sequence                |
|-------|----------|---------|-------------------------|
| 40.6  | 993.5495 | -0.0017 | <a href="#">TLLDYIR</a> |

## AT1G17220.1

|     |          |         |                           |
|-----|----------|---------|---------------------------|
| 7.5 | 993.5495 | -0.0017 | <a href="#">TILSANIFK</a> |
| 0.7 | 993.5468 | 0.0010  | <a href="#">LVRQHGER</a>  |
| 0.3 | 993.5468 | 0.0010  | <a href="#">ELNGRHIR</a>  |

**Mascot:** <http://www.matrixscience.com/>

**Peptide View**MS/MS Fragmentation of **DGILSSLAR**

Found in **AT1G17290.1** in **TAIR\_Arabidopsis**, Symbols: ALAAT1 | ALAAT1 (ALANINE AMINOTRANSFERAS); alanine transaminase | chr1:5922764-5926086 FORWARD

Match to Query 2078: 942.479082 from(472.246817,2+) index(6327)

Title: Elution from: 55.132 to 55.132 scan no 8009 cid35.00 polarity:+

Data file D6h-1\_1.mgf

Click mouse within plot area to zoom in by factor of two about that point

Or,   to  Da

Label all possible matches  Label matches used for scoring

Show Y-axis

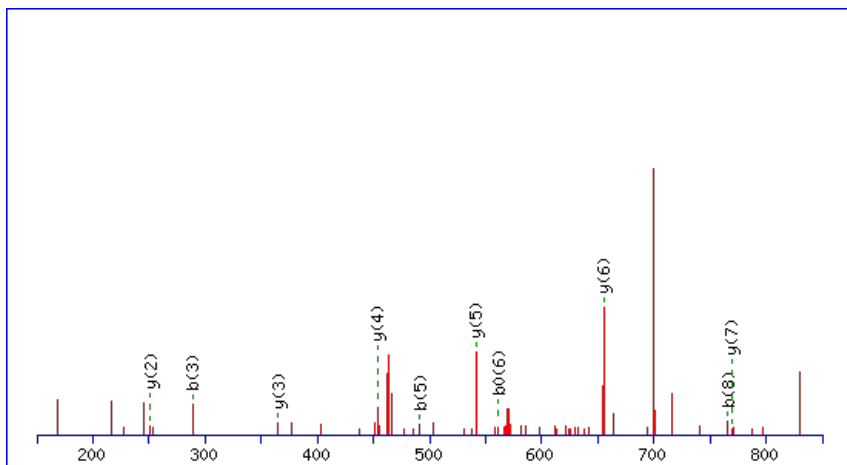

Monoisotopic mass of neutral peptide Mr(calc): 942.4779

Fixed modifications: Carbamidomethyl (C) (apply to specified residues or termini only)

Ions Score: 30 Expect: 0.016

Matches : 10/74 fragment ions using 32 most intense peaks ([help](#))

| # | b               | b <sup>++</sup> | b <sup>0</sup>  | b <sup>0++</sup> | Seq. | y               | y <sup>++</sup> | y*       | y <sup>*++</sup> | y <sup>0</sup> | y <sup>0++</sup> | # |
|---|-----------------|-----------------|-----------------|------------------|------|-----------------|-----------------|----------|------------------|----------------|------------------|---|
| 1 | 117.0313        | 59.0193         | 99.0207         | 50.0140          | D    |                 |                 |          |                  |                |                  | 9 |
| 2 | 175.0498        | 88.0285         | 157.0392        | 79.0232          | G    | 827.4612        | 414.2342        | 809.4376 | 405.2224         | 809.4506       | 405.2289         | 8 |
| 3 | <b>289.1309</b> | 145.0691        | 271.1203        | 136.0638         | I    | <b>769.4427</b> | 385.2250        | 751.4191 | 376.2132         | 751.4321       | 376.2197         | 7 |
| 4 | 403.2120        | 202.1096        | 385.2014        | 193.1043         | L    | <b>655.3616</b> | 328.1844        | 637.3380 | 319.1726         | 637.3510       | 319.1791         | 6 |
| 5 | <b>491.2410</b> | 246.1241        | 473.2304        | 237.1189         | S    | <b>541.2805</b> | 271.1439        | 523.2569 | 262.1321         | 523.2699       | 262.1386         | 5 |
| 6 | 579.2701        | 290.1387        | <b>561.2595</b> | 281.1334         | S    | <b>453.2514</b> | 227.1293        | 435.2278 | 218.1175         | 435.2408       | 218.1241         | 4 |
| 7 | 693.3512        | 347.1792        | 675.3406        | 338.1739         | L    | <b>365.2223</b> | 183.1148        | 347.1988 | 174.1030         |                |                  | 3 |
| 8 | <b>765.3853</b> | 383.1963        | 747.3748        | 374.1910         | A    | <b>251.1412</b> | 126.0743        | 233.1177 | 117.0625         |                |                  | 2 |
| 9 |                 |                 |                 |                  | R    | 179.1071        | 90.0572         | 161.0835 | 81.0454          |                |                  | 1 |

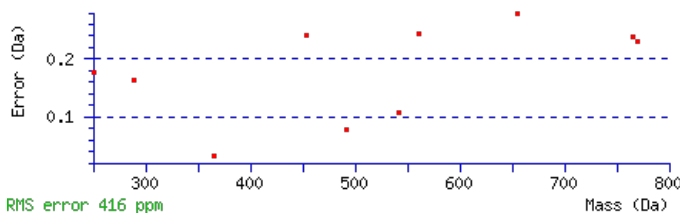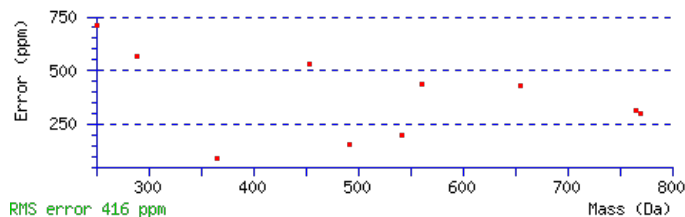

NCBI BLAST search of [DGILSSLAR](#)

(Parameters: blastp, nr protein database, expect=20000, no filter, PAM30)

Other BLAST [web gateways](#)

**All matches to this query**

| Score | Mr(calc) | Delta | Sequence |
|-------|----------|-------|----------|
|       |          |       |          |



# AT1G17290.1

|      |          |         |                           |
|------|----------|---------|---------------------------|
| 29.9 | 942.4779 | 0.0012  | <a href="#">DGILSSLAR</a> |
| 15.5 | 942.4778 | 0.0012  | <a href="#">DAVSLGLTR</a> |
| 11.2 | 942.4778 | 0.0012  | <a href="#">GLAQSQVTK</a> |
| 7.4  | 942.4801 | -0.0010 | <a href="#">SVYSVLHK</a>  |
| 6.3  | 942.4801 | -0.0010 | <a href="#">LTFDPLAR</a>  |
| 5.5  | 942.4778 | 0.0012  | <a href="#">AVTTSTPVR</a> |
| 5.1  | 942.4805 | -0.0014 | <a href="#">QNKLAQAR</a>  |
| 0.7  | 942.4805 | -0.0014 | <a href="#">IENQRLR</a>   |
| 0.7  | 942.4805 | -0.0014 | <a href="#">IQNERLR</a>   |
| 0.3  | 942.4778 | 0.0012  | <a href="#">IQDKDQK</a>   |

Mascot: <http://www.matrixscience.com/>

**Peptide View**MS/MS Fragmentation of **GFGFVSFR**

Found in **AT1G17370.1** in **TAIR\_Arabidopsis**, Symbols: UB1B | UB1B (OLIGOURIDYLATE BINDING PROTEIN 1B); mRNA 3'-UTR binding | chr1:5951835-5954818 REVERSE

Match to Query 1732: 926.428132 from(464.221342,2+) index(6970)

Title: Elution from: 62.073 to 62.073 scan no 9053 cid35.00 polarity:+

Data file C7-1\_3.mgf

Click mouse within plot area to zoom in by factor of two about that point

Or,   to  Da

Label all possible matches  Label matches used for scoring

Show Y-axis

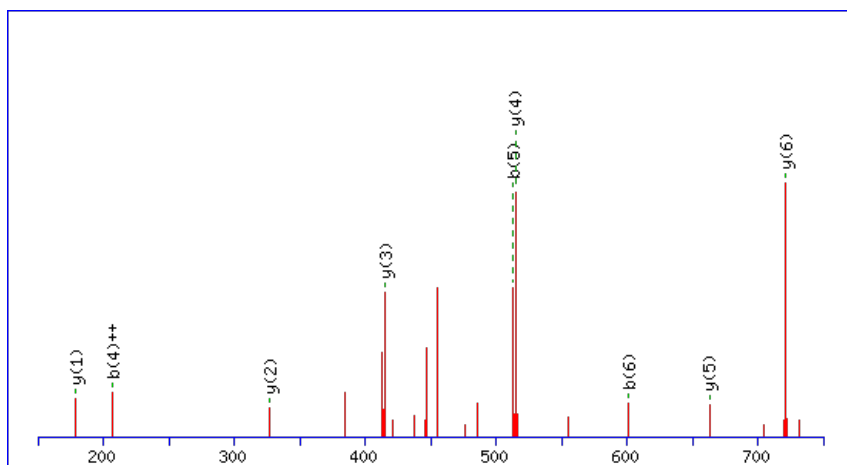

**Monoisotopic mass of neutral peptide Mr(calc):** 926.4276

**Fixed modifications:** Carbamidomethyl (C) (apply to specified residues or termini only)

**Ions Score:** 61 **Expect:** 4.1e-006

**Matches:** 10/56 fragment ions using 11 most intense peaks ([help](#))

| # | b               | b <sup>++</sup> | b <sup>0</sup> | b <sup>0++</sup> | Seq. | y               | y <sup>++</sup> | y*       | y <sup>*++</sup> | y <sup>0</sup> | y <sup>0++</sup> | # |
|---|-----------------|-----------------|----------------|------------------|------|-----------------|-----------------|----------|------------------|----------------|------------------|---|
| 1 | 59.0258         | 30.0165         |                |                  | G    |                 |                 |          |                  |                |                  | 8 |
| 2 | <b>207.0912</b> | 104.0492        |                |                  | F    | 869.4165        | 435.2119        | 851.3929 | 426.2001         | 851.4059       | 426.2066         | 7 |
| 3 | 265.1097        | 133.0585        |                |                  | G    | <b>721.3510</b> | 361.1791        | 703.3274 | 352.1673         | 703.3404       | 352.1739         | 6 |
| 4 | 413.1752        | <b>207.0912</b> |                |                  | F    | <b>663.3325</b> | 332.1699        | 645.3089 | 323.1581         | 645.3219       | 323.1646         | 5 |
| 5 | <b>513.2406</b> | 257.1239        |                |                  | V    | <b>515.2671</b> | 258.1372        | 497.2435 | 249.1254         | 497.2565       | 249.1319         | 4 |
| 6 | <b>601.2697</b> | 301.1385        | 583.2591       | 292.1332         | S    | <b>415.2016</b> | 208.1044        | 397.1780 | 199.0926         | 397.1910       | 199.0992         | 3 |
| 7 | 749.3351        | 375.1712        | 731.3246       | 366.1659         | F    | <b>327.1725</b> | 164.0899        | 309.1490 | 155.0781         |                |                  | 2 |
| 8 |                 |                 |                |                  | R    | <b>179.1071</b> | 90.0572         | 161.0835 | 81.0454          |                |                  | 1 |

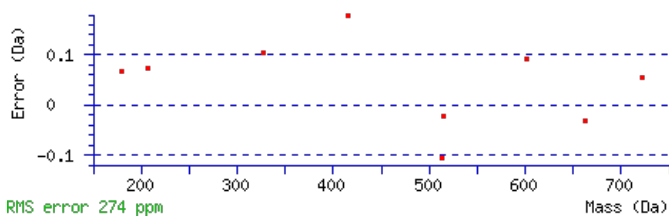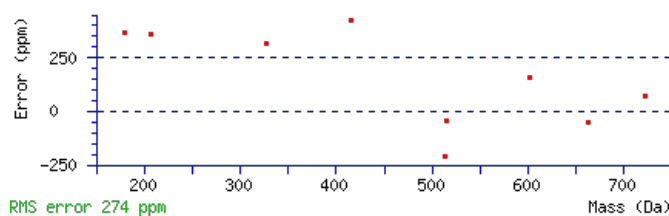

NCBI **BLAST** search of [GFGFVSFR](#)

(Parameters: blastp, nr protein database, expect=20000, no filter, PAM30)

Other BLAST [web gateways](#)

**All matches to this query**

| Score | Mr(calc) | Delta  | Sequence                 |
|-------|----------|--------|--------------------------|
| 60.9  | 926.4276 | 0.0005 | <a href="#">GFGFVSFR</a> |

## AT1G17370.1

|      |          |        |                          |
|------|----------|--------|--------------------------|
| 13.5 | 926.4277 | 0.0005 | <a href="#">GFINYFR</a>  |
| 9.6  | 926.4254 | 0.0027 | <a href="#">QSPPPAYR</a> |
| 3.9  | 926.4281 | 0.0000 | <a href="#">RYRDER</a>   |
| 0.6  | 926.4259 | 0.0023 | <a href="#">RIHDSGAR</a> |
| 0.3  | 926.4259 | 0.0023 | <a href="#">SYRSRSR</a>  |

**Mascot:** <http://www.matrixscience.com/>

## Peptide View

### MS/MS Fragmentation of **QDTFAAGRLK**

Found in **AT1G17420.1** in **TAIR\_Arabidopsis**, Symbols: LOX3 | LOX3 (Lipoxygenase 3); iron ion binding / lipoxygenase/ metal ion binding / oxidoreductase, acting on single donors with incorporation of molecular oxygen, incorporation of two atoms of oxygen | chr1:5977505-5981377  
FORWARD

Match to Query 3751: 1120.545448 from(561.280000,2+) index(3353)

Title: Elution from: 33.099 to 33.099 scan no 4161 cid35.00 polarity:+

Data file C7-2\_1.mgf

Click mouse within plot area to zoom in by factor of two about that point

Or,   to  Da

Label all possible matches  Label matches used for scoring

Show Y-axis

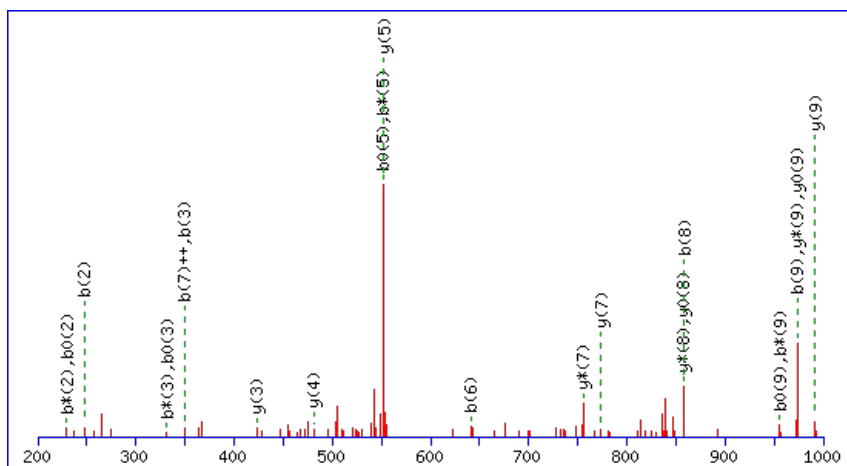

**Monoisotopic mass of neutral peptide Mr(calc):** 1120.5435

**Fixed modifications:** Carbamidomethyl (C) (apply to specified residues or termini only)

**Ions Score:** 26 **Expect:** 0.023

**Matches:** 24/92 fragment ions using 48 most intense peaks ([help](#))

| #  | b               | b <sup>++</sup> | b <sup>*</sup>  | b <sup>*++</sup> | b <sup>0</sup>  | b <sup>0++</sup> | Seq. | y               | y <sup>++</sup> | y <sup>*</sup>  | y <sup>*++</sup> | y <sup>0</sup>  | y <sup>0++</sup> | #  |
|----|-----------------|-----------------|-----------------|------------------|-----------------|------------------|------|-----------------|-----------------|-----------------|------------------|-----------------|------------------|----|
| 1  | 131.0599        | 66.0336         | 113.0363        | 57.0218          |                 |                  | Q    |                 |                 |                 |                  |                 |                  | 10 |
| 2  | <b>247.0839</b> | 124.0456        | <b>229.0603</b> | 115.0338         | <b>229.0733</b> | 115.0403         | D    | <b>991.4982</b> | 496.2527        | <b>973.4746</b> | 487.2409         | <b>973.4876</b> | 487.2474         | 9  |
| 3  | <b>349.1286</b> | 175.0679        | <b>331.1050</b> | 166.0562         | <b>331.1180</b> | 166.0627         | T    | 875.4742        | 438.2407        | <b>857.4506</b> | 429.2289         | <b>857.4636</b> | 429.2354         | 8  |
| 4  | 497.1941        | 249.1007        | 479.1705        | 240.0889         | 479.1835        | 240.0954         | F    | <b>773.4295</b> | 387.2184        | <b>755.4059</b> | 378.2066         |                 |                  | 7  |
| 5  | 569.2282        | 285.1177        | <b>551.2046</b> | 276.1060         | <b>551.2176</b> | 276.1125         | A    | 625.3640        | 313.1856        | 607.3404        | 304.1739         |                 |                  | 6  |
| 6  | <b>641.2624</b> | 321.1348        | 623.2388        | 312.1230         | 623.2518        | 312.1295         | A    | <b>553.3299</b> | 277.1686        | 535.3063        | 268.1568         |                 |                  | 5  |
| 7  | 699.2809        | <b>350.1441</b> | 681.2573        | 341.1323         | 681.2703        | 341.1388         | G    | <b>481.2957</b> | 241.1515        | 463.2721        | 232.1397         |                 |                  | 4  |
| 8  | <b>859.3701</b> | 430.1887        | 841.3465        | 421.1769         | 841.3595        | 421.1834         | R    | <b>423.2772</b> | 212.1423        | 405.2536        | 203.1305         |                 |                  | 3  |
| 9  | <b>973.4512</b> | 487.2292        | <b>955.4276</b> | 478.2175         | <b>955.4406</b> | 478.2240         | L    | 263.1880        | 132.0976        | 245.1644        | 123.0858         |                 |                  | 2  |
| 10 |                 |                 |                 |                  |                 |                  | K    | 149.1069        | 75.0571         | 131.0833        | 66.0453          |                 |                  | 1  |

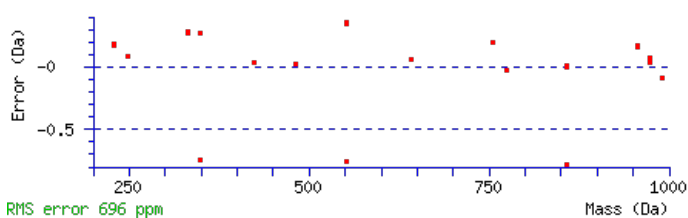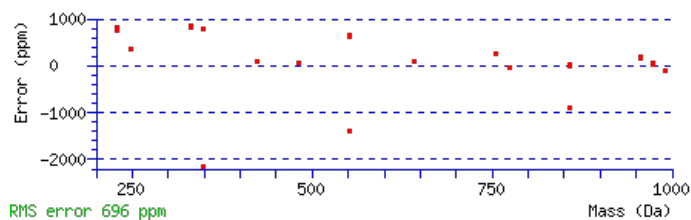

NCBI **BLAST** search of **QDTFAAGRLK**

(Parameters: blastp, nr protein database, expect=20000, no filter, PAM30)

Other BLAST [web gateways](#)

All matches to this query

## AT1G17420.1

| Score | Mr(calc)  | Delta   | Sequence                   |
|-------|-----------|---------|----------------------------|
| 26.2  | 1120.5435 | 0.0019  | <a href="#">QDTFAAGRLK</a> |
| 19.6  | 1120.5431 | 0.0024  | <a href="#">FDEFKSLPK</a>  |
| 11.7  | 1120.5435 | 0.0019  | <a href="#">FSGAESRKP</a>  |
| 11.4  | 1120.5435 | 0.0019  | <a href="#">FIRAAQASDK</a> |
| 10.7  | 1120.5464 | -0.0010 | <a href="#">EDTMKFLVK</a>  |
| 9.3   | 1120.5465 | -0.0010 | <a href="#">MLLISQFDK</a>  |
| 8.9   | 1120.5469 | -0.0015 | <a href="#">KIKMASGSR</a>  |
| 8.6   | 1120.5469 | -0.0015 | <a href="#">MSERAKLQK</a>  |
| 8.3   | 1120.5435 | 0.0019  | <a href="#">QFQAIRESK</a>  |
| 6.8   | 1120.5442 | 0.0012  | <a href="#">ELMKTTKDK</a>  |

Mascot: <http://www.matrixscience.com/>

**Peptide View**MS/MS Fragmentation of **LGLLLDAR**Found in **AT1G17630.1** in **TAIR\_Arabidopsis**, Symbols: | pentatricopeptide (PPR) repeat-containing protein | chr1:6064518-6066713 FORWARD

Match to Query 1428: 880.499712 from(441.257132,2+) index(3442)

Title: Elution from: 32.434 to 32.434 scan no 4286 cid35.00 polarity:+

Data file 0-2\_3.mgf

Click mouse within plot area to zoom in by factor of two about that point

Or,   to  Da Label all possible matches  Label matches used for scoring Show Y-axis 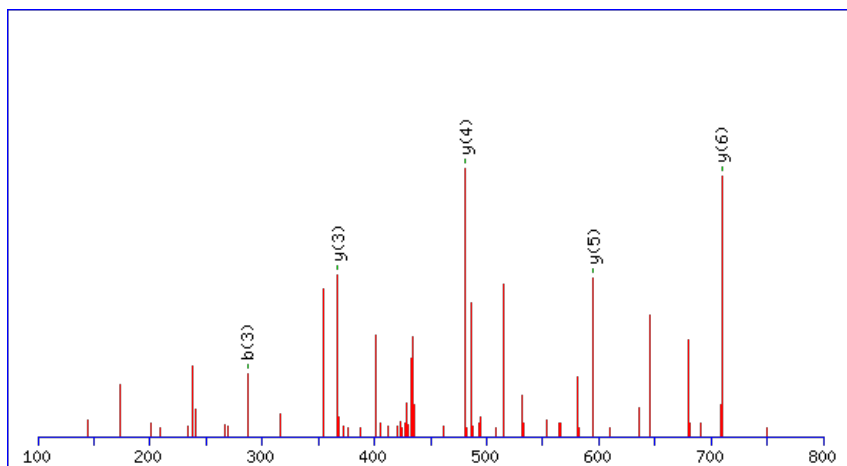Monoisotopic mass of neutral peptide **Mr(calc)**: 880.5008**Fixed modifications**: Carbamidomethyl (C) (apply to specified residues or termini only)**Ions Score**: 26 **Expect**: 0.012**Matches**: 5/56 fragment ions using 7 most intense peaks ([help](#))

| # | b        | b <sup>++</sup> | b <sup>0</sup> | b <sup>0++</sup> | Seq. | y        | y <sup>++</sup> | y*       | y <sup>*++</sup> | y <sup>0</sup> | y <sup>0++</sup> | # |
|---|----------|-----------------|----------------|------------------|------|----------|-----------------|----------|------------------|----------------|------------------|---|
| 1 | 115.0884 | 58.0478         |                |                  | L    |          |                 |          |                  |                |                  | 8 |
| 2 | 173.1069 | 87.0571         |                |                  | G    | 767.4270 | 384.2171        | 749.4034 | 375.2054         | 749.4164       | 375.2119         | 7 |
| 3 | 287.1880 | 144.0976        |                |                  | L    | 709.4085 | 355.2079        | 691.3849 | 346.1961         | 691.3980       | 346.2026         | 6 |
| 4 | 401.2691 | 201.1382        |                |                  | L    | 595.3274 | 298.1673        | 577.3038 | 289.1556         | 577.3169       | 289.1621         | 5 |
| 5 | 515.3502 | 258.1787        |                |                  | L    | 481.2463 | 241.1268        | 463.2227 | 232.1150         | 463.2358       | 232.1215         | 4 |
| 6 | 631.3741 | 316.1907        | 613.3636       | 307.1854         | D    | 367.1652 | 184.0862        | 349.1416 | 175.0745         | 349.1547       | 175.0810         | 3 |
| 7 | 703.4083 | 352.2078        | 685.3977       | 343.2025         | A    | 251.1412 | 126.0743        | 233.1177 | 117.0625         |                |                  | 2 |
| 8 |          |                 |                |                  | R    | 179.1071 | 90.0572         | 161.0835 | 81.0454          |                |                  | 1 |

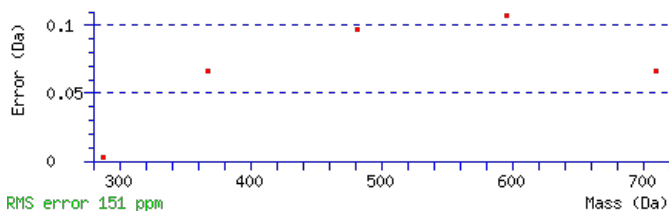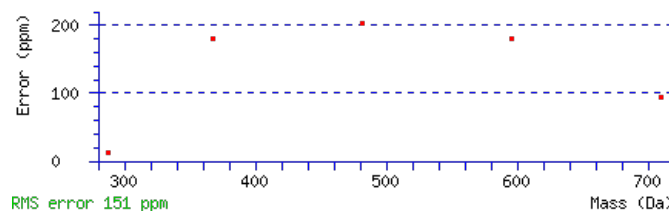NCBI **BLAST** search of [LGLLLDAR](#)

(Parameters: blastp, nr protein database, expect=20000, no filter, PAM30)

Other BLAST [web gateways](#)**All matches to this query**

| Score | Mr(calc) | Delta   | Sequence                 |
|-------|----------|---------|--------------------------|
| 26.1  | 880.5008 | -0.0011 | <a href="#">LGLLLDAR</a> |



## Peptide View

### MS/MS Fragmentation of **IMDAIKSK**

Found in **AT1G17780.2** in **TAIR\_Arabidopsis**, Symbols: | similar to unknown protein [Arabidopsis thaliana] (TAIR:AT2G16575.1); similar to hypothetical protein [Vitis vinifera] (GB:CAN66610.1); similar to unnamed protein product [Vitis vinifera] (GB:CAO39378.1) | chr1:6124088-6125159 FORWARD

Match to Query 1514: 930.472628 from(466.243590,2+) index(7338)

Title: Elution from: 68.717 to 68.717 scan no 9771 cid35.00 polarity:+

Data file D1d-1-2.mgf

Click mouse within plot area to zoom in by factor of two about that point

Or,   to  Da

Label all possible matches  Label matches used for scoring

Show Y-axis

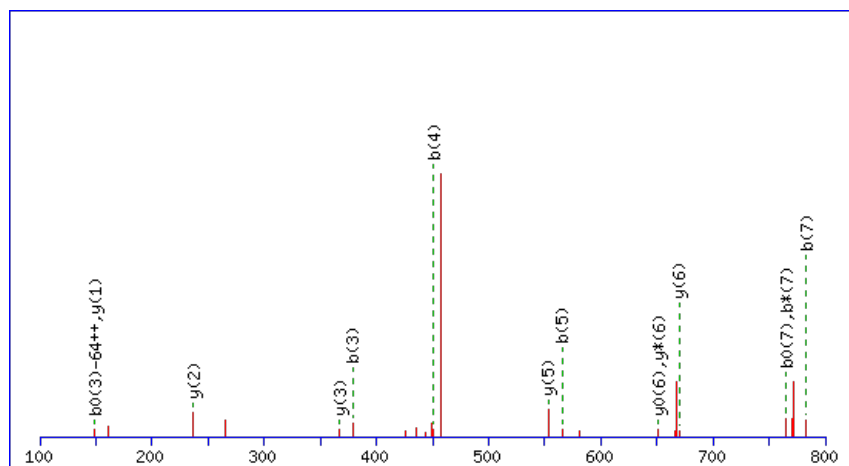

Monoisotopic mass of neutral peptide **Mr(calc)**: 930.4705

**Fixed modifications:** Carbamidomethyl (C) (apply to specified residues or termini only)

**Variable modifications:**

**M2** : Oxidation (M), with neutral losses 0.0000 (shown in table), 63.9983

**Ions Score:** 35 **Expect:** 0.0042

**Matches** : 14/100 fragment ions using 22 most intense peaks ([help](#))

| # | b               | b <sup>++</sup> | b*              | b* <sup>++</sup> | b <sup>0</sup>  | b <sup>0++</sup> | Seq. | y               | y <sup>++</sup> | y*              | y* <sup>++</sup> | y <sup>0</sup>  | y <sup>0++</sup> | # |
|---|-----------------|-----------------|-----------------|------------------|-----------------|------------------|------|-----------------|-----------------|-----------------|------------------|-----------------|------------------|---|
| 1 | 115.0884        | 58.0478         |                 |                  |                 |                  | I    |                 |                 |                 |                  |                 |                  | 8 |
| 2 | 263.1208        | 132.0640        |                 |                  |                 |                  | M    | 817.3966        | 409.2020        | 799.3730        | 400.1902         | 799.3861        | 400.1967         | 7 |
| 3 | <b>379.1448</b> | 190.0760        |                 |                  | 361.1342        | 181.0707         | D    | <b>669.3642</b> | 335.1857        | <b>651.3406</b> | 326.1739         | <b>651.3536</b> | 326.1805         | 6 |
| 4 | <b>451.1789</b> | 226.0931        |                 |                  | 433.1684        | 217.0878         | A    | <b>553.3402</b> | 277.1737        | 535.3166        | 268.1620         | 535.3297        | 268.1685         | 5 |
| 5 | <b>565.2600</b> | 283.1337        |                 |                  | 547.2495        | 274.1284         | I    | 481.3061        | 241.1567        | 463.2825        | 232.1449         | 463.2955        | 232.1514         | 4 |
| 6 | 695.3491        | 348.1782        | 677.3255        | 339.1664         | 677.3385        | 339.1729         | K    | <b>367.2250</b> | 184.1161        | 349.2014        | 175.1043         | 349.2144        | 175.1108         | 3 |
| 7 | <b>783.3781</b> | 392.1927        | <b>765.3545</b> | 383.1809         | <b>765.3676</b> | 383.1874         | S    | <b>237.1359</b> | 119.0716        | 219.1124        | 110.0598         | 219.1254        | 110.0663         | 2 |
| 8 |                 |                 |                 |                  |                 |                  | K    | <b>149.1069</b> | 75.0571         | 131.0833        | 66.0453          |                 |                  | 1 |

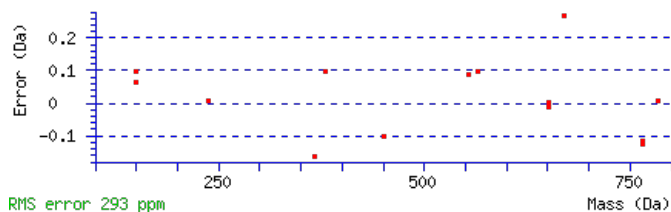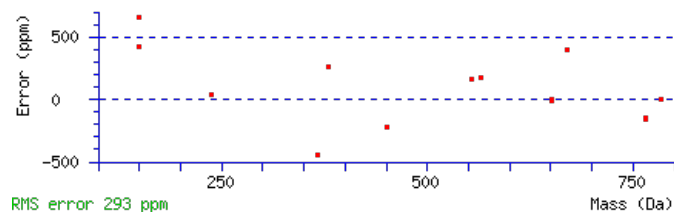

NCBI **BLAST** search of **IMDAIKSK**

(Parameters: blastp, nr protein database, expect=20000, no filter, PAM30)

Other BLAST [web gateways](#)

All matches to this query



## AT1G17780.2

| Score | Mr(calc) | Delta   | Sequence                 |
|-------|----------|---------|--------------------------|
| 34.5  | 930.4705 | 0.0022  | <a href="#">IMDAIKSK</a> |
| 30.9  | 930.4705 | 0.0022  | <a href="#">MSEKGLIK</a> |
| 22.9  | 930.4705 | 0.0022  | <a href="#">MESKIVSK</a> |
| 22.0  | 930.4705 | 0.0022  | <a href="#">LMGLEKSK</a> |
| 21.5  | 930.4731 | -0.0005 | <a href="#">EMRKLNK</a>  |
| 19.1  | 930.4705 | 0.0022  | <a href="#">MLESVKAK</a> |
| 18.7  | 930.4705 | 0.0022  | <a href="#">MDKASIIK</a> |
| 18.6  | 930.4704 | 0.0022  | <a href="#">DMKTLVSK</a> |
| 18.3  | 930.4704 | 0.0022  | <a href="#">MLTGEVKK</a> |
| 17.8  | 930.4727 | -0.0001 | <a href="#">MAFLPSLK</a> |

Mascot: <http://www.matrixscience.com/>

## Peptide View

### MS/MS Fragmentation of **KLAEQFQK**

Found in **AT1G17880.1** in **TAIR\_Arabidopsis**, Symbols: | nascent polypeptide-associated complex (NAC) domain-containing protein / BTF3b-like transcription factor, putative | chr1:6152565-6153418 REVERSE

Match to Query 2654: 1002.514156 from(502.264354,2+) index(521)

Title: Elution from: 10.937 to 10.937 scan no 818 cid35.00 polarity:+

Data file C7-2\_1.mgf

Click mouse within plot area to zoom in by factor of two about that point

Or,   to  Da

Label all possible matches  Label matches used for scoring

Show Y-axis

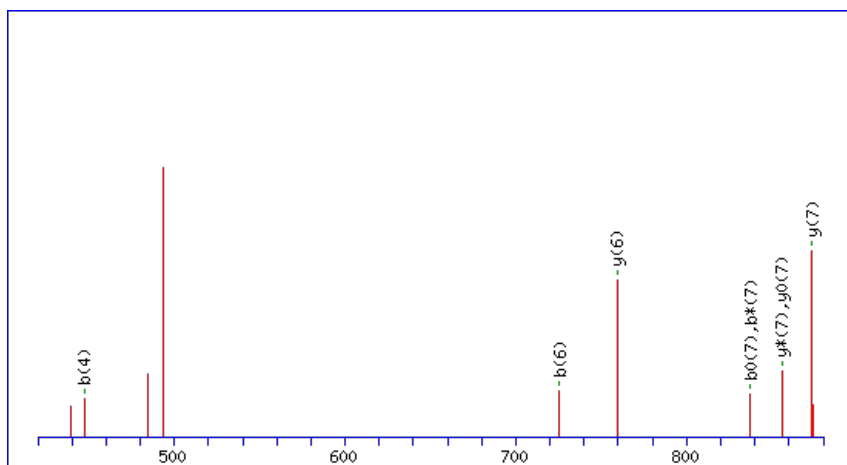

Monoisotopic mass of neutral peptide  $M_r(\text{calc})$ : 1002.5142

Fixed modifications: Carbamidomethyl (C) (apply to specified residues or termini only)

Ions Score: 31 Expect: 0.0091

Matches : 9/70 fragment ions using 10 most intense peaks ([help](#))

| # | b               | b <sup>++</sup> | b*              | b <sup>*++</sup> | b <sup>0</sup>  | b <sup>0++</sup> | Seq.     | y               | y <sup>++</sup> | y*              | y <sup>*++</sup> | y <sup>0</sup>  | y <sup>0++</sup> | # |
|---|-----------------|-----------------|-----------------|------------------|-----------------|------------------|----------|-----------------|-----------------|-----------------|------------------|-----------------|------------------|---|
| 1 | 131.0963        | 66.0518         | 113.0727        | 57.0400          |                 |                  | <b>K</b> |                 |                 |                 |                  |                 |                  | 8 |
| 2 | 245.1774        | 123.0923        | 227.1538        | 114.0805         |                 |                  | <b>L</b> | <b>873.4325</b> | 437.2199        | <b>855.4089</b> | 428.2081         | <b>855.4219</b> | 428.2146         | 7 |
| 3 | 317.2116        | 159.1094        | 299.1880        | 150.0976         |                 |                  | <b>A</b> | <b>759.3514</b> | 380.1793        | 741.3278        | 371.1675         | 741.3408        | 371.1741         | 6 |
| 4 | <b>447.2512</b> | 224.1292        | 429.2276        | 215.1174         | 429.2406        | 215.1239         | <b>E</b> | 687.3172        | 344.1623        | 669.2937        | 335.1505         | 669.3067        | 335.1570         | 5 |
| 5 | 577.3038        | 289.1556        | 559.2802        | 280.1438         | 559.2933        | 280.1503         | <b>Q</b> | 557.2776        | 279.1424        | 539.2540        | 270.1307         |                 |                  | 4 |
| 6 | <b>725.3693</b> | 363.1883        | 707.3457        | 354.1765         | 707.3587        | 354.1830         | <b>F</b> | 427.2250        | 214.1161        | 409.2014        | 205.1043         |                 |                  | 3 |
| 7 | <b>855.4219</b> | 428.2146        | <b>837.3983</b> | 419.2028         | <b>837.4114</b> | 419.2093         | <b>Q</b> | 279.1595        | 140.0834        | 261.1359        | 131.0716         |                 |                  | 2 |
| 8 |                 |                 |                 |                  |                 |                  | <b>K</b> | 149.1069        | 75.0571         | 131.0833        | 66.0453          |                 |                  | 1 |

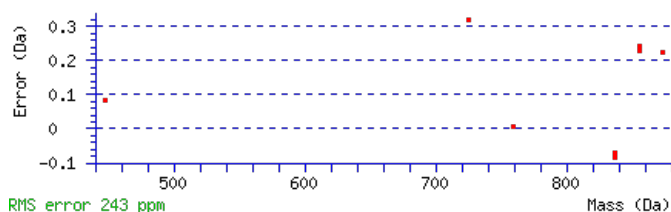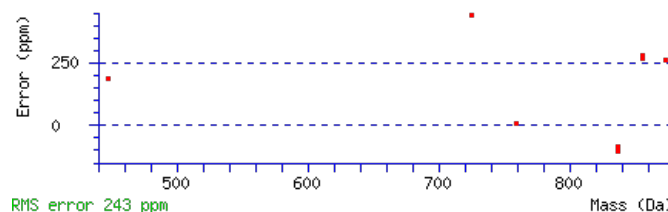

NCBI **BLAST** search of [KLAEQFQK](#)

(Parameters: blastp, nr protein database, expect=20000, no filter, PAM30)

Other BLAST [web gateways](#)

### All matches to this query

| Score | $M_r(\text{calc})$ | Delta   | Sequence                 |
|-------|--------------------|---------|--------------------------|
| 30.8  | 1002.5142          | -0.0001 | <a href="#">KLAEQFQK</a> |

**AT1G17880.1**

|      |           |         |                            |
|------|-----------|---------|----------------------------|
| 21.6 | 1002.5142 | -0.0001 | <a href="#">KAGTFDPKK</a>  |
| 20.5 | 1002.5142 | -0.0001 | <a href="#">ELQAYLVR</a>   |
| 15.1 | 1002.5142 | -0.0001 | <a href="#">IAVRFE EK</a>  |
| 12.7 | 1002.5142 | -0.0001 | <a href="#">EIVKEAFR</a>   |
| 12.7 | 1002.5116 | 0.0026  | <a href="#">EIVVTELK</a>   |
| 12.7 | 1002.5142 | -0.0001 | <a href="#">ELVLSFAGR</a>  |
| 12.7 | 1002.5120 | 0.0021  | <a href="#">KIVANGSSSK</a> |
| 12.7 | 1002.5147 | -0.0005 | <a href="#">KLAQRSER</a>   |
| 12.7 | 1002.5142 | -0.0001 | <a href="#">KLLFAEDR</a>   |

**Mascot:** <http://www.matrixscience.com/>


**Mascot Search Results**
**Peptide View**MS/MS Fragmentation of **DVVFLPISGLMGK**Found in **AT1G18070.1** in **TAIR\_Arabidopsis**, Symbols: | EF-1-alpha-related GTP-binding protein, putative | chr1:6214229-6218204 REVERSE

Match to Query 5659: 1374.757452 from(688.386002,2+) index(10927)

Title: Elution from: 103.688 to 103.688 scan no 15422 cid35.00 polarity:+

Data file D12h-1\_1.mgf

Click mouse within plot area to zoom in by factor of two about that point

Or,  to  Da Label all possible matches  Label matches used for scoring Show Y-axis 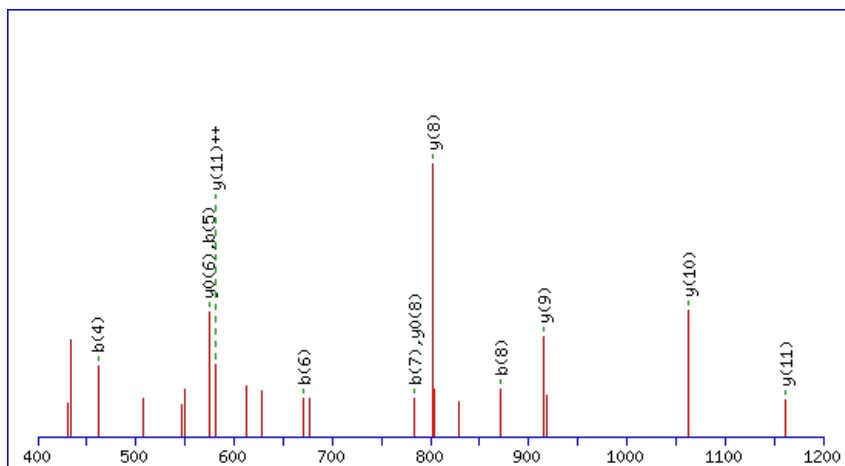Monoisotopic mass of neutral peptide  $M_r(\text{calc})$ : 1374.7581

Fixed modifications: Carbamidomethyl (C) (apply to specified residues or termini only)

Ions Score: 32 Expect: 0.002

Matches : 12/110 fragment ions using 17 most intense peaks ([help](#))

| #  | b               | b <sup>++</sup> | b <sup>0</sup> | b <sup>0++</sup> | Seq. | y                | y <sup>++</sup> | y*        | y <sup>*++</sup> | y <sup>0</sup>  | y <sup>0++</sup> | #  |
|----|-----------------|-----------------|----------------|------------------|------|------------------|-----------------|-----------|------------------|-----------------|------------------|----|
| 1  | 116.0342        | 58.5207         | 98.0237        | 49.5155          | D    |                  |                 |           |                  |                 |                  | 13 |
| 2  | 215.1026        | 108.0550        | 197.0921       | 99.0497          | V    | 1260.7384        | 630.8729        | 1243.7119 | 622.3596         | 1242.7279       | 621.8676         | 12 |
| 3  | 314.1710        | 157.5892        | 296.1605       | 148.5839         | V    | <b>1161.6700</b> | <b>581.3387</b> | 1144.6435 | 572.8254         | 1143.6595       | 572.3334         | 11 |
| 4  | <b>461.2395</b> | 231.1234        | 443.2289       | 222.1181         | F    | <b>1062.6016</b> | 531.8044        | 1045.5751 | 523.2912         | 1044.5911       | 522.7992         | 10 |
| 5  | <b>574.3235</b> | 287.6654        | 556.3130       | 278.6601         | L    | <b>915.5332</b>  | 458.2702        | 898.5067  | 449.7570         | 897.5226        | 449.2650         | 9  |
| 6  | <b>671.3763</b> | 336.1918        | 653.3657       | 327.1865         | P    | <b>802.4491</b>  | 401.7282        | 785.4226  | 393.2149         | <b>784.4386</b> | 392.7229         | 8  |
| 7  | <b>784.4604</b> | 392.7338        | 766.4498       | 383.7285         | I    | 705.3964         | 353.2018        | 688.3698  | 344.6886         | 687.3858        | 344.1965         | 7  |
| 8  | <b>871.4924</b> | 436.2498        | 853.4818       | 427.2445         | S    | 592.3123         | 296.6598        | 575.2858  | 288.1465         | <b>574.3017</b> | 287.6545         | 6  |
| 9  | 928.5138        | 464.7606        | 910.5033       | 455.7553         | G    | 505.2803         | 253.1438        | 488.2537  | 244.6305         |                 |                  | 5  |
| 10 | 1041.5979       | 521.3026        | 1023.5873      | 512.2973         | L    | 448.2588         | 224.6330        | 431.2323  | 216.1198         |                 |                  | 4  |
| 11 | 1172.6384       | 586.8228        | 1154.6278      | 577.8176         | M    | 335.1748         | 168.0910        | 318.1482  | 159.5777         |                 |                  | 3  |
| 12 | 1229.6599       | 615.3336        | 1211.6493      | 606.3283         | G    | 204.1343         | 102.5708        | 187.1077  | 94.0575          |                 |                  | 2  |
| 13 |                 |                 |                |                  | K    | 147.1128         | 74.0600         | 130.0863  | 65.5468          |                 |                  | 1  |

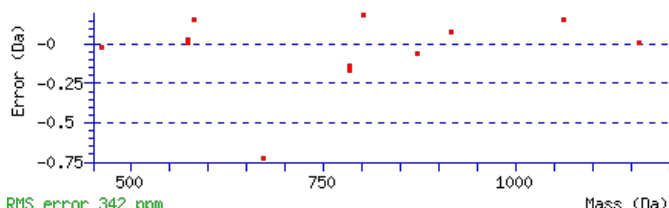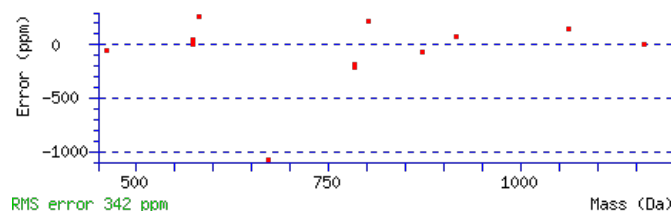NCBI **BLAST** search of **DVVFLPISGLMGK**

(Parameters: blastp, nr protein database, expect=20000, no filter, PAM30)

Other BLAST [web gateways](#)

AT1G18070.1

All matches to this query

| Score | Mr(calc)  | Delta   | Sequence                      |
|-------|-----------|---------|-------------------------------|
| 32.0  | 1374.7581 | -0.0007 | <a href="#">DVVFLPISGLMGK</a> |
| 3.4   | 1374.7547 | 0.0027  | <a href="#">YLPSLQVIEWK</a>   |

Mascot: <http://www.matrixscience.com/>

**Peptide View**MS/MS Fragmentation of **IWDLESK**

Found in **AT1G18080.1** in **TAIR\_Arabidopsis**, Symbols: ATARCA | ATARCA (Arabidopsis thaliana Homolog of the Tobacco ArcA); nucleotide binding | chr1:6222318-6223894 FORWARD

Match to Query 1571: 889.454754 from(445.734653,2+) index(4271)

Title: Elution from: 39.492 to 39.492 scan no 5333 cid35.00 polarity:+

Data file D12h-1\_2.mgf

Click mouse within plot area to zoom in by factor of two about that point

Or,  to  Da

Label all possible matches  Label matches used for scoring

Show Y-axis

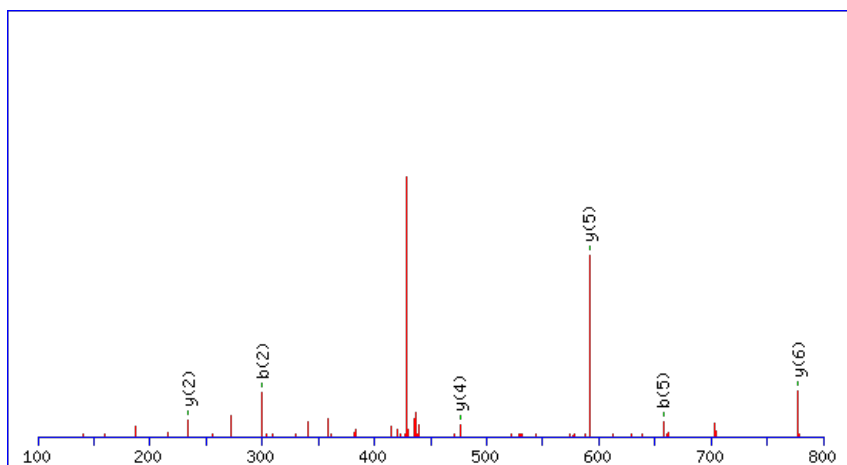

Monoisotopic mass of neutral peptide  $M_r(\text{calc})$ : 889.4545

Fixed modifications: Carbamidomethyl (C) (apply to specified residues or termini only)

Ions Score: 33 Expect: 0.0013

Matches : 6/54 fragment ions using 7 most intense peaks ([help](#))

| # | b               | b <sup>++</sup> | b <sup>0</sup> | b <sup>0++</sup> | Seq. | y               | y <sup>++</sup> | y*       | y <sup>*++</sup> | y <sup>0</sup> | y <sup>0++</sup> | # |
|---|-----------------|-----------------|----------------|------------------|------|-----------------|-----------------|----------|------------------|----------------|------------------|---|
| 1 | 114.0913        | 57.5493         |                |                  | I    |                 |                 |          |                  |                |                  | 7 |
| 2 | <b>300.1707</b> | 150.5890        |                |                  | W    | <b>777.3777</b> | 389.1925        | 760.3512 | 380.6792         | 759.3672       | 380.1872         | 6 |
| 3 | 415.1976        | 208.1024        | 397.1870       | 199.0972         | D    | <b>591.2984</b> | 296.1529        | 574.2719 | 287.6396         | 573.2879       | 287.1476         | 5 |
| 4 | 528.2817        | 264.6445        | 510.2711       | 255.6392         | L    | <b>476.2715</b> | 238.6394        | 459.2449 | 230.1261         | 458.2609       | 229.6341         | 4 |
| 5 | <b>657.3243</b> | 329.1658        | 639.3137       | 320.1605         | E    | 363.1874        | 182.0974        | 346.1609 | 173.5841         | 345.1769       | 173.0921         | 3 |
| 6 | 744.3563        | 372.6818        | 726.3457       | 363.6765         | S    | <b>234.1448</b> | 117.5761        | 217.1183 | 109.0628         | 216.1343       | 108.5708         | 2 |
| 7 |                 |                 |                |                  | K    | 147.1128        | 74.0600         | 130.0863 | 65.5468          |                |                  | 1 |

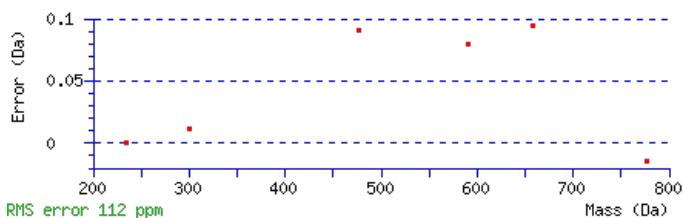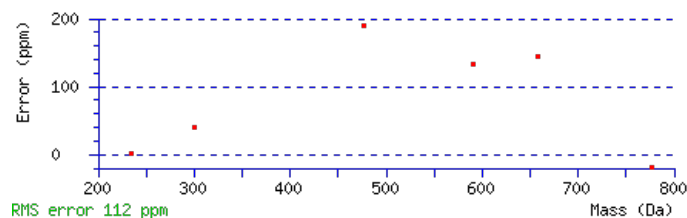

NCBI **BLAST** search of **IWDLESK**

(Parameters: blastp, nr protein database, expect=20000, no filter, PAM30)

Other BLAST [web gateways](#)

**All matches to this query**

| Score | $M_r(\text{calc})$ | Delta  | Sequence                |
|-------|--------------------|--------|-------------------------|
| 32.7  | 889.4545           | 0.0002 | <a href="#">IWDLESK</a> |
| 13.9  | 889.4545           | 0.0002 | <a href="#">LWEVSEK</a> |



**Peptide View**MS/MS Fragmentation of **MNMKKFLK**Found in **AT1G18160.1** in **TAIR\_Arabidopsis**, Symbols: | protein kinase family protein | chr1:6249119-6253828 FORWARD

Match to Query 3159: 1066.529342 from(534.271947,2+) index(5904)

Title: Elution from: 51.164 to 51.164 scan no 7511 cid35.00 polarity:+

Data file D1d-3\_3.mgf

Click mouse within plot area to zoom in by factor of two about that point

Or,   to  Da Label all possible matches  Label matches used for scoring Show Y-axis 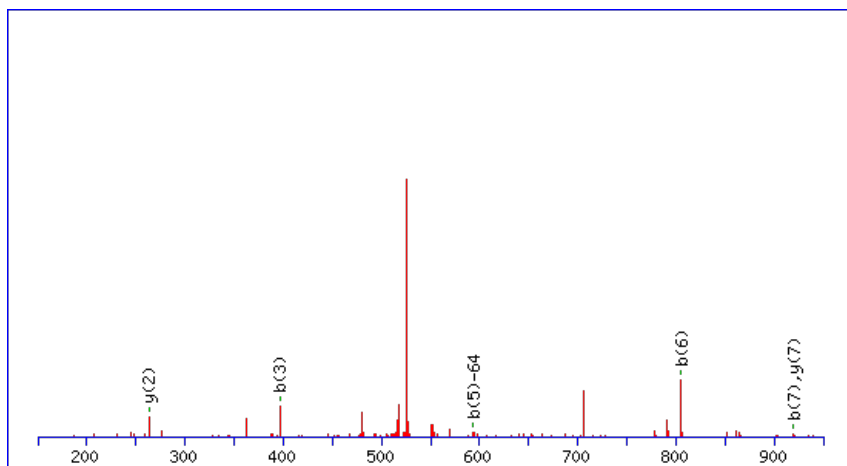Monoisotopic mass of neutral peptide **Mr(calc)**: 1066.5312**Fixed modifications:** Carbamidomethyl (C) (apply to specified residues or termini only)**Variable modifications:****M1** : Oxidation (M), with neutral losses 0.0000 (shown in table), 63.9983**Ions Score:** 20 **Expect:** 0.035**Matches** : 6/80 fragment ions using 8 most intense peaks ([help](#))

| # | b               | b <sup>++</sup> | b*       | b <sup>*++</sup> | Seq. | y               | y <sup>++</sup> | y*       | y <sup>*++</sup> | # |
|---|-----------------|-----------------|----------|------------------|------|-----------------|-----------------|----------|------------------|---|
| 1 | 149.0397        | 75.0235         |          |                  | M    |                 |                 |          |                  | 8 |
| 2 | 265.0767        | 133.0420        | 247.0531 | 124.0302         | N    | <b>919.5060</b> | 460.2566        | 901.4824 | 451.2448         | 7 |
| 3 | <b>397.1142</b> | 199.0608        | 379.0906 | 190.0490         | M    | 803.4690        | 402.2381        | 785.4454 | 393.2264         | 6 |
| 4 | 527.2033        | 264.1053        | 509.1797 | 255.0935         | K    | 671.4315        | 336.2194        | 653.4079 | 327.2076         | 5 |
| 5 | 657.2923        | 329.1498        | 639.2687 | 320.1380         | K    | 541.3425        | 271.1749        | 523.3189 | 262.1631         | 4 |
| 6 | <b>805.3577</b> | 403.1825        | 787.3342 | 394.1707         | F    | 411.2534        | 206.1303        | 393.2298 | 197.1186         | 3 |
| 7 | <b>919.4388</b> | 460.2231        | 901.4153 | 451.2113         | L    | <b>263.1880</b> | 132.0976        | 245.1644 | 123.0858         | 2 |
| 8 |                 |                 |          |                  | K    | 149.1069        | 75.0571         | 131.0833 | 66.0453          | 1 |

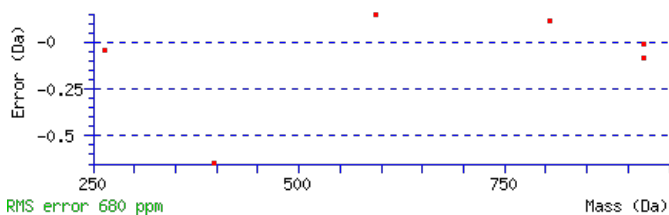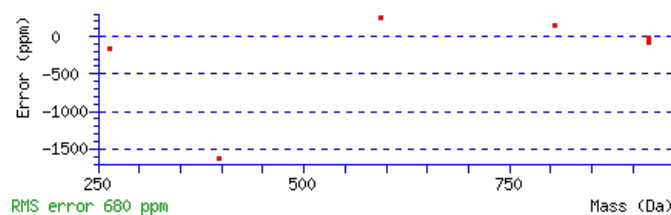NCBI **BLAST** search of [MNMKKFLK](#)

(Parameters: blastp, nr protein database, expect=20000, no filter, PAM30)

Other BLAST [web gateways](#)**All matches to this query**

| Score | Mr(calc)  | Delta   | Sequence                 | Site Analysis       |
|-------|-----------|---------|--------------------------|---------------------|
| 19.7  | 1066.5312 | -0.0018 | <a href="#">MNMKKFLK</a> | Oxidation M1 74.03% |



**AT1G18160.1**

|      |           |         |                            |                     |
|------|-----------|---------|----------------------------|---------------------|
| 15.2 | 1066.5312 | -0.0018 | <a href="#">MNMKKFLK</a>   | Oxidation M3 25.97% |
| 7.5  | 1066.5325 | -0.0032 | <a href="#">VDFGYSKLK</a>  |                     |
| 3.3  | 1066.5325 | -0.0032 | <a href="#">GTISSGFLFK</a> |                     |
| 3.0  | 1066.5303 | -0.0010 | <a href="#">ESEIHSLIK</a>  |                     |
| 3.0  | 1066.5303 | -0.0009 | <a href="#">LVGANPDEIK</a> |                     |
| 3.0  | 1066.5303 | -0.0010 | <a href="#">NPNEVEILK</a>  |                     |
| 3.0  | 1066.5325 | -0.0032 | <a href="#">QSLFGYTLK</a>  |                     |
| 3.0  | 1066.5303 | -0.0009 | <a href="#">TDELVHTLK</a>  |                     |
| 2.9  | 1066.5325 | -0.0032 | <a href="#">TKKEFFEK</a>   |                     |

**Mascot:** <http://www.matrixscience.com/>

## Peptide View

MS/MS Fragmentation of **AMGTSYTETELNR**

Found in **AT1G18210.1** in **TAIR\_Arabidopsis**, Symbols: | calcium-binding protein, putative | chr1:6268266-6268778 REVERSE

Match to Query 5940: 1471.658536 from(736.836544,2+) index(2936)

Title: Elution from: 29.626 to 29.626 scan no 3658 cid35.00 polarity:+

Data file 0-3\_2.mgf

Click mouse within plot area to zoom in by factor of two about that point

Or,   to  Da

Label all possible matches  Label matches used for scoring

Show Y-axis

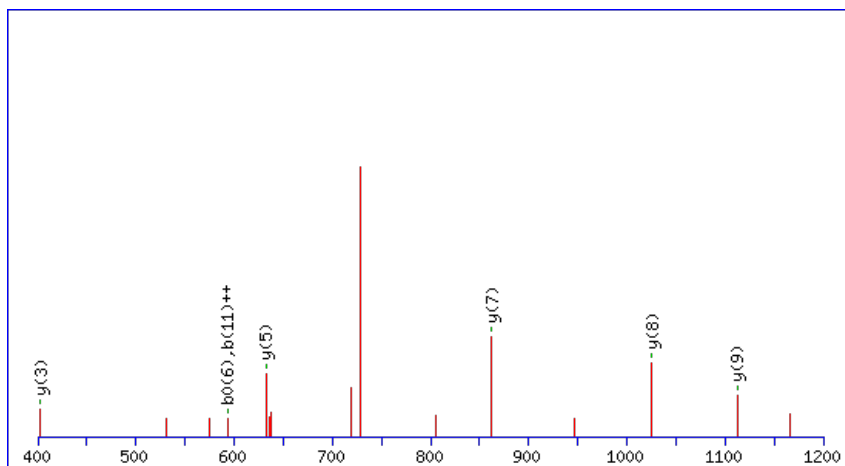

Monoisotopic mass of neutral peptide  $M_r(\text{calc})$ : 1471.6613

Fixed modifications: Carbamidomethyl (C) (apply to specified residues or termini only)

Ions Score: 38 Expect: 0.00023

Matches : 7/110 fragment ions using 8 most intense peaks ([help](#))

| #  | b         | b <sup>++</sup> | b <sup>*</sup> | b <sup>*++</sup> | b <sup>0</sup>  | b <sup>0++</sup> | Seq. | y                | y <sup>++</sup> | y <sup>*</sup> | y <sup>*++</sup> | y <sup>0</sup> | y <sup>0++</sup> | #  |
|----|-----------|-----------------|----------------|------------------|-----------------|------------------|------|------------------|-----------------|----------------|------------------|----------------|------------------|----|
| 1  | 72.0444   | 36.5258         |                |                  |                 |                  | A    |                  |                 |                |                  |                |                  | 13 |
| 2  | 203.0849  | 102.0461        |                |                  |                 |                  | M    | 1401.6315        | 701.3194        | 1384.6049      | 692.8061         | 1383.6209      | 692.3141         | 12 |
| 3  | 260.1063  | 130.5568        |                |                  |                 |                  | G    | 1270.5910        | 635.7991        | 1253.5644      | 627.2859         | 1252.5804      | 626.7938         | 11 |
| 4  | 361.1540  | 181.0806        |                |                  | 343.1435        | 172.0754         | T    | 1213.5695        | 607.2884        | 1196.5430      | 598.7751         | 1195.5590      | 598.2831         | 10 |
| 5  | 448.1860  | 224.5967        |                |                  | 430.1755        | 215.5914         | S    | <b>1112.5218</b> | 556.7646        | 1095.4953      | 548.2513         | 1094.5113      | 547.7593         | 9  |
| 6  | 611.2494  | 306.1283        |                |                  | <b>593.2388</b> | 297.1230         | Y    | <b>1025.4898</b> | 513.2485        | 1008.4633      | 504.7353         | 1007.4793      | 504.2433         | 8  |
| 7  | 712.2971  | 356.6522        |                |                  | 694.2865        | 347.6469         | T    | <b>862.4265</b>  | 431.7169        | 845.3999       | 423.2036         | 844.4159       | 422.7116         | 7  |
| 8  | 841.3396  | 421.1735        |                |                  | 823.3291        | 412.1682         | E    | 761.3788         | 381.1930        | 744.3523       | 372.6798         | 743.3682       | 372.1878         | 6  |
| 9  | 942.3873  | 471.6973        |                |                  | 924.3768        | 462.6920         | T    | <b>632.3362</b>  | 316.6717        | 615.3097       | 308.1585         | 614.3256       | 307.6665         | 5  |
| 10 | 1071.4299 | 536.2186        |                |                  | 1053.4194       | 527.2133         | E    | 531.2885         | 266.1479        | 514.2620       | 257.6346         | 513.2780       | 257.1426         | 4  |
| 11 | 1184.5140 | <b>592.7606</b> |                |                  | 1166.5034       | 583.7553         | L    | <b>402.2459</b>  | 201.6266        | 385.2194       | 193.1133         |                |                  | 3  |
| 12 | 1298.5569 | 649.7821        | 1281.5304      | 641.2688         | 1280.5463       | 640.7768         | N    | 289.1619         | 145.0846        | 272.1353       | 136.5713         |                |                  | 2  |
| 13 |           |                 |                |                  |                 |                  | R    | 175.1190         | 88.0631         | 158.0924       | 79.5498          |                |                  | 1  |

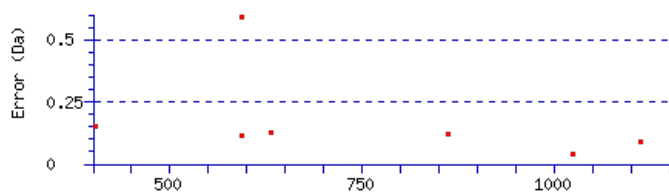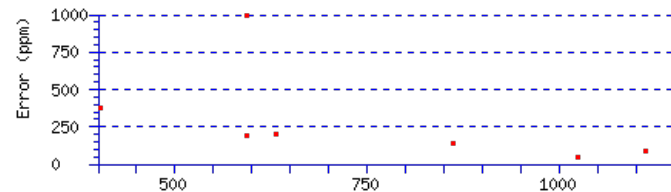

NCBI BLAST search of **AMGTSYTETELNR**

(Parameters: blastp, nr protein database, expect=20000, no filter, PAM30)

Other BLAST [web gateways](#)

AT1G18210.1

All matches to this query

| Score | Mr(calc)  | Delta   | Sequence                      |
|-------|-----------|---------|-------------------------------|
| 38.2  | 1471.6613 | -0.0027 | <a href="#">AMGTSYTETELNR</a> |

Mascot: <http://www.matrixscience.com/>

## Peptide View

MS/MS Fragmentation of **AAESAAEEAMAMLLK**

Found in **AT1G18265.1** in **TAIR\_Arabidopsis**, Symbols: | contains InterPro domain Protein of unknown function DUF593 (InterPro:IPR007656) | chr1.6282331-6283173 REVERSE

Match to Query 6883: 1566.687716 from(784.351134,2+) index(8896)

Title: Elution from: 80.415 to 80.415 scan no 12077 cid35.00 polarity:+

Data file 0-2\_2.mgf

Click mouse within plot area to zoom in by factor of two about that point

Or,   to  Da

Label all possible matches  Label matches used for scoring

Show Y-axis

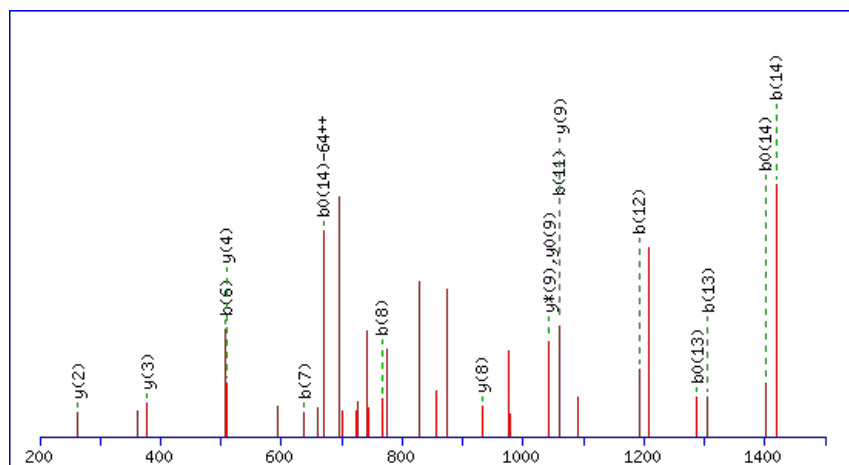

Monoisotopic mass of neutral peptide  $M_r(\text{calc})$ : 1566.6846

Fixed modifications: Carbamidomethyl (C) (apply to specified residues or termini only)

Variable modifications:

M10 : Oxidation (M), with neutral losses 0.0000 (shown in table), 63.9983

Ions Score: 35 Expect: 0.0023

Matches : 17/192 fragment ions using 30 most intense peaks ([help](#))

| #  | b                | b <sup>++</sup> | b <sup>0</sup>   | b <sup>0++</sup> | Seq. | y                | y <sup>++</sup> | y <sup>*</sup>   | y <sup>*++</sup> | y <sup>0</sup>   | y <sup>0++</sup> | #  |
|----|------------------|-----------------|------------------|------------------|------|------------------|-----------------|------------------|------------------|------------------|------------------|----|
| 1  | 73.0414          | 37.0244         |                  |                  | A    |                  |                 |                  |                  |                  |                  | 15 |
| 2  | 145.0756         | 73.0414         |                  |                  | A    | 1495.6577        | 748.3325        | 1477.6341        | 739.3207         | 1477.6472        | 739.3272         | 14 |
| 3  | 275.1152         | 138.0612        | 257.1046         | 129.0560         | E    | 1423.6236        | 712.3154        | 1405.6000        | 703.3036         | 1405.6130        | 703.3101         | 13 |
| 4  | 363.1443         | 182.0758        | 345.1337         | 173.0705         | S    | 1293.5839        | 647.2956        | 1275.5604        | 638.2838         | 1275.5734        | 638.2903         | 12 |
| 5  | 435.1784         | 218.0928        | 417.1678         | 209.0876         | A    | 1205.5549        | 603.2811        | 1187.5313        | 594.2693         | 1187.5443        | 594.2758         | 11 |
| 6  | <b>507.2126</b>  | 254.1099        | 489.2020         | 245.1046         | A    | 1133.5207        | 567.2640        | 1115.4971        | 558.2522         | 1115.5102        | 558.2587         | 10 |
| 7  | <b>637.2522</b>  | 319.1297        | 619.2416         | 310.1245         | E    | <b>1061.4866</b> | 531.2469        | <b>1043.4630</b> | 522.2351         | <b>1043.4760</b> | 522.2416         | 9  |
| 8  | <b>767.2918</b>  | 384.1495        | 749.2813         | 375.1443         | E    | <b>931.4470</b>  | 466.2271        | 913.4234         | 457.2153         | 913.4364         | 457.2218         | 8  |
| 9  | 839.3260         | 420.1666        | 821.3154         | 411.1613         | A    | 801.4073         | 401.2073        | 783.3837         | 392.1955         |                  |                  | 7  |
| 10 | 987.3584         | 494.1828        | 969.3478         | 485.1776         | M    | 729.3732         | 365.1902        | 711.3496         | 356.1784         |                  |                  | 6  |
| 11 | <b>1059.3926</b> | 530.1999        | 1041.3820        | 521.1946         | A    | 581.3407         | 291.1740        | 563.3172         | 282.1622         |                  |                  | 5  |
| 12 | <b>1191.4301</b> | 596.2187        | 1173.4195        | 587.2134         | M    | <b>509.3066</b>  | 255.1569        | 491.2830         | 246.1451         |                  |                  | 4  |
| 13 | <b>1305.5112</b> | 653.2592        | <b>1287.5006</b> | 644.2539         | L    | <b>377.2691</b>  | 189.1382        | 359.2455         | 180.1264         |                  |                  | 3  |
| 14 | <b>1419.5923</b> | 710.2998        | <b>1401.5817</b> | 701.2945         | L    | <b>263.1880</b>  | 132.0976        | 245.1644         | 123.0858         |                  |                  | 2  |
| 15 |                  |                 |                  |                  | K    | 149.1069         | 75.0571         | 131.0833         | 66.0453          |                  |                  | 1  |

# AT1G18265.1

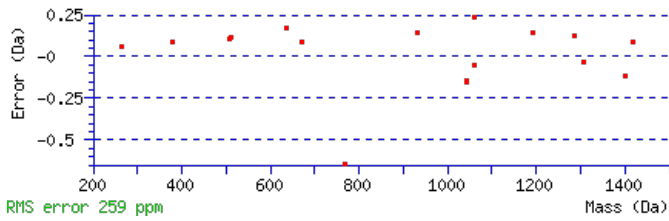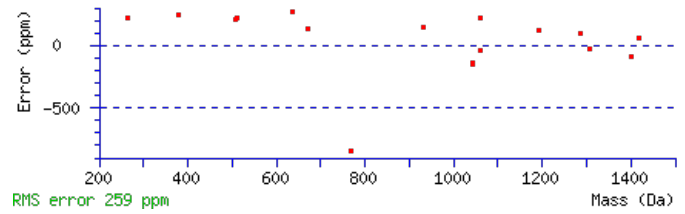

NCBI **BLAST** search of [AAESA AEEAMAMLLK](#)

(Parameters: blastp, nr protein database, expect=20000, no filter, PAM30)

Other BLAST [web gateways](#)

## All matches to this query

| Score | Mr(calc)  | Delta   | Sequence                         | Site Analysis        |
|-------|-----------|---------|----------------------------------|----------------------|
| 35.3  | 1566.6846 | 0.0031  | <a href="#">AAESA AEEAMAMLLK</a> | Oxidation M10 69.17% |
| 31.8  | 1566.6846 | 0.0031  | <a href="#">AAESA AEEAMAMLLK</a> | Oxidation M12 30.83% |
| 15.6  | 1566.6920 | -0.0043 | <a href="#">MLEDARNEIDSLK</a>    |                      |
| 14.4  | 1566.6855 | 0.0022  | <a href="#">MLKIHMMEDMIK</a>     |                      |
| 12.4  | 1566.6855 | 0.0022  | <a href="#">MLKIHMMEDMIK</a>     |                      |
| 12.4  | 1566.6855 | 0.0022  | <a href="#">MLKIHMMEDMIK</a>     |                      |
| 11.7  | 1566.6846 | 0.0031  | <a href="#">SEGDLAVMKPETMK</a>   |                      |
| 10.4  | 1566.6866 | 0.0012  | <a href="#">MANLGGGAEAHARFK</a>  |                      |
| 7.9   | 1566.6920 | -0.0043 | <a href="#">TSLAKEDSLPMGER</a>   |                      |
| 7.8   | 1566.6899 | -0.0022 | <a href="#">MLRDAGAKEVHMR</a>    |                      |

Mascot: <http://www.matrixscience.com/>

## Peptide View

### MS/MS Fragmentation of **GKGMLFPK**

Found in **AT1G18300.1** in **TAIR\_Arabidopsis**, Symbols: ATNUDT4 | ATNUDT4 (Arabidopsis thaliana Nudix hydrolase homolog 4); hydrolase | chr1.6299834-6300792 FORWARD

Match to Query 1525: 902.456776 from(452.235664,2+) index(5393)

Title: Elution from: 47.686 to 47.686 scan no 6866 cid35.00 polarity:+

Data file D6h-3\_3.mgf

Click mouse within plot area to zoom in by factor of two about that point

Or,  to  Da

Label all possible matches  Label matches used for scoring

Show Y-axis

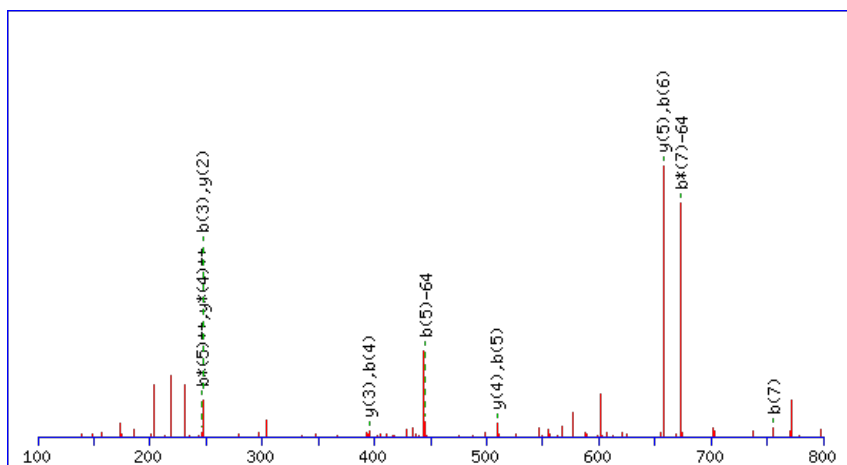

Monoisotopic mass of neutral peptide  $M_r(\text{calc})$ : 902.4544

Fixed modifications: Carbamidomethyl (C) (apply to specified residues or termini only)

Variable modifications:

M4 : Oxidation (M), with neutral losses 0.0000 (shown in table), 63.9983

Ions Score: 24 Expect: 0.035

Matches : 13/82 fragment ions using 21 most intense peaks ([help](#))

| # | b               | b <sup>++</sup> | b*       | b <sup>*++</sup> | Seq. | y               | y <sup>++</sup> | y*       | y <sup>*++</sup> | # |
|---|-----------------|-----------------|----------|------------------|------|-----------------|-----------------|----------|------------------|---|
| 1 | 59.0258         | 30.0165         |          |                  | G    |                 |                 |          |                  | 8 |
| 2 | 189.1148        | 95.0610         | 171.0912 | 86.0492          | K    | 845.4432        | 423.2252        | 827.4196 | 414.2134         | 7 |
| 3 | <b>247.1333</b> | 124.0703        | 229.1097 | 115.0585         | G    | 715.3542        | 358.1807        | 697.3306 | 349.1689         | 6 |
| 4 | <b>395.1657</b> | 198.0865        | 377.1422 | 189.0747         | M    | <b>657.3357</b> | 329.1715        | 639.3121 | 320.1597         | 5 |
| 5 | <b>509.2468</b> | 255.1271        | 491.2233 | <b>246.1153</b>  | L    | <b>509.3032</b> | 255.1552        | 491.2796 | <b>246.1435</b>  | 4 |
| 6 | <b>657.3123</b> | 329.1598        | 639.2887 | 320.1480         | F    | <b>395.2221</b> | 198.1147        | 377.1985 | 189.1029         | 3 |
| 7 | <b>755.3621</b> | 378.1847        | 737.3385 | 369.1729         | P    | <b>247.1567</b> | 124.0820        | 229.1331 | 115.0702         | 2 |
| 8 |                 |                 |          |                  | K    | 149.1069        | 75.0571         | 131.0833 | 66.0453          | 1 |

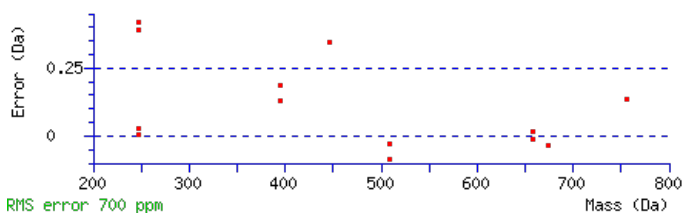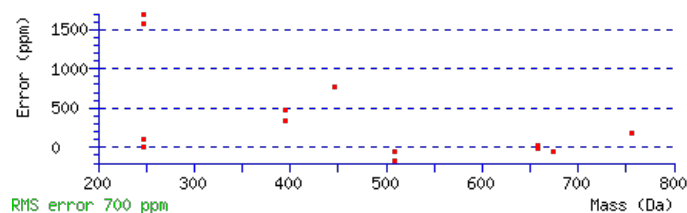

NCBI BLAST search of **GKGMLFPK**

(Parameters: blastp, nr protein database, expect=20000, no filter, PAM30)

Other BLAST [web gateways](#)

All matches to this query

| Score | $M_r(\text{calc})$ | Delta | Sequence |
|-------|--------------------|-------|----------|
|       |                    |       |          |

**AT1G18300.1**

|      |          |         |                          |
|------|----------|---------|--------------------------|
| 24.0 | 902.4544 | 0.0024  | <a href="#">GKGMLFPK</a> |
| 17.6 | 902.4591 | -0.0024 | <a href="#">IDYLKDK</a>  |
| 9.7  | 902.4591 | -0.0024 | <a href="#">EATSVLFK</a> |
| 9.1  | 902.4591 | -0.0024 | <a href="#">VKYELDK</a>  |
| 8.4  | 902.4548 | 0.0019  | <a href="#">NLARCKK</a>  |
| 6.9  | 902.4591 | -0.0024 | <a href="#">DALTSFIK</a> |
| 6.4  | 902.4591 | -0.0024 | <a href="#">EDYLVKK</a>  |
| 6.0  | 902.4544 | 0.0024  | <a href="#">KYGGLMPK</a> |
| 5.1  | 902.4569 | -0.0001 | <a href="#">TVSTKTEK</a> |
| 5.0  | 902.4548 | 0.0019  | <a href="#">KAVQRCK</a>  |

**Mascot:** <http://www.matrixscience.com/>

**Peptide View**MS/MS Fragmentation of **RSSSVNMKK**Found in **AT1G18370.1** in **TAIR\_Arabidopsis**, Symbols: HIK | HIK (HINKEL); microtubule motor | chr1:6319725-6323813 REVERSE

Match to Query 3013: 1066.501554 from(534.258053,2+) index(1580)

Title: Elution from: 20.386 to 20.386 scan no 2092 cid35.00 polarity:+

Data file D6h-3\_2.mgf

Click mouse within plot area to zoom in by factor of two about that point

Or,   to  Da Label all possible matches  Label matches used for scoring Show Y-axis 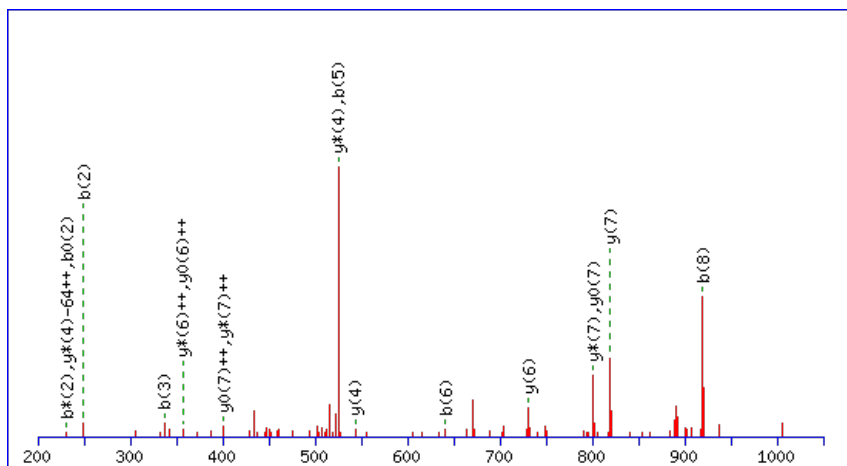Monoisotopic mass of neutral peptide **Mr(calc)**: 1066.5000**Fixed modifications:** Carbamidomethyl (C) (apply to specified residues or termini only)**Variable modifications:****M7** : Oxidation (M), with neutral losses 0.0000 (shown in table), 63.9983**Ions Score:** 29 **Expect:** 0.0073**Matches** : 18/126 fragment ions using 24 most intense peaks ([help](#))

| # | b               | b <sup>++</sup> | b <sup>*</sup>  | b <sup>*++</sup> | b <sup>0</sup>  | b <sup>0++</sup> | Seq. | y               | y <sup>++</sup> | y <sup>*</sup>  | y <sup>*++</sup> | y <sup>0</sup>  | y <sup>0++</sup> | # |
|---|-----------------|-----------------|-----------------|------------------|-----------------|------------------|------|-----------------|-----------------|-----------------|------------------|-----------------|------------------|---|
| 1 | 161.0965        | 81.0519         | 143.0729        | 72.0401          |                 |                  | R    |                 |                 |                 |                  |                 |                  | 9 |
| 2 | <b>249.1256</b> | 125.0664        | <b>231.1020</b> | 116.0546         | <b>231.1150</b> | 116.0612         | S    | 907.4180        | 454.2126        | 889.3944        | 445.2008         | 889.4074        | 445.2073         | 8 |
| 3 | <b>337.1547</b> | 169.0810        | 319.1311        | 160.0692         | 319.1441        | 160.0757         | S    | <b>819.3889</b> | 410.1981        | <b>801.3653</b> | <b>401.1863</b>  | <b>801.3783</b> | <b>401.1928</b>  | 7 |
| 4 | 425.1837        | 213.0955        | 407.1601        | 204.0837         | 407.1732        | 204.0902         | S    | <b>731.3599</b> | 366.1836        | 713.3363        | <b>357.1718</b>  | 713.3493        | <b>357.1783</b>  | 6 |
| 5 | <b>525.2492</b> | 263.1282        | 507.2256        | 254.1164         | 507.2386        | 254.1229         | V    | 643.3308        | 322.1690        | 625.3072        | 313.1572         |                 |                  | 5 |
| 6 | <b>641.2862</b> | 321.1467        | 623.2626        | 312.1349         | 623.2756        | 312.1414         | N    | <b>543.2653</b> | 272.1363        | <b>525.2418</b> | 263.1245         |                 |                  | 4 |
| 7 | 789.3186        | 395.1629        | 771.2950        | 386.1511         | 771.3080        | 386.1577         | M    | 427.2283        | 214.1178        | 409.2048        | 205.1060         |                 |                  | 3 |
| 8 | <b>919.4076</b> | 460.2075        | 901.3840        | 451.1957         | 901.3971        | 451.2022         | K    | 279.1959        | 140.1016        | 261.1723        | 131.0898         |                 |                  | 2 |
| 9 |                 |                 |                 |                  |                 |                  | K    | 149.1069        | 75.0571         | 131.0833        | 66.0453          |                 |                  | 1 |

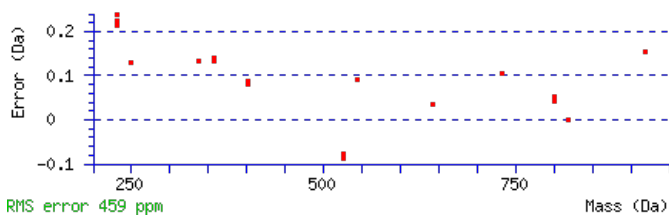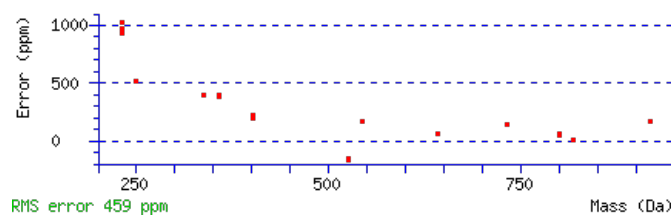NCBI **BLAST** search of **RSSSVNMKK**

(Parameters: blastp, nr protein database, expect=20000, no filter, PAM30)

Other BLAST [web gateways](#)**All matches to this query**

| Score | Mr(calc) | Delta | Sequence |
|-------|----------|-------|----------|
|-------|----------|-------|----------|



## AT1G18370.1

|      |           |         |                           |
|------|-----------|---------|---------------------------|
| 28.9 | 1066.5000 | 0.0016  | <a href="#">RSSSVNMKK</a> |
| 23.8 | 1066.4988 | 0.0027  | <a href="#">RTYNWSVK</a>  |
| 12.1 | 1066.4984 | 0.0032  | <a href="#">TWVDYFVK</a>  |
| 11.6 | 1066.5042 | -0.0027 | <a href="#">EEDEIVPVK</a> |
| 7.2  | 1066.5044 | -0.0029 | <a href="#">MFKGNKWK</a>  |
| 6.5  | 1066.5022 | -0.0006 | <a href="#">LSCSVRGFK</a> |
| 6.2  | 1066.5017 | -0.0002 | <a href="#">GYMFALEVK</a> |
| 2.2  | 1066.5042 | -0.0027 | <a href="#">DEEIVPVK</a>  |
| 2.2  | 1066.5000 | 0.0016  | <a href="#">SRAMTKNTK</a> |
| 2.1  | 1066.5018 | -0.0002 | <a href="#">FYNIEMLK</a>  |

Mascot: <http://www.matrixscience.com/>

**Peptide View**MS/MS Fragmentation of **KDKEEDMVGIEK**Found in **AT1G18410.1** in **TAIR\_Arabidopsis**, Symbols: | kinesin motor protein-related | chr1:6336521-6342453 REVERSE

Match to Query 5913: 1419.694618 from(710.854585,2+) index(6255)

Title: Elution from: 54.059 to 54.059 scan no 7856 cid35.00 polarity:+

Data file D1d-3\_1.mgf

Click mouse within plot area to zoom in by factor of two about that point

Or,   to  Da Label all possible matches  Label matches used for scoring Show Y-axis 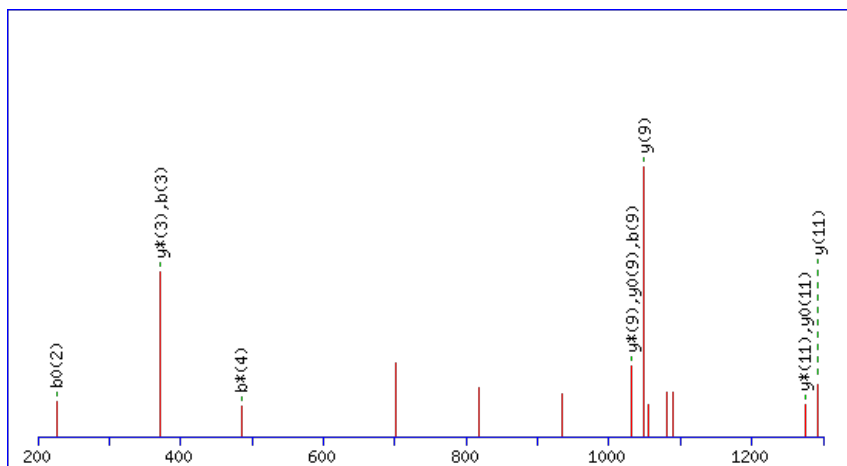**Monoisotopic mass of neutral peptide Mr(calc):** 1419.6915**Fixed modifications:** Carbamidomethyl (C) (apply to specified residues or termini only)**Ions Score:** 22 **Expect:** 0.018**Matches:** 12/128 fragment ions using 11 most intense peaks ([help](#))

| #  | b         | b <sup>++</sup> | b*        | b <sup>++</sup> * | b <sup>0</sup> | b <sup>0++</sup> | Seq.     | y         | y <sup>++</sup> | y*        | y <sup>++</sup> * | y <sup>0</sup> | y <sup>0++</sup> | #  |
|----|-----------|-----------------|-----------|-------------------|----------------|------------------|----------|-----------|-----------------|-----------|-------------------|----------------|------------------|----|
| 1  | 129.1022  | 65.0548         | 112.0757  | 56.5415           |                |                  | <b>K</b> |           |                 |           |                   |                |                  | 12 |
| 2  | 244.1292  | 122.5682        | 227.1026  | 114.0550          | 226.1186       | 113.5629         | <b>D</b> | 1292.6039 | 646.8056        | 1275.5773 | 638.2923          | 1274.5933      | 637.8003         | 11 |
| 3  | 372.2241  | 186.6157        | 355.1976  | 178.1024          | 354.2136       | 177.6104         | <b>K</b> | 1177.5769 | 589.2921        | 1160.5504 | 580.7788          | 1159.5664      | 580.2868         | 10 |
| 4  | 501.2667  | 251.1370        | 484.2402  | 242.6237          | 483.2562       | 242.1317         | <b>E</b> | 1049.4820 | 525.2446        | 1032.4554 | 516.7313          | 1031.4714      | 516.2393         | 9  |
| 5  | 630.3093  | 315.6583        | 613.2828  | 307.1450          | 612.2988       | 306.6530         | <b>E</b> | 920.4394  | 460.7233        | 903.4128  | 452.2100          | 902.4288       | 451.7180         | 8  |
| 6  | 745.3363  | 373.1718        | 728.3097  | 364.6585          | 727.3257       | 364.1665         | <b>D</b> | 791.3968  | 396.2020        | 774.3702  | 387.6887          | 773.3862       | 387.1967         | 7  |
| 7  | 876.3768  | 438.6920        | 859.3502  | 430.1787          | 858.3662       | 429.6867         | <b>M</b> | 676.3698  | 338.6886        | 659.3433  | 330.1753          | 658.3593       | 329.6833         | 6  |
| 8  | 975.4452  | 488.2262        | 958.4186  | 479.7130          | 957.4346       | 479.2209         | <b>V</b> | 545.3293  | 273.1683        | 528.3028  | 264.6550          | 527.3188       | 264.1630         | 5  |
| 9  | 1032.4666 | 516.7370        | 1015.4401 | 508.2237          | 1014.4561      | 507.7317         | <b>G</b> | 446.2609  | 223.6341        | 429.2344  | 215.1208          | 428.2504       | 214.6288         | 4  |
| 10 | 1145.5507 | 573.2790        | 1128.5242 | 564.7657          | 1127.5401      | 564.2737         | <b>I</b> | 389.2395  | 195.1234        | 372.2129  | 186.6101          | 371.2289       | 186.1181         | 3  |
| 11 | 1274.5933 | 637.8003        | 1257.5667 | 629.2870          | 1256.5827      | 628.7950         | <b>E</b> | 276.1554  | 138.5813        | 259.1288  | 130.0681          | 258.1448       | 129.5761         | 2  |
| 12 |           |                 |           |                   |                |                  | <b>K</b> | 147.1128  | 74.0600         | 130.0863  | 65.5468           |                |                  | 1  |

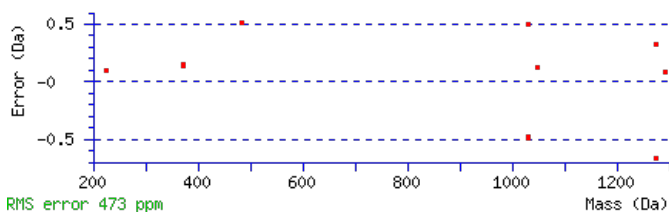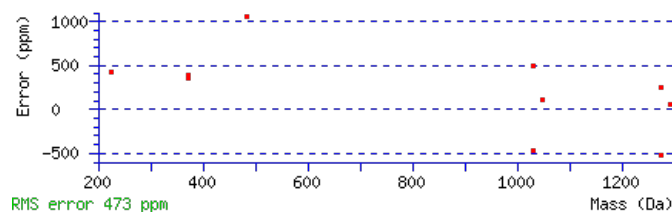NCBI **BLAST** search of **KDKEEDMVGIEK**

(Parameters: blastp, nr protein database, expect=20000, no filter, PAM30)

Other BLAST [web gateways](#)**All matches to this query**

## AT1G18410.1

| Score | Mr(calc)  | Delta   | Sequence                       |
|-------|-----------|---------|--------------------------------|
| 22.0  | 1419.6915 | 0.0031  | <a href="#">KDKKEEDMVGIEK</a>  |
| 17.8  | 1419.6915 | 0.0031  | <a href="#">LEELSSDCLVQK</a>   |
| 2.9   | 1419.6954 | -0.0007 | <a href="#">VNASSQVEERSK</a>   |
| 1.9   | 1419.6915 | 0.0031  | <a href="#">MLEDLISVODNK</a>   |
| 0.2   | 1419.6915 | 0.0031  | <a href="#">MAGIEDTANLEK</a>   |
| 0.2   | 1419.6915 | 0.0031  | <a href="#">MAPGILTELAGESK</a> |

Mascot: <http://www.matrixscience.com/>

**Peptide View**MS/MS Fragmentation of **SIEAVPELK**Found in **AT1G18540.1** in **TAIR\_Arabidopsis**, Symbols: | 60S ribosomal protein L6 (RPL6A) | chr1:6377441-6378541 REVERSE

Match to Query 2310: 984.546804 from(493.280678,2+) index(3611)

Title: Elution from: 34.950 to 34.950 scan no 4530 cid35.00 polarity:+

Data file D6h-1\_3.mgf

Click mouse within plot area to zoom in by factor of two about that point

Or,   to  Da Label all possible matches  Label matches used for scoring Show Y-axis 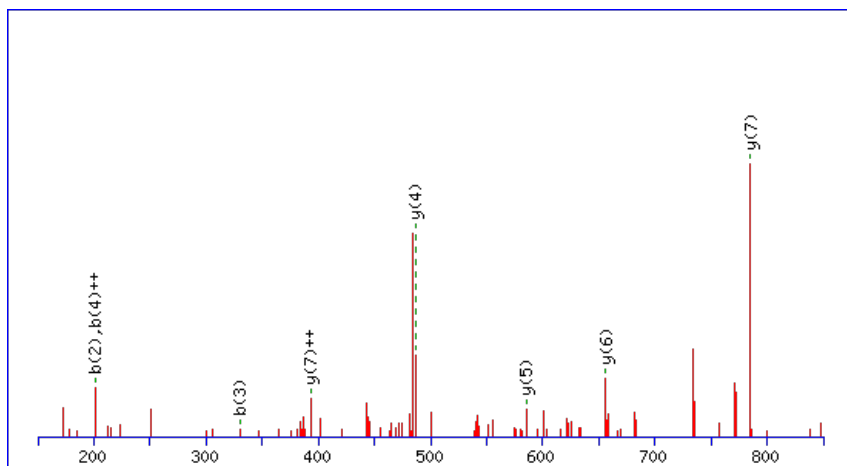Monoisotopic mass of neutral peptide **Mr(calc)**: 984.5491**Fixed modifications**: Carbamidomethyl (C) (apply to specified residues or termini only)**Ions Score**: 21 **Expect**: 0.016**Matches**: 8/76 fragment ions using 14 most intense peaks ([help](#))

| # | b               | b <sup>++</sup> | b <sup>0</sup> | b <sup>0++</sup> | Seq. | y               | y <sup>++</sup> | y*       | y <sup>*++</sup> | y <sup>0</sup> | y <sup>0++</sup> | # |
|---|-----------------|-----------------|----------------|------------------|------|-----------------|-----------------|----------|------------------|----------------|------------------|---|
| 1 | 88.0393         | 44.5233         | 70.0287        | 35.5180          | S    |                 |                 |          |                  |                |                  | 9 |
| 2 | <b>201.1234</b> | 101.0653        | 183.1128       | 92.0600          | I    | 898.5244        | 449.7658        | 881.4979 | 441.2526         | 880.5138       | 440.7606         | 8 |
| 3 | <b>330.1660</b> | 165.5866        | 312.1554       | 156.5813         | E    | <b>785.4403</b> | <b>393.2238</b> | 768.4138 | 384.7105         | 767.4298       | 384.2185         | 7 |
| 4 | 401.2031        | <b>201.1052</b> | 383.1925       | 192.0999         | A    | <b>656.3978</b> | 328.7025        | 639.3712 | 320.1892         | 638.3872       | 319.6972         | 6 |
| 5 | 500.2715        | 250.6394        | 482.2609       | 241.6341         | V    | <b>585.3606</b> | 293.1840        | 568.3341 | 284.6707         | 567.3501       | 284.1787         | 5 |
| 6 | 597.3243        | 299.1658        | 579.3137       | 290.1605         | P    | <b>486.2922</b> | 243.6498        | 469.2657 | 235.1365         | 468.2817       | 234.6445         | 4 |
| 7 | 726.3668        | 363.6871        | 708.3563       | 354.6818         | E    | 389.2395        | 195.1234        | 372.2129 | 186.6101         | 371.2289       | 186.1181         | 3 |
| 8 | 839.4509        | 420.2291        | 821.4403       | 411.2238         | L    | 260.1969        | 130.6021        | 243.1703 | 122.0888         |                |                  | 2 |
| 9 |                 |                 |                |                  | K    | 147.1128        | 74.0600         | 130.0863 | 65.5468          |                |                  | 1 |

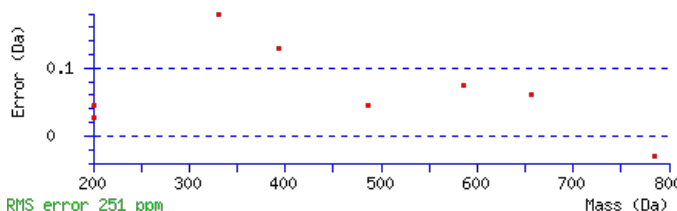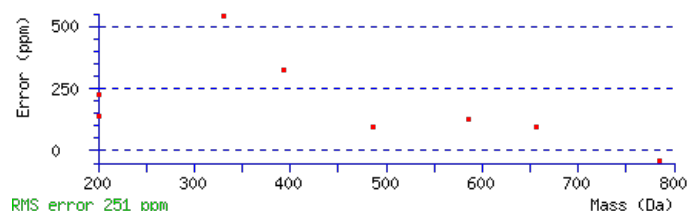NCBI **BLAST** search of [SIEAVPELK](#)

(Parameters: blastp, nr protein database, expect=20000, no filter, PAM30)

Other BLAST [web gateways](#)**All matches to this query**

| Score | Mr(calc) | Delta   | Sequence                  |
|-------|----------|---------|---------------------------|
| 20.8  | 984.5491 | -0.0023 | <a href="#">SIEAVPELK</a> |

# AT1G18540.1

|     |          |         |                            |
|-----|----------|---------|----------------------------|
| 0.2 | 984.5491 | -0.0023 | <a href="#">SLAEILDPK</a>  |
| 0.0 | 984.5464 | 0.0004  | <a href="#">AERAAAALGR</a> |

**Mascot:** <http://www.matrixscience.com/>

**Peptide View**MS/MS Fragmentation of **AVAEWTAR**Found in **AT1G18640.2** in **TAIR\_Arabidopsis**, Symbols: PSP | PSP (3-PHOSPHOSERINE PHOSPHATASE) | chr1:6416516-6418237 REVERSE

Match to Query 1596: 902.461252 from(452.237902,2+) index(1158)

Title: Elution from: 16.150 to 16.150 scan no 1567 cid35.00 polarity:+

Data file D12h-3\_3.mgf

Click mouse within plot area to zoom in by factor of two about that point

Or,   to  Da Label all possible matches  Label matches used for scoring Show Y-axis 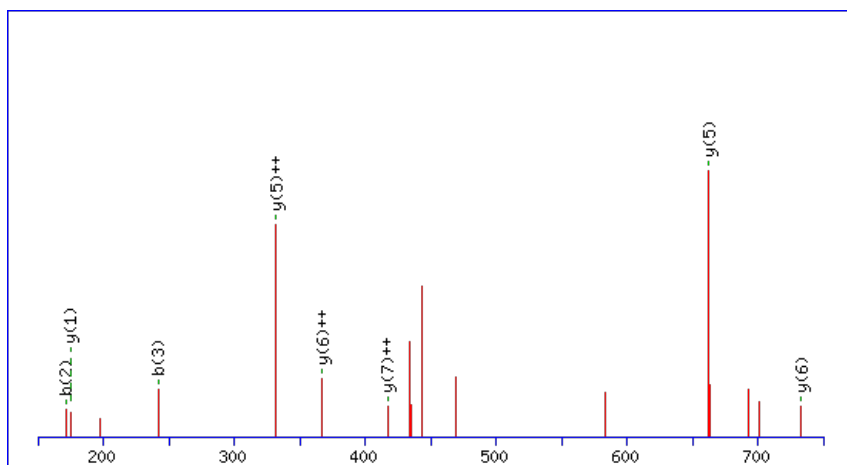Monoisotopic mass of neutral peptide  $M_r(\text{calc})$ : 902.4610

Fixed modifications: Carbamidomethyl (C) (apply to specified residues or termini only)

Ions Score: 20 Expect: 0.028

Matches : 8/60 fragment ions using 18 most intense peaks ([help](#))

| # | b               | b <sup>++</sup> | b <sup>0</sup> | b <sup>0++</sup> | Seq. | y               | y <sup>++</sup> | y*       | y <sup>*++</sup> | y <sup>0</sup> | y <sup>0++</sup> | # |
|---|-----------------|-----------------|----------------|------------------|------|-----------------|-----------------|----------|------------------|----------------|------------------|---|
| 1 | 72.0444         | 36.5258         |                |                  | A    |                 |                 |          |                  |                |                  | 8 |
| 2 | <b>171.1128</b> | 86.0600         |                |                  | V    | 832.4312        | <b>416.7192</b> | 815.4046 | 408.2060         | 814.4206       | 407.7139         | 7 |
| 3 | <b>242.1499</b> | 121.5786        |                |                  | A    | <b>733.3628</b> | <b>367.1850</b> | 716.3362 | 358.6717         | 715.3522       | 358.1797         | 6 |
| 4 | 371.1925        | 186.0999        | 353.1819       | 177.0946         | E    | <b>662.3257</b> | <b>331.6665</b> | 645.2991 | 323.1532         | 644.3151       | 322.6612         | 5 |
| 5 | 557.2718        | 279.1396        | 539.2613       | 270.1343         | W    | 533.2831        | 267.1452        | 516.2565 | 258.6319         | 515.2725       | 258.1399         | 4 |
| 6 | 658.3195        | 329.6634        | 640.3089       | 320.6581         | T    | 347.2037        | 174.1055        | 330.1772 | 165.5922         | 329.1932       | 165.1002         | 3 |
| 7 | 729.3566        | 365.1819        | 711.3461       | 356.1767         | A    | 246.1561        | 123.5817        | 229.1295 | 115.0684         |                |                  | 2 |
| 8 |                 |                 |                |                  | R    | <b>175.1190</b> | 88.0631         | 158.0924 | 79.5498          |                |                  | 1 |

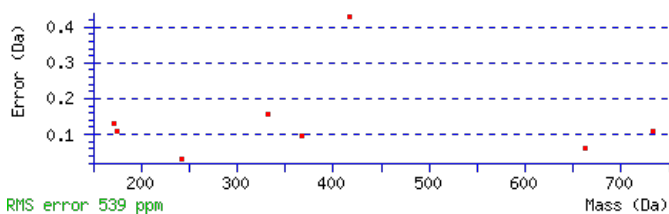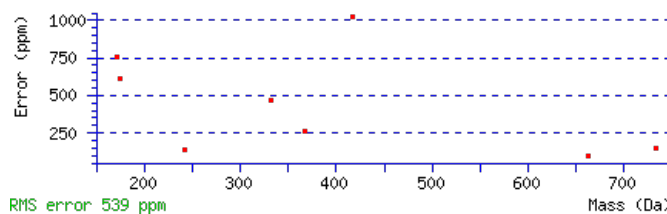NCBI BLAST search of [AVAEWTAR](#)

(Parameters: blastp, nr protein database, expect=20000, no filter, PAM30)

Other BLAST [web gateways](#)

All matches to this query

| Score | $M_r(\text{calc})$ | Delta  | Sequence                 |
|-------|--------------------|--------|--------------------------|
| 19.7  | 902.4610           | 0.0003 | <a href="#">AVAEWTAR</a> |

## AT1G18640.2

|     |          |        |                           |
|-----|----------|--------|---------------------------|
| 2.1 | 902.4610 | 0.0003 | <a href="#">QLTEWAR</a>   |
| 0.3 | 902.4610 | 0.0002 | <a href="#">HPPSSPPGK</a> |

**Mascot:** <http://www.matrixscience.com/>

## Peptide View

### MS/MS Fragmentation of **LYHLQVALGHFK**

Found in **AT1G19570.1** in **TAIR\_Arabidopsis**, Symbols: DHAR1 | DHAR1 (DEHYDROASCORBATE REDUCTASE); glutathione dehydrogenase (ascorbate) | chr1:6773453-6774404 REVERSE

Match to Query 5536: 1424.792316 from(357.205355,4+) index(5189)

Title: Elution from: 45.438 to 45.438 scan no 6501 cid35.00 polarity:+

Data file C7-2\_3.mgf

Click mouse within plot area to zoom in by factor of two about that point

Or,   to  Da

Label all possible matches  Label matches used for scoring

Show Y-axis

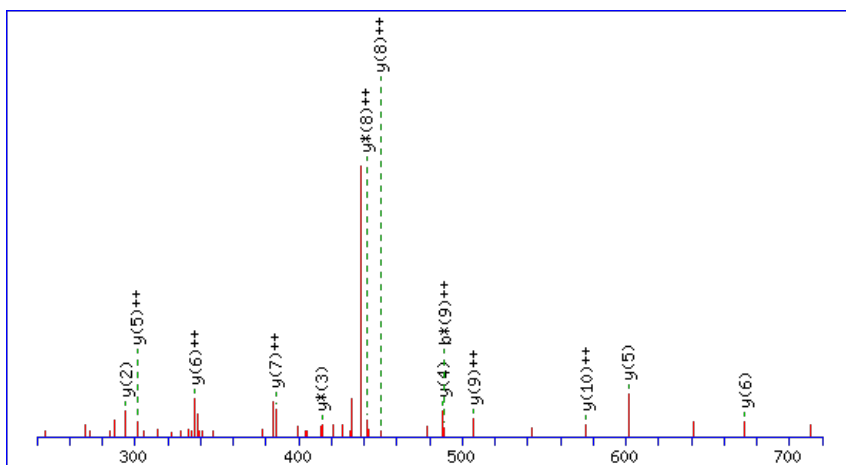

Monoisotopic mass of neutral peptide  $M_r(\text{calc})$ : 1424.7928

Fixed modifications: Carbamidomethyl (C) (apply to specified residues or termini only)

Ions Score: 33 Expect: 0.0014

Matches : 14/80 fragment ions using 23 most intense peaks ([help](#))

| #  | b         | b <sup>++</sup> | b*        | b <sup>*++</sup> | Seq. | y         | y <sup>++</sup> | y*        | y <sup>*++</sup> | #  |
|----|-----------|-----------------|-----------|------------------|------|-----------|-----------------|-----------|------------------|----|
| 1  | 114.0913  | 57.5493         |           |                  | L    |           |                 |           |                  | 12 |
| 2  | 277.1547  | 139.0810        |           |                  | Y    | 1312.7161 | 656.8617        | 1295.6895 | 648.3484         | 11 |
| 3  | 414.2136  | 207.6104        |           |                  | H    | 1149.6527 | 575.3300        | 1132.6262 | 566.8167         | 10 |
| 4  | 527.2976  | 264.1525        |           |                  | L    | 1012.5938 | 506.8006        | 995.5673  | 498.2873         | 9  |
| 5  | 655.3562  | 328.1817        | 638.3297  | 319.6685         | Q    | 899.5098  | 450.2585        | 882.4832  | 441.7452         | 8  |
| 6  | 754.4246  | 377.7160        | 737.3981  | 369.2027         | V    | 771.4512  | 386.2292        | 754.4246  | 377.7160         | 7  |
| 7  | 825.4618  | 413.2345        | 808.4352  | 404.7212         | A    | 672.3828  | 336.6950        | 655.3562  | 328.1817         | 6  |
| 8  | 938.5458  | 469.7765        | 921.5193  | 461.2633         | L    | 601.3457  | 301.1765        | 584.3191  | 292.6632         | 5  |
| 9  | 995.5673  | 498.2873        | 978.5407  | 489.7740         | G    | 488.2616  | 244.6344        | 471.2350  | 236.1212         | 4  |
| 10 | 1132.6262 | 566.8167        | 1115.5996 | 558.3035         | H    | 431.2401  | 216.1237        | 414.2136  | 207.6104         | 3  |
| 11 | 1279.6946 | 640.3509        | 1262.6681 | 631.8377         | F    | 294.1812  | 147.5942        | 277.1547  | 139.0810         | 2  |
| 12 |           |                 |           |                  | K    | 147.1128  | 74.0600         | 130.0863  | 65.5468          | 1  |

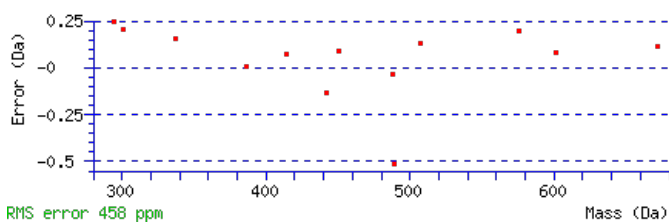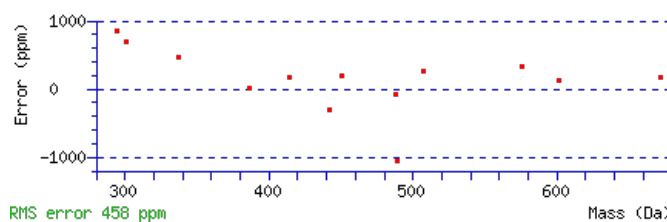

NCBI BLAST search of **LYHLQVALGHFK**

(Parameters: blastp, nr protein database, expect=20000, no filter, PAM30)

Other BLAST [web gateways](#)



AT1G19570.1

All matches to this query

| Score | Mr(calc)  | Delta   | Sequence                     |
|-------|-----------|---------|------------------------------|
| 32.6  | 1424.7928 | -0.0005 | <a href="#">LYHLQVALGHFK</a> |

Mascot: <http://www.matrixscience.com/>

**Peptide View**MS/MS Fragmentation of **SGVGVASMGVMRPELVMK**

Found in **AT1G19910.1** in **TAIR\_Arabidopsis**, Symbols: AVA-2PE, ATVHA-C2, AVA-P2 | AVA-P2 (vacuolar-H<sup>+</sup>-pumping ATPase 16 kDa proteolipid subunit 2); ATPase | chr1:6913308-6914313 FORWARD

Match to Query 8464: 1916.863668 from(639.961832,3+) index(2807)

Title: Elution from: 28.676 to 28.676 scan no 3523 cid35.00 polarity:+

Data file C7-3\_3.mgf

Click mouse within plot area to zoom in by factor of two about that point

Or,   to  Da

Label all possible matches  Label matches used for scoring

Show Y-axis

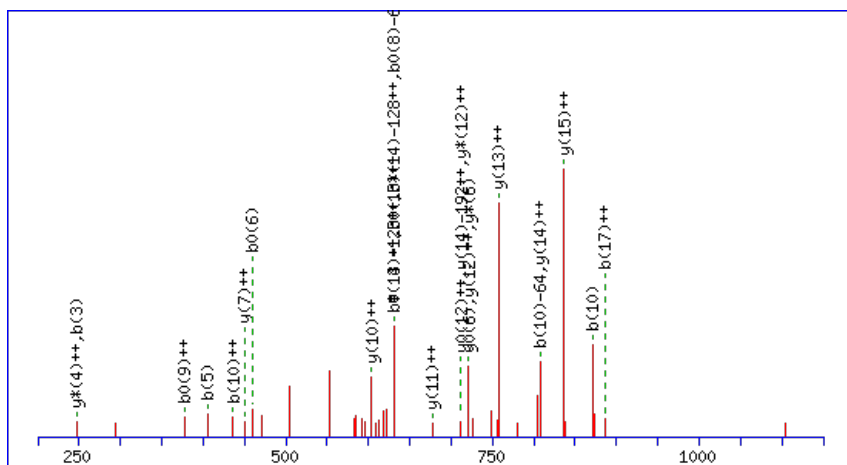

**Monoisotopic mass of neutral peptide Mr(calc):** 1916.8662

**Fixed modifications:** Carbamidomethyl (C) (apply to specified residues or termini only)

**Variable modifications:**

**M8** : Oxidation (M), with neutral losses 0.0000 (shown in table), 63.9983

**M11** : Oxidation (M), with neutral losses 0.0000 (shown in table), 63.9983

**M17** : Oxidation (M), with neutral losses 0.0000 (shown in table), 63.9983

**Ions Score:** 40 **Expect:** 0.00085

**Matches** : 26/316 fragment ions using 25 most intense peaks ([help](#))

| #  | b               | b <sup>++</sup> | b <sup>*</sup> | b <sup>*++</sup> | b <sup>0</sup>  | b <sup>0++</sup> | Seq. | y         | y <sup>++</sup> | y <sup>*</sup>  | y <sup>*++</sup> | y <sup>0</sup>  | y <sup>0++</sup> | #  |
|----|-----------------|-----------------|----------------|------------------|-----------------|------------------|------|-----------|-----------------|-----------------|------------------|-----------------|------------------|----|
| 1  | 89.0363         | 45.0218         |                |                  | 71.0258         | 36.0165          | S    |           |                 |                 |                  |                 |                  | 18 |
| 2  | 147.0548        | 74.0311         |                |                  | 129.0443        | 65.0258          | G    | 1829.8445 | 915.4259        | 1811.8209       | 906.4141         | 1811.8339       | 906.4206         | 17 |
| 3  | <b>247.1203</b> | 124.0638        |                |                  | 229.1097        | 115.0585         | V    | 1771.8260 | 886.4166        | 1753.8024       | 877.4048         | 1753.8154       | 877.4113         | 16 |
| 4  | 305.1388        | 153.0730        |                |                  | 287.1282        | 144.0677         | G    | 1671.7605 | <b>836.3839</b> | 1653.7369       | 827.3721         | 1653.7499       | 827.3786         | 15 |
| 5  | <b>405.2042</b> | 203.1058        |                |                  | 387.1937        | 194.1005         | V    | 1613.7420 | <b>807.3746</b> | 1595.7184       | 798.3629         | 1595.7314       | 798.3694         | 14 |
| 6  | 477.2384        | 239.1228        |                |                  | <b>459.2278</b> | 230.1175         | A    | 1513.6766 | <b>757.3419</b> | 1495.6530       | 748.3301         | 1495.6660       | 748.3366         | 13 |
| 7  | 565.2674        | 283.1374        |                |                  | 547.2569        | 274.1321         | S    | 1441.6424 | <b>721.3248</b> | 1423.6188       | <b>712.3131</b>  | 1423.6319       | <b>712.3196</b>  | 12 |
| 8  | 713.2999        | 357.1536        |                |                  | 695.2893        | 348.1483         | M    | 1353.6134 | <b>677.3103</b> | 1335.5898       | 668.2985         | 1335.6028       | 668.3050         | 11 |
| 9  | 771.3184        | 386.1628        |                |                  | 753.3078        | <b>377.1575</b>  | G    | 1205.5809 | <b>603.2941</b> | 1187.5573       | 594.2823         | 1187.5704       | 594.2888         | 10 |
| 10 | <b>871.3838</b> | <b>436.1956</b> |                |                  | 853.3733        | 427.1903         | V    | 1147.5624 | 574.2848        | 1129.5388       | 565.2731         | 1129.5519       | 565.2796         | 9  |
| 11 | 1019.4163       | 510.2118        |                |                  | 1001.4057       | 501.2065         | M    | 1047.4970 | 524.2521        | 1029.4734       | 515.2403         | 1029.4864       | 515.2468         | 8  |
| 12 | 1179.5055       | 590.2564        | 1161.4819      | 581.2446         | 1161.4950       | 581.2511         | R    | 899.4645  | <b>450.2359</b> | 881.4410        | 441.2241         | 881.4540        | 441.2306         | 7  |
| 13 | 1277.5553       | 639.2813        | 1259.5317      | <b>630.2695</b>  | 1259.5447       | <b>630.2760</b>  | P    | 739.3753  | 370.1913        | <b>721.3517</b> | 361.1795         | <b>721.3647</b> | 361.1860         | 6  |
| 14 | 1407.5949       | 704.3011        | 1389.5714      | 695.2893         | 1389.5844       | 695.2958         | E    | 641.3255  | 321.1664        | 623.3019        | 312.1546         | 623.3149        | 312.1611         | 5  |
| 15 | 1521.6760       | 761.3417        | 1503.6525      | 752.3299         | 1503.6655       | 752.3364         | L    | 511.2859  | 256.1466        | 493.2623        | <b>247.1348</b>  |                 |                  | 4  |
| 16 | 1621.7415       | 811.3744        | 1603.7179      | 802.3626         | 1603.7309       | 802.3691         | V    | 397.2048  | 199.1060        | 379.1812        | 190.0942         |                 |                  | 3  |
| 17 | 1769.7739       | <b>885.3906</b> | 1751.7503      | 876.3788         | 1751.7634       | 876.3853         | M    | 297.1393  | 149.0733        | 279.1157        | 140.0615         |                 |                  | 2  |
| 18 |                 |                 |                |                  |                 |                  | K    | 149.1069  | 75.0571         | 131.0833        | 66.0453          |                 |                  | 1  |

# AT1G19910.1

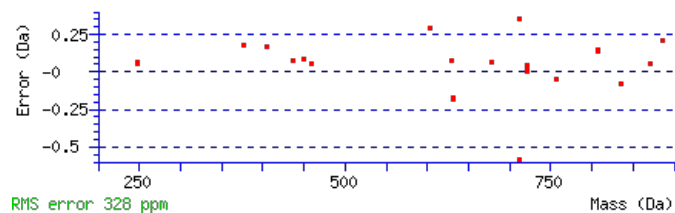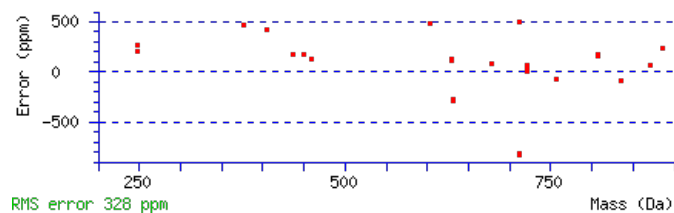

NCBI **BLAST** search of [SGVGVASMGVMRPELVMK](#)  
(Parameters: blastp, nr protein database, expect=20000, no filter, PAM30)

Other BLAST [web gateways](#)

## All matches to this query

| Score | Mr(calc)  | Delta   | Sequence                           |
|-------|-----------|---------|------------------------------------|
| 39.5  | 1916.8662 | -0.0026 | <a href="#">SGVGVASMGVMRPELVMK</a> |
| 5.9   | 1916.8629 | 0.0008  | <a href="#">MIEVAMDALSSSRFGGPK</a> |
| 5.3   | 1916.8676 | -0.0039 | <a href="#">TAKQSSTVDFNMPETLK</a>  |

Mascot: <http://www.matrixscience.com/>

**Peptide View**MS/MS Fragmentation of **ETIMEETLR**

Found in **AT1G19950.1** in **TAIR\_Arabidopsis**, Symbols: HVA22H | HVA22H (HVA22-LIKE PROTEIN H (ATHVA22H)) | chr1:6925034-6926518 FORWARD

Match to Query 3266: 1148.504920 from(575.259736,2+) index(6420)

Title: Elution from: 60.667 to 60.667 scan no 8440 cid35.00 polarity:+

Data file D1d-1-2.mgf

Click mouse within plot area to zoom in by factor of two about that point

Or,   to  Da

Label all possible matches  Label matches used for scoring

Show Y-axis

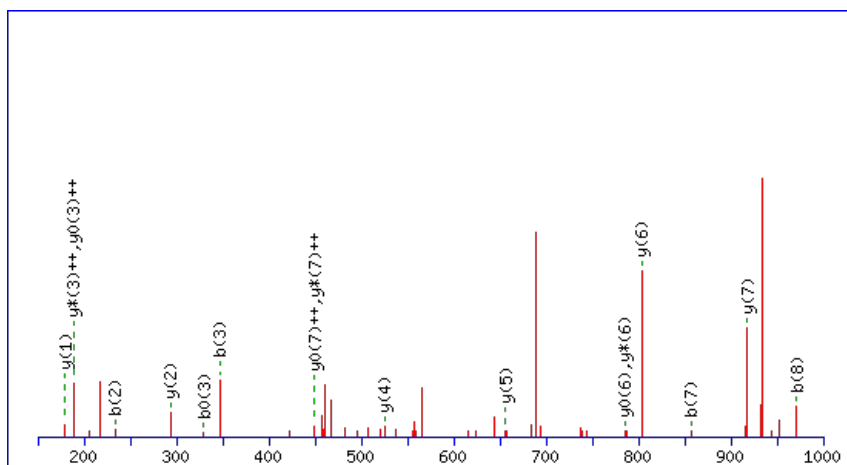

**Monoisotopic mass of neutral peptide Mr(calc):** 1148.5027

**Fixed modifications:** Carbamidomethyl (C) (apply to specified residues or termini only)

**Variable modifications:**

**M4** : Oxidation (M), with neutral losses 0.0000 (shown in table), 63.9983

**Ions Score:** 32 **Expect:** 0.0067

**Matches** : 17/114 fragment ions using 31 most intense peaks ([help](#))

| # | b               | b <sup>++</sup> | b <sup>0</sup>  | b <sup>0++</sup> | Seq. | y               | y <sup>++</sup> | y*              | y <sup>*++</sup> | y <sup>0</sup>  | y <sup>0++</sup> | # |
|---|-----------------|-----------------|-----------------|------------------|------|-----------------|-----------------|-----------------|------------------|-----------------|------------------|---|
| 1 | 131.0469        | 66.0271         | 113.0363        | 57.0218          | E    |                 |                 |                 |                  |                 |                  | 9 |
| 2 | <b>233.0916</b> | 117.0494        | 215.0811        | 108.0442         | T    | 1019.4704       | 510.2388        | 1001.4468       | 501.2270         | 1001.4598       | 501.2336         | 8 |
| 3 | <b>347.1727</b> | 174.0900        | <b>329.1622</b> | 165.0847         | I    | <b>917.4257</b> | 459.2165        | 899.4021        | <b>450.2047</b>  | 899.4151        | <b>450.2112</b>  | 7 |
| 4 | 495.2052        | 248.1062        | 477.1946        | 239.1009         | M    | <b>803.3446</b> | 402.1759        | <b>785.3210</b> | 393.1641         | <b>785.3340</b> | 393.1707         | 6 |
| 5 | 625.2448        | 313.1260        | 607.2342        | 304.1207         | E    | <b>655.3122</b> | 328.1597        | 637.2886        | 319.1479         | 637.3016        | 319.1544         | 5 |
| 6 | 755.2844        | 378.1458        | 737.2738        | 369.1406         | E    | <b>525.2725</b> | 263.1399        | 507.2489        | 254.1281         | 507.2620        | 254.1346         | 4 |
| 7 | <b>857.3291</b> | 429.1682        | 839.3186        | 420.1629         | T    | 395.2329        | 198.1201        | 377.2093        | <b>189.1083</b>  | 377.2223        | <b>189.1148</b>  | 3 |
| 8 | <b>971.4102</b> | 486.2087        | 953.3997        | 477.2035         | L    | <b>293.1882</b> | 147.0977        | 275.1646        | 138.0859         |                 |                  | 2 |
| 9 |                 |                 |                 |                  | R    | <b>179.1071</b> | 90.0572         | 161.0835        | 81.0454          |                 |                  | 1 |

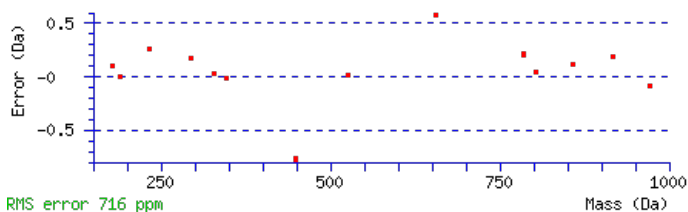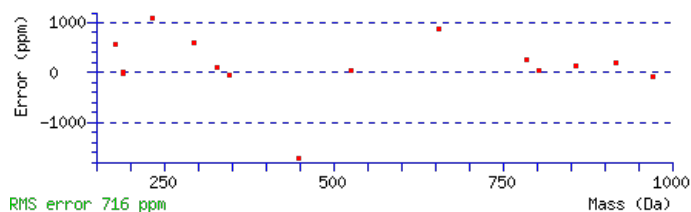

NCBI **BLAST** search of **ETIMEETLR**

(Parameters: blastp, nr protein database, expect=20000, no filter, PAM30)

Other BLAST [web gateways](#)

**All matches to this query**

## AT1G19950.1

| Score | Mr(calc)  | Delta   | Sequence                   |
|-------|-----------|---------|----------------------------|
| 31.6  | 1148.5027 | 0.0022  | <a href="#">ETMEETLR</a>   |
| 18.7  | 1148.5047 | 0.0002  | <a href="#">RAQPNDGFAR</a> |
| 18.3  | 1148.5054 | -0.0005 | <a href="#">DDKKGMGIDR</a> |
| 9.0   | 1148.5050 | -0.0001 | <a href="#">MPVLYEQDK</a>  |
| 6.2   | 1148.5054 | -0.0005 | <a href="#">DVACSVQSLR</a> |
| 4.8   | 1148.5025 | 0.0025  | <a href="#">DVGEDARRGR</a> |
| 4.6   | 1148.5047 | 0.0002  | <a href="#">WVGDQSRQR</a>  |
| 3.8   | 1148.5054 | -0.0005 | <a href="#">DAMEGKRPSK</a> |
| 3.5   | 1148.5054 | -0.0005 | <a href="#">DMVREEIAR</a>  |
| 3.0   | 1148.5054 | -0.0005 | <a href="#">QNEMQISLR</a>  |

Mascot: <http://www.matrixscience.com/>

## Peptide View

### MS/MS Fragmentation of **YSGDTADLQLER**

Found in **AT1G20010.1** in **TAIR\_Arabidopsis**, Symbols: TUB5 | TUB5 (tubulin beta-5 chain) | chr1:6938024-6940472 REVERSE

Match to Query 4906: 1382.589112 from(692.301832,2+) index(3154)

Title: Elution from: 32.154 to 32.154 scan no 3981 cid35.00 polarity:+

Data file D12h-2\_3.mgf

Click mouse within plot area to zoom in by factor of two about that point

Or, Plot from  to  Da

Label all possible matches  Label matches used for scoring

Show Y-axis

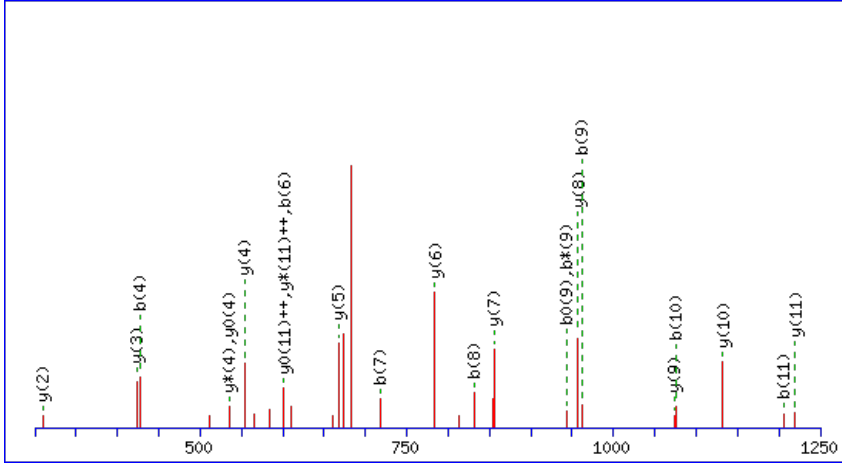

**Monoisotopic mass of neutral peptide Mr(calc):** 1382.5890

**Fixed modifications:** Carbamidomethyl (C) (apply to specified residues or termini only)

**Ions Score:** 116 **Expect:** 1.4e-011

**Matches:** 23/112 fragment ions using 23 most intense peaks [\(help\)](#)

| #  | b         | b <sup>++</sup> | b*        | b <sup>*++</sup> | b <sup>0</sup> | b <sup>0++</sup> | Seq. | y         | y <sup>++</sup> | y*        | y <sup>*++</sup> | y <sup>0</sup> | y <sup>0++</sup> | #  |
|----|-----------|-----------------|-----------|------------------|----------------|------------------|------|-----------|-----------------|-----------|------------------|----------------|------------------|----|
| 1  | 165.0676  | 83.0375         |           |                  |                |                  | Y    |           |                 |           |                  |                |                  | 12 |
| 2  | 253.0967  | 127.0520        |           |                  | 235.0861       | 118.0467         | S    | 1219.5359 | 610.2716        | 1201.5124 | 601.2598         | 1201.5254      | 601.2663         | 11 |
| 3  | 311.1152  | 156.0612        |           |                  | 293.1046       | 147.0560         | G    | 1131.5069 | 566.2571        | 1113.4833 | 557.2453         | 1113.4963      | 557.2518         | 10 |
| 4  | 427.1392  | 214.0732        |           |                  | 409.1286       | 205.0679         | D    | 1073.4884 | 537.2478        | 1055.4648 | 528.2360         | 1055.4778      | 528.2425         | 9  |
| 5  | 529.1839  | 265.0956        |           |                  | 511.1733       | 256.0903         | T    | 957.4644  | 479.2358        | 939.4408  | 470.2240         | 939.4538       | 470.2306         | 8  |
| 6  | 601.2180  | 301.1127        |           |                  | 583.2075       | 292.1074         | A    | 855.4197  | 428.2135        | 837.3961  | 419.2017         | 837.4091       | 419.2082         | 7  |
| 7  | 717.2420  | 359.1246        |           |                  | 699.2315       | 350.1194         | D    | 783.3855  | 392.1964        | 765.3620  | 383.1846         | 765.3750       | 383.1911         | 6  |
| 8  | 831.3231  | 416.1652        |           |                  | 813.3126       | 407.1599         | L    | 667.3616  | 334.1844        | 649.3380  | 325.1726         | 649.3510       | 325.1791         | 5  |
| 9  | 961.3758  | 481.1915        | 943.3522  | 472.1797         | 943.3652       | 472.1862         | Q    | 553.2805  | 277.1439        | 535.2569  | 268.1321         | 535.2699       | 268.1386         | 4  |
| 10 | 1075.4569 | 538.2321        | 1057.4333 | 529.2203         | 1057.4463      | 529.2268         | L    | 423.2278  | 212.1175        | 405.2042  | 203.1058         | 405.2173       | 203.1123         | 3  |
| 11 | 1205.4965 | 603.2519        | 1187.4729 | 594.2401         | 1187.4859      | 594.2466         | E    | 309.1467  | 155.0770        | 291.1231  | 146.0652         | 291.1362       | 146.0717         | 2  |
| 12 |           |                 |           |                  |                |                  | R    | 179.1071  | 90.0572         | 161.0835  | 81.0454          |                |                  | 1  |

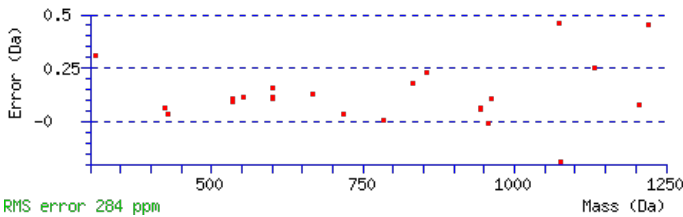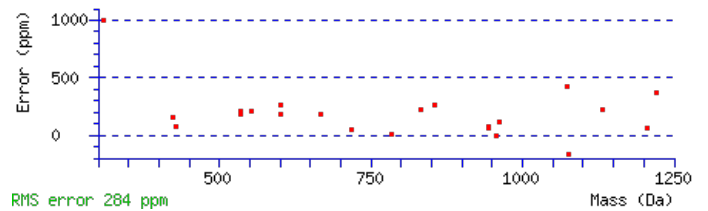

### NCBI BLAST search of **YSGDTADLQLER**

(Parameters: blastp, nr protein database, expect=20000, no filter, PAM30)

Other BLAST [web gateways](#)

**All matches to this query**

## AT1G20010.1

| Score | Mr(calc)  | Delta   | Sequence                      |
|-------|-----------|---------|-------------------------------|
| 116.1 | 1382.5890 | 0.0001  | <a href="#">YSGDTADLQLER</a>  |
| 26.1  | 1382.5903 | -0.0012 | <a href="#">CRDLQEKMQR</a>    |
| 12.9  | 1382.5924 | -0.0033 | <a href="#">ATASSAVESIMER</a> |
| 2.5   | 1382.5877 | 0.0014  | <a href="#">MNNSEVLMEKR</a>   |
| 1.8   | 1382.5865 | 0.0026  | <a href="#">NMDGGYLAQVVK</a>  |
| 1.2   | 1382.5865 | 0.0026  | <a href="#">AAMGEDTFWAIR</a>  |
| 0.7   | 1382.5899 | -0.0008 | <a href="#">CFGEMIGGLVER</a>  |
| 0.4   | 1382.5903 | -0.0012 | <a href="#">MSNPTRKNMER</a>   |
| 0.4   | 1382.5926 | -0.0034 | <a href="#">MCGSVHAYVGKR</a>  |
| 0.3   | 1382.5924 | -0.0033 | <a href="#">KSKNSMGEDVK</a>   |

Mascot: <http://www.matrixscience.com/>



# Mascot Search Results

## Peptide View

MS/MS Fragmentation of **EGQSVGVIADGIDK**

Found in **AT1G20020.1** in **TAIR\_Arabidopsis**, Symbols: ATLFNR2 | ATLFNR2 (LEAF FNR 2); NADPH dehydrogenase/ oxidoreductase/ poly(U) binding | chr1:6942842-6944859 FORWARD

Match to Query 5239: 1402.650502 from(702.332527,2+) index(3940)

Title: Elution from: 36.659 to 36.659 scan no 4903 cid35.00 polarity:+

Data file D12h-1\_3.mgf

Click mouse within plot area to zoom in by factor of two about that point

Or,   to  Da

Label all possible matches  Label matches used for scoring

Show Y-axis

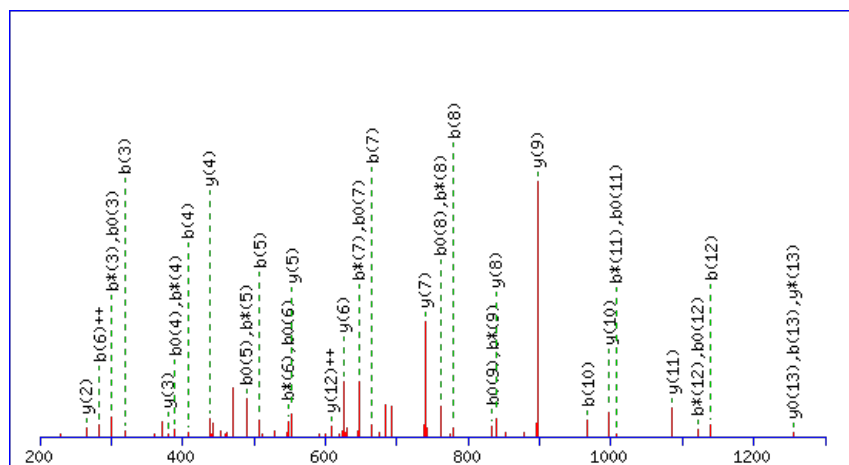

Monoisotopic mass of neutral peptide  $M_r(\text{calc})$ : 1402.6516

Fixed modifications: Carbamidomethyl (C) (apply to specified residues or termini only)

Ions Score: 93 Expect: 2.9e-009

Matches : 40/150 fragment ions using 36 most intense peaks [\(help\)](#)

| #  | b         | b <sup>++</sup> | b*        | b <sup>*++</sup> | b <sup>0</sup> | b <sup>0++</sup> | Seq. | y         | y <sup>++</sup> | y*        | y <sup>*++</sup> | y <sup>0</sup> | y <sup>0++</sup> | #  |
|----|-----------|-----------------|-----------|------------------|----------------|------------------|------|-----------|-----------------|-----------|------------------|----------------|------------------|----|
| 1  | 131.0469  | 66.0271         |           |                  | 113.0363       | 57.0218          | E    |           |                 |           |                  |                |                  | 14 |
| 2  | 189.0654  | 95.0363         |           |                  | 171.0548       | 86.0311          | G    | 1273.6193 | 637.3133        | 1255.5957 | 628.3015         | 1255.6087      | 628.3080         | 13 |
| 3  | 319.1180  | 160.0627        | 301.0945  | 151.0509         | 301.1075       | 151.0574         | Q    | 1215.6008 | 608.3040        | 1197.5772 | 599.2922         | 1197.5902      | 599.2987         | 12 |
| 4  | 407.1471  | 204.0772        | 389.1235  | 195.0654         | 389.1365       | 195.0719         | S    | 1085.5481 | 543.2777        | 1067.5246 | 534.2659         | 1067.5376      | 534.2724         | 11 |
| 5  | 507.2126  | 254.1099        | 489.1890  | 245.0981         | 489.2020       | 245.1046         | V    | 997.5191  | 499.2632        | 979.4955  | 490.2514         | 979.5085       | 490.2579         | 10 |
| 6  | 565.2311  | 283.1192        | 547.2075  | 274.1074         | 547.2205       | 274.1139         | G    | 897.4536  | 449.2305        | 879.4300  | 440.2187         | 879.4431       | 440.2252         | 9  |
| 7  | 665.2965  | 333.1519        | 647.2729  | 324.1401         | 647.2859       | 324.1466         | V    | 839.4351  | 420.2212        | 821.4115  | 411.2094         | 821.4246       | 411.2159         | 8  |
| 8  | 779.3776  | 390.1924        | 761.3540  | 381.1807         | 761.3670       | 381.1872         | I    | 739.3697  | 370.1885        | 721.3461  | 361.1767         | 721.3591       | 361.1832         | 7  |
| 9  | 851.4118  | 426.2095        | 833.3882  | 417.1977         | 833.4012       | 417.2042         | A    | 625.2886  | 313.1479        | 607.2650  | 304.1361         | 607.2780       | 304.1426         | 6  |
| 10 | 967.4357  | 484.2215        | 949.4122  | 475.2097         | 949.4252       | 475.2162         | D    | 553.2544  | 277.1309        | 535.2308  | 268.1191         | 535.2439       | 268.1256         | 5  |
| 11 | 1025.4542 | 513.2308        | 1007.4307 | 504.2190         | 1007.4437      | 504.2255         | G    | 437.2304  | 219.1189        | 419.2069  | 210.1071         | 419.2199       | 210.1136         | 4  |
| 12 | 1139.5353 | 570.2713        | 1121.5118 | 561.2595         | 1121.5248      | 561.2660         | I    | 379.2120  | 190.1096        | 361.1884  | 181.0978         | 361.2014       | 181.1043         | 3  |
| 13 | 1255.5593 | 628.2833        | 1237.5357 | 619.2715         | 1237.5487      | 619.2780         | D    | 265.1309  | 133.0691        | 247.1073  | 124.0573         | 247.1203       | 124.0638         | 2  |
| 14 |           |                 |           |                  |                |                  | K    | 149.1069  | 75.0571         | 131.0833  | 66.0453          |                |                  | 1  |

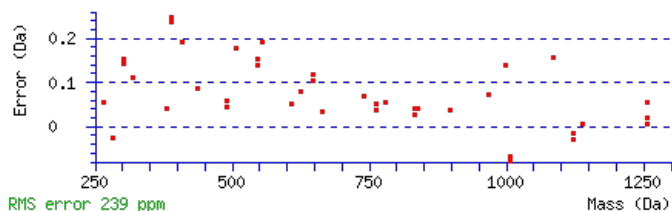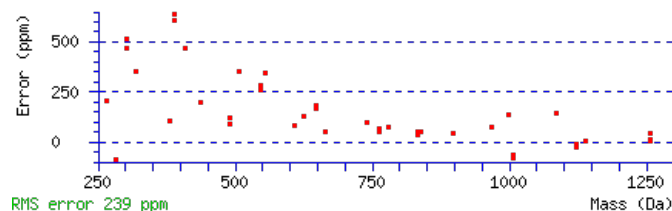

NCBI BLAST search of [EGQSVGVIADGIDK](#)



## AT1G20020.1

(Parameters: blastp, nr protein database, expect=20000, no filter, PAM30)

Other BLAST [web gateways](#)

### All matches to this query

| Score | Mr(calc)  | Delta   | Sequence                       |
|-------|-----------|---------|--------------------------------|
| 93.1  | 1402.6516 | -0.0011 | <a href="#">EGQSVGVIADGIDK</a> |
| 6.5   | 1402.6491 | 0.0014  | <a href="#">FKLRASYMEDK</a>    |
| 4.9   | 1402.6539 | -0.0034 | <a href="#">HYVEELEDKVK</a>    |
| 4.5   | 1402.6516 | -0.0011 | <a href="#">GEGKGDGELVAIDK</a> |
| 0.1   | 1402.6516 | -0.0011 | <a href="#">SLNALVPTNESDK</a>  |

Mascot: <http://www.matrixscience.com/>

**Peptide View**MS/MS Fragmentation of **IGDLELFR**

Found in **AT1G20200.1** in **TAIR\_Arabidopsis**, Symbols: EMB2719 | EMB2719 (EMBRYO DEFECTIVE 2719) | chr1:7001400-7004145  
REVERSE

Match to Query 2171: 961.523608 from(481.769080,2+) index(7541)

Title: Elution from: 65.217 to 65.217 scan no 9709 cid35.00 polarity:+

Data file C7-1\_1.mgf

Click mouse within plot area to zoom in by factor of two about that point

Or,   to  Da

Label all possible matches  Label matches used for scoring

Show Y-axis

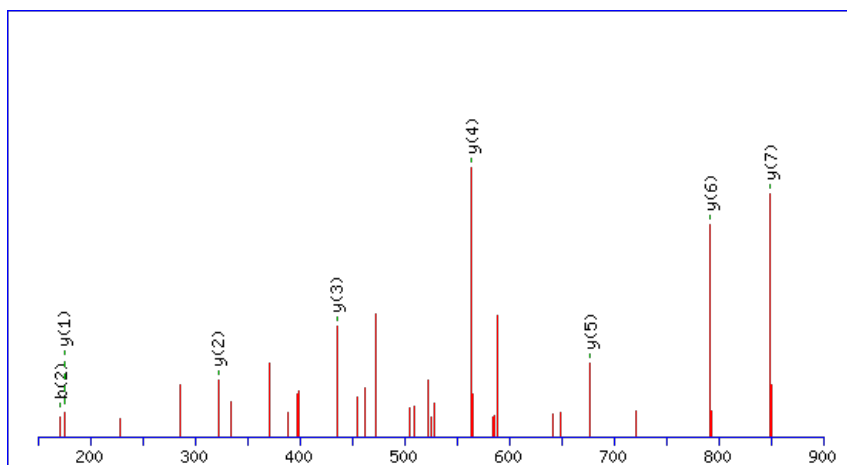

**Monoisotopic mass of neutral peptide Mr(calc):** 961.5233

**Fixed modifications:** Carbamidomethyl (C) (apply to specified residues or termini only)

**Ions Score:** 56 **Expect:** 8.4e-006

**Matches:** 8/60 fragment ions using 14 most intense peaks ([help](#))

| # | b        | b <sup>++</sup> | b <sup>0</sup> | b <sup>0++</sup> | Seq. | y        | y <sup>++</sup> | y*       | y <sup>*++</sup> | y <sup>0</sup> | y <sup>0++</sup> | # |
|---|----------|-----------------|----------------|------------------|------|----------|-----------------|----------|------------------|----------------|------------------|---|
| 1 | 114.0913 | 57.5493         |                |                  | I    |          |                 |          |                  |                |                  | 8 |
| 2 | 171.1128 | 86.0600         |                |                  | G    | 849.4465 | 425.2269        | 832.4199 | 416.7136         | 831.4359       | 416.2216         | 7 |
| 3 | 286.1397 | 143.5735        | 268.1292       | 134.5682         | D    | 792.4250 | 396.7162        | 775.3985 | 388.2029         | 774.4145       | 387.7109         | 6 |
| 4 | 399.2238 | 200.1155        | 381.2132       | 191.1103         | L    | 677.3981 | 339.2027        | 660.3715 | 330.6894         | 659.3875       | 330.1974         | 5 |
| 5 | 528.2664 | 264.6368        | 510.2558       | 255.6316         | E    | 564.3140 | 282.6606        | 547.2875 | 274.1474         | 546.3035       | 273.6554         | 4 |
| 6 | 641.3505 | 321.1789        | 623.3399       | 312.1736         | L    | 435.2714 | 218.1394        | 418.2449 | 209.6261         |                |                  | 3 |
| 7 | 788.4189 | 394.7131        | 770.4083       | 385.7078         | F    | 322.1874 | 161.5973        | 305.1608 | 153.0840         |                |                  | 2 |
| 8 |          |                 |                |                  | R    | 175.1190 | 88.0631         | 158.0924 | 79.5498          |                |                  | 1 |

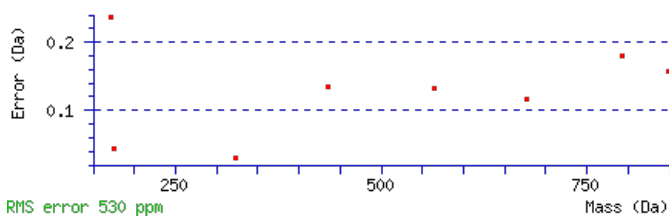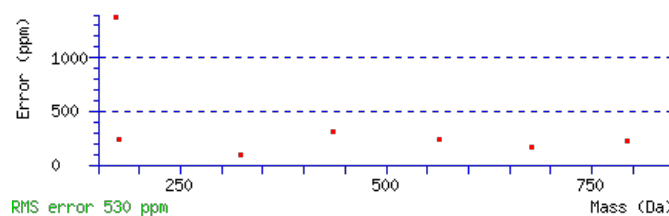

NCBI **BLAST** search of **IGDLELFR**

(Parameters: blastp, nr protein database, expect=20000, no filter, PAM30)

Other BLAST [web gateways](#)

**All matches to this query**

| Score | Mr(calc) | Delta  | Sequence                 |
|-------|----------|--------|--------------------------|
| 56.1  | 961.5233 | 0.0003 | <a href="#">IGDLELFR</a> |

## AT1G20200.1

|      |          |         |                          |
|------|----------|---------|--------------------------|
| 13.2 | 961.5233 | 0.0003  | <a href="#">GEVELIFR</a> |
| 12.0 | 961.5233 | 0.0004  | <a href="#">IIATPEYR</a> |
| 5.8  | 961.5246 | -0.0010 | <a href="#">IARHYFR</a>  |
| 4.1  | 961.5246 | -0.0010 | <a href="#">AYRHIFR</a>  |
| 2.4  | 961.5233 | 0.0003  | <a href="#">IDPFLTR</a>  |

**Mascot:** <http://www.matrixscience.com/>

### Peptide View

 MS/MS Fragmentation of **TYPEEMIQTGISTIDVMNSIAR**

 Found in **AT1G20260.2** in **TAIR\_Arabidopsis**, Symbols: | (VACUOLAR ATP SYNTHASE SUBUNIT B3); hydrogen ion transmembrane transporter/ hydrogen ion transporting ATP synthase, rotational mechanism/ hydrogen ion transporting ATPase, rotational mechanism/ hydrogen-exporting ATPase, phosphorylati

Match to Query 10032:2468.191833 from(823.737887,3+) index(10519)

Title: Elution from: 111.867 to 111.867 scan no 15701 cid35.00 polarity:+

Data file D6h-2\_3.mgf

Click mouse within plot area to zoom in by factor of two about that point

 Or,   to  Da 

 Label all possible matches  Label matches used for scoring 

 Show Y-axis 
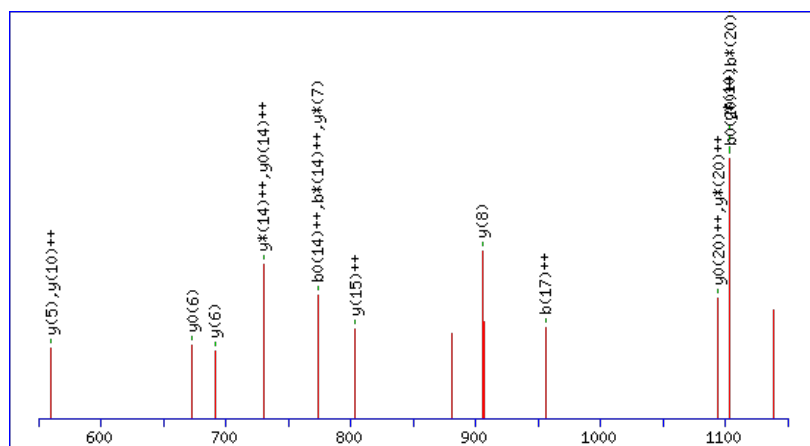

Monoisotopic mass of neutral peptide Mr(calc): 2468.1927

Fixed modifications: Carbamidomethyl (C) (apply to specified residues or termini only)

Ions Score: 25 Expect: 0.012

 Matches : 18/232 fragment ions using 12 most intense peaks ([help](#))

| #  | b         | b <sup>++</sup> | b <sup>*</sup> | b <sup>*++</sup> | b <sup>0</sup> | b <sup>0++</sup> | Seq | y         | y <sup>++</sup> | y <sup>*</sup> | y <sup>*++</sup> | y <sup>0</sup> | y <sup>0++</sup> | #  |
|----|-----------|-----------------|----------------|------------------|----------------|------------------|-----|-----------|-----------------|----------------|------------------|----------------|------------------|----|
| 1  | 102.0550  | 51.5311         |                |                  | 84.0444        | 42.5258          | T   |           |                 |                |                  |                |                  | 22 |
| 2  | 265.1183  | 133.0628        |                |                  | 247.1077       | 124.0575         | Y   | 2368.1523 | 1184.5798       | 2351.1258      | 1176.0665        | 2350.1417      | 1175.5745        | 21 |
| 3  | 362.1710  | 181.5892        |                |                  | 344.1605       | 172.5839         | P   | 2205.0890 | 1103.0481       | 2188.0624      | 1094.5349        | 2187.0784      | 1094.0428        | 20 |
| 4  | 491.2136  | 246.1105        |                |                  | 473.2031       | 237.1052         | E   | 2108.0362 | 1054.5217       | 2091.0097      | 1046.0085        | 2090.0257      | 1045.5165        | 19 |
| 5  | 620.2562  | 310.6318        |                |                  | 602.2457       | 301.6265         | E   | 1978.9936 | 990.0005        | 1961.9671      | 981.4872         | 1960.9831      | 980.9952         | 18 |
| 6  | 751.2967  | 376.1520        |                |                  | 733.2862       | 367.1467         | M   | 1849.9510 | 925.4792        | 1832.9245      | 916.9659         | 1831.9405      | 916.4739         | 17 |
| 7  | 864.3808  | 432.6940        |                |                  | 846.3702       | 423.6887         | I   | 1718.9105 | 859.9589        | 1701.8840      | 851.4456         | 1700.9000      | 850.9536         | 16 |
| 8  | 992.4394  | 496.7233        | 975.4128       | 488.2100         | 974.4288       | 487.7180         | Q   | 1605.8265 | 803.4169        | 1588.7999      | 794.9036         | 1587.8159      | 794.4116         | 15 |
| 9  | 1093.4870 | 547.2472        | 1076.4605      | 538.7339         | 1075.4765      | 538.2419         | T   | 1477.7679 | 739.3876        | 1460.7414      | 730.8743         | 1459.7573      | 730.3823         | 14 |
| 10 | 1150.5085 | 575.7579        | 1133.4820      | 567.2446         | 1132.4979      | 566.7526         | G   | 1376.7202 | 688.8638        | 1359.6937      | 680.3505         | 1358.7097      | 679.8585         | 13 |
| 11 | 1263.5926 | 632.2999        | 1246.5660      | 623.7866         | 1245.5820      | 623.2946         | I   | 1319.6988 | 660.3530        | 1302.6722      | 651.8397         | 1301.6882      | 651.3477         | 12 |
| 12 | 1350.6246 | 675.8159        | 1333.5980      | 667.3027         | 1332.6140      | 666.8107         | S   | 1206.6147 | 603.8110        | 1189.5881      | 595.2977         | 1188.6041      | 594.8057         | 11 |
| 13 | 1451.6723 | 726.3398        | 1434.6457      | 717.8265         | 1433.6617      | 717.3345         | T   | 1119.5827 | 560.2950        | 1102.5561      | 551.7817         | 1101.5721      | 551.2897         | 10 |
| 14 | 1564.7563 | 782.8818        | 1547.7298      | 774.3685         | 1546.7458      | 773.8765         | I   | 1018.5350 | 509.7711        | 1001.5084      | 501.2579         | 1000.5244      | 500.7659         | 9  |
| 15 | 1679.7833 | 840.3953        | 1662.7567      | 831.8820         | 1661.7727      | 831.3900         | D   | 905.4509  | 453.2291        | 888.4244       | 444.7158         | 887.4404       | 444.2238         | 8  |
| 16 | 1778.8517 | 889.9295        | 1761.8251      | 881.4162         | 1760.8411      | 880.9242         | V   | 790.4240  | 395.7156        | 773.3974       | 387.2024         | 772.4134       | 386.7103         | 7  |
| 17 | 1909.8922 | 955.4497        | 1892.8656      | 946.9365         | 1891.8816      | 946.4444         | M   | 691.3556  | 346.1814        | 674.3290       | 337.6681         | 673.3450       | 337.1761         | 6  |
| 18 | 2023.9351 | 1012.4712       | 2006.9086      | 1003.9579        | 2005.9245      | 1003.4659        | N   | 560.3151  | 280.6612        | 543.2885       | 272.1479         | 542.3045       | 271.6559         | 5  |
| 19 | 2110.9671 | 1055.9872       | 2093.9406      | 1047.4739        | 2092.9566      | 1046.9819        | S   | 446.2722  | 223.6397        | 429.2456       | 215.1264         | 428.2616       | 214.6344         | 4  |
| 20 | 2224.0512 | 1112.5292       | 2207.0247      | 1104.0160        | 2206.0406      | 1103.5240        | I   | 359.2401  | 180.1237        | 342.2136       | 171.6104         |                |                  | 3  |
| 21 | 2295.0883 | 1148.0478       | 2278.0618      | 1139.5345        | 2277.0777      | 1139.0425        | A   | 246.1561  | 123.5817        | 229.1295       | 115.0684         |                |                  | 2  |
| 22 |           |                 |                |                  |                |                  | R   | 175.1190  | 88.0631         | 158.0924       | 79.5498          |                |                  | 1  |

# AT1G20260.2

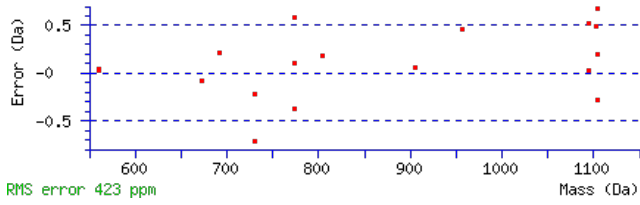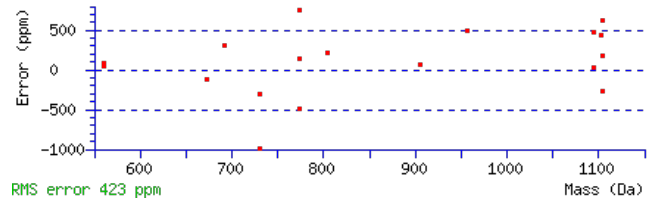

NCBI **BLAST** search of [TYPEEMIQTGISTIDVMNSIAR](#)  
(Parameters: blastp, nr protein database, expect=20000, no filter, PAM30)  
Other BLAST [web gateways](#)

## All matches to this query

| Score | Mr(calc)  | Delta   | Sequence                                 |
|-------|-----------|---------|------------------------------------------|
| 25.2  | 2468.1927 | -0.0009 | <a href="#">TYPEEMIQTGISTIDVMNSIAR</a>   |
| 3.0   | 2468.1927 | -0.0009 | <a href="#">LEGISGDPFTGICISNATISMAAK</a> |

Mascot: <http://www.matrixscience.com/>

**MASCOT** Mascot Search Results

Peptide View

MS/MS Fragmentation of **NNAGYPHVVFEDEIPSGVDVAK**

Found in **AT1G20340.1** in **TAIR\_Arabidopsis**, Symbols: DRT112 | DRT112 (DNA-damage-repair/toleration protein 112); copper ion binding / electron carrier | chr1:7042760-7043263 REVERSE

Match to Query 10660: 2585.196753 from(862.739527,3+) index(7190)  
 Title: Elution from: 63.048 to 63.048 scan no 9216 cid35.00 polarity:+  
 Data file C7-3\_1.mgf

Click mouse within plot area to zoom in by factor of two about that point

Or, Plot from  to  Da

Label all possible matches  Label matches used for scoring

Show Y-axis

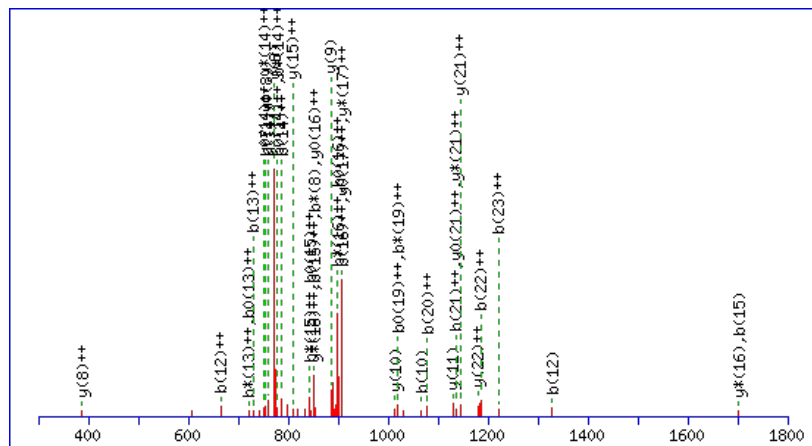

Monoisotopic mass of neutral peptide **Mr(calc)**: 2585.2034

Fixed modifications: Carbamidomethyl (C) (apply to specified residues or termini only)

Ions Score: 60 Expect: 3.3e-006

Matches : 43/248 fragment ions using 44 most intense peaks ([help](#))

| #  | b         | b <sup>++</sup> | b <sup>*</sup> | b <sup>*++</sup> | b <sup>0</sup> | b <sup>0++</sup> | Seq | y         | y <sup>++</sup> | y <sup>*</sup> | y <sup>*++</sup> | y <sup>0</sup> | y <sup>0++</sup> | #  |
|----|-----------|-----------------|----------------|------------------|----------------|------------------|-----|-----------|-----------------|----------------|------------------|----------------|------------------|----|
| 1  | 115.0502  | 58.0287         | 98.0237        | 49.5155          |                |                  | N   |           |                 |                |                  |                |                  | 24 |
| 2  | 229.0931  | 115.0502        | 212.0666       | 106.5369         |                |                  | N   | 2472.1678 | 1236.5875       | 2455.1412      | 1228.0742        | 2454.1572      | 1227.5822        | 23 |
| 3  | 300.1302  | 150.5688        | 283.1037       | 142.0555         |                |                  | A   | 2358.1248 | 1179.5661       | 2341.0983      | 1171.0528        | 2340.1143      | 1170.5608        | 22 |
| 4  | 357.1517  | 179.0795        | 340.1252       | 170.5662         |                |                  | G   | 2287.0877 | 1144.0475       | 2270.0612      | 1135.5342        | 2269.0772      | 1135.0422        | 21 |
| 5  | 520.2150  | 260.6112        | 503.1885       | 252.0979         |                |                  | Y   | 2230.0663 | 1115.5368       | 2213.0397      | 1107.0235        | 2212.0557      | 1106.5315        | 20 |
| 6  | 617.2678  | 309.1375        | 600.2413       | 300.6243         |                |                  | P   | 2067.0029 | 1034.0051       | 2049.9764      | 1025.4918        | 2048.9924      | 1024.9998        | 19 |
| 7  | 754.3267  | 377.6670        | 737.3002       | 369.1537         |                |                  | H   | 1969.9502 | 985.4787        | 1952.9236      | 976.9654         | 1951.9396      | 976.4734         | 18 |
| 8  | 868.3696  | 434.6885        | 851.3431       | 426.1752         |                |                  | N   | 1832.8912 | 916.9493        | 1815.8647      | 908.4360         | 1814.8807      | 907.9440         | 17 |
| 9  | 967.4381  | 484.2227        | 950.4115       | 475.7094         |                |                  | V   | 1718.8483 | 859.9278        | 1701.8218      | 851.4145         | 1700.8378      | 850.9225         | 16 |
| 10 | 1066.5065 | 533.7569        | 1049.4799      | 525.2436         |                |                  | V   | 1619.7799 | 810.3936        | 1602.7534      | 801.8803         | 1601.7693      | 801.3883         | 15 |
| 11 | 1213.5749 | 607.2911        | 1196.5483      | 598.7778         |                |                  | F   | 1520.7115 | 760.8594        | 1503.6849      | 752.3461         | 1502.7009      | 751.8541         | 14 |
| 12 | 1328.6018 | 664.8046        | 1311.5753      | 656.2913         | 1310.5913      | 655.7993         | D   | 1373.6431 | 687.3252        | 1356.6165      | 678.8119         | 1355.6325      | 678.3199         | 13 |
| 13 | 1457.6444 | 729.3258        | 1440.6179      | 720.8126         | 1439.6339      | 720.3206         | E   | 1258.6161 | 629.8117        | 1241.5896      | 621.2984         | 1240.6056      | 620.8064         | 12 |
| 14 | 1572.6714 | 786.8393        | 1555.6448      | 778.3260         | 1554.6608      | 777.8340         | D   | 1129.5735 | 565.2904        | 1112.5470      | 556.7771         | 1111.5630      | 556.2851         | 11 |
| 15 | 1701.7140 | 851.3606        | 1684.6874      | 842.8473         | 1683.7034      | 842.3553         | E   | 1014.5466 | 507.7769        | 997.5201       | 499.2637         | 996.5360       | 498.7717         | 10 |
| 16 | 1814.7980 | 907.9026        | 1797.7715      | 899.3894         | 1796.7875      | 898.8974         | I   | 885.5040  | 443.2556        | 868.4775       | 434.7424         | 867.4934       | 434.2504         | 9  |
| 17 | 1911.8508 | 956.4290        | 1894.8242      | 947.9158         | 1893.8402      | 947.4237         | P   | 772.4199  | 386.7136        | 755.3934       | 378.2003         | 754.4094       | 377.7083         | 8  |
| 18 | 1998.8828 | 999.9450        | 1981.8563      | 991.4318         | 1980.8722      | 990.9398         | S   | 675.3672  | 338.1872        | 658.3406       | 329.6740         | 657.3566       | 329.1819         | 7  |
| 19 | 2055.9043 | 1028.4558       | 2038.8777      | 1019.9425        | 2037.8937      | 1019.4505        | G   | 588.3352  | 294.6712        | 571.3086       | 286.1579         | 570.3246       | 285.6659         | 6  |
| 20 | 2154.9727 | 1077.9900       | 2137.9461      | 1069.4767        | 2136.9621      | 1068.9847        | V   | 531.3137  | 266.1605        | 514.2871       | 257.6472         | 513.3031       | 257.1552         | 5  |
| 21 | 2269.9996 | 1135.5035       | 2252.9731      | 1126.9902        | 2251.9891      | 1126.4982        | D   | 432.2453  | 216.6263        | 415.2187       | 208.1130         | 414.2347       | 207.6210         | 4  |
| 22 | 2369.0680 | 1185.0377       | 2352.0415      | 1176.5244        | 2351.0575      | 1176.0324        | V   | 317.2183  | 159.1128        | 300.1918       | 150.5995         |                |                  | 3  |
| 23 | 2440.1052 | 1220.5562       | 2423.0786      | 1212.0429        | 2422.0946      | 1211.5509        | A   | 218.1499  | 109.5786        | 201.1234       | 101.0653         |                |                  | 2  |
| 24 |           |                 |                |                  |                |                  | K   | 147.1128  | 74.0600         | 130.0863       | 65.5468          |                |                  | 1  |

# AT1G20340.1

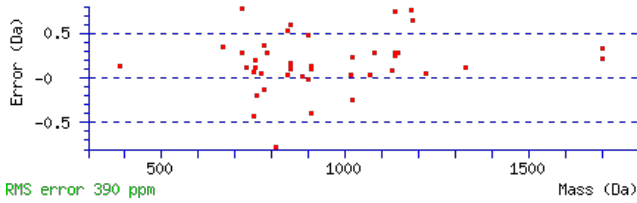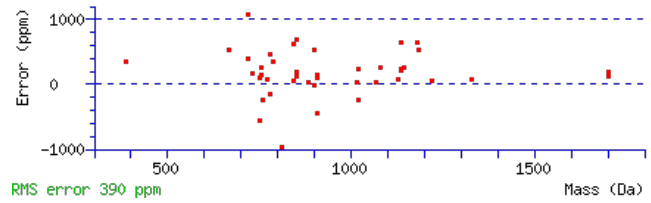

NCBI BLAST search of [NNAGYPHNVVFEDEEIPSGVDVAK](#)  
 (Parameters: blastp, nr protein database, expect=20000, no filter, PAM30)  
 Other BLAST [web gateways](#)

## All matches to this query

| Score | Mr(calc)  | Delta   | Sequence                                 |
|-------|-----------|---------|------------------------------------------|
| 59.7  | 2585.2034 | -0.0067 | <a href="#">NNAGYPHNVVFEDEEIPSGVDVAK</a> |
| 9.5   | 2585.1964 | 0.0004  | <a href="#">MAEMEINFMVFNPIIDGLGEAGR</a>  |
| 9.5   | 2585.1964 | 0.0004  | <a href="#">MAEMEINFMVFNPIIDGLGEAGR</a>  |
| 9.3   | 2585.2011 | -0.0043 | <a href="#">AFFYGWMLKPLVFGDYPDEMK</a>    |
| 6.1   | 2585.1922 | 0.0046  | <a href="#">DWETVDDGFASSFVEEGKLDALR</a>  |
| 4.1   | 2585.2030 | -0.0062 | <a href="#">MDLLDCLDTTWSGAVVYVDEGVK</a>  |
| 1.5   | 2585.1930 | 0.0037  | <a href="#">IGMDVAASEFFMKDGRYDLNEK</a>   |
| 1.4   | 2585.1964 | 0.0004  | <a href="#">MAEMEINFMVFNPIIDGLGEAGR</a>  |
| 0.7   | 2585.2027 | -0.0060 | <a href="#">ANSMANEITEEDDSLGHQIRDLK</a>  |
| 0.3   | 2585.2036 | -0.0068 | <a href="#">GMREKGIEPDIATFNIMMNSQR</a>   |

Mascot: <http://www.matrixscience.com/>

Peptide View

MS/MS Fragmentation of **NNVPEHETPTVATEESPATTEVTDR**

Found in **AT1G20440.1** in **TAIR\_Arabidopsis**, Symbols: RD17, COR47 | COR47 (cold regulated 47) | chr1:7084712-7085654 REVERSE

Match to Query 11262: 2824.299591 from(942.440473,3+) index(3512)

Title: Elution from: 33.511 to 33.511 scan no 4327 cid35.00 polarity:+

Data file D6h-1\_1.mgf

Click mouse within plot area to zoom in by factor of two about that point

Or,  to  Da

Label all possible matches  Label matches used for scoring

Show Y-axis

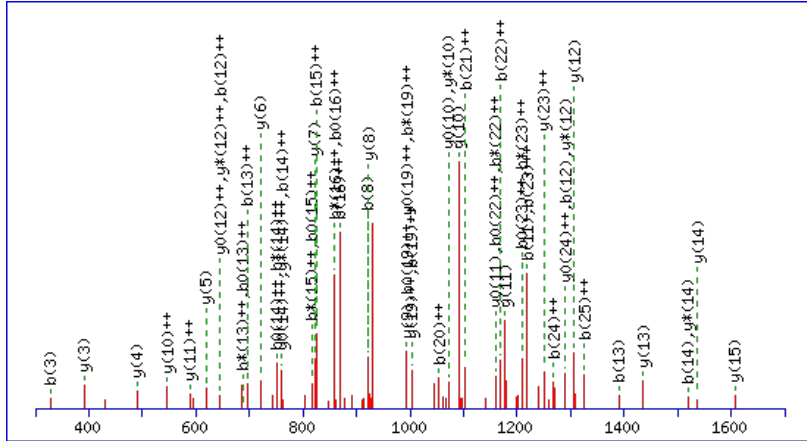

**Monoisotopic mass of neutral peptide Mr(calc):** 2824.2999

**Fixed modifications:** Carbamidomethyl (C) (apply to specified residues or termini only)

**Ions Score:** 125 **Expect:** 5.5e-013

**Matches :** 60/290 fragment ions using 45 most intense peaks [\(help\)](#)

| #  | b                | b <sup>++</sup>  | b*        | b <sup>*++</sup> | b <sup>0</sup> | b <sup>0++</sup> | Seq. | y                | y <sup>++</sup>  | y*               | y <sup>*++</sup> | y <sup>0</sup>   | y <sup>0++</sup> | #  |
|----|------------------|------------------|-----------|------------------|----------------|------------------|------|------------------|------------------|------------------|------------------|------------------|------------------|----|
| 1  | 115.0502         | 58.0287          | 98.0237   | 49.5155          |                |                  | N    |                  |                  |                  |                  |                  |                  | 26 |
| 2  | 229.0931         | 115.0502         | 212.0666  | 106.5369         |                |                  | N    | 2711.2642        | 1356.1358        | 2694.2377        | 1347.6225        | 2693.2537        | 1347.1305        | 25 |
| 3  | <b>328.1615</b>  | 164.5844         | 311.1350  | 156.0711         |                |                  | V    | 2597.2213        | 1299.1143        | 2580.1948        | 1290.6010        | 2579.2107        | <b>1290.1090</b> | 24 |
| 4  | 425.2143         | 213.1108         | 408.1878  | 204.5975         |                |                  | P    | 2498.1529        | <b>1249.5801</b> | 2481.1264        | 1241.0668        | 2480.1423        | 1240.5748        | 23 |
| 5  | 554.2569         | 277.6321         | 537.2304  | 269.1188         | 536.2463       | 268.6268         | E    | 2401.1001        | 1201.0537        | 2384.0736        | 1192.5404        | 2383.0896        | 1192.0484        | 22 |
| 6  | 691.3158         | 346.1615         | 674.2893  | 337.6483         | 673.3052       | 337.1563         | H    | 2272.0575        | 1136.5324        | 2255.0310        | 1128.0191        | 2254.0470        | 1127.5271        | 21 |
| 7  | 820.3584         | 410.6828         | 803.3319  | 402.1696         | 802.3478       | 401.6776         | E    | 2134.9986        | 1068.0030        | 2117.9721        | 1059.4897        | 2116.9881        | 1058.9977        | 20 |
| 8  | <b>921.4061</b>  | 461.2067         | 904.3795  | 452.6934         | 903.3955       | 452.2014         | T    | 2005.9560        | <b>1003.4817</b> | 1988.9295        | 994.9684         | 1987.9455        | <b>994.4764</b>  | 19 |
| 9  | 1018.4588        | 509.7331         | 1001.4323 | 501.2198         | 1000.4483      | 500.7278         | P    | 1904.9084        | 952.9578         | 1887.8818        | 944.4445         | 1886.8978        | 943.9525         | 18 |
| 10 | 1119.5065        | 560.2569         | 1102.4800 | 551.7436         | 1101.4960      | 551.2516         | T    | 1807.8556        | 904.4314         | 1790.8290        | 895.9182         | 1789.8450        | 895.4262         | 17 |
| 11 | <b>1218.5749</b> | 609.7911         | 1201.5484 | 601.2778         | 1200.5644      | 600.7858         | V    | 1706.8079        | 853.9076         | 1689.7814        | 845.3943         | 1688.7974        | 844.9023         | 16 |
| 12 | <b>1289.6121</b> | <b>645.3097</b>  | 1272.5855 | 636.7964         | 1271.6015      | 636.3044         | A    | <b>1607.7395</b> | 804.3734         | 1590.7130        | 795.8601         | 1589.7289        | 795.3681         | 15 |
| 13 | <b>1390.6597</b> | <b>695.8335</b>  | 1373.6332 | <b>687.3202</b>  | 1372.6492      | <b>686.8282</b>  | T    | <b>1536.7024</b> | 768.8548         | <b>1519.6758</b> | <b>760.3416</b>  | 1518.6918        | <b>759.8495</b>  | 14 |
| 14 | <b>1519.7023</b> | <b>760.3548</b>  | 1502.6758 | <b>751.8415</b>  | 1501.6918      | <b>751.3495</b>  | E    | <b>1435.6547</b> | 718.3310         | 1418.6282        | 709.8177         | 1417.6441        | 709.3257         | 13 |
| 15 | 1648.7449        | <b>824.8761</b>  | 1631.7184 | <b>816.3628</b>  | 1630.7344      | <b>815.8708</b>  | E    | <b>1306.6121</b> | 653.8097         | <b>1289.5856</b> | <b>645.2964</b>  | 1288.6016        | <b>644.8044</b>  | 12 |
| 16 | 1735.7769        | <b>868.3921</b>  | 1718.7504 | <b>859.8788</b>  | 1717.7664      | <b>859.3868</b>  | S    | <b>1177.5695</b> | <b>589.2884</b>  | 1160.5430        | 580.7751         | <b>1159.5590</b> | 580.2831         | 11 |
| 17 | 1832.8297        | 916.9185         | 1815.8032 | 908.4052         | 1814.8191      | 907.9132         | P    | <b>1090.5375</b> | <b>545.7724</b>  | <b>1073.5109</b> | 537.2591         | <b>1072.5269</b> | 536.7671         | 10 |
| 18 | 1903.8668        | 952.4371         | 1886.8403 | 943.9238         | 1885.8563      | 943.4318         | A    | <b>993.4847</b>  | 497.2460         | 976.4582         | 488.7327         | 975.4742         | 488.2407         | 9  |
| 19 | 2004.9145        | <b>1002.9609</b> | 1987.8880 | <b>994.4476</b>  | 1986.9039      | <b>993.9556</b>  | T    | <b>922.4476</b>  | 461.7274         | 905.4211         | 453.2142         | 904.4371         | 452.7222         | 8  |
| 20 | 2105.9622        | <b>1053.4847</b> | 2088.9356 | 1044.9715        | 2087.9516      | 1044.4794        | T    | <b>821.3999</b>  | 411.2036         | 804.3734         | 402.6903         | 803.3894         | 402.1983         | 7  |
| 21 | 2207.0099        | <b>1104.0086</b> | 2189.9833 | 1095.4953        | 2188.9993      | 1095.0033        | T    | <b>720.3523</b>  | 360.6798         | 703.3257         | 352.1665         | 702.3417         | 351.6745         | 6  |
| 22 | 2336.0525        | <b>1168.5299</b> | 2319.0259 | <b>1160.0166</b> | 2318.0419      | <b>1159.5246</b> | E    | <b>619.3046</b>  | 310.1559         | 602.2780         | 301.6427         | 601.2940         | 301.1506         | 5  |
| 23 | 2435.1209        | <b>1218.0641</b> | 2418.0943 | <b>1209.5508</b> | 2417.1103      | <b>1209.0588</b> | V    | <b>490.2620</b>  | 245.6346         | 473.2354         | 237.1214         | 472.2514         | 236.6293         | 4  |
| 24 | 2536.1685        | <b>1268.5879</b> | 2519.1420 | 1260.0746        | 2518.1580      | 1259.5826        | T    | <b>391.1936</b>  | 196.1004         | 374.1670         | 187.5872         | 373.1830         | 187.0951         | 3  |
| 25 | 2651.1955        | <b>1326.1014</b> | 2634.1689 | 1317.5881        | 2633.1849      | 1317.0961        | D    | 290.1459         | 145.5766         | 273.1193         | 137.0633         | 272.1353         | 136.5713         | 2  |



|    |  |  |  |  |  |   |          |         |          |         |  |  |   |
|----|--|--|--|--|--|---|----------|---------|----------|---------|--|--|---|
| 26 |  |  |  |  |  | R | 175.1190 | 88.0631 | 158.0924 | 79.5498 |  |  | 1 |
|----|--|--|--|--|--|---|----------|---------|----------|---------|--|--|---|

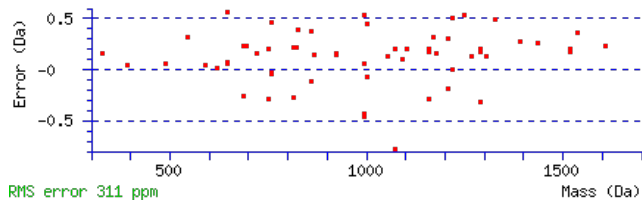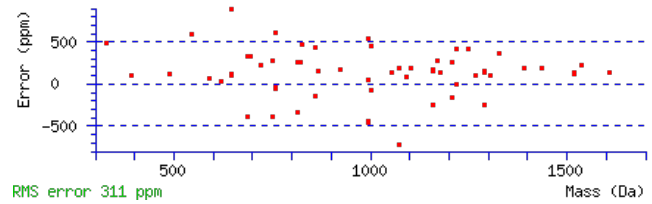

NCBI BLAST search of [NNVPEHETPTVATEESPATTEVTDR](#)  
 (Parameters: blastp, nr protein database, expect=20000, no filter, PAM30)  
 Other BLAST [web gateways](#)

**All matches to this query**

| Score | Mr(calc)  | Delta   | Sequence                                  |
|-------|-----------|---------|-------------------------------------------|
| 124.5 | 2824.2999 | -0.0003 | <a href="#">NNVPEHETPTVATEESPATTEVTDR</a> |

Mascot: <http://www.matrixscience.com/>



# Mascot Search Results

## Peptide View

MS/MS Fragmentation of **HEEEEEENKPSLLDK**

Found in **AT1G20450.1** in **TAIR\_Arabidopsis**, Symbols: LTI45, ERD10, LTI29 | ERD10/LTI45 (EARLY RESPONSIVE TO DEHYDRATION 10) | chr1:7088225-7089097 REVERSE

Match to Query 8350: 1714.738314 from(572.586714,3+) index(963)

Title: Elution from: 15.867 to 15.867 scan no 1379 cid35.00 polarity:+

Data file D12h-3\_1.mgf

Click mouse within plot area to zoom in by factor of two about that point

Or,   to  Da

Label all possible matches  Label matches used for scoring

Show Y-axis

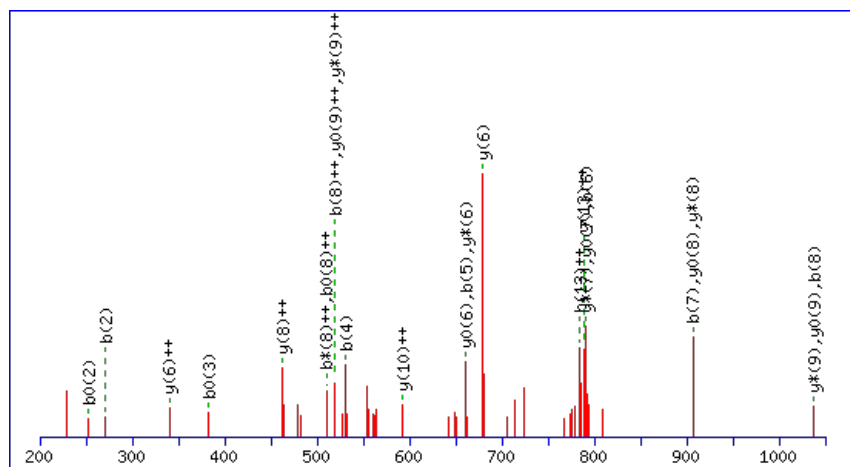

Monoisotopic mass of neutral peptide  $M_r(\text{calc})$ : 1714.7388

Fixed modifications: Carbamidomethyl (C) (apply to specified residues or termini only)

Ions Score: 40 Expect: 0.00058

Matches : 27/140 fragment ions using 20 most intense peaks [\(help\)](#)

| #  | b                | b <sup>++</sup> | b*        | b <sup>*++</sup> | b <sup>0</sup>  | b <sup>0++</sup> | Seq. | y               | y <sup>++</sup> | y*               | y <sup>*++</sup> | y <sup>0</sup>   | y <sup>0++</sup> | #  |
|----|------------------|-----------------|-----------|------------------|-----------------|------------------|------|-----------------|-----------------|------------------|------------------|------------------|------------------|----|
| 1  | 141.0573         | 71.0323         |           |                  |                 |                  | H    |                 |                 |                  |                  |                  |                  | 14 |
| 2  | <b>271.0969</b>  | 136.0521        |           |                  | <b>253.0864</b> | 127.0468         | E    | 1575.6961       | <b>788.3517</b> | 1557.6725        | 779.3399         | 1557.6855        | 779.3464         | 13 |
| 3  | 401.1365         | 201.0719        |           |                  | <b>383.1260</b> | 192.0666         | E    | 1445.6565       | 723.3319        | 1427.6329        | 714.3201         | 1427.6459        | 714.3266         | 12 |
| 4  | <b>531.1762</b>  | 266.0917        |           |                  | 513.1656        | 257.0864         | E    | 1315.6168       | 658.3121        | 1297.5932        | 649.3003         | 1297.6063        | 649.3068         | 11 |
| 5  | <b>661.2158</b>  | 331.1115        |           |                  | 643.2052        | 322.1063         | E    | 1185.5772       | <b>593.2922</b> | 1167.5536        | 584.2804         | 1167.5666        | 584.2870         | 10 |
| 6  | <b>791.2554</b>  | 396.1314        |           |                  | 773.2449        | 387.1261         | E    | 1055.5376       | 528.2724        | <b>1037.5140</b> | <b>519.2606</b>  | <b>1037.5270</b> | <b>519.2671</b>  | 9  |
| 7  | <b>907.2924</b>  | 454.1499        | 889.2688  | 445.1381         | 889.2819        | 445.1446         | N    | 925.4979        | <b>463.2526</b> | <b>907.4744</b>  | 454.2408         | <b>907.4874</b>  | 454.2473         | 8  |
| 8  | <b>1037.3815</b> | <b>519.1944</b> | 1019.3579 | <b>510.1826</b>  | 1019.3709       | <b>510.1891</b>  | K    | 809.4609        | 405.2341        | <b>791.4374</b>  | 396.2223         | <b>791.4504</b>  | 396.2288         | 7  |
| 9  | 1135.4313        | 568.2193        | 1117.4077 | 559.2075         | 1117.4207       | 559.2140         | P    | <b>679.3719</b> | <b>340.1896</b> | <b>661.3483</b>  | 331.1778         | <b>661.3613</b>  | 331.1843         | 6  |
| 10 | 1223.4603        | 612.2338        | 1205.4367 | 603.2220         | 1205.4498       | 603.2285         | S    | 581.3221        | 291.1647        | 563.2985         | 282.1529         | 563.3115         | 282.1594         | 5  |
| 11 | 1337.5414        | 669.2744        | 1319.5178 | 660.2626         | 1319.5309       | 660.2691         | L    | 493.2930        | 247.1502        | 475.2695         | 238.1384         | 475.2825         | 238.1449         | 4  |
| 12 | 1451.6225        | 726.3149        | 1433.5989 | 717.3031         | 1433.6120       | 717.3096         | L    | 379.2120        | 190.1096        | 361.1884         | 181.0978         | 361.2014         | 181.1043         | 3  |
| 13 | 1567.6465        | <b>784.3269</b> | 1549.6229 | 775.3151         | 1549.6359       | 775.3216         | D    | 265.1309        | 133.0691        | 247.1073         | 124.0573         | 247.1203         | 124.0638         | 2  |
| 14 |                  |                 |           |                  |                 |                  | K    | 149.1069        | 75.0571         | 131.0833         | 66.0453          |                  |                  | 1  |

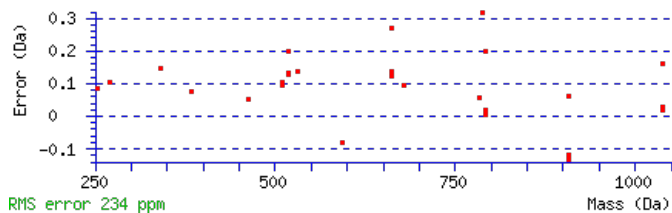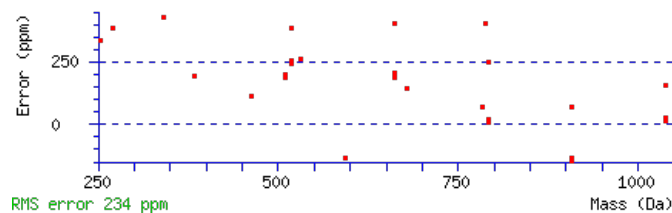

NCBI BLAST search of [HEEEEEENKPSLLDK](#)

## AT1G20450.1

(Parameters: blastp, nr protein database, expect=20000, no filter, PAM30)

Other BLAST [web gateways](#)

### All matches to this query

| Score | Mr(calc)  | Delta   | Sequence                        |
|-------|-----------|---------|---------------------------------|
| 40.0  | 1714.7388 | -0.0005 | <a href="#">HEEEENKPSLLDK</a>   |
| 8.3   | 1714.7385 | -0.0002 | <a href="#">EGEIPFWMLAFSDR</a>  |
| 1.2   | 1714.7394 | -0.0011 | <a href="#">ASGSHAPRQKGMQYR</a> |
| 0.7   | 1714.7356 | 0.0027  | <a href="#">YINNLYQNHPDRE</a>   |

Mascot: <http://www.matrixscience.com/>

**Peptide View**MS/MS Fragmentation of **DQKVSSDLSEVTK**

Found in **AT1G20530.1** in **TAIR\_Arabidopsis**, Symbols: | similar to unknown protein [Arabidopsis thaliana] (TAIR:AT2G17110.1); similar to hypothetical protein [Vitis vinifera] (GB:CAN74079.1); contains InterPro domain Protein of unknown function DUF632 (InterPro:IPR006867); contains InterPro

Match to Query 5595: 1434.716686 from(718.365619,2+) index(5696)

Title: Elution from: 52.900 to 52.900 scan no 7320 cid35.00 polarity:+

Data file D1d-2\_1.mgf

Click mouse within plot area to zoom in by factor of two about that point

Or,   to  Da

Label all possible matches  Label matches used for scoring

Show Y-axis

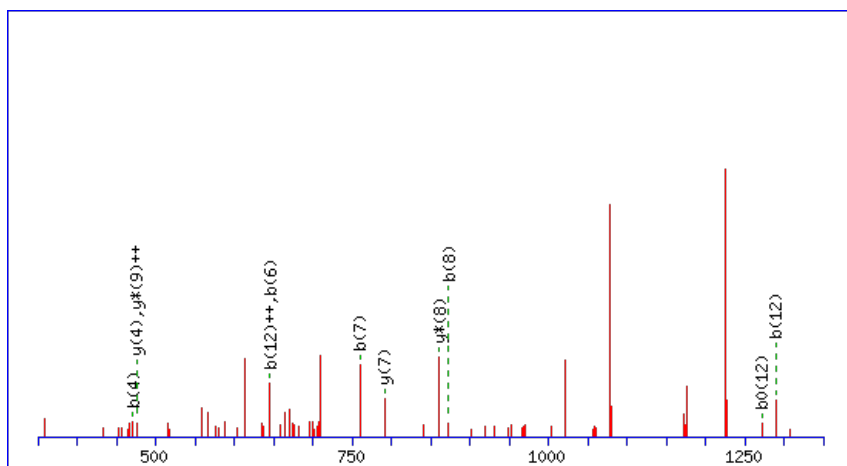

**Monoisotopic mass of neutral peptide Mr(calc):** 1434.7202

**Fixed modifications:** Carbamidomethyl (C) (apply to specified residues or termini only)

**Ions Score:** 20 **Expect:** 0.032

**Matches:** 11/140 fragment ions using 20 most intense peaks ([help](#))

| #  | b                | b <sup>++</sup> | b*        | b <sup>+++</sup> | b <sup>0</sup>   | b <sup>0++</sup> | Seq.     | y               | y <sup>++</sup> | y*              | y <sup>+++</sup> | y <sup>0</sup> | y <sup>0++</sup> | #         |
|----|------------------|-----------------|-----------|------------------|------------------|------------------|----------|-----------------|-----------------|-----------------|------------------|----------------|------------------|-----------|
| 1  | 116.0342         | 58.5207         |           |                  | 98.0237          | 49.5155          | <b>D</b> |                 |                 |                 |                  |                |                  | <b>13</b> |
| 2  | 244.0928         | 122.5500        | 227.0662  | 114.0368         | 226.0822         | 113.5448         | <b>Q</b> | 1320.7005       | 660.8539        | 1303.6740       | 652.3406         | 1302.6900      | 651.8486         | <b>12</b> |
| 3  | 372.1878         | 186.5975        | 355.1612  | 178.0842         | 354.1772         | 177.5922         | <b>K</b> | 1192.6420       | 596.8246        | 1175.6154       | 588.3113         | 1174.6314      | 587.8193         | <b>11</b> |
| 4  | <b>471.2562</b>  | 236.1317        | 454.2296  | 227.6185         | 453.2456         | 227.1264         | <b>V</b> | 1064.5470       | 532.7771        | 1047.5204       | 524.2639         | 1046.5364      | 523.7719         | <b>10</b> |
| 5  | 558.2882         | 279.6477        | 541.2617  | 271.1345         | 540.2776         | 270.6425         | <b>S</b> | 965.4786        | 483.2429        | 948.4520        | <b>474.7297</b>  | 947.4680       | 474.2376         | <b>9</b>  |
| 6  | <b>645.3202</b>  | 323.1638        | 628.2937  | 314.6505         | 627.3097         | 314.1585         | <b>S</b> | 878.4466        | 439.7269        | <b>861.4200</b> | 431.2136         | 860.4360       | 430.7216         | <b>8</b>  |
| 7  | <b>760.3472</b>  | 380.6772        | 743.3206  | 372.1640         | 742.3366         | 371.6719         | <b>D</b> | <b>791.4145</b> | 396.2109        | 774.3880        | 387.6976         | 773.4040       | 387.2056         | <b>7</b>  |
| 8  | <b>873.4312</b>  | 437.2193        | 856.4047  | 428.7060         | 855.4207         | 428.2140         | <b>L</b> | 676.3876        | 338.6974        | 659.3610        | 330.1842         | 658.3770       | 329.6921         | <b>6</b>  |
| 9  | 960.4633         | 480.7353        | 943.4367  | 472.2220         | 942.4527         | 471.7300         | <b>S</b> | 563.3035        | 282.1554        | 546.2770        | 273.6421         | 545.2930       | 273.1501         | <b>5</b>  |
| 10 | 1089.5059        | 545.2566        | 1072.4793 | 536.7433         | 1071.4953        | 536.2513         | <b>E</b> | <b>476.2715</b> | 238.6394        | 459.2449        | 230.1261         | 458.2609       | 229.6341         | <b>4</b>  |
| 11 | 1188.5743        | 594.7908        | 1171.5477 | 586.2775         | 1170.5637        | 585.7855         | <b>V</b> | 347.2289        | 174.1181        | 330.2023        | 165.6048         | 329.2183       | 165.1128         | <b>3</b>  |
| 12 | <b>1289.6220</b> | <b>645.3146</b> | 1272.5954 | 636.8013         | <b>1271.6114</b> | 636.3093         | <b>T</b> | 248.1605        | 124.5839        | 231.1339        | 116.0706         | 230.1499       | 115.5786         | <b>2</b>  |
| 13 |                  |                 |           |                  |                  |                  | <b>K</b> | 147.1128        | 74.0600         | 130.0863        | 65.5468          |                |                  | <b>1</b>  |

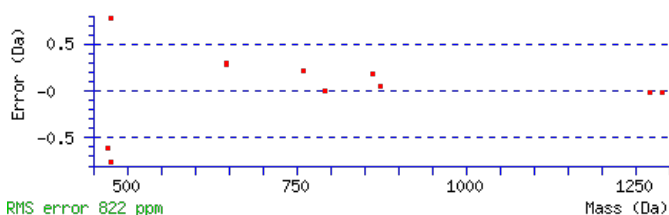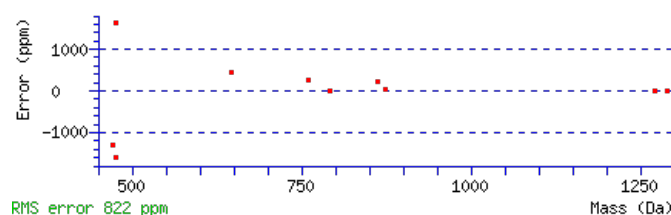

NCBI **BLAST** search of [DQKVSSDLSEVTK](#)

## AT1G20530.1

(Parameters: blastp, nr protein database, expect=20000, no filter, PAM30)

Other BLAST [web gateways](#)

### All matches to this query

| Score | Mr(calc)  | Delta   | Sequence                        |
|-------|-----------|---------|---------------------------------|
| 20.4  | 1434.7202 | -0.0035 | <a href="#">DQKVSSDLSEVTK</a>   |
| 5.7   | 1434.7136 | 0.0030  | <a href="#">SDRMVENAKLEK</a>    |
| 4.6   | 1434.7177 | -0.0010 | <a href="#">VEEWMTIQKQK</a>     |
| 4.5   | 1434.7202 | -0.0035 | <a href="#">KSSDSGVVSI AEEK</a> |
| 1.0   | 1434.7137 | 0.0030  | <a href="#">SIKSVASSMTGHSK</a>  |

Mascot: <http://www.matrixscience.com/>

### Peptide View

 MS/MS Fragmentation of **GFFEVTHTDISNLTCADFLR**

 Found in **AT1G20620.1** in **TAIR\_Arabidopsis**, Symbols: SEN2, CAT3 | CAT3 (CATALASE 3); catalase | chr1:7143132-7146183 FORWARD

Match to Query 9661: 2241.050222 from(1121.532387,2+) index(10083)

Title: Elution from: 99.457 to 99.457 scan no 14640 cid35.00 polarity:+

Data file D1d-2\_2.mgf

Click mouse within plot area to zoom in by factor of two about that point

 Or, Plot from  to  Da 

 Label all possible matches  Label matches used for scoring 

 Show Y-axis 
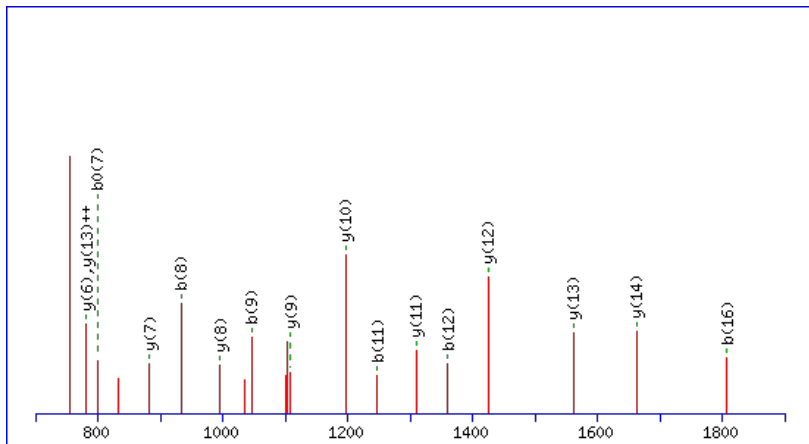
 Monoisotopic mass of neutral peptide  $M_r(\text{calc})$ : 2241.0525

Fixed modifications: Carbamidomethyl (C) (apply to specified residues or termini only)

Ions Score: 62 Expect: 1.8e-006

 Matches : 16/184 fragment ions using 24 most intense peaks ([help](#))

| #  | b                | b <sup>++</sup> | b <sup>*</sup> | b <sup>*++</sup> | b <sup>0</sup>  | b <sup>0++</sup> | Seq. | y                | y <sup>++</sup> | y <sup>*</sup> | y <sup>*++</sup> | y <sup>0</sup> | y <sup>0++</sup> | #  |
|----|------------------|-----------------|----------------|------------------|-----------------|------------------|------|------------------|-----------------|----------------|------------------|----------------|------------------|----|
| 1  | 58.0287          | 29.5180         |                |                  |                 |                  | G    |                  |                 |                |                  |                |                  | 19 |
| 2  | 205.0972         | 103.0522        |                |                  |                 |                  | F    | 2185.0383        | 1093.0228       | 2168.0117      | 1084.5095        | 2167.0277      | 1084.0175        | 18 |
| 3  | 352.1656         | 176.5864        |                |                  |                 |                  | F    | 2037.9699        | 1019.4886       | 2020.9433      | 1010.9753        | 2019.9593      | 1010.4833        | 17 |
| 4  | 481.2082         | 241.1077        |                |                  | 463.1976        | 232.1024         | E    | 1890.9014        | 945.9544        | 1873.8749      | 937.4411         | 1872.8909      | 936.9491         | 16 |
| 5  | 580.2766         | 290.6419        |                |                  | 562.2660        | 281.6366         | V    | 1761.8588        | 881.4331        | 1744.8323      | 872.9198         | 1743.8483      | 872.4278         | 15 |
| 6  | 681.3243         | 341.1658        |                |                  | 663.3137        | 332.1605         | T    | <b>1662.7904</b> | 831.8989        | 1645.7639      | 823.3856         | 1644.7799      | 822.8936         | 14 |
| 7  | 818.3832         | 409.6952        |                |                  | <b>800.3726</b> | 400.6899         | H    | <b>1561.7428</b> | <b>781.3750</b> | 1544.7162      | 772.8617         | 1543.7322      | 772.3697         | 13 |
| 8  | <b>933.4101</b>  | 467.2087        |                |                  | 915.3995        | 458.2034         | D    | <b>1424.6838</b> | 712.8456        | 1407.6573      | 704.3323         | 1406.6733      | 703.8403         | 12 |
| 9  | <b>1046.4942</b> | 523.7507        |                |                  | 1028.4836       | 514.7454         | I    | <b>1309.6569</b> | 655.3321        | 1292.6303      | 646.8188         | 1291.6463      | 646.3268         | 11 |
| 10 | 1133.5262        | 567.2667        |                |                  | 1115.5156       | 558.2615         | S    | <b>1196.5728</b> | 598.7901        | 1179.5463      | 590.2768         | 1178.5623      | 589.7848         | 10 |
| 11 | <b>1247.5691</b> | 624.2882        | 1230.5426      | 615.7749         | 1229.5586       | 615.2829         | N    | <b>1109.5408</b> | 555.2740        | 1092.5143      | 546.7608         | 1091.5302      | 546.2688         | 9  |
| 12 | <b>1360.6532</b> | 680.8302        | 1343.6266      | 672.3170         | 1342.6426       | 671.8250         | L    | <b>995.4979</b>  | 498.2526        | 978.4713       | 489.7393         | 977.4873       | 489.2473         | 8  |
| 13 | 1461.7009        | 731.3541        | 1444.6743      | 722.8408         | 1443.6903       | 722.3488         | T    | <b>882.4138</b>  | 441.7105        | 865.3873       | 433.1973         | 864.4033       | 432.7053         | 7  |
| 14 | 1621.7315        | 811.3694        | 1604.7050      | 802.8561         | 1603.7210       | 802.3641         | C    | <b>781.3661</b>  | 391.1867        | 764.3396       | 382.6734         | 763.3556       | 382.1814         | 6  |
| 15 | 1692.7686        | 846.8880        | 1675.7421      | 838.3747         | 1674.7581       | 837.8827         | A    | 621.3355         | 311.1714        | 604.3089       | 302.6581         | 603.3249       | 302.1661         | 5  |
| 16 | <b>1807.7956</b> | 904.4014        | 1790.7690      | 895.8882         | 1789.7850       | 895.3961         | D    | 550.2984         | 275.6528        | 533.2718       | 267.1396         | 532.2878       | 266.6475         | 4  |
| 17 | 1954.8640        | 977.9356        | 1937.8374      | 969.4224         | 1936.8534       | 968.9304         | F    | 435.2714         | 218.1394        | 418.2449       | 209.6261         |                |                  | 3  |
| 18 | 2067.9481        | 1034.4777       | 2050.9215      | 1025.9644        | 2049.9375       | 1025.4724        | L    | 288.2030         | 144.6051        | 271.1765       | 136.0919         |                |                  | 2  |
| 19 |                  |                 |                |                  |                 |                  | R    | 175.1190         | 88.0631         | 158.0924       | 79.5498          |                |                  | 1  |

# AT1G20620.1

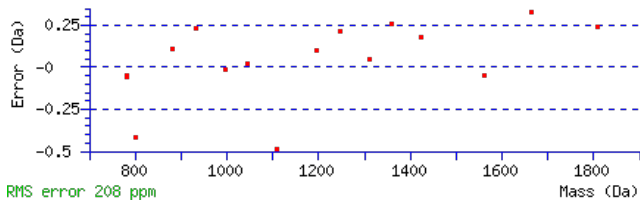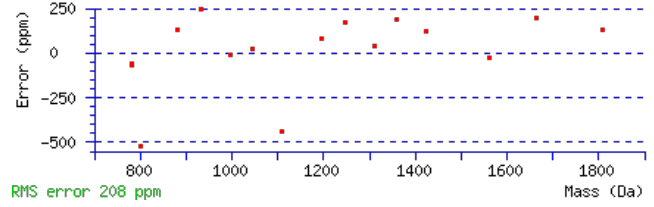

NCBI **BLAST** search of [GFFEVTHTDISNLTCADFLR](#)  
(Parameters: blastp, nr protein database, expect=20000, no filter, PAM30)  
Other BLAST [web gateways](#)

## All matches to this query

| Score | Mr(calc)  | Delta   | Sequence                             |
|-------|-----------|---------|--------------------------------------|
| 62.1  | 2241.0525 | -0.0023 | <a href="#">GFFEVTHTDISNLTCADFLR</a> |

Mascot: <http://www.matrixscience.com/>

**Peptide View**MS/MS Fragmentation of **NKSVAAVGK**

Found in **AT1G20696.1** in **TAIR\_Arabidopsis**, Symbols: NFD3, NFD03, HMGB3 | HMGB3 (HIGH MOBILITY GROUP B 3); transcription factor | chr1:7179815-7181164 FORWARD

Match to Query 1577: 884.470360 from(443.242456,2+) index(6041)

Title: Elution from: 53.489 to 53.489 scan no 7638 cid35.00 polarity:+

Data file 0-2\_1.mgf

Click mouse within plot area to zoom in by factor of two about that point

Or,   to  Da

Label all possible matches  Label matches used for scoring

Show Y-axis

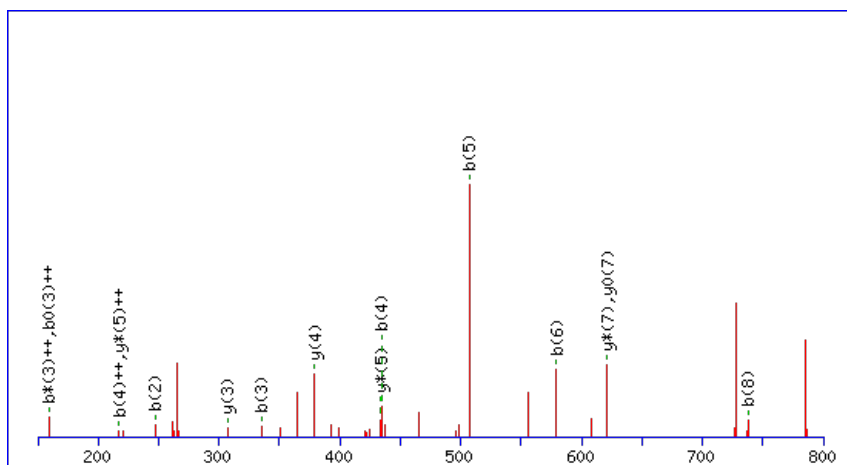

Monoisotopic mass of neutral peptide  $M_r(\text{calc})$ : 884.4724

Fixed modifications: Carbamidomethyl (C) (apply to specified residues or termini only)

Ions Score: 34 Expect: 0.0057

Matches : 15/80 fragment ions using 26 most intense peaks ([help](#))

| # | b               | b <sup>++</sup> | b*       | b <sup>*++</sup> | b <sup>0</sup> | b <sup>0++</sup> | Seq. | y               | y <sup>++</sup> | y*              | y <sup>*++</sup> | y <sup>0</sup>  | y <sup>0++</sup> | # |
|---|-----------------|-----------------|----------|------------------|----------------|------------------|------|-----------------|-----------------|-----------------|------------------|-----------------|------------------|---|
| 1 | 117.0443        | 59.0258         | 99.0207  | 50.0140          |                |                  | N    |                 |                 |                 |                  |                 |                  | 9 |
| 2 | <b>247.1333</b> | 124.0703        | 229.1097 | 115.0585         |                |                  | K    | 769.4427        | 385.2250        | 751.4191        | 376.2132         | 751.4321        | 376.2197         | 8 |
| 3 | <b>335.1624</b> | 168.0848        | 317.1388 | <b>159.0730</b>  | 317.1518       | <b>159.0795</b>  | S    | 639.3536        | 320.1805        | <b>621.3300</b> | 311.1687         | <b>621.3431</b> | 311.1752         | 7 |
| 4 | <b>435.2278</b> | <b>218.1175</b> | 417.2042 | 209.1058         | 417.2173       | 209.1123         | V    | 551.3246        | 276.1659        | 533.3010        | 267.1541         |                 |                  | 6 |
| 5 | <b>507.2620</b> | 254.1346        | 489.2384 | 245.1228         | 489.2514       | 245.1293         | A    | 451.2591        | 226.1332        | <b>433.2355</b> | <b>217.1214</b>  |                 |                  | 5 |
| 6 | <b>579.2961</b> | 290.1517        | 561.2725 | 281.1399         | 561.2856       | 281.1464         | A    | <b>379.2250</b> | 190.1161        | 361.2014        | 181.1043         |                 |                  | 4 |
| 7 | 679.3616        | 340.1844        | 661.3380 | 331.1726         | 661.3510       | 331.1791         | V    | <b>307.1908</b> | 154.0990        | 289.1672        | 145.0873         |                 |                  | 3 |
| 8 | <b>737.3801</b> | 369.1937        | 719.3565 | 360.1819         | 719.3695       | 360.1884         | G    | 207.1254        | 104.0663        | 189.1018        | 95.0545          |                 |                  | 2 |
| 9 |                 |                 |          |                  |                |                  | K    | 149.1069        | 75.0571         | 131.0833        | 66.0453          |                 |                  | 1 |

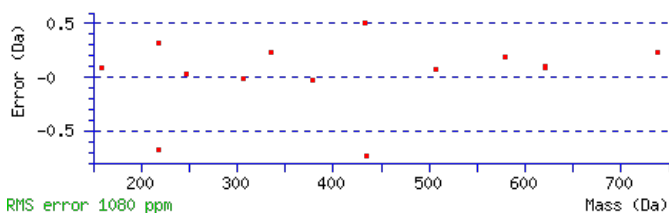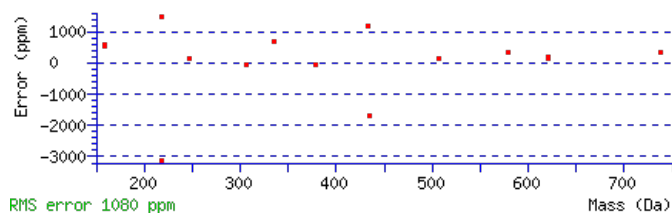

NCBI BLAST search of **NKSVAAVGK**

(Parameters: blastp, nr protein database, expect=20000, no filter, PAM30)

Other BLAST [web gateways](#)

All matches to this query

| Score | $M_r(\text{calc})$ | Delta | Sequence |
|-------|--------------------|-------|----------|
|       |                    |       |          |



## AT1G20696.1

|      |          |         |                           |
|------|----------|---------|---------------------------|
| 33.7 | 884.4724 | -0.0020 | <a href="#">NKSVAAVGK</a> |
| 12.7 | 884.4724 | -0.0020 | <a href="#">TREILNK</a>   |
| 11.7 | 884.4719 | -0.0016 | <a href="#">DFIELK</a>    |
| 11.7 | 884.4724 | -0.0020 | <a href="#">SGKNILNK</a>  |
| 7.7  | 884.4724 | -0.0020 | <a href="#">VKKEGAGGK</a> |
| 6.3  | 884.4724 | -0.0020 | <a href="#">RGSELALK</a>  |
| 6.1  | 884.4724 | -0.0020 | <a href="#">KASSQKPK</a>  |
| 5.9  | 884.4724 | -0.0020 | <a href="#">NOKKVEK</a>   |
| 0.2  | 884.4724 | -0.0020 | <a href="#">LTRENIK</a>   |

Mascot: <http://www.matrixscience.com/>

**Peptide View**MS/MS Fragmentation of **MAASGKFIYR**Found in **AT1G21450.1** in **TAIR\_Arabidopsis**, Symbols: SCL1 | SCL1 (SCARECROW-LIKE 1); transcription factor | chr1:7509710-7511491  
FORWARD

Match to Query 3664: 1142.588074 from(572.301313,2+) index(4523)

Title: Elution from: 41.457 to 41.457 scan no 5712 cid35.00 polarity:+

Data file D6h-3\_2.mgf

Click mouse within plot area to zoom in by factor of two about that point

Or,   to  Da Label all possible matches  Label matches used for scoring Show Y-axis 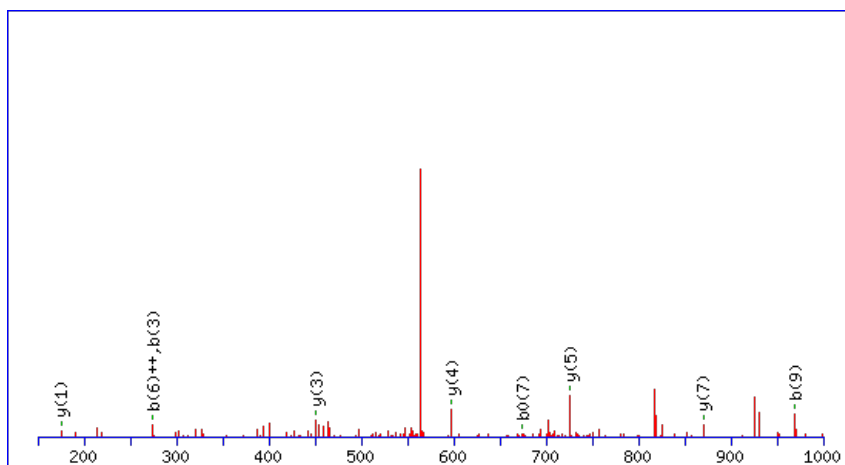Monoisotopic mass of neutral peptide  $M_r(\text{calc})$ : 1142.5906

Fixed modifications: Carbamidomethyl (C) (apply to specified residues or termini only)

Ions Score: 20 Expect: 0.021

Matches : 9/80 fragment ions using 26 most intense peaks ([help](#))

| #  | b               | b <sup>++</sup> | b*       | b <sup>*++</sup> | b <sup>0</sup>  | b <sup>0++</sup> | Seq. | y               | y <sup>++</sup> | y*       | y <sup>*++</sup> | y <sup>0</sup> | y <sup>0++</sup> | #  |
|----|-----------------|-----------------|----------|------------------|-----------------|------------------|------|-----------------|-----------------|----------|------------------|----------------|------------------|----|
| 1  | 132.0478        | 66.5275         |          |                  |                 |                  | M    |                 |                 |          |                  |                |                  | 10 |
| 2  | 203.0849        | 102.0461        |          |                  |                 |                  | A    | 1012.5574       | 506.7824        | 995.5309 | 498.2691         | 994.5469       | 497.7771         | 9  |
| 3  | <b>274.1220</b> | 137.5646        |          |                  |                 |                  | A    | 941.5203        | 471.2638        | 924.4938 | 462.7505         | 923.5098       | 462.2585         | 8  |
| 4  | 361.1540        | 181.0806        |          |                  | 343.1435        | 172.0754         | S    | <b>870.4832</b> | 435.7452        | 853.4567 | 427.2320         | 852.4726       | 426.7400         | 7  |
| 5  | 418.1755        | 209.5914        |          |                  | 400.1649        | 200.5861         | G    | 783.4512        | 392.2292        | 766.4246 | 383.7160         |                |                  | 6  |
| 6  | 546.2704        | <b>273.6389</b> | 529.2439 | 265.1256         | 528.2599        | 264.6336         | K    | <b>726.4297</b> | 363.7185        | 709.4032 | 355.2052         |                |                  | 5  |
| 7  | 693.3389        | 347.1731        | 676.3123 | 338.6598         | <b>675.3283</b> | 338.1678         | F    | <b>598.3348</b> | 299.6710        | 581.3082 | 291.1577         |                |                  | 4  |
| 8  | 806.4229        | 403.7151        | 789.3964 | 395.2018         | 788.4124        | 394.7098         | I    | <b>451.2663</b> | 226.1368        | 434.2398 | 217.6235         |                |                  | 3  |
| 9  | <b>969.4863</b> | 485.2468        | 952.4597 | 476.7335         | 951.4757        | 476.2415         | Y    | 338.1823        | 169.5948        | 321.1557 | 161.0815         |                |                  | 2  |
| 10 |                 |                 |          |                  |                 |                  | R    | <b>175.1190</b> | 88.0631         | 158.0924 | 79.5498          |                |                  | 1  |

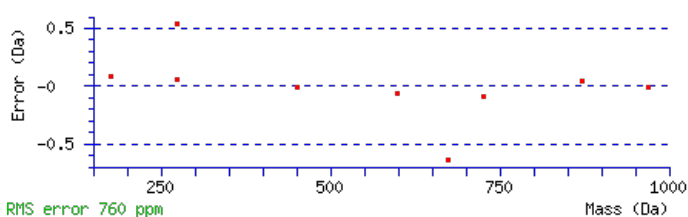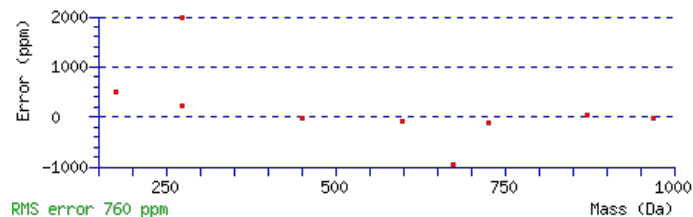NCBI BLAST search of [MAASGKFIYR](#)

(Parameters: blastp, nr protein database, expect=20000, no filter, PAM30)

Other BLAST [web gateways](#)**All matches to this query**

**AT1G21450.1**

| <b>Score</b> | <b>Mr(calc)</b> | <b>Delta</b> | <b>Sequence</b>              |
|--------------|-----------------|--------------|------------------------------|
| 19.6         | 1142.5906       | -0.0025      | <a href="#">MAASGKFIYR</a>   |
| 5.3          | 1142.5866       | 0.0015       | <a href="#">VPMAAAGNGLSR</a> |
| 2.1          | 1142.5904       | -0.0024      | <a href="#">AASSSHGKRSR</a>  |
| 1.8          | 1142.5906       | -0.0026      | <a href="#">MPRFPPSAPK</a>   |
| 0.4          | 1142.5866       | 0.0015       | <a href="#">MATHAALAVSR</a>  |

**Mascot:** <http://www.matrixscience.com/>

## Peptide View

### MS/MS Fragmentation of **LDATANDFPK**

Found in **AT1G21750.1** in **TAIR\_Arabidopsis**, Symbols: ATPDIL1-1 | ATPDIL1-1 (PDI-LIKE 1-1); protein disulfide isomerase | chr1:7645756-7648503 FORWARD

Match to Query 3344: 1090.532504 from(546.273528,2+) index(2822)

Title: Elution from: 28.950 to 28.950 scan no 3528 cid35.00 polarity:+

Data file D12h-1\_2.mgf

Click mouse within plot area to zoom in by factor of two about that point

Or,   to  Da

Label all possible matches  Label matches used for scoring

Show Y-axis

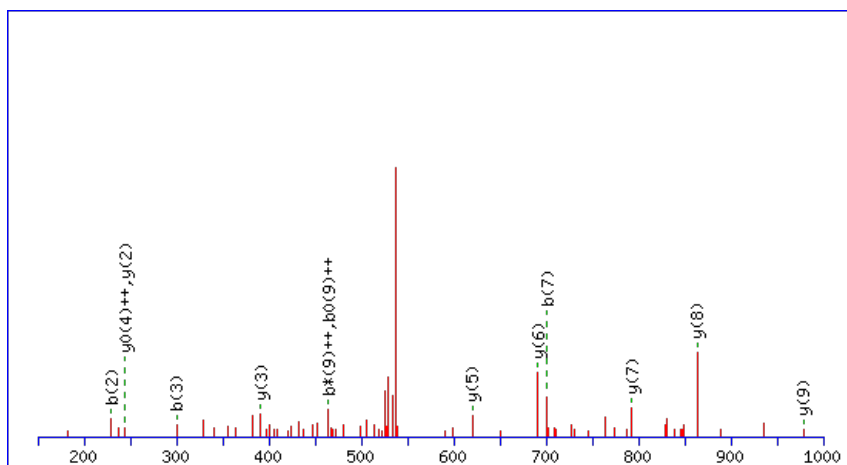

**Monoisotopic mass of neutral peptide Mr(calc):** 1090.5295

**Fixed modifications:** Carbamidomethyl (C) (apply to specified residues or termini only)

**Ions Score:** 64 **Expect:** 2.2e-006

**Matches:** 13/90 fragment ions using 16 most intense peaks ([help](#))

| #  | b               | b <sup>++</sup> | b*       | b* <sup>++</sup> | b <sup>0</sup> | b <sup>0++</sup> | Seq. | y               | y <sup>++</sup> | y*       | y* <sup>++</sup> | y <sup>0</sup> | y <sup>0++</sup> | #  |
|----|-----------------|-----------------|----------|------------------|----------------|------------------|------|-----------------|-----------------|----------|------------------|----------------|------------------|----|
| 1  | 114.0913        | 57.5493         |          |                  |                |                  | L    |                 |                 |          |                  |                |                  | 10 |
| 2  | <b>229.1183</b> | 115.0628        |          |                  | 211.1077       | 106.0575         | D    | <b>978.4527</b> | 489.7300        | 961.4262 | 481.2167         | 960.4421       | 480.7247         | 9  |
| 3  | <b>300.1554</b> | 150.5813        |          |                  | 282.1448       | 141.5761         | A    | <b>863.4258</b> | 432.2165        | 846.3992 | 423.7032         | 845.4152       | 423.2112         | 8  |
| 4  | 401.2031        | 201.1052        |          |                  | 383.1925       | 192.0999         | T    | <b>792.3886</b> | 396.6980        | 775.3621 | 388.1847         | 774.3781       | 387.6927         | 7  |
| 5  | 472.2402        | 236.6237        |          |                  | 454.2296       | 227.6185         | A    | <b>691.3410</b> | 346.1741        | 674.3144 | 337.6608         | 673.3304       | 337.1688         | 6  |
| 6  | 586.2831        | 293.6452        | 569.2566 | 285.1319         | 568.2726       | 284.6399         | N    | <b>620.3039</b> | 310.6556        | 603.2773 | 302.1423         | 602.2933       | 301.6503         | 5  |
| 7  | <b>701.3101</b> | 351.1587        | 684.2835 | 342.6454         | 683.2995       | 342.1534         | D    | 506.2609        | 253.6341        | 489.2344 | 245.1208         | 488.2504       | <b>244.6288</b>  | 4  |
| 8  | 848.3785        | 424.6929        | 831.3519 | 416.1796         | 830.3679       | 415.6876         | F    | <b>391.2340</b> | 196.1206        | 374.2074 | 187.6074         |                |                  | 3  |
| 9  | 945.4312        | 473.2193        | 928.4047 | <b>464.7060</b>  | 927.4207       | <b>464.2140</b>  | P    | <b>244.1656</b> | 122.5864        | 227.1390 | 114.0731         |                |                  | 2  |
| 10 |                 |                 |          |                  |                |                  | K    | 147.1128        | 74.0600         | 130.0863 | 65.5468          |                |                  | 1  |

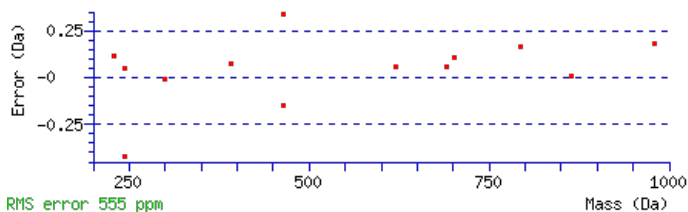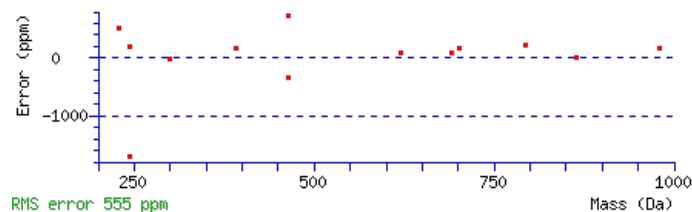

### NCBI BLAST search of **LDATANDFPK**

(Parameters: blastp, nr protein database, expect=20000, no filter, PAM30)

Other BLAST [web gateways](#)

All matches to this query

## AT1G21750.1

| Score | Mr(calc)  | Delta   | Sequence                   |
|-------|-----------|---------|----------------------------|
| 64.1  | 1090.5295 | 0.0030  | <a href="#">LDATANDFPK</a> |
| 14.2  | 1090.5329 | -0.0003 | <a href="#">LNTIIDCDK</a>  |
| 10.2  | 1090.5295 | 0.0030  | <a href="#">EVAGQAPYEK</a> |
| 1.4   | 1090.5302 | 0.0023  | <a href="#">GGGTKACRER</a> |
| 0.7   | 1090.5329 | -0.0004 | <a href="#">EQTVVVECK</a>  |
| 0.3   | 1090.5295 | 0.0030  | <a href="#">AIDFSNPEAK</a> |

Mascot: <http://www.matrixscience.com/>

## Peptide View

MS/MS Fragmentation of **LQEELDLQR**

Found in **AT1G22275.1** in **TAIR\_Arabidopsis**, Symbols: ZYP1, ZYP1b | ZYP1b | chr1:7867234-7872055 FORWARD

Match to Query 3806: 1156.552394 from(579.283473,2+) index(3095)

Title: Elution from: 32.150 to 32.150 scan no 3882 cid35.00 polarity:+

Data file D6h-2\_2.mgf

Click mouse within plot area to zoom in by factor of two about that point

Or,   to  Da

Label all possible matches  Label matches used for scoring

Show Y-axis

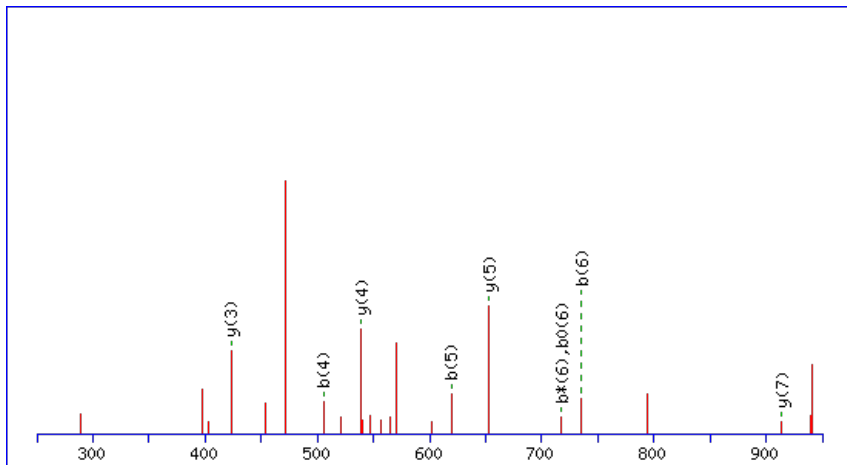

Monoisotopic mass of neutral peptide **Mr(calc)**: 1156.5516

**Fixed modifications**: Carbamidomethyl (C) (apply to specified residues or termini only)

**Ions Score**: 22 **Expect**: 0.039

**Matches**: 9/84 fragment ions using 16 most intense peaks ([help](#))

| # | b               | b <sup>++</sup> | b*              | b <sup>*++</sup> | b <sup>0</sup>  | b <sup>0++</sup> | Seq. | y               | y <sup>++</sup> | y*        | y <sup>*++</sup> | y <sup>0</sup> | y <sup>0++</sup> | # |
|---|-----------------|-----------------|-----------------|------------------|-----------------|------------------|------|-----------------|-----------------|-----------|------------------|----------------|------------------|---|
| 1 | 115.0884        | 58.0478         |                 |                  |                 |                  | L    |                 |                 |           |                  |                |                  | 9 |
| 2 | 245.1410        | 123.0741        | 227.1174        | 114.0624         |                 |                  | Q    | 1043.4778       | 522.2425        | 1025.4542 | 513.2308         | 1025.4673      | 513.2373         | 8 |
| 3 | 375.1806        | 188.0940        | 357.1571        | 179.0822         | 357.1701        | 179.0887         | E    | <b>913.4252</b> | 457.2162        | 895.4016  | 448.2044         | 895.4146       | 448.2109         | 7 |
| 4 | <b>505.2203</b> | 253.1138        | 487.1967        | 244.1020         | 487.2097        | 244.1085         | E    | 783.3855        | 392.1964        | 765.3620  | 383.1846         | 765.3750       | 383.1911         | 6 |
| 5 | <b>619.3014</b> | 310.1543        | 601.2778        | 301.1425         | 601.2908        | 301.1490         | L    | <b>653.3459</b> | 327.1766        | 635.3223  | 318.1648         | 635.3354       | 318.1713         | 5 |
| 6 | <b>735.3254</b> | 368.1663        | <b>717.3018</b> | 359.1545         | <b>717.3148</b> | 359.1610         | D    | <b>539.2648</b> | 270.1360        | 521.2412  | 261.1243         | 521.2543       | 261.1308         | 4 |
| 7 | 849.4065        | 425.2069        | 831.3829        | 416.1951         | 831.3959        | 416.2016         | L    | <b>423.2408</b> | 212.1241        | 405.2173  | 203.1123         |                |                  | 3 |
| 8 | 979.4591        | 490.2332        | 961.4355        | 481.2214         | 961.4485        | 481.2279         | Q    | 309.1597        | 155.0835        | 291.1362  | 146.0717         |                |                  | 2 |
| 9 |                 |                 |                 |                  |                 |                  | R    | 179.1071        | 90.0572         | 161.0835  | 81.0454          |                |                  | 1 |

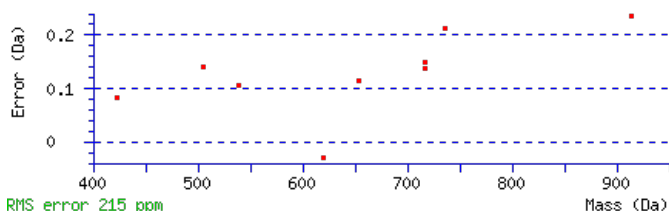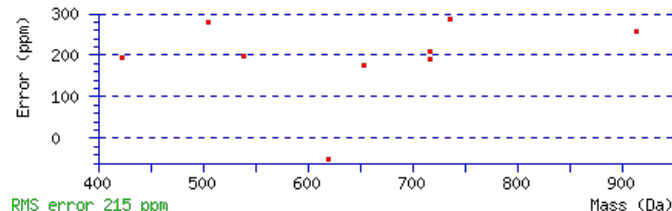

NCBI **BLAST** search of **LQEELDLQR**

(Parameters: blastp, nr protein database, expect=20000, no filter, PAM30)

Other BLAST [web gateways](#)

All matches to this query

| Score | Mr(calc)  | Delta  | Sequence                  |
|-------|-----------|--------|---------------------------|
| 22.1  | 1156.5516 | 0.0008 | <a href="#">LQEELDLQR</a> |

## AT1G22275.1

|     |           |         |                              |
|-----|-----------|---------|------------------------------|
| 5.2 | 1156.5543 | -0.0019 | <a href="#">SLRNDHGTLK</a>   |
| 2.0 | 1156.5516 | 0.0008  | <a href="#">ITTVSSHVDGK</a>  |
| 0.9 | 1156.5491 | 0.0033  | <a href="#">VYRIFCTGK</a>    |
| 0.2 | 1156.5516 | 0.0008  | <a href="#">LSGAGPSNVDVK</a> |

**Mascot:** <http://www.matrixscience.com/>

## Peptide View

### MS/MS Fragmentation of **YLAEFSSGAER**

Found in **AT1G22300.1** in **TAIR\_Arabidopsis**, Symbols: GF14 EPSILON, GRF10 | GRF10 (GENERAL REGULATORY FACTOR 10); protein phosphorylated amino acid binding | chr1:7879135-7881092 REVERSE

Match to Query 4327: 1228.569936 from(615.292244,2+) index(3333)

Title: Elution from: 34.208 to 34.208 scan no 4208 cid35.00 polarity:+

Data file D6h-2\_1.mgf

Click mouse within plot area to zoom in by factor of two about that point

Or,   to  Da

Label all possible matches  Label matches used for scoring

Show Y-axis

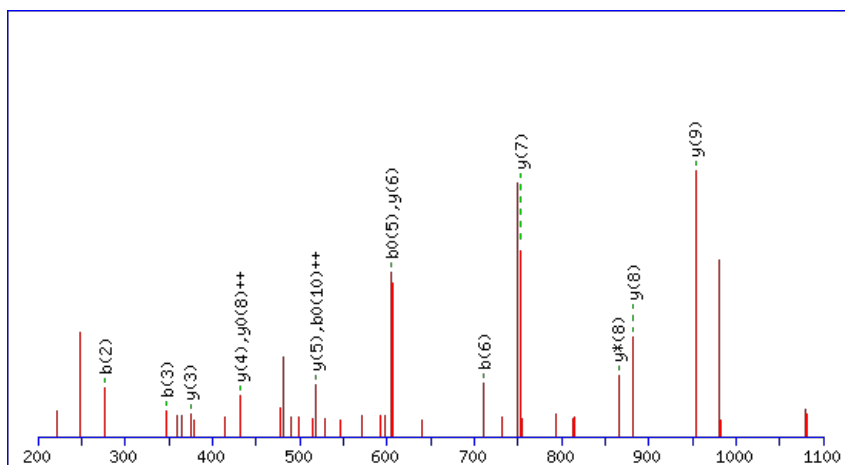

Monoisotopic mass of neutral peptide  $M_r(\text{calc})$ : 1228.5724

Fixed modifications: Carbamidomethyl (C) (apply to specified residues or termini only)

Ions Score: 43 Expect: 7.7e-005

Matches : 14/92 fragment ions using 24 most intense peaks ([help](#))

| #  | b               | b <sup>++</sup> | b <sup>0</sup>  | b <sup>0++</sup> | Seq. | y               | y <sup>++</sup> | y*              | y <sup>*++</sup> | y <sup>0</sup> | y <sup>0++</sup> | #  |
|----|-----------------|-----------------|-----------------|------------------|------|-----------------|-----------------|-----------------|------------------|----------------|------------------|----|
| 1  | 164.0706        | 82.5389         |                 |                  | Y    |                 |                 |                 |                  |                |                  | 11 |
| 2  | <b>277.1547</b> | 139.0810        |                 |                  | L    | 1066.5164       | 533.7618        | 1049.4898       | 525.2485         | 1048.5058      | 524.7565         | 10 |
| 3  | <b>348.1918</b> | 174.5995        |                 |                  | A    | <b>953.4323</b> | 477.2198        | 936.4058        | 468.7065         | 935.4217       | 468.2145         | 9  |
| 4  | 477.2344        | 239.1208        | 459.2238        | 230.1155         | E    | <b>882.3952</b> | 441.7012        | <b>865.3686</b> | 433.1880         | 864.3846       | <b>432.6959</b>  | 8  |
| 5  | 624.3028        | 312.6550        | <b>606.2922</b> | 303.6498         | F    | <b>753.3526</b> | 377.1799        | 736.3260        | 368.6667         | 735.3420       | 368.1747         | 7  |
| 6  | <b>711.3348</b> | 356.1710        | 693.3243        | 347.1658         | S    | <b>606.2842</b> | 303.6457        | 589.2576        | 295.1325         | 588.2736       | 294.6404         | 6  |
| 7  | 798.3668        | 399.6871        | 780.3563        | 390.6818         | S    | <b>519.2522</b> | 260.1297        | 502.2256        | 251.6164         | 501.2416       | 251.1244         | 5  |
| 8  | 855.3883        | 428.1978        | 837.3777        | 419.1925         | G    | <b>432.2201</b> | 216.6137        | 415.1936        | 208.1004         | 414.2096       | 207.6084         | 4  |
| 9  | 926.4254        | 463.7164        | 908.4149        | 454.7111         | A    | <b>375.1987</b> | 188.1030        | 358.1721        | 179.5897         | 357.1881       | 179.0977         | 3  |
| 10 | 1055.4680       | 528.2376        | 1037.4575       | <b>519.2324</b>  | E    | 304.1615        | 152.5844        | 287.1350        | 144.0711         | 286.1510       | 143.5791         | 2  |
| 11 |                 |                 |                 |                  | R    | 175.1190        | 88.0631         | 158.0924        | 79.5498          |                |                  | 1  |

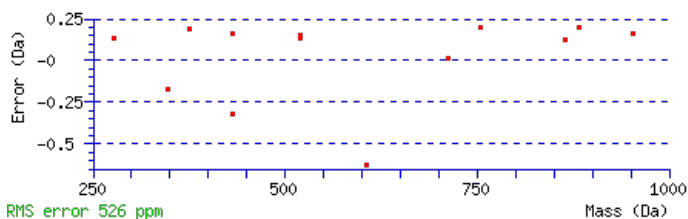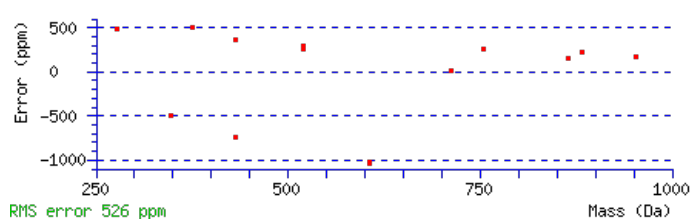

NCBI BLAST search of **YLAEFSSGAER**

(Parameters: blastp, nr protein database, expect=20000, no filter, PAM30)

Other BLAST [web gateways](#)

All matches to this query



AT1G22300.1

| Score | Mr(calc)  | Delta   | Sequence                    |
|-------|-----------|---------|-----------------------------|
| 43.0  | 1228.5724 | -0.0025 | <a href="#">YLAEFSSGAER</a> |
| 4.8   | 1228.5731 | -0.0031 | <a href="#">MTDEERHRR</a>   |
| 2.0   | 1228.5724 | -0.0025 | <a href="#">YLTFNNDQSK</a>  |

Mascot: <http://www.matrixscience.com/>

**Peptide View**MS/MS Fragmentation of **ASQLSHANTAR**

Found in **AT1G22620.1** in **TAIR\_Arabidopsis**, Symbols: **ATSAC1** | **ATSAC1** (SUPPRESSOR OF ACTIN 1); phosphoinositide 5-phosphatase | chr1:7997878-8002776 REVERSE

Match to Query 3931: 1172.525788 from(587.270170,2+) index(1469)

Title: Elution from: 18.744 to 18.744 scan no 1931 cid35.00 polarity:+

Data file C7-2\_3.mgf

Click mouse within plot area to zoom in by factor of two about that point

Or,   to  Da

Label all possible matches  Label matches used for scoring

Show Y-axis

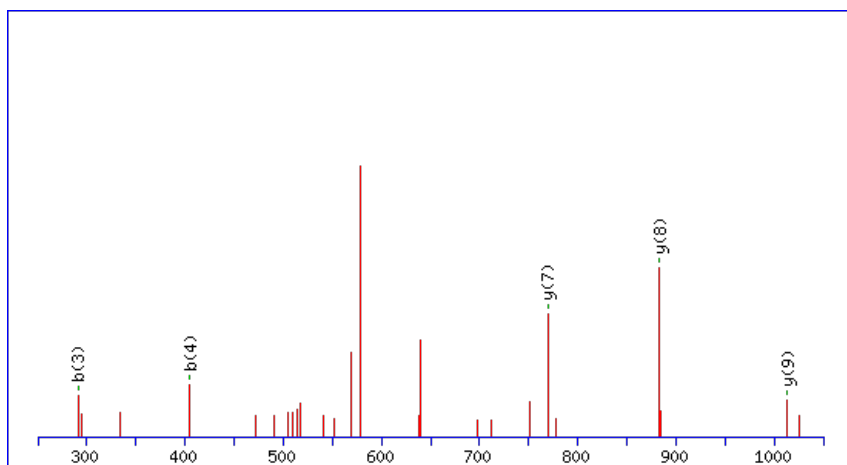

**Monoisotopic mass of neutral peptide Mr(calc):** 1172.5259

**Fixed modifications:** Carbamidomethyl (C) (apply to specified residues or termini only)

**Ions Score:** 22 **Expect:** 0.034

**Matches:** 5/110 fragment ions using 7 most intense peaks ([help](#))

| #  | b               | b <sup>++</sup> | b*       | b <sup>*++</sup> | b <sup>0</sup> | b <sup>0++</sup> | Seq. | y                | y <sup>++</sup> | y*        | y <sup>*++</sup> | y <sup>0</sup> | y <sup>0++</sup> | #  |
|----|-----------------|-----------------|----------|------------------|----------------|------------------|------|------------------|-----------------|-----------|------------------|----------------|------------------|----|
| 1  | 73.0414         | 37.0244         |          |                  |                |                  | A    |                  |                 |           |                  |                |                  | 11 |
| 2  | 161.0705        | 81.0389         |          |                  | 143.0599       | 72.0336          | S    | 1101.4990        | 551.2531        | 1083.4754 | 542.2413         | 1083.4884      | 542.2478         | 10 |
| 3  | <b>291.1231</b> | 146.0652        | 273.0996 | 137.0534         | 273.1126       | 137.0599         | Q    | <b>1013.4699</b> | 507.2386        | 995.4463  | 498.2268         | 995.4594       | 498.2333         | 9  |
| 4  | <b>405.2042</b> | 203.1058        | 387.1807 | 194.0940         | 387.1937       | 194.1005         | L    | <b>883.4173</b>  | 442.2123        | 865.3937  | 433.2005         | 865.4067       | 433.2070         | 8  |
| 5  | 493.2333        | 247.1203        | 475.2097 | 238.1085         | 475.2227       | 238.1150         | S    | <b>769.3362</b>  | 385.1717        | 751.3126  | 376.1599         | 751.3256       | 376.1664         | 7  |
| 6  | 633.2833        | 317.1453        | 615.2597 | 308.1335         | 615.2727       | 308.1400         | H    | 681.3071         | 341.1572        | 663.2835  | 332.1454         | 663.2966       | 332.1519         | 6  |
| 7  | 705.3175        | 353.1624        | 687.2939 | 344.1506         | 687.3069       | 344.1571         | A    | 541.2571         | 271.1322        | 523.2335  | 262.1204         | 523.2465       | 262.1269         | 5  |
| 8  | 821.3545        | 411.1809        | 803.3309 | 402.1691         | 803.3439       | 402.1756         | N    | 469.2230         | 235.1151        | 451.1994  | 226.1033         | 451.2124       | 226.1098         | 4  |
| 9  | 923.3992        | 462.2032        | 905.3756 | 453.1914         | 905.3886       | 453.1979         | T    | 353.1860         | 177.0966        | 335.1624  | 168.0848         | 335.1754       | 168.0913         | 3  |
| 10 | 995.4333        | 498.2203        | 977.4097 | 489.2085         | 977.4228       | 489.2150         | A    | 251.1412         | 126.0743        | 233.1177  | 117.0625         |                |                  | 2  |
| 11 |                 |                 |          |                  |                |                  | R    | 179.1071         | 90.0572         | 161.0835  | 81.0454          |                |                  | 1  |

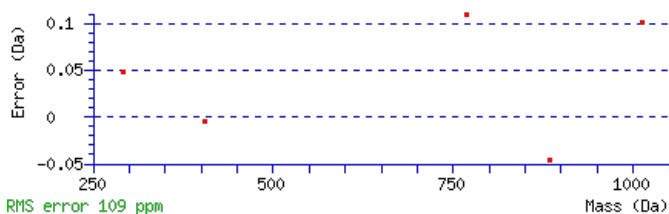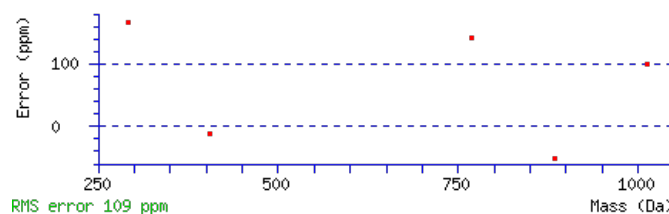

NCBI **BLAST** search of **ASQLSHANTAR**

(Parameters: blastp, nr protein database, expect=20000, no filter, PAM30)

Other BLAST [web gateways](#)

**All matches to this query**

## AT1G22620.1

| Score | Mr(calc)  | Delta   | Sequence                    |
|-------|-----------|---------|-----------------------------|
| 22.0  | 1172.5259 | -0.0001 | <a href="#">ASQLSHANTAR</a> |
| 7.5   | 1172.5254 | 0.0004  | <a href="#">REWEIDPSK</a>   |
| 3.6   | 1172.5281 | -0.0023 | <a href="#">REDYLAHPR</a>   |
| 2.5   | 1172.5259 | -0.0001 | <a href="#">ASNRPSEAPAR</a> |
| 2.5   | 1172.5254 | 0.0004  | <a href="#">SAGQSPWLGEK</a> |
| 2.3   | 1172.5281 | -0.0023 | <a href="#">EWRRLGPGE</a>   |
| 1.5   | 1172.5232 | 0.0026  | <a href="#">DNGDAQNLLAK</a> |
| 1.4   | 1172.5288 | -0.0030 | <a href="#">MGATEPAVVER</a> |
| 0.9   | 1172.5261 | -0.0003 | <a href="#">TVEMTPEEVK</a>  |

Mascot: <http://www.matrixscience.com/>

## Peptide View

### MS/MS Fragmentation of **IPDWFLNR**

Found in **AT1G22780.1** in **TAIR Arabidopsis**, Symbols: RPS18A, PFL1, PFL | PFL (POINTED FIRST LEAVES); structural constituent of ribosome | chr1:8067979-8069152 FORWARD

Match to Query 3254: 1059.549678 from(530.782115,2+) index(8165)

Title: Elution from: 71.149 to 71.149 scan no 10663 cid35.00 polarity:+

Data file D1d-3\_1.mgf

Click mouse within plot area to zoom in by factor of two about that point

Or,   to  Da

Label all possible matches  Label matches used for scoring

Show Y-axis

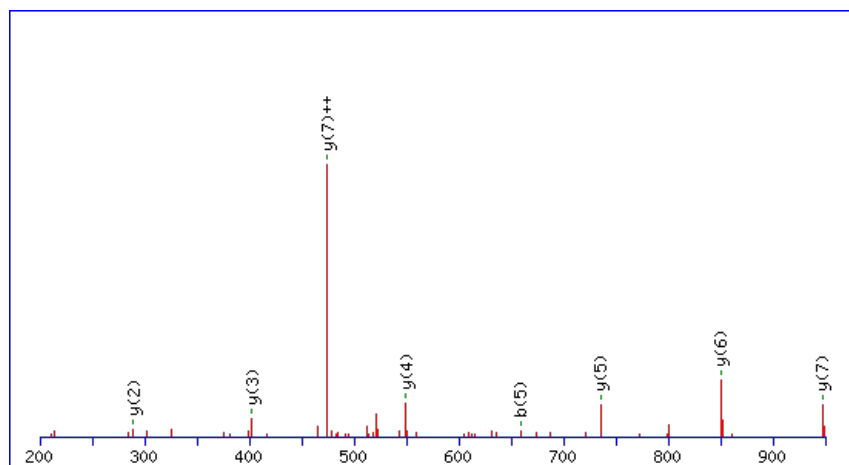

Monoisotopic mass of neutral peptide **Mr(calc)**: 1059.5502

**Fixed modifications**: Carbamidomethyl (C) (apply to specified residues or termini only)

**Ions Score**: 54 **Expect**: 1.5e-005

**Matches**: 8/58 fragment ions using 8 most intense peaks ([help](#))

| # | b        | b <sup>++</sup> | b*       | b <sup>*++</sup> | b <sup>0</sup> | b <sup>0++</sup> | Seq. | y        | y <sup>++</sup> | y*       | y <sup>*++</sup> | y <sup>0</sup> | y <sup>0++</sup> | # |
|---|----------|-----------------|----------|------------------|----------------|------------------|------|----------|-----------------|----------|------------------|----------------|------------------|---|
| 1 | 114.0913 | 57.5493         |          |                  |                |                  | I    |          |                 |          |                  |                |                  | 8 |
| 2 | 211.1441 | 106.0757        |          |                  |                |                  | P    | 947.4734 | 474.2403        | 930.4468 | 465.7271         | 929.4628       | 465.2350         | 7 |
| 3 | 326.1710 | 163.5892        |          |                  | 308.1605       | 154.5839         | D    | 850.4206 | 425.7139        | 833.3941 | 417.2007         | 832.4100       | 416.7087         | 6 |
| 4 | 512.2504 | 256.6288        |          |                  | 494.2398       | 247.6235         | W    | 735.3937 | 368.2005        | 718.3671 | 359.6872         |                |                  | 5 |
| 5 | 659.3188 | 330.1630        |          |                  | 641.3082       | 321.1577         | F    | 549.3144 | 275.1608        | 532.2878 | 266.6475         |                |                  | 4 |
| 6 | 772.4028 | 386.7051        |          |                  | 754.3923       | 377.6998         | L    | 402.2459 | 201.6266        | 385.2194 | 193.1133         |                |                  | 3 |
| 7 | 886.4458 | 443.7265        | 869.4192 | 435.2132         | 868.4352       | 434.7212         | N    | 289.1619 | 145.0846        | 272.1353 | 136.5713         |                |                  | 2 |
| 8 |          |                 |          |                  |                |                  | R    | 175.1190 | 88.0631         | 158.0924 | 79.5498          |                |                  | 1 |

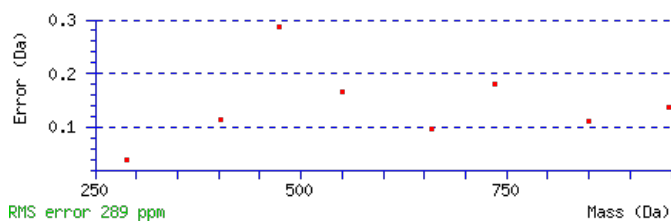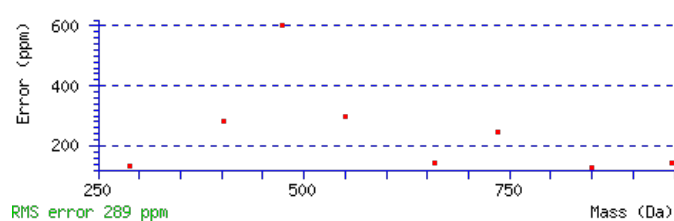

NCBI **BLAST** search of [IPDWFLNR](#)

(Parameters: blastp, nr protein database, expect=20000, no filter, PAM30)

Other BLAST [web gateways](#)

### All matches to this query

| Score | Mr(calc)  | Delta   | Sequence                 |
|-------|-----------|---------|--------------------------|
| 53.6  | 1059.5502 | -0.0005 | <a href="#">IPDWFLNR</a> |

AT1G22780.1

|     |           |        |                           |
|-----|-----------|--------|---------------------------|
| 5.7 | 1059.5495 | 0.0002 | <a href="#">IIEMRNR</a>   |
| 2.7 | 1059.5495 | 0.0002 | <a href="#">ACIEANVKR</a> |

**Mascot:** <http://www.matrixscience.com/>

## Peptide View

MS/MS Fragmentation of **QGPNLNGLFGR**

Found in **AT1G22840.1** in **TAIR\_Arabidopsis**, Symbols: CYTC-1, ATCYTC-A | ATCYTC-A/CYTC-1 (CYTOCHROME C-1); electron carrier | chr1:8079373-8080275 FORWARD

Match to Query 3483: 1188.559094 from(595.286823,2+) index(5945)

Title: Elution from: 55.199 to 55.199 scan no 7759 cid35.00 polarity:+

Data file D1d-1\_3.mgf

Click mouse within plot area to zoom in by factor of two about that point

Or,   to  Da

Label all possible matches  Label matches used for scoring

Show Y-axis

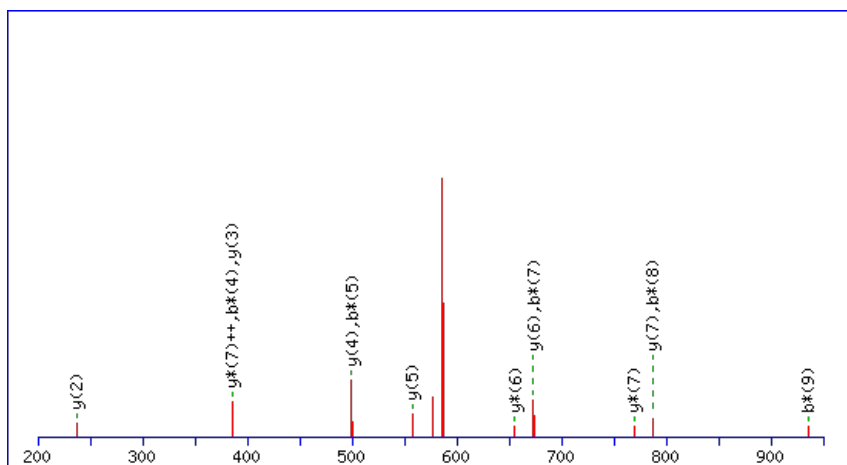

Monoisotopic mass of neutral peptide Mr(calc): 1188.5594

Fixed modifications: Carbamidomethyl (C) (apply to specified residues or termini only)

Ions Score: 46 Expect: 0.00025

Matches : 14/80 fragment ions using 15 most intense peaks ([help](#))

| #  | b         | b <sup>++</sup> | b*       | b <sup>*++</sup> | Seq. | y         | y <sup>++</sup> | y*        | y <sup>*++</sup> | #  |
|----|-----------|-----------------|----------|------------------|------|-----------|-----------------|-----------|------------------|----|
| 1  | 131.0599  | 66.0336         | 113.0363 | 57.0218          | Q    |           |                 |           |                  | 11 |
| 2  | 189.0784  | 95.0428         | 171.0548 | 86.0311          | G    | 1059.5140 | 530.2607        | 1041.4904 | 521.2489         | 10 |
| 3  | 287.1282  | 144.0677        | 269.1046 | 135.0560         | P    | 1001.4955 | 501.2514        | 983.4719  | 492.2396         | 9  |
| 4  | 403.1652  | 202.0862        | 385.1416 | 193.0745         | N    | 903.4457  | 452.2265        | 885.4221  | 443.2147         | 8  |
| 5  | 517.2463  | 259.1268        | 499.2227 | 250.1150         | L    | 787.4087  | 394.2080        | 769.3852  | 385.1962         | 7  |
| 6  | 633.2833  | 317.1453        | 615.2597 | 308.1335         | N    | 673.3276  | 337.1675        | 655.3041  | 328.1557         | 6  |
| 7  | 691.3018  | 346.1545        | 673.2782 | 337.1428         | G    | 557.2906  | 279.1490        | 539.2671  | 270.1372         | 5  |
| 8  | 805.3829  | 403.1951        | 787.3593 | 394.1833         | L    | 499.2721  | 250.1397        | 481.2486  | 241.1279         | 4  |
| 9  | 953.4484  | 477.2278        | 935.4248 | 468.2160         | F    | 385.1910  | 193.0992        | 367.1675  | 184.0874         | 3  |
| 10 | 1011.4669 | 506.2371        | 993.4433 | 497.2253         | G    | 237.1256  | 119.0664        | 219.1020  | 110.0546         | 2  |
| 11 |           |                 |          |                  | R    | 179.1071  | 90.0572         | 161.0835  | 81.0454          | 1  |

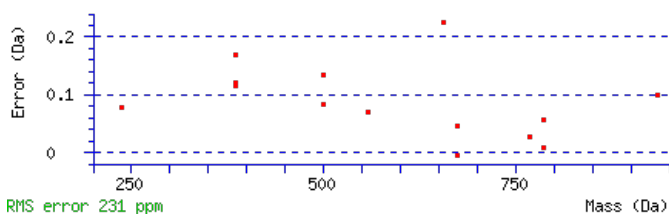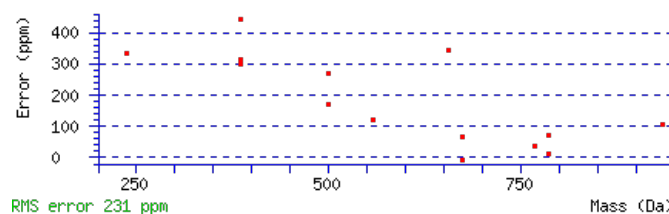

NCBI BLAST search of **QGPNLNGLFGR**

(Parameters: blastp, nr protein database, expect=20000, no filter, PAM30)

Other BLAST [web gateways](#)

All matches to this query

## AT1G22840.1

| Score | Mr(calc)  | Delta   | Sequence                     |
|-------|-----------|---------|------------------------------|
| 45.8  | 1188.5594 | -0.0003 | <a href="#">QGPNLNGLFGR</a>  |
| 19.1  | 1188.5623 | -0.0032 | <a href="#">GDILFLHMSK</a>   |
| 5.2   | 1188.5601 | -0.0010 | <a href="#">DAIVILSCER</a>   |
| 3.8   | 1188.5623 | -0.0032 | <a href="#">KHLMDYLEK</a>    |
| 3.5   | 1188.5572 | 0.0019  | <a href="#">AAVGPPSSSSRR</a> |
| 3.2   | 1188.5567 | 0.0024  | <a href="#">AESELNWKAK</a>   |
| 2.9   | 1188.5567 | 0.0024  | <a href="#">IKTWGGSDPSK</a>  |

Mascot: <http://www.matrixscience.com/>

## Peptide View

### MS/MS Fragmentation of ESQEALSPLVDLALK

Found in **AT1G23190.1** in **TAIR\_Arabidopsis**, Symbols: | phosphoglucomutase, cytoplasmic, putative / glucose phosphomutase, putative | chr1:8219935-8224175 FORWARD

Match to Query 7391: 1611.871616 from(806.943084,2+) index(9570)

Title: Elution from: 86.596 to 86.596 scan no 13071 cid35.00 polarity:+

Data file D6h-3\_1.mgf

Click mouse within plot area to zoom in by factor of two about that point

Or,  to  Da

Label all possible matches  Label matches used for scoring

Show Y-axis

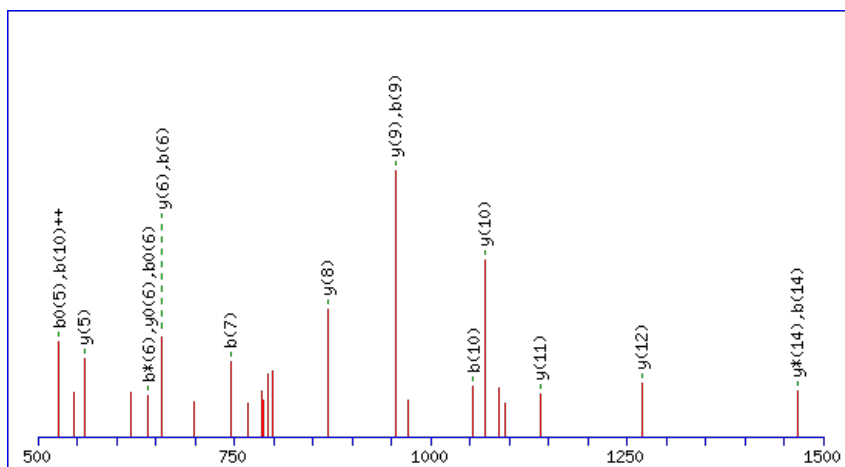

Monoisotopic mass of neutral peptide  $M_r(\text{calc})$ : 1611.8719

Fixed modifications: Carbamidomethyl (C) (apply to specified residues or termini only)

Ions Score: 72 Expect: 1.5e-007

Matches : 18/156 fragment ions using 14 most intense peaks ([help](#))

| #  | b         | b <sup>++</sup> | b*        | b <sup>*++</sup> | b <sup>0</sup> | b <sup>0++</sup> | Seq. | y         | y <sup>++</sup> | y*        | y <sup>*++</sup> | y <sup>0</sup> | y <sup>0++</sup> | #  |
|----|-----------|-----------------|-----------|------------------|----------------|------------------|------|-----------|-----------------|-----------|------------------|----------------|------------------|----|
| 1  | 130.0499  | 65.5286         |           |                  | 112.0393       | 56.5233          | E    |           |                 |           |                  |                |                  | 15 |
| 2  | 217.0819  | 109.0446        |           |                  | 199.0713       | 100.0393         | S    | 1483.8366 | 742.4220        | 1466.8101 | 733.9087         | 1465.8261      | 733.4167         | 14 |
| 3  | 345.1405  | 173.0739        | 328.1139  | 164.5606         | 327.1299       | 164.0686         | Q    | 1396.8046 | 698.9059        | 1379.7781 | 690.3927         | 1378.7940      | 689.9007         | 13 |
| 4  | 474.1831  | 237.5952        | 457.1565  | 229.0819         | 456.1725       | 228.5899         | E    | 1268.7460 | 634.8767        | 1251.7195 | 626.3634         | 1250.7355      | 625.8714         | 12 |
| 5  | 545.2202  | 273.1137        | 528.1936  | 264.6005         | 527.2096       | 264.1084         | A    | 1139.7034 | 570.3554        | 1122.6769 | 561.8421         | 1121.6929      | 561.3501         | 11 |
| 6  | 658.3042  | 329.6558        | 641.2777  | 321.1425         | 640.2937       | 320.6505         | L    | 1068.6663 | 534.8368        | 1051.6398 | 526.3235         | 1050.6558      | 525.8315         | 10 |
| 7  | 745.3363  | 373.1718        | 728.3097  | 364.6585         | 727.3257       | 364.1665         | S    | 955.5823  | 478.2948        | 938.5557  | 469.7815         | 937.5717       | 469.2895         | 9  |
| 8  | 842.3890  | 421.6982        | 825.3625  | 413.1849         | 824.3785       | 412.6929         | P    | 868.5502  | 434.7788        | 851.5237  | 426.2655         | 850.5397       | 425.7735         | 8  |
| 9  | 955.4731  | 478.2402        | 938.4466  | 469.7269         | 937.4625       | 469.2349         | L    | 771.4975  | 386.2524        | 754.4709  | 377.7391         | 753.4869       | 377.2471         | 7  |
| 10 | 1054.5415 | 527.7744        | 1037.5150 | 519.2611         | 1036.5310      | 518.7691         | V    | 658.4134  | 329.7103        | 641.3869  | 321.1971         | 640.4028       | 320.7051         | 6  |
| 11 | 1169.5685 | 585.2879        | 1152.5419 | 576.7746         | 1151.5579      | 576.2826         | D    | 559.3450  | 280.1761        | 542.3184  | 271.6629         | 541.3344       | 271.1708         | 5  |
| 12 | 1282.6525 | 641.8299        | 1265.6260 | 633.3166         | 1264.6420      | 632.8246         | L    | 444.3180  | 222.6627        | 427.2915  | 214.1494         |                |                  | 4  |
| 13 | 1353.6896 | 677.3485        | 1336.6631 | 668.8352         | 1335.6791      | 668.3432         | A    | 331.2340  | 166.1206        | 314.2074  | 157.6074         |                |                  | 3  |
| 14 | 1466.7737 | 733.8905        | 1449.7472 | 725.3772         | 1448.7631      | 724.8852         | L    | 260.1969  | 130.6021        | 243.1703  | 122.0888         |                |                  | 2  |
| 15 |           |                 |           |                  |                |                  | K    | 147.1128  | 74.0600         | 130.0863  | 65.5468          |                |                  | 1  |

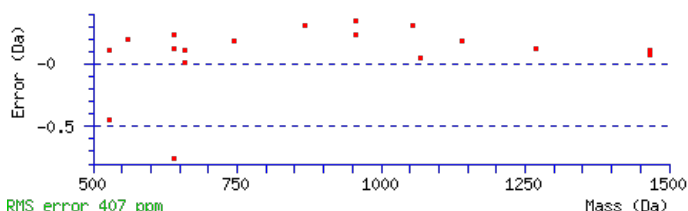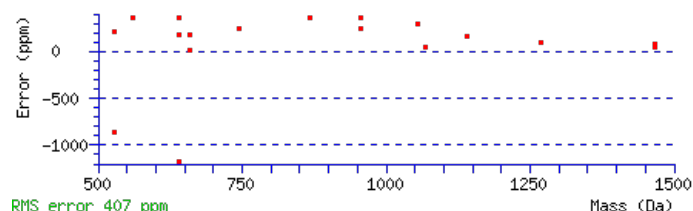



## AT1G23190.1

NCBI **BLAST** search of [ESQEALSPLVDLALK](#)

(Parameters: blastp, nr protein database, expect=20000, no filter, PAM30)

Other BLAST [web gateways](#)

### All matches to this query

| Score | Mr(calc)  | Delta   | Sequence                        |
|-------|-----------|---------|---------------------------------|
| 72.2  | 1611.8719 | -0.0003 | <a href="#">ESQEALSPLVDLALK</a> |
| 12.1  | 1611.8733 | -0.0016 | <a href="#">WPNLEVEVSKKQR</a>   |
| 1.1   | 1611.8692 | 0.0024  | <a href="#">TSNRTALQVLPGNNK</a> |

**Mascot:** <http://www.matrixscience.com/>

**Peptide View**MS/MS Fragmentation of **FFCPVNLDK**

Found in **AT1G23290.1** in **TAIR\_Arabidopsis**, Symbols: RPL27AB, RPL27A | RPL27A (RIBOSOMAL PROTEIN L27A); structural constituent of ribosome | chr1:8262996-8263436 FORWARD

Match to Query 3974: 1251.633414 from(626.823983,2+) index(6998)

Title: Elution from: 63.244 to 63.244 scan no 9237 cid35.00 polarity:+

Data file D1d-2\_3.mgf

Click mouse within plot area to zoom in by factor of two about that point

Or,   to  Da

Label all possible matches  Label matches used for scoring

Show Y-axis

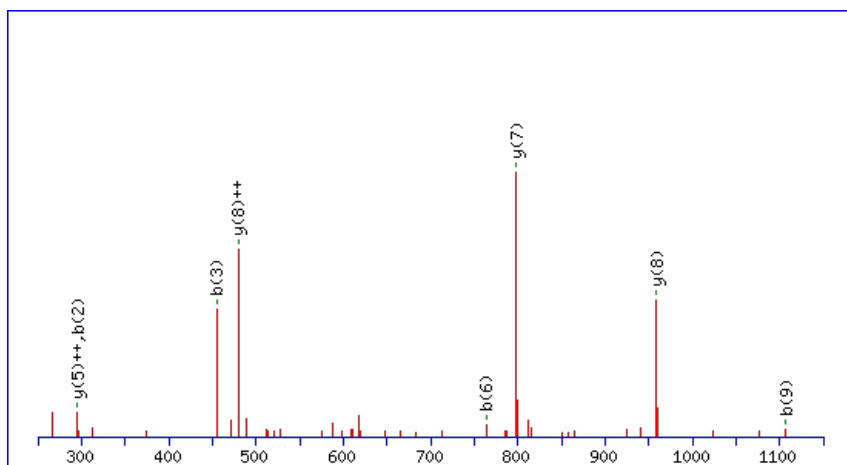

Monoisotopic mass of neutral peptide  $M_r(\text{calc})$ : 1251.6322

Fixed modifications: Carbamidomethyl (C) (apply to specified residues or termini only)

Ions Score: 33 Expect: 0.002

Matches : 8/78 fragment ions using 9 most intense peaks ([help](#))

| #  | b                | b <sup>++</sup> | b*        | b <sup>*++</sup> | b <sup>0</sup> | b <sup>0++</sup> | Seq. | y               | y <sup>++</sup> | y*        | y <sup>*++</sup> | y <sup>0</sup> | y <sup>0++</sup> | #  |
|----|------------------|-----------------|-----------|------------------|----------------|------------------|------|-----------------|-----------------|-----------|------------------|----------------|------------------|----|
| 1  | 148.0757         | 74.5415         |           |                  |                |                  | F    |                 |                 |           |                  |                |                  | 10 |
| 2  | <b>295.1441</b>  | 148.0757        |           |                  |                |                  | F    | 1105.5710       | 553.2892        | 1088.5445 | 544.7759         | 1087.5605      | 544.2839         | 9  |
| 3  | <b>455.1748</b>  | 228.0910        |           |                  |                |                  | C    | <b>958.5026</b> | <b>479.7550</b> | 941.4761  | 471.2417         | 940.4921       | 470.7497         | 8  |
| 4  | 552.2275         | 276.6174        |           |                  |                |                  | P    | <b>798.4720</b> | 399.7396        | 781.4454  | 391.2264         | 780.4614       | 390.7343         | 7  |
| 5  | 665.3116         | 333.1594        |           |                  |                |                  | I    | 701.4192        | 351.2132        | 684.3927  | 342.7000         | 683.4087       | 342.2080         | 6  |
| 6  | <b>764.3800</b>  | 382.6936        |           |                  |                |                  | V    | 588.3352        | <b>294.6712</b> | 571.3086  | 286.1579         | 570.3246       | 285.6659         | 5  |
| 7  | 878.4229         | 439.7151        | 861.3964  | 431.2018         |                |                  | N    | 489.2667        | 245.1370        | 472.2402  | 236.6237         | 471.2562       | 236.1317         | 4  |
| 8  | 991.5070         | 496.2571        | 974.4804  | 487.7439         |                |                  | L    | 375.2238        | 188.1155        | 358.1973  | 179.6023         | 357.2132       | 179.1103         | 3  |
| 9  | <b>1106.5339</b> | 553.7706        | 1089.5074 | 545.2573         | 1088.5234      | 544.7653         | D    | 262.1397        | 131.5735        | 245.1132  | 123.0602         | 244.1292       | 122.5682         | 2  |
| 10 |                  |                 |           |                  |                |                  | K    | 147.1128        | 74.0600         | 130.0863  | 65.5468          |                |                  | 1  |

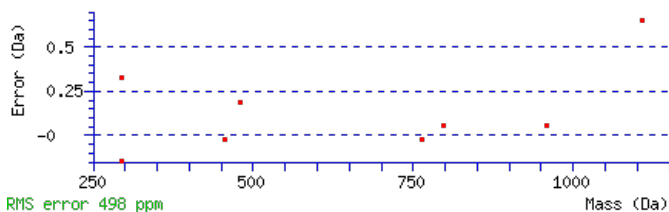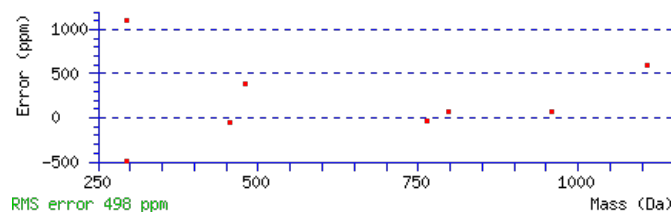

NCBI BLAST search of **FFCPVNLDK**

(Parameters: blastp, nr protein database, expect=20000, no filter, PAM30)

Other BLAST [web gateways](#)

All matches to this query

AT1G23290.1

| Score | Mr(calc)  | Delta   | Sequence                     |
|-------|-----------|---------|------------------------------|
| 32.9  | 1251.6322 | 0.0012  | <a href="#">FFCPIVNLDK</a>   |
| 3.8   | 1251.6315 | 0.0019  | <a href="#">MMKSLANAVGAK</a> |
| 0.1   | 1251.6347 | -0.0013 | <a href="#">KTDELSLDGFK</a>  |

Mascot: <http://www.matrixscience.com/>



# Mascot Search Results

## Peptide View

MS/MS Fragmentation of **LPTGALQAAK**

Found in **AT1G23310.1** in **TAIR\_Arabidopsis**, Symbols: AOAT1, GGT1 | GGT1 (ALANINE-2-OXOGLUTARATE AMINOTRANSFERASE 1) | chr1:8268709-8271318 REVERSE

Match to Query 2131: 968.565944 from(485.290248,2+) index(2000)

Title: Elution from: 23.085 to 23.085 scan no 2557 cid35.00 polarity:+

Data file D6h-2\_3.mgf

Click mouse within plot area to zoom in by factor of two about that point

Or,   to  Da

Label all possible matches  Label matches used for scoring

Show Y-axis

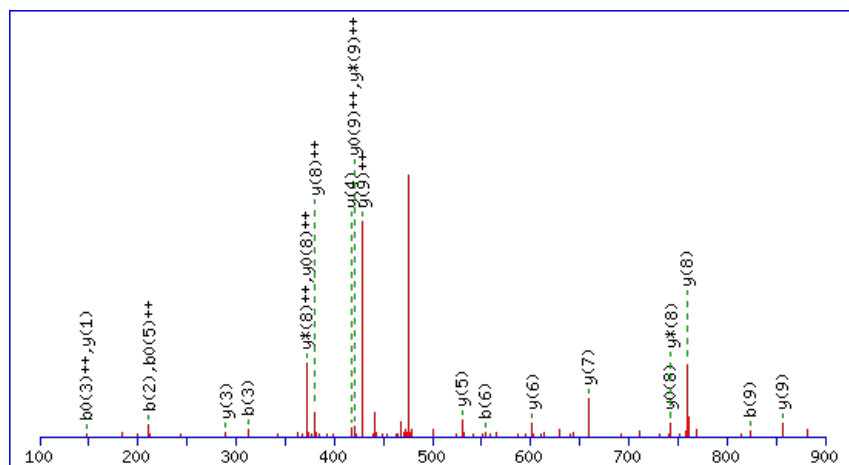

Monoisotopic mass of neutral peptide  $M_r(\text{calc})$ : 968.5655

Fixed modifications: Carbamidomethyl (C) (apply to specified residues or termini only)

Ions Score: 51 Expect: 1.7e-005

Matches : 22/78 fragment ions using 42 most intense peaks [\(help\)](#)

| #  | b               | b <sup>++</sup> | b*       | b <sup>*++</sup> | b <sup>0</sup> | b <sup>0++</sup> | Seq. | y               | y <sup>++</sup> | y*              | y <sup>*++</sup> | y <sup>0</sup>  | y <sup>0++</sup> | #  |
|----|-----------------|-----------------|----------|------------------|----------------|------------------|------|-----------------|-----------------|-----------------|------------------|-----------------|------------------|----|
| 1  | 114.0913        | 57.5493         |          |                  |                |                  | L    |                 |                 |                 |                  |                 |                  | 10 |
| 2  | <b>211.1441</b> | 106.0757        |          |                  |                |                  | P    | <b>856.4887</b> | <b>428.7480</b> | 839.4621        | <b>420.2347</b>  | 838.4781        | <b>419.7427</b>  | 9  |
| 3  | <b>312.1918</b> | 156.5995        |          |                  | 294.1812       | <b>147.5942</b>  | T    | <b>759.4359</b> | <b>380.2216</b> | <b>742.4094</b> | <b>371.7083</b>  | <b>741.4254</b> | <b>371.2163</b>  | 8  |
| 4  | 369.2132        | 185.1103        |          |                  | 351.2027       | 176.1050         | G    | <b>658.3883</b> | 329.6978        | 641.3617        | 321.1845         |                 |                  | 7  |
| 5  | 440.2504        | 220.6288        |          |                  | 422.2398       | <b>211.6235</b>  | A    | <b>601.3668</b> | 301.1870        | 584.3402        | 292.6738         |                 |                  | 6  |
| 6  | <b>553.3344</b> | 277.1709        |          |                  | 535.3239       | 268.1656         | L    | <b>530.3297</b> | 265.6685        | 513.3031        | 257.1552         |                 |                  | 5  |
| 7  | 681.3930        | 341.2001        | 664.3665 | 332.6869         | 663.3824       | 332.1949         | Q    | <b>417.2456</b> | 209.1264        | 400.2191        | 200.6132         |                 |                  | 4  |
| 8  | 752.4301        | 376.7187        | 735.4036 | 368.2054         | 734.4196       | 367.7134         | A    | <b>289.1870</b> | 145.0972        | 272.1605        | 136.5839         |                 |                  | 3  |
| 9  | <b>823.4672</b> | 412.2373        | 806.4407 | 403.7240         | 805.4567       | 403.2320         | A    | 218.1499        | 109.5786        | 201.1234        | 101.0653         |                 |                  | 2  |
| 10 |                 |                 |          |                  |                |                  | K    | <b>147.1128</b> | 74.0600         | 130.0863        | 65.5468          |                 |                  | 1  |

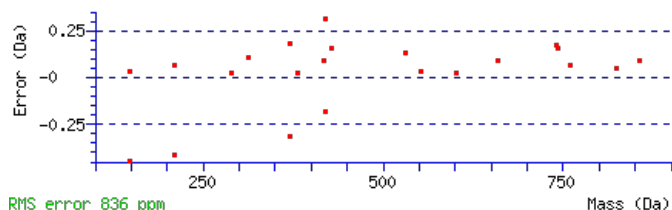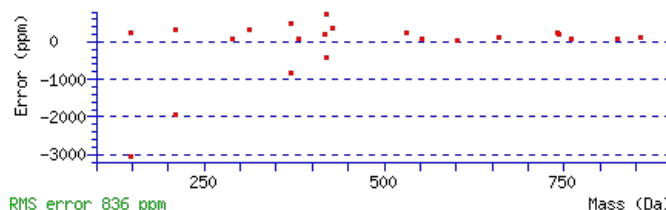

NCBI BLAST search of **LPTGALQAAK**

(Parameters: blastp, nr protein database, expect=20000, no filter, PAM30)

Other BLAST [web gateways](#)

All matches to this query

## AT1G23310.1

| Score | Mr(calc) | Delta   | Sequence                   |
|-------|----------|---------|----------------------------|
| 51.3  | 968.5655 | 0.0005  | <a href="#">LPTGALQAAK</a> |
| 10.5  | 968.5655 | 0.0005  | <a href="#">LTSLASHK</a>   |
| 8.3   | 968.5654 | 0.0005  | <a href="#">IPKELQNK</a>   |
| 6.9   | 968.5655 | 0.0005  | <a href="#">SGPVKSVPK</a>  |
| 4.1   | 968.5668 | -0.0009 | <a href="#">IRQFLHR</a>    |
| 2.5   | 968.5655 | 0.0005  | <a href="#">LSHITGK</a>    |
| 1.6   | 968.5655 | 0.0005  | <a href="#">LLQNSPGLK</a>  |
| 0.8   | 968.5655 | 0.0005  | <a href="#">LREVLDPK</a>   |

Mascot: <http://www.matrixscience.com/>

## Peptide View

MS/MS Fragmentation of **TITLEVESSDTIDNVK**

Found in **AT1G23410.1** in **TAIR\_Arabidopsis**, Symbols: | ubiquitin extension protein, putative / 40S ribosomal protein S27A (RPS27aA) | chr1:8314929-8315399 FORWARD

Match to Query 8101: 1780.829488 from(891.422020,2+) index(5835)

Title: Elution from: 54.560 to 54.560 scan no 7531 cid35.00 polarity:+

Data file D12h-2\_2.mgf

Click mouse within plot area to zoom in by factor of two about that point

Or,   to  Da

Label all possible matches  Label matches used for scoring

Show Y-axis

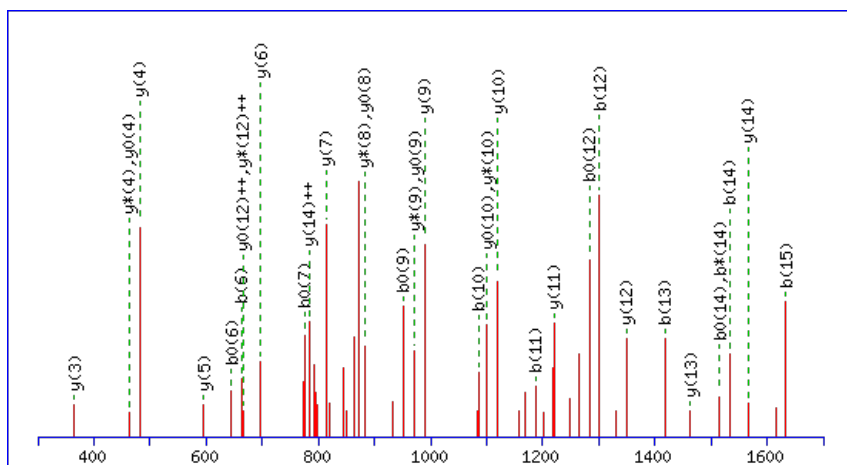

Monoisotopic mass of neutral peptide  $M_r(\text{calc})$ : 1780.8302

Fixed modifications: Carbamidomethyl (C) (apply to specified residues or termini only)

Ions Score: 114 Expect: 4.6e-011

Matches : 35/148 fragment ions using 33 most intense peaks ([help](#))

| #  | b                | b <sup>++</sup> | b <sup>*</sup>   | b <sup>*++</sup> | b <sup>0</sup>   | b <sup>0++</sup> | Seq. | y                | y <sup>++</sup> | y <sup>*</sup>   | y <sup>*++</sup> | y <sup>0</sup>   | y <sup>0++</sup> | #  |
|----|------------------|-----------------|------------------|------------------|------------------|------------------|------|------------------|-----------------|------------------|------------------|------------------|------------------|----|
| 1  | 103.0520         | 52.0296         |                  |                  | 85.0414          | 43.0244          | T    |                  |                 |                  |                  |                  |                  | 16 |
| 2  | 217.1331         | 109.0702        |                  |                  | 199.1225         | 100.0649         | I    | 1679.7928        | 840.4001        | 1661.7692        | 831.3883         | 1661.7823        | 831.3948         | 15 |
| 3  | 319.1778         | 160.0925        |                  |                  | 301.1672         | 151.0873         | T    | <b>1565.7117</b> | <b>783.3595</b> | 1547.6881        | 774.3477         | 1547.7012        | 774.3542         | 14 |
| 4  | 433.2589         | 217.1331        |                  |                  | 415.2483         | 208.1278         | L    | <b>1463.6670</b> | 732.3371        | 1445.6434        | 723.3254         | 1445.6565        | 723.3319         | 13 |
| 5  | 563.2985         | 282.1529        |                  |                  | 545.2880         | 273.1476         | E    | <b>1349.5859</b> | 675.2966        | 1331.5623        | <b>666.2848</b>  | 1331.5754        | <b>666.2913</b>  | 12 |
| 6  | <b>663.3640</b>  | 332.1856        |                  |                  | <b>645.3534</b>  | 323.1803         | V    | <b>1219.5463</b> | 610.2768        | 1201.5227        | 601.2650         | 1201.5357        | 601.2715         | 11 |
| 7  | 793.4036         | 397.2054        |                  |                  | <b>775.3930</b>  | 388.2002         | E    | <b>1119.4808</b> | 560.2441        | <b>1101.4573</b> | 551.2323         | <b>1101.4703</b> | 551.2388         | 10 |
| 8  | 881.4327         | 441.2200        |                  |                  | 863.4221         | 432.2147         | S    | <b>989.4412</b>  | 495.2242        | <b>971.4176</b>  | 486.2125         | <b>971.4306</b>  | 486.2190         | 9  |
| 9  | 969.4617         | 485.2345        |                  |                  | <b>951.4512</b>  | 476.2292         | S    | 901.4122         | 451.2097        | <b>883.3886</b>  | 442.1979         | <b>883.4016</b>  | 442.2044         | 8  |
| 10 | <b>1085.4857</b> | 543.2465        |                  |                  | 1067.4751        | 534.2412         | D    | <b>813.3831</b>  | 407.1952        | 795.3595         | 398.1834         | 795.3725         | 398.1899         | 7  |
| 11 | <b>1187.5304</b> | 594.2688        |                  |                  | 1169.5199        | 585.2636         | T    | <b>697.3591</b>  | 349.1832        | 679.3355         | 340.1714         | 679.3485         | 340.1779         | 6  |
| 12 | <b>1301.6115</b> | 651.3094        |                  |                  | <b>1283.6010</b> | 642.3041         | I    | <b>595.3144</b>  | 298.1608        | 577.2908         | 289.1490         | 577.3038         | 289.1556         | 5  |
| 13 | <b>1417.6355</b> | 709.3214        |                  |                  | 1399.6249        | 700.3161         | D    | <b>481.2333</b>  | 241.1203        | <b>463.2097</b>  | 232.1085         | <b>463.2227</b>  | 232.1150         | 4  |
| 14 | <b>1533.6725</b> | 767.3399        | <b>1515.6489</b> | 758.3281         | <b>1515.6619</b> | 758.3346         | N    | <b>365.2093</b>  | 183.1083        | 347.1857         | 174.0965         |                  |                  | 3  |
| 15 | <b>1633.7379</b> | 817.3726        | 1615.7144        | 808.3608         | 1615.7274        | 808.3673         | V    | 249.1723         | 125.0898        | 231.1487         | 116.0780         |                  |                  | 2  |
| 16 |                  |                 |                  |                  |                  |                  | K    | 149.1069         | 75.0571         | 131.0833         | 66.0453          |                  |                  | 1  |

# AT1G23410.1

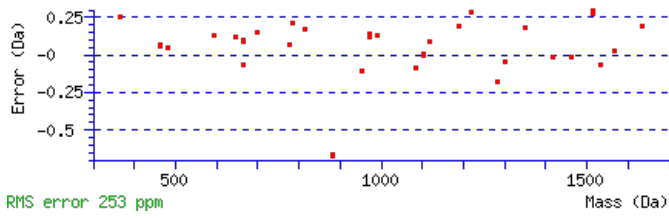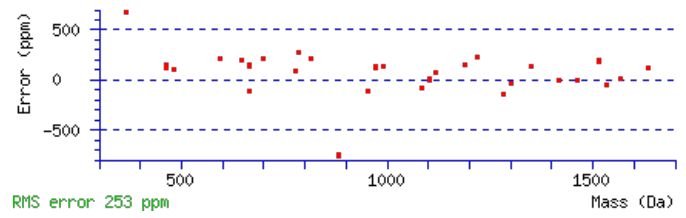

NCBI **BLAST** search of [TITLEVESSDTIDNVK](#)

(Parameters: blastp, nr protein database, expect=20000, no filter, PAM30)

Other BLAST [web gateways](#)

## All matches to this query

| Score | Mr(calc)  | Delta   | Sequence                          |
|-------|-----------|---------|-----------------------------------|
| 114.4 | 1780.8302 | -0.0008 | <a href="#">TITLEVESSDTIDNVK</a>  |
| 12.1  | 1780.8282 | 0.0013  | <a href="#">MKTESPERVVLPSR</a>    |
| 12.0  | 1780.8309 | -0.0014 | <a href="#">NHHTLTNRMTGVGNTLK</a> |
| 9.8   | 1780.8277 | 0.0017  | <a href="#">ELEGSLKWMVDVDVK</a>   |
| 8.4   | 1780.8309 | -0.0014 | <a href="#">RQILQAACETLSNPR</a>   |
| 7.5   | 1780.8311 | -0.0017 | <a href="#">SLEEVMTPSVVAMNLK</a>  |
| 2.7   | 1780.8297 | -0.0002 | <a href="#">IGDFGLSNFYRGQRK</a>   |
| 2.6   | 1780.8304 | -0.0009 | <a href="#">EGRYLLSRDYMTLK</a>    |
| 2.1   | 1780.8255 | 0.0040  | <a href="#">EEEENVVKAMETKVK</a>   |
| 1.5   | 1780.8282 | 0.0013  | <a href="#">LVAEGMRAANLEENVK</a>  |

Mascot: <http://www.matrixscience.com/>

**Peptide View**MS/MS Fragmentation of **GTFDLWELDFK**Found in **AT1G23730.1** in **TAIR\_Arabidopsis**, Symbols: | carbonic anhydrase, putative / carbonate dehydratase, putative | chr1:8395954-8398003  
FORWARD

Match to Query 5151: 1382.614830 from(692.314691,2+) index(10468)

Title: Elution from: 100.716 to 100.716 scan no 14911 cid35.00 polarity:+

Data file D12h-2\_1.mgf

Click mouse within plot area to zoom in by factor of two about that point

Or,   to  Da Label all possible matches  Label matches used for scoring Show Y-axis 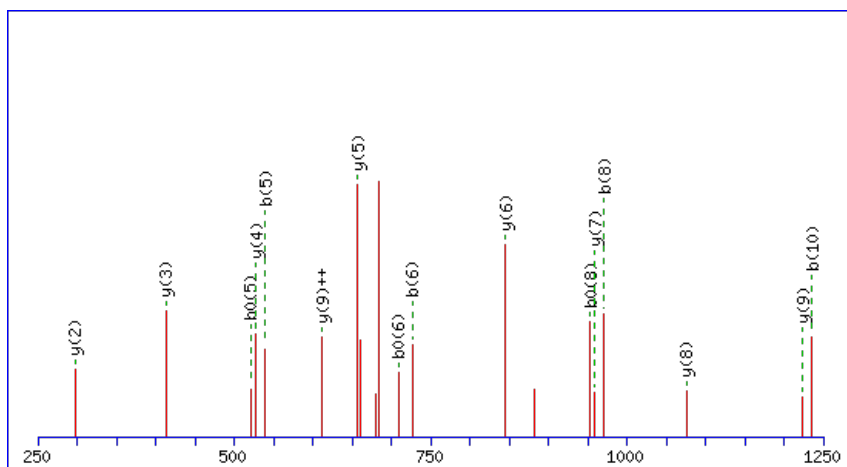Monoisotopic mass of neutral peptide  $M_r(\text{calc})$ : 1382.6168

Fixed modifications: Carbamidomethyl (C) (apply to specified residues or termini only)

Ions Score: 77 Expect: 1.5e-007

Matches : 16/94 fragment ions using 18 most intense peaks ([help](#))

| #  | b                | b <sup>++</sup> | b <sup>0</sup>  | b <sup>0++</sup> | Seq. | y                | y <sup>++</sup> | y*        | y <sup>*++</sup> | y <sup>0</sup> | y <sup>0++</sup> | #  |
|----|------------------|-----------------|-----------------|------------------|------|------------------|-----------------|-----------|------------------|----------------|------------------|----|
| 1  | 59.0258          | 30.0165         |                 |                  | G    |                  |                 |           |                  |                |                  | 11 |
| 2  | 161.0705         | 81.0389         | 143.0599        | 72.0336          | T    | 1325.6057        | 663.3065        | 1307.5821 | 654.2947         | 1307.5951      | 654.3012         | 10 |
| 3  | 309.1359         | 155.0716        | 291.1254        | 146.0663         | F    | <b>1223.5609</b> | <b>612.2841</b> | 1205.5374 | 603.2723         | 1205.5504      | 603.2788         | 9  |
| 4  | 425.1599         | 213.0836        | 407.1493        | 204.0783         | D    | <b>1075.4955</b> | 538.2514        | 1057.4719 | 529.2396         | 1057.4849      | 529.2461         | 8  |
| 5  | <b>539.2410</b>  | 270.1241        | <b>521.2304</b> | 261.1189         | L    | <b>959.4715</b>  | 480.2394        | 941.4479  | 471.2276         | 941.4609       | 471.2341         | 7  |
| 6  | <b>727.3144</b>  | 364.1608        | <b>709.3038</b> | 355.1556         | W    | <b>845.3904</b>  | 423.1988        | 827.3668  | 414.1871         | 827.3798       | 414.1936         | 6  |
| 7  | 857.3540         | 429.1807        | 839.3435        | 420.1754         | E    | <b>657.3170</b>  | 329.1622        | 639.2934  | 320.1504         | 639.3065       | 320.1569         | 5  |
| 8  | <b>971.4351</b>  | 486.2212        | <b>953.4246</b> | 477.2159         | L    | <b>527.2774</b>  | 264.1423        | 509.2538  | 255.1305         | 509.2668       | 255.1371         | 4  |
| 9  | 1087.4591        | 544.2332        | 1069.4485       | 535.2279         | D    | <b>413.1963</b>  | 207.1018        | 395.1727  | 198.0900         | 395.1857       | 198.0965         | 3  |
| 10 | <b>1235.5246</b> | 618.2659        | 1217.5140       | 609.2606         | F    | <b>297.1723</b>  | 149.0898        | 279.1487  | 140.0780         |                |                  | 2  |
| 11 |                  |                 |                 |                  | K    | 149.1069         | 75.0571         | 131.0833  | 66.0453          |                |                  | 1  |

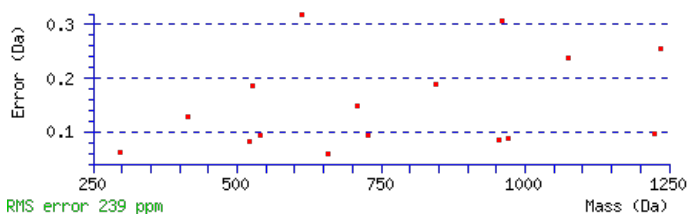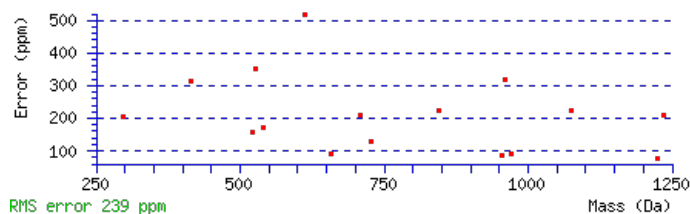NCBI **BLAST** search of **GTFDLWELDFK**

(Parameters: blastp, nr protein database, expect=20000, no filter, PAM30)

Other BLAST [web gateways](#)**All matches to this query**



## AT1G23730.1

| Score | Mr(calc)  | Delta   | Sequence                      |
|-------|-----------|---------|-------------------------------|
| 77.3  | 1382.6168 | -0.0020 | <a href="#">GTFDLWELDFK</a>   |
| 9.0   | 1382.6124 | 0.0024  | <a href="#">FSESaelITDR</a>   |
| 8.5   | 1382.6128 | 0.0020  | <a href="#">ELSRtSDtGDRK</a>  |
| 4.7   | 1382.6177 | -0.0029 | <a href="#">FRDANQRNDVK</a>   |
| 4.4   | 1382.6180 | -0.0032 | <a href="#">IEELMDKsFNK</a>   |
| 3.0   | 1382.6173 | -0.0025 | <a href="#">SFHsFLGQTNTK</a>  |
| 1.8   | 1382.6146 | 0.0002  | <a href="#">KEAEFNDFLEK</a>   |
| 1.6   | 1382.6111 | 0.0038  | <a href="#">ALMNGSMNLSSVK</a> |
| 1.6   | 1382.6111 | 0.0038  | <a href="#">ALMNGSMNLSSVK</a> |
| 1.2   | 1382.6158 | -0.0010 | <a href="#">LNLsSTAMDSVSK</a> |

Mascot: <http://www.matrixscience.com/>

## Peptide View

MS/MS Fragmentation of **SLGADLAIDYTK**

Found in **AT1G23740.1** in **TAIR\_Arabidopsis**, Symbols: | oxidoreductase, zinc-binding dehydrogenase family protein | chr1:8398234-8399645  
REVERSE

Match to Query 4935: 1278.611844 from(640.313198,2+) index(6496)

Title: Elution from: 56.680 to 56.680 scan no 8137 cid35.00 polarity:+

Data file 0-1\_1.mgf

Click mouse within plot area to zoom in by factor of two about that point

Or,   to  Da

Label all possible matches  Label matches used for scoring

Show Y-axis

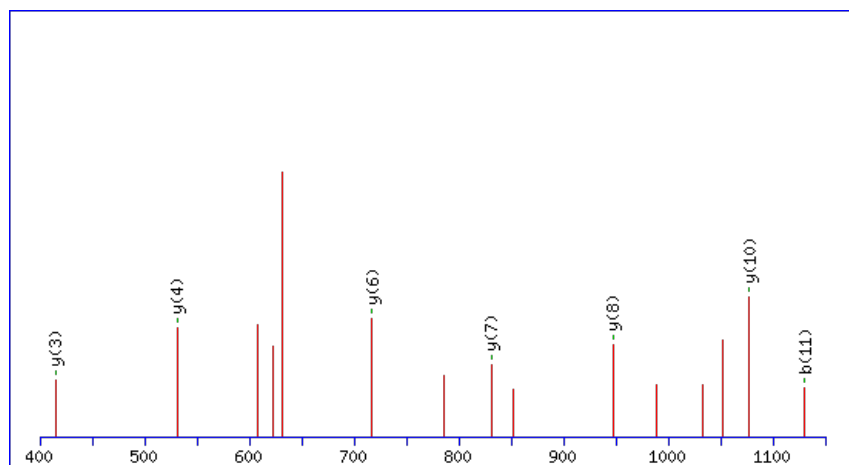

Monoisotopic mass of neutral peptide  $M_r(\text{calc})$ : 1278.6118

Fixed modifications: Carbamidomethyl (C) (apply to specified residues or termini only)

Ions Score: 40 Expect: 0.00083

Matches : 7/108 fragment ions using 14 most intense peaks ([help](#))

| #  | b                | b <sup>++</sup> | b <sup>0</sup> | b <sup>0++</sup> | Seq. | y                | y <sup>++</sup> | y*        | y <sup>*++</sup> | y <sup>0</sup> | y <sup>0++</sup> | #  |
|----|------------------|-----------------|----------------|------------------|------|------------------|-----------------|-----------|------------------|----------------|------------------|----|
| 1  | 89.0363          | 45.0218         | 71.0258        | 36.0165          | S    |                  |                 |           |                  |                |                  | 12 |
| 2  | 203.1174         | 102.0624        | 185.1069       | 93.0571          | L    | 1191.5900        | 596.2986        | 1173.5664 | 587.2868         | 1173.5794      | 587.2934         | 11 |
| 3  | 261.1359         | 131.0716        | 243.1254       | 122.0663         | G    | <b>1077.5089</b> | 539.2581        | 1059.4853 | 530.2463         | 1059.4983      | 530.2528         | 10 |
| 4  | 333.1701         | 167.0887        | 315.1595       | 158.0834         | A    | 1019.4904        | 510.2488        | 1001.4668 | 501.2370         | 1001.4798      | 501.2436         | 9  |
| 5  | 449.1941         | 225.1007        | 431.1835       | 216.0954         | D    | <b>947.4563</b>  | 474.2318        | 929.4327  | 465.2200         | 929.4457       | 465.2265         | 8  |
| 6  | 563.2752         | 282.1412        | 545.2646       | 273.1359         | L    | <b>831.4323</b>  | 416.2198        | 813.4087  | 407.2080         | 813.4217       | 407.2145         | 7  |
| 7  | 635.3093         | 318.1583        | 617.2987       | 309.1530         | A    | <b>717.3512</b>  | 359.1792        | 699.3276  | 350.1674         | 699.3406       | 350.1739         | 6  |
| 8  | 749.3904         | 375.1988        | 731.3798       | 366.1936         | I    | 645.3170         | 323.1622        | 627.2934  | 314.1504         | 627.3065       | 314.1569         | 5  |
| 9  | 865.4144         | 433.2108        | 847.4038       | 424.2056         | D    | <b>531.2359</b>  | 266.1216        | 513.2123  | 257.1098         | 513.2254       | 257.1163         | 4  |
| 10 | 1029.4748        | 515.2410        | 1011.4642      | 506.2357         | Y    | <b>415.2120</b>  | 208.1096        | 397.1884  | 199.0978         | 397.2014       | 199.1043         | 3  |
| 11 | <b>1131.5195</b> | 566.2634        | 1113.5089      | 557.2581         | T    | 251.1516         | 126.0794        | 233.1280  | 117.0676         | 233.1410       | 117.0741         | 2  |
| 12 |                  |                 |                |                  | K    | 149.1069         | 75.0571         | 131.0833  | 66.0453          |                |                  | 1  |

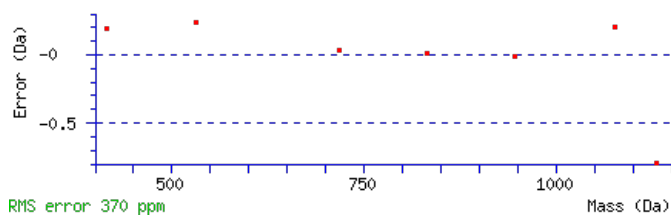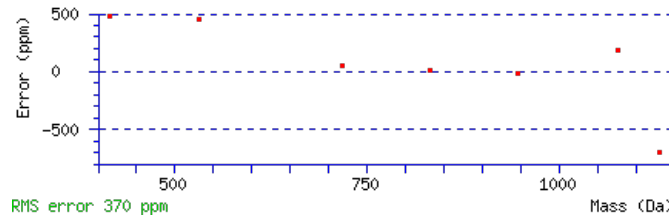

NCBI BLAST search of **SLGADLAIDYTK**

(Parameters: blastp, nr protein database, expect=20000, no filter, PAM30)

Other BLAST [web gateways](#)

**AT1G23740.1**

All matches to this query

| Score | Mr(calc)  | Delta   | Sequence                     |
|-------|-----------|---------|------------------------------|
| 40.4  | 1278.6118 | 0.0001  | <a href="#">SLGADLAIDYTK</a> |
| 7.3   | 1278.6140 | -0.0022 | <a href="#">EGYYIGIEVPK</a>  |
| 2.3   | 1278.6144 | -0.0026 | <a href="#">SLRVVDFEGNK</a>  |
| 2.1   | 1278.6122 | -0.0004 | <a href="#">TVKRESEATGGK</a> |
| 1.7   | 1278.6122 | -0.0004 | <a href="#">AQKTDTSGVISR</a> |
| 1.7   | 1278.6131 | -0.0012 | <a href="#">KQARIMEMQK</a>   |
| 1.5   | 1278.6118 | 0.0001  | <a href="#">LLTETENATFK</a>  |
| 1.4   | 1278.6131 | -0.0012 | <a href="#">TVVPSVRMSMR</a>  |
| 1.3   | 1278.6145 | -0.0026 | <a href="#">AKSYSDHVKTK</a>  |
| 0.9   | 1278.6149 | -0.0031 | <a href="#">KNQLPRSSSR</a>   |

Mascot: <http://www.matrixscience.com/>

**Peptide View**MS/MS Fragmentation of **VLVIGGGDGGVLR**Found in **AT1G23820.1** in **TAIR\_Arabidopsis**, Symbols: SPDS1 | SPDS1 (SPERMIDINE SYNTHASE 1) | chr1:8420267-8422713 FORWARD

Match to Query 3794: 1226.656840 from(614.335696,2+) index(5259)

Title: Elution from: 48.515 to 48.515 scan no 6798 cid35.00 polarity:+

Data file D1d-2\_3.mgf

Click mouse within plot area to zoom in by factor of two about that point

Or,   to  Da Label all possible matches  Label matches used for scoring Show Y-axis 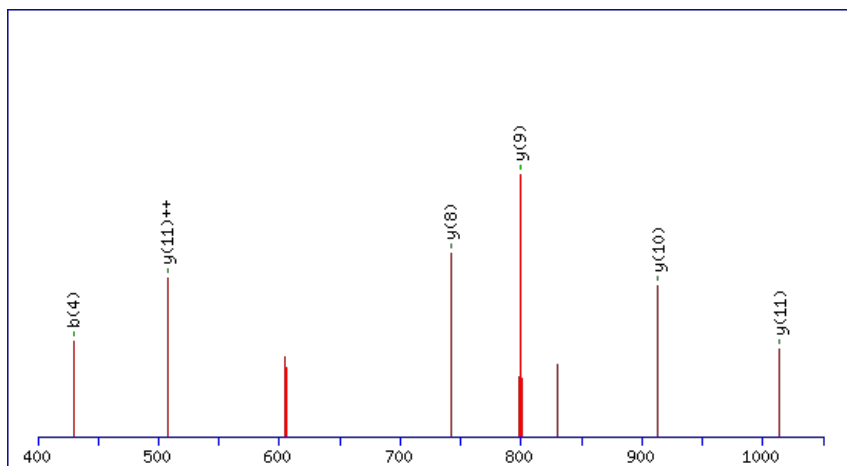Monoisotopic mass of neutral peptide  $M_r(\text{calc})$ : 1226.6559

Fixed modifications: Carbamidomethyl (C) (apply to specified residues or termini only)

Ions Score: 30 Expect: 0.0048

Matches : 6/96 fragment ions using 9 most intense peaks ([help](#))

| #  | b               | b <sup>++</sup> | b <sup>0</sup> | b <sup>0++</sup> | Seq. | y                | y <sup>++</sup> | y*        | y <sup>*++</sup> | y <sup>0</sup> | y <sup>0++</sup> | #  |
|----|-----------------|-----------------|----------------|------------------|------|------------------|-----------------|-----------|------------------|----------------|------------------|----|
| 1  | 101.0727        | 51.0400         |                |                  | V    |                  |                 |           |                  |                |                  | 13 |
| 2  | 215.1538        | 108.0805        |                |                  | L    | 1127.5978        | 564.3025        | 1109.5742 | 555.2907         | 1109.5872      | 555.2972         | 12 |
| 3  | 315.2193        | 158.1133        |                |                  | V    | <b>1013.5167</b> | <b>507.2620</b> | 995.4931  | 498.2502         | 995.5061       | 498.2567         | 11 |
| 4  | <b>429.3004</b> | 215.1538        |                |                  | I    | <b>913.4512</b>  | 457.2292        | 895.4276  | 448.2175         | 895.4406       | 448.2240         | 10 |
| 5  | 487.3189        | 244.1631        |                |                  | G    | <b>799.3701</b>  | 400.1887        | 781.3465  | 391.1769         | 781.3595       | 391.1834         | 9  |
| 6  | 545.3374        | 273.1723        |                |                  | G    | <b>741.3516</b>  | 371.1794        | 723.3280  | 362.1677         | 723.3410       | 362.1742         | 8  |
| 7  | 603.3559        | 302.1816        |                |                  | G    | 683.3331         | 342.1702        | 665.3095  | 333.1584         | 665.3225       | 333.1649         | 7  |
| 8  | 719.3798        | 360.1936        | 701.3693       | 351.1883         | D    | 625.3146         | 313.1609        | 607.2910  | 304.1492         | 607.3041       | 304.1557         | 6  |
| 9  | 777.3983        | 389.2028        | 759.3878       | 380.1975         | G    | 509.2906         | 255.1490        | 491.2671  | 246.1372         |                |                  | 5  |
| 10 | 835.4168        | 418.2121        | 817.4063       | 409.2068         | G    | 451.2721         | 226.1397        | 433.2486  | 217.1279         |                |                  | 4  |
| 11 | 935.4823        | 468.2448        | 917.4717       | 459.2395         | V    | 393.2536         | 197.1305        | 375.2301  | 188.1187         |                |                  | 3  |
| 12 | 1049.5634       | 525.2853        | 1031.5528      | 516.2801         | L    | 293.1882         | 147.0977        | 275.1646  | 138.0859         |                |                  | 2  |
| 13 |                 |                 |                |                  | R    | 179.1071         | 90.0572         | 161.0835  | 81.0454          |                |                  | 1  |

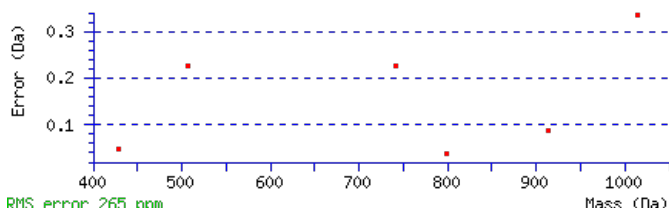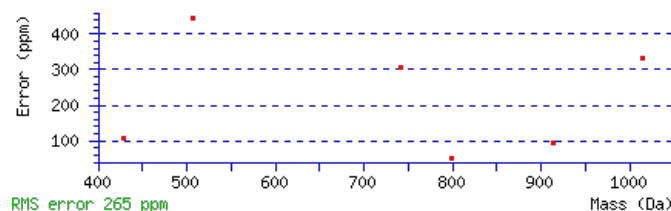NCBI BLAST search of [VLVIGGGDGGVLR](#)

(Parameters: blastp, nr protein database, expect=20000, no filter, PAM30)

Other BLAST [web gateways](#)

AT1G23820.1

All matches to this query

| Score | Mr(calc)  | Delta  | Sequence                      |
|-------|-----------|--------|-------------------------------|
| 30.0  | 1226.6559 | 0.0010 | <a href="#">VLVIGGGDGGVLR</a> |

Mascot: <http://www.matrixscience.com/>

**Peptide View**MS/MS Fragmentation of **DNNIRYVALNMLMK**Found in **AT1G23900.1** in **TAIR\_Arabidopsis**, Symbols: GAMMA-ADR, GAMMA-ADAPTIN 1 | GAMMA-ADAPTIN 1; clathrin binding | chr1:8441368-8447141 FORWARD

Match to Query 7867: 1730.793128 from(866.403840,2+) index(6043)

Title: Elution from: 52.880 to 52.880 scan no 7740 cid35.00 polarity:+

Data file D6h-3\_3.mgf

Click mouse within plot area to zoom in by factor of two about that point

Or,   to  Da Label all possible matches  Label matches used for scoring Show Y-axis 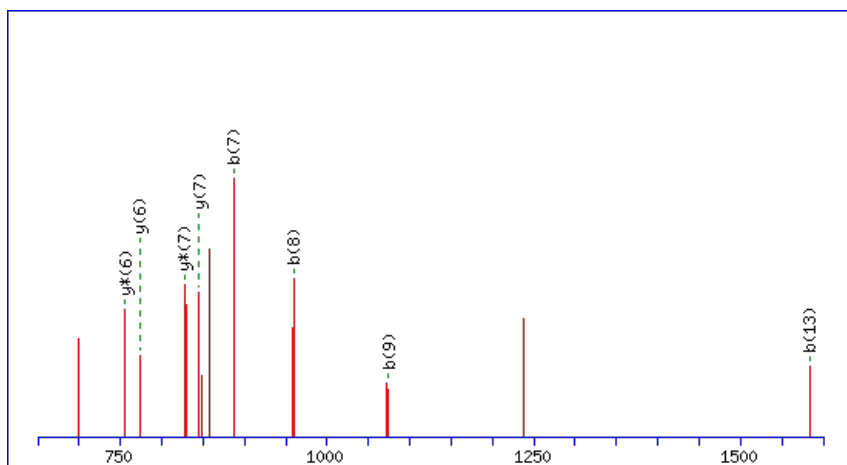Monoisotopic mass of neutral peptide  $M_r(\text{calc})$ : 1730.7970

Fixed modifications: Carbamidomethyl (C) (apply to specified residues or termini only)

Variable modifications:

M13 : Oxidation (M), with neutral losses 0.0000 (shown in table), 63.9983

Ions Score: 23 Expect: 0.041

Matches : 8/182 fragment ions using 13 most intense peaks ([help](#))

| #  | b                | b <sup>++</sup> | b*        | b <sup>*++</sup> | b <sup>0</sup> | b <sup>0++</sup> | Seq. | y               | y <sup>++</sup> | y*              | y <sup>*++</sup> | #  |
|----|------------------|-----------------|-----------|------------------|----------------|------------------|------|-----------------|-----------------|-----------------|------------------|----|
| 1  | 117.0313         | 59.0193         |           |                  | 99.0207        | 50.0140          | D    |                 |                 |                 |                  | 14 |
| 2  | 233.0683         | 117.0378        | 215.0447  | 108.0260         | 215.0577       | 108.0325         | N    | 1615.7803       | 808.3938        | 1597.7567       | 799.3820         | 13 |
| 3  | 349.1052         | 175.0563        | 331.0817  | 166.0445         | 331.0947       | 166.0510         | N    | 1499.7433       | 750.3753        | 1481.7197       | 741.3635         | 12 |
| 4  | 463.1863         | 232.0968        | 445.1628  | 223.0850         | 445.1758       | 223.0915         | I    | 1383.7063       | 692.3568        | 1365.6828       | 683.3450         | 11 |
| 5  | 623.2756         | 312.1414        | 605.2520  | 303.1296         | 605.2650       | 303.1362         | R    | 1269.6252       | 635.3163        | 1251.6017       | 626.3045         | 10 |
| 6  | 787.3360         | 394.1716        | 769.3124  | 385.1598         | 769.3254       | 385.1663         | Y    | 1109.5360       | 555.2716        | 1091.5124       | 546.2598         | 9  |
| 7  | <b>887.4014</b>  | 444.2043        | 869.3778  | 435.1926         | 869.3908       | 435.1991         | V    | 945.4756        | 473.2414        | 927.4520        | 464.2297         | 8  |
| 8  | <b>959.4356</b>  | 480.2214        | 941.4120  | 471.2096         | 941.4250       | 471.2161         | A    | <b>845.4102</b> | 423.2087        | <b>827.3866</b> | 414.1969         | 7  |
| 9  | <b>1073.5167</b> | 537.2620        | 1055.4931 | 528.2502         | 1055.5061      | 528.2567         | L    | <b>773.3760</b> | 387.1917        | <b>755.3524</b> | 378.1799         | 6  |
| 10 | 1189.5537        | 595.2805        | 1171.5301 | 586.2687         | 1171.5431      | 586.2752         | N    | 659.2949        | 330.1511        | 641.2713        | 321.1393         | 5  |
| 11 | 1321.5912        | 661.2992        | 1303.5676 | 652.2874         | 1303.5806      | 652.2939         | M    | 543.2579        | 272.1326        | 525.2343        | 263.1208         | 4  |
| 12 | 1435.6723        | 718.3398        | 1417.6487 | 709.3280         | 1417.6617      | 709.3345         | L    | 411.2204        | 206.1138        | 393.1968        | 197.1020         | 3  |
| 13 | <b>1583.7047</b> | 792.3560        | 1565.6811 | 783.3442         | 1565.6941      | 783.3507         | M    | 297.1393        | 149.0733        | 279.1157        | 140.0615         | 2  |
| 14 |                  |                 |           |                  |                |                  | K    | 149.1069        | 75.0571         | 131.0833        | 66.0453          | 1  |

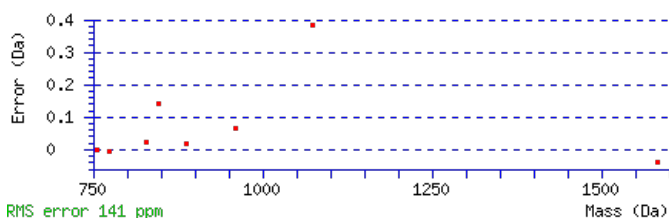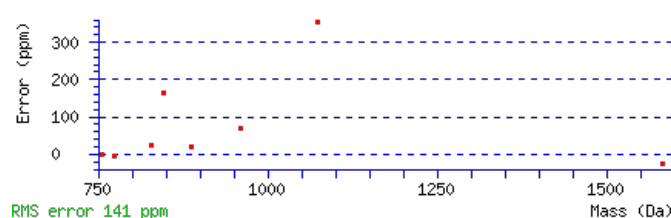

## AT1G23900.1

NCBI **BLAST** search of [DNNIRYVALNMLMK](#)

(Parameters: blastp, nr protein database, expect=20000, no filter, PAM30)

Other BLAST [web gateways](#)

### All matches to this query

| Score | Mr(calc)  | Delta   | Sequence                          | Site Analysis        |
|-------|-----------|---------|-----------------------------------|----------------------|
| 23.1  | 1730.7970 | -0.0039 | <a href="#">DNNIRYVALNMLMK</a>    | Oxidation M13 50.00% |
| 23.1  | 1730.7970 | -0.0039 | <a href="#">DNNIRYVALNMLMK</a>    | Oxidation M11 50.00% |
| 6.5   | 1730.7957 | -0.0026 | <a href="#">VTSEFSDSLLFLNK</a>    |                      |
| 3.2   | 1730.7888 | 0.0044  | <a href="#">NAPPPATGIEAVDSMVK</a> |                      |
| 2.8   | 1730.7962 | -0.0030 | <a href="#">VNDHPISTVESNLSAK</a>  |                      |
| 1.1   | 1730.7888 | 0.0044  | <a href="#">NSLLNMYVKSGETEK</a>   |                      |
| 0.2   | 1730.7880 | 0.0051  | <a href="#">QVRSYQGSEVWKDK</a>    |                      |

Mascot: <http://www.matrixscience.com/>

**Peptide View**MS/MS Fragmentation of **IEAVDLENK**Found in **AT1G24020.1** in **TAIR\_Arabidopsis**, Symbols: MLP423 | MLP423 (MLP-LIKE PROTEIN 423) | chr1:8500642-8501447 REVERSE

Match to Query 2658: 1029.534028 from(515.774290,2+) index(2540)

Title: Elution from: 26.697 to 26.697 scan no 3179 cid35.00 polarity:+

Data file D6h-3\_2.mgf

Click mouse within plot area to zoom in by factor of two about that point

Or,   to  Da Label all possible matches  Label matches used for scoring Show Y-axis 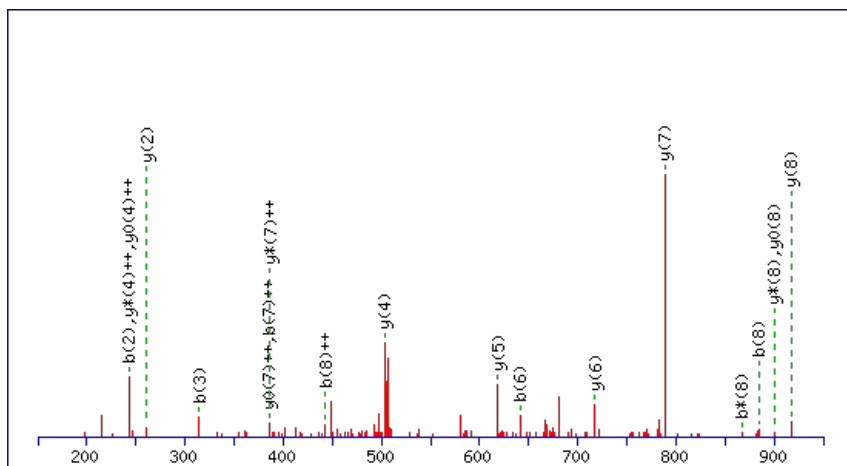Monoisotopic mass of neutral peptide **Mr(calc)**: 1029.5342**Fixed modifications**: Carbamidomethyl (C) (apply to specified residues or termini only)**Ions Score**: 47 **Expect**: 6.9e-005**Matches**: 19/76 fragment ions using 23 most intense peaks ([help](#))

| # | b               | b <sup>++</sup> | b*              | b <sup>*++</sup> | b <sup>0</sup> | b <sup>0++</sup> | Seq. | y               | y <sup>++</sup> | y*              | y <sup>*++</sup> | y <sup>0</sup>  | y <sup>0++</sup> | # |
|---|-----------------|-----------------|-----------------|------------------|----------------|------------------|------|-----------------|-----------------|-----------------|------------------|-----------------|------------------|---|
| 1 | 114.0913        | 57.5493         |                 |                  |                |                  | I    |                 |                 |                 |                  |                 |                  | 9 |
| 2 | <b>243.1339</b> | 122.0706        |                 |                  | 225.1234       | 113.0653         | E    | <b>917.4575</b> | 459.2324        | <b>900.4309</b> | 450.7191         | <b>899.4469</b> | 450.2271         | 8 |
| 3 | <b>314.1710</b> | 157.5892        |                 |                  | 296.1605       | 148.5839         | A    | <b>788.4149</b> | 394.7111        | 771.3883        | <b>386.1978</b>  | 770.4043        | <b>385.7058</b>  | 7 |
| 4 | 413.2395        | 207.1234        |                 |                  | 395.2289       | 198.1181         | V    | <b>717.3777</b> | 359.1925        | 700.3512        | 350.6792         | 699.3672        | 350.1872         | 6 |
| 5 | 528.2664        | 264.6368        |                 |                  | 510.2558       | 255.6316         | D    | <b>618.3093</b> | 309.6583        | 601.2828        | 301.1450         | 600.2988        | 300.6530         | 5 |
| 6 | <b>641.3505</b> | 321.1789        |                 |                  | 623.3399       | 312.1736         | L    | <b>503.2824</b> | 252.1448        | 486.2558        | <b>243.6316</b>  | 485.2718        | <b>243.1395</b>  | 4 |
| 7 | 770.3931        | <b>385.7002</b> |                 |                  | 752.3825       | 376.6949         | E    | 390.1983        | 195.6028        | 373.1718        | 187.0895         | 372.1878        | 186.5975         | 3 |
| 8 | <b>884.4360</b> | <b>442.7216</b> | <b>867.4094</b> | 434.2084         | 866.4254       | 433.7163         | N    | <b>261.1557</b> | 131.0815        | 244.1292        | 122.5682         |                 |                  | 2 |
| 9 |                 |                 |                 |                  |                |                  | K    | 147.1128        | 74.0600         | 130.0863        | 65.5468          |                 |                  | 1 |

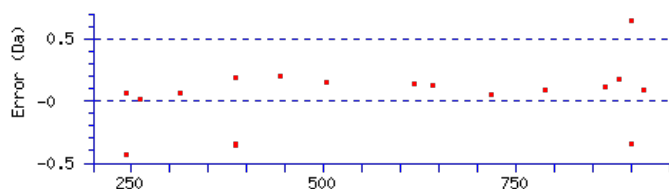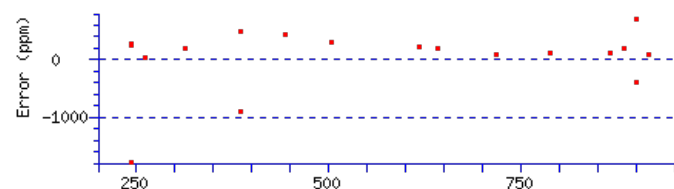NCBI **BLAST** search of [IEAVDLENK](#)

(Parameters: blastp, nr protein database, expect=20000, no filter, PAM30)

Other BLAST [web gateways](#)**All matches to this query**

| Score | Mr(calc)  | Delta   | Sequence                  |
|-------|-----------|---------|---------------------------|
| 47.1  | 1029.5342 | -0.0002 | <a href="#">IEAVDLENK</a> |



## AT1G24020.1

|     |           |         |                           |
|-----|-----------|---------|---------------------------|
| 6.2 | 1029.5342 | -0.0002 | <a href="#">IAEIDEVNK</a> |
| 4.5 | 1029.5315 | 0.0025  | <a href="#">GQQQQASRK</a> |
| 2.7 | 1029.5342 | -0.0002 | <a href="#">IQEDITPSK</a> |

**Mascot:** <http://www.matrixscience.com/>

**Peptide View**MS/MS Fragmentation of **GLPSLSYDELPSFVGR**

Found in **AT1G24100.1** in **TAIR\_Arabidopsis**, Symbols: UGT74B1 | UGT74B1 (UDP-glucosyl transférse 74B1); UDP-glycosyltransférse/thiohydroximate beta-D-glucosyltransférse/ transférse, transferring glycosyl groups | chr1:8525536-8526999 REVERSE

Match to Query 8427: 1735.875292 from(868.944922,2+) index(9790)

Title: Elution from: 89.901 to 89.901 scan no 13446 cid35.00 polarity:+

Data file 0-3\_1.mgf

Click mouse within plot area to zoom in by factor of two about that point

Or,   to  Da

Label all possible matches  Label matches used for scoring

Show Y-axis

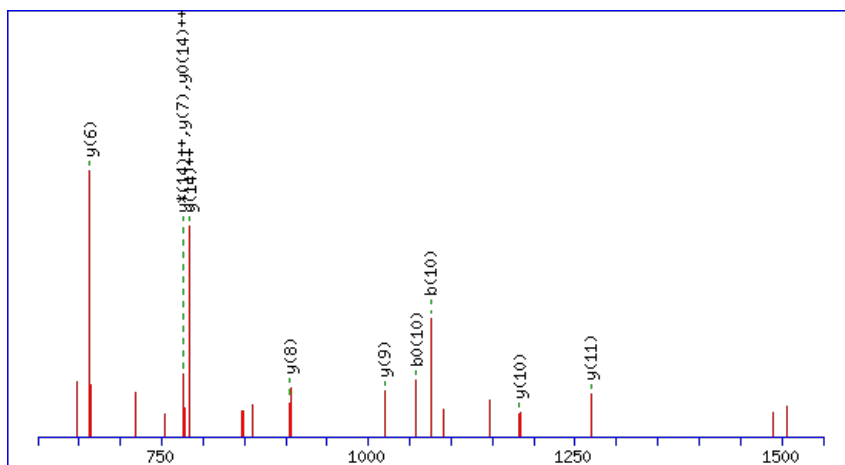

**Monoisotopic mass of neutral peptide Mr(calc):** 1735.8781

**Fixed modifications:** Carbamidomethyl (C) (apply to specified residues or termini only)

**Ions Score:** 29 **Expect:** 0.0055

**Matches:** 11/136 fragment ions using 15 most intense peaks ([help](#))

| #  | b                | b <sup>++</sup> | b <sup>0</sup>   | b <sup>0++</sup> | Seq.     | y                | y <sup>++</sup> | y <sup>*</sup> | y <sup>*++</sup> | y <sup>0</sup> | y <sup>0++</sup> | #  |
|----|------------------|-----------------|------------------|------------------|----------|------------------|-----------------|----------------|------------------|----------------|------------------|----|
| 1  | 58.0287          | 29.5180         |                  |                  | <b>G</b> |                  |                 |                |                  |                |                  | 16 |
| 2  | 171.1128         | 86.0600         |                  |                  | <b>L</b> | 1679.8639        | 840.4356        | 1662.8374      | 831.9223         | 1661.8533      | 831.4303         | 15 |
| 3  | 268.1656         | 134.5864        |                  |                  | <b>P</b> | 1566.7798        | <b>783.8936</b> | 1549.7533      | <b>775.3803</b>  | 1548.7693      | <b>774.8883</b>  | 14 |
| 4  | 355.1976         | 178.1024        | 337.1870         | 169.0972         | <b>S</b> | 1469.7271        | 735.3672        | 1452.7005      | 726.8539         | 1451.7165      | 726.3619         | 13 |
| 5  | 468.2817         | 234.6445        | 450.2711         | 225.6392         | <b>L</b> | 1382.6951        | 691.8512        | 1365.6685      | 683.3379         | 1364.6845      | 682.8459         | 12 |
| 6  | 555.3137         | 278.1605        | 537.3031         | 269.1552         | <b>S</b> | <b>1269.6110</b> | 635.3091        | 1252.5844      | 626.7959         | 1251.6004      | 626.3039         | 11 |
| 7  | 718.3770         | 359.6921        | 700.3665         | 350.6869         | <b>Y</b> | <b>1182.5790</b> | 591.7931        | 1165.5524      | 583.2798         | 1164.5684      | 582.7878         | 10 |
| 8  | 833.4040         | 417.2056        | 815.3934         | 408.2003         | <b>D</b> | <b>1019.5156</b> | 510.2615        | 1002.4891      | 501.7482         | 1001.5051      | 501.2562         | 9  |
| 9  | 962.4466         | 481.7269        | 944.4360         | 472.7216         | <b>E</b> | <b>904.4887</b>  | 452.7480        | 887.4621       | 444.2347         | 886.4781       | 443.7427         | 8  |
| 10 | <b>1075.5306</b> | 538.2689        | <b>1057.5201</b> | 529.2637         | <b>L</b> | <b>775.4461</b>  | 388.2267        | 758.4196       | 379.7134         | 757.4355       | 379.2214         | 7  |
| 11 | 1172.5834        | 586.7953        | 1154.5728        | 577.7900         | <b>P</b> | <b>662.3620</b>  | 331.6847        | 645.3355       | 323.1714         | 644.3515       | 322.6794         | 6  |
| 12 | 1259.6154        | 630.3113        | 1241.6048        | 621.3061         | <b>S</b> | 565.3093         | 283.1583        | 548.2827       | 274.6450         | 547.2987       | 274.1530         | 5  |
| 13 | 1406.6838        | 703.8455        | 1388.6733        | 694.8403         | <b>F</b> | 478.2772         | 239.6423        | 461.2507       | 231.1290         |                |                  | 4  |
| 14 | 1505.7522        | 753.3798        | 1487.7417        | 744.3745         | <b>V</b> | 331.2088         | 166.1081        | 314.1823       | 157.5948         |                |                  | 3  |
| 15 | 1562.7737        | 781.8905        | 1544.7631        | 772.8852         | <b>G</b> | 232.1404         | 116.5738        | 215.1139       | 108.0606         |                |                  | 2  |
| 16 |                  |                 |                  |                  | <b>R</b> | 175.1190         | 88.0631         | 158.0924       | 79.5498          |                |                  | 1  |

# AT1G24100.1

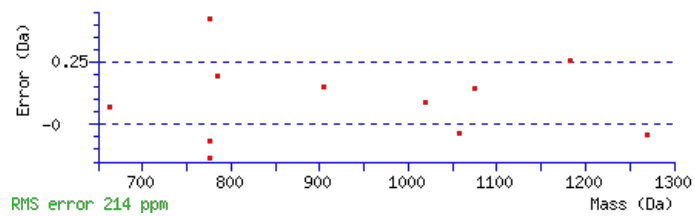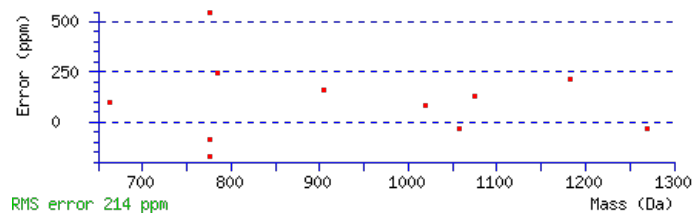

NCBI **BLAST** search of [GLPSLSYDELPSFVGR](#)

(Parameters: blastp, nr protein database, expect=20000, no filter, PAM30)

Other BLAST [web gateways](#)

## All matches to this query

| Score | Mr(calc)  | Delta   | Sequence                         |
|-------|-----------|---------|----------------------------------|
| 28.9  | 1735.8781 | -0.0028 | <a href="#">GLPSLSYDELPSFVGR</a> |
| 6.8   | 1735.8740 | 0.0013  | <a href="#">ERVDFAEETINASKK</a>  |
| 1.1   | 1735.8749 | 0.0004  | <a href="#">LQMSWMPSSLQSQR</a>   |

Mascot: <http://www.matrixscience.com/>

## Peptide View

### MS/MS Fragmentation of **FAKEHALK**

Found in **AT1G24180.1** in **TAIR\_Arabidopsis**, Symbols: IAR4 | IAR4 (IAA-conjugate-resistant 4); pyruvate dehydrogenase (acetyl-transferring) | chr1:8560766-8563371 REVERSE

Match to Query 2108: 954.494594 from(478.254573,2+) index(4844)

Title: Elution from: 43.276 to 43.276 scan no 6026 cid35.00 polarity:+

Data file C7-1\_1.mgf

Click mouse within plot area to zoom in by factor of two about that point

Or,   to  Da

Label all possible matches  Label matches used for scoring

Show Y-axis

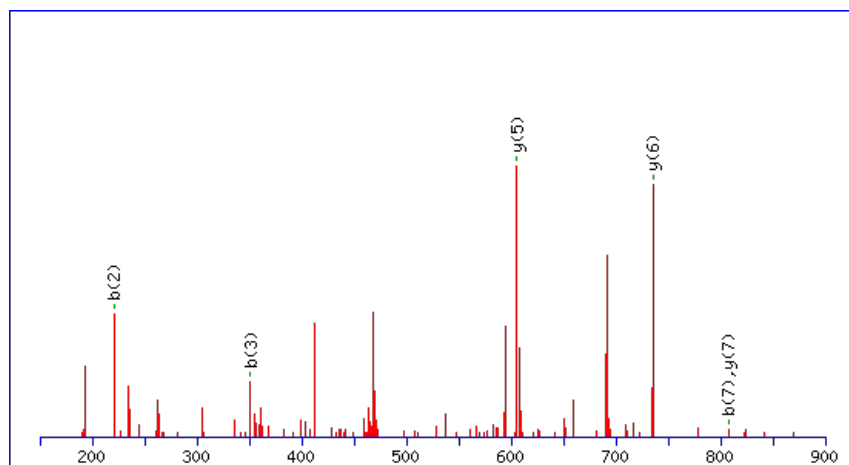

Monoisotopic mass of neutral peptide  $M_r(\text{calc})$ : 954.4931

Fixed modifications: Carbamidomethyl (C) (apply to specified residues or termini only)

Ions Score: 23 Expect: 0.024

Matches : 6/66 fragment ions using 7 most intense peaks ([help](#))

| # | b               | b <sup>++</sup> | b*       | b <sup>*++</sup> | b <sup>0</sup> | b <sup>0++</sup> | Seq. | y               | y <sup>++</sup> | y*       | y <sup>*++</sup> | y <sup>0</sup> | y <sup>0++</sup> | # |
|---|-----------------|-----------------|----------|------------------|----------------|------------------|------|-----------------|-----------------|----------|------------------|----------------|------------------|---|
| 1 | 149.0727        | 75.0400         |          |                  |                |                  | F    |                 |                 |          |                  |                |                  | 8 |
| 2 | <b>221.1069</b> | 111.0571        |          |                  |                |                  | A    | <b>807.4349</b> | 404.2211        | 789.4114 | 395.2093         | 789.4244       | 395.2158         | 7 |
| 3 | <b>351.1959</b> | 176.1016        | 333.1723 | 167.0898         |                |                  | K    | <b>735.4008</b> | 368.2040        | 717.3772 | 359.1922         | 717.3902       | 359.1988         | 6 |
| 4 | 481.2355        | 241.1214        | 463.2120 | 232.1096         | 463.2250       | 232.1161         | E    | <b>605.3118</b> | 303.1595        | 587.2882 | 294.1477         | 587.3012       | 294.1542         | 5 |
| 5 | 621.2856        | 311.1464        | 603.2620 | 302.1346         | 603.2750       | 302.1411         | H    | 475.2721        | 238.1397        | 457.2486 | 229.1279         |                |                  | 4 |
| 6 | 693.3197        | 347.1635        | 675.2961 | 338.1517         | 675.3091       | 338.1582         | A    | 335.2221        | 168.1147        | 317.1985 | 159.1029         |                |                  | 3 |
| 7 | <b>807.4008</b> | 404.2040        | 789.3772 | 395.1922         | 789.3902       | 395.1988         | L    | 263.1880        | 132.0976        | 245.1644 | 123.0858         |                |                  | 2 |
| 8 |                 |                 |          |                  |                |                  | K    | 149.1069        | 75.0571         | 131.0833 | 66.0453          |                |                  | 1 |

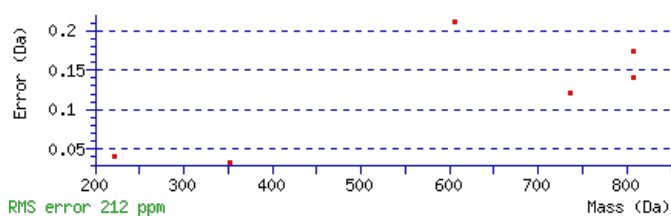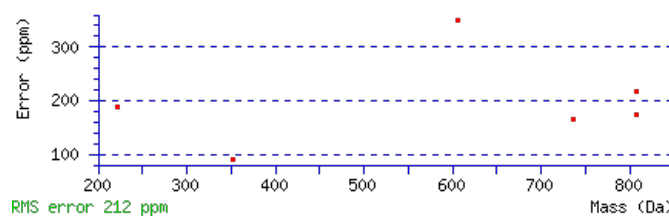

NCBI BLAST search of [FAKEHALK](#)

(Parameters: blastp, nr protein database, expect=20000, no filter, PAM30)

Other BLAST [web gateways](#)

All matches to this query

| Score | $M_r(\text{calc})$ | Delta  | Sequence                 |
|-------|--------------------|--------|--------------------------|
| 23.4  | 954.4931           | 0.0015 | <a href="#">FAKEHALK</a> |

## AT1G24180.1

|      |          |         |                           |
|------|----------|---------|---------------------------|
| 19.3 | 954.4965 | -0.0019 | <a href="#">MISHKALK</a>  |
| 10.3 | 954.4938 | 0.0008  | <a href="#">SLMEIPLK</a>  |
| 8.2  | 954.4931 | 0.0015  | <a href="#">LLGHGTFAK</a> |
| 6.7  | 954.4965 | -0.0019 | <a href="#">MLGPSLLGR</a> |
| 6.3  | 954.4931 | 0.0015  | <a href="#">FEAAKLHK</a>  |
| 6.3  | 954.4965 | -0.0019 | <a href="#">MHVTLAKK</a>  |
| 5.8  | 954.4965 | -0.0019 | <a href="#">CGVVVKGPK</a> |

**Mascot:** <http://www.matrixscience.com/>

### Peptide View

 MS/MS Fragmentation of **DPSLYRFVLSAVTSGVKDVR**

 Found in **AT1G24290.1** in **TAIR\_Arabidopsis**, Symbols: | AAA-type ATPase family protein | chr1:8612639-8614216 REVERSE

Match to Query 10271: 2295.223168 from(574.813068,4+) index(3820)

Title: Elution from: 38.362 to 38.362 scan no 4855 cid35.00 polarity:+

Data file D1d-2\_1.mgf

Click mouse within plot area to zoom in by factor of two about that point

 Or,   to  Da 

 Label all possible matches  Label matches used for scoring 

 Show Y-axis 
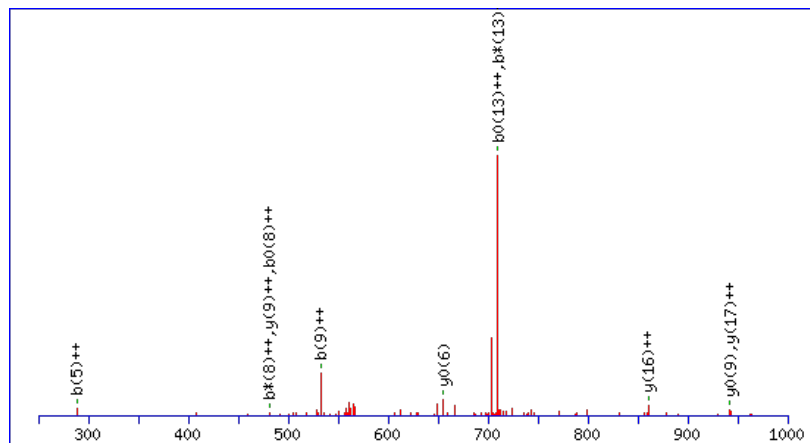
 Monoisotopic mass of neutral peptide **Mr(calc)**: 2295.2223

Fixed modifications: Carbamidomethyl (C) (apply to specified residues or termini only)

 Ions Score: 28 **Expect**: 0.004

 Matches : 12/226 fragment ions using 7 most intense peaks ([help](#))

| #  | b         | b <sup>++</sup> | b <sup>*</sup> | b <sup>*++</sup> | b <sup>0</sup> | b <sup>0++</sup> | Seq. | y         | y <sup>++</sup> | y <sup>*</sup> | y <sup>*++</sup> | y <sup>0</sup>  | y <sup>0++</sup> | #  |
|----|-----------|-----------------|----------------|------------------|----------------|------------------|------|-----------|-----------------|----------------|------------------|-----------------|------------------|----|
| 1  | 116.0342  | 58.5207         |                |                  | 98.0237        | 49.5155          | D    |           |                 |                |                  |                 |                  | 21 |
| 2  | 213.0870  | 107.0471        |                |                  | 195.0764       | 98.0418          | P    | 2181.2026 | 1091.1050       | 2164.1761      | 1082.5917        | 2163.1921       | 1082.0997        | 20 |
| 3  | 300.1190  | 150.5631        |                |                  | 282.1084       | 141.5579         | S    | 2084.1499 | 1042.5786       | 2067.1233      | 1034.0653        | 2066.1393       | 1033.5733        | 19 |
| 4  | 413.2031  | 207.1052        |                |                  | 395.1925       | 198.0999         | L    | 1997.1178 | 999.0626        | 1980.0913      | 990.5493         | 1979.1073       | 990.0573         | 18 |
| 5  | 576.2664  | <b>288.6368</b> |                |                  | 558.2558       | 279.6316         | Y    | 1884.0338 | <b>942.5205</b> | 1867.0072      | 934.0073         | 1866.0232       | 933.5152         | 17 |
| 6  | 732.3675  | 366.6874        | 715.3410       | 358.1741         | 714.3569       | 357.6821         | R    | 1720.9704 | <b>860.9889</b> | 1703.9439      | 852.4756         | 1702.9599       | 851.9836         | 16 |
| 7  | 879.4359  | 440.2216        | 862.4094       | 431.7083         | 861.4254       | 431.2163         | F    | 1564.8693 | 782.9383        | 1547.8428      | 774.4250         | 1546.8588       | 773.9330         | 15 |
| 8  | 978.5043  | 489.7558        | 961.4778       | <b>481.2425</b>  | 960.4938       | <b>480.7505</b>  | V    | 1417.8009 | <b>709.4041</b> | 1400.7744      | 700.8908         | 1399.7904       | 700.3988         | 14 |
| 9  | 1065.5364 | <b>533.2718</b> | 1048.5098      | 524.7585         | 1047.5258      | 524.2665         | S    | 1318.7325 | 659.8699        | 1301.7060      | 651.3566         | 1300.7219       | 650.8646         | 13 |
| 10 | 1178.6204 | 589.8139        | 1161.5939      | 581.3006         | 1160.6099      | 580.8086         | L    | 1231.7005 | 616.3539        | 1214.6739      | 607.8406         | 1213.6899       | 607.3486         | 12 |
| 11 | 1265.6525 | 633.3299        | 1248.6259      | 624.8166         | 1247.6419      | 624.3246         | S    | 1118.6164 | 559.8118        | 1101.5899      | 551.2986         | 1100.6058       | 550.8066         | 11 |
| 12 | 1336.6896 | 668.8484        | 1319.6630      | 660.3352         | 1318.6790      | 659.8431         | A    | 1031.5844 | 516.2958        | 1014.5578      | 507.7826         | 1013.5738       | 507.2905         | 10 |
| 13 | 1435.7580 | 718.3826        | 1418.7314      | <b>709.8694</b>  | 1417.7474      | <b>709.3774</b>  | V    | 960.5473  | <b>480.7773</b> | 943.5207       | 472.2640         | <b>942.5367</b> | 471.7720         | 9  |
| 14 | 1536.8057 | 768.9065        | 1519.7791      | 760.3932         | 1518.7951      | 759.9012         | T    | 861.4789  | 431.2431        | 844.4523       | 422.7298         | 843.4683        | 422.2378         | 8  |
| 15 | 1623.8377 | 812.4225        | 1606.8111      | 803.9092         | 1605.8271      | 803.4172         | S    | 760.4312  | 380.7192        | 743.4046       | 372.2060         | 742.4206        | 371.7139         | 7  |
| 16 | 1680.8592 | 840.9332        | 1663.8326      | 832.4199         | 1662.8486      | 831.9279         | G    | 673.3991  | 337.2032        | 656.3726       | 328.6899         | <b>655.3886</b> | 328.1979         | 6  |
| 17 | 1779.9276 | 890.4674        | 1762.9010      | 881.9542         | 1761.9170      | 881.4621         | V    | 616.3777  | 308.6925        | 599.3511       | 300.1792         | 598.3671        | 299.6872         | 5  |
| 18 | 1908.0225 | 954.5149        | 1890.9960      | 946.0016         | 1890.0120      | 945.5096         | K    | 517.3093  | 259.1583        | 500.2827       | 250.6450         | 499.2987        | 250.1530         | 4  |
| 19 | 2023.0495 | 1012.0284       | 2006.0229      | 1003.5151        | 2005.0389      | 1003.0231        | D    | 389.2143  | 195.1108        | 372.1878       | 186.5975         | 371.2037        | 186.1055         | 3  |
| 20 | 2122.1179 | 1061.5626       | 2105.0913      | 1053.0493        | 2104.1073      | 1052.5573        | V    | 274.1874  | 137.5973        | 257.1608       | 129.0840         |                 |                  | 2  |
| 21 |           |                 |                |                  |                |                  | R    | 175.1190  | 88.0631         | 158.0924       | 79.5498          |                 |                  | 1  |

# AT1G24290.1

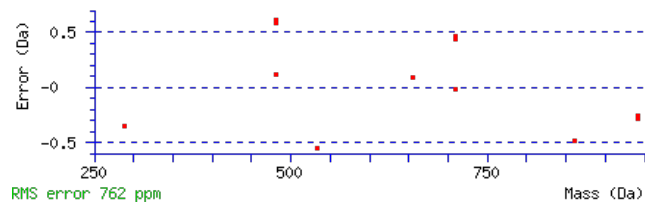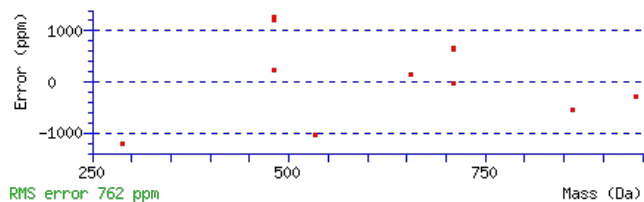

NCBI **BLAST** search of [DPSLYRFVLSAVTSGVKDVR](#)  
(Parameters: blastp, nr protein database, expect=20000, no filter, PAM30)  
Other BLAST [web gateways](#)

## All matches to this query

| Score | Mr(calc)  | Delta   | Sequence                              |
|-------|-----------|---------|---------------------------------------|
| 27.5  | 2295.2223 | 0.0009  | <a href="#">DPSLYRFVLSAVTSGVKDVR</a>  |
| 4.4   | 2295.2263 | -0.0032 | <a href="#">TVPFVLSFDNLTYNVSVRPK</a>  |
| 0.2   | 2295.2184 | 0.0047  | <a href="#">ELQFSVEVLFTGEKIGIGMAK</a> |

Mascot: <http://www.matrixscience.com/>

**Peptide View**MS/MS Fragmentation of **WGTDVVVNNAGITR**Found in **AT1G24360.1** in **TAIR\_Arabidopsis**, Symbols: | 3-oxoacyl-(acyl-carrier protein) reductase, chloroplast / 3-ketoacyl-acyl carrier protein reductase | chr1:8640809-8643272 FORWARD

Match to Query 6877: 1613.849756 from(807.932154,2+) index(7327)

Title: Elution from: 67.498 to 67.498 scan no 9659 cid35.00 polarity:+

Data file D12h-2\_2.mgf

Click mouse within plot area to zoom in by factor of two about that point

Or,   to  Da Label all possible matches  Label matches used for scoring Show Y-axis 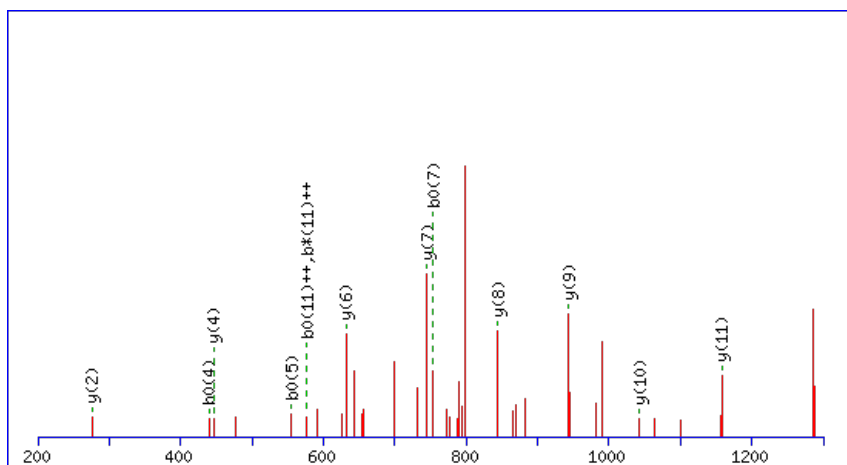Monoisotopic mass of neutral peptide  $M_r(\text{calc})$ : 1613.8526

Fixed modifications: Carbamidomethyl (C) (apply to specified residues or termini only)

Ions Score: 29 Expect: 0.0059

Matches : 13/146 fragment ions using 32 most intense peaks ([help](#))

| #  | b         | b <sup>++</sup> | b <sup>*</sup> | b <sup>*++</sup> | b <sup>0</sup> | b <sup>0++</sup> | Seq. | y         | y <sup>++</sup> | y <sup>*</sup> | y <sup>*++</sup> | y <sup>0</sup> | y <sup>0++</sup> | #  |
|----|-----------|-----------------|----------------|------------------|----------------|------------------|------|-----------|-----------------|----------------|------------------|----------------|------------------|----|
| 1  | 187.0866  | 94.0469         |                |                  |                |                  | W    |           |                 |                |                  |                |                  | 15 |
| 2  | 244.1081  | 122.5577        |                |                  |                |                  | G    | 1428.7805 | 714.8939        | 1411.7540      | 706.3806         | 1410.7700      | 705.8886         | 14 |
| 3  | 345.1557  | 173.0815        |                |                  | 327.1452       | 164.0762         | T    | 1371.7591 | 686.3832        | 1354.7325      | 677.8699         | 1353.7485      | 677.3779         | 13 |
| 4  | 458.2398  | 229.6235        |                |                  | 440.2292       | 220.6183         | I    | 1270.7114 | 635.8593        | 1253.6848      | 627.3461         | 1252.7008      | 626.8540         | 12 |
| 5  | 573.2667  | 287.1370        |                |                  | 555.2562       | 278.1317         | D    | 1157.6273 | 579.3173        | 1140.6008      | 570.8040         | 1139.6167      | 570.3120         | 11 |
| 6  | 672.3352  | 336.6712        |                |                  | 654.3246       | 327.6659         | V    | 1042.6004 | 521.8038        | 1025.5738      | 513.2905         | 1024.5898      | 512.7985         | 10 |
| 7  | 771.4036  | 386.2054        |                |                  | 753.3930       | 377.2001         | V    | 943.5320  | 472.2696        | 926.5054       | 463.7563         | 925.5214       | 463.2643         | 9  |
| 8  | 870.4720  | 435.7396        |                |                  | 852.4614       | 426.7343         | V    | 844.4635  | 422.7354        | 827.4370       | 414.2221         | 826.4530       | 413.7301         | 8  |
| 9  | 984.5149  | 492.7611        | 967.4884       | 484.2478         | 966.5043       | 483.7558         | N    | 745.3951  | 373.2012        | 728.3686       | 364.6879         | 727.3846       | 364.1959         | 7  |
| 10 | 1098.5578 | 549.7826        | 1081.5313      | 541.2693         | 1080.5473      | 540.7773         | N    | 631.3522  | 316.1797        | 614.3257       | 307.6665         | 613.3416       | 307.1745         | 6  |
| 11 | 1169.5949 | 585.3011        | 1152.5684      | 576.7878         | 1151.5844      | 576.2958         | A    | 517.3093  | 259.1583        | 500.2827       | 250.6450         | 499.2987       | 250.1530         | 5  |
| 12 | 1226.6164 | 613.8118        | 1209.5899      | 605.2986         | 1208.6058      | 604.8066         | G    | 446.2722  | 223.6397        | 429.2456       | 215.1264         | 428.2616       | 214.6344         | 4  |
| 13 | 1339.7005 | 670.3539        | 1322.6739      | 661.8406         | 1321.6899      | 661.3486         | I    | 389.2507  | 195.1290        | 372.2241       | 186.6157         | 371.2401       | 186.1237         | 3  |
| 14 | 1440.7482 | 720.8777        | 1423.7216      | 712.3644         | 1422.7376      | 711.8724         | T    | 276.1666  | 138.5870        | 259.1401       | 130.0737         | 258.1561       | 129.5817         | 2  |
| 15 |           |                 |                |                  |                |                  | R    | 175.1190  | 88.0631         | 158.0924       | 79.5498          |                |                  | 1  |

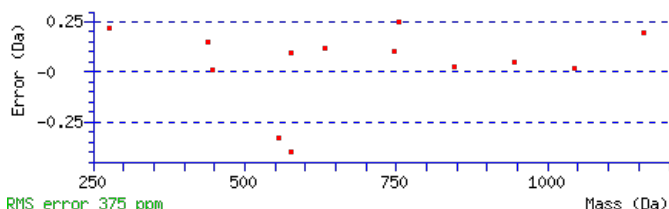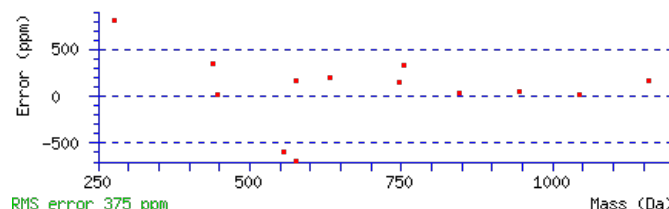



## AT1G24360.1

NCBI **BLAST** search of [WGTIDVVVNNAGITR](#)

(Parameters: blastp, nr protein database, expect=20000, no filter, PAM30)

Other BLAST [web gateways](#)

### All matches to this query

| Score | Mr(calc)  | Delta   | Sequence                        |
|-------|-----------|---------|---------------------------------|
| 28.8  | 1613.8526 | -0.0028 | <a href="#">WGTIDVVVNNAGITR</a> |

Mascot: <http://www.matrixscience.com/>

## Peptide View

### MS/MS Fragmentation of **AVLAVADLER**

Found in **AT1G24510.1** in **TAIR\_Arabidopsis**, Symbols: | T-complex protein 1 epsilon subunit, putative / TCP-1-epsilon, putative / chaperonin, putative | chr1:8685492-8688089 REVERSE

Match to Query 3051: 1055.597682 from(528.806117,2+) index(5245)

Title: Elution from: 45.610 to 45.610 scan no 6581 cid35.00 polarity:+

Data file D1d-3\_3.mgf

Click mouse within plot area to zoom in by factor of two about that point

Or,   to  Da

Label all possible matches  Label matches used for scoring

Show Y-axis

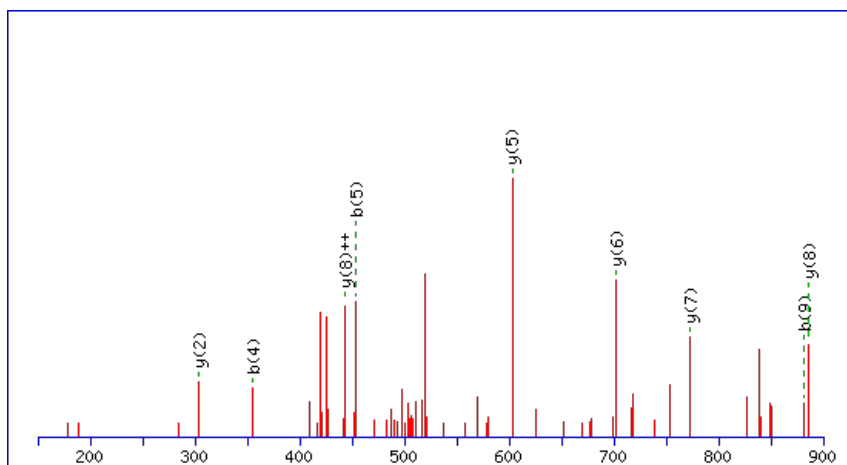

Monoisotopic mass of neutral peptide  $M_r(\text{calc})$ : 1055.5975

Fixed modifications: Carbamidomethyl (C) (apply to specified residues or termini only)

Ions Score: 30 Expect: 0.0042

Matches : 9/76 fragment ions using 16 most intense peaks ([help](#))

| #  | b        | b <sup>++</sup> | b <sup>0</sup> | b <sup>0++</sup> | Seq. | y        | y <sup>++</sup> | y*       | y <sup>*++</sup> | y <sup>0</sup> | y <sup>0++</sup> | #  |
|----|----------|-----------------|----------------|------------------|------|----------|-----------------|----------|------------------|----------------|------------------|----|
| 1  | 72.0444  | 36.5258         |                |                  | A    |          |                 |          |                  |                |                  | 10 |
| 2  | 171.1128 | 86.0600         |                |                  | V    | 985.5677 | 493.2875        | 968.5411 | 484.7742         | 967.5571       | 484.2822         | 9  |
| 3  | 284.1969 | 142.6021        |                |                  | L    | 886.4993 | 443.7533        | 869.4727 | 435.2400         | 868.4887       | 434.7480         | 8  |
| 4  | 355.2340 | 178.1206        |                |                  | A    | 773.4152 | 387.2112        | 756.3886 | 378.6980         | 755.4046       | 378.2060         | 7  |
| 5  | 454.3024 | 227.6548        |                |                  | V    | 702.3781 | 351.6927        | 685.3515 | 343.1794         | 684.3675       | 342.6874         | 6  |
| 6  | 525.3395 | 263.1734        |                |                  | A    | 603.3097 | 302.1585        | 586.2831 | 293.6452         | 585.2991       | 293.1532         | 5  |
| 7  | 640.3665 | 320.6869        | 622.3559       | 311.6816         | D    | 532.2726 | 266.6399        | 515.2460 | 258.1266         | 514.2620       | 257.6346         | 4  |
| 8  | 753.4505 | 377.2289        | 735.4400       | 368.2236         | L    | 417.2456 | 209.1264        | 400.2191 | 200.6132         | 399.2350       | 200.1212         | 3  |
| 9  | 882.4931 | 441.7502        | 864.4825       | 432.7449         | E    | 304.1615 | 152.5844        | 287.1350 | 144.0711         | 286.1510       | 143.5791         | 2  |
| 10 |          |                 |                |                  | R    | 175.1190 | 88.0631         | 158.0924 | 79.5498          |                |                  | 1  |

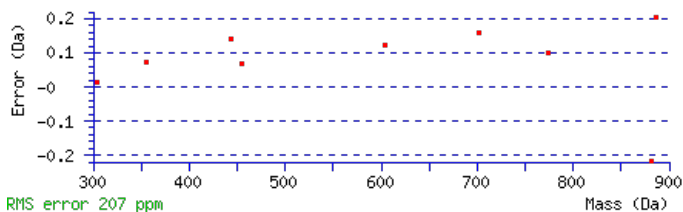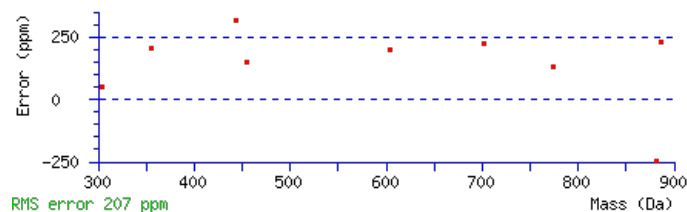

NCBI BLAST search of [AVLAVADLER](#)

(Parameters: blastp, nr protein database, expect=20000, no filter, PAM30)

Other BLAST [web gateways](#)

All matches to this query

AT1G24510.1

| Score | Mr(calc)  | Delta  | Sequence                   |
|-------|-----------|--------|----------------------------|
| 30.2  | 1055.5975 | 0.0002 | <a href="#">AVLAVADLER</a> |
| 1.1   | 1055.5975 | 0.0002 | <a href="#">AVLEDQLLR</a>  |

Mascot: <http://www.matrixscience.com/>

## Peptide View

MS/MS Fragmentation of **ETAALKEMCEVLGGGLR**

Found in **AT1G26160.1** in **TAIR\_Arabidopsis**, Symbols: | metal-dependent phosphohydrolase HD domain-containing protein | chr1:9044771-9046932 REVERSE

Match to Query 8688: 1870.839996 from(936.427274,2+) index(6849)

Title: Elution from: 60.703 to 60.703 scan no 8890 cid35.00 polarity:+

Data file D12h-3\_2.mgf

Click mouse within plot area to zoom in by factor of two about that point

Or,   to  Da

Label all possible matches  Label matches used for scoring

Show Y-axis

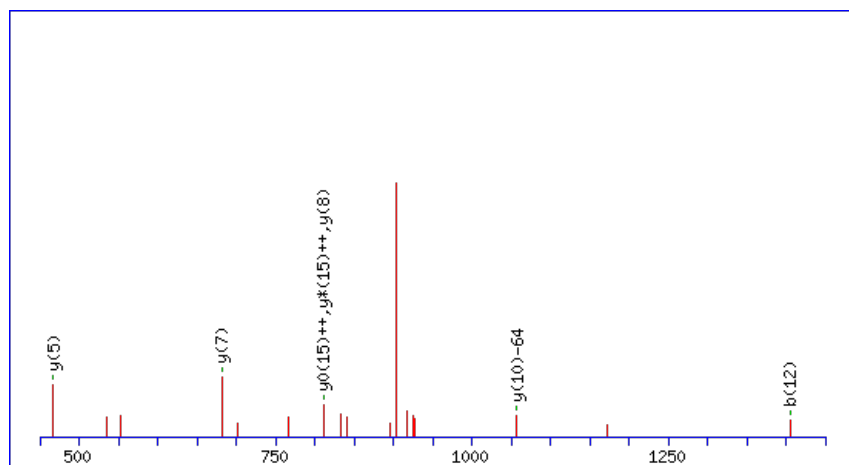

Monoisotopic mass of neutral peptide  $M_r(\text{calc})$ : 1870.8421

Fixed modifications: Carbamidomethyl (C) (apply to specified residues or termini only)

Variable modifications:

M8 : Oxidation (M), with neutral losses 63.9983 (shown in table), 0.0000

Ions Score: 26 Expect: 0.019

Matches : 7/264 fragment ions using 7 most intense peaks ([help](#))

| #  | b         | b <sup>++</sup> | b <sup>*</sup> | b <sup>*++</sup> | b <sup>0</sup> | b <sup>0++</sup> | Seq. | y                | y <sup>++</sup> | y <sup>*</sup> | y <sup>*++</sup> | y <sup>0</sup> | y <sup>0++</sup> | #  |
|----|-----------|-----------------|----------------|------------------|----------------|------------------|------|------------------|-----------------|----------------|------------------|----------------|------------------|----|
| 1  | 131.0469  | 66.0271         |                |                  | 113.0363       | 57.0218          | E    |                  |                 |                |                  |                |                  | 17 |
| 2  | 233.0916  | 117.0494        |                |                  | 215.0811       | 108.0442         | T    | 1677.8115        | 839.4094        | 1659.7879      | 830.3976         | 1659.8009      | 830.4041         | 16 |
| 3  | 305.1258  | 153.0665        |                |                  | 287.1152       | 144.0612         | A    | 1575.7668        | 788.3870        | 1557.7432      | 779.3752         | 1557.7562      | 779.3818         | 15 |
| 4  | 377.1599  | 189.0836        |                |                  | 359.1494       | 180.0783         | A    | 1503.7326        | 752.3700        | 1485.7091      | 743.3582         | 1485.7221      | 743.3647         | 14 |
| 5  | 491.2410  | 246.1241        |                |                  | 473.2304       | 237.1189         | L    | 1431.6985        | 716.3529        | 1413.6749      | 707.3411         | 1413.6879      | 707.3476         | 13 |
| 6  | 621.3300  | 311.1687        | 603.3065       | 302.1569         | 603.3195       | 302.1634         | K    | 1317.6174        | 659.3123        | 1299.5938      | 650.3005         | 1299.6068      | 650.3071         | 12 |
| 7  | 751.3697  | 376.1885        | 733.3461       | 367.1767         | 733.3591       | 367.1832         | E    | 1187.5284        | 594.2678        | 1169.5048      | 585.2560         | 1169.5178      | 585.2625         | 11 |
| 8  | 835.4038  | 418.2056        | 817.3802       | 409.1938         | 817.3933       | 409.2003         | M    | <b>1057.4887</b> | 529.2480        | 1039.4651      | 520.2362         | 1039.4782      | 520.2427         | 10 |
| 9  | 997.4285  | 499.2179        | 979.4050       | 490.2061         | 979.4180       | 490.2126         | C    | 973.4546         | 487.2309        | 955.4310       | 478.2191         | 955.4440       | 478.2256         | 9  |
| 10 | 1127.4682 | 564.2377        | 1109.4446      | 555.2259         | 1109.4576      | 555.2324         | E    | <b>811.4299</b>  | 406.2186        | 793.4063       | 397.2068         | 793.4193       | 397.2133         | 8  |
| 11 | 1227.5336 | 614.2704        | 1209.5100      | 605.2587         | 1209.5231      | 605.2652         | V    | <b>681.3902</b>  | 341.1988        | 663.3667       | 332.1870         |                |                  | 7  |
| 12 | 1341.6147 | 671.3110        | 1323.5911      | 662.2992         | 1323.6042      | 662.3057         | L    | 581.3248         | 291.1660        | 563.3012       | 282.1542         |                |                  | 6  |
| 13 | 1399.6332 | 700.3202        | 1381.6096      | 691.3085         | 1381.6227      | 691.3150         | G    | <b>467.2437</b>  | 234.1255        | 449.2201       | 225.1137         |                |                  | 5  |
| 14 | 1457.6517 | 729.3295        | 1439.6281      | 720.3177         | 1439.6412      | 720.3242         | G    | 409.2252         | 205.1162        | 391.2016       | 196.1044         |                |                  | 4  |
| 15 | 1515.6702 | 758.3387        | 1497.6466      | 749.3270         | 1497.6597      | 749.3335         | G    | 351.2067         | 176.1070        | 333.1831       | 167.0952         |                |                  | 3  |
| 16 | 1629.7513 | 815.3793        | 1611.7277      | 806.3675         | 1611.7407      | 806.3740         | L    | 293.1882         | 147.0977        | 275.1646       | 138.0859         |                |                  | 2  |
| 17 |           |                 |                |                  |                |                  | R    | 179.1071         | 90.0572         | 161.0835       | 81.0454          |                |                  | 1  |

# AT1G26160.1

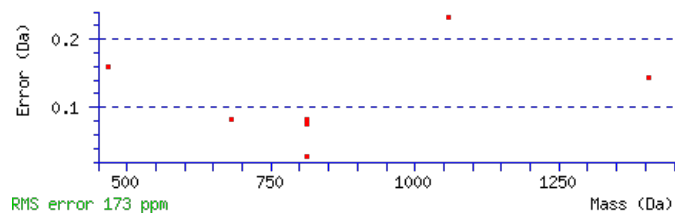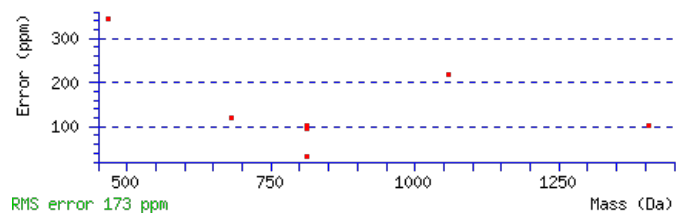

NCBI **BLAST** search of [ETAALKEMCEVLGGGLR](#)

(Parameters: blastp, nr protein database, expect=20000, no filter, PAM30)

Other BLAST [web gateways](#)

## All matches to this query

| Score | Mr(calc)  | Delta   | Sequence                          |
|-------|-----------|---------|-----------------------------------|
| 25.9  | 1870.8421 | -0.0021 | <a href="#">ETAALKEMCEVLGGGLR</a> |
| 11.2  | 1870.8410 | -0.0010 | <a href="#">AFDQVLGMEVAWNQVK</a>  |
| 4.3   | 1870.8387 | 0.0013  | <a href="#">KRTTLAELFMEDHDK</a>   |
| 1.4   | 1870.8396 | 0.0004  | <a href="#">HIVFCLCVMVVVDSR</a>   |
| 0.4   | 1870.8437 | -0.0037 | <a href="#">TSFLHRLVCHTFDSK</a>   |

Mascot: <http://www.matrixscience.com/>



# Mascot Search Results

## Peptide View

MS/MS Fragmentation of **TYPQSAGNIR**

Found in **AT1G26630.1** in **TAIR\_Arabidopsis**, Symbols: FBR12 | FBR12 (FUMONISIN B1-RESISTANT12); translation initiation factor | chr1:9205955-9207085 FORWARD

Match to Query 3601: 1105.551212 from(553.782882,2+) index(963)

Title: Elution from: 14.043 to 14.043 scan no 1308 cid35.00 polarity:+

Data file D1d-3\_2.mgf

Click mouse within plot area to zoom in by factor of two about that point

Or,   to  Da

Label all possible matches  Label matches used for scoring

Show Y-axis

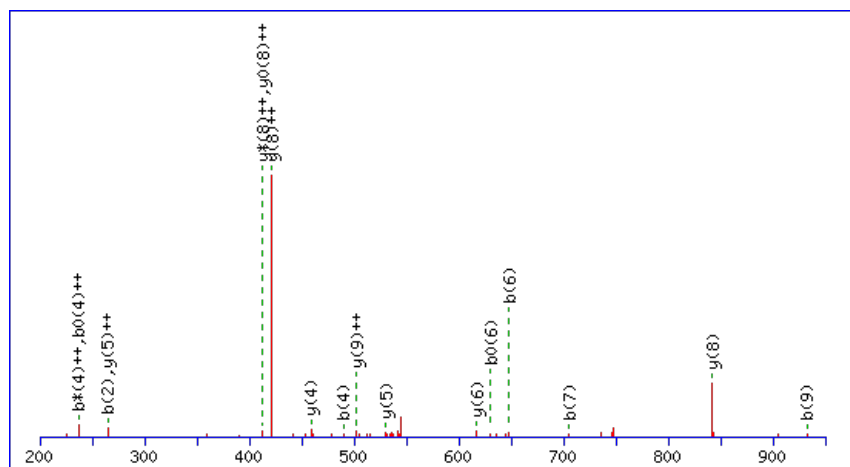

Monoisotopic mass of neutral peptide Mr(calc): 1105.5516

Fixed modifications: Carbamidomethyl (C) (apply to specified residues or termini only)

Ions Score: 28 Expect: 0.0029

Matches : 17/92 fragment ions using 30 most intense peaks [\(help\)](#)

| #  | b               | b <sup>++</sup> | b*       | b <sup>*++</sup> | b <sup>0</sup>  | b <sup>0++</sup> | Seq. | y               | y <sup>++</sup> | y*       | y <sup>*++</sup> | y <sup>0</sup> | y <sup>0++</sup> | #  |
|----|-----------------|-----------------|----------|------------------|-----------------|------------------|------|-----------------|-----------------|----------|------------------|----------------|------------------|----|
| 1  | 102.0550        | 51.5311         |          |                  | 84.0444         | 42.5258          | T    |                 |                 |          |                  |                |                  | 10 |
| 2  | <b>265.1183</b> | 133.0628        |          |                  | 247.1077        | 124.0575         | Y    | 1005.5112       | <b>503.2592</b> | 988.4847 | 494.7460         | 987.5007       | 494.2540         | 9  |
| 3  | 362.1710        | 181.5892        |          |                  | 344.1605        | 172.5839         | P    | <b>842.4479</b> | <b>421.7276</b> | 825.4213 | <b>413.2143</b>  | 824.4373       | <b>412.7223</b>  | 8  |
| 4  | <b>490.2296</b> | 245.6185        | 473.2031 | <b>237.1052</b>  | 472.2191        | <b>236.6132</b>  | Q    | 745.3951        | 373.2012        | 728.3686 | 364.6879         | 727.3846       | 364.1959         | 7  |
| 5  | 577.2617        | 289.1345        | 560.2351 | 280.6212         | 559.2511        | 280.1292         | S    | <b>617.3365</b> | 309.1719        | 600.3100 | 300.6586         | 599.3260       | 300.1666         | 6  |
| 6  | <b>648.2988</b> | 324.6530        | 631.2722 | 316.1397         | <b>630.2882</b> | 315.6477         | A    | <b>530.3045</b> | <b>265.6559</b> | 513.2780 | 257.1426         |                |                  | 5  |
| 7  | <b>705.3202</b> | 353.1638        | 688.2937 | 344.6505         | 687.3097        | 344.1585         | G    | <b>459.2674</b> | 230.1373        | 442.2409 | 221.6241         |                |                  | 4  |
| 8  | 819.3632        | 410.1852        | 802.3366 | 401.6719         | 801.3526        | 401.1799         | N    | 402.2459        | 201.6266        | 385.2194 | 193.1133         |                |                  | 3  |
| 9  | <b>932.4472</b> | 466.7272        | 915.4207 | 458.2140         | 914.4367        | 457.7220         | I    | 288.2030        | 144.6051        | 271.1765 | 136.0919         |                |                  | 2  |
| 10 |                 |                 |          |                  |                 |                  | R    | 175.1190        | 88.0631         | 158.0924 | 79.5498          |                |                  | 1  |

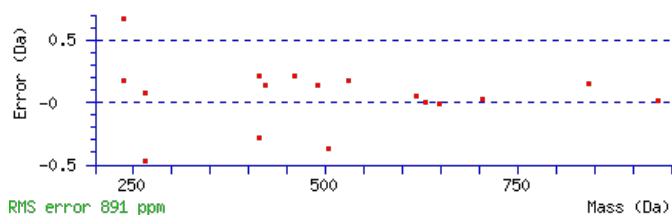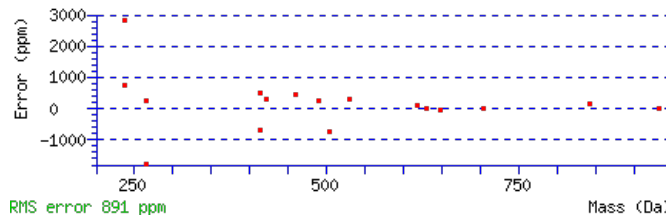

NCBI BLAST search of [TYPQSAGNIR](#)

(Parameters: blastp, nr protein database, expect=20000, no filter, PAM30)

Other BLAST [web gateways](#)

All matches to this query

AT1G26630.1

| Score | Mr(calc)  | Delta   | Sequence                   |
|-------|-----------|---------|----------------------------|
| 27.9  | 1105.5516 | -0.0004 | <a href="#">TYPQSAGNIR</a> |
| 1.9   | 1105.5516 | -0.0004 | <a href="#">KASGSLDSWR</a> |
| 1.0   | 1105.5516 | -0.0004 | <a href="#">RYIPSEGER</a>  |

Mascot: <http://www.matrixscience.com/>

## Peptide View

MS/MS Fragmentation of **MAVEGMMKKKHGGFSNIVEMEK**Found in **AT1G26760.1** in **TAIR\_Arabidopsis**, Symbols: | binding | chr1:9248291-9249928 REVERSE

Match to Query 10276: 2427.012402 from(810.011410,3+) index(5891)

Title: Elution from: 52.204 to 52.204 scan no 7492 cid35.00 polarity:+

Data file 0-3\_2.mgf

Click mouse within plot area to zoom in by factor of two about that point

Or, Plot from  to  Da Label all possible matches  Label matches used for scoring Show Y-axis 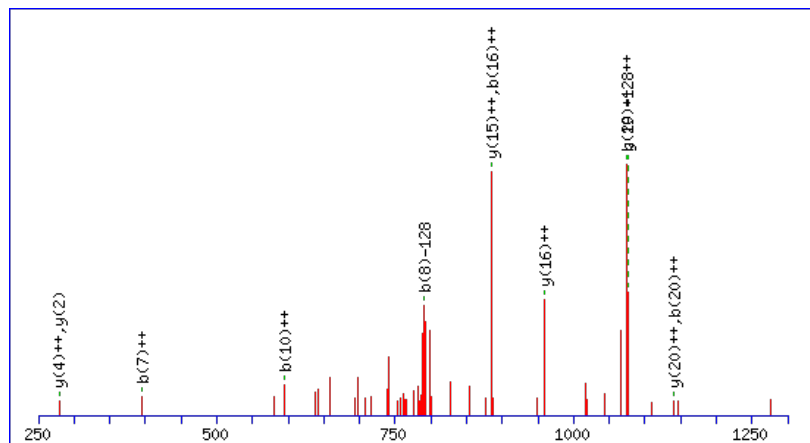Monoisotopic mass of neutral peptide **Mr(calc)**: 2427.0145

Fixed modifications: Carbamidomethyl (C) (apply to specified residues or termini only)

Variable modifications:

**M1** : Oxidation (M), with neutral losses 0.0000 (shown in table), 63.9983**M6** : Oxidation (M), with neutral losses 0.0000 (shown in table), 63.9983**M19** : Oxidation (M), with neutral losses 0.0000 (shown in table), 63.9983Ions Score: 24 **Expect**: 0.015Matches : 12/426 fragment ions using 15 most intense peaks ([help](#))

| #  | b         | b <sup>++</sup> | b*        | b* <sup>++</sup> | b <sup>0</sup> | b <sup>0</sup> <sup>++</sup> | Seq | y         | y <sup>++</sup> | y*        | y* <sup>++</sup> | y <sup>0</sup> | y <sup>0</sup> <sup>++</sup> | #  |
|----|-----------|-----------------|-----------|------------------|----------------|------------------------------|-----|-----------|-----------------|-----------|------------------|----------------|------------------------------|----|
| 1  | 149.0397  | 75.0235         |           |                  |                |                              | M   |           |                 |           |                  |                |                              | 21 |
| 2  | 221.0739  | 111.0406        |           |                  |                |                              | A   | 2279.9894 | 1140.4983       | 2261.9658 | 1131.4865        | 2261.9788      | 1131.4930                    | 20 |
| 3  | 321.1393  | 161.0733        |           |                  |                |                              | V   | 2207.9552 | 1104.4813       | 2189.9316 | 1095.4695        | 2189.9447      | 1095.4760                    | 19 |
| 4  | 451.1789  | 226.0931        |           |                  | 433.1684       | 217.0878                     | E   | 2107.8898 | 1054.4485       | 2089.8662 | 1045.4367        | 2089.8792      | 1045.4432                    | 18 |
| 5  | 509.1974  | 255.1024        |           |                  | 491.1869       | 246.0971                     | G   | 1977.8502 | 989.4287        | 1959.8266 | 980.4169         | 1959.8396      | 980.4234                     | 17 |
| 6  | 657.2299  | 329.1186        |           |                  | 639.2193       | 320.1133                     | M   | 1919.8317 | 960.4195        | 1901.8081 | 951.4077         | 1901.8211      | 951.4142                     | 16 |
| 7  | 789.2674  | 395.1373        |           |                  | 771.2568       | 386.1321                     | M   | 1771.7992 | 886.4032        | 1753.7756 | 877.3915         | 1753.7887      | 877.3980                     | 15 |
| 8  | 919.3564  | 460.1819        | 901.3328  | 451.1701         | 901.3459       | 451.1766                     | K   | 1639.7617 | 820.3845        | 1621.7381 | 811.3727         | 1621.7511      | 811.3792                     | 14 |
| 9  | 1049.4455 | 525.2264        | 1031.4219 | 516.2146         | 1031.4349      | 516.2211                     | K   | 1509.6727 | 755.3400        | 1491.6491 | 746.3282         | 1491.6621      | 746.3347                     | 13 |
| 10 | 1189.4955 | 595.2514        | 1171.4719 | 586.2396         | 1171.4849      | 586.2461                     | H   | 1379.5836 | 690.2955        | 1361.5601 | 681.2837         | 1361.5731      | 681.2902                     | 12 |
| 11 | 1247.5140 | 624.2606        | 1229.4904 | 615.2488         | 1229.5034      | 615.2553                     | G   | 1239.5336 | 620.2704        | 1221.5100 | 611.2587         | 1221.5231      | 611.2652                     | 11 |
| 12 | 1305.5325 | 653.2699        | 1287.5089 | 644.2581         | 1287.5219      | 644.2646                     | G   | 1181.5151 | 591.2612        | 1163.4915 | 582.2494         | 1163.5046      | 582.2559                     | 10 |
| 13 | 1453.5979 | 727.3026        | 1435.5743 | 718.2908         | 1435.5874      | 718.2973                     | F   | 1123.4966 | 562.2519        | 1105.4730 | 553.2402         | 1105.4861      | 553.2467                     | 9  |
| 14 | 1541.6270 | 771.3171        | 1523.6034 | 762.3053         | 1523.6164      | 762.3118                     | S   | 975.4312  | 488.2192        | 957.4076  | 479.2074         | 957.4206       | 479.2139                     | 8  |
| 15 | 1657.6640 | 829.3356        | 1639.6404 | 820.3238         | 1639.6534      | 820.3303                     | N   | 887.4021  | 444.2047        | 869.3785  | 435.1929         | 869.3915       | 435.1994                     | 7  |
| 16 | 1771.7451 | 886.3762        | 1753.7215 | 877.3644         | 1753.7345      | 877.3709                     | I   | 771.3651  | 386.1862        | 753.3415  | 377.1744         | 753.3545       | 377.1809                     | 6  |
| 17 | 1871.8105 | 936.4089        | 1853.7869 | 927.3971         | 1853.8000      | 927.4036                     | V   | 657.2840  | 329.1456        | 639.2604  | 320.1339         | 639.2734       | 320.1404                     | 5  |
| 18 | 2001.8502 | 1001.4287       | 1983.8266 | 992.4169         | 1983.8396      | 992.4234                     | E   | 557.2186  | 279.1129        | 539.1950  | 270.1011         | 539.2080       | 270.1076                     | 4  |
| 19 | 2149.8826 | 1075.4449       | 2131.8590 | 1066.4331        | 2131.8720      | 1066.4397                    | M   | 427.1789  | 214.0931        | 409.1554  | 205.0813         | 409.1684       | 205.0878                     | 3  |
| 20 | 2279.9222 | 1140.4647       | 2261.8986 | 1131.4530        | 2261.9117      | 1131.4595                    | E   | 279.1465  | 140.0769        | 261.1229  | 131.0651         | 261.1359       | 131.0716                     | 2  |
| 21 |           |                 |           |                  |                |                              | K   | 149.1069  | 75.0571         | 131.0833  | 66.0453          |                |                              | 1  |



# AT1G26760.1

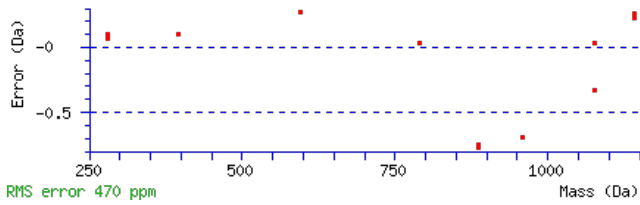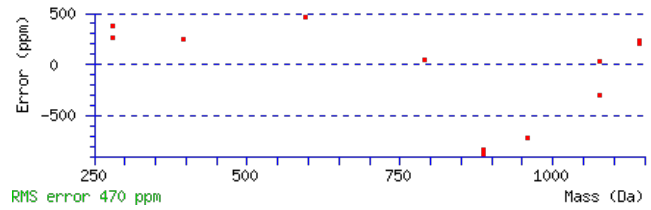

NCBI BLAST search of [MAVEGMMKKHGGFSNIVEMEK](#)  
 (Parameters: blastp, nr protein database, expect=20000, no filter, PAM30)  
 Other BLAST [web gateways](#)

## All matches to this query

| Score | Mr(calc)  | Delta   | Sequence                                | Site Analysis                |
|-------|-----------|---------|-----------------------------------------|------------------------------|
| 24.0  | 2427.0145 | -0.0021 | <a href="#">MAVEGMMKKHGGFSNIVEMEK</a>   | Oxidation M1, M6, M19 49.91% |
| 22.5  | 2427.0145 | -0.0021 | <a href="#">MAVEGMMKKHGGFSNIVEMEK</a>   | Oxidation M1, M7, M19 34.93% |
| 18.4  | 2427.0145 | -0.0021 | <a href="#">MAVEGMMKKHGGFSNIVEMEK</a>   | Oxidation M6, M7, M19 13.65% |
| 13.6  | 2427.0058 | 0.0066  | <a href="#">KNESTAGGSKMENGVSSENIEK</a>  |                              |
| 9.5   | 2427.0150 | -0.0026 | <a href="#">NDGFSLTSGDFPSLGAEKDTSEK</a> |                              |
| 8.8   | 2427.0145 | -0.0021 | <a href="#">MAVEGMMKKHGGFSNIVEMEK</a>   | Oxidation M1, M6, M7 1.52%   |
| 7.9   | 2427.0062 | 0.0062  | <a href="#">GLCYEMRIEDAESVVLDM EK</a>   |                              |
| 5.8   | 2427.0078 | 0.0046  | <a href="#">APSWMATQSSWIGYVAVCQDK</a>   |                              |
| 2.2   | 2427.0082 | 0.0042  | <a href="#">EDFHVTSMTTAGNRWGVVMSR</a>   |                              |
| 1.6   | 2427.0184 | -0.0060 | <a href="#">MDYKVSRSGEIVEGEVEDSEK</a>   |                              |

Mascot: <http://www.matrixscience.com/>

**Peptide View**MS/MS Fragmentation of **AFLVEEQK**Found in **AT1G26880.1** in **TAIR\_Arabidopsis**, Symbols: | 60S ribosomal protein L34 (RPL34A) | chr1:9315627-9316668 REVERSE

Match to Query 2435: 972.475280 from(487.244916,2+) index(2840)

Title: Elution from: 29.484 to 29.484 scan no 3560 cid35.00 polarity:+

Data file D12h-1\_1.mgf

Click mouse within plot area to zoom in by factor of two about that point

Or,   to  Da Label all possible matches  Label matches used for scoring Show Y-axis 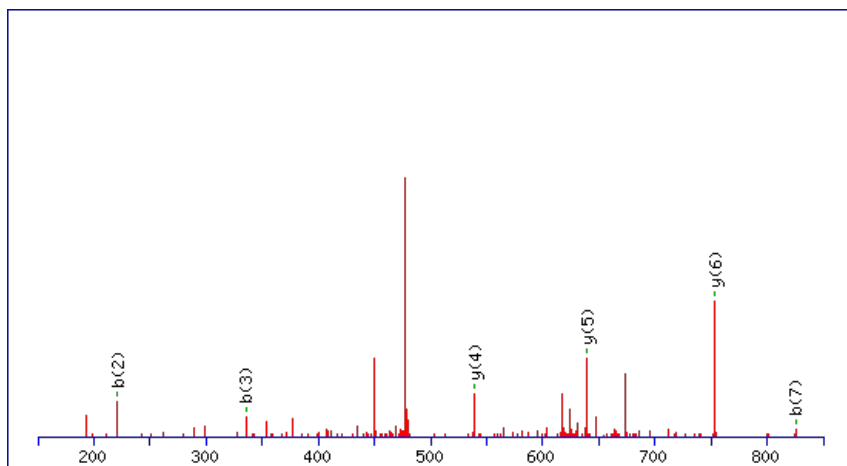Monoisotopic mass of neutral peptide **Mr(calc)**: 972.4776

Fixed modifications: Carbamidomethyl (C) (apply to specified residues or termini only)

Ions Score: 33 Expect: 0.0066

Matches : 6/60 fragment ions using 7 most intense peaks ([help](#))

| # | b               | b <sup>++</sup> | b*       | b <sup>*++</sup> | b <sup>0</sup> | b <sup>0++</sup> | Seq. | y               | y <sup>++</sup> | y*       | y <sup>*++</sup> | y <sup>0</sup> | y <sup>0++</sup> | # |
|---|-----------------|-----------------|----------|------------------|----------------|------------------|------|-----------------|-----------------|----------|------------------|----------------|------------------|---|
| 1 | 73.0414         | 37.0244         |          |                  |                |                  | A    |                 |                 |          |                  |                |                  | 8 |
| 2 | <b>221.1069</b> | 111.0571        |          |                  |                |                  | F    | 901.4508        | 451.2290        | 883.4272 | 442.2172         | 883.4402       | 442.2237         | 7 |
| 3 | <b>335.1880</b> | 168.0976        |          |                  |                |                  | L    | <b>753.3853</b> | 377.1963        | 735.3617 | 368.1845         | 735.3748       | 368.1910         | 6 |
| 4 | 435.2534        | 218.1303        |          |                  |                |                  | V    | <b>639.3042</b> | 320.1558        | 621.2806 | 311.1440         | 621.2937       | 311.1505         | 5 |
| 5 | 565.2930        | 283.1502        |          |                  | 547.2825       | 274.1449         | E    | <b>539.2388</b> | 270.1230        | 521.2152 | 261.1112         | 521.2282       | 261.1177         | 4 |
| 6 | 695.3327        | 348.1700        |          |                  | 677.3221       | 339.1647         | E    | 409.1991        | 205.1032        | 391.1756 | 196.0914         | 391.1886       | 196.0979         | 3 |
| 7 | <b>825.3853</b> | 413.1963        | 807.3617 | 404.1845         | 807.3748       | 404.1910         | Q    | 279.1595        | 140.0834        | 261.1359 | 131.0716         |                |                  | 2 |
| 8 |                 |                 |          |                  |                |                  | K    | 149.1069        | 75.0571         | 131.0833 | 66.0453          |                |                  | 1 |

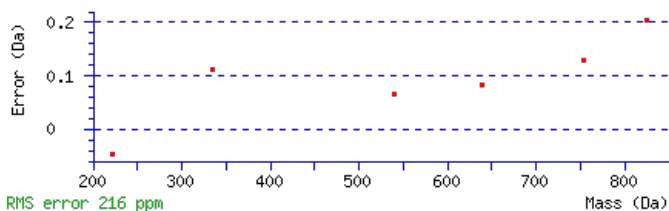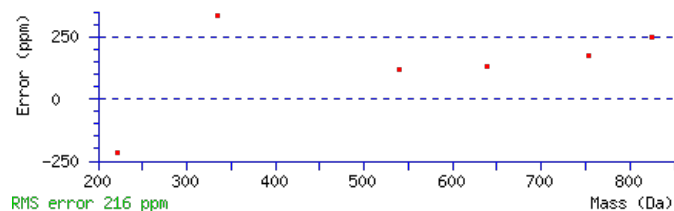NCBI **BLAST** search of [AFLVEEQK](#)

(Parameters: blastp, nr protein database, expect=20000, no filter, PAM30)

Other BLAST [web gateways](#)**All matches to this query**

| Score | Mr(calc) | Delta   | Sequence                  |
|-------|----------|---------|---------------------------|
| 33.2  | 972.4776 | -0.0024 | <a href="#">AFLVEEQK</a>  |
| 22.5  | 972.4754 | -0.0001 | <a href="#">DQTSISLAK</a> |

# AT1G26880.1

|      |          |         |                            |
|------|----------|---------|----------------------------|
| 22.5 | 972.4776 | -0.0024 | <a href="#">EGEFLGIAK</a>  |
| 22.5 | 972.4754 | -0.0001 | <a href="#">TEKESGIAK</a>  |
| 22.5 | 972.4776 | -0.0024 | <a href="#">YEDPKLAK</a>   |
| 16.3 | 972.4754 | -0.0001 | <a href="#">KDSLSTPSK</a>  |
| 14.4 | 972.4754 | -0.0001 | <a href="#">ESAKQSLLS</a>  |
| 13.3 | 972.4754 | -0.0001 | <a href="#">DINTTIAVK</a>  |
| 12.4 | 972.4781 | -0.0028 | <a href="#">QENVSRVK</a>   |
| 12.1 | 972.4754 | -0.0002 | <a href="#">GISSLSSPSK</a> |

Mascot: <http://www.matrixscience.com/>

**Peptide View**MS/MS Fragmentation of **RLNMEQLK**

Found in **AT1G26960.1** in **TAIR\_Arabidopsis**, Symbols: ATHB23 | ATHB23 (ARABIDOPSIS THALIANA HOMEBOX PROTEIN 23); DNA binding / transcription factor | chr1:9356113-9357226 FORWARD

Match to Query 3041: 1060.514198 from(531.264375,2+) index(4985)

Title: Elution from: 43.872 to 43.872 scan no 6236 cid35.00 polarity:+

Data file C7-2\_3.mgf

Click mouse within plot area to zoom in by factor of two about that point

Or,   to  Da

Label all possible matches  Label matches used for scoring

Show Y-axis

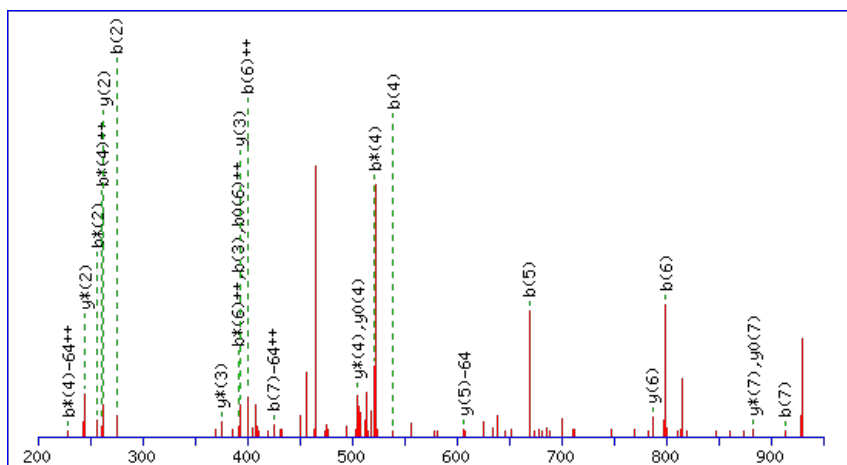

Monoisotopic mass of neutral peptide  $M_r(\text{calc})$ : 1060.5128

Fixed modifications: Carbamidomethyl (C) (apply to specified residues or termini only)

Variable modifications:

M4 : Oxidation (M), with neutral losses 0.0000 (shown in table), 63.9983

Ions Score: 25 Expect: 0.029

Matches : 24/110 fragment ions using 50 most intense peaks ([help](#))

| # | b        | b <sup>++</sup> | b <sup>*</sup> | b <sup>*++</sup> | b <sup>0</sup> | b <sup>0++</sup> | Seq. | y        | y <sup>++</sup> | y <sup>*</sup> | y <sup>*++</sup> | y <sup>0</sup> | y <sup>0++</sup> | # |
|---|----------|-----------------|----------------|------------------|----------------|------------------|------|----------|-----------------|----------------|------------------|----------------|------------------|---|
| 1 | 161.0965 | 81.0519         | 143.0729       | 72.0401          |                |                  | R    |          |                 |                |                  |                |                  | 8 |
| 2 | 275.1776 | 138.0925        | 257.1540       | 129.0807         |                |                  | L    | 901.4308 | 451.2190        | 883.4072       | 442.2072         | 883.4202       | 442.2137         | 7 |
| 3 | 391.2146 | 196.1109        | 373.1910       | 187.0992         |                |                  | N    | 787.3497 | 394.1785        | 769.3261       | 385.1667         | 769.3391       | 385.1732         | 6 |
| 4 | 539.2471 | 270.1272        | 521.2235       | 261.1154         |                |                  | M    | 671.3127 | 336.1600        | 653.2891       | 327.1482         | 653.3021       | 327.1547         | 5 |
| 5 | 669.2867 | 335.1470        | 651.2631       | 326.1352         | 651.2761       | 326.1417         | E    | 523.2802 | 262.1438        | 505.2567       | 253.1320         | 505.2697       | 253.1385         | 4 |
| 6 | 799.3393 | 400.1733        | 781.3157       | 391.1615         | 781.3288       | 391.1680         | Q    | 393.2406 | 197.1239        | 375.2170       | 188.1122         |                |                  | 3 |
| 7 | 913.4204 | 457.2139        | 895.3968       | 448.2021         | 895.4099       | 448.2086         | L    | 263.1880 | 132.0976        | 245.1644       | 123.0858         |                |                  | 2 |
| 8 |          |                 |                |                  |                |                  | K    | 149.1069 | 75.0571         | 131.0833       | 66.0453          |                |                  | 1 |

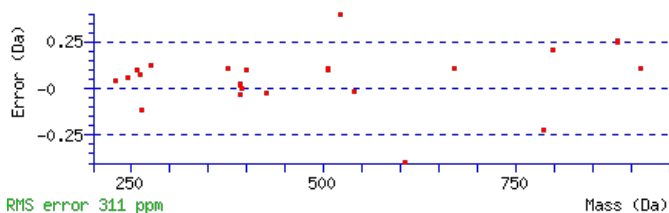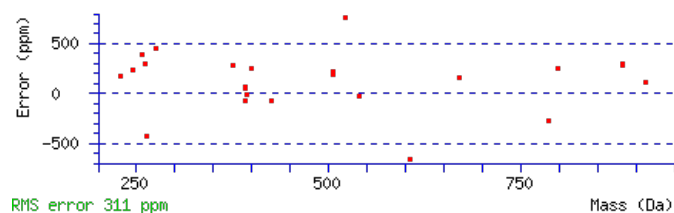

NCBI BLAST search of **RLNMEQLK**

(Parameters: blastp, nr protein database, expect=20000, no filter, PAM30)

Other BLAST [web gateways](#)

All matches to this query

| Score | Mr(calc) | Delta | Sequence |
|-------|----------|-------|----------|
|       |          |       |          |

**AT1G26960.1**

|      |           |         |                            |
|------|-----------|---------|----------------------------|
| 24.7 | 1060.5128 | 0.0014  | <a href="#">RLNMEQLK</a>   |
| 20.2 | 1060.5127 | 0.0015  | <a href="#">MAARETGALK</a> |
| 19.4 | 1060.5127 | 0.0015  | <a href="#">MEQOKQKK</a>   |
| 11.5 | 1060.5127 | 0.0015  | <a href="#">QMIQDRIK</a>   |
| 11.5 | 1060.5150 | -0.0008 | <a href="#">MIKWDALR</a>   |
| 11.4 | 1060.5127 | 0.0015  | <a href="#">MDVSRVNVK</a>  |
| 11.0 | 1060.5128 | 0.0014  | <a href="#">KMEERNIK</a>   |
| 9.8  | 1060.5116 | 0.0026  | <a href="#">DVGFGWVIR</a>  |
| 8.2  | 1060.5127 | 0.0015  | <a href="#">KMSADVLQR</a>  |
| 7.4  | 1060.5127 | 0.0015  | <a href="#">MRKDLEQK</a>   |

**Mascot:** <http://www.matrixscience.com/>

**Peptide View**MS/MS Fragmentation of **SAQFVLDLLK**Found in **AT1G27400.1** in **TAIR\_Arabidopsis**, Symbols: | 60S ribosomal protein L17 (RPL17A) | chr1:9515217-9516712 FORWARD

Match to Query 3662: 1144.615854 from(573.315203,2+) index(9241)

Title: Elution from: 83.180 to 83.180 scan no 12534 cid35.00 polarity:+

Data file 0-3\_2.mgf

Click mouse within plot area to zoom in by factor of two about that point

Or,   to  Da Label all possible matches  Label matches used for scoring Show Y-axis 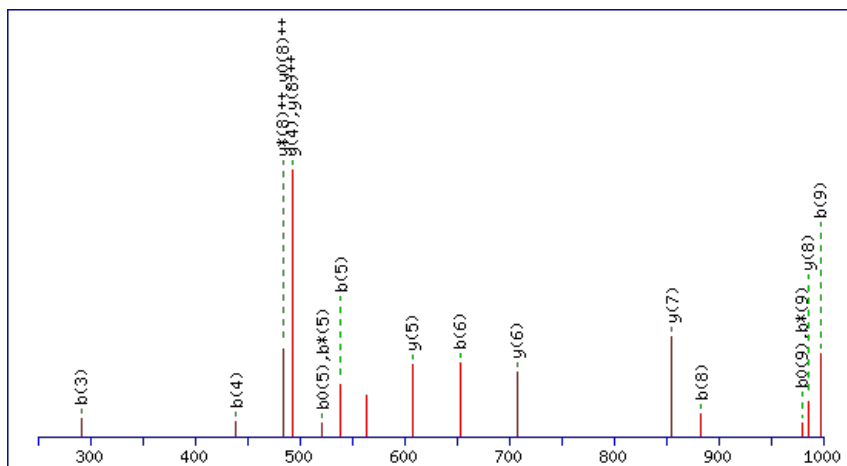Monoisotopic mass of neutral peptide **Mr(calc)**: 1144.6136**Fixed modifications**: Carbamidomethyl (C) (apply to specified residues or termini only)**Ions Score**: 69 **Expect**: 1e-006**Matches**: 18/98 fragment ions using 16 most intense peaks ([help](#))

| #  | b               | b <sup>++</sup> | b*              | b <sup>*++</sup> | b <sup>0</sup>  | b <sup>0++</sup> | Seq. | y               | y <sup>++</sup> | y*        | y <sup>*++</sup> | y <sup>0</sup> | y <sup>0++</sup> | #  |
|----|-----------------|-----------------|-----------------|------------------|-----------------|------------------|------|-----------------|-----------------|-----------|------------------|----------------|------------------|----|
| 1  | 89.0363         | 45.0218         |                 |                  | 71.0258         | 36.0165          | S    |                 |                 |           |                  |                |                  | 10 |
| 2  | 161.0705        | 81.0389         |                 |                  | 143.0599        | 72.0336          | A    | 1057.5918       | 529.2996        | 1039.5683 | 520.2878         | 1039.5813      | 520.2943         | 9  |
| 3  | <b>291.1231</b> | 146.0652        | 273.0996        | 137.0534         | 273.1126        | 137.0599         | Q    | <b>985.5577</b> | <b>493.2825</b> | 967.5341  | <b>484.2707</b>  | 967.5471       | <b>484.2772</b>  | 8  |
| 4  | <b>439.1886</b> | 220.0979        | 421.1650        | 211.0861         | 421.1780        | 211.0926         | F    | <b>855.5050</b> | 428.2562        | 837.4815  | 419.2444         | 837.4945       | 419.2509         | 7  |
| 5  | <b>539.2540</b> | 270.1307        | <b>521.2304</b> | 261.1189         | <b>521.2435</b> | 261.1254         | V    | <b>707.4396</b> | 354.2234        | 689.4160  | 345.2116         | 689.4290       | 345.2182         | 6  |
| 6  | <b>653.3351</b> | 327.1712        | 635.3115        | 318.1594         | 635.3246        | 318.1659         | L    | <b>607.3741</b> | 304.1907        | 589.3506  | 295.1789         | 589.3636       | 295.1854         | 5  |
| 7  | 769.3591        | 385.1832        | 751.3355        | 376.1714         | 751.3485        | 376.1779         | D    | <b>493.2930</b> | 247.1502        | 475.2695  | 238.1384         | 475.2825       | 238.1449         | 4  |
| 8  | <b>883.4402</b> | 442.2237        | 865.4166        | 433.2120         | 865.4296        | 433.2185         | L    | 377.2691        | 189.1382        | 359.2455  | 180.1264         |                |                  | 3  |
| 9  | <b>997.5213</b> | 499.2643        | <b>979.4977</b> | 490.2525         | <b>979.5107</b> | 490.2590         | L    | 263.1880        | 132.0976        | 245.1644  | 123.0858         |                |                  | 2  |
| 10 |                 |                 |                 |                  |                 |                  | K    | 149.1069        | 75.0571         | 131.0833  | 66.0453          |                |                  | 1  |

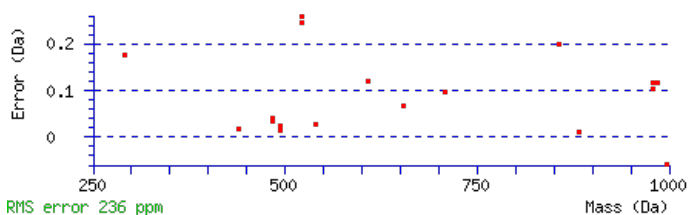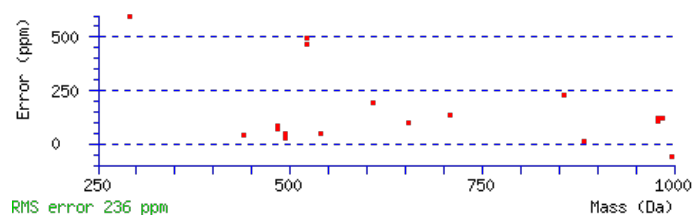NCBI **BLAST** search of **SAQFVLDLLK**

(Parameters: blastp, nr protein database, expect=20000, no filter, PAM30)

Other BLAST [web gateways](#)**All matches to this query**

| Score | Mr(calc) | Delta | Sequence |
|-------|----------|-------|----------|
|       |          |       |          |

**AT1G27400.1**

|      |           |         |                             |
|------|-----------|---------|-----------------------------|
| 68.9 | 1144.6136 | 0.0022  | <a href="#">SAQFVLDLLK</a>  |
| 22.9 | 1144.6141 | 0.0018  | <a href="#">TDARAKNLLK</a>  |
| 15.5 | 1144.6141 | 0.0018  | <a href="#">REQIKTLNK</a>   |
| 9.0  | 1144.6190 | -0.0031 | <a href="#">LRHHPNILK</a>   |
| 7.5  | 1144.6190 | -0.0031 | <a href="#">RTGRHLFLK</a>   |
| 6.3  | 1144.6136 | 0.0022  | <a href="#">YLQEVA AVLK</a> |
| 5.3  | 1144.6163 | -0.0004 | <a href="#">NTAFAPLKIR</a>  |
| 4.5  | 1144.6167 | -0.0009 | <a href="#">ARRVIDQIR</a>   |
| 3.6  | 1144.6167 | -0.0009 | <a href="#">RVTQTLPRR</a>   |
| 2.7  | 1144.6136 | 0.0022  | <a href="#">EFTATPIKVK</a>  |

**Mascot:** <http://www.matrixscience.com/>

## Peptide View

### MS/MS Fragmentation of **DTIALFVDR**

Found in **AT1G27450.1** in **TAIR\_Arabidopsis**, Symbols: APT1, ATAPT1, APRT | APT1; adenine phosphoribosyltransferase | chr1:9532029-9533794 FORWARD

Match to Query 2574: 1060.517488 from(531.266020,2+) index(6780)

Title: Elution from: 61.246 to 61.246 scan no 8898 cid35.00 polarity:+

Data file D12h-2\_3.mgf

Click mouse within plot area to zoom in by factor of two about that point

Or,   to  Da

Label all possible matches  Label matches used for scoring

Show Y-axis

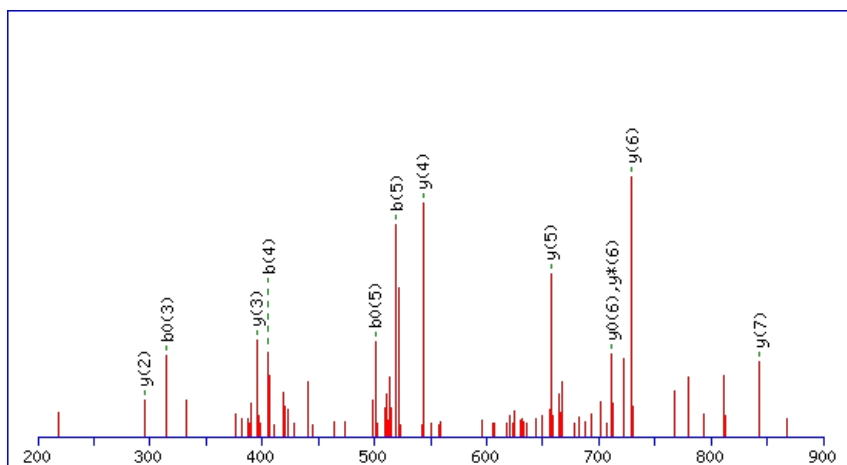

Monoisotopic mass of neutral peptide  $M_r(\text{calc})$ : 1060.5197

Fixed modifications: Carbamidomethyl (C) (apply to specified residues or termini only)

Ions Score: 54 Expect: 4.8e-005

Matches : 12/78 fragment ions using 14 most intense peaks ([help](#))

| # | b        | b <sup>++</sup> | b <sup>0</sup> | b <sup>0++</sup> | Seq. | y        | y <sup>++</sup> | y*       | y <sup>*++</sup> | y <sup>0</sup> | y <sup>0++</sup> | # |
|---|----------|-----------------|----------------|------------------|------|----------|-----------------|----------|------------------|----------------|------------------|---|
| 1 | 117.0313 | 59.0193         | 99.0207        | 50.0140          | D    |          |                 |          |                  |                |                  | 9 |
| 2 | 219.0760 | 110.0416        | 201.0654       | 101.0363         | T    | 945.5030 | 473.2552        | 927.4794 | 464.2434         | 927.4925       | 464.2499         | 8 |
| 3 | 333.1571 | 167.0822        | 315.1465       | 158.0769         | I    | 843.4583 | 422.2328        | 825.4347 | 413.2210         | 825.4478       | 413.2275         | 7 |
| 4 | 405.1912 | 203.0992        | 387.1807       | 194.0940         | A    | 729.3772 | 365.1922        | 711.3536 | 356.1805         | 711.3667       | 356.1870         | 6 |
| 5 | 519.2723 | 260.1398        | 501.2617       | 251.1345         | L    | 657.3431 | 329.1752        | 639.3195 | 320.1634         | 639.3325       | 320.1699         | 5 |
| 6 | 667.3378 | 334.1725        | 649.3272       | 325.1672         | F    | 543.2620 | 272.1346        | 525.2384 | 263.1228         | 525.2514       | 263.1293         | 4 |
| 7 | 767.4032 | 384.2052        | 749.3926       | 375.2000         | V    | 395.1965 | 198.1019        | 377.1729 | 189.0901         | 377.1860       | 189.0966         | 3 |
| 8 | 883.4272 | 442.2172        | 865.4166       | 433.2120         | D    | 295.1311 | 148.0692        | 277.1075 | 139.0574         | 277.1205       | 139.0639         | 2 |
| 9 |          |                 |                |                  | R    | 179.1071 | 90.0572         | 161.0835 | 81.0454          |                |                  | 1 |

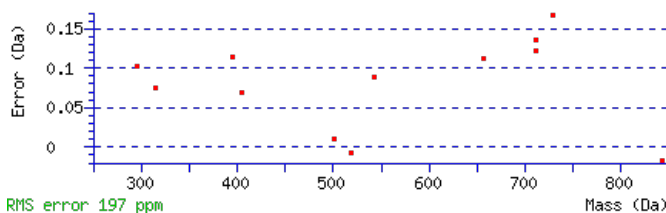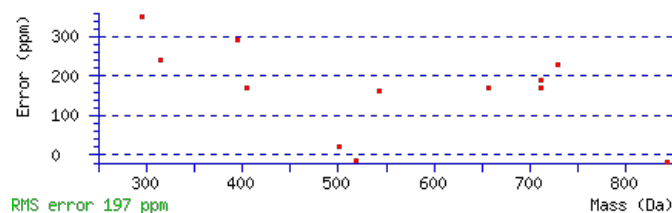

NCBI BLAST search of [DTIALFVDR](#)

(Parameters: blastp, nr protein database, expect=20000, no filter, PAM30)

Other BLAST [web gateways](#)

All matches to this query

| Score | $M_r(\text{calc})$ | Delta | Sequence |
|-------|--------------------|-------|----------|
|       |                    |       |          |



# AT1G27450.1

|      |           |         |                            |
|------|-----------|---------|----------------------------|
| 53.9 | 1060.5197 | -0.0022 | <a href="#">DTIALFVDR</a>  |
| 6.8  | 1060.5197 | -0.0022 | <a href="#">ESLFGPKSGK</a> |
| 6.0  | 1060.5175 | 0.0000  | <a href="#">AEQSEKKTk</a>  |
| 5.0  | 1060.5175 | 0.0000  | <a href="#">EAKASVSQTK</a> |
| 3.8  | 1060.5202 | -0.0027 | <a href="#">SELRSNIAR</a>  |
| 1.9  | 1060.5202 | -0.0027 | <a href="#">SELGKARER</a>  |
| 1.0  | 1060.5197 | -0.0022 | <a href="#">DIVVSFDVR</a>  |
| 0.4  | 1060.5197 | -0.0022 | <a href="#">LGVGGKFDEK</a> |

**Mascot:** <http://www.matrixscience.com/>

## Peptide View

MS/MS Fragmentation of **MFHSAYLASQK**Found in **AT1G27520.1** in **TAIR\_Arabidopsis**, Symbols: | glycoside hydrolase family 47 protein | chr1:9558739-9562078 FORWARD

Match to Query 4790: 1281.614871 from(428.212233,3+) index(7093)

Title: Elution from: 61.526 to 61.526 scan no 9159 cid35.00 polarity:+

Data file D1d-3\_2.mgf

Click mouse within plot area to zoom in by factor of two about that point

Or,   to  Da Label all possible matches  Label matches used for scoring Show Y-axis 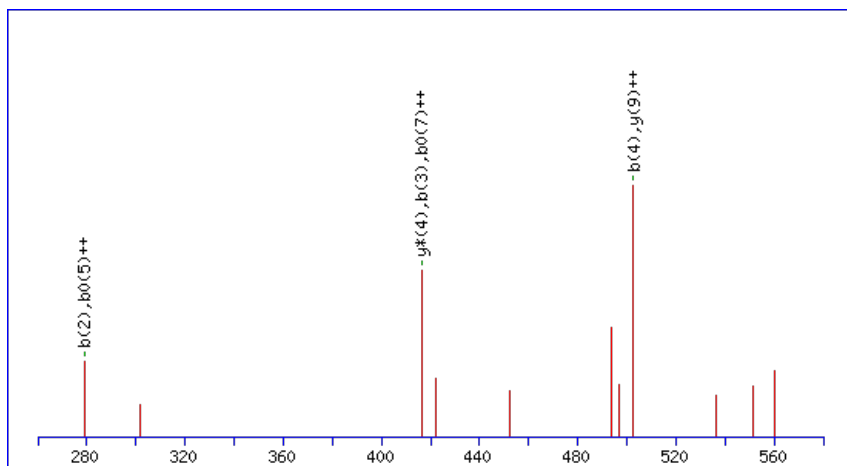Monoisotopic mass of neutral peptide **Mr(calc)**: 1281.6176

Fixed modifications: Carbamidomethyl (C) (apply to specified residues or termini only)

Ions Score: 25 Expect: 0.013

Matches : 7/92 fragment ions using 3 most intense peaks ([help](#))

| #  | b               | b <sup>++</sup> | b*        | b <sup>*++</sup> | b <sup>0</sup> | b <sup>0++</sup> | Seq. | y         | y <sup>++</sup> | y*              | y <sup>*++</sup> | y <sup>0</sup> | y <sup>0++</sup> | #  |
|----|-----------------|-----------------|-----------|------------------|----------------|------------------|------|-----------|-----------------|-----------------|------------------|----------------|------------------|----|
| 1  | 132.0478        | 66.5275         |           |                  |                |                  | M    |           |                 |                 |                  |                |                  | 11 |
| 2  | <b>279.1162</b> | 140.0617        |           |                  |                |                  | F    | 1151.5844 | 576.2958        | 1134.5578       | 567.7826         | 1133.5738      | 567.2905         | 10 |
| 3  | <b>416.1751</b> | 208.5912        |           |                  |                |                  | H    | 1004.5160 | <b>502.7616</b> | 987.4894        | 494.2483         | 986.5054       | 493.7563         | 9  |
| 4  | <b>503.2071</b> | 252.1072        |           |                  | 485.1965       | 243.1019         | S    | 867.4571  | 434.2322        | 850.4305        | 425.7189         | 849.4465       | 425.2269         | 8  |
| 5  | 574.2442        | 287.6258        |           |                  | 556.2337       | <b>278.6205</b>  | A    | 780.4250  | 390.7162        | 763.3985        | 382.2029         | 762.4145       | 381.7109         | 7  |
| 6  | 737.3076        | 369.1574        |           |                  | 719.2970       | 360.1521         | Y    | 709.3879  | 355.1976        | 692.3614        | 346.6843         | 691.3774       | 346.1923         | 6  |
| 7  | 850.3916        | 425.6994        |           |                  | 832.3811       | <b>416.6942</b>  | L    | 546.3246  | 273.6659        | 529.2980        | 265.1527         | 528.3140       | 264.6606         | 5  |
| 8  | 921.4287        | 461.2180        |           |                  | 903.4182       | 452.2127         | A    | 433.2405  | 217.1239        | <b>416.2140</b> | 208.6106         | 415.2300       | 208.1186         | 4  |
| 9  | 1008.4608       | 504.7340        |           |                  | 990.4502       | 495.7287         | S    | 362.2034  | 181.6053        | 345.1769        | 173.0921         | 344.1928       | 172.6001         | 3  |
| 10 | 1136.5193       | 568.7633        | 1119.4928 | 560.2500         | 1118.5088      | 559.7580         | Q    | 275.1714  | 138.0893        | 258.1448        | 129.5761         |                |                  | 2  |
| 11 |                 |                 |           |                  |                |                  | K    | 147.1128  | 74.0600         | 130.0863        | 65.5468          |                |                  | 1  |

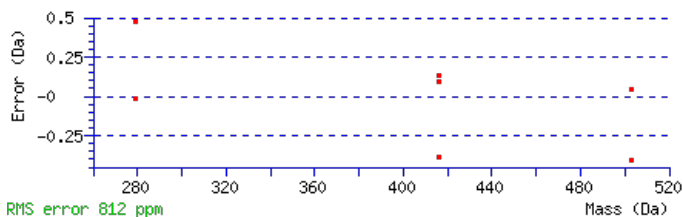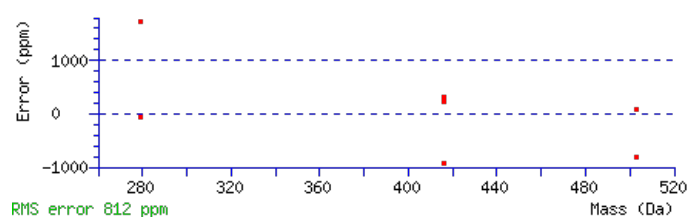NCBI BLAST search of **MFHSAYLASQK**

(Parameters: blastp, nr protein database, expect=20000, no filter, PAM30)

Other BLAST [web gateways](#)

All matches to this query

AT1G27520.1

| Score | Mr(calc)  | Delta   | Sequence                    |
|-------|-----------|---------|-----------------------------|
| 25.0  | 1281.6176 | -0.0027 | <a href="#">MFHSAYLASQK</a> |
| 14.3  | 1281.6136 | 0.0013  | <a href="#">EARQVFNGMSK</a> |
| 13.2  | 1281.6142 | 0.0006  | <a href="#">YDTPFHSLFR</a>  |

Mascot: <http://www.matrixscience.com/>

**Peptide View**MS/MS Fragmentation of **LISEGLLK**Found in **AT1G28590.1** in **TAIR\_Arabidopsis**, Symbols: | lipase, putative | chr1:10047495-10049286 REVERSE

Match to Query 1424: 871.539660 from(436.777106,2+) index(1959)

Title: Elution from: 21.917 to 21.917 scan no 2472 cid35.00 polarity:+

Data file C7-2\_3.mgf

Click mouse within plot area to zoom in by factor of two about that point

Or,   to  Da Label all possible matches  Label matches used for scoring Show Y-axis 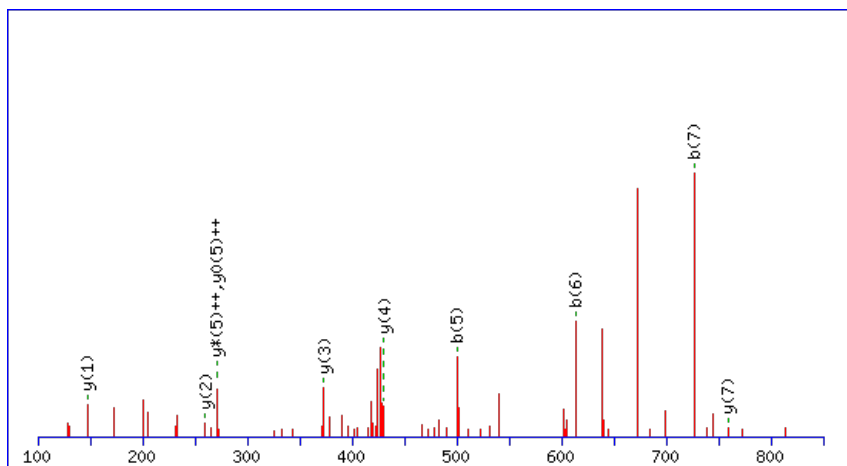Monoisotopic mass of neutral peptide  $M_r(\text{calc})$ : 871.5378

Fixed modifications: Carbamidomethyl (C) (apply to specified residues or termini only)

Ions Score: 27 Expect: 0.0056

Matches : 10/58 fragment ions using 21 most intense peaks ([help](#))

| # | b        | b <sup>++</sup> | b <sup>0</sup> | b <sup>0++</sup> | Seq. | y        | y <sup>++</sup> | y*       | y <sup>*++</sup> | y <sup>0</sup> | y <sup>0++</sup> | # |
|---|----------|-----------------|----------------|------------------|------|----------|-----------------|----------|------------------|----------------|------------------|---|
| 1 | 114.0913 | 57.5493         |                |                  | L    |          |                 |          |                  |                |                  | 8 |
| 2 | 227.1754 | 114.0913        |                |                  | I    | 759.4611 | 380.2342        | 742.4345 | 371.7209         | 741.4505       | 371.2289         | 7 |
| 3 | 314.2074 | 157.6074        | 296.1969       | 148.6021         | S    | 646.3770 | 323.6921        | 629.3505 | 315.1789         | 628.3665       | 314.6869         | 6 |
| 4 | 443.2500 | 222.1287        | 425.2395       | 213.1234         | E    | 559.3450 | 280.1761        | 542.3184 | 271.6629         | 541.3344       | 271.1709         | 5 |
| 5 | 500.2715 | 250.6394        | 482.2609       | 241.6341         | G    | 430.3024 | 215.6548        | 413.2758 | 207.1416         |                |                  | 4 |
| 6 | 613.3556 | 307.1814        | 595.3450       | 298.1761         | L    | 373.2809 | 187.1441        | 356.2544 | 178.6308         |                |                  | 3 |
| 7 | 726.4396 | 363.7234        | 708.4291       | 354.7182         | L    | 260.1969 | 130.6021        | 243.1703 | 122.0888         |                |                  | 2 |
| 8 |          |                 |                |                  | K    | 147.1128 | 74.0600         | 130.0863 | 65.5468          |                |                  | 1 |

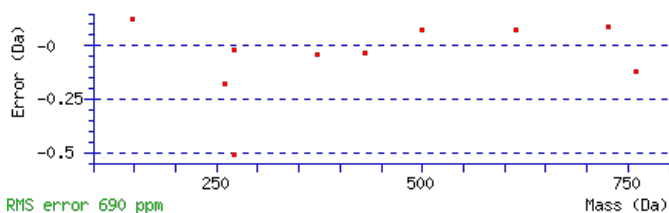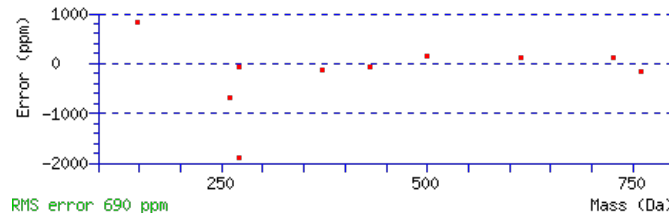NCBI **BLAST** search of [LISEGLLK](#)

(Parameters: blastp, nr protein database, expect=20000, no filter, PAM30)

Other BLAST [web gateways](#)**All matches to this query**

| Score | $M_r(\text{calc})$ | Delta  | Sequence                 |
|-------|--------------------|--------|--------------------------|
| 27.0  | 871.5378           | 0.0018 | <a href="#">LISEGLLK</a> |
| 25.1  | 871.5378           | 0.0018 | <a href="#">KELELIK</a>  |

# AT1G28590.1

|      |          |        |                          |
|------|----------|--------|--------------------------|
| 20.4 | 871.5378 | 0.0018 | <a href="#">LEEKLLK</a>  |
| 16.5 | 871.5379 | 0.0018 | <a href="#">ITVADIIK</a> |
| 15.9 | 871.5378 | 0.0018 | <a href="#">IKEIELK</a>  |
| 15.9 | 871.5378 | 0.0018 | <a href="#">IKELEIK</a>  |
| 15.9 | 871.5378 | 0.0018 | <a href="#">LKELELK</a>  |
| 15.1 | 871.5378 | 0.0018 | <a href="#">EEKLLLK</a>  |
| 15.0 | 871.5378 | 0.0018 | <a href="#">EKIELLK</a>  |
| 15.0 | 871.5378 | 0.0018 | <a href="#">ELKELLK</a>  |

**Mascot:** <http://www.matrixscience.com/>

**Peptide View**MS/MS Fragmentation of **IQVAELK**Found in **AT1G29020.1** in **TAIR\_Arabidopsis**, Symbols: | calcium-binding EF hand family protein | chr1:10120483-10126861 REVERSE

Match to Query 987: 799.480068 from(400.747310,2+) index(3219)

Title: Elution from: 33.407 to 33.407 scan no 4072 cid35.00 polarity:+

Data file D6h-2\_1.mgf

Click mouse within plot area to zoom in by factor of two about that point

Or,  to  Da Label all possible matches  Label matches used for scoring Show Y-axis 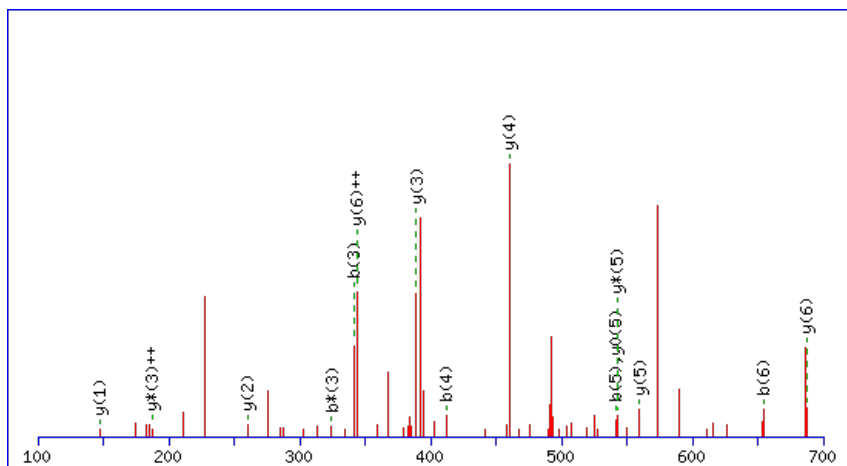Monoisotopic mass of neutral peptide **Mr(calc)**: 799.4803**Fixed modifications**: Carbamidomethyl (C) (apply to specified residues or termini only)**Ions Score**: 29 **Expect**: 0.0069**Matches** : 15/58 fragment ions using 39 most intense peaks ([help](#))

| # | b        | b <sup>++</sup> | b*       | b <sup>*++</sup> | b <sup>0</sup> | b <sup>0++</sup> | Seq. | y        | y <sup>++</sup> | y*       | y <sup>*++</sup> | y <sup>0</sup> | y <sup>0++</sup> | # |
|---|----------|-----------------|----------|------------------|----------------|------------------|------|----------|-----------------|----------|------------------|----------------|------------------|---|
| 1 | 114.0913 | 57.5493         |          |                  |                |                  | I    |          |                 |          |                  |                |                  | 7 |
| 2 | 242.1499 | 121.5786        | 225.1234 | 113.0653         |                |                  | Q    | 687.4036 | 344.2054        | 670.3770 | 335.6921         | 669.3930       | 335.2001         | 6 |
| 3 | 341.2183 | 171.1128        | 324.1918 | 162.5995         |                |                  | V    | 559.3450 | 280.1761        | 542.3184 | 271.6629         | 541.3344       | 271.1709         | 5 |
| 4 | 412.2554 | 206.6314        | 395.2289 | 198.1181         |                |                  | A    | 460.2766 | 230.6419        | 443.2500 | 222.1287         | 442.2660       | 221.6366         | 4 |
| 5 | 541.2980 | 271.1527        | 524.2715 | 262.6394         | 523.2875       | 262.1474         | E    | 389.2395 | 195.1234        | 372.2129 | 186.6101         | 371.2289       | 186.1181         | 3 |
| 6 | 654.3821 | 327.6947        | 637.3556 | 319.1814         | 636.3715       | 318.6894         | L    | 260.1969 | 130.6021        | 243.1703 | 122.0888         |                |                  | 2 |
| 7 |          |                 |          |                  |                |                  | K    | 147.1128 | 74.0600         | 130.0863 | 65.5468          |                |                  | 1 |

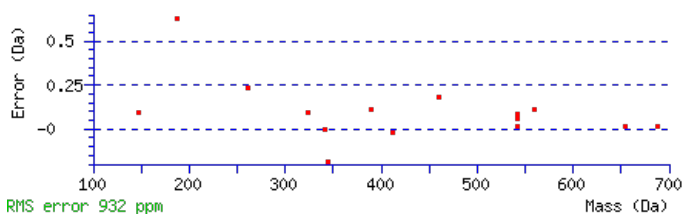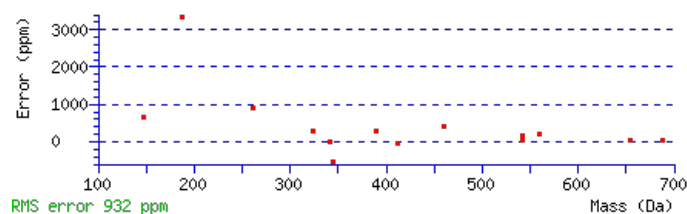NCBI **BLAST** search of **IQVAELK**

(Parameters: blastp, nr protein database, expect=20000, no filter, PAM30)

Other BLAST [web gateways](#)**All matches to this query**

| Score | Mr(calc) | Delta   | Sequence                 |
|-------|----------|---------|--------------------------|
| 28.8  | 799.4803 | -0.0003 | <a href="#">IQVAELK</a>  |
| 14.8  | 799.4803 | -0.0003 | <a href="#">LLLGGAEK</a> |
| 11.8  | 799.4803 | -0.0003 | <a href="#">ALVGIAEK</a> |

## AT1G29020.1

|     |          |         |                          |
|-----|----------|---------|--------------------------|
| 8.9 | 799.4803 | -0.0003 | <a href="#">ILGSSPVK</a> |
| 8.5 | 799.4803 | -0.0003 | <a href="#">IVQEAIK</a>  |
| 6.9 | 799.4803 | -0.0002 | <a href="#">LIAELNK</a>  |
| 6.4 | 799.4803 | -0.0003 | <a href="#">TAAPTVLK</a> |
| 6.1 | 799.4803 | -0.0003 | <a href="#">VNVVEIK</a>  |
| 5.5 | 799.4817 | -0.0016 | <a href="#">AIRVWR</a>   |
| 5.1 | 799.4803 | -0.0003 | <a href="#">LIDSPKK</a>  |

**Mascot:** <http://www.matrixscience.com/>

**Peptide View**MS/MS Fragmentation of **FDELMAAANEK**Found in **AT1G29250.1** in **TAIR\_Arabidopsis**, Symbols: | nucleic acid binding | chr1:10223447-10224578 REVERSE

Match to Query 5598: 1366.606550 from(684.310551,2+) index(4689)

Title: Elution from: 42.432 to 42.432 scan no 5859 cid35.00 polarity:+

Data file D6h-1\_1.mgf

Click mouse within plot area to zoom in by factor of two about that point

Or,   to  Da Label all possible matches  Label matches used for scoring Show Y-axis 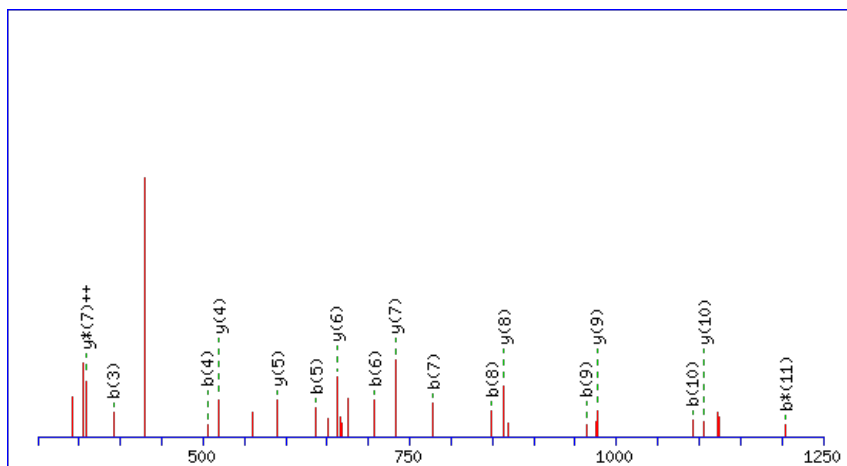Monoisotopic mass of neutral peptide **Mr(calc)**: 1366.6074

Fixed modifications: Carbamidomethyl (C) (apply to specified residues or termini only)

Ions Score: 62 Expect: 1.1e-006

Matches : 17/112 fragment ions using 28 most intense peaks ([help](#))

| #  | b                | b <sup>++</sup> | b*               | b <sup>*++</sup> | b <sup>0</sup> | b <sup>0++</sup> | Seq. | y                | y <sup>++</sup> | y*        | y <sup>*++</sup> | y <sup>0</sup> | y <sup>0++</sup> | #  |
|----|------------------|-----------------|------------------|------------------|----------------|------------------|------|------------------|-----------------|-----------|------------------|----------------|------------------|----|
| 1  | 148.0757         | 74.5415         |                  |                  |                |                  | F    |                  |                 |           |                  |                |                  | 12 |
| 2  | 263.1026         | 132.0550        |                  |                  | 245.0921       | 123.0497         | D    | 1220.5463        | 610.7768        | 1203.5198 | 602.2635         | 1202.5358      | 601.7715         | 11 |
| 3  | <b>392.1452</b>  | 196.5763        |                  |                  | 374.1347       | 187.5710         | E    | <b>1105.5194</b> | 553.2633        | 1088.4929 | 544.7501         | 1087.5088      | 544.2581         | 10 |
| 4  | <b>505.2293</b>  | 253.1183        |                  |                  | 487.2187       | 244.1130         | L    | <b>976.4768</b>  | 488.7420        | 959.4503  | 480.2288         | 958.4662       | 479.7368         | 9  |
| 5  | <b>636.2698</b>  | 318.6385        |                  |                  | 618.2592       | 309.6332         | M    | <b>863.3927</b>  | 432.2000        | 846.3662  | 423.6867         | 845.3822       | 423.1947         | 8  |
| 6  | <b>707.3069</b>  | 354.1571        |                  |                  | 689.2963       | 345.1518         | A    | <b>732.3523</b>  | 366.6798        | 715.3257  | <b>358.1665</b>  | 714.3417       | 357.6745         | 7  |
| 7  | <b>778.3440</b>  | 389.6756        |                  |                  | 760.3334       | 380.6704         | A    | <b>661.3151</b>  | 331.1612        | 644.2886  | 322.6479         | 643.3046       | 322.1559         | 6  |
| 8  | <b>849.3811</b>  | 425.1942        |                  |                  | 831.3706       | 416.1889         | A    | <b>590.2780</b>  | 295.6427        | 573.2515  | 287.1294         | 572.2675       | 286.6374         | 5  |
| 9  | <b>963.4240</b>  | 482.2157        | 946.3975         | 473.7024         | 945.4135       | 473.2104         | N    | <b>519.2409</b>  | 260.1241        | 502.2144  | 251.6108         | 501.2304       | 251.1188         | 4  |
| 10 | <b>1092.4666</b> | 546.7370        | 1075.4401        | 538.2237         | 1074.4561      | 537.7317         | E    | 405.1980         | 203.1026        | 388.1714  | 194.5894         | 387.1874       | 194.0974         | 3  |
| 11 | 1221.5092        | 611.2583        | <b>1204.4827</b> | 602.7450         | 1203.4987      | 602.2530         | E    | 276.1554         | 138.5813        | 259.1288  | 130.0681         | 258.1448       | 129.5761         | 2  |
| 12 |                  |                 |                  |                  |                |                  | K    | 147.1128         | 74.0600         | 130.0863  | 65.5468          |                |                  | 1  |

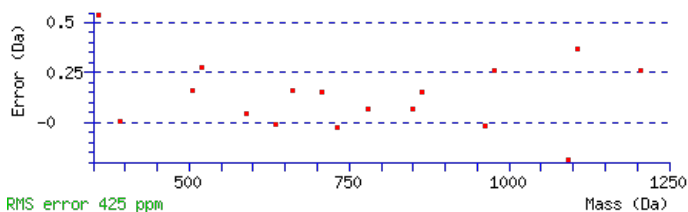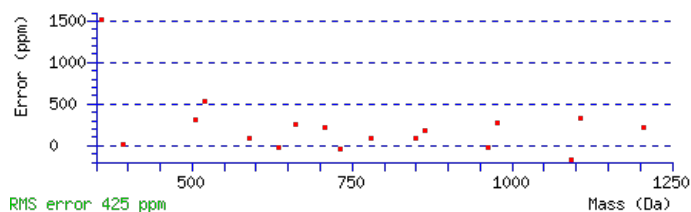NCBI **BLAST** search of **FDELMAAANEK**

(Parameters: blastp, nr protein database, expect=20000, no filter, PAM30)

Other BLAST [web gateways](#)**All matches to this query**



AT1G29250.1

| Score | Mr(calc)  | Delta   | Sequence                      |
|-------|-----------|---------|-------------------------------|
| 61.5  | 1366.6074 | -0.0009 | <a href="#">FDELMAAANEK</a>   |
| 4.1   | 1366.6034 | 0.0031  | <a href="#">CSKEGLSSDEGAK</a> |

Mascot: <http://www.matrixscience.com/>

## Peptide View

MS/MS Fragmentation of **DVLAVMEDFSPEQLGAK**

Found in **AT1G29880.1** in **TAIR\_Arabidopsis**, Symbols: | glycyl-tRNA synthetase / glycine--tRNA ligase | chr1:10459646-10462765 REVERSE

Match to Query 9176: 1847.897414 from(924.955983,2+) index(11074)

Title: Elution from: 105.123 to 105.123 scan no 15712 cid35.00 polarity:+

Data file C7-1\_1.mgf

Click mouse within plot area to zoom in by factor of two about that point

Or,  to  Da

Label all possible matches  Label matches used for scoring

Show Y-axis

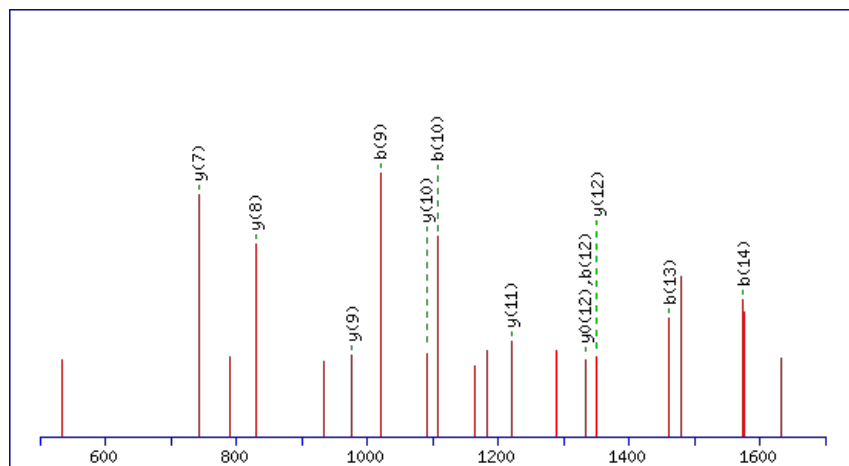

Monoisotopic mass of neutral peptide  $M_r(\text{calc})$ : 1847.8975

Fixed modifications: Carbamidomethyl (C) (apply to specified residues or termini only)

Ions Score: 46 Expect: 0.00011

Matches : 12/158 fragment ions using 17 most intense peaks ([help](#))

| #  | b                | b <sup>++</sup> | b*        | b <sup>*++</sup> | b <sup>0</sup> | b <sup>0++</sup> | Seq.     | y                | y <sup>++</sup> | y*        | y <sup>*++</sup> | y <sup>0</sup>   | y <sup>0++</sup> | #  |
|----|------------------|-----------------|-----------|------------------|----------------|------------------|----------|------------------|-----------------|-----------|------------------|------------------|------------------|----|
| 1  | 116.0342         | 58.5207         |           |                  | 98.0237        | 49.5155          | <b>D</b> |                  |                 |           |                  |                  |                  | 17 |
| 2  | 215.1026         | 108.0550        |           |                  | 197.0921       | 99.0497          | <b>V</b> | 1733.8778        | 867.4426        | 1716.8513 | 858.9293         | 1715.8673        | 858.4373         | 16 |
| 3  | 328.1867         | 164.5970        |           |                  | 310.1761       | 155.5917         | <b>L</b> | 1634.8094        | 817.9084        | 1617.7829 | 809.3951         | 1616.7989        | 808.9031         | 15 |
| 4  | 399.2238         | 200.1155        |           |                  | 381.2132       | 191.1103         | <b>A</b> | 1521.7254        | 761.3663        | 1504.6988 | 752.8530         | 1503.7148        | 752.3610         | 14 |
| 5  | 498.2922         | 249.6498        |           |                  | 480.2817       | 240.6445         | <b>V</b> | 1450.6883        | 725.8478        | 1433.6617 | 717.3345         | 1432.6777        | 716.8425         | 13 |
| 6  | 629.3327         | 315.1700        |           |                  | 611.3221       | 306.1647         | <b>M</b> | <b>1351.6198</b> | 676.3136        | 1334.5933 | 667.8003         | <b>1333.6093</b> | 667.3083         | 12 |
| 7  | 758.3753         | 379.6913        |           |                  | 740.3647       | 370.6860         | <b>E</b> | <b>1220.5794</b> | 610.7933        | 1203.5528 | 602.2800         | 1202.5688        | 601.7880         | 11 |
| 8  | 873.4022         | 437.2048        |           |                  | 855.3917       | 428.1995         | <b>D</b> | <b>1091.5368</b> | 546.2720        | 1074.5102 | 537.7587         | 1073.5262        | 537.2667         | 10 |
| 9  | <b>1020.4707</b> | 510.7390        |           |                  | 1002.4601      | 501.7337         | <b>F</b> | <b>976.5098</b>  | 488.7585        | 959.4833  | 480.2453         | 958.4993         | 479.7533         | 9  |
| 10 | <b>1107.5027</b> | 554.2550        |           |                  | 1089.4921      | 545.2497         | <b>S</b> | <b>829.4414</b>  | 415.2243        | 812.4149  | 406.7111         | 811.4308         | 406.2191         | 8  |
| 11 | 1204.5555        | 602.7814        |           |                  | 1186.5449      | 593.7761         | <b>P</b> | <b>742.4094</b>  | 371.7083        | 725.3828  | 363.1951         | 724.3988         | 362.7030         | 7  |
| 12 | <b>1333.5980</b> | 667.3027        |           |                  | 1315.5875      | 658.2974         | <b>E</b> | 645.3566         | 323.1819        | 628.3301  | 314.6687         | 627.3461         | 314.1767         | 6  |
| 13 | <b>1461.6566</b> | 731.3319        | 1444.6301 | 722.8187         | 1443.6461      | 722.3267         | <b>Q</b> | 516.3140         | 258.6607        | 499.2875  | 250.1474         |                  |                  | 5  |
| 14 | <b>1574.7407</b> | 787.8740        | 1557.7141 | 779.3607         | 1556.7301      | 778.8687         | <b>L</b> | 388.2554         | 194.6314        | 371.2289  | 186.1181         |                  |                  | 4  |
| 15 | 1631.7622        | 816.3847        | 1614.7356 | 807.8714         | 1613.7516      | 807.3794         | <b>G</b> | 275.1714         | 138.0893        | 258.1448  | 129.5761         |                  |                  | 3  |
| 16 | 1702.7993        | 851.9033        | 1685.7727 | 843.3900         | 1684.7887      | 842.8980         | <b>A</b> | 218.1499         | 109.5786        | 201.1234  | 101.0653         |                  |                  | 2  |
| 17 |                  |                 |           |                  |                |                  | <b>K</b> | 147.1128         | 74.0600         | 130.0863  | 65.5468          |                  |                  | 1  |

# AT1G29880.1

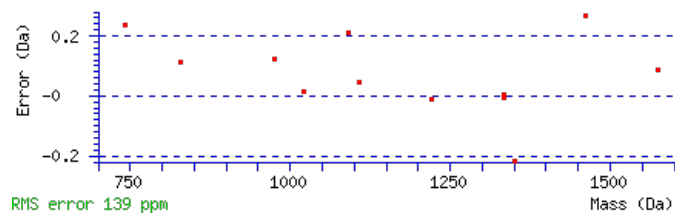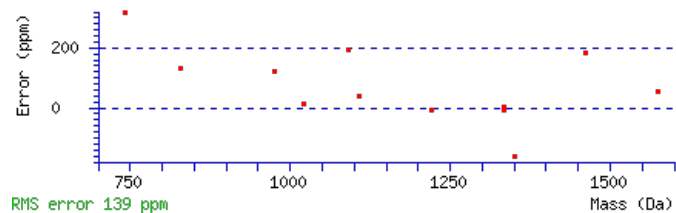

NCBI **BLAST** search of [DVLAVMEDFSPEQLGAK](#)  
(Parameters: blastp, nr protein database, expect=20000, no filter, PAM30)  
Other BLAST [web gateways](#)

## All matches to this query

| Score | Mr(calc)  | Delta   | Sequence                          |
|-------|-----------|---------|-----------------------------------|
| 46.3  | 1847.8975 | -0.0001 | <a href="#">DVLAVMEDFSPEQLGAK</a> |
| 1.1   | 1847.8935 | 0.0039  | <a href="#">NPSVESQSEKMVGVVDK</a> |

Mascot: <http://www.matrixscience.com/>

## Peptide View

### MS/MS Fragmentation of TPASFEPSIDYVVTK

Found in **AT1G29900.1** in **TAIR\_Arabidopsis**, Symbols: CARB | CARB (CARBAMOYL PHOSPHATE SYNTHETASE B); ATP binding / carbamoyl-phosphate synthase | chr1:10468148-10471960 FORWARD

Match to Query 7649: 1652.828118 from(827.421335,2+) index(6946)

Title: Elution from: 63.624 to 63.624 scan no 9096 cid35.00 polarity:+

Data file D1d-2\_1.mgf

Click mouse within plot area to zoom in by factor of two about that point

Or,   to  Da

Label all possible matches  Label matches used for scoring

Show Y-axis

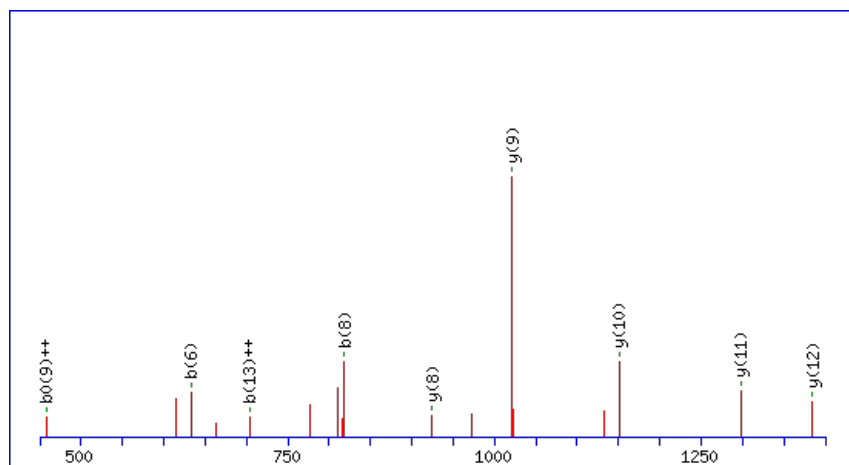

Monoisotopic mass of neutral peptide Mr(calc): 1652.8298

Fixed modifications: Carbamidomethyl (C) (apply to specified residues or termini only)

Ions Score: 41 Expect: 0.00026

Matches : 9/138 fragment ions using 9 most intense peaks ([help](#))

| #  | b               | b <sup>++</sup> | b <sup>0</sup> | b <sup>0++</sup> | Seq. | y                | y <sup>++</sup> | y*        | y <sup>*++</sup> | y <sup>0</sup> | y <sup>0++</sup> | #  |
|----|-----------------|-----------------|----------------|------------------|------|------------------|-----------------|-----------|------------------|----------------|------------------|----|
| 1  | 102.0550        | 51.5311         | 84.0444        | 42.5258          | T    |                  |                 |           |                  |                |                  | 15 |
| 2  | 199.1077        | 100.0575        | 181.0972       | 91.0522          | P    | 1552.7894        | 776.8983        | 1535.7628 | 768.3850         | 1534.7788      | 767.8930         | 14 |
| 3  | 270.1448        | 135.5761        | 252.1343       | 126.5708         | A    | 1455.7366        | 728.3719        | 1438.7100 | 719.8587         | 1437.7260      | 719.3666         | 13 |
| 4  | 357.1769        | 179.0921        | 339.1663       | 170.0868         | S    | <b>1384.6995</b> | 692.8534        | 1367.6729 | 684.3401         | 1366.6889      | 683.8481         | 12 |
| 5  | 504.2453        | 252.6263        | 486.2347       | 243.6210         | F    | <b>1297.6674</b> | 649.3374        | 1280.6409 | 640.8241         | 1279.6569      | 640.3321         | 11 |
| 6  | <b>633.2879</b> | 317.1476        | 615.2773       | 308.1423         | E    | <b>1150.5990</b> | 575.8032        | 1133.5725 | 567.2899         | 1132.5885      | 566.7979         | 10 |
| 7  | 730.3406        | 365.6740        | 712.3301       | 356.6687         | P    | <b>1021.5564</b> | 511.2819        | 1004.5299 | 502.7686         | 1003.5459      | 502.2766         | 9  |
| 8  | <b>817.3727</b> | 409.1900        | 799.3621       | 400.1847         | S    | <b>924.5037</b>  | 462.7555        | 907.4771  | 454.2422         | 906.4931       | 453.7502         | 8  |
| 9  | 930.4567        | 465.7320        | 912.4462       | 456.7267         | I    | 837.4716         | 419.2395        | 820.4451  | 410.7262         | 819.4611       | 410.2342         | 7  |
| 10 | 1045.4837       | 523.2455        | 1027.4731      | 514.2402         | D    | 724.3876         | 362.6974        | 707.3610  | 354.1842         | 706.3770       | 353.6921         | 6  |
| 11 | 1208.5470       | 604.7771        | 1190.5364      | 595.7719         | Y    | 609.3606         | 305.1840        | 592.3341  | 296.6707         | 591.3501       | 296.1787         | 5  |
| 12 | 1307.6154       | 654.3113        | 1289.6048      | 645.3061         | V    | 446.2973         | 223.6523        | 429.2708  | 215.1390         | 428.2867       | 214.6470         | 4  |
| 13 | 1406.6838       | <b>703.8456</b> | 1388.6733      | 694.8403         | V    | 347.2289         | 174.1181        | 330.2023  | 165.6048         | 329.2183       | 165.1128         | 3  |
| 14 | 1507.7315       | 754.3694        | 1489.7209      | 745.3641         | T    | 248.1605         | 124.5839        | 231.1339  | 116.0706         | 230.1499       | 115.5786         | 2  |
| 15 |                 |                 |                |                  | K    | 147.1128         | 74.0600         | 130.0863  | 65.5468          |                |                  | 1  |

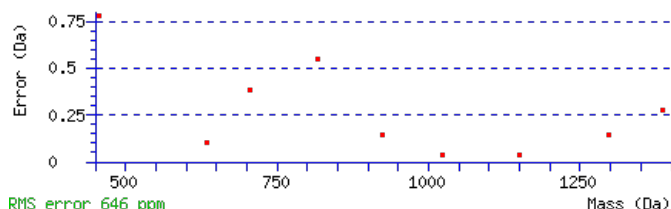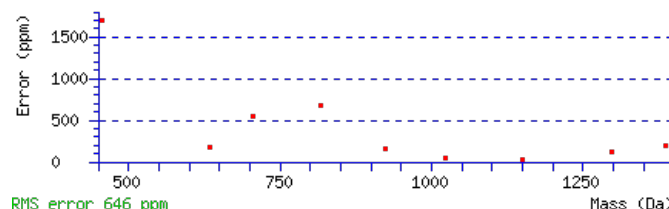

## AT1G29900.1

NCBI **BLAST** search of [TPASFEPSIDYVVTK](#)

(Parameters: blastp, nr protein database, expect=20000, no filter, PAM30)

Other BLAST [web gateways](#)

### All matches to this query

| Score | Mr(calc)  | Delta   | Sequence                        |
|-------|-----------|---------|---------------------------------|
| 41.4  | 1652.8298 | -0.0016 | <a href="#">TPASFEPSIDYVVTK</a> |
| 8.7   | 1652.8266 | 0.0015  | <a href="#">EVMKKMVAF AENPK</a> |
| 1.9   | 1652.8299 | -0.0018 | <a href="#">NCSSTVKMLMEILK</a>  |

**Mascot:** <http://www.matrixscience.com/>

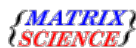

# Mascot Search Results

## Peptide View

MS/MS Fragmentation of **GPIENLADHLADPVNNAWAFATNFVPGK**

Found in **AT1G29910.1** in **TAIR\_Arabidopsis**, Symbols: AB180, LHCBI.2, CAB3 | CAB3 (CHLOROPHYLL A/B BINDING PROTEIN 3); chlorophyll binding | chr1:10472427-10473230 REVERSE

Match to Query 10928: 3091.524051 from(1031.515293,3+) index(10923)  
 Title: Elution from: 110.752 to 110.752 scan no 15860 cid35.00 polarity:+  
 Data file C7-2\_2.mgf

Click mouse within plot area to zoom in by factor of two about that point

Or, Plot from  to  Da

Label all possible matches  Label matches used for scoring

Show Y-axis

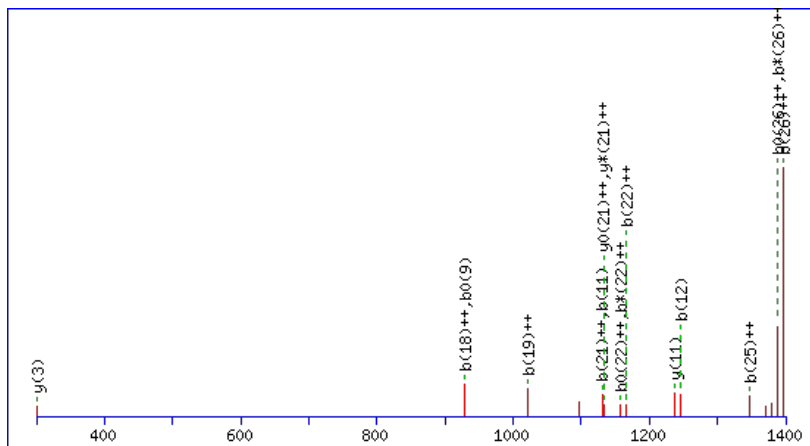

Monoisotopic mass of neutral peptide  $M_r(\text{calc})$ : 3091.5152

Fixed modifications: Carbamidomethyl (C) (apply to specified residues or termini only)

Ions Score: 38 Expect: 0.00049

Matches : 17/310 fragment ions using 15 most intense peaks ([help](#))

| #  | b         | b <sup>++</sup> | b*        | b <sup>*++</sup> | b <sup>0</sup> | b <sup>0++</sup> | Seq | y         | y <sup>++</sup> | y*        | y <sup>*++</sup> | y <sup>0</sup> | y <sup>0++</sup> | #  |
|----|-----------|-----------------|-----------|------------------|----------------|------------------|-----|-----------|-----------------|-----------|------------------|----------------|------------------|----|
| 1  | 58.0287   | 29.5180         |           |                  |                |                  | G   |           |                 |           |                  |                |                  | 29 |
| 2  | 155.0815  | 78.0444         |           |                  |                |                  | P   | 3035.5010 | 1518.2541       | 3018.4744 | 1509.7409        | 3017.4904      | 1509.2489        | 28 |
| 3  | 268.1656  | 134.5864        |           |                  |                |                  | I   | 2938.4482 | 1469.7278       | 2921.4217 | 1461.2145        | 2920.4377      | 1460.7225        | 27 |
| 4  | 397.2082  | 199.1077        |           |                  | 379.1976       | 190.1024         | E   | 2825.3642 | 1413.1857       | 2808.3376 | 1404.6724        | 2807.3536      | 1404.1804        | 26 |
| 5  | 511.2511  | 256.1292        | 494.2245  | 247.6159         | 493.2405       | 247.1239         | N   | 2696.3216 | 1348.6644       | 2679.2950 | 1340.1512        | 2678.3110      | 1339.6591        | 25 |
| 6  | 624.3352  | 312.6712        | 607.3086  | 304.1579         | 606.3246       | 303.6659         | L   | 2582.2786 | 1291.6430       | 2565.2521 | 1283.1297        | 2564.2681      | 1282.6377        | 24 |
| 7  | 695.3723  | 348.1898        | 678.3457  | 339.6765         | 677.3617       | 339.1845         | A   | 2469.1946 | 1235.1009       | 2452.1680 | 1226.5877        | 2451.1840      | 1226.0956        | 23 |
| 8  | 810.3992  | 405.7032        | 793.3727  | 397.1900         | 792.3886       | 396.6980         | D   | 2398.1575 | 1199.5824       | 2381.1309 | 1191.0691        | 2380.1469      | 1190.5771        | 22 |
| 9  | 947.4581  | 474.2327        | 930.4316  | 465.7194         | 929.4476       | 465.2274         | H   | 2283.1305 | 1142.0689       | 2266.1040 | 1133.5556        | 2265.1200      | 1133.0636        | 21 |
| 10 | 1060.5422 | 530.7747        | 1043.5156 | 522.2615         | 1042.5316      | 521.7694         | L   | 2146.0716 | 1073.5394       | 2129.0451 | 1065.0262        | 2128.0610      | 1064.5342        | 20 |
| 11 | 1131.5793 | 566.2933        | 1114.5528 | 557.7800         | 1113.5687      | 557.2880         | A   | 2032.9876 | 1016.9974       | 2015.9610 | 1008.4841        | 2014.9770      | 1007.9921        | 19 |
| 12 | 1246.6062 | 623.8068        | 1229.5797 | 615.2935         | 1228.5957      | 614.8015         | D   | 1961.9504 | 981.4789        | 1944.9239 | 972.9656         | 1943.9399      | 972.4736         | 18 |
| 13 | 1343.6590 | 672.3331        | 1326.6325 | 663.8199         | 1325.6484      | 663.3279         | P   | 1846.9235 | 923.9654        | 1829.8969 | 915.4521         | 1828.9129      | 914.9601         | 17 |
| 14 | 1442.7274 | 721.8673        | 1425.7009 | 713.3541         | 1424.7169      | 712.8621         | V   | 1749.8707 | 875.4390        | 1732.8442 | 866.9257         | 1731.8602      | 866.4337         | 16 |
| 15 | 1556.7703 | 778.8888        | 1539.7438 | 770.3755         | 1538.7598      | 769.8835         | N   | 1650.8023 | 825.9048        | 1633.7758 | 817.3915         | 1632.7918      | 816.8995         | 15 |
| 16 | 1670.8133 | 835.9103        | 1653.7867 | 827.3970         | 1652.8027      | 826.9050         | N   | 1536.7594 | 768.8833        | 1519.7328 | 760.3701         | 1518.7488      | 759.8780         | 14 |
| 17 | 1784.8562 | 892.9317        | 1767.8297 | 884.4185         | 1766.8456      | 883.9265         | N   | 1422.7165 | 711.8619        | 1405.6899 | 703.3486         | 1404.7059      | 702.8566         | 13 |
| 18 | 1855.8933 | 928.4503        | 1838.8668 | 919.9370         | 1837.8828      | 919.4450         | A   | 1308.6735 | 654.8404        | 1291.6470 | 646.3271         | 1290.6630      | 645.8351         | 12 |
| 19 | 2041.9726 | 1021.4900       | 2024.9461 | 1012.9767        | 2023.9621      | 1012.4847        | W   | 1237.6364 | 619.3218        | 1220.6099 | 610.8086         | 1219.6259      | 610.3166         | 11 |
| 20 | 2113.0097 | 1057.0085       | 2095.9832 | 1048.4952        | 2094.9992      | 1048.0032        | A   | 1051.5571 | 526.2822        | 1034.5306 | 517.7689         | 1033.5465      | 517.2769         | 10 |
| 21 | 2260.0782 | 1130.5427       | 2243.0516 | 1122.0294        | 2242.0676      | 1121.5374        | F   | 980.5200  | 490.7636        | 963.4934  | 482.2504         | 962.5094       | 481.7584         | 9  |
| 22 | 2331.1153 | 1166.0613       | 2314.0887 | 1157.5480        | 2313.1047      | 1157.0560        | A   | 833.4516  | 417.2294        | 816.4250  | 408.7162         | 815.4410       | 408.2241         | 8  |
| 23 | 2432.1629 | 1216.5851       | 2415.1364 | 1208.0718        | 2414.1524      | 1207.5798        | T   | 762.4145  | 381.7109        | 745.3879  | 373.1976         | 744.4039       | 372.7056         | 7  |
| 24 | 2546.2059 | 1273.6066       | 2529.1793 | 1265.0933        | 2528.1953      | 1264.6013        | N   | 661.3668  | 331.1870        | 644.3402  | 322.6738         |                |                  | 6  |

# AT1G29910.1

|    |           |                  |           |                  |           |                  |   |                 |          |          |          |  |  |   |
|----|-----------|------------------|-----------|------------------|-----------|------------------|---|-----------------|----------|----------|----------|--|--|---|
| 25 | 2693.2743 | <b>1347.1408</b> | 2676.2477 | 1338.6275        | 2675.2637 | 1338.1355        | F | 547.3239        | 274.1656 | 530.2973 | 265.6523 |  |  | 5 |
| 26 | 2792.3427 | <b>1396.6750</b> | 2775.3162 | <b>1388.1617</b> | 2774.3321 | <b>1387.6697</b> | V | 400.2554        | 200.6314 | 383.2289 | 192.1181 |  |  | 4 |
| 27 | 2889.3955 | 1445.2014        | 2872.3689 | 1436.6881        | 2871.3849 | 1436.1961        | P | <b>301.1870</b> | 151.0972 | 284.1605 | 142.5839 |  |  | 3 |
| 28 | 2946.4169 | 1473.7121        | 2929.3904 | 1465.1988        | 2928.4064 | 1464.7068        | G | 204.1343        | 102.5708 | 187.1077 | 94.0575  |  |  | 2 |
| 29 |           |                  |           |                  |           |                  | K | 147.1128        | 74.0600  | 130.0863 | 65.5468  |  |  | 1 |

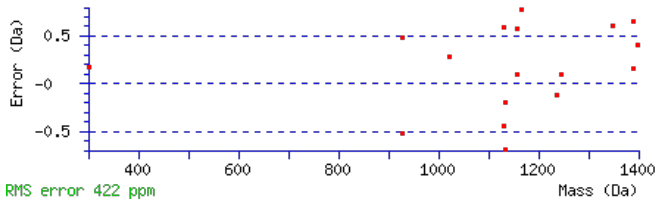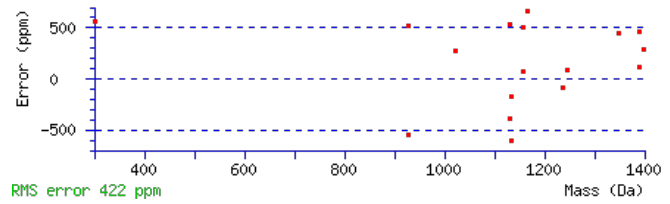

NCBI **BLAST** search of [GPIENLADHLADPVNNNAWAFATNFVPGK](#)

(Parameters: blastp, nr protein database, expect=20000, no filter, PAM30)

Other BLAST [web gateways](#)

## All matches to this query

| Score | Mr(calc)  | Delta   | Sequence                                      |
|-------|-----------|---------|-----------------------------------------------|
| 38.4  | 3091.5152 | 0.0089  | <a href="#">GPIENLADHLADPVNNNAWAFATNFVPGK</a> |
| 38.4  | 3091.5152 | 0.0089  | <a href="#">GPLENLADHLADPVNNNAWAFATNFVPGK</a> |
| 6.0   | 3091.5300 | -0.0059 | <a href="#">FGLMWYDSELMLWRV VYGLDLDKAR</a>    |
| 3.1   | 3091.5324 | -0.0084 | <a href="#">IWLWGDESGASPELVAGMVEYLAVESRK</a>  |
| 0.1   | 3091.5300 | -0.0059 | <a href="#">FGLMWYDSELMLWRV VYGLDLDKAR</a>    |

Mascot: <http://www.matrixscience.com/>


**Mascot Search Results**
**Peptide View**MS/MS Fragmentation of **SYITGYQASK**Found in **AT1G30230.1** in **TAIR\_Arabidopsis**, Symbols: | elongation factor 1-beta / EF-1-beta | chr1:10639270-10640499 FORWARD

Match to Query 3828: 1128.512314 from(565.263433,2+) index(2077)

Title: Elution from: 24.700 to 24.700 scan no 2692 cid35.00 polarity:+

Data file 0-1\_1.mgf

Click mouse within plot area to zoom in by factor of two about that point

Or,   to  Da Label all possible matches  Label matches used for scoring Show Y-axis 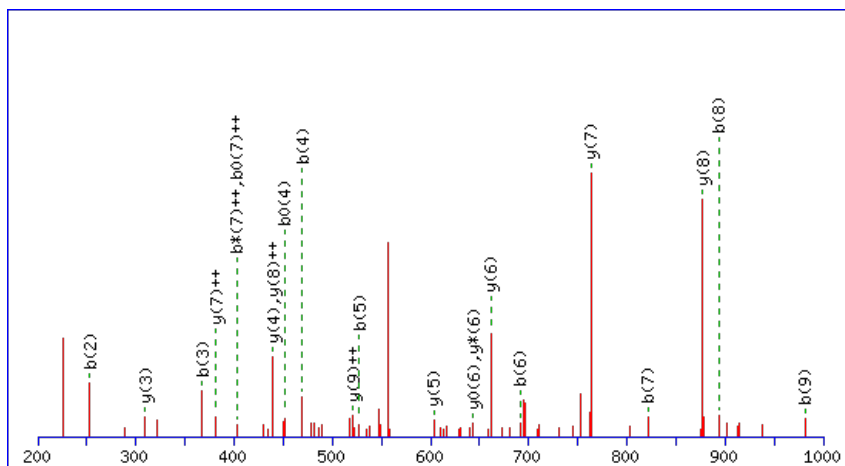**Monoisotopic mass of neutral peptide Mr(calc):** 1128.5096**Fixed modifications:** Carbamidomethyl (C) (apply to specified residues or termini only)**Ions Score:** 61 **Expect:** 5.1e-006**Matches:** 22/94 fragment ions using 35 most intense peaks ([help](#))

| #  | b               | b <sup>++</sup> | b*       | b <sup>*++</sup> | b <sup>0</sup>  | b <sup>0++</sup> | Seq. | y               | y <sup>++</sup> | y*              | y <sup>*++</sup> | y <sup>0</sup>  | y <sup>0++</sup> | #  |
|----|-----------------|-----------------|----------|------------------|-----------------|------------------|------|-----------------|-----------------|-----------------|------------------|-----------------|------------------|----|
| 1  | 89.0363         | 45.0218         |          |                  | 71.0258         | 36.0165          | S    |                 |                 |                 |                  |                 |                  | 10 |
| 2  | <b>253.0967</b> | 127.0520        |          |                  | 235.0861        | 118.0467         | Y    | 1041.4878       | <b>521.2475</b> | 1023.4642       | 512.2357         | 1023.4772       | 512.2422         | 9  |
| 3  | <b>367.1778</b> | 184.0925        |          |                  | 349.1672        | 175.0873         | I    | <b>877.4274</b> | <b>439.2173</b> | 859.4038        | 430.2056         | 859.4168        | 430.2121         | 8  |
| 4  | <b>469.2225</b> | 235.1149        |          |                  | <b>451.2120</b> | 226.1096         | T    | <b>763.3463</b> | <b>382.1768</b> | 745.3227        | 373.1650         | 745.3357        | 373.1715         | 7  |
| 5  | <b>527.2410</b> | 264.1241        |          |                  | 509.2304        | 255.1189         | G    | <b>661.3016</b> | 331.1544        | <b>643.2780</b> | 322.1426         | <b>643.2910</b> | 322.1492         | 6  |
| 6  | <b>691.3014</b> | 346.1543        |          |                  | 673.2908        | 337.1490         | Y    | <b>603.2831</b> | 302.1452        | 585.2595        | 293.1334         | 585.2725        | 293.1399         | 5  |
| 7  | <b>821.3540</b> | 411.1807        | 803.3304 | <b>402.1689</b>  | 803.3435        | <b>402.1754</b>  | Q    | <b>439.2227</b> | 220.1150        | 421.1991        | 211.1032         | 421.2122        | 211.1097         | 4  |
| 8  | <b>893.3882</b> | 447.1977        | 875.3646 | 438.1859         | 875.3776        | 438.1924         | A    | <b>309.1701</b> | 155.0887        | 291.1465        | 146.0769         | 291.1595        | 146.0834         | 3  |
| 9  | <b>981.4172</b> | 491.2123        | 963.3937 | 482.2005         | 963.4067        | 482.2070         | S    | 237.1359        | 119.0716        | 219.1124        | 110.0598         | 219.1254        | 110.0663         | 2  |
| 10 |                 |                 |          |                  |                 |                  | K    | 149.1069        | 75.0571         | 131.0833        | 66.0453          |                 |                  | 1  |

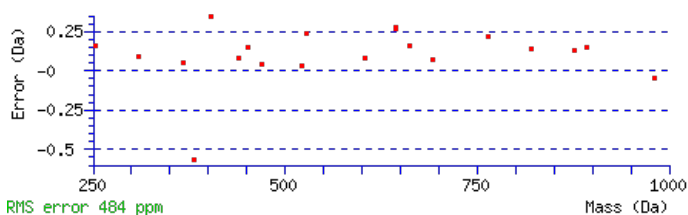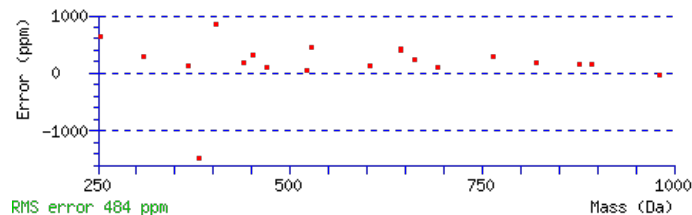NCBI **BLAST** search of **SYITGYQASK**

(Parameters: blastp, nr protein database, expect=20000, no filter, PAM30)

Other BLAST [web gateways](#)**All matches to this query**

| Score | Mr(calc) | Delta | Sequence |
|-------|----------|-------|----------|
|       |          |       |          |



## AT1G30230.1

|      |           |         |                            |
|------|-----------|---------|----------------------------|
| 60.9 | 1128.5096 | 0.0028  | <a href="#">SYITGYQASK</a> |
| 15.3 | 1128.5096 | 0.0028  | <a href="#">AYETSQKYK</a>  |
| 7.8  | 1128.5104 | 0.0019  | <a href="#">KIMGFCFSK</a>  |
| 4.2  | 1128.5152 | -0.0029 | <a href="#">KFSYSEVMK</a>  |
| 3.1  | 1128.5156 | -0.0033 | <a href="#">IVSDMHERK</a>  |
| 2.2  | 1128.5156 | -0.0033 | <a href="#">MHAVDVTVSR</a> |
| 0.7  | 1128.5129 | -0.0006 | <a href="#">KYTSKMSEK</a>  |
| 0.7  | 1128.5100 | 0.0023  | <a href="#">SSSYGRNSKK</a> |
| 0.7  | 1128.5152 | -0.0029 | <a href="#">WMVLEPSEK</a>  |

Mascot: <http://www.matrixscience.com/>

**Peptide View**MS/MS Fragmentation of **FGLAPSANRK**Found in **AT1G30380.1** in **TAIR\_Arabidopsis**, Symbols: PSAK | PSAK (PHOTOSYSTEM I SUBUNIT K) | chr1:10722307-1072295  
FORWARD

Match to Query 3011: 1059.582585 from(354.201471,3+) index(1004)

Title: Elution from: 15.903 to 15.903 scan no 1419 cid35.00 polarity:+

Data file 0-2\_2.mgf

Click mouse within plot area to zoom in by factor of two about that point

Or,  to  Da Label all possible matches  Label matches used for scoring Show Y-axis 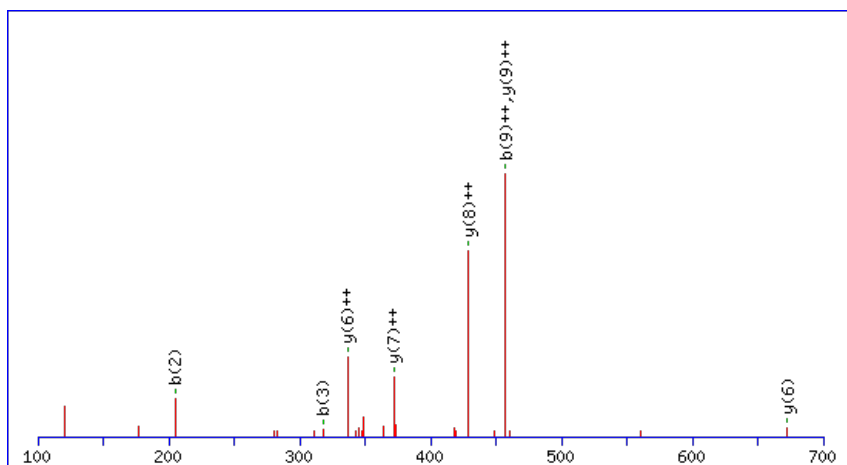Monoisotopic mass of neutral peptide  $M_r(\text{calc})$ : 1059.5825

Fixed modifications: Carbamidomethyl (C) (apply to specified residues or termini only)

Ions Score: 27 Expect: 0.0069

Matches : 8/76 fragment ions using 10 most intense peaks ([help](#))

| #  | b               | b <sup>++</sup> | b*       | b <sup>*++</sup> | b <sup>0</sup> | b <sup>0++</sup> | Seq. | y               | y <sup>++</sup> | y*       | y <sup>*++</sup> | y <sup>0</sup> | y <sup>0++</sup> | #  |
|----|-----------------|-----------------|----------|------------------|----------------|------------------|------|-----------------|-----------------|----------|------------------|----------------|------------------|----|
| 1  | 148.0757        | 74.5415         |          |                  |                |                  | F    |                 |                 |          |                  |                |                  | 10 |
| 2  | <b>205.0972</b> | 103.0522        |          |                  |                |                  | G    | 913.5214        | <b>457.2643</b> | 896.4948 | 448.7511         | 895.5108       | 448.2591         | 9  |
| 3  | <b>318.1812</b> | 159.5942        |          |                  |                |                  | L    | 856.4999        | <b>428.7536</b> | 839.4734 | 420.2403         | 838.4894       | 419.7483         | 8  |
| 4  | 389.2183        | 195.1128        |          |                  |                |                  | A    | 743.4159        | <b>372.2116</b> | 726.3893 | 363.6983         | 725.4053       | 363.2063         | 7  |
| 5  | 486.2711        | 243.6392        |          |                  |                |                  | P    | <b>672.3787</b> | <b>336.6930</b> | 655.3522 | 328.1797         | 654.3682       | 327.6877         | 6  |
| 6  | 573.3031        | 287.1552        |          |                  | 555.2926       | 278.1499         | S    | 575.3260        | 288.1666        | 558.2994 | 279.6534         | 557.3154       | 279.1613         | 5  |
| 7  | 644.3402        | 322.6738        |          |                  | 626.3297       | 313.6685         | A    | 488.2940        | 244.6506        | 471.2674 | 236.1373         |                |                  | 4  |
| 8  | 758.3832        | 379.6952        | 741.3566 | 371.1819         | 740.3726       | 370.6899         | N    | 417.2568        | 209.1321        | 400.2303 | 200.6188         |                |                  | 3  |
| 9  | 914.4843        | <b>457.7458</b> | 897.4577 | 449.2325         | 896.4737       | 448.7405         | R    | 303.2139        | 152.1106        | 286.1874 | 143.5973         |                |                  | 2  |
| 10 |                 |                 |          |                  |                |                  | K    | 147.1128        | 74.0600         | 130.0863 | 65.5468          |                |                  | 1  |

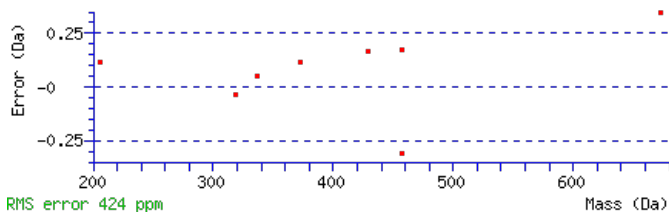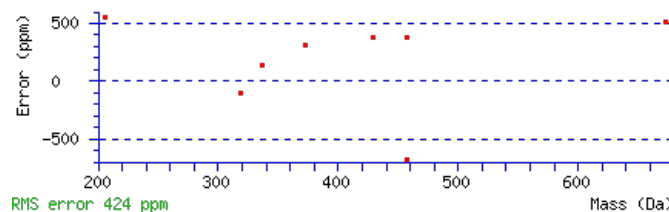NCBI BLAST search of **FGLAPSANRK**

(Parameters: blastp, nr protein database, expect=20000, no filter, PAM30)

Other BLAST [web gateways](#)**All matches to this query**

## AT1G30380.1

| Score | Mr(calc)  | Delta  | Sequence                   |
|-------|-----------|--------|----------------------------|
| 26.8  | 1059.5825 | 0.0001 | <a href="#">EGLAPSANRK</a> |
| 4.7   | 1059.5811 | 0.0014 | <a href="#">EEEEIAKTLK</a> |
| 4.6   | 1059.5812 | 0.0014 | <a href="#">LTEASVALEK</a> |
| 3.9   | 1059.5812 | 0.0014 | <a href="#">EKVIDSELK</a>  |
| 3.9   | 1059.5812 | 0.0014 | <a href="#">LSELETQLK</a>  |
| 3.8   | 1059.5825 | 0.0001 | <a href="#">ASVHIYSRK</a>  |
| 3.8   | 1059.5825 | 0.0001 | <a href="#">RTWKVNEK</a>   |
| 3.0   | 1059.5825 | 0.0001 | <a href="#">QGWIKTATR</a>  |
| 3.0   | 1059.5825 | 0.0001 | <a href="#">SRVWLQSGK</a>  |

Mascot: <http://www.matrixscience.com/>

**Peptide View**MS/MS Fragmentation of **TYVVQDGDIIFFK**Found in **AT1G30580.1** in **TAIR\_Arabidopsis**, Symbols: | GTP binding | chr1:10831935-10835436 REVERSE

Match to Query 6794: 1558.749602 from(780.382077,2+) index(8462)

Title: Elution from: 76.041 to 76.041 scan no 11376 cid35.00 polarity:+

Data file 0-2\_2.mgf

Click mouse within plot area to zoom in by factor of two about that point

Or,  to  Da Label all possible matches  Label matches used for scoring Show Y-axis 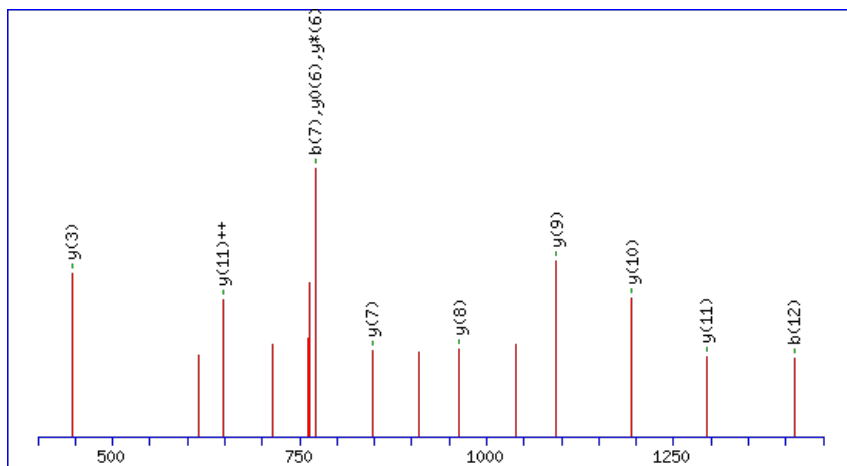Monoisotopic mass of neutral peptide  $M_r(\text{calc})$ : 1558.7477

Fixed modifications: Carbamidomethyl (C) (apply to specified residues or termini only)

Ions Score: 41 Expect: 0.00059

Matches : 11/126 fragment ions using 15 most intense peaks ([help](#))

| #  | b                | b <sup>++</sup> | b*        | b <sup>*++</sup> | b <sup>0</sup> | b <sup>0++</sup> | Seq. | y                | y <sup>++</sup> | y*              | y <sup>*++</sup> | y <sup>0</sup>  | y <sup>0++</sup> | #  |
|----|------------------|-----------------|-----------|------------------|----------------|------------------|------|------------------|-----------------|-----------------|------------------|-----------------|------------------|----|
| 1  | 103.0520         | 52.0296         |           |                  | 85.0414        | 43.0244          | T    |                  |                 |                 |                  |                 |                  | 13 |
| 2  | 267.1124         | 134.0598        |           |                  | 249.1018       | 125.0545         | Y    | 1457.7103        | 729.3588        | 1439.6867       | 720.3470         | 1439.6998       | 720.3535         | 12 |
| 3  | 367.1778         | 184.0925        |           |                  | 349.1672       | 175.0873         | V    | <b>1293.6500</b> | <b>647.3286</b> | 1275.6264       | 638.3168         | 1275.6394       | 638.3233         | 11 |
| 4  | 467.2433         | 234.1253        |           |                  | 449.2327       | 225.1200         | V    | <b>1193.5845</b> | 597.2959        | 1175.5609       | 588.2841         | 1175.5740       | 588.2906         | 10 |
| 5  | 597.2959         | 299.1516        | 579.2723  | 290.1398         | 579.2853       | 290.1463         | Q    | <b>1093.5191</b> | 547.2632        | 1075.4955       | 538.2514         | 1075.5085       | 538.2579         | 9  |
| 6  | 713.3199         | 357.1636        | 695.2963  | 348.1518         | 695.3093       | 348.1583         | D    | <b>963.4664</b>  | 482.2369        | 945.4428        | 473.2251         | 945.4559        | 473.2316         | 8  |
| 7  | <b>771.3384</b>  | 386.1728        | 753.3148  | 377.1610         | 753.3278       | 377.1675         | G    | <b>847.4424</b>  | 424.2249        | 829.4189        | 415.2131         | 829.4319        | 415.2196         | 7  |
| 8  | 887.3624         | 444.1848        | 869.3388  | 435.1730         | 869.3518       | 435.1795         | D    | 789.4239         | 395.2156        | <b>771.4004</b> | 386.2038         | <b>771.4134</b> | 386.2103         | 6  |
| 9  | 1001.4435        | 501.2254        | 983.4199  | 492.2136         | 983.4329       | 492.2201         | I    | 673.4000         | 337.2036        | 655.3764        | 328.1918         |                 |                  | 5  |
| 10 | 1115.5246        | 558.2659        | 1097.5010 | 549.2541         | 1097.5140      | 549.2606         | I    | 559.3189         | 280.1631        | 541.2953        | 271.1513         |                 |                  | 4  |
| 11 | 1263.5900        | 632.2986        | 1245.5664 | 623.2868         | 1245.5794      | 623.2934         | F    | <b>445.2378</b>  | 223.1225        | 427.2142        | 214.1107         |                 |                  | 3  |
| 12 | <b>1411.6554</b> | 706.3314        | 1393.6319 | 697.3196         | 1393.6449      | 697.3261         | F    | 297.1723         | 149.0898        | 279.1487        | 140.0780         |                 |                  | 2  |
| 13 |                  |                 |           |                  |                |                  | K    | 149.1069         | 75.0571         | 131.0833        | 66.0453          |                 |                  | 1  |

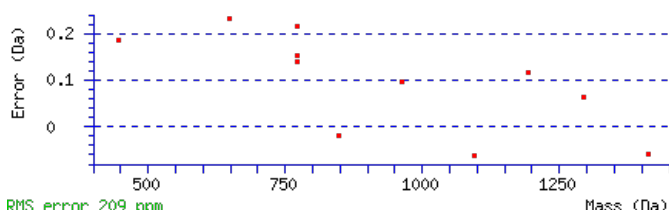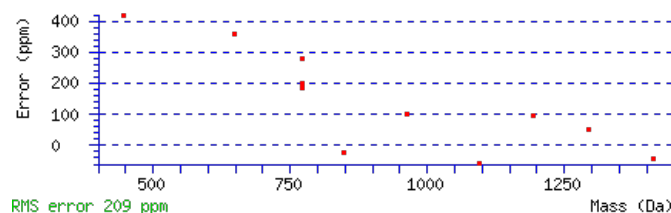NCBI BLAST search of **TYVVQDGDIIFFK**

(Parameters: blastp, nr protein database, expect=20000, no filter, PAM30)

Other BLAST [web gateways](#)

# AT1G30580.1

All matches to this query

| Score | Mr(calc)  | Delta   | Sequence                        |
|-------|-----------|---------|---------------------------------|
| 41.2  | 1558.7477 | 0.0019  | <a href="#">TYVVQDGDIIFFK</a>   |
| 22.8  | 1558.7542 | -0.0046 | <a href="#">MINKVNRAFTIAR</a>   |
| 10.9  | 1558.7482 | 0.0014  | <a href="#">VASYNVYGVVEGRVK</a> |
| 10.0  | 1558.7460 | 0.0036  | <a href="#">TTNVNHLVISAQDK</a>  |
| 4.9   | 1558.7534 | -0.0038 | <a href="#">FMFEAEISFLLAK</a>   |
| 4.4   | 1558.7538 | -0.0042 | <a href="#">FMALQPPGQPSQLK</a>  |
| 3.5   | 1558.7455 | 0.0041  | <a href="#">SFKVIATSDIYGDK</a>  |
| 2.5   | 1558.7455 | 0.0041  | <a href="#">VFSKQEYSESVIK</a>   |
| 2.5   | 1558.7542 | -0.0046 | <a href="#">ERFMLLSQRVSR</a>    |
| 2.3   | 1558.7486 | 0.0010  | <a href="#">MPVSKMYLPGFFK</a>   |

Mascot: <http://www.matrixscience.com/>

**Peptide View**MS/MS Fragmentation of **EAILNAEPYPLK**Found in **AT1G30660.1** in **TAIR\_Arabidopsis**, Symbols: | toprim domain-containing protein | chr1:10876835-10878999 FORWARD

Match to Query 5303: 1370.690552 from(686.352552,2+) index(10153)

Title: Elution from: 94.203 to 94.203 scan no 14110 cid35.00 polarity:+

Data file 0-3\_1.mgf

Click mouse within plot area to zoom in by factor of two about that point

Or,   to  Da Label all possible matches  Label matches used for scoring Show Y-axis 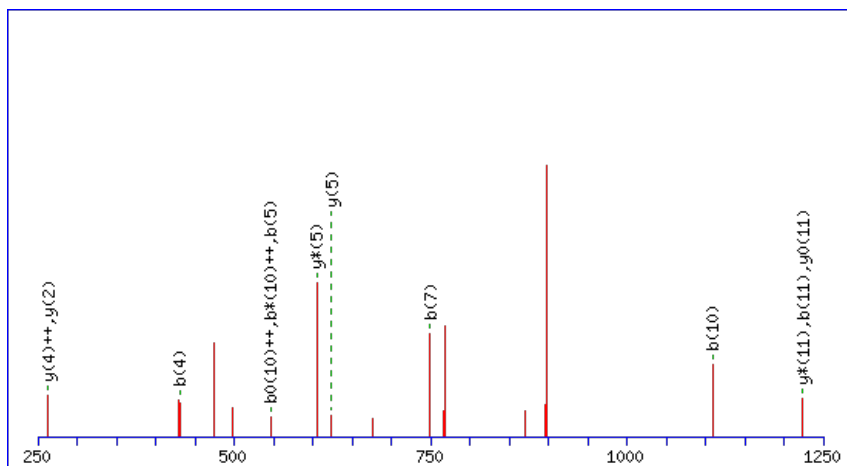Monoisotopic mass of neutral peptide  $M_r(\text{calc})$ : 1370.6874

Fixed modifications: Carbamidomethyl (C) (apply to specified residues or termini only)

Ions Score: 24 Expect: 0.021

Matches : 13/114 fragment ions using 18 most intense peaks ([help](#))

| #  | b         | b <sup>++</sup> | b*        | b <sup>*++</sup> | b <sup>0</sup> | b <sup>0++</sup> | Seq. | y         | y <sup>++</sup> | y*        | y <sup>*++</sup> | y <sup>0</sup> | y <sup>0++</sup> | #  |
|----|-----------|-----------------|-----------|------------------|----------------|------------------|------|-----------|-----------------|-----------|------------------|----------------|------------------|----|
| 1  | 131.0469  | 66.0271         |           |                  | 113.0363       | 57.0218          | E    |           |                 |           |                  |                |                  | 12 |
| 2  | 203.0811  | 102.0442        |           |                  | 185.0705       | 93.0389          | A    | 1241.6551 | 621.3312        | 1223.6315 | 612.3194         | 1223.6445      | 612.3259         | 11 |
| 3  | 317.1622  | 159.0847        |           |                  | 299.1516       | 150.0794         | I    | 1169.6209 | 585.3141        | 1151.5973 | 576.3023         | 1151.6103      | 576.3088         | 10 |
| 4  | 431.2433  | 216.1253        |           |                  | 413.2327       | 207.1200         | L    | 1055.5398 | 528.2735        | 1037.5162 | 519.2617         | 1037.5292      | 519.2683         | 9  |
| 5  | 547.2802  | 274.1438        | 529.2567  | 265.1320         | 529.2697       | 265.1385         | N    | 941.4587  | 471.2330        | 923.4351  | 462.2212         | 923.4481       | 462.2277         | 8  |
| 6  | 619.3144  | 310.1608        | 601.2908  | 301.1490         | 601.3038       | 301.1556         | A    | 825.4217  | 413.2145        | 807.3981  | 404.2027         | 807.4111       | 404.2092         | 7  |
| 7  | 749.3540  | 375.1807        | 731.3304  | 366.1689         | 731.3435       | 366.1754         | E    | 753.3876  | 377.1974        | 735.3640  | 368.1856         | 735.3770       | 368.1921         | 6  |
| 8  | 847.4038  | 424.2056        | 829.3802  | 415.1938         | 829.3933       | 415.2003         | P    | 623.3479  | 312.1776        | 605.3244  | 303.1658         |                |                  | 5  |
| 9  | 1011.4642 | 506.2357        | 993.4406  | 497.2239         | 993.4536       | 497.2304         | Y    | 525.2981  | 263.1527        | 507.2746  | 254.1409         |                |                  | 4  |
| 10 | 1109.5140 | 555.2606        | 1091.4904 | 546.2488         | 1091.5034      | 546.2553         | P    | 361.2378  | 181.1225        | 343.2142  | 172.1107         |                |                  | 3  |
| 11 | 1223.5951 | 612.3012        | 1205.5715 | 603.2894         | 1205.5845      | 603.2959         | L    | 263.1880  | 132.0976        | 245.1644  | 123.0858         |                |                  | 2  |
| 12 |           |                 |           |                  |                |                  | K    | 149.1069  | 75.0571         | 131.0833  | 66.0453          |                |                  | 1  |

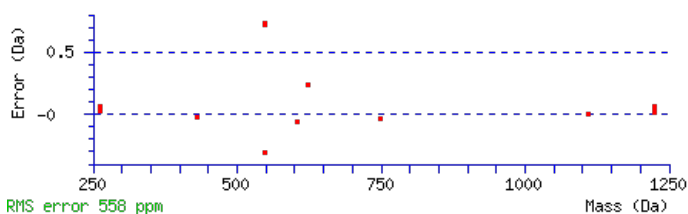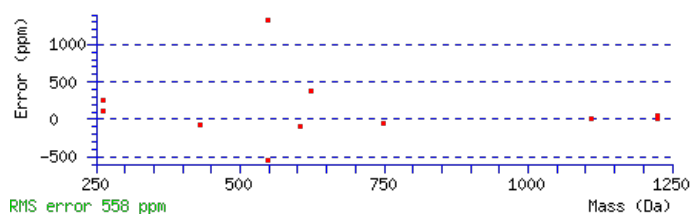NCBI BLAST search of **EAILNAEPYPLK**

(Parameters: blastp, nr protein database, expect=20000, no filter, PAM30)

Other BLAST [web gateways](#)

All matches to this query

**AT1G30660.1**

| <b>Score</b> | <b>Mr(calc)</b> | <b>Delta</b> | <b>Sequence</b>              |
|--------------|-----------------|--------------|------------------------------|
| 23.8         | 1370.6874       | 0.0031       | <a href="#">EAILNAEPYPLK</a> |
| 13.6         | 1370.6908       | -0.0002      | <a href="#">MKLPLDIDSPTK</a> |
| 3.3          | 1370.6935       | -0.0029      | <a href="#">SLSRMTQKFIK</a>  |
| 2.3          | 1370.6901       | 0.0005       | <a href="#">LYKDQGFERSIK</a> |

**Mascot:** <http://www.matrixscience.com/>

**Peptide View**MS/MS Fragmentation of **RVLFAEVR**Found in **AT1G30890.1** in **TAIR\_Arabidopsis**, Symbols: | integral membrane HRF1 family protein | chr1:10994871-10995980 FORWARD

Match to Query 2716: 1002.540624 from(502.277588,2+) index(8233)

Title: Elution from: 71.746 to 71.746 scan no 10760 cid35.00 polarity:+

Data file D1d-3\_1.mgf

Click mouse within plot area to zoom in by factor of two about that point

Or,   to  Da Label all possible matches  Label matches used for scoring Show Y-axis 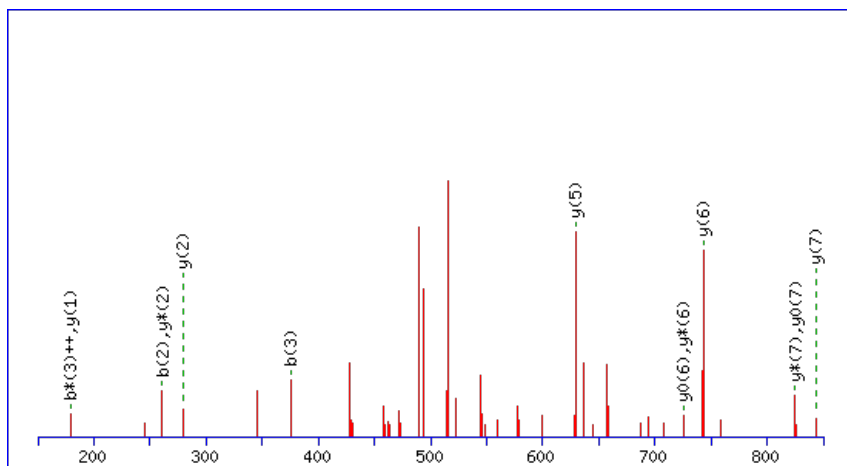Monoisotopic mass of neutral peptide **Mr(calc)**: 1002.5403

Fixed modifications: Carbamidomethyl (C) (apply to specified residues or termini only)

Ions Score: 28 Expect: 0.015

Matches : 15/70 fragment ions using 21 most intense peaks ([help](#))

| # | b               | b <sup>++</sup> | b*       | b <sup>*++</sup> | b <sup>0</sup> | b <sup>0++</sup> | Seq. | y               | y <sup>++</sup> | y*              | y <sup>*++</sup> | y <sup>0</sup>  | y <sup>0++</sup> | # |
|---|-----------------|-----------------|----------|------------------|----------------|------------------|------|-----------------|-----------------|-----------------|------------------|-----------------|------------------|---|
| 1 | 161.0965        | 81.0519         | 143.0729 | 72.0401          |                |                  | R    |                 |                 |                 |                  |                 |                  | 8 |
| 2 | <b>261.1620</b> | 131.0846        | 243.1384 | 122.0728         |                |                  | V    | <b>843.4583</b> | 422.2328        | <b>825.4347</b> | 413.2210         | <b>825.4478</b> | 413.2275         | 7 |
| 3 | <b>375.2431</b> | 188.1252        | 357.2195 | <b>179.1134</b>  |                |                  | L    | <b>743.3929</b> | 372.2001        | <b>725.3693</b> | 363.1883         | <b>725.3823</b> | 363.1948         | 6 |
| 4 | 523.3085        | 262.1579        | 505.2849 | 253.1461         |                |                  | F    | <b>629.3118</b> | 315.1595        | 611.2882        | 306.1477         | 611.3012        | 306.1542         | 5 |
| 5 | 595.3427        | 298.1750        | 577.3191 | 289.1632         |                |                  | A    | 481.2463        | 241.1268        | 463.2227        | 232.1150         | 463.2358        | 232.1215         | 4 |
| 6 | <b>725.3823</b> | 363.1948        | 707.3587 | 354.1830         | 707.3717       | 354.1895         | E    | 409.2122        | 205.1097        | 391.1886        | 196.0979         | 391.2016        | 196.1044         | 3 |
| 7 | <b>825.4478</b> | 413.2275        | 807.4242 | 404.2157         | 807.4372       | 404.2222         | V    | <b>279.1725</b> | 140.0899        | <b>261.1490</b> | 131.0781         |                 |                  | 2 |
| 8 |                 |                 |          |                  |                |                  | R    | <b>179.1071</b> | 90.0572         | 161.0835        | 81.0454          |                 |                  | 1 |

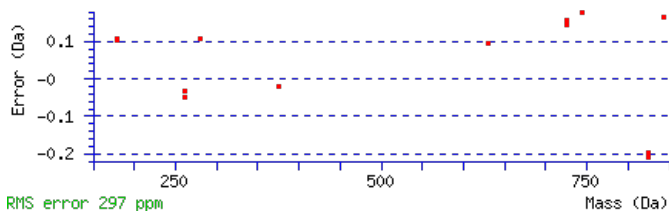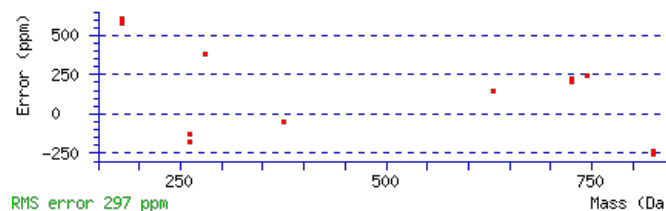NCBI **BLAST** search of [RVLFAEVR](#)

(Parameters: blastp, nr protein database, expect=20000, no filter, PAM30)

Other BLAST [web gateways](#)**All matches to this query**

| Score | Mr(calc)  | Delta  | Sequence                 |
|-------|-----------|--------|--------------------------|
| 27.7  | 1002.5403 | 0.0004 | <a href="#">RVLFAEVR</a> |
| 10.3  | 1002.5376 | 0.0030 | <a href="#">KLOIESFK</a> |



## AT1G30890.1

|     |           |         |                            |
|-----|-----------|---------|----------------------------|
| 9.2 | 1002.5407 | -0.0001 | <a href="#">RAILNSRR</a>   |
| 9.1 | 1002.5381 | 0.0026  | <a href="#">LKLESSRR</a>   |
| 8.8 | 1002.5407 | -0.0001 | <a href="#">RVRSAAALGR</a> |
| 8.3 | 1002.5376 | 0.0030  | <a href="#">ELKLFTNK</a>   |
| 8.2 | 1002.5380 | 0.0026  | <a href="#">LKTERSVR</a>   |
| 7.7 | 1002.5429 | -0.0023 | <a href="#">VRPGFRVR</a>   |
| 7.1 | 1002.5410 | -0.0004 | <a href="#">EKLTQVMK</a>   |
| 7.1 | 1002.5410 | -0.0004 | <a href="#">KKIEMLSK</a>   |

Mascot: <http://www.matrixscience.com/>

## Peptide View

MS/MS Fragmentation of **AAASVADTGAPTIFDK**

Found in **AT1G31160.1** in **TAIR\_Arabidopsis**, Symbols: | zinc-binding protein, putative / protein kinase C inhibitor, putative | chr1:1122861-11124087 REVERSE

Match to Query 6183: 1533.769194 from(767.891873,2+) index(4771)

Title: Elution from: 46.338 to 46.338 scan no 6132 cid35.00 polarity:+

Data file D1d-2\_2.mgf

Click mouse within plot area to zoom in by factor of two about that point

Or,   to  Da

Label all possible matches  Label matches used for scoring

Show Y-axis

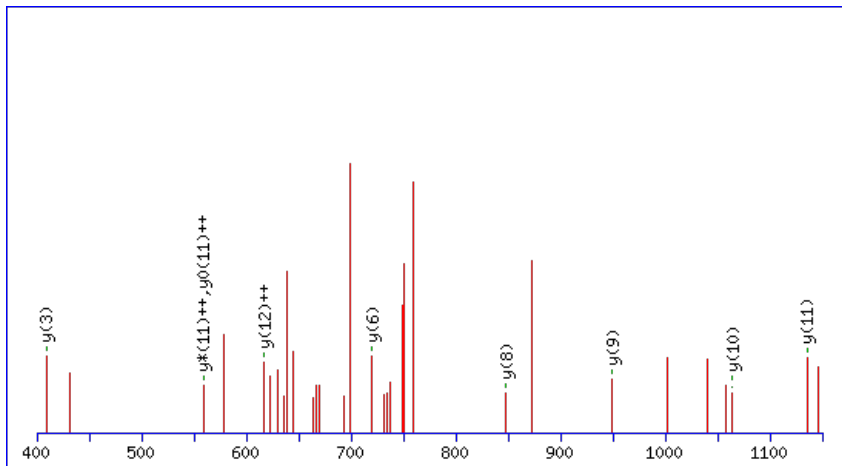

Monoisotopic mass of neutral peptide  $M_r(\text{calc})$ : 1533.7675

Fixed modifications: Carbamidomethyl (C) (apply to specified residues or termini only)

Ions Score: 22 Expect: 0.036

Matches : 9/142 fragment ions using 21 most intense peaks ([help](#))

| #  | b         | b <sup>++</sup> | b <sup>0</sup> | b <sup>0++</sup> | Seq. | y         | y <sup>++</sup> | y*        | y <sup>*++</sup> | y <sup>0</sup> | y <sup>0++</sup> | #  |
|----|-----------|-----------------|----------------|------------------|------|-----------|-----------------|-----------|------------------|----------------|------------------|----|
| 1  | 72.0444   | 36.5258         |                |                  | A    |           |                 |           |                  |                |                  | 16 |
| 2  | 143.0815  | 72.0444         |                |                  | A    | 1463.7377 | 732.3725        | 1446.7111 | 723.8592         | 1445.7271      | 723.3672         | 15 |
| 3  | 214.1186  | 107.5629        |                |                  | A    | 1392.7005 | 696.8539        | 1375.6740 | 688.3406         | 1374.6900      | 687.8486         | 14 |
| 4  | 301.1506  | 151.0790        | 283.1401       | 142.0737         | S    | 1321.6634 | 661.3354        | 1304.6369 | 652.8221         | 1303.6529      | 652.3301         | 13 |
| 5  | 400.2191  | 200.6132        | 382.2085       | 191.6079         | V    | 1234.6314 | 617.8193        | 1217.6048 | 609.3061         | 1216.6208      | 608.8141         | 12 |
| 6  | 471.2562  | 236.1317        | 453.2456       | 227.1264         | A    | 1135.5630 | 568.2851        | 1118.5364 | 559.7719         | 1117.5524      | 559.2798         | 11 |
| 7  | 586.2831  | 293.6452        | 568.2726       | 284.6399         | D    | 1064.5259 | 532.7666        | 1047.4993 | 524.2533         | 1046.5153      | 523.7613         | 10 |
| 8  | 687.3308  | 344.1690        | 669.3202       | 335.1638         | T    | 949.4989  | 475.2531        | 932.4724  | 466.7398         | 931.4884       | 466.2478         | 9  |
| 9  | 744.3523  | 372.6798        | 726.3417       | 363.6745         | G    | 848.4512  | 424.7293        | 831.4247  | 416.2160         | 830.4407       | 415.7240         | 8  |
| 10 | 815.3894  | 408.1983        | 797.3788       | 399.1930         | A    | 791.4298  | 396.2185        | 774.4032  | 387.7053         | 773.4192       | 387.2132         | 7  |
| 11 | 912.4421  | 456.7247        | 894.4316       | 447.7194         | P    | 720.3927  | 360.7000        | 703.3661  | 352.1867         | 702.3821       | 351.6947         | 6  |
| 12 | 1013.4898 | 507.2485        | 995.4793       | 498.2433         | T    | 623.3399  | 312.1736        | 606.3134  | 303.6603         | 605.3293       | 303.1683         | 5  |
| 13 | 1126.5739 | 563.7906        | 1108.5633      | 554.7853         | I    | 522.2922  | 261.6498        | 505.2657  | 253.1365         | 504.2817       | 252.6445         | 4  |
| 14 | 1273.6423 | 637.3248        | 1255.6317      | 628.3195         | F    | 409.2082  | 205.1077        | 392.1816  | 196.5944         | 391.1976       | 196.1024         | 3  |
| 15 | 1388.6692 | 694.8383        | 1370.6587      | 685.8330         | D    | 262.1397  | 131.5735        | 245.1132  | 123.0602         | 244.1292       | 122.5682         | 2  |
| 16 |           |                 |                |                  | K    | 147.1128  | 74.0600         | 130.0863  | 65.5468          |                |                  | 1  |

# AT1G31160.1

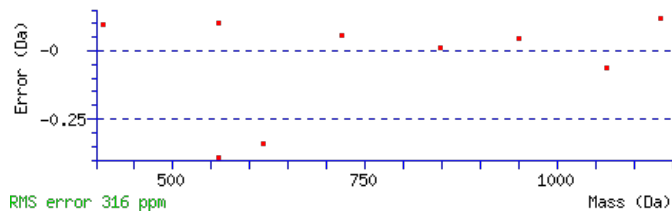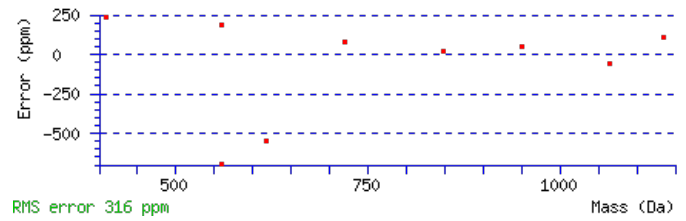

NCBI **BLAST** search of [AAASVADTGAPTIFDK](#)  
(Parameters: blastp, nr protein database, expect=20000, no filter, PAM30)  
Other BLAST [web gateways](#)

## All matches to this query

| Score | Mr(calc)  | Delta   | Sequence                         |
|-------|-----------|---------|----------------------------------|
| 21.9  | 1533.7675 | 0.0017  | <a href="#">AAASVADTGAPTIFDK</a> |
| 10.3  | 1533.7675 | 0.0017  | <a href="#">TELSDSSPIKSWGK</a>   |
| 2.9   | 1533.7722 | -0.0030 | <a href="#">VRNMLWQNTAGTK</a>    |
| 0.2   | 1533.7648 | 0.0044  | <a href="#">DESVNDGKRLHHK</a>    |

Mascot: <http://www.matrixscience.com/>

### Peptide View

 MS/MS Fragmentation of **YGLLCGSDGLPHLIVNGDQR**

 Found in **AT1G31330.1** in **TAIR\_Arabidopsis**, Symbols: PSAF | PSAF (photosystem I subunit F) | chr1:11214992-11215920 REVERSE

Match to Query 9820: 2183.077785 from(728.699871,3+) index(8529)

Title: Elution from: 75.073 to 75.073 scan no 11312 cid35.00 polarity:+

Data file C7-3\_2.mgf

Click mouse within plot area to zoom in by factor of two about that point

 Or, Plot from  to  Da 

 Label all possible matches  Label matches used for scoring 

 Show Y-axis 
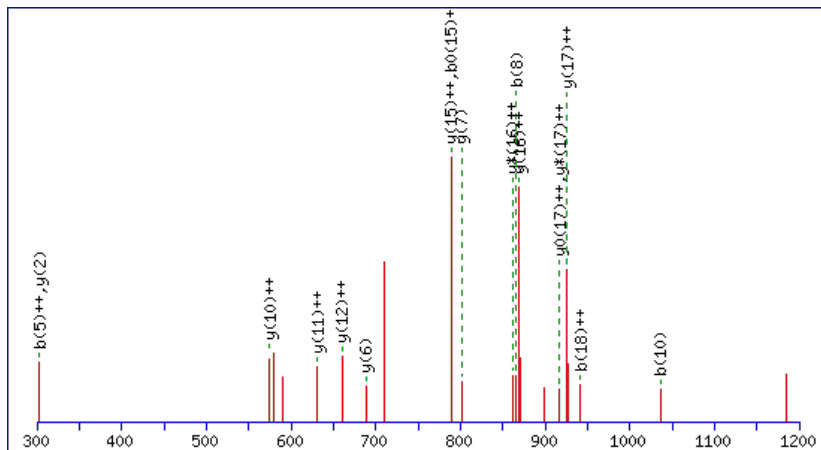

Monoisotopic mass of neutral peptide Mr(calc): 2183.0793

Fixed modifications: Carbamidomethyl (C) (apply to specified residues or termini only)

Ions Score: 40 Expect: 0.00042

 Matches : 17/182 fragment ions using 21 most intense peaks ([help](#))

| #  | b         | b <sup>++</sup> | b <sup>*</sup> | b <sup>*++</sup> | b <sup>0</sup> | b <sup>0++</sup> | Seq. | y         | y <sup>++</sup> | y <sup>*</sup> | y <sup>*++</sup> | y <sup>0</sup> | y <sup>0++</sup> | #  |
|----|-----------|-----------------|----------------|------------------|----------------|------------------|------|-----------|-----------------|----------------|------------------|----------------|------------------|----|
| 1  | 164.0706  | 82.5389         |                |                  |                |                  | Y    |           |                 |                |                  |                |                  | 20 |
| 2  | 221.0921  | 111.0497        |                |                  |                |                  | G    | 2021.0233 | 1011.0153       | 2003.9967      | 1002.5020        | 2003.0127      | 1002.0100        | 19 |
| 3  | 334.1761  | 167.5917        |                |                  |                |                  | L    | 1964.0018 | 982.5045        | 1946.9753      | 973.9913         | 1945.9913      | 973.4993         | 18 |
| 4  | 447.2602  | 224.1337        |                |                  |                |                  | L    | 1850.9178 | 925.9625        | 1833.8912      | 917.4492         | 1832.9072      | 916.9572         | 17 |
| 5  | 607.2908  | 304.1491        |                |                  |                |                  | C    | 1737.8337 | 869.4205        | 1720.8071      | 860.9072         | 1719.8231      | 860.4152         | 16 |
| 6  | 664.3123  | 332.6598        |                |                  |                |                  | G    | 1577.8030 | 789.4052        | 1560.7765      | 780.8919         | 1559.7925      | 780.3999         | 15 |
| 7  | 751.3443  | 376.1758        |                |                  | 733.3338       | 367.1705         | S    | 1520.7816 | 760.8944        | 1503.7550      | 752.3812         | 1502.7710      | 751.8891         | 14 |
| 8  | 866.3713  | 433.6893        |                |                  | 848.3607       | 424.6840         | D    | 1433.7496 | 717.3784        | 1416.7230      | 708.8651         | 1415.7390      | 708.3731         | 13 |
| 9  | 923.3927  | 462.2000        |                |                  | 905.3822       | 453.1947         | G    | 1318.7226 | 659.8649        | 1301.6961      | 651.3517         | 1300.7120      | 650.8597         | 12 |
| 10 | 1036.4768 | 518.7420        |                |                  | 1018.4662      | 509.7368         | L    | 1261.7011 | 631.3542        | 1244.6746      | 622.8409         | 1243.6906      | 622.3489         | 11 |
| 11 | 1133.5296 | 567.2684        |                |                  | 1115.5190      | 558.2631         | P    | 1148.6171 | 574.8122        | 1131.5905      | 566.2989         | 1130.6065      | 565.8069         | 10 |
| 12 | 1270.5885 | 635.7979        |                |                  | 1252.5779      | 626.7926         | H    | 1051.5643 | 526.2858        | 1034.5378      | 517.7725         | 1033.5538      | 517.2805         | 9  |
| 13 | 1383.6725 | 692.3399        |                |                  | 1365.6620      | 683.3346         | L    | 914.5054  | 457.7563        | 897.4789       | 449.2431         | 896.4948       | 448.7511         | 8  |
| 14 | 1496.7566 | 748.8819        |                |                  | 1478.7460      | 739.8767         | I    | 801.4213  | 401.2143        | 784.3948       | 392.7010         | 783.4108       | 392.2090         | 7  |
| 15 | 1595.8250 | 798.4162        |                |                  | 1577.8145      | 789.4109         | V    | 688.3373  | 344.6723        | 671.3107       | 336.1590         | 670.3267       | 335.6670         | 6  |
| 16 | 1709.8680 | 855.4376        | 1692.8414      | 846.9243         | 1691.8574      | 846.4323         | N    | 589.2689  | 295.1381        | 572.2423       | 286.6248         | 571.2583       | 286.1328         | 5  |
| 17 | 1766.8894 | 883.9483        | 1749.8629      | 875.4351         | 1748.8789      | 874.9431         | G    | 475.2259  | 238.1166        | 458.1994       | 229.6033         | 457.2154       | 229.1113         | 4  |
| 18 | 1881.9164 | 941.4618        | 1864.8898      | 932.9485         | 1863.9058      | 932.4565         | D    | 418.2045  | 209.6059        | 401.1779       | 201.0926         | 400.1939       | 200.6006         | 3  |
| 19 | 2009.9749 | 1005.4911       | 1992.9484      | 996.9778         | 1991.9644      | 996.4858         | Q    | 303.1775  | 152.0924        | 286.1510       | 143.5791         |                |                  | 2  |
| 20 |           |                 |                |                  |                |                  | R    | 175.1190  | 88.0631         | 158.0924       | 79.5498          |                |                  | 1  |

# AT1G31330.1

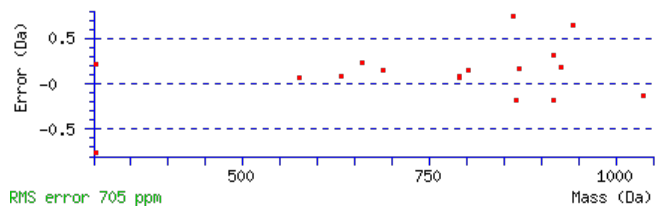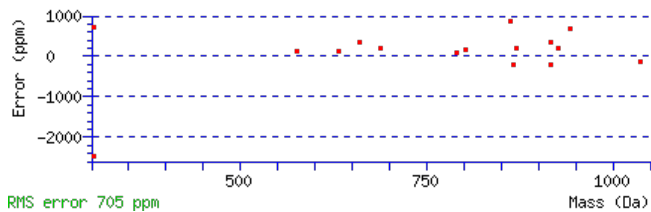

NCBI BLAST search of [YGLLCGSDGLPHLIVNGDQR](#)

(Parameters: blastp, nr protein database, expect=20000, no filter, PAM30)

Other BLAST [web gateways](#)

## All matches to this query

| Score | Mr(calc)  | Delta   | Sequence                             |
|-------|-----------|---------|--------------------------------------|
| 39.7  | 2183.0793 | -0.0016 | <a href="#">YGLLCGSDGLPHLIVNGDQR</a> |
| 9.1   | 2183.0827 | -0.0049 | <a href="#">LOKIRPEAVNEMESCVHK</a>   |
| 4.8   | 2183.0793 | -0.0016 | <a href="#">MNFPTIPHESNVVSINVGGR</a> |
| 3.8   | 2183.0818 | -0.0040 | <a href="#">RSSDVISYESSVANLSREGK</a> |
| 3.4   | 2183.0754 | 0.0023  | <a href="#">KLMEEFLEIWQEAMSKR</a>    |
| 1.8   | 2183.0775 | 0.0003  | <a href="#">GYNFLFWIFKMNFFRR</a>     |
| 0.5   | 2183.0740 | 0.0038  | <a href="#">DTMTTTTTGSELAVVSRNGK</a> |
| 0.1   | 2183.0768 | 0.0009  | <a href="#">VSLPFSDFIRECKQHMR</a>    |

Mascot: <http://www.matrixscience.com/>

**MASCOT** Mascot Search Results

**Peptide View**

MS/MS Fragmentation of **DLIAELK**

Found in **AT1G31360.1** in **TAIR\_Arabidopsis**, Symbols: RECQL2 | RECQL2 (Arabidopsis RecQ helicase 12); ATP-dependent helicase/ protein binding | chr1:11232403-11237393 FORWARD

Match to Query 1043: 800.465458 from(401.240005,2+) index(2292)

Title: Elution from: 26.026 to 26.026 scan no 2923 cid35.00 polarity:+

Data file D12h-3\_1.mgf

Click mouse within plot area to zoom in by factor of two about that point

Or,  150 to  Da

Label all possible matches  Label matches used for scoring

Show Y-axis

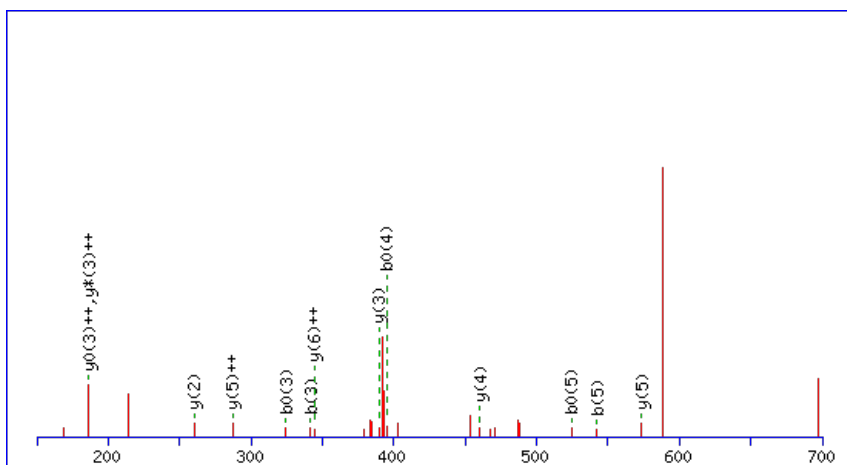

Monoisotopic mass of neutral peptide **Mr(calc)**: 800.4643

Fixed modifications: Carbamidomethyl (C) (apply to specified residues or termini only)

Ions Score: 22 Expect: 0.028

Matches : 13/56 fragment ions using 25 most intense peaks [\(help\)](#)

| # | b        | b <sup>++</sup> | b <sup>0</sup> | b <sup>0++</sup> | Seq. | y        | y <sup>++</sup> | y*       | y <sup>*++</sup> | y <sup>0</sup> | y <sup>0++</sup> | # |
|---|----------|-----------------|----------------|------------------|------|----------|-----------------|----------|------------------|----------------|------------------|---|
| 1 | 116.0342 | 58.5207         | 98.0237        | 49.5155          | D    |          |                 |          |                  |                |                  | 7 |
| 2 | 229.1183 | 115.0628        | 211.1077       | 106.0575         | L    | 686.4447 | 343.7260        | 669.4182 | 335.2127         | 668.4341       | 334.7207         | 6 |
| 3 | 342.2023 | 171.6048        | 324.1918       | 162.5995         | I    | 573.3606 | 287.1840        | 556.3341 | 278.6707         | 555.3501       | 278.1787         | 5 |
| 4 | 413.2395 | 207.1234        | 395.2289       | 198.1181         | A    | 460.2766 | 230.6419        | 443.2500 | 222.1287         | 442.2660       | 221.6366         | 4 |
| 5 | 542.2821 | 271.6447        | 524.2715       | 262.6394         | E    | 389.2395 | 195.1234        | 372.2129 | 186.6101         | 371.2289       | 186.1181         | 3 |
| 6 | 655.3661 | 328.1867        | 637.3556       | 319.1814         | L    | 260.1969 | 130.6021        | 243.1703 | 122.0888         |                |                  | 2 |
| 7 |          |                 |                |                  | K    | 147.1128 | 74.0600         | 130.0863 | 65.5468          |                |                  | 1 |

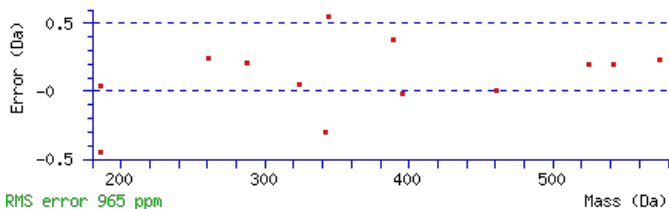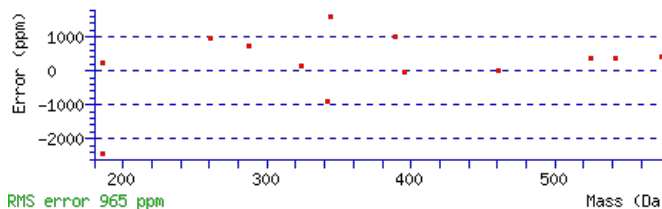

NCBI BLAST search of **DLIAELK**

(Parameters: blastp, nr protein database, expect=20000, no filter, PAM30)

Other BLAST [web gateways](#)

**All matches to this query**

| Score | Mr(calc) | Delta  | Sequence                |
|-------|----------|--------|-------------------------|
| 22.0  | 800.4643 | 0.0011 | <a href="#">DLIAELK</a> |
| 22.0  | 800.4643 | 0.0011 | <a href="#">IDLAELK</a> |

# AT1G31360.1

|      |          |        |                         |
|------|----------|--------|-------------------------|
| 19.7 | 800.4643 | 0.0011 | <a href="#">EVIAELK</a> |
| 17.0 | 800.4643 | 0.0011 | <a href="#">LLDAEIK</a> |

**Mascot:** <http://www.matrixscience.com/>

### Peptide View

 MS/MS Fragmentation of **VEQELMASENDGAISLGFRKVLK**

 Found in **AT1G31810.1** in **TAIR\_Arabidopsis**, Symbols: | actin binding | chr1:11399903-11405742 REVERSE

Match to Query 10300: 2563.227174 from(855.416334,3+) index(6988)

Title: Elution from: 61.641 to 61.641 scan no 9097 cid35.00 polarity:+

Data file D12h-1\_3.mgf

Click mouse within plot area to zoom in by factor of two about that point

 Or, Plot from  to  Da 

 Label all possible matches  Label matches used for scoring 

 Show Y-axis 
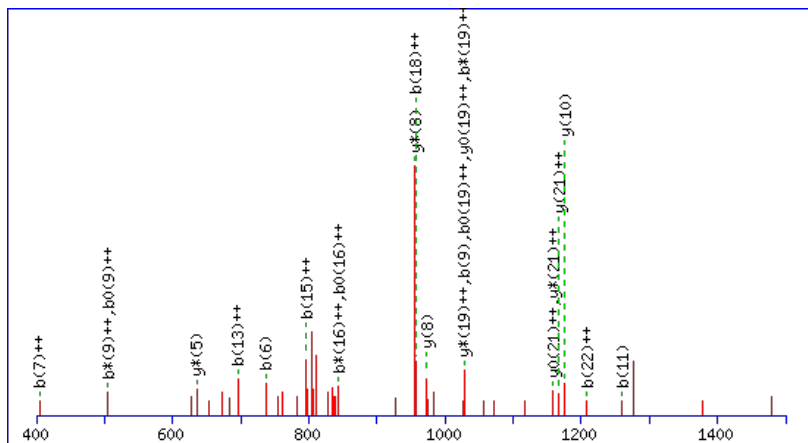
 Monoisotopic mass of neutral peptide  $M_r(\text{calc})$ : 2563.2321

Fixed modifications: Carbamidomethyl (C) (apply to specified residues or termini only)

Ions Score: 27 Expect: 0.014

 Matches : 23/242 fragment ions using 25 most intense peaks ([help](#))

| #  | b         | b <sup>++</sup> | b <sup>*</sup> | b <sup>*++</sup> | b <sup>0</sup> | b <sup>0++</sup> | Seq. | y         | y <sup>++</sup> | y <sup>*</sup> | y <sup>*++</sup> | y <sup>0</sup> | y <sup>0++</sup> | #  |
|----|-----------|-----------------|----------------|------------------|----------------|------------------|------|-----------|-----------------|----------------|------------------|----------------|------------------|----|
| 1  | 101.0727  | 51.0400         |                |                  |                |                  | V    |           |                 |                |                  |                |                  | 23 |
| 2  | 231.1124  | 116.0598        |                |                  | 213.1018       | 107.0545         | E    | 2464.1739 | 1232.5906       | 2446.1503      | 1223.5788        | 2446.1633      | 1223.5853        | 22 |
| 3  | 361.1650  | 181.0861        | 343.1414       | 172.0743         | 343.1544       | 172.0809         | Q    | 2334.1343 | 1167.5708       | 2316.1107      | 1158.5590        | 2316.1237      | 1158.5655        | 21 |
| 4  | 491.2046  | 246.1060        | 473.1810       | 237.0942         | 473.1941       | 237.1007         | E    | 2204.0816 | 1102.5445       | 2186.0580      | 1093.5327        | 2186.0711      | 1093.5392        | 20 |
| 5  | 605.2857  | 303.1465        | 587.2621       | 294.1347         | 587.2752       | 294.1412         | L    | 2074.0420 | 1037.5246       | 2056.0184      | 1028.5128        | 2056.0314      | 1028.5194        | 19 |
| 6  | 737.3232  | 369.1653        | 719.2997       | 360.1535         | 719.3127       | 360.1600         | M    | 1959.9609 | 980.4841        | 1941.9373      | 971.4723         | 1941.9503      | 971.4788         | 18 |
| 7  | 809.3574  | 405.1823        | 791.3338       | 396.1705         | 791.3468       | 396.1771         | A    | 1827.9234 | 914.4653        | 1809.8998      | 905.4535         | 1809.9128      | 905.4600         | 17 |
| 8  | 897.3865  | 449.1969        | 879.3629       | 440.1851         | 879.3759       | 440.1916         | S    | 1755.8892 | 878.4483        | 1737.8656      | 869.4365         | 1737.8787      | 869.4430         | 16 |
| 9  | 1027.4261 | 514.2167        | 1009.4025      | 505.2049         | 1009.4155      | 505.2114         | E    | 1667.8602 | 834.4337        | 1649.8366      | 825.4219         | 1649.8496      | 825.4284         | 15 |
| 10 | 1143.4631 | 572.2352        | 1125.4395      | 563.2234         | 1125.4525      | 563.2299         | N    | 1537.8205 | 769.4139        | 1519.7970      | 760.4021         | 1519.8100      | 760.4086         | 14 |
| 11 | 1259.4871 | 630.2472        | 1241.4635      | 621.2354         | 1241.4765      | 621.2419         | D    | 1421.7835 | 711.3954        | 1403.7600      | 702.3836         | 1403.7730      | 702.3901         | 13 |
| 12 | 1317.5056 | 659.2564        | 1299.4820      | 650.2446         | 1299.4950      | 650.2511         | G    | 1305.7596 | 653.3834        | 1287.7360      | 644.3716         | 1287.7490      | 644.3781         | 12 |
| 13 | 1389.5397 | 695.2735        | 1371.5161      | 686.2617         | 1371.5291      | 686.2682         | A    | 1247.7411 | 624.3742        | 1229.7175      | 615.3624         | 1229.7305      | 615.3689         | 11 |
| 14 | 1503.6208 | 752.3140        | 1485.5972      | 743.3023         | 1485.6102      | 743.3088         | I    | 1175.7069 | 588.3571        | 1157.6833      | 579.3453         | 1157.6964      | 579.3518         | 10 |
| 15 | 1591.6499 | 796.3286        | 1573.6263      | 787.3168         | 1573.6393      | 787.3233         | S    | 1061.6258 | 531.3165        | 1043.6022      | 522.3048         | 1043.6153      | 522.3113         | 9  |
| 16 | 1705.7310 | 853.3691        | 1687.7074      | 844.3573         | 1687.7204      | 844.3638         | L    | 973.5968  | 487.3020        | 955.5732       | 478.2902         |                |                  | 8  |
| 17 | 1763.7495 | 882.3784        | 1745.7259      | 873.3666         | 1745.7389      | 873.3731         | G    | 859.5157  | 430.2615        | 841.4921       | 421.2497         |                |                  | 7  |
| 18 | 1911.8149 | 956.4111        | 1893.7913      | 947.3993         | 1893.8044      | 947.4058         | F    | 801.4972  | 401.2522        | 783.4736       | 392.2404         |                |                  | 6  |
| 19 | 2071.9042 | 1036.4557       | 2053.8806      | 1027.4439        | 2053.8936      | 1027.4504        | R    | 653.4317  | 327.2195        | 635.4081       | 318.2077         |                |                  | 5  |
| 20 | 2201.9932 | 1101.5002       | 2183.9696      | 1092.4884        | 2183.9826      | 1092.4950        | K    | 493.3425  | 247.1749        | 475.3189       | 238.1631         |                |                  | 4  |
| 21 | 2302.0587 | 1151.5330       | 2284.0351      | 1142.5212        | 2284.0481      | 1142.5277        | V    | 363.2534  | 182.1303        | 345.2298       | 173.1186         |                |                  | 3  |
| 22 | 2416.1398 | 1208.5735       | 2398.1162      | 1199.5617        | 2398.1292      | 1199.5682        | L    | 263.1880  | 132.0976        | 245.1644       | 123.0858         |                |                  | 2  |
| 23 |           |                 |                |                  |                |                  | K    | 149.1069  | 75.0571         | 131.0833       | 66.0453          |                |                  | 1  |



# AT1G31810.1

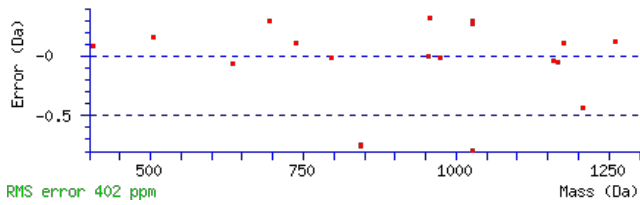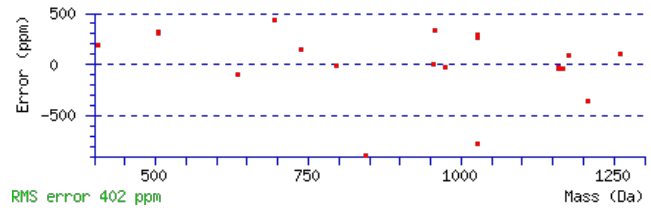

NCBI **BLAST** search of [VEQELMASENDGAISLGFRKVLK](#)  
 (Parameters: blastp, nr protein database, expect=20000, no filter, PAM30)  
 Other BLAST [web gateways](#)

## All matches to this query

| Score | Mr(calc)  | Delta   | Sequence                                |
|-------|-----------|---------|-----------------------------------------|
| 27.2  | 2563.2321 | -0.0049 | <a href="#">VEQELMASENDGAISLGFRKVLK</a> |
| 11.4  | 2563.2343 | -0.0071 | <a href="#">GLQFLVAESMSKNAPVENDNLK</a>  |
| 3.1   | 2563.2199 | 0.0073  | <a href="#">YMIKICKILGMATLVEVHDER</a>   |
| 1.2   | 2563.2305 | -0.0033 | <a href="#">AFSALVGEFPIGEYIPSLSWIDK</a> |
| 0.7   | 2563.2247 | 0.0025  | <a href="#">IPVPKIELASMDFTVQNTMTR</a>   |
| 0.2   | 2563.2343 | -0.0071 | <a href="#">SLDFHALCALYAVTDVALVTSR</a>  |
| 0.1   | 2563.2291 | -0.0020 | <a href="#">AEESRVSSVSVTVAHDLLLAGHR</a> |

Mascot: <http://www.matrixscience.com/>



# Mascot Search Results

## Peptide View

MS/MS Fragmentation of **SSEEAMNDYTK**

Found in **AT1G31812.1** in **TAIR\_Arabidopsis**, Symbols: ACBP | ACBP (ACYL-COA-BINDING PROTEIN); acyl-CoA binding | chr1:11411113-11412080 REVERSE

Match to Query 5400: 1400.556330 from(701.285441,2+) index(3010)

Title: Elution from: 30.088 to 30.088 scan no 3758 cid35.00 polarity:+

Data file D6h-3\_2.mgf

Click mouse within plot area to zoom in by factor of two about that point

Or,  to  Da

Label all possible matches  Label matches used for scoring

Show Y-axis

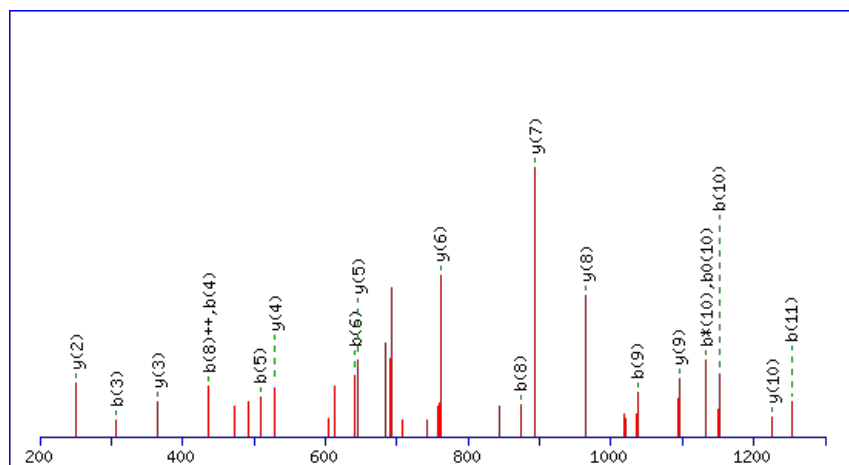

Monoisotopic mass of neutral peptide  $M_r(\text{calc})$ : 1400.5558

Fixed modifications: Carbamidomethyl (C) (apply to specified residues or termini only)

Ions Score: 106 Expect: 6.2e-011

Matches : 20/118 fragment ions using 21 most intense peaks [\(help\)](#)

| #  | b                | b <sup>++</sup> | b*               | b <sup>*++</sup> | b <sup>0</sup>   | b <sup>0++</sup> | Seq. | y                | y <sup>++</sup> | y*        | y <sup>*++</sup> | y <sup>0</sup> | y <sup>0++</sup> | #  |
|----|------------------|-----------------|------------------|------------------|------------------|------------------|------|------------------|-----------------|-----------|------------------|----------------|------------------|----|
| 1  | 89.0363          | 45.0218         |                  |                  | 71.0258          | 36.0165          | S    |                  |                 |           |                  |                |                  | 12 |
| 2  | 177.0654         | 89.0363         |                  |                  | 159.0548         | 80.0311          | S    | 1313.5340        | 657.2706        | 1295.5104 | 648.2589         | 1295.5234      | 648.2654         | 11 |
| 3  | <b>307.1050</b>  | 154.0562        |                  |                  | 289.0945         | 145.0509         | E    | <b>1225.5050</b> | 613.2561        | 1207.4814 | 604.2443         | 1207.4944      | 604.2508         | 10 |
| 4  | <b>437.1447</b>  | 219.0760        |                  |                  | 419.1341         | 210.0707         | E    | <b>1095.4653</b> | 548.2363        | 1077.4417 | 539.2245         | 1077.4548      | 539.2310         | 9  |
| 5  | <b>509.1788</b>  | 255.0930        |                  |                  | 491.1682         | 246.0878         | A    | <b>965.4257</b>  | 483.2165        | 947.4021  | 474.2047         | 947.4151       | 474.2112         | 8  |
| 6  | <b>641.2163</b>  | 321.1118        |                  |                  | 623.2058         | 312.1065         | M    | <b>893.3915</b>  | 447.1994        | 875.3680  | 438.1876         | 875.3810       | 438.1941         | 7  |
| 7  | 757.2533         | 379.1303        | 739.2297         | 370.1185         | 739.2428         | 370.1250         | N    | <b>761.3540</b>  | 381.1807        | 743.3304  | 372.1689         | 743.3435       | 372.1754         | 6  |
| 8  | <b>873.2773</b>  | <b>437.1423</b> | 855.2537         | 428.1305         | 855.2667         | 428.1370         | D    | <b>645.3170</b>  | 323.1622        | 627.2934  | 314.1504         | 627.3065       | 314.1569         | 5  |
| 9  | <b>1037.3377</b> | 519.1725        | 1019.3141        | 510.1607         | 1019.3271        | 510.1672         | Y    | <b>529.2930</b>  | 265.1502        | 511.2695  | 256.1384         | 511.2825       | 256.1449         | 4  |
| 10 | <b>1151.4188</b> | 576.2130        | <b>1133.3952</b> | 567.2012         | <b>1133.4082</b> | 567.2077         | I    | <b>365.2327</b>  | 183.1200        | 347.2091  | 174.1082         | 347.2221       | 174.1147         | 3  |
| 11 | <b>1253.4635</b> | 627.2354        | 1235.4399        | 618.2236         | 1235.4529        | 618.2301         | T    | <b>251.1516</b>  | 126.0794        | 233.1280  | 117.0676         | 233.1410       | 117.0741         | 2  |
| 12 |                  |                 |                  |                  |                  |                  | K    | 149.1069         | 75.0571         | 131.0833  | 66.0453          |                |                  | 1  |

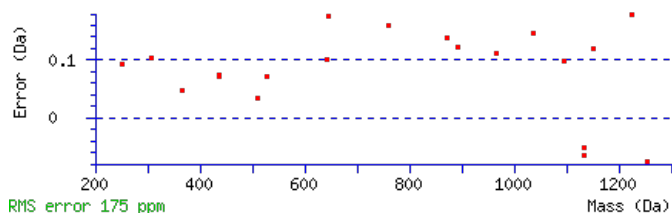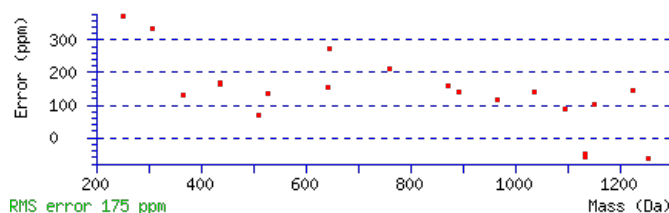

NCBI BLAST search of **SSEEAMNDYTK**

(Parameters: blastp, nr protein database, expect=20000, no filter, PAM30)

Other BLAST [web gateways](#)

AT1G31812.1

All matches to this query

| Score | Mr(calc)  | Delta   | Sequence                     |
|-------|-----------|---------|------------------------------|
| 106.3 | 1400.5558 | 0.0005  | <a href="#">SSEEAMNDYITK</a> |
| 5.8   | 1400.5537 | 0.0026  | <a href="#">FNMQDPNKAMR</a>  |
| 0.0   | 1400.5567 | -0.0004 | <a href="#">CGIAMMPSYPTK</a> |

Mascot: <http://www.matrixscience.com/>

**MASCOT** SCIENCE Mascot Search Results

Peptide View

MS/MS Fragmentation of **QYADAVIEVLPTLIPDDNEGK**

Found in **AT1G32060.1** in **TAIR\_Arabidopsis**, Symbols: PRK | PRK (PHOSPHORIBULOKINASE); ATP binding / phosphoribulokinase/ protein binding | chr1:11532648-11534386 FORWARD

Match to Query 10331: 2400.206520 from(1201.110536,2+) index(10201)  
 Title: Elution from: 94.798 to 94.798 scan no 14349 cid35.00 polarity:+  
 Data file D6h-3\_2.mgf

Click mouse within plot area to zoom in by factor of two about that point

Or, Plot from  to  Da

Label all possible matches  Label matches used for scoring

Show Y-axis

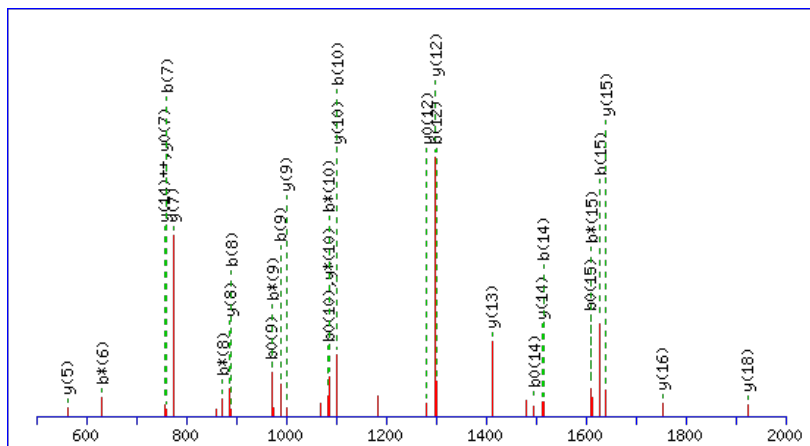

Monoisotopic mass of neutral peptide  $M_r(\text{calc})$ : 2400.2060

Fixed modifications: Carbamidomethyl (C) (apply to specified residues or termini only)

Ions Score: 89 Expect: 5.4e-009

Matches : 31/242 fragment ions using 37 most intense peaks ([help](#))

| #  | b                | b <sup>++</sup> | b*               | b <sup>*++</sup> | b <sup>0</sup>   | b <sup>0++</sup> | Seq | y                | y <sup>++</sup> | y*               | y <sup>*++</sup> | y <sup>0</sup>   | y <sup>0++</sup> | #  |
|----|------------------|-----------------|------------------|------------------|------------------|------------------|-----|------------------|-----------------|------------------|------------------|------------------|------------------|----|
| 1  | 129.0659         | 65.0366         | 112.0393         | 56.5233          |                  |                  | Q   |                  |                 |                  |                  |                  |                  | 22 |
| 2  | 292.1292         | 146.5682        | 275.1026         | 138.0550         |                  |                  | Y   | 2273.1547        | 1137.0810       | 2256.1282        | 1128.5677        | 2255.1442        | 1128.0757        | 21 |
| 3  | 363.1663         | 182.0868        | 346.1397         | 173.5735         |                  |                  | A   | 2110.0914        | 1055.5493       | 2093.0649        | 1047.0361        | 2092.0808        | 1046.5441        | 20 |
| 4  | 478.1932         | 239.6003        | 461.1667         | 231.0870         | 460.1827         | 230.5950         | D   | 2039.0543        | 1020.0308       | 2022.0277        | 1011.5175        | 2021.0437        | 1011.0255        | 19 |
| 5  | 549.2304         | 275.1188        | 532.2038         | 266.6055         | 531.2198         | 266.1135         | A   | <b>1924.0274</b> | 962.5173        | 1907.0008        | 954.0040         | 1906.0168        | 953.5120         | 18 |
| 6  | 648.2988         | 324.6530        | <b>631.2722</b>  | 316.1397         | 630.2882         | 315.6477         | V   | 1852.9902        | 926.9988        | 1835.9637        | 918.4855         | 1834.9797        | 917.9935         | 17 |
| 7  | <b>761.3828</b>  | 381.1951        | 744.3563         | 372.6818         | 743.3723         | 372.1898         | I   | <b>1753.9218</b> | 877.4645        | 1736.8953        | 868.9513         | 1735.9113        | 868.4593         | 16 |
| 8  | <b>890.4254</b>  | 445.7164        | <b>873.3989</b>  | 437.2031         | 872.4149         | 436.7111         | E   | <b>1640.8378</b> | 820.9225        | 1623.8112        | 812.4092         | 1622.8272        | 811.9172         | 15 |
| 9  | <b>989.4938</b>  | 495.2506        | <b>972.4673</b>  | 486.7373         | <b>971.4833</b>  | 486.2453         | V   | <b>1511.7952</b> | <b>756.4012</b> | 1494.7686        | 747.8879         | 1493.7846        | 747.3959         | 14 |
| 10 | <b>1102.5779</b> | 551.7926        | <b>1085.5514</b> | 543.2793         | <b>1084.5673</b> | 542.7873         | L   | <b>1412.7268</b> | 706.8670        | 1395.7002        | 698.3537         | 1394.7162        | 697.8617         | 13 |
| 11 | 1199.6307        | 600.3190        | 1182.6041        | 591.8057         | 1181.6201        | 591.3137         | P   | <b>1299.6427</b> | 650.3250        | 1282.6161        | 641.8117         | <b>1281.6321</b> | 641.3197         | 12 |
| 12 | <b>1300.6783</b> | 650.8428        | 1283.6518        | 642.3295         | 1282.6678        | 641.8375         | T   | 1202.5899        | 601.7986        | 1185.5634        | 593.2853         | 1184.5794        | 592.7933         | 11 |
| 13 | 1401.7260        | 701.3667        | 1384.6995        | 692.8534         | 1383.7155        | 692.3614         | T   | <b>1101.5422</b> | 551.2748        | <b>1084.5157</b> | 542.7615         | 1083.5317        | 542.2695         | 10 |
| 14 | <b>1514.8101</b> | 757.9087        | 1497.7835        | 749.3954         | <b>1496.7995</b> | 748.9034         | L   | <b>1000.4946</b> | 500.7509        | 983.4680         | 492.2376         | 982.4840         | 491.7456         | 9  |
| 15 | <b>1627.8942</b> | 814.4507        | <b>1610.8676</b> | 805.9374         | <b>1609.8836</b> | 805.4454         | I   | <b>887.4105</b>  | 444.2089        | 870.3840         | 435.6956         | 869.3999         | 435.2036         | 8  |
| 16 | 1724.9469        | 862.9771        | 1707.9204        | 854.4638         | 1706.9364        | 853.9718         | P   | <b>774.3264</b>  | 387.6669        | 757.2999         | 379.1536         | <b>756.3159</b>  | 378.6616         | 7  |
| 17 | 1839.9739        | 920.4906        | 1822.9473        | 911.9773         | 1821.9633        | 911.4853         | D   | 677.2737         | 339.1405        | 660.2471         | 330.6272         | 659.2631         | 330.1352         | 6  |
| 18 | 1955.0008        | 978.0040        | 1937.9743        | 969.4908         | 1936.9902        | 968.9988         | D   | <b>562.2467</b>  | 281.6270        | 545.2202         | 273.1137         | 544.2362         | 272.6217         | 5  |
| 19 | 2069.0437        | 1035.0255       | 2052.0172        | 1026.5122        | 2051.0332        | 1026.0202        | N   | 447.2198         | 224.1135        | 430.1932         | 215.6003         | 429.2092         | 215.1082         | 4  |
| 20 | 2198.0863        | 1099.5468       | 2181.0598        | 1091.0335        | 2180.0758        | 1090.5415        | E   | 333.1769         | 167.0921        | 316.1503         | 158.5788         | 315.1663         | 158.0868         | 3  |
| 21 | 2255.1078        | 1128.0575       | 2238.0812        | 1119.5443        | 2237.0972        | 1119.0522        | G   | 204.1343         | 102.5708        | 187.1077         | 94.0575          |                  |                  | 2  |
| 22 |                  |                 |                  |                  |                  |                  | K   | 147.1128         | 74.0600         | 130.0863         | 65.5468          |                  |                  | 1  |

# AT1G32060.1

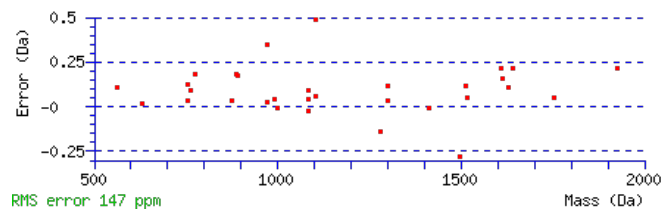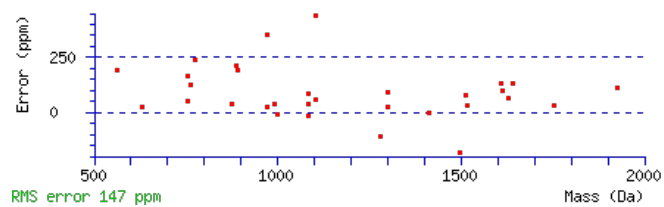

NCBI **BLAST** search of [QYADAVIEVLPTTLIPDDNEGK](#)  
(Parameters: blastp, nr protein database, expect=20000, no filter, PAM30)  
Other BLAST [web gateways](#)

## All matches to this query

| Score | Mr(calc)  | Delta  | Sequence                               |
|-------|-----------|--------|----------------------------------------|
| 89.2  | 2400.2060 | 0.0005 | <a href="#">QYADAVIEVLPTTLIPDDNEGK</a> |

Mascot: <http://www.matrixscience.com/>

## Peptide View

MS/MS Fragmentation of **RNAEAELLSK**

Found in **AT1G32220.1** in **TAIR\_Arabidopsis**, Symbols: | binding / catalytic / coenzyme binding | chr1:11608018-11609571 FORWARD

Match to Query 3631: 1144.562720 from(573.288636,2+) index(1374)

Title: Elution from: 18.891 to 18.891 scan no 1854 cid35.00 polarity:+

Data file D12h-1\_3.mgf

Click mouse within plot area to zoom in by factor of two about that point

Or,   to  Da

Label all possible matches  Label matches used for scoring

Show Y-axis

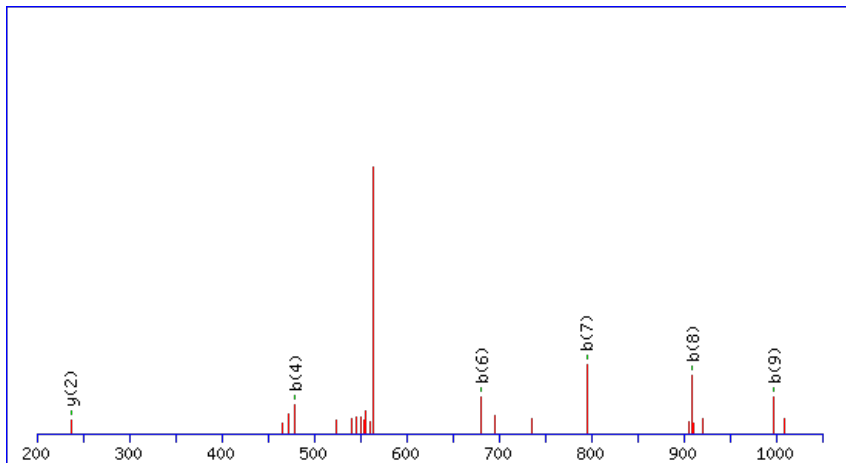

Monoisotopic mass of neutral peptide **Mr(calc)**: 1144.5647

**Fixed modifications**: Carbamidomethyl (C) (apply to specified residues or termini only)

**Ions Score**: 40 **Expect**: 0.0011

**Matches**: 6/100 fragment ions using 7 most intense peaks ([help](#))

| #  | b               | b <sup>++</sup> | b*       | b <sup>*++</sup> | b <sup>0</sup> | b <sup>0++</sup> | Seq. | y               | y <sup>++</sup> | y*       | y <sup>*++</sup> | y <sup>0</sup> | y <sup>0++</sup> | #  |
|----|-----------------|-----------------|----------|------------------|----------------|------------------|------|-----------------|-----------------|----------|------------------|----------------|------------------|----|
| 1  | 161.0965        | 81.0519         | 143.0729 | 72.0401          |                |                  | R    |                 |                 |          |                  |                |                  | 10 |
| 2  | 277.1335        | 139.0704        | 259.1099 | 130.0586         |                |                  | N    | 985.4827        | 493.2450        | 967.4591 | 484.2332         | 967.4721       | 484.2397         | 9  |
| 3  | 349.1677        | 175.0875        | 331.1441 | 166.0757         |                |                  | A    | 869.4457        | 435.2265        | 851.4221 | 426.2147         | 851.4351       | 426.2212         | 8  |
| 4  | <b>479.2073</b> | 240.1073        | 461.1837 | 231.0955         | 461.1967       | 231.1020         | E    | 797.4115        | 399.2094        | 779.3880 | 390.1976         | 779.4010       | 390.2041         | 7  |
| 5  | 551.2414        | 276.1244        | 533.2179 | 267.1126         | 533.2309       | 267.1191         | A    | 667.3719        | 334.1896        | 649.3483 | 325.1778         | 649.3613       | 325.1843         | 6  |
| 6  | <b>681.2811</b> | 341.1442        | 663.2575 | 332.1324         | 663.2705       | 332.1389         | E    | 595.3378        | 298.1725        | 577.3142 | 289.1607         | 577.3272       | 289.1672         | 5  |
| 7  | <b>795.3622</b> | 398.1847        | 777.3386 | 389.1729         | 777.3516       | 389.1794         | L    | 465.2981        | 233.1527        | 447.2746 | 224.1409         | 447.2876       | 224.1474         | 4  |
| 8  | <b>909.4433</b> | 455.2253        | 891.4197 | 446.2135         | 891.4327       | 446.2200         | L    | 351.2170        | 176.1122        | 333.1935 | 167.1004         | 333.2065       | 167.1069         | 3  |
| 9  | <b>997.4723</b> | 499.2398        | 979.4488 | 490.2280         | 979.4618       | 490.2345         | S    | <b>237.1359</b> | 119.0716        | 219.1124 | 110.0598         | 219.1254       | 110.0663         | 2  |
| 10 |                 |                 |          |                  |                |                  | K    | 149.1069        | 75.0571         | 131.0833 | 66.0453          |                |                  | 1  |

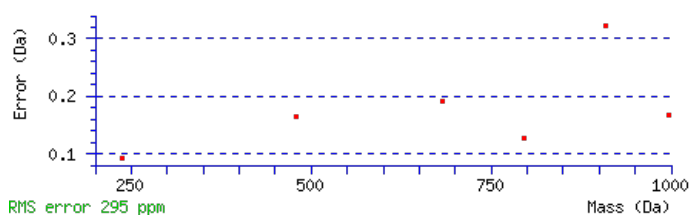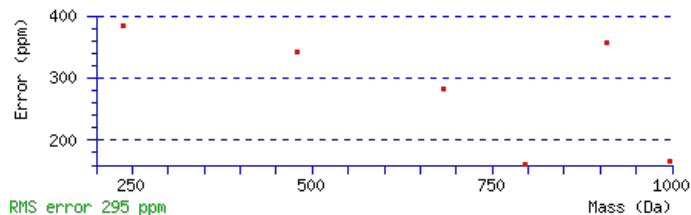

NCBI **BLAST** search of [RNAEAELLSK](#)

(Parameters: blastp, nr protein database, expect=20000, no filter, PAM30)

Other BLAST [web gateways](#)

All matches to this query

| Score | Mr(calc) | Delta | Sequence |
|-------|----------|-------|----------|
|       |          |       |          |

## AT1G32220.1

|      |           |         |                             |
|------|-----------|---------|-----------------------------|
| 39.6 | 1144.5647 | -0.0019 | <a href="#">RNAEAELLSK</a>  |
| 18.1 | 1144.5646 | -0.0019 | <a href="#">EVRDGLGGISK</a> |
| 11.6 | 1144.5642 | -0.0015 | <a href="#">ELFAEVGELK</a>  |
| 10.3 | 1144.5647 | -0.0019 | <a href="#">LSSNVEGVLGR</a> |
| 8.0  | 1144.5642 | -0.0015 | <a href="#">EIGFLEGEIK</a>  |
| 6.0  | 1144.5642 | -0.0015 | <a href="#">YGLELSDPK</a>   |
| 5.3  | 1144.5647 | -0.0019 | <a href="#">SRSEPLDAKK</a>  |
| 4.7  | 1144.5647 | -0.0019 | <a href="#">AGKGKDKPSDK</a> |
| 4.2  | 1144.5655 | -0.0028 | <a href="#">HRGILMMLK</a>   |
| 4.0  | 1144.5647 | -0.0019 | <a href="#">REKEQAELK</a>   |

Mascot: <http://www.matrixscience.com/>

**Peptide View**MS/MS Fragmentation of **VKPSSPAELEALMGPK**Found in **AT1G32470.1** in **TAIR\_Arabidopsis**, Symbols: | glycine cleavage system H protein, mitochondrial, putative | chr1:11739459-11740226  
REVERSE

Match to Query 8299: 1670.827272 from(836.420912,2+) index(6369)

Title: Elution from: 55.488 to 55.488 scan no 8068 cid35.00 polarity:+

Data file D6h-1\_1.mgf

Click mouse within plot area to zoom in by factor of two about that point

Or,  to  Da Label all possible matches  Label matches used for scoring Show Y-axis 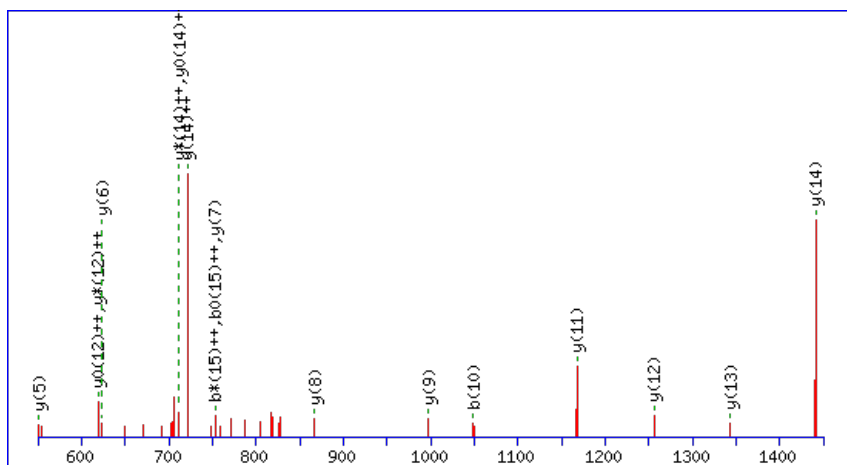**Monoisotopic mass of neutral peptide Mr(calc):** 1670.8274**Fixed modifications:** Carbamidomethyl (C) (apply to specified residues or termini only)**Ions Score:** 70 **Expect:** 6.3e-007**Matches:** 17/160 fragment ions using 20 most intense peaks ([help](#))

| #  | b                | b <sup>++</sup> | b <sup>*</sup> | b <sup>*++</sup> | b <sup>0</sup> | b <sup>0++</sup> | Seq. | y                | y <sup>++</sup> | y <sup>*</sup> | y <sup>*++</sup> | y <sup>0</sup> | y <sup>0++</sup> | #  |
|----|------------------|-----------------|----------------|------------------|----------------|------------------|------|------------------|-----------------|----------------|------------------|----------------|------------------|----|
| 1  | 101.0727         | 51.0400         |                |                  |                |                  | V    |                  |                 |                |                  |                |                  | 16 |
| 2  | 231.1618         | 116.0845        | 213.1382       | 107.0727         |                |                  | K    | 1571.7692        | 786.3882        | 1553.7456      | 777.3764         | 1553.7586      | 777.3830         | 15 |
| 3  | 329.2116         | 165.1094        | 311.1880       | 156.0976         |                |                  | P    | <b>1441.6802</b> | <b>721.3437</b> | 1423.6566      | <b>712.3319</b>  | 1423.6696      | <b>712.3384</b>  | 14 |
| 4  | 417.2406         | 209.1239        | 399.2170       | 200.1122         | 399.2301       | 200.1187         | S    | <b>1343.6304</b> | 672.3188        | 1325.6068      | 663.3070         | 1325.6198      | 663.3135         | 13 |
| 5  | 505.2697         | 253.1385        | 487.2461       | 244.1267         | 487.2591       | 244.1332         | S    | <b>1255.6013</b> | 628.3043        | 1237.5777      | <b>619.2925</b>  | 1237.5907      | <b>619.2990</b>  | 12 |
| 6  | 603.3195         | 302.1634        | 585.2959       | 293.1516         | 585.3089       | 293.1581         | P    | <b>1167.5722</b> | 584.2898        | 1149.5487      | 575.2780         | 1149.5617      | 575.2845         | 11 |
| 7  | 675.3536         | 338.1805        | 657.3300       | 329.1687         | 657.3431       | 329.1752         | A    | 1069.5224        | 535.2649        | 1051.4989      | 526.2531         | 1051.5119      | 526.2596         | 10 |
| 8  | 805.3933         | 403.2003        | 787.3697       | 394.1885         | 787.3827       | 394.1950         | E    | <b>997.4883</b>  | 499.2478        | 979.4647       | 490.2360         | 979.4777       | 490.2425         | 9  |
| 9  | 919.4744         | 460.2408        | 901.4508       | 451.2290         | 901.4638       | 451.2355         | L    | <b>867.4487</b>  | 434.2280        | 849.4251       | 425.2162         | 849.4381       | 425.2227         | 8  |
| 10 | <b>1049.5140</b> | 525.2606        | 1031.4904      | 516.2488         | 1031.5034      | 516.2553         | E    | <b>753.3676</b>  | 377.1874        | 735.3440       | 368.1756         | 735.3570       | 368.1821         | 7  |
| 11 | 1121.5481        | 561.2777        | 1103.5246      | 552.2659         | 1103.5376      | 552.2724         | A    | <b>623.3279</b>  | 312.1676        | 605.3044       | 303.1558         |                |                  | 6  |
| 12 | 1235.6292        | 618.3183        | 1217.6057      | 609.3065         | 1217.6187      | 609.3130         | L    | <b>551.2938</b>  | 276.1505        | 533.2702       | 267.1387         |                |                  | 5  |
| 13 | 1367.6668        | 684.3370        | 1349.6432      | 675.3252         | 1349.6562      | 675.3317         | M    | 437.2127         | 219.1100        | 419.1891       | 210.0982         |                |                  | 4  |
| 14 | 1425.6853        | 713.3463        | 1407.6617      | 704.3345         | 1407.6747      | 704.3410         | G    | 305.1752         | 153.0912        | 287.1516       | 144.0794         |                |                  | 3  |
| 15 | 1523.7351        | 762.3712        | 1505.7115      | <b>753.3594</b>  | 1505.7245      | <b>753.3659</b>  | P    | 247.1567         | 124.0820        | 229.1331       | 115.0702         |                |                  | 2  |
| 16 |                  |                 |                |                  |                |                  | K    | 149.1069         | 75.0571         | 131.0833       | 66.0453          |                |                  | 1  |



AT1G32470.1

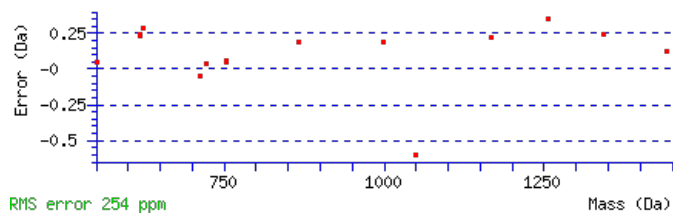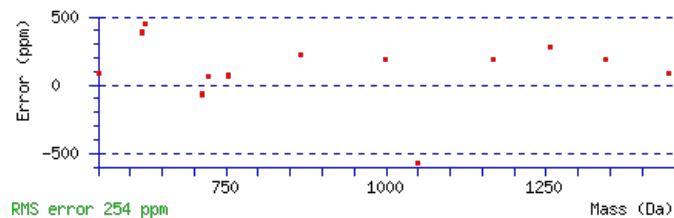

NCBI **BLAST** search of [VKPSSPAELEALMGPK](#)

(Parameters: blastp, nr protein database, expect=20000, no filter, PAM30)

Other BLAST [web gateways](#)

**All matches to this query**

| Score | Mr(calc)  | Delta   | Sequence                         |
|-------|-----------|---------|----------------------------------|
| 70.5  | 1670.8274 | -0.0001 | <a href="#">VKPSSPAELEALMGPK</a> |
| 7.2   | 1670.8274 | -0.0001 | <a href="#">SVYSEAPMKKVSALK</a>  |
| 4.2   | 1670.8248 | 0.0024  | <a href="#">VKVMVMPGFYVLDLDR</a> |
| 1.4   | 1670.8271 | 0.0002  | <a href="#">LQVATELNAYGRRR</a>   |

Mascot: <http://www.matrixscience.com/>

**Peptide View**MS/MS Fragmentation of **FNLSPSMK**

Found in **AT1G32530.1** in **TAIR\_Arabidopsis**, Symbols: | zinc finger (C3HC4-type RING finger) family protein | chr1:11759646-11762366  
REVERSE

Match to Query 1649: 948.421824 from(475.218188,2+) index(1981)

Title: Elution from: 26.406 to 26.406 scan no 2651 cid35.00 polarity:+

Data file D1d-1-2.mgf

Click mouse within plot area to zoom in by factor of two about that point

Or,   to  Da

Label all possible matches  Label matches used for scoring

Show Y-axis

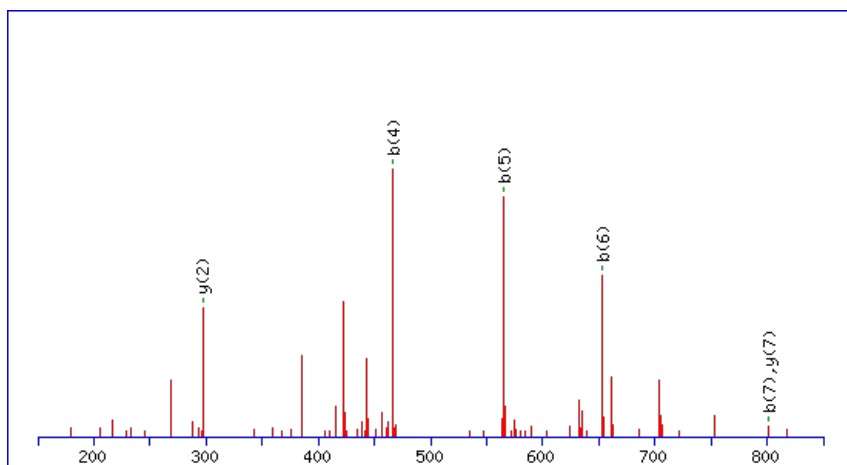

**Monoisotopic mass of neutral peptide Mr(calc):** 948.4235

**Fixed modifications:** Carbamidomethyl (C) (apply to specified residues or termini only)

**Variable modifications:**

**M7** : Oxidation (M), with neutral losses 0.0000 (shown in table), 63.9983

**Ions Score:** 29 **Expect:** 0.011

**Matches** : 6/112 fragment ions using 7 most intense peaks ([help](#))

| # | b               | b <sup>++</sup> | b*       | b <sup>*++</sup> | b <sup>0</sup> | b <sup>0++</sup> | Seq. | y               | y <sup>++</sup> | y*       | y <sup>*++</sup> | y <sup>0</sup> | y <sup>0++</sup> | # |
|---|-----------------|-----------------|----------|------------------|----------------|------------------|------|-----------------|-----------------|----------|------------------|----------------|------------------|---|
| 1 | 149.0727        | 75.0400         |          |                  |                |                  | F    |                 |                 |          |                  |                |                  | 8 |
| 2 | 265.1097        | 133.0585        | 247.0861 | 124.0467         |                |                  | N    | <b>801.3653</b> | 401.1863        | 783.3417 | 392.1745         | 783.3548       | 392.1810         | 7 |
| 3 | 379.1908        | 190.0990        | 361.1672 | 181.0873         |                |                  | L    | 685.3283        | 343.1678        | 667.3047 | 334.1560         | 667.3178       | 334.1625         | 6 |
| 4 | <b>467.2199</b> | 234.1136        | 449.1963 | 225.1018         | 449.2093       | 225.1083         | S    | 571.2472        | 286.1273        | 553.2236 | 277.1155         | 553.2367       | 277.1220         | 5 |
| 5 | <b>565.2697</b> | 283.1385        | 547.2461 | 274.1267         | 547.2591       | 274.1332         | P    | 483.2182        | 242.1127        | 465.1946 | 233.1009         | 465.2076       | 233.1074         | 4 |
| 6 | <b>653.2987</b> | 327.1530        | 635.2752 | 318.1412         | 635.2882       | 318.1477         | S    | 385.1684        | 193.0878        | 367.1448 | 184.0760         | 367.1578       | 184.0825         | 3 |
| 7 | <b>801.3312</b> | 401.1692        | 783.3076 | 392.1574         | 783.3206       | 392.1639         | M    | <b>297.1393</b> | 149.0733        | 279.1157 | 140.0615         |                |                  | 2 |
| 8 |                 |                 |          |                  |                |                  | K    | 149.1069        | 75.0571         | 131.0833 | 66.0453          |                |                  | 1 |

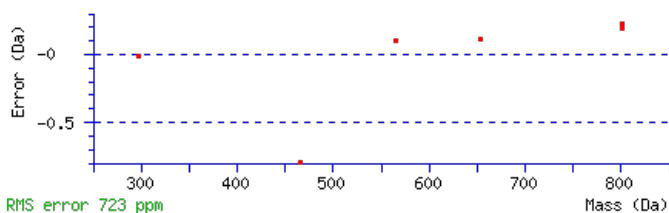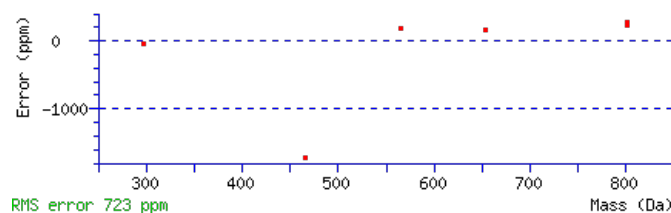

NCBI **BLAST** search of **FNLSPSMK**

(Parameters: blastp, nr protein database, expect=20000, no filter, PAM30)

Other BLAST [web gateways](#)

**All matches to this query**

| Score | Mr(calc) | Delta | Sequence |
|-------|----------|-------|----------|
|       |          |       |          |

**AT1G32530.1**

|      |          |         |                           |
|------|----------|---------|---------------------------|
| 29.4 | 948.4235 | -0.0017 | <a href="#">FNLSPSMK</a>  |
| 18.3 | 948.4235 | -0.0017 | <a href="#">EQIMGSEFK</a> |
| 15.9 | 948.4201 | 0.0017  | <a href="#">SPWTSSFK</a>  |
| 10.7 | 948.4235 | -0.0017 | <a href="#">QLQEMFK</a>   |
| 8.9  | 948.4235 | -0.0017 | <a href="#">MVDGLNEK</a>  |
| 6.9  | 948.4235 | -0.0017 | <a href="#">LNGFVDMK</a>  |
| 5.5  | 948.4235 | -0.0017 | <a href="#">MYDQAALK</a>  |
| 4.1  | 948.4235 | -0.0017 | <a href="#">FEMEVR</a>    |
| 4.0  | 948.4235 | -0.0017 | <a href="#">IQGMEAFK</a>  |
| 3.4  | 948.4213 | 0.0005  | <a href="#">ELLSSMSR</a>  |

**Mascot:** <http://www.matrixscience.com/>



# Mascot Search Results

## Peptide View

MS/MS Fragmentation of **VSAVNESEIK**

Found in **AT1G32850.1** in **TAIR\_Arabidopsis**, Symbols: | ubiquitin carboxyl-terminal hydrolase family protein | chr1:11902609-11906880  
FORWARD

Match to Query 3376: 1086.518002 from(544.266277,2+) index(2631)

Title: Elution from: 28.089 to 28.089 scan no 3308 cid35.00 polarity:+

Data file 0-2\_1.mgf

Click mouse within plot area to zoom in by factor of two about that point

Or,   to  Da

Label all possible matches  Label matches used for scoring

Show Y-axis

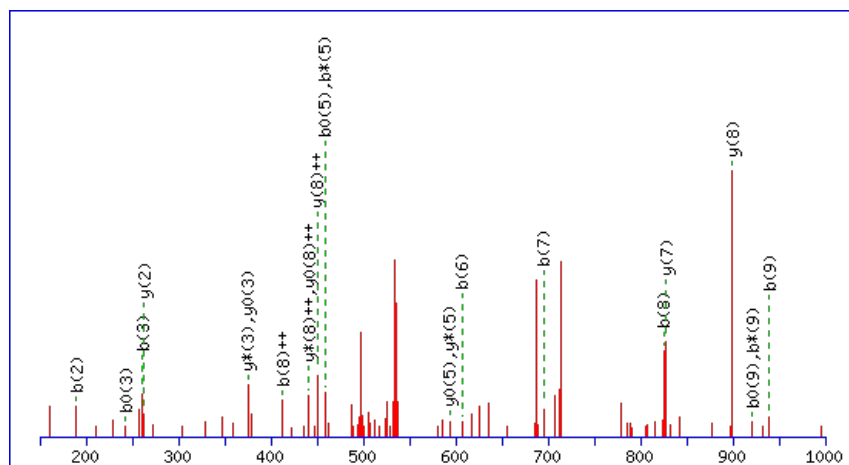

**Monoisotopic mass of neutral peptide Mr(calc):** 1086.5201

**Fixed modifications:** Carbamidomethyl (C) (apply to specified residues or termini only)

**Ions Score:** 26 **Expect:** 0.018

**Matches :** 22/94 fragment ions using 49 most intense peaks ([help](#))

| #  | b               | b <sup>++</sup> | b*              | b <sup>*++</sup> | b <sup>0</sup>  | b <sup>0++</sup> | Seq. | y               | y <sup>++</sup> | y*              | y <sup>*++</sup> | y <sup>0</sup>  | y <sup>0++</sup> | #  |
|----|-----------------|-----------------|-----------------|------------------|-----------------|------------------|------|-----------------|-----------------|-----------------|------------------|-----------------|------------------|----|
| 1  | 101.0727        | 51.0400         |                 |                  |                 |                  | V    |                 |                 |                 |                  |                 |                  | 10 |
| 2  | <b>189.1018</b> | 95.0545         |                 |                  | 171.0912        | 86.0492          | S    | 987.4620        | 494.2346        | 969.4384        | 485.2228         | 969.4514        | 485.2293         | 9  |
| 3  | <b>261.1359</b> | 131.0716        |                 |                  | <b>243.1254</b> | 122.0663         | A    | <b>899.4329</b> | <b>450.2201</b> | 881.4093        | <b>441.2083</b>  | 881.4223        | <b>441.2148</b>  | 8  |
| 4  | 361.2014        | 181.1043        |                 |                  | 343.1908        | 172.0990         | V    | <b>827.3987</b> | 414.2030        | 809.3752        | 405.1912         | 809.3882        | 405.1977         | 7  |
| 5  | 477.2384        | 239.1228        | <b>459.2148</b> | 230.1110         | <b>459.2278</b> | 230.1175         | N    | 727.3333        | 364.1703        | 709.3097        | 355.1585         | 709.3227        | 355.1650         | 6  |
| 6  | <b>607.2780</b> | 304.1426        | 589.2544        | 295.1309         | 589.2674        | 295.1374         | E    | 611.2963        | 306.1518        | <b>593.2727</b> | 297.1400         | <b>593.2857</b> | 297.1465         | 5  |
| 7  | <b>695.3071</b> | 348.1572        | 677.2835        | 339.1454         | 677.2965        | 339.1519         | S    | 481.2567        | 241.1320        | 463.2331        | 232.1202         | 463.2461        | 232.1267         | 4  |
| 8  | <b>825.3467</b> | <b>413.1770</b> | 807.3231        | 404.1652         | 807.3361        | 404.1717         | E    | 393.2276        | 197.1174        | <b>375.2040</b> | 188.1056         | <b>375.2170</b> | 188.1122         | 3  |
| 9  | <b>939.4278</b> | 470.2175        | <b>921.4042</b> | 461.2057         | <b>921.4172</b> | 461.2123         | I    | <b>263.1880</b> | 132.0976        | 245.1644        | 123.0858         |                 |                  | 2  |
| 10 |                 |                 |                 |                  |                 |                  | K    | 149.1069        | 75.0571         | 131.0833        | 66.0453          |                 |                  | 1  |

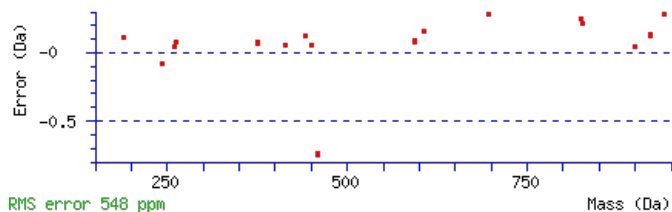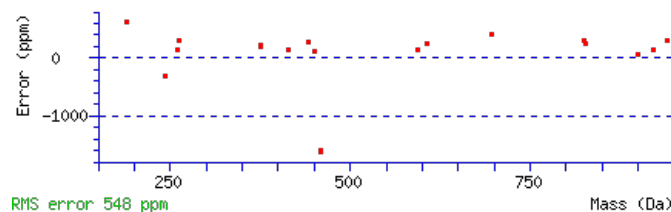

NCBI BLAST search of **VSAVNESEIK**

(Parameters: blastp, nr protein database, expect=20000, no filter, PAM30)

Other BLAST [web gateways](#)

All matches to this query

## AT1G32850.1

| Score | Mr(calc)  | Delta   | Sequence                   |
|-------|-----------|---------|----------------------------|
| 25.9  | 1086.5201 | -0.0021 | <a href="#">VSAVNESEIK</a> |
| 21.9  | 1086.5201 | -0.0021 | <a href="#">EQLSASEALK</a> |
| 13.8  | 1086.5176 | 0.0004  | <a href="#">WCLTGPIK</a>   |
| 7.7   | 1086.5201 | -0.0021 | <a href="#">SVKDVVDDAK</a> |
| 5.9   | 1086.5199 | -0.0019 | <a href="#">FCFFSKLK</a>   |
| 4.7   | 1086.5154 | 0.0026  | <a href="#">SAPSPKSCLK</a> |
| 3.5   | 1086.5154 | 0.0026  | <a href="#">TMGHSSVVLK</a> |
| 2.5   | 1086.5201 | -0.0021 | <a href="#">SLGNLSLEDK</a> |

Mascot: <http://www.matrixscience.com/>

**Peptide View**MS/MS Fragmentation of **GSDILVEAISK**Found in **AT1G32900.1** in **TAIR\_Arabidopsis**, Symbols: | starch synthase, putative | chr1:11920562-11923486 REVERSE

Match to Query 3197: 1142.583830 from(572.299191,2+) index(5432)

Title: Elution from: 52.305 to 52.305 scan no 7054 cid35.00 polarity:+

Data file D1d-1-2.mgf

Click mouse within plot area to zoom in by factor of two about that point

Or,   to  Da Label all possible matches  Label matches used for scoring Show Y-axis 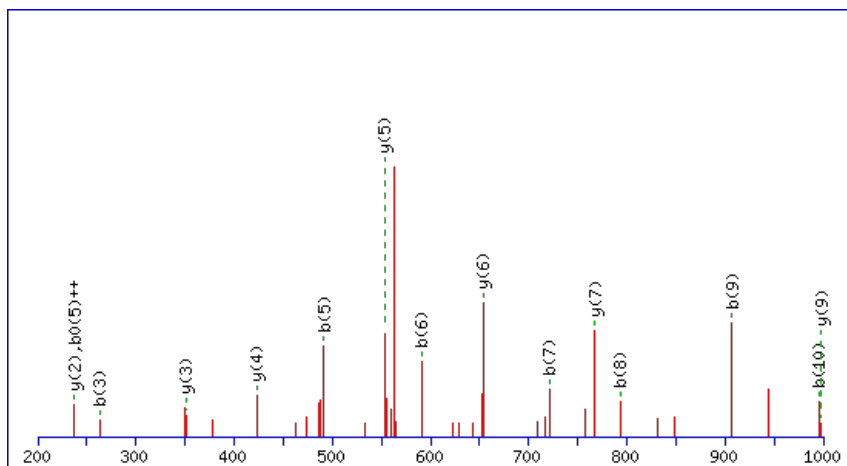Monoisotopic mass of neutral peptide  $M_r(\text{calc})$ : 1142.5827

Fixed modifications: Carbamidomethyl (C) (apply to specified residues or termini only)

Ions Score: 67 Expect: 1.7e-006

Matches : 15/96 fragment ions using 22 most intense peaks ([help](#))

| #  | b               | b <sup>++</sup> | b <sup>0</sup> | b <sup>0++</sup> | Seq. | y               | y <sup>++</sup> | y*        | y <sup>*++</sup> | y <sup>0</sup> | y <sup>0++</sup> | #  |
|----|-----------------|-----------------|----------------|------------------|------|-----------------|-----------------|-----------|------------------|----------------|------------------|----|
| 1  | 59.0258         | 30.0165         |                |                  | G    |                 |                 |           |                  |                |                  | 11 |
| 2  | 147.0548        | 74.0311         | 129.0443       | 65.0258          | S    | 1085.5715       | 543.2894        | 1067.5479 | 534.2776         | 1067.5609      | 534.2841         | 10 |
| 3  | <b>263.0788</b> | 132.0430        | 245.0683       | 123.0378         | D    | <b>997.5424</b> | 499.2749        | 979.5189  | 490.2631         | 979.5319       | 490.2696         | 9  |
| 4  | 377.1599        | 189.0836        | 359.1494       | 180.0783         | I    | 881.5185        | 441.2629        | 863.4949  | 432.2511         | 863.5079       | 432.2576         | 8  |
| 5  | <b>491.2410</b> | 246.1241        | 473.2304       | <b>237.1189</b>  | L    | <b>767.4374</b> | 384.2223        | 749.4138  | 375.2105         | 749.4268       | 375.2170         | 7  |
| 6  | <b>591.3065</b> | 296.1569        | 573.2959       | 287.1516         | V    | <b>653.3563</b> | 327.1818        | 635.3327  | 318.1700         | 635.3457       | 318.1765         | 6  |
| 7  | <b>721.3461</b> | 361.1767        | 703.3355       | 352.1714         | E    | <b>553.2908</b> | 277.1490        | 535.2672  | 268.1373         | 535.2802       | 268.1438         | 5  |
| 8  | <b>793.3802</b> | 397.1938        | 775.3697       | 388.1885         | A    | <b>423.2512</b> | 212.1292        | 405.2276  | 203.1174         | 405.2406       | 203.1239         | 4  |
| 9  | <b>907.4613</b> | 454.2343        | 889.4508       | 445.2290         | I    | <b>351.2170</b> | 176.1122        | 333.1935  | 167.1004         | 333.2065       | 167.1069         | 3  |
| 10 | <b>995.4904</b> | 498.2488        | 977.4798       | 489.2436         | S    | <b>237.1359</b> | 119.0716        | 219.1124  | 110.0598         | 219.1254       | 110.0663         | 2  |
| 11 |                 |                 |                |                  | K    | 149.1069        | 75.0571         | 131.0833  | 66.0453          |                |                  | 1  |

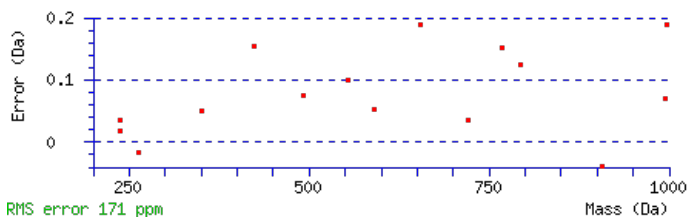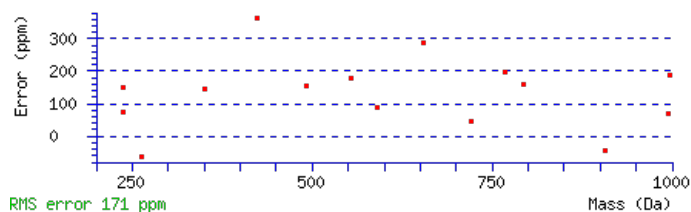NCBI BLAST search of **GSDILVEAISK**

(Parameters: blastp, nr protein database, expect=20000, no filter, PAM30)

Other BLAST [web gateways](#)

All matches to this query

## AT1G32900.1

| Score | Mr(calc)  | Delta   | Sequence                    |
|-------|-----------|---------|-----------------------------|
| 66.7  | 1142.5827 | 0.0011  | <a href="#">GSDILVEAISK</a> |
| 21.7  | 1142.5854 | -0.0016 | <a href="#">LNEEVQRLK</a>   |
| 15.8  | 1142.5827 | 0.0011  | <a href="#">KVELEDALSK</a>  |
| 10.7  | 1142.5827 | 0.0011  | <a href="#">DSGVILAESLK</a> |
| 10.2  | 1142.5827 | 0.0011  | <a href="#">ELSGVASVELK</a> |
| 10.0  | 1142.5854 | -0.0016 | <a href="#">TRTPVPSVSGK</a> |
| 9.6   | 1142.5829 | 0.0009  | <a href="#">MLRRVFYK</a>    |
| 9.4   | 1142.5807 | 0.0032  | <a href="#">TMLRPLPSGR</a>  |
| 8.7   | 1142.5854 | -0.0015 | <a href="#">GSVLEVGNVVR</a> |
| 8.2   | 1142.5854 | -0.0016 | <a href="#">KETPQERLK</a>   |

Mascot: <http://www.matrixscience.com/>

**Peptide View**MS/MS Fragmentation of **TPPASVLLLK**

Found in **AT1G32990.1** in **TAIR\_Arabidopsis**, Symbols: PRPL11 | PRPL11 (PLASTID RIBOSOMAL PROTEIN L11); structural constituent of ribosome | chr1:11955807-11957119 FORWARD

Match to Query 2393: 1037.649326 from(519.831939,2+) index(5157)

Title: Elution from: 49.409 to 49.409 scan no 6652 cid35.00 polarity:+

Data file D1d-2\_2.mgf

Click mouse within plot area to zoom in by factor of two about that point

Or,   to  Da

Label all possible matches  Label matches used for scoring

Show Y-axis

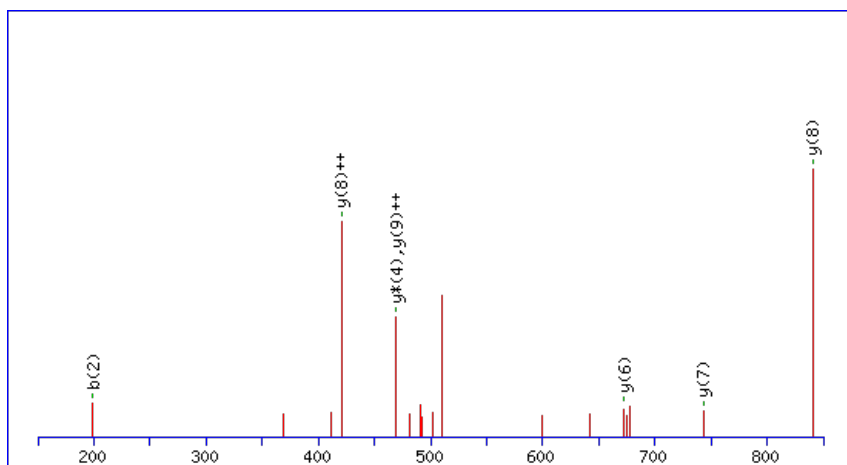

Monoisotopic mass of neutral peptide  $M_r(\text{calc})$ : 1037.6485

Fixed modifications: Carbamidomethyl (C) (apply to specified residues or termini only)

Ions Score: 19 Expect: 0.012

Matches : 7/80 fragment ions using 10 most intense peaks ([help](#))

| #  | b        | b <sup>++</sup> | b <sup>0</sup> | b <sup>0++</sup> | Seq. | y        | y <sup>++</sup> | y*       | y <sup>*++</sup> | y <sup>0</sup> | y <sup>0++</sup> | #  |
|----|----------|-----------------|----------------|------------------|------|----------|-----------------|----------|------------------|----------------|------------------|----|
| 1  | 102.0550 | 51.5311         | 84.0444        | 42.5258          | T    |          |                 |          |                  |                |                  | 10 |
| 2  | 199.1077 | 100.0575        | 181.0972       | 91.0522          | P    | 937.6081 | 469.3077        | 920.5815 | 460.7944         | 919.5975       | 460.3024         | 9  |
| 3  | 296.1605 | 148.5839        | 278.1499       | 139.5786         | P    | 840.5553 | 420.7813        | 823.5288 | 412.2680         | 822.5448       | 411.7760         | 8  |
| 4  | 367.1976 | 184.1024        | 349.1870       | 175.0972         | A    | 743.5026 | 372.2549        | 726.4760 | 363.7416         | 725.4920       | 363.2496         | 7  |
| 5  | 454.2296 | 227.6185        | 436.2191       | 218.6132         | S    | 672.4654 | 336.7364        | 655.4389 | 328.2231         | 654.4549       | 327.7311         | 6  |
| 6  | 553.2980 | 277.1527        | 535.2875       | 268.1474         | V    | 585.4334 | 293.2203        | 568.4069 | 284.7071         |                |                  | 5  |
| 7  | 666.3821 | 333.6947        | 648.3715       | 324.6894         | L    | 486.3650 | 243.6861        | 469.3384 | 235.1729         |                |                  | 4  |
| 8  | 779.4662 | 390.2367        | 761.4556       | 381.2314         | L    | 373.2809 | 187.1441        | 356.2544 | 178.6308         |                |                  | 3  |
| 9  | 892.5502 | 446.7788        | 874.5397       | 437.7735         | L    | 260.1969 | 130.6021        | 243.1703 | 122.0888         |                |                  | 2  |
| 10 |          |                 |                |                  | K    | 147.1128 | 74.0600         | 130.0863 | 65.5468          |                |                  | 1  |

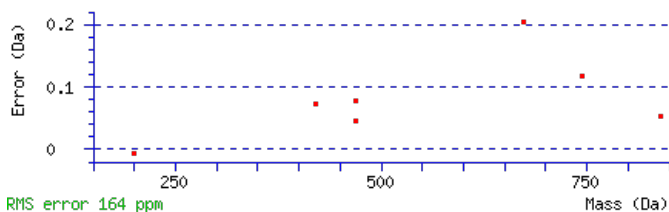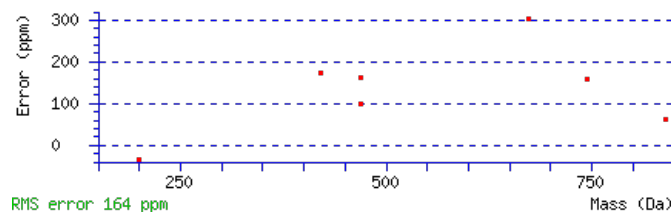

NCBI BLAST search of **TPPASVLLLK**

(Parameters: blastp, nr protein database, expect=20000, no filter, PAM30)

Other BLAST [web gateways](#)

All matches to this query



AT1G32990.1

| Score | Mr(calc)  | Delta  | Sequence                  |
|-------|-----------|--------|---------------------------|
| 19.1  | 1037.6485 | 0.0009 | <a href="#">TPPASVLLK</a> |

Mascot: <http://www.matrixscience.com/>


**Mascot Search Results**
**Peptide View**MS/MS Fragmentation of **VEMLDGVTIVR**Found in **AT1G33120.1** in **TAIR\_Arabidopsis**, Symbols: | 60S ribosomal protein L9 (RPL90B) | chr1:12010966-12012203 FORWARD

Match to Query 4084: 1230.664294 from(616.339423,2+) index(6390)

Title: Elution from: 56.660 to 56.660 scan no 8264 cid35.00 polarity:+

Data file D6h-2\_3.mgf

Click mouse within plot area to zoom in by factor of two about that point

Or,   to  Da Label all possible matches  Label matches used for scoring Show Y-axis 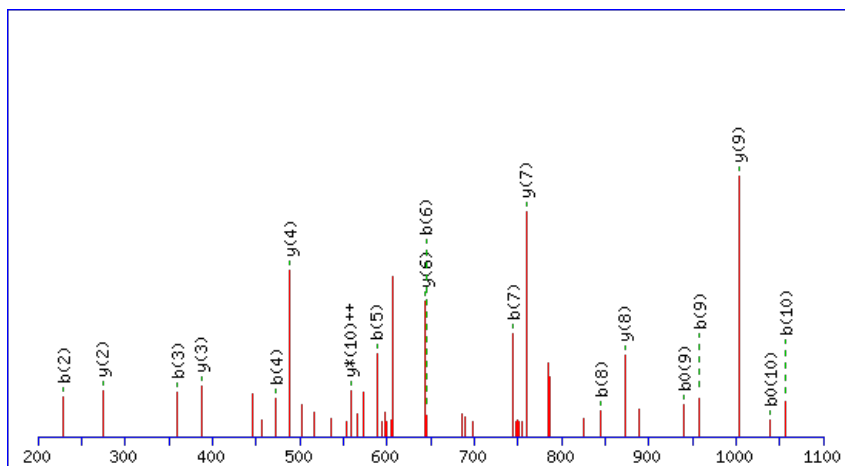Monoisotopic mass of neutral peptide  $M_r(\text{calc})$ : 1230.6642

Fixed modifications: Carbamidomethyl (C) (apply to specified residues or termini only)

Ions Score: 83 Expect: 2.8e-008

Matches : 19/92 fragment ions using 25 most intense peaks ([help](#))

| #  | b                | b <sup>++</sup> | b <sup>0</sup>   | b <sup>0++</sup> | Seq. | y                | y <sup>++</sup> | y*        | y <sup>*++</sup> | y <sup>0</sup> | y <sup>0++</sup> | #  |
|----|------------------|-----------------|------------------|------------------|------|------------------|-----------------|-----------|------------------|----------------|------------------|----|
| 1  | 100.0757         | 50.5415         |                  |                  | V    |                  |                 |           |                  |                |                  | 11 |
| 2  | <b>229.1183</b>  | 115.0628        | 211.1077         | 106.0575         | E    | 1132.6031        | 566.8052        | 1115.5765 | <b>558.2919</b>  | 1114.5925      | 557.7999         | 10 |
| 3  | <b>360.1588</b>  | 180.5830        | 342.1482         | 171.5777         | M    | <b>1003.5605</b> | 502.2839        | 986.5339  | 493.7706         | 985.5499       | 493.2786         | 9  |
| 4  | <b>473.2428</b>  | 237.1251        | 455.2323         | 228.1198         | L    | <b>872.5200</b>  | 436.7636        | 855.4934  | 428.2504         | 854.5094       | 427.7584         | 8  |
| 5  | <b>588.2698</b>  | 294.6385        | 570.2592         | 285.6332         | D    | <b>759.4359</b>  | 380.2216        | 742.4094  | 371.7083         | 741.4254       | 371.2163         | 7  |
| 6  | <b>645.2912</b>  | 323.1493        | 627.2807         | 314.1440         | G    | <b>644.4090</b>  | 322.7081        | 627.3824  | 314.1949         | 626.3984       | 313.7028         | 6  |
| 7  | <b>744.3597</b>  | 372.6835        | 726.3491         | 363.6782         | V    | 587.3875         | 294.1974        | 570.3610  | 285.6841         | 569.3770       | 285.1921         | 5  |
| 8  | <b>845.4073</b>  | 423.2073        | 827.3968         | 414.2020         | T    | <b>488.3191</b>  | 244.6632        | 471.2926  | 236.1499         | 470.3085       | 235.6579         | 4  |
| 9  | <b>958.4914</b>  | 479.7493        | <b>940.4808</b>  | 470.7441         | I    | <b>387.2714</b>  | 194.1394        | 370.2449  | 185.6261         |                |                  | 3  |
| 10 | <b>1057.5598</b> | 529.2835        | <b>1039.5492</b> | 520.2783         | V    | <b>274.1874</b>  | 137.5973        | 257.1608  | 129.0840         |                |                  | 2  |
| 11 |                  |                 |                  |                  | R    | 175.1190         | 88.0631         | 158.0924  | 79.5498          |                |                  | 1  |

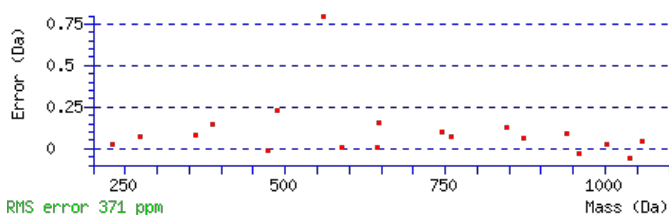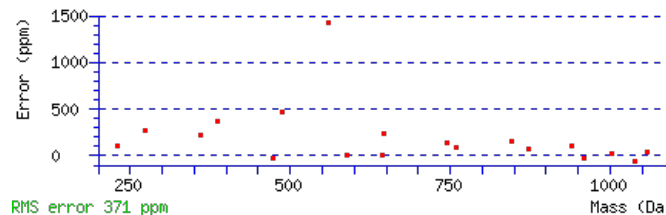NCBI BLAST search of **VEMLDGVTIVR**

(Parameters: blastp, nr protein database, expect=20000, no filter, PAM30)

Other BLAST [web gateways](#)

All matches to this query

AT1G33120.1

| Score | Mr(calc)  | Delta  | Sequence                   |
|-------|-----------|--------|----------------------------|
| 82.6  | 1230.6642 | 0.0001 | <a href="#">VEMLDGVTVR</a> |

Mascot: <http://www.matrixscience.com/>

**Peptide View**MS/MS Fragmentation of **QMDLLFSNR**

Found in **AT1G33360.1** in **TAIR\_Arabidopsis**, Symbols: | ATP-dependent Clp protease ATP-binding subunit ClpX, putative | chr1:12092091-12095769 FORWARD

Match to Query 3644: 1152.501704 from(577.258128,2+) index(4414)

Title: Elution from: 39.868 to 39.868 scan no 5543 cid35.00 polarity:+

Data file D6h-3\_3.mgf

Click mouse within plot area to zoom in by factor of two about that point

Or,   to  Da

Label all possible matches  Label matches used for scoring

Show Y-axis

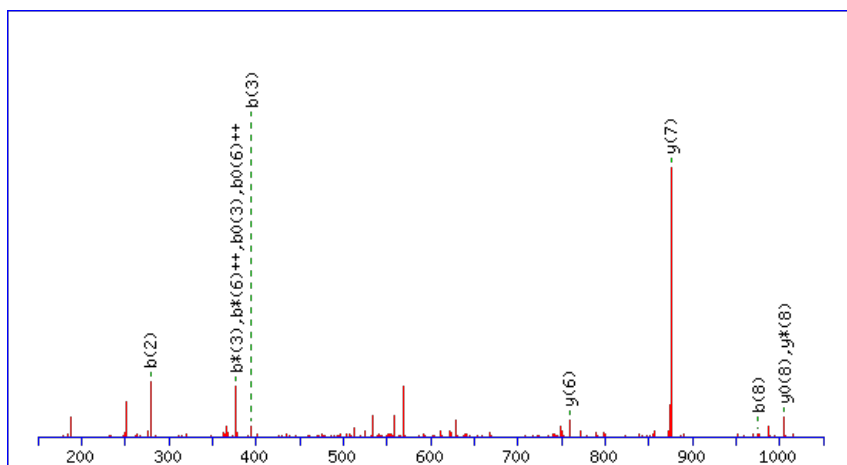

**Monoisotopic mass of neutral peptide Mr(calc):** 1152.5026

**Fixed modifications:** Carbamidomethyl (C) (apply to specified residues or termini only)

**Variable modifications:**

**M2** : Oxidation (M), with neutral losses 0.0000 (shown in table), 63.9983

**Ions Score:** 22 **Expect:** 0.045

**Matches** : 11/134 fragment ions using 9 most intense peaks ([help](#))

| # | b               | b <sup>++</sup> | b*              | b <sup>*++</sup> | b <sup>0</sup>  | b <sup>0++</sup> | Seq. | y               | y <sup>++</sup> | y*               | y <sup>*++</sup> | y <sup>0</sup>   | y <sup>0++</sup> | # |
|---|-----------------|-----------------|-----------------|------------------|-----------------|------------------|------|-----------------|-----------------|------------------|------------------|------------------|------------------|---|
| 1 | 131.0599        | 66.0336         | 113.0363        | 57.0218          |                 |                  | Q    |                 |                 |                  |                  |                  |                  | 9 |
| 2 | <b>279.0924</b> | 140.0498        | 261.0688        | 131.0380         |                 |                  | M    | 1023.4572       | 512.2322        | <b>1005.4336</b> | 503.2205         | <b>1005.4466</b> | 503.2270         | 8 |
| 3 | <b>395.1163</b> | 198.0618        | <b>377.0928</b> | 189.0500         | <b>377.1058</b> | 189.0565         | D    | <b>875.4248</b> | 438.2160        | 857.4012         | 429.2042         | 857.4142         | 429.2107         | 7 |
| 4 | 509.1974        | 255.1024        | 491.1739        | 246.0906         | 491.1869        | 246.0971         | L    | <b>759.4008</b> | 380.2040        | 741.3772         | 371.1922         | 741.3902         | 371.1988         | 6 |
| 5 | 623.2785        | 312.1429        | 605.2550        | 303.1311         | 605.2680        | 303.1376         | L    | 645.3197        | 323.1635        | 627.2961         | 314.1517         | 627.3091         | 314.1582         | 5 |
| 6 | 771.3440        | 386.1756        | 753.3204        | <b>377.1638</b>  | 753.3334        | <b>377.1703</b>  | F    | 531.2386        | 266.1229        | 513.2150         | 257.1111         | 513.2280         | 257.1177         | 4 |
| 7 | 859.3730        | 430.1902        | 841.3495        | 421.1784         | 841.3625        | 421.1849         | S    | 383.1732        | 192.0902        | 365.1496         | 183.0784         | 365.1626         | 183.0849         | 3 |
| 8 | <b>975.4100</b> | 488.2087        | 957.3865        | 479.1969         | 957.3995        | 479.2034         | N    | 295.1441        | 148.0757        | 277.1205         | 139.0639         |                  |                  | 2 |
| 9 |                 |                 |                 |                  |                 |                  | R    | 179.1071        | 90.0572         | 161.0835         | 81.0454          |                  |                  | 1 |

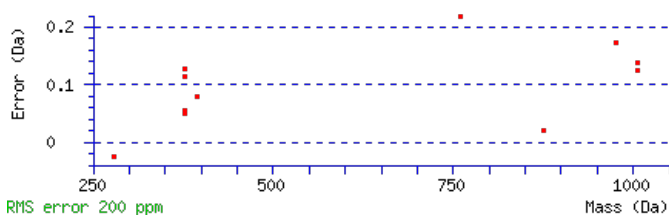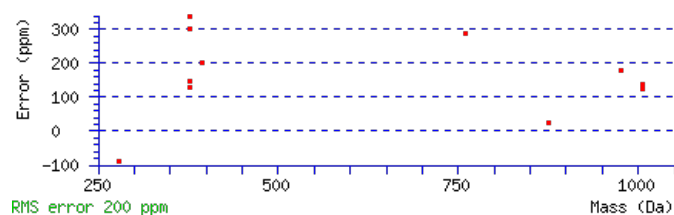

NCBI **BLAST** search of **QMDLLFSNR**

(Parameters: blastp, nr protein database, expect=20000, no filter, PAM30)

Other BLAST [web gateways](#)

**All matches to this query**

## AT1G33360.1

| Score | Mr(calc)  | Delta   | Sequence                    |
|-------|-----------|---------|-----------------------------|
| 22.3  | 1152.5026 | -0.0009 | <a href="#">QMDLLFSNR</a>   |
| 21.9  | 1152.5030 | -0.0013 | <a href="#">MNOGSGGGRKK</a> |
| 18.3  | 1152.4996 | 0.0021  | <a href="#">FQEDRRER</a>    |
| 11.4  | 1152.5026 | -0.0009 | <a href="#">FEMKGGEVAR</a>  |
| 11.3  | 1152.5026 | -0.0009 | <a href="#">EAETRMFQK</a>   |
| 11.0  | 1152.5030 | -0.0013 | <a href="#">AMASSRNGAVR</a> |
| 10.7  | 1152.4992 | 0.0025  | <a href="#">FAGAFDNLER</a>  |
| 9.9   | 1152.5033 | -0.0016 | <a href="#">MESLSSITMK</a>  |
| 7.1   | 1152.4986 | 0.0032  | <a href="#">MMTINMKEK</a>   |
| 7.1   | 1152.4999 | 0.0018  | <a href="#">KMLESDEFK</a>   |

Mascot: <http://www.matrixscience.com/>

**Peptide View**MS/MS Fragmentation of **FSVEQAQPVK**Found in **AT1G34360.1** in **TAIR\_Arabidopsis**, Symbols: | translation initiation factor 3 (IF-3) family protein | chr1:12542964-12546003 FORWARD

Match to Query 3766: 1144.550542 from(573.282547,2+) index(2708)

Title: Elution from: 26.857 to 26.857 scan no 3328 cid35.00 polarity:+

Data file C7-2\_3.mgf

Click mouse within plot area to zoom in by factor of two about that point

Or,   to  Da Label all possible matches  Label matches used for scoring Show Y-axis 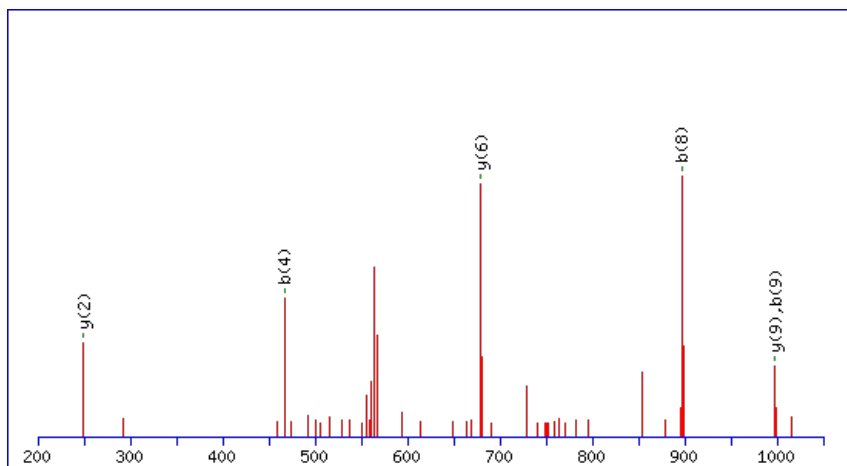Monoisotopic mass of neutral peptide **Mr(calc)**: 1144.5539**Fixed modifications**: Carbamidomethyl (C) (apply to specified residues or termini only)**Ions Score**: 24 **Expect**: 0.033**Matches**: 6/86 fragment ions using 7 most intense peaks ([help](#))

| #  | b               | b <sup>++</sup> | b*       | b* <sup>++</sup> | b <sup>0</sup> | b <sup>0++</sup> | Seq. | y               | y <sup>++</sup> | y*       | y* <sup>++</sup> | y <sup>0</sup> | y <sup>0++</sup> | #  |
|----|-----------------|-----------------|----------|------------------|----------------|------------------|------|-----------------|-----------------|----------|------------------|----------------|------------------|----|
| 1  | 149.0727        | 75.0400         |          |                  |                |                  | F    |                 |                 |          |                  |                |                  | 10 |
| 2  | 237.1018        | 119.0545        |          |                  | 219.0912       | 110.0492         | S    | <b>997.4957</b> | 499.2515        | 979.4721 | 490.2397         | 979.4851       | 490.2462         | 9  |
| 3  | 337.1672        | 169.0873        |          |                  | 319.1567       | 160.0820         | V    | 909.4666        | 455.2370        | 891.4431 | 446.2252         | 891.4561       | 446.2317         | 8  |
| 4  | <b>467.2069</b> | 234.1071        |          |                  | 449.1963       | 225.1018         | E    | 809.4012        | 405.2042        | 791.3776 | 396.1924         | 791.3906       | 396.1990         | 7  |
| 5  | 597.2595        | 299.1334        | 579.2359 | 290.1216         | 579.2489       | 290.1281         | Q    | <b>679.3616</b> | 340.1844        | 661.3380 | 331.1726         |                |                  | 6  |
| 6  | 669.2937        | 335.1505        | 651.2701 | 326.1387         | 651.2831       | 326.1452         | A    | 549.3089        | 275.1581        | 531.2853 | 266.1463         |                |                  | 5  |
| 7  | 799.3463        | 400.1768        | 781.3227 | 391.1650         | 781.3357       | 391.1715         | Q    | 477.2748        | 239.1410        | 459.2512 | 230.1292         |                |                  | 4  |
| 8  | <b>897.3961</b> | 449.2017        | 879.3725 | 440.1899         | 879.3855       | 440.1964         | P    | 347.2221        | 174.1147        | 329.1985 | 165.1029         |                |                  | 3  |
| 9  | <b>997.4616</b> | 499.2344        | 979.4380 | 490.2226         | 979.4510       | 490.2291         | V    | <b>249.1723</b> | 125.0898        | 231.1487 | 116.0780         |                |                  | 2  |
| 10 |                 |                 |          |                  |                |                  | K    | 149.1069        | 75.0571         | 131.0833 | 66.0453          |                |                  | 1  |

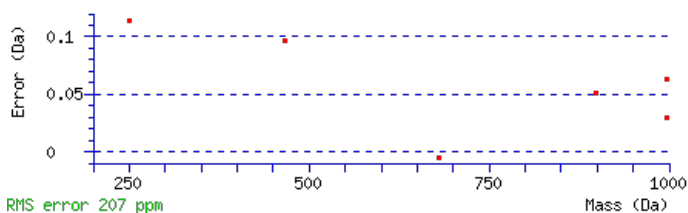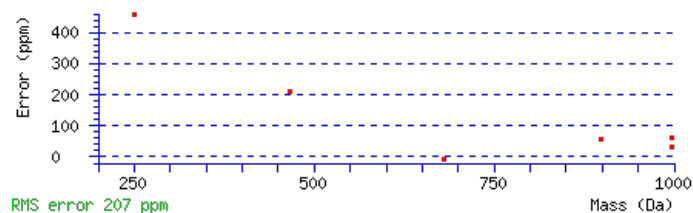NCBI **BLAST** search of [FSVEQAQPVK](#)

(Parameters: blastp, nr protein database, expect=20000, no filter, PAM30)

Other BLAST [web gateways](#)**All matches to this query**

| Score | Mr(calc) | Delta | Sequence |
|-------|----------|-------|----------|
|       |          |       |          |

**AT1G34360.1**

|      |           |         |                              |
|------|-----------|---------|------------------------------|
| 23.9 | 1144.5539 | -0.0033 | <a href="#">FSVEQAQPVK</a>   |
| 9.7  | 1144.5516 | -0.0011 | <a href="#">EAIYSRDDVK</a>   |
| 8.4  | 1144.5516 | -0.0011 | <a href="#">EGRDLTIAEK</a>   |
| 8.1  | 1144.5517 | -0.0011 | <a href="#">NLNTELSNVK</a>   |
| 7.8  | 1144.5539 | -0.0033 | <a href="#">YSPPEVVSVR</a>   |
| 7.6  | 1144.5516 | -0.0011 | <a href="#">AKKTETPDNK</a>   |
| 6.7  | 1144.5516 | -0.0011 | <a href="#">GTISGGENVAVK</a> |
| 5.3  | 1144.5512 | -0.0007 | <a href="#">FVEEEILEK</a>    |
| 3.1  | 1144.5516 | -0.0011 | <a href="#">EKSPGGTVQTK</a>  |
| 1.9  | 1144.5516 | -0.0011 | <a href="#">IQRELDETK</a>    |

**Mascot:** <http://www.matrixscience.com/>

## Peptide View

### MS/MS Fragmentation of **AAQDIANAELAPTHPIR**

Found in **AT1G35160.1** in **TAIR\_Arabidopsis**, Symbols: GF14 PHI, GRF4 | GRF4 (GENERAL REGULATORY FACTOR 4); protein phosphorylated amino acid binding | chr1:12867242-12868492 FORWARD

Match to Query 8046: 1786.932075 from(596.651301,3+) index(3568)

Title: Elution from: 37.811 to 37.811 scan no 4595 cid35.00 polarity:+

Data file D1d-1-2.mgf

Click mouse within plot area to zoom in by factor of two about that point

Or,   to  Da

Label all possible matches  Label matches used for scoring

Show Y-axis

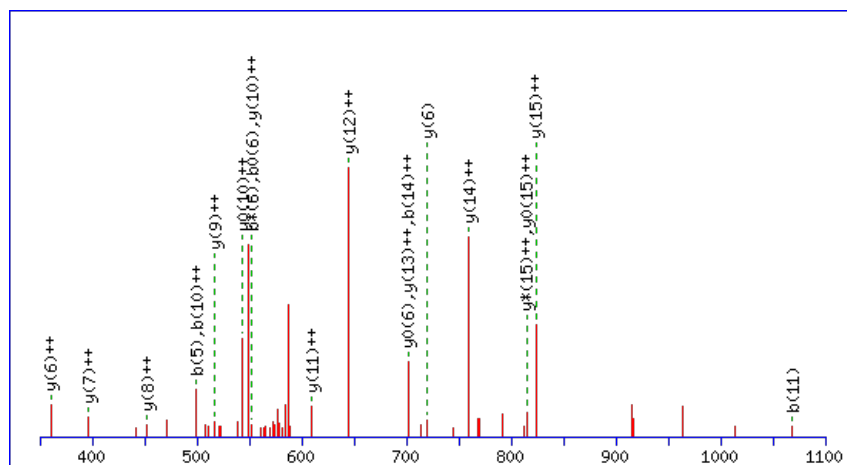

Monoisotopic mass of neutral peptide  $M_r(\text{calc})$ : 1786.9326

Fixed modifications: Carbamidomethyl (C) (apply to specified residues or termini only)

Ions Score: 42 Expect: 0.0002

Matches : 21/174 fragment ions using 34 most intense peaks ([help](#))

| #  | b         | b <sup>++</sup> | b <sup>*</sup> | b <sup>*++</sup> | b <sup>0</sup> | b <sup>0++</sup> | Seq. | y         | y <sup>++</sup> | y <sup>*</sup> | y <sup>*++</sup> | y <sup>0</sup> | y <sup>0++</sup> | #  |
|----|-----------|-----------------|----------------|------------------|----------------|------------------|------|-----------|-----------------|----------------|------------------|----------------|------------------|----|
| 1  | 72.0444   | 36.5258         |                |                  |                |                  | A    |           |                 |                |                  |                |                  | 17 |
| 2  | 143.0815  | 72.0444         |                |                  |                |                  | A    | 1716.9028 | 858.9550        | 1699.8762      | 850.4417         | 1698.8922      | 849.9497         | 16 |
| 3  | 271.1401  | 136.0737        | 254.1135       | 127.5604         |                |                  | Q    | 1645.8656 | 823.4365        | 1628.8391      | 814.9232         | 1627.8551      | 814.4312         | 15 |
| 4  | 386.1670  | 193.5872        | 369.1405       | 185.0739         | 368.1565       | 184.5819         | D    | 1517.8071 | 759.4072        | 1500.7805      | 750.8939         | 1499.7965      | 750.4019         | 14 |
| 5  | 499.2511  | 250.1292        | 482.2245       | 241.6159         | 481.2405       | 241.1239         | I    | 1402.7801 | 701.8937        | 1385.7536      | 693.3804         | 1384.7696      | 692.8884         | 13 |
| 6  | 570.2882  | 285.6477        | 553.2617       | 277.1345         | 552.2776       | 276.6425         | A    | 1289.6961 | 645.3517        | 1272.6695      | 636.8384         | 1271.6855      | 636.3464         | 12 |
| 7  | 684.3311  | 342.6692        | 667.3046       | 334.1559         | 666.3206       | 333.6639         | N    | 1218.6589 | 609.8331        | 1201.6324      | 601.3198         | 1200.6484      | 600.8278         | 11 |
| 8  | 755.3682  | 378.1878        | 738.3417       | 369.6745         | 737.3577       | 369.1825         | A    | 1104.6160 | 552.8116        | 1087.5895      | 544.2984         | 1086.6055      | 543.8064         | 10 |
| 9  | 884.4108  | 442.7091        | 867.3843       | 434.1958         | 866.4003       | 433.7038         | E    | 1033.5789 | 517.2931        | 1016.5524      | 508.7798         | 1015.5683      | 508.2878         | 9  |
| 10 | 997.4949  | 499.2511        | 980.4684       | 490.7378         | 979.4843       | 490.2458         | L    | 904.5363  | 452.7718        | 887.5098       | 444.2585         | 886.5257       | 443.7665         | 8  |
| 11 | 1068.5320 | 534.7696        | 1051.5055      | 526.2564         | 1050.5215      | 525.7644         | A    | 791.4522  | 396.2298        | 774.4257       | 387.7165         | 773.4417       | 387.2245         | 7  |
| 12 | 1165.5848 | 583.2960        | 1148.5582      | 574.7828         | 1147.5742      | 574.2907         | P    | 720.4151  | 360.7112        | 703.3886       | 352.1979         | 702.4046       | 351.7059         | 6  |
| 13 | 1266.6325 | 633.8199        | 1249.6059      | 625.3066         | 1248.6219      | 624.8146         | T    | 623.3624  | 312.1848        | 606.3358       | 303.6715         | 605.3518       | 303.1795         | 5  |
| 14 | 1403.6914 | 702.3493        | 1386.6648      | 693.8360         | 1385.6808      | 693.3440         | H    | 522.3147  | 261.6610        | 505.2881       | 253.1477         |                |                  | 4  |
| 15 | 1500.7441 | 750.8757        | 1483.7176      | 742.3624         | 1482.7336      | 741.8704         | P    | 385.2558  | 193.1315        | 368.2292       | 184.6183         |                |                  | 3  |
| 16 | 1613.8282 | 807.4177        | 1596.8016      | 798.9045         | 1595.8176      | 798.4125         | I    | 288.2030  | 144.6051        | 271.1765       | 136.0919         |                |                  | 2  |
| 17 |           |                 |                |                  |                |                  | R    | 175.1190  | 88.0631         | 158.0924       | 79.5498          |                |                  | 1  |



# AT1G35160.1

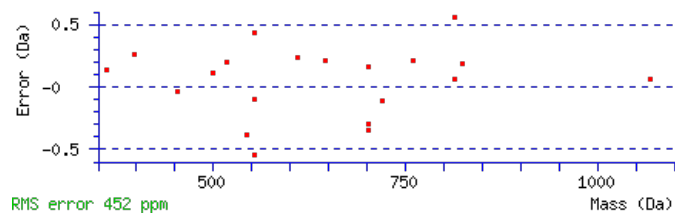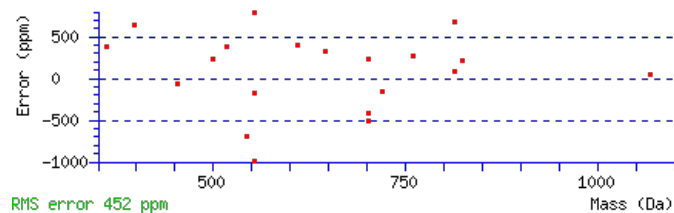

NCBI **BLAST** search of [AAQDIANAELAPTHPIR](#)

(Parameters: blastp, nr protein database, expect=20000, no filter, PAM30)

Other BLAST [web gateways](#)

## All matches to this query

| Score | Mr(calc)  | Delta   | Sequence                           |
|-------|-----------|---------|------------------------------------|
| 42.5  | 1786.9326 | -0.0005 | <a href="#">AAQDIANAELAPTHPIR</a>  |
| 5.6   | 1786.9286 | 0.0035  | <a href="#">RLGSGLDDAETTGLARR</a>  |
| 2.4   | 1786.9359 | -0.0038 | <a href="#">LASLLRRENDPSAAMK</a>   |
| 0.9   | 1786.9294 | 0.0027  | <a href="#">IAAECTRLMGKERPR</a>    |
| 0.7   | 1786.9326 | -0.0005 | <a href="#">LGNGLTASGISLNGFNPR</a> |
| 0.7   | 1786.9360 | -0.0039 | <a href="#">GLTVKCEVVEVARGDR</a>   |
| 0.7   | 1786.9359 | -0.0038 | <a href="#">LVLEDAEKMLNRSNR</a>    |
| 0.4   | 1786.9360 | -0.0039 | <a href="#">QGGTVKAIQEASACIVR</a>  |

Mascot: <http://www.matrixscience.com/>

**Peptide View**MS/MS Fragmentation of **MNYESSNELTSKISQLKESIK**Found in **AT1G35340.1** in **TAIR\_Arabidopsis**, Symbols: | ATP-dependent protease La (LON) domain-containing protein | chr1:12977746-12979727

FORWARD

Match to Query 10225:2444.204154 from(815.741994,3+) index(10691)

Title: Elution from: 111.298 to 111.298 scan no 15805 cid35.00 polarity:+

Data file 0-1\_3.mgf

Click mouse within plot area to zoom in by factor of two about that point

Or,   to  Da Label all possible matches  Label matches used for scoring Show Y-axis 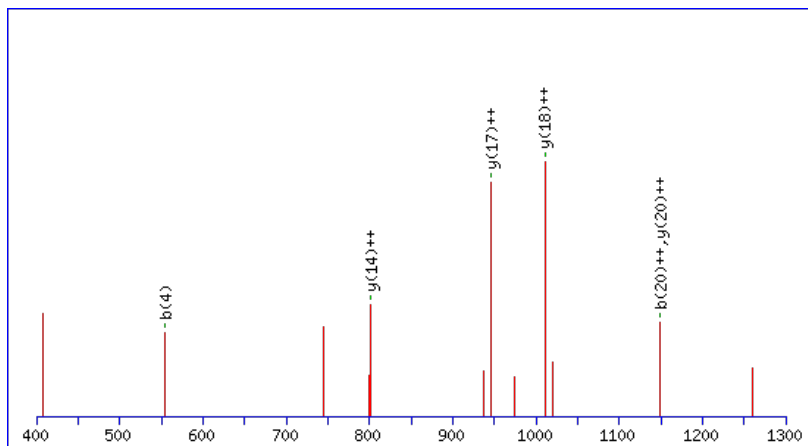Monoisotopic mass of neutral peptide  $M_r(\text{calc})$ : 2444.2104

Fixed modifications: Carbamidomethyl (C) (apply to specified residues or termini only)

Variable modifications:

M1 : Oxidation (M), with neutral losses 0.0000 (shown in table), 63.9983

Ions Score: 21 Expect: 0.024

Matches : 6/340 fragment ions using 7 most intense peaks ([help](#))

| #  | b         | b <sup>++</sup> | b*        | b <sup>*++</sup> | b <sup>0</sup> | b <sup>0++</sup> | Seq | y         | y <sup>++</sup> | y*        | y <sup>*++</sup> | y <sup>0</sup> | y <sup>0++</sup> | #  |
|----|-----------|-----------------|-----------|------------------|----------------|------------------|-----|-----------|-----------------|-----------|------------------|----------------|------------------|----|
| 1  | 148.0427  | 74.5250         |           |                  |                |                  | M   |           |                 |           |                  |                |                  | 21 |
| 2  | 262.0856  | 131.5464        | 245.0591  | 123.0332         |                |                  | N   | 2298.1823 | 1149.5948       | 2281.1558 | 1141.0815        | 2280.1718      | 1140.5895        | 20 |
| 3  | 425.1489  | 213.0781        | 408.1224  | 204.5648         |                |                  | Y   | 2184.1394 | 1092.5733       | 2167.1129 | 1084.0601        | 2166.1289      | 1083.5681        | 19 |
| 4  | 554.1915  | 277.5994        | 537.1650  | 269.0861         | 536.1810       | 268.5941         | E   | 2021.0761 | 1011.0417       | 2004.0495 | 1002.5284        | 2003.0655      | 1002.0364        | 18 |
| 5  | 641.2236  | 321.1154        | 624.1970  | 312.6021         | 623.2130       | 312.1101         | S   | 1892.0335 | 946.5204        | 1875.0069 | 938.0071         | 1874.0229      | 937.5151         | 17 |
| 6  | 728.2556  | 364.6314        | 711.2290  | 356.1182         | 710.2450       | 355.6261         | S   | 1805.0015 | 903.0044        | 1787.9749 | 894.4911         | 1786.9909      | 893.9991         | 16 |
| 7  | 842.2985  | 421.6529        | 825.2720  | 413.1396         | 824.2879       | 412.6476         | N   | 1717.9694 | 859.4884        | 1700.9429 | 850.9751         | 1699.9589      | 850.4831         | 15 |
| 8  | 971.3411  | 486.1742        | 954.3146  | 477.6609         | 953.3305       | 477.1689         | E   | 1603.9265 | 802.4669        | 1586.9000 | 793.9536         | 1585.9159      | 793.4616         | 14 |
| 9  | 1084.4252 | 542.7162        | 1067.3986 | 534.2029         | 1066.4146      | 533.7109         | L   | 1474.8839 | 737.9456        | 1457.8574 | 729.4323         | 1456.8734      | 728.9403         | 13 |
| 10 | 1185.4728 | 593.2401        | 1168.4463 | 584.7268         | 1167.4623      | 584.2348         | T   | 1361.7999 | 681.4036        | 1344.7733 | 672.8903         | 1343.7893      | 672.3983         | 12 |
| 11 | 1272.5049 | 636.7561        | 1255.4783 | 628.2428         | 1254.4943      | 627.7508         | S   | 1260.7522 | 630.8797        | 1243.7256 | 622.3665         | 1242.7416      | 621.8744         | 11 |
| 12 | 1400.5998 | 700.8036        | 1383.5733 | 692.2903         | 1382.5893      | 691.7983         | K   | 1173.7201 | 587.3637        | 1156.6936 | 578.8504         | 1155.7096      | 578.3584         | 10 |
| 13 | 1513.6839 | 757.3456        | 1496.6574 | 748.8323         | 1495.6733      | 748.3403         | I   | 1045.6252 | 523.3162        | 1028.5986 | 514.8030         | 1027.6146      | 514.3109         | 9  |
| 14 | 1600.7159 | 800.8616        | 1583.6894 | 792.3483         | 1582.7054      | 791.8563         | S   | 932.5411  | 466.7742        | 915.5146  | 458.2609         | 914.5306       | 457.7689         | 8  |
| 15 | 1728.7745 | 864.8909        | 1711.7480 | 856.3776         | 1710.7639      | 855.8856         | Q   | 845.5091  | 423.2582        | 828.4825  | 414.7449         | 827.4985       | 414.2529         | 7  |
| 16 | 1841.8586 | 921.4329        | 1824.8320 | 912.9196         | 1823.8480      | 912.4276         | L   | 717.4505  | 359.2289        | 700.4240  | 350.7156         | 699.4400       | 350.2236         | 6  |
| 17 | 1969.9535 | 985.4804        | 1952.9270 | 976.9671         | 1951.9430      | 976.4751         | K   | 604.3665  | 302.6869        | 587.3399  | 294.1736         | 586.3559       | 293.6816         | 5  |
| 18 | 2098.9961 | 1050.0017       | 2081.9696 | 1041.4884        | 2080.9856      | 1040.9964        | E   | 476.2715  | 238.6394        | 459.2449  | 230.1261         | 458.2609       | 229.6341         | 4  |
| 19 | 2186.0282 | 1093.5177       | 2169.0016 | 1085.0044        | 2168.0176      | 1084.5124        | S   | 347.2289  | 174.1181        | 330.2023  | 165.6048         | 329.2183       | 165.1128         | 3  |
| 20 | 2299.1122 | 1150.0597       | 2282.0857 | 1141.5465        | 2281.1017      | 1141.0545        | I   | 260.1969  | 130.6021        | 243.1703  | 122.0888         |                |                  | 2  |
| 21 |           |                 |           |                  |                |                  | K   | 147.1128  | 74.0600         | 130.0863  | 65.5468          |                |                  | 1  |

# AT1G35340.1

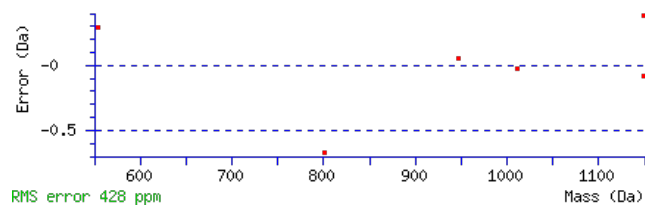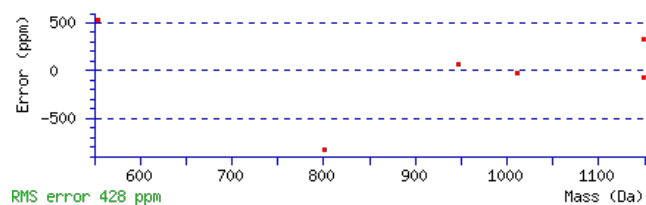

NCBI **BLAST** search of [MNYESSNELTSKISQLKESIK](#)  
(Parameters: blastp, nr protein database, expect=20000, no filter, PAM30)  
Other BLAST [web gateways](#)

## All matches to this query

| Score | Mr(calc)  | Delta   | Sequence                               |
|-------|-----------|---------|----------------------------------------|
| 21.4  | 2444.2104 | -0.0062 | <a href="#">MNYESSNELTSKISQLKESIK</a>  |
| 4.9   | 2444.2005 | 0.0036  | <a href="#">EEISDRLNPGITPEFDPK TMR</a> |
| 1.1   | 2444.2001 | 0.0041  | <a href="#">MECLEVVKVYLATEMNDLKK</a>   |
| 0.0   | 2444.2044 | -0.0002 | <a href="#">NGIWEVSKPNTNGLSSNRQEK</a>  |

Mascot: <http://www.matrixscience.com/>

**Peptide View**MS/MS Fragmentation of **QYIVFPGR**

Found in **AT1G35680.1** in **TAIR\_Arabidopsis**, Symbols: | 50S ribosomal protein L21, chloroplast / CL21 (RPL21) | chr1:13209989-13211458  
FORWARD

Match to Query 2201: 978.531644 from(490.273098,2+) index(4826)

Title: Elution from: 43.644 to 43.644 scan no 6084 cid35.00 polarity:+

Data file D6h-2\_3.mgf

Click mouse within plot area to zoom in by factor of two about that point

Or,   to  Da

Label all possible matches  Label matches used for scoring

Show Y-axis

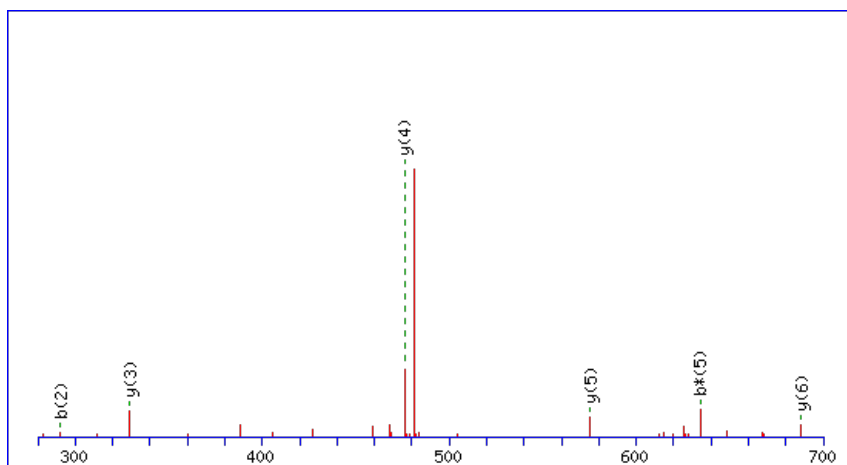

Monoisotopic mass of neutral peptide  $M_r(\text{calc})$ : 978.5287

Fixed modifications: Carbamidomethyl (C) (apply to specified residues or termini only)

Ions Score: 27 Expect: 0.0051

Matches : 6/56 fragment ions using 9 most intense peaks ([help](#))

| # | b               | b <sup>++</sup> | b*              | b <sup>*++</sup> | Seq. | y               | y <sup>++</sup> | y*       | y <sup>*++</sup> | # |
|---|-----------------|-----------------|-----------------|------------------|------|-----------------|-----------------|----------|------------------|---|
| 1 | 129.0659        | 65.0366         | 112.0393        | 56.5233          | Q    |                 |                 |          |                  | 8 |
| 2 | <b>292.1292</b> | 146.5682        | 275.1026        | 138.0550         | Y    | 851.4774        | 426.2423        | 834.4509 | 417.7291         | 7 |
| 3 | 405.2132        | 203.1103        | 388.1867        | 194.5970         | I    | <b>688.4141</b> | 344.7107        | 671.3875 | 336.1974         | 6 |
| 4 | 504.2817        | 252.6445        | 487.2551        | 244.1312         | V    | <b>575.3300</b> | 288.1686        | 558.3035 | 279.6554         | 5 |
| 5 | 651.3501        | 326.1787        | <b>634.3235</b> | 317.6654         | F    | <b>476.2616</b> | 238.6344        | 459.2350 | 230.1212         | 4 |
| 6 | 748.4028        | 374.7051        | 731.3763        | 366.1918         | P    | <b>329.1932</b> | 165.1002        | 312.1666 | 156.5870         | 3 |
| 7 | 805.4243        | 403.2158        | 788.3978        | 394.7025         | G    | 232.1404        | 116.5738        | 215.1139 | 108.0606         | 2 |
| 8 |                 |                 |                 |                  | R    | 175.1190        | 88.0631         | 158.0924 | 79.5498          | 1 |

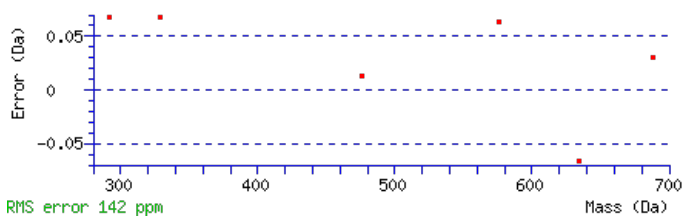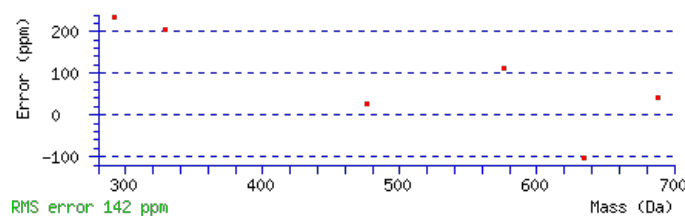

NCBI BLAST search of [QYIVFPGR](#)

(Parameters: blastp, nr protein database, expect=20000, no filter, PAM30)

Other BLAST [web gateways](#)

**All matches to this query**

| Score | $M_r(\text{calc})$ | Delta  | Sequence                 |
|-------|--------------------|--------|--------------------------|
| 27.1  | 978.5287           | 0.0029 | <a href="#">QYIVFPGR</a> |



## Peptide View

### MS/MS Fragmentation of **LLVSLVTSYR**

Found in **AT1G35720.1** in **TAIR\_Arabidopsis**, Symbols: OXY5, ATOXY5, ANNAT1 | ANNAT1 (ANNEXIN ARABIDOPSIS 1); calcium ion binding / calcium-dependent phospholipid binding | chr1:13226516-13228151 FORWARD

Match to Query 3877: 1149.675248 from(575.844900,2+) index(7389)

Title: Elution from: 66.463 to 66.463 scan no 9642 cid35.00 polarity:+

Data file D6h-2\_1.mgf

Click mouse within plot area to zoom in by factor of two about that point

Or,   to  Da

Label all possible matches  Label matches used for scoring

Show Y-axis

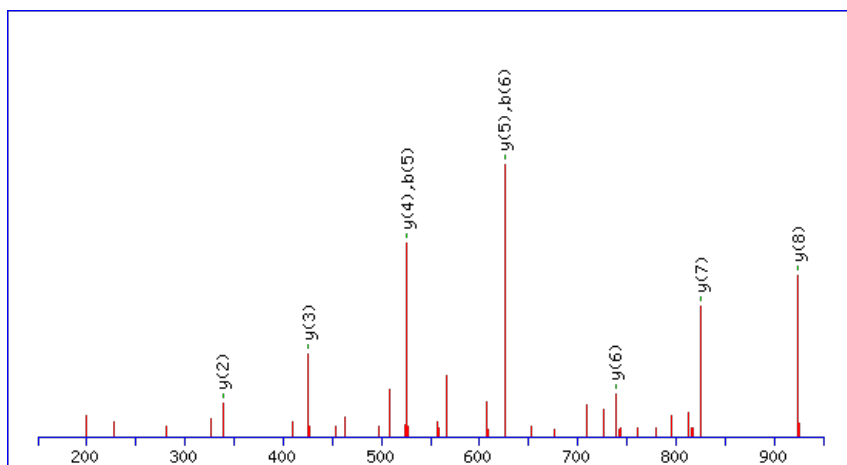

**Monoisotopic mass of neutral peptide Mr(calc):** 1149.6758

**Fixed modifications:** Carbamidomethyl (C) (apply to specified residues or termini only)

**Ions Score:** 69 **Expect:** 1.9e-007

**Matches:** 9/80 fragment ions using 8 most intense peaks ([help](#))

| #  | b               | b <sup>++</sup> | b <sup>0</sup> | b <sup>0++</sup> | Seq. | y               | y <sup>++</sup> | y*        | y <sup>*++</sup> | y <sup>0</sup> | y <sup>0++</sup> | #  |
|----|-----------------|-----------------|----------------|------------------|------|-----------------|-----------------|-----------|------------------|----------------|------------------|----|
| 1  | 114.0913        | 57.5493         |                |                  | L    |                 |                 |           |                  |                |                  | 10 |
| 2  | 227.1754        | 114.0913        |                |                  | L    | 1037.5990       | 519.3031        | 1020.5724 | 510.7898         | 1019.5884      | 510.2978         | 9  |
| 3  | 326.2438        | 163.6255        |                |                  | V    | <b>924.5149</b> | 462.7611        | 907.4884  | 454.2478         | 906.5043       | 453.7558         | 8  |
| 4  | 413.2758        | 207.1416        | 395.2653       | 198.1363         | S    | <b>825.4465</b> | 413.2269        | 808.4199  | 404.7136         | 807.4359       | 404.2216         | 7  |
| 5  | <b>526.3599</b> | 263.6836        | 508.3493       | 254.6783         | L    | <b>738.4145</b> | 369.7109        | 721.3879  | 361.1976         | 720.4039       | 360.7056         | 6  |
| 6  | <b>625.4283</b> | 313.2178        | 607.4178       | 304.2125         | V    | <b>625.3304</b> | 313.1688        | 608.3039  | 304.6556         | 607.3198       | 304.1636         | 5  |
| 7  | 726.4760        | 363.7416        | 708.4654       | 354.7364         | T    | <b>526.2620</b> | 263.6346        | 509.2354  | 255.1214         | 508.2514       | 254.6293         | 4  |
| 8  | 813.5080        | 407.2577        | 795.4975       | 398.2524         | S    | <b>425.2143</b> | 213.1108        | 408.1878  | 204.5975         | 407.2037       | 204.1055         | 3  |
| 9  | 976.5714        | 488.7893        | 958.5608       | 479.7840         | Y    | <b>338.1823</b> | 169.5948        | 321.1557  | 161.0815         |                |                  | 2  |
| 10 |                 |                 |                |                  | R    | 175.1190        | 88.0631         | 158.0924  | 79.5498          |                |                  | 1  |

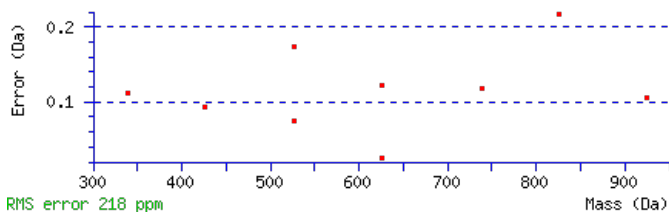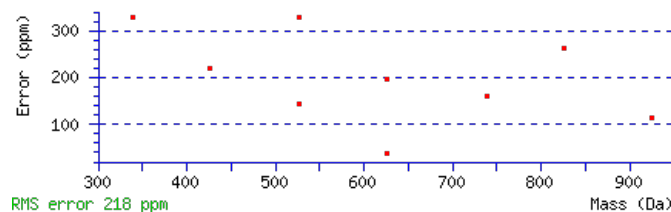

NCBI **BLAST** search of **LLVSLVTSYR**

(Parameters: blastp, nr protein database, expect=20000, no filter, PAM30)

Other BLAST [web gateways](#)

All matches to this query

AT1G35720.1

| Score | Mr(calc)  | Delta   | Sequence                    |
|-------|-----------|---------|-----------------------------|
| 69.3  | 1149.6758 | -0.0005 | <a href="#">LLVSLVTSYR</a>  |
| 0.0   | 1149.6731 | 0.0022  | <a href="#">GVAARALHLSR</a> |

Mascot: <http://www.matrixscience.com/>

**Peptide View**MS/MS Fragmentation of **QYLGGQLYLR**Found in **AT1G41830.1** in **TAIR\_Arabidopsis**, Symbols: SKS6 | SKS6 (SKU5 Similar 6); pectinesterase | chr1:15606333-15610243 REVERSE

Match to Query 4784: 1296.640156 from(649.327354,2+) index(5673)

Title: Elution from: 50.768 to 50.768 scan no 7217 cid35.00 polarity:+

Data file D6h-3\_1.mgf

Click mouse within plot area to zoom in by factor of two about that point

Or,  to  Da Label all possible matches  Label matches used for scoring Show Y-axis 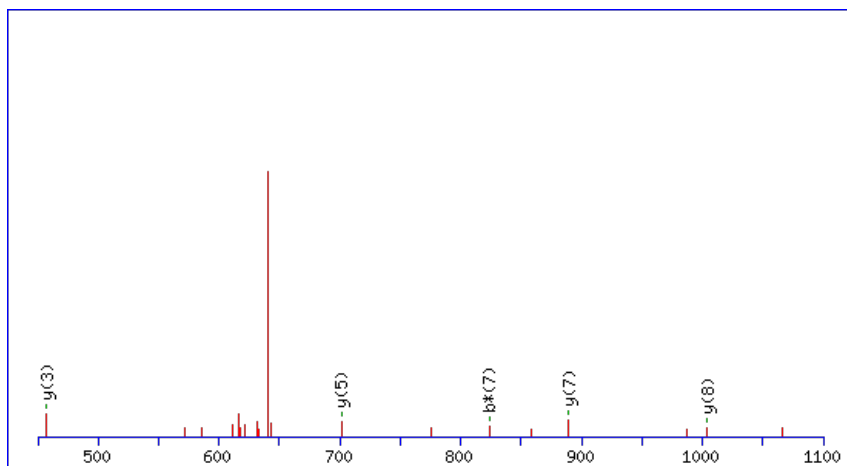Monoisotopic mass of neutral peptide **Mr(calc)**: 1296.6403**Fixed modifications**: Carbamidomethyl (C) (apply to specified residues or termini only)**Ions Score**: 29 **Expect**: 0.009**Matches**: 5/72 fragment ions using 7 most intense peaks ([help](#))

| #  | b         | b <sup>++</sup> | b*              | b <sup>+++</sup> | Seq. | y                | y <sup>++</sup> | y*        | y <sup>+++</sup> | #  |
|----|-----------|-----------------|-----------------|------------------|------|------------------|-----------------|-----------|------------------|----|
| 1  | 131.0599  | 66.0336         | 113.0363        | 57.0218          | Q    |                  |                 |           |                  | 10 |
| 2  | 295.1203  | 148.0638        | 277.0967        | 139.0520         | Y    | 1167.5949        | 584.3011        | 1149.5713 | 575.2893         | 9  |
| 3  | 409.2014  | 205.1043        | 391.1778        | 196.0925         | L    | <b>1003.5345</b> | 502.2709        | 985.5110  | 493.2591         | 8  |
| 4  | 467.2199  | 234.1136        | 449.1963        | 225.1018         | G    | <b>889.4534</b>  | 445.2304        | 871.4299  | 436.2186         | 7  |
| 5  | 597.2725  | 299.1399        | 579.2489        | 290.1281         | Q    | 831.4349         | 416.2211        | 813.4114  | 407.2093         | 6  |
| 6  | 727.3252  | 364.1662        | 709.3016        | 355.1544         | Q    | <b>701.3823</b>  | 351.1948        | 683.3587  | 342.1830         | 5  |
| 7  | 841.4063  | 421.2068        | <b>823.3827</b> | 412.1950         | L    | 571.3297         | 286.1685        | 553.3061  | 277.1567         | 4  |
| 8  | 1005.4666 | 503.2370        | 987.4431        | 494.2252         | Y    | <b>457.2486</b>  | 229.1279        | 439.2250  | 220.1161         | 3  |
| 9  | 1119.5477 | 560.2775        | 1101.5242       | 551.2657         | L    | 293.1882         | 147.0977        | 275.1646  | 138.0859         | 2  |
| 10 |           |                 |                 |                  | R    | 179.1071         | 90.0572         | 161.0835  | 81.0454          | 1  |

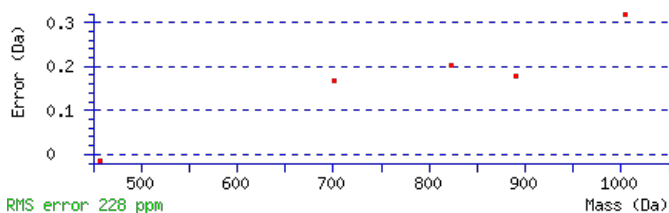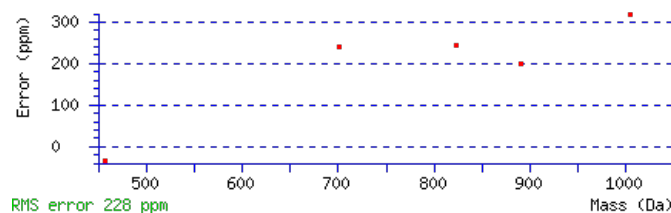NCBI **BLAST** search of **QYLGGQLYLR**

(Parameters: blastp, nr protein database, expect=20000, no filter, PAM30)

Other BLAST [web gateways](#)**All matches to this query**

| Score | Mr(calc) | Delta | Sequence |
|-------|----------|-------|----------|
|       |          |       |          |



**AT1G41830.1**

|      |           |         |                              |
|------|-----------|---------|------------------------------|
| 29.0 | 1296.6403 | -0.0001 | <a href="#">QYLGQQLYLR</a>   |
| 5.3  | 1296.6437 | -0.0035 | <a href="#">YKLAERNMLK</a>   |
| 4.9  | 1296.6403 | -0.0001 | <a href="#">FGAKLSDFGLAR</a> |
| 4.7  | 1296.6381 | 0.0021  | <a href="#">IAAPINPSDINR</a> |
| 4.7  | 1296.6437 | -0.0035 | <a href="#">LGLYMAKSLNR</a>  |
| 3.7  | 1296.6380 | 0.0021  | <a href="#">VEDHLTALNLR</a>  |
| 3.4  | 1296.6436 | -0.0035 | <a href="#">GMLSLFERGKK</a>  |
| 3.1  | 1296.6380 | 0.0021  | <a href="#">KSFARSELGAK</a>  |
| 3.0  | 1296.6380 | 0.0021  | <a href="#">HVVDGLELRK</a>   |
| 2.9  | 1296.6436 | -0.0035 | <a href="#">GTMQTLFKIAR</a>  |

**Mascot:** <http://www.matrixscience.com/>

**Peptide View**MS/MS Fragmentation of **RLAYIYK**Found in **AT1G41880.1** in **TAIR\_Arabidopsis**, Symbols: | 60S ribosomal protein L35a (RPL35aB) | chr1:15654026-15654868 REVERSE

Match to Query 1612: 925.538250 from(463.776401,2+) index(1557)

Title: Elution from: 23.188 to 23.188 scan no 2183 cid35.00 polarity:+

Data file D12h-2\_1.mgf

Click mouse within plot area to zoom in by factor of two about that point

Or,  to  Da Label all possible matches  Label matches used for scoring Show Y-axis 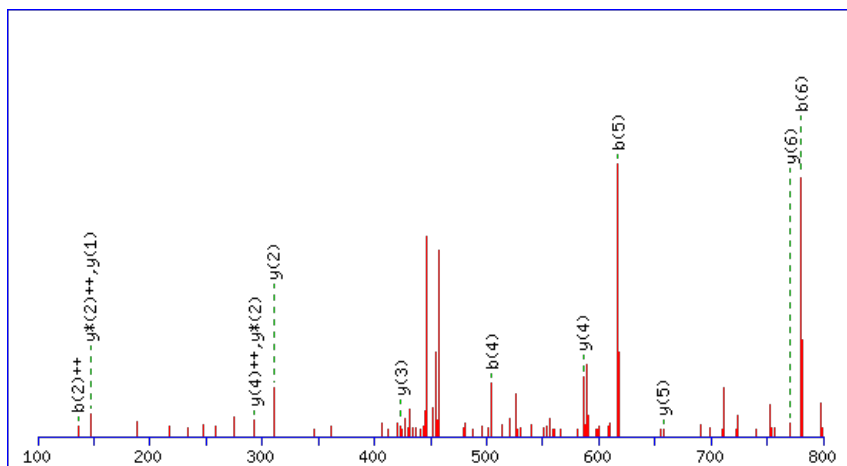Monoisotopic mass of neutral peptide **Mr(calc)**: 925.5385

Fixed modifications: Carbamidomethyl (C) (apply to specified residues or termini only)

Ions Score: 19 **Expect**: 0.033Matches : 13/48 fragment ions using 47 most intense peaks ([help](#))

| # | b        | b <sup>++</sup> | b*       | b <sup>*++</sup> | Seq. | y        | y <sup>++</sup> | y*       | y <sup>*++</sup> | # |
|---|----------|-----------------|----------|------------------|------|----------|-----------------|----------|------------------|---|
| 1 | 157.1084 | 79.0578         | 140.0818 | 70.5446          | R    |          |                 |          |                  | 7 |
| 2 | 270.1925 | 135.5999        | 253.1659 | 127.0866         | L    | 770.4447 | 385.7260        | 753.4182 | 377.2127         | 6 |
| 3 | 341.2296 | 171.1184        | 324.2030 | 162.6051         | A    | 657.3606 | 329.1840        | 640.3341 | 320.6707         | 5 |
| 4 | 504.2929 | 252.6501        | 487.2663 | 244.1368         | Y    | 586.3235 | 293.6654        | 569.2970 | 285.1521         | 4 |
| 5 | 617.3770 | 309.1921        | 600.3504 | 300.6788         | I    | 423.2602 | 212.1337        | 406.2336 | 203.6205         | 3 |
| 6 | 780.4403 | 390.7238        | 763.4137 | 382.2105         | Y    | 310.1761 | 155.5917        | 293.1496 | 147.0784         | 2 |
| 7 |          |                 |          |                  | K    | 147.1128 | 74.0600         | 130.0863 | 65.5468          | 1 |

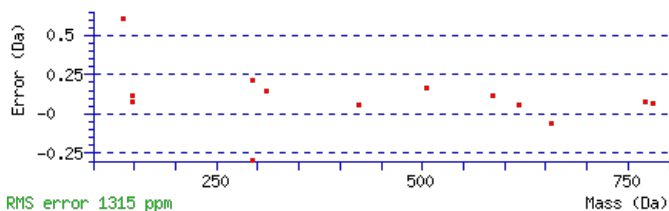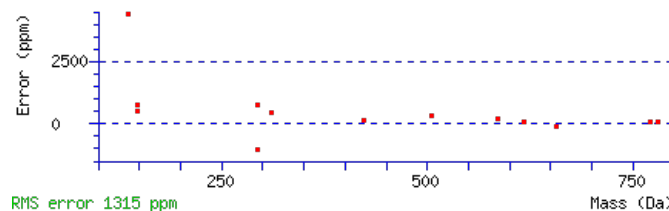NCBI **BLAST** search of [RLAYIYK](#)

(Parameters: blastp, nr protein database, expect=20000, no filter, PAM30)

Other BLAST [web gateways](#)**All matches to this query**

| Score | Mr(calc) | Delta   | Sequence                |
|-------|----------|---------|-------------------------|
| 18.9  | 925.5385 | -0.0002 | <a href="#">RLAYIYK</a> |
| 11.1  | 925.5385 | -0.0003 | <a href="#">FLRSIYK</a> |



**Peptide View**MS/MS Fragmentation of **IAQLNSAIDVSSQLK**Found in **AT1G42960.1** in **TAIR\_Arabidopsis**, Symbols: | expressed protein localized to the inner membrane of the chloroplast. | chr1:16128303-16129520 FORWARD

Match to Query 8094: 1700.891362 from(851.452957,2+) index(7841)

Title: Elution from: 70.270 to 70.270 scan no 10375 cid35.00 polarity:+

Data file 0-1\_2.mgf

Click mouse within plot area to zoom in by factor of two about that point

Or,  to  Da Label all possible matches  Label matches used for scoring Show Y-axis 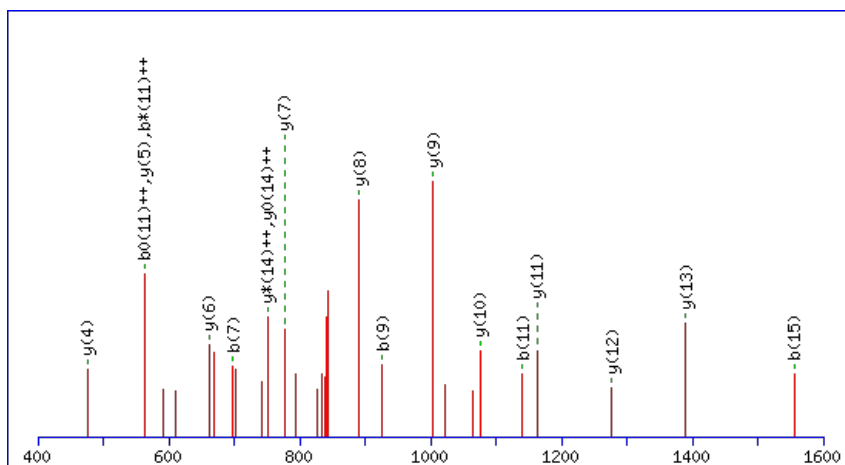**Monoisotopic mass of neutral peptide Mr(calc):** 1700.8945**Fixed modifications:** Carbamidomethyl (C) (apply to specified residues or termini only)**Ions Score:** 86 **Expect:** 1.2e-008**Matches:** 18/160 fragment ions using 22 most intense peaks ([help](#))

| #  | b         | b <sup>++</sup> | b <sup>*</sup> | b <sup>*++</sup> | b <sup>0</sup> | b <sup>0++</sup> | Seq. | y         | y <sup>++</sup> | y <sup>*</sup> | y <sup>*++</sup> | y <sup>0</sup> | y <sup>0++</sup> | #  |
|----|-----------|-----------------|----------------|------------------|----------------|------------------|------|-----------|-----------------|----------------|------------------|----------------|------------------|----|
| 1  | 114.0913  | 57.5493         |                |                  |                |                  | I    |           |                 |                |                  |                |                  | 16 |
| 2  | 185.1285  | 93.0679         |                |                  |                |                  | A    | 1588.8177 | 794.9125        | 1571.7911      | 786.3992         | 1570.8071      | 785.9072         | 15 |
| 3  | 313.1870  | 157.0972        | 296.1605       | 148.5839         |                |                  | Q    | 1517.7806 | 759.3939        | 1500.7540      | 750.8807         | 1499.7700      | 750.3886         | 14 |
| 4  | 426.2711  | 213.6392        | 409.2445       | 205.1259         |                |                  | L    | 1389.7220 | 695.3646        | 1372.6955      | 686.8514         | 1371.7114      | 686.3594         | 13 |
| 5  | 540.3140  | 270.6606        | 523.2875       | 262.1474         |                |                  | N    | 1276.6379 | 638.8226        | 1259.6114      | 630.3093         | 1258.6274      | 629.8173         | 12 |
| 6  | 627.3461  | 314.1767        | 610.3195       | 305.6634         | 609.3355       | 305.1714         | S    | 1162.5950 | 581.8011        | 1145.5685      | 573.2879         | 1144.5844      | 572.7959         | 11 |
| 7  | 698.3832  | 349.6952        | 681.3566       | 341.1819         | 680.3726       | 340.6899         | A    | 1075.5630 | 538.2851        | 1058.5364      | 529.7719         | 1057.5524      | 529.2798         | 10 |
| 8  | 811.4672  | 406.2373        | 794.4407       | 397.7240         | 793.4567       | 397.2320         | I    | 1004.5259 | 502.7666        | 987.4993       | 494.2533         | 986.5153       | 493.7613         | 9  |
| 9  | 926.4942  | 463.7507        | 909.4676       | 455.2374         | 908.4836       | 454.7454         | D    | 891.4418  | 446.2245        | 874.4153       | 437.7113         | 873.4312       | 437.2193         | 8  |
| 10 | 1041.5211 | 521.2642        | 1024.4946      | 512.7509         | 1023.5106      | 512.2589         | D    | 776.4149  | 388.7111        | 759.3883       | 380.1978         | 758.4043       | 379.7058         | 7  |
| 11 | 1140.5895 | 570.7984        | 1123.5630      | 562.2851         | 1122.5790      | 561.7931         | V    | 661.3879  | 331.1976        | 644.3614       | 322.6843         | 643.3774       | 322.1923         | 6  |
| 12 | 1227.6216 | 614.3144        | 1210.5950      | 605.8011         | 1209.6110      | 605.3091         | S    | 562.3195  | 281.6634        | 545.2930       | 273.1501         | 544.3089       | 272.6581         | 5  |
| 13 | 1314.6536 | 657.8304        | 1297.6270      | 649.3172         | 1296.6430      | 648.8251         | S    | 475.2875  | 238.1474        | 458.2609       | 229.6341         | 457.2769       | 229.1421         | 4  |
| 14 | 1442.7122 | 721.8597        | 1425.6856      | 713.3464         | 1424.7016      | 712.8544         | Q    | 388.2554  | 194.6314        | 371.2289       | 186.1181         |                |                  | 3  |
| 15 | 1555.7962 | 778.4018        | 1538.7697      | 769.8885         | 1537.7857      | 769.3965         | L    | 260.1969  | 130.6021        | 243.1703       | 122.0888         |                |                  | 2  |
| 16 |           |                 |                |                  |                |                  | K    | 147.1128  | 74.0600         | 130.0863       | 65.5468          |                |                  | 1  |

AT1G42960.1

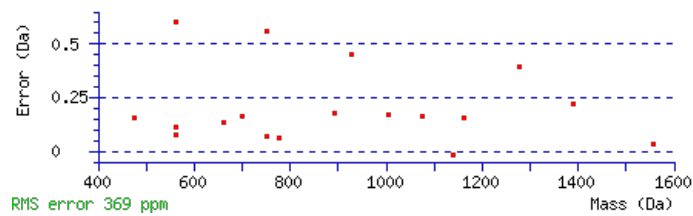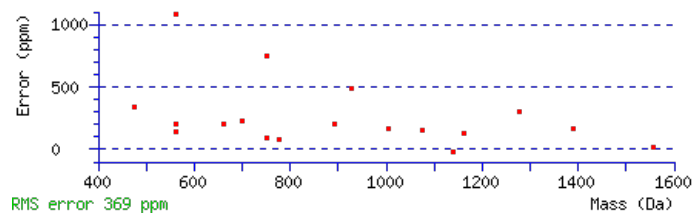

NCBI **BLAST** search of [IAQLNSAIDDVSSQLK](#)

(Parameters: blastp, nr protein database, expect=20000, no filter, PAM30)

Other BLAST [web gateways](#)

**All matches to this query**

| Score | Mr(calc)  | Delta   | Sequence                         |
|-------|-----------|---------|----------------------------------|
| 86.1  | 1700.8945 | -0.0031 | <a href="#">IAQLNSAIDDVSSQLK</a> |
| 2.9   | 1700.8880 | 0.0034  | <a href="#">VOISQAALGDGITICR</a> |
| 2.3   | 1700.8933 | -0.0019 | <a href="#">YVKGGGVHGWNLMRK</a>  |

Mascot: <http://www.matrixscience.com/>

**MATRIX SCIENCE Mascot Search Results**

**Peptide View**

MS/MS Fragmentation of **KGLTAEDVNEAFRK**

Found in **AT1G42970.1** in **TAIR\_Arabidopsis**, Symbols: GAPB | GAPB (GLYCERALDEHYDE-3-PHOSPHATE DEHYDROGENASE B SUBUNIT); glyceraldehyde-3-phosphate dehydrogenase | chr1:1612992-16132024 FORWARD

Match to Query 6718: 1576.819443 from(526.613757,3+) index(3152)

Title: Elution from: 31.538 to 31.538 scan no 3917 cid35.00 polarity:+

Data file C7-1\_3.mgf

Click mouse within plot area to zoom in by factor of two about that point

Or,  to  Da

Label all possible matches  Label matches used for scoring

Show Y-axis

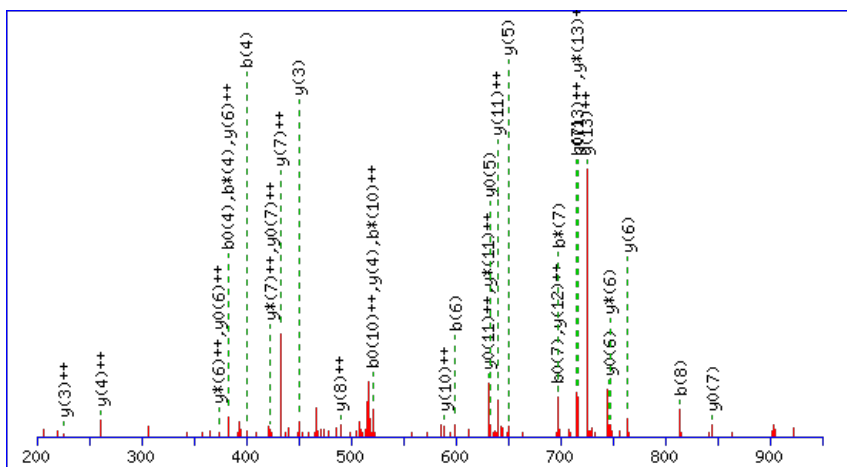

**Monoisotopic mass of neutral peptide Mr(calc):** 1576.8209

**Fixed modifications:** Carbamidomethyl (C) (apply to specified residues or termini only)

**Ions Score:** 46 **Expect:** 6.8e-005

**Matches:** 36/142 fragment ions using 53 most intense peaks [\(help\)](#)

| #  | b               | b <sup>++</sup> | b*              | b <sup>*++</sup> | b <sup>0</sup>  | b <sup>0++</sup> | Seq.     | y               | y <sup>++</sup> | y*              | y <sup>*++</sup> | y <sup>0</sup>  | y <sup>0++</sup> | #  |
|----|-----------------|-----------------|-----------------|------------------|-----------------|------------------|----------|-----------------|-----------------|-----------------|------------------|-----------------|------------------|----|
| 1  | 129.1022        | 65.0548         | 112.0757        | 56.5415          |                 |                  | <b>K</b> |                 |                 |                 |                  |                 |                  | 14 |
| 2  | 186.1237        | 93.5655         | 169.0972        | 85.0522          |                 |                  | <b>G</b> | 1449.7332       | 725.3703        | 1432.7067       | 716.8570         | 1431.7227       | 716.3650         | 13 |
| 3  | 299.2078        | 150.1075        | 282.1812        | 141.5942         |                 |                  | <b>L</b> | 1392.7118       | 696.8595        | 1375.6852       | 688.3462         | 1374.7012       | 687.8542         | 12 |
| 4  | <b>400.2554</b> | 200.6314        | <b>383.2289</b> | 192.1181         | <b>382.2449</b> | 191.6261         | <b>T</b> | 1279.6277       | <b>640.3175</b> | 1262.6012       | <b>631.8042</b>  | 1261.6171       | <b>631.3122</b>  | 11 |
| 5  | 471.2926        | 236.1499        | 454.2660        | 227.6366         | 453.2820        | 227.1446         | <b>A</b> | 1178.5800       | <b>589.7937</b> | 1161.5535       | 581.2804         | 1160.5695       | 580.7884         | 10 |
| 6  | <b>600.3352</b> | 300.6712        | 583.3086        | 292.1579         | 582.3246        | 291.6659         | <b>E</b> | 1107.5429       | 554.2751        | 1090.5164       | 545.7618         | 1089.5323       | 545.2698         | 9  |
| 7  | <b>715.3621</b> | 358.1847        | <b>698.3355</b> | 349.6714         | <b>697.3515</b> | 349.1794         | <b>D</b> | 978.5003        | <b>489.7538</b> | 961.4738        | 481.2405         | 960.4898        | 480.7485         | 8  |
| 8  | <b>814.4305</b> | 407.7189        | 797.4040        | 399.2056         | 796.4199        | 398.7136         | <b>V</b> | 863.4734        | <b>432.2403</b> | 846.4468        | <b>423.7271</b>  | <b>845.4628</b> | <b>423.2350</b>  | 7  |
| 9  | 928.4734        | 464.7404        | 911.4469        | 456.2271         | 910.4629        | 455.7351         | <b>N</b> | <b>764.4050</b> | <b>382.7061</b> | <b>747.3784</b> | <b>374.1928</b>  | <b>746.3944</b> | <b>373.7008</b>  | 6  |
| 10 | 1057.5160       | 529.2617        | 1040.4895       | <b>520.7484</b>  | 1039.5055       | <b>520.2564</b>  | <b>E</b> | <b>650.3620</b> | 325.6847        | 633.3355        | 317.1714         | <b>632.3515</b> | 316.6794         | 5  |
| 11 | 1128.5531       | 564.7802        | 1111.5266       | 556.2669         | 1110.5426       | 555.7749         | <b>A</b> | <b>521.3194</b> | <b>261.1634</b> | 504.2929        | 252.6501         |                 |                  | 4  |
| 12 | 1275.6216       | 638.3144        | 1258.5950       | 629.8011         | 1257.6110       | 629.3091         | <b>F</b> | <b>450.2823</b> | <b>225.6448</b> | 433.2558        | 217.1315         |                 |                  | 3  |
| 13 | 1431.7227       | <b>716.3650</b> | 1414.6961       | 707.8517         | 1413.7121       | 707.3597         | <b>R</b> | 303.2139        | 152.1106        | 286.1874        | 143.5973         |                 |                  | 2  |
| 14 |                 |                 |                 |                  |                 |                  | <b>K</b> | 147.1128        | 74.0600         | 130.0863        | 65.5468          |                 |                  | 1  |

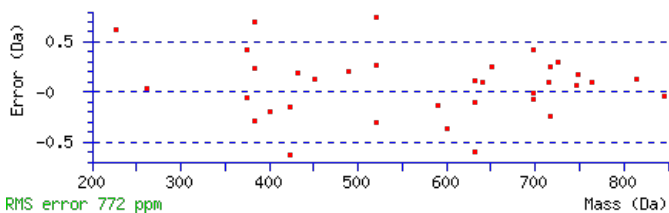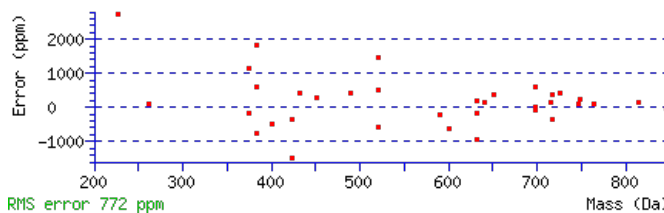

## AT1G42970.1

(Parameters: blastp, nr protein database, expect=20000, no filter, PAM30)

Other BLAST [web gateways](#)

### All matches to this query

| Score | Mr(calc)  | Delta   | Sequence                       |
|-------|-----------|---------|--------------------------------|
| 46.0  | 1576.8209 | -0.0014 | <a href="#">KGLTAEDVNEAFRK</a> |
| 6.9   | 1576.8222 | -0.0028 | <a href="#">WVQATFRRINGNK</a>  |

Mascot: <http://www.matrixscience.com/>

**Peptide View**MS/MS Fragmentation of **FQTSLEK**

Found in **AT1G43170.1** in **TAIR Arabidopsis**, Symbols: EMB2207, RPL3A | ARP1 (ARABIDOPSIS RIBOSOMAL PROTEIN 1); structural constituent of ribosome | chr1:16269432-16271071 FORWARD

Match to Query 1222: 851.439270 from(426.726911,2+) index(1319)

Title: Elution from: 18.221 to 18.221 scan no 1791 cid35.00 polarity:+

Data file 0-3\_3.mgf

Click mouse within plot area to zoom in by factor of two about that point

Or,   to  Da

Label all possible matches  Label matches used for scoring

Show Y-axis

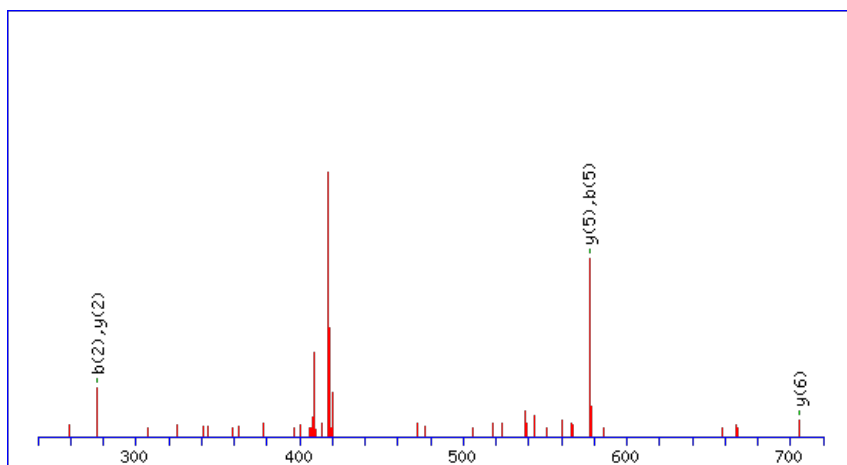

**Monoisotopic mass of neutral peptide Mr(calc):** 851.4389

**Fixed modifications:** Carbamidomethyl (C) (apply to specified residues or termini only)

**Ions Score:** 23 **Expect:** 0.029

**Matches:** 5/64 fragment ions using 5 most intense peaks ([help](#))

| # | b               | b <sup>++</sup> | b*       | b <sup>*++</sup> | b <sup>0</sup> | b <sup>0++</sup> | Seq. | y               | y <sup>++</sup> | y*       | y <sup>*++</sup> | y <sup>0</sup> | y <sup>0++</sup> | # |
|---|-----------------|-----------------|----------|------------------|----------------|------------------|------|-----------------|-----------------|----------|------------------|----------------|------------------|---|
| 1 | 148.0757        | 74.5415         |          |                  |                |                  | F    |                 |                 |          |                  |                |                  | 7 |
| 2 | <b>276.1343</b> | 138.5708        | 259.1077 | 130.0575         |                |                  | Q    | <b>705.3777</b> | 353.1925        | 688.3512 | 344.6792         | 687.3672       | 344.1872         | 6 |
| 3 | 377.1819        | 189.0946        | 360.1554 | 180.5813         | 359.1714       | 180.0893         | T    | <b>577.3192</b> | 289.1632        | 560.2926 | 280.6499         | 559.3086       | 280.1579         | 5 |
| 4 | 464.2140        | 232.6106        | 447.1874 | 224.0974         | 446.2034       | 223.6053         | S    | 476.2715        | 238.6394        | 459.2449 | 230.1261         | 458.2609       | 229.6341         | 4 |
| 5 | <b>577.2980</b> | 289.1527        | 560.2715 | 280.6394         | 559.2875       | 280.1474         | L    | 389.2395        | 195.1234        | 372.2129 | 186.6101         | 371.2289       | 186.1181         | 3 |
| 6 | 706.3406        | 353.6740        | 689.3141 | 345.1607         | 688.3301       | 344.6687         | E    | <b>276.1554</b> | 138.5813        | 259.1288 | 130.0681         | 258.1448       | 129.5761         | 2 |
| 7 |                 |                 |          |                  |                |                  | K    | 147.1128        | 74.0600         | 130.0863 | 65.5468          |                |                  | 1 |

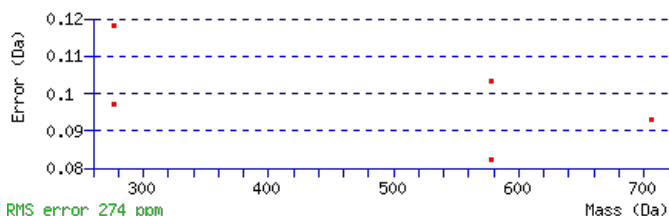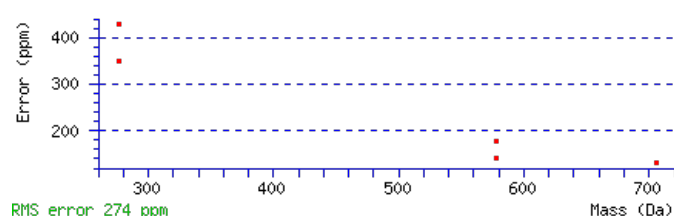

NCBI **BLAST** search of **FQTSLEK**

(Parameters: blastp, nr protein database, expect=20000, no filter, PAM30)

Other BLAST [web gateways](#)

**All matches to this query**

| Score | Mr(calc) | Delta  | Sequence                 |
|-------|----------|--------|--------------------------|
| 22.8  | 851.4389 | 0.0004 | <a href="#">FQTSLEK</a>  |
| 10.4  | 851.4389 | 0.0004 | <a href="#">FAATVSEK</a> |



# AT1G43170.1

|      |          |        |                          |
|------|----------|--------|--------------------------|
| 10.4 | 851.4389 | 0.0004 | <a href="#">FOETISK</a>  |
| 9.6  | 851.4389 | 0.0004 | <a href="#">EGVYKEK</a>  |
| 2.5  | 851.4389 | 0.0004 | <a href="#">GLGTFTEK</a> |
| 2.4  | 851.4389 | 0.0004 | <a href="#">NLIFTEK</a>  |
| 2.2  | 851.4389 | 0.0004 | <a href="#">GYESIVGK</a> |
| 0.6  | 851.4389 | 0.0004 | <a href="#">ELTYAQK</a>  |
| 0.5  | 851.4389 | 0.0004 | <a href="#">FATLDTGK</a> |

**Mascot:** <http://www.matrixscience.com/>

**Peptide View**MS/MS Fragmentation of **FEGALPANQLVER**

Found in **AT1G43560.1** in **TAIR Arabidopsis**, Symbols: ATY2 | ATY2 (Arabidopsis thioredoxin y2); thiol-disulfide exchange intermediate | chr1:16400799-16402268 REVERSE

Match to Query 6371: 1460.695716 from(731.355134,2+) index(5604)

Title: Elution from: 49.312 to 49.312 scan no 7022 cid35.00 polarity:+

Data file D6h-1\_1.mgf

Click mouse within plot area to zoom in by factor of two about that point

Or,  to  Da

Label all possible matches  Label matches used for scoring

Show Y-axis

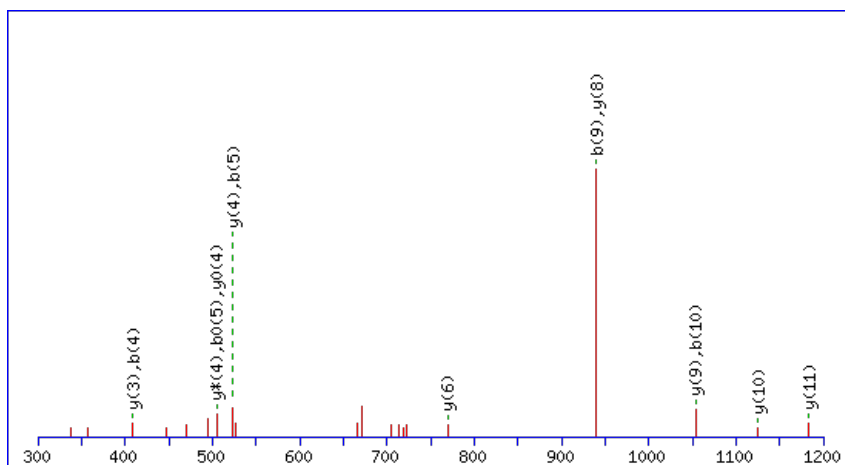

Monoisotopic mass of neutral peptide  $M_r(\text{calc})$ : 1460.6984

Fixed modifications: Carbamidomethyl (C) (apply to specified residues or termini only)

Ions Score: 58 Expect: 1.4e-005

Matches : 14/126 fragment ions using 12 most intense peaks ([help](#))

| #  | b                | b <sup>++</sup> | b*        | b* <sup>++</sup> | b <sup>0</sup>  | b <sup>0++</sup> | Seq. | y                | y <sup>++</sup> | y*              | y* <sup>++</sup> | y <sup>0</sup>  | y <sup>0++</sup> | #  |
|----|------------------|-----------------|-----------|------------------|-----------------|------------------|------|------------------|-----------------|-----------------|------------------|-----------------|------------------|----|
| 1  | 149.0727         | 75.0400         |           |                  |                 |                  | F    |                  |                 |                 |                  |                 |                  | 13 |
| 2  | 279.1124         | 140.0598        |           |                  | 261.1018        | 131.0545         | E    | 1313.6402        | 657.3238        | 1295.6167       | 648.3120         | 1295.6297       | 648.3185         | 12 |
| 3  | 337.1309         | 169.0691        |           |                  | 319.1203        | 160.0638         | G    | <b>1183.6006</b> | 592.3039        | 1165.5770       | 583.2921         | 1165.5900       | 583.2987         | 11 |
| 4  | <b>409.1650</b>  | 205.0861        |           |                  | 391.1544        | 196.0809         | A    | <b>1125.5821</b> | 563.2947        | 1107.5585       | 554.2829         | 1107.5715       | 554.2894         | 10 |
| 5  | <b>523.2461</b>  | 262.1267        |           |                  | <b>505.2355</b> | 253.1214         | L    | <b>1053.5480</b> | 527.2776        | 1035.5244       | 518.2658         | 1035.5374       | 518.2723         | 9  |
| 6  | 621.2959         | 311.1516        |           |                  | 603.2853        | 302.1463         | P    | <b>939.4669</b>  | 470.2371        | 921.4433        | 461.2253         | 921.4563        | 461.2318         | 8  |
| 7  | 693.3300         | 347.1687        |           |                  | 675.3195        | 338.1634         | A    | 841.4171         | 421.2122        | 823.3935        | 412.2004         | 823.4065        | 412.2069         | 7  |
| 8  | 809.3670         | 405.1872        | 791.3435  | 396.1754         | 791.3565        | 396.1819         | N    | <b>769.3829</b>  | 385.1951        | 751.3593        | 376.1833         | 751.3723        | 376.1898         | 6  |
| 9  | <b>939.4197</b>  | 470.2135        | 921.3961  | 461.2017         | 921.4091        | 461.2082         | Q    | 653.3459         | 327.1766        | 635.3223        | 318.1648         | 635.3354        | 318.1713         | 5  |
| 10 | <b>1053.5008</b> | 527.2540        | 1035.4772 | 518.2422         | 1035.4902       | 518.2488         | L    | <b>523.2933</b>  | 262.1503        | <b>505.2697</b> | 253.1385         | <b>505.2827</b> | 253.1450         | 4  |
| 11 | 1153.5662        | 577.2868        | 1135.5427 | 568.2750         | 1135.5557       | 568.2815         | V    | <b>409.2122</b>  | 205.1097        | 391.1886        | 196.0979         | 391.2016        | 196.1044         | 3  |
| 12 | 1283.6059        | 642.3066        | 1265.5823 | 633.2948         | 1265.5953       | 633.3013         | E    | 309.1467         | 155.0770        | 291.1231        | 146.0652         | 291.1362        | 146.0717         | 2  |
| 13 |                  |                 |           |                  |                 |                  | R    | 179.1071         | 90.0572         | 161.0835        | 81.0454          |                 |                  | 1  |

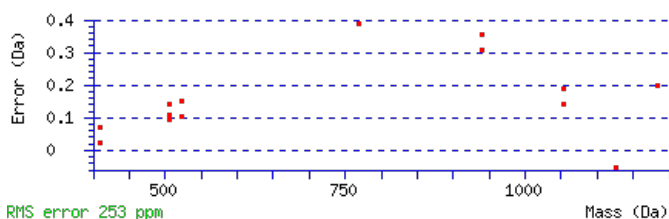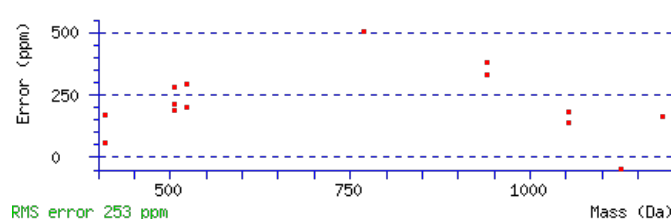

NCBI **BLAST** search of **FEGALPANQLVER**

(Parameters: blastp, nr protein database, expect=20000, no filter, PAM30)

# AT1G43560.1

Other BLAST [web gateways](#)

## All matches to this query

| Score | Mr(calc)  | Delta   | Sequence                       |
|-------|-----------|---------|--------------------------------|
| 57.5  | 1460.6984 | -0.0027 | <a href="#">FEGALPANQLVER</a>  |
| 17.7  | 1460.6993 | -0.0036 | <a href="#">FPCLHALAVCKK</a>   |
| 9.8   | 1460.6962 | -0.0004 | <a href="#">AVLSQRGPDVSGEK</a> |
| 9.0   | 1460.6932 | 0.0025  | <a href="#">LYKMFKGTEWK</a>    |
| 4.5   | 1460.6962 | -0.0004 | <a href="#">EDVVNRVNAGELK</a>  |
| 4.1   | 1460.6935 | 0.0022  | <a href="#">EVNDVELDEKKK</a>   |
| 4.1   | 1460.6935 | 0.0022  | <a href="#">KEVNDVELDEKK</a>   |
| 3.7   | 1460.6984 | -0.0027 | <a href="#">ANHETIFDQLKK</a>   |
| 3.6   | 1460.6962 | -0.0004 | <a href="#">LQEQDNEAVLRK</a>   |
| 3.4   | 1460.6914 | 0.0043  | <a href="#">LTAGSSKGYRMVR</a>  |

Mascot: <http://www.matrixscience.com/>

**Peptide View**MS/MS Fragmentation of **LIGLAGETNIQGEEQK**

Found in **AT1G43670.1** in **TAIR\_Arabidopsis**, Symbols: | fructose-1,6-bisphosphatase, putative / D-fructose-1,6-bisphosphate 1-phosphohydrolase, putative / FBPase, putative | chr1:16470624-16472787 FORWARD

Match to Query 7814: 1718.818244 from(860.416398,2+) index(4544)

Title: Elution from: 44.198 to 44.198 scan no 5789 cid35.00 polarity:+

Data file D12h-2\_2.mgf

Click mouse within plot area to zoom in by factor of two about that point

Or,   to  Da

Label all possible matches  Label matches used for scoring

Show Y-axis

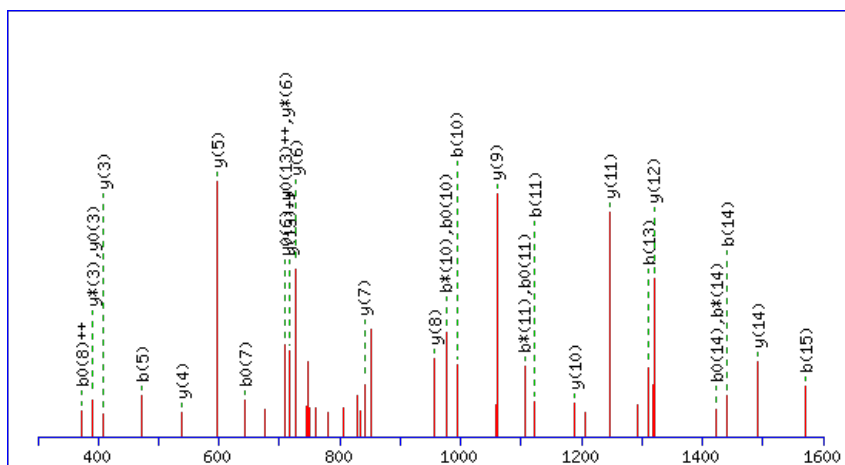

**Monoisotopic mass of neutral peptide Mr(calc):** 1718.8195

**Fixed modifications:** Carbamidomethyl (C) (apply to specified residues or termini only)

**Ions Score:** 117 **Expect:** 1.3e-011

**Matches:** 31/148 fragment ions using 29 most intense peaks ([help](#))

| #  | b         | b <sup>++</sup> | b <sup>*</sup> | b <sup>*++</sup> | b <sup>0</sup> | b <sup>0++</sup> | Seq. | y         | y <sup>++</sup> | y <sup>*</sup> | y <sup>*++</sup> | y <sup>0</sup> | y <sup>0++</sup> | #  |
|----|-----------|-----------------|----------------|------------------|----------------|------------------|------|-----------|-----------------|----------------|------------------|----------------|------------------|----|
| 1  | 115.0884  | 58.0478         |                |                  |                |                  | L    |           |                 |                |                  |                |                  | 16 |
| 2  | 229.1695  | 115.0884        |                |                  |                |                  | I    | 1605.7457 | 803.3765        | 1587.7221      | 794.3647         | 1587.7351      | 794.3712         | 15 |
| 3  | 287.1880  | 144.0976        |                |                  |                |                  | G    | 1491.6646 | 746.3359        | 1473.6410      | 737.3241         | 1473.6540      | 737.3307         | 14 |
| 4  | 401.2691  | 201.1382        |                |                  |                |                  | L    | 1433.6461 | 717.3267        | 1415.6225      | 708.3149         | 1415.6355      | 708.3214         | 13 |
| 5  | 473.3032  | 237.1552        |                |                  |                |                  | A    | 1319.5650 | 660.2861        | 1301.5414      | 651.2744         | 1301.5544      | 651.2809         | 12 |
| 6  | 531.3217  | 266.1645        |                |                  |                |                  | G    | 1247.5309 | 624.2691        | 1229.5073      | 615.2573         | 1229.5203      | 615.2638         | 11 |
| 7  | 661.3613  | 331.1843        |                |                  | 643.3508       | 322.1790         | E    | 1189.5124 | 595.2598        | 1171.4888      | 586.2480         | 1171.5018      | 586.2545         | 10 |
| 8  | 763.4061  | 382.2067        |                |                  | 745.3955       | 373.2014         | T    | 1059.4727 | 530.2400        | 1041.4491      | 521.2282         | 1041.4622      | 521.2347         | 9  |
| 9  | 879.4431  | 440.2252        | 861.4195       | 431.2134         | 861.4325       | 431.2199         | N    | 957.4280  | 479.2176        | 939.4044       | 470.2059         | 939.4175       | 470.2124         | 8  |
| 10 | 993.5242  | 497.2657        | 975.5006       | 488.2539         | 975.5136       | 488.2604         | I    | 841.3910  | 421.1991        | 823.3674       | 412.1874         | 823.3805       | 412.1939         | 7  |
| 11 | 1123.5768 | 562.2920        | 1105.5532      | 553.2802         | 1105.5662      | 553.2868         | Q    | 727.3099  | 364.1586        | 709.2863       | 355.1468         | 709.2994       | 355.1533         | 6  |
| 12 | 1181.5953 | 591.3013        | 1163.5717      | 582.2895         | 1163.5847      | 582.2960         | G    | 597.2573  | 299.1323        | 579.2337       | 290.1205         | 579.2467       | 290.1270         | 5  |
| 13 | 1311.6349 | 656.3211        | 1293.6113      | 647.3093         | 1293.6244      | 647.3158         | E    | 539.2388  | 270.1230        | 521.2152       | 261.1112         | 521.2282       | 261.1177         | 4  |
| 14 | 1441.6746 | 721.3409        | 1423.6510      | 712.3291         | 1423.6640      | 712.3356         | E    | 409.1991  | 205.1032        | 391.1756       | 196.0914         | 391.1886       | 196.0979         | 3  |
| 15 | 1571.7272 | 786.3672        | 1553.7036      | 777.3554         | 1553.7166      | 777.3620         | Q    | 279.1595  | 140.0834        | 261.1359       | 131.0716         |                |                  | 2  |
| 16 |           |                 |                |                  |                |                  | K    | 149.1069  | 75.0571         | 131.0833       | 66.0453          |                |                  | 1  |

AT1G43670.1

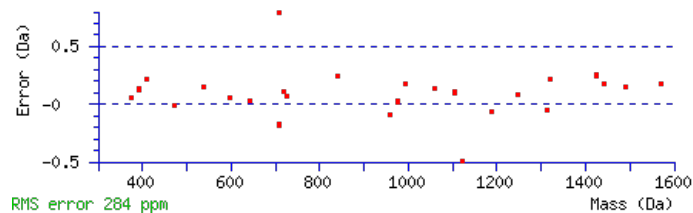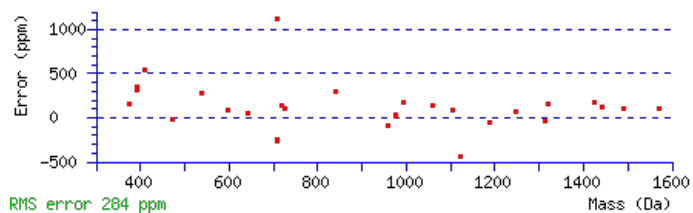

NCBI **BLAST** search of [LIGLAGETNIQGEEQK](#)

(Parameters: blastp, nr protein database, expect=20000, no filter, PAM30)

Other BLAST [web gateways](#)

**All matches to this query**

| Score | Mr(calc)  | Delta   | Sequence                          |
|-------|-----------|---------|-----------------------------------|
| 116.7 | 1718.8195 | -0.0013 | <a href="#">LIGLAGETNIQGEEQK</a>  |
| 7.7   | 1718.8170 | 0.0012  | <a href="#">SFRNESMVIDVFKK</a>    |
| 3.2   | 1718.8192 | -0.0010 | <a href="#">FAMYWLKQTQEVK</a>     |
| 0.8   | 1718.8148 | 0.0035  | <a href="#">VSGFITGSMANSKAGKK</a> |

Mascot: <http://www.matrixscience.com/>

## Peptide View

MS/MS Fragmentation of **FVDDPPTGLEK**

Found in **AT1G44575.1** in **TAIR\_Arabidopsis**, Symbols: PSBS, NPQ4 | NPQ4 (NONPHOTOCHEMICAL QUENCHING) | chr1:16874208-16875634 FORWARD

Match to Query 3717: 1216.598842 from(609.306697,2+) index(2962)

Title: Elution from: 32.644 to 32.644 scan no 3802 cid35.00 polarity:+

Data file D1d-2\_2.mgf

Click mouse within plot area to zoom in by factor of two about that point

Or,   to  Da

Label all possible matches  Label matches used for scoring

Show Y-axis

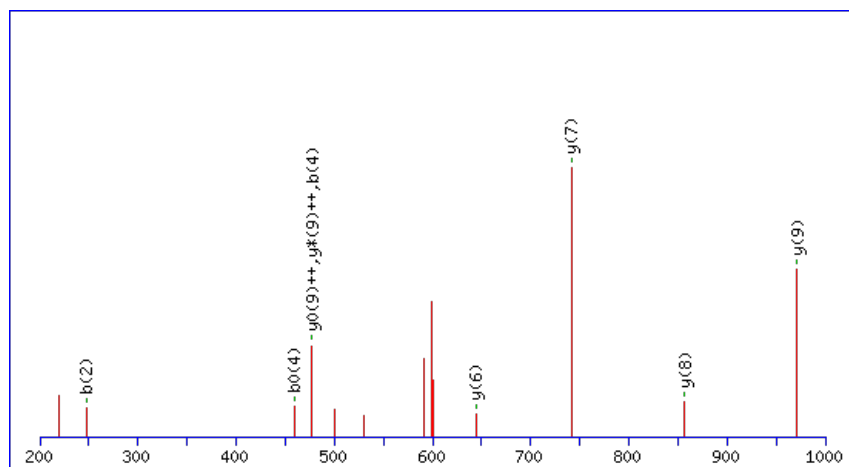

Monoisotopic mass of neutral peptide  $M_r(\text{calc})$ : 1216.5976

Fixed modifications: Carbamidomethyl (C) (apply to specified residues or termini only)

Ions Score: 35 Expect: 0.0012

Matches : 9/94 fragment ions using 10 most intense peaks ([help](#))

| #  | b               | b <sup>++</sup> | b <sup>0</sup>  | b <sup>0++</sup> | Seq. | y               | y <sup>++</sup> | y*        | y <sup>*++</sup> | y <sup>0</sup> | y <sup>0++</sup> | #  |
|----|-----------------|-----------------|-----------------|------------------|------|-----------------|-----------------|-----------|------------------|----------------|------------------|----|
| 1  | 148.0757        | 74.5415         |                 |                  | F    |                 |                 |           |                  |                |                  | 11 |
| 2  | <b>247.1441</b> | 124.0757        |                 |                  | V    | 1070.5364       | 535.7719        | 1053.5099 | 527.2586         | 1052.5259      | 526.7666         | 10 |
| 3  | 362.1710        | 181.5892        | 344.1605        | 172.5839         | D    | <b>971.4680</b> | 486.2376        | 954.4415  | <b>477.7244</b>  | 953.4575       | <b>477.2324</b>  | 9  |
| 4  | <b>477.1980</b> | 239.1026        | <b>459.1874</b> | 230.0974         | D    | <b>856.4411</b> | 428.7242        | 839.4145  | 420.2109         | 838.4305       | 419.7189         | 8  |
| 5  | 574.2508        | 287.6290        | 556.2402        | 278.6237         | P    | <b>741.4141</b> | 371.2107        | 724.3876  | 362.6974         | 723.4036       | 362.2054         | 7  |
| 6  | 671.3035        | 336.1554        | 653.2930        | 327.1501         | P    | <b>644.3614</b> | 322.6843        | 627.3348  | 314.1710         | 626.3508       | 313.6790         | 6  |
| 7  | 772.3512        | 386.6792        | 754.3406        | 377.6740         | T    | 547.3086        | 274.1579        | 530.2821  | 265.6447         | 529.2980       | 265.1527         | 5  |
| 8  | 829.3727        | 415.1900        | 811.3621        | 406.1847         | G    | 446.2609        | 223.6341        | 429.2344  | 215.1208         | 428.2504       | 214.6288         | 4  |
| 9  | 942.4567        | 471.7320        | 924.4462        | 462.7267         | L    | 389.2395        | 195.1234        | 372.2129  | 186.6101         | 371.2289       | 186.1181         | 3  |
| 10 | 1071.4993       | 536.2533        | 1053.4888       | 527.2480         | E    | 276.1554        | 138.5813        | 259.1288  | 130.0681         | 258.1448       | 129.5761         | 2  |
| 11 |                 |                 |                 |                  | K    | 147.1128        | 74.0600         | 130.0863  | 65.5468          |                |                  | 1  |

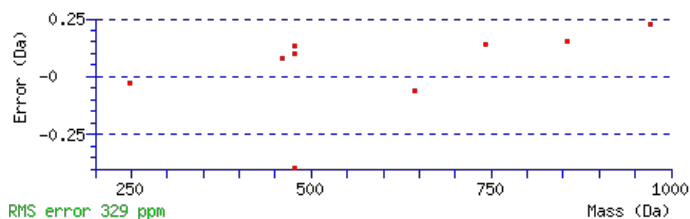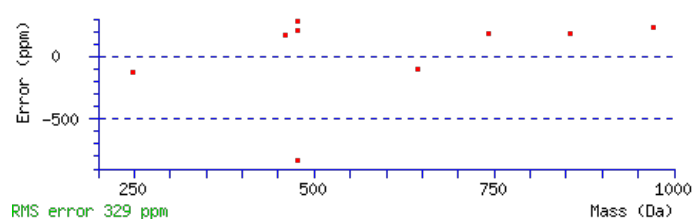

NCBI **BLAST** search of **FVDDPPTGLEK**

(Parameters: blastp, nr protein database, expect=20000, no filter, PAM30)

Other BLAST [web gateways](#)

All matches to this query

AT1G44575.1

| Score | Mr(calc)  | Delta  | Sequence                    |
|-------|-----------|--------|-----------------------------|
| 34.7  | 1216.5976 | 0.0013 | <a href="#">FVDDPPTGLEK</a> |
| 3.3   | 1216.5982 | 0.0006 | <a href="#">DKSQPMERAR</a>  |

Mascot: <http://www.matrixscience.com/>

**Peptide View**MS/MS Fragmentation of **ASEGTSSKDIKR**Found in **AT1G44810.1** in **TAIR\_Arabidopsis**, Symbols: | transcription regulator | chr1:16926061-16926951 FORWARD

Match to Query 4674: 1294.604404 from(648.309478,2+) index(7117)

Title: Elution from: 63.760 to 63.760 scan no 9310 cid35.00 polarity:+

Data file 0-1\_2.mgf

Click mouse within plot area to zoom in by factor of two about that point

Or,   to  Da Label all possible matches  Label matches used for scoring Show Y-axis 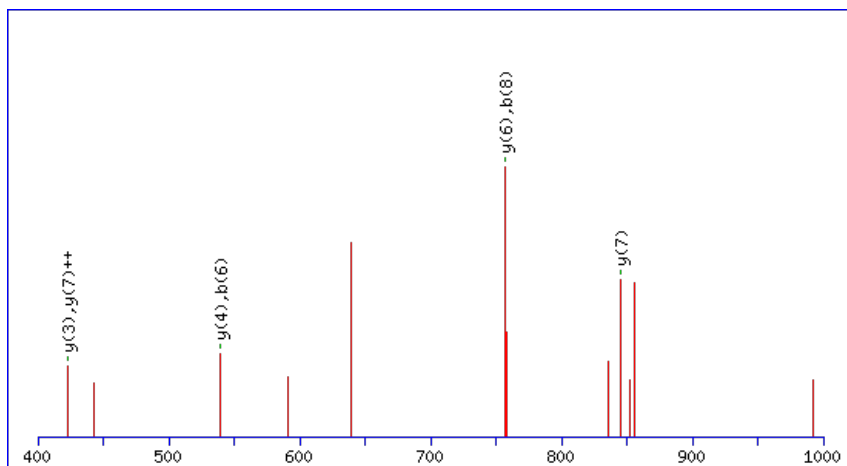Monoisotopic mass of neutral peptide **Mr(calc)**: 1294.6071

Fixed modifications: Carbamidomethyl (C) (apply to specified residues or termini only)

Ions Score: 31 **Expect**: 0.0081Matches : 7/110 fragment ions using 6 most intense peaks ([help](#))

| #  | b               | b <sup>++</sup> | b <sup>*</sup> | b <sup>*++</sup> | b <sup>0</sup> | b <sup>0++</sup> | Seq. | y               | y <sup>++</sup> | y <sup>*</sup> | y <sup>*++</sup> | y <sup>0</sup> | y <sup>0++</sup> | #  |
|----|-----------------|-----------------|----------------|------------------|----------------|------------------|------|-----------------|-----------------|----------------|------------------|----------------|------------------|----|
| 1  | 73.0414         | 37.0244         |                |                  |                |                  | A    |                 |                 |                |                  |                |                  | 12 |
| 2  | 161.0705        | 81.0389         |                |                  | 143.0599       | 72.0336          | S    | 1223.5803       | 612.2938        | 1205.5567      | 603.2820         | 1205.5697      | 603.2885         | 11 |
| 3  | 291.1101        | 146.0587        |                |                  | 273.0996       | 137.0534         | E    | 1135.5512       | 568.2792        | 1117.5276      | 559.2674         | 1117.5406      | 559.2740         | 10 |
| 4  | 349.1286        | 175.0679        |                |                  | 331.1181       | 166.0627         | G    | 1005.5116       | 503.2594        | 987.4880       | 494.2476         | 987.5010       | 494.2541         | 9  |
| 5  | 451.1733        | 226.0903        |                |                  | 433.1628       | 217.0850         | T    | 947.4931        | 474.2502        | 929.4695       | 465.2384         | 929.4825       | 465.2449         | 8  |
| 6  | <b>539.2024</b> | 270.1048        |                |                  | 521.1918       | 261.0996         | S    | <b>845.4484</b> | <b>423.2278</b> | 827.4248       | 414.2160         | 827.4378       | 414.2225         | 7  |
| 7  | 627.2315        | 314.1194        |                |                  | 609.2209       | 305.1141         | S    | <b>757.4193</b> | 379.2133        | 739.3957       | 370.2015         | 739.4087       | 370.2080         | 6  |
| 8  | <b>757.3205</b> | 379.1639        | 739.2969       | 370.1521         | 739.3099       | 370.1586         | K    | 669.3902        | 335.1988        | 651.3667       | 326.1870         | 651.3797       | 326.1935         | 5  |
| 9  | 873.3445        | 437.1759        | 855.3209       | 428.1641         | 855.3339       | 428.1706         | D    | <b>539.3012</b> | 270.1542        | 521.2776       | 261.1424         | 521.2906       | 261.1490         | 4  |
| 10 | 987.4256        | 494.2164        | 969.4020       | 485.2046         | 969.4150       | 485.2111         | I    | <b>423.2772</b> | 212.1423        | 405.2536       | 203.1305         |                |                  | 3  |
| 11 | 1117.5146       | 559.2609        | 1099.4910      | 550.2491         | 1099.5040      | 550.2557         | K    | 309.1961        | 155.1017        | 291.1725       | 146.0899         |                |                  | 2  |
| 12 |                 |                 |                |                  |                |                  | R    | 179.1071        | 90.0572         | 161.0835       | 81.0454          |                |                  | 1  |

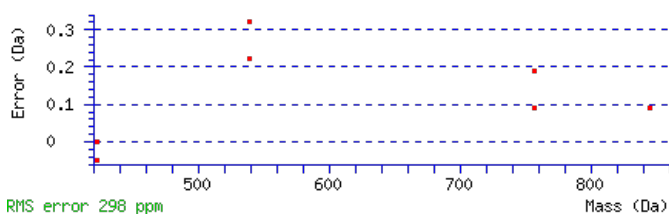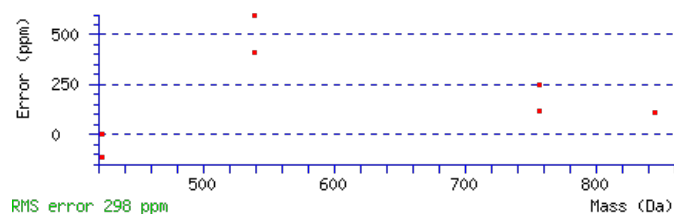NCBI **BLAST** search of **ASEGTSSKDIKR**

(Parameters: blastp, nr protein database, expect=20000, no filter, PAM30)

Other BLAST [web gateways](#)**All matches to this query**



## AT1G44810.1

| Score | Mr(calc)  | Delta   | Sequence                     |
|-------|-----------|---------|------------------------------|
| 31.3  | 1294.6071 | -0.0027 | <a href="#">ASEGTSSKDIKR</a> |
| 6.7   | 1294.6020 | 0.0024  | <a href="#">KYLEESCKPK</a>   |
| 3.7   | 1294.6017 | 0.0027  | <a href="#">RATSDIYHRR</a>   |
| 2.8   | 1294.6017 | 0.0027  | <a href="#">GRDGGLFGPSRR</a> |
| 2.8   | 1294.6033 | 0.0011  | <a href="#">AMMICRVIAGR</a>  |
| 0.8   | 1294.6071 | -0.0027 | <a href="#">EKPKTASTSSR</a>  |
| 0.5   | 1294.6046 | -0.0002 | <a href="#">CRQAILVANSE</a>  |
| 0.2   | 1294.6024 | 0.0020  | <a href="#">LTDMRERSAAK</a>  |

Mascot: <http://www.matrixscience.com/>

**Peptide View**MS/MS Fragmentation of **KLESSSHYNADFGKE**Found in **AT1G45000.1** in **TAIR\_Arabidopsis**, Symbols: | 26S proteasome regulatory complex subunit p42D, putative | chr1:17011660-17014047  
FORWARD

Match to Query 8123: 1710.785883 from(571.269237,3+) index(1177)

Title: Elution from: 19.968 to 19.968 scan no 1735 cid35.00 polarity:+

Data file D1d-2\_1.mgf

Click mouse within plot area to zoom in by factor of two about that point

Or,   to  Da Label all possible matches  Label matches used for scoring Show Y-axis 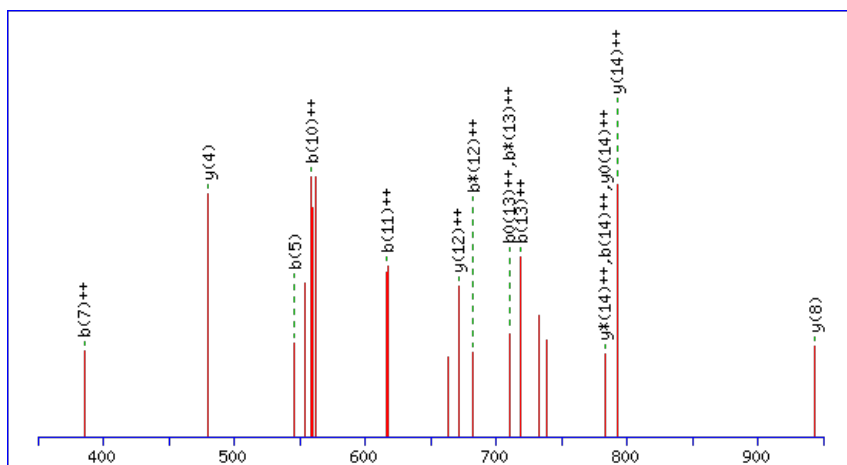Monoisotopic mass of neutral peptide  $M_r(\text{calc})$ : 1710.7849

Fixed modifications: Carbamidomethyl (C) (apply to specified residues or termini only)

Ions Score: 20 Expect: 0.018

Matches : 15/162 fragment ions using 20 most intense peaks ([help](#))

| #  | b               | b <sup>++</sup> | b*        | b <sup>*++</sup> | b <sup>0</sup> | b <sup>0++</sup> | Seq.     | y               | y <sup>++</sup> | y*        | y <sup>*++</sup> | y <sup>0</sup> | y <sup>0++</sup> | #         |
|----|-----------------|-----------------|-----------|------------------|----------------|------------------|----------|-----------------|-----------------|-----------|------------------|----------------|------------------|-----------|
| 1  | 129.1022        | 65.0548         | 112.0757  | 56.5415          |                |                  | <b>K</b> |                 |                 |           |                  |                |                  | <b>15</b> |
| 2  | 242.1863        | 121.5968        | 225.1598  | 113.0835         |                |                  | <b>L</b> | 1583.6972       | <b>792.3523</b> | 1566.6707 | <b>783.8390</b>  | 1565.6867      | <b>783.3470</b>  | <b>14</b> |
| 3  | 371.2289        | 186.1181        | 354.2023  | 177.6048         | 353.2183       | 177.1128         | <b>E</b> | 1470.6132       | 735.8102        | 1453.5866 | 727.2970         | 1452.6026      | 726.8049         | <b>13</b> |
| 4  | 458.2609        | 229.6341        | 441.2344  | 221.1208         | 440.2504       | 220.6288         | <b>S</b> | 1341.5706       | <b>671.2889</b> | 1324.5440 | 662.7757         | 1323.5600      | 662.2836         | <b>12</b> |
| 5  | <b>545.2930</b> | 273.1501        | 528.2664  | 264.6368         | 527.2824       | 264.1448         | <b>S</b> | 1254.5386       | 627.7729        | 1237.5120 | 619.2596         | 1236.5280      | 618.7676         | <b>11</b> |
| 6  | 632.3250        | 316.6661        | 615.2984  | 308.1529         | 614.3144       | 307.6608         | <b>S</b> | 1167.5065       | 584.2569        | 1150.4800 | 575.7436         | 1149.4960      | 575.2516         | <b>10</b> |
| 7  | 769.3839        | <b>385.1956</b> | 752.3573  | 376.6823         | 751.3733       | 376.1903         | <b>H</b> | 1080.4745       | 540.7409        | 1063.4480 | 532.2276         | 1062.4639      | 531.7356         | <b>9</b>  |
| 8  | 932.4472        | 466.7272        | 915.4207  | 458.2140         | 914.4367       | 457.7220         | <b>Y</b> | <b>943.4156</b> | 472.2114        | 926.3890  | 463.6982         | 925.4050       | 463.2061         | <b>8</b>  |
| 9  | 1046.4901       | 523.7487        | 1029.4636 | 515.2354         | 1028.4796      | 514.7434         | <b>N</b> | 780.3523        | 390.6798        | 763.3257  | 382.1665         | 762.3417       | 381.6745         | <b>7</b>  |
| 10 | 1117.5273       | <b>559.2673</b> | 1100.5007 | 550.7540         | 1099.5167      | 550.2620         | <b>A</b> | 666.3093        | 333.6583        | 649.2828  | 325.1450         | 648.2988       | 324.6530         | <b>6</b>  |
| 11 | 1232.5542       | <b>616.7807</b> | 1215.5277 | 608.2675         | 1214.5436      | 607.7755         | <b>D</b> | 595.2722        | 298.1397        | 578.2457  | 289.6265         | 577.2617       | 289.1345         | <b>5</b>  |
| 12 | 1379.6226       | 690.3149        | 1362.5961 | <b>681.8017</b>  | 1361.6121      | 681.3097         | <b>F</b> | <b>480.2453</b> | 240.6263        | 463.2187  | 232.1130         | 462.2347       | 231.6210         | <b>4</b>  |
| 13 | 1436.6441       | <b>718.8257</b> | 1419.6175 | <b>710.3124</b>  | 1418.6335      | <b>709.8204</b>  | <b>G</b> | 333.1769        | 167.0921        | 316.1503  | 158.5788         | 315.1663       | 158.0868         | <b>3</b>  |
| 14 | 1564.7390       | <b>782.8732</b> | 1547.7125 | 774.3599         | 1546.7285      | 773.8679         | <b>K</b> | 276.1554        | 138.5813        | 259.1288  | 130.0681         | 258.1448       | 129.5761         | <b>2</b>  |
| 15 |                 |                 |           |                  |                |                  | <b>E</b> | 148.0604        | 74.5339         |           |                  | 130.0499       | 65.5286          | <b>1</b>  |

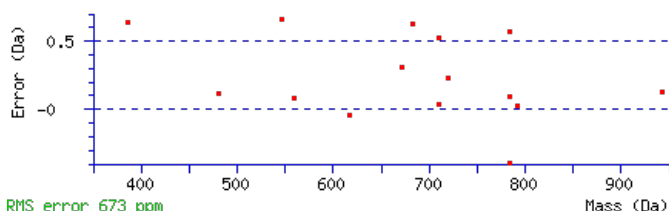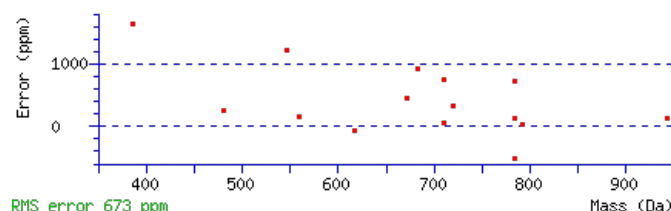

## AT1G45000.1

NCBI **BLAST** search of [KLESSSHYNADEFGKE](#)

(Parameters: blastp, nr protein database, expect=20000, no filter, PAM30)

Other BLAST [web gateways](#)

### All matches to this query

| Score | Mr(calc)  | Delta  | Sequence                         |
|-------|-----------|--------|----------------------------------|
| 20.4  | 1710.7849 | 0.0010 | <a href="#">KLESSSHYNADEFGKE</a> |
| 1.8   | 1710.7858 | 0.0001 | <a href="#">DPYEGIPMSFPRMR</a>   |
| 0.4   | 1710.7818 | 0.0041 | <a href="#">MRSSNEFVSSMHGDK</a>  |

**Mascot:** <http://www.matrixscience.com/>

## Peptide View

MS/MS Fragmentation of **VVTIDSYEDVPTYSEESLKK**

Found in **AT1G47128.1** in **TAIR\_Arabidopsis**, Symbols: RD21A, RD21 | RD21 (RESPONSIVE TO DEHYDRATION 21); cysteine-type peptidase | chr1:17285579-17288049 REVERSE

Match to Query 10189: 2301.124443 from(768.048757,3+) index(6362)

Title: Elution from: 56.105 to 56.105 scan no 8149 cid35.00 polarity:+

Data file C7-1\_2.mgf

Click mouse within plot area to zoom in by factor of two about that point

Or, Plot from  to  Da

Label all possible matches  Label matches used for scoring

Show Y-axis

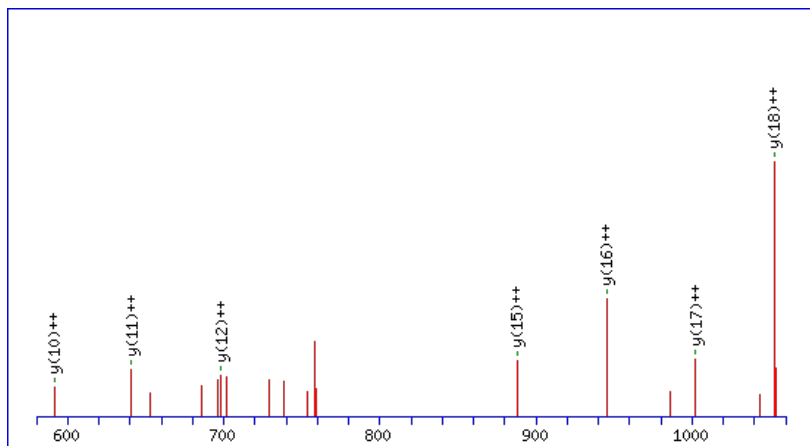

Monoisotopic mass of neutral peptide  $M_r(\text{calc})$ : 2301.1264

Fixed modifications: Carbamidomethyl (C) (apply to specified residues or termini only)

Ions Score: 43 Expect: 0.00023

Matches : 7/182 fragment ions using 12 most intense peaks ([help](#))

| #  | b         | b <sup>++</sup> | b*        | b <sup>*++</sup> | b <sup>0</sup> | b <sup>0++</sup> | Seq | y         | y <sup>++</sup> | y*        | y <sup>*++</sup> | y <sup>0</sup> | y <sup>0++</sup> | #  |
|----|-----------|-----------------|-----------|------------------|----------------|------------------|-----|-----------|-----------------|-----------|------------------|----------------|------------------|----|
| 1  | 100.0757  | 50.5415         |           |                  |                |                  | V   |           |                 |           |                  |                |                  | 20 |
| 2  | 199.1441  | 100.0757        |           |                  |                |                  | V   | 2203.0653 | 1102.0363       | 2186.0387 | 1093.5230        | 2185.0547      | 1093.0310        | 19 |
| 3  | 300.1918  | 150.5995        |           |                  | 282.1812       | 141.5942         | T   | 2103.9968 | 1052.5021       | 2086.9703 | 1043.9888        | 2085.9863      | 1043.4968        | 18 |
| 4  | 413.2758  | 207.1416        |           |                  | 395.2653       | 198.1363         | I   | 2002.9492 | 1001.9782       | 1985.9226 | 993.4649         | 1984.9386      | 992.9729         | 17 |
| 5  | 528.3028  | 264.6550        |           |                  | 510.2922       | 255.6498         | D   | 1889.8651 | 945.4362        | 1872.8385 | 936.9229         | 1871.8545      | 936.4309         | 16 |
| 6  | 615.3348  | 308.1710        |           |                  | 597.3243       | 299.1658         | S   | 1774.8382 | 887.9227        | 1757.8116 | 879.4094         | 1756.8276      | 878.9174         | 15 |
| 7  | 778.3981  | 389.7027        |           |                  | 760.3876       | 380.6974         | Y   | 1687.8061 | 844.4067        | 1670.7796 | 835.8934         | 1669.7956      | 835.4014         | 14 |
| 8  | 907.4407  | 454.2240        |           |                  | 889.4302       | 445.2187         | E   | 1524.7428 | 762.8750        | 1507.7162 | 754.3618         | 1506.7322      | 753.8698         | 13 |
| 9  | 1022.4677 | 511.7375        |           |                  | 1004.4571      | 502.7322         | D   | 1395.7002 | 698.3537        | 1378.6737 | 689.8405         | 1377.6896      | 689.3485         | 12 |
| 10 | 1121.5361 | 561.2717        |           |                  | 1103.5255      | 552.2664         | V   | 1280.6733 | 640.8403        | 1263.6467 | 632.3270         | 1262.6627      | 631.8350         | 11 |
| 11 | 1218.5889 | 609.7981        |           |                  | 1200.5783      | 600.7928         | P   | 1181.6048 | 591.3061        | 1164.5783 | 582.7928         | 1163.5943      | 582.3008         | 10 |
| 12 | 1319.6365 | 660.3219        |           |                  | 1301.6260      | 651.3166         | T   | 1084.5521 | 542.7797        | 1067.5255 | 534.2664         | 1066.5415      | 533.7744         | 9  |
| 13 | 1482.6999 | 741.8536        |           |                  | 1464.6893      | 732.8483         | Y   | 983.5044  | 492.2558        | 966.4779  | 483.7426         | 965.4938       | 483.2506         | 8  |
| 14 | 1569.7319 | 785.3696        |           |                  | 1551.7213      | 776.3643         | S   | 820.4411  | 410.7242        | 803.4145  | 402.2109         | 802.4305       | 401.7189         | 7  |
| 15 | 1698.7745 | 849.8909        |           |                  | 1680.7639      | 840.8856         | E   | 733.4090  | 367.2082        | 716.3825  | 358.6949         | 715.3985       | 358.2029         | 6  |
| 16 | 1827.8171 | 914.4122        |           |                  | 1809.8065      | 905.4069         | E   | 604.3665  | 302.6869        | 587.3399  | 294.1736         | 586.3559       | 293.6816         | 5  |
| 17 | 1914.8491 | 957.9282        |           |                  | 1896.8385      | 948.9229         | S   | 475.3239  | 238.1656        | 458.2973  | 229.6523         | 457.3133       | 229.1603         | 4  |
| 18 | 2027.9332 | 1014.4702       |           |                  | 2009.9226      | 1005.4649        | L   | 388.2918  | 194.6496        | 371.2653  | 186.1363         |                |                  | 3  |
| 19 | 2156.0281 | 1078.5177       | 2139.0016 | 1070.0044        | 2138.0176      | 1069.5124        | K   | 275.2078  | 138.1075        | 258.1812  | 129.5942         |                |                  | 2  |
| 20 |           |                 |           |                  |                |                  | K   | 147.1128  | 74.0600         | 130.0863  | 65.5468          |                |                  | 1  |

# AT1G47128.1

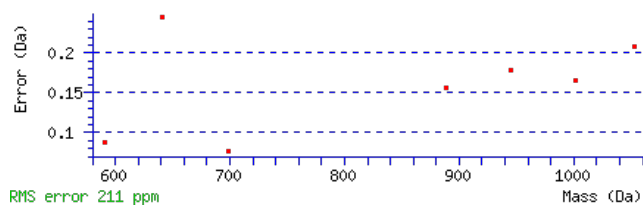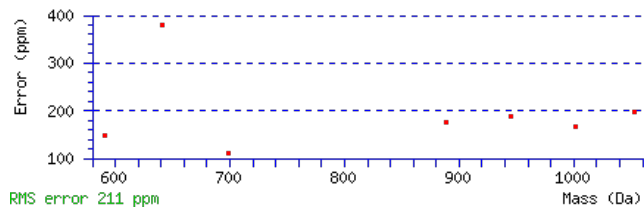

NCBI **BLAST** search of [VVTIDSYEDVPTYSEESLKK](#)  
(Parameters: blastp, nr protein database, expect=20000, no filter, PAM30)  
Other BLAST [web gateways](#)

## All matches to this query

| Score | Mr(calc)  | Delta   | Sequence                                |
|-------|-----------|---------|-----------------------------------------|
| 43.0  | 2301.1264 | -0.0019 | <a href="#">VVTIDSYEDVPTYSEESLKK</a>    |
| 4.3   | 2301.1218 | 0.0026  | <a href="#">SDKEGFYTAAFVLYKNHPK</a>     |
| 0.6   | 2301.1271 | -0.0026 | <a href="#">TGLSPSSALTSQGGRDMIPPEGK</a> |
| 0.5   | 2301.1271 | -0.0026 | <a href="#">LTHVGIAGEAQMVDVSSKDNSK</a>  |

Mascot: <http://www.matrixscience.com/>



# Mascot Search Results

## Peptide View

MS/MS Fragmentation of **VDDHIGVAIAGLTADGR**

Found in **AT1G47250.1** in **TAIR\_Arabidopsis**, Symbols: PAF2 | PAF2 (20S proteasome alpha subunit F2); peptidase | chr1:17321660-17323340  
FORWARD

Match to Query 8132: 1678.863900 from(560.628576,3+) index(7020)

Title: Elution from: 61.491 to 61.491 scan no 8960 cid35.00 polarity:+

Data file C7-3\_1.mgf

Click mouse within plot area to zoom in by factor of two about that point

Or,   to  Da

Label all possible matches  Label matches used for scoring

Show Y-axis

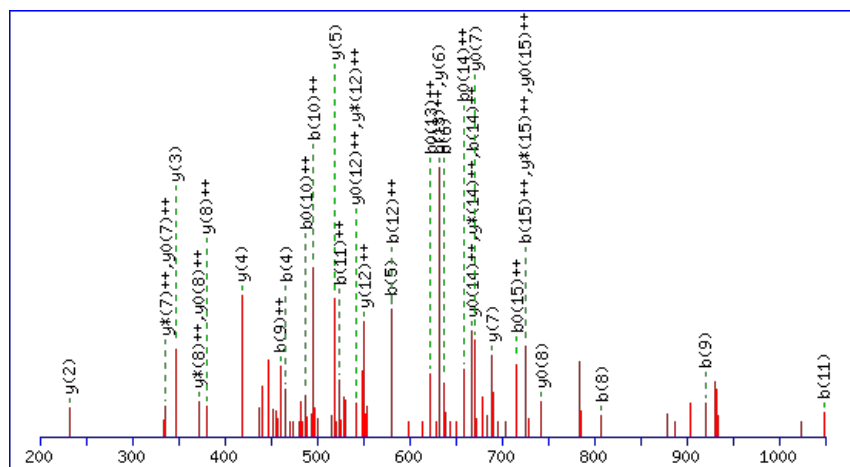

Monoisotopic mass of neutral peptide **Mr(calc)**: 1678.8639

**Fixed modifications**: Carbamidomethyl (C) (apply to specified residues or termini only)

**Ions Score**: 42 **Expect**: 0.00023

**Matches** : 37/154 fragment ions using 47 most intense peaks ([help](#))

| #  | b         | b <sup>++</sup> | b <sup>0</sup> | b <sup>0++</sup> | Seq. | y         | y <sup>++</sup> | y <sup>*</sup> | y <sup>*++</sup> | y <sup>0</sup> | y <sup>0++</sup> | #  |
|----|-----------|-----------------|----------------|------------------|------|-----------|-----------------|----------------|------------------|----------------|------------------|----|
| 1  | 100.0757  | 50.5415         |                |                  | V    |           |                 |                |                  |                |                  | 17 |
| 2  | 215.1026  | 108.0550        | 197.0921       | 99.0497          | D    | 1580.8027 | 790.9050        | 1563.7762      | 782.3917         | 1562.7921      | 781.8997         | 16 |
| 3  | 330.1296  | 165.5684        | 312.1190       | 156.5631         | D    | 1465.7758 | 733.3915        | 1448.7492      | 724.8782         | 1447.7652      | 724.3862         | 15 |
| 4  | 467.1885  | 234.0979        | 449.1779       | 225.0926         | H    | 1350.7488 | 675.8781        | 1333.7223      | 667.3648         | 1332.7383      | 666.8728         | 14 |
| 5  | 580.2726  | 290.6399        | 562.2620       | 281.6346         | I    | 1213.6899 | 607.3486        | 1196.6634      | 598.8353         | 1195.6793      | 598.3433         | 13 |
| 6  | 637.2940  | 319.1506        | 619.2835       | 310.1454         | G    | 1100.6058 | 550.8066        | 1083.5793      | 542.2933         | 1082.5953      | 541.8013         | 12 |
| 7  | 736.3624  | 368.6849        | 718.3519       | 359.6796         | V    | 1043.5844 | 522.2958        | 1026.5578      | 513.7826         | 1025.5738      | 513.2905         | 11 |
| 8  | 807.3995  | 404.2034        | 789.3890       | 395.1981         | A    | 944.5160  | 472.7616        | 927.4894       | 464.2483         | 926.5054       | 463.7563         | 10 |
| 9  | 920.4836  | 460.7454        | 902.4730       | 451.7402         | I    | 873.4789  | 437.2431        | 856.4523       | 428.7298         | 855.4683       | 428.2378         | 9  |
| 10 | 991.5207  | 496.2640        | 973.5102       | 487.2587         | A    | 760.3948  | 380.7010        | 743.3682       | 372.1878         | 742.3842       | 371.6958         | 8  |
| 11 | 1048.5422 | 524.7747        | 1030.5316      | 515.7694         | G    | 689.3577  | 345.1825        | 672.3311       | 336.6692         | 671.3471       | 336.1772         | 7  |
| 12 | 1161.6262 | 581.3168        | 1143.6157      | 572.3115         | L    | 632.3362  | 316.6717        | 615.3097       | 308.1585         | 614.3257       | 307.6665         | 6  |
| 13 | 1262.6739 | 631.8406        | 1244.6634      | 622.8353         | T    | 519.2522  | 260.1297        | 502.2256       | 251.6164         | 501.2416       | 251.1244         | 5  |
| 14 | 1333.7110 | 667.3592        | 1315.7005      | 658.3539         | A    | 418.2045  | 209.6059        | 401.1779       | 201.0926         | 400.1939       | 200.6006         | 4  |
| 15 | 1448.7380 | 724.8726        | 1430.7274      | 715.8673         | D    | 347.1674  | 174.0873        | 330.1408       | 165.5740         | 329.1568       | 165.0820         | 3  |
| 16 | 1505.7594 | 753.3834        | 1487.7489      | 744.3781         | G    | 232.1404  | 116.5738        | 215.1139       | 108.0606         |                |                  | 2  |
| 17 |           |                 |                |                  | R    | 175.1190  | 88.0631         | 158.0924       | 79.5498          |                |                  | 1  |

AT1G47250.1

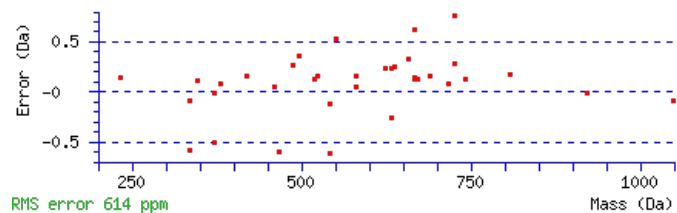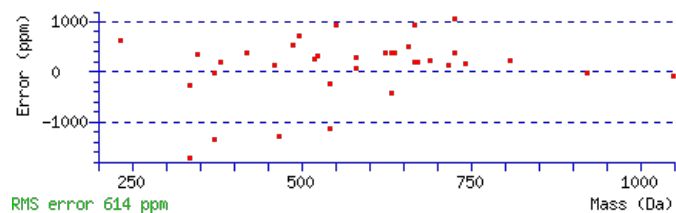

NCBI **BLAST** search of [VDDHIGVAIAGLTADGR](#)

(Parameters: blastp, nr protein database, expect=20000, no filter, PAM30)

Other BLAST [web gateways](#)

**All matches to this query**

| Score | Mr(calc)  | Delta  | Sequence                          |
|-------|-----------|--------|-----------------------------------|
| 42.3  | 1678.8639 | 0.0000 | <a href="#">VDDHIGVAIAGLTADGR</a> |

Mascot: <http://www.matrixscience.com/>



# Mascot Search Results

## Peptide View

MS/MS Fragmentation of **SFEQIEVER**

Found in **AT1G47260.1** in **TAIR\_Arabidopsis**, Symbols: GAMMA CA2, APFI | APFI; carbonate dehydratase | chr1:17323824-17325787  
REVERSE

Match to Query 3210: 1135.550604 from(568.782578,2+) index(3219)

Title: Elution from: 34.568 to 34.568 scan no 4135 cid35.00 polarity:+

Data file D1d-2\_2.mgf

Click mouse within plot area to zoom in by factor of two about that point

Or,  to  Da

Label all possible matches  Label matches used for scoring

Show Y-axis

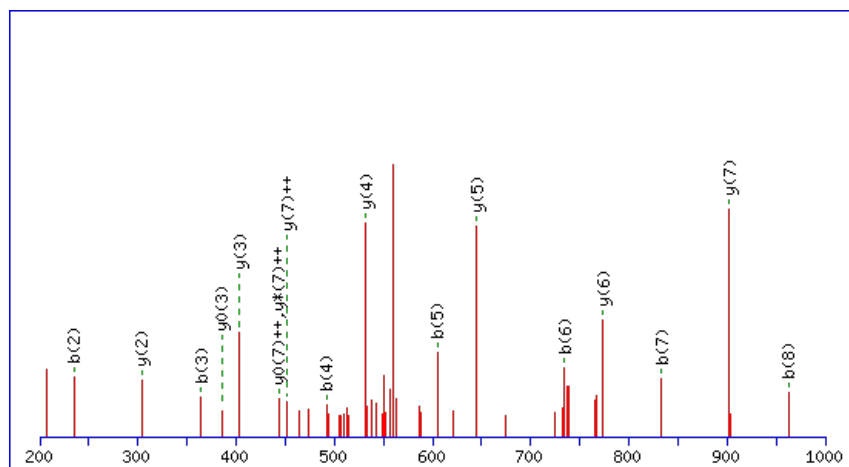

Monoisotopic mass of neutral peptide Mr(calc): 1135.5509

Fixed modifications: Carbamidomethyl (C) (apply to specified residues or termini only)

Ions Score: 56 Expect: 8.6e-006

Matches : 17/88 fragment ions using 22 most intense peaks [\(help\)](#)

| # | b               | b <sup>++</sup> | b*       | b <sup>*++</sup> | b <sup>0</sup> | b <sup>0++</sup> | Seq. | y               | y <sup>++</sup> | y*        | y <sup>*++</sup> | y <sup>0</sup>  | y <sup>0++</sup> | # |
|---|-----------------|-----------------|----------|------------------|----------------|------------------|------|-----------------|-----------------|-----------|------------------|-----------------|------------------|---|
| 1 | 88.0393         | 44.5233         |          |                  | 70.0287        | 35.5180          | S    |                 |                 |           |                  |                 |                  | 9 |
| 2 | <b>235.1077</b> | 118.0575        |          |                  | 217.0972       | 109.0522         | F    | 1049.5262       | 525.2667        | 1032.4997 | 516.7535         | 1031.5156       | 516.2615         | 8 |
| 3 | <b>364.1503</b> | 182.5788        |          |                  | 346.1397       | 173.5735         | E    | <b>902.4578</b> | <b>451.7325</b> | 885.4312  | <b>443.2193</b>  | 884.4472        | <b>442.7272</b>  | 7 |
| 4 | <b>492.2089</b> | 246.6081        | 475.1823 | 238.0948         | 474.1983       | 237.6028         | Q    | <b>773.4152</b> | 387.2112        | 756.3886  | 378.6980         | 755.4046        | 378.2060         | 6 |
| 5 | <b>605.2930</b> | 303.1501        | 588.2664 | 294.6368         | 587.2824       | 294.1448         | I    | <b>645.3566</b> | 323.1819        | 628.3301  | 314.6687         | 627.3461        | 314.1767         | 5 |
| 6 | <b>734.3355</b> | 367.6714        | 717.3090 | 359.1581         | 716.3250       | 358.6661         | E    | <b>532.2726</b> | 266.6399        | 515.2460  | 258.1266         | 514.2620        | 257.6346         | 4 |
| 7 | <b>833.4040</b> | 417.2056        | 816.3774 | 408.6923         | 815.3934       | 408.2003         | V    | <b>403.2300</b> | 202.1186        | 386.2034  | 193.6053         | <b>385.2194</b> | 193.1133         | 3 |
| 8 | <b>962.4466</b> | 481.7269        | 945.4200 | 473.2136         | 944.4360       | 472.7216         | E    | <b>304.1615</b> | 152.5844        | 287.1350  | 144.0711         | 286.1510        | 143.5791         | 2 |
| 9 |                 |                 |          |                  |                |                  | R    | 175.1190        | 88.0631         | 158.0924  | 79.5498          |                 |                  | 1 |

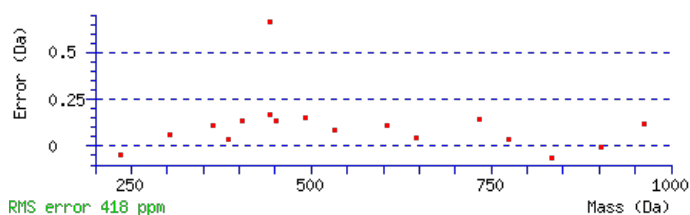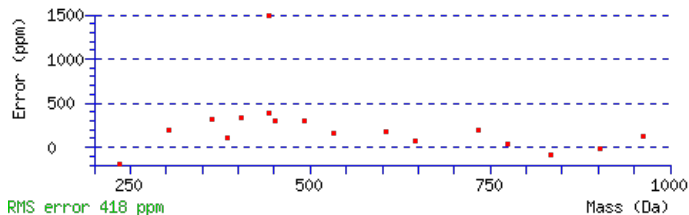

NCBI BLAST search of [SFEQIEVER](#)

(Parameters: blastp, nr protein database, expect=20000, no filter, PAM30)

Other BLAST [web gateways](#)

All matches to this query

| Score | Mr(calc) | Delta | Sequence |
|-------|----------|-------|----------|
|       |          |       |          |



## AT1G47260.1

|      |           |         |                           |
|------|-----------|---------|---------------------------|
| 55.9 | 1135.5509 | -0.0003 | <a href="#">SFEQIEVER</a> |
| 5.0  | 1135.5509 | -0.0003 | <a href="#">VYDQLDVER</a> |
| 3.4  | 1135.5516 | -0.0010 | <a href="#">MTRGSQRER</a> |

**Mascot:** <http://www.matrixscience.com/>

**Peptide View**MS/MS Fragmentation of **LLLSAK**

Found in **AT1G47270.1** in **TAIR\_Arabidopsis**, Symbols: AtTLP6 | AtTLP6 (TUBBY LIKE PROTEIN 6); phosphoric diester hydrolase/transcription factor | chr1:17329268-17331004 FORWARD

Match to Query 573: 643.427480 from(322.721016,2+) index(1045)

Title: Elution from: 16.152 to 16.152 scan no 1452 cid35.00 polarity:+

Data file 0-3\_2.mgf

Click mouse within plot area to zoom in by factor of two about that point

Or,   to  Da

Label all possible matches  Label matches used for scoring

Show Y-axis

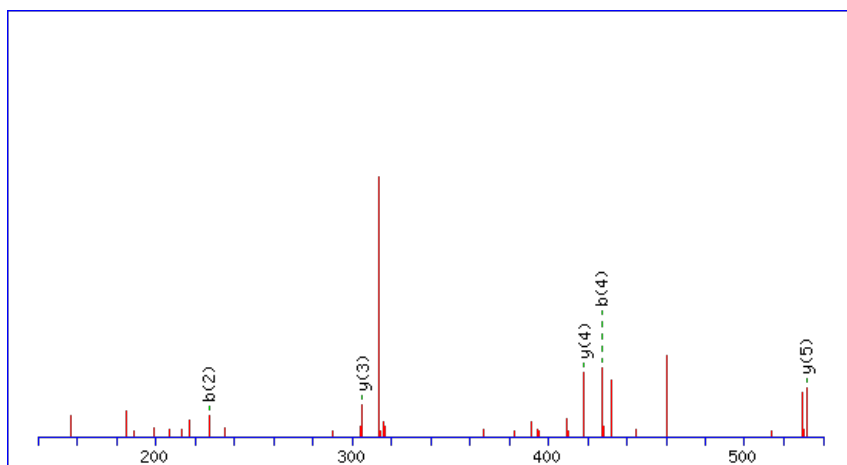

**Monoisotopic mass of neutral peptide Mr(calc):** 643.4268

**Fixed modifications:** Carbamidomethyl (C) (apply to specified residues or termini only)

**Ions Score:** 25 **Expect:** 0.017

**Matches:** 5/40 fragment ions using 8 most intense peaks ([help](#))

| # | b               | b <sup>++</sup> | b <sup>0</sup> | b <sup>0++</sup> | Seq. | y               | y <sup>++</sup> | y*       | y <sup>*++</sup> | y <sup>0</sup> | y <sup>0++</sup> | # |
|---|-----------------|-----------------|----------------|------------------|------|-----------------|-----------------|----------|------------------|----------------|------------------|---|
| 1 | 114.0913        | 57.5493         |                |                  | L    |                 |                 |          |                  |                |                  | 6 |
| 2 | <b>227.1754</b> | 114.0913        |                |                  | L    | <b>531.3501</b> | 266.1787        | 514.3235 | 257.6654         | 513.3395       | 257.1734         | 5 |
| 3 | 340.2595        | 170.6334        |                |                  | L    | <b>418.2660</b> | 209.6366        | 401.2395 | 201.1234         | 400.2554       | 200.6314         | 4 |
| 4 | <b>427.2915</b> | 214.1494        | 409.2809       | 205.1441         | S    | <b>305.1819</b> | 153.0946        | 288.1554 | 144.5813         | 287.1714       | 144.0893         | 3 |
| 5 | 498.3286        | 249.6679        | 480.3180       | 240.6627         | A    | 218.1499        | 109.5786        | 201.1234 | 101.0653         |                |                  | 2 |
| 6 |                 |                 |                |                  | K    | 147.1128        | 74.0600         | 130.0863 | 65.5468          |                |                  | 1 |

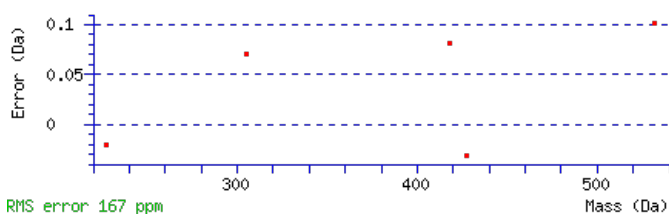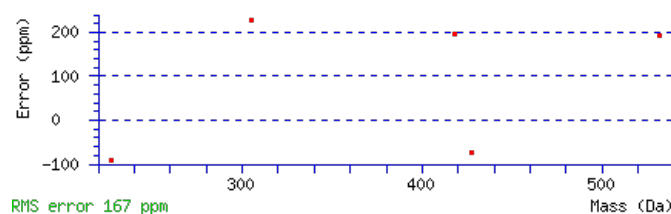NCBI BLAST search of [LLLSAK](#)

(Parameters: blastp, nr protein database, expect=20000, no filter, PAM30)

Other BLAST [web gateways](#)

**All matches to this query**

| Score | Mr(calc) | Delta  | Sequence               |
|-------|----------|--------|------------------------|
| 24.9  | 643.4268 | 0.0006 | <a href="#">LLLSAK</a> |
| 23.2  | 643.4268 | 0.0006 | <a href="#">IISLAK</a> |
| 23.2  | 643.4268 | 0.0006 | <a href="#">ILSLAK</a> |

# AT1G47270.1

|      |          |        |                        |
|------|----------|--------|------------------------|
| 17.7 | 643.4268 | 0.0006 | <a href="#">LLIGTK</a> |
| 17.2 | 643.4268 | 0.0006 | <a href="#">LLTVAK</a> |
| 11.4 | 643.4268 | 0.0006 | <a href="#">IISAIK</a> |
| 11.4 | 643.4268 | 0.0006 | <a href="#">IISALK</a> |
| 11.4 | 643.4268 | 0.0006 | <a href="#">LISALK</a> |
| 11.4 | 643.4268 | 0.0006 | <a href="#">LLSAIK</a> |
| 9.1  | 643.4268 | 0.0006 | <a href="#">LITAVK</a> |

**Mascot:** <http://www.matrixscience.com/>

**Peptide View**MS/MS Fragmentation of **AAEAVEEFGGILTSIK**

Found in **AT1G47420.1** in **TAIR\_Arabidopsis**, Symbols: | Identical to Uncharacterized protein At1g47420, mitochondrial precursor [Arabidopsis thaliana] (GB:Q9SX77); similar to APFI, carbonate dehydratase [Arabidopsis thaliana] (TAIR:AT1G47260.1); similar to unknown [Populus trichocarpa] (GB:A

Match to Query 7826: 1650.801753 from(551.274527,3+) index(9856)

Title: Elution from: 89.641 to 89.641 scan no 13457 cid35.00 polarity:+

Data file C7-3\_1.mgf

Click mouse within plot area to zoom in by factor of two about that point

Or,   to  Da

Label all possible matches  Label matches used for scoring

Show Y-axis

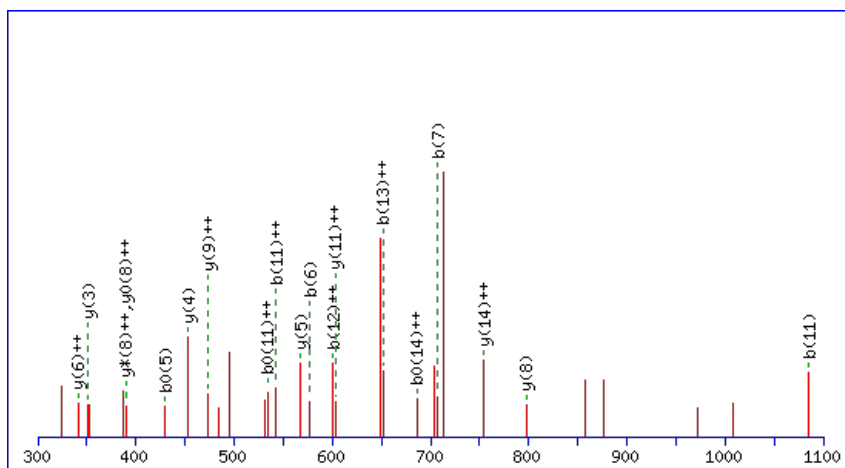

**Monoisotopic mass of neutral peptide Mr(calc):** 1650.8059

**Fixed modifications:** Carbamidomethyl (C) (apply to specified residues or termini only)

**Ions Score:** 26 **Expect:** 0.027

**Matches:** 19/142 fragment ions using 31 most intense peaks ([help](#))

| #  | b         | b <sup>++</sup> | b <sup>0</sup> | b <sup>0++</sup> | Seq. | y         | y <sup>++</sup> | y <sup>*</sup> | y <sup>*++</sup> | y <sup>0</sup> | y <sup>0++</sup> | #  |
|----|-----------|-----------------|----------------|------------------|------|-----------|-----------------|----------------|------------------|----------------|------------------|----|
| 1  | 73.0414   | 37.0244         |                |                  | A    |           |                 |                |                  |                |                  | 16 |
| 2  | 145.0756  | 73.0414         |                |                  | A    | 1579.7790 | 790.3932        | 1561.7554      | 781.3814         | 1561.7685      | 781.3879         | 15 |
| 3  | 275.1152  | 138.0612        | 257.1046       | 129.0560         | E    | 1507.7449 | 754.3761        | 1489.7213      | 745.3643         | 1489.7343      | 745.3708         | 14 |
| 4  | 347.1494  | 174.0783        | 329.1388       | 165.0730         | A    | 1377.7052 | 689.3563        | 1359.6817      | 680.3445         | 1359.6947      | 680.3510         | 13 |
| 5  | 447.2148  | 224.1110        | 429.2042       | 215.1058         | V    | 1305.6711 | 653.3392        | 1287.6475      | 644.3274         | 1287.6605      | 644.3339         | 12 |
| 6  | 577.2544  | 289.1309        | 559.2439       | 280.1256         | E    | 1205.6057 | 603.3065        | 1187.5821      | 594.2947         | 1187.5951      | 594.3012         | 11 |
| 7  | 707.2941  | 354.1507        | 689.2835       | 345.1454         | E    | 1075.5660 | 538.2866        | 1057.5424      | 529.2749         | 1057.5555      | 529.2814         | 10 |
| 8  | 855.3595  | 428.1834        | 837.3489       | 419.1781         | F    | 945.5264  | 473.2668        | 927.5028       | 464.2550         | 927.5158       | 464.2616         | 9  |
| 9  | 913.3780  | 457.1926        | 895.3674       | 448.1874         | G    | 797.4609  | 399.2341        | 779.4374       | 390.2223         | 779.4504       | 390.2288         | 8  |
| 10 | 971.3965  | 486.2019        | 953.3859       | 477.1966         | G    | 739.4424  | 370.2249        | 721.4189       | 361.2131         | 721.4319       | 361.2196         | 7  |
| 11 | 1085.4776 | 543.2424        | 1067.4670      | 534.2372         | I    | 681.4239  | 341.2156        | 663.4004       | 332.2038         | 663.4134       | 332.2103         | 6  |
| 12 | 1199.5587 | 600.2830        | 1181.5481      | 591.2777         | L    | 567.3428  | 284.1751        | 549.3193       | 275.1633         | 549.3323       | 275.1698         | 5  |
| 13 | 1301.6034 | 651.3053        | 1283.5928      | 642.3001         | T    | 453.2617  | 227.1345        | 435.2382       | 218.1227         | 435.2512       | 218.1292         | 4  |
| 14 | 1389.6325 | 695.3199        | 1371.6219      | 686.3146         | S    | 351.2170  | 176.1122        | 333.1935       | 167.1004         | 333.2065       | 167.1069         | 3  |
| 15 | 1503.7136 | 752.3604        | 1485.7030      | 743.3551         | I    | 263.1880  | 132.0976        | 245.1644       | 123.0858         |                |                  | 2  |
| 16 |           |                 |                |                  | K    | 149.1069  | 75.0571         | 131.0833       | 66.0453          |                |                  | 1  |

# AT1G47420.1

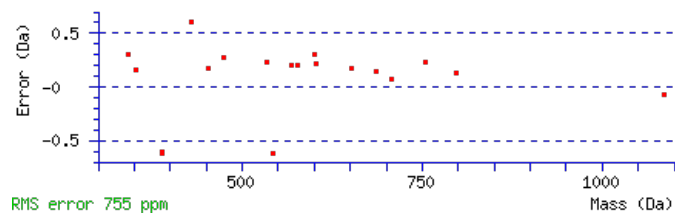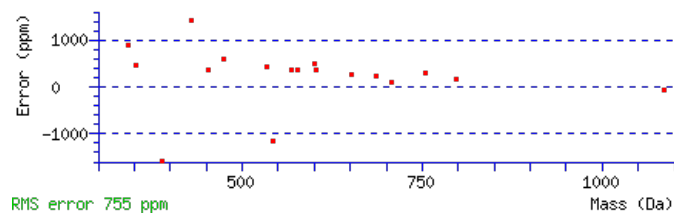

NCBI **BLAST** search of [AAEAVEEFGGILTSIK](#)  
(Parameters: blastp, nr protein database, expect=20000, no filter, PAM30)  
Other BLAST [web gateways](#)

## All matches to this query

| Score | Mr(calc)  | Delta   | Sequence                         |
|-------|-----------|---------|----------------------------------|
| 25.8  | 1650.8059 | -0.0041 | <a href="#">AAEAVEEFGGILTSIK</a> |
| 3.0   | 1650.8038 | -0.0021 | <a href="#">LHQMLYERIQTAK</a>    |
| 1.3   | 1650.8063 | -0.0046 | <a href="#">ELAVRERSATLEK</a>    |

Mascot: <http://www.matrixscience.com/>

**Peptide View**MS/MS Fragmentation of **VSSVEVDLPAMLAQK**

Found in **AT1G48030.1** in **TAIR\_Arabidopsis**, Symbols: MTLPD1 | dihydrolipoamide dehydrogenase 1, mitochondrial / lipoamide dehydrogenase 1 (MTLPD1) | chr1:17721101-17722810 REVERSE

Match to Query 6934: 1602.784732 from(802.399642,2+) index(8030)

Title: Elution from: 72.013 to 72.013 scan no 10765 cid35.00 polarity:+

Data file D6h-2\_3.mgf

Click mouse within plot area to zoom in by factor of two about that point

Or,   to  Da

Label all possible matches  Label matches used for scoring

Show Y-axis

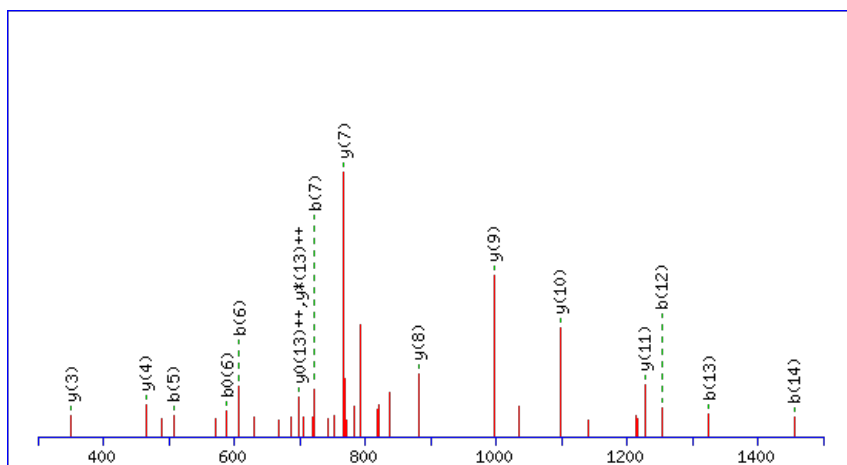

**Monoisotopic mass of neutral peptide Mr(calc):** 1602.7881

**Fixed modifications:** Carbamidomethyl (C) (apply to specified residues or termini only)

**Ions Score:** 62 **Expect:** 4e-006

**Matches:** 16/124 fragment ions using 20 most intense peaks ([help](#))

| #  | b                | b <sup>++</sup> | b*        | b <sup>*++</sup> | b <sup>0</sup>  | b <sup>0++</sup> | Seq. | y                | y <sup>++</sup> | y*        | y <sup>*++</sup> | y <sup>0</sup> | y <sup>0++</sup> | #  |
|----|------------------|-----------------|-----------|------------------|-----------------|------------------|------|------------------|-----------------|-----------|------------------|----------------|------------------|----|
| 1  | 101.0727         | 51.0400         |           |                  |                 |                  | V    |                  |                 |           |                  |                |                  | 15 |
| 2  | 189.1018         | 95.0545         |           |                  | 171.0912        | 86.0492          | S    | 1503.7300        | 752.3686        | 1485.7064 | 743.3568         | 1485.7194      | 743.3633         | 14 |
| 3  | 277.1309         | 139.0691        |           |                  | 259.1203        | 130.0638         | S    | 1415.7009        | 708.3541        | 1397.6773 | 699.3423         | 1397.6903      | 699.3488         | 13 |
| 4  | 377.1963         | 189.1018        |           |                  | 359.1857        | 180.0965         | V    | 1327.6718        | 664.3396        | 1309.6483 | 655.3278         | 1309.6613      | 655.3343         | 12 |
| 5  | <b>507.2359</b>  | 254.1216        |           |                  | 489.2254        | 245.1163         | E    | <b>1227.6064</b> | 614.3068        | 1209.5828 | 605.2950         | 1209.5958      | 605.3016         | 11 |
| 6  | <b>607.3014</b>  | 304.1543        |           |                  | <b>589.2908</b> | 295.1490         | V    | <b>1097.5668</b> | 549.2870        | 1079.5432 | 540.2752         | 1079.5562      | 540.2817         | 10 |
| 7  | <b>723.3254</b>  | 362.1663        |           |                  | 705.3148        | 353.1610         | D    | <b>997.5013</b>  | 499.2543        | 979.4777  | 490.2425         | 979.4907       | 490.2490         | 9  |
| 8  | 837.4065         | 419.2069        |           |                  | 819.3959        | 410.2016         | L    | <b>881.4773</b>  | 441.2423        | 863.4538  | 432.2305         |                |                  | 8  |
| 9  | 935.4563         | 468.2318        |           |                  | 917.4457        | 459.2265         | P    | <b>767.3962</b>  | 384.2018        | 749.3727  | 375.1900         |                |                  | 7  |
| 10 | 1007.4904        | 504.2488        |           |                  | 989.4798        | 495.2436         | A    | 669.3464         | 335.1769        | 651.3229  | 326.1651         |                |                  | 6  |
| 11 | 1139.5279        | 570.2676        |           |                  | 1121.5174       | 561.2623         | M    | 597.3123         | 299.1598        | 579.2887  | 290.1480         |                |                  | 5  |
| 12 | <b>1253.6090</b> | 627.3081        |           |                  | 1235.5985       | 618.3029         | L    | <b>465.2748</b>  | 233.1410        | 447.2512  | 224.1292         |                |                  | 4  |
| 13 | <b>1325.6432</b> | 663.3252        |           |                  | 1307.6326       | 654.3199         | A    | <b>351.1937</b>  | 176.1005        | 333.1701  | 167.0887         |                |                  | 3  |
| 14 | <b>1455.6958</b> | 728.3515        | 1437.6722 | 719.3398         | 1437.6853       | 719.3463         | Q    | 279.1595         | 140.0834        | 261.1359  | 131.0716         |                |                  | 2  |
| 15 |                  |                 |           |                  |                 |                  | K    | 149.1069         | 75.0571         | 131.0833  | 66.0453          |                |                  | 1  |

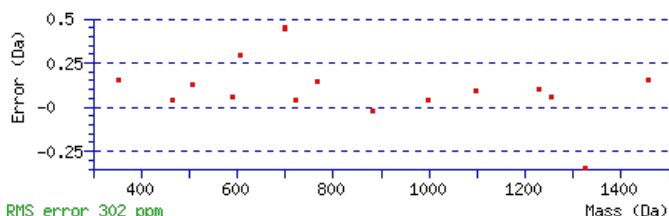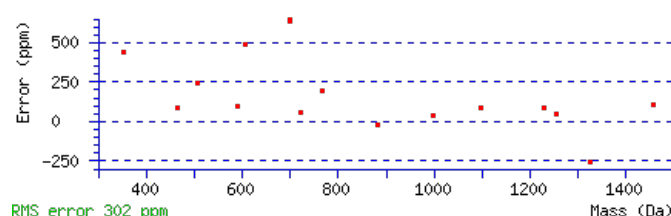

## AT1G48030.1

NCBI **BLAST** search of [VSSVEVDLPAMLAQK](#)

(Parameters: blastp, nr protein database, expect=20000, no filter, PAM30)

Other BLAST [web gateways](#)

### All matches to this query

| Score | Mr(calc)  | Delta   | Sequence                        |
|-------|-----------|---------|---------------------------------|
| 61.7  | 1602.7881 | -0.0034 | <a href="#">VSSVEVDLPAMLAQK</a> |
| 10.0  | 1602.7874 | -0.0027 | <a href="#">NKVLASTLASHEWK</a>  |
| 6.8   | 1602.7852 | -0.0005 | <a href="#">DSEIGNLVKKNHTK</a>  |
| 3.6   | 1602.7800 | 0.0047  | <a href="#">MFTYDPKARISIK</a>   |
| 0.6   | 1602.7800 | 0.0047  | <a href="#">STPEMWPGLIQKAK</a>  |
| 0.4   | 1602.7834 | 0.0013  | <a href="#">YTGARMMLMLSLK</a>   |

Mascot: <http://www.matrixscience.com/>

**Peptide View**MS/MS Fragmentation of **QPQRRR**Found in **AT1G48040.1** in **TAIR\_Arabidopsis**, Symbols: | protein serine/threonine phosphatase | chr1:17723733-17725367 REVERSE

Match to Query 1436: 856.435494 from(429.225023,2+) index(2109)

Title: Elution from: 24.726 to 24.726 scan no 2722 cid35.00 polarity:+

Data file C7-2\_1.mgf

Click mouse within plot area to zoom in by factor of two about that point

Or,   to  Da Label all possible matches  Label matches used for scoring Show Y-axis 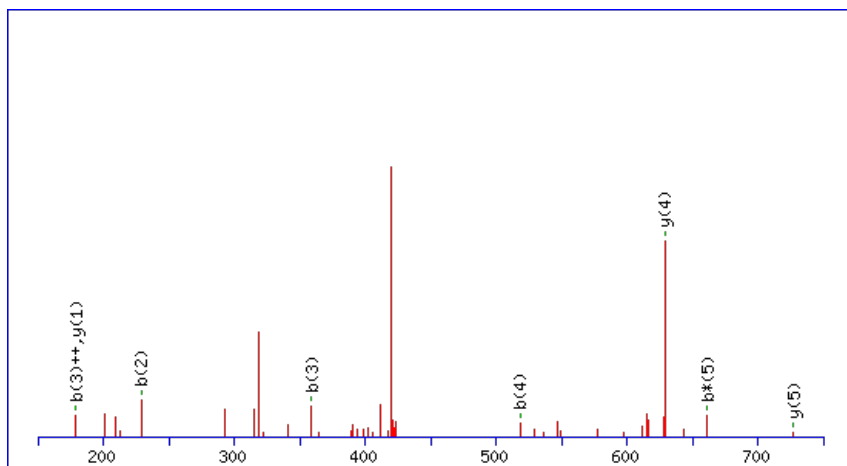Monoisotopic mass of neutral peptide **Mr(calc)**: 856.4334

Fixed modifications: Carbamidomethyl (C) (apply to specified residues or termini only)

Ions Score: 24 **Expect**: 0.03Matches : 8/40 fragment ions using 16 most intense peaks ([help](#))

| # | b               | b <sup>++</sup> | b*              | b <sup>*++</sup> | Seq. | y               | y <sup>++</sup> | y*       | y <sup>*++</sup> | # |
|---|-----------------|-----------------|-----------------|------------------|------|-----------------|-----------------|----------|------------------|---|
| 1 | 131.0599        | 66.0336         | 113.0363        | 57.0218          | Q    |                 |                 |          |                  | 6 |
| 2 | <b>229.1097</b> | 115.0585        | 211.0861        | 106.0467         | P    | <b>727.3880</b> | 364.1977        | 709.3645 | 355.1859         | 5 |
| 3 | <b>359.1624</b> | <b>180.0848</b> | 341.1388        | 171.0730         | Q    | <b>629.3382</b> | 315.1728        | 611.3147 | 306.1610         | 4 |
| 4 | <b>519.2516</b> | 260.1294        | 501.2280        | 251.1177         | R    | 499.2856        | 250.1464        | 481.2620 | 241.1346         | 3 |
| 5 | 679.3409        | 340.1741        | <b>661.3173</b> | 331.1623         | R    | 339.1963        | 170.1018        | 321.1728 | 161.0900         | 2 |
| 6 |                 |                 |                 |                  | R    | <b>179.1071</b> | 90.0572         | 161.0835 | 81.0454          | 1 |

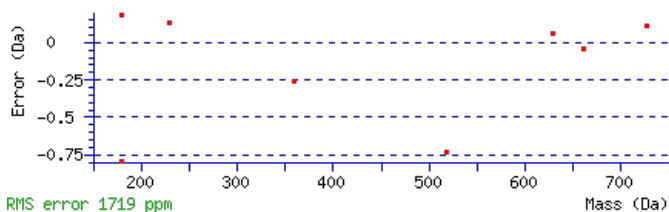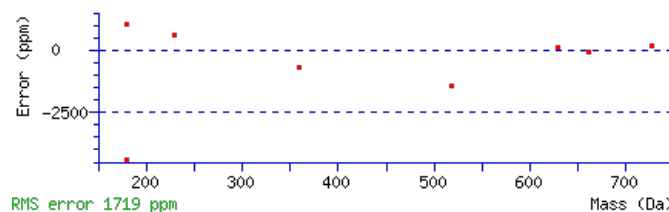NCBI **BLAST** search of **QPQRRR**

(Parameters: blastp, nr protein database, expect=20000, no filter, PAM30)

Other BLAST [web gateways](#)**All matches to this query**

| Score | Mr(calc) | Delta  | Sequence                |
|-------|----------|--------|-------------------------|
| 24.2  | 856.4334 | 0.0021 | <a href="#">QPQRRR</a>  |
| 11.0  | 856.4334 | 0.0021 | <a href="#">QGAPRRR</a> |
| 10.0  | 856.4337 | 0.0018 | <a href="#">LLADMLR</a> |
| 9.9   | 856.4330 | 0.0025 | <a href="#">SHKAFVR</a> |



# AT1G48040.1

|     |          |        |                          |
|-----|----------|--------|--------------------------|
| 5.3 | 856.4337 | 0.0018 | <a href="#">SMVEILR</a>  |
| 1.6 | 856.4337 | 0.0018 | <a href="#">LLDLMSR</a>  |
| 1.5 | 856.4337 | 0.0018 | <a href="#">LLVSCAGK</a> |
| 1.2 | 856.4337 | 0.0018 | <a href="#">KILDACK</a>  |
| 0.8 | 856.4337 | 0.0018 | <a href="#">VESMLLR</a>  |
| 0.6 | 856.4330 | 0.0025 | <a href="#">QWQKVR</a>   |

**Mascot:** <http://www.matrixscience.com/>

**Peptide View**MS/MS Fragmentation of **HLYVQVIDDTK**Found in **AT1G48350.1** in **TAIR\_Arabidopsis**, Symbols: | ribosomal protein L18 family protein | chr1:17870937-17871883 FORWARD

Match to Query 5293: 1329.691126 from(665.852839,2+) index(3942)

Title: Elution from: 37.435 to 37.435 scan no 4882 cid35.00 polarity:+

Data file 0-1\_1.mgf

Click mouse within plot area to zoom in by factor of two about that point

Or,  to  Da Label all possible matches  Label matches used for scoring Show Y-axis 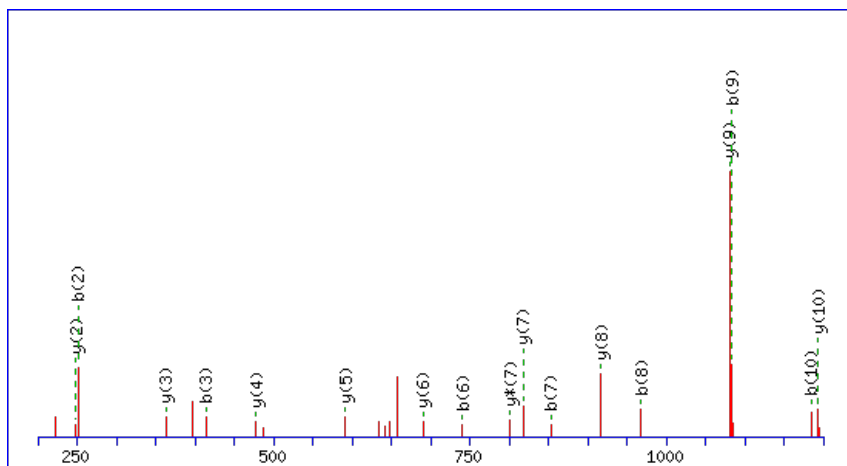Monoisotopic mass of neutral peptide  $M_r(\text{calc})$ : 1329.6929

Fixed modifications: Carbamidomethyl (C) (apply to specified residues or termini only)

Ions Score: 83 Expect: 2.3e-008

Matches : 17/96 fragment ions using 24 most intense peaks ([help](#))

| #  | b                | b <sup>++</sup> | b <sup>*</sup> | b <sup>*++</sup> | b <sup>0</sup> | b <sup>0++</sup> | Seq. | y                | y <sup>++</sup> | y <sup>*</sup>  | y <sup>*++</sup> | y <sup>0</sup> | y <sup>0++</sup> | #  |
|----|------------------|-----------------|----------------|------------------|----------------|------------------|------|------------------|-----------------|-----------------|------------------|----------------|------------------|----|
| 1  | 138.0662         | 69.5367         |                |                  |                |                  | H    |                  |                 |                 |                  |                |                  | 11 |
| 2  | <b>251.1503</b>  | 126.0788        |                |                  |                |                  | L    | <b>1193.6412</b> | 597.3243        | 1176.6147       | 588.8110         | 1175.6307      | 588.3190         | 10 |
| 3  | <b>414.2136</b>  | 207.6104        |                |                  |                |                  | Y    | <b>1080.5572</b> | 540.7822        | 1063.5306       | 532.2689         | 1062.5466      | 531.7769         | 9  |
| 4  | 513.2820         | 257.1446        |                |                  |                |                  | V    | <b>917.4938</b>  | 459.2506        | 900.4673        | 450.7373         | 899.4833       | 450.2453         | 8  |
| 5  | 641.3406         | 321.1739        | 624.3140       | 312.6607         |                |                  | Q    | <b>818.4254</b>  | 409.7164        | <b>801.3989</b> | 401.2031         | 800.4149       | 400.7111         | 7  |
| 6  | <b>740.4090</b>  | 370.7081        | 723.3824       | 362.1949         |                |                  | V    | <b>690.3668</b>  | 345.6871        | 673.3403        | 337.1738         | 672.3563       | 336.6818         | 6  |
| 7  | <b>853.4931</b>  | 427.2502        | 836.4665       | 418.7369         |                |                  | I    | <b>591.2984</b>  | 296.1529        | 574.2719        | 287.6396         | 573.2879       | 287.1476         | 5  |
| 8  | <b>968.5200</b>  | 484.7636        | 951.4934       | 476.2504         | 950.5094       | 475.7584         | D    | <b>478.2144</b>  | 239.6108        | 461.1878        | 231.0975         | 460.2038       | 230.6055         | 4  |
| 9  | <b>1083.5469</b> | 542.2771        | 1066.5204      | 533.7638         | 1065.5364      | 533.2718         | D    | <b>363.1874</b>  | 182.0974        | 346.1609        | 173.5841         | 345.1769       | 173.0921         | 3  |
| 10 | <b>1184.5946</b> | 592.8009        | 1167.5681      | 584.2877         | 1166.5841      | 583.7957         | T    | <b>248.1605</b>  | 124.5839        | 231.1339        | 116.0706         | 230.1499       | 115.5786         | 2  |
| 11 |                  |                 |                |                  |                |                  | K    | 147.1128         | 74.0600         | 130.0863        | 65.5468          |                |                  | 1  |

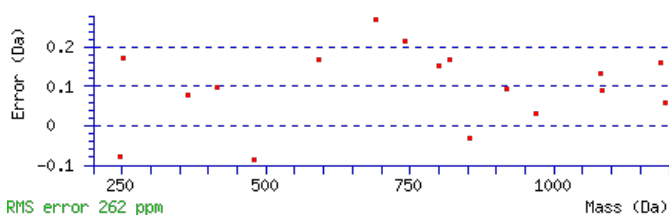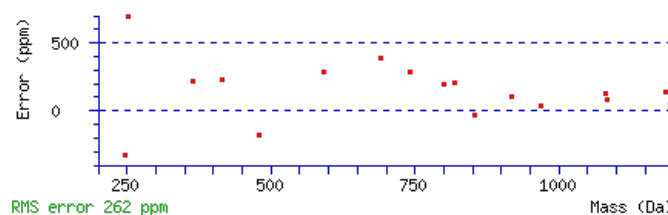NCBI BLAST search of **HLYVQVIDDTK**

(Parameters: blastp, nr protein database, expect=20000, no filter, PAM30)

Other BLAST [web gateways](#)

All matches to this query

AT1G48350.1

| Score | Mr(calc)  | Delta   | Sequence                    |
|-------|-----------|---------|-----------------------------|
| 83.0  | 1329.6929 | -0.0017 | <a href="#">HLYVQVIDDTK</a> |

Mascot: <http://www.matrixscience.com/>

## Peptide View

### MS/MS Fragmentation of **LLADEDPGLVGNLLVER**

Found in **AT1G48420.1** in **TAIR\_Arabidopsis**, Symbols: D-CDES | D-CDES (D-CYSTEINE DESULFHYDRASE); 1-aminocyclopropane-1-carboxylate deaminase/ D-cysteine desulfhydrase/ catalytic | chr1:17900435-17902471 REVERSE

Match to Query 8600: 1842.920000 from(922.467276,2+) index(9205)

Title: Elution from: 83.623 to 83.623 scan no 12643 cid35.00 polarity:+

Data file D12h-1\_3.mgf

Click mouse within plot area to zoom in by factor of two about that point

Or,   to  Da

Label all possible matches  Label matches used for scoring

Show Y-axis

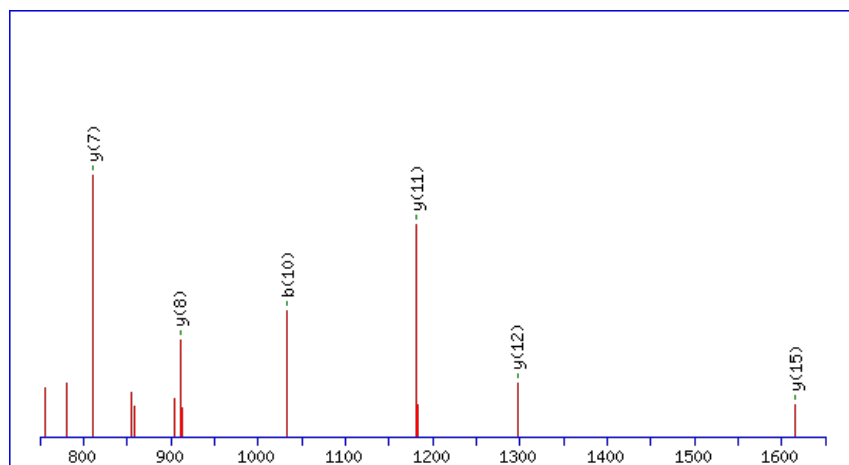

**Monoisotopic mass of neutral peptide Mr(calc):** 1842.9213

**Fixed modifications:** Carbamidomethyl (C) (apply to specified residues or termini only)

**Ions Score:** 40 **Expect:** 0.00059

**Matches:** 6/162 fragment ions using 6 most intense peaks ([help](#))

| #  | b                | b <sup>++</sup> | b*        | b <sup>*++</sup> | b <sup>0</sup> | b <sup>0++</sup> | Seq. | y                | y <sup>++</sup> | y*        | y <sup>*++</sup> | y <sup>0</sup> | y <sup>0++</sup> | #  |
|----|------------------|-----------------|-----------|------------------|----------------|------------------|------|------------------|-----------------|-----------|------------------|----------------|------------------|----|
| 1  | 115.0884         | 58.0478         |           |                  |                |                  | L    |                  |                 |           |                  |                |                  | 17 |
| 2  | 229.1695         | 115.0884        |           |                  |                |                  | L    | 1729.8475        | 865.4274        | 1711.8240 | 856.4156         | 1711.8370      | 856.4221         | 16 |
| 3  | 301.2036         | 151.1054        |           |                  |                |                  | A    | <b>1615.7664</b> | 808.3869        | 1597.7429 | 799.3751         | 1597.7559      | 799.3816         | 15 |
| 4  | 417.2276         | 209.1174        |           |                  | 399.2170       | 200.1122         | D    | 1543.7323        | 772.3698        | 1525.7087 | 763.3580         | 1525.7217      | 763.3645         | 14 |
| 5  | 547.2672         | 274.1373        |           |                  | 529.2567       | 265.1320         | E    | 1427.7083        | 714.3578        | 1409.6847 | 705.3460         | 1409.6977      | 705.3525         | 13 |
| 6  | 663.2912         | 332.1492        |           |                  | 645.2806       | 323.1440         | D    | <b>1297.6687</b> | 649.3380        | 1279.6451 | 640.3262         | 1279.6581      | 640.3327         | 12 |
| 7  | 761.3410         | 381.1741        |           |                  | 743.3304       | 372.1689         | P    | <b>1181.6447</b> | 591.3260        | 1163.6211 | 582.3142         | 1163.6341      | 582.3207         | 11 |
| 8  | 819.3595         | 410.1834        |           |                  | 801.3489       | 401.1781         | G    | 1083.5949        | 542.3011        | 1065.5713 | 533.2893         | 1065.5843      | 533.2958         | 10 |
| 9  | 933.4406         | 467.2239        |           |                  | 915.4300       | 458.2187         | L    | 1025.5764        | 513.2918        | 1007.5528 | 504.2801         | 1007.5658      | 504.2866         | 9  |
| 10 | <b>1033.5061</b> | 517.2567        |           |                  | 1015.4955      | 508.2514         | V    | <b>911.4953</b>  | 456.2513        | 893.4717  | 447.2395         | 893.4847       | 447.2460         | 8  |
| 11 | 1091.5246        | 546.2659        |           |                  | 1073.5140      | 537.2606         | G    | <b>811.4299</b>  | 406.2186        | 793.4063  | 397.2068         | 793.4193       | 397.2133         | 7  |
| 12 | 1207.5615        | 604.2844        | 1189.5380 | 595.2726         | 1189.5510      | 595.2791         | N    | 753.4114         | 377.2093        | 735.3878  | 368.1975         | 735.4008       | 368.2040         | 6  |
| 13 | 1321.6426        | 661.3250        | 1303.6191 | 652.3132         | 1303.6321      | 652.3197         | L    | 637.3744         | 319.1908        | 619.3508  | 310.1790         | 619.3638       | 310.1855         | 5  |
| 14 | 1435.7237        | 718.3655        | 1417.7002 | 709.3537         | 1417.7132      | 709.3602         | L    | 523.2933         | 262.1503        | 505.2697  | 253.1385         | 505.2827       | 253.1450         | 4  |
| 15 | 1535.7892        | 768.3982        | 1517.7656 | 759.3864         | 1517.7786      | 759.3930         | V    | 409.2122         | 205.1097        | 391.1886  | 196.0979         | 391.2016       | 196.1044         | 3  |
| 16 | 1665.8288        | 833.4180        | 1647.8052 | 824.4063         | 1647.8183      | 824.4128         | E    | 309.1467         | 155.0770        | 291.1231  | 146.0652         | 291.1362       | 146.0717         | 2  |
| 17 |                  |                 |           |                  |                |                  | R    | 179.1071         | 90.0572         | 161.0835  | 81.0454          |                |                  | 1  |

# AT1G48420.1

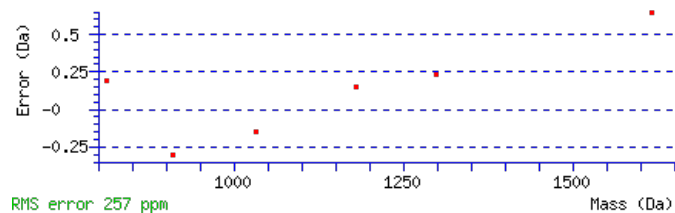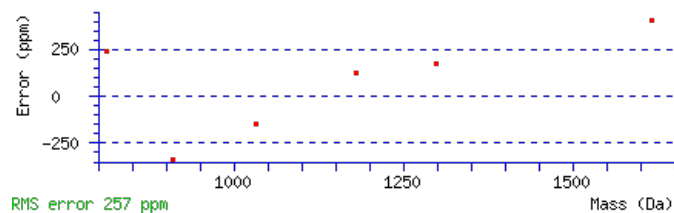

NCBI **BLAST** search of [LLADEDPGLVGNLLVER](#)  
(Parameters: blastp, nr protein database, expect=20000, no filter, PAM30)  
Other BLAST [web gateways](#)

## All matches to this query

| Score | Mr(calc)  | Delta   | Sequence                          |
|-------|-----------|---------|-----------------------------------|
| 39.7  | 1842.9213 | -0.0013 | <a href="#">LLADEDPGLVGNLLVER</a> |
| 9.2   | 1842.9166 | 0.0034  | <a href="#">YGKEALDMLLKLOOR</a>   |
| 1.3   | 1842.9166 | 0.0034  | <a href="#">MPETARYTALVAKNIK</a>  |

Mascot: <http://www.matrixscience.com/>

**Peptide View**MS/MS Fragmentation of **HETADINTFSWGVADR**Found in **AT1G48470.1** in **TAIR\_Arabidopsis**, Symbols: GLN1;5 | GLN1;5 (GLUTAMINE SYNTHETASE 1;5); glutamate-ammonia ligase | chr1:17917452-17919594 FORWARD

Match to Query 9187: 1840.767532 from(921.391042,2+) index(6497)

Title: Elution from: 56.568 to 56.568 scan no 8166 cid35.00 polarity:+

Data file D12h-1\_1.mgf

Click mouse within plot area to zoom in by factor of two about that point

Or,   to  Da Label all possible matches  Label matches used for scoring Show Y-axis 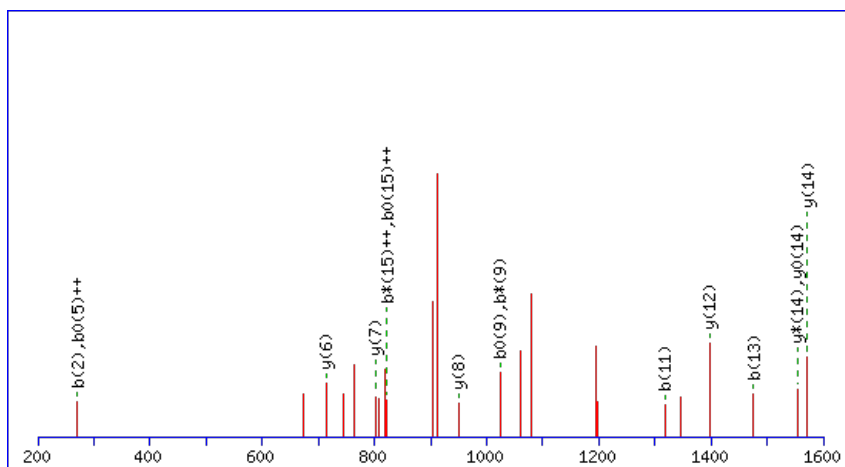Monoisotopic mass of neutral peptide  $M_r(\text{calc})$ : 1840.7650

Fixed modifications: Carbamidomethyl (C) (apply to specified residues or termini only)

Ions Score: 25 Expect: 0.0088

Matches : 15/164 fragment ions using 27 most intense peaks ([help](#))

| #  | b                | b <sup>++</sup> | b*               | b <sup>*++</sup> | b <sup>0</sup>   | b <sup>0++</sup> | Seq. | y                | y <sup>++</sup> | y*               | y <sup>*++</sup> | y <sup>0</sup>   | y <sup>0++</sup> | #  |
|----|------------------|-----------------|------------------|------------------|------------------|------------------|------|------------------|-----------------|------------------|------------------|------------------|------------------|----|
| 1  | 141.0573         | 71.0323         |                  |                  |                  |                  | H    |                  |                 |                  |                  |                  |                  | 16 |
| 2  | <b>271.0969</b>  | 136.0521        |                  |                  | 253.0864         | 127.0468         | E    | 1701.7223        | 851.3648        | 1683.6988        | 842.3530         | 1683.7118        | 842.3595         | 15 |
| 3  | 373.1416         | 187.0745        |                  |                  | 355.1311         | 178.0692         | T    | <b>1571.6827</b> | 786.3450        | <b>1553.6591</b> | 777.3332         | <b>1553.6721</b> | 777.3397         | 14 |
| 4  | 445.1758         | 223.0915        |                  |                  | 427.1652         | 214.0862         | A    | 1469.6380        | 735.3226        | 1451.6144        | 726.3108         | 1451.6274        | 726.3174         | 13 |
| 5  | 561.1998         | 281.1035        |                  |                  | 543.1892         | <b>272.0982</b>  | D    | <b>1397.6038</b> | 699.3056        | 1379.5803        | 690.2938         | 1379.5933        | 690.3003         | 12 |
| 6  | 675.2809         | 338.1441        |                  |                  | 657.2703         | 329.1388         | I    | 1281.5799        | 641.2936        | 1263.5563        | 632.2818         | 1263.5693        | 632.2883         | 11 |
| 7  | 791.3179         | 396.1626        | 773.2943         | 387.1508         | 773.3073         | 387.1573         | N    | 1167.4988        | 584.2530        | 1149.4752        | 575.2412         | 1149.4882        | 575.2477         | 10 |
| 8  | 893.3626         | 447.1849        | 875.3390         | 438.1731         | 875.3520         | 438.1796         | T    | 1051.4618        | 526.2345        | 1033.4382        | 517.2227         | 1033.4512        | 517.2292         | 9  |
| 9  | 1041.4280        | 521.2176        | <b>1023.4044</b> | 512.2059         | <b>1023.4175</b> | 512.2124         | F    | <b>949.4171</b>  | 475.2122        | 931.3935         | 466.2004         | 931.4065         | 466.2069         | 8  |
| 10 | 1129.4571        | 565.2322        | 1111.4335        | 556.2204         | 1111.4465        | 556.2269         | S    | <b>801.3516</b>  | 401.1794        | 783.3280         | 392.1677         | 783.3410         | 392.1742         | 7  |
| 11 | <b>1317.5305</b> | 659.2689        | 1299.5069        | 650.2571         | 1299.5199        | 650.2636         | W    | <b>713.3226</b>  | 357.1649        | 695.2990         | 348.1531         | 695.3120         | 348.1596         | 6  |
| 12 | 1375.5490        | 688.2781        | 1357.5254        | 679.2663         | 1357.5384        | 679.2728         | G    | 525.2492         | 263.1282        | 507.2256         | 254.1164         | 507.2386         | 254.1229         | 5  |
| 13 | <b>1475.6144</b> | 738.3108        | 1457.5908        | 729.2991         | 1457.6038        | 729.3056         | V    | 467.2307         | 234.1190        | 449.2071         | 225.1072         | 449.2201         | 225.1137         | 4  |
| 14 | 1547.6486        | 774.3279        | 1529.6250        | 765.3161         | 1529.6380        | 765.3226         | A    | 367.1652         | 184.0862        | 349.1416         | 175.0745         | 349.1547         | 175.0810         | 3  |
| 15 | 1663.6725        | 832.3399        | 1645.6490        | <b>823.3281</b>  | 1645.6620        | <b>823.3346</b>  | D    | 295.1311         | 148.0692        | 277.1075         | 139.0574         | 277.1205         | 139.0639         | 2  |
| 16 |                  |                 |                  |                  |                  |                  | R    | 179.1071         | 90.0572         | 161.0835         | 81.0454          |                  |                  | 1  |

AT1G48470.1

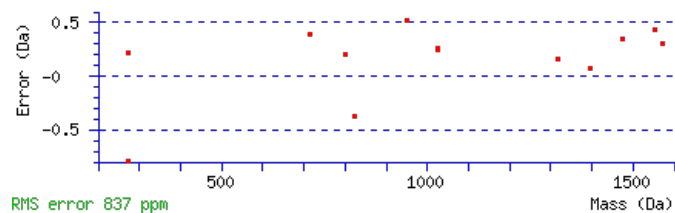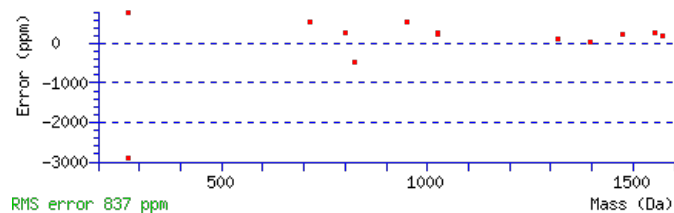

NCBI **BLAST** search of [HETADINTFSWGVADR](#)

(Parameters: blastp, nr protein database, expect=20000, no filter, PAM30)

Other BLAST [web gateways](#)

**All matches to this query**

| Score | Mr(calc)  | Delta   | Sequence                         |
|-------|-----------|---------|----------------------------------|
| 24.8  | 1840.7650 | 0.0025  | <a href="#">HETADINTFSWGVADR</a> |
| 4.4   | 1840.7637 | 0.0038  | <a href="#">MRGQFDGSCFLTNR</a>   |
| 1.2   | 1840.7713 | -0.0038 | <a href="#">AVMHVIGTEMDFVDDK</a> |

Mascot: <http://www.matrixscience.com/>


**Mascot Search Results**
**Peptide View**MS/MS Fragmentation of **DGVILLWDLAEGK**Found in **AT1G48630.1** in **TAIR\_Arabidopsis**, Symbols: | guanine nucleotide-binding family protein / activated protein kinase C receptor, putative / RACK, putative | chr1:17985645-17986936 REVERSE

Match to Query 5648: 1442.720406 from(722.367479,2+) index(11037)

Title: Elution from: 110.556 to 110.556 scan no 16185 cid35.00 polarity:+

Data file D1d-2\_1.mgf

Click mouse within plot area to zoom in by factor of two about that point

Or,   to  Da Label all possible matches  Label matches used for scoring Show Y-axis 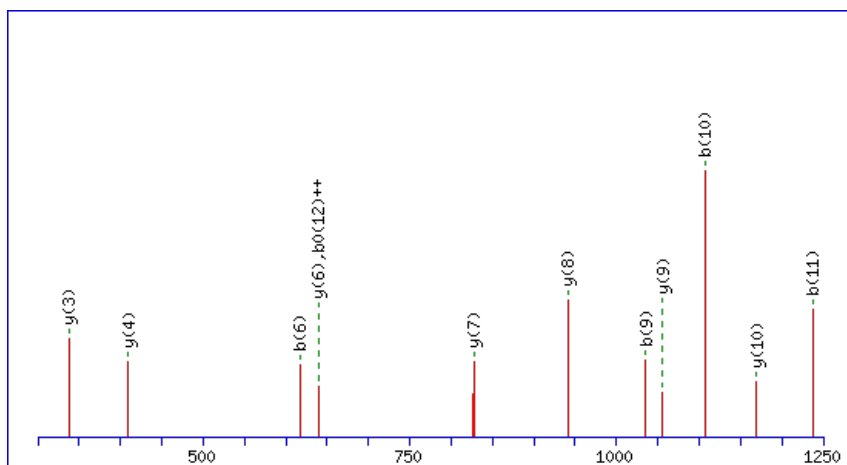Monoisotopic mass of neutral peptide  $M_r(\text{calc})$ : 1442.7215

Fixed modifications: Carbamidomethyl (C) (apply to specified residues or termini only)

Ions Score: 74 Expect: 2.5e-007

Matches : 12/116 fragment ions using 12 most intense peaks ([help](#))

| #  | b                | b <sup>++</sup> | b <sup>0</sup> | b <sup>0++</sup> | Seq. | y                | y <sup>++</sup> | y*        | y <sup>*++</sup> | y <sup>0</sup> | y <sup>0++</sup> | #  |
|----|------------------|-----------------|----------------|------------------|------|------------------|-----------------|-----------|------------------|----------------|------------------|----|
| 1  | 117.0313         | 59.0193         | 99.0207        | 50.0140          | D    |                  |                 |           |                  |                |                  | 13 |
| 2  | 175.0498         | 88.0285         | 157.0392       | 79.0232          | G    | 1327.7049        | 664.3561        | 1309.6813 | 655.3443         | 1309.6943      | 655.3508         | 12 |
| 3  | 275.1152         | 138.0612        | 257.1046       | 129.0560         | V    | 1269.6864        | 635.3468        | 1251.6628 | 626.3350         | 1251.6758      | 626.3415         | 11 |
| 4  | 389.1963         | 195.1018        | 371.1857       | 186.0965         | I    | <b>1169.6209</b> | 585.3141        | 1151.5973 | 576.3023         | 1151.6103      | 576.3088         | 10 |
| 5  | 503.2774         | 252.1423        | 485.2668       | 243.1371         | L    | <b>1055.5398</b> | 528.2735        | 1037.5162 | 519.2618         | 1037.5292      | 519.2683         | 9  |
| 6  | <b>617.3585</b>  | 309.1829        | 599.3479       | 300.1776         | L    | <b>941.4587</b>  | 471.2330        | 923.4351  | 462.2212         | 923.4481       | 462.2277         | 8  |
| 7  | 805.4319         | 403.2196        | 787.4213       | 394.2143         | W    | <b>827.3776</b>  | 414.1924        | 809.3540  | 405.1807         | 809.3670       | 405.1872         | 7  |
| 8  | 921.4559         | 461.2316        | 903.4453       | 452.2263         | D    | <b>639.3042</b>  | 320.1558        | 621.2806  | 311.1440         | 621.2937       | 311.1505         | 6  |
| 9  | <b>1035.5370</b> | 518.2721        | 1017.5264      | 509.2668         | L    | 523.2802         | 262.1438        | 505.2567  | 253.1320         | 505.2697       | 253.1385         | 5  |
| 10 | <b>1107.5711</b> | 554.2892        | 1089.5605      | 545.2839         | A    | <b>409.1992</b>  | 205.1032        | 391.1756  | 196.0914         | 391.1886       | 196.0979         | 4  |
| 11 | <b>1237.6107</b> | 619.3090        | 1219.6002      | 610.3037         | E    | <b>337.1650</b>  | 169.0861        | 319.1414  | 160.0743         | 319.1544       | 160.0809         | 3  |
| 12 | 1295.6292        | 648.3183        | 1277.6187      | <b>639.3130</b>  | G    | 207.1254         | 104.0663        | 189.1018  | 95.0545          |                |                  | 2  |
| 13 |                  |                 |                |                  | K    | 149.1069         | 75.0571         | 131.0833  | 66.0453          |                |                  | 1  |

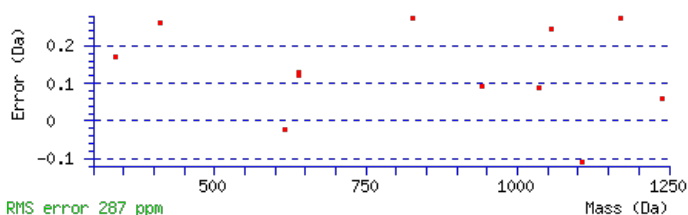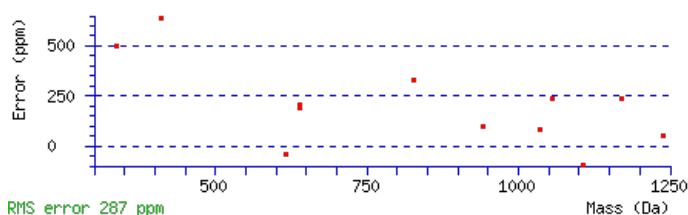NCBI **BLAST** search of **DGVILLWDLAEGK**

(Parameters: blastp, nr protein database, expect=20000, no filter, PAM30)



AT1G48630.1

Other BLAST [web gateways](#)

**All matches to this query**

| Score | Mr(calc)  | Delta   | Sequence                        |
|-------|-----------|---------|---------------------------------|
| 74.4  | 1442.7215 | -0.0011 | <a href="#">DGVILLWDLAEGK</a>   |
| 16.4  | 1442.7193 | 0.0011  | <a href="#">LPESEVAALDAK GK</a> |
| 7.9   | 1442.7168 | 0.0036  | <a href="#">AYVGALNKMLGFK</a>   |
| 3.7   | 1442.7215 | -0.0011 | <a href="#">FTTIVTGFLEK GK</a>  |

**Mascot:** <http://www.matrixscience.com/>

**Peptide View**MS/MS Fragmentation of **QIQDDVLK**Found in **AT1G48660.1** in **TAIR\_Arabidopsis**, Symbols: | auxin-responsive GH3 family protein | chr1:17999616-18001640 REVERSE

Match to Query 2183: 968.482288 from(485.248420,2+) index(2353)

Title: Elution from: 26.924 to 26.924 scan no 3034 cid35.00 polarity:+

Data file 0-3\_1.mgf

Click mouse within plot area to zoom in by factor of two about that point

Or,   to  Da Label all possible matches  Label matches used for scoring Show Y-axis 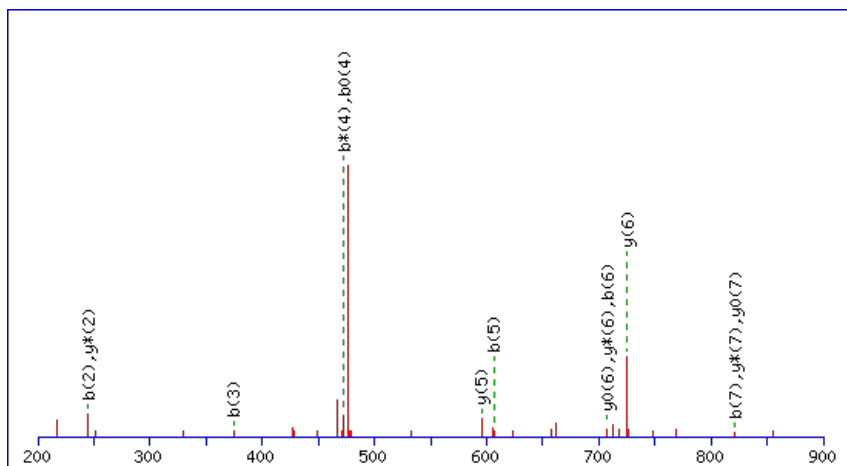Monoisotopic mass of neutral peptide **Mr(calc)**: 968.4805

Fixed modifications: Carbamidomethyl (C) (apply to specified residues or termini only)

Ions Score: 28 Expect: 0.011

Matches : 14/72 fragment ions using 23 most intense peaks ([help](#))

| # | b               | b <sup>++</sup> | b*              | b <sup>*++</sup> | b <sup>0</sup>  | b <sup>0++</sup> | Seq. | y               | y <sup>++</sup> | y*              | y <sup>*++</sup> | y <sup>0</sup>  | y <sup>0++</sup> | # |
|---|-----------------|-----------------|-----------------|------------------|-----------------|------------------|------|-----------------|-----------------|-----------------|------------------|-----------------|------------------|---|
| 1 | 131.0599        | 66.0336         | 113.0363        | 57.0218          |                 |                  | Q    |                 |                 |                 |                  |                 |                  | 8 |
| 2 | <b>245.1410</b> | 123.0741        | 227.1174        | 114.0624         |                 |                  | I    | 839.4351        | 420.2212        | <b>821.4115</b> | 411.2094         | <b>821.4246</b> | 411.2159         | 7 |
| 3 | <b>375.1937</b> | 188.1005        | 357.1701        | 179.0887         |                 |                  | Q    | <b>725.3540</b> | 363.1807        | <b>707.3304</b> | 354.1689         | <b>707.3435</b> | 354.1754         | 6 |
| 4 | 491.2176        | 246.1125        | <b>473.1941</b> | 237.1007         | <b>473.2071</b> | 237.1072         | D    | <b>595.3014</b> | 298.1543        | 577.2778        | 289.1425         | 577.2908        | 289.1490         | 5 |
| 5 | <b>607.2416</b> | 304.1245        | 589.2180        | 295.1127         | 589.2311        | 295.1192         | D    | 479.2774        | 240.1423        | 461.2538        | 231.1305         | 461.2668        | 231.1371         | 4 |
| 6 | <b>707.3071</b> | 354.1572        | 689.2835        | 345.1454         | 689.2965        | 345.1519         | V    | 363.2534        | 182.1303        | 345.2298        | 173.1186         |                 |                  | 3 |
| 7 | <b>821.3882</b> | 411.1977        | 803.3646        | 402.1859         | 803.3776        | 402.1924         | L    | 263.1880        | 132.0976        | <b>245.1644</b> | 123.0858         |                 |                  | 2 |
| 8 |                 |                 |                 |                  |                 |                  | K    | 149.1069        | 75.0571         | 131.0833        | 66.0453          |                 |                  | 1 |

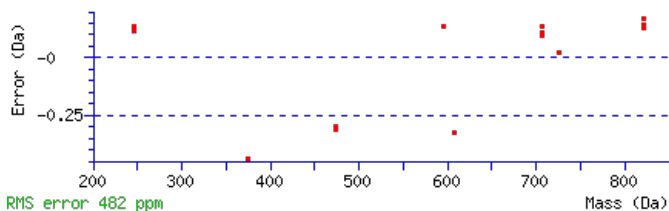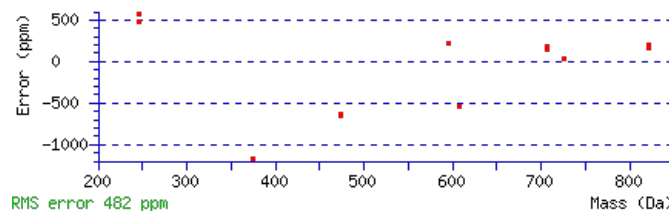NCBI **BLAST** search of **QIQDDVLK**

(Parameters: blastp, nr protein database, expect=20000, no filter, PAM30)

Other BLAST [web gateways](#)**All matches to this query**

| Score | Mr(calc) | Delta  | Sequence                  |
|-------|----------|--------|---------------------------|
| 27.8  | 968.4805 | 0.0018 | <a href="#">QIQDDVLK</a>  |
| 14.6  | 968.4805 | 0.0018 | <a href="#">AIGEVDLNK</a> |

**AT1G48660.1**

|      |          |         |                            |
|------|----------|---------|----------------------------|
| 14.6 | 968.4805 | 0.0018  | <a href="#">ELQALQEK</a>   |
| 14.6 | 968.4805 | 0.0018  | <a href="#">ELQENVVK</a>   |
| 10.6 | 968.4805 | 0.0018  | <a href="#">ISAVQIDPK</a>  |
| 7.1  | 968.4805 | 0.0018  | <a href="#">EDQINVLK</a>   |
| 5.1  | 968.4805 | 0.0018  | <a href="#">LEAEVELR</a>   |
| 2.9  | 968.4827 | -0.0004 | <a href="#">QPPDYVLK</a>   |
| 2.8  | 968.4805 | 0.0018  | <a href="#">ELAQQIEK</a>   |
| 2.0  | 968.4832 | -0.0009 | <a href="#">VSPSGAPRGK</a> |

**Mascot:** <http://www.matrixscience.com/>

## Peptide View

MS/MS Fragmentation of **AIVVNPYR**

Found in **AT1G48830.1** in **TAIR\_Arabidopsis**, Symbols: | 40S ribosomal protein S7 (RPS7A) | chr1:18063522-18064603 REVERSE

Match to Query 2754: 1042.556310 from(522.285431,2+) index(4552)

Title: Elution from: 41.628 to 41.628 scan no 5715 cid35.00 polarity:+

Data file 0-3\_2.mgf

Click mouse within plot area to zoom in by factor of two about that point

Or,   to  Da

Label all possible matches  Label matches used for scoring

Show Y-axis

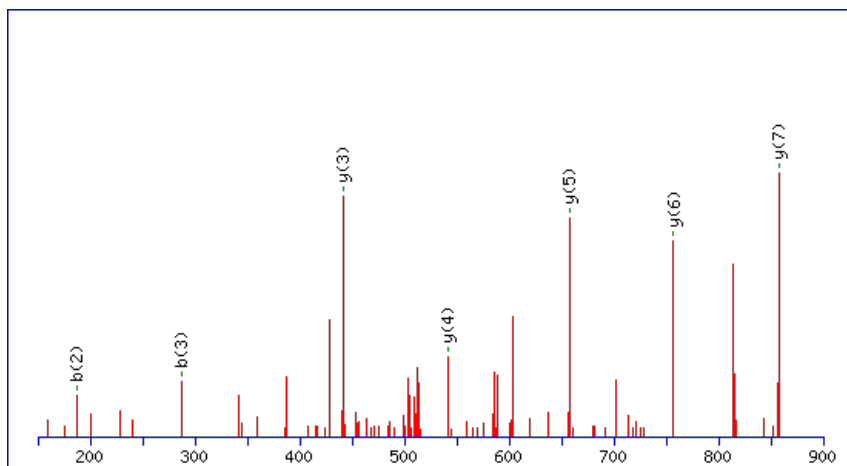

Monoisotopic mass of neutral peptide **Mr(calc)**: 1042.5586

**Fixed modifications**: Carbamidomethyl (C) (apply to specified residues or termini only)

**Ions Score**: 49 **Expect**: 0.00016

**Matches**: 7/56 fragment ions using 7 most intense peaks ([help](#))

| # | b               | b <sup>++</sup> | b*       | b <sup>*++</sup> | Seq. | y               | y <sup>++</sup> | y*       | y <sup>*++</sup> | # |
|---|-----------------|-----------------|----------|------------------|------|-----------------|-----------------|----------|------------------|---|
| 1 | 73.0414         | 37.0244         |          |                  | A    |                 |                 |          |                  | 9 |
| 2 | <b>187.1225</b> | 94.0649         |          |                  | I    | 971.5317        | 486.2695        | 953.5081 | 477.2577         | 8 |
| 3 | <b>287.1880</b> | 144.0976        |          |                  | V    | <b>857.4506</b> | 429.2289        | 839.4270 | 420.2171         | 7 |
| 4 | 387.2534        | 194.1303        |          |                  | V    | <b>757.3852</b> | 379.1962        | 739.3616 | 370.1844         | 6 |
| 5 | 503.2904        | 252.1488        | 485.2668 | 243.1371         | N    | <b>657.3197</b> | 329.1635        | 639.2961 | 320.1517         | 5 |
| 6 | 603.3559        | 302.1816        | 585.3323 | 293.1698         | V    | <b>541.2827</b> | 271.1450        | 523.2591 | 262.1332         | 4 |
| 7 | 701.4057        | 351.2065        | 683.3821 | 342.1947         | P    | <b>441.2173</b> | 221.1123        | 423.1937 | 212.1005         | 3 |
| 8 | 865.4660        | 433.2367        | 847.4424 | 424.2249         | Y    | 343.1675        | 172.0874        | 325.1439 | 163.0756         | 2 |
| 9 |                 |                 |          |                  | R    | 179.1071        | 90.0572         | 161.0835 | 81.0454          | 1 |

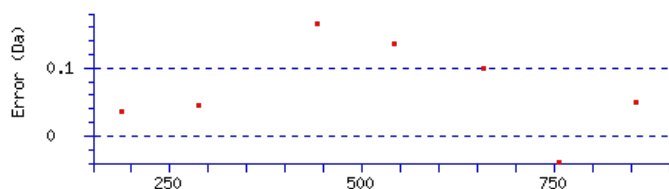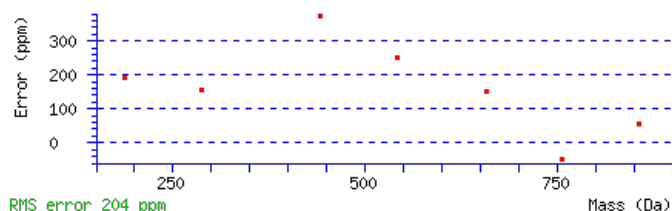

NCBI **BLAST** search of [AIVVNPYR](#)

(Parameters: blastp, nr protein database, expect=20000, no filter, PAM30)

Other BLAST [web gateways](#)

All matches to this query

| Score | Mr(calc)  | Delta   | Sequence                 |
|-------|-----------|---------|--------------------------|
| 48.6  | 1042.5586 | -0.0023 | <a href="#">AIVVNPYR</a> |

# AT1G48830.1

|     |           |         |                            |
|-----|-----------|---------|----------------------------|
| 6.4 | 1042.5563 | -0.0000 | <a href="#">ALVKAGDLSR</a> |
| 6.4 | 1042.5563 | -0.0000 | <a href="#">LAVESLNRK</a>  |
| 1.3 | 1042.5590 | -0.0027 | <a href="#">GKPIAQTRR</a>  |

**Mascot:** <http://www.matrixscience.com/>



# Mascot Search Results

## Peptide View

MS/MS Fragmentation of **FQGHVEFASSEEQAQK**

Found in **AT1G48920.1** in **TAIR\_Arabidopsis**, Symbols: ATNUC-L1, PARL1 | ATNUC-L1/PARL1 (PARALLEL 1); nucleic acid binding | chr1:18101854-18105090 FORWARD

Match to Query 7660: 1621.734783 from(541.585537,3+) index(3344)

Title: Elution from: 32.226 to 32.226 scan no 4130 cid35.00 polarity:+

Data file C7-1\_1.mgf

Click mouse within plot area to zoom in by factor of two about that point

Or,   to  Da

Label all possible matches  Label matches used for scoring

Show Y-axis

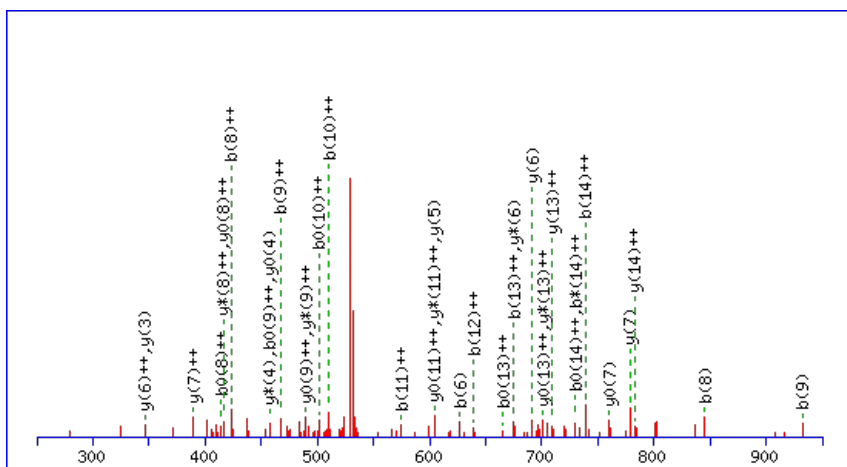

Monoisotopic mass of neutral peptide  $M_r(\text{calc})$ : 1621.7372

Fixed modifications: Carbamidomethyl (C) (apply to specified residues or termini only)

Ions Score: 29 Expect: 0.0015

Matches : 36/126 fragment ions using 54 most intense peaks [\(help\)](#)

| #  | b         | b <sup>++</sup> | b*        | b <sup>*++</sup> | b <sup>0</sup> | b <sup>0++</sup> | Seq. | y         | y <sup>++</sup> | y*        | y <sup>*++</sup> | y <sup>0</sup> | y <sup>0++</sup> | #  |
|----|-----------|-----------------|-----------|------------------|----------------|------------------|------|-----------|-----------------|-----------|------------------|----------------|------------------|----|
| 1  | 58.0287   | 29.5180         |           |                  |                |                  | G    |           |                 |           |                  |                |                  | 15 |
| 2  | 205.0972  | 103.0522        |           |                  |                |                  | F    | 1565.7231 | 783.3652        | 1548.6965 | 774.8519         | 1547.7125      | 774.3599         | 14 |
| 3  | 262.1186  | 131.5629        |           |                  |                |                  | G    | 1418.6546 | 709.8310        | 1401.6281 | 701.3177         | 1400.6441      | 700.8257         | 13 |
| 4  | 399.1775  | 200.0924        |           |                  |                |                  | H    | 1361.6332 | 681.3202        | 1344.6066 | 672.8070         | 1343.6226      | 672.3149         | 12 |
| 5  | 498.2459  | 249.6266        |           |                  |                |                  | V    | 1224.5743 | 612.7908        | 1207.5477 | 604.2775         | 1206.5637      | 603.7855         | 11 |
| 6  | 627.2885  | 314.1479        |           |                  | 609.2780       | 305.1426         | E    | 1125.5059 | 563.2566        | 1108.4793 | 554.7433         | 1107.4953      | 554.2513         | 10 |
| 7  | 774.3570  | 387.6821        |           |                  | 756.3464       | 378.6768         | F    | 996.4633  | 498.7353        | 979.4367  | 490.2220         | 978.4527       | 489.7300         | 9  |
| 8  | 845.3941  | 423.2007        |           |                  | 827.3835       | 414.1954         | A    | 849.3949  | 425.2011        | 832.3683  | 416.6878         | 831.3843       | 416.1958         | 8  |
| 9  | 932.4261  | 466.7167        |           |                  | 914.4155       | 457.7114         | S    | 778.3577  | 389.6825        | 761.3312  | 381.1692         | 760.3472       | 380.6772         | 7  |
| 10 | 1019.4581 | 510.2327        |           |                  | 1001.4476      | 501.2274         | S    | 691.3257  | 346.1665        | 674.2992  | 337.6532         | 673.3151       | 337.1612         | 6  |
| 11 | 1148.5007 | 574.7540        |           |                  | 1130.4901      | 565.7487         | E    | 604.2937  | 302.6505        | 587.2671  | 294.1372         | 586.2831       | 293.6452         | 5  |
| 12 | 1277.5433 | 639.2753        |           |                  | 1259.5327      | 630.2700         | E    | 475.2511  | 238.1292        | 458.2245  | 229.6159         | 457.2405       | 229.1239         | 4  |
| 13 | 1348.5804 | 674.7938        |           |                  | 1330.5699      | 665.7886         | A    | 346.2085  | 173.6079        | 329.1819  | 165.0946         |                |                  | 3  |
| 14 | 1476.6390 | 738.8231        | 1459.6125 | 730.3099         | 1458.6284      | 729.8179         | Q    | 275.1714  | 138.0893        | 258.1448  | 129.5761         |                |                  | 2  |
| 15 |           |                 |           |                  |                |                  | K    | 147.1128  | 74.0600         | 130.0863  | 65.5468          |                |                  | 1  |

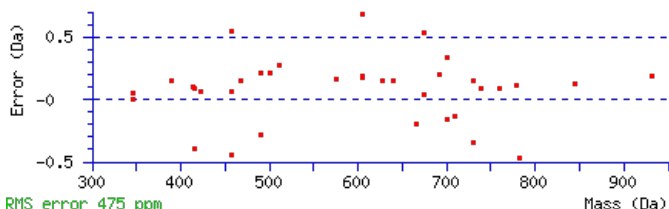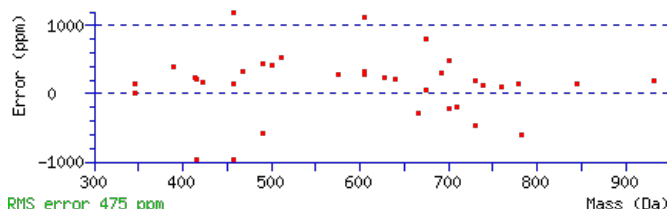

## AT1G48920.1

NCBI **BLAST** search of [GFGHVEFASSEEAK](#)

(Parameters: blastp, nr protein database, expect=20000, no filter, PAM30)

Other BLAST [web gateways](#)

### All matches to this query

| Score | Mr(calc)  | Delta   | Sequence                       |
|-------|-----------|---------|--------------------------------|
| 28.9  | 1621.7372 | -0.0025 | <a href="#">GFGHVEFASSEEAK</a> |

Mascot: <http://www.matrixscience.com/>

## Peptide View

MS/MS Fragmentation of **YPIEHGVVSNWDDMEK**

Found in **AT1G49240.1** in **TAIR\_Arabidopsis**, Symbols: ACT8 | ACT8 (ACTIN 8); structural constituent of cytoskeleton | chr1:18220207-18221615 FORWARD

Match to Query 9076: 1933.847886 from(645.623238,3+) index(4628)

Title: Elution from: 41.210 to 41.210 scan no 5767 cid35.00 polarity:+

Data file D1d-3\_2.mgf

Click mouse within plot area to zoom in by factor of two about that point

Or,   to  Da

Label all possible matches  Label matches used for scoring

Show Y-axis

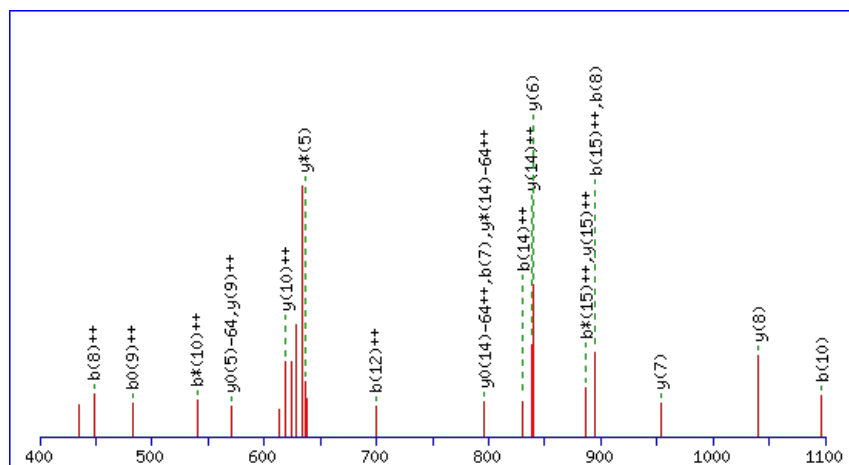

Monoisotopic mass of neutral peptide  $M_r(\text{calc})$ : 1933.8516

Fixed modifications: Carbamidomethyl (C) (apply to specified residues or termini only)

Variable modifications:

M14 : Oxidation (M), with neutral losses 0.0000 (shown in table), 63.9983

Ions Score: 35 Expect: 0.0003

Matches : 21/244 fragment ions using 21 most intense peaks ([help](#))

| #  | b         | b <sup>++</sup> | b <sup>*</sup> | b <sup>*++</sup> | b <sup>0</sup> | b <sup>0++</sup> | Seq. | y         | y <sup>++</sup> | y <sup>*</sup> | y <sup>*++</sup> | y <sup>0</sup> | y <sup>0++</sup> | #  |
|----|-----------|-----------------|----------------|------------------|----------------|------------------|------|-----------|-----------------|----------------|------------------|----------------|------------------|----|
| 1  | 164.0706  | 82.5389         |                |                  |                |                  | Y    |           |                 |                |                  |                |                  | 16 |
| 2  | 261.1234  | 131.0653        |                |                  |                |                  | P    | 1771.7956 | 886.4014        | 1754.7690      | 877.8882         | 1753.7850      | 877.3961         | 15 |
| 3  | 374.2074  | 187.6074        |                |                  |                |                  | I    | 1674.7428 | 837.8750        | 1657.7163      | 829.3618         | 1656.7322      | 828.8698         | 14 |
| 4  | 503.2500  | 252.1287        |                |                  | 485.2395       | 243.1234         | E    | 1561.6587 | 781.3330        | 1544.6322      | 772.8197         | 1543.6482      | 772.3277         | 13 |
| 5  | 640.3089  | 320.6581        |                |                  | 622.2984       | 311.6528         | H    | 1432.6162 | 716.8117        | 1415.5896      | 708.2984         | 1414.6056      | 707.8064         | 12 |
| 6  | 697.3304  | 349.1688        |                |                  | 679.3198       | 340.1636         | G    | 1295.5572 | 648.2823        | 1278.5307      | 639.7690         | 1277.5467      | 639.2770         | 11 |
| 7  | 796.3988  | 398.7030        |                |                  | 778.3883       | 389.6978         | V    | 1238.5358 | 619.7715        | 1221.5092      | 611.2583         | 1220.5252      | 610.7662         | 10 |
| 8  | 895.4672  | 448.2373        |                |                  | 877.4567       | 439.2320         | V    | 1139.4674 | 570.2373        | 1122.4408      | 561.7240         | 1121.4568      | 561.2320         | 9  |
| 9  | 982.4993  | 491.7533        |                |                  | 964.4887       | 482.7480         | S    | 1040.3990 | 520.7031        | 1023.3724      | 512.1898         | 1022.3884      | 511.6978         | 8  |
| 10 | 1096.5422 | 548.7747        | 1079.5156      | 540.2615         | 1078.5316      | 539.7694         | N    | 953.3669  | 477.1871        | 936.3404       | 468.6738         | 935.3564       | 468.1818         | 7  |
| 11 | 1282.6215 | 641.8144        | 1265.5949      | 633.3011         | 1264.6109      | 632.8091         | W    | 839.3240  | 420.1656        | 822.2974       | 411.6524         | 821.3134       | 411.1604         | 6  |
| 12 | 1397.6484 | 699.3279        | 1380.6219      | 690.8146         | 1379.6379      | 690.3226         | D    | 653.2447  | 327.1260        | 636.2181       | 318.6127         | 635.2341       | 318.1207         | 5  |
| 13 | 1512.6754 | 756.8413        | 1495.6488      | 748.3281         | 1494.6648      | 747.8360         | D    | 538.2177  | 269.6125        | 521.1912       | 261.0992         | 520.2072       | 260.6072         | 4  |
| 14 | 1659.7108 | 830.3590        | 1642.6842      | 821.8458         | 1641.7002      | 821.3537         | M    | 423.1908  | 212.0990        | 406.1642       | 203.5858         | 405.1802       | 203.0938         | 3  |
| 15 | 1788.7534 | 894.8803        | 1771.7268      | 886.3671         | 1770.7428      | 885.8750         | E    | 276.1554  | 138.5813        | 259.1288       | 130.0681         | 258.1448       | 129.5761         | 2  |
| 16 |           |                 |                |                  |                |                  | K    | 147.1128  | 74.0600         | 130.0863       | 65.5468          |                |                  | 1  |



# AT1G49240.1

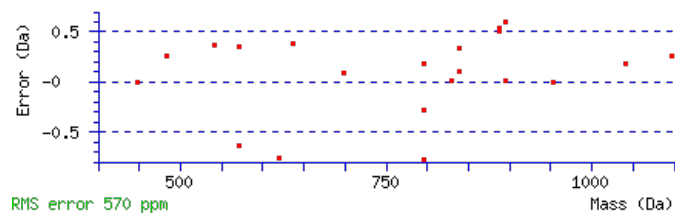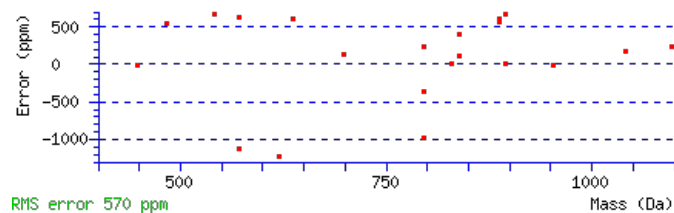

NCBI **BLAST** search of [YPIEHGVVSNWDDMEK](#)

(Parameters: blastp, nr protein database, expect=20000, no filter, PAM30)

Other BLAST [web gateways](#)

## All matches to this query

| Score | Mr(calc)  | Delta   | Sequence                         |
|-------|-----------|---------|----------------------------------|
| 35.5  | 1933.8516 | -0.0037 | <a href="#">YPIEHGVVSNWDDMEK</a> |

Mascot: <http://www.matrixscience.com/>

**Peptide View**MS/MS Fragmentation of **GVYSQPDNILGR**Found in **AT1G49630.1** in **TAIR\_Arabidopsis**, Symbols: ATPREP2 | ATPREP2; metalloendopeptidase | chr1:18372073-18379004 REVERSE

Match to Query 4969: 1317.667008 from(659.840780,2+) index(4555)

Title: Elution from: 41.386 to 41.386 scan no 5689 cid35.00 polarity:+

Data file C7-2\_2.mgf

Click mouse within plot area to zoom in by factor of two about that point

Or,   to  Da Label all possible matches  Label matches used for scoring Show Y-axis 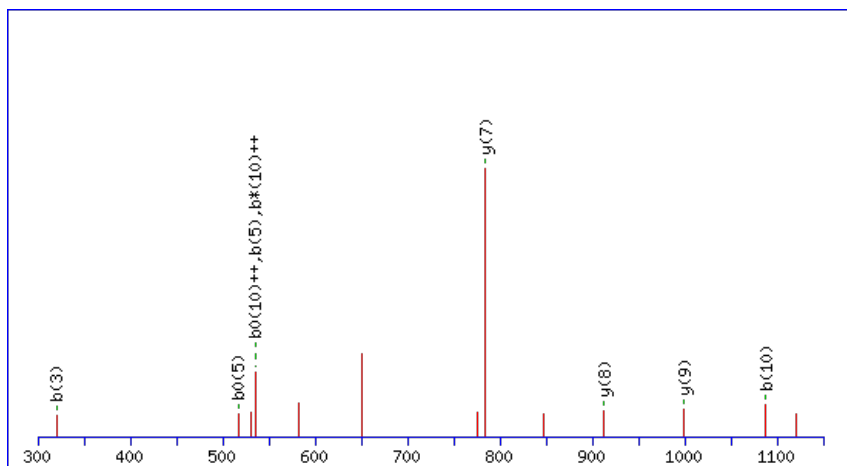Monoisotopic mass of neutral peptide  $M_r(\text{calc})$ : 1317.6677

Fixed modifications: Carbamidomethyl (C) (apply to specified residues or termini only)

Ions Score: 29 Expect: 0.0045

Matches : 9/108 fragment ions using 9 most intense peaks ([help](#))

| #  | b                | b <sup>++</sup> | b*        | b <sup>*++</sup> | b <sup>0</sup>  | b <sup>0++</sup> | Seq. | y               | y <sup>++</sup> | y*        | y <sup>*++</sup> | y <sup>0</sup> | y <sup>0++</sup> | #  |
|----|------------------|-----------------|-----------|------------------|-----------------|------------------|------|-----------------|-----------------|-----------|------------------|----------------|------------------|----|
| 1  | 58.0287          | 29.5180         |           |                  |                 |                  | G    |                 |                 |           |                  |                |                  | 12 |
| 2  | 157.0972         | 79.0522         |           |                  |                 |                  | V    | 1261.6535       | 631.3304        | 1244.6270 | 622.8171         | 1243.6430      | 622.3251         | 11 |
| 3  | <b>320.1605</b>  | 160.5839        |           |                  |                 |                  | Y    | 1162.5851       | 581.7962        | 1145.5586 | 573.2829         | 1144.5745      | 572.7909         | 10 |
| 4  | 407.1925         | 204.0999        |           |                  | 389.1819        | 195.0946         | S    | <b>999.5218</b> | 500.2645        | 982.4952  | 491.7513         | 981.5112       | 491.2592         | 9  |
| 5  | <b>535.2511</b>  | 268.1292        | 518.2245  | 259.6159         | <b>517.2405</b> | 259.1239         | Q    | <b>912.4898</b> | 456.7485        | 895.4632  | 448.2352         | 894.4792       | 447.7432         | 8  |
| 6  | 632.3039         | 316.6556        | 615.2773  | 308.1423         | 614.2933        | 307.6503         | P    | <b>784.4312</b> | 392.7192        | 767.4046  | 384.2060         | 766.4206       | 383.7139         | 7  |
| 7  | 747.3308         | 374.1690        | 730.3042  | 365.6558         | 729.3202        | 365.1638         | D    | 687.3784        | 344.1928        | 670.3519  | 335.6796         | 669.3678       | 335.1876         | 6  |
| 8  | 861.3737         | 431.1905        | 844.3472  | 422.6772         | 843.3632        | 422.1852         | N    | 572.3515        | 286.6794        | 555.3249  | 278.1661         |                |                  | 5  |
| 9  | 974.4578         | 487.7325        | 957.4312  | 479.2193         | 956.4472        | 478.7272         | I    | 458.3085        | 229.6579        | 441.2820  | 221.1446         |                |                  | 4  |
| 10 | <b>1087.5419</b> | 544.2746        | 1070.5153 | <b>535.7613</b>  | 1069.5313       | <b>535.2693</b>  | L    | 345.2245        | 173.1159        | 328.1979  | 164.6026         |                |                  | 3  |
| 11 | 1144.5633        | 572.7853        | 1127.5368 | 564.2720         | 1126.5527       | 563.7800         | G    | 232.1404        | 116.5738        | 215.1139  | 108.0606         |                |                  | 2  |
| 12 |                  |                 |           |                  |                 |                  | R    | 175.1190        | 88.0631         | 158.0924  | 79.5498          |                |                  | 1  |

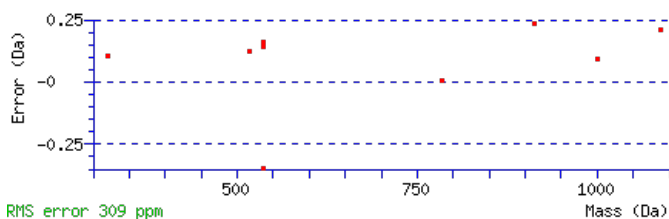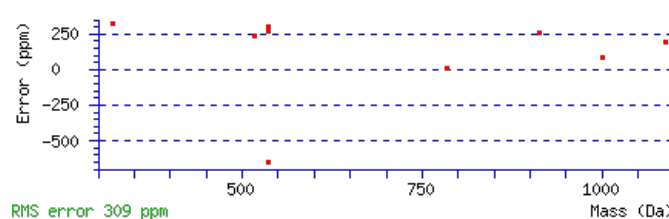NCBI BLAST search of **GVYSQPDNILGR**

(Parameters: blastp, nr protein database, expect=20000, no filter, PAM30)

Other BLAST [web gateways](#)**All matches to this query**

AT1G49630.1

| Score | Mr(calc)  | Delta   | Sequence                     |
|-------|-----------|---------|------------------------------|
| 29.1  | 1317.6677 | -0.0007 | <a href="#">GVYSQPDNILGR</a> |

Mascot: <http://www.matrixscience.com/>

**Peptide View**MS/MS Fragmentation of **SGVGNIFIK**

Found in **AT1G49760.1** in **TAIR\_Arabidopsis**, Symbols: PAB8 | PAB8 (POLY(A) BINDING PROTEIN 8); RNA binding / translation initiation factor | chr1:18420408-18423421 FORWARD

Match to Query 1608: 933.529394 from(467.771973,2+) index(4370)

Title: Elution from: 41.409 to 41.409 scan no 5601 cid35.00 polarity:+

Data file D1d-2\_3.mgf

Click mouse within plot area to zoom in by factor of two about that point

Or,  to  Da

Label all possible matches  Label matches used for scoring

Show Y-axis

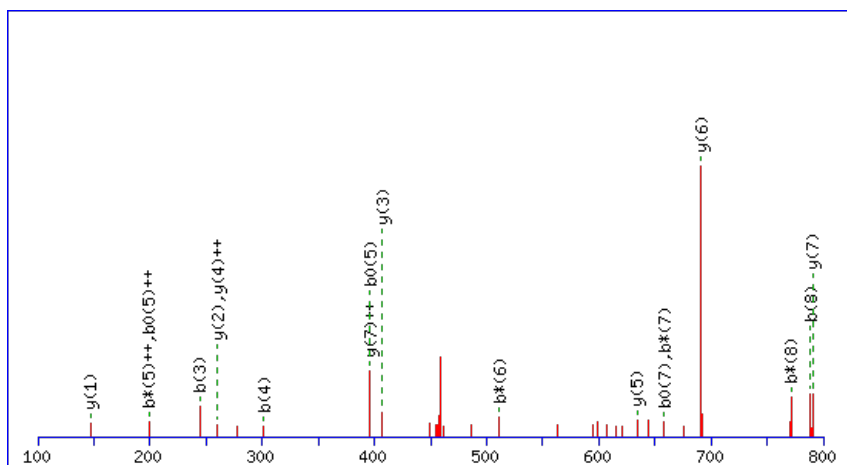

**Monoisotopic mass of neutral peptide Mr(calc):** 933.5284

**Fixed modifications:** Carbamidomethyl (C) (apply to specified residues or termini only)

**Ions Score:** 53 **Expect:** 3.6e-005

**Matches:** 18/72 fragment ions using 21 most intense peaks ([help](#))

| # | b               | b <sup>++</sup> | b*              | b <sup>*++</sup> | b <sup>0</sup>  | b <sup>0++</sup> | Seq. | y               | y <sup>++</sup> | y*       | y <sup>*++</sup> | # |
|---|-----------------|-----------------|-----------------|------------------|-----------------|------------------|------|-----------------|-----------------|----------|------------------|---|
| 1 | 88.0393         | 44.5233         |                 |                  | 70.0287         | 35.5180          | S    |                 |                 |          |                  | 9 |
| 2 | 145.0608        | 73.0340         |                 |                  | 127.0502        | 64.0287          | G    | 847.5036        | 424.2554        | 830.4771 | 415.7422         | 8 |
| 3 | <b>244.1292</b> | 122.5682        |                 |                  | 226.1186        | 113.5629         | V    | <b>790.4822</b> | <b>395.7447</b> | 773.4556 | 387.2314         | 7 |
| 4 | <b>301.1506</b> | 151.0790        |                 |                  | 283.1401        | 142.0737         | G    | <b>691.4137</b> | 346.2105        | 674.3872 | 337.6972         | 6 |
| 5 | 415.1936        | 208.1004        | 398.1670        | <b>199.5872</b>  | <b>397.1830</b> | <b>199.0951</b>  | N    | <b>634.3923</b> | 317.6998        | 617.3657 | 309.1865         | 5 |
| 6 | 528.2776        | 264.6425        | <b>511.2511</b> | 256.1292         | 510.2671        | 255.6372         | I    | 520.3493        | <b>260.6783</b> | 503.3228 | 252.1650         | 4 |
| 7 | 675.3461        | 338.1767        | <b>658.3195</b> | 329.6634         | <b>657.3355</b> | 329.1714         | F    | <b>407.2653</b> | 204.1363        | 390.2387 | 195.6230         | 3 |
| 8 | <b>788.4301</b> | 394.7187        | <b>771.4036</b> | 386.2054         | 770.4195        | 385.7134         | I    | <b>260.1969</b> | 130.6021        | 243.1703 | 122.0888         | 2 |
| 9 |                 |                 |                 |                  |                 |                  | K    | <b>147.1128</b> | 74.0600         | 130.0863 | 65.5468          | 1 |

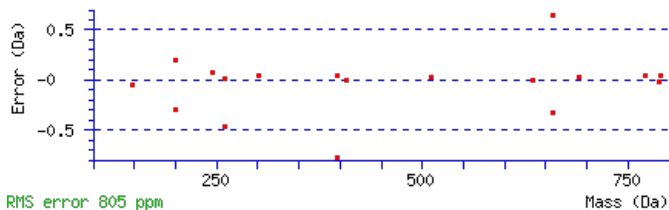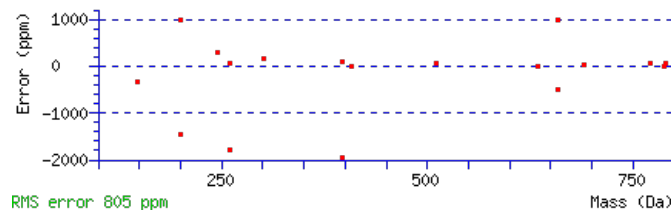

NCBI **BLAST** search of [SGVGNIFIK](#)

(Parameters: blastp, nr protein database, expect=20000, no filter, PAM30)

Other BLAST [web gateways](#)

**All matches to this query**

| Score | Mr(calc) | Delta | Sequence |
|-------|----------|-------|----------|
|       |          |       |          |

**AT1G49760.1**

|      |          |         |                           |
|------|----------|---------|---------------------------|
| 52.8 | 933.5284 | 0.0010  | <a href="#">SGVGNIFIK</a> |
| 21.6 | 933.5283 | 0.0011  | <a href="#">YKNLTAPK</a>  |
| 14.5 | 933.5284 | 0.0010  | <a href="#">YGKKDVPK</a>  |
| 10.8 | 933.5317 | -0.0023 | <a href="#">SGVLVGMKK</a> |
| 8.6  | 933.5317 | -0.0023 | <a href="#">KMKETGLK</a>  |
| 7.8  | 933.5283 | 0.0011  | <a href="#">ELERLFK</a>   |
| 6.9  | 933.5284 | 0.0010  | <a href="#">VVSYNPKK</a>  |
| 6.5  | 933.5284 | 0.0010  | <a href="#">KKGVYDPK</a>  |
| 6.5  | 933.5284 | 0.0010  | <a href="#">KVVSYNPK</a>  |
| 6.4  | 933.5317 | -0.0023 | <a href="#">MKKETGLK</a>  |

**Mascot:** <http://www.matrixscience.com/>

## Peptide View

### MS/MS Fragmentation of **AEEGFFNGLVSSVIR**

Found in **AT1G50200.1** in **TAIR\_Arabidopsis**, Symbols: ACD, ALATS | ALATS (ALANYL-TRNA SYNTHETASE); ATP binding / alanine-tRNA ligase/ ligase, forming aminoacyl-tRNA and related compounds / nucleic acid binding | chr1:18595097-18601979 REVERSE

Match to Query 7987: 1642.770342 from(822.392447,2+) index(10739)

Title: Elution from: 99.186 to 99.186 scan no 15032 cid35.00 polarity:+

Data file D6h-1\_1.mgf

Click mouse within plot area to zoom in by factor of two about that point

Or,   to  Da

Label all possible matches  Label matches used for scoring

Show Y-axis

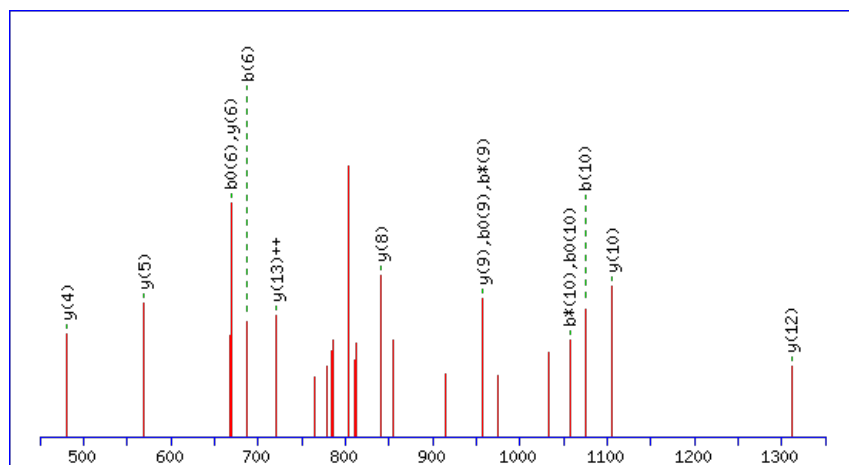

Monoisotopic mass of neutral peptide  $M_r(\text{calc})$ : 1642.7693

Fixed modifications: Carbamidomethyl (C) (apply to specified residues or termini only)

Ions Score: 65 Expect: 3.3e-006

Matches : 15/148 fragment ions using 14 most intense peaks [\(help\)](#)

| #  | b         | b <sup>++</sup> | b*        | b <sup>*++</sup> | b <sup>0</sup> | b <sup>0++</sup> | Seq. | y         | y <sup>++</sup> | y*        | y <sup>*++</sup> | y <sup>0</sup> | y <sup>0++</sup> | #  |
|----|-----------|-----------------|-----------|------------------|----------------|------------------|------|-----------|-----------------|-----------|------------------|----------------|------------------|----|
| 1  | 73.0414   | 37.0244         |           |                  |                |                  | A    |           |                 |           |                  |                |                  | 15 |
| 2  | 203.0811  | 102.0442        |           |                  | 185.0705       | 93.0389          | E    | 1571.7425 | 786.3749        | 1553.7189 | 777.3631         | 1553.7319      | 777.3696         | 14 |
| 3  | 333.1207  | 167.0640        |           |                  | 315.1101       | 158.0587         | E    | 1441.7028 | 721.3551        | 1423.6793 | 712.3433         | 1423.6923      | 712.3498         | 13 |
| 4  | 391.1392  | 196.0732        |           |                  | 373.1286       | 187.0679         | G    | 1311.6632 | 656.3352        | 1293.6396 | 647.3234         | 1293.6526      | 647.3300         | 12 |
| 5  | 539.2046  | 270.1060        |           |                  | 521.1941       | 261.1007         | F    | 1253.6447 | 627.3260        | 1235.6211 | 618.3142         | 1235.6341      | 618.3207         | 11 |
| 6  | 687.2701  | 344.1387        |           |                  | 669.2595       | 335.1334         | F    | 1105.5793 | 553.2933        | 1087.5557 | 544.2815         | 1087.5687      | 544.2880         | 10 |
| 7  | 803.3071  | 402.1572        | 785.2835  | 393.1454         | 785.2965       | 393.1519         | N    | 957.5138  | 479.2605        | 939.4902  | 470.2488         | 939.5032       | 470.2553         | 9  |
| 8  | 861.3256  | 431.1664        | 843.3020  | 422.1546         | 843.3150       | 422.1611         | G    | 841.4768  | 421.2420        | 823.4532  | 412.2303         | 823.4662       | 412.2368         | 8  |
| 9  | 975.4067  | 488.2070        | 957.3831  | 479.1952         | 957.3961       | 479.2017         | L    | 783.4583  | 392.2328        | 765.4347  | 383.2210         | 765.4477       | 383.2275         | 7  |
| 10 | 1075.4721 | 538.2397        | 1057.4485 | 529.2279         | 1057.4616      | 529.2344         | V    | 669.3772  | 335.1922        | 651.3536  | 326.1805         | 651.3666       | 326.1870         | 6  |
| 11 | 1163.5012 | 582.2542        | 1145.4776 | 573.2424         | 1145.4906      | 573.2489         | S    | 569.3118  | 285.1595        | 551.2882  | 276.1477         | 551.3012       | 276.1542         | 5  |
| 12 | 1251.5302 | 626.2688        | 1233.5067 | 617.2570         | 1233.5197      | 617.2635         | S    | 481.2827  | 241.1450        | 463.2591  | 232.1332         | 463.2721       | 232.1397         | 4  |
| 13 | 1351.5957 | 676.3015        | 1333.5721 | 667.2897         | 1333.5851      | 667.2962         | V    | 393.2536  | 197.1305        | 375.2301  | 188.1187         |                |                  | 3  |
| 14 | 1465.6768 | 733.3420        | 1447.6532 | 724.3302         | 1447.6662      | 724.3368         | I    | 293.1882  | 147.0977        | 275.1646  | 138.0859         |                |                  | 2  |
| 15 |           |                 |           |                  |                |                  | R    | 179.1071  | 90.0572         | 161.0835  | 81.0454          |                |                  | 1  |

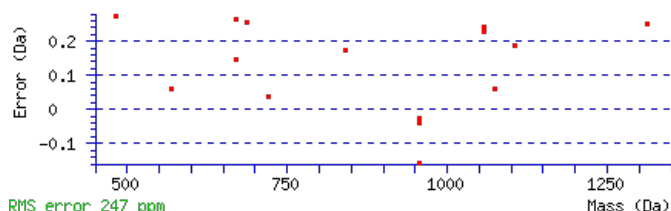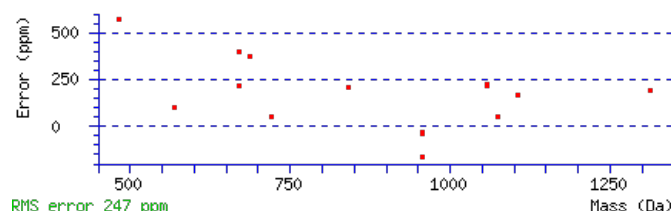

## AT1G50200.1

NCBI **BLAST** search of [AEEGFFNGLVSSVIR](#)

(Parameters: blastp, nr protein database, expect=20000, no filter, PAM30)

Other BLAST [web gateways](#)

### All matches to this query

| Score | Mr(calc)  | Delta   | Sequence                         |
|-------|-----------|---------|----------------------------------|
| 64.6  | 1642.7693 | 0.0010  | <a href="#">AEEGFFNGLVSSVIR</a>  |
| 8.3   | 1642.7713 | -0.0010 | <a href="#">LKIRAMTNVGDMMK</a>   |
| 4.3   | 1642.7727 | -0.0024 | <a href="#">SLNFVSGLEVMEKR</a>   |
| 2.0   | 1642.7697 | 0.0006  | <a href="#">LRLYDSQADRQOK</a>    |
| 1.8   | 1642.7747 | -0.0043 | <a href="#">SFLGRFRGHIESGR</a>   |
| 1.2   | 1642.7697 | 0.0006  | <a href="#">TPSRVAGREFSGTQEK</a> |
| 0.5   | 1642.7702 | 0.0001  | <a href="#">FKICIDKLCNWK</a>     |

Mascot: <http://www.matrixscience.com/>

**Peptide View**MS/MS Fragmentation of **DLQRKESVEWVNMVLGK**Found in **AT1G50260.1** in **TAIR\_Arabidopsis**, Symbols: NTMC2TYPE5.1, NTMC2T5.1 | NTMC2T5.1/NTMC2TYPE5.1 | chr1:18621923-18625311 REVERSE

Match to Query 9491: 2070.986700 from(691.336176,3+) index(9133)

Title: Elution from: 81.171 to 81.171 scan no 12271 cid35.00 polarity:+

Data file D6h-3\_2.mgf

Click mouse within plot area to zoom in by factor of two about that point

Or,   to  Da Label all possible matches  Label matches used for scoring Show Y-axis 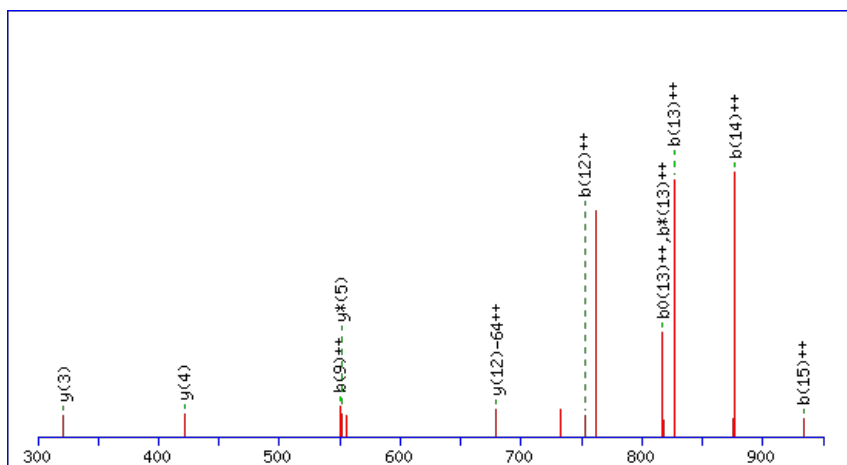Monoisotopic mass of neutral peptide  $M_r(\text{calc})$ : 2070.9827

Fixed modifications: Carbamidomethyl (C) (apply to specified residues or termini only)

Variable modifications:

M13 : Oxidation (M), with neutral losses 0.0000 (shown in table), 63.9983

Ions Score: 28 Expect: 0.011

Matches : 11/260 fragment ions using 15 most intense peaks ([help](#))

| #  | b         | b <sup>++</sup> | b <sup>*</sup> | b <sup>*++</sup> | b <sup>0</sup> | b <sup>0++</sup> | Seq. | y               | y <sup>++</sup> | y <sup>*</sup>  | y <sup>*++</sup> | y <sup>0</sup> | y <sup>0++</sup> | #  |
|----|-----------|-----------------|----------------|------------------|----------------|------------------|------|-----------------|-----------------|-----------------|------------------|----------------|------------------|----|
| 1  | 117.0313  | 59.0193         |                |                  | 99.0207        | 50.0140          | D    |                 |                 |                 |                  |                |                  | 17 |
| 2  | 231.1124  | 116.0598        |                |                  | 213.1018       | 107.0545         | L    | 1955.9660       | 978.4866        | 1937.9424       | 969.4748         | 1937.9554      | 969.4813         | 16 |
| 3  | 361.1650  | 181.0861        | 343.1414       | 172.0743         | 343.1544       | 172.0809         | Q    | 1841.8849       | 921.4461        | 1823.8613       | 912.4343         | 1823.8743      | 912.4408         | 15 |
| 4  | 521.2543  | 261.1308        | 503.2307       | 252.1190         | 503.2437       | 252.1255         | R    | 1711.8322       | 856.4198        | 1693.8087       | 847.4080         | 1693.8217      | 847.4145         | 14 |
| 5  | 651.3433  | 326.1753        | 633.3197       | 317.1635         | 633.3327       | 317.1700         | K    | 1551.7430       | 776.3751        | 1533.7194       | 767.3633         | 1533.7324      | 767.3698         | 13 |
| 6  | 781.3829  | 391.1951        | 763.3593       | 382.1833         | 763.3723       | 382.1898         | E    | 1421.6540       | 711.3306        | 1403.6304       | 702.3188         | 1403.6434      | 702.3253         | 12 |
| 7  | 869.4120  | 435.2096        | 851.3884       | 426.1978         | 851.4014       | 426.2043         | S    | 1291.6143       | 646.3108        | 1273.5907       | 637.2990         | 1273.6038      | 637.3055         | 11 |
| 8  | 969.4774  | 485.2423        | 951.4538       | 476.2306         | 951.4669       | 476.2371         | V    | 1203.5853       | 602.2963        | 1185.5617       | 593.2845         | 1185.5747      | 593.2910         | 10 |
| 9  | 1099.5171 | <b>550.2622</b> | 1081.4935      | 541.2504         | 1081.5065      | 541.2569         | E    | 1103.5198       | 552.2635        | 1085.4962       | 543.2518         | 1085.5092      | 543.2583         | 9  |
| 10 | 1287.5904 | 644.2989        | 1269.5669      | 635.2871         | 1269.5799      | 635.2936         | W    | 973.4802        | 487.2437        | 955.4566        | 478.2319         |                |                  | 8  |
| 11 | 1387.6559 | 694.3316        | 1369.6323      | 685.3198         | 1369.6453      | 685.3263         | V    | 785.4068        | 393.2070        | 767.3832        | 384.1952         |                |                  | 7  |
| 12 | 1503.6929 | <b>752.3501</b> | 1485.6693      | 743.3383         | 1485.6823      | 743.3448         | N    | 685.3414        | 343.1743        | 667.3178        | 334.1625         |                |                  | 6  |
| 13 | 1651.7253 | <b>826.3663</b> | 1633.7017      | <b>817.3545</b>  | 1633.7148      | <b>817.3610</b>  | M    | 569.3044        | 285.1558        | <b>551.2808</b> | 276.1440         |                |                  | 5  |
| 14 | 1751.7908 | <b>876.3990</b> | 1733.7672      | 867.3872         | 1733.7802      | 867.3937         | V    | <b>421.2719</b> | 211.1396        | 403.2483        | 202.1278         |                |                  | 4  |
| 15 | 1865.8719 | <b>933.4396</b> | 1847.8483      | 924.4278         | 1847.8613      | 924.4343         | L    | <b>321.2065</b> | 161.1069        | 303.1829        | 152.0951         |                |                  | 3  |
| 16 | 1923.8904 | 962.4488        | 1905.8668      | 953.4370         | 1905.8798      | 953.4435         | G    | 207.1254        | 104.0663        | 189.1018        | 95.0545          |                |                  | 2  |
| 17 |           |                 |                |                  |                |                  | K    | 149.1069        | 75.0571         | 131.0833        | 66.0453          |                |                  | 1  |



# AT1G50260.1

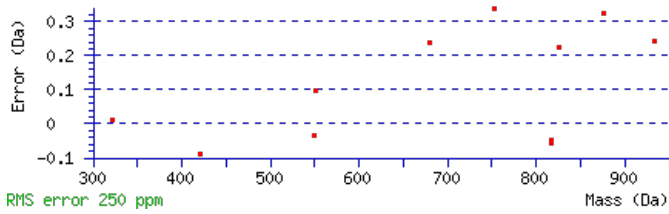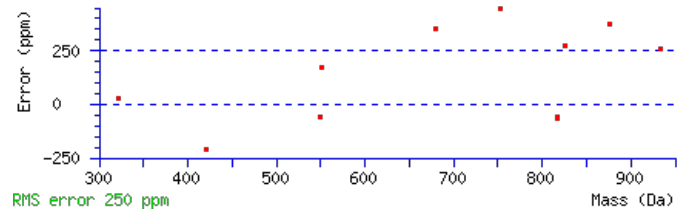

NCBI **BLAST** search of [DLQRKESVEWVNMVLGK](#)  
 (Parameters: blastp, nr protein database, expect=20000, no filter, PAM30)  
 Other BLAST [web gateways](#)

## All matches to this query

| Score | Mr(calc)  | Delta   | Sequence                             |
|-------|-----------|---------|--------------------------------------|
| 28.3  | 2070.9827 | 0.0040  | <a href="#">DLQRKESVEWVNMVLGK</a>    |
| 11.0  | 2070.9849 | 0.0018  | <a href="#">DFVHYTKGNPLALQMLGK</a>   |
| 7.4   | 2070.9897 | -0.0030 | <a href="#">SVENLIYIGFPGDPSTAIR</a>  |
| 7.2   | 2070.9820 | 0.0047  | <a href="#">NGGTVFRFRGRSNSLSFLGK</a> |
| 6.8   | 2070.9908 | -0.0041 | <a href="#">SNNIMITGDGIGKTIITGDK</a> |
| 2.5   | 2070.9878 | -0.0011 | <a href="#">IRERTDALDAAGNTTAAIGK</a> |
| 1.3   | 2070.9854 | 0.0013  | <a href="#">FENGRIEMHSLRQLGK</a>     |

Mascot: <http://www.matrixscience.com/>

## Peptide View

### MS/MS Fragmentation of **VYGLPHFILFK**

Found in **AT1G50320.1** in **TAIR\_Arabidopsis**, Symbols: ATX, ATHX | ATHX (THIOREDOXIN X); thiol-disulfide exchange intermediate | chr1:18642274-18643132 REVERSE

Match to Query 5054: 1346.717985 from(449.913271,3+) index(9084)

Title: Elution from: 80.592 to 80.592 scan no 12179 cid35.00 polarity:+

Data file D6h-3\_2.mgf

Click mouse within plot area to zoom in by factor of two about that point

Or,   to  Da

Label all possible matches  Label matches used for scoring

Show Y-axis

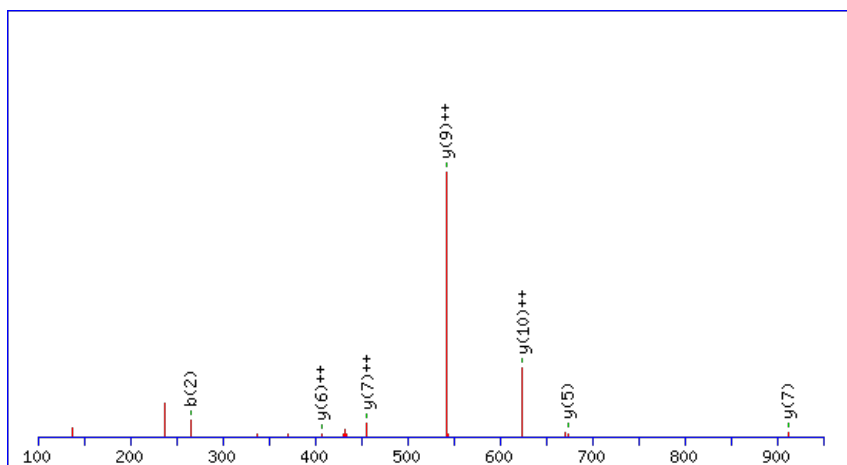

Monoisotopic mass of neutral peptide  $M_r(\text{calc})$ : 1346.7179

Fixed modifications: Carbamidomethyl (C) (apply to specified residues or termini only)

Ions Score: 23 Expect: 0.021

Matches : 7/60 fragment ions using 11 most intense peaks ([help](#))

| #  | b         | b <sup>++</sup> | Seq. | y         | y <sup>++</sup> | y*        | y <sup>*++</sup> | #  |
|----|-----------|-----------------|------|-----------|-----------------|-----------|------------------|----|
| 1  | 101.0727  | 51.0400         | V    |           |                 |           |                  | 11 |
| 2  | 265.1331  | 133.0702        | Y    | 1247.6597 | 624.3335        | 1229.6362 | 615.3217         | 10 |
| 3  | 323.1516  | 162.0794        | G    | 1083.5994 | 542.3033        | 1065.5758 | 533.2915         | 9  |
| 4  | 437.2327  | 219.1200        | L    | 1025.5809 | 513.2941        | 1007.5573 | 504.2823         | 8  |
| 5  | 535.2825  | 268.1449        | P    | 911.4998  | 456.2535        | 893.4762  | 447.2417         | 7  |
| 6  | 675.3325  | 338.1699        | H    | 813.4500  | 407.2286        | 795.4264  | 398.2168         | 6  |
| 7  | 823.3980  | 412.2026        | F    | 673.4000  | 337.2036        | 655.3764  | 328.1918         | 5  |
| 8  | 937.4791  | 469.2432        | I    | 525.3345  | 263.1709        | 507.3109  | 254.1591         | 4  |
| 9  | 1051.5602 | 526.2837        | L    | 411.2534  | 206.1303        | 393.2298  | 197.1186         | 3  |
| 10 | 1199.6256 | 600.3164        | F    | 297.1723  | 149.0898        | 279.1487  | 140.0780         | 2  |
| 11 |           |                 | K    | 149.1069  | 75.0571         | 131.0833  | 66.0453          | 1  |

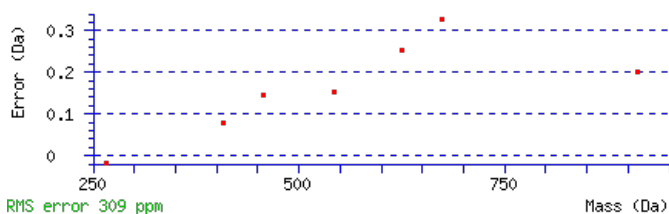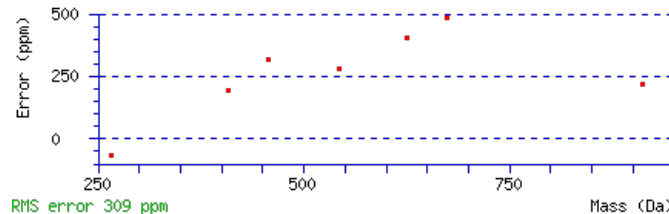

NCBI **BLAST** search of **VYGLPHFILFK**

(Parameters: blastp, nr protein database, expect=20000, no filter, PAM30)

Other BLAST [web gateways](#)

All matches to this query

AT1G50320.1

| Score | Mr(calc)  | Delta   | Sequence                    |
|-------|-----------|---------|-----------------------------|
| 23.1  | 1346.7179 | 0.0001  | <a href="#">VYGLPHFILFK</a> |
| 2.0   | 1346.7195 | -0.0015 | <a href="#">TCITPRLKAR</a>  |

Mascot: <http://www.matrixscience.com/>

**Peptide View**MS/MS Fragmentation of **KFLMEVK**Found in **AT1G50360.1** in **TAIR\_Arabidopsis**, Symbols: ATVIII, VIIIA | VIIIA (Myosin-like protein VIIA); motor | chr1:18654356-18660774  
FORWARD

Match to Query 1860: 918.473046 from(460.243799,2+) index(7422)

Title: Elution from: 65.408 to 65.408 scan no 9612 cid35.00 polarity:+

Data file 0-2\_1.mgf

Click mouse within plot area to zoom in by factor of two about that point

Or,   to  Da Label all possible matches  Label matches used for scoring Show Y-axis 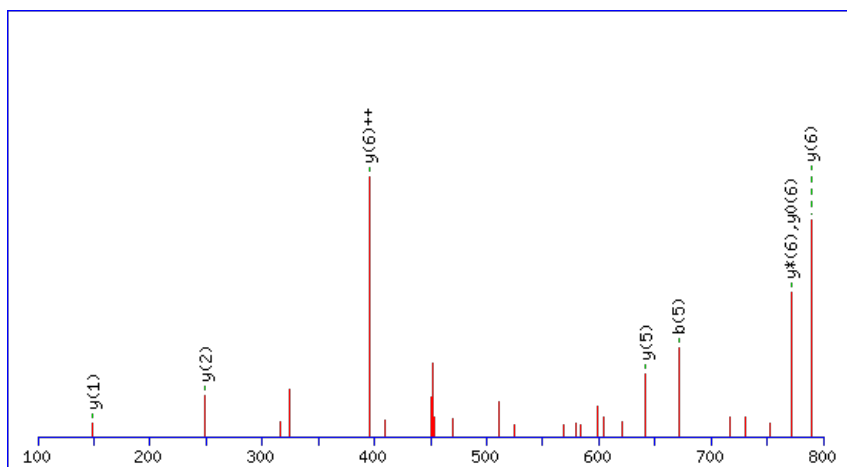Monoisotopic mass of neutral peptide **Mr(calc)**: 918.4727**Fixed modifications:** Carbamidomethyl (C) (apply to specified residues or termini only)**Variable modifications:****M4** : Oxidation (M), with neutral losses 0.0000 (shown in table), 63.9983**Ions Score:** 26 **Expect:** 0.01**Matches** : 9/94 fragment ions using 13 most intense peaks ([help](#))

| # | b               | b <sup>++</sup> | b <sup>*</sup> | b <sup>*++</sup> | b <sup>0</sup> | b <sup>0++</sup> | Seq.     | y               | y <sup>++</sup> | y <sup>*</sup>  | y <sup>*++</sup> | y <sup>0</sup>  | y <sup>0++</sup> | # |
|---|-----------------|-----------------|----------------|------------------|----------------|------------------|----------|-----------------|-----------------|-----------------|------------------|-----------------|------------------|---|
| 1 | 131.0963        | 66.0518         | 113.0727       | 57.0400          |                |                  | <b>K</b> |                 |                 |                 |                  |                 |                  | 7 |
| 2 | 279.1618        | 140.0845        | 261.1382       | 131.0727         |                |                  | <b>F</b> | <b>789.3909</b> | <b>395.1991</b> | <b>771.3673</b> | 386.1873         | <b>771.3804</b> | 386.1938         | 6 |
| 3 | 393.2429        | 197.1251        | 375.2193       | 188.1133         |                |                  | <b>L</b> | <b>641.3255</b> | 321.1664        | 623.3019        | 312.1546         | 623.3149        | 312.1611         | 5 |
| 4 | 541.2753        | 271.1413        | 523.2517       | 262.1295         |                |                  | <b>M</b> | 527.2444        | 264.1258        | 509.2208        | 255.1140         | 509.2338        | 255.1205         | 4 |
| 5 | <b>671.3149</b> | 336.1611        | 653.2913       | 327.1493         | 653.3044       | 327.1558         | <b>E</b> | 379.2120        | 190.1096        | 361.1884        | 181.0978         | 361.2014        | 181.1043         | 3 |
| 6 | <b>771.3804</b> | 386.1938        | 753.3568       | 377.1820         | 753.3698       | 377.1885         | <b>V</b> | <b>249.1723</b> | 125.0898        | 231.1487        | 116.0780         |                 |                  | 2 |
| 7 |                 |                 |                |                  |                |                  | <b>K</b> | <b>149.1069</b> | 75.0571         | 131.0833        | 66.0453          |                 |                  | 1 |

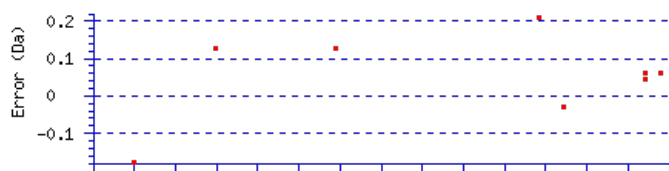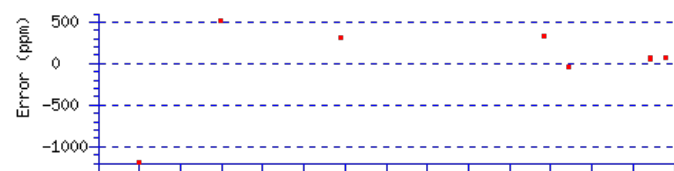NCBI **BLAST** search of **KFLMEVK**

(Parameters: blastp, nr protein database, expect=20000, no filter, PAM30)

Other BLAST [web gateways](#)**All matches to this query**

| Score | Mr(calc) | Delta  | Sequence       |
|-------|----------|--------|----------------|
| 26.4  | 918.4727 | 0.0004 | <b>KFLMEVK</b> |

**AT1G50360.1**

|      |          |         |                          |
|------|----------|---------|--------------------------|
| 22.9 | 918.4754 | -0.0023 | <a href="#">FIMRNVK</a>  |
| 21.0 | 918.4753 | -0.0023 | <a href="#">FVGRMVAK</a> |
| 20.2 | 918.4731 | -0.0001 | <a href="#">RSMKSVAK</a> |
| 16.3 | 918.4727 | 0.0004  | <a href="#">MKELVFK</a>  |
| 16.3 | 918.4731 | -0.0001 | <a href="#">MKQLSRK</a>  |
| 15.4 | 918.4727 | 0.0004  | <a href="#">KYVIMEK</a>  |
| 12.1 | 918.4731 | -0.0001 | <a href="#">MTRQKVK</a>  |
| 12.1 | 918.4705 | 0.0026  | <a href="#">MVSSTKLK</a> |
| 12.1 | 918.4705 | 0.0026  | <a href="#">MVSTSKIK</a> |

**Mascot:** <http://www.matrixscience.com/>

## Peptide View

### MS/MS Fragmentation of **ERNGQIAR**

Found in **AT1G50840.1** in **TAIR\_Arabidopsis**, Symbols: POLGAMMA2 | POLGAMMA2 (polymerase gamma 2); DNA binding / DNA-directed DNA polymerase | chr1:18842945-18847981 FORWARD

Match to Query 1671: 942.498956 from(472.256754,2+) index(1265)

Title: Elution from: 18.883 to 18.883 scan no 1768 cid35.00 polarity:+

Data file D1d-2\_3.mgf

Click mouse within plot area to zoom in by factor of two about that point

Or,   to  Da

Label all possible matches  Label matches used for scoring

Show Y-axis

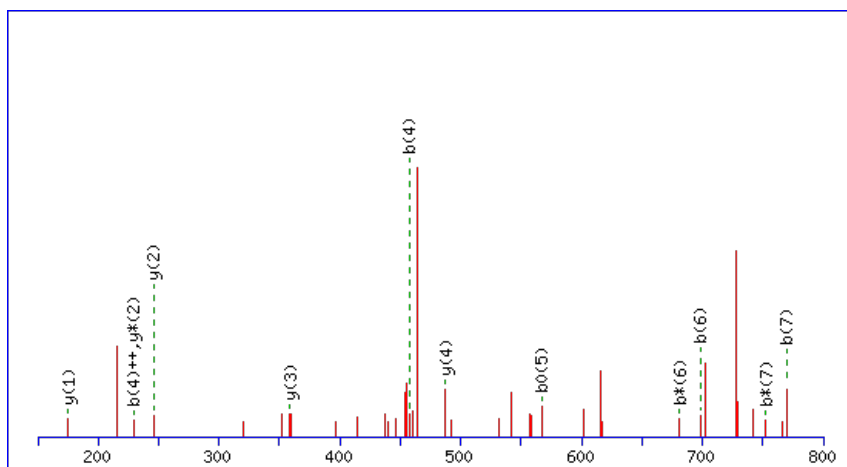

Monoisotopic mass of neutral peptide  $M_r(\text{calc})$ : 942.4995

Fixed modifications: Carbamidomethyl (C) (apply to specified residues or termini only)

Ions Score: 15 Expect: 0.039

Matches : 12/68 fragment ions using 34 most intense peaks ([help](#))

| # | b               | b <sup>++</sup> | b*              | b <sup>*++</sup> | b <sup>0</sup>  | b <sup>0++</sup> | Seq. | y               | y <sup>++</sup> | y*              | y <sup>*++</sup> | # |
|---|-----------------|-----------------|-----------------|------------------|-----------------|------------------|------|-----------------|-----------------|-----------------|------------------|---|
| 1 | 130.0499        | 65.5286         |                 |                  | 112.0393        | 56.5233          | E    |                 |                 |                 |                  | 8 |
| 2 | 286.1510        | 143.5791        | 269.1244        | 135.0659         | 268.1404        | 134.5738         | R    | 814.4642        | 407.7357        | 797.4377        | 399.2225         | 7 |
| 3 | 400.1939        | 200.6006        | 383.1674        | 192.0873         | 382.1833        | 191.5953         | N    | 658.3631        | 329.6852        | 641.3366        | 321.1719         | 6 |
| 4 | <b>457.2154</b> | <b>229.1113</b> | 440.1888        | 220.5980         | 439.2048        | 220.1060         | G    | 544.3202        | 272.6637        | 527.2936        | 264.1504         | 5 |
| 5 | 585.2739        | 293.1406        | 568.2474        | 284.6273         | <b>567.2634</b> | 284.1353         | Q    | <b>487.2987</b> | 244.1530        | 470.2722        | 235.6397         | 4 |
| 6 | <b>698.3580</b> | 349.6826        | <b>681.3315</b> | 341.1694         | 680.3474        | 340.6774         | I    | <b>359.2401</b> | 180.1237        | 342.2136        | 171.6104         | 3 |
| 7 | <b>769.3951</b> | 385.2012        | <b>752.3686</b> | 376.6879         | 751.3846        | 376.1959         | A    | <b>246.1561</b> | 123.5817        | <b>229.1295</b> | 115.0684         | 2 |
| 8 |                 |                 |                 |                  |                 |                  | R    | <b>175.1190</b> | 88.0631         | 158.0924        | 79.5498          | 1 |

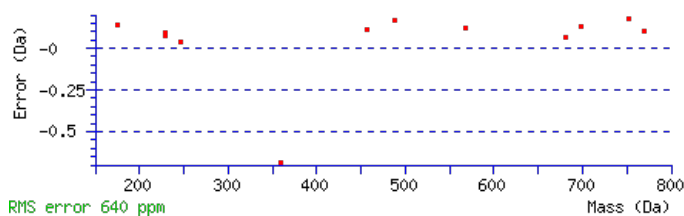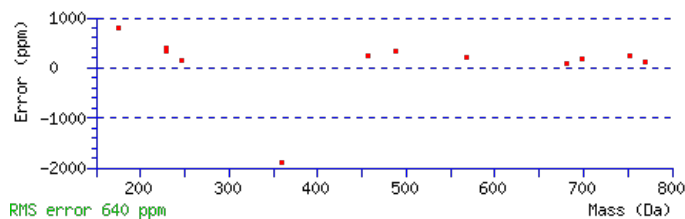

NCBI BLAST search of [ERNGQIAR](#)

(Parameters: blastp, nr protein database, expect=20000, no filter, PAM30)

Other BLAST [web gateways](#)

### All matches to this query

| Score | $M_r(\text{calc})$ | Delta   | Sequence                 |
|-------|--------------------|---------|--------------------------|
| 15.0  | 942.4995           | -0.0005 | <a href="#">ERNGQIAR</a> |

# AT1G50840.1

|     |          |         |                           |
|-----|----------|---------|---------------------------|
| 3.0 | 942.4995 | -0.0006 | <a href="#">QSGAARTPR</a> |
| 1.6 | 942.4995 | -0.0005 | <a href="#">QLDNRAAR</a>  |

**Mascot:** <http://www.matrixscience.com/>



# Mascot Search Results

## Peptide View

MS/MS Fragmentation of **YAPVCVTMPTAK**

Found in **AT1G51400.1** in **TAIR\_Arabidopsis**, Symbols: | photosystem II 5 kD protein | chr1:19055840-19056160 REVERSE

Match to Query 5010: 1336.649332 from(669.331942,2+) index(4608)

Title: Elution from: 42.000 to 42.000 scan no 5757 cid35.00 polarity:+

Data file D12h-1\_2.mgf

Click mouse within plot area to zoom in by factor of two about that point

Or,   to  Da

Label all possible matches  Label matches used for scoring

Show Y-axis

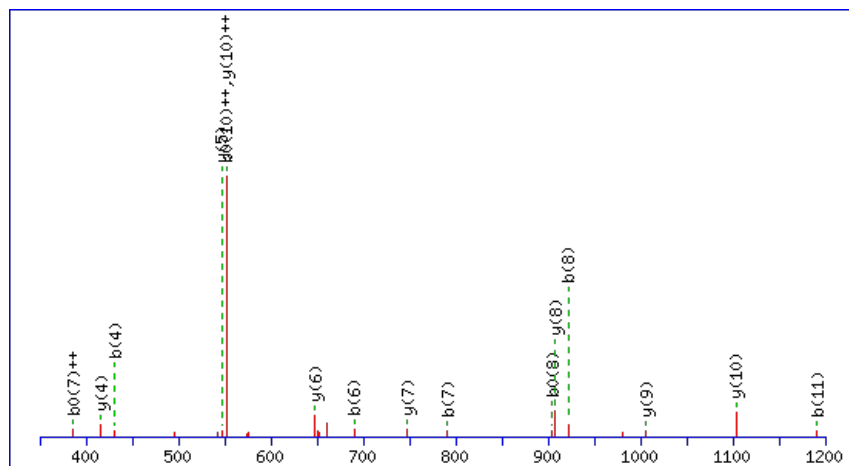

**Monoisotopic mass of neutral peptide Mr(calc):** 1336.6519

**Fixed modifications:** Carbamidomethyl (C) (apply to specified residues or termini only)

**Ions Score:** 69 **Expect:** 5.2e-007

**Matches:** 16/94 fragment ions using 18 most intense peaks ([help](#))

| #  | b                | b <sup>++</sup> | b <sup>0</sup>  | b <sup>0++</sup> | Seq. | y                | y <sup>++</sup> | y*        | y <sup>*++</sup> | y <sup>0</sup> | y <sup>0++</sup> | #  |
|----|------------------|-----------------|-----------------|------------------|------|------------------|-----------------|-----------|------------------|----------------|------------------|----|
| 1  | 164.0706         | 82.5389         |                 |                  | Y    |                  |                 |           |                  |                |                  | 12 |
| 2  | 235.1077         | 118.0575        |                 |                  | A    | 1174.5959        | 587.8016        | 1157.5693 | 579.2883         | 1156.5853      | 578.7963         | 11 |
| 3  | 332.1605         | 166.5839        |                 |                  | P    | <b>1103.5588</b> | <b>552.2830</b> | 1086.5322 | 543.7697         | 1085.5482      | 543.2777         | 10 |
| 4  | <b>431.2289</b>  | 216.1181        |                 |                  | V    | <b>1006.5060</b> | 503.7566        | 989.4795  | 495.2434         | 988.4954       | 494.7514         | 9  |
| 5  | 591.2595         | 296.1334        |                 |                  | C    | <b>907.4376</b>  | 454.2224        | 890.4110  | 445.7092         | 889.4270       | 445.2171         | 8  |
| 6  | <b>690.3280</b>  | 345.6676        |                 |                  | V    | <b>747.4069</b>  | 374.2071        | 730.3804  | 365.6938         | 729.3964       | 365.2018         | 7  |
| 7  | <b>791.3756</b>  | 396.1915        | 773.3651        | <b>387.1862</b>  | T    | <b>648.3385</b>  | 324.6729        | 631.3120  | 316.1596         | 630.3280       | 315.6676         | 6  |
| 8  | <b>922.4161</b>  | 461.7117        | <b>904.4056</b> | 452.7064         | M    | <b>547.2908</b>  | 274.1491        | 530.2643  | 265.6358         | 529.2803       | 265.1438         | 5  |
| 9  | 1019.4689        | 510.2381        | 1001.4583       | 501.2328         | P    | <b>416.2504</b>  | 208.6288        | 399.2238  | 200.1155         | 398.2398       | 199.6235         | 4  |
| 10 | 1120.5166        | 560.7619        | 1102.5060       | <b>551.7566</b>  | T    | 319.1976         | 160.1024        | 302.1710  | 151.5892         | 301.1870       | 151.0972         | 3  |
| 11 | <b>1191.5537</b> | 596.2805        | 1173.5431       | 587.2752         | A    | 218.1499         | 109.5786        | 201.1234  | 101.0653         |                |                  | 2  |
| 12 |                  |                 |                 |                  | K    | 147.1128         | 74.0600         | 130.0863  | 65.5468          |                |                  | 1  |

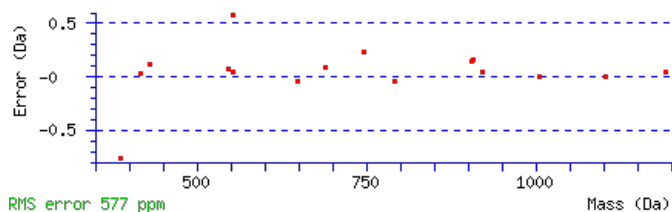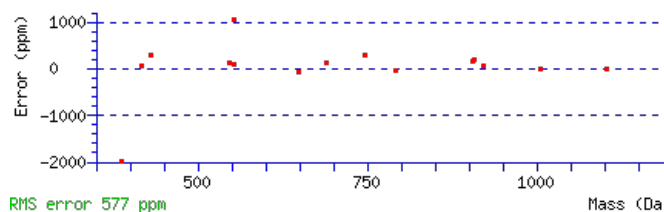

NCBI **BLAST** search of **YAPVCVTMPTAK**

(Parameters: blastp, nr protein database, expect=20000, no filter, PAM30)

Other BLAST [web gateways](#)

All matches to this query



AT1G51400.1

| Score | Mr(calc)  | Delta   | Sequence                    |
|-------|-----------|---------|-----------------------------|
| 69.3  | 1336.6519 | -0.0026 | <a href="#">YAPVCVTMPAK</a> |
| 8.3   | 1336.6486 | 0.0008  | <a href="#">FSNIVWTMDPK</a> |
| 2.1   | 1336.6517 | -0.0024 | <a href="#">VQRNESMSRSK</a> |

Mascot: <http://www.matrixscience.com/>

**Peptide View**MS/MS Fragmentation of **QSNKQTHVSDNK**Found in **AT1G51440.1** in **TAIR\_Arabidopsis**, Symbols: | lipase class 3 family protein | chr1:19074639-19076222 FORWARD

Match to Query 4790: 1384.668330 from(693.341441,2+) index(4689)

Title: Elution from: 44.941 to 44.941 scan no 6039 cid35.00 polarity:+

Data file D1d-1\_3.mgf

Click mouse within plot area to zoom in by factor of two about that point

Or,   to  Da Label all possible matches  Label matches used for scoring Show Y-axis 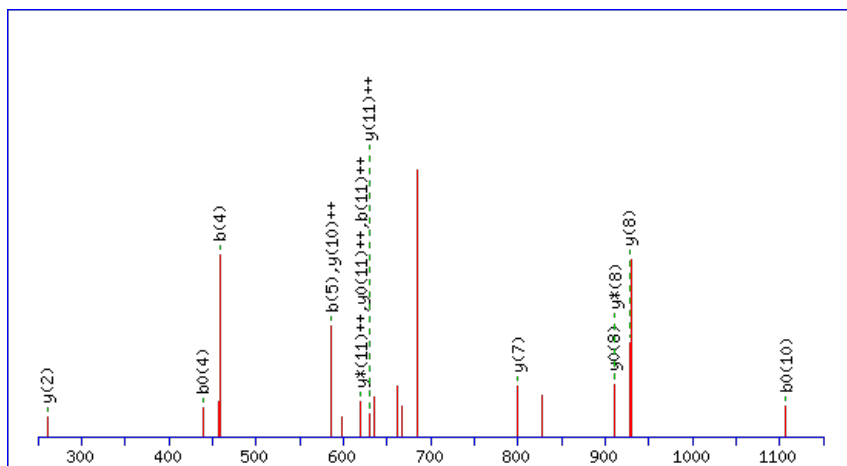Monoisotopic mass of neutral peptide  $M_r(\text{calc})$ : 1384.6695

Fixed modifications: Carbamidomethyl (C) (apply to specified residues or termini only)

Ions Score: 19 Expect: 0.031

Matches : 14/126 fragment ions using 20 most intense peaks ([help](#))

| #  | b         | b <sup>++</sup> | b*        | b <sup>*++</sup> | b <sup>0</sup> | b <sup>0++</sup> | Seq. | y         | y <sup>++</sup> | y*        | y <sup>*++</sup> | y <sup>0</sup> | y <sup>0++</sup> | #  |
|----|-----------|-----------------|-----------|------------------|----------------|------------------|------|-----------|-----------------|-----------|------------------|----------------|------------------|----|
| 1  | 129.0659  | 65.0366         | 112.0393  | 56.5233          |                |                  | Q    |           |                 |           |                  |                |                  | 12 |
| 2  | 216.0979  | 108.5526        | 199.0713  | 100.0393         | 198.0873       | 99.5473          | S    | 1257.6182 | 629.3127        | 1240.5917 | 620.7995         | 1239.6076      | 620.3075         | 11 |
| 3  | 330.1408  | 165.5740        | 313.1143  | 157.0608         | 312.1302       | 156.5688         | N    | 1170.5862 | 585.7967        | 1153.5596 | 577.2835         | 1152.5756      | 576.7914         | 10 |
| 4  | 458.2358  | 229.6215        | 441.2092  | 221.1082         | 440.2252       | 220.6162         | K    | 1056.5432 | 528.7753        | 1039.5167 | 520.2620         | 1038.5327      | 519.7700         | 9  |
| 5  | 586.2944  | 293.6508        | 569.2678  | 285.1375         | 568.2838       | 284.6455         | Q    | 928.4483  | 464.7278        | 911.4217  | 456.2145         | 910.4377       | 455.7225         | 8  |
| 6  | 687.3420  | 344.1747        | 670.3155  | 335.6614         | 669.3315       | 335.1694         | T    | 800.3897  | 400.6985        | 783.3632  | 392.1852         | 782.3791       | 391.6932         | 7  |
| 7  | 824.4009  | 412.7041        | 807.3744  | 404.1908         | 806.3904       | 403.6988         | H    | 699.3420  | 350.1747        | 682.3155  | 341.6614         | 681.3315       | 341.1694         | 6  |
| 8  | 923.4694  | 462.2383        | 906.4428  | 453.7250         | 905.4588       | 453.2330         | V    | 562.2831  | 281.6452        | 545.2566  | 273.1319         | 544.2726       | 272.6399         | 5  |
| 9  | 1010.5014 | 505.7543        | 993.4748  | 497.2411         | 992.4908       | 496.7490         | S    | 463.2147  | 232.1110        | 446.1882  | 223.5977         | 445.2041       | 223.1057         | 4  |
| 10 | 1125.5283 | 563.2678        | 1108.5018 | 554.7545         | 1107.5178      | 554.2625         | D    | 376.1827  | 188.5950        | 359.1561  | 180.0817         | 358.1721       | 179.5897         | 3  |
| 11 | 1239.5713 | 620.2893        | 1222.5447 | 611.7760         | 1221.5607      | 611.2840         | N    | 261.1557  | 131.0815        | 244.1292  | 122.5682         |                |                  | 2  |
| 12 |           |                 |           |                  |                |                  | K    | 147.1128  | 74.0600         | 130.0863  | 65.5468          |                |                  | 1  |

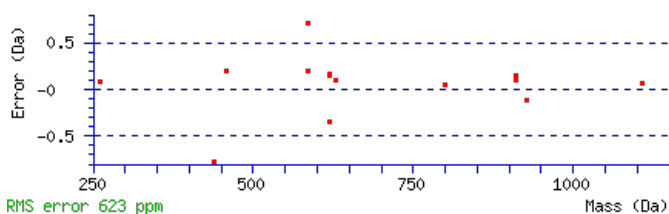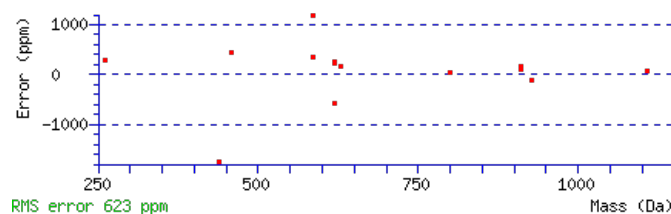NCBI **BLAST** search of **QSNKQTHVSDNK**

(Parameters: blastp, nr protein database, expect=20000, no filter, PAM30)

Other BLAST [web gateways](#)**All matches to this query**

**AT1G51440.1**

| <b>Score</b> | <b>Mr(calc)</b> | <b>Delta</b> | <b>Sequence</b>              |
|--------------|-----------------|--------------|------------------------------|
| 19.0         | 1384.6695       | -0.0012      | <a href="#">QSNKQTHVSDNK</a> |
| 7.7          | 1384.6656       | 0.0027       | <a href="#">VNDELKTYMTR</a>  |
| 5.0          | 1384.6722       | -0.0038      | <a href="#">ETLEQTSSYSIK</a> |
| 2.9          | 1384.6697       | -0.0013      | <a href="#">LPYVYDDNMKK</a>  |
| 1.5          | 1384.6657       | 0.0027       | <a href="#">TLDCSSVTLFSR</a> |

**Mascot:** <http://www.matrixscience.com/>

## Peptide View

### MS/MS Fragmentation of FTPGLEHWSIAVK

Found in **AT1G51540.1** in **TAIR\_Arabidopsis**, Symbols: | similar to kelch repeat-containing protein [Arabidopsis thaliana] (TAIR:AT3G27220.1); similar to unnamed protein product [Vitis vinifera] (GB:CAO41666.1); contains InterPro domain Kelch repeat type 1 (InterPro:IPR006652); contains Inter

Match to Query 6528: 1500.730988 from(751.372770,2+) index(9384)

Title: Elution from: 84.687 to 84.687 scan no 12691 cid35.00 polarity:+

Data file D12h-3\_1.mgf

Click mouse within plot area to zoom in by factor of two about that point

Or,   to  Da

Label all possible matches  Label matches used for scoring

Show Y-axis

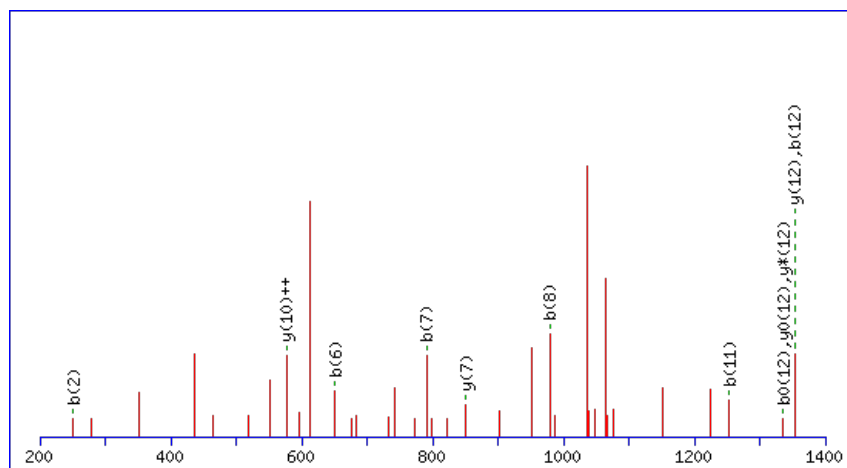

Monoisotopic mass of neutral peptide  $M_r(\text{calc})$ : 1500.7319

Fixed modifications: Carbamidomethyl (C) (apply to specified residues or termini only)

Ions Score: 23 Expect: 0.031

Matches : 12/110 fragment ions using 23 most intense peaks ([help](#))

| #  | b                | b <sup>++</sup> | b <sup>0</sup>   | b <sup>0++</sup> | Seq. | y                | y <sup>++</sup> | y*               | y <sup>*++</sup> | y <sup>0</sup>   | y <sup>0++</sup> | #  |
|----|------------------|-----------------|------------------|------------------|------|------------------|-----------------|------------------|------------------|------------------|------------------|----|
| 1  | 149.0727         | 75.0400         |                  |                  | F    |                  |                 |                  |                  |                  |                  | 13 |
| 2  | <b>251.1174</b>  | 126.0624        | 233.1069         | 117.0571         | T    | <b>1353.6738</b> | 677.3405        | <b>1335.6502</b> | 668.3287         | <b>1335.6632</b> | 668.3352         | 12 |
| 3  | 349.1672         | 175.0873        | 331.1567         | 166.0820         | P    | 1251.6291        | 626.3182        | 1233.6055        | 617.3064         | 1233.6185        | 617.3129         | 11 |
| 4  | 407.1857         | 204.0965        | 389.1752         | 195.0912         | G    | 1153.5793        | <b>577.2933</b> | 1135.5557        | 568.2815         | 1135.5687        | 568.2880         | 10 |
| 5  | 521.2668         | 261.1371        | 503.2563         | 252.1318         | L    | 1095.5608        | 548.2840        | 1077.5372        | 539.2722         | 1077.5502        | 539.2787         | 9  |
| 6  | <b>651.3065</b>  | 326.1569        | 633.2959         | 317.1516         | E    | 981.4797         | 491.2435        | 963.4561         | 482.2317         | 963.4691         | 482.2382         | 8  |
| 7  | <b>791.3565</b>  | 396.1819        | 773.3459         | 387.1766         | H    | <b>851.4400</b>  | 426.2237        | 833.4165         | 417.2119         | 833.4295         | 417.2184         | 7  |
| 8  | <b>979.4299</b>  | 490.2186        | 961.4193         | 481.2133         | W    | 711.3900         | 356.1986        | 693.3664         | 347.1869         | 693.3795         | 347.1934         | 6  |
| 9  | 1067.4589        | 534.2331        | 1049.4484        | 525.2278         | S    | 523.3166         | 262.1620        | 505.2931         | 253.1502         | 505.3061         | 253.1567         | 5  |
| 10 | 1181.5400        | 591.2737        | 1163.5295        | 582.2684         | I    | 435.2876         | 218.1474        | 417.2640         | 209.1356         |                  |                  | 4  |
| 11 | <b>1253.5742</b> | 627.2907        | 1235.5636        | 618.2854         | A    | 321.2065         | 161.1069        | 303.1829         | 152.0951         |                  |                  | 3  |
| 12 | <b>1353.6396</b> | 677.3234        | <b>1335.6291</b> | 668.3182         | V    | 249.1723         | 125.0898        | 231.1487         | 116.0780         |                  |                  | 2  |
| 13 |                  |                 |                  |                  | K    | 149.1069         | 75.0571         | 131.0833         | 66.0453          |                  |                  | 1  |

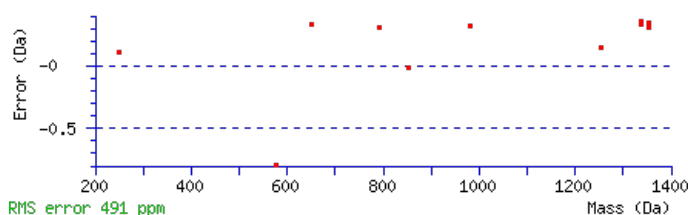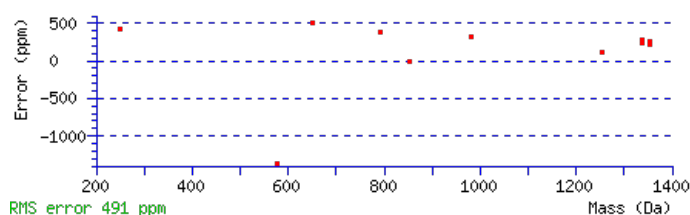

NCBI BLAST search of [FTPGLEHWSIAVK](#)

## AT1G51540.1

(Parameters: blastp, nr protein database, expect=20000, no filter, PAM30)

Other BLAST [web gateways](#)

### All matches to this query

| Score | Mr(calc)  | Delta   | Sequence                        |
|-------|-----------|---------|---------------------------------|
| 23.0  | 1500.7319 | -0.0009 | <a href="#">FTPGLEHWSIAVK</a>   |
| 14.3  | 1500.7331 | -0.0021 | <a href="#">MESIPDPSVPRKK</a>   |
| 12.5  | 1500.7297 | 0.0013  | <a href="#">FEGVRKQYSLEK</a>    |
| 11.3  | 1500.7270 | 0.0040  | <a href="#">EFVKSSYEIGLSK</a>   |
| 6.7   | 1500.7274 | 0.0035  | <a href="#">GEVEVAKEAPAGVAR</a> |
| 6.7   | 1500.7281 | 0.0029  | <a href="#">LRCLVRTHHGAR</a>    |
| 6.2   | 1500.7274 | 0.0035  | <a href="#">EKAHDVKETVAQK</a>   |
| 2.7   | 1500.7319 | -0.0009 | <a href="#">QFKYALVWGSSAK</a>   |
| 1.8   | 1500.7270 | 0.0040  | <a href="#">TKYSVYIAEEGVK</a>   |
| 1.0   | 1500.7275 | 0.0035  | <a href="#">IPKENQQQLQEK</a>    |

Mascot: <http://www.matrixscience.com/>

**Peptide View**MS/MS Fragmentation of **MVLAASGVEHEELLK**Found in **AT1G51980.1** in **TAIR\_Arabidopsis**, Symbols: | mitochondrial processing peptidase alpha subunit, putative | chr1:19327361-19330440  
REVERSE

Match to Query 7462: 1642.797552 from(548.606460,3+) index(5248)

Title: Elution from: 46.833 to 46.833 scan no 6597 cid35.00 polarity:+

Data file 0-1\_3.mgf

Click mouse within plot area to zoom in by factor of two about that point

Or,   to  Da Label all possible matches  Label matches used for scoring Show Y-axis 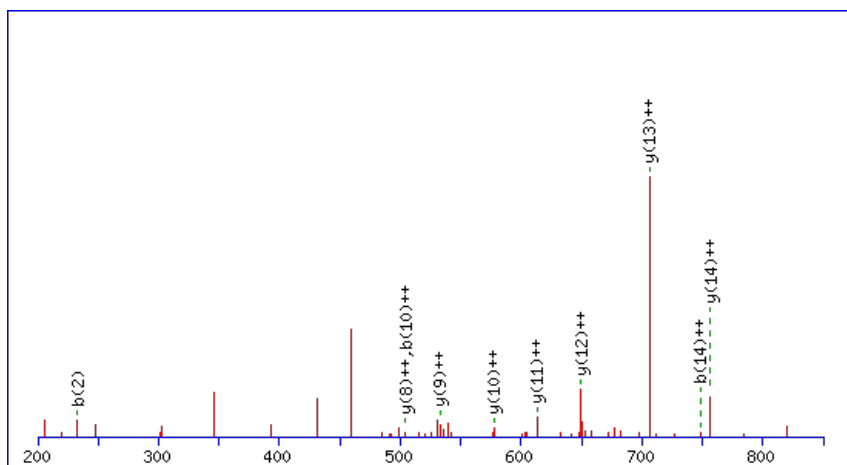Monoisotopic mass of neutral peptide **Mr(calc)**: 1642.7961**Fixed modifications**: Carbamidomethyl (C) (apply to specified residues or termini only)**Ions Score**: 31 **Expect**: 0.0069**Matches** : 10/124 fragment ions using 28 most intense peaks ([help](#))

| #  | b         | b <sup>++</sup> | b <sup>0</sup> | b <sup>0++</sup> | Seq. | y         | y <sup>++</sup> | y*        | y* <sup>++</sup> | y <sup>0</sup> | y <sup>0++</sup> | #  |
|----|-----------|-----------------|----------------|------------------|------|-----------|-----------------|-----------|------------------|----------------|------------------|----|
| 1  | 133.0448  | 67.0260         |                |                  | M    |           |                 |           |                  |                |                  | 15 |
| 2  | 233.1102  | 117.0588        |                |                  | V    | 1511.7658 | 756.3866        | 1493.7422 | 747.3748         | 1493.7553      | 747.3813         | 14 |
| 3  | 347.1913  | 174.0993        |                |                  | L    | 1411.7004 | 706.3538        | 1393.6768 | 697.3420         | 1393.6898      | 697.3485         | 13 |
| 4  | 419.2255  | 210.1164        |                |                  | A    | 1297.6193 | 649.3133        | 1279.5957 | 640.3015         | 1279.6087      | 640.3080         | 12 |
| 5  | 491.2596  | 246.1335        |                |                  | A    | 1225.5851 | 613.2962        | 1207.5615 | 604.2844         | 1207.5746      | 604.2909         | 11 |
| 6  | 579.2887  | 290.1480        | 561.2781       | 281.1427         | S    | 1153.5510 | 577.2791        | 1135.5274 | 568.2673         | 1135.5404      | 568.2738         | 10 |
| 7  | 637.3072  | 319.1572        | 619.2966       | 310.1520         | G    | 1065.5219 | 533.2646        | 1047.4983 | 524.2528         | 1047.5114      | 524.2593         | 9  |
| 8  | 737.3727  | 369.1900        | 719.3621       | 360.1847         | V    | 1007.5034 | 504.2553        | 989.4798  | 495.2436         | 989.4929       | 495.2501         | 8  |
| 9  | 867.4123  | 434.2098        | 849.4017       | 425.2045         | E    | 907.4380  | 454.2226        | 889.4144  | 445.2108         | 889.4274       | 445.2173         | 7  |
| 10 | 1007.4623 | 504.2348        | 989.4517       | 495.2295         | H    | 777.3983  | 389.2028        | 759.3748  | 380.1910         | 759.3878       | 380.1975         | 6  |
| 11 | 1137.5019 | 569.2546        | 1119.4914      | 560.2493         | E    | 637.3483  | 319.1778        | 619.3247  | 310.1660         | 619.3378       | 310.1725         | 5  |
| 12 | 1267.5416 | 634.2744        | 1249.5310      | 625.2691         | E    | 507.3087  | 254.1580        | 489.2851  | 245.1462         | 489.2981       | 245.1527         | 4  |
| 13 | 1381.6227 | 691.3150        | 1363.6121      | 682.3097         | L    | 377.2691  | 189.1382        | 359.2455  | 180.1264         |                |                  | 3  |
| 14 | 1495.7038 | 748.3555        | 1477.6932      | 739.3502         | L    | 263.1880  | 132.0976        | 245.1644  | 123.0858         |                |                  | 2  |
| 15 |           |                 |                |                  | K    | 149.1069  | 75.0571         | 131.0833  | 66.0453          |                |                  | 1  |

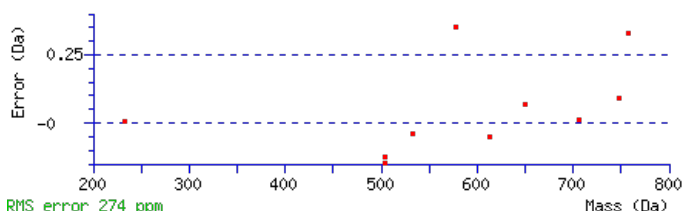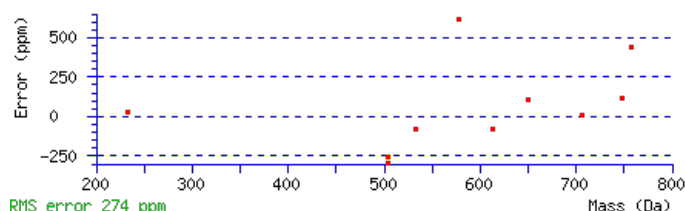

## AT1G51980.1

NCBI **BLAST** search of [MVLAASGVEHEELK](#)

(Parameters: blastp, nr protein database, expect=20000, no filter, PAM30)

Other BLAST [web gateways](#)

### All matches to this query

| Score | Mr(calc)  | Delta   | Sequence                         |
|-------|-----------|---------|----------------------------------|
| 30.9  | 1642.7961 | 0.0015  | <a href="#">MVLAASGVEHEELK</a>   |
| 4.4   | 1642.8012 | -0.0037 | <a href="#">KSTTTSASSKGLAQQK</a> |
| 2.0   | 1642.7961 | 0.0015  | <a href="#">ETKELVAMKYIER</a>    |

Mascot: <http://www.matrixscience.com/>


**Mascot Search Results**
**Peptide View**MS/MS Fragmentation of **FFETF AAPFTK**Found in **AT1G52230.1** in **TAIR\_Arabidopsis**, Symbols: PSAH2, PSAH-2, PSI-H | PSAH-2/PSAH2/PSI-H (PHOTOSYSTEM I SUBUNIT H-2) | chr1:19458571-19459177 FORWARD

Match to Query 4673: 1316.608638 from(659.311595,2+) index(8793)

Title: Elution from: 80.762 to 80.762 scan no 11824 cid35.00 polarity:+

Data file D12h-2\_1.mgf

Click mouse within plot area to zoom in by factor of two about that point

Or,  to  Da Label all possible matches  Label matches used for scoring Show Y-axis 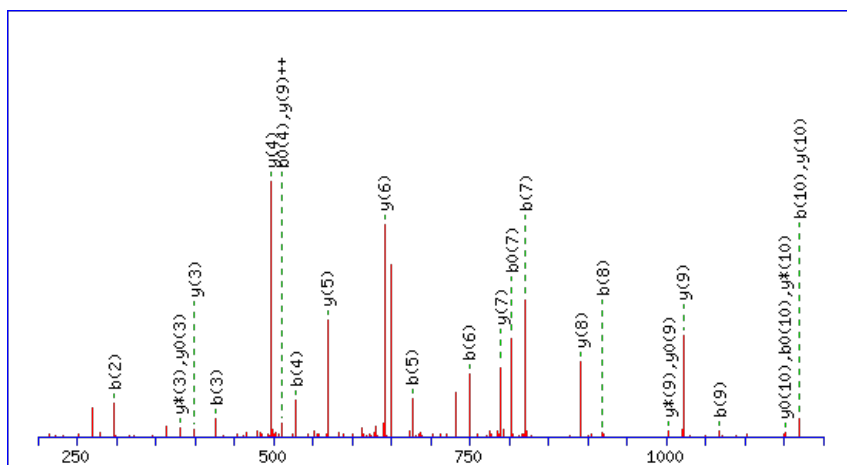Monoisotopic mass of neutral peptide  $M_r(\text{calc})$ : 1316.6085

Fixed modifications: Carbamidomethyl (C) (apply to specified residues or termini only)

Ions Score: 86 Expect: 1.6e-008

Matches : 27/94 fragment ions using 30 most intense peaks ([help](#))

| #  | b                | b <sup>++</sup> | b <sup>0</sup>   | b <sup>0++</sup> | Seq. | y                | y <sup>++</sup> | y*               | y* <sup>++</sup> | y <sup>0</sup>   | y <sup>0++</sup> | #  |
|----|------------------|-----------------|------------------|------------------|------|------------------|-----------------|------------------|------------------|------------------|------------------|----|
| 1  | 149.0727         | 75.0400         |                  |                  | F    |                  |                 |                  |                  |                  |                  | 11 |
| 2  | <b>297.1382</b>  | 149.0727        |                  |                  | F    | <b>1169.5504</b> | 585.2788        | <b>1151.5268</b> | 576.2670         | <b>1151.5398</b> | 576.2735         | 10 |
| 3  | <b>427.1778</b>  | 214.0925        | 409.1672         | 205.0873         | E    | <b>1021.4849</b> | <b>511.2461</b> | <b>1003.4613</b> | 502.2343         | <b>1003.4744</b> | 502.2408         | 9  |
| 4  | <b>529.2225</b>  | 265.1149        | <b>511.2120</b>  | 256.1096         | T    | <b>891.4453</b>  | 446.2263        | 873.4217         | 437.2145         | 873.4347         | 437.2210         | 8  |
| 5  | <b>677.2880</b>  | 339.1476        | 659.2774         | 330.1423         | F    | <b>789.4006</b>  | 395.2039        | 771.3770         | 386.1921         | 771.3900         | 386.1986         | 7  |
| 6  | <b>749.3221</b>  | 375.1647        | 731.3115         | 366.1594         | A    | <b>641.3351</b>  | 321.1712        | 623.3115         | 312.1594         | 623.3246         | 312.1659         | 6  |
| 7  | <b>821.3563</b>  | 411.1818        | <b>803.3457</b>  | 402.1765         | A    | <b>569.3010</b>  | 285.1541        | 551.2774         | 276.1423         | 551.2904         | 276.1488         | 5  |
| 8  | <b>919.4061</b>  | 460.2067        | 901.3955         | 451.2014         | P    | <b>497.2668</b>  | 249.1371        | 479.2433         | 240.1253         | 479.2563         | 240.1318         | 4  |
| 9  | <b>1067.4715</b> | 534.2394        | 1049.4609        | 525.2341         | F    | <b>399.2170</b>  | 200.1122        | <b>381.1935</b>  | 191.1004         | <b>381.2065</b>  | 191.1069         | 3  |
| 10 | <b>1169.5162</b> | 585.2617        | <b>1151.5057</b> | 576.2565         | T    | 251.1516         | 126.0794        | 233.1280         | 117.0676         | 233.1410         | 117.0741         | 2  |
| 11 |                  |                 |                  |                  | K    | 149.1069         | 75.0571         | 131.0833         | 66.0453          |                  |                  | 1  |

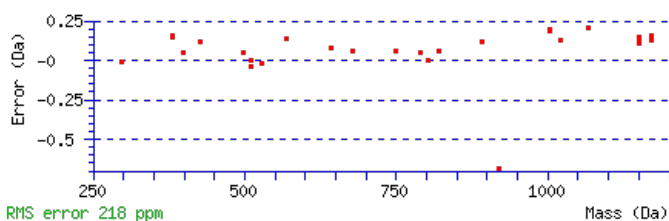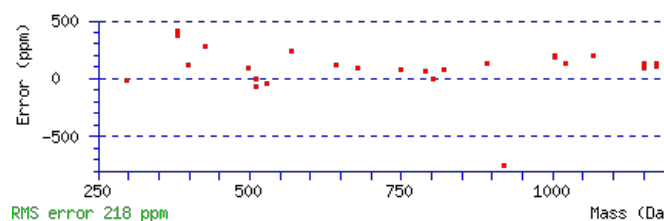NCBI **BLAST** search of **FFETF AAPFTK**

(Parameters: blastp, nr protein database, expect=20000, no filter, PAM30)

Other BLAST [web gateways](#)

All matches to this query



## AT1G52230.1

| Score | Mr(calc)  | Delta   | Sequence                     |
|-------|-----------|---------|------------------------------|
| 85.7  | 1316.6085 | 0.0001  | <a href="#">FFETFAAPFTK</a>  |
| 21.8  | 1316.6074 | 0.0012  | <a href="#">HVETITLSEMK</a>  |
| 21.7  | 1316.6074 | 0.0012  | <a href="#">TKTMESSEFKTK</a> |
| 15.7  | 1316.6063 | 0.0023  | <a href="#">DITYNFEFKK</a>   |
| 11.9  | 1316.6067 | 0.0019  | <a href="#">FKDTYDRTVR</a>   |
| 9.3   | 1316.6049 | 0.0037  | <a href="#">MNCLFLFKSK</a>   |
| 8.2   | 1316.6067 | 0.0019  | <a href="#">GYGVDKRNYTK</a>  |
| 7.2   | 1316.6101 | -0.0014 | <a href="#">TGVHGMVKQDTK</a> |
| 6.9   | 1316.6097 | -0.0011 | <a href="#">YLKTSSAPYMK</a>  |
| 6.2   | 1316.6124 | -0.0037 | <a href="#">KSEKCYLFAR</a>   |

Mascot: <http://www.matrixscience.com/>

**Peptide View**MS/MS Fragmentation of **RTYNWSVK**Found in **AT1G52300.1** in **TAIR\_Arabidopsis**, Symbols: | 60S ribosomal protein L37 (RPL37B) | chr1:1947882-19479821 REVERSE

Match to Query 3239: 1066.500674 from(534.257613,2+) index(1544)

Title: Elution from: 20.917 to 20.917 scan no 2091 cid35.00 polarity:+

Data file C7-3\_1.mgf

Click mouse within plot area to zoom in by factor of two about that point

Or,  to  Da Label all possible matches  Label matches used for scoring Show Y-axis 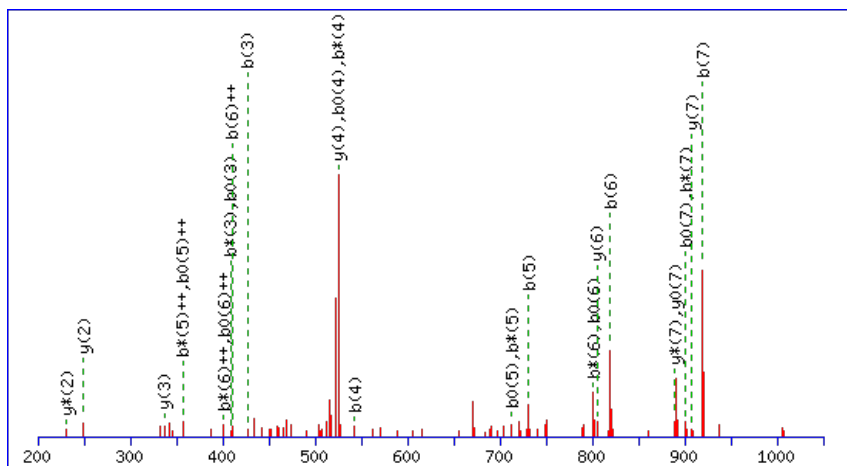Monoisotopic mass of neutral peptide  $M_r(\text{calc})$ : 1066.4988

Fixed modifications: Carbamidomethyl (C) (apply to specified residues or termini only)

Ions Score: 21 Expect: 0.037

Matches : 28/78 fragment ions using 56 most intense peaks ([help](#))

| # | b        | b <sup>++</sup> | b*       | b <sup>*++</sup> | b <sup>0</sup> | b <sup>0++</sup> | Seq. | y        | y <sup>++</sup> | y*       | y <sup>*++</sup> | y <sup>0</sup> | y <sup>0++</sup> | # |
|---|----------|-----------------|----------|------------------|----------------|------------------|------|----------|-----------------|----------|------------------|----------------|------------------|---|
| 1 | 161.0965 | 81.0519         | 143.0729 | 72.0401          |                |                  | R    |          |                 |          |                  |                |                  | 8 |
| 2 | 263.1412 | 132.0743        | 245.1177 | 123.0625         | 245.1307       | 123.0690         | T    | 907.4168 | 454.2121        | 889.3933 | 445.2003         | 889.4063       | 445.2068         | 7 |
| 3 | 427.2016 | 214.1044        | 409.1780 | 205.0926         | 409.1910       | 205.0992         | Y    | 805.3721 | 403.1897        | 787.3485 | 394.1779         | 787.3616       | 394.1844         | 6 |
| 4 | 543.2386 | 272.1229        | 525.2150 | 263.1111         | 525.2280       | 263.1177         | N    | 641.3118 | 321.1595        | 623.2882 | 312.1477         | 623.3012       | 312.1542         | 5 |
| 5 | 731.3120 | 366.1596        | 713.2884 | 357.1478         | 713.3014       | 357.1543         | W    | 525.2748 | 263.1410        | 507.2512 | 254.1292         | 507.2642       | 254.1357         | 4 |
| 6 | 819.3410 | 410.1742        | 801.3175 | 401.1624         | 801.3305       | 401.1689         | S    | 337.2014 | 169.1043        | 319.1778 | 160.0925         | 319.1908       | 160.0990         | 3 |
| 7 | 919.4065 | 460.2069        | 901.3829 | 451.1951         | 901.3959       | 451.2016         | V    | 249.1723 | 125.0898        | 231.1487 | 116.0780         |                |                  | 2 |
| 8 |          |                 |          |                  |                |                  | K    | 149.1069 | 75.0571         | 131.0833 | 66.0453          |                |                  | 1 |

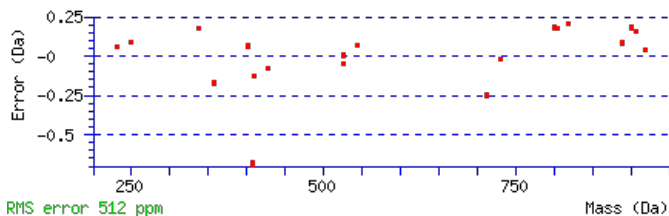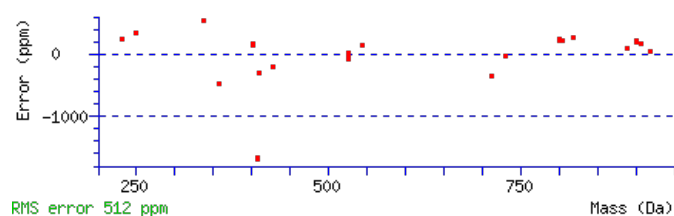NCBI **BLAST** search of **RTYNWSVK**

(Parameters: blastp, nr protein database, expect=20000, no filter, PAM30)

Other BLAST [web gateways](#)**All matches to this query**

| Score | $M_r(\text{calc})$ | Delta  | Sequence                 |
|-------|--------------------|--------|--------------------------|
| 21.4  | 1066.4988          | 0.0019 | <a href="#">RTYNWSVK</a> |
| 18.1  | 1066.5000          | 0.0007 | <a href="#">RSSVNMKK</a> |

## AT1G52300.1

|      |           |         |                           |
|------|-----------|---------|---------------------------|
| 11.4 | 1066.4984 | 0.0023  | <a href="#">TWVDYFVK</a>  |
| 7.3  | 1066.5000 | 0.0007  | <a href="#">SRAMTKNTK</a> |
| 5.2  | 1066.5017 | -0.0011 | <a href="#">GYMFALEVK</a> |
| 4.9  | 1066.5018 | -0.0011 | <a href="#">LYFNEMLK</a>  |
| 4.6  | 1066.4984 | 0.0023  | <a href="#">WFSYDVLK</a>  |
| 3.6  | 1066.5018 | -0.0011 | <a href="#">FYNIEMLK</a>  |
| 2.1  | 1066.5022 | -0.0015 | <a href="#">KLNYCSLR</a>  |
| 1.5  | 1066.5022 | -0.0015 | <a href="#">CEIYRK GK</a> |

**Mascot:** <http://www.matrixscience.com/>

### Peptide View

 MS/MS Fragmentation of **IGIAHSPAWFEPQDLEHVGGSIER**

 Found in **AT1G52400.1** in **TAIR\_Arabidopsis**, Symbols: BGL1 | BGL1 (BETA-GLUCOSIDASE HOMOLOG 1); hydrolase, hydrolyzing O-glycosyl compounds | chr1:19518919-19521599 FORWARD

Match to Query 10238: 2644.304836 from(662.083485,4+) index(7889)

Title: Elution from: 70.697 to 70.697 scan no 10457 cid35.00 polarity:+

Data file D1d-2\_3.mgf

Click mouse within plot area to zoom in by factor of two about that point

 Or, Plot from  to  Da 

 Label all possible matches  Label matches used for scoring 

 Show Y-axis 
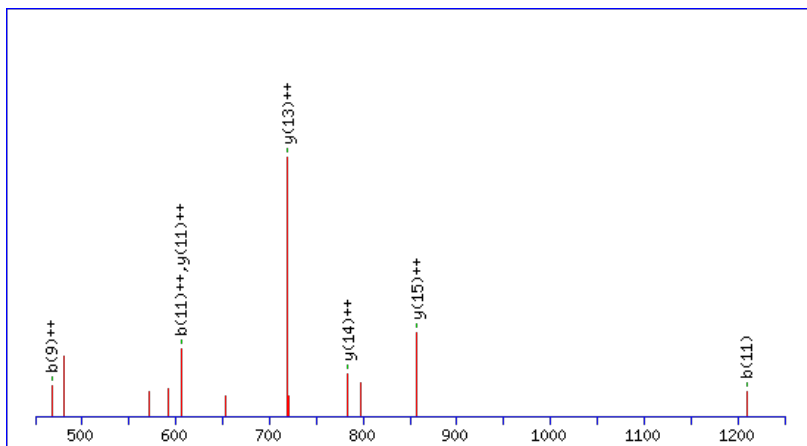
 Monoisotopic mass of neutral peptide  $M_r(\text{calc})$ : 2644.3034

Fixed modifications: Carbamidomethyl (C) (apply to specified residues or termini only)

Ions Score: 20 Expect: 0.035

 Matches : 7/240 fragment ions using 9 most intense peaks ([help](#))

| #  | b                | b <sup>++</sup> | b*        | b <sup>*++</sup> | b <sup>0</sup> | b <sup>0++</sup> | Seq | y         | y <sup>++</sup> | y*        | y <sup>*++</sup> | y <sup>0</sup> | y <sup>0++</sup> | #  |
|----|------------------|-----------------|-----------|------------------|----------------|------------------|-----|-----------|-----------------|-----------|------------------|----------------|------------------|----|
| 1  | 114.0913         | 57.5493         |           |                  |                |                  | I   |           |                 |           |                  |                |                  | 24 |
| 2  | 171.1128         | 86.0600         |           |                  |                |                  | G   | 2532.2266 | 1266.6169       | 2515.2001 | 1258.1037        | 2514.2160      | 1257.6117        | 23 |
| 3  | 284.1969         | 142.6021        |           |                  |                |                  | I   | 2475.2051 | 1238.1062       | 2458.1786 | 1229.5929        | 2457.1946      | 1229.1009        | 22 |
| 4  | 355.2340         | 178.1206        |           |                  |                |                  | A   | 2362.1211 | 1181.5642       | 2345.0945 | 1173.0509        | 2344.1105      | 1172.5589        | 21 |
| 5  | 492.2929         | 246.6501        |           |                  |                |                  | H   | 2291.0840 | 1146.0456       | 2274.0574 | 1137.5323        | 2273.0734      | 1137.0403        | 20 |
| 6  | 579.3249         | 290.1661        |           |                  | 561.3144       | 281.1608         | S   | 2154.0251 | 1077.5162       | 2136.9985 | 1069.0029        | 2136.0145      | 1068.5109        | 19 |
| 7  | 676.3777         | 338.6925        |           |                  | 658.3671       | 329.6872         | P   | 2066.9930 | 1034.0002       | 2049.9665 | 1025.4869        | 2048.9825      | 1024.9949        | 18 |
| 8  | 747.4148         | 374.2110        |           |                  | 729.4042       | 365.2058         | A   | 1969.9403 | 985.4738        | 1952.9137 | 976.9605         | 1951.9297      | 976.4685         | 17 |
| 9  | 933.4941         | <b>467.2507</b> |           |                  | 915.4835       | 458.2454         | W   | 1898.9032 | 949.9552        | 1881.8766 | 941.4419         | 1880.8926      | 940.9499         | 16 |
| 10 | 1080.5625        | 540.7849        |           |                  | 1062.5520      | 531.7796         | F   | 1712.8238 | <b>856.9156</b> | 1695.7973 | 848.4023         | 1694.8133      | 847.9103         | 15 |
| 11 | <b>1209.6051</b> | <b>605.3062</b> |           |                  | 1191.5946      | 596.3009         | E   | 1565.7554 | <b>783.3814</b> | 1548.7289 | 774.8681         | 1547.7449      | 774.3761         | 14 |
| 12 | 1306.6579        | 653.8326        |           |                  | 1288.6473      | 644.8273         | P   | 1436.7128 | <b>718.8601</b> | 1419.6863 | 710.3468         | 1418.7023      | 709.8548         | 13 |
| 13 | 1434.7165        | 717.8619        | 1417.6899 | 709.3486         | 1416.7059      | 708.8566         | Q   | 1339.6601 | 670.3337        | 1322.6335 | 661.8204         | 1321.6495      | 661.3284         | 12 |
| 14 | 1549.7434        | 775.3753        | 1532.7169 | 766.8621         | 1531.7328      | 766.3701         | D   | 1211.6015 | <b>606.3044</b> | 1194.5749 | 597.7911         | 1193.5909      | 597.2991         | 11 |
| 15 | 1662.8275        | 831.9174        | 1645.8009 | 823.4041         | 1644.8169      | 822.9121         | L   | 1096.5745 | 548.7909        | 1079.5480 | 540.2776         | 1078.5640      | 539.7856         | 10 |
| 16 | 1791.8701        | 896.4387        | 1774.8435 | 887.9254         | 1773.8595      | 887.4334         | E   | 983.4905  | 492.2489        | 966.4639  | 483.7356         | 965.4799       | 483.2436         | 9  |
| 17 | 1928.9290        | 964.9681        | 1911.9024 | 956.4549         | 1910.9184      | 955.9628         | H   | 854.4479  | 427.7276        | 837.4213  | 419.2143         | 836.4373       | 418.7223         | 8  |
| 18 | 2027.9974        | 1014.5023       | 2010.9708 | 1005.9891        | 2009.9868      | 1005.4970        | V   | 717.3890  | 359.1981        | 700.3624  | 350.6849         | 699.3784       | 350.1928         | 7  |
| 19 | 2085.0189        | 1043.0131       | 2067.9923 | 1034.4998        | 2067.0083      | 1034.0078        | G   | 618.3206  | 309.6639        | 601.2940  | 301.1506         | 600.3100       | 300.6586         | 6  |
| 20 | 2142.0403        | 1071.5238       | 2125.0138 | 1063.0105        | 2124.0298      | 1062.5185        | G   | 561.2991  | 281.1532        | 544.2726  | 272.6399         | 543.2885       | 272.1479         | 5  |
| 21 | 2229.0723        | 1115.0398       | 2212.0458 | 1106.5265        | 2211.0618      | 1106.0345        | S   | 504.2776  | 252.6425        | 487.2511  | 244.1292         | 486.2671       | 243.6372         | 4  |
| 22 | 2342.1564        | 1171.5818       | 2325.1299 | 1163.0686        | 2324.1458      | 1162.5766        | I   | 417.2456  | 209.1264        | 400.2191  | 200.6132         | 399.2350       | 200.1212         | 3  |
| 23 | 2471.1990        | 1236.1031       | 2454.1725 | 1227.5899        | 2453.1884      | 1227.0979        | E   | 304.1615  | 152.5844        | 287.1350  | 144.0711         | 286.1510       | 143.5791         | 2  |
| 24 |                  |                 |           |                  |                |                  | R   | 175.1190  | 88.0631         | 158.0924  | 79.5498          |                |                  | 1  |

# AT1G52400.1

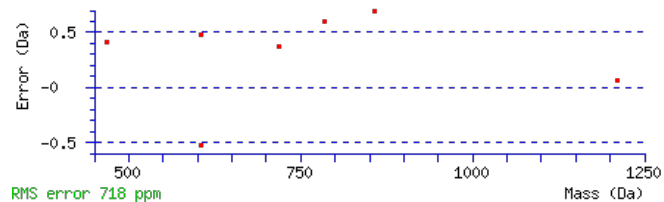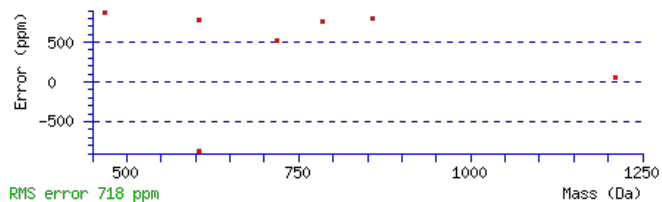

NCBI **BLAST** search of [IGIAHSPAWFEPQDLEHVGGSIER](#)  
(Parameters: blastp, nr protein database, expect=20000, no filter, PAM30)  
Other BLAST [web gateways](#)

## All matches to this query

| Score | Mr(calc)  | Delta   | Sequence                                   |
|-------|-----------|---------|--------------------------------------------|
| 20.3  | 2644.3034 | 0.0014  | <a href="#">IGIAHSPAWFEPQDLEHVGGSIER</a>   |
| 3.4   | 2644.3080 | -0.0031 | <a href="#">DGLLPGDVILAVDGTLSNSGSDSVSK</a> |
| 2.8   | 2644.2989 | 0.0060  | <a href="#">SNLGSNAYVLNALLDMYAKCGNLK</a>   |

Mascot: <http://www.matrixscience.com/>

## Peptide View

### MS/MS Fragmentation of VIRMEYQK

Found in **AT1G52450.1** in **TAIR\_Arabidopsis**, Symbols: | ubiquitin carboxyl-terminal hydrolase-related | chr1:19545353-19549935 REVERSE

Match to Query 3311: 1094.521772 from(548.268162,2+) index(3571)

Title: Elution from: 35.495 to 35.495 scan no 4505 cid35.00 polarity:+

Data file 0-3\_1.mgf

Click mouse within plot area to zoom in by factor of two about that point

Or,   to  Da

Label all possible matches  Label matches used for scoring

Show Y-axis

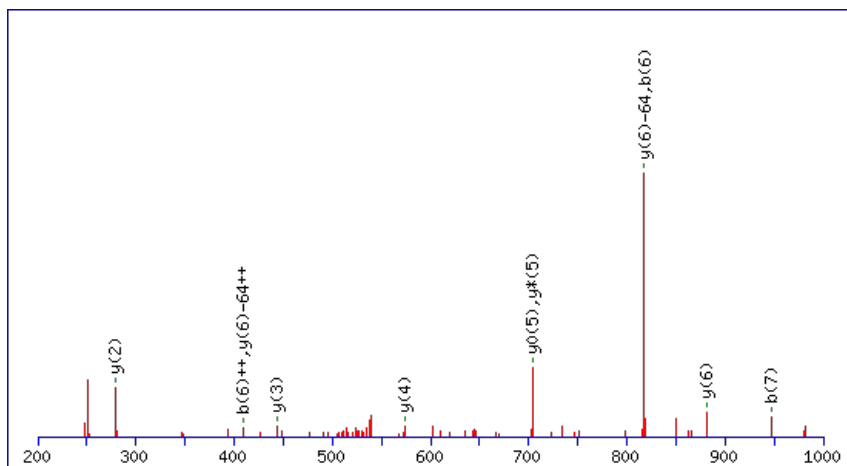

**Monoisotopic mass of neutral peptide Mr(calc):** 1094.5205

**Fixed modifications:** Carbamidomethyl (C) (apply to specified residues or termini only)

**Variable modifications:**

**M4** : Oxidation (M), with neutral losses 0.0000 (shown in table), 63.9983

**Ions Score:** 26 **Expect:** 0.022

**Matches** : 11/106 fragment ions using 16 most intense peaks ([help](#))

| # | b               | b <sup>++</sup> | b*       | b <sup>*++</sup> | b <sup>0</sup> | b <sup>0++</sup> | Seq. | y               | y <sup>++</sup> | y*              | y <sup>*++</sup> | y <sup>0</sup>  | y <sup>0++</sup> | # |
|---|-----------------|-----------------|----------|------------------|----------------|------------------|------|-----------------|-----------------|-----------------|------------------|-----------------|------------------|---|
| 1 | 101.0727        | 51.0400         |          |                  |                |                  | V    |                 |                 |                 |                  |                 |                  | 8 |
| 2 | 215.1538        | 108.0805        |          |                  |                |                  | I    | 995.4623        | 498.2348        | 977.4387        | 489.2230         | 977.4517        | 489.2295         | 7 |
| 3 | 375.2431        | 188.1252        | 357.2195 | 179.1134         |                |                  | R    | <b>881.3812</b> | 441.1942        | 863.3576        | 432.1824         | 863.3706        | 432.1890         | 6 |
| 4 | 523.2755        | 262.1414        | 505.2519 | 253.1296         |                |                  | M    | 721.2919        | 361.1496        | <b>703.2684</b> | 352.1378         | <b>703.2814</b> | 352.1443         | 5 |
| 5 | 653.3151        | 327.1612        | 635.2916 | 318.1494         | 635.3046       | 318.1559         | E    | <b>573.2595</b> | 287.1334        | 555.2359        | 278.1216         | 555.2489        | 278.1281         | 4 |
| 6 | <b>817.3755</b> | <b>409.1914</b> | 799.3519 | 400.1796         | 799.3649       | 400.1861         | Y    | <b>443.2199</b> | 222.1136        | 425.1963        | 213.1018         |                 |                  | 3 |
| 7 | <b>947.4281</b> | 474.2177        | 929.4046 | 465.2059         | 929.4176       | 465.2124         | Q    | <b>279.1595</b> | 140.0834        | 261.1359        | 131.0716         |                 |                  | 2 |
| 8 |                 |                 |          |                  |                |                  | K    | 149.1069        | 75.0571         | 131.0833        | 66.0453          |                 |                  | 1 |

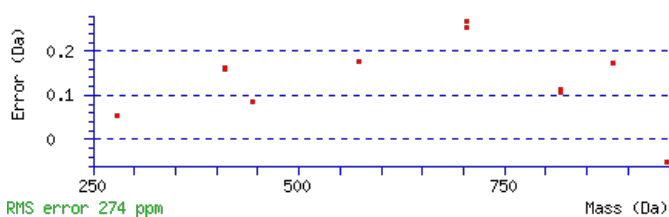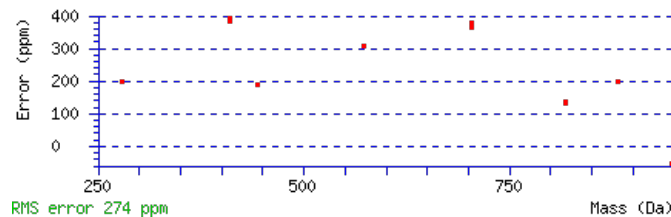

NCBI **BLAST** search of [VIRMEYQK](#)

(Parameters: blastp, nr protein database, expect=20000, no filter, PAM30)

Other BLAST [web gateways](#)

### All matches to this query

| Score | Mr(calc)  | Delta  | Sequence                 |
|-------|-----------|--------|--------------------------|
| 25.5  | 1094.5205 | 0.0013 | <a href="#">VIRMEYQK</a> |

## AT1G52450.1

|      |           |         |                            |
|------|-----------|---------|----------------------------|
| 18.4 | 1094.5205 | 0.0013  | <a href="#">SDCFGKIKK</a>  |
| 17.9 | 1094.5205 | 0.0013  | <a href="#">MVASFEKVR</a>  |
| 14.1 | 1094.5231 | -0.0014 | <a href="#">MKYNPRVR</a>   |
| 13.1 | 1094.5205 | 0.0013  | <a href="#">DMLRIYQK</a>   |
| 10.1 | 1094.5205 | 0.0013  | <a href="#">LMESGYRVK</a>  |
| 8.8  | 1094.5205 | 0.0013  | <a href="#">QFSAMNKLK</a>  |
| 8.3  | 1094.5205 | 0.0013  | <a href="#">IQRYVMEK</a>   |
| 7.5  | 1094.5204 | 0.0013  | <a href="#">FKVATGQGMK</a> |
| 4.8  | 1094.5205 | 0.0013  | <a href="#">LMKDAVYAR</a>  |

Mascot: <http://www.matrixscience.com/>

**Peptide View**MS/MS Fragmentation of **LLEVLEVK**Found in **AT1G52510.1** in **TAIR\_Arabidopsis**, Symbols: | hydrolase, alpha/beta fold family protein | chr1:19566708-19568929 REVERSE

Match to Query 1924: 941.580102 from(471.797327,2+) index(6296)

Title: Elution from: 55.744 to 55.744 scan no 8082 cid35.00 polarity:+

Data file 0-3\_2.mgf

Click mouse within plot area to zoom in by factor of two about that point

Or,   to  Da Label all possible matches  Label matches used for scoring Show Y-axis 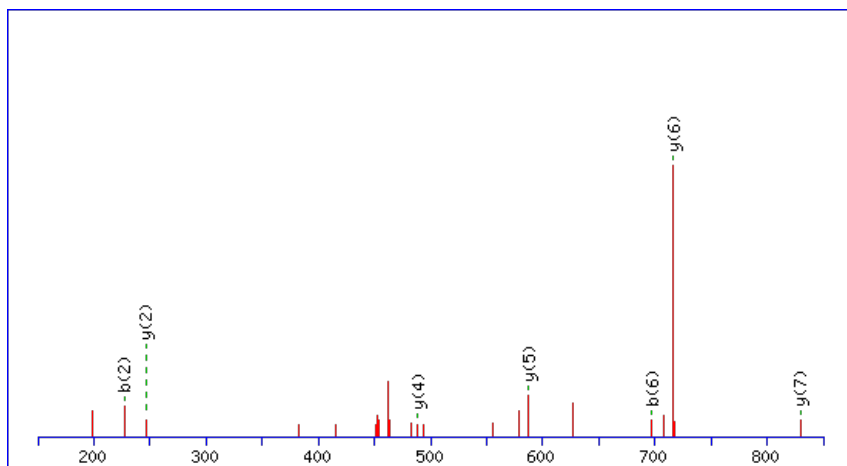Monoisotopic mass of neutral peptide **Mr(calc)**: 941.5797

Fixed modifications: Carbamidomethyl (C) (apply to specified residues or termini only)

Ions Score: 33 Expect: 0.00067

Matches : 7/62 fragment ions using 19 most intense peaks ([help](#))

| # | b               | b <sup>++</sup> | b <sup>0</sup> | b <sup>0++</sup> | Seq. | y               | y <sup>++</sup> | y*       | y <sup>*++</sup> | y <sup>0</sup> | y <sup>0++</sup> | # |
|---|-----------------|-----------------|----------------|------------------|------|-----------------|-----------------|----------|------------------|----------------|------------------|---|
| 1 | 114.0913        | 57.5493         |                |                  | L    |                 |                 |          |                  |                |                  | 8 |
| 2 | <b>227.1754</b> | 114.0913        |                |                  | L    | <b>829.5029</b> | 415.2551        | 812.4764 | 406.7418         | 811.4924       | 406.2498         | 7 |
| 3 | 356.2180        | 178.6126        | 338.2074       | 169.6074         | E    | <b>716.4189</b> | 358.7131        | 699.3923 | 350.1998         | 698.4083       | 349.7078         | 6 |
| 4 | 455.2864        | 228.1468        | 437.2758       | 219.1416         | V    | <b>587.3763</b> | 294.1918        | 570.3497 | 285.6785         | 569.3657       | 285.1865         | 5 |
| 5 | 568.3705        | 284.6889        | 550.3599       | 275.6836         | L    | <b>488.3079</b> | 244.6576        | 471.2813 | 236.1443         | 470.2973       | 235.6523         | 4 |
| 6 | <b>697.4131</b> | 349.2102        | 679.4025       | 340.2049         | E    | 375.2238        | 188.1155        | 358.1973 | 179.6023         | 357.2132       | 179.1103         | 3 |
| 7 | 796.4815        | 398.7444        | 778.4709       | 389.7391         | V    | <b>246.1812</b> | 123.5942        | 229.1547 | 115.0810         |                |                  | 2 |
| 8 |                 |                 |                |                  | K    | 147.1128        | 74.0600         | 130.0863 | 65.5468          |                |                  | 1 |

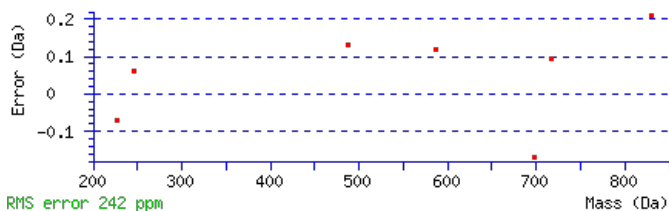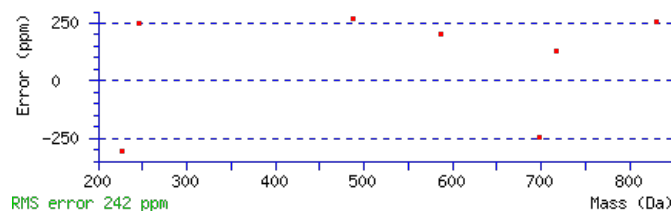NCBI **BLAST** search of [LLEVLEVK](#)

(Parameters: blastp, nr protein database, expect=20000, no filter, PAM30)

Other BLAST [web gateways](#)**All matches to this query**

| Score | Mr(calc) | Delta  | Sequence                 |
|-------|----------|--------|--------------------------|
| 32.5  | 941.5797 | 0.0004 | <a href="#">LLEVLEVK</a> |
| 21.4  | 941.5797 | 0.0004 | <a href="#">ILLDEIVK</a> |



## AT1G52510.1

|      |          |         |                          |
|------|----------|---------|--------------------------|
| 14.1 | 941.5797 | 0.0004  | <a href="#">LLDEIIVK</a> |
| 8.1  | 941.5797 | 0.0004  | <a href="#">LLDLVELK</a> |
| 7.1  | 941.5811 | -0.0010 | <a href="#">LIVQKWR</a>  |
| 4.7  | 941.5797 | 0.0004  | <a href="#">LLVVEIEK</a> |

**Mascot:** <http://www.matrixscience.com/>

## Peptide View

### MS/MS Fragmentation of **VILLVWDDR**

Found in **AT1G52570.1** in **TAIR\_Arabidopsis**, Symbols: PLDALPHA2 | PLDALPHA2 (PHOSPHOLIPASE D ALPHA 2); phospholipase D | chr1:19587609-19590220 REVERSE

Match to Query 3763: 1127.635204 from(564.824878,2+) index(9196)

Title: Elution from: 81.871 to 81.871 scan no 12286 cid35.00 polarity:+

Data file 0-2\_1.mgf

Click mouse within plot area to zoom in by factor of two about that point

Or,   to  Da

Label all possible matches  Label matches used for scoring

Show Y-axis

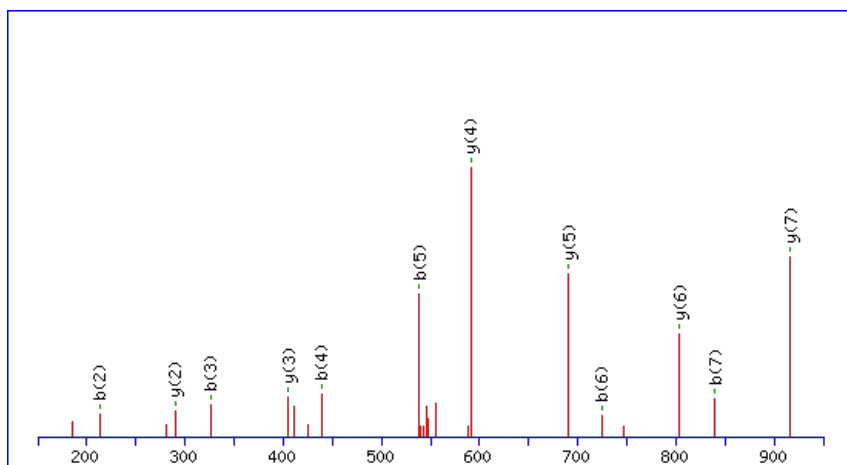

**Monoisotopic mass of neutral peptide Mr(calc):** 1127.6339

**Fixed modifications:** Carbamidomethyl (C) (apply to specified residues or termini only)

**Ions Score:** 57 **Expect:** 3.6e-006

**Matches:** 12/66 fragment ions using 15 most intense peaks ([help](#))

| # | b               | b <sup>++</sup> | b <sup>0</sup> | b <sup>0++</sup> | Seq. | y               | y <sup>++</sup> | y*        | y <sup>*++</sup> | y <sup>0</sup> | y <sup>0++</sup> | # |
|---|-----------------|-----------------|----------------|------------------|------|-----------------|-----------------|-----------|------------------|----------------|------------------|---|
| 1 | 100.0757        | 50.5415         |                |                  | V    |                 |                 |           |                  |                |                  | 9 |
| 2 | <b>213.1598</b> | 107.0835        |                |                  | I    | 1029.5728       | 515.2900        | 1012.5462 | 506.7767         | 1011.5622      | 506.2847         | 8 |
| 3 | <b>326.2438</b> | 163.6255        |                |                  | L    | <b>916.4887</b> | 458.7480        | 899.4621  | 450.2347         | 898.4781       | 449.7427         | 7 |
| 4 | <b>439.3279</b> | 220.1676        |                |                  | L    | <b>803.4046</b> | 402.2060        | 786.3781  | 393.6927         | 785.3941       | 393.2007         | 6 |
| 5 | <b>538.3963</b> | 269.7018        |                |                  | V    | <b>690.3206</b> | 345.6639        | 673.2940  | 337.1506         | 672.3100       | 336.6586         | 5 |
| 6 | <b>724.4756</b> | 362.7414        |                |                  | W    | <b>591.2522</b> | 296.1297        | 574.2256  | 287.6164         | 573.2416       | 287.1244         | 4 |
| 7 | <b>839.5026</b> | 420.2549        | 821.4920       | 411.2496         | D    | <b>405.1728</b> | 203.0901        | 388.1463  | 194.5768         | 387.1623       | 194.0848         | 3 |
| 8 | 954.5295        | 477.7684        | 936.5189       | 468.7631         | D    | <b>290.1459</b> | 145.5766        | 273.1193  | 137.0633         | 272.1353       | 136.5713         | 2 |
| 9 |                 |                 |                |                  | R    | 175.1190        | 88.0631         | 158.0924  | 79.5498          |                |                  | 1 |

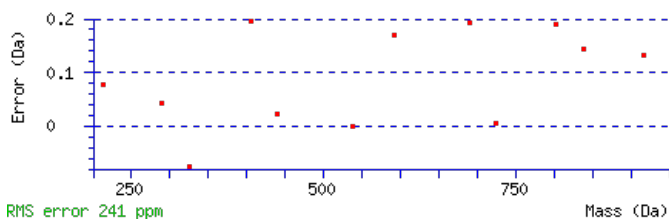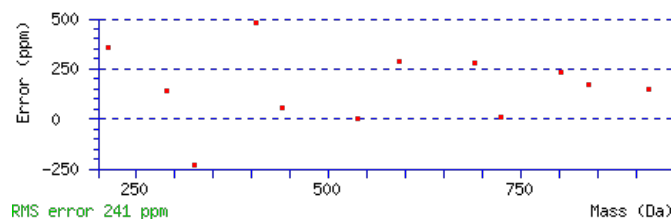

NCBI **BLAST** search of [VILLVWDDR](#)

(Parameters: blastp, nr protein database, expect=20000, no filter, PAM30)

Other BLAST [web gateways](#)

All matches to this query

| Score | Mr(calc) | Delta | Sequence |
|-------|----------|-------|----------|
|       |          |       |          |

## AT1G52570.1

|      |           |        |                           |
|------|-----------|--------|---------------------------|
| 57.4 | 1127.6339 | 0.0013 | <a href="#">VILLVWDDR</a> |
| 57.4 | 1127.6339 | 0.0013 | <a href="#">VLLLWDDR</a>  |

**Mascot:** <http://www.matrixscience.com/>


**Mascot Search Results**
**Peptide View**MS/MS Fragmentation of **AGLQFPVGR**Found in **AT1G52740.1** in **TAIR\_Arabidopsis**, Symbols: HTA9 | HTA9; DNA binding | chr1:19649077-19649889 FORWARD

Match to Query 2083: 956.484898 from(479.249725,2+) index(4550)

Title: Elution from: 41.934 to 41.934 scan no 5721 cid35.00 polarity:+

Data file D6h-1\_3.mgf

Click mouse within plot area to zoom in by factor of two about that point

Or,   to  Da Label all possible matches  Label matches used for scoring Show Y-axis 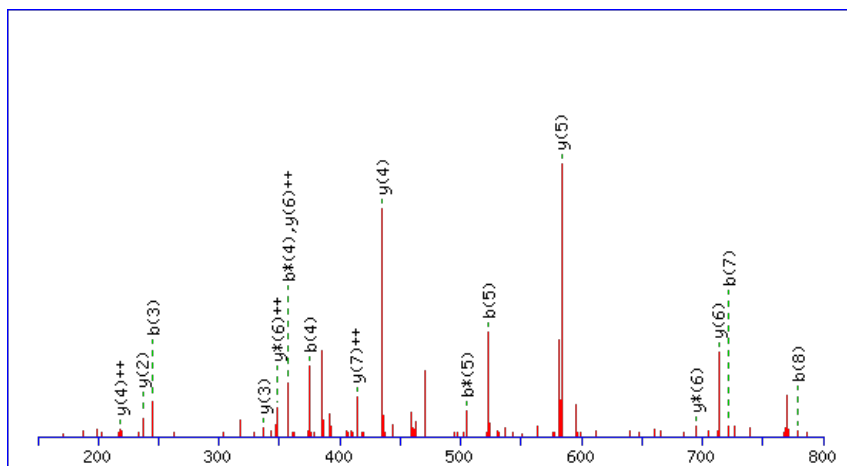Monoisotopic mass of neutral peptide **Mr(calc)**: 956.4854**Fixed modifications**: Carbamidomethyl (C) (apply to specified residues or termini only)**Ions Score**: 29 **Expect**: 0.015**Matches** : 17/58 fragment ions using 33 most intense peaks ([help](#))

| # | b               | b <sup>++</sup> | b*              | b <sup>*++</sup> | Seq. | y               | y <sup>++</sup> | y*              | y <sup>*++</sup> | # |
|---|-----------------|-----------------|-----------------|------------------|------|-----------------|-----------------|-----------------|------------------|---|
| 1 | 73.0414         | 37.0244         |                 |                  | A    |                 |                 |                 |                  | 9 |
| 2 | 131.0599        | 66.0336         |                 |                  | G    | 885.4585        | 443.2329        | 867.4349        | 434.2211         | 8 |
| 3 | <b>245.1410</b> | 123.0741        |                 |                  | L    | 827.4400        | <b>414.2237</b> | 809.4165        | 405.2119         | 7 |
| 4 | <b>375.1937</b> | 188.1005        | <b>357.1701</b> | 179.0887         | Q    | <b>713.3589</b> | <b>357.1831</b> | <b>695.3354</b> | <b>348.1713</b>  | 6 |
| 5 | <b>523.2591</b> | 262.1332        | <b>505.2355</b> | 253.1214         | F    | <b>583.3063</b> | 292.1568        | 565.2827        | 283.1450         | 5 |
| 6 | 621.3089        | 311.1581        | 603.2853        | 302.1463         | P    | <b>435.2408</b> | <b>218.1241</b> | 417.2173        | 209.1123         | 4 |
| 7 | <b>721.3744</b> | 361.1908        | 703.3508        | 352.1790         | V    | <b>337.1910</b> | 169.0992        | 319.1675        | 160.0874         | 3 |
| 8 | <b>779.3929</b> | 390.2001        | 761.3693        | 381.1883         | G    | <b>237.1256</b> | 119.0664        | 219.1020        | 110.0546         | 2 |
| 9 |                 |                 |                 |                  | R    | 179.1071        | 90.0572         | 161.0835        | 81.0454          | 1 |

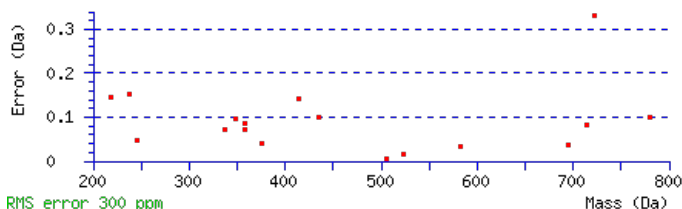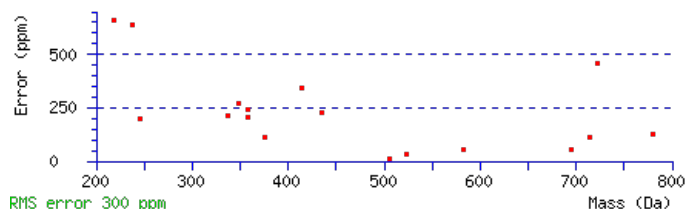NCBI **BLAST** search of [AGLQFPVGR](#)

(Parameters: blastp, nr protein database, expect=20000, no filter, PAM30)

Other BLAST [web gateways](#)**All matches to this query**

| Score | Mr(calc) | Delta   | Sequence                  |
|-------|----------|---------|---------------------------|
| 29.5  | 956.4854 | -0.0005 | <a href="#">AGIQFPVGR</a> |

# AT1G52740.1

|      |          |         |                           |
|------|----------|---------|---------------------------|
| 29.5 | 956.4854 | -0.0005 | <a href="#">AGLOFPVGR</a> |
| 17.9 | 956.4832 | 0.0017  | <a href="#">KIQQEAAAR</a> |
| 17.9 | 956.4832 | 0.0017  | <a href="#">LQEELRR</a>   |
| 6.3  | 956.4832 | 0.0017  | <a href="#">LEERLQR</a>   |
| 1.4  | 956.4861 | -0.0012 | <a href="#">KLEMEGIK</a>  |
| 0.8  | 956.4861 | -0.0012 | <a href="#">ELKIEGMK</a>  |
| 0.8  | 956.4827 | 0.0022  | <a href="#">IEEPKGFK</a>  |

**Mascot:** <http://www.matrixscience.com/>

**Peptide View**MS/MS Fragmentation of **MGCVCGKPSAIEDSK**Found in **AT1G53050.1** in **TAIR\_Arabidopsis**, Symbols: | protein kinase family protein | chr1:19776242-19779199 FORWARD

Match to Query 7617: 1656.660694 from(829.337623,2+) index(3819)

Title: Elution from: 35.975 to 35.975 scan no 4757 cid35.00 polarity:+

Data file 0-1\_3.mgf

Click mouse within plot area to zoom in by factor of two about that point

Or,   to  Da Label all possible matches  Label matches used for scoring Show Y-axis 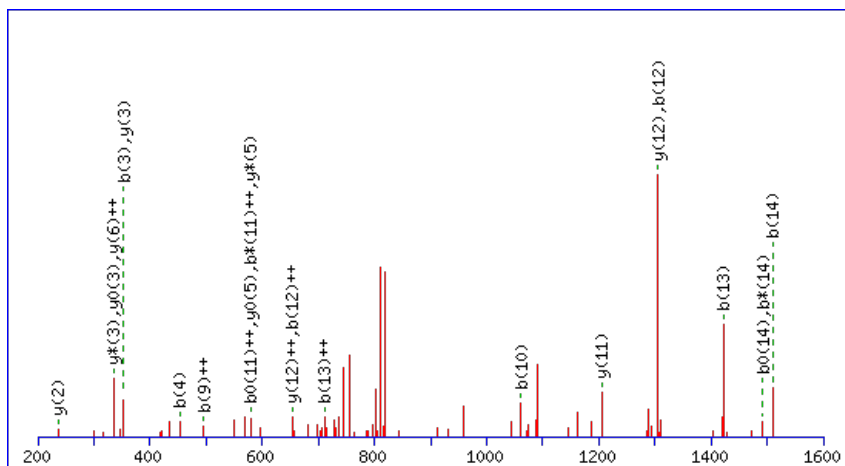Monoisotopic mass of neutral peptide  $M_r(\text{calc})$ : 1656.6648

Fixed modifications: Carbamidomethyl (C) (apply to specified residues or termini only)

Ions Score: 36 Expect: 0.00069

Matches : 23/138 fragment ions using 25 most intense peaks ([help](#))

| #  | b                | b <sup>++</sup> | b <sup>*</sup>   | b <sup>*++</sup> | b <sup>0</sup>   | b <sup>0++</sup> | Seq. | y                | y <sup>++</sup> | y <sup>*</sup>  | y <sup>*++</sup> | y <sup>0</sup>  | y <sup>0++</sup> | #  |
|----|------------------|-----------------|------------------|------------------|------------------|------------------|------|------------------|-----------------|-----------------|------------------|-----------------|------------------|----|
| 1  | 133.0448         | 67.0260         |                  |                  |                  |                  | M    |                  |                 |                 |                  |                 |                  | 15 |
| 2  | 191.0633         | 96.0353         |                  |                  |                  |                  | G    | 1525.6346        | 763.3209        | 1507.6110       | 754.3091         | 1507.6240       | 754.3156         | 14 |
| 3  | <b>353.0880</b>  | 177.0476        |                  |                  |                  |                  | C    | 1467.6161        | 734.3117        | 1449.5925       | 725.2999         | 1449.6055       | 725.3064         | 13 |
| 4  | <b>453.1535</b>  | 227.0804        |                  |                  |                  |                  | V    | <b>1305.5914</b> | <b>653.2993</b> | 1287.5678       | 644.2875         | 1287.5808       | 644.2940         | 12 |
| 5  | 615.1782         | 308.0927        |                  |                  |                  |                  | C    | <b>1205.5259</b> | 603.2666        | 1187.5023       | 594.2548         | 1187.5153       | 594.2613         | 11 |
| 6  | 673.1967         | 337.1020        |                  |                  |                  |                  | G    | 1043.5012        | 522.2542        | 1025.4776       | 513.2424         | 1025.4906       | 513.2489         | 10 |
| 7  | 803.2857         | 402.1465        | 785.2621         | 393.1347         |                  |                  | K    | 985.4827         | 493.2450        | 967.4591        | 484.2332         | 967.4721        | 484.2397         | 9  |
| 8  | 901.3355         | 451.1714        | 883.3119         | 442.1596         |                  |                  | P    | 855.3937         | 428.2005        | 837.3701        | 419.1887         | 837.3831        | 419.1952         | 8  |
| 9  | 989.3646         | <b>495.1859</b> | 971.3410         | 486.1741         | 971.3540         | 486.1806         | S    | 757.3439         | 379.1756        | 739.3203        | 370.1638         | 739.3333        | 370.1703         | 7  |
| 10 | <b>1061.3987</b> | 531.2030        | 1043.3751        | 522.1912         | 1043.3882        | 522.1977         | A    | 669.3148         | <b>335.1610</b> | 651.2912        | 326.1492         | 651.3042        | 326.1558         | 6  |
| 11 | 1175.4798        | 588.2435        | 1157.4562        | <b>579.2318</b>  | 1157.4693        | <b>579.2383</b>  | I    | 597.2806         | 299.1440        | <b>579.2571</b> | 290.1322         | <b>579.2701</b> | 290.1387         | 5  |
| 12 | <b>1305.5195</b> | <b>653.2634</b> | 1287.4959        | 644.2516         | 1287.5089        | 644.2581         | E    | 483.1995         | 242.1034        | 465.1760        | 233.0916         | 465.1890        | 233.0981         | 4  |
| 13 | <b>1421.5434</b> | <b>711.2754</b> | 1403.5198        | 702.2636         | 1403.5329        | 702.2701         | D    | <b>353.1599</b>  | 177.0836        | <b>335.1363</b> | 168.0718         | <b>335.1493</b> | 168.0783         | 3  |
| 14 | <b>1509.5725</b> | 755.2899        | <b>1491.5489</b> | 746.2781         | <b>1491.5619</b> | 746.2846         | S    | <b>237.1359</b>  | 119.0716        | 219.1124        | 110.0598         | 219.1254        | 110.0663         | 2  |
| 15 |                  |                 |                  |                  |                  |                  | K    | 149.1069         | 75.0571         | 131.0833        | 66.0453          |                 |                  | 1  |

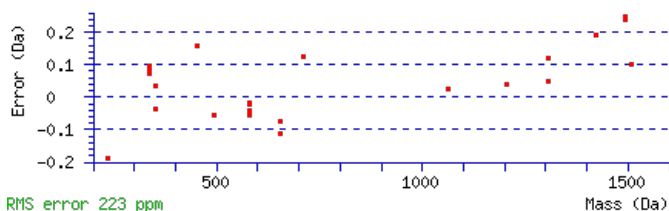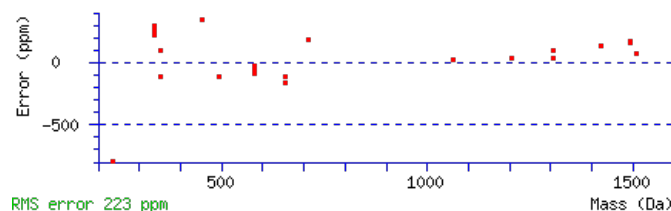NCBI BLAST search of [MGCVCGKPSAIEDSK](#)

## AT1G53050.1

(Parameters: blastp, nr protein database, expect=20000, no filter, PAM30)

Other BLAST [web gateways](#)

### All matches to this query

| Score | Mr(calc)  | Delta   | Sequence                        |
|-------|-----------|---------|---------------------------------|
| 36.3  | 1656.6648 | -0.0041 | <a href="#">MGCVCGKPSAIEDSK</a> |
| 9.4   | 1656.6579 | 0.0028  | <a href="#">LDFSEEKDDEETGK</a>  |
| 0.8   | 1656.6639 | -0.0032 | <a href="#">VGTMETISNEGDVDR</a> |

Mascot: <http://www.matrixscience.com/>

**Peptide View**MS/MS Fragmentation of **IFECESIHK**Found in **AT1G53090.1** in **TAIR\_Arabidopsis**, Symbols: SPA4 | SPA4 (SPA1-RELATED 4); signal transducer | chr1:19787416-19790358  
FORWARD

Match to Query 3748: 1148.540396 from(575.277474,2+) index(8546)

Title: Elution from: 77.117 to 77.117 scan no 11362 cid35.00 polarity:+

Data file D6h-2\_2.mgf

Click mouse within plot area to zoom in by factor of two about that point

Or,   to  Da Label all possible matches  Label matches used for scoring Show Y-axis 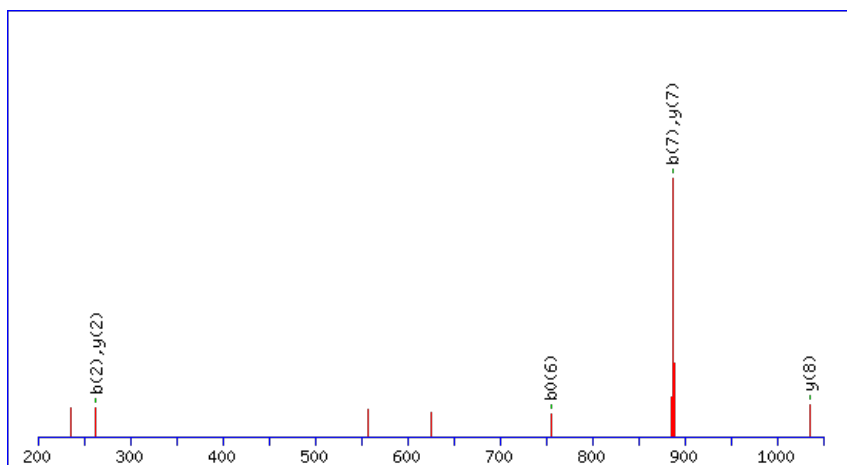

Monoisotopic mass of neutral peptide Mr(calc): 1148.5414

Fixed modifications: Carbamidomethyl (C) (apply to specified residues or termini only)

Ions Score: 26 Expect: 0.023

Matches : 6/70 fragment ions using 5 most intense peaks ([help](#))

| # | b               | b <sup>++</sup> | b <sup>0</sup>  | b <sup>0++</sup> | Seq. | y                | y <sup>++</sup> | y*        | y <sup>*++</sup> | y <sup>0</sup> | y <sup>0++</sup> | # |
|---|-----------------|-----------------|-----------------|------------------|------|------------------|-----------------|-----------|------------------|----------------|------------------|---|
| 1 | 115.0884        | 58.0478         |                 |                  | I    |                  |                 |           |                  |                |                  | 9 |
| 2 | <b>263.1538</b> | 132.0805        |                 |                  | F    | <b>1035.4676</b> | 518.2374        | 1017.4440 | 509.2256         | 1017.4570      | 509.2321         | 8 |
| 3 | 393.1935        | 197.1004        | 375.1829        | 188.0951         | E    | <b>887.4021</b>  | 444.2047        | 869.3785  | 435.1929         | 869.3915       | 435.1994         | 7 |
| 4 | 555.2182        | 278.1127        | 537.2076        | 269.1074         | C    | 757.3625         | 379.1849        | 739.3389  | 370.1731         | 739.3519       | 370.1796         | 6 |
| 5 | 685.2578        | 343.1325        | 667.2472        | 334.1273         | E    | 595.3378         | 298.1725        | 577.3142  | 289.1607         | 577.3272       | 289.1672         | 5 |
| 6 | 773.2869        | 387.1471        | <b>755.2763</b> | 378.1418         | S    | 465.2981         | 233.1527        | 447.2746  | 224.1409         | 447.2876       | 224.1474         | 4 |
| 7 | <b>887.3680</b> | 444.1876        | 869.3574        | 435.1823         | I    | 377.2691         | 189.1382        | 359.2455  | 180.1264         |                |                  | 3 |
| 8 | 1001.4491       | 501.2282        | 983.4385        | 492.2229         | I    | <b>263.1880</b>  | 132.0976        | 245.1644  | 123.0858         |                |                  | 2 |
| 9 |                 |                 |                 |                  | K    | 149.1069         | 75.0571         | 131.0833  | 66.0453          |                |                  | 1 |

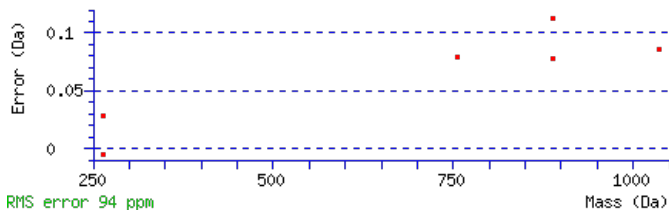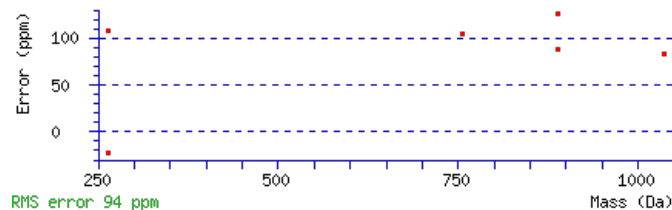NCBI **BLAST** search of **IFECESIHK**

(Parameters: blastp, nr protein database, expect=20000, no filter, PAM30)

Other BLAST [web gateways](#)

All matches to this query

| Score | Mr(calc) | Delta | Sequence |
|-------|----------|-------|----------|
|       |          |       |          |



**AT1G53090.1**

|      |           |         |                             |
|------|-----------|---------|-----------------------------|
| 26.5 | 1148.5414 | -0.0010 | <a href="#">IFECESIHK</a>   |
| 24.9 | 1148.5418 | -0.0014 | <a href="#">TRDMLKENK</a>   |
| 21.3 | 1148.5418 | -0.0014 | <a href="#">IMKRQAEDK</a>   |
| 5.7  | 1148.5418 | -0.0014 | <a href="#">IMQADKSLGR</a>  |
| 5.7  | 1148.5392 | 0.0012  | <a href="#">ISSGSGIMELK</a> |
| 5.7  | 1148.5414 | -0.0010 | <a href="#">LYEACLEIK</a>   |
| 5.6  | 1148.5414 | -0.0010 | <a href="#">YDLCVDLK</a>    |
| 4.6  | 1148.5418 | -0.0014 | <a href="#">MTDGGKRELK</a>  |

**Mascot:** <http://www.matrixscience.com/>

**Peptide View**MS/MS Fragmentation of **TLDEQVDQEEFVR**

Found in **AT1G53210.1** in **TAIR\_Arabidopsis**, Symbols: | sodium/calcium exchanger family protein / calcium-binding EF hand family protein | chr1:19848458-19851201 FORWARD

Match to Query 7064: 1606.747366 from(804.380959,2+) index(4941)

Title: Elution from: 43.286 to 43.286 scan no 6187 cid35.00 polarity:+

Data file D1d-3\_3.mgf

Click mouse within plot area to zoom in by factor of two about that point

Or,   to  Da

Label all possible matches  Label matches used for scoring

Show Y-axis

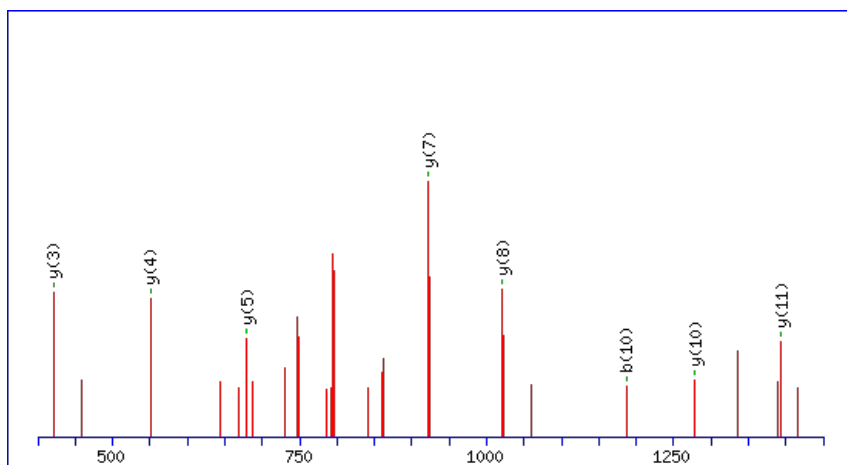

**Monoisotopic mass of neutral peptide Mr(calc):** 1606.7475

**Fixed modifications:** Carbamidomethyl (C) (apply to specified residues or termini only)

**Ions Score:** 57 **Expect:** 4.7e-006

**Matches:** 8/130 fragment ions using 10 most intense peaks ([help](#))

| #  | b                | b <sup>++</sup> | b*        | b <sup>*++</sup> | b <sup>0</sup> | b <sup>0++</sup> | Seq. | y                | y <sup>++</sup> | y*        | y <sup>*++</sup> | y <sup>0</sup> | y <sup>0++</sup> | #  |
|----|------------------|-----------------|-----------|------------------|----------------|------------------|------|------------------|-----------------|-----------|------------------|----------------|------------------|----|
| 1  | 102.0550         | 51.5311         |           |                  | 84.0444        | 42.5258          | T    |                  |                 |           |                  |                |                  | 13 |
| 2  | 215.1390         | 108.0731        |           |                  | 197.1285       | 99.0679          | L    | 1506.7071        | 753.8572        | 1489.6805 | 745.3439         | 1488.6965      | 744.8519         | 12 |
| 3  | 330.1660         | 165.5866        |           |                  | 312.1554       | 156.5813         | D    | <b>1393.6230</b> | 697.3151        | 1376.5965 | 688.8019         | 1375.6125      | 688.3099         | 11 |
| 4  | 459.2086         | 230.1079        |           |                  | 441.1980       | 221.1026         | E    | <b>1278.5961</b> | 639.8017        | 1261.5695 | 631.2884         | 1260.5855      | 630.7964         | 10 |
| 5  | 587.2671         | 294.1372        | 570.2406  | 285.6239         | 569.2566       | 285.1319         | Q    | 1149.5535        | 575.2804        | 1132.5269 | 566.7671         | 1131.5429      | 566.2751         | 9  |
| 6  | 686.3355         | 343.6714        | 669.3090  | 335.1581         | 668.3250       | 334.6661         | V    | <b>1021.4949</b> | 511.2511        | 1004.4684 | 502.7378         | 1003.4843      | 502.2458         | 8  |
| 7  | 801.3625         | 401.1849        | 784.3359  | 392.6716         | 783.3519       | 392.1796         | D    | <b>922.4265</b>  | 461.7169        | 905.3999  | 453.2036         | 904.4159       | 452.7116         | 7  |
| 8  | 929.4211         | 465.2142        | 912.3945  | 456.7009         | 911.4105       | 456.2089         | Q    | 807.3995         | 404.2034        | 790.3730  | 395.6901         | 789.3890       | 395.1981         | 6  |
| 9  | 1058.4637        | 529.7355        | 1041.4371 | 521.2222         | 1040.4531      | 520.7302         | E    | <b>679.3410</b>  | 340.1741        | 662.3144  | 331.6608         | 661.3304       | 331.1688         | 5  |
| 10 | <b>1187.5063</b> | 594.2568        | 1170.4797 | 585.7435         | 1169.4957      | 585.2515         | E    | <b>550.2984</b>  | 275.6528        | 533.2718  | 267.1396         | 532.2878       | 266.6475         | 4  |
| 11 | 1334.5747        | 667.7910        | 1317.5481 | 659.2777         | 1316.5641      | 658.7857         | F    | <b>421.2558</b>  | 211.1315        | 404.2292  | 202.6183         |                |                  | 3  |
| 12 | 1433.6431        | 717.3252        | 1416.6165 | 708.8119         | 1415.6325      | 708.3199         | V    | 274.1874         | 137.5973        | 257.1608  | 129.0840         |                |                  | 2  |
| 13 |                  |                 |           |                  |                |                  | R    | 175.1190         | 88.0631         | 158.0924  | 79.5498          |                |                  | 1  |

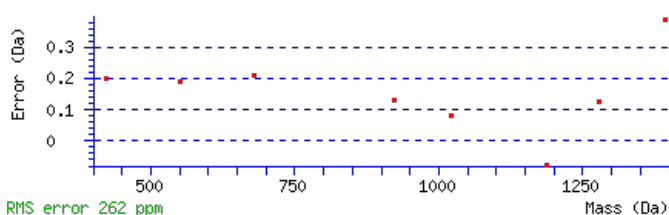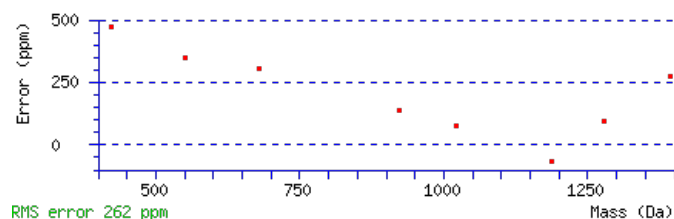

NCBI **BLAST** search of **TLDEQVDQEEFVR**

(Parameters: blastp, nr protein database, expect=20000, no filter, PAM30)

AT1G53210.1

Other BLAST [web gateways](#)

All matches to this query

| Score | Mr(calc)  | Delta   | Sequence                        |
|-------|-----------|---------|---------------------------------|
| 57.4  | 1606.7475 | -0.0001 | <a href="#">TLDEQVDQEEFVR</a>   |
| 1.3   | 1606.7488 | -0.0014 | <a href="#">SNAFHGSINQNGFSK</a> |

Mascot: <http://www.matrixscience.com/>

**Peptide View**MS/MS Fragmentation of **SEVVGVMGDDNLAK**Found in **AT1G53240.1** in **TAIR\_Arabidopsis**, Symbols: | malate dehydrogenase (NAD), mitochondrial | chr1:19858634-19860470 REVERSE

Match to Query 6503: 1512.632962 from(757.323757,2+) index(4418)

Title: Elution from: 42.228 to 42.228 scan no 5588 cid35.00 polarity:+

Data file D6h-2\_1.mgf

Click mouse within plot area to zoom in by factor of two about that point

Or,   to  Da Label all possible matches  Label matches used for scoring Show Y-axis 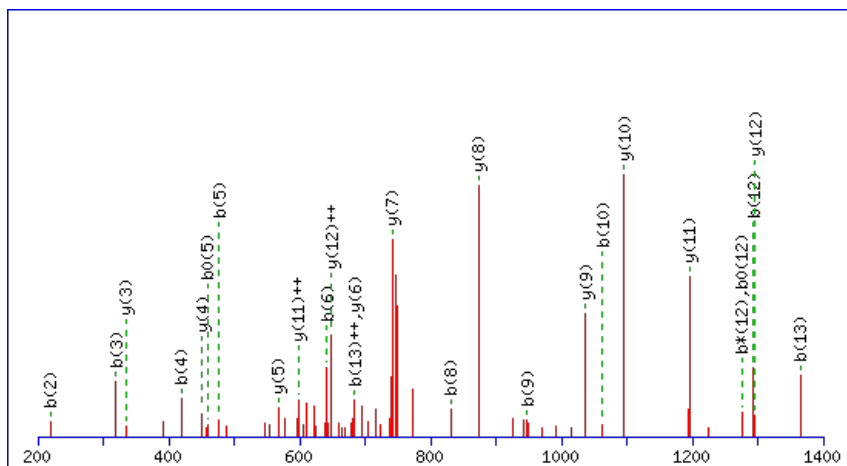Monoisotopic mass of neutral peptide  $M_r(\text{calc})$ : 1512.6342

Fixed modifications: Carbamidomethyl (C) (apply to specified residues or termini only)

Ions Score: 86 Expect: 1.5e-008

Matches : 26/128 fragment ions using 39 most intense peaks ([help](#))

| #  | b                | b <sup>++</sup> | b <sup>*</sup>   | b <sup>*++</sup> | b <sup>0</sup>   | b <sup>0++</sup> | Seq. | y                | y <sup>++</sup> | y <sup>*</sup> | y <sup>*++</sup> | y <sup>0</sup> | y <sup>0++</sup> | #  |
|----|------------------|-----------------|------------------|------------------|------------------|------------------|------|------------------|-----------------|----------------|------------------|----------------|------------------|----|
| 1  | 89.0363          | 45.0218         |                  |                  | 71.0258          | 36.0165          | S    |                  |                 |                |                  |                |                  | 14 |
| 2  | <b>219.0760</b>  | 110.0416        |                  |                  | 201.0654         | 101.0363         | E    | 1425.6125        | 713.3099        | 1407.5889      | 704.2981         | 1407.6019      | 704.3046         | 13 |
| 3  | <b>319.1414</b>  | 160.0743        |                  |                  | 301.1309         | 151.0691         | V    | <b>1295.5729</b> | <b>648.2901</b> | 1277.5493      | 639.2783         | 1277.5623      | 639.2848         | 12 |
| 4  | <b>419.2069</b>  | 210.1071        |                  |                  | 401.1963         | 201.1018         | V    | <b>1195.5074</b> | <b>598.2573</b> | 1177.4838      | 589.2455         | 1177.4968      | 589.2521         | 11 |
| 5  | <b>477.2254</b>  | 239.1163        |                  |                  | <b>459.2148</b>  | 230.1110         | G    | <b>1095.4420</b> | 548.2246        | 1077.4184      | 539.2128         | 1077.4314      | 539.2193         | 10 |
| 6  | <b>641.2857</b>  | 321.1465        |                  |                  | 623.2752         | 312.1412         | Y    | <b>1037.4235</b> | 519.2154        | 1019.3999      | 510.2036         | 1019.4129      | 510.2101         | 9  |
| 7  | 773.3232         | 387.1653        |                  |                  | 755.3127         | 378.1600         | M    | <b>873.3631</b>  | 437.1852        | 855.3395       | 428.1734         | 855.3525       | 428.1799         | 8  |
| 8  | <b>831.3417</b>  | 416.1745        |                  |                  | 813.3312         | 407.1692         | G    | <b>741.3256</b>  | 371.1664        | 723.3020       | 362.1546         | 723.3150       | 362.1611         | 7  |
| 9  | <b>947.3657</b>  | 474.1865        |                  |                  | 929.3552         | 465.1812         | D    | <b>683.3071</b>  | 342.1572        | 665.2835       | 333.1454         | 665.2965       | 333.1519         | 6  |
| 10 | <b>1063.3897</b> | 532.1985        |                  |                  | 1045.3791        | 523.1932         | D    | <b>567.2831</b>  | 284.1452        | 549.2595       | 275.1334         | 549.2725       | 275.1399         | 5  |
| 11 | 1179.4267        | 590.2170        | 1161.4031        | 581.2052         | 1161.4161        | 581.2117         | N    | <b>451.2591</b>  | 226.1332        | 433.2355       | 217.1214         |                |                  | 4  |
| 12 | <b>1293.5078</b> | 647.2575        | <b>1275.4842</b> | 638.2457         | <b>1275.4972</b> | 638.2523         | L    | <b>335.2221</b>  | 168.1147        | 317.1985       | 159.1029         |                |                  | 3  |
| 13 | <b>1365.5419</b> | <b>683.2746</b> | 1347.5184        | 674.2628         | 1347.5314        | 674.2693         | A    | 221.1410         | 111.0741        | 203.1174       | 102.0624         |                |                  | 2  |
| 14 |                  |                 |                  |                  |                  |                  | K    | 149.1069         | 75.0571         | 131.0833       | 66.0453          |                |                  | 1  |

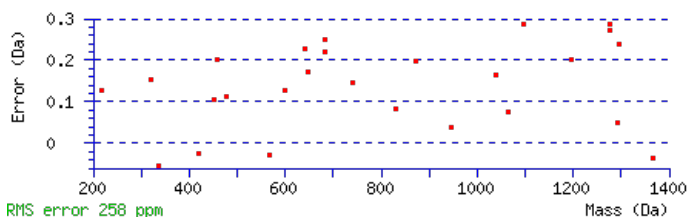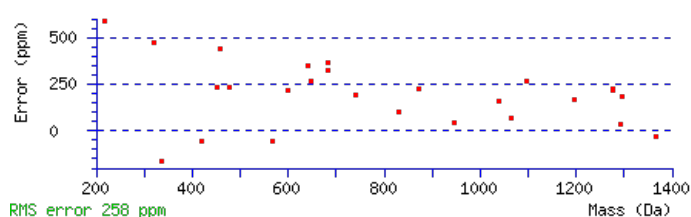NCBI BLAST search of **SEVVGVMGDDNLAK**

(Parameters: blastp, nr protein database, expect=20000, no filter, PAM30)

AT1G53240.1

Other BLAST [web gateways](#)

**All matches to this query**

| Score | Mr(calc)  | Delta   | Sequence                        |
|-------|-----------|---------|---------------------------------|
| 86.0  | 1512.6342 | -0.0013 | <a href="#">SEVVG YMGDDNLAK</a> |
| 11.8  | 1512.6347 | -0.0017 | <a href="#">GRVCNSSGEEASLK</a>  |
| 10.8  | 1512.6286 | 0.0043  | <a href="#">FADLSESQQQTk</a>    |
| 0.7   | 1512.6369 | -0.0040 | <a href="#">TDPTFREMENVR</a>    |
| 0.2   | 1512.6349 | -0.0019 | <a href="#">AFQECRKQMHR</a>     |

Mascot: <http://www.matrixscience.com/>



# Mascot Search Results

## Peptide View

MS/MS Fragmentation of **EIQAAFR**

Found in **AT1G53310.1** in **TAIR\_Arabidopsis**, Symbols: ATPPC1 | ATPPC1 (PHOSPHOENOLPYRUVATE CARBOXYLASE 1); phosphoenolpyruvate carboxylase | chr1:19887929-19891738 REVERSE

Match to Query 1187: 833.439070 from(417.726811,2+) index(1778)

Title: Elution from: 23.332 to 23.332 scan no 2369 cid35.00 polarity:+

Data file D6h-2\_2.mgf

Click mouse within plot area to zoom in by factor of two about that point

Or,   to  Da

Label all possible matches  Label matches used for scoring

Show Y-axis

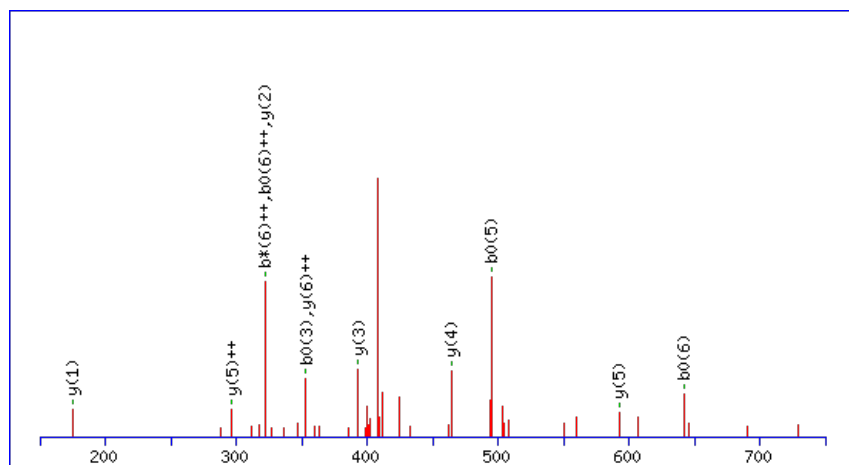

Monoisotopic mass of neutral peptide **Mr(calc)**: 833.4395

**Fixed modifications**: Carbamidomethyl (C) (apply to specified residues or termini only)

**Ions Score**: 33 **Expect**: 0.0021

**Matches** : 12/56 fragment ions using 15 most intense peaks ([help](#))

| # | b        | b <sup>++</sup> | b*       | b <sup>*++</sup> | b <sup>0</sup> | b <sup>0++</sup> | Seq. | y        | y <sup>++</sup> | y*       | y <sup>*++</sup> | # |
|---|----------|-----------------|----------|------------------|----------------|------------------|------|----------|-----------------|----------|------------------|---|
| 1 | 130.0499 | 65.5286         |          |                  | 112.0393       | 56.5233          | E    |          |                 |          |                  | 7 |
| 2 | 243.1339 | 122.0706        |          |                  | 225.1234       | 113.0653         | I    | 705.4042 | 353.2058        | 688.3777 | 344.6925         | 6 |
| 3 | 371.1925 | 186.0999        | 354.1660 | 177.5866         | 353.1819       | 177.0946         | Q    | 592.3202 | 296.6637        | 575.2936 | 288.1504         | 5 |
| 4 | 442.2296 | 221.6185        | 425.2031 | 213.1052         | 424.2191       | 212.6132         | A    | 464.2616 | 232.6344        | 447.2350 | 224.1212         | 4 |
| 5 | 513.2667 | 257.1370        | 496.2402 | 248.6237         | 495.2562       | 248.1317         | A    | 393.2245 | 197.1159        | 376.1979 | 188.6026         | 3 |
| 6 | 660.3352 | 330.6712        | 643.3086 | 322.1579         | 642.3246       | 321.6659         | F    | 322.1874 | 161.5973        | 305.1608 | 153.0840         | 2 |
| 7 |          |                 |          |                  |                |                  | R    | 175.1190 | 88.0631         | 158.0924 | 79.5498          | 1 |

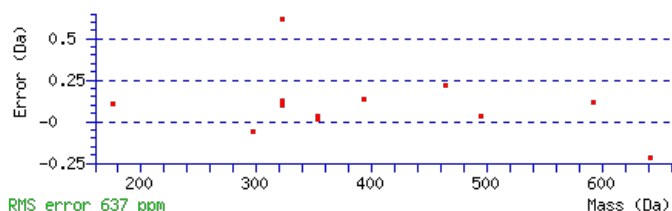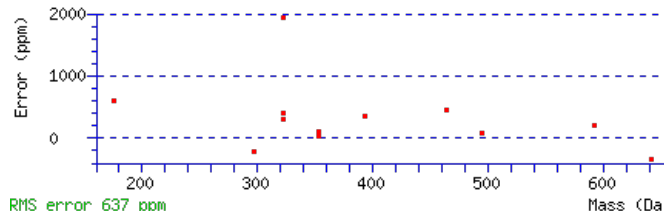

NCBI **BLAST** search of [EIQAAFR](#)

(Parameters: blastp, nr protein database, expect=20000, no filter, PAM30)

Other BLAST [web gateways](#)

### All matches to this query

| Score | Mr(calc) | Delta   | Sequence                |
|-------|----------|---------|-------------------------|
| 32.7  | 833.4395 | -0.0005 | <a href="#">EIQAAFR</a> |
| 7.4   | 833.4395 | -0.0005 | <a href="#">EVGNLFR</a> |

# AT1G53310.1

|     |          |         |                         |
|-----|----------|---------|-------------------------|
| 7.4 | 833.4395 | -0.0005 | <a href="#">QSSPLFR</a> |
| 0.7 | 833.4395 | -0.0005 | <a href="#">QSIPYAR</a> |

**Mascot:** <http://www.matrixscience.com/>

**Peptide View**MS/MS Fragmentation of **YFLDDQK**

Found in **AT1G53500.1** in **TAIR\_Arabidopsis**, Symbols: RHM2, MUM4 | MUM4 (MUCILAGE-MODIFIED 4); catalytic | chr1:19970825-19972907 REVERSE

Match to Query 1810: 927.433742 from(464.724147,2+) index(2773)

Title: Elution from: 28.440 to 28.440 scan no 3484 cid35.00 polarity:+

Data file C7-3\_3.mgf

Click mouse within plot area to zoom in by factor of two about that point

Or,   to  Da

Label all possible matches  Label matches used for scoring

Show Y-axis

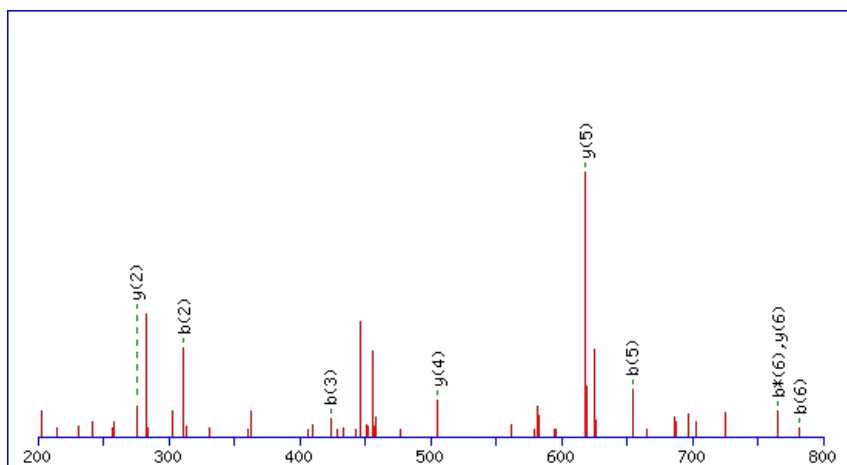

Monoisotopic mass of neutral peptide  $M_r(\text{calc})$ : 927.4338

Fixed modifications: Carbamidomethyl (C) (apply to specified residues or termini only)

Ions Score: 20 Expect: 0.012

Matches : 9/52 fragment ions using 23 most intense peaks ([help](#))

| # | b               | b <sup>++</sup> | b*              | b <sup>*++</sup> | b <sup>0</sup> | b <sup>0++</sup> | Seq. | y               | y <sup>++</sup> | y*       | y <sup>*++</sup> | y <sup>0</sup> | y <sup>0++</sup> | # |
|---|-----------------|-----------------|-----------------|------------------|----------------|------------------|------|-----------------|-----------------|----------|------------------|----------------|------------------|---|
| 1 | 164.0706        | 82.5389         |                 |                  |                |                  | Y    |                 |                 |          |                  |                |                  | 7 |
| 2 | <b>311.1390</b> | 156.0731        |                 |                  |                |                  | F    | <b>765.3777</b> | 383.1925        | 748.3512 | 374.6792         | 747.3672       | 374.1872         | 6 |
| 3 | <b>424.2231</b> | 212.6152        |                 |                  |                |                  | L    | <b>618.3093</b> | 309.6583        | 601.2828 | 301.1450         | 600.2988       | 300.6530         | 5 |
| 4 | 539.2500        | 270.1287        |                 |                  | 521.2395       | 261.1234         | D    | <b>505.2253</b> | 253.1163        | 488.1987 | 244.6030         | 487.2147       | 244.1110         | 4 |
| 5 | <b>654.2770</b> | 327.6421        |                 |                  | 636.2664       | 318.6368         | D    | 390.1983        | 195.6028        | 373.1718 | 187.0895         | 372.1878       | 186.5975         | 3 |
| 6 | <b>782.3355</b> | 391.6714        | <b>765.3090</b> | 383.1581         | 764.3250       | 382.6661         | Q    | <b>275.1714</b> | 138.0893        | 258.1448 | 129.5761         |                |                  | 2 |
| 7 |                 |                 |                 |                  |                |                  | K    | 147.1128        | 74.0600         | 130.0863 | 65.5468          |                |                  | 1 |

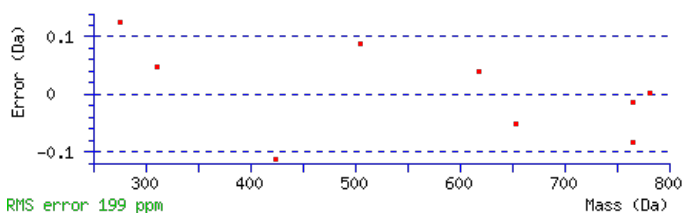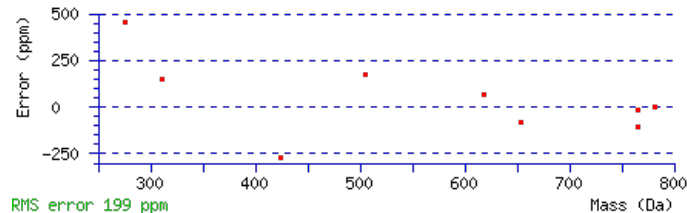

NCBI **BLAST** search of **YFLDDQK**

(Parameters: blastp, nr protein database, expect=20000, no filter, PAM30)

Other BLAST [web gateways](#)

**All matches to this query**

| Score | $M_r(\text{calc})$ | Delta   | Sequence                |
|-------|--------------------|---------|-------------------------|
| 19.8  | 927.4338           | -0.0001 | <a href="#">YFLDDQK</a> |
| 7.8   | 927.4338           | -0.0000 | <a href="#">FYIENDK</a> |



## AT1G53500.1

|     |          |         |                          |
|-----|----------|---------|--------------------------|
| 7.3 | 927.4338 | -0.0001 | <a href="#">YFPGSTEK</a> |
| 2.9 | 927.4340 | -0.0003 | <a href="#">MVMRTMK</a>  |

**Mascot:** <http://www.matrixscience.com/>

**Peptide View**MS/MS Fragmentation of **AIGSGSEGADSSLQEQFNK**Found in **AT1G53850.1** in **TAIR\_Arabidopsis**, Symbols: PAE1 | PAE1 (20S proteasome alpha subunit E1); peptidase | chr1:20107799-20109460  
REVERSE

Match to Query 8810: 1946.811672 from(974.413112,2+) index(3662)

Title: Elution from: 37.643 to 37.643 scan no 4672 cid35.00 polarity:+

Data file D12h-2\_2.mgf

Click mouse within plot area to zoom in by factor of two about that point

Or,  to  Da Label all possible matches  Label matches used for scoring Show Y-axis 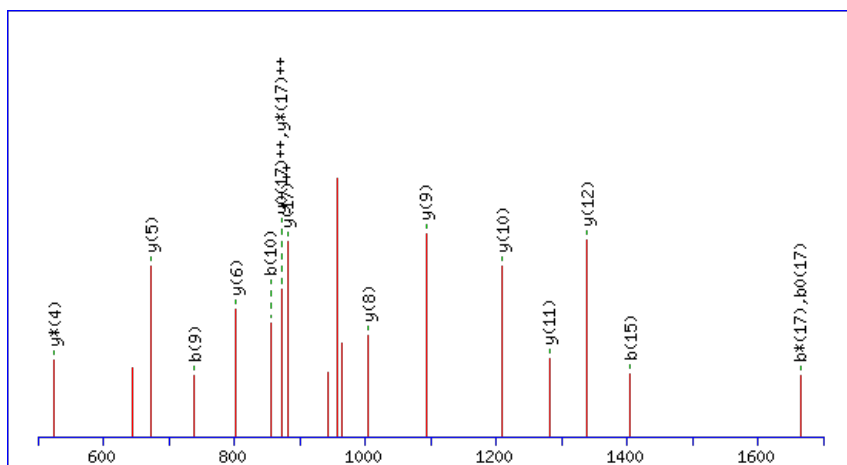**Monoisotopic mass of neutral peptide Mr(calc):** 1946.8128**Fixed modifications:** Carbamidomethyl (C) (apply to specified residues or termini only)**Ions Score:** 55 **Expect:** 1.6e-005**Matches:** 16/176 fragment ions using 18 most intense peaks ([help](#))

| #  | b         | b <sup>++</sup> | b <sup>*</sup> | b <sup>*++</sup> | b <sup>0</sup> | b <sup>0++</sup> | Seq. | y         | y <sup>++</sup> | y <sup>*</sup> | y <sup>*++</sup> | y <sup>0</sup> | y <sup>0++</sup> | #  |
|----|-----------|-----------------|----------------|------------------|----------------|------------------|------|-----------|-----------------|----------------|------------------|----------------|------------------|----|
| 1  | 73.0414   | 37.0244         |                |                  |                |                  | A    |           |                 |                |                  |                |                  | 19 |
| 2  | 187.1225  | 94.0649         |                |                  |                |                  | I    | 1875.7859 | 938.3966        | 1857.7624      | 929.3848         | 1857.7754      | 929.3913         | 18 |
| 3  | 245.1410  | 123.0741        |                |                  |                |                  | G    | 1761.7048 | 881.3561        | 1743.6813      | 872.3443         | 1743.6943      | 872.3508         | 17 |
| 4  | 333.1701  | 167.0887        |                |                  | 315.1595       | 158.0834         | S    | 1703.6863 | 852.3468        | 1685.6628      | 843.3350         | 1685.6758      | 843.3415         | 16 |
| 5  | 391.1886  | 196.0979        |                |                  | 373.1780       | 187.0926         | G    | 1615.6573 | 808.3323        | 1597.6337      | 799.3205         | 1597.6467      | 799.3270         | 15 |
| 6  | 479.2176  | 240.1125        |                |                  | 461.2071       | 231.1072         | S    | 1557.6388 | 779.3230        | 1539.6152      | 770.3112         | 1539.6282      | 770.3177         | 14 |
| 7  | 609.2573  | 305.1323        |                |                  | 591.2467       | 296.1270         | E    | 1469.6097 | 735.3085        | 1451.5861      | 726.2967         | 1451.5992      | 726.3032         | 13 |
| 8  | 667.2758  | 334.1415        |                |                  | 649.2652       | 325.1362         | G    | 1339.5701 | 670.2887        | 1321.5465      | 661.2769         | 1321.5595      | 661.2834         | 12 |
| 9  | 739.3099  | 370.1586        |                |                  | 721.2994       | 361.1533         | A    | 1281.5516 | 641.2794        | 1263.5280      | 632.2676         | 1263.5410      | 632.2742         | 11 |
| 10 | 855.3339  | 428.1706        |                |                  | 837.3233       | 419.1653         | D    | 1209.5174 | 605.2624        | 1191.4939      | 596.2506         | 1191.5069      | 596.2571         | 10 |
| 11 | 943.3630  | 472.1851        |                |                  | 925.3524       | 463.1798         | S    | 1093.4935 | 547.2504        | 1075.4699      | 538.2386         | 1075.4829      | 538.2451         | 9  |
| 12 | 1031.3920 | 516.1997        |                |                  | 1013.3815      | 507.1944         | S    | 1005.4644 | 503.2358        | 987.4408       | 494.2240         | 987.4538       | 494.2306         | 8  |
| 13 | 1145.4731 | 573.2402        |                |                  | 1127.4626      | 564.2349         | L    | 917.4353  | 459.2213        | 899.4118       | 450.2095         | 899.4248       | 450.2160         | 7  |
| 14 | 1275.5258 | 638.2665        | 1257.5022      | 629.2547         | 1257.5152      | 629.2612         | Q    | 803.3542  | 402.1808        | 785.3307       | 393.1690         | 785.3437       | 393.1755         | 6  |
| 15 | 1405.5654 | 703.2863        | 1387.5418      | 694.2745         | 1387.5548      | 694.2811         | E    | 673.3016  | 337.1544        | 655.2780       | 328.1426         | 655.2910       | 328.1492         | 5  |
| 16 | 1535.6180 | 768.3127        | 1517.5945      | 759.3009         | 1517.6075      | 759.3074         | Q    | 543.2620  | 272.1346        | 525.2384       | 263.1228         |                |                  | 4  |
| 17 | 1683.6835 | 842.3454        | 1665.6599      | 833.3336         | 1665.6729      | 833.3401         | F    | 413.2093  | 207.1083        | 395.1857       | 198.0965         |                |                  | 3  |
| 18 | 1799.7205 | 900.3639        | 1781.6969      | 891.3521         | 1781.7099      | 891.3586         | N    | 265.1439  | 133.0756        | 247.1203       | 124.0638         |                |                  | 2  |
| 19 |           |                 |                |                  |                |                  | K    | 149.1069  | 75.0571         | 131.0833       | 66.0453          |                |                  | 1  |

# AT1G53850.1

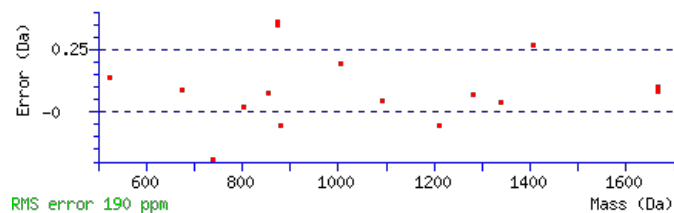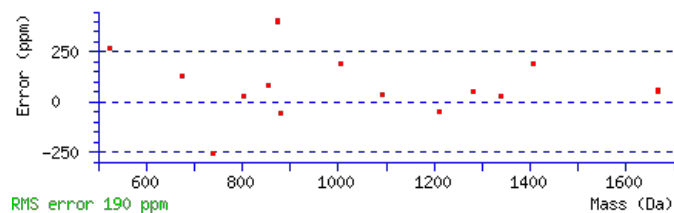

NCBI **BLAST** search of [AIGSGSEGADSSLQEQFNK](#)  
 (Parameters: blastp, nr protein database, expect=20000, no filter, PAM30)

Other BLAST [web gateways](#)

## All matches to this query

| Score | Mr(calc)  | Delta   | Sequence                            |
|-------|-----------|---------|-------------------------------------|
| 54.6  | 1946.8128 | -0.0011 | <a href="#">AIGSGSEGADSSLQEQFNK</a> |
| 2.3   | 1946.8069 | 0.0047  | <a href="#">YPPPPSQSEDVEHWTR</a>    |
| 1.8   | 1946.8137 | -0.0020 | <a href="#">DRVPKMTSHFESMAEK</a>    |
| 0.4   | 1946.8099 | 0.0018  | <a href="#">GYPGYMYTDLATIYER</a>    |

Mascot: <http://www.matrixscience.com/>

**Peptide View**MS/MS Fragmentation of **NDISLLYSSGASK**Found in **AT1G54010.1** in **TAIR\_Arabidopsis**, Symbols: | myrosinase-associated protein, putative | chr1:20162522-20164415 REVERSE

Match to Query 5054: 1353.677460 from(677.846006,2+) index(5026)

Title: Elution from: 45.049 to 45.049 scan no 6298 cid35.00 polarity:+

Data file 0-1\_3.mgf

Click mouse within plot area to zoom in by factor of two about that point

Or,   to  Da Label all possible matches  Label matches used for scoring Show Y-axis 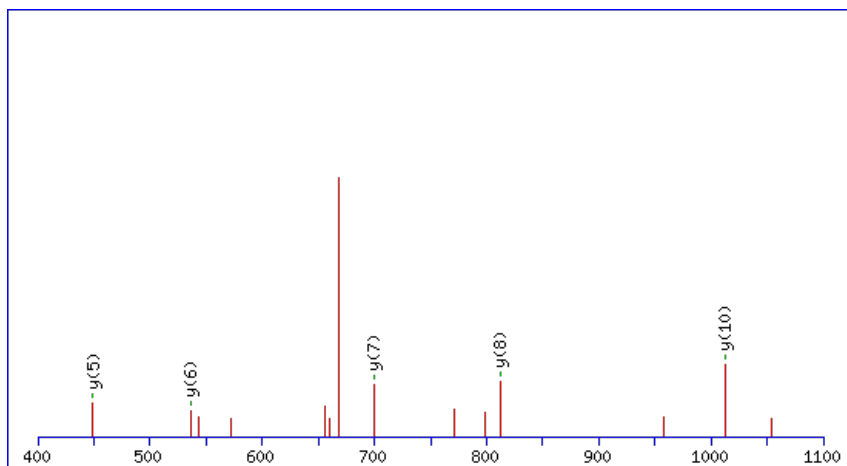Monoisotopic mass of neutral peptide **Mr(calc)**: 1353.6776**Fixed modifications:** Carbamidomethyl (C) (apply to specified residues or termini only)**Ions Score:** 33 **Expect:** 0.0014**Matches** : 5/140 fragment ions using 10 most intense peaks ([help](#))

| #  | b         | b <sup>++</sup> | b <sup>*</sup> | b <sup>*++</sup> | b <sup>0</sup> | b <sup>0++</sup> | Seq. | y                | y <sup>++</sup> | y <sup>*</sup> | y <sup>*++</sup> | y <sup>0</sup> | y <sup>0++</sup> | #  |
|----|-----------|-----------------|----------------|------------------|----------------|------------------|------|------------------|-----------------|----------------|------------------|----------------|------------------|----|
| 1  | 115.0502  | 58.0287         | 98.0237        | 49.5155          |                |                  | N    |                  |                 |                |                  |                |                  | 13 |
| 2  | 230.0771  | 115.5422        | 213.0506       | 107.0289         | 212.0666       | 106.5369         | D    | 1240.6420        | 620.8246        | 1223.6154      | 612.3113         | 1222.6314      | 611.8193         | 12 |
| 3  | 343.1612  | 172.0842        | 326.1347       | 163.5710         | 325.1506       | 163.0790         | I    | 1125.6150        | 563.3111        | 1108.5885      | 554.7979         | 1107.6045      | 554.3059         | 11 |
| 4  | 430.1932  | 215.6003        | 413.1667       | 207.0870         | 412.1827       | 206.5950         | S    | <b>1012.5310</b> | 506.7691        | 995.5044       | 498.2558         | 994.5204       | 497.7638         | 10 |
| 5  | 543.2773  | 272.1423        | 526.2508       | 263.6290         | 525.2667       | 263.1370         | L    | 925.4989         | 463.2531        | 908.4724       | 454.7398         | 907.4884       | 454.2478         | 9  |
| 6  | 656.3614  | 328.6843        | 639.3348       | 320.1710         | 638.3508       | 319.6790         | L    | <b>812.4149</b>  | 406.7111        | 795.3883       | 398.1978         | 794.4043       | 397.7058         | 8  |
| 7  | 819.4247  | 410.2160        | 802.3981       | 401.7027         | 801.4141       | 401.2107         | Y    | <b>699.3308</b>  | 350.1690        | 682.3042       | 341.6558         | 681.3202       | 341.1638         | 7  |
| 8  | 906.4567  | 453.7320        | 889.4302       | 445.2187         | 888.4462       | 444.7267         | S    | <b>536.2675</b>  | 268.6374        | 519.2409       | 260.1241         | 518.2569       | 259.6321         | 6  |
| 9  | 993.4888  | 497.2480        | 976.4622       | 488.7347         | 975.4782       | 488.2427         | S    | <b>449.2354</b>  | 225.1214        | 432.2089       | 216.6081         | 431.2249       | 216.1161         | 5  |
| 10 | 1050.5102 | 525.7587        | 1033.4837      | 517.2455         | 1032.4997      | 516.7535         | G    | 362.2034         | 181.6053        | 345.1769       | 173.0921         | 344.1928       | 172.6001         | 4  |
| 11 | 1121.5473 | 561.2773        | 1104.5208      | 552.7640         | 1103.5368      | 552.2720         | A    | 305.1819         | 153.0946        | 288.1554       | 144.5813         | 287.1714       | 144.0893         | 3  |
| 12 | 1208.5794 | 604.7933        | 1191.5528      | 596.2800         | 1190.5688      | 595.7880         | S    | 234.1448         | 117.5761        | 217.1183       | 109.0628         | 216.1343       | 108.5708         | 2  |
| 13 |           |                 |                |                  |                |                  | K    | 147.1128         | 74.0600         | 130.0863       | 65.5468          |                |                  | 1  |

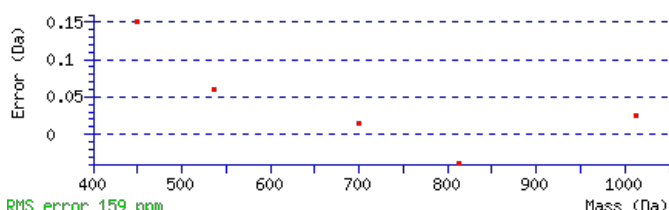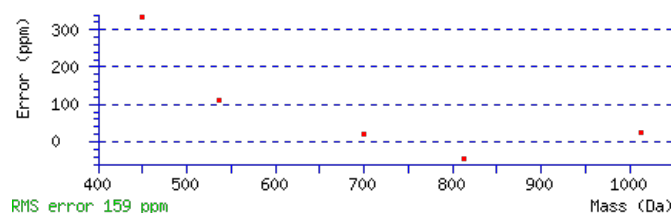NCBI **BLAST** search of **NDISLLYSSGASK**

(Parameters: blastp, nr protein database, expect=20000, no filter, PAM30)

Other BLAST [web gateways](#)

AT1G54010.1

All matches to this query

| Score | Mr(calc)  | Delta   | Sequence                      |
|-------|-----------|---------|-------------------------------|
| 33.3  | 1353.6776 | -0.0001 | <a href="#">NDISLLYSSGASK</a> |
| 21.8  | 1353.6776 | -0.0001 | <a href="#">SDINLLYSSGASK</a> |
| 2.0   | 1353.6785 | -0.0010 | <a href="#">NLVILNMCYSK</a>   |

Mascot: <http://www.matrixscience.com/>

## Peptide View

### MS/MS Fragmentation of **GVAINFVTLDDQR**

Found in **AT1G54270.1** in **TAIR\_Arabidopsis**, Symbols: EIF4A-2 | EIF4A-2 (eukaryotic translation initiation factor 4A-2); ATP-dependent helicase | chr1:20264162-20265685 FORWARD

Match to Query 5693: 1464.697440 from(733.355996,2+) index(7180)

Title: Elution from: 63.956 to 63.956 scan no 9360 cid35.00 polarity:+

Data file C7-1\_3.mgf

Click mouse within plot area to zoom in by factor of two about that point

Or,   to  Da

Label all possible matches  Label matches used for scoring

Show Y-axis

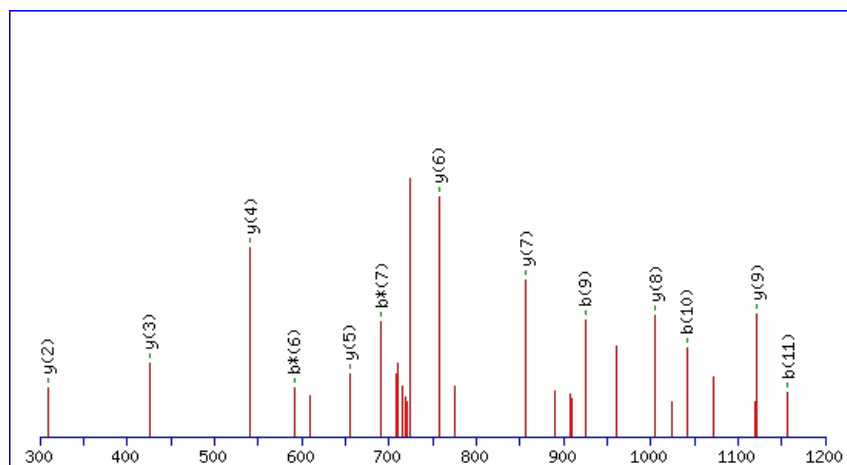

Monoisotopic mass of neutral peptide  $M_r(\text{calc})$ : 1464.6933

Fixed modifications: Carbamidomethyl (C) (apply to specified residues or termini only)

Ions Score: 74 Expect: 4.1e-007

Matches : 13/118 fragment ions using 16 most intense peaks ([help](#))

| #  | b                | b <sup>++</sup> | b*              | b <sup>*++</sup> | b <sup>0</sup> | b <sup>0++</sup> | Seq. | y                | y <sup>++</sup> | y*        | y <sup>*++</sup> | y <sup>0</sup> | y <sup>0++</sup> | #  |
|----|------------------|-----------------|-----------------|------------------|----------------|------------------|------|------------------|-----------------|-----------|------------------|----------------|------------------|----|
| 1  | 59.0258          | 30.0165         |                 |                  |                |                  | G    |                  |                 |           |                  |                |                  | 13 |
| 2  | 159.0912         | 80.0492         |                 |                  |                |                  | V    | 1407.6821        | 704.3447        | 1389.6585 | 695.3329         | 1389.6715      | 695.3394         | 12 |
| 3  | 231.1254         | 116.0663        |                 |                  |                |                  | A    | 1307.6166        | 654.3120        | 1289.5931 | 645.3002         | 1289.6061      | 645.3067         | 11 |
| 4  | 345.2065         | 173.1069        |                 |                  |                |                  | I    | 1235.5825        | 618.2949        | 1217.5589 | 609.2831         | 1217.5719      | 609.2896         | 10 |
| 5  | 461.2435         | 231.1254        | 443.2199        | 222.1136         |                |                  | N    | <b>1121.5014</b> | 561.2543        | 1103.4778 | 552.2425         | 1103.4908      | 552.2491         | 9  |
| 6  | 609.3089         | 305.1581        | <b>591.2853</b> | 296.1463         |                |                  | F    | <b>1005.4644</b> | 503.2358        | 987.4408  | 494.2240         | 987.4538       | 494.2306         | 8  |
| 7  | 709.3744         | 355.1908        | <b>691.3508</b> | 346.1790         |                |                  | V    | <b>857.3990</b>  | 429.2031        | 839.3754  | 420.1913         | 839.3884       | 420.1978         | 7  |
| 8  | 811.4191         | 406.2132        | 793.3955        | 397.2014         | 793.4085       | 397.2079         | T    | <b>757.3335</b>  | 379.1704        | 739.3099  | 370.1586         | 739.3229       | 370.1651         | 6  |
| 9  | <b>925.5002</b>  | 463.2537        | 907.4766        | 454.2419         | 907.4896       | 454.2484         | L    | <b>655.2888</b>  | 328.1480        | 637.2652  | 319.1362         | 637.2782       | 319.1428         | 5  |
| 10 | <b>1041.5242</b> | 521.2657        | 1023.5006       | 512.2539         | 1023.5136      | 512.2604         | D    | <b>541.2077</b>  | 271.1075        | 523.1841  | 262.0957         | 523.1971       | 262.1022         | 4  |
| 11 | <b>1157.5481</b> | 579.2777        | 1139.5246       | 570.2659         | 1139.5376      | 570.2724         | D    | <b>425.1837</b>  | 213.0955        | 407.1601  | 204.0837         | 407.1732       | 204.0902         | 3  |
| 12 | 1287.6008        | 644.3040        | 1269.5772       | 635.2922         | 1269.5902      | 635.2987         | Q    | <b>309.1597</b>  | 155.0835        | 291.1362  | 146.0717         |                |                  | 2  |
| 13 |                  |                 |                 |                  |                |                  | R    | 179.1071         | 90.0572         | 161.0835  | 81.0454          |                |                  | 1  |

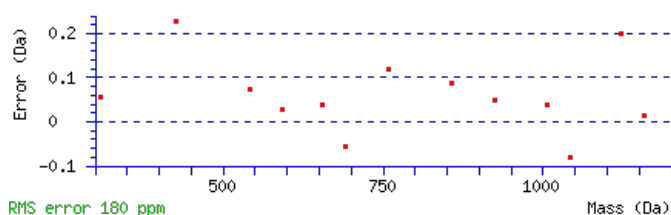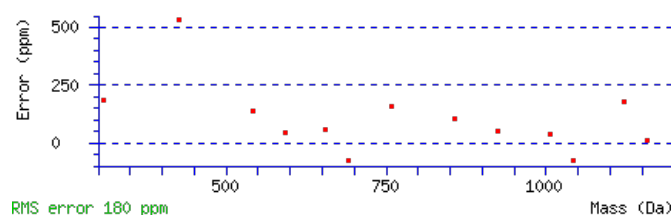

NCBI **BLAST** search of **GVAINFVTLDDQR**

(Parameters: blastp, nr protein database, expect=20000, no filter, PAM30)

# AT1G54270.1

Other BLAST [web gateways](#)

## All matches to this query

| Score | Mr(calc)  | Delta   | Sequence                       |
|-------|-----------|---------|--------------------------------|
| 74.3  | 1464.6933 | 0.0042  | <a href="#">GVAINFVTLDDQR</a>  |
| 11.4  | 1464.6933 | 0.0041  | <a href="#">YAANVIDQPGGSKK</a> |
| 11.0  | 1464.6989 | -0.0015 | <a href="#">ALPVMLLYNNER</a>   |
| 4.4   | 1464.6940 | 0.0034  | <a href="#">VEEVTEETKMQLK</a>  |
| 4.2   | 1464.6989 | -0.0015 | <a href="#">VLHSMDYSKLQK</a>   |
| 1.4   | 1464.6989 | -0.0015 | <a href="#">SASMAKIPLPDR</a>   |
| 0.8   | 1464.6937 | 0.0037  | <a href="#">RKNDAAVALSDQR</a>  |

Mascot: <http://www.matrixscience.com/>



# Mascot Search Results

## Peptide View

MS/MS Fragmentation of **AMAGLWRS GK**

Found in **AT1G54350.1** in **TAIR\_Arabidopsis**, Symbols: | ABC transporter family protein | chr1:20290584-20293912 FORWARD

Match to Query 3556: 1091.556438 from(546.785495,2+) index(1904)

Title: Elution from: 22.542 to 22.542 scan no 2480 cid35.00 polarity:+

Data file D1d-3\_1.mgf

Click mouse within plot area to zoom in by factor of two about that point

Or,   to  Da

Label all possible matches  Label matches used for scoring

Show Y-axis

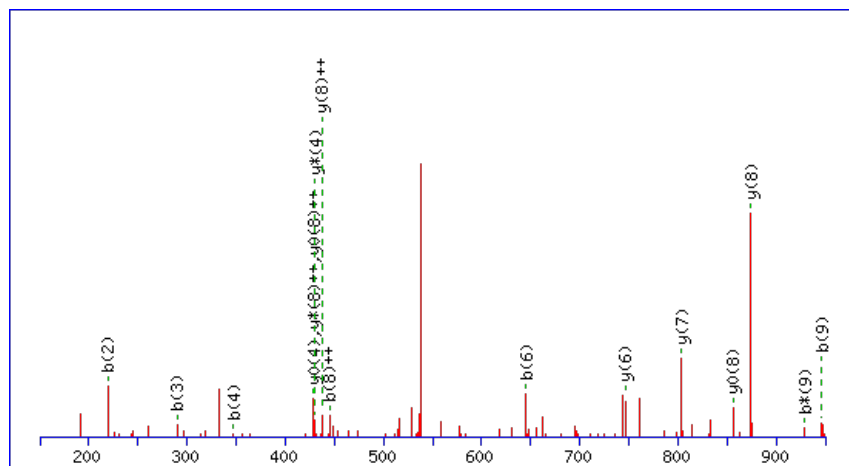

**Monoisotopic mass of neutral peptide Mr(calc):** 1091.5546

**Fixed modifications:** Carbamidomethyl (C) (apply to specified residues or termini only)

**Variable modifications:**

**M2** : Oxidation (M), with neutral losses 0.0000 (shown in table), 63.9983

**Ions Score:** 24 **Expect:** 0.016

**Matches** : 16/110 fragment ions using 32 most intense peaks ([help](#))

| #  | b               | b <sup>++</sup> | b <sup>*</sup>  | b <sup>*++</sup> | b <sup>0</sup> | b <sup>0++</sup> | Seq. | y               | y <sup>++</sup> | y <sup>*</sup>  | y <sup>*++</sup> | y <sup>0</sup>  | y <sup>0++</sup> | #  |
|----|-----------------|-----------------|-----------------|------------------|----------------|------------------|------|-----------------|-----------------|-----------------|------------------|-----------------|------------------|----|
| 1  | 72.0444         | 36.5258         |                 |                  |                |                  | A    |                 |                 |                 |                  |                 |                  | 10 |
| 2  | <b>219.0798</b> | 110.0435        |                 |                  |                |                  | M    | 1021.5248       | 511.2660        | 1004.4982       | 502.7527         | 1003.5142       | 502.2607         | 9  |
| 3  | <b>290.1169</b> | 145.5621        |                 |                  |                |                  | A    | <b>874.4894</b> | <b>437.7483</b> | 857.4628        | <b>429.2350</b>  | <b>856.4788</b> | <b>428.7430</b>  | 8  |
| 4  | <b>347.1384</b> | 174.0728        |                 |                  |                |                  | G    | <b>803.4522</b> | 402.2298        | 786.4257        | 393.7165         | 785.4417        | 393.2245         | 7  |
| 5  | 460.2224        | 230.6149        |                 |                  |                |                  | L    | <b>746.4308</b> | 373.7190        | 729.4042        | 365.2058         | 728.4202        | 364.7137         | 6  |
| 6  | <b>646.3017</b> | 323.6545        |                 |                  |                |                  | W    | 633.3467        | 317.1770        | 616.3202        | 308.6637         | 615.3362        | 308.1717         | 5  |
| 7  | 802.4029        | 401.7051        | 785.3763        | 393.1918         |                |                  | R    | 447.2674        | 224.1373        | <b>430.2409</b> | 215.6241         | <b>429.2568</b> | 215.1321         | 4  |
| 8  | 889.4349        | <b>445.2211</b> | 872.4083        | 436.7078         | 871.4243       | 436.2158         | S    | 291.1663        | 146.0868        | 274.1397        | 137.5735         | 273.1557        | 137.0815         | 3  |
| 9  | <b>946.4563</b> | 473.7318        | <b>929.4298</b> | 465.2185         | 928.4458       | 464.7265         | G    | 204.1343        | 102.5708        | 187.1077        | 94.0575          |                 |                  | 2  |
| 10 |                 |                 |                 |                  |                |                  | K    | 147.1128        | 74.0600         | 130.0863        | 65.5468          |                 |                  | 1  |

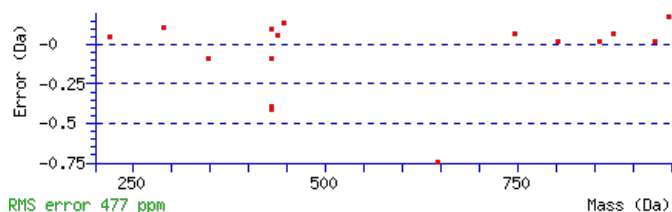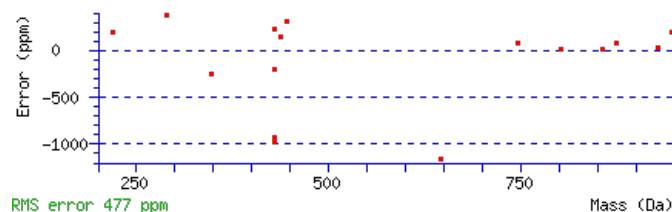

NCBI **BLAST** search of [AMAGLWRS GK](#)

(Parameters: blastp, nr protein database, expect=20000, no filter, PAM30)

Other BLAST [web gateways](#)

**All matches to this query**



**AT1G54350.1**

| <b>Score</b> | <b>Mr(calc)</b> | <b>Delta</b> | <b>Sequence</b>             |
|--------------|-----------------|--------------|-----------------------------|
| 24.4         | 1091.5546       | 0.0019       | <a href="#">AMAGLWRS GK</a> |
| 11.5         | 1091.5532       | 0.0032       | <a href="#">MAADSLDLLK</a>  |
| 8.7          | 1091.5532       | 0.0032       | <a href="#">LSLDEV MASK</a> |
| 4.5          | 1091.5546       | 0.0018       | <a href="#">KWKGTCAGGK</a>  |
| 3.1          | 1091.5532       | 0.0032       | <a href="#">MAVEKELEK</a>   |
| 2.7          | 1091.5579       | -0.0015      | <a href="#">AMRIM ADR</a>   |
| 0.0          | 1091.5546       | 0.0019       | <a href="#">CKKTQYHK</a>    |

**Mascot:** <http://www.matrixscience.com/>


**Mascot Search Results**
**Peptide View**MS/MS Fragmentation of **IGDALHIGGGNK**Found in **AT1G54410.1** in **TAIR\_Arabidopsis**, Symbols: | dehydrin family protein | chr1:20313972-20314268 REVERSE

Match to Query 3410: 1166.561266 from(584.287909,2+) index(1829)

Title: Elution from: 23.084 to 23.084 scan no 2421 cid35.00 polarity:+

Data file D12h-2\_3.mgf

Click mouse within plot area to zoom in by factor of two about that point

Or,   to  Da Label all possible matches  Label matches used for scoring Show Y-axis 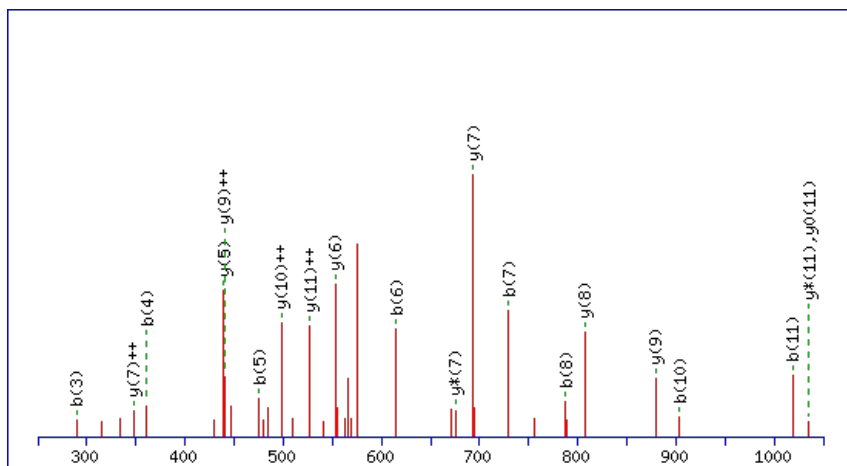**Monoisotopic mass of neutral peptide Mr(calc):** 1166.5620**Fixed modifications:** Carbamidomethyl (C) (apply to specified residues or termini only)**Ions Score:** 76 **Expect:** 1.8e-007**Matches:** 20/90 fragment ions using 24 most intense peaks ([help](#))

| #  | b                | b <sup>++</sup> | b <sup>*</sup> | b <sup>*++</sup> | b <sup>0</sup> | b <sup>0++</sup> | Seq. | y               | y <sup>++</sup> | y <sup>*</sup>  | y <sup>*++</sup> | y <sup>0</sup> | y <sup>0++</sup> | #  |
|----|------------------|-----------------|----------------|------------------|----------------|------------------|------|-----------------|-----------------|-----------------|------------------|----------------|------------------|----|
| 1  | 115.0884         | 58.0478         |                |                  |                |                  | I    |                 |                 |                 |                  |                |                  | 12 |
| 2  | 173.1069         | 87.0571         |                |                  |                |                  | G    | 1053.4882       | 527.2477        | 1035.4646       | 518.2360         | 1035.4776      | 518.2425         | 11 |
| 3  | <b>289.1309</b>  | 145.0691        |                |                  | 271.1203       | 136.0638         | D    | 995.4697        | <b>498.2385</b> | 977.4461        | 489.2267         | 977.4591       | 489.2332         | 10 |
| 4  | <b>361.1650</b>  | 181.0861        |                |                  | 343.1544       | 172.0809         | A    | <b>879.4457</b> | <b>440.2265</b> | 861.4221        | 431.2147         |                |                  | 9  |
| 5  | <b>475.2461</b>  | 238.1267        |                |                  | 457.2355       | 229.1214         | L    | <b>807.4116</b> | 404.2094        | 789.3880        | 395.1976         |                |                  | 8  |
| 6  | <b>615.2961</b>  | 308.1517        |                |                  | 597.2856       | 299.1464         | H    | <b>693.3305</b> | <b>347.1689</b> | <b>675.3069</b> | 338.1571         |                |                  | 7  |
| 7  | <b>729.3772</b>  | 365.1922        |                |                  | 711.3667       | 356.1870         | I    | <b>553.2805</b> | 277.1439        | 535.2569        | 268.1321         |                |                  | 6  |
| 8  | <b>787.3957</b>  | 394.2015        |                |                  | 769.3851       | 385.1962         | G    | <b>439.1994</b> | 220.1033        | 421.1758        | 211.0915         |                |                  | 5  |
| 9  | 845.4142         | 423.2107        |                |                  | 827.4036       | 414.2055         | G    | 381.1809        | 191.0941        | 363.1573        | 182.0823         |                |                  | 4  |
| 10 | <b>903.4327</b>  | 452.2200        |                |                  | 885.4221       | 443.2147         | G    | 323.1624        | 162.0848        | 305.1388        | 153.0730         |                |                  | 3  |
| 11 | <b>1019.4697</b> | 510.2385        | 1001.4461      | 501.2267         | 1001.4591      | 501.2332         | N    | 265.1439        | 133.0756        | 247.1203        | 124.0638         |                |                  | 2  |
| 12 |                  |                 |                |                  |                |                  | K    | 149.1069        | 75.0571         | 131.0833        | 66.0453          |                |                  | 1  |

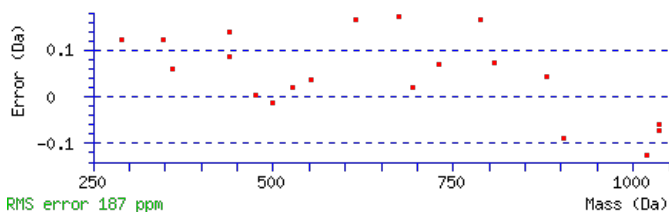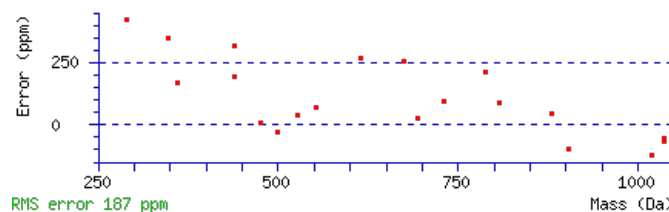NCBI **BLAST** search of **IGDALHIGGGNK**

(Parameters: blastp, nr protein database, expect=20000, no filter, PAM30)

Other BLAST [web gateways](#)**All matches to this query**

## AT1G54410.1

| Score | Mr(calc)  | Delta   | Sequence                     |
|-------|-----------|---------|------------------------------|
| 75.8  | 1166.5620 | -0.0007 | <a href="#">IGDALHIGGGNK</a> |
| 19.0  | 1166.5595 | 0.0017  | <a href="#">FKRLHCYK</a>     |
| 8.9   | 1166.5616 | -0.0003 | <a href="#">YAEAIEKGFK</a>   |
| 3.3   | 1166.5580 | 0.0033  | <a href="#">MSQSKVAMKK</a>   |
| 2.9   | 1166.5620 | -0.0008 | <a href="#">RLYREAESK</a>    |
| 2.5   | 1166.5595 | 0.0017  | <a href="#">FAHRKYMAK</a>    |
| 0.1   | 1166.5593 | 0.0019  | <a href="#">IETEIGDLHK</a>   |

Mascot: <http://www.matrixscience.com/>

**Peptide View**MS/MS Fragmentation of **EADEITAATK**Found in **AT1G54580.1** in **TAIR\_Arabidopsis**, Symbols: ACP2 | ACP2 (ACYL CARRIER PROTEIN 2) | chr1:20393239-20394437 FORWARD

Match to Query 2934: 1058.474488 from(530.244520,2+) index(723)

Title: Elution from: 13.255 to 13.255 scan no 1078 cid35.00 polarity:+

Data file C7-1\_2.mgf

Click mouse within plot area to zoom in by factor of two about that point

Or,   to  Da Label all possible matches  Label matches used for scoring Show Y-axis 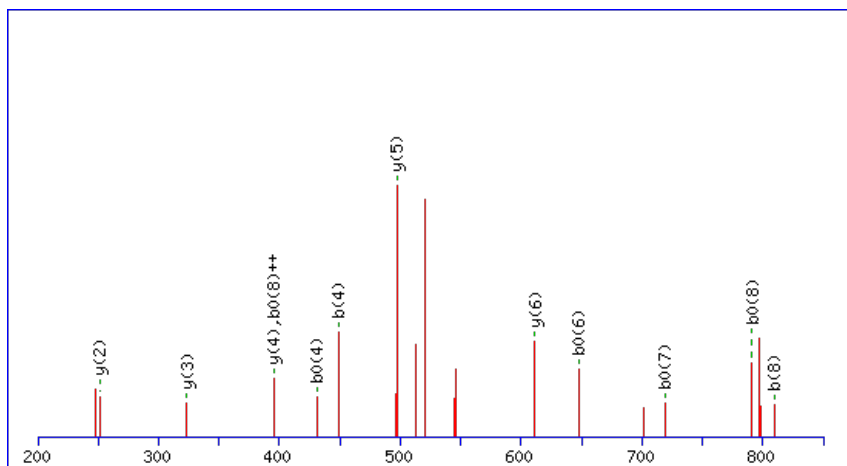Monoisotopic mass of neutral peptide **Mr(calc)**: 1058.4758**Fixed modifications**: Carbamidomethyl (C) (apply to specified residues or termini only)**Ions Score**: 41 **Expect**: 0.00034**Matches**: 12/88 fragment ions using 15 most intense peaks ([help](#))

| #  | b               | b <sup>++</sup> | b <sup>0</sup>  | b <sup>0++</sup> | Seq. | y               | y <sup>++</sup> | y*       | y <sup>*++</sup> | y <sup>0</sup> | y <sup>0++</sup> | #  |
|----|-----------------|-----------------|-----------------|------------------|------|-----------------|-----------------|----------|------------------|----------------|------------------|----|
| 1  | 131.0469        | 66.0271         | 113.0363        | 57.0218          | E    |                 |                 |          |                  |                |                  | 10 |
| 2  | 203.0811        | 102.0442        | 185.0705        | 93.0389          | A    | 929.4435        | 465.2254        | 911.4199 | 456.2136         | 911.4329       | 456.2201         | 9  |
| 3  | 319.1050        | 160.0562        | 301.0945        | 151.0509         | D    | 857.4093        | 429.2083        | 839.3857 | 420.1965         | 839.3987       | 420.2030         | 8  |
| 4  | <b>449.1447</b> | 225.0760        | <b>431.1341</b> | 216.0707         | E    | 741.3853        | 371.1963        | 723.3617 | 362.1845         | 723.3748       | 362.1910         | 7  |
| 5  | 563.2258        | 282.1165        | 545.2152        | 273.1112         | I    | <b>611.3457</b> | 306.1765        | 593.3221 | 297.1647         | 593.3351       | 297.1712         | 6  |
| 6  | 665.2705        | 333.1389        | <b>647.2599</b> | 324.1336         | T    | <b>497.2646</b> | 249.1359        | 479.2410 | 240.1241         | 479.2540       | 240.1307         | 5  |
| 7  | 737.3046        | 369.1559        | <b>719.2941</b> | 360.1507         | A    | <b>395.2199</b> | 198.1136        | 377.1963 | 189.1018         | 377.2093       | 189.1083         | 4  |
| 8  | <b>809.3388</b> | 405.1730        | <b>791.3282</b> | <b>396.1677</b>  | A    | <b>323.1857</b> | 162.0965        | 305.1622 | 153.0847         | 305.1752       | 153.0912         | 3  |
| 9  | 911.3835        | 456.1954        | 893.3729        | 447.1901         | T    | <b>251.1516</b> | 126.0794        | 233.1280 | 117.0676         | 233.1410       | 117.0741         | 2  |
| 10 |                 |                 |                 |                  | K    | 149.1069        | 75.0571         | 131.0833 | 66.0453          |                |                  | 1  |

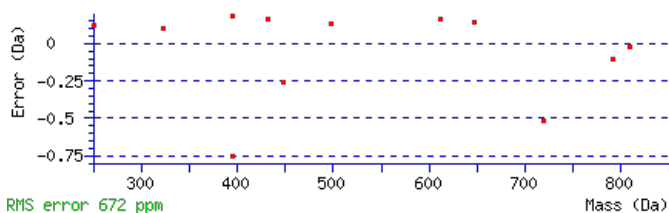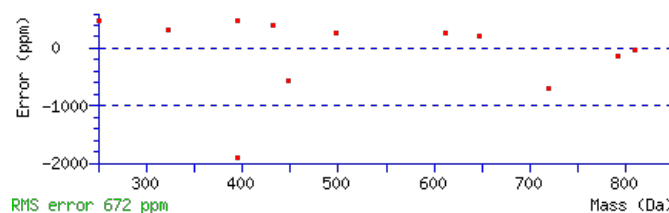NCBI **BLAST** search of **EADEITAATK**

(Parameters: blastp, nr protein database, expect=20000, no filter, PAM30)

Other BLAST [web gateways](#)**All matches to this query**

| Score | Mr(calc) | Delta | Sequence |
|-------|----------|-------|----------|
|       |          |       |          |

## AT1G54580.1

|      |           |         |                            |
|------|-----------|---------|----------------------------|
| 40.6 | 1058.4758 | -0.0013 | <a href="#">EADEITAATK</a> |
| 2.9  | 1058.4758 | -0.0013 | <a href="#">QLDSIEESK</a>  |
| 1.4  | 1058.4758 | -0.0013 | <a href="#">VEESLOSEK</a>  |

**Mascot:** <http://www.matrixscience.com/>

**Peptide View**MS/MS Fragmentation of **KVRFDNLEPESVK**Found in **AT1G54610.1** in **TAIR\_Arabidopsis**, Symbols: | protein kinase family protein | chr1:20397629-20400569 REVERSE

Match to Query 6701: 1578.778024 from(790.396288,2+) index(9886)

Title: Elution from: 93.648 to 93.648 scan no 14219 cid35.00 polarity:+

Data file D12h-3\_3.mgf

Click mouse within plot area to zoom in by factor of two about that point

Or,   to  Da Label all possible matches  Label matches used for scoring Show Y-axis 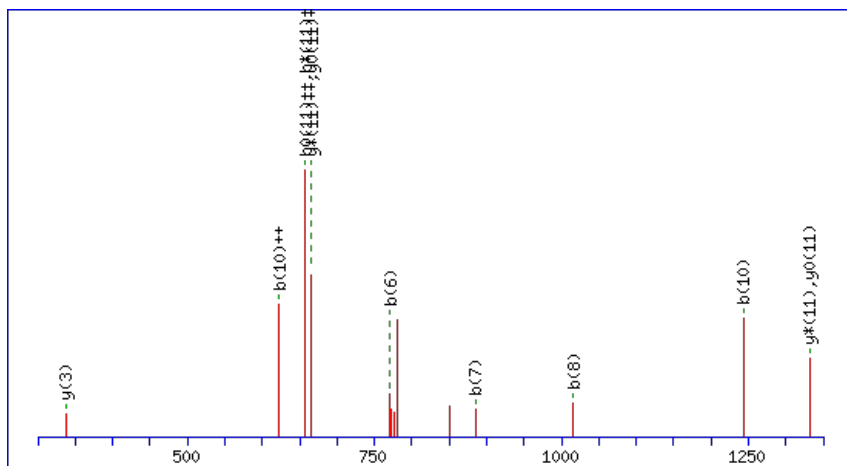**Monoisotopic mass of neutral peptide Mr(calc):** 1578.7744**Fixed modifications:** Carbamidomethyl (C) (apply to specified residues or termini only)**Ions Score:** 40 **Expect:** 0.0011**Matches:** 14/132 fragment ions using 14 most intense peaks ([help](#))

| #  | b                | b <sup>++</sup> | b <sup>*</sup> | b <sup>*++</sup> | b <sup>0</sup> | b <sup>0++</sup> | Seq.     | y               | y <sup>++</sup> | y <sup>*</sup>   | y <sup>*++</sup> | y <sup>0</sup>   | y <sup>0++</sup> | #         |
|----|------------------|-----------------|----------------|------------------|----------------|------------------|----------|-----------------|-----------------|------------------|------------------|------------------|------------------|-----------|
| 1  | 131.0963         | 66.0518         | 113.0727       | 57.0400          |                |                  | <b>K</b> |                 |                 |                  |                  |                  |                  | <b>13</b> |
| 2  | 231.1618         | 116.0845        | 213.1382       | 107.0727         |                |                  | <b>V</b> | 1449.6927       | 725.3500        | 1431.6691        | 716.3382         | 1431.6821        | 716.3447         | <b>12</b> |
| 3  | 391.2510         | 196.1291        | 373.2274       | 187.1174         |                |                  | <b>R</b> | 1349.6272       | 675.3172        | <b>1331.6036</b> | <b>666.3055</b>  | <b>1331.6166</b> | <b>666.3120</b>  | <b>11</b> |
| 4  | 539.3165         | 270.1619        | 521.2929       | 261.1501         |                |                  | <b>F</b> | 1189.5380       | 595.2726        | 1171.5144        | 586.2608         | 1171.5274        | 586.2673         | <b>10</b> |
| 5  | 655.3404         | 328.1739        | 637.3169       | 319.1621         | 637.3299       | 319.1686         | <b>D</b> | 1041.4725       | 521.2399        | 1023.4489        | 512.2281         | 1023.4619        | 512.2346         | <b>9</b>  |
| 6  | <b>771.3774</b>  | 386.1924        | 753.3538       | 377.1806         | 753.3669       | 377.1871         | <b>N</b> | 925.4485        | 463.2279        | 907.4250         | 454.2161         | 907.4380         | 454.2226         | <b>8</b>  |
| 7  | <b>885.4585</b>  | 443.2329        | 867.4349       | 434.2211         | 867.4480       | 434.2276         | <b>L</b> | 809.4115        | 405.2094        | 791.3880         | 396.1976         | 791.4010         | 396.2041         | <b>7</b>  |
| 8  | <b>1015.4982</b> | 508.2527        | 997.4746       | 499.2409         | 997.4876       | 499.2474         | <b>E</b> | 695.3304        | 348.1689        | 677.3069         | 339.1571         | 677.3199         | 339.1636         | <b>6</b>  |
| 9  | 1113.5480        | 557.2776        | 1095.5244      | 548.2658         | 1095.5374      | 548.2723         | <b>P</b> | 565.2908        | 283.1490        | 547.2672         | 274.1373         | 547.2802         | 274.1438         | <b>5</b>  |
| 10 | <b>1243.5876</b> | <b>622.2974</b> | 1225.5640      | 613.2856         | 1225.5770      | 613.2921         | <b>E</b> | 467.2410        | 234.1241        | 449.2174         | 225.1124         | 449.2304         | 225.1189         | <b>4</b>  |
| 11 | <b>1331.6166</b> | <b>666.3120</b> | 1313.5931      | <b>657.3002</b>  | 1313.6061      | <b>657.3067</b>  | <b>S</b> | <b>337.2014</b> | 169.1043        | 319.1778         | 160.0925         | 319.1908         | 160.0990         | <b>3</b>  |
| 12 | 1431.6821        | 716.3447        | 1413.6585      | 707.3329         | 1413.6715      | 707.3394         | <b>V</b> | 249.1723        | 125.0898        | 231.1487         | 116.0780         |                  |                  | <b>2</b>  |
| 13 |                  |                 |                |                  |                |                  | <b>K</b> | 149.1069        | 75.0571         | 131.0833         | 66.0453          |                  |                  | <b>1</b>  |

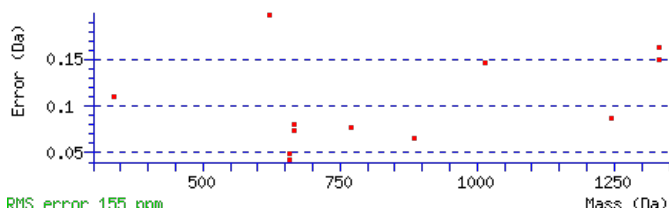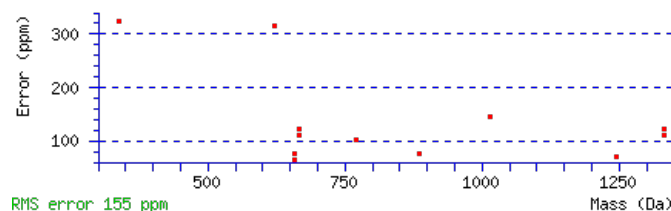NCBI **BLAST** search of **KVRFDNLEPESVK**

(Parameters: blastp, nr protein database, expect=20000, no filter, PAM30)

Other BLAST [web gateways](#)

AT1G54610.1

All matches to this query

| Score | Mr(calc)  | Delta   | Sequence                         |
|-------|-----------|---------|----------------------------------|
| 39.9  | 1578.7744 | 0.0036  | <a href="#">KVRFDNLEPESVK</a>    |
| 39.4  | 1578.7774 | 0.0007  | <a href="#">VFSPEEISAMILTK</a>   |
| 19.7  | 1578.7778 | 0.0002  | <a href="#">AQAMVDAAIKAASSVK</a> |
| 8.4   | 1578.7827 | -0.0047 | <a href="#">ARQKCVPAAPFSVK</a>   |
| 3.8   | 1578.7825 | -0.0045 | <a href="#">DLTKTVESIKDANK</a>   |

Mascot: <http://www.matrixscience.com/>

**Peptide View**MS/MS Fragmentation of **ETYVDDAGVLSR**Found in **AT1G54780.1** in **TAIR\_Arabidopsis**, Symbols: | thylakoid lumen 18.3 kDa protein | chr1:20443200-20444620 FORWARD

Match to Query 5950: 1438.650488 from(720.332520,2+) index(5294)

Title: Elution from: 47.273 to 47.273 scan no 6606 cid35.00 polarity:+

Data file C7-3\_1.mgf

Click mouse within plot area to zoom in by factor of two about that point

Or,   to  Da Label all possible matches  Label matches used for scoring Show Y-axis 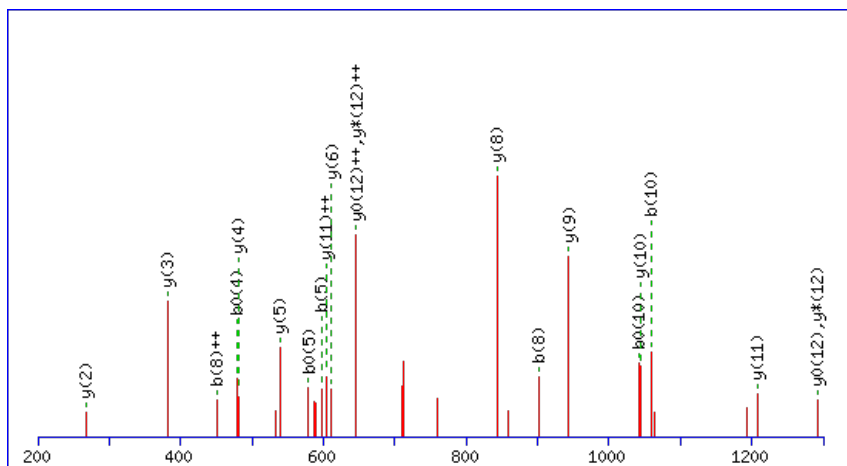Monoisotopic mass of neutral peptide  $M_r(\text{calc})$ : 1438.6516

Fixed modifications: Carbamidomethyl (C) (apply to specified residues or termini only)

Ions Score: 71 Expect: 8.8e-007

Matches : 21/118 fragment ions using 27 most intense peaks ([help](#))

| #  | b         | b <sup>++</sup> | b <sup>0</sup> | b <sup>0++</sup> | Seq. | y         | y <sup>++</sup> | y*        | y <sup>*++</sup> | y <sup>0</sup> | y <sup>0++</sup> | #  |
|----|-----------|-----------------|----------------|------------------|------|-----------|-----------------|-----------|------------------|----------------|------------------|----|
| 1  | 131.0469  | 66.0271         | 113.0363       | 57.0218          | E    |           |                 |           |                  |                |                  | 13 |
| 2  | 233.0916  | 117.0494        | 215.0811       | 108.0442         | T    | 1309.6193 | 655.3133        | 1291.5957 | 646.3015         | 1291.6087      | 646.3080         | 12 |
| 3  | 397.1520  | 199.0796        | 379.1414       | 190.0743         | Y    | 1207.5746 | 604.2909        | 1189.5510 | 595.2791         | 1189.5640      | 595.2856         | 11 |
| 4  | 497.2174  | 249.1124        | 479.2069       | 240.1071         | V    | 1043.5142 | 522.2607        | 1025.4906 | 513.2489         | 1025.5036      | 513.2555         | 10 |
| 5  | 597.2829  | 299.1451        | 579.2723       | 290.1398         | V    | 943.4488  | 472.2280        | 925.4252  | 463.2162         | 925.4382       | 463.2227         | 9  |
| 6  | 713.3069  | 357.1571        | 695.2963       | 348.1518         | D    | 843.3833  | 422.1953        | 825.3597  | 413.1835         | 825.3727       | 413.1900         | 8  |
| 7  | 829.3308  | 415.1691        | 811.3203       | 406.1638         | D    | 727.3593  | 364.1833        | 709.3357  | 355.1715         | 709.3488       | 355.1780         | 7  |
| 8  | 901.3650  | 451.1861        | 883.3544       | 442.1808         | A    | 611.3354  | 306.1713        | 593.3118  | 297.1595         | 593.3248       | 297.1660         | 6  |
| 9  | 959.3835  | 480.1954        | 941.3729       | 471.1901         | G    | 539.3012  | 270.1542        | 521.2776  | 261.1424         | 521.2906       | 261.1490         | 5  |
| 10 | 1059.4489 | 530.2281        | 1041.4384      | 521.2228         | V    | 481.2827  | 241.1450        | 463.2591  | 232.1332         | 463.2721       | 232.1397         | 4  |
| 11 | 1173.5300 | 587.2687        | 1155.5195      | 578.2634         | L    | 381.2173  | 191.1123        | 363.1937  | 182.1005         | 363.2067       | 182.1070         | 3  |
| 12 | 1261.5591 | 631.2832        | 1243.5485      | 622.2779         | S    | 267.1362  | 134.0717        | 249.1126  | 125.0599         | 249.1256       | 125.0664         | 2  |
| 13 |           |                 |                |                  | R    | 179.1071  | 90.0572         | 161.0835  | 81.0454          |                |                  | 1  |

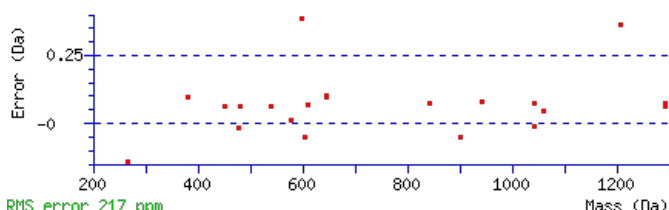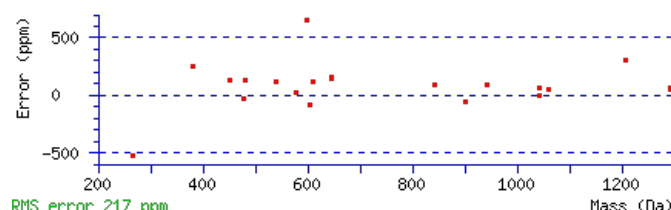NCBI BLAST search of [ETYVDDAGVLSR](#)

(Parameters: blastp, nr protein database, expect=20000, no filter, PAM30)

Other BLAST [web gateways](#)



# AT1G54780.1

All matches to this query

| Score | Mr(calc)  | Delta   | Sequence                       |
|-------|-----------|---------|--------------------------------|
| 70.9  | 1438.6516 | -0.0011 | <a href="#">ETYVDDAGVLSR</a>   |
| 12.9  | 1438.6469 | 0.0036  | <a href="#">MLPGSSYPVAQR</a>   |
| 11.4  | 1438.6494 | 0.0011  | <a href="#">TTSSASSQTPAQQ</a>  |
| 8.4   | 1438.6529 | -0.0024 | <a href="#">RGCMLNAAVAGATK</a> |
| 3.6   | 1438.6516 | -0.0011 | <a href="#">VEKSSGNDDFVVK</a>  |
| 2.2   | 1438.6494 | 0.0011  | <a href="#">GSVETASSTLSDR</a>  |
| 1.8   | 1438.6538 | -0.0033 | <a href="#">LADFLAVDFGGDK</a>  |
| 1.6   | 1438.6521 | -0.0016 | <a href="#">KSRESSPSTPSR</a>   |
| 1.5   | 1438.6473 | 0.0032  | <a href="#">RGLDMAREAVR</a>    |
| 1.3   | 1438.6543 | -0.0038 | <a href="#">TSWNTRSPSEKK</a>   |

Mascot: <http://www.matrixscience.com/>

**Peptide View**MS/MS Fragmentation of **LEV DLLSR**Found in **AT1G54820.1** in **TAIR\_Arabidopsis**, Symbols: | protein kinase family protein | chr1:20451037-20454428 FORWARD

Match to Query 2000: 954.499008 from(478.256780,2+) index(5025)

Title: Elution from: 45.149 to 45.149 scan no 6338 cid35.00 polarity:+

Data file D6h-2\_3.mgf

Click mouse within plot area to zoom in by factor of two about that point

Or,  to  Da Label all possible matches  Label matches used for scoring Show Y-axis 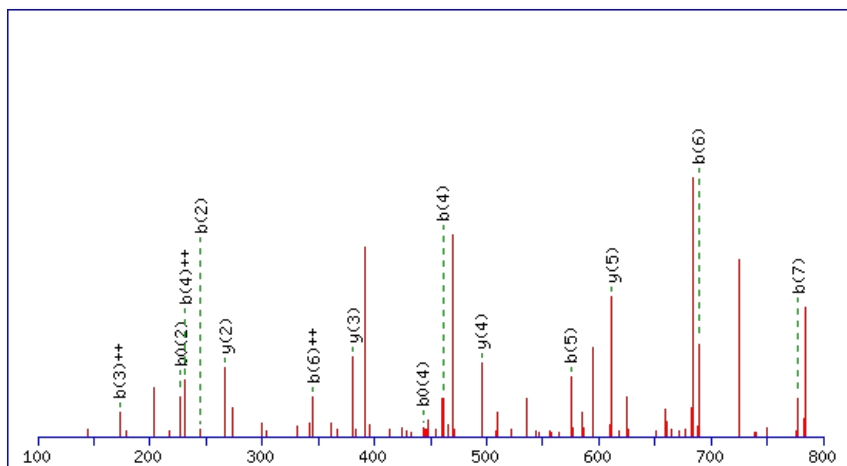Monoisotopic mass of neutral peptide **Mr(calc)**: 954.5012

Fixed modifications: Carbamidomethyl (C) (apply to specified residues or termini only)

Ions Score: 30 Expect: 0.0067

Matches : 15/66 fragment ions using 35 most intense peaks ([help](#))

| # | b               | b <sup>++</sup> | b <sup>0</sup>  | b <sup>0++</sup> | Seq. | y               | y <sup>++</sup> | y*       | y <sup>*++</sup> | y <sup>0</sup> | y <sup>0++</sup> | # |
|---|-----------------|-----------------|-----------------|------------------|------|-----------------|-----------------|----------|------------------|----------------|------------------|---|
| 1 | 115.0884        | 58.0478         |                 |                  | L    |                 |                 |          |                  |                |                  | 8 |
| 2 | <b>245.1280</b> | 123.0676        | <b>227.1174</b> | 114.0624         | E    | 841.4274        | 421.2173        | 823.4038 | 412.2056         | 823.4168       | 412.2121         | 7 |
| 3 | <b>345.1935</b> | <b>173.1004</b> | 327.1829        | 164.0951         | V    | 711.3878        | 356.1975        | 693.3642 | 347.1857         | 693.3772       | 347.1922         | 6 |
| 4 | <b>461.2174</b> | <b>231.1124</b> | <b>443.2069</b> | 222.1071         | D    | <b>611.3223</b> | 306.1648        | 593.2987 | 297.1530         | 593.3118       | 297.1595         | 5 |
| 5 | <b>575.2985</b> | 288.1529        | 557.2880        | 279.1476         | L    | <b>495.2984</b> | 248.1528        | 477.2748 | 239.1410         | 477.2878       | 239.1475         | 4 |
| 6 | <b>689.3796</b> | <b>345.1935</b> | 671.3691        | 336.1882         | L    | <b>381.2173</b> | 191.1123        | 363.1937 | 182.1005         | 363.2067       | 182.1070         | 3 |
| 7 | <b>777.4087</b> | 389.2080        | 759.3981        | 380.2027         | S    | <b>267.1362</b> | 134.0717        | 249.1126 | 125.0599         | 249.1256       | 125.0664         | 2 |
| 8 |                 |                 |                 |                  | R    | 179.1071        | 90.0572         | 161.0835 | 81.0454          |                |                  | 1 |

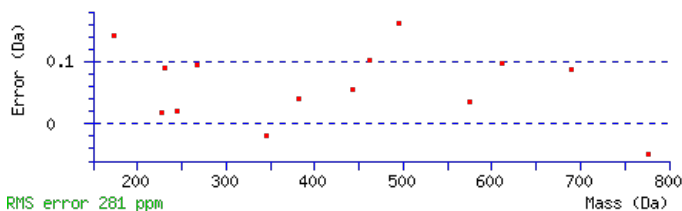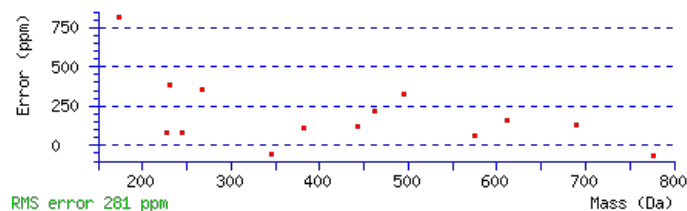NCBI **BLAST** search of [LEV DLLSR](#)

(Parameters: blastp, nr protein database, expect=20000, no filter, PAM30)

Other BLAST [web gateways](#)**All matches to this query**

| Score | Mr(calc) | Delta   | Sequence                  |
|-------|----------|---------|---------------------------|
| 30.1  | 954.5012 | -0.0022 | <a href="#">LEV DLLSR</a> |
| 25.6  | 954.5012 | -0.0022 | <a href="#">LDILDISR</a>  |

# AT1G54820.1

|      |          |         |                           |
|------|----------|---------|---------------------------|
| 16.6 | 954.5012 | -0.0022 | <a href="#">ELVDLSLR</a>  |
| 13.4 | 954.5012 | -0.0022 | <a href="#">VLELDLSR</a>  |
| 9.3  | 954.5012 | -0.0022 | <a href="#">DIVENVKK</a>  |
| 9.2  | 954.4965 | 0.0025  | <a href="#">MPLLSNR</a>   |
| 6.2  | 954.5012 | -0.0022 | <a href="#">LTIIEEAR</a>  |
| 5.5  | 954.5012 | -0.0022 | <a href="#">IEIVDSLR</a>  |
| 5.3  | 954.5012 | -0.0022 | <a href="#">LGLGTDLQK</a> |
| 1.7  | 954.5012 | -0.0022 | <a href="#">INLEKEAK</a>  |

Mascot: <http://www.matrixscience.com/>

**Peptide View**MS/MS Fragmentation of **VSSVAVPCR**Found in **AT1G55090.1** in **TAIR\_Arabidopsis**, Symbols: | carbon-nitrogen hydrolase family protein | chr1:20558524-20561855 FORWARD

Match to Query 2533: 986.463584 from(494.239068,2+) index(665)

Title: Elution from: 11.519 to 11.519 scan no 950 cid35.00 polarity:+

Data file D1d-3\_2.mgf

Click mouse within plot area to zoom in by factor of two about that point

Or,   to  Da Label all possible matches  Label matches used for scoring Show Y-axis 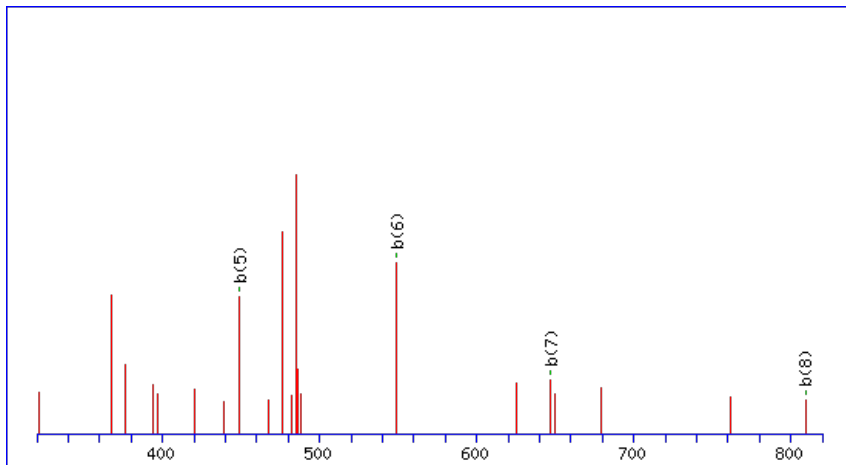Monoisotopic mass of neutral peptide **Mr(calc)**: 986.4630**Fixed modifications**: Carbamidomethyl (C) (apply to specified residues or termini only)**Ions Score**: 20 **Expect**: 0.047**Matches**: 4/66 fragment ions using 12 most intense peaks ([help](#))

| # | b               | b <sup>++</sup> | b <sup>0</sup> | b <sup>0++</sup> | Seq. | y        | y <sup>++</sup> | y*       | y <sup>*++</sup> | y <sup>0</sup> | y <sup>0++</sup> | # |
|---|-----------------|-----------------|----------------|------------------|------|----------|-----------------|----------|------------------|----------------|------------------|---|
| 1 | 101.0727        | 51.0400         |                |                  | V    |          |                 |          |                  |                |                  | 9 |
| 2 | 189.1018        | 95.0545         | 171.0912       | 86.0492          | S    | 887.4048 | 444.2060        | 869.3812 | 435.1942         | 869.3942       | 435.2007         | 8 |
| 3 | 277.1309        | 139.0691        | 259.1203       | 130.0638         | S    | 799.3757 | 400.1915        | 781.3521 | 391.1797         | 781.3652       | 391.1862         | 7 |
| 4 | 377.1963        | 189.1018        | 359.1857       | 180.0965         | V    | 711.3467 | 356.1770        | 693.3231 | 347.1652         |                |                  | 6 |
| 5 | <b>449.2304</b> | 225.1189        | 431.2199       | 216.1136         | A    | 611.2812 | 306.1442        | 593.2576 | 297.1324         |                |                  | 5 |
| 6 | <b>549.2959</b> | 275.1516        | 531.2853       | 266.1463         | V    | 539.2471 | 270.1272        | 521.2235 | 261.1154         |                |                  | 4 |
| 7 | <b>647.3457</b> | 324.1765        | 629.3351       | 315.1712         | P    | 439.1816 | 220.0944        | 421.1580 | 211.0827         |                |                  | 3 |
| 8 | <b>809.3704</b> | 405.1888        | 791.3599       | 396.1836         | C    | 341.1318 | 171.0695        | 323.1082 | 162.0578         |                |                  | 2 |
| 9 |                 |                 |                |                  | R    | 179.1071 | 90.0572         | 161.0835 | 81.0454          |                |                  | 1 |

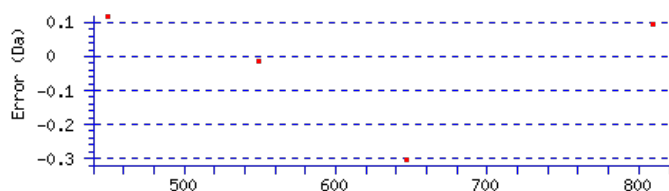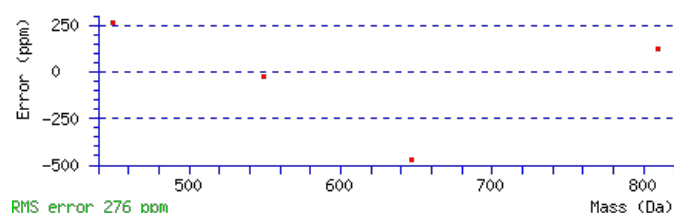NCBI **BLAST** search of [VSSVAVPCR](#)

(Parameters: blastp, nr protein database, expect=20000, no filter, PAM30)

Other BLAST [web gateways](#)**All matches to this query**

| Score | Mr(calc) | Delta  | Sequence                  |
|-------|----------|--------|---------------------------|
| 20.1  | 986.4630 | 0.0006 | <a href="#">VSSVAVPCR</a> |

## AT1G55090.1

|      |          |         |                           |
|------|----------|---------|---------------------------|
| 15.1 | 986.4622 | 0.0014  | <a href="#">GRTYYRR</a>   |
| 9.4  | 986.4629 | 0.0006  | <a href="#">MQELGLQR</a>  |
| 8.5  | 986.4630 | 0.0006  | <a href="#">MSQPNLLR</a>  |
| 1.8  | 986.4652 | -0.0016 | <a href="#">LMPWERK</a>   |
| 1.6  | 986.4623 | 0.0013  | <a href="#">GFNPPARGR</a> |
| 1.6  | 986.4656 | -0.0020 | <a href="#">AARLPGACR</a> |
| 1.4  | 986.4623 | 0.0013  | <a href="#">NRLFHER</a>   |
| 1.2  | 986.4622 | 0.0014  | <a href="#">LHEFGGRR</a>  |
| 1.1  | 986.4630 | 0.0006  | <a href="#">LQSNMPLR</a>  |

Mascot: <http://www.matrixscience.com/>

**Peptide View**MS/MS Fragmentation of **LNQVQAGLSALEEALK**Found in **AT1G55480.1** in **TAIR\_Arabidopsis**, Symbols: | binding / protein binding | chr1:20717488-20719017 FORWARD

Match to Query 7614: 1702.859596 from(852.437074,2+) index(10118)

Title: Elution from: 101.475 to 101.475 scan no 14783 cid35.00 polarity:+

Data file D1d-1-2.mgf

Click mouse within plot area to zoom in by factor of two about that point

Or,   to  Da Label all possible matches  Label matches used for scoring Show Y-axis 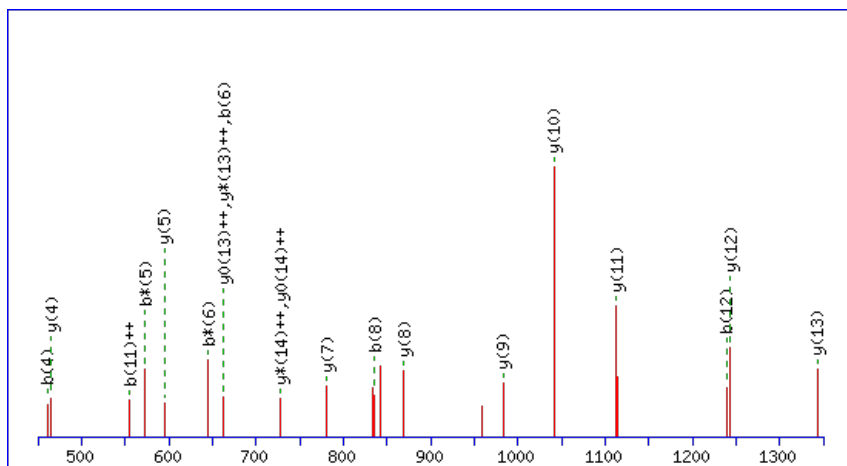**Monoisotopic mass of neutral peptide Mr(calc):** 1702.8610**Fixed modifications:** Carbamidomethyl (C) (apply to specified residues or termini only)**Ions Score:** 86 **Expect:** 1.4e-008**Matches:** 20/156 fragment ions using 21 most intense peaks ([help](#))

| #  | b                | b <sup>++</sup> | b <sup>*</sup>  | b <sup>*++</sup> | b <sup>0</sup> | b <sup>0++</sup> | Seq. | y                | y <sup>++</sup> | y <sup>*</sup> | y <sup>*++</sup> | y <sup>0</sup> | y <sup>0++</sup> | #  |
|----|------------------|-----------------|-----------------|------------------|----------------|------------------|------|------------------|-----------------|----------------|------------------|----------------|------------------|----|
| 1  | 115.0884         | 58.0478         |                 |                  |                |                  | L    |                  |                 |                |                  |                |                  | 16 |
| 2  | 231.1254         | 116.0663        | 213.1018        | 107.0545         |                |                  | N    | 1589.7872        | 795.3972        | 1571.7636      | 786.3854         | 1571.7766      | 786.3919         | 15 |
| 3  | 361.1780         | 181.0926        | 343.1544        | 172.0809         |                |                  | Q    | 1473.7502        | 737.3787        | 1455.7266      | 728.3669         | 1455.7396      | 728.3734         | 14 |
| 4  | <b>461.2435</b>  | 231.1254        | 443.2199        | 222.1136         |                |                  | V    | <b>1343.6975</b> | 672.3524        | 1325.6739      | <b>663.3406</b>  | 1325.6870      | <b>663.3471</b>  | 13 |
| 5  | 591.2961         | 296.1517        | <b>573.2725</b> | 287.1399         |                |                  | Q    | <b>1243.6321</b> | 622.3197        | 1225.6085      | 613.3079         | 1225.6215      | 613.3144         | 12 |
| 6  | <b>663.3303</b>  | 332.1688        | <b>645.3067</b> | 323.1570         |                |                  | A    | <b>1113.5794</b> | 557.2934        | 1095.5559      | 548.2816         | 1095.5689      | 548.2881         | 11 |
| 7  | 721.3488         | 361.1780        | 703.3252        | 352.1662         |                |                  | G    | <b>1041.5453</b> | 521.2763        | 1023.5217      | 512.2645         | 1023.5347      | 512.2710         | 10 |
| 8  | <b>835.4299</b>  | 418.2186        | 817.4063        | 409.2068         |                |                  | L    | <b>983.5268</b>  | 492.2670        | 965.5032       | 483.2552         | 965.5162       | 483.2617         | 9  |
| 9  | 923.4589         | 462.2331        | 905.4353        | 453.2213         | 905.4484       | 453.2278         | S    | <b>869.4457</b>  | 435.2265        | 851.4221       | 426.2147         | 851.4351       | 426.2212         | 8  |
| 10 | 995.4931         | 498.2502        | 977.4695        | 489.2384         | 977.4825       | 489.2449         | A    | <b>781.4166</b>  | 391.2120        | 763.3930       | 382.2002         | 763.4061       | 382.2067         | 7  |
| 11 | 1109.5742        | <b>555.2907</b> | 1091.5506       | 546.2789         | 1091.5636      | 546.2854         | L    | 709.3825         | 355.1949        | 691.3589       | 346.1831         | 691.3719       | 346.1896         | 6  |
| 12 | <b>1239.6138</b> | 620.3105        | 1221.5902       | 611.2987         | 1221.6032      | 611.3053         | E    | <b>595.3014</b>  | 298.1543        | 577.2778       | 289.1425         | 577.2908       | 289.1490         | 5  |
| 13 | 1369.6534        | 685.3304        | 1351.6298       | 676.3186         | 1351.6429      | 676.3251         | E    | <b>465.2618</b>  | 233.1345        | 447.2382       | 224.1227         | 447.2512       | 224.1292         | 4  |
| 14 | 1441.6876        | 721.3474        | 1423.6640       | 712.3356         | 1423.6770      | 712.3421         | A    | 335.2221         | 168.1147        | 317.1985       | 159.1029         |                |                  | 3  |
| 15 | 1555.7687        | 778.3880        | 1537.7451       | 769.3762         | 1537.7581      | 769.3827         | L    | 263.1880         | 132.0976        | 245.1644       | 123.0858         |                |                  | 2  |
| 16 |                  |                 |                 |                  |                |                  | K    | 149.1069         | 75.0571         | 131.0833       | 66.0453          |                |                  | 1  |

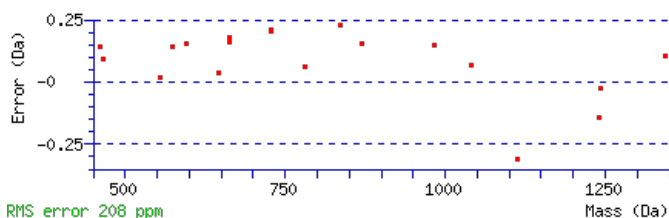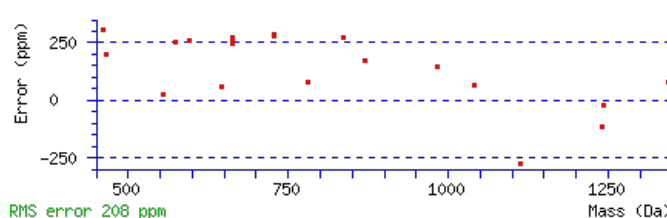

## AT1G55480.1

NCBI **BLAST** search of [LNQVQAGLSALEEALK](#)

(Parameters: blastp, nr protein database, expect=20000, no filter, PAM30)

Other BLAST [web gateways](#)

### All matches to this query

| Score | Mr(calc)  | Delta   | Sequence                         |
|-------|-----------|---------|----------------------------------|
| 85.6  | 1702.8610 | -0.0014 | <a href="#">LNQVQAGLSALEEALK</a> |
| 10.1  | 1702.8551 | 0.0045  | <a href="#">SLPYELRLHWEK</a>     |
| 5.2   | 1702.8563 | 0.0033  | <a href="#">MTKLRYLAVLSER</a>    |
| 2.7   | 1702.8610 | -0.0014 | <a href="#">NLVELSQPLLSESR</a>   |

**Mascot:** <http://www.matrixscience.com/>

**Peptide View**MS/MS Fragmentation of **VEDALNATK**

Found in **AT1G55490.1** in **TAIR\_Arabidopsis**, Symbols: LEN1, CPN60B | CPN60B (CHAPERONIN 60 BETA); ATP binding / protein binding / unfolded protein binding | chr1:20719383-20722339 REVERSE

Match to Query 2265: 970.459096 from(486.236824,2+) index(676)

Title: Elution from: 11.218 to 11.218 scan no 932 cid35.00 polarity:+

Data file D1d-3\_3.mgf

Click mouse within plot area to zoom in by factor of two about that point

Or,   to  Da

Label all possible matches  Label matches used for scoring

Show Y-axis

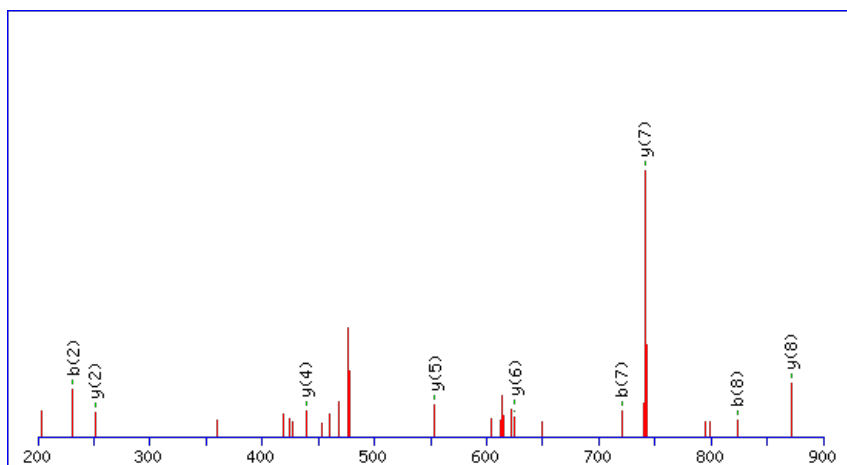

Monoisotopic mass of neutral peptide  $M_r(\text{calc})$ : 970.4597

Fixed modifications: Carbamidomethyl (C) (apply to specified residues or termini only)

Ions Score: 45 Expect: 0.00031

Matches : 9/82 fragment ions using 19 most intense peaks ([help](#))

| # | b               | b <sup>++</sup> | b*       | b <sup>*++</sup> | b <sup>0</sup> | b <sup>0++</sup> | Seq. | y               | y <sup>++</sup> | y*       | y <sup>*++</sup> | y <sup>0</sup> | y <sup>0++</sup> | # |
|---|-----------------|-----------------|----------|------------------|----------------|------------------|------|-----------------|-----------------|----------|------------------|----------------|------------------|---|
| 1 | 101.0727        | 51.0400         |          |                  |                |                  | V    |                 |                 |          |                  |                |                  | 9 |
| 2 | <b>231.1124</b> | 116.0598        |          |                  | 213.1018       | 107.0545         | E    | <b>871.4016</b> | 436.2044        | 853.3780 | 427.1926         | 853.3910       | 427.1991         | 8 |
| 3 | 347.1363        | 174.0718        |          |                  | 329.1258       | 165.0665         | D    | <b>741.3620</b> | 371.1846        | 723.3384 | 362.1728         | 723.3514       | 362.1793         | 7 |
| 4 | 419.1705        | 210.0889        |          |                  | 401.1599       | 201.0836         | A    | <b>625.3380</b> | 313.1726        | 607.3144 | 304.1608         | 607.3274       | 304.1673         | 6 |
| 5 | 533.2516        | 267.1294        |          |                  | 515.2410       | 258.1241         | L    | <b>553.3038</b> | 277.1556        | 535.2802 | 268.1438         | 535.2933       | 268.1503         | 5 |
| 6 | 649.2886        | 325.1479        | 631.2650 | 316.1361         | 631.2780       | 316.1426         | N    | <b>439.2227</b> | 220.1150        | 421.1991 | 211.1032         | 421.2122       | 211.1097         | 4 |
| 7 | <b>721.3227</b> | 361.1650        | 703.2991 | 352.1532         | 703.3122       | 352.1597         | A    | 323.1857        | 162.0965        | 305.1622 | 153.0847         | 305.1752       | 153.0912         | 3 |
| 8 | <b>823.3674</b> | 412.1874        | 805.3439 | 403.1756         | 805.3569       | 403.1821         | T    | <b>251.1516</b> | 126.0794        | 233.1280 | 117.0676         | 233.1410       | 117.0741         | 2 |
| 9 |                 |                 |          |                  |                |                  | K    | 149.1069        | 75.0571         | 131.0833 | 66.0453          |                |                  | 1 |

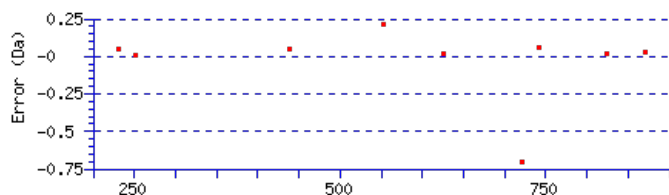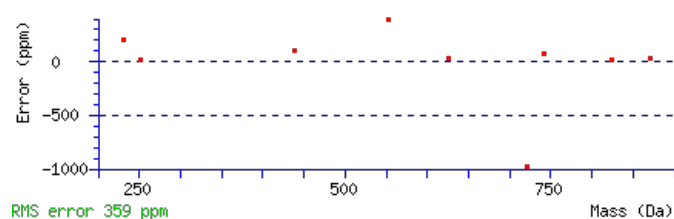

NCBI **BLAST** search of [VEDALNATK](#)

(Parameters: blastp, nr protein database, expect=20000, no filter, PAM30)

Other BLAST [web gateways](#)

All matches to this query

| Score | $M_r(\text{calc})$ | Delta | Sequence |
|-------|--------------------|-------|----------|
|       |                    |       |          |



## AT1G55490.1

|      |          |         |                           |
|------|----------|---------|---------------------------|
| 44.5 | 970.4597 | -0.0007 | <a href="#">VEDALNATK</a> |
| 10.8 | 970.4620 | -0.0029 | <a href="#">LDWETIGK</a>  |
| 10.5 | 970.4597 | -0.0007 | <a href="#">EVLQENTK</a>  |
| 10.2 | 970.4598 | -0.0007 | <a href="#">NLNETLEK</a>  |
| 9.4  | 970.4598 | -0.0007 | <a href="#">INVSPSTDK</a> |
| 8.4  | 970.4606 | -0.0015 | <a href="#">GGLQPMKVM</a> |
| 6.8  | 970.4597 | -0.0007 | <a href="#">EVSVELER</a>  |
| 6.1  | 970.4597 | -0.0007 | <a href="#">DLDDINKK</a>  |
| 6.1  | 970.4597 | -0.0007 | <a href="#">GAVNTEIEK</a> |
| 3.9  | 970.4597 | -0.0007 | <a href="#">IETAIEER</a>  |

Mascot: <http://www.matrixscience.com/>

**Peptide View**MS/MS Fragmentation of **FVFFNFQR**Found in **AT1G55670.1** in **TAIR\_Arabidopsis**, Symbols: PSAG | PSAG | chr1:20806540-20807022 REVERSE

Match to Query 3411: 1116.517438 from(559.265995,2+) index(8844)

Title: Elution from: 78.019 to 78.019 scan no 11763 cid35.00 polarity:+

Data file D6h-3\_2.mgf

Click mouse within plot area to zoom in by factor of two about that point

Or,   to  Da Label all possible matches  Label matches used for scoring Show Y-axis 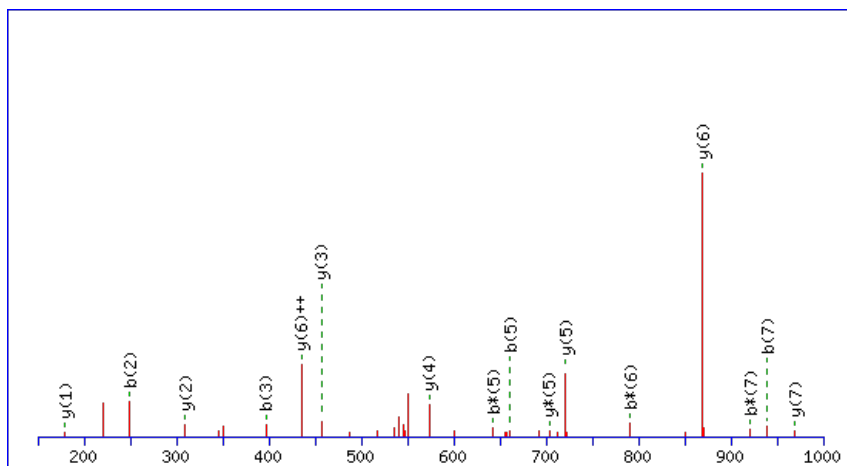Monoisotopic mass of neutral peptide **Mr(calc)**: 1116.5167

Fixed modifications: Carbamidomethyl (C) (apply to specified residues or termini only)

Ions Score: 57 **Expect**: 1.8e-005Matches : 16/48 fragment ions using 24 most intense peaks ([help](#))

| # | b               | b <sup>++</sup> | b*              | b <sup>+++</sup> | Seq. | y               | y <sup>++</sup> | y*              | y <sup>+++</sup> | # |
|---|-----------------|-----------------|-----------------|------------------|------|-----------------|-----------------|-----------------|------------------|---|
| 1 | 149.0727        | 75.0400         |                 |                  | F    |                 |                 |                 |                  | 8 |
| 2 | <b>249.1382</b> | 125.0727        |                 |                  | V    | <b>969.4585</b> | 485.2329        | 951.4349        | 476.2211         | 7 |
| 3 | <b>397.2036</b> | 199.1054        |                 |                  | F    | <b>869.3931</b> | <b>435.2002</b> | 851.3695        | 426.1884         | 6 |
| 4 | 545.2691        | 273.1382        |                 |                  | F    | <b>721.3276</b> | 361.1675        | <b>703.3040</b> | 352.1557         | 5 |
| 5 | <b>661.3061</b> | 331.1567        | <b>643.2825</b> | 322.1449         | N    | <b>573.2622</b> | 287.1347        | 555.2386        | 278.1229         | 4 |
| 6 | 809.3715        | 405.1894        | <b>791.3479</b> | 396.1776         | F    | <b>457.2252</b> | 229.1162        | 439.2016        | 220.1044         | 3 |
| 7 | <b>939.4242</b> | 470.2157        | <b>921.4006</b> | 461.2039         | Q    | <b>309.1597</b> | 155.0835        | 291.1362        | 146.0717         | 2 |
| 8 |                 |                 |                 |                  | R    | <b>179.1071</b> | 90.0572         | 161.0835        | 81.0454          | 1 |

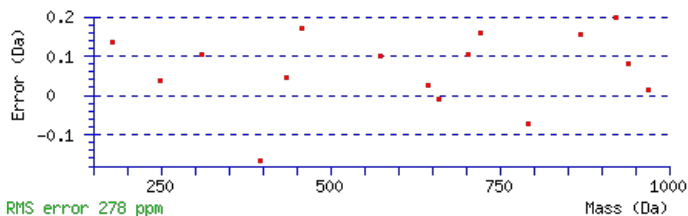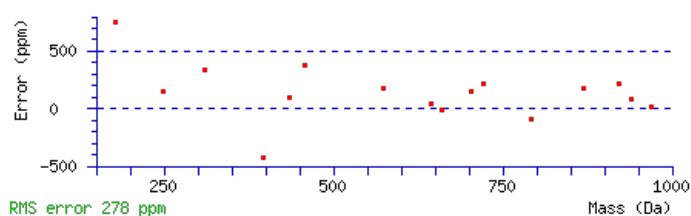NCBI **BLAST** search of [FVFFNFQR](#)

(Parameters: blastp, nr protein database, expect=20000, no filter, PAM30)

Other BLAST [web gateways](#)**All matches to this query**

| Score | Mr(calc)  | Delta  | Sequence                  |
|-------|-----------|--------|---------------------------|
| 57.2  | 1116.5167 | 0.0008 | <a href="#">FVFFNFQR</a>  |
| 11.7  | 1116.5149 | 0.0025 | <a href="#">RSRYGYAAR</a> |

**AT1G55670.1**

|     |           |         |                             |
|-----|-----------|---------|-----------------------------|
| 6.6 | 1116.5203 | -0.0029 | <a href="#">VVVDDGKSER</a>  |
| 6.6 | 1116.5203 | -0.0029 | <a href="#">QDEKIVSER</a>   |
| 5.8 | 1116.5203 | -0.0029 | <a href="#">EAAA EKISER</a> |
| 5.8 | 1116.5203 | -0.0029 | <a href="#">EIEAAKASER</a>  |
| 5.6 | 1116.5177 | -0.0002 | <a href="#">EAITEESTVK</a>  |
| 5.0 | 1116.5153 | 0.0021  | <a href="#">RAGGARHSQR</a>  |
| 4.2 | 1116.5156 | 0.0018  | <a href="#">LIANAGDCR</a>   |
| 4.1 | 1116.5156 | 0.0018  | <a href="#">DIPKKACDR</a>   |

**Mascot:** <http://www.matrixscience.com/>

## Peptide View

MS/MS Fragmentation of **LENKPVGEEASSETR**Found in **AT1G55860.1** in **TAIR\_Arabidopsis**, Symbols: UPL1 | UPL1 (UBIQUITIN-PROTEIN LIGASE 1); ubiquitin-protein ligase | chr1:20883566-20899059 REVERSE

Match to Query 8164: 1664.735180 from(833.374866,2+) index(9175)

Title: Elution from: 81.049 to 81.049 scan no 12246 cid35.00 polarity:+

Data file D1d-3\_1.mgf

Click mouse within plot area to zoom in by factor of two about that point

Or,   to  Da Label all possible matches  Label matches used for scoring Show Y-axis 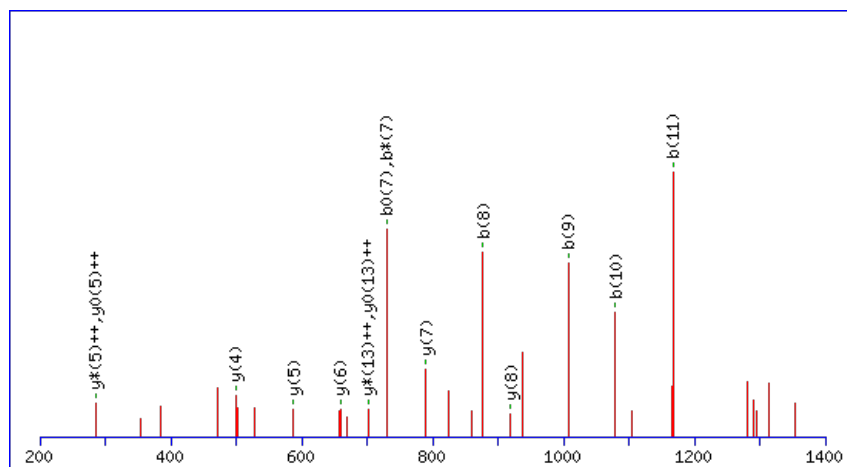Monoisotopic mass of neutral peptide  $M_r(\text{calc})$ : 1664.7362

Fixed modifications: Carbamidomethyl (C) (apply to specified residues or termini only)

Ions Score: 25 Expect: 0.021

Matches : 15/160 fragment ions using 21 most intense peaks ([help](#))

| #  | b         | b <sup>++</sup> | b <sup>*</sup> | b <sup>*++</sup> | b <sup>0</sup> | b <sup>0++</sup> | Seq. | y         | y <sup>++</sup> | y <sup>*</sup> | y <sup>*++</sup> | y <sup>0</sup> | y <sup>0++</sup> | #  |
|----|-----------|-----------------|----------------|------------------|----------------|------------------|------|-----------|-----------------|----------------|------------------|----------------|------------------|----|
| 1  | 115.0884  | 58.0478         |                |                  |                |                  | L    |           |                 |                |                  |                |                  | 15 |
| 2  | 245.1280  | 123.0676        |                |                  | 227.1174       | 114.0624         | E    | 1551.6624 | 776.3348        | 1533.6388      | 767.3230         | 1533.6518      | 767.3295         | 14 |
| 3  | 361.1650  | 181.0861        | 343.1414       | 172.0743         | 343.1544       | 172.0809         | N    | 1421.6227 | 711.3150        | 1403.5992      | 702.3032         | 1403.6122      | 702.3097         | 13 |
| 4  | 491.2540  | 246.1307        | 473.2304       | 237.1189         | 473.2435       | 237.1254         | K    | 1305.5857 | 653.2965        | 1287.5622      | 644.2847         | 1287.5752      | 644.2912         | 12 |
| 5  | 589.3038  | 295.1556        | 571.2802       | 286.1438         | 571.2933       | 286.1503         | P    | 1175.4967 | 588.2520        | 1157.4731      | 579.2402         | 1157.4861      | 579.2467         | 11 |
| 6  | 689.3693  | 345.1883        | 671.3457       | 336.1765         | 671.3587       | 336.1830         | V    | 1077.4469 | 539.2271        | 1059.4233      | 530.2153         | 1059.4363      | 530.2218         | 10 |
| 7  | 747.3878  | 374.1975        | 729.3642       | 365.1857         | 729.3772       | 365.1922         | G    | 977.3815  | 489.1944        | 959.3579       | 480.1826         | 959.3709       | 480.1891         | 9  |
| 8  | 877.4274  | 439.2173        | 859.4038       | 430.2056         | 859.4168       | 430.2121         | E    | 919.3630  | 460.1851        | 901.3394       | 451.1733         | 901.3524       | 451.1798         | 8  |
| 9  | 1007.4670 | 504.2372        | 989.4435       | 495.2254         | 989.4565       | 495.2319         | E    | 789.3233  | 395.1653        | 771.2998       | 386.1535         | 771.3128       | 386.1600         | 7  |
| 10 | 1079.5012 | 540.2542        | 1061.4776      | 531.2424         | 1061.4906      | 531.2489         | A    | 659.2837  | 330.1455        | 641.2601       | 321.1337         | 641.2731       | 321.1402         | 6  |
| 11 | 1167.5302 | 584.2688        | 1149.5067      | 575.2570         | 1149.5197      | 575.2635         | S    | 587.2496  | 294.1284        | 569.2260       | 285.1166         | 569.2390       | 285.1231         | 5  |
| 12 | 1255.5593 | 628.2833        | 1237.5357      | 619.2715         | 1237.5487      | 619.2780         | S    | 499.2205  | 250.1139        | 481.1969       | 241.1021         | 481.2099       | 241.1086         | 4  |
| 13 | 1385.5989 | 693.3031        | 1367.5754      | 684.2913         | 1367.5884      | 684.2978         | E    | 411.1914  | 206.0994        | 393.1678       | 197.0876         | 393.1809       | 197.0941         | 3  |
| 14 | 1487.6437 | 744.3255        | 1469.6201      | 735.3137         | 1469.6331      | 735.3202         | T    | 281.1518  | 141.0795        | 263.1282       | 132.0677         | 263.1412       | 132.0743         | 2  |
| 15 |           |                 |                |                  |                |                  | R    | 179.1071  | 90.0572         | 161.0835       | 81.0454          |                |                  | 1  |

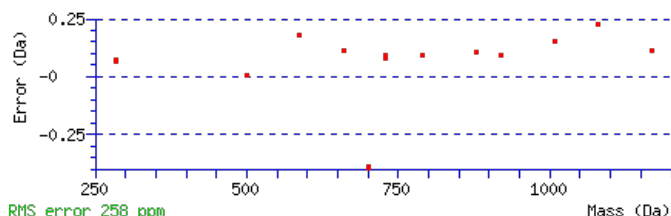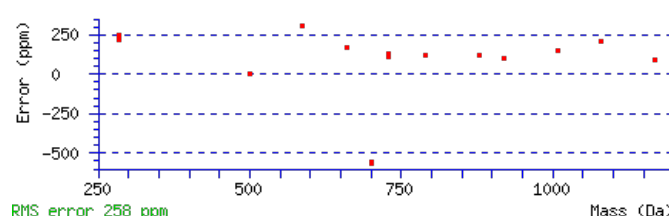

## AT1G55860.1

NCBI **BLAST** search of [LENKPVGEEASSETR](#)

(Parameters: blastp, nr protein database, expect=20000, no filter, PAM30)

Other BLAST [web gateways](#)

### All matches to this query

| Score | Mr(calc)  | Delta   | Sequence                        |
|-------|-----------|---------|---------------------------------|
| 25.4  | 1664.7362 | -0.0010 | <a href="#">LENKPVGEEASSETR</a> |
| 9.6   | 1664.7357 | -0.0006 | <a href="#">ETTYVEISTNITYK</a>  |

**Mascot:** <http://www.matrixscience.com/>

**Peptide View**MS/MS Fragmentation of **IMGPNYIPGEK**

Found in **AT1G56070.1** in **TAIR\_Arabidopsis**, Symbols: AT1G56075.1, LOS1 | LOS1 (Low expression of osmotically responsive genes 1); translation elongation factor/ translation factor, nucleic acid binding | chr1:20971910-20974742 REVERSE

Match to Query 3944: 1246.566092 from(624.290322,2+) index(2893)

Title: Elution from: 30.032 to 30.032 scan no 3662 cid35.00 polarity:+

Data file D1d-2\_3.mgf

Click mouse within plot area to zoom in by factor of two about that point

Or,   to  Da

Label all possible matches  Label matches used for scoring

Show Y-axis

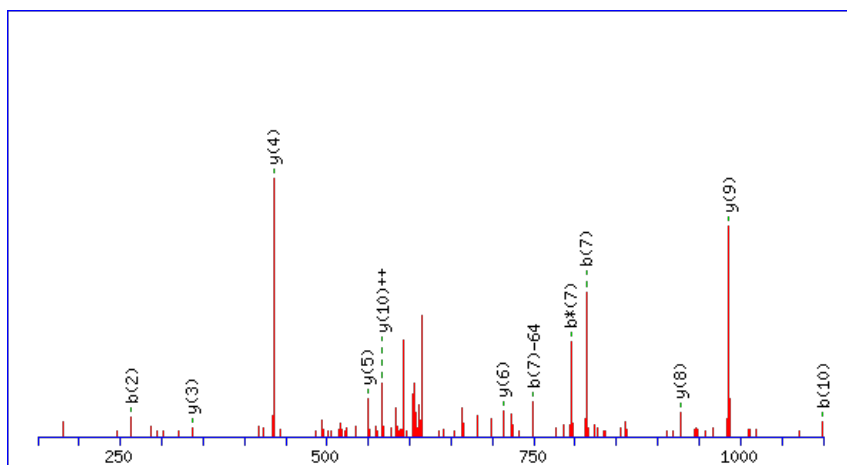

**Monoisotopic mass of neutral peptide Mr(calc):** 1246.5678

**Fixed modifications:** Carbamidomethyl (C) (apply to specified residues or termini only)

**Variable modifications:**

**M2** : Oxidation (M), with neutral losses 0.0000 (shown in table), 63.9983

**Ions Score:** 44 **Expect:** 0.00029

**Matches** : 12/130 fragment ions using 19 most intense peaks ([help](#))

| #  | b                | b <sup>++</sup> | b <sup>*</sup>  | b <sup>*++</sup> | b <sup>0</sup> | b <sup>0++</sup> | Seq. | y               | y <sup>++</sup> | y <sup>*</sup> | y <sup>*++</sup> | y <sup>0</sup> | y <sup>0++</sup> | #  |
|----|------------------|-----------------|-----------------|------------------|----------------|------------------|------|-----------------|-----------------|----------------|------------------|----------------|------------------|----|
| 1  | 115.0884         | 58.0478         |                 |                  |                |                  | I    |                 |                 |                |                  |                |                  | 11 |
| 2  | <b>263.1208</b>  | 132.0640        |                 |                  |                |                  | M    | 1133.4940       | <b>567.2506</b> | 1115.4704      | 558.2388         | 1115.4834      | 558.2454         | 10 |
| 3  | 321.1393         | 161.0733        |                 |                  |                |                  | G    | <b>985.4616</b> | 493.2344        | 967.4380       | 484.2226         | 967.4510       | 484.2291         | 9  |
| 4  | 419.1891         | 210.0982        |                 |                  |                |                  | P    | <b>927.4431</b> | 464.2252        | 909.4195       | 455.2134         | 909.4325       | 455.2199         | 8  |
| 5  | 535.2261         | 268.1167        | 517.2025        | 259.1049         |                |                  | N    | 829.3933        | 415.2003        | 811.3697       | 406.1885         | 811.3827       | 406.1950         | 7  |
| 6  | 699.2865         | 350.1469        | 681.2629        | 341.1351         |                |                  | Y    | <b>713.3563</b> | 357.1818        | 695.3327       | 348.1700         | 695.3457       | 348.1765         | 6  |
| 7  | <b>813.3676</b>  | 407.1874        | <b>795.3440</b> | 398.1756         |                |                  | I    | <b>549.2959</b> | 275.1516        | 531.2723       | 266.1398         | 531.2853       | 266.1463         | 5  |
| 8  | 911.4174         | 456.2123        | 893.3938        | 447.2005         |                |                  | P    | <b>435.2148</b> | 218.1110        | 417.1912       | 209.0992         | 417.2042       | 209.1058         | 4  |
| 9  | 969.4359         | 485.2216        | 951.4123        | 476.2098         |                |                  | G    | <b>337.1650</b> | 169.0861        | 319.1414       | 160.0743         | 319.1544       | 160.0809         | 3  |
| 10 | <b>1099.4755</b> | 550.2414        | 1081.4519       | 541.2296         | 1081.4649      | 541.2361         | E    | 279.1465        | 140.0769        | 261.1229       | 131.0651         | 261.1359       | 131.0716         | 2  |
| 11 |                  |                 |                 |                  |                |                  | K    | 149.1069        | 75.0571         | 131.0833       | 66.0453          |                |                  | 1  |

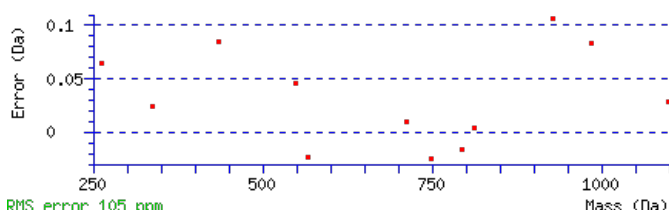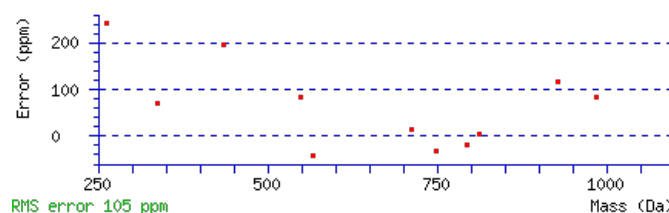

NCBI **BLAST** search of **IMGPNYIPGEK**

(Parameters: blastp, nr protein database, expect=20000, no filter, PAM30)

Other BLAST [web gateways](#)

# AT1G56070.1

All matches to this query

| Score | Mr(calc)  | Delta   | Sequence                     |
|-------|-----------|---------|------------------------------|
| 44.2  | 1246.5678 | -0.0017 | <a href="#">IMGPNYIPGEK</a>  |
| 19.0  | 1246.5656 | 0.0005  | <a href="#">MKND AIDGELK</a> |
| 7.4   | 1246.5678 | -0.0017 | <a href="#">ELFTAEMHLK</a>   |
| 7.1   | 1246.5626 | 0.0035  | <a href="#">GRVNNLEDANK</a>  |
| 6.9   | 1246.5626 | 0.0035  | <a href="#">RRLDPEGS GDK</a> |
| 5.9   | 1246.5656 | 0.0005  | <a href="#">LTENQQMELK</a>   |
| 4.0   | 1246.5656 | 0.0005  | <a href="#">LMPQDKDKDK</a>   |
| 2.5   | 1246.5656 | 0.0005  | <a href="#">SMVDQGILGDAK</a> |
| 2.3   | 1246.5649 | 0.0012  | <a href="#">FSAITNLHGDR</a>  |
| 2.2   | 1246.5678 | -0.0017 | <a href="#">LMEETAHYIK</a>   |

Mascot: <http://www.matrixscience.com/>

**Peptide View**MS/MS Fragmentation of **IDCFADGATTAFGEK**Found in **AT1G56110.1** in **TAIR\_Arabidopsis**, Symbols: NOP56 | NOP56 (ARABIDOPSIS HOMOLOG OF NUCLEOLAR PROTEIN NOP56)  
| chr1:20988209-20990558 REVERSE

Match to Query 7456: 1601.702640 from(801.858596,2+) index(5797)

Title: Elution from: 51.789 to 51.789 scan no 7310 cid35.00 polarity:+

Data file D12h-3\_1.mgf

Click mouse within plot area to zoom in by factor of two about that point

Or,   to  Da Label all possible matches  Label matches used for scoring Show Y-axis 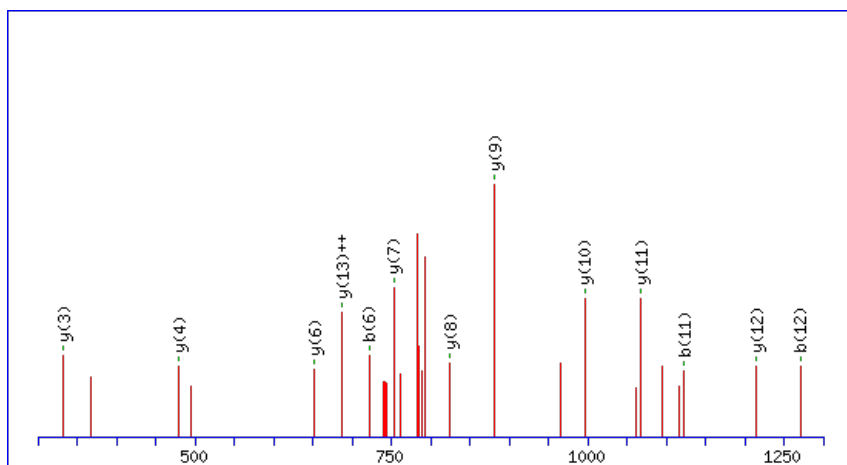Monoisotopic mass of neutral peptide  $M_r(\text{calc})$ : 1601.7032

Fixed modifications: Carbamidomethyl (C) (apply to specified residues or termini only)

Ions Score: 67 Expect: 1.9e-007

Matches : 13/136 fragment ions using 23 most intense peaks ([help](#))

| #  | b         | b <sup>++</sup> | b <sup>0</sup> | b <sup>0++</sup> | Seq. | y         | y <sup>++</sup> | y*        | y* <sup>++</sup> | y <sup>0</sup> | y <sup>0++</sup> | #  |
|----|-----------|-----------------|----------------|------------------|------|-----------|-----------------|-----------|------------------|----------------|------------------|----|
| 1  | 114.0913  | 57.5493         |                |                  | I    |           |                 |           |                  |                |                  | 15 |
| 2  | 229.1183  | 115.0628        | 211.1077       | 106.0575         | D    | 1489.6264 | 745.3168        | 1472.5998 | 736.8036         | 1471.6158      | 736.3115         | 14 |
| 3  | 389.1489  | 195.0781        | 371.1384       | 186.0728         | C    | 1374.5994 | 687.8034        | 1357.5729 | 679.2901         | 1356.5889      | 678.7981         | 13 |
| 4  | 536.2173  | 268.6123        | 518.2068       | 259.6070         | F    | 1214.5688 | 607.7880        | 1197.5422 | 599.2748         | 1196.5582      | 598.7828         | 12 |
| 5  | 607.2545  | 304.1309        | 589.2439       | 295.1256         | A    | 1067.5004 | 534.2538        | 1050.4738 | 525.7406         | 1049.4898      | 525.2485         | 11 |
| 6  | 722.2814  | 361.6443        | 704.2708       | 352.6391         | D    | 996.4633  | 498.7353        | 979.4367  | 490.2220         | 978.4527       | 489.7300         | 10 |
| 7  | 779.3029  | 390.1551        | 761.2923       | 381.1498         | G    | 881.4363  | 441.2218        | 864.4098  | 432.7085         | 863.4258       | 432.2165         | 9  |
| 8  | 850.3400  | 425.6736        | 832.3294       | 416.6683         | A    | 824.4149  | 412.7111        | 807.3883  | 404.1978         | 806.4043       | 403.7058         | 8  |
| 9  | 951.3877  | 476.1975        | 933.3771       | 467.1922         | T    | 753.3777  | 377.1925        | 736.3512  | 368.6792         | 735.3672       | 368.1872         | 7  |
| 10 | 1052.4353 | 526.7213        | 1034.4248      | 517.7160         | T    | 652.3301  | 326.6687        | 635.3035  | 318.1554         | 634.3195       | 317.6634         | 6  |
| 11 | 1123.4725 | 562.2399        | 1105.4619      | 553.2346         | A    | 551.2824  | 276.1448        | 534.2558  | 267.6316         | 533.2718       | 267.1396         | 5  |
| 12 | 1270.5409 | 635.7741        | 1252.5303      | 626.7688         | F    | 480.2453  | 240.6263        | 463.2187  | 232.1130         | 462.2347       | 231.6210         | 4  |
| 13 | 1327.5623 | 664.2848        | 1309.5518      | 655.2795         | G    | 333.1769  | 167.0921        | 316.1503  | 158.5788         | 315.1663       | 158.0868         | 3  |
| 14 | 1456.6049 | 728.8061        | 1438.5944      | 719.8008         | E    | 276.1554  | 138.5813        | 259.1288  | 130.0681         | 258.1448       | 129.5761         | 2  |
| 15 |           |                 |                |                  | K    | 147.1128  | 74.0600         | 130.0863  | 65.5468          |                |                  | 1  |

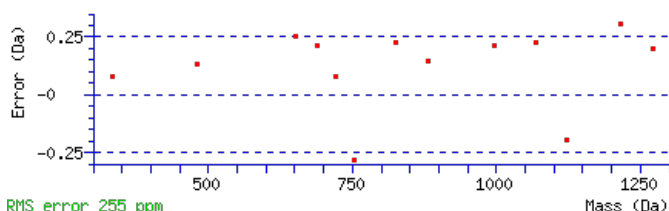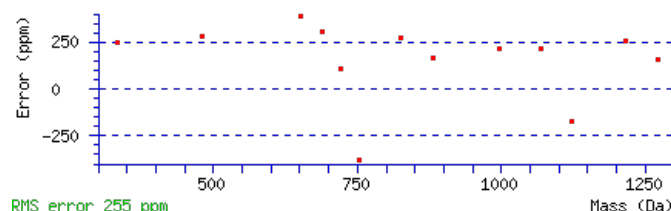



## AT1G56110.1

NCBI **BLAST** search of [IDCFADGATTAFGEK](#)

(Parameters: blastp, nr protein database, expect=20000, no filter, PAM30)

Other BLAST [web gateways](#)

### All matches to this query

| Score | Mr(calc)  | Delta   | Sequence                        |
|-------|-----------|---------|---------------------------------|
| 67.2  | 1601.7032 | -0.0005 | <a href="#">IDCFADGATTAFGEK</a> |

Mascot: <http://www.matrixscience.com/>

## Peptide View

MS/MS Fragmentation of **GVSLLLPTDVVIADK**

Found in **AT1G56190.1** in **TAIR\_Arabidopsis**, Symbols: | phosphoglycerate kinase, putative | chr1:21032068-21034119 FORWARD

Match to Query 7198: 1554.844218 from(778.429385,2+) index(9680)

Title: Elution from: 86.060 to 86.060 scan no 12973 cid35.00 polarity:+

Data file D12h-1\_1.mgf

Click mouse within plot area to zoom in by factor of two about that point

Or,   to  Da

Label all possible matches  Label matches used for scoring

Show Y-axis

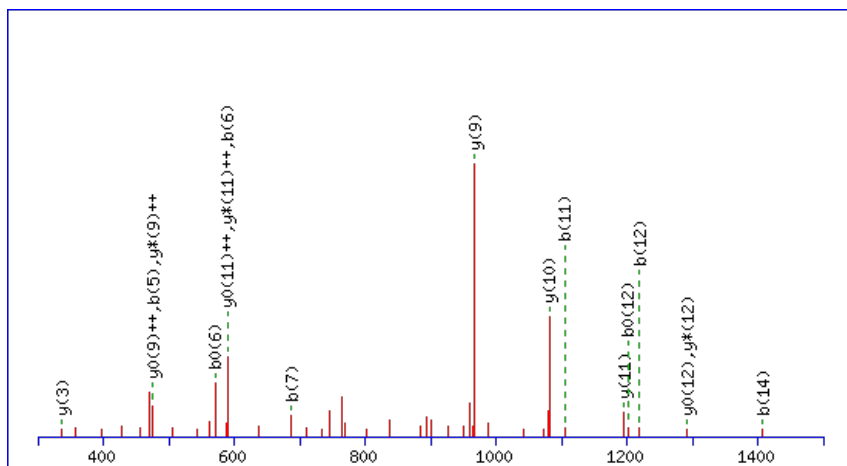

Monoisotopic mass of neutral peptide  $M_r(\text{calc})$ : 1554.8445

Fixed modifications: Carbamidomethyl (C) (apply to specified residues or termini only)

Ions Score: 32 Expect: 0.00066

Matches : 19/134 fragment ions using 38 most intense peaks ([help](#))

| #  | b                | b <sup>++</sup> | b <sup>0</sup>   | b <sup>0++</sup> | Seq.     | y                | y <sup>++</sup> | y*               | y <sup>*++</sup> | y <sup>0</sup>   | y <sup>0++</sup> | #         |
|----|------------------|-----------------|------------------|------------------|----------|------------------|-----------------|------------------|------------------|------------------|------------------|-----------|
| 1  | 59.0258          | 30.0165         |                  |                  | <b>G</b> |                  |                 |                  |                  |                  |                  | <b>15</b> |
| 2  | 159.0912         | 80.0492         |                  |                  | <b>V</b> | 1497.8333        | 749.4203        | 1479.8097        | 740.4085         | 1479.8227        | 740.4150         | <b>14</b> |
| 3  | 247.1203         | 124.0638        | 229.1097         | 115.0585         | <b>S</b> | 1397.7678        | 699.3876        | 1379.7443        | 690.3758         | 1379.7573        | 690.3823         | <b>13</b> |
| 4  | 361.2014         | 181.1043        | 343.1908         | 172.0990         | <b>L</b> | 1309.7388        | 655.3730        | <b>1291.7152</b> | 646.3612         | <b>1291.7282</b> | 646.3677         | <b>12</b> |
| 5  | <b>475.2825</b>  | 238.1449        | 457.2719         | 229.1396         | <b>L</b> | <b>1195.6577</b> | 598.3325        | 1177.6341        | <b>589.3207</b>  | 1177.6471        | <b>589.3272</b>  | <b>11</b> |
| 6  | <b>589.3636</b>  | 295.1854        | <b>571.3530</b>  | 286.1801         | <b>L</b> | <b>1081.5766</b> | 541.2919        | 1063.5530        | 532.2801         | 1063.5660        | 532.2866         | <b>10</b> |
| 7  | <b>687.4134</b>  | 344.2103        | 669.4028         | 335.2050         | <b>P</b> | <b>967.4955</b>  | 484.2514        | 949.4719         | <b>475.2396</b>  | 949.4849         | <b>475.2461</b>  | <b>9</b>  |
| 8  | 789.4581         | 395.2327        | 771.4475         | 386.2274         | <b>T</b> | 869.4457         | 435.2265        | 851.4221         | 426.2147         | 851.4351         | 426.2212         | <b>8</b>  |
| 9  | 905.4821         | 453.2447        | 887.4715         | 444.2394         | <b>D</b> | 767.4010         | 384.2041        | 749.3774         | 375.1923         | 749.3904         | 375.1988         | <b>7</b>  |
| 10 | 1005.5475        | 503.2774        | 987.5370         | 494.2721         | <b>V</b> | 651.3770         | 326.1921        | 633.3534         | 317.1803         | 633.3664         | 317.1869         | <b>6</b>  |
| 11 | <b>1105.6130</b> | 553.3101        | 1087.6024        | 544.3048         | <b>V</b> | 551.3115         | 276.1594        | 533.2880         | 267.1476         | 533.3010         | 267.1541         | <b>5</b>  |
| 12 | <b>1219.6941</b> | 610.3507        | <b>1201.6835</b> | 601.3454         | <b>I</b> | 451.2461         | 226.1267        | 433.2225         | 217.1149         | 433.2355         | 217.1214         | <b>4</b>  |
| 13 | <b>1291.7282</b> | 646.3677        | 1273.7177        | 637.3625         | <b>A</b> | <b>337.1650</b>  | 169.0861        | 319.1414         | 160.0743         | 319.1544         | 160.0809         | <b>3</b>  |
| 14 | <b>1407.7522</b> | 704.3797        | 1389.7416        | 695.3745         | <b>D</b> | 265.1309         | 133.0691        | 247.1073         | 124.0573         | 247.1203         | 124.0638         | <b>2</b>  |
| 15 |                  |                 |                  |                  | <b>K</b> | 149.1069         | 75.0571         | 131.0833         | 66.0453          |                  |                  | <b>1</b>  |

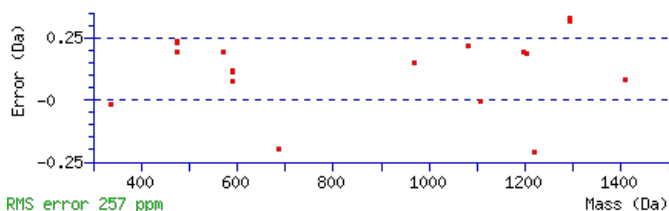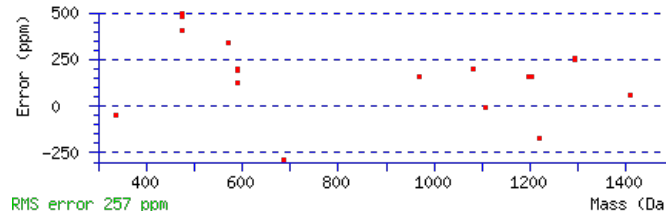

NCBI **BLAST** search of **GVSLLLPTDVVIADK**

## AT1G56190.1

(Parameters: blastp, nr protein database, expect=20000, no filter, PAM30)

Other BLAST [web gateways](#)

### All matches to this query

| Score | Mr(calc)  | Delta   | Sequence                        |
|-------|-----------|---------|---------------------------------|
| 32.0  | 1554.8445 | -0.0003 | <a href="#">GVSLLLPTDVVIADK</a> |
| 12.8  | 1554.8398 | 0.0044  | <a href="#">MPLEEILSRLPLK</a>   |
| 4.2   | 1554.8445 | -0.0003 | <a href="#">EVLKLPSESPLK</a>    |
| 0.4   | 1554.8445 | -0.0003 | <a href="#">VAALLDVSPITDVVK</a> |

Mascot: <http://www.matrixscience.com/>


**Mascot Search Results**
**Peptide View**MS/MS Fragmentation of **KKMGLDWMLPPTR**Found in **AT1G56290.1** in **TAIR\_Arabidopsis**, Symbols: | CwfJ-like family protein | chr1:21079604-21082273 FORWARD

Match to Query 6704: 1590.771816 from(796.393184,2+) index(4939)

Title: Elution from: 47.617 to 47.617 scan no 6349 cid35.00 polarity:+

Data file D1d-2\_2.mgf

Click mouse within plot area to zoom in by factor of two about that point

Or,  to  Da Label all possible matches  Label matches used for scoring Show Y-axis 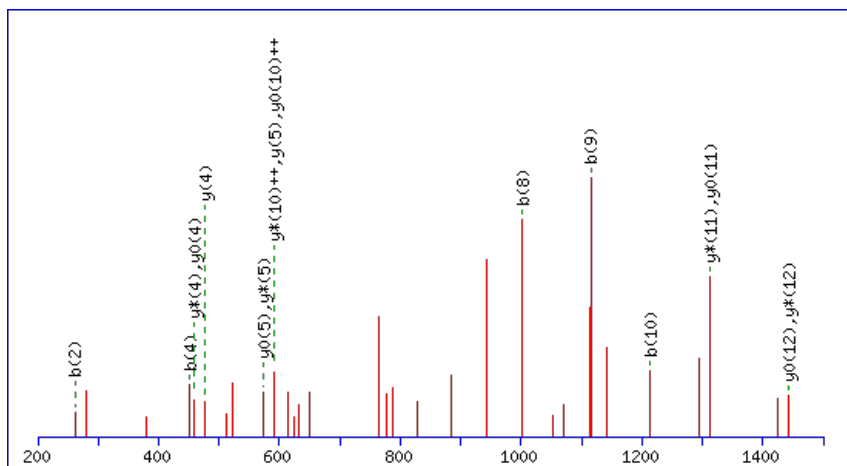Monoisotopic mass of neutral peptide  $M_r(\text{calc})$ : 1590.7753

Fixed modifications: Carbamidomethyl (C) (apply to specified residues or termini only)

Ions Score: 28 Expect: 0.014

Matches : 17/132 fragment ions using 21 most intense peaks ([help](#))

| #  | b                | b <sup>++</sup> | b*        | b <sup>*++</sup> | b <sup>0</sup> | b <sup>0++</sup> | Seq.     | y               | y <sup>++</sup> | y*               | y <sup>*++</sup> | y <sup>0</sup>   | y <sup>0++</sup> | #         |
|----|------------------|-----------------|-----------|------------------|----------------|------------------|----------|-----------------|-----------------|------------------|------------------|------------------|------------------|-----------|
| 1  | 131.0963         | 66.0518         | 113.0727  | 57.0400          |                |                  | <b>K</b> |                 |                 |                  |                  |                  |                  | <b>13</b> |
| 2  | <b>261.1853</b>  | 131.0963        | 243.1618  | 122.0845         |                |                  | <b>K</b> | 1461.6935       | 731.3504        | <b>1443.6700</b> | 722.3386         | <b>1443.6830</b> | 722.3451         | <b>12</b> |
| 3  | 393.2229         | 197.1151        | 375.1993  | 188.1033         |                |                  | <b>M</b> | 1331.6045       | 666.3059        | <b>1313.5809</b> | 657.2941         | <b>1313.5939</b> | 657.3006         | <b>11</b> |
| 4  | <b>451.2414</b>  | 226.1243        | 433.2178  | 217.1125         |                |                  | <b>G</b> | 1199.5670       | 600.2871        | 1181.5434        | <b>591.2753</b>  | 1181.5564        | <b>591.2818</b>  | <b>10</b> |
| 5  | 565.3225         | 283.1649        | 547.2989  | 274.1531         |                |                  | <b>L</b> | 1141.5485       | 571.2779        | 1123.5249        | 562.2661         | 1123.5379        | 562.2726         | <b>9</b>  |
| 6  | 681.3464         | 341.1769        | 663.3229  | 332.1651         | 663.3359       | 332.1716         | <b>D</b> | 1027.4674       | 514.2373        | 1009.4438        | 505.2255         | 1009.4568        | 505.2320         | <b>8</b>  |
| 7  | 869.4198         | 435.2135        | 851.3962  | 426.2018         | 851.4093       | 426.2083         | <b>W</b> | 911.4434        | 456.2253        | 893.4198         | 447.2135         | 893.4328         | 447.2201         | <b>7</b>  |
| 8  | <b>1001.4573</b> | 501.2323        | 983.4338  | 492.2205         | 983.4468       | 492.2270         | <b>M</b> | 723.3700        | 362.1886        | 705.3464         | 353.1769         | 705.3595         | 353.1834         | <b>6</b>  |
| 9  | <b>1115.5384</b> | 558.2729        | 1097.5149 | 549.2611         | 1097.5279      | 549.2676         | <b>L</b> | <b>591.3325</b> | 296.1699        | <b>573.3089</b>  | 287.1581         | <b>573.3219</b>  | 287.1646         | <b>5</b>  |
| 10 | <b>1213.5882</b> | 607.2978        | 1195.5647 | 598.2860         | 1195.5777      | 598.2925         | <b>P</b> | <b>477.2514</b> | 239.1293        | <b>459.2278</b>  | 230.1175         | <b>459.2408</b>  | 230.1241         | <b>4</b>  |
| 11 | 1311.6380        | 656.3227        | 1293.6145 | 647.3109         | 1293.6275      | 647.3174         | <b>P</b> | 379.2016        | 190.1044        | 361.1780         | 181.0926         | 361.1910         | 181.0992         | <b>3</b>  |
| 12 | 1413.6828        | 707.3450        | 1395.6592 | 698.3332         | 1395.6722      | 698.3397         | <b>T</b> | 281.1518        | 141.0795        | 263.1282         | 132.0677         | 263.1412         | 132.0743         | <b>2</b>  |
| 13 |                  |                 |           |                  |                |                  | <b>R</b> | 179.1071        | 90.0572         | 161.0835         | 81.0454          |                  |                  | <b>1</b>  |

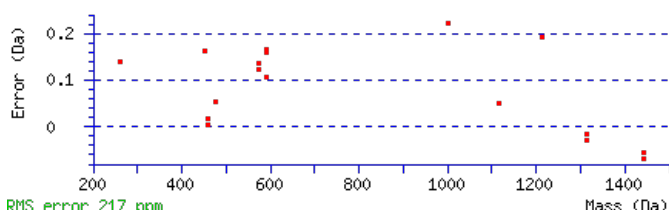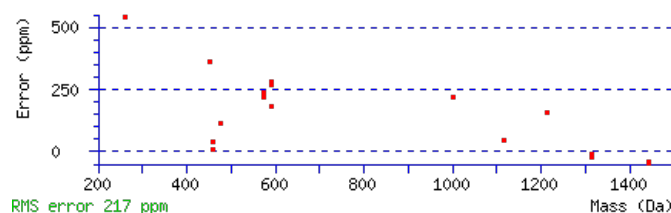NCBI **BLAST** search of [KKMGLDWMLPPTR](#)

(Parameters: blastp, nr protein database, expect=20000, no filter, PAM30)

Other BLAST [web gateways](#)

## AT1G56290.1

All matches to this query

| Score | Mr(calc)  | Delta   | Sequence                         |
|-------|-----------|---------|----------------------------------|
| 27.8  | 1590.7753 | -0.0035 | <a href="#">KKMGLDWMLPPTR</a>    |
| 11.4  | 1590.7760 | -0.0042 | <a href="#">IPMDLVMCNILLK</a>    |
| 9.6   | 1590.7722 | -0.0004 | <a href="#">LTKGATSSDDHALKK</a>  |
| 8.5   | 1590.7722 | -0.0004 | <a href="#">LEQTNQIDLQNKK</a>    |
| 8.5   | 1590.7674 | 0.0044  | <a href="#">LSPGRVSAVMGPGAGK</a> |
| 6.8   | 1590.7695 | 0.0023  | <a href="#">EISSIDNSLQLDK</a>    |
| 6.2   | 1590.7693 | 0.0026  | <a href="#">ISMAYIEWYKKK</a>     |
| 6.0   | 1590.7740 | -0.0022 | <a href="#">YPPYPLNTIELEK</a>    |
| 1.0   | 1590.7751 | -0.0033 | <a href="#">CIEDDLTKEVLLK</a>    |
| 0.4   | 1590.7690 | 0.0028  | <a href="#">HSRYHLTHYVKK</a>     |

Mascot: <http://www.matrixscience.com/>

## Peptide View

MS/MS Fragmentation of **TLVFQFSVK**

Found in **AT1G56340.1** in **TAIR\_Arabidopsis**, Symbols: CRT1 | CRT1 (CALRETICULIN 1); calcium ion binding | chr1:21093724-21096295 REVERSE

Match to Query 3046: 1067.601940 from(534.808246,2+) index(7221)

Title: Elution from: 64.513 to 64.513 scan no 9480 cid35.00 polarity:+

Data file D6h-1\_3.mgf

Click mouse within plot area to zoom in by factor of two about that point

Or,   to  Da

Label all possible matches  Label matches used for scoring

Show Y-axis

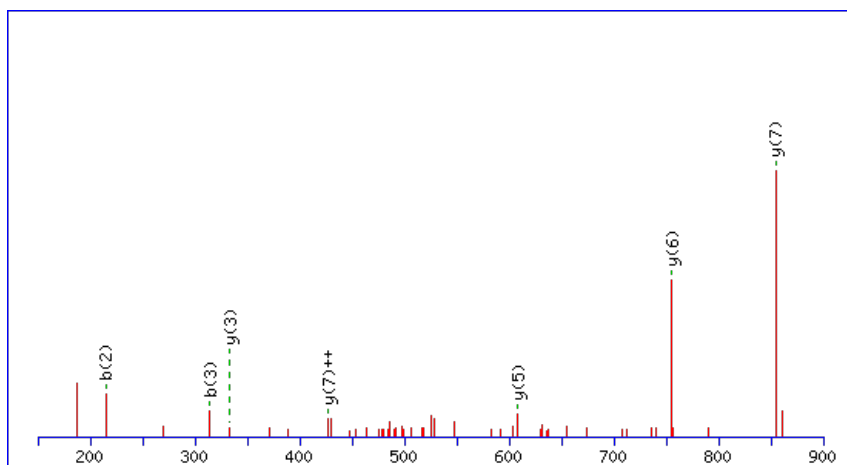

Monoisotopic mass of neutral peptide Mr(calc): 1067.6015

Fixed modifications: Carbamidomethyl (C) (apply to specified residues or termini only)

Ions Score: 21 Expect: 0.022

Matches : 7/84 fragment ions using 14 most intense peaks ([help](#))

| # | b               | b <sup>++</sup> | b*       | b <sup>*++</sup> | b <sup>0</sup> | b <sup>0++</sup> | Seq. | y               | y <sup>++</sup> | y*       | y <sup>*++</sup> | y <sup>0</sup> | y <sup>0++</sup> | # |
|---|-----------------|-----------------|----------|------------------|----------------|------------------|------|-----------------|-----------------|----------|------------------|----------------|------------------|---|
| 1 | 102.0550        | 51.5311         |          |                  | 84.0444        | 42.5258          | T    |                 |                 |          |                  |                |                  | 9 |
| 2 | <b>215.1390</b> | 108.0731        |          |                  | 197.1285       | 99.0679          | L    | 967.5611        | 484.2842        | 950.5346 | 475.7709         | 949.5506       | 475.2789         | 8 |
| 3 | <b>314.2074</b> | 157.6074        |          |                  | 296.1969       | 148.6021         | V    | <b>854.4771</b> | <b>427.7422</b> | 837.4505 | 419.2289         | 836.4665       | 418.7369         | 7 |
| 4 | 461.2758        | 231.1416        |          |                  | 443.2653       | 222.1363         | F    | <b>755.4087</b> | 378.2080        | 738.3821 | 369.6947         | 737.3981       | 369.2027         | 6 |
| 5 | 589.3344        | 295.1709        | 572.3079 | 286.6576         | 571.3239       | 286.1656         | Q    | <b>608.3402</b> | 304.6738        | 591.3137 | 296.1605         | 590.3297       | 295.6685         | 5 |
| 6 | 736.4028        | 368.7051        | 719.3763 | 360.1918         | 718.3923       | 359.6998         | F    | 480.2817        | 240.6445        | 463.2551 | 232.1312         | 462.2711       | 231.6392         | 4 |
| 7 | 823.4349        | 412.2211        | 806.4083 | 403.7078         | 805.4243       | 403.2158         | S    | <b>333.2132</b> | 167.1103        | 316.1867 | 158.5970         | 315.2027       | 158.1050         | 3 |
| 8 | 922.5033        | 461.7553        | 905.4767 | 453.2420         | 904.4927       | 452.7500         | V    | 246.1812        | 123.5942        | 229.1547 | 115.0810         |                |                  | 2 |
| 9 |                 |                 |          |                  |                |                  | K    | 147.1128        | 74.0600         | 130.0863 | 65.5468          |                |                  | 1 |

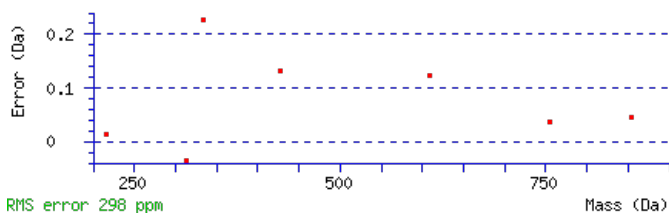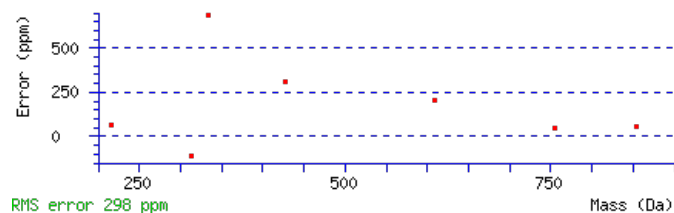

NCBI BLAST search of **TLVFQFSVK**

(Parameters: blastp, nr protein database, expect=20000, no filter, PAM30)

Other BLAST [web gateways](#)

All matches to this query

| Score | Mr(calc) | Delta | Sequence |
|-------|----------|-------|----------|
|       |          |       |          |

AT1G56340.1

|      |           |        |                           |
|------|-----------|--------|---------------------------|
| 21.0 | 1067.6015 | 0.0004 | <a href="#">TLVFQFSVK</a> |
|------|-----------|--------|---------------------------|

**Mascot:** <http://www.matrixscience.com/>

## Peptide View

MS/MS Fragmentation of **FYAISAEFPFESNK**

Found in **AT1G56340.2** in **TAIR\_Arabidopsis**, Symbols: CRT1 | CRT1 (CALRETICULIN 1); calcium ion binding | chr1:21093687-21096295 REVERSE

Match to Query 7911: 1664.734308 from(833.374430,2+) index(9050)

Title: Elution from: 80.975 to 80.975 scan no 12171 cid35.00 polarity:+

Data file D6h-3\_1.mgf

Click mouse within plot area to zoom in by factor of two about that point

Or,   to  Da

Label all possible matches  Label matches used for scoring

Show Y-axis

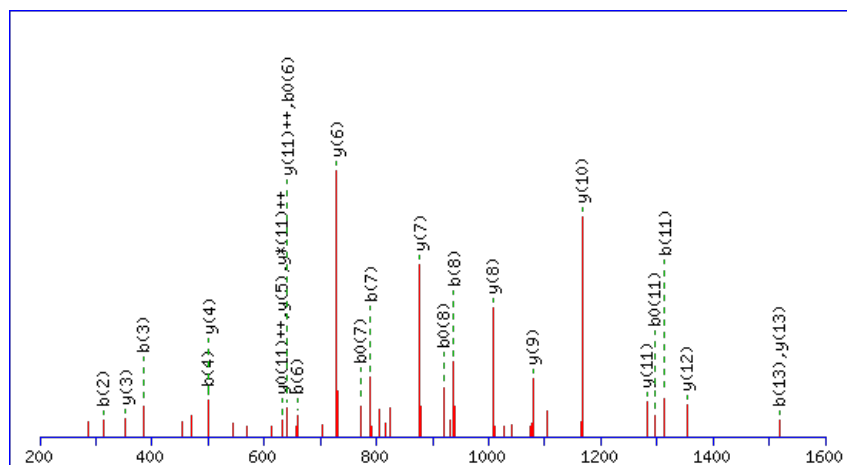

Monoisotopic mass of neutral peptide  $M_r(\text{calc})$ : 1664.7299

Fixed modifications: Carbamidomethyl (C) (apply to specified residues or termini only)

Ions Score: 94 Expect: 2.8e-009

Matches : 26/120 fragment ions using 31 most intense peaks ([help](#))

| #  | b                | b <sup>++</sup> | b*        | b <sup>*++</sup> | b <sup>0</sup>   | b <sup>0++</sup> | Seq. | y                | y <sup>++</sup> | y*        | y <sup>*++</sup> | y <sup>0</sup> | y <sup>0++</sup> | #  |
|----|------------------|-----------------|-----------|------------------|------------------|------------------|------|------------------|-----------------|-----------|------------------|----------------|------------------|----|
| 1  | 149.0727         | 75.0400         |           |                  |                  |                  | F    |                  |                 |           |                  |                |                  | 14 |
| 2  | <b>313.1331</b>  | 157.0702        |           |                  |                  |                  | Y    | <b>1517.6717</b> | 759.3395        | 1499.6481 | 750.3277         | 1499.6611      | 750.3342         | 13 |
| 3  | <b>385.1672</b>  | 193.0873        |           |                  |                  |                  | A    | <b>1353.6113</b> | 677.3093        | 1335.5878 | 668.2975         | 1335.6008      | 668.3040         | 12 |
| 4  | <b>499.2483</b>  | 250.1278        |           |                  |                  |                  | I    | <b>1281.5772</b> | <b>641.2922</b> | 1263.5536 | <b>632.2804</b>  | 1263.5666      | <b>632.2870</b>  | 11 |
| 5  | 587.2774         | 294.1423        |           |                  | 569.2668         | 285.1371         | S    | <b>1167.4961</b> | 584.2517        | 1149.4725 | 575.2399         | 1149.4855      | 575.2464         | 10 |
| 6  | <b>659.3115</b>  | 330.1594        |           |                  | <b>641.3010</b>  | 321.1541         | A    | <b>1079.4670</b> | 540.2372        | 1061.4435 | 531.2254         | 1061.4565      | 531.2319         | 9  |
| 7  | <b>789.3512</b>  | 395.1792        |           |                  | <b>771.3406</b>  | 386.1739         | E    | <b>1007.4329</b> | 504.2201        | 989.4093  | 495.2083         | 989.4223       | 495.2148         | 8  |
| 8  | <b>937.4166</b>  | 469.2120        |           |                  | <b>919.4061</b>  | 460.2067         | F    | <b>877.3933</b>  | 439.2003        | 859.3697  | 430.1885         | 859.3827       | 430.1950         | 7  |
| 9  | 1035.4664        | 518.2369        |           |                  | 1017.4559        | 509.2316         | P    | <b>729.3278</b>  | 365.1675        | 711.3042  | 356.1558         | 711.3172       | 356.1623         | 6  |
| 10 | 1165.5061        | 583.2567        |           |                  | 1147.4955        | 574.2514         | E    | <b>631.2780</b>  | 316.1426        | 613.2544  | 307.1309         | 613.2674       | 307.1374         | 5  |
| 11 | <b>1313.5715</b> | 657.2894        |           |                  | <b>1295.5609</b> | 648.2841         | F    | <b>501.2384</b>  | 251.1228        | 483.2148  | 242.1110         | 483.2278       | 242.1175         | 4  |
| 12 | 1401.6006        | 701.3039        |           |                  | 1383.5900        | 692.2986         | S    | <b>353.1729</b>  | 177.0901        | 335.1493  | 168.0783         | 335.1624       | 168.0848         | 3  |
| 13 | <b>1517.6376</b> | 759.3224        | 1499.6140 | 750.3106         | 1499.6270        | 750.3171         | N    | 265.1439         | 133.0756        | 247.1203  | 124.0638         |                |                  | 2  |
| 14 |                  |                 |           |                  |                  |                  | K    | 149.1069         | 75.0571         | 131.0833  | 66.0453          |                |                  | 1  |

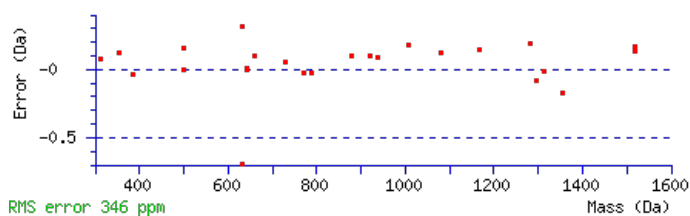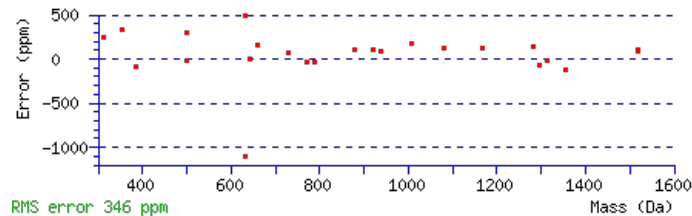

NCBI BLAST search of [FYAISAEFPFESNK](#)



## AT1G56340.2

(Parameters: blastp, nr protein database, expect=20000, no filter, PAM30)

Other BLAST [web gateways](#)

### All matches to this query

| Score | Mr(calc)  | Delta   | Sequence                        |
|-------|-----------|---------|---------------------------------|
| 94.1  | 1664.7299 | 0.0044  | <a href="#">FYAISAEPPEFSNK</a>  |
| 17.4  | 1664.7362 | -0.0019 | <a href="#">LENKPVGEEASSETR</a> |
| 16.1  | 1664.7357 | -0.0014 | <a href="#">ETTYVETSTNITYK</a>  |
| 7.7   | 1664.7393 | -0.0050 | <a href="#">MCGGAIISDFIPPPR</a> |
| 4.8   | 1664.7366 | -0.0023 | <a href="#">DFSTTVIMKSFMDK</a>  |

Mascot: <http://www.matrixscience.com/>



# Mascot Search Results

## Peptide View

MS/MS Fragmentation of **FNPLWNTLVGGVK**

Found in **AT1G56450.1** in **TAIR\_Arabidopsis**, Symbols: PBG1 | PBG1 (20S proteasome beta subunit G1); peptidase | chr1:21145635-21147851  
FORWARD

Match to Query 6608: 1556.871218 from(779.442885,2+) index(9935)  
Title: Elution from: 92.899 to 92.899 scan no 14056 cid35.00 polarity:+  
Data file D12h-1\_3.mgf

Click mouse within plot area to zoom in by factor of two about that point

Or,   to  Da

Label all possible matches  Label matches used for scoring

Show Y-axis

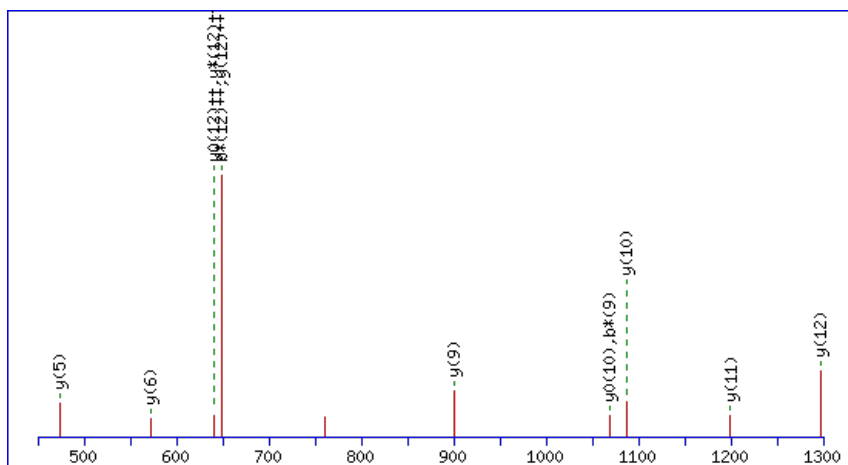

Monoisotopic mass of neutral peptide  $M_r(\text{calc})$ : 1556.8715

Fixed modifications: Carbamidomethyl (C) (apply to specified residues or termini only)

Ions Score: 50 Expect: 3.3e-005

Matches : 12/128 fragment ions using 10 most intense peaks [\(help\)](#)

| #  | b         | b <sup>++</sup> | b*        | b <sup>*++</sup> | b <sup>0</sup> | b <sup>0++</sup> | Seq. | y         | y <sup>++</sup> | y*        | y <sup>*++</sup> | y <sup>0</sup> | y <sup>0++</sup> | #  |
|----|-----------|-----------------|-----------|------------------|----------------|------------------|------|-----------|-----------------|-----------|------------------|----------------|------------------|----|
| 1  | 148.0757  | 74.5415         |           |                  |                |                  | F    |           |                 |           |                  |                |                  | 14 |
| 2  | 262.1186  | 131.5629        | 245.0921  | 123.0497         |                |                  | N    | 1410.8104 | 705.9088        | 1393.7838 | 697.3955         | 1392.7998      | 696.9035         | 13 |
| 3  | 359.1714  | 180.0893        | 342.1448  | 171.5761         |                |                  | P    | 1296.7674 | 648.8874        | 1279.7409 | 640.3741         | 1278.7569      | 639.8821         | 12 |
| 4  | 472.2554  | 236.6314        | 455.2289  | 228.1181         |                |                  | L    | 1199.7147 | 600.3610        | 1182.6881 | 591.8477         | 1181.7041      | 591.3557         | 11 |
| 5  | 658.3348  | 329.6710        | 641.3082  | 321.1577         |                |                  | W    | 1086.6306 | 543.8189        | 1069.6041 | 535.3057         | 1068.6200      | 534.8137         | 10 |
| 6  | 772.3777  | 386.6925        | 755.3511  | 378.1792         |                |                  | N    | 900.5513  | 450.7793        | 883.5247  | 442.2660         | 882.5407       | 441.7740         | 9  |
| 7  | 873.4254  | 437.2163        | 856.3988  | 428.7030         | 855.4148       | 428.2110         | T    | 786.5084  | 393.7578        | 769.4818  | 385.2445         | 768.4978       | 384.7525         | 8  |
| 8  | 986.5094  | 493.7584        | 969.4829  | 485.2451         | 968.4989       | 484.7531         | L    | 685.4607  | 343.2340        | 668.4341  | 334.7207         |                |                  | 7  |
| 9  | 1085.5778 | 543.2926        | 1068.5513 | 534.7793         | 1067.5673      | 534.2873         | V    | 572.3766  | 286.6919        | 555.3501  | 278.1787         |                |                  | 6  |
| 10 | 1198.6619 | 599.8346        | 1181.6354 | 591.3213         | 1180.6513      | 590.8293         | L    | 473.3082  | 237.1577        | 456.2817  | 228.6445         |                |                  | 5  |
| 11 | 1255.6834 | 628.3453        | 1238.6568 | 619.8320         | 1237.6728      | 619.3400         | G    | 360.2241  | 180.6157        | 343.1976  | 172.1024         |                |                  | 4  |
| 12 | 1312.7048 | 656.8561        | 1295.6783 | 648.3428         | 1294.6943      | 647.8508         | G    | 303.2027  | 152.1050        | 286.1761  | 143.5917         |                |                  | 3  |
| 13 | 1411.7732 | 706.3903        | 1394.7467 | 697.8770         | 1393.7627      | 697.3850         | V    | 246.1812  | 123.5942        | 229.1547  | 115.0810         |                |                  | 2  |
| 14 |           |                 |           |                  |                |                  | K    | 147.1128  | 74.0600         | 130.0863  | 65.5468          |                |                  | 1  |

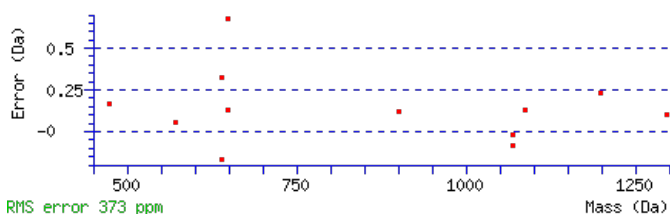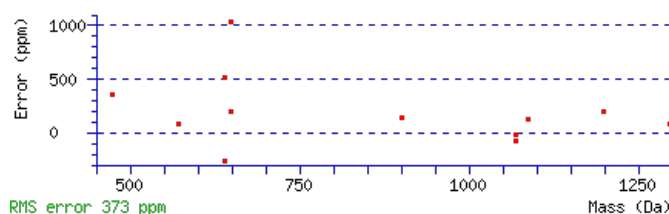

NCBI BLAST search of [FNPLWNTLVGGVK](#)

## AT1G56450.1

(Parameters: blastp, nr protein database, expect=20000, no filter, PAM30)

Other BLAST [web gateways](#)

### All matches to this query

| Score | Mr(calc)  | Delta   | Sequence                       |
|-------|-----------|---------|--------------------------------|
| 49.6  | 1556.8715 | -0.0003 | <a href="#">FNPLWNTLVLGGVK</a> |
| 6.7   | 1556.8755 | -0.0043 | <a href="#">MMNLVRANRIAR</a>   |

Mascot: <http://www.matrixscience.com/>

## Peptide View

MS/MS Fragmentation of **ALIAAEYAGVK**Found in **AT1G57720.1** in **TAIR\_Arabidopsis**, Symbols: | elongation factor 1B-gamma, putative / eEF-1B gamma, putative | chr1:21381538-21383779 FORWARD

Match to Query 3490: 1116.584428 from(559.299490,2+) index(4291)

Title: Elution from: 39.800 to 39.800 scan no 5390 cid35.00 polarity:+

Data file D12h-3\_2.mgf

Click mouse within plot area to zoom in by factor of two about that point

Or,   to  Da Label all possible matches  Label matches used for scoring Show Y-axis 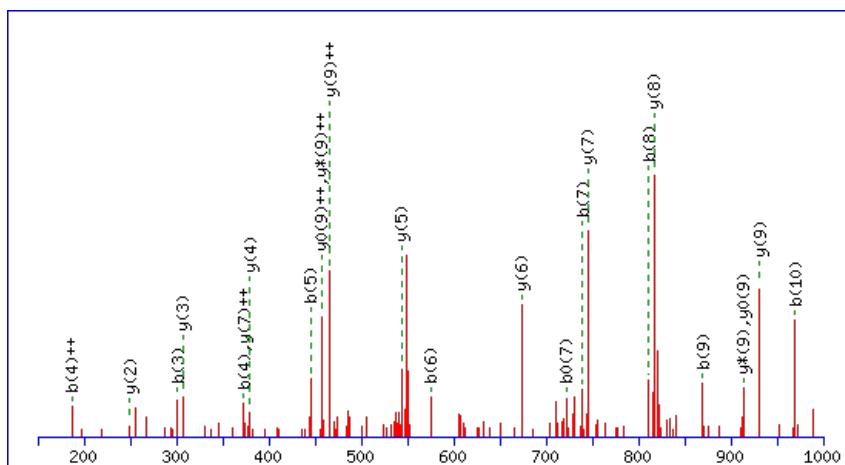Monoisotopic mass of neutral peptide  $M_r(\text{calc})$ : 1116.5823

Fixed modifications: Carbamidomethyl (C) (apply to specified residues or termini only)

Ions Score: 73 Expect: 6e-007

Matches : 25/80 fragment ions using 33 most intense peaks ([help](#))

| #  | b               | b <sup>++</sup> | b <sup>0</sup>  | b <sup>0++</sup> | Seq. | y               | y <sup>++</sup> | y <sup>*</sup>  | y <sup>*++</sup> | y <sup>0</sup>  | y <sup>0++</sup> | #  |
|----|-----------------|-----------------|-----------------|------------------|------|-----------------|-----------------|-----------------|------------------|-----------------|------------------|----|
| 1  | 73.0414         | 37.0244         |                 |                  | A    |                 |                 |                 |                  |                 |                  | 11 |
| 2  | <b>187.1225</b> | 94.0649         |                 |                  | L    | 1045.5555       | 523.2814        | 1027.5319       | 514.2696         | 1027.5449       | 514.2761         | 10 |
| 3  | <b>301.2036</b> | 151.1054        |                 |                  | I    | <b>931.4744</b> | <b>466.2408</b> | <b>913.4508</b> | <b>457.2290</b>  | <b>913.4638</b> | <b>457.2355</b>  | 9  |
| 4  | <b>373.2378</b> | <b>187.1225</b> |                 |                  | A    | <b>817.3933</b> | 409.2003        | 799.3697        | 400.1885         | 799.3827        | 400.1950         | 8  |
| 5  | <b>445.2719</b> | 223.1396        |                 |                  | A    | <b>745.3591</b> | <b>373.1832</b> | 727.3355        | 364.1714         | 727.3485        | 364.1779         | 7  |
| 6  | <b>575.3115</b> | 288.1594        | 557.3010        | 279.1541         | E    | <b>673.3250</b> | 337.1661        | 655.3014        | 328.1543         | 655.3144        | 328.1608         | 6  |
| 7  | <b>739.3719</b> | 370.1896        | <b>721.3613</b> | 361.1843         | Y    | <b>543.2853</b> | 272.1463        | 525.2618        | 263.1345         |                 |                  | 5  |
| 8  | <b>811.4061</b> | 406.2067        | 793.3955        | 397.2014         | A    | <b>379.2250</b> | 190.1161        | 361.2014        | 181.1043         |                 |                  | 4  |
| 9  | <b>869.4246</b> | 435.2159        | 851.4140        | 426.2106         | G    | <b>307.1908</b> | 154.0990        | 289.1672        | 145.0873         |                 |                  | 3  |
| 10 | <b>969.4900</b> | 485.2486        | 951.4794        | 476.2434         | V    | <b>249.1723</b> | 125.0898        | 231.1487        | 116.0780         |                 |                  | 2  |
| 11 |                 |                 |                 |                  | K    | 149.1069        | 75.0571         | 131.0833        | 66.0453          |                 |                  | 1  |

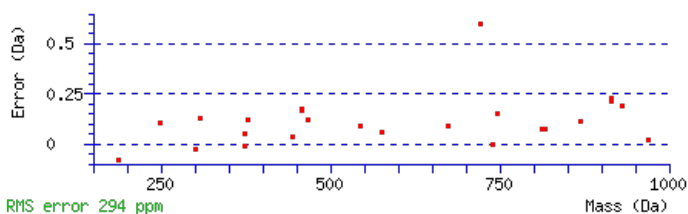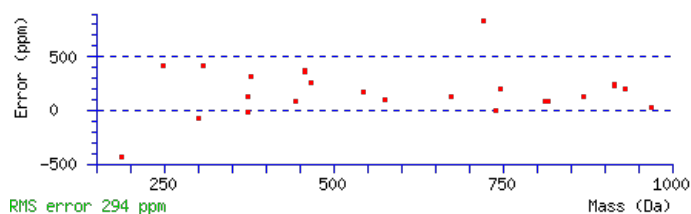NCBI BLAST search of **ALIAAEYAGVK**

(Parameters: blastp, nr protein database, expect=20000, no filter, PAM30)

Other BLAST [web gateways](#)

All matches to this query

**AT1G57720.1**

| <b>Score</b> | <b>Mr(calc)</b> | <b>Delta</b> | <b>Sequence</b>             |
|--------------|-----------------|--------------|-----------------------------|
| 72.6         | 1116.5823       | 0.0021       | <a href="#">ALIAAEYAGVK</a> |
| 8.3          | 1116.5823       | 0.0021       | <a href="#">ALIEGQFLSK</a>  |
| 4.6          | 1116.5823       | 0.0021       | <a href="#">FVQEVKDLK</a>   |
| 3.1          | 1116.5828       | 0.0017       | <a href="#">ALAREIVSSR</a>  |
| 0.5          | 1116.5824       | 0.0021       | <a href="#">SPSSLNIFK</a>   |
| 0.4          | 1116.5823       | 0.0021       | <a href="#">IASQELAFVK</a>  |

**Mascot:** <http://www.matrixscience.com/>

### Peptide View

 MS/MS Fragmentation of **QYVAQIPQLPNTTEVWFQRPK**

 Found in **AT1G58080.1** in **TAIR\_Arabidopsis**, Symbols: H1SN1A, ATATP-PR1 | ATATP-PR1 (ATP PHOSPHORIBOSYL TRANSFERASE) | chr1:21508227-21511094 REVERSE

Match to Query 10571: 2471.193519 from(824.738449,3+) index(9351)

Title: Elution from: 84.352 to 84.352 scan no 12637 cid35.00 polarity:+

Data file D12h-3\_1.mgf

Click mouse within plot area to zoom in by factor of two about that point

 Or,   to  Da 

 Label all possible matches  Label matches used for scoring 

 Show Y-axis 
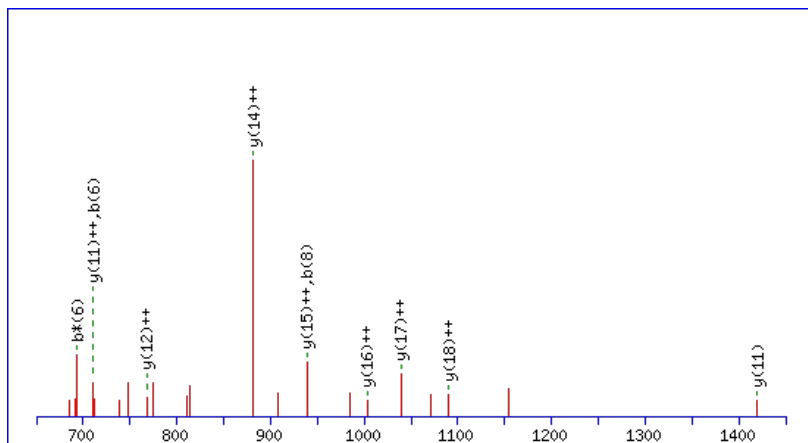
 Monoisotopic mass of neutral peptide  $M_r(\text{calc})$ : 2471.1966

Fixed modifications: Carbamidomethyl (C) (apply to specified residues or termini only)

Ions Score: 36 Expect: 0.0015

 Matches : 11/192 fragment ions using 19 most intense peaks ([help](#))

| #  | b               | b <sup>++</sup> | b <sup>*</sup>  | b <sup>*++</sup> | b <sup>0</sup> | b <sup>0++</sup> | Seq | y                | y <sup>++</sup> | y <sup>*</sup> | y <sup>*++</sup> | y <sup>0</sup> | y <sup>0++</sup> | #  |
|----|-----------------|-----------------|-----------------|------------------|----------------|------------------|-----|------------------|-----------------|----------------|------------------|----------------|------------------|----|
| 1  | 131.0599        | 66.0336         | 113.0363        | 57.0218          |                |                  | Q   |                  |                 |                |                  |                |                  | 20 |
| 2  | 295.1203        | 148.0638        | 277.0967        | 139.0520         |                |                  | Y   | 2342.1512        | 1171.5793       | 2324.1277      | 1162.5675        | 2324.1407      | 1162.5740        | 19 |
| 3  | 395.1857        | 198.0965        | 377.1622        | 189.0847         |                |                  | V   | 2178.0909        | 1089.5491       | 2160.0673      | 1080.5373        | 2160.0803      | 1080.5438        | 18 |
| 4  | 467.2199        | 234.1136        | 449.1963        | 225.1018         |                |                  | A   | 2078.0254        | 1039.5164       | 2060.0018      | 1030.5046        | 2060.0149      | 1030.5111        | 17 |
| 5  | 597.2725        | 299.1399        | 579.2489        | 290.1281         |                |                  | Q   | 2005.9913        | 1003.4993       | 1987.9677      | 994.4875         | 1987.9807      | 994.4940         | 16 |
| 6  | <b>711.3536</b> | 356.1805        | <b>693.3300</b> | 347.1687         |                |                  | I   | 1875.9386        | <b>938.4730</b> | 1857.9150      | 929.4612         | 1857.9281      | 929.4677         | 15 |
| 7  | 809.4034        | 405.2054        | 791.3798        | 396.1936         |                |                  | P   | 1761.8575        | <b>881.4324</b> | 1743.8339      | 872.4206         | 1743.8470      | 872.4271         | 14 |
| 8  | <b>939.4561</b> | 470.2317        | 921.4325        | 461.2199         |                |                  | Q   | 1663.8077        | 832.4075        | 1645.7842      | 823.3957         | 1645.7972      | 823.4022         | 13 |
| 9  | 1053.5372       | 527.2722        | 1035.5136       | 518.2604         |                |                  | L   | 1533.7551        | <b>767.3812</b> | 1515.7315      | 758.3694         | 1515.7445      | 758.3759         | 12 |
| 10 | 1151.5870       | 576.2971        | 1133.5634       | 567.2853         |                |                  | P   | <b>1419.6740</b> | <b>710.3406</b> | 1401.6504      | 701.3288         | 1401.6634      | 701.3353         | 11 |
| 11 | 1267.6240       | 634.3156        | 1249.6004       | 625.3038         |                |                  | N   | 1321.6242        | 661.3157        | 1303.6006      | 652.3039         | 1303.6136      | 652.3105         | 10 |
| 12 | 1369.6687       | 685.3380        | 1351.6451       | 676.3262         | 1351.6581      | 676.3327         | T   | 1205.5872        | 603.2972        | 1187.5636      | 594.2854         | 1187.5766      | 594.2920         | 9  |
| 13 | 1499.7083       | 750.3578        | 1481.6847       | 741.3460         | 1481.6977      | 741.3525         | E   | 1103.5425        | 552.2749        | 1085.5189      | 543.2631         | 1085.5319      | 543.2696         | 8  |
| 14 | 1599.7738       | 800.3905        | 1581.7502       | 791.3787         | 1581.7632      | 791.3852         | V   | 973.5029         | 487.2551        | 955.4793       | 478.2433         |                |                  | 7  |
| 15 | 1787.8471       | 894.4272        | 1769.8236       | 885.4154         | 1769.8366      | 885.4219         | W   | 873.4374         | 437.2223        | 855.4138       | 428.2105         |                |                  | 6  |
| 16 | 1935.9126       | 968.4599        | 1917.8890       | 959.4481         | 1917.9020      | 959.4547         | F   | 685.3640         | 343.1856        | 667.3404       | 334.1739         |                |                  | 5  |
| 17 | 2065.9652       | 1033.4863       | 2047.9417       | 1024.4745        | 2047.9547      | 1024.4810        | Q   | 537.2986         | 269.1529        | 519.2750       | 260.1411         |                |                  | 4  |
| 18 | 2226.0545       | 1113.5309       | 2208.0309       | 1104.5191        | 2208.0439      | 1104.5256        | R   | 407.2459         | 204.1266        | 389.2223       | 195.1148         |                |                  | 3  |
| 19 | 2324.1043       | 1162.5558       | 2306.0807       | 1153.5440        | 2306.0937      | 1153.5505        | P   | 247.1567         | 124.0820        | 229.1331       | 115.0702         |                |                  | 2  |
| 20 |                 |                 |                 |                  |                |                  | K   | 149.1069         | 75.0571         | 131.0833       | 66.0453          |                |                  | 1  |

# AT1G58080.1

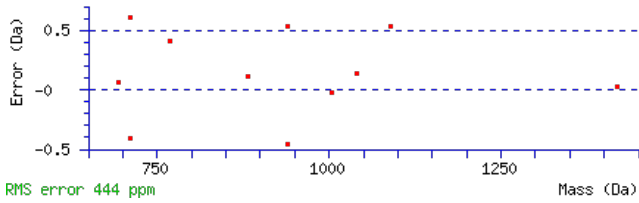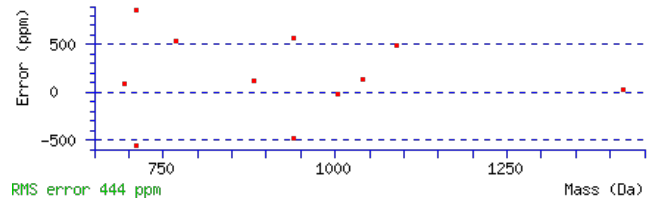

NCBI BLAST search of [QYVAQIPQLPNTVWFQRPK](#)  
 (Parameters: blastp, nr protein database, expect=20000, no filter, PAM30)  
 Other BLAST [web gateways](#)

## All matches to this query

| Score | Mr(calc)  | Delta   | Sequence                                 |
|-------|-----------|---------|------------------------------------------|
| 36.0  | 2471.1966 | -0.0031 | <a href="#">QYVAQIPQLPNTVWFQRPK</a>      |
| 11.6  | 2471.1944 | -0.0008 | <a href="#">FDHTSPDNILRYNLALTVPVR</a>    |
| 8.5   | 2471.1944 | -0.0008 | <a href="#">YSDPLVYTGFIARTGNEILR</a>     |
| 6.3   | 2471.2000 | -0.0065 | <a href="#">SENLYLNPAMNGVIPKYLIHR</a>    |
| 4.4   | 2471.1908 | 0.0028  | <a href="#">YLIGSAVMMIGVLPVGYMMER</a>    |
| 4.3   | 2471.1976 | -0.0041 | <a href="#">SDVTGEKSIVPKTEPSSSNVIAAK</a> |
| 3.6   | 2471.1944 | -0.0009 | <a href="#">QPFSQIPQLVAQPGSSVNPPPR</a>   |
| 2.7   | 2471.1923 | 0.0012  | <a href="#">CVILGCLVRFWLGLMWFKE</a>      |
| 2.6   | 2471.1903 | 0.0032  | <a href="#">MELHGALVASPGMGHAVPIELGK</a>  |
| 2.6   | 2471.1870 | 0.0066  | <a href="#">AYPVGPLLHLKVNCDYVDKK</a>     |

Mascot: <http://www.matrixscience.com/>

**Peptide View**MS/MS Fragmentation of **NEFLFPK**Found in **AT1G58230.1** in **TAIR\_Arabidopsis**, Symbols: | WD-40 repeat family protein / beige-related | chr1:21577371-21582530 FORWARD

Match to Query 1724: 902.440676 from(452.227614,2+) index(5961)

Title: Elution from: 52.187 to 52.187 scan no 7513 cid35.00 polarity:+

Data file D6h-1\_1.mgf

Click mouse within plot area to zoom in by factor of two about that point

Or,   to  Da Label all possible matches  Label matches used for scoring Show Y-axis 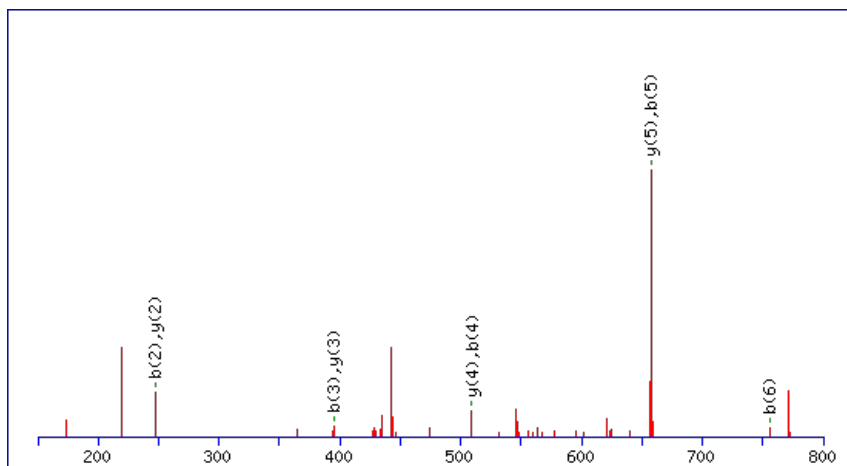Monoisotopic mass of neutral peptide **Mr(calc)**: 902.4380

Fixed modifications: Carbamidomethyl (C) (apply to specified residues or termini only)

Ions Score: 25 **Expect**: 0.048Matches : 9/60 fragment ions using 20 most intense peaks ([help](#))

| # | b               | b <sup>++</sup> | b*       | b <sup>*++</sup> | b <sup>0</sup> | b <sup>0++</sup> | Seq. | y               | y <sup>++</sup> | y*       | y <sup>*++</sup> | y <sup>0</sup> | y <sup>0++</sup> | # |
|---|-----------------|-----------------|----------|------------------|----------------|------------------|------|-----------------|-----------------|----------|------------------|----------------|------------------|---|
| 1 | 117.0443        | 59.0258         | 99.0207  | 50.0140          |                |                  | N    |                 |                 |          |                  |                |                  | 7 |
| 2 | <b>247.0839</b> | 124.0456        | 229.0603 | 115.0338         | 229.0733       | 115.0403         | E    | 787.4083        | 394.2078        | 769.3847 | 385.1960         | 769.3977       | 385.2025         | 6 |
| 3 | <b>395.1493</b> | 198.0783        | 377.1258 | 189.0665         | 377.1388       | 189.0730         | F    | <b>657.3687</b> | 329.1880        | 639.3451 | 320.1762         |                |                  | 5 |
| 4 | <b>509.2304</b> | 255.1189        | 491.2069 | 246.1071         | 491.2199       | 246.1136         | L    | <b>509.3032</b> | 255.1552        | 491.2796 | 246.1435         |                |                  | 4 |
| 5 | <b>657.2959</b> | 329.1516        | 639.2723 | 320.1398         | 639.2853       | 320.1463         | F    | <b>395.2221</b> | 198.1147        | 377.1985 | 189.1029         |                |                  | 3 |
| 6 | <b>755.3457</b> | 378.1765        | 737.3221 | 369.1647         | 737.3351       | 369.1712         | P    | <b>247.1567</b> | 124.0820        | 229.1331 | 115.0702         |                |                  | 2 |
| 7 |                 |                 |          |                  |                |                  | K    | 149.1069        | 75.0571         | 131.0833 | 66.0453          |                |                  | 1 |

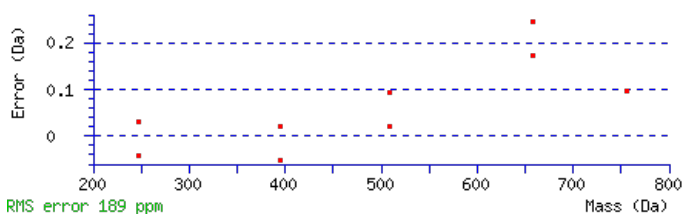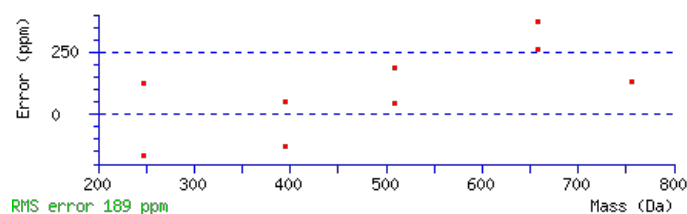NCBI **BLAST** search of **NEFLFPK**

(Parameters: blastp, nr protein database, expect=20000, no filter, PAM30)

Other BLAST [web gateways](#)**All matches to this query**

| Score | Mr(calc) | Delta   | Sequence                |
|-------|----------|---------|-------------------------|
| 25.0  | 902.4380 | 0.0027  | <a href="#">NEFLFPK</a> |
| 20.3  | 902.4414 | -0.0007 | <a href="#">MLKYDPK</a> |
| 17.4  | 902.4414 | -0.0007 | <a href="#">MLFDIQK</a> |



## AT1G58230.1

|      |          |         |                           |
|------|----------|---------|---------------------------|
| 10.3 | 902.4414 | -0.0007 | <a href="#">MLDOFLK</a>   |
| 8.5  | 902.4414 | -0.0007 | <a href="#">DFVAAMIK</a>  |
| 7.2  | 902.4414 | -0.0007 | <a href="#">KIMFDPK</a>   |
| 7.0  | 902.4391 | 0.0015  | <a href="#">MTASIGSVK</a> |
| 6.1  | 902.4414 | -0.0007 | <a href="#">QMLVYPK</a>   |
| 5.6  | 902.4418 | -0.0011 | <a href="#">GRSGLCIK</a>  |
| 5.0  | 902.4418 | -0.0012 | <a href="#">KMQNKKNK</a>  |

**Mascot:** <http://www.matrixscience.com/>

**Peptide View**MS/MS Fragmentation of **FLSFADIK**Found in **AT1G58270.1** in **TAIR\_Arabidopsis**, Symbols: ZW9 | ZW9 | chr1:21616059-21617754 REVERSE

Match to Query 1928: 939.507188 from(470.760870,2+) index(7162)

Title: Elution from: 63.522 to 63.522 scan no 9351 cid35.00 polarity:+

Data file D12h-3\_2.mgf

Click mouse within plot area to zoom in by factor of two about that point

Or,   to  Da Label all possible matches  Label matches used for scoring Show Y-axis 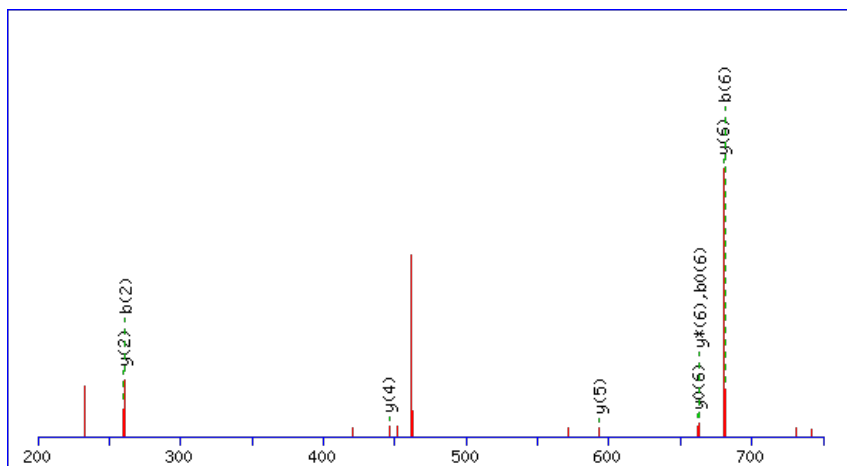Monoisotopic mass of neutral peptide  $M_r(\text{calc})$ : 939.5066

Fixed modifications: Carbamidomethyl (C) (apply to specified residues or termini only)

Ions Score: 30 Expect: 0.0032

Matches : 9/62 fragment ions using 15 most intense peaks ([help](#))

| # | b               | b <sup>++</sup> | b <sup>0</sup>  | b <sup>0++</sup> | Seq. | y               | y <sup>++</sup> | y*              | y <sup>*++</sup> | y <sup>0</sup>  | y <sup>0++</sup> | # |
|---|-----------------|-----------------|-----------------|------------------|------|-----------------|-----------------|-----------------|------------------|-----------------|------------------|---|
| 1 | 148.0757        | 74.5415         |                 |                  | F    |                 |                 |                 |                  |                 |                  | 8 |
| 2 | <b>261.1598</b> | 131.0835        |                 |                  | L    | 793.4454        | 397.2264        | 776.4189        | 388.7131         | 775.4349        | 388.2211         | 7 |
| 3 | 348.1918        | 174.5995        | 330.1812        | 165.5942         | S    | <b>680.3614</b> | 340.6843        | <b>663.3348</b> | 332.1710         | <b>662.3508</b> | 331.6790         | 6 |
| 4 | 495.2602        | 248.1337        | 477.2496        | 239.1285         | F    | <b>593.3293</b> | 297.1683        | 576.3028        | 288.6550         | 575.3188        | 288.1630         | 5 |
| 5 | 566.2973        | 283.6523        | 548.2867        | 274.6470         | A    | <b>446.2609</b> | 223.6341        | 429.2344        | 215.1208         | 428.2504        | 214.6288         | 4 |
| 6 | <b>681.3243</b> | 341.1658        | <b>663.3137</b> | 332.1605         | D    | 375.2238        | 188.1155        | 358.1973        | 179.6023         | 357.2132        | 179.1103         | 3 |
| 7 | 794.4083        | 397.7078        | 776.3978        | 388.7025         | I    | <b>260.1969</b> | 130.6021        | 243.1703        | 122.0888         |                 |                  | 2 |
| 8 |                 |                 |                 |                  | K    | 147.1128        | 74.0600         | 130.0863        | 65.5468          |                 |                  | 1 |

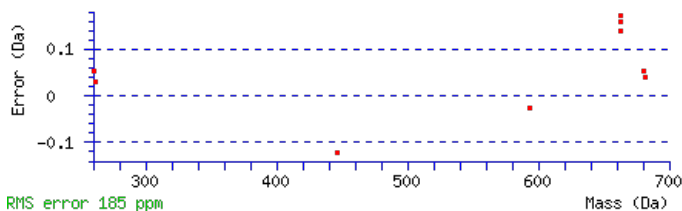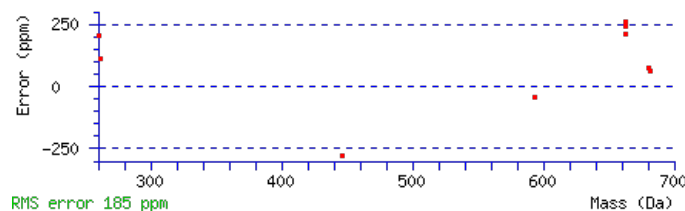NCBI **BLAST** search of [FLSFADIK](#)

(Parameters: blastp, nr protein database, expect=20000, no filter, PAM30)

Other BLAST [web gateways](#)**All matches to this query**

| Score | $M_r(\text{calc})$ | Delta  | Sequence                 |
|-------|--------------------|--------|--------------------------|
| 29.7  | 939.5066           | 0.0006 | <a href="#">FLSFADIK</a> |
| 0.2   | 939.5066           | 0.0006 | <a href="#">TVFFLGEK</a> |



**Peptide View**MS/MS Fragmentation of **AFVVVGDGNGHVGLGVK**Found in **AT1G58380.1** in **TAIR\_Arabidopsis**, Symbols: XW6 | XW6; structural constituent of ribosome | chr1:21692780-21693750 FORWARD

Match to Query 7767: 1644.815019 from(549.278949,3+) index(5769)

Title: Elution from: 51.018 to 51.018 scan no 7236 cid35.00 polarity:+

Data file C7-3\_1.mgf

Click mouse within plot area to zoom in by factor of two about that point

Or,   to  Da Label all possible matches  Label matches used for scoring Show Y-axis 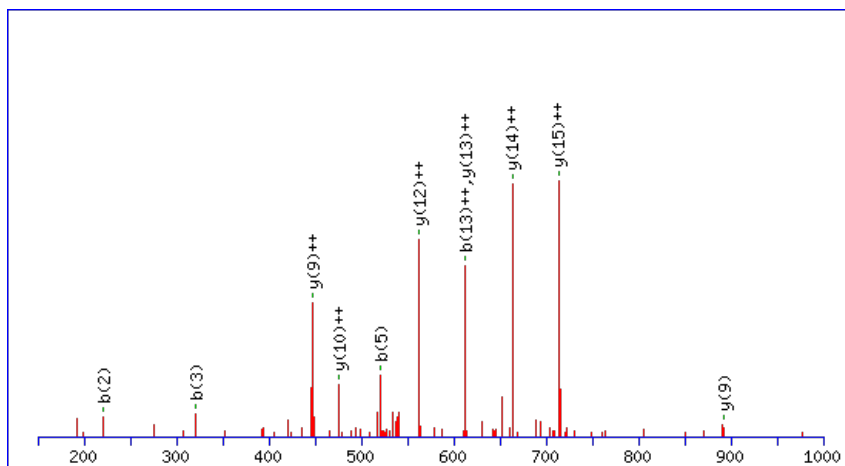Monoisotopic mass of neutral peptide **Mr(calc)**: 1644.8110**Fixed modifications**: Carbamidomethyl (C) (apply to specified residues or termini only)**Ions Score**: 37 **Expect**: 0.0013**Matches**: 11/144 fragment ions using 16 most intense peaks ([help](#))

| #  | b               | b <sup>++</sup> | b <sup>*</sup> | b <sup>*++</sup> | b <sup>0</sup> | b <sup>0++</sup> | Seq. | y               | y <sup>++</sup> | y <sup>*</sup> | y <sup>*++</sup> | y <sup>0</sup> | y <sup>0++</sup> | #  |
|----|-----------------|-----------------|----------------|------------------|----------------|------------------|------|-----------------|-----------------|----------------|------------------|----------------|------------------|----|
| 1  | 73.0414         | 37.0244         |                |                  |                |                  | A    |                 |                 |                |                  |                |                  | 17 |
| 2  | <b>221.1069</b> | 111.0571        |                |                  |                |                  | F    | 1573.7842       | 787.3957        | 1555.7606      | 778.3839         | 1555.7736      | 778.3904         | 16 |
| 3  | <b>321.1723</b> | 161.0898        |                |                  |                |                  | V    | 1425.7187       | <b>713.3630</b> | 1407.6951      | 704.3512         | 1407.7081      | 704.3577         | 15 |
| 4  | 421.2378        | 211.1225        |                |                  |                |                  | V    | 1325.6533       | <b>663.3303</b> | 1307.6297      | 654.3185         | 1307.6427      | 654.3250         | 14 |
| 5  | <b>521.3032</b> | 261.1552        |                |                  |                |                  | V    | 1225.5878       | <b>613.2975</b> | 1207.5642      | 604.2857         | 1207.5772      | 604.2923         | 13 |
| 6  | 579.3217        | 290.1645        |                |                  |                |                  | G    | 1125.5224       | <b>563.2648</b> | 1107.4988      | 554.2530         | 1107.5118      | 554.2595         | 12 |
| 7  | 695.3457        | 348.1765        |                |                  | 677.3351       | 339.1712         | D    | 1067.5039       | 534.2556        | 1049.4803      | 525.2438         | 1049.4933      | 525.2503         | 11 |
| 8  | 753.3642        | 377.1857        |                |                  | 735.3536       | 368.1805         | G    | 951.4799        | <b>476.2436</b> | 933.4563       | 467.2318         |                |                  | 10 |
| 9  | 869.4012        | 435.2042        | 851.3776       | 426.1924         | 851.3906       | 426.1990         | N    | <b>893.4614</b> | <b>447.2343</b> | 875.4378       | 438.2225         |                |                  | 9  |
| 10 | 927.4197        | 464.2135        | 909.3961       | 455.2017         | 909.4091       | 455.2082         | G    | 777.4244        | 389.2158        | 759.4008       | 380.2040         |                |                  | 8  |
| 11 | 1067.4697       | 534.2385        | 1049.4461      | 525.2267         | 1049.4591      | 525.2332         | H    | 719.4059        | 360.2066        | 701.3823       | 351.1948         |                |                  | 7  |
| 12 | 1167.5352       | 584.2712        | 1149.5116      | 575.2594         | 1149.5246      | 575.2659         | V    | 579.3559        | 290.1816        | 561.3323       | 281.1698         |                |                  | 6  |
| 13 | 1225.5537       | <b>613.2805</b> | 1207.5301      | 604.2687         | 1207.5431      | 604.2752         | G    | 479.2904        | 240.1488        | 461.2668       | 231.1371         |                |                  | 5  |
| 14 | 1339.6348       | 670.3210        | 1321.6112      | 661.3092         | 1321.6242      | 661.3157         | L    | 421.2719        | 211.1396        | 403.2483       | 202.1278         |                |                  | 4  |
| 15 | 1397.6533       | 699.3303        | 1379.6297      | 690.3185         | 1379.6427      | 690.3250         | G    | 307.1908        | 154.0990        | 289.1672       | 145.0873         |                |                  | 3  |
| 16 | 1497.7187       | 749.3630        | 1479.6951      | 740.3512         | 1479.7081      | 740.3577         | V    | 249.1723        | 125.0898        | 231.1487       | 116.0780         |                |                  | 2  |
| 17 |                 |                 |                |                  |                |                  | K    | 149.1069        | 75.0571         | 131.0833       | 66.0453          |                |                  | 1  |

# AT1G58380.1

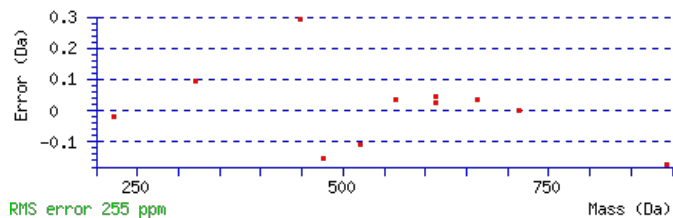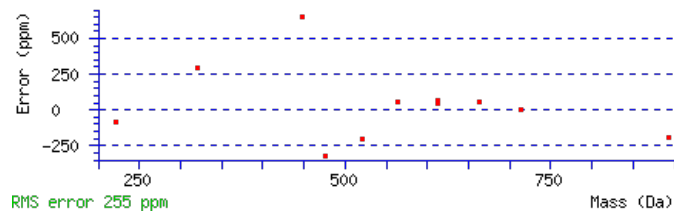

NCBI **BLAST** search of [AFVVVGDGNGHVGLGVK](#)

(Parameters: blastp, nr protein database, expect=20000, no filter, PAM30)

Other BLAST [web gateways](#)

## All matches to this query

| Score | Mr(calc)  | Delta   | Sequence                          |
|-------|-----------|---------|-----------------------------------|
| 36.6  | 1644.8110 | 0.0040  | <a href="#">AFVVVGDGNGHVGLGVK</a> |
| 7.0   | 1644.8191 | -0.0041 | <a href="#">TVQEVVAAGEKLPK</a>    |
| 0.5   | 1644.8191 | -0.0041 | <a href="#">RQEEVVQVTDVVPK</a>    |
| 0.3   | 1644.8170 | -0.0020 | <a href="#">CVIAIVRHGDRTPK</a>    |

Mascot: <http://www.matrixscience.com/>

## Peptide View

### MS/MS Fragmentation of **TYLEMLK**

Found in **AT1G59171.1** in **TAIR\_Arabidopsis**, Symbols: | similar to unknown protein [Arabidopsis thaliana] (TAIR:AT1G58936.1); similar to unknown protein [Arabidopsis thaliana] (TAIR:AT1G58643.1); similar to unknown protein [Arabidopsis thaliana] (TAIR:AT1G59312.1); contains InterPro domain P

Match to Query 1698: 912.462384 from(457.238468,2+) index(2871)

Title: Elution from: 29.604 to 29.604 scan no 3627 cid35.00 polarity:+

Data file 0-2\_2.mgf

Click mouse within plot area to zoom in by factor of two about that point

Or,   to  Da

Label all possible matches  Label matches used for scoring

Show Y-axis

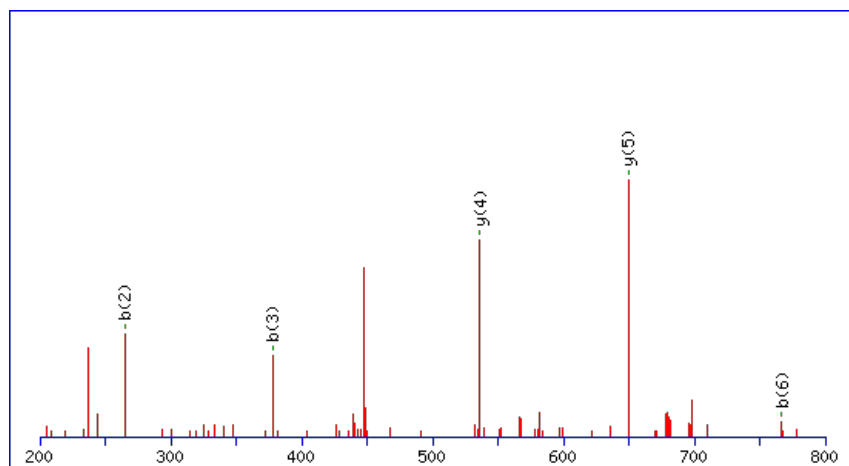

**Monoisotopic mass of neutral peptide Mr(calc):** 912.4626

**Fixed modifications:** Carbamidomethyl (C) (apply to specified residues or termini only)

**Variable modifications:**

**M5** : Oxidation (M), with neutral losses 0.0000 (shown in table), 63.9983

**Ions Score:** 27 **Expect:** 0.0029

**Matches** : 5/84 fragment ions using 6 most intense peaks ([help](#))

| # | b               | b <sup>++</sup> | b <sup>0</sup> | b <sup>0++</sup> | Seq. | y               | y <sup>++</sup> | y*       | y <sup>*++</sup> | y <sup>0</sup> | y <sup>0++</sup> | # |
|---|-----------------|-----------------|----------------|------------------|------|-----------------|-----------------|----------|------------------|----------------|------------------|---|
| 1 | 102.0550        | 51.5311         | 84.0444        | 42.5258          | T    |                 |                 |          |                  |                |                  | 7 |
| 2 | <b>265.1183</b> | 133.0628        | 247.1077       | 124.0575         | Y    | 812.4223        | 406.7148        | 795.3957 | 398.2015         | 794.4117       | 397.7095         | 6 |
| 3 | <b>378.2023</b> | 189.6048        | 360.1918       | 180.5995         | L    | <b>649.3589</b> | 325.1831        | 632.3324 | 316.6698         | 631.3484       | 316.1778         | 5 |
| 4 | 507.2449        | 254.1261        | 489.2344       | 245.1208         | E    | <b>536.2749</b> | 268.6411        | 519.2483 | 260.1278         | 518.2643       | 259.6358         | 4 |
| 5 | 654.2803        | 327.6438        | 636.2698       | 318.6385         | M    | 407.2323        | 204.1198        | 390.2057 | 195.6065         |                |                  | 3 |
| 6 | <b>767.3644</b> | 384.1858        | 749.3538       | 375.1806         | L    | 260.1969        | 130.6021        | 243.1703 | 122.0888         |                |                  | 2 |
| 7 |                 |                 |                |                  | K    | 147.1128        | 74.0600         | 130.0863 | 65.5468          |                |                  | 1 |

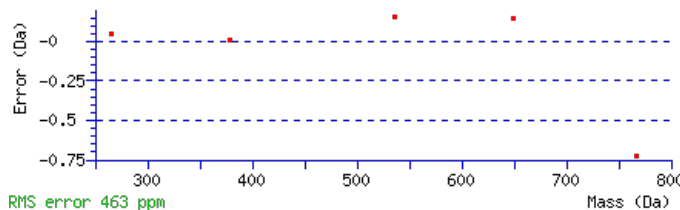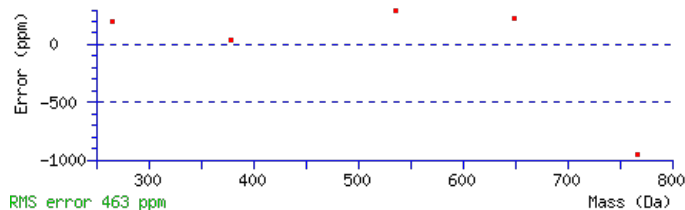

NCBI **BLAST** search of [TYLEMLK](#)

(Parameters: blastp, nr protein database, expect=20000, no filter, PAM30)

Other BLAST [web gateways](#)

All matches to this query

| Score | Mr(calc) | Delta | Sequence |
|-------|----------|-------|----------|
|       |          |       |          |

## AT1G59171.1

|      |          |         |                         |
|------|----------|---------|-------------------------|
| 27.1 | 912.4626 | -0.0002 | <a href="#">TYLEMLK</a> |
| 2.4  | 912.4626 | -0.0002 | <a href="#">LYTLEMK</a> |
| 0.2  | 912.4599 | 0.0024  | <a href="#">RMSYRGK</a> |

**Mascot:** <http://www.matrixscience.com/>

**Peptide View**MS/MS Fragmentation of **AALVFDK**

Found in **AT1G59870.1** in **TAIR\_Arabidopsis**, Symbols: PEN3, PDR8 | PDR8/PEN3 (PLEIOTROPIC DRUG RESISTANCE8); ATPase, coupled to transmembrane movement of substances / cadmium ion transmembrane transporter | chr1:22038326-22043509 FORWARD

Match to Query 788: 762.426996 from(382.220774,2+) index(5338)

Title: Elution from: 48.530 to 48.530 scan no 6784 cid35.00 polarity:+

Data file 0-1\_2.mgf

Click mouse within plot area to zoom in by factor of two about that point

Or,   to  Da

Label all possible matches  Label matches used for scoring

Show Y-axis

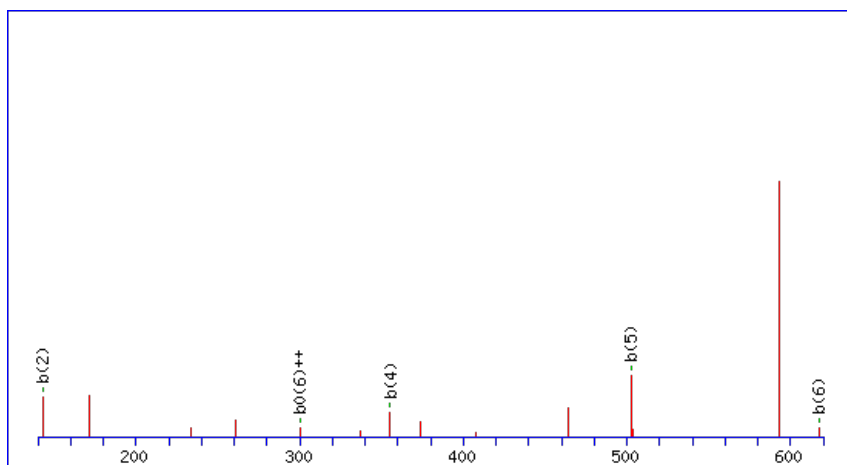

**Monoisotopic mass of neutral peptide Mr(calc):** 762.4276

**Fixed modifications:** Carbamidomethyl (C) (apply to specified residues or termini only)

**Ions Score:** 23 **Expect:** 0.025

**Matches :** 5/48 fragment ions using 10 most intense peaks ([help](#))

| # | b               | b <sup>++</sup> | b <sup>0</sup> | b <sup>0++</sup> | Seq. | y        | y <sup>++</sup> | y*       | y <sup>*++</sup> | y <sup>0</sup> | y <sup>0++</sup> | # |
|---|-----------------|-----------------|----------------|------------------|------|----------|-----------------|----------|------------------|----------------|------------------|---|
| 1 | 72.0444         | 36.5258         |                |                  | A    |          |                 |          |                  |                |                  | 7 |
| 2 | <b>143.0815</b> | 72.0444         |                |                  | A    | 692.3978 | 346.7025        | 675.3712 | 338.1892         | 674.3872       | 337.6972         | 6 |
| 3 | 256.1656        | 128.5864        |                |                  | L    | 621.3606 | 311.1840        | 604.3341 | 302.6707         | 603.3501       | 302.1787         | 5 |
| 4 | <b>355.2340</b> | 178.1206        |                |                  | V    | 508.2766 | 254.6419        | 491.2500 | 246.1287         | 490.2660       | 245.6366         | 4 |
| 5 | <b>502.3024</b> | 251.6548        |                |                  | F    | 409.2082 | 205.1077        | 392.1816 | 196.5944         | 391.1976       | 196.1024         | 3 |
| 6 | <b>617.3293</b> | 309.1683        | 599.3188       | <b>300.1630</b>  | D    | 262.1397 | 131.5735        | 245.1132 | 123.0602         | 244.1292       | 122.5682         | 2 |
| 7 |                 |                 |                |                  | K    | 147.1128 | 74.0600         | 130.0863 | 65.5468          |                |                  | 1 |

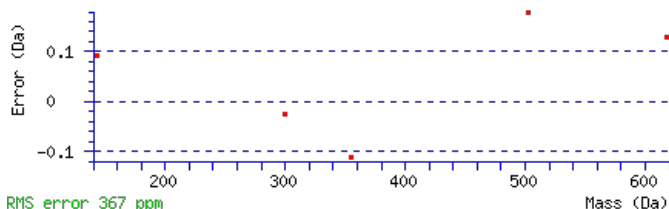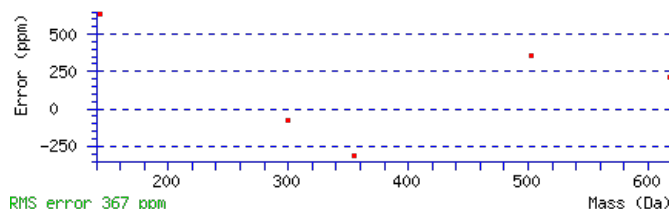

NCBI **BLAST** search of [AALVFDK](#)

(Parameters: blastp, nr protein database, expect=20000, no filter, PAM30)

Other BLAST [web gateways](#)

**All matches to this query**

| Score | Mr(calc) | Delta   | Sequence                |
|-------|----------|---------|-------------------------|
| 23.1  | 762.4276 | -0.0006 | <a href="#">AALVFDK</a> |
| 19.8  | 762.4276 | -0.0006 | <a href="#">GIEGLFK</a> |



# AT1G59870.1

|      |          |         |                         |
|------|----------|---------|-------------------------|
| 19.3 | 762.4276 | -0.0006 | <a href="#">GLEIFGK</a> |
| 12.7 | 762.4276 | -0.0006 | <a href="#">IFLENK</a>  |
| 10.3 | 762.4276 | -0.0006 | <a href="#">FLGALDK</a> |
| 6.7  | 762.4276 | -0.0006 | <a href="#">LVSGYPK</a> |
| 5.3  | 762.4276 | -0.0006 | <a href="#">LTGTFPK</a> |
| 4.0  | 762.4276 | -0.0006 | <a href="#">GLAEFVK</a> |
| 3.8  | 762.4276 | -0.0006 | <a href="#">GLFLEGK</a> |
| 3.8  | 762.4276 | -0.0006 | <a href="#">IGFGIEK</a> |

Mascot: <http://www.matrixscience.com/>



# Mascot Search Results

## Peptide View

MS/MS Fragmentation of **YIGLSEASASTIR**

Found in **AT1G60690.1** in **TAIR\_Arabidopsis**, Symbols: | aldo/keto reductase family protein | chr1:22353557-22355333 REVERSE

Match to Query 5366: 1382.665240 from(692.339896,2+) index(4796)

Title: Elution from: 43.909 to 43.909 scan no 6057 cid35.00 polarity:+

Data file D6h-3\_1.mgf

Click mouse within plot area to zoom in by factor of two about that point

Or,   to  Da

Label all possible matches  Label matches used for scoring

Show Y-axis

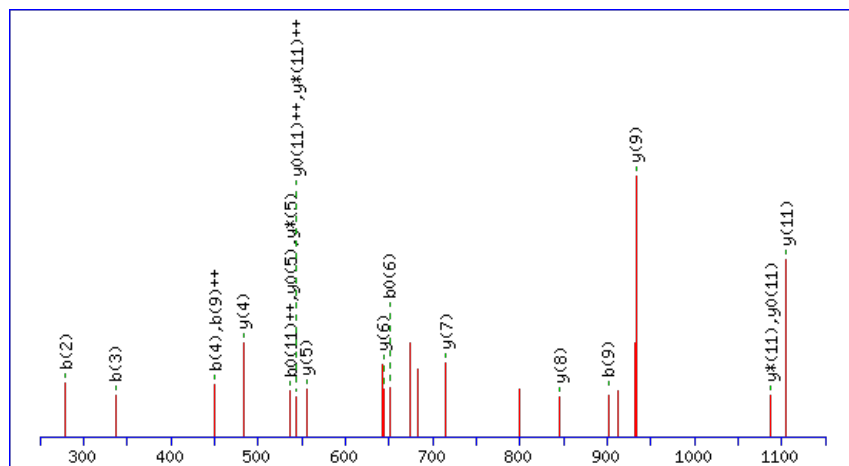

**Monoisotopic mass of neutral peptide Mr(calc):** 1382.6618

**Fixed modifications:** Carbamidomethyl (C) (apply to specified residues or termini only)

**Ions Score:** 62 **Expect:** 5.5e-006

**Matches:** 20/108 fragment ions using 23 most intense peaks ([help](#))

| #  | b               | b <sup>++</sup> | b <sup>0</sup>  | b <sup>0++</sup> | Seq. | y                | y <sup>++</sup> | y*               | y <sup>*++</sup> | y <sup>0</sup>   | y <sup>0++</sup> | #  |
|----|-----------------|-----------------|-----------------|------------------|------|------------------|-----------------|------------------|------------------|------------------|------------------|----|
| 1  | 165.0676        | 83.0375         |                 |                  | Y    |                  |                 |                  |                  |                  |                  | 13 |
| 2  | <b>279.1487</b> | 140.0780        |                 |                  | I    | 1219.6087        | 610.3080        | 1201.5851        | 601.2962         | 1201.5982        | 601.3027         | 12 |
| 3  | <b>337.1672</b> | 169.0873        |                 |                  | G    | <b>1105.5276</b> | 553.2674        | <b>1087.5040</b> | <b>544.2557</b>  | <b>1087.5171</b> | <b>544.2622</b>  | 11 |
| 4  | <b>451.2483</b> | 226.1278        |                 |                  | L    | 1047.5091        | 524.2582        | 1029.4855        | 515.2464         | 1029.4986        | 515.2529         | 10 |
| 5  | 539.2774        | 270.1423        | 521.2668        | 261.1371         | S    | <b>933.4280</b>  | 467.2176        | 915.4044         | 458.2059         | 915.4175         | 458.2124         | 9  |
| 6  | 669.3170        | 335.1622        | <b>651.3065</b> | 326.1569         | E    | <b>845.3990</b>  | 423.2031        | 827.3754         | 414.1913         | 827.3884         | 414.1978         | 8  |
| 7  | 741.3512        | 371.1792        | 723.3406        | 362.1739         | A    | <b>715.3593</b>  | 358.1833        | 697.3357         | 349.1715         | 697.3488         | 349.1780         | 7  |
| 8  | 829.3802        | 415.1938        | 811.3697        | 406.1885         | S    | <b>643.3252</b>  | 322.1662        | 625.3016         | 313.1544         | 625.3146         | 313.1609         | 6  |
| 9  | <b>901.4144</b> | <b>451.2108</b> | 883.4038        | 442.2055         | A    | <b>555.2961</b>  | 278.1517        | <b>537.2725</b>  | 269.1399         | <b>537.2856</b>  | 269.1464         | 5  |
| 10 | 989.4435        | 495.2254        | 971.4329        | 486.2201         | S    | <b>483.2620</b>  | 242.1346        | 465.2384         | 233.1228         | 465.2514         | 233.1293         | 4  |
| 11 | 1091.4882       | 546.2477        | 1073.4776       | <b>537.2424</b>  | T    | 395.2329         | 198.1201        | 377.2093         | 189.1083         | 377.2223         | 189.1148         | 3  |
| 12 | 1205.5693       | 603.2883        | 1187.5587       | 594.2830         | I    | 293.1882         | 147.0977        | 275.1646         | 138.0859         |                  |                  | 2  |
| 13 |                 |                 |                 |                  | R    | 179.1071         | 90.0572         | 161.0835         | 81.0454          |                  |                  | 1  |

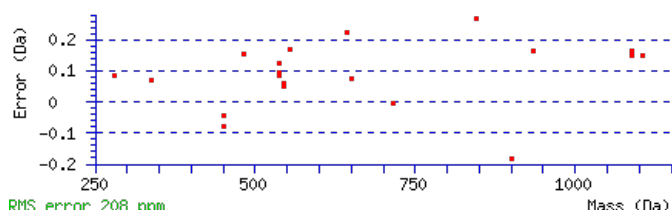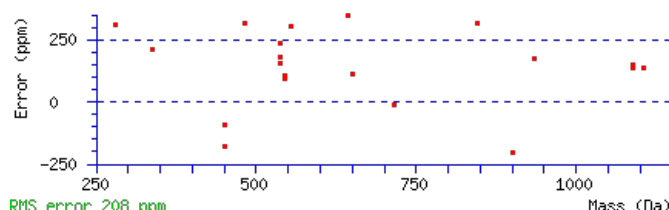

NCBI **BLAST** search of [YIGLSEASASTIR](#)

(Parameters: blastp, nr protein database, expect=20000, no filter, PAM30)

Other BLAST [web gateways](#)

## AT1G60690.1

All matches to this query

| Score | Mr(calc)  | Delta   | Sequence                      |
|-------|-----------|---------|-------------------------------|
| 61.9  | 1382.6618 | 0.0034  | <a href="#">YIGLSEASASTIR</a> |
| 20.9  | 1382.6674 | -0.0022 | <a href="#">MKETAEAFGLGKK</a> |
| 13.7  | 1382.6645 | 0.0008  | <a href="#">QFDSTNQLRKK</a>   |
| 13.3  | 1382.6674 | -0.0022 | <a href="#">MKETAEAYLGKK</a>  |
| 9.3   | 1382.6640 | 0.0012  | <a href="#">DFQSVLKEFQK</a>   |
| 7.1   | 1382.6640 | 0.0012  | <a href="#">KFAELSGNDIFK</a>  |
| 2.9   | 1382.6678 | -0.0026 | <a href="#">QMKAAASGKSLTR</a> |
| 2.0   | 1382.6645 | 0.0008  | <a href="#">FQSIDSAVSRVR</a>  |
| 2.0   | 1382.6644 | 0.0008  | <a href="#">FQSVDTAVSRVR</a>  |
| 2.0   | 1382.6674 | -0.0022 | <a href="#">LYAAESMLNTKK</a>  |

Mascot: <http://www.matrixscience.com/>

### Peptide View

 MS/MS Fragmentation of **VVSGSVDQSDQSFLLDDEQIGEGFVLTC AAYPTSDVTIETHKEEDIV**

 Found in **AT1G60950.1** in **TAIR Arabidopsis**, Symbols: ATFD2, FED A | FED A (FERREDOXIN 2); 2 iron, 2 sulfur cluster binding / electron carrier / iron-sulfur cluster binding | chr1:22448230-22448676 FORWARD

Match to Query 10799: 5082.166588 from(1271.548923,4+) index(10348)

Title: Elution from: 99.977 to 99.977 scan no 14936 cid35.00 polarity:+

Data file D12h-1\_3.mgf

Click mouse within plot area to zoom in by factor of two about that point

 Or,  to  Da 

 Label all possible matches  Label matches used for scoring 

 Show Y-axis 
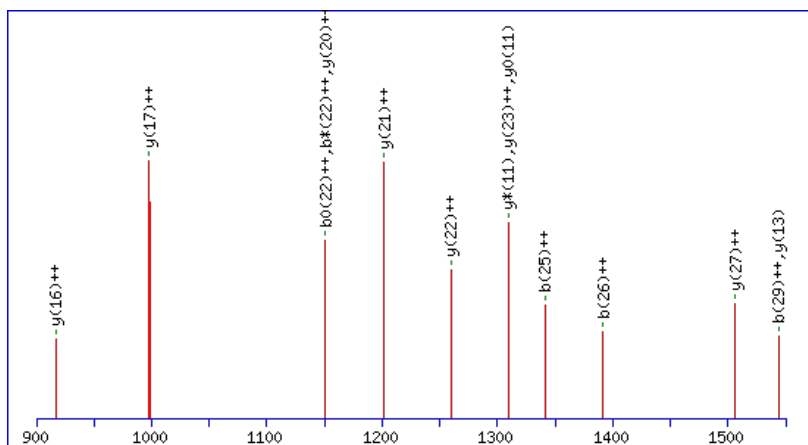
 Monoisotopic mass of neutral peptide  $M_r(\text{calc})$ : 5082.1614

Fixed modifications: Carbamidomethyl (C) (apply to specified residues or termini only)

Ions Score: 56 Expect: 4.5e-006

 Matches : 15/508 fragment ions using 11 most intense peaks ([help](#))

| #  | b         | b <sup>++</sup> | b*        | b* <sup>++</sup> | b <sup>0</sup> | b <sup>0</sup> <sup>++</sup> | Seq | y         | y <sup>++</sup> | y*        | y* <sup>++</sup> | y <sup>0</sup> | y <sup>0</sup> <sup>++</sup> | #  |
|----|-----------|-----------------|-----------|------------------|----------------|------------------------------|-----|-----------|-----------------|-----------|------------------|----------------|------------------------------|----|
| 1  | 101.0727  | 51.0400         |           |                  |                |                              | V   |           |                 |           |                  |                |                              | 46 |
| 2  | 201.1382  | 101.0727        |           |                  |                |                              | V   | 4983.1033 | 2492.0553       | 4965.0797 | 2483.0435        | 4965.0928      | 2483.0500                    | 45 |
| 3  | 289.1672  | 145.0873        |           |                  | 271.1567       | 136.0820                     | S   | 4883.0379 | 2442.0226       | 4865.0143 | 2433.0108        | 4865.0273      | 2433.0173                    | 44 |
| 4  | 347.1857  | 174.0965        |           |                  | 329.1752       | 165.0912                     | G   | 4795.0088 | 2398.0080       | 4776.9852 | 2388.9963        | 4776.9982      | 2389.0028                    | 43 |
| 5  | 435.2148  | 218.1110        |           |                  | 417.2042       | 209.1058                     | S   | 4736.9903 | 2368.9988       | 4718.9667 | 2359.9870        | 4718.9797      | 2359.9935                    | 42 |
| 6  | 535.2802  | 268.1438        |           |                  | 517.2697       | 259.1385                     | V   | 4648.9612 | 2324.9843       | 4630.9377 | 2315.9725        | 4630.9507      | 2315.9790                    | 41 |
| 7  | 651.3042  | 326.1558        |           |                  | 633.2937       | 317.1505                     | D   | 4548.8958 | 2274.9515       | 4530.8722 | 2265.9397        | 4530.8852      | 2265.9463                    | 40 |
| 8  | 781.3569  | 391.1821        | 763.3333  | 382.1703         | 763.3463       | 382.1768                     | Q   | 4432.8718 | 2216.9395       | 4414.8482 | 2207.9278        | 4414.8613      | 2207.9343                    | 39 |
| 9  | 869.3859  | 435.1966        | 851.3624  | 426.1848         | 851.3754       | 426.1913                     | S   | 4302.8192 | 2151.9132       | 4284.7956 | 2142.9014        | 4284.8086      | 2142.9079                    | 38 |
| 10 | 985.4099  | 493.2086        | 967.3863  | 484.1968         | 967.3993       | 484.2033                     | D   | 4214.7901 | 2107.8987       | 4196.7665 | 2098.8869        | 4196.7795      | 2098.8934                    | 37 |
| 11 | 1115.4626 | 558.2349        | 1097.4390 | 549.2231         | 1097.4520      | 549.2296                     | Q   | 4098.7661 | 2049.8867       | 4080.7425 | 2040.8749        | 4080.7556      | 2040.8814                    | 36 |
| 12 | 1203.4916 | 602.2494        | 1185.4680 | 593.2377         | 1185.4811      | 593.2442                     | S   | 3968.7135 | 1984.8604       | 3950.6899 | 1975.8486        | 3950.7029      | 1975.8551                    | 35 |
| 13 | 1351.5571 | 676.2822        | 1333.5335 | 667.2704         | 1333.5465      | 667.2769                     | F   | 3880.6844 | 1940.8458       | 3862.6608 | 1931.8341        | 3862.6739      | 1931.8406                    | 34 |
| 14 | 1465.6382 | 733.3227        | 1447.6146 | 724.3109         | 1447.6276      | 724.3174                     | L   | 3732.6190 | 1866.8131       | 3714.5954 | 1857.8013        | 3714.6084      | 1857.8078                    | 33 |
| 15 | 1581.6621 | 791.3347        | 1563.6386 | 782.3229         | 1563.6516      | 782.3294                     | D   | 3618.5379 | 1809.7726       | 3600.5143 | 1800.7608        | 3600.5273      | 1800.7673                    | 32 |
| 16 | 1697.6861 | 849.3467        | 1679.6625 | 840.3349         | 1679.6756      | 840.3414                     | D   | 3502.5139 | 1751.7606       | 3484.4903 | 1742.7488        | 3484.5033      | 1742.7553                    | 31 |
| 17 | 1827.7258 | 914.3665        | 1809.7022 | 905.3547         | 1809.7152      | 905.3612                     | E   | 3386.4899 | 1693.7486       | 3368.4663 | 1684.7368        | 3368.4794      | 1684.7433                    | 30 |
| 18 | 1957.7784 | 979.3928        | 1939.7548 | 970.3810         | 1939.7678      | 970.3876                     | Q   | 3256.4503 | 1628.7288       | 3238.4267 | 1619.7170        | 3238.4397      | 1619.7235                    | 29 |
| 19 | 2071.8595 | 1036.4334       | 2053.8359 | 1027.4216        | 2053.8489      | 1027.4281                    | I   | 3126.3976 | 1563.7025       | 3108.3741 | 1554.6907        | 3108.3871      | 1554.6972                    | 28 |
| 20 | 2129.8780 | 1065.4426       | 2111.8544 | 1056.4308        | 2111.8674      | 1056.4374                    | G   | 3012.3165 | 1506.6619       | 2994.2930 | 1497.6501        | 2994.3060      | 1497.6566                    | 27 |
| 21 | 2259.9176 | 1130.4625       | 2241.8940 | 1121.4507        | 2241.9071      | 1121.4572                    | E   | 2954.2980 | 1477.6527       | 2936.2745 | 1468.6409        | 2936.2875      | 1468.6474                    | 26 |
| 22 | 2317.9361 | 1159.4717       | 2299.9125 | 1150.4599        | 2299.9256      | 1150.4664                    | G   | 2824.2584 | 1412.6328       | 2806.2348 | 1403.6211        | 2806.2479      | 1403.6276                    | 25 |
| 23 | 2466.0016 | 1233.5044       | 2447.9780 | 1224.4926        | 2447.9910      | 1224.4991                    | F   | 2766.2399 | 1383.6236       | 2748.2163 | 1374.6118        | 2748.2294      | 1374.6183                    | 24 |
| 24 | 2566.0670 | 1283.5372       | 2548.0434 | 1274.5254        | 2548.0565      | 1274.5319                    | V   | 2618.1745 | 1309.5909       | 2600.1509 | 1300.5791        | 2600.1639      | 1300.5856                    | 23 |

# AT1G60950.1

|    |           |           |           |           |           |           |   |           |           |           |           |           |           |    |
|----|-----------|-----------|-----------|-----------|-----------|-----------|---|-----------|-----------|-----------|-----------|-----------|-----------|----|
| 25 | 2680.1481 | 1340.5777 | 2662.1245 | 1331.5659 | 2662.1376 | 1331.5724 | L | 2518.1090 | 1259.5581 | 2500.0854 | 1250.5464 | 2500.0985 | 1250.5529 | 22 |
| 26 | 2782.1928 | 1391.6001 | 2764.1693 | 1382.5883 | 2764.1823 | 1382.5948 | T | 2404.0279 | 1202.5176 | 2386.0043 | 1193.5058 | 2386.0174 | 1193.5123 | 21 |
| 27 | 2944.2176 | 1472.6124 | 2926.1940 | 1463.6006 | 2926.2070 | 1463.6071 | C | 2301.9832 | 1151.4952 | 2283.9596 | 1142.4834 | 2283.9726 | 1142.4900 | 20 |
| 28 | 3016.2517 | 1508.6295 | 2998.2281 | 1499.6177 | 2998.2411 | 1499.6242 | A | 2139.9585 | 1070.4829 | 2121.9349 | 1061.4711 | 2121.9479 | 1061.4776 | 19 |
| 29 | 3088.2859 | 1544.6466 | 3070.2623 | 1535.6348 | 3070.2753 | 1535.6413 | A | 2067.9243 | 1034.4658 | 2049.9008 | 1025.4540 | 2049.9138 | 1025.4605 | 18 |
| 30 | 3252.3462 | 1626.6767 | 3234.3226 | 1617.6650 | 3234.3357 | 1617.6715 | Y | 1995.8902 | 998.4487  | 1977.8666 | 989.4369  | 1977.8796 | 989.4435  | 17 |
| 31 | 3350.3960 | 1675.7016 | 3332.3724 | 1666.6899 | 3332.3855 | 1666.6964 | P | 1831.8298 | 916.4186  | 1813.8062 | 907.4068  | 1813.8193 | 907.4133  | 16 |
| 32 | 3452.4407 | 1726.7240 | 3434.4171 | 1717.7122 | 3434.4302 | 1717.7187 | T | 1733.7800 | 867.3937  | 1715.7564 | 858.3819  | 1715.7695 | 858.3884  | 15 |
| 33 | 3540.4698 | 1770.7385 | 3522.4462 | 1761.7267 | 3522.4592 | 1761.7333 | S | 1631.7353 | 816.3713  | 1613.7117 | 807.3595  | 1613.7248 | 807.3660  | 14 |
| 34 | 3656.4938 | 1828.7505 | 3638.4702 | 1819.7387 | 3638.4832 | 1819.7452 | D | 1543.7063 | 772.3568  | 1525.6827 | 763.3450  | 1525.6957 | 763.3515  | 13 |
| 35 | 3756.5592 | 1878.7832 | 3738.5356 | 1869.7715 | 3738.5487 | 1869.7780 | V | 1427.6823 | 714.3448  | 1409.6587 | 705.3330  | 1409.6717 | 705.3395  | 12 |
| 36 | 3858.6039 | 1929.8056 | 3840.5803 | 1920.7938 | 3840.5934 | 1920.8003 | T | 1327.6168 | 664.3121  | 1309.5932 | 655.3003  | 1309.6063 | 655.3068  | 11 |
| 37 | 3972.6850 | 1986.8462 | 3954.6614 | 1977.8344 | 3954.6745 | 1977.8409 | I | 1225.5721 | 613.2897  | 1207.5485 | 604.2779  | 1207.5615 | 604.2844  | 10 |
| 38 | 4102.7247 | 2051.8660 | 4084.7011 | 2042.8542 | 4084.7141 | 2042.8607 | E | 1111.4910 | 556.2491  | 1093.4674 | 547.2374  | 1093.4804 | 547.2439  | 9  |
| 39 | 4204.7694 | 2102.8883 | 4186.7458 | 2093.8765 | 4186.7588 | 2093.8830 | T | 981.4514  | 491.2293  | 963.4278  | 482.2175  | 963.4408  | 482.2240  | 8  |
| 40 | 4344.8194 | 2172.9133 | 4326.7958 | 2163.9015 | 4326.8088 | 2163.9081 | H | 879.4067  | 440.2070  | 861.3831  | 431.1952  | 861.3961  | 431.2017  | 7  |
| 41 | 4474.9084 | 2237.9578 | 4456.8848 | 2228.9461 | 4456.8979 | 2228.9526 | K | 739.3567  | 370.1820  | 721.3331  | 361.1702  | 721.3461  | 361.1767  | 6  |
| 42 | 4604.9481 | 2302.9777 | 4586.9245 | 2293.9659 | 4586.9375 | 2293.9724 | E | 609.2676  | 305.1374  |           |           | 591.2571  | 296.1322  | 5  |
| 43 | 4734.9877 | 2367.9975 | 4716.9641 | 2358.9857 | 4716.9771 | 2358.9922 | E | 479.2280  | 240.1176  |           |           | 461.2174  | 231.1124  | 4  |
| 44 | 4851.0117 | 2426.0095 | 4832.9881 | 2416.9977 | 4833.0011 | 2417.0042 | D | 349.1884  | 175.0978  |           |           | 331.1778  | 166.0925  | 3  |
| 45 | 4965.0928 | 2483.0500 | 4947.0692 | 2474.0382 | 4947.0822 | 2474.0447 | I | 233.1644  | 117.0858  |           |           |           |           | 2  |
| 46 |           |           |           |           |           |           | V | 119.0833  | 60.0453   |           |           |           |           | 1  |

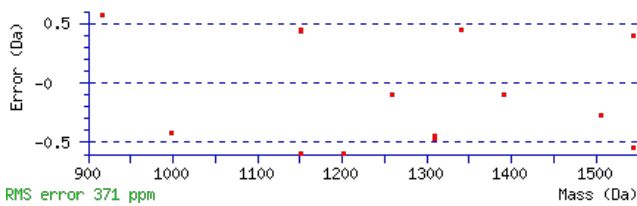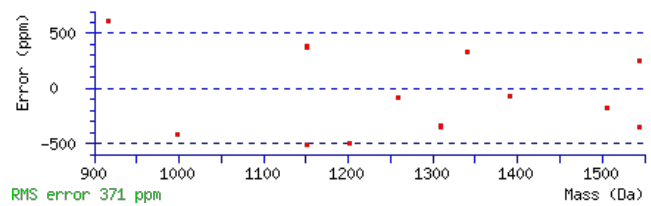

NCBI BLAST search of [VVSGSVDQSDQSFLDDEQIGEGFVLTCAA YPTSDVTIETHKEEDIV](#)

(Parameters: blastp, nr protein database, expect=20000, no filter, PAM30)

Other BLAST [web gateways](#)

### All matches to this query

| Score | Mr(calc)  | Delta  | Sequence                                                        |
|-------|-----------|--------|-----------------------------------------------------------------|
| 55.7  | 5082.1614 | 0.0052 | <a href="#">VVSGSVDQSDQSFLDDEQIGEGFVLTCAA YPTSDVTIETHKEEDIV</a> |
| 5.4   | 5082.1549 | 0.0117 | <a href="#">EDDCEELQVPVGTLSIGFISISNNDRDKMSVLEVEAPNQVTD SR</a>   |

Mascot: <http://www.matrixscience.com/>

### Peptide View

 MS/MS Fragmentation of **GLAGSGNPAYPGPFNPLGFGK**

 Found in **AT1G61520.1** in **TAIR\_Arabidopsis**, Symbols: LHCA3 | LHCA3 (Photosystem I light harvesting complex gene 3); chlorophyll binding | chr1:22703817-22704814 FORWARD

Match to Query 10439: 2221.090512 from(1111.552532,2+) index(10492)

Title: Elution from: 95.621 to 95.621 scan no 14522 cid35.00 polarity:+

Data file D6h-1\_1.mgf

Click mouse within plot area to zoom in by factor of two about that point

 Or, Plot from  to  Da 

 Label all possible matches  Label matches used for scoring 

 Show Y-axis 
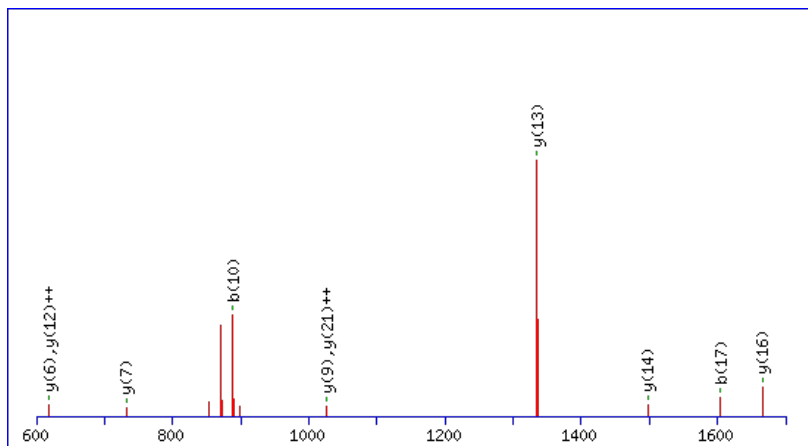
 Monoisotopic mass of neutral peptide  $M_r(\text{calc})$ : 2221.0957

Fixed modifications: Carbamidomethyl (C) (apply to specified residues or termini only)

Ions Score: 52 Expect: 2.7e-005

 Matches : 10/208 fragment ions using 8 most intense peaks ([help](#))

| #  | b         | b <sup>++</sup> | b*        | b <sup>*++</sup> | b <sup>0</sup> | b <sup>0++</sup> | Seq | y         | y <sup>++</sup> | y*        | y <sup>*++</sup> | y <sup>0</sup> | y <sup>0++</sup> | #  |
|----|-----------|-----------------|-----------|------------------|----------------|------------------|-----|-----------|-----------------|-----------|------------------|----------------|------------------|----|
| 1  | 58.0287   | 29.5180         |           |                  |                |                  | G   |           |                 |           |                  |                |                  | 23 |
| 2  | 171.1128  | 86.0600         |           |                  |                |                  | L   | 2165.0815 | 1083.0444       | 2148.0549 | 1074.5311        | 2147.0709      | 1074.0391        | 22 |
| 3  | 242.1499  | 121.5786        |           |                  |                |                  | A   | 2051.9974 | 1026.5023       | 2034.9708 | 1017.9891        | 2033.9868      | 1017.4970        | 21 |
| 4  | 299.1714  | 150.0893        |           |                  |                |                  | G   | 1980.9603 | 990.9838        | 1963.9337 | 982.4705         | 1962.9497      | 981.9785         | 20 |
| 5  | 386.2034  | 193.6053        |           |                  | 368.1928       | 184.6001         | S   | 1923.9388 | 962.4730        | 1906.9123 | 953.9598         | 1905.9282      | 953.4678         | 19 |
| 6  | 443.2249  | 222.1161        |           |                  | 425.2143       | 213.1108         | G   | 1836.9068 | 918.9570        | 1819.8802 | 910.4438         |                |                  | 18 |
| 7  | 557.2678  | 279.1375        | 540.2413  | 270.6243         | 539.2572       | 270.1323         | N   | 1779.8853 | 890.4463        | 1762.8588 | 881.9330         |                |                  | 17 |
| 8  | 654.3206  | 327.6639        | 637.2940  | 319.1506         | 636.3100       | 318.6586         | P   | 1665.8424 | 833.4248        | 1648.8158 | 824.9116         |                |                  | 16 |
| 9  | 725.3577  | 363.1825        | 708.3311  | 354.6692         | 707.3471       | 354.1772         | A   | 1568.7896 | 784.8985        | 1551.7631 | 776.3852         |                |                  | 15 |
| 10 | 888.4210  | 444.7141        | 871.3945  | 436.2009         | 870.4104       | 435.7089         | Y   | 1497.7525 | 749.3799        | 1480.7260 | 740.8666         |                |                  | 14 |
| 11 | 985.4738  | 493.2405        | 968.4472  | 484.7272         | 967.4632       | 484.2352         | P   | 1334.6892 | 667.8482        | 1317.6626 | 659.3350         |                |                  | 13 |
| 12 | 1042.4952 | 521.7513        | 1025.4687 | 513.2380         | 1024.4847      | 512.7460         | G   | 1237.6364 | 619.3218        | 1220.6099 | 610.8086         |                |                  | 12 |
| 13 | 1099.5167 | 550.2620        | 1082.4902 | 541.7487         | 1081.5061      | 541.2567         | G   | 1180.6150 | 590.8111        | 1163.5884 | 582.2978         |                |                  | 11 |
| 14 | 1196.5695 | 598.7884        | 1179.5429 | 590.2751         | 1178.5589      | 589.7831         | P   | 1123.5935 | 562.3004        | 1106.5669 | 553.7871         |                |                  | 10 |
| 15 | 1343.6379 | 672.3226        | 1326.6113 | 663.8093         | 1325.6273      | 663.3173         | F   | 1026.5407 | 513.7740        | 1009.5142 | 505.2607         |                |                  | 9  |
| 16 | 1490.7063 | 745.8568        | 1473.6797 | 737.3435         | 1472.6957      | 736.8515         | F   | 879.4723  | 440.2398        | 862.4458  | 431.7265         |                |                  | 8  |
| 17 | 1604.7492 | 802.8782        | 1587.7227 | 794.3650         | 1586.7387      | 793.8730         | N   | 732.4039  | 366.7056        | 715.3774  | 358.1923         |                |                  | 7  |
| 18 | 1701.8020 | 851.4046        | 1684.7754 | 842.8914         | 1683.7914      | 842.3993         | P   | 618.3610  | 309.6841        | 601.3344  | 301.1709         |                |                  | 6  |
| 19 | 1814.8860 | 907.9467        | 1797.8595 | 899.4334         | 1796.8755      | 898.9414         | L   | 521.3082  | 261.1577        | 504.2817  | 252.6445         |                |                  | 5  |
| 20 | 1871.9075 | 936.4574        | 1854.8810 | 927.9441         | 1853.8969      | 927.4521         | G   | 408.2241  | 204.6157        | 391.1976  | 196.1024         |                |                  | 4  |
| 21 | 2018.9759 | 1009.9916       | 2001.9494 | 1001.4783        | 2000.9654      | 1000.9863        | F   | 351.2027  | 176.1050        | 334.1761  | 167.5917         |                |                  | 3  |
| 22 | 2075.9974 | 1038.5023       | 2058.9708 | 1029.9891        | 2057.9868      | 1029.4970        | G   | 204.1343  | 102.5708        | 187.1077  | 94.0575          |                |                  | 2  |
| 23 |           |                 |           |                  |                |                  | K   | 147.1128  | 74.0600         | 130.0863  | 65.5468          |                |                  | 1  |

# AT1G61520.1

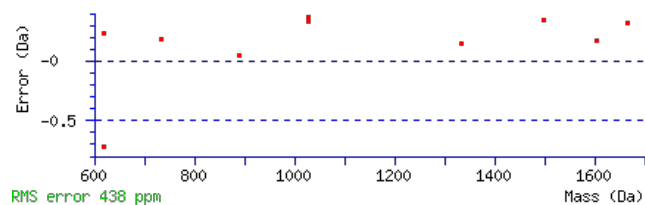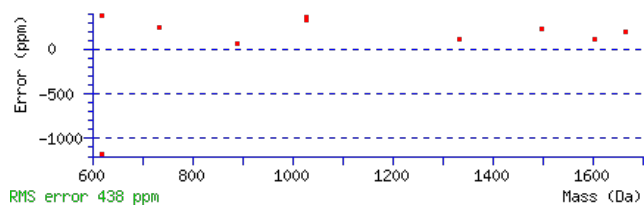

NCBI **BLAST** search of [GLAGSGNPAYPGGPFENPLGFGK](#)  
(Parameters: blastp, nr protein database, expect=20000, no filter, PAM30)  
Other BLAST [web gateways](#)

## All matches to this query

| Score | Mr(calc)  | Delta   | Sequence                                |
|-------|-----------|---------|-----------------------------------------|
| 51.6  | 2221.0957 | -0.0051 | <a href="#">GLAGSGNPAYPGGPFENPLGFGK</a> |

Mascot: <http://www.matrixscience.com/>

## Peptide View

### MS/MS Fragmentation of **RADGVLLVK**

Found in **AT1G61600.1** in **TAIR\_Arabidopsis**, Symbols: | similar to unknown protein [Arabidopsis thaliana] (TAIR:AT1G13520.1); similar to unknown [Populus trichocarpa] (GB:ABK94028.1); contains InterPro domain Protein of unknown function DUF1262 (InterPro:IPR010683) | chr1:22733481-22734847 F

Match to Query 1778: 969.597306 from(485.805929,2+) index(2417)

Title: Elution from: 27.800 to 27.800 scan no 3123 cid35.00 polarity:+

Data file D1d-1\_3.mgf

Click mouse within plot area to zoom in by factor of two about that point

Or,  to  Da

Label all possible matches  Label matches used for scoring

Show Y-axis

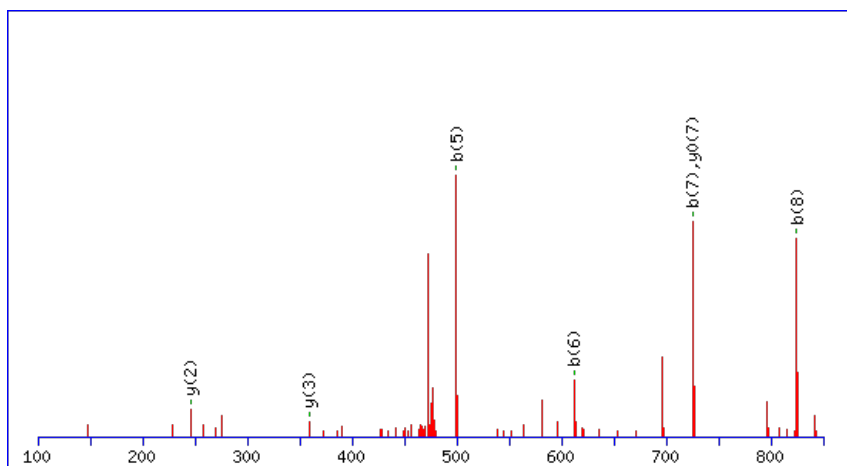

Monoisotopic mass of neutral peptide  $M_r(\text{calc})$ : 969.5971

Fixed modifications: Carbamidomethyl (C) (apply to specified residues or termini only)

Ions Score: 33 Expect: 0.0021

Matches : 7/80 fragment ions using 7 most intense peaks ([help](#))

| # | b               | b <sup>++</sup> | b*       | b <sup>*++</sup> | b <sup>0</sup> | b <sup>0++</sup> | Seq.     | y               | y <sup>++</sup> | y*       | y <sup>*++</sup> | y <sup>0</sup> | y <sup>0++</sup> | # |
|---|-----------------|-----------------|----------|------------------|----------------|------------------|----------|-----------------|-----------------|----------|------------------|----------------|------------------|---|
| 1 | 157.1084        | 79.0578         | 140.0818 | 70.5446          |                |                  | <b>R</b> |                 |                 |          |                  |                |                  | 9 |
| 2 | 228.1455        | 114.5764        | 211.1190 | 106.0631         |                |                  | <b>A</b> | 814.5033        | 407.7553        | 797.4767 | 399.2420         | 796.4927       | 398.7500         | 8 |
| 3 | 343.1724        | 172.0899        | 326.1459 | 163.5766         | 325.1619       | 163.0846         | <b>D</b> | 743.4662        | 372.2367        | 726.4396 | 363.7234         | 725.4556       | 363.2314         | 7 |
| 4 | 400.1939        | 200.6006        | 383.1674 | 192.0873         | 382.1833       | 191.5953         | <b>G</b> | 628.4392        | 314.7233        | 611.4127 | 306.2100         |                |                  | 6 |
| 5 | <b>499.2623</b> | 250.1348        | 482.2358 | 241.6215         | 481.2518       | 241.1295         | <b>V</b> | 571.4178        | 286.2125        | 554.3912 | 277.6992         |                |                  | 5 |
| 6 | <b>612.3464</b> | 306.6768        | 595.3198 | 298.1636         | 594.3358       | 297.6715         | <b>L</b> | 472.3493        | 236.6783        | 455.3228 | 228.1650         |                |                  | 4 |
| 7 | <b>725.4305</b> | 363.2189        | 708.4039 | 354.7056         | 707.4199       | 354.2136         | <b>L</b> | <b>359.2653</b> | 180.1363        | 342.2387 | 171.6230         |                |                  | 3 |
| 8 | <b>824.4989</b> | 412.7531        | 807.4723 | 404.2398         | 806.4883       | 403.7478         | <b>V</b> | <b>246.1812</b> | 123.5942        | 229.1547 | 115.0810         |                |                  | 2 |
| 9 |                 |                 |          |                  |                |                  | <b>K</b> | 147.1128        | 74.0600         | 130.0863 | 65.5468          |                |                  | 1 |

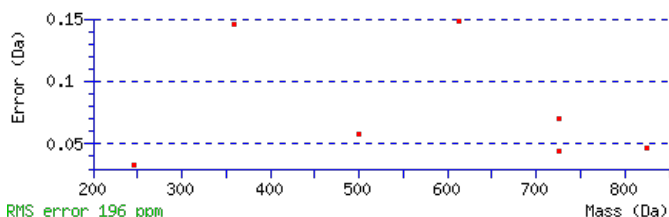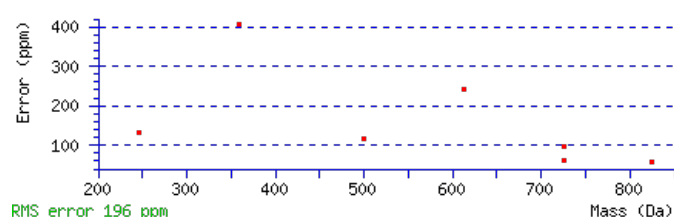

NCBI **BLAST** search of [RADGVLLVK](#)

(Parameters: blastp, nr protein database, expect=20000, no filter, PAM30)

Other BLAST [web gateways](#)

All matches to this query



## AT1G61600.1

| Score | Mr(calc) | Delta   | Sequence                  |
|-------|----------|---------|---------------------------|
| 33.4  | 969.5971 | 0.0002  | <a href="#">RADGVLLVK</a> |
| 33.4  | 969.5971 | 0.0002  | <a href="#">RLNDLLVK</a>  |
| 18.1  | 969.5971 | 0.0002  | <a href="#">RINDLVLK</a>  |
| 12.8  | 969.5984 | -0.0011 | <a href="#">RLWRLAR</a>   |
| 11.5  | 969.5971 | 0.0002  | <a href="#">VSKAISPR</a>  |
| 7.3   | 969.5971 | 0.0002  | <a href="#">RIKLSPEK</a>  |
| 6.3   | 969.5971 | 0.0002  | <a href="#">LQLKEIAR</a>  |
| 2.9   | 969.5971 | 0.0002  | <a href="#">LNVVVISAR</a> |
| 2.4   | 969.5971 | 0.0002  | <a href="#">NKKKPLDK</a>  |
| 0.8   | 969.5971 | 0.0002  | <a href="#">ALRAGLLEK</a> |

Mascot: <http://www.matrixscience.com/>



# Mascot Search Results

## Peptide View

MS/MS Fragmentation of **RGTGGSAVFIAR**

Found in **AT1G62020.1** in **TAIR\_Arabidopsis**, Symbols: | coatomer protein complex, subunit alpha, putative | chr1:22923479-22927393  
FORWARD

Match to Query 3771: 1190.652045 from(397.891291,3+) index(1290)

Title: Elution from: 20.827 to 20.827 scan no 1866 cid35.00 polarity:+

Data file D1d-2\_1.mgf

Click mouse within plot area to zoom in by factor of two about that point

Or,  to  Da

Label all possible matches  Label matches used for scoring

Show Y-axis

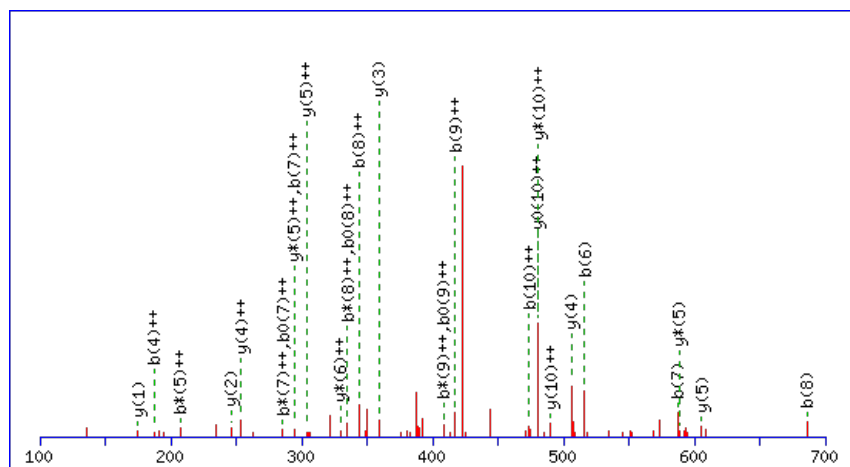

Monoisotopic mass of neutral peptide  $M_r(\text{calc})$ : 1190.6520

Fixed modifications: Carbamidomethyl (C) (apply to specified residues or termini only)

Ions Score: 25 Expect: 0.011

Matches : 28/116 fragment ions using 40 most intense peaks [\(help\)](#)

| #  | b         | b <sup>++</sup> | b*        | b <sup>*++</sup> | b <sup>0</sup> | b <sup>0++</sup> | Seq. | y         | y <sup>++</sup> | y*        | y <sup>*++</sup> | y <sup>0</sup> | y <sup>0++</sup> | #  |
|----|-----------|-----------------|-----------|------------------|----------------|------------------|------|-----------|-----------------|-----------|------------------|----------------|------------------|----|
| 1  | 157.1084  | 79.0578         | 140.0818  | 70.5446          |                |                  | R    |           |                 |           |                  |                |                  | 12 |
| 2  | 214.1299  | 107.5686        | 197.1033  | 99.0553          |                |                  | G    | 1035.5582 | 518.2827        | 1018.5316 | 509.7694         | 1017.5476      | 509.2774         | 11 |
| 3  | 315.1775  | 158.0924        | 298.1510  | 149.5791         | 297.1670       | 149.0871         | T    | 978.5367  | 489.7720        | 961.5102  | 481.2587         | 960.5261       | 480.7667         | 10 |
| 4  | 372.1990  | 186.6031        | 355.1724  | 178.0899         | 354.1884       | 177.5979         | G    | 877.4890  | 439.2482        | 860.4625  | 430.7349         | 859.4785       | 430.2429         | 9  |
| 5  | 429.2205  | 215.1139        | 412.1939  | 206.6006         | 411.2099       | 206.1086         | G    | 820.4676  | 410.7374        | 803.4410  | 402.2241         | 802.4570       | 401.7321         | 8  |
| 6  | 516.2525  | 258.6299        | 499.2259  | 250.1166         | 498.2419       | 249.6246         | S    | 763.4461  | 382.2267        | 746.4196  | 373.7134         | 745.4355       | 373.2214         | 7  |
| 7  | 587.2896  | 294.1484        | 570.2631  | 285.6352         | 569.2790       | 285.1432         | A    | 676.4141  | 338.7107        | 659.3875  | 330.1974         |                |                  | 6  |
| 8  | 686.3580  | 343.6826        | 669.3315  | 335.1694         | 668.3474       | 334.6774         | V    | 605.3770  | 303.1921        | 588.3504  | 294.6788         |                |                  | 5  |
| 9  | 833.4264  | 417.2169        | 816.3999  | 408.7036         | 815.4159       | 408.2116         | F    | 506.3085  | 253.6579        | 489.2820  | 245.1446         |                |                  | 4  |
| 10 | 946.5105  | 473.7589        | 929.4839  | 465.2456         | 928.4999       | 464.7536         | I    | 359.2401  | 180.1237        | 342.2136  | 171.6104         |                |                  | 3  |
| 11 | 1017.5476 | 509.2774        | 1000.5211 | 500.7642         | 999.5370       | 500.2722         | A    | 246.1561  | 123.5817        | 229.1295  | 115.0684         |                |                  | 2  |
| 12 |           |                 |           |                  |                |                  | R    | 175.1190  | 88.0631         | 158.0924  | 79.5498          |                |                  | 1  |

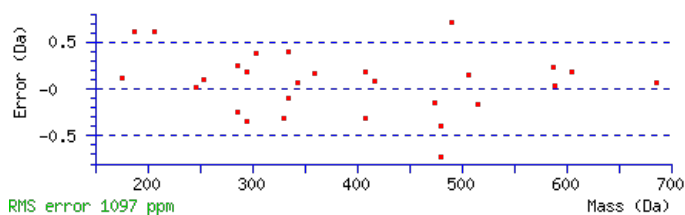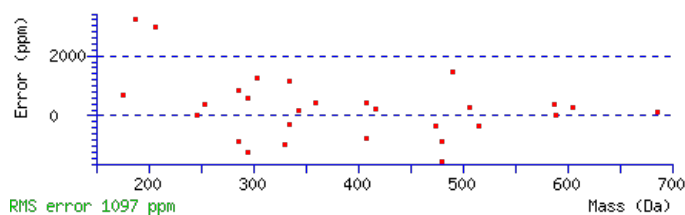

NCBI BLAST search of **RGTGGSAVFIAR**

(Parameters: blastp, nr protein database, expect=20000, no filter, PAM30)

Other BLAST [web gateways](#)

AT1G62020.1

All matches to this query

| Score | Mr(calc)  | Delta   | Sequence                     |
|-------|-----------|---------|------------------------------|
| 25.3  | 1190.6520 | 0.0000  | <a href="#">RGTGGSAVFIAR</a> |
| 10.7  | 1190.6547 | -0.0026 | <a href="#">YLTEALGPLSK</a>  |
| 4.3   | 1190.6520 | 0.0001  | <a href="#">VPLPAPRNDGR</a>  |
| 3.1   | 1190.6554 | -0.0033 | <a href="#">CSVAKTRLTR</a>   |
| 1.2   | 1190.6520 | 0.0001  | <a href="#">YDKLRNVGAR</a>   |

Mascot: <http://www.matrixscience.com/>


**Mascot Search Results**
**Peptide View**MS/MS Fragmentation of **FPVVDLSK**Found in **AT1G62380.1** in **TAIR\_Arabidopsis**, Symbols: ATACO2, ACO2 | ACO2 (ACC OXIDASE 2) | chr1:23086005-23087733 FORWARD

Match to Query 1716: 903.506846 from(452.760699,2+) index(5543)

Title: Elution from: 49.568 to 49.568 scan no 6975 cid35.00 polarity:+

Data file 0-2\_1.mgf

Click mouse within plot area to zoom in by factor of two about that point

Or,   to  Da Label all possible matches  Label matches used for scoring Show Y-axis 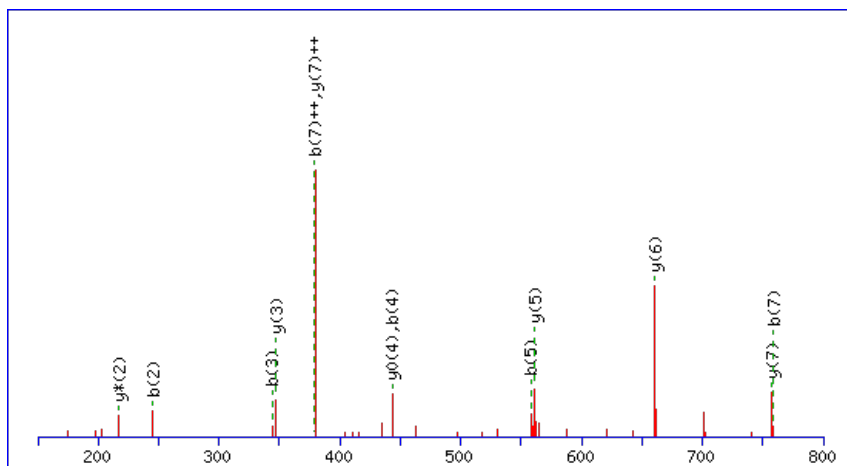Monoisotopic mass of neutral peptide **Mr(calc)**: 903.5066

Fixed modifications: Carbamidomethyl (C) (apply to specified residues or termini only)

Ions Score: 38 **Expect**: 0.00032Matches : 13/60 fragment ions using 17 most intense peaks ([help](#))

| # | b               | b <sup>++</sup> | b <sup>0</sup> | b <sup>0++</sup> | Seq. | y               | y <sup>++</sup> | y*              | y <sup>*++</sup> | y <sup>0</sup>  | y <sup>0++</sup> | # |
|---|-----------------|-----------------|----------------|------------------|------|-----------------|-----------------|-----------------|------------------|-----------------|------------------|---|
| 1 | 148.0757        | 74.5415         |                |                  | F    |                 |                 |                 |                  |                 |                  | 8 |
| 2 | <b>245.1285</b> | 123.0679        |                |                  | P    | <b>757.4454</b> | <b>379.2264</b> | 740.4189        | 370.7131         | 739.4349        | 370.2211         | 7 |
| 3 | <b>344.1969</b> | 172.6021        |                |                  | V    | <b>660.3927</b> | 330.7000        | 643.3661        | 322.1867         | 642.3821        | 321.6947         | 6 |
| 4 | <b>443.2653</b> | 222.1363        |                |                  | V    | <b>561.3243</b> | 281.1658        | 544.2977        | 272.6525         | 543.3137        | 272.1605         | 5 |
| 5 | <b>558.2922</b> | 279.6498        | 540.2817       | 270.6445         | D    | 462.2558        | 231.6316        | 445.2293        | 223.1183         | <b>444.2453</b> | 222.6263         | 4 |
| 6 | 671.3763        | 336.1918        | 653.3657       | 327.1865         | L    | <b>347.2289</b> | 174.1181        | 330.2023        | 165.6048         | 329.2183        | 165.1128         | 3 |
| 7 | <b>758.4083</b> | <b>379.7078</b> | 740.3978       | 370.7025         | S    | 234.1448        | 117.5761        | <b>217.1183</b> | 109.0628         | 216.1343        | 108.5708         | 2 |
| 8 |                 |                 |                |                  | K    | 147.1128        | 74.0600         | 130.0863        | 65.5468          |                 |                  | 1 |

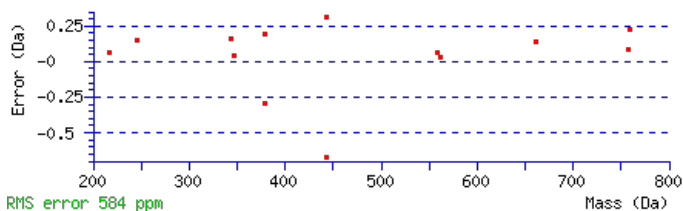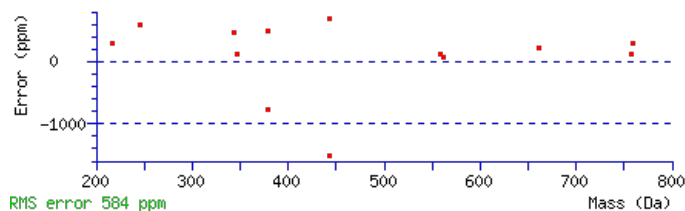NCBI **BLAST** search of **FPVVDLSK**

(Parameters: blastp, nr protein database, expect=20000, no filter, PAM30)

Other BLAST [web gateways](#)**All matches to this query**

| Score | Mr(calc) | Delta   | Sequence                 |
|-------|----------|---------|--------------------------|
| 37.6  | 903.5066 | 0.0003  | <a href="#">FPVVDLSK</a> |
| 7.2   | 903.5072 | -0.0004 | <a href="#">RSVKQMR</a>  |

## AT1G62380.1

|     |          |         |                          |
|-----|----------|---------|--------------------------|
| 6.9 | 903.5072 | -0.0004 | <a href="#">MARINRK</a>  |
| 2.6 | 903.5072 | -0.0004 | <a href="#">MGRGSLRK</a> |
| 1.6 | 903.5072 | -0.0004 | <a href="#">KVSRCVR</a>  |
| 1.2 | 903.5072 | -0.0004 | <a href="#">MISRNKR</a>  |
| 1.0 | 903.5072 | -0.0004 | <a href="#">RAKGLGMR</a> |
| 0.4 | 903.5066 | 0.0003  | <a href="#">VLVAYDPK</a> |
| 0.4 | 903.5066 | 0.0003  | <a href="#">LPEVYVGK</a> |
| 0.2 | 903.5066 | 0.0003  | <a href="#">TDPFLALK</a> |

Mascot: <http://www.matrixscience.com/>

**Peptide View**MS/MS Fragmentation of **LGQMLK**

Found in **AT1G62430.1** in **TAIR\_Arabidopsis**, Symbols: ATCDS1 | ATCDS1 (CDP-diacylglycerol synthase 1); phosphatidate cytidyltransferase | chr1:23109939-23112588 REVERSE

Match to Query 638: 696.369250 from(349.191901,2+) index(7126)

Title: Elution from: 63.208 to 63.208 scan no 9204 cid35.00 polarity:+

Data file D12h-3\_1.mgf

Click mouse within plot area to zoom in by factor of two about that point

Or,   to  Da

Label all possible matches  Label matches used for scoring

Show Y-axis

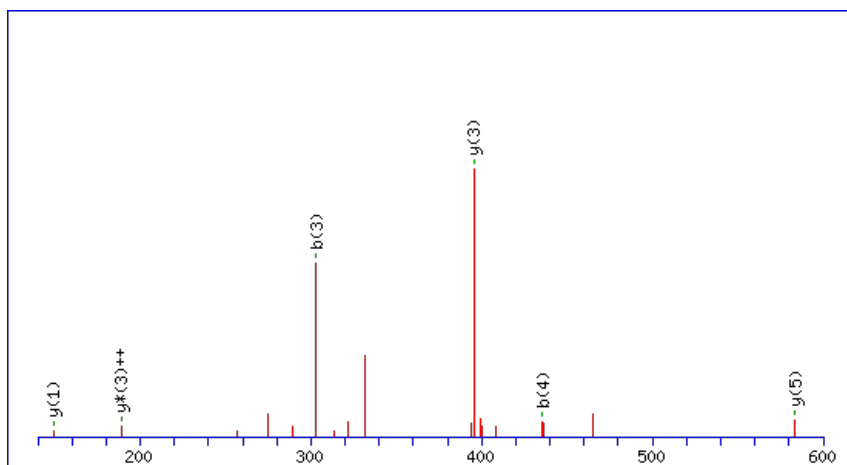

**Monoisotopic mass of neutral peptide Mr(calc):** 696.3705

**Fixed modifications:** Carbamidomethyl (C) (apply to specified residues or termini only)

**Ions Score:** 23 **Expect:** 0.037

**Matches:** 6/36 fragment ions using 10 most intense peaks ([help](#))

| # | b               | b <sup>++</sup> | b*       | b <sup>*++</sup> | Seq. | y               | y <sup>++</sup> | y*       | y <sup>*++</sup> | # |
|---|-----------------|-----------------|----------|------------------|------|-----------------|-----------------|----------|------------------|---|
| 1 | 115.0884        | 58.0478         |          |                  | L    |                 |                 |          |                  | 6 |
| 2 | 173.1069        | 87.0571         |          |                  | G    | <b>583.2966</b> | 292.1520        | 565.2731 | 283.1402         | 5 |
| 3 | <b>303.1595</b> | 152.0834        | 285.1359 | 143.0716         | Q    | 525.2781        | 263.1427        | 507.2546 | 254.1309         | 4 |
| 4 | <b>435.1970</b> | 218.1022        | 417.1735 | 209.0904         | M    | <b>395.2255</b> | 198.1164        | 377.2019 | <b>189.1046</b>  | 3 |
| 5 | 549.2781        | 275.1427        | 531.2546 | 266.1309         | L    | 263.1880        | 132.0976        | 245.1644 | 123.0858         | 2 |
| 6 |                 |                 |          |                  | K    | <b>149.1069</b> | 75.0571         | 131.0833 | 66.0453          | 1 |

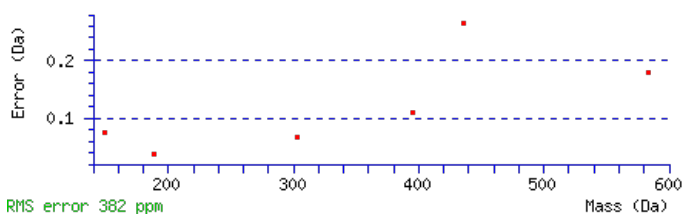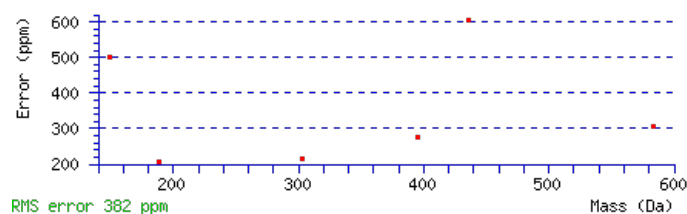NCBI **BLAST** search of **LGQMLK**

(Parameters: blastp, nr protein database, expect=20000, no filter, PAM30)

Other BLAST [web gateways](#)

**All matches to this query**

| Score | Mr(calc) | Delta   | Sequence               |
|-------|----------|---------|------------------------|
| 22.9  | 696.3705 | -0.0012 | <a href="#">LGQMLK</a> |
| 18.0  | 696.3705 | -0.0012 | <a href="#">LQGLMK</a> |
| 18.0  | 696.3693 | -0.0001 | <a href="#">LWPFK</a>  |

## AT1G62430.1

|     |          |         |                         |
|-----|----------|---------|-------------------------|
| 9.8 | 696.3693 | -0.0001 | <a href="#">WLPFK</a>   |
| 7.3 | 696.3705 | -0.0012 | <a href="#">IAMGIGK</a> |
| 7.3 | 696.3705 | -0.0012 | <a href="#">ICVAVK</a>  |
| 5.0 | 696.3705 | -0.0012 | <a href="#">ANMIK</a>   |
| 2.0 | 696.3693 | -0.0001 | <a href="#">LFPWK</a>   |

**Mascot:** <http://www.matrixscience.com/>

## Peptide View

MS/MS Fragmentation of **FSYEDIPEDLEDLAQEYR**

Found in **AT1G62750.1** in **TAIR\_Arabidopsis**, Symbols: ATSCO1, ATSCO1/CPEF-G, SCO1 | ATSCO1/ATSCO1/CPEF-G/SCO1 (SNOWY COTYLEDON1); translation elongation factor/ translation factor, nucleic acid binding | chr1:23237287-23239986 REVERSE

Match to Query 10194: 2230.991654 from(1116.503103,2+) index(11238)

Title: Elution from: 120.086 to 120.086 scan no 16770 cid35.00 polarity:+

Data file D6h-3\_1.mgf

Click mouse within plot area to zoom in by factor of two about that point

Or, Plot from  to  Da

Label all possible matches  Label matches used for scoring

Show Y-axis

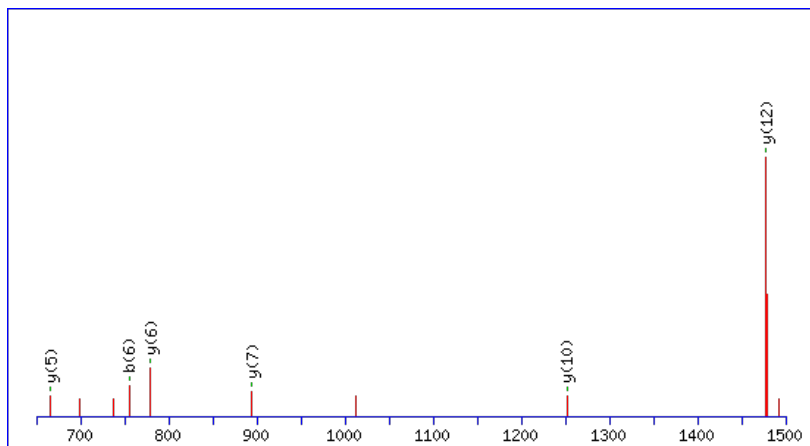

Monoisotopic mass of neutral peptide  $M_r(\text{calc})$ : 2230.9906

Fixed modifications: Carbamidomethyl (C) (apply to specified residues or termini only)

Ions Score: 30 Expect: 0.0013

Matches : 6/170 fragment ions using 8 most intense peaks ([help](#))

| #  | b         | b <sup>++</sup> | b <sup>*</sup> | b <sup>*++</sup> | b <sup>0</sup> | b <sup>0++</sup> | Seq | y         | y <sup>++</sup> | y <sup>*</sup> | y <sup>*++</sup> | y <sup>0</sup> | y <sup>0++</sup> | #  |
|----|-----------|-----------------|----------------|------------------|----------------|------------------|-----|-----------|-----------------|----------------|------------------|----------------|------------------|----|
| 1  | 148.0757  | 74.5415         |                |                  |                |                  | F   |           |                 |                |                  |                |                  | 18 |
| 2  | 235.1077  | 118.0575        |                |                  | 217.0972       | 109.0522         | S   | 2084.9295 | 1042.9684       | 2067.9029      | 1034.4551        | 2066.9189      | 1033.9631        | 17 |
| 3  | 398.1710  | 199.5892        |                |                  | 380.1605       | 190.5839         | Y   | 1997.8975 | 999.4524        | 1980.8709      | 990.9391         | 1979.8869      | 990.4471         | 16 |
| 4  | 527.2136  | 264.1105        |                |                  | 509.2031       | 255.1052         | E   | 1834.8341 | 917.9207        | 1817.8076      | 909.4074         | 1816.8236      | 908.9154         | 15 |
| 5  | 642.2406  | 321.6239        |                |                  | 624.2300       | 312.6186         | D   | 1705.7915 | 853.3994        | 1688.7650      | 844.8861         | 1687.7810      | 844.3941         | 14 |
| 6  | 755.3246  | 378.1660        |                |                  | 737.3141       | 369.1607         | I   | 1590.7646 | 795.8859        | 1573.7380      | 787.3727         | 1572.7540      | 786.8807         | 13 |
| 7  | 852.3774  | 426.6923        |                |                  | 834.3668       | 417.6871         | P   | 1477.6805 | 739.3439        | 1460.6540      | 730.8306         | 1459.6700      | 730.3386         | 12 |
| 8  | 981.4200  | 491.2136        |                |                  | 963.4094       | 482.2084         | E   | 1380.6278 | 690.8175        | 1363.6012      | 682.3042         | 1362.6172      | 681.8122         | 11 |
| 9  | 1096.4469 | 548.7271        |                |                  | 1078.4364      | 539.7218         | D   | 1251.5852 | 626.2962        | 1234.5586      | 617.7830         | 1233.5746      | 617.2909         | 10 |
| 10 | 1209.5310 | 605.2691        |                |                  | 1191.5204      | 596.2639         | L   | 1136.5582 | 568.7828        | 1119.5317      | 560.2695         | 1118.5477      | 559.7775         | 9  |
| 11 | 1338.5736 | 669.7904        |                |                  | 1320.5630      | 660.7852         | E   | 1023.4742 | 512.2407        | 1006.4476      | 503.7274         | 1005.4636      | 503.2354         | 8  |
| 12 | 1453.6005 | 727.3039        |                |                  | 1435.5900      | 718.2986         | D   | 894.4316  | 447.7194        | 877.4050       | 439.2062         | 876.4210       | 438.7141         | 7  |
| 13 | 1566.6846 | 783.8459        |                |                  | 1548.6740      | 774.8407         | L   | 779.4046  | 390.2060        | 762.3781       | 381.6927         | 761.3941       | 381.2007         | 6  |
| 14 | 1637.7217 | 819.3645        |                |                  | 1619.7112      | 810.3592         | A   | 666.3206  | 333.6639        | 649.2940       | 325.1506         | 648.3100       | 324.6586         | 5  |
| 15 | 1765.7803 | 883.3938        | 1748.7538      | 874.8805         | 1747.7697      | 874.3885         | Q   | 595.2835  | 298.1454        | 578.2569       | 289.6321         | 577.2729       | 289.1401         | 4  |
| 16 | 1894.8229 | 947.9151        | 1877.7963      | 939.4018         | 1876.8123      | 938.9098         | E   | 467.2249  | 234.1161        | 450.1983       | 225.6028         | 449.2143       | 225.1108         | 3  |
| 17 | 2057.8862 | 1029.4468       | 2040.8597      | 1020.9335        | 2039.8757      | 1020.4415        | Y   | 338.1823  | 169.5948        | 321.1557       | 161.0815         |                |                  | 2  |
| 18 |           |                 |                |                  |                |                  | R   | 175.1190  | 88.0631         | 158.0924       | 79.5498          |                |                  | 1  |

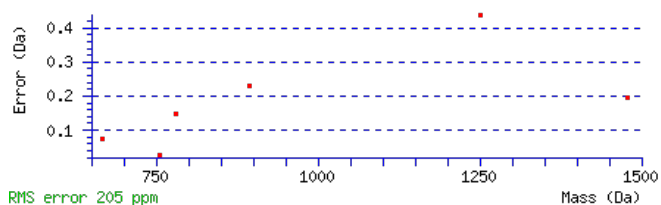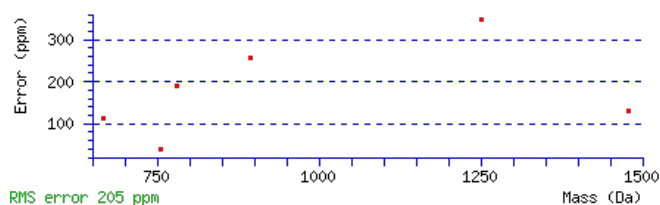



## AT1G62750.1

NCBI **BLAST** search of [FSYEDIPEDLEDLAQEYR](#)

(Parameters: blastp, nr protein database, expect=20000, no filter, PAM30)

Other BLAST [web gateways](#)

### All matches to this query

| Score | Mr(cal)   | Delta  | Sequence                           |
|-------|-----------|--------|------------------------------------|
| 30.5  | 2230.9906 | 0.0011 | <a href="#">FSYEDIPEDLEDLAQEYR</a> |
| 14.5  | 2230.9908 | 0.0008 | <a href="#">NMEIQSACAMLETQIDSK</a> |
| 14.5  | 2230.9908 | 0.0008 | <a href="#">NMEIQSACAMLETQIDSK</a> |

**Mascot:** <http://www.matrixscience.com/>

**Peptide View**MS/MS Fragmentation of **SASKFVK**Found in **AT1G62760.1** in **TAIR\_Arabidopsis**, Symbols: | invertase/pectin methylesterase inhibitor family protein | chr1:23241239-23242177  
REVERSE

Match to Query 880: 774.413562 from(388.214057,2+) index(5718)

Title: Elution from: 51.135 to 51.135 scan no 7292 cid35.00 polarity:+

Data file 0-2\_2.mgf

Click mouse within plot area to zoom in by factor of two about that point

Or,  to  Da Label all possible matches  Label matches used for scoring Show Y-axis 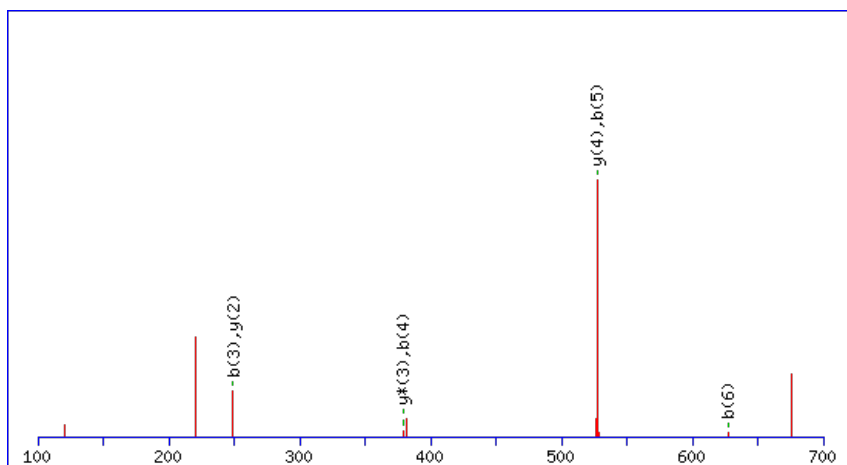Monoisotopic mass of neutral peptide **Mr(calc)**: 774.4118

Fixed modifications: Carbamidomethyl (C) (apply to specified residues or termini only)

Ions Score: 25 **Expect**: 0.019Matches : 7/58 fragment ions using 9 most intense peaks ([help](#))

| # | b               | b <sup>++</sup> | b*       | b <sup>*++</sup> | b <sup>0</sup> | b <sup>0++</sup> | Seq. | y               | y <sup>++</sup> | y*              | y <sup>*++</sup> | y <sup>0</sup> | y <sup>0++</sup> | # |
|---|-----------------|-----------------|----------|------------------|----------------|------------------|------|-----------------|-----------------|-----------------|------------------|----------------|------------------|---|
| 1 | 89.0363         | 45.0218         |          |                  | 71.0258        | 36.0165          | S    |                 |                 |                 |                  |                |                  | 7 |
| 2 | 161.0705        | 81.0389         |          |                  | 143.0599       | 72.0336          | A    | 687.3900        | 344.1986        | 669.3664        | 335.1869         | 669.3795       | 335.1934         | 6 |
| 3 | <b>249.0996</b> | 125.0534        |          |                  | 231.0890       | 116.0481         | S    | 615.3559        | 308.1816        | 597.3323        | 299.1698         | 597.3453       | 299.1763         | 5 |
| 4 | <b>379.1886</b> | 190.0979        | 361.1650 | 181.0861         | 361.1780       | 181.0926         | K    | <b>527.3268</b> | 264.1670        | 509.3032        | 255.1552         |                |                  | 4 |
| 5 | <b>527.2540</b> | 264.1307        | 509.2304 | 255.1189         | 509.2435       | 255.1254         | F    | 397.2378        | 199.1225        | <b>379.2142</b> | 190.1107         |                |                  | 3 |
| 6 | <b>627.3195</b> | 314.1634        | 609.2959 | 305.1516         | 609.3089       | 305.1581         | V    | <b>249.1723</b> | 125.0898        | 231.1487        | 116.0780         |                |                  | 2 |
| 7 |                 |                 |          |                  |                |                  | K    | 149.1069        | 75.0571         | 131.0833        | 66.0453          |                |                  | 1 |

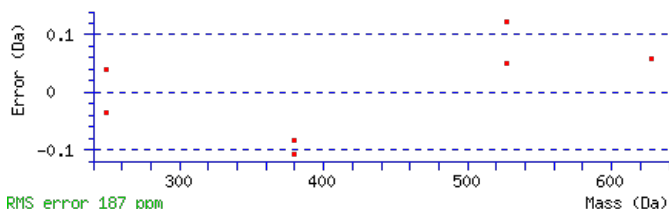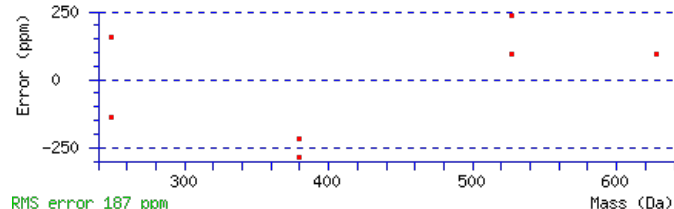NCBI **BLAST** search of **SASKFVK**

(Parameters: blastp, nr protein database, expect=20000, no filter, PAM30)

Other BLAST [web gateways](#)**All matches to this query**

| Score | Mr(calc) | Delta   | Sequence                |
|-------|----------|---------|-------------------------|
| 25.2  | 774.4118 | 0.0018  | <a href="#">SASKFVK</a> |
| 14.1  | 774.4140 | -0.0005 | <a href="#">VFGGLFK</a> |

## AT1G62760.1

|      |          |         |                        |
|------|----------|---------|------------------------|
| 14.1 | 774.4140 | -0.0005 | <a href="#">VFLFNK</a> |
| 10.4 | 774.4140 | -0.0005 | <a href="#">VFNFKI</a> |
| 3.6  | 774.4140 | -0.0005 | <a href="#">NFFLVK</a> |
| 3.6  | 774.4145 | -0.0009 | <a href="#">RSFVVR</a> |

**Mascot:** <http://www.matrixscience.com/>



# Mascot Search Results

## Peptide View

MS/MS Fragmentation of **MQNELMTATNSLTK**

Found in **AT1G62780.1** in **TAIR\_Arabidopsis**, Symbols: | similar to hypothetical protein [Vitis vinifera] (GB:CAN83165.1) | chr1:23253014-23254731 REVERSE

Match to Query 7085: 1598.704658 from(800.359605,2+) index(5615)

Title: Elution from: 49.893 to 49.893 scan no 7110 cid35.00 polarity:+

Data file 0-3\_2.mgf

Click mouse within plot area to zoom in by factor of two about that point

Or,  to  Da

Label all possible matches  Label matches used for scoring

Show Y-axis

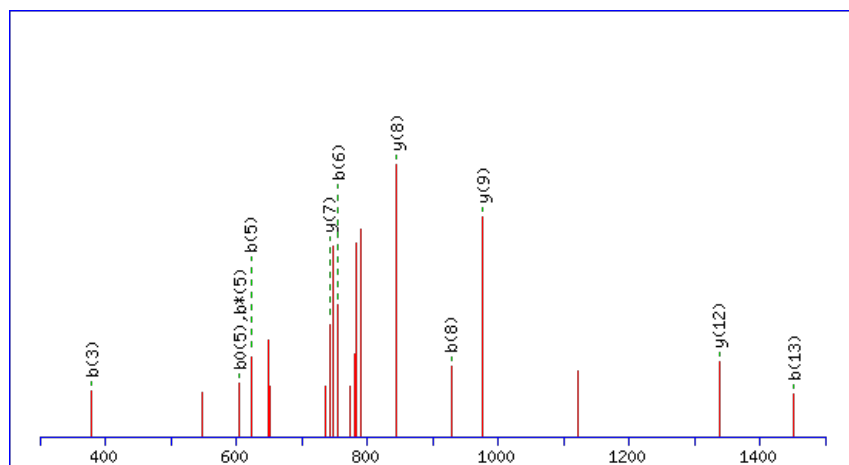

Monoisotopic mass of neutral peptide  $M_r(\text{calc})$ : 1598.7005

Fixed modifications: Carbamidomethyl (C) (apply to specified residues or termini only)

Ions Score: 39 Expect: 0.00087

Matches : 11/146 fragment ions using 16 most intense peaks [\(help\)](#)

| #  | b                | b <sup>++</sup> | b*              | b <sup>*++</sup> | b <sup>0</sup>  | b <sup>0++</sup> | Seq. | y                | y <sup>++</sup> | y*        | y <sup>*++</sup> | y <sup>0</sup> | y <sup>0++</sup> | #  |
|----|------------------|-----------------|-----------------|------------------|-----------------|------------------|------|------------------|-----------------|-----------|------------------|----------------|------------------|----|
| 1  | 133.0448         | 67.0260         |                 |                  |                 |                  | M    |                  |                 |           |                  |                |                  | 14 |
| 2  | 263.0974         | 132.0524        | 245.0739        | 123.0406         |                 |                  | Q    | 1467.6702        | 734.3387        | 1449.6466 | 725.3270         | 1449.6596      | 725.3335         | 13 |
| 3  | <b>379.1344</b>  | 190.0709        | 361.1109        | 181.0591         |                 |                  | N    | <b>1337.6176</b> | 669.3124        | 1319.5940 | 660.3006         | 1319.6070      | 660.3071         | 12 |
| 4  | 509.1741         | 255.0907        | 491.1505        | 246.0789         | 491.1635        | 246.0854         | E    | 1221.5806        | 611.2939        | 1203.5570 | 602.2821         | 1203.5700      | 602.2886         | 11 |
| 5  | <b>623.2552</b>  | 312.1312        | <b>605.2316</b> | 303.1194         | <b>605.2446</b> | 303.1259         | L    | 1091.5409        | 546.2741        | 1073.5174 | 537.2623         | 1073.5304      | 537.2688         | 10 |
| 6  | <b>755.2927</b>  | 378.1500        | 737.2691        | 369.1382         | 737.2821        | 369.1447         | M    | <b>977.4598</b>  | 489.2336        | 959.4363  | 480.2218         | 959.4493       | 480.2283         | 9  |
| 7  | 857.3374         | 429.1723        | 839.3138        | 420.1605         | 839.3268        | 420.1671         | T    | <b>845.4223</b>  | 423.2148        | 827.3987  | 414.2030         | 827.4118       | 414.2095         | 8  |
| 8  | <b>929.3715</b>  | 465.1894        | 911.3480        | 456.1776         | 911.3610        | 456.1841         | A    | <b>743.3776</b>  | 372.1924        | 725.3540  | 363.1806         | 725.3670       | 363.1872         | 7  |
| 9  | 1031.4163        | 516.2118        | 1013.3927       | 507.2000         | 1013.4057       | 507.2065         | T    | 671.3435         | 336.1754        | 653.3199  | 327.1636         | 653.3329       | 327.1701         | 6  |
| 10 | 1147.4533        | 574.2303        | 1129.4297       | 565.2185         | 1129.4427       | 565.2250         | N    | 569.2987         | 285.1530        | 551.2752  | 276.1412         | 551.2882       | 276.1477         | 5  |
| 11 | 1235.4823        | 618.2448        | 1217.4587       | 609.2330         | 1217.4718       | 609.2395         | S    | 453.2617         | 227.1345        | 435.2382  | 218.1227         | 435.2512       | 218.1292         | 4  |
| 12 | 1349.5634        | 675.2853        | 1331.5398       | 666.2736         | 1331.5529       | 666.2801         | L    | 365.2327         | 183.1200        | 347.2091  | 174.1082         | 347.2221       | 174.1147         | 3  |
| 13 | <b>1451.6081</b> | 726.3077        | 1433.5845       | 717.2959         | 1433.5976       | 717.3024         | T    | 251.1516         | 126.0794        | 233.1280  | 117.0676         | 233.1410       | 117.0741         | 2  |
| 14 |                  |                 |                 |                  |                 |                  | K    | 149.1069         | 75.0571         | 131.0833  | 66.0453          |                |                  | 1  |

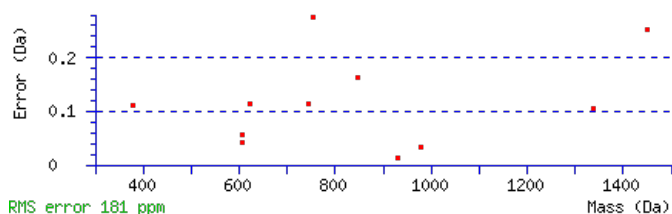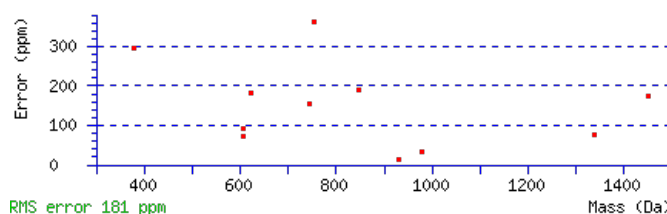

NCBI BLAST search of [MQNELMTATNSLTK](#)

## AT1G62780.1

(Parameters: blastp, nr protein database, expect=20000, no filter, PAM30)

Other BLAST [web gateways](#)

### All matches to this query

| Score | Mr(calc)  | Delta   | Sequence                         |
|-------|-----------|---------|----------------------------------|
| 39.3  | 1598.7005 | 0.0042  | <a href="#">MQNELMTATNSLTK</a>   |
| 22.9  | 1598.7074 | -0.0028 | <a href="#">QFLMETSNELDIK</a>    |
| 11.2  | 1598.7074 | -0.0028 | <a href="#">YAQEMQSIDELK</a>     |
| 8.4   | 1598.7094 | -0.0047 | <a href="#">WLSGVGFARGGGGGDK</a> |
| 6.3   | 1598.7005 | 0.0042  | <a href="#">IMVEEEGAEMRKK</a>    |
| 4.2   | 1598.7054 | -0.0007 | <a href="#">DPFQMIMLERR</a>      |
| 3.6   | 1598.7027 | 0.0020  | <a href="#">SKLVDMCQEFTP</a>     |
| 3.4   | 1598.7052 | -0.0005 | <a href="#">MDKTSSPESATISTK</a>  |
| 3.0   | 1598.7005 | 0.0042  | <a href="#">MLQSSGSCLINDIK</a>   |
| 2.1   | 1598.7042 | 0.0004  | <a href="#">MPEWTPDVRFFR</a>     |

Mascot: <http://www.matrixscience.com/>

**Peptide View**MS/MS Fragmentation of **HILTSIGEK**Found in **AT1G62820.1** in **TAIR\_Arabidopsis**, Symbols: | calmodulin, putative | chr1:23267487-23267933 REVERSE

Match to Query 2553: 1008.523946 from(505.269249,2+) index(1435)

Title: Elution from: 19.526 to 19.526 scan no 1934 cid35.00 polarity:+

Data file 0-1\_3.mgf

Click mouse within plot area to zoom in by factor of two about that point

Or,   to  Da Label all possible matches  Label matches used for scoring Show Y-axis 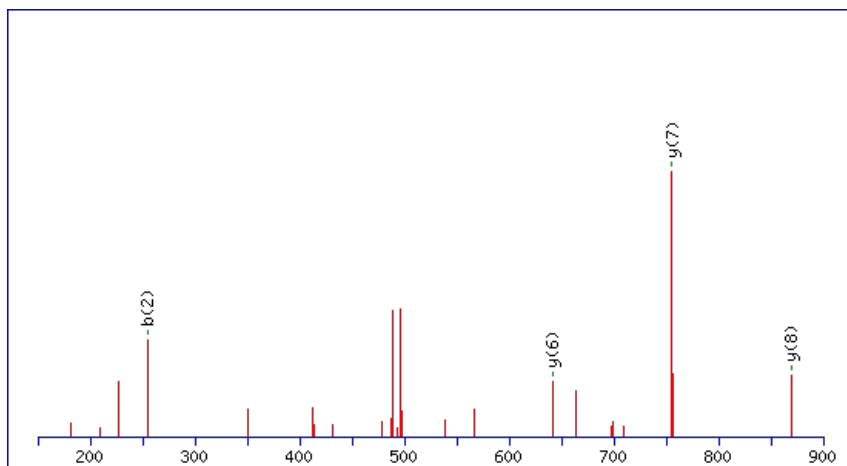Monoisotopic mass of neutral peptide **Mr(calc)**: 1008.5248

Fixed modifications: Carbamidomethyl (C) (apply to specified residues or termini only)

Ions Score: 17 Expect: 0.024

Matches : 4/72 fragment ions using 7 most intense peaks ([help](#))

| # | b        | b <sup>++</sup> | b <sup>0</sup> | b <sup>0++</sup> | Seq. | y        | y <sup>++</sup> | y*       | y <sup>*++</sup> | y <sup>0</sup> | y <sup>0++</sup> | # |
|---|----------|-----------------|----------------|------------------|------|----------|-----------------|----------|------------------|----------------|------------------|---|
| 1 | 141.0573 | 71.0323         |                |                  | H    |          |                 |          |                  |                |                  | 9 |
| 2 | 255.1384 | 128.0728        |                |                  | I    | 869.4821 | 435.2447        | 851.4585 | 426.2329         | 851.4715       | 426.2394         | 8 |
| 3 | 369.2195 | 185.1134        |                |                  | L    | 755.4010 | 378.2041        | 737.3774 | 369.1923         | 737.3904       | 369.1988         | 7 |
| 4 | 471.2642 | 236.1357        | 453.2536       | 227.1305         | T    | 641.3199 | 321.1636        | 623.2963 | 312.1518         | 623.3093       | 312.1583         | 6 |
| 5 | 559.2933 | 280.1503        | 541.2827       | 271.1450         | S    | 539.2752 | 270.1412        | 521.2516 | 261.1294         | 521.2646       | 261.1359         | 5 |
| 6 | 673.3744 | 337.1908        | 655.3638       | 328.1855         | I    | 451.2461 | 226.1267        | 433.2225 | 217.1149         | 433.2355       | 217.1214         | 4 |
| 7 | 731.3929 | 366.2001        | 713.3823       | 357.1948         | G    | 337.1650 | 169.0861        | 319.1414 | 160.0743         | 319.1544       | 160.0809         | 3 |
| 8 | 861.4325 | 431.2199        | 843.4219       | 422.2146         | E    | 279.1465 | 140.0769        | 261.1229 | 131.0651         | 261.1359       | 131.0716         | 2 |
| 9 |          |                 |                |                  | K    | 149.1069 | 75.0571         | 131.0833 | 66.0453          |                |                  | 1 |

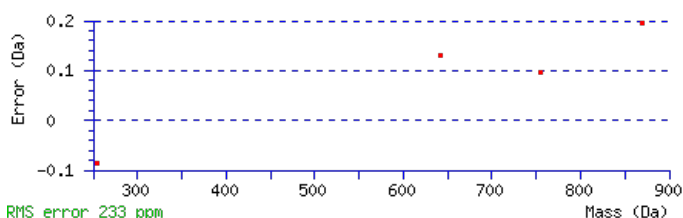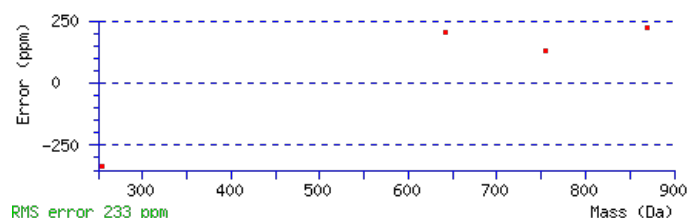NCBI **BLAST** search of [HILTSIGEK](#)

(Parameters: blastp, nr protein database, expect=20000, no filter, PAM30)

Other BLAST [web gateways](#)**All matches to this query**

| Score | Mr(calc)  | Delta   | Sequence                  |
|-------|-----------|---------|---------------------------|
| 16.6  | 1008.5248 | -0.0009 | <a href="#">HILTSIGEK</a> |



**Peptide View**MS/MS Fragmentation of **LGLICTTENPLK**

Found in **AT1G62950.1** in **TAIR\_Arabidopsis**, Symbols: | leucine-rich repeat transmembrane protein kinase, putative | chr1:23318959-23321726  
FORWARD

Match to Query 5043: 1357.724622 from(679.869587,2+) index(9799)

Title: Elution from: 91.818 to 91.818 scan no 13787 cid35.00 polarity:+

Data file D6h-1\_3.mgf

Click mouse within plot area to zoom in by factor of two about that point

Or,   to  Da

Label all possible matches  Label matches used for scoring

Show Y-axis

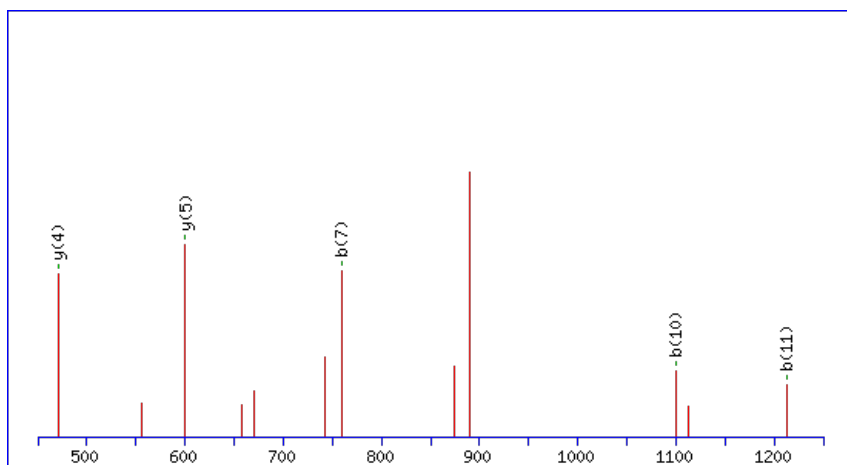

Monoisotopic mass of neutral peptide  $M_r(\text{calc})$ : 1357.7275

Fixed modifications: Carbamidomethyl (C) (apply to specified residues or termini only)

Ions Score: 22 Expect: 0.019

Matches : 5/98 fragment ions using 6 most intense peaks ([help](#))

| #  | b                | b <sup>++</sup> | b*        | b <sup>*++</sup> | b <sup>0</sup> | b <sup>0++</sup> | Seq. | y               | y <sup>++</sup> | y*        | y <sup>*++</sup> | y <sup>0</sup> | y <sup>0++</sup> | #  |
|----|------------------|-----------------|-----------|------------------|----------------|------------------|------|-----------------|-----------------|-----------|------------------|----------------|------------------|----|
| 1  | 114.0913         | 57.5493         |           |                  |                |                  | L    |                 |                 |           |                  |                |                  | 12 |
| 2  | 171.1128         | 86.0600         |           |                  |                |                  | G    | 1245.6508       | 623.3290        | 1228.6242 | 614.8157         | 1227.6402      | 614.3237         | 11 |
| 3  | 284.1969         | 142.6021        |           |                  |                |                  | L    | 1188.6293       | 594.8183        | 1171.6027 | 586.3050         | 1170.6187      | 585.8130         | 10 |
| 4  | 397.2809         | 199.1441        |           |                  |                |                  | I    | 1075.5452       | 538.2762        | 1058.5187 | 529.7630         | 1057.5347      | 529.2710         | 9  |
| 5  | 557.3116         | 279.1594        |           |                  |                |                  | C    | 962.4612        | 481.7342        | 945.4346  | 473.2209         | 944.4506       | 472.7289         | 8  |
| 6  | 658.3593         | 329.6833        |           |                  | 640.3487       | 320.6780         | T    | 802.4305        | 401.7189        | 785.4040  | 393.2056         | 784.4199       | 392.7136         | 7  |
| 7  | <b>759.4069</b>  | 380.2071        |           |                  | 741.3964       | 371.2018         | T    | 701.3828        | 351.1951        | 684.3563  | 342.6818         | 683.3723       | 342.1898         | 6  |
| 8  | 888.4495         | 444.7284        |           |                  | 870.4390       | 435.7231         | E    | <b>600.3352</b> | 300.6712        | 583.3086  | 292.1579         | 582.3246       | 291.6659         | 5  |
| 9  | 1002.4925        | 501.7499        | 985.4659  | 493.2366         | 984.4819       | 492.7446         | N    | <b>471.2926</b> | 236.1499        | 454.2660  | 227.6366         |                |                  | 4  |
| 10 | <b>1099.5452</b> | 550.2762        | 1082.5187 | 541.7630         | 1081.5347      | 541.2710         | P    | 357.2496        | 179.1285        | 340.2231  | 170.6152         |                |                  | 3  |
| 11 | <b>1212.6293</b> | 606.8183        | 1195.6027 | 598.3050         | 1194.6187      | 597.8130         | L    | 260.1969        | 130.6021        | 243.1703  | 122.0888         |                |                  | 2  |
| 12 |                  |                 |           |                  |                |                  | K    | 147.1128        | 74.0600         | 130.0863  | 65.5468          |                |                  | 1  |

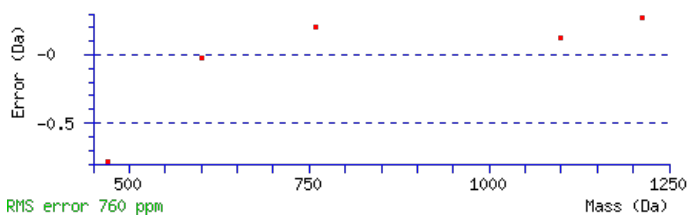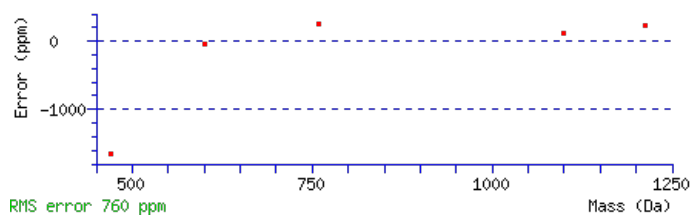

NCBI BLAST search of **LGLICTTENPLK**

(Parameters: blastp, nr protein database, expect=20000, no filter, PAM30)

Other BLAST [web gateways](#)



AT1G62950.1

All matches to this query

| Score | Mr(calc)  | Delta   | Sequence                      |
|-------|-----------|---------|-------------------------------|
| 22.4  | 1357.7275 | -0.0029 | <a href="#">LGLICTTENPLK</a>  |
| 13.8  | 1357.7275 | -0.0029 | <a href="#">LMSLAKDNPELK</a>  |
| 2.3   | 1357.7275 | -0.0029 | <a href="#">EIVEKOSPGLMK</a>  |
| 1.4   | 1357.7275 | -0.0029 | <a href="#">CILGGEVIGEALK</a> |

Mascot: <http://www.matrixscience.com/>

**Peptide View**MS/MS Fragmentation of **AFYQAK**

Found in **AT1G62960.1** in **TAIR\_Arabidopsis**, Symbols: ACS10 | ACS10 (ACC SYNTHASE 10); 1-aminocyclopropane-1-carboxylate synthase | chr1:23321936-23323894 REVERSE

Match to Query 640: 734.345894 from(368.180223,2+) index(492)

Title: Elution from: 10.770 to 10.770 scan no 777 cid35.00 polarity:+

Data file D1d-2\_3.mgf

Click mouse within plot area to zoom in by factor of two about that point

Or,   to  Da

Label all possible matches  Label matches used for scoring

Show Y-axis

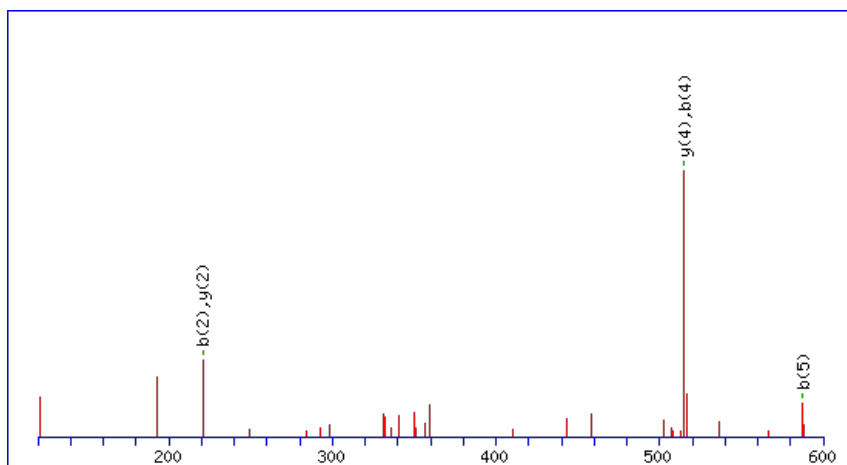

**Monoisotopic mass of neutral peptide Mr(calc):** 734.3463

**Fixed modifications:** Carbamidomethyl (C) (apply to specified residues or termini only)

**Ions Score:** 24 **Expect:** 0.023

**Matches:** 5/34 fragment ions using 5 most intense peaks ([help](#))

| # | b               | b <sup>++</sup> | b*       | b <sup>*++</sup> | Seq. | y               | y <sup>++</sup> | y*       | y <sup>*++</sup> | # |
|---|-----------------|-----------------|----------|------------------|------|-----------------|-----------------|----------|------------------|---|
| 1 | 73.0414         | 37.0244         |          |                  | A    |                 |                 |          |                  | 6 |
| 2 | <b>221.1069</b> | 111.0571        |          |                  | F    | 663.3195        | 332.1634        | 645.2959 | 323.1516         | 5 |
| 3 | 385.1672        | 193.0873        |          |                  | Y    | <b>515.2540</b> | 258.1307        | 497.2305 | 249.1189         | 4 |
| 4 | <b>515.2199</b> | 258.1136        | 497.1963 | 249.1018         | Q    | 351.1937        | 176.1005        | 333.1701 | 167.0887         | 3 |
| 5 | <b>587.2540</b> | 294.1307        | 569.2305 | 285.1189         | A    | <b>221.1410</b> | 111.0741        | 203.1174 | 102.0624         | 2 |
| 6 |                 |                 |          |                  | K    | 149.1069        | 75.0571         | 131.0833 | 66.0453          | 1 |

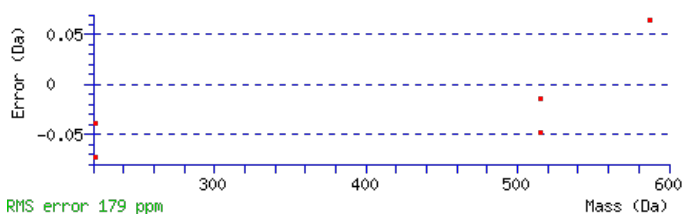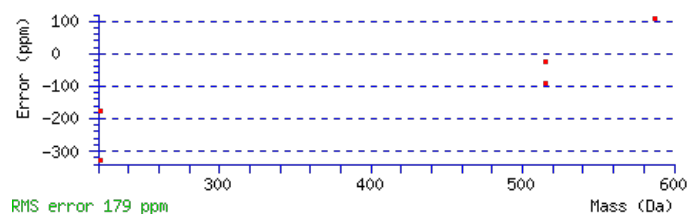NCBI **BLAST** search of **AFYQAK**

(Parameters: blastp, nr protein database, expect=20000, no filter, PAM30)

Other BLAST [web gateways](#)

**All matches to this query**

| Score | Mr(calc) | Delta   | Sequence               |
|-------|----------|---------|------------------------|
| 24.0  | 734.3463 | -0.0004 | <a href="#">AFYQAK</a> |
| 8.9   | 734.3463 | -0.0004 | <a href="#">AYFQAK</a> |
| 8.9   | 734.3441 | 0.0018  | <a href="#">IEEHAK</a> |

## AT1G62960.1

|     |          |         |                         |
|-----|----------|---------|-------------------------|
| 8.9 | 734.3463 | -0.0004 | <a href="#">NFTFAK</a>  |
| 0.9 | 734.3468 | -0.0009 | <a href="#">KSHSHK</a>  |
| 0.9 | 734.3441 | 0.0018  | <a href="#">NPAAEPK</a> |

**Mascot:** <http://www.matrixscience.com/>

**Peptide View**MS/MS Fragmentation of **LFSRMVDPER**

Found in **AT1G63680.1** in **TAIR\_Arabidopsis**, Symbols: ATMURE, PDE316 | ATMURE/PDE316 (PIGMENT DEFECTIVE EMBRYO); ATP binding/ ligase | chr1:23618124-23620764 FORWARD

Match to Query 4827: 1280.575904 from(641.295228,2+) index(3123)

Title: Elution from: 31.316 to 31.316 scan no 3889 cid35.00 polarity:+

Data file C7-3\_1.mgf

Click mouse within plot area to zoom in by factor of two about that point

Or,   to  Da

Label all possible matches  Label matches used for scoring

Show Y-axis

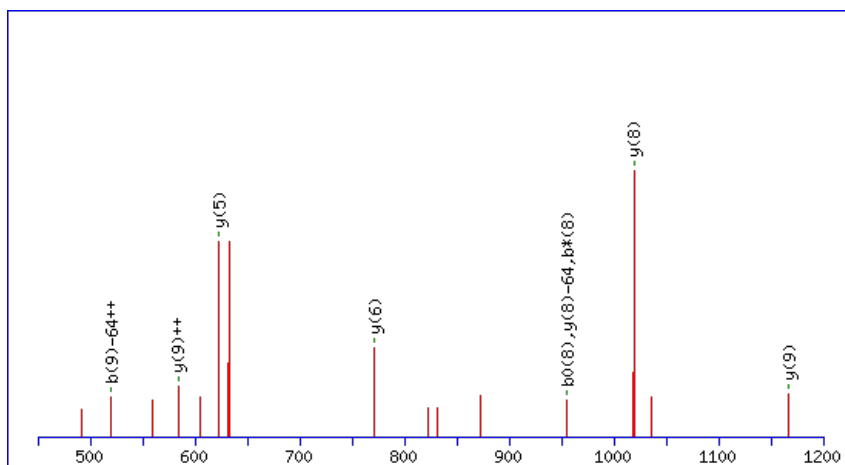

**Monoisotopic mass of neutral peptide Mr(calc):** 1280.5760

**Fixed modifications:** Carbamidomethyl (C) (apply to specified residues or termini only)

**Variable modifications:**

**M5** : Oxidation (M), with neutral losses 0.0000 (shown in table), 63.9983

**Ions Score:** 25 **Expect:** 0.028

**Matches** : 9/150 fragment ions using 11 most intense peaks ([help](#))

| #  | b         | b <sup>++</sup> | b <sup>*</sup>  | b <sup>*++</sup> | b <sup>0</sup>  | b <sup>0++</sup> | Seq. | y                | y <sup>++</sup> | y <sup>*</sup> | y <sup>*++</sup> | y <sup>0</sup> | y <sup>0++</sup> | #  |
|----|-----------|-----------------|-----------------|------------------|-----------------|------------------|------|------------------|-----------------|----------------|------------------|----------------|------------------|----|
| 1  | 115.0884  | 58.0478         |                 |                  |                 |                  | L    |                  |                 |                |                  |                |                  | 10 |
| 2  | 263.1538  | 132.0805        |                 |                  |                 |                  | F    | <b>1167.5021</b> | <b>584.2547</b> | 1149.4786      | 575.2429         | 1149.4916      | 575.2494         | 9  |
| 3  | 351.1829  | 176.0951        |                 |                  | 333.1723        | 167.0898         | S    | <b>1019.4367</b> | 510.2220        | 1001.4131      | 501.2102         | 1001.4261      | 501.2167         | 8  |
| 4  | 511.2721  | 256.1397        | 493.2486        | 247.1279         | 493.2616        | 247.1344         | R    | 931.4076         | 466.2075        | 913.3840       | 457.1957         | 913.3971       | 457.2022         | 7  |
| 5  | 659.3046  | 330.1559        | 641.2810        | 321.1441         | 641.2940        | 321.1506         | M    | <b>771.3184</b>  | 386.1628        | 753.2948       | 377.1510         | 753.3078       | 377.1575         | 6  |
| 6  | 759.3700  | 380.1886        | 741.3464        | 371.1769         | 741.3595        | 371.1834         | V    | <b>623.2859</b>  | 312.1466        | 605.2624       | 303.1348         | 605.2754       | 303.1413         | 5  |
| 7  | 875.3940  | 438.2006        | 857.3704        | 429.1888         | 857.3834        | 429.1954         | D    | 523.2205         | 262.1139        | 505.1969       | 253.1021         | 505.2099       | 253.1086         | 4  |
| 8  | 973.4438  | 487.2255        | <b>955.4202</b> | 478.2137         | <b>955.4332</b> | 478.2203         | P    | 407.1965         | 204.1019        | 389.1729       | 195.0901         | 389.1860       | 195.0966         | 3  |
| 9  | 1103.4834 | 552.2454        | 1085.4598       | 543.2336         | 1085.4729       | 543.2401         | E    | 309.1467         | 155.0770        | 291.1231       | 146.0652         | 291.1362       | 146.0717         | 2  |
| 10 |           |                 |                 |                  |                 |                  | R    | 179.1071         | 90.0572         | 161.0835       | 81.0454          |                |                  | 1  |

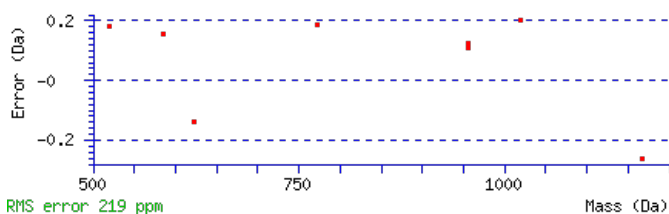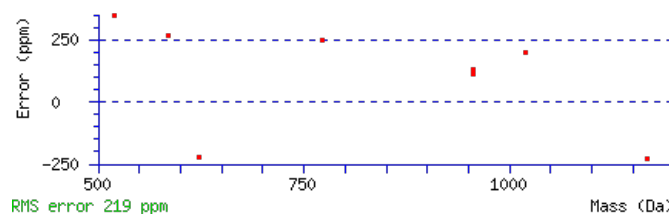

NCBI **BLAST** search of **LFSRMVDPER**

(Parameters: blastp, nr protein database, expect=20000, no filter, PAM30)

Other BLAST [web gateways](#)

**All matches to this query**

## AT1G63680.1

| Score | Mr(calc)  | Delta   | Sequence                     |
|-------|-----------|---------|------------------------------|
| 25.3  | 1280.5760 | -0.0001 | <a href="#">LFSRMVDPER</a>   |
| 4.0   | 1280.5789 | -0.0030 | <a href="#">CYIVLDDMIK</a>   |
| 3.9   | 1280.5733 | 0.0026  | <a href="#">LMDELDKNEK</a>   |
| 3.1   | 1280.5760 | -0.0001 | <a href="#">SFRGPGMAEGLK</a> |
| 3.1   | 1280.5733 | 0.0026  | <a href="#">CYEEKLDALK</a>   |
| 2.7   | 1280.5733 | 0.0026  | <a href="#">EQMGYTIDALK</a>  |
| 2.3   | 1280.5759 | -0.0000 | <a href="#">FLQGEMQQLR</a>   |
| 1.8   | 1280.5764 | -0.0005 | <a href="#">MEQGSLRERR</a>   |
| 1.6   | 1280.5784 | -0.0025 | <a href="#">TGSNKTATDAAK</a> |
| 1.5   | 1280.5733 | 0.0026  | <a href="#">NEDMKVFLEK</a>   |

Mascot: <http://www.matrixscience.com/>

## Peptide View

MS/MS Fragmentation of **MSLTLFMKFGLK**

Found in **AT1G63710.1** in **TAIR\_Arabidopsis**, Symbols: CYP86A7 | CYP86A7 (cytochrome P450, family 86, subfamily A, polypeptide 7); oxygen binding | chr1:23636023-23637594 REVERSE

Match to Query 5870: 1444.721217 from(482.581015,3+) index(859)

Title: Elution from: 13.640 to 13.640 scan no 1206 cid35.00 polarity:+

Data file C7-3\_2.mgf

Click mouse within plot area to zoom in by factor of two about that point

Or,  to  Da

Label all possible matches  Label matches used for scoring

Show Y-axis

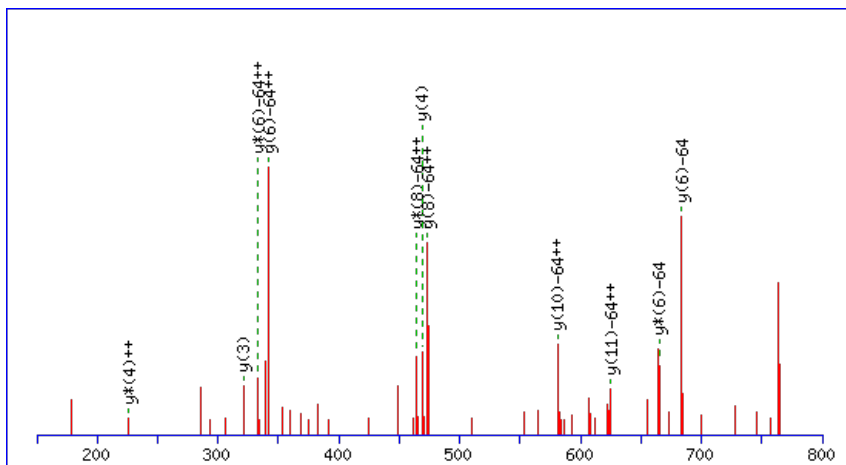

Monoisotopic mass of neutral peptide  $M_r(\text{calc})$ : 1444.7251

Fixed modifications: Carbamidomethyl (C) (apply to specified residues or termini only)

Variable modifications:

M7 : Oxidation (M), with neutral losses 63.9983 (shown in table), 0.0000

Ions Score: 22 Expect: 0.039

Matches : 12/158 fragment ions using 21 most intense peaks ([help](#))

| #  | b         | b <sup>++</sup> | b <sup>*</sup> | b <sup>*++</sup> | b <sup>0</sup> | b <sup>0++</sup> | Seq. | y         | y <sup>++</sup> | y <sup>*</sup> | y <sup>*++</sup> | y <sup>0</sup> | y <sup>0++</sup> | #  |
|----|-----------|-----------------|----------------|------------------|----------------|------------------|------|-----------|-----------------|----------------|------------------|----------------|------------------|----|
| 1  | 133.0448  | 67.0260         |                |                  |                |                  | M    |           |                 |                |                  |                |                  | 12 |
| 2  | 221.0739  | 111.0406        |                |                  | 203.0633       | 102.0353         | S    | 1249.6965 | 625.3519        | 1231.6729      | 616.3401         | 1231.6860      | 616.3466         | 11 |
| 3  | 335.1550  | 168.0811        |                |                  | 317.1444       | 159.0758         | L    | 1161.6675 | 581.3374        | 1143.6439      | 572.3256         | 1143.6569      | 572.3321         | 10 |
| 4  | 437.1997  | 219.1035        |                |                  | 419.1891       | 210.0982         | T    | 1047.5864 | 524.2968        | 1029.5628      | 515.2850         | 1029.5758      | 515.2915         | 9  |
| 5  | 551.2808  | 276.1440        |                |                  | 533.2702       | 267.1387         | L    | 945.5417  | 473.2745        | 927.5181       | 464.2627         |                |                  | 8  |
| 6  | 699.3462  | 350.1767        |                |                  | 681.3357       | 341.1715         | F    | 831.4606  | 416.2339        | 813.4370       | 407.2221         |                |                  | 7  |
| 7  | 783.3804  | 392.1938        |                |                  | 765.3698       | 383.1885         | M    | 683.3951  | 342.2012        | 665.3715       | 333.1894         |                |                  | 6  |
| 8  | 913.4694  | 457.2383        | 895.4458       | 448.2265         | 895.4588       | 448.2331         | K    | 599.3610  | 300.1841        | 581.3374       | 291.1723         |                |                  | 5  |
| 9  | 1061.5349 | 531.2711        | 1043.5113      | 522.2593         | 1043.5243      | 522.2658         | F    | 469.2719  | 235.1396        | 451.2483       | 226.1278         |                |                  | 4  |
| 10 | 1119.5534 | 560.2803        | 1101.5298      | 551.2685         | 1101.5428      | 551.2750         | G    | 321.2065  | 161.1069        | 303.1829       | 152.0951         |                |                  | 3  |
| 11 | 1233.6344 | 617.3209        | 1215.6109      | 608.3091         | 1215.6239      | 608.3156         | L    | 263.1880  | 132.0976        | 245.1644       | 123.0858         |                |                  | 2  |
| 12 |           |                 |                |                  |                |                  | K    | 149.1069  | 75.0571         | 131.0833       | 66.0453          |                |                  | 1  |

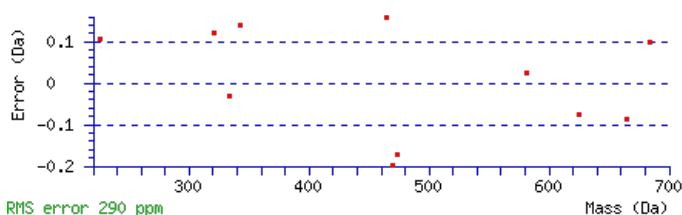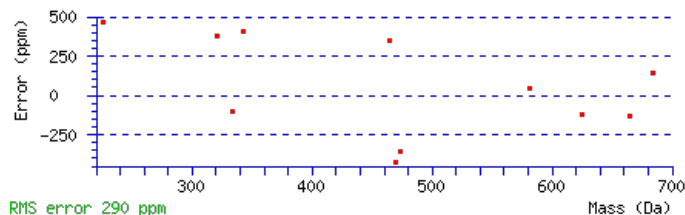

NCBI BLAST search of [MSLTLFMKFGLK](#)

(Parameters: blastp, nr protein database, expect=20000, no filter, PAM30)

AT1G63710.1

Other BLAST [web gateways](#)

All matches to this query

| Score | Mr(calc)  | Delta   | Sequence                        |
|-------|-----------|---------|---------------------------------|
| 21.7  | 1444.7251 | -0.0038 | <a href="#">MSLTLFMKFKLK</a>    |
| 17.0  | 1444.7199 | 0.0014  | <a href="#">VCVIGAGPAGLVSAR</a> |

Mascot: <http://www.matrixscience.com/>

**Peptide View**MS/MS Fragmentation of **LLDHPAFDLR**Found in **AT1G63770.1** in **TAIR\_Arabidopsis**, Symbols: | peptidase M1 family protein | chr1:23661913-23667906 REVERSE

Match to Query 3588: 1195.635273 from(399.552367,3+) index(4964)

Title: Elution from: 47.802 to 47.802 scan no 6378 cid35.00 polarity:+

Data file D1d-2\_2.mgf

Click mouse within plot area to zoom in by factor of two about that point

Or,   to  Da Label all possible matches  Label matches used for scoring Show Y-axis 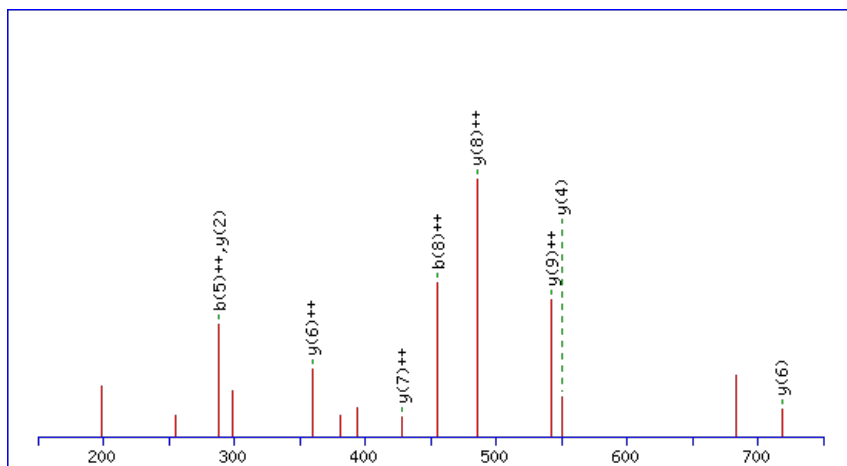**Monoisotopic mass of neutral peptide Mr(calc)**: 1195.6349**Fixed modifications**: Carbamidomethyl (C) (apply to specified residues or termini only)**Ions Score**: 30 **Expect**: 0.0037**Matches**: 9/82 fragment ions using 13 most intense peaks ([help](#))

| #  | b         | b <sup>++</sup> | b <sup>0</sup> | b <sup>0++</sup> | Seq. | y         | y <sup>++</sup> | y*        | y <sup>*++</sup> | y <sup>0</sup> | y <sup>0++</sup> | #  |
|----|-----------|-----------------|----------------|------------------|------|-----------|-----------------|-----------|------------------|----------------|------------------|----|
| 1  | 114.0913  | 57.5493         |                |                  | L    |           |                 |           |                  |                |                  | 10 |
| 2  | 227.1754  | 114.0913        |                |                  | L    | 1083.5582 | 542.2827        | 1066.5316 | 533.7694         | 1065.5476      | 533.2774         | 9  |
| 3  | 342.2023  | 171.6048        | 324.1918       | 162.5995         | D    | 970.4741  | 485.7407        | 953.4476  | 477.2274         | 952.4635       | 476.7354         | 8  |
| 4  | 479.2613  | 240.1343        | 461.2507       | 231.1290         | H    | 855.4472  | 428.2272        | 838.4206  | 419.7139         | 837.4366       | 419.2219         | 7  |
| 5  | 576.3140  | 288.6606        | 558.3035       | 279.6554         | P    | 718.3883  | 359.6978        | 701.3617  | 351.1845         | 700.3777       | 350.6925         | 6  |
| 6  | 647.3511  | 324.1792        | 629.3406       | 315.1739         | A    | 621.3355  | 311.1714        | 604.3089  | 302.6581         | 603.3249       | 302.1661         | 5  |
| 7  | 794.4196  | 397.7134        | 776.4090       | 388.7081         | F    | 550.2984  | 275.6528        | 533.2718  | 267.1395         | 532.2878       | 266.6475         | 4  |
| 8  | 909.4465  | 455.2269        | 891.4359       | 446.2216         | D    | 403.2300  | 202.1186        | 386.2034  | 193.6053         | 385.2194       | 193.1133         | 3  |
| 9  | 1022.5306 | 511.7689        | 1004.5200      | 502.7636         | L    | 288.2030  | 144.6051        | 271.1765  | 136.0919         |                |                  | 2  |
| 10 |           |                 |                |                  | R    | 175.1190  | 88.0631         | 158.0924  | 79.5498          |                |                  | 1  |

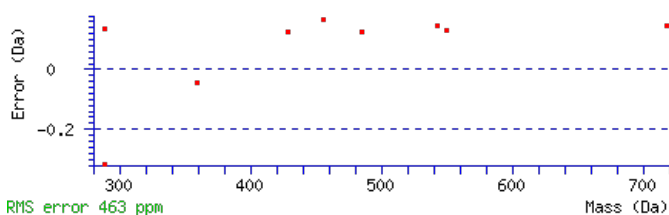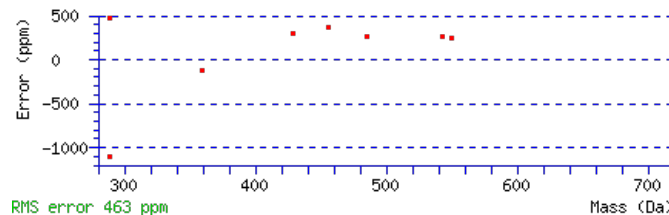NCBI **BLAST** search of **LLDHPAFDLR**

(Parameters: blastp, nr protein database, expect=20000, no filter, PAM30)

Other BLAST [web gateways](#)**All matches to this query**

| Score | Mr(calc) | Delta | Sequence |
|-------|----------|-------|----------|
|       |          |       |          |



## AT1G63770.1

|      |           |         |                            |
|------|-----------|---------|----------------------------|
| 30.0 | 1195.6349 | 0.0003  | <a href="#">LLDHPAFDLR</a> |
| 4.1  | 1195.6356 | -0.0004 | <a href="#">RHLMTGGPRR</a> |
| 3.2  | 1195.6349 | 0.0003  | <a href="#">ILKNGDFYAR</a> |
| 2.9  | 1195.6350 | 0.0003  | <a href="#">TWVVPDPNLR</a> |
| 0.6  | 1195.6349 | 0.0003  | <a href="#">YFQQLASALR</a> |

**Mascot:** <http://www.matrixscience.com/>

**Peptide View**MS/MS Fragmentation of **VYSLIGGFCGSPVNFHAK**Found in **AT1G63770.2** in **TAIR\_Arabidopsis**, Symbols: | peptidase M1 family protein | chr1:23661828-23667906 REVERSE

Match to Query 9190: 1951.959804 from(651.660544,3+) index(7867)

Title: Elution from: 68.775 to 68.775 scan no 10296 cid35.00 polarity:+

Data file C7-3\_2.mgf

Click mouse within plot area to zoom in by factor of two about that point

Or,   to  Da Label all possible matches  Label matches used for scoring Show Y-axis 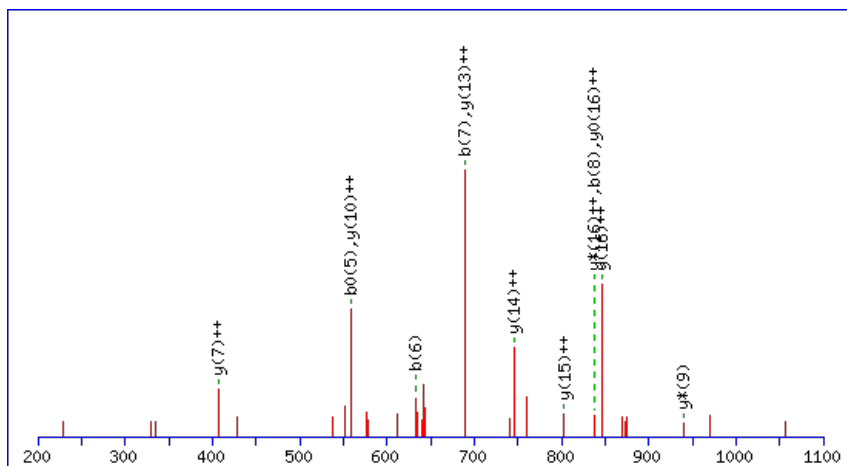**Monoisotopic mass of neutral peptide Mr(calc):** 1951.9615**Fixed modifications:** Carbamidomethyl (C) (apply to specified residues or termini only)**Ions Score:** 31 **Expect:** 0.0035**Matches:** 13/160 fragment ions using 19 most intense peaks ([help](#))

| #  | b         | b <sup>++</sup> | b <sup>*</sup> | b <sup>*++</sup> | b <sup>0</sup> | b <sup>0++</sup> | Seq. | y         | y <sup>++</sup> | y <sup>*</sup> | y <sup>*++</sup> | y <sup>0</sup> | y <sup>0++</sup> | #  |
|----|-----------|-----------------|----------------|------------------|----------------|------------------|------|-----------|-----------------|----------------|------------------|----------------|------------------|----|
| 1  | 100.0757  | 50.5415         |                |                  |                |                  | V    |           |                 |                |                  |                |                  | 18 |
| 2  | 263.1390  | 132.0731        |                |                  |                |                  | Y    | 1853.9003 | 927.4538        | 1836.8738      | 918.9405         | 1835.8898      | 918.4485         | 17 |
| 3  | 350.1710  | 175.5892        |                |                  | 332.1605       | 166.5839         | S    | 1690.8370 | 845.9221        | 1673.8104      | 837.4089         | 1672.8264      | 836.9168         | 16 |
| 4  | 463.2551  | 232.1312        |                |                  | 445.2445       | 223.1259         | L    | 1603.8050 | 802.4061        | 1586.7784      | 793.8928         | 1585.7944      | 793.4008         | 15 |
| 5  | 576.3392  | 288.6732        |                |                  | 558.3286       | 279.6679         | I    | 1490.7209 | 745.8641        | 1473.6943      | 737.3508         | 1472.7103      | 736.8588         | 14 |
| 6  | 633.3606  | 317.1840        |                |                  | 615.3501       | 308.1787         | G    | 1377.6368 | 689.3221        | 1360.6103      | 680.8088         | 1359.6263      | 680.3168         | 13 |
| 7  | 690.3821  | 345.6947        |                |                  | 672.3715       | 336.6894         | G    | 1320.6154 | 660.8113        | 1303.5888      | 652.2980         | 1302.6048      | 651.8060         | 12 |
| 8  | 837.4505  | 419.2289        |                |                  | 819.4400       | 410.2236         | F    | 1263.5939 | 632.3006        | 1246.5674      | 623.7873         | 1245.5833      | 623.2953         | 11 |
| 9  | 997.4812  | 499.2442        |                |                  | 979.4706       | 490.2389         | C    | 1116.5255 | 558.7664        | 1099.4989      | 550.2531         | 1098.5149      | 549.7611         | 10 |
| 10 | 1054.5026 | 527.7550        |                |                  | 1036.4921      | 518.7497         | G    | 956.4948  | 478.7511        | 939.4683       | 470.2378         | 938.4843       | 469.7458         | 9  |
| 11 | 1141.5347 | 571.2710        |                |                  | 1123.5241      | 562.2657         | S    | 899.4734  | 450.2403        | 882.4468       | 441.7271         | 881.4628       | 441.2350         | 8  |
| 12 | 1238.5874 | 619.7973        |                |                  | 1220.5769      | 610.7921         | P    | 812.4413  | 406.7243        | 795.4148       | 398.2110         |                |                  | 7  |
| 13 | 1337.6558 | 669.3316        |                |                  | 1319.6453      | 660.3263         | V    | 715.3886  | 358.1979        | 698.3620       | 349.6847         |                |                  | 6  |
| 14 | 1451.6988 | 726.3530        | 1434.6722      | 717.8397         | 1433.6882      | 717.3477         | N    | 616.3202  | 308.6637        | 599.2936       | 300.1504         |                |                  | 5  |
| 15 | 1598.7672 | 799.8872        | 1581.7406      | 791.3740         | 1580.7566      | 790.8819         | F    | 502.2772  | 251.6423        | 485.2507       | 243.1290         |                |                  | 4  |
| 16 | 1735.8261 | 868.4167        | 1718.7995      | 859.9034         | 1717.8155      | 859.4114         | H    | 355.2088  | 178.1081        | 338.1823       | 169.5948         |                |                  | 3  |
| 17 | 1806.8632 | 903.9352        | 1789.8367      | 895.4220         | 1788.8526      | 894.9300         | A    | 218.1499  | 109.5786        | 201.1234       | 101.0653         |                |                  | 2  |
| 18 |           |                 |                |                  |                |                  | K    | 147.1128  | 74.0600         | 130.0863       | 65.5468          |                |                  | 1  |

# AT1G63770.2

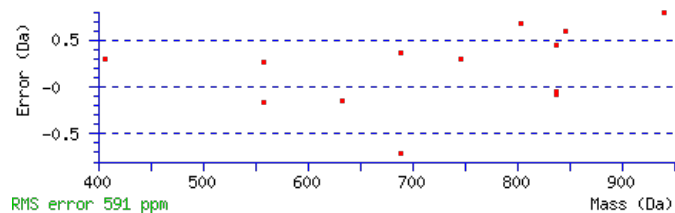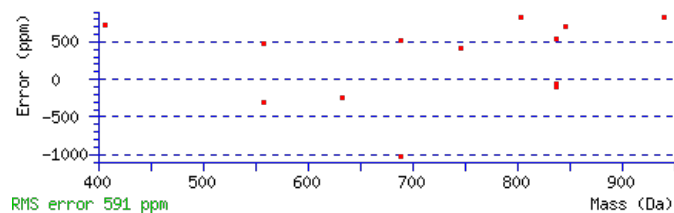

NCBI **BLAST** search of [VYSLIGGFCGSPVNFHAK](#)  
 (Parameters: blastp, nr protein database, expect=20000, no filter, PAM30)  
 Other BLAST [web gateways](#)

## All matches to this query

| Score | Mr(calc)  | Delta   | Sequence                             |
|-------|-----------|---------|--------------------------------------|
| 30.6  | 1951.9615 | -0.0017 | <a href="#">VYSLIGGFCGSPVNFHAK</a>   |
| 5.4   | 1951.9594 | 0.0004  | <a href="#">LNSLVMELDNMAKLSDK</a>    |
| 2.4   | 1951.9608 | -0.0010 | <a href="#">MDMIKPDFQQIRRDK</a>      |
| 2.4   | 1951.9561 | 0.0037  | <a href="#">NIQEYMVQKLGIEEDK</a>     |
| 1.1   | 1951.9599 | -0.0001 | <a href="#">GESEPIAAAAAVAGPSSQSR</a> |
| 0.6   | 1951.9601 | -0.0003 | <a href="#">VFDLKNYTMLYSISDK</a>     |

Mascot: <http://www.matrixscience.com/>

**Peptide View**MS/MS Fragmentation of **LLQQMGKR**Found in **AT1G63880.1** in **TAIR\_Arabidopsis**, Symbols: | disease resistance protein (TIR-NBS-LRR class), putative | chr1:23716177-23719710  
REVERSE

Match to Query 2313: 1002.506992 from(502.260772,2+) index(4293)

Title: Elution from: 39.011 to 39.011 scan no 5400 cid35.00 polarity:+

Data file D6h-3\_3.mgf

Click mouse within plot area to zoom in by factor of two about that point

Or,   to  Da Label all possible matches  Label matches used for scoring Show Y-axis 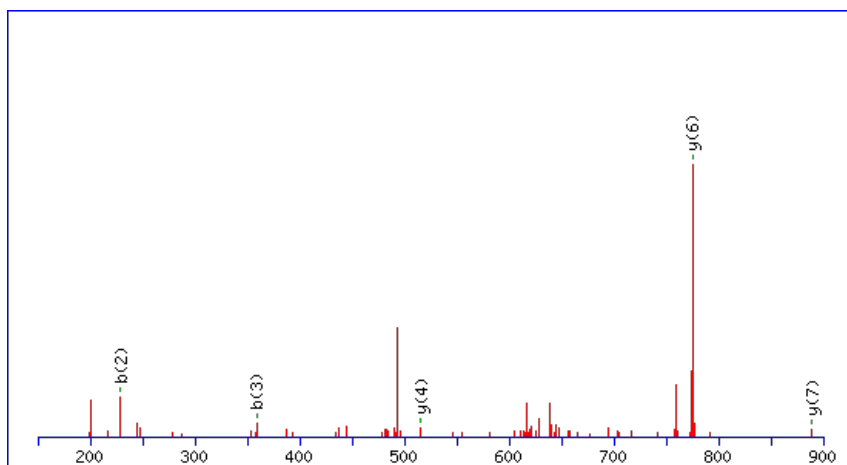Monoisotopic mass of neutral peptide  $M_r(\text{calc})$ : 1002.5073

Fixed modifications: Carbamidomethyl (C) (apply to specified residues or termini only)

Variable modifications:

M5 : Oxidation (M), with neutral losses 0.0000 (shown in table), 63.9983

Ions Score: 24 Expect: 0.04

Matches : 5/80 fragment ions using 7 most intense peaks ([help](#))

| # | b               | b <sup>++</sup> | b <sup>*</sup> | b <sup>*++</sup> | Seq. | y               | y <sup>++</sup> | y <sup>*</sup> | y <sup>*++</sup> | # |
|---|-----------------|-----------------|----------------|------------------|------|-----------------|-----------------|----------------|------------------|---|
| 1 | 115.0884        | 58.0478         |                |                  | L    |                 |                 |                |                  | 8 |
| 2 | <b>229.1695</b> | 115.0884        |                |                  | L    | <b>889.4335</b> | 445.2204        | 871.4099       | 436.2086         | 7 |
| 3 | <b>359.2221</b> | 180.1147        | 341.1985       | 171.1029         | Q    | <b>775.3524</b> | 388.1798        | 757.3288       | 379.1680         | 6 |
| 4 | 489.2748        | 245.1410        | 471.2512       | 236.1292         | Q    | 645.2997        | 323.1535        | 627.2761       | 314.1417         | 5 |
| 5 | 637.3072        | 319.1572        | 619.2836       | 310.1454         | M    | <b>515.2471</b> | 258.1272        | 497.2235       | 249.1154         | 4 |
| 6 | 695.3257        | 348.1665        | 677.3021       | 339.1547         | G    | 367.2146        | 184.1109        | 349.1910       | 175.0992         | 3 |
| 7 | 825.4147        | 413.2110        | 807.3912       | 404.1992         | K    | 309.1961        | 155.1017        | 291.1725       | 146.0899         | 2 |
| 8 |                 |                 |                |                  | R    | 179.1071        | 90.0572         | 161.0835       | 81.0454          | 1 |

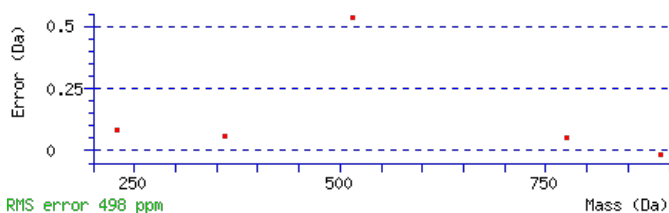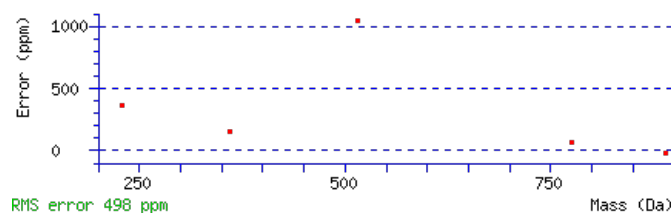NCBI **BLAST** search of **LLQQMGKR**

(Parameters: blastp, nr protein database, expect=20000, no filter, PAM30)

Other BLAST [web gateways](#)**All matches to this query**

| Score | Mr(calc) | Delta | Sequence |
|-------|----------|-------|----------|
|       |          |       |          |

## AT1G63880.1

|      |           |         |                          |
|------|-----------|---------|--------------------------|
| 23.8 | 1002.5073 | -0.0003 | <a href="#">LLQMGKR</a>  |
| 14.2 | 1002.5073 | -0.0003 | <a href="#">LLQRNMSK</a> |
| 9.5  | 1002.5046 | 0.0024  | <a href="#">IQMISEK</a>  |
| 9.5  | 1002.5046 | 0.0024  | <a href="#">LQKMISEK</a> |
| 1.1  | 1002.5073 | -0.0003 | <a href="#">LKMNEARK</a> |

**Mascot:** <http://www.matrixscience.com/>

**Peptide View**MS/MS Fragmentation of **YGSLIATGCTASR**Found in **AT1G63940.1** in **TAIR\_Arabidopsis**, Symbols: | monodehydroascorbate reductase, putative | chr1:23733869-23737197 FORWARD

Match to Query 6262: 1468.733034 from(735.373793,2+) index(4664)

Title: Elution from: 42.559 to 42.559 scan no 5813 cid35.00 polarity:+

Data file C7-3\_1.mgf

Click mouse within plot area to zoom in by factor of two about that point

Or,  to  Da Label all possible matches  Label matches used for scoring Show Y-axis 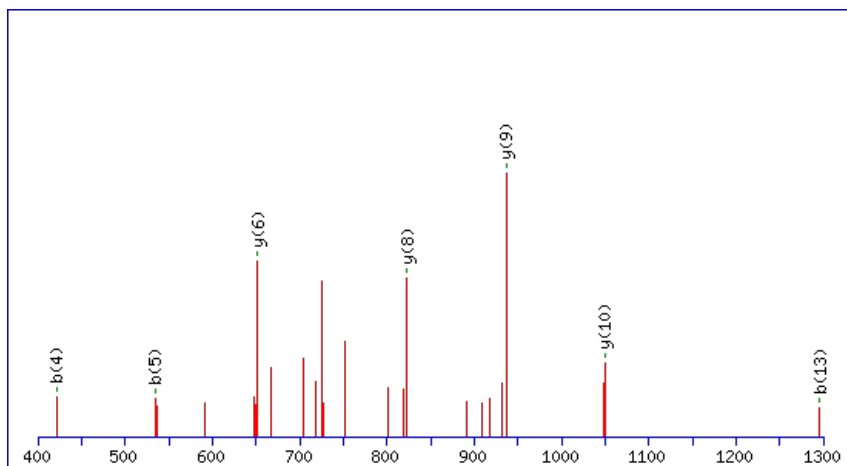Monoisotopic mass of neutral peptide  $M_r(\text{calc})$ : 1468.7344

Fixed modifications: Carbamidomethyl (C) (apply to specified residues or termini only)

Ions Score: 38 Expect: 0.00051

Matches : 7/124 fragment ions using 8 most intense peaks ([help](#))

| #  | b                | b <sup>++</sup> | b <sup>0</sup> | b <sup>0++</sup> | Seq. | y                | y <sup>++</sup> | y*        | y <sup>*++</sup> | y <sup>0</sup> | y <sup>0++</sup> | #  |
|----|------------------|-----------------|----------------|------------------|------|------------------|-----------------|-----------|------------------|----------------|------------------|----|
| 1  | 164.0706         | 82.5389         |                |                  | Y    |                  |                 |           |                  |                |                  | 14 |
| 2  | 221.0921         | 111.0497        |                |                  | G    | 1306.6784        | 653.8428        | 1289.6518 | 645.3295         | 1288.6678      | 644.8375         | 13 |
| 3  | 308.1241         | 154.5657        | 290.1135       | 145.5604         | S    | 1249.6569        | 625.3321        | 1232.6304 | 616.8188         | 1231.6463      | 616.3268         | 12 |
| 4  | <b>421.2082</b>  | 211.1077        | 403.1976       | 202.1024         | L    | 1162.6249        | 581.8161        | 1145.5983 | 573.3028         | 1144.6143      | 572.8108         | 11 |
| 5  | <b>534.2922</b>  | 267.6498        | 516.2817       | 258.6445         | I    | <b>1049.5408</b> | 525.2740        | 1032.5143 | 516.7608         | 1031.5302      | 516.2688         | 10 |
| 6  | 647.3763         | 324.1918        | 629.3657       | 315.1865         | I    | <b>936.4567</b>  | 468.7320        | 919.4302  | 460.2187         | 918.4462       | 459.7267         | 9  |
| 7  | 718.4134         | 359.7103        | 700.4028       | 350.7051         | A    | <b>823.3727</b>  | 412.1900        | 806.3461  | 403.6767         | 805.3621       | 403.1847         | 8  |
| 8  | 819.4611         | 410.2342        | 801.4505       | 401.2289         | T    | 752.3356         | 376.6714        | 735.3090  | 368.1581         | 734.3250       | 367.6661         | 7  |
| 9  | 876.4825         | 438.7449        | 858.4720       | 429.7396         | G    | <b>651.2879</b>  | 326.1476        | 634.2613  | 317.6343         | 633.2773       | 317.1423         | 6  |
| 10 | 1036.5132        | 518.7602        | 1018.5026      | 509.7550         | C    | 594.2664         | 297.6368        | 577.2399  | 289.1236         | 576.2559       | 288.6316         | 5  |
| 11 | 1137.5609        | 569.2841        | 1119.5503      | 560.2788         | T    | 434.2358         | 217.6215        | 417.2092  | 209.1083         | 416.2252       | 208.6162         | 4  |
| 12 | 1208.5980        | 604.8026        | 1190.5874      | 595.7973         | A    | 333.1881         | 167.0977        | 316.1615  | 158.5844         | 315.1775       | 158.0924         | 3  |
| 13 | <b>1295.6300</b> | 648.3186        | 1277.6195      | 639.3134         | S    | 262.1510         | 131.5791        | 245.1244  | 123.0659         | 244.1404       | 122.5738         | 2  |
| 14 |                  |                 |                |                  | R    | 175.1190         | 88.0631         | 158.0924  | 79.5498          |                |                  | 1  |

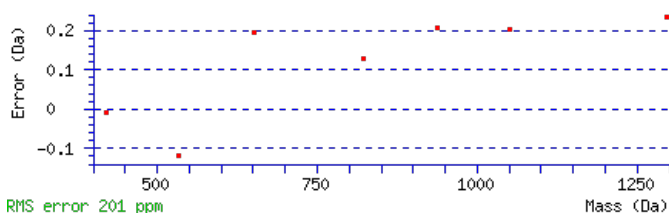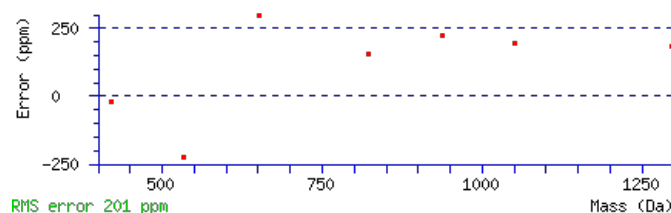NCBI BLAST search of **YGSLIATGCTASR**

(Parameters: blastp, nr protein database, expect=20000, no filter, PAM30)

AT1G63940.1

Other BLAST [web gateways](#)

**All matches to this query**

| Score | Mr(calc)  | Delta   | Sequence                      |
|-------|-----------|---------|-------------------------------|
| 38.1  | 1468.7344 | -0.0014 | <a href="#">YGSLIATGCTASR</a> |
| 0.9   | 1468.7305 | 0.0025  | <a href="#">YELKDILGMEMK</a>  |

**Mascot:** <http://www.matrixscience.com/>


**Mascot Search Results**
**Peptide View**MS/MS Fragmentation of **SIGGIQVDGLFR**Found in **AT1G63940.3** in **TAIR\_Arabidopsis**, Symbols: | monodehydroascorbate reductase, putative | chr1:23733869-23736580 FORWARD

Match to Query 4455: 1260.681830 from(631.348191,2+) index(8037)

Title: Elution from: 70.391 to 70.391 scan no 10625 cid35.00 polarity:+

Data file C7-2\_3.mgf

Click mouse within plot area to zoom in by factor of two about that point

Or,   to  Da Label all possible matches  Label matches used for scoring Show Y-axis 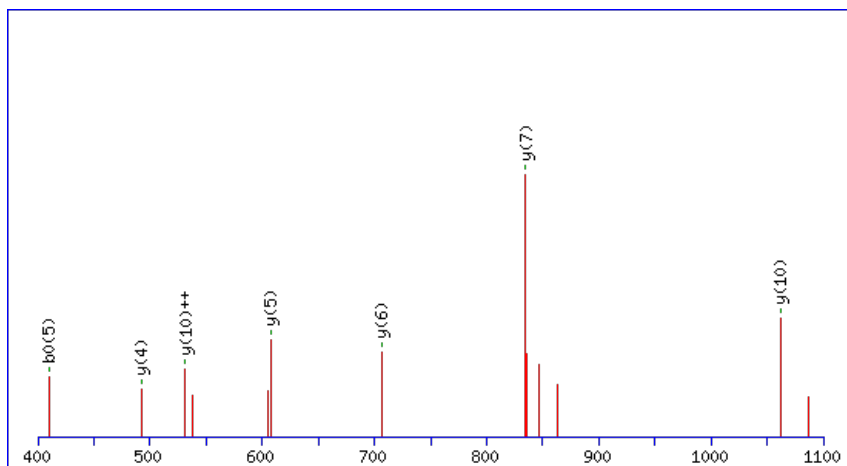Monoisotopic mass of neutral peptide  $M_r(\text{calc})$ : 1260.6826

Fixed modifications: Carbamidomethyl (C) (apply to specified residues or termini only)

Ions Score: 32 Expect: 0.002

Matches : 7/114 fragment ions using 9 most intense peaks ([help](#))

| #  | b         | b <sup>++</sup> | b <sup>*</sup> | b <sup>*++</sup> | b <sup>0</sup> | b <sup>0++</sup> | Seq. | y         | y <sup>++</sup> | y <sup>*</sup> | y <sup>*++</sup> | y <sup>0</sup> | y <sup>0++</sup> | #  |
|----|-----------|-----------------|----------------|------------------|----------------|------------------|------|-----------|-----------------|----------------|------------------|----------------|------------------|----|
| 1  | 88.0393   | 44.5233         |                |                  | 70.0287        | 35.5180          | S    |           |                 |                |                  |                |                  | 12 |
| 2  | 201.1234  | 101.0653        |                |                  | 183.1128       | 92.0600          | I    | 1174.6579 | 587.8326        | 1157.6313      | 579.3193         | 1156.6473      | 578.8273         | 11 |
| 3  | 258.1448  | 129.5761        |                |                  | 240.1343       | 120.5708         | G    | 1061.5738 | 531.2905        | 1044.5473      | 522.7773         | 1043.5633      | 522.2853         | 10 |
| 4  | 315.1663  | 158.0868        |                |                  | 297.1557       | 149.0815         | G    | 1004.5524 | 502.7798        | 987.5258       | 494.2665         | 986.5418       | 493.7745         | 9  |
| 5  | 428.2504  | 214.6288        |                |                  | 410.2398       | 205.6235         | I    | 947.5309  | 474.2691        | 930.5043       | 465.7558         | 929.5203       | 465.2638         | 8  |
| 6  | 556.3089  | 278.6581        | 539.2824       | 270.1448         | 538.2984       | 269.6528         | Q    | 834.4468  | 417.7271        | 817.4203       | 409.2138         | 816.4363       | 408.7218         | 7  |
| 7  | 655.3774  | 328.1923        | 638.3508       | 319.6790         | 637.3668       | 319.1870         | V    | 706.3883  | 353.6978        | 689.3617       | 345.1845         | 688.3777       | 344.6925         | 6  |
| 8  | 770.4043  | 385.7058        | 753.3777       | 377.1925         | 752.3937       | 376.7005         | D    | 607.3198  | 304.1636        | 590.2933       | 295.6503         | 589.3093       | 295.1583         | 5  |
| 9  | 827.4258  | 414.2165        | 810.3992       | 405.7032         | 809.4152       | 405.2112         | G    | 492.2929  | 246.6501        | 475.2663       | 238.1368         |                |                  | 4  |
| 10 | 940.5098  | 470.7585        | 923.4833       | 462.2453         | 922.4993       | 461.7533         | L    | 435.2714  | 218.1394        | 418.2449       | 209.6261         |                |                  | 3  |
| 11 | 1087.5782 | 544.2928        | 1070.5517      | 535.7795         | 1069.5677      | 535.2875         | F    | 322.1874  | 161.5973        | 305.1608       | 153.0840         |                |                  | 2  |
| 12 |           |                 |                |                  |                |                  | R    | 175.1190  | 88.0631         | 158.0924       | 79.5498          |                |                  | 1  |

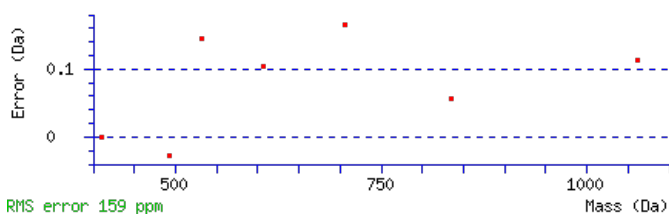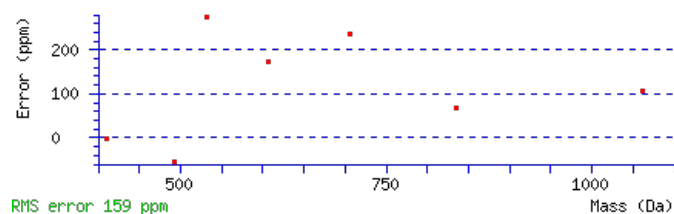NCBI BLAST search of **SIGGIQVDGLFR**

(Parameters: blastp, nr protein database, expect=20000, no filter, PAM30)

Other BLAST [web gateways](#)**All matches to this query**



AT1G63940.3

| Score | Mr(calc)  | Delta   | Sequence                     |
|-------|-----------|---------|------------------------------|
| 32.2  | 1260.6826 | -0.0008 | <a href="#">SIGGIQVDGLFR</a> |
| 2.8   | 1260.6786 | 0.0032  | <a href="#">SVTQDLRISR</a>   |

Mascot: <http://www.matrixscience.com/>

**Peptide View**MS/MS Fragmentation of **LILLDETVR**

Found in **AT1G64050.1** in **TAIR\_Arabidopsis**, Symbols: | similar to unnamed protein product [Vitis vinifera] (GB:CAO65897.1) | chr1:23766247-23769377 FORWARD

Match to Query 3152: 1082.597950 from(542.306251,2+) index(5868)

Title: Elution from: 52.624 to 52.624 scan no 7492 cid35.00 polarity:+

Data file D6h-1\_2.mgf

Click mouse within plot area to zoom in by factor of two about that point

Or,   to  Da

Label all possible matches  Label matches used for scoring

Show Y-axis

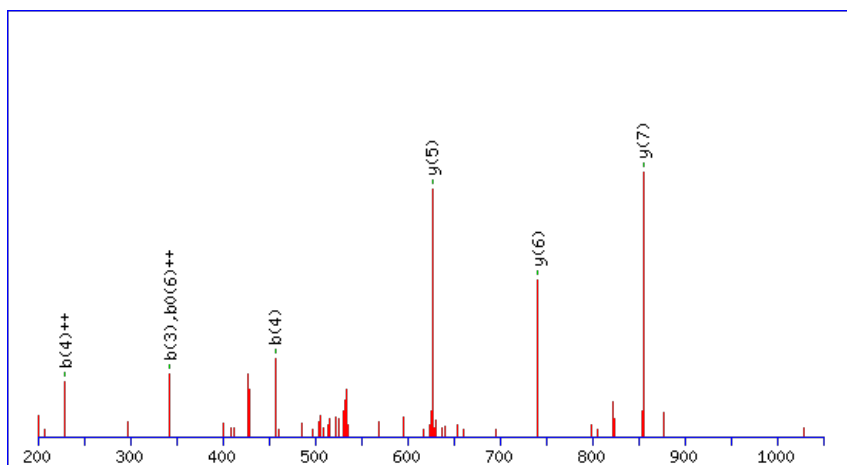

Monoisotopic mass of neutral peptide  $M_r(\text{calc})$ : 1082.5980

Fixed modifications: Carbamidomethyl (C) (apply to specified residues or termini only)

Ions Score: 25 Expect: 0.015

Matches : 8/68 fragment ions using 8 most intense peaks ([help](#))

| # | b               | b <sup>++</sup> | b <sup>0</sup> | b <sup>0++</sup> | Seq. | y               | y <sup>++</sup> | y*       | y <sup>*++</sup> | y <sup>0</sup> | y <sup>0++</sup> | # |
|---|-----------------|-----------------|----------------|------------------|------|-----------------|-----------------|----------|------------------|----------------|------------------|---|
| 1 | 115.0884        | 58.0478         |                |                  | L    |                 |                 |          |                  |                |                  | 9 |
| 2 | <b>229.1695</b> | 115.0884        |                |                  | I    | 969.5242        | 485.2657        | 951.5006 | 476.2539         | 951.5136       | 476.2604         | 8 |
| 3 | <b>343.2506</b> | 172.1289        |                |                  | L    | <b>855.4431</b> | 428.2252        | 837.4195 | 419.2134         | 837.4325       | 419.2199         | 7 |
| 4 | <b>457.3317</b> | <b>229.1695</b> |                |                  | L    | <b>741.3620</b> | 371.1846        | 723.3384 | 362.1728         | 723.3514       | 362.1793         | 6 |
| 5 | 573.3556        | 287.1815        | 555.3451       | 278.1762         | D    | <b>627.2809</b> | 314.1441        | 609.2573 | 305.1323         | 609.2703       | 305.1388         | 5 |
| 6 | 703.3953        | 352.2013        | 685.3847       | <b>343.1960</b>  | E    | 511.2569        | 256.1321        | 493.2333 | 247.1203         | 493.2463       | 247.1268         | 4 |
| 7 | 805.4400        | 403.2236        | 787.4294       | 394.2184         | T    | 381.2173        | 191.1123        | 363.1937 | 182.1005         | 363.2067       | 182.1070         | 3 |
| 8 | 905.5054        | 453.2564        | 887.4949       | 444.2511         | V    | 279.1725        | 140.0899        | 261.1490 | 131.0781         |                |                  | 2 |
| 9 |                 |                 |                |                  | R    | 179.1071        | 90.0572         | 161.0835 | 81.0454          |                |                  | 1 |

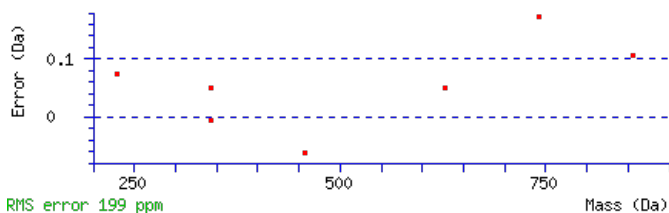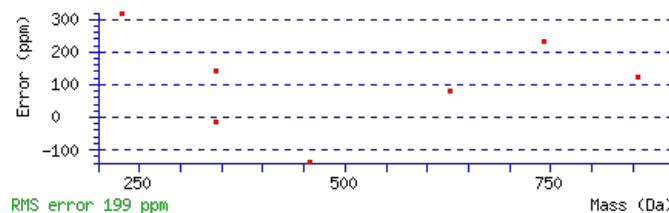

NCBI **BLAST** search of **LILLDETVR**

(Parameters: blastp, nr protein database, expect=20000, no filter, PAM30)

Other BLAST [web gateways](#)

All matches to this query

| Score | $M_r(\text{calc})$ | Delta | Sequence |
|-------|--------------------|-------|----------|
|       |                    |       |          |

# AT1G64050.1

|      |           |         |                             |
|------|-----------|---------|-----------------------------|
| 25.3 | 1082.5980 | -0.0000 | <a href="#">LILLDETVR</a>   |
| 24.9 | 1082.5980 | -0.0000 | <a href="#">IILIGDSGVGK</a> |
| 24.9 | 1082.5980 | -0.0000 | <a href="#">IILIGDSGVGK</a> |
| 24.9 | 1082.5980 | -0.0000 | <a href="#">LLIGDSGVGK</a>  |

**Mascot:** <http://www.matrixscience.com/>

## Peptide View

### MS/MS Fragmentation of **GAFAFIK**

Found in **AT1G64090.1** in **TAIR\_Arabidopsis**, Symbols: | reticulon family protein (RTNLB3) | chr1:23793058-23794332 FORWARD

Match to Query 742: 752.420994 from(377.217773,2+) index(5214)

Title: Elution from: 47.743 to 47.743 scan no 6537 cid35.00 polarity:+

Data file D6h-2\_2.mgf

Click mouse within plot area to zoom in by factor of two about that point

Or,   to  Da

Label all possible matches  Label matches used for scoring

Show Y-axis

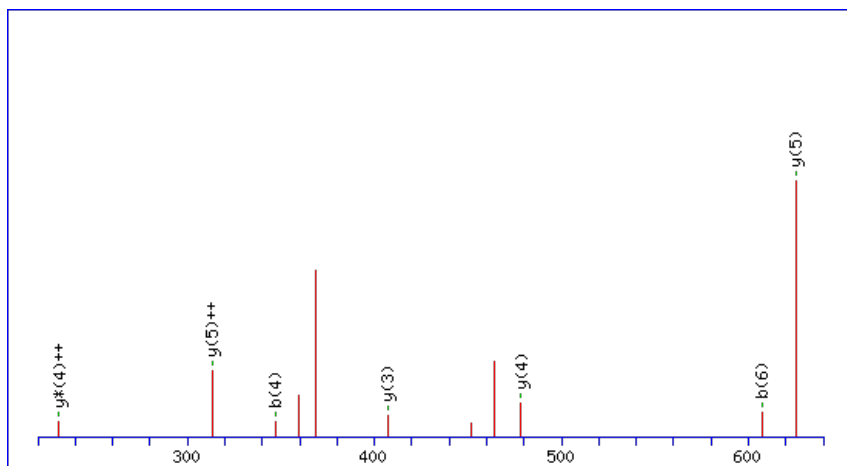

**Monoisotopic mass of neutral peptide Mr(calc):** 752.4221

**Fixed modifications:** Carbamidomethyl (C) (apply to specified residues or termini only)

**Ions Score:** 24 **Expect:** 0.0039

**Matches:** 7/36 fragment ions using 11 most intense peaks ([help](#))

| # | b               | b <sup>++</sup> | Seq.     | y               | y <sup>++</sup> | y*       | y <sup>*++</sup> | # |
|---|-----------------|-----------------|----------|-----------------|-----------------|----------|------------------|---|
| 1 | 58.0287         | 29.5180         | <b>G</b> |                 |                 |          |                  | 7 |
| 2 | 129.0659        | 65.0366         | <b>A</b> | 696.4079        | 348.7076        | 679.3814 | 340.1943         | 6 |
| 3 | 276.1343        | 138.5708        | <b>F</b> | <b>625.3708</b> | <b>313.1890</b> | 608.3443 | 304.6758         | 5 |
| 4 | <b>347.1714</b> | 174.0893        | <b>A</b> | <b>478.3024</b> | 239.6548        | 461.2758 | <b>231.1416</b>  | 4 |
| 5 | 494.2398        | 247.6235        | <b>F</b> | <b>407.2653</b> | 204.1363        | 390.2387 | 195.6230         | 3 |
| 6 | <b>607.3239</b> | 304.1656        | <b>I</b> | 260.1969        | 130.6021        | 243.1703 | 122.0888         | 2 |
| 7 |                 |                 | <b>K</b> | 147.1128        | 74.0600         | 130.0863 | 65.5468          | 1 |

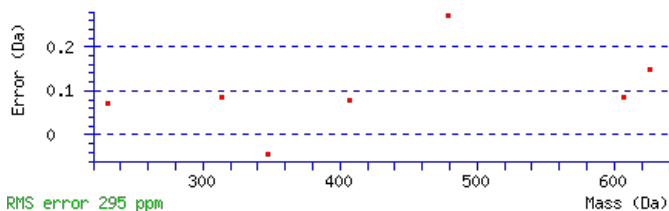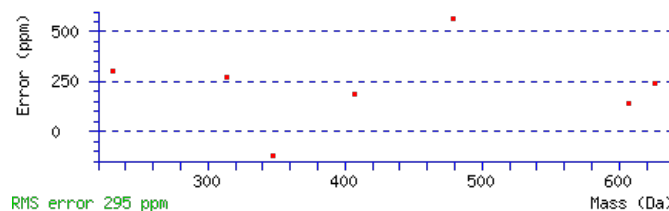

### NCBI BLAST search of **GAFAFIK**

(Parameters: blastp, nr protein database, expect=20000, no filter, PAM30)

Other BLAST [web gateways](#)

### All matches to this query

| Score | Mr(calc) | Delta   | Sequence                |
|-------|----------|---------|-------------------------|
| 24.1  | 752.4221 | -0.0011 | <a href="#">GAFAFIK</a> |
| 12.5  | 752.4221 | -0.0011 | <a href="#">FQAFIK</a>  |
| 7.7   | 752.4221 | -0.0011 | <a href="#">FPSEKK</a>  |

AT1G64090.1

|     |          |         |                         |
|-----|----------|---------|-------------------------|
| 1.1 | 752.4221 | -0.0011 | <a href="#">VGFFGVK</a> |
|-----|----------|---------|-------------------------|

**Mascot:** <http://www.matrixscience.com/>

**Peptide View**MS/MS Fragmentation of **LSSAVQSLEDERK**Found in **AT1G64180.1** in **TAIR\_Arabidopsis**, Symbols: | intracellular protein transport protein USO1-related | chr1:23825303-23827856  
FORWARD

Match to Query 5886: 1460.750739 from(487.924189,3+) index(7216)

Title: Elution from: 63.484 to 63.484 scan no 9390 cid35.00 polarity:+

Data file D6h-3\_2.mgf

Click mouse within plot area to zoom in by factor of two about that point

Or,   to  Da Label all possible matches  Label matches used for scoring Show Y-axis 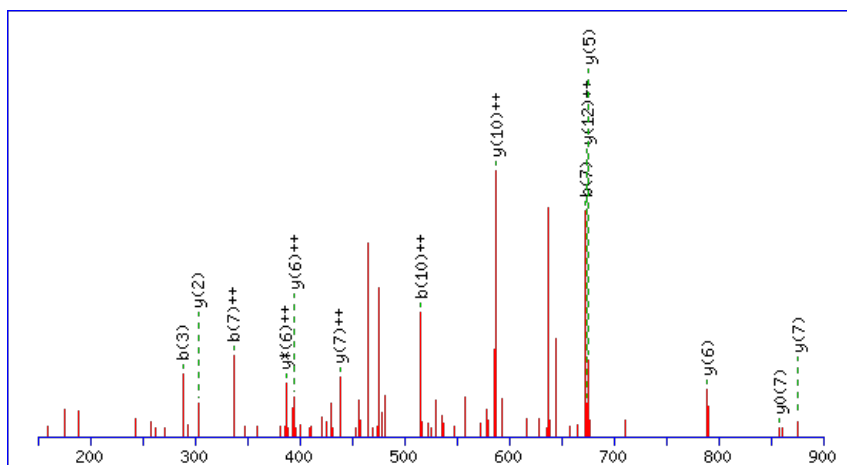Monoisotopic mass of neutral peptide  $M_r(\text{calc})$ : 1460.7471

Fixed modifications: Carbamidomethyl (C) (apply to specified residues or termini only)

Ions Score: 26 Expect: 0.015

Matches : 14/128 fragment ions using 23 most intense peaks ([help](#))

| #  | b         | b <sup>++</sup> | b*        | b <sup>*++</sup> | b <sup>0</sup> | b <sup>0++</sup> | Seq. | y         | y <sup>++</sup> | y*        | y <sup>*++</sup> | y <sup>0</sup> | y <sup>0++</sup> | #  |
|----|-----------|-----------------|-----------|------------------|----------------|------------------|------|-----------|-----------------|-----------|------------------|----------------|------------------|----|
| 1  | 114.0913  | 57.5493         |           |                  |                |                  | L    |           |                 |           |                  |                |                  | 13 |
| 2  | 201.1234  | 101.0653        |           |                  | 183.1128       | 92.0600          | S    | 1348.6703 | 674.8388        | 1331.6437 | 666.3255         | 1330.6597      | 665.8335         | 12 |
| 3  | 288.1554  | 144.5813        |           |                  | 270.1448       | 135.5761         | S    | 1261.6383 | 631.3228        | 1244.6117 | 622.8095         | 1243.6277      | 622.3175         | 11 |
| 4  | 359.1925  | 180.0999        |           |                  | 341.1819       | 171.0946         | A    | 1174.6062 | 587.8068        | 1157.5797 | 579.2935         | 1156.5957      | 578.8015         | 10 |
| 5  | 458.2609  | 229.6341        |           |                  | 440.2504       | 220.6288         | V    | 1103.5691 | 552.2882        | 1086.5426 | 543.7749         | 1085.5586      | 543.2829         | 9  |
| 6  | 586.3195  | 293.6634        | 569.2930  | 285.1501         | 568.3089       | 284.6581         | Q    | 1004.5007 | 502.7540        | 987.4742  | 494.2407         | 986.4901       | 493.7487         | 8  |
| 7  | 673.3515  | 337.1794        | 656.3250  | 328.6661         | 655.3410       | 328.1741         | S    | 876.4421  | 438.7247        | 859.4156  | 430.2114         | 858.4316       | 429.7194         | 7  |
| 8  | 786.4356  | 393.7214        | 769.4090  | 385.2082         | 768.4250       | 384.7162         | L    | 789.4101  | 395.2087        | 772.3836  | 386.6954         | 771.3995       | 386.2034         | 6  |
| 9  | 915.4782  | 458.2427        | 898.4516  | 449.7295         | 897.4676       | 449.2374         | E    | 676.3260  | 338.6667        | 659.2995  | 330.1534         | 658.3155       | 329.6614         | 5  |
| 10 | 1030.5051 | 515.7562        | 1013.4786 | 507.2429         | 1012.4946      | 506.7509         | D    | 547.2835  | 274.1454        | 530.2569  | 265.6321         | 529.2729       | 265.1401         | 4  |
| 11 | 1159.5477 | 580.2775        | 1142.5212 | 571.7642         | 1141.5372      | 571.2722         | E    | 432.2565  | 216.6319        | 415.2300  | 208.1186         | 414.2459       | 207.6266         | 3  |
| 12 | 1315.6488 | 658.3281        | 1298.6223 | 649.8148         | 1297.6383      | 649.3228         | R    | 303.2139  | 152.1106        | 286.1874  | 143.5973         |                |                  | 2  |
| 13 |           |                 |           |                  |                |                  | K    | 147.1128  | 74.0600         | 130.0863  | 65.5468          |                |                  | 1  |

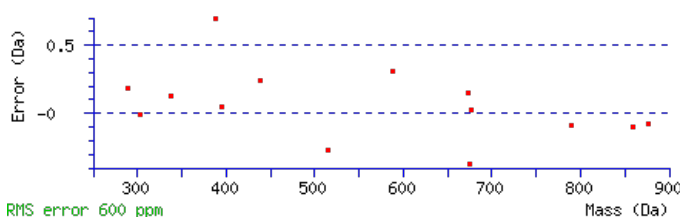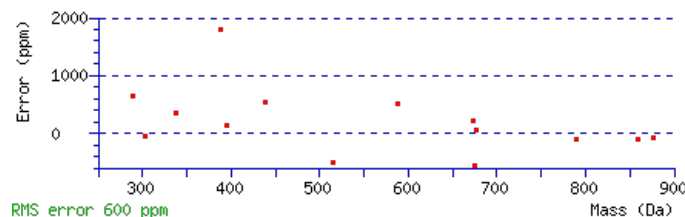NCBI **BLAST** search of **LSSAVQSLEDERK**

(Parameters: blastp, nr protein database, expect=20000, no filter, PAM30)

# AT1G64180.1

Other BLAST [web gateways](#)

## All matches to this query

| Score | Mr(calc)  | Delta   | Sequence                        |
|-------|-----------|---------|---------------------------------|
| 25.5  | 1460.7471 | 0.0037  | <a href="#">LSSAVQSLEDERK</a>   |
| 5.6   | 1460.7511 | -0.0004 | <a href="#">TLTSVLGWQEEAK</a>   |
| 4.8   | 1460.7524 | -0.0017 | <a href="#">HNPILQDPFQR</a>     |
| 3.2   | 1460.7518 | -0.0010 | <a href="#">RLDGTMSLAARDR</a>   |
| 3.2   | 1460.7470 | 0.0037  | <a href="#">KSSEQLEDLEKR</a>    |
| 2.7   | 1460.7518 | -0.0010 | <a href="#">LLEQTRMERNR</a>     |
| 2.4   | 1460.7486 | 0.0022  | <a href="#">VYMSSKLWYLR</a>     |
| 1.6   | 1460.7471 | 0.0037  | <a href="#">DENVESSIKQK GK</a>  |
| 0.4   | 1460.7518 | -0.0010 | <a href="#">MAQSSLVAAAGRSGR</a> |
| 0.2   | 1460.7470 | 0.0037  | <a href="#">ATNGGAEKSLKEK</a>   |

Mascot: <http://www.matrixscience.com/>

## Peptide View

MS/MS Fragmentation of **DFVLSIQRPR**Found in **AT1G64190.1** in **TAIR\_Arabidopsis**, Symbols: | 6-phosphogluconate dehydrogenase family protein | chr1:23829212-23830675 REVERSE

Match to Query 3878: 1246.636665 from(416.552831,3+) index(4876)

Title: Elution from: 46.359 to 46.359 scan no 6278 cid35.00 polarity:+

Data file D1d-1\_3.mgf

Click mouse within plot area to zoom in by factor of two about that point

Or,   to  Da Label all possible matches  Label matches used for scoring Show Y-axis 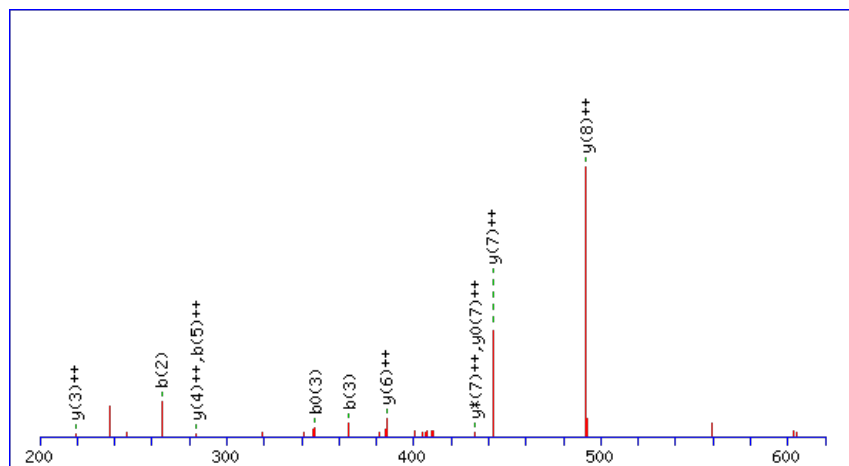Monoisotopic mass of neutral peptide  $M_r(\text{calc})$ : 1246.6376

Fixed modifications: Carbamidomethyl (C) (apply to specified residues or termini only)

Ions Score: 31 Expect: 0.0067

Matches : 11/86 fragment ions using 18 most intense peaks ([help](#))

| #  | b               | b <sup>++</sup> | b*        | b <sup>*++</sup> | b <sup>0</sup>  | b <sup>0++</sup> | Seq. | y         | y <sup>++</sup> | y*        | y <sup>*++</sup> | y <sup>0</sup> | y <sup>0++</sup> | #  |
|----|-----------------|-----------------|-----------|------------------|-----------------|------------------|------|-----------|-----------------|-----------|------------------|----------------|------------------|----|
| 1  | 117.0313        | 59.0193         |           |                  | 99.0207         | 50.0140          | D    |           |                 |           |                  |                |                  | 10 |
| 2  | <b>265.0967</b> | 133.0520        |           |                  | 247.0861        | 124.0467         | F    | 1131.6209 | 566.3141        | 1113.5974 | 557.3023         | 1113.6104      | 557.3088         | 9  |
| 3  | <b>365.1622</b> | 183.0847        |           |                  | <b>347.1516</b> | 174.0794         | V    | 983.5555  | <b>492.2814</b> | 965.5319  | 483.2696         | 965.5449       | 483.2761         | 8  |
| 4  | 479.2433        | 240.1253        |           |                  | 461.2327        | 231.1200         | L    | 883.4901  | <b>442.2487</b> | 865.4665  | <b>433.2369</b>  | 865.4795       | <b>433.2434</b>  | 7  |
| 5  | 567.2723        | <b>284.1398</b> |           |                  | 549.2617        | 275.1345         | S    | 769.4090  | <b>385.2081</b> | 751.3854  | 376.1963         | 751.3984       | 376.2028         | 6  |
| 6  | 681.3534        | 341.1803        |           |                  | 663.3428        | 332.1751         | I    | 681.3799  | 341.1936        | 663.3563  | 332.1818         |                |                  | 5  |
| 7  | 811.4061        | 406.2067        | 793.3825  | 397.1949         | 793.3955        | 397.2014         | Q    | 567.2988  | <b>284.1530</b> | 549.2752  | 275.1412         |                |                  | 4  |
| 8  | 971.4953        | 486.2513        | 953.4717  | 477.2395         | 953.4847        | 477.2460         | R    | 437.2461  | <b>219.1267</b> | 419.2226  | 210.1149         |                |                  | 3  |
| 9  | 1069.5451       | 535.2762        | 1051.5215 | 526.2644         | 1051.5345       | 526.2709         | P    | 277.1569  | 139.0821        | 259.1333  | 130.0703         |                |                  | 2  |
| 10 |                 |                 |           |                  |                 |                  | R    | 179.1071  | 90.0572         | 161.0835  | 81.0454          |                |                  | 1  |

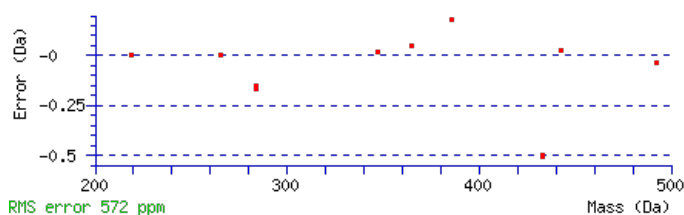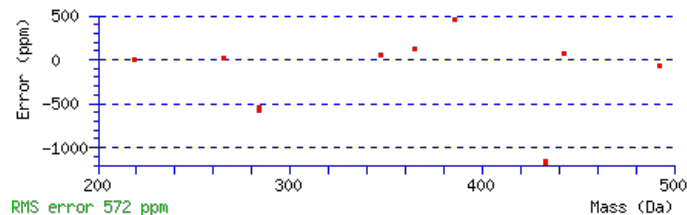NCBI BLAST search of **DFVLSIQRPR**

(Parameters: blastp, nr protein database, expect=20000, no filter, PAM30)

Other BLAST [web gateways](#)

All matches to this query

| Score | $M_r(\text{calc})$ | Delta | Sequence |
|-------|--------------------|-------|----------|
|       |                    |       |          |



**AT1G64190.1**

|      |           |         |                              |
|------|-----------|---------|------------------------------|
| 31.3 | 1246.6376 | -0.0010 | <a href="#">DFVLSIQRPR</a>   |
| 21.2 | 1246.6383 | -0.0017 | <a href="#">CTVLEAAIKTK</a>  |
| 7.3  | 1246.6372 | -0.0005 | <a href="#">VLSWNFLIDK</a>   |
| 6.7  | 1246.6354 | 0.0013  | <a href="#">SNAQKRAVLDK</a>  |
| 3.0  | 1246.6372 | -0.0005 | <a href="#">YVGLELWQVK</a>   |
| 1.3  | 1246.6349 | 0.0017  | <a href="#">IADFGVAKVADK</a> |
| 0.1  | 1246.6372 | -0.0005 | <a href="#">TLFITDFIHK</a>   |

**Mascot:** <http://www.matrixscience.com/>

**Peptide View**MS/MS Fragmentation of **VLQAQDDIVNAMK**

Found in **AT1G64200.1** in **TAIR\_Arabidopsis**, Symbols: VHA-E3 | VHA-E3 (VACUOLAR H<sup>+</sup>-ATPASE SUBUNIT E ISOFORM 3); hydrogen ion transporting ATPase, rotational mechanism | chr1:23832200-23833665 REVERSE

Match to Query 5661: 1460.685996 from(731.350274,2+) index(5470)

Title: Elution from: 48.871 to 48.871 scan no 6970 cid35.00 polarity:+

Data file D6h-2\_3.mgf

Click mouse within plot area to zoom in by factor of two about that point

Or,   to  Da

Label all possible matches  Label matches used for scoring

Show Y-axis

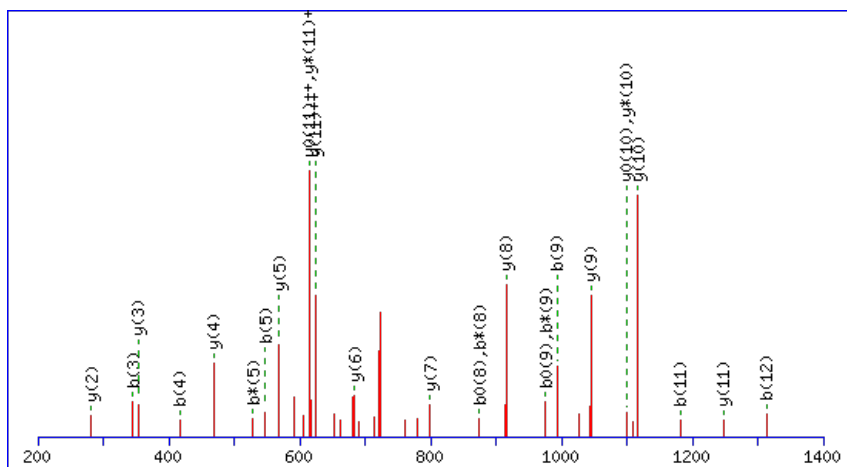

Monoisotopic mass of neutral peptide  $M_r(\text{calc})$ : 1460.6887

Fixed modifications: Carbamidomethyl (C) (apply to specified residues or termini only)

Ions Score: 99 Expect: 1e-009

Matches : 26/118 fragment ions using 28 most intense peaks ([help](#))

| #  | b                | b <sup>++</sup> | b*              | b <sup>*++</sup> | b <sup>0</sup>  | b <sup>0++</sup> | Seq. | y                | y <sup>++</sup> | y*               | y <sup>*++</sup> | y <sup>0</sup>   | y <sup>0++</sup> | #  |
|----|------------------|-----------------|-----------------|------------------|-----------------|------------------|------|------------------|-----------------|------------------|------------------|------------------|------------------|----|
| 1  | 101.0727         | 51.0400         |                 |                  |                 |                  | V    |                  |                 |                  |                  |                  |                  | 13 |
| 2  | 215.1538         | 108.0805        |                 |                  |                 |                  | L    | 1361.6306        | 681.3189        | 1343.6070        | 672.3071         | 1343.6200        | 672.3136         | 12 |
| 3  | <b>345.2065</b>  | 173.1069        | 327.1829        | 164.0951         |                 |                  | Q    | <b>1247.5495</b> | <b>624.2784</b> | 1229.5259        | <b>615.2666</b>  | 1229.5389        | <b>615.2731</b>  | 11 |
| 4  | <b>417.2406</b>  | 209.1239        | 399.2170        | 200.1122         |                 |                  | A    | <b>1117.4968</b> | 559.2521        | <b>1099.4733</b> | 550.2403         | <b>1099.4863</b> | 550.2468         | 10 |
| 5  | <b>547.2933</b>  | 274.1503        | <b>529.2697</b> | 265.1385         |                 |                  | Q    | <b>1045.4627</b> | 523.2350        | 1027.4391        | 514.2232         | 1027.4521        | 514.2297         | 9  |
| 6  | 663.3172         | 332.1623        | 645.2937        | 323.1505         | 645.3067        | 323.1570         | D    | <b>915.4100</b>  | 458.2087        | 897.3865         | 449.1969         | 897.3995         | 449.2034         | 8  |
| 7  | 779.3412         | 390.1742        | 761.3176        | 381.1625         | 761.3307        | 381.1690         | D    | <b>799.3861</b>  | 400.1967        | 781.3625         | 391.1849         | 781.3755         | 391.1914         | 7  |
| 8  | 893.4223         | 447.2148        | <b>875.3987</b> | 438.2030         | <b>875.4118</b> | 438.2095         | I    | <b>683.3621</b>  | 342.1847        | 665.3385         | 333.1729         |                  |                  | 6  |
| 9  | <b>993.4878</b>  | 497.2475        | <b>975.4642</b> | 488.2357         | <b>975.4772</b> | 488.2422         | V    | <b>569.2810</b>  | 285.1441        | 551.2574         | 276.1323         |                  |                  | 5  |
| 10 | 1109.5248        | 555.2660        | 1091.5012       | 546.2542         | 1091.5142       | 546.2607         | N    | <b>469.2155</b>  | 235.1114        | 451.1920         | 226.0996         |                  |                  | 4  |
| 11 | <b>1181.5589</b> | 591.2831        | 1163.5353       | 582.2713         | 1163.5484       | 582.2778         | A    | <b>353.1785</b>  | 177.0929        | 335.1550         | 168.0811         |                  |                  | 3  |
| 12 | <b>1313.5964</b> | 657.3019        | 1295.5729       | 648.2901         | 1295.5859       | 648.2966         | M    | <b>281.1444</b>  | 141.0758        | 263.1208         | 132.0640         |                  |                  | 2  |
| 13 |                  |                 |                 |                  |                 |                  | K    | 149.1069         | 75.0571         | 131.0833         | 66.0453          |                  |                  | 1  |

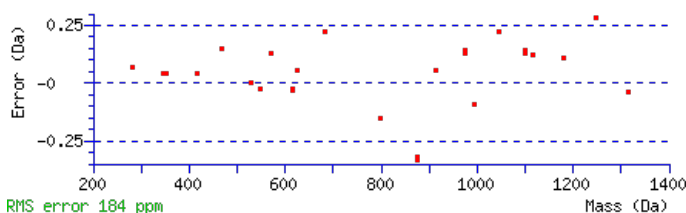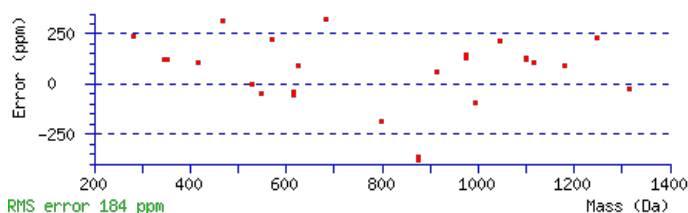

NCBI **BLAST** search of **VLQAQDDIVNAMK**

(Parameters: blastp, nr protein database, expect=20000, no filter, PAM30)

# AT1G64200.1

Other BLAST [web gateways](#)

## All matches to this query

| Score | Mr(calc)  | Delta   | Sequence                      |
|-------|-----------|---------|-------------------------------|
| 98.5  | 1460.6887 | -0.0027 | <a href="#">VLQAQDDIVNAMK</a> |
| 2.9   | 1460.6867 | -0.0007 | <a href="#">MAMFVRRALSSR</a>  |
| 2.5   | 1460.6854 | 0.0006  | <a href="#">WIDQNIDPSKTK</a>  |
| 2.3   | 1460.6862 | -0.0003 | <a href="#">KMGLDWMLPPTR</a>  |

Mascot: <http://www.matrixscience.com/>

**Peptide View**MS/MS Fragmentation of **WFFTK**Found in **AT1G64260.1** in **TAIR\_Arabidopsis**

Match to Query 747: 727.369096 from(364.691824,2+) index(6103)

Title: Elution from: 53.483 to 53.483 scan no 7716 cid35.00 polarity:+

Data file C7-2\_2.mgf

Click mouse within plot area to zoom in by factor of two about that point

Or,   to  Da Label all possible matches  Label matches used for scoring Show Y-axis 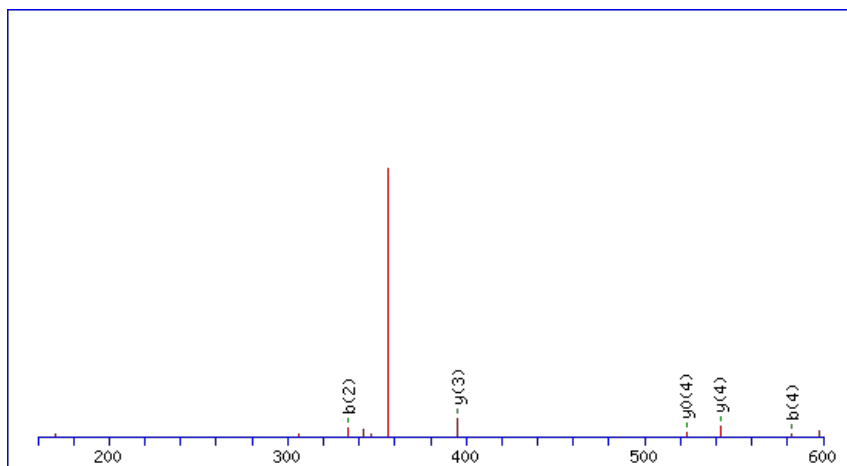Monoisotopic mass of neutral peptide **Mr(calc)**: 727.3694

Fixed modifications: Carbamidomethyl (C) (apply to specified residues or termini only)

Ions Score: 19 Expect: 0.014

Matches : 5/32 fragment ions using 8 most intense peaks ([help](#))

| # | b               | b <sup>++</sup> | b <sup>0</sup> | b <sup>0++</sup> | Seq. | y               | y <sup>++</sup> | y*       | y <sup>*++</sup> | y <sup>0</sup>  | y <sup>0++</sup> | # |
|---|-----------------|-----------------|----------------|------------------|------|-----------------|-----------------|----------|------------------|-----------------|------------------|---|
| 1 | 187.0866        | 94.0469         |                |                  | W    |                 |                 |          |                  |                 |                  | 5 |
| 2 | <b>334.1550</b> | 167.5811        |                |                  | F    | <b>542.2973</b> | 271.6523        | 525.2708 | 263.1390         | <b>524.2867</b> | 262.6470         | 4 |
| 3 | 481.2234        | 241.1153        |                |                  | F    | <b>395.2289</b> | 198.1181        | 378.2023 | 189.6048         | 377.2183        | 189.1128         | 3 |
| 4 | <b>582.2711</b> | 291.6392        | 564.2605       | 282.6339         | T    | 248.1605        | 124.5839        | 231.1339 | 116.0706         | 230.1499        | 115.5786         | 2 |
| 5 |                 |                 |                |                  | K    | 147.1128        | 74.0600         | 130.0863 | 65.5468          |                 |                  | 1 |

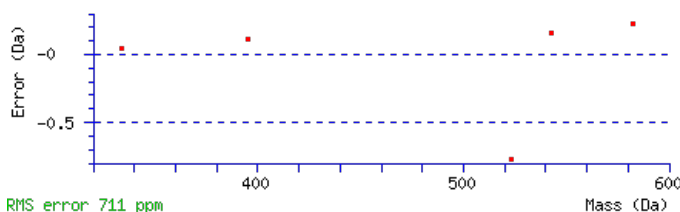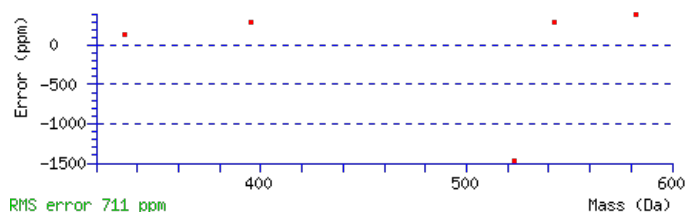NCBI **BLAST** search of [WFFTK](#)

(Parameters: blastp, nr protein database, expect=20000, no filter, PAM30)

Other BLAST [web gateways](#)**All matches to this query**

| Score | Mr(calc) | Delta   | Sequence              |
|-------|----------|---------|-----------------------|
| 18.8  | 727.3694 | -0.0003 | <a href="#">WFFTK</a> |
| 5.8   | 727.3694 | -0.0003 | <a href="#">FWTEK</a> |

**Peptide View**MS/MS Fragmentation of **DWWGKVINFHQNK**Found in **AT1G64300.1** in **TAIR\_Arabidopsis**, Symbols: | protein kinase family protein | chr1:23867206-23869439 FORWARD

Match to Query 7685: 1692.768316 from(847.391434,2+) index(5956)

Title: Elution from: 52.855 to 52.855 scan no 7635 cid35.00 polarity:+

Data file D6h-2\_3.mgf

Click mouse within plot area to zoom in by factor of two about that point

Or,  to  Da Label all possible matches  Label matches used for scoring Show Y-axis 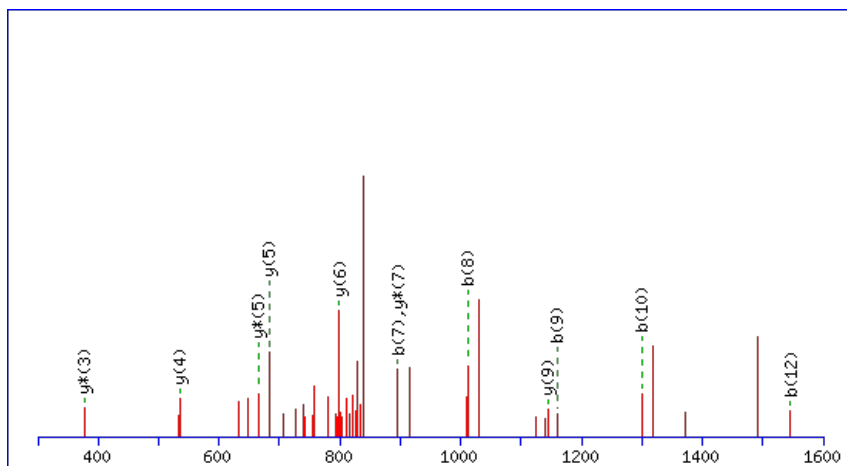Monoisotopic mass of neutral peptide  $M_r(\text{calc})$ : 1692.7665

Fixed modifications: Carbamidomethyl (C) (apply to specified residues or termini only)

Ions Score: 28 Expect: 0.012

Matches : 12/112 fragment ions using 19 most intense peaks ([help](#))

| #  | b                | b <sup>++</sup> | b*        | b <sup>*++</sup> | b <sup>0</sup> | b <sup>0++</sup> | Seq. | y                | y <sup>++</sup> | y*              | y <sup>*++</sup> | #  |
|----|------------------|-----------------|-----------|------------------|----------------|------------------|------|------------------|-----------------|-----------------|------------------|----|
| 1  | 117.0313         | 59.0193         |           |                  | 99.0207        | 50.0140          | D    |                  |                 |                 |                  | 13 |
| 2  | 305.1046         | 153.0560        |           |                  | 287.0941       | 144.0507         | W    | 1577.7498        | 789.3786        | 1559.7262       | 780.3668         | 12 |
| 3  | 493.1780         | 247.0926        |           |                  | 475.1675       | 238.0874         | W    | 1389.6764        | 695.3419        | 1371.6529       | 686.3301         | 11 |
| 4  | 551.1965         | 276.1019        |           |                  | 533.1860       | 267.0966         | G    | 1201.6031        | 601.3052        | 1183.5795       | 592.2934         | 10 |
| 5  | 681.2856         | 341.1464        | 663.2620  | 332.1346         | 663.2750       | 332.1411         | K    | <b>1143.5846</b> | 572.2959        | 1125.5610       | 563.2841         | 9  |
| 6  | 781.3510         | 391.1791        | 763.3274  | 382.1673         | 763.3404       | 382.1739         | V    | 1013.4955        | 507.2514        | 995.4719        | 498.2396         | 8  |
| 7  | <b>895.4321</b>  | 448.2197        | 877.4085  | 439.2079         | 877.4215       | 439.2144         | I    | 913.4301         | 457.2187        | <b>895.4065</b> | 448.2069         | 7  |
| 8  | <b>1011.4691</b> | 506.2382        | 993.4455  | 497.2264         | 993.4585       | 497.2329         | N    | <b>799.3490</b>  | 400.1781        | 781.3254        | 391.1663         | 6  |
| 9  | <b>1159.5345</b> | 580.2709        | 1141.5110 | 571.2591         | 1141.5240      | 571.2656         | F    | <b>683.3120</b>  | 342.1596        | <b>665.2884</b> | 333.1478         | 5  |
| 10 | <b>1299.5846</b> | 650.2959        | 1281.5610 | 641.2841         | 1281.5740      | 641.2906         | H    | <b>535.2465</b>  | 268.1269        | 517.2230        | 259.1151         | 4  |
| 11 | 1429.6372        | 715.3222        | 1411.6136 | 706.3105         | 1411.6266      | 706.3170         | Q    | 395.1965         | 198.1019        | <b>377.1729</b> | 189.0901         | 3  |
| 12 | <b>1545.6742</b> | 773.3407        | 1527.6506 | 764.3289         | 1527.6636      | 764.3355         | N    | 265.1439         | 133.0756        | 247.1203        | 124.0638         | 2  |
| 13 |                  |                 |           |                  |                |                  | K    | 149.1069         | 75.0571         | 131.0833        | 66.0453          | 1  |

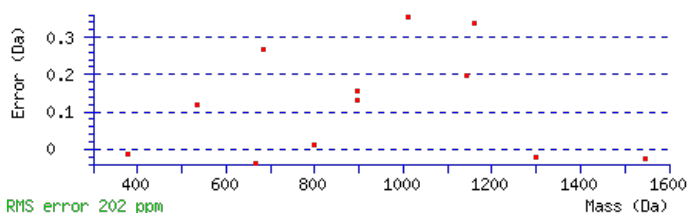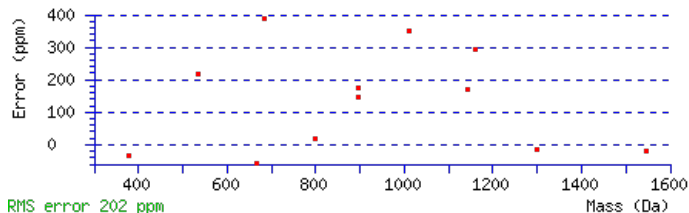NCBI BLAST search of **DWWGKVINFHQNK**

(Parameters: blastp, nr protein database, expect=20000, no filter, PAM30)

Other BLAST [web gateways](#)

# AT1G64300.1

All matches to this query

| Score | Mr(calc)  | Delta  | Sequence                         |
|-------|-----------|--------|----------------------------------|
| 27.5  | 1692.7665 | 0.0018 | <a href="#">DWWGKVINFHQNK</a>    |
| 11.9  | 1692.7675 | 0.0008 | <a href="#">NSIEVGKVGNVEDDAK</a> |
| 6.2   | 1692.7645 | 0.0038 | <a href="#">EVLMGKAEYFESFK</a>   |
| 3.1   | 1692.7650 | 0.0033 | <a href="#">FTADELRRIMDYK</a>    |
| 3.0   | 1692.7675 | 0.0008 | <a href="#">NLSSVNVGLDTENPSK</a> |
| 0.8   | 1692.7650 | 0.0033 | <a href="#">SGPPLRCFTPGEIDK</a>  |
| 0.2   | 1692.7645 | 0.0038 | <a href="#">FTAYKVSGFMVEEGI</a>  |

Mascot: <http://www.matrixscience.com/>

## Peptide View

MS/MS Fragmentation of **QYETMAVLRPDMSEDER**

Found in **AT1G64510.1** in **TAIR\_Arabidopsis**, Symbols: | ribosomal protein S6 family protein | chr1:23958656-23959868 REVERSE

Match to Query 9151:2068.916616 from(690.646148,3+) index(5233)

Title: Elution from: 46.154 to 46.154 scan no 6622 cid35.00 polarity:+

Data file 0-2\_3.mgf

Click mouse within plot area to zoom in by factor of two about that point

Or,   to  Da

Label all possible matches  Label matches used for scoring

Show Y-axis

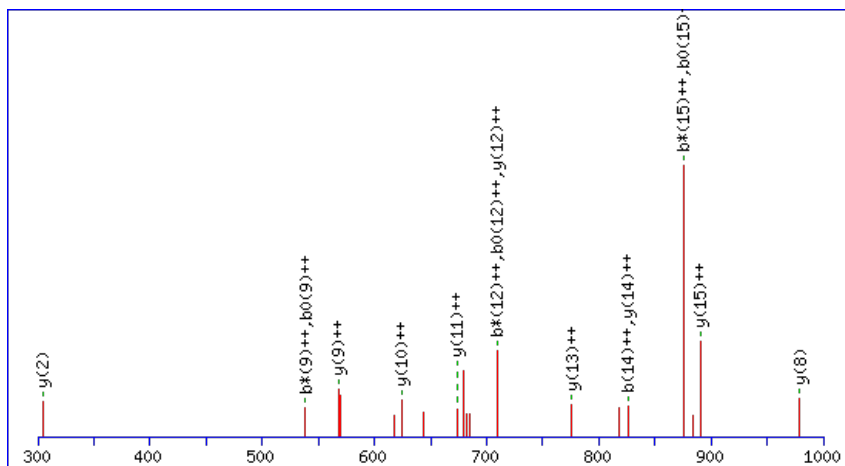

Monoisotopic mass of neutral peptide  $M_r(\text{calc})$ : 2068.9194

Fixed modifications: Carbamidomethyl (C) (apply to specified residues or termini only)

Ions Score: 47 Expect: 2.9e-005

Matches : 16/186 fragment ions using 13 most intense peaks ([help](#))

| #  | b         | b <sup>++</sup> | b*        | b <sup>+++</sup> | b <sup>0</sup> | b <sup>0++</sup> | Seq. | y         | y <sup>++</sup> | y*        | y <sup>+++</sup> | y <sup>0</sup> | y <sup>0++</sup> | #  |
|----|-----------|-----------------|-----------|------------------|----------------|------------------|------|-----------|-----------------|-----------|------------------|----------------|------------------|----|
| 1  | 129.0659  | 65.0366         | 112.0393  | 56.5233          |                |                  | Q    |           |                 |           |                  |                |                  | 17 |
| 2  | 292.1292  | 146.5682        | 275.1026  | 138.0550         |                |                  | Y    | 1941.8681 | 971.4377        | 1924.8415 | 962.9244         | 1923.8575      | 962.4324         | 16 |
| 3  | 421.1718  | 211.0895        | 404.1452  | 202.5763         | 403.1612       | 202.0842         | E    | 1778.8048 | 889.9060        | 1761.7782 | 881.3927         | 1760.7942      | 880.9007         | 15 |
| 4  | 522.2195  | 261.6134        | 505.1929  | 253.1001         | 504.2089       | 252.6081         | T    | 1649.7622 | 825.3847        | 1632.7356 | 816.8714         | 1631.7516      | 816.3794         | 14 |
| 5  | 653.2599  | 327.1336        | 636.2334  | 318.6203         | 635.2494       | 318.1283         | M    | 1548.7145 | 774.8609        | 1531.6879 | 766.3476         | 1530.7039      | 765.8556         | 13 |
| 6  | 724.2971  | 362.6522        | 707.2705  | 354.1389         | 706.2865       | 353.6469         | A    | 1417.6740 | 709.3406        | 1400.6475 | 700.8274         | 1399.6634      | 700.3354         | 12 |
| 7  | 823.3655  | 412.1864        | 806.3389  | 403.6731         | 805.3549       | 403.1811         | V    | 1346.6369 | 673.8221        | 1329.6103 | 665.3088         | 1328.6263      | 664.8168         | 11 |
| 8  | 936.4495  | 468.7284        | 919.4230  | 460.2151         | 918.4390       | 459.7231         | L    | 1247.5685 | 624.2879        | 1230.5419 | 615.7746         | 1229.5579      | 615.2826         | 10 |
| 9  | 1092.5506 | 546.7790        | 1075.5241 | 538.2657         | 1074.5401      | 537.7737         | R    | 1134.4844 | 567.7458        | 1117.4579 | 559.2326         | 1116.4738      | 558.7406         | 9  |
| 10 | 1189.6034 | 595.3053        | 1172.5769 | 586.7921         | 1171.5928      | 586.3001         | P    | 978.3833  | 489.6953        | 961.3568  | 481.1820         | 960.3727       | 480.6900         | 8  |
| 11 | 1304.6304 | 652.8188        | 1287.6038 | 644.3055         | 1286.6198      | 643.8135         | D    | 881.3305  | 441.1689        | 864.3040  | 432.6556         | 863.3200       | 432.1636         | 7  |
| 12 | 1435.6708 | 718.3391        | 1418.6443 | 709.8258         | 1417.6603      | 709.3338         | M    | 766.3036  | 383.6554        | 749.2770  | 375.1422         | 748.2930       | 374.6502         | 6  |
| 13 | 1522.7029 | 761.8551        | 1505.6763 | 753.3418         | 1504.6923      | 752.8498         | S    | 635.2631  | 318.1352        | 618.2366  | 309.6219         | 617.2525       | 309.1299         | 5  |
| 14 | 1651.7455 | 826.3764        | 1634.7189 | 817.8631         | 1633.7349      | 817.3711         | E    | 548.2311  | 274.6192        | 531.2045  | 266.1059         | 530.2205       | 265.6139         | 4  |
| 15 | 1766.7724 | 883.8898        | 1749.7459 | 875.3766         | 1748.7618      | 874.8846         | D    | 419.1885  | 210.0979        | 402.1619  | 201.5846         | 401.1779       | 201.0926         | 3  |
| 16 | 1895.8150 | 948.4111        | 1878.7884 | 939.8979         | 1877.8044      | 939.4059         | E    | 304.1615  | 152.5844        | 287.1350  | 144.0711         | 286.1510       | 143.5791         | 2  |
| 17 |           |                 |           |                  |                |                  | R    | 175.1190  | 88.0631         | 158.0924  | 79.5498          |                |                  | 1  |

AT1G64510.1

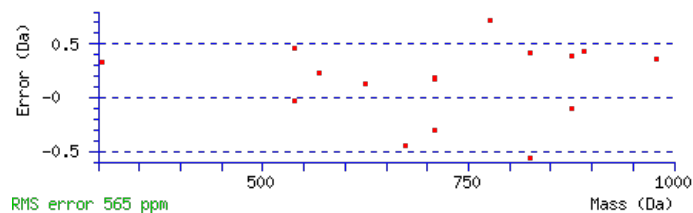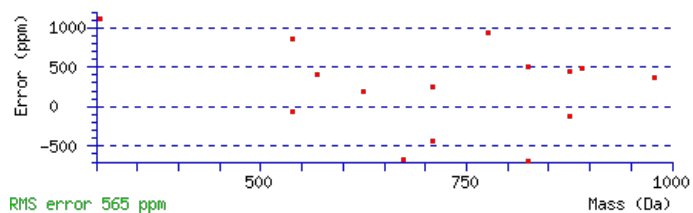

NCBI **BLAST** search of [QYETMAVLRPDMSEDER](#)

(Parameters: blastp, nr protein database, expect=20000, no filter, PAM30)

Other BLAST [web gateways](#)

**All matches to this query**

| Score | Mr(calc)  | Delta   | Sequence                          |
|-------|-----------|---------|-----------------------------------|
| 46.9  | 2068.9194 | -0.0027 | <a href="#">QYETMAVLRPDMSEDER</a> |

Mascot: <http://www.matrixscience.com/>



**Peptide View**MS/MS Fragmentation of **ELRGMIPNGAK**Found in **AT1G64625.1** in **TAIR\_Arabidopsis**, Symbols: | transcription factor | chr1:24020541-24022844 FORWARD

Match to Query 4165: 1200.583644 from(601.299098,2+) index(4015)

Title: Elution from: 37.402 to 37.402 scan no 4975 cid35.00 polarity:+

Data file D12h-1\_2.mgf

Click mouse within plot area to zoom in by factor of two about that point

Or,   to  Da Label all possible matches  Label matches used for scoring Show Y-axis 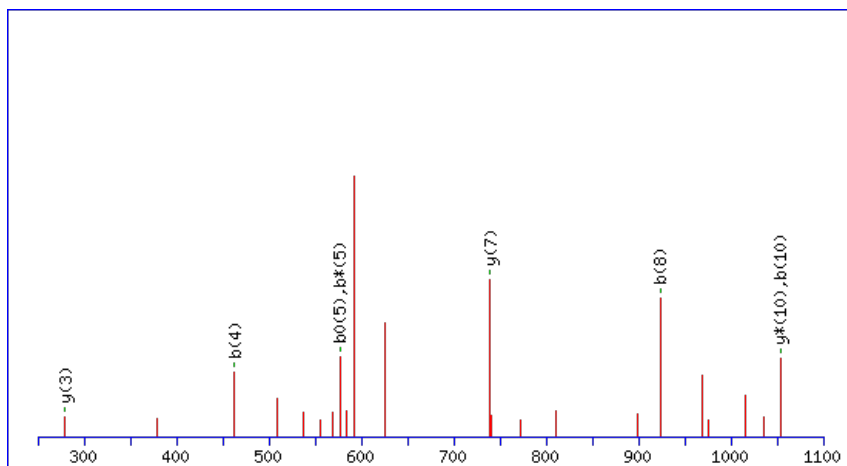Monoisotopic mass of neutral peptide **Mr(calc)**: 1200.5861**Fixed modifications**: Carbamidomethyl (C) (apply to specified residues or termini only)**Ions Score**: 22 **Expect**: 0.043**Matches**: 8/96 fragment ions using 8 most intense peaks ([help](#))

| #  | b         | b <sup>++</sup> | b*        | b <sup>*++</sup> | b <sup>0</sup> | b <sup>0++</sup> | Seq. | y         | y <sup>++</sup> | y*        | y <sup>*++</sup> | #  |
|----|-----------|-----------------|-----------|------------------|----------------|------------------|------|-----------|-----------------|-----------|------------------|----|
| 1  | 131.0469  | 66.0271         |           |                  | 113.0363       | 57.0218          | E    |           |                 |           |                  | 11 |
| 2  | 245.1280  | 123.0676        |           |                  | 227.1174       | 114.0624         | L    | 1071.5538 | 536.2805        | 1053.5302 | 527.2687         | 10 |
| 3  | 405.2173  | 203.1123        | 387.1937  | 194.1005         | 387.2067       | 194.1070         | R    | 957.4727  | 479.2400        | 939.4491  | 470.2282         | 9  |
| 4  | 463.2358  | 232.1215        | 445.2122  | 223.1097         | 445.2252       | 223.1162         | G    | 797.3834  | 399.1954        | 779.3599  | 390.1836         | 8  |
| 5  | 595.2733  | 298.1403        | 577.2497  | 289.1285         | 577.2627       | 289.1350         | M    | 739.3649  | 370.1861        | 721.3414  | 361.1743         | 7  |
| 6  | 709.3544  | 355.1808        | 691.3308  | 346.1690         | 691.3438       | 346.1755         | I    | 607.3274  | 304.1673        | 589.3038  | 295.1556         | 6  |
| 7  | 807.4042  | 404.2057        | 789.3806  | 395.1939         | 789.3936       | 395.2004         | P    | 493.2463  | 247.1268        | 475.2227  | 238.1150         | 5  |
| 8  | 923.4412  | 462.2242        | 905.4176  | 453.2124         | 905.4306       | 453.2189         | N    | 395.1965  | 198.1019        | 377.1729  | 189.0901         | 4  |
| 9  | 981.4597  | 491.2335        | 963.4361  | 482.2217         | 963.4491       | 482.2282         | G    | 279.1595  | 140.0834        | 261.1359  | 131.0716         | 3  |
| 10 | 1053.4938 | 527.2505        | 1035.4702 | 518.2388         | 1035.4833      | 518.2453         | A    | 221.1410  | 111.0741        | 203.1174  | 102.0624         | 2  |
| 11 |           |                 |           |                  |                |                  | K    | 149.1069  | 75.0571         | 131.0833  | 66.0453          | 1  |

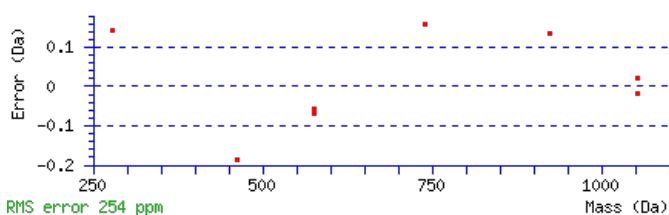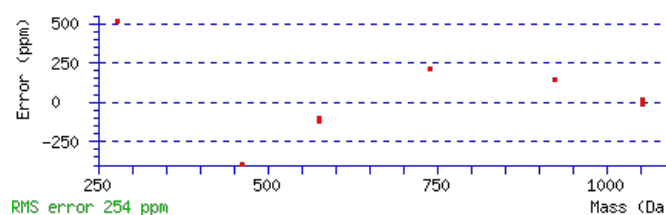NCBI **BLAST** search of **ELRGMIPNGAK**

(Parameters: blastp, nr protein database, expect=20000, no filter, PAM30)

Other BLAST [web gateways](#)**All matches to this query**

## AT1G64625.1

| Score | Mr(calc)  | Delta   | Sequence                     |
|-------|-----------|---------|------------------------------|
| 22.3  | 1200.5861 | -0.0025 | <a href="#">ELRGMPNGAK</a>   |
| 6.9   | 1200.5805 | 0.0031  | <a href="#">ARSEGP AEIVR</a> |
| 2.3   | 1200.5857 | -0.0021 | <a href="#">MLLFVPNDPK</a>   |
| 2.3   | 1200.5828 | 0.0009  | <a href="#">GWKGSVNPVK</a>   |
| 1.8   | 1200.5827 | 0.0009  | <a href="#">ATQVFNHQK</a>    |
| 1.8   | 1200.5801 | 0.0036  | <a href="#">DPFLTPQDKK</a>   |
| 1.8   | 1200.5861 | -0.0025 | <a href="#">HALLSMRTEK</a>   |
| 1.8   | 1200.5857 | -0.0020 | <a href="#">IIEWMELOK</a>    |
| 1.8   | 1200.5861 | -0.0025 | <a href="#">LPGRMDQLQK</a>   |
| 1.8   | 1200.5801 | 0.0036  | <a href="#">LPKFDPTDQK</a>   |

Mascot: <http://www.matrixscience.com/>

### Peptide View

 MS/MS Fragmentation of **LKDRLGCEPSDEQLAVSLK**

 Found in **AT1G64860.1** in **TAIR Arabidopsis**, Symbols: SIG1, SIG2, SIGB, RPOD1, SIGA | SIGA (SIGMA FACTOR A); DNA binding / DNA-directed RNA polymerase/ transcription factor | chr1:24102160-24104409 FORWARD

Match to Query 9711: 2183.035146 from(728.685658,3+) index(10827)

Title: Elution from: 116.799 to 116.799 scan no 15896 cid35.00 polarity:+

Data file D6h-2\_2.mgf

Click mouse within plot area to zoom in by factor of two about that point

 Or,   to  Da 

 Label all possible matches  Label matches used for scoring 

 Show Y-axis 
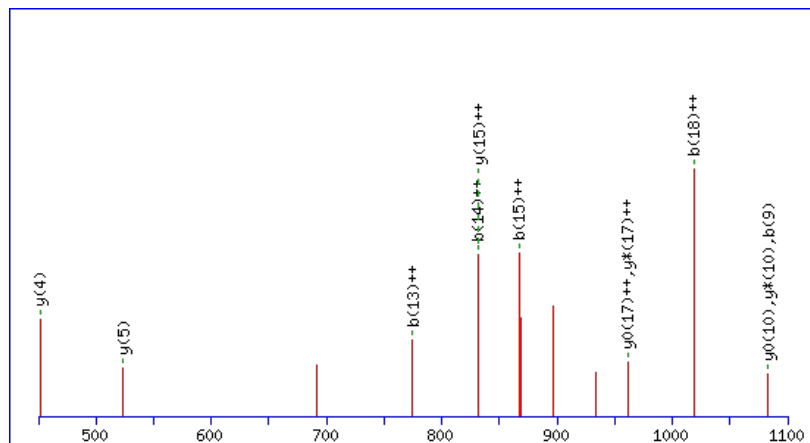
 Monoisotopic mass of neutral peptide  $M_r(\text{calc})$ : 2183.0329

Fixed modifications: Carbamidomethyl (C) (apply to specified residues or termini only)

Ions Score: 33 Expect: 0.0038

 Matches : 13/206 fragment ions using 13 most intense peaks ([help](#))

| #  | b         | b <sup>++</sup> | b <sup>*</sup> | b <sup>*++</sup> | b <sup>0</sup> | b <sup>0++</sup> | Seq | y         | y <sup>++</sup> | y <sup>*</sup> | y <sup>*++</sup> | y <sup>0</sup> | y <sup>0++</sup> | #  |
|----|-----------|-----------------|----------------|------------------|----------------|------------------|-----|-----------|-----------------|----------------|------------------|----------------|------------------|----|
| 1  | 115.0884  | 58.0478         |                |                  |                |                  | L   |           |                 |                |                  |                |                  | 19 |
| 2  | 245.1774  | 123.0923        | 227.1538       | 114.0805         |                |                  | K   | 2069.9591 | 1035.4832       | 2051.9355      | 1026.4714        | 2051.9485      | 1026.4779        | 18 |
| 3  | 361.2014  | 181.1043        | 343.1778       | 172.0925         | 343.1908       | 172.0990         | D   | 1939.8700 | 970.4386        | 1921.8464      | 961.4269         | 1921.8595      | 961.4334         | 17 |
| 4  | 521.2906  | 261.1490        | 503.2671       | 252.1372         | 503.2801       | 252.1437         | R   | 1823.8460 | 912.4267        | 1805.8225      | 903.4149         | 1805.8355      | 903.4214         | 16 |
| 5  | 635.3717  | 318.1895        | 617.3482       | 309.1777         | 617.3612       | 309.1842         | L   | 1663.7568 | 832.3820        | 1645.7332      | 823.3702         | 1645.7462      | 823.3768         | 15 |
| 6  | 693.3902  | 347.1988        | 675.3667       | 338.1870         | 675.3797       | 338.1935         | G   | 1549.6757 | 775.3415        | 1531.6521      | 766.3297         | 1531.6651      | 766.3362         | 14 |
| 7  | 855.4150  | 428.2111        | 837.3914       | 419.1993         | 837.4044       | 419.2058         | C   | 1491.6572 | 746.3322        | 1473.6336      | 737.3204         | 1473.6466      | 737.3270         | 13 |
| 8  | 985.4546  | 493.2309        | 967.4310       | 484.2191         | 967.4440       | 484.2256         | E   | 1329.6325 | 665.3199        | 1311.6089      | 656.3081         | 1311.6219      | 656.3146         | 12 |
| 9  | 1083.5044 | 542.2558        | 1065.4808      | 533.2440         | 1065.4938      | 533.2505         | P   | 1199.5928 | 600.3001        | 1181.5693      | 591.2883         | 1181.5823      | 591.2948         | 11 |
| 10 | 1171.5334 | 586.2704        | 1153.5099      | 577.2586         | 1153.5229      | 577.2651         | S   | 1101.5430 | 551.2752        | 1083.5195      | 542.2634         | 1083.5325      | 542.2699         | 10 |
| 11 | 1287.5574 | 644.2823        | 1269.5338      | 635.2706         | 1269.5469      | 635.2771         | D   | 1013.5140 | 507.2606        | 995.4904       | 498.2488         | 995.5034       | 498.2553         | 9  |
| 12 | 1417.5970 | 709.3022        | 1399.5735      | 700.2904         | 1399.5865      | 700.2969         | E   | 897.4900  | 449.2486        | 879.4664       | 440.2369         | 879.4794       | 440.2434         | 8  |
| 13 | 1547.6497 | 774.3285        | 1529.6261      | 765.3167         | 1529.6391      | 765.3232         | Q   | 767.4504  | 384.2288        | 749.4268       | 375.2170         | 749.4398       | 375.2235         | 7  |
| 14 | 1661.7308 | 831.3690        | 1643.7072      | 822.3572         | 1643.7202      | 822.3638         | L   | 637.3977  | 319.2025        | 619.3741       | 310.1907         | 619.3872       | 310.1972         | 6  |
| 15 | 1733.7649 | 867.3861        | 1715.7414      | 858.3743         | 1715.7544      | 858.3808         | A   | 523.3166  | 262.1620        | 505.2931       | 253.1502         | 505.3061       | 253.1567         | 5  |
| 16 | 1833.8304 | 917.4188        | 1815.8068      | 908.4070         | 1815.8198      | 908.4136         | V   | 451.2825  | 226.1449        | 433.2589       | 217.1331         | 433.2719       | 217.1396         | 4  |
| 17 | 1921.8595 | 961.4334        | 1903.8359      | 952.4216         | 1903.8489      | 952.4281         | S   | 351.2170  | 176.1122        | 333.1935       | 167.1004         | 333.2065       | 167.1069         | 3  |
| 18 | 2035.9406 | 1018.4739       | 2017.9170      | 1009.4621        | 2017.9300      | 1009.4686        | L   | 263.1880  | 132.0976        | 245.1644       | 123.0858         |                |                  | 2  |
| 19 |           |                 |                |                  |                |                  | K   | 149.1069  | 75.0571         | 131.0833       | 66.0453          |                |                  | 1  |

# AT1G64860.1

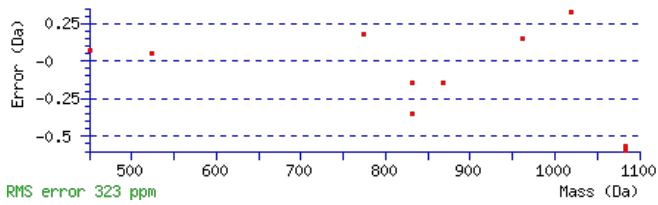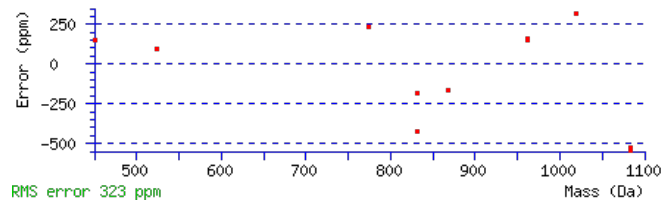

NCBI BLAST search of [LKDRLGCEPSDEQLAVSLK](#)  
 (Parameters: blastp, nr protein database, expect=20000, no filter, PAM30)  
 Other BLAST [web gateways](#)

## All matches to this query

| Score | Mr(calc)  | Delta   | Sequence                              |
|-------|-----------|---------|---------------------------------------|
| 33.3  | 2183.0329 | 0.0023  | <a href="#">LKDRLGCEPSDEQLAVSLK</a>   |
| 7.4   | 2183.0295 | 0.0057  | <a href="#">FTPNEPVDITNANVAKGIKK</a>  |
| 7.0   | 2183.0329 | 0.0023  | <a href="#">AAKPAVKAAMDDVNADQSVLK</a> |
| 7.0   | 2183.0317 | 0.0034  | <a href="#">SPVDYSRAPGEVNLVEWLK</a>   |
| 6.4   | 2183.0329 | 0.0023  | <a href="#">PVMERVAEETVATNNIQLK</a>   |
| 6.0   | 2183.0351 | 0.0000  | <a href="#">ASPTSSVNELHLEIMKFOK</a>   |
| 5.7   | 2183.0351 | 0.0000  | <a href="#">LNYSSNTRFMLEAIDKLLK</a>   |
| 5.1   | 2183.0304 | 0.0048  | <a href="#">ASVGKFIEQSMSHMIVHLK</a>   |
| 5.1   | 2183.0304 | 0.0048  | <a href="#">ASVGKFIEQSMSHMIVHLK</a>   |
| 4.4   | 2183.0373 | -0.0022 | <a href="#">GCDLLEGEWGKVGSIILLWK</a>  |

Mascot: <http://www.matrixscience.com/>

## Peptide View

MS/MS Fragmentation of **FQMLETSSVDDDLADLKK**

Found in **AT1G65260.1** in **TAIR\_Arabidopsis**, Symbols: PTAC4 | PTAC4 (PLASTID TRANSCRIPTIONALLY ACTIVE4) | chr1:2423992-24244091 FORWARD

Match to Query 9787: 2074.927866 from(692.649898,3+) index(8146)

Title: Elution from: 70.985 to 70.985 scan no 10636 cid35.00 polarity:+

Data file D1d-3\_1.mgf

Click mouse within plot area to zoom in by factor of two about that point

Or,   to  Da

Label all possible matches  Label matches used for scoring

Show Y-axis

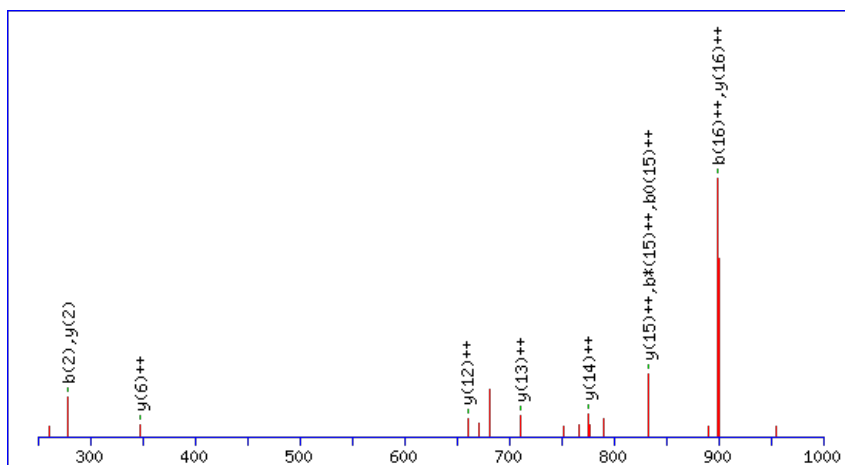

Monoisotopic mass of neutral peptide  $M_r(\text{calc})$ : 2074.9255

Fixed modifications: Carbamidomethyl (C) (apply to specified residues or termini only)

Ions Score: 46 Expect: 0.00021

Matches : 11/188 fragment ions using 9 most intense peaks ([help](#))

| #  | b         | b <sup>++</sup> | b*        | b <sup>*++</sup> | b <sup>0</sup> | b <sup>0++</sup> | Seq. | y         | y <sup>++</sup> | y*        | y <sup>*++</sup> | y <sup>0</sup> | y <sup>0++</sup> | #  |
|----|-----------|-----------------|-----------|------------------|----------------|------------------|------|-----------|-----------------|-----------|------------------|----------------|------------------|----|
| 1  | 149.0727  | 75.0400         |           |                  |                |                  | F    |           |                 |           |                  |                |                  | 18 |
| 2  | 279.1254  | 140.0663        | 261.1018  | 131.0545         |                |                  | Q    | 1927.8673 | 964.4373        | 1909.8438 | 955.4255         | 1909.8568      | 955.4320         | 17 |
| 3  | 411.1629  | 206.0851        | 393.1393  | 197.0733         |                |                  | M    | 1797.8147 | 899.4110        | 1779.7911 | 890.3992         | 1779.8041      | 890.4057         | 16 |
| 4  | 525.2440  | 263.1256        | 507.2204  | 254.1138         |                |                  | L    | 1665.7772 | 833.3922        | 1647.7536 | 824.3804         | 1647.7666      | 824.3869         | 15 |
| 5  | 655.2836  | 328.1454        | 637.2600  | 319.1337         | 637.2731       | 319.1402         | E    | 1551.6961 | 776.3517        | 1533.6725 | 767.3399         | 1533.6855      | 767.3464         | 14 |
| 6  | 757.3283  | 379.1678        | 739.3047  | 370.1560         | 739.3178       | 370.1625         | T    | 1421.6565 | 711.3319        | 1403.6329 | 702.3201         | 1403.6459      | 702.3266         | 13 |
| 7  | 845.3574  | 423.1823        | 827.3338  | 414.1705         | 827.3468       | 414.1771         | S    | 1319.6117 | 660.3095        | 1301.5882 | 651.2977         | 1301.6012      | 651.3042         | 12 |
| 8  | 933.3865  | 467.1969        | 915.3629  | 458.1851         | 915.3759       | 458.1916         | S    | 1231.5827 | 616.2950        | 1213.5591 | 607.2832         | 1213.5721      | 607.2897         | 11 |
| 9  | 1033.4519 | 517.2296        | 1015.4283 | 508.2178         | 1015.4413      | 508.2243         | V    | 1143.5536 | 572.2804        | 1125.5300 | 563.2687         | 1125.5430      | 563.2752         | 10 |
| 10 | 1149.4759 | 575.2416        | 1131.4523 | 566.2298         | 1131.4653      | 566.2363         | D    | 1043.4882 | 522.2477        | 1025.4646 | 513.2359         | 1025.4776      | 513.2424         | 9  |
| 11 | 1265.4999 | 633.2536        | 1247.4763 | 624.2418         | 1247.4893      | 624.2483         | D    | 927.4642  | 464.2357        | 909.4406  | 455.2239         | 909.4536       | 455.2304         | 8  |
| 12 | 1381.5238 | 691.2656        | 1363.5003 | 682.2538         | 1363.5133      | 682.2603         | D    | 811.4402  | 406.2237        | 793.4166  | 397.2120         | 793.4296       | 397.2185         | 7  |
| 13 | 1495.6049 | 748.3061        | 1477.5814 | 739.2943         | 1477.5944      | 739.3008         | L    | 695.4162  | 348.2118        | 677.3926  | 339.2000         | 677.4057       | 339.2065         | 6  |
| 14 | 1567.6391 | 784.3232        | 1549.6155 | 775.3114         | 1549.6285      | 775.3179         | A    | 581.3351  | 291.1712        | 563.3115  | 282.1594         | 563.3246       | 282.1659         | 5  |
| 15 | 1683.6631 | 842.3352        | 1665.6395 | 833.3234         | 1665.6525      | 833.3299         | D    | 509.3010  | 255.1541        | 491.2774  | 246.1423         | 491.2904       | 246.1488         | 4  |
| 16 | 1797.7442 | 899.3757        | 1779.7206 | 890.3639         | 1779.7336      | 890.3704         | L    | 393.2770  | 197.1421        | 375.2534  | 188.1303         |                |                  | 3  |
| 17 | 1927.8332 | 964.4202        | 1909.8096 | 955.4084         | 1909.8226      | 955.4150         | K    | 279.1959  | 140.1016        | 261.1723  | 131.0898         |                |                  | 2  |
| 18 |           |                 |           |                  |                |                  | K    | 149.1069  | 75.0571         | 131.0833  | 66.0453          |                |                  | 1  |

# AT1G65260.1

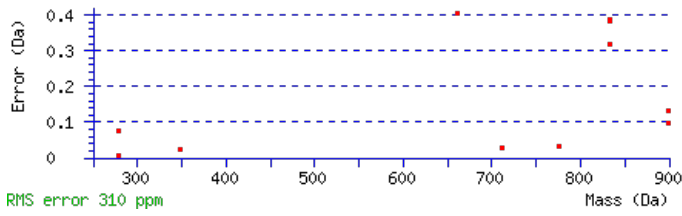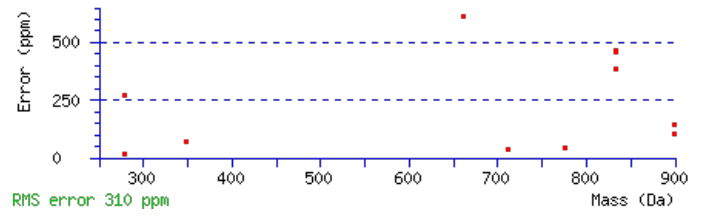

NCBI **BLAST** search of [FQMLETSSVDDDLADLKK](#)  
 (Parameters: blastp, nr protein database, expect=20000, no filter, PAM30)  
 Other BLAST [web gateways](#)

## All matches to this query

| Score | Mr(calc)  | Delta   | Sequence                              |
|-------|-----------|---------|---------------------------------------|
| 45.6  | 2074.9255 | 0.0024  | <a href="#">FQMLETSSVDDDLADLKK</a>    |
| 9.9   | 2074.9329 | -0.0051 | <a href="#">AEYETLSQESRELIQEK</a>     |
| 9.3   | 2074.9338 | -0.0059 | <a href="#">AACYTKLGAMPEGLKDAEK</a>   |
| 6.6   | 2074.9248 | 0.0031  | <a href="#">DYKLYEEIGDGVSATVHR</a>    |
| 4.8   | 2074.9290 | -0.0012 | <a href="#">EVICKCIPCQGIGYVQK</a>     |
| 4.5   | 2074.9338 | -0.0059 | <a href="#">MLOGLTGMPSAAFQESKK</a>    |
| 4.4   | 2074.9248 | 0.0030  | <a href="#">WDVQSFIRSSPELSGSEK</a>    |
| 4.4   | 2074.9221 | 0.0058  | <a href="#">FTDLTADETSDLWLTAQK</a>    |
| 4.1   | 2074.9281 | -0.0003 | <a href="#">LTTFEIQGCENVTVDGLR</a>    |
| 3.7   | 2074.9268 | 0.0011  | <a href="#">SVKLGCGEGGCGACLVLVLSK</a> |

Mascot: <http://www.matrixscience.com/>

## Peptide View

MS/MS Fragmentation of **IQSIDLAVDFIASHPQAK**

Found in **AT1G65290.1** in **TAIR\_Arabidopsis**, Symbols: MTACP2 | MTACP2 (MITOCHONDRIAL ACYL CARRIER PROTEIN 2); acyl carrier | chr1:24252751-24254029 REVERSE

Match to Query 9319: 1952.034000 from(651.685276,3+) index(8994)

Title: Elution from: 81.238 to 81.238 scan no 12081 cid35.00 polarity:+

Data file 0-3\_1.mgf

Click mouse within plot area to zoom in by factor of two about that point

Or,   to  Da

Label all possible matches  Label matches used for scoring

Show Y-axis

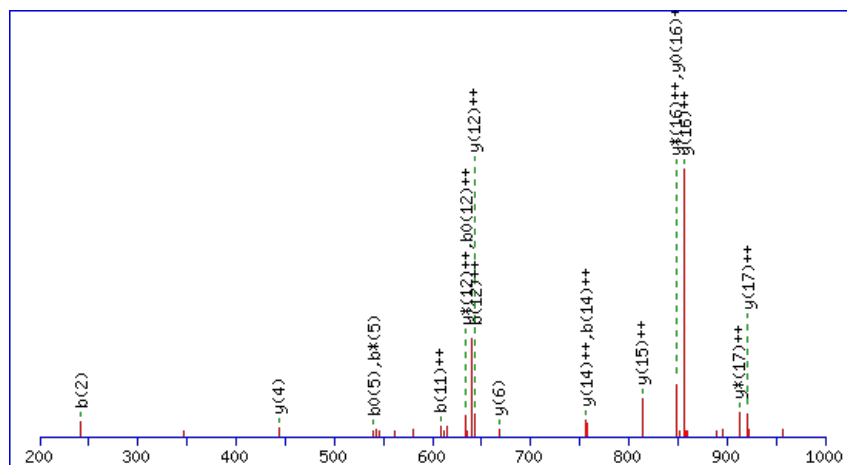

Monoisotopic mass of neutral peptide  $M_r(\text{calc})$ : 1952.0367

Fixed modifications: Carbamidomethyl (C) (apply to specified residues or termini only)

Ions Score: 27 Expect: 0.0046

Matches : 18/188 fragment ions using 22 most intense peaks ([help](#))

| #  | b         | b <sup>++</sup> | b*        | b* <sup>++</sup> | b <sup>0</sup> | b <sup>0++</sup> | Seq. | y         | y <sup>++</sup> | y*        | y* <sup>++</sup> | y <sup>0</sup> | y <sup>0++</sup> | #  |
|----|-----------|-----------------|-----------|------------------|----------------|------------------|------|-----------|-----------------|-----------|------------------|----------------|------------------|----|
| 1  | 114.0913  | 57.5493         |           |                  |                |                  | I    |           |                 |           |                  |                |                  | 18 |
| 2  | 242.1499  | 121.5786        | 225.1234  | 113.0653         |                |                  | Q    | 1839.9599 | 920.4836        | 1822.9334 | 911.9703         | 1821.9494      | 911.4783         | 17 |
| 3  | 329.1819  | 165.0946        | 312.1554  | 156.5813         | 311.1714       | 156.0893         | S    | 1711.9014 | 856.4543        | 1694.8748 | 847.9410         | 1693.8908      | 847.4490         | 16 |
| 4  | 442.2660  | 221.6366        | 425.2395  | 213.1234         | 424.2554       | 212.6314         | I    | 1624.8693 | 812.9383        | 1607.8428 | 804.4250         | 1606.8588      | 803.9330         | 15 |
| 5  | 557.2930  | 279.1501        | 540.2664  | 270.6368         | 539.2824       | 270.1448         | D    | 1511.7853 | 756.3963        | 1494.7587 | 747.8830         | 1493.7747      | 747.3910         | 14 |
| 6  | 670.3770  | 335.6921        | 653.3505  | 327.1789         | 652.3665       | 326.6869         | L    | 1396.7583 | 698.8828        | 1379.7318 | 690.3695         | 1378.7478      | 689.8775         | 13 |
| 7  | 741.4141  | 371.2107        | 724.3876  | 362.6974         | 723.4036       | 362.2054         | A    | 1283.6743 | 642.3408        | 1266.6477 | 633.8275         | 1265.6637      | 633.3355         | 12 |
| 8  | 840.4825  | 420.7449        | 823.4560  | 412.2316         | 822.4720       | 411.7396         | V    | 1212.6371 | 606.8222        | 1195.6106 | 598.3089         | 1194.6266      | 597.8169         | 11 |
| 9  | 955.5095  | 478.2584        | 938.4829  | 469.7451         | 937.4989       | 469.2531         | D    | 1113.5687 | 557.2880        | 1096.5422 | 548.7747         | 1095.5582      | 548.2827         | 10 |
| 10 | 1102.5779 | 551.7926        | 1085.5514 | 543.2793         | 1084.5673      | 542.7873         | F    | 998.5418  | 499.7745        | 981.5152  | 491.2613         | 980.5312       | 490.7693         | 9  |
| 11 | 1215.6620 | 608.3346        | 1198.6354 | 599.8213         | 1197.6514      | 599.3293         | I    | 851.4734  | 426.2403        | 834.4468  | 417.7271         | 833.4628       | 417.2350         | 8  |
| 12 | 1286.6991 | 643.8532        | 1269.6725 | 635.3399         | 1268.6885      | 634.8479         | A    | 738.3893  | 369.6983        | 721.3628  | 361.1850         | 720.3787       | 360.6930         | 7  |
| 13 | 1373.7311 | 687.3692        | 1356.7046 | 678.8559         | 1355.7205      | 678.3639         | S    | 667.3522  | 334.1797        | 650.3257  | 325.6665         | 649.3416       | 325.1745         | 6  |
| 14 | 1510.7900 | 755.8986        | 1493.7635 | 747.3854         | 1492.7795      | 746.8934         | H    | 580.3202  | 290.6637        | 563.2936  | 282.1504         |                |                  | 5  |
| 15 | 1607.8428 | 804.4250        | 1590.8162 | 795.9118         | 1589.8322      | 795.4197         | P    | 443.2613  | 222.1343        | 426.2347  | 213.6210         |                |                  | 4  |
| 16 | 1735.9014 | 868.4543        | 1718.8748 | 859.9410         | 1717.8908      | 859.4490         | Q    | 346.2085  | 173.6079        | 329.1819  | 165.0946         |                |                  | 3  |
| 17 | 1806.9385 | 903.9729        | 1789.9119 | 895.4596         | 1788.9279      | 894.9676         | A    | 218.1499  | 109.5786        | 201.1234  | 101.0653         |                |                  | 2  |
| 18 |           |                 |           |                  |                |                  | K    | 147.1128  | 74.0600         | 130.0863  | 65.5468          |                |                  | 1  |

AT1G65290.1

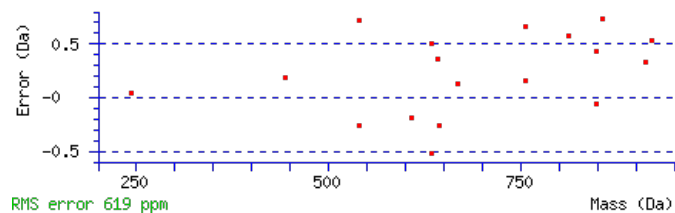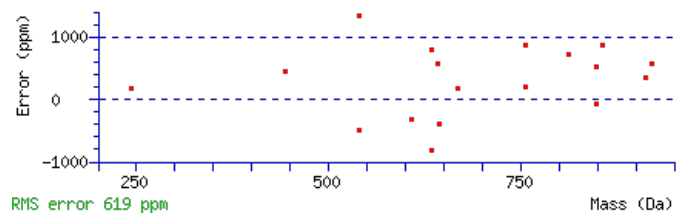

NCBI BLAST search of [IQSIDLAVDFIASHPOAK](#)

(Parameters: blastp, nr protein database, expect=20000, no filter, PAM30)

Other BLAST [web gateways](#)

**All matches to this query**

| Score | Mr(calc)  | Delta   | Sequence                           |
|-------|-----------|---------|------------------------------------|
| 26.8  | 1952.0367 | -0.0027 | <a href="#">IQSIDLAVDFIASHPOAK</a> |
| 1.8   | 1952.0302 | 0.0038  | <a href="#">ELRQLFSPFGQIKSMR</a>   |

Mascot: <http://www.matrixscience.com/>



**Peptide View**MS/MS Fragmentation of **MQIFVK**Found in **AT1G65350.1** in **TAIR\_Arabidopsis**, Symbols: UBQ13 | UBQ13 (ubiquitin 13) | chr1:24280054-24280938 REVERSE

Match to Query 827: 764.425488 from(383.220020,2+) index(3275)

Title: Elution from: 31.911 to 31.911 scan no 4061 cid35.00 polarity:+

Data file 0-1\_3.mgf

Click mouse within plot area to zoom in by factor of two about that point

Or,  to  Da Label all possible matches  Label matches used for scoring Show Y-axis 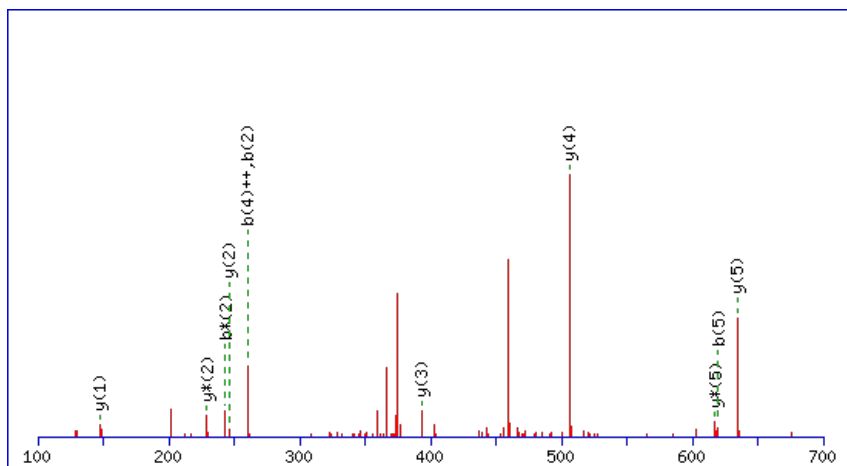Monoisotopic mass of neutral peptide  $M_r(\text{calc})$ : 764.4255

Fixed modifications: Carbamidomethyl (C) (apply to specified residues or termini only)

Ions Score: 41 Expect: 0.00014

Matches : 11/38 fragment ions using 18 most intense peaks ([help](#))

| # | b               | b <sup>++</sup> | b*              | b <sup>*++</sup> | Seq. | y               | y <sup>++</sup> | y*              | y <sup>*++</sup> | # |
|---|-----------------|-----------------|-----------------|------------------|------|-----------------|-----------------|-----------------|------------------|---|
| 1 | 132.0478        | 66.5275         |                 |                  | M    |                 |                 |                 |                  | 6 |
| 2 | <b>260.1063</b> | 130.5568        | <b>243.0798</b> | 122.0435         | Q    | <b>634.3923</b> | 317.6998        | <b>617.3657</b> | 309.1865         | 5 |
| 3 | 373.1904        | 187.0988        | 356.1639        | 178.5856         | I    | <b>506.3337</b> | 253.6705        | 489.3071        | 245.1572         | 4 |
| 4 | 520.2588        | <b>260.6330</b> | 503.2323        | 252.1198         | F    | <b>393.2496</b> | 197.1285        | 376.2231        | 188.6152         | 3 |
| 5 | <b>619.3272</b> | 310.1673        | 602.3007        | 301.6540         | V    | <b>246.1812</b> | 123.5942        | <b>229.1547</b> | 115.0810         | 2 |
| 6 |                 |                 |                 |                  | K    | <b>147.1128</b> | 74.0600         | 130.0863        | 65.5468          | 1 |

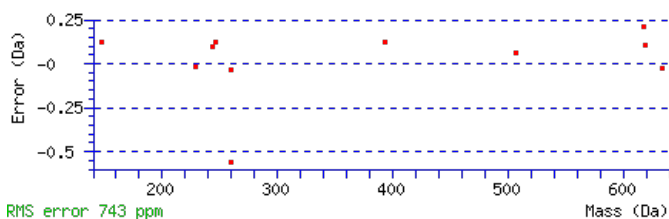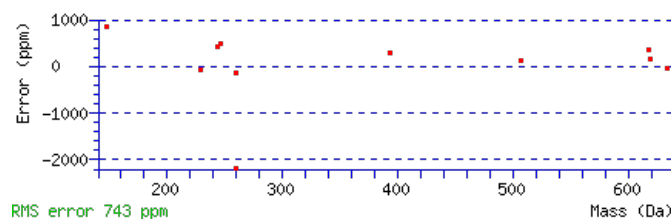NCBI **BLAST** search of **MQIFVK**

(Parameters: blastp, nr protein database, expect=20000, no filter, PAM30)

Other BLAST [web gateways](#)**All matches to this query**

| Score | $M_r(\text{calc})$ | Delta  | Sequence                |
|-------|--------------------|--------|-------------------------|
| 41.0  | 764.4255           | 0.0000 | <a href="#">MQIFVK</a>  |
| 19.0  | 764.4255           | 0.0000 | <a href="#">MGLAFVK</a> |
| 17.2  | 764.4255           | 0.0000 | <a href="#">MYPKVK</a>  |
| 15.5  | 764.4255           | 0.0000 | <a href="#">MVGFK</a>   |

## AT1G65350.1

|     |          |         |                         |
|-----|----------|---------|-------------------------|
| 4.4 | 764.4255 | 0.0000  | <a href="#">FMIGVAK</a> |
| 1.1 | 764.4255 | -0.0000 | <a href="#">VFIVCK</a>  |
| 1.1 | 764.4255 | -0.0000 | <a href="#">VFVLCK</a>  |

**Mascot:** <http://www.matrixscience.com/>

**Peptide View**MS/MS Fragmentation of **DLALIIHGSK**

Found in **AT1G65930.1** in **TAIR\_Arabidopsis**, Symbols: | isocitrate dehydrogenase, putative / NADP+ isocitrate dehydrogenase, putative | chr1:24542751-24545524 FORWARD

Match to Query 3130: 1078.577163 from(360.532997,3+) index(4535)

Title: Elution from: 40.687 to 40.687 scan no 5702 cid35.00 polarity:+

Data file 0-2\_3.mgf

Click mouse within plot area to zoom in by factor of two about that point

Or,   to  Da

Label all possible matches  Label matches used for scoring

Show Y-axis

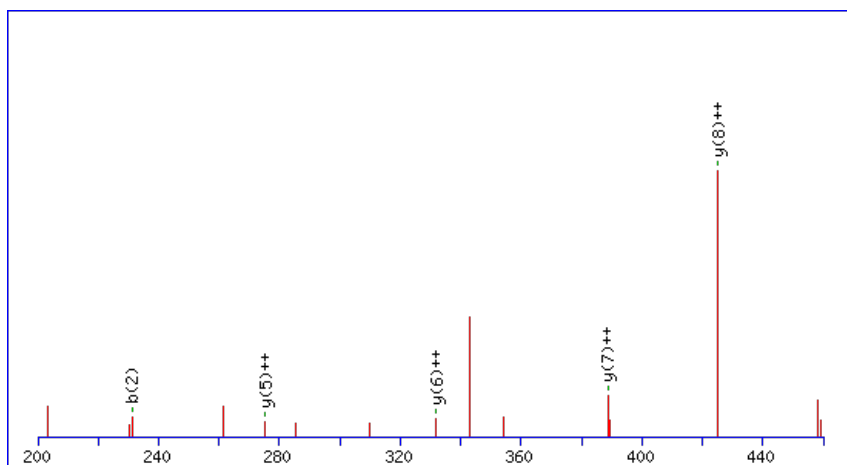

Monoisotopic mass of neutral peptide  $M_r(\text{calc})$ : 1078.5797

Fixed modifications: Carbamidomethyl (C) (apply to specified residues or termini only)

Ions Score: 19 Expect: 0.033

Matches : 5/88 fragment ions using 11 most intense peaks ([help](#))

| #  | b               | b <sup>++</sup> | b <sup>0</sup> | b <sup>0++</sup> | Seq.     | y        | y <sup>++</sup> | y*       | y* <sup>++</sup> | y <sup>0</sup> | y <sup>0++</sup> | #         |
|----|-----------------|-----------------|----------------|------------------|----------|----------|-----------------|----------|------------------|----------------|------------------|-----------|
| 1  | 117.0313        | 59.0193         | 99.0207        | 50.0140          | <b>D</b> |          |                 |          |                  |                |                  | <b>10</b> |
| 2  | <b>231.1124</b> | 116.0598        | 213.1018       | 107.0545         | <b>L</b> | 963.5630 | 482.2851        | 945.5394 | 473.2733         | 945.5524       | 473.2799         | <b>9</b>  |
| 3  | 303.1465        | 152.0769        | 285.1359       | 143.0716         | <b>A</b> | 849.4819 | <b>425.2446</b> | 831.4583 | 416.2328         | 831.4713       | 416.2393         | <b>8</b>  |
| 4  | 417.2276        | 209.1174        | 399.2170       | 200.1122         | <b>L</b> | 777.4478 | <b>389.2275</b> | 759.4242 | 380.2157         | 759.4372       | 380.2222         | <b>7</b>  |
| 5  | 531.3087        | 266.1580        | 513.2981       | 257.1527         | <b>I</b> | 663.3667 | <b>332.1870</b> | 645.3431 | 323.1752         | 645.3561       | 323.1817         | <b>6</b>  |
| 6  | 645.3898        | 323.1985        | 627.3792       | 314.1933         | <b>I</b> | 549.2856 | <b>275.1464</b> | 531.2620 | 266.1346         | 531.2750       | 266.1411         | <b>5</b>  |
| 7  | 785.4398        | 393.2235        | 767.4293       | 384.2183         | <b>H</b> | 435.2045 | 218.1059        | 417.1809 | 209.0941         | 417.1939       | 209.1006         | <b>4</b>  |
| 8  | 843.4583        | 422.2328        | 825.4478       | 413.2275         | <b>G</b> | 295.1544 | 148.0809        | 277.1309 | 139.0691         | 277.1439       | 139.0756         | <b>3</b>  |
| 9  | 931.4874        | 466.2473        | 913.4768       | 457.2420         | <b>S</b> | 237.1359 | 119.0716        | 219.1124 | 110.0598         | 219.1254       | 110.0663         | <b>2</b>  |
| 10 |                 |                 |                |                  | <b>K</b> | 149.1069 | 75.0571         | 131.0833 | 66.0453          |                |                  | <b>1</b>  |

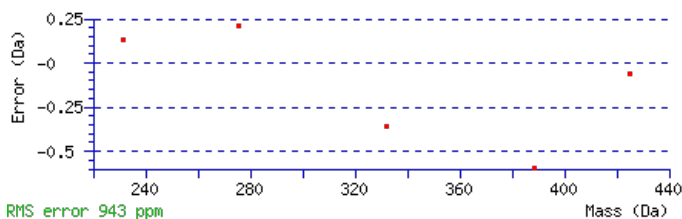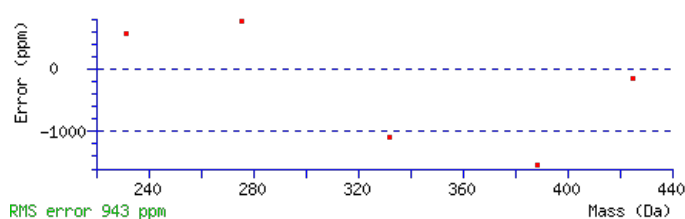

NCBI BLAST search of **DLALIIHGSK**

(Parameters: blastp, nr protein database, expect=20000, no filter, PAM30)

Other BLAST [web gateways](#)

All matches to this query

AT1G65930.1

| Score | Mr(calc)  | Delta   | Sequence                  |
|-------|-----------|---------|---------------------------|
| 18.5  | 1078.5797 | -0.0025 | <a href="#">DLALIHGSK</a> |
| 9.9   | 1078.5797 | -0.0025 | <a href="#">VKAIEHLEK</a> |

Mascot: <http://www.matrixscience.com/>

**Peptide View**MS/MS Fragmentation of **LGFEQYK**

Found in **AT1G65960.1** in **TAIR\_Arabidopsis**, Symbols: GAD2 | GAD2 (GLUTAMATE DECARBOXYLASE 2); calmodulin binding | chr1:24559531-24560916 FORWARD

Match to Query 1113: 812.404970 from(407.209761,2+) index(3173)

Title: Elution from: 31.118 to 31.118 scan no 3930 cid35.00 polarity:+

Data file C7-2\_2.mgf

Click mouse within plot area to zoom in by factor of two about that point

Or,   to  Da

Label all possible matches  Label matches used for scoring

Show Y-axis

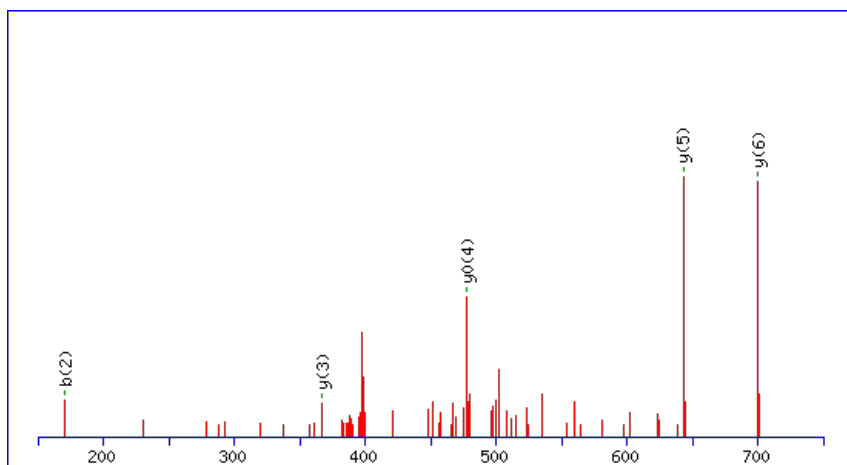

**Monoisotopic mass of neutral peptide Mr(calc):** 812.4068

**Fixed modifications:** Carbamidomethyl (C) (apply to specified residues or termini only)

**Ions Score:** 23 **Expect:** 0.013

**Matches:** 5/48 fragment ions using 6 most intense peaks ([help](#))

| # | b        | b <sup>++</sup> | b <sup>0</sup> | b <sup>0++</sup> | Seq. | y        | y <sup>++</sup> | y*       | y <sup>*++</sup> | y <sup>0</sup> | y <sup>0++</sup> | # |
|---|----------|-----------------|----------------|------------------|------|----------|-----------------|----------|------------------|----------------|------------------|---|
| 1 | 114.0913 | 57.5493         |                |                  | L    |          |                 |          |                  |                |                  | 7 |
| 2 | 171.1128 | 86.0600         |                |                  | G    | 700.3301 | 350.6687        | 683.3035 | 342.1554         | 682.3195       | 341.6634         | 6 |
| 3 | 318.1812 | 159.5942        |                |                  | F    | 643.3086 | 322.1579        | 626.2821 | 313.6447         | 625.2980       | 313.1527         | 5 |
| 4 | 447.2238 | 224.1155        | 429.2132       | 215.1103         | E    | 496.2402 | 248.6237        | 479.2136 | 240.1105         | 478.2296       | 239.6185         | 4 |
| 5 | 504.2453 | 252.6263        | 486.2347       | 243.6210         | G    | 367.1976 | 184.1024        | 350.1710 | 175.5892         |                |                  | 3 |
| 6 | 667.3086 | 334.1579        | 649.2980       | 325.1527         | Y    | 310.1761 | 155.5917        | 293.1496 | 147.0784         |                |                  | 2 |
| 7 |          |                 |                |                  | K    | 147.1128 | 74.0600         | 130.0863 | 65.5468          |                |                  | 1 |

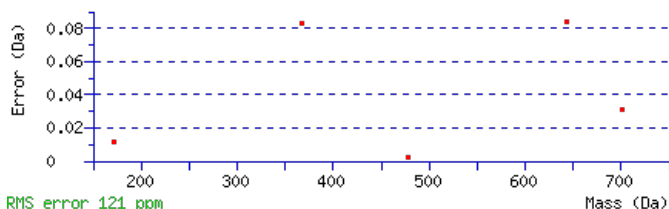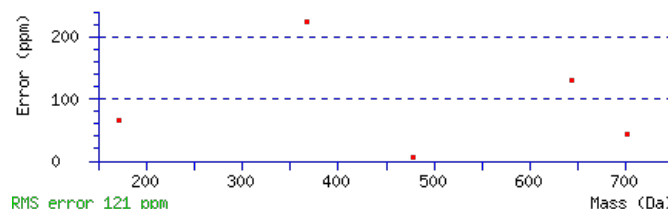

NCBI **BLAST** search of **LGFEQYK**

(Parameters: blastp, nr protein database, expect=20000, no filter, PAM30)

Other BLAST [web gateways](#)

**All matches to this query**

| Score | Mr(calc) | Delta   | Sequence                |
|-------|----------|---------|-------------------------|
| 23.2  | 812.4068 | -0.0019 | <a href="#">LGFEQYK</a> |
| 8.0   | 812.4069 | -0.0019 | <a href="#">IGDFFSK</a> |

AT1G65960.1

|     |          |        |                         |
|-----|----------|--------|-------------------------|
| 8.0 | 812.4028 | 0.0022 | <a href="#">IGTEHEK</a> |
|-----|----------|--------|-------------------------|

**Mascot:** <http://www.matrixscience.com/>

### Peptide View

 MS/MS Fragmentation of **EVNLSSEGYVMDPK**

 Found in **AT1G65960.2** in **TAIR\_Arabidopsis**, Symbols: GAD2 | GAD2 (GLUTAMATE DECARBOXYLASE 2) | chr1:24555757-24560916  
 FORWARD

Match to Query 8386: 1757.779192 from(879.896872,2+) index(7067)

Title: Elution from: 64.633 to 64.633 scan no 9262 cid35.00 polarity:+

Data file D1d-2\_1.mgf

Click mouse within plot area to zoom in by factor of two about that point

 Or,   to  Da 

 Label all possible matches  Label matches used for scoring 

 Show Y-axis 
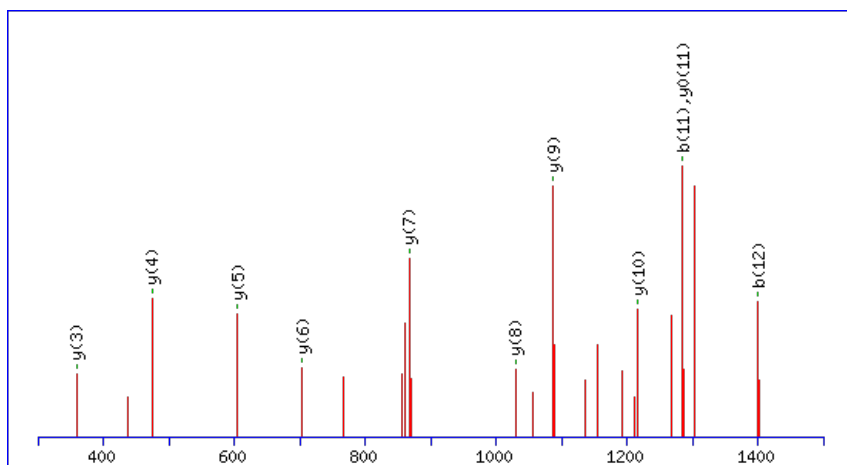
 Monoisotopic mass of neutral peptide  $M_r(\text{calc})$ : 1757.7818

Fixed modifications: Carbamidomethyl (C) (apply to specified residues or termini only)

Ions Score: 74 Expect: 4.1e-008

 Matches : 11/162 fragment ions using 11 most intense peaks ([help](#))

| #  | b         | b <sup>++</sup> | b*        | b <sup>*++</sup> | b <sup>0</sup> | b <sup>0++</sup> | Seq. | y         | y <sup>++</sup> | y*        | y <sup>*++</sup> | y <sup>0</sup> | y <sup>0++</sup> | #  |
|----|-----------|-----------------|-----------|------------------|----------------|------------------|------|-----------|-----------------|-----------|------------------|----------------|------------------|----|
| 1  | 130.0499  | 65.5286         |           |                  | 112.0393       | 56.5233          | E    |           |                 |           |                  |                |                  | 15 |
| 2  | 229.1183  | 115.0628        |           |                  | 211.1077       | 106.0575         | V    | 1629.7465 | 815.3769        | 1612.7200 | 806.8636         | 1611.7359      | 806.3716         | 14 |
| 3  | 343.1612  | 172.0842        | 326.1347  | 163.5710         | 325.1506       | 163.0790         | N    | 1530.6781 | 765.8427        | 1513.6515 | 757.3294         | 1512.6675      | 756.8374         | 13 |
| 4  | 456.2453  | 228.6263        | 439.2187  | 220.1130         | 438.2347       | 219.6210         | L    | 1416.6352 | 708.8212        | 1399.6086 | 700.3079         | 1398.6246      | 699.8159         | 12 |
| 5  | 543.2773  | 272.1423        | 526.2508  | 263.6290         | 525.2667       | 263.1370         | S    | 1303.5511 | 652.2792        | 1286.5245 | 643.7659         | 1285.5405      | 643.2739         | 11 |
| 6  | 672.3199  | 336.6636        | 655.2933  | 328.1503         | 654.3093       | 327.6583         | E    | 1216.5191 | 608.7632        | 1199.4925 | 600.2499         | 1198.5085      | 599.7579         | 10 |
| 7  | 729.3414  | 365.1743        | 712.3148  | 356.6610         | 711.3308       | 356.1690         | G    | 1087.4765 | 544.2419        | 1070.4499 | 535.7286         | 1069.4659      | 535.2366         | 9  |
| 8  | 892.4047  | 446.7060        | 875.3781  | 438.1927         | 874.3941       | 437.7007         | Y    | 1030.4550 | 515.7311        | 1013.4285 | 507.2179         | 1012.4444      | 506.7259         | 8  |
| 9  | 1055.4680 | 528.2376        | 1038.4415 | 519.7244         | 1037.4575      | 519.2324         | Y    | 867.3917  | 434.1995        | 850.3651  | 425.6862         | 849.3811       | 425.1942         | 7  |
| 10 | 1154.5364 | 577.7719        | 1137.5099 | 569.2586         | 1136.5259      | 568.7666         | V    | 704.3284  | 352.6678        | 687.3018  | 344.1545         | 686.3178       | 343.6625         | 6  |
| 11 | 1285.5769 | 643.2921        | 1268.5504 | 634.7788         | 1267.5664      | 634.2868         | M    | 605.2599  | 303.1336        | 588.2334  | 294.6203         | 587.2494       | 294.1283         | 5  |
| 12 | 1400.6039 | 700.8056        | 1383.5773 | 692.2923         | 1382.5933      | 691.8003         | D    | 474.2195  | 237.6134        | 457.1929  | 229.1001         | 456.2089       | 228.6081         | 4  |
| 13 | 1497.6566 | 749.3319        | 1480.6301 | 740.8187         | 1479.6461      | 740.3267         | P    | 359.1925  | 180.0999        | 342.1660  | 171.5866         | 341.1819       | 171.0946         | 3  |
| 14 | 1612.6836 | 806.8454        | 1595.6570 | 798.3321         | 1594.6730      | 797.8401         | D    | 262.1397  | 131.5735        | 245.1132  | 123.0602         | 244.1292       | 122.5682         | 2  |
| 15 |           |                 |           |                  |                |                  | K    | 147.1128  | 74.0600         | 130.0863  | 65.5468          |                |                  | 1  |

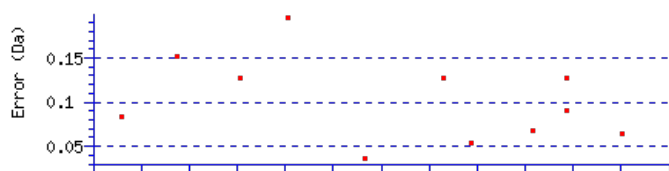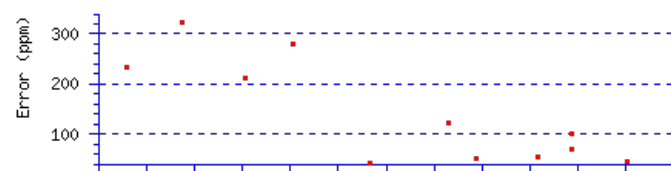

## AT1G65960.2

NCBI **BLAST** search of [EVNLSEGYVMDPK](#)

(Parameters: blastp, nr protein database, expect=20000, no filter, PAM30)

Other BLAST [web gateways](#)

### All matches to this query

| Score | Mr(calc)  | Delta   | Sequence                       |
|-------|-----------|---------|--------------------------------|
| 73.8  | 1757.7818 | -0.0026 | <a href="#">EVNLSEGYVMDPK</a>  |
| 8.8   | 1757.7834 | -0.0042 | <a href="#">HHKSDCMCAICVLK</a> |

**Mascot:** <http://www.matrixscience.com/>



**Peptide View**MS/MS Fragmentation of **FALLDDLK**

Found in **AT1G65980.1** in **TAIR\_Arabidopsis**, Symbols: TPX1 | TPX1 (THIOREDOXIN-DEPENDENT PEROXIDASE 1); antioxidant | chr1:24563187-24564416 REVERSE

Match to Query 3001: 1056.570370 from(529.292461,2+) index(8835)

Title: Elution from: 79.117 to 79.117 scan no 11899 cid35.00 polarity:+

Data file 0-1\_3.mgf

Click mouse within plot area to zoom in by factor of two about that point

Or,   to  Da

Label all possible matches  Label matches used for scoring

Show Y-axis

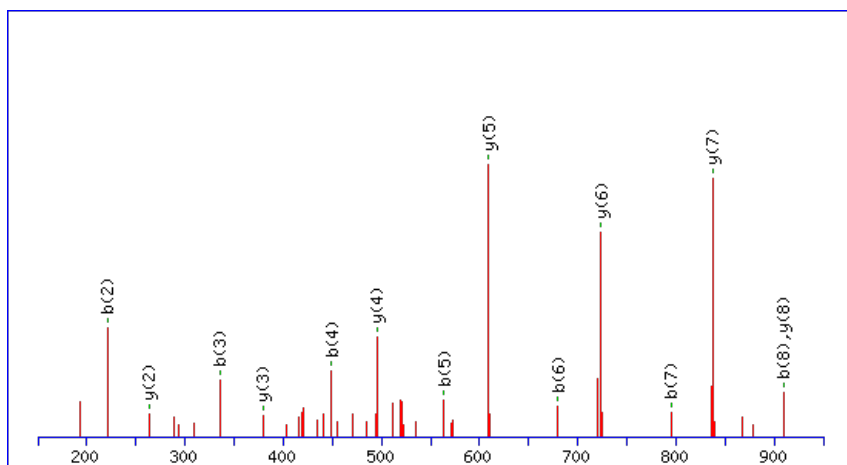

Monoisotopic mass of neutral peptide Mr(calc): 1056.5715

Fixed modifications: Carbamidomethyl (C) (apply to specified residues or termini only)

Ions Score: 61 Expect: 6.5e-006

Matches : 14/66 fragment ions using 22 most intense peaks ([help](#))

| # | b               | b <sup>++</sup> | b <sup>0</sup> | b <sup>0++</sup> | Seq. | y               | y <sup>++</sup> | y*       | y <sup>*++</sup> | y <sup>0</sup> | y <sup>0++</sup> | # |
|---|-----------------|-----------------|----------------|------------------|------|-----------------|-----------------|----------|------------------|----------------|------------------|---|
| 1 | 149.0727        | 75.0400         |                |                  | F    |                 |                 |          |                  |                |                  | 9 |
| 2 | <b>221.1069</b> | 111.0571        |                |                  | A    | <b>909.5134</b> | 455.2603        | 891.4898 | 446.2485         | 891.5028       | 446.2550         | 8 |
| 3 | <b>335.1880</b> | 168.0976        |                |                  | L    | <b>837.4792</b> | 419.2433        | 819.4556 | 410.2315         | 819.4687       | 410.2380         | 7 |
| 4 | <b>449.2691</b> | 225.1382        |                |                  | L    | <b>723.3981</b> | 362.2027        | 705.3745 | 353.1909         | 705.3876       | 353.1974         | 6 |
| 5 | <b>563.3502</b> | 282.1787        |                |                  | L    | <b>609.3170</b> | 305.1622        | 591.2934 | 296.1504         | 591.3065       | 296.1569         | 5 |
| 6 | <b>679.3741</b> | 340.1907        | 661.3636       | 331.1854         | D    | <b>495.2359</b> | 248.1216        | 477.2123 | 239.1098         | 477.2254       | 239.1163         | 4 |
| 7 | <b>795.3981</b> | 398.2027        | 777.3876       | 389.1974         | D    | <b>379.2120</b> | 190.1096        | 361.1884 | 181.0978         | 361.2014       | 181.1043         | 3 |
| 8 | <b>909.4792</b> | 455.2433        | 891.4687       | 446.2380         | L    | <b>263.1880</b> | 132.0976        | 245.1644 | 123.0858         |                |                  | 2 |
| 9 |                 |                 |                |                  | K    | 149.1069        | 75.0571         | 131.0833 | 66.0453          |                |                  | 1 |

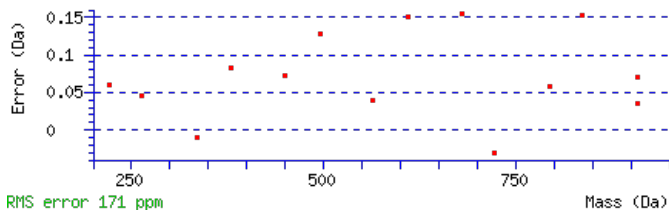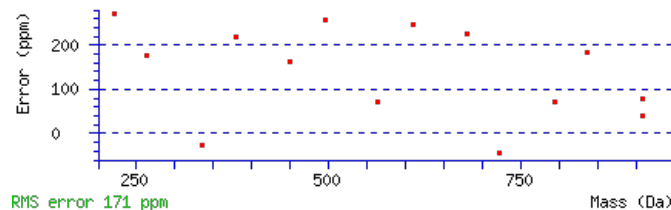

NCBI BLAST search of **FALLDDLK**

(Parameters: blastp, nr protein database, expect=20000, no filter, PAM30)

Other BLAST [web gateways](#)

**All matches to this query**

| Score | Mr(calc) | Delta | Sequence |
|-------|----------|-------|----------|
|       |          |       |          |

**AT1G65980.1**

|      |           |         |                           |
|------|-----------|---------|---------------------------|
| 60.6 | 1056.5715 | -0.0012 | <a href="#">FALLDDLK</a>  |
| 27.2 | 1056.5693 | 0.0011  | <a href="#">DSKLIETK</a>  |
| 15.4 | 1056.5693 | 0.0011  | <a href="#">DKSLTLEK</a>  |
| 15.4 | 1056.5720 | -0.0016 | <a href="#">RDGIDKLVK</a> |
| 15.0 | 1056.5693 | 0.0011  | <a href="#">ITQTIETK</a>  |
| 14.2 | 1056.5720 | -0.0016 | <a href="#">SRKLDSPK</a>  |
| 4.7  | 1056.5720 | -0.0016 | <a href="#">RITVNEALK</a> |
| 3.7  | 1056.5720 | -0.0016 | <a href="#">RDGVDKLLK</a> |
| 1.8  | 1056.5672 | 0.0031  | <a href="#">CAALPRKVK</a> |
| 1.1  | 1056.5720 | -0.0016 | <a href="#">QRTTSSLK</a>  |

**Mascot:** <http://www.matrixscience.com/>

**Peptide View**MS/MS Fragmentation of **SMREEGGYEIIKK**

Found in **AT1G66200.1** in **TAIR\_Arabidopsis**, Symbols: ATGSR2 | ATGSR2 (Arabidopsis thaliana glutamine synthase clone R2); glutamate-ammonia ligase | chr1:24659183-24661183 REVERSE

Match to Query 6968: 1538.776050 from(513.932626,3+) index(1872)

Title: Elution from: 22.366 to 22.366 scan no 2434 cid35.00 polarity:+

Data file C7-1\_1.mgf

Click mouse within plot area to zoom in by factor of two about that point

Or,   to  Da

Label all possible matches  Label matches used for scoring

Show Y-axis

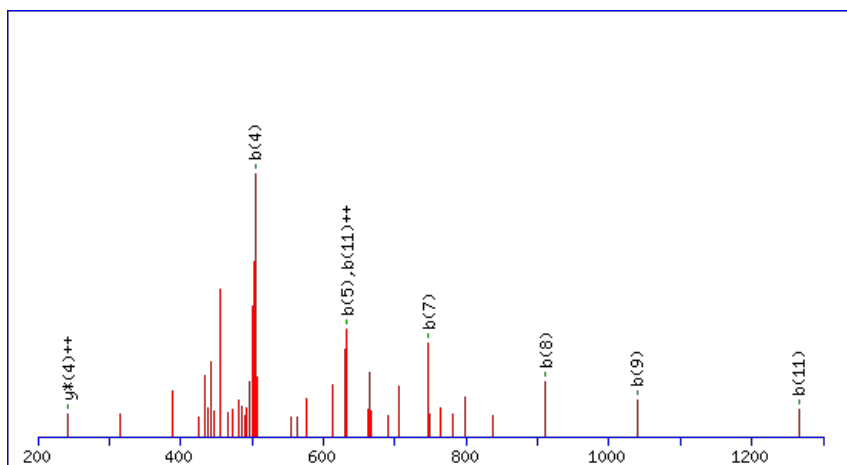

Monoisotopic mass of neutral peptide  $M_r(\text{calc})$ : 1538.7762

Fixed modifications: Carbamidomethyl (C) (apply to specified residues or termini only)

Ions Score: 41 Expect: 0.00042

Matches : 8/132 fragment ions using 9 most intense peaks ([help](#))

| #  | b                | b <sup>++</sup> | b*        | b <sup>*++</sup> | b <sup>0</sup> | b <sup>0++</sup> | Seq. | y         | y <sup>++</sup> | y*        | y <sup>*++</sup> | y <sup>0</sup> | y <sup>0++</sup> | #  |
|----|------------------|-----------------|-----------|------------------|----------------|------------------|------|-----------|-----------------|-----------|------------------|----------------|------------------|----|
| 1  | 88.0393          | 44.5233         |           |                  | 70.0287        | 35.5180          | S    |           |                 |           |                  |                |                  | 13 |
| 2  | 219.0798         | 110.0435        |           |                  | 201.0692       | 101.0382         | M    | 1452.7515 | 726.8794        | 1435.7250 | 718.3661         | 1434.7410      | 717.8741         | 12 |
| 3  | 375.1809         | 188.0941        | 358.1544  | 179.5808         | 357.1703       | 179.0888         | R    | 1321.7110 | 661.3592        | 1304.6845 | 652.8459         | 1303.7005      | 652.3539         | 11 |
| 4  | <b>504.2235</b>  | 252.6154        | 487.1969  | 244.1021         | 486.2129       | 243.6101         | E    | 1165.6099 | 583.3086        | 1148.5834 | 574.7953         | 1147.5994      | 574.3033         | 10 |
| 5  | <b>633.2661</b>  | 317.1367        | 616.2395  | 308.6234         | 615.2555       | 308.1314         | E    | 1036.5673 | 518.7873        | 1019.5408 | 510.2740         | 1018.5568      | 509.7820         | 9  |
| 6  | 690.2876         | 345.6474        | 673.2610  | 337.1341         | 672.2770       | 336.6421         | G    | 907.5247  | 454.2660        | 890.4982  | 445.7527         | 889.5142       | 445.2607         | 8  |
| 7  | <b>747.3090</b>  | 374.1581        | 730.2825  | 365.6449         | 729.2984       | 365.1529         | G    | 850.5033  | 425.7553        | 833.4767  | 417.2420         | 832.4927       | 416.7500         | 7  |
| 8  | <b>910.3723</b>  | 455.6898        | 893.3458  | 447.1765         | 892.3618       | 446.6845         | Y    | 793.4818  | 397.2445        | 776.4553  | 388.7313         | 775.4713       | 388.2393         | 6  |
| 9  | <b>1039.4149</b> | 520.2111        | 1022.3884 | 511.6978         | 1021.4044      | 511.2058         | E    | 630.4185  | 315.7129        | 613.3919  | 307.1996         | 612.4079       | 306.7076         | 5  |
| 10 | 1152.4990        | 576.7531        | 1135.4725 | 568.2399         | 1134.4884      | 567.7479         | I    | 501.3759  | 251.1916        | 484.3493  | <b>242.6783</b>  |                |                  | 4  |
| 11 | <b>1265.5831</b> | <b>633.2952</b> | 1248.5565 | 624.7819         | 1247.5725      | 624.2899         | I    | 388.2918  | 194.6496        | 371.2653  | 186.1363         |                |                  | 3  |
| 12 | 1393.6780        | 697.3427        | 1376.6515 | 688.8294         | 1375.6675      | 688.3374         | K    | 275.2078  | 138.1075        | 258.1812  | 129.5942         |                |                  | 2  |
| 13 |                  |                 |           |                  |                |                  | K    | 147.1128  | 74.0600         | 130.0863  | 65.5468          |                |                  | 1  |

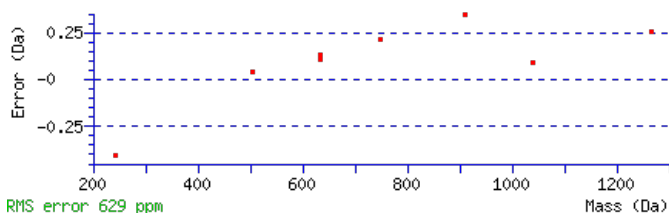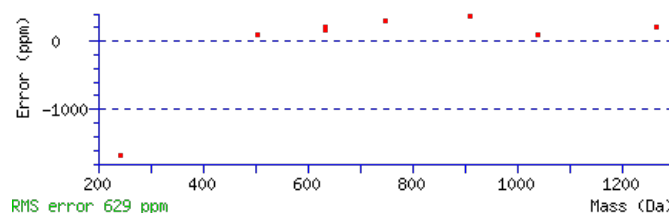

NCBI **BLAST** search of **SMREEGGYEIIKK**

(Parameters: blastp, nr protein database, expect=20000, no filter, PAM30)

AT1G66200.1

Other BLAST [web gateways](#)

**All matches to this query**

| Score | Mr(calc)  | Delta   | Sequence                      |
|-------|-----------|---------|-------------------------------|
| 40.8  | 1538.7762 | -0.0002 | <a href="#">SMREEGGYEIIKK</a> |
| 6.3   | 1538.7796 | -0.0036 | <a href="#">MSEASNKOMKLIK</a> |
| 5.7   | 1538.7763 | -0.0002 | <a href="#">LKMGTVEDEFSRK</a> |
| 5.2   | 1538.7763 | -0.0002 | <a href="#">MVLPDQIDDTHKK</a> |

**Mascot:** <http://www.matrixscience.com/>


**Mascot Search Results**
**Peptide View**MS/MS Fragmentation of **TAFWEAEGETA**KAFound in **AT1G66240.1** in **TAIR\_Arabidopsis**, Symbols: ATX1 | ATX1; metal ion binding | chr1:24690108-24690990 REVERSE

Match to Query 5400: 1424.603022 from(713.308787,2+) index(4760)

Title: Elution from: 42.473 to 42.473 scan no 5984 cid35.00 polarity:+

Data file D6h-3\_3.mgf

Click mouse within plot area to zoom in by factor of two about that point

Or,   to  Da Label all possible matches  Label matches used for scoring Show Y-axis 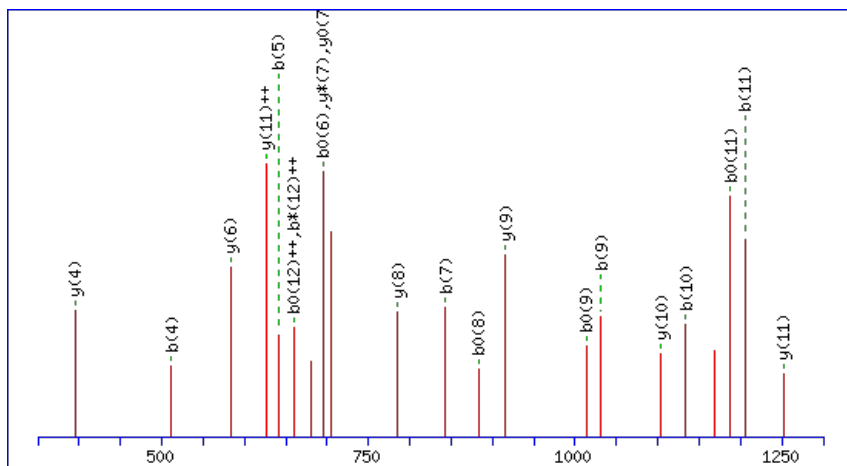Monoisotopic mass of neutral peptide  $M_r(\text{calc})$ : 1424.6018

Fixed modifications: Carbamidomethyl (C) (apply to specified residues or termini only)

Ions Score: 61 Expect: 4.7e-006

Matches : 21/114 fragment ions using 21 most intense peaks ([help](#))

| #  | b                | b <sup>++</sup> | b*        | b* <sup>++</sup> | b <sup>0</sup>   | b <sup>0++</sup> | Seq. | y                | y <sup>++</sup> | y*              | y* <sup>++</sup> | y <sup>0</sup>  | y <sup>0++</sup> | #  |
|----|------------------|-----------------|-----------|------------------|------------------|------------------|------|------------------|-----------------|-----------------|------------------|-----------------|------------------|----|
| 1  | 103.0520         | 52.0296         |           |                  | 85.0414          | 43.0244          | T    |                  |                 |                 |                  |                 |                  | 13 |
| 2  | 175.0861         | 88.0467         |           |                  | 157.0756         | 79.0414          | A    | 1323.5644        | 662.2858        | 1305.5408       | 653.2740         | 1305.5538       | 653.2806         | 12 |
| 3  | 323.1516         | 162.0794        |           |                  | 305.1410         | 153.0741         | F    | <b>1251.5302</b> | <b>626.2688</b> | 1233.5067       | 617.2570         | 1233.5197       | 617.2635         | 11 |
| 4  | <b>511.2250</b>  | 256.1161        |           |                  | 493.2144         | 247.1108         | W    | <b>1103.4648</b> | 552.2360        | 1085.4412       | 543.2242         | 1085.4542       | 543.2308         | 10 |
| 5  | <b>641.2646</b>  | 321.1359        |           |                  | 623.2540         | 312.1307         | E    | <b>915.3914</b>  | 458.1993        | 897.3678        | 449.1876         | 897.3809        | 449.1941         | 9  |
| 6  | 713.2987         | 357.1530        |           |                  | <b>695.2882</b>  | 348.1477         | A    | <b>785.3518</b>  | 393.1795        | 767.3282        | 384.1677         | 767.3412        | 384.1743         | 8  |
| 7  | <b>843.3384</b>  | 422.1728        |           |                  | 825.3278         | 413.1675         | E    | 713.3176         | 357.1625        | <b>695.2941</b> | 348.1507         | <b>695.3071</b> | 348.1572         | 7  |
| 8  | 901.3569         | 451.1821        |           |                  | <b>883.3463</b>  | 442.1768         | G    | <b>583.2780</b>  | 292.1426        | 565.2544        | 283.1309         | 565.2674        | 283.1374         | 6  |
| 9  | <b>1031.3965</b> | 516.2019        |           |                  | <b>1013.3859</b> | 507.1966         | E    | 525.2595         | 263.1334        | 507.2359        | 254.1216         | 507.2489        | 254.1281         | 5  |
| 10 | <b>1133.4412</b> | 567.2242        |           |                  | 1115.4307        | 558.2190         | T    | <b>395.2199</b>  | 198.1136        | 377.1963        | 189.1018         | 377.2093        | 189.1083         | 4  |
| 11 | <b>1205.4754</b> | 603.2413        |           |                  | <b>1187.4648</b> | 594.2360         | A    | 293.1752         | 147.0912        | 275.1516        | 138.0794         |                 |                  | 3  |
| 12 | 1335.5644        | 668.2858        | 1317.5408 | <b>659.2740</b>  | 1317.5538        | <b>659.2806</b>  | K    | 221.1410         | 111.0741        | 203.1174        | 102.0624         |                 |                  | 2  |
| 13 |                  |                 |           |                  |                  |                  | A    | 91.0520          | 46.0296         |                 |                  |                 |                  | 1  |

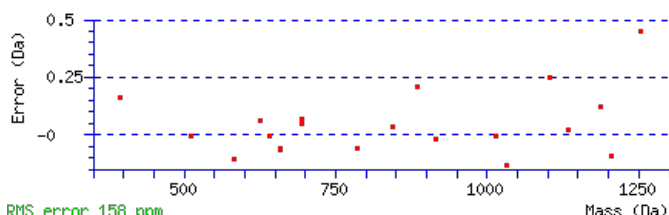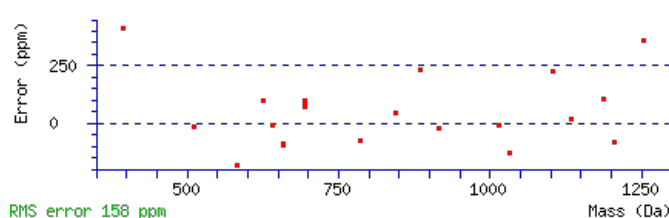NCBI **BLAST** search of **TAFWEAEGETA**KA

(Parameters: blastp, nr protein database, expect=20000, no filter, PAM30)

Other BLAST [web gateways](#)

# AT1G66240.1

All matches to this query

| Score | Mr(calc)  | Delta   | Sequence                      |
|-------|-----------|---------|-------------------------------|
| 60.9  | 1424.6018 | 0.0012  | <a href="#">TAFWEAEGETAKA</a> |
| 10.2  | 1424.6056 | -0.0026 | <a href="#">MNEDALEAVRSR</a>  |
| 8.9   | 1424.5996 | 0.0035  | <a href="#">FLRDDEEDDKK</a>   |
| 8.9   | 1424.6057 | -0.0026 | <a href="#">MEAEASRK NENK</a> |
| 2.9   | 1424.6052 | -0.0022 | <a href="#">SEPYAQSAGELMK</a> |
| 2.2   | 1424.6005 | 0.0026  | <a href="#">NQMVSMQEIWK</a>   |
| 0.9   | 1424.6027 | 0.0003  | <a href="#">DEESRRQVGGNR</a>  |
| 0.7   | 1424.6031 | -0.0001 | <a href="#">SHTCRFLPNMK</a>   |

Mascot: <http://www.matrixscience.com/>

**Peptide View**MS/MS Fragmentation of **EAFSLFDK**

Found in **AT1G66410.1** in **TAIR\_Arabidopsis**, Symbols: ACAM-4, CAM4 | CAM4 (CALMODULIN 4); calcium ion binding | chr1:24778094-24779448 REVERSE

Match to Query 2127: 955.465892 from(478.740222,2+) index(6424)

Title: Elution from: 56.635 to 56.635 scan no 8216 cid35.00 polarity:+

Data file D12h-1\_2.mgf

Click mouse within plot area to zoom in by factor of two about that point

Or,   to  Da

Label all possible matches  Label matches used for scoring

Show Y-axis

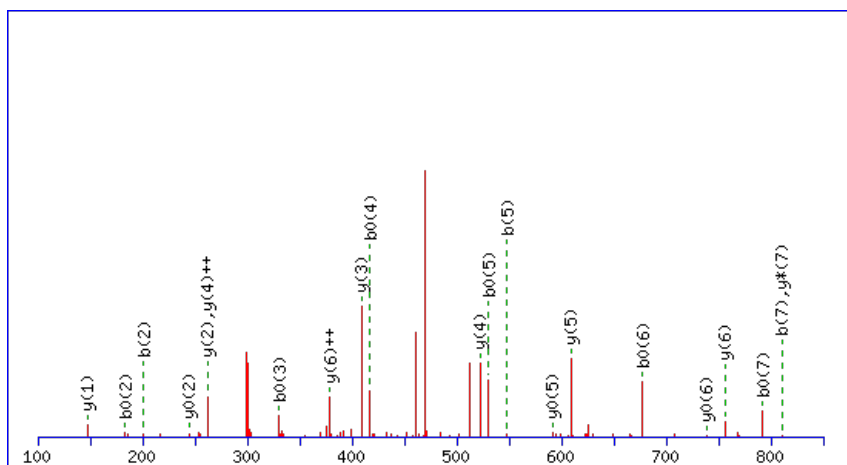

Monoisotopic mass of neutral peptide  $M_r(\text{calc})$ : 955.4651

Fixed modifications: Carbamidomethyl (C) (apply to specified residues or termini only)

Ions Score: 37 Expect: 0.00051

Matches : 21/68 fragment ions using 35 most intense peaks ([help](#))

| # | b               | b <sup>++</sup> | b <sup>0</sup>  | b <sup>0++</sup> | Seq. | y               | y <sup>++</sup> | y*              | y <sup>*++</sup> | y <sup>0</sup>  | y <sup>0++</sup> | # |
|---|-----------------|-----------------|-----------------|------------------|------|-----------------|-----------------|-----------------|------------------|-----------------|------------------|---|
| 1 | 130.0499        | 65.5286         | 112.0393        | 56.5233          | E    |                 |                 |                 |                  |                 |                  | 8 |
| 2 | <b>201.0870</b> | 101.0471        | <b>183.0764</b> | 92.0418          | A    | 827.4298        | 414.2185        | <b>810.4032</b> | 405.7053         | 809.4192        | 405.2132         | 7 |
| 3 | 348.1554        | 174.5813        | <b>330.1448</b> | 165.5761         | F    | <b>756.3927</b> | <b>378.7000</b> | 739.3661        | 370.1867         | <b>738.3821</b> | 369.6947         | 6 |
| 4 | 435.1874        | 218.0974        | <b>417.1769</b> | 209.0921         | S    | <b>609.3243</b> | 305.1658        | 592.2977        | 296.6525         | <b>591.3137</b> | 296.1605         | 5 |
| 5 | <b>548.2715</b> | 274.6394        | <b>530.2609</b> | 265.6341         | L    | <b>522.2922</b> | <b>261.6498</b> | 505.2657        | 253.1365         | 504.2817        | 252.6445         | 4 |
| 6 | 695.3399        | 348.1736        | <b>677.3293</b> | 339.1683         | F    | <b>409.2082</b> | 205.1077        | 392.1816        | 196.5944         | 391.1976        | 196.1024         | 3 |
| 7 | <b>810.3668</b> | 405.6871        | <b>792.3563</b> | 396.6818         | D    | <b>262.1397</b> | 131.5735        | 245.1132        | 123.0602         | <b>244.1292</b> | 122.5682         | 2 |
| 8 |                 |                 |                 |                  | K    | <b>147.1128</b> | 74.0600         | 130.0863        | 65.5468          |                 |                  | 1 |

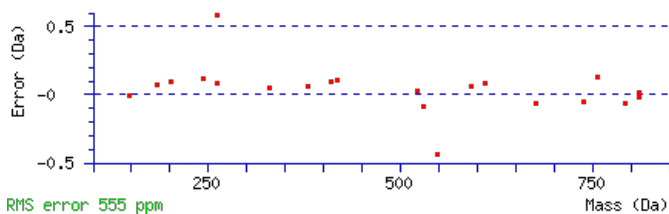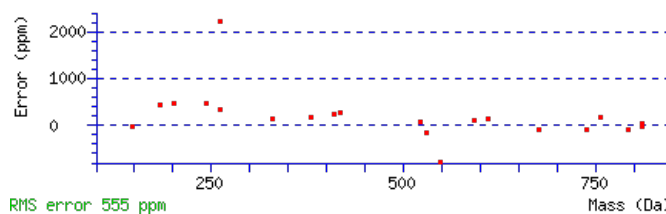

NCBI BLAST search of **EAFSLFDK**

(Parameters: blastp, nr protein database, expect=20000, no filter, PAM30)

Other BLAST [web gateways](#)

**All matches to this query**

| Score | $M_r(\text{calc})$ | Delta  | Sequence                 |
|-------|--------------------|--------|--------------------------|
| 37.4  | 955.4651           | 0.0008 | <a href="#">EAFSLFDK</a> |

# AT1G66410.1

|      |          |         |                          |
|------|----------|---------|--------------------------|
| 18.6 | 955.4651 | 0.0008  | <a href="#">SLFEFADK</a> |
| 10.3 | 955.4684 | -0.0026 | <a href="#">EAMYLVSQ</a> |
| 6.7  | 955.4657 | 0.0001  | <a href="#">HAAMERNK</a> |
| 2.8  | 955.4685 | -0.0026 | <a href="#">KSFLDMLS</a> |
| 2.2  | 955.4685 | -0.0026 | <a href="#">TMIDAYVK</a> |
| 1.6  | 955.4685 | -0.0026 | <a href="#">MESTTFLK</a> |
| 1.6  | 955.4651 | 0.0008  | <a href="#">AFDSFLEK</a> |
| 0.0  | 955.4685 | -0.0026 | <a href="#">DFSMSILK</a> |

Mascot: <http://www.matrixscience.com/>



**Peptide View**MS/MS Fragmentation of **ENVSSALEAAR**Found in **AT1G66580.1** in **TAIR\_Arabidopsis**, Symbols: | 60S ribosomal protein L10 (RPL10C) | chr1:24842871-24844102 FORWARD

Match to Query 4632: 1290.564184 from(646.289368,2+) index(2748)

Title: Elution from: 28.965 to 28.965 scan no 3461 cid35.00 polarity:+

Data file D6h-1\_2.mgf

Click mouse within plot area to zoom in by factor of two about that point

Or,  to  Da Label all possible matches  Label matches used for scoring Show Y-axis 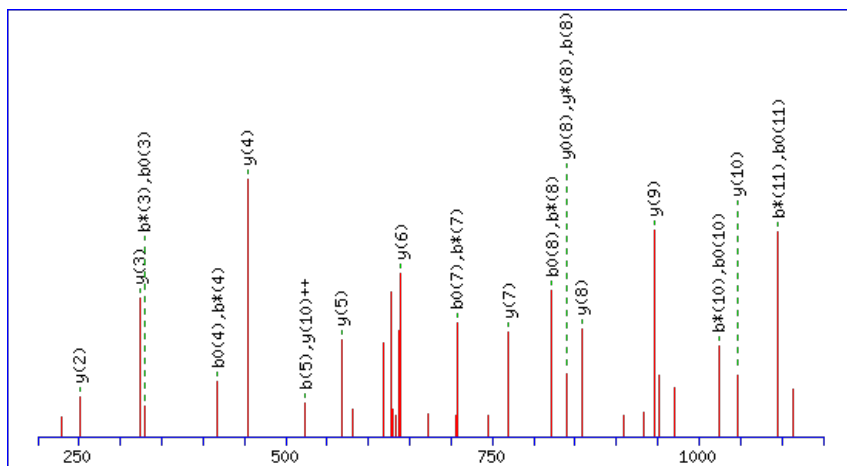Monoisotopic mass of neutral peptide  $M_r(\text{calc})$ : 1290.5628

Fixed modifications: Carbamidomethyl (C) (apply to specified residues or termini only)

Ions Score: 103 Expect: 2.7e-010

Matches : 26/124 fragment ions using 18 most intense peaks ([help](#))

| #  | b         | b <sup>++</sup> | b <sup>*</sup> | b <sup>*++</sup> | b <sup>0</sup> | b <sup>0++</sup> | Seq. | y         | y <sup>++</sup> | y <sup>*</sup> | y <sup>*++</sup> | y <sup>0</sup> | y <sup>0++</sup> | #  |
|----|-----------|-----------------|----------------|------------------|----------------|------------------|------|-----------|-----------------|----------------|------------------|----------------|------------------|----|
| 1  | 131.0469  | 66.0271         |                |                  | 113.0363       | 57.0218          | E    |           |                 |                |                  |                |                  | 12 |
| 2  | 247.0839  | 124.0456        | 229.0603       | 115.0338         | 229.0733       | 115.0403         | N    | 1161.5305 | 581.2689        | 1143.5069      | 572.2571         | 1143.5199      | 572.2636         | 11 |
| 3  | 347.1493  | 174.0783        | 329.1258       | 165.0665         | 329.1388       | 165.0730         | V    | 1045.4935 | 523.2504        | 1027.4699      | 514.2386         | 1027.4829      | 514.2451         | 10 |
| 4  | 435.1784  | 218.0928        | 417.1548       | 209.0811         | 417.1678       | 209.0876         | S    | 945.4280  | 473.2176        | 927.4044       | 464.2059         | 927.4175       | 464.2124         | 9  |
| 5  | 523.2075  | 262.1074        | 505.1839       | 253.0956         | 505.1969       | 253.1021         | S    | 857.3990  | 429.2031        | 839.3754       | 420.1913         | 839.3884       | 420.1978         | 8  |
| 6  | 653.2471  | 327.1272        | 635.2235       | 318.1154         | 635.2365       | 318.1219         | E    | 769.3699  | 385.1886        | 751.3463       | 376.1768         | 751.3593       | 376.1833         | 7  |
| 7  | 725.2813  | 363.1443        | 707.2577       | 354.1325         | 707.2707       | 354.1390         | A    | 639.3303  | 320.1688        | 621.3067       | 311.1570         | 621.3197       | 311.1635         | 6  |
| 8  | 839.3624  | 420.1848        | 821.3388       | 411.1730         | 821.3518       | 411.1795         | L    | 567.2961  | 284.1517        | 549.2725       | 275.1399         | 549.2856       | 275.1464         | 5  |
| 9  | 969.4020  | 485.2046        | 951.3784       | 476.1928         | 951.3914       | 476.1993         | E    | 453.2150  | 227.1111        | 435.1914       | 218.0994         | 435.2045       | 218.1059         | 4  |
| 10 | 1041.4361 | 521.2217        | 1023.4125      | 512.2099         | 1023.4256      | 512.2164         | A    | 323.1754  | 162.0913        | 305.1518       | 153.0795         |                |                  | 3  |
| 11 | 1113.4703 | 557.2388        | 1095.4467      | 548.2270         | 1095.4597      | 548.2335         | A    | 251.1412  | 126.0743        | 233.1177       | 117.0625         |                |                  | 2  |
| 12 |           |                 |                |                  |                |                  | R    | 179.1071  | 90.0572         | 161.0835       | 81.0454          |                |                  | 1  |

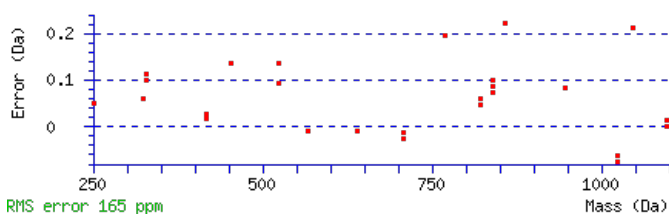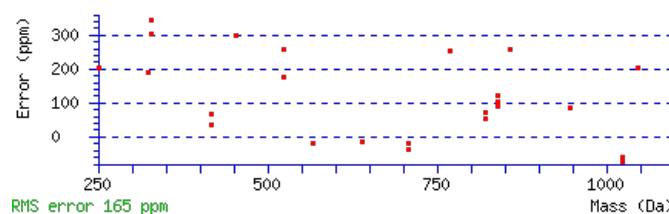NCBI **BLAST** search of **ENVSSALEAAR**

(Parameters: blastp, nr protein database, expect=20000, no filter, PAM30)

Other BLAST [web gateways](#)**All matches to this query**

**AT1G66580.1**

| <b>Score</b> | <b>Mr(calc)</b> | <b>Delta</b> | <b>Sequence</b>              |
|--------------|-----------------|--------------|------------------------------|
| 102.9        | 1290.5628       | 0.0014       | <a href="#">ENVSSEALEAAR</a> |
| 11.4         | 1290.5673       | -0.0031      | <a href="#">FVDSDFHSVPK</a>  |
| 5.5          | 1290.5637       | 0.0005       | <a href="#">LATHMEMIAAR</a>  |
| 0.0          | 1290.5637       | 0.0005       | <a href="#">NCLPMELNLR</a>   |

**Mascot:** <http://www.matrixscience.com/>

## Peptide View

### MS/MS Fragmentation of **VWDLWK**

Found in **AT1G66670.1** in **TAIR\_Arabidopsis**, Symbols: NCLPP4, CLPP3 | CLPP3 (Clp protease proteolytic subunit 3); endopeptidase Clp | chr1:24867658-24869309 REVERSE

Match to Query 1267: 845.443978 from(423.729265,2+) index(7121)

Title: Elution from: 63.303 to 63.303 scan no 9309 cid35.00 polarity:+

Data file 0-2\_2.mgf

Click mouse within plot area to zoom in by factor of two about that point

Or,   to  Da

Label all possible matches  Label matches used for scoring

Show Y-axis

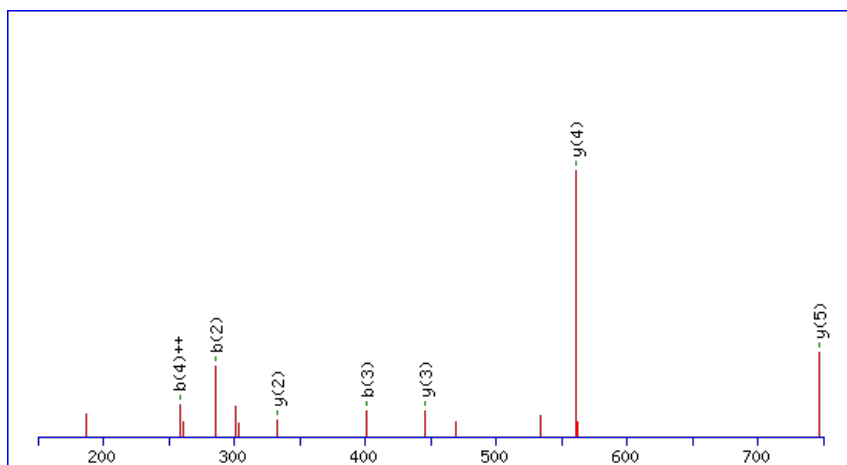

**Monoisotopic mass of neutral peptide Mr(calc):** 845.4436

**Fixed modifications:** Carbamidomethyl (C) (apply to specified residues or termini only)

**Ions Score:** 31 **Expect:** 0.003

**Matches:** 7/40 fragment ions using 9 most intense peaks ([help](#))

| # | b               | b <sup>++</sup> | b <sup>0</sup> | b <sup>0++</sup> | Seq. | y               | y <sup>++</sup> | y*       | y <sup>*++</sup> | y <sup>0</sup> | y <sup>0++</sup> | # |
|---|-----------------|-----------------|----------------|------------------|------|-----------------|-----------------|----------|------------------|----------------|------------------|---|
| 1 | 100.0757        | 50.5415         |                |                  | V    |                 |                 |          |                  |                |                  | 6 |
| 2 | <b>286.1550</b> | 143.5811        |                |                  | W    | <b>747.3824</b> | 374.1949        | 730.3559 | 365.6816         | 729.3719       | 365.1896         | 5 |
| 3 | <b>401.1819</b> | 201.0946        | 383.1714       | 192.0893         | D    | <b>561.3031</b> | 281.1552        | 544.2766 | 272.6419         | 543.2926       | 272.1499         | 4 |
| 4 | 514.2660        | <b>257.6366</b> | 496.2554       | 248.6314         | L    | <b>446.2762</b> | 223.6417        | 429.2496 | 215.1285         |                |                  | 3 |
| 5 | 700.3453        | 350.6763        | 682.3348       | 341.6710         | W    | <b>333.1921</b> | 167.0997        | 316.1656 | 158.5864         |                |                  | 2 |
| 6 |                 |                 |                |                  | K    | 147.1128        | 74.0600         | 130.0863 | 65.5468          |                |                  | 1 |

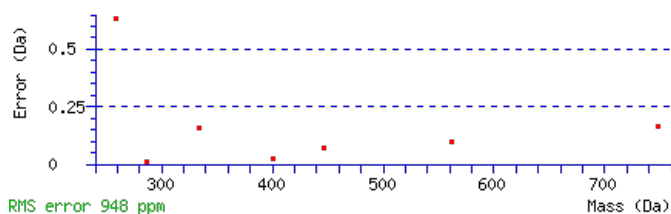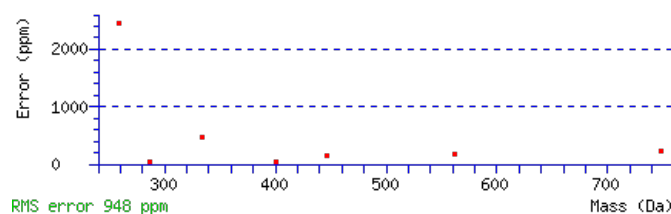

NCBI **BLAST** search of **VWDLWK**

(Parameters: blastp, nr protein database, expect=20000, no filter, PAM30)

Other BLAST [web gateways](#)

### All matches to this query

| Score | Mr(calc) | Delta  | Sequence               |
|-------|----------|--------|------------------------|
| 30.9  | 845.4436 | 0.0004 | <a href="#">VWDLWK</a> |

**Peptide View**MS/MS Fragmentation of **QRKAMNIMK**Found in **AT1G66860.1** in **TAIR\_Arabidopsis**, Symbols: | hydrolase | chr1:24945903-24948015 FORWARD

Match to Query 3683: 1134.556600 from(568.285576,2+) index(5301)

Title: Elution from: 46.341 to 46.341 scan no 6653 cid35.00 polarity:+

Data file C7-2\_3.mgf

Click mouse within plot area to zoom in by factor of two about that point

Or,   to  Da Label all possible matches  Label matches used for scoring Show Y-axis 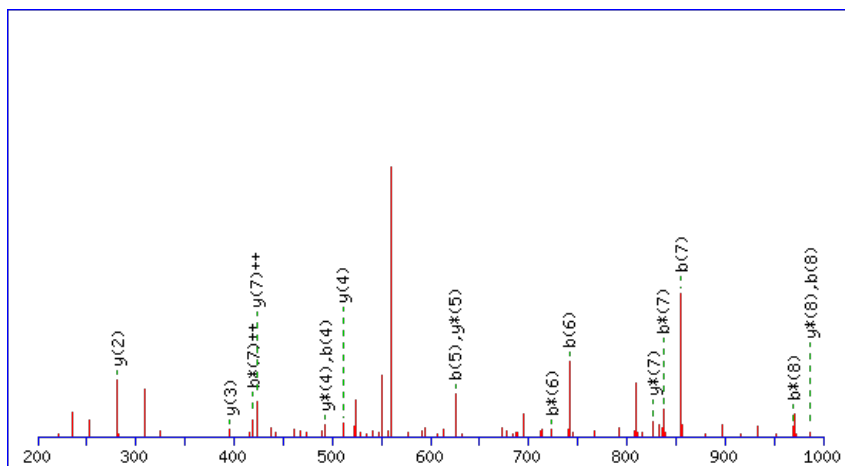Monoisotopic mass of neutral peptide **Mr(calc)**: 1134.5578**Fixed modifications**: Carbamidomethyl (C) (apply to specified residues or termini only)**Ions Score**: 25 **Expect**: 0.027**Matches**: 17/64 fragment ions using 32 most intense peaks ([help](#))

| # | b        | b <sup>++</sup> | b*       | b <sup>*++</sup> | Seq. | y         | y <sup>++</sup> | y*       | y <sup>*++</sup> | # |
|---|----------|-----------------|----------|------------------|------|-----------|-----------------|----------|------------------|---|
| 1 | 131.0599 | 66.0336         | 113.0363 | 57.0218          | Q    |           |                 |          |                  | 9 |
| 2 | 291.1492 | 146.0782        | 273.1256 | 137.0664         | R    | 1005.5124 | 503.2599        | 987.4889 | 494.2481         | 8 |
| 3 | 421.2382 | 211.1227        | 403.2146 | 202.1109         | K    | 845.4232  | 423.2152        | 827.3996 | 414.2034         | 7 |
| 4 | 493.2724 | 247.1398        | 475.2488 | 238.1280         | A    | 715.3342  | 358.1707        | 697.3106 | 349.1589         | 6 |
| 5 | 625.3099 | 313.1586        | 607.2863 | 304.1468         | M    | 643.3000  | 322.1536        | 625.2764 | 313.1419         | 5 |
| 6 | 741.3469 | 371.1771        | 723.3233 | 362.1653         | N    | 511.2625  | 256.1349        | 493.2389 | 247.1231         | 4 |
| 7 | 855.4280 | 428.2176        | 837.4044 | 419.2058         | I    | 395.2255  | 198.1164        | 377.2019 | 189.1046         | 3 |
| 8 | 987.4655 | 494.2364        | 969.4419 | 485.2246         | M    | 281.1444  | 141.0758        | 263.1208 | 132.0640         | 2 |
| 9 |          |                 |          |                  | K    | 149.1069  | 75.0571         | 131.0833 | 66.0453          | 1 |

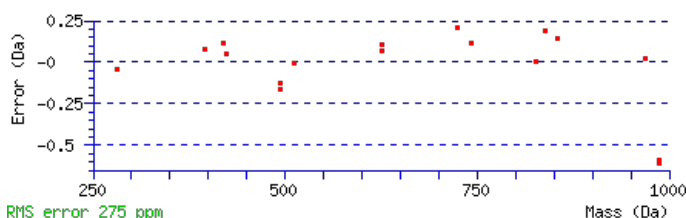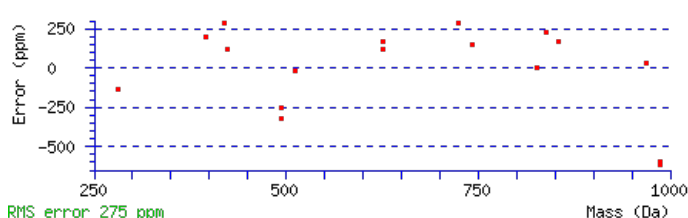NCBI **BLAST** search of **QRKAMNIMK**

(Parameters: blastp, nr protein database, expect=20000, no filter, PAM30)

Other BLAST [web gateways](#)**All matches to this query**

| Score | Mr(calc)  | Delta   | Sequence                  |
|-------|-----------|---------|---------------------------|
| 25.3  | 1134.5578 | -0.0012 | <a href="#">QRKAMNIMK</a> |

**AT1G66860.1**

|      |           |         |                             |
|------|-----------|---------|-----------------------------|
| 16.7 | 1134.5599 | -0.0033 | <a href="#">MLEKTISSKA</a>  |
| 14.6 | 1134.5565 | 0.0001  | <a href="#">DITELYLTR</a>   |
| 10.7 | 1134.5587 | -0.0021 | <a href="#">DVYKLDLDFPK</a> |
| 8.0  | 1134.5592 | -0.0026 | <a href="#">YIAAAAEQRK</a>  |
| 6.3  | 1134.5592 | -0.0026 | <a href="#">VQYGGSPVSRK</a> |
| 5.3  | 1134.5551 | 0.0015  | <a href="#">LLETTMMRK</a>   |
| 1.0  | 1134.5565 | 0.0001  | <a href="#">LYETLKDNK</a>   |
| 0.9  | 1134.5544 | 0.0022  | <a href="#">RTMLWLAGR</a>   |
| 0.7  | 1134.5565 | 0.0001  | <a href="#">LYELSNVSAK</a>  |

**Mascot:** <http://www.matrixscience.com/>

**Peptide View**MS/MS Fragmentation of **GGFGIVYR**Found in **AT1G66930.1** in **TAIR\_Arabidopsis**, Symbols: | serine/threonine protein kinase family protein | chr1:24974186-24976732 FORWARD

Match to Query 1401: 867.458820 from(434.736686,2+) index(2856)

Title: Elution from: 28.991 to 28.991 scan no 3577 cid35.00 polarity:+

Data file C7-3\_3.mgf

Click mouse within plot area to zoom in by factor of two about that point

Or,   to  Da Label all possible matches  Label matches used for scoring Show Y-axis 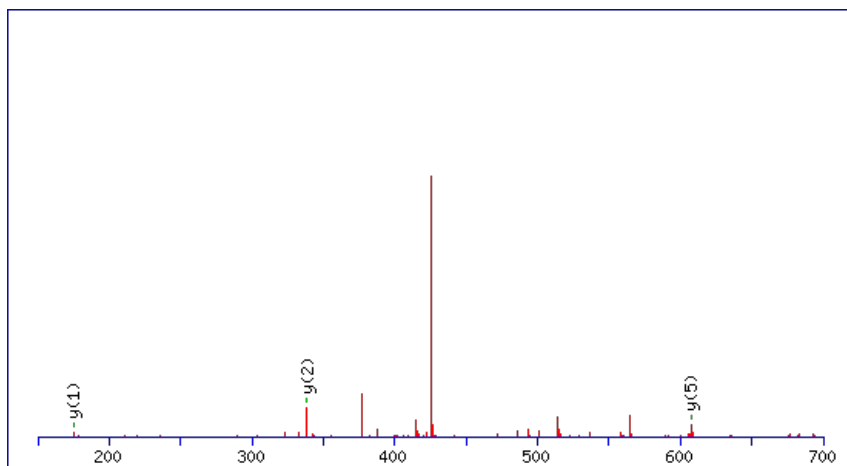Monoisotopic mass of neutral peptide **Mr(calc)**: 867.4603**Fixed modifications**: Carbamidomethyl (C) (apply to specified residues or termini only)**Ions Score**: 21 **Expect**: 0.025**Matches** : 3/42 fragment ions using 6 most intense peaks ([help](#))

| # | b        | b <sup>++</sup> | Seq.     | y               | y <sup>++</sup> | y*       | y <sup>*++</sup> | # |
|---|----------|-----------------|----------|-----------------|-----------------|----------|------------------|---|
| 1 | 58.0287  | 29.5180         | <b>G</b> |                 |                 |          |                  | 8 |
| 2 | 115.0502 | 58.0287         | <b>G</b> | 811.4461        | 406.2267        | 794.4196 | 397.7134         | 7 |
| 3 | 262.1186 | 131.5629        | <b>F</b> | 754.4246        | 377.7160        | 737.3981 | 369.2027         | 6 |
| 4 | 319.1401 | 160.0737        | <b>G</b> | <b>607.3562</b> | 304.1817        | 590.3297 | 295.6685         | 5 |
| 5 | 432.2241 | 216.6157        | <b>I</b> | 550.3348        | 275.6710        | 533.3082 | 267.1577         | 4 |
| 6 | 531.2926 | 266.1499        | <b>V</b> | 437.2507        | 219.1290        | 420.2241 | 210.6157         | 3 |
| 7 | 694.3559 | 347.6816        | <b>Y</b> | <b>338.1823</b> | 169.5948        | 321.1557 | 161.0815         | 2 |
| 8 |          |                 | <b>R</b> | <b>175.1190</b> | 88.0631         | 158.0924 | 79.5498          | 1 |

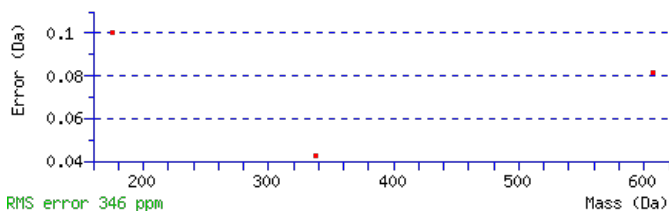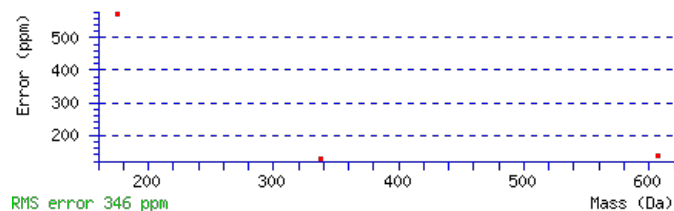NCBI **BLAST** search of [GGFGIVYR](#)

(Parameters: blastp, nr protein database, expect=20000, no filter, PAM30)

Other BLAST [web gateways](#)**All matches to this query**

| Score | Mr(calc) | Delta   | Sequence                 |
|-------|----------|---------|--------------------------|
| 21.0  | 867.4603 | -0.0015 | <a href="#">GGFGIVYR</a> |
| 20.8  | 867.4603 | -0.0015 | <a href="#">QGFVVYR</a>  |

## AT1G66930.1

|     |          |         |                          |
|-----|----------|---------|--------------------------|
| 9.9 | 867.4563 | 0.0026  | <a href="#">GSIPPNQR</a> |
| 9.8 | 867.4603 | -0.0015 | <a href="#">FVGGAVYR</a> |
| 3.0 | 867.4563 | 0.0026  | <a href="#">LHPTSASR</a> |
| 2.4 | 867.4603 | -0.0015 | <a href="#">IFFTGGAR</a> |
| 1.3 | 867.4603 | -0.0015 | <a href="#">SAIAGFFR</a> |
| 1.2 | 867.4603 | -0.0015 | <a href="#">QFGTIFR</a>  |

Mascot: <http://www.matrixscience.com/>

**Peptide View**MS/MS Fragmentation of **TVSIDFISSPEVNFFK**Found in **AT1G66970.1** in **TAIR\_Arabidopsis**, Symbols: | glycerophosphoryl diester phosphodiesterase family protein | chr1:24996409-24999668  
REVERSE

Match to Query 9274: 1846.870268 from(924.442410,2+) index(10768)

Title: Elution from: 99.626 to 99.626 scan no 15092 cid35.00 polarity:+

Data file D6h-1\_1.mgf

Click mouse within plot area to zoom in by factor of two about that point

Or,  to  Da Label all possible matches  Label matches used for scoring Show Y-axis 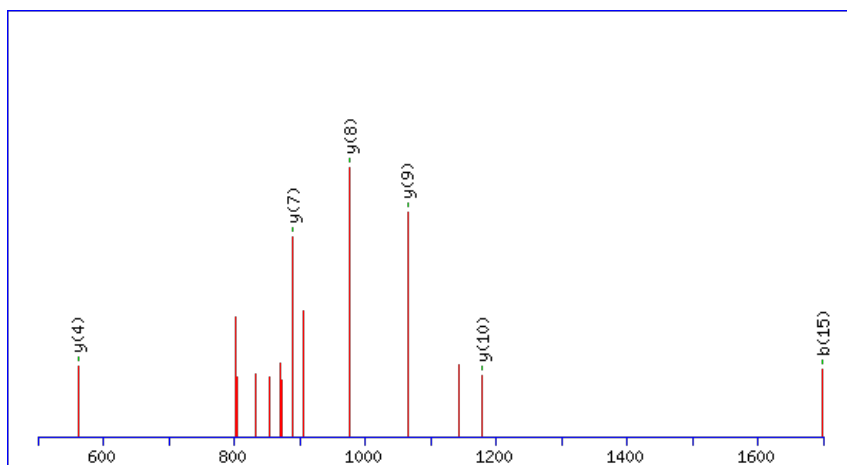Monoisotopic mass of neutral peptide **Mr(calc)**: 1846.8713

Fixed modifications: Carbamidomethyl (C) (apply to specified residues or termini only)

Ions Score: 35 Expect: 0.0028

Matches : 6/146 fragment ions using 7 most intense peaks ([help](#))

| #  | b                | b <sup>++</sup> | b <sup>*</sup> | b <sup>*++</sup> | b <sup>0</sup> | b <sup>0++</sup> | Seq. | y                | y <sup>++</sup> | y <sup>*</sup> | y <sup>*++</sup> | y <sup>0</sup> | y <sup>0++</sup> | #  |
|----|------------------|-----------------|----------------|------------------|----------------|------------------|------|------------------|-----------------|----------------|------------------|----------------|------------------|----|
| 1  | 103.0520         | 52.0296         |                |                  | 85.0414        | 43.0244          | T    |                  |                 |                |                  |                |                  | 16 |
| 2  | 203.1174         | 102.0624        |                |                  | 185.1069       | 93.0571          | V    | 1745.8339        | 873.4206        | 1727.8103      | 864.4088         | 1727.8233      | 864.4153         | 15 |
| 3  | 291.1465         | 146.0769        |                |                  | 273.1359       | 137.0716         | S    | 1645.7685        | 823.3879        | 1627.7449      | 814.3761         | 1627.7579      | 814.3826         | 14 |
| 4  | 405.2276         | 203.1174        |                |                  | 387.2170       | 194.1122         | I    | 1557.7394        | 779.3733        | 1539.7158      | 770.3615         | 1539.7288      | 770.3681         | 13 |
| 5  | 521.2516         | 261.1294        |                |                  | 503.2410       | 252.1241         | D    | 1443.6583        | 722.3328        | 1425.6347      | 713.3210         | 1425.6477      | 713.3275         | 12 |
| 6  | 669.3170         | 335.1622        |                |                  | 651.3065       | 326.1569         | F    | 1327.6343        | 664.3208        | 1309.6107      | 655.3090         | 1309.6238      | 655.3155         | 11 |
| 7  | 783.3981         | 392.2027        |                |                  | 765.3876       | 383.1974         | I    | <b>1179.5689</b> | 590.2881        | 1161.5453      | 581.2763         | 1161.5583      | 581.2828         | 10 |
| 8  | 871.4272         | 436.2172        |                |                  | 853.4166       | 427.2120         | S    | <b>1065.4878</b> | 533.2475        | 1047.4642      | 524.2357         | 1047.4772      | 524.2422         | 9  |
| 9  | 959.4563         | 480.2318        |                |                  | 941.4457       | 471.2265         | S    | <b>977.4587</b>  | 489.2330        | 959.4351       | 480.2212         | 959.4481       | 480.2277         | 8  |
| 10 | 1057.5061        | 529.2567        |                |                  | 1039.4955      | 520.2514         | P    | <b>889.4296</b>  | 445.2185        | 871.4061       | 436.2067         | 871.4191       | 436.2132         | 7  |
| 11 | 1187.5457        | 594.2765        |                |                  | 1169.5351      | 585.2712         | E    | 791.3798         | 396.1936        | 773.3563       | 387.1818         | 773.3693       | 387.1883         | 6  |
| 12 | 1287.6111        | 644.3092        |                |                  | 1269.6006      | 635.3039         | V    | 661.3402         | 331.1737        | 643.3166       | 322.1620         |                |                  | 5  |
| 13 | 1403.6481        | 702.3277        | 1385.6245      | 693.3159         | 1385.6376      | 693.3224         | N    | <b>561.2748</b>  | 281.1410        | 543.2512       | 272.1292         |                |                  | 4  |
| 14 | 1551.7136        | 776.3604        | 1533.6900      | 767.3486         | 1533.7030      | 767.3551         | F    | 445.2378         | 223.1225        | 427.2142       | 214.1107         |                |                  | 3  |
| 15 | <b>1699.7790</b> | 850.3931        | 1681.7554      | 841.3814         | 1681.7685      | 841.3879         | F    | 297.1723         | 149.0898        | 279.1487       | 140.0780         |                |                  | 2  |
| 16 |                  |                 |                |                  |                |                  | K    | 149.1069         | 75.0571         | 131.0833       | 66.0453          |                |                  | 1  |



# AT1G66970.1

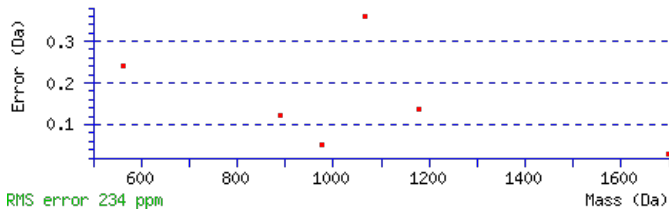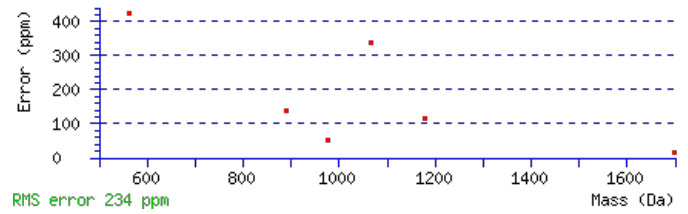

NCBI **BLAST** search of [TVSIDISSPEVNEFK](#)

(Parameters: blastp, nr protein database, expect=20000, no filter, PAM30)

Other BLAST [web gateways](#)

## All matches to this query

| Score | Mr(calc)  | Delta   | Sequence                          |
|-------|-----------|---------|-----------------------------------|
| 34.9  | 1846.8713 | -0.0011 | <a href="#">TVSIDISSPEVNEFK</a>   |
| 5.7   | 1846.8699 | 0.0003  | <a href="#">GFFDIDKLMIMLVGK</a>   |
| 1.9   | 1846.8722 | -0.0019 | <a href="#">HGEPLKSSGPQSGGVTR</a> |
| 1.4   | 1846.8752 | -0.0049 | <a href="#">IEKTENLIADHMNGK</a>   |
| 1.1   | 1846.8747 | -0.0045 | <a href="#">LEMPPPFSVVIQSEK</a>   |
| 0.4   | 1846.8670 | 0.0032  | <a href="#">YKMQRVPFVEEQVR</a>    |

Mascot: <http://www.matrixscience.com/>

## Peptide View

### MS/MS Fragmentation of **EYPNAFIR**

Found in **AT1G67090.1** in **TAIR\_Arabidopsis**, Symbols: RBCS1A | RBCS1A; ribulose-bisphosphate carboxylase | chr1:25052128-25052912  
REVERSE

Match to Query 2800: 1020.467052 from(511.240802,2+) index(4136)

Title: Elution from: 38.635 to 38.635 scan no 5141 cid35.00 polarity:+

Data file C7-3\_1.mgf

Click mouse within plot area to zoom in by factor of two about that point

Or,   to  Da

Label all possible matches  Label matches used for scoring

Show Y-axis

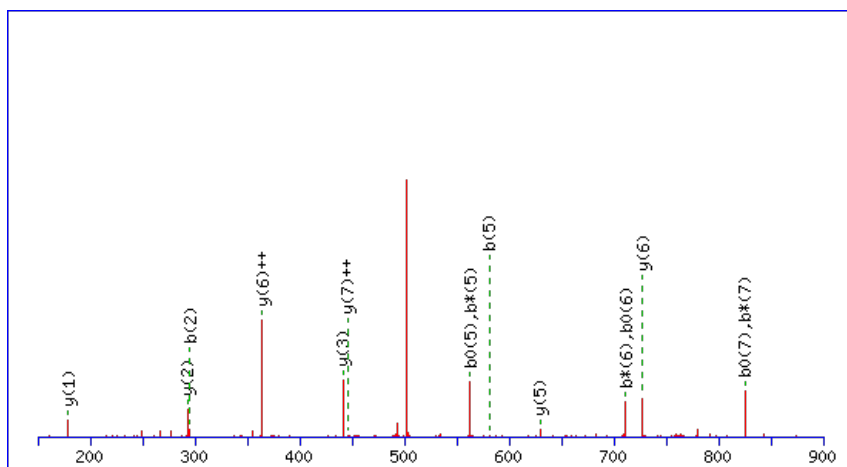

Monoisotopic mass of neutral peptide  $M_r(\text{calc})$ : 1020.4673

Fixed modifications: Carbamidomethyl (C) (apply to specified residues or termini only)

Ions Score: 36 Expect: 0.0019

Matches : 15/64 fragment ions using 22 most intense peaks ([help](#))

| # | b               | b <sup>++</sup> | b*              | b <sup>*++</sup> | b <sup>0</sup>  | b <sup>0++</sup> | Seq. | y               | y <sup>++</sup> | y*       | y <sup>*++</sup> | # |
|---|-----------------|-----------------|-----------------|------------------|-----------------|------------------|------|-----------------|-----------------|----------|------------------|---|
| 1 | 131.0469        | 66.0271         |                 |                  | 113.0363        | 57.0218          | E    |                 |                 |          |                  | 8 |
| 2 | <b>295.1073</b> | 148.0573        |                 |                  | 277.0967        | 139.0520         | Y    | 891.4349        | <b>446.2211</b> | 873.4114 | 437.2093         | 7 |
| 3 | 393.1571        | 197.0822        |                 |                  | 375.1465        | 188.0769         | P    | <b>727.3746</b> | <b>364.1909</b> | 709.3510 | 355.1791         | 6 |
| 4 | 509.1941        | 255.1007        | 491.1705        | 246.0889         | 491.1835        | 246.0954         | N    | <b>629.3248</b> | 315.1660        | 611.3012 | 306.1542         | 5 |
| 5 | <b>581.2282</b> | 291.1177        | <b>563.2046</b> | 282.1060         | <b>563.2176</b> | 282.1125         | A    | 513.2878        | 257.1475        | 495.2642 | 248.1357         | 4 |
| 6 | 729.2937        | 365.1505        | <b>711.2701</b> | 356.1387         | <b>711.2831</b> | 356.1452         | F    | <b>441.2536</b> | 221.1305        | 423.2301 | 212.1187         | 3 |
| 7 | 843.3748        | 422.1910        | <b>825.3512</b> | 413.1792         | <b>825.3642</b> | 413.1857         | I    | <b>293.1882</b> | 147.0977        | 275.1646 | 138.0859         | 2 |
| 8 |                 |                 |                 |                  |                 |                  | R    | <b>179.1071</b> | 90.0572         | 161.0835 | 81.0454          | 1 |

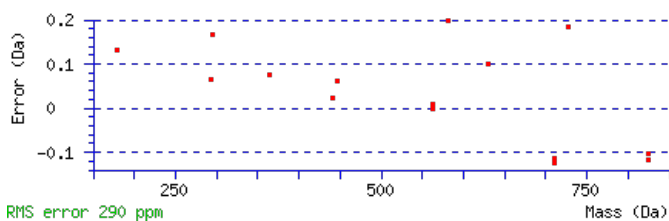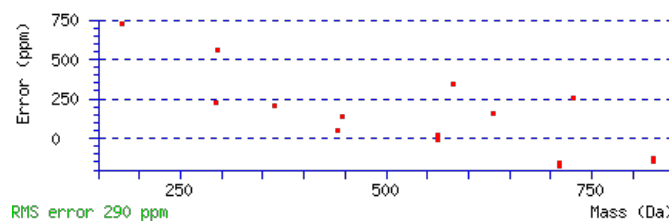

NCBI BLAST search of [EYPNAFIR](#)

(Parameters: blastp, nr protein database, expect=20000, no filter, PAM30)

Other BLAST [web gateways](#)

All matches to this query

| Score | $M_r(\text{calc})$ | Delta   | Sequence                 |
|-------|--------------------|---------|--------------------------|
| 36.3  | 1020.4673          | -0.0002 | <a href="#">EYPNAFIR</a> |

## AT1G67090.1

|      |           |         |                           |
|------|-----------|---------|---------------------------|
| 15.6 | 1020.4650 | 0.0020  | <a href="#">GSFVSDQIR</a> |
| 10.9 | 1020.4655 | 0.0016  | <a href="#">TNGKRDSR</a>  |
| 9.9  | 1020.4650 | 0.0020  | <a href="#">GSEGYVQIR</a> |
| 9.1  | 1020.4655 | 0.0016  | <a href="#">SRSIDRDR</a>  |
| 7.8  | 1020.4700 | -0.0029 | <a href="#">WDRFLR</a>    |
| 7.7  | 1020.4651 | 0.0020  | <a href="#">EKIYGENR</a>  |
| 5.7  | 1020.4655 | 0.0016  | <a href="#">QSNRIRSR</a>  |
| 5.2  | 1020.4684 | -0.0014 | <a href="#">KASVMDVSR</a> |
| 4.2  | 1020.4650 | 0.0020  | <a href="#">YQKDLEGR</a>  |

Mascot: <http://www.matrixscience.com/>

**Peptide View**MS/MS Fragmentation of **MEATDAYLLCLR**Found in **AT1G67120.1** in **TAIR\_Arabidopsis**, Symbols: | midasin-related | chr1:25073390-25099189 REVERSE

Match to Query 6513: 1486.635346 from(744.324949,2+) index(7322)

Title: Elution from: 63.391 to 63.391 scan no 9404 cid35.00 polarity:+

Data file C7-1\_1.mgf

Click mouse within plot area to zoom in by factor of two about that point

Or,   to  Da Label all possible matches  Label matches used for scoring Show Y-axis 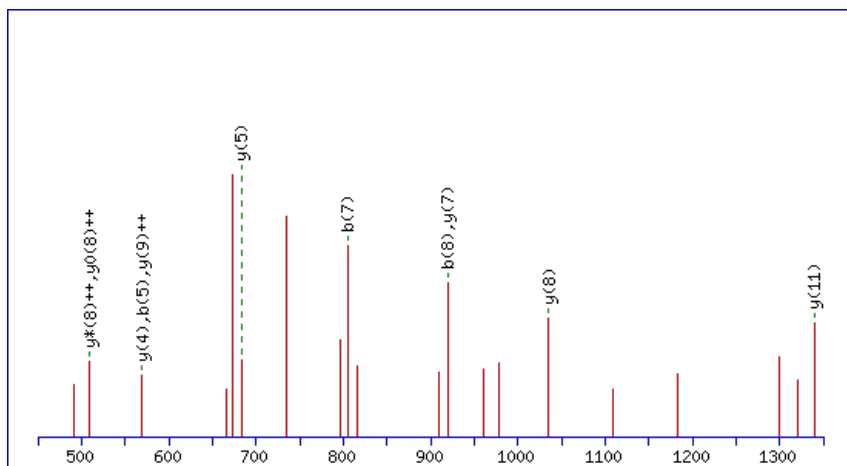Monoisotopic mass of neutral peptide **Mr(calc)**: 1486.6372**Fixed modifications:** Carbamidomethyl (C) (apply to specified residues or termini only)**Variable modifications:****M1** : Oxidation (M), with neutral losses 0.0000 (shown in table), 63.9983**Ions Score:** 28 **Expect:** 0.0076**Matches** : 11/136 fragment ions using 14 most intense peaks ([help](#))

| #  | b               | b <sup>++</sup> | b <sup>0</sup> | b <sup>0++</sup> | Seq. | y                | y <sup>++</sup> | y <sup>*</sup> | y <sup>*++</sup> | y <sup>0</sup> | y <sup>0++</sup> | #  |
|----|-----------------|-----------------|----------------|------------------|------|------------------|-----------------|----------------|------------------|----------------|------------------|----|
| 1  | 149.0397        | 75.0235         |                |                  | M    |                  |                 |                |                  |                |                  | 12 |
| 2  | 279.0793        | 140.0433        | 261.0688       | 131.0380         | E    | <b>1339.6121</b> | 670.3097        | 1321.5885      | 661.2979         | 1321.6015      | 661.3044         | 11 |
| 3  | 351.1135        | 176.0604        | 333.1029       | 167.0551         | A    | 1209.5725        | 605.2899        | 1191.5489      | 596.2781         | 1191.5619      | 596.2846         | 10 |
| 4  | 453.1582        | 227.0827        | 435.1476       | 218.0775         | T    | 1137.5383        | <b>569.2728</b> | 1119.5147      | 560.2610         | 1119.5277      | 560.2675         | 9  |
| 5  | <b>569.1822</b> | 285.0947        | 551.1716       | 276.0894         | D    | <b>1035.4936</b> | 518.2504        | 1017.4700      | <b>509.2386</b>  | 1017.4830      | <b>509.2452</b>  | 8  |
| 6  | 641.2163        | 321.1118        | 623.2058       | 312.1065         | A    | <b>919.4696</b>  | 460.2384        | 901.4460       | 451.2267         |                |                  | 7  |
| 7  | <b>805.2767</b> | 403.1420        | 787.2661       | 394.1367         | Y    | 847.4355         | 424.2214        | 829.4119       | 415.2096         |                |                  | 6  |
| 8  | <b>919.3578</b> | 460.1825        | 901.3472       | 451.1773         | L    | <b>683.3751</b>  | 342.1912        | 665.3515       | 333.1794         |                |                  | 5  |
| 9  | 1033.4389       | 517.2231        | 1015.4283      | 508.2178         | L    | <b>569.2940</b>  | 285.1506        | 551.2704       | 276.1388         |                |                  | 4  |
| 10 | 1195.4636       | 598.2354        | 1177.4530      | 589.2302         | C    | 455.2129         | 228.1101        | 437.1893       | 219.0983         |                |                  | 3  |
| 11 | 1309.5447       | 655.2760        | 1291.5341      | 646.2707         | L    | 293.1882         | 147.0977        | 275.1646       | 138.0859         |                |                  | 2  |
| 12 |                 |                 |                |                  | R    | 179.1071         | 90.0572         | 161.0835       | 81.0454          |                |                  | 1  |

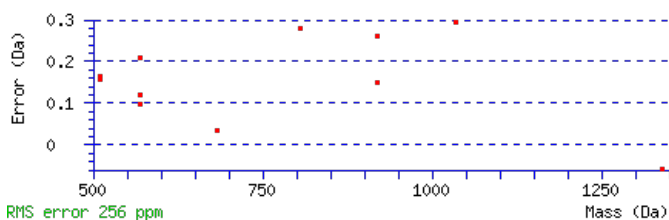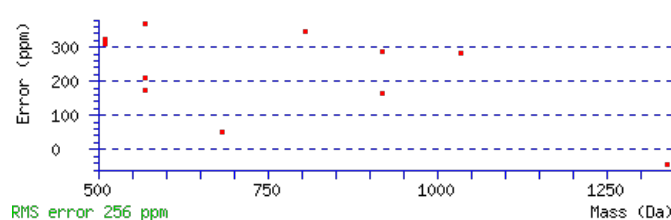NCBI **BLAST** search of **MEATDAYLLCLR**

(Parameters: blastp, nr protein database, expect=20000, no filter, PAM30)

Other BLAST [web gateways](#)

## AT1G67120.1

All matches to this query

| Score | Mr(calc)  | Delta   | Sequence                        |
|-------|-----------|---------|---------------------------------|
| 27.9  | 1486.6372 | -0.0019 | <a href="#">MEATDAYLLCLR</a>    |
| 13.3  | 1486.6339 | 0.0015  | <a href="#">DFEGAYNMLGNLK</a>   |
| 10.7  | 1486.6309 | 0.0044  | <a href="#">AENTSYFGASRHK</a>   |
| 4.8   | 1486.6339 | 0.0015  | <a href="#">SGTYLYKHEMDK</a>    |
| 3.6   | 1486.6358 | -0.0005 | <a href="#">HHGLNNFWVADR</a>    |
| 3.5   | 1486.6343 | 0.0011  | <a href="#">ICTAGRFSEAEAR</a>   |
| 3.3   | 1486.6390 | -0.0037 | <a href="#">GKQVAGSDSYSGGOK</a> |
| 2.0   | 1486.6390 | -0.0037 | <a href="#">NLKNDDHEQDLK</a>    |
| 1.2   | 1486.6372 | -0.0019 | <a href="#">GAFELMREMVEK</a>    |
| 0.3   | 1486.6352 | 0.0002  | <a href="#">WIMSRQNMVMR</a>     |

Mascot: <http://www.matrixscience.com/>

**Peptide View**MS/MS Fragmentation of **IMTSGIIR**Found in **AT1G67140.1** in **TAIR\_Arabidopsis**, Symbols: | binding | chr1:25104679-25121035 REVERSE

Match to Query 1712: 916.466252 from(459.240402,2+) index(4239)

Title: Elution from: 39.380 to 39.380 scan no 5332 cid35.00 polarity:+

Data file 0-3\_2.mgf

Click mouse within plot area to zoom in by factor of two about that point

Or,   to  Da Label all possible matches  Label matches used for scoring Show Y-axis 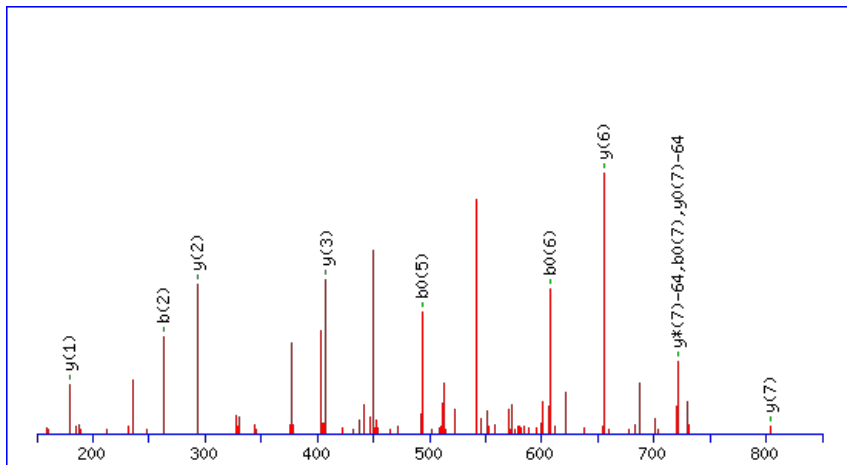**Monoisotopic mass of neutral peptide Mr(calc):** 916.4678**Fixed modifications:** Carbamidomethyl (C) (apply to specified residues or termini only)**Variable modifications:****M2** : Oxidation (M), with neutral losses 0.0000 (shown in table), 63.9983**Ions Score:** 28 **Expect:** 0.022**Matches** : 11/86 fragment ions using 13 most intense peaks ([help](#))

| # | b        | b <sup>++</sup> | b <sup>0</sup> | b <sup>0++</sup> | Seq. | y        | y <sup>++</sup> | y <sup>*</sup> | y <sup>*++</sup> | y <sup>0</sup> | y <sup>0++</sup> | # |
|---|----------|-----------------|----------------|------------------|------|----------|-----------------|----------------|------------------|----------------|------------------|---|
| 1 | 115.0884 | 58.0478         |                |                  | I    |          |                 |                |                  |                |                  | 8 |
| 2 | 263.1208 | 132.0640        |                |                  | M    | 803.3940 | 402.2006        | 785.3704       | 393.1888         | 785.3834       | 393.1954         | 7 |
| 3 | 365.1655 | 183.0864        | 347.1550       | 174.0811         | T    | 655.3616 | 328.1844        | 637.3380       | 319.1726         | 637.3510       | 319.1791         | 6 |
| 4 | 453.1946 | 227.1009        | 435.1840       | 218.0956         | S    | 553.3169 | 277.1621        | 535.2933       | 268.1503         | 535.3063       | 268.1568         | 5 |
| 5 | 511.2131 | 256.1102        | 493.2025       | 247.1049         | G    | 465.2878 | 233.1475        | 447.2642       | 224.1357         |                |                  | 4 |
| 6 | 625.2942 | 313.1507        | 607.2836       | 304.1454         | I    | 407.2693 | 204.1383        | 389.2457       | 195.1265         |                |                  | 3 |
| 7 | 739.3753 | 370.1913        | 721.3647       | 361.1860         | I    | 293.1882 | 147.0977        | 275.1646       | 138.0859         |                |                  | 2 |
| 8 |          |                 |                |                  | R    | 179.1071 | 90.0572         | 161.0835       | 81.0454          |                |                  | 1 |

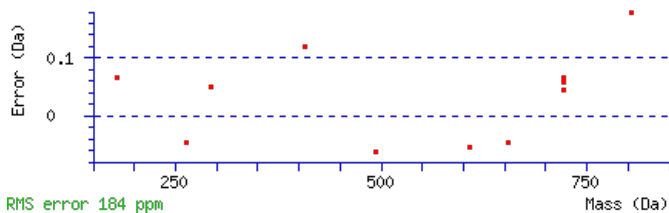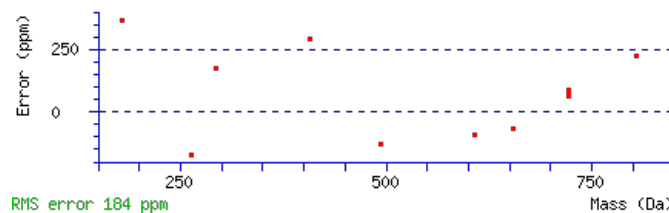NCBI **BLAST** search of **IMTSGIIR**

(Parameters: blastp, nr protein database, expect=20000, no filter, PAM30)

Other BLAST [web gateways](#)**All matches to this query**

| Score | Mr(calc) | Delta   | Sequence                 |
|-------|----------|---------|--------------------------|
| 28.3  | 916.4678 | -0.0016 | <a href="#">IMTSGIIR</a> |

## AT1G67140.1

|      |          |         |                          |
|------|----------|---------|--------------------------|
| 18.5 | 916.4649 | 0.0014  | <a href="#">NGSISRIR</a> |
| 9.2  | 916.4671 | -0.0009 | <a href="#">IEHHVLR</a>  |
| 9.0  | 916.4644 | 0.0018  | <a href="#">VELGYGIR</a> |
| 7.8  | 916.4644 | 0.0018  | <a href="#">YPGLSTLR</a> |
| 7.2  | 916.4644 | 0.0018  | <a href="#">LFAIAESR</a> |
| 7.2  | 916.4644 | 0.0018  | <a href="#">IFDLRDK</a>  |
| 6.8  | 916.4644 | 0.0018  | <a href="#">IFGLVSDR</a> |
| 6.8  | 916.4644 | 0.0018  | <a href="#">IFSGEVVR</a> |
| 6.8  | 916.4678 | -0.0016 | <a href="#">LMKTLER</a>  |

Mascot: <http://www.matrixscience.com/>

**Peptide View**MS/MS Fragmentation of **CPNLKK**Found in **AT1G67190.1** in **TAIR\_Arabidopsis**, Symbols: | F-box family protein | chr1:25136717-25137976 FORWARD

Match to Query 891: 768.381678 from(385.198115,2+) index(456)

Title: Elution from: 10.573 to 10.573 scan no 739 cid35.00 polarity:+

Data file D6h-1\_1.mgf

Click mouse within plot area to zoom in by factor of two about that point

Or,  to  Da Label all possible matches  Label matches used for scoring Show Y-axis 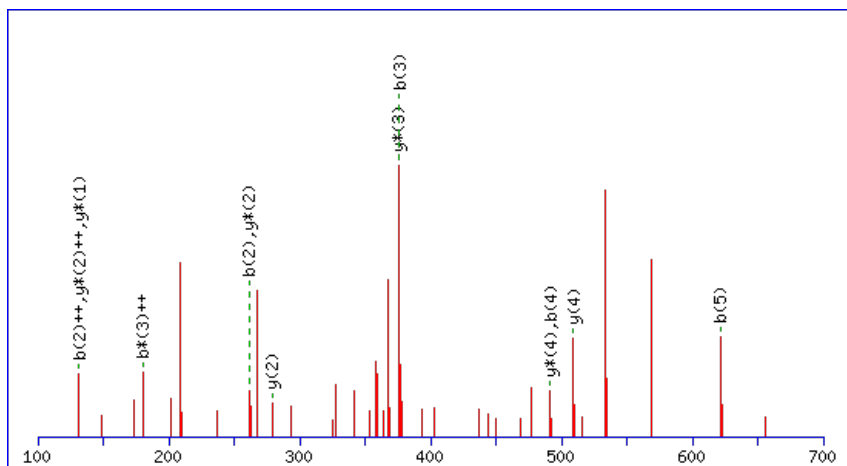Monoisotopic mass of neutral peptide **Mr(calc)**: 768.3813**Fixed modifications**: Carbamidomethyl (C) (apply to specified residues or termini only)**Ions Score**: 19 **Expect**: 0.038**Matches**: 13/36 fragment ions using 21 most intense peaks ([help](#))

| # | b               | b <sup>++</sup> | b*       | b <sup>*++</sup> | Seq. | y               | y <sup>++</sup> | y*              | y <sup>*++</sup> | # |
|---|-----------------|-----------------|----------|------------------|------|-----------------|-----------------|-----------------|------------------|---|
| 1 | 163.0320        | 82.0196         |          |                  | C    |                 |                 |                 |                  | 6 |
| 2 | <b>261.0818</b> | <b>131.0445</b> |          |                  | P    | 607.3638        | 304.1855        | 589.3402        | 295.1737         | 5 |
| 3 | <b>377.1188</b> | 189.0630        | 359.0952 | <b>180.0512</b>  | N    | <b>509.3140</b> | 255.1606        | <b>491.2904</b> | 246.1488         | 4 |
| 4 | <b>491.1999</b> | 246.1036        | 473.1763 | 237.0918         | L    | 393.2770        | 197.1421        | <b>375.2534</b> | 188.1303         | 3 |
| 5 | <b>621.2889</b> | 311.1481        | 603.2653 | 302.1363         | K    | <b>279.1959</b> | 140.1016        | <b>261.1723</b> | <b>131.0898</b>  | 2 |
| 6 |                 |                 |          |                  | K    | 149.1069        | 75.0571         | <b>131.0833</b> | 66.0453          | 1 |

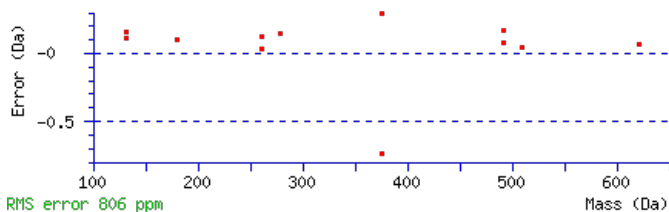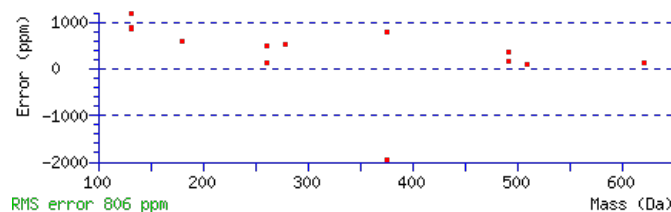NCBI **BLAST** search of **CPNLKK**

(Parameters: blastp, nr protein database, expect=20000, no filter, PAM30)

Other BLAST [web gateways](#)**All matches to this query**

| Score | Mr(calc) | Delta  | Sequence               |
|-------|----------|--------|------------------------|
| 19.2  | 768.3813 | 0.0004 | <a href="#">CPNLKK</a> |
| 11.2  | 768.3813 | 0.0004 | <a href="#">KMISHK</a> |
| 6.2   | 768.3813 | 0.0004 | <a href="#">KCPNLK</a> |
| 3.8   | 768.3813 | 0.0004 | <a href="#">KSHMIK</a> |



AT1G67190.1

|     |          |        |                         |
|-----|----------|--------|-------------------------|
| 3.8 | 768.3812 | 0.0004 | <a href="#">GAMVPIR</a> |
|-----|----------|--------|-------------------------|

**Mascot:** <http://www.matrixscience.com/>

**Peptide View**MS/MS Fragmentation of **ELQALQEK**Found in **AT1G67230.1** in **TAIR\_Arabidopsis**, Symbols: LINC1 | LINC1 (LITTLE NUCLEI1) | chr1:25155224-25159695 REVERSE

Match to Query 2237: 957.512954 from(479.763753,2+) index(935)

Title: Elution from: 15.139 to 15.139 scan no 1333 cid35.00 polarity:+

Data file C7-3\_1.mgf

Click mouse within plot area to zoom in by factor of two about that point

Or,  to  Da Label all possible matches  Label matches used for scoring Show Y-axis 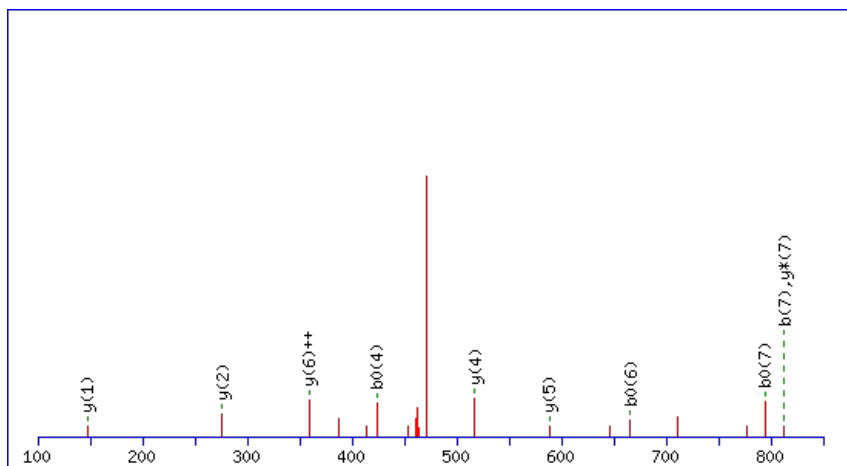Monoisotopic mass of neutral peptide **Mr(calc)**: 957.5131**Fixed modifications**: Carbamidomethyl (C) (apply to specified residues or termini only)**Ions Score**: 23 **Expect**: 0.033**Matches** : 10/78 fragment ions using 12 most intense peaks ([help](#))

| # | b        | b <sup>++</sup> | b*       | b <sup>*++</sup> | b <sup>0</sup> | b <sup>0++</sup> | Seq. | y        | y <sup>++</sup> | y*       | y <sup>*++</sup> | y <sup>0</sup> | y <sup>0++</sup> | # |
|---|----------|-----------------|----------|------------------|----------------|------------------|------|----------|-----------------|----------|------------------|----------------|------------------|---|
| 1 | 130.0499 | 65.5286         |          |                  | 112.0393       | 56.5233          | E    |          |                 |          |                  |                |                  | 8 |
| 2 | 243.1339 | 122.0706        |          |                  | 225.1234       | 113.0653         | L    | 829.4778 | 415.2425        | 812.4512 | 406.7293         | 811.4672       | 406.2373         | 7 |
| 3 | 371.1925 | 186.0999        | 354.1660 | 177.5866         | 353.1819       | 177.0946         | Q    | 716.3937 | 358.7005        | 699.3672 | 350.1872         | 698.3832       | 349.6952         | 6 |
| 4 | 442.2296 | 221.6185        | 425.2031 | 213.1052         | 424.2191       | 212.6132         | A    | 588.3352 | 294.6712        | 571.3086 | 286.1579         | 570.3246       | 285.6659         | 5 |
| 5 | 555.3137 | 278.1605        | 538.2871 | 269.6472         | 537.3031       | 269.1552         | L    | 517.2980 | 259.1527        | 500.2715 | 250.6394         | 499.2875       | 250.1474         | 4 |
| 6 | 683.3723 | 342.1898        | 666.3457 | 333.6765         | 665.3617       | 333.1845         | Q    | 404.2140 | 202.6106        | 387.1874 | 194.0974         | 386.2034       | 193.6053         | 3 |
| 7 | 812.4149 | 406.7111        | 795.3883 | 398.1978         | 794.4043       | 397.7058         | E    | 276.1554 | 138.5813        | 259.1288 | 130.0681         | 258.1448       | 129.5761         | 2 |
| 8 |          |                 |          |                  |                |                  | K    | 147.1128 | 74.0600         | 130.0863 | 65.5468          |                |                  | 1 |

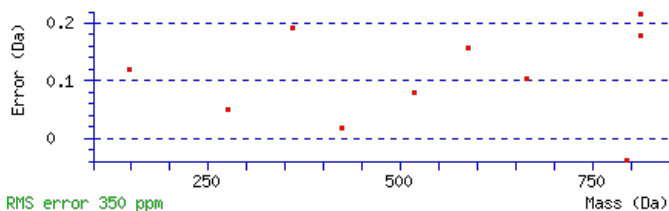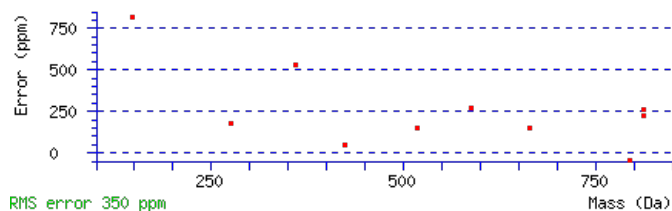NCBI **BLAST** search of [ELQALQEK](#)

(Parameters: blastp, nr protein database, expect=20000, no filter, PAM30)

Other BLAST [web gateways](#)**All matches to this query**

| Score | Mr(calc) | Delta   | Sequence                  |
|-------|----------|---------|---------------------------|
| 23.2  | 957.5131 | -0.0001 | <a href="#">ELQALQEK</a>  |
| 14.9  | 957.5131 | -0.0001 | <a href="#">AIGEVDLTK</a> |

# AT1G67230.1

|      |          |         |                           |
|------|----------|---------|---------------------------|
| 13.3 | 957.5131 | -0.0001 | <a href="#">ELAQQIEK</a>  |
| 11.1 | 957.5131 | -0.0001 | <a href="#">TNPEKEIK</a>  |
| 11.1 | 957.5131 | -0.0002 | <a href="#">ISAVQTPDK</a> |
| 8.9  | 957.5131 | -0.0001 | <a href="#">AIADVDLNK</a> |
| 5.5  | 957.5131 | -0.0001 | <a href="#">EDLQNLVK</a>  |
| 4.5  | 957.5131 | -0.0001 | <a href="#">EDQINVLK</a>  |
| 4.5  | 957.5131 | -0.0002 | <a href="#">QIQDDVLK</a>  |
| 4.3  | 957.5131 | -0.0001 | <a href="#">AQSVSPIEK</a> |

Mascot: <http://www.matrixscience.com/>

**Peptide View**MS/MS Fragmentation of **AFGMELLR**

Found in **AT1G67280.1** in **TAIR\_Arabidopsis**, Symbols: | lactoylglutathione lyase, putative / glyoxalase I, putative | chr1:25192226-25194210  
REVERSE

Match to Query 1554: 935.490266 from(468.752409,2+) index(6617)

Title: Elution from: 62.501 to 62.501 scan no 8745 cid35.00 polarity:+

Data file D1d-1-2.mgf

Click mouse within plot area to zoom in by factor of two about that point

Or,   to  Da

Label all possible matches  Label matches used for scoring

Show Y-axis

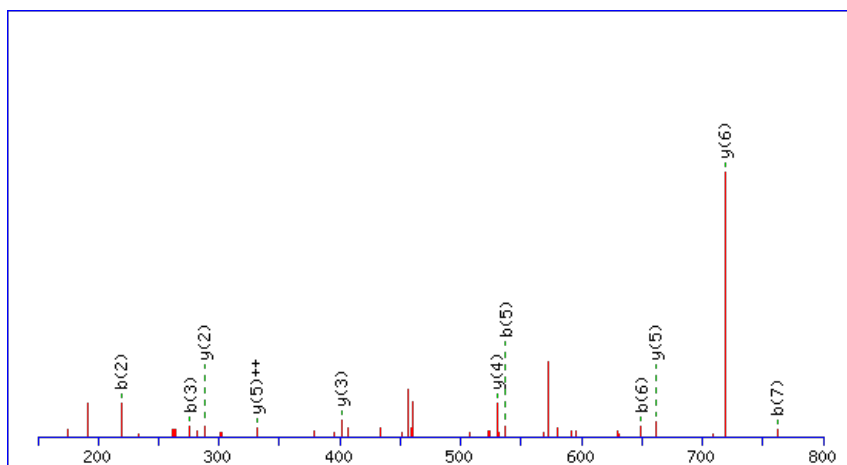

**Monoisotopic mass of neutral peptide Mr(calc):** 935.4899

**Fixed modifications:** Carbamidomethyl (C) (apply to specified residues or termini only)

**Ions Score:** 38 **Expect:** 0.0004

**Matches:** 11/56 fragment ions using 18 most intense peaks ([help](#))

| # | b               | b <sup>++</sup> | b <sup>0</sup> | b <sup>0++</sup> | Seq. | y               | y <sup>++</sup> | y*       | y <sup>*++</sup> | y <sup>0</sup> | y <sup>0++</sup> | # |
|---|-----------------|-----------------|----------------|------------------|------|-----------------|-----------------|----------|------------------|----------------|------------------|---|
| 1 | 72.0444         | 36.5258         |                |                  | A    |                 |                 |          |                  |                |                  | 8 |
| 2 | <b>219.1128</b> | 110.0600        |                |                  | F    | 865.4600        | 433.2337        | 848.4335 | 424.7204         | 847.4495       | 424.2284         | 7 |
| 3 | <b>276.1343</b> | 138.5708        |                |                  | G    | <b>718.3916</b> | 359.6994        | 701.3651 | 351.1862         | 700.3811       | 350.6942         | 6 |
| 4 | 407.1748        | 204.0910        |                |                  | M    | <b>661.3702</b> | <b>331.1887</b> | 644.3436 | 322.6754         | 643.3596       | 322.1834         | 5 |
| 5 | <b>536.2173</b> | 268.6123        | 518.2068       | 259.6070         | E    | <b>530.3297</b> | 265.6685        | 513.3031 | 257.1552         | 512.3191       | 256.6632         | 4 |
| 6 | <b>649.3014</b> | 325.1543        | 631.2908       | 316.1491         | L    | <b>401.2871</b> | 201.1472        | 384.2605 | 192.6339         |                |                  | 3 |
| 7 | <b>762.3855</b> | 381.6964        | 744.3749       | 372.6911         | L    | <b>288.2030</b> | 144.6051        | 271.1765 | 136.0919         |                |                  | 2 |
| 8 |                 |                 |                |                  | R    | 175.1190        | 88.0631         | 158.0924 | 79.5498          |                |                  | 1 |

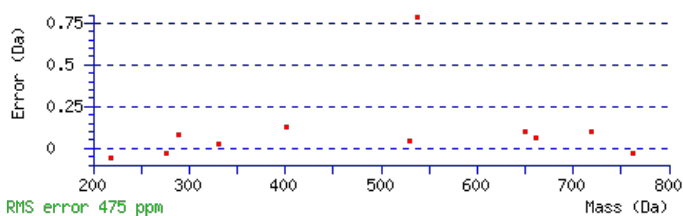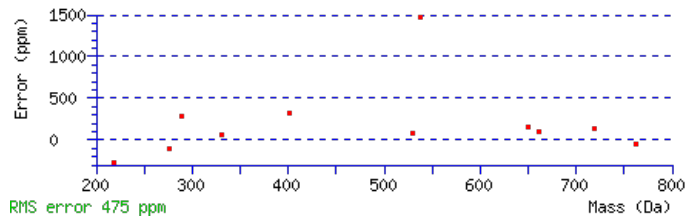

NCBI **BLAST** search of [AFGMELLR](#)

(Parameters: blastp, nr protein database, expect=20000, no filter, PAM30)

Other BLAST [web gateways](#)

**All matches to this query**

| Score | Mr(calc) | Delta  | Sequence                 |
|-------|----------|--------|--------------------------|
| 37.6  | 935.4899 | 0.0004 | <a href="#">AFGMELLR</a> |

## AT1G67280.1

|     |          |        |                          |
|-----|----------|--------|--------------------------|
| 8.8 | 935.4899 | 0.0004 | <a href="#">AFIDAMIR</a> |
| 3.0 | 935.4899 | 0.0004 | <a href="#">QFELMLR</a>  |
| 1.9 | 935.4899 | 0.0004 | <a href="#">YPGLMSLR</a> |

**Mascot:** <http://www.matrixscience.com/>

**Peptide View**MS/MS Fragmentation of **YGDGSIINHGR**Found in **AT1G67550.1** in **TAIR\_Arabidopsis**, Symbols: URE | URE (UREASE); urease | chr1:25316505-25320574 FORWARD

Match to Query 4456: 1318.596750 from(660.305651,2+) index(3107)

Title: Elution from: 31.824 to 31.824 scan no 3924 cid35.00 polarity:+

Data file D12h-2\_3.mgf

Click mouse within plot area to zoom in by factor of two about that point

Or,   to  Da Label all possible matches  Label matches used for scoring Show Y-axis 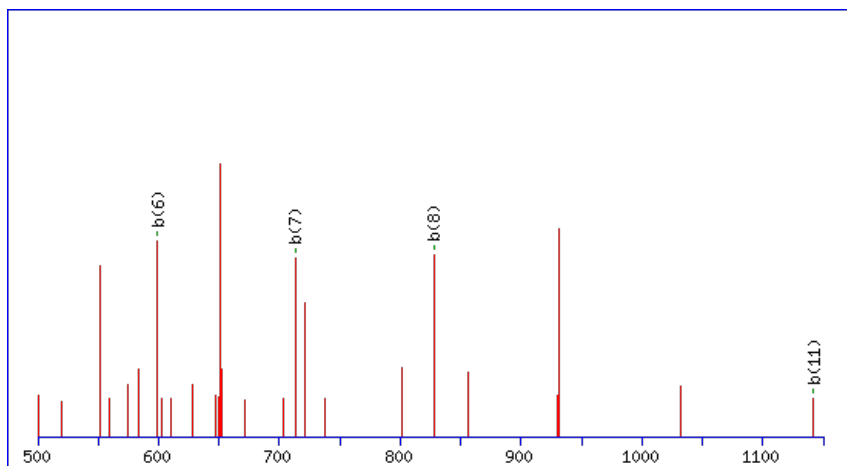Monoisotopic mass of neutral peptide  $M_r(\text{calc})$ : 1318.5990

Fixed modifications: Carbamidomethyl (C) (apply to specified residues or termini only)

Ions Score: 23 Expect: 0.033

Matches : 4/98 fragment ions using 7 most intense peaks ([help](#))

| #  | b                | b <sup>++</sup> | b <sup>*</sup> | b <sup>*++</sup> | b <sup>0</sup> | b <sup>0++</sup> | Seq. | y         | y <sup>++</sup> | y <sup>*</sup> | y <sup>*++</sup> | y <sup>0</sup> | y <sup>0++</sup> | #  |
|----|------------------|-----------------|----------------|------------------|----------------|------------------|------|-----------|-----------------|----------------|------------------|----------------|------------------|----|
| 1  | 165.0676         | 83.0375         |                |                  |                |                  | Y    |           |                 |                |                  |                |                  | 12 |
| 2  | 223.0861         | 112.0467        |                |                  |                |                  | G    | 1155.5459 | 578.2766        | 1137.5224      | 569.2648         | 1137.5354      | 569.2713         | 11 |
| 3  | 339.1101         | 170.0587        |                |                  | 321.0996       | 161.0534         | D    | 1097.5274 | 549.2674        | 1079.5039      | 540.2556         | 1079.5169      | 540.2621         | 10 |
| 4  | 397.1286         | 199.0679        |                |                  | 379.1181       | 190.0627         | G    | 981.5035  | 491.2554        | 963.4799       | 482.2436         | 963.4929       | 482.2501         | 9  |
| 5  | 485.1577         | 243.0825        |                |                  | 467.1471       | 234.0772         | S    | 923.4850  | 462.2461        | 905.4614       | 453.2343         | 905.4744       | 453.2408         | 8  |
| 6  | <b>599.2388</b>  | 300.1230        |                |                  | 581.2282       | 291.1177         | I    | 835.4559  | 418.2316        | 817.4323       | 409.2198         |                |                  | 7  |
| 7  | <b>713.3199</b>  | 357.1636        |                |                  | 695.3093       | 348.1583         | I    | 721.3748  | 361.1910        | 703.3512       | 352.1792         |                |                  | 6  |
| 8  | <b>827.4010</b>  | 414.2041        |                |                  | 809.3904       | 405.1988         | I    | 607.2937  | 304.1505        | 589.2701       | 295.1387         |                |                  | 5  |
| 9  | 943.4380         | 472.2226        | 925.4144       | 463.2108         | 925.4274       | 463.2173         | N    | 493.2126  | 247.1099        | 475.1890       | 238.0981         |                |                  | 4  |
| 10 | 1083.4880        | 542.2476        | 1065.4644      | 533.2358         | 1065.4774      | 533.2424         | H    | 377.1756  | 189.0914        | 359.1520       | 180.0796         |                |                  | 3  |
| 11 | <b>1141.5065</b> | 571.2569        | 1123.4829      | 562.2451         | 1123.4959      | 562.2516         | G    | 237.1256  | 119.0664        | 219.1020       | 110.0546         |                |                  | 2  |
| 12 |                  |                 |                |                  |                |                  | R    | 179.1071  | 90.0572         | 161.0835       | 81.0454          |                |                  | 1  |

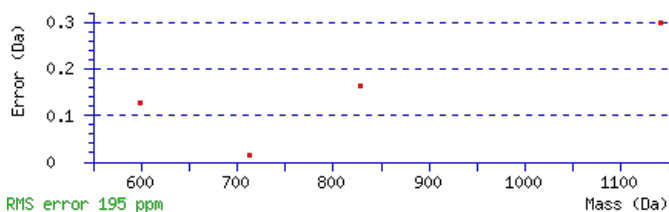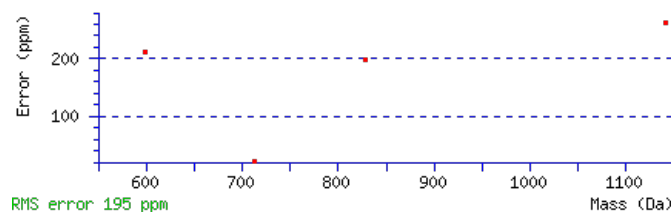NCBI BLAST search of **YGDGSIINHGR**

(Parameters: blastp, nr protein database, expect=20000, no filter, PAM30)

Other BLAST [web gateways](#)**All matches to this query**

AT1G67550.1

| Score | Mr(calc)  | Delta   | Sequence                      |
|-------|-----------|---------|-------------------------------|
| 23.1  | 1318.5990 | -0.0023 | <a href="#">YGDGSIINHGR</a>   |
| 3.1   | 1318.5941 | 0.0026  | <a href="#">VANVSIGETEER</a>  |
| 0.8   | 1318.5941 | 0.0027  | <a href="#">TLLVDDGSAEGAR</a> |

Mascot: <http://www.matrixscience.com/>

**Peptide View**MS/MS Fragmentation of **LKYEIDELSLR**

Found in **AT1G67690.1** in **TAIR\_Arabidopsis**, Symbols: | peptidase M3 family protein / thimet oligopeptidase family protein | chr1:25372749-25377393 FORWARD

Match to Query 5237: 1392.708048 from(697.361300,2+) index(8108)

Title: Elution from: 71.651 to 71.651 scan no 10689 cid35.00 polarity:+

Data file 0-3\_2.mgf

Click mouse within plot area to zoom in by factor of two about that point

Or,   to  Da

Label all possible matches  Label matches used for scoring

Show Y-axis

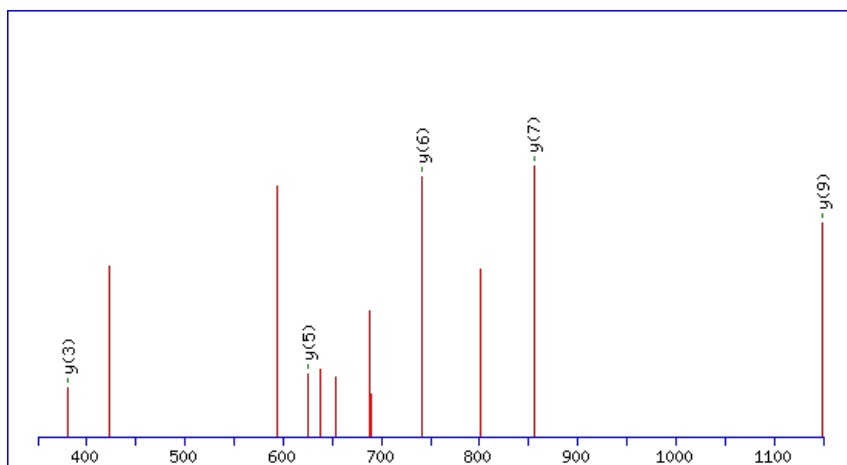

**Monoisotopic mass of neutral peptide Mr(calc):** 1392.7059

**Fixed modifications:** Carbamidomethyl (C) (apply to specified residues or termini only)

**Ions Score:** 30 **Expect:** 0.0096

**Matches:** 5/108 fragment ions using 11 most intense peaks ([help](#))

| #  | b         | b <sup>++</sup> | b <sup>*</sup> | b <sup>*++</sup> | b <sup>0</sup> | b <sup>0++</sup> | Seq. | y                | y <sup>++</sup> | y <sup>*</sup> | y <sup>*++</sup> | y <sup>0</sup> | y <sup>0++</sup> | #  |
|----|-----------|-----------------|----------------|------------------|----------------|------------------|------|------------------|-----------------|----------------|------------------|----------------|------------------|----|
| 1  | 115.0884  | 58.0478         |                |                  |                |                  | L    |                  |                 |                |                  |                |                  | 11 |
| 2  | 245.1774  | 123.0923        | 227.1538       | 114.0805         |                |                  | K    | 1279.6321        | 640.3197        | 1261.6085      | 631.3079         | 1261.6215      | 631.3144         | 10 |
| 3  | 409.2378  | 205.1225        | 391.2142       | 196.1107         |                |                  | Y    | <b>1149.5431</b> | 575.2752        | 1131.5195      | 566.2634         | 1131.5325      | 566.2699         | 9  |
| 4  | 539.2774  | 270.1423        | 521.2538       | 261.1305         | 521.2668       | 261.1371         | E    | 985.4827         | 493.2450        | 967.4591       | 484.2332         | 967.4721       | 484.2397         | 8  |
| 5  | 653.3585  | 327.1829        | 635.3349       | 318.1711         | 635.3479       | 318.1776         | I    | <b>855.4431</b>  | 428.2252        | 837.4195       | 419.2134         | 837.4325       | 419.2199         | 7  |
| 6  | 769.3825  | 385.1949        | 751.3589       | 376.1831         | 751.3719       | 376.1896         | D    | <b>741.3620</b>  | 371.1846        | 723.3384       | 362.1728         | 723.3514       | 362.1793         | 6  |
| 7  | 899.4221  | 450.2147        | 881.3985       | 441.2029         | 881.4115       | 441.2094         | E    | <b>625.3380</b>  | 313.1726        | 607.3144       | 304.1608         | 607.3274       | 304.1673         | 5  |
| 8  | 1013.5032 | 507.2552        | 995.4796       | 498.2434         | 995.4926       | 498.2500         | L    | 495.2984         | 248.1528        | 477.2748       | 239.1410         | 477.2878       | 239.1475         | 4  |
| 9  | 1101.5323 | 551.2698        | 1083.5087      | 542.2580         | 1083.5217      | 542.2645         | S    | <b>381.2173</b>  | 191.1123        | 363.1937       | 182.1005         | 363.2067       | 182.1070         | 3  |
| 10 | 1215.6134 | 608.3103        | 1197.5898      | 599.2985         | 1197.6028      | 599.3050         | L    | 293.1882         | 147.0977        | 275.1646       | 138.0859         |                |                  | 2  |
| 11 |           |                 |                |                  |                |                  | R    | 179.1071         | 90.0572         | 161.0835       | 81.0454          |                |                  | 1  |

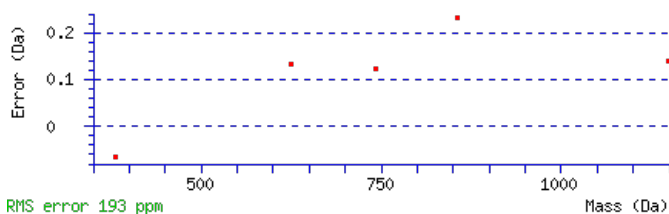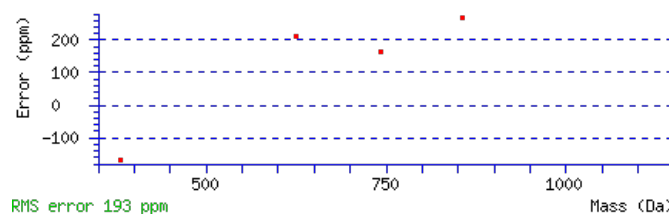NCBI **BLAST** search of **LKYEIDELSLR**

(Parameters: blastp, nr protein database, expect=20000, no filter, PAM30)

Other BLAST [web gateways](#)

**All matches to this query**



## AT1G67690.1

| Score | Mr(calc)  | Delta   | Sequence                       |
|-------|-----------|---------|--------------------------------|
| 29.7  | 1392.7059 | 0.0021  | <a href="#">LKYEIDELSLR</a>    |
| 2.9   | 1392.7085 | -0.0005 | <a href="#">IDRFIVDDVRK</a>    |
| 2.5   | 1392.7086 | -0.0005 | <a href="#">IKNTERFKPDK</a>    |
| 2.4   | 1392.7045 | 0.0035  | <a href="#">KLMGVTMLDVVR</a>   |
| 2.1   | 1392.7119 | -0.0039 | <a href="#">MRIVGLTGGLASGK</a> |
| 1.5   | 1392.7086 | -0.0005 | <a href="#">LQSLNEQFLRK</a>    |
| 0.1   | 1392.7063 | 0.0017  | <a href="#">DTTIGRVVRETK</a>   |

Mascot: <http://www.matrixscience.com/>

**Peptide View**MS/MS Fragmentation of **AALSTSDVIELPTQDQLK**

Found in **AT1G67700.1** in **TAIR\_Arabidopsis**, Symbols: | similar to unknown [Populus trichocarpa] (GB:ABK95743.1); contains domain PTHR11804:SF2 (PTHR11804:SF2); contains domain PTHR11804 (PTHR11804) | chr1:25377958-25379379 FORWARD

Match to Query 9384: 1928.006566 from(965.010559,2+) index(8003)

Title: Elution from: 69.683 to 69.683 scan no 10422 cid35.00 polarity:+

Data file D1d-3\_1.mgf

Click mouse within plot area to zoom in by factor of two about that point

Or,   to  Da

Label all possible matches  Label matches used for scoring

Show Y-axis

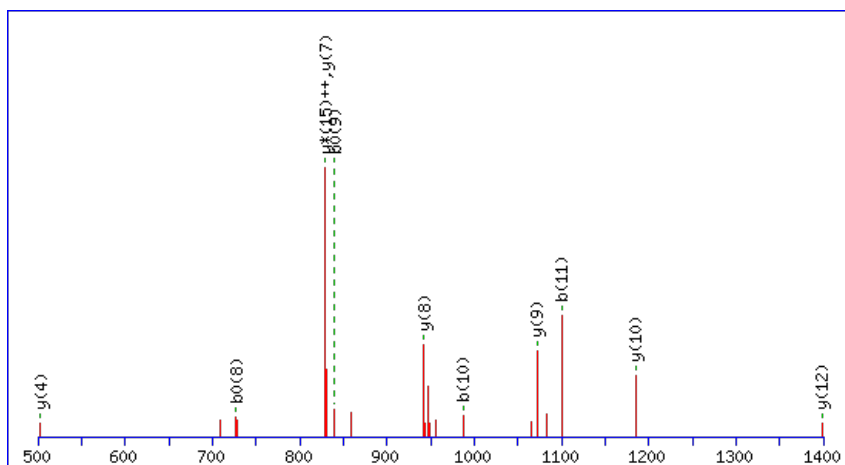

Monoisotopic mass of neutral peptide  $M_r(\text{calc})$ : 1928.0102

Fixed modifications: Carbamidomethyl (C) (apply to specified residues or termini only)

Ions Score: 41 Expect: 0.00033

Matches : 11/166 fragment ions using 15 most intense peaks ([help](#))

| #  | b         | b <sup>++</sup> | b*        | b <sup>*++</sup> | b <sup>0</sup> | b <sup>0++</sup> | Seq. | y         | y <sup>++</sup> | y*        | y <sup>*++</sup> | y <sup>0</sup> | y <sup>0++</sup> | #  |
|----|-----------|-----------------|-----------|------------------|----------------|------------------|------|-----------|-----------------|-----------|------------------|----------------|------------------|----|
| 1  | 72.0444   | 36.5258         |           |                  |                |                  | A    |           |                 |           |                  |                |                  | 18 |
| 2  | 143.0815  | 72.0444         |           |                  |                |                  | A    | 1857.9804 | 929.4938        | 1840.9539 | 920.9806         | 1839.9698      | 920.4886         | 17 |
| 3  | 256.1656  | 128.5864        |           |                  |                |                  | L    | 1786.9433 | 893.9753        | 1769.9167 | 885.4620         | 1768.9327      | 884.9700         | 16 |
| 4  | 343.1976  | 172.1024        |           |                  | 325.1870       | 163.0972         | S    | 1673.8592 | 837.4332        | 1656.8327 | 828.9200         | 1655.8487      | 828.4280         | 15 |
| 5  | 444.2453  | 222.6263        |           |                  | 426.2347       | 213.6210         | T    | 1586.8272 | 793.9172        | 1569.8006 | 785.4040         | 1568.8166      | 784.9120         | 14 |
| 6  | 531.2773  | 266.1423        |           |                  | 513.2667       | 257.1370         | S    | 1485.7795 | 743.3934        | 1468.7530 | 734.8801         | 1467.7690      | 734.3881         | 13 |
| 7  | 646.3042  | 323.6558        |           |                  | 628.2937       | 314.6505         | D    | 1398.7475 | 699.8774        | 1381.7209 | 691.3641         | 1380.7369      | 690.8721         | 12 |
| 8  | 745.3727  | 373.1900        |           |                  | 727.3621       | 364.1847         | V    | 1283.7205 | 642.3639        | 1266.6940 | 633.8506         | 1265.7100      | 633.3586         | 11 |
| 9  | 858.4567  | 429.7320        |           |                  | 840.4462       | 420.7267         | I    | 1184.6521 | 592.8297        | 1167.6256 | 584.3164         | 1166.6416      | 583.8244         | 10 |
| 10 | 987.4993  | 494.2533        |           |                  | 969.4888       | 485.2480         | E    | 1071.5681 | 536.2877        | 1054.5415 | 527.7744         | 1053.5575      | 527.2824         | 9  |
| 11 | 1100.5834 | 550.7953        |           |                  | 1082.5728      | 541.7900         | L    | 942.5255  | 471.7664        | 925.4989  | 463.2531         | 924.5149       | 462.7611         | 8  |
| 12 | 1197.6361 | 599.3217        |           |                  | 1179.6256      | 590.3164         | P    | 829.4414  | 415.2243        | 812.4149  | 406.7111         | 811.4308       | 406.2191         | 7  |
| 13 | 1298.6838 | 649.8456        |           |                  | 1280.6733      | 640.8403         | T    | 732.3886  | 366.6980        | 715.3621  | 358.1847         | 714.3781       | 357.6927         | 6  |
| 14 | 1426.7424 | 713.8748        | 1409.7159 | 705.3616         | 1408.7318      | 704.8696         | Q    | 631.3410  | 316.1741        | 614.3144  | 307.6608         | 613.3304       | 307.1688         | 5  |
| 15 | 1541.7693 | 771.3883        | 1524.7428 | 762.8750         | 1523.7588      | 762.3830         | D    | 503.2824  | 252.1448        | 486.2558  | 243.6316         | 485.2718       | 243.1395         | 4  |
| 16 | 1669.8279 | 835.4176        | 1652.8014 | 826.9043         | 1651.8174      | 826.4123         | Q    | 388.2554  | 194.6314        | 371.2289  | 186.1181         |                |                  | 3  |
| 17 | 1782.9120 | 891.9596        | 1765.8854 | 883.4464         | 1764.9014      | 882.9543         | L    | 260.1969  | 130.6021        | 243.1703  | 122.0888         |                |                  | 2  |
| 18 |           |                 |           |                  |                |                  | K    | 147.1128  | 74.0600         | 130.0863  | 65.5468          |                |                  | 1  |

# AT1G67700.1

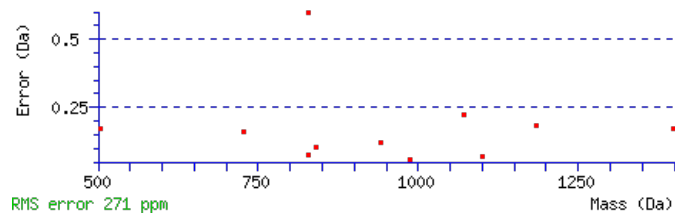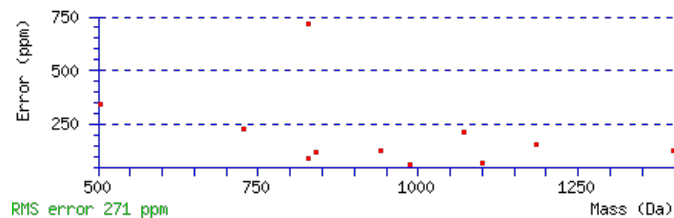

NCBI **BLAST** search of [AALSTSDVIELPTQDQLK](#)  
(Parameters: blastp, nr protein database, expect=20000, no filter, PAM30)  
Other BLAST [web gateways](#)

## All matches to this query

| Score | Mr(calc)  | Delta   | Sequence                           |
|-------|-----------|---------|------------------------------------|
| 41.1  | 1928.0102 | -0.0037 | <a href="#">AALSTSDVIELPTQDQLK</a> |
| 1.2   | 1928.0116 | -0.0050 | <a href="#">KSGDSGKPSISLAHFLR</a>  |

Mascot: <http://www.matrixscience.com/>

## Peptide View

MS/MS Fragmentation of **EADLISLHPVLDK**

Found in **AT1G68010.1** in **TAIR\_Arabidopsis**, Symbols: HPR | HPR (HYDROXYPYRUVATE REDUCTASE); glycerate dehydrogenase/ poly(U) binding | chr1:25497081-25499383 FORWARD

Match to Query 5640: 1464.735723 from(489.252517,3+) index(6107)

Title: Elution from: 54.424 to 54.424 scan no 7873 cid35.00 polarity:+

Data file C7-3\_3.mgf

Click mouse within plot area to zoom in by factor of two about that point

Or,   to  Da

Label all possible matches  Label matches used for scoring

Show Y-axis

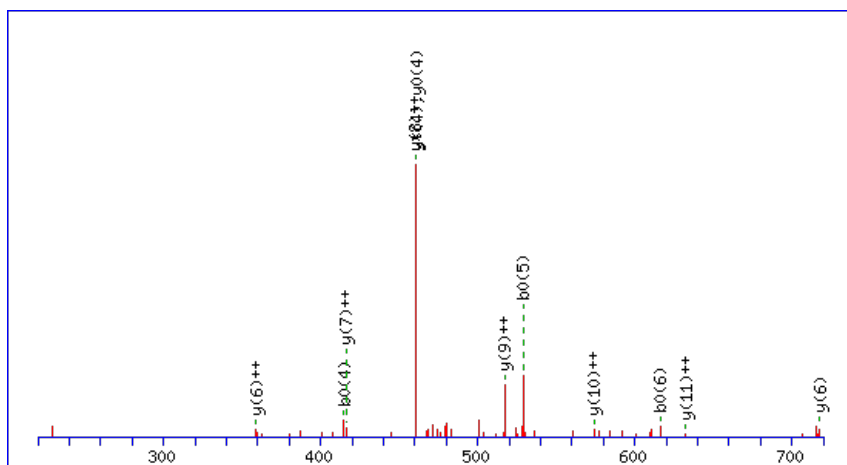

Monoisotopic mass of neutral peptide  $M_r(\text{calc})$ : 1464.7401

Fixed modifications: Carbamidomethyl (C) (apply to specified residues or termini only)

Ions Score: 37 Expect: 0.0016

Matches : 12/118 fragment ions using 13 most intense peaks ([help](#))

| #  | b         | b <sup>++</sup> | b <sup>0</sup> | b <sup>0++</sup> | Seq. | y         | y <sup>++</sup> | y*        | y <sup>*++</sup> | y <sup>0</sup> | y <sup>0++</sup> | #  |
|----|-----------|-----------------|----------------|------------------|------|-----------|-----------------|-----------|------------------|----------------|------------------|----|
| 1  | 131.0469  | 66.0271         | 113.0363       | 57.0218          | E    |           |                 |           |                  |                |                  | 13 |
| 2  | 203.0811  | 102.0442        | 185.0705       | 93.0389          | A    | 1335.7077 | 668.3575        | 1317.6841 | 659.3457         | 1317.6971      | 659.3522         | 12 |
| 3  | 319.1050  | 160.0562        | 301.0945       | 151.0509         | D    | 1263.6736 | 632.3404        | 1245.6500 | 623.3286         | 1245.6630      | 623.3351         | 11 |
| 4  | 433.1861  | 217.0967        | 415.1756       | 208.0914         | L    | 1147.6496 | 574.3284        | 1129.6260 | 565.3166         | 1129.6390      | 565.3231         | 10 |
| 5  | 547.2672  | 274.1373        | 529.2567       | 265.1320         | I    | 1033.5685 | 517.2879        | 1015.5449 | 508.2761         | 1015.5579      | 508.2826         | 9  |
| 6  | 635.2963  | 318.1518        | 617.2857       | 309.1465         | S    | 919.4874  | 460.2473        | 901.4638  | 451.2355         | 901.4768       | 451.2420         | 8  |
| 7  | 749.3774  | 375.1923        | 731.3668       | 366.1871         | L    | 831.4583  | 416.2328        | 813.4347  | 407.2210         | 813.4478       | 407.2275         | 7  |
| 8  | 889.4274  | 445.2173        | 871.4168       | 436.2121         | H    | 717.3772  | 359.1922        | 699.3536  | 350.1805         | 699.3667       | 350.1870         | 6  |
| 9  | 987.4772  | 494.2422        | 969.4666       | 485.2370         | P    | 577.3272  | 289.1672        | 559.3036  | 280.1554         | 559.3166       | 280.1620         | 5  |
| 10 | 1087.5427 | 544.2750        | 1069.5321      | 535.2697         | V    | 479.2774  | 240.1423        | 461.2538  | 231.1305         | 461.2668       | 231.1371         | 4  |
| 11 | 1201.6238 | 601.3155        | 1183.6132      | 592.3102         | L    | 379.2120  | 190.1096        | 361.1884  | 181.0978         | 361.2014       | 181.1043         | 3  |
| 12 | 1317.6477 | 659.3275        | 1299.6372      | 650.3222         | D    | 265.1309  | 133.0691        | 247.1073  | 124.0573         | 247.1203       | 124.0638         | 2  |
| 13 |           |                 |                |                  | K    | 149.1069  | 75.0571         | 131.0833  | 66.0453          |                |                  | 1  |

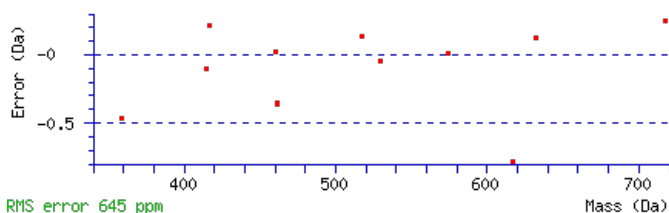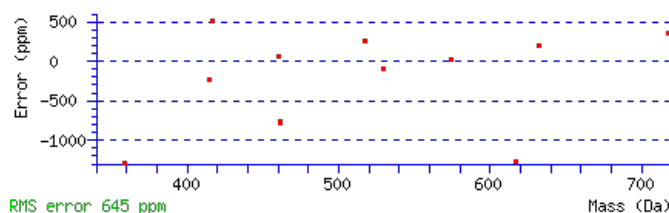

NCBI BLAST search of **EADLISLHPVLDK**

(Parameters: blastp, nr protein database, expect=20000, no filter, PAM30)

AT1G68010.1

Other BLAST [web gateways](#)

**All matches to this query**

| Score | Mr(calc)  | Delta   | Sequence                       |
|-------|-----------|---------|--------------------------------|
| 37.0  | 1464.7401 | -0.0043 | <a href="#">EADLISLHPVLDK</a>  |
| 16.7  | 1464.7401 | -0.0044 | <a href="#">TSSSIFSISKPPAK</a> |
| 8.5   | 1464.7319 | 0.0038  | <a href="#">HTDGKLSFLGFVK</a>  |
| 0.8   | 1464.7331 | 0.0026  | <a href="#">LLETMNTNIKVR</a>   |

**Mascot:** <http://www.matrixscience.com/>

## Peptide View

### MS/MS Fragmentation of **EIGLSLSLEK**

Found in **AT1G68150.1** in **TAIR\_Arabidopsis**, Symbols: ATWRKY9, WRKY9 | WRKY9 (WRKY DNA-binding protein 9); transcription factor | chr1:25547633-25549278 FORWARD

Match to Query 3455: 1098.578222 from(550.296387,2+) index(5207)

Title: Elution from: 47.173 to 47.173 scan no 6528 cid35.00 polarity:+

Data file D12h-3\_1.mgf

Click mouse within plot area to zoom in by factor of two about that point

Or,   to  Da

Label all possible matches  Label matches used for scoring

Show Y-axis

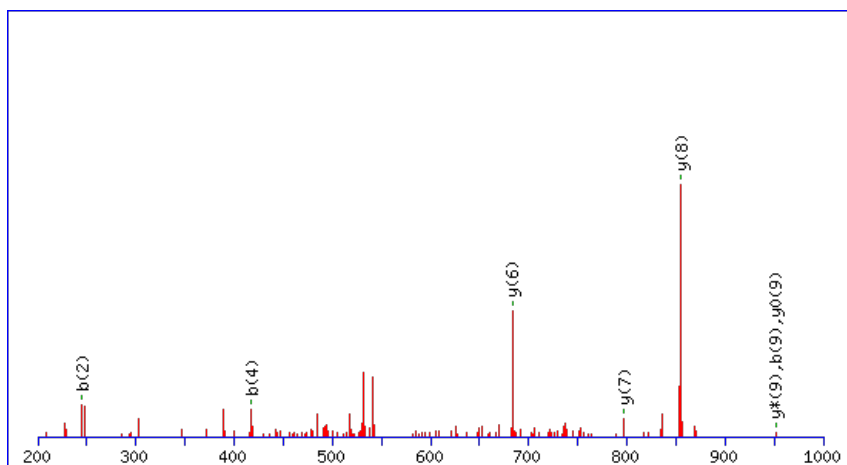

Monoisotopic mass of neutral peptide  $M_r(\text{calc})$ : 1098.5799

Fixed modifications: Carbamidomethyl (C) (apply to specified residues or termini only)

Ions Score: 27 Expect: 0.0058

Matches : 8/88 fragment ions using 8 most intense peaks ([help](#))

| #  | b               | b <sup>++</sup> | b <sup>0</sup> | b <sup>0++</sup> | Seq. | y               | y <sup>++</sup> | y*              | y <sup>*++</sup> | y <sup>0</sup>  | y <sup>0++</sup> | #  |
|----|-----------------|-----------------|----------------|------------------|------|-----------------|-----------------|-----------------|------------------|-----------------|------------------|----|
| 1  | 131.0469        | 66.0271         | 113.0363       | 57.0218          | E    |                 |                 |                 |                  |                 |                  | 10 |
| 2  | <b>245.1280</b> | 123.0676        | 227.1174       | 114.0624         | I    | 969.5475        | 485.2774        | <b>951.5239</b> | 476.2656         | <b>951.5370</b> | 476.2721         | 9  |
| 3  | 303.1465        | 152.0769        | 285.1359       | 143.0716         | G    | <b>855.4664</b> | 428.2369        | 837.4428        | 419.2251         | 837.4559        | 419.2316         | 8  |
| 4  | <b>417.2276</b> | 209.1174        | 399.2170       | 200.1122         | L    | <b>797.4479</b> | 399.2276        | 779.4243        | 390.2158         | 779.4374        | 390.2223         | 7  |
| 5  | 505.2567        | 253.1320        | 487.2461       | 244.1267         | S    | <b>683.3668</b> | 342.1871        | 665.3432        | 333.1753         | 665.3563        | 333.1818         | 6  |
| 6  | 619.3378        | 310.1725        | 601.3272       | 301.1672         | L    | 595.3378        | 298.1725        | 577.3142        | 289.1607         | 577.3272        | 289.1672         | 5  |
| 7  | 707.3668        | 354.1871        | 689.3563       | 345.1818         | S    | 481.2567        | 241.1320        | 463.2331        | 232.1202         | 463.2461        | 232.1267         | 4  |
| 8  | 821.4479        | 411.2276        | 803.4374       | 402.2223         | L    | 393.2276        | 197.1174        | 375.2040        | 188.1056         | 375.2170        | 188.1122         | 3  |
| 9  | <b>951.4876</b> | 476.2474        | 933.4770       | 467.2421         | E    | 279.1465        | 140.0769        | 261.1229        | 131.0651         | 261.1359        | 131.0716         | 2  |
| 10 |                 |                 |                |                  | K    | 149.1069        | 75.0571         | 131.0833        | 66.0453          |                 |                  | 1  |

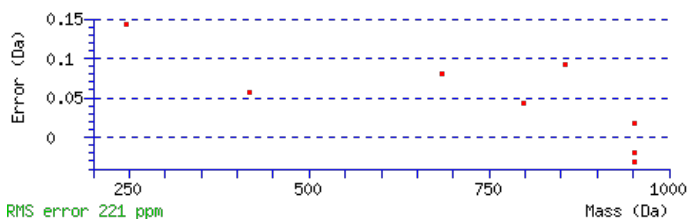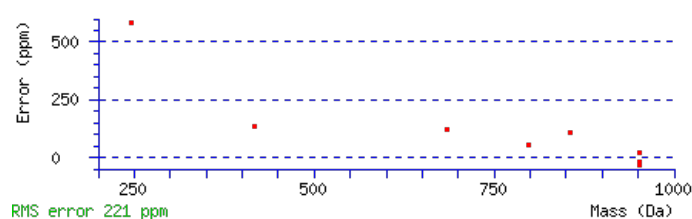

NCBI BLAST search of **EIGLSLSLEK**

(Parameters: blastp, nr protein database, expect=20000, no filter, PAM30)

Other BLAST [web gateways](#)

All matches to this query

## AT1G68150.1

| Score | Mr(calc)  | Delta   | Sequence                    |
|-------|-----------|---------|-----------------------------|
| 27.2  | 1098.5799 | -0.0017 | <a href="#">EIGLSLSLEK</a>  |
| 18.1  | 1098.5751 | 0.0031  | <a href="#">IKAVGGIAVME</a> |
| 8.5   | 1098.5799 | -0.0017 | <a href="#">VSLIIESEAK</a>  |
| 7.4   | 1098.5778 | 0.0004  | <a href="#">MLPARGNVVK</a>  |
| 5.0   | 1098.5799 | -0.0016 | <a href="#">IAVEESTLVK</a>  |
| 4.8   | 1098.5808 | -0.0025 | <a href="#">MVIIGLLMAPK</a> |
| 1.9   | 1098.5751 | 0.0031  | <a href="#">MSNVTIVVPK</a>  |
| 1.3   | 1098.5774 | 0.0008  | <a href="#">MVKPFLEPK</a>   |

Mascot: <http://www.matrixscience.com/>

**Peptide View**MS/MS Fragmentation of **AAKMEKPIVR**Found in **AT1G68410.1** in **TAIR\_Arabidopsis**, Symbols: | protein phosphatase 2C-related / PP2C-related | chr1:25653925-25655918 REVERSE

Match to Query 3661: 1141.666870 from(571.840711,2+) index(6073)

Title: Elution from: 54.931 to 54.931 scan no 7744 cid35.00 polarity:+

Data file D6h-2\_2.mgf

Click mouse within plot area to zoom in by factor of two about that point

Or,   to  Da Label all possible matches  Label matches used for scoring Show Y-axis 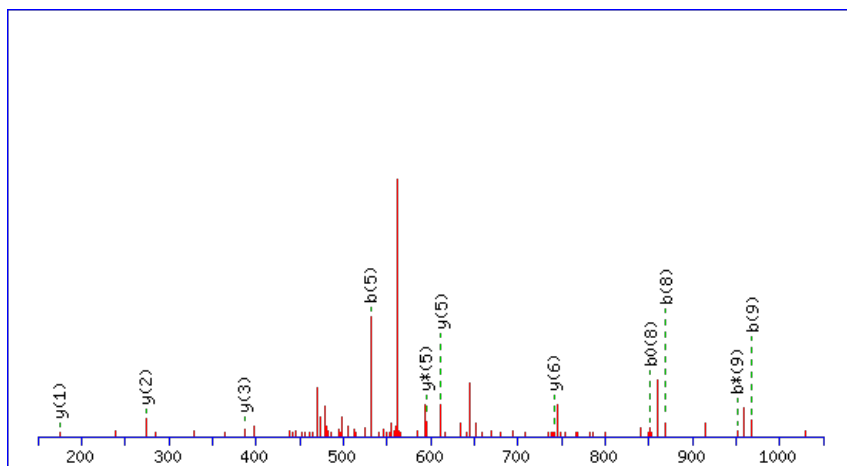Monoisotopic mass of neutral peptide  $M_r(\text{calc})$ : 1141.6641

Fixed modifications: Carbamidomethyl (C) (apply to specified residues or termini only)

Ions Score: 18 Expect: 0.026

Matches : 11/86 fragment ions using 31 most intense peaks ([help](#))

| #  | b               | b <sup>++</sup> | b*              | b <sup>*++</sup> | b <sup>0</sup>  | b <sup>0++</sup> | Seq. | y               | y <sup>++</sup> | y*              | y <sup>*++</sup> | y <sup>0</sup> | y <sup>0++</sup> | #  |
|----|-----------------|-----------------|-----------------|------------------|-----------------|------------------|------|-----------------|-----------------|-----------------|------------------|----------------|------------------|----|
| 1  | 72.0444         | 36.5258         |                 |                  |                 |                  | A    |                 |                 |                 |                  |                |                  | 10 |
| 2  | 143.0815        | 72.0444         |                 |                  |                 |                  | A    | 1071.6343       | 536.3208        | 1054.6078       | 527.8075         | 1053.6237      | 527.3155         | 9  |
| 3  | 271.1765        | 136.0919        | 254.1499        | 127.5786         |                 |                  | K    | 1000.5972       | 500.8022        | 983.5706        | 492.2890         | 982.5866       | 491.7970         | 8  |
| 4  | 402.2170        | 201.6121        | 385.1904        | 193.0988         |                 |                  | M    | 872.5022        | 436.7548        | 855.4757        | 428.2415         | 854.4917       | 427.7495         | 7  |
| 5  | <b>531.2595</b> | 266.1334        | 514.2330        | 257.6201         | 513.2490        | 257.1281         | E    | <b>741.4618</b> | 371.2345        | 724.4352        | 362.7212         | 723.4512       | 362.2292         | 6  |
| 6  | 659.3545        | 330.1809        | 642.3280        | 321.6676         | 641.3439        | 321.1756         | K    | <b>612.4192</b> | 306.7132        | <b>595.3926</b> | 298.1999         |                |                  | 5  |
| 7  | 756.4073        | 378.7073        | 739.3807        | 370.1940         | 738.3967        | 369.7020         | P    | 484.3242        | 242.6657        | 467.2976        | 234.1525         |                |                  | 4  |
| 8  | <b>869.4913</b> | 435.2493        | 852.4648        | 426.7360         | <b>851.4808</b> | 426.2440         | I    | <b>387.2714</b> | 194.1394        | 370.2449        | 185.6261         |                |                  | 3  |
| 9  | <b>968.5598</b> | 484.7835        | <b>951.5332</b> | 476.2702         | 950.5492        | 475.7782         | V    | <b>274.1874</b> | 137.5973        | 257.1608        | 129.0840         |                |                  | 2  |
| 10 |                 |                 |                 |                  |                 |                  | R    | <b>175.1190</b> | 88.0631         | 158.0924        | 79.5498          |                |                  | 1  |

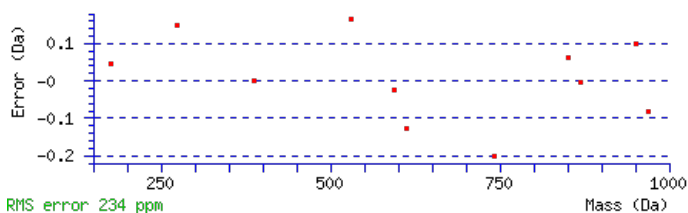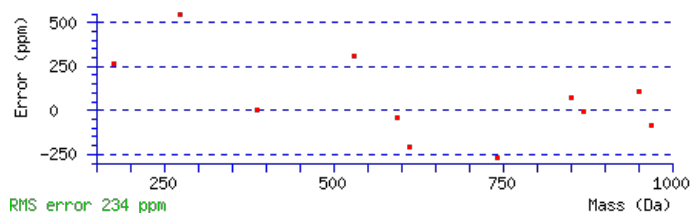NCBI BLAST search of [AAKMEKPIVR](#)

(Parameters: blastp, nr protein database, expect=20000, no filter, PAM30)

Other BLAST [web gateways](#)**All matches to this query**

| Score | Mr(calc) | Delta | Sequence |
|-------|----------|-------|----------|
|       |          |       |          |



## AT1G68410.1

|      |           |         |                            |
|------|-----------|---------|----------------------------|
| 18.3 | 1141.6641 | 0.0028  | <a href="#">AAKMEKPIVR</a> |
| 5.1  | 1141.6680 | -0.0011 | <a href="#">LQRSVDRLR</a>  |
| 0.3  | 1141.6679 | -0.0011 | <a href="#">ARSAERALR</a>  |

**Mascot:** <http://www.matrixscience.com/>

**Peptide View**MS/MS Fragmentation of **WIEVGAFYPFSR**

Found in **AT1G68560.1** in **TAIR\_Arabidopsis**, Symbols: ATXYL1, XYL1 | ATXYL1/XYL1 (ALPHA-XYLOSIDASE 1); alpha-N-arabinofuranosidase/hydrolase, hydrolyzing O-glycosyl compounds / xylan 1,4-beta-xylosidase | chr1:25738098-25741560 REVERSE

Match to Query 6487: 1470.729186 from(736.371869,2+) index(10497)

Title: Elution from: 95.704 to 95.704 scan no 14534 cid35.00 polarity:+

Data file D6h-1\_1.mgf

Click mouse within plot area to zoom in by factor of two about that point

Or,  to  Da

Label all possible matches  Label matches used for scoring

Show Y-axis

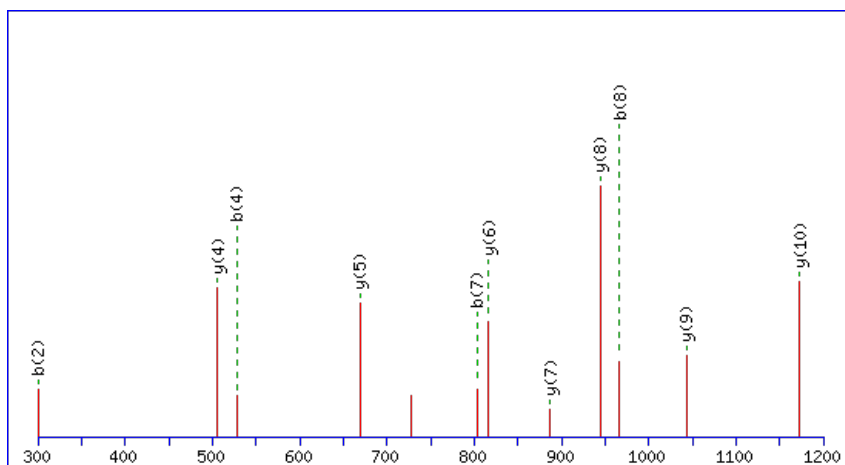

Monoisotopic mass of neutral peptide  $M_r(\text{calc})$ : 1470.7296

Fixed modifications: Carbamidomethyl (C) (apply to specified residues or termini only)

Ions Score: 73 Expect: 2.2e-007

Matches : 11/104 fragment ions using 12 most intense peaks ([help](#))

| #  | b               | b <sup>++</sup> | b <sup>0</sup> | b <sup>0++</sup> | Seq. | y                | y <sup>++</sup> | y*        | y <sup>*++</sup> | y <sup>0</sup> | y <sup>0++</sup> | #  |
|----|-----------------|-----------------|----------------|------------------|------|------------------|-----------------|-----------|------------------|----------------|------------------|----|
| 1  | 187.0866        | 94.0469         |                |                  | W    |                  |                 |           |                  |                |                  | 12 |
| 2  | <b>300.1707</b> | 150.5890        |                |                  | I    | 1285.6576        | 643.3324        | 1268.6310 | 634.8191         | 1267.6470      | 634.3271         | 11 |
| 3  | 429.2132        | 215.1103        | 411.2027       | 206.1050         | E    | <b>1172.5735</b> | 586.7904        | 1155.5469 | 578.2771         | 1154.5629      | 577.7851         | 10 |
| 4  | <b>528.2817</b> | 264.6445        | 510.2711       | 255.6392         | V    | <b>1043.5309</b> | 522.2691        | 1026.5043 | 513.7558         | 1025.5203      | 513.2638         | 9  |
| 5  | 585.3031        | 293.1552        | 567.2926       | 284.1499         | G    | <b>944.4625</b>  | 472.7349        | 927.4359  | 464.2216         | 926.4519       | 463.7296         | 8  |
| 6  | 656.3402        | 328.6738        | 638.3297       | 319.6685         | A    | <b>887.4410</b>  | 444.2241        | 870.4145  | 435.7109         | 869.4305       | 435.2189         | 7  |
| 7  | <b>803.4087</b> | 402.2080        | 785.3981       | 393.2027         | F    | <b>816.4039</b>  | 408.7056        | 799.3774  | 400.1923         | 798.3933       | 399.7003         | 6  |
| 8  | <b>966.4720</b> | 483.7396        | 948.4614       | 474.7343         | Y    | <b>669.3355</b>  | 335.1714        | 652.3089  | 326.6581         | 651.3249       | 326.1661         | 5  |
| 9  | 1063.5247       | 532.2660        | 1045.5142      | 523.2607         | P    | <b>506.2722</b>  | 253.6397        | 489.2456  | 245.1264         | 488.2616       | 244.6344         | 4  |
| 10 | 1210.5932       | 605.8002        | 1192.5826      | 596.7949         | F    | 409.2194         | 205.1133        | 392.1928  | 196.6001         | 391.2088       | 196.1081         | 3  |
| 11 | 1297.6252       | 649.3162        | 1279.6146      | 640.3109         | S    | 262.1510         | 131.5791        | 245.1244  | 123.0659         | 244.1404       | 122.5738         | 2  |
| 12 |                 |                 |                |                  | R    | 175.1190         | 88.0631         | 158.0924  | 79.5498          |                |                  | 1  |

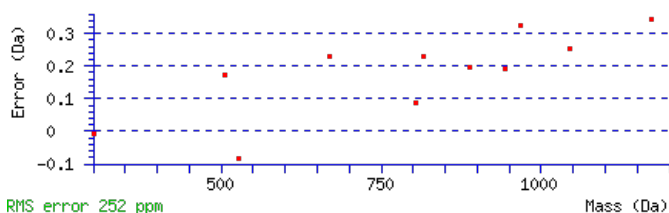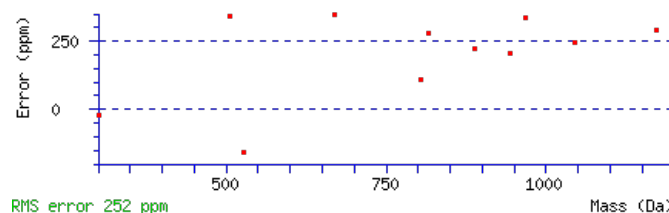

NCBI BLAST search of **WIEVGAFYPFSR**

(Parameters: blastp, nr protein database, expect=20000, no filter, PAM30)

Other BLAST [web gateways](#)

AT1G68560.1

All matches to this query

| Score | Mr(calc)  | Delta   | Sequence                        |
|-------|-----------|---------|---------------------------------|
| 73.0  | 1470.7296 | -0.0004 | <a href="#">WIEVGAFYPFSR</a>    |
| 1.6   | 1470.7314 | -0.0022 | <a href="#">DDAIAIGGNLAANEK</a> |

Mascot: <http://www.matrixscience.com/>

**Peptide View**MS/MS Fragmentation of **EAITEESTVK**Found in **AT1G68710.1** in **TAIR\_Arabidopsis**, Symbols: | haloacid dehalogenase-like hydrolase family protein | chr1:25797161-25801638  
REVERSE

Match to Query 3102: 1105.553192 from(553.783872,2+) index(4984)

Title: Elution from: 48.038 to 48.038 scan no 6415 cid35.00 polarity:+

Data file D12h-2\_1.mgf

Click mouse within plot area to zoom in by factor of two about that point

Or,   to  Da Label all possible matches  Label matches used for scoring Show Y-axis 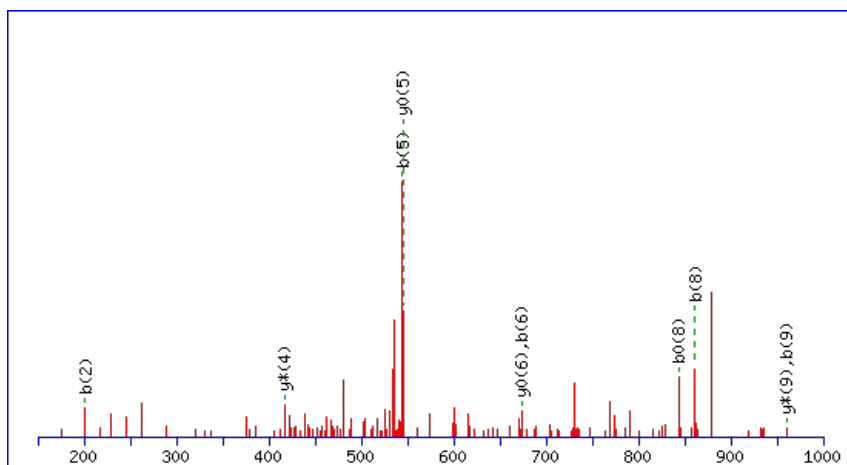Monoisotopic mass of neutral peptide  $M_r(\text{calc})$ : 1105.5503

Fixed modifications: Carbamidomethyl (C) (apply to specified residues or termini only)

Ions Score: 22 Expect: 0.036

Matches : 10/86 fragment ions using 16 most intense peaks ([help](#))

| #  | b               | b <sup>++</sup> | b <sup>0</sup>  | b <sup>0++</sup> | Seq. | y        | y <sup>++</sup> | y*              | y <sup>*++</sup> | y <sup>0</sup>  | y <sup>0++</sup> | #  |
|----|-----------------|-----------------|-----------------|------------------|------|----------|-----------------|-----------------|------------------|-----------------|------------------|----|
| 1  | 130.0499        | 65.5286         | 112.0393        | 56.5233          | E    |          |                 |                 |                  |                 |                  | 10 |
| 2  | <b>201.0870</b> | 101.0471        | 183.0764        | 92.0418          | A    | 977.5150 | 489.2611        | <b>960.4884</b> | 480.7478         | 959.5044        | 480.2558         | 9  |
| 3  | 314.1710        | 157.5892        | 296.1605        | 148.5839         | I    | 906.4779 | 453.7426        | 889.4513        | 445.2293         | 888.4673        | 444.7373         | 8  |
| 4  | 415.2187        | 208.1130        | 397.2082        | 199.1077         | T    | 793.3938 | 397.2005        | 776.3672        | 388.6873         | 775.3832        | 388.1953         | 7  |
| 5  | <b>544.2613</b> | 272.6343        | 526.2508        | 263.6290         | E    | 692.3461 | 346.6767        | 675.3196        | 338.1634         | <b>674.3355</b> | 337.6714         | 6  |
| 6  | <b>673.3039</b> | 337.1556        | 655.2933        | 328.1503         | E    | 563.3035 | 282.1554        | 546.2770        | 273.6421         | <b>545.2930</b> | 273.1501         | 5  |
| 7  | 760.3359        | 380.6716        | 742.3254        | 371.6663         | S    | 434.2609 | 217.6341        | <b>417.2344</b> | 209.1208         | 416.2504        | 208.6288         | 4  |
| 8  | <b>861.3836</b> | 431.1954        | <b>843.3731</b> | 422.1902         | T    | 347.2289 | 174.1181        | 330.2023        | 165.6048         | 329.2183        | 165.1128         | 3  |
| 9  | <b>960.4520</b> | 480.7297        | 942.4415        | 471.7244         | V    | 246.1812 | 123.5942        | 229.1547        | 115.0810         |                 |                  | 2  |
| 10 |                 |                 |                 |                  | K    | 147.1128 | 74.0600         | 130.0863        | 65.5468          |                 |                  | 1  |

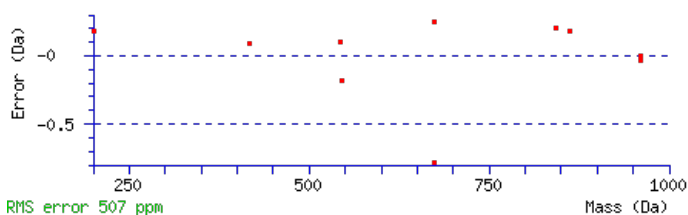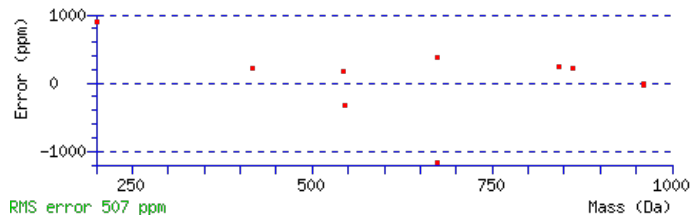NCBI BLAST search of **EAITEESTVK**

(Parameters: blastp, nr protein database, expect=20000, no filter, PAM30)

Other BLAST [web gateways](#)

All matches to this query

## AT1G68710.1

| Score | Mr(calc)  | Delta   | Sequence                   |
|-------|-----------|---------|----------------------------|
| 21.8  | 1105.5503 | 0.0029  | <a href="#">EAITEESTVK</a> |
| 11.5  | 1105.5550 | -0.0018 | <a href="#">MGSRGIINDK</a> |
| 9.0   | 1105.5556 | -0.0025 | <a href="#">NFHFIDSVK</a>  |
| 7.4   | 1105.5516 | 0.0016  | <a href="#">RYIPSEGER</a>  |
| 5.6   | 1105.5550 | -0.0018 | <a href="#">KADMQVRDK</a>  |
| 5.0   | 1105.5516 | 0.0016  | <a href="#">LYNNPDKSR</a>  |
| 4.3   | 1105.5550 | -0.0018 | <a href="#">ENSKILSCR</a>  |
| 3.2   | 1105.5550 | -0.0018 | <a href="#">CTPSARSSLK</a> |
| 1.7   | 1105.5556 | -0.0025 | <a href="#">IVGFHGYADK</a> |
| 1.3   | 1105.5549 | -0.0018 | <a href="#">RAMNEKTEK</a>  |

Mascot: <http://www.matrixscience.com/>

**Peptide View**MS/MS Fragmentation of **CGLEMALLNAMAVR**

Found in **AT1G68890.1** in **TAIR\_Arabidopsis**, Symbols: | 2-oxoglutarate decarboxylase/ hydro-lyase/ magnesium ion binding / thiamin pyrophosphate binding | chr1:25900651-25910216 FORWARD

Match to Query 7331: 1582.698034 from(792.356293,2+) index(3723)

Title: Elution from: 35.678 to 35.678 scan no 4602 cid35.00 polarity:+

Data file C7-2\_1.mgf

Click mouse within plot area to zoom in by factor of two about that point

Or,   to  Da

Label all possible matches  Label matches used for scoring

Show Y-axis

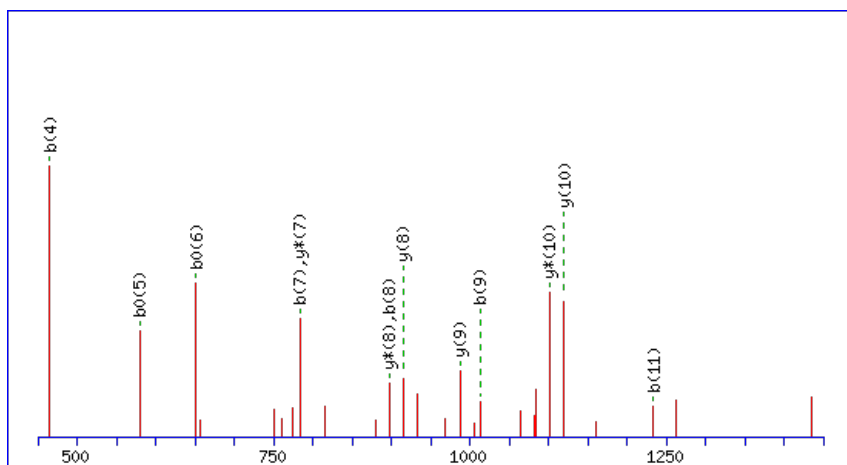

**Monoisotopic mass of neutral peptide Mr(calc):** 1582.7008

**Fixed modifications:** Carbamidomethyl (C) (apply to specified residues or termini only)

**Variable modifications:**

**M11** : Oxidation (M), with neutral losses 0.0000 (shown in table), 63.9983

**Ions Score:** 37 **Expect:** 0.0021

**Matches** : 13/178 fragment ions using 17 most intense peaks ([help](#))

| #  | b                | b <sup>++</sup> | b <sup>*</sup> | b <sup>*++</sup> | b <sup>0</sup>  | b <sup>0++</sup> | Seq. | y                | y <sup>++</sup> | y <sup>*</sup>   | y <sup>*++</sup> | y <sup>0</sup> | y <sup>0++</sup> | #  |
|----|------------------|-----------------|----------------|------------------|-----------------|------------------|------|------------------|-----------------|------------------|------------------|----------------|------------------|----|
| 1  | 163.0320         | 82.0196         |                |                  |                 |                  | C    |                  |                 |                  |                  |                |                  | 14 |
| 2  | 221.0505         | 111.0289        |                |                  |                 |                  | G    | 1421.6834        | 711.3453        | 1403.6598        | 702.3335         | 1403.6728      | 702.3400         | 13 |
| 3  | 335.1316         | 168.0694        |                |                  |                 |                  | L    | 1363.6649        | 682.3361        | 1345.6413        | 673.3243         | 1345.6543      | 673.3308         | 12 |
| 4  | <b>465.1712</b>  | 233.0892        |                |                  | 447.1607        | 224.0840         | E    | 1249.5838        | 625.2955        | 1231.5602        | 616.2837         | 1231.5732      | 616.2902         | 11 |
| 5  | 597.2087         | 299.1080        |                |                  | <b>579.1982</b> | 290.1027         | M    | <b>1119.5441</b> | 560.2757        | <b>1101.5206</b> | 551.2639         |                |                  | 10 |
| 6  | 669.2429         | 335.1251        |                |                  | <b>651.2323</b> | 326.1198         | A    | <b>987.5066</b>  | 494.2569        | 969.4830         | 485.2452         |                |                  | 9  |
| 7  | <b>783.3240</b>  | 392.1656        |                |                  | 765.3134        | 383.1603         | L    | <b>915.4725</b>  | 458.2399        | <b>897.4489</b>  | 449.2281         |                |                  | 8  |
| 8  | <b>897.4051</b>  | 449.2062        |                |                  | 879.3945        | 440.2009         | L    | 801.3914         | 401.1993        | <b>783.3678</b>  | 392.1875         |                |                  | 7  |
| 9  | <b>1013.4421</b> | 507.2247        | 995.4185       | 498.2129         | 995.4315        | 498.2194         | N    | 687.3103         | 344.1588        | 669.2867         | 335.1470         |                |                  | 6  |
| 10 | 1085.4762        | 543.2418        | 1067.4526      | 534.2300         | 1067.4657       | 534.2365         | A    | 571.2733         | 286.1403        | 553.2497         | 277.1285         |                |                  | 5  |
| 11 | <b>1233.5087</b> | 617.2580        | 1215.4851      | 608.2462         | 1215.4981       | 608.2527         | M    | 499.2391         | 250.1232        | 481.2155         | 241.1114         |                |                  | 4  |
| 12 | 1305.5428        | 653.2750        | 1287.5192      | 644.2633         | 1287.5323       | 644.2698         | A    | 351.2067         | 176.1070        | 333.1831         | 167.0952         |                |                  | 3  |
| 13 | 1405.6083        | 703.3078        | 1387.5847      | 694.2960         | 1387.5977       | 694.3025         | V    | 279.1725         | 140.0899        | 261.1490         | 131.0781         |                |                  | 2  |
| 14 |                  |                 |                |                  |                 |                  | R    | 179.1071         | 90.0572         | 161.0835         | 81.0454          |                |                  | 1  |

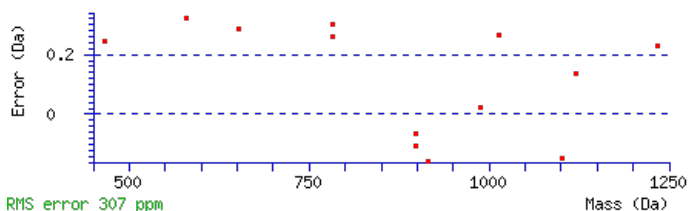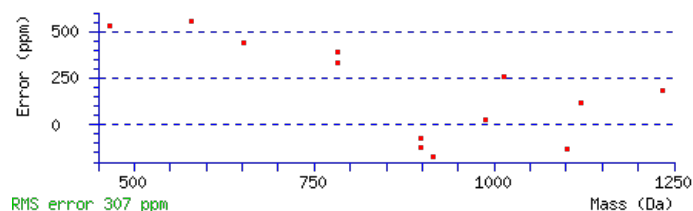

# AT1G68890.1

NCBI **BLAST** search of [CGLEMALLNAMAVR](#)

(Parameters: blastp, nr protein database, expect=20000, no filter, PAM30)

Other BLAST [web gateways](#)

## All matches to this query

| Score | Mr(calc)  | Delta   | Sequence                         | Site Analysis        |
|-------|-----------|---------|----------------------------------|----------------------|
| 36.7  | 1582.7008 | -0.0028 | <a href="#">CGLEMALLNAMAVR</a>   | Oxidation M11 99.95% |
| 11.8  | 1582.6965 | 0.0015  | <a href="#">DFSEEGPSGRVKEK</a>   |                      |
| 9.5   | 1582.7026 | -0.0045 | <a href="#">DGAQVVVNCSEGRGDK</a> |                      |
| 4.2   | 1582.7014 | -0.0034 | <a href="#">RFPGTVNWSEGGQK</a>   |                      |
| 4.0   | 1582.7008 | -0.0028 | <a href="#">CGLEMALLNAMAVR</a>   | Oxidation M5 0.05%   |
| 3.5   | 1582.7021 | -0.0041 | <a href="#">SMQADELKTTWQK</a>    |                      |
| 1.8   | 1582.6936 | 0.0044  | <a href="#">VSEFQGYVYFMAK</a>    |                      |
| 1.5   | 1582.6999 | -0.0019 | <a href="#">RKQMLETTTSEQP</a>    |                      |
| 0.8   | 1582.6952 | 0.0028  | <a href="#">DCLNRIISCGEVK</a>    |                      |
| 0.6   | 1582.7022 | -0.0041 | <a href="#">NNNFDMKIEDVVK</a>    |                      |

Mascot: <http://www.matrixscience.com/>

**Peptide View**MS/MS Fragmentation of **MSQLLCRISK**

Found in **AT1G68960.1** in **TAIR\_Arabidopsis**, Symbols: | similar to unknown protein [Arabidopsis thaliana] (TAIR:AT5G03390.1); contains InterPro domain Protein of unknown function DUF295 (InterPro:IPR005174) | chr1:25933606-25934806 FORWARD

Match to Query 4752: 1266.600524 from(634.307538,2+) index(1725)

Title: Elution from: 22.198 to 22.198 scan no 2292 cid35.00 polarity:+

Data file 0-2\_1.mgf

Click mouse within plot area to zoom in by factor of two about that point

Or,   to  Da

Label all possible matches  Label matches used for scoring

Show Y-axis

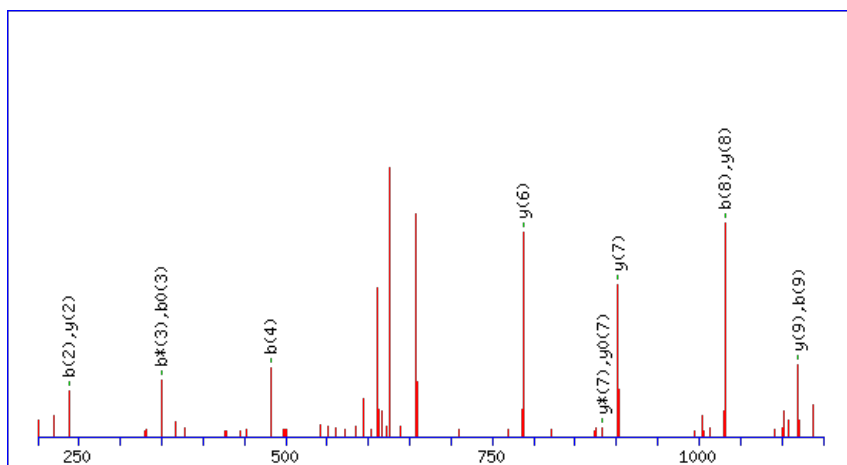

**Monoisotopic mass of neutral peptide Mr(calc):** 1266.6001

**Fixed modifications:** Carbamidomethyl (C) (apply to specified residues or termini only)

**Variable modifications:**

**M1** : Oxidation (M), with neutral losses 0.0000 (shown in table), 63.9983

**Ions Score:** 48 **Expect:** 0.00015

**Matches** : 13/148 fragment ions using 10 most intense peaks ([help](#))

| #  | b                | b <sup>++</sup> | b <sup>*</sup>  | b <sup>*+</sup> | b <sup>0</sup>  | b <sup>0+</sup> | Seq. | y                | y <sup>++</sup> | y <sup>*</sup>  | y <sup>*+</sup> | y <sup>0</sup>  | y <sup>0+</sup> | #  |
|----|------------------|-----------------|-----------------|-----------------|-----------------|-----------------|------|------------------|-----------------|-----------------|-----------------|-----------------|-----------------|----|
| 1  | 149.0397         | 75.0235         |                 |                 |                 |                 | M    |                  |                 |                 |                 |                 |                 | 10 |
| 2  | <b>237.0688</b>  | 119.0380        |                 |                 | 219.0582        | 110.0327        | S    | <b>1119.5749</b> | 560.2911        | 1101.5513       | 551.2793        | 1101.5643       | 551.2858        | 9  |
| 3  | 367.1214         | 184.0643        | <b>349.0978</b> | 175.0526        | <b>349.1109</b> | 175.0591        | Q    | <b>1031.5459</b> | 516.2766        | 1013.5223       | 507.2648        | 1013.5353       | 507.2713        | 8  |
| 4  | <b>481.2025</b>  | 241.1049        | 463.1789        | 232.0931        | 463.1920        | 232.0996        | L    | <b>901.4932</b>  | 451.2502        | <b>883.4696</b> | 442.2384        | <b>883.4826</b> | 442.2450        | 7  |
| 5  | 595.2836         | 298.1454        | 577.2600        | 289.1337        | 577.2731        | 289.1402        | L    | <b>787.4121</b>  | 394.2097        | 769.3885        | 385.1979        | 769.4015        | 385.2044        | 6  |
| 6  | 757.3083         | 379.1578        | 739.2848        | 370.1460        | 739.2978        | 370.1525        | C    | 673.3310         | 337.1691        | 655.3074        | 328.1573        | 655.3204        | 328.1639        | 5  |
| 7  | 917.3976         | 459.2024        | 899.3740        | 450.1906        | 899.3870        | 450.1971        | R    | 511.3063         | 256.1568        | 493.2827        | 247.1450        | 493.2957        | 247.1515        | 4  |
| 8  | <b>1031.4787</b> | 516.2430        | 1013.4551       | 507.2312        | 1013.4681       | 507.2377        | I    | 351.2170         | 176.1122        | 333.1935        | 167.1004        | 333.2065        | 167.1069        | 3  |
| 9  | <b>1119.5078</b> | 560.2575        | 1101.4842       | 551.2457        | 1101.4972       | 551.2522        | S    | <b>237.1359</b>  | 119.0716        | 219.1124        | 110.0598        | 219.1254        | 110.0663        | 2  |
| 10 |                  |                 |                 |                 |                 |                 | K    | 149.1069         | 75.0571         | 131.0833        | 66.0453         |                 |                 | 1  |

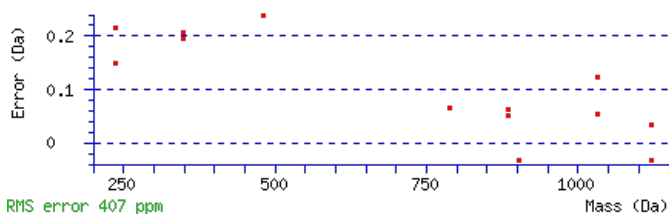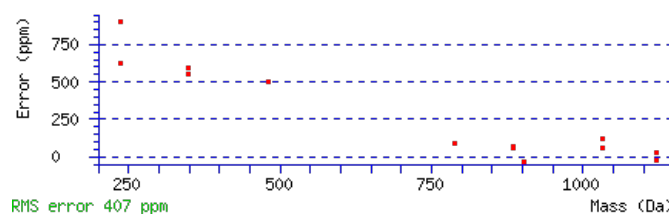

NCBI **BLAST** search of **MSQLLCRISK**

(Parameters: blastp, nr protein database, expect=20000, no filter, PAM30)

Other BLAST [web gateways](#)

**All matches to this query**



## AT1G68960.1

| Score | Mr(calc)  | Delta   | Sequence                    |
|-------|-----------|---------|-----------------------------|
| 47.7  | 1266.6001 | 0.0004  | <a href="#">MSQLLCRISK</a>  |
| 46.6  | 1266.6014 | -0.0009 | <a href="#">RLTYDEIQSK</a>  |
| 15.5  | 1266.6037 | -0.0031 | <a href="#">KSFWLETASGK</a> |
| 10.1  | 1266.6014 | -0.0009 | <a href="#">RYEELEAKSK</a>  |
| 7.0   | 1266.6014 | -0.0009 | <a href="#">EITKATNNFSK</a> |
| 5.9   | 1266.5974 | 0.0031  | <a href="#">KMESLSSITMK</a> |
| 4.4   | 1266.6041 | -0.0036 | <a href="#">RGYNLVDAVSR</a> |
| 4.1   | 1266.6014 | -0.0009 | <a href="#">KTSGYIEGEIR</a> |
| 2.1   | 1266.6014 | -0.0009 | <a href="#">TKDKVNEGAYK</a> |
| 0.7   | 1266.6041 | -0.0036 | <a href="#">SRSTGLSSWR</a>  |

Mascot: <http://www.matrixscience.com/>

**Peptide View**MS/MS Fragmentation of **ENGSLAAFLK**Found in **AT1G68980.1** in **TAIR\_Arabidopsis**, Symbols: | pentatricopeptide (PPR) repeat-containing protein | chr1:25936686-25938545  
FORWARD

Match to Query 2989: 1060.522262 from(531.268407,2+) index(4876)

Title: Elution from: 43.288 to 43.288 scan no 6142 cid35.00 polarity:+

Data file 0-2\_3.mgf

Click mouse within plot area to zoom in by factor of two about that point

Or,   to  Da Label all possible matches  Label matches used for scoring Show Y-axis 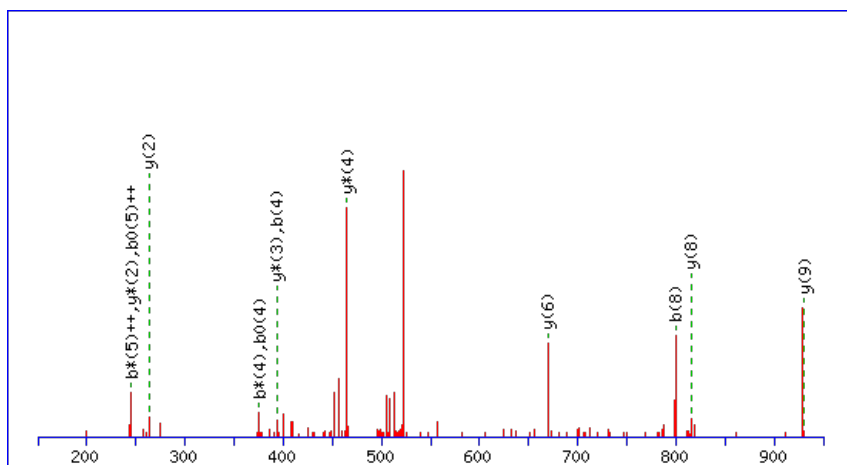Monoisotopic mass of neutral peptide  $M_r(\text{calc})$ : 1060.5197

Fixed modifications: Carbamidomethyl (C) (apply to specified residues or termini only)

Ions Score: 27 Expect: 0.03

Matches : 13/94 fragment ions using 16 most intense peaks ([help](#))

| #  | b               | b <sup>++</sup> | b*              | b <sup>*++</sup> | b <sup>0</sup>  | b <sup>0++</sup> | Seq. | y               | y <sup>++</sup> | y*              | y <sup>*++</sup> | y <sup>0</sup> | y <sup>0++</sup> | #  |
|----|-----------------|-----------------|-----------------|------------------|-----------------|------------------|------|-----------------|-----------------|-----------------|------------------|----------------|------------------|----|
| 1  | 131.0469        | 66.0271         |                 |                  | 113.0363        | 57.0218          | E    |                 |                 |                 |                  |                |                  | 10 |
| 2  | 247.0839        | 124.0456        | 229.0603        | 115.0338         | 229.0733        | 115.0403         | N    | <b>931.4874</b> | 466.2473        | 913.4638        | 457.2355         | 913.4768       | 457.2420         | 9  |
| 3  | 305.1024        | 153.0548        | 287.0788        | 144.0430         | 287.0918        | 144.0496         | G    | <b>815.4504</b> | 408.2288        | 797.4268        | 399.2170         | 797.4398       | 399.2235         | 8  |
| 4  | <b>393.1315</b> | 197.0694        | <b>375.1079</b> | 188.0576         | <b>375.1209</b> | 188.0641         | S    | 757.4319        | 379.2196        | 739.4083        | 370.2078         | 739.4213       | 370.2143         | 7  |
| 5  | 507.2126        | 254.1099        | 489.1890        | <b>245.0981</b>  | 489.2020        | <b>245.1046</b>  | L    | <b>669.4028</b> | 335.2050        | 651.3792        | 326.1933         |                |                  | 6  |
| 6  | 579.2467        | 290.1270        | 561.2231        | 281.1152         | 561.2361        | 281.1217         | A    | 555.3217        | 278.1645        | 537.2981        | 269.1527         |                |                  | 5  |
| 7  | 651.2809        | 326.1441        | 633.2573        | 317.1323         | 633.2703        | 317.1388         | A    | 483.2876        | 242.1474        | <b>465.2640</b> | 233.1356         |                |                  | 4  |
| 8  | <b>799.3463</b> | 400.1768        | 781.3227        | 391.1650         | 781.3357        | 391.1715         | F    | 411.2534        | 206.1303        | <b>393.2298</b> | 197.1186         |                |                  | 3  |
| 9  | 913.4274        | 457.2173        | 895.4038        | 448.2056         | 895.4168        | 448.2121         | L    | <b>263.1880</b> | 132.0976        | <b>245.1644</b> | 123.0858         |                |                  | 2  |
| 10 |                 |                 |                 |                  |                 |                  | K    | 149.1069        | 75.0571         | 131.0833        | 66.0453          |                |                  | 1  |

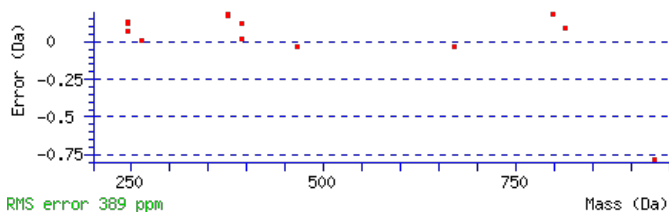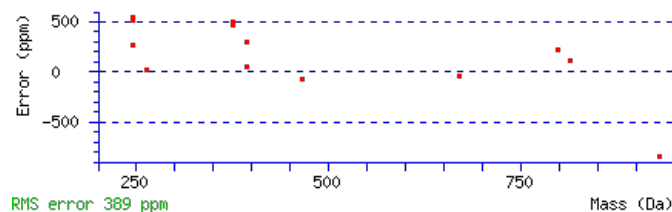NCBI BLAST search of **ENGSLAAFLK**

(Parameters: blastp, nr protein database, expect=20000, no filter, PAM30)

Other BLAST [web gateways](#)**All matches to this query**

## AT1G68980.1

| Score | Mr(calc)  | Delta   | Sequence                   |
|-------|-----------|---------|----------------------------|
| 27.0  | 1060.5197 | 0.0025  | <a href="#">ENGLAFLK</a>   |
| 17.9  | 1060.5231 | -0.0009 | <a href="#">MEKNISISK</a>  |
| 14.9  | 1060.5231 | -0.0008 | <a href="#">TREALLMS</a>   |
| 13.7  | 1060.5231 | -0.0008 | <a href="#">KMKEQLK</a>    |
| 13.7  | 1060.5210 | 0.0012  | <a href="#">QMKPVMRR</a>   |
| 12.8  | 1060.5197 | 0.0026  | <a href="#">IQQFDGIK</a>   |
| 11.3  | 1060.5197 | 0.0026  | <a href="#">LFEVEVGR</a>   |
| 11.1  | 1060.5231 | -0.0008 | <a href="#">GLAMVSQSLK</a> |
| 9.5   | 1060.5253 | -0.0031 | <a href="#">KPMFAALEK</a>  |
| 8.3   | 1060.5197 | 0.0025  | <a href="#">ESTSWKAIK</a>  |

Mascot: <http://www.matrixscience.com/>

**Peptide View**MS/MS Fragmentation of **RVIAGMGAQK**Found in **AT1G68990.1** in **TAIR\_Arabidopsis**, Symbols: | DNA-directed RNA polymerase, mitochondrial (RPOMT) | chr1:25939162-25944418  
REVERSE

Match to Query 3055: 1044.531084 from(523.272818,2+) index(5807)

Title: Elution from: 50.455 to 50.455 scan no 7328 cid35.00 polarity:+

Data file D1d-3\_2.mgf

Click mouse within plot area to zoom in by factor of two about that point

Or,   to  Da Label all possible matches  Label matches used for scoring Show Y-axis 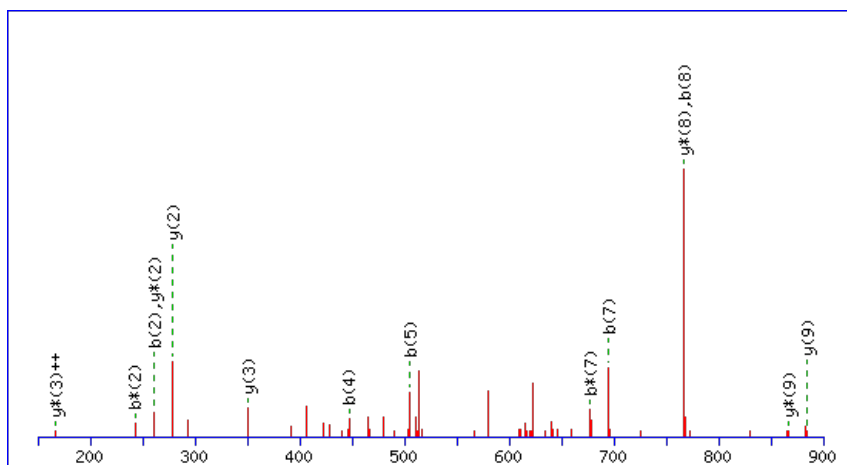Monoisotopic mass of neutral peptide  $M_r(\text{calc})$ : 1044.5308

Fixed modifications: Carbamidomethyl (C) (apply to specified residues or termini only)

Ions Score: 29 Expect: 0.0096

Matches : 14/72 fragment ions using 24 most intense peaks ([help](#))

| #  | b               | b <sup>++</sup> | b*              | b <sup>*++</sup> | Seq. | y               | y <sup>++</sup> | y*              | y <sup>*++</sup> | #  |
|----|-----------------|-----------------|-----------------|------------------|------|-----------------|-----------------|-----------------|------------------|----|
| 1  | 161.0965        | 81.0519         | 143.0729        | 72.0401          | R    |                 |                 |                 |                  | 10 |
| 2  | <b>261.1620</b> | 131.0846        | <b>243.1384</b> | 122.0728         | V    | <b>885.4489</b> | 443.2281        | <b>867.4253</b> | 434.2163         | 9  |
| 3  | 375.2431        | 188.1252        | 357.2195        | 179.1134         | I    | 785.3834        | 393.1954        | <b>767.3599</b> | 384.1836         | 8  |
| 4  | <b>447.2772</b> | 224.1422        | 429.2536        | 215.1305         | A    | 671.3023        | 336.1548        | 653.2788        | 327.1430         | 7  |
| 5  | <b>505.2957</b> | 253.1515        | 487.2721        | 244.1397         | G    | 599.2682        | 300.1377        | 581.2446        | 291.1259         | 6  |
| 6  | 637.3332        | 319.1703        | 619.3097        | 310.1585         | M    | 541.2497        | 271.1285        | 523.2261        | 262.1167         | 5  |
| 7  | <b>695.3517</b> | 348.1795        | <b>677.3282</b> | 339.1677         | G    | 409.2122        | 205.1097        | 391.1886        | 196.0979         | 4  |
| 8  | <b>767.3859</b> | 384.1966        | 749.3623        | 375.1848         | A    | <b>351.1937</b> | 176.1005        | 333.1701        | <b>167.0887</b>  | 3  |
| 9  | 897.4385        | 449.2229        | 879.4150        | 440.2111         | Q    | <b>279.1595</b> | 140.0834        | <b>261.1359</b> | 131.0716         | 2  |
| 10 |                 |                 |                 |                  | K    | 149.1069        | 75.0571         | 131.0833        | 66.0453          | 1  |

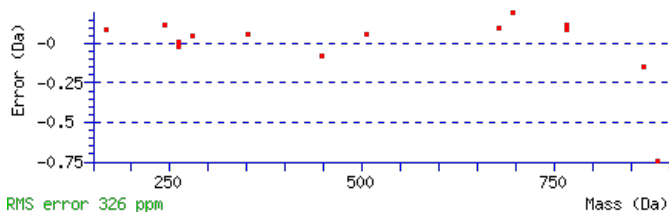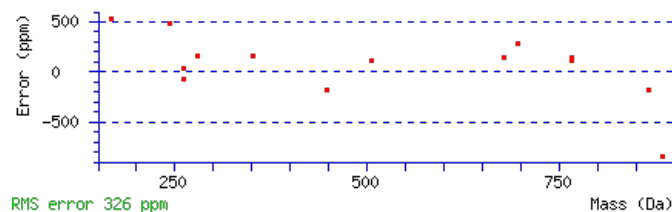NCBI BLAST search of **RVIAGMGAQK**

(Parameters: blastp, nr protein database, expect=20000, no filter, PAM30)

Other BLAST [web gateways](#)

All matches to this query

## AT1G68990.1

| Score | Mr(calc)  | Delta  | Sequence                   |
|-------|-----------|--------|----------------------------|
| 28.8  | 1044.5308 | 0.0002 | <a href="#">RVIAGMGAQK</a> |
| 17.8  | 1044.5308 | 0.0002 | <a href="#">MRVLGEAVR</a>  |
| 16.6  | 1044.5309 | 0.0002 | <a href="#">KAGAMNALVR</a> |
| 13.6  | 1044.5282 | 0.0029 | <a href="#">VLAMAQEEK</a>  |
| 11.0  | 1044.5282 | 0.0029 | <a href="#">VLVTMQAQK</a>  |
| 8.0   | 1044.5309 | 0.0002 | <a href="#">MAQKNAIVR</a>  |
| 8.0   | 1044.5309 | 0.0002 | <a href="#">MAQKNALVR</a>  |
| 6.3   | 1044.5282 | 0.0029 | <a href="#">EMEKLIVR</a>   |
| 5.7   | 1044.5309 | 0.0002 | <a href="#">VLRDMKPR</a>   |
| 5.5   | 1044.5282 | 0.0029 | <a href="#">QMLKIQEK</a>   |

Mascot: <http://www.matrixscience.com/>

**Peptide View**MS/MS Fragmentation of **AESKDDEAKK**

Found in **AT1G69030.1** in **TAIR\_Arabidopsis**, Symbols: | similar to BSD domain-containing protein [Arabidopsis thaliana] (TAIR:AT1G26300.1); similar to hypothetical protein [Vitis vinifera] (GB:CAN73547.1); contains InterPro domain BSD (InterPro:IPR005607) | chr1:25951092-25952925 REVERSE

Match to Query 3891: 1146.515542 from(574.265047,2+) index(1627)

Title: Elution from: 20.214 to 20.214 scan no 2136 cid35.00 polarity:+

Data file C7-3\_2.mgf

Click mouse within plot area to zoom in by factor of two about that point

Or,   to  Da

Label all possible matches  Label matches used for scoring

Show Y-axis

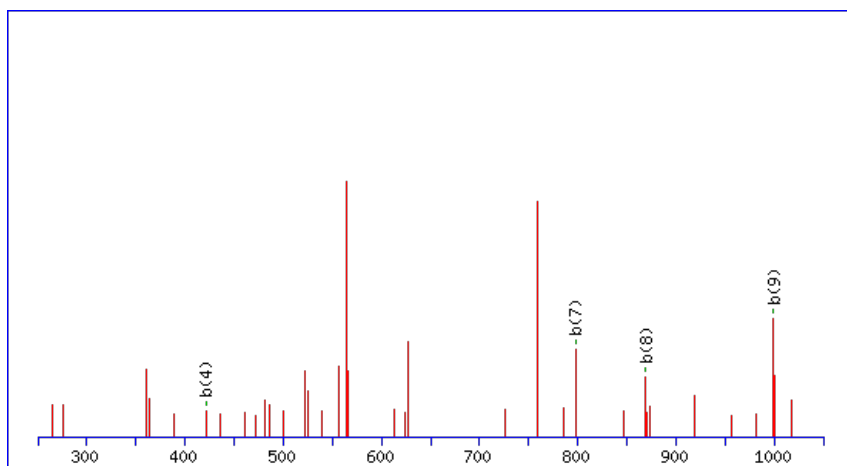

**Monoisotopic mass of neutral peptide Mr(calc):** 1146.5179

**Fixed modifications:** Carbamidomethyl (C) (apply to specified residues or termini only)

**Ions Score:** 24 **Expect:** 0.037

**Matches:** 4/94 fragment ions using 8 most intense peaks ([help](#))

| #  | b               | b <sup>++</sup> | b*       | b <sup>*++</sup> | b <sup>0</sup> | b <sup>0++</sup> | Seq. | y         | y <sup>++</sup> | y*        | y <sup>*++</sup> | y <sup>0</sup> | y <sup>0++</sup> | #  |
|----|-----------------|-----------------|----------|------------------|----------------|------------------|------|-----------|-----------------|-----------|------------------|----------------|------------------|----|
| 1  | 73.0414         | 37.0244         |          |                  |                |                  | A    |           |                 |           |                  |                |                  | 10 |
| 2  | 203.0811        | 102.0442        |          |                  | 185.0705       | 93.0389          | E    | 1075.4910 | 538.2491        | 1057.4674 | 529.2374         | 1057.4804      | 529.2439         | 9  |
| 3  | 291.1101        | 146.0587        |          |                  | 273.0996       | 137.0534         | S    | 945.4514  | 473.2293        | 927.4278  | 464.2175         | 927.4408       | 464.2240         | 8  |
| 4  | <b>421.1991</b> | 211.1032        | 403.1756 | 202.0914         | 403.1886       | 202.0979         | K    | 857.4223  | 429.2148        | 839.3987  | 420.2030         | 839.4118       | 420.2095         | 7  |
| 5  | 537.2231        | 269.1152        | 519.1995 | 260.1034         | 519.2126       | 260.1099         | D    | 727.3333  | 364.1703        | 709.3097  | 355.1585         | 709.3227       | 355.1650         | 6  |
| 6  | 667.2628        | 334.1350        | 649.2392 | 325.1232         | 649.2522       | 325.1297         | E    | 611.3093  | 306.1583        | 593.2857  | 297.1465         | 593.2987       | 297.1530         | 5  |
| 7  | <b>797.3024</b> | 399.1548        | 779.2788 | 390.1430         | 779.2918       | 390.1495         | E    | 481.2697  | 241.1385        | 463.2461  | 232.1267         | 463.2591       | 232.1332         | 4  |
| 8  | <b>869.3365</b> | 435.1719        | 851.3129 | 426.1601         | 851.3260       | 426.1666         | A    | 351.2301  | 176.1187        | 333.2065  | 167.1069         |                |                  | 3  |
| 9  | <b>999.4256</b> | 500.2164        | 981.4020 | 491.2046         | 981.4150       | 491.2111         | K    | 279.1959  | 140.1016        | 261.1723  | 131.0898         |                |                  | 2  |
| 10 |                 |                 |          |                  |                |                  | K    | 149.1069  | 75.0571         | 131.0833  | 66.0453          |                |                  | 1  |

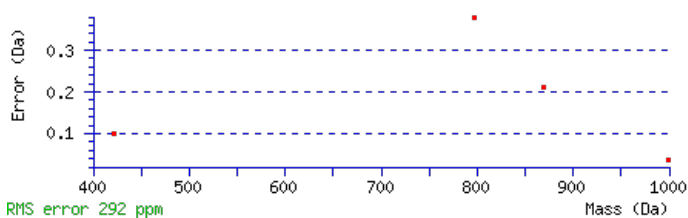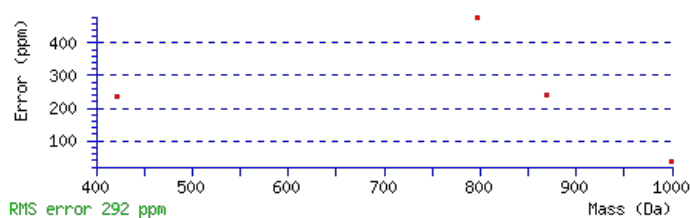

NCBI **BLAST** search of [AESKDDEAKK](#)

(Parameters: blastp, nr protein database, expect=20000, no filter, PAM30)

Other BLAST [web gateways](#)

**All matches to this query**

## AT1G69030.1

| Score | Mr(calc)  | Delta   | Sequence                     |
|-------|-----------|---------|------------------------------|
| 23.7  | 1146.5179 | -0.0023 | <a href="#">AESKDDEEAKK</a>  |
| 14.4  | 1146.5179 | -0.0023 | <a href="#">TLADASTAEQK</a>  |
| 12.4  | 1146.5131 | 0.0024  | <a href="#">GIDLMOQNAQK</a>  |
| 12.3  | 1146.5131 | 0.0024  | <a href="#">EDLVNQCKK</a>    |
| 12.3  | 1146.5179 | -0.0023 | <a href="#">VGISTNETGEK</a>  |
| 12.2  | 1146.5188 | -0.0032 | <a href="#">MGPDVAVAMKAK</a> |
| 11.9  | 1146.5179 | -0.0023 | <a href="#">EASQTETLQK</a>   |
| 11.0  | 1146.5154 | 0.0002  | <a href="#">EVMTVGFESHK</a>  |
| 10.7  | 1146.5132 | 0.0024  | <a href="#">MKEESHKTK</a>    |
| 8.8   | 1146.5154 | 0.0002  | <a href="#">MGAEHFSLVK</a>   |

Mascot: <http://www.matrixscience.com/>

**Peptide View**MS/MS Fragmentation of **FSGEILR**

Found in **AT1G69720.1** in **TAIR\_Arabidopsis**, Symbols: HO3 | HO3 (HEME OXYGENASE 3); heme oxygenase (decyclizing) | chr1:26230841-26232082 FORWARD

Match to Query 1163: 830.415348 from(416.214950,2+) index(3296)

Title: Elution from: 32.526 to 32.526 scan no 4127 cid35.00 polarity:+

Data file 0-2\_2.mgf

Click mouse within plot area to zoom in by factor of two about that point

Or,   to  Da

Label all possible matches  Label matches used for scoring

Show Y-axis

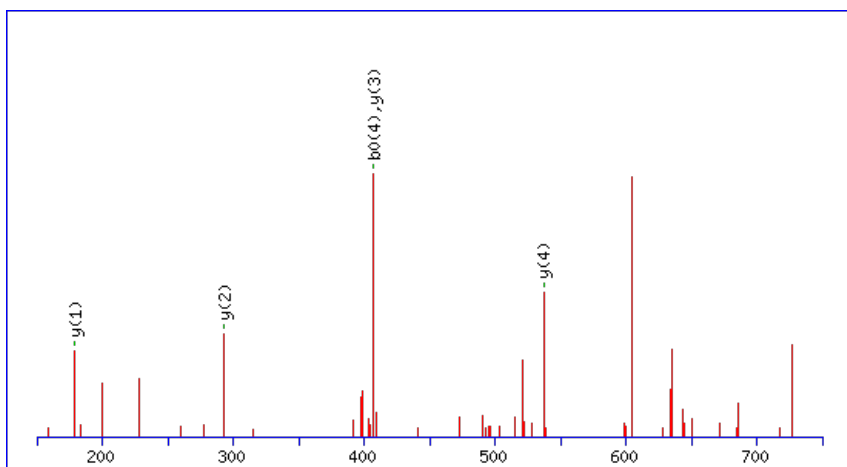

**Monoisotopic mass of neutral peptide Mr(calc):** 830.4146

**Fixed modifications:** Carbamidomethyl (C) (apply to specified residues or termini only)

**Ions Score:** 29 **Expect:** 0.02

**Matches:** 5/52 fragment ions using 6 most intense peaks ([help](#))

| # | b        | b <sup>++</sup> | b <sup>0</sup> | b <sup>0++</sup> | Seq. | y        | y <sup>++</sup> | y*       | y <sup>*++</sup> | y <sup>0</sup> | y <sup>0++</sup> | # |
|---|----------|-----------------|----------------|------------------|------|----------|-----------------|----------|------------------|----------------|------------------|---|
| 1 | 149.0727 | 75.0400         |                |                  | F    |          |                 |          |                  |                |                  | 7 |
| 2 | 237.1018 | 119.0545        | 219.0912       | 110.0492         | S    | 683.3565 | 342.1819        | 665.3329 | 333.1701         | 665.3459       | 333.1766         | 6 |
| 3 | 295.1203 | 148.0638        | 277.1097       | 139.0585         | G    | 595.3274 | 298.1673        | 577.3038 | 289.1556         | 577.3169       | 289.1621         | 5 |
| 4 | 425.1599 | 213.0836        | 407.1494       | 204.0783         | E    | 537.3089 | 269.1581        | 519.2853 | 260.1463         | 519.2984       | 260.1528         | 4 |
| 5 | 539.2410 | 270.1241        | 521.2304       | 261.1189         | I    | 407.2693 | 204.1383        | 389.2457 | 195.1265         |                |                  | 3 |
| 6 | 653.3221 | 327.1647        | 635.3115       | 318.1594         | L    | 293.1882 | 147.0977        | 275.1646 | 138.0859         |                |                  | 2 |
| 7 |          |                 |                |                  | R    | 179.1071 | 90.0572         | 161.0835 | 81.0454          |                |                  | 1 |

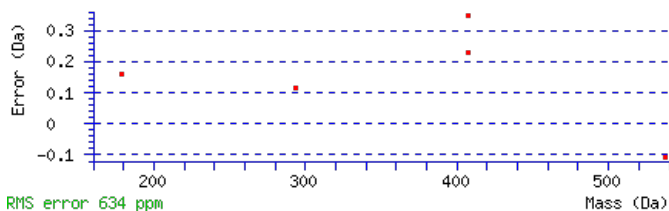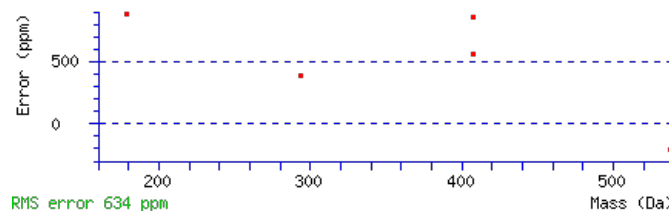

NCBI **BLAST** search of **FSGEILR**

(Parameters: blastp, nr protein database, expect=20000, no filter, PAM30)

Other BLAST [web gateways](#)

**All matches to this query**

| Score | Mr(calc) | Delta  | Sequence                |
|-------|----------|--------|-------------------------|
| 28.6  | 830.4146 | 0.0007 | <a href="#">FSGEILR</a> |
| 18.2  | 830.4146 | 0.0007 | <a href="#">FGSLELR</a> |



## AT1G69720.1

|      |          |         |                          |
|------|----------|---------|--------------------------|
| 14.1 | 830.4146 | 0.0007  | <a href="#">DFTGIIR</a>  |
| 10.7 | 830.4178 | -0.0024 | <a href="#">RNRVNR</a>   |
| 9.0  | 830.4173 | -0.0020 | <a href="#">WSTRLR</a>   |
| 6.3  | 830.4151 | 0.0003  | <a href="#">RGTAGSIR</a> |
| 6.3  | 830.4146 | 0.0007  | <a href="#">QYLIER</a>   |
| 6.1  | 830.4151 | 0.0003  | <a href="#">RTASLGGR</a> |
| 6.0  | 830.4146 | 0.0007  | <a href="#">AFISDIR</a>  |
| 6.0  | 830.4146 | 0.0007  | <a href="#">ALDYAIR</a>  |

**Mascot:** <http://www.matrixscience.com/>

## Peptide View

MS/MS Fragmentation of **NSTGDEAYNDNGLVPR**

Found in **AT1G69740.1** in **TAIR\_Arabidopsis**, Symbols: HEMB1 | HEMB1; porphobilinogen synthase | chr1:26235860-26238376 FORWARD

Match to Query 8284: 1742.698580 from(872.356566,2+) index(3422)

Title: Elution from: 33.726 to 33.726 scan no 4278 cid35.00 polarity:+

Data file D6h-1\_2.mgf

Click mouse within plot area to zoom in by factor of two about that point

Or,   to  Da

Label all possible matches  Label matches used for scoring

Show Y-axis

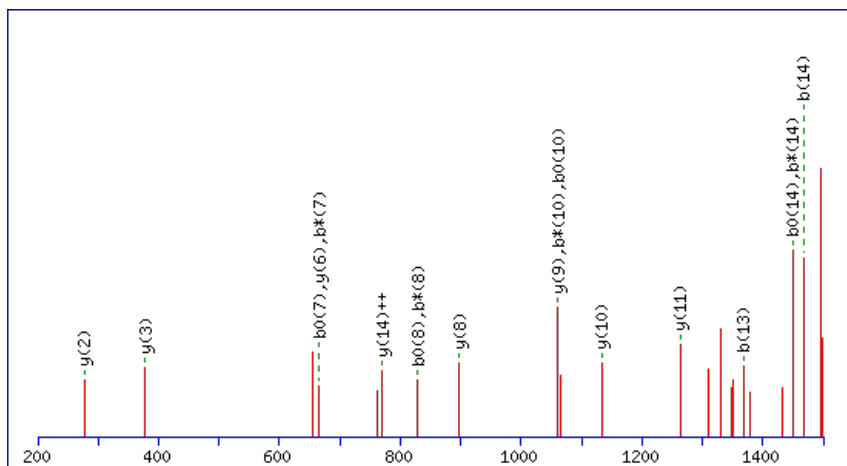

Monoisotopic mass of neutral peptide **Mr(calc)**: 1742.7000

**Fixed modifications**: Carbamidomethyl (C) (apply to specified residues or termini only)

**Ions Score**: 44 **Expect**: 0.00012

**Matches**: 18/166 fragment ions using 18 most intense peaks ([help](#))

| #  | b         | b <sup>++</sup> | b*        | b <sup>+++</sup> | b <sup>0</sup> | b <sup>0++</sup> | Seq. | y         | y <sup>++</sup> | y*        | y <sup>+++</sup> | y <sup>0</sup> | y <sup>0++</sup> | #  |
|----|-----------|-----------------|-----------|------------------|----------------|------------------|------|-----------|-----------------|-----------|------------------|----------------|------------------|----|
| 1  | 117.0443  | 59.0258         | 99.0207   | 50.0140          |                |                  | N    |           |                 |           |                  |                |                  | 16 |
| 2  | 205.0733  | 103.0403        | 187.0498  | 94.0285          | 187.0628       | 94.0350          | S    | 1627.6703 | 814.3388        | 1609.6467 | 805.3270         | 1609.6597      | 805.3335         | 15 |
| 3  | 307.1180  | 154.0627        | 289.0945  | 145.0509         | 289.1075       | 145.0574         | T    | 1539.6412 | 770.3243        | 1521.6177 | 761.3125         | 1521.6307      | 761.3190         | 14 |
| 4  | 365.1365  | 183.0719        | 347.1130  | 174.0601         | 347.1260       | 174.0666         | G    | 1437.5965 | 719.3019        | 1419.5729 | 710.2901         | 1419.5860      | 710.2966         | 13 |
| 5  | 481.1605  | 241.0839        | 463.1369  | 232.0721         | 463.1500       | 232.0786         | D    | 1379.5780 | 690.2927        | 1361.5544 | 681.2809         | 1361.5675      | 681.2874         | 12 |
| 6  | 611.2002  | 306.1037        | 593.1766  | 297.0919         | 593.1896       | 297.0984         | E    | 1263.5541 | 632.2807        | 1245.5305 | 623.2689         | 1245.5435      | 623.2754         | 11 |
| 7  | 683.2343  | 342.1208        | 665.2107  | 333.1090         | 665.2237       | 333.1155         | A    | 1133.5144 | 567.2608        | 1115.4908 | 558.2491         | 1115.5039      | 558.2556         | 10 |
| 8  | 847.2947  | 424.1510        | 829.2711  | 415.1392         | 829.2841       | 415.1457         | Y    | 1061.4803 | 531.2438        | 1043.4567 | 522.2320         | 1043.4697      | 522.2385         | 9  |
| 9  | 963.3317  | 482.1695        | 945.3081  | 473.1577         | 945.3211       | 473.1642         | N    | 897.4199  | 449.2136        | 879.3963  | 440.2018         | 879.4093       | 440.2083         | 8  |
| 10 | 1079.3556 | 540.1815        | 1061.3321 | 531.1697         | 1061.3451      | 531.1762         | D    | 781.3829  | 391.1951        | 763.3593  | 382.1833         | 763.3723       | 382.1898         | 7  |
| 11 | 1195.3926 | 598.2000        | 1177.3691 | 589.1882         | 1177.3821      | 589.1947         | N    | 665.3589  | 333.1831        | 647.3354  | 324.1713         |                |                  | 6  |
| 12 | 1253.4111 | 627.2092        | 1235.3876 | 618.1974         | 1235.4006      | 618.2039         | G    | 549.3219  | 275.1646        | 531.2984  | 266.1528         |                |                  | 5  |
| 13 | 1367.4922 | 684.2498        | 1349.4687 | 675.2380         | 1349.4817      | 675.2445         | L    | 491.3034  | 246.1554        | 473.2799  | 237.1436         |                |                  | 4  |
| 14 | 1467.5577 | 734.2825        | 1449.5341 | 725.2707         | 1449.5471      | 725.2772         | V    | 377.2223  | 189.1148        | 359.1988  | 180.1030         |                |                  | 3  |
| 15 | 1565.6075 | 783.3074        | 1547.5839 | 774.2956         | 1547.5969      | 774.3021         | P    | 277.1569  | 139.0821        | 259.1333  | 130.0703         |                |                  | 2  |
| 16 |           |                 |           |                  |                |                  | R    | 179.1071  | 90.0572         | 161.0835  | 81.0454          |                |                  | 1  |

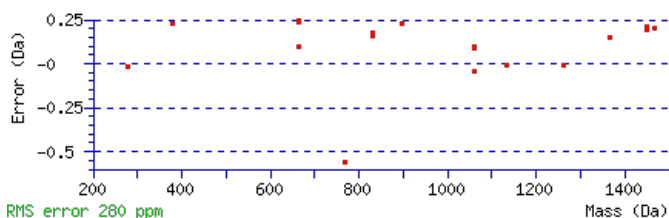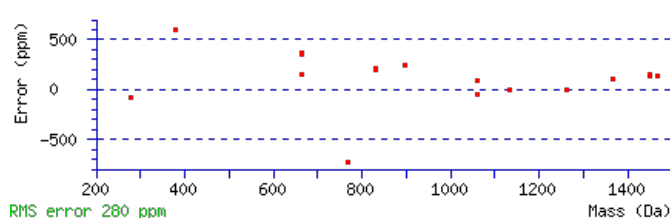

AT1G69740.1

NCBI **BLAST** search of [NSTGDEAYNDNGLVPR](#)

(Parameters: blastp, nr protein database, expect=20000, no filter, PAM30)

Other BLAST [web gateways](#)

**All matches to this query**

| Score | Mr(calc)  | Delta   | Sequence                         |
|-------|-----------|---------|----------------------------------|
| 44.3  | 1742.7000 | -0.0014 | <a href="#">NSTGDEAYNDNGLVPR</a> |

**Mascot:** <http://www.matrixscience.com/>

**Peptide View**MS/MS Fragmentation of **DEQEQEIIK**

Found in **AT1G69760.1** in **TAIR\_Arabidopsis**, Symbols: | similar to unknown protein [Arabidopsis thaliana] (TAIR:AT1G26920.1); similar to hypothetical protein [Ricinus communis] (GB:CAH56540.1) | chr1:26243757-26244290 REVERSE

Match to Query 3990: 1142.509622 from(572.262087,2+) index(1980)

Title: Elution from: 24.069 to 24.069 scan no 2583 cid35.00 polarity:+

Data file 0-1\_1.mgf

Click mouse within plot area to zoom in by factor of two about that point

Or,  to  Da

Label all possible matches  Label matches used for scoring

Show Y-axis

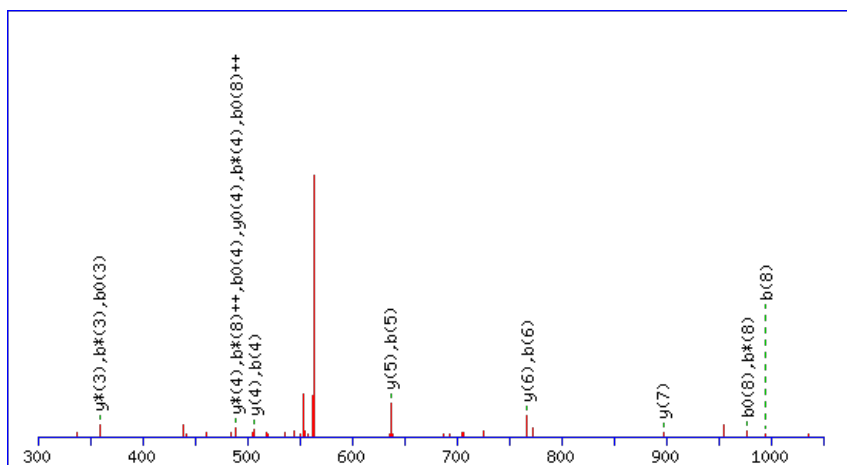

Monoisotopic mass of neutral peptide Mr(calc): 1142.5099

Fixed modifications: Carbamidomethyl (C) (apply to specified residues or termini only)

Ions Score: 33 Expect: 0.0022

Matches : 19/86 fragment ions using 18 most intense peaks ([help](#))

| # | b               | b <sup>++</sup> | b*              | b <sup>*++</sup> | b <sup>0</sup>  | b <sup>0++</sup> | Seq.     | y               | y <sup>++</sup> | y*              | y <sup>*++</sup> | y <sup>0</sup>  | y <sup>0++</sup> | #        |
|---|-----------------|-----------------|-----------------|------------------|-----------------|------------------|----------|-----------------|-----------------|-----------------|------------------|-----------------|------------------|----------|
| 1 | 117.0313        | 59.0193         |                 |                  | 99.0207         | 50.0140          | <b>D</b> |                 |                 |                 |                  |                 |                  | <b>9</b> |
| 2 | 247.0709        | 124.0391        |                 |                  | 229.0603        | 115.0338         | <b>E</b> | 1027.4933       | 514.2503        | 1009.4697       | 505.2385         | 1009.4827       | 505.2450         | <b>8</b> |
| 3 | 377.1235        | 189.0654        | <b>359.0999</b> | 180.0536         | <b>359.1130</b> | 180.0601         | <b>Q</b> | <b>897.4536</b> | 449.2304        | 879.4300        | 440.2187         | 879.4431        | 440.2252         | <b>7</b> |
| 4 | <b>507.1632</b> | 254.0852        | <b>489.1396</b> | 245.0734         | <b>489.1526</b> | 245.0799         | <b>E</b> | <b>767.4010</b> | 384.2041        | 749.3774        | 375.1923         | 749.3904        | 375.1988         | <b>6</b> |
| 5 | <b>637.2158</b> | 319.1115        | 619.1922        | 310.0997         | 619.2052        | 310.1063         | <b>Q</b> | <b>637.3613</b> | 319.1843        | 619.3378        | 310.1725         | 619.3508        | 310.1790         | <b>5</b> |
| 6 | <b>767.2554</b> | 384.1314        | 749.2318        | 375.1196         | 749.2449        | 375.1261         | <b>E</b> | <b>507.3087</b> | 254.1580        | <b>489.2851</b> | 245.1462         | <b>489.2981</b> | 245.1527         | <b>4</b> |
| 7 | 881.3365        | 441.1719        | 863.3129        | 432.1601         | 863.3260        | 432.1666         | <b>I</b> | 377.2691        | 189.1382        | <b>359.2455</b> | 180.1264         |                 |                  | <b>3</b> |
| 8 | <b>995.4176</b> | 498.2125        | <b>977.3940</b> | <b>489.2007</b>  | <b>977.4071</b> | <b>489.2072</b>  | <b>I</b> | 263.1880        | 132.0976        | 245.1644        | 123.0858         |                 |                  | <b>2</b> |
| 9 |                 |                 |                 |                  |                 |                  | <b>K</b> | 149.1069        | 75.0571         | 131.0833        | 66.0453          |                 |                  | <b>1</b> |

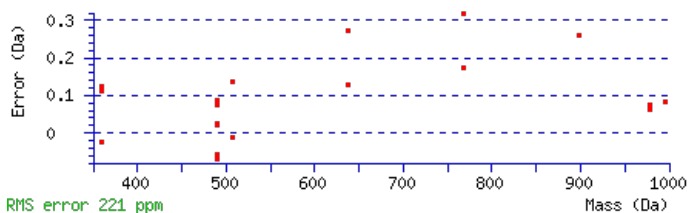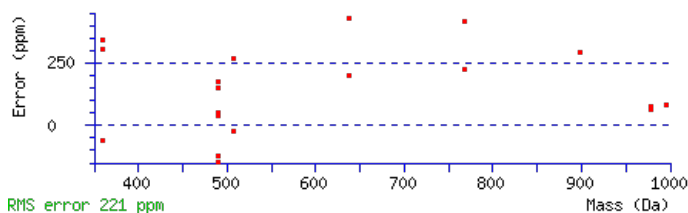

NCBI **BLAST** search of **DEQEQEIIK**

(Parameters: blastp, nr protein database, expect=20000, no filter, PAM30)

Other BLAST [web gateways](#)

All matches to this query

| Score | Mr(calc) | Delta | Sequence |
|-------|----------|-------|----------|
|       |          |       |          |

**AT1G69760.1**

|      |           |         |                             |
|------|-----------|---------|-----------------------------|
| 32.7 | 1142.5099 | -0.0003 | <a href="#">DEQEQEIIK</a>   |
| 26.1 | 1142.5126 | -0.0030 | <a href="#">QDOKEPQQK</a>   |
| 16.9 | 1142.5101 | -0.0005 | <a href="#">MIEEHKWR</a>    |
| 11.3 | 1142.5126 | -0.0030 | <a href="#">KEDQTDHKK</a>   |
| 7.9  | 1142.5108 | -0.0012 | <a href="#">SVMLMSYLR</a>   |
| 7.8  | 1142.5099 | -0.0003 | <a href="#">ETGPDGVEVTK</a> |
| 2.8  | 1142.5090 | 0.0006  | <a href="#">WFHVHEFK</a>    |
| 2.6  | 1142.5074 | 0.0022  | <a href="#">YIEYMERK</a>    |
| 2.5  | 1142.5074 | 0.0022  | <a href="#">AFDVYKNMK</a>   |
| 2.3  | 1142.5106 | -0.0010 | <a href="#">HPSCPRSRK</a>   |

**Mascot:** <http://www.matrixscience.com/>

**Peptide View**MS/MS Fragmentation of **GLNDLLSTK**Found in **AT1G70410.1** in **TAIR\_Arabidopsis**, Symbols: | carbonic anhydrase, putative / carbonate dehydratase, putative | chr1:26537830-26540168 REVERSE

Match to Query 2174: 959.528950 from(480.771751,2+) index(5323)

Title: Elution from: 46.184 to 46.184 scan no 6678 cid35.00 polarity:+

Data file D1d-3\_3.mgf

Click mouse within plot area to zoom in by factor of two about that point

Or,   to  Da Label all possible matches  Label matches used for scoring Show Y-axis 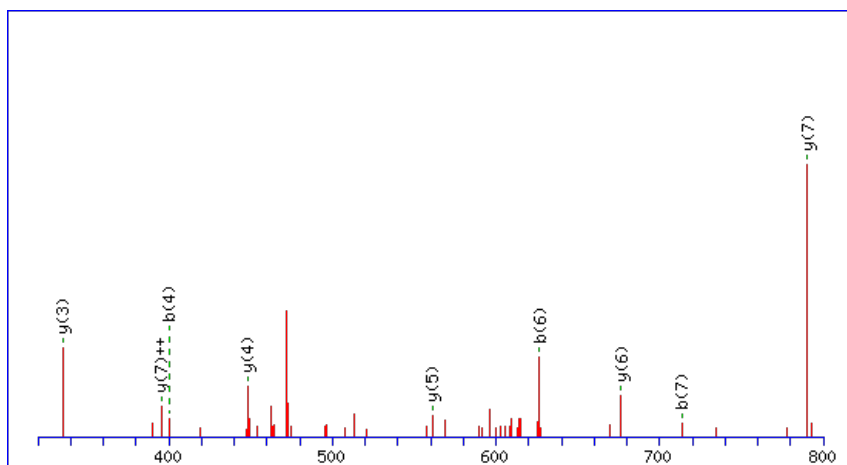Monoisotopic mass of neutral peptide  $M_r(\text{calc})$ : 959.5287

Fixed modifications: Carbamidomethyl (C) (apply to specified residues or termini only)

Ions Score: 37 Expect: 0.0014

Matches : 9/84 fragment ions using 15 most intense peaks ([help](#))

| # | b               | b <sup>++</sup> | b*       | b <sup>*++</sup> | b <sup>0</sup> | b <sup>0++</sup> | Seq.     | y               | y <sup>++</sup> | y*       | y <sup>*++</sup> | y <sup>0</sup> | y <sup>0++</sup> | # |
|---|-----------------|-----------------|----------|------------------|----------------|------------------|----------|-----------------|-----------------|----------|------------------|----------------|------------------|---|
| 1 | 58.0287         | 29.5180         |          |                  |                |                  | <b>G</b> |                 |                 |          |                  |                |                  | 9 |
| 2 | 171.1128        | 86.0600         |          |                  |                |                  | <b>L</b> | 903.5146        | 452.2609        | 886.4880 | 443.7477         | 885.5040       | 443.2556         | 8 |
| 3 | 285.1557        | 143.0815        | 268.1292 | 134.5682         |                |                  | <b>N</b> | <b>790.4305</b> | <b>395.7189</b> | 773.4040 | 387.2056         | 772.4199       | 386.7136         | 7 |
| 4 | <b>400.1827</b> | 200.5950        | 383.1561 | 192.0817         | 382.1721       | 191.5897         | <b>D</b> | <b>676.3876</b> | 338.6974        | 659.3610 | 330.1842         | 658.3770       | 329.6921         | 6 |
| 5 | 513.2667        | 257.1370        | 496.2402 | 248.6237         | 495.2562       | 248.1317         | <b>L</b> | <b>561.3606</b> | 281.1840        | 544.3341 | 272.6707         | 543.3501       | 272.1787         | 5 |
| 6 | <b>626.3508</b> | 313.6790        | 609.3243 | 305.1658         | 608.3402       | 304.6738         | <b>L</b> | <b>448.2766</b> | 224.6419        | 431.2500 | 216.1287         | 430.2660       | 215.6366         | 4 |
| 7 | <b>713.3828</b> | 357.1951        | 696.3563 | 348.6818         | 695.3723       | 348.1898         | <b>S</b> | <b>335.1925</b> | 168.0999        | 318.1660 | 159.5866         | 317.1819       | 159.0946         | 3 |
| 8 | 814.4305        | 407.7189        | 797.4040 | 399.2056         | 796.4199       | 398.7136         | <b>T</b> | 248.1605        | 124.5839        | 231.1339 | 116.0706         | 230.1499       | 115.5786         | 2 |
| 9 |                 |                 |          |                  |                |                  | <b>K</b> | 147.1128        | 74.0600         | 130.0863 | 65.5468          |                |                  | 1 |

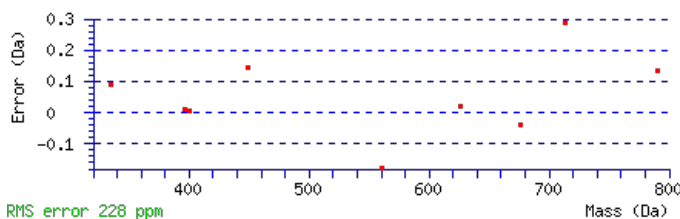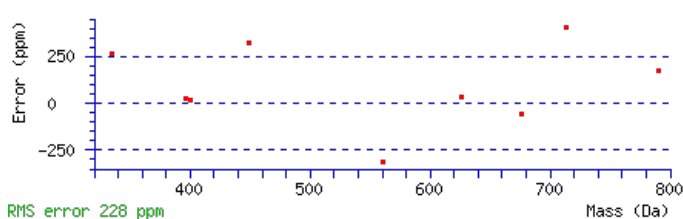NCBI **BLAST** search of **GLNDLLSTK**

(Parameters: blastp, nr protein database, expect=20000, no filter, PAM30)

Other BLAST [web gateways](#)

All matches to this query

| Score | $M_r(\text{calc})$ | Delta | Sequence |
|-------|--------------------|-------|----------|
|       |                    |       |          |

AT1G70410.1

|      |          |        |                           |
|------|----------|--------|---------------------------|
| 37.1 | 959.5287 | 0.0002 | <a href="#">GLNDLLSTK</a> |
|------|----------|--------|---------------------------|

**Mascot:** <http://www.matrixscience.com/>

**Peptide View**MS/MS Fragmentation of **LAFEETR**Found in **AT1G70430.1** in **TAIR\_Arabidopsis**, Symbols: | protein kinase family protein | chr1:26549252-26552419 FORWARD

Match to Query 1384: 870.411748 from(436.213150,2+) index(5277)

Title: Elution from: 47.155 to 47.155 scan no 6635 cid35.00 polarity:+

Data file D12h-3\_2.mgf

Click mouse within plot area to zoom in by factor of two about that point

Or,   to  Da Label all possible matches  Label matches used for scoring Show Y-axis 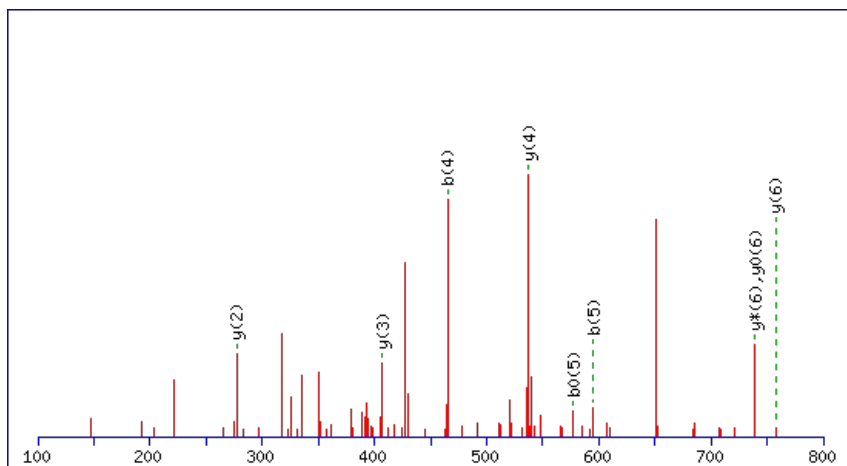Monoisotopic mass of neutral peptide **Mr(calc)**: 870.4096**Fixed modifications**: Carbamidomethyl (C) (apply to specified residues or termini only)**Ions Score**: 27 **Expect**: 0.014**Matches**: 9/50 fragment ions using 13 most intense peaks ([help](#))

| # | b        | b <sup>++</sup> | b <sup>0</sup> | b <sup>0++</sup> | Seq. | y        | y <sup>++</sup> | y*       | y <sup>*++</sup> | y <sup>0</sup> | y <sup>0++</sup> | # |
|---|----------|-----------------|----------------|------------------|------|----------|-----------------|----------|------------------|----------------|------------------|---|
| 1 | 115.0884 | 58.0478         |                |                  | L    |          |                 |          |                  |                |                  | 7 |
| 2 | 187.1225 | 94.0649         |                |                  | A    | 757.3357 | 379.1715        | 739.3122 | 370.1597         | 739.3252       | 370.1662         | 6 |
| 3 | 335.1880 | 168.0976        |                |                  | F    | 685.3016 | 343.1544        | 667.2780 | 334.1426         | 667.2910       | 334.1492         | 5 |
| 4 | 465.2276 | 233.1174        | 447.2170       | 224.1122         | E    | 537.2361 | 269.1217        | 519.2126 | 260.1099         | 519.2256       | 260.1164         | 4 |
| 5 | 595.2672 | 298.1373        | 577.2567       | 289.1320         | E    | 407.1965 | 204.1019        | 389.1729 | 195.0901         | 389.1860       | 195.0966         | 3 |
| 6 | 693.3170 | 347.1622        | 675.3065       | 338.1569         | P    | 277.1569 | 139.0821        | 259.1333 | 130.0703         |                |                  | 2 |
| 7 |          |                 |                |                  | R    | 179.1071 | 90.0572         | 161.0835 | 81.0454          |                |                  | 1 |

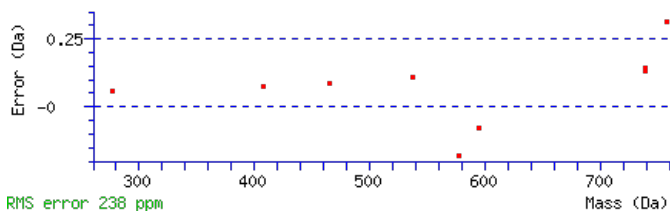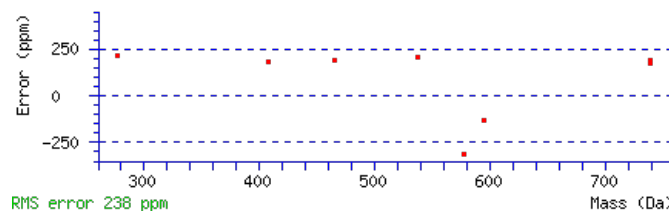NCBI **BLAST** search of **LAFEETR**

(Parameters: blastp, nr protein database, expect=20000, no filter, PAM30)

Other BLAST [web gateways](#)**All matches to this query**

| Score | Mr(calc) | Delta   | Sequence                 |
|-------|----------|---------|--------------------------|
| 27.2  | 870.4096 | 0.0022  | <a href="#">LAFEETR</a>  |
| 15.8  | 870.4100 | 0.0018  | <a href="#">DGREKPR</a>  |
| 8.1   | 870.4129 | -0.0012 | <a href="#">AEAQMLAK</a> |



## AT1G70430.1

|     |          |         |                          |
|-----|----------|---------|--------------------------|
| 8.1 | 870.4129 | -0.0012 | <a href="#">MALQEAAK</a> |
| 7.4 | 870.4122 | -0.0005 | <a href="#">HRYSPAK</a>  |
| 6.2 | 870.4096 | 0.0022  | <a href="#">HYTEAIK</a>  |
| 6.1 | 870.4096 | 0.0022  | <a href="#">SWIDAAAK</a> |
| 6.0 | 870.4100 | 0.0018  | <a href="#">DRDPRAK</a>  |
| 4.0 | 870.4129 | -0.0012 | <a href="#">IGNVEMAK</a> |
| 3.7 | 870.4129 | -0.0012 | <a href="#">MAPKAAEK</a> |

**Mascot:** <http://www.matrixscience.com/>

**Peptide View**MS/MS Fragmentation of **FFEVPTGWK**Found in **AT1G70730.1** in **TAIR\_Arabidopsis**, Symbols: | phosphoglucomutase, cytoplasmic, putative / glucose phosphomutase, putative | chr1:26672682-26676388 REVERSE

Match to Query 3618: 1109.554956 from(555.784754,2+) index(7704)

Title: Elution from: 67.683 to 67.683 scan no 9976 cid35.00 polarity:+

Data file C7-3\_1.mgf

Click mouse within plot area to zoom in by factor of two about that point

Or,   to  Da Label all possible matches  Label matches used for scoring Show Y-axis 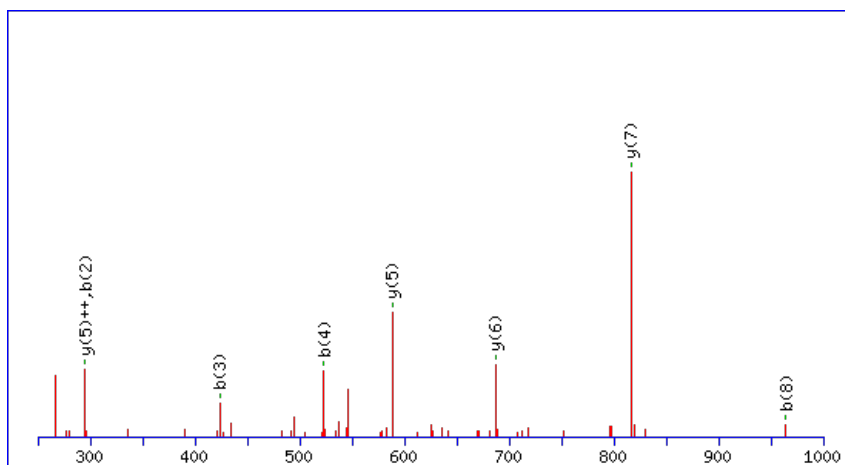

Monoisotopic mass of neutral peptide Mr(calc): 1109.5546

Fixed modifications: Carbamidomethyl (C) (apply to specified residues or termini only)

Ions Score: 38 Expect: 0.00078

Matches : 8/70 fragment ions using 7 most intense peaks ([help](#))

| # | b               | b <sup>++</sup> | b <sup>0</sup> | b <sup>0++</sup> | Seq. | y               | y <sup>++</sup> | y*       | y <sup>*++</sup> | y <sup>0</sup> | y <sup>0++</sup> | # |
|---|-----------------|-----------------|----------------|------------------|------|-----------------|-----------------|----------|------------------|----------------|------------------|---|
| 1 | 148.0757        | 74.5415         |                |                  | F    |                 |                 |          |                  |                |                  | 9 |
| 2 | <b>295.1441</b> | 148.0757        |                |                  | F    | 963.4934        | 482.2504        | 946.4669 | 473.7371         | 945.4829       | 473.2451         | 8 |
| 3 | <b>424.1867</b> | 212.5970        | 406.1761       | 203.5917         | E    | <b>816.4250</b> | 408.7162        | 799.3985 | 400.2029         | 798.4145       | 399.7109         | 7 |
| 4 | <b>523.2551</b> | 262.1312        | 505.2445       | 253.1259         | V    | <b>687.3824</b> | 344.1949        | 670.3559 | 335.6816         | 669.3719       | 335.1896         | 6 |
| 5 | 620.3079        | 310.6576        | 602.2973       | 301.6523         | P    | <b>588.3140</b> | <b>294.6607</b> | 571.2875 | 286.1474         | 570.3035       | 285.6554         | 5 |
| 6 | 721.3556        | 361.1814        | 703.3450       | 352.1761         | T    | 491.2613        | 246.1343        | 474.2347 | 237.6210         | 473.2507       | 237.1290         | 4 |
| 7 | 778.3770        | 389.6921        | 760.3665       | 380.6869         | G    | 390.2136        | 195.6104        | 373.1870 | 187.0972         |                |                  | 3 |
| 8 | <b>964.4563</b> | 482.7318        | 946.4458       | 473.7265         | W    | 333.1921        | 167.0997        | 316.1656 | 158.5864         |                |                  | 2 |
| 9 |                 |                 |                |                  | K    | 147.1128        | 74.0600         | 130.0863 | 65.5468          |                |                  | 1 |

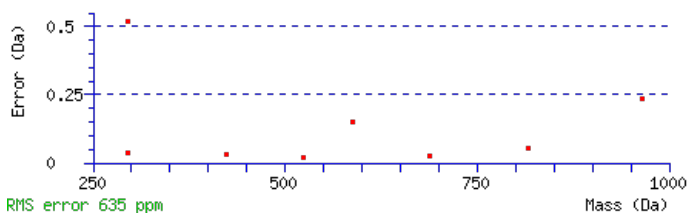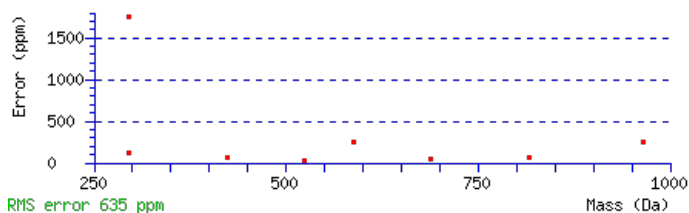NCBI **BLAST** search of [FFEVPTGWK](#)

(Parameters: blastp, nr protein database, expect=20000, no filter, PAM30)

Other BLAST [web gateways](#)**All matches to this query**

| Score | Mr(calc) | Delta | Sequence |
|-------|----------|-------|----------|
|       |          |       |          |

# AT1G70730.1

|      |           |         |                           |
|------|-----------|---------|---------------------------|
| 38.1 | 1109.5546 | 0.0004  | <a href="#">FFEVPTGWK</a> |
| 1.8  | 1109.5573 | -0.0023 | <a href="#">MIKNLSNMK</a> |

**Mascot:** <http://www.matrixscience.com/>

**Peptide View**MS/MS Fragmentation of **LETDVEIK**Found in **AT1G70830.3** in **TAIR\_Arabidopsis**, Symbols: MLP28 | MLP28 (MLP-LIKE PROTEIN 28) | chr1:26713865-26715057 REVERSE

Match to Query 2208: 954.474596 from(478.244574,2+) index(2511)

Title: Elution from: 27.379 to 27.379 scan no 3181 cid35.00 polarity:+

Data file C7-2\_1.mgf

Click mouse within plot area to zoom in by factor of two about that point

Or,   to  Da Label all possible matches  Label matches used for scoring Show Y-axis 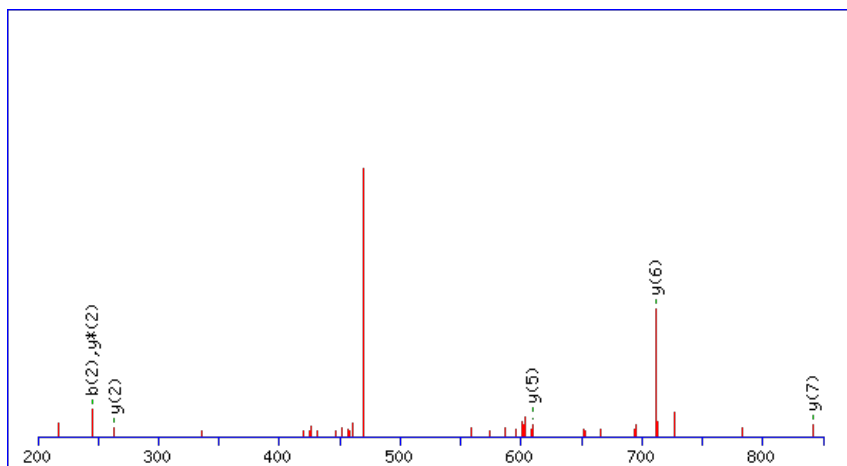

Monoisotopic mass of neutral peptide Mr(calc): 954.4752

Fixed modifications: Carbamidomethyl (C) (apply to specified residues or termini only)

Ions Score: 20 Expect: 0.024

Matches : 6/64 fragment ions using 16 most intense peaks ([help](#))

| # | b        | b <sup>++</sup> | b <sup>0</sup> | b <sup>0++</sup> | Seq. | y        | y <sup>++</sup> | y*       | y <sup>*++</sup> | y <sup>0</sup> | y <sup>0++</sup> | # |
|---|----------|-----------------|----------------|------------------|------|----------|-----------------|----------|------------------|----------------|------------------|---|
| 1 | 115.0884 | 58.0478         |                |                  | L    |          |                 |          |                  |                |                  | 8 |
| 2 | 245.1280 | 123.0676        | 227.1174       | 114.0624         | E    | 841.4014 | 421.2043        | 823.3778 | 412.1925         | 823.3908       | 412.1990         | 7 |
| 3 | 347.1727 | 174.0900        | 329.1622       | 165.0847         | T    | 711.3617 | 356.1845        | 693.3382 | 347.1727         | 693.3512       | 347.1792         | 6 |
| 4 | 463.1967 | 232.1020        | 445.1861       | 223.0967         | D    | 609.3170 | 305.1622        | 591.2934 | 296.1504         | 591.3065       | 296.1569         | 5 |
| 5 | 563.2621 | 282.1347        | 545.2516       | 273.1294         | V    | 493.2930 | 247.1502        | 475.2695 | 238.1384         | 475.2825       | 238.1449         | 4 |
| 6 | 693.3018 | 347.1545        | 675.2912       | 338.1492         | E    | 393.2276 | 197.1174        | 375.2040 | 188.1056         | 375.2170       | 188.1122         | 3 |
| 7 | 807.3829 | 404.1951        | 789.3723       | 395.1898         | I    | 263.1880 | 132.0976        | 245.1644 | 123.0858         |                |                  | 2 |
| 8 |          |                 |                |                  | K    | 149.1069 | 75.0571         | 131.0833 | 66.0453          |                |                  | 1 |

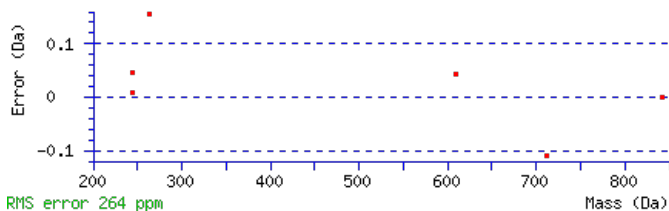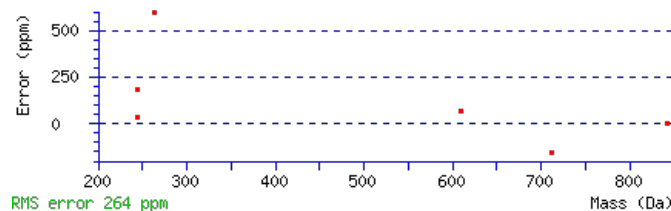NCBI **BLAST** search of [LETDVEIK](#)

(Parameters: blastp, nr protein database, expect=20000, no filter, PAM30)

Other BLAST [web gateways](#)**All matches to this query**

| Score | Mr(calc) | Delta   | Sequence                 |
|-------|----------|---------|--------------------------|
| 20.2  | 954.4752 | -0.0006 | <a href="#">LETDVEIK</a> |
| 5.1   | 954.4731 | 0.0015  | <a href="#">LEMHLKR</a>  |

### AT1G70830.3

|     |          |         |                          |
|-----|----------|---------|--------------------------|
| 3.6 | 954.4752 | -0.0006 | <a href="#">LLDEVETK</a> |
| 3.6 | 954.4752 | -0.0006 | <a href="#">LLDLDTEK</a> |
| 1.4 | 954.4752 | -0.0006 | <a href="#">LSDEEILK</a> |
| 1.4 | 954.4752 | -0.0006 | <a href="#">EESVLLK</a>  |
| 1.4 | 954.4752 | -0.0006 | <a href="#">EESVEILK</a> |
| 1.3 | 954.4754 | -0.0008 | <a href="#">MKARYFK</a>  |

Mascot: <http://www.matrixscience.com/>

**Peptide View**MS/MS Fragmentation of **VLEGLMNEYK**Found in **AT1G70890.1** in **TAIR\_Arabidopsis**, Symbols: MLP43 | MLP43 (MLP-LIKE PROTEIN 43) | chr1:26729574-26730151 REVERSE

Match to Query 4954: 1322.581084 from(662.297818,2+) index(5260)

Title: Elution from: 46.366 to 46.366 scan no 6598 cid35.00 polarity:+

Data file C7-3\_2.mgf

Click mouse within plot area to zoom in by factor of two about that point

Or,   to  Da Label all possible matches  Label matches used for scoring Show Y-axis 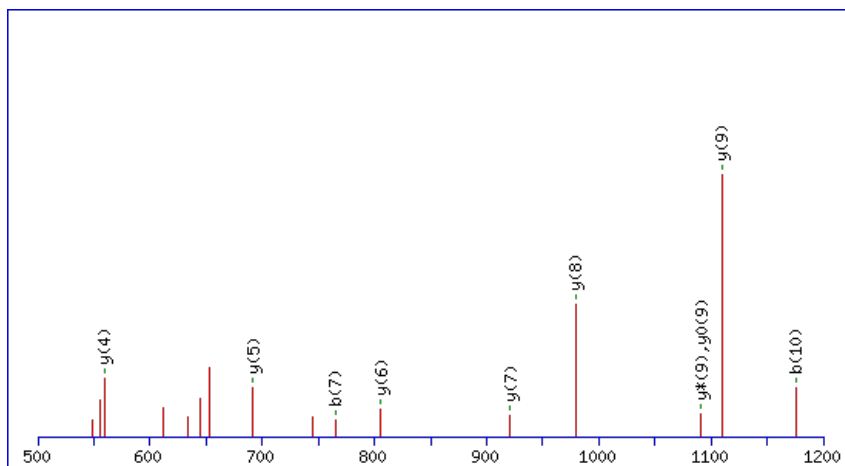Monoisotopic mass of neutral peptide **Mr(calc)**: 1322.5838**Fixed modifications**: Carbamidomethyl (C) (apply to specified residues or termini only)**Ions Score**: 62 **Expect**: 5.6e-006**Matches**: 10/98 fragment ions using 11 most intense peaks ([help](#))

| #  | b                | b <sup>++</sup> | b*        | b <sup>*++</sup> | b <sup>0</sup> | b <sup>0++</sup> | Seq. | y                | y <sup>++</sup> | y*               | y <sup>*++</sup> | y <sup>0</sup>   | y <sup>0++</sup> | #  |
|----|------------------|-----------------|-----------|------------------|----------------|------------------|------|------------------|-----------------|------------------|------------------|------------------|------------------|----|
| 1  | 101.0727         | 51.0400         |           |                  |                |                  | V    |                  |                 |                  |                  |                  |                  | 11 |
| 2  | 215.1538         | 108.0805        |           |                  |                |                  | L    | 1223.5257        | 612.2665        | 1205.5021        | 603.2547         | 1205.5151        | 603.2612         | 10 |
| 3  | 345.1935         | 173.1004        |           |                  | 327.1829       | 164.0951         | E    | <b>1109.4446</b> | 555.2259        | <b>1091.4210</b> | 546.2141         | <b>1091.4340</b> | 546.2206         | 9  |
| 4  | 403.2120         | 202.1096        |           |                  | 385.2014       | 193.1043         | G    | <b>979.4050</b>  | 490.2061        | 961.3814         | 481.1943         | 961.3944         | 481.2008         | 8  |
| 5  | 519.2359         | 260.1216        |           |                  | 501.2254       | 251.1163         | D    | <b>921.3865</b>  | 461.1969        | 903.3629         | 452.1851         | 903.3759         | 452.1916         | 7  |
| 6  | 633.3170         | 317.1622        |           |                  | 615.3065       | 308.1569         | L    | <b>805.3625</b>  | 403.1849        | 787.3389         | 394.1731         | 787.3519         | 394.1796         | 6  |
| 7  | <b>765.3545</b>  | 383.1809        |           |                  | 747.3440       | 374.1756         | M    | <b>691.2814</b>  | 346.1443        | 673.2578         | 337.1325         | 673.2708         | 337.1390         | 5  |
| 8  | 881.3915         | 441.1994        | 863.3680  | 432.1876         | 863.3810       | 432.1941         | N    | <b>559.2439</b>  | 280.1256        | 541.2203         | 271.1138         | 541.2333         | 271.1203         | 4  |
| 9  | 1011.4312        | 506.2192        | 993.4076  | 497.2074         | 993.4206       | 497.2139         | E    | 443.2069         | 222.1071        | 425.1833         | 213.0953         | 425.1963         | 213.1018         | 3  |
| 10 | <b>1175.4915</b> | 588.2494        | 1157.4680 | 579.2376         | 1157.4810      | 579.2441         | Y    | 313.1672         | 157.0873        | 295.1437         | 148.0755         |                  |                  | 2  |
| 11 |                  |                 |           |                  |                |                  | K    | 149.1069         | 75.0571         | 131.0833         | 66.0453          |                  |                  | 1  |

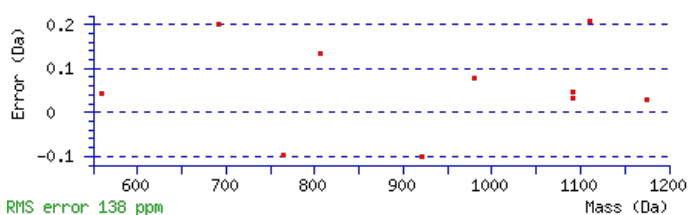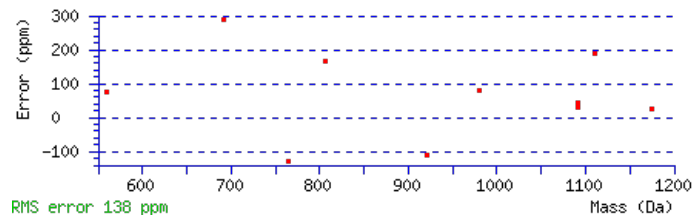NCBI **BLAST** search of **VLEGLMNEYK**

(Parameters: blastp, nr protein database, expect=20000, no filter, PAM30)

Other BLAST [web gateways](#)**All matches to this query**

## AT1G70890.1

| Score | Mr(calc)  | Delta   | Sequence                     |
|-------|-----------|---------|------------------------------|
| 62.3  | 1322.5838 | -0.0028 | <a href="#">VLEGDMNEYK</a>   |
| 13.5  | 1322.5809 | 0.0002  | <a href="#">LLDGNADSFAQR</a> |
| 2.7   | 1322.5805 | 0.0006  | <a href="#">FDLGLPDNYEK</a>  |
| 1.6   | 1322.5838 | -0.0027 | <a href="#">VLTCGEEFDLK</a>  |
| 1.1   | 1322.5818 | -0.0007 | <a href="#">VLVGMGQHFMR</a>  |

Mascot: <http://www.matrixscience.com/>

**Peptide View**MS/MS Fragmentation of **TVAAMDVLVPK**

Found in **AT1G70980.1** in **TAIR\_Arabidopsis**, Symbols: SYNC3 | SYNC3; ATP binding / aminoacyl-tRNA ligase/ asparagine-tRNA ligase/ aspartate-tRNA ligase/ nucleic acid binding/ nucleotide binding | chr1:26766001-26768056 FORWARD

Match to Query 3917: 1170.598556 from(586.306554,2+) index(5522)

Title: Elution from: 49.120 to 49.120 scan no 6976 cid35.00 polarity:+

Data file C7-1\_2.mgf

Click mouse within plot area to zoom in by factor of two about that point

Or,  to  Da

Label all possible matches  Label matches used for scoring

Show Y-axis

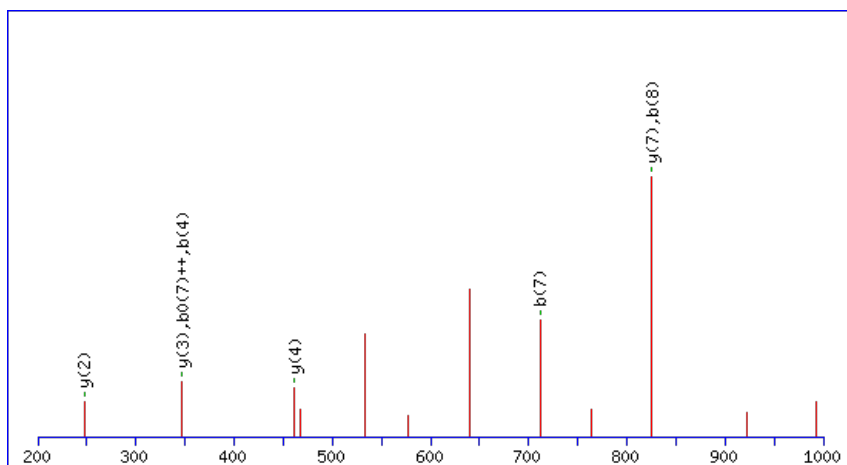

**Monoisotopic mass of neutral peptide Mr(calc):** 1170.5963

**Fixed modifications:** Carbamidomethyl (C) (apply to specified residues or termini only)

**Variable modifications:**

**M5** : Oxidation (M), with neutral losses 0.0000 (shown in table), 63.9983

**Ions Score:** 23 **Expect:** 0.025

**Matches** : 8/138 fragment ions using 11 most intense peaks ([help](#))

| #  | b               | b <sup>++</sup> | b <sup>0</sup> | b <sup>0++</sup> | Seq. | y               | y <sup>++</sup> | y <sup>*</sup> | y <sup>*++</sup> | y <sup>0</sup> | y <sup>0++</sup> | #  |
|----|-----------------|-----------------|----------------|------------------|------|-----------------|-----------------|----------------|------------------|----------------|------------------|----|
| 1  | 103.0520        | 52.0296         | 85.0414        | 43.0244          | T    |                 |                 |                |                  |                |                  | 11 |
| 2  | 203.1174        | 102.0624        | 185.1069       | 93.0571          | V    | 1069.5588       | 535.2831        | 1051.5352      | 526.2713         | 1051.5483      | 526.2778         | 10 |
| 3  | 275.1516        | 138.0794        | 257.1410       | 129.0741         | A    | 969.4934        | 485.2503        | 951.4698       | 476.2385         | 951.4828       | 476.2450         | 9  |
| 4  | <b>347.1857</b> | 174.0965        | 329.1752       | 165.0912         | A    | 897.4592        | 449.2333        | 879.4356       | 440.2215         | 879.4487       | 440.2280         | 8  |
| 5  | 495.2182        | 248.1127        | 477.2076       | 239.1074         | M    | <b>825.4251</b> | 413.2162        | 807.4015       | 404.2044         | 807.4145       | 404.2109         | 7  |
| 6  | 611.2421        | 306.1247        | 593.2316       | 297.1194         | D    | 677.3926        | 339.2000        | 659.3691       | 330.1882         | 659.3821       | 330.1947         | 6  |
| 7  | <b>711.3076</b> | 356.1574        | 693.2970       | <b>347.1522</b>  | V    | 561.3687        | 281.1880        | 543.3451       | 272.1762         |                |                  | 5  |
| 8  | <b>825.3887</b> | 413.1980        | 807.3781       | 404.1927         | L    | <b>461.3032</b> | 231.1552        | 443.2796       | 222.1435         |                |                  | 4  |
| 9  | 925.4541        | 463.2307        | 907.4436       | 454.2254         | V    | <b>347.2221</b> | 174.1147        | 329.1985       | 165.1029         |                |                  | 3  |
| 10 | 1023.5039       | 512.2556        | 1005.4934      | 503.2503         | P    | <b>247.1567</b> | 124.0820        | 229.1331       | 115.0702         |                |                  | 2  |
| 11 |                 |                 |                |                  | K    | 149.1069        | 75.0571         | 131.0833       | 66.0453          |                |                  | 1  |

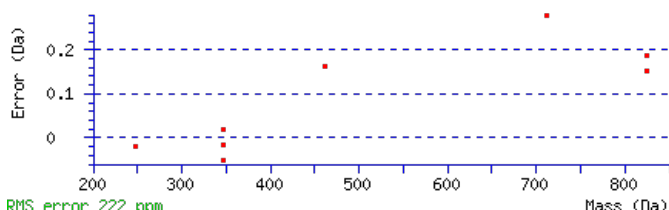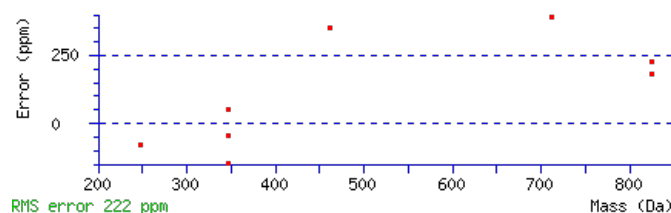

NCBI **BLAST** search of [TVAAMDVLVPK](#)

(Parameters: blastp, nr protein database, expect=20000, no filter, PAM30)

Other BLAST [web gateways](#)



# AT1G70980.1

All matches to this query

| Score | Mr(calc)  | Delta   | Sequence                    |
|-------|-----------|---------|-----------------------------|
| 22.9  | 1170.5963 | 0.0023  | <a href="#">TVAAMDVLVPK</a> |
| 19.2  | 1170.6016 | -0.0031 | <a href="#">RALLIMHQR</a>   |
| 13.0  | 1170.6012 | -0.0026 | <a href="#">MPIIGLVWR</a>   |
| 8.3   | 1170.5963 | 0.0023  | <a href="#">IQDVMSIPK</a>   |
| 1.3   | 1170.6005 | -0.0019 | <a href="#">KFHLEGLR</a>    |
| 0.1   | 1170.5960 | 0.0026  | <a href="#">LVNETKRHR</a>   |

Mascot: <http://www.matrixscience.com/>

## Peptide View

MS/MS Fragmentation of **MQRYGSLNSKK**

Found in **AT1G71020.2** in **TAIR\_Arabidopsis**, Symbols: | armadillo/beta-catenin repeat family protein / U-box domain-containing protein |  
chr1:26794487-26796019 REVERSE

Match to Query 5397: 1344.619138 from(673.316845,2+) index(6304)

Title: Elution from: 55.054 to 55.054 scan no 7865 cid35.00 polarity:+

Data file 0-1\_1.mgf

Click mouse within plot area to zoom in by factor of two about that point

Or,   to  Da

Label all possible matches  Label matches used for scoring

Show Y-axis

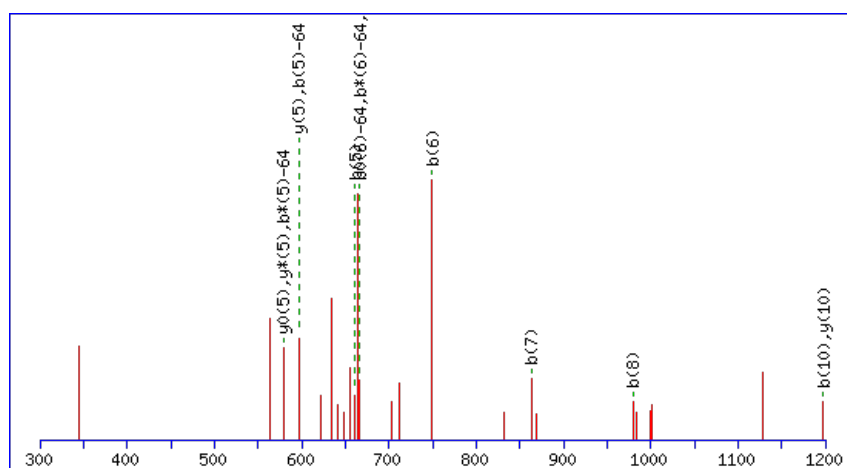

Monoisotopic mass of neutral peptide  $M_r(\text{calc})$ : 1344.6181

Fixed modifications: Carbamidomethyl (C) (apply to specified residues or termini only)

Variable modifications:

M1 : Oxidation (M), with neutral losses 0.0000 (shown in table), 63.9983

Ions Score: 22 Expect: 0.04

Matches : 15/152 fragment ions using 22 most intense peaks ([help](#))

| #  | b                | b <sup>++</sup> | b <sup>*</sup> | b <sup>*++</sup> | b <sup>0</sup> | b <sup>0++</sup> | Seq. | y                | y <sup>++</sup> | y <sup>*</sup>  | y <sup>*++</sup> | y <sup>0</sup>  | y <sup>0++</sup> | #  |
|----|------------------|-----------------|----------------|------------------|----------------|------------------|------|------------------|-----------------|-----------------|------------------|-----------------|------------------|----|
| 1  | 149.0397         | 75.0235         |                |                  |                |                  | M    |                  |                 |                 |                  |                 |                  | 11 |
| 2  | 279.0924         | 140.0498        | 261.0688       | 131.0380         |                |                  | Q    | <b>1197.5929</b> | 599.3001        | 1179.5693       | 590.2883         | 1179.5823       | 590.2948         | 10 |
| 3  | 439.1816         | 220.0944        | 421.1580       | 211.0827         |                |                  | R    | 1067.5402        | 534.2738        | 1049.5167       | 525.2620         | 1049.5297       | 525.2685         | 9  |
| 4  | 603.2420         | 302.1246        | 585.2184       | 293.1128         |                |                  | Y    | 907.4510         | 454.2291        | 889.4274        | 445.2173         | 889.4404        | 445.2239         | 8  |
| 5  | <b>661.2605</b>  | 331.1339        | 643.2369       | 322.1221         |                |                  | G    | 743.3906         | 372.1990        | 725.3670        | 363.1872         | 725.3801        | 363.1937         | 7  |
| 6  | <b>749.2895</b>  | 375.1484        | 731.2660       | 366.1366         | 731.2790       | 366.1431         | S    | 685.3721         | 343.1897        | <b>667.3485</b> | 334.1779         | <b>667.3616</b> | 334.1844         | 6  |
| 7  | <b>863.3706</b>  | 432.1890        | 845.3470       | 423.1772         | 845.3601       | 423.1837         | L    | <b>597.3431</b>  | 299.1752        | <b>579.3195</b> | 290.1634         | <b>579.3325</b> | 290.1699         | 5  |
| 8  | <b>979.4076</b>  | 490.2075        | 961.3840       | 481.1957         | 961.3971       | 481.2022         | N    | 483.2620         | 242.1346        | 465.2384        | 233.1228         | 465.2514        | 233.1293         | 4  |
| 9  | 1067.4367        | 534.2220        | 1049.4131      | 525.2102         | 1049.4261      | 525.2167         | S    | 367.2250         | 184.1161        | 349.2014        | 175.1043         | 349.2144        | 175.1108         | 3  |
| 10 | <b>1197.5257</b> | 599.2665        | 1179.5021      | 590.2547         | 1179.5152      | 590.2612         | K    | 279.1959         | 140.1016        | 261.1723        | 131.0898         |                 |                  | 2  |
| 11 |                  |                 |                |                  |                |                  | K    | 149.1069         | 75.0571         | 131.0833        | 66.0453          |                 |                  | 1  |

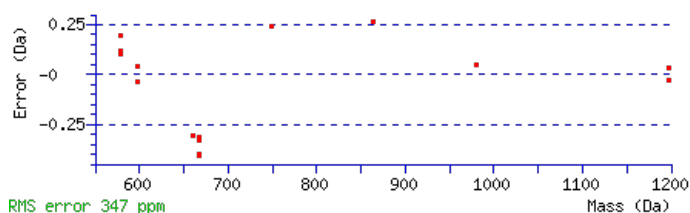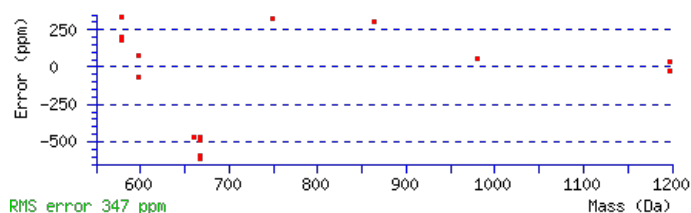

NCBI BLAST search of **MQRYGSLNSKK**

(Parameters: blastp, nr protein database, expect=20000, no filter, PAM30)

Other BLAST [web gateways](#)

# AT1G71020.2

All matches to this query

| Score | Mr(calc)  | Delta   | Sequence                      |
|-------|-----------|---------|-------------------------------|
| 22.1  | 1344.6181 | 0.0011  | <a href="#">MORYGSLNSKK</a>   |
| 2.4   | 1344.6198 | -0.0007 | <a href="#">FYSVFVCPVSK</a>   |
| 1.2   | 1344.6154 | 0.0038  | <a href="#">NAMAGEALLPAEK</a> |
| 0.4   | 1344.6180 | 0.0011  | <a href="#">GRELVDKHMDK</a>   |
| 0.1   | 1344.6198 | -0.0007 | <a href="#">TYVDVYMKWK</a>    |
| 0.0   | 1344.6203 | -0.0011 | <a href="#">YGMNFVQGLRK</a>   |

Mascot: <http://www.matrixscience.com/>

**Peptide View**MS/MS Fragmentation of **VTDLVVKMDR**Found in **AT1G71060.1** in **TAIR\_Arabidopsis**, Symbols: | pentatricopeptide (PPR) repeat-containing protein | chr1:26809313-26810845 REVERSE

Match to Query 4201: 1204.589460 from(603.302006,2+) index(3452)

Title: Elution from: 34.643 to 34.643 scan no 4358 cid35.00 polarity:+

Data file 0-3\_1.mgf

Click mouse within plot area to zoom in by factor of two about that point

Or,   to  Da Label all possible matches  Label matches used for scoring Show Y-axis 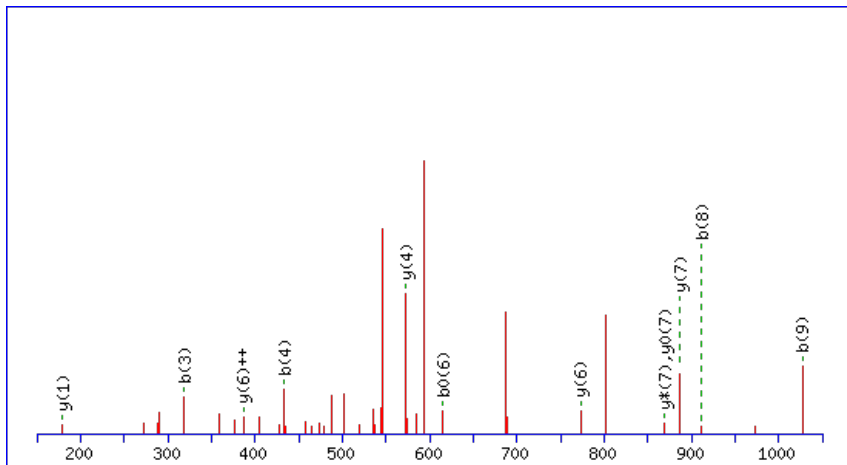Monoisotopic mass of neutral peptide **Mr(calc)**: 1204.5914**Fixed modifications:** Carbamidomethyl (C) (apply to specified residues or termini only)**Variable modifications:****M8** : Oxidation (M), with neutral losses 0.0000 (shown in table), 63.9983**Ions Score:** 27 **Expect:** 0.025**Matches** : 12/146 fragment ions using 17 most intense peaks ([help](#))

| #  | b                | b <sup>++</sup> | b <sup>*</sup> | b <sup>*++</sup> | b <sup>0</sup>  | b <sup>0++</sup> | Seq. | y               | y <sup>++</sup> | y <sup>*</sup>  | y <sup>*++</sup> | y <sup>0</sup>  | y <sup>0++</sup> | #  |
|----|------------------|-----------------|----------------|------------------|-----------------|------------------|------|-----------------|-----------------|-----------------|------------------|-----------------|------------------|----|
| 1  | 101.0727         | 51.0400         |                |                  |                 |                  | V    |                 |                 |                 |                  |                 |                  | 10 |
| 2  | 203.1174         | 102.0624        |                |                  | 185.1069        | 93.0571          | T    | 1105.5332       | 553.2703        | 1087.5096       | 544.2585         | 1087.5227       | 544.2650         | 9  |
| 3  | <b>319.1414</b>  | 160.0743        |                |                  | 301.1309        | 151.0691         | D    | 1003.4885       | 502.2479        | 985.4649        | 493.2361         | 985.4779        | 493.2426         | 8  |
| 4  | <b>433.2225</b>  | 217.1149        |                |                  | 415.2120        | 208.1096         | L    | <b>887.4645</b> | 444.2359        | <b>869.4410</b> | 435.2241         | <b>869.4540</b> | 435.2306         | 7  |
| 5  | 533.2880         | 267.1476        |                |                  | 515.2774        | 258.1423         | V    | <b>773.3834</b> | <b>387.1954</b> | 755.3599        | 378.1836         | 755.3729        | 378.1901         | 6  |
| 6  | 633.3534         | 317.1803        |                |                  | <b>615.3428</b> | 308.1751         | V    | 673.3180        | 337.1626        | 655.2944        | 328.1508         | 655.3074        | 328.1573         | 5  |
| 7  | 763.4424         | 382.2249        | 745.4189       | 373.2131         | 745.4319        | 373.2196         | K    | <b>573.2525</b> | 287.1299        | 555.2290        | 278.1181         | 555.2420        | 278.1246         | 4  |
| 8  | <b>911.4749</b>  | 456.2411        | 893.4513       | 447.2293         | 893.4643        | 447.2358         | M    | 443.1635        | 222.0854        | 425.1399        | 213.0736         | 425.1529        | 213.0801         | 3  |
| 9  | <b>1027.4989</b> | 514.2531        | 1009.4753      | 505.2413         | 1009.4883       | 505.2478         | D    | 295.1311        | 148.0692        | 277.1075        | 139.0574         | 277.1205        | 139.0639         | 2  |
| 10 |                  |                 |                |                  |                 |                  | R    | <b>179.1071</b> | 90.0572         | 161.0835        | 81.0454          |                 |                  | 1  |

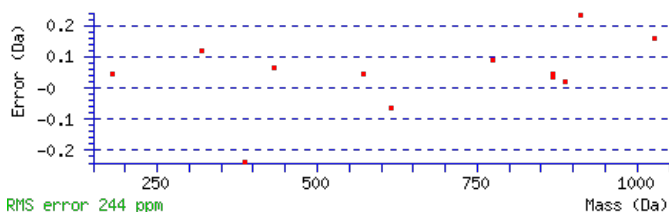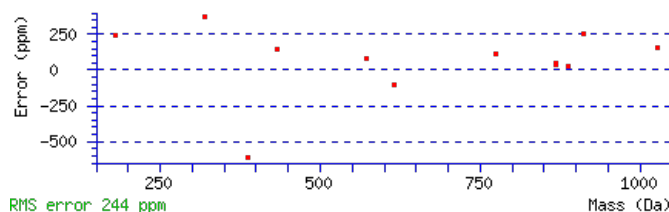NCBI **BLAST** search of **VTDLVVKMDR**

(Parameters: blastp, nr protein database, expect=20000, no filter, PAM30)

Other BLAST [web gateways](#)**All matches to this query**

## AT1G71060.1

| Score | Mr(calc)  | Delta   | Sequence                    |
|-------|-----------|---------|-----------------------------|
| 26.5  | 1204.5914 | -0.0019 | <a href="#">VTDLVVKMDR</a>  |
| 8.9   | 1204.5914 | -0.0020 | <a href="#">ISNIIAVSSCK</a> |
| 7.7   | 1204.5884 | 0.0010  | <a href="#">LREETLRDR</a>   |
| 7.5   | 1204.5859 | 0.0035  | <a href="#">MVGATLFHRR</a>  |
| 7.3   | 1204.5880 | 0.0014  | <a href="#">LVIGNEEYVR</a>  |
| 6.0   | 1204.5880 | 0.0015  | <a href="#">DLTVDFGVLGR</a> |
| 5.8   | 1204.5903 | -0.0008 | <a href="#">LIEWIFSER</a>   |
| 4.4   | 1204.5907 | -0.0012 | <a href="#">RPDLAAKFDR</a>  |
| 2.2   | 1204.5907 | -0.0012 | <a href="#">DKYSAKAHIR</a>  |
| 1.9   | 1204.5884 | 0.0010  | <a href="#">IKRDTVENGR</a>  |

Mascot: <http://www.matrixscience.com/>

**Peptide View**MS/MS Fragmentation of **KIAAYK**

Found in **AT1G71100.1** in **TAIR\_Arabidopsis**, Symbols: RSW10 | RSW10 (RADIAL SWELLING 10); ribose-5-phosphate isomerase | chr1:26818388-26819191 FORWARD

Match to Query 635: 692.421960 from(347.218256,2+) index(734)

Title: Elution from: 13.541 to 13.541 scan no 1094 cid35.00 polarity:+

Data file D6h-1\_1.mgf

Click mouse within plot area to zoom in by factor of two about that point

Or,   to  Da

Label all possible matches  Label matches used for scoring

Show Y-axis

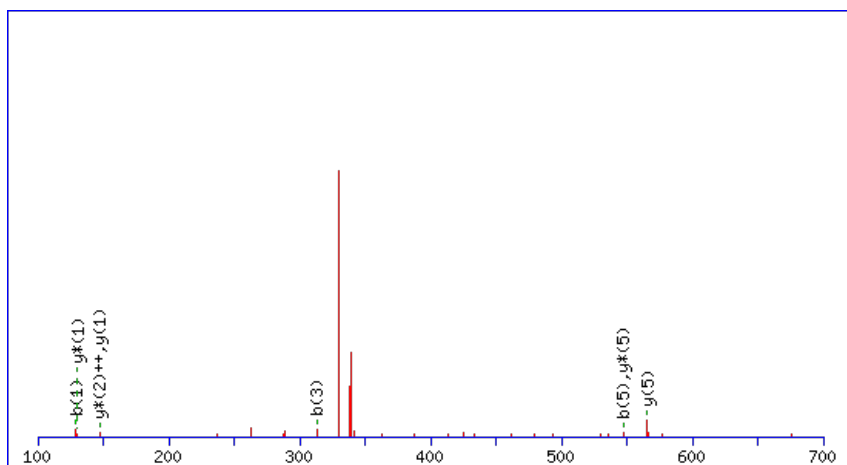

Monoisotopic mass of neutral peptide **Mr(calc)**: 692.4221

**Fixed modifications**: Carbamidomethyl (C) (apply to specified residues or termini only)

**Ions Score**: 19 **Expect**: 0.027

**Matches**: 8/40 fragment ions using 16 most intense peaks ([help](#))

| # | b               | b <sup>++</sup> | b*       | b <sup>*++</sup> | Seq.     | y               | y <sup>++</sup> | y*              | y <sup>*++</sup> | #        |
|---|-----------------|-----------------|----------|------------------|----------|-----------------|-----------------|-----------------|------------------|----------|
| 1 | <b>129.1022</b> | 65.0548         | 112.0757 | 56.5415          | <b>K</b> |                 |                 |                 |                  | <b>6</b> |
| 2 | 242.1863        | 121.5968        | 225.1598 | 113.0835         | <b>I</b> | <b>565.3344</b> | 283.1709        | <b>548.3079</b> | 274.6576         | <b>5</b> |
| 3 | <b>313.2234</b> | 157.1153        | 296.1969 | 148.6021         | <b>A</b> | 452.2504        | 226.6288        | 435.2238        | 218.1155         | <b>4</b> |
| 4 | 384.2605        | 192.6339        | 367.2340 | 184.1206         | <b>A</b> | 381.2132        | 191.1103        | 364.1867        | 182.5970         | <b>3</b> |
| 5 | <b>547.3239</b> | 274.1656        | 530.2973 | 265.6523         | <b>Y</b> | 310.1761        | 155.5917        | 293.1496        | <b>147.0784</b>  | <b>2</b> |
| 6 |                 |                 |          |                  | <b>K</b> | <b>147.1128</b> | 74.0600         | <b>130.0863</b> | 65.5468          | <b>1</b> |

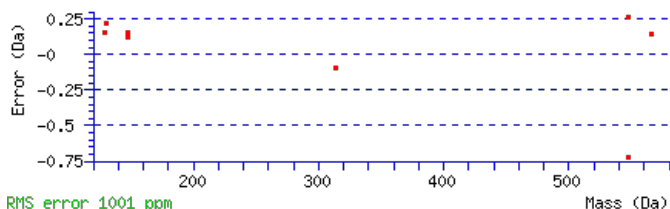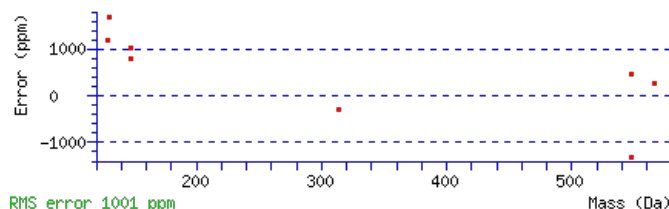

NCBI **BLAST** search of **KIAAYK**

(Parameters: blastp, nr protein database, expect=20000, no filter, PAM30)

Other BLAST [web gateways](#)

**All matches to this query**

| Score | Mr(calc) | Delta   | Sequence               |
|-------|----------|---------|------------------------|
| 19.1  | 692.4221 | -0.0001 | <a href="#">KIAAYK</a> |
| 19.0  | 692.4221 | -0.0001 | <a href="#">KFGTLK</a> |
| 19.0  | 692.4221 | -0.0001 | <a href="#">KGFTLK</a> |

## AT1G71100.1

|      |          |         |                        |
|------|----------|---------|------------------------|
| 19.0 | 692.4221 | -0.0001 | <a href="#">KLSFAK</a> |
| 17.7 | 692.4221 | -0.0001 | <a href="#">KSIAFK</a> |
| 17.7 | 692.4221 | -0.0001 | <a href="#">KTVFAK</a> |
| 16.6 | 692.4221 | -0.0001 | <a href="#">KTGIFK</a> |
| 14.2 | 692.4221 | -0.0001 | <a href="#">ASKFIK</a> |
| 14.2 | 692.4221 | -0.0001 | <a href="#">ASKFLK</a> |
| 10.4 | 692.4221 | -0.0001 | <a href="#">KFTLGK</a> |

**Mascot:** <http://www.matrixscience.com/>

**Peptide View**MS/MS Fragmentation of **MKLNESIK**

Found in **AT1G71220.1** in **TAIR\_Arabidopsis**, Symbols: EBS1 | EBS1 (EMS-MUTAGENIZED BRI1 SUPPRESSOR 1); UDP-glucose:glycoprotein glucosyltransferase/transferase, transferring glycosyl groups / transférase, transferring hexosyl groups | chr1:26845326-26855392  
FORWARD

Match to Query 1906: 972.491404 from(487.252978,2+) index(5649)

Title: Elution from: 53.526 to 53.526 scan no 7312 cid35.00 polarity:+

Data file D1d-1\_1.mgf

Click mouse within plot area to zoom in by factor of two about that point

Or,   to  Da

Label all possible matches  Label matches used for scoring

Show Y-axis

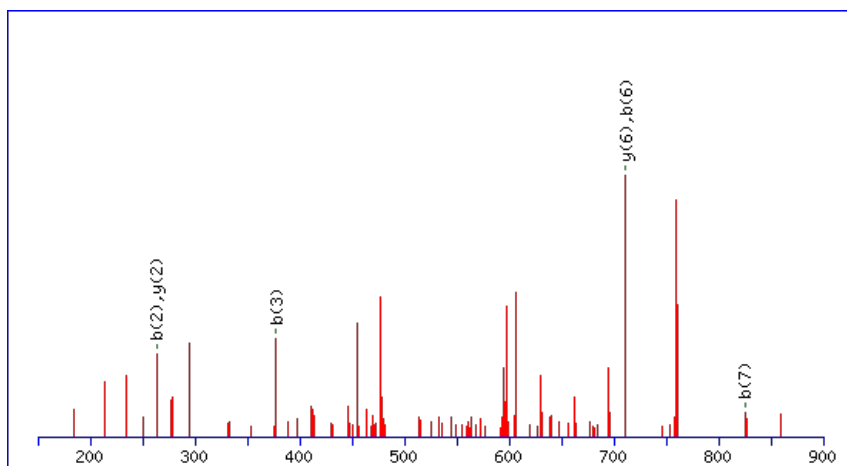

**Monoisotopic mass of neutral peptide Mr(calc):** 972.4940

**Fixed modifications:** Carbamidomethyl (C) (apply to specified residues or termini only)

**Ions Score:** 27 **Expect:** 0.031

**Matches:** 6/70 fragment ions using 7 most intense peaks ([help](#))

| # | b               | b <sup>++</sup> | b*       | b <sup>+++</sup> | b <sup>0</sup> | b <sup>0++</sup> | Seq. | y               | y <sup>++</sup> | y*       | y <sup>+++</sup> | y <sup>0</sup> | y <sup>0++</sup> | # |
|---|-----------------|-----------------|----------|------------------|----------------|------------------|------|-----------------|-----------------|----------|------------------|----------------|------------------|---|
| 1 | 133.0448        | 67.0260         |          |                  |                |                  | M    |                 |                 |          |                  |                |                  | 8 |
| 2 | <b>263.1338</b> | 132.0706        | 245.1102 | 123.0588         |                |                  | K    | 841.4638        | 421.2355        | 823.4402 | 412.2237         | 823.4532       | 412.2303         | 7 |
| 3 | <b>377.2149</b> | 189.1111        | 359.1913 | 180.0993         |                |                  | L    | <b>711.3748</b> | 356.1910        | 693.3512 | 347.1792         | 693.3642       | 347.1857         | 6 |
| 4 | 493.2519        | 247.1296        | 475.2283 | 238.1178         |                |                  | N    | 597.2937        | 299.1505        | 579.2701 | 290.1387         | 579.2831       | 290.1452         | 5 |
| 5 | 623.2916        | 312.1494        | 605.2680 | 303.1376         | 605.2810       | 303.1441         | E    | 481.2567        | 241.1320        | 463.2331 | 232.1202         | 463.2461       | 232.1267         | 4 |
| 6 | <b>711.3206</b> | 356.1639        | 693.2970 | 347.1522         | 693.3101       | 347.1587         | S    | 351.2170        | 176.1122        | 333.1935 | 167.1004         | 333.2065       | 167.1069         | 3 |
| 7 | <b>825.4017</b> | 413.2045        | 807.3781 | 404.1927         | 807.3911       | 404.1992         | I    | <b>263.1880</b> | 132.0976        | 245.1644 | 123.0858         |                |                  | 2 |
| 8 |                 |                 |          |                  |                |                  | K    | 149.1069        | 75.0571         | 131.0833 | 66.0453          |                |                  | 1 |

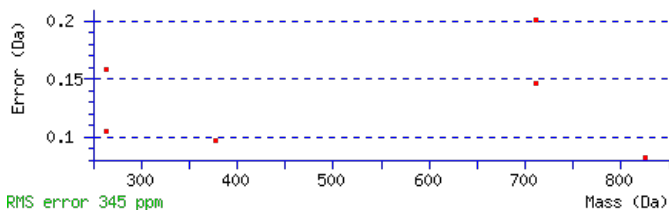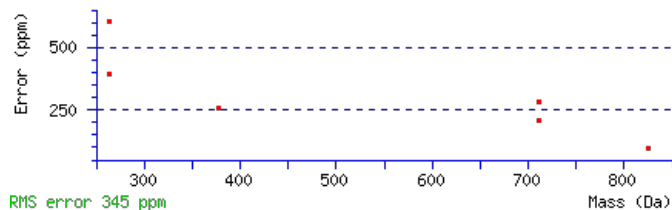

NCBI BLAST search of **MKLNESIK**

(Parameters: blastp, nr protein database, expect=20000, no filter, PAM30)

Other BLAST [web gateways](#)

**All matches to this query**

| Score | Mr(calc) | Delta | Sequence |
|-------|----------|-------|----------|
|       |          |       |          |



## AT1G71220.1

|      |          |         |                           |
|------|----------|---------|---------------------------|
| 26.7 | 972.4940 | -0.0026 | <a href="#">MKLNESIK</a>  |
| 19.2 | 972.4906 | 0.0008  | <a href="#">IFLIADDR</a>  |
| 15.9 | 972.4940 | -0.0026 | <a href="#">QMAKDLIK</a>  |
| 13.7 | 972.4940 | -0.0026 | <a href="#">MKVDTKPK</a>  |
| 13.2 | 972.4940 | -0.0026 | <a href="#">KMTVQDLK</a>  |
| 12.8 | 972.4907 | 0.0007  | <a href="#">IPSSFGNLK</a> |
| 12.3 | 972.4940 | -0.0026 | <a href="#">VCLSVKEK</a>  |
| 11.4 | 972.4940 | -0.0026 | <a href="#">MGSGEKILK</a> |
| 10.6 | 972.4907 | 0.0007  | <a href="#">YPPDSKKK</a>  |
| 9.2  | 972.4911 | 0.0003  | <a href="#">IVNDRSVR</a>  |

Mascot: <http://www.matrixscience.com/>

**Peptide View**MS/MS Fragmentation of **SPAEGAYSEGLLNAR**Found in **AT1G71500.1** in **TAIR\_Arabidopsis**, Symbols: | Rieske (2Fe-2S) domain-containing protein | chr1:26939746-26940993 FORWARD

Match to Query 6570: 1552.688516 from(777.351534,2+) index(4479)

Title: Elution from: 40.786 to 40.786 scan no 5604 cid35.00 polarity:+

Data file D12h-1\_3.mgf

Click mouse within plot area to zoom in by factor of two about that point

Or,   to  Da Label all possible matches  Label matches used for scoring Show Y-axis 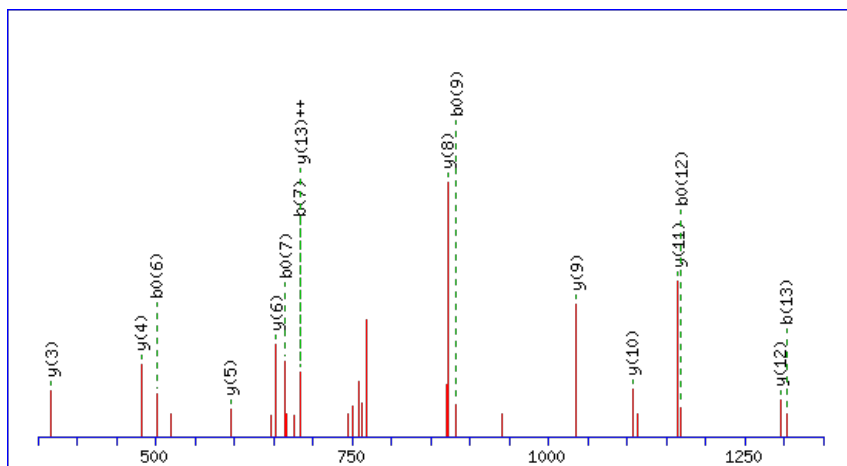Monoisotopic mass of neutral peptide  $M_r(\text{calc})$ : 1552.6860

Fixed modifications: Carbamidomethyl (C) (apply to specified residues or termini only)

Ions Score: 83 Expect: 4e-008

Matches : 16/132 fragment ions using 23 most intense peaks ([help](#))

| #  | b         | b <sup>++</sup> | b*        | b <sup>*++</sup> | b <sup>0</sup> | b <sup>0++</sup> | Seq. | y         | y <sup>++</sup> | y*        | y <sup>*++</sup> | y <sup>0</sup> | y <sup>0++</sup> | #  |
|----|-----------|-----------------|-----------|------------------|----------------|------------------|------|-----------|-----------------|-----------|------------------|----------------|------------------|----|
| 1  | 89.0363   | 45.0218         |           |                  | 71.0258        | 36.0165          | S    |           |                 |           |                  |                |                  | 15 |
| 2  | 187.0861  | 94.0467         |           |                  | 169.0756       | 85.0414          | P    | 1465.6642 | 733.3357        | 1447.6406 | 724.3240         | 1447.6536      | 724.3305         | 14 |
| 3  | 259.1203  | 130.0638        |           |                  | 241.1097       | 121.0585         | A    | 1367.6144 | 684.3108        | 1349.5908 | 675.2991         | 1349.6039      | 675.3056         | 13 |
| 4  | 389.1599  | 195.0836        |           |                  | 371.1493       | 186.0783         | E    | 1295.5803 | 648.2938        | 1277.5567 | 639.2820         | 1277.5697      | 639.2885         | 12 |
| 5  | 447.1784  | 224.0928        |           |                  | 429.1678       | 215.0876         | G    | 1165.5406 | 583.2740        | 1147.5171 | 574.2622         | 1147.5301      | 574.2687         | 11 |
| 6  | 519.2126  | 260.1099        |           |                  | 501.2020       | 251.1046         | A    | 1107.5221 | 554.2647        | 1089.4986 | 545.2529         | 1089.5116      | 545.2594         | 10 |
| 7  | 683.2729  | 342.1401        |           |                  | 665.2624       | 333.1348         | Y    | 1035.4880 | 518.2476        | 1017.4644 | 509.2358         | 1017.4774      | 509.2424         | 9  |
| 8  | 771.3020  | 386.1546        |           |                  | 753.2914       | 377.1494         | S    | 871.4276  | 436.2175        | 853.4040  | 427.2057         | 853.4171       | 427.2122         | 8  |
| 9  | 901.3416  | 451.1744        |           |                  | 883.3311       | 442.1692         | E    | 783.3986  | 392.2029        | 765.3750  | 383.1911         | 765.3880       | 383.1976         | 7  |
| 10 | 959.3601  | 480.1837        |           |                  | 941.3496       | 471.1784         | G    | 653.3589  | 327.1831        | 635.3354  | 318.1713         |                |                  | 6  |
| 11 | 1073.4412 | 537.2242        |           |                  | 1055.4307      | 528.2190         | L    | 595.3404  | 298.1739        | 577.3169  | 289.1621         |                |                  | 5  |
| 12 | 1187.5223 | 594.2648        |           |                  | 1169.5117      | 585.2595         | L    | 481.2593  | 241.1333        | 463.2358  | 232.1215         |                |                  | 4  |
| 13 | 1303.5593 | 652.2833        | 1285.5357 | 643.2715         | 1285.5487      | 643.2780         | N    | 367.1782  | 184.0928        | 349.1547  | 175.0810         |                |                  | 3  |
| 14 | 1375.5935 | 688.3004        | 1357.5699 | 679.2886         | 1357.5829      | 679.2951         | A    | 251.1412  | 126.0743        | 233.1177  | 117.0625         |                |                  | 2  |
| 15 |           |                 |           |                  |                |                  | R    | 179.1071  | 90.0572         | 161.0835  | 81.0454          |                |                  | 1  |

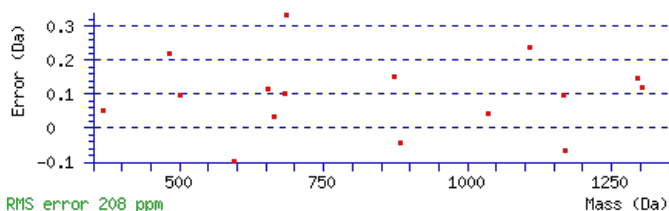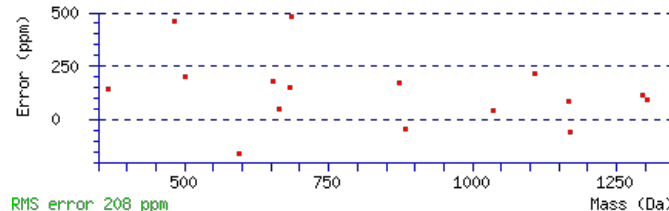NCBI BLAST search of [SPAEGAYSEGLLNAR](#)

## AT1G71500.1

(Parameters: blastp, nr protein database, expect=20000, no filter, PAM30)

Other BLAST [web gateways](#)

### All matches to this query

| Score | Mr(calc)  | Delta   | Sequence                        |
|-------|-----------|---------|---------------------------------|
| 83.0  | 1552.6860 | 0.0025  | <a href="#">SPAEGAYSEGLLNAR</a> |
| 6.1   | 1552.6882 | 0.0003  | <a href="#">FKAETVSPGEWER</a>   |
| 0.1   | 1552.6894 | -0.0009 | <a href="#">TCNVSLPLQNSSSK</a>  |

Mascot: <http://www.matrixscience.com/>

**Peptide View**MS/MS Fragmentation of **GTMEGMIDKYMK**Found in **AT1G71692.1** in **TAIR\_Arabidopsis**, Symbols: XAL1, AGL12 | AGL12 (AGAMOUS-LIKE 12); transcription factor | chr1:26956565-26958601 REVERSE

Match to Query 5804: 1432.585946 from(717.300249,2+) index(3330)

Title: Elution from: 32.178 to 32.178 scan no 4111 cid35.00 polarity:+

Data file C7-2\_2.mgf

Click mouse within plot area to zoom in by factor of two about that point

Or,  to  Da Label all possible matches  Label matches used for scoring Show Y-axis 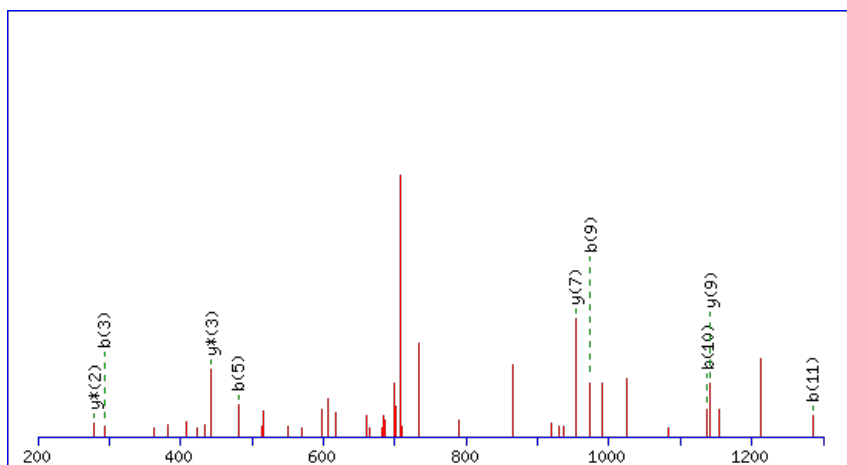Monoisotopic mass of neutral peptide  $M_r(\text{calc})$ : 1432.5829

Fixed modifications: Carbamidomethyl (C) (apply to specified residues or termini only)

Variable modifications:

M11 : Oxidation (M), with neutral losses 0.0000 (shown in table), 63.9983

Ions Score: 22 Expect: 0.02

Matches : 9/166 fragment ions using 21 most intense peaks ([help](#))

| #  | b                | b <sup>++</sup> | b*        | b <sup>*++</sup> | b <sup>0</sup> | b <sup>0++</sup> | Seq. | y                | y <sup>++</sup> | y*              | y <sup>*++</sup> | y <sup>0</sup> | y <sup>0++</sup> | #  |
|----|------------------|-----------------|-----------|------------------|----------------|------------------|------|------------------|-----------------|-----------------|------------------|----------------|------------------|----|
| 1  | 59.0258          | 30.0165         |           |                  |                |                  | G    |                  |                 |                 |                  |                |                  | 12 |
| 2  | 161.0705         | 81.0389         |           |                  | 143.0599       | 72.0336          | T    | 1375.5717        | 688.2895        | 1357.5481       | 679.2777         | 1357.5611      | 679.2842         | 11 |
| 3  | <b>293.1080</b>  | 147.0576        |           |                  | 275.0974       | 138.0524         | M    | 1273.5269        | 637.2671        | 1255.5034       | 628.2553         | 1255.5164      | 628.2618         | 10 |
| 4  | 423.1476         | 212.0775        |           |                  | 405.1371       | 203.0722         | E    | <b>1141.4894</b> | 571.2484        | 1123.4658       | 562.2366         | 1123.4789      | 562.2431         | 9  |
| 5  | <b>481.1661</b>  | 241.0867        |           |                  | 463.1556       | 232.0814         | G    | 1011.4498        | 506.2285        | 993.4262        | 497.2167         | 993.4392       | 497.2233         | 8  |
| 6  | 613.2037         | 307.1055        |           |                  | 595.1931       | 298.1002         | M    | <b>953.4313</b>  | 477.2193        | 935.4077        | 468.2075         | 935.4207       | 468.2140         | 7  |
| 7  | 727.2848         | 364.1460        |           |                  | 709.2742       | 355.1407         | I    | 821.3938         | 411.2005        | 803.3702        | 402.1887         | 803.3832       | 402.1952         | 6  |
| 8  | 843.3087         | 422.1580        |           |                  | 825.2982       | 413.1527         | D    | 707.3127         | 354.1600        | 689.2891        | 345.1482         | 689.3021       | 345.1547         | 5  |
| 9  | <b>973.3978</b>  | 487.2025        | 955.3742  | 478.1907         | 955.3872       | 478.1972         | K    | 591.2887         | 296.1480        | 573.2651        | 287.1362         |                |                  | 4  |
| 10 | <b>1137.4581</b> | 569.2327        | 1119.4345 | 560.2209         | 1119.4476      | 560.2274         | Y    | 461.1997         | 231.1035        | <b>443.1761</b> | 222.0917         |                |                  | 3  |
| 11 | <b>1285.4906</b> | 643.2489        | 1267.4670 | 634.2371         | 1267.4800      | 634.2436         | M    | 297.1393         | 149.0733        | <b>279.1157</b> | 140.0615         |                |                  | 2  |
| 12 |                  |                 |           |                  |                |                  | K    | 149.1069         | 75.0571         | 131.0833        | 66.0453          |                |                  | 1  |

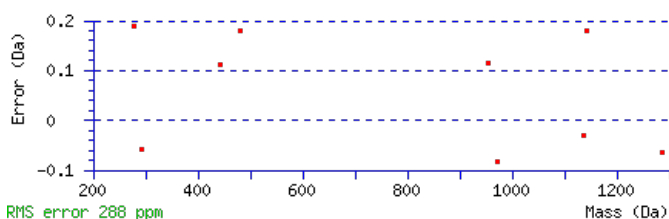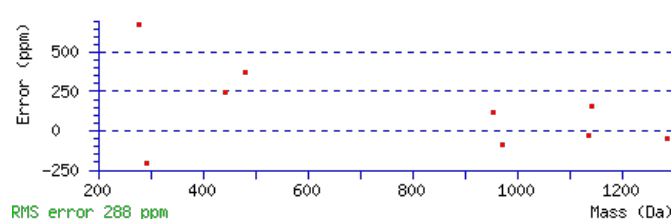NCBI BLAST search of **GTMEGMIDKYMK**

(Parameters: blastp, nr protein database, expect=20000, no filter, PAM30)

# AT1G71692.1

Other BLAST [web gateways](#)

## All matches to this query

| Score | Mr(calc)  | Delta   | Sequence                     | Site Analysis        |
|-------|-----------|---------|------------------------------|----------------------|
| 22.0  | 1432.5829 | 0.0031  | <a href="#">GTMEGMIDKYMK</a> | Oxidation M11 95.96% |
| 7.7   | 1432.5829 | 0.0031  | <a href="#">GTMEGMIDKYMK</a> | Oxidation M6 3.56%   |
| 5.7   | 1432.5826 | 0.0033  | <a href="#">KCNERCYINR</a>   |                      |
| 3.7   | 1432.5829 | 0.0031  | <a href="#">FTATSMMDMLQK</a> |                      |
| 3.7   | 1432.5829 | 0.0031  | <a href="#">FTATSMMDMLQK</a> |                      |
| 0.0   | 1432.5873 | -0.0014 | <a href="#">MDRSYRDLEGR</a>  |                      |

Mascot: <http://www.matrixscience.com/>

## Peptide View

MS/MS Fragmentation of **QGLFTSDQDLFVDK**

Found in **AT1G71695.1** in **TAIR\_Arabidopsis**, Symbols: | peroxidase 12 (PER12) (P12) (PRXR6) | chr1:26968021-26970219 FORWARD

Match to Query 7098: 1611.778034 from(806.896293,2+) index(7939)

Title: Elution from: 69.307 to 69.307 scan no 10498 cid35.00 polarity:+

Data file D1d-3\_3.mgf

Click mouse within plot area to zoom in by factor of two about that point

Or,   to  Da

Label all possible matches  Label matches used for scoring

Show Y-axis

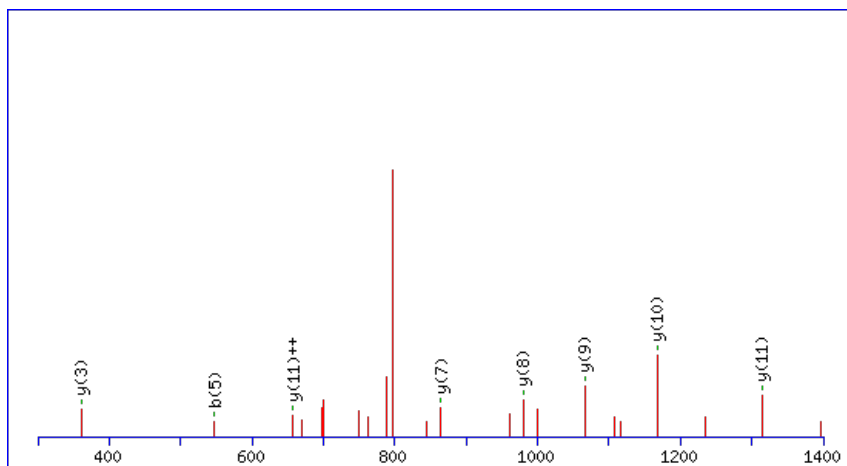

Monoisotopic mass of neutral peptide **Mr(calc)**: 1611.7781

**Fixed modifications**: Carbamidomethyl (C) (apply to specified residues or termini only)

**Ions Score**: 41 **Expect**: 0.00028

**Matches**: 8/146 fragment ions using 11 most intense peaks ([help](#))

| #  | b               | b <sup>++</sup> | b <sup>*</sup> | b <sup>*++</sup> | b <sup>0</sup> | b <sup>0++</sup> | Seq. | y                | y <sup>++</sup> | y <sup>*</sup> | y <sup>*++</sup> | y <sup>0</sup> | y <sup>0++</sup> | #  |
|----|-----------------|-----------------|----------------|------------------|----------------|------------------|------|------------------|-----------------|----------------|------------------|----------------|------------------|----|
| 1  | 129.0659        | 65.0366         | 112.0393       | 56.5233          |                |                  | Q    |                  |                 |                |                  |                |                  | 14 |
| 2  | 186.0873        | 93.5473         | 169.0608       | 85.0340          |                |                  | G    | 1484.7268        | 742.8670        | 1467.7002      | 734.3537         | 1466.7162      | 733.8617         | 13 |
| 3  | 299.1714        | 150.0893        | 282.1448       | 141.5761         |                |                  | L    | 1427.7053        | 714.3563        | 1410.6787      | 705.8430         | 1409.6947      | 705.3510         | 12 |
| 4  | 446.2398        | 223.6235        | 429.2132       | 215.1103         |                |                  | F    | <b>1314.6212</b> | <b>657.8143</b> | 1297.5947      | 649.3010         | 1296.6107      | 648.8090         | 11 |
| 5  | <b>547.2875</b> | 274.1474        | 530.2609       | 265.6341         | 529.2769       | 265.1421         | T    | <b>1167.5528</b> | 584.2800        | 1150.5263      | 575.7668         | 1149.5422      | 575.2748         | 10 |
| 6  | 634.3195        | 317.6634        | 617.2930       | 309.1501         | 616.3089       | 308.6581         | S    | <b>1066.5051</b> | 533.7562        | 1049.4786      | 525.2429         | 1048.4946      | 524.7509         | 9  |
| 7  | 749.3464        | 375.1769        | 732.3199       | 366.6636         | 731.3359       | 366.1716         | D    | <b>979.4731</b>  | 490.2402        | 962.4466       | 481.7269         | 961.4625       | 481.2349         | 8  |
| 8  | 877.4050        | 439.2062        | 860.3785       | 430.6929         | 859.3945       | 430.2009         | Q    | <b>864.4462</b>  | 432.7267        | 847.4196       | 424.2134         | 846.4356       | 423.7214         | 7  |
| 9  | 992.4320        | 496.7196        | 975.4054       | 488.2063         | 974.4214       | 487.7143         | D    | 736.3876         | 368.6974        | 719.3610       | 360.1842         | 718.3770       | 359.6921         | 6  |
| 10 | 1105.5160       | 553.2617        | 1088.4895      | 544.7484         | 1087.5055      | 544.2564         | L    | 621.3606         | 311.1840        | 604.3341       | 302.6707         | 603.3501       | 302.1787         | 5  |
| 11 | 1252.5844       | 626.7959        | 1235.5579      | 618.2826         | 1234.5739      | 617.7906         | F    | 508.2766         | 254.6419        | 491.2500       | 246.1287         | 490.2660       | 245.6366         | 4  |
| 12 | 1351.6529       | 676.3301        | 1334.6263      | 667.8168         | 1333.6423      | 667.3248         | V    | <b>361.2082</b>  | 181.1077        | 344.1816       | 172.5944         | 343.1976       | 172.1024         | 3  |
| 13 | 1466.6798       | 733.8435        | 1449.6533      | 725.3303         | 1448.6692      | 724.8383         | D    | 262.1397         | 131.5735        | 245.1132       | 123.0602         | 244.1292       | 122.5682         | 2  |
| 14 |                 |                 |                |                  |                |                  | K    | 147.1128         | 74.0600         | 130.0863       | 65.5468          |                |                  | 1  |

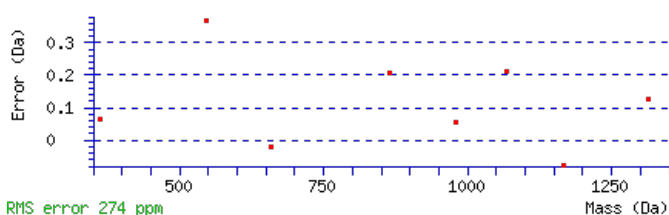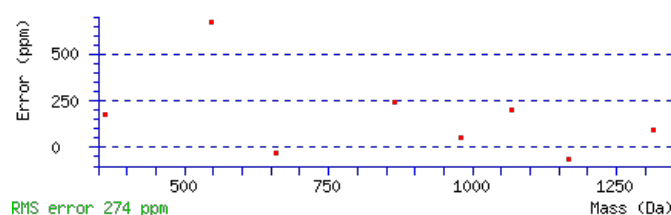

NCBI BLAST search of **QGLFTSDQDLFVDK**

(Parameters: blastp, nr protein database, expect=20000, no filter, PAM30)

AT1G71695.1

Other BLAST [web gateways](#)

All matches to this query

| Score | Mr(calc)  | Delta   | Sequence                       |
|-------|-----------|---------|--------------------------------|
| 41.2  | 1611.7781 | -0.0000 | <a href="#">QGLFTSDQDLFVDK</a> |
| 1.8   | 1611.7827 | -0.0047 | <a href="#">TNLSQAFSQKMWR</a>  |

Mascot: <http://www.matrixscience.com/>

## Peptide View

MS/MS Fragmentation of **MIPSHQSK**

Found in **AT1G72130.2** in **TAIR\_Arabidopsis**, Symbols: | proton-dependent oligopeptide transport (POT) family protein | chr1:27141425-27142885  
FORWARD

Match to Query 1943: 954.424096 from(478.219324,2+) index(3015)

Title: Elution from: 29.619 to 29.619 scan no 3743 cid35.00 polarity:+

Data file 0-3\_3.mgf

Click mouse within plot area to zoom in by factor of two about that point

Or,  to  Da Label all possible matches  Label matches used for scoring Show Y-axis 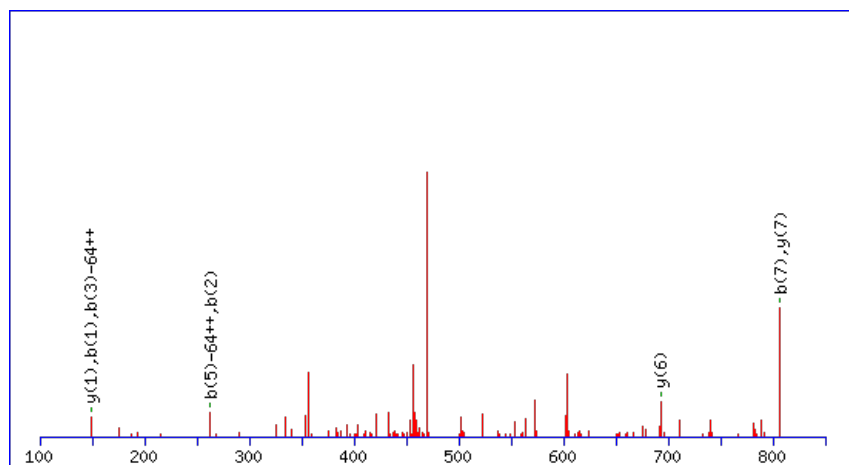Monoisotopic mass of neutral peptide  $M_r(\text{calc})$ : 954.4237

Fixed modifications: Carbamidomethyl (C) (apply to specified residues or termini only)

Variable modifications:

M1 : Oxidation (M), with neutral losses 0.0000 (shown in table), 63.9983

Ions Score: 21 Expect: 0.025

Matches : 8/92 fragment ions using 7 most intense peaks ([help](#))

| # | b               | b <sup>++</sup> | b*       | b <sup>*++</sup> | b <sup>0</sup> | b <sup>0++</sup> | Seq.     | y               | y <sup>++</sup> | y*       | y <sup>*++</sup> | y <sup>0</sup> | y <sup>0++</sup> | #        |
|---|-----------------|-----------------|----------|------------------|----------------|------------------|----------|-----------------|-----------------|----------|------------------|----------------|------------------|----------|
| 1 | <b>149.0397</b> | 75.0235         |          |                  |                |                  | <b>M</b> |                 |                 |          |                  |                |                  | <b>8</b> |
| 2 | <b>263.1208</b> | 132.0640        |          |                  |                |                  | <b>I</b> | <b>807.3986</b> | 404.2029        | 789.3750 | 395.1911         | 789.3880       | 395.1976         | <b>7</b> |
| 3 | 361.1706        | 181.0889        |          |                  |                |                  | <b>P</b> | <b>693.3175</b> | 347.1624        | 675.2939 | 338.1506         | 675.3069       | 338.1571         | <b>6</b> |
| 4 | 449.1997        | 225.1035        |          |                  | 431.1891       | 216.0982         | <b>S</b> | 595.2677        | 298.1375        | 577.2441 | 289.1257         | 577.2571       | 289.1322         | <b>5</b> |
| 5 | 589.2497        | 295.1285        |          |                  | 571.2391       | 286.1232         | <b>H</b> | 507.2386        | 254.1229        | 489.2150 | 245.1111         | 489.2280       | 245.1177         | <b>4</b> |
| 6 | 719.3023        | 360.1548        | 701.2788 | 351.1430         | 701.2918       | 351.1495         | <b>Q</b> | 367.1886        | 184.0979        | 349.1650 | 175.0861         | 349.1780       | 175.0926         | <b>3</b> |
| 7 | <b>807.3314</b> | 404.1693        | 789.3078 | 395.1575         | 789.3208       | 395.1641         | <b>S</b> | 237.1359        | 119.0716        | 219.1124 | 110.0598         | 219.1254       | 110.0663         | <b>2</b> |
| 8 |                 |                 |          |                  |                |                  | <b>K</b> | <b>149.1069</b> | 75.0571         | 131.0833 | 66.0453          |                |                  | <b>1</b> |

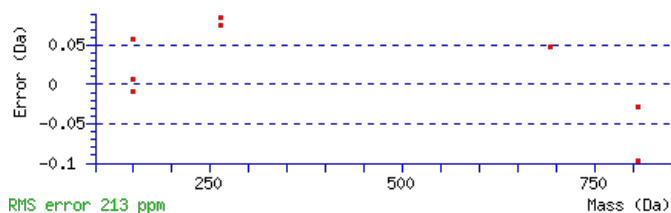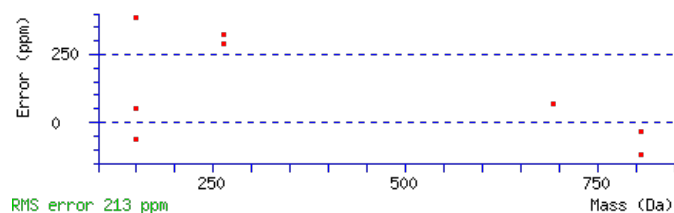NCBI **BLAST** search of **MIPSHQSK**

(Parameters: blastp, nr protein database, expect=20000, no filter, PAM30)

Other BLAST [web gateways](#)

All matches to this query

| Score | $M_r(\text{calc})$ | Delta | Sequence |
|-------|--------------------|-------|----------|
|       |                    |       |          |



**AT1G72130.2**

|      |          |         |                           |
|------|----------|---------|---------------------------|
| 20.8 | 954.4237 | 0.0004  | <a href="#">MHGLGDGLK</a> |
| 20.8 | 954.4237 | 0.0004  | <a href="#">MIPSHQSK</a>  |
| 11.3 | 954.4237 | 0.0004  | <a href="#">LMVNHEGK</a>  |
| 11.3 | 954.4237 | 0.0004  | <a href="#">MIEHLER</a>   |
| 2.6  | 954.4237 | 0.0004  | <a href="#">MHEILER</a>   |
| 1.4  | 954.4237 | 0.0004  | <a href="#">GAIPSPDR</a>  |
| 1.0  | 954.4259 | -0.0019 | <a href="#">MFLSQFR</a>   |
| 0.6  | 954.4226 | 0.0015  | <a href="#">FFSSPGR</a>   |
| 0.5  | 954.4259 | -0.0019 | <a href="#">HIEWMTK</a>   |
| 0.4  | 954.4264 | -0.0023 | <a href="#">CHKPDRK</a>   |

**Mascot:** <http://www.matrixscience.com/>

## Peptide View

MS/MS Fragmentation of **TFGSIITSPR**

Found in **AT1G72150.1** in **TAIR\_Arabidopsis**, Symbols: PATL1 | PATL1 (PATELLIN 1); transporter | chr1:27152220-27154314 FORWARD

Match to Query 3221: 1077.583106 from(539.798829,2+) index(4801)

Title: Elution from: 42.978 to 42.978 scan no 5975 cid35.00 polarity:+

Data file C7-1\_1.mgf

Click mouse within plot area to zoom in by factor of two about that point

Or,   to  Da

Label all possible matches  Label matches used for scoring

Show Y-axis

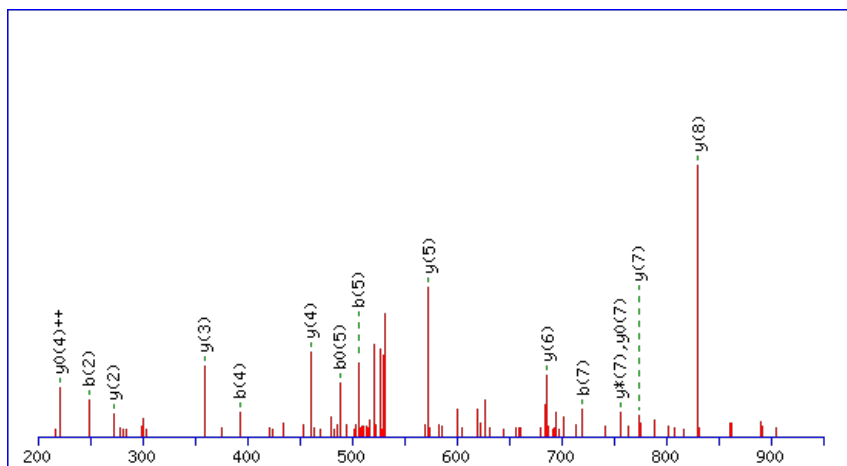

Monoisotopic mass of neutral peptide **Mr(calc)**: 1077.5819

**Fixed modifications**: Carbamidomethyl (C) (apply to specified residues or termini only)

**Ions Score**: 60 **Expect**: 6.6e-006

**Matches**: 15/86 fragment ions using 21 most intense peaks ([help](#))

| #  | b               | b <sup>++</sup> | b <sup>0</sup>  | b <sup>0++</sup> | Seq. | y               | y <sup>++</sup> | y*              | y <sup>*++</sup> | y <sup>0</sup>  | y <sup>0++</sup> | #  |
|----|-----------------|-----------------|-----------------|------------------|------|-----------------|-----------------|-----------------|------------------|-----------------|------------------|----|
| 1  | 102.0550        | 51.5311         | 84.0444         | 42.5258          | T    |                 |                 |                 |                  |                 |                  | 10 |
| 2  | <b>249.1234</b> | 125.0653        | 231.1128        | 116.0600         | F    | 977.5415        | 489.2744        | 960.5149        | 480.7611         | 959.5309        | 480.2691         | 9  |
| 3  | 306.1448        | 153.5761        | 288.1343        | 144.5708         | G    | <b>830.4730</b> | 415.7402        | 813.4465        | 407.2269         | 812.4625        | 406.7349         | 8  |
| 4  | <b>393.1769</b> | 197.0921        | 375.1663        | 188.0868         | S    | <b>773.4516</b> | 387.2294        | <b>756.4250</b> | 378.7162         | <b>755.4410</b> | 378.2241         | 7  |
| 5  | <b>506.2609</b> | 253.6341        | <b>488.2504</b> | 244.6288         | I    | <b>686.4196</b> | 343.7134        | 669.3930        | 335.2001         | 668.4090        | 334.7081         | 6  |
| 6  | 619.3450        | 310.1761        | 601.3344        | 301.1709         | I    | <b>573.3355</b> | 287.1714        | 556.3089        | 278.6581         | 555.3249        | 278.1661         | 5  |
| 7  | <b>720.3927</b> | 360.7000        | 702.3821        | 351.6947         | T    | <b>460.2514</b> | 230.6293        | 443.2249        | 222.1161         | 442.2409        | <b>221.6241</b>  | 4  |
| 8  | 807.4247        | 404.2160        | 789.4141        | 395.2107         | S    | <b>359.2037</b> | 180.1055        | 342.1772        | 171.5922         | 341.1932        | 171.1002         | 3  |
| 9  | 904.4775        | 452.7424        | 886.4669        | 443.7371         | P    | <b>272.1717</b> | 136.5895        | 255.1452        | 128.0762         |                 |                  | 2  |
| 10 |                 |                 |                 |                  | R    | 175.1190        | 88.0631         | 158.0924        | 79.5498          |                 |                  | 1  |

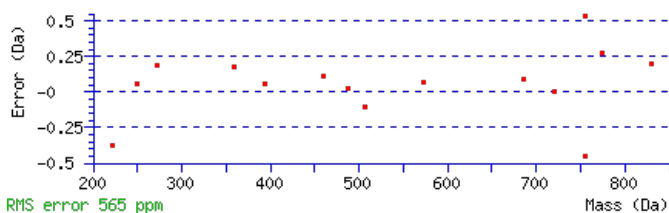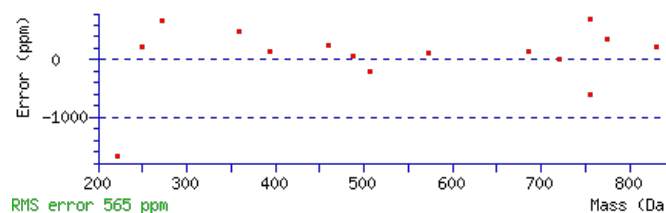

NCBI **BLAST** search of [TFGSIITSPR](#)

(Parameters: blastp, nr protein database, expect=20000, no filter, PAM30)

Other BLAST [web gateways](#)

All matches to this query

| Score | Mr(calc) | Delta | Sequence |
|-------|----------|-------|----------|
|       |          |       |          |

## AT1G72150.1

|      |           |        |                            |
|------|-----------|--------|----------------------------|
| 59.7 | 1077.5819 | 0.0012 | <a href="#">TFGSIITSPR</a> |
| 20.5 | 1077.5818 | 0.0013 | <a href="#">AFSAELTAIR</a> |
| 6.5  | 1077.5818 | 0.0013 | <a href="#">DYNLNKLAK</a>  |
| 0.6  | 1077.5819 | 0.0012 | <a href="#">DNVGLKGFTK</a> |

**Mascot:** <http://www.matrixscience.com/>

**Peptide View**MS/MS Fragmentation of **FVDIGIPANNK**

Found in **AT1G72370.1** in **TAIR\_Arabidopsis**, Symbols: AP40, RP40, RPSAA, P40 | P40 (40S ribosomal protein SA); structural constituent of ribosome | chr1:27246810-27248504 REVERSE

Match to Query 4301: 1200.595076 from(601.304814,2+) index(5135)

Title: Elution from: 46.090 to 46.090 scan no 6406 cid35.00 polarity:+

Data file C7-3\_1.mgf

Click mouse within plot area to zoom in by factor of two about that point

Or,   to  Da

Label all possible matches  Label matches used for scoring

Show Y-axis

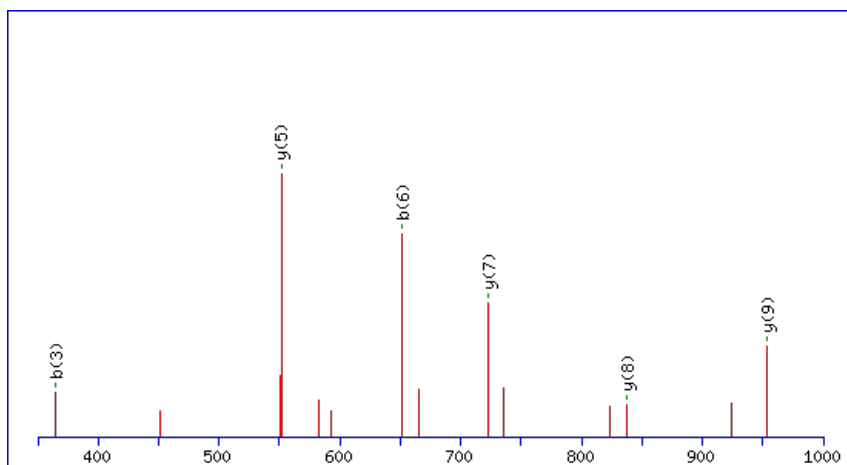

**Monoisotopic mass of neutral peptide Mr(calc):** 1200.5931

**Fixed modifications:** Carbamidomethyl (C) (apply to specified residues or termini only)

**Ions Score:** 38 **Expect:** 0.0011

**Matches:** 6/84 fragment ions using 6 most intense peaks ([help](#))

| #  | b               | b <sup>++</sup> | b*        | b* <sup>++</sup> | b <sup>0</sup> | b <sup>0++</sup> | Seq. | y               | y <sup>++</sup> | y*        | y* <sup>++</sup> | y <sup>0</sup> | y <sup>0++</sup> | #  |
|----|-----------------|-----------------|-----------|------------------|----------------|------------------|------|-----------------|-----------------|-----------|------------------|----------------|------------------|----|
| 1  | 149.0727        | 75.0400         |           |                  |                |                  | F    |                 |                 |           |                  |                |                  | 11 |
| 2  | 249.1382        | 125.0727        |           |                  |                |                  | V    | 1053.5349       | 527.2711        | 1035.5114 | 518.2593         | 1035.5244      | 518.2658         | 10 |
| 3  | <b>365.1622</b> | 183.0847        |           |                  | 347.1516       | 174.0794         | D    | <b>953.4695</b> | 477.2384        | 935.4459  | 468.2266         | 935.4589       | 468.2331         | 9  |
| 4  | 479.2433        | 240.1253        |           |                  | 461.2327       | 231.1200         | I    | <b>837.4455</b> | 419.2264        | 819.4219  | 410.2146         |                |                  | 8  |
| 5  | 537.2618        | 269.1345        |           |                  | 519.2512       | 260.1292         | G    | <b>723.3644</b> | 362.1858        | 705.3408  | 353.1741         |                |                  | 7  |
| 6  | <b>651.3428</b> | 326.1751        |           |                  | 633.3323       | 317.1698         | I    | 665.3459        | 333.1766        | 647.3223  | 324.1648         |                |                  | 6  |
| 7  | 749.3926        | 375.2000        |           |                  | 731.3821       | 366.1947         | P    | <b>551.2648</b> | 276.1360        | 533.2412  | 267.1243         |                |                  | 5  |
| 8  | 821.4268        | 411.2170        |           |                  | 803.4162       | 402.2118         | A    | 453.2150        | 227.1111        | 435.1914  | 218.0994         |                |                  | 4  |
| 9  | 937.4638        | 469.2355        | 919.4402  | 460.2237         | 919.4532       | 460.2303         | N    | 381.1809        | 191.0941        | 363.1573  | 182.0823         |                |                  | 3  |
| 10 | 1053.5008       | 527.2540        | 1035.4772 | 518.2422         | 1035.4902      | 518.2488         | N    | 265.1439        | 133.0756        | 247.1203  | 124.0638         |                |                  | 2  |
| 11 |                 |                 |           |                  |                |                  | K    | 149.1069        | 75.0571         | 131.0833  | 66.0453          |                |                  | 1  |

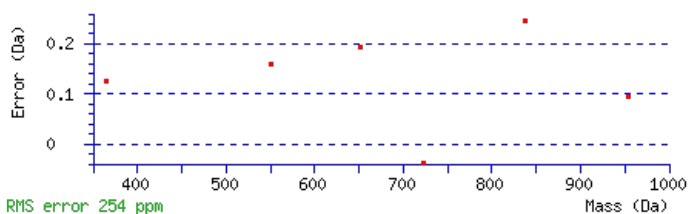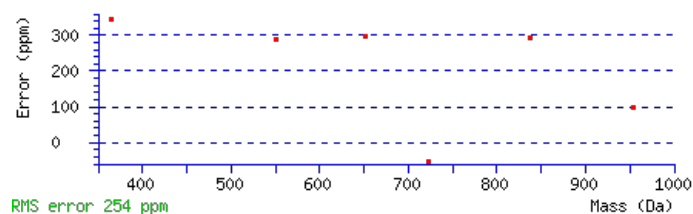

NCBI **BLAST** search of **FVDIGIPANNK**

(Parameters: blastp, nr protein database, expect=20000, no filter, PAM30)

Other BLAST [web gateways](#)

**All matches to this query**

## AT1G72370.1

| Score | Mr(calc)  | Delta   | Sequence                    |
|-------|-----------|---------|-----------------------------|
| 37.8  | 1200.5931 | 0.0020  | <a href="#">FVDIGIPANNK</a> |
| 11.6  | 1200.5958 | -0.0007 | <a href="#">GKFVIHGSPSR</a> |
| 4.2   | 1200.5931 | 0.0020  | <a href="#">DIKSSIPYHK</a>  |
| 0.8   | 1200.5935 | 0.0015  | <a href="#">SKRVGVSHEGK</a> |
| 0.0   | 1200.5936 | 0.0015  | <a href="#">VTPSPGNISRR</a> |

Mascot: <http://www.matrixscience.com/>

**Peptide View**MS/MS Fragmentation of **LDLAPK**

Found in **AT1G72610.1** in **TAIR\_Arabidopsis**, Symbols: GLP1 | GLP1 (GERMIN-LIKE PROTEIN 1); manganese ion binding / metal ion binding / nutrient reservoir | chr1:27342964-27343590 REVERSE

Match to Query 514: 655.390632 from(328.702592,2+) index(1481)

Title: Elution from: 20.361 to 20.361 scan no 2001 cid35.00 polarity:+

Data file C7-1\_3.mgf

Click mouse within plot area to zoom in by factor of two about that point

Or,   to  Da

Label all possible matches  Label matches used for scoring

Show Y-axis

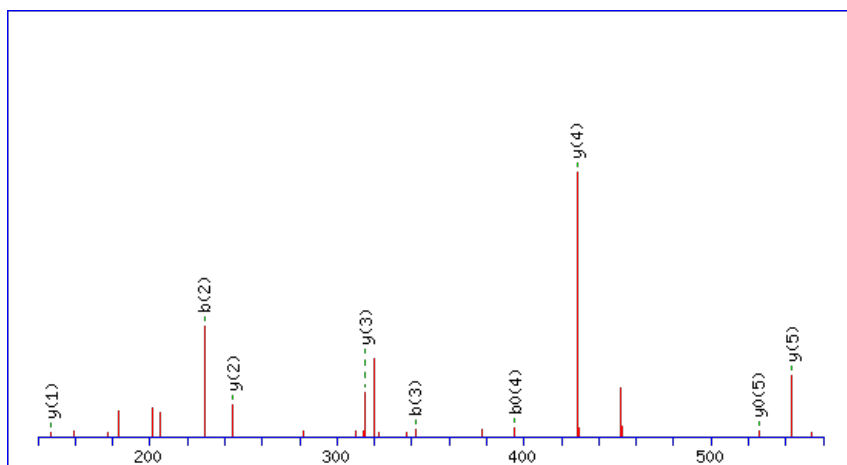

**Monoisotopic mass of neutral peptide Mr(calc):** 655.3905

**Fixed modifications:** Carbamidomethyl (C) (apply to specified residues or termini only)

**Ions Score:** 33 **Expect:** 0.0012

**Matches:** 9/40 fragment ions using 25 most intense peaks ([help](#))

| # | b               | b <sup>++</sup> | b <sup>0</sup>  | b <sup>0++</sup> | Seq. | y               | y <sup>++</sup> | y*       | y <sup>*++</sup> | y <sup>0</sup>  | y <sup>0++</sup> | # |
|---|-----------------|-----------------|-----------------|------------------|------|-----------------|-----------------|----------|------------------|-----------------|------------------|---|
| 1 | 114.0913        | 57.5493         |                 |                  | L    |                 |                 |          |                  |                 |                  | 6 |
| 2 | <b>229.1183</b> | 115.0628        | 211.1077        | 106.0575         | D    | <b>543.3137</b> | 272.1605        | 526.2871 | 263.6472         | <b>525.3031</b> | 263.1552         | 5 |
| 3 | <b>342.2023</b> | 171.6048        | 324.1918        | 162.5995         | L    | <b>428.2867</b> | 214.6470        | 411.2602 | 206.1337         |                 |                  | 4 |
| 4 | 413.2395        | 207.1234        | <b>395.2289</b> | 198.1181         | A    | <b>315.2027</b> | 158.1050        | 298.1761 | 149.5917         |                 |                  | 3 |
| 5 | 510.2922        | 255.6498        | 492.2817        | 246.6445         | P    | <b>244.1656</b> | 122.5864        | 227.1390 | 114.0731         |                 |                  | 2 |
| 6 |                 |                 |                 |                  | K    | <b>147.1128</b> | 74.0600         | 130.0863 | 65.5468          |                 |                  | 1 |

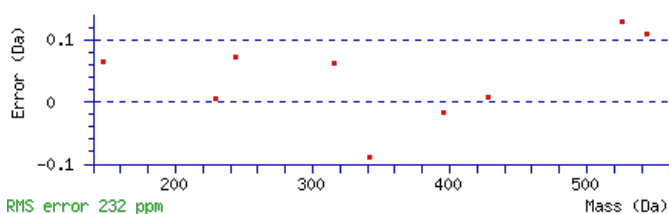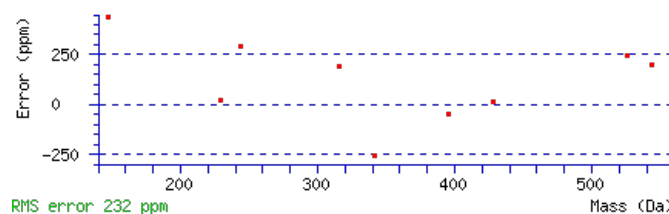

NCBI **BLAST** search of **LDLAPK**

(Parameters: blastp, nr protein database, expect=20000, no filter, PAM30)

Other BLAST [web gateways](#)

**All matches to this query**

| Score | Mr(calc) | Delta  | Sequence               |
|-------|----------|--------|------------------------|
| 33.3  | 655.3905 | 0.0002 | <a href="#">LDLAPK</a> |
| 13.6  | 655.3905 | 0.0002 | <a href="#">LEVAPK</a> |
| 13.6  | 655.3905 | 0.0002 | <a href="#">LLDAPK</a> |

# AT1G72610.1

|     |          |        |                        |
|-----|----------|--------|------------------------|
| 7.8 | 655.3905 | 0.0002 | <a href="#">DIALPK</a> |
| 7.7 | 655.3905 | 0.0002 | <a href="#">EALVPK</a> |
| 5.4 | 655.3905 | 0.0002 | <a href="#">LPIGEK</a> |
| 5.4 | 655.3905 | 0.0002 | <a href="#">LPLGEK</a> |
| 4.2 | 655.3905 | 0.0002 | <a href="#">LLADPK</a> |
| 3.2 | 655.3905 | 0.0002 | <a href="#">ILEGPK</a> |
| 3.2 | 655.3905 | 0.0002 | <a href="#">LEGLPK</a> |

**Mascot:** <http://www.matrixscience.com/>

## Peptide View

MS/MS Fragmentation of **SNVGSAAVSLGLTEAK**

Found in **AT1G72820.1** in **TAIR\_Arabidopsis**, Symbols: | mitochondrial substrate carrier family protein | chr1:27407119-27408168 FORWARD

Match to Query 6413: 1520.736908 from(761.375730,2+) index(10860)

Title: Elution from: 108.515 to 108.515 scan no 15918 cid35.00 polarity:+

Data file D6h-3\_2.mgf

Click mouse within plot area to zoom in by factor of two about that point

Or,   to  Da

Label all possible matches  Label matches used for scoring

Show Y-axis

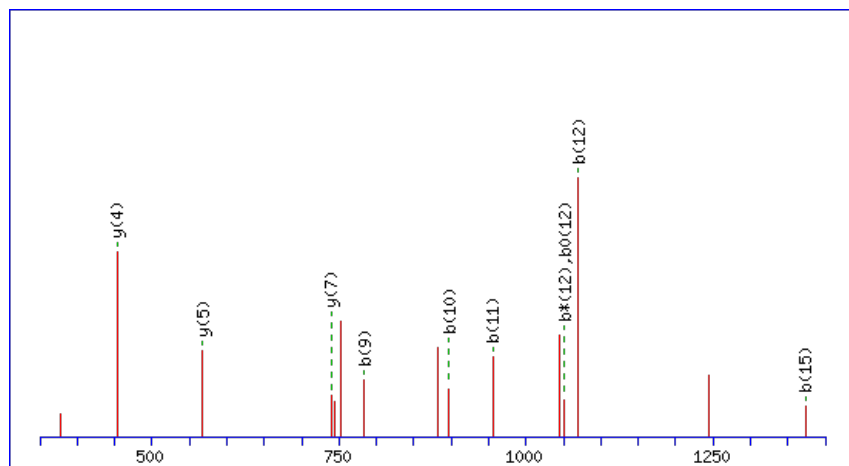

Monoisotopic mass of neutral peptide  $M_r(\text{calc})$ : 1520.7407

Fixed modifications: Carbamidomethyl (C) (apply to specified residues or termini only)

Ions Score: 31 Expect: 0.0064

Matches : 10/174 fragment ions using 17 most intense peaks ([help](#))

| #  | b                | b <sup>++</sup> | b*               | b <sup>*++</sup> | b <sup>0</sup>   | b <sup>0++</sup> | Seq. | y               | y <sup>++</sup> | y*        | y <sup>*++</sup> | y <sup>0</sup> | y <sup>0++</sup> | #  |
|----|------------------|-----------------|------------------|------------------|------------------|------------------|------|-----------------|-----------------|-----------|------------------|----------------|------------------|----|
| 1  | 89.0363          | 45.0218         |                  |                  | 71.0258          | 36.0165          | S    |                 |                 |           |                  |                |                  | 16 |
| 2  | 205.0733         | 103.0403        | 187.0498         | 94.0285          | 187.0628         | 94.0350          | N    | 1433.7189       | 717.3631        | 1415.6953 | 708.3513         | 1415.7083      | 708.3578         | 15 |
| 3  | 305.1388         | 153.0730        | 287.1152         | 144.0612         | 287.1282         | 144.0677         | V    | 1317.6819       | 659.3446        | 1299.6583 | 650.3328         | 1299.6713      | 650.3393         | 14 |
| 4  | 363.1573         | 182.0823        | 345.1337         | 173.0705         | 345.1467         | 173.0770         | G    | 1217.6164       | 609.3119        | 1199.5928 | 600.3001         | 1199.6059      | 600.3066         | 13 |
| 5  | 451.1863         | 226.0968        | 433.1628         | 217.0850         | 433.1758         | 217.0915         | S    | 1159.5979       | 580.3026        | 1141.5743 | 571.2908         | 1141.5874      | 571.2973         | 12 |
| 6  | 523.2205         | 262.1139        | 505.1969         | 253.1021         | 505.2099         | 253.1086         | A    | 1071.5689       | 536.2881        | 1053.5453 | 527.2763         | 1053.5583      | 527.2828         | 11 |
| 7  | 595.2546         | 298.1310        | 577.2311         | 289.1192         | 577.2441         | 289.1257         | A    | 999.5347        | 500.2710        | 981.5111  | 491.2592         | 981.5242       | 491.2657         | 10 |
| 8  | 695.3201         | 348.1637        | 677.2965         | 339.1519         | 677.3095         | 339.1584         | V    | 927.5006        | 464.2539        | 909.4770  | 455.2421         | 909.4900       | 455.2486         | 9  |
| 9  | <b>783.3492</b>  | 392.1782        | 765.3256         | 383.1664         | 765.3386         | 383.1729         | S    | 827.4351        | 414.2212        | 809.4115  | 405.2094         | 809.4246       | 405.2159         | 8  |
| 10 | <b>897.4303</b>  | 449.2188        | 879.4067         | 440.2070         | 879.4197         | 440.2135         | L    | <b>739.4061</b> | 370.2067        | 721.3825  | 361.1949         | 721.3955       | 361.2014         | 7  |
| 11 | <b>955.4488</b>  | 478.2280        | 937.4252         | 469.2162         | 937.4382         | 469.2227         | G    | 625.3250        | 313.1661        | 607.3014  | 304.1543         | 607.3144       | 304.1608         | 6  |
| 12 | <b>1069.5299</b> | 535.2686        | <b>1051.5063</b> | 526.2568         | <b>1051.5193</b> | 526.2633         | L    | <b>567.3065</b> | 284.1569        | 549.2829  | 275.1451         | 549.2959       | 275.1516         | 5  |
| 13 | 1171.5746        | 586.2909        | 1153.5510        | 577.2791         | 1153.5640        | 577.2856         | T    | <b>453.2254</b> | 227.1163        | 435.2018  | 218.1045         | 435.2148       | 218.1110         | 4  |
| 14 | 1301.6142        | 651.3107        | 1283.5906        | 642.2989         | 1283.6036        | 642.3055         | E    | 351.1807        | 176.0940        | 333.1571  | 167.0822         | 333.1701       | 167.0887         | 3  |
| 15 | <b>1373.6483</b> | 687.3278        | 1355.6248        | 678.3160         | 1355.6378        | 678.3225         | A    | 221.1410        | 111.0741        | 203.1174  | 102.0624         |                |                  | 2  |
| 16 |                  |                 |                  |                  |                  |                  | K    | 149.1069        | 75.0571         | 131.0833  | 66.0453          |                |                  | 1  |

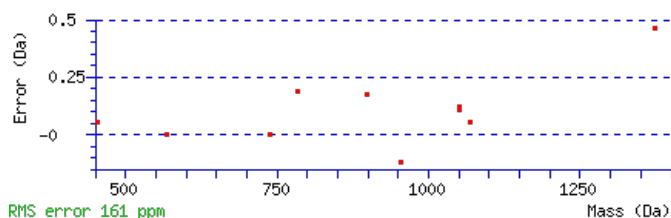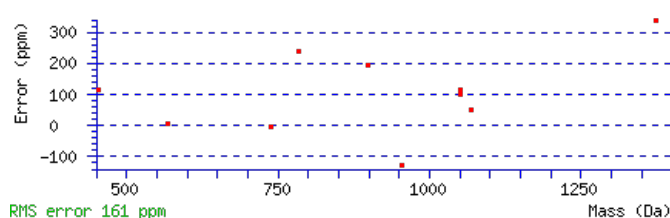



# AT1G72820.1

NCBI BLAST search of [SNVGSAAVSLGLTEAK](#)

(Parameters: blastp, nr protein database, expect=20000, no filter, PAM30)

Other BLAST [web gateways](#)

## All matches to this query

| Score | Mr(calc)  | Delta   | Sequence                         |
|-------|-----------|---------|----------------------------------|
| 31.3  | 1520.7407 | -0.0038 | <a href="#">SNVGSAAVSLGLTEAK</a> |
| 15.6  | 1520.7334 | 0.0035  | <a href="#">MMISHKALKHYK</a>     |
| 11.3  | 1520.7332 | 0.0037  | <a href="#">TLEEAICEVVSCK</a>    |
| 11.2  | 1520.7334 | 0.0035  | <a href="#">MMISHKALKHYK</a>     |
| 9.8   | 1520.7325 | 0.0044  | <a href="#">YHSQTVGK VIGGEK</a>  |
| 9.7   | 1520.7406 | -0.0037 | <a href="#">KLEQSSTVADVQAK</a>   |
| 7.2   | 1520.7382 | -0.0013 | <a href="#">MVKFINNLPENCK</a>    |
| 3.0   | 1520.7359 | 0.0010  | <a href="#">QLNKTDLMNAVQK</a>    |
| 3.0   | 1520.7325 | 0.0044  | <a href="#">RIYQSPTPEVGQK</a>    |
| 2.7   | 1520.7325 | 0.0044  | <a href="#">EIKDRDSLWVWK</a>     |

Mascot: <http://www.matrixscience.com/>

### Peptide View

 MS/MS Fragmentation of **KLQDILPQIISQLGPDNLDNLK**

 Found in **AT1G73230.1** in **TAIR\_Arabidopsis**, Symbols: | nascent polypeptide-associated complex (NAC) domain-containing protein | chr1:27544167-27545025 REVERSE

 Match to Query 10386: 2474.370507 from(825.797445,3+) index(10817)  
 Title: Elution from: 110.617 to 110.617 scan no 15828 cid35.00 polarity:+  
 Data file D12h-1\_2.mgf

Click mouse within plot area to zoom in by factor of two about that point

 Or,   to  Da 

 Label all possible matches  Label matches used for scoring 

 Show Y-axis 
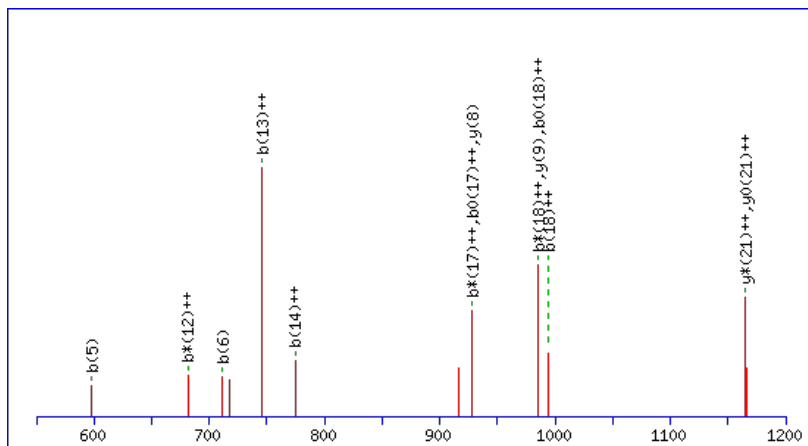
 Monoisotopic mass of neutral peptide  $M_r(\text{calc})$ : 2474.3744

Fixed modifications: Carbamidomethyl (C) (apply to specified residues or termini only)

Ions Score: 36 Expect: 0.00036

 Matches : 15/240 fragment ions using 10 most intense peaks ([help](#))

| #  | b               | b <sup>++</sup>  | b <sup>*</sup> | b <sup>*++</sup> | b <sup>0</sup> | b <sup>0++</sup> | Seq      | y               | y <sup>++</sup> | y <sup>*</sup> | y <sup>*++</sup> | y <sup>0</sup> | y <sup>0++</sup> | #  |
|----|-----------------|------------------|----------------|------------------|----------------|------------------|----------|-----------------|-----------------|----------------|------------------|----------------|------------------|----|
| 1  | 129.1022        | 65.0548          | 112.0757       | 56.5415          |                |                  | <b>K</b> |                 |                 |                |                  |                |                  | 22 |
| 2  | 242.1863        | 121.5968         | 225.1598       | 113.0835         |                |                  | <b>L</b> | 2347.2868       | 1174.1470       | 2330.2602      | <b>1165.6337</b> | 2329.2762      | <b>1165.1417</b> | 21 |
| 3  | 370.2449        | 185.6261         | 353.2183       | 177.1128         |                |                  | <b>Q</b> | 2234.2027       | 1117.6050       | 2217.1761      | 1109.0917        | 2216.1921      | 1108.5997        | 20 |
| 4  | 485.2718        | 243.1396         | 468.2453       | 234.6263         | 467.2613       | 234.1343         | <b>D</b> | 2106.1441       | 1053.5757       | 2089.1176      | 1045.0624        | 2088.1335      | 1044.5704        | 19 |
| 5  | <b>598.3559</b> | 299.6816         | 581.3293       | 291.1683         | 580.3453       | 290.6763         | <b>I</b> | 1991.1172       | 996.0622        | 1974.0906      | 987.5489         | 1973.1066      | 987.0569         | 18 |
| 6  | <b>711.4400</b> | 356.2236         | 694.4134       | 347.7103         | 693.4294       | 347.2183         | <b>L</b> | 1878.0331       | 939.5202        | 1861.0066      | 931.0069         | 1860.0225      | 930.5149         | 17 |
| 7  | 808.4927        | 404.7500         | 791.4662       | 396.2367         | 790.4822       | 395.7447         | <b>P</b> | 1764.9490       | 882.9782        | 1747.9225      | 874.4649         | 1746.9385      | 873.9729         | 16 |
| 8  | 936.5513        | 468.7793         | 919.5247       | 460.2660         | 918.5407       | 459.7740         | <b>Q</b> | 1667.8963       | 834.4518        | 1650.8697      | 825.9385         | 1649.8857      | 825.4465         | 15 |
| 9  | 1049.6354       | 525.3213         | 1032.6088      | 516.8080         | 1031.6248      | 516.3160         | <b>I</b> | 1539.8377       | 770.4225        | 1522.8111      | 761.9092         | 1521.8271      | 761.4172         | 14 |
| 10 | 1162.7194       | 581.8633         | 1145.6929      | 573.3501         | 1144.7089      | 572.8581         | <b>I</b> | 1426.7536       | 713.8805        | 1409.7271      | 705.3672         | 1408.7431      | 704.8752         | 13 |
| 11 | 1249.7515       | 625.3794         | 1232.7249      | 616.8661         | 1231.7409      | 616.3741         | <b>S</b> | 1313.6696       | 657.3384        | 1296.6430      | 648.8251         | 1295.6590      | 648.3331         | 12 |
| 12 | 1377.8100       | 689.4087         | 1360.7835      | <b>680.8954</b>  | 1359.7995      | 680.4034         | <b>Q</b> | 1226.6375       | 613.8224        | 1209.6110      | 605.3091         | 1208.6270      | 604.8171         | 11 |
| 13 | 1490.8941       | <b>745.9507</b>  | 1473.8675      | 737.4374         | 1472.8835      | 736.9454         | <b>L</b> | 1098.5790       | 549.7931        | 1081.5524      | 541.2798         | 1080.5684      | 540.7878         | 10 |
| 14 | 1547.9156       | <b>774.4614</b>  | 1530.8890      | 765.9481         | 1529.9050      | 765.4561         | <b>G</b> | <b>985.4949</b> | 493.2511        | 968.4684       | 484.7378         | 967.4843       | 484.2458         | 9  |
| 15 | 1644.9683       | 822.9878         | 1627.9418      | 814.4745         | 1626.9578      | 813.9825         | <b>P</b> | <b>928.4734</b> | 464.7404        | 911.4469       | 456.2271         | 910.4629       | 455.7351         | 8  |
| 16 | 1759.9953       | 880.5013         | 1742.9687      | 871.9880         | 1741.9847      | 871.4960         | <b>D</b> | 831.4207        | 416.2140        | 814.3941       | 407.7007         | 813.4101       | 407.2087         | 7  |
| 17 | 1874.0382       | 937.5227         | 1857.0116      | <b>929.0095</b>  | 1856.0276      | <b>928.5175</b>  | <b>N</b> | 716.3937        | 358.7005        | 699.3672       | 350.1872         | 698.3832       | 349.6952         | 6  |
| 18 | 1987.1223       | <b>994.0648</b>  | 1970.0957      | <b>985.5515</b>  | 1969.1117      | <b>985.0595</b>  | <b>L</b> | 602.3508        | 301.6790        | 585.3243       | 293.1658         | 584.3402       | 292.6738         | 5  |
| 19 | 2102.1492       | 1051.5782        | 2085.1226      | 1043.0650        | 2084.1386      | 1042.5730        | <b>D</b> | 489.2667        | 245.1370        | 472.2402       | 236.6237         | 471.2562       | 236.1317         | 4  |
| 20 | 2216.1921       | 1108.5997        | 2199.1656      | 1100.0864        | 2198.1816      | 1099.5944        | <b>N</b> | 374.2398        | 187.6235        | 357.2132       | 179.1103         |                |                  | 3  |
| 21 | 2329.2762       | <b>1165.1417</b> | 2312.2496      | 1156.6285        | 2311.2656      | 1156.1364        | <b>L</b> | 260.1969        | 130.6021        | 243.1703       | 122.0888         |                |                  | 2  |
| 22 |                 |                  |                |                  |                |                  | <b>K</b> | 147.1128        | 74.0600         | 130.0863       | 65.5468          |                |                  | 1  |

# AT1G73230.1

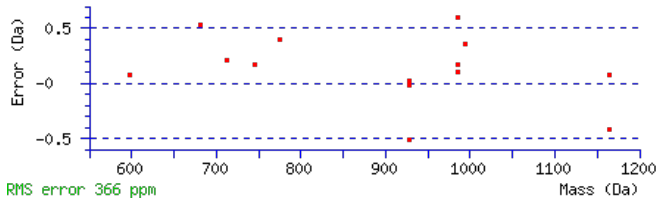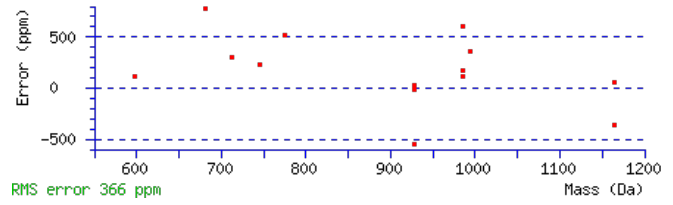

NCBI **BLAST** search of [KLQDILPQIISQLGPDNLDNLK](#)  
(Parameters: blastp, nr protein database, expect=20000, no filter, PAM30)  
Other BLAST [web gateways](#)

## All matches to this query

| Score | Mr(calc)  | Delta   | Sequence                                |
|-------|-----------|---------|-----------------------------------------|
| 35.6  | 2474.3744 | -0.0039 | <a href="#">KLQDILPQIISQLGPDNLDNLK</a>  |
| 1.3   | 2474.3744 | -0.0039 | <a href="#">LQDILPQIISQLGPDNLDNLK</a>   |
| 1.1   | 2474.3719 | -0.0014 | <a href="#">NALWAVMTVVVVLEFSAGATLRK</a> |

Mascot: <http://www.matrixscience.com>

**Peptide View**MS/MS Fragmentation of **IVIDMLDYMKR**Found in **AT1G73400.1** in **TAIR\_Arabidopsis**, Symbols: | pentatricopeptide (PPR) repeat-containing protein | chr1:27602073-27603473  
FORWARD

Match to Query 4964: 1410.676840 from(706.345696,2+) index(9629)

Title: Elution from: 93.859 to 93.859 scan no 13742 cid35.00 polarity:+

Data file D1d-1-2.mgf

Click mouse within plot area to zoom in by factor of two about that point

Or,   to  Da Label all possible matches  Label matches used for scoring Show Y-axis 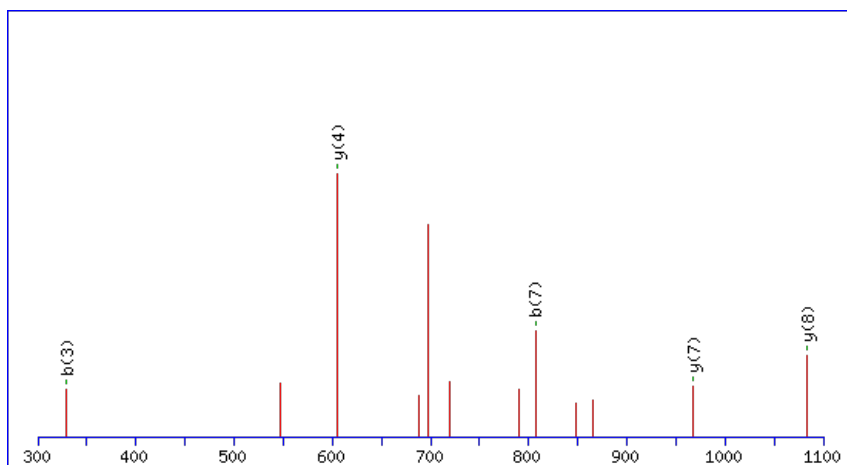Monoisotopic mass of neutral peptide  $M_r(\text{calc})$ : 1410.6809

Fixed modifications: Carbamidomethyl (C) (apply to specified residues or termini only)

Ions Score: 22 Expect: 0.047

Matches : 5/88 fragment ions using 7 most intense peaks ([help](#))

| #  | b               | b <sup>++</sup> | b*        | b <sup>*++</sup> | b <sup>0</sup> | b <sup>0++</sup> | Seq. | y                | y <sup>++</sup> | y*        | y <sup>*++</sup> | y <sup>0</sup> | y <sup>0++</sup> | #  |
|----|-----------------|-----------------|-----------|------------------|----------------|------------------|------|------------------|-----------------|-----------|------------------|----------------|------------------|----|
| 1  | 115.0884        | 58.0478         |           |                  |                |                  | I    |                  |                 |           |                  |                |                  | 11 |
| 2  | 215.1538        | 108.0805        |           |                  |                |                  | V    | 1297.6071        | 649.3072        | 1279.5835 | 640.2954         | 1279.5966      | 640.3019         | 10 |
| 3  | <b>329.2349</b> | 165.1211        |           |                  |                |                  | I    | 1197.5417        | 599.2745        | 1179.5181 | 590.2627         | 1179.5311      | 590.2692         | 9  |
| 4  | 445.2589        | 223.1331        |           |                  | 427.2483       | 214.1278         | D    | <b>1083.4606</b> | 542.2339        | 1065.4370 | 533.2221         | 1065.4500      | 533.2286         | 8  |
| 5  | 577.2964        | 289.1518        |           |                  | 559.2859       | 280.1466         | M    | <b>967.4366</b>  | 484.2219        | 949.4130  | 475.2101         | 949.4260       | 475.2167         | 7  |
| 6  | 691.3775        | 346.1924        |           |                  | 673.3670       | 337.1871         | L    | 835.3991         | 418.2032        | 817.3755  | 409.1914         | 817.3885       | 409.1979         | 6  |
| 7  | <b>807.4015</b> | 404.2044        |           |                  | 789.3909       | 395.1991         | D    | 721.3180         | 361.1626        | 703.2944  | 352.1508         | 703.3074       | 352.1573         | 5  |
| 8  | 971.4619        | 486.2346        |           |                  | 953.4513       | 477.2293         | Y    | <b>605.2940</b>  | 303.1506        | 587.2704  | 294.1389         |                |                  | 4  |
| 9  | 1103.4994       | 552.2533        |           |                  | 1085.4888      | 543.2480         | M    | 441.2336         | 221.1205        | 423.2101  | 212.1087         |                |                  | 3  |
| 10 | 1233.5884       | 617.2978        | 1215.5648 | 608.2861         | 1215.5778      | 608.2926         | K    | 309.1961         | 155.1017        | 291.1725  | 146.0899         |                |                  | 2  |
| 11 |                 |                 |           |                  |                |                  | R    | 179.1071         | 90.0572         | 161.0835  | 81.0454          |                |                  | 1  |

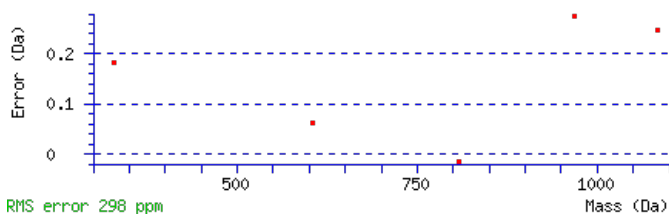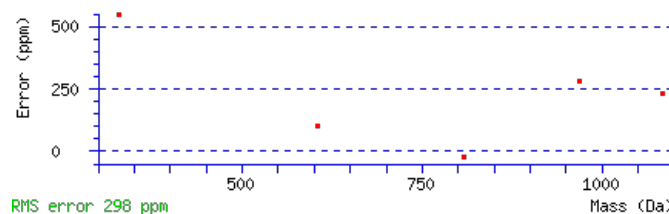NCBI **BLAST** search of **IVIDMLDYMKR**

(Parameters: blastp, nr protein database, expect=20000, no filter, PAM30)

Other BLAST [web gateways](#)**All matches to this query**

**AT1G73400.1**

| <b>Score</b> | <b>Mr(calc)</b> | <b>Delta</b> | <b>Sequence</b>                |
|--------------|-----------------|--------------|--------------------------------|
| 22.4         | 1410.6809       | -0.0041      | <a href="#">IVIDMLDYMKR</a>    |
| 2.3          | 1410.6801       | -0.0032      | <a href="#">VTGGSLEVDYKTK</a>  |
| 1.7          | 1410.6780       | -0.0012      | <a href="#">LPLRQTGSMFAR</a>   |
| 1.5          | 1410.6809       | -0.0041      | <a href="#">IAAAMVGLGATFMK</a> |
| 1.1          | 1410.6773       | -0.0005      | <a href="#">HNRFGLOFSRK</a>    |

**Mascot:** <http://www.matrixscience.com/>

## Peptide View

### MS/MS Fragmentation of MCPVGLQVR

Found in **AT1G73620.1** in **TAIR\_Arabidopsis**, Symbols: | thaumatin-like protein, putative / pathogenesis-related protein, putative | chr1:27685093-27686615 FORWARD

Match to Query 2859: 1088.488256 from(545.251404,2+) index(2371)

Title: Elution from: 28.759 to 28.759 scan no 3099 cid35.00 polarity:+

Data file D1d-1\_1.mgf

Click mouse within plot area to zoom in by factor of two about that point

Or,   to  Da

Label all possible matches  Label matches used for scoring

Show Y-axis

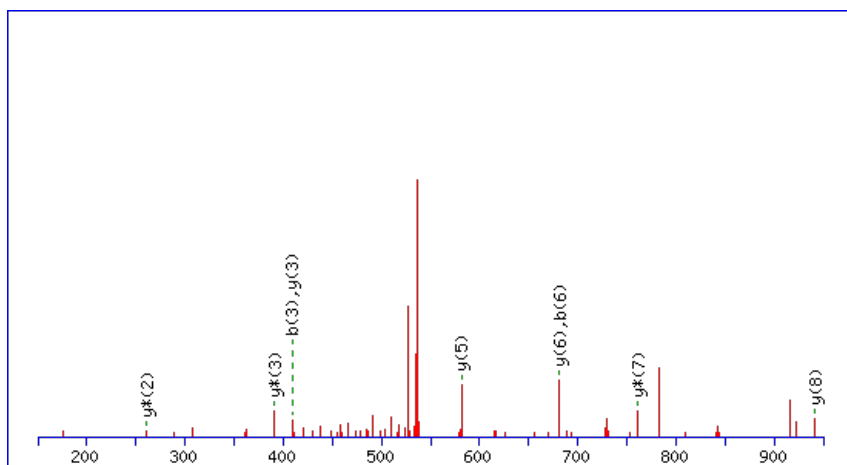

**Monoisotopic mass of neutral peptide Mr(calc):** 1088.4899

**Fixed modifications:** Carbamidomethyl (C) (apply to specified residues or termini only)

**Variable modifications:**

**M1** : Oxidation (M), with neutral losses 0.0000 (shown in table), 63.9983

**Ions Score:** 23 **Expect:** 0.039

**Matches** : 9/72 fragment ions using 16 most intense peaks ([help](#))

| # | b        | b <sup>++</sup> | b*       | b <sup>+++</sup> | Seq. | y        | y <sup>++</sup> | y*       | y <sup>+++</sup> | # |
|---|----------|-----------------|----------|------------------|------|----------|-----------------|----------|------------------|---|
| 1 | 149.0397 | 75.0235         |          |                  | M    |          |                 |          |                  | 9 |
| 2 | 311.0644 | 156.0359        |          |                  | C    | 941.4648 | 471.2360        | 923.4412 | 462.2242         | 8 |
| 3 | 409.1142 | 205.0608        |          |                  | P    | 779.4400 | 390.2237        | 761.4165 | 381.2119         | 7 |
| 4 | 509.1797 | 255.0935        |          |                  | V    | 681.3902 | 341.1988        | 663.3667 | 332.1870         | 6 |
| 5 | 567.1982 | 284.1027        |          |                  | G    | 581.3248 | 291.1660        | 563.3012 | 282.1542         | 5 |
| 6 | 681.2793 | 341.1433        |          |                  | L    | 523.3063 | 262.1568        | 505.2827 | 253.1450         | 4 |
| 7 | 811.3319 | 406.1696        | 793.3083 | 397.1578         | Q    | 409.2252 | 205.1162        | 391.2016 | 196.1044         | 3 |
| 8 | 911.3974 | 456.2023        | 893.3738 | 447.1905         | V    | 279.1725 | 140.0899        | 261.1490 | 131.0781         | 2 |
| 9 |          |                 |          |                  | R    | 179.1071 | 90.0572         | 161.0835 | 81.0454          | 1 |

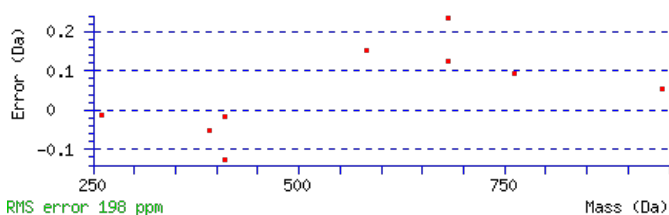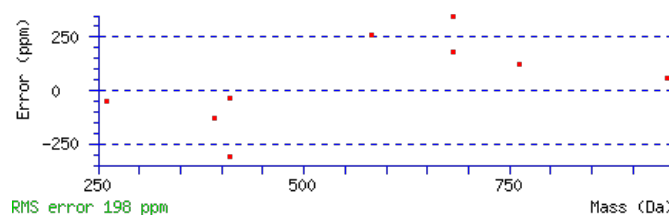

NCBI **BLAST** search of [MCPVGLQVR](#)

(Parameters: blastp, nr protein database, expect=20000, no filter, PAM30)

Other BLAST [web gateways](#)

All matches to this query

## AT1G73620.1

| Score | Mr(calc)  | Delta   | Sequence                   |
|-------|-----------|---------|----------------------------|
| 23.3  | 1088.4899 | -0.0016 | <a href="#">MCPVGLQVR</a>  |
| 13.2  | 1088.4872 | 0.0010  | <a href="#">MAMAELSTPK</a> |
| 8.5   | 1088.4890 | -0.0008 | <a href="#">REEQKEEK</a>   |
| 8.4   | 1088.4890 | -0.0008 | <a href="#">DKKSNGPDSK</a> |
| 8.2   | 1088.4890 | -0.0008 | <a href="#">NEENGEKKK</a>  |
| 7.3   | 1088.4913 | -0.0030 | <a href="#">QEFADTLPR</a>  |
| 7.0   | 1088.4872 | 0.0010  | <a href="#">ETVMLTPCK</a>  |
| 6.3   | 1088.4872 | 0.0010  | <a href="#">MDGDVAMVLK</a> |
| 5.2   | 1088.4913 | -0.0030 | <a href="#">KNLDSWDAK</a>  |
| 4.8   | 1088.4864 | 0.0019  | <a href="#">DLESLESASK</a> |

Mascot: <http://www.matrixscience.com/>

**Peptide View**MS/MS Fragmentation of **NINELVAPK**Found in **AT1G74030.1** in **TAIR\_Arabidopsis**, Symbols: | enolase, putative | chr1:27843126-27845562 REVERSE

Match to Query 2745: 1008.524234 from(505.269393,2+) index(3185)

Title: Elution from: 31.824 to 31.824 scan no 3965 cid35.00 polarity:+

Data file D12h-1\_1.mgf

Click mouse within plot area to zoom in by factor of two about that point

Or,   to  Da Label all possible matches  Label matches used for scoring Show Y-axis 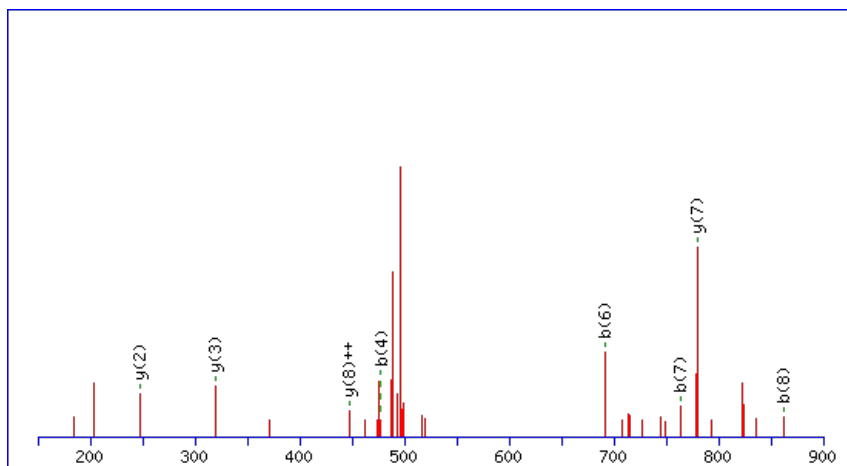Monoisotopic mass of neutral peptide **Mr(calc)**: 1008.5248**Fixed modifications**: Carbamidomethyl (C) (apply to specified residues or termini only)**Ions Score**: 17 **Expect**: 0.033**Matches**: 8/80 fragment ions using 21 most intense peaks ([help](#))

| # | b        | b <sup>++</sup> | b*       | b <sup>*++</sup> | b <sup>0</sup> | b <sup>0++</sup> | Seq. | y        | y <sup>++</sup> | y*       | y <sup>*++</sup> | y <sup>0</sup> | y <sup>0++</sup> | # |
|---|----------|-----------------|----------|------------------|----------------|------------------|------|----------|-----------------|----------|------------------|----------------|------------------|---|
| 1 | 117.0443 | 59.0258         | 99.0207  | 50.0140          |                |                  | N    |          |                 |          |                  |                |                  | 9 |
| 2 | 231.1254 | 116.0663        | 213.1018 | 107.0545         |                |                  | I    | 893.4951 | 447.2512        | 875.4715 | 438.2394         | 875.4845       | 438.2459         | 8 |
| 3 | 347.1624 | 174.0848        | 329.1388 | 165.0730         |                |                  | N    | 779.4140 | 390.2106        | 761.3904 | 381.1988         | 761.4034       | 381.2054         | 7 |
| 4 | 477.2020 | 239.1046        | 459.1784 | 230.0928         | 459.1914       | 230.0994         | E    | 663.3770 | 332.1921        | 645.3534 | 323.1803         | 645.3664       | 323.1869         | 6 |
| 5 | 591.2831 | 296.1452        | 573.2595 | 287.1334         | 573.2725       | 287.1399         | L    | 533.3374 | 267.1723        | 515.3138 | 258.1605         |                |                  | 5 |
| 6 | 691.3485 | 346.1779        | 673.3250 | 337.1661         | 673.3380       | 337.1726         | V    | 419.2563 | 210.1318        | 401.2327 | 201.1200         |                |                  | 4 |
| 7 | 763.3827 | 382.1950        | 745.3591 | 373.1832         | 745.3721       | 373.1897         | A    | 319.1908 | 160.0990        | 301.1672 | 151.0873         |                |                  | 3 |
| 8 | 861.4325 | 431.2199        | 843.4089 | 422.2081         | 843.4219       | 422.2146         | P    | 247.1567 | 124.0820        | 229.1331 | 115.0702         |                |                  | 2 |
| 9 |          |                 |          |                  |                |                  | K    | 149.1069 | 75.0571         | 131.0833 | 66.0453          |                |                  | 1 |

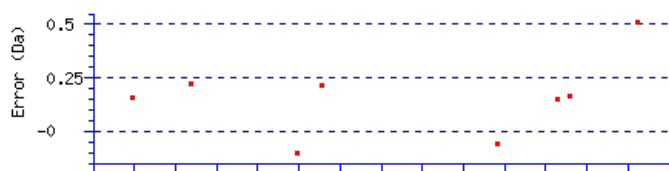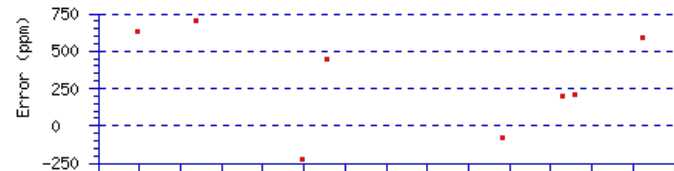NCBI **BLAST** search of **NINELVAPK**

(Parameters: blastp, nr protein database, expect=20000, no filter, PAM30)

Other BLAST [web gateways](#)**All matches to this query**

| Score | Mr(calc)  | Delta   | Sequence                  |
|-------|-----------|---------|---------------------------|
| 17.2  | 1008.5248 | -0.0006 | <a href="#">NINELVAPK</a> |



# AT1G74030.1

|     |           |         |                            |
|-----|-----------|---------|----------------------------|
| 6.4 | 1008.5248 | -0.0006 | <a href="#">VAQAEALAPK</a> |
| 2.5 | 1008.5248 | -0.0006 | <a href="#">SGLTGLPQPK</a> |

**Mascot:** <http://www.matrixscience.com/>


**Mascot Search Results**
**Peptide View**MS/MS Fragmentation of **VNRRNPDLIR**Found in **AT1G74050.1** in **TAIR\_Arabidopsis**, Symbols: | 60S ribosomal protein L6 (RPL6C) | chr1:27850917-27852341 REVERSE

Match to Query 3005: 1112.565465 from(371.862431,3+) index(619)

Title: Elution from: 12.369 to 12.369 scan no 946 cid35.00 polarity:+

Data file D1d-2\_3.mgf

Click mouse within plot area to zoom in by factor of two about that point

Or,  to  Da Label all possible matches  Label matches used for scoring Show Y-axis 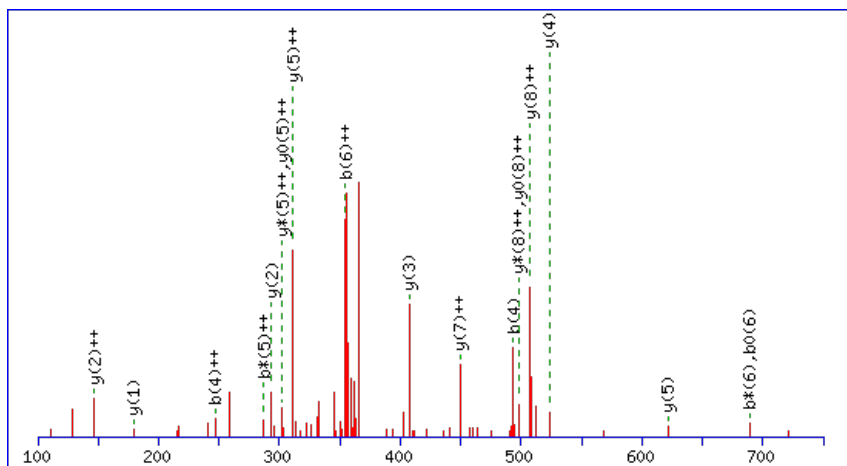Monoisotopic mass of neutral peptide  $M_r(\text{calc})$ : 1112.5645

Fixed modifications: Carbamidomethyl (C) (apply to specified residues or termini only)

Ions Score: 31 Expect: 0.004

Matches : 19/78 fragment ions using 25 most intense peaks ([help](#))

| # | b        | b <sup>++</sup> | b*       | b <sup>*++</sup> | b <sup>0</sup> | b <sup>0++</sup> | Seq. | y         | y <sup>++</sup> | y*       | y <sup>*++</sup> | y <sup>0</sup> | y <sup>0++</sup> | # |
|---|----------|-----------------|----------|------------------|----------------|------------------|------|-----------|-----------------|----------|------------------|----------------|------------------|---|
| 1 | 101.0727 | 51.0400         |          |                  |                |                  | V    |           |                 |          |                  |                |                  | 9 |
| 2 | 217.1097 | 109.0585        | 199.0861 | 100.0467         |                |                  | N    | 1013.5063 | 507.2568        | 995.4827 | 498.2450         | 995.4957       | 498.2515         | 8 |
| 3 | 377.1990 | 189.1031        | 359.1754 | 180.0913         |                |                  | R    | 897.4693  | 449.2383        | 879.4457 | 440.2265         | 879.4587       | 440.2330         | 7 |
| 4 | 493.2360 | 247.1216        | 475.2124 | 238.1098         |                |                  | N    | 737.3801  | 369.1937        | 719.3565 | 360.1819         | 719.3695       | 360.1884         | 6 |
| 5 | 591.2858 | 296.1465        | 573.2622 | 287.1347         |                |                  | P    | 621.3431  | 311.1752        | 603.3195 | 302.1634         | 603.3325       | 302.1699         | 5 |
| 6 | 707.3097 | 354.1585        | 689.2862 | 345.1467         | 689.2992       | 345.1532         | D    | 523.2933  | 262.1503        | 505.2697 | 253.1385         | 505.2827       | 253.1450         | 4 |
| 7 | 821.3908 | 411.1991        | 803.3673 | 402.1873         | 803.3803       | 402.1938         | L    | 407.2693  | 204.1383        | 389.2457 | 195.1265         |                |                  | 3 |
| 8 | 935.4719 | 468.2396        | 917.4484 | 459.2278         | 917.4614       | 459.2343         | I    | 293.1882  | 147.0977        | 275.1646 | 138.0859         |                |                  | 2 |
| 9 |          |                 |          |                  |                |                  | R    | 179.1071  | 90.0572         | 161.0835 | 81.0454          |                |                  | 1 |

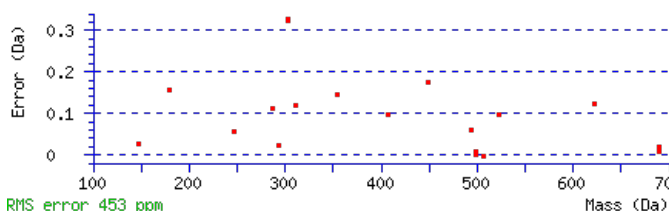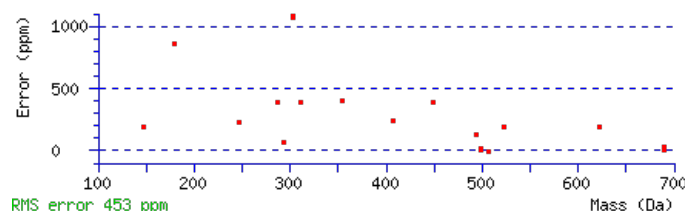NCBI BLAST search of [VNRRNPDLIR](#)

(Parameters: blastp, nr protein database, expect=20000, no filter, PAM30)

Other BLAST [web gateways](#)**All matches to this query**

| Score | $M_r(\text{calc})$ | Delta  | Sequence                   |
|-------|--------------------|--------|----------------------------|
| 31.0  | 1112.5645          | 0.0010 | <a href="#">VNRRNPDLIR</a> |

AT1G74050.1

|     |           |        |                           |
|-----|-----------|--------|---------------------------|
| 0.1 | 1112.5647 | 0.0007 | <a href="#">EVMELIELK</a> |
|-----|-----------|--------|---------------------------|

**Mascot:** <http://www.matrixscience.com/>

**Peptide View**MS/MS Fragmentation of **VDISGVTLDK**Found in **AT1G74060.1** in **TAIR\_Arabidopsis**, Symbols: | 60S ribosomal protein L6 (RPL6B) | chr1:27853694-27854960 REVERSE

Match to Query 2994: 1056.530752 from(529.272652,2+) index(4544)

Title: Elution from: 43.142 to 43.142 scan no 5741 cid35.00 polarity:+

Data file D6h-2\_1.mgf

Click mouse within plot area to zoom in by factor of two about that point

Or,   to  Da Label all possible matches  Label matches used for scoring Show Y-axis 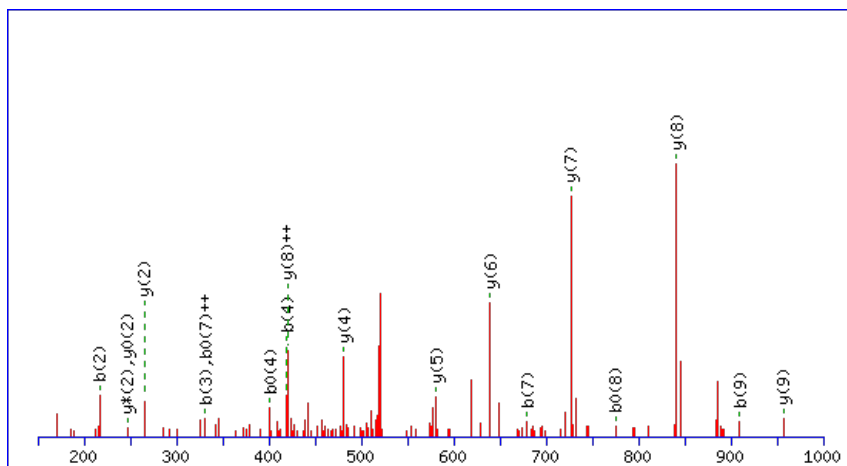Monoisotopic mass of neutral peptide **Mr(calc)**: 1056.5329**Fixed modifications**: Carbamidomethyl (C) (apply to specified residues or termini only)**Ions Score**: 47 **Expect**: 0.00011**Matches**: 18/86 fragment ions using 40 most intense peaks ([help](#))

| #  | b               | b <sup>++</sup> | b <sup>0</sup>  | b <sup>0++</sup> | Seq. | y               | y <sup>++</sup> | y <sup>*</sup>  | y <sup>*++</sup> | y <sup>0</sup>  | y <sup>0++</sup> | #  |
|----|-----------------|-----------------|-----------------|------------------|------|-----------------|-----------------|-----------------|------------------|-----------------|------------------|----|
| 1  | 101.0727        | 51.0400         |                 |                  | V    |                 |                 |                 |                  |                 |                  | 10 |
| 2  | <b>217.0967</b> | 109.0520        | 199.0861        | 100.0467         | D    | <b>957.4748</b> | 479.2410        | 939.4512        | 470.2292         | 939.4642        | 470.2357         | 9  |
| 3  | <b>331.1778</b> | 166.0925        | 313.1672        | 157.0873         | I    | <b>841.4508</b> | <b>421.2290</b> | 823.4272        | 412.2172         | 823.4402        | 412.2237         | 8  |
| 4  | <b>419.2069</b> | 210.1071        | <b>401.1963</b> | 201.1018         | S    | <b>727.3697</b> | 364.1885        | 709.3461        | 355.1767         | 709.3591        | 355.1832         | 7  |
| 5  | 477.2254        | 239.1163        | 459.2148        | 230.1110         | G    | <b>639.3406</b> | 320.1739        | 621.3170        | 311.1622         | 621.3300        | 311.1687         | 6  |
| 6  | 577.2908        | 289.1490        | 559.2802        | 280.1438         | V    | <b>581.3221</b> | 291.1647        | 563.2985        | 282.1529         | 563.3115        | 282.1594         | 5  |
| 7  | <b>679.3355</b> | 340.1714        | 661.3250        | <b>331.1661</b>  | T    | <b>481.2567</b> | 241.1320        | 463.2331        | 232.1202         | 463.2461        | 232.1267         | 4  |
| 8  | 793.4166        | 397.2120        | <b>775.4061</b> | 388.2067         | L    | 379.2120        | 190.1096        | 361.1884        | 181.0978         | 361.2014        | 181.1043         | 3  |
| 9  | <b>909.4406</b> | 455.2239        | 891.4300        | 446.2187         | D    | <b>265.1309</b> | 133.0691        | <b>247.1073</b> | 124.0573         | <b>247.1203</b> | 124.0638         | 2  |
| 10 |                 |                 |                 |                  | K    | 149.1069        | 75.0571         | 131.0833        | 66.0453          |                 |                  | 1  |

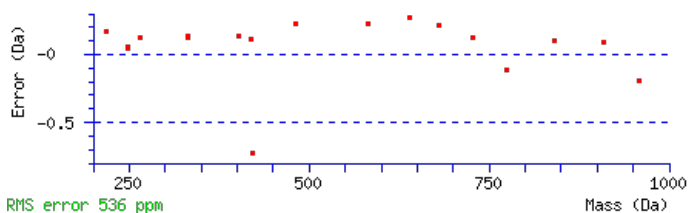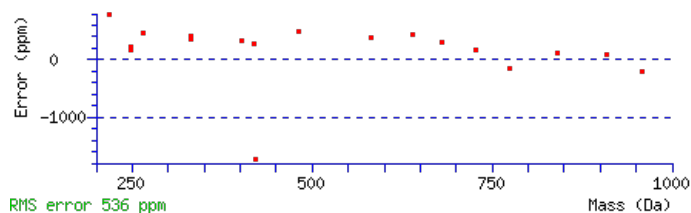NCBI **BLAST** search of **VDISGVTLDK**

(Parameters: blastp, nr protein database, expect=20000, no filter, PAM30)

Other BLAST [web gateways](#)**All matches to this query**

| Score | Mr(calc) | Delta | Sequence |
|-------|----------|-------|----------|
|       |          |       |          |

**AT1G74060.1**

|      |           |         |                            |
|------|-----------|---------|----------------------------|
| 47.0 | 1056.5329 | -0.0021 | <a href="#">VDISGVILDK</a> |
| 13.9 | 1056.5282 | 0.0026  | <a href="#">TIISDMLPR</a>  |
| 8.9  | 1056.5329 | -0.0021 | <a href="#">VVETEKVDK</a>  |
| 1.4  | 1056.5329 | -0.0022 | <a href="#">DVSLISDGK</a>  |
| 0.4  | 1056.5329 | -0.0022 | <a href="#">VITIPSSDK</a>  |
| 0.2  | 1056.5329 | -0.0022 | <a href="#">DLVSLEAATK</a> |

**Mascot:** <http://www.matrixscience.com/>

## Peptide View

MS/MS Fragmentation of **DTFISMWTF LHK**

Found in **AT1G74100.1** in **TAIR\_Arabidopsis**, Symbols: | sulfotransferase family protein | chr1:27868150-27869166 REVERSE

Match to Query 6576: 1540.698285 from(514.573371,3+) index(10271)

Title: Elution from: 95.543 to 95.543 scan no 14463 cid35.00 polarity:+

Data file D6h-3\_2.mgf

Click mouse within plot area to zoom in by factor of two about that point

Or,   to  Da

Label all possible matches  Label matches used for scoring

Show Y-axis

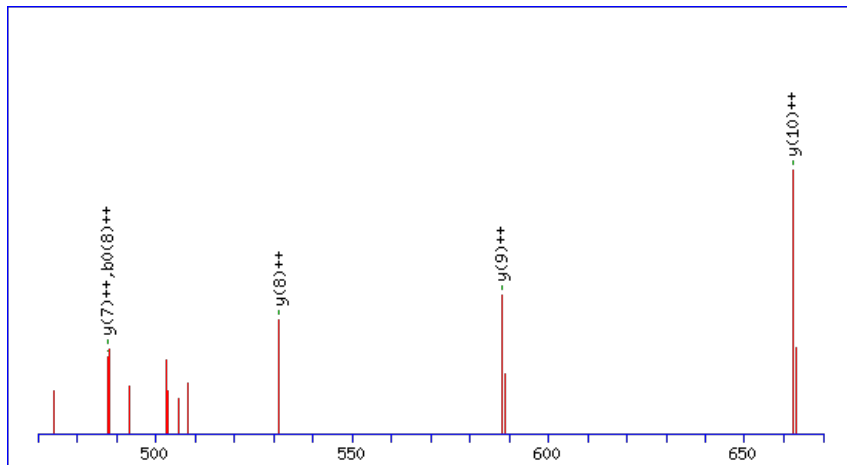

Monoisotopic mass of neutral peptide  $M_r(\text{calc})$ : 1540.6961

**Fixed modifications:** Carbamidomethyl (C) (apply to specified residues or termini only)

**Ions Score:** 31 **Expect:** 0.0092

**Matches:** 5/102 fragment ions using 6 most intense peaks ([help](#))

| #  | b         | b <sup>++</sup> | b <sup>0</sup> | b <sup>0++</sup> | Seq.     | y         | y <sup>++</sup> | y*        | y <sup>*++</sup> | y <sup>0</sup> | y <sup>0++</sup> | #  |
|----|-----------|-----------------|----------------|------------------|----------|-----------|-----------------|-----------|------------------|----------------|------------------|----|
| 1  | 117.0313  | 59.0193         | 99.0207        | 50.0140          | <b>D</b> |           |                 |           |                  |                |                  | 12 |
| 2  | 219.0760  | 110.0416        | 201.0654       | 101.0363         | <b>T</b> | 1425.6794 | 713.3433        | 1407.6558 | 704.3315         | 1407.6688      | 704.3380         | 11 |
| 3  | 367.1414  | 184.0743        | 349.1309       | 175.0691         | <b>F</b> | 1323.6347 | 662.3210        | 1305.6111 | 653.3092         | 1305.6241      | 653.3157         | 10 |
| 4  | 481.2225  | 241.1149        | 463.2120       | 232.1096         | <b>I</b> | 1175.5692 | 588.2882        | 1157.5456 | 579.2765         | 1157.5587      | 579.2830         | 9  |
| 5  | 569.2516  | 285.1294        | 551.2410       | 276.1241         | <b>S</b> | 1061.4881 | 531.2477        | 1043.4645 | 522.2359         | 1043.4776      | 522.2424         | 8  |
| 6  | 701.2891  | 351.1482        | 683.2785       | 342.1429         | <b>M</b> | 973.4591  | 487.2332        | 955.4355  | 478.2214         | 955.4485       | 478.2279         | 7  |
| 7  | 889.3625  | 445.1849        | 871.3519       | 436.1796         | <b>W</b> | 841.4215  | 421.2144        | 823.3980  | 412.2026         | 823.4110       | 412.2091         | 6  |
| 8  | 991.4072  | 496.2072        | 973.3966       | 487.2020         | <b>T</b> | 653.3482  | 327.1777        | 635.3246  | 318.1659         | 635.3376       | 318.1724         | 5  |
| 9  | 1139.4726 | 570.2400        | 1121.4621      | 561.2347         | <b>F</b> | 551.3034  | 276.1554        | 533.2799  | 267.1436         |                |                  | 4  |
| 10 | 1253.5537 | 627.2805        | 1235.5432      | 618.2752         | <b>L</b> | 403.2380  | 202.1226        | 385.2144  | 193.1108         |                |                  | 3  |
| 11 | 1393.6038 | 697.3055        | 1375.5932      | 688.3002         | <b>H</b> | 289.1569  | 145.0821        | 271.1333  | 136.0703         |                |                  | 2  |
| 12 |           |                 |                |                  | <b>K</b> | 149.1069  | 75.0571         | 131.0833  | 66.0453          |                |                  | 1  |

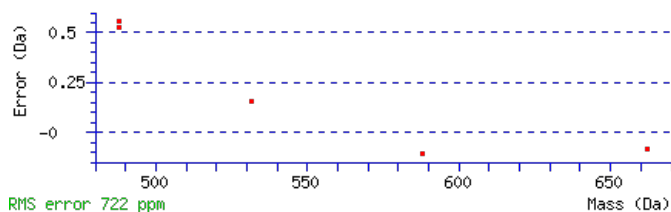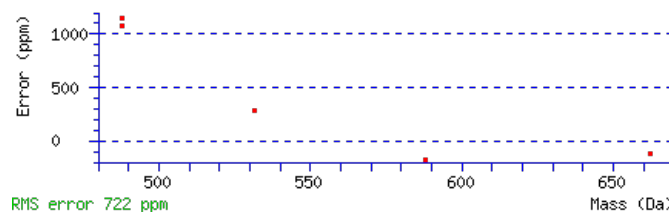

NCBI **BLAST** search of **DTFISMWTF LHK**

(Parameters: blastp, nr protein database, expect=20000, no filter, PAM30)

Other BLAST [web gateways](#)

All matches to this query

## AT1G74100.1

| Score | Mr(calc)  | Delta   | Sequence                        |
|-------|-----------|---------|---------------------------------|
| 30.6  | 1540.6961 | 0.0022  | <a href="#">DTFISMWTFLHK</a>    |
| 12.6  | 1540.6938 | 0.0045  | <a href="#">KSMEEDLFWAIR</a>    |
| 8.2   | 1540.6950 | 0.0033  | <a href="#">CTVDSLIRPTMK</a>    |
| 5.8   | 1540.6972 | 0.0011  | <a href="#">LNALLDVCMGFOK</a>   |
| 4.1   | 1540.6950 | 0.0033  | <a href="#">MKSLLCLES GDVR</a>  |
| 3.2   | 1540.6941 | 0.0042  | <a href="#">KSGSESEEKASVSAK</a> |
| 2.7   | 1540.6990 | -0.0007 | <a href="#">DFQDRITGNIQSK</a>   |
| 2.7   | 1540.7019 | -0.0037 | <a href="#">ELGIMVVSDEVYR</a>   |
| 2.7   | 1540.6987 | -0.0005 | <a href="#">LAFHSCVYAIWR</a>    |
| 2.6   | 1540.6950 | 0.0033  | <a href="#">SKANQOMASALDMLK</a> |

Mascot: <http://www.matrixscience.com/>

**Peptide View**MS/MS Fragmentation of **IFVGGISYSTDEFGLR**Found in **AT1G74230.1** in **TAIR\_Arabidopsis**, Symbols: GR-RBP5 | GR-RBP5 (glycine-rich RNA-binding protein 5); RNA binding | chr1:27919007-27920518 FORWARD

Match to Query 8519: 1759.880228 from(880.947390,2+) index(9319)

Title: Elution from: 83.690 to 83.690 scan no 12612 cid35.00 polarity:+

Data file D6h-3\_1.mgf

Click mouse within plot area to zoom in by factor of two about that point

Or,   to  Da Label all possible matches  Label matches used for scoring Show Y-axis 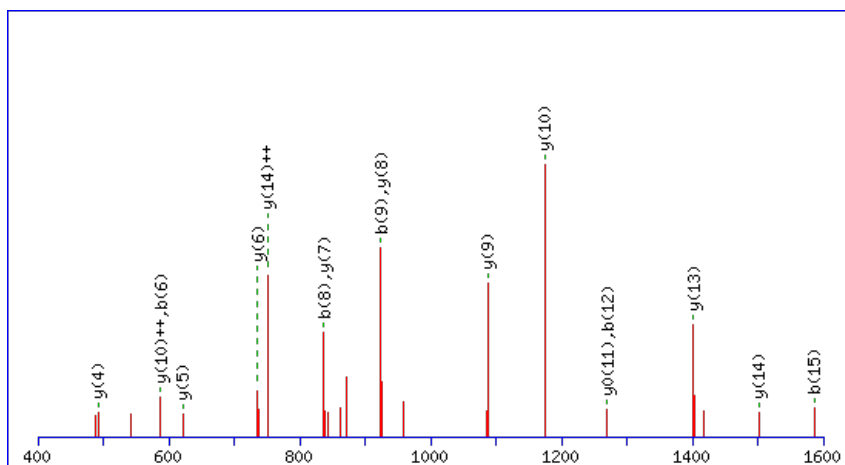Monoisotopic mass of neutral peptide  $M_r(\text{calc})$ : 1759.8781

Fixed modifications: Carbamidomethyl (C) (apply to specified residues or termini only)

Ions Score: 76 Expect: 1.1e-007

Matches : 17/130 fragment ions using 18 most intense peaks ([help](#))

| #  | b                | b <sup>++</sup> | b <sup>0</sup> | b <sup>0++</sup> | Seq. | y                | y <sup>++</sup> | y*        | y <sup>*++</sup> | y <sup>0</sup>   | y <sup>0++</sup> | #  |
|----|------------------|-----------------|----------------|------------------|------|------------------|-----------------|-----------|------------------|------------------|------------------|----|
| 1  | 114.0913         | 57.5493         |                |                  | I    |                  |                 |           |                  |                  |                  | 16 |
| 2  | 261.1598         | 131.0835        |                |                  | F    | 1647.8013        | 824.4043        | 1630.7748 | 815.8910         | 1629.7907        | 815.3990         | 15 |
| 3  | 360.2282         | 180.6177        |                |                  | V    | <b>1500.7329</b> | <b>750.8701</b> | 1483.7064 | 742.3568         | 1482.7223        | 741.8648         | 14 |
| 4  | 417.2496         | 209.1285        |                |                  | G    | <b>1401.6645</b> | 701.3359        | 1384.6379 | 692.8226         | 1383.6539        | 692.3306         | 13 |
| 5  | 474.2711         | 237.6392        |                |                  | G    | 1344.6430        | 672.8251        | 1327.6165 | 664.3119         | 1326.6325        | 663.8199         | 12 |
| 6  | <b>587.3552</b>  | 294.1812        |                |                  | I    | 1287.6216        | 644.3144        | 1270.5950 | 635.8011         | <b>1269.6110</b> | 635.3091         | 11 |
| 7  | 674.3872         | 337.6972        | 656.3766       | 328.6919         | S    | <b>1174.5375</b> | <b>587.7724</b> | 1157.5109 | 579.2591         | 1156.5269        | 578.7671         | 10 |
| 8  | <b>837.4505</b>  | 419.2289        | 819.4400       | 410.2236         | Y    | <b>1087.5055</b> | 544.2564        | 1070.4789 | 535.7431         | 1069.4949        | 535.2511         | 9  |
| 9  | <b>924.4825</b>  | 462.7449        | 906.4720       | 453.7396         | S    | <b>924.4421</b>  | 462.7247        | 907.4156  | 454.2114         | 906.4316         | 453.7194         | 8  |
| 10 | 1025.5302        | 513.2687        | 1007.5197      | 504.2635         | T    | <b>837.4101</b>  | 419.2087        | 820.3836  | 410.6954         | 819.3995         | 410.2034         | 7  |
| 11 | 1140.5572        | 570.7822        | 1122.5466      | 561.7769         | D    | <b>736.3624</b>  | 368.6849        | 719.3359  | 360.1716         | 718.3519         | 359.6796         | 6  |
| 12 | <b>1269.5998</b> | 635.3035        | 1251.5892      | 626.2982         | E    | <b>621.3355</b>  | 311.1714        | 604.3089  | 302.6581         | 603.3249         | 302.1661         | 5  |
| 13 | 1416.6682        | 708.8377        | 1398.6576      | 699.8324         | F    | <b>492.2929</b>  | 246.6501        | 475.2663  | 238.1368         |                  |                  | 4  |
| 14 | 1473.6896        | 737.3485        | 1455.6791      | 728.3432         | G    | 345.2245         | 173.1159        | 328.1979  | 164.6026         |                  |                  | 3  |
| 15 | <b>1586.7737</b> | 793.8905        | 1568.7631      | 784.8852         | L    | 288.2030         | 144.6051        | 271.1765  | 136.0919         |                  |                  | 2  |
| 16 |                  |                 |                |                  | R    | 175.1190         | 88.0631         | 158.0924  | 79.5498          |                  |                  | 1  |



# AT1G74230.1

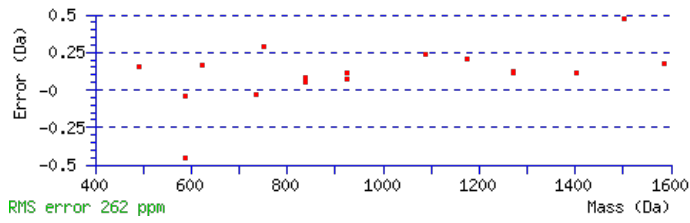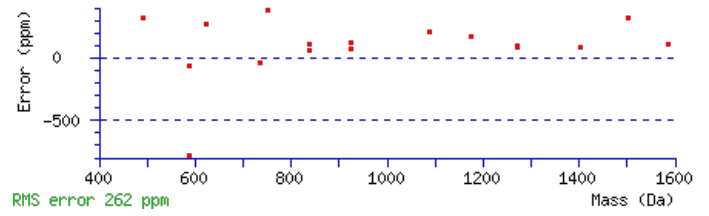

NCBI **BLAST** search of [IFVGGISYSTDEFGLR](#)

(Parameters: blastp, nr protein database, expect=20000, no filter, PAM30)

Other BLAST [web gateways](#)

## All matches to this query

| Score | Mr(calc)  | Delta   | Sequence                         |
|-------|-----------|---------|----------------------------------|
| 76.2  | 1759.8781 | 0.0021  | <a href="#">IFVGGISYSTDEFGLR</a> |
| 11.7  | 1759.8839 | -0.0037 | <a href="#">SDEPKTEETASNLVLK</a> |
| 10.9  | 1759.8790 | 0.0012  | <a href="#">FLKVVDYDFCIGMR</a>   |
| 1.8   | 1759.8813 | -0.0010 | <a href="#">DEITKRSSGOELNQR</a>  |
| 0.2   | 1759.8828 | -0.0025 | <a href="#">WREKNIPCPLYER</a>    |

Mascot: <http://www.matrixscience.com/>



# Mascot Search Results

## Peptide View

MS/MS Fragmentation of **LAVNTIGSLVR**

Found in **AT1G74470.1** in **TAIR\_Arabidopsis**, Symbols: | geranylgeranyl reductase | chr1:27994909-27996506 FORWARD

Match to Query 3592: 1156.636786 from(579,325669,2+) index(6123)

Title: Elution from: 56.436 to 56.436 scan no 7915 cid35.00 polarity:+

Data file D1d-2\_1.mgf

Click mouse within plot area to zoom in by factor of two about that point

Or,   to  Da

Label all possible matches  Label matches used for scoring

Show Y-axis

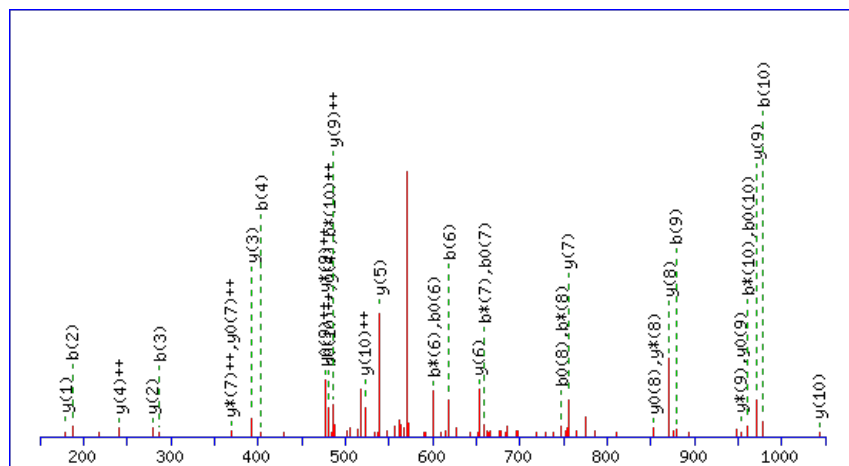

Monoisotopic mass of neutral peptide **Mr(calc)**: 1156.6374

**Fixed modifications:** Carbamidomethyl (C) (apply to specified residues or termini only)

**Ions Score:** 86 **Expect:** 1.9e-008

**Matches** : 37/100 fragment ions using 42 most intense peaks ([help](#))

| #  | b               | b <sup>++</sup> | b*              | b <sup>*++</sup> | b <sup>0</sup>  | b <sup>0++</sup> | Seq. | y                | y <sup>++</sup> | y*              | y <sup>*++</sup> | y <sup>0</sup>  | y <sup>0++</sup> | #  |
|----|-----------------|-----------------|-----------------|------------------|-----------------|------------------|------|------------------|-----------------|-----------------|------------------|-----------------|------------------|----|
| 1  | 115.0884        | 58.0478         |                 |                  |                 |                  | L    |                  |                 |                 |                  |                 |                  | 11 |
| 2  | <b>187.1225</b> | 94.0649         |                 |                  |                 |                  | A    | <b>1043.5636</b> | <b>522.2854</b> | 1025.5400       | 513.2737         | 1025.5530       | 513.2802         | 10 |
| 3  | <b>287.1880</b> | 144.0976        |                 |                  |                 |                  | V    | <b>971.5295</b>  | <b>486.2684</b> | <b>953.5059</b> | <b>477.2566</b>  | <b>953.5189</b> | <b>477.2631</b>  | 9  |
| 4  | <b>403.2250</b> | 202.1161        | 385.2014        | 193.1043         |                 |                  | N    | <b>871.4640</b>  | 436.2356        | <b>853.4404</b> | 427.2239         | <b>853.4534</b> | 427.2304         | 8  |
| 5  | 505.2697        | 253.1385        | 487.2461        | 244.1267         | 487.2591        | 244.1332         | T    | <b>755.4270</b>  | 378.2171        | 737.4034        | <b>369.2054</b>  | 737.4164        | <b>369.2119</b>  | 7  |
| 6  | <b>619.3508</b> | 310.1790        | <b>601.3272</b> | 301.1672         | <b>601.3402</b> | 301.1737         | I    | <b>653.3823</b>  | 327.1948        | 635.3587        | 318.1830         | 635.3717        | 318.1895         | 6  |
| 7  | 677.3693        | 339.1883        | <b>659.3457</b> | 330.1765         | <b>659.3587</b> | 330.1830         | G    | <b>539.3012</b>  | 270.1542        | 521.2776        | 261.1424         | 521.2906        | 261.1490         | 5  |
| 8  | 765.3983        | 383.2028        | <b>747.3748</b> | 374.1910         | <b>747.3878</b> | 374.1975         | S    | <b>481.2827</b>  | <b>241.1450</b> | 463.2591        | 232.1332         | 463.2721        | 232.1397         | 4  |
| 9  | <b>879.4794</b> | 440.2434        | 861.4559        | 431.2316         | 861.4689        | 431.2381         | L    | <b>393.2536</b>  | 197.1305        | 375.2301        | 188.1187         |                 |                  | 3  |
| 10 | <b>979.5449</b> | 490.2761        | <b>961.5213</b> | 481.2643         | <b>961.5343</b> | 481.2708         | V    | <b>279.1725</b>  | 140.0899        | 261.1490        | 131.0781         |                 |                  | 2  |
| 11 |                 |                 |                 |                  |                 |                  | R    | <b>179.1071</b>  | 90.0572         | 161.0835        | 81.0454          |                 |                  | 1  |

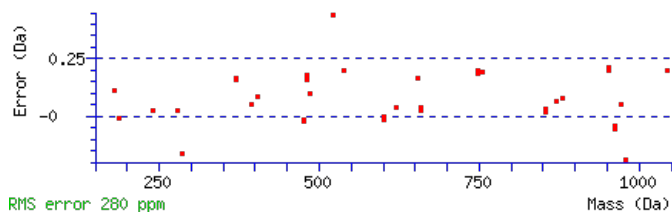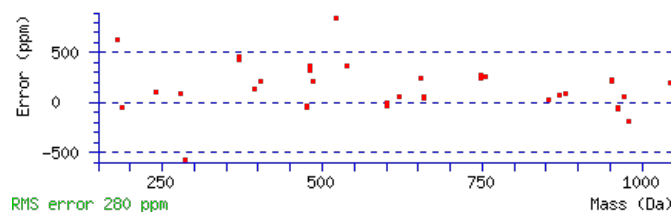

NCBI **BLAST** search of **LAVNTIGSLVR**

(Parameters: blastp, nr protein database, expect=20000, no filter, PAM30)

Other BLAST [web gateways](#)

All matches to this query

## AT1G74470.1

| Score | Mr(calc)  | Delta   | Sequence                    |
|-------|-----------|---------|-----------------------------|
| 85.5  | 1156.6374 | -0.0006 | <a href="#">LAVNTIGSLVR</a> |
| 8.1   | 1156.6374 | -0.0006 | <a href="#">LADGTLVAVKR</a> |
| 5.9   | 1156.6374 | -0.0006 | <a href="#">LGIIDNKTLR</a>  |
| 5.3   | 1156.6347 | 0.0020  | <a href="#">ALITKLTEEK</a>  |
| 3.9   | 1156.6374 | -0.0006 | <a href="#">LALGNNAKTK</a>  |
| 3.9   | 1156.6401 | -0.0033 | <a href="#">AARGPVKVSVR</a> |
| 0.6   | 1156.6374 | -0.0006 | <a href="#">LNGLSLEKLR</a>  |
| 0.5   | 1156.6374 | -0.0006 | <a href="#">LTGKRPTIEK</a>  |
| 0.3   | 1156.6397 | -0.0029 | <a href="#">ALGPLLEKFR</a>  |
| 0.2   | 1156.6374 | -0.0006 | <a href="#">ATIIIQSOIR</a>  |

Mascot: <http://www.matrixscience.com/>

**Peptide View**MS/MS Fragmentation of **LQEIQDDLEK**Found in **AT1G74560.3** in **TAIR\_Arabidopsis**, Symbols: NRP1 | NRP1 (NAP1-RELATED PROTEIN 1) | chr1:28021424-28023561 REVERSE

Match to Query 4320: 1242.576090 from(622.295321,2+) index(3299)

Title: Elution from: 32.243 to 32.243 scan no 4096 cid35.00 polarity:+

Data file C7-1\_2.mgf

Click mouse within plot area to zoom in by factor of two about that point

Or,   to  Da Label all possible matches  Label matches used for scoring Show Y-axis 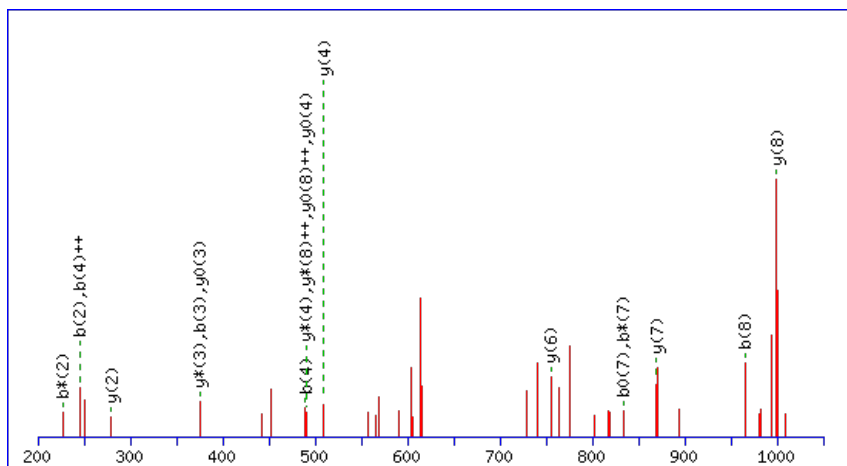Monoisotopic mass of neutral peptide  $M_r(\text{calc})$ : 1242.5754

Fixed modifications: Carbamidomethyl (C) (apply to specified residues or termini only)

Ions Score: 24 Expect: 0.02

Matches : 19/100 fragment ions using 25 most intense peaks ([help](#))

| #  | b               | b <sup>++</sup> | b*              | b <sup>*++</sup> | b <sup>0</sup>  | b <sup>0++</sup> | Seq. | y               | y <sup>++</sup> | y*              | y <sup>*++</sup> | y <sup>0</sup>  | y <sup>0++</sup> | #  |
|----|-----------------|-----------------|-----------------|------------------|-----------------|------------------|------|-----------------|-----------------|-----------------|------------------|-----------------|------------------|----|
| 1  | 115.0884        | 58.0478         |                 |                  |                 |                  | L    |                 |                 |                 |                  |                 |                  | 10 |
| 2  | <b>245.1410</b> | 123.0741        | <b>227.1174</b> | 114.0624         |                 |                  | Q    | 1129.5016       | 565.2544        | 1111.4780       | 556.2426         | 1111.4910       | 556.2491         | 9  |
| 3  | <b>375.1806</b> | 188.0940        | 357.1571        | 179.0822         | 357.1701        | 179.0887         | E    | <b>999.4489</b> | 500.2281        | 981.4253        | <b>491.2163</b>  | 981.4384        | <b>491.2228</b>  | 8  |
| 4  | <b>489.2617</b> | <b>245.1345</b> | 471.2382        | 236.1227         | 471.2512        | 236.1292         | I    | <b>869.4093</b> | 435.2083        | 851.3857        | 426.1965         | 851.3987        | 426.2030         | 7  |
| 5  | 619.3144        | 310.1608        | 601.2908        | 301.1490         | 601.3038        | 301.1556         | Q    | <b>755.3282</b> | 378.1677        | 737.3046        | 369.1559         | 737.3176        | 369.1625         | 6  |
| 6  | 735.3384        | 368.1728        | 717.3148        | 359.1610         | 717.3278        | 359.1675         | D    | 625.2756        | 313.1414        | 607.2520        | 304.1296         | 607.2650        | 304.1361         | 5  |
| 7  | 851.3624        | 426.1848        | <b>833.3388</b> | 417.1730         | <b>833.3518</b> | 417.1795         | D    | <b>509.2516</b> | 255.1294        | <b>491.2280</b> | 246.1176         | <b>491.2410</b> | 246.1241         | 4  |
| 8  | <b>965.4435</b> | 483.2254        | 947.4199        | 474.2136         | 947.4329        | 474.2201         | L    | 393.2276        | 197.1174        | <b>375.2040</b> | 188.1056         | <b>375.2170</b> | 188.1122         | 3  |
| 9  | 1095.4831       | 548.2452        | 1077.4595       | 539.2334         | 1077.4725       | 539.2399         | E    | <b>279.1465</b> | 140.0769        | 261.1229        | 131.0651         | 261.1359        | 131.0716         | 2  |
| 10 |                 |                 |                 |                  |                 |                  | K    | 149.1069        | 75.0571         | 131.0833        | 66.0453          |                 |                  | 1  |

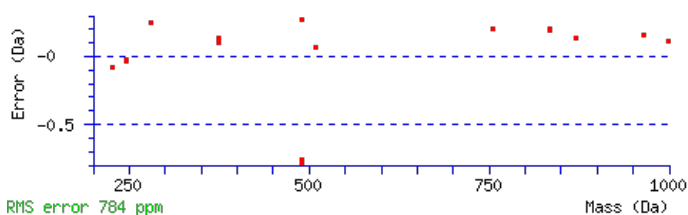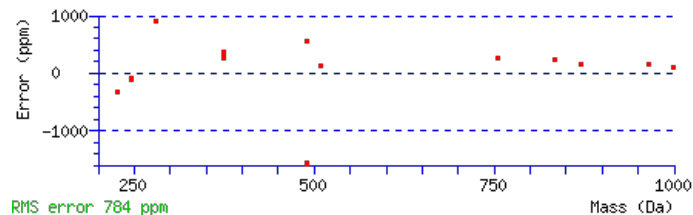NCBI BLAST search of **LQEIQDDLEK**

(Parameters: blastp, nr protein database, expect=20000, no filter, PAM30)

Other BLAST [web gateways](#)**All matches to this query**

| Score | Mr(calc) | Delta | Sequence |
|-------|----------|-------|----------|
|       |          |       |          |

### AT1G74560.3

|      |           |         |                             |
|------|-----------|---------|-----------------------------|
| 24.1 | 1242.5754 | 0.0007  | <a href="#">LQEIQDDLEK</a>  |
| 10.9 | 1242.5781 | -0.0020 | <a href="#">IEKEHESVTR</a>  |
| 2.3  | 1242.5781 | -0.0020 | <a href="#">QIEPKEQNGGK</a> |

**Mascot:** <http://www.matrixscience.com/>

## Peptide View

MS/MS Fragmentation of **CRLQLLQGNK**

Found in **AT1G74690.1** in **TAIR\_Arabidopsis**, Symbols: IQD31 | IQD31 (IQ-domain 31); calmodulin binding | chr1:28065159-28067585  
REVERSE

Match to Query 4432: 1246.621146 from(624.317849,2+) index(8588)

Title: Elution from: 76.212 to 76.212 scan no 11403 cid35.00 polarity:+

Data file D6h-3\_1.mgf

Click mouse within plot area to zoom in by factor of two about that point

Or,   to  Da

Label all possible matches  Label matches used for scoring

Show Y-axis

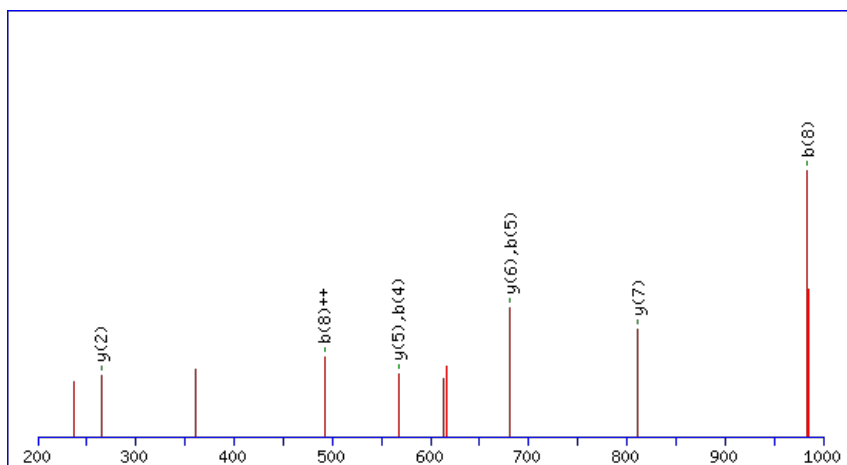

Monoisotopic mass of neutral peptide  $M_r(\text{calc})$ : 1246.6176

Fixed modifications: Carbamidomethyl (C) (apply to specified residues or termini only)

Ions Score: 25 Expect: 0.03

Matches : 8/70 fragment ions using 10 most intense peaks ([help](#))

| #  | b               | b <sup>++</sup> | b*        | b <sup>*++</sup> | Seq. | y               | y <sup>++</sup> | y*        | y <sup>*++</sup> | #  |
|----|-----------------|-----------------|-----------|------------------|------|-----------------|-----------------|-----------|------------------|----|
| 1  | 163.0320        | 82.0196         |           |                  | C    |                 |                 |           |                  | 10 |
| 2  | 323.1212        | 162.0643        | 305.0977  | 153.0525         | R    | 1085.6002       | 543.3037        | 1067.5766 | 534.2920         | 9  |
| 3  | 437.2023        | 219.1048        | 419.1788  | 210.0930         | L    | 925.5110        | 463.2591        | 907.4874  | 454.2473         | 8  |
| 4  | <b>567.2550</b> | 284.1311        | 549.2314  | 275.1193         | Q    | <b>811.4299</b> | 406.2186        | 793.4063  | 397.2068         | 7  |
| 5  | <b>681.3361</b> | 341.1717        | 663.3125  | 332.1599         | L    | <b>681.3772</b> | 341.1922        | 663.3536  | 332.1805         | 6  |
| 6  | 795.4172        | 398.2122        | 777.3936  | 389.2004         | L    | <b>567.2961</b> | 284.1517        | 549.2725  | 275.1399         | 5  |
| 7  | 925.4698        | 463.2386        | 907.4463  | 454.2268         | Q    | 453.2150        | 227.1111        | 435.1914  | 218.0994         | 4  |
| 8  | <b>983.4883</b> | <b>492.2478</b> | 965.4648  | 483.2360         | G    | 323.1624        | 162.0848        | 305.1388  | 153.0730         | 3  |
| 9  | 1099.5253       | 550.2663        | 1081.5017 | 541.2545         | N    | <b>265.1439</b> | 133.0756        | 247.1203  | 124.0638         | 2  |
| 10 |                 |                 |           |                  | K    | 149.1069        | 75.0571         | 131.0833  | 66.0453          | 1  |

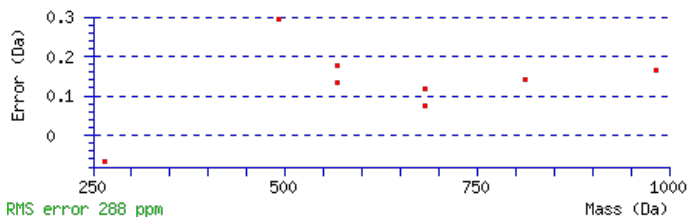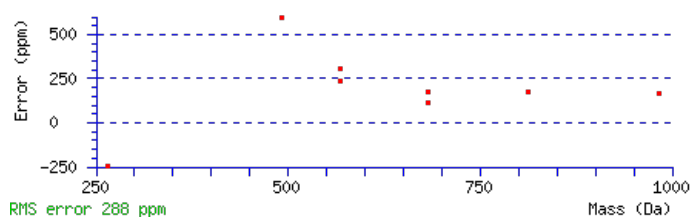

NCBI BLAST search of **CRLQLLQGNK**

(Parameters: blastp, nr protein database, expect=20000, no filter, PAM30)

Other BLAST [web gateways](#)

All matches to this query

## AT1G74690.1

| Score | Mr(calc)  | Delta   | Sequence                     |
|-------|-----------|---------|------------------------------|
| 24.7  | 1246.6176 | 0.0035  | <a href="#">CRLQLQGNK</a>    |
| 16.5  | 1246.6219 | -0.0008 | <a href="#">FVDLVTEAVNK</a>  |
| 16.5  | 1246.6224 | -0.0013 | <a href="#">NVNKKSEAVNK</a>  |
| 12.2  | 1246.6176 | 0.0035  | <a href="#">RICAGIALAER</a>  |
| 11.8  | 1246.6246 | -0.0035 | <a href="#">EIDSARKWVK</a>   |
| 3.7   | 1246.6206 | 0.0005  | <a href="#">ILMKNMEINK</a>   |
| 3.2   | 1246.6219 | -0.0008 | <a href="#">ILLQNYLDDK</a>   |
| 0.4   | 1246.6197 | 0.0014  | <a href="#">ESVTSIVGSNIK</a> |
| 0.4   | 1246.6206 | 0.0005  | <a href="#">MVNEKKMLPK</a>   |

Mascot: <http://www.matrixscience.com/>

**Peptide View**MS/MS Fragmentation of **EYLQGNPLWLQYVK**

Found in **AT1G74970.1** in **TAIR\_Arabidopsis**, Symbols: TWN3, RPS9 | RPS9 (RIBOSOMAL PROTEIN S9); structural constituent of ribosome | chr1:28161422-28162863 REVERSE

Match to Query 7872: 1749.906778 from(875.960665,2+) index(8960)

Title: Elution from: 85.363 to 85.363 scan no 12433 cid35.00 polarity:+

Data file D1d-1-2.mgf

Click mouse within plot area to zoom in by factor of two about that point

Or,   to  Da

Label all possible matches  Label matches used for scoring

Show Y-axis

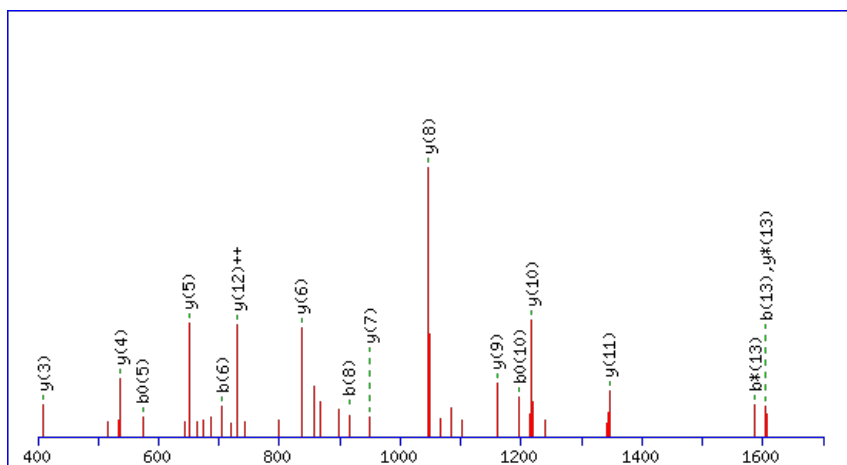

Monoisotopic mass of neutral peptide  $M_r(\text{calc})$ : 1749.9090

**Fixed modifications:** Carbamidomethyl (C) (apply to specified residues or termini only)

**Ions Score:** 73 **Expect:** 2.1e-007

**Matches:** 17/124 fragment ions using 21 most intense peaks ([help](#))

| #  | b         | b <sup>++</sup> | b*        | b <sup>*++</sup> | b <sup>0</sup> | b <sup>0++</sup> | Seq. | y         | y <sup>++</sup> | y*        | y <sup>*++</sup> | #  |
|----|-----------|-----------------|-----------|------------------|----------------|------------------|------|-----------|-----------------|-----------|------------------|----|
| 1  | 130.0499  | 65.5286         |           |                  | 112.0393       | 56.5233          | E    |           |                 |           |                  | 14 |
| 2  | 293.1132  | 147.0602        |           |                  | 275.1026       | 138.0550         | Y    | 1621.8737 | 811.4405        | 1604.8471 | 802.9272         | 13 |
| 3  | 406.1973  | 203.6023        |           |                  | 388.1867       | 194.5970         | L    | 1458.8104 | 729.9088        | 1441.7838 | 721.3955         | 12 |
| 4  | 534.2558  | 267.6316        | 517.2293  | 259.1183         | 516.2453       | 258.6263         | Q    | 1345.7263 | 673.3668        | 1328.6998 | 664.8535         | 11 |
| 5  | 591.2773  | 296.1423        | 574.2508  | 287.6290         | 573.2667       | 287.1370         | G    | 1217.6677 | 609.3375        | 1200.6412 | 600.8242         | 10 |
| 6  | 705.3202  | 353.1638        | 688.2937  | 344.6505         | 687.3097       | 344.1585         | N    | 1160.6463 | 580.8268        | 1143.6197 | 572.3135         | 9  |
| 7  | 802.3730  | 401.6901        | 785.3464  | 393.1769         | 784.3624       | 392.6849         | P    | 1046.6033 | 523.8053        | 1029.5768 | 515.2920         | 8  |
| 8  | 915.4571  | 458.2322        | 898.4305  | 449.7189         | 897.4465       | 449.2269         | L    | 949.5506  | 475.2789        | 932.5240  | 466.7656         | 7  |
| 9  | 1101.5364 | 551.2718        | 1084.5098 | 542.7585         | 1083.5258      | 542.2665         | W    | 836.4665  | 418.7369        | 819.4400  | 410.2236         | 6  |
| 10 | 1214.6204 | 607.8139        | 1197.5939 | 599.3006         | 1196.6099      | 598.8086         | L    | 650.3872  | 325.6972        | 633.3606  | 317.1840         | 5  |
| 11 | 1342.6790 | 671.8431        | 1325.6525 | 663.3299         | 1324.6684      | 662.8379         | Q    | 537.3031  | 269.1552        | 520.2766  | 260.6419         | 4  |
| 12 | 1505.7423 | 753.3748        | 1488.7158 | 744.8615         | 1487.7318      | 744.3695         | Y    | 409.2445  | 205.1259        | 392.2180  | 196.6126         | 3  |
| 13 | 1604.8108 | 802.9090        | 1587.7842 | 794.3957         | 1586.8002      | 793.9037         | V    | 246.1812  | 123.5942        | 229.1547  | 115.0810         | 2  |
| 14 |           |                 |           |                  |                |                  | K    | 147.1128  | 74.0600         | 130.0863  | 65.5468          | 1  |

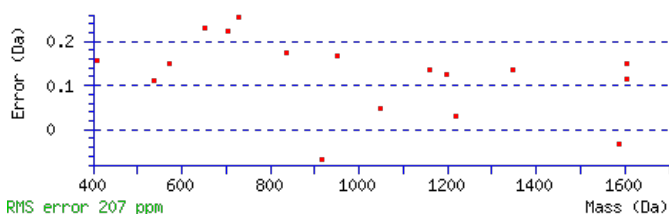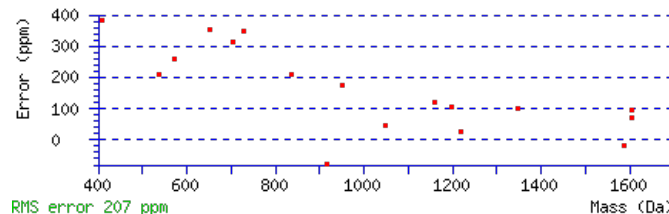

NCBI BLAST search of [EYLQGNPLWLQYVK](#)



## AT1G74970.1

(Parameters: blastp, nr protein database, expect=20000, no filter, PAM30)

Other BLAST [web gateways](#)

### All matches to this query

| Score | Mr(calc)  | Delta   | Sequence                         |
|-------|-----------|---------|----------------------------------|
| 73.3  | 1749.9090 | -0.0022 | <a href="#">EYLQGNPLWLQYVK</a>   |
| 0.4   | 1749.9043 | 0.0025  | <a href="#">TLSSGDAERMLRSSLK</a> |

Mascot: <http://www.matrixscience.com/>

## Peptide View

### MS/MS Fragmentation of **DFLAIDDFDTATIK**

Found in **AT1G75330.1** in **TAIR\_Arabidopsis**, Symbols: OTC | OTC (ORNITHINE CARBAMOYLTRANSFERASE); amino acid binding / carboxyl- or carbamoyltransferase | chr1:28270118-28272044 REVERSE

Match to Query 7197: 1598.723406 from(800.368979,2+) index(9786)

Title: Elution from: 90.367 to 90.367 scan no 13594 cid35.00 polarity:+

Data file D6h-1\_2.mgf

Click mouse within plot area to zoom in by factor of two about that point

Or,   to  Da

Label all possible matches  Label matches used for scoring

Show Y-axis

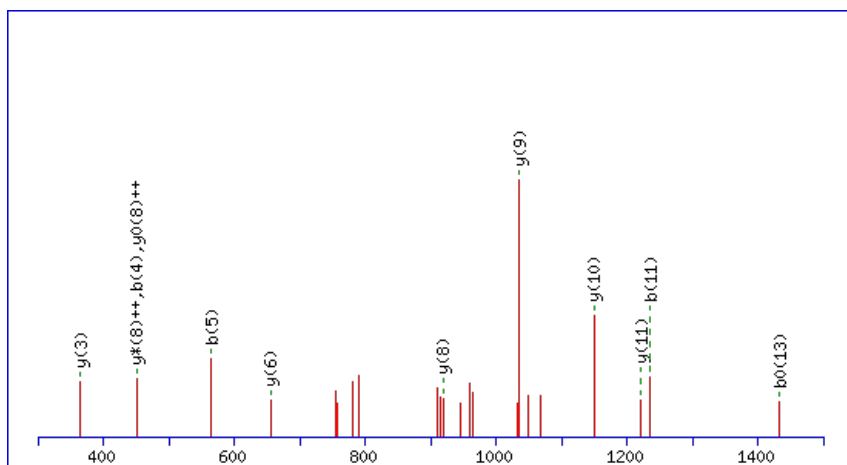

Monoisotopic mass of neutral peptide  $M_r(\text{calc})$ : 1598.7274

Fixed modifications: Carbamidomethyl (C) (apply to specified residues or termini only)

Ions Score: 36 Expect: 0.0021

Matches : 12/126 fragment ions using 22 most intense peaks ([help](#))

| #  | b                | b <sup>++</sup> | b <sup>0</sup>   | b <sup>0++</sup> | Seq. | y                | y <sup>++</sup> | y*        | y <sup>*++</sup> | y <sup>0</sup> | y <sup>0++</sup> | #  |
|----|------------------|-----------------|------------------|------------------|------|------------------|-----------------|-----------|------------------|----------------|------------------|----|
| 1  | 117.0313         | 59.0193         | 99.0207          | 50.0140          | D    |                  |                 |           |                  |                |                  | 14 |
| 2  | 265.0967         | 133.0520        | 247.0861         | 124.0467         | F    | 1483.7107        | 742.3590        | 1465.6871 | 733.3472         | 1465.7002      | 733.3537         | 13 |
| 3  | 379.1778         | 190.0925        | 361.1672         | 181.0873         | L    | 1335.6453        | 668.3263        | 1317.6217 | 659.3145         | 1317.6347      | 659.3210         | 12 |
| 4  | <b>451.2120</b>  | 226.1096        | 433.2014         | 217.1043         | A    | <b>1221.5642</b> | 611.2857        | 1203.5406 | 602.2739         | 1203.5536      | 602.2804         | 11 |
| 5  | <b>565.2930</b>  | 283.1502        | 547.2825         | 274.1449         | I    | <b>1149.5300</b> | 575.2687        | 1131.5064 | 566.2569         | 1131.5195      | 566.2634         | 10 |
| 6  | 681.3170         | 341.1622        | 663.3065         | 332.1569         | D    | <b>1035.4489</b> | 518.2281        | 1017.4253 | 509.2163         | 1017.4384      | 509.2228         | 9  |
| 7  | 797.3410         | 399.1741        | 779.3304         | 390.1689         | D    | <b>919.4250</b>  | 460.2161        | 901.4014  | <b>451.2043</b>  | 901.4144       | <b>451.2108</b>  | 8  |
| 8  | 945.4065         | 473.2069        | 927.3959         | 464.2016         | F    | 803.4010         | 402.2041        | 785.3774  | 393.1923         | 785.3904       | 393.1988         | 7  |
| 9  | 1061.4304        | 531.2189        | 1043.4199        | 522.2136         | D    | <b>655.3355</b>  | 328.1714        | 637.3119  | 319.1596         | 637.3250       | 319.1661         | 6  |
| 10 | 1163.4751        | 582.2412        | 1145.4646        | 573.2359         | T    | 539.3115         | 270.1594        | 521.2880  | 261.1476         | 521.3010       | 261.1541         | 5  |
| 11 | <b>1235.5093</b> | 618.2583        | 1217.4987        | 609.2530         | A    | 437.2668         | 219.1371        | 419.2433  | 210.1253         | 419.2563       | 210.1318         | 4  |
| 12 | 1337.5540        | 669.2806        | 1319.5434        | 660.2754         | T    | <b>365.2327</b>  | 183.1200        | 347.2091  | 174.1082         | 347.2221       | 174.1147         | 3  |
| 13 | 1451.6351        | 726.3212        | <b>1433.6245</b> | 717.3159         | I    | 263.1880         | 132.0976        | 245.1644  | 123.0858         |                |                  | 2  |
| 14 |                  |                 |                  |                  | K    | 149.1069         | 75.0571         | 131.0833  | 66.0453          |                |                  | 1  |

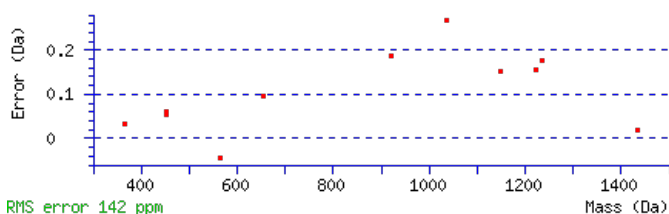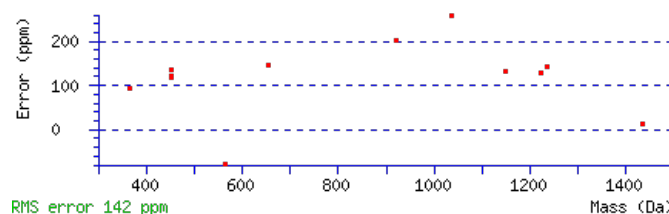

## AT1G75330.1

(Parameters: blastp, nr protein database, expect=20000, no filter, PAM30)

Other BLAST [web gateways](#)

### All matches to this query

| Score | Mr(calc)  | Delta   | Sequence                         |
|-------|-----------|---------|----------------------------------|
| 36.3  | 1598.7274 | -0.0040 | <a href="#">DFLAIDDFDTATIK</a>   |
| 11.0  | 1598.7252 | -0.0018 | <a href="#">TSEDYGSITAI AIDK</a> |
| 5.2   | 1598.7209 | 0.0025  | <a href="#">TDTEIQRSLCSR</a>     |
| 1.8   | 1598.7280 | -0.0046 | <a href="#">LAVCGFN VYHKNR</a>   |
| 1.2   | 1598.7279 | -0.0045 | <a href="#">SDISSVRNYS DLPK</a>  |
| 1.1   | 1598.7254 | -0.0020 | <a href="#">FVAGGLAGHLYMNSK</a>  |
| 0.6   | 1598.7218 | 0.0017  | <a href="#">MGRKPCCDKIGLK</a>    |
| 0.1   | 1598.7204 | 0.0030  | <a href="#">DLQTSIDYACGVLK</a>   |

Mascot: <http://www.matrixscience.com/>

**Peptide View**MS/MS Fragmentation of **AEAVEGAATSDDDLK**

Found in **AT1G75950.1** in **TAIR\_Arabidopsis**, Symbols: ASK1, ATSKP1, SKP1A, UIP1, SKP1 | SKP1 (ARABIDOPSIS SKP1 HOMOLOGUE); ubiquitin-protein ligase | chr1:28520376-28521115 FORWARD

Match to Query 6676: 1490.673204 from(746.343878,2+) index(1944)

Title: Elution from: 22.970 to 22.970 scan no 2513 cid35.00 polarity:+

Data file D6h-1\_1.mgf

Click mouse within plot area to zoom in by factor of two about that point

Or,  to  Da

Label all possible matches  Label matches used for scoring

Show Y-axis

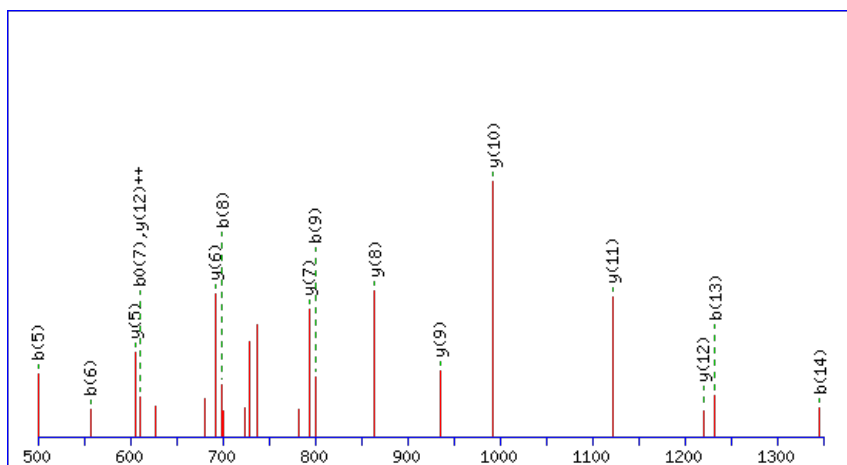

Monoisotopic mass of neutral peptide  $M_r(\text{calc})$ : 1490.6736

Fixed modifications: Carbamidomethyl (C) (apply to specified residues or termini only)

Ions Score: 91 Expect: 9.7e-010

Matches : 16/134 fragment ions using 18 most intense peaks ([help](#))

| #  | b                | b <sup>++</sup> | b <sup>0</sup>  | b <sup>0++</sup> | Seq. | y                | y <sup>++</sup> | y*        | y <sup>*++</sup> | y <sup>0</sup> | y <sup>0++</sup> | #  |
|----|------------------|-----------------|-----------------|------------------|------|------------------|-----------------|-----------|------------------|----------------|------------------|----|
| 1  | 72.0444          | 36.5258         |                 |                  | A    |                  |                 |           |                  |                |                  | 15 |
| 2  | 201.0870         | 101.0471        | 183.0764        | 92.0418          | E    | 1420.6438        | 710.8255        | 1403.6173 | 702.3123         | 1402.6332      | 701.8203         | 14 |
| 3  | 272.1241         | 136.5657        | 254.1135        | 127.5604         | A    | 1291.6012        | 646.3042        | 1274.5747 | 637.7910         | 1273.5907      | 637.2990         | 13 |
| 4  | 371.1925         | 186.0999        | 353.1819        | 177.0946         | V    | <b>1220.5641</b> | <b>610.7857</b> | 1203.5376 | 602.2724         | 1202.5535      | 601.7804         | 12 |
| 5  | <b>500.2351</b>  | 250.6212        | 482.2245        | 241.6159         | E    | <b>1121.4957</b> | 561.2515        | 1104.4691 | 552.7382         | 1103.4851      | 552.2462         | 11 |
| 6  | <b>557.2566</b>  | 279.1319        | 539.2460        | 270.1266         | G    | <b>992.4531</b>  | 496.7302        | 975.4265  | 488.2169         | 974.4425       | 487.7249         | 10 |
| 7  | 628.2937         | 314.6505        | <b>610.2831</b> | 305.6452         | A    | <b>935.4316</b>  | 468.2195        | 918.4051  | 459.7062         | 917.4211       | 459.2142         | 9  |
| 8  | <b>699.3308</b>  | 350.1690        | 681.3202        | 341.1638         | A    | <b>864.3945</b>  | 432.7009        | 847.3680  | 424.1876         | 846.3840       | 423.6956         | 8  |
| 9  | <b>800.3785</b>  | 400.6929        | 782.3679        | 391.6876         | T    | <b>793.3574</b>  | 397.1823        | 776.3309  | 388.6691         | 775.3468       | 388.1771         | 7  |
| 10 | 887.4105         | 444.2089        | 869.3999        | 435.2036         | S    | <b>692.3097</b>  | 346.6585        | 675.2832  | 338.1452         | 674.2992       | 337.6532         | 6  |
| 11 | 1002.4374        | 501.7224        | 984.4269        | 492.7171         | D    | <b>605.2777</b>  | 303.1425        | 588.2511  | 294.6292         | 587.2671       | 294.1372         | 5  |
| 12 | 1117.4644        | 559.2358        | 1099.4538       | 550.2305         | D    | 490.2508         | 245.6290        | 473.2242  | 237.1157         | 472.2402       | 236.6237         | 4  |
| 13 | <b>1232.4913</b> | 616.7493        | 1214.4808       | 607.7440         | D    | 375.2238         | 188.1155        | 358.1973  | 179.6023         | 357.2132       | 179.1103         | 3  |
| 14 | <b>1345.5754</b> | 673.2913        | 1327.5648       | 664.2861         | L    | 260.1969         | 130.6021        | 243.1703  | 122.0888         |                |                  | 2  |
| 15 |                  |                 |                 |                  | K    | 147.1128         | 74.0600         | 130.0863  | 65.5468          |                |                  | 1  |

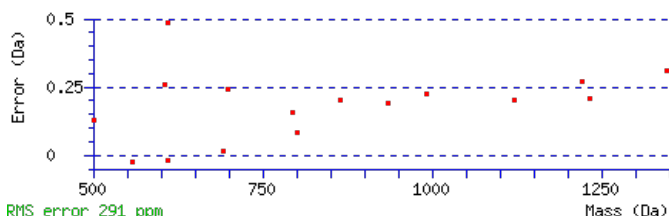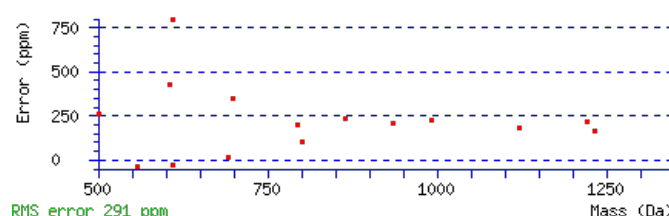

## AT1G75950.1

NCBI **BLAST** search of [AEAVEGAATSDDDLK](#)

(Parameters: blastp, nr protein database, expect=20000, no filter, PAM30)

Other BLAST [web gateways](#)

### All matches to this query

| Score | Mr(calc)  | Delta   | Sequence                        |
|-------|-----------|---------|---------------------------------|
| 91.1  | 1490.6736 | -0.0004 | <a href="#">AEAVEGAATSDDDLK</a> |

Mascot: <http://www.matrixscience.com/>

## Peptide View

MS/MS Fragmentation of **IALLTTAEYLAIECGK**

Found in **AT1G76030.1** in **TAIR\_Arabidopsis**, Symbols: | (VACUOLAR ATP SYNTHASE SUBUNIT B1); hydrogen ion transporting ATP synthase, rotational mechanism | chr1:28537795-28540577 FORWARD

Match to Query 8107: 1701.832654 from(851.923603,2+) index(6989)

Title: Elution from: 61.715 to 61.715 scan no 9071 cid35.00 polarity:+

Data file C7-1\_2.mgf

Click mouse within plot area to zoom in by factor of two about that point

Or,   to  Da

Label all possible matches  Label matches used for scoring

Show Y-axis

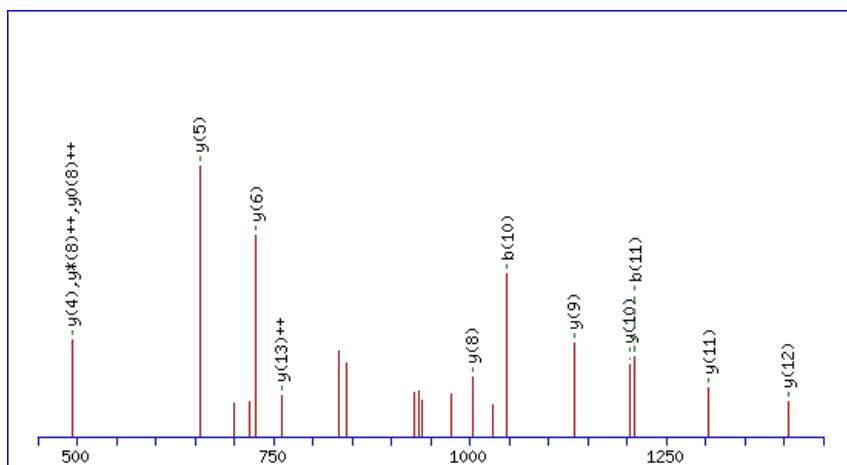

Monoisotopic mass of neutral peptide  $M_r(\text{calc})$ : 1701.8283

Fixed modifications: Carbamidomethyl (C) (apply to specified residues or termini only)

Ions Score: 68 Expect: 6e-007

Matches : 13/128 fragment ions using 15 most intense peaks ([help](#))

| #  | b         | b <sup>++</sup> | b <sup>0</sup> | b <sup>0++</sup> | Seq. | y         | y <sup>++</sup> | y*        | y <sup>*++</sup> | y <sup>0</sup> | y <sup>0++</sup> | #  |
|----|-----------|-----------------|----------------|------------------|------|-----------|-----------------|-----------|------------------|----------------|------------------|----|
| 1  | 114.0913  | 57.5493         |                |                  | I    |           |                 |           |                  |                |                  | 15 |
| 2  | 185.1285  | 93.0679         |                |                  | A    | 1589.7516 | 795.3794        | 1572.7250 | 786.8662         | 1571.7410      | 786.3742         | 14 |
| 3  | 298.2125  | 149.6099        |                |                  | L    | 1518.7145 | 759.8609        | 1501.6879 | 751.3476         | 1500.7039      | 750.8556         | 13 |
| 4  | 399.2602  | 200.1337        | 381.2496       | 191.1285         | T    | 1405.6304 | 703.3188        | 1388.6039 | 694.8056         | 1387.6198      | 694.3136         | 12 |
| 5  | 500.3079  | 250.6576        | 482.2973       | 241.6523         | T    | 1304.5827 | 652.7950        | 1287.5562 | 644.2817         | 1286.5722      | 643.7897         | 11 |
| 6  | 571.3450  | 286.1761        | 553.3344       | 277.1709         | A    | 1203.5351 | 602.2712        | 1186.5085 | 593.7579         | 1185.5245      | 593.2659         | 10 |
| 7  | 700.3876  | 350.6974        | 682.3770       | 341.6921         | E    | 1132.4979 | 566.7526        | 1115.4714 | 558.2393         | 1114.4874      | 557.7473         | 9  |
| 8  | 863.4509  | 432.2291        | 845.4403       | 423.2238         | Y    | 1003.4553 | 502.2313        | 986.4288  | 493.7180         | 985.4448       | 493.2260         | 8  |
| 9  | 976.5350  | 488.7711        | 958.5244       | 479.7658         | L    | 840.3920  | 420.6996        | 823.3655  | 412.1864         | 822.3815       | 411.6944         | 7  |
| 10 | 1047.5721 | 524.2897        | 1029.5615      | 515.2844         | A    | 727.3080  | 364.1576        | 710.2814  | 355.6443         | 709.2974       | 355.1523         | 6  |
| 11 | 1210.6354 | 605.8213        | 1192.6249      | 596.8161         | Y    | 656.2708  | 328.6391        | 639.2443  | 320.1258         | 638.2603       | 319.6338         | 5  |
| 12 | 1339.6780 | 670.3426        | 1321.6674      | 661.3374         | E    | 493.2075  | 247.1074        | 476.1810  | 238.5941         | 475.1969       | 238.1021         | 4  |
| 13 | 1499.7087 | 750.3580        | 1481.6981      | 741.3527         | C    | 364.1649  | 182.5861        | 347.1384  | 174.0728         |                |                  | 3  |
| 14 | 1556.7301 | 778.8687        | 1538.7196      | 769.8634         | G    | 204.1343  | 102.5708        | 187.1077  | 94.0575          |                |                  | 2  |
| 15 |           |                 |                |                  | K    | 147.1128  | 74.0600         | 130.0863  | 65.5468          |                |                  | 1  |

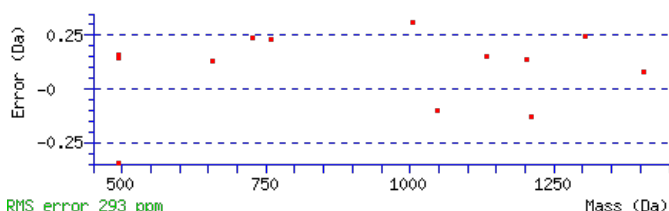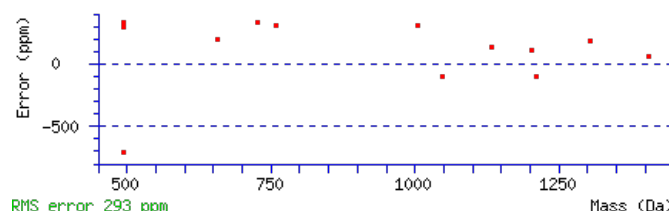

## AT1G76030.1

NCBI **BLAST** search of [IALTTAEYLAYECGK](#)

(Parameters: blastp, nr protein database, expect=20000, no filter, PAM30)

Other BLAST [web gateways](#)

### All matches to this query

| Score | Mr(calc)  | Delta   | Sequence                        |
|-------|-----------|---------|---------------------------------|
| 67.9  | 1701.8283 | 0.0043  | <a href="#">IALTTAEYLAYECGK</a> |
| 7.8   | 1701.8331 | -0.0004 | <a href="#">SKEFEVIMMRNFR</a>   |
| 7.8   | 1701.8331 | -0.0004 | <a href="#">SKEFEVIMMRNFR</a>   |
| 4.4   | 1701.8331 | -0.0004 | <a href="#">HAIYNGACNLTLPK</a>  |

**Mascot:** <http://www.matrixscience.com/>

**Peptide View**MS/MS Fragmentation of **GELIGEILR**

Found in **AT1G76080.1** in **TAIR\_Arabidopsis**, Symbols: ATCDSP32, CDSP32 | ATCDSP32/CDSP32 (CHLOROPLASTIC DROUGHT-INDUCED STRESS PROTEIN OF 32 KD); thiol-disulfide exchange intermediate | chr1:28552957-28554242 REVERSE

Match to Query 2564: 1010.540572 from(506.277562,2+) index(6700)

Title: Elution from: 58.218 to 58.218 scan no 8633 cid35.00 polarity:+

Data file C7-2\_3.mgf

Click mouse within plot area to zoom in by factor of two about that point

Or,   to  Da

Label all possible matches  Label matches used for scoring

Show Y-axis

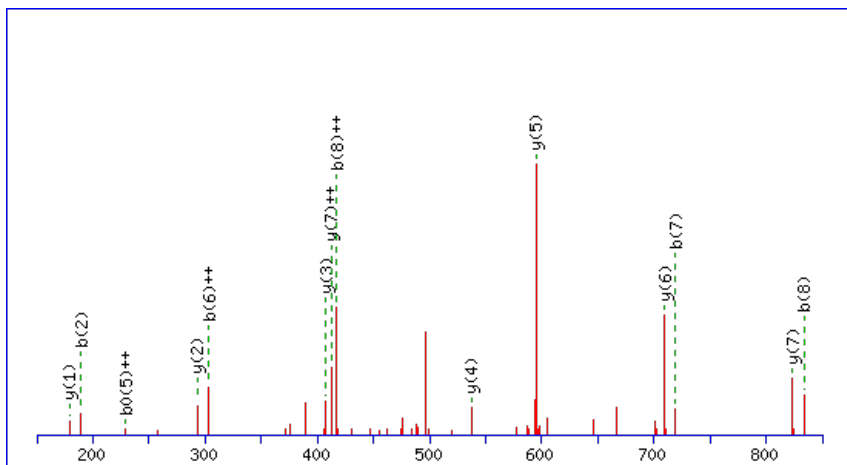

Monoisotopic mass of neutral peptide  $M_r(\text{calc})$ : 1010.5405

Fixed modifications: Carbamidomethyl (C) (apply to specified residues or termini only)

Ions Score: 67 Expect: 1.3e-006

Matches : 16/72 fragment ions using 21 most intense peaks ([help](#))

| # | b               | b <sup>++</sup> | b <sup>0</sup> | b <sup>0++</sup> | Seq.     | y               | y <sup>++</sup> | y*       | y <sup>*++</sup> | y <sup>0</sup> | y <sup>0++</sup> | # |
|---|-----------------|-----------------|----------------|------------------|----------|-----------------|-----------------|----------|------------------|----------------|------------------|---|
| 1 | 59.0258         | 30.0165         |                |                  | <b>G</b> |                 |                 |          |                  |                |                  | 9 |
| 2 | <b>189.0654</b> | 95.0363         | 171.0548       | 86.0311          | <b>E</b> | 953.5292        | 477.2683        | 935.5057 | 468.2565         | 935.5187       | 468.2630         | 8 |
| 3 | <b>303.1465</b> | 152.0769        | 285.1359       | 143.0716         | <b>L</b> | <b>823.4896</b> | <b>412.2484</b> | 805.4660 | 403.2367         | 805.4791       | 403.2432         | 7 |
| 4 | <b>417.2276</b> | 209.1174        | 399.2170       | 200.1122         | <b>I</b> | <b>709.4085</b> | 355.2079        | 691.3849 | 346.1961         | 691.3980       | 346.2026         | 6 |
| 5 | 475.2461        | 238.1267        | 457.2355       | <b>229.1214</b>  | <b>G</b> | <b>595.3274</b> | 298.1673        | 577.3038 | 289.1556         | 577.3169       | 289.1621         | 5 |
| 6 | 605.2857        | <b>303.1465</b> | 587.2752       | 294.1412         | <b>E</b> | <b>537.3089</b> | 269.1581        | 519.2853 | 260.1463         | 519.2984       | 260.1528         | 4 |
| 7 | <b>719.3668</b> | 360.1871        | 701.3563       | 351.1818         | <b>I</b> | <b>407.2693</b> | 204.1383        | 389.2457 | 195.1265         |                |                  | 3 |
| 8 | <b>833.4479</b> | <b>417.2276</b> | 815.4374       | 408.2223         | <b>L</b> | <b>293.1882</b> | 147.0977        | 275.1646 | 138.0859         |                |                  | 2 |
| 9 |                 |                 |                |                  | <b>R</b> | <b>179.1071</b> | 90.0572         | 161.0835 | 81.0454          |                |                  | 1 |

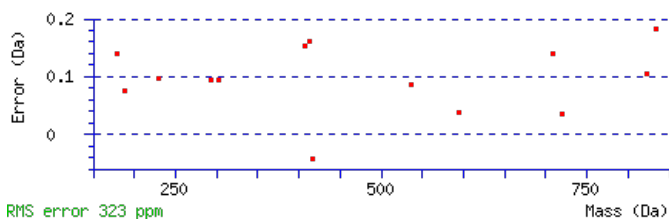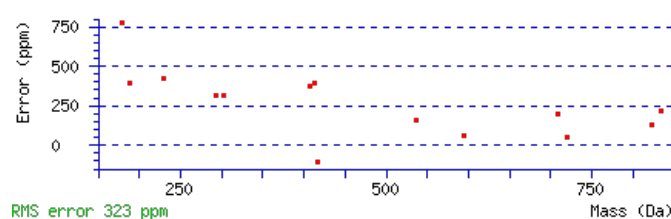

NCBI **BLAST** search of [GELIGEILR](#)

(Parameters: blastp, nr protein database, expect=20000, no filter, PAM30)

Other BLAST [web gateways](#)

All matches to this query

| Score | $M_r(\text{calc})$ | Delta | Sequence |
|-------|--------------------|-------|----------|
|       |                    |       |          |



**AT1G76080.1**

|      |           |         |                            |
|------|-----------|---------|----------------------------|
| 66.6 | 1010.5405 | 0.0001  | <a href="#">GELIGEILR</a>  |
| 31.4 | 1010.5405 | 0.0001  | <a href="#">ELGLAVEIR</a>  |
| 31.4 | 1010.5405 | 0.0001  | <a href="#">ELGLAVELR</a>  |
| 28.6 | 1010.5405 | 0.0001  | <a href="#">TPTLVEALR</a>  |
| 18.2 | 1010.5405 | 0.0001  | <a href="#">ALLDLEGLR</a>  |
| 15.8 | 1010.5405 | 0.0001  | <a href="#">LGEIELAVR</a>  |
| 12.8 | 1010.5431 | -0.0025 | <a href="#">LQGGPKGAIR</a> |
| 12.4 | 1010.5404 | 0.0001  | <a href="#">VIVGDDLRL</a>  |
| 12.3 | 1010.5405 | 0.0001  | <a href="#">AQVIAIQEK</a>  |
| 12.3 | 1010.5405 | 0.0001  | <a href="#">IANLEAQIK</a>  |

**Mascot:** <http://www.matrixscience.com/>



# Mascot Search Results

## Peptide View

MS/MS Fragmentation of **ISNVGLQDSLNR**

Found in **AT1G76160.1** in **TAIR\_Arabidopsis**, Symbols: SKS5 | SKS5 (SKU5 Similar 5); copper ion binding / oxidoreductase | chr1:28583105-28585914 REVERSE

Match to Query 5831: 1461.757460 from(731.886006,2+) index(6357)

Title: Elution from: 56.273 to 56.273 scan no 8171 cid35.00 polarity:+

Data file 0-3\_2.mgf

Click mouse within plot area to zoom in by factor of two about that point

Or,  to  Da

Label all possible matches  Label matches used for scoring

Show Y-axis

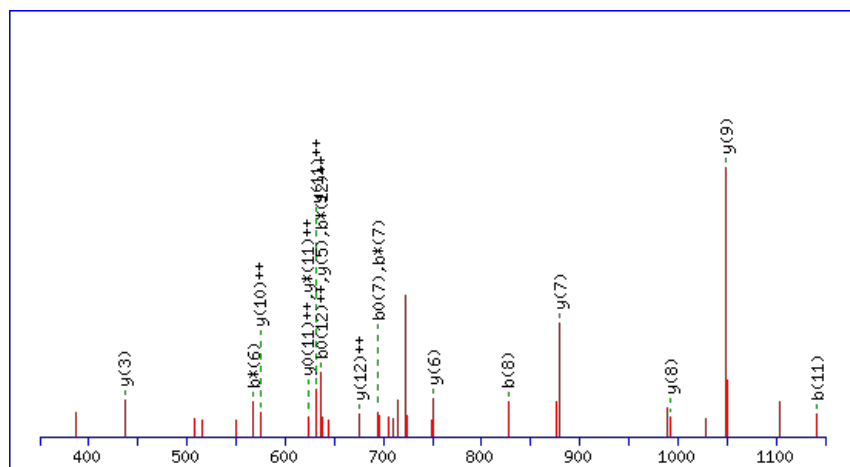

Monoisotopic mass of neutral peptide Mr(calc): 1461.7576

Fixed modifications: Carbamidomethyl (C) (apply to specified residues or termini only)

Ions Score: 44 Expect: 0.00025

Matches : 18/130 fragment ions using 23 most intense peaks [\(help\)](#)

| #  | b         | b <sup>++</sup> | b*        | b* <sup>++</sup> | b <sup>0</sup> | b <sup>0++</sup> | Seq. | y         | y <sup>++</sup> | y*        | y* <sup>++</sup> | y <sup>0</sup> | y <sup>0++</sup> | #  |
|----|-----------|-----------------|-----------|------------------|----------------|------------------|------|-----------|-----------------|-----------|------------------|----------------|------------------|----|
| 1  | 114.0913  | 57.5493         |           |                  |                |                  | I    |           |                 |           |                  |                |                  | 13 |
| 2  | 201.1234  | 101.0653        |           |                  | 183.1128       | 92.0600          | S    | 1349.6808 | 675.3440        | 1332.6543 | 666.8308         | 1331.6702      | 666.3388         | 12 |
| 3  | 315.1663  | 158.0868        | 298.1397  | 149.5735         | 297.1557       | 149.0815         | N    | 1262.6488 | 631.8280        | 1245.6222 | 623.3148         | 1244.6382      | 622.8227         | 11 |
| 4  | 414.2347  | 207.6210        | 397.2082  | 199.1077         | 396.2241       | 198.6157         | V    | 1148.6058 | 574.8066        | 1131.5793 | 566.2933         | 1130.5953      | 565.8013         | 10 |
| 5  | 471.2562  | 236.1317        | 454.2296  | 227.6185         | 453.2456       | 227.1264         | G    | 1049.5374 | 525.2724        | 1032.5109 | 516.7591         | 1031.5269      | 516.2671         | 9  |
| 6  | 584.3402  | 292.6738        | 567.3137  | 284.1605         | 566.3297       | 283.6685         | L    | 992.5160  | 496.7616        | 975.4894  | 488.2483         | 974.5054       | 487.7563         | 8  |
| 7  | 712.3988  | 356.7030        | 695.3723  | 348.1898         | 694.3882       | 347.6978         | Q    | 879.4319  | 440.2196        | 862.4054  | 431.7063         | 861.4213       | 431.2143         | 7  |
| 8  | 827.4258  | 414.2165        | 810.3992  | 405.7032         | 809.4152       | 405.2112         | D    | 751.3733  | 376.1903        | 734.3468  | 367.6770         | 733.3628       | 367.1850         | 6  |
| 9  | 914.4578  | 457.7325        | 897.4312  | 449.2193         | 896.4472       | 448.7272         | S    | 636.3464  | 318.6768        | 619.3198  | 310.1636         | 618.3358       | 309.6715         | 5  |
| 10 | 1027.5418 | 514.2746        | 1010.5153 | 505.7613         | 1009.5313      | 505.2693         | L    | 549.3144  | 275.1608        | 532.2878  | 266.6475         |                |                  | 4  |
| 11 | 1141.5848 | 571.2960        | 1124.5582 | 562.7828         | 1123.5742      | 562.2907         | N    | 436.2303  | 218.6188        | 419.2037  | 210.1055         |                |                  | 3  |
| 12 | 1288.6532 | 644.8302        | 1271.6266 | 636.3170         | 1270.6426      | 635.8250         | F    | 322.1874  | 161.5973        | 305.1608  | 153.0840         |                |                  | 2  |
| 13 |           |                 |           |                  |                |                  | R    | 175.1190  | 88.0631         | 158.0924  | 79.5498          |                |                  | 1  |

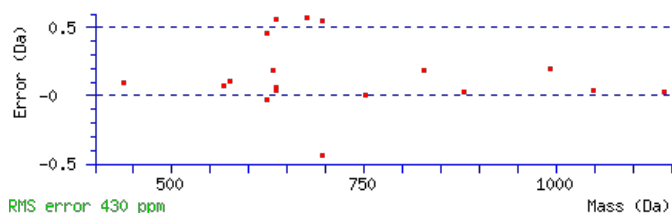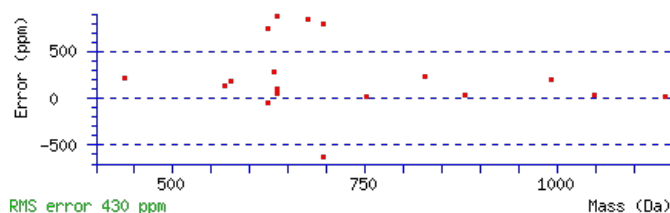

NCBI BLAST search of **ISNVGLQDSLNR**

(Parameters: blastp, nr protein database, expect=20000, no filter, PAM30)

AT1G76160.1

Other BLAST [web gateways](#)

**All matches to this query**

| Score | Mr(calc)  | Delta   | Sequence                      |
|-------|-----------|---------|-------------------------------|
| 43.8  | 1461.7576 | -0.0001 | <a href="#">ISNVGLQDSLNFR</a> |
| 5.2   | 1461.7610 | -0.0035 | <a href="#">IVTRDNGAKMDVK</a> |
| 2.7   | 1461.7610 | -0.0035 | <a href="#">TDLGRLTSPSIMR</a> |
| 0.2   | 1461.7537 | 0.0037  | <a href="#">VLIEERMPVYDV</a>  |

**Mascot:** <http://www.matrixscience.com/>

**Peptide View**MS/MS Fragmentation of **VHISEPEPEVK**Found in **AT1G76180.1** in **TAIR\_Arabidopsis**, Symbols: ERD14 | ERD14 (EARLY RESPONSE TO DEHYDRATION 14) | chr1:28591907-28592551 REVERSE

Match to Query 4571: 1262.650136 from(632.332344,2+) index(1816)

Title: Elution from: 21.438 to 21.438 scan no 2345 cid35.00 polarity:+

Data file C7-3\_2.mgf

Click mouse within plot area to zoom in by factor of two about that point

Or,   to  Da Label all possible matches  Label matches used for scoring Show Y-axis 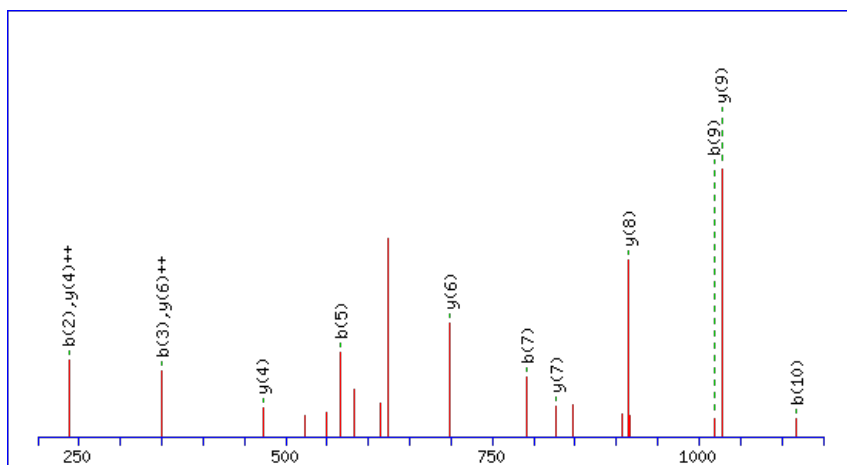Monoisotopic mass of neutral peptide  $M_r(\text{calc})$ : 1262.6507

Fixed modifications: Carbamidomethyl (C) (apply to specified residues or termini only)

Ions Score: 57 Expect: 9.2e-006

Matches : 13/90 fragment ions using 14 most intense peaks ([help](#))

| #  | b                | b <sup>++</sup> | b <sup>0</sup> | b <sup>0++</sup> | Seq. | y                | y <sup>++</sup> | y*        | y <sup>*++</sup> | y <sup>0</sup> | y <sup>0++</sup> | #  |
|----|------------------|-----------------|----------------|------------------|------|------------------|-----------------|-----------|------------------|----------------|------------------|----|
| 1  | 100.0757         | 50.5415         |                |                  | V    |                  |                 |           |                  |                |                  | 11 |
| 2  | <b>237.1346</b>  | 119.0709        |                |                  | H    | 1164.5895        | 582.7984        | 1147.5630 | 574.2851         | 1146.5790      | 573.7931         | 10 |
| 3  | <b>350.2187</b>  | 175.6130        |                |                  | I    | <b>1027.5306</b> | 514.2689        | 1010.5041 | 505.7557         | 1009.5201      | 505.2637         | 9  |
| 4  | 437.2507         | 219.1290        | 419.2401       | 210.1237         | S    | <b>914.4466</b>  | 457.7269        | 897.4200  | 449.2136         | 896.4360       | 448.7216         | 8  |
| 5  | <b>566.2933</b>  | 283.6503        | 548.2827       | 274.6450         | E    | <b>827.4145</b>  | 414.2109        | 810.3880  | 405.6976         | 809.4040       | 405.2056         | 7  |
| 6  | 663.3461         | 332.1767        | 645.3355       | 323.1714         | P    | <b>698.3719</b>  | <b>349.6896</b> | 681.3454  | 341.1763         | 680.3614       | 340.6843         | 6  |
| 7  | <b>792.3886</b>  | 396.6980        | 774.3781       | 387.6927         | E    | 601.3192         | 301.1632        | 584.2926  | 292.6499         | 583.3086       | 292.1579         | 5  |
| 8  | 889.4414         | 445.2243        | 871.4308       | 436.2191         | P    | <b>472.2766</b>  | <b>236.6419</b> | 455.2500  | 228.1287         | 454.2660       | 227.6366         | 4  |
| 9  | <b>1018.4840</b> | 509.7456        | 1000.4734      | 500.7404         | E    | 375.2238         | 188.1155        | 358.1973  | 179.6023         | 357.2132       | 179.1103         | 3  |
| 10 | <b>1117.5524</b> | 559.2798        | 1099.5419      | 550.2746         | V    | 246.1812         | 123.5942        | 229.1547  | 115.0810         |                |                  | 2  |
| 11 |                  |                 |                |                  | K    | 147.1128         | 74.0600         | 130.0863  | 65.5468          |                |                  | 1  |

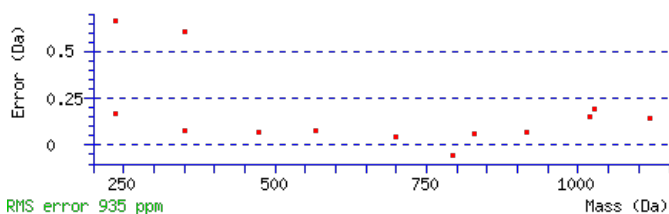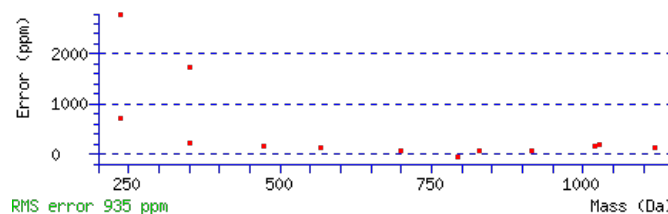NCBI BLAST search of **VHISEPEPEVK**

(Parameters: blastp, nr protein database, expect=20000, no filter, PAM30)

Other BLAST [web gateways](#)**All matches to this query**

## AT1G76180.1

| Score | Mr(calc)  | Delta   | Sequence                     |
|-------|-----------|---------|------------------------------|
| 56.5  | 1262.6507 | -0.0005 | <a href="#">VHISEPEPEVK</a>  |
| 3.8   | 1262.6507 | -0.0005 | <a href="#">YGLAGDNVLDVK</a> |
| 2.4   | 1262.6466 | 0.0035  | <a href="#">KSQQKEDSVSK</a>  |
| 0.4   | 1262.6481 | 0.0020  | <a href="#">YWPLVMDIAR</a>   |
| 0.1   | 1262.6475 | 0.0026  | <a href="#">RMMLTSGQPVK</a>  |
| 0.1   | 1262.6475 | 0.0026  | <a href="#">RMMLTSGQPVK</a>  |

Mascot: <http://www.matrixscience.com/>

**Peptide View**MS/MS Fragmentation of **GTFISAGGFTR**

Found in **AT1G76680.1** in **TAIR\_Arabidopsis**, Symbols: OPR1 | OPR1 (12-oxophytodienoate reductase 1); 12-oxophytodienoate reductase | chr1:28781876-28783165 FORWARD

Match to Query 3441: 1126.518862 from(564.266707,2+) index(4758)

Title: Elution from: 43.661 to 43.661 scan no 5988 cid35.00 polarity:+

Data file C7-1\_3.mgf

Click mouse within plot area to zoom in by factor of two about that point

Or,   to  Da

Label all possible matches  Label matches used for scoring

Show Y-axis

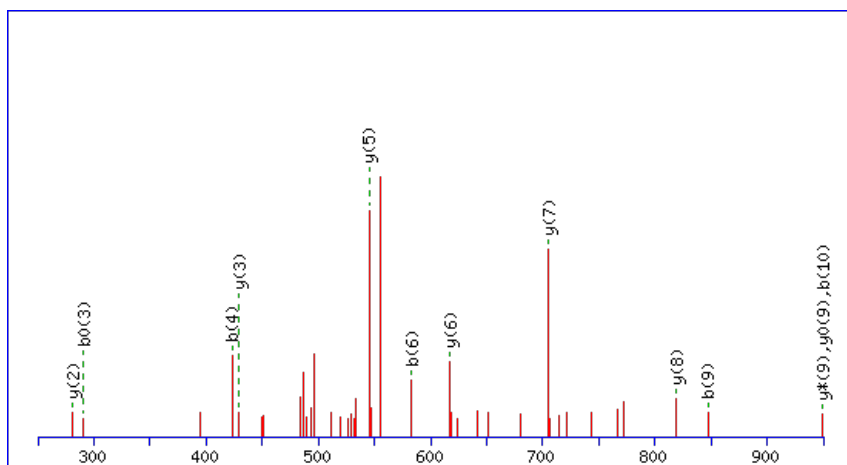

**Monoisotopic mass of neutral peptide Mr(calc):** 1126.5199

**Fixed modifications:** Carbamidomethyl (C) (apply to specified residues or termini only)

**Ions Score:** 57 **Expect:** 8.4e-006

**Matches:** 13/96 fragment ions using 13 most intense peaks ([help](#))

| #  | b               | b <sup>++</sup> | b <sup>0</sup>  | b <sup>0++</sup> | Seq.     | y               | y <sup>++</sup> | y*              | y <sup>*++</sup> | y <sup>0</sup>  | y <sup>0++</sup> | #         |
|----|-----------------|-----------------|-----------------|------------------|----------|-----------------|-----------------|-----------------|------------------|-----------------|------------------|-----------|
| 1  | 59.0258         | 30.0165         |                 |                  | <b>G</b> |                 |                 |                 |                  |                 |                  | <b>11</b> |
| 2  | 161.0705        | 81.0389         | 143.0599        | 72.0336          | <b>T</b> | 1069.5087       | 535.2580        | 1051.4851       | 526.2462         | 1051.4982       | 526.2527         | <b>10</b> |
| 3  | 309.1359        | 155.0716        | <b>291.1254</b> | 146.0663         | <b>F</b> | 967.4640        | 484.2356        | <b>949.4404</b> | 475.2239         | <b>949.4534</b> | 475.2304         | <b>9</b>  |
| 4  | <b>423.2170</b> | 212.1122        | 405.2065        | 203.1069         | <b>I</b> | <b>819.3986</b> | 410.2029        | 801.3750        | 401.1911         | 801.3880        | 401.1976         | <b>8</b>  |
| 5  | 511.2461        | 256.1267        | 493.2355        | 247.1214         | <b>S</b> | <b>705.3175</b> | 353.1624        | 687.2939        | 344.1506         | 687.3069        | 344.1571         | <b>7</b>  |
| 6  | <b>583.2802</b> | 292.1438        | 565.2697        | 283.1385         | <b>A</b> | <b>617.2884</b> | 309.1478        | 599.2648        | 300.1360         | 599.2778        | 300.1426         | <b>6</b>  |
| 7  | 641.2987        | 321.1530        | 623.2882        | 312.1477         | <b>G</b> | <b>545.2543</b> | 273.1308        | 527.2307        | 264.1190         | 527.2437        | 264.1255         | <b>5</b>  |
| 8  | 699.3172        | 350.1623        | 681.3067        | 341.1570         | <b>G</b> | 487.2358        | 244.1215        | 469.2122        | 235.1097         | 469.2252        | 235.1162         | <b>4</b>  |
| 9  | <b>847.3827</b> | 424.1950        | 829.3721        | 415.1897         | <b>F</b> | <b>429.2173</b> | 215.1123        | 411.1937        | 206.1005         | 411.2067        | 206.1070         | <b>3</b>  |
| 10 | <b>949.4274</b> | 475.2173        | 931.4168        | 466.2121         | <b>T</b> | <b>281.1518</b> | 141.0795        | 263.1282        | 132.0677         | 263.1412        | 132.0743         | <b>2</b>  |
| 11 |                 |                 |                 |                  | <b>R</b> | 179.1071        | 90.0572         | 161.0835        | 81.0454          |                 |                  | <b>1</b>  |

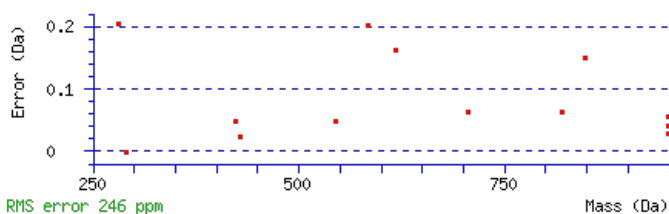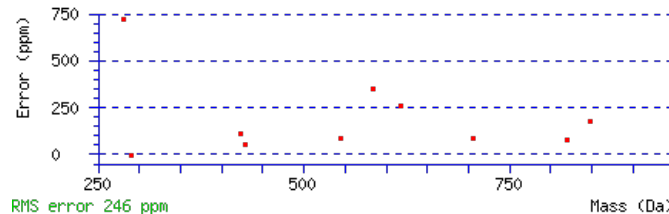

NCBI **BLAST** search of **GTFISAGGFTR**

(Parameters: blastp, nr protein database, expect=20000, no filter, PAM30)

Other BLAST [web gateways](#)

**All matches to this query**

AT1G76680.1

| Score | Mr(calc)  | Delta   | Sequence                    |
|-------|-----------|---------|-----------------------------|
| 56.5  | 1126.5199 | -0.0011 | <a href="#">GTFISAGGFTR</a> |
| 1.6   | 1126.5159 | 0.0029  | <a href="#">SVMLMSYLR</a>   |
| 0.7   | 1126.5199 | -0.0011 | <a href="#">FDYKSGQR</a>    |
| 0.1   | 1126.5204 | -0.0015 | <a href="#">RHSPQLSR</a>    |

Mascot: <http://www.matrixscience.com/>

**Peptide View**MS/MS Fragmentation of **IFKIP**Found in **AT1G76825.1** in **TAIR\_Arabidopsis**

Match to Query 514: 616.394686 from(309.204619,2+) index(2175)

Title: Elution from: 24.705 to 24.705 scan no 2772 cid35.00 polarity:+

Data file D6h-1\_3.mgf

Click mouse within plot area to zoom in by factor of two about that point

Or,  to  Da Label all possible matches  Label matches used for scoring Show Y-axis 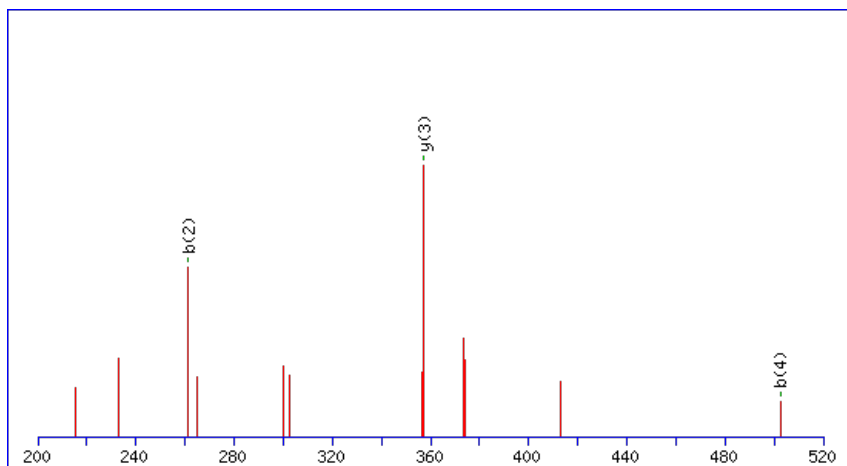Monoisotopic mass of neutral peptide **Mr(calc)**: 616.3948**Fixed modifications**: Carbamidomethyl (C) (apply to specified residues or termini only)**Ions Score**: 17 **Expect**: 0.044**Matches**: 3/24 fragment ions using 3 most intense peaks ([help](#))

| # | b               | b <sup>++</sup> | b*       | b <sup>*++</sup> | Seq. | y               | y <sup>++</sup> | y*       | y <sup>*++</sup> | # |
|---|-----------------|-----------------|----------|------------------|------|-----------------|-----------------|----------|------------------|---|
| 1 | 114.0913        | 57.5493         |          |                  | I    |                 |                 |          |                  | 5 |
| 2 | <b>261.1598</b> | 131.0835        |          |                  | F    | 504.3180        | 252.6627        | 487.2915 | 244.1494         | 4 |
| 3 | 389.2547        | 195.1310        | 372.2282 | 186.6177         | K    | <b>357.2496</b> | 179.1285        | 340.2231 | 170.6152         | 3 |
| 4 | <b>502.3388</b> | 251.6730        | 485.3122 | 243.1598         | I    | 229.1547        | 115.0810        |          |                  | 2 |
| 5 |                 |                 |          |                  | P    | 116.0706        | 58.5389         |          |                  | 1 |

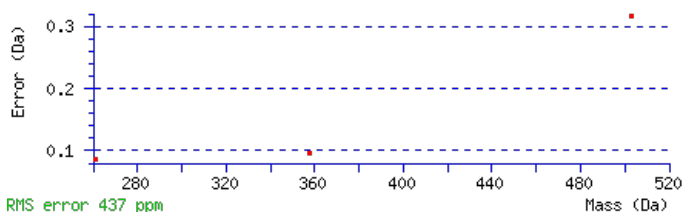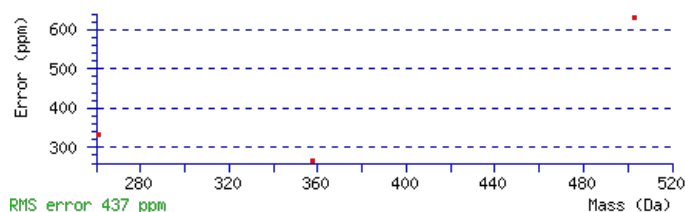NCBI **BLAST** search of [IFKIP](#)

(Parameters: blastp, nr protein database, expect=20000, no filter, PAM30)

Other BLAST [web gateways](#)**All matches to this query**

| Score | Mr(calc) | Delta   | Sequence              |
|-------|----------|---------|-----------------------|
| 16.7  | 616.3948 | -0.0001 | <a href="#">IFKIP</a> |
| 4.1   | 616.3948 | -0.0001 | <a href="#">FIIPK</a> |
| 4.1   | 616.3948 | -0.0001 | <a href="#">FLLPK</a> |
| 4.1   | 616.3948 | -0.0001 | <a href="#">IFIPK</a> |
| 4.1   | 616.3948 | -0.0001 | <a href="#">IFLPK</a> |



AT1G76825.1

|     |          |         |                       |
|-----|----------|---------|-----------------------|
| 4.1 | 616.3948 | -0.0001 | <a href="#">LFLPK</a> |
|-----|----------|---------|-----------------------|

**Mascot:** <http://www.matrixscience.com/>

**Peptide View**MS/MS Fragmentation of **GTFFGNYKPK**

Found in **AT1G77120.1** in **TAIR\_Arabidopsis**, Symbols: ADH, ATADH, ADH1 | ADH1 (ALCOHOL DEHYDROGENASE 1) | chr1:28980403-28982110 FORWARD

Match to Query 3984: 1170.545382 from(586.279967,2+) index(3018)

Title: Elution from: 30.298 to 30.298 scan no 3755 cid35.00 polarity:+

Data file D12h-1\_2.mgf

Click mouse within plot area to zoom in by factor of two about that point

Or,   to  Da

Label all possible matches  Label matches used for scoring

Show Y-axis

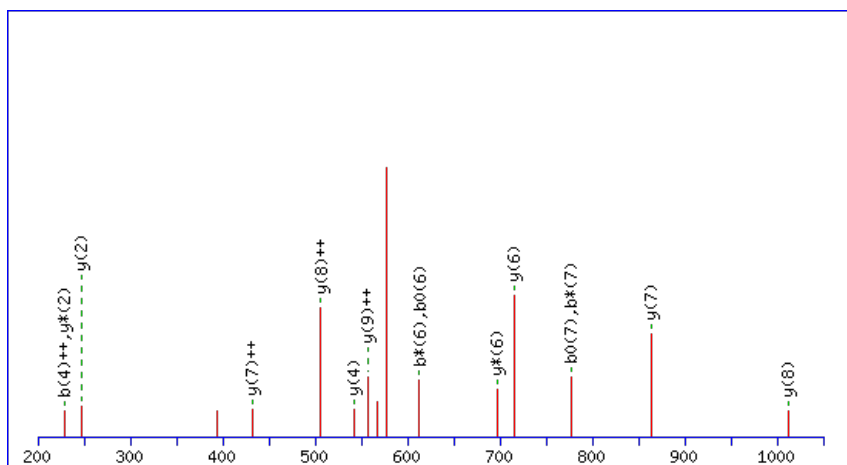

**Monoisotopic mass of neutral peptide Mr(calc):** 1170.5484

**Fixed modifications:** Carbamidomethyl (C) (apply to specified residues or termini only)

**Ions Score:** 38 **Expect:** 0.00088

**Matches:** 15/80 fragment ions using 16 most intense peaks ([help](#))

| #  | b         | b <sup>++</sup> | b*              | b <sup>*++</sup> | b <sup>0</sup>  | b <sup>0++</sup> | Seq.     | y                | y <sup>++</sup> | y*              | y <sup>*++</sup> | y <sup>0</sup> | y <sup>0++</sup> | #         |
|----|-----------|-----------------|-----------------|------------------|-----------------|------------------|----------|------------------|-----------------|-----------------|------------------|----------------|------------------|-----------|
| 1  | 59.0258   | 30.0165         |                 |                  |                 |                  | <b>G</b> |                  |                 |                 |                  |                |                  | <b>10</b> |
| 2  | 161.0705  | 81.0389         |                 |                  | 143.0599        | 72.0336          | <b>T</b> | 1113.5372        | <b>557.2722</b> | 1095.5136       | 548.2604         | 1095.5266      | 548.2669         | <b>9</b>  |
| 3  | 309.1359  | 155.0716        |                 |                  | 291.1254        | 146.0663         | <b>F</b> | <b>1011.4925</b> | <b>506.2499</b> | 993.4689        | 497.2381         |                |                  | <b>8</b>  |
| 4  | 457.2014  | <b>229.1043</b> |                 |                  | 439.1908        | 220.0990         | <b>F</b> | <b>863.4270</b>  | <b>432.2171</b> | 845.4034        | 423.2054         |                |                  | <b>7</b>  |
| 5  | 515.2199  | 258.1136        |                 |                  | 497.2093        | 249.1083         | <b>G</b> | <b>715.3616</b>  | 358.1844        | <b>697.3380</b> | 349.1726         |                |                  | <b>6</b>  |
| 6  | 631.2569  | 316.1321        | <b>613.2333</b> | 307.1203         | <b>613.2463</b> | 307.1268         | <b>N</b> | 657.3431         | 329.1752        | 639.3195        | 320.1634         |                |                  | <b>5</b>  |
| 7  | 795.3172  | 398.1623        | <b>777.2937</b> | 389.1505         | <b>777.3067</b> | 389.1570         | <b>Y</b> | <b>541.3061</b>  | 271.1567        | 523.2825        | 262.1449         |                |                  | <b>4</b>  |
| 8  | 925.4063  | 463.2068        | 907.3827        | 454.1950         | 907.3957        | 454.2015         | <b>K</b> | 377.2457         | 189.1265        | 359.2221        | 180.1147         |                |                  | <b>3</b>  |
| 9  | 1023.4561 | 512.2317        | 1005.4325       | 503.2199         | 1005.4455       | 503.2264         | <b>P</b> | <b>247.1567</b>  | 124.0820        | <b>229.1331</b> | 115.0702         |                |                  | <b>2</b>  |
| 10 |           |                 |                 |                  |                 |                  | <b>K</b> | 149.1069         | 75.0571         | 131.0833        | 66.0453          |                |                  | <b>1</b>  |

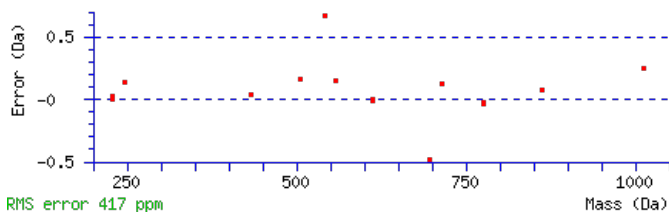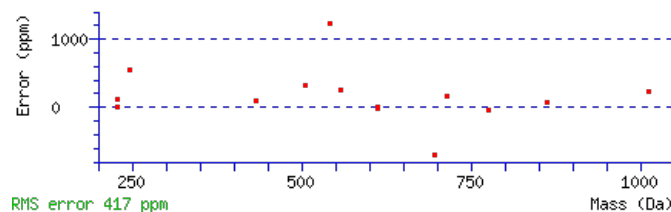NCBI **BLAST** search of **GTFFGNYKPK**

(Parameters: blastp, nr protein database, expect=20000, no filter, PAM30)

Other BLAST [web gateways](#)

**All matches to this query**

## AT1G77120.1

| Score | Mr(calc)  | Delta   | Sequence                    |
|-------|-----------|---------|-----------------------------|
| 37.9  | 1170.5484 | -0.0030 | <a href="#">GTFEGNYKPK</a>  |
| 9.8   | 1170.5488 | -0.0034 | <a href="#">RFKGSNGNEK</a>  |
| 3.1   | 1170.5448 | 0.0006  | <a href="#">MGKYQVMKR</a>   |
| 1.9   | 1170.5462 | -0.0008 | <a href="#">RVPFSSYSK</a>   |
| 1.8   | 1170.5466 | -0.0012 | <a href="#">SANGSLPHSKR</a> |
| 1.7   | 1170.5469 | -0.0015 | <a href="#">AIEVLDEMPK</a>  |
| 1.5   | 1170.5466 | -0.0012 | <a href="#">LDRALSHGER</a>  |
| 1.4   | 1170.5461 | -0.0007 | <a href="#">TTGFTVYVNR</a>  |
| 1.3   | 1170.5462 | -0.0008 | <a href="#">GPISDHLQYK</a>  |
| 0.9   | 1170.5484 | -0.0030 | <a href="#">LLHWDSYPK</a>   |

Mascot: <http://www.matrixscience.com/>

**Peptide View**MS/MS Fragmentation of **QMREFGVRPNK**Found in **AT1G77170.1** in **TAIR\_Arabidopsis**, Symbols: | pentatricopeptide (PPR) repeat-containing protein | chr1:29003027-29004430 REVERSE

Match to Query 5264: 1396.635640 from(699.325096,2+) index(3229)

Title: Elution from: 31.582 to 31.582 scan no 3995 cid35.00 polarity:+

Data file 0-3\_2.mgf

Click mouse within plot area to zoom in by factor of two about that point

Or,   to  Da Label all possible matches  Label matches used for scoring Show Y-axis 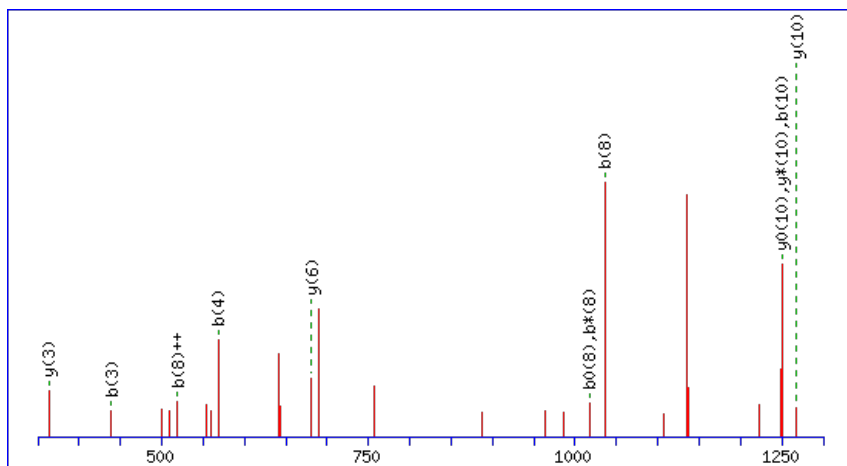Monoisotopic mass of neutral peptide  $M_r(\text{calc})$ : 1396.6390

Fixed modifications: Carbamidomethyl (C) (apply to specified residues or termini only)

Variable modifications:

M2 : Oxidation (M), with neutral losses 0.0000 (shown in table), 63.9983

Ions Score: 26 Expect: 0.023

Matches : 12/156 fragment ions using 16 most intense peaks ([help](#))

| #  | b                | b <sup>++</sup> | b <sup>*</sup>   | b <sup>*++</sup> | b <sup>0</sup>   | b <sup>0++</sup> | Seq. | y                | y <sup>++</sup> | y <sup>*</sup>   | y <sup>*++</sup> | y <sup>0</sup>   | y <sup>0++</sup> | #  |
|----|------------------|-----------------|------------------|------------------|------------------|------------------|------|------------------|-----------------|------------------|------------------|------------------|------------------|----|
| 1  | 131.0599         | 66.0336         | 113.0363         | 57.0218          |                  |                  | Q    |                  |                 |                  |                  |                  |                  | 11 |
| 2  | 279.0924         | 140.0498        | 261.0688         | 131.0380         |                  |                  | M    | <b>1267.5936</b> | 634.3005        | <b>1249.5700</b> | 625.2887         | <b>1249.5831</b> | 625.2952         | 10 |
| 3  | <b>439.1816</b>  | 220.0944        | 421.1580         | 211.0827         |                  |                  | R    | 1119.5612        | 560.2842        | 1101.5376        | 551.2724         | 1101.5506        | 551.2790         | 9  |
| 4  | <b>569.2212</b>  | 285.1143        | 551.1977         | 276.1025         | 551.2107         | 276.1090         | E    | 959.4719         | 480.2396        | 941.4484         | 471.2278         | 941.4614         | 471.2343         | 8  |
| 5  | 717.2867         | 359.1470        | 699.2631         | 350.1352         | 699.2761         | 350.1417         | F    | 829.4323         | 415.2198        | 811.4087         | 406.2080         |                  |                  | 7  |
| 6  | 775.3052         | 388.1562        | 757.2816         | 379.1444         | 757.2946         | 379.1509         | G    | <b>681.3669</b>  | 341.1871        | 663.3433         | 332.1753         |                  |                  | 6  |
| 7  | 875.3706         | 438.1890        | 857.3470         | 429.1772         | 857.3601         | 429.1837         | V    | 623.3484         | 312.1778        | 605.3248         | 303.1660         |                  |                  | 5  |
| 8  | <b>1035.4599</b> | <b>518.2336</b> | <b>1017.4363</b> | 509.2218         | <b>1017.4493</b> | 509.2283         | R    | 523.2829         | 262.1451        | 505.2593         | 253.1333         |                  |                  | 4  |
| 9  | 1133.5097        | 567.2585        | 1115.4861        | 558.2467         | 1115.4991        | 558.2532         | P    | <b>363.1937</b>  | 182.1005        | 345.1701         | 173.0887         |                  |                  | 3  |
| 10 | <b>1249.5467</b> | 625.2770        | 1231.5231        | 616.2652         | 1231.5361        | 616.2717         | N    | 265.1439         | 133.0756        | 247.1203         | 124.0638         |                  |                  | 2  |
| 11 |                  |                 |                  |                  |                  |                  | K    | 149.1069         | 75.0571         | 131.0833         | 66.0453          |                  |                  | 1  |

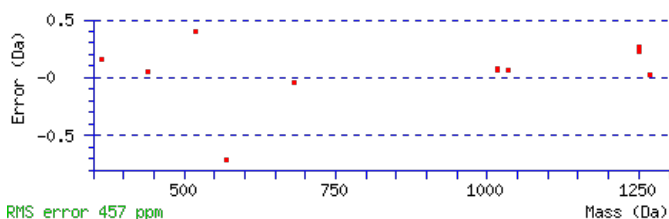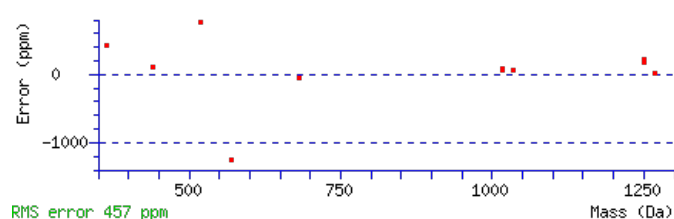NCBI **BLAST** search of **QMREFGVRPNK**

(Parameters: blastp, nr protein database, expect=20000, no filter, PAM30)

Other BLAST [web gateways](#)

AT1G77170.1

All matches to this query

| Score | Mr(calc)  | Delta   | Sequence                      |
|-------|-----------|---------|-------------------------------|
| 25.8  | 1396.6390 | -0.0034 | <a href="#">QMREFGVRPNK</a>   |
| 13.7  | 1396.6370 | -0.0014 | <a href="#">MTEKKEMEVVK</a>   |
| 12.9  | 1396.6397 | -0.0041 | <a href="#">MSSEKRVGMVEK</a>  |
| 10.9  | 1396.6336 | 0.0020  | <a href="#">DATASMIFDLTAK</a> |
| 9.7   | 1396.6359 | -0.0002 | <a href="#">QDFMEVVEFLK</a>   |
| 8.9   | 1396.6359 | -0.0002 | <a href="#">VGVFSFIEDMPK</a>  |
| 8.5   | 1396.6390 | -0.0033 | <a href="#">FRLQAMEQQAR</a>   |
| 6.8   | 1396.6330 | 0.0027  | <a href="#">ENLRSFPNEFK</a>   |
| 6.5   | 1396.6341 | 0.0015  | <a href="#">KSVMGNLQSQSGK</a> |
| 6.2   | 1396.6329 | 0.0027  | <a href="#">SAEEAFSRWAVK</a>  |

Mascot: <http://www.matrixscience.com/>

## Peptide View

MS/MS Fragmentation of **EAKDDLKSAK**

Found in **AT1G77230.1** in **TAIR\_Arabidopsis**, Symbols: | tetratricopeptide repeat (TPR)-containing protein | chr1:29021023-29022767  
FORWARD

Match to Query 3045: 1116.544592 from(559.279572,2+) index(1442)

Title: Elution from: 20.117 to 20.117 scan no 1967 cid35.00 polarity:+

Data file D1d-2\_3.mgf

Click mouse within plot area to zoom in by factor of two about that point

Or,   to  Da

Label all possible matches  Label matches used for scoring

Show Y-axis

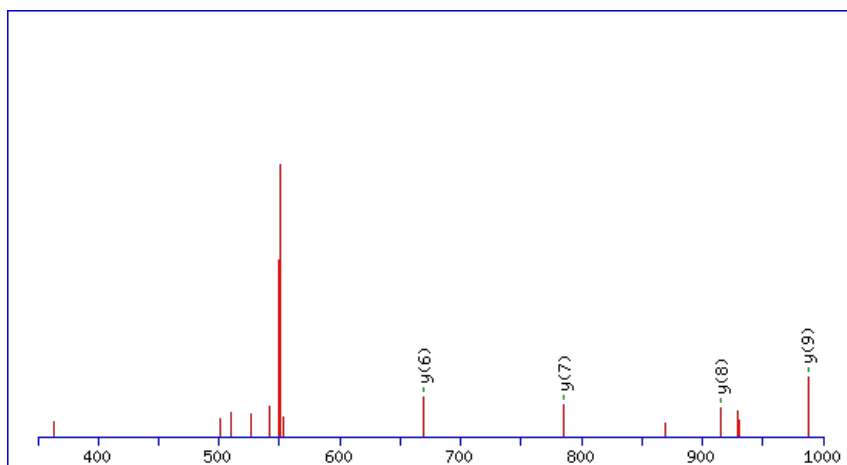

Monoisotopic mass of neutral peptide  $M_r(\text{calc})$ : 1116.5437

Fixed modifications: Carbamidomethyl (C) (apply to specified residues or termini only)

Ions Score: 32 Expect: 0.006

Matches : 4/100 fragment ions using 6 most intense peaks ([help](#))

| #  | b        | b <sup>++</sup> | b*       | b <sup>*++</sup> | b <sup>0</sup> | b <sup>0++</sup> | Seq. | y        | y <sup>++</sup> | y*       | y <sup>*++</sup> | y <sup>0</sup> | y <sup>0++</sup> | #  |
|----|----------|-----------------|----------|------------------|----------------|------------------|------|----------|-----------------|----------|------------------|----------------|------------------|----|
| 1  | 131.0469 | 66.0271         |          |                  | 113.0363       | 57.0218          | E    |          |                 |          |                  |                |                  | 10 |
| 2  | 203.0811 | 102.0442        |          |                  | 185.0705       | 93.0389          | A    | 987.5114 | 494.2593        | 969.4878 | 485.2475         | 969.5008       | 485.2540         | 9  |
| 3  | 333.1701 | 167.0887        | 315.1465 | 158.0769         | 315.1595       | 158.0834         | K    | 915.4772 | 458.2422        | 897.4536 | 449.2304         | 897.4666       | 449.2370         | 8  |
| 4  | 449.1941 | 225.1007        | 431.1705 | 216.0889         | 431.1835       | 216.0954         | D    | 785.3882 | 393.1977        | 767.3646 | 384.1859         | 767.3776       | 384.1924         | 7  |
| 5  | 565.2180 | 283.1127        | 547.1945 | 274.1009         | 547.2075       | 274.1074         | D    | 669.3642 | 335.1857        | 651.3406 | 326.1739         | 651.3536       | 326.1805         | 6  |
| 6  | 679.2991 | 340.1532        | 661.2756 | 331.1414         | 661.2886       | 331.1479         | L    | 553.3402 | 277.1737        | 535.3166 | 268.1620         | 535.3297       | 268.1685         | 5  |
| 7  | 809.3882 | 405.1977        | 791.3646 | 396.1859         | 791.3776       | 396.1924         | K    | 439.2591 | 220.1332        | 421.2355 | 211.1214         | 421.2486       | 211.1279         | 4  |
| 8  | 897.4172 | 449.2123        | 879.3937 | 440.2005         | 879.4067       | 440.2070         | S    | 309.1701 | 155.0887        | 291.1465 | 146.0769         | 291.1595       | 146.0834         | 3  |
| 9  | 969.4514 | 485.2293        | 951.4278 | 476.2175         | 951.4408       | 476.2240         | A    | 221.1410 | 111.0741        | 203.1174 | 102.0624         |                |                  | 2  |
| 10 |          |                 |          |                  |                |                  | K    | 149.1069 | 75.0571         | 131.0833 | 66.0453          |                |                  | 1  |

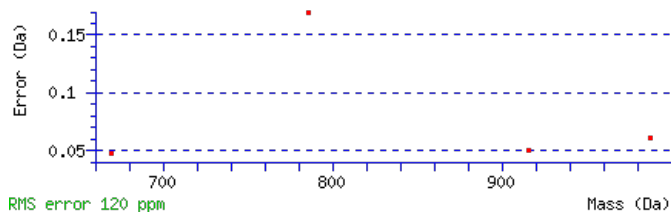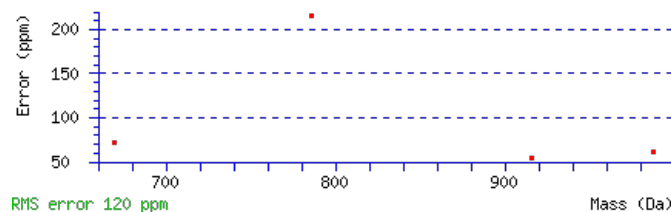

NCBI BLAST search of **EAKDDLKSAK**

(Parameters: blastp, nr protein database, expect=20000, no filter, PAM30)

Other BLAST [web gateways](#)

All matches to this query

## AT1G77230.1

| Score | Mr(calc)  | Delta   | Sequence                    |
|-------|-----------|---------|-----------------------------|
| 32.0  | 1116.5437 | 0.0009  | <a href="#">EAKDDLKSAK</a>  |
| 16.3  | 1116.5437 | 0.0009  | <a href="#">EGSKVSASLNI</a> |
| 14.3  | 1116.5464 | -0.0018 | <a href="#">EGSSSLPRR</a>   |
| 11.8  | 1116.5437 | 0.0009  | <a href="#">GEGLSGTVKEK</a> |
| 10.4  | 1116.5437 | 0.0009  | <a href="#">EATEKAEEKAK</a> |
| 10.1  | 1116.5464 | -0.0018 | <a href="#">EALLRASADR</a>  |
| 5.1   | 1116.5437 | 0.0009  | <a href="#">EAGKKTVEAAK</a> |
| 5.0   | 1116.5437 | 0.0009  | <a href="#">ESITVNGEKK</a>  |
| 5.0   | 1116.5437 | 0.0009  | <a href="#">ESLENSIKGK</a>  |
| 5.0   | 1116.5464 | -0.0018 | <a href="#">KALAREEER</a>   |

Mascot: <http://www.matrixscience.com/>

**Peptide View**MS/MS Fragmentation of **LFKPFDELFDVDSK**

Found in **AT1G77510.1** in **TAIR\_Arabidopsis**, Symbols: ATPDIL1-2 | ATPDIL1-2 (PDI-LIKE 1-2); protein disulfide isomerase | chr1:29131636-29134327 FORWARD

Match to Query 6941: 1583.821497 from(528.947775,3+) index(9126)

Title: Elution from: 82.718 to 82.718 scan no 12442 cid35.00 polarity:+

Data file D12h-3\_2.mgf

Click mouse within plot area to zoom in by factor of two about that point

Or,   to  Da

Label all possible matches  Label matches used for scoring

Show Y-axis

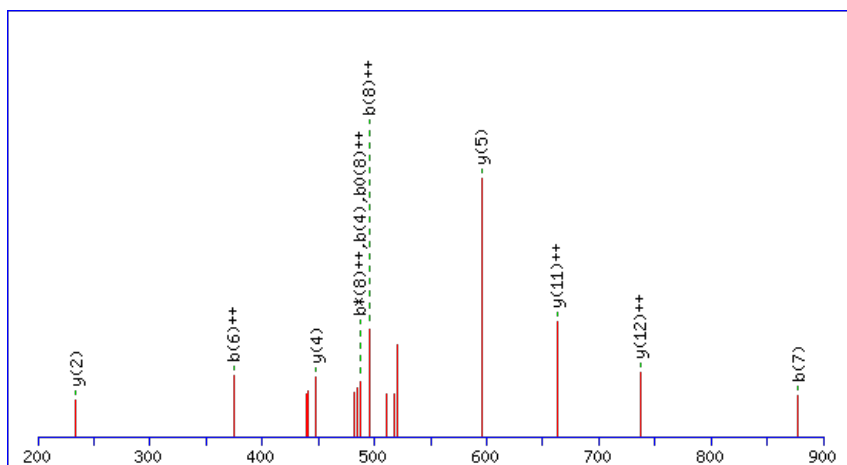

Monoisotopic mass of neutral peptide  $M_r(\text{calc})$ : 1583.8235

Fixed modifications: Carbamidomethyl (C) (apply to specified residues or termini only)

Ions Score: 31 Expect: 0.0036

Matches : 11/128 fragment ions using 12 most intense peaks ([help](#))

| #  | b         | b <sup>++</sup> | b*        | b <sup>*++</sup> | b <sup>0</sup> | b <sup>0++</sup> | Seq. | y         | y <sup>++</sup> | y*        | y <sup>*++</sup> | y <sup>0</sup> | y <sup>0++</sup> | #  |
|----|-----------|-----------------|-----------|------------------|----------------|------------------|------|-----------|-----------------|-----------|------------------|----------------|------------------|----|
| 1  | 114.0913  | 57.5493         |           |                  |                |                  | L    |           |                 |           |                  |                |                  | 13 |
| 2  | 261.1598  | 131.0835        |           |                  |                |                  | F    | 1471.7468 | 736.3770        | 1454.7202 | 727.8637         | 1453.7362      | 727.3717         | 12 |
| 3  | 389.2547  | 195.1310        | 372.2282  | 186.6177         |                |                  | K    | 1324.6783 | 662.8428        | 1307.6518 | 654.3295         | 1306.6678      | 653.8375         | 11 |
| 4  | 486.3075  | 243.6574        | 469.2809  | 235.1441         |                |                  | P    | 1196.5834 | 598.7953        | 1179.5568 | 590.2821         | 1178.5728      | 589.7900         | 10 |
| 5  | 633.3759  | 317.1916        | 616.3493  | 308.6783         |                |                  | F    | 1099.5306 | 550.2689        | 1082.5041 | 541.7557         | 1081.5201      | 541.2637         | 9  |
| 6  | 748.4028  | 374.7051        | 731.3763  | 366.1918         | 730.3923       | 365.6998         | D    | 952.4622  | 476.7347        | 935.4357  | 468.2215         | 934.4516       | 467.7295         | 8  |
| 7  | 877.4454  | 439.2264        | 860.4189  | 430.7131         | 859.4349       | 430.2211         | E    | 837.4353  | 419.2213        | 820.4087  | 410.7080         | 819.4247       | 410.2160         | 7  |
| 8  | 990.5295  | 495.7684        | 973.5029  | 487.2551         | 972.5189       | 486.7631         | L    | 708.3927  | 354.7000        | 691.3661  | 346.1867         | 690.3821       | 345.6947         | 6  |
| 9  | 1137.5979 | 569.3026        | 1120.5714 | 560.7893         | 1119.5873      | 560.2973         | F    | 595.3086  | 298.1579        | 578.2821  | 289.6447         | 577.2980       | 289.1527         | 5  |
| 10 | 1236.6663 | 618.8368        | 1219.6398 | 610.3235         | 1218.6558      | 609.8315         | V    | 448.2402  | 224.6237        | 431.2136  | 216.1105         | 430.2296       | 215.6185         | 4  |
| 11 | 1351.6933 | 676.3503        | 1334.6667 | 667.8370         | 1333.6827      | 667.3450         | D    | 349.1718  | 175.0895        | 332.1452  | 166.5763         | 331.1612       | 166.0842         | 3  |
| 12 | 1438.7253 | 719.8663        | 1421.6987 | 711.3530         | 1420.7147      | 710.8610         | S    | 234.1448  | 117.5761        | 217.1183  | 109.0628         | 216.1343       | 108.5708         | 2  |
| 13 |           |                 |           |                  |                |                  | K    | 147.1128  | 74.0600         | 130.0863  | 65.5468          |                |                  | 1  |

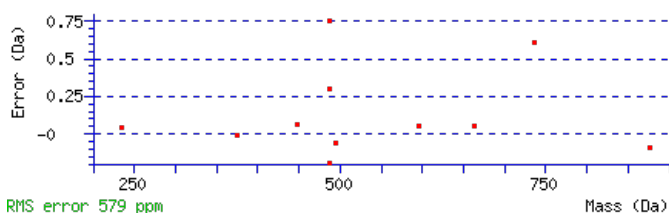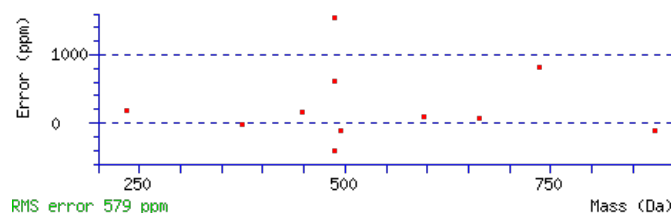

NCBI BLAST search of **LFKPFDELFDVDSK**

(Parameters: blastp, nr protein database, expect=20000, no filter, PAM30)



AT1G77510.1

Other BLAST [web gateways](#)

**All matches to this query**

| Score | Mr(calc)  | Delta   | Sequence                          |
|-------|-----------|---------|-----------------------------------|
| 30.6  | 1583.8235 | -0.0021 | <a href="#">LFKPFDELFVDSK</a>     |
| 4.0   | 1583.8242 | -0.0027 | <a href="#">NMVHLPKGFLDGTR</a>    |
| 3.6   | 1583.8208 | 0.0006  | <a href="#">FLWRTNSSFAISR</a>     |
| 2.2   | 1583.8242 | -0.0027 | <a href="#">YGRFAEILGRGAMK</a>    |
| 2.0   | 1583.8195 | 0.0020  | <a href="#">NFLLESKSGAYDLK</a>    |
| 1.5   | 1583.8242 | -0.0027 | <a href="#">GFKAAAGMYAGLRAAGK</a> |
| 0.6   | 1583.8168 | 0.0047  | <a href="#">DKFEGLGHGRNNLK</a>    |

Mascot: <http://www.matrixscience.com/>

**Peptide View**MS/MS Fragmentation of **VFSVPEGAPFTAVLK**

Found in **AT1G77710.1** in **TAIR\_Arabidopsis**, Symbols: | Identical to Probable ubiquitin-fold modifier 1 precursor [Arabidopsis Thaliana] (GB:Q9CA23); similar to unknown [Populus trichocarpa] (GB:ABK93968.1); similar to unnamed protein product [Vitis vinifera] (GB:CAO61814.1); contains InterP

Match to Query 6329: 1560.854946 from(781.434749,2+) index(8753)

Title: Elution from: 82.776 to 82.776 scan no 12040 cid35.00 polarity:+

Data file D1d-1-2.mgf

Click mouse within plot area to zoom in by factor of two about that point

Or,   to  Da

Label all possible matches  Label matches used for scoring

Show Y-axis

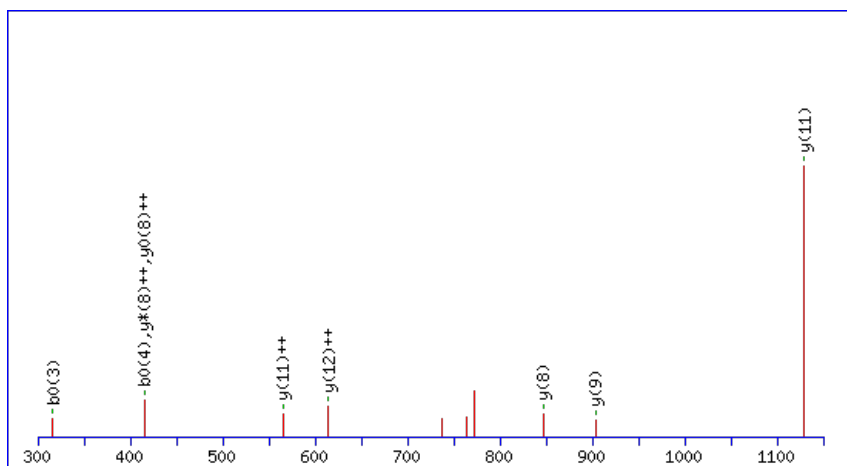

**Monoisotopic mass of neutral peptide Mr(calc):** 1560.8552

**Fixed modifications:** Carbamidomethyl (C) (apply to specified residues or termini only)

**Ions Score:** 22 **Expect:** 0.021

**Matches:** 9/128 fragment ions using 9 most intense peaks ([help](#))

| #  | b         | b <sup>++</sup> | b <sup>0</sup> | b <sup>0++</sup> | Seq. | y         | y <sup>++</sup> | y <sup>*</sup> | y <sup>*++</sup> | y <sup>0</sup> | y <sup>0++</sup> | #  |
|----|-----------|-----------------|----------------|------------------|------|-----------|-----------------|----------------|------------------|----------------|------------------|----|
| 1  | 100.0757  | 50.5415         |                |                  | V    |           |                 |                |                  |                |                  | 15 |
| 2  | 247.1441  | 124.0757        |                |                  | F    | 1462.7940 | 731.9007        | 1445.7675      | 723.3874         | 1444.7835      | 722.8954         | 14 |
| 3  | 334.1761  | 167.5917        | 316.1656       | 158.5864         | S    | 1315.7256 | 658.3665        | 1298.6991      | 649.8532         | 1297.7151      | 649.3612         | 13 |
| 4  | 433.2445  | 217.1259        | 415.2340       | 208.1206         | V    | 1228.6936 | 614.8504        | 1211.6671      | 606.3372         | 1210.6830      | 605.8452         | 12 |
| 5  | 530.2973  | 265.6523        | 512.2867       | 256.6470         | P    | 1129.6252 | 565.3162        | 1112.5986      | 556.8030         | 1111.6146      | 556.3109         | 11 |
| 6  | 659.3399  | 330.1736        | 641.3293       | 321.1683         | E    | 1032.5724 | 516.7899        | 1015.5459      | 508.2766         | 1014.5619      | 507.7846         | 10 |
| 7  | 716.3614  | 358.6843        | 698.3508       | 349.6790         | G    | 903.5298  | 452.2686        | 886.5033       | 443.7553         | 885.5193       | 443.2633         | 9  |
| 8  | 787.3985  | 394.2029        | 769.3879       | 385.1976         | A    | 846.5084  | 423.7578        | 829.4818       | 415.2445         | 828.4978       | 414.7525         | 8  |
| 9  | 884.4512  | 442.7293        | 866.4407       | 433.7240         | P    | 775.4713  | 388.2393        | 758.4447       | 379.7260         | 757.4607       | 379.2340         | 7  |
| 10 | 1031.5197 | 516.2635        | 1013.5091      | 507.2582         | F    | 678.4185  | 339.7129        | 661.3919       | 331.1996         | 660.4079       | 330.7076         | 6  |
| 11 | 1132.5673 | 566.7873        | 1114.5568      | 557.7820         | T    | 531.3501  | 266.1787        | 514.3235       | 257.6654         | 513.3395       | 257.1734         | 5  |
| 12 | 1203.6045 | 602.3059        | 1185.5939      | 593.3006         | A    | 430.3024  | 215.6548        | 413.2758       | 207.1416         |                |                  | 4  |
| 13 | 1302.6729 | 651.8401        | 1284.6623      | 642.8348         | V    | 359.2653  | 180.1363        | 342.2387       | 171.6230         |                |                  | 3  |
| 14 | 1415.7569 | 708.3821        | 1397.7464      | 699.3768         | L    | 260.1969  | 130.6021        | 243.1703       | 122.0888         |                |                  | 2  |
| 15 |           |                 |                |                  | K    | 147.1128  | 74.0600         | 130.0863       | 65.5468          |                |                  | 1  |

AT1G77710.1

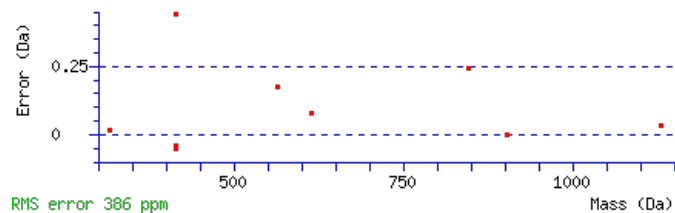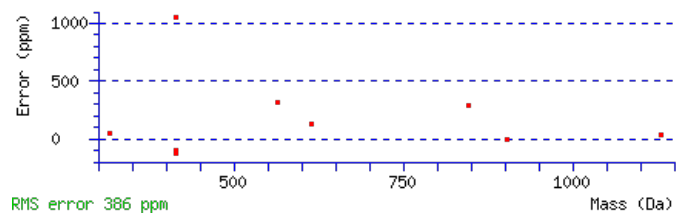

NCBI **BLAST** search of [VFSVPEGAPFTAVLK](#)

(Parameters: blastp, nr protein database, expect=20000, no filter, PAM30)

Other BLAST [web gateways](#)

**All matches to this query**

| Score | Mr(calc)  | Delta   | Sequence                        |
|-------|-----------|---------|---------------------------------|
| 21.6  | 1560.8552 | -0.0002 | <a href="#">VFSVPEGAPFTAVLK</a> |

Mascot: <http://www.matrixscience.com/>

**Peptide View**MS/MS Fragmentation of **LILISTNCPPLRR**Found in **AT1G77940.1** in **TAIR\_Arabidopsis**, Symbols: | 60S ribosomal protein L30 (RPL30B) | chr1:29309010-29310182 REVERSE

Match to Query 6858: 1572.833436 from(525.285088,3+) index(5275)

Title: Elution from: 46.992 to 46.992 scan no 6621 cid35.00 polarity:+

Data file 0-3\_2.mgf

Click mouse within plot area to zoom in by factor of two about that point

Or,   to  Da Label all possible matches  Label matches used for scoring Show Y-axis 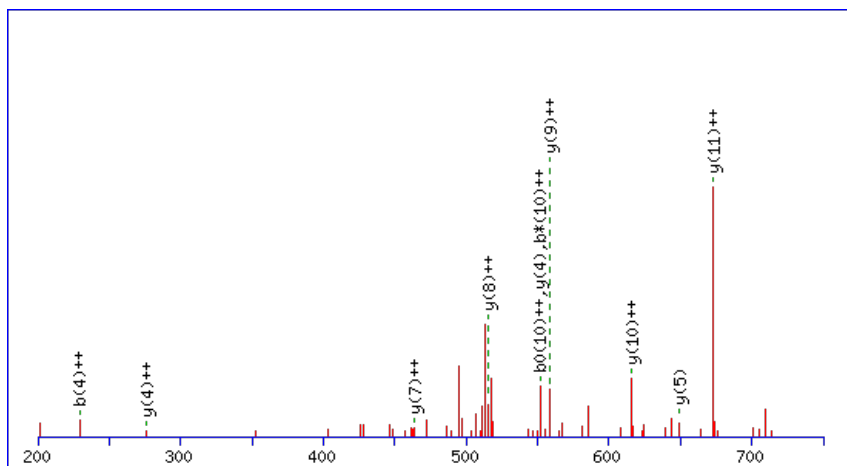Monoisotopic mass of neutral peptide  $M_r(\text{calc})$ : 1572.8297

Fixed modifications: Carbamidomethyl (C) (apply to specified residues or termini only)

Ions Score: 18 Expect: 0.047

Matches : 12/110 fragment ions using 31 most intense peaks ([help](#))

| #  | b         | b <sup>++</sup> | b <sup>*</sup> | b <sup>*++</sup> | b <sup>0</sup> | b <sup>0++</sup> | Seq. | y         | y <sup>++</sup> | y <sup>*</sup> | y <sup>*++</sup> | y <sup>0</sup> | y <sup>0++</sup> | #  |
|----|-----------|-----------------|----------------|------------------|----------------|------------------|------|-----------|-----------------|----------------|------------------|----------------|------------------|----|
| 1  | 115.0884  | 58.0478         |                |                  |                |                  | L    |           |                 |                |                  |                |                  | 13 |
| 2  | 229.1695  | 115.0884        |                |                  |                |                  | I    | 1459.7558 | 730.3816        | 1441.7322      | 721.3698         | 1441.7453      | 721.3763         | 12 |
| 3  | 343.2506  | 172.1289        |                |                  |                |                  | L    | 1345.6747 | 673.3410        | 1327.6511      | 664.3292         | 1327.6642      | 664.3357         | 11 |
| 4  | 457.3317  | 229.1695        |                |                  |                |                  | I    | 1231.5936 | 616.3005        | 1213.5700      | 607.2887         | 1213.5831      | 607.2952         | 10 |
| 5  | 545.3607  | 273.1840        |                |                  | 527.3502       | 264.1787         | S    | 1117.5125 | 559.2599        | 1099.4889      | 550.2481         | 1099.5020      | 550.2546         | 9  |
| 6  | 647.4054  | 324.2064        |                |                  | 629.3949       | 315.2011         | T    | 1029.4835 | 515.2454        | 1011.4599      | 506.2336         | 1011.4729      | 506.2401         | 8  |
| 7  | 763.4424  | 382.2249        | 745.4189       | 373.2131         | 745.4319       | 373.2196         | N    | 927.4388  | 464.2230        | 909.4152       | 455.2112         |                |                  | 7  |
| 8  | 925.4672  | 463.2372        | 907.4436       | 454.2254         | 907.4566       | 454.2319         | C    | 811.4018  | 406.2045        | 793.3782       | 397.1927         |                |                  | 6  |
| 9  | 1023.5170 | 512.2621        | 1005.4934      | 503.2503         | 1005.5064      | 503.2568         | P    | 649.3770  | 325.1922        | 631.3535       | 316.1804         |                |                  | 5  |
| 10 | 1121.5668 | 561.2870        | 1103.5432      | 552.2752         | 1103.5562      | 552.2817         | P    | 551.3272  | 276.1673        | 533.3037       | 267.1555         |                |                  | 4  |
| 11 | 1235.6479 | 618.3276        | 1217.6243      | 609.3158         | 1217.6373      | 609.3223         | L    | 453.2774  | 227.1424        | 435.2539       | 218.1306         |                |                  | 3  |
| 12 | 1395.7371 | 698.3722        | 1377.7135      | 689.3604         | 1377.7265      | 689.3669         | R    | 339.1963  | 170.1018        | 321.1728       | 161.0900         |                |                  | 2  |
| 13 |           |                 |                |                  |                |                  | R    | 179.1071  | 90.0572         | 161.0835       | 81.0454          |                |                  | 1  |

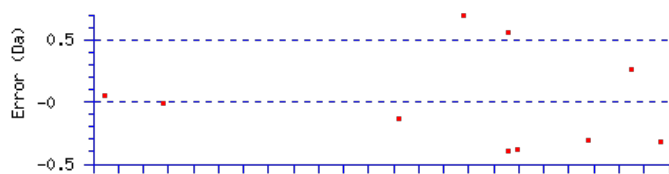

RMS error 655 ppm

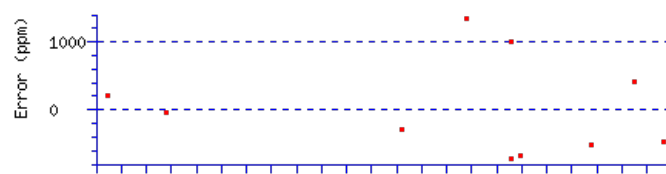

RMS error 655 ppm

NCBI BLAST search of **LILISTNCPPLRR**

(Parameters: blastp, nr protein database, expect=20000, no filter, PAM30)

Other BLAST [web gateways](#)

AT1G77940.1

All matches to this query

| Score | Mr(calc)  | Delta   | Sequence                        |
|-------|-----------|---------|---------------------------------|
| 17.9  | 1572.8297 | 0.0038  | <a href="#">LILISTNCPPLRR</a>   |
| 3.3   | 1572.8371 | -0.0036 | <a href="#">IPNQRQNLVSILR</a>   |
| 2.9   | 1572.8366 | -0.0032 | <a href="#">ILGFIPVKAPDGTAR</a> |
| 0.3   | 1572.8373 | -0.0039 | <a href="#">LDMINLLATSLPK</a>   |

Mascot: <http://www.matrixscience.com/>

**Peptide View**MS/MS Fragmentation of **LLSMVTPR**Found in **AT1G78020.1** in **TAIR\_Arabidopsis**, Symbols: | senescence-associated protein-related | chr1:29343681-29344385 FORWARD

Match to Query 1844: 926.489012 from(464.251782,2+) index(1139)

Title: Elution from: 15.557 to 15.557 scan no 1519 cid35.00 polarity:+

Data file C7-2\_3.mgf

Click mouse within plot area to zoom in by factor of two about that point

Or,   to  Da Label all possible matches  Label matches used for scoring Show Y-axis 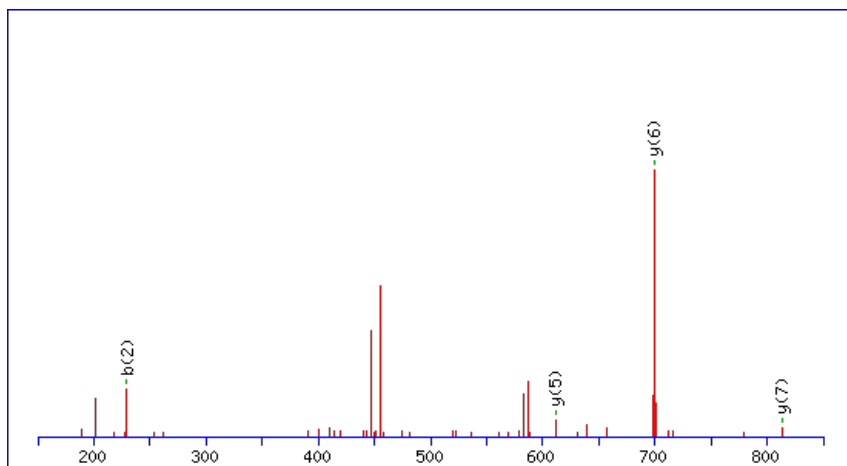Monoisotopic mass of neutral peptide **Mr(calc)**: 926.4886

Fixed modifications: Carbamidomethyl (C) (apply to specified residues or termini only)

Ions Score: 20 Expect: 0.035

Matches : 4/62 fragment ions using 6 most intense peaks ([help](#))

| # | b        | b <sup>++</sup> | b <sup>0</sup> | b <sup>0++</sup> | Seq. | y        | y <sup>++</sup> | y*       | y <sup>*++</sup> | y <sup>0</sup> | y <sup>0++</sup> | # |
|---|----------|-----------------|----------------|------------------|------|----------|-----------------|----------|------------------|----------------|------------------|---|
| 1 | 115.0884 | 58.0478         |                |                  | L    |          |                 |          |                  |                |                  | 8 |
| 2 | 229.1695 | 115.0884        |                |                  | L    | 813.4147 | 407.2110        | 795.3912 | 398.1992         | 795.4042       | 398.2057         | 7 |
| 3 | 317.1985 | 159.1029        | 299.1880       | 150.0976         | S    | 699.3336 | 350.1705        | 681.3101 | 341.1587         | 681.3231       | 341.1652         | 6 |
| 4 | 449.2361 | 225.1217        | 431.2255       | 216.1164         | M    | 611.3046 | 306.1559        | 593.2810 | 297.1441         | 593.2940       | 297.1506         | 5 |
| 5 | 549.3015 | 275.1544        | 531.2909       | 266.1491         | V    | 479.2671 | 240.1372        | 461.2435 | 231.1254         | 461.2565       | 231.1319         | 4 |
| 6 | 651.3462 | 326.1767        | 633.3357       | 317.1715         | T    | 379.2016 | 190.1044        | 361.1780 | 181.0926         | 361.1910       | 181.0992         | 3 |
| 7 | 749.3960 | 375.2016        | 731.3855       | 366.1964         | P    | 277.1569 | 139.0821        | 259.1333 | 130.0703         |                |                  | 2 |
| 8 |          |                 |                |                  | R    | 179.1071 | 90.0572         | 161.0835 | 81.0454          |                |                  | 1 |

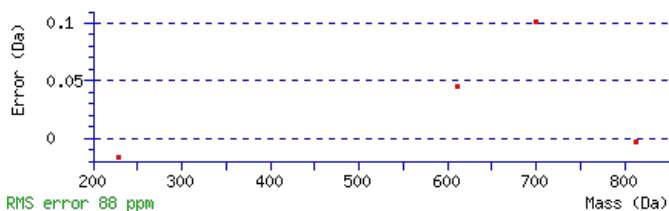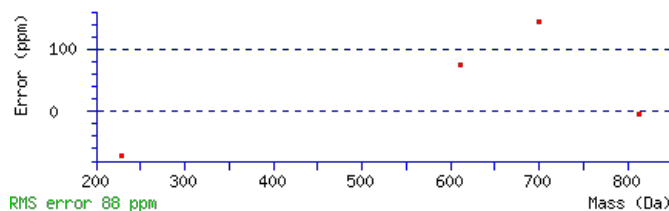NCBI **BLAST** search of [LLSMVTPR](#)

(Parameters: blastp, nr protein database, expect=20000, no filter, PAM30)

Other BLAST [web gateways](#)**All matches to this query**

| Score | Mr(calc) | Delta   | Sequence                 |
|-------|----------|---------|--------------------------|
| 19.7  | 926.4886 | 0.0005  | <a href="#">LLSMVTPR</a> |
| 10.4  | 926.4912 | -0.0022 | <a href="#">LIQRMPR</a>  |

## AT1G78020.1

|     |          |         |                          |
|-----|----------|---------|--------------------------|
| 8.9 | 926.4886 | 0.0005  | <a href="#">ILCELLR</a>  |
| 4.6 | 926.4886 | 0.0004  | <a href="#">ISIPAIMR</a> |
| 2.8 | 926.4885 | 0.0005  | <a href="#">LAMVVEVR</a> |
| 0.1 | 926.4908 | -0.0018 | <a href="#">WLNILMK</a>  |

**Mascot:** <http://www.matrixscience.com/>

**Peptide View**MS/MS Fragmentation of **SAQDIANAELAPTHPIR**

Found in **AT1G78300.1** in **TAIR\_Arabidopsis**, Symbols: GF14 OMEGA, GRF2 | GRF2 (GENERAL REGULATORY FACTOR 2); protein phosphorylated amino acid binding | chr1:29466776-29467945 FORWARD

Match to Query 8944: 1802.925609 from(601.982479,3+) index(4536)

Title: Elution from: 40.938 to 40.938 scan no 5645 cid35.00 polarity:+

Data file D1d-3\_1.mgf

Click mouse within plot area to zoom in by factor of two about that point

Or,   to  Da

Label all possible matches  Label matches used for scoring

Show Y-axis

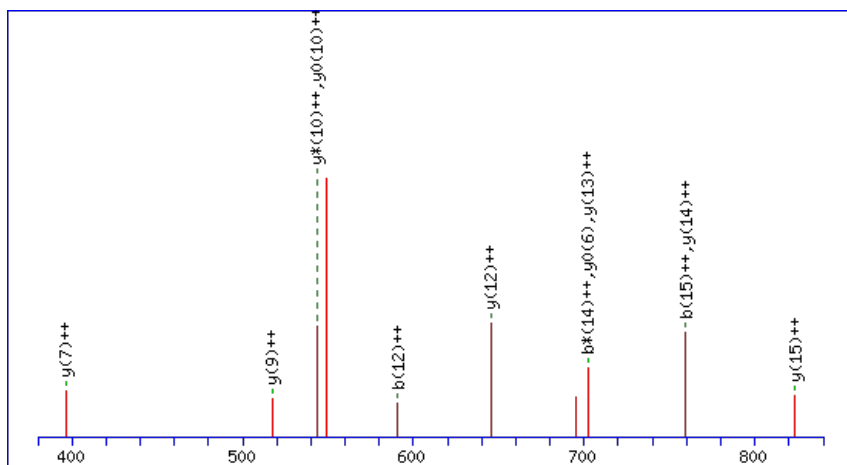

**Monoisotopic mass of neutral peptide Mr(calc):** 1802.9275

**Fixed modifications:** Carbamidomethyl (C) (apply to specified residues or termini only)

**Ions Score:** 42 **Expect:** 0.00031

**Matches:** 12/180 fragment ions using 10 most intense peaks ([help](#))

| #  | b         | b <sup>++</sup> | b <sup>*</sup> | b <sup>*++</sup> | b <sup>0</sup> | b <sup>0++</sup> | Seq. | y         | y <sup>++</sup> | y <sup>*</sup> | y <sup>*++</sup> | y <sup>0</sup> | y <sup>0++</sup> | #  |
|----|-----------|-----------------|----------------|------------------|----------------|------------------|------|-----------|-----------------|----------------|------------------|----------------|------------------|----|
| 1  | 88.0393   | 44.5233         |                |                  | 70.0287        | 35.5180          | S    |           |                 |                |                  |                |                  | 17 |
| 2  | 159.0764  | 80.0418         |                |                  | 141.0659       | 71.0366          | A    | 1716.9028 | 858.9550        | 1699.8762      | 850.4417         | 1698.8922      | 849.9497         | 16 |
| 3  | 287.1350  | 144.0711        | 270.1084       | 135.5579         | 269.1244       | 135.0659         | Q    | 1645.8656 | 823.4365        | 1628.8391      | 814.9232         | 1627.8551      | 814.4312         | 15 |
| 4  | 402.1619  | 201.5846        | 385.1354       | 193.0713         | 384.1514       | 192.5793         | D    | 1517.8071 | 759.4072        | 1500.7805      | 750.8939         | 1499.7965      | 750.4019         | 14 |
| 5  | 515.2460  | 258.1266        | 498.2195       | 249.6134         | 497.2354       | 249.1214         | I    | 1402.7801 | 701.8937        | 1385.7536      | 693.3804         | 1384.7696      | 692.8884         | 13 |
| 6  | 586.2831  | 293.6452        | 569.2566       | 285.1319         | 568.2726       | 284.6399         | A    | 1289.6961 | 645.3517        | 1272.6695      | 636.8384         | 1271.6855      | 636.3464         | 12 |
| 7  | 700.3260  | 350.6667        | 683.2995       | 342.1534         | 682.3155       | 341.6614         | N    | 1218.6589 | 609.8331        | 1201.6324      | 601.3198         | 1200.6484      | 600.8278         | 11 |
| 8  | 771.3632  | 386.1852        | 754.3366       | 377.6719         | 753.3526       | 377.1799         | A    | 1104.6160 | 552.8116        | 1087.5895      | 544.2984         | 1086.6055      | 543.8064         | 10 |
| 9  | 900.4058  | 450.7065        | 883.3792       | 442.1932         | 882.3952       | 441.7012         | E    | 1033.5789 | 517.2931        | 1016.5524      | 508.7798         | 1015.5683      | 508.2878         | 9  |
| 10 | 1013.4898 | 507.2485        | 996.4633       | 498.7353         | 995.4792       | 498.2433         | L    | 904.5363  | 452.7718        | 887.5098       | 444.2585         | 886.5257       | 443.7665         | 8  |
| 11 | 1084.5269 | 542.7671        | 1067.5004      | 534.2538         | 1066.5164      | 533.7618         | A    | 791.4522  | 396.2298        | 774.4257       | 387.7165         | 773.4417       | 387.2245         | 7  |
| 12 | 1181.5797 | 591.2935        | 1164.5531      | 582.7802         | 1163.5691      | 582.2882         | P    | 720.4151  | 360.7112        | 703.3886       | 352.1979         | 702.4046       | 351.7059         | 6  |
| 13 | 1282.6274 | 641.8173        | 1265.6008      | 633.3040         | 1264.6168      | 632.8120         | T    | 623.3624  | 312.1848        | 606.3358       | 303.6715         | 605.3518       | 303.1795         | 5  |
| 14 | 1419.6863 | 710.3468        | 1402.6597      | 701.8335         | 1401.6757      | 701.3415         | H    | 522.3147  | 261.6610        | 505.2881       | 253.1477         |                |                  | 4  |
| 15 | 1516.7390 | 758.8732        | 1499.7125      | 750.3599         | 1498.7285      | 749.8679         | P    | 385.2558  | 193.1315        | 368.2292       | 184.6183         |                |                  | 3  |
| 16 | 1629.8231 | 815.4152        | 1612.7966      | 806.9019         | 1611.8125      | 806.4099         | I    | 288.2030  | 144.6051        | 271.1765       | 136.0919         |                |                  | 2  |
| 17 |           |                 |                |                  |                |                  | R    | 175.1190  | 88.0631         | 158.0924       | 79.5498          |                |                  | 1  |



# AT1G78300.1

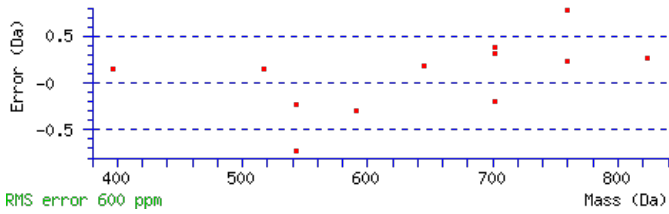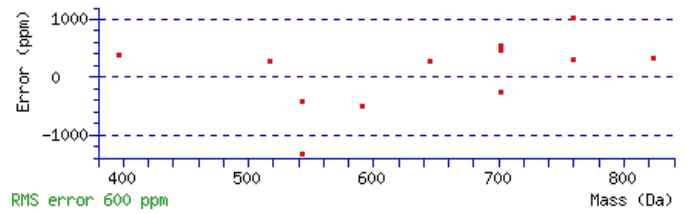

NCBI **BLAST** search of [SAQDIANAELAPTHPIR](#)

(Parameters: blastp, nr protein database, expect=20000, no filter, PAM30)

Other BLAST [web gateways](#)

## All matches to this query

| Score | Mr(calc)  | Delta   | Sequence                           |
|-------|-----------|---------|------------------------------------|
| 41.6  | 1802.9275 | -0.0019 | <a href="#">SAQDIANAELAPTHPIR</a>  |
| 16.8  | 1802.9308 | -0.0052 | <a href="#">TMSENSRNLEAGLLR</a>    |
| 14.5  | 1802.9283 | -0.0027 | <a href="#">ASLQMLQNWMQGLR</a>     |
| 5.7   | 1802.9275 | -0.0019 | <a href="#">AAQDIANSELAPTHPIR</a>  |
| 5.1   | 1802.9275 | -0.0019 | <a href="#">VGENTLGSHPDIPQLAR</a>  |
| 4.5   | 1802.9237 | 0.0019  | <a href="#">GCSPLLSGVIPSGFGLDK</a> |
| 0.5   | 1802.9308 | -0.0052 | <a href="#">REAALSPLKNMDLSSR</a>   |
| 0.3   | 1802.9210 | 0.0046  | <a href="#">ERMROSSPYVVRPGK</a>    |

Mascot: <http://www.matrixscience.com/>

## Peptide View

MS/MS Fragmentation of **GVEFEYREENLR**

Found in **AT1G78340.1** in **TAIR\_Arabidopsis**, Symbols: ATGSTU22 | ATGSTU22 (Arabidopsis thaliana Glutathione S-transferase (class tau) 22); glutathione transferase | chr1:29477939-29478690 REVERSE

Match to Query 6534: 1558.676842 from(780.345697,2+) index(4100)

Title: Elution from: 37.490 to 37.490 scan no 5139 cid35.00 polarity:+

Data file D6h-3\_3.mgf

Click mouse within plot area to zoom in by factor of two about that point

Or,   to  Da

Label all possible matches  Label matches used for scoring

Show Y-axis

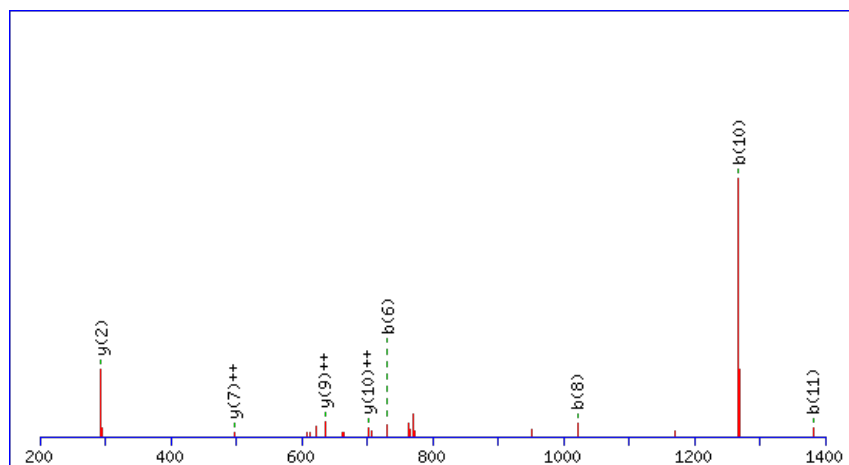

Monoisotopic mass of neutral peptide  $M_r(\text{calc})$ : 1558.6754

Fixed modifications: Carbamidomethyl (C) (apply to specified residues or termini only)

Ions Score: 22 Expect: 0.048

Matches : 8/110 fragment ions using 20 most intense peaks ([help](#))

| #  | b         | b <sup>++</sup> | b*        | b <sup>*++</sup> | b <sup>0</sup> | b <sup>0++</sup> | Seq.     | y         | y <sup>++</sup> | y*        | y <sup>*++</sup> | y <sup>0</sup> | y <sup>0++</sup> | #  |
|----|-----------|-----------------|-----------|------------------|----------------|------------------|----------|-----------|-----------------|-----------|------------------|----------------|------------------|----|
| 1  | 59.0258   | 30.0165         |           |                  |                |                  | <b>G</b> |           |                 |           |                  |                |                  | 12 |
| 2  | 159.0912  | 80.0492         |           |                  |                |                  | <b>V</b> | 1501.6642 | 751.3357        | 1483.6406 | 742.3240         | 1483.6536      | 742.3305         | 11 |
| 3  | 289.1309  | 145.0691        |           |                  | 271.1203       | 136.0638         | <b>E</b> | 1401.5988 | 701.3030        | 1383.5752 | 692.2912         | 1383.5882      | 692.2977         | 10 |
| 4  | 437.1963  | 219.1018        |           |                  | 419.1857       | 210.0965         | <b>F</b> | 1271.5591 | 636.2832        | 1253.5356 | 627.2714         | 1253.5486      | 627.2779         | 9  |
| 5  | 567.2359  | 284.1216        |           |                  | 549.2254       | 275.1163         | <b>E</b> | 1123.4937 | 562.2505        | 1105.4701 | 553.2387         | 1105.4831      | 553.2452         | 8  |
| 6  | 731.2963  | 366.1518        |           |                  | 713.2857       | 357.1465         | <b>Y</b> | 993.4541  | 497.2307        | 975.4305  | 488.2189         | 975.4435       | 488.2254         | 7  |
| 7  | 891.3855  | 446.1964        | 873.3620  | 437.1846         | 873.3750       | 437.1911         | <b>R</b> | 829.3937  | 415.2005        | 811.3701  | 406.1887         | 811.3831       | 406.1952         | 6  |
| 8  | 1021.4252 | 511.2162        | 1003.4016 | 502.2044         | 1003.4146      | 502.2109         | <b>E</b> | 669.3044  | 335.1559        | 651.2809  | 326.1441         | 651.2939       | 326.1506         | 5  |
| 9  | 1151.4648 | 576.2360        | 1133.4412 | 567.2242         | 1133.4542      | 567.2308         | <b>E</b> | 539.2648  | 270.1360        | 521.2412  | 261.1243         | 521.2543       | 261.1308         | 4  |
| 10 | 1267.5018 | 634.2545        | 1249.4782 | 625.2427         | 1249.4912      | 625.2493         | <b>N</b> | 409.2252  | 205.1162        | 391.2016  | 196.1044         |                |                  | 3  |
| 11 | 1381.5829 | 691.2951        | 1363.5593 | 682.2833         | 1363.5723      | 682.2898         | <b>L</b> | 293.1882  | 147.0977        | 275.1646  | 138.0859         |                |                  | 2  |
| 12 |           |                 |           |                  |                |                  | <b>R</b> | 179.1071  | 90.0572         | 161.0835  | 81.0454          |                |                  | 1  |

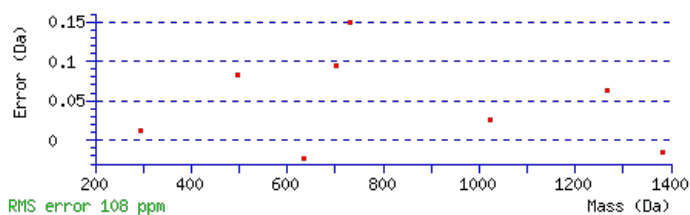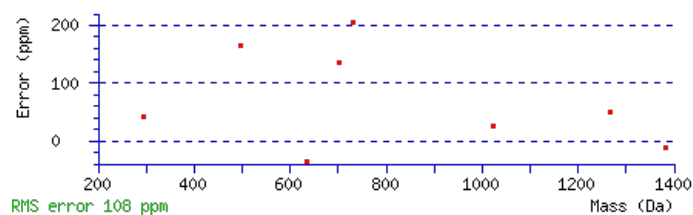

NCBI BLAST search of [GVEFEYREENLR](#)

(Parameters: blastp, nr protein database, expect=20000, no filter, PAM30)

Other BLAST [web gateways](#)

**AT1G78340.1**

All matches to this query

| Score | Mr(calc)  | Delta   | Sequence                       |
|-------|-----------|---------|--------------------------------|
| 21.7  | 1558.6754 | 0.0014  | <a href="#">GVEFEYREENLR</a>   |
| 10.9  | 1558.6810 | -0.0042 | <a href="#">GMLESGHYVTYLR</a>  |
| 4.5   | 1558.6792 | -0.0024 | <a href="#">CESRATTQGVKSGR</a> |
| 3.6   | 1558.6767 | 0.0001  | <a href="#">ASRGCAKAMWNL</a>   |
| 3.5   | 1558.6741 | 0.0028  | <a href="#">CKYHVTKTMESR</a>   |
| 3.5   | 1558.6784 | -0.0015 | <a href="#">EMDAFYILEELR</a>   |
| 3.5   | 1558.6788 | -0.0020 | <a href="#">EMQERYSEISLR</a>   |
| 3.5   | 1558.6788 | -0.0020 | <a href="#">LENHDMPLTDAIR</a>  |
| 3.5   | 1558.6788 | -0.0019 | <a href="#">MVQSTGTANAAYLR</a> |

**Mascot:** <http://www.matrixscience.com/>

**Peptide View**MS/MS Fragmentation of **SPLLEMNPIHK**

Found in **AT1G78360.1** in **TAIR\_Arabidopsis**, Symbols: ATGSTU21 | ATGSTU21 (Arabidopsis thaliana Glutathione S-transferase (class tau) 21); glutathione transferase | chr1:29486963-29487859 REVERSE

Match to Query 5016: 1406.715266 from(704.364909,2+) index(5841)

Title: Elution from: 55.173 to 55.173 scan no 7615 cid35.00 polarity:+

Data file D1d-2\_2.mgf

Click mouse within plot area to zoom in by factor of two about that point

Or,   to  Da

Label all possible matches  Label matches used for scoring

Show Y-axis

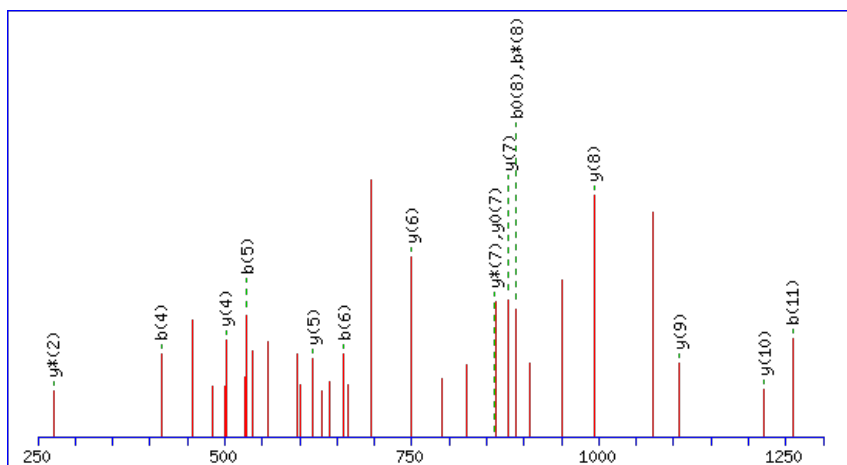

**Monoisotopic mass of neutral peptide Mr(calc)** : 1406.7168

**Fixed modifications**: Carbamidomethyl (C) (apply to specified residues or termini only)

**Ions Score**: 48 **Expect**: 0.00014

**Matches** : 16/106 fragment ions using 24 most intense peaks ([help](#))

| #  | b                | b <sup>++</sup> | b*              | b <sup>*++</sup> | b <sup>0</sup>  | b <sup>0++</sup> | Seq. | y                | y <sup>++</sup> | y*              | y <sup>*++</sup> | y <sup>0</sup>  | y <sup>0++</sup> | #  |
|----|------------------|-----------------|-----------------|------------------|-----------------|------------------|------|------------------|-----------------|-----------------|------------------|-----------------|------------------|----|
| 1  | 89.0363          | 45.0218         |                 |                  | 71.0258         | 36.0165          | S    |                  |                 |                 |                  |                 |                  | 12 |
| 2  | 187.0861         | 94.0467         |                 |                  | 169.0756        | 85.0414          | P    | 1319.6950        | 660.3512        | 1301.6714       | 651.3394         | 1301.6845       | 651.3459         | 11 |
| 3  | 301.1672         | 151.0873        |                 |                  | 283.1567        | 142.0820         | L    | <b>1221.6452</b> | 611.3263        | 1203.6216       | 602.3145         | 1203.6347       | 602.3210         | 10 |
| 4  | <b>415.2483</b>  | 208.1278        |                 |                  | 397.2378        | 199.1225         | L    | <b>1107.5641</b> | 554.2857        | 1089.5405       | 545.2739         | 1089.5536       | 545.2804         | 9  |
| 5  | <b>529.3294</b>  | 265.1684        |                 |                  | 511.3189        | 256.1631         | L    | <b>993.4830</b>  | 497.2452        | 975.4594        | 488.2334         | 975.4725        | 488.2399         | 8  |
| 6  | <b>659.3691</b>  | 330.1882        |                 |                  | 641.3585        | 321.1829         | E    | <b>879.4019</b>  | 440.2046        | <b>861.3784</b> | 431.1928         | <b>861.3914</b> | 431.1993         | 7  |
| 7  | 791.4066         | 396.2069        |                 |                  | 773.3960        | 387.2016         | M    | <b>749.3623</b>  | 375.1848        | 731.3387        | 366.1730         |                 |                  | 6  |
| 8  | 907.4436         | 454.2254        | <b>889.4200</b> | 445.2136         | <b>889.4330</b> | 445.2201         | N    | <b>617.3248</b>  | 309.1660        | 599.3012        | 300.1542         |                 |                  | 5  |
| 9  | 1005.4934        | 503.2503        | 987.4698        | 494.2385         | 987.4828        | 494.2450         | P    | <b>501.2878</b>  | 251.1475        | 483.2642        | 242.1357         |                 |                  | 4  |
| 10 | 1119.5745        | 560.2909        | 1101.5509       | 551.2791         | 1101.5639       | 551.2856         | I    | 403.2380         | 202.1226        | 385.2144        | 193.1108         |                 |                  | 3  |
| 11 | <b>1259.6245</b> | 630.3159        | 1241.6009       | 621.3041         | 1241.6139       | 621.3106         | H    | 289.1569         | 145.0821        | <b>271.1333</b> | 136.0703         |                 |                  | 2  |
| 12 |                  |                 |                 |                  |                 |                  | K    | 149.1069         | 75.0571         | 131.0833        | 66.0453          |                 |                  | 1  |

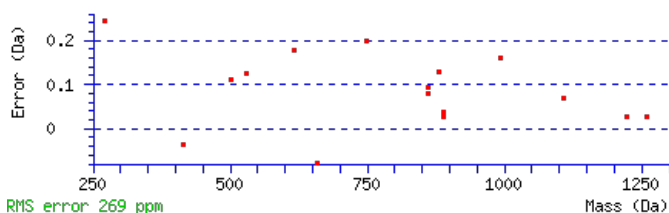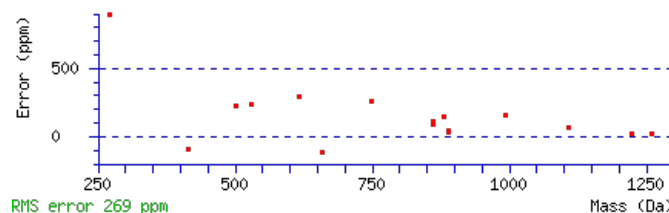

NCBI **BLAST** search of **SPLLEMNPIHK**

(Parameters: blastp, nr protein database, expect=20000, no filter, PAM30)

Other BLAST [web gateways](#)

AT1G78360.1

All matches to this query

| Score | Mr(calc)  | Delta   | Sequence                     |
|-------|-----------|---------|------------------------------|
| 48.1  | 1406.7168 | -0.0016 | <a href="#">SPLLEMNPIHK</a>  |
| 9.1   | 1406.7183 | -0.0031 | <a href="#">FRFKWLVEK</a>    |
| 7.8   | 1406.7168 | -0.0015 | <a href="#">DMALLDVAREK</a>  |
| 0.8   | 1406.7112 | 0.0041  | <a href="#">LAVSGLLDQAFR</a> |

Mascot: <http://www.matrixscience.com/>

**Peptide View**MS/MS Fragmentation of **EFIEAVK**

Found in **AT1G78370.1** in **TAIR\_Arabidopsis**, Symbols: ATGSTU20 | ATGSTU20 (Arabidopsis thaliana Glutathione S-transferase (class tau) 20); glutathione transferase | chr1:29489321-29490097 REVERSE

Match to Query 1020: 834.448776 from(418.231664,2+) index(2453)

Title: Elution from: 29.326 to 29.326 scan no 3194 cid35.00 polarity:+

Data file D1d-1\_1.mgf

Click mouse within plot area to zoom in by factor of two about that point

Or,   to  Da

Label all possible matches  Label matches used for scoring

Show Y-axis

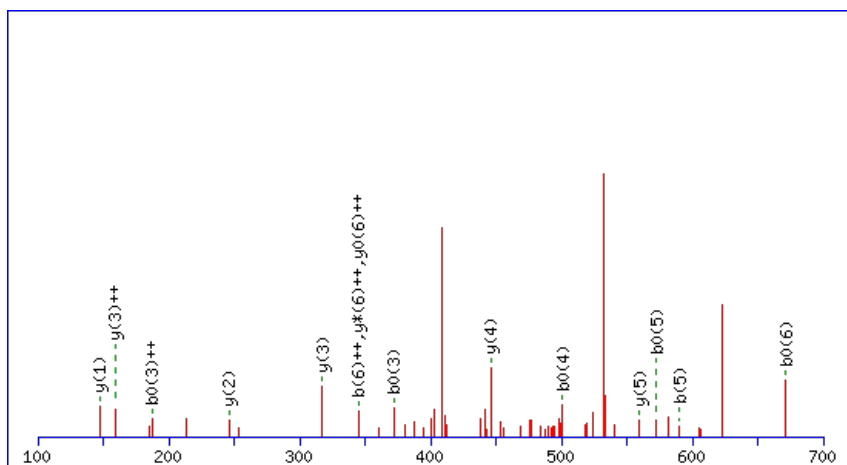

Monoisotopic mass of neutral peptide  $M_r(\text{calc})$ : 834.4487

Fixed modifications: Carbamidomethyl (C) (apply to specified residues or termini only)

Ions Score: 20 Expect: 0.032

Matches : 15/54 fragment ions using 24 most intense peaks ([help](#))

| # | b        | b <sup>++</sup> | b <sup>0</sup> | b <sup>0++</sup> | Seq. | y        | y <sup>++</sup> | y*       | y <sup>*++</sup> | y <sup>0</sup> | y <sup>0++</sup> | # |
|---|----------|-----------------|----------------|------------------|------|----------|-----------------|----------|------------------|----------------|------------------|---|
| 1 | 130.0499 | 65.5286         | 112.0393       | 56.5233          | E    |          |                 |          |                  |                |                  | 7 |
| 2 | 277.1183 | 139.0628        | 259.1077       | 130.0575         | F    | 706.4134 | 353.7103        | 689.3869 | 345.1971         | 688.4028       | 344.7051         | 6 |
| 3 | 390.2023 | 195.6048        | 372.1918       | 186.5995         | I    | 559.3450 | 280.1761        | 542.3184 | 271.6629         | 541.3344       | 271.1709         | 5 |
| 4 | 519.2449 | 260.1261        | 501.2344       | 251.1208         | E    | 446.2609 | 223.6341        | 429.2344 | 215.1208         | 428.2504       | 214.6288         | 4 |
| 5 | 590.2821 | 295.6447        | 572.2715       | 286.6394         | A    | 317.2183 | 159.1128        | 300.1918 | 150.5995         |                |                  | 3 |
| 6 | 689.3505 | 345.1789        | 671.3399       | 336.1736         | V    | 246.1812 | 123.5942        | 229.1547 | 115.0810         |                |                  | 2 |
| 7 |          |                 |                |                  | K    | 147.1128 | 74.0600         | 130.0863 | 65.5468          |                |                  | 1 |

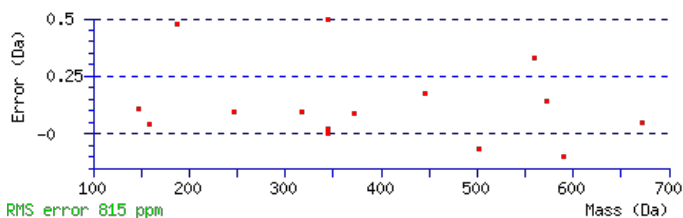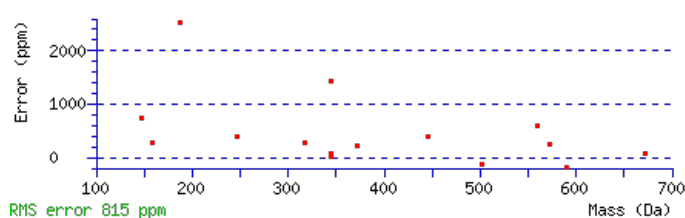

NCBI BLAST search of **EFIEAVK**

(Parameters: blastp, nr protein database, expect=20000, no filter, PAM30)

Other BLAST [web gateways](#)

**All matches to this query**

| Score | $M_r(\text{calc})$ | Delta  | Sequence                |
|-------|--------------------|--------|-------------------------|
| 20.4  | 834.4487           | 0.0001 | <a href="#">EFIEAVK</a> |
| 17.1  | 834.4487           | 0.0001 | <a href="#">FIEEVAK</a> |

# AT1G78370.1

|     |          |         |                         |
|-----|----------|---------|-------------------------|
| 5.4 | 834.4487 | 0.0001  | <a href="#">ALEIFDK</a> |
| 1.9 | 834.4494 | -0.0006 | <a href="#">MARASKR</a> |
| 1.4 | 834.4494 | -0.0006 | <a href="#">SAMARKR</a> |
| 0.6 | 834.4487 | 0.0001  | <a href="#">TPELFK</a>  |
| 0.3 | 834.4494 | -0.0006 | <a href="#">MRSAKR</a>  |
| 0.3 | 834.4487 | 0.0001  | <a href="#">FLEAVEK</a> |
| 0.3 | 834.4500 | -0.0013 | <a href="#">WAKFQR</a>  |

**Mascot:** <http://www.matrixscience.com/>

**Peptide View**MS/MS Fragmentation of **NPILPSDPYLR**

Found in **AT1G78380.1** in **TAIR\_Arabidopsis**, Symbols: GST8, ATGSTU19 | ATGSTU19 (GLUTATHIONE TRANSFERASE 8); glutathione transferase | chr1:29491552-29492712 REVERSE

Match to Query 4546: 1298.642180 from(650.328366,2+) index(6081)

Title: Elution from: 53.933 to 53.933 scan no 7815 cid35.00 polarity:+

Data file D6h-2\_3.mgf

Click mouse within plot area to zoom in by factor of two about that point

Or,   to  Da

Label all possible matches  Label matches used for scoring

Show Y-axis

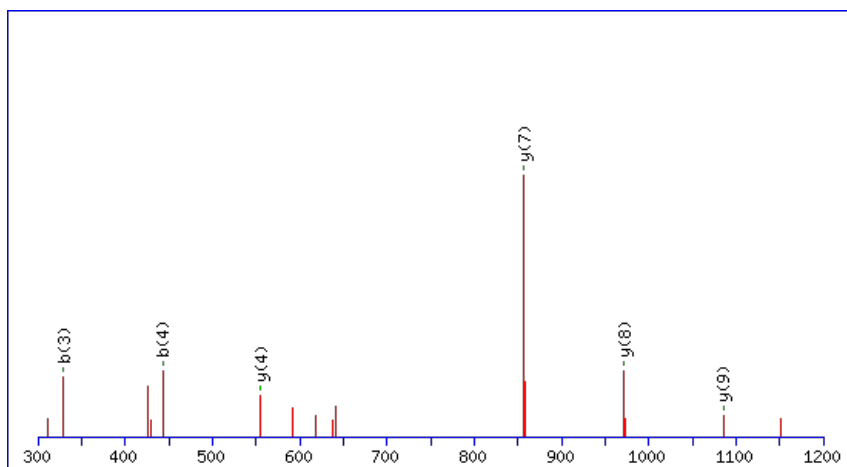

Monoisotopic mass of neutral peptide  $M_r(\text{calc})$ : 1298.6429

Fixed modifications: Carbamidomethyl (C) (apply to specified residues or termini only)

Ions Score: 32 Expect: 0.0035

Matches : 6/102 fragment ions using 8 most intense peaks ([help](#))

| #  | b               | b <sup>++</sup> | b*        | b <sup>*++</sup> | b <sup>0</sup> | b <sup>0++</sup> | Seq. | y                | y <sup>++</sup> | y*        | y <sup>*++</sup> | y <sup>0</sup> | y <sup>0++</sup> | #  |
|----|-----------------|-----------------|-----------|------------------|----------------|------------------|------|------------------|-----------------|-----------|------------------|----------------|------------------|----|
| 1  | 117.0443        | 59.0258         | 99.0207   | 50.0140          |                |                  | N    |                  |                 |           |                  |                |                  | 11 |
| 2  | 215.0941        | 108.0507        | 197.0705  | 99.0389          |                |                  | P    | 1183.6132        | 592.3102        | 1165.5896 | 583.2984         | 1165.6026      | 583.3050         | 10 |
| 3  | <b>329.1752</b> | 165.0912        | 311.1516  | 156.0794         |                |                  | I    | <b>1085.5634</b> | 543.2853        | 1067.5398 | 534.2735         | 1067.5528      | 534.2801         | 9  |
| 4  | <b>443.2563</b> | 222.1318        | 425.2327  | 213.1200         |                |                  | L    | <b>971.4823</b>  | 486.2448        | 953.4587  | 477.2330         | 953.4717       | 477.2395         | 8  |
| 5  | 541.3061        | 271.1567        | 523.2825  | 262.1449         |                |                  | P    | <b>857.4012</b>  | 429.2042        | 839.3776  | 420.1924         | 839.3906       | 420.1990         | 7  |
| 6  | 629.3351        | 315.1712        | 611.3115  | 306.1594         | 611.3246       | 306.1659         | S    | 759.3514         | 380.1793        | 741.3278  | 371.1675         | 741.3408       | 371.1741         | 6  |
| 7  | 745.3591        | 373.1832        | 727.3355  | 364.1714         | 727.3485       | 364.1779         | D    | 671.3223         | 336.1648        | 653.2987  | 327.1530         | 653.3118       | 327.1595         | 5  |
| 8  | 843.4089        | 422.2081        | 825.3853  | 413.1963         | 825.3983       | 413.2028         | P    | <b>555.2984</b>  | 278.1528        | 537.2748  | 269.1410         |                |                  | 4  |
| 9  | 1007.4693       | 504.2383        | 989.4457  | 495.2265         | 989.4587       | 495.2330         | Y    | 457.2486         | 229.1279        | 439.2250  | 220.1161         |                |                  | 3  |
| 10 | 1121.5504       | 561.2788        | 1103.5268 | 552.2670         | 1103.5398      | 552.2735         | L    | 293.1882         | 147.0977        | 275.1646  | 138.0859         |                |                  | 2  |
| 11 |                 |                 |           |                  |                |                  | R    | 179.1071         | 90.0572         | 161.0835  | 81.0454          |                |                  | 1  |

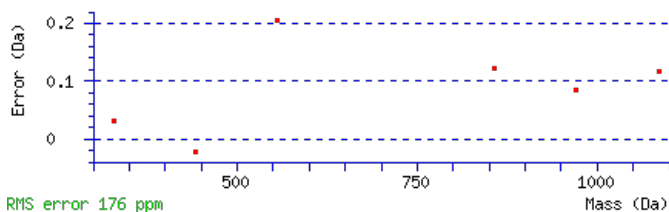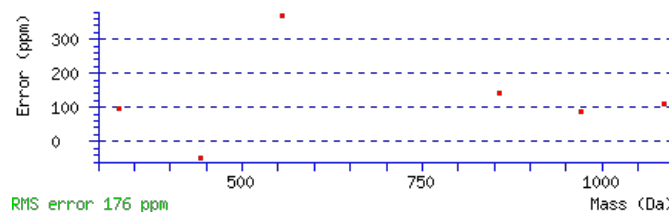NCBI **BLAST** search of **NPILPSDPYLR**

(Parameters: blastp, nr protein database, expect=20000, no filter, PAM30)

Other BLAST [web gateways](#)

All matches to this query



AT1G78380.1

| Score | Mr(calc)  | Delta   | Sequence                   |
|-------|-----------|---------|----------------------------|
| 32.1  | 1298.6429 | -0.0007 | <a href="#">NPILSPDYLR</a> |

Mascot: <http://www.matrixscience.com/>

**Peptide View**MS/MS Fragmentation of **VSDFLATLMEPDK**Found in **AT1G78530.1** in **TAIR\_Arabidopsis**, Symbols: | protein kinase family protein | chr1:29544167-29545574 REVERSE

Match to Query 6388: 1536.694516 from(769.354534,2+) index(6548)

Title: Elution from: 60.909 to 60.909 scan no 8551 cid35.00 polarity:+

Data file D1d-1\_1.mgf

Click mouse within plot area to zoom in by factor of two about that point

Or,  to  Da Label all possible matches  Label matches used for scoring Show Y-axis 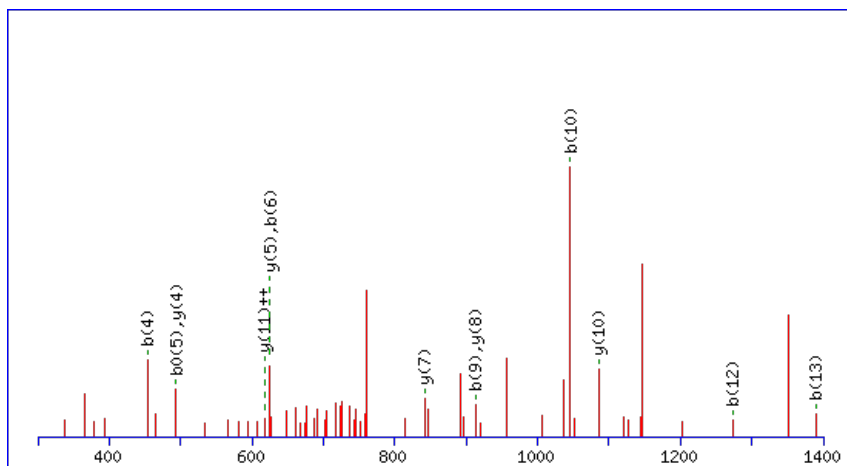Monoisotopic mass of neutral peptide  $M_r(\text{calc})$ : 1536.6940

Fixed modifications: Carbamidomethyl (C) (apply to specified residues or termini only)

Ions Score: 23 Expect: 0.042

Matches : 13/126 fragment ions using 30 most intense peaks ([help](#))

| #  | b                | b <sup>++</sup> | b <sup>0</sup>  | b <sup>0++</sup> | Seq. | y                | y <sup>++</sup> | y*        | y <sup>*++</sup> | y <sup>0</sup> | y <sup>0++</sup> | #  |
|----|------------------|-----------------|-----------------|------------------|------|------------------|-----------------|-----------|------------------|----------------|------------------|----|
| 1  | 101.0727         | 51.0400         |                 |                  | V    |                  |                 |           |                  |                |                  | 14 |
| 2  | 189.1018         | 95.0545         | 171.0912        | 86.0492          | S    | 1437.6358        | 719.3216        | 1419.6123 | 710.3098         | 1419.6253      | 710.3163         | 13 |
| 3  | 305.1258         | 153.0665        | 287.1152        | 144.0612         | D    | 1349.6068        | 675.3070        | 1331.5832 | 666.2952         | 1331.5962      | 666.3017         | 12 |
| 4  | <b>453.1912</b>  | 227.0992        | 435.1807        | 218.0940         | F    | 1233.5828        | <b>617.2950</b> | 1215.5592 | 608.2832         | 1215.5722      | 608.2898         | 11 |
| 5  | 511.2097         | 256.1085        | <b>493.1991</b> | 247.1032         | G    | <b>1085.5174</b> | 543.2623        | 1067.4938 | 534.2505         | 1067.5068      | 534.2570         | 10 |
| 6  | <b>625.2908</b>  | 313.1490        | 607.2802        | 304.1438         | L    | 1027.4989        | 514.2531        | 1009.4753 | 505.2413         | 1009.4883      | 505.2478         | 9  |
| 7  | 697.3250         | 349.1661        | 679.3144        | 340.1608         | A    | <b>913.4178</b>  | 457.2125        | 895.3942  | 448.2007         | 895.4072       | 448.2072         | 8  |
| 8  | 799.3697         | 400.1885        | 781.3591        | 391.1832         | T    | <b>841.3836</b>  | 421.1954        | 823.3600  | 412.1837         | 823.3730       | 412.1902         | 7  |
| 9  | <b>913.4508</b>  | 457.2290        | 895.4402        | 448.2237         | L    | 739.3389         | 370.1731        | 721.3153  | 361.1613         | 721.3283       | 361.1678         | 6  |
| 10 | <b>1045.4883</b> | 523.2478        | 1027.4777       | 514.2425         | M    | <b>625.2578</b>  | 313.1325        | 607.2342  | 304.1207         | 607.2472       | 304.1273         | 5  |
| 11 | 1175.5279        | 588.2676        | 1157.5174       | 579.2623         | E    | <b>493.2203</b>  | 247.1138        | 475.1967  | 238.1020         | 475.2097       | 238.1085         | 4  |
| 12 | <b>1273.5777</b> | 637.2925        | 1255.5672       | 628.2872         | P    | 363.1807         | 182.0940        | 345.1571  | 173.0822         | 345.1701       | 173.0887         | 3  |
| 13 | <b>1389.6017</b> | 695.3045        | 1371.5911       | 686.2992         | D    | 265.1309         | 133.0691        | 247.1073  | 124.0573         | 247.1203       | 124.0638         | 2  |
| 14 |                  |                 |                 |                  | K    | 149.1069         | 75.0571         | 131.0833  | 66.0453          |                |                  | 1  |

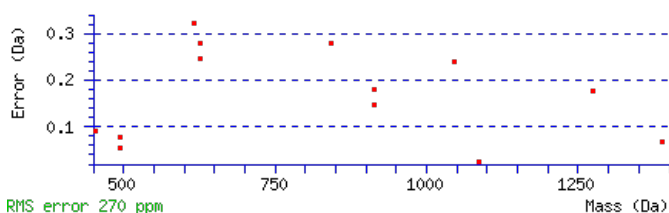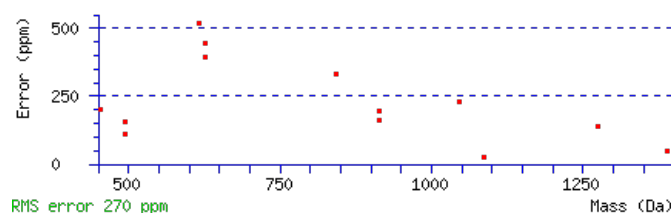NCBI BLAST search of **VSDFLATLMEPDK**

(Parameters: blastp, nr protein database, expect=20000, no filter, PAM30)

# AT1G78530.1

Other BLAST [web gateways](#)

## All matches to this query

| Score | Mr(calc)  | Delta   | Sequence                       |
|-------|-----------|---------|--------------------------------|
| 22.8  | 1536.6940 | 0.0005  | <a href="#">VSDFGLATLMEPDK</a> |
| 8.7   | 1536.6940 | 0.0005  | <a href="#">MFEIEGELSPKDK</a>  |
| 1.5   | 1536.6967 | -0.0022 | <a href="#">SLYCSVDHANLLK</a>  |
| 0.0   | 1536.6967 | -0.0022 | <a href="#">MDELVQFGKTHSK</a>  |

Mascot: <http://www.matrixscience.com/>

## Peptide View

### MS/MS Fragmentation of **MPISSDLNNPR**

Found in **AT1G78570.1** in **TAIR\_Arabidopsis**, Symbols: RHM1, ROL1 | RHM1/ROL1 (RHAMNOSE BIOSYNTHESIS1); UDP-L-rhamnose synthase/ UDP-glucose 4,6-dehydratase/ catalytic | chr1:29555003-29557100 FORWARD

Match to Query 4698: 1258.554588 from(630.284570,2+) index(2941)

Title: Elution from: 30.182 to 30.182 scan no 3663 cid35.00 polarity:+

Data file C7-2\_1.mgf

Click mouse within plot area to zoom in by factor of two about that point

Or,   to  Da

Label all possible matches  Label matches used for scoring

Show Y-axis

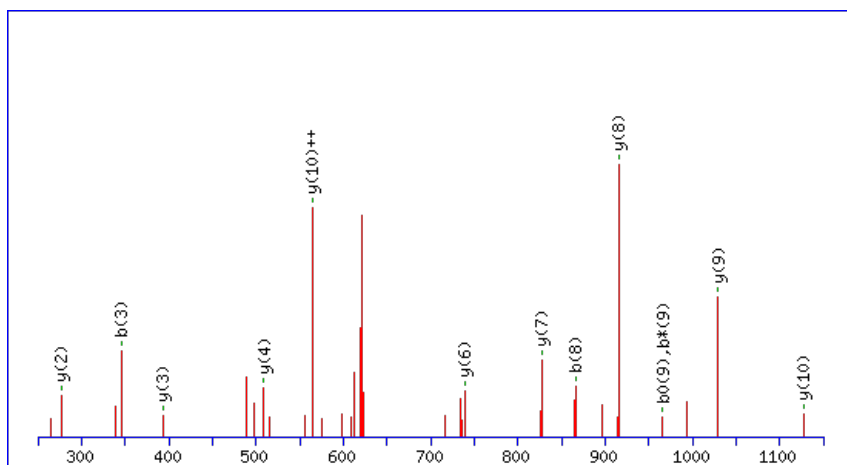

Monoisotopic mass of neutral peptide  $M_r(\text{calc})$ : 1258.5553

Fixed modifications: Carbamidomethyl (C) (apply to specified residues or termini only)

Ions Score: 59 Expect: 6.7e-006

Matches : 13/90 fragment ions using 23 most intense peaks ([help](#))

| #  | b         | b <sup>++</sup> | b <sup>*</sup> | b <sup>*++</sup> | b <sup>0</sup> | b <sup>0++</sup> | Seq. | y         | y <sup>++</sup> | y <sup>*</sup> | y <sup>*++</sup> | y <sup>0</sup> | y <sup>0++</sup> | #  |
|----|-----------|-----------------|----------------|------------------|----------------|------------------|------|-----------|-----------------|----------------|------------------|----------------|------------------|----|
| 1  | 133.0448  | 67.0260         |                |                  |                |                  | M    |           |                 |                |                  |                |                  | 11 |
| 2  | 231.0946  | 116.0509        |                |                  |                |                  | P    | 1127.5250 | 564.2661        | 1109.5014      | 555.2543         | 1109.5144      | 555.2608         | 10 |
| 3  | 345.1757  | 173.0915        |                |                  |                |                  | I    | 1029.4752 | 515.2412        | 1011.4516      | 506.2294         | 1011.4646      | 506.2359         | 9  |
| 4  | 433.2048  | 217.1060        |                |                  | 415.1942       | 208.1007         | S    | 915.3941  | 458.2007        | 897.3705       | 449.1889         | 897.3835       | 449.1954         | 8  |
| 5  | 521.2338  | 261.1205        |                |                  | 503.2233       | 252.1153         | S    | 827.3650  | 414.1862        | 809.3414       | 405.1744         | 809.3545       | 405.1809         | 7  |
| 6  | 637.2578  | 319.1325        |                |                  | 619.2472       | 310.1273         | D    | 739.3360  | 370.1716        | 721.3124       | 361.1598         | 721.3254       | 361.1663         | 6  |
| 7  | 751.3389  | 376.1731        |                |                  | 733.3283       | 367.1678         | L    | 623.3120  | 312.1596        | 605.2884       | 303.1478         |                |                  | 5  |
| 8  | 867.3759  | 434.1916        | 849.3523       | 425.1798         | 849.3653       | 425.1863         | N    | 509.2309  | 255.1191        | 491.2073       | 246.1073         |                |                  | 4  |
| 9  | 983.4129  | 492.2101        | 965.3893       | 483.1983         | 965.4023       | 483.2048         | N    | 393.1939  | 197.1006        | 375.1703       | 188.0888         |                |                  | 3  |
| 10 | 1081.4627 | 541.2350        | 1063.4391      | 532.2232         | 1063.4521      | 532.2297         | P    | 277.1569  | 139.0821        | 259.1333       | 130.0703         |                |                  | 2  |
| 11 |           |                 |                |                  |                |                  | R    | 179.1071  | 90.0572         | 161.0835       | 81.0454          |                |                  | 1  |

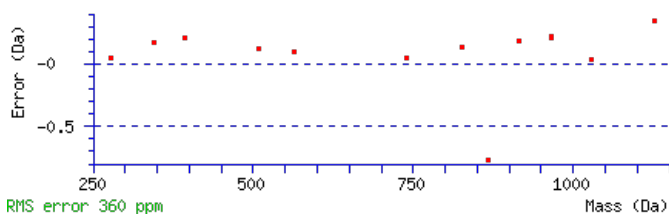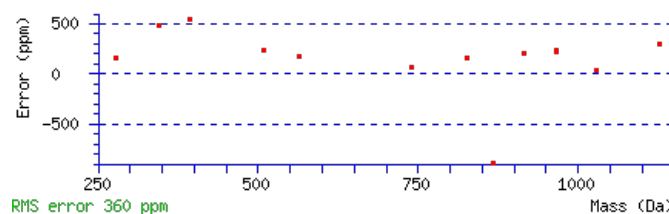

NCBI BLAST search of **MPISSDLNNPR**

(Parameters: blastp, nr protein database, expect=20000, no filter, PAM30)

Other BLAST [web gateways](#)

All matches to this query

AT1G78570.1

| Score | Mr(calc)  | Delta   | Sequence                    |
|-------|-----------|---------|-----------------------------|
| 58.7  | 1258.5553 | -0.0007 | <a href="#">MPISSDLNNPR</a> |
| 1.0   | 1258.5526 | 0.0020  | <a href="#">MPESDDLSPKK</a> |

Mascot: <http://www.matrixscience.com/>



# Mascot Search Results

## Peptide View

MS/MS Fragmentation of **GTVTFAVTR**

Found in **AT1G78820.1** in **TAIR\_Arabidopsis**, Symbols: | curculin-like (mannose-binding) lectin family protein / PAN domain-containing protein | chr1:29639294-29640661 REVERSE

Match to Query 1912: 962.480636 from(482.247594,2+) index(2753)

Title: Elution from: 31.280 to 31.280 scan no 3570 cid35.00 polarity:+

Data file D12h-2\_1.mgf

Click mouse within plot area to zoom in by factor of two about that point

Or,   to  Da

Label all possible matches  Label matches used for scoring

Show Y-axis

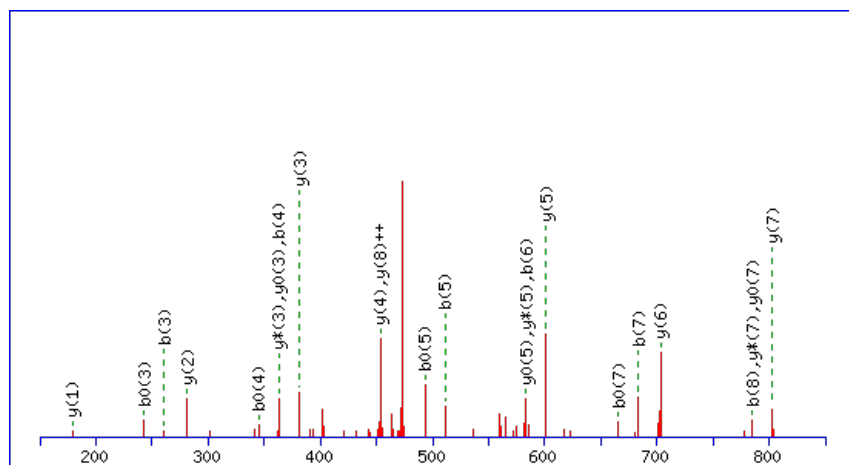

Monoisotopic mass of neutral peptide  $M_r(\text{calc})$ : 962.4829

Fixed modifications: Carbamidomethyl (C) (apply to specified residues or termini only)

Ions Score: 76 Expect: 1.7e-007

Matches : 24/76 fragment ions using 21 most intense peaks ([help](#))

| # | b               | b <sup>++</sup> | b <sup>0</sup>  | b <sup>0++</sup> | Seq.     | y               | y <sup>++</sup> | y*              | y <sup>*++</sup> | y <sup>0</sup>  | y <sup>0++</sup> | # |
|---|-----------------|-----------------|-----------------|------------------|----------|-----------------|-----------------|-----------------|------------------|-----------------|------------------|---|
| 1 | 59.0258         | 30.0165         |                 |                  | <b>G</b> |                 |                 |                 |                  |                 |                  | 9 |
| 2 | 161.0705        | 81.0389         | 143.0599        | 72.0336          | <b>T</b> | 905.4717        | <b>453.2395</b> | 887.4481        | 444.2277         | 887.4612        | 444.2342         | 8 |
| 3 | <b>261.1359</b> | 131.0716        | <b>243.1254</b> | 122.0663         | <b>V</b> | <b>803.4270</b> | 402.2171        | <b>785.4034</b> | 393.2054         | <b>785.4164</b> | 393.2119         | 7 |
| 4 | <b>363.1806</b> | 182.0940        | <b>345.1701</b> | 173.0887         | <b>T</b> | <b>703.3616</b> | 352.1844        | 685.3380        | 343.1726         | 685.3510        | 343.1791         | 6 |
| 5 | <b>511.2461</b> | 256.1267        | <b>493.2355</b> | 247.1214         | <b>F</b> | <b>601.3169</b> | 301.1621        | <b>583.2933</b> | 292.1503         | <b>583.3063</b> | 292.1568         | 5 |
| 6 | <b>583.2802</b> | 292.1438        | 565.2697        | 283.1385         | <b>A</b> | <b>453.2514</b> | 227.1293        | 435.2278        | 218.1175         | 435.2408        | 218.1241         | 4 |
| 7 | <b>683.3457</b> | 342.1765        | <b>665.3351</b> | 333.1712         | <b>V</b> | <b>381.2173</b> | 191.1123        | <b>363.1937</b> | 182.1005         | <b>363.2067</b> | 182.1070         | 3 |
| 8 | <b>785.3904</b> | 393.1988        | 767.3798        | 384.1936         | <b>T</b> | <b>281.1518</b> | 141.0795        | 263.1282        | 132.0677         | 263.1412        | 132.0743         | 2 |
| 9 |                 |                 |                 |                  | <b>R</b> | <b>179.1071</b> | 90.0572         | 161.0835        | 81.0454          |                 |                  | 1 |

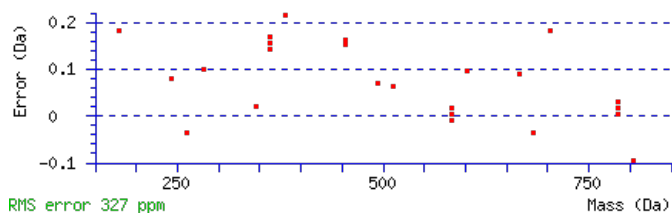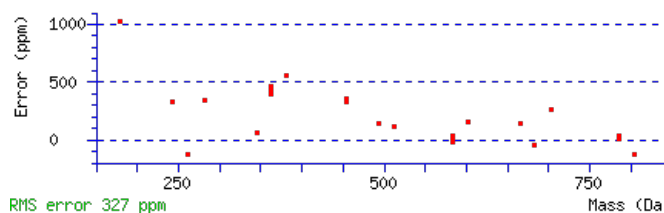

NCBI **BLAST** search of [GTVTFAVTR](#)

(Parameters: blastp, nr protein database, expect=20000, no filter, PAM30)

Other BLAST [web gateways](#)

All matches to this query

| Score | $M_r(\text{calc})$ | Delta | Sequence |
|-------|--------------------|-------|----------|
|       |                    |       |          |

## AT1G78820.1

|      |          |         |                           |
|------|----------|---------|---------------------------|
| 76.0 | 962.4829 | -0.0023 | <a href="#">GTVTFAVTR</a> |
| 19.1 | 962.4829 | -0.0023 | <a href="#">ISGAAYLTR</a> |
| 13.1 | 962.4782 | 0.0024  | <a href="#">GCRAFLVK</a>  |
| 11.1 | 962.4782 | 0.0024  | <a href="#">LFVEMRR</a>   |
| 10.3 | 962.4786 | 0.0020  | <a href="#">MRSAIGRR</a>  |
| 9.6  | 962.4789 | 0.0017  | <a href="#">KMTSMIVK</a>  |
| 9.0  | 962.4834 | -0.0027 | <a href="#">RKLSGGSSR</a> |
| 7.2  | 962.4829 | -0.0023 | <a href="#">LSRFSDVK</a>  |
| 6.2  | 962.4816 | -0.0009 | <a href="#">MLVRIMR</a>   |
| 3.5  | 962.4816 | -0.0009 | <a href="#">AKRVAMMK</a>  |

Mascot: <http://www.matrixscience.com/>

**Peptide View**MS/MS Fragmentation of **WIWDANR**

Found in **AT1G78830.1** in **TAIR\_Arabidopsis**, Symbols: | curculin-like (mannose-binding) lectin family protein | chr1:29642034-29643401  
REVERSE

Match to Query 2170: 959.461126 from(480.737839,2+) index(6472)

Title: Elution from: 55.937 to 55.937 scan no 8305 cid35.00 polarity:+

Data file D1d-3\_3.mgf

Click mouse within plot area to zoom in by factor of two about that point

Or,   to  Da

Label all possible matches  Label matches used for scoring

Show Y-axis

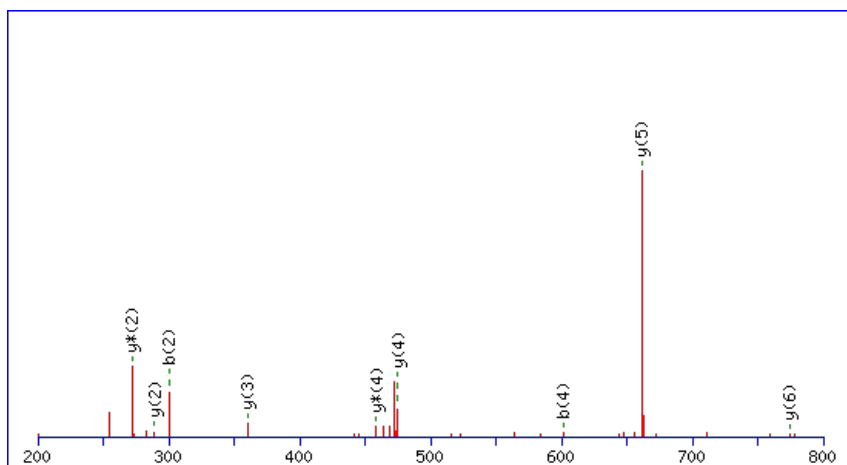

Monoisotopic mass of neutral peptide **Mr(calc)**: 959.4613

**Fixed modifications**: Carbamidomethyl (C) (apply to specified residues or termini only)

**Ions Score**: 27 **Expect**: 0.0027

**Matches** : 9/50 fragment ions using 22 most intense peaks ([help](#))

| # | b               | b <sup>++</sup> | b*       | b <sup>*++</sup> | b <sup>0</sup> | b <sup>0++</sup> | Seq. | y               | y <sup>++</sup> | y*              | y <sup>*++</sup> | y <sup>0</sup> | y <sup>0++</sup> | # |
|---|-----------------|-----------------|----------|------------------|----------------|------------------|------|-----------------|-----------------|-----------------|------------------|----------------|------------------|---|
| 1 | 187.0866        | 94.0469         |          |                  |                |                  | W    |                 |                 |                 |                  |                |                  | 7 |
| 2 | <b>300.1707</b> | 150.5890        |          |                  |                |                  | I    | <b>774.3893</b> | 387.6983        | 757.3628        | 379.1850         | 756.3787       | 378.6930         | 6 |
| 3 | 486.2500        | 243.6286        |          |                  |                |                  | W    | <b>661.3052</b> | 331.1563        | 644.2787        | 322.6430         | 643.2947       | 322.1510         | 5 |
| 4 | <b>601.2769</b> | 301.1421        |          |                  | 583.2663       | 292.1368         | D    | <b>475.2259</b> | 238.1166        | <b>458.1994</b> | 229.6033         | 457.2154       | 229.1113         | 4 |
| 5 | 672.3140        | 336.6606        |          |                  | 654.3035       | 327.6554         | A    | <b>360.1990</b> | 180.6031        | 343.1724        | 172.0899         |                |                  | 3 |
| 6 | 786.3569        | 393.6821        | 769.3304 | 385.1688         | 768.3464       | 384.6768         | N    | <b>289.1619</b> | 145.0846        | <b>272.1353</b> | 136.5713         |                |                  | 2 |
| 7 |                 |                 |          |                  |                |                  | R    | 175.1190        | 88.0631         | 158.0924        | 79.5498          |                |                  | 1 |

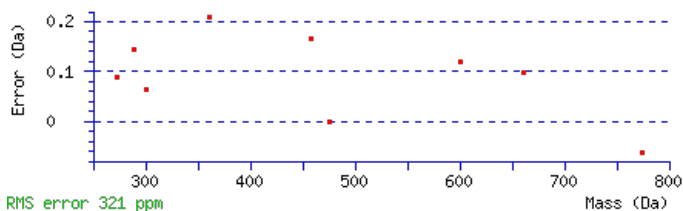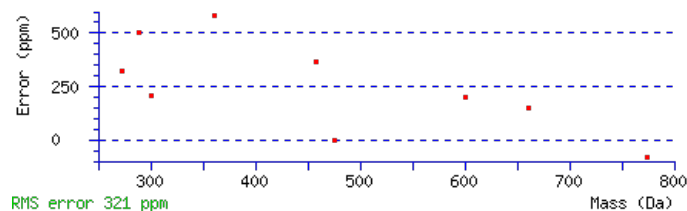

NCBI **BLAST** search of [WIWDANR](#)

(Parameters: blastp, nr protein database, expect=20000, no filter, PAM30)

Other BLAST [web gateways](#)

**All matches to this query**

| Score | Mr(calc) | Delta   | Sequence                |
|-------|----------|---------|-------------------------|
| 27.5  | 959.4613 | -0.0002 | <a href="#">WIWDANR</a> |
| 5.6   | 959.4613 | -0.0002 | <a href="#">WVWEANR</a> |





**Peptide View**MS/MS Fragmentation of **TGDSSLVAYVK**Found in **AT1G78850.1** in **TAIR\_Arabidopsis**, Symbols: | curculin-like (mannose-binding) lectin family protein | chr1:29646965-29648290  
REVERSE

Match to Query 3751: 1150.551034 from(576.282793,2+) index(3983)

Title: Elution from: 37.223 to 37.223 scan no 4987 cid35.00 polarity:+

Data file D6h-3\_2.mgf

Click mouse within plot area to zoom in by factor of two about that point

Or,   to  Da Label all possible matches  Label matches used for scoring Show Y-axis 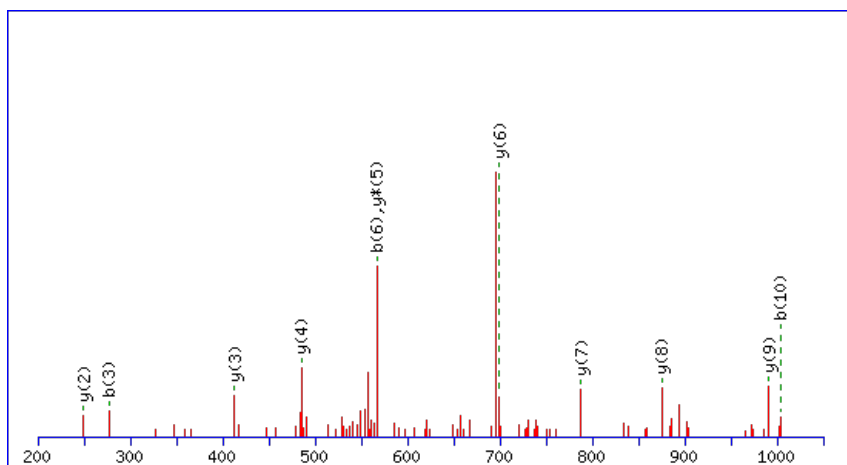**Monoisotopic mass of neutral peptide Mr(calc):** 1150.5514**Fixed modifications:** Carbamidomethyl (C) (apply to specified residues or termini only)**Ions Score:** 54 **Expect:** 2.9e-005**Matches:** 11/88 fragment ions using 16 most intense peaks ([help](#))

| #  | b                | b <sup>++</sup> | b <sup>0</sup> | b <sup>0++</sup> | Seq. | y               | y <sup>++</sup> | y*              | y <sup>*++</sup> | y <sup>0</sup> | y <sup>0++</sup> | #  |
|----|------------------|-----------------|----------------|------------------|------|-----------------|-----------------|-----------------|------------------|----------------|------------------|----|
| 1  | 103.0520         | 52.0296         | 85.0414        | 43.0244          | T    |                 |                 |                 |                  |                |                  | 11 |
| 2  | 161.0705         | 81.0389         | 143.0599       | 72.0336          | G    | 1049.5140       | 525.2606        | 1031.4904       | 516.2488         | 1031.5034      | 516.2553         | 10 |
| 3  | <b>277.0945</b>  | 139.0509        | 259.0839       | 130.0456         | D    | <b>991.4955</b> | 496.2514        | 973.4719        | 487.2396         | 973.4849       | 487.2461         | 9  |
| 4  | 365.1235         | 183.0654        | 347.1130       | 174.0601         | S    | <b>875.4715</b> | 438.2394        | 857.4479        | 429.2276         | 857.4609       | 429.2341         | 8  |
| 5  | 453.1526         | 227.0799        | 435.1420       | 218.0747         | S    | <b>787.4424</b> | 394.2249        | 769.4189        | 385.2131         | 769.4319       | 385.2196         | 7  |
| 6  | <b>567.2337</b>  | 284.1205        | 549.2231       | 275.1152         | L    | <b>699.4134</b> | 350.2103        | 681.3898        | 341.1985         |                |                  | 6  |
| 7  | 667.2991         | 334.1532        | 649.2886       | 325.1479         | V    | 585.3323        | 293.1698        | <b>567.3087</b> | 284.1580         |                |                  | 5  |
| 8  | 739.3333         | 370.1703        | 721.3227       | 361.1650         | A    | <b>485.2668</b> | 243.1371        | 467.2433        | 234.1253         |                |                  | 4  |
| 9  | 903.3937         | 452.2005        | 885.3831       | 443.1952         | Y    | <b>413.2327</b> | 207.1200        | 395.2091        | 198.1082         |                |                  | 3  |
| 10 | <b>1003.4591</b> | 502.2332        | 985.4485       | 493.2279         | V    | <b>249.1723</b> | 125.0898        | 231.1487        | 116.0780         |                |                  | 2  |
| 11 |                  |                 |                |                  | K    | 149.1069        | 75.0571         | 131.0833        | 66.0453          |                |                  | 1  |

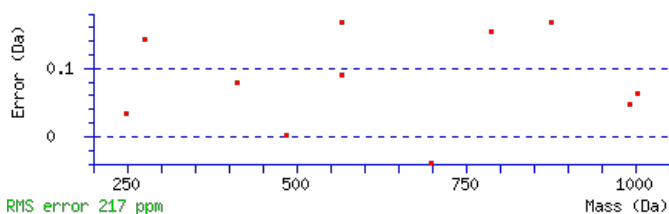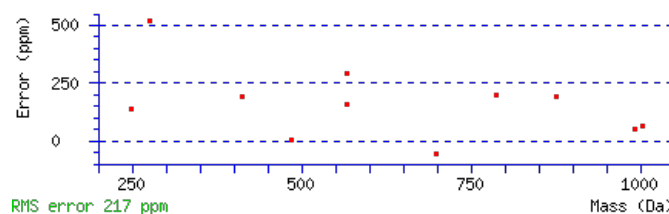NCBI **BLAST** search of **TGDSSLVAYVK**

(Parameters: blastp, nr protein database, expect=20000, no filter, PAM30)

Other BLAST [web gateways](#)**All matches to this query**

## AT1G78850.1

| Score | Mr(calc)  | Delta   | Sequence                    |
|-------|-----------|---------|-----------------------------|
| 54.4  | 1150.5514 | -0.0004 | <a href="#">TGDSSLVAYVK</a> |
| 11.8  | 1150.5486 | 0.0024  | <a href="#">RNHGFFARK</a>   |
| 6.0   | 1150.5523 | -0.0013 | <a href="#">MDYPMKKVK</a>   |
| 6.0   | 1150.5514 | -0.0004 | <a href="#">TAEKTFDVK</a>   |
| 5.9   | 1150.5519 | -0.0008 | <a href="#">RSVEKQSSSK</a>  |
| 5.3   | 1150.5541 | -0.0030 | <a href="#">RFATTVADGAK</a> |
| 2.9   | 1150.5541 | -0.0031 | <a href="#">ASSTVANLAFR</a> |
| 2.7   | 1150.5527 | -0.0017 | <a href="#">MKQLRAMNK</a>   |
| 0.9   | 1150.5500 | 0.0010  | <a href="#">LLETMMRK</a>    |

Mascot: <http://www.matrixscience.com/>

**Peptide View**MS/MS Fragmentation of **ITYIAPAGQYSLK**

Found in **AT1G78900.1** in **TAIR\_Arabidopsis**, Symbols: VHA-A | VHA-A; ATP binding / hydrogen ion transporting ATP synthase, rotational mechanism | chr1:29665356-29669468 FORWARD

Match to Query 5697: 1423.768854 from(712.891703,2+) index(5422)

Title: Elution from: 47.549 to 47.549 scan no 6799 cid35.00 polarity:+

Data file C7-3\_2.mgf

Click mouse within plot area to zoom in by factor of two about that point

Or,   to  Da

Label all possible matches  Label matches used for scoring

Show Y-axis

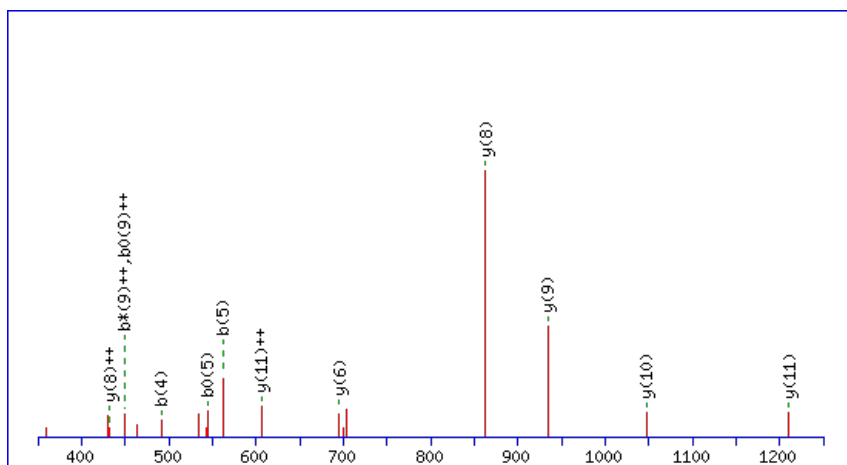

Monoisotopic mass of neutral peptide Mr(calc): 1423.7711

Fixed modifications: Carbamidomethyl (C) (apply to specified residues or termini only)

Ions Score: 38 Expect: 0.00032

Matches : 12/122 fragment ions using 15 most intense peaks ([help](#))

| #  | b               | b <sup>++</sup> | b*        | b <sup>*++</sup> | b <sup>0</sup>  | b <sup>0++</sup> | Seq. | y                | y <sup>++</sup> | y*        | y <sup>*++</sup> | y <sup>0</sup> | y <sup>0++</sup> | #  |
|----|-----------------|-----------------|-----------|------------------|-----------------|------------------|------|------------------|-----------------|-----------|------------------|----------------|------------------|----|
| 1  | 114.0913        | 57.5493         |           |                  |                 |                  | I    |                  |                 |           |                  |                |                  | 13 |
| 2  | 215.1390        | 108.0731        |           |                  | 197.1285        | 99.0679          | T    | 1311.6943        | 656.3508        | 1294.6678 | 647.8375         | 1293.6838      | 647.3455         | 12 |
| 3  | 378.2023        | 189.6048        |           |                  | 360.1918        | 180.5995         | Y    | <b>1210.6467</b> | <b>605.8270</b> | 1193.6201 | 597.3137         | 1192.6361      | 596.8217         | 11 |
| 4  | <b>491.2864</b> | 246.1468        |           |                  | 473.2758        | 237.1416         | I    | <b>1047.5833</b> | 524.2953        | 1030.5568 | 515.7820         | 1029.5728      | 515.2900         | 10 |
| 5  | <b>562.3235</b> | 281.6654        |           |                  | <b>544.3130</b> | 272.6601         | A    | <b>934.4993</b>  | 467.7533        | 917.4727  | 459.2400         | 916.4887       | 458.7480         | 9  |
| 6  | 659.3763        | 330.1918        |           |                  | 641.3657        | 321.1865         | P    | <b>863.4621</b>  | <b>432.2347</b> | 846.4356  | 423.7214         | 845.4516       | 423.2294         | 8  |
| 7  | 730.4134        | 365.7103        |           |                  | 712.4028        | 356.7051         | A    | 766.4094         | 383.7083        | 749.3828  | 375.1951         | 748.3988       | 374.7030         | 7  |
| 8  | 787.4349        | 394.2211        |           |                  | 769.4243        | 385.2158         | G    | <b>695.3723</b>  | 348.1898        | 678.3457  | 339.6765         | 677.3617       | 339.1845         | 6  |
| 9  | 915.4934        | 458.2504        | 898.4669  | <b>449.7371</b>  | 897.4829        | <b>449.2451</b>  | Q    | 638.3508         | 319.6790        | 621.3243  | 311.1658         | 620.3402       | 310.6738         | 5  |
| 10 | 1078.5568       | 539.7820        | 1061.5302 | 531.2688         | 1060.5462       | 530.7767         | Y    | 510.2922         | 255.6498        | 493.2657  | 247.1365         | 492.2817       | 246.6445         | 4  |
| 11 | 1165.5888       | 583.2980        | 1148.5623 | 574.7848         | 1147.5782       | 574.2928         | S    | 347.2289         | 174.1181        | 330.2023  | 165.6048         | 329.2183       | 165.1128         | 3  |
| 12 | 1278.6729       | 639.8401        | 1261.6463 | 631.3268         | 1260.6623       | 630.8348         | L    | 260.1969         | 130.6021        | 243.1703  | 122.0888         |                |                  | 2  |
| 13 |                 |                 |           |                  |                 |                  | K    | 147.1128         | 74.0600         | 130.0863  | 65.5468          |                |                  | 1  |

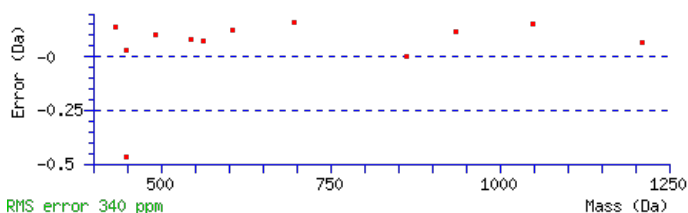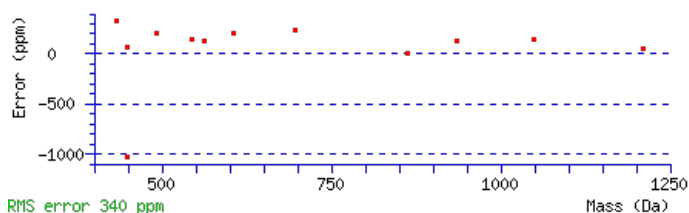

NCBI BLAST search of **ITYIAPAGQYSLK**

(Parameters: blastp, nr protein database, expect=20000, no filter, PAM30)

AT1G78900.1

Other BLAST [web gateways](#)

**All matches to this query**

| Score | Mr(calc)  | Delta   | Sequence                      |
|-------|-----------|---------|-------------------------------|
| 38.5  | 1423.7711 | -0.0022 | <a href="#">ITYIAPAGQYSLK</a> |

Mascot: <http://www.matrixscience.com/>

**Peptide View**

MS/MS Fragmentation of **YGANVDGYSPIYNENEWSASGDVYK**

Found in **AT1G79040.1** in **TAIR\_Arabidopsis**, Symbols: PSBR | PSBR (photosystem II subunit R) | chr1:29740978-29741674 FORWARD

Match to Query 10278: 2827.126539 from(943.382789,3+) index(7433)

Title: Elution from: 67.920 to 67.920 scan no 9857 cid35.00 polarity:+

Data file D1d-1\_3.mgf

Click mouse within plot area to zoom in by factor of two about that point

Or, Plot from  to  Da

Label all possible matches  Label matches used for scoring

Show Y-axis

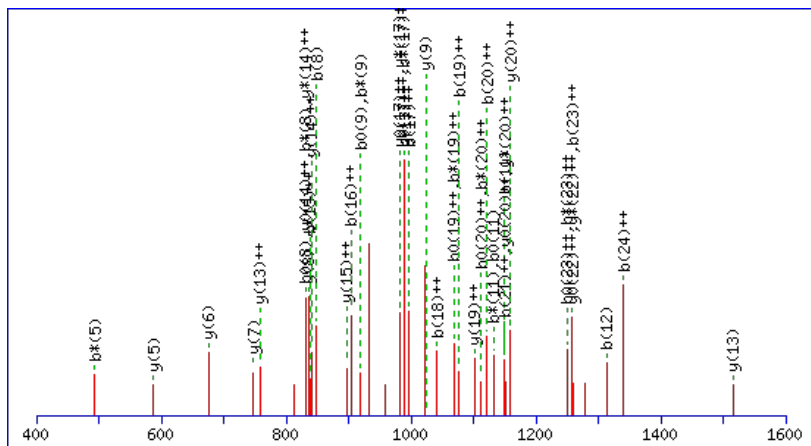

**Monoisotopic mass of neutral peptide Mr(calc):** 2827.1254

**Fixed modifications:** Carbamidomethyl (C) (apply to specified residues or termini only)

**Ions Score:** 90 **Expect:** 1.4e-009

**Matches :** 47/266 fragment ions using 37 most intense peaks [\(help\)](#)

| #  | b         | b <sup>++</sup> | b <sup>*</sup> | b <sup>*++</sup> | b <sup>0</sup> | b <sup>0++</sup> | Seq. | y         | y <sup>++</sup> | y <sup>*</sup> | y <sup>*++</sup> | y <sup>0</sup> | y <sup>0++</sup> | #  |
|----|-----------|-----------------|----------------|------------------|----------------|------------------|------|-----------|-----------------|----------------|------------------|----------------|------------------|----|
| 1  | 165.0676  | 83.0375         |                |                  |                |                  | Y    |           |                 |                |                  |                |                  | 25 |
| 2  | 223.0861  | 112.0467        |                |                  |                |                  | G    | 2664.0723 | 1332.5398       | 2646.0487      | 1323.5280        | 2646.0618      | 1323.5345        | 24 |
| 3  | 295.1203  | 148.0638        |                |                  |                |                  | A    | 2606.0538 | 1303.5306       | 2588.0302      | 1294.5188        | 2588.0433      | 1294.5253        | 23 |
| 4  | 411.1573  | 206.0823        | 393.1337       | 197.0705         |                |                  | N    | 2534.0197 | 1267.5135       | 2515.9961      | 1258.5017        | 2516.0091      | 1258.5082        | 22 |
| 5  | 511.2227  | 256.1150        | 493.1991       | 247.1032         |                |                  | V    | 2417.9827 | 1209.4950       | 2399.9591      | 1200.4832        | 2399.9721      | 1200.4897        | 21 |
| 6  | 627.2467  | 314.1270        | 609.2231       | 305.1152         | 609.2361       | 305.1217         | D    | 2317.9172 | 1159.4623       | 2299.8937      | 1150.4505        | 2299.9067      | 1150.4570        | 20 |
| 7  | 685.2652  | 343.1362        | 667.2416       | 334.1245         | 667.2546       | 334.1310         | G    | 2201.8933 | 1101.4503       | 2183.8697      | 1092.4385        | 2183.8827      | 1092.4450        | 19 |
| 8  | 849.3256  | 425.1664        | 831.3020       | 416.1546         | 831.3150       | 416.1611         | Y    | 2143.8748 | 1072.4410       | 2125.8512      | 1063.4292        | 2125.8642      | 1063.4357        | 18 |
| 9  | 937.3546  | 469.1810        | 919.3311       | 460.1692         | 919.3441       | 460.1757         | S    | 1979.8144 | 990.4108        | 1961.7908      | 981.3990         | 1961.8038      | 981.4056         | 17 |
| 10 | 1035.4044 | 518.2059        | 1017.3809      | 509.1941         | 1017.3939      | 509.2006         | P    | 1891.7853 | 946.3963        | 1873.7617      | 937.3845         | 1873.7748      | 937.3910         | 16 |
| 11 | 1149.4855 | 575.2464        | 1131.4620      | 566.2346         | 1131.4750      | 566.2411         | I    | 1793.7355 | 897.3714        | 1775.7120      | 888.3596         | 1775.7250      | 888.3661         | 15 |
| 12 | 1313.5459 | 657.2766        | 1295.5223      | 648.2648         | 1295.5353      | 648.2713         | Y    | 1679.6544 | 840.3309        | 1661.6309      | 831.3191         | 1661.6439      | 831.3256         | 14 |
| 13 | 1429.5829 | 715.2951        | 1411.5593      | 706.2833         | 1411.5723      | 706.2898         | N    | 1515.5941 | 758.3007        | 1497.5705      | 749.2889         | 1497.5835      | 749.2954         | 13 |
| 14 | 1559.6225 | 780.3149        | 1541.5989      | 771.3031         | 1541.6120      | 771.3096         | E    | 1399.5571 | 700.2822        | 1381.5335      | 691.2704         | 1381.5465      | 691.2769         | 12 |
| 15 | 1675.6595 | 838.3334        | 1657.6359      | 829.3216         | 1657.6490      | 829.3281         | N    | 1269.5174 | 635.2624        | 1251.4939      | 626.2506         | 1251.5069      | 626.2571         | 11 |
| 16 | 1805.6991 | 903.3532        | 1787.6756      | 894.3414         | 1787.6886      | 894.3479         | E    | 1153.4805 | 577.2439        | 1135.4569      | 568.2321         | 1135.4699      | 568.2386         | 10 |
| 17 | 1993.7725 | 997.3899        | 1975.7489      | 988.3781         | 1975.7620      | 988.3846         | W    | 1023.4408 | 512.2240        | 1005.4172      | 503.2123         | 1005.4303      | 503.2188         | 9  |
| 18 | 2081.8016 | 1041.4044       | 2063.7780      | 1032.3926        | 2063.7910      | 1032.3992        | S    | 835.3674  | 418.1874        | 817.3439       | 409.1756         | 817.3569       | 409.1821         | 8  |
| 19 | 2153.8357 | 1077.4215       | 2135.8122      | 1068.4097        | 2135.8252      | 1068.4162        | A    | 747.3384  | 374.1728        | 729.3148       | 365.1610         | 729.3278       | 365.1675         | 7  |
| 20 | 2241.8648 | 1121.4360       | 2223.8412      | 1112.4242        | 2223.8542      | 1112.4308        | S    | 675.3042  | 338.1558        | 657.2806       | 329.1440         | 657.2937       | 329.1505         | 6  |
| 21 | 2299.8833 | 1150.4453       | 2281.8597      | 1141.4335        | 2281.8727      | 1141.4400        | G    | 587.2752  | 294.1412        | 569.2516       | 285.1294         | 569.2646       | 285.1359         | 5  |
| 22 | 2415.9073 | 1208.4573       | 2397.8837      | 1199.4455        | 2397.8967      | 1199.4520        | D    | 529.2567  | 265.1320        | 511.2331       | 256.1202         | 511.2461       | 256.1267         | 4  |
| 23 | 2515.9727 | 1258.4900       | 2497.9491      | 1249.4782        | 2497.9622      | 1249.4847        | V    | 413.2327  | 207.1200        | 395.2091       | 198.1082         |                |                  | 3  |
| 24 | 2680.0331 | 1340.5202       | 2662.0095      | 1331.5084        | 2662.0225      | 1331.5149        | Y    | 313.1672  | 157.0873        | 295.1437       | 148.0755         |                |                  | 2  |
| 25 |           |                 |                |                  |                |                  | K    | 149.1069  | 75.0571         | 131.0833       | 66.0453          |                |                  | 1  |

# AT1G79040.1

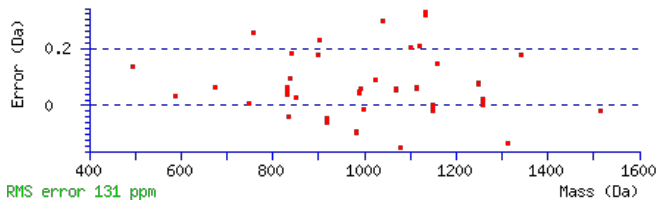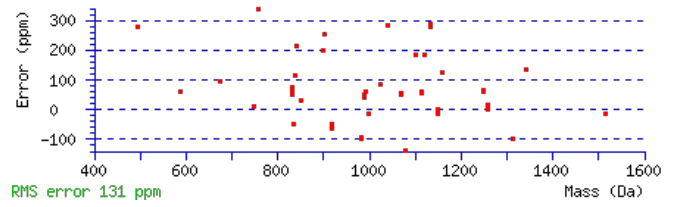

NCBI **BLAST** search of [YGANVDGYSPIYNENEWSASGDVYK](#)  
(Parameters: blastp, nr protein database, expect=20000, no filter, PAM30)  
Other BLAST [web gateways](#)

## All matches to this query

| Score | Mr(calc)  | Delta  | Sequence                                  |
|-------|-----------|--------|-------------------------------------------|
| 90.3  | 2827.1254 | 0.0011 | <a href="#">YGANVDGYSPIYNENEWSASGDVYK</a> |

Mascot: <http://www.matrixscience.com/>

**Peptide View**MS/MS Fragmentation of **IYQGQTVSPITFQTK**

Found in **AT1G79230.1** in **TAIR\_Arabidopsis**, Symbols: ATMST1, MST1, ATRDH1, ST1 | ST1 (MERCAPTOPYRUVATE SULFURTRANSFERASE 1); thiosulfate sulfurtransferase | chr1:29805717-29808572 FORWARD

Match to Query 8383: 1728.841234 from(865.427893,2+) index(5619)

Title: Elution from: 50.886 to 50.886 scan no 7113 cid35.00 polarity:+

Data file 0-3\_1.mgf

Click mouse within plot area to zoom in by factor of two about that point

Or,  to  Da

Label all possible matches  Label matches used for scoring

Show Y-axis

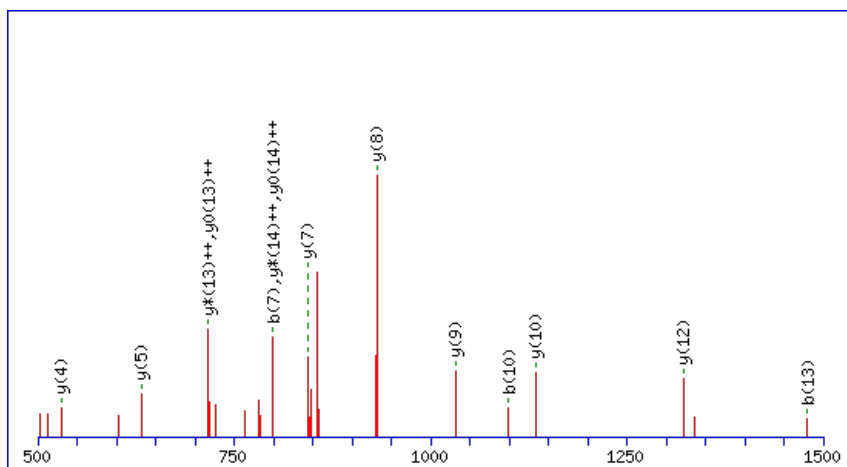

Monoisotopic mass of neutral peptide  $M_r(\text{calc})$ : 1728.8425

**Fixed modifications:** Carbamidomethyl (C) (apply to specified residues or termini only)

**Ions Score:** 53 **Expect:** 3.5e-005

**Matches:** 14/152 fragment ions using 17 most intense peaks ([help](#))

| #  | b         | b <sup>++</sup> | b*        | b <sup>*++</sup> | b <sup>0</sup> | b <sup>0++</sup> | Seq. | y         | y <sup>++</sup> | y*        | y <sup>*++</sup> | y <sup>0</sup> | y <sup>0++</sup> | #  |
|----|-----------|-----------------|-----------|------------------|----------------|------------------|------|-----------|-----------------|-----------|------------------|----------------|------------------|----|
| 1  | 115.0884  | 58.0478         |           |                  |                |                  | I    |           |                 |           |                  |                |                  | 15 |
| 2  | 279.1487  | 140.0780        |           |                  |                |                  | Y    | 1615.7687 | 808.3880        | 1597.7451 | 799.3762         | 1597.7581      | 799.3827         | 14 |
| 3  | 409.2014  | 205.1043        | 391.1778  | 196.0925         |                |                  | Q    | 1451.7083 | 726.3578        | 1433.6847 | 717.3460         | 1433.6977      | 717.3525         | 13 |
| 4  | 467.2199  | 234.1136        | 449.1963  | 225.1018         |                |                  | G    | 1321.6557 | 661.3315        | 1303.6321 | 652.3197         | 1303.6451      | 652.3262         | 12 |
| 5  | 597.2725  | 299.1399        | 579.2489  | 290.1281         |                |                  | Q    | 1263.6372 | 632.3222        | 1245.6136 | 623.3104         | 1245.6266      | 623.3169         | 11 |
| 6  | 699.3172  | 350.1623        | 681.2937  | 341.1505         | 681.3067       | 341.1570         | T    | 1133.5845 | 567.2959        | 1115.5609 | 558.2841         | 1115.5740      | 558.2906         | 10 |
| 7  | 799.3827  | 400.1950        | 781.3591  | 391.1832         | 781.3721       | 391.1897         | V    | 1031.5398 | 516.2735        | 1013.5162 | 507.2617         | 1013.5292      | 507.2683         | 9  |
| 8  | 887.4118  | 444.2095        | 869.3882  | 435.1977         | 869.4012       | 435.2042         | S    | 931.4744  | 466.2408        | 913.4508  | 457.2290         | 913.4638       | 457.2355         | 8  |
| 9  | 985.4616  | 493.2344        | 967.4380  | 484.2226         | 967.4510       | 484.2291         | P    | 843.4453  | 422.2263        | 825.4217  | 413.2145         | 825.4347       | 413.2210         | 7  |
| 10 | 1099.5427 | 550.2750        | 1081.5191 | 541.2632         | 1081.5321      | 541.2697         | I    | 745.3955  | 373.2014        | 727.3719  | 364.1896         | 727.3849       | 364.1961         | 6  |
| 11 | 1201.5874 | 601.2973        | 1183.5638 | 592.2855         | 1183.5768      | 592.2920         | T    | 631.3144  | 316.1608        | 613.2908  | 307.1490         | 613.3038       | 307.1556         | 5  |
| 12 | 1349.6528 | 675.3300        | 1331.6292 | 666.3183         | 1331.6423      | 666.3248         | F    | 529.2697  | 265.1385        | 511.2461  | 256.1267         | 511.2591       | 256.1332         | 4  |
| 13 | 1479.7055 | 740.3564        | 1461.6819 | 731.3446         | 1461.6949      | 731.3511         | Q    | 381.2042  | 191.1058        | 363.1806  | 182.0940         | 363.1937       | 182.1005         | 3  |
| 14 | 1581.7502 | 791.3787        | 1563.7266 | 782.3669         | 1563.7396      | 782.3734         | T    | 251.1516  | 126.0794        | 233.1280  | 117.0676         | 233.1410       | 117.0741         | 2  |
| 15 |           |                 |           |                  |                |                  | K    | 149.1069  | 75.0571         | 131.0833  | 66.0453          |                |                  | 1  |

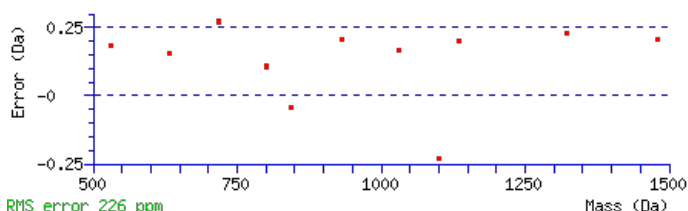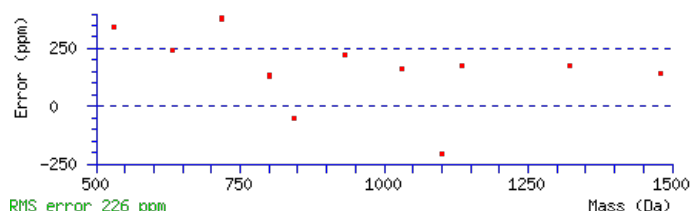



## AT1G79230.1

NCBI **BLAST** search of [IYQGQTVSPITFQTK](#)

(Parameters: blastp, nr protein database, expect=20000, no filter, PAM30)

Other BLAST [web gateways](#)

### All matches to this query

| Score | Mr(calc)  | Delta   | Sequence                        |
|-------|-----------|---------|---------------------------------|
| 52.9  | 1728.8425 | -0.0012 | <a href="#">IYQGQTVSPITFQTK</a> |
| 6.0   | 1728.8429 | -0.0017 | <a href="#">AVEHIRVLAEEIDGR</a> |

**Mascot:** <http://www.matrixscience.com/>

**Peptide View**MS/MS Fragmentation of **ESGGSSGLGIK**

Found in **AT1G79330.1** in **TAIR\_Arabidopsis**, Symbols: AMC6, ATMCP2B, ATMC5 | AMC6/ATMC5/ATMCP2B (TYPE-II METACASPASES); caspase/ cysteine-type endopeptidase | chr1:29843615-29845030 FORWARD

Match to Query 2570: 990.498754 from(496.256653,2+) index(4173)

Title: Elution from: 37.775 to 37.775 scan no 5179 cid35.00 polarity:+

Data file D1d-3\_2.mgf

Click mouse within plot area to zoom in by factor of two about that point

Or,   to  Da

Label all possible matches  Label matches used for scoring

Show Y-axis

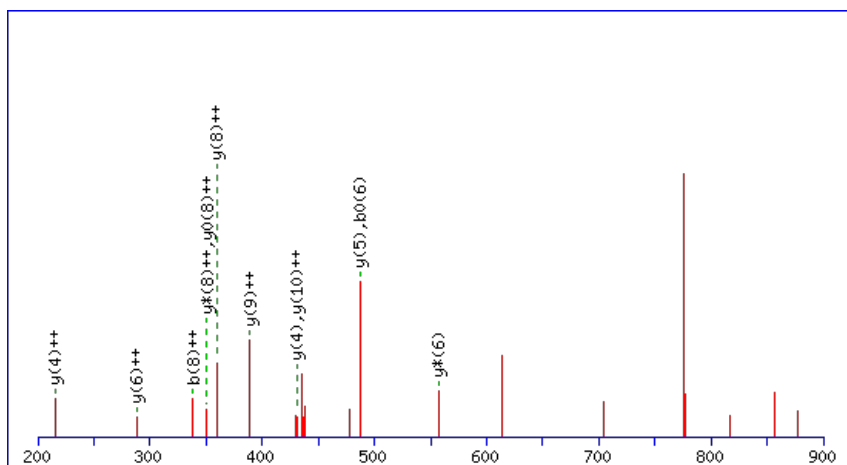

**Monoisotopic mass of neutral peptide Mr(calc):** 990.4982

**Fixed modifications:** Carbamidomethyl (C) (apply to specified residues or termini only)

**Ions Score:** 22 **Expect:** 0.018

**Matches:** 12/90 fragment ions using 21 most intense peaks ([help](#))

| #  | b        | b <sup>++</sup> | b <sup>0</sup> | b <sup>0++</sup> | Seq. | y        | y <sup>++</sup> | y*       | y <sup>*++</sup> | y <sup>0</sup> | y <sup>0++</sup> | #  |
|----|----------|-----------------|----------------|------------------|------|----------|-----------------|----------|------------------|----------------|------------------|----|
| 1  | 130.0499 | 65.5286         | 112.0393       | 56.5233          | E    |          |                 |          |                  |                |                  | 11 |
| 2  | 217.0819 | 109.0446        | 199.0713       | 100.0393         | S    | 862.4629 | 431.7351        | 845.4363 | 423.2218         | 844.4523       | 422.7298         | 10 |
| 3  | 274.1034 | 137.5553        | 256.0928       | 128.5500         | G    | 775.4308 | 388.2191        | 758.4043 | 379.7058         | 757.4203       | 379.2138         | 9  |
| 4  | 331.1248 | 166.0661        | 313.1143       | 157.0608         | G    | 718.4094 | 359.7083        | 701.3828 | 351.1951         | 700.3988       | 350.7030         | 8  |
| 5  | 418.1569 | 209.5821        | 400.1463       | 200.5768         | S    | 661.3879 | 331.1976        | 644.3614 | 322.6843         | 643.3774       | 322.1923         | 7  |
| 6  | 505.1889 | 253.0981        | 487.1783       | 244.0928         | S    | 574.3559 | 287.6816        | 557.3293 | 279.1683         | 556.3453       | 278.6763         | 6  |
| 7  | 562.2103 | 281.6088        | 544.1998       | 272.6035         | G    | 487.3239 | 244.1656        | 470.2973 | 235.6523         |                |                  | 5  |
| 8  | 675.2944 | 338.1508        | 657.2838       | 329.1456         | L    | 430.3024 | 215.6548        | 413.2758 | 207.1416         |                |                  | 4  |
| 9  | 732.3159 | 366.6616        | 714.3053       | 357.6563         | G    | 317.2183 | 159.1128        | 300.1918 | 150.5995         |                |                  | 3  |
| 10 | 845.3999 | 423.2036        | 827.3894       | 414.1983         | I    | 260.1969 | 130.6021        | 243.1703 | 122.0888         |                |                  | 2  |
| 11 |          |                 |                |                  | K    | 147.1128 | 74.0600         | 130.0863 | 65.5468          |                |                  | 1  |

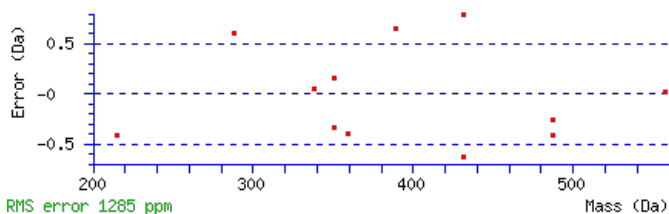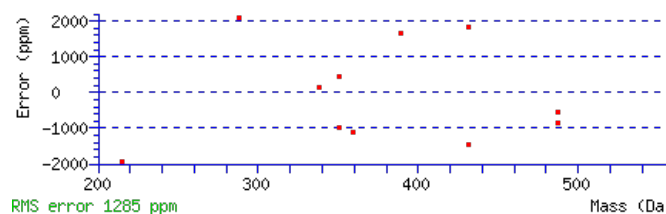

NCBI **BLAST** search of **ESGGSSGLGIK**

(Parameters: blastp, nr protein database, expect=20000, no filter, PAM30)

Other BLAST [web gateways](#)

**All matches to this query**

**AT1G79330.1**

| <b>Score</b> | <b>Mr(calc)</b> | <b>Delta</b> | <b>Sequence</b>             |
|--------------|-----------------|--------------|-----------------------------|
| 22.2         | 990.4982        | 0.0006       | <a href="#">ESGGSSGLGIK</a> |
| 3.8          | 990.4982        | 0.0006       | <a href="#">SKEEELTR</a>    |
| 3.7          | 990.4991        | -0.0003      | <a href="#">MVPMQTR</a>     |
| 3.7          | 990.4991        | -0.0003      | <a href="#">MVPMQTR</a>     |
| 1.4          | 990.4982        | 0.0006       | <a href="#">ASETSLIDR</a>   |

**Mascot:** <http://www.matrixscience.com/>

**Peptide View**MS/MS Fragmentation of **IIEIR**

Found in **AT1G79350.1** in **TAIR\_Arabidopsis**, Symbols: EMB1135 | EMB1135 (EMBRYO DEFECTIVE 1135); DNA binding | chr1:29849722-29858108 REVERSE

Match to Query 871: 764.464056 from(383.239304,2+) index(5122)

Title: Elution from: 45.560 to 45.560 scan no 6391 cid35.00 polarity:+

Data file D6h-1\_1.mgf

Click mouse within plot area to zoom in by factor of two about that point

Or,   to  Da

Label all possible matches  Label matches used for scoring

Show Y-axis

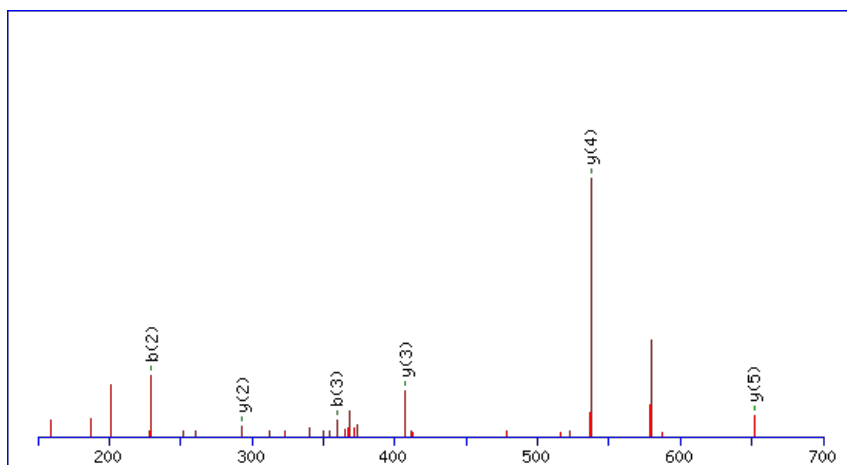

**Monoisotopic mass of neutral peptide Mr(calc):** 764.4638

**Fixed modifications:** Carbamidomethyl (C) (apply to specified residues or termini only)

**Ions Score:** 21 **Expect:** 0.03

**Matches:** 6/40 fragment ions using 15 most intense peaks ([help](#))

| # | b               | b <sup>++</sup> | b <sup>0</sup> | b <sup>0++</sup> | Seq. | y               | y <sup>++</sup> | y*       | y <sup>*++</sup> | y <sup>0</sup> | y <sup>0++</sup> | # |
|---|-----------------|-----------------|----------------|------------------|------|-----------------|-----------------|----------|------------------|----------------|------------------|---|
| 1 | 115.0884        | 58.0478         |                |                  | I    |                 |                 |          |                  |                |                  | 6 |
| 2 | <b>229.1695</b> | 115.0884        |                |                  | I    | <b>651.3900</b> | 326.1986        | 633.3664 | 317.1869         | 633.3795       | 317.1934         | 5 |
| 3 | <b>359.2091</b> | 180.1082        | 341.1985       | 171.1029         | E    | <b>537.3089</b> | 269.1581        | 519.2853 | 260.1463         | 519.2984       | 260.1528         | 4 |
| 4 | 473.2902        | 237.1487        | 455.2796       | 228.1435         | I    | <b>407.2693</b> | 204.1383        | 389.2457 | 195.1265         |                |                  | 3 |
| 5 | 587.3713        | 294.1893        | 569.3607       | 285.1840         | I    | <b>293.1882</b> | 147.0977        | 275.1646 | 138.0859         |                |                  | 2 |
| 6 |                 |                 |                |                  | R    | 179.1071        | 90.0572         | 161.0835 | 81.0454          |                |                  | 1 |

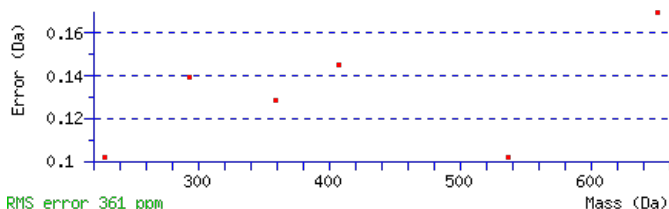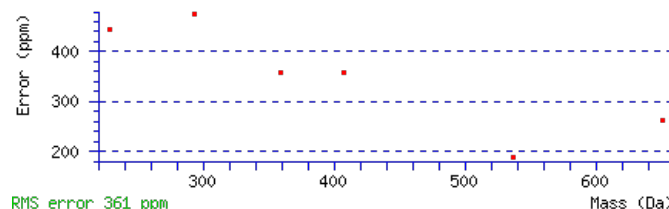NCBI **BLAST** search of **IIEIR**

(Parameters: blastp, nr protein database, expect=20000, no filter, PAM30)

Other BLAST [web gateways](#)

**All matches to this query**

| Score | Mr(calc) | Delta  | Sequence               |
|-------|----------|--------|------------------------|
| 20.6  | 764.4638 | 0.0002 | <a href="#">IIEIR</a>  |
| 20.6  | 764.4638 | 0.0002 | <a href="#">LIELIR</a> |
| 9.7   | 764.4638 | 0.0002 | <a href="#">LILELR</a> |

# AT1G79350.1

|     |          |        |                       |
|-----|----------|--------|-----------------------|
| 9.7 | 764.4638 | 0.0002 | <a href="#">LLELR</a> |
| 4.5 | 764.4638 | 0.0002 | <a href="#">LELIR</a> |
| 0.5 | 764.4638 | 0.0002 | <a href="#">EILIR</a> |
| 0.5 | 764.4638 | 0.0002 | <a href="#">ELILR</a> |
| 0.5 | 764.4638 | 0.0002 | <a href="#">ELLLR</a> |

**Mascot:** <http://www.matrixscience.com/>

## Peptide View

MS/MS Fragmentation of **DLNLTPLGSEVVDDMIRK**

Found in **AT1G79460.1** in **TAIR\_Arabidopsis**, Symbols: KS, ATKS, GA2 | GA2 (GA REQUIRING 2); ent-kaurene synthase | chr1:29895461-29899329 FORWARD

Match to Query 9865: 2151.055113 from(718.025647,3+) index(10224)

Title: Elution from: 94.286 to 94.286 scan no 14140 cid35.00 polarity:+

Data file C7-3\_1.mgf

Click mouse within plot area to zoom in by factor of two about that point

Or, Plot from  to  Da

Label all possible matches  Label matches used for scoring

Show Y-axis

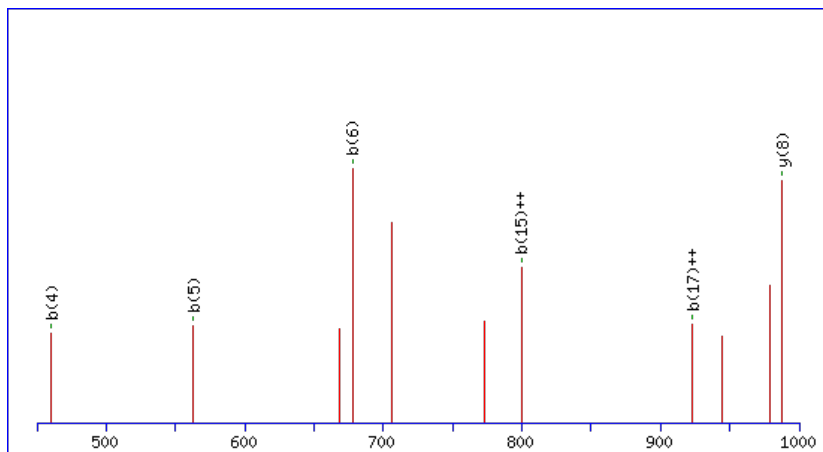

Monoisotopic mass of neutral peptide  $M_r(\text{calc})$ : 2151.0534

Fixed modifications: Carbamidomethyl (C) (apply to specified residues or termini only)

Ions Score: 23 Expect: 0.025

Matches : 6/204 fragment ions using 6 most intense peaks ([help](#))

| #  | b               | b <sup>++</sup> | b <sup>*</sup> | b <sup>*++</sup> | b <sup>0</sup> | b <sup>0++</sup> | Seq. | y               | y <sup>++</sup> | y <sup>*</sup> | y <sup>*++</sup> | y <sup>0</sup> | y <sup>0++</sup> | #  |
|----|-----------------|-----------------|----------------|------------------|----------------|------------------|------|-----------------|-----------------|----------------|------------------|----------------|------------------|----|
| 1  | 117.0313        | 59.0193         |                |                  | 99.0207        | 50.0140          | D    |                 |                 |                |                  |                |                  | 19 |
| 2  | 231.1124        | 116.0598        |                |                  | 213.1018       | 107.0545         | L    | 2036.0367       | 1018.5220       | 2018.0131      | 1009.5102        | 2018.0261      | 1009.5167        | 18 |
| 3  | 347.1493        | 174.0783        | 329.1258       | 165.0665         | 329.1388       | 165.0730         | N    | 1921.9556       | 961.4814        | 1903.9320      | 952.4696         | 1903.9450      | 952.4762         | 17 |
| 4  | <b>461.2304</b> | 231.1189        | 443.2069       | 222.1071         | 443.2199       | 222.1136         | L    | 1805.9186       | 903.4629        | 1787.8950      | 894.4511         | 1787.9080      | 894.4577         | 16 |
| 5  | <b>563.2752</b> | 282.1412        | 545.2516       | 273.1294         | 545.2646       | 273.1359         | T    | 1691.8375       | 846.4224        | 1673.8139      | 837.4106         | 1673.8269      | 837.4171         | 15 |
| 6  | <b>677.3563</b> | 339.1818        | 659.3327       | 330.1700         | 659.3457       | 330.1765         | I    | 1589.7928       | 795.4000        | 1571.7692      | 786.3882         | 1571.7822      | 786.3947         | 14 |
| 7  | 775.4061        | 388.2067        | 757.3825       | 379.1949         | 757.3955       | 379.2014         | P    | 1475.7117       | 738.3595        | 1457.6881      | 729.3477         | 1457.7011      | 729.3542         | 13 |
| 8  | 889.4872        | 445.2472        | 871.4636       | 436.2354         | 871.4766       | 436.2419         | L    | 1377.6619       | 689.3346        | 1359.6383      | 680.3228         | 1359.6513      | 680.3293         | 12 |
| 9  | 947.5057        | 474.2565        | 929.4821       | 465.2447         | 929.4951       | 465.2512         | G    | 1263.5808       | 632.2940        | 1245.5572      | 623.2822         | 1245.5702      | 623.2887         | 11 |
| 10 | 1035.5347       | 518.2710        | 1017.5111      | 509.2592         | 1017.5242      | 509.2657         | S    | 1205.5623       | 603.2848        | 1187.5387      | 594.2730         | 1187.5517      | 594.2795         | 10 |
| 11 | 1165.5743       | 583.2908        | 1147.5508      | 574.2790         | 1147.5638      | 574.2855         | E    | 1117.5332       | 559.2703        | 1099.5096      | 550.2585         | 1099.5227      | 550.2650         | 9  |
| 12 | 1265.6398       | 633.3235        | 1247.6162      | 624.3117         | 1247.6292      | 624.3183         | V    | <b>987.4936</b> | 494.2504        | 969.4700       | 485.2386         | 969.4830       | 485.2452         | 8  |
| 13 | 1365.7052       | 683.3563        | 1347.6817      | 674.3445         | 1347.6947      | 674.3510         | V    | 887.4281        | 444.2177        | 869.4046       | 435.2059         | 869.4176       | 435.2124         | 7  |
| 14 | 1481.7292       | 741.3683        | 1463.7056      | 732.3565         | 1463.7187      | 732.3630         | D    | 787.3627        | 394.1850        | 769.3391       | 385.1732         | 769.3521       | 385.1797         | 6  |
| 15 | 1597.7532       | <b>799.3802</b> | 1579.7296      | 790.3684         | 1579.7426      | 790.3750         | D    | 671.3387        | 336.1730        | 653.3151       | 327.1612         | 653.3282       | 327.1677         | 5  |
| 16 | 1729.7907       | 865.3990        | 1711.7671      | 856.3872         | 1711.7802      | 856.3937         | M    | 555.3147        | 278.1610        | 537.2912       | 269.1492         |                |                  | 4  |
| 17 | 1843.8718       | <b>922.4395</b> | 1825.8482      | 913.4278         | 1825.8613      | 913.4343         | I    | 423.2772        | 212.1423        | 405.2536       | 203.1305         |                |                  | 3  |
| 18 | 2003.9611       | 1002.4842       | 1985.9375      | 993.4724         | 1985.9505      | 993.4789         | R    | 309.1961        | 155.1017        | 291.1725       | 146.0899         |                |                  | 2  |
| 19 |                 |                 |                |                  |                |                  | K    | 149.1069        | 75.0571         | 131.0833       | 66.0453          |                |                  | 1  |

# AT1G79460.1

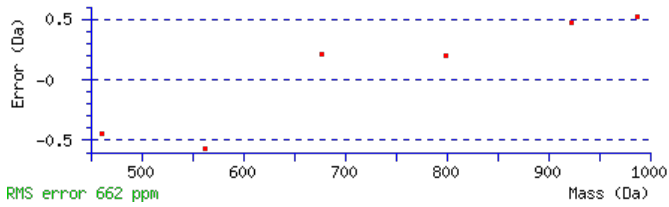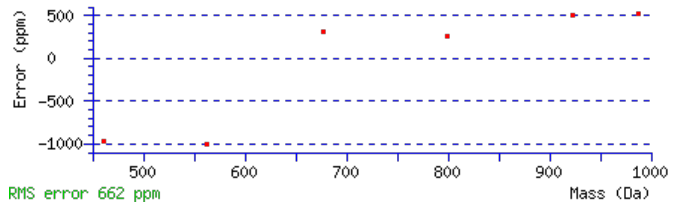

NCBI BLAST search of [DLNLTIPLGSEVVDDMIRK](#)  
 (Parameters: blastp, nr protein database, expect=20000, no filter, PAM30)  
 Other BLAST [web gateways](#)

## All matches to this query

| Score | Mr(calc)  | Delta   | Sequence                              |
|-------|-----------|---------|---------------------------------------|
| 23.3  | 2151.0534 | 0.0017  | <a href="#">DLNLTIPLGSEVVDDMIRK</a>   |
| 13.3  | 2151.0531 | 0.0020  | <a href="#">QNANAVLNVIANLQQQLR</a>    |
| 13.1  | 2151.0561 | -0.0010 | <a href="#">VLQMIANGKSSLSEIHLR</a>    |
| 8.0   | 2151.0610 | -0.0059 | <a href="#">RNPDLDPVGPPPPMIRVR</a>    |
| 7.3   | 2151.0556 | -0.0005 | <a href="#">KISLGGWEPVDAVAVEMIK</a>   |
| 5.7   | 2151.0560 | -0.0009 | <a href="#">QISGPAKTLIDTLQAAGMGPR</a> |
| 4.4   | 2151.0583 | -0.0032 | <a href="#">LMNVEGLTIYHVKSHLQK</a>    |
| 3.6   | 2151.0527 | 0.0024  | <a href="#">GFSLLADPERHLITAESLR</a>   |
| 2.5   | 2151.0505 | 0.0046  | <a href="#">KETNPQKNTSLPTS NVLPR</a>  |
| 1.5   | 2151.0576 | -0.0025 | <a href="#">EKLTHLRVYWHDIVTGR</a>     |

Mascot: <http://www.matrixscience.com/>

**Peptide View**MS/MS Fragmentation of **LAALADVYVNDAFGTAHR**Found in **AT1G79550.1** in **TAIR\_Arabidopsis**, Symbols: PGK | PGK (PHOSPHOGLYCERATE KINASE) | chr1:29929240-29931188  
REVERSE

Match to Query 9123: 1902.958785 from(635.326871,3+) index(8058)

Title: Elution from: 73.598 to 73.598 scan no 10662 cid35.00 polarity:+

Data file D12h-2\_1.mgf

Click mouse within plot area to zoom in by factor of two about that point

Or,   to  Da Label all possible matches  Label matches used for scoring Show Y-axis 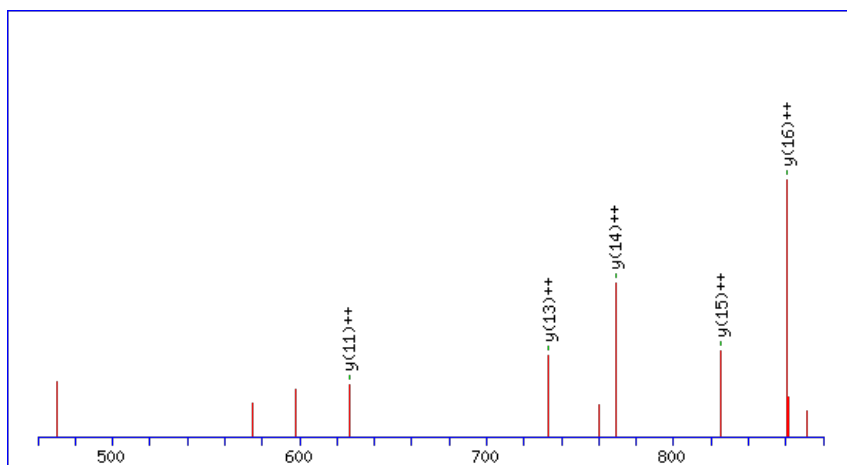Monoisotopic mass of neutral peptide **Mr(calc)**: 1902.9588**Fixed modifications**: Carbamidomethyl (C) (apply to specified residues or termini only)**Ions Score**: 32 **Expect**: 0.0036**Matches**: 5/170 fragment ions using 8 most intense peaks ([help](#))

| #  | b         | b <sup>++</sup> | b <sup>*</sup> | b <sup>*++</sup> | b <sup>0</sup> | b <sup>0++</sup> | Seq. | y         | y <sup>++</sup> | y <sup>*</sup> | y <sup>*++</sup> | y <sup>0</sup> | y <sup>0++</sup> | #  |
|----|-----------|-----------------|----------------|------------------|----------------|------------------|------|-----------|-----------------|----------------|------------------|----------------|------------------|----|
| 1  | 114.0913  | 57.5493         |                |                  |                |                  | L    |           |                 |                |                  |                |                  | 18 |
| 2  | 185.1285  | 93.0679         |                |                  |                |                  | A    | 1790.8820 | 895.9447        | 1773.8555      | 887.4314         | 1772.8715      | 886.9394         | 17 |
| 3  | 256.1656  | 128.5864        |                |                  |                |                  | A    | 1719.8449 | 860.4261        | 1702.8184      | 851.9128         | 1701.8343      | 851.4208         | 16 |
| 4  | 369.2496  | 185.1285        |                |                  |                |                  | L    | 1648.8078 | 824.9075        | 1631.7812      | 816.3943         | 1630.7972      | 815.9023         | 15 |
| 5  | 440.2867  | 220.6470        |                |                  |                |                  | A    | 1535.7237 | 768.3655        | 1518.6972      | 759.8522         | 1517.7132      | 759.3602         | 14 |
| 6  | 555.3137  | 278.1605        |                |                  | 537.3031       | 269.1552         | D    | 1464.6866 | 732.8469        | 1447.6601      | 724.3337         | 1446.6761      | 723.8417         | 13 |
| 7  | 654.3821  | 327.6947        |                |                  | 636.3715       | 318.6894         | V    | 1349.6597 | 675.3335        | 1332.6331      | 666.8202         | 1331.6491      | 666.3282         | 12 |
| 8  | 817.4454  | 409.2264        |                |                  | 799.4349       | 400.2211         | Y    | 1250.5913 | 625.7993        | 1233.5647      | 617.2860         | 1232.5807      | 616.7940         | 11 |
| 9  | 916.5138  | 458.7606        |                |                  | 898.5033       | 449.7553         | V    | 1087.5279 | 544.2676        | 1070.5014      | 535.7543         | 1069.5174      | 535.2623         | 10 |
| 10 | 1030.5568 | 515.7820        | 1013.5302      | 507.2688         | 1012.5462      | 506.7767         | N    | 988.4595  | 494.7334        | 971.4330       | 486.2201         | 970.4490       | 485.7281         | 9  |
| 11 | 1145.5837 | 573.2955        | 1128.5572      | 564.7822         | 1127.5732      | 564.2902         | D    | 874.4166  | 437.7119        | 857.3900       | 429.1987         | 856.4060       | 428.7067         | 8  |
| 12 | 1216.6208 | 608.8141        | 1199.5943      | 600.3008         | 1198.6103      | 599.8088         | A    | 759.3896  | 380.1985        | 742.3631       | 371.6852         | 741.3791       | 371.1932         | 7  |
| 13 | 1363.6892 | 682.3483        | 1346.6627      | 673.8350         | 1345.6787      | 673.3430         | F    | 688.3525  | 344.6799        | 671.3260       | 336.1666         | 670.3420       | 335.6746         | 6  |
| 14 | 1420.7107 | 710.8590        | 1403.6842      | 702.3457         | 1402.7001      | 701.8537         | G    | 541.2841  | 271.1457        | 524.2576       | 262.6324         | 523.2736       | 262.1404         | 5  |
| 15 | 1521.7584 | 761.3828        | 1504.7318      | 752.8696         | 1503.7478      | 752.3775         | T    | 484.2627  | 242.6350        | 467.2361       | 234.1217         | 466.2521       | 233.6297         | 4  |
| 16 | 1592.7955 | 796.9014        | 1575.7690      | 788.3881         | 1574.7849      | 787.8961         | A    | 383.2150  | 192.1111        | 366.1884       | 183.5979         |                |                  | 3  |
| 17 | 1729.8544 | 865.4308        | 1712.8279      | 856.9176         | 1711.8438      | 856.4256         | H    | 312.1779  | 156.5926        | 295.1513       | 148.0793         |                |                  | 2  |
| 18 |           |                 |                |                  |                |                  | R    | 175.1190  | 88.0631         | 158.0924       | 79.5498          |                |                  | 1  |



# AT1G79550.1

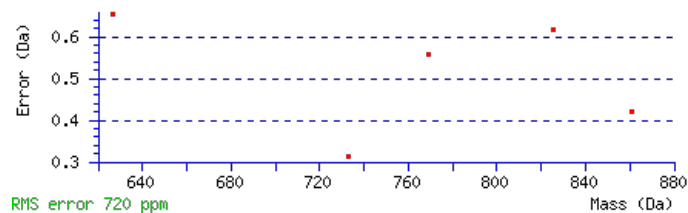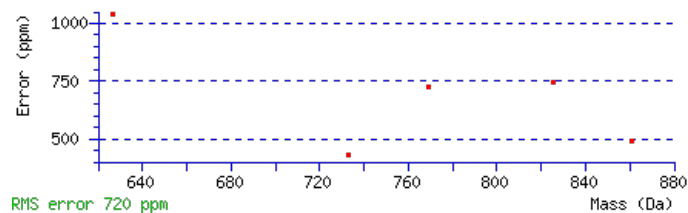

NCBI **BLAST** search of [LAALADVYNDAFGTAHR](#)

(Parameters: blastp, nr protein database, expect=20000, no filter, PAM30)

Other BLAST [web gateways](#)

## All matches to this query

| Score | Mr(calc)  | Delta   | Sequence                          |
|-------|-----------|---------|-----------------------------------|
| 31.9  | 1902.9588 | -0.0000 | <a href="#">LAALADVYNDAFGTAHR</a> |
| 0.4   | 1902.9581 | 0.0006  | <a href="#">QDGNSLDMLIRRAVGK</a>  |
| 0.2   | 1902.9548 | 0.0040  | <a href="#">SPDRVDSFDVSSPIRAR</a> |
| 0.0   | 1902.9588 | -0.0000 | <a href="#">SVFDDQTSKALKNWHK</a>  |

Mascot: <http://www.matrixscience.com/>

**Peptide View**MS/MS Fragmentation of **LYVTMK**

Found in **AT1G79560.1** in **TAIR\_Arabidopsis**, Symbols: EMB1047, FTSH12 | EMB1047/FTSH12 (EMBRYO DEFECTIVE 1047); ATP-dependent peptidase/ ATPase/ metallopeptidase | chr1:29931869-29937201 FORWARD

Match to Query 825: 769.404274 from(385.709413,2+) index(2579)

Title: Elution from: 26.805 to 26.805 scan no 3207 cid35.00 polarity:+

Data file D12h-1\_3.mgf

Click mouse within plot area to zoom in by factor of two about that point

Or,   to  Da

Label all possible matches  Label matches used for scoring

Show Y-axis

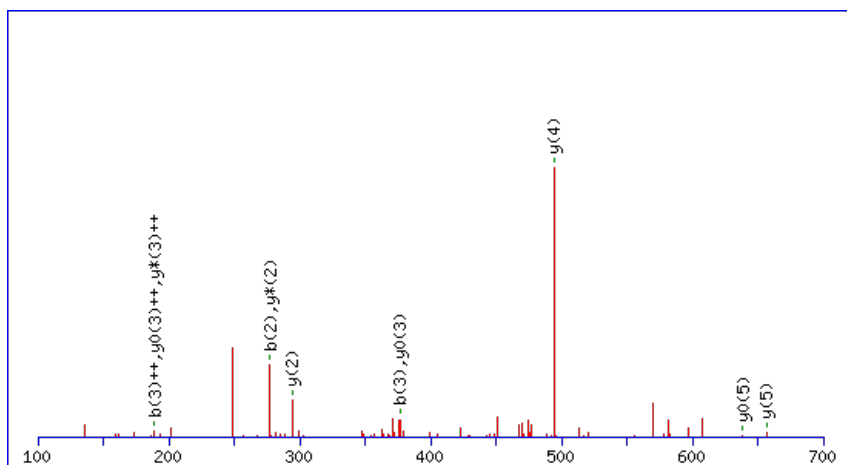

Monoisotopic mass of neutral peptide  $M_r(\text{calc})$ : 769.4044

Fixed modifications: Carbamidomethyl (C) (apply to specified residues or termini only)

Variable modifications:

M5 : Oxidation (M), with neutral losses 0.0000 (shown in table), 63.9983

Ions Score: 15 Expect: 0.033

Matches : 11/66 fragment ions using 18 most intense peaks ([help](#))

| # | b               | b <sup>++</sup> | b <sup>0</sup> | b <sup>0++</sup> | Seq. | y               | y <sup>++</sup> | y <sup>*</sup>  | y <sup>*++</sup> | y <sup>0</sup>  | y <sup>0++</sup> | # |
|---|-----------------|-----------------|----------------|------------------|------|-----------------|-----------------|-----------------|------------------|-----------------|------------------|---|
| 1 | 114.0913        | 57.5493         |                |                  | L    |                 |                 |                 |                  |                 |                  | 6 |
| 2 | <b>277.1547</b> | 139.0810        |                |                  | Y    | <b>657.3276</b> | 329.1675        | 640.3011        | 320.6542         | <b>639.3171</b> | 320.1622         | 5 |
| 3 | <b>376.2231</b> | <b>188.6152</b> |                |                  | V    | <b>494.2643</b> | 247.6358        | 477.2377        | 239.1225         | 476.2537        | 238.6305         | 4 |
| 4 | 477.2708        | 239.1390        | 459.2602       | 230.1337         | T    | 395.1959        | 198.1016        | 378.1693        | <b>189.5883</b>  | <b>377.1853</b> | <b>189.0963</b>  | 3 |
| 5 | 624.3062        | 312.6567        | 606.2956       | 303.6514         | M    | <b>294.1482</b> | 147.5777        | <b>277.1217</b> | 139.0645         |                 |                  | 2 |
| 6 |                 |                 |                |                  | K    | 147.1128        | 74.0600         | 130.0863        | 65.5468          |                 |                  | 1 |

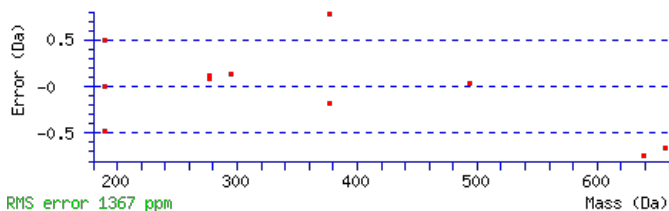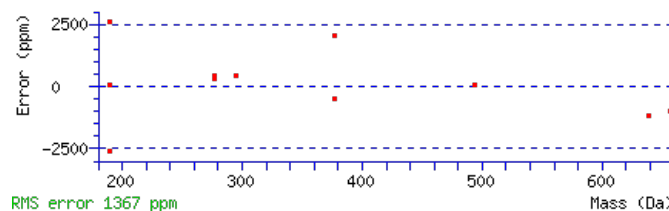

NCBI **BLAST** search of [LYVTMK](#)

(Parameters: blastp, nr protein database, expect=20000, no filter, PAM30)

Other BLAST [web gateways](#)

**All matches to this query**

| Score | $M_r(\text{calc})$ | Delta   | Sequence               |
|-------|--------------------|---------|------------------------|
| 14.8  | 769.4044           | -0.0001 | <a href="#">LYVTMK</a> |



**Peptide View**MS/MS Fragmentation of **LTGGQDIIR**Found in **AT1G79740.1** in **TAIR\_Arabidopsis**, Symbols: | hAT dimerisation domain-containing protein | chr1:30009260-30011122 REVERSE

Match to Query 2271: 984.503668 from(493.259110,2+) index(8703)

Title: Elution from: 77.643 to 77.643 scan no 11648 cid35.00 polarity:+

Data file 0-3\_2.mgf

Click mouse within plot area to zoom in by factor of two about that point

Or,   to  Da Label all possible matches  Label matches used for scoring Show Y-axis 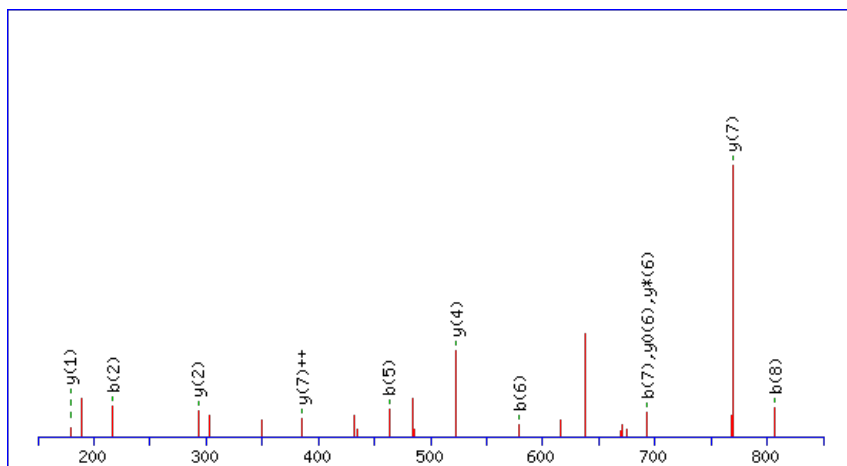Monoisotopic mass of neutral peptide **Mr(calc)**: 984.5014**Fixed modifications**: Carbamidomethyl (C) (apply to specified residues or termini only)**Ions Score**: 30 **Expect**: 0.01**Matches** : 12/80 fragment ions using 19 most intense peaks ([help](#))

| # | b               | b <sup>++</sup> | b*       | b <sup>*++</sup> | b <sup>0</sup> | b <sup>0++</sup> | Seq. | y               | y <sup>++</sup> | y*              | y <sup>*++</sup> | y <sup>0</sup>  | y <sup>0++</sup> | # |
|---|-----------------|-----------------|----------|------------------|----------------|------------------|------|-----------------|-----------------|-----------------|------------------|-----------------|------------------|---|
| 1 | 115.0884        | 58.0478         |          |                  |                |                  | L    |                 |                 |                 |                  |                 |                  | 9 |
| 2 | <b>217.1331</b> | 109.0702        |          |                  | 199.1225       | 100.0649         | T    | 871.4276        | 436.2175        | 853.4040        | 427.2057         | 853.4171        | 427.2122         | 8 |
| 3 | 275.1516        | 138.0794        |          |                  | 257.1410       | 129.0741         | G    | <b>769.3829</b> | <b>385.1951</b> | 751.3593        | 376.1833         | 751.3723        | 376.1898         | 7 |
| 4 | 333.1701        | 167.0887        |          |                  | 315.1595       | 158.0834         | G    | 711.3644        | 356.1858        | <b>693.3408</b> | 347.1741         | <b>693.3538</b> | 347.1806         | 6 |
| 5 | <b>463.2227</b> | 232.1150        | 445.1991 | 223.1032         | 445.2122       | 223.1097         | Q    | 653.3459        | 327.1766        | 635.3223        | 318.1648         | 635.3353        | 318.1713         | 5 |
| 6 | <b>579.2467</b> | 290.1270        | 561.2231 | 281.1152         | 561.2361       | 281.1217         | D    | <b>523.2933</b> | 262.1503        | 505.2697        | 253.1385         | 505.2827        | 253.1450         | 4 |
| 7 | <b>693.3278</b> | 347.1675        | 675.3042 | 338.1558         | 675.3172       | 338.1623         | I    | 407.2693        | 204.1383        | 389.2457        | 195.1265         |                 |                  | 3 |
| 8 | <b>807.4089</b> | 404.2081        | 789.3853 | 395.1963         | 789.3983       | 395.2028         | I    | <b>293.1882</b> | 147.0977        | 275.1646        | 138.0859         |                 |                  | 2 |
| 9 |                 |                 |          |                  |                |                  | R    | <b>179.1071</b> | 90.0572         | 161.0835        | 81.0454          |                 |                  | 1 |

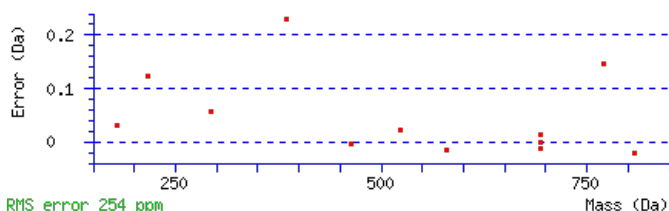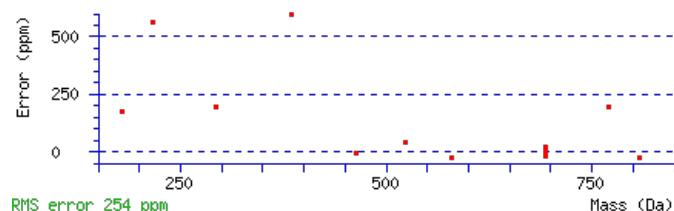NCBI **BLAST** search of [LTGGQDIIR](#)

(Parameters: blastp, nr protein database, expect=20000, no filter, PAM30)

Other BLAST [web gateways](#)**All matches to this query**

| Score | Mr(calc) | Delta  | Sequence                  |
|-------|----------|--------|---------------------------|
| 30.4  | 984.5014 | 0.0022 | <a href="#">LTGGQDIIR</a> |

## AT1G79740.1

|      |          |         |                           |
|------|----------|---------|---------------------------|
| 15.0 | 984.5014 | 0.0022  | <a href="#">LQTDNIIR</a>  |
| 12.6 | 984.5037 | -0.0000 | <a href="#">WIEIAVSR</a>  |
| 9.2  | 984.5037 | -0.0000 | <a href="#">VPNDLFIR</a>  |
| 8.7  | 984.5041 | -0.0004 | <a href="#">TLRTVHSR</a>  |
| 7.7  | 984.5063 | -0.0027 | <a href="#">NVFKGLHR</a>  |
| 6.7  | 984.5041 | -0.0004 | <a href="#">TVRNVGPAR</a> |
| 5.3  | 984.5063 | -0.0027 | <a href="#">QWKKGPAR</a>  |
| 5.2  | 984.5014 | 0.0022  | <a href="#">TKVKDEPR</a>  |
| 4.7  | 984.5014 | 0.0022  | <a href="#">EGVNITALR</a> |

Mascot: <http://www.matrixscience.com/>

## Peptide View

### MS/MS Fragmentation of **SFVALPVIAR**

Found in **AT1G79850.1** in **TAIR\_Arabidopsis**, Symbols: ORE4, CS17, PRPS17, RPS17 | RPS17 (ribosomal protein S17); structural constituent of ribosome | chr1:30046366-30046815 REVERSE

Match to Query 2909: 1071.644784 from(536.829668,2+) index(7140)

Title: Elution from: 62.307 to 62.307 scan no 9300 cid35.00 polarity:+

Data file D6h-3\_3.mgf

Click mouse within plot area to zoom in by factor of two about that point

Or,   to  Da

Label all possible matches  Label matches used for scoring

Show Y-axis

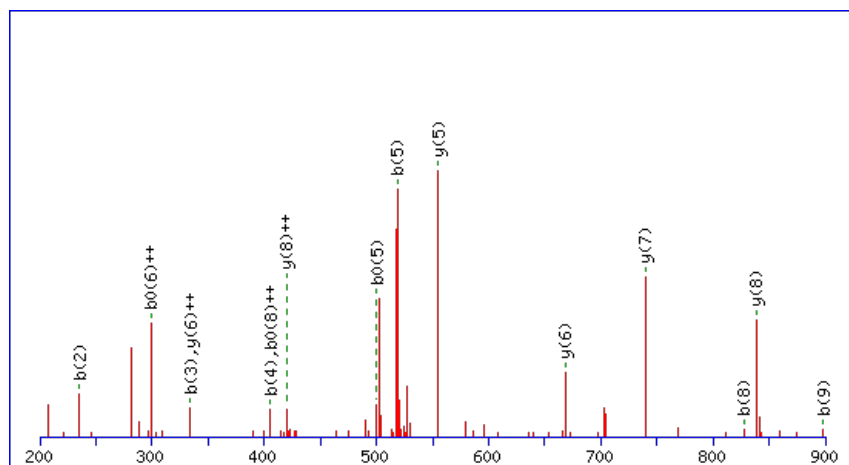

Monoisotopic mass of neutral peptide  $M_r(\text{calc})$ : 1071.6441

Fixed modifications: Carbamidomethyl (C) (apply to specified residues or termini only)

Ions Score: 38 Expect: 0.00022

Matches : 15/72 fragment ions using 26 most intense peaks ([help](#))

| #  | b               | b <sup>++</sup> | b <sup>0</sup>  | b <sup>0++</sup> | Seq. | y               | y <sup>++</sup> | y*       | y <sup>*++</sup> | #  |
|----|-----------------|-----------------|-----------------|------------------|------|-----------------|-----------------|----------|------------------|----|
| 1  | 88.0393         | 44.5233         | 70.0287         | 35.5180          | S    |                 |                 |          |                  | 10 |
| 2  | <b>235.1077</b> | 118.0575        | 217.0972        | 109.0522         | F    | 985.6193        | 493.3133        | 968.5928 | 484.8000         | 9  |
| 3  | <b>334.1761</b> | 167.5917        | 316.1656        | 158.5864         | V    | <b>838.5509</b> | <b>419.7791</b> | 821.5244 | 411.2658         | 8  |
| 4  | <b>405.2132</b> | 203.1103        | 387.2027        | 194.1050         | A    | <b>739.4825</b> | 370.2449        | 722.4559 | 361.7316         | 7  |
| 5  | <b>518.2973</b> | 259.6523        | <b>500.2867</b> | 250.6470         | L    | <b>668.4454</b> | <b>334.7263</b> | 651.4188 | 326.2130         | 6  |
| 6  | 615.3501        | 308.1787        | 597.3395        | <b>299.1734</b>  | P    | <b>555.3613</b> | 278.1843        | 538.3348 | 269.6710         | 5  |
| 7  | 714.4185        | 357.7129        | 696.4079        | 348.7076         | V    | 458.3085        | 229.6579        | 441.2820 | 221.1446         | 4  |
| 8  | <b>827.5026</b> | 414.2549        | 809.4920        | <b>405.2496</b>  | I    | 359.2401        | 180.1237        | 342.2136 | 171.6104         | 3  |
| 9  | <b>898.5397</b> | 449.7735        | 880.5291        | 440.7682         | A    | 246.1561        | 123.5817        | 229.1295 | 115.0684         | 2  |
| 10 |                 |                 |                 |                  | R    | 175.1190        | 88.0631         | 158.0924 | 79.5498          | 1  |

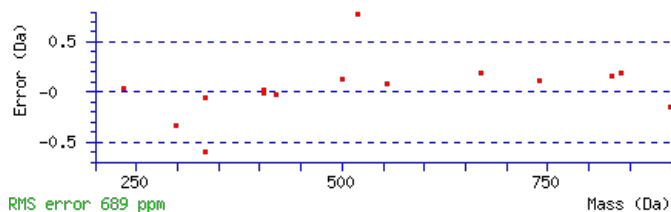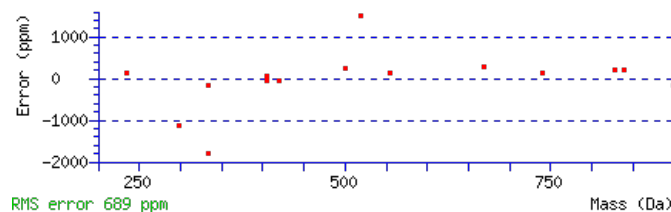

NCBI BLAST search of **SFVALPVIAR**

(Parameters: blastp, nr protein database, expect=20000, no filter, PAM30)

Other BLAST [web gateways](#)

All matches to this query

AT1G79850.1

| Score | Mr(calc)  | Delta  | Sequence                   |
|-------|-----------|--------|----------------------------|
| 38.3  | 1071.6441 | 0.0007 | <a href="#">SFVALPVIAR</a> |
| 0.1   | 1071.6441 | 0.0007 | <a href="#">LAPSGFVLLR</a> |

Mascot: <http://www.matrixscience.com/>

**Peptide View**MS/MS Fragmentation of **FIGTAGAASTMMNPK**Found in **AT1G79920.1** in **TAIR\_Arabidopsis**, Symbols: | heat shock protein 70, putative / HSP70, putative | chr1:30064195-30067117 REVERSE

Match to Query 5859: 1495.716876 from(748.865714,2+) index(4294)

Title: Elution from: 42.650 to 42.650 scan no 5514 cid35.00 polarity:+

Data file D1d-2\_2.mgf

Click mouse within plot area to zoom in by factor of two about that point

Or,  to  Da Label all possible matches  Label matches used for scoring Show Y-axis 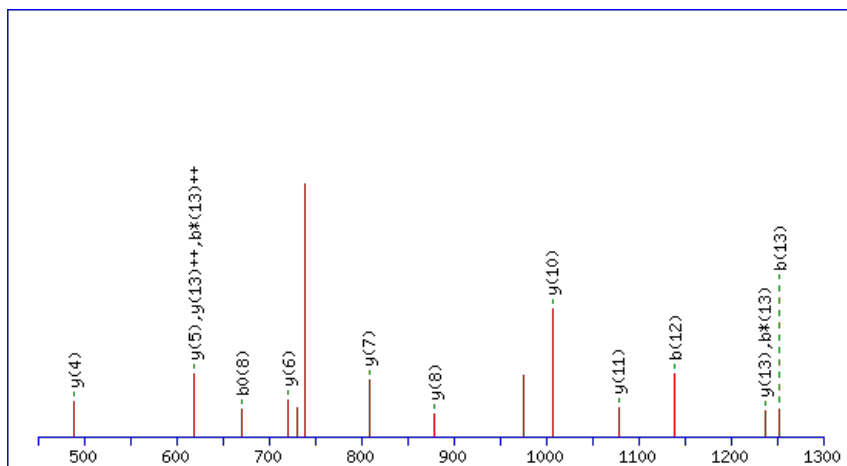Monoisotopic mass of neutral peptide  $M_r(\text{calc})$ : 1495.7163

Fixed modifications: Carbamidomethyl (C) (apply to specified residues or termini only)

Ions Score: 78 Expect: 8.9e-008

Matches : 14/128 fragment ions using 13 most intense peaks ([help](#))

| #  | b                | b <sup>++</sup> | b*               | b <sup>*++</sup> | b <sup>0</sup>  | b <sup>0++</sup> | Seq. | y                | y <sup>++</sup> | y*        | y <sup>*++</sup> | y <sup>0</sup> | y <sup>0++</sup> | #  |
|----|------------------|-----------------|------------------|------------------|-----------------|------------------|------|------------------|-----------------|-----------|------------------|----------------|------------------|----|
| 1  | 148.0757         | 74.5415         |                  |                  |                 |                  | F    |                  |                 |           |                  |                |                  | 15 |
| 2  | 261.1598         | 131.0835        |                  |                  |                 |                  | I    | 1349.6552        | 675.3312        | 1332.6286 | 666.8180         | 1331.6446      | 666.3259         | 14 |
| 3  | 318.1812         | 159.5942        |                  |                  |                 |                  | G    | <b>1236.5711</b> | <b>618.7892</b> | 1219.5446 | 610.2759         | 1218.5606      | 609.7839         | 13 |
| 4  | 419.2289         | 210.1181        |                  |                  | 401.2183        | 201.1128         | T    | 1179.5497        | 590.2785        | 1162.5231 | 581.7652         | 1161.5391      | 581.2732         | 12 |
| 5  | 490.2660         | 245.6366        |                  |                  | 472.2554        | 236.6314         | A    | <b>1078.5020</b> | 539.7546        | 1061.4754 | 531.2414         | 1060.4914      | 530.7493         | 11 |
| 6  | 547.2875         | 274.1474        |                  |                  | 529.2769        | 265.1421         | G    | <b>1007.4649</b> | 504.2361        | 990.4383  | 495.7228         | 989.4543       | 495.2308         | 10 |
| 7  | 618.3246         | 309.6659        |                  |                  | 600.3140        | 300.6607         | A    | 950.4434         | 475.7253        | 933.4169  | 467.2121         | 932.4328       | 466.7201         | 9  |
| 8  | 689.3617         | 345.1845        |                  |                  | <b>671.3511</b> | 336.1792         | A    | <b>879.4063</b>  | 440.2068        | 862.3797  | 431.6935         | 861.3957       | 431.2015         | 8  |
| 9  | 776.3937         | 388.7005        |                  |                  | 758.3832        | 379.6952         | S    | <b>808.3692</b>  | 404.6882        | 791.3426  | 396.1749         | 790.3586       | 395.6829         | 7  |
| 10 | 877.4414         | 439.2243        |                  |                  | 859.4308        | 430.2191         | T    | <b>721.3371</b>  | 361.1722        | 704.3106  | 352.6589         | 703.3266       | 352.1669         | 6  |
| 11 | 1008.4819        | 504.7446        |                  |                  | 990.4713        | 495.7393         | M    | <b>620.2895</b>  | 310.6484        | 603.2629  | 302.1351         |                |                  | 5  |
| 12 | <b>1139.5224</b> | 570.2648        |                  |                  | 1121.5118       | 561.2595         | M    | <b>489.2490</b>  | 245.1281        | 472.2224  | 236.6149         |                |                  | 4  |
| 13 | <b>1253.5653</b> | 627.2863        | <b>1236.5388</b> | <b>618.7730</b>  | 1235.5547       | 618.2810         | N    | 358.2085         | 179.6079        | 341.1819  | 171.0946         |                |                  | 3  |
| 14 | 1350.6181        | 675.8127        | 1333.5915        | 667.2994         | 1332.6075       | 666.8074         | P    | 244.1656         | 122.5864        | 227.1390  | 114.0731         |                |                  | 2  |
| 15 |                  |                 |                  |                  |                 |                  | K    | 147.1128         | 74.0600         | 130.0863  | 65.5468          |                |                  | 1  |

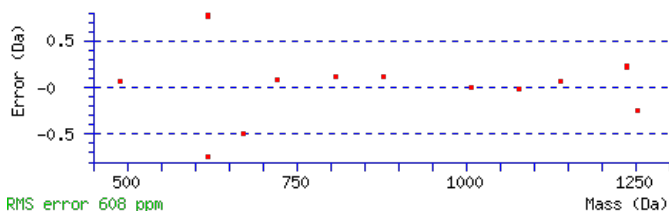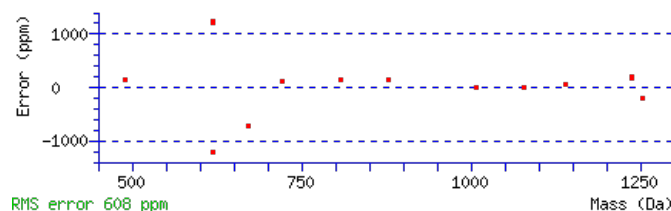NCBI **BLAST** search of [FIGTAGAASTMMNPK](#)



## AT1G79920.1

(Parameters: blastp, nr protein database, expect=20000, no filter, PAM30)

Other BLAST [web gateways](#)

### All matches to this query

| Score | Mr(calc)  | Delta   | Sequence                        |
|-------|-----------|---------|---------------------------------|
| 77.9  | 1495.7163 | 0.0006  | <a href="#">FIGTAGAASTMMNPK</a> |
| 3.8   | 1495.7163 | 0.0006  | <a href="#">NEACKQMLVYPK</a>    |
| 3.6   | 1495.7168 | 0.0001  | <a href="#">SWDTRSFQQVSR</a>    |
| 3.4   | 1495.7154 | 0.0015  | <a href="#">EHIEALETESNPK</a>   |
| 1.5   | 1495.7163 | 0.0006  | <a href="#">MLDMGFEPQIRK</a>    |
| 1.2   | 1495.7130 | 0.0039  | <a href="#">YPSDVVPCEFRK</a>    |
| 1.2   | 1495.7163 | 0.0006  | <a href="#">QQMTFNDMQLLK</a>    |
| 1.0   | 1495.7197 | -0.0028 | <a href="#">KCVSDMLKDCLK</a>    |
| 0.8   | 1495.7188 | -0.0019 | <a href="#">IMTSTVDIKDDSR</a>   |

Mascot: <http://www.matrixscience.com/>

**Peptide View**MS/MS Fragmentation of **ISTYTIGPFQSSK**Found in **AT1G79930.1** in **TAIR\_Arabidopsis**, Symbols: HSP91 | HSP91 (Heat shock protein 91) | chr1:30068674-30071960 REVERSE

Match to Query 5421: 1427.726858 from(714.870705,2+) index(5485)

Title: Elution from: 48.892 to 48.892 scan no 7069 cid35.00 polarity:+

Data file D12h-3\_3.mgf

Click mouse within plot area to zoom in by factor of two about that point

Or,   to  Da Label all possible matches  Label matches used for scoring Show Y-axis 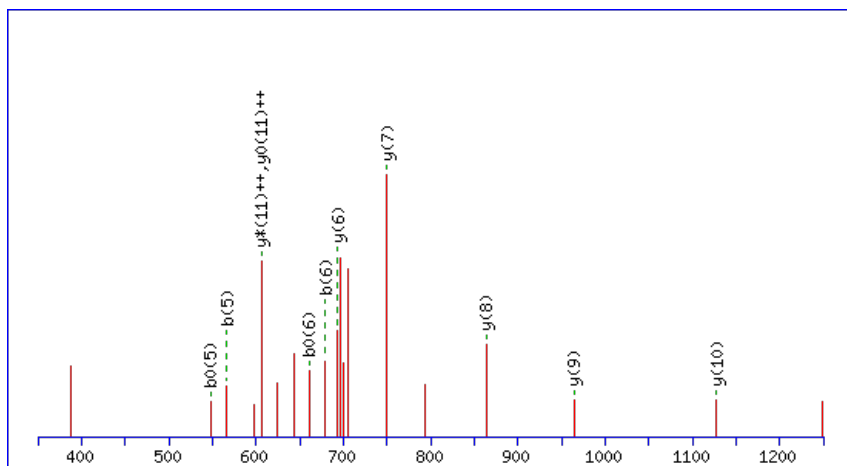Monoisotopic mass of neutral peptide  $M_r(\text{calc})$ : 1427.7296

Fixed modifications: Carbamidomethyl (C) (apply to specified residues or termini only)

Ions Score: 36 Expect: 0.0015

Matches : 11/122 fragment ions using 16 most intense peaks ([help](#))

| #  | b         | b <sup>++</sup> | b*        | b <sup>*++</sup> | b <sup>0</sup> | b <sup>0++</sup> | Seq. | y         | y <sup>++</sup> | y*        | y <sup>*++</sup> | y <sup>0</sup> | y <sup>0++</sup> | #  |
|----|-----------|-----------------|-----------|------------------|----------------|------------------|------|-----------|-----------------|-----------|------------------|----------------|------------------|----|
| 1  | 114.0913  | 57.5493         |           |                  |                |                  | I    |           |                 |           |                  |                |                  | 13 |
| 2  | 201.1234  | 101.0653        |           |                  | 183.1128       | 92.0600          | S    | 1315.6529 | 658.3301        | 1298.6263 | 649.8168         | 1297.6423      | 649.3248         | 12 |
| 3  | 302.1710  | 151.5892        |           |                  | 284.1605       | 142.5839         | T    | 1228.6208 | 614.8141        | 1211.5943 | 606.3008         | 1210.6103      | 605.8088         | 11 |
| 4  | 465.2344  | 233.1208        |           |                  | 447.2238       | 224.1155         | Y    | 1127.5732 | 564.2902        | 1110.5466 | 555.7769         | 1109.5626      | 555.2849         | 10 |
| 5  | 566.2821  | 283.6447        |           |                  | 548.2715       | 274.6394         | T    | 964.5098  | 482.7585        | 947.4833  | 474.2453         | 946.4993       | 473.7533         | 9  |
| 6  | 679.3661  | 340.1867        |           |                  | 661.3556       | 331.1814         | I    | 863.4621  | 432.2347        | 846.4356  | 423.7214         | 845.4516       | 423.2294         | 8  |
| 7  | 736.3876  | 368.6974        |           |                  | 718.3770       | 359.6921         | G    | 750.3781  | 375.6927        | 733.3515  | 367.1794         | 732.3675       | 366.6874         | 7  |
| 8  | 833.4403  | 417.2238        |           |                  | 815.4298       | 408.2185         | P    | 693.3566  | 347.1819        | 676.3301  | 338.6687         | 675.3461       | 338.1767         | 6  |
| 9  | 980.5088  | 490.7580        |           |                  | 962.4982       | 481.7527         | F    | 596.3039  | 298.6556        | 579.2773  | 290.1423         | 578.2933       | 289.6503         | 5  |
| 10 | 1108.5673 | 554.7873        | 1091.5408 | 546.2740         | 1090.5568      | 545.7820         | Q    | 449.2354  | 225.1214        | 432.2089  | 216.6081         | 431.2249       | 216.1161         | 4  |
| 11 | 1195.5994 | 598.3033        | 1178.5728 | 589.7900         | 1177.5888      | 589.2980         | S    | 321.1769  | 161.0921        | 304.1503  | 152.5788         | 303.1663       | 152.0868         | 3  |
| 12 | 1282.6314 | 641.8193        | 1265.6048 | 633.3061         | 1264.6208      | 632.8141         | S    | 234.1448  | 117.5761        | 217.1183  | 109.0628         | 216.1343       | 108.5708         | 2  |
| 13 |           |                 |           |                  |                |                  | K    | 147.1128  | 74.0600         | 130.0863  | 65.5468          |                |                  | 1  |

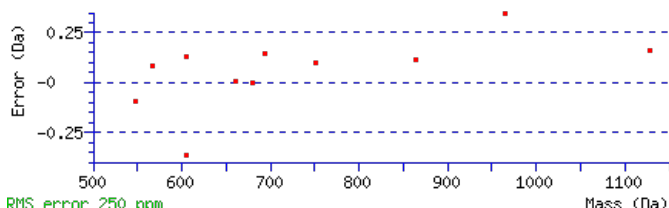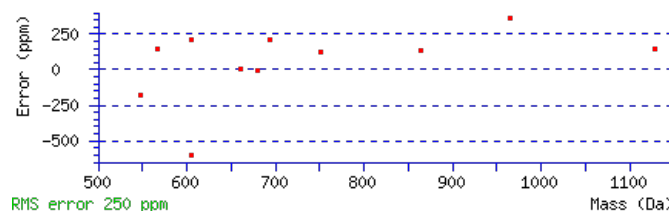NCBI BLAST search of [ISTYTIGPFQSSK](#)

(Parameters: blastp, nr protein database, expect=20000, no filter, PAM30)

Other BLAST [web gateways](#)

AT1G79930.1

All matches to this query

| Score | Mr(calc)  | Delta   | Sequence                      |
|-------|-----------|---------|-------------------------------|
| 35.5  | 1427.7296 | -0.0028 | <a href="#">ISTYTIGPFQSSK</a> |

Mascot: <http://www.matrixscience.com/>

**Peptide View**MS/MS Fragmentation of **AVDPQLEVVNK**Found in **AT1G80380.1** in **TAIR\_Arabidopsis**, Symbols: | phosphoribulokinase/uridine kinase-related | chr1:30222224-30224676 FORWARD

Match to Query 4155: 1224.614698 from(613.314625,2+) index(3065)

Title: Elution from: 30.492 to 30.492 scan no 3806 cid35.00 polarity:+

Data file 0-3\_2.mgf

Click mouse within plot area to zoom in by factor of two about that point

Or,   to  Da Label all possible matches  Label matches used for scoring Show Y-axis 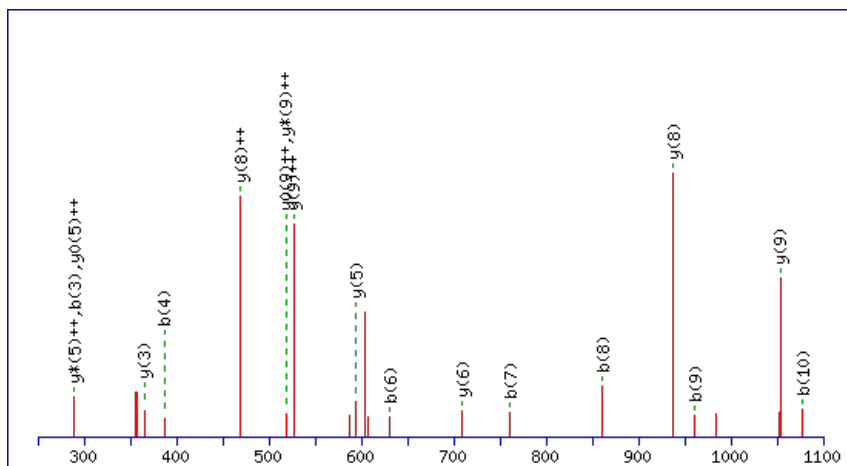Monoisotopic mass of neutral peptide  $M_r(\text{calc})$ : 1224.6142

Fixed modifications: Carbamidomethyl (C) (apply to specified residues or termini only)

Ions Score: 57 Expect: 1e-005

Matches : 18/100 fragment ions using 24 most intense peaks ([help](#))

| #  | b                | b <sup>++</sup> | b <sup>*</sup> | b <sup>*++</sup> | b <sup>0</sup> | b <sup>0++</sup> | Seq. | y                | y <sup>++</sup> | y <sup>*</sup> | y <sup>*++</sup> | y <sup>0</sup> | y <sup>0++</sup> | #  |
|----|------------------|-----------------|----------------|------------------|----------------|------------------|------|------------------|-----------------|----------------|------------------|----------------|------------------|----|
| 1  | 73.0414          | 37.0244         |                |                  |                |                  | A    |                  |                 |                |                  |                |                  | 11 |
| 2  | 173.1069         | 87.0571         |                |                  |                |                  | V    | 1153.5874        | 577.2973        | 1135.5638      | 568.2855         | 1135.5768      | 568.2920         | 10 |
| 3  | <b>289.1309</b>  | 145.0691        |                |                  | 271.1203       | 136.0638         | D    | <b>1053.5219</b> | <b>527.2646</b> | 1035.4983      | <b>518.2528</b>  | 1035.5114      | <b>518.2593</b>  | 9  |
| 4  | <b>387.1807</b>  | 194.0940        |                |                  | 369.1701       | 185.0887         | P    | <b>937.4979</b>  | <b>469.2526</b> | 919.4744       | 460.2408         | 919.4874       | 460.2473         | 8  |
| 5  | 517.2333         | 259.1203        | 499.2097       | 250.1085         | 499.2227       | 250.1150         | Q    | 839.4481         | 420.2277        | 821.4246       | 411.2159         | 821.4376       | 411.2224         | 7  |
| 6  | <b>631.3144</b>  | 316.1608        | 613.2908       | 307.1490         | 613.3038       | 307.1556         | L    | <b>709.3955</b>  | 355.2014        | 691.3719       | 346.1896         | 691.3849       | 346.1961         | 6  |
| 7  | <b>761.3540</b>  | 381.1807        | 743.3304       | 372.1689         | 743.3435       | 372.1754         | E    | <b>595.3144</b>  | 298.1608        | 577.2908       | <b>289.1490</b>  | 577.3038       | <b>289.1556</b>  | 5  |
| 8  | <b>861.4195</b>  | 431.2134        | 843.3959       | 422.2016         | 843.4089       | 422.2081         | V    | 465.2748         | 233.1410        | 447.2512       | 224.1292         |                |                  | 4  |
| 9  | <b>961.4849</b>  | 481.2461        | 943.4613       | 472.2343         | 943.4744       | 472.2408         | V    | <b>365.2093</b>  | 183.1083        | 347.1857       | 174.0965         |                |                  | 3  |
| 10 | <b>1077.5219</b> | 539.2646        | 1059.4983      | 530.2528         | 1059.5114      | 530.2593         | N    | 265.1439         | 133.0756        | 247.1203       | 124.0638         |                |                  | 2  |
| 11 |                  |                 |                |                  |                |                  | K    | 149.1069         | 75.0571         | 131.0833       | 66.0453          |                |                  | 1  |

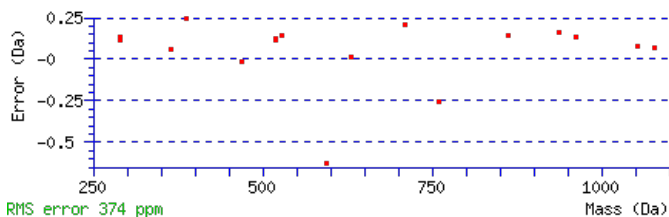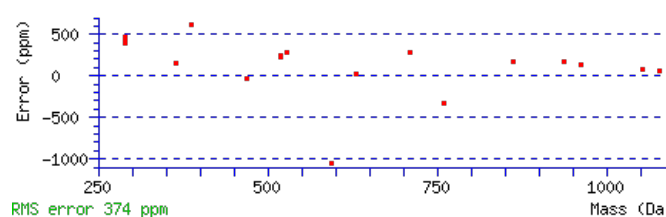NCBI BLAST search of **AVDPQLEVVNK**

(Parameters: blastp, nr protein database, expect=20000, no filter, PAM30)

Other BLAST [web gateways](#)

All matches to this query

**AT1G80380.1**

| <b>Score</b> | <b>Mr(calc)</b> | <b>Delta</b> | <b>Sequence</b>             |
|--------------|-----------------|--------------|-----------------------------|
| 56.9         | 1224.6142       | 0.0005       | <a href="#">AVDPQLEVVNK</a> |
| 4.2          | 1224.6169       | -0.0022      | <a href="#">VSKRTGGYVNK</a> |
| 3.6          | 1224.6169       | -0.0022      | <a href="#">AVYESLSRRK</a>  |
| 2.7          | 1224.6169       | -0.0022      | <a href="#">AREVLATPSHK</a> |
| 1.1          | 1224.6122       | 0.0025       | <a href="#">RICPGVGLAHK</a> |

**Mascot:** <http://www.matrixscience.com/>

## Peptide View

### MS/MS Fragmentation of **RLVASSFADR**

Found in **AT1G80600.1** in **TAIR\_Arabidopsis**, Symbols: | acetylmithine aminotransferase, mitochondrial, putative / acetylmithine transaminase, putative / AOTA, putative / ACOAT, putative | chr1:30303567-30305405 REVERSE

Match to Query 3521: 1136.548736 from(569.281644,2+) index(1807)

Title: Elution from: 21.491 to 21.491 scan no 2336 cid35.00 polarity:+

Data file 0-3\_3.mgf

Click mouse within plot area to zoom in by factor of two about that point

Or,   to  Da

Label all possible matches  Label matches used for scoring

Show Y-axis

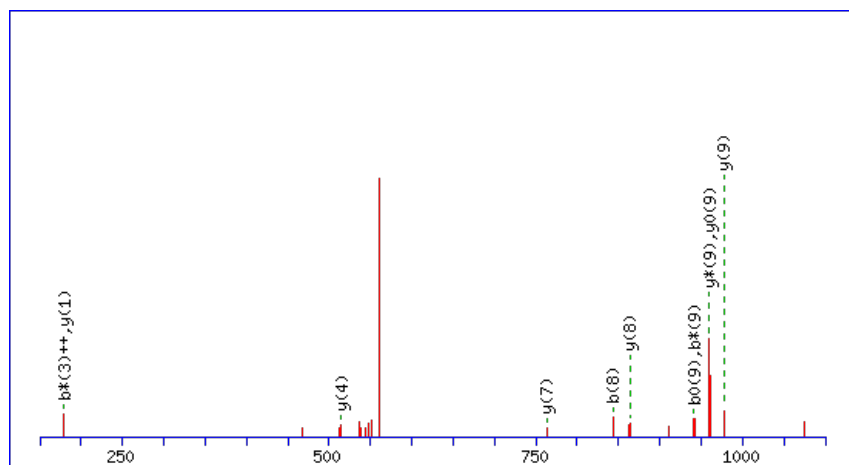

Monoisotopic mass of neutral peptide  $M_r(\text{calc})$ : 1136.5515

Fixed modifications: Carbamidomethyl (C) (apply to specified residues or termini only)

Ions Score: 29 Expect: 0.0097

Matches : 12/98 fragment ions using 20 most intense peaks ([help](#))

| #  | b        | b <sup>++</sup> | b*       | b <sup>*++</sup> | b <sup>0</sup> | b <sup>0++</sup> | Seq. | y        | y <sup>++</sup> | y*       | y <sup>*++</sup> | y <sup>0</sup> | y <sup>0++</sup> | #  |
|----|----------|-----------------|----------|------------------|----------------|------------------|------|----------|-----------------|----------|------------------|----------------|------------------|----|
| 1  | 161.0965 | 81.0519         | 143.0729 | 72.0401          |                |                  | R    |          |                 |          |                  |                |                  | 10 |
| 2  | 275.1776 | 138.0925        | 257.1540 | 129.0807         |                |                  | L    | 977.4695 | 489.2384        | 959.4459 | 480.2266         | 959.4589       | 480.2331         | 9  |
| 3  | 375.2431 | 188.1252        | 357.2195 | 179.1134         |                |                  | V    | 863.3884 | 432.1978        | 845.3648 | 423.1860         | 845.3778       | 423.1926         | 8  |
| 4  | 447.2772 | 224.1422        | 429.2536 | 215.1305         |                |                  | A    | 763.3229 | 382.1651        | 745.2994 | 373.1533         | 745.3124       | 373.1598         | 7  |
| 5  | 535.3063 | 268.1568        | 517.2827 | 259.1450         | 517.2957       | 259.1515         | S    | 691.2888 | 346.1480        | 673.2652 | 337.1362         | 673.2782       | 337.1428         | 6  |
| 6  | 623.3353 | 312.1713        | 605.3118 | 303.1595         | 605.3248       | 303.1660         | S    | 603.2597 | 302.1335        | 585.2361 | 293.1217         | 585.2492       | 293.1282         | 5  |
| 7  | 771.4008 | 386.2040        | 753.3772 | 377.1922         | 753.3902       | 377.1988         | F    | 515.2307 | 258.1190        | 497.2071 | 249.1072         | 497.2201       | 249.1137         | 4  |
| 8  | 843.4349 | 422.2211        | 825.4114 | 413.2093         | 825.4244       | 413.2158         | A    | 367.1652 | 184.0862        | 349.1416 | 175.0745         | 349.1547       | 175.0810         | 3  |
| 9  | 959.4589 | 480.2331        | 941.4353 | 471.2213         | 941.4484       | 471.2278         | D    | 295.1311 | 148.0692        | 277.1075 | 139.0574         | 277.1205       | 139.0639         | 2  |
| 10 |          |                 |          |                  |                |                  | R    | 179.1071 | 90.0572         | 161.0835 | 81.0454          |                |                  | 1  |

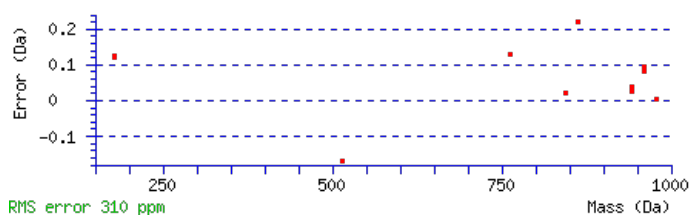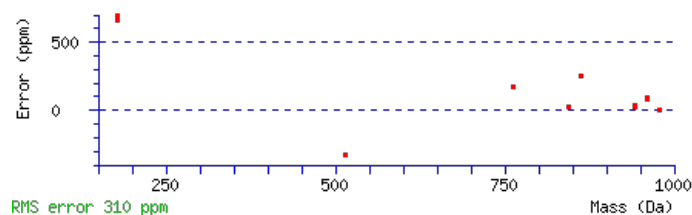

NCBI BLAST search of [RLVASSFADR](#)

(Parameters: blastp, nr protein database, expect=20000, no filter, PAM30)

Other BLAST [web gateways](#)

All matches to this query

## AT1G80600.1

| Score | Mr(calc)  | Delta   | Sequence                   |
|-------|-----------|---------|----------------------------|
| 28.8  | 1136.5515 | -0.0027 | <a href="#">RLVASSFADR</a> |
| 14.5  | 1136.5515 | -0.0027 | <a href="#">IRVNYATER</a>  |
| 11.8  | 1136.5515 | -0.0027 | <a href="#">RDFLQSLSR</a>  |
| 6.0   | 1136.5488 | -0.0001 | <a href="#">LEEYKSISR</a>  |
| 4.6   | 1136.5515 | -0.0027 | <a href="#">ALSSSPRFTR</a> |
| 4.6   | 1136.5515 | -0.0027 | <a href="#">IASQLDRYR</a>  |
| 4.6   | 1136.5515 | -0.0027 | <a href="#">EYEKLQRR</a>   |
| 4.5   | 1136.5515 | -0.0027 | <a href="#">FSREAAATIR</a> |
| 4.5   | 1136.5515 | -0.0027 | <a href="#">KKEEYQRR</a>   |
| 4.5   | 1136.5515 | -0.0027 | <a href="#">LQQSKNTER</a>  |

Mascot: <http://www.matrixscience.com/>

## Peptide View

### MS/MS Fragmentation of **ALDLGVNVK**

Found in **AT1G80660.1** in **TAIR\_Arabidopsis**, Symbols: AHA9 | AHA9 (Arabidopsis H(+)-ATPase 9); hydrogen-exporting ATPase, phosphorylative mechanism | chr1:30321119-30324840 REVERSE

Match to Query 1645: 938.506878 from(470.260715,2+) index(3476)

Title: Elution from: 34.457 to 34.457 scan no 4416 cid35.00 polarity:+

Data file D1d-2\_3.mgf

Click mouse within plot area to zoom in by factor of two about that point

Or,   to  Da

Label all possible matches  Label matches used for scoring

Show Y-axis

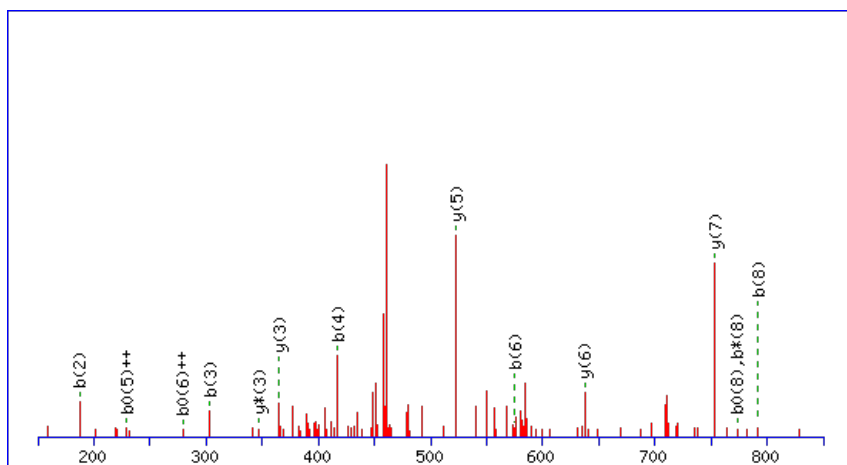

Monoisotopic mass of neutral peptide  $M_r(\text{calc})$ : 938.5063

Fixed modifications: Carbamidomethyl (C) (apply to specified residues or termini only)

Ions Score: 24 Expect: 0.022

Matches : 14/68 fragment ions using 34 most intense peaks ([help](#))

| # | b               | b <sup>++</sup> | b*              | b <sup>*++</sup> | b <sup>0</sup>  | b <sup>0++</sup> | Seq. | y               | y <sup>++</sup> | y*              | y <sup>*++</sup> | y <sup>0</sup> | y <sup>0++</sup> | # |
|---|-----------------|-----------------|-----------------|------------------|-----------------|------------------|------|-----------------|-----------------|-----------------|------------------|----------------|------------------|---|
| 1 | 73.0414         | 37.0244         |                 |                  |                 |                  | A    |                 |                 |                 |                  |                |                  | 9 |
| 2 | <b>187.1225</b> | 94.0649         |                 |                  |                 |                  | L    | 867.4794        | 434.2434        | 849.4559        | 425.2316         | 849.4689       | 425.2381         | 8 |
| 3 | <b>303.1465</b> | 152.0769        |                 |                  | 285.1359        | 143.0716         | D    | <b>753.3983</b> | 377.2028        | 735.3748        | 368.1910         | 735.3878       | 368.1975         | 7 |
| 4 | <b>417.2276</b> | 209.1174        |                 |                  | 399.2170        | 200.1122         | L    | <b>637.3744</b> | 319.1908        | 619.3508        | 310.1790         |                |                  | 6 |
| 5 | 475.2461        | 238.1267        |                 |                  | 457.2355        | <b>229.1214</b>  | G    | <b>523.2933</b> | 262.1503        | 505.2697        | 253.1385         |                |                  | 5 |
| 6 | <b>575.3115</b> | 288.1594        |                 |                  | 557.3010        | <b>279.1541</b>  | V    | 465.2748        | 233.1410        | 447.2512        | 224.1292         |                |                  | 4 |
| 7 | 691.3485        | 346.1779        | 673.3250        | 337.1661         | 673.3380        | 337.1726         | N    | <b>365.2093</b> | 183.1083        | <b>347.1857</b> | 174.0965         |                |                  | 3 |
| 8 | <b>791.4140</b> | 396.2106        | <b>773.3904</b> | 387.1988         | <b>773.4034</b> | 387.2054         | V    | 249.1723        | 125.0898        | 231.1487        | 116.0780         |                |                  | 2 |
| 9 |                 |                 |                 |                  |                 |                  | K    | 149.1069        | 75.0571         | 131.0833        | 66.0453          |                |                  | 1 |

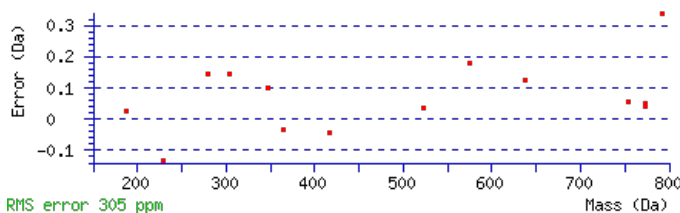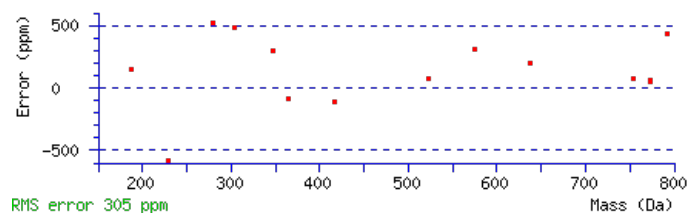

NCBI BLAST search of [ALDLGVNVK](#)

(Parameters: blastp, nr protein database, expect=20000, no filter, PAM30)

Other BLAST [web gateways](#)

All matches to this query

| Score | $M_r(\text{calc})$ | Delta | Sequence |
|-------|--------------------|-------|----------|
|       |                    |       |          |



# AT1G80660.1

|      |          |        |                            |
|------|----------|--------|----------------------------|
| 24.4 | 938.5063 | 0.0006 | <a href="#">ALDLGVNVK</a>  |
| 4.8  | 938.5063 | 0.0006 | <a href="#">EVGIGIGVGK</a> |

**Mascot:** <http://www.matrixscience.com/>

## Peptide View

MS/MS Fragmentation of **GILAI DESNATCGK**Found in **AT2G01140.1** in **TAIR\_Arabidopsis**, Symbols: | fructose-bisphosphate aldolase, putative | chr2:95005-96490 REVERSE

Match to Query 5727: 1447.696320 from(724.855436,2+) index(4066)

Title: Elution from: 41.163 to 41.163 scan no 5256 cid35.00 polarity:+

Data file D12h-2\_1.mgf

Click mouse within plot area to zoom in by factor of two about that point

Or,   to  Da Label all possible matches  Label matches used for scoring Show Y-axis 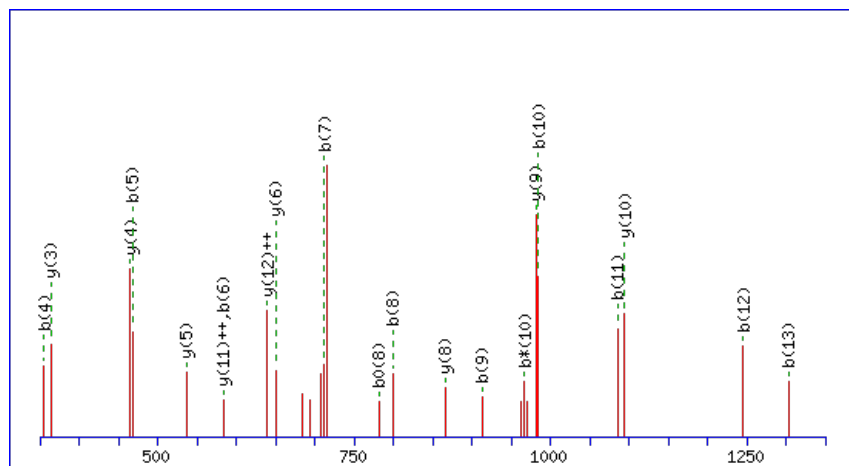Monoisotopic mass of neutral peptide  $M_r(\text{calc})$ : 1447.6977

Fixed modifications: Carbamidomethyl (C) (apply to specified residues or termini only)

Ions Score: 113 Expect: 2e-011

Matches : 21/124 fragment ions using 22 most intense peaks ([help](#))

| #  | b                | b <sup>++</sup> | b*              | b <sup>*++</sup> | b <sup>0</sup>  | b <sup>0++</sup> | Seq.     | y                | y <sup>++</sup> | y*        | y <sup>*++</sup> | y <sup>0</sup> | y <sup>0++</sup> | #         |
|----|------------------|-----------------|-----------------|------------------|-----------------|------------------|----------|------------------|-----------------|-----------|------------------|----------------|------------------|-----------|
| 1  | 58.0287          | 29.5180         |                 |                  |                 |                  | <b>G</b> |                  |                 |           |                  |                |                  | <b>14</b> |
| 2  | 171.1128         | 86.0600         |                 |                  |                 |                  | <b>I</b> | 1391.6835        | 696.3454        | 1374.6570 | 687.8321         | 1373.6729      | 687.3401         | <b>13</b> |
| 3  | 284.1969         | 142.6021        |                 |                  |                 |                  | <b>L</b> | 1278.5994        | <b>639.8034</b> | 1261.5729 | 631.2901         | 1260.5889      | 630.7981         | <b>12</b> |
| 4  | <b>355.2340</b>  | 178.1206        |                 |                  |                 |                  | <b>A</b> | 1165.5154        | <b>583.2613</b> | 1148.4888 | 574.7481         | 1147.5048      | 574.2560         | <b>11</b> |
| 5  | <b>468.3180</b>  | 234.6627        |                 |                  |                 |                  | <b>I</b> | <b>1094.4783</b> | 547.7428        | 1077.4517 | 539.2295         | 1076.4677      | 538.7375         | <b>10</b> |
| 6  | <b>583.3450</b>  | 292.1761        |                 |                  | 565.3344        | 283.1709         | <b>D</b> | <b>981.3942</b>  | 491.2007        | 964.3677  | 482.6875         | 963.3836       | 482.1955         | <b>9</b>  |
| 7  | <b>712.3876</b>  | 356.6974        |                 |                  | 694.3770        | 347.6921         | <b>E</b> | <b>866.3673</b>  | 433.6873        | 849.3407  | 425.1740         | 848.3567       | 424.6820         | <b>8</b>  |
| 8  | <b>799.4196</b>  | 400.2134        |                 |                  | <b>781.4090</b> | 391.2082         | <b>S</b> | 737.3247         | 369.1660        | 720.2981  | 360.6527         | 719.3141       | 360.1607         | <b>7</b>  |
| 9  | <b>913.4625</b>  | 457.2349        | 896.4360        | 448.7216         | 895.4520        | 448.2296         | <b>N</b> | <b>650.2926</b>  | 325.6500        | 633.2661  | 317.1367         | 632.2821       | 316.6447         | <b>6</b>  |
| 10 | <b>984.4997</b>  | 492.7535        | <b>967.4731</b> | 484.2402         | 966.4891        | 483.7482         | <b>A</b> | <b>536.2497</b>  | 268.6285        | 519.2232  | 260.1152         | 518.2391       | 259.6232         | <b>5</b>  |
| 11 | <b>1085.5473</b> | 543.2773        | 1068.5208       | 534.7640         | 1067.5368       | 534.2720         | <b>T</b> | <b>465.2126</b>  | 233.1099        | 448.1860  | 224.5967         | 447.2020       | 224.1047         | <b>4</b>  |
| 12 | <b>1245.5780</b> | 623.2926        | 1228.5514       | 614.7794         | 1227.5674       | 614.2873         | <b>C</b> | <b>364.1649</b>  | 182.5861        | 347.1384  | 174.0728         |                |                  | <b>3</b>  |
| 13 | <b>1302.5994</b> | 651.8034        | 1285.5729       | 643.2901         | 1284.5889       | 642.7981         | <b>G</b> | 204.1343         | 102.5708        | 187.1077  | 94.0575          |                |                  | <b>2</b>  |
| 14 |                  |                 |                 |                  |                 |                  | <b>K</b> | 147.1128         | 74.0600         | 130.0863  | 65.5468          |                |                  | <b>1</b>  |

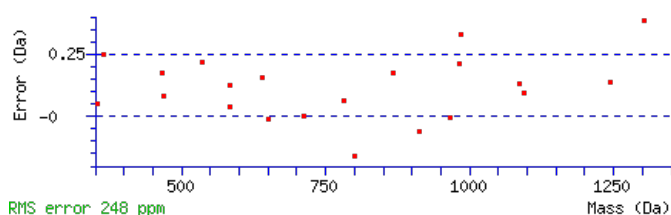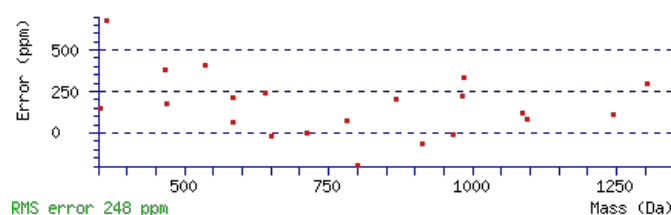NCBI **BLAST** search of **GILAI DESNATCGK**

(Parameters: blastp, nr protein database, expect=20000, no filter, PAM30)

AT2G01140.1

Other BLAST [web gateways](#)

**All matches to this query**

| Score | Mr(calc)  | Delta   | Sequence                       |
|-------|-----------|---------|--------------------------------|
| 113.4 | 1447.6977 | -0.0014 | <a href="#">GILAIDESNATCGK</a> |
| 8.1   | 1447.6943 | 0.0020  | <a href="#">ATYEDSSQVHAIK</a>  |
| 5.6   | 1447.6952 | 0.0011  | <a href="#">MYLVGGNMIDAHK</a>  |
| 1.1   | 1447.6977 | -0.0014 | <a href="#">LGNNPTSDDKMLK</a>  |

**Mascot:** <http://www.matrixscience.com/>

**Peptide View**MS/MS Fragmentation of **IALTDNSIVEQALGK**Found in **AT2G01250.1** in **TAIR\_Arabidopsis**, Symbols: | 60S ribosomal protein L7 (RPL7B) | chr2:132942-134263 REVERSE

Match to Query 6966: 1588.798616 from(795.406584,2+) index(8327)

Title: Elution from: 73.289 to 73.289 scan no 11093 cid35.00 polarity:+

Data file C7-2\_3.mgf

Click mouse within plot area to zoom in by factor of two about that point

Or,  to  Da Label all possible matches  Label matches used for scoring Show Y-axis 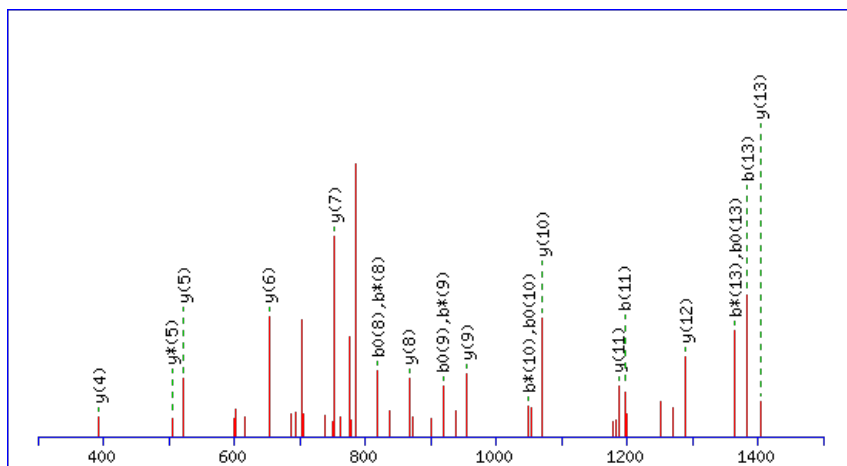**Monoisotopic mass of neutral peptide Mr(calc):** 1588.8033**Fixed modifications:** Carbamidomethyl (C) (apply to specified residues or termini only)**Ions Score:** 104 **Expect:** 1.7e-010**Matches:** 21/142 fragment ions using 20 most intense peaks ([help](#))

| #  | b                | b <sup>++</sup> | b*               | b <sup>*++</sup> | b <sup>0</sup>   | b <sup>0++</sup> | Seq. | y                | y <sup>++</sup> | y*              | y <sup>*++</sup> | y <sup>0</sup> | y <sup>0++</sup> | #  |
|----|------------------|-----------------|------------------|------------------|------------------|------------------|------|------------------|-----------------|-----------------|------------------|----------------|------------------|----|
| 1  | 115.0884         | 58.0478         |                  |                  |                  |                  | I    |                  |                 |                 |                  |                |                  | 15 |
| 2  | 187.1225         | 94.0649         |                  |                  |                  |                  | A    | 1475.7294        | 738.3684        | 1457.7059       | 729.3566         | 1457.7189      | 729.3631         | 14 |
| 3  | 301.2036         | 151.1054        |                  |                  |                  |                  | L    | <b>1403.6953</b> | 702.3513        | 1385.6717       | 693.3395         | 1385.6847      | 693.3460         | 13 |
| 4  | 403.2483         | 202.1278        |                  |                  | 385.2378         | 193.1225         | T    | <b>1289.6142</b> | 645.3107        | 1271.5906       | 636.2989         | 1271.6036      | 636.3055         | 12 |
| 5  | 519.2723         | 260.1398        |                  |                  | 501.2617         | 251.1345         | D    | <b>1187.5695</b> | 594.2884        | 1169.5459       | 585.2766         | 1169.5589      | 585.2831         | 11 |
| 6  | 635.3093         | 318.1583        | 617.2857         | 309.1465         | 617.2987         | 309.1530         | N    | <b>1071.5455</b> | 536.2764        | 1053.5219       | 527.2646         | 1053.5349      | 527.2711         | 10 |
| 7  | 723.3384         | 362.1728        | 705.3148         | 353.1610         | 705.3278         | 353.1675         | S    | <b>955.5085</b>  | 478.2579        | 937.4849        | 469.2461         | 937.4979       | 469.2526         | 9  |
| 8  | 837.4195         | 419.2134        | <b>819.3959</b>  | 410.2016         | <b>819.4089</b>  | 410.2081         | I    | <b>867.4794</b>  | 434.2434        | 849.4559        | 425.2316         | 849.4689       | 425.2381         | 8  |
| 9  | 937.4849         | 469.2461        | <b>919.4613</b>  | 460.2343         | <b>919.4744</b>  | 460.2408         | V    | <b>753.3983</b>  | 377.2028        | 735.3748        | 368.1910         | 735.3878       | 368.1975         | 7  |
| 10 | 1067.5246        | 534.2659        | <b>1049.5010</b> | 525.2541         | <b>1049.5140</b> | 525.2606         | E    | <b>653.3329</b>  | 327.1701        | 635.3093        | 318.1583         | 635.3223       | 318.1648         | 6  |
| 11 | <b>1197.5772</b> | 599.2922        | 1179.5536        | 590.2804         | 1179.5666        | 590.2870         | Q    | <b>523.2933</b>  | 262.1503        | <b>505.2697</b> | 253.1385         |                |                  | 5  |
| 12 | 1269.6113        | 635.3093        | 1251.5878        | 626.2975         | 1251.6008        | 626.3040         | A    | <b>393.2406</b>  | 197.1239        | 375.2170        | 188.1122         |                |                  | 4  |
| 13 | <b>1383.6924</b> | 692.3499        | <b>1365.6689</b> | 683.3381         | <b>1365.6819</b> | 683.3446         | L    | 321.2065         | 161.1069        | 303.1829        | 152.0951         |                |                  | 3  |
| 14 | 1441.7109        | 721.3591        | 1423.6874        | 712.3473         | 1423.7004        | 712.3538         | G    | 207.1254         | 104.0663        | 189.1018        | 95.0545          |                |                  | 2  |
| 15 |                  |                 |                  |                  |                  |                  | K    | 149.1069         | 75.0571         | 131.0833        | 66.0453          |                |                  | 1  |

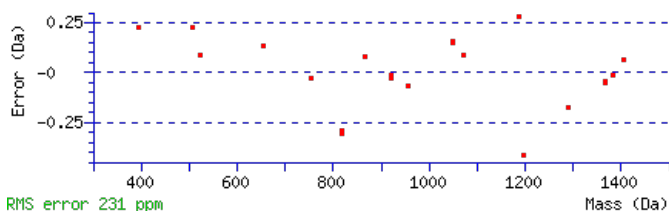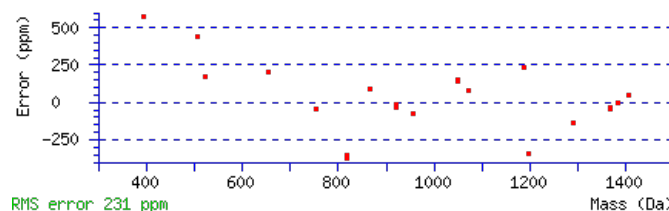NCBI **BLAST** search of [IALTDNSIVEQALGK](#)

## AT2G01250.1

(Parameters: blastp, nr protein database, expect=20000, no filter, PAM30)

Other BLAST [web gateways](#)

### All matches to this query

| Score | Mr(calc)  | Delta   | Sequence                        |
|-------|-----------|---------|---------------------------------|
| 103.6 | 1588.8033 | -0.0046 | <a href="#">IALTDNSIVEQALGK</a> |
| 2.6   | 1588.8033 | -0.0047 | <a href="#">NELEIGKAAEEKLK</a>  |
| 1.1   | 1588.8008 | -0.0021 | <a href="#">TKRFVFGSLMEK</a>    |
| 0.5   | 1588.7974 | 0.0012  | <a href="#">RTFKLPNSIYYVA</a>   |

Mascot: <http://www.matrixscience.com/>

**Peptide View**MS/MS Fragmentation of **MAITAYDALTERQK**Found in **AT2G01810.1** in **TAIR\_Arabidopsis**, Symbols: | PHD finger family protein | chr2:347536-349951 FORWARD

Match to Query 7543: 1644.747312 from(823.380932,2+) index(7317)

Title: Elution from: 65.191 to 65.191 scan no 9616 cid35.00 polarity:+

Data file 0-2\_2.mgf

Click mouse within plot area to zoom in by factor of two about that point

Or,   to  Da Label all possible matches  Label matches used for scoring Show Y-axis 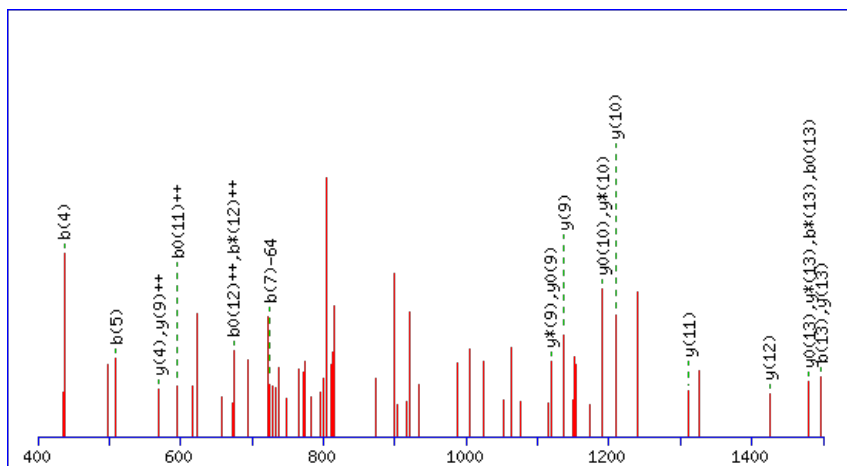Monoisotopic mass of neutral peptide  $M_r(\text{calc})$ : 1644.7520

Fixed modifications: Carbamidomethyl (C) (apply to specified residues or termini only)

Variable modifications:

M1 : Oxidation (M), with neutral losses 0.0000 (shown in table), 63.9983

Ions Score: 25 Expect: 0.031

Matches : 22/172 fragment ions using 37 most intense peaks ([help](#))

| #  | b         | b <sup>++</sup> | b <sup>*</sup> | b <sup>*++</sup> | b <sup>0</sup> | b <sup>0++</sup> | Seq. | y         | y <sup>++</sup> | y <sup>*</sup> | y <sup>*++</sup> | y <sup>0</sup> | y <sup>0++</sup> | #  |
|----|-----------|-----------------|----------------|------------------|----------------|------------------|------|-----------|-----------------|----------------|------------------|----------------|------------------|----|
| 1  | 149.0397  | 75.0235         |                |                  |                |                  | M    |           |                 |                |                  |                |                  | 14 |
| 2  | 221.0739  | 111.0406        |                |                  |                |                  | A    | 1497.7268 | 749.3670        | 1479.7032      | 740.3553         | 1479.7162      | 740.3618         | 13 |
| 3  | 335.1550  | 168.0811        |                |                  |                |                  | I    | 1425.6927 | 713.3500        | 1407.6691      | 704.3382         | 1407.6821      | 704.3447         | 12 |
| 4  | 437.1997  | 219.1035        |                |                  | 419.1891       | 210.0982         | T    | 1311.6116 | 656.3094        | 1293.5880      | 647.2976         | 1293.6010      | 647.3041         | 11 |
| 5  | 509.2338  | 255.1205        |                |                  | 491.2233       | 246.1153         | A    | 1209.5669 | 605.2871        | 1191.5433      | 596.2753         | 1191.5563      | 596.2818         | 10 |
| 6  | 673.2942  | 337.1507        |                |                  | 655.2836       | 328.1454         | Y    | 1137.5327 | 569.2700        | 1119.5091      | 560.2582         | 1119.5221      | 560.2647         | 9  |
| 7  | 789.3182  | 395.1627        |                |                  | 771.3076       | 386.1574         | D    | 973.4723  | 487.2398        | 955.4488       | 478.2280         | 955.4618       | 478.2345         | 8  |
| 8  | 861.3523  | 431.1798        |                |                  | 843.3417       | 422.1745         | A    | 857.4484  | 429.2278        | 839.4248       | 420.2160         | 839.4378       | 420.2225         | 7  |
| 9  | 975.4334  | 488.2203        |                |                  | 957.4228       | 479.2151         | L    | 785.4142  | 393.2107        | 767.3906       | 384.1990         | 767.4036       | 384.2055         | 6  |
| 10 | 1077.4781 | 539.2427        |                |                  | 1059.4676      | 530.2374         | T    | 671.3331  | 336.1702        | 653.3095       | 327.1584         | 653.3225       | 327.1649         | 5  |
| 11 | 1207.5178 | 604.2625        |                |                  | 1189.5072      | 595.2572         | E    | 569.2884  | 285.1478        | 551.2648       | 276.1360         | 551.2778       | 276.1426         | 4  |
| 12 | 1367.6070 | 684.3071        | 1349.5834      | 675.2953         | 1349.5964      | 675.3019         | R    | 439.2488  | 220.1280        | 421.2252       | 211.1162         |                |                  | 3  |
| 13 | 1497.6596 | 749.3335        | 1479.6361      | 740.3217         | 1479.6491      | 740.3282         | Q    | 279.1595  | 140.0834        | 261.1359       | 131.0716         |                |                  | 2  |
| 14 |           |                 |                |                  |                |                  | K    | 149.1069  | 75.0571         | 131.0833       | 66.0453          |                |                  | 1  |

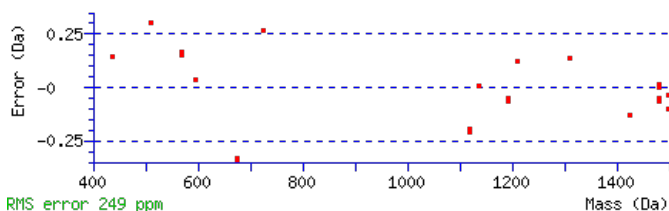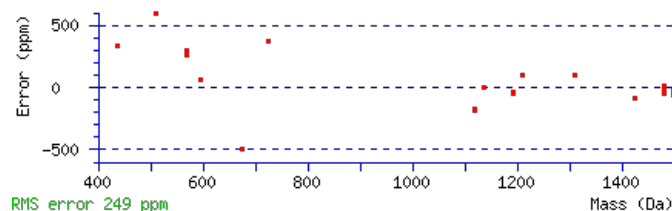

## AT2G01810.1

NCBI **BLAST** search of [MAITAYDALTERQK](#)

(Parameters: blastp, nr protein database, expect=20000, no filter, PAM30)

Other BLAST [web gateways](#)

### All matches to this query

| Score | Mr(calc)  | Delta   | Sequence                         |
|-------|-----------|---------|----------------------------------|
| 24.6  | 1644.7520 | -0.0046 | <a href="#">MAITAYDALTERQK</a>   |
| 18.6  | 1644.7465 | 0.0008  | <a href="#">FHHMLSGRPQDVAK</a>   |
| 16.7  | 1644.7479 | -0.0006 | <a href="#">MTMLSMGKTLVEQK</a>   |
| 16.7  | 1644.7479 | -0.0006 | <a href="#">MTMLSMGKTLVEQK</a>   |
| 11.2  | 1644.7479 | -0.0006 | <a href="#">MTMLSMGKTLVEQK</a>   |
| 0.8   | 1644.7472 | 0.0001  | <a href="#">EVGRAQGM YALTAMK</a> |
| 0.6   | 1644.7464 | 0.0009  | <a href="#">ENNSSANLKIYSSAK</a>  |
| 0.2   | 1644.7520 | -0.0046 | <a href="#">MATATATSERFELAK</a>  |

Mascot: <http://www.matrixscience.com/>

**Peptide View**MS/MS Fragmentation of **YFEVELK**

Found in **AT2G02010.1** in **TAIR\_Arabidopsis**, Symbols: GAD4 | GAD4 (GLUTAMATE DECARBOXYLASE 4); calmodulin binding | chr2:474374-476494 REVERSE

Match to Query 1878: 934.451896 from(468.233224,2+) index(4995)

Title: Elution from: 44.990 to 44.990 scan no 6268 cid35.00 polarity:+

Data file D12h-3\_2.mgf

Click mouse within plot area to zoom in by factor of two about that point

Or,   to  Da

Label all possible matches  Label matches used for scoring

Show Y-axis

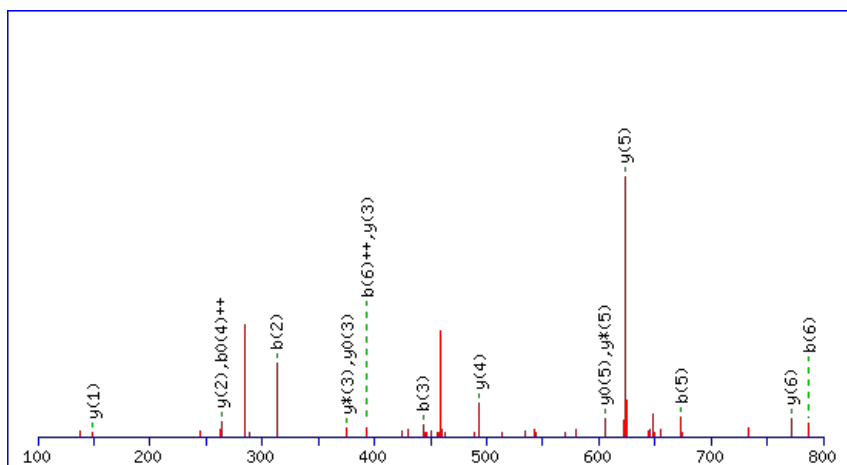

Monoisotopic mass of neutral peptide  $M_r(\text{calc})$ : 934.4512

Fixed modifications: Carbamidomethyl (C) (apply to specified residues or termini only)

Ions Score: 47 Expect: 0.00021

Matches : 16/52 fragment ions using 19 most intense peaks ([help](#))

| # | b               | b <sup>++</sup> | b <sup>0</sup> | b <sup>0++</sup> | Seq. | y               | y <sup>++</sup> | y*              | y <sup>*++</sup> | y <sup>0</sup>  | y <sup>0++</sup> | # |
|---|-----------------|-----------------|----------------|------------------|------|-----------------|-----------------|-----------------|------------------|-----------------|------------------|---|
| 1 | 165.0676        | 83.0375         |                |                  | Y    |                 |                 |                 |                  |                 |                  | 7 |
| 2 | <b>313.1331</b> | 157.0702        |                |                  | F    | <b>771.3981</b> | 386.2027        | 753.3745        | 377.1909         | 753.3876        | 377.1974         | 6 |
| 3 | <b>443.1727</b> | 222.0900        | 425.1622       | 213.0847         | E    | <b>623.3327</b> | 312.1700        | <b>605.3091</b> | 303.1582         | <b>605.3221</b> | 303.1647         | 5 |
| 4 | 543.2382        | 272.1227        | 525.2276       | <b>263.1174</b>  | V    | <b>493.2930</b> | 247.1502        | 475.2695        | 238.1384         | 475.2825        | 238.1449         | 4 |
| 5 | <b>673.2778</b> | 337.1425        | 655.2672       | 328.1373         | E    | <b>393.2276</b> | 197.1174        | <b>375.2040</b> | 188.1056         | <b>375.2170</b> | 188.1122         | 3 |
| 6 | <b>787.3589</b> | <b>394.1831</b> | 769.3483       | 385.1778         | L    | <b>263.1880</b> | 132.0976        | 245.1644        | 123.0858         |                 |                  | 2 |
| 7 |                 |                 |                |                  | K    | <b>149.1069</b> | 75.0571         | 131.0833        | 66.0453          |                 |                  | 1 |

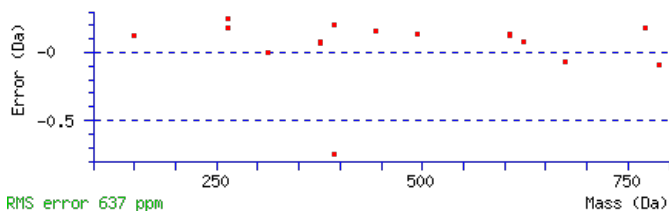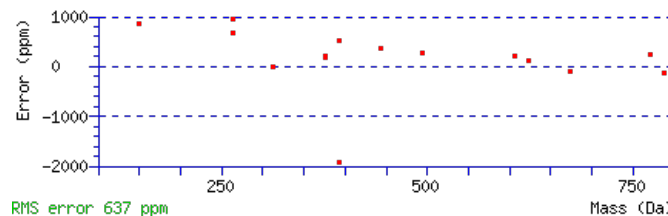

NCBI **BLAST** search of **YFEVELK**

(Parameters: blastp, nr protein database, expect=20000, no filter, PAM30)

Other BLAST [web gateways](#)

**All matches to this query**

| Score | $M_r(\text{calc})$ | Delta  | Sequence                |
|-------|--------------------|--------|-------------------------|
| 46.9  | 934.4512           | 0.0007 | <a href="#">YFEVELK</a> |
| 31.7  | 934.4512           | 0.0007 | <a href="#">YFLDELK</a> |



**AT2G02010.1**

|      |          |         |                          |
|------|----------|---------|--------------------------|
| 11.7 | 934.4512 | 0.0007  | <a href="#">FLEYLDK</a>  |
| 9.7  | 934.4532 | -0.0013 | <a href="#">KIMMMIK</a>  |
| 9.7  | 934.4532 | -0.0013 | <a href="#">KIMMMIK</a>  |
| 6.8  | 934.4539 | -0.0020 | <a href="#">FINLDFR</a>  |
| 5.5  | 934.4516 | 0.0003  | <a href="#">KAASQYQK</a> |
| 5.3  | 934.4503 | 0.0016  | <a href="#">KMCLRSK</a>  |
| 4.6  | 934.4516 | 0.0003  | <a href="#">TVERYQK</a>  |
| 4.5  | 934.4516 | 0.0003  | <a href="#">FREESKK</a>  |

**Mascot:** <http://www.matrixscience.com/>

**Peptide View**MS/MS Fragmentation of **MLMEILK**

Found in **AT2G02560.1** in **TAIR\_Arabidopsis**, Symbols: ATCAND1, ETA2, TIP120, HVE, CAND1 | CAND1 (CULLIN-ASSOCIATED AND NEDDYLATION DISSOCIATED); binding | chr2:690344-697341 FORWARD

Match to Query 1573: 900.451406 from(451.232979,2+) index(2595)

Title: Elution from: 28.214 to 28.214 scan no 3308 cid35.00 polarity:+

Data file 0-1\_2.mgf

Click mouse within plot area to zoom in by factor of two about that point

Or,   to  Da

Label all possible matches  Label matches used for scoring

Show Y-axis

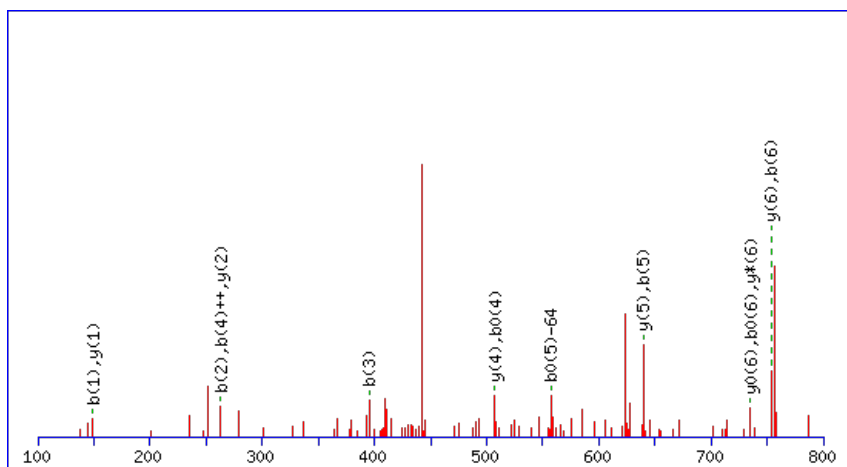

Monoisotopic mass of neutral peptide  $M_r(\text{calc})$ : 900.4525

Fixed modifications: Carbamidomethyl (C) (apply to specified residues or termini only)

Variable modifications:

M1 : Oxidation (M), with neutral losses 0.0000 (shown in table), 63.9983

Ions Score: 31 Expect: 0.005

Matches : 16/66 fragment ions using 14 most intense peaks ([help](#))

| # | b        | b <sup>++</sup> | b <sup>0</sup> | b <sup>0++</sup> | Seq. | y        | y <sup>++</sup> | y*       | y <sup>*++</sup> | y <sup>0</sup> | y <sup>0++</sup> | # |
|---|----------|-----------------|----------------|------------------|------|----------|-----------------|----------|------------------|----------------|------------------|---|
| 1 | 149.0397 | 75.0235         |                |                  | M    |          |                 |          |                  |                |                  | 7 |
| 2 | 263.1208 | 132.0640        |                |                  | L    | 753.4273 | 377.2173        | 735.4037 | 368.2055         | 735.4168       | 368.2120         | 6 |
| 3 | 395.1583 | 198.0828        |                |                  | M    | 639.3462 | 320.1767        | 621.3226 | 311.1650         | 621.3357       | 311.1715         | 5 |
| 4 | 525.1980 | 263.1026        | 507.1874       | 254.0973         | E    | 507.3087 | 254.1580        | 489.2851 | 245.1462         | 489.2981       | 245.1527         | 4 |
| 5 | 639.2791 | 320.1432        | 621.2685       | 311.1379         | I    | 377.2691 | 189.1382        | 359.2455 | 180.1264         |                |                  | 3 |
| 6 | 753.3602 | 377.1837        | 735.3496       | 368.1784         | L    | 263.1880 | 132.0976        | 245.1644 | 123.0858         |                |                  | 2 |
| 7 |          |                 |                |                  | K    | 149.1069 | 75.0571         | 131.0833 | 66.0453          |                |                  | 1 |

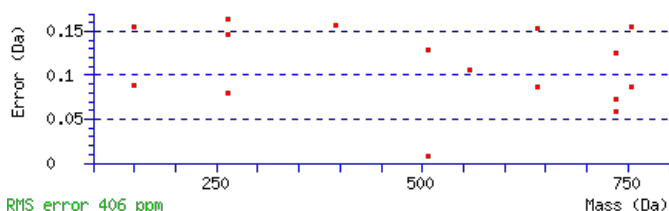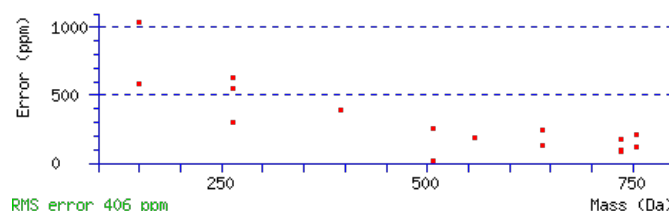

NCBI BLAST search of [MLMEILK](#)

(Parameters: blastp, nr protein database, expect=20000, no filter, PAM30)

Other BLAST [web gateways](#)

**All matches to this query**

| Score | $M_r(\text{calc})$ | Delta   | Sequence                | Site Analysis       |
|-------|--------------------|---------|-------------------------|---------------------|
| 31.2  | 900.4525           | -0.0011 | <a href="#">MLMEILK</a> | Oxidation M1 98.14% |

## AT2G02560.1

|      |          |         |                          |                    |
|------|----------|---------|--------------------------|--------------------|
| 25.6 | 900.4495 | 0.0019  | <a href="#">CNGGIKIK</a> |                    |
| 19.9 | 900.4491 | 0.0023  | <a href="#">MLPFLEK</a>  |                    |
| 19.4 | 900.4496 | 0.0019  | <a href="#">NCKNILK</a>  |                    |
| 17.7 | 900.4491 | 0.0023  | <a href="#">IFLEMPK</a>  |                    |
| 17.6 | 900.4495 | 0.0019  | <a href="#">CVKNIQK</a>  |                    |
| 14.9 | 900.4495 | 0.0019  | <a href="#">TCAGKPKK</a> |                    |
| 14.0 | 900.4525 | -0.0011 | <a href="#">MLMEILK</a>  | Oxidation M3 1.86% |
| 14.0 | 900.4495 | 0.0019  | <a href="#">NAKQGMLK</a> |                    |
| 12.1 | 900.4495 | 0.0019  | <a href="#">EMKLNVR</a>  |                    |

Mascot: <http://www.matrixscience.com/>

## Peptide View

### MS/MS Fragmentation of **VLIALHEK**

Found in **AT2G02930.1** in **TAIR\_Arabidopsis**, Symbols: GST16, ATGSTF3 | ATGSTF3 (GLUTATHIONE S-TRANSFERASE 16); glutathione transferase | chr2:851347-852105 REVERSE

Match to Query 1937: 932.531544 from(311.851124,3+) index(2184)

Title: Elution from: 23.859 to 23.859 scan no 2760 cid35.00 polarity:+

Data file C7-3\_2.mgf

Click mouse within plot area to zoom in by factor of two about that point

Or,   to  Da

Label all possible matches  Label matches used for scoring

Show Y-axis

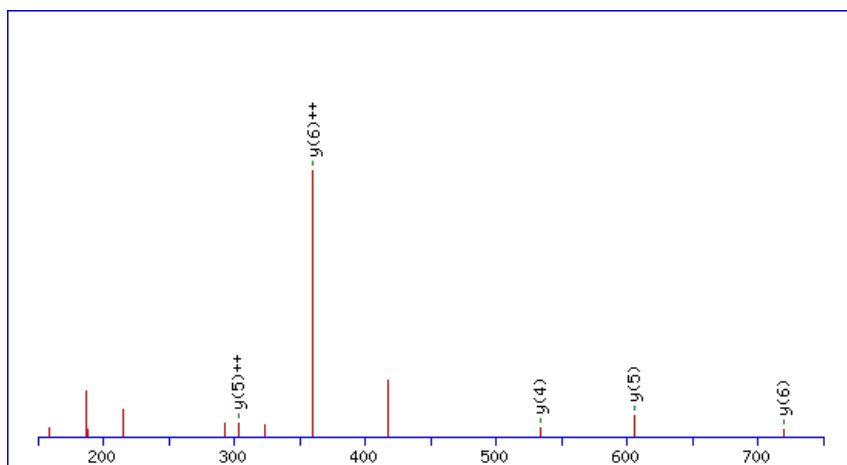

Monoisotopic mass of neutral peptide **Mr(calc)**: 932.5321

**Fixed modifications**: Carbamidomethyl (C) (apply to specified residues or termini only)

**Ions Score**: 23 **Expect**: 0.0067

**Matches**: 5/56 fragment ions using 6 most intense peaks ([help](#))

| # | b        | b <sup>++</sup> | b <sup>0</sup> | b <sup>0++</sup> | Seq. | y               | y <sup>++</sup> | y*       | y <sup>*++</sup> | y <sup>0</sup> | y <sup>0++</sup> | # |
|---|----------|-----------------|----------------|------------------|------|-----------------|-----------------|----------|------------------|----------------|------------------|---|
| 1 | 101.0727 | 51.0400         |                |                  | V    |                 |                 |          |                  |                |                  | 8 |
| 2 | 215.1538 | 108.0805        |                |                  | L    | 833.4740        | 417.2406        | 815.4504 | 408.2288         | 815.4634       | 408.2353         | 7 |
| 3 | 329.2349 | 165.1211        |                |                  | I    | <b>719.3929</b> | <b>360.2001</b> | 701.3693 | 351.1883         | 701.3823       | 351.1948         | 6 |
| 4 | 401.2691 | 201.1382        |                |                  | A    | <b>605.3118</b> | <b>303.1595</b> | 587.2882 | 294.1477         | 587.3012       | 294.1542         | 5 |
| 5 | 515.3502 | 258.1787        |                |                  | L    | <b>533.2776</b> | 267.1424        | 515.2540 | 258.1307         | 515.2671       | 258.1372         | 4 |
| 6 | 655.4002 | 328.2037        |                |                  | H    | 419.1965        | 210.1019        | 401.1729 | 201.0901         | 401.1860       | 201.0966         | 3 |
| 7 | 785.4398 | 393.2235        | 767.4293       | 384.2183         | E    | 279.1465        | 140.0769        | 261.1229 | 131.0651         | 261.1359       | 131.0716         | 2 |
| 8 |          |                 |                |                  | K    | 149.1069        | 75.0571         | 131.0833 | 66.0453          |                |                  | 1 |

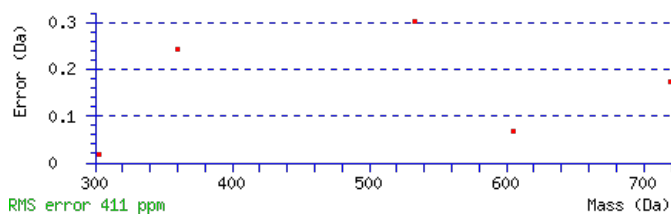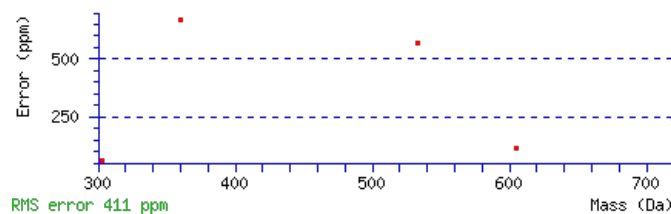

NCBI **BLAST** search of [VLIALHEK](#)

(Parameters: blastp, nr protein database, expect=20000, no filter, PAM30)

Other BLAST [web gateways](#)

All matches to this query

| Score | Mr(calc) | Delta   | Sequence                 |
|-------|----------|---------|--------------------------|
| 23.2  | 932.5321 | -0.0006 | <a href="#">VLIALHEK</a> |

AT2G02930.1

|      |          |         |                          |
|------|----------|---------|--------------------------|
| 20.0 | 932.5321 | -0.0006 | <a href="#">LVLELHAK</a> |
|------|----------|---------|--------------------------|

**Mascot:** <http://www.matrixscience.com/>

**Peptide View**MS/MS Fragmentation of **LNPKLEK**

Found in **AT2G03070.1** in **TAIR\_Arabidopsis**, Symbols: | similar to unnamed protein product [Vitis vinifera] (GB:CAO41701.1) | chr2:905977-908791 FORWARD

Match to Query 1357: 850.475942 from(426.245247,2+) index(4162)

Title: Elution from: 38.439 to 38.439 scan no 5184 cid35.00 polarity:+

Data file C7-2\_2.mgf

Click mouse within plot area to zoom in by factor of two about that point

Or,  to  Da

Label all possible matches  Label matches used for scoring

Show Y-axis

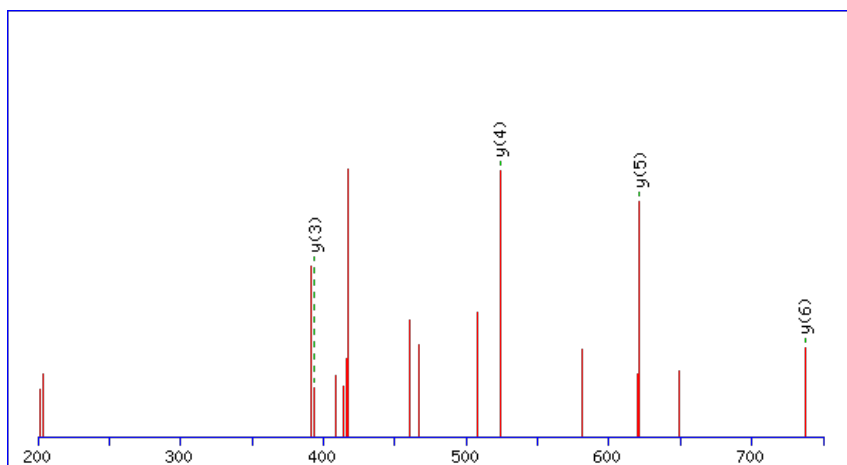

**Monoisotopic mass of neutral peptide Mr(calc):** 850.4773

**Fixed modifications:** Carbamidomethyl (C) (apply to specified residues or termini only)

**Ions Score:** 22 **Expect:** 0.017

**Matches:** 4/58 fragment ions using 11 most intense peaks ([help](#))

| # | b        | b <sup>++</sup> | b*       | b <sup>*++</sup> | b <sup>0</sup> | b <sup>0++</sup> | Seq. | y               | y <sup>++</sup> | y*       | y <sup>*++</sup> | y <sup>0</sup> | y <sup>0++</sup> | # |
|---|----------|-----------------|----------|------------------|----------------|------------------|------|-----------------|-----------------|----------|------------------|----------------|------------------|---|
| 1 | 115.0884 | 58.0478         |          |                  |                |                  | L    |                 |                 |          |                  |                |                  | 7 |
| 2 | 231.1254 | 116.0663        | 213.1018 | 107.0545         |                |                  | N    | <b>737.4034</b> | 369.2054        | 719.3798 | 360.1936         | 719.3929       | 360.2001         | 6 |
| 3 | 329.1752 | 165.0912        | 311.1516 | 156.0794         |                |                  | P    | <b>621.3664</b> | 311.1869        | 603.3428 | 302.1751         | 603.3559       | 302.1816         | 5 |
| 4 | 459.2642 | 230.1357        | 441.2406 | 221.1239         |                |                  | K    | <b>523.3166</b> | 262.1620        | 505.2930 | 253.1502         | 505.3061       | 253.1567         | 4 |
| 5 | 573.3453 | 287.1763        | 555.3217 | 278.1645         |                |                  | L    | <b>393.2276</b> | 197.1174        | 375.2040 | 188.1056         | 375.2170       | 188.1122         | 3 |
| 6 | 703.3849 | 352.1961        | 685.3613 | 343.1843         | 685.3744       | 343.1908         | E    | 279.1465        | 140.0769        | 261.1229 | 131.0651         | 261.1359       | 131.0716         | 2 |
| 7 |          |                 |          |                  |                |                  | K    | 149.1069        | 75.0571         | 131.0833 | 66.0453          |                |                  | 1 |

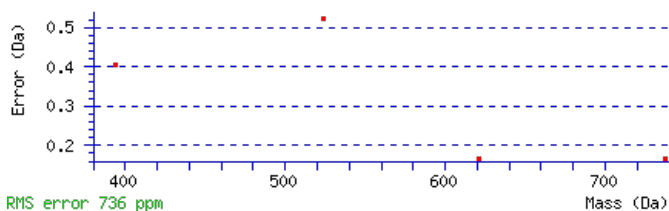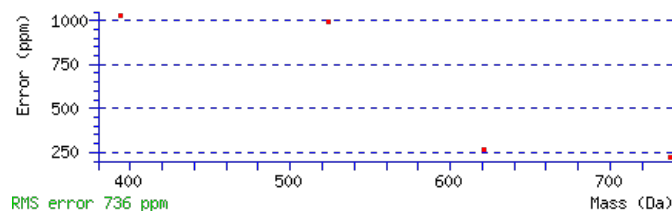NCBI **BLAST** search of **LNPKLEK**

(Parameters: blastp, nr protein database, expect=20000, no filter, PAM30)

Other BLAST [web gateways](#)

**All matches to this query**

| Score | Mr(calc) | Delta   | Sequence                 |
|-------|----------|---------|--------------------------|
| 22.0  | 850.4773 | -0.0013 | <a href="#">LNPKLEK</a>  |
| 10.8  | 850.4773 | -0.0013 | <a href="#">NLPISIGK</a> |

## AT2G03070.1

|     |          |         |                           |
|-----|----------|---------|---------------------------|
| 6.4 | 850.4772 | -0.0013 | <a href="#">ITELPIR</a>   |
| 6.1 | 850.4772 | -0.0013 | <a href="#">LAAAQVVVA</a> |
| 1.7 | 850.4773 | -0.0013 | <a href="#">IPLNEKK</a>   |
| 0.8 | 850.4772 | -0.0013 | <a href="#">KLVDPAAK</a>  |

**Mascot:** <http://www.matrixscience.com/>

**Peptide View**MS/MS Fragmentation of **QYGLDLKASNKEK**Found in **AT2G03140.1** in **TAIR\_Arabidopsis**, Symbols: | CAAX amino terminal protease family protein | chr2:941997-949334 FORWARD

Match to Query 6185: 1492.787793 from(498.603207,3+) index(1130)

Title: Elution from: 19.584 to 19.584 scan no 1681 cid35.00 polarity:+

Data file D1d-2\_1.mgf

Click mouse within plot area to zoom in by factor of two about that point

Or,   to  Da Label all possible matches  Label matches used for scoring Show Y-axis 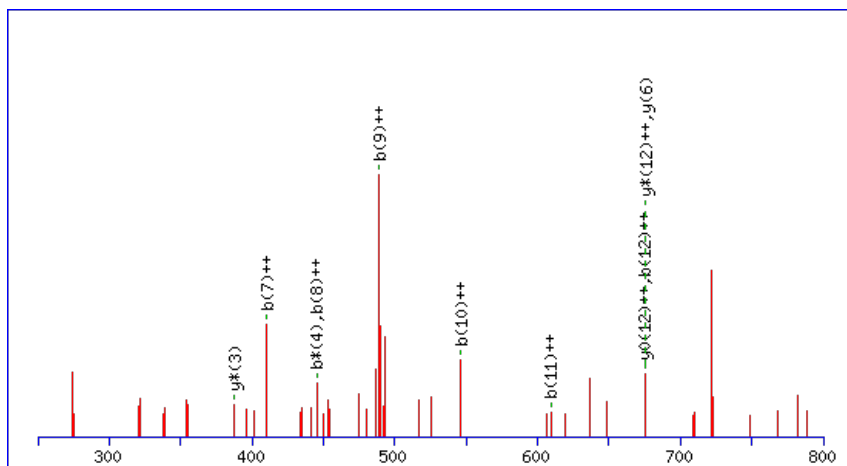Monoisotopic mass of neutral peptide **Mr(calc)**: 1492.7885**Fixed modifications**: Carbamidomethyl (C) (apply to specified residues or termini only)**Ions Score**: 19 **Expect**: 0.048**Matches**: 11/134 fragment ions using 22 most intense peaks ([help](#))

| #  | b         | b <sup>++</sup> | b*        | b <sup>*++</sup> | b <sup>0</sup> | b <sup>0++</sup> | Seq. | y         | y <sup>++</sup> | y*        | y <sup>*++</sup> | y <sup>0</sup> | y <sup>0++</sup> | #  |
|----|-----------|-----------------|-----------|------------------|----------------|------------------|------|-----------|-----------------|-----------|------------------|----------------|------------------|----|
| 1  | 129.0659  | 65.0366         | 112.0393  | 56.5233          |                |                  | Q    |           |                 |           |                  |                |                  | 13 |
| 2  | 292.1292  | 146.5682        | 275.1026  | 138.0550         |                |                  | Y    | 1365.7373 | 683.3723        | 1348.7107 | 674.8590         | 1347.7267      | 674.3670         | 12 |
| 3  | 349.1506  | 175.0790        | 332.1241  | 166.5657         |                |                  | G    | 1202.6739 | 601.8406        | 1185.6474 | 593.3273         | 1184.6634      | 592.8353         | 11 |
| 4  | 462.2347  | 231.6210        | 445.2082  | 223.1077         |                |                  | L    | 1145.6525 | 573.3299        | 1128.6259 | 564.8166         | 1127.6419      | 564.3246         | 10 |
| 5  | 577.2617  | 289.1345        | 560.2351  | 280.6212         | 559.2511       | 280.1292         | D    | 1032.5684 | 516.7878        | 1015.5419 | 508.2746         | 1014.5578      | 507.7826         | 9  |
| 6  | 690.3457  | 345.6765        | 673.3192  | 337.1632         | 672.3352       | 336.6712         | L    | 917.5415  | 459.2744        | 900.5149  | 450.7611         | 899.5309       | 450.2691         | 8  |
| 7  | 818.4407  | 409.7240        | 801.4141  | 401.2107         | 800.4301       | 400.7187         | K    | 804.4574  | 402.7323        | 787.4308  | 394.2191         | 786.4468       | 393.7271         | 7  |
| 8  | 889.4778  | 445.2425        | 872.4512  | 436.7293         | 871.4672       | 436.2373         | A    | 676.3624  | 338.6849        | 659.3359  | 330.1716         | 658.3519       | 329.6796         | 6  |
| 9  | 976.5098  | 488.7585        | 959.4833  | 480.2453         | 958.4993       | 479.7533         | S    | 605.3253  | 303.1663        | 588.2988  | 294.6530         | 587.3148       | 294.1610         | 5  |
| 10 | 1090.5528 | 545.7800        | 1073.5262 | 537.2667         | 1072.5422      | 536.7747         | N    | 518.2933  | 259.6503        | 501.2667  | 251.1370         | 500.2827       | 250.6450         | 4  |
| 11 | 1218.6477 | 609.8275        | 1201.6212 | 601.3142         | 1200.6371      | 600.8222         | K    | 404.2504  | 202.6288        | 387.2238  | 194.1155         | 386.2398       | 193.6235         | 3  |
| 12 | 1347.6903 | 674.3488        | 1330.6638 | 665.8355         | 1329.6797      | 665.3435         | E    | 276.1554  | 138.5813        | 259.1288  | 130.0681         | 258.1448       | 129.5761         | 2  |
| 13 |           |                 |           |                  |                |                  | K    | 147.1128  | 74.0600         | 130.0863  | 65.5468          |                |                  | 1  |

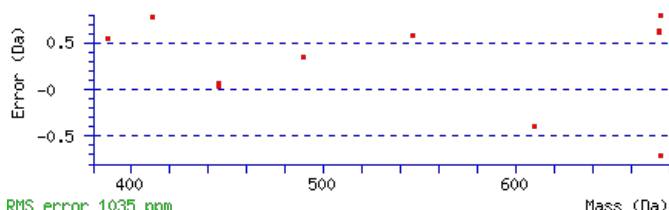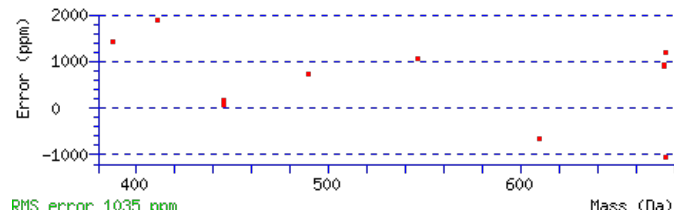NCBI **BLAST** search of **QYGLDLKASNKEK**

(Parameters: blastp, nr protein database, expect=20000, no filter, PAM30)

Other BLAST [web gateways](#)



AT2G03140.1

All matches to this query

| Score | Mr(calc)  | Delta   | Sequence                        |
|-------|-----------|---------|---------------------------------|
| 18.8  | 1492.7885 | -0.0007 | <a href="#">QYGLDLKASNKEK</a>   |
| 8.9   | 1492.7885 | -0.0007 | <a href="#">YRKEELETQ GK</a>    |
| 7.9   | 1492.7886 | -0.0008 | <a href="#">GESHLLLIGDPGTGK</a> |
| 3.6   | 1492.7858 | 0.0019  | <a href="#">SHHRRLSSEISGK</a>   |
| 1.9   | 1492.7885 | -0.0007 | <a href="#">SRATPYTEAEIKK</a>   |

Mascot: <http://www.matrixscience.com/>

**Peptide View**MS/MS Fragmentation of **YLGFKK**

Found in **AT2G03280.1** in **TAIR\_Arabidopsis**, Symbols: | similar to unknown protein [Arabidopsis thaliana] (TAIR:AT1G14020.1); similar to hypothetical protein OsJ\_000519 [Oryza sativa (japonica cultivar-group)] (GB:EAZ10694.1); similar to hypothetical protein OsI\_000541 [Oryza sativa (indica)]

Match to Query 688: 762.413550 from(382.214051,2+) index(3336)

Title: Elution from: 35.478 to 35.478 scan no 4294 cid35.00 polarity:+

Data file D1d-2\_2.mgf

Click mouse within plot area to zoom in by factor of two about that point

Or,   to  Da

Label all possible matches  Label matches used for scoring

Show Y-axis

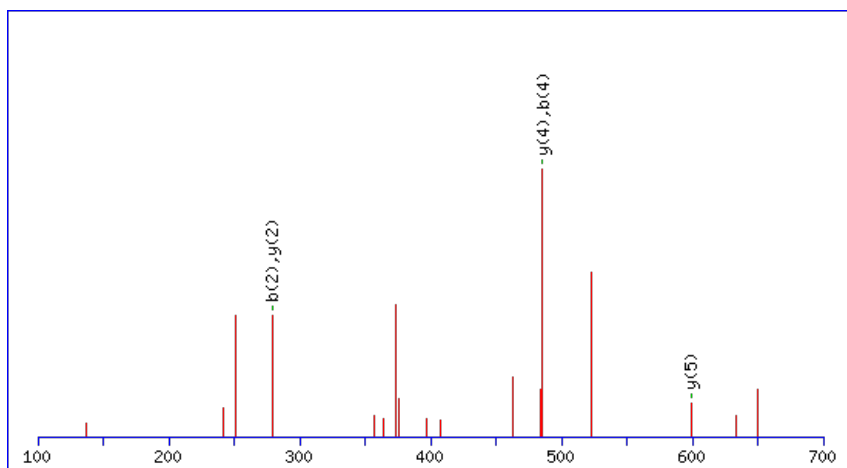

**Monoisotopic mass of neutral peptide Mr(calc):** 762.4140

**Fixed modifications:** Carbamidomethyl (C) (apply to specified residues or termini only)

**Ions Score:** 21 **Expect:** 0.024

**Matches:** 5/32 fragment ions using 6 most intense peaks ([help](#))

| # | b               | b <sup>++</sup> | b*       | b <sup>+++</sup> | Seq. | y               | y <sup>++</sup> | y*       | y <sup>+++</sup> | # |
|---|-----------------|-----------------|----------|------------------|------|-----------------|-----------------|----------|------------------|---|
| 1 | 165.0676        | 83.0375         |          |                  | Y    |                 |                 |          |                  | 6 |
| 2 | <b>279.1487</b> | 140.0780        |          |                  | L    | <b>599.3610</b> | 300.1841        | 581.3374 | 291.1723         | 5 |
| 3 | 337.1672        | 169.0873        |          |                  | G    | <b>485.2799</b> | 243.1436        | 467.2563 | 234.1318         | 4 |
| 4 | <b>485.2327</b> | 243.1200        |          |                  | F    | 427.2614        | 214.1343        | 409.2378 | 205.1225         | 3 |
| 5 | 615.3217        | 308.1645        | 597.2981 | 299.1527         | K    | <b>279.1959</b> | 140.1016        | 261.1723 | 131.0898         | 2 |
| 6 |                 |                 |          |                  | K    | 149.1069        | 75.0571         | 131.0833 | 66.0453          | 1 |

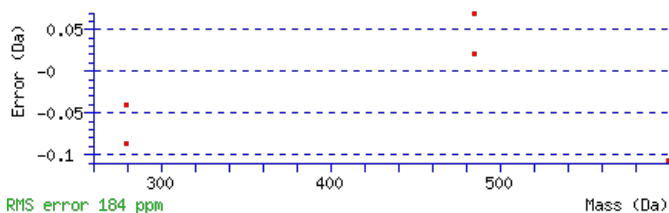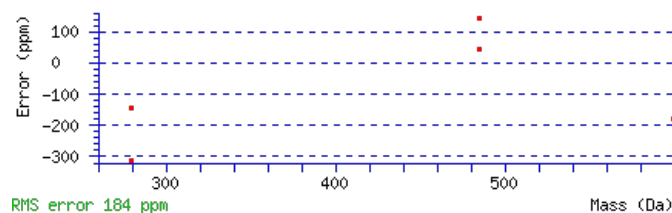NCBI **BLAST** search of **YLGFKK**

(Parameters: blastp, nr protein database, expect=20000, no filter, PAM30)

Other BLAST [web gateways](#)

**All matches to this query**

| Score | Mr(calc) | Delta   | Sequence               |
|-------|----------|---------|------------------------|
| 20.5  | 762.4140 | -0.0005 | <a href="#">YLGFKK</a> |
| 9.0   | 762.4140 | -0.0005 | <a href="#">YFGIKK</a> |

## AT2G03280.1

|     |          |         |                        |
|-----|----------|---------|------------------------|
| 7.1 | 762.4140 | -0.0005 | <a href="#">KFYVAK</a> |
| 4.8 | 762.4118 | 0.0017  | <a href="#">YSKGTK</a> |
| 1.2 | 762.4140 | -0.0005 | <a href="#">VFFSKK</a> |

**Mascot:** <http://www.matrixscience.com/>

**Peptide View**MS/MS Fragmentation of **SGVGQYLEK**Found in **AT2G03440.1** in **TAIR\_Arabidopsis**, Symbols: | nodulin-related | chr2:1039406-1039969 REVERSE

Match to Query 2593: 990.462580 from(496.238566,2+) index(2541)

Title: Elution from: 26.694 to 26.694 scan no 3200 cid35.00 polarity:+

Data file D1d-3\_1.mgf

Click mouse within plot area to zoom in by factor of two about that point

Or,  to  Da Label all possible matches  Label matches used for scoring Show Y-axis 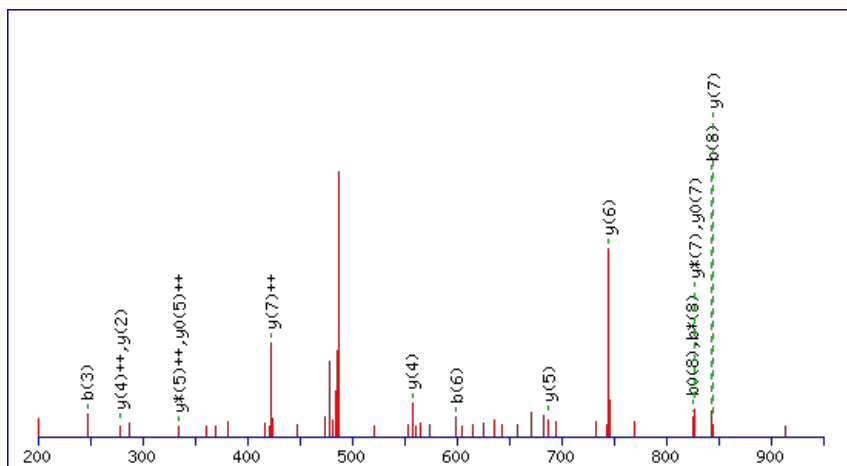Monoisotopic mass of neutral peptide  $M_r(\text{calc})$ : 990.4648

Fixed modifications: Carbamidomethyl (C) (apply to specified residues or termini only)

Ions Score: 30 Expect: 0.012

Matches : 16/86 fragment ions using 29 most intense peaks ([help](#))

| # | b               | b <sup>++</sup> | b*              | b <sup>*++</sup> | b <sup>0</sup>  | b <sup>0++</sup> | Seq. | y               | y <sup>++</sup> | y*              | y <sup>*++</sup> | y <sup>0</sup>  | y <sup>0++</sup> | # |
|---|-----------------|-----------------|-----------------|------------------|-----------------|------------------|------|-----------------|-----------------|-----------------|------------------|-----------------|------------------|---|
| 1 | 89.0363         | 45.0218         |                 |                  | 71.0258         | 36.0165          | S    |                 |                 |                 |                  |                 |                  | 9 |
| 2 | 147.0548        | 74.0311         |                 |                  | 129.0443        | 65.0258          | G    | 903.4431        | 452.2252        | 885.4195        | 443.2134         | 885.4325        | 443.2199         | 8 |
| 3 | <b>247.1203</b> | 124.0638        |                 |                  | 229.1097        | 115.0585         | V    | <b>845.4246</b> | <b>423.2159</b> | <b>827.4010</b> | 414.2041         | <b>827.4140</b> | 414.2106         | 7 |
| 4 | 305.1388        | 153.0730        |                 |                  | 287.1282        | 144.0677         | G    | <b>745.3591</b> | 373.1832        | 727.3355        | 364.1714         | 727.3485        | 364.1779         | 6 |
| 5 | 435.1914        | 218.0994        | 417.1678        | 209.0876         | 417.1809        | 209.0941         | Q    | <b>687.3406</b> | 344.1739        | 669.3170        | <b>335.1622</b>  | 669.3300        | <b>335.1687</b>  | 5 |
| 6 | <b>599.2518</b> | 300.1295        | 581.2282        | 291.1177         | 581.2412        | 291.1243         | Y    | <b>557.2880</b> | <b>279.1476</b> | 539.2644        | 270.1358         | 539.2774        | 270.1423         | 4 |
| 7 | 713.3329        | 357.1701        | 695.3093        | 348.1583         | 695.3223        | 348.1648         | L    | 393.2276        | 197.1174        | 375.2040        | 188.1056         | 375.2170        | 188.1122         | 3 |
| 8 | <b>843.3725</b> | 422.1899        | <b>825.3489</b> | 413.1781         | <b>825.3620</b> | 413.1846         | E    | <b>279.1465</b> | 140.0769        | 261.1229        | 131.0651         | 261.1359        | 131.0716         | 2 |
| 9 |                 |                 |                 |                  |                 |                  | K    | 149.1069        | 75.0571         | 131.0833        | 66.0453          |                 |                  | 1 |

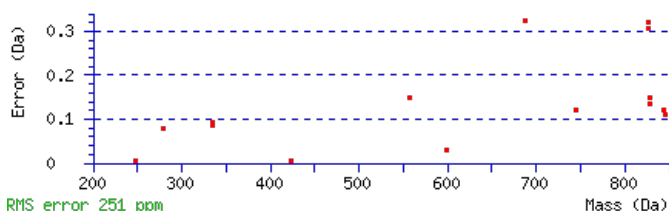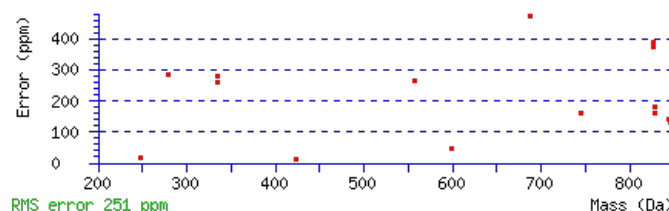NCBI BLAST search of [SGVGQYLEK](#)

(Parameters: blastp, nr protein database, expect=20000, no filter, PAM30)

Other BLAST [web gateways](#)**All matches to this query**

| Score | $M_r(\text{calc})$ | Delta   | Sequence                  |
|-------|--------------------|---------|---------------------------|
| 30.0  | 990.4648           | -0.0022 | <a href="#">SGVGQYLEK</a> |

## AT2G03440.1

|      |          |         |                            |
|------|----------|---------|----------------------------|
| 16.0 | 990.4648 | -0.0023 | <a href="#">ENGEKYIK</a>   |
| 12.5 | 990.4648 | -0.0023 | <a href="#">NEKGYIEK</a>   |
| 12.0 | 990.4648 | -0.0023 | <a href="#">EFAAEASKK</a>  |
| 8.5  | 990.4648 | -0.0023 | <a href="#">SFAEEAAKK</a>  |
| 7.5  | 990.4648 | -0.0022 | <a href="#">KDSLQDFK</a>   |
| 7.3  | 990.4626 | -0.0000 | <a href="#">ATKSTGGTEK</a> |
| 6.4  | 990.4648 | -0.0022 | <a href="#">YGDNIITGK</a>  |
| 5.5  | 990.4648 | -0.0022 | <a href="#">DKDAIGFSK</a>  |
| 5.5  | 990.4648 | -0.0023 | <a href="#">ASAFQSELK</a>  |

Mascot: <http://www.matrixscience.com/>

**Peptide View**MS/MS Fragmentation of **NYSQFVGFPIYTWQEK**Found in **AT2G04030.1** in **TAIR\_Arabidopsis**, Symbols: EMB1956, CR88 | CR88 (EMBRYO DEFECTIVE 1956); ATP binding | chr2:1281980-1285906 FORWARD

Match to Query 9533: 2026.891380 from(1014.452966,2+) index(10083)

Title: Elution from: 93.056 to 93.056 scan no 13969 cid35.00 polarity:+

Data file D12h-3\_1.mgf

Click mouse within plot area to zoom in by factor of two about that point

Or,   to  Da Label all possible matches  Label matches used for scoring Show Y-axis 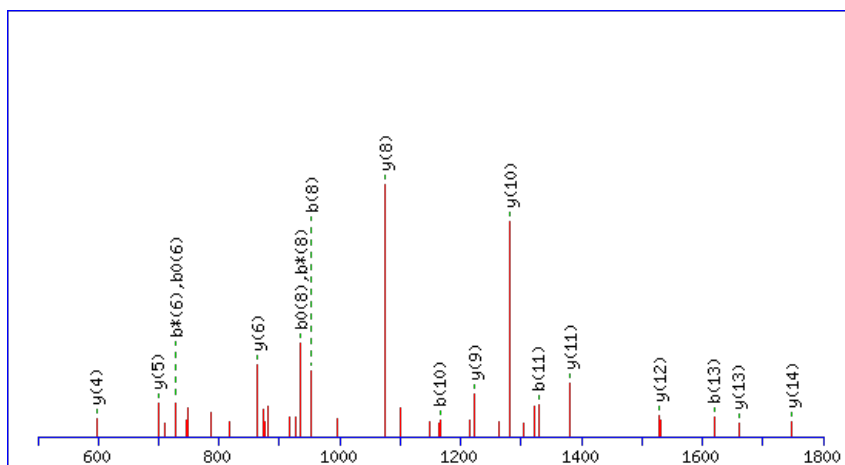**Monoisotopic mass of neutral peptide Mr(calc):** 2026.8951**Fixed modifications:** Carbamidomethyl (C) (apply to specified residues or termini only)**Ions Score:** 92 **Expect:** 4.6e-009**Matches:** 18/174 fragment ions using 20 most intense peaks ([help](#))

| #  | b                | b <sup>++</sup> | b*              | b <sup>*++</sup> | b <sup>0</sup>  | b <sup>0++</sup> | Seq. | y                | y <sup>++</sup> | y*        | y <sup>*++</sup> | y <sup>0</sup> | y <sup>0++</sup> | #  |
|----|------------------|-----------------|-----------------|------------------|-----------------|------------------|------|------------------|-----------------|-----------|------------------|----------------|------------------|----|
| 1  | 117.0443         | 59.0258         | 99.0207         | 50.0140          |                 |                  | N    |                  |                 |           |                  |                |                  | 16 |
| 2  | 281.1046         | 141.0560        | 263.0811        | 132.0442         |                 |                  | Y    | 1911.8654        | 956.4364        | 1893.8418 | 947.4246         | 1893.8549      | 947.4311         | 15 |
| 3  | 369.1337         | 185.0705        | 351.1101        | 176.0587         | 351.1231        | 176.0652         | S    | <b>1747.8051</b> | 874.4062        | 1729.7815 | 865.3944         | 1729.7945      | 865.4009         | 14 |
| 4  | 499.1863         | 250.0968        | 481.1628        | 241.0850         | 481.1758        | 241.0915         | Q    | <b>1659.7760</b> | 830.3916        | 1641.7524 | 821.3798         | 1641.7654      | 821.3864         | 13 |
| 5  | 647.2518         | 324.1295        | 629.2282        | 315.1177         | 629.2412        | 315.1243         | F    | <b>1529.7234</b> | 765.3653        | 1511.6998 | 756.3535         | 1511.7128      | 756.3600         | 12 |
| 6  | 747.3172         | 374.1623        | <b>729.2937</b> | 365.1505         | <b>729.3067</b> | 365.1570         | V    | <b>1381.6579</b> | 691.3326        | 1363.6343 | 682.3208         | 1363.6473      | 682.3273         | 11 |
| 7  | 805.3357         | 403.1715        | 787.3122        | 394.1597         | 787.3252        | 394.1662         | G    | <b>1281.5925</b> | 641.2999        | 1263.5689 | 632.2881         | 1263.5819      | 632.2946         | 10 |
| 8  | <b>953.4012</b>  | 477.2042        | <b>935.3776</b> | 468.1924         | <b>935.3906</b> | 468.1990         | F    | <b>1223.5740</b> | 612.2906        | 1205.5504 | 603.2788         | 1205.5634      | 603.2853         | 9  |
| 9  | 1051.4510        | 526.2291        | 1033.4274       | 517.2173         | 1033.4404       | 517.2239         | P    | <b>1075.5085</b> | 538.2579        | 1057.4849 | 529.2461         | 1057.4979      | 529.2526         | 8  |
| 10 | <b>1165.5321</b> | 583.2697        | 1147.5085       | 574.2579         | 1147.5215       | 574.2644         | I    | 977.4587         | 489.2330        | 959.4351  | 480.2212         | 959.4481       | 480.2277         | 7  |
| 11 | <b>1329.5925</b> | 665.2999        | 1311.5689       | 656.2881         | 1311.5819       | 656.2946         | Y    | <b>863.3776</b>  | 432.1924        | 845.3540  | 423.1807         | 845.3670       | 423.1872         | 6  |
| 12 | 1431.6372        | 716.3222        | 1413.6136       | 707.3104         | 1413.6266       | 707.3169         | T    | <b>699.3172</b>  | 350.1623        | 681.2937  | 341.1505         | 681.3067       | 341.1570         | 5  |
| 13 | <b>1619.7106</b> | 810.3589        | 1601.6870       | 801.3471         | 1601.7000       | 801.3536         | W    | <b>597.2725</b>  | 299.1399        | 579.2489  | 290.1281         | 579.2620       | 290.1346         | 4  |
| 14 | 1749.7632        | 875.3852        | 1731.7396       | 866.3734         | 1731.7526       | 866.3800         | Q    | 409.1991         | 205.1032        | 391.1756  | 196.0914         | 391.1886       | 196.0979         | 3  |
| 15 | 1879.8028        | 940.4051        | 1861.7792       | 931.3933         | 1861.7923       | 931.3998         | E    | 279.1465         | 140.0769        | 261.1229  | 131.0651         | 261.1359       | 131.0716         | 2  |
| 16 |                  |                 |                 |                  |                 |                  | K    | 149.1069         | 75.0571         | 131.0833  | 66.0453          |                |                  | 1  |

AT2G04030.1

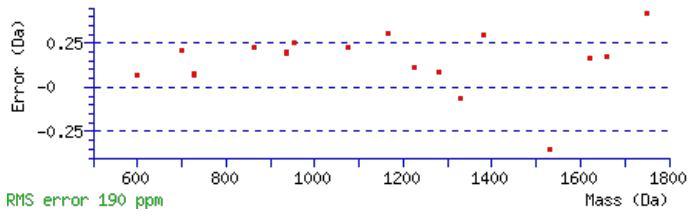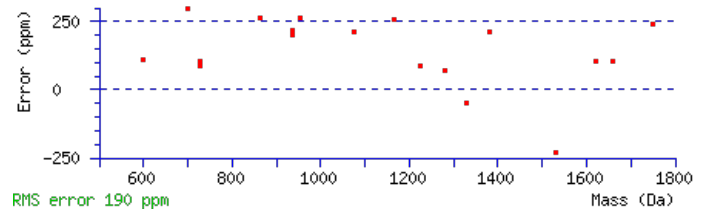

NCBI **BLAST** search of [NYSQFVGFPIYTWQEK](#)  
(Parameters: blastp, nr protein database, expect=20000, no filter, PAM30)  
Other BLAST [web gateways](#)

**All matches to this query**

| Score | Mr(calc)  | Delta   | Sequence                          |
|-------|-----------|---------|-----------------------------------|
| 92.0  | 2026.8951 | -0.0037 | <a href="#">NYSQFVGFPIYTWQEK</a>  |
| 0.8   | 2026.8891 | 0.0023  | <a href="#">GVLSPDEVMTSEITDLR</a> |

Mascot: <http://www.matrixscience.com/>

## Peptide View

MS/MS Fragmentation of **VTFISNPPNNVFTWK**

Found in **AT2G04170.1** in **TAIR\_Arabidopsis**, Symbols: | meprin and TRAF homology domain-containing protein / MATH domain-containing protein | chr2:1417401-1419153 REVERSE

Match to Query 8306: 1782.844482 from(892.429517,2+) index(8667)

Title: Elution from: 77.688 to 77.688 scan no 11652 cid35.00 polarity:+

Data file D12h-3\_2.mgf

Click mouse within plot area to zoom in by factor of two about that point

Or,   to  Da

Label all possible matches  Label matches used for scoring

Show Y-axis

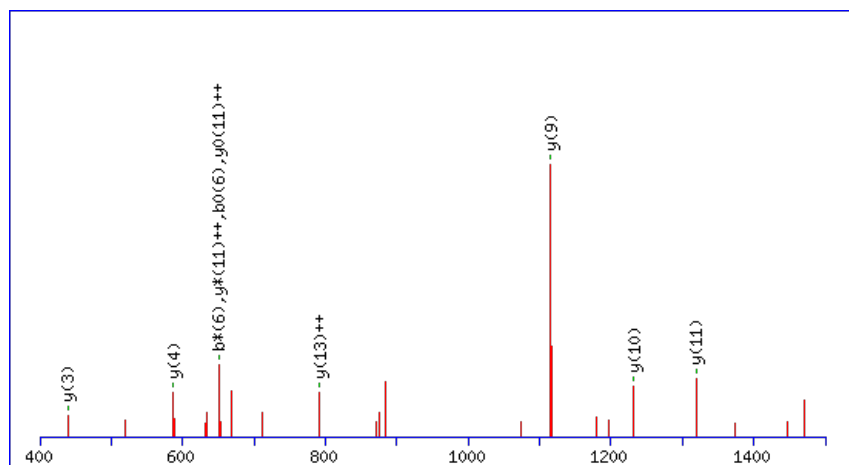

Monoisotopic mass of neutral peptide  $M_r(\text{calc})$ : 1782.8450

Fixed modifications: Carbamidomethyl (C) (apply to specified residues or termini only)

Ions Score: 33 Expect: 0.0056

Matches : 10/152 fragment ions using 10 most intense peaks ([help](#))

| #  | b         | b <sup>++</sup> | b*        | b <sup>*++</sup> | b <sup>0</sup> | b <sup>0++</sup> | Seq. | y         | y <sup>++</sup> | y*        | y <sup>*++</sup> | y <sup>0</sup> | y <sup>0++</sup> | #  |
|----|-----------|-----------------|-----------|------------------|----------------|------------------|------|-----------|-----------------|-----------|------------------|----------------|------------------|----|
| 1  | 101.0727  | 51.0400         |           |                  |                |                  | V    |           |                 |           |                  |                |                  | 15 |
| 2  | 203.1174  | 102.0624        |           |                  | 185.1069       | 93.0571          | T    | 1683.7868 | 842.3970        | 1665.7632 | 833.3852         | 1665.7762      | 833.3917         | 14 |
| 3  | 351.1829  | 176.0951        |           |                  | 333.1723       | 167.0898         | F    | 1581.7421 | 791.3747        | 1563.7185 | 782.3629         | 1563.7315      | 782.3694         | 13 |
| 4  | 465.2640  | 233.1356        |           |                  | 447.2534       | 224.1303         | I    | 1433.6766 | 717.3419        | 1415.6530 | 708.3302         | 1415.6661      | 708.3367         | 12 |
| 5  | 553.2930  | 277.1502        |           |                  | 535.2825       | 268.1449         | S    | 1319.5955 | 660.3014        | 1301.5719 | 651.2896         | 1301.5850      | 651.2961         | 11 |
| 6  | 669.3300  | 335.1687        | 651.3065  | 326.1569         | 651.3195       | 326.1634         | N    | 1231.5665 | 616.2869        | 1213.5429 | 607.2751         | 1213.5559      | 607.2816         | 10 |
| 7  | 767.3798  | 384.1936        | 749.3563  | 375.1818         | 749.3693       | 375.1883         | P    | 1115.5295 | 558.2684        | 1097.5059 | 549.2566         | 1097.5189      | 549.2631         | 9  |
| 8  | 865.4296  | 433.2185        | 847.4061  | 424.2067         | 847.4191       | 424.2132         | P    | 1017.4797 | 509.2435        | 999.4561  | 500.2317         | 999.4691       | 500.2382         | 8  |
| 9  | 981.4666  | 491.2370        | 963.4431  | 482.2252         | 963.4561       | 482.2317         | N    | 919.4299  | 460.2186        | 901.4063  | 451.2068         | 901.4193       | 451.2133         | 7  |
| 10 | 1097.5036 | 549.2555        | 1079.4801 | 540.2437         | 1079.4931      | 540.2502         | N    | 803.3929  | 402.2001        | 785.3693  | 393.1883         | 785.3823       | 393.1948         | 6  |
| 11 | 1197.5691 | 599.2882        | 1179.5455 | 590.2764         | 1179.5585      | 590.2829         | V    | 687.3559  | 344.1816        | 669.3323  | 335.1698         | 669.3453       | 335.1763         | 5  |
| 12 | 1345.6345 | 673.3209        | 1327.6110 | 664.3091         | 1327.6240      | 664.3156         | F    | 587.2904  | 294.1488        | 569.2668  | 285.1371         | 569.2799       | 285.1436         | 4  |
| 13 | 1447.6792 | 724.3433        | 1429.6557 | 715.3315         | 1429.6687      | 715.3380         | T    | 439.2250  | 220.1161        | 421.2014  | 211.1043         | 421.2144       | 211.1108         | 3  |
| 14 | 1635.7526 | 818.3800        | 1617.7290 | 809.3682         | 1617.7421      | 809.3747         | W    | 337.1803  | 169.0938        | 319.1567  | 160.0820         |                |                  | 2  |
| 15 |           |                 |           |                  |                |                  | K    | 149.1069  | 75.0571         | 131.0833  | 66.0453          |                |                  | 1  |

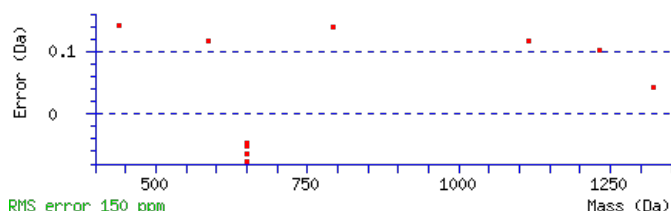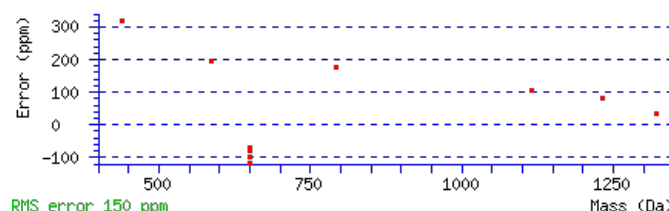



## AT2G04170.1

NCBI **BLAST** search of [VTFISNPPNNVFTWK](#)

(Parameters: blastp, nr protein database, expect=20000, no filter, PAM30)

Other BLAST [web gateways](#)

### All matches to this query

| Score | Mr(calc)  | Delta   | Sequence                               |
|-------|-----------|---------|----------------------------------------|
| 32.6  | 1782.8450 | -0.0005 | <a href="#">VTFISNPPNNVFTWK</a>        |
| 4.5   | 1782.8439 | 0.0006  | <a href="#">TIMPNAGSERAASLSLK</a>      |
| 3.0   | 1782.8409 | 0.0036  | <a href="#">KAAQAAGASSGGAAGGKGAAAK</a> |
| 2.6   | 1782.8461 | -0.0016 | <a href="#">MRKPFLSEPEQSVSK</a>        |
| 2.6   | 1782.8432 | 0.0013  | <a href="#">EKPVTALRSSSFHGSR</a>       |
| 2.0   | 1782.8432 | 0.0013  | <a href="#">NIPHVVSVGTPAPNSNR</a>      |
| 1.3   | 1782.8449 | -0.0005 | <a href="#">IQYAANWFVPGEAVAK</a>       |
| 0.5   | 1782.8404 | 0.0040  | <a href="#">LDVRDALDGFEDRLK</a>        |
| 0.1   | 1782.8461 | -0.0016 | <a href="#">GSPNLQVLDIFEMKR</a>        |

Mascot: <http://www.matrixscience.com/>

**Peptide View**MS/MS Fragmentation of **VNILKDTDK**Found in **AT2G04380.1** in **TAIR\_Arabidopsis**, Symbols: | unknown protein | chr2:1525639-1526499 FORWARD

Match to Query 3165: 1056.542880 from(529.278716,2+) index(4725)

Title: Elution from: 42.689 to 42.689 scan no 5902 cid35.00 polarity:+

Data file D6h-1\_1.mgf

Click mouse within plot area to zoom in by factor of two about that point

Or,   to  Da Label all possible matches  Label matches used for scoring Show Y-axis 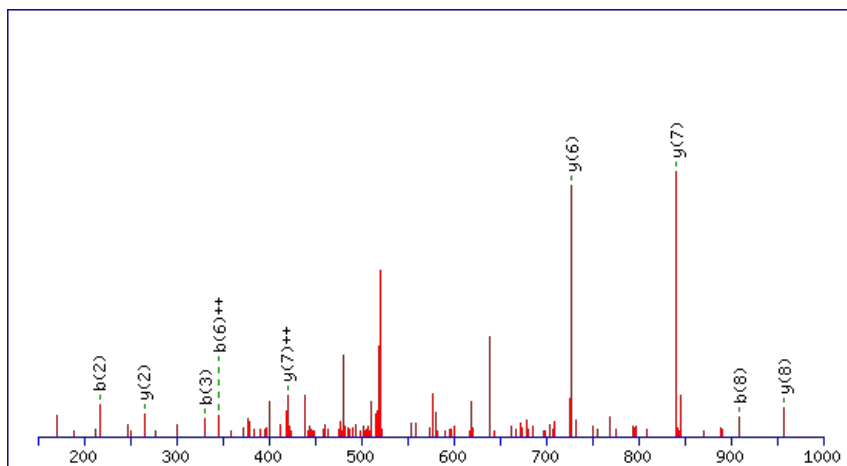Monoisotopic mass of neutral peptide **Mr(calc)**: 1056.5459**Fixed modifications**: Carbamidomethyl (C) (apply to specified residues or termini only)**Ions Score**: 26 **Expect**: 0.016**Matches**: 9/82 fragment ions using 16 most intense peaks ([help](#))

| # | b               | b <sup>++</sup> | b*       | b <sup>*++</sup> | b <sup>0</sup> | b <sup>0++</sup> | Seq. | y               | y <sup>++</sup> | y*       | y <sup>*++</sup> | y <sup>0</sup> | y <sup>0++</sup> | # |
|---|-----------------|-----------------|----------|------------------|----------------|------------------|------|-----------------|-----------------|----------|------------------|----------------|------------------|---|
| 1 | 101.0727        | 51.0400         |          |                  |                |                  | V    |                 |                 |          |                  |                |                  | 9 |
| 2 | <b>217.1097</b> | 109.0585        | 199.0861 | 100.0467         |                |                  | N    | <b>957.4878</b> | 479.2475        | 939.4642 | 470.2357         | 939.4772       | 470.2422         | 8 |
| 3 | <b>331.1908</b> | 166.0990        | 313.1672 | 157.0873         |                |                  | I    | <b>841.4508</b> | <b>421.2290</b> | 823.4272 | 412.2172         | 823.4402       | 412.2237         | 7 |
| 4 | 445.2719        | 223.1396        | 427.2483 | 214.1278         |                |                  | L    | <b>727.3697</b> | 364.1885        | 709.3461 | 355.1767         | 709.3591       | 355.1832         | 6 |
| 5 | 575.3610        | 288.1841        | 557.3374 | 279.1723         |                |                  | K    | 613.2886        | 307.1479        | 595.2650 | 298.1361         | 595.2780       | 298.1426         | 5 |
| 6 | 691.3849        | <b>346.1961</b> | 673.3613 | 337.1843         | 673.3744       | 337.1908         | D    | 483.1995        | 242.1034        | 465.1760 | 233.0916         | 465.1890       | 233.0981         | 4 |
| 7 | 793.4296        | 397.2185        | 775.4061 | 388.2067         | 775.4191       | 388.2132         | T    | 367.1756        | 184.0914        | 349.1520 | 175.0796         | 349.1650       | 175.0861         | 3 |
| 8 | <b>909.4536</b> | 455.2304        | 891.4300 | 446.2187         | 891.4431       | 446.2252         | D    | <b>265.1309</b> | 133.0691        | 247.1073 | 124.0573         | 247.1203       | 124.0638         | 2 |
| 9 |                 |                 |          |                  |                |                  | K    | 149.1069        | 75.0571         | 131.0833 | 66.0453          |                |                  | 1 |

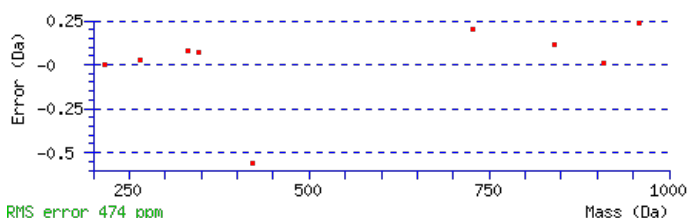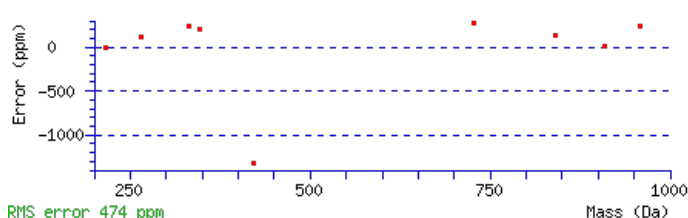NCBI **BLAST** search of [VNILKDTDK](#)

(Parameters: blastp, nr protein database, expect=20000, no filter, PAM30)

Other BLAST [web gateways](#)**All matches to this query**

| Score | Mr(calc)  | Delta   | Sequence                  |
|-------|-----------|---------|---------------------------|
| 26.2  | 1056.5459 | -0.0030 | <a href="#">VNILKDTDK</a> |

**AT2G04380.1**

|     |           |         |                           |
|-----|-----------|---------|---------------------------|
| 9.7 | 1056.5459 | -0.0030 | <a href="#">VEVGKKEEK</a> |
| 7.5 | 1056.5412 | 0.0017  | <a href="#">VVKCIPNSK</a> |
| 7.2 | 1056.5459 | -0.0030 | <a href="#">DVSLEKQVK</a> |
| 5.9 | 1056.5459 | -0.0030 | <a href="#">DQAVVLATK</a> |
| 4.0 | 1056.5459 | -0.0030 | <a href="#">LTLETLEAR</a> |
| 2.1 | 1056.5459 | -0.0031 | <a href="#">TIDPSKEKK</a> |
| 1.6 | 1056.5439 | -0.0010 | <a href="#">HRKMVNLK</a>  |

**Mascot:** <http://www.matrixscience.com/>

**Peptide View**MS/MS Fragmentation of **ILEEVAIIPSK**Found in **AT2G04390.1** in **TAIR\_Arabidopsis**, Symbols: | 40S ribosomal protein S17 (RPS17A) | chr2:1527908-1528333 FORWARD

Match to Query 4431: 1222.680738 from(612.347645,2+) index(6652)

Title: Elution from: 58.728 to 58.728 scan no 8509 cid35.00 polarity:+

Data file 0-2\_1.mgf

Click mouse within plot area to zoom in by factor of two about that point

Or,   to  Da Label all possible matches  Label matches used for scoring Show Y-axis 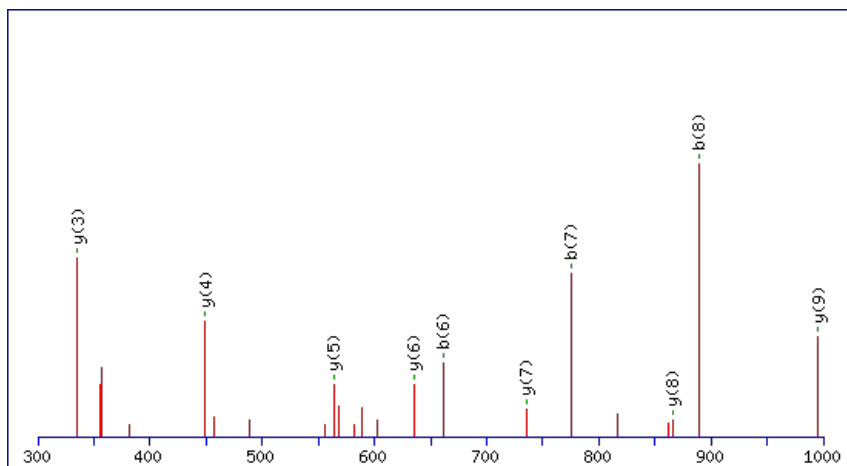**Monoisotopic mass of neutral peptide Mr(calc):** 1222.6817**Fixed modifications:** Carbamidomethyl (C) (apply to specified residues or termini only)**Ions Score:** 61 **Expect:** 1.1e-006**Matches:** 10/94 fragment ions using 13 most intense peaks ([help](#))

| #  | b               | b <sup>++</sup> | b <sup>0</sup> | b <sup>0++</sup> | Seq. | y               | y <sup>++</sup> | y*        | y <sup>*++</sup> | y <sup>0</sup> | y <sup>0++</sup> | #  |
|----|-----------------|-----------------|----------------|------------------|------|-----------------|-----------------|-----------|------------------|----------------|------------------|----|
| 1  | 115.0884        | 58.0478         |                |                  | I    |                 |                 |           |                  |                |                  | 11 |
| 2  | 229.1695        | 115.0884        |                |                  | L    | 1109.6079       | 555.3076        | 1091.5843 | 546.2958         | 1091.5973      | 546.3023         | 10 |
| 3  | 359.2091        | 180.1082        | 341.1985       | 171.1029         | E    | <b>995.5268</b> | 498.2670        | 977.5032  | 489.2552         | 977.5162       | 489.2617         | 9  |
| 4  | 489.2487        | 245.1280        | 471.2382       | 236.1227         | E    | <b>865.4872</b> | 433.2472        | 847.4636  | 424.2354         | 847.4766       | 424.2419         | 8  |
| 5  | 589.3142        | 295.1607        | 571.3036       | 286.1554         | V    | <b>735.4475</b> | 368.2274        | 717.4239  | 359.2156         | 717.4370       | 359.2221         | 7  |
| 6  | <b>661.3483</b> | 331.1778        | 643.3378       | 322.1725         | A    | <b>635.3821</b> | 318.1947        | 617.3585  | 309.1829         | 617.3715       | 309.1894         | 6  |
| 7  | <b>775.4294</b> | 388.2184        | 757.4189       | 379.2131         | I    | <b>563.3479</b> | 282.1776        | 545.3243  | 273.1658         | 545.3374       | 273.1723         | 5  |
| 8  | <b>889.5105</b> | 445.2589        | 871.5000       | 436.2536         | I    | <b>449.2668</b> | 225.1371        | 431.2433  | 216.1253         | 431.2563       | 216.1318         | 4  |
| 9  | 987.5603        | 494.2838        | 969.5498       | 485.2785         | P    | <b>335.1857</b> | 168.0965        | 317.1622  | 159.0847         | 317.1752       | 159.0912         | 3  |
| 10 | 1075.5894       | 538.2983        | 1057.5788      | 529.2930         | S    | 237.1359        | 119.0716        | 219.1124  | 110.0598         | 219.1254       | 110.0663         | 2  |
| 11 |                 |                 |                |                  | K    | 149.1069        | 75.0571         | 131.0833  | 66.0453          |                |                  | 1  |

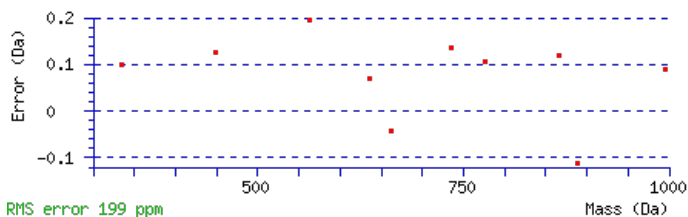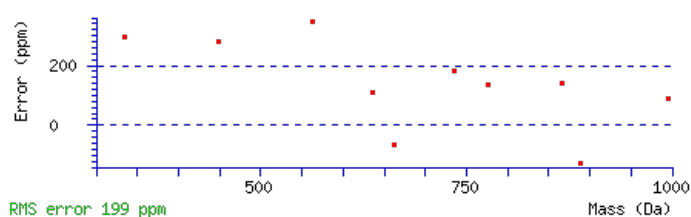NCBI **BLAST** search of **ILEEVAIIPSK**

(Parameters: blastp, nr protein database, expect=20000, no filter, PAM30)

Other BLAST [web gateways](#)**All matches to this query**

AT2G04390.1

| Score | Mr(calc)  | Delta   | Sequence                    |
|-------|-----------|---------|-----------------------------|
| 60.9  | 1222.6817 | -0.0010 | <a href="#">ILEEVAIIPSK</a> |

Mascot: <http://www.matrixscience.com/>

**Peptide View**MS/MS Fragmentation of **VSSSVFSTDPVAVYQVNR**Found in **AT2G04780.1** in **TAIR\_Arabidopsis**, Symbols: FLA7 | FLA7 | chr2:1677485-1678249 FORWARD

Match to Query 8740: 1953.979226 from(977.996889,2+) index(6886)

Title: Elution from: 64.849 to 64.849 scan no 9131 cid35.00 polarity:+

Data file D1d-1-2.mgf

Click mouse within plot area to zoom in by factor of two about that point

Or,   to  Da Label all possible matches  Label matches used for scoring Show Y-axis 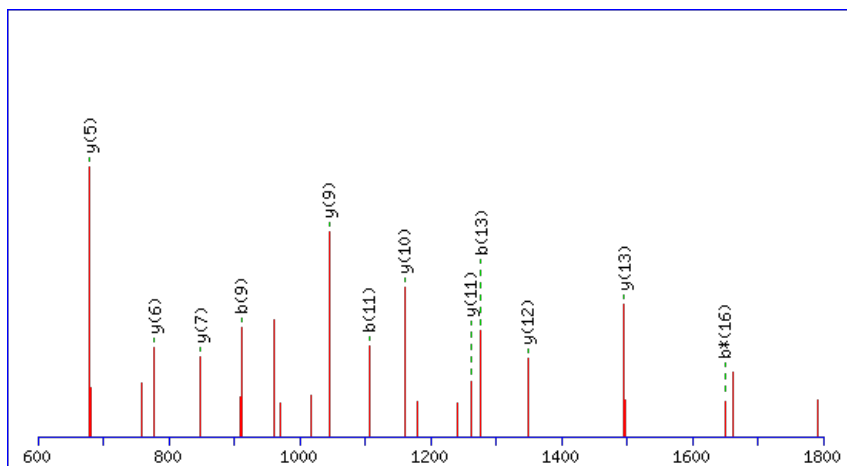**Monoisotopic mass of neutral peptide Mr(calc):** 1953.9796**Fixed modifications:** Carbamidomethyl (C) (apply to specified residues or termini only)**Ions Score:** 59 **Expect:** 5.2e-006**Matches:** 12/156 fragment ions using 18 most intense peaks ([help](#))

| #  | b                | b <sup>++</sup> | b*               | b <sup>*++</sup> | b <sup>0</sup> | b <sup>0++</sup> | Seq. | y                | y <sup>++</sup> | y*        | y <sup>*++</sup> | y <sup>0</sup> | y <sup>0++</sup> | #  |
|----|------------------|-----------------|------------------|------------------|----------------|------------------|------|------------------|-----------------|-----------|------------------|----------------|------------------|----|
| 1  | 100.0757         | 50.5415         |                  |                  |                |                  | V    |                  |                 |           |                  |                |                  | 18 |
| 2  | 187.1077         | 94.0575         |                  |                  | 169.0972       | 85.0522          | S    | 1855.9185        | 928.4629        | 1838.8919 | 919.9496         | 1837.9079      | 919.4576         | 17 |
| 3  | 274.1397         | 137.5735        |                  |                  | 256.1292       | 128.5682         | S    | 1768.8864        | 884.9469        | 1751.8599 | 876.4336         | 1750.8759      | 875.9416         | 16 |
| 4  | 361.1718         | 181.0895        |                  |                  | 343.1612       | 172.0842         | S    | 1681.8544        | 841.4308        | 1664.8279 | 832.9176         | 1663.8438      | 832.4256         | 15 |
| 5  | 460.2402         | 230.6237        |                  |                  | 442.2296       | 221.6184         | V    | 1594.8224        | 797.9148        | 1577.7958 | 789.4016         | 1576.8118      | 788.9095         | 14 |
| 6  | 607.3086         | 304.1579        |                  |                  | 589.2980       | 295.1527         | F    | <b>1495.7540</b> | 748.3806        | 1478.7274 | 739.8673         | 1477.7434      | 739.3753         | 13 |
| 7  | 694.3406         | 347.6740        |                  |                  | 676.3301       | 338.6687         | S    | <b>1348.6856</b> | 674.8464        | 1331.6590 | 666.3331         | 1330.6750      | 665.8411         | 12 |
| 8  | 795.3883         | 398.1978        |                  |                  | 777.3777       | 389.1925         | T    | <b>1261.6535</b> | 631.3304        | 1244.6270 | 622.8171         | 1243.6430      | 622.3251         | 11 |
| 9  | <b>910.4153</b>  | 455.7113        |                  |                  | 892.4047       | 446.7060         | D    | <b>1160.6058</b> | 580.8066        | 1143.5793 | 572.2933         | 1142.5953      | 571.8013         | 10 |
| 10 | 1007.4680        | 504.2376        |                  |                  | 989.4575       | 495.2324         | P    | <b>1045.5789</b> | 523.2931        | 1028.5524 | 514.7798         |                |                  | 9  |
| 11 | <b>1106.5364</b> | 553.7719        |                  |                  | 1088.5259      | 544.7666         | V    | 948.5261         | 474.7667        | 931.4996  | 466.2534         |                |                  | 8  |
| 12 | 1177.5735        | 589.2904        |                  |                  | 1159.5630      | 580.2851         | A    | <b>849.4577</b>  | 425.2325        | 832.4312  | 416.7192         |                |                  | 7  |
| 13 | <b>1276.6420</b> | 638.8246        |                  |                  | 1258.6314      | 629.8193         | V    | <b>778.4206</b>  | 389.7139        | 761.3941  | 381.2007         |                |                  | 6  |
| 14 | 1439.7053        | 720.3563        |                  |                  | 1421.6947      | 711.3510         | Y    | <b>679.3522</b>  | 340.1797        | 662.3257  | 331.6665         |                |                  | 5  |
| 15 | 1567.7639        | 784.3856        | 1550.7373        | 775.8723         | 1549.7533      | 775.3803         | Q    | 516.2889         | 258.6481        | 499.2623  | 250.1348         |                |                  | 4  |
| 16 | 1666.8323        | 833.9198        | <b>1649.8057</b> | 825.4065         | 1648.8217      | 824.9145         | V    | 388.2303         | 194.6188        | 371.2037  | 186.1055         |                |                  | 3  |
| 17 | 1780.8752        | 890.9412        | 1763.8487        | 882.4280         | 1762.8646      | 881.9360         | N    | 289.1619         | 145.0846        | 272.1353  | 136.5713         |                |                  | 2  |
| 18 |                  |                 |                  |                  |                |                  | R    | 175.1190         | 88.0631         | 158.0924  | 79.5498          |                |                  | 1  |

AT2G04780.1

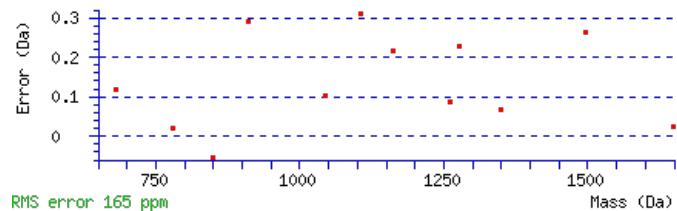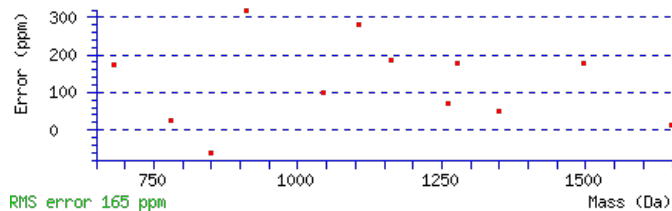

NCBI **BLAST** search of [VSSSVFSTDPVAVYQVNR](#)

(Parameters: blastp, nr protein database, expect=20000, no filter, PAM30)

Other BLAST [web gateways](#)

**All matches to this query**

| Score | Mr(calc)  | Delta   | Sequence                           |
|-------|-----------|---------|------------------------------------|
| 59.1  | 1953.9796 | -0.0004 | <a href="#">VSSSVFSTDPVAVYQVNR</a> |
| 3.0   | 1953.9756 | 0.0037  | <a href="#">RVPTKPDDPNESENTKK</a>  |
| 0.8   | 1953.9829 | -0.0037 | <a href="#">ATKMAYEDTVAKITEQR</a>  |
| 0.5   | 1953.9782 | 0.0010  | <a href="#">YEEELVEAITTATTEKK</a>  |

Mascot: <http://www.matrixscience.com/>

## Peptide View

### MS/MS Fragmentation of **ELEVIHSR**

Found in **AT2G05070.1** in **TAIR\_Arabidopsis**, Symbols: LHC2, LHC2.2 | LHC2.2 (Photosystem II light harvesting complex gene 2.2); chlorophyll binding | chr2:1799433-1800326 REVERSE

Match to Query 2055: 994.486722 from(498.250637,2+) index(964)

Title: Elution from: 19.169 to 19.169 scan no 1504 cid35.00 polarity:+

Data file D1d-1\_1.mgf

Click mouse within plot area to zoom in by factor of two about that point

Or,   to  Da

Label all possible matches  Label matches used for scoring

Show Y-axis

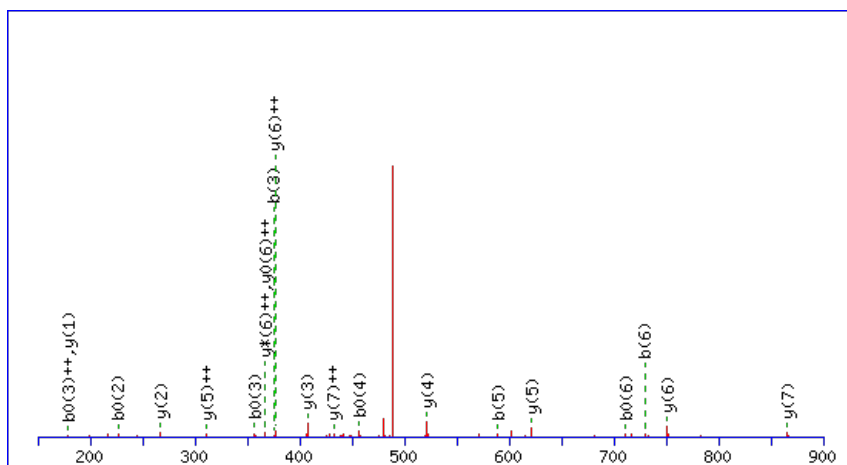

**Monoisotopic mass of neutral peptide Mr(calc):** 994.4858

**Fixed modifications:** Carbamidomethyl (C) (apply to specified residues or termini only)

**Ions Score:** 56 **Expect:** 1.6e-005

**Matches:** 20/68 fragment ions using 32 most intense peaks ([help](#))

| # | b        | b <sup>++</sup> | b <sup>0</sup> | b <sup>0++</sup> | Seq. | y        | y <sup>++</sup> | y*       | y <sup>*++</sup> | y <sup>0</sup> | y <sup>0++</sup> | # |
|---|----------|-----------------|----------------|------------------|------|----------|-----------------|----------|------------------|----------------|------------------|---|
| 1 | 131.0469 | 66.0271         | 113.0363       | 57.0218          | E    |          |                 |          |                  |                |                  | 8 |
| 2 | 245.1280 | 123.0676        | 227.1174       | 114.0624         | L    | 865.4534 | 433.2304        | 847.4299 | 424.2186         | 847.4429       | 424.2251         | 7 |
| 3 | 375.1676 | 188.0875        | 357.1571       | 179.0822         | E    | 751.3723 | 376.1898        | 733.3488 | 367.1780         | 733.3618       | 367.1845         | 6 |
| 4 | 475.2331 | 238.1202        | 457.2225       | 229.1149         | V    | 621.3327 | 311.1700        | 603.3091 | 302.1582         | 603.3222       | 302.1647         | 5 |
| 5 | 589.3142 | 295.1607        | 571.3036       | 286.1554         | I    | 521.2673 | 261.1373        | 503.2437 | 252.1255         | 503.2567       | 252.1320         | 4 |
| 6 | 729.3642 | 365.1857        | 711.3536       | 356.1805         | H    | 407.1862 | 204.0967        | 389.1626 | 195.0849         | 389.1756       | 195.0914         | 3 |
| 7 | 817.3933 | 409.2003        | 799.3827       | 400.1950         | S    | 267.1362 | 134.0717        | 249.1126 | 125.0599         | 249.1256       | 125.0664         | 2 |
| 8 |          |                 |                |                  | R    | 179.1071 | 90.0572         | 161.0835 | 81.0454          |                |                  | 1 |

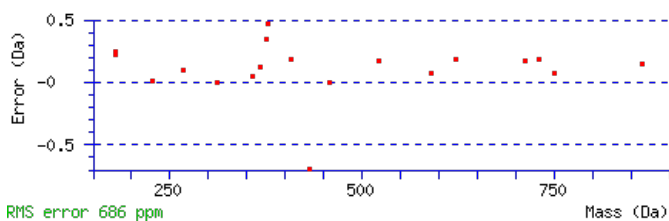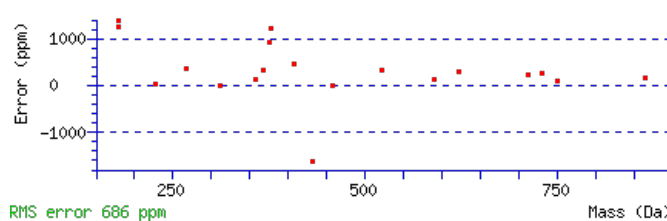

NCBI **BLAST** search of [ELEVIHSR](#)

(Parameters: blastp, nr protein database, expect=20000, no filter, PAM30)

Other BLAST [web gateways](#)

### All matches to this query

| Score | Mr(calc) | Delta  | Sequence                 |
|-------|----------|--------|--------------------------|
| 56.0  | 994.4858 | 0.0009 | <a href="#">ELEVIHSR</a> |



## AT2G05070.1

|      |          |         |                           |
|------|----------|---------|---------------------------|
| 20.6 | 994.4858 | 0.0009  | <a href="#">ELLDLSHR</a>  |
| 10.7 | 994.4858 | 0.0009  | <a href="#">QPADPISVR</a> |
| 10.7 | 994.4858 | 0.0009  | <a href="#">HLEELVSR</a>  |
| 5.8  | 994.4858 | 0.0009  | <a href="#">ELTVHIDR</a>  |
| 5.7  | 994.4858 | 0.0009  | <a href="#">KVDSKYSR</a>  |
| 5.2  | 994.4858 | 0.0009  | <a href="#">IQDTHQK</a>   |
| 3.3  | 994.4858 | 0.0009  | <a href="#">LPPIQSGDR</a> |
| 3.2  | 994.4880 | -0.0013 | <a href="#">SFALGFVSR</a> |
| 3.1  | 994.4858 | 0.0009  | <a href="#">EKHIAEQK</a>  |

Mascot: <http://www.matrixscience.com/>



# Mascot Search Results

## Peptide View

MS/MS Fragmentation of **VVNFSFDGQPAELK**

Found in **AT2G05710.1** in **TAIR\_Arabidopsis**, Symbols: | aconitate hydratase, cytoplasmic, putative / citrate hydro-lyase/aconitase, putative | chr2:2141588-2146347 FORWARD

Match to Query 6499: 1566.725646 from(784.370099,2+) index(6538)

Title: Elution from: 58.248 to 58.248 scan no 8504 cid35.00 polarity:+

Data file C7-3\_3.mgf

Click mouse within plot area to zoom in by factor of two about that point

Or,  to  Da

Label all possible matches  Label matches used for scoring

Show Y-axis

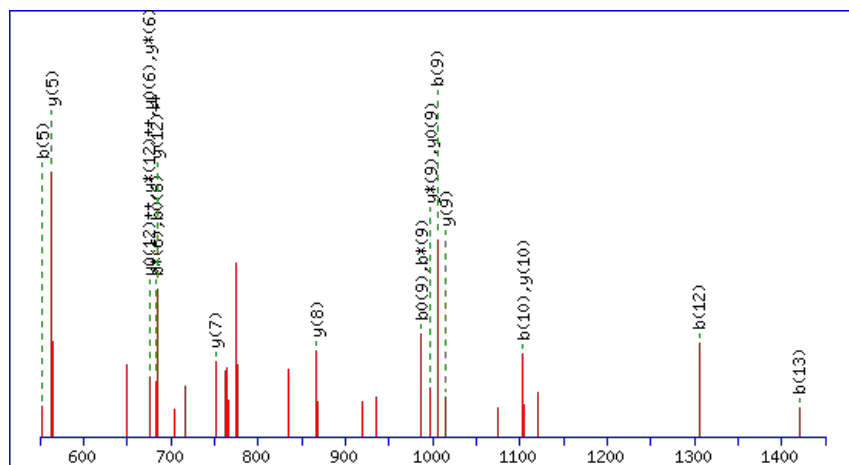

Monoisotopic mass of neutral peptide  $M_r(\text{calc})$ : 1566.7272

Fixed modifications: Carbamidomethyl (C) (apply to specified residues or termini only)

Ions Score: 35 Expect: 0.003

Matches : 21/140 fragment ions using 27 most intense peaks [\(help\)](#)

| #  | b         | b <sup>++</sup> | b*        | b <sup>*++</sup> | b <sup>0</sup> | b <sup>0++</sup> | Seq. | y         | y <sup>++</sup> | y*        | y <sup>*++</sup> | y <sup>0</sup> | y <sup>0++</sup> | #  |
|----|-----------|-----------------|-----------|------------------|----------------|------------------|------|-----------|-----------------|-----------|------------------|----------------|------------------|----|
| 1  | 101.0727  | 51.0400         |           |                  |                |                  | V    |           |                 |           |                  |                |                  | 14 |
| 2  | 201.1382  | 101.0727        |           |                  |                |                  | V    | 1467.6691 | 734.3382        | 1449.6455 | 725.3264         | 1449.6585      | 725.3329         | 13 |
| 3  | 317.1752  | 159.0912        | 299.1516  | 150.0794         |                |                  | N    | 1367.6036 | 684.3055        | 1349.5800 | 675.2937         | 1349.5931      | 675.3002         | 12 |
| 4  | 465.2406  | 233.1239        | 447.2170  | 224.1122         |                |                  | F    | 1251.5666 | 626.2870        | 1233.5430 | 617.2752         | 1233.5561      | 617.2817         | 11 |
| 5  | 553.2697  | 277.1385        | 535.2461  | 268.1267         | 535.2591       | 268.1332         | S    | 1103.5012 | 552.2542        | 1085.4776 | 543.2424         | 1085.4906      | 543.2489         | 10 |
| 6  | 701.3351  | 351.1712        | 683.3115  | 342.1594         | 683.3246       | 342.1659         | F    | 1015.4721 | 508.2397        | 997.4485  | 499.2279         | 997.4616       | 499.2344         | 9  |
| 7  | 817.3591  | 409.1832        | 799.3355  | 400.1714         | 799.3485       | 400.1779         | D    | 867.4067  | 434.2070        | 849.3831  | 425.1952         | 849.3961       | 425.2017         | 8  |
| 8  | 875.3776  | 438.1924        | 857.3540  | 429.1807         | 857.3670       | 429.1872         | G    | 751.3827  | 376.1950        | 733.3591  | 367.1832         | 733.3721       | 367.1897         | 7  |
| 9  | 1005.4303 | 503.2188        | 987.4067  | 494.2070         | 987.4197       | 494.2135         | Q    | 693.3642  | 347.1857        | 675.3406  | 338.1739         | 675.3536       | 338.1805         | 6  |
| 10 | 1103.4801 | 552.2437        | 1085.4565 | 543.2319         | 1085.4695      | 543.2384         | P    | 563.3115  | 282.1594        | 545.2880  | 273.1476         | 545.3010       | 273.1541         | 5  |
| 11 | 1175.5142 | 588.2607        | 1157.4906 | 579.2489         | 1157.5036      | 579.2555         | A    | 465.2618  | 233.1345        | 447.2382  | 224.1227         | 447.2512       | 224.1292         | 4  |
| 12 | 1305.5538 | 653.2806        | 1287.5302 | 644.2688         | 1287.5433      | 644.2753         | E    | 393.2276  | 197.1174        | 375.2040  | 188.1056         | 375.2170       | 188.1122         | 3  |
| 13 | 1419.6349 | 710.3211        | 1401.6113 | 701.3093         | 1401.6244      | 701.3158         | L    | 263.1880  | 132.0976        | 245.1644  | 123.0858         |                |                  | 2  |
| 14 |           |                 |           |                  |                |                  | K    | 149.1069  | 75.0571         | 131.0833  | 66.0453          |                |                  | 1  |

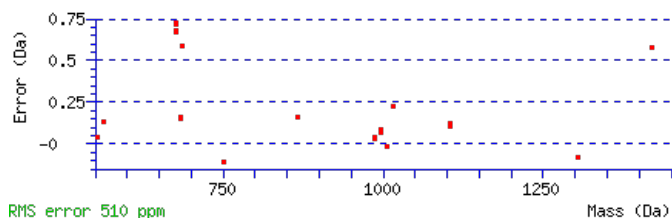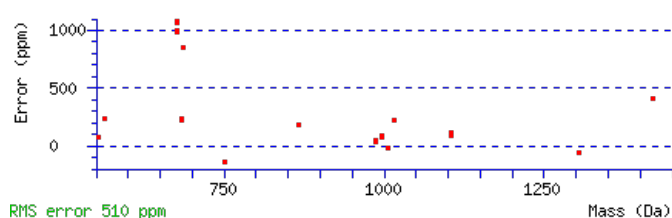

## AT2G05710.1

(Parameters: blastp, nr protein database, expect=20000, no filter, PAM30)

Other BLAST [web gateways](#)

### All matches to this query

| Score | Mr(calc)  | Delta   | Sequence                         |
|-------|-----------|---------|----------------------------------|
| 34.9  | 1566.7272 | -0.0016 | <a href="#">VVNFSFDGQPAELK</a>   |
| 11.4  | 1566.7229 | 0.0027  | <a href="#">LMFRODGHKELR</a>     |
| 10.9  | 1566.7272 | -0.0016 | <a href="#">SVDSAPLGNYTIWK</a>   |
| 4.8   | 1566.7250 | 0.0006  | <a href="#">FLSSEASGSPKNTK</a>   |
| 3.8   | 1566.7229 | 0.0027  | <a href="#">RFDQKMSAHGAGIK</a>   |
| 1.8   | 1566.7280 | -0.0023 | <a href="#">LEYLEMQEELIK</a>     |
| 1.1   | 1566.7284 | -0.0027 | <a href="#">VSGTDANSLMTNVLK</a>  |
| 0.9   | 1566.7259 | -0.0002 | <a href="#">LMVKHQIMEFNK</a>     |
| 0.8   | 1566.7299 | -0.0043 | <a href="#">AINYSAQVFVNGHK</a>   |
| 0.8   | 1566.7250 | 0.0006  | <a href="#">QGLLGSESEDFSGPKK</a> |

Mascot: <http://www.matrixscience.com/>

**Peptide View**MS/MS Fragmentation of **LFQVEYAFK**

Found in **AT2G05840.1** in **TAIR\_Arabidopsis**, Symbols: PAA2 | PAA2 (20S PROTEASOME SUBUNIT PAA2); peptidase | chr2:2234223-2236050 FORWARD

Match to Query 3308: 1154.562250 from(578.288401,2+) index(6752)

Title: Elution from: 63.716 to 63.716 scan no 8945 cid35.00 polarity:+

Data file D1d-1-2.mgf

Click mouse within plot area to zoom in by factor of two about that point

Or,   to  Da

Label all possible matches  Label matches used for scoring

Show Y-axis

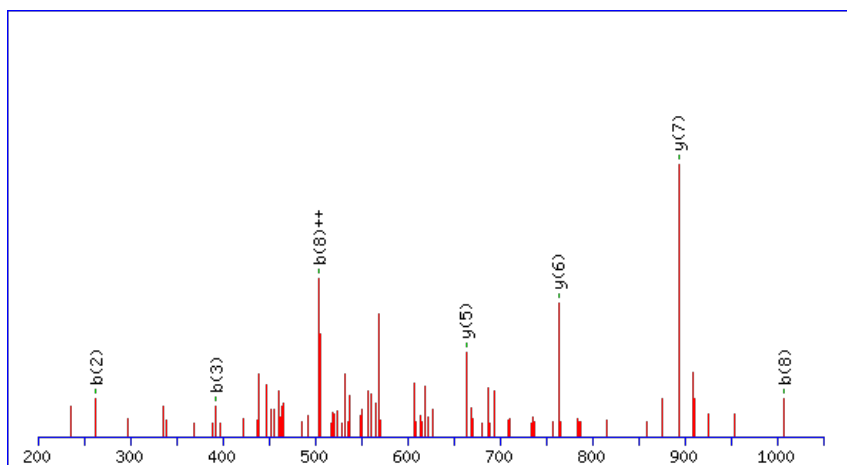

**Monoisotopic mass of neutral peptide Mr(calc):** 1154.5638

**Fixed modifications:** Carbamidomethyl (C) (apply to specified residues or termini only)

**Ions Score:** 26 **Expect:** 0.015

**Matches:** 7/76 fragment ions using 8 most intense peaks ([help](#))

| # | b                | b <sup>++</sup> | b*       | b <sup>*++</sup> | b <sup>0</sup> | b <sup>0++</sup> | Seq. | y               | y <sup>++</sup> | y*        | y <sup>*++</sup> | y <sup>0</sup> | y <sup>0++</sup> | # |
|---|------------------|-----------------|----------|------------------|----------------|------------------|------|-----------------|-----------------|-----------|------------------|----------------|------------------|---|
| 1 | 115.0884         | 58.0478         |          |                  |                |                  | L    |                 |                 |           |                  |                |                  | 9 |
| 2 | <b>263.1538</b>  | 132.0805        |          |                  |                |                  | F    | 1041.4900       | 521.2486        | 1023.4664 | 512.2369         | 1023.4794      | 512.2434         | 8 |
| 3 | <b>393.2065</b>  | 197.1069        | 375.1829 | 188.0951         |                |                  | Q    | <b>893.4246</b> | 447.2159        | 875.4010  | 438.2041         | 875.4140       | 438.2106         | 7 |
| 4 | 493.2719         | 247.1396        | 475.2483 | 238.1278         |                |                  | V    | <b>763.3719</b> | 382.1896        | 745.3483  | 373.1778         | 745.3613       | 373.1843         | 6 |
| 5 | 623.3115         | 312.1594        | 605.2880 | 303.1476         | 605.3010       | 303.1541         | E    | <b>663.3065</b> | 332.1569        | 645.2829  | 323.1451         | 645.2959       | 323.1516         | 5 |
| 6 | 787.3719         | 394.1896        | 769.3483 | 385.1778         | 769.3613       | 385.1843         | Y    | 533.2668        | 267.1371        | 515.2433  | 258.1253         |                |                  | 4 |
| 7 | 859.4061         | 430.2067        | 841.3825 | 421.1949         | 841.3955       | 421.2014         | A    | 369.2065        | 185.1069        | 351.1829  | 176.0951         |                |                  | 3 |
| 8 | <b>1007.4715</b> | <b>504.2394</b> | 989.4479 | 495.2276         | 989.4609       | 495.2341         | F    | 297.1723        | 149.0898        | 279.1487  | 140.0780         |                |                  | 2 |
| 9 |                  |                 |          |                  |                |                  | K    | 149.1069        | 75.0571         | 131.0833  | 66.0453          |                |                  | 1 |

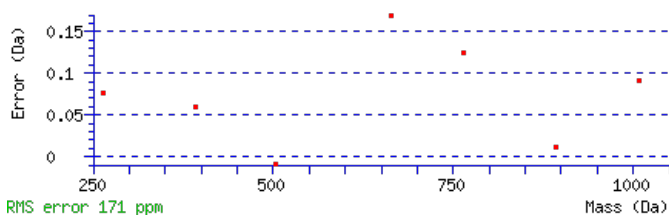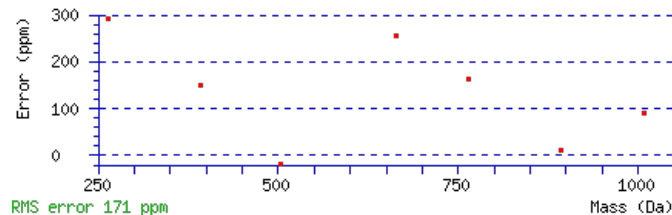

NCBI **BLAST** search of **LFQVEYAFK**

(Parameters: blastp, nr protein database, expect=20000, no filter, PAM30)

Other BLAST [web gateways](#)

**All matches to this query**

| Score | Mr(calc) | Delta | Sequence |
|-------|----------|-------|----------|
|       |          |       |          |

**AT2G05840.1**

|      |           |         |                              |
|------|-----------|---------|------------------------------|
| 25.9 | 1154.5638 | -0.0016 | <a href="#">LFQVEYAFK</a>    |
| 23.2 | 1154.5591 | 0.0032  | <a href="#">FGWFSMKLK</a>    |
| 12.4 | 1154.5650 | -0.0027 | <a href="#">KMQEDGLLPL</a>   |
| 10.0 | 1154.5620 | 0.0002  | <a href="#">DSLGDRHVLK</a>   |
| 4.0  | 1154.5616 | 0.0007  | <a href="#">FATKFSDSIK</a>   |
| 1.5  | 1154.5593 | 0.0029  | <a href="#">GGDDSAPAIVLK</a> |
| 0.8  | 1154.5650 | -0.0027 | <a href="#">SKMSYASILK</a>   |
| 0.6  | 1154.5638 | -0.0016 | <a href="#">APSFYYVGLK</a>   |
| 0.4  | 1154.5620 | 0.0002  | <a href="#">DAHESRAILK</a>   |
| 0.4  | 1154.5650 | -0.0027 | <a href="#">MKVSTYLSSK</a>   |

**Mascot:** <http://www.matrixscience.com/>

**Peptide View**MS/MS Fragmentation of **AFIAGIADDNGYGWAIK**Found in **AT2G05990.1** in **TAIR\_Arabidopsis**, Symbols: ENR1, MOD1 | MOD1 (MOSAIC DEATH 1); enoyl-[acyl-carrier-protein] reductase (NADH)/ oxidoreductase | chr2:2322873-2324864 FORWARD

Match to Query 8748: 1851.916680 from(926.965616,2+) index(9086)

Title: Elution from: 81.404 to 81.404 scan no 12259 cid35.00 polarity:+

Data file 0-3\_2.mgf

Click mouse within plot area to zoom in by factor of two about that point

Or,   to  Da Label all possible matches  Label matches used for scoring Show Y-axis 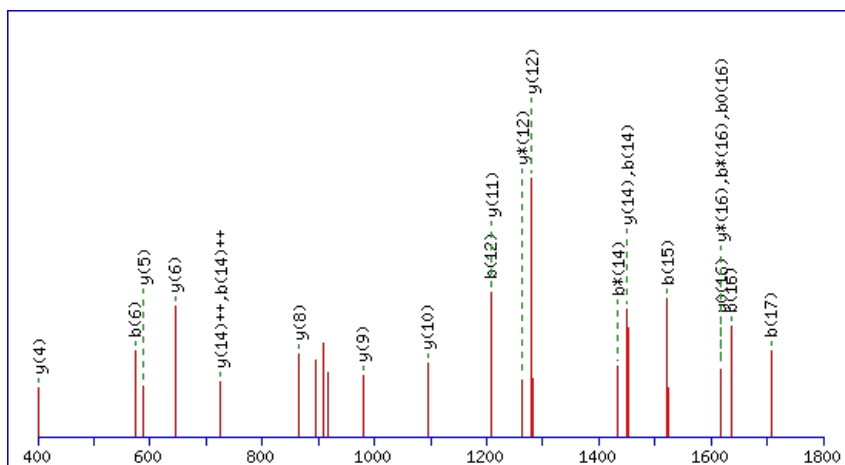Monoisotopic mass of neutral peptide  $M_r(\text{calc})$ : 1851.9155

Fixed modifications: Carbamidomethyl (C) (apply to specified residues or termini only)

Ions Score: 74 Expect: 1.5e-007

Matches : 23/154 fragment ions using 27 most intense peaks ([help](#))

| #  | b         | b <sup>++</sup> | b*        | b <sup>*++</sup> | b <sup>0</sup> | b <sup>0++</sup> | Seq. | y         | y <sup>++</sup> | y*        | y <sup>*++</sup> | y <sup>0</sup> | y <sup>0++</sup> | #  |
|----|-----------|-----------------|-----------|------------------|----------------|------------------|------|-----------|-----------------|-----------|------------------|----------------|------------------|----|
| 1  | 72.0444   | 36.5258         |           |                  |                |                  | A    |           |                 |           |                  |                |                  | 18 |
| 2  | 219.1128  | 110.0600        |           |                  |                |                  | F    | 1781.8857 | 891.4465        | 1764.8592 | 882.9332         | 1763.8751      | 882.4412         | 17 |
| 3  | 332.1969  | 166.6021        |           |                  |                |                  | I    | 1634.8173 | 817.9123        | 1617.7907 | 809.3990         | 1616.8067      | 808.9070         | 16 |
| 4  | 403.2340  | 202.1206        |           |                  |                |                  | A    | 1521.7332 | 761.3703        | 1504.7067 | 752.8570         | 1503.7227      | 752.3650         | 15 |
| 5  | 460.2554  | 230.6314        |           |                  |                |                  | G    | 1450.6961 | 725.8517        | 1433.6696 | 717.3384         | 1432.6856      | 716.8464         | 14 |
| 6  | 573.3395  | 287.1734        |           |                  |                |                  | I    | 1393.6747 | 697.3410        | 1376.6481 | 688.8277         | 1375.6641      | 688.3357         | 13 |
| 7  | 644.3766  | 322.6920        |           |                  |                |                  | A    | 1280.5906 | 640.7989        | 1263.5640 | 632.2857         | 1262.5800      | 631.7937         | 12 |
| 8  | 759.4036  | 380.2054        |           |                  | 741.3930       | 371.2001         | D    | 1209.5535 | 605.2804        | 1192.5269 | 596.7671         | 1191.5429      | 596.2751         | 11 |
| 9  | 874.4305  | 437.7189        |           |                  | 856.4199       | 428.7136         | D    | 1094.5265 | 547.7669        | 1077.5000 | 539.2536         | 1076.5160      | 538.7616         | 10 |
| 10 | 988.4734  | 494.7404        | 971.4469  | 486.2271         | 970.4629       | 485.7351         | N    | 979.4996  | 490.2534        | 962.4730  | 481.7402         |                |                  | 9  |
| 11 | 1045.4949 | 523.2511        | 1028.4684 | 514.7378         | 1027.4843      | 514.2458         | G    | 865.4567  | 433.2320        | 848.4301  | 424.7187         |                |                  | 8  |
| 12 | 1208.5582 | 604.7828        | 1191.5317 | 596.2695         | 1190.5477      | 595.7775         | Y    | 808.4352  | 404.7212        | 791.4087  | 396.2080         |                |                  | 7  |
| 13 | 1265.5797 | 633.2935        | 1248.5531 | 624.7802         | 1247.5691      | 624.2882         | G    | 645.3719  | 323.1896        | 628.3453  | 314.6763         |                |                  | 6  |
| 14 | 1451.6590 | 726.3331        | 1434.6325 | 717.8199         | 1433.6484      | 717.3279         | W    | 588.3504  | 294.6788        | 571.3239  | 286.1656         |                |                  | 5  |
| 15 | 1522.6961 | 761.8517        | 1505.6696 | 753.3384         | 1504.6856      | 752.8464         | A    | 402.2711  | 201.6392        | 385.2445  | 193.1259         |                |                  | 4  |
| 16 | 1635.7802 | 818.3937        | 1618.7536 | 809.8805         | 1617.7696      | 809.3884         | I    | 331.2340  | 166.1206        | 314.2074  | 157.6074         |                |                  | 3  |
| 17 | 1706.8173 | 853.9123        | 1689.7907 | 845.3990         | 1688.8067      | 844.9070         | A    | 218.1499  | 109.5786        | 201.1234  | 101.0653         |                |                  | 2  |
| 18 |           |                 |           |                  |                |                  | K    | 147.1128  | 74.0600         | 130.0863  | 65.5468          |                |                  | 1  |

AT2G05990.1

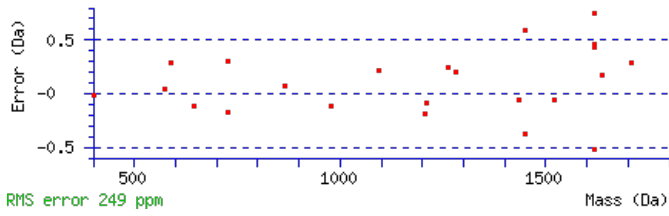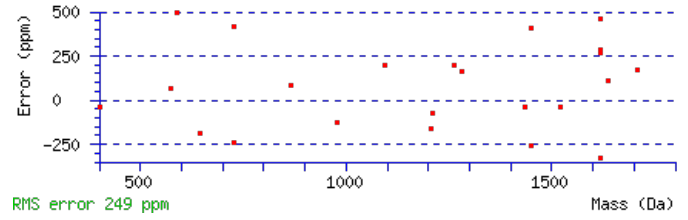

NCBI **BLAST** search of [AFIAGIADDNGYGWAIK](#)  
(Parameters: blastp, nr protein database, expect=20000, no filter, PAM30)  
Other BLAST [web gateways](#)

**All matches to this query**

| Score | Mr(calc)  | Delta  | Sequence                          |
|-------|-----------|--------|-----------------------------------|
| 74.0  | 1851.9155 | 0.0012 | <a href="#">AFIAGIADDNGYGWAIK</a> |
| 2.4   | 1851.9149 | 0.0018 | <a href="#">EVERDQHISPPSLMAK</a>  |

Mascot: <http://www.matrixscience.com/>

### Peptide View

 MS/MS Fragmentation of **FVAREAMLDEEYWTAAWLR**

 Found in **AT2G06025.1** in **TAIR\_Arabidopsis**, Symbols: | GCN5-related N-acetyltransferase (GNAT) family protein | chr2:2350228-2351895

FORWARD

Match to Query 10004: 2383.054851 from(795.358893,3+) index(9181)

Title: Elution from: 86.574 to 86.574 scan no 12697 cid35.00 polarity:+

Data file D12h-2\_2.mgf

Click mouse within plot area to zoom in by factor of two about that point

Or, Plot from  to  Da Label all possible matches  Label matches used for scoring Show Y-axis 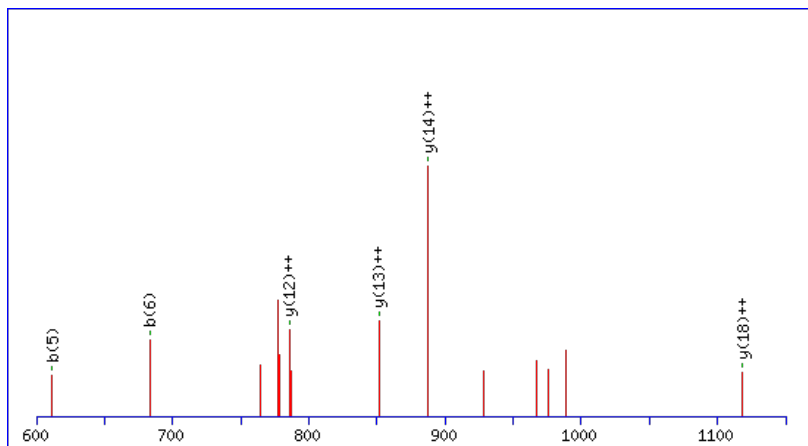Monoisotopic mass of neutral peptide  $M_r(\text{calc})$ : 2383.0509

Fixed modifications: Carbamidomethyl (C) (apply to specified residues or termini only)

Ions Score: 21 Expect: 0.048

Matches : 6/192 fragment ions using 9 most intense peaks ([help](#))

| #  | b               | b <sup>++</sup> | b*        | b* <sup>++</sup> | b <sup>0</sup> | b <sup>0</sup> ++ | Seq | y         | y <sup>++</sup> | y*        | y* <sup>++</sup> | y <sup>0</sup> | y <sup>0</sup> ++ | #  |
|----|-----------------|-----------------|-----------|------------------|----------------|-------------------|-----|-----------|-----------------|-----------|------------------|----------------|-------------------|----|
| 1  | 149.0727        | 75.0400         |           |                  |                |                   | F   |           |                 |           |                  |                |                   | 19 |
| 2  | 249.1382        | 125.0727        |           |                  |                |                   | V   | 2235.9928 | 1118.5000       | 2217.9692 | 1109.4883        | 2217.9822      | 1109.4948         | 18 |
| 3  | 321.1723        | 161.0898        |           |                  |                |                   | A   | 2135.9274 | 1068.4673       | 2117.9038 | 1059.4555        | 2117.9168      | 1059.4620         | 17 |
| 4  | 481.2616        | 241.1344        | 463.2380  | 232.1226         |                |                   | R   | 2063.8932 | 1032.4502       | 2045.8696 | 1023.4385        | 2045.8826      | 1023.4450         | 16 |
| 5  | <b>611.3012</b> | 306.1542        | 593.2776  | 297.1424         | 593.2906       | 297.1490          | E   | 1903.8040 | 952.4056        | 1885.7804 | 943.3938         | 1885.7934      | 943.4003          | 15 |
| 6  | <b>683.3354</b> | 342.1713        | 665.3118  | 333.1595         | 665.3248       | 333.1660          | A   | 1773.7643 | <b>887.3858</b> | 1755.7407 | 878.3740         | 1755.7538      | 878.3805          | 14 |
| 7  | 815.3729        | 408.1901        | 797.3493  | 399.1783         | 797.3623       | 399.1848          | M   | 1701.7302 | <b>851.3687</b> | 1683.7066 | 842.3569         | 1683.7196      | 842.3634          | 13 |
| 8  | 929.4540        | 465.2306        | 911.4304  | 456.2188         | 911.4434       | 456.2253          | L   | 1569.6927 | <b>785.3500</b> | 1551.6691 | 776.3382         | 1551.6821      | 776.3447          | 12 |
| 9  | 1045.4779       | 523.2426        | 1027.4544 | 514.2308         | 1027.4674      | 514.2373          | D   | 1455.6116 | 728.3094        | 1437.5880 | 719.2976         | 1437.6010      | 719.3041          | 11 |
| 10 | 1175.5176       | 588.2624        | 1157.4940 | 579.2506         | 1157.5070      | 579.2571          | E   | 1339.5876 | 670.2974        | 1321.5640 | 661.2856         | 1321.5770      | 661.2921          | 10 |
| 11 | 1305.5572       | 653.2822        | 1287.5336 | 644.2704         | 1287.5466      | 644.2770          | E   | 1209.5480 | 605.2776        | 1191.5244 | 596.2658         | 1191.5374      | 596.2723          | 9  |
| 12 | 1469.6176       | 735.3124        | 1451.5940 | 726.3006         | 1451.6070      | 726.3071          | Y   | 1079.5083 | 540.2578        | 1061.4847 | 531.2460         | 1061.4978      | 531.2525          | 8  |
| 13 | 1657.6910       | 829.3491        | 1639.6674 | 820.3373         | 1639.6804      | 820.3438          | W   | 915.4480  | 458.2276        | 897.4244  | 449.2158         | 897.4374       | 449.2223          | 7  |
| 14 | 1759.7357       | 880.3715        | 1741.7121 | 871.3597         | 1741.7251      | 871.3662          | T   | 727.3746  | 364.1909        | 709.3510  | 355.1791         | 709.3640       | 355.1856          | 6  |
| 15 | 1831.7698       | 916.3885        | 1813.7462 | 907.3768         | 1813.7592      | 907.3833          | A   | 625.3299  | 313.1686        | 607.3063  | 304.1568         |                |                   | 5  |
| 16 | 1903.8040       | 952.4056        | 1885.7804 | 943.3938         | 1885.7934      | 943.4003          | A   | 553.2957  | 277.1515        | 535.2721  | 268.1397         |                |                   | 4  |
| 17 | 2091.8773       | 1046.4423       | 2073.8538 | 1037.4305        | 2073.8668      | 1037.4370         | W   | 481.2616  | 241.1344        | 463.2380  | 232.1226         |                |                   | 3  |
| 18 | 2205.9584       | 1103.4829       | 2187.9349 | 1094.4711        | 2187.9479      | 1094.4776         | L   | 293.1882  | 147.0977        | 275.1646  | 138.0859         |                |                   | 2  |
| 19 |                 |                 |           |                  |                |                   | R   | 179.1071  | 90.0572         | 161.0835  | 81.0454          |                |                   | 1  |



# AT2G06025.1

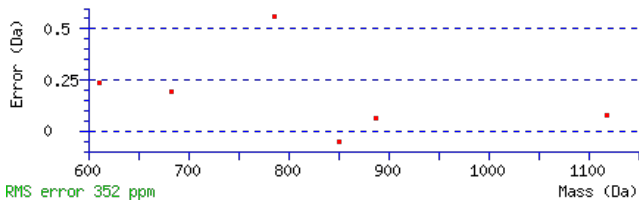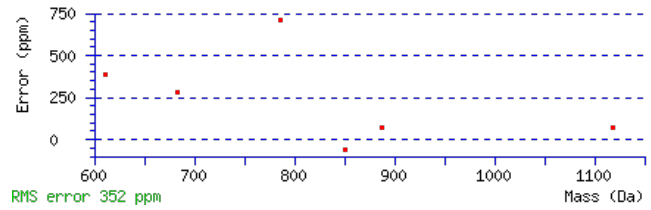

NCBI BLAST search of [FVAREAMLDEEYWTAAWLR](#)  
 (Parameters: blastp, nr protein database, expect=20000, no filter, PAM30)  
 Other BLAST [web gateways](#)

## All matches to this query

| Score | Mr(calc)  | Delta   | Sequence                                |
|-------|-----------|---------|-----------------------------------------|
| 21.4  | 2383.0509 | 0.0039  | <a href="#">FVAREAMLDEEYWTAAWLR</a>     |
| 18.2  | 2383.0573 | -0.0024 | <a href="#">GFAVSNQKRNTNGSSISDPVMK</a>  |
| 14.1  | 2383.0490 | 0.0059  | <a href="#">NSDIDPQEAQQTLEIAEANLR</a>   |
| 13.6  | 2383.0573 | -0.0024 | <a href="#">LYLKRMQGLSSGGGAGSDPATDR</a> |
| 10.9  | 2383.0606 | -0.0058 | <a href="#">NSTDASVMTTAMSGVERGVRVGK</a> |
| 7.9   | 2383.0542 | 0.0007  | <a href="#">DEASSMLKATDFGVSVFIEEGK</a>  |
| 5.6   | 2383.0510 | 0.0039  | <a href="#">MEYNWGSDAALFKPERWLK</a>     |
| 5.6   | 2383.0593 | -0.0045 | <a href="#">VVPTVDEKQVSEEEEGRPSDK</a>   |
| 5.3   | 2383.0546 | 0.0002  | <a href="#">LSPSSSVVLTQESSNCNYKQK</a>   |
| 4.8   | 2383.0487 | 0.0061  | <a href="#">GVVSMANSGPHINGSQFFVLYK</a>  |

Mascot: <http://www.matrixscience.com/>

## Peptide View

### MS/MS Fragmentation of **TGQPAILQTNVFTGGK**

Found in **AT2G06850.1** in **TAIR\_Arabidopsis**, Symbols: EXT, EXGT-A1 | EXGT-A1 (ENDOXYLOGLUCAN TRANSFERASE); hydrolase, acting on glycosyl bonds | chr2:2763616-2765487 FORWARD

Match to Query 7452: 1650.810198 from(826.412375,2+) index(6648)

Title: Elution from: 58.482 to 58.482 scan no 8577 cid35.00 polarity:+

Data file D12h-1\_3.mgf

Click mouse within plot area to zoom in by factor of two about that point

Or,  to  Da

Label all possible matches  Label matches used for scoring

Show Y-axis

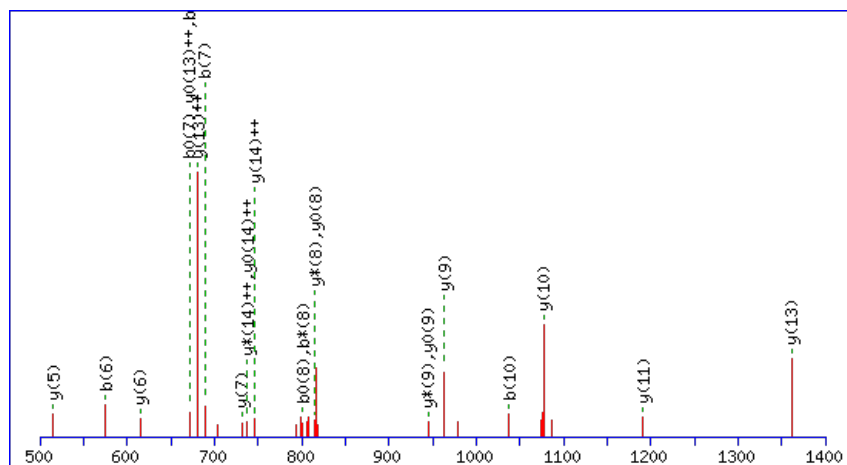

Monoisotopic mass of neutral peptide  $M_r(\text{calc})$ : 1650.8085

Fixed modifications: Carbamidomethyl (C) (apply to specified residues or termini only)

Ions Score: 44 Expect: 0.0004

Matches : 24/170 fragment ions using 30 most intense peaks ([help](#))

| #  | b         | b <sup>++</sup> | b*        | b <sup>*++</sup> | b <sup>0</sup> | b <sup>0++</sup> | Seq. | y         | y <sup>++</sup> | y*        | y <sup>*++</sup> | y <sup>0</sup> | y <sup>0++</sup> | #  |
|----|-----------|-----------------|-----------|------------------|----------------|------------------|------|-----------|-----------------|-----------|------------------|----------------|------------------|----|
| 1  | 103.0520  | 52.0296         |           |                  | 85.0414        | 43.0244          | T    |           |                 |           |                  |                |                  | 16 |
| 2  | 161.0705  | 81.0389         |           |                  | 143.0599       | 72.0336          | G    | 1549.7711 | 775.3892        | 1531.7475 | 766.3774         | 1531.7606      | 766.3839         | 15 |
| 3  | 291.1231  | 146.0652        | 273.0996  | 137.0534         | 273.1126       | 137.0599         | Q    | 1491.7526 | 746.3800        | 1473.7290 | 737.3682         | 1473.7421      | 737.3747         | 14 |
| 4  | 389.1729  | 195.0901        | 371.1494  | 186.0783         | 371.1624       | 186.0848         | P    | 1361.7000 | 681.3536        | 1343.6764 | 672.3418         | 1343.6894      | 672.3483         | 13 |
| 5  | 461.2071  | 231.1072        | 443.1835  | 222.0954         | 443.1965       | 222.1019         | A    | 1263.6502 | 632.3287        | 1245.6266 | 623.3169         | 1245.6396      | 623.3234         | 12 |
| 6  | 575.2882  | 288.1477        | 557.2646  | 279.1359         | 557.2776       | 279.1424         | I    | 1191.6160 | 596.3117        | 1173.5925 | 587.2999         | 1173.6055      | 587.3064         | 11 |
| 7  | 689.3693  | 345.1883        | 671.3457  | 336.1765         | 671.3587       | 336.1830         | L    | 1077.5349 | 539.2711        | 1059.5114 | 530.2593         | 1059.5244      | 530.2658         | 10 |
| 8  | 819.4219  | 410.2146        | 801.3983  | 401.2028         | 801.4114       | 401.2093         | Q    | 963.4538  | 482.2306        | 945.4303  | 473.2188         | 945.4433       | 473.2253         | 9  |
| 9  | 921.4666  | 461.2370        | 903.4431  | 452.2252         | 903.4561       | 452.2317         | T    | 833.4012  | 417.2042        | 815.3776  | 408.1924         | 815.3906       | 408.1990         | 8  |
| 10 | 1037.5036 | 519.2555        | 1019.4801 | 510.2437         | 1019.4931      | 510.2502         | N    | 731.3565  | 366.1819        | 713.3329  | 357.1701         | 713.3459       | 357.1766         | 7  |
| 11 | 1137.5691 | 569.2882        | 1119.5455 | 560.2764         | 1119.5585      | 560.2829         | V    | 615.3195  | 308.1634        | 597.2959  | 299.1516         | 597.3089       | 299.1581         | 6  |
| 12 | 1285.6345 | 643.3209        | 1267.6110 | 634.3091         | 1267.6240      | 634.3156         | F    | 515.2540  | 258.1307        | 497.2305  | 249.1189         | 497.2435       | 249.1254         | 5  |
| 13 | 1387.6792 | 694.3433        | 1369.6557 | 685.3315         | 1369.6687      | 685.3380         | T    | 367.1886  | 184.0979        | 349.1650  | 175.0861         | 349.1780       | 175.0926         | 4  |
| 14 | 1445.6977 | 723.3525        | 1427.6742 | 714.3407         | 1427.6872      | 714.3472         | G    | 265.1439  | 133.0756        | 247.1203  | 124.0638         |                |                  | 3  |
| 15 | 1503.7162 | 752.3618        | 1485.6927 | 743.3500         | 1485.7057      | 743.3565         | G    | 207.1254  | 104.0663        | 189.1018  | 95.0545          |                |                  | 2  |
| 16 |           |                 |           |                  |                |                  | K    | 149.1069  | 75.0571         | 131.0833  | 66.0453          |                |                  | 1  |

AT2G06850.1

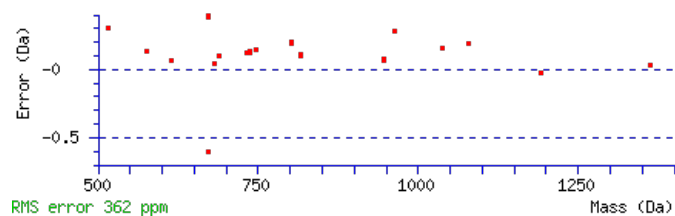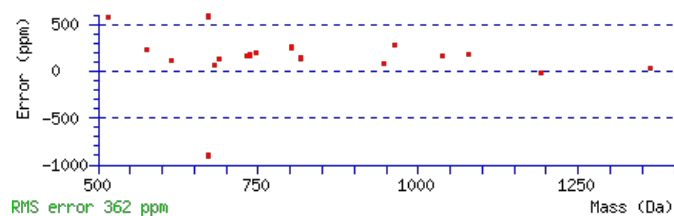

NCBI **BLAST** search of [TGQPAILQTNVFTGGK](#)

(Parameters: blastp, nr protein database, expect=20000, no filter, PAM30)

Other BLAST [web gateways](#)

**All matches to this query**

| Score | Mr(calc)  | Delta  | Sequence                         |
|-------|-----------|--------|----------------------------------|
| 44.0  | 1650.8085 | 0.0017 | <a href="#">TGQPAILQTNVFTGGK</a> |
| 2.7   | 1650.8068 | 0.0034 | <a href="#">GTOPGLMIYMLPLGK</a>  |
| 0.5   | 1650.8093 | 0.0009 | <a href="#">SLLVDDLGSMLKEK</a>   |

Mascot: <http://www.matrixscience.com/>

**Peptide View**MS/MS Fragmentation of **LGACVDLLGGLVK**Found in **AT2G10940.1** in **TAIR\_Arabidopsis**, Symbols: | protease inhibitor/seed storage/lipid transfer protein (LTP) family protein | chr2:4318242-4319117 REVERSE

Match to Query 4513: 1313.737100 from(657.875826,2+) index(8943)

Title: Elution from: 82.485 to 82.485 scan no 12070 cid35.00 polarity:+

Data file D1d-1\_1.mgf

Click mouse within plot area to zoom in by factor of two about that point

Or,   to  Da Label all possible matches  Label matches used for scoring Show Y-axis 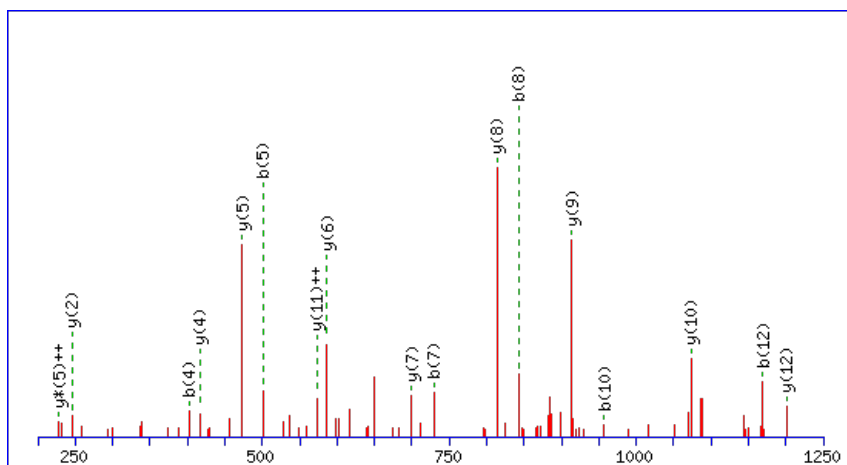Monoisotopic mass of neutral peptide  $M_r(\text{calc})$ : 1313.7377

Fixed modifications: Carbamidomethyl (C) (apply to specified residues or termini only)

Ions Score: 87 Expect: 5.1e-009

Matches : 17/96 fragment ions using 20 most intense peaks ([help](#))

| #  | b         | b <sup>++</sup> | b <sup>0</sup> | b <sup>0++</sup> | Seq. | y         | y <sup>++</sup> | y*        | y <sup>*++</sup> | y <sup>0</sup> | y <sup>0++</sup> | #  |
|----|-----------|-----------------|----------------|------------------|------|-----------|-----------------|-----------|------------------|----------------|------------------|----|
| 1  | 114.0913  | 57.5493         |                |                  | L    |           |                 |           |                  |                |                  | 13 |
| 2  | 171.1128  | 86.0600         |                |                  | G    | 1201.6609 | 601.3341        | 1184.6344 | 592.8208         | 1183.6504      | 592.3288         | 12 |
| 3  | 242.1499  | 121.5786        |                |                  | A    | 1144.6395 | 572.8234        | 1127.6129 | 564.3101         | 1126.6289      | 563.8181         | 11 |
| 4  | 402.1806  | 201.5939        |                |                  | C    | 1073.6023 | 537.3048        | 1056.5758 | 528.7915         | 1055.5918      | 528.2995         | 10 |
| 5  | 501.2490  | 251.1281        |                |                  | V    | 913.5717  | 457.2895        | 896.5451  | 448.7762         | 895.5611       | 448.2842         | 9  |
| 6  | 616.2759  | 308.6416        | 598.2654       | 299.6363         | D    | 814.5033  | 407.7553        | 797.4767  | 399.2420         | 796.4927       | 398.7500         | 8  |
| 7  | 729.3600  | 365.1836        | 711.3494       | 356.1783         | L    | 699.4763  | 350.2418        | 682.4498  | 341.7285         |                |                  | 7  |
| 8  | 842.4441  | 421.7257        | 824.4335       | 412.7204         | L    | 586.3923  | 293.6998        | 569.3657  | 285.1865         |                |                  | 6  |
| 9  | 899.4655  | 450.2364        | 881.4550       | 441.2311         | G    | 473.3082  | 237.1577        | 456.2817  | 228.6445         |                |                  | 5  |
| 10 | 956.4870  | 478.7471        | 938.4764       | 469.7418         | G    | 416.2867  | 208.6470        | 399.2602  | 200.1337         |                |                  | 4  |
| 11 | 1069.5710 | 535.2892        | 1051.5605      | 526.2839         | L    | 359.2653  | 180.1363        | 342.2387  | 171.6230         |                |                  | 3  |
| 12 | 1168.6395 | 584.8234        | 1150.6289      | 575.8181         | V    | 246.1812  | 123.5942        | 229.1547  | 115.0810         |                |                  | 2  |
| 13 |           |                 |                |                  | K    | 147.1128  | 74.0600         | 130.0863  | 65.5468          |                |                  | 1  |

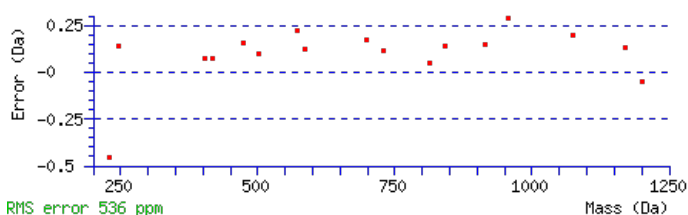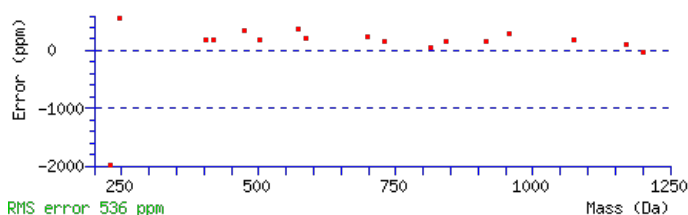NCBI **BLAST** search of **LGACVDLLGGLVK**

(Parameters: blastp, nr protein database, expect=20000, no filter, PAM30)

AT2G10940.1

Other BLAST [web gateways](#)

All matches to this query

| Score | Mr(calc)  | Delta   | Sequence                      |
|-------|-----------|---------|-------------------------------|
| 86.8  | 1313.7377 | -0.0006 | <a href="#">LGACVDLLGGLVK</a> |
| 1.1   | 1313.7343 | 0.0028  | <a href="#">QVQEFLNIPVK</a>   |

Mascot: <http://www.matrixscience.com/>

**Peptide View**MS/MS Fragmentation of **YNLSLGLGLNK**

Found in **AT2G13360.1** in **TAIR\_Arabidopsis**, Symbols: AGT1, AGT | AGT (ALANINE:GLYOXYLATE AMINOTRANSFERASE) | chr2:5546499-5547984 REVERSE

Match to Query 3640: 1190.666044 from(596.340298,2+) index(7011)

Title: Elution from: 65.035 to 65.035 scan no 9227 cid35.00 polarity:+

Data file D1d-1\_1.mgf

Click mouse within plot area to zoom in by factor of two about that point

Or,   to  Da

Label all possible matches  Label matches used for scoring

Show Y-axis

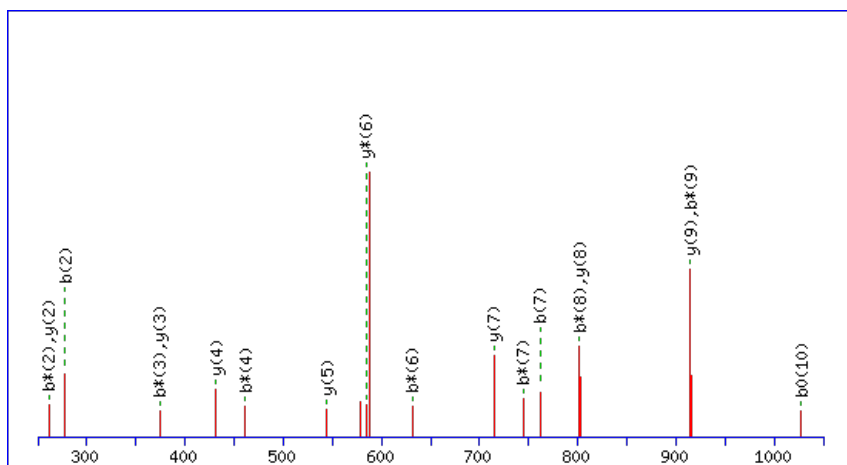

Monoisotopic mass of neutral peptide  $M_r(\text{calc})$ : 1190.6659

Fixed modifications: Carbamidomethyl (C) (apply to specified residues or termini only)

Ions Score: 65 Expect: 1.3e-006

Matches : 18/98 fragment ions using 20 most intense peaks ([help](#))

| #  | b               | b <sup>++</sup> | b*              | b <sup>*++</sup> | b <sup>0</sup>   | b <sup>0++</sup> | Seq. | y               | y <sup>++</sup> | y*              | y <sup>*++</sup> | y <sup>0</sup> | y <sup>0++</sup> | #  |
|----|-----------------|-----------------|-----------------|------------------|------------------|------------------|------|-----------------|-----------------|-----------------|------------------|----------------|------------------|----|
| 1  | 164.0706        | 82.5389         |                 |                  |                  |                  | Y    |                 |                 |                 |                  |                |                  | 11 |
| 2  | <b>278.1135</b> | 139.5604        | <b>261.0870</b> | 131.0471         |                  |                  | N    | 1028.6099       | 514.8086        | 1011.5833       | 506.2953         | 1010.5993      | 505.8033         | 10 |
| 3  | 391.1976        | 196.1024        | <b>374.1710</b> | 187.5892         |                  |                  | L    | <b>914.5669</b> | 457.7871        | 897.5404        | 449.2738         | 896.5564       | 448.7818         | 9  |
| 4  | 478.2296        | 239.6185        | <b>461.2031</b> | 231.1052         | 460.2191         | 230.6132         | S    | <b>801.4829</b> | 401.2451        | 784.4563        | 392.7318         | 783.4723       | 392.2398         | 8  |
| 5  | 591.3137        | 296.1605        | 574.2871        | 287.6472         | 573.3031         | 287.1552         | L    | <b>714.4509</b> | 357.7291        | 697.4243        | 349.2158         |                |                  | 7  |
| 6  | 648.3352        | 324.6712        | <b>631.3086</b> | 316.1579         | 630.3246         | 315.6659         | G    | 601.3668        | 301.1870        | <b>584.3402</b> | 292.6738         |                |                  | 6  |
| 7  | <b>761.4192</b> | 381.2132        | <b>744.3927</b> | 372.7000         | 743.4087         | 372.2080         | L    | <b>544.3453</b> | 272.6763        | 527.3188        | 264.1630         |                |                  | 5  |
| 8  | 818.4407        | 409.7240        | <b>801.4141</b> | 401.2107         | 800.4301         | 400.7187         | G    | <b>431.2613</b> | 216.1343        | 414.2347        | 207.6210         |                |                  | 4  |
| 9  | 931.5247        | 466.2660        | <b>914.4982</b> | 457.7527         | 913.5142         | 457.2607         | L    | <b>374.2398</b> | 187.6235        | 357.2132        | 179.1103         |                |                  | 3  |
| 10 | 1045.5677       | 523.2875        | 1028.5411       | 514.7742         | <b>1027.5571</b> | 514.2822         | N    | <b>261.1557</b> | 131.0815        | 244.1292        | 122.5682         |                |                  | 2  |
| 11 |                 |                 |                 |                  |                  |                  | K    | 147.1128        | 74.0600         | 130.0863        | 65.5468          |                |                  | 1  |

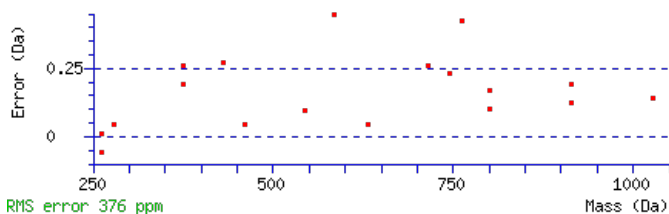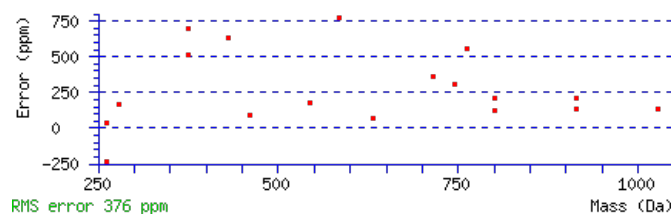

NCBI **BLAST** search of **YNLSLGLGLNK**

(Parameters: blastp, nr protein database, expect=20000, no filter, PAM30)

Other BLAST [web gateways](#)

All matches to this query

## AT2G13360.1

| Score | Mr(calc)  | Delta   | Sequence                     |
|-------|-----------|---------|------------------------------|
| 64.7  | 1190.6659 | 0.0001  | <a href="#">YNLSLGLGLNK</a>  |
| 10.3  | 1190.6659 | 0.0001  | <a href="#">YLNGVAGKEIK</a>  |
| 8.3   | 1190.6693 | -0.0032 | <a href="#">SKITSMILNAVK</a> |
| 8.2   | 1190.6659 | 0.0002  | <a href="#">LYNLINEKGGK</a>  |
| 2.5   | 1190.6659 | 0.0001  | <a href="#">ASGKGVLTSPEK</a> |
| 2.3   | 1190.6693 | -0.0032 | <a href="#">TKMALAEKGVK</a>  |
| 0.7   | 1190.6659 | 0.0001  | <a href="#">YRSVVPTEK</a>    |
| 0.5   | 1190.6659 | 0.0001  | <a href="#">YLPISVKTDR</a>   |
| 0.4   | 1190.6659 | 0.0002  | <a href="#">QGLAYAAKLEK</a>  |

Mascot: <http://www.matrixscience.com/>

**Peptide View**MS/MS Fragmentation of **GILMMLK**

Found in **AT2G14050.1** in **TAIR\_Arabidopsis**, Symbols: MCM9 | MCM9; ATP binding / DNA binding / DNA-dependent ATPase | chr2:5916322-5920899 FORWARD

Match to Query 906: 812.435366 from(407.224959,2+) index(5914)

Title: Elution from: 54.731 to 54.731 scan no 7626 cid35.00 polarity:+

Data file D1d-2\_1.mgf

Click mouse within plot area to zoom in by factor of two about that point

Or,   to  Da

Label all possible matches  Label matches used for scoring

Show Y-axis

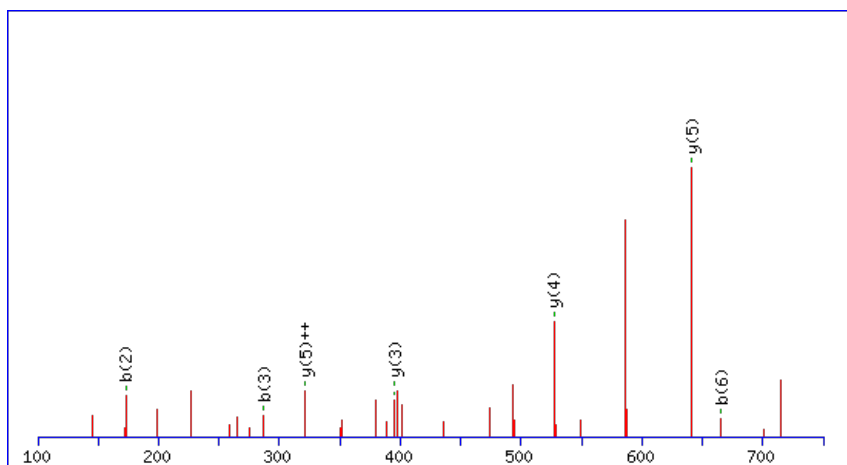

**Monoisotopic mass of neutral peptide Mr(calc):** 812.4364

**Fixed modifications:** Carbamidomethyl (C) (apply to specified residues or termini only)

**Ions Score:** 20 **Expect:** 0.011

**Matches:** 7/36 fragment ions using 12 most intense peaks ([help](#))

| # | b               | b <sup>++</sup> | Seq.     | y               | y <sup>++</sup> | y*       | y <sup>*++</sup> | # |
|---|-----------------|-----------------|----------|-----------------|-----------------|----------|------------------|---|
| 1 | 59.0258         | 30.0165         | <b>G</b> |                 |                 |          |                  | 7 |
| 2 | <b>173.1069</b> | 87.0571         | <b>I</b> | 755.4252        | 378.2162        | 737.4016 | 369.2045         | 6 |
| 3 | <b>287.1880</b> | 144.0976        | <b>L</b> | <b>641.3441</b> | <b>321.1757</b> | 623.3205 | 312.1639         | 5 |
| 4 | 419.2255        | 210.1164        | <b>M</b> | <b>527.2630</b> | 264.1351        | 509.2394 | 255.1234         | 4 |
| 5 | 551.2630        | 276.1351        | <b>M</b> | <b>395.2255</b> | 198.1164        | 377.2019 | 189.1046         | 3 |
| 6 | <b>665.3441</b> | 333.1757        | <b>L</b> | 263.1880        | 132.0976        | 245.1644 | 123.0858         | 2 |
| 7 |                 |                 | <b>K</b> | 149.1069        | 75.0571         | 131.0833 | 66.0453          | 1 |

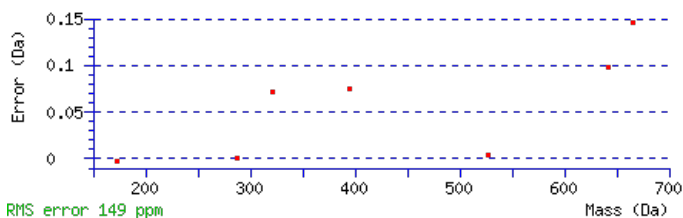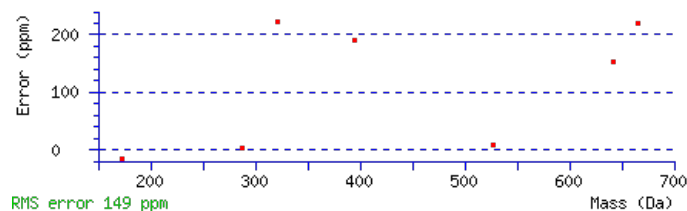

NCBI **BLAST** search of [GILMMLK](#)

(Parameters: blastp, nr protein database, expect=20000, no filter, PAM30)

Other BLAST [web gateways](#)

**All matches to this query**

| Score | Mr(calc) | Delta   | Sequence                |
|-------|----------|---------|-------------------------|
| 19.6  | 812.4364 | -0.0011 | <a href="#">GILMMLK</a> |





**Peptide View**MS/MS Fragmentation of **DFKGAAQILEK**Found in **AT2G14720.1** in **TAIR\_Arabidopsis**, Symbols: VSR-2 | VSR-2 (Vacuolar sorting receptor 2); calcium ion binding | chr2:6307960-6311238 REVERSE

Match to Query 4484: 1232.617518 from(617.316035,2+) index(7785)

Title: Elution from: 67.305 to 67.305 scan no 10050 cid35.00 polarity:+

Data file C7-1\_1.mgf

Click mouse within plot area to zoom in by factor of two about that point

Or,   to  Da Label all possible matches  Label matches used for scoring Show Y-axis 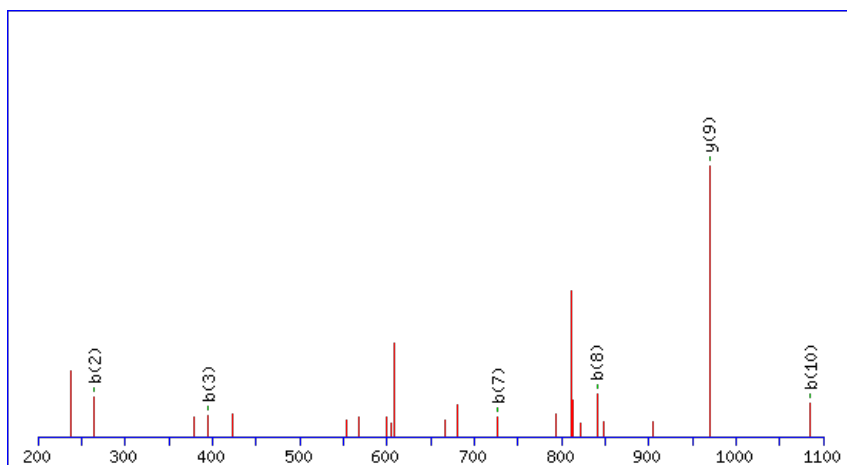Monoisotopic mass of neutral peptide  $M_r(\text{calc})$ : 1232.6193

Fixed modifications: Carbamidomethyl (C) (apply to specified residues or termini only)

Ions Score: 23 Expect: 0.039

Matches : 6/114 fragment ions using 15 most intense peaks ([help](#))

| #  | b                | b <sup>++</sup> | b*        | b <sup>*++</sup> | b <sup>0</sup> | b <sup>0++</sup> | Seq. | y               | y <sup>++</sup> | y*        | y <sup>*++</sup> | y <sup>0</sup> | y <sup>0++</sup> | #  |
|----|------------------|-----------------|-----------|------------------|----------------|------------------|------|-----------------|-----------------|-----------|------------------|----------------|------------------|----|
| 1  | 117.0313         | 59.0193         |           |                  | 99.0207        | 50.0140          | D    |                 |                 |           |                  |                |                  | 11 |
| 2  | <b>265.0967</b>  | 133.0520        |           |                  | 247.0861       | 124.0467         | F    | 1117.6026       | 559.3050        | 1099.5790 | 550.2932         | 1099.5921      | 550.2997         | 10 |
| 3  | <b>395.1857</b>  | 198.0965        | 377.1622  | 189.0847         | 377.1752       | 189.0912         | K    | <b>969.5372</b> | 485.2722        | 951.5136  | 476.2604         | 951.5266       | 476.2669         | 9  |
| 4  | 453.2042         | 227.1058        | 435.1807  | 218.0940         | 435.1937       | 218.1005         | G    | 839.4481        | 420.2277        | 821.4246  | 411.2159         | 821.4376       | 411.2224         | 8  |
| 5  | 525.2384         | 263.1228        | 507.2148  | 254.1110         | 507.2278       | 254.1175         | A    | 781.4296        | 391.2185        | 763.4061  | 382.2067         | 763.4191       | 382.2132         | 7  |
| 6  | 597.2725         | 299.1399        | 579.2489  | 290.1281         | 579.2620       | 290.1346         | A    | 709.3955        | 355.2014        | 691.3719  | 346.1896         | 691.3849       | 346.1961         | 6  |
| 7  | <b>727.3252</b>  | 364.1662        | 709.3016  | 355.1544         | 709.3146       | 355.1609         | Q    | 637.3613        | 319.1843        | 619.3378  | 310.1725         | 619.3508       | 310.1790         | 5  |
| 8  | <b>841.4063</b>  | 421.2068        | 823.3827  | 412.1950         | 823.3957       | 412.2015         | I    | 507.3087        | 254.1580        | 489.2851  | 245.1462         | 489.2981       | 245.1527         | 4  |
| 9  | 955.4874         | 478.2473        | 937.4638  | 469.2355         | 937.4768       | 469.2420         | L    | 393.2276        | 197.1174        | 375.2040  | 188.1056         | 375.2170       | 188.1122         | 3  |
| 10 | <b>1085.5270</b> | 543.2671        | 1067.5034 | 534.2553         | 1067.5164      | 534.2619         | E    | 279.1465        | 140.0769        | 261.1229  | 131.0651         | 261.1359       | 131.0716         | 2  |
| 11 |                  |                 |           |                  |                |                  | K    | 149.1069        | 75.0571         | 131.0833  | 66.0453          |                |                  | 1  |

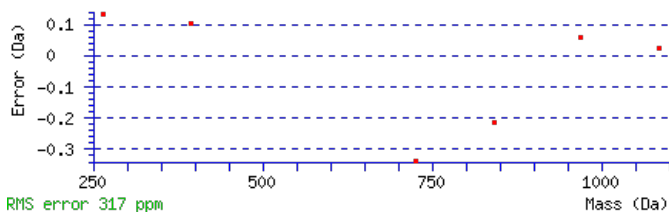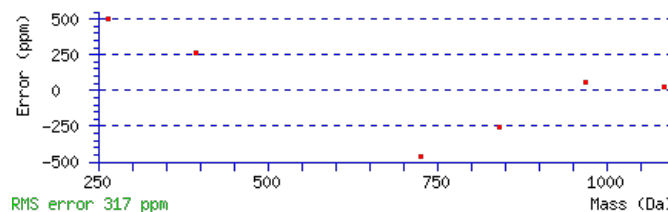NCBI **BLAST** search of **DFKGAAQILEK**

(Parameters: blastp, nr protein database, expect=20000, no filter, PAM30)

Other BLAST [web gateways](#)**All matches to this query**

## AT2G14720.1

| Score | Mr(calc)  | Delta   | Sequence                     |
|-------|-----------|---------|------------------------------|
| 23.3  | 1232.6193 | -0.0018 | <a href="#">DFKGAAQILEK</a>  |
| 14.4  | 1232.6193 | -0.0018 | <a href="#">LGEDFLERIK</a>   |
| 12.8  | 1232.6193 | -0.0018 | <a href="#">DVYILGAANVGK</a> |
| 9.9   | 1232.6171 | 0.0004  | <a href="#">ESQSKLASALGK</a> |
| 7.8   | 1232.6171 | 0.0004  | <a href="#">LKSSEERLEK</a>   |
| 7.8   | 1232.6171 | 0.0004  | <a href="#">SLKESERLEK</a>   |
| 7.1   | 1232.6171 | 0.0005  | <a href="#">GGAVTKSETLQK</a> |
| 6.5   | 1232.6193 | -0.0018 | <a href="#">VSGSSWIEVKK</a>  |
| 6.2   | 1232.6198 | -0.0022 | <a href="#">AREVVQSGKNK</a>  |
| 4.9   | 1232.6198 | -0.0022 | <a href="#">EAQKASARINK</a>  |

Mascot: <http://www.matrixscience.com/>

**Peptide View**MS/MS Fragmentation of **QSRVADNSVGPLEIR**Found in **AT2G14960.1** in **TAIR\_Arabidopsis**, Symbols: GH3.1 | GH3.1 | chr2:6458741-6460752 REVERSE

Match to Query 8087: 1662.798268 from(832.406410,2+) index(11076)

Title: Elution from: 107.339 to 107.339 scan no 15879 cid35.00 polarity:+

Data file C7-2\_1.mgf

Click mouse within plot area to zoom in by factor of two about that point

Or,   to  Da Label all possible matches  Label matches used for scoring Show Y-axis 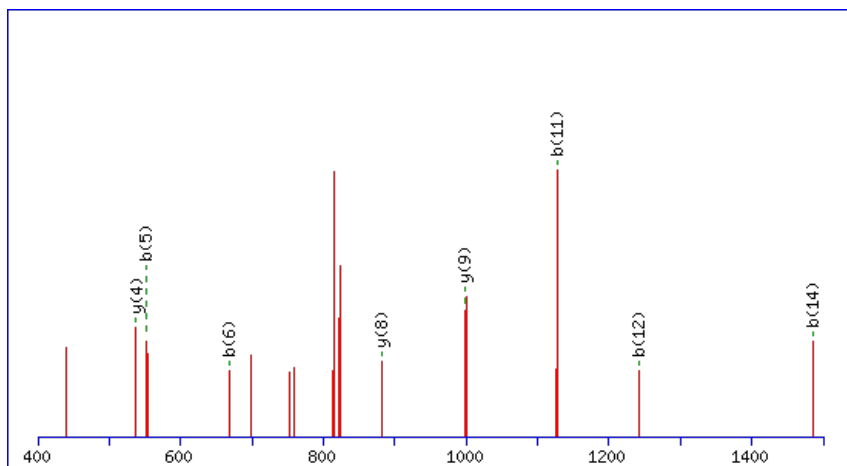Monoisotopic mass of neutral peptide  $M_r(\text{calc})$ : 1662.7960

Fixed modifications: Carbamidomethyl (C) (apply to specified residues or termini only)

Ions Score: 31 Expect: 0.0068

Matches : 8/162 fragment ions using 15 most intense peaks ([help](#))

| #  | b                | b <sup>++</sup> | b*        | b <sup>*++</sup> | b <sup>0</sup> | b <sup>0++</sup> | Seq. | y               | y <sup>++</sup> | y*        | y <sup>*++</sup> | y <sup>0</sup> | y <sup>0++</sup> | #  |
|----|------------------|-----------------|-----------|------------------|----------------|------------------|------|-----------------|-----------------|-----------|------------------|----------------|------------------|----|
| 1  | 131.0599         | 66.0336         | 113.0363  | 57.0218          |                |                  | Q    |                 |                 |           |                  |                |                  | 15 |
| 2  | 219.0890         | 110.0481        | 201.0654  | 101.0363         | 201.0784       | 101.0428         | S    | 1533.7506       | 767.3789        | 1515.7270 | 758.3672         | 1515.7401      | 758.3737         | 14 |
| 3  | 379.1782         | 190.0928        | 361.1547  | 181.0810         | 361.1677       | 181.0875         | R    | 1445.7216       | 723.3644        | 1427.6980 | 714.3526         | 1427.7110      | 714.3591         | 13 |
| 4  | 479.2437         | 240.1255        | 461.2201  | 231.1137         | 461.2331       | 231.1202         | V    | 1285.6323       | 643.3198        | 1267.6087 | 634.3080         | 1267.6217      | 634.3145         | 12 |
| 5  | <b>551.2778</b>  | 276.1426        | 533.2543  | 267.1308         | 533.2673       | 267.1373         | A    | 1185.5669       | 593.2871        | 1167.5433 | 584.2753         | 1167.5563      | 584.2818         | 11 |
| 6  | <b>667.3018</b>  | 334.1545        | 649.2782  | 325.1428         | 649.2912       | 325.1493         | D    | 1113.5327       | 557.2700        | 1095.5091 | 548.2582         | 1095.5221      | 548.2647         | 10 |
| 7  | 783.3388         | 392.1730        | 765.3152  | 383.1613         | 765.3282       | 383.1678         | N    | <b>997.5087</b> | 499.2580        | 979.4851  | 490.2462         | 979.4982       | 490.2527         | 9  |
| 8  | 871.3679         | 436.1876        | 853.3443  | 427.1758         | 853.3573       | 427.1823         | S    | <b>881.4717</b> | 441.2395        | 863.4481  | 432.2277         | 863.4612       | 432.2342         | 8  |
| 9  | 971.4333         | 486.2203        | 953.4097  | 477.2085         | 953.4228       | 477.2150         | V    | 793.4427        | 397.2250        | 775.4191  | 388.2132         | 775.4321       | 388.2197         | 7  |
| 10 | 1029.4518        | 515.2295        | 1011.4282 | 506.2178         | 1011.4413      | 506.2243         | G    | 693.3772        | 347.1922        | 675.3536  | 338.1805         | 675.3667       | 338.1870         | 6  |
| 11 | <b>1127.5016</b> | 564.2544        | 1109.4780 | 555.2427         | 1109.4911      | 555.2492         | P    | 635.3587        | 318.1830        | 617.3351  | 309.1712         | 617.3482       | 309.1777         | 5  |
| 12 | <b>1241.5827</b> | 621.2950        | 1223.5591 | 612.2832         | 1223.5722      | 612.2897         | L    | <b>537.3089</b> | 269.1581        | 519.2853  | 260.1463         | 519.2984       | 260.1528         | 4  |
| 13 | 1371.6223        | 686.3148        | 1353.5988 | 677.3030         | 1353.6118      | 677.3095         | E    | 423.2278        | 212.1175        | 405.2042  | 203.1058         | 405.2173       | 203.1123         | 3  |
| 14 | <b>1485.7034</b> | 743.3554        | 1467.6799 | 734.3436         | 1467.6929      | 734.3501         | I    | 293.1882        | 147.0977        | 275.1646  | 138.0859         |                |                  | 2  |
| 15 |                  |                 |           |                  |                |                  | R    | 179.1071        | 90.0572         | 161.0835  | 81.0454          |                |                  | 1  |

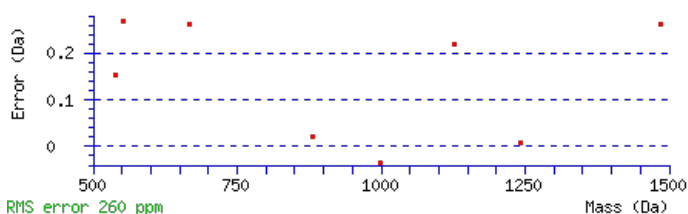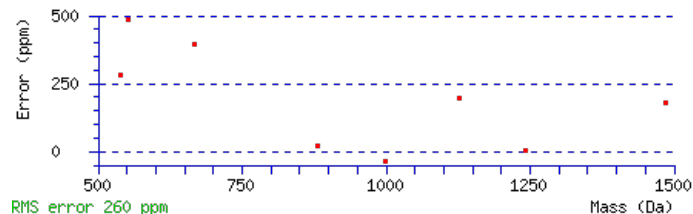NCBI **BLAST** search of [QSRVADNSVGPLEIR](#)

## AT2G14960.1

(Parameters: blastp, nr protein database, expect=20000, no filter, PAM30)

Other BLAST [web gateways](#)

### All matches to this query

| Score | Mr(calc)  | Delta   | Sequence                         |
|-------|-----------|---------|----------------------------------|
| 30.7  | 1662.7960 | 0.0023  | <a href="#">QSRVADNSVGPLEIR</a>  |
| 30.7  | 1662.7955 | 0.0027  | <a href="#">NSTNIDQVIDWLVK</a>   |
| 19.7  | 1662.7933 | 0.0050  | <a href="#">DQVESVINTIIEGAR</a>  |
| 13.7  | 1662.7935 | 0.0048  | <a href="#">MHEFNITLRPVQR</a>    |
| 7.2   | 1662.8016 | -0.0033 | <a href="#">IHSDDTVARMLVGNK</a>  |
| 4.8   | 1662.8009 | -0.0026 | <a href="#">FDHLPRNTKNQLR</a>    |
| 3.0   | 1662.7933 | 0.0050  | <a href="#">DSVNQLSLAIAELDR</a>  |
| 2.3   | 1662.7982 | 0.0001  | <a href="#">DHEGAYAQLIRLQK</a>   |
| 1.8   | 1662.7955 | 0.0027  | <a href="#">DGVYASLVQLHLTAAS</a> |
| 0.8   | 1662.7964 | 0.0019  | <a href="#">NLEMTFSMKFLKR</a>    |

Mascot: <http://www.matrixscience.com/>

**Peptide View**MS/MS Fragmentation of **NLKMVFFK**Found in **AT2G15090.1** in **TAIR\_Arabidopsis**, Symbols: | fatty acid elongase, putative | chr2:6549418-6550863 FORWARD

Match to Query 3104: 1052.533582 from(527.274067,2+) index(4064)

Title: Elution from: 38.150 to 38.150 scan no 5059 cid35.00 polarity:+

Data file C7-3\_1.mgf

Click mouse within plot area to zoom in by factor of two about that point

Or,   to  Da Label all possible matches  Label matches used for scoring Show Y-axis 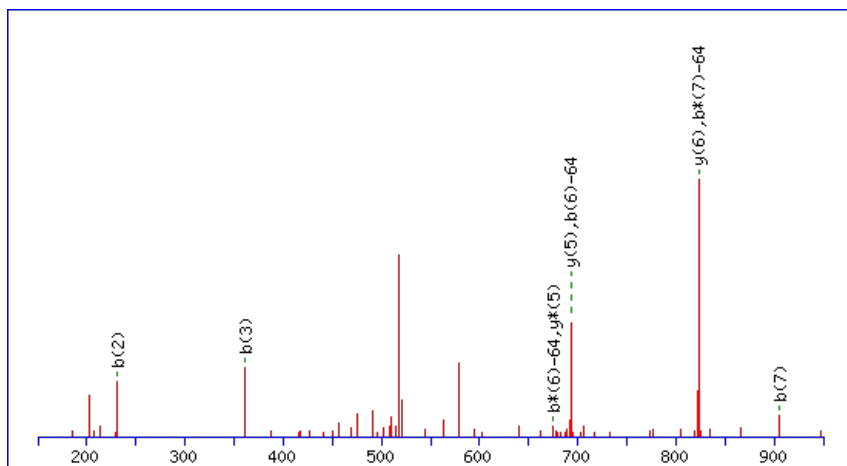Monoisotopic mass of neutral peptide **Mr(calc)**: 1052.5355**Fixed modifications:** Carbamidomethyl (C) (apply to specified residues or termini only)**Variable modifications:****M4** : Oxidation (M), with neutral losses 0.0000 (shown in table), 63.9983**Ions Score:** 23 **Expect:** 0.012**Matches** : 9/84 fragment ions using 8 most intense peaks ([help](#))

| # | b               | b <sup>++</sup> | b*       | b <sup>*++</sup> | Seq. | y               | y <sup>++</sup> | y*              | y <sup>*++</sup> | # |
|---|-----------------|-----------------|----------|------------------|------|-----------------|-----------------|-----------------|------------------|---|
| 1 | 117.0443        | 59.0258         | 99.0207  | 50.0140          | N    |                 |                 |                 |                  | 8 |
| 2 | <b>231.1254</b> | 116.0663        | 213.1018 | 107.0545         | L    | 937.5058        | 469.2565        | 919.4822        | 460.2447         | 7 |
| 3 | <b>361.2144</b> | 181.1108        | 343.1908 | 172.0990         | K    | <b>823.4247</b> | 412.2160        | 805.4011        | 403.2042         | 6 |
| 4 | 509.2468        | 255.1271        | 491.2233 | 246.1153         | M    | <b>693.3357</b> | 347.1715        | <b>675.3121</b> | 338.1597         | 5 |
| 5 | 609.3123        | 305.1598        | 591.2887 | 296.1480         | V    | 545.3032        | 273.1552        | 527.2796        | 264.1435         | 4 |
| 6 | 757.3777        | 379.1925        | 739.3542 | 370.1807         | F    | 445.2378        | 223.1225        | 427.2142        | 214.1107         | 3 |
| 7 | <b>905.4432</b> | 453.2252        | 887.4196 | 444.2134         | F    | 297.1723        | 149.0898        | 279.1487        | 140.0780         | 2 |
| 8 |                 |                 |          |                  | K    | 149.1069        | 75.0571         | 131.0833        | 66.0453          | 1 |

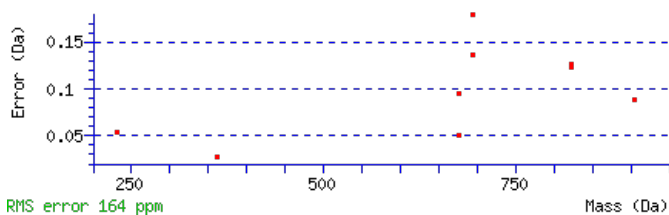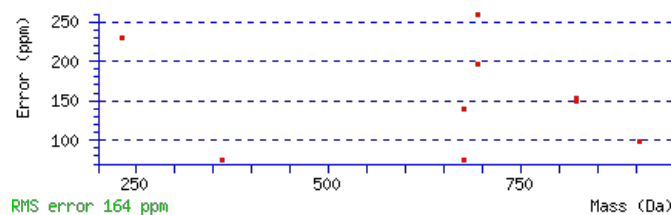NCBI **BLAST** search of **NLKMVFFK**

(Parameters: blastp, nr protein database, expect=20000, no filter, PAM30)

Other BLAST [web gateways](#)**All matches to this query**

| Score | Mr(calc)  | Delta   | Sequence                 |
|-------|-----------|---------|--------------------------|
| 22.6  | 1052.5355 | -0.0019 | <a href="#">NLKMVFFK</a> |



**Peptide View**MS/MS Fragmentation of **NLIDLALK**Found in **AT2G15320.1** in **TAIR\_Arabidopsis**, Symbols: | leucine-rich repeat family protein | chr2:6673609-6674757 REVERSE

Match to Query 1715: 908.519586 from(455.267069,2+) index(6259)

Title: Elution from: 54.610 to 54.610 scan no 7977 cid35.00 polarity:+

Data file C7-3\_2.mgf

Click mouse within plot area to zoom in by factor of two about that point

Or,  to  Da Label all possible matches  Label matches used for scoring Show Y-axis 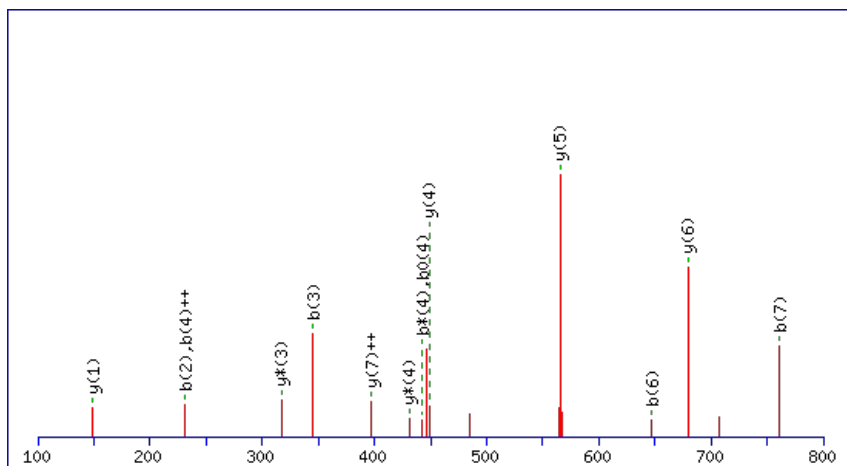Monoisotopic mass of neutral peptide  $M_r(\text{calc})$ : 908.5191

Fixed modifications: Carbamidomethyl (C) (apply to specified residues or termini only)

Ions Score: 35 Expect: 0.0013

Matches : 14/70 fragment ions using 18 most intense peaks ([help](#))

| # | b               | b <sup>++</sup> | b*              | b <sup>*++</sup> | b <sup>0</sup>  | b <sup>0++</sup> | Seq. | y               | y <sup>++</sup> | y*              | y <sup>*++</sup> | y <sup>0</sup> | y <sup>0++</sup> | # |
|---|-----------------|-----------------|-----------------|------------------|-----------------|------------------|------|-----------------|-----------------|-----------------|------------------|----------------|------------------|---|
| 1 | 117.0443        | 59.0258         | 99.0207         | 50.0140          |                 |                  | N    |                 |                 |                 |                  |                |                  | 8 |
| 2 | <b>231.1254</b> | 116.0663        | 213.1018        | 107.0545         |                 |                  | L    | 793.4894        | <b>397.2483</b> | 775.4658        | 388.2365         | 775.4788       | 388.2431         | 7 |
| 3 | <b>345.2065</b> | 173.1069        | 327.1829        | 164.0951         |                 |                  | I    | <b>679.4083</b> | 340.2078        | 661.3847        | 331.1960         | 661.3977       | 331.2025         | 6 |
| 4 | 461.2304        | <b>231.1189</b> | <b>443.2069</b> | 222.1071         | <b>443.2199</b> | 222.1136         | D    | <b>565.3272</b> | 283.1672        | 547.3036        | 274.1554         | 547.3166       | 274.1620         | 5 |
| 5 | 575.3115        | 288.1594        | 557.2880        | 279.1476         | 557.3010        | 279.1541         | L    | <b>449.3032</b> | 225.1552        | <b>431.2796</b> | 216.1435         |                |                  | 4 |
| 6 | <b>647.3457</b> | 324.1765        | 629.3221        | 315.1647         | 629.3351        | 315.1712         | A    | 335.2221        | 168.1147        | <b>317.1985</b> | 159.1029         |                |                  | 3 |
| 7 | <b>761.4268</b> | 381.2170        | 743.4032        | 372.2052         | 743.4162        | 372.2118         | L    | 263.1880        | 132.0976        | 245.1644        | 123.0858         |                |                  | 2 |
| 8 |                 |                 |                 |                  |                 |                  | K    | <b>149.1069</b> | 75.0571         | 131.0833        | 66.0453          |                |                  | 1 |

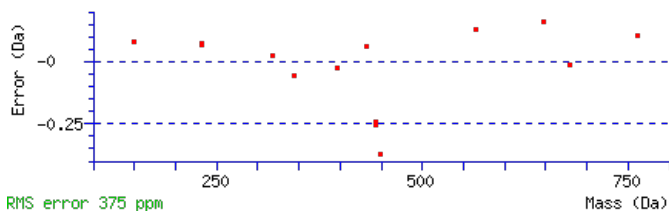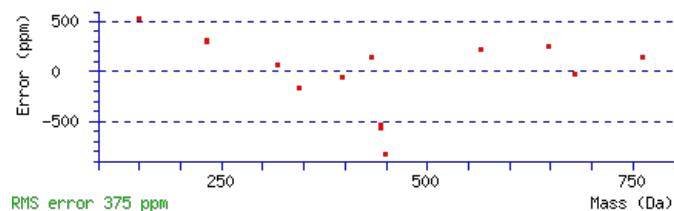NCBI **BLAST** search of [NLIDLALK](#)

(Parameters: blastp, nr protein database, expect=20000, no filter, PAM30)

Other BLAST [web gateways](#)**All matches to this query**

| Score | $M_r(\text{calc})$ | Delta  | Sequence                 |
|-------|--------------------|--------|--------------------------|
| 35.2  | 908.5191           | 0.0005 | <a href="#">NLIDLALK</a> |
| 32.9  | 908.5191           | 0.0005 | <a href="#">VKIDPSIK</a> |



## AT2G15320.1

|      |          |         |                           |
|------|----------|---------|---------------------------|
| 26.5 | 908.5191 | 0.0005  | <a href="#">DLILNAIK</a>  |
| 26.5 | 908.5191 | 0.0005  | <a href="#">GGLLIDAIK</a> |
| 24.5 | 908.5213 | -0.0018 | <a href="#">EVLLWLK</a>   |
| 24.5 | 908.5191 | 0.0005  | <a href="#">INLGEILK</a>  |
| 16.2 | 908.5218 | -0.0022 | <a href="#">KVLGQPVR</a>  |
| 12.6 | 908.5191 | 0.0005  | <a href="#">NVVIDVIK</a>  |
| 10.2 | 908.5214 | -0.0018 | <a href="#">SLPPLVFK</a>  |
| 9.3  | 908.5218 | -0.0022 | <a href="#">IPKPARSK</a>  |

Mascot: <http://www.matrixscience.com/>

**Peptide View**MS/MS Fragmentation of **LQADDMDELAR**

Found in **AT2G15620.1** in **TAIR\_Arabidopsis**, Symbols: NIR, ATHNIR, NIR1 | NIR1 (NITRITE REDUCTASE); ferredoxin-nitrate reductase | chr2:6817634-6819748 FORWARD

Match to Query 4479: 1290.532732 from(646.273642,2+) index(3881)

Title: Elution from: 36.982 to 36.982 scan no 4851 cid35.00 polarity:+

Data file C7-1\_3.mgf

Click mouse within plot area to zoom in by factor of two about that point

Or,   to  Da

Label all possible matches  Label matches used for scoring

Show Y-axis

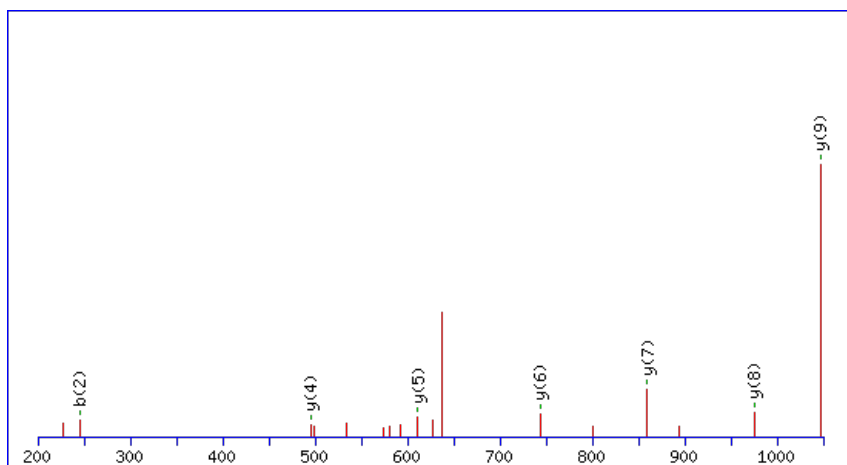

Monoisotopic mass of neutral peptide  $M_r(\text{calc})$ : 1290.5320

Fixed modifications: Carbamidomethyl (C) (apply to specified residues or termini only)

Ions Score: 56 Expect: 7.2e-006

Matches : 7/106 fragment ions using 8 most intense peaks ([help](#))

| #  | b               | b <sup>++</sup> | b*        | b <sup>*++</sup> | b <sup>0</sup> | b <sup>0++</sup> | Seq. | y                | y <sup>++</sup> | y*        | y <sup>*++</sup> | y <sup>0</sup> | y <sup>0++</sup> | #  |
|----|-----------------|-----------------|-----------|------------------|----------------|------------------|------|------------------|-----------------|-----------|------------------|----------------|------------------|----|
| 1  | 115.0884        | 58.0478         |           |                  |                |                  | L    |                  |                 |           |                  |                |                  | 11 |
| 2  | <b>245.1410</b> | 123.0741        | 227.1174  | 114.0624         |                |                  | Q    | 1177.4582        | 589.2327        | 1159.4346 | 580.2210         | 1159.4477      | 580.2275         | 10 |
| 3  | 317.1752        | 159.0912        | 299.1516  | 150.0794         |                |                  | A    | <b>1047.4056</b> | 524.2064        | 1029.3820 | 515.1946         | 1029.3950      | 515.2011         | 9  |
| 4  | 433.1991        | 217.1032        | 415.1756  | 208.0914         | 415.1886       | 208.0979         | D    | <b>975.3714</b>  | 488.1893        | 957.3478  | 479.1776         | 957.3609       | 479.1841         | 8  |
| 5  | 549.2231        | 275.1152        | 531.1995  | 266.1034         | 531.2126       | 266.1099         | D    | <b>859.3474</b>  | 430.1774        | 841.3239  | 421.1656         | 841.3369       | 421.1721         | 7  |
| 6  | 681.2606        | 341.1340        | 663.2371  | 332.1222         | 663.2501       | 332.1287         | M    | <b>743.3235</b>  | 372.1654        | 725.2999  | 363.1536         | 725.3129       | 363.1601         | 6  |
| 7  | 797.2846        | 399.1460        | 779.2610  | 390.1342         | 779.2741       | 390.1407         | D    | <b>611.2859</b>  | 306.1466        | 593.2624  | 297.1348         | 593.2754       | 297.1413         | 5  |
| 8  | 927.3243        | 464.1658        | 909.3007  | 455.1540         | 909.3137       | 455.1605         | E    | <b>495.2620</b>  | 248.1346        | 477.2384  | 239.1228         | 477.2514       | 239.1293         | 4  |
| 9  | 1041.4054       | 521.2063        | 1023.3818 | 512.1945         | 1023.3948      | 512.2010         | L    | 365.2223         | 183.1148        | 347.1988  | 174.1030         |                |                  | 3  |
| 10 | 1113.4395       | 557.2234        | 1095.4159 | 548.2116         | 1095.4289      | 548.2181         | A    | 251.1412         | 126.0743        | 233.1177  | 117.0625         |                |                  | 2  |
| 11 |                 |                 |           |                  |                |                  | R    | 179.1071         | 90.0572         | 161.0835  | 81.0454          |                |                  | 1  |

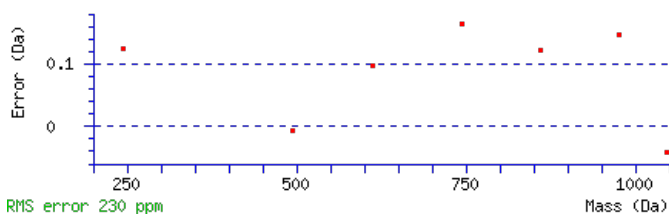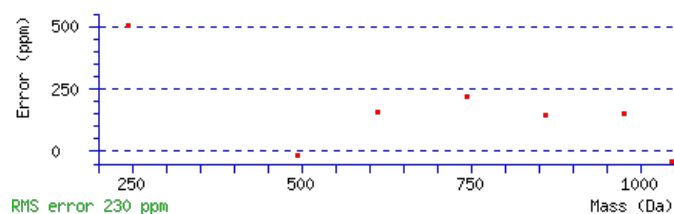

NCBI **BLAST** search of **LQADDMDELAR**

(Parameters: blastp, nr protein database, expect=20000, no filter, PAM30)

Other BLAST [web gateways](#)

All matches to this query

AT2G15620.1

| Score | Mr(calc)  | Delta   | Sequence                    |
|-------|-----------|---------|-----------------------------|
| 56.4  | 1290.5320 | 0.0007  | <a href="#">LQADDMDELAR</a> |
| 1.7   | 1290.5347 | -0.0020 | <a href="#">HSQRCDTELK</a>  |

Mascot: <http://www.matrixscience.com/>

## Peptide View

MS/MS Fragmentation of **LITPSILSDR**

Found in **AT2G16360.1** in **TAIR\_Arabidopsis**, Symbols: | 40S ribosomal protein S25 (RPS25A) | chr2:7083795-7084448 REVERSE

Match to Query 3540: 1126.598468 from(564.306510,2+) index(6099)

Title: Elution from: 53.895 to 53.895 scan no 7779 cid35.00 polarity:+

Data file C7-1\_2.mgf

Click mouse within plot area to zoom in by factor of two about that point

Or,   to  Da

Label all possible matches  Label matches used for scoring

Show Y-axis

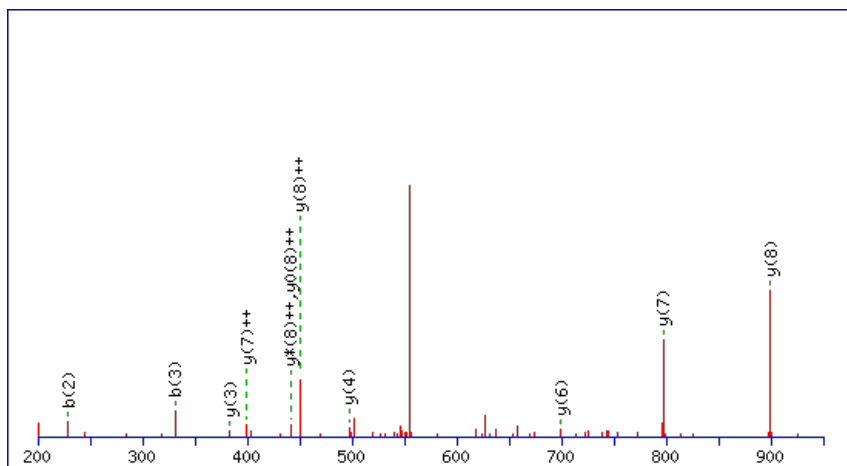

Monoisotopic mass of neutral peptide **Mr(calc)**: 1126.6008

**Fixed modifications:** Carbamidomethyl (C) (apply to specified residues or termini only)

**Ions Score:** 30 **Expect:** 0.0059

**Matches** : 11/84 fragment ions using 22 most intense peaks ([help](#))

| #  | b               | b <sup>++</sup> | b <sup>0</sup> | b <sup>0++</sup> | Seq. | y               | y <sup>++</sup> | y*       | y <sup>+++</sup> | y <sup>0</sup> | y <sup>0++</sup> | #  |
|----|-----------------|-----------------|----------------|------------------|------|-----------------|-----------------|----------|------------------|----------------|------------------|----|
| 1  | 115.0884        | 58.0478         |                |                  | L    |                 |                 |          |                  |                |                  | 10 |
| 2  | <b>229.1695</b> | 115.0884        |                |                  | I    | 1013.5270       | 507.2671        | 995.5034 | 498.2553         | 995.5164       | 498.2619         | 9  |
| 3  | <b>331.2142</b> | 166.1107        | 313.2036       | 157.1054         | T    | <b>899.4459</b> | <b>450.2266</b> | 881.4223 | <b>441.2148</b>  | 881.4353       | <b>441.2213</b>  | 8  |
| 4  | 429.2640        | 215.1356        | 411.2534       | 206.1303         | P    | <b>797.4012</b> | <b>399.2042</b> | 779.3776 | 390.1924         | 779.3906       | 390.1990         | 7  |
| 5  | 517.2930        | 259.1502        | 499.2825       | 250.1449         | S    | <b>699.3514</b> | 350.1793        | 681.3278 | 341.1675         | 681.3408       | 341.1741         | 6  |
| 6  | 631.3741        | 316.1907        | 613.3636       | 307.1854         | I    | 611.3223        | 306.1648        | 593.2987 | 297.1530         | 593.3118       | 297.1595         | 5  |
| 7  | 745.4552        | 373.2313        | 727.4447       | 364.2260         | L    | <b>497.2412</b> | 249.1243        | 479.2176 | 240.1125         | 479.2307       | 240.1190         | 4  |
| 8  | 833.4843        | 417.2458        | 815.4737       | 408.2405         | S    | <b>383.1601</b> | 192.0837        | 365.1365 | 183.0719         | 365.1496       | 183.0784         | 3  |
| 9  | 949.5083        | 475.2578        | 931.4977       | 466.2525         | D    | 295.1311        | 148.0692        | 277.1075 | 139.0574         | 277.1205       | 139.0639         | 2  |
| 10 |                 |                 |                |                  | R    | 179.1071        | 90.0572         | 161.0835 | 81.0454          |                |                  | 1  |

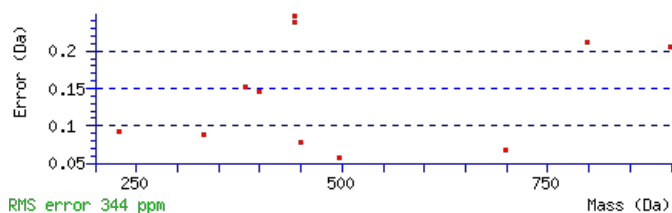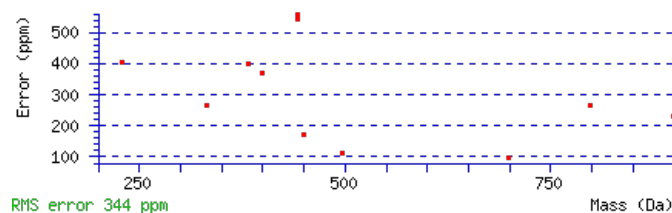

NCBI **BLAST** search of **LITPSILSDR**

(Parameters: blastp, nr protein database, expect=20000, no filter, PAM30)

Other BLAST [web gateways](#)

All matches to this query

| Score | Mr(calc) | Delta | Sequence |
|-------|----------|-------|----------|
|       |          |       |          |

## AT2G16360.1

|      |           |         |                            |
|------|-----------|---------|----------------------------|
| 29.7 | 1126.6008 | -0.0024 | <a href="#">LITPSILSDR</a> |
| 3.5  | 1126.6008 | -0.0024 | <a href="#">QPVVSISAVK</a> |
| 2.2  | 1126.6008 | -0.0023 | <a href="#">VVQVGEKVEK</a> |
| 1.4  | 1126.6008 | -0.0024 | <a href="#">IISLNLAENK</a> |

**Mascot:** <http://www.matrixscience.com/>

**Peptide View**MS/MS Fragmentation of **HVVFGQVVEGLNVVR**Found in **AT2G16600.1** in **TAIR\_Arabidopsis**, Symbols: ROC3 | ROC3 (rotamase CyP 3); peptidyl-prolyl cis-trans isomerase | chr2:7207944-7208465 FORWARD

Match to Query 7891: 1672.852378 from(837.433465,2+) index(7292)

Title: Elution from: 64.460 to 64.460 scan no 9526 cid35.00 polarity:+

Data file C7-1\_2.mgf

Click mouse within plot area to zoom in by factor of two about that point

Or,   to  Da Label all possible matches  Label matches used for scoring Show Y-axis 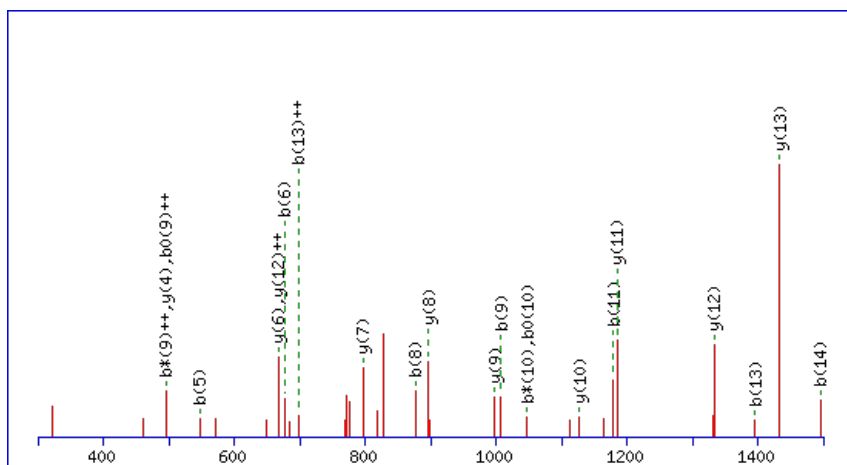

Monoisotopic mass of neutral peptide Mr(calc): 1672.8553

Fixed modifications: Carbamidomethyl (C) (apply to specified residues or termini only)

Ions Score: 77 Expect: 1.2e-007

Matches : 22/130 fragment ions using 28 most intense peaks ([help](#))

| #  | b         | b <sup>++</sup> | b <sup>*</sup> | b <sup>*++</sup> | b <sup>0</sup> | b <sup>0++</sup> | Seq. | y         | y <sup>++</sup> | y <sup>*</sup> | y <sup>*++</sup> | y <sup>0</sup> | y <sup>0++</sup> | #  |
|----|-----------|-----------------|----------------|------------------|----------------|------------------|------|-----------|-----------------|----------------|------------------|----------------|------------------|----|
| 1  | 141.0573  | 71.0323         |                |                  |                |                  | H    |           |                 |                |                  |                |                  | 15 |
| 2  | 241.1227  | 121.0650        |                |                  |                |                  | V    | 1533.8126 | 767.4099        | 1515.7890      | 758.3981         | 1515.8020      | 758.4047         | 14 |
| 3  | 341.1882  | 171.0977        |                |                  |                |                  | V    | 1433.7472 | 717.3772        | 1415.7236      | 708.3654         | 1415.7366      | 708.3719         | 13 |
| 4  | 489.2536  | 245.1305        |                |                  |                |                  | F    | 1333.6817 | 667.3445        | 1315.6581      | 658.3327         | 1315.6711      | 658.3392         | 12 |
| 5  | 547.2721  | 274.1397        |                |                  |                |                  | G    | 1185.6163 | 593.3118        | 1167.5927      | 584.3000         | 1167.6057      | 584.3065         | 11 |
| 6  | 677.3248  | 339.1660        | 659.3012       | 330.1542         |                |                  | Q    | 1127.5978 | 564.3025        | 1109.5742      | 555.2907         | 1109.5872      | 555.2972         | 10 |
| 7  | 777.3902  | 389.1988        | 759.3667       | 380.1870         |                |                  | V    | 997.5451  | 499.2762        | 979.5215       | 490.2644         | 979.5345       | 490.2709         | 9  |
| 8  | 877.4557  | 439.2315        | 859.4321       | 430.2197         |                |                  | V    | 897.4797  | 449.2435        | 879.4561       | 440.2317         | 879.4691       | 440.2382         | 8  |
| 9  | 1007.4953 | 504.2513        | 989.4717       | 495.2395         | 989.4847       | 495.2460         | E    | 797.4142  | 399.2107        | 779.3906       | 390.1990         | 779.4036       | 390.2055         | 7  |
| 10 | 1065.5138 | 533.2605        | 1047.4902      | 524.2488         | 1047.5032      | 524.2553         | G    | 667.3746  | 334.1909        | 649.3510       | 325.1791         |                |                  | 6  |
| 11 | 1179.5949 | 590.3011        | 1161.5713      | 581.2893         | 1161.5843      | 581.2958         | L    | 609.3561  | 305.1817        | 591.3325       | 296.1699         |                |                  | 5  |
| 12 | 1295.6319 | 648.3196        | 1277.6083      | 639.3078         | 1277.6213      | 639.3143         | N    | 495.2750  | 248.1411        | 477.2514       | 239.1293         |                |                  | 4  |
| 13 | 1395.6974 | 698.3523        | 1377.6738      | 689.3405         | 1377.6868      | 689.3470         | V    | 379.2380  | 190.1226        | 361.2144       | 181.1108         |                |                  | 3  |
| 14 | 1495.7628 | 748.3850        | 1477.7392      | 739.3732         | 1477.7522      | 739.3798         | V    | 279.1725  | 140.0899        | 261.1490       | 131.0781         |                |                  | 2  |
| 15 |           |                 |                |                  |                |                  | R    | 179.1071  | 90.0572         | 161.0835       | 81.0454          |                |                  | 1  |

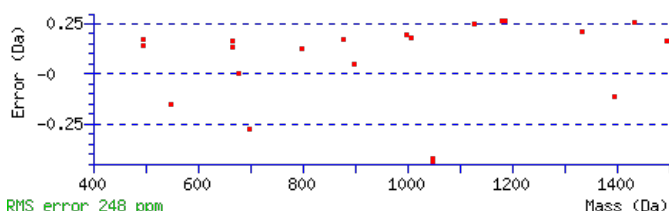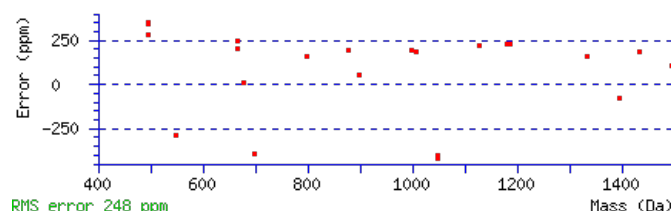

## AT2G16600.1

NCBI **BLAST** search of [HVVFGQVVEGLNVVR](#)

(Parameters: blastp, nr protein database, expect=20000, no filter, PAM30)

Other BLAST [web gateways](#)

### All matches to this query

| Score | Mr(calc)  | Delta   | Sequence                        |
|-------|-----------|---------|---------------------------------|
| 76.9  | 1672.8553 | -0.0029 | <a href="#">HVVFGQVVEGLNVVR</a> |
| 3.3   | 1672.8553 | -0.0029 | <a href="#">GGFGEVYRGKLLSR</a>  |

**Mascot:** <http://www.matrixscience.com/>

**Peptide View**MS/MS Fragmentation of **LLYDTK**Found in **AT2G17360.1** in **TAIR\_Arabidopsis**, Symbols: | 40S ribosomal protein S4 (RPS4A) | chr2:7553680-7555220 FORWARD

Match to Query 883: 751.411424 from(376.712988,2+) index(1673)

Title: Elution from: 21.882 to 21.882 scan no 2253 cid35.00 polarity:+

Data file D12h-1\_1.mgf

Click mouse within plot area to zoom in by factor of two about that point

Or,   to  Da Label all possible matches  Label matches used for scoring Show Y-axis 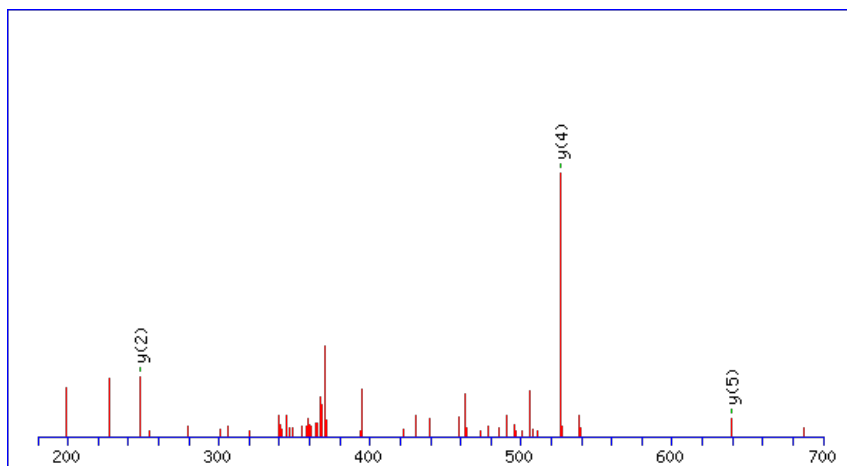Monoisotopic mass of neutral peptide **Mr(calc)**: 751.4116**Fixed modifications**: Carbamidomethyl (C) (apply to specified residues or termini only)**Ions Score**: 19 **Expect**: 0.03**Matches**: 3/42 fragment ions using 5 most intense peaks ([help](#))

| # | b        | b <sup>++</sup> | b <sup>0</sup> | b <sup>0++</sup> | Seq. | y               | y <sup>++</sup> | y*       | y <sup>*++</sup> | y <sup>0</sup> | y <sup>0++</sup> | # |
|---|----------|-----------------|----------------|------------------|------|-----------------|-----------------|----------|------------------|----------------|------------------|---|
| 1 | 114.0913 | 57.5493         |                |                  | L    |                 |                 |          |                  |                |                  | 6 |
| 2 | 227.1754 | 114.0913        |                |                  | L    | <b>639.3348</b> | 320.1710        | 622.3083 | 311.6578         | 621.3243       | 311.1658         | 5 |
| 3 | 390.2387 | 195.6230        |                |                  | Y    | <b>526.2508</b> | 263.6290        | 509.2242 | 255.1157         | 508.2402       | 254.6237         | 4 |
| 4 | 505.2657 | 253.1365        | 487.2551       | 244.1312         | D    | 363.1874        | 182.0974        | 346.1609 | 173.5841         | 345.1769       | 173.0921         | 3 |
| 5 | 606.3134 | 303.6603        | 588.3028       | 294.6550         | T    | <b>248.1605</b> | 124.5839        | 231.1339 | 116.0706         | 230.1499       | 115.5786         | 2 |
| 6 |          |                 |                |                  | K    | 147.1128        | 74.0600         | 130.0863 | 65.5468          |                |                  | 1 |

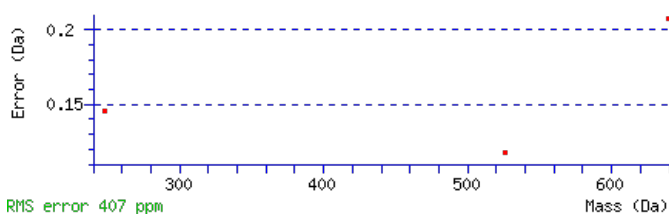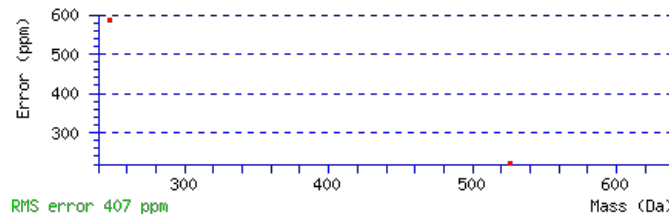NCBI **BLAST** search of **LLYDTK**

(Parameters: blastp, nr protein database, expect=20000, no filter, PAM30)

Other BLAST [web gateways](#)**All matches to this query**

| Score | Mr(calc) | Delta   | Sequence               |
|-------|----------|---------|------------------------|
| 18.6  | 751.4116 | -0.0002 | <a href="#">LLYDTK</a> |



**Peptide View**MS/MS Fragmentation of **EMKKSIVR**Found in **AT2G17440.1** in **TAIR\_Arabidopsis**, Symbols: | leucine-rich repeat family protein | chr2:7578413-7580488 FORWARD

Match to Query 2050: 1002.532454 from(502.273503,2+) index(943)

Title: Elution from: 18.412 to 18.412 scan no 1458 cid35.00 polarity:+

Data file D12h-2\_2.mgf

Click mouse within plot area to zoom in by factor of two about that point

Or,  to  Da Label all possible matches  Label matches used for scoring Show Y-axis 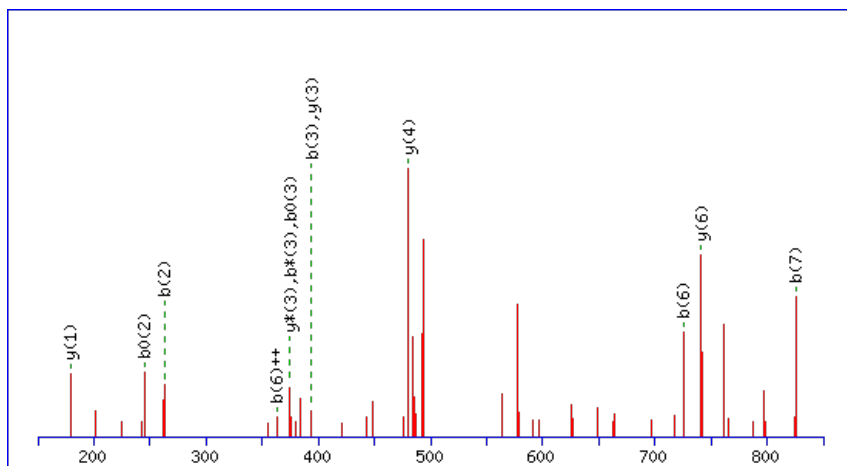Monoisotopic mass of neutral peptide  $M_r(\text{calc})$ : 1002.5306

Fixed modifications: Carbamidomethyl (C) (apply to specified residues or termini only)

Ions Score: 22 Expect: 0.034

Matches : 13/74 fragment ions using 21 most intense peaks ([help](#))

| # | b               | b <sup>++</sup> | b*              | b <sup>*++</sup> | b <sup>0</sup>  | b <sup>0++</sup> | Seq. | y               | y <sup>++</sup> | y*              | y <sup>*++</sup> | y <sup>0</sup> | y <sup>0++</sup> | # |
|---|-----------------|-----------------|-----------------|------------------|-----------------|------------------|------|-----------------|-----------------|-----------------|------------------|----------------|------------------|---|
| 1 | 131.0469        | 66.0271         |                 |                  | 113.0363        | 57.0218          | E    |                 |                 |                 |                  |                |                  | 8 |
| 2 | <b>263.0844</b> | 132.0458        |                 |                  | <b>245.0739</b> | 123.0406         | M    | 873.4983        | 437.2528        | 855.4747        | 428.2410         | 855.4877       | 428.2475         | 7 |
| 3 | <b>393.1735</b> | 197.0904        | <b>375.1499</b> | 188.0786         | <b>375.1629</b> | 188.0851         | K    | <b>741.4608</b> | 371.2340        | 723.4372        | 362.2222         | 723.4502       | 362.2287         | 6 |
| 4 | 523.2625        | 262.1349        | 505.2389        | 253.1231         | 505.2519        | 253.1296         | K    | 611.3717        | 306.1895        | 593.3482        | 297.1777         | 593.3612       | 297.1842         | 5 |
| 5 | 611.2916        | 306.1494        | 593.2680        | 297.1376         | 593.2810        | 297.1441         | S    | <b>481.2827</b> | 241.1450        | 463.2591        | 232.1332         | 463.2721       | 232.1397         | 4 |
| 6 | <b>725.3727</b> | <b>363.1900</b> | 707.3491        | 354.1782         | 707.3621        | 354.1847         | L    | <b>393.2536</b> | 197.1305        | <b>375.2301</b> | 188.1187         |                |                  | 3 |
| 7 | <b>825.4381</b> | 413.2227        | 807.4145        | 404.2109         | 807.4275        | 404.2174         | V    | 279.1725        | 140.0899        | 261.1490        | 131.0781         |                |                  | 2 |
| 8 |                 |                 |                 |                  |                 |                  | R    | <b>179.1071</b> | 90.0572         | 161.0835        | 81.0454          |                |                  | 1 |

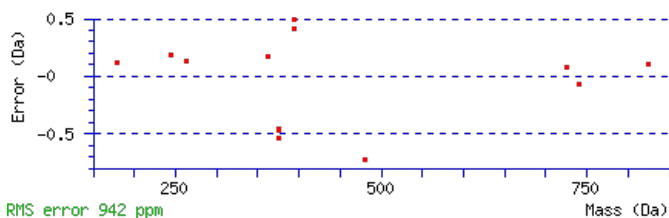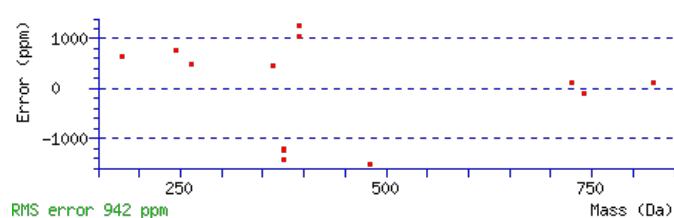NCBI **BLAST** search of [EMKKSIVR](#)

(Parameters: blastp, nr protein database, expect=20000, no filter, PAM30)

Other BLAST [web gateways](#)**All matches to this query**

| Score | $M_r(\text{calc})$ | Delta   | Sequence                  |
|-------|--------------------|---------|---------------------------|
| 21.8  | 1002.5306          | 0.0018  | <a href="#">EMKKSIVR</a>  |
| 16.8  | 1002.5354          | -0.0029 | <a href="#">STSQISKLK</a> |

**AT2G17440.1**

|      |           |         |                           |
|------|-----------|---------|---------------------------|
| 13.7 | 1002.5306 | 0.0018  | <a href="#">QMLSRVLK</a>  |
| 8.7  | 1002.5306 | 0.0018  | <a href="#">VKMRSELK</a>  |
| 8.2  | 1002.5302 | 0.0023  | <a href="#">LVFDMLLK</a>  |
| 7.2  | 1002.5295 | 0.0030  | <a href="#">IKEWLFR</a>   |
| 3.5  | 1002.5354 | -0.0029 | <a href="#">SKTAESLKK</a> |
| 2.5  | 1002.5306 | 0.0018  | <a href="#">LGELKMKR</a>  |
| 1.9  | 1002.5306 | 0.0018  | <a href="#">KEVAIKMR</a>  |

**Mascot:** <http://www.matrixscience.com/>

**Peptide View**MS/MS Fragmentation of **DVNIVKNK**

Found in **AT2G17520.1** in **TAIR\_Arabidopsis**, Symbols: IRE1A | IRE1A (Yeast endoribonuclease/protein kinase IRE1-like gene); kinase | chr2:7624586-7628011 FORWARD

Match to Query 1877: 928.534890 from(465.274721,2+) index(5306)

Title: Elution from: 46.759 to 46.759 scan no 6619 cid35.00 polarity:+

Data file C7-1\_1.mgf

Click mouse within plot area to zoom in by factor of two about that point

Or,   to  Da

Label all possible matches  Label matches used for scoring

Show Y-axis

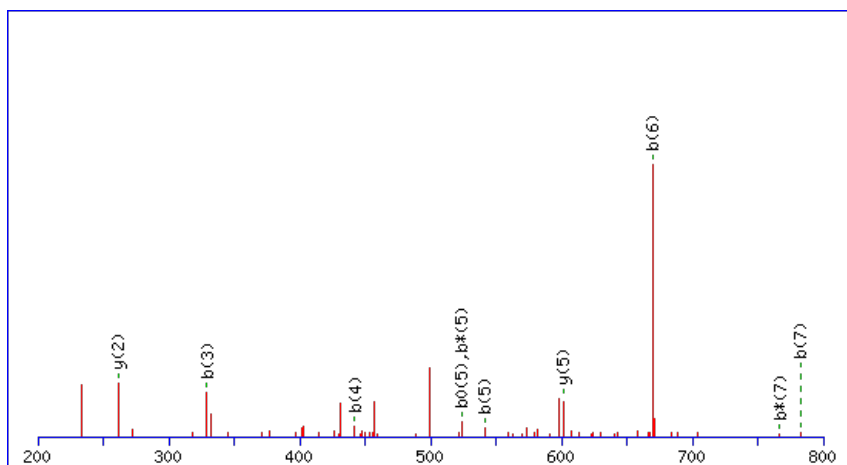

Monoisotopic mass of neutral peptide  $M_r(\text{calc})$ : 928.5342

Fixed modifications: Carbamidomethyl (C) (apply to specified residues or termini only)

Ions Score: 26 Expect: 0.017

Matches : 10/66 fragment ions using 22 most intense peaks ([help](#))

| # | b               | b <sup>++</sup> | b*              | b <sup>*++</sup> | b <sup>0</sup>  | b <sup>0++</sup> | Seq. | y               | y <sup>++</sup> | y*       | y <sup>*++</sup> | # |
|---|-----------------|-----------------|-----------------|------------------|-----------------|------------------|------|-----------------|-----------------|----------|------------------|---|
| 1 | 116.0342        | 58.5207         |                 |                  | 98.0237         | 49.5155          | D    |                 |                 |          |                  | 8 |
| 2 | 215.1026        | 108.0550        |                 |                  | 197.0921        | 99.0497          | V    | 814.5145        | 407.7609        | 797.4880 | 399.2476         | 7 |
| 3 | <b>329.1456</b> | 165.0764        | 312.1190        | 156.5631         | 311.1350        | 156.0711         | N    | 715.4461        | 358.2267        | 698.4195 | 349.7134         | 6 |
| 4 | <b>442.2296</b> | 221.6185        | 425.2031        | 213.1052         | 424.2191        | 212.6132         | I    | <b>601.4032</b> | 301.2052        | 584.3766 | 292.6919         | 5 |
| 5 | <b>541.2980</b> | 271.1527        | <b>524.2715</b> | 262.6394         | <b>523.2875</b> | 262.1474         | V    | 488.3191        | 244.6632        | 471.2926 | 236.1499         | 4 |
| 6 | <b>669.3930</b> | 335.2001        | 652.3665        | 326.6869         | 651.3824        | 326.1949         | K    | 389.2507        | 195.1290        | 372.2241 | 186.6157         | 3 |
| 7 | <b>783.4359</b> | 392.2216        | <b>766.4094</b> | 383.7083         | 765.4254        | 383.2163         | N    | <b>261.1557</b> | 131.0815        | 244.1292 | 122.5682         | 2 |
| 8 |                 |                 |                 |                  |                 |                  | K    | 147.1128        | 74.0600         | 130.0863 | 65.5468          | 1 |

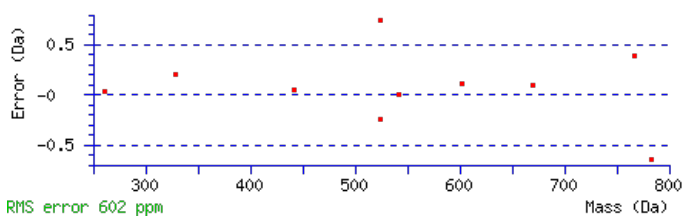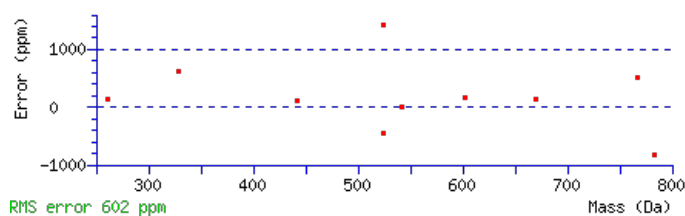

NCBI BLAST search of [DVNIVKNK](#)

(Parameters: blastp, nr protein database, expect=20000, no filter, PAM30)

Other BLAST [web gateways](#)

**All matches to this query**

| Score | $M_r(\text{calc})$ | Delta  | Sequence                 |
|-------|--------------------|--------|--------------------------|
| 26.1  | 928.5342           | 0.0007 | <a href="#">DVNIVKNK</a> |

## AT2G17520.1

|     |          |        |                            |
|-----|----------|--------|----------------------------|
| 8.4 | 928.5342 | 0.0007 | <a href="#">KLEGIGQGK</a>  |
| 6.9 | 928.5342 | 0.0007 | <a href="#">IEAIGGKGGK</a> |
| 5.9 | 928.5341 | 0.0008 | <a href="#">EAALREIK</a>   |
| 4.6 | 928.5341 | 0.0007 | <a href="#">LKELNQGK</a>   |
| 3.7 | 928.5341 | 0.0007 | <a href="#">AVEALNGKK</a>  |
| 3.3 | 928.5341 | 0.0007 | <a href="#">LALDQKNK</a>   |
| 3.3 | 928.5342 | 0.0007 | <a href="#">LVKGVGDK</a>   |
| 2.1 | 928.5342 | 0.0007 | <a href="#">DEIVGRIK</a>   |
| 1.4 | 928.5342 | 0.0007 | <a href="#">KLDLGEVR</a>   |

Mascot: <http://www.matrixscience.com/>

**Peptide View**MS/MS Fragmentation of **LLLCDNTLK**Found in **AT2G17540.1** in **TAIR\_Arabidopsis**, Symbols: | similar to unknown protein [Arabidopsis thaliana] (TAIR:AT4G35510.1) | chr2:7637744-7638571 REVERSE

Match to Query 3444: 1100.556936 from(551.285744,2+) index(7745)

Title: Elution from: 67.541 to 67.541 scan no 10211 cid35.00 polarity:+

Data file D1d-3\_3.mgf

Click mouse within plot area to zoom in by factor of two about that point

Or,  to  Da Label all possible matches  Label matches used for scoring Show Y-axis 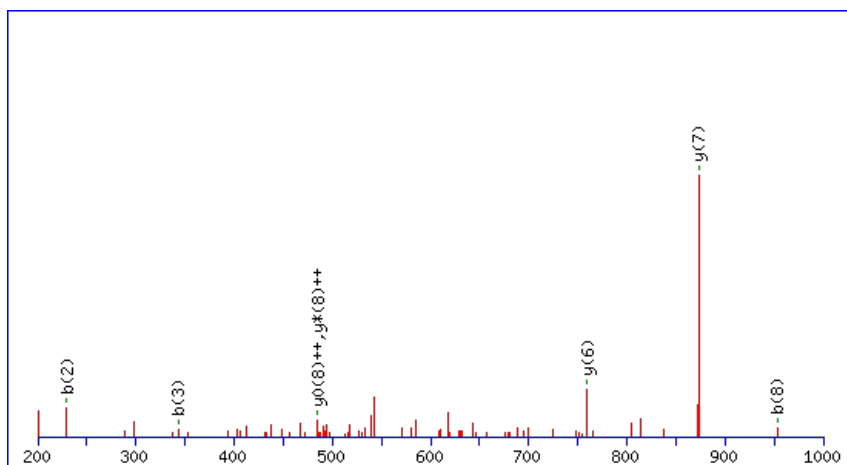

Monoisotopic mass of neutral peptide Mr(calc): 1100.5544

Fixed modifications: Carbamidomethyl (C) (apply to specified residues or termini only)

Ions Score: 22 Expect: 0.047

Matches : 7/74 fragment ions using 8 most intense peaks ([help](#))

| # | b               | b <sup>++</sup> | b*       | b <sup>*++</sup> | b <sup>0</sup> | b <sup>0++</sup> | Seq. | y               | y <sup>++</sup> | y*       | y <sup>*++</sup> | y <sup>0</sup> | y <sup>0++</sup> | # |
|---|-----------------|-----------------|----------|------------------|----------------|------------------|------|-----------------|-----------------|----------|------------------|----------------|------------------|---|
| 1 | 115.0884        | 58.0478         |          |                  |                |                  | L    |                 |                 |          |                  |                |                  | 9 |
| 2 | <b>229.1695</b> | 115.0884        |          |                  |                |                  | L    | 987.4806        | 494.2439        | 969.4570 | <b>485.2321</b>  | 969.4700       | <b>485.2386</b>  | 8 |
| 3 | <b>343.2506</b> | 172.1289        |          |                  |                |                  | L    | <b>873.3995</b> | 437.2034        | 855.3759 | 428.1916         | 855.3889       | 428.1981         | 7 |
| 4 | 505.2753        | 253.1413        |          |                  |                |                  | C    | <b>759.3184</b> | 380.1628        | 741.2948 | 371.1510         | 741.3078       | 371.1575         | 6 |
| 5 | 621.2993        | 311.1533        |          |                  | 603.2887       | 302.1480         | D    | 597.2937        | 299.1505        | 579.2701 | 290.1387         | 579.2831       | 290.1452         | 5 |
| 6 | 737.3363        | 369.1718        | 719.3127 | 360.1600         | 719.3257       | 360.1665         | N    | 481.2697        | 241.1385        | 463.2461 | 232.1267         | 463.2591       | 232.1332         | 4 |
| 7 | 839.3810        | 420.1941        | 821.3574 | 411.1823         | 821.3704       | 411.1888         | T    | 365.2327        | 183.1200        | 347.2091 | 174.1082         | 347.2221       | 174.1147         | 3 |
| 8 | <b>953.4621</b> | 477.2347        | 935.4385 | 468.2229         | 935.4515       | 468.2294         | L    | 263.1880        | 132.0976        | 245.1644 | 123.0858         |                |                  | 2 |
| 9 |                 |                 |          |                  |                |                  | K    | 149.1069        | 75.0571         | 131.0833 | 66.0453          |                |                  | 1 |

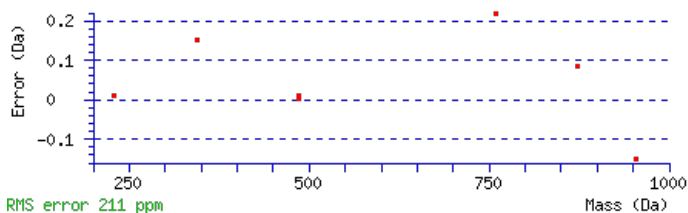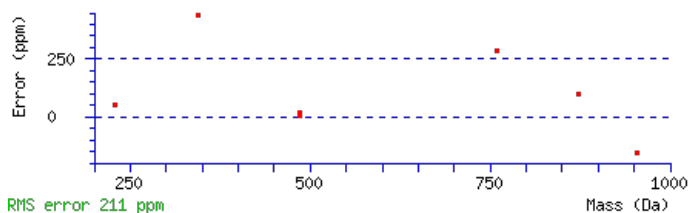NCBI **BLAST** search of [LLLCDNTLK](#)

(Parameters: blastp, nr protein database, expect=20000, no filter, PAM30)

Other BLAST [web gateways](#)**All matches to this query**

| Score | Mr(calc) | Delta | Sequence |
|-------|----------|-------|----------|
|       |          |       |          |

## AT2G17540.1

|      |           |        |                             |
|------|-----------|--------|-----------------------------|
| 22.2 | 1100.5544 | 0.0025 | <a href="#">LLLCDNTLK</a>   |
| 10.3 | 1100.5544 | 0.0025 | <a href="#">LISVNPTSMK</a>  |
| 7.8  | 1100.5544 | 0.0025 | <a href="#">LGDIMGLLNK</a>  |
| 6.8  | 1100.5544 | 0.0025 | <a href="#">LLCLGSVAEK</a>  |
| 2.6  | 1100.5544 | 0.0026 | <a href="#">ILMVGLDGSGK</a> |
| 2.3  | 1100.5544 | 0.0026 | <a href="#">VVMLGLDAAGK</a> |

Mascot: <http://www.matrixscience.com/>

**Peptide View**MS/MS Fragmentation of **QINELESEVQVR**

Found in **AT2G17550.1** in **TAIR\_Arabidopsis**, Symbols: | similar to unknown protein [Arabidopsis thaliana] (TAIR:AT5G02390.1); similar to unnamed protein product [Vitis vinifera] (GB:CAO14481.1) | chr2:7641577-7644294 REVERSE

Match to Query 6389: 1460.682130 from(731.348341,2+) index(7424)

Title: Elution from: 64.424 to 64.424 scan no 9417 cid35.00 polarity:+

Data file 0-1\_1.mgf

Click mouse within plot area to zoom in by factor of two about that point

Or,   to  Da

Label all possible matches  Label matches used for scoring

Show Y-axis

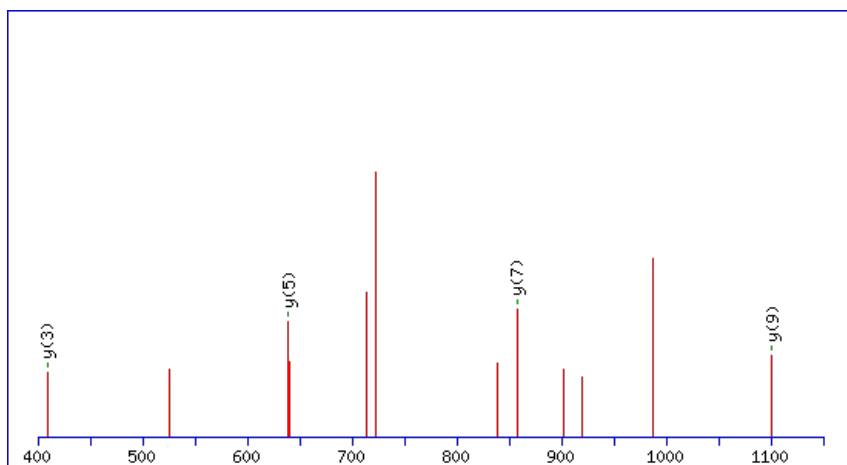

**Monoisotopic mass of neutral peptide Mr(calc):** 1460.6831

**Fixed modifications:** Carbamidomethyl (C) (apply to specified residues or termini only)

**Ions Score:** 26 **Expect:** 0.015

**Matches:** 4/118 fragment ions using 7 most intense peaks ([help](#))

| #  | b         | b <sup>++</sup> | b*        | b <sup>*++</sup> | b <sup>0</sup> | b <sup>0++</sup> | Seq. | y                | y <sup>++</sup> | y*        | y <sup>*++</sup> | y <sup>0</sup> | y <sup>0++</sup> | #  |
|----|-----------|-----------------|-----------|------------------|----------------|------------------|------|------------------|-----------------|-----------|------------------|----------------|------------------|----|
| 1  | 131.0599  | 66.0336         | 113.0363  | 57.0218          |                |                  | Q    |                  |                 |           |                  |                |                  | 12 |
| 2  | 245.1410  | 123.0741        | 227.1174  | 114.0624         |                |                  | I    | 1331.6378        | 666.3225        | 1313.6142 | 657.3107         | 1313.6272      | 657.3172         | 11 |
| 3  | 361.1780  | 181.0926        | 343.1544  | 172.0809         |                |                  | N    | 1217.5567        | 609.2820        | 1199.5331 | 600.2702         | 1199.5461      | 600.2767         | 10 |
| 4  | 491.2176  | 246.1125        | 473.1941  | 237.1007         | 473.2071       | 237.1072         | E    | <b>1101.5197</b> | 551.2635        | 1083.4961 | 542.2517         | 1083.5091      | 542.2582         | 9  |
| 5  | 605.2987  | 303.1530        | 587.2752  | 294.1412         | 587.2882       | 294.1477         | L    | 971.4801         | 486.2437        | 953.4565  | 477.2319         | 953.4695       | 477.2384         | 8  |
| 6  | 735.3384  | 368.1728        | 717.3148  | 359.1610         | 717.3278       | 359.1675         | E    | <b>857.3990</b>  | 429.2031        | 839.3754  | 420.1913         | 839.3884       | 420.1978         | 7  |
| 7  | 823.3674  | 412.1874        | 805.3439  | 403.1756         | 805.3569       | 403.1821         | S    | 727.3593         | 364.1833        | 709.3357  | 355.1715         | 709.3488       | 355.1780         | 6  |
| 8  | 953.4071  | 477.2072        | 935.3835  | 468.1954         | 935.3965       | 468.2019         | E    | <b>639.3303</b>  | 320.1688        | 621.3067  | 311.1570         | 621.3197       | 311.1635         | 5  |
| 9  | 1053.4725 | 527.2399        | 1035.4489 | 518.2281         | 1035.4619      | 518.2346         | V    | 509.2906         | 255.1490        | 491.2671  | 246.1372         |                |                  | 4  |
| 10 | 1183.5252 | 592.2662        | 1165.5016 | 583.2544         | 1165.5146      | 583.2609         | Q    | <b>409.2252</b>  | 205.1162        | 391.2016  | 196.1044         |                |                  | 3  |
| 11 | 1283.5906 | 642.2989        | 1265.5670 | 633.2872         | 1265.5800      | 633.2937         | V    | 279.1725         | 140.0899        | 261.1490  | 131.0781         |                |                  | 2  |
| 12 |           |                 |           |                  |                |                  | R    | 179.1071         | 90.0572         | 161.0835  | 81.0454          |                |                  | 1  |

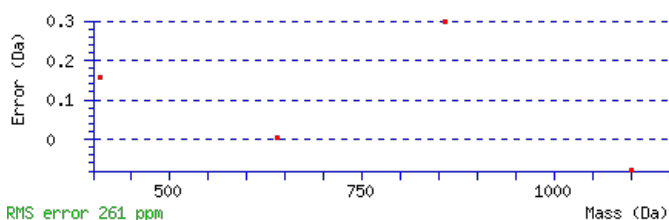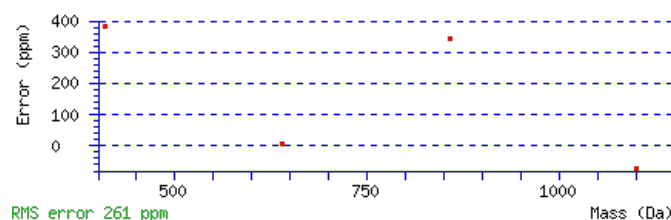NCBI BLAST search of **QINELESEVQVR**

(Parameters: blastp, nr protein database, expect=20000, no filter, PAM30)

Other BLAST [web gateways](#)

AT2G17550.1

All matches to this query

| Score | Mr(calc)  | Delta   | Sequence                      |
|-------|-----------|---------|-------------------------------|
| 26.4  | 1460.6831 | -0.0010 | <a href="#">QINELESEVQVR</a>  |
| 14.1  | 1460.6831 | -0.0010 | <a href="#">KTHASDTAIDKEK</a> |
| 2.7   | 1460.6840 | -0.0019 | <a href="#">LGAMERHLMIEK</a>  |
| 1.7   | 1460.6840 | -0.0019 | <a href="#">VGVKTMKMYTNR</a>  |
| 0.9   | 1460.6831 | -0.0010 | <a href="#">SLEGTEPTKQTPR</a> |
| 0.3   | 1460.6831 | -0.0010 | <a href="#">LGTDDNAQLDIR</a>  |

Mascot: <http://www.matrixscience.com/>



**Peptide View**MS/MS Fragmentation of **SMPANLLVR**Found in **AT2G17670.1** in **TAIR\_Arabidopsis**, Symbols: | pentatricopeptide (PPR) repeat-containing protein | chr2:7681502-7682893 FORWARD

Match to Query 2611: 1012.513498 from(507.264025,2+) index(4944)

Title: Elution from: 43.956 to 43.956 scan no 6142 cid35.00 polarity:+

Data file C7-1\_1.mgf

Click mouse within plot area to zoom in by factor of two about that point

Or,   to  Da Label all possible matches  Label matches used for scoring Show Y-axis 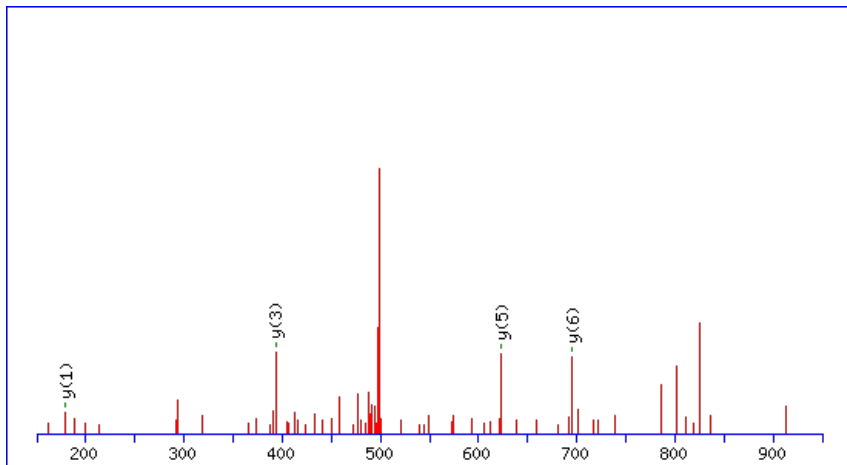Monoisotopic mass of neutral peptide **Mr(calc)**: 1012.5150**Fixed modifications**: Carbamidomethyl (C) (apply to specified residues or termini only)**Ions Score**: 24 **Expect**: 0.025**Matches**: 4/72 fragment ions using 8 most intense peaks ([help](#))

| # | b        | b <sup>++</sup> | b*       | b <sup>*++</sup> | b <sup>0</sup> | b <sup>0++</sup> | Seq. | y               | y <sup>++</sup> | y*       | y <sup>*++</sup> | # |
|---|----------|-----------------|----------|------------------|----------------|------------------|------|-----------------|-----------------|----------|------------------|---|
| 1 | 89.0363  | 45.0218         |          |                  | 71.0258        | 36.0165          | S    |                 |                 |          |                  | 9 |
| 2 | 221.0739 | 111.0406        |          |                  | 203.0633       | 102.0353         | M    | 925.4932        | 463.2502        | 907.4696 | 454.2384         | 8 |
| 3 | 319.1237 | 160.0655        |          |                  | 301.1131       | 151.0602         | P    | 793.4557        | 397.2315        | 775.4321 | 388.2197         | 7 |
| 4 | 391.1578 | 196.0825        |          |                  | 373.1472       | 187.0773         | A    | <b>695.4059</b> | 348.2066        | 677.3823 | 339.1948         | 6 |
| 5 | 507.1948 | 254.1010        | 489.1712 | 245.0892         | 489.1842       | 245.0958         | N    | <b>623.3717</b> | 312.1895        | 605.3482 | 303.1777         | 5 |
| 6 | 621.2759 | 311.1416        | 603.2523 | 302.1298         | 603.2653       | 302.1363         | L    | 507.3347        | 254.1710        | 489.3112 | 245.1592         | 4 |
| 7 | 735.3570 | 368.1821        | 717.3334 | 359.1703         | 717.3464       | 359.1769         | L    | <b>393.2536</b> | 197.1305        | 375.2301 | 188.1187         | 3 |
| 8 | 835.4225 | 418.2149        | 817.3989 | 409.2031         | 817.4119       | 409.2096         | V    | 279.1725        | 140.0899        | 261.1490 | 131.0781         | 2 |
| 9 |          |                 |          |                  |                |                  | R    | <b>179.1071</b> | 90.0572         | 161.0835 | 81.0454          | 1 |

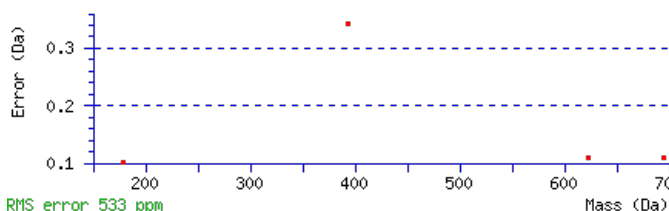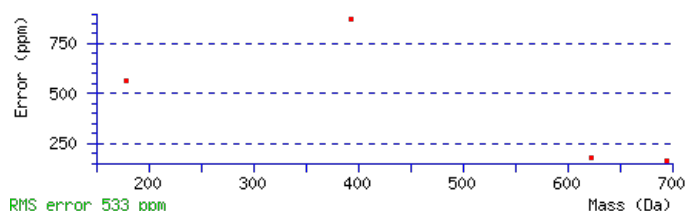NCBI **BLAST** search of [SMPANLLVR](#)

(Parameters: blastp, nr protein database, expect=20000, no filter, PAM30)

Other BLAST [web gateways](#)**All matches to this query**

| Score | Mr(calc)  | Delta   | Sequence                  |
|-------|-----------|---------|---------------------------|
| 24.3  | 1012.5150 | -0.0015 | <a href="#">SMPANLLVR</a> |

## AT2G17670.1

|      |           |         |                            |
|------|-----------|---------|----------------------------|
| 24.2 | 1012.5138 | -0.0003 | <a href="#">WWIEVIR</a>    |
| 14.9 | 1012.5150 | -0.0015 | <a href="#">VTMPALAAAR</a> |
| 12.5 | 1012.5121 | 0.0014  | <a href="#">KGSINKHGR</a>  |
| 12.5 | 1012.5116 | 0.0019  | <a href="#">WEVIGGIAR</a>  |
| 8.8  | 1012.5150 | -0.0015 | <a href="#">IPSVNAIMR</a>  |
| 6.7  | 1012.5138 | -0.0003 | <a href="#">FYKLFQR</a>    |
| 5.1  | 1012.5120 | 0.0015  | <a href="#">DTKARLHR</a>   |
| 2.3  | 1012.5139 | -0.0004 | <a href="#">WEPWKKK</a>    |
| 2.3  | 1012.5116 | 0.0019  | <a href="#">WESPVVRK</a>   |

Mascot: <http://www.matrixscience.com/>

**Peptide View**MS/MS Fragmentation of **ASGDYAVIAHNPDSDTTR**Found in **AT2G18020.1** in **TAIR\_Arabidopsis**, Symbols: EMB2296 | EMB2296 (EMBRYO DEFECTIVE 2296); structural constituent of ribosome | chr2:7844233-7845242 FORWARD

Match to Query 8741: 2026.866090 from(676.629306,3+) index(3764)

Title: Elution from: 35.683 to 35.683 scan no 4722 cid35.00 polarity:+

Data file C7-3\_3.mgf

Click mouse within plot area to zoom in by factor of two about that point

Or,  480 to  Da Label all possible matches  Label matches used for scoring Show Y-axis 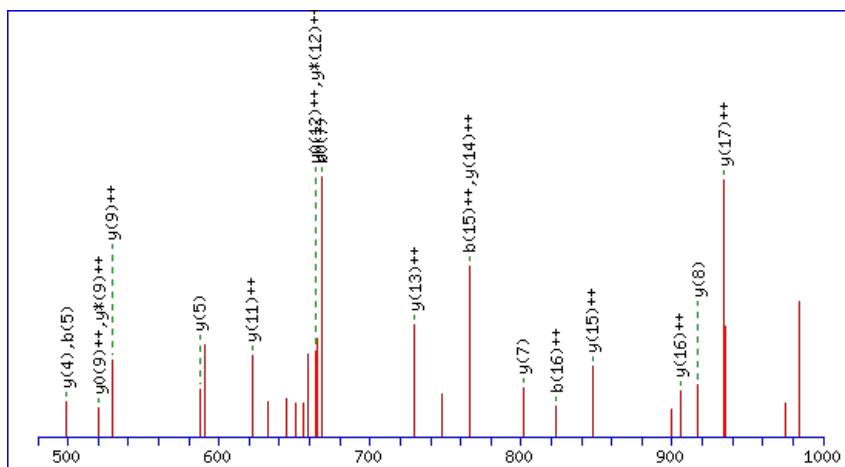**Monoisotopic mass of neutral peptide Mr(calc):** 2026.8651**Fixed modifications:** Carbamidomethyl (C) (apply to specified residues or termini only)**Ions Score:** 49 **Expect:** 7.1e-005**Matches:** 20/190 fragment ions using 21 most intense peaks ([help](#))

| #  | b         | b <sup>++</sup> | b*        | b <sup>*++</sup> | b <sup>0</sup> | b <sup>0++</sup> | Seq. | y         | y <sup>++</sup> | y*        | y <sup>*++</sup> | y <sup>0</sup> | y <sup>0++</sup> | #  |
|----|-----------|-----------------|-----------|------------------|----------------|------------------|------|-----------|-----------------|-----------|------------------|----------------|------------------|----|
| 1  | 73.0414   | 37.0244         |           |                  |                |                  | A    |           |                 |           |                  |                |                  | 19 |
| 2  | 161.0705  | 81.0389         |           |                  | 143.0599       | 72.0336          | S    | 1955.8382 | 978.4227        | 1937.8146 | 969.4109         | 1937.8276      | 969.4175         | 18 |
| 3  | 219.0890  | 110.0481        |           |                  | 201.0784       | 101.0428         | G    | 1867.8091 | 934.4082        | 1849.7856 | 925.3964         | 1849.7986      | 925.4029         | 17 |
| 4  | 335.1130  | 168.0601        |           |                  | 317.1024       | 159.0548         | D    | 1809.7906 | 905.3990        | 1791.7671 | 896.3872         | 1791.7801      | 896.3937         | 16 |
| 5  | 499.1733  | 250.0903        |           |                  | 481.1628       | 241.0850         | Y    | 1693.7667 | 847.3870        | 1675.7431 | 838.3752         | 1675.7561      | 838.3817         | 15 |
| 6  | 571.2075  | 286.1074        |           |                  | 553.1969       | 277.1021         | A    | 1529.7063 | 765.3568        | 1511.6827 | 756.3450         | 1511.6957      | 756.3515         | 14 |
| 7  | 685.2886  | 343.1479        |           |                  | 667.2780       | 334.1426         | I    | 1457.6721 | 729.3397        | 1439.6486 | 720.3279         | 1439.6616      | 720.3344         | 13 |
| 8  | 785.3540  | 393.1807        |           |                  | 767.3435       | 384.1754         | V    | 1343.5910 | 672.2992        | 1325.5675 | 663.2874         | 1325.5805      | 663.2939         | 12 |
| 9  | 899.4351  | 450.2212        |           |                  | 881.4246       | 441.2159         | I    | 1243.5256 | 622.2664        | 1225.5020 | 613.2546         | 1225.5150      | 613.2612         | 11 |
| 10 | 971.4693  | 486.2383        |           |                  | 953.4587       | 477.2330         | A    | 1129.4445 | 565.2259        | 1111.4209 | 556.2141         | 1111.4339      | 556.2206         | 10 |
| 11 | 1111.5193 | 556.2633        |           |                  | 1093.5087      | 547.2580         | H    | 1057.4103 | 529.2088        | 1039.3868 | 520.1970         | 1039.3998      | 520.2035         | 9  |
| 12 | 1227.5563 | 614.2818        | 1209.5327 | 605.2700         | 1209.5457      | 605.2765         | N    | 917.3603  | 459.1838        | 899.3367  | 450.1720         | 899.3498       | 450.1785         | 8  |
| 13 | 1325.6061 | 663.3067        | 1307.5825 | 654.2949         | 1307.5955      | 654.3014         | P    | 801.3233  | 401.1653        | 783.2998  | 392.1535         | 783.3128       | 392.1600         | 7  |
| 14 | 1441.6301 | 721.3187        | 1423.6065 | 712.3069         | 1423.6195      | 712.3134         | D    | 703.2735  | 352.1404        | 685.2500  | 343.1286         | 685.2630       | 343.1351         | 6  |
| 15 | 1529.6591 | 765.3332        | 1511.6355 | 756.3214         | 1511.6486      | 756.3279         | S    | 587.2496  | 294.1284        | 569.2260  | 285.1166         | 569.2390       | 285.1231         | 5  |
| 16 | 1645.6831 | 823.3452        | 1627.6595 | 814.3334         | 1627.6725      | 814.3399         | D    | 499.2205  | 250.1139        | 481.1969  | 241.1021         | 481.2099       | 241.1086         | 4  |
| 17 | 1747.7278 | 874.3675        | 1729.7042 | 865.3558         | 1729.7173      | 865.3623         | T    | 383.1965  | 192.1019        | 365.1729  | 183.0901         | 365.1860       | 183.0966         | 3  |
| 18 | 1849.7725 | 925.3899        | 1831.7489 | 916.3781         | 1831.7620      | 916.3846         | T    | 281.1518  | 141.0795        | 263.1282  | 132.0677         | 263.1412       | 132.0743         | 2  |
| 19 |           |                 |           |                  |                |                  | R    | 179.1071  | 90.0572         | 161.0835  | 81.0454          |                |                  | 1  |

# AT2G18020.1

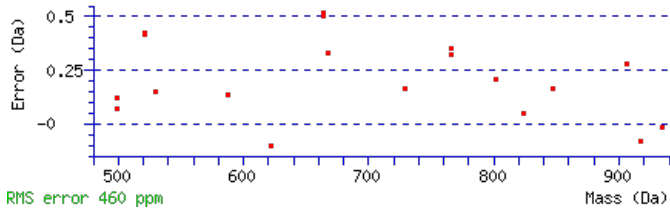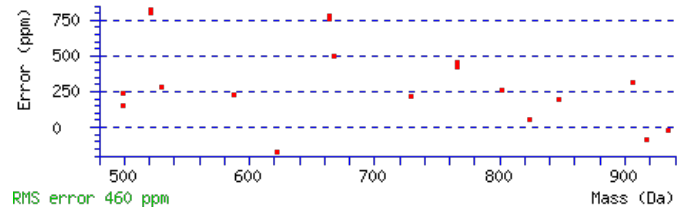

NCBI **BLAST** search of [ASGDYAIVIAHNPDSDTTR](#)  
(Parameters: blastp, nr protein database, expect=20000, no filter, PAM30)  
Other BLAST [web gateways](#)

## All matches to this query

| Score | Mr(calc)  | Delta  | Sequence                            |
|-------|-----------|--------|-------------------------------------|
| 48.7  | 2026.8651 | 0.0010 | <a href="#">ASGDYAIVIAHNPDSDTTR</a> |

Mascot: <http://www.matrixscience.com/>

## Peptide View

MS/MS Fragmentation of **WFNHIDALLR**Found in **AT2G18110.1** in **TAIR\_Arabidopsis**, Symbols: | elongation factor 1-beta, putative / EF-1-beta, putative | chr2:7879718-7880795  
FORWARD

Match to Query 4224: 1300.625643 from(434.549157,3+) index(7269)

Title: Elution from: 68.065 to 68.065 scan no 9662 cid35.00 polarity:+

Data file D1d-1-2.mgf

Click mouse within plot area to zoom in by factor of two about that point

Or,   to  Da Label all possible matches  Label matches used for scoring Show Y-axis 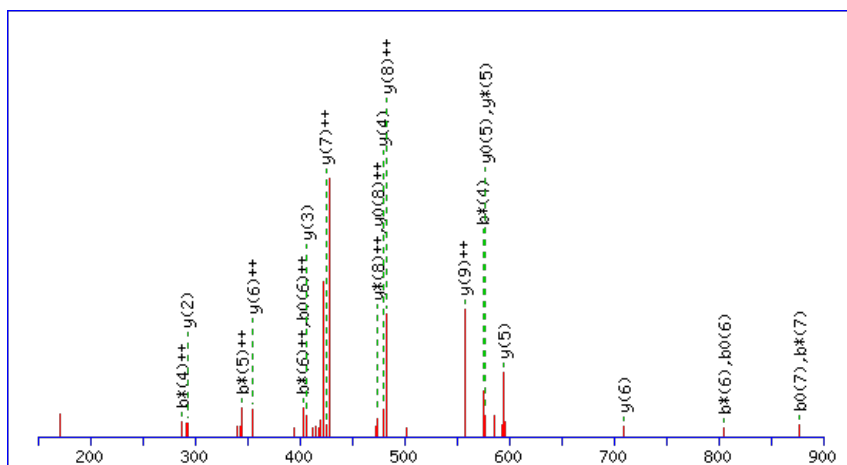Monoisotopic mass of neutral peptide  $M_r(\text{calc})$ : 1300.6271

Fixed modifications: Carbamidomethyl (C) (apply to specified residues or termini only)

Ions Score: 28 Expect: 0.011

Matches : 22/86 fragment ions using 28 most intense peaks ([help](#))

| #  | b         | b <sup>++</sup> | b*        | b <sup>*++</sup> | b <sup>0</sup> | b <sup>0++</sup> | Seq. | y         | y <sup>++</sup> | y*        | y <sup>*++</sup> | y <sup>0</sup> | y <sup>0++</sup> | #  |
|----|-----------|-----------------|-----------|------------------|----------------|------------------|------|-----------|-----------------|-----------|------------------|----------------|------------------|----|
| 1  | 189.0807  | 95.0440         |           |                  |                |                  | W    |           |                 |           |                  |                |                  | 10 |
| 2  | 337.1461  | 169.0767        |           |                  |                |                  | F    | 1113.5610 | 557.2841        | 1095.5374 | 548.2723         | 1095.5504      | 548.2788         | 9  |
| 3  | 453.1831  | 227.0952        | 435.1595  | 218.0834         |                |                  | N    | 965.4955  | 483.2514        | 947.4719  | 474.2396         | 947.4850       | 474.2461         | 8  |
| 4  | 593.2331  | 297.1202        | 575.2095  | 288.1084         |                |                  | H    | 849.4585  | 425.2329        | 831.4349  | 416.2211         | 831.4480       | 416.2276         | 7  |
| 5  | 707.3142  | 354.1607        | 689.2906  | 345.1490         |                |                  | I    | 709.4085  | 355.2079        | 691.3849  | 346.1961         | 691.3980       | 346.2026         | 6  |
| 6  | 823.3382  | 412.1727        | 805.3146  | 403.1609         | 805.3276       | 403.1675         | D    | 595.3274  | 298.1673        | 577.3038  | 289.1556         | 577.3169       | 289.1621         | 5  |
| 7  | 895.3723  | 448.1898        | 877.3488  | 439.1780         | 877.3618       | 439.1845         | A    | 479.3034  | 240.1554        | 461.2799  | 231.1436         |                |                  | 4  |
| 8  | 1009.4534 | 505.2304        | 991.4299  | 496.2186         | 991.4429       | 496.2251         | L    | 407.2693  | 204.1383        | 389.2457  | 195.1265         |                |                  | 3  |
| 9  | 1123.5345 | 562.2709        | 1105.5110 | 553.2591         | 1105.5240      | 553.2656         | L    | 293.1882  | 147.0977        | 275.1646  | 138.0859         |                |                  | 2  |
| 10 |           |                 |           |                  |                |                  | R    | 179.1071  | 90.0572         | 161.0835  | 81.0454          |                |                  | 1  |

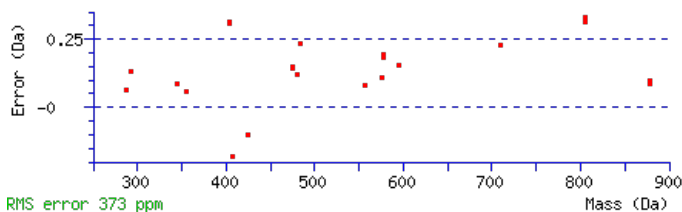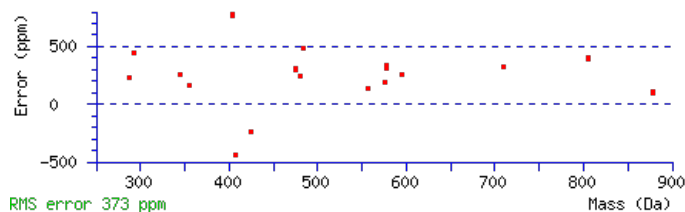NCBI BLAST search of **WFNHIDALLR**

(Parameters: blastp, nr protein database, expect=20000, no filter, PAM30)

Other BLAST [web gateways](#)

All matches to this query

## AT2G18110.1

| Score | Mr(calc)  | Delta   | Sequence                       |
|-------|-----------|---------|--------------------------------|
| 28.1  | 1300.6271 | -0.0014 | <a href="#">WFNHIDALLR</a>     |
| 12.9  | 1300.6248 | 0.0008  | <a href="#">FNRADYTKLR</a>     |
| 9.2   | 1300.6248 | 0.0008  | <a href="#">APPRGPATGFQ GK</a> |
| 8.5   | 1300.6255 | 0.0001  | <a href="#">SYSSVLKTMVR</a>    |
| 0.2   | 1300.6256 | 0.0001  | <a href="#">GPVSLPSQMNLK</a>   |

Mascot: <http://www.matrixscience.com/>

**Peptide View**MS/MS Fragmentation of **FLYLK**Found in **AT2G18400.1** in **TAIR\_Arabidopsis**

Match to Query 558: 688.387162 from(345.200857,2+) index(3050)

Title: Elution from: 30.834 to 30.834 scan no 3799 cid35.00 polarity:+

Data file C7-1\_3.mgf

Click mouse within plot area to zoom in by factor of two about that point

Or,   to  Da Label all possible matches  Label matches used for scoring Show Y-axis 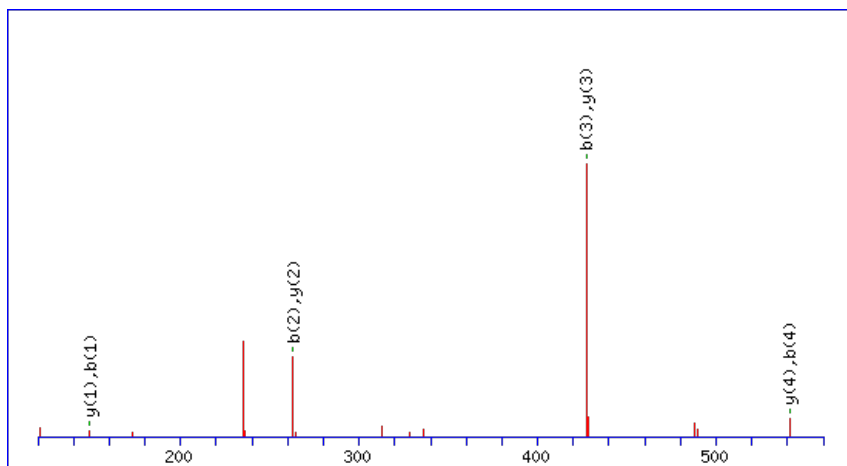Monoisotopic mass of neutral peptide **Mr(calc)**: 688.3876

Fixed modifications: Carbamidomethyl (C) (apply to specified residues or termini only)

Ions Score: 30 **Expect**: 0.0036Matches : 8/24 fragment ions using 9 most intense peaks ([help](#))

| # | b        | b <sup>++</sup> | Seq. | y        | y <sup>++</sup> | y*       | y <sup>*++</sup> | # |
|---|----------|-----------------|------|----------|-----------------|----------|------------------|---|
| 1 | 149.0727 | 75.0400         | F    |          |                 |          |                  | 5 |
| 2 | 263.1538 | 132.0805        | L    | 541.3294 | 271.1684        | 523.3059 | 262.1566         | 4 |
| 3 | 427.2142 | 214.1107        | Y    | 427.2483 | 214.1278        | 409.2248 | 205.1160         | 3 |
| 4 | 541.2953 | 271.1513        | L    | 263.1880 | 132.0976        | 245.1644 | 123.0858         | 2 |
| 5 |          |                 | K    | 149.1069 | 75.0571         | 131.0833 | 66.0453          | 1 |

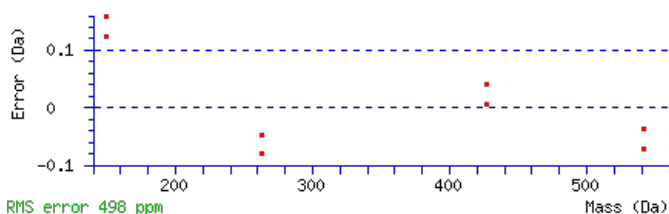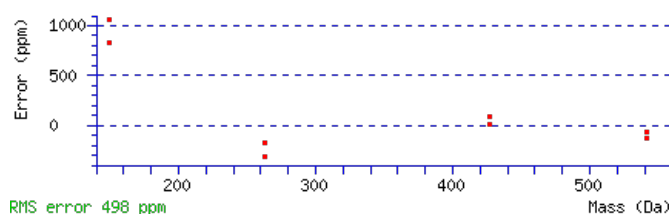NCBI **BLAST** search of [FLYLK](#)

(Parameters: blastp, nr protein database, expect=20000, no filter, PAM30)

Other BLAST [web gateways](#)**All matches to this query**

| Score | Mr(calc) | Delta   | Sequence              |
|-------|----------|---------|-----------------------|
| 29.9  | 688.3876 | -0.0004 | <a href="#">FLYLK</a> |
| 25.9  | 688.3876 | -0.0004 | <a href="#">FIIYK</a> |
| 25.9  | 688.3876 | -0.0004 | <a href="#">FLIYK</a> |
| 25.9  | 688.3876 | -0.0004 | <a href="#">FLLYK</a> |
| 25.9  | 688.3876 | -0.0004 | <a href="#">FYIHK</a> |

## AT2G18400.1

|      |          |         |                        |
|------|----------|---------|------------------------|
| 16.8 | 688.3876 | -0.0004 | <a href="#">IFLYK</a>  |
| 16.8 | 688.3876 | -0.0004 | <a href="#">YFIK</a>   |
| 11.4 | 688.3854 | 0.0018  | <a href="#">IDPPIK</a> |
| 11.4 | 688.3880 | -0.0009 | <a href="#">RTFKK</a>  |
| 11.4 | 688.3880 | -0.0009 | <a href="#">TRKFK</a>  |

**Mascot:** <http://www.matrixscience.com/>



**Peptide View**MS/MS Fragmentation of **AVIELENYGLPFSR**Found in **AT2G18450.1** in **TAIR\_Arabidopsis**, Symbols: SDH1-2 | SDH1-2 (Succinate dehydrogenase 1-2) | chr2:8004592-8007883 REVERSE

Match to Query 7093: 1624.786418 from(813.400485,2+) index(8871)

Title: Elution from: 79.977 to 79.977 scan no 12122 cid35.00 polarity:+

Data file 0-3\_3.mgf

Click mouse within plot area to zoom in by factor of two about that point

Or,   to  Da Label all possible matches  Label matches used for scoring Show Y-axis 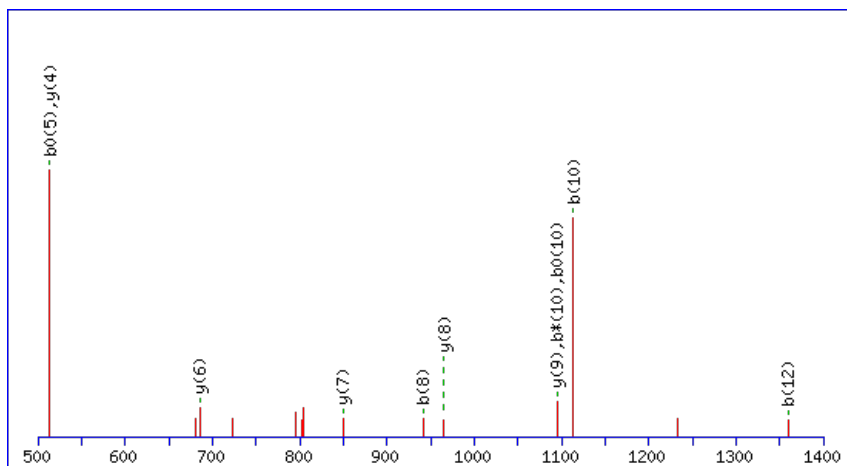

Monoisotopic mass of neutral peptide Mr(calc): 1624.7821

Fixed modifications: Carbamidomethyl (C) (apply to specified residues or termini only)

Ions Score: 39 Expect: 0.0011

Matches : 11/136 fragment ions using 13 most intense peaks ([help](#))

| #  | b         | b <sup>++</sup> | b <sup>*</sup> | b <sup>*++</sup> | b <sup>0</sup> | b <sup>0++</sup> | Seq. | y         | y <sup>++</sup> | y <sup>*</sup> | y <sup>*++</sup> | y <sup>0</sup> | y <sup>0++</sup> | #  |
|----|-----------|-----------------|----------------|------------------|----------------|------------------|------|-----------|-----------------|----------------|------------------|----------------|------------------|----|
| 1  | 73.0414   | 37.0244         |                |                  |                |                  | A    |           |                 |                |                  |                |                  | 14 |
| 2  | 173.1069  | 87.0571         |                |                  |                |                  | V    | 1553.7553 | 777.3813        | 1535.7317      | 768.3695         | 1535.7447      | 768.3760         | 13 |
| 3  | 287.1880  | 144.0976        |                |                  |                |                  | I    | 1453.6898 | 727.3485        | 1435.6662      | 718.3368         | 1435.6793      | 718.3433         | 12 |
| 4  | 417.2276  | 209.1174        |                |                  | 399.2170       | 200.1122         | E    | 1339.6087 | 670.3080        | 1321.5851      | 661.2962         | 1321.5982      | 661.3027         | 11 |
| 5  | 531.3087  | 266.1580        |                |                  | 513.2981       | 257.1527         | L    | 1209.5691 | 605.2882        | 1191.5455      | 596.2764         | 1191.5585      | 596.2829         | 10 |
| 6  | 661.3483  | 331.1778        |                |                  | 643.3378       | 322.1725         | E    | 1095.4880 | 548.2476        | 1077.4644      | 539.2358         | 1077.4774      | 539.2424         | 9  |
| 7  | 777.3853  | 389.1963        | 759.3617       | 380.1845         | 759.3748       | 380.1910         | N    | 965.4484  | 483.2278        | 947.4248       | 474.2160         | 947.4378       | 474.2225         | 8  |
| 8  | 941.4457  | 471.2265        | 923.4221       | 462.2147         | 923.4351       | 462.2212         | Y    | 849.4114  | 425.2093        | 831.3878       | 416.1975         | 831.4008       | 416.2040         | 7  |
| 9  | 999.4642  | 500.2357        | 981.4406       | 491.2239         | 981.4536       | 491.2304         | G    | 685.3510  | 343.1791        | 667.3274       | 334.1673         | 667.3404       | 334.1739         | 6  |
| 10 | 1113.5453 | 557.2763        | 1095.5217      | 548.2645         | 1095.5347      | 548.2710         | L    | 627.3325  | 314.1699        | 609.3089       | 305.1581         | 609.3219       | 305.1646         | 5  |
| 11 | 1211.5951 | 606.3012        | 1193.5715      | 597.2894         | 1193.5845      | 597.2959         | P    | 513.2514  | 257.1293        | 495.2278       | 248.1175         | 495.2408       | 248.1241         | 4  |
| 12 | 1359.6605 | 680.3339        | 1341.6370      | 671.3221         | 1341.6500      | 671.3286         | F    | 415.2016  | 208.1044        | 397.1780       | 199.0926         | 397.1910       | 199.0992         | 3  |
| 13 | 1447.6896 | 724.3484        | 1429.6660      | 715.3366         | 1429.6790      | 715.3432         | S    | 267.1362  | 134.0717        | 249.1126       | 125.0599         | 249.1256       | 125.0664         | 2  |
| 14 |           |                 |                |                  |                |                  | R    | 179.1071  | 90.0572         | 161.0835       | 81.0454          |                |                  | 1  |

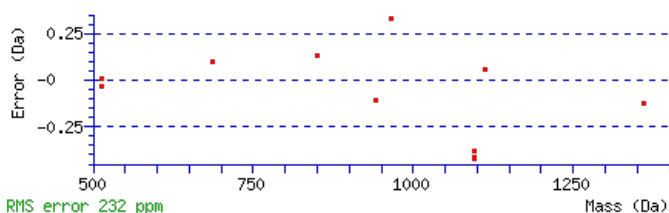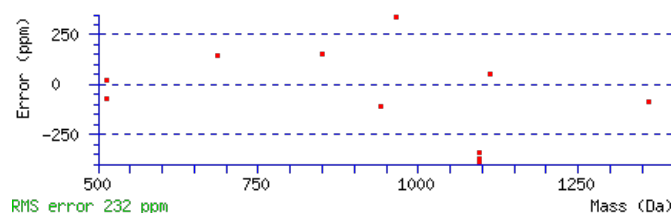NCBI BLAST search of **AVIELENYGLPFSR**

(Parameters: blastp, nr protein database, expect=20000, no filter, PAM30)

AT2G18450.1

Other BLAST [web gateways](#)

**All matches to this query**

| Score | Mr(calc)  | Delta   | Sequence                        |
|-------|-----------|---------|---------------------------------|
| 39.5  | 1624.7821 | 0.0043  | <a href="#">AVIELENYGLPFSR</a>  |
| 4.7   | 1624.7906 | -0.0042 | <a href="#">SKDGQTVLGTLDSCR</a> |
| 0.5   | 1624.7904 | -0.0040 | <a href="#">HIYLEDLMRFLR</a>    |

Mascot: <http://www.matrixscience.com/>

## Peptide View

### MS/MS Fragmentation of **MRAMKPAVR**

Found in **AT2G18570.1** in **TAIR\_Arabidopsis**, Symbols: | UDP-glucuronosyl/UDP-glucosyl transferase family protein | chr2:8070511-8071923  
FORWARD

Match to Query 2878: 1090.531884 from(546.273218,2+) index(4189)

Title: Elution from: 42.248 to 42.248 scan no 5400 cid35.00 polarity:+

Data file D1d-1\_1.mgf

Click mouse within plot area to zoom in by factor of two about that point

Or,   to  Da

Label all possible matches  Label matches used for scoring

Show Y-axis

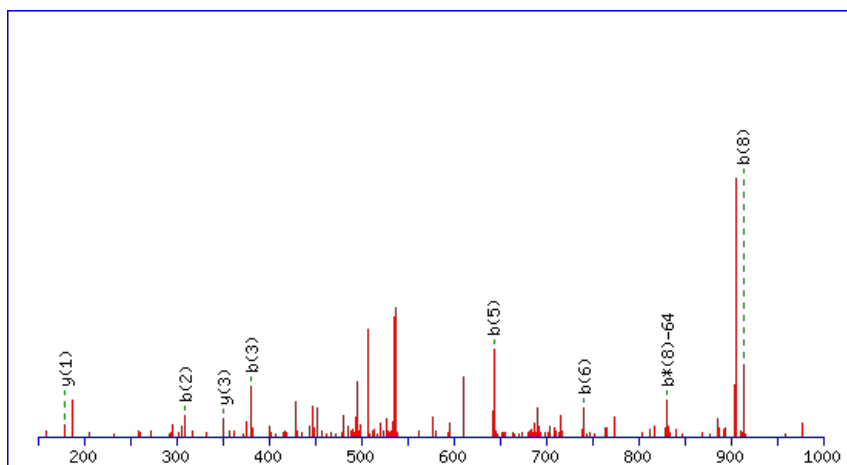

**Monoisotopic mass of neutral peptide Mr(calc):** 1090.5316

**Fixed modifications:** Carbamidomethyl (C) (apply to specified residues or termini only)

**Variable modifications:**

**M1** : Oxidation (M), with neutral losses 0.0000 (shown in table), 63.9983

**Ions Score:** 25 **Expect:** 0.038

**Matches** : 8/92 fragment ions using 18 most intense peaks ([help](#))

| # | b               | b <sup>++</sup> | b*       | b <sup>+++</sup> | Seq. | y               | y <sup>++</sup> | y*       | y <sup>+++</sup> | # |
|---|-----------------|-----------------|----------|------------------|------|-----------------|-----------------|----------|------------------|---|
| 1 | 149.0397        | 75.0235         |          |                  | M    |                 |                 |          |                  | 9 |
| 2 | <b>309.1290</b> | 155.0681        | 291.1054 | 146.0563         | R    | 943.5064        | 472.2569        | 925.4829 | 463.2451         | 8 |
| 3 | <b>381.1631</b> | 191.0852        | 363.1395 | 182.0734         | A    | 783.4172        | 392.2122        | 765.3936 | 383.2004         | 7 |
| 4 | 513.2006        | 257.1040        | 495.1770 | 248.0922         | M    | 711.3830        | 356.1952        | 693.3595 | 347.1834         | 6 |
| 5 | <b>643.2897</b> | 322.1485        | 625.2661 | 313.1367         | K    | 579.3455        | 290.1764        | 561.3219 | 281.1646         | 5 |
| 6 | <b>741.3395</b> | 371.1734        | 723.3159 | 362.1616         | P    | 449.2565        | 225.1319        | 431.2329 | 216.1201         | 4 |
| 7 | 813.3736        | 407.1904        | 795.3500 | 398.1787         | A    | <b>351.2067</b> | 176.1070        | 333.1831 | 167.0952         | 3 |
| 8 | <b>913.4391</b> | 457.2232        | 895.4155 | 448.2114         | V    | 279.1725        | 140.0899        | 261.1490 | 131.0781         | 2 |
| 9 |                 |                 |          |                  | R    | <b>179.1071</b> | 90.0572         | 161.0835 | 81.0454          | 1 |

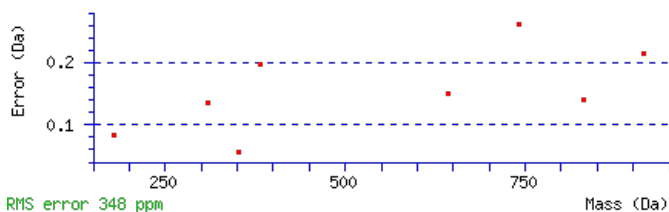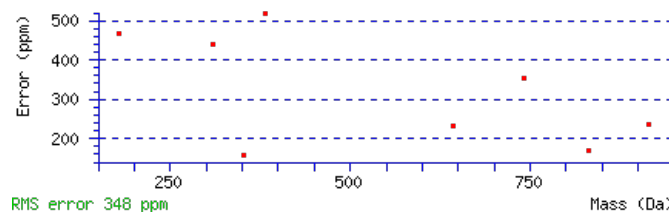

NCBI **BLAST** search of [MRAMKPAVR](#)

(Parameters: blastp, nr protein database, expect=20000, no filter, PAM30)

Other BLAST [web gateways](#)

All matches to this query

## AT2G18570.1

| Score | Mr(calc)  | Delta   | Sequence                   | Site Analysis       |
|-------|-----------|---------|----------------------------|---------------------|
| 24.9  | 1090.5316 | 0.0003  | <a href="#">MRAMKPAVR</a>  | Oxidation M1 98.57% |
| 10.9  | 1090.5325 | -0.0006 | <a href="#">IAFIGDGPYK</a> |                     |
| 10.4  | 1090.5330 | -0.0011 | <a href="#">IAEHALTGHK</a> |                     |
| 8.9   | 1090.5334 | -0.0015 | <a href="#">LARQSDRAR</a>  |                     |
| 8.2   | 1090.5289 | 0.0030  | <a href="#">MSMLKIAER</a>  |                     |
| 7.9   | 1090.5329 | -0.0011 | <a href="#">AIRFVEGER</a>  |                     |
| 7.2   | 1090.5330 | -0.0011 | <a href="#">QSIINFAQR</a>  |                     |
| 6.5   | 1090.5330 | -0.0011 | <a href="#">FSLPDVSRR</a>  |                     |
| 6.5   | 1090.5316 | 0.0003  | <a href="#">MRAMKPAVR</a>  | Oxidation M4 1.43%  |
| 6.5   | 1090.5334 | -0.0015 | <a href="#">LGRNRSDVR</a>  |                     |

Mascot: <http://www.matrixscience.com/>

## Peptide View

### MS/MS Fragmentation of **LFLKNK**

Found in **AT2G18690.1** in **TAIR\_Arabidopsis**, Symbols: | similar to unknown protein [Arabidopsis thaliana] (TAIR:AT2G18680.1); similar to hypothetical protein OsI\_029427 [Oryza sativa (indica cultivar-group)] (GB:EAZ08195.1) | chr2:8104732-8105700 FORWARD

Match to Query 865: 770.454096 from(386.234324,2+) index(5206)

Title: Elution from: 46.771 to 46.771 scan no 6604 cid35.00 polarity:+

Data file D6h-3\_2.mgf

Click mouse within plot area to zoom in by factor of two about that point

Or,   to  Da

Label all possible matches  Label matches used for scoring

Show Y-axis

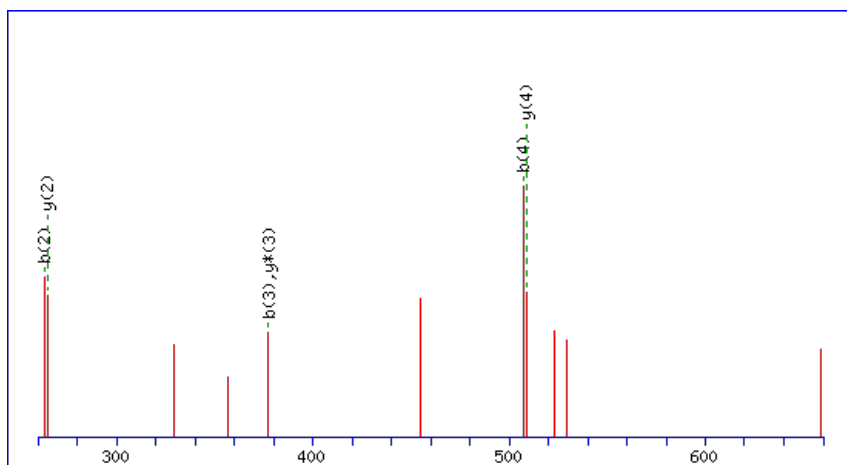

Monoisotopic mass of neutral peptide  $M_r(\text{calc})$ : 770.4533

Fixed modifications: Carbamidomethyl (C) (apply to specified residues or termini only)

Ions Score: 22 Expect: 0.049

Matches : 6/34 fragment ions using 7 most intense peaks ([help](#))

| # | b               | b <sup>++</sup> | b*       | b <sup>*++</sup> | Seq. | y               | y <sup>++</sup> | y*              | y <sup>*++</sup> | # |
|---|-----------------|-----------------|----------|------------------|------|-----------------|-----------------|-----------------|------------------|---|
| 1 | 115.0884        | 58.0478         |          |                  | L    |                 |                 |                 |                  | 6 |
| 2 | <b>263.1538</b> | 132.0805        |          |                  | F    | 657.3795        | 329.1934        | 639.3559        | 320.1816         | 5 |
| 3 | <b>377.2349</b> | 189.1211        |          |                  | L    | <b>509.3140</b> | 255.1606        | 491.2904        | 246.1488         | 4 |
| 4 | <b>507.3240</b> | 254.1656        | 489.3004 | 245.1538         | K    | 395.2329        | 198.1201        | <b>377.2093</b> | 189.1083         | 3 |
| 5 | 623.3610        | 312.1841        | 605.3374 | 303.1723         | N    | <b>265.1439</b> | 133.0756        | 247.1203        | 124.0638         | 2 |
| 6 |                 |                 |          |                  | K    | 149.1069        | 75.0571         | 131.0833        | 66.0453          | 1 |

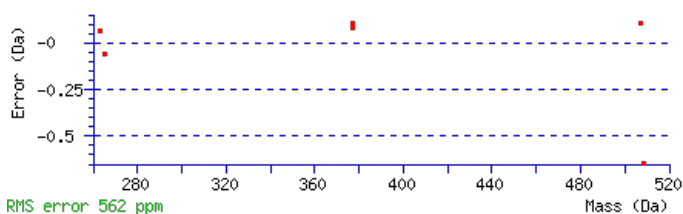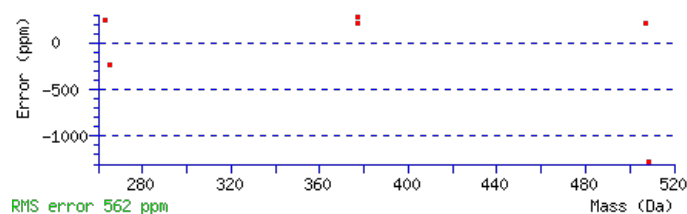

### NCBI BLAST search of **LFLKNK**

(Parameters: blastp, nr protein database, expect=20000, no filter, PAM30)

Other BLAST [web gateways](#)

### All matches to this query

| Score | $M_r(\text{calc})$ | Delta  | Sequence               |
|-------|--------------------|--------|------------------------|
| 21.7  | 770.4533           | 0.0008 | <a href="#">FNKIIK</a> |
| 21.7  | 770.4533           | 0.0008 | <a href="#">LFLKNK</a> |
| 13.2  | 770.4533           | 0.0008 | <a href="#">LFKINK</a> |

## AT2G18690.1

|     |          |        |                         |
|-----|----------|--------|-------------------------|
| 8.0 | 770.4533 | 0.0008 | <a href="#">IFKNIK</a>  |
| 7.8 | 770.4533 | 0.0008 | <a href="#">NKFLIK</a>  |
| 7.3 | 770.4533 | 0.0008 | <a href="#">FIKGGIK</a> |
| 2.1 | 770.4533 | 0.0008 | <a href="#">LFILTR</a>  |
| 2.0 | 770.4533 | 0.0008 | <a href="#">VYKPKK</a>  |
| 1.4 | 770.4533 | 0.0008 | <a href="#">FLLTR</a>   |
| 1.4 | 770.4533 | 0.0008 | <a href="#">FLLLTR</a>  |

**Mascot:** <http://www.matrixscience.com/>

**Peptide View**MS/MS Fragmentation of **ILMFGGLAK**

Found in **AT2G18915.1** in **TAIR\_Arabidopsis**, Symbols: ADO2, LKP2 | LKP2 (LOV KELCH PROTEIN 2); ubiquitin-protein ligase | chr2:8201874-8204337 REVERSE

Match to Query 2200: 958.514444 from(480.264498,2+) index(1680)

Title: Elution from: 21.111 to 21.111 scan no 2211 cid35.00 polarity:+

Data file C7-2\_2.mgf

Click mouse within plot area to zoom in by factor of two about that point

Or,   to  Da

Label all possible matches  Label matches used for scoring

Show Y-axis

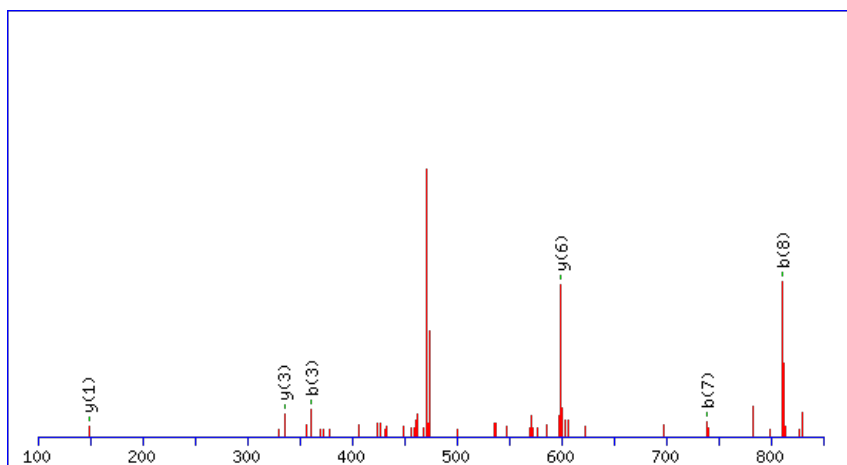

**Monoisotopic mass of neutral peptide Mr(calc):** 958.5170

**Fixed modifications:** Carbamidomethyl (C) (apply to specified residues or termini only)

**Ions Score:** 33 **Expect:** 0.004

**Matches:** 6/48 fragment ions using 7 most intense peaks ([help](#))

| # | b               | b <sup>++</sup> | Seq. | y               | y <sup>++</sup> | y*       | y <sup>*++</sup> | # |
|---|-----------------|-----------------|------|-----------------|-----------------|----------|------------------|---|
| 1 | 115.0884        | 58.0478         | I    |                 |                 |          |                  | 9 |
| 2 | 229.1695        | 115.0884        | L    | 845.4432        | 423.2252        | 827.4196 | 414.2134         | 8 |
| 3 | <b>361.2070</b> | 181.1071        | M    | 731.3621        | 366.1847        | 713.3385 | 357.1729         | 7 |
| 4 | 509.2724        | 255.1399        | F    | <b>599.3246</b> | 300.1659        | 581.3010 | 291.1541         | 6 |
| 5 | 567.2909        | 284.1491        | G    | 451.2591        | 226.1332        | 433.2355 | 217.1214         | 5 |
| 6 | 625.3094        | 313.1584        | G    | 393.2406        | 197.1239        | 375.2170 | 188.1122         | 4 |
| 7 | <b>739.3905</b> | 370.1989        | L    | <b>335.2221</b> | 168.1147        | 317.1985 | 159.1029         | 3 |
| 8 | <b>811.4247</b> | 406.2160        | A    | 221.1410        | 111.0741        | 203.1174 | 102.0624         | 2 |
| 9 |                 |                 | K    | <b>149.1069</b> | 75.0571         | 131.0833 | 66.0453          | 1 |

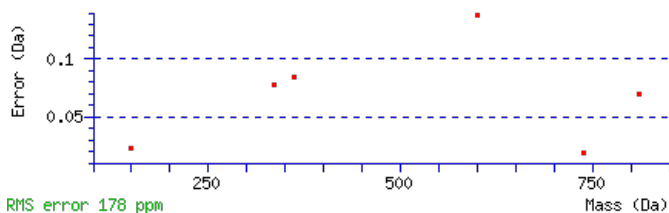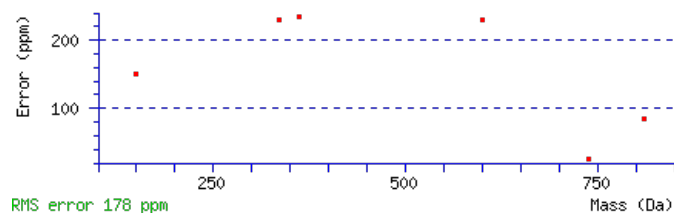

NCBI **BLAST** search of **ILMFGGLAK**

(Parameters: blastp, nr protein database, expect=20000, no filter, PAM30)

Other BLAST [web gateways](#)

All matches to this query

| Score | Mr(calc) | Delta | Sequence |
|-------|----------|-------|----------|
|       |          |       |          |

## AT2G18915.1

|      |          |         |                           |
|------|----------|---------|---------------------------|
| 33.2 | 958.5170 | -0.0026 | <a href="#">ILMFGGLAK</a> |
| 18.6 | 958.5148 | -0.0003 | <a href="#">MKIAIGTAK</a> |
| 18.0 | 958.5136 | 0.0008  | <a href="#">VWAIGYIK</a>  |
| 16.3 | 958.5118 | 0.0026  | <a href="#">SRRDVIAK</a>  |
| 14.0 | 958.5148 | -0.0003 | <a href="#">KAALMALSK</a> |
| 13.5 | 958.5148 | -0.0003 | <a href="#">ISSAKMLAK</a> |
| 12.8 | 958.5118 | 0.0026  | <a href="#">QNRKASIK</a>  |
| 12.2 | 958.5141 | 0.0004  | <a href="#">FPIEKRR</a>   |
| 8.4  | 958.5136 | 0.0008  | <a href="#">FLKVWEK</a>   |
| 8.4  | 958.5136 | 0.0008  | <a href="#">FVWKELK</a>   |

Mascot: <http://www.matrixscience.com/>



### Peptide View

 MS/MS Fragmentation of **MESLLSSSLVSAAGGFCWKKQNLK**

 Found in **AT2G18950.1** in **TAIR\_Arabidopsis**, Symbols: TPT1, ATHPT, HPT, VTE2, HPT1 | HPT1 (HOMOGENITISATE PHYTYLTRANSFERASE 1); prenyltransferase | chr2:8214573-8217129 FORWARD

Match to Query 10257: 2759.269449 from(920.763759,3+) index(8710)

Title: Elution from: 82.300 to 82.300 scan no 11962 cid35.00 polarity:+

Data file D1d-1-2.mgf

Click mouse within plot area to zoom in by factor of two about that point

 Or, Plot from  to  Da 

 Label all possible matches  Label matches used for scoring 

 Show Y-axis 
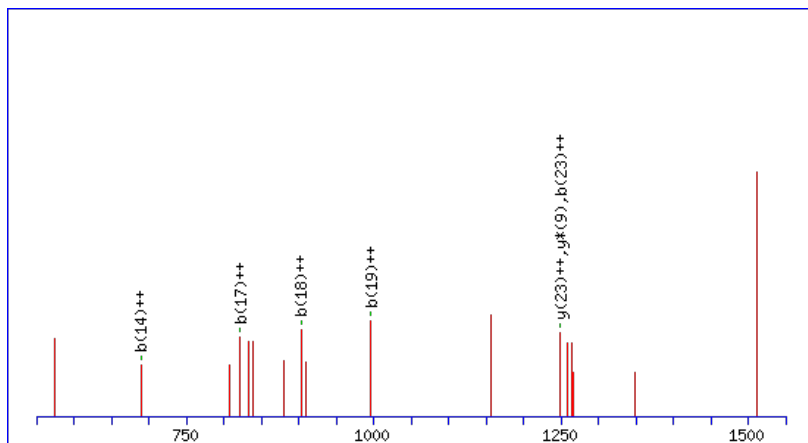
 Monoisotopic mass of neutral peptide  $M_r(\text{calc})$ : 2759.2775

Fixed modifications: Carbamidomethyl (C) (apply to specified residues or termini only)

Ions Score: 23 Expect: 0.04

 Matches : 7/222 fragment ions using 9 most intense peaks ([help](#))

| #  | b         | b <sup>++</sup> | b*        | b <sup>*++</sup> | b <sup>0</sup> | b <sup>0++</sup> | Seq | y         | y <sup>++</sup> | y*        | y <sup>*++</sup> | y <sup>0</sup> | y <sup>0++</sup> | #  |
|----|-----------|-----------------|-----------|------------------|----------------|------------------|-----|-----------|-----------------|-----------|------------------|----------------|------------------|----|
| 1  | 133.0448  | 67.0260         |           |                  |                |                  | M   |           |                 |           |                  |                |                  | 25 |
| 2  | 263.0844  | 132.0458        |           |                  | 245.0739       | 123.0406         | E   | 2628.2473 | 1314.6273       | 2610.2237 | 1305.6155        | 2610.2367      | 1305.6220        | 24 |
| 3  | 351.1135  | 176.0604        |           |                  | 333.1029       | 167.0551         | S   | 2498.2077 | 1249.6075       | 2480.1841 | 1240.5957        | 2480.1971      | 1240.6022        | 23 |
| 4  | 465.1946  | 233.1009        |           |                  | 447.1840       | 224.0956         | L   | 2410.1786 | 1205.5929       | 2392.1550 | 1196.5811        | 2392.1680      | 1196.5877        | 22 |
| 5  | 579.2757  | 290.1415        |           |                  | 561.2651       | 281.1362         | L   | 2296.0975 | 1148.5524       | 2278.0739 | 1139.5406        | 2278.0869      | 1139.5471        | 21 |
| 6  | 667.3047  | 334.1560        |           |                  | 649.2942       | 325.1507         | S   | 2182.0164 | 1091.5118       | 2163.9928 | 1082.5000        | 2164.0058      | 1082.5066        | 20 |
| 7  | 755.3338  | 378.1705        |           |                  | 737.3232       | 369.1653         | S   | 2093.9873 | 1047.4973       | 2075.9637 | 1038.4855        | 2075.9768      | 1038.4920        | 19 |
| 8  | 843.3629  | 422.1851        |           |                  | 825.3523       | 413.1798         | S   | 2005.9583 | 1003.4828       | 1987.9347 | 994.4710         | 1987.9477      | 994.4775         | 18 |
| 9  | 931.3919  | 466.1996        |           |                  | 913.3814       | 457.1943         | S   | 1917.9292 | 959.4682        | 1899.9056 | 950.4564         | 1899.9186      | 950.4630         | 17 |
| 10 | 1045.4730 | 523.2402        |           |                  | 1027.4625      | 514.2349         | L   | 1829.9001 | 915.4537        | 1811.8766 | 906.4419         | 1811.8896      | 906.4484         | 16 |
| 11 | 1145.5385 | 573.2729        |           |                  | 1127.5279      | 564.2676         | V   | 1715.8190 | 858.4132        | 1697.7955 | 849.4014         | 1697.8085      | 849.4079         | 15 |
| 12 | 1233.5675 | 617.2874        |           |                  | 1215.5570      | 608.2821         | S   | 1615.7536 | 808.3804        | 1597.7300 | 799.3686         | 1597.7430      | 799.3752         | 14 |
| 13 | 1305.6017 | 653.3045        |           |                  | 1287.5911      | 644.2992         | A   | 1527.7245 | 764.3659        | 1509.7009 | 755.3541         |                |                  | 13 |
| 14 | 1377.6358 | 689.3216        |           |                  | 1359.6253      | 680.3163         | A   | 1455.6904 | 728.3488        | 1437.6668 | 719.3370         |                |                  | 12 |
| 15 | 1435.6543 | 718.3308        |           |                  | 1417.6438      | 709.3255         | G   | 1383.6562 | 692.3318        | 1365.6326 | 683.3200         |                |                  | 11 |
| 16 | 1493.6728 | 747.3401        |           |                  | 1475.6623      | 738.3348         | G   | 1325.6377 | 663.3225        | 1307.6141 | 654.3107         |                |                  | 10 |
| 17 | 1641.7383 | 821.3728        |           |                  | 1623.7277      | 812.3675         | F   | 1267.6192 | 634.3133        | 1249.5956 | 625.3015         |                |                  | 9  |
| 18 | 1803.7630 | 902.3851        |           |                  | 1785.7524      | 893.3799         | C   | 1119.5538 | 560.2805        | 1101.5302 | 551.2687         |                |                  | 8  |
| 19 | 1991.8364 | 996.4218        |           |                  | 1973.8258      | 987.4166         | W   | 957.5291  | 479.2682        | 939.5055  | 470.2564         |                |                  | 7  |
| 20 | 2121.9254 | 1061.4664       | 2103.9018 | 1052.4546        | 2103.9149      | 1052.4611        | K   | 769.4557  | 385.2315        | 751.4321  | 376.2197         |                |                  | 6  |
| 21 | 2252.0145 | 1126.5109       | 2233.9909 | 1117.4991        | 2234.0039      | 1117.5056        | K   | 639.3667  | 320.1870        | 621.3431  | 311.1752         |                |                  | 5  |
| 22 | 2382.0671 | 1191.5372       | 2364.0435 | 1182.5254        | 2364.0565      | 1182.5319        | Q   | 509.2776  | 255.1424        | 491.2540  | 246.1307         |                |                  | 4  |
| 23 | 2498.1041 | 1249.5557       | 2480.0805 | 1240.5439        | 2480.0935      | 1240.5504        | N   | 379.2250  | 190.1161        | 361.2014  | 181.1043         |                |                  | 3  |
| 24 | 2612.1852 | 1306.5962       | 2594.1616 | 1297.5844        | 2594.1746      | 1297.5910        | L   | 263.1880  | 132.0976        | 245.1644  | 123.0858         |                |                  | 2  |

|    |  |  |  |  |  |   |          |         |          |         |  |  |   |
|----|--|--|--|--|--|---|----------|---------|----------|---------|--|--|---|
| 25 |  |  |  |  |  | K | 149.1069 | 75.0571 | 131.0833 | 66.0453 |  |  | 1 |
|----|--|--|--|--|--|---|----------|---------|----------|---------|--|--|---|

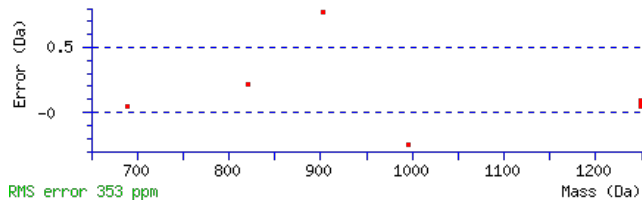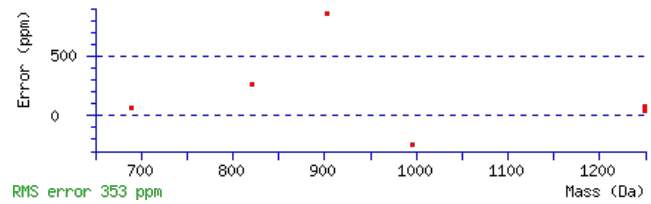

NCBI BLAST search of [MESLLSSSSLVSAAGGFCWKKQNLK](#)  
 (Parameters: blastp, nr protein database, expect=20000, no filter, PAM30)  
 Other BLAST [web gateways](#)

#### All matches to this query

| Score | Mr(calc)  | Delta   | Sequence                                    |
|-------|-----------|---------|---------------------------------------------|
| 23.0  | 2759.2775 | -0.0081 | <a href="#">MESLLSSSSLVSAAGGFCWKKQNLK</a>   |
| 1.6   | 2759.2670 | 0.0025  | <a href="#">DIDASCSLVLYGKSSVETDTATRLK</a>   |
| 1.5   | 2759.2645 | 0.0050  | <a href="#">LAVIFNMGAGYCDVAVTATAGGVSOIK</a> |
| 1.3   | 2759.2701 | -0.0007 | <a href="#">SMLQVNACLGSLIDKSSMVFALWK</a>    |
| 1.3   | 2759.2692 | 0.0002  | <a href="#">DLLTSYMNLDITKYKLLNPSDER</a>     |
| 0.9   | 2759.2645 | 0.0050  | <a href="#">DILGNVLSGLSMQFSRPFSMGDTIK</a>   |
| 0.4   | 2759.2692 | 0.0002  | <a href="#">SSFLASADDSGDVKIIDLGQKCLYK</a>   |

Mascot: <http://www.matrixscience.com/>

**Peptide View**MS/MS Fragmentation of **DSNIASIPVEELIEK**Found in **AT2G18960.1** in **TAIR\_Arabidopsis**, Symbols: PMA, OST2, AHA1 | AHA1 (ARABIDOPSIS H+ ATPASE 1); ATPase | chr:8228940-8234350 FORWARD

Match to Query 7854: 1672.808812 from(837.411682,2+) index(9206)

Title: Elution from: 83.920 to 83.920 scan no 12628 cid35.00 polarity:+

Data file 0-2\_2.mgf

Click mouse within plot area to zoom in by factor of two about that point

Or,  to  Da Label all possible matches  Label matches used for scoring Show Y-axis 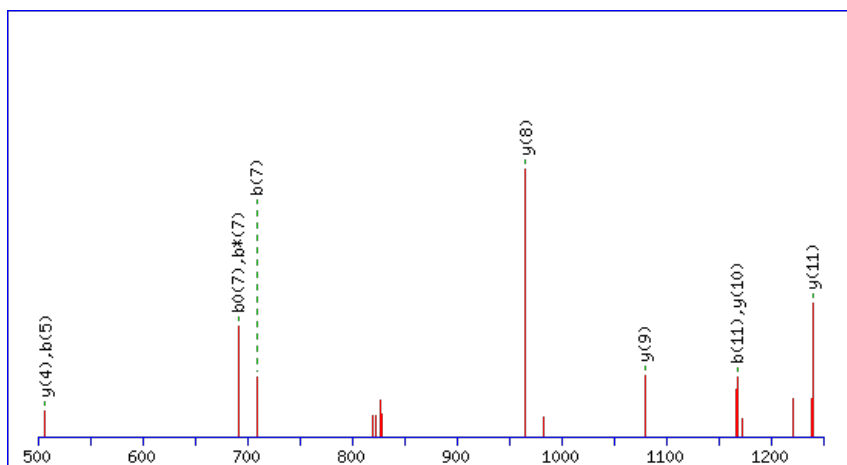Monoisotopic mass of neutral peptide  $M_r(\text{calc})$ : 1672.8114

Fixed modifications: Carbamidomethyl (C) (apply to specified residues or termini only)

Ions Score: 46 Expect: 0.00016

Matches : 10/162 fragment ions using 8 most intense peaks ([help](#))

| #  | b                | b <sup>++</sup> | b*              | b <sup>*++</sup> | b <sup>0</sup>  | b <sup>0++</sup> | Seq. | y                | y <sup>++</sup> | y*        | y <sup>*++</sup> | y <sup>0</sup> | y <sup>0++</sup> | #  |
|----|------------------|-----------------|-----------------|------------------|-----------------|------------------|------|------------------|-----------------|-----------|------------------|----------------|------------------|----|
| 1  | 117.0313         | 59.0193         |                 |                  | 99.0207         | 50.0140          | D    |                  |                 |           |                  |                |                  | 15 |
| 2  | 205.0603         | 103.0338        |                 |                  | 187.0498        | 94.0285          | S    | 1557.7947        | 779.4010        | 1539.7711 | 770.3892         | 1539.7841      | 770.3957         | 14 |
| 3  | 321.0973         | 161.0523        | 303.0737        | 152.0405         | 303.0867        | 152.0470         | N    | 1469.7656        | 735.3864        | 1451.7420 | 726.3747         | 1451.7550      | 726.3812         | 13 |
| 4  | 435.1784         | 218.0928        | 417.1548        | 209.0811         | 417.1678        | 209.0876         | I    | 1353.7286        | 677.3679        | 1335.7050 | 668.3562         | 1335.7180      | 668.3627         | 12 |
| 5  | <b>507.2126</b>  | 254.1099        | 489.1890        | 245.0981         | 489.2020        | 245.1046         | A    | <b>1239.6475</b> | 620.3274        | 1221.6239 | 611.3156         | 1221.6369      | 611.3221         | 11 |
| 6  | 595.2416         | 298.1245        | 577.2180        | 289.1127         | 577.2311        | 289.1192         | S    | <b>1167.6134</b> | 584.3103        | 1149.5898 | 575.2985         | 1149.6028      | 575.3050         | 10 |
| 7  | <b>709.3227</b>  | 355.1650        | <b>691.2991</b> | 346.1532         | <b>691.3122</b> | 346.1597         | I    | <b>1079.5843</b> | 540.2958        | 1061.5607 | 531.2840         | 1061.5737      | 531.2905         | 9  |
| 8  | 807.3725         | 404.1899        | 789.3489        | 395.1781         | 789.3620        | 395.1846         | P    | <b>965.5032</b>  | 483.2552        | 947.4796  | 474.2434         | 947.4926       | 474.2500         | 8  |
| 9  | 907.4380         | 454.2226        | 889.4144        | 445.2108         | 889.4274        | 445.2173         | V    | 867.4534         | 434.2303        | 849.4298  | 425.2185         | 849.4428       | 425.2251         | 7  |
| 10 | 1037.4776        | 519.2424        | 1019.4540       | 510.2306         | 1019.4670       | 510.2372         | E    | 767.3880         | 384.1976        | 749.3644  | 375.1858         | 749.3774       | 375.1923         | 6  |
| 11 | <b>1167.5172</b> | 584.2623        | 1149.4936       | 575.2505         | 1149.5067       | 575.2570         | E    | 637.3483         | 319.1778        | 619.3247  | 310.1660         | 619.3378       | 310.1725         | 5  |
| 12 | 1281.5983        | 641.3028        | 1263.5747       | 632.2910         | 1263.5878       | 632.2975         | L    | <b>507.3087</b>  | 254.1580        | 489.2851  | 245.1462         | 489.2981       | 245.1527         | 4  |
| 13 | 1395.6794        | 698.3434        | 1377.6558       | 689.3316         | 1377.6689       | 689.3381         | I    | 393.2276         | 197.1174        | 375.2040  | 188.1056         | 375.2170       | 188.1122         | 3  |
| 14 | 1525.7191        | 763.3632        | 1507.6955       | 754.3514         | 1507.7085       | 754.3579         | E    | 279.1465         | 140.0769        | 261.1229  | 131.0651         | 261.1359       | 131.0716         | 2  |
| 15 |                  |                 |                 |                  |                 |                  | K    | 149.1069         | 75.0571         | 131.0833  | 66.0453          |                |                  | 1  |

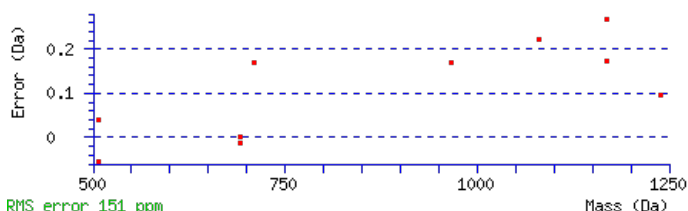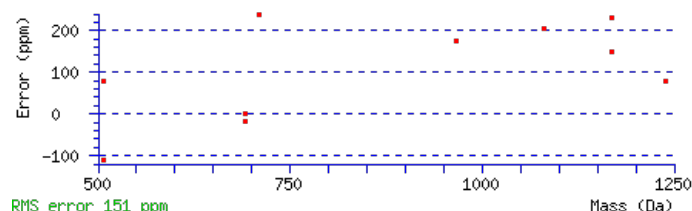

## AT2G18960.1

NCBI **BLAST** search of [DSNIASIPVEELIEK](#)

(Parameters: blastp, nr protein database, expect=20000, no filter, PAM30)

Other BLAST [web gateways](#)

### All matches to this query

| Score | Mr(calc)  | Delta   | Sequence                        |
|-------|-----------|---------|---------------------------------|
| 45.8  | 1672.8114 | -0.0026 | <a href="#">DSNIASIPVEELIEK</a> |
| 9.5   | 1672.8059 | 0.0029  | <a href="#">ERVNKAFFGNLTEK</a>  |
| 5.3   | 1672.8046 | 0.0042  | <a href="#">MPOCSPLSPILRR</a>   |
| 2.1   | 1672.8082 | 0.0006  | <a href="#">VLQRDSTPLFFPPH</a>  |
| 1.9   | 1672.8082 | 0.0006  | <a href="#">SHEIYAIEKWLHK</a>   |

**Mascot:** <http://www.matrixscience.com/>

**Peptide View**MS/MS Fragmentation of **NIPDIIAELMR**Found in **AT2G19050.1** in **TAIR\_Arabidopsis**, Symbols: | GDSL-motif lipase/hydrolase family protein | chr:2:8260498-8262616 FORWARD

Match to Query 4893: 1298.647784 from(650.331168,2+) index(6375)

Title: Elution from: 55.317 to 55.317 scan no 8138 cid35.00 polarity:+

Data file D1d-3\_2.mgf

Click mouse within plot area to zoom in by factor of two about that point

Or,  to  Da Label all possible matches  Label matches used for scoring Show Y-axis 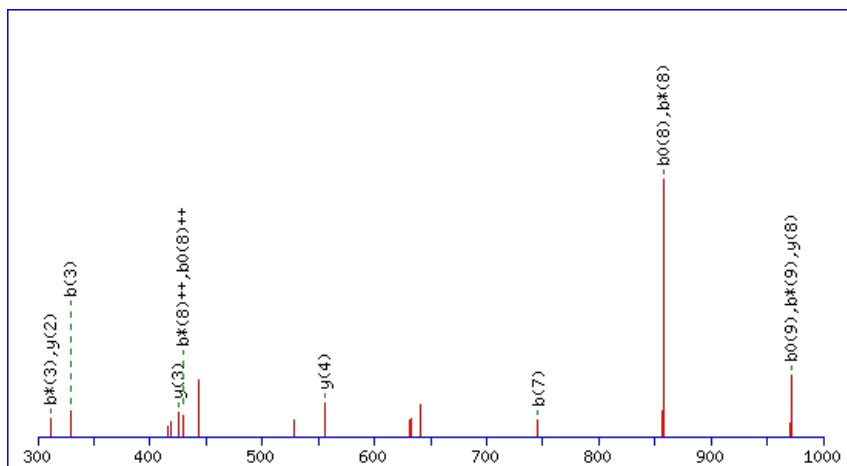Monoisotopic mass of neutral peptide **Mr(calc)**: 1298.6463

Fixed modifications: Carbamidomethyl (C) (apply to specified residues or termini only)

Ions Score: 27 Expect: 0.0089

Matches : 13/108 fragment ions using 15 most intense peaks ([help](#))

| #  | b               | b <sup>++</sup> | b*              | b <sup>*++</sup> | b <sup>0</sup>  | b <sup>0++</sup> | Seq. | y               | y <sup>++</sup> | y*        | y <sup>*++</sup> | y <sup>0</sup> | y <sup>0++</sup> | #  |
|----|-----------------|-----------------|-----------------|------------------|-----------------|------------------|------|-----------------|-----------------|-----------|------------------|----------------|------------------|----|
| 1  | 117.0443        | 59.0258         | 99.0207         | 50.0140          |                 |                  | N    |                 |                 |           |                  |                |                  | 11 |
| 2  | 231.1254        | 116.0663        | 213.1018        | 107.0545         |                 |                  | I    | 1183.6166       | 592.3119        | 1165.5930 | 583.3001         | 1165.6060      | 583.3066         | 10 |
| 3  | <b>329.1752</b> | 165.0912        | <b>311.1516</b> | 156.0794         |                 |                  | P    | 1069.5355       | 535.2714        | 1051.5119 | 526.2596         | 1051.5249      | 526.2661         | 9  |
| 4  | 445.1991        | 223.1032        | 427.1756        | 214.0914         | 427.1886        | 214.0979         | D    | <b>971.4857</b> | 486.2465        | 953.4621  | 477.2347         | 953.4751       | 477.2412         | 8  |
| 5  | 559.2802        | 280.1438        | 541.2567        | 271.1320         | 541.2697        | 271.1385         | I    | 855.4617        | 428.2345        | 837.4381  | 419.2227         | 837.4511       | 419.2292         | 7  |
| 6  | 673.3613        | 337.1843        | 655.3378        | 328.1725         | 655.3508        | 328.1790         | I    | 741.3806        | 371.1939        | 723.3570  | 362.1821         | 723.3700       | 362.1886         | 6  |
| 7  | <b>745.3955</b> | 373.2014        | 727.3719        | 364.1896         | 727.3849        | 364.1961         | A    | 627.2995        | 314.1534        | 609.2759  | 305.1416         | 609.2889       | 305.1481         | 5  |
| 8  | 875.4351        | 438.2212        | <b>857.4115</b> | <b>429.2094</b>  | <b>857.4246</b> | <b>429.2159</b>  | E    | <b>555.2653</b> | 278.1363        | 537.2418  | 269.1245         | 537.2548       | 269.1310         | 4  |
| 9  | 989.5162        | 495.2617        | <b>971.4926</b> | 486.2500         | <b>971.5057</b> | 486.2565         | L    | <b>425.2257</b> | 213.1165        | 407.2021  | 204.1047         |                |                  | 3  |
| 10 | 1121.5537       | 561.2805        | 1103.5302       | 552.2687         | 1103.5432       | 552.2752         | M    | <b>311.1446</b> | 156.0759        | 293.1210  | 147.0642         |                |                  | 2  |
| 11 |                 |                 |                 |                  |                 |                  | R    | 179.1071        | 90.0572         | 161.0835  | 81.0454          |                |                  | 1  |

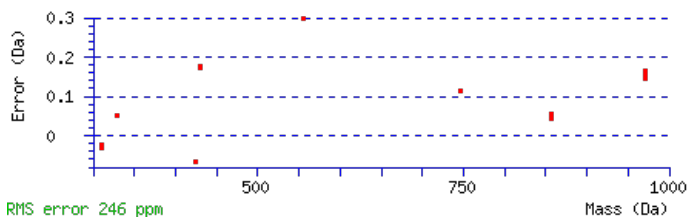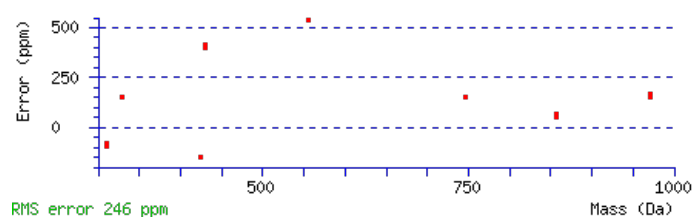NCBI **BLAST** search of **NIPDIIAELMR**

(Parameters: blastp, nr protein database, expect=20000, no filter, PAM30)

Other BLAST [web gateways](#)

All matches to this query

AT2G19050.1

| Score | Mr(calc)  | Delta  | Sequence                    |
|-------|-----------|--------|-----------------------------|
| 26.6  | 1298.6463 | 0.0015 | <a href="#">NIPDIIAELMR</a> |

Mascot: <http://www.matrixscience.com/>

**Peptide View**MS/MS Fragmentation of **VLDRGFIDGEMR**Found in **AT2G19120.1** in **TAIR\_Arabidopsis**, Symbols: | tRNA-splicing endonuclease positive effector-related | chr2:8294118-8298884 REVERSE

Match to Query 5694: 1440.640186 from(721.327369,2+) index(9962)

Title: Elution from: 92.600 to 92.600 scan no 13946 cid35.00 polarity:+

Data file D6h-1\_2.mgf

Click mouse within plot area to zoom in by factor of two about that point

Or,   to  Da Label all possible matches  Label matches used for scoring Show Y-axis 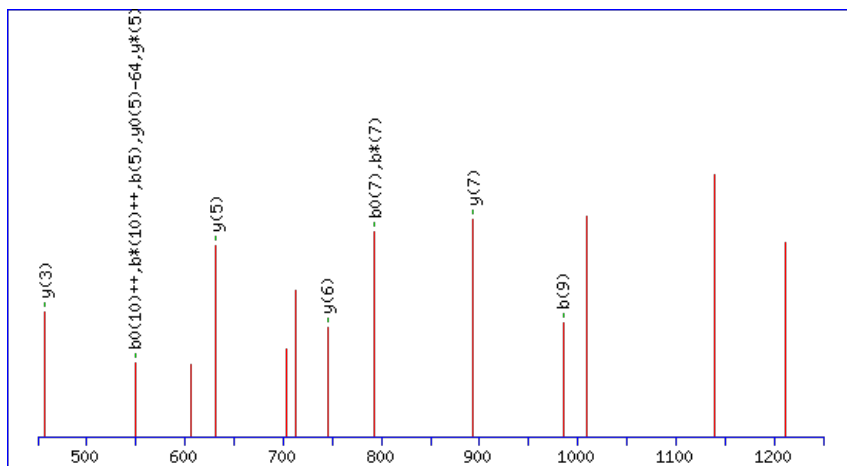Monoisotopic mass of neutral peptide **Mr(calc)**: 1440.6391**Fixed modifications:** Carbamidomethyl (C) (apply to specified residues or termini only)**Variable modifications:****M11** : Oxidation (M), with neutral losses 0.0000 (shown in table), 63.9983**Ions Score:** 25 **Expect:** 0.029**Matches** : 12/182 fragment ions using 13 most intense peaks ([help](#))

| #  | b               | b <sup>++</sup> | b*              | b <sup>*++</sup> | b <sup>0</sup>  | b <sup>0++</sup> | Seq. | y               | y <sup>++</sup> | y*        | y <sup>*++</sup> | y <sup>0</sup> | y <sup>0++</sup> | #  |
|----|-----------------|-----------------|-----------------|------------------|-----------------|------------------|------|-----------------|-----------------|-----------|------------------|----------------|------------------|----|
| 1  | 101.0727        | 51.0400         |                 |                  |                 |                  | V    |                 |                 |           |                  |                |                  | 12 |
| 2  | 215.1538        | 108.0805        |                 |                  |                 |                  | L    | 1341.5810       | 671.2941        | 1323.5574 | 662.2823         | 1323.5704      | 662.2889         | 11 |
| 3  | 331.1778        | 166.0925        |                 |                  | 313.1672        | 157.0873         | D    | 1227.4999       | 614.2536        | 1209.4763 | 605.2418         | 1209.4893      | 605.2483         | 10 |
| 4  | 491.2671        | 246.1372        | 473.2435        | 237.1254         | 473.2565        | 237.1319         | R    | 1111.4759       | 556.2416        | 1093.4523 | 547.2298         | 1093.4654      | 547.2363         | 9  |
| 5  | <b>549.2856</b> | 275.1464        | 531.2620        | 266.1346         | 531.2750        | 266.1411         | G    | 951.3867        | 476.1970        | 933.3631  | 467.1852         | 933.3761       | 467.1917         | 8  |
| 6  | 697.3510        | 349.1791        | 679.3274        | 340.1673         | 679.3404        | 340.1739         | F    | <b>893.3682</b> | 447.1877        | 875.3446  | 438.1759         | 875.3576       | 438.1824         | 7  |
| 7  | 811.4321        | 406.2197        | <b>793.4085</b> | 397.2079         | <b>793.4215</b> | 397.2144         | I    | <b>745.3027</b> | 373.1550        | 727.2791  | 364.1432         | 727.2922       | 364.1497         | 6  |
| 8  | 927.4561        | 464.2317        | 909.4325        | 455.2199         | 909.4455        | 455.2264         | D    | <b>631.2216</b> | 316.1145        | 613.1980  | 307.1027         | 613.2111       | 307.1092         | 5  |
| 9  | <b>985.4746</b> | 493.2409        | 967.4510        | 484.2291         | 967.4640        | 484.2356         | G    | 515.1977        | 258.1025        | 497.1741  | 249.0907         | 497.1871       | 249.0972         | 4  |
| 10 | 1115.5142       | 558.2607        | 1097.4906       | <b>549.2489</b>  | 1097.5036       | <b>549.2555</b>  | E    | <b>457.1792</b> | 229.0932        | 439.1556  | 220.0814         | 439.1686       | 220.0879         | 3  |
| 11 | 1263.5466       | 632.2770        | 1245.5231       | 623.2652         | 1245.5361       | 623.2717         | M    | 327.1395        | 164.0734        | 309.1159  | 155.0616         |                |                  | 2  |
| 12 |                 |                 |                 |                  |                 |                  | R    | 179.1071        | 90.0572         | 161.0835  | 81.0454          |                |                  | 1  |

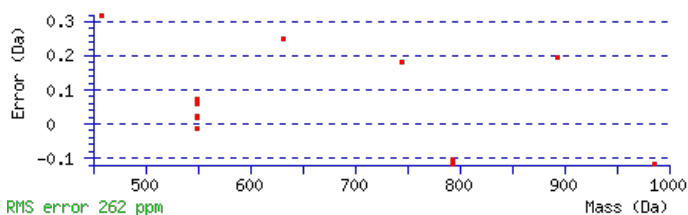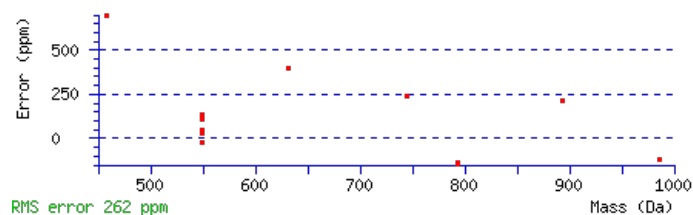NCBI **BLAST** search of **VLDRGFIDGEMR**

(Parameters: blastp, nr protein database, expect=20000, no filter, PAM30)

Other BLAST [web gateways](#)

AT2G19120.1

All matches to this query

| Score | Mr(calc)  | Delta   | Sequence                      |
|-------|-----------|---------|-------------------------------|
| 24.6  | 1440.6391 | 0.0010  | <a href="#">VLDRGFIDGEMR</a>  |
| 1.7   | 1440.6399 | 0.0003  | <a href="#">EKSMQVETLSK</a>   |
| 1.2   | 1440.6392 | 0.0010  | <a href="#">LNSIQAFMDVNR</a>  |
| 0.8   | 1440.6367 | 0.0035  | <a href="#">CMDAVLHFRFK</a>   |
| 0.4   | 1440.6423 | -0.0021 | <a href="#">NLNINRSRNCR</a>   |
| 0.3   | 1440.6369 | 0.0033  | <a href="#">DTNLASQGVSKMR</a> |

Mascot: <http://www.matrixscience.com/>



## Peptide View

### MS/MS Fragmentation of **LGKINYMQSLPGAR**

Found in **AT2G19160.1** in **TAIR\_Arabidopsis**, Symbols: | similar to unknown protein [Arabidopsis thaliana] (TAIR:AT4G30060.1); similar to unnamed protein product [Vitis vinifera] (GB:CAO64039.1); contains InterPro domain Protein of unknown function DUF266, plant (InterPro:IPR004949) | chr2:83

Match to Query 6669: 1546.824996 from(516.615608,3+) index(3991)

Title: Elution from: 37.326 to 37.326 scan no 4989 cid35.00 polarity:+

Data file 0-1\_3.mgf

Click mouse within plot area to zoom in by factor of two about that point

Or,   to  Da

Label all possible matches  Label matches used for scoring

Show Y-axis

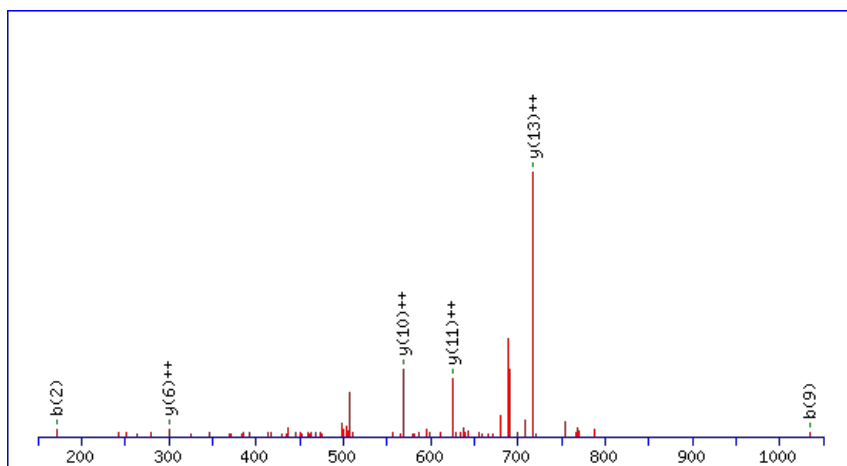

**Monoisotopic mass of neutral peptide Mr(calc):** 1546.8289

**Fixed modifications:** Carbamidomethyl (C) (apply to specified residues or termini only)

**Ions Score:** 29 **Expect:** 0.0069

**Matches:** 6/126 fragment ions using 8 most intense peaks ([help](#))

| #  | b                | b <sup>++</sup> | b*        | b <sup>*++</sup> | b <sup>0</sup> | b <sup>0++</sup> | Seq. | y         | y <sup>++</sup> | y*        | y <sup>*++</sup> | y <sup>0</sup> | y <sup>0++</sup> | #  |
|----|------------------|-----------------|-----------|------------------|----------------|------------------|------|-----------|-----------------|-----------|------------------|----------------|------------------|----|
| 1  | 114.0913         | 57.5493         |           |                  |                |                  | L    |           |                 |           |                  |                |                  | 14 |
| 2  | <b>171.1128</b>  | 86.0600         |           |                  |                |                  | G    | 1434.7522 | <b>717.8797</b> | 1417.7256 | 709.3665         | 1416.7416      | 708.8745         | 13 |
| 3  | 299.2078         | 150.1075        | 282.1812  | 141.5942         |                |                  | K    | 1377.7307 | 689.3690        | 1360.7042 | 680.8557         | 1359.7202      | 680.3637         | 12 |
| 4  | 412.2918         | 206.6496        | 395.2653  | 198.1363         |                |                  | I    | 1249.6358 | <b>625.3215</b> | 1232.6092 | 616.8082         | 1231.6252      | 616.3162         | 11 |
| 5  | 526.3348         | 263.6710        | 509.3082  | 255.1577         |                |                  | N    | 1136.5517 | <b>568.7795</b> | 1119.5252 | 560.2662         | 1118.5411      | 559.7742         | 10 |
| 6  | 689.3981         | 345.2027        | 672.3715  | 336.6894         |                |                  | Y    | 1022.5088 | 511.7580        | 1005.4822 | 503.2448         | 1004.4982      | 502.7527         | 9  |
| 7  | 820.4386         | 410.7229        | 803.4120  | 402.2096         |                |                  | M    | 859.4454  | 430.2264        | 842.4189  | 421.7131         | 841.4349       | 421.2211         | 8  |
| 8  | 948.4972         | 474.7522        | 931.4706  | 466.2389         |                |                  | Q    | 728.4050  | 364.7061        | 711.3784  | 356.1928         | 710.3944       | 355.7008         | 7  |
| 9  | <b>1035.5292</b> | 518.2682        | 1018.5026 | 509.7550         | 1017.5186      | 509.2629         | S    | 600.3464  | <b>300.6768</b> | 583.3198  | 292.1636         | 582.3358       | 291.6715         | 6  |
| 10 | 1148.6132        | 574.8103        | 1131.5867 | 566.2970         | 1130.6027      | 565.8050         | L    | 513.3144  | 257.1608        | 496.2878  | 248.6475         |                |                  | 5  |
| 11 | 1245.6660        | 623.3366        | 1228.6395 | 614.8234         | 1227.6554      | 614.3314         | P    | 400.2303  | 200.6188        | 383.2037  | 192.1055         |                |                  | 4  |
| 12 | 1302.6875        | 651.8474        | 1285.6609 | 643.3341         | 1284.6769      | 642.8421         | G    | 303.1775  | 152.0924        | 286.1510  | 143.5791         |                |                  | 3  |
| 13 | 1373.7246        | 687.3659        | 1356.6980 | 678.8527         | 1355.7140      | 678.3606         | A    | 246.1561  | 123.5817        | 229.1295  | 115.0684         |                |                  | 2  |
| 14 |                  |                 |           |                  |                |                  | R    | 175.1190  | 88.0631         | 158.0924  | 79.5498          |                |                  | 1  |

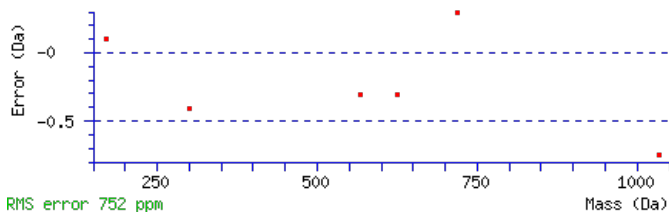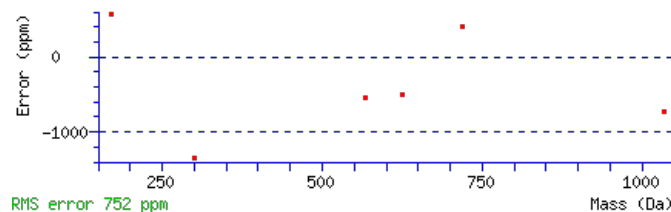

## AT2G19160.1

NCBI **BLAST** search of [LGKINYMOSLPGAR](#)

(Parameters: blastp, nr protein database, expect=20000, no filter, PAM30)

Other BLAST [web gateways](#)

### All matches to this query

| Score | Mr(calc)  | Delta   | Sequence                       |
|-------|-----------|---------|--------------------------------|
| 28.5  | 1546.8289 | -0.0040 | <a href="#">LGKINYMOSLPGAR</a> |
| 20.5  | 1546.8276 | -0.0026 | <a href="#">LGELEMDLLDKKK</a>  |
| 10.5  | 1546.8211 | 0.0039  | <a href="#">LGEAKQMLELMIR</a>  |
| 8.9   | 1546.8211 | 0.0039  | <a href="#">LGEAKQMLELMIR</a>  |
| 7.3   | 1546.8256 | -0.0006 | <a href="#">GILQFAVKGOYWR</a>  |
| 5.4   | 1546.8290 | -0.0040 | <a href="#">LAGMERSVSVFPSR</a> |
| 4.5   | 1546.8242 | 0.0008  | <a href="#">VADEILAAFSAIK</a>  |
| 3.9   | 1546.8216 | 0.0034  | <a href="#">NSVFSNALSSPIR</a>  |
| 3.3   | 1546.8243 | 0.0007  | <a href="#">YSIGTIGLDGVDPK</a> |
| 2.8   | 1546.8215 | 0.0034  | <a href="#">NNAASQKKIFGNK</a>  |

Mascot: <http://www.matrixscience.com/>

### Peptide View

 MS/MS Fragmentation of **ILRVAMETTQDLGACDATFYVR**

 Found in **AT2G19200.1** in **TAIR\_Arabidopsis**, Symbols: | similar to unknown protein [Arabidopsis thaliana] (TAIR:AT4G11700.1); contains InterPro domain Protein of unknown function DUF626, Arabidopsis thaliana (InterPro:IPR006462) | chr2:8340300-8341703 FORWARD

Match to Query 10461: 2545.225023 from(849.415617,3+) index(8038)

Title: Elution from: 70.700 to 70.700 scan no 10525 cid35.00 polarity:+

Data file D12h-1\_2.mgf

Click mouse within plot area to zoom in by factor of two about that point

 Or, Plot from  to  Da 

 Label all possible matches  Label matches used for scoring 

 Show Y-axis 
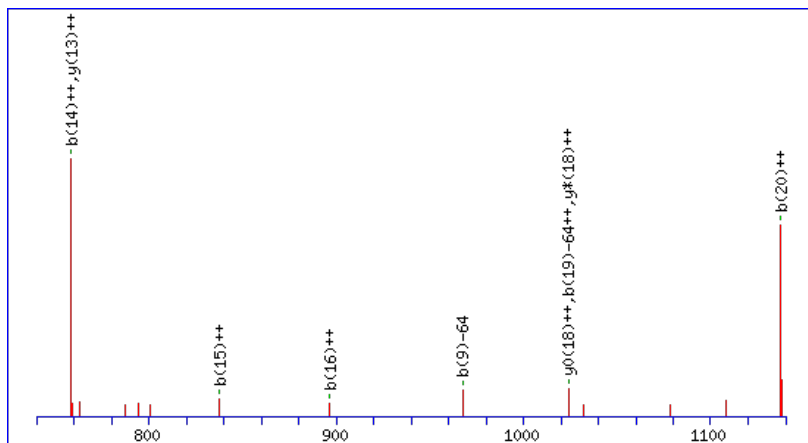
 Monoisotopic mass of neutral peptide  $M_r(\text{calc})$ : 2545.2305

Fixed modifications: Carbamidomethyl (C) (apply to specified residues or termini only)

Variable modifications:

M6 : Oxidation (M), with neutral losses 0.0000 (shown in table), 63.9983

Ions Score: 22 Expect: 0.026

 Matches : 9/352 fragment ions using 7 most intense peaks ([help](#))

| #  | b         | b <sup>++</sup> | b <sup>*</sup> | b <sup>*++</sup> | b <sup>0</sup> | b <sup>0++</sup> | Seq | y         | y <sup>++</sup> | y <sup>*</sup> | y <sup>*++</sup> | y <sup>0</sup> | y <sup>0++</sup> | #  |
|----|-----------|-----------------|----------------|------------------|----------------|------------------|-----|-----------|-----------------|----------------|------------------|----------------|------------------|----|
| 1  | 114.0913  | 57.5493         |                |                  |                |                  | I   |           |                 |                |                  |                |                  | 22 |
| 2  | 227.1754  | 114.0913        |                |                  |                |                  | L   | 2433.1537 | 1217.0805       | 2416.1272      | 1208.5672        | 2415.1431      | 1208.0752        | 21 |
| 3  | 383.2765  | 192.1419        | 366.2500       | 183.6286         |                |                  | R   | 2320.0696 | 1160.5385       | 2303.0431      | 1152.0252        | 2302.0591      | 1151.5332        | 20 |
| 4  | 482.3449  | 241.6761        | 465.3184       | 233.1628         |                |                  | V   | 2163.9685 | 1082.4879       | 2146.9420      | 1073.9746        | 2145.9580      | 1073.4826        | 19 |
| 5  | 553.3820  | 277.1947        | 536.3555       | 268.6814         |                |                  | A   | 2064.9001 | 1032.9537       | 2047.8736      | 1024.4404        | 2046.8896      | 1023.9484        | 18 |
| 6  | 700.4174  | 350.7124        | 683.3909       | 342.1991         |                |                  | M   | 1993.8630 | 997.4351        | 1976.8365      | 988.9219         | 1975.8524      | 988.4299         | 17 |
| 7  | 829.4600  | 415.2337        | 812.4335       | 406.7204         | 811.4495       | 406.2284         | E   | 1846.8276 | 923.9174        | 1829.8011      | 915.4042         | 1828.8170      | 914.9122         | 16 |
| 8  | 930.5077  | 465.7575        | 913.4812       | 457.2442         | 912.4972       | 456.7522         | T   | 1717.7850 | 859.3961        | 1700.7585      | 850.8829         | 1699.7744      | 850.3909         | 15 |
| 9  | 1031.5554 | 516.2813        | 1014.5288      | 507.7681         | 1013.5448      | 507.2761         | T   | 1616.7373 | 808.8723        | 1599.7108      | 800.3590         | 1598.7268      | 799.8670         | 14 |
| 10 | 1159.6140 | 580.3106        | 1142.5874      | 571.7973         | 1141.6034      | 571.3053         | Q   | 1515.6897 | 758.3485        | 1498.6631      | 749.8352         | 1497.6791      | 749.3432         | 13 |
| 11 | 1274.6409 | 637.8241        | 1257.6144      | 629.3108         | 1256.6303      | 628.8188         | D   | 1387.6311 | 694.3192        | 1370.6045      | 685.8059         | 1369.6205      | 685.3139         | 12 |
| 12 | 1387.7250 | 694.3661        | 1370.6984      | 685.8529         | 1369.7144      | 685.3608         | L   | 1272.6041 | 636.8057        | 1255.5776      | 628.2924         | 1254.5936      | 627.8004         | 11 |
| 13 | 1444.7464 | 722.8769        | 1427.7199      | 714.3636         | 1426.7359      | 713.8716         | G   | 1159.5201 | 580.2637        | 1142.4935      | 571.7504         | 1141.5095      | 571.2584         | 10 |
| 14 | 1515.7836 | 758.3954        | 1498.7570      | 749.8821         | 1497.7730      | 749.3901         | A   | 1102.4986 | 551.7529        | 1085.4721      | 543.2397         | 1084.4880      | 542.7477         | 9  |
| 15 | 1675.8142 | 838.4107        | 1658.7877      | 829.8975         | 1657.8036      | 829.4055         | C   | 1031.4615 | 516.2344        | 1014.4349      | 507.7211         | 1013.4509      | 507.2291         | 8  |
| 16 | 1790.8411 | 895.9242        | 1773.8146      | 887.4109         | 1772.8306      | 886.9189         | D   | 871.4308  | 436.2191        | 854.4043       | 427.7058         | 853.4203       | 427.2138         | 7  |
| 17 | 1861.8783 | 931.4428        | 1844.8517      | 922.9295         | 1843.8677      | 922.4375         | A   | 756.4039  | 378.7056        | 739.3774       | 370.1923         | 738.3933       | 369.7003         | 6  |
| 18 | 1962.9259 | 981.9666        | 1945.8994      | 973.4533         | 1944.9154      | 972.9613         | T   | 685.3668  | 343.1870        | 668.3402       | 334.6738         | 667.3562       | 334.1817         | 5  |
| 19 | 2109.9944 | 1055.5008       | 2092.9678      | 1046.9875        | 2091.9838      | 1046.4955        | F   | 584.3191  | 292.6632        | 567.2926       | 284.1499         |                |                  | 4  |
| 20 | 2273.0577 | 1137.0325       | 2256.0311      | 1128.5192        | 2255.0471      | 1128.0272        | Y   | 437.2507  | 219.1290        | 420.2241       | 210.6157         |                |                  | 3  |
| 21 | 2372.1261 | 1186.5667       | 2355.0995      | 1178.0534        | 2354.1155      | 1177.5614        | V   | 274.1874  | 137.5973        | 257.1608       | 129.0840         |                |                  | 2  |
| 22 |           |                 |                |                  |                |                  | R   | 175.1190  | 88.0631         | 158.0924       | 79.5498          |                |                  | 1  |

# AT2G19200.1

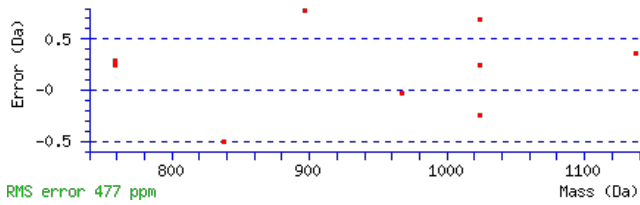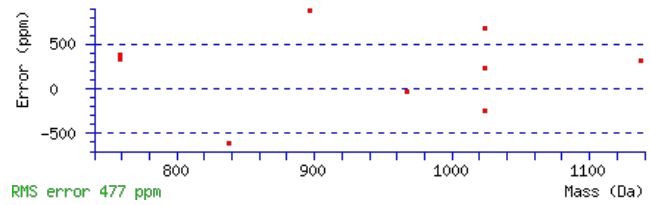

NCBI **BLAST** search of [ILRVAMETTQDLGACDATFYVR](#)  
(Parameters: blastp, nr protein database, expect=20000, no filter, PAM30)  
Other BLAST [web gateways](#)

## All matches to this query

| Score | Mr(calc)  | Delta   | Sequence                               |
|-------|-----------|---------|----------------------------------------|
| 21.9  | 2545.2305 | -0.0055 | <a href="#">ILRVAMETTQDLGACDATFYVR</a> |
| 6.2   | 2545.2266 | -0.0016 | <a href="#">LLGCCIEGEEKLLIYEFMANK</a>  |
| 5.5   | 2545.2206 | 0.0045  | <a href="#">SPWYEKIMNEMLGHLERQPR</a>   |
| 3.1   | 2545.2240 | 0.0011  | <a href="#">VKMHDVVREMLWISSGCGDQK</a>  |
| 1.7   | 2545.2305 | -0.0055 | <a href="#">AHPDVFNMMLQILEDGRLTDSK</a> |
| 1.7   | 2545.2305 | -0.0055 | <a href="#">AHPDVFNMMLQILEDGRLTDSK</a> |

Mascot: <http://www.matrixscience.com>

## Peptide View

MS/MS Fragmentation of **NNEITAEETERDEGALK**

Found in **AT2G19480.1** in **TAIR\_Arabidopsis**, Symbols: NAP1;2, NFA2 | NAP1;2/NFA2 (NUCLEOSOME ASSEMBLY PROTEIN1;2); DNA binding | chr2:8445683-8448122 FORWARD

Match to Query 9444: 2030.972763 from(677.998197,3+) index(4636)

Title: Elution from: 42.335 to 42.335 scan no 5831 cid35.00 polarity:+

Data file C7-1\_2.mgf

Click mouse within plot area to zoom in by factor of two about that point

Or,   to  Da

Label all possible matches  Label matches used for scoring

Show Y-axis

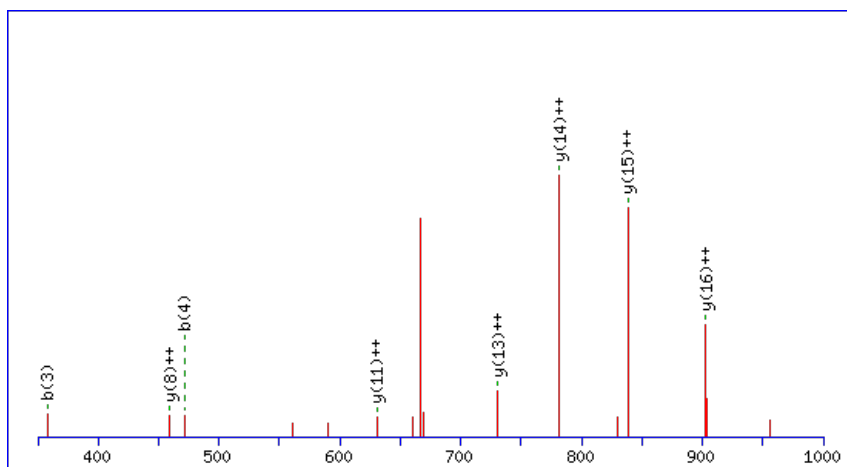

Monoisotopic mass of neutral peptide  $M_r(\text{calc})$ : 2030.9756

Fixed modifications: Carbamidomethyl (C) (apply to specified residues or termini only)

Ions Score: 45 Expect: 9.5e-005

Matches : 8/192 fragment ions using 11 most intense peaks ([help](#))

| #  | b               | b <sup>++</sup> | b*        | b <sup>*++</sup> | b <sup>0</sup> | b <sup>0++</sup> | Seq. | y         | y <sup>++</sup> | y*        | y <sup>*++</sup> | y <sup>0</sup> | y <sup>0++</sup> | #  |
|----|-----------------|-----------------|-----------|------------------|----------------|------------------|------|-----------|-----------------|-----------|------------------|----------------|------------------|----|
| 1  | 115.0502        | 58.0287         | 98.0237   | 49.5155          |                |                  | N    |           |                 |           |                  |                |                  | 18 |
| 2  | 229.0931        | 115.0502        | 212.0666  | 106.5369         |                |                  | N    | 1917.9400 | 959.4736        | 1900.9134 | 950.9604         | 1899.9294      | 950.4684         | 17 |
| 3  | <b>358.1357</b> | 179.5715        | 341.1092  | 171.0582         | 340.1252       | 170.5662         | E    | 1803.8971 | <b>902.4522</b> | 1786.8705 | 893.9389         | 1785.8865      | 893.4469         | 16 |
| 4  | <b>471.2198</b> | 236.1135        | 454.1932  | 227.6003         | 453.2092       | 227.1082         | I    | 1674.8545 | <b>837.9309</b> | 1657.8279 | 829.4176         | 1656.8439      | 828.9256         | 15 |
| 5  | 572.2675        | 286.6374        | 555.2409  | 278.1241         | 554.2569       | 277.6321         | T    | 1561.7704 | <b>781.3888</b> | 1544.7439 | 772.8756         | 1543.7598      | 772.3836         | 14 |
| 6  | 643.3046        | 322.1559        | 626.2780  | 313.6427         | 625.2940       | 313.1506         | A    | 1460.7227 | <b>730.8650</b> | 1443.6962 | 722.3517         | 1442.7122      | 721.8597         | 13 |
| 7  | 772.3472        | 386.6772        | 755.3206  | 378.1640         | 754.3366       | 377.6719         | E    | 1389.6856 | 695.3464        | 1372.6591 | 686.8332         | 1371.6750      | 686.3412         | 12 |
| 8  | 901.3898        | 451.1985        | 884.3632  | 442.6852         | 883.3792       | 442.1932         | E    | 1260.6430 | <b>630.8251</b> | 1243.6165 | 622.3119         | 1242.6325      | 621.8199         | 11 |
| 9  | 1014.4738       | 507.7406        | 997.4473  | 499.2273         | 996.4633       | 498.7353         | I    | 1131.6004 | 566.3039        | 1114.5739 | 557.7906         | 1113.5899      | 557.2986         | 10 |
| 10 | 1115.5215       | 558.2644        | 1098.4950 | 549.7511         | 1097.5109      | 549.2591         | T    | 1018.5164 | 509.7618        | 1001.4898 | 501.2485         | 1000.5058      | 500.7565         | 9  |
| 11 | 1244.5641       | 622.7857        | 1227.5376 | 614.2724         | 1226.5535      | 613.7804         | E    | 917.4687  | <b>459.2380</b> | 900.4421  | 450.7247         | 899.4581       | 450.2327         | 8  |
| 12 | 1400.6652       | 700.8362        | 1383.6387 | 692.3230         | 1382.6546      | 691.8310         | R    | 788.4261  | 394.7167        | 771.3995  | 386.2034         | 770.4155       | 385.7114         | 7  |
| 13 | 1515.6922       | 758.3497        | 1498.6656 | 749.8364         | 1497.6816      | 749.3444         | D    | 632.3250  | 316.6661        | 615.2984  | 308.1529         | 614.3144       | 307.6608         | 6  |
| 14 | 1644.7347       | 822.8710        | 1627.7082 | 814.3577         | 1626.7242      | 813.8657         | E    | 517.2980  | 259.1527        | 500.2715  | 250.6394         | 499.2875       | 250.1474         | 5  |
| 15 | 1701.7562       | 851.3817        | 1684.7297 | 842.8685         | 1683.7456      | 842.3765         | G    | 388.2554  | 194.6314        | 371.2289  | 186.1181         |                |                  | 4  |
| 16 | 1772.7933       | 886.9003        | 1755.7668 | 878.3870         | 1754.7828      | 877.8950         | A    | 331.2340  | 166.1206        | 314.2074  | 157.6074         |                |                  | 3  |
| 17 | 1885.8774       | 943.4423        | 1868.8508 | 934.9291         | 1867.8668      | 934.4371         | L    | 260.1969  | 130.6021        | 243.1703  | 122.0888         |                |                  | 2  |
| 18 |                 |                 |           |                  |                |                  | K    | 147.1128  | 74.0600         | 130.0863  | 65.5468          |                |                  | 1  |

AT2G19480.1

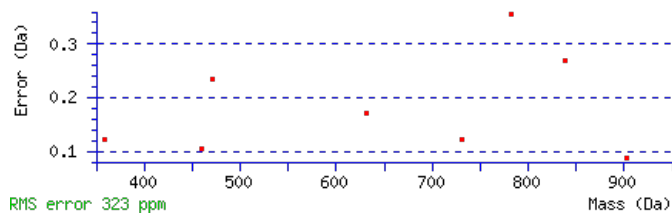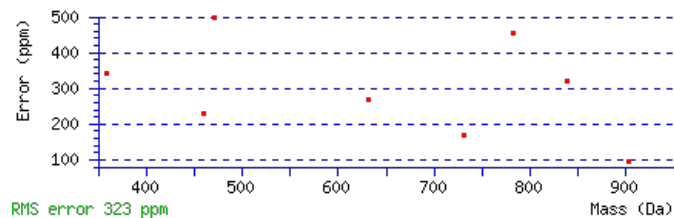

NCBI **BLAST** search of [NNEITAEETERDEGALK](#)  
(Parameters: blastp, nr protein database, expect=20000, no filter, PAM30)  
Other BLAST [web gateways](#)

**All matches to this query**

| Score | Mr(calc)  | Delta   | Sequence                           |
|-------|-----------|---------|------------------------------------|
| 45.5  | 2030.9756 | -0.0028 | <a href="#">NNEITAEETERDEGALK</a>  |
| 7.7   | 2030.9693 | 0.0035  | <a href="#">VEEFLLMMNSLEFEIR</a>   |
| 7.2   | 2030.9770 | -0.0042 | <a href="#">DIQQNIQHHLDNNSVEK</a>  |
| 3.0   | 2030.9778 | -0.0051 | <a href="#">WRPERIDLSAMACPASR</a>  |
| 1.6   | 2030.9691 | 0.0037  | <a href="#">RKEGEDAVASCVISEPER</a> |
| 1.1   | 2030.9765 | -0.0037 | <a href="#">LDEAAKMVQDMRTEPGPK</a> |
| 1.1   | 2030.9765 | -0.0037 | <a href="#">LDEAAKMVQDMRTEPGPK</a> |
| 0.8   | 2030.9731 | -0.0004 | <a href="#">LNQADNMPSYEPPVALTR</a> |

Mascot: <http://www.matrixscience.com/>

**Peptide View**MS/MS Fragmentation of **FVTAVVGFGK**Found in **AT2G19750.1** in **TAIR\_Arabidopsis**, Symbols: | 40S ribosomal protein S30 (RPS30A) | chr2:8522119-8522888 FORWARD

Match to Query 2817: 1034.545670 from(518,280111,2+) index(5772)

Title: Elution from: 51.043 to 51.043 scan no 7282 cid35.00 polarity:+

Data file D12h-1\_2.mgf

Click mouse within plot area to zoom in by factor of two about that point

Or,   to  Da Label all possible matches  Label matches used for scoring Show Y-axis 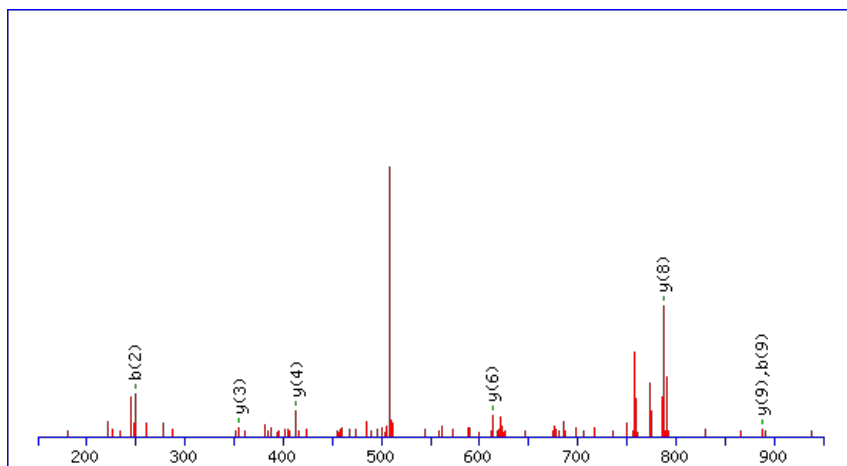

Monoisotopic mass of neutral peptide Mr(calc): 1034.5427

Fixed modifications: Carbamidomethyl (C) (apply to specified residues or termini only)

Ions Score: 43 Expect: 0.00028

Matches : 7/72 fragment ions using 8 most intense peaks ([help](#))

| #  | b               | b <sup>++</sup> | b <sup>0</sup> | b <sup>0++</sup> | Seq. | y               | y <sup>++</sup> | y <sup>*</sup> | y <sup>*++</sup> | y <sup>0</sup> | y <sup>0++</sup> | #  |
|----|-----------------|-----------------|----------------|------------------|------|-----------------|-----------------|----------------|------------------|----------------|------------------|----|
| 1  | 149.0727        | 75.0400         |                |                  | F    |                 |                 |                |                  |                |                  | 10 |
| 2  | <b>249.1382</b> | 125.0727        |                |                  | V    | <b>887.4845</b> | 444.2459        | 869.4609       | 435.2341         | 869.4740       | 435.2406         | 9  |
| 3  | 351.1829        | 176.0951        | 333.1723       | 167.0898         | T    | <b>787.4191</b> | 394.2132        | 769.3955       | 385.2014         | 769.4085       | 385.2079         | 8  |
| 4  | 423.2170        | 212.1122        | 405.2065       | 203.1069         | A    | 685.3744        | 343.1908        | 667.3508       | 334.1790         |                |                  | 7  |
| 5  | 523.2825        | 262.1449        | 505.2719       | 253.1396         | V    | <b>613.3402</b> | 307.1737        | 595.3166       | 298.1620         |                |                  | 6  |
| 6  | 623.3479        | 312.1776        | 605.3374       | 303.1723         | V    | 513.2748        | 257.1410        | 495.2512       | 248.1292         |                |                  | 5  |
| 7  | 681.3664        | 341.1869        | 663.3559       | 332.1816         | G    | <b>413.2093</b> | 207.1083        | 395.1857       | 198.0965         |                |                  | 4  |
| 8  | 829.4319        | 415.2196        | 811.4213       | 406.2143         | F    | <b>355.1908</b> | 178.0990        | 337.1672       | 169.0873         |                |                  | 3  |
| 9  | <b>887.4504</b> | 444.2288        | 869.4398       | 435.2235         | G    | 207.1254        | 104.0663        | 189.1018       | 95.0545          |                |                  | 2  |
| 10 |                 |                 |                |                  | K    | 149.1069        | 75.0571         | 131.0833       | 66.0453          |                |                  | 1  |

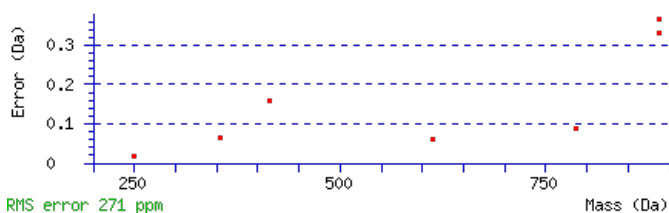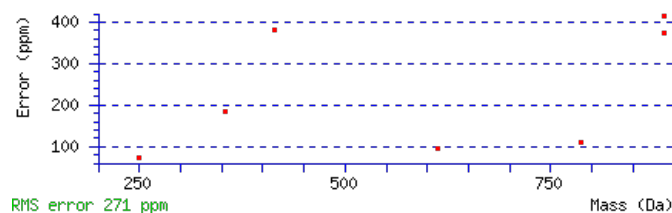NCBI **BLAST** search of **FVTAVVGFGK**

(Parameters: blastp, nr protein database, expect=20000, no filter, PAM30)

Other BLAST [web gateways](#)**All matches to this query**

| Score | Mr(calc) | Delta | Sequence |
|-------|----------|-------|----------|
|       |          |       |          |

**AT2G19750.1**

|      |           |         |                             |
|------|-----------|---------|-----------------------------|
| 43.4 | 1034.5427 | 0.0030  | <a href="#">FVTAVVGF GK</a> |
| 7.4  | 1034.5487 | -0.0031 | <a href="#">FLRMLGLR</a>    |
| 3.7  | 1034.5431 | 0.0025  | <a href="#">VQKRTNFK</a>    |
| 3.5  | 1034.5427 | 0.0030  | <a href="#">GEPVWIPVK</a>   |
| 1.6  | 1034.5431 | 0.0025  | <a href="#">RSLRDVEK</a>    |
| 1.6  | 1034.5465 | -0.0008 | <a href="#">SRLMRLTK</a>    |
| 1.6  | 1034.5431 | 0.0025  | <a href="#">TFNKROVK</a>    |
| 1.6  | 1034.5465 | -0.0008 | <a href="#">TTRMRLVK</a>    |
| 1.3  | 1034.5487 | -0.0031 | <a href="#">CRGFLK LK</a>   |
| 0.4  | 1034.5431 | 0.0025  | <a href="#">AKNQYLRK</a>    |

**Mascot:** <http://www.matrixscience.com/>



**Peptide View**MS/MS Fragmentation of **ILGLGDLGCQGMGIPVGK**

Found in **AT2G19900.1** in **TAIR\_Arabidopsis**, Symbols: ATNADP-ME1 | ATNADP-ME1 (NADP-MALIC ENZYME 1); malate dehydrogenase (oxaloacetate-decarboxylating) (NADP+)/ malic enzyme/ oxidoreductase, acting on NADH or NADPH, NAD or NADP as acceptor | chr2:8599188-8602485 REVERSE

Match to Query 8651: 1783.932164 from(892.973358,2+) index(9529)

Title: Elution from: 87.370 to 87.370 scan no 12999 cid35.00 polarity:+

Data file D6h-2\_1.mgf

Click mouse within plot area to zoom in by factor of two about that point

Or,   to  Da

Label all possible matches  Label matches used for scoring

Show Y-axis

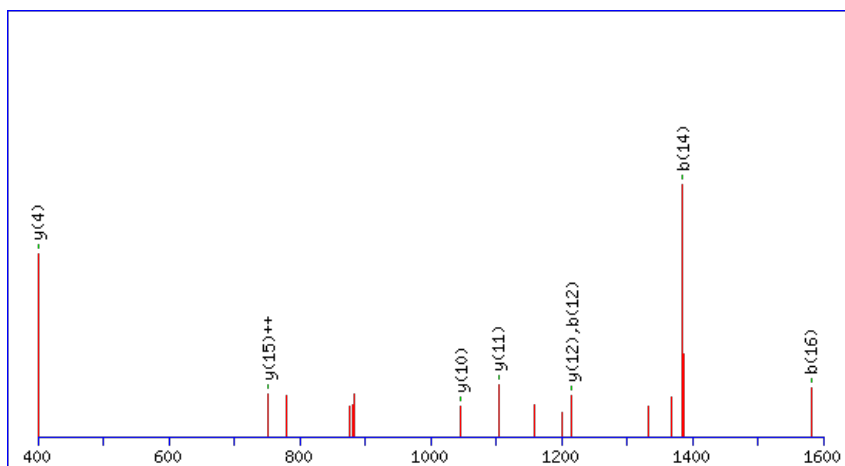

**Monoisotopic mass of neutral peptide Mr(calc):** 1783.9325

**Fixed modifications:** Carbamidomethyl (C) (apply to specified residues or termini only)

**Ions Score:** 32 **Expect:** 0.0019

**Matches:** 8/152 fragment ions using 8 most intense peaks ([help](#))

| #  | b         | b <sup>++</sup> | b <sup>*</sup> | b <sup>*++</sup> | b <sup>0</sup> | b <sup>0++</sup> | Seq. | y         | y <sup>++</sup> | y <sup>*</sup> | y <sup>*++</sup> | y <sup>0</sup> | y <sup>0++</sup> | #  |
|----|-----------|-----------------|----------------|------------------|----------------|------------------|------|-----------|-----------------|----------------|------------------|----------------|------------------|----|
| 1  | 114.0913  | 57.5493         |                |                  |                |                  | I    |           |                 |                |                  |                |                  | 18 |
| 2  | 227.1754  | 114.0913        |                |                  |                |                  | L    | 1671.8557 | 836.4315        | 1654.8291      | 827.9182         | 1653.8451      | 827.4262         | 17 |
| 3  | 284.1969  | 142.6021        |                |                  |                |                  | G    | 1558.7716 | 779.8894        | 1541.7451      | 771.3762         | 1540.7610      | 770.8842         | 16 |
| 4  | 397.2809  | 199.1441        |                |                  |                |                  | L    | 1501.7501 | 751.3787        | 1484.7236      | 742.8654         | 1483.7396      | 742.3734         | 15 |
| 5  | 454.3024  | 227.6548        |                |                  |                |                  | G    | 1388.6661 | 694.8367        | 1371.6395      | 686.3234         | 1370.6555      | 685.8314         | 14 |
| 6  | 569.3293  | 285.1683        |                |                  | 551.3188       | 276.1630         | D    | 1331.6446 | 666.3259        | 1314.6181      | 657.8127         | 1313.6341      | 657.3207         | 13 |
| 7  | 682.4134  | 341.7103        |                |                  | 664.4028       | 332.7051         | L    | 1216.6177 | 608.8125        | 1199.5911      | 600.2992         |                |                  | 12 |
| 8  | 739.4349  | 370.2211        |                |                  | 721.4243       | 361.2158         | G    | 1103.5336 | 552.2704        | 1086.5071      | 543.7572         |                |                  | 11 |
| 9  | 899.4655  | 450.2364        |                |                  | 881.4550       | 441.2311         | C    | 1046.5121 | 523.7597        | 1029.4856      | 515.2464         |                |                  | 10 |
| 10 | 1027.5241 | 514.2657        | 1010.4975      | 505.7524         | 1009.5135      | 505.2604         | Q    | 886.4815  | 443.7444        | 869.4550       | 435.2311         |                |                  | 9  |
| 11 | 1084.5456 | 542.7764        | 1067.5190      | 534.2631         | 1066.5350      | 533.7711         | G    | 758.4229  | 379.7151        | 741.3964       | 371.2018         |                |                  | 8  |
| 12 | 1215.5860 | 608.2967        | 1198.5595      | 599.7834         | 1197.5755      | 599.2914         | M    | 701.4015  | 351.2044        | 684.3749       | 342.6911         |                |                  | 7  |
| 13 | 1272.6075 | 636.8074        | 1255.5810      | 628.2941         | 1254.5969      | 627.8021         | G    | 570.3610  | 285.6841        | 553.3344       | 277.1709         |                |                  | 6  |
| 14 | 1385.6916 | 693.3494        | 1368.6650      | 684.8361         | 1367.6810      | 684.3441         | I    | 513.3395  | 257.1734        | 496.3130       | 248.6601         |                |                  | 5  |
| 15 | 1482.7443 | 741.8758        | 1465.7178      | 733.3625         | 1464.7338      | 732.8705         | P    | 400.2554  | 200.6314        | 383.2289       | 192.1181         |                |                  | 4  |
| 16 | 1581.8127 | 791.4100        | 1564.7862      | 782.8967         | 1563.8022      | 782.4047         | V    | 303.2027  | 152.1050        | 286.1761       | 143.5917         |                |                  | 3  |
| 17 | 1638.8342 | 819.9207        | 1621.8077      | 811.4075         | 1620.8236      | 810.9155         | G    | 204.1343  | 102.5708        | 187.1077       | 94.0575          |                |                  | 2  |
| 18 |           |                 |                |                  |                |                  | K    | 147.1128  | 74.0600         | 130.0863       | 65.5468          |                |                  | 1  |

# AT2G19900.1

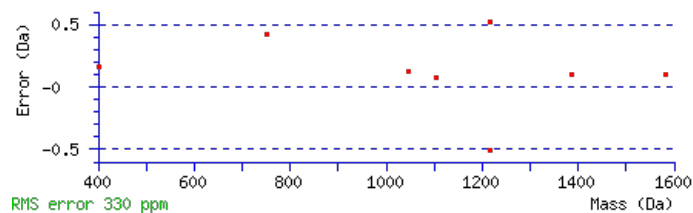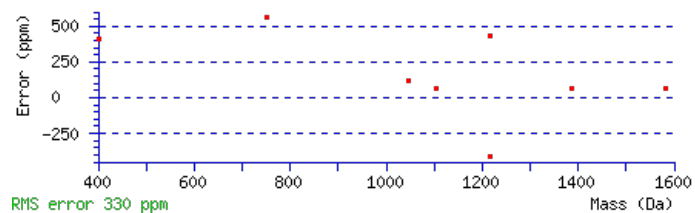

NCBI **BLAST** search of [ILGLGDLGCQGMGIPVGK](#)  
(Parameters: blastp, nr protein database, expect=20000, no filter, PAM30)  
Other BLAST [web gateways](#)

## All matches to this query

| Score | Mr(calc)  | Delta   | Sequence                           |
|-------|-----------|---------|------------------------------------|
| 32.2  | 1783.9325 | -0.0003 | <a href="#">ILGLGDLGCQGMGIPVGK</a> |
| 3.1   | 1783.9329 | -0.0007 | <a href="#">ETSQRWERVAAAVPGK</a>   |
| 0.9   | 1783.9291 | 0.0031  | <a href="#">MTLYRAFSGLVQTPGK</a>   |

Mascot: <http://www.matrixscience.com/>

**Peptide View**MS/MS Fragmentation of **ELPTALK**Found in **AT2G19940.1** in **TAIR\_Arabidopsis**, Symbols: | senialdehyde dehydrogenase family protein | chr2:8620505-8622730 FORWARD

Match to Query 913: 770.453810 from(386.234181,2+) index(5545)

Title: Elution from: 49.579 to 49.579 scan no 6977 cid35.00 polarity:+

Data file 0-2\_1.mgf

Click mouse within plot area to zoom in by factor of two about that point

Or,   to  Da Label all possible matches  Label matches used for scoring Show Y-axis 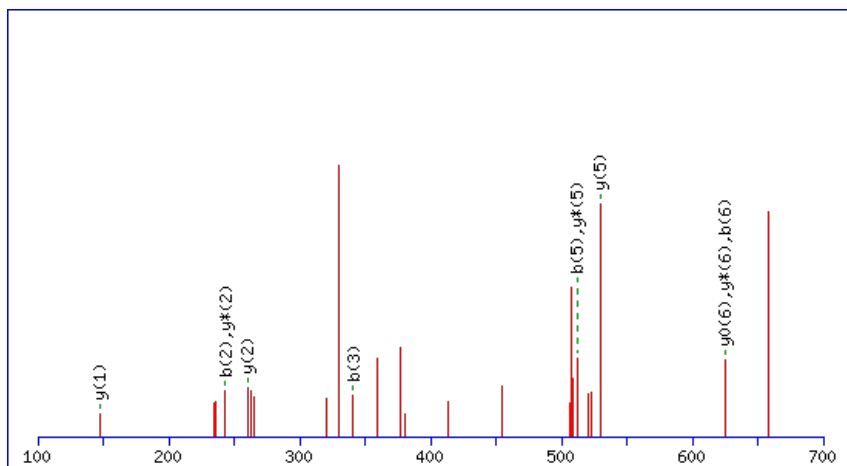Monoisotopic mass of neutral peptide **Mr(calc)**: 770.4538

Fixed modifications: Carbamidomethyl (C) (apply to specified residues or termini only)

Ions Score: 19 **Expect**: 0.031Matches : 11/54 fragment ions using 18 most intense peaks ([help](#))

| # | b               | b <sup>++</sup> | b <sup>0</sup> | b <sup>0++</sup> | Seq. | y               | y <sup>++</sup> | y*              | y <sup>*++</sup> | y <sup>0</sup>  | y <sup>0++</sup> | # |
|---|-----------------|-----------------|----------------|------------------|------|-----------------|-----------------|-----------------|------------------|-----------------|------------------|---|
| 1 | 130.0499        | 65.5286         | 112.0393       | 56.5233          | E    |                 |                 |                 |                  |                 |                  | 7 |
| 2 | <b>243.1339</b> | 122.0706        | 225.1234       | 113.0653         | L    | 642.4185        | 321.7129        | <b>625.3919</b> | 313.1996         | <b>624.4079</b> | 312.7076         | 6 |
| 3 | <b>340.1867</b> | 170.5970        | 322.1761       | 161.5917         | P    | <b>529.3344</b> | 265.1709        | <b>512.3079</b> | 256.6576         | 511.3239        | 256.1656         | 5 |
| 4 | 441.2344        | 221.1208        | 423.2238       | 212.1155         | T    | 432.2817        | 216.6445        | 415.2551        | 208.1312         | 414.2711        | 207.6392         | 4 |
| 5 | <b>512.2715</b> | 256.6394        | 494.2609       | 247.6341         | A    | 331.2340        | 166.1206        | 314.2074        | 157.6074         |                 |                  | 3 |
| 6 | <b>625.3556</b> | 313.1814        | 607.3450       | 304.1761         | L    | <b>260.1969</b> | 130.6021        | <b>243.1703</b> | 122.0888         |                 |                  | 2 |
| 7 |                 |                 |                |                  | K    | <b>147.1128</b> | 74.0600         | 130.0863        | 65.5468          |                 |                  | 1 |

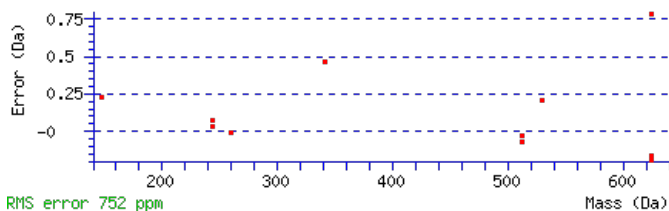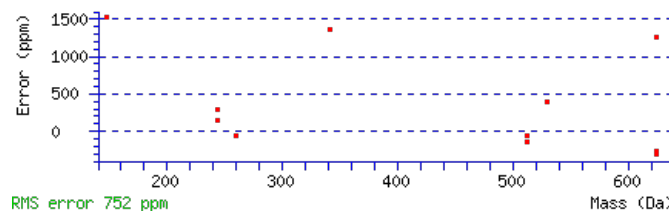NCBI **BLAST** search of **ELPTALK**

(Parameters: blastp, nr protein database, expect=20000, no filter, PAM30)

Other BLAST [web gateways](#)**All matches to this query**

| Score | Mr(calc) | Delta  | Sequence                |
|-------|----------|--------|-------------------------|
| 18.9  | 770.4538 | 0.0000 | <a href="#">ELPTALK</a> |
| 15.5  | 770.4538 | 0.0000 | <a href="#">LPETALK</a> |
| 11.4  | 770.4538 | 0.0000 | <a href="#">DPLSVLK</a> |

**AT2G19940.1**

|      |          |         |                         |
|------|----------|---------|-------------------------|
| 11.0 | 770.4538 | 0.0000  | <a href="#">LSPVDLK</a> |
| 6.0  | 770.4551 | -0.0013 | <a href="#">IHFARK</a>  |
| 5.9  | 770.4551 | -0.0013 | <a href="#">IARFHK</a>  |
| 5.1  | 770.4538 | 0.0000  | <a href="#">IPELATK</a> |
| 2.8  | 770.4551 | -0.0013 | <a href="#">HFRALK</a>  |
| 2.0  | 770.4538 | 0.0000  | <a href="#">ESVVPLK</a> |
| 1.8  | 770.4538 | 0.0000  | <a href="#">APETLLK</a> |

**Mascot:** <http://www.matrixscience.com/>

**Peptide View**MS/MS Fragmentation of **VEMAAMKR**

Found in **AT2G19950.1** in **TAIR\_Arabidopsis**, Symbols: GC1 | This gene is predicted to encode a protein that functions as a Golgi apparatus structural component known as a golgin in mammals and yeast. A fluorescently-tagged version of GC1 co-localizes with Golgi markers, and this localization

Match to Query 2091: 962.432452 from(482.223502,2+) index(5413)

Title: Elution from: 48.430 to 48.430 scan no 6878 cid35.00 polarity:+

Data file C7-3\_3.mgf

Click mouse within plot area to zoom in by factor of two about that point

Or,   to  Da

Label all possible matches  Label matches used for scoring

Show Y-axis

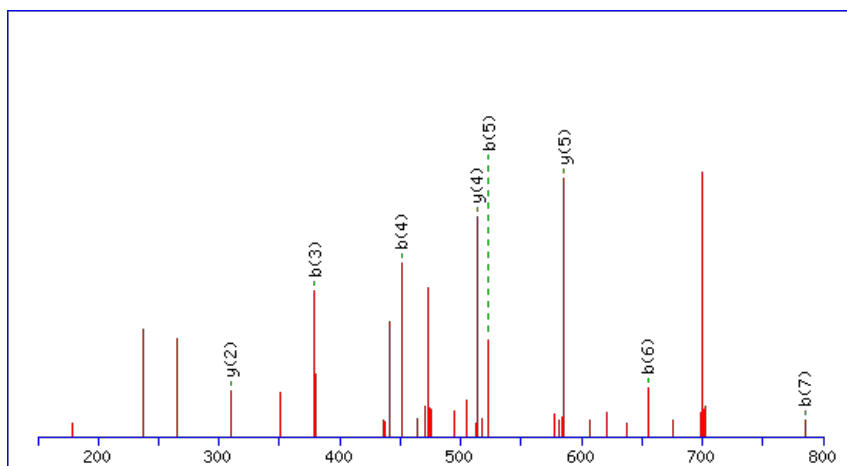

**Monoisotopic mass of neutral peptide Mr(calc):** 962.4322

**Fixed modifications:** Carbamidomethyl (C) (apply to specified residues or termini only)

**Variable modifications:**

**M3** : Oxidation (M), with neutral losses 0.0000 (shown in table), 63.9983

**Ions Score:** 37 **Expect:** 0.0011

**Matches** : 8/90 fragment ions using 13 most intense peaks ([help](#))

| # | b               | b <sup>++</sup> | b*       | b <sup>*++</sup> | b <sup>0</sup> | b <sup>0++</sup> | Seq. | y               | y <sup>++</sup> | y*       | y <sup>*++</sup> | y <sup>0</sup> | y <sup>0++</sup> | # |
|---|-----------------|-----------------|----------|------------------|----------------|------------------|------|-----------------|-----------------|----------|------------------|----------------|------------------|---|
| 1 | 101.0727        | 51.0400         |          |                  |                |                  | V    |                 |                 |          |                  |                |                  | 8 |
| 2 | 231.1124        | 116.0598        |          |                  | 213.1018       | 107.0545         | E    | 863.3740        | 432.1906        | 845.3504 | 423.1788         | 845.3634       | 423.1854         | 7 |
| 3 | <b>379.1448</b> | 190.0760        |          |                  | 361.1342       | 181.0707         | M    | 733.3344        | 367.1708        | 715.3108 | 358.1590         |                |                  | 6 |
| 4 | <b>451.1789</b> | 226.0931        |          |                  | 433.1684       | 217.0878         | A    | <b>585.3019</b> | 293.1546        | 567.2784 | 284.1428         |                |                  | 5 |
| 5 | <b>523.2131</b> | 262.1102        |          |                  | 505.2025       | 253.1049         | A    | <b>513.2678</b> | 257.1375        | 495.2442 | 248.1257         |                |                  | 4 |
| 6 | <b>655.2506</b> | 328.1289        |          |                  | 637.2400       | 319.1237         | M    | 441.2336        | 221.1205        | 423.2101 | 212.1087         |                |                  | 3 |
| 7 | <b>785.3396</b> | 393.1735        | 767.3161 | 384.1617         | 767.3291       | 384.1682         | K    | <b>309.1961</b> | 155.1017        | 291.1725 | 146.0899         |                |                  | 2 |
| 8 |                 |                 |          |                  |                |                  | R    | 179.1071        | 90.0572         | 161.0835 | 81.0454          |                |                  | 1 |

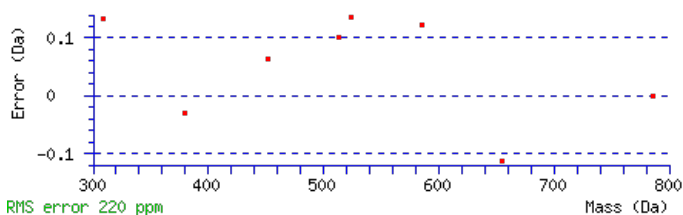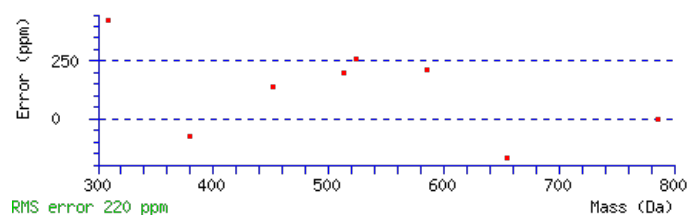

NCBI **BLAST** search of **VEMAAMKR**

(Parameters: blastp, nr protein database, expect=20000, no filter, PAM30)

Other BLAST [web gateways](#)

**All matches to this query**

## AT2G19950.1

| Score | Mr(calc) | Delta   | Sequence                  |
|-------|----------|---------|---------------------------|
| 37.3  | 962.4322 | 0.0003  | <a href="#">VEMAAMKR</a>  |
| 24.1  | 962.4313 | 0.0011  | <a href="#">SSSALTER</a>  |
| 15.5  | 962.4322 | 0.0003  | <a href="#">MKEEMKR</a>   |
| 10.3  | 962.4322 | 0.0003  | <a href="#">SMLAVVCR</a>  |
| 8.3   | 962.4335 | -0.0011 | <a href="#">YGGVSLNDK</a> |
| 7.4   | 962.4315 | 0.0010  | <a href="#">MLNGWRR</a>   |
| 6.1   | 962.4340 | -0.0015 | <a href="#">STGRLSDGR</a> |
| 5.9   | 962.4322 | 0.0003  | <a href="#">MEEKMRK</a>   |
| 5.4   | 962.4348 | -0.0024 | <a href="#">MMVQQR</a>    |
| 5.1   | 962.4340 | -0.0015 | <a href="#">SVSESRQR</a>  |

Mascot: <http://www.matrixscience.com/>

**Peptide View**MS/MS Fragmentation of **LPPVGK**

Found in **AT2G20020.1** in **TAIR\_Arabidopsis**, Symbols: | Identical to CRS2-associated factor 1, chloroplast precursor [Arabidopsis Thaliana] (GB:Q9SL79;GB:Q94AQ2); similar to ATCAF2/CAF2 (ARABIDOPSIS THALIANA HOMOLOG OF MAIZE CAF2) [Arabidopsis thaliana] (TAIR:AT1G23400.1); similar to unname

Match to Query 518: 609.384730 from(305.699641,2+) index(843)

Title: Elution from: 14.526 to 14.526 scan no 1224 cid35.00 polarity:+

Data file 0-2\_1.mgf

Click mouse within plot area to zoom in by factor of two about that point

Or,   to  Da

Label all possible matches  Label matches used for scoring

Show Y-axis

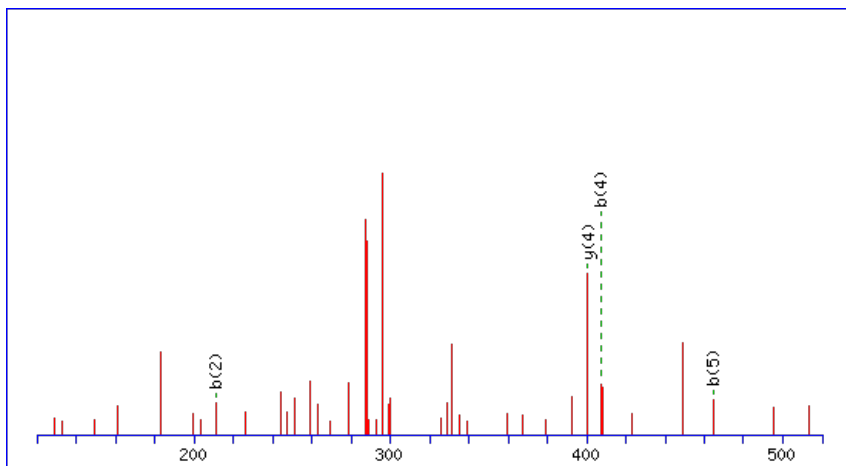

**Monoisotopic mass of neutral peptide Mr(calc):** 609.3850

**Fixed modifications:** Carbamidomethyl (C) (apply to specified residues or termini only)

**Ions Score:** 15 **Expect:** 0.035

**Matches:** 4/30 fragment ions using 12 most intense peaks ([help](#))

| # | b               | b <sup>++</sup> | Seq. | y               | y <sup>++</sup> | y*       | y <sup>*++</sup> | # |
|---|-----------------|-----------------|------|-----------------|-----------------|----------|------------------|---|
| 1 | 114.0913        | 57.5493         | L    |                 |                 |          |                  | 6 |
| 2 | <b>211.1441</b> | 106.0757        | P    | 497.3082        | 249.1577        | 480.2817 | 240.6445         | 5 |
| 3 | 308.1969        | 154.6021        | P    | <b>400.2554</b> | 200.6314        | 383.2289 | 192.1181         | 4 |
| 4 | <b>407.2653</b> | 204.1363        | V    | 303.2027        | 152.1050        | 286.1761 | 143.5917         | 3 |
| 5 | <b>464.2867</b> | 232.6470        | G    | 204.1343        | 102.5708        | 187.1077 | 94.0575          | 2 |
| 6 |                 |                 | K    | 147.1128        | 74.0600         | 130.0863 | 65.5468          | 1 |

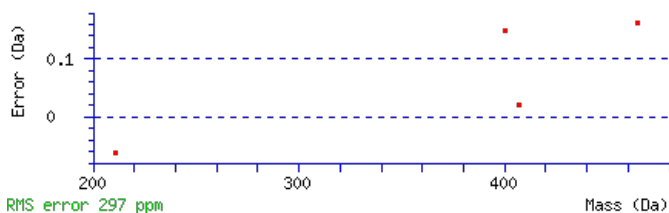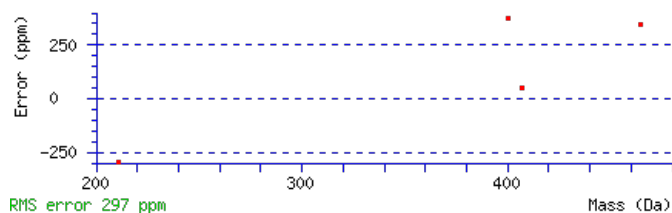

NCBI **BLAST** search of [LPPVGK](#)

(Parameters: blastp, nr protein database, expect=20000, no filter, PAM30)

Other BLAST [web gateways](#)

**All matches to this query**

| Score | Mr(calc) | Delta   | Sequence               |
|-------|----------|---------|------------------------|
| 14.6  | 609.3850 | -0.0003 | <a href="#">LPPVGK</a> |
| 12.6  | 609.3850 | -0.0003 | <a href="#">PIGVPK</a> |

AT2G20020.1

|     |          |         |                        |
|-----|----------|---------|------------------------|
| 7.0 | 609.3850 | -0.0003 | <a href="#">IPGPVK</a> |
| 7.0 | 609.3850 | -0.0003 | <a href="#">LPGPVK</a> |

**Mascot:** <http://www.matrixscience.com/>



**Peptide View**MS/MS Fragmentation of **AVANSTSATFLR**Found in **AT2G20140.1** in **TAIR\_Arabidopsis**, Symbols: | 26S protease regulatory complex subunit 4, putative | chr2:8699817-8701918  
FORWARD

Match to Query 4226: 1236.647284 from(619.330918,2+) index(3023)

Title: Elution from: 31.664 to 31.664 scan no 3801 cid35.00 polarity:+

Data file D6h-2\_2.mgf

Click mouse within plot area to zoom in by factor of two about that point

Or,   to  Da Label all possible matches  Label matches used for scoring Show Y-axis 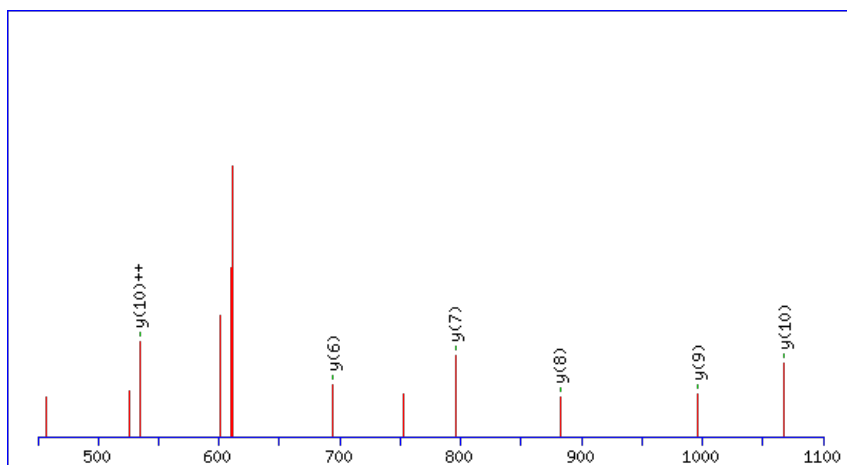Monoisotopic mass of neutral peptide  $M_r(\text{calc})$ : 1236.6462

Fixed modifications: Carbamidomethyl (C) (apply to specified residues or termini only)

Ions Score: 43 Expect: 0.0002

Matches : 6/112 fragment ions using 7 most intense peaks ([help](#))

| #  | b         | b <sup>++</sup> | b*        | b <sup>*++</sup> | b <sup>0</sup> | b <sup>0++</sup> | Seq. | y                | y <sup>++</sup> | y*        | y <sup>*++</sup> | y <sup>0</sup> | y <sup>0++</sup> | #  |
|----|-----------|-----------------|-----------|------------------|----------------|------------------|------|------------------|-----------------|-----------|------------------|----------------|------------------|----|
| 1  | 72.0444   | 36.5258         |           |                  |                |                  | A    |                  |                 |           |                  |                |                  | 12 |
| 2  | 171.1128  | 86.0600         |           |                  |                |                  | V    | 1166.6164        | 583.8118        | 1149.5899 | 575.2986         | 1148.6058      | 574.8066         | 11 |
| 3  | 242.1499  | 121.5786        |           |                  |                |                  | A    | <b>1067.5480</b> | <b>534.2776</b> | 1050.5215 | 525.7644         | 1049.5374      | 525.2724         | 10 |
| 4  | 356.1928  | 178.6001        | 339.1663  | 170.0868         |                |                  | N    | <b>996.5109</b>  | 498.7591        | 979.4843  | 490.2458         | 978.5003       | 489.7538         | 9  |
| 5  | 443.2249  | 222.1161        | 426.1983  | 213.6028         | 425.2143       | 213.1108         | S    | <b>882.4680</b>  | 441.7376        | 865.4414  | 433.2243         | 864.4574       | 432.7323         | 8  |
| 6  | 544.2726  | 272.6399        | 527.2460  | 264.1266         | 526.2620       | 263.6346         | T    | <b>795.4359</b>  | 398.2216        | 778.4094  | 389.7083         | 777.4254       | 389.2163         | 7  |
| 7  | 631.3046  | 316.1559        | 614.2780  | 307.6427         | 613.2940       | 307.1506         | S    | <b>694.3883</b>  | 347.6978        | 677.3617  | 339.1845         | 676.3777       | 338.6925         | 6  |
| 8  | 702.3417  | 351.6745        | 685.3151  | 343.1612         | 684.3311       | 342.6692         | A    | 607.3562         | 304.1817        | 590.3297  | 295.6685         | 589.3457       | 295.1765         | 5  |
| 9  | 803.3894  | 402.1983        | 786.3628  | 393.6850         | 785.3788       | 393.1930         | T    | 536.3191         | 268.6632        | 519.2926  | 260.1499         | 518.3085       | 259.6579         | 4  |
| 10 | 950.4578  | 475.7325        | 933.4312  | 467.2193         | 932.4472       | 466.7272         | F    | 435.2714         | 218.1394        | 418.2449  | 209.6261         |                |                  | 3  |
| 11 | 1063.5419 | 532.2746        | 1046.5153 | 523.7613         | 1045.5313      | 523.2693         | L    | 288.2030         | 144.6051        | 271.1765  | 136.0919         |                |                  | 2  |
| 12 |           |                 |           |                  |                |                  | R    | 175.1190         | 88.0631         | 158.0924  | 79.5498          |                |                  | 1  |

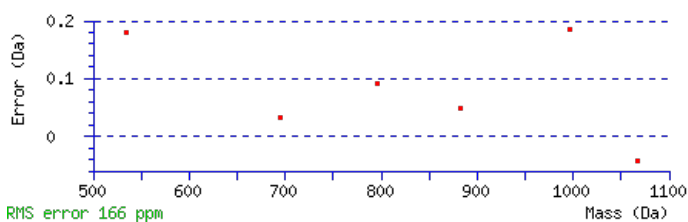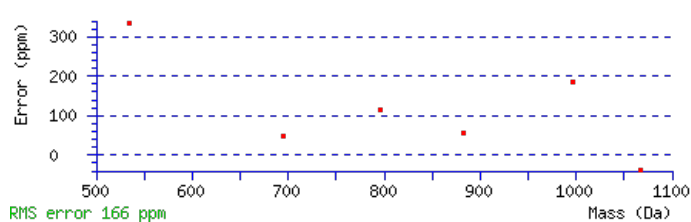NCBI BLAST search of **AVANSTSATFLR**

(Parameters: blastp, nr protein database, expect=20000, no filter, PAM30)

Other BLAST [web gateways](#)

AT2G20140.1

All matches to this query

| Score | Mr(calc)  | Delta  | Sequence                     |
|-------|-----------|--------|------------------------------|
| 43.0  | 1236.6462 | 0.0010 | <a href="#">AVANSTSATFLR</a> |

Mascot: <http://www.matrixscience.com/>

**Peptide View**MS/MS Fragmentation of **ITGQYTVPNVFIGGK**Found in **AT2G20270.1** in **TAIR\_Arabidopsis**, Symbols: | glutaredoxin family protein | chr2:8745082-8746698 REVERSE

Match to Query 7596: 1592.855762 from(797.435157,2+) index(7741)

Title: Elution from: 67.402 to 67.402 scan no 10044 cid35.00 polarity:+

Data file D6h-1\_1.mgf

Click mouse within plot area to zoom in by factor of two about that point

Or,  to  Da Label all possible matches  Label matches used for scoring Show Y-axis 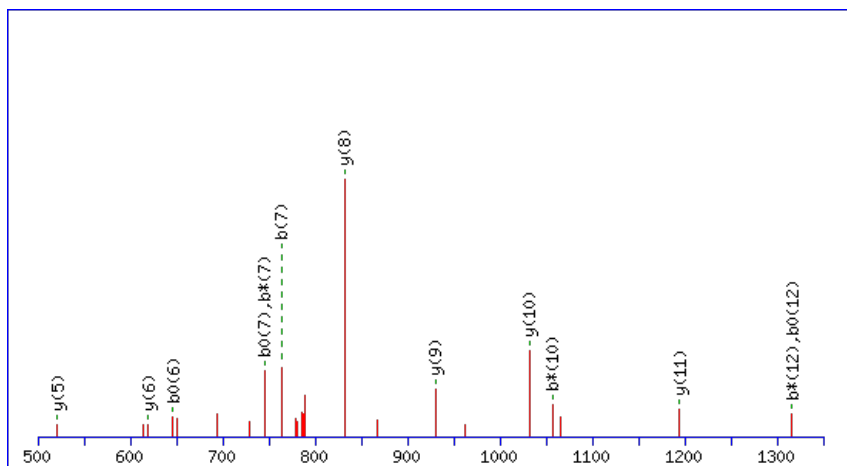**Monoisotopic mass of neutral peptide Mr(calc):** 1592.8563**Fixed modifications:** Carbamidomethyl (C) (apply to specified residues or termini only)**Ions Score:** 28 **Expect:** 0.0064**Matches:** 13/142 fragment ions using 18 most intense peaks ([help](#))

| #  | b               | b <sup>++</sup> | b*               | b <sup>*++</sup> | b <sup>0</sup>   | b <sup>0++</sup> | Seq. | y                | y <sup>++</sup> | y*        | y <sup>*++</sup> | y <sup>0</sup> | y <sup>0++</sup> | #  |
|----|-----------------|-----------------|------------------|------------------|------------------|------------------|------|------------------|-----------------|-----------|------------------|----------------|------------------|----|
| 1  | 114.0913        | 57.5493         |                  |                  |                  |                  | I    |                  |                 |           |                  |                |                  | 15 |
| 2  | 215.1390        | 108.0731        |                  |                  | 197.1285         | 99.0679          | T    | 1480.7795        | 740.8934        | 1463.7529 | 732.3801         | 1462.7689      | 731.8881         | 14 |
| 3  | 272.1605        | 136.5839        |                  |                  | 254.1499         | 127.5786         | G    | 1379.7318        | 690.3695        | 1362.7052 | 681.8563         | 1361.7212      | 681.3642         | 13 |
| 4  | 400.2191        | 200.6132        | 383.1925         | 192.0999         | 382.2085         | 191.6079         | Q    | 1322.7103        | 661.8588        | 1305.6838 | 653.3455         | 1304.6997      | 652.8535         | 12 |
| 5  | 563.2824        | 282.1448        | 546.2558         | 273.6316         | 545.2718         | 273.1396         | Y    | <b>1194.6517</b> | 597.8295        | 1177.6252 | 589.3162         | 1176.6412      | 588.8242         | 11 |
| 6  | 664.3301        | 332.6687        | 647.3035         | 324.1554         | <b>646.3195</b>  | 323.6634         | T    | <b>1031.5884</b> | 516.2978        | 1014.5619 | 507.7846         | 1013.5778      | 507.2926         | 10 |
| 7  | <b>763.3985</b> | 382.2029        | <b>746.3719</b>  | 373.6896         | <b>745.3879</b>  | 373.1976         | V    | <b>930.5407</b>  | 465.7740        | 913.5142  | 457.2607         |                |                  | 9  |
| 8  | 860.4512        | 430.7293        | 843.4247         | 422.2160         | 842.4407         | 421.7240         | P    | <b>831.4723</b>  | 416.2398        | 814.4458  | 407.7265         |                |                  | 8  |
| 9  | 974.4942        | 487.7507        | 957.4676         | 479.2375         | 956.4836         | 478.7454         | N    | 734.4196         | 367.7134        | 717.3930  | 359.2001         |                |                  | 7  |
| 10 | 1073.5626       | 537.2849        | <b>1056.5360</b> | 528.7717         | 1055.5520        | 528.2796         | V    | <b>620.3766</b>  | 310.6919        | 603.3501  | 302.1787         |                |                  | 6  |
| 11 | 1220.6310       | 610.8191        | 1203.6045        | 602.3059         | 1202.6204        | 601.8139         | F    | <b>521.3082</b>  | 261.1577        | 504.2817  | 252.6445         |                |                  | 5  |
| 12 | 1333.7151       | 667.3612        | <b>1316.6885</b> | 658.8479         | <b>1315.7045</b> | 658.3559         | I    | 374.2398         | 187.6235        | 357.2132  | 179.1103         |                |                  | 4  |
| 13 | 1390.7365       | 695.8719        | 1373.7100        | 687.3586         | 1372.7260        | 686.8666         | G    | 261.1557         | 131.0815        | 244.1292  | 122.5682         |                |                  | 3  |
| 14 | 1447.7580       | 724.3826        | 1430.7314        | 715.8694         | 1429.7474        | 715.3774         | G    | 204.1343         | 102.5708        | 187.1077  | 94.0575          |                |                  | 2  |
| 15 |                 |                 |                  |                  |                  |                  | K    | 147.1128         | 74.0600         | 130.0863  | 65.5468          |                |                  | 1  |

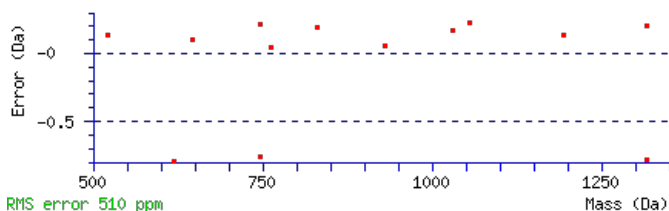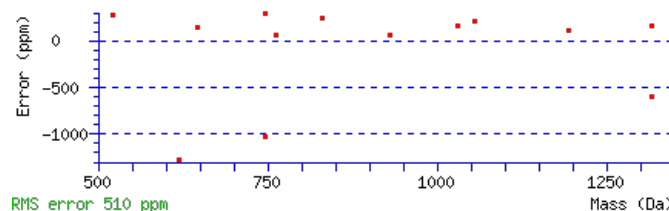NCBI **BLAST** search of [ITGQYTVPNVFIGGK](#)

## AT2G20270.1

(Parameters: blastp, nr protein database, expect=20000, no filter, PAM30)

Other BLAST [web gateways](#)

### All matches to this query

| Score | Mr(calc)  | Delta   | Sequence                       |
|-------|-----------|---------|--------------------------------|
| 27.6  | 1592.8563 | -0.0005 | <a href="#">ITGQYTPNVFIGGK</a> |
| 0.2   | 1592.8537 | 0.0020  | <a href="#">VFADAKMWKWALK</a>  |

Mascot: <http://www.matrixscience.com/>

**Peptide View**MS/MS Fragmentation of **MPPKQQPK**Found in **AT2G20280.1** in **TAIR\_Arabidopsis**, Symbols: | zinc finger (CCCH-type) family protein | chr2:8747135-8749430 REVERSE

Match to Query 2305:980.473084 from(491.243818,2+) index(2087)

Title: Elution from: 22.756 to 22.756 scan no 2616 cid35.00 polarity:+

Data file C7-2\_3.mgf

Click mouse within plot area to zoom in by factor of two about that point

Or,   to  Da Label all possible matches  Label matches used for scoring Show Y-axis 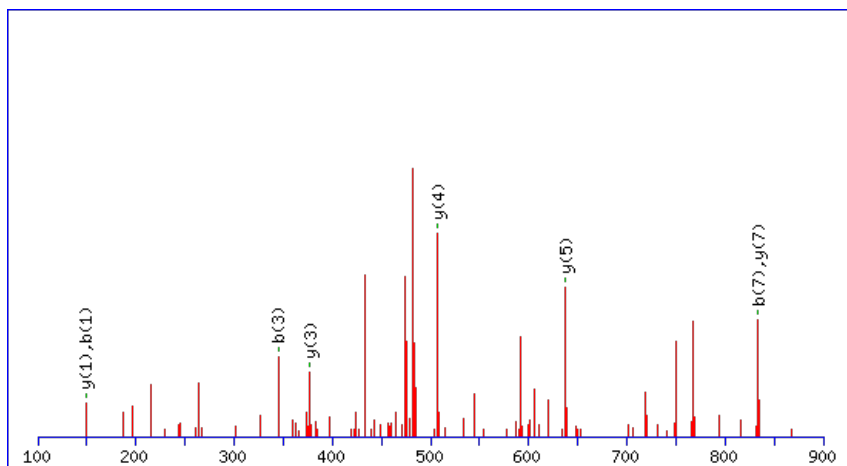**Monoisotopic mass of neutral peptide Mr(calc):** 980.4758**Fixed modifications:** Carbamidomethyl (C) (apply to specified residues or termini only)**Variable modifications:****M1** : Oxidation (M), with neutral losses 0.0000 (shown in table), 63.9983**Ions Score:** 27 **Expect:** 0.018**Matches** : 8/72 fragment ions using 15 most intense peaks ([help](#))

| # | b               | b <sup>++</sup> | b*       | b <sup>*++</sup> | Seq.     | y               | y <sup>++</sup> | y*       | y <sup>*++</sup> | #        |
|---|-----------------|-----------------|----------|------------------|----------|-----------------|-----------------|----------|------------------|----------|
| 1 | <b>149.0397</b> | 75.0235         |          |                  | <b>M</b> |                 |                 |          |                  | <b>8</b> |
| 2 | 247.0895        | 124.0484        |          |                  | <b>P</b> | <b>833.4506</b> | 417.2289        | 815.4270 | 408.2171         | <b>7</b> |
| 3 | <b>345.1393</b> | 173.0733        |          |                  | <b>P</b> | 735.4008        | 368.2040        | 717.3772 | 359.1922         | <b>6</b> |
| 4 | 475.2283        | 238.1178        | 457.2048 | 229.1060         | <b>K</b> | <b>637.3510</b> | 319.1791        | 619.3274 | 310.1673         | <b>5</b> |
| 5 | 605.2810        | 303.1441        | 587.2574 | 294.1323         | <b>Q</b> | <b>507.2620</b> | 254.1346        | 489.2384 | 245.1228         | <b>4</b> |
| 6 | 735.3336        | 368.1705        | 717.3101 | 359.1587         | <b>Q</b> | <b>377.2093</b> | 189.1083        | 359.1857 | 180.0965         | <b>3</b> |
| 7 | <b>833.3834</b> | 417.1954        | 815.3599 | 408.1836         | <b>P</b> | 247.1567        | 124.0820        | 229.1331 | 115.0702         | <b>2</b> |
| 8 |                 |                 |          |                  | <b>K</b> | <b>149.1069</b> | 75.0571         | 131.0833 | 66.0453          | <b>1</b> |

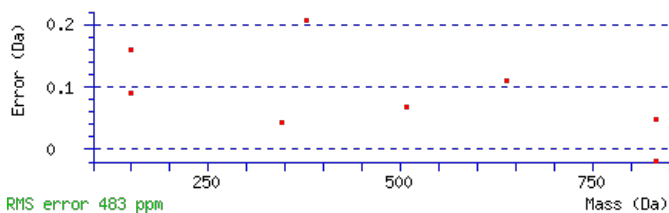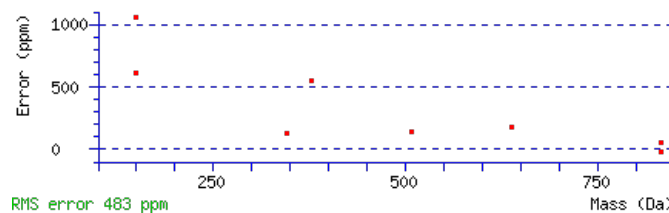NCBI **BLAST** search of **MPPKQQPK**

(Parameters: blastp, nr protein database, expect=20000, no filter, PAM30)

Other BLAST [web gateways](#)**All matches to this query**

| Score | Mr(calc) | Delta   | Sequence                 |
|-------|----------|---------|--------------------------|
| 27.0  | 980.4758 | -0.0027 | <a href="#">MPPKQQPK</a> |

## AT2G20280.1

|      |          |         |                          |
|------|----------|---------|--------------------------|
| 22.3 | 980.4758 | -0.0027 | <a href="#">AIHCDILK</a> |
| 22.1 | 980.4702 | 0.0029  | <a href="#">SHNQIELK</a> |
| 9.3  | 980.4758 | -0.0027 | <a href="#">MSTARFIK</a> |
| 8.9  | 980.4758 | -0.0027 | <a href="#">NHPTLMIK</a> |
| 6.8  | 980.4724 | 0.0007  | <a href="#">IFDHPNVK</a> |
| 6.2  | 980.4702 | 0.0029  | <a href="#">RDNLPEPK</a> |
| 6.0  | 980.4728 | 0.0003  | <a href="#">RLTSHSHK</a> |
| 4.7  | 980.4758 | -0.0027 | <a href="#">MAFSRTK</a>  |
| 4.2  | 980.4701 | 0.0029  | <a href="#">DDVHLKNK</a> |

Mascot: <http://www.matrixscience.com/>

## Peptide View

### MS/MS Fragmentation of VPIDVFAGITDEDAK

Found in **AT2G20420.1** in **TAIR\_Arabidopsis**, Symbols: | succinyl-CoA ligase (GDP-forming) beta-chain, mitochondrial, putative / succinyl-CoA synthetase, beta chain, putative / SCS-beta, putative | chr2:8812655-8814939 FORWARD

Match to Query 7781: 1676.784952 from(839.399752,2+) index(8623)

Title: Elution from: 79.565 to 79.565 scan no 11595 cid35.00 polarity:+

Data file D1d-1\_1.mgf

Click mouse within plot area to zoom in by factor of two about that point

Or,   to  Da

Label all possible matches  Label matches used for scoring

Show Y-axis

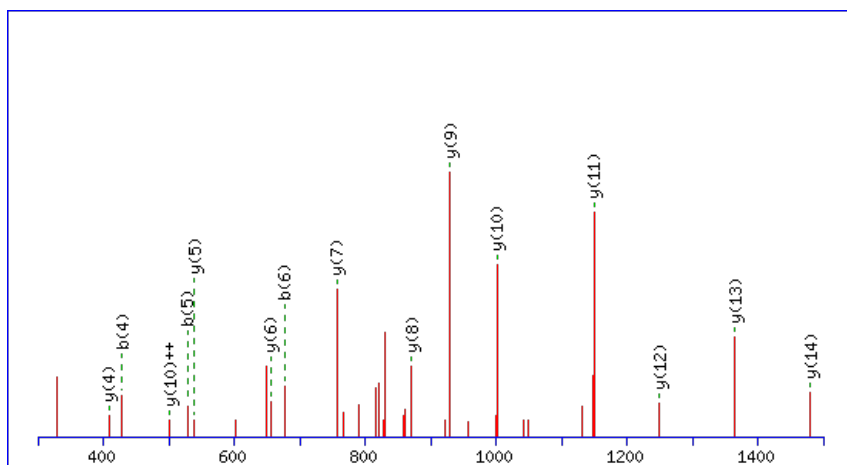

Monoisotopic mass of neutral peptide  $M_r(\text{calc})$ : 1676.7851

Fixed modifications: Carbamidomethyl (C) (apply to specified residues or termini only)

Ions Score: 88 Expect: 1.2e-008

Matches : 15/138 fragment ions using 28 most intense peaks ([help](#))

| #  | b         | b <sup>++</sup> | b <sup>0</sup> | b <sup>0++</sup> | Seq. | y         | y <sup>++</sup> | y*        | y <sup>*++</sup> | y <sup>0</sup> | y <sup>0++</sup> | #  |
|----|-----------|-----------------|----------------|------------------|------|-----------|-----------------|-----------|------------------|----------------|------------------|----|
| 1  | 101.0727  | 51.0400         |                |                  | V    |           |                 |           |                  |                |                  | 16 |
| 2  | 199.1225  | 100.0649        |                |                  | P    | 1577.7270 | 789.3671        | 1559.7034 | 780.3553         | 1559.7164      | 780.3619         | 15 |
| 3  | 313.2036  | 157.1054        |                |                  | I    | 1479.6772 | 740.3422        | 1461.6536 | 731.3304         | 1461.6666      | 731.3370         | 14 |
| 4  | 429.2276  | 215.1174        | 411.2170       | 206.1122         | D    | 1365.5961 | 683.3017        | 1347.5725 | 674.2899         | 1347.5855      | 674.2964         | 13 |
| 5  | 529.2930  | 265.1502        | 511.2825       | 256.1449         | V    | 1249.5721 | 625.2897        | 1231.5485 | 616.2779         | 1231.5615      | 616.2844         | 12 |
| 6  | 677.3585  | 339.1829        | 659.3479       | 330.1776         | F    | 1149.5067 | 575.2570        | 1131.4831 | 566.2452         | 1131.4961      | 566.2517         | 11 |
| 7  | 749.3926  | 375.2000        | 731.3821       | 366.1947         | A    | 1001.4412 | 501.2242        | 983.4176  | 492.2125         | 983.4307       | 492.2190         | 10 |
| 8  | 807.4111  | 404.2092        | 789.4006       | 395.2039         | G    | 929.4071  | 465.2072        | 911.3835  | 456.1954         | 911.3965       | 456.2019         | 9  |
| 9  | 921.4922  | 461.2498        | 903.4817       | 452.2445         | I    | 871.3886  | 436.1979        | 853.3650  | 427.1861         | 853.3780       | 427.1926         | 8  |
| 10 | 1023.5370 | 512.2721        | 1005.5264      | 503.2668         | T    | 757.3075  | 379.1574        | 739.2839  | 370.1456         | 739.2969       | 370.1521         | 7  |
| 11 | 1139.5609 | 570.2841        | 1121.5504      | 561.2788         | D    | 655.2628  | 328.1350        | 637.2392  | 319.1232         | 637.2522       | 319.1297         | 6  |
| 12 | 1269.6006 | 635.3039        | 1251.5900      | 626.2986         | E    | 539.2388  | 270.1230        | 521.2152  | 261.1112         | 521.2282       | 261.1177         | 5  |
| 13 | 1385.6245 | 693.3159        | 1367.6140      | 684.3106         | D    | 409.1992  | 205.1032        | 391.1756  | 196.0914         | 391.1886       | 196.0979         | 4  |
| 14 | 1457.6587 | 729.3330        | 1439.6481      | 720.3277         | A    | 293.1752  | 147.0912        | 275.1516  | 138.0794         |                |                  | 3  |
| 15 | 1529.6928 | 765.3501        | 1511.6823      | 756.3448         | A    | 221.1410  | 111.0741        | 203.1174  | 102.0624         |                |                  | 2  |
| 16 |           |                 |                |                  | K    | 149.1069  | 75.0571         | 131.0833  | 66.0453          |                |                  | 1  |

AT2G20420.1

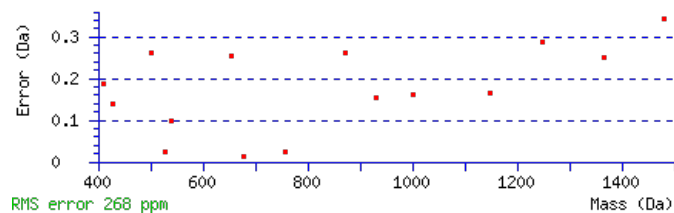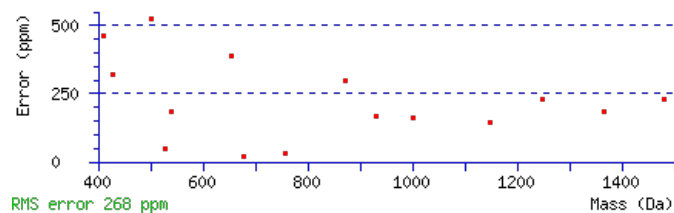

NCBI **BLAST** search of [VPIDVFAGITDEDAAK](#)

(Parameters: blastp, nr protein database, expect=20000, no filter, PAM30)

Other BLAST [web gateways](#)

**All matches to this query**

| Score | Mr(calc)  | Delta   | Sequence                         |
|-------|-----------|---------|----------------------------------|
| 88.3  | 1676.7851 | -0.0002 | <a href="#">VPIDVFAGITDEDAAK</a> |
| 3.0   | 1676.7804 | 0.0046  | <a href="#">VFTLVTSQNAGKTMF</a>  |
| 0.5   | 1676.7838 | 0.0012  | <a href="#">VDEAHLMLEKMLSK</a>   |

Mascot: <http://www.matrixscience.com/>



**Peptide View**MS/MS Fragmentation of **VALVNYGEDYGK**Found in **AT2G20450.1** in **TAIR\_Arabidopsis**, Symbols: | 60S ribosomal protein L14 (RPL14A) | chr2:8821004-8822152 FORWARD

Match to Query 4845: 1326.644214 from(664.329383,2+) index(4270)

Title: Elution from: 40.169 to 40.169 scan no 5389 cid35.00 polarity:+

Data file D6h-1\_2.mgf

Click mouse within plot area to zoom in by factor of two about that point

Or,   to  Da Label all possible matches  Label matches used for scoring Show Y-axis 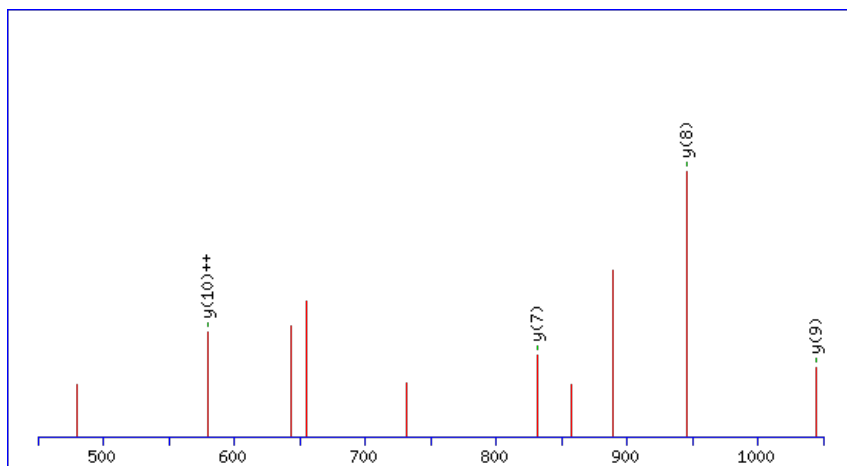**Monoisotopic mass of neutral peptide Mr(calc):** 1326.6456**Fixed modifications:** Carbamidomethyl (C) (apply to specified residues or termini only)**Ions Score:** 19 **Expect:** 0.023**Matches:** 4/104 fragment ions using 6 most intense peaks ([help](#))

| #  | b         | b <sup>++</sup> | b <sup>*</sup> | b <sup>*++</sup> | b <sup>0</sup> | b <sup>0++</sup> | Seq. | y         | y <sup>++</sup> | y <sup>*</sup> | y <sup>*++</sup> | y <sup>0</sup> | y <sup>0++</sup> | #  |
|----|-----------|-----------------|----------------|------------------|----------------|------------------|------|-----------|-----------------|----------------|------------------|----------------|------------------|----|
| 1  | 100.0757  | 50.5415         |                |                  |                |                  | V    |           |                 |                |                  |                |                  | 12 |
| 2  | 171.1128  | 86.0600         |                |                  |                |                  | A    | 1228.5844 | 614.7959        | 1211.5579      | 606.2826         | 1210.5739      | 605.7906         | 11 |
| 3  | 284.1969  | 142.6021        |                |                  |                |                  | L    | 1157.5473 | 579.2773        | 1140.5208      | 570.7640         | 1139.5368      | 570.2720         | 10 |
| 4  | 383.2653  | 192.1363        |                |                  |                |                  | V    | 1044.4633 | 522.7353        | 1027.4367      | 514.2220         | 1026.4527      | 513.7300         | 9  |
| 5  | 497.3082  | 249.1577        | 480.2817       | 240.6445         |                |                  | N    | 945.3949  | 473.2011        | 928.3683       | 464.6878         | 927.3843       | 464.1958         | 8  |
| 6  | 660.3715  | 330.6894        | 643.3450       | 322.1761         |                |                  | Y    | 831.3519  | 416.1796        | 814.3254       | 407.6663         | 813.3414       | 407.1743         | 7  |
| 7  | 717.3930  | 359.2001        | 700.3665       | 350.6869         |                |                  | G    | 668.2886  | 334.6479        | 651.2620       | 326.1347         | 650.2780       | 325.6427         | 6  |
| 8  | 846.4356  | 423.7214        | 829.4090       | 415.2082         | 828.4250       | 414.7162         | E    | 611.2671  | 306.1372        | 594.2406       | 297.6239         | 593.2566       | 297.1319         | 5  |
| 9  | 961.4625  | 481.2349        | 944.4360       | 472.7216         | 943.4520       | 472.2296         | D    | 482.2245  | 241.6159        | 465.1980       | 233.1026         | 464.2140       | 232.6106         | 4  |
| 10 | 1124.5259 | 562.7666        | 1107.4993      | 554.2533         | 1106.5153      | 553.7613         | Y    | 367.1976  | 184.1024        | 350.1710       | 175.5892         |                |                  | 3  |
| 11 | 1181.5473 | 591.2773        | 1164.5208      | 582.7640         | 1163.5368      | 582.2720         | G    | 204.1343  | 102.5708        | 187.1077       | 94.0575          |                |                  | 2  |
| 12 |           |                 |                |                  |                |                  | K    | 147.1128  | 74.0600         | 130.0863       | 65.5468          |                |                  | 1  |

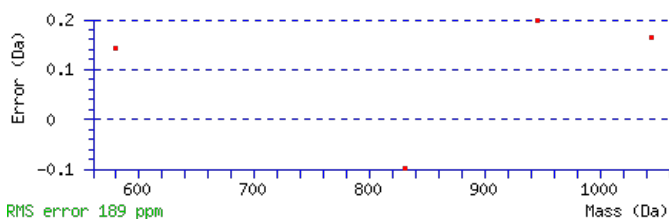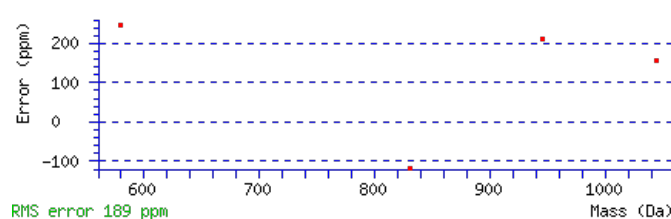NCBI **BLAST** search of **VALVNYGEDYGK**

(Parameters: blastp, nr protein database, expect=20000, no filter, PAM30)

Other BLAST [web gateways](#)**All matches to this query**

AT2G20450.1

| Score | Mr(calc)  | Delta   | Sequence                    |
|-------|-----------|---------|-----------------------------|
| 18.8  | 1326.6456 | -0.0014 | <a href="#">VALVNYGEDYK</a> |

Mascot: <http://www.matrixscience.com/>

## Peptide View

MS/MS Fragmentation of **LLELASATDPTVLDK**

Found in **AT2G20890.1** in **TAIR\_Arabidopsis**, Symbols: THF1, PSB29 | PSB29 (THYLAKOID FORMATION1) | chr2:8994864-8996266  
FORWARD

Match to Query 6774: 1600.812370 from(801.413461,2+) index(6950)

Title: Elution from: 62.035 to 62.035 scan no 9127 cid35.00 polarity:+

Data file C7-3\_3.mgf

Click mouse within plot area to zoom in by factor of two about that point

Or,   to  Da

Label all possible matches  Label matches used for scoring

Show Y-axis

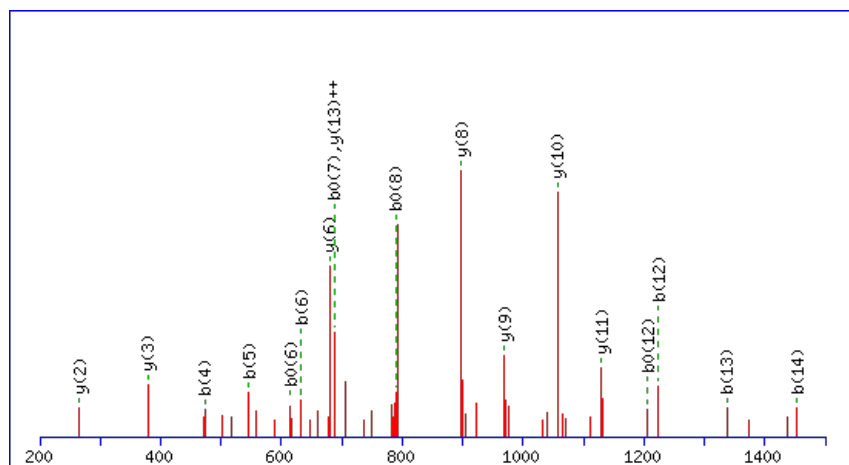

Monoisotopic mass of neutral peptide  $M_r(\text{calc})$ : 1600.8136

Fixed modifications: Carbamidomethyl (C) (apply to specified residues or termini only)

Ions Score: 58 Expect: 8.7e-006

Matches : 18/134 fragment ions using 22 most intense peaks ([help](#))

| #  | b         | b <sup>++</sup> | b <sup>0</sup> | b <sup>0++</sup> | Seq. | y         | y <sup>++</sup> | y*        | y <sup>*++</sup> | y <sup>0</sup> | y <sup>0++</sup> | #  |
|----|-----------|-----------------|----------------|------------------|------|-----------|-----------------|-----------|------------------|----------------|------------------|----|
| 1  | 115.0884  | 58.0478         |                |                  | L    |           |                 |           |                  |                |                  | 15 |
| 2  | 229.1695  | 115.0884        |                |                  | L    | 1487.7398 | 744.3735        | 1469.7162 | 735.3617         | 1469.7292      | 735.3683         | 14 |
| 3  | 359.2091  | 180.1082        | 341.1985       | 171.1029         | E    | 1373.6587 | 687.3330        | 1355.6351 | 678.3212         | 1355.6481      | 678.3277         | 13 |
| 4  | 473.2902  | 237.1487        | 455.2796       | 228.1435         | L    | 1243.6191 | 622.3132        | 1225.5955 | 613.3014         | 1225.6085      | 613.3079         | 12 |
| 5  | 545.3243  | 273.1658        | 527.3138       | 264.1605         | A    | 1129.5380 | 565.2726        | 1111.5144 | 556.2608         | 1111.5274      | 556.2673         | 11 |
| 6  | 633.3534  | 317.1803        | 615.3428       | 308.1751         | S    | 1057.5038 | 529.2555        | 1039.4802 | 520.2438         | 1039.4932      | 520.2503         | 10 |
| 7  | 705.3876  | 353.1974        | 687.3770       | 344.1921         | A    | 969.4748  | 485.2410        | 951.4512  | 476.2292         | 951.4642       | 476.2357         | 9  |
| 8  | 807.4323  | 404.2198        | 789.4217       | 395.2145         | T    | 897.4406  | 449.2239        | 879.4170  | 440.2121         | 879.4300       | 440.2187         | 8  |
| 9  | 923.4563  | 462.2318        | 905.4457       | 453.2265         | D    | 795.3959  | 398.2016        | 777.3723  | 389.1898         | 777.3853       | 389.1963         | 7  |
| 10 | 1021.5061 | 511.2567        | 1003.4955      | 502.2514         | P    | 679.3719  | 340.1896        | 661.3483  | 331.1778         | 661.3613       | 331.1843         | 6  |
| 11 | 1123.5508 | 562.2790        | 1105.5402      | 553.2737         | T    | 581.3221  | 291.1647        | 563.2985  | 282.1529         | 563.3115       | 282.1594         | 5  |
| 12 | 1223.6162 | 612.3117        | 1205.6056      | 603.3065         | V    | 479.2774  | 240.1423        | 461.2538  | 231.1305         | 461.2668       | 231.1371         | 4  |
| 13 | 1337.6973 | 669.3523        | 1319.6867      | 660.3470         | L    | 379.2120  | 190.1096        | 361.1884  | 181.0978         | 361.2014       | 181.1043         | 3  |
| 14 | 1453.7213 | 727.3643        | 1435.7107      | 718.3590         | D    | 265.1309  | 133.0691        | 247.1073  | 124.0573         | 247.1203       | 124.0638         | 2  |
| 15 |           |                 |                |                  | K    | 149.1069  | 75.0571         | 131.0833  | 66.0453          |                |                  | 1  |

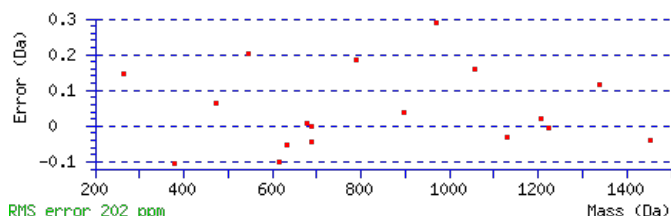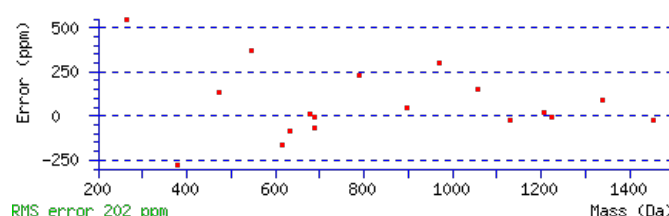

## AT2G20890.1

NCBI **BLAST** search of [LLELASATDPTVLDK](#)

(Parameters: blastp, nr protein database, expect=20000, no filter, PAM30)

Other BLAST [web gateways](#)

### All matches to this query

| Score | Mr(calc)  | Delta   | Sequence                        |
|-------|-----------|---------|---------------------------------|
| 58.0  | 1600.8136 | -0.0012 | <a href="#">LLELASATDPTVLDK</a> |
| 10.7  | 1600.8136 | -0.0012 | <a href="#">ELLETTISNLPLDK</a>  |
| 7.8   | 1600.8126 | -0.0003 | <a href="#">YVLPFWTRFVK</a>     |
| 2.6   | 1600.8115 | 0.0008  | <a href="#">MKVQRSTFLAVTGK</a>  |

**Mascot:** <http://www.matrixscience.com/>

**Peptide View**MS/MS Fragmentation of **KFGAADTFK**Found in **AT2G20900.1** in **TAIR\_Arabidopsis**, Symbols: | diacylglycerol kinase, putative | chr2:8996493-8999879 REVERSE

Match to Query 2396: 994.475678 from(498.245115,2+) index(1199)

Title: Elution from: 19.740 to 19.740 scan no 1751 cid35.00 polarity:+

Data file D6h-2\_1.mgf

Click mouse within plot area to zoom in by factor of two about that point

Or,   to  Da Label all possible matches  Label matches used for scoring Show Y-axis 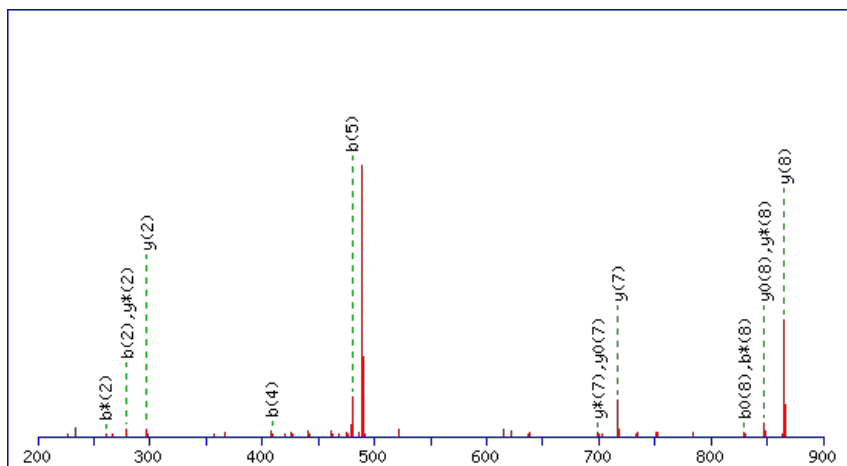Monoisotopic mass of neutral peptide **Mr(calc)**: 994.4750**Fixed modifications**: Carbamidomethyl (C) (apply to specified residues or termini only)**Ions Score**: 23 **Expect**: 0.04**Matches**: 16/82 fragment ions using 32 most intense peaks ([help](#))

| # | b               | b <sup>++</sup> | b*              | b <sup>*++</sup> | b <sup>0</sup>  | b <sup>0++</sup> | Seq.     | y               | y <sup>++</sup> | y*              | y <sup>*++</sup> | y <sup>0</sup>  | y <sup>0++</sup> | # |
|---|-----------------|-----------------|-----------------|------------------|-----------------|------------------|----------|-----------------|-----------------|-----------------|------------------|-----------------|------------------|---|
| 1 | 131.0963        | 66.0518         | 113.0727        | 57.0400          |                 |                  | <b>K</b> |                 |                 |                 |                  |                 |                  | 9 |
| 2 | <b>279.1618</b> | 140.0845        | <b>261.1382</b> | 131.0727         |                 |                  | <b>F</b> | <b>865.3933</b> | 433.2003        | <b>847.3697</b> | 424.1885         | <b>847.3827</b> | 424.1950         | 8 |
| 3 | 337.1803        | 169.0938        | 319.1567        | 160.0820         |                 |                  | <b>G</b> | <b>717.3278</b> | 359.1675        | <b>699.3042</b> | 350.1558         | <b>699.3172</b> | 350.1623         | 7 |
| 4 | <b>409.2144</b> | 205.1108        | 391.1908        | 196.0990         |                 |                  | <b>A</b> | 659.3093        | 330.1583        | 641.2857        | 321.1465         | 641.2987        | 321.1530         | 6 |
| 5 | <b>481.2486</b> | 241.1279        | 463.2250        | 232.1161         |                 |                  | <b>A</b> | 587.2752        | 294.1412        | 569.2516        | 285.1294         | 569.2646        | 285.1359         | 5 |
| 6 | 597.2725        | 299.1399        | 579.2489        | 290.1281         | 579.2620        | 290.1346         | <b>D</b> | 515.2410        | 258.1241        | 497.2174        | 249.1124         | 497.2304        | 249.1189         | 4 |
| 7 | <b>699.3172</b> | 350.1623        | 681.2937        | 341.1505         | 681.3067        | 341.1570         | <b>T</b> | 399.2170        | 200.1122        | 381.1935        | 191.1004         | 381.2065        | 191.1069         | 3 |
| 8 | <b>847.3827</b> | 424.1950        | <b>829.3591</b> | 415.1832         | <b>829.3721</b> | 415.1897         | <b>F</b> | <b>297.1723</b> | 149.0898        | <b>279.1487</b> | 140.0780         |                 |                  | 2 |
| 9 |                 |                 |                 |                  |                 |                  | <b>K</b> | 149.1069        | 75.0571         | 131.0833        | 66.0453          |                 |                  | 1 |

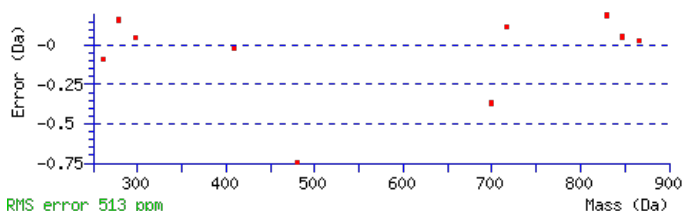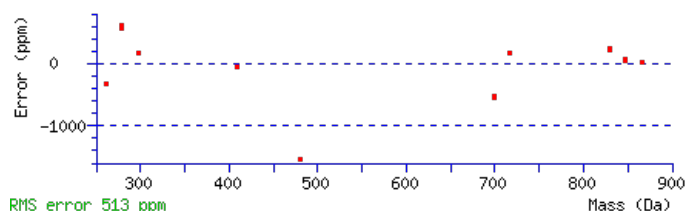NCBI **BLAST** search of [KFGAADTFK](#)

(Parameters: blastp, nr protein database, expect=20000, no filter, PAM30)

Other BLAST [web gateways](#)**All matches to this query**

| Score | Mr(calc) | Delta  | Sequence                  |
|-------|----------|--------|---------------------------|
| 23.1  | 994.4750 | 0.0007 | <a href="#">KFGAADTFK</a> |

## AT2G20900.1

|      |          |         |                            |
|------|----------|---------|----------------------------|
| 19.7 | 994.4750 | 0.0007  | <a href="#">KFTDAQFK</a>   |
| 17.9 | 994.4750 | 0.0007  | <a href="#">YLSAAGFGAK</a> |
| 13.6 | 994.4784 | -0.0027 | <a href="#">KTVAMAYGK</a>  |
| 13.4 | 994.4784 | -0.0027 | <a href="#">EYAKMAKK</a>   |
| 12.5 | 994.4750 | 0.0007  | <a href="#">KTQADFFK</a>   |
| 12.4 | 994.4777 | -0.0020 | <a href="#">EFFRQVR</a>    |
| 11.7 | 994.4784 | -0.0027 | <a href="#">KAKFTDMK</a>   |
| 11.6 | 994.4784 | -0.0027 | <a href="#">MKGSIFTGK</a>  |
| 11.1 | 994.4784 | -0.0027 | <a href="#">FIQSKSMK</a>   |

Mascot: <http://www.matrixscience.com/>

## Peptide View

### MS/MS Fragmentation of **LFGFGK**

Found in **AT2G20960.1** in **TAIR\_Arabidopsis**, Symbols: pEARLI4 | pEARLI4 | chr2:9014170-9016692 FORWARD

Match to Query 516: 667.369168 from(334.691860,2+) index(3797)

Title: Elution from: 37.098 to 37.098 scan no 4869 cid35.00 polarity:+

Data file D1d-2\_3.mgf

Click mouse within plot area to zoom in by factor of two about that point

Or,   to  Da

Label all possible matches  Label matches used for scoring

Show Y-axis

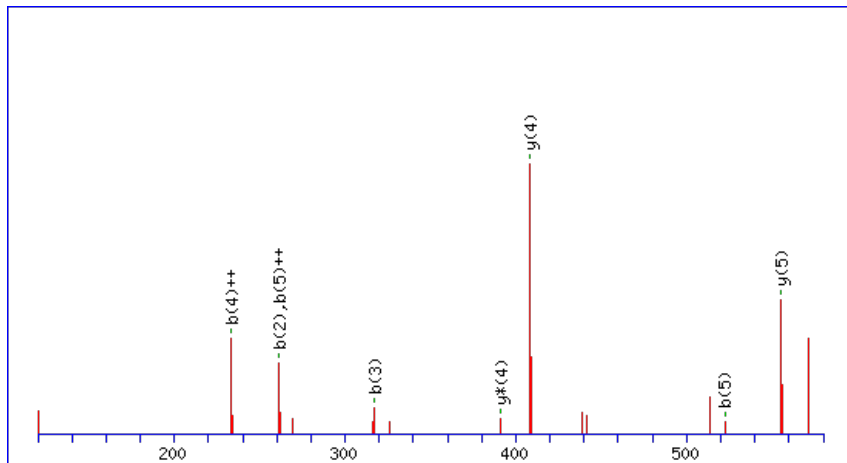

Monoisotopic mass of neutral peptide  $M_r(\text{calc})$ : 667.3694

Fixed modifications: Carbamidomethyl (C) (apply to specified residues or termini only)

Ions Score: 19 Expect: 0.024

Matches : 8/30 fragment ions using 16 most intense peaks ([help](#))

| # | b               | b <sup>++</sup> | Seq. | y               | y <sup>++</sup> | y*              | y <sup>*++</sup> | # |
|---|-----------------|-----------------|------|-----------------|-----------------|-----------------|------------------|---|
| 1 | 114.0913        | 57.5493         | L    |                 |                 |                 |                  | 6 |
| 2 | <b>261.1598</b> | 131.0835        | F    | <b>555.2926</b> | 278.1499        | 538.2660        | 269.6366         | 5 |
| 3 | <b>318.1812</b> | 159.5942        | G    | <b>408.2241</b> | 204.6157        | <b>391.1976</b> | 196.1024         | 4 |
| 4 | 465.2496        | <b>233.1285</b> | F    | 351.2027        | 176.1050        | 334.1761        | 167.5917         | 3 |
| 5 | <b>522.2711</b> | <b>261.6392</b> | G    | 204.1343        | 102.5708        | 187.1077        | 94.0575          | 2 |
| 6 |                 |                 | K    | 147.1128        | 74.0600         | 130.0863        | 65.5468          | 1 |

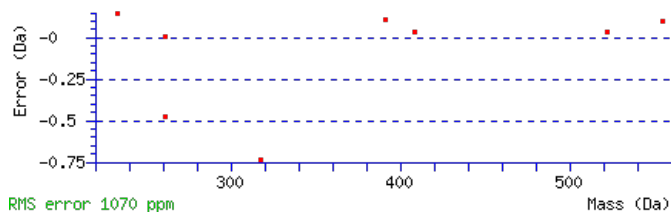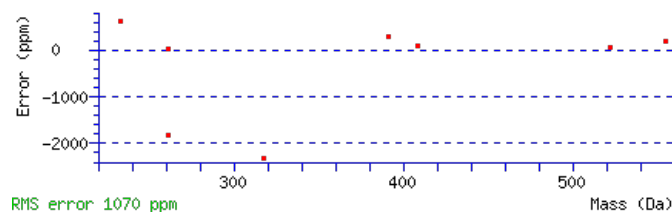

### NCBI BLAST search of **LFGFGK**

(Parameters: blastp, nr protein database, expect=20000, no filter, PAM30)

Other BLAST [web gateways](#)

### All matches to this query

| Score | $M_r(\text{calc})$ | Delta   | Sequence               |
|-------|--------------------|---------|------------------------|
| 18.6  | 667.3694           | -0.0002 | <a href="#">LFGFGK</a> |
| 16.6  | 667.3693           | -0.0002 | <a href="#">LFFNK</a>  |
| 10.8  | 667.3693           | -0.0002 | <a href="#">LEFNK</a>  |
| 9.3   | 667.3693           | -0.0002 | <a href="#">IFENK</a>  |

## AT2G20960.1

|     |          |         |                        |
|-----|----------|---------|------------------------|
| 9.3 | 667.3693 | -0.0002 | <a href="#">LFNFK</a>  |
| 5.2 | 667.3693 | -0.0002 | <a href="#">FNFLK</a>  |
| 4.5 | 667.3694 | -0.0002 | <a href="#">FGIGFK</a> |
| 4.5 | 667.3694 | -0.0002 | <a href="#">FGLGFK</a> |
| 0.3 | 667.3693 | -0.0002 | <a href="#">FFLNK</a>  |

**Mascot:** <http://www.matrixscience.com/>



**Peptide View**MS/MS Fragmentation of **HVVFGQVVEGLDVVK**Found in **AT2G21130.1** in **TAIR\_Arabidopsis**, Symbols: | peptidyl-prolyl cis-trans isomerase / cyclophilin (CYP2) / rotamase | chr2:9062700-9063224 REVERSE

Match to Query 7561: 1642.842684 from(548.621504,3+) index(7462)

Title: Elution from: 66.739 to 66.739 scan no 9821 cid35.00 polarity:+

Data file D6h-1\_2.mgf

Click mouse within plot area to zoom in by factor of two about that point

Or,   to  Da Label all possible matches  Label matches used for scoring Show Y-axis 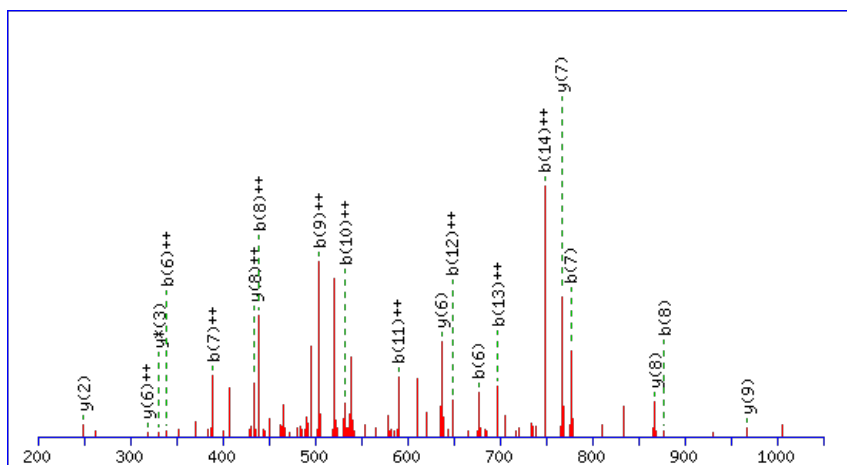Monoisotopic mass of neutral peptide  $M_r(\text{calc})$ : 1642.8421

Fixed modifications: Carbamidomethyl (C) (apply to specified residues or termini only)

Ions Score: 52 Expect: 2.8e-005

Matches : 20/136 fragment ions using 37 most intense peaks ([help](#))

| #  | b               | b <sup>++</sup> | b*        | b <sup>*++</sup> | b <sup>0</sup> | b <sup>0++</sup> | Seq. | y               | y <sup>++</sup> | y*              | y <sup>*++</sup> | y <sup>0</sup> | y <sup>0++</sup> | #  |
|----|-----------------|-----------------|-----------|------------------|----------------|------------------|------|-----------------|-----------------|-----------------|------------------|----------------|------------------|----|
| 1  | 141.0573        | 71.0323         |           |                  |                |                  | H    |                 |                 |                 |                  |                |                  | 15 |
| 2  | 241.1227        | 121.0650        |           |                  |                |                  | V    | 1503.7994       | 752.4033        | 1485.7758       | 743.3915         | 1485.7888      | 743.3980         | 14 |
| 3  | 341.1882        | 171.0977        |           |                  |                |                  | V    | 1403.7339       | 702.3706        | 1385.7103       | 693.3588         | 1385.7234      | 693.3653         | 13 |
| 4  | 489.2536        | 245.1305        |           |                  |                |                  | F    | 1303.6685       | 652.3379        | 1285.6449       | 643.3261         | 1285.6579      | 643.3326         | 12 |
| 5  | 547.2721        | 274.1397        |           |                  |                |                  | G    | 1155.6030       | 578.3051        | 1137.5794       | 569.2934         | 1137.5925      | 569.2999         | 11 |
| 6  | <b>677.3248</b> | <b>339.1660</b> | 659.3012  | 330.1542         |                |                  | Q    | 1097.5845       | 549.2959        | 1079.5609       | 540.2841         | 1079.5740      | 540.2906         | 10 |
| 7  | <b>777.3902</b> | <b>389.1988</b> | 759.3667  | 380.1870         |                |                  | V    | <b>967.5319</b> | 484.2696        | 949.5083        | 475.2578         | 949.5213       | 475.2643         | 9  |
| 8  | <b>877.4557</b> | <b>439.2315</b> | 859.4321  | 430.2197         |                |                  | V    | <b>867.4664</b> | <b>434.2369</b> | 849.4428        | 425.2251         | 849.4559       | 425.2316         | 8  |
| 9  | 1007.4953       | <b>504.2513</b> | 989.4717  | 495.2395         | 989.4847       | 495.2460         | E    | <b>767.4010</b> | 384.2041        | 749.3774        | 375.1923         | 749.3904       | 375.1988         | 7  |
| 10 | 1065.5138       | <b>533.2605</b> | 1047.4902 | 524.2488         | 1047.5032      | 524.2553         | G    | <b>637.3613</b> | <b>319.1843</b> | 619.3378        | 310.1725         | 619.3508       | 310.1790         | 6  |
| 11 | 1179.5949       | <b>590.3011</b> | 1161.5713 | 581.2893         | 1161.5843      | 581.2958         | L    | 579.3428        | 290.1751        | 561.3193        | 281.1633         | 561.3323       | 281.1698         | 5  |
| 12 | 1295.6189       | <b>648.3131</b> | 1277.5953 | 639.3013         | 1277.6083      | 639.3078         | D    | 465.2617        | 233.1345        | 447.2382        | 224.1227         | 447.2512       | 224.1292         | 4  |
| 13 | 1395.6843       | <b>698.3458</b> | 1377.6608 | 689.3340         | 1377.6738      | 689.3405         | V    | 349.2378        | 175.1225        | <b>331.2142</b> | 166.1107         |                |                  | 3  |
| 14 | 1495.7498       | <b>748.3785</b> | 1477.7262 | 739.3667         | 1477.7392      | 739.3732         | V    | <b>249.1723</b> | 125.0898        | 231.1487        | 116.0780         |                |                  | 2  |
| 15 |                 |                 |           |                  |                |                  | K    | 149.1069        | 75.0571         | 131.0833        | 66.0453          |                |                  | 1  |

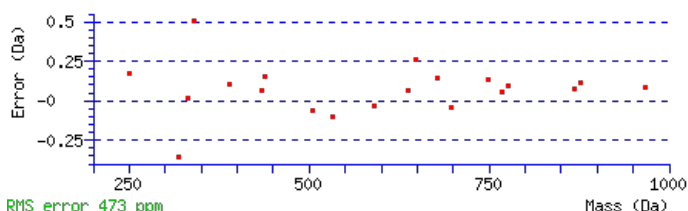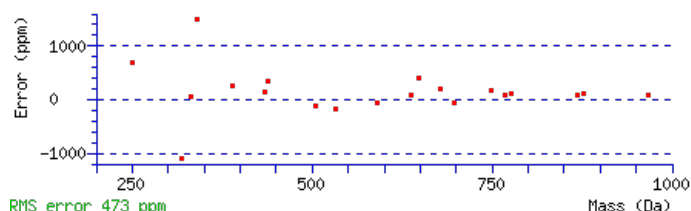

## AT2G21130.1

NCBI **BLAST** search of [HVVFGQVVEGLDVVK](#)

(Parameters: blastp, nr protein database, expect=20000, no filter, PAM30)

Other BLAST [web gateways](#)

### All matches to this query

| Score | Mr(calc)  | Delta  | Sequence                        |
|-------|-----------|--------|---------------------------------|
| 51.7  | 1642.8421 | 0.0006 | <a href="#">HVVFGQVVEGLDVVK</a> |
| 13.6  | 1642.8421 | 0.0006 | <a href="#">EHVVWTDEKLKLLK</a>  |
| 6.8   | 1642.8398 | 0.0028 | <a href="#">VIQKALDVIEPDQR</a>  |
| 0.5   | 1642.8399 | 0.0028 | <a href="#">ELESHIRLIKEEK</a>   |

**Mascot:** <http://www.matrixscience.com/>

## Peptide View

### MS/MS Fragmentation of **HVIGEKDEFI**KK

Found in **AT2G21170.1** in **TAIR\_Arabidopsis**, Symbols: TIM | TIM (TRIOSEPHOSPHATE ISOMERASE); triose-phosphate isomerase | chr2:9078128-9080187 REVERSE

Match to Query 6029: 1498.814748 from(375.710963,4+) index(919)

Title: Elution from: 13.624 to 13.624 scan no 1263 cid35.00 polarity:+

Data file D12h-3\_3.mgf

Click mouse within plot area to zoom in by factor of two about that point

Or,  to  Da

Label all possible matches  Label matches used for scoring

Show Y-axis

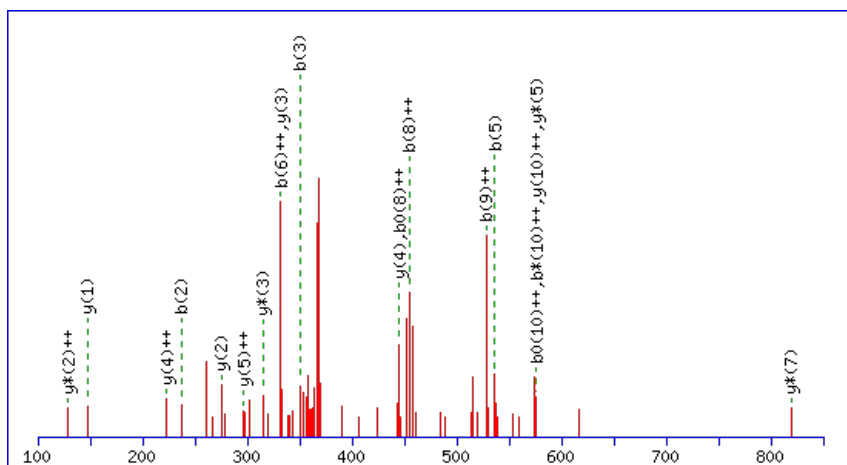

Monoisotopic mass of neutral peptide  $M_r(\text{calc})$ : 1498.8144

Fixed modifications: Carbamidomethyl (C) (apply to specified residues or termini only)

Ions Score: 21 Expect: 0.04

Matches : 20/116 fragment ions using 28 most intense peaks ([help](#))

| #  | b               | b <sup>++</sup> | b*        | b <sup>*++</sup> | b <sup>0</sup> | b <sup>0++</sup> | Seq. | y               | y <sup>++</sup> | y*              | y <sup>*++</sup> | y <sup>0</sup> | y <sup>0++</sup> | #  |
|----|-----------------|-----------------|-----------|------------------|----------------|------------------|------|-----------------|-----------------|-----------------|------------------|----------------|------------------|----|
| 1  | 138.0662        | 69.5367         |           |                  |                |                  | H    |                 |                 |                 |                  |                |                  | 13 |
| 2  | <b>237.1346</b> | 119.0709        |           |                  |                |                  | V    | 1362.7627       | 681.8850        | 1345.7362       | 673.3717         | 1344.7522      | 672.8797         | 12 |
| 3  | <b>350.2187</b> | 175.6130        |           |                  |                |                  | I    | 1263.6943       | 632.3508        | 1246.6678       | 623.8375         | 1245.6838      | 623.3455         | 11 |
| 4  | 407.2401        | 204.1237        |           |                  |                |                  | G    | 1150.6103       | <b>575.8088</b> | 1133.5837       | 567.2955         | 1132.5997      | 566.8035         | 10 |
| 5  | <b>536.2827</b> | 268.6450        |           |                  | 518.2722       | 259.6397         | E    | 1093.5888       | 547.2980        | 1076.5623       | 538.7848         | 1075.5782      | 538.2928         | 9  |
| 6  | 664.3777        | <b>332.6925</b> | 647.3511  | 324.1792         | 646.3671       | 323.6872         | K    | 964.5462        | 482.7767        | 947.5197        | 474.2635         | 946.5356       | 473.7715         | 8  |
| 7  | 779.4046        | 390.2060        | 762.3781  | 381.6927         | 761.3941       | 381.2007         | D    | 836.4512        | 418.7293        | <b>819.4247</b> | 410.2160         | 818.4407       | 409.7240         | 7  |
| 8  | 908.4472        | <b>454.7272</b> | 891.4207  | 446.2140         | 890.4367       | <b>445.7220</b>  | E    | 721.4243        | 361.2158        | 704.3978        | 352.7025         | 703.4137       | 352.2105         | 6  |
| 9  | 1055.5156       | <b>528.2615</b> | 1038.4891 | 519.7482         | 1037.5051      | 519.2562         | F    | 592.3817        | <b>296.6945</b> | <b>575.3552</b> | 288.1812         |                |                  | 5  |
| 10 | 1168.5997       | 584.8035        | 1151.5732 | <b>576.2902</b>  | 1150.5891      | <b>575.7982</b>  | I    | <b>445.3133</b> | <b>223.1603</b> | 428.2867        | 214.6470         |                |                  | 4  |
| 11 | 1225.6212       | 613.3142        | 1208.5946 | 604.8009         | 1207.6106      | 604.3089         | G    | <b>332.2292</b> | 166.6183        | <b>315.2027</b> | 158.1050         |                |                  | 3  |
| 12 | 1353.7161       | 677.3617        | 1336.6896 | 668.8484         | 1335.7056      | 668.3564         | K    | <b>275.2078</b> | 138.1075        | 258.1812        | <b>129.5942</b>  |                |                  | 2  |
| 13 |                 |                 |           |                  |                |                  | K    | <b>147.1128</b> | 74.0600         | 130.0863        | 65.5468          |                |                  | 1  |

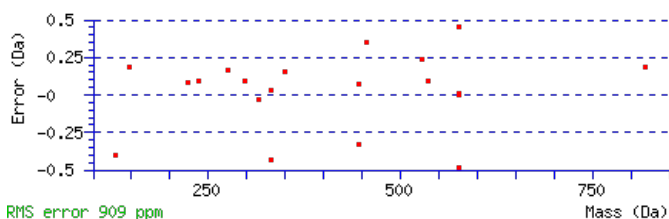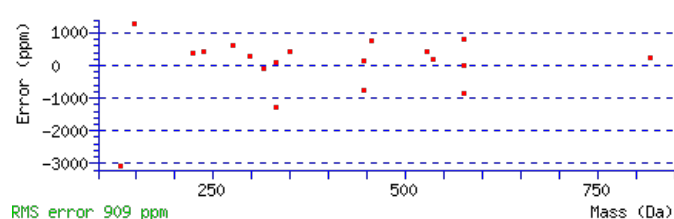

NCBI **BLAST** search of **HVIGEKDEFI**KK

(Parameters: blastp, nr protein database, expect=20000, no filter, PAM30)

AT2G21170.1

Other BLAST [web gateways](#)

**All matches to this query**

| Score | Mr(calc)  | Delta   | Sequence                      |
|-------|-----------|---------|-------------------------------|
| 20.6  | 1498.8144 | 0.0004  | <a href="#">HVIGEKDEFIHK</a>  |
| 11.7  | 1498.8105 | 0.0042  | <a href="#">MLAIFVVELDSTK</a> |
| 3.3   | 1498.8184 | -0.0036 | <a href="#">QVAEFFEFVKKK</a>  |
| 0.9   | 1498.8143 | 0.0004  | <a href="#">ILREIDWEALNK</a>  |

**Mascot:** <http://www.matrixscience.com/>

**Peptide View**MS/MS Fragmentation of **SIGISNYDVFLTR**Found in **AT2G21250.1** in **TAIR\_Arabidopsis**, Symbols: | mannose 6-phosphate reductase (NADPH-dependent), putative | chr2:9110489-9112197 REVERSE

Match to Query 6368: 1483.766546 from(742.890549,2+) index(8897)

Title: Elution from: 79.745 to 79.745 scan no 11893 cid35.00 polarity:+

Data file D12h-3\_1.mgf

Click mouse within plot area to zoom in by factor of two about that point

Or,  to  Da Label all possible matches  Label matches used for scoring Show Y-axis 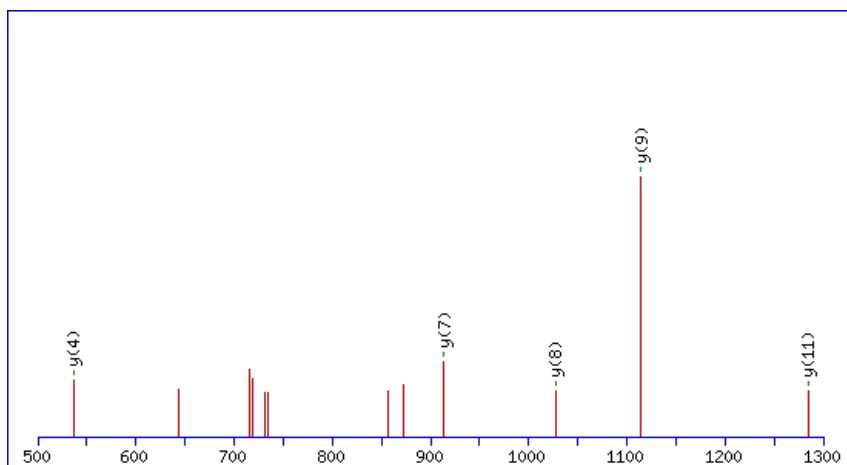Monoisotopic mass of neutral peptide  $M_r(\text{calc})$ : 1483.7671

Fixed modifications: Carbamidomethyl (C) (apply to specified residues or termini only)

Ions Score: 41 Expect: 0.00026

Matches : 5/132 fragment ions using 6 most intense peaks ([help](#))

| #  | b         | b <sup>++</sup> | b*        | b <sup>*++</sup> | b <sup>0</sup> | b <sup>0++</sup> | Seq. | y                | y <sup>++</sup> | y*        | y <sup>*++</sup> | y <sup>0</sup> | y <sup>0++</sup> | #  |
|----|-----------|-----------------|-----------|------------------|----------------|------------------|------|------------------|-----------------|-----------|------------------|----------------|------------------|----|
| 1  | 88.0393   | 44.5233         |           |                  | 70.0287        | 35.5180          | S    |                  |                 |           |                  |                |                  | 13 |
| 2  | 201.1234  | 101.0653        |           |                  | 183.1128       | 92.0600          | I    | 1397.7423        | 699.3748        | 1380.7158 | 690.8615         | 1379.7318      | 690.3695         | 12 |
| 3  | 258.1448  | 129.5761        |           |                  | 240.1343       | 120.5708         | G    | <b>1284.6583</b> | 642.8328        | 1267.6317 | 634.3195         | 1266.6477      | 633.8275         | 11 |
| 4  | 371.2289  | 186.1181        |           |                  | 353.2183       | 177.1128         | I    | 1227.6368        | 614.3220        | 1210.6103 | 605.8088         | 1209.6262      | 605.3168         | 10 |
| 5  | 458.2609  | 229.6341        |           |                  | 440.2504       | 220.6288         | S    | <b>1114.5527</b> | 557.7800        | 1097.5262 | 549.2667         | 1096.5422      | 548.7747         | 9  |
| 6  | 572.3039  | 286.6556        | 555.2773  | 278.1423         | 554.2933       | 277.6503         | N    | <b>1027.5207</b> | 514.2640        | 1010.4942 | 505.7507         | 1009.5102      | 505.2587         | 8  |
| 7  | 735.3672  | 368.1872        | 718.3406  | 359.6740         | 717.3566       | 359.1819         | Y    | <b>913.4778</b>  | 457.2425        | 896.4512  | 448.7293         | 895.4672       | 448.2373         | 7  |
| 8  | 850.3941  | 425.7007        | 833.3676  | 417.1874         | 832.3836       | 416.6954         | D    | 750.4145         | 375.7109        | 733.3879  | 367.1976         | 732.4039       | 366.7056         | 6  |
| 9  | 949.4625  | 475.2349        | 932.4360  | 466.7216         | 931.4520       | 466.2296         | V    | 635.3875         | 318.1974        | 618.3610  | 309.6841         | 617.3770       | 309.1921         | 5  |
| 10 | 1096.5310 | 548.7691        | 1079.5044 | 540.2558         | 1078.5204      | 539.7638         | F    | <b>536.3191</b>  | 268.6632        | 519.2926  | 260.1499         | 518.3085       | 259.6579         | 4  |
| 11 | 1209.6150 | 605.3111        | 1192.5885 | 596.7979         | 1191.6044      | 596.3059         | L    | 389.2507         | 195.1290        | 372.2241  | 186.6157         | 371.2401       | 186.1237         | 3  |
| 12 | 1310.6627 | 655.8350        | 1293.6361 | 647.3217         | 1292.6521      | 646.8297         | T    | 276.1666         | 138.5870        | 259.1401  | 130.0737         | 258.1561       | 129.5817         | 2  |
| 13 |           |                 |           |                  |                |                  | R    | 175.1190         | 88.0631         | 158.0924  | 79.5498          |                |                  | 1  |

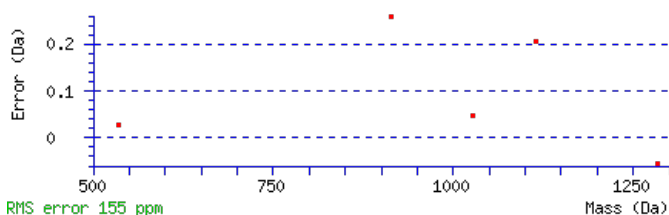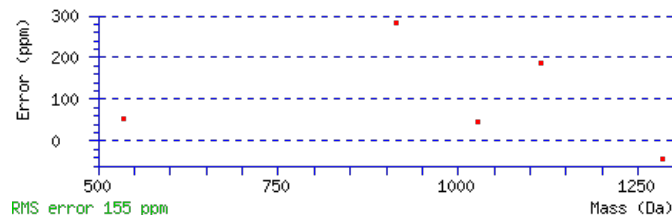NCBI **BLAST** search of **SIGISNYDVFLTR**

(Parameters: blastp, nr protein database, expect=20000, no filter, PAM30)

AT2G21250.1

Other BLAST [web gateways](#)

**All matches to this query**

| Score | Mr(calc)  | Delta   | Sequence                      |
|-------|-----------|---------|-------------------------------|
| 40.8  | 1483.7671 | -0.0005 | <a href="#">SIGISNYDVFLTR</a> |
| 2.0   | 1483.7704 | -0.0039 | <a href="#">CIELVEEKLKSH</a>  |

**Mascot:** <http://www.matrixscience.com/>

**Peptide View**MS/MS Fragmentation of **ATPEQVASYTLK**Found in **AT2G21330.1** in **TAIR\_Arabidopsis**, Symbols: | fructose-bisphosphate aldolase, putative | chr2:9135497-9137233 REVERSE

Match to Query 5240: 1320.638190 from(661.326371,2+) index(4505)

Title: Elution from: 41.637 to 41.637 scan no 5601 cid35.00 polarity:+

Data file 0-1\_1.mgf

Click mouse within plot area to zoom in by factor of two about that point

Or,  to  Da Label all possible matches  Label matches used for scoring Show Y-axis 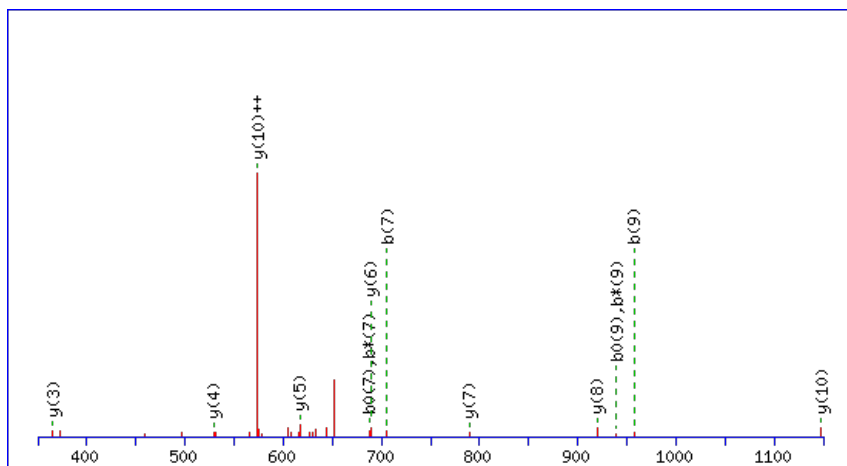Monoisotopic mass of neutral peptide **Mr(calc)**: 1320.6354**Fixed modifications**: Carbamidomethyl (C) (apply to specified residues or termini only)**Ions Score**: 57 **Expect**: 2.3e-005**Matches**: 14/118 fragment ions using 19 most intense peaks ([help](#))

| #  | b               | b <sup>++</sup> | b*              | b <sup>*++</sup> | b <sup>0</sup>  | b <sup>0++</sup> | Seq. | y                | y <sup>++</sup> | y*        | y <sup>*++</sup> | y <sup>0</sup> | y <sup>0++</sup> | #  |
|----|-----------------|-----------------|-----------------|------------------|-----------------|------------------|------|------------------|-----------------|-----------|------------------|----------------|------------------|----|
| 1  | 73.0414         | 37.0244         |                 |                  |                 |                  | A    |                  |                 |           |                  |                |                  | 12 |
| 2  | 175.0861        | 88.0467         |                 |                  | 157.0756        | 79.0414          | T    | 1249.6085        | 625.3079        | 1231.5849 | 616.2961         | 1231.5979      | 616.3026         | 11 |
| 3  | 273.1359        | 137.0716        |                 |                  | 255.1254        | 128.0663         | P    | <b>1147.5638</b> | <b>574.2855</b> | 1129.5402 | 565.2737         | 1129.5532      | 565.2802         | 10 |
| 4  | 403.1756        | 202.0914        |                 |                  | 385.1650        | 193.0861         | E    | 1049.5140        | 525.2606        | 1031.4904 | 516.2488         | 1031.5034      | 516.2553         | 9  |
| 5  | 533.2282        | 267.1177        | 515.2046        | 258.1060         | 515.2176        | 258.1125         | Q    | <b>919.4744</b>  | 460.2408        | 901.4508  | 451.2290         | 901.4638       | 451.2355         | 8  |
| 6  | 633.2937        | 317.1505        | 615.2701        | 308.1387         | 615.2831        | 308.1452         | V    | <b>789.4217</b>  | 395.2145        | 771.3981  | 386.2027         | 771.4111       | 386.2092         | 7  |
| 7  | <b>705.3278</b> | 353.1675        | <b>687.3042</b> | 344.1558         | <b>687.3172</b> | 344.1623         | A    | <b>689.3563</b>  | 345.1818        | 671.3327  | 336.1700         | 671.3457       | 336.1765         | 6  |
| 8  | 793.3569        | 397.1821        | 775.3333        | 388.1703         | 775.3463        | 388.1768         | S    | <b>617.3221</b>  | 309.1647        | 599.2985  | 300.1529         | 599.3115       | 300.1594         | 5  |
| 9  | <b>957.4172</b> | 479.2123        | <b>939.3937</b> | 470.2005         | <b>939.4067</b> | 470.2070         | Y    | <b>529.2931</b>  | 265.1502        | 511.2695  | 256.1384         | 511.2825       | 256.1449         | 4  |
| 10 | 1059.4620       | 530.2346        | 1041.4384       | 521.2228         | 1041.4514       | 521.2293         | T    | <b>365.2327</b>  | 183.1200        | 347.2091  | 174.1082         | 347.2221       | 174.1147         | 3  |
| 11 | 1173.5430       | 587.2752        | 1155.5195       | 578.2634         | 1155.5325       | 578.2699         | L    | 263.1880         | 132.0976        | 245.1644  | 123.0858         |                |                  | 2  |
| 12 |                 |                 |                 |                  |                 |                  | K    | 149.1069         | 75.0571         | 131.0833  | 66.0453          |                |                  | 1  |

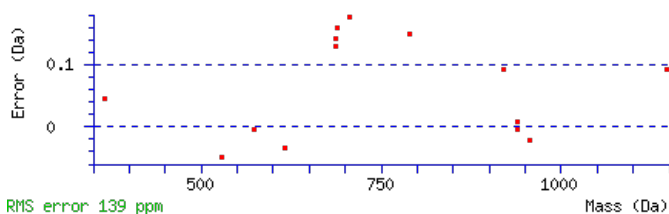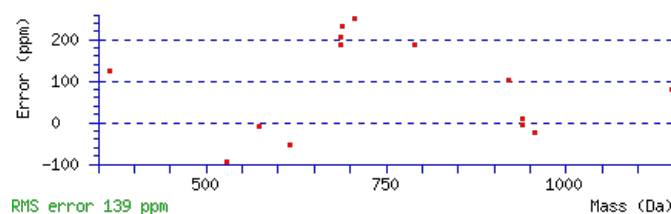NCBI **BLAST** search of **ATPEQVASYTLK**

(Parameters: blastp, nr protein database, expect=20000, no filter, PAM30)

Other BLAST [web gateways](#)**All matches to this query**

AT2G21330.1

| Score | Mr(calc)  | Delta  | Sequence                    |
|-------|-----------|--------|-----------------------------|
| 57.2  | 1320.6354 | 0.0028 | <a href="#">ATPEQVASYLK</a> |
| 0.0   | 1320.6380 | 0.0001 | <a href="#">QLNPDISKAYR</a> |

Mascot: <http://www.matrixscience.com/>



**Peptide View**MS/MS Fragmentation of **EDKLAATLK**Found in **AT2G21510.1** in **TAIR\_Arabidopsis**, Symbols: | DNAJ heat shock N-terminal domain-containing protein | chr2:9217921-9219779  
REVERSE

Match to Query 2441: 998.527936 from(500.271244,2+) index(1237)

Title: Elution from: 19.152 to 19.152 scan no 1764 cid35.00 polarity:+

Data file 0-1\_2.mgf

Click mouse within plot area to zoom in by factor of two about that point

Or,   to  Da Label all possible matches  Label matches used for scoring Show Y-axis 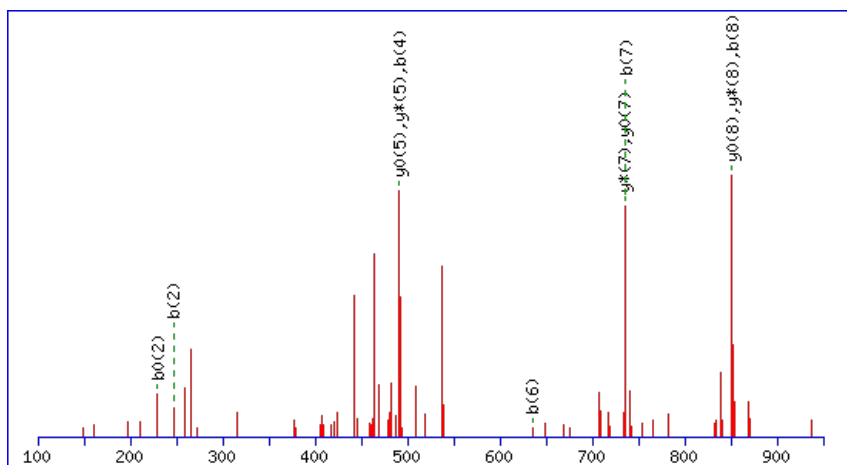Monoisotopic mass of neutral peptide  $M_r(\text{calc})$ : 998.5274

Fixed modifications: Carbamidomethyl (C) (apply to specified residues or termini only)

Ions Score: 24 Expect: 0.038

Matches : 12/88 fragment ions using 15 most intense peaks ([help](#))

| # | b               | b <sup>++</sup> | b*       | b <sup>*++</sup> | b <sup>0</sup>  | b <sup>0++</sup> | Seq. | y        | y <sup>++</sup> | y*              | y <sup>*++</sup> | y <sup>0</sup>  | y <sup>0++</sup> | # |
|---|-----------------|-----------------|----------|------------------|-----------------|------------------|------|----------|-----------------|-----------------|------------------|-----------------|------------------|---|
| 1 | 131.0469        | 66.0271         |          |                  | 113.0363        | 57.0218          | E    |          |                 |                 |                  |                 |                  | 9 |
| 2 | <b>247.0709</b> | 124.0391        |          |                  | <b>229.0603</b> | 115.0338         | D    | 869.4951 | 435.2512        | <b>851.4715</b> | 426.2394         | <b>851.4845</b> | 426.2459         | 8 |
| 3 | 377.1599        | 189.0836        | 359.1363 | 180.0718         | 359.1494        | 180.0783         | K    | 753.4711 | 377.2392        | <b>735.4475</b> | 368.2274         | <b>735.4606</b> | 368.2339         | 7 |
| 4 | <b>491.2410</b> | 246.1241        | 473.2174 | 237.1124         | 473.2304        | 237.1189         | L    | 623.3821 | 312.1947        | 605.3585        | 303.1829         | 605.3715        | 303.1894         | 6 |
| 5 | 563.2752        | 282.1412        | 545.2516 | 273.1294         | 545.2646        | 273.1359         | A    | 509.3010 | 255.1541        | <b>491.2774</b> | 246.1423         | <b>491.2904</b> | 246.1488         | 5 |
| 6 | <b>635.3093</b> | 318.1583        | 617.2857 | 309.1465         | 617.2987        | 309.1530         | A    | 437.2668 | 219.1371        | 419.2433        | 210.1253         | 419.2563        | 210.1318         | 4 |
| 7 | <b>737.3540</b> | 369.1807        | 719.3304 | 360.1689         | 719.3435        | 360.1754         | T    | 365.2327 | 183.1200        | 347.2091        | 174.1082         | 347.2221        | 174.1147         | 3 |
| 8 | <b>851.4351</b> | 426.2212        | 833.4115 | 417.2094         | 833.4246        | 417.2159         | L    | 263.1880 | 132.0976        | 245.1644        | 123.0858         |                 |                  | 2 |
| 9 |                 |                 |          |                  |                 |                  | K    | 149.1069 | 75.0571         | 131.0833        | 66.0453          |                 |                  | 1 |

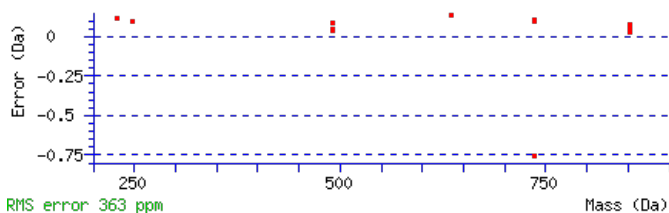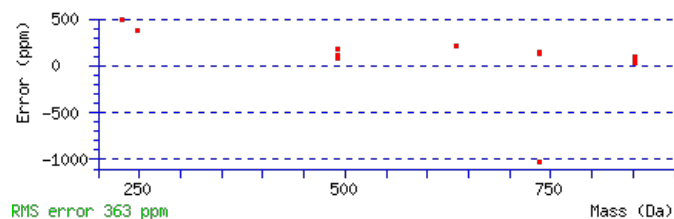NCBI **BLAST** search of **EDKLAATLK**

(Parameters: blastp, nr protein database, expect=20000, no filter, PAM30)

Other BLAST [web gateways](#)**All matches to this query**

| Score | $M_r(\text{calc})$ | Delta | Sequence |
|-------|--------------------|-------|----------|
|       |                    |       |          |

## AT2G21510.1

|      |          |         |                            |
|------|----------|---------|----------------------------|
| 24.5 | 998.5274 | 0.0005  | <a href="#">EDKLAATLK</a>  |
| 19.3 | 998.5301 | -0.0022 | <a href="#">AGVVRELGGK</a> |
| 15.2 | 998.5301 | -0.0022 | <a href="#">RDLAQAAIK</a>  |
| 12.3 | 998.5275 | 0.0005  | <a href="#">IAASELSGLK</a> |
| 12.3 | 998.5301 | -0.0022 | <a href="#">DKDVKPRK</a>   |
| 11.8 | 998.5274 | 0.0005  | <a href="#">LLATISQDK</a>  |
| 11.8 | 998.5301 | -0.0022 | <a href="#">LLDLRNNK</a>   |
| 10.2 | 998.5297 | -0.0017 | <a href="#">AAITEFLPK</a>  |
| 8.9  | 998.5283 | -0.0004 | <a href="#">MMKLQPIK</a>   |
| 7.7  | 998.5275 | 0.0005  | <a href="#">EIANLTSIK</a>  |

Mascot: <http://www.matrixscience.com/>

**Peptide View**MS/MS Fragmentation of **ITFGDTNLAIFR**Found in **AT2G21530.1** in **TAIR\_Arabidopsis**, Symbols: | forkhead-associated domain-containing protein / FHA domain-containing protein | chr2:9226452-9227544 FORWARD

Match to Query 5349: 1382.677886 from(692.346219,2+) index(9080)

Title: Elution from: 81.080 to 81.080 scan no 12206 cid35.00 polarity:+

Data file D12h-1\_2.mgf

Click mouse within plot area to zoom in by factor of two about that point

Or,  to  Da Label all possible matches  Label matches used for scoring Show Y-axis 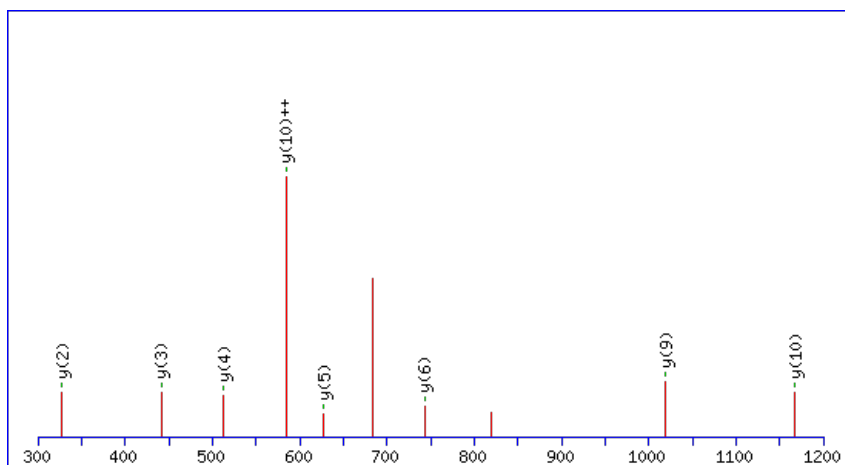Monoisotopic mass of neutral peptide  $M_r(\text{calc})$ : 1382.6770

Fixed modifications: Carbamidomethyl (C) (apply to specified residues or termini only)

Ions Score: 63 Expect: 3.5e-006

Matches : 8/106 fragment ions using 10 most intense peaks ([help](#))

| #  | b         | b <sup>++</sup> | b*        | b <sup>*++</sup> | b <sup>0</sup> | b <sup>0++</sup> | Seq. | y                | y <sup>++</sup> | y*        | y <sup>*++</sup> | y <sup>0</sup> | y <sup>0++</sup> | #  |
|----|-----------|-----------------|-----------|------------------|----------------|------------------|------|------------------|-----------------|-----------|------------------|----------------|------------------|----|
| 1  | 115.0884  | 58.0478         |           |                  |                |                  | I    |                  |                 |           |                  |                |                  | 12 |
| 2  | 217.1331  | 109.0702        |           |                  | 199.1225       | 100.0649         | T    | 1269.6032        | 635.3053        | 1251.5797 | 626.2935         | 1251.5927      | 626.3000         | 11 |
| 3  | 365.1985  | 183.1029        |           |                  | 347.1880       | 174.0976         | F    | <b>1167.5585</b> | <b>584.2829</b> | 1149.5349 | 575.2711         | 1149.5480      | 575.2776         | 10 |
| 4  | 423.2170  | 212.1122        |           |                  | 405.2065       | 203.1069         | G    | <b>1019.4931</b> | 510.2502        | 1001.4695 | 501.2384         | 1001.4825      | 501.2449         | 9  |
| 5  | 539.2410  | 270.1241        |           |                  | 521.2304       | 261.1189         | D    | 961.4746         | 481.2409        | 943.4510  | 472.2291         | 943.4640       | 472.2356         | 8  |
| 6  | 641.2857  | 321.1465        |           |                  | 623.2752       | 312.1412         | T    | 845.4506         | 423.2289        | 827.4270  | 414.2171         | 827.4400       | 414.2237         | 7  |
| 7  | 757.3227  | 379.1650        | 739.2991  | 370.1532         | 739.3122       | 370.1597         | N    | <b>743.4059</b>  | 372.2066        | 725.3823  | 363.1948         |                |                  | 6  |
| 8  | 871.4038  | 436.2055        | 853.3802  | 427.1938         | 853.3933       | 427.2003         | L    | <b>627.3689</b>  | 314.1881        | 609.3453  | 305.1763         |                |                  | 5  |
| 9  | 943.4380  | 472.2226        | 925.4144  | 463.2108         | 925.4274       | 463.2173         | A    | <b>513.2878</b>  | 257.1475        | 495.2642  | 248.1357         |                |                  | 4  |
| 10 | 1057.5191 | 529.2632        | 1039.4955 | 520.2514         | 1039.5085      | 520.2579         | I    | <b>441.2536</b>  | 221.1305        | 423.2301  | 212.1187         |                |                  | 3  |
| 11 | 1205.5845 | 603.2959        | 1187.5609 | 594.2841         | 1187.5740      | 594.2906         | F    | <b>327.1725</b>  | 164.0899        | 309.1490  | 155.0781         |                |                  | 2  |
| 12 |           |                 |           |                  |                |                  | R    | 179.1071         | 90.0572         | 161.0835  | 81.0454          |                |                  | 1  |

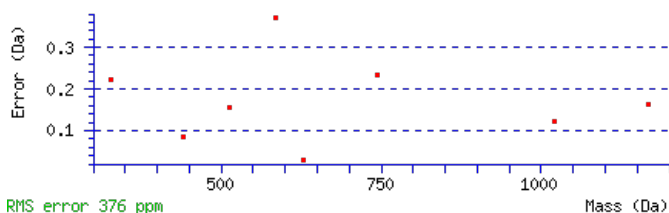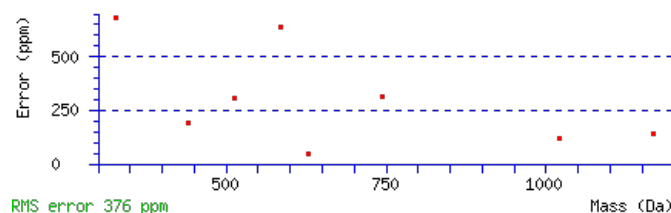NCBI BLAST search of **ITFGDTNLAIFR**

(Parameters: blastp, nr protein database, expect=20000, no filter, PAM30)

Other BLAST [web gateways](#)

# AT2G21530.1

All matches to this query

| Score | Mr(calc)  | Delta   | Sequence                      |
|-------|-----------|---------|-------------------------------|
| 63.5  | 1382.6770 | 0.0009  | <a href="#">ITFGDTNLAIFR</a>  |
| 22.3  | 1382.6793 | -0.0014 | <a href="#">FFAAAASGSWILK</a> |
| 10.2  | 1382.6793 | -0.0014 | <a href="#">TFIDSWIFIAR</a>   |
| 6.0   | 1382.6744 | 0.0035  | <a href="#">TIFLFGSEEISK</a>  |
| 4.3   | 1382.6748 | 0.0031  | <a href="#">LTDSKGRTVDFK</a>  |
| 3.9   | 1382.6748 | 0.0031  | <a href="#">LQSDRSTATLFK</a>  |
| 2.9   | 1382.6748 | 0.0031  | <a href="#">TPYSRTILSNK</a>   |
| 2.1   | 1382.6775 | 0.0004  | <a href="#">LIIRSHGPDAR</a>   |
| 1.5   | 1382.6804 | -0.0025 | <a href="#">VFMDIGRVSSIK</a>  |
| 0.9   | 1382.6771 | 0.0008  | <a href="#">QPALKSPSPWEK</a>  |

Mascot: <http://www.matrixscience.com/>

## Peptide View

MS/MS Fragmentation of **ALETAFAYGQGVDSK**

Found in **AT2G21660.1** in **TAIR\_Arabidopsis**, Symbols: GR-RBP7, GRP7, CCR2, ATGRP7 | ATGRP7 (COLD, CIRCADIAN RHYTHM, AND RNA BINDING 2); RNA binding / double-stranded DNA binding / single-stranded DNA binding | chr2:9272557-9273396 REVERSE

Match to Query 8451: 1744.792564 from(873.403558,2+) index(8123)

Title: Elution from: 71.635 to 71.635 scan no 10667 cid35.00 polarity:+

Data file D6h-3\_1.mgf

Click mouse within plot area to zoom in by factor of two about that point

Or,   to  Da

Label all possible matches  Label matches used for scoring

Show Y-axis

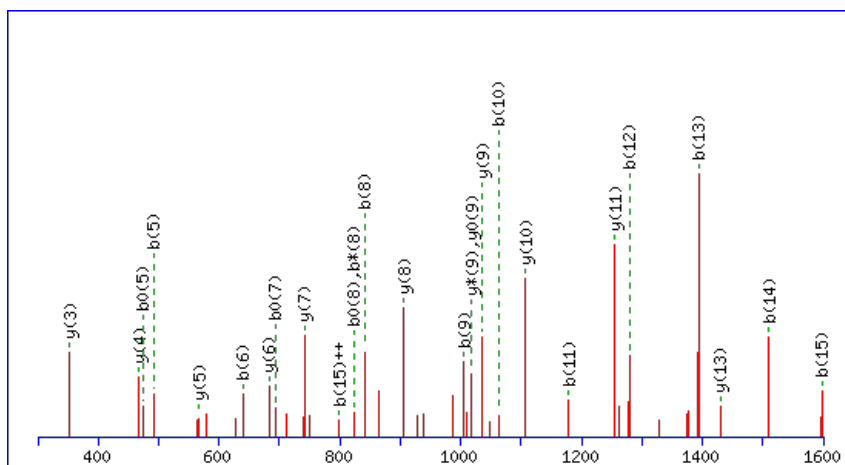

**Monoisotopic mass of neutral peptide Mr(calc):** 1744.7880

**Fixed modifications:** Carbamidomethyl (C) (apply to specified residues or termini only)

**Ions Score:** 108 **Expect:** 1.4e-010

**Matches:** 27/160 fragment ions using 33 most intense peaks ([help](#))

| #  | b                | b <sup>++</sup> | b*              | b <sup>*++</sup> | b <sup>0</sup>  | b <sup>0++</sup> | Seq. | y                | y <sup>++</sup> | y*               | y <sup>*++</sup> | y <sup>0</sup>   | y <sup>0++</sup> | #  |
|----|------------------|-----------------|-----------------|------------------|-----------------|------------------|------|------------------|-----------------|------------------|------------------|------------------|------------------|----|
| 1  | 73.0414          | 37.0244         |                 |                  |                 |                  | A    |                  |                 |                  |                  |                  |                  | 16 |
| 2  | 187.1225         | 94.0649         |                 |                  |                 |                  | L    | 1673.7611        | 837.3842        | 1655.7376        | 828.3724         | 1655.7506        | 828.3789         | 15 |
| 3  | 317.1622         | 159.0847        |                 |                  | 299.1516        | 150.0794         | E    | 1559.6800        | 780.3437        | 1541.6565        | 771.3319         | 1541.6695        | 771.3384         | 14 |
| 4  | 419.2069         | 210.1071        |                 |                  | 401.1963        | 201.1018         | T    | <b>1429.6404</b> | 715.3238        | 1411.6168        | 706.3121         | 1411.6298        | 706.3186         | 13 |
| 5  | <b>491.2410</b>  | 246.1241        |                 |                  | <b>473.2304</b> | 237.1189         | A    | 1327.5957        | 664.3015        | 1309.5721        | 655.2897         | 1309.5851        | 655.2962         | 12 |
| 6  | <b>639.3065</b>  | 320.1569        |                 |                  | 621.2959        | 311.1516         | F    | <b>1255.5615</b> | 628.2844        | 1237.5380        | 619.2726         | 1237.5510        | 619.2791         | 11 |
| 7  | 711.3406         | 356.1739        |                 |                  | <b>693.3300</b> | 347.1687         | A    | <b>1107.4961</b> | 554.2517        | 1089.4725        | 545.2399         | 1089.4855        | 545.2464         | 10 |
| 8  | <b>841.3933</b>  | 421.2003        | <b>823.3697</b> | 412.1885         | <b>823.3827</b> | 412.1950         | Q    | <b>1035.4620</b> | 518.2346        | <b>1017.4384</b> | 509.2228         | <b>1017.4514</b> | 509.2293         | 9  |
| 9  | <b>1005.4536</b> | 503.2304        | 987.4300        | 494.2187         | 987.4431        | 494.2252         | Y    | <b>905.4093</b>  | 453.2083        | 887.3857         | 444.1965         | 887.3987         | 444.2030         | 8  |
| 10 | <b>1063.4721</b> | 532.2397        | 1045.4485       | 523.2279         | 1045.4616       | 523.2344         | G    | <b>741.3489</b>  | 371.1781        | 723.3254         | 362.1663         | 723.3384         | 362.1728         | 7  |
| 11 | <b>1179.4961</b> | 590.2517        | 1161.4725       | 581.2399         | 1161.4855       | 581.2464         | D    | <b>683.3304</b>  | 342.1689        | 665.3069         | 333.1571         | 665.3199         | 333.1636         | 6  |
| 12 | <b>1279.5615</b> | 640.2844        | 1261.5380       | 631.2726         | 1261.5510       | 631.2791         | V    | <b>567.3065</b>  | 284.1569        | 549.2829         | 275.1451         | 549.2959         | 275.1516         | 5  |
| 13 | <b>1393.6426</b> | 697.3250        | 1375.6191       | 688.3132         | 1375.6321       | 688.3197         | I    | <b>467.2410</b>  | 234.1241        | 449.2174         | 225.1124         | 449.2304         | 225.1189         | 4  |
| 14 | <b>1509.6666</b> | 755.3370        | 1491.6430       | 746.3252         | 1491.6561       | 746.3317         | D    | <b>353.1599</b>  | 177.0836        | 335.1363         | 168.0718         | 335.1493         | 168.0783         | 3  |
| 15 | <b>1597.6957</b> | <b>799.3515</b> | 1579.6721       | 790.3397         | 1579.6851       | 790.3462         | S    | 237.1359         | 119.0716        | 219.1124         | 110.0598         | 219.1254         | 110.0663         | 2  |
| 16 |                  |                 |                 |                  |                 |                  | K    | 149.1069         | 75.0571         | 131.0833         | 66.0453          |                  |                  | 1  |

AT2G21660.1

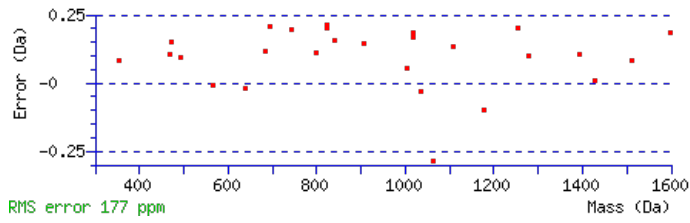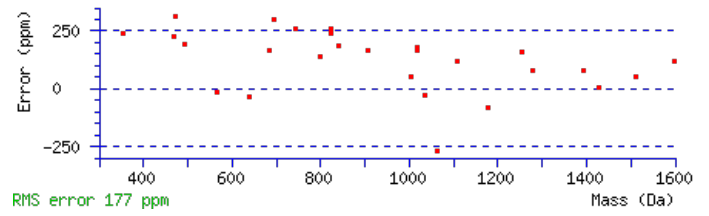

NCBI **BLAST** search of [ALETAFAYGDVIDSK](#)  
(Parameters: blastp, nr protein database, expect=20000, no filter, PAM30)  
Other BLAST [web gateways](#)

**All matches to this query**

| Score | Mr(calc)  | Delta   | Sequence                         |
|-------|-----------|---------|----------------------------------|
| 108.0 | 1744.7880 | 0.0046  | <a href="#">ALETAFAYGDVIDSK</a>  |
| 13.0  | 1744.7892 | 0.0034  | <a href="#">NKSSITITPSTVMESK</a> |
| 7.1   | 1744.7893 | 0.0033  | <a href="#">VMGSSLRGMSKQEWK</a>  |
| 4.4   | 1744.7941 | -0.0015 | <a href="#">MSVVENFSSEPKAKR</a>  |
| 0.4   | 1744.7945 | -0.0019 | <a href="#">TQRQMRTLDISNNK</a>   |

Mascot: <http://www.matrixscience.com/>

**Peptide View**MS/MS Fragmentation of **FQAAVDILR**

Found in **AT2G21870.1** in **TAIR\_Arabidopsis**, Symbols: | Identical to Probable ATP synthase 24 kDa subunit, mitochondrial precursor [Arabidopsis Thaliana] (GB:Q9SJ12;GB:Q8LBN3); similar to unnamed protein product [Vitis vinifera] (GB:CAO71749.1) | chr2:9327536-9329698 REVERSE

Match to Query 2597: 1031.57648 from(516.795510,2+) index(5590)

Title: Elution from: 49.296 to 49.296 scan no 7096 cid35.00 polarity:+

Data file 0-3\_3.mgf

Click mouse within plot area to zoom in by factor of two about that point

Or,   to  Da

Label all possible matches  Label matches used for scoring

Show Y-axis

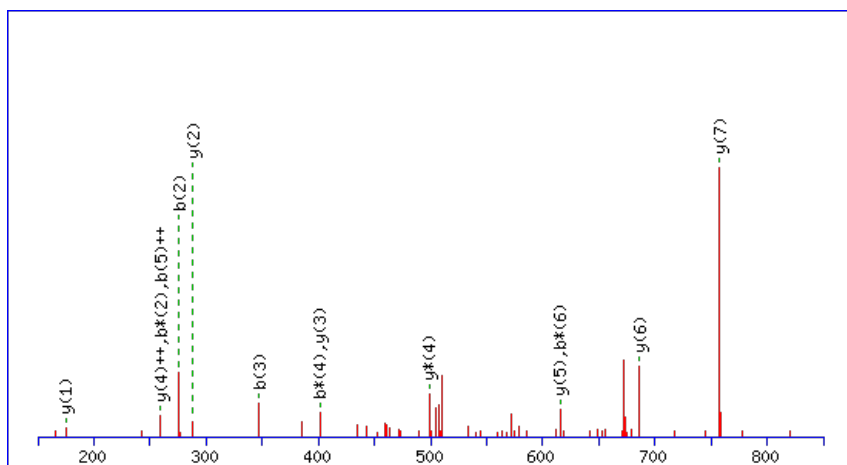

**Monoisotopic mass of neutral peptide Mr(calc):** 1031.5764

**Fixed modifications:** Carbamidomethyl (C) (apply to specified residues or termini only)

**Ions Score:** 39 **Expect:** 0.0004

**Matches:** 14/78 fragment ions using 20 most intense peaks ([help](#))

| # | b               | b <sup>++</sup> | b*              | b <sup>*++</sup> | b <sup>0</sup> | b <sup>0++</sup> | Seq.     | y               | y <sup>++</sup> | y*              | y <sup>*++</sup> | y <sup>0</sup> | y <sup>0++</sup> | #        |
|---|-----------------|-----------------|-----------------|------------------|----------------|------------------|----------|-----------------|-----------------|-----------------|------------------|----------------|------------------|----------|
| 1 | 148.0757        | 74.5415         |                 |                  |                |                  | <b>F</b> |                 |                 |                 |                  |                |                  | <b>9</b> |
| 2 | <b>276.1343</b> | 138.5708        | <b>259.1077</b> | 130.0575         |                |                  | <b>Q</b> | 885.5152        | 443.2613        | 868.4887        | 434.7480         | 867.5047       | 434.2560         | <b>8</b> |
| 3 | <b>347.1714</b> | 174.0893        | 330.1448        | 165.5761         |                |                  | <b>A</b> | <b>757.4567</b> | 379.2320        | 740.4301        | 370.7187         | 739.4461       | 370.2267         | <b>7</b> |
| 4 | 418.2085        | 209.6079        | <b>401.1819</b> | 201.0946         |                |                  | <b>A</b> | <b>686.4196</b> | 343.7134        | 669.3930        | 335.2001         | 668.4090       | 334.7081         | <b>6</b> |
| 5 | 517.2769        | <b>259.1421</b> | 500.2504        | 250.6288         |                |                  | <b>V</b> | <b>615.3824</b> | 308.1949        | 598.3559        | 299.6816         | 597.3719       | 299.1896         | <b>5</b> |
| 6 | 632.3039        | 316.6556        | <b>615.2773</b> | 308.1423         | 614.2933       | 307.6503         | <b>D</b> | 516.3140        | <b>258.6606</b> | <b>499.2875</b> | 250.1474         | 498.3035       | 249.6554         | <b>4</b> |
| 7 | 745.3879        | 373.1976        | 728.3614        | 364.6843         | 727.3774       | 364.1923         | <b>I</b> | <b>401.2871</b> | 201.1472        | 384.2605        | 192.6339         |                |                  | <b>3</b> |
| 8 | 858.4720        | 429.7396        | 841.4454        | 421.2264         | 840.4614       | 420.7343         | <b>L</b> | <b>288.2030</b> | 144.6051        | 271.1765        | 136.0919         |                |                  | <b>2</b> |
| 9 |                 |                 |                 |                  |                |                  | <b>R</b> | <b>175.1190</b> | 88.0631         | 158.0924        | 79.5498          |                |                  | <b>1</b> |

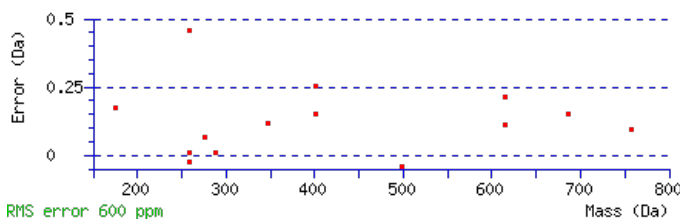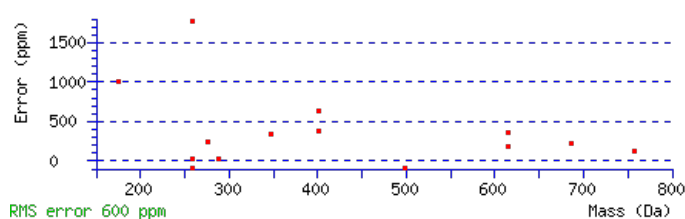

NCBI **BLAST** search of **FQAAVDILR**

(Parameters: blastp, nr protein database, expect=20000, no filter, PAM30)

Other BLAST [web gateways](#)

All matches to this query

| Score | Mr(calc) | Delta | Sequence |
|-------|----------|-------|----------|
|       |          |       |          |

AT2G21870.1

|      |           |        |                          |
|------|-----------|--------|--------------------------|
| 38.5 | 1031.5764 | 0.0001 | <a href="#">FQAAVDLR</a> |
|------|-----------|--------|--------------------------|

**Mascot:** <http://www.matrixscience.com/>



**Peptide View**MS/MS Fragmentation of **NESVLAGLR**

Found in **AT2G22140.1** in **TAIR\_Arabidopsis**, Symbols: | similar to unknown protein [Arabidopsis thaliana] (TAIR:AT2G21800.1); similar to unnamed protein product [Vitis vinifera] (GB:CAO71735.1) | chr2:9421975-9425664 REVERSE

Match to Query 2087: 970.483392 from(486.248972,2+) index(5786)

Title: Elution from: 50.868 to 50.868 scan no 7359 cid35.00 polarity:+

Data file 0-3\_3.mgf

Click mouse within plot area to zoom in by factor of two about that point

Or,   to  Da

Label all possible matches  Label matches used for scoring

Show Y-axis

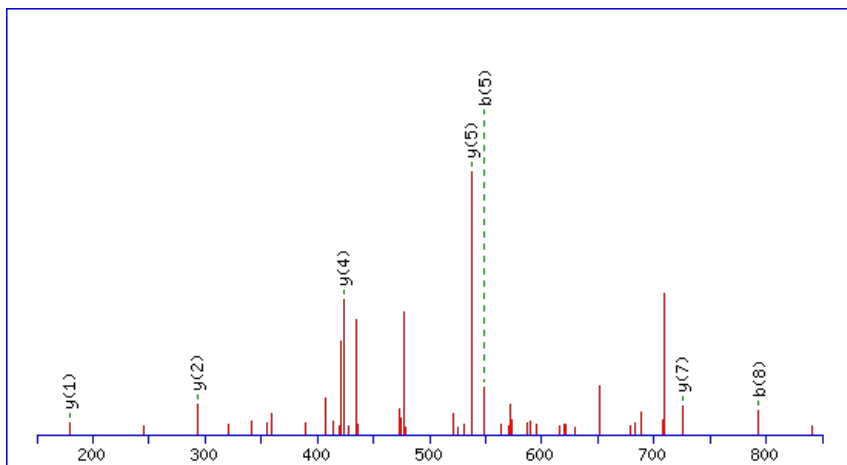

Monoisotopic mass of neutral peptide **Mr(calc)**: 970.4858

**Fixed modifications**: Carbamidomethyl (C) (apply to specified residues or termini only)

**Ions Score**: 32 **Expect**: 0.0077

**Matches** : 7/82 fragment ions using 14 most intense peaks ([help](#))

| # | b               | b <sup>++</sup> | b*       | b <sup>*++</sup> | b <sup>0</sup> | b <sup>0++</sup> | Seq. | y               | y <sup>++</sup> | y*       | y <sup>*++</sup> | y <sup>0</sup> | y <sup>0++</sup> | # |
|---|-----------------|-----------------|----------|------------------|----------------|------------------|------|-----------------|-----------------|----------|------------------|----------------|------------------|---|
| 1 | 117.0443        | 59.0258         | 99.0207  | 50.0140          |                |                  | N    |                 |                 |          |                  |                |                  | 9 |
| 2 | 247.0839        | 124.0456        | 229.0603 | 115.0338         | 229.0733       | 115.0403         | E    | 855.4561        | 428.2317        | 837.4325 | 419.2199         | 837.4455       | 419.2264         | 8 |
| 3 | 335.1130        | 168.0601        | 317.0894 | 159.0483         | 317.1024       | 159.0548         | S    | <b>725.4165</b> | 363.2119        | 707.3929 | 354.2001         | 707.4059       | 354.2066         | 7 |
| 4 | 435.1784        | 218.0928        | 417.1548 | 209.0811         | 417.1678       | 209.0876         | V    | 637.3874        | 319.1973        | 619.3638 | 310.1855         |                |                  | 6 |
| 5 | <b>549.2595</b> | 275.1334        | 531.2359 | 266.1216         | 531.2489       | 266.1281         | L    | <b>537.3219</b> | 269.1646        | 519.2984 | 260.1528         |                |                  | 5 |
| 6 | 621.2937        | 311.1505        | 603.2701 | 302.1387         | 603.2831       | 302.1452         | A    | <b>423.2408</b> | 212.1241        | 405.2173 | 203.1123         |                |                  | 4 |
| 7 | 679.3122        | 340.1597        | 661.2886 | 331.1479         | 661.3016       | 331.1544         | G    | 351.2067        | 176.1070        | 333.1831 | 167.0952         |                |                  | 3 |
| 8 | <b>793.3933</b> | 397.2003        | 775.3697 | 388.1885         | 775.3827       | 388.1950         | L    | <b>293.1882</b> | 147.0977        | 275.1646 | 138.0859         |                |                  | 2 |
| 9 |                 |                 |          |                  |                |                  | R    | <b>179.1071</b> | 90.0572         | 161.0835 | 81.0454          |                |                  | 1 |

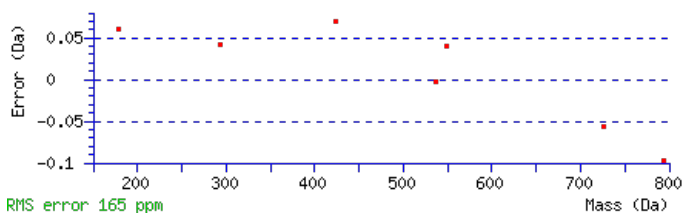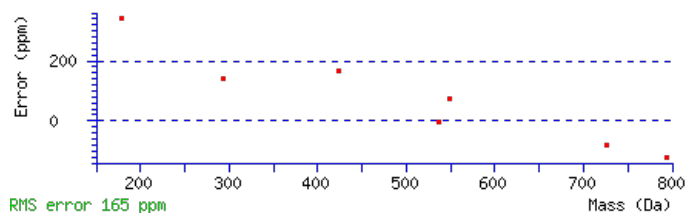

NCBI **BLAST** search of [NESVLAGLR](#)

(Parameters: blastp, nr protein database, expect=20000, no filter, PAM30)

Other BLAST [web gateways](#)

**All matches to this query**

| Score | Mr(calc) | Delta | Sequence |
|-------|----------|-------|----------|
|       |          |       |          |

**AT2G22140.1**

|      |          |         |                           |
|------|----------|---------|---------------------------|
| 32.2 | 970.4858 | -0.0024 | <a href="#">NESVLAGLR</a> |
| 16.7 | 970.4858 | -0.0024 | <a href="#">LKEGNEIR</a>  |
| 16.5 | 970.4858 | -0.0024 | <a href="#">ELKNGLER</a>  |
| 10.6 | 970.4858 | -0.0024 | <a href="#">QLDLISNR</a>  |
| 10.4 | 970.4858 | -0.0024 | <a href="#">QAVEDIKR</a>  |
| 10.0 | 970.4831 | 0.0003  | <a href="#">EIDSSLLGK</a> |
| 9.7  | 970.4858 | -0.0024 | <a href="#">QIIEKDGR</a>  |
| 9.3  | 970.4810 | 0.0023  | <a href="#">HMRVTGLK</a>  |
| 9.0  | 970.4811 | 0.0023  | <a href="#">HKMEKLR</a>   |
| 9.0  | 970.4858 | -0.0024 | <a href="#">LTNNVELR</a>  |

**Mascot:** <http://www.matrixscience.com/>

**Peptide View**MS/MS Fragmentation of **YGDYIGIR**Found in **AT2G22170.1** in **TAIR\_Arabidopsis**, Symbols: | lipid-associated family protein | chr2:9434090-9434822 REVERSE

Match to Query 1777: 955.475280 from(478.744916,2+) index(3560)

Title: Elution from: 37.437 to 37.437 scan no 4579 cid35.00 polarity:+

Data file D1d-1\_1.mgf

Click mouse within plot area to zoom in by factor of two about that point

Or,  to  Da Label all possible matches  Label matches used for scoring Show Y-axis 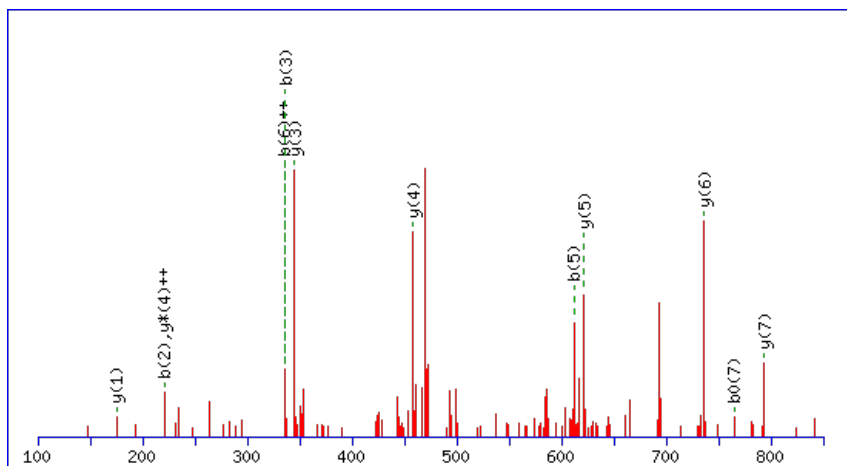Monoisotopic mass of neutral peptide  $M_r(\text{calc})$ : 955.4763

Fixed modifications: Carbamidomethyl (C) (apply to specified residues or termini only)

Ions Score: 42 Expect: 0.00015

Matches : 12/56 fragment ions using 21 most intense peaks ([help](#))

| # | b               | b <sup>++</sup> | b <sup>0</sup>  | b <sup>0++</sup> | Seq. | y               | y <sup>++</sup> | y*       | y <sup>*++</sup> | y <sup>0</sup> | y <sup>0++</sup> | # |
|---|-----------------|-----------------|-----------------|------------------|------|-----------------|-----------------|----------|------------------|----------------|------------------|---|
| 1 | 164.0706        | 82.5389         |                 |                  | Y    |                 |                 |          |                  |                |                  | 8 |
| 2 | <b>221.0921</b> | 111.0497        |                 |                  | G    | <b>793.4203</b> | 397.2138        | 776.3937 | 388.7005         | 775.4097       | 388.2085         | 7 |
| 3 | <b>336.1190</b> | 168.5631        | 318.1084        | 159.5579         | D    | <b>736.3988</b> | 368.7030        | 719.3723 | 360.1898         | 718.3883       | 359.6978         | 6 |
| 4 | 499.1823        | 250.0948        | 481.1718        | 241.0895         | Y    | <b>621.3719</b> | 311.1896        | 604.3453 | 302.6763         |                |                  | 5 |
| 5 | <b>612.2664</b> | 306.6368        | 594.2558        | 297.6316         | I    | <b>458.3085</b> | 229.6579        | 441.2820 | <b>221.1446</b>  |                |                  | 4 |
| 6 | 669.2879        | <b>335.1476</b> | 651.2773        | 326.1423         | G    | <b>345.2245</b> | 173.1159        | 328.1979 | 164.6026         |                |                  | 3 |
| 7 | 782.3719        | 391.6896        | <b>764.3614</b> | 382.6843         | I    | 288.2030        | 144.6051        | 271.1765 | 136.0919         |                |                  | 2 |
| 8 |                 |                 |                 |                  | R    | <b>175.1190</b> | 88.0631         | 158.0924 | 79.5498          |                |                  | 1 |

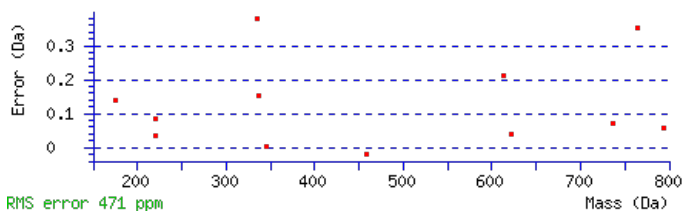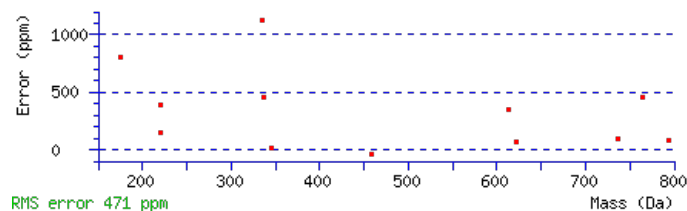NCBI **BLAST** search of [YGDYIGIR](#)

(Parameters: blastp, nr protein database, expect=20000, no filter, PAM30)

Other BLAST [web gateways](#)**All matches to this query**

| Score | $M_r(\text{calc})$ | Delta   | Sequence                 |
|-------|--------------------|---------|--------------------------|
| 42.4  | 955.4763           | -0.0010 | <a href="#">YGDYIGIR</a> |
| 4.5   | 955.4763           | -0.0010 | <a href="#">YVPAYSTR</a> |

# AT2G22170.1

|     |          |         |                          |
|-----|----------|---------|--------------------------|
| 1.8 | 955.4763 | -0.0011 | <a href="#">YVDGISFR</a> |
| 1.6 | 955.4763 | -0.0010 | <a href="#">DYYINIR</a>  |

**Mascot:** <http://www.matrixscience.com/>

**Peptide View**MS/MS Fragmentation of **FPAFPTVMDINQIR**Found in **AT2G22230.1** in **TAIR\_Arabidopsis**, Symbols: | beta-hydroxyacyl-ACP dehydratase, putative | chr2:9457122-9458507 FORWARD

Match to Query 7826: 1666.786846 from(834.400699,2+) index(9923)

Title: Elution from: 91.016 to 91.016 scan no 13783 cid35.00 polarity:+

Data file C7-1\_2.mgf

Click mouse within plot area to zoom in by factor of two about that point

Or,   to  Da Label all possible matches  Label matches used for scoring Show Y-axis 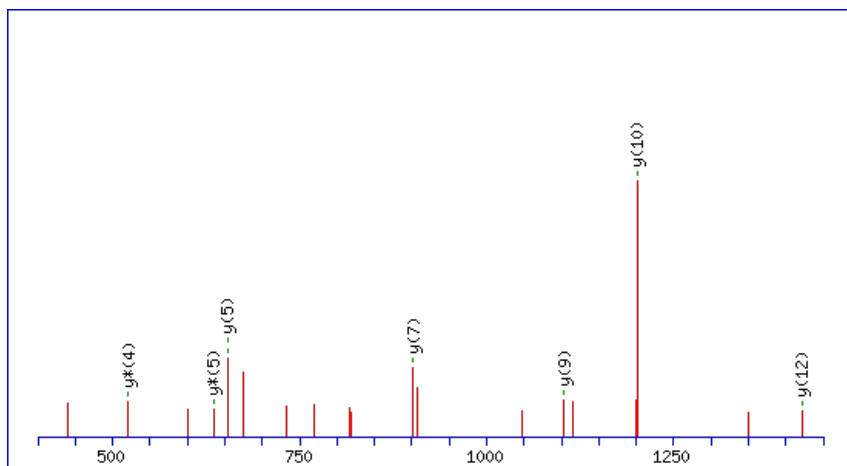Monoisotopic mass of neutral peptide **Mr(calc)**: 1666.7879**Fixed modifications:** Carbamidomethyl (C) (apply to specified residues or termini only)**Ions Score:** 40 **Expect:** 0.0011**Matches** : 7/116 fragment ions using 8 most intense peaks ([help](#))

| #  | b         | b <sup>++</sup> | b*        | b <sup>*++</sup> | b <sup>0</sup> | b <sup>0++</sup> | Seq. | y                | y <sup>++</sup> | y*              | y <sup>*++</sup> | y <sup>0</sup> | y <sup>0++</sup> | #  |
|----|-----------|-----------------|-----------|------------------|----------------|------------------|------|------------------|-----------------|-----------------|------------------|----------------|------------------|----|
| 1  | 149.0727  | 75.0400         |           |                  |                |                  | F    |                  |                 |                 |                  |                |                  | 14 |
| 2  | 247.1225  | 124.0649        |           |                  |                |                  | P    | 1519.7298        | 760.3685        | 1501.7062       | 751.3567         | 1501.7192      | 751.3633         | 13 |
| 3  | 319.1567  | 160.0820        |           |                  |                |                  | A    | <b>1421.6800</b> | 711.3436        | 1403.6564       | 702.3318         | 1403.6694      | 702.3384         | 12 |
| 4  | 467.2221  | 234.1147        |           |                  |                |                  | F    | 1349.6458        | 675.3266        | 1331.6223       | 666.3148         | 1331.6353      | 666.3213         | 11 |
| 5  | 565.2719  | 283.1396        |           |                  |                |                  | P    | <b>1201.5804</b> | 601.2938        | 1183.5568       | 592.2820         | 1183.5698      | 592.2886         | 10 |
| 6  | 667.3166  | 334.1620        |           |                  | 649.3061       | 325.1567         | T    | <b>1103.5306</b> | 552.2689        | 1085.5070       | 543.2571         | 1085.5200      | 543.2637         | 9  |
| 7  | 767.3821  | 384.1947        |           |                  | 749.3715       | 375.1894         | V    | 1001.4859        | 501.2466        | 983.4623        | 492.2348         | 983.4753       | 492.2413         | 8  |
| 8  | 899.4196  | 450.2134        |           |                  | 881.4090       | 441.2082         | M    | <b>901.4204</b>  | 451.2139        | 883.3968        | 442.2021         | 883.4099       | 442.2086         | 7  |
| 9  | 1015.4436 | 508.2254        |           |                  | 997.4330       | 499.2201         | D    | 769.3829         | 385.1951        | 751.3593        | 376.1833         | 751.3723       | 376.1898         | 6  |
| 10 | 1129.5247 | 565.2660        |           |                  | 1111.5141      | 556.2607         | I    | <b>653.3589</b>  | 327.1831        | <b>635.3353</b> | 318.1713         |                |                  | 5  |
| 11 | 1245.5617 | 623.2845        | 1227.5381 | 614.2727         | 1227.5511      | 614.2792         | N    | 539.2778         | 270.1426        | <b>521.2543</b> | 261.1308         |                |                  | 4  |
| 12 | 1375.6143 | 688.3108        | 1357.5907 | 679.2990         | 1357.6038      | 679.3055         | Q    | 423.2408         | 212.1241        | 405.2173        | 203.1123         |                |                  | 3  |
| 13 | 1489.6954 | 745.3513        | 1471.6718 | 736.3396         | 1471.6849      | 736.3461         | I    | 293.1882         | 147.0977        | 275.1646        | 138.0859         |                |                  | 2  |
| 14 |           |                 |           |                  |                |                  | R    | 179.1071         | 90.0572         | 161.0835        | 81.0454          |                |                  | 1  |

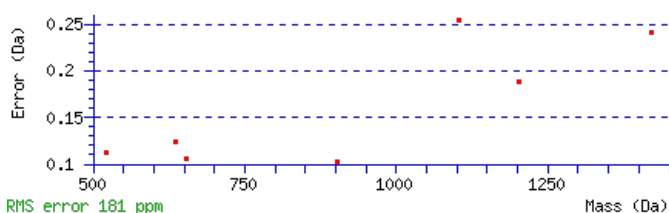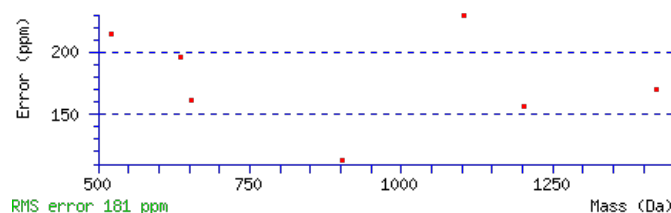NCBI **BLAST** search of **FPAFPTVMDINQIR**

(Parameters: blastp, nr protein database, expect=20000, no filter, PAM30)

AT2G22230.1

Other BLAST [web gateways](#)

**All matches to this query**

| Score | Mr(calc)  | Delta   | Sequence                         |
|-------|-----------|---------|----------------------------------|
| 39.7  | 1666.7879 | -0.0011 | <a href="#">FPAFPTVMDINQIR</a>   |
| 2.3   | 1666.7882 | -0.0014 | <a href="#">SDLKDLREVSTAEGK</a>  |
| 1.1   | 1666.7909 | -0.0040 | <a href="#">AGTTPLSVTRNSANQK</a> |

Mascot: <http://www.matrixscience.com/>



# Mascot Search Results

## Peptide View

MS/MS Fragmentation of **MDTLASNSSDLTTK**

Found in **AT2G22330.1** in **TAIR\_Arabidopsis**, Symbols: CYP79B3 | CYP79B3 (cytochrome P450, family 79, subfamily B, polypeptide 3); oxygen binding | chr2:9495681-9498063 FORWARD

Match to Query 6178: 1498.639920 from(750.327236,2+) index(6309)

Title: Elution from: 54.588 to 54.588 scan no 8081 cid35.00 polarity:+

Data file D1d-3\_3.mgf

Click mouse within plot area to zoom in by factor of two about that point

Or,  to  Da

Label all possible matches  Label matches used for scoring

Show Y-axis

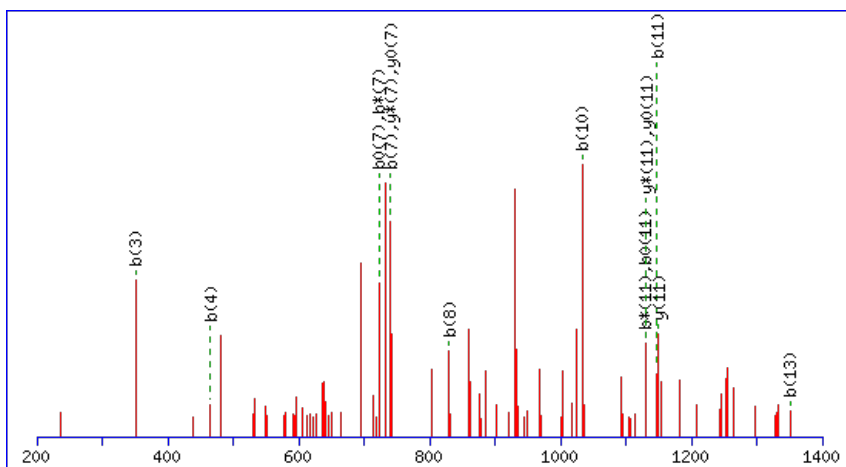

Monoisotopic mass of neutral peptide  $M_r(\text{calc})$ : 1498.6397

Fixed modifications: Carbamidomethyl (C) (apply to specified residues or termini only)

Ions Score: 27 Expect: 0.01

Matches : 16/140 fragment ions using 30 most intense peaks [\(help\)](#)

| #  | b                | b <sup>++</sup> | b*               | b <sup>*++</sup> | b <sup>0</sup>   | b <sup>0++</sup> | Seq. | y                | y <sup>++</sup> | y*               | y <sup>*++</sup> | y <sup>0</sup>   | y <sup>0++</sup> | #  |
|----|------------------|-----------------|------------------|------------------|------------------|------------------|------|------------------|-----------------|------------------|------------------|------------------|------------------|----|
| 1  | 133.0448         | 67.0260         |                  |                  |                  |                  | M    |                  |                 |                  |                  |                  |                  | 14 |
| 2  | 249.0688         | 125.0380        |                  |                  | 231.0582         | 116.0327         | D    | 1367.6095        | 684.3084        | 1349.5859        | 675.2966         | 1349.5989        | 675.3031         | 13 |
| 3  | <b>351.1135</b>  | 176.0604        |                  |                  | 333.1029         | 167.0551         | T    | 1251.5855        | 626.2964        | 1233.5619        | 617.2846         | 1233.5750        | 617.2911         | 12 |
| 4  | <b>465.1946</b>  | 233.1009        |                  |                  | 447.1840         | 224.0956         | L    | <b>1149.5408</b> | 575.2740        | <b>1131.5172</b> | 566.2623         | <b>1131.5302</b> | 566.2688         | 11 |
| 5  | 537.2287         | 269.1180        |                  |                  | 519.2182         | 260.1127         | A    | 1035.4597        | 518.2335        | 1017.4361        | 509.2217         | 1017.4491        | 509.2282         | 10 |
| 6  | 625.2578         | 313.1325        |                  |                  | 607.2472         | 304.1273         | S    | 963.4256         | 482.2164        | 945.4020         | 473.2046         | 945.4150         | 473.2111         | 9  |
| 7  | <b>741.2948</b>  | 371.1510        | <b>723.2712</b>  | 362.1392         | <b>723.2842</b>  | 362.1458         | N    | 875.3965         | 438.2019        | 857.3729         | 429.1901         | 857.3859         | 429.1966         | 8  |
| 8  | <b>829.3239</b>  | 415.1656        | 811.3003         | 406.1538         | 811.3133         | 406.1603         | S    | 759.3595         | 380.1834        | <b>741.3359</b>  | 371.1716         | <b>741.3489</b>  | 371.1781         | 7  |
| 9  | 917.3529         | 459.1801        | 899.3293         | 450.1683         | 899.3424         | 450.1748         | S    | 671.3304         | 336.1689        | 653.3069         | 327.1571         | 653.3199         | 327.1636         | 6  |
| 10 | <b>1033.3769</b> | 517.1921        | 1015.3533        | 508.1803         | 1015.3663        | 508.1868         | D    | 583.3014         | 292.1543        | 565.2778         | 283.1425         | 565.2908         | 283.1490         | 5  |
| 11 | <b>1147.4580</b> | 574.2326        | <b>1129.4344</b> | 565.2208         | <b>1129.4474</b> | 565.2274         | L    | 467.2774         | 234.1423        | 449.2538         | 225.1305         | 449.2668         | 225.1371         | 4  |
| 12 | 1249.5027        | 625.2550        | 1231.4791        | 616.2432         | 1231.4921        | 616.2497         | T    | 353.1963         | 177.1018        | 335.1727         | 168.0900         | 335.1857         | 168.0965         | 3  |
| 13 | <b>1351.5474</b> | 676.2773        | 1333.5238        | 667.2656         | 1333.5369        | 667.2721         | T    | 251.1516         | 126.0794        | 233.1280         | 117.0676         | 233.1410         | 117.0741         | 2  |
| 14 |                  |                 |                  |                  |                  |                  | K    | 149.1069         | 75.0571         | 131.0833         | 66.0453          |                  |                  | 1  |

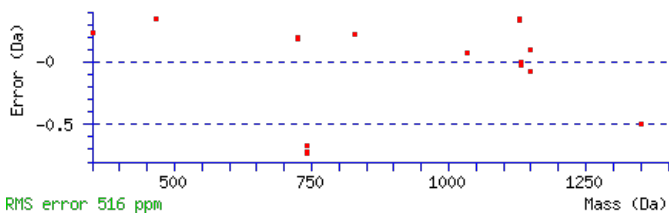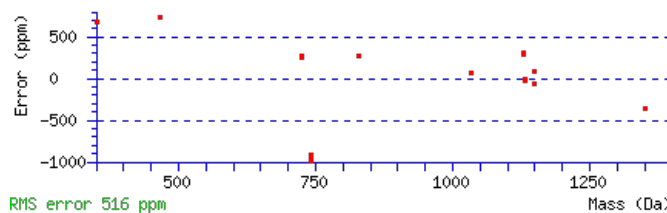

## AT2G22330.1

(Parameters: blastp, nr protein database, expect=20000, no filter, PAM30)

Other BLAST [web gateways](#)

### All matches to this query

| Score | Mr(calc)  | Delta   | Sequence                        |
|-------|-----------|---------|---------------------------------|
| 27.4  | 1498.6397 | 0.0002  | <a href="#">MDTLASNSSDLTK</a>   |
| 5.8   | 1498.6377 | 0.0023  | <a href="#">GMCNEGKVEVGRK</a>   |
| 5.6   | 1498.6370 | 0.0029  | <a href="#">MSNGRYNNVLHR</a>    |
| 3.9   | 1498.6364 | 0.0036  | <a href="#">QEELIHIEEEAEK</a>   |
| 2.9   | 1498.6399 | -0.0000 | <a href="#">NSVIMHPCHLEK</a>    |
| 2.4   | 1498.6370 | 0.0030  | <a href="#">AANQGRRCTWEK</a>    |
| 2.3   | 1498.6372 | 0.0027  | <a href="#">CGKMDEAEVLF GK</a>  |
| 2.0   | 1498.6424 | -0.0025 | <a href="#">MATNGSASSAQLSOK</a> |
| 1.9   | 1498.6417 | -0.0018 | <a href="#">SFSCFMFVLF GK</a>   |

Mascot: <http://www.matrixscience.com/>



**Peptide View**MS/MS Fragmentation of **TLLGESLYPLVDQIESEHAAK**Found in **AT2G23350.1** in **TAIR\_Arabidopsis**, Symbols: PAB4 | PAB4 (POLY(A) BINDING PROTEIN 4); RNA binding / translation initiation factor | chr2:9950289-9953121 FORWARD

Match to Query 10324: 2312.194260 from(771.738696,3+) index(10116)

Title: Elution from: 94.904 to 94.904 scan no 14136 cid35.00 polarity:+

Data file D1d-2\_1.mgf

Click mouse within plot area to zoom in by factor of two about that point

Or, Plot from  to  Da Label all possible matches  Label matches used for scoring Show Y-axis 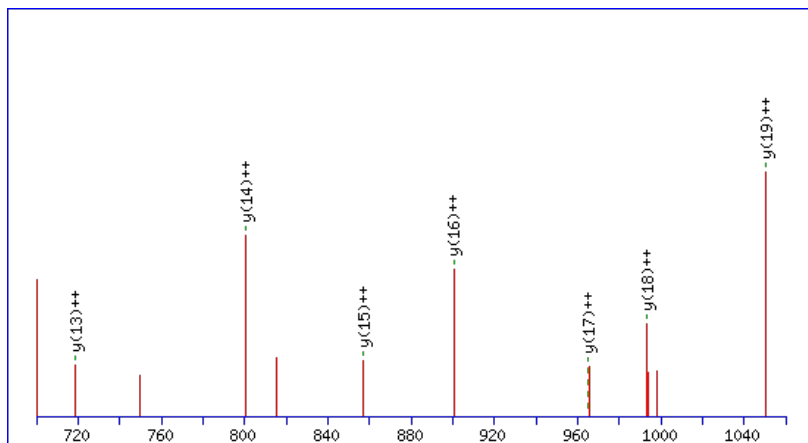Monoisotopic mass of neutral peptide  $M_r(\text{calc})$ : 2312.1900

Fixed modifications: Carbamidomethyl (C) (apply to specified residues or termini only)

Ions Score: 50 Expect: 3.6e-005

Matches : 7/208 fragment ions using 10 most intense peaks ([help](#))

| #  | b         | b <sup>++</sup> | b*        | b <sup>*++</sup> | b <sup>0</sup> | b <sup>0++</sup> | Seq | y         | y <sup>++</sup> | y*        | y <sup>*++</sup> | y <sup>0</sup> | y <sup>0++</sup> | #  |
|----|-----------|-----------------|-----------|------------------|----------------|------------------|-----|-----------|-----------------|-----------|------------------|----------------|------------------|----|
| 1  | 102.0550  | 51.5311         |           |                  | 84.0444        | 42.5258          | T   |           |                 |           |                  |                |                  | 21 |
| 2  | 215.1390  | 108.0731        |           |                  | 197.1285       | 99.0679          | L   | 2212.1496 | 1106.5784       | 2195.1230 | 1098.0652        | 2194.1390      | 1097.5732        | 20 |
| 3  | 328.2231  | 164.6152        |           |                  | 310.2125       | 155.6099         | L   | 2099.0655 | 1050.0364       | 2082.0390 | 1041.5231        | 2081.0550      | 1041.0311        | 19 |
| 4  | 385.2445  | 193.1259        |           |                  | 367.2340       | 184.1206         | G   | 1985.9815 | 993.4944        | 1968.9549 | 984.9811         | 1967.9709      | 984.4891         | 18 |
| 5  | 514.2871  | 257.6472        |           |                  | 496.2766       | 248.6419         | E   | 1928.9600 | 964.9836        | 1911.9335 | 956.4704         | 1910.9494      | 955.9784         | 17 |
| 6  | 601.3192  | 301.1632        |           |                  | 583.3086       | 292.1579         | S   | 1799.9174 | 900.4623        | 1782.8909 | 891.9491         | 1781.9068      | 891.4571         | 16 |
| 7  | 714.4032  | 357.7053        |           |                  | 696.3927       | 348.7000         | L   | 1712.8854 | 856.9463        | 1695.8588 | 848.4331         | 1694.8748      | 847.9410         | 15 |
| 8  | 877.4666  | 439.2369        |           |                  | 859.4560       | 430.2316         | Y   | 1599.8013 | 800.4043        | 1582.7748 | 791.8910         | 1581.7907      | 791.3990         | 14 |
| 9  | 974.5193  | 487.7633        |           |                  | 956.5088       | 478.7580         | P   | 1436.7380 | 718.8726        | 1419.7114 | 710.3594         | 1418.7274      | 709.8673         | 13 |
| 10 | 1087.6034 | 544.3053        |           |                  | 1069.5928      | 535.3000         | L   | 1339.6852 | 670.3462        | 1322.6587 | 661.8330         | 1321.6747      | 661.3410         | 12 |
| 11 | 1186.6718 | 593.8395        |           |                  | 1168.6612      | 584.8343         | V   | 1226.6012 | 613.8042        | 1209.5746 | 605.2909         | 1208.5906      | 604.7989         | 11 |
| 12 | 1301.6987 | 651.3530        |           |                  | 1283.6882      | 642.3477         | D   | 1127.5327 | 564.2700        | 1110.5062 | 555.7567         | 1109.5222      | 555.2647         | 10 |
| 13 | 1429.7573 | 715.3823        | 1412.7308 | 706.8690         | 1411.7468      | 706.3770         | Q   | 1012.5058 | 506.7565        | 995.4793  | 498.2433         | 994.4952       | 497.7513         | 9  |
| 14 | 1542.8414 | 771.9243        | 1525.8148 | 763.4111         | 1524.8308      | 762.9190         | I   | 884.4472  | 442.7272        | 867.4207  | 434.2140         | 866.4367       | 433.7220         | 8  |
| 15 | 1671.8840 | 836.4456        | 1654.8574 | 827.9324         | 1653.8734      | 827.4403         | E   | 771.3632  | 386.1852        | 754.3366  | 377.6719         | 753.3526       | 377.1799         | 7  |
| 16 | 1758.9160 | 879.9616        | 1741.8895 | 871.4484         | 1740.9054      | 870.9564         | S   | 642.3206  | 321.6639        | 625.2940  | 313.1506         | 624.3100       | 312.6586         | 6  |
| 17 | 1887.9586 | 944.4829        | 1870.9321 | 935.9697         | 1869.9480      | 935.4777         | E   | 555.2885  | 278.1479        | 538.2620  | 269.6346         | 537.2780       | 269.1426         | 5  |
| 18 | 2025.0175 | 1013.0124       | 2007.9910 | 1004.4991        | 2007.0069      | 1004.0071        | H   | 426.2459  | 213.6266        | 409.2194  | 205.1133         |                |                  | 4  |
| 19 | 2096.0546 | 1048.5310       | 2079.0281 | 1040.0177        | 2078.0441      | 1039.5257        | A   | 289.1870  | 145.0972        | 272.1605  | 136.5839         |                |                  | 3  |
| 20 | 2167.0917 | 1084.0495       | 2150.0652 | 1075.5362        | 2149.0812      | 1075.0442        | A   | 218.1499  | 109.5786        | 201.1234  | 101.0653         |                |                  | 2  |
| 21 |           |                 |           |                  |                |                  | K   | 147.1128  | 74.0600         | 130.0863  | 65.5468          |                |                  | 1  |

# AT2G23350.1

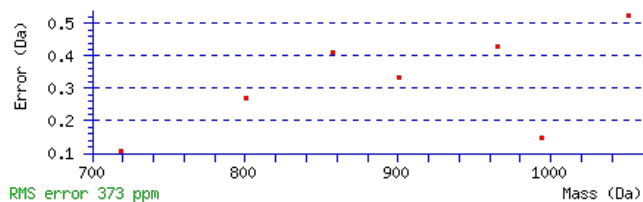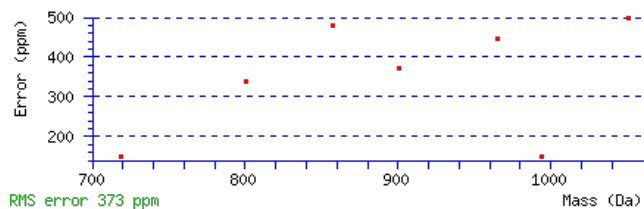

NCBI BLAST search of [TLLGESLYPLVDQIESEHAAK](#)  
(Parameters: blastp, nr protein database, expect=20000, no filter, PAM30)  
Other BLAST [web gateways](#)

## All matches to this query

| Score | Mr(calc)  | Delta   | Sequence                               |
|-------|-----------|---------|----------------------------------------|
| 50.0  | 2312.1900 | 0.0043  | <a href="#">TLLGESLYPLVDQIESEHAAK</a>  |
| 8.3   | 2312.1913 | 0.0029  | <a href="#">NVLSVVRDEQFSVLYQNFR</a>    |
| 4.8   | 2312.1985 | -0.0043 | <a href="#">SPVTQDSGGFSGRTRALAQHLK</a> |
| 2.5   | 2312.1947 | -0.0004 | <a href="#">LAQRMILNYYRGITSPSVDK</a>   |

Mascot: <http://www.matrixscience.com/>

## Peptide View

MS/MS Fragmentation of **NSAKFFSMK**

Found in **AT2G23450.1** in **TAIR\_Arabidopsis**, Symbols: | protein kinase family protein | chr2:9996006-9998324 REVERSE

Match to Query 3037: 1070.487606 from(536.251079,2+) index(5079)

Title: Elution from: 45.767 to 45.767 scan no 6437 cid35.00 polarity:+

Data file D6h-3\_2.mgf

Click mouse within plot area to zoom in by factor of two about that point

Or,   to  Da

Label all possible matches  Label matches used for scoring

Show Y-axis

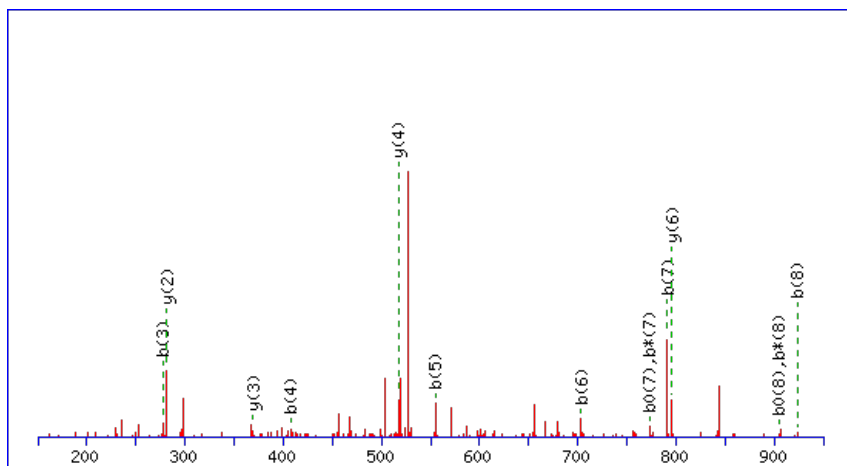

Monoisotopic mass of neutral peptide **Mr(calc)**: 1070.4863

**Fixed modifications**: Carbamidomethyl (C) (apply to specified residues or termini only)

**Ions Score**: 22 **Expect**: 0.029

**Matches**: 14/90 fragment ions using 47 most intense peaks ([help](#))

| # | b               | b <sup>++</sup> | b*              | b <sup>*++</sup> | b <sup>0</sup>  | b <sup>0++</sup> | Seq. | y               | y <sup>++</sup> | y*       | y <sup>*++</sup> | y <sup>0</sup> | y <sup>0++</sup> | # |
|---|-----------------|-----------------|-----------------|------------------|-----------------|------------------|------|-----------------|-----------------|----------|------------------|----------------|------------------|---|
| 1 | 117.0443        | 59.0258         | 99.0207         | 50.0140          |                 |                  | N    |                 |                 |          |                  |                |                  | 9 |
| 2 | 205.0733        | 103.0403        | 187.0498        | 94.0285          | 187.0628        | 94.0350          | S    | 955.4566        | 478.2319        | 937.4330 | 469.2201         | 937.4460       | 469.2267         | 8 |
| 3 | <b>277.1075</b> | 139.0574        | 259.0839        | 130.0456         | 259.0969        | 130.0521         | A    | 867.4275        | 434.2174        | 849.4040 | 425.2056         | 849.4170       | 425.2121         | 7 |
| 4 | <b>407.1965</b> | 204.1019        | 389.1729        | 195.0901         | 389.1860        | 195.0966         | K    | <b>795.3934</b> | 398.2003        | 777.3698 | 389.1885         | 777.3828       | 389.1950         | 6 |
| 5 | <b>555.2620</b> | 278.1346        | 537.2384        | 269.1228         | 537.2514        | 269.1293         | F    | 665.3044        | 333.1558        | 647.2808 | 324.1440         | 647.2938       | 324.1505         | 5 |
| 6 | <b>703.3274</b> | 352.1673        | 685.3038        | 343.1556         | 685.3169        | 343.1621         | F    | <b>517.2389</b> | 259.1231        | 499.2153 | 250.1113         | 499.2283       | 250.1178         | 4 |
| 7 | <b>791.3565</b> | 396.1819        | <b>773.3329</b> | 387.1701         | <b>773.3459</b> | 387.1766         | S    | <b>369.1735</b> | 185.0904        | 351.1499 | 176.0786         | 351.1629       | 176.0851         | 3 |
| 8 | <b>923.3940</b> | 462.2006        | <b>905.3704</b> | 453.1888         | <b>905.3834</b> | 453.1954         | M    | <b>281.1444</b> | 141.0758        | 263.1208 | 132.0640         |                |                  | 2 |
| 9 |                 |                 |                 |                  |                 |                  | K    | 149.1069        | 75.0571         | 131.0833 | 66.0453          |                |                  | 1 |

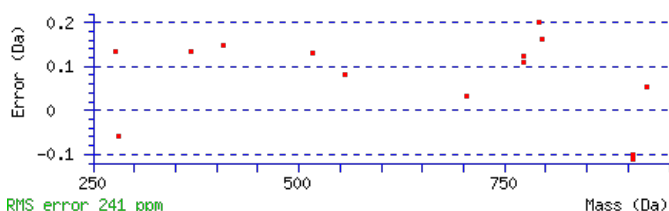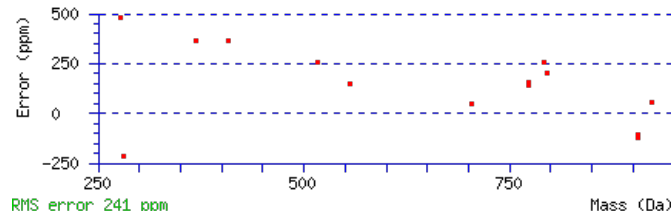

NCBI **BLAST** search of [NSAKFFSMK](#)

(Parameters: blastp, nr protein database, expect=20000, no filter, PAM30)

Other BLAST [web gateways](#)

### All matches to this query

| Score | Mr(calc)  | Delta  | Sequence                  |
|-------|-----------|--------|---------------------------|
| 21.8  | 1070.4863 | 0.0013 | <a href="#">NSAKFFSMK</a> |

## AT2G23450.1

|      |           |         |                           |
|------|-----------|---------|---------------------------|
| 11.7 | 1070.4897 | -0.0021 | <a href="#">IHLMAESMK</a> |
| 7.3  | 1070.4863 | 0.0013  | <a href="#">MIERFGYK</a>  |

**Mascot:** <http://www.matrixscience.com/>

## Peptide View

MS/MS Fragmentation of **KAEEEEAVEIVK**

Found in **AT2G23670.1** in **TAIR\_Arabidopsis**, Symbols: YCF37 | YCF37 (Arabidopsis homolog of Synechocystis YCF37) | chr2:10070387-10070890 REVERSE

Match to Query 4696: 1243.665542 from(622.840047,2+) index(1877)

Title: Elution from: 22.549 to 22.549 scan no 2440 cid35.00 polarity:+

Data file D6h-1\_1.mgf

Click mouse within plot area to zoom in by factor of two about that point

Or,   to  Da

Label all possible matches  Label matches used for scoring

Show Y-axis

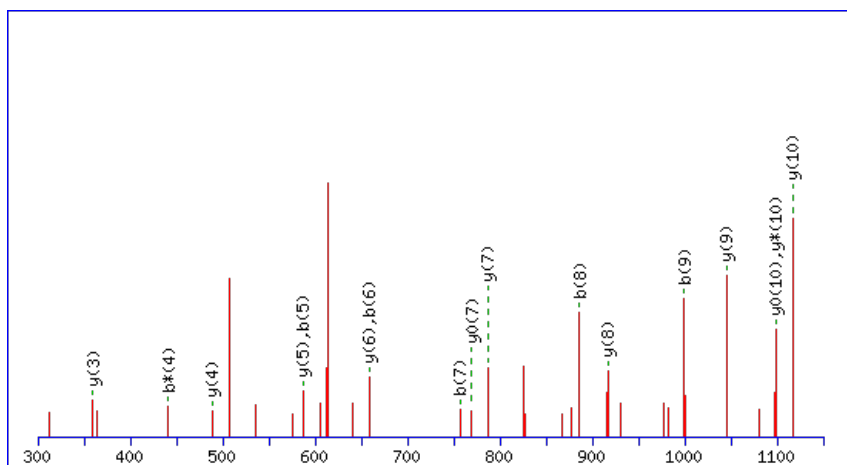

Monoisotopic mass of neutral peptide  $M_r(\text{calc})$ : 1243.6659

Fixed modifications: Carbamidomethyl (C) (apply to specified residues or termini only)

Ions Score: 71 Expect: 4.2e-007

Matches : 18/110 fragment ions using 26 most intense peaks ([help](#))

| #  | b                | b <sup>++</sup> | b*              | b* <sup>++</sup> | b <sup>0</sup> | b <sup>0++</sup> | Seq. | y                | y <sup>++</sup> | y*               | y* <sup>++</sup> | y <sup>0</sup>   | y <sup>0++</sup> | #  |
|----|------------------|-----------------|-----------------|------------------|----------------|------------------|------|------------------|-----------------|------------------|------------------|------------------|------------------|----|
| 1  | 129.1022         | 65.0548         | 112.0757        | 56.5415          |                |                  | K    |                  |                 |                  |                  |                  |                  | 11 |
| 2  | 200.1394         | 100.5733        | 183.1128        | 92.0600          |                |                  | A    | <b>1116.5783</b> | 558.7928        | <b>1099.5517</b> | 550.2795         | <b>1098.5677</b> | 549.7875         | 10 |
| 3  | 329.1819         | 165.0946        | 312.1554        | 156.5813         | 311.1714       | 156.0893         | E    | <b>1045.5412</b> | 523.2742        | 1028.5146        | 514.7610         | 1027.5306        | 514.2689         | 9  |
| 4  | 458.2245         | 229.6159        | <b>441.1980</b> | 221.1026         | 440.2140       | 220.6106         | E    | <b>916.4986</b>  | 458.7529        | 899.4720         | 450.2397         | 898.4880         | 449.7477         | 8  |
| 5  | <b>587.2671</b>  | 294.1372        | 570.2406        | 285.6239         | 569.2566       | 285.1319         | E    | <b>787.4560</b>  | 394.2316        | 770.4294         | 385.7184         | <b>769.4454</b>  | 385.2264         | 7  |
| 6  | <b>658.3042</b>  | 329.6558        | 641.2777        | 321.1425         | 640.2937       | 320.6505         | A    | <b>658.4134</b>  | 329.7103        | 641.3869         | 321.1971         | 640.4028         | 320.7051         | 6  |
| 7  | <b>757.3727</b>  | 379.1900        | 740.3461        | 370.6767         | 739.3621       | 370.1847         | V    | <b>587.3763</b>  | 294.1918        | 570.3497         | 285.6785         | 569.3657         | 285.1865         | 5  |
| 8  | <b>886.4153</b>  | 443.7113        | 869.3887        | 435.1980         | 868.4047       | 434.7060         | E    | <b>488.3079</b>  | 244.6576        | 471.2813         | 236.1443         | 470.2973         | 235.6523         | 4  |
| 9  | <b>999.4993</b>  | 500.2533        | 982.4728        | 491.7400         | 981.4888       | 491.2480         | I    | <b>359.2653</b>  | 180.1363        | 342.2387         | 171.6230         |                  |                  | 3  |
| 10 | <b>1098.5677</b> | 549.7875        | 1081.5412       | 541.2742         | 1080.5572      | 540.7822         | V    | 246.1812         | 123.5942        | 229.1547         | 115.0810         |                  |                  | 2  |
| 11 |                  |                 |                 |                  |                |                  | K    | 147.1128         | 74.0600         | 130.0863         | 65.5468          |                  |                  | 1  |

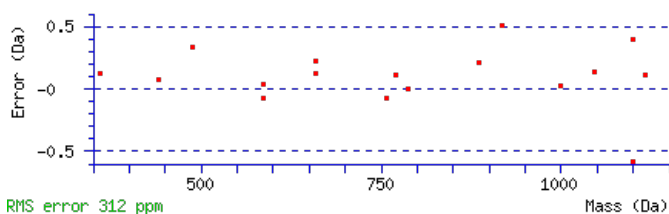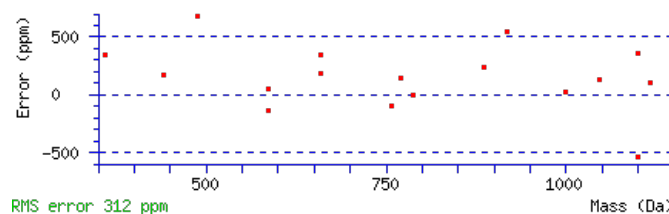

NCBI BLAST search of **KAEEEEAVEIVK**

(Parameters: blastp, nr protein database, expect=20000, no filter, PAM30)

Other BLAST [web gateways](#)

All matches to this query

## AT2G23670.1

| Score | Mr(calc)  | Delta   | Sequence                     |
|-------|-----------|---------|------------------------------|
| 71.0  | 1243.6659 | -0.0004 | <a href="#">KAEEEEAVEIVK</a> |
| 18.8  | 1243.6633 | 0.0022  | <a href="#">AQRTDTGGVIAR</a> |
| 13.3  | 1243.6633 | 0.0023  | <a href="#">QAIQKATNTR</a>   |
| 2.7   | 1243.6660 | -0.0004 | <a href="#">LITENADLVEK</a>  |
| 1.6   | 1243.6633 | 0.0023  | <a href="#">TGNRGQQEKVK</a>  |
| 1.5   | 1243.6634 | 0.0021  | <a href="#">KAAAYLAYSVMK</a> |

Mascot: <http://www.matrixscience.com/>

**Peptide View**MS/MS Fragmentation of **VTLSGNQQPIR**

Found in **AT2G24020.1** in **TAIR\_Arabidopsis**, Symbols: | similar to unknown protein [Arabidopsis thaliana] (TAIR:AT4G30620.1); similar to unknown [Picea sitchensis] (GB:ABK26000.1); similar to Os02g0180200 [Oryza sativa (japonica cultivar-group)] (GB:NP\_001046090.1); contains InterPro domain

Match to Query 4106: 1211.665764 from(606.840158,2+) index(1749)

Title: Elution from: 21.948 to 21.948 scan no 2297 cid35.00 polarity:+

Data file D6h-1\_3.mgf

Click mouse within plot area to zoom in by factor of two about that point

Or,   to  Da

Label all possible matches  Label matches used for scoring

Show Y-axis

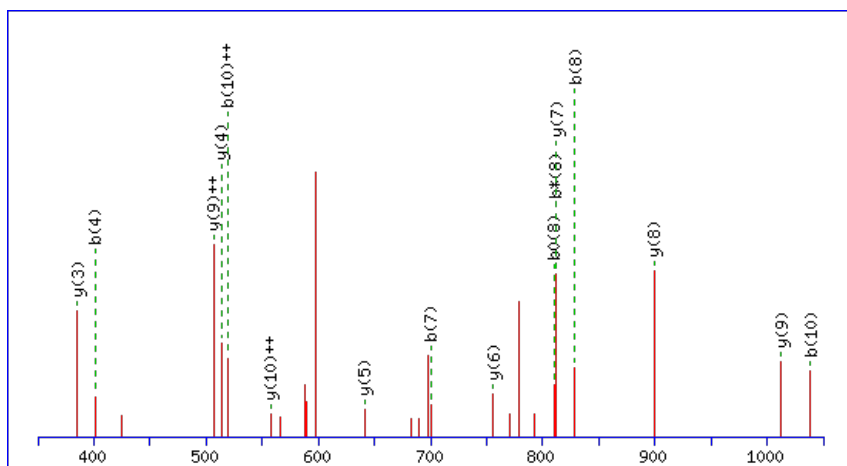

**Monoisotopic mass of neutral peptide Mr(calc):** 1211.6622

**Fixed modifications:** Carbamidomethyl (C) (apply to specified residues or termini only)

**Ions Score:** 62 **Expect:** 2.4e-006

**Matches:** 16/94 fragment ions using 22 most intense peaks ([help](#))

| #  | b         | b <sup>++</sup> | b <sup>*</sup> | b <sup>*++</sup> | b <sup>0</sup> | b <sup>0++</sup> | Seq. | y         | y <sup>++</sup> | y <sup>*</sup> | y <sup>*++</sup> | y <sup>0</sup> | y <sup>0++</sup> | #  |
|----|-----------|-----------------|----------------|------------------|----------------|------------------|------|-----------|-----------------|----------------|------------------|----------------|------------------|----|
| 1  | 100.0757  | 50.5415         |                |                  |                |                  | V    |           |                 |                |                  |                |                  | 11 |
| 2  | 201.1234  | 101.0653        |                |                  | 183.1128       | 92.0600          | T    | 1113.6011 | 557.3042        | 1096.5745      | 548.7909         | 1095.5905      | 548.2989         | 10 |
| 3  | 314.2074  | 157.6074        |                |                  | 296.1969       | 148.6021         | L    | 1012.5534 | 506.7803        | 995.5269       | 498.2671         | 994.5429       | 497.7751         | 9  |
| 4  | 401.2395  | 201.1234        |                |                  | 383.2289       | 192.1181         | S    | 899.4694  | 450.2383        | 882.4428       | 441.7250         | 881.4588       | 441.2330         | 8  |
| 5  | 458.2609  | 229.6341        |                |                  | 440.2504       | 220.6288         | G    | 812.4373  | 406.7223        | 795.4108       | 398.2090         |                |                  | 7  |
| 6  | 572.3039  | 286.6556        | 555.2773       | 278.1423         | 554.2933       | 277.6503         | N    | 755.4159  | 378.2116        | 738.3893       | 369.6983         |                |                  | 6  |
| 7  | 700.3624  | 350.6849        | 683.3359       | 342.1716         | 682.3519       | 341.6796         | Q    | 641.3729  | 321.1901        | 624.3464       | 312.6768         |                |                  | 5  |
| 8  | 828.4210  | 414.7141        | 811.3945       | 406.2009         | 810.4104       | 405.7089         | Q    | 513.3144  | 257.1608        | 496.2878       | 248.6475         |                |                  | 4  |
| 9  | 925.4738  | 463.2405        | 908.4472       | 454.7272         | 907.4632       | 454.2352         | P    | 385.2558  | 193.1315        | 368.2292       | 184.6183         |                |                  | 3  |
| 10 | 1038.5578 | 519.7826        | 1021.5313      | 511.2693         | 1020.5473      | 510.7773         | I    | 288.2030  | 144.6051        | 271.1765       | 136.0919         |                |                  | 2  |
| 11 |           |                 |                |                  |                |                  | R    | 175.1190  | 88.0631         | 158.0924       | 79.5498          |                |                  | 1  |

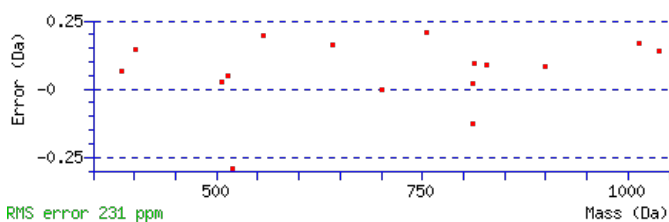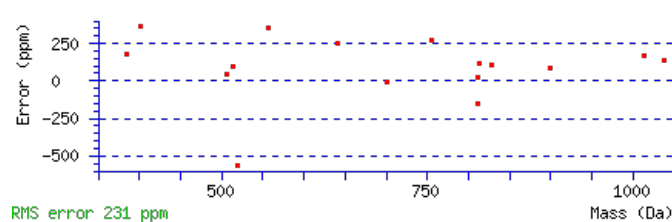

NCBI **BLAST** search of **VTLSGNQQPIR**

(Parameters: blastp, nr protein database, expect=20000, no filter, PAM30)

Other BLAST [web gateways](#)

AT2G24020.1

All matches to this query

| Score | Mr(calc)  | Delta   | Sequence                    |
|-------|-----------|---------|-----------------------------|
| 61.9  | 1211.6622 | 0.0035  | <a href="#">VTLSGNQPIR</a>  |
| 8.6   | 1211.6622 | 0.0036  | <a href="#">EASLAALERPR</a> |
| 2.1   | 1211.6669 | -0.0012 | <a href="#">MHSVSRLARR</a>  |
| 1.5   | 1211.6622 | 0.0036  | <a href="#">SNIERPPGSKK</a> |

Mascot: <http://www.matrixscience.com/>



**Peptide View**MS/MS Fragmentation of **EIDVIEWK**Found in **AT2G24200.1** in **TAIR\_Arabidopsis**, Symbols: | cytosol aminopeptidase | chr2:10294097-10296530 REVERSE

Match to Query 2905: 1040.502868 from(521.258710,2+) index(6597)

Title: Elution from: 57.508 to 57.508 scan no 8454 cid35.00 polarity:+

Data file C7-3\_2.mgf

Click mouse within plot area to zoom in by factor of two about that point

Or,   to  Da Label all possible matches  Label matches used for scoring Show Y-axis 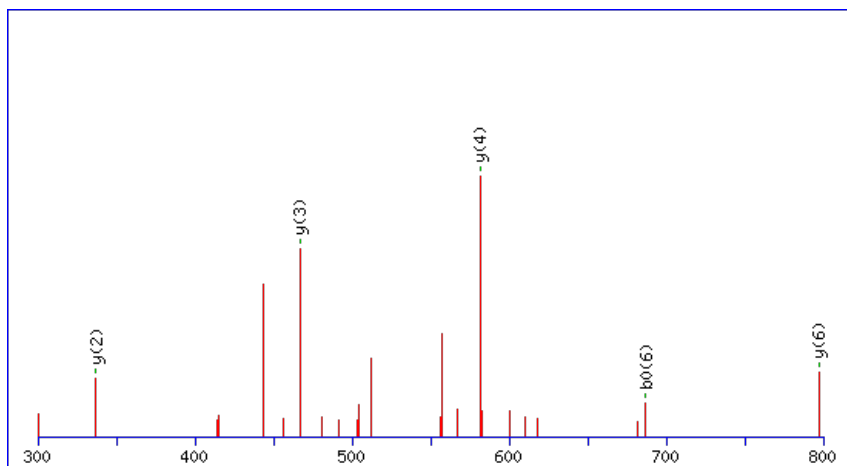Monoisotopic mass of neutral peptide **Mr(calc)**: 1040.5038**Fixed modifications**: Carbamidomethyl (C) (apply to specified residues or termini only)**Ions Score**: 32 **Expect**: 0.0027**Matches**: 5/66 fragment ions using 5 most intense peaks ([help](#))

| # | b        | b <sup>++</sup> | b <sup>0</sup>  | b <sup>0++</sup> | Seq. | y               | y <sup>++</sup> | y*       | y <sup>*++</sup> | y <sup>0</sup> | y <sup>0++</sup> | # |
|---|----------|-----------------|-----------------|------------------|------|-----------------|-----------------|----------|------------------|----------------|------------------|---|
| 1 | 131.0469 | 66.0271         | 113.0363        | 57.0218          | E    |                 |                 |          |                  |                |                  | 8 |
| 2 | 245.1280 | 123.0676        | 227.1174        | 114.0624         | I    | 911.4715        | 456.2394        | 893.4479 | 447.2276         | 893.4609       | 447.2341         | 7 |
| 3 | 361.1520 | 181.0796        | 343.1414        | 172.0743         | D    | <b>797.3904</b> | 399.1988        | 779.3668 | 390.1871         | 779.3798       | 390.1936         | 6 |
| 4 | 461.2174 | 231.1124        | 443.2069        | 222.1071         | V    | 681.3664        | 341.1869        | 663.3428 | 332.1751         | 663.3559       | 332.1816         | 5 |
| 5 | 575.2985 | 288.1529        | 557.2880        | 279.1476         | I    | <b>581.3010</b> | 291.1541        | 563.2774 | 282.1423         | 563.2904       | 282.1488         | 4 |
| 6 | 705.3382 | 353.1727        | <b>687.3276</b> | 344.1674         | E    | <b>467.2199</b> | 234.1136        | 449.1963 | 225.1018         | 449.2093       | 225.1083         | 3 |
| 7 | 893.4115 | 447.2094        | 875.4010        | 438.2041         | W    | <b>337.1803</b> | 169.0938        | 319.1567 | 160.0820         |                |                  | 2 |
| 8 |          |                 |                 |                  | K    | 149.1069        | 75.0571         | 131.0833 | 66.0453          |                |                  | 1 |

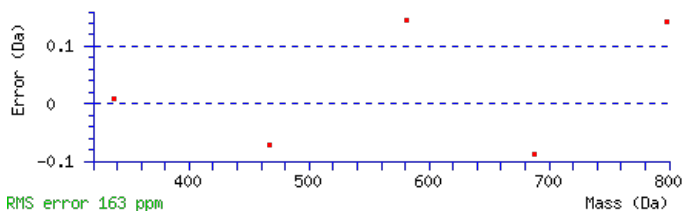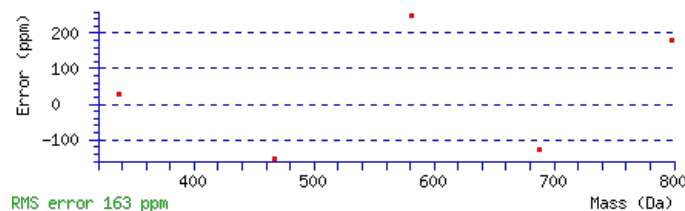NCBI **BLAST** search of [EIDVIEWK](#)

(Parameters: blastp, nr protein database, expect=20000, no filter, PAM30)

Other BLAST [web gateways](#)**All matches to this query**

| Score | Mr(calc)  | Delta   | Sequence                    |
|-------|-----------|---------|-----------------------------|
| 31.9  | 1040.5038 | -0.0010 | <a href="#">EIDVIEWK</a>    |
| 1.2   | 1040.5043 | -0.0014 | <a href="#">GIAPGDGTAIR</a> |



**Peptide View**MS/MS Fragmentation of **GLISCITGK**

Found in **AT2G24270.1** in **TAIR\_Arabidopsis**, Symbols: ALDH11A3 | ALDH11A3 (Aldehyde dehydrogenase 11A3); 3-chloroallyl aldehyde dehydrogenase/ glyceraldehyde-3-phosphate dehydrogenase (NADP+) | chr2:10334405-10336681 REVERSE

Match to Query 2132: 947.511928 from(474.763240,2+) index(5161)

Title: Elution from: 45.879 to 45.879 scan no 6445 cid35.00 polarity:+

Data file D6h-1\_1.mgf

Click mouse within plot area to zoom in by factor of two about that point

Or,   to  Da

Label all possible matches  Label matches used for scoring

Show Y-axis

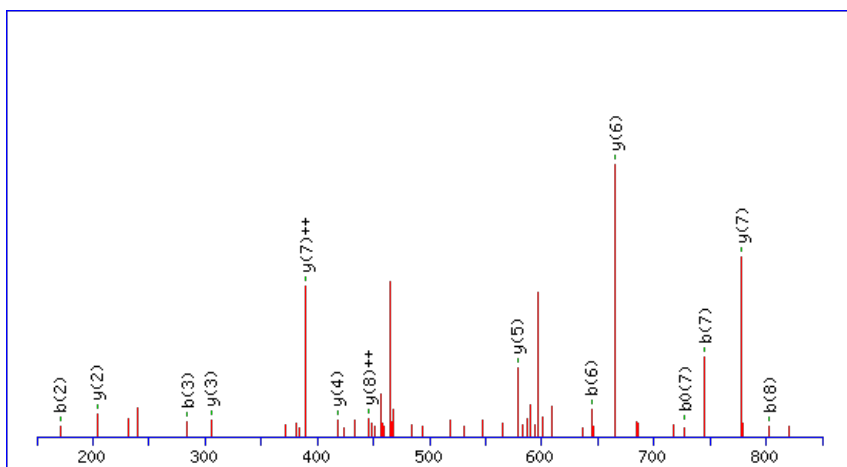

Monoisotopic mass of neutral peptide Mr(calc): 947.5110

Fixed modifications: Carbamidomethyl (C) (apply to specified residues or termini only)

Ions Score: 29 Expect: 0.0083

Matches : 14/70 fragment ions using 37 most intense peaks ([help](#))

| # | b               | b <sup>++</sup> | b <sup>0</sup>  | b <sup>0++</sup> | Seq.     | y               | y <sup>++</sup> | y*       | y <sup>*++</sup> | y <sup>0</sup> | y <sup>0++</sup> | # |
|---|-----------------|-----------------|-----------------|------------------|----------|-----------------|-----------------|----------|------------------|----------------|------------------|---|
| 1 | 58.0287         | 29.5180         |                 |                  | <b>G</b> |                 |                 |          |                  |                |                  | 9 |
| 2 | <b>171.1128</b> | 86.0600         |                 |                  | <b>L</b> | 891.4968        | <b>446.2520</b> | 874.4703 | 437.7388         | 873.4863       | 437.2468         | 8 |
| 3 | <b>284.1969</b> | 142.6021        |                 |                  | <b>I</b> | <b>778.4128</b> | <b>389.7100</b> | 761.3862 | 381.1967         | 760.4022       | 380.7047         | 7 |
| 4 | 371.2289        | 186.1181        | 353.2183        | 177.1128         | <b>S</b> | <b>665.3287</b> | 333.1680        | 648.3021 | 324.6547         | 647.3181       | 324.1627         | 6 |
| 5 | 531.2595        | 266.1334        | 513.2490        | 257.1281         | <b>C</b> | <b>578.2967</b> | 289.6520        | 561.2701 | 281.1387         | 560.2861       | 280.6467         | 5 |
| 6 | <b>644.3436</b> | 322.6754        | 626.3330        | 313.6702         | <b>I</b> | <b>418.2660</b> | 209.6366        | 401.2395 | 201.1234         | 400.2554       | 200.6314         | 4 |
| 7 | <b>745.3913</b> | 373.1993        | <b>727.3807</b> | 364.1940         | <b>T</b> | <b>305.1819</b> | 153.0946        | 288.1554 | 144.5813         | 287.1714       | 144.0893         | 3 |
| 8 | <b>802.4128</b> | 401.7100        | 784.4022        | 392.7047         | <b>G</b> | <b>204.1343</b> | 102.5708        | 187.1077 | 94.0575          |                |                  | 2 |
| 9 |                 |                 |                 |                  | <b>K</b> | 147.1128        | 74.0600         | 130.0863 | 65.5468          |                |                  | 1 |

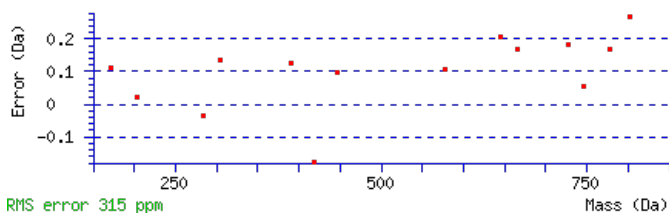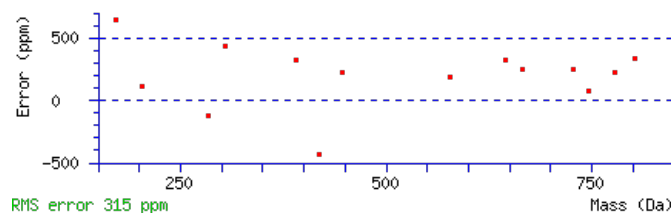

NCBI **BLAST** search of **GLISCITGK**

(Parameters: blastp, nr protein database, expect=20000, no filter, PAM30)

Other BLAST [web gateways](#)

All matches to this query

| Score | Mr(calc) | Delta | Sequence |
|-------|----------|-------|----------|
|       |          |       |          |

# AT2G24270.1

|      |          |        |                           |
|------|----------|--------|---------------------------|
| 28.7 | 947.5110 | 0.0009 | <a href="#">GLISCITGK</a> |
| 1.9  | 947.5110 | 0.0010 | <a href="#">LSMALELR</a>  |

**Mascot:** <http://www.matrixscience.com/>

## Peptide View

MS/MS Fragmentation of **VDVNGPSTAPIYEFLK**

Found in **AT2G25080.1** in **TAIR\_Arabidopsis**, Symbols: ATGPX1 | ATGPX1 (GLUTATHIONE PEROXIDASE 1); glutathione peroxidase | chr2:10675213-10676907 FORWARD

Match to Query 8137: 1766.844408 from(884.429480,2+) index(8905)

Title: Elution from: 79.665 to 79.665 scan no 12113 cid35.00 polarity:+

Data file 0-2\_3.mgf

Click mouse within plot area to zoom in by factor of two about that point

Or,   to  Da

Label all possible matches  Label matches used for scoring

Show Y-axis

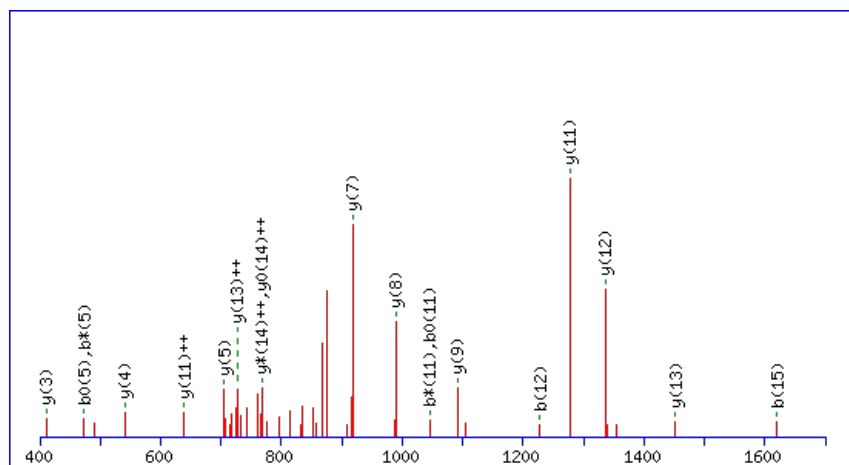

Monoisotopic mass of neutral peptide Mr(calc): 1766.8451

Fixed modifications: Carbamidomethyl (C) (apply to specified residues or termini only)

Ions Score: 89 Expect: 1.3e-008

Matches : 19/166 fragment ions using 19 most intense peaks ([help](#))

| #  | b         | b <sup>++</sup> | b*        | b* <sup>++</sup> | b <sup>0</sup> | b <sup>0++</sup> | Seq. | y         | y <sup>++</sup> | y*        | y* <sup>++</sup> | y <sup>0</sup> | y <sup>0++</sup> | #  |
|----|-----------|-----------------|-----------|------------------|----------------|------------------|------|-----------|-----------------|-----------|------------------|----------------|------------------|----|
| 1  | 101.0727  | 51.0400         |           |                  |                |                  | V    |           |                 |           |                  |                |                  | 16 |
| 2  | 217.0967  | 109.0520        |           |                  | 199.0861       | 100.0467         | D    | 1667.7870 | 834.3971        | 1649.7634 | 825.3853         | 1649.7764      | 825.3918         | 15 |
| 3  | 317.1622  | 159.0847        |           |                  | 299.1516       | 150.0794         | V    | 1551.7630 | 776.3851        | 1533.7394 | 767.3733         | 1533.7524      | 767.3798         | 14 |
| 4  | 433.1991  | 217.1032        | 415.1756  | 208.0914         | 415.1886       | 208.0979         | N    | 1451.6975 | 726.3524        | 1433.6739 | 717.3406         | 1433.6870      | 717.3471         | 13 |
| 5  | 491.2176  | 246.1125        | 473.1941  | 237.1007         | 473.2071       | 237.1072         | G    | 1335.6605 | 668.3339        | 1317.6370 | 659.3221         | 1317.6500      | 659.3286         | 12 |
| 6  | 589.2674  | 295.1374        | 571.2439  | 286.1256         | 571.2569       | 286.1321         | P    | 1277.6420 | 639.3247        | 1259.6185 | 630.3129         | 1259.6315      | 630.3194         | 11 |
| 7  | 677.2965  | 339.1519        | 659.2729  | 330.1401         | 659.2859       | 330.1466         | S    | 1179.5922 | 590.2998        | 1161.5687 | 581.2880         | 1161.5817      | 581.2945         | 10 |
| 8  | 779.3412  | 390.1742        | 761.3176  | 381.1625         | 761.3307       | 381.1690         | T    | 1091.5632 | 546.2852        | 1073.5396 | 537.2734         | 1073.5526      | 537.2799         | 9  |
| 9  | 851.3754  | 426.1913        | 833.3518  | 417.1795         | 833.3648       | 417.1860         | A    | 989.5185  | 495.2629        | 971.4949  | 486.2511         | 971.5079       | 486.2576         | 8  |
| 10 | 949.4252  | 475.2162        | 931.4016  | 466.2044         | 931.4146       | 466.2109         | P    | 917.4843  | 459.2458        | 899.4607  | 450.2340         | 899.4737       | 450.2405         | 7  |
| 11 | 1063.5063 | 532.2568        | 1045.4827 | 523.2450         | 1045.4957      | 523.2515         | I    | 819.4345  | 410.2209        | 801.4109  | 401.2091         | 801.4239       | 401.2156         | 6  |
| 12 | 1227.5666 | 614.2870        | 1209.5431 | 605.2752         | 1209.5561      | 605.2817         | Y    | 705.3534  | 353.1803        | 687.3298  | 344.1686         | 687.3428       | 344.1751         | 5  |
| 13 | 1357.6063 | 679.3068        | 1339.5827 | 670.2950         | 1339.5957      | 670.3015         | E    | 541.2930  | 271.1502        | 523.2695  | 262.1384         | 523.2825       | 262.1449         | 4  |
| 14 | 1505.6717 | 753.3395        | 1487.6481 | 744.3277         | 1487.6611      | 744.3342         | F    | 411.2534  | 206.1303        | 393.2298  | 197.1186         |                |                  | 3  |
| 15 | 1619.7528 | 810.3800        | 1601.7292 | 801.3683         | 1601.7422      | 801.3748         | L    | 263.1880  | 132.0976        | 245.1644  | 123.0858         |                |                  | 2  |
| 16 |           |                 |           |                  |                |                  | K    | 149.1069  | 75.0571         | 131.0833  | 66.0453          |                |                  | 1  |

# AT2G25080.1

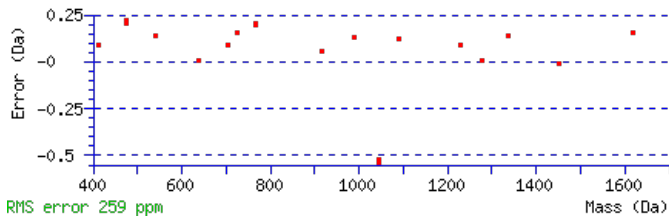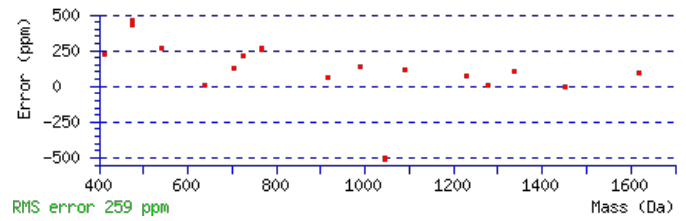

NCBI **BLAST** search of [VDVNGPSTAPIYEFLK](#)

(Parameters: blastp, nr protein database, expect=20000, no filter, PAM30)

Other BLAST [web gateways](#)

## All matches to this query

| Score | Mr(calc)  | Delta   | Sequence                         |
|-------|-----------|---------|----------------------------------|
| 88.8  | 1766.8451 | -0.0007 | <a href="#">VDVNGPSTAPIYEFLK</a> |
| 3.2   | 1766.8489 | -0.0045 | <a href="#">MVEELKLENOQKTR</a>   |
| 0.5   | 1766.8429 | 0.0015  | <a href="#">EVTVVSDLPASFSLER</a> |
| 0.4   | 1766.8463 | -0.0018 | <a href="#">DSLVAKTLMQEQLEK</a>  |

Mascot: <http://www.matrixscience.com/>

**Peptide View**MS/MS Fragmentation of **VVEELDIK**

Found in **AT2G25160.1** in **TAIR\_Arabidopsis**, Symbols: CYP82F1 | CYP82F1 (cytochrome P450, family 82, subfamily F, polypeptide 1); oxygen binding | chr2:10716315-10718290 REVERSE

Match to Query 1929: 952.495488 from(477.255020,2+) index(2752)

Title: Elution from: 27.859 to 27.859 scan no 3441 cid35.00 polarity:+

Data file 0-3\_3.mgf

Click mouse within plot area to zoom in by factor of two about that point

Or,   to  Da

Label all possible matches  Label matches used for scoring

Show Y-axis

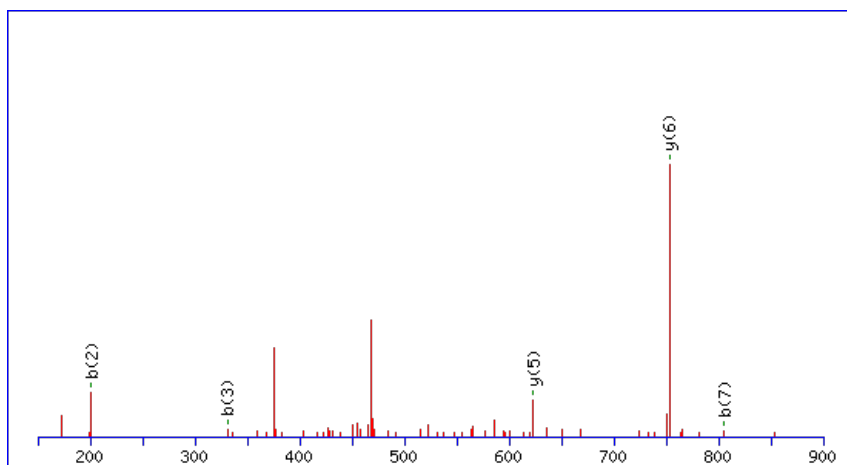

**Monoisotopic mass of neutral peptide Mr(calc):** 952.4959

**Fixed modifications:** Carbamidomethyl (C) (apply to specified residues or termini only)

**Ions Score:** 23 **Expect:** 0.0054

**Matches:** 5/62 fragment ions using 7 most intense peaks ([help](#))

| # | b               | b <sup>++</sup> | b <sup>0</sup> | b <sup>0++</sup> | Seq. | y               | y <sup>++</sup> | y*       | y <sup>*++</sup> | y <sup>0</sup> | y <sup>0++</sup> | # |
|---|-----------------|-----------------|----------------|------------------|------|-----------------|-----------------|----------|------------------|----------------|------------------|---|
| 1 | 101.0727        | 51.0400         |                |                  | V    |                 |                 |          |                  |                |                  | 8 |
| 2 | <b>201.1382</b> | 101.0727        |                |                  | V    | 853.4378        | 427.2225        | 835.4142 | 418.2107         | 835.4272       | 418.2172         | 7 |
| 3 | <b>331.1778</b> | 166.0925        | 313.1672       | 157.0873         | E    | <b>753.3723</b> | 377.1898        | 735.3487 | 368.1780         | 735.3617       | 368.1845         | 6 |
| 4 | 461.2174        | 231.1124        | 443.2069       | 222.1071         | E    | <b>623.3327</b> | 312.1700        | 605.3091 | 303.1582         | 605.3221       | 303.1647         | 5 |
| 5 | 575.2985        | 288.1529        | 557.2880       | 279.1476         | L    | 493.2930        | 247.1502        | 475.2695 | 238.1384         | 475.2825       | 238.1449         | 4 |
| 6 | 691.3225        | 346.1649        | 673.3119       | 337.1596         | D    | 379.2120        | 190.1096        | 361.1884 | 181.0978         | 361.2014       | 181.1043         | 3 |
| 7 | <b>805.4036</b> | 403.2054        | 787.3930       | 394.2002         | I    | 263.1880        | 132.0976        | 245.1644 | 123.0858         |                |                  | 2 |
| 8 |                 |                 |                |                  | K    | 149.1069        | 75.0571         | 131.0833 | 66.0453          |                |                  | 1 |

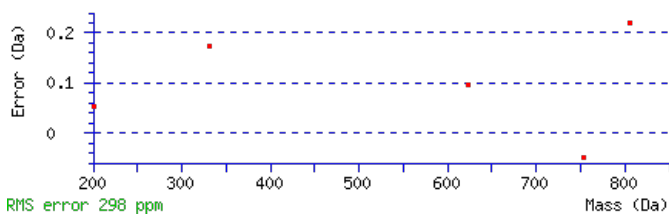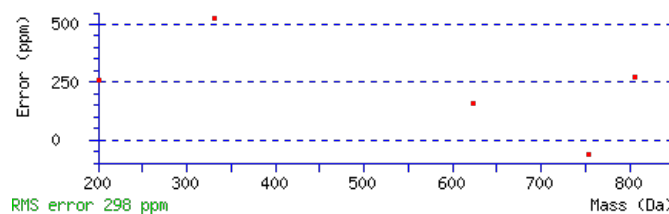

NCBI **BLAST** search of [VVEELDIK](#)

(Parameters: blastp, nr protein database, expect=20000, no filter, PAM30)

Other BLAST [web gateways](#)

**All matches to this query**

| Score | Mr(calc) | Delta   | Sequence                 |
|-------|----------|---------|--------------------------|
| 23.1  | 952.4959 | -0.0004 | <a href="#">VVEELDIK</a> |





**Peptide View**MS/MS Fragmentation of **FLANDFAGAR**

Found in **AT2G25560.1** in **TAIR\_Arabidopsis**, Symbols: | DNAJ heat shock N-terminal domain-containing protein | chr2:1088868-10890838  
FORWARD

Match to Query 3270: 1094.493678 from(548.254115,2+) index(2209)

Title: Elution from: 24.924 to 24.924 scan no 2810 cid35.00 polarity:+

Data file D6h-1\_3.mgf

Click mouse within plot area to zoom in by factor of two about that point

Or,   to  Da

Label all possible matches  Label matches used for scoring

Show Y-axis

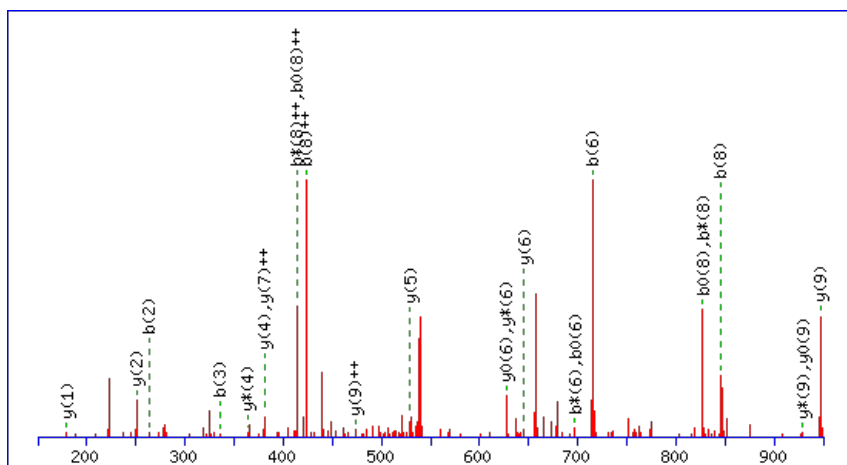

**Monoisotopic mass of neutral peptide Mr(calc):** 1094.4937

**Fixed modifications:** Carbamidomethyl (C) (apply to specified residues or termini only)

**Ions Score:** 21 **Expect:** 0.048

**Matches:** 24/84 fragment ions using 76 most intense peaks ([help](#))

| #  | b               | b <sup>++</sup> | b*              | b <sup>*++</sup> | b <sup>0</sup>  | b <sup>0++</sup> | Seq. | y               | y <sup>++</sup> | y*              | y <sup>*++</sup> | y <sup>0</sup>  | y <sup>0++</sup> | #  |
|----|-----------------|-----------------|-----------------|------------------|-----------------|------------------|------|-----------------|-----------------|-----------------|------------------|-----------------|------------------|----|
| 1  | 149.0727        | 75.0400         |                 |                  |                 |                  | F    |                 |                 |                 |                  |                 |                  | 10 |
| 2  | <b>263.1538</b> | 132.0805        |                 |                  |                 |                  | L    | <b>947.4356</b> | <b>474.2214</b> | <b>929.4120</b> | 465.2096         | <b>929.4250</b> | 465.2161         | 9  |
| 3  | <b>335.1880</b> | 168.0976        |                 |                  |                 |                  | A    | 833.3545        | 417.1809        | 815.3309        | 408.1691         | 815.3439        | 408.1756         | 8  |
| 4  | 451.2250        | 226.1161        | 433.2014        | 217.1043         |                 |                  | N    | 761.3203        | <b>381.1638</b> | 743.2967        | 372.1520         | 743.3097        | 372.1585         | 7  |
| 5  | 567.2489        | 284.1281        | 549.2254        | 275.1163         | 549.2384        | 275.1228         | D    | <b>645.2833</b> | 323.1453        | <b>627.2597</b> | 314.1335         | <b>627.2728</b> | 314.1400         | 6  |
| 6  | <b>715.3144</b> | 358.1608        | <b>697.2908</b> | 349.1490         | <b>697.3038</b> | 349.1556         | F    | <b>529.2593</b> | 265.1333        | 511.2358        | 256.1215         |                 |                  | 5  |
| 7  | 787.3485        | 394.1779        | 769.3250        | 385.1661         | 769.3380        | 385.1726         | A    | <b>381.1939</b> | 191.1006        | <b>363.1703</b> | 182.0888         |                 |                  | 4  |
| 8  | <b>845.3670</b> | <b>423.1872</b> | <b>827.3435</b> | <b>414.1754</b>  | <b>827.3565</b> | <b>414.1819</b>  | G    | 309.1597        | 155.0835        | 291.1362        | 146.0717         |                 |                  | 3  |
| 9  | 917.4012        | 459.2042        | 899.3776        | 450.1924         | 899.3906        | 450.1990         | A    | <b>251.1412</b> | 126.0743        | 233.1177        | 117.0625         |                 |                  | 2  |
| 10 |                 |                 |                 |                  |                 |                  | R    | <b>179.1071</b> | 90.0572         | 161.0835        | 81.0454          |                 |                  | 1  |

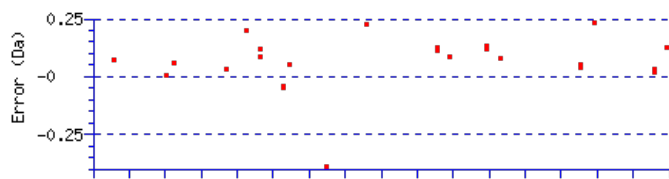

RMS error 277 ppb

Mass (Da)

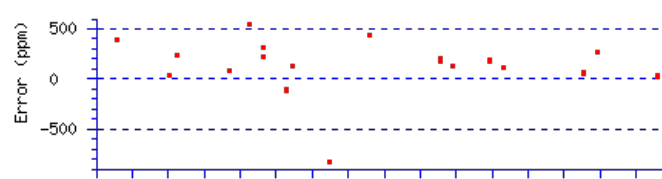

RMS error 277 ppb

Mass (Da)

NCBI BLAST search of **FLANDFAGAR**

(Parameters: blastp, nr protein database, expect=20000, no filter, PAM30)

Other BLAST [web gateways](#)

**All matches to this query**

## AT2G25560.1

| Score | Mr(calc)  | Delta   | Sequence                   |
|-------|-----------|---------|----------------------------|
| 20.8  | 1094.4937 | -0.0000 | <a href="#">FLANDFAGAR</a> |
| 15.0  | 1094.4944 | -0.0008 | <a href="#">YGIMEINTK</a>  |
| 12.1  | 1094.4944 | -0.0008 | <a href="#">MEKQVASEK</a>  |
| 10.2  | 1094.4915 | 0.0022  | <a href="#">TENFTGGARK</a> |
| 6.5   | 1094.4944 | -0.0008 | <a href="#">GLSSFESVMK</a> |
| 6.5   | 1094.4915 | 0.0022  | <a href="#">GNQEEYRKK</a>  |
| 3.7   | 1094.4910 | 0.0026  | <a href="#">FSEFEAQVK</a>  |
| 3.6   | 1094.4944 | -0.0007 | <a href="#">STGGEMFLVK</a> |
| 3.3   | 1094.4910 | 0.0026  | <a href="#">FETPKDGYK</a>  |
| 2.0   | 1094.4915 | 0.0022  | <a href="#">NLSYDNKAR</a>  |

Mascot: <http://www.matrixscience.com/>

**Peptide View**MS/MS Fragmentation of **VTYLLVDDPKR**

Found in **AT2G25600.1** in **TAIR\_Arabidopsis**, Symbols: AKT6, SPIK | SPIK (SHAKER POLLEN INWARD K<sup>+</sup> CHANNEL); cyclic nucleotide binding / inward rectifier potassium channel/ potassium channel | chr2:10901681-10905447 FORWARD

Match to Query 4811: 1317.730200 from(330.439826,4+) index(2675)

Title: Elution from: 27.661 to 27.661 scan no 3333 cid35.00 polarity:+

Data file 0-1\_3.mgf

Click mouse within plot area to zoom in by factor of two about that point

Or,   to  Da

Label all possible matches  Label matches used for scoring

Show Y-axis

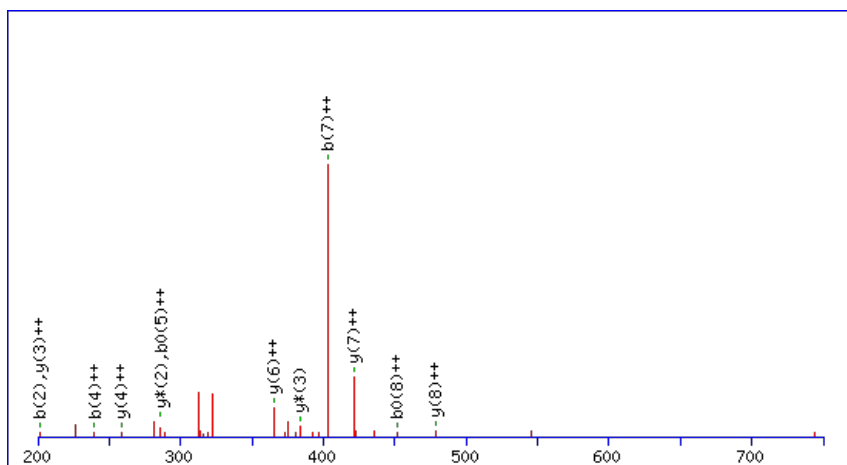

Monoisotopic mass of neutral peptide  $M_r(\text{calc})$ : 1317.7292

Fixed modifications: Carbamidomethyl (C) (apply to specified residues or termini only)

Ions Score: 20 Expect: 0.047

Matches : 12/94 fragment ions using 23 most intense peaks ([help](#))

| #  | b         | b <sup>++</sup> | b*        | b <sup>*++</sup> | b <sup>0</sup> | b <sup>0++</sup> | Seq. | y         | y <sup>++</sup> | y*        | y <sup>*++</sup> | y <sup>0</sup> | y <sup>0++</sup> | #  |
|----|-----------|-----------------|-----------|------------------|----------------|------------------|------|-----------|-----------------|-----------|------------------|----------------|------------------|----|
| 1  | 100.0757  | 50.5415         |           |                  |                |                  | V    |           |                 |           |                  |                |                  | 11 |
| 2  | 201.1234  | 101.0653        |           |                  | 183.1128       | 92.0600          | T    | 1219.6681 | 610.3377        | 1202.6416 | 601.8244         | 1201.6575      | 601.3324         | 10 |
| 3  | 364.1867  | 182.5970        |           |                  | 346.1761       | 173.5917         | Y    | 1118.6204 | 559.8139        | 1101.5939 | 551.3006         | 1100.6099      | 550.8086         | 9  |
| 4  | 477.2708  | 239.1390        |           |                  | 459.2602       | 230.1337         | L    | 955.5571  | 478.2822        | 938.5306  | 469.7689         | 937.5465       | 469.2769         | 8  |
| 5  | 590.3548  | 295.6811        |           |                  | 572.3443       | 286.6758         | L    | 842.4730  | 421.7402        | 825.4465  | 413.2269         | 824.4625       | 412.7349         | 7  |
| 6  | 689.4232  | 345.2153        |           |                  | 671.4127       | 336.2100         | V    | 729.3890  | 365.1981        | 712.3624  | 356.6849         | 711.3784       | 356.1928         | 6  |
| 7  | 804.4502  | 402.7287        |           |                  | 786.4396       | 393.7234         | D    | 630.3206  | 315.6639        | 613.2940  | 307.1506         | 612.3100       | 306.6586         | 5  |
| 8  | 919.4771  | 460.2422        |           |                  | 901.4666       | 451.2369         | D    | 515.2936  | 258.1504        | 498.2671  | 249.6372         | 497.2831       | 249.1452         | 4  |
| 9  | 1016.5299 | 508.7686        |           |                  | 998.5193       | 499.7633         | P    | 400.2667  | 200.6370        | 383.2401  | 192.1237         |                |                  | 3  |
| 10 | 1144.6249 | 572.8161        | 1127.5983 | 564.3028         | 1126.6143      | 563.8108         | K    | 303.2139  | 152.1106        | 286.1874  | 143.5973         |                |                  | 2  |
| 11 |           |                 |           |                  |                |                  | R    | 175.1190  | 88.0631         | 158.0924  | 79.5498          |                |                  | 1  |

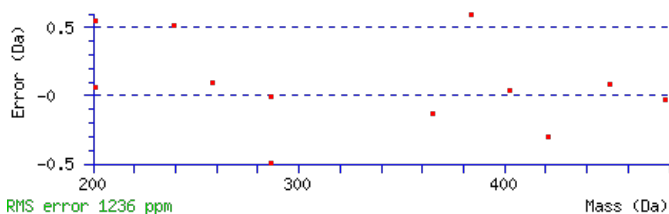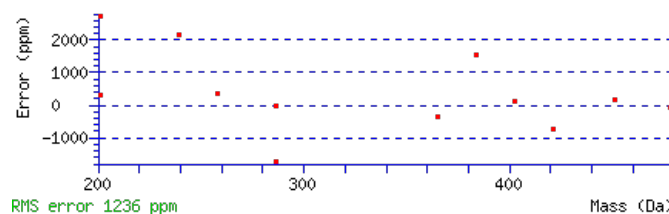

NCBI **BLAST** search of **VTYLLVDDPKR**

(Parameters: blastp, nr protein database, expect=20000, no filter, PAM30)

Other BLAST [web gateways](#)

All matches to this query

## AT2G25600.1

| Score | Mr(calc)  | Delta   | Sequence                     |
|-------|-----------|---------|------------------------------|
| 19.6  | 1317.7292 | 0.0010  | <a href="#">VTYLLVDDPKR</a>  |
| 10.9  | 1317.7306 | -0.0004 | <a href="#">JGGHLPGVHYIR</a> |
| 5.1   | 1317.7326 | -0.0024 | <a href="#">RMLDIELTVK</a>   |
| 3.7   | 1317.7292 | 0.0010  | <a href="#">KTTAWSLVEVGK</a> |
| 0.9   | 1317.7339 | -0.0037 | <a href="#">QIQQMVRFIR</a>   |
| 0.6   | 1317.7292 | 0.0010  | <a href="#">LIGIDSLGFDLR</a> |

Mascot: <http://www.matrixscience.com/>

## Peptide View

MS/MS Fragmentation of **FSQFCGKNVQLLR**

Found in **AT2G25660.1** in **TAIR\_Arabidopsis**, Symbols: EMB2410 | EMB2410 (EMBRYO DEFECTIVE 2410) | chr2:10923534-10934468  
REVERSE

Match to Query 7636: 1616.766482 from(809.390517,2+) index(9103)

Title: Elution from: 80.995 to 80.995 scan no 12143 cid35.00 polarity:+

Data file 0-2\_1.mgf

Click mouse within plot area to zoom in by factor of two about that point

Or,   to  Da

Label all possible matches  Label matches used for scoring

Show Y-axis

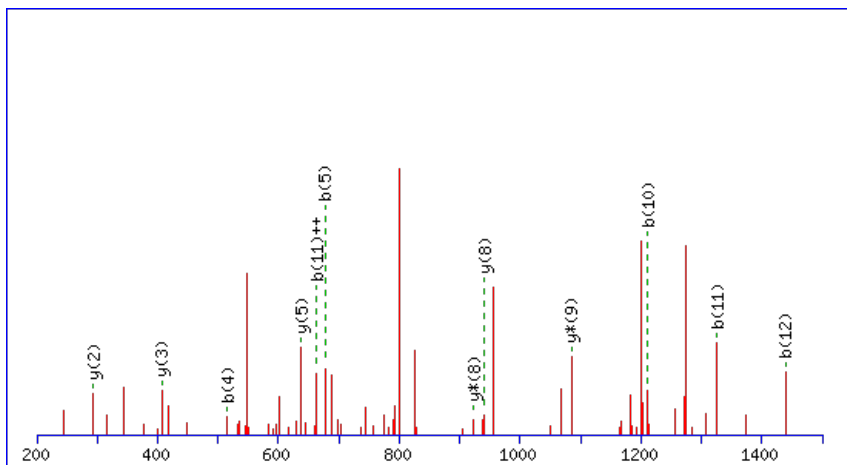

Monoisotopic mass of neutral peptide  $M_r(\text{calc})$ : 1616.7619

Fixed modifications: Carbamidomethyl (C) (apply to specified residues or termini only)

Ions Score: 22 Expect: 0.04

Matches : 12/116 fragment ions using 24 most intense peaks [\(help\)](#)

| #  | b                | b <sup>++</sup> | b*        | b <sup>*++</sup> | b <sup>0</sup> | b <sup>0++</sup> | Seq. | y               | y <sup>++</sup> | y*               | y <sup>*++</sup> | y <sup>0</sup> | y <sup>0++</sup> | #  |
|----|------------------|-----------------|-----------|------------------|----------------|------------------|------|-----------------|-----------------|------------------|------------------|----------------|------------------|----|
| 1  | 149.0727         | 75.0400         |           |                  |                |                  | F    |                 |                 |                  |                  |                |                  | 13 |
| 2  | 237.1018         | 119.0545        |           |                  | 219.0912       | 110.0492         | S    | 1469.7038       | 735.3555        | 1451.6802        | 726.3437         | 1451.6932      | 726.3503         | 12 |
| 3  | 367.1544         | 184.0809        | 349.1309  | 175.0691         | 349.1439       | 175.0756         | Q    | 1381.6747       | 691.3410        | 1363.6511        | 682.3292         |                |                  | 11 |
| 4  | <b>515.2199</b>  | 258.1136        | 497.1963  | 249.1018         | 497.2093       | 249.1083         | F    | 1251.6221       | 626.3147        | 1233.5985        | 617.3029         |                |                  | 10 |
| 5  | <b>677.2446</b>  | 339.1259        | 659.2210  | 330.1141         | 659.2340       | 330.1207         | C    | 1103.5566       | 552.2820        | <b>1085.5330</b> | 543.2702         |                |                  | 9  |
| 6  | 735.2631         | 368.1352        | 717.2395  | 359.1234         | 717.2525       | 359.1299         | G    | <b>941.5319</b> | 471.2696        | <b>923.5083</b>  | 462.2578         |                |                  | 8  |
| 7  | 865.3521         | 433.1797        | 847.3286  | 424.1679         | 847.3416       | 424.1744         | K    | 883.5134        | 442.2603        | 865.4898         | 433.2486         |                |                  | 7  |
| 8  | 981.3891         | 491.1982        | 963.3655  | 482.1864         | 963.3786       | 482.1929         | N    | 753.4244        | 377.2158        | 735.4008         | 368.2040         |                |                  | 6  |
| 9  | 1081.4546        | 541.2309        | 1063.4310 | 532.2191         | 1063.4440      | 532.2256         | V    | <b>637.3874</b> | 319.1973        | 619.3638         | 310.1855         |                |                  | 5  |
| 10 | <b>1211.5072</b> | 606.2573        | 1193.4836 | 597.2455         | 1193.4967      | 597.2520         | Q    | 537.3219        | 269.1646        | 519.2984         | 260.1528         |                |                  | 4  |
| 11 | <b>1325.5883</b> | <b>663.2978</b> | 1307.5647 | 654.2860         | 1307.5778      | 654.2925         | L    | <b>407.2693</b> | 204.1383        | 389.2457         | 195.1265         |                |                  | 3  |
| 12 | <b>1439.6694</b> | 720.3384        | 1421.6458 | 711.3266         | 1421.6589      | 711.3331         | L    | <b>293.1882</b> | 147.0977        | 275.1646         | 138.0859         |                |                  | 2  |
| 13 |                  |                 |           |                  |                |                  | R    | 179.1071        | 90.0572         | 161.0835         | 81.0454          |                |                  | 1  |

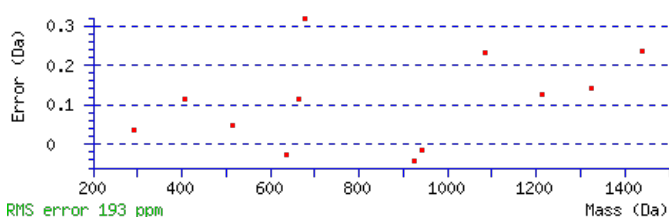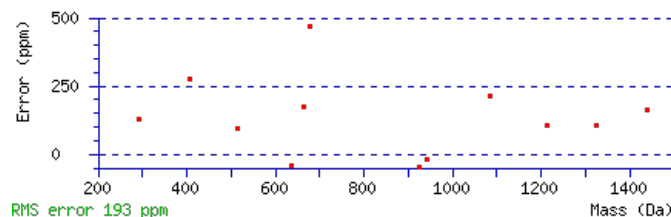

NCBI **BLAST** search of **FSQFCGKNVQLLR**

(Parameters: blastp, nr protein database, expect=20000, no filter, PAM30)

AT2G25660.1

Other BLAST [web gateways](#)

**All matches to this query**

| Score | Mr(calc)  | Delta   | Sequence                        |
|-------|-----------|---------|---------------------------------|
| 22.1  | 1616.7619 | 0.0045  | <a href="#">FSQFCGKNVQLLR</a>   |
| 6.7   | 1616.7672 | -0.0007 | <a href="#">ANVSGKPKHSLDANR</a> |
| 3.8   | 1616.7701 | -0.0036 | <a href="#">LDLAGRDLDHLMK</a>   |
| 3.6   | 1616.7689 | -0.0024 | <a href="#">TFADPFEYRALR</a>    |
| 3.1   | 1616.7645 | 0.0020  | <a href="#">QNFTSKKASSETIR</a>  |
| 1.2   | 1616.7711 | -0.0047 | <a href="#">GPVSGFGLGFVPFYR</a> |
| 0.8   | 1616.7674 | -0.0009 | <a href="#">VLEMVAEELGIEPR</a>  |
| 0.1   | 1616.7644 | 0.0020  | <a href="#">KALEDVATIAGEHSR</a> |

**Mascot:** <http://www.matrixscience.com/>



# Mascot Search Results

## Peptide View

MS/MS Fragmentation of **FRQLTLKIER**

Found in **AT2G25850.1** in **TAIR\_Arabidopsis**, Symbols: | nucleotidyltransferase family protein | chr2:11033126-11037518 REVERSE

Match to Query 4814: 1320.720627 from(441.247485,3+) index(7762)

Title: Elution from: 68.864 to 68.864 scan no 10229 cid35.00 polarity:+

Data file D12h-3\_2.mgf

Click mouse within plot area to zoom in by factor of two about that point

Or,  to  Da

Label all possible matches  Label matches used for scoring

Show Y-axis

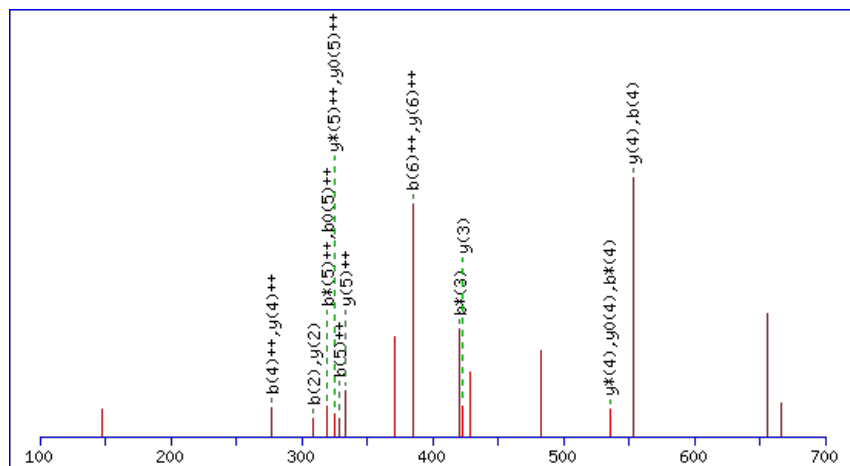

Monoisotopic mass of neutral peptide  $M_r(\text{calc})$ : 1320.7238

Fixed modifications: Carbamidomethyl (C) (apply to specified residues or termini only)

Ions Score: 21 Expect: 0.021

Matches : 19/96 fragment ions using 17 most intense peaks [\(help\)](#)

| #  | b               | b <sup>++</sup> | b*              | b <sup>*++</sup> | b <sup>0</sup> | b <sup>0++</sup> | Seq. | y               | y <sup>++</sup> | y*              | y <sup>*++</sup> | y <sup>0</sup>  | y <sup>0++</sup> | #  |
|----|-----------------|-----------------|-----------------|------------------|----------------|------------------|------|-----------------|-----------------|-----------------|------------------|-----------------|------------------|----|
| 1  | 149.0727        | 75.0400         |                 |                  |                |                  | F    |                 |                 |                 |                  |                 |                  | 10 |
| 2  | <b>309.1620</b> | 155.0846        | 291.1384        | 146.0728         |                |                  | R    | 1173.6657       | 587.3365        | 1155.6421       | 578.3247         | 1155.6551       | 578.3312         | 9  |
| 3  | 439.2146        | 220.1109        | <b>421.1910</b> | 211.0992         |                |                  | Q    | 1013.5764       | 507.2918        | 995.5528        | 498.2801         | 995.5658        | 498.2866         | 8  |
| 4  | <b>553.2957</b> | <b>277.1515</b> | <b>535.2721</b> | 268.1397         |                |                  | L    | 883.5238        | 442.2655        | 865.5002        | 433.2537         | 865.5132        | 433.2602         | 7  |
| 5  | 655.3404        | <b>328.1739</b> | 637.3169        | <b>319.1621</b>  | 637.3299       | <b>319.1686</b>  | T    | 769.4427        | <b>385.2250</b> | 751.4191        | 376.2132         | 751.4321        | 376.2197         | 6  |
| 6  | 769.4215        | <b>385.2144</b> | 751.3980        | 376.2026         | 751.4110       | 376.2091         | L    | 667.3980        | <b>334.2026</b> | 649.3744        | <b>325.1908</b>  | 649.3874        | <b>325.1973</b>  | 5  |
| 7  | 899.5106        | 450.2589        | 881.4870        | 441.2471         | 881.5000       | 441.2536         | K    | <b>553.3169</b> | <b>277.1621</b> | <b>535.2933</b> | 268.1503         | <b>535.3063</b> | 268.1568         | 4  |
| 8  | 1013.5917       | 507.2995        | 995.5681        | 498.2877         | 995.5811       | 498.2942         | I    | <b>423.2278</b> | 212.1175        | 405.2042        | 203.1058         | 405.2173        | 203.1123         | 3  |
| 9  | 1143.6313       | 572.3193        | 1125.6077       | 563.3075         | 1125.6207      | 563.3140         | E    | <b>309.1467</b> | 155.0770        | 291.1231        | 146.0652         | 291.1362        | 146.0717         | 2  |
| 10 |                 |                 |                 |                  |                |                  | R    | 179.1071        | 90.0572         | 161.0835        | 81.0454          |                 |                  | 1  |

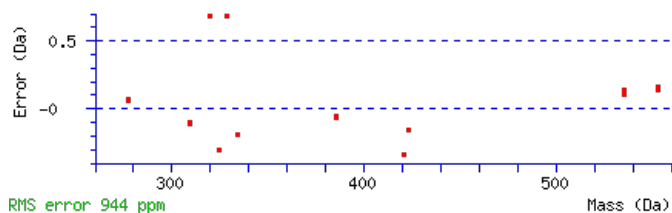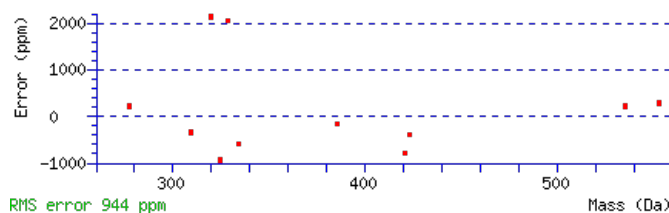

NCBI BLAST search of **FRQLTLKIER**

(Parameters: blastp, nr protein database, expect=20000, no filter, PAM30)

Other BLAST [web gateways](#)

### All matches to this query

| Score | $M_r(\text{calc})$ | Delta | Sequence |
|-------|--------------------|-------|----------|
|       |                    |       |          |

## AT2G25850.1

|      |           |         |                               |
|------|-----------|---------|-------------------------------|
| 21.4 | 1320.7238 | -0.0032 | <a href="#">FRQLTKIER</a>     |
| 1.7  | 1320.7211 | -0.0005 | <a href="#">IGLKG YELGKTK</a> |

**Mascot:** <http://www.matrixscience.com/>



### Peptide View

 MS/MS Fragmentation of **VYTVVLESYTVDIPEGNTEEDTK**

 Found in **AT2G26040.1** in **TAIR\_Arabidopsis**, Symbols: | Bet v I allergen family protein | chr2:11101910-11102482 REVERSE

Match to Query 10662: 2625.156618 from(876.059482,3+) index(10405)

Title: Elution from: 97.898 to 97.898 scan no 14769 cid35.00 polarity:+

Data file C7-1\_2.mgf

Click mouse within plot area to zoom in by factor of two about that point

 Or,  to  Da 

 Label all possible matches  Label matches used for scoring 

 Show Y-axis 
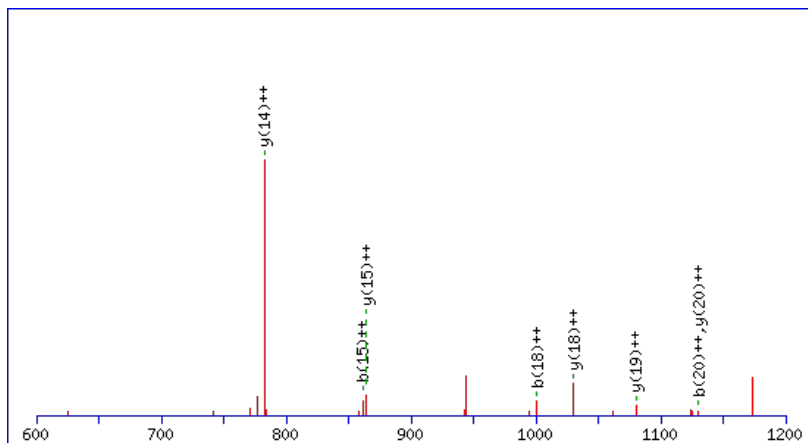
 Monoisotopic mass of neutral peptide **Mr(calc)**: 2625.1640

Fixed modifications: Carbamidomethyl (C) (apply to specified residues or termini only)

Ions Score: 21 Expect: 0.049

 Matches : 8/226 fragment ions using 16 most intense peaks ([help](#))

| #  | b         | b <sup>++</sup> | b <sup>*</sup> | b <sup>*++</sup> | b <sup>0</sup> | b <sup>0++</sup> | Seq. | y         | y <sup>++</sup> | y <sup>*</sup> | y <sup>*++</sup> | y <sup>0</sup> | y <sup>0++</sup> | #  |
|----|-----------|-----------------|----------------|------------------|----------------|------------------|------|-----------|-----------------|----------------|------------------|----------------|------------------|----|
| 1  | 101.0727  | 51.0400         |                |                  |                |                  | V    |           |                 |                |                  |                |                  | 23 |
| 2  | 265.1331  | 133.0702        |                |                  |                |                  | Y    | 2526.1058 | 1263.5566       | 2508.0822      | 1254.5448        | 2508.0953      | 1254.5513        | 22 |
| 3  | 367.1778  | 184.0925        |                |                  | 349.1672       | 175.0873         | T    | 2362.0455 | 1181.5264       | 2344.0219      | 1172.5146        | 2344.0349      | 1172.5211        | 21 |
| 4  | 467.2433  | 234.1253        |                |                  | 449.2327       | 225.1200         | V    | 2260.0007 | 1130.5040       | 2241.9772      | 1121.4922        | 2241.9902      | 1121.4987        | 20 |
| 5  | 567.3087  | 284.1580        |                |                  | 549.2981       | 275.1527         | V    | 2159.9353 | 1080.4713       | 2141.9117      | 1071.4595        | 2141.9247      | 1071.4660        | 19 |
| 6  | 681.3898  | 341.1985        |                |                  | 663.3792       | 332.1933         | L    | 2059.8698 | 1030.4386       | 2041.8463      | 1021.4268        | 2041.8593      | 1021.4333        | 18 |
| 7  | 811.4294  | 406.2184        |                |                  | 793.4189       | 397.2131         | E    | 1945.7888 | 973.3980        | 1927.7652      | 964.3862         | 1927.7782      | 964.3927         | 17 |
| 8  | 899.4585  | 450.2329        |                |                  | 881.4479       | 441.2276         | S    | 1815.7491 | 908.3782        | 1797.7255      | 899.3664         | 1797.7386      | 899.3729         | 16 |
| 9  | 1063.5189 | 532.2631        |                |                  | 1045.5083      | 523.2578         | Y    | 1727.7201 | 864.3637        | 1709.6965      | 855.3519         | 1709.7095      | 855.3584         | 15 |
| 10 | 1165.5636 | 583.2854        |                |                  | 1147.5530      | 574.2801         | T    | 1563.6597 | 782.3335        | 1545.6361      | 773.3217         | 1545.6491      | 773.3282         | 14 |
| 11 | 1265.6290 | 633.3181        |                |                  | 1247.6185      | 624.3129         | V    | 1461.6150 | 731.3111        | 1443.5914      | 722.2993         | 1443.6044      | 722.3058         | 13 |
| 12 | 1381.6530 | 691.3301        |                |                  | 1363.6424      | 682.3249         | D    | 1361.5495 | 681.2784        | 1343.5259      | 672.2666         | 1343.5390      | 672.2731         | 12 |
| 13 | 1495.7341 | 748.3707        |                |                  | 1477.7235      | 739.3654         | I    | 1245.5256 | 623.2664        | 1227.5020      | 614.2546         | 1227.5150      | 614.2611         | 11 |
| 14 | 1593.7839 | 797.3956        |                |                  | 1575.7733      | 788.3903         | P    | 1131.4445 | 566.2259        | 1113.4209      | 557.2141         | 1113.4339      | 557.2206         | 10 |
| 15 | 1723.8235 | 862.4154        |                |                  | 1705.8130      | 853.4101         | E    | 1033.3947 | 517.2010        | 1015.3711      | 508.1892         | 1015.3841      | 508.1957         | 9  |
| 16 | 1781.8420 | 891.4246        |                |                  | 1763.8315      | 882.4194         | G    | 903.3550  | 452.1812        | 885.3314       | 443.1694         | 885.3445       | 443.1759         | 8  |
| 17 | 1897.8790 | 949.4431        | 1879.8554      | 940.4314         | 1879.8685      | 940.4379         | N    | 845.3365  | 423.1719        | 827.3129       | 414.1601         | 827.3260       | 414.1666         | 7  |
| 18 | 1999.9237 | 1000.4655       | 1981.9001      | 991.4537         | 1981.9132      | 991.4602         | T    | 729.2995  | 365.1534        | 711.2759       | 356.1416         | 711.2890       | 356.1481         | 6  |
| 19 | 2129.9634 | 1065.4853       | 2111.9398      | 1056.4735        | 2111.9528      | 1056.4800        | E    | 627.2548  | 314.1310        | 609.2312       | 305.1193         | 609.2443       | 305.1258         | 5  |
| 20 | 2260.0030 | 1130.5051       | 2241.9794      | 1121.4933        | 2241.9924      | 1121.4998        | E    | 497.2152  | 249.1112        | 479.1916       | 240.0994         | 479.2046       | 240.1060         | 4  |
| 21 | 2376.0270 | 1188.5171       | 2358.0034      | 1179.5053        | 2358.0164      | 1179.5118        | D    | 367.1756  | 184.0914        | 349.1520       | 175.0796         | 349.1650       | 175.0861         | 3  |
| 22 | 2478.0717 | 1239.5395       | 2460.0481      | 1230.5277        | 2460.0611      | 1230.5342        | T    | 251.1516  | 126.0794        | 233.1280       | 117.0676         | 233.1410       | 117.0741         | 2  |
| 23 |           |                 |                |                  |                |                  | K    | 149.1069  | 75.0571         | 131.0833       | 66.0453          |                |                  | 1  |

# AT2G26040.1

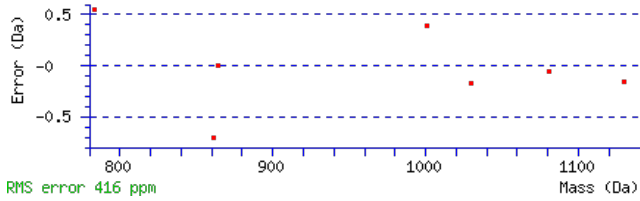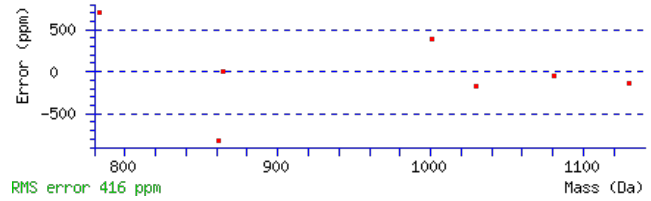

NCBI BLAST search of [VYTVVLESYTVDIPEGNTEEDTK](#)  
 (Parameters: blastp, nr protein database, expect=20000, no filter, PAM30)  
 Other BLAST [web gateways](#)

## All matches to this query

| Score | Mr(calc)  | Delta   | Sequence                                  |
|-------|-----------|---------|-------------------------------------------|
| 21.2  | 2625.1640 | -0.0073 | <a href="#">VYTVVLESYTVDIPEGNTEEDTK</a>   |
| 19.3  | 2625.1612 | -0.0046 | <a href="#">ITASSRNWEHNVFSSFSSVDVPK</a>   |
| 8.9   | 2625.1597 | -0.0031 | <a href="#">SGEMQEGNKDFVGELSVTLVNAOK</a>  |
| 8.4   | 2625.1622 | -0.0056 | <a href="#">SESSIGDSGIEKSSDSSVDRVIDK</a>  |
| 5.7   | 2625.1541 | 0.0026  | <a href="#">GDEIVPPANQLAADNLENDGSTVQK</a> |
| 5.3   | 2625.1630 | -0.0064 | <a href="#">EASMGGEVKTLSEKVDSLAEQEMTR</a> |
| 5.0   | 2625.1547 | 0.0019  | <a href="#">KSGFVAALMCFSCWVGSSFLAVR</a>   |
| 5.0   | 2625.1502 | 0.0064  | <a href="#">LSRVAMVENGECVICLEEWRK</a>     |
| 4.5   | 2625.1565 | 0.0001  | <a href="#">SNLLTEYPWSPRWEVGRMAER</a>     |
| 4.5   | 2625.1557 | 0.0009  | <a href="#">SMEMEIQSLEKLLDINDSMSR</a>     |

Mascot: <http://www.matrixscience.com/>


**Mascot Search Results**
**Peptide View**MS/MS Fragmentation of **IIGVSDSSGK**

Found in **AT2G26080.1** in **TAIR\_Arabidopsis**, Symbols: ATGLDP2 | ATGLDP2 (ARABIDOPSIS THALIANA GLYCINE DECARBOXYLASE P-PROTEIN 2); glycine dehydrogenase (decarboxylating) | chr2:11116408-11120864 REVERSE

Match to Query 2692: 1060.576168 from(531.295360,2+) index(2439)

Title: Elution from: 28.428 to 28.428 scan no 3160 cid35.00 polarity:+

Data file D1d-2\_1.mgf

Click mouse within plot area to zoom in by factor of two about that point

Or,   to  Da

Label all possible matches  Label matches used for scoring

Show Y-axis

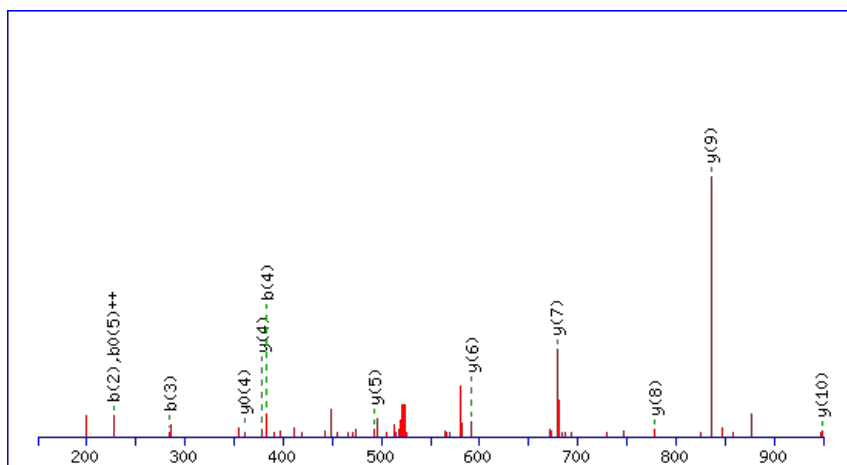

**Monoisotopic mass of neutral peptide Mr(calc):** 1060.5764

**Fixed modifications:** Carbamidomethyl (C) (apply to specified residues or termini only)

**Ions Score:** 29 **Expect:** 0.0049

**Matches:** 12/88 fragment ions using 39 most intense peaks ([help](#))

| #  | b               | b <sup>++</sup> | b <sup>0</sup> | b <sup>0++</sup> | Seq. | y               | y <sup>++</sup> | y*       | y <sup>*++</sup> | y <sup>0</sup>  | y <sup>0++</sup> | #  |
|----|-----------------|-----------------|----------------|------------------|------|-----------------|-----------------|----------|------------------|-----------------|------------------|----|
| 1  | 114.0913        | 57.5493         |                |                  | I    |                 |                 |          |                  |                 |                  | 11 |
| 2  | <b>227.1754</b> | 114.0913        |                |                  | I    | <b>948.4997</b> | 474.7535        | 931.4731 | 466.2402         | 930.4891        | 465.7482         | 10 |
| 3  | <b>284.1969</b> | 142.6021        |                |                  | G    | <b>835.4156</b> | 418.2114        | 818.3890 | 409.6982         | 817.4050        | 409.2061         | 9  |
| 4  | <b>383.2653</b> | 192.1363        |                |                  | V    | <b>778.3941</b> | 389.7007        | 761.3676 | 381.1874         | 760.3836        | 380.6954         | 8  |
| 5  | 470.2973        | 235.6523        | 452.2867       | <b>226.6470</b>  | S    | <b>679.3257</b> | 340.1665        | 662.2992 | 331.6532         | 661.3151        | 331.1612         | 7  |
| 6  | 569.3657        | 285.1865        | 551.3552       | 276.1812         | V    | <b>592.2937</b> | 296.6505        | 575.2671 | 288.1372         | 574.2831        | 287.6452         | 6  |
| 7  | 684.3927        | 342.7000        | 666.3821       | 333.6947         | D    | <b>493.2253</b> | 247.1163        | 476.1987 | 238.6030         | 475.2147        | 238.1110         | 5  |
| 8  | 771.4247        | 386.2160        | 753.4141       | 377.2107         | S    | <b>378.1983</b> | 189.6028        | 361.1718 | 181.0895         | <b>360.1878</b> | 180.5975         | 4  |
| 9  | 858.4567        | 429.7320        | 840.4462       | 420.7267         | S    | 291.1663        | 146.0868        | 274.1397 | 137.5735         | 273.1557        | 137.0815         | 3  |
| 10 | 915.4782        | 458.2427        | 897.4676       | 449.2374         | G    | 204.1343        | 102.5708        | 187.1077 | 94.0575          |                 |                  | 2  |
| 11 |                 |                 |                |                  | K    | 147.1128        | 74.0600         | 130.0863 | 65.5468          |                 |                  | 1  |

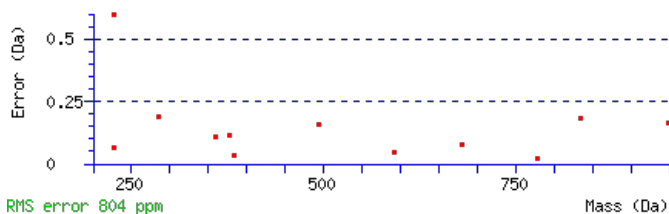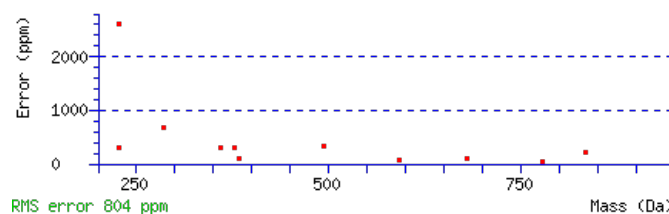NCBI **BLAST** search of **IIGVSDSSGK**

(Parameters: blastp, nr protein database, expect=20000, no filter, PAM30)

Other BLAST [web gateways](#)

**All matches to this query**

AT2G26080.1

| Score | Mr(calc)  | Delta   | Sequence                     |
|-------|-----------|---------|------------------------------|
| 29.2  | 1060.5764 | -0.0003 | <a href="#">IIGVSV DSSGK</a> |
| 2.3   | 1060.5773 | -0.0011 | <a href="#">SPVAKGMMIK</a>   |

Mascot: <http://www.matrixscience.com/>

**Peptide View**MS/MS Fragmentation of **IFIEDK**

Found in **AT2G26420.1** in **TAIR\_Arabidopsis**, Symbols: PIP5K3 | PIP5K3; 1-phosphatidylinositol-4-phosphate 5-kinase | chr2:11246512-11249317 REVERSE

Match to Query 717: 770.391054 from(386.202803,2+) index(4735)

Title: Elution from: 44.281 to 44.281 scan no 6049 cid35.00 polarity:+

Data file D12h-2\_3.mgf

Click mouse within plot area to zoom in by factor of two about that point

Or,  to  Da

Label all possible matches  Label matches used for scoring

Show Y-axis

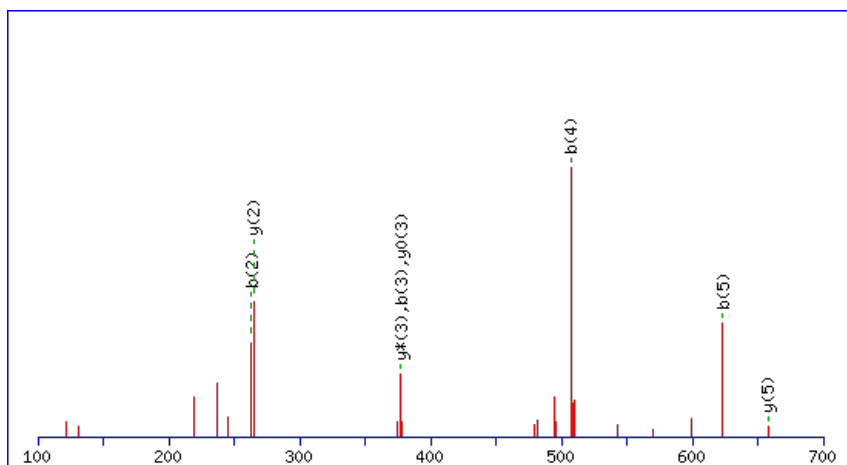

Monoisotopic mass of neutral peptide  $M_r(\text{calc})$ : 770.3908

Fixed modifications: Carbamidomethyl (C) (apply to specified residues or termini only)

Ions Score: 28 Expect: 0.03

Matches : 8/42 fragment ions using 12 most intense peaks ([help](#))

| # | b               | b <sup>++</sup> | b <sup>0</sup> | b <sup>0++</sup> | Seq. | y               | y <sup>++</sup> | y*              | y <sup>*++</sup> | y <sup>0</sup>  | y <sup>0++</sup> | # |
|---|-----------------|-----------------|----------------|------------------|------|-----------------|-----------------|-----------------|------------------|-----------------|------------------|---|
| 1 | 115.0884        | 58.0478         |                |                  | I    |                 |                 |                 |                  |                 |                  | 6 |
| 2 | <b>263.1538</b> | 132.0805        |                |                  | F    | <b>657.3170</b> | 329.1622        | 639.2934        | 320.1504         | 639.3065        | 320.1569         | 5 |
| 3 | <b>377.2349</b> | 189.1211        |                |                  | I    | 509.2516        | 255.1294        | 491.2280        | 246.1176         | 491.2410        | 246.1241         | 4 |
| 4 | <b>507.2746</b> | 254.1409        | 489.2640       | 245.1356         | E    | 395.1705        | 198.0889        | <b>377.1469</b> | 189.0771         | <b>377.1599</b> | 189.0836         | 3 |
| 5 | <b>623.2985</b> | 312.1529        | 605.2880       | 303.1476         | D    | <b>265.1309</b> | 133.0691        | 247.1073        | 124.0573         | 247.1203        | 124.0638         | 2 |
| 6 |                 |                 |                |                  | K    | 149.1069        | 75.0571         | 131.0833        | 66.0453          |                 |                  | 1 |

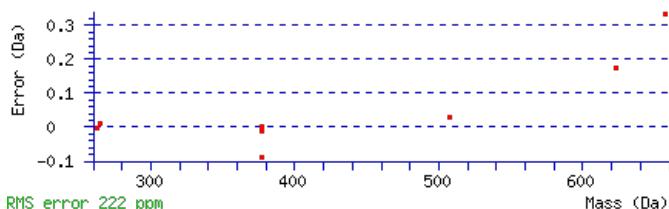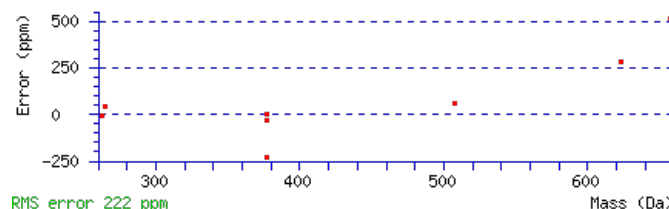

NCBI BLAST search of **IFIEDK**

(Parameters: blastp, nr protein database, expect=20000, no filter, PAM30)

Other BLAST [web gateways](#)

**All matches to this query**

| Score | $M_r(\text{calc})$ | Delta   | Sequence                |
|-------|--------------------|---------|-------------------------|
| 27.9  | 770.3908           | 0.0002  | <a href="#">IFIEDK</a>  |
| 18.5  | 770.3913           | -0.0002 | <a href="#">IRTEGGK</a> |
| 18.5  | 770.3913           | -0.0002 | <a href="#">TLRENK</a>  |

## AT2G26420.1

|      |          |         |                         |
|------|----------|---------|-------------------------|
| 17.3 | 770.3908 | 0.0002  | <a href="#">LEFLDK</a>  |
| 16.9 | 770.3908 | 0.0002  | <a href="#">FDIELK</a>  |
| 16.9 | 770.3908 | 0.0002  | <a href="#">FDLELK</a>  |
| 16.2 | 770.3913 | -0.0002 | <a href="#">LERTNK</a>  |
| 16.1 | 770.3908 | 0.0002  | <a href="#">IFEDLK</a>  |
| 13.8 | 770.3908 | 0.0002  | <a href="#">LEFDLK</a>  |
| 13.5 | 770.3913 | -0.0002 | <a href="#">ELRTGGK</a> |

**Mascot:** <http://www.matrixscience.com/>

**Peptide View**MS/MS Fragmentation of **EGVIEVAK**

Found in **AT2G27020.1** in **TAIR\_Arabidopsis**, Symbols: PAG1 | PAG1 (20S proteasome alpha subunit G1); peptidase | chr2:1153593-11537936  
REVERSE

Match to Query 1368: 843.470156 from(422.742354,2+) index(1538)

Title: Elution from: 19.310 to 19.310 scan no 2016 cid35.00 polarity:+

Data file D1d-3\_2.mgf

Click mouse within plot area to zoom in by factor of two about that point

Or,  to  Da

Label all possible matches  Label matches used for scoring

Show Y-axis

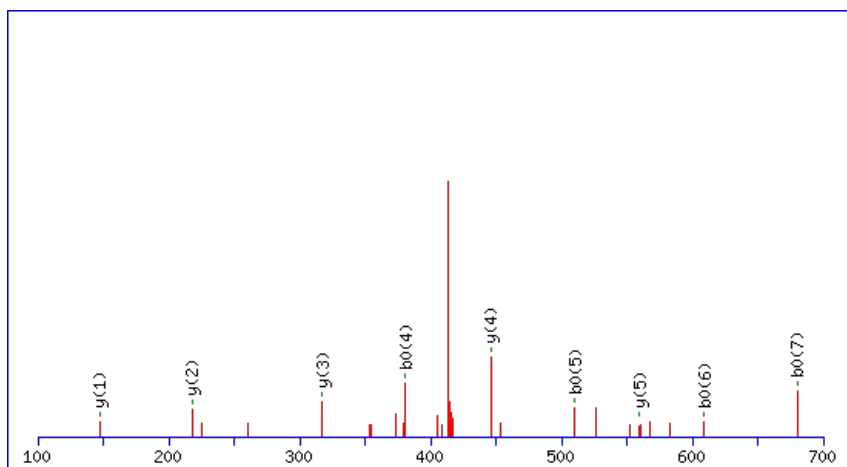

Monoisotopic mass of neutral peptide  $M_r(\text{calc})$ : 843.4702

Fixed modifications: Carbamidomethyl (C) (apply to specified residues or termini only)

Ions Score: 23 Expect: 0.033

Matches : 9/64 fragment ions using 21 most intense peaks ([help](#))

| # | b        | b <sup>++</sup> | b <sup>0</sup> | b <sup>0++</sup> | Seq. | y        | y <sup>++</sup> | y*       | y <sup>*++</sup> | y <sup>0</sup> | y <sup>0++</sup> | # |
|---|----------|-----------------|----------------|------------------|------|----------|-----------------|----------|------------------|----------------|------------------|---|
| 1 | 130.0499 | 65.5286         | 112.0393       | 56.5233          | E    |          |                 |          |                  |                |                  | 8 |
| 2 | 187.0713 | 94.0393         | 169.0608       | 85.0340          | G    | 715.4349 | 358.2211        | 698.4083 | 349.7078         | 697.4243       | 349.2158         | 7 |
| 3 | 286.1397 | 143.5735        | 268.1292       | 134.5682         | V    | 658.4134 | 329.7103        | 641.3869 | 321.1971         | 640.4028       | 320.7051         | 6 |
| 4 | 399.2238 | 200.1155        | 381.2132       | 191.1103         | I    | 559.3450 | 280.1761        | 542.3184 | 271.6629         | 541.3344       | 271.1709         | 5 |
| 5 | 528.2664 | 264.6368        | 510.2558       | 255.6316         | E    | 446.2609 | 223.6341        | 429.2344 | 215.1208         | 428.2504       | 214.6288         | 4 |
| 6 | 627.3348 | 314.1710        | 609.3243       | 305.1658         | V    | 317.2183 | 159.1128        | 300.1918 | 150.5995         |                |                  | 3 |
| 7 | 698.3719 | 349.6896        | 680.3614       | 340.6843         | A    | 218.1499 | 109.5786        | 201.1234 | 101.0653         |                |                  | 2 |
| 8 |          |                 |                |                  | K    | 147.1128 | 74.0600         | 130.0863 | 65.5468          |                |                  | 1 |

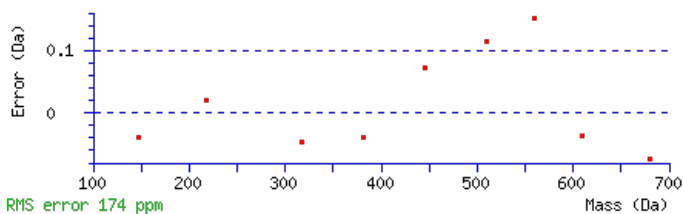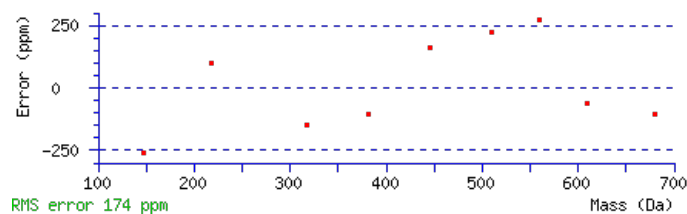

NCBI BLAST search of [EGVIEVAK](#)

(Parameters: blastp, nr protein database, expect=20000, no filter, PAM30)

Other BLAST [web gateways](#)

**All matches to this query**

| Score | $M_r(\text{calc})$ | Delta   | Sequence                 |
|-------|--------------------|---------|--------------------------|
| 23.3  | 843.4702           | -0.0000 | <a href="#">EGVIEVAK</a> |

## AT2G27020.1

|      |          |         |                          |
|------|----------|---------|--------------------------|
| 13.1 | 843.4702 | -0.0000 | <a href="#">DVAGELLK</a> |
| 11.9 | 843.4702 | -0.0000 | <a href="#">GIEVVEAK</a> |
| 9.9  | 843.4702 | -0.0000 | <a href="#">ELAVLGDK</a> |
| 8.8  | 843.4702 | -0.0000 | <a href="#">GLLDGLEK</a> |
| 8.3  | 843.4702 | -0.0000 | <a href="#">EAVLLGDK</a> |
| 7.3  | 843.4702 | -0.0000 | <a href="#">EDQVLIK</a>  |
| 7.3  | 843.4702 | -0.0000 | <a href="#">EDVQLLK</a>  |
| 7.3  | 843.4702 | 0.0000  | <a href="#">ENVEILK</a>  |
| 7.3  | 843.4702 | 0.0000  | <a href="#">NEIDILK</a>  |

Mascot: <http://www.matrixscience.com/>



**Peptide View**MS/MS Fragmentation of **ENPNLPSPSAK**Found in **AT2G27140.1** in **TAIR\_Arabidopsis**, Symbols: | heat shock family protein | chr2:11605574-11606342 REVERSE

Match to Query 3745: 1166.532692 from(584.273622,2+) index(1217)

Title: Elution from: 17.257 to 17.257 scan no 1664 cid35.00 polarity:+

Data file 0-3\_3.mgf

Click mouse within plot area to zoom in by factor of two about that point

Or,  to  Da Label all possible matches  Label matches used for scoring Show Y-axis 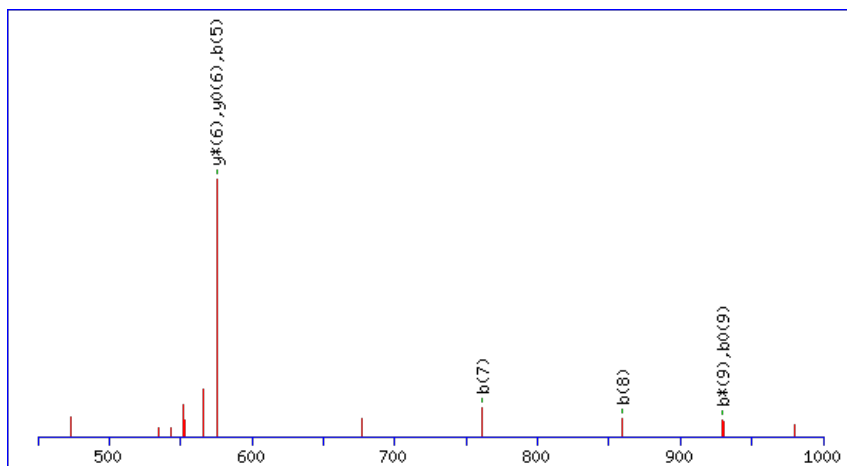Monoisotopic mass of neutral peptide **Mr(calc)**: 1166.5360**Fixed modifications**: Carbamidomethyl (C) (apply to specified residues or termini only)**Ions Score**: 23 **Expect**: 0.035**Matches**: 7/114 fragment ions using 6 most intense peaks ([help](#))

| #  | b               | b <sup>++</sup> | b <sup>*</sup>  | b <sup>*++</sup> | b <sup>0</sup>  | b <sup>0++</sup> | Seq. | y         | y <sup>++</sup> | y <sup>*</sup>  | y <sup>*++</sup> | y <sup>0</sup>  | y <sup>0++</sup> | #  |
|----|-----------------|-----------------|-----------------|------------------|-----------------|------------------|------|-----------|-----------------|-----------------|------------------|-----------------|------------------|----|
| 1  | 131.0469        | 66.0271         |                 |                  | 113.0363        | 57.0218          | E    |           |                 |                 |                  |                 |                  | 11 |
| 2  | 247.0839        | 124.0456        | 229.0603        | 115.0338         | 229.0733        | 115.0403         | N    | 1037.5036 | 519.2555        | 1019.4801       | 510.2437         | 1019.4931       | 510.2502         | 10 |
| 3  | 345.1337        | 173.0705        | 327.1101        | 164.0587         | 327.1231        | 164.0652         | P    | 921.4666  | 461.2370        | 903.4431        | 452.2252         | 903.4561        | 452.2317         | 9  |
| 4  | 461.1707        | 231.0890        | 443.1471        | 222.0772         | 443.1601        | 222.0837         | N    | 823.4168  | 412.2121        | 805.3933        | 403.2003         | 805.4063        | 403.2068         | 8  |
| 5  | <b>575.2518</b> | 288.1295        | 557.2282        | 279.1177         | 557.2412        | 279.1243         | L    | 707.3798  | 354.1936        | 689.3563        | 345.1818         | 689.3693        | 345.1883         | 7  |
| 6  | 673.3016        | 337.1544        | 655.2780        | 328.1426         | 655.2910        | 328.1492         | P    | 593.2987  | 297.1530        | <b>575.2752</b> | 288.1412         | <b>575.2882</b> | 288.1477         | 6  |
| 7  | <b>761.3307</b> | 381.1690        | 743.3071        | 372.1572         | 743.3201        | 372.1637         | S    | 495.2489  | 248.1281        | 477.2254        | 239.1163         | 477.2384        | 239.1228         | 5  |
| 8  | <b>859.3805</b> | 430.1939        | 841.3569        | 421.1821         | 841.3699        | 421.1886         | P    | 407.2199  | 204.1136        | 389.1963        | 195.1018         | 389.2093        | 195.1083         | 4  |
| 9  | 947.4095        | 474.2084        | <b>929.3859</b> | 465.1966         | <b>929.3990</b> | 465.2031         | S    | 309.1701  | 155.0887        | 291.1465        | 146.0769         | 291.1595        | 146.0834         | 3  |
| 10 | 1019.4437       | 510.2255        | 1001.4201       | 501.2137         | 1001.4331       | 501.2202         | A    | 221.1410  | 111.0741        | 203.1174        | 102.0624         |                 |                  | 2  |
| 11 |                 |                 |                 |                  |                 |                  | K    | 149.1069  | 75.0571         | 131.0833        | 66.0453          |                 |                  | 1  |

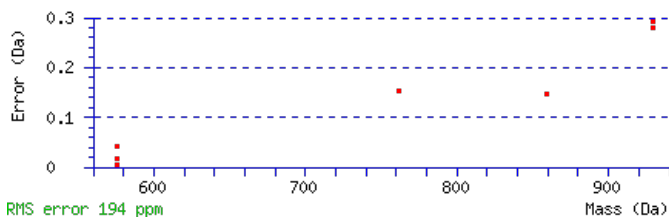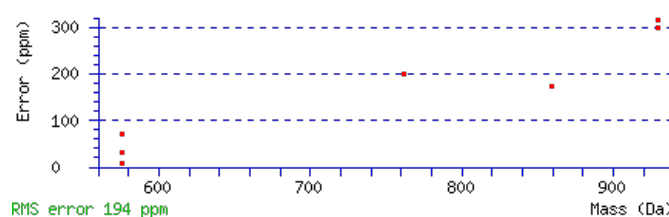NCBI **BLAST** search of **ENPNLPSPSAK**

(Parameters: blastp, nr protein database, expect=20000, no filter, PAM30)

Other BLAST [web gateways](#)**All matches to this query**

## AT2G27140.1

| Score | Mr(calc)  | Delta   | Sequence                    |
|-------|-----------|---------|-----------------------------|
| 23.2  | 1166.5360 | -0.0033 | <a href="#">ENPNLPSPSAK</a> |
| 6.7   | 1166.5360 | -0.0033 | <a href="#">DVQAPIEPER</a>  |
| 6.1   | 1166.5328 | -0.0001 | <a href="#">RFPAWGFGGR</a>  |
| 4.8   | 1166.5346 | -0.0019 | <a href="#">VAVMOGMTRK</a>  |
| 4.6   | 1166.5317 | 0.0010  | <a href="#">KNVGGRMSAGR</a> |

Mascot: <http://www.matrixscience.com/>

**Peptide View**MS/MS Fragmentation of **NDALEQLNTVER**Found in **AT2G27170.1** in **TAIR\_Arabidopsis**, Symbols: SMC3, TTN7 | TTN7 (TITAN7); ATP binding | chr:11616397-11624142 REVERSE

Match to Query 5651: 1418.639074 from(710.326813,2+) index(4947)

Title: Elution from: 46.088 to 46.088 scan no 6243 cid35.00 polarity:+

Data file D6h-2\_1.mgf

Click mouse within plot area to zoom in by factor of two about that point

Or,   to  Da Label all possible matches  Label matches used for scoring Show Y-axis 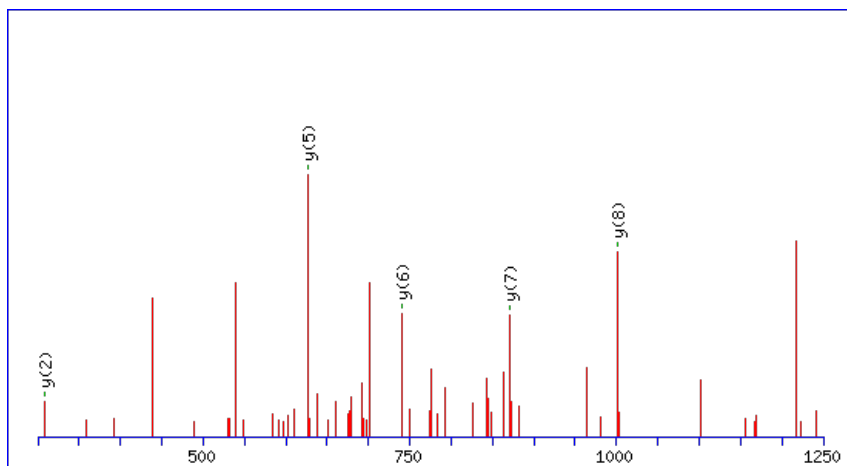

Monoisotopic mass of neutral peptide Mr(calc): 1418.6362

Fixed modifications: Carbamidomethyl (C) (apply to specified residues or termini only)

Ions Score: 26 Expect: 0.016

Matches : 5/128 fragment ions using 10 most intense peaks ([help](#))

| #  | b         | b <sup>++</sup> | b*        | b <sup>+++</sup> | b <sup>0</sup> | b <sup>0++</sup> | Seq. | y                | y <sup>++</sup> | y*        | y <sup>+++</sup> | y <sup>0</sup> | y <sup>0++</sup> | #  |
|----|-----------|-----------------|-----------|------------------|----------------|------------------|------|------------------|-----------------|-----------|------------------|----------------|------------------|----|
| 1  | 117.0443  | 59.0258         | 99.0207   | 50.0140          |                |                  | N    |                  |                 |           |                  |                |                  | 12 |
| 2  | 233.0683  | 117.0378        | 215.0447  | 108.0260         | 215.0577       | 108.0325         | D    | 1303.6065        | 652.3069        | 1285.5829 | 643.2951         | 1285.5959      | 643.3016         | 11 |
| 3  | 305.1024  | 153.0548        | 287.0788  | 144.0430         | 287.0918       | 144.0496         | A    | 1187.5825        | 594.2949        | 1169.5589 | 585.2831         | 1169.5719      | 585.2896         | 10 |
| 4  | 419.1835  | 210.0954        | 401.1599  | 201.0836         | 401.1729       | 201.0901         | L    | 1115.5484        | 558.2778        | 1097.5248 | 549.2660         | 1097.5378      | 549.2725         | 9  |
| 5  | 549.2231  | 275.1152        | 531.1995  | 266.1034         | 531.2126       | 266.1099         | E    | <b>1001.4673</b> | 501.2373        | 983.4437  | 492.2255         | 983.4567       | 492.2320         | 8  |
| 6  | 679.2758  | 340.1415        | 661.2522  | 331.1297         | 661.2652       | 331.1362         | Q    | <b>871.4276</b>  | 436.2175        | 853.4040  | 427.2057         | 853.4171       | 427.2122         | 7  |
| 7  | 793.3569  | 397.1821        | 775.3333  | 388.1703         | 775.3463       | 388.1768         | L    | <b>741.3750</b>  | 371.1911        | 723.3514  | 362.1793         | 723.3644       | 362.1858         | 6  |
| 8  | 909.3939  | 455.2006        | 891.3703  | 446.1888         | 891.3833       | 446.1953         | N    | <b>627.2939</b>  | 314.1506        | 609.2703  | 305.1388         | 609.2833       | 305.1453         | 5  |
| 9  | 1011.4386 | 506.2229        | 993.4150  | 497.2111         | 993.4280       | 497.2176         | T    | 511.2569         | 256.1321        | 493.2333  | 247.1203         | 493.2463       | 247.1268         | 4  |
| 10 | 1111.5040 | 556.2557        | 1093.4804 | 547.2439         | 1093.4935      | 547.2504         | V    | 409.2122         | 205.1097        | 391.1886  | 196.0979         | 391.2016       | 196.1044         | 3  |
| 11 | 1241.5437 | 621.2755        | 1223.5201 | 612.2637         | 1223.5331      | 612.2702         | E    | <b>309.1467</b>  | 155.0770        | 291.1231  | 146.0652         | 291.1362       | 146.0717         | 2  |
| 12 |           |                 |           |                  |                |                  | R    | 179.1071         | 90.0572         | 161.0835  | 81.0454          |                |                  | 1  |

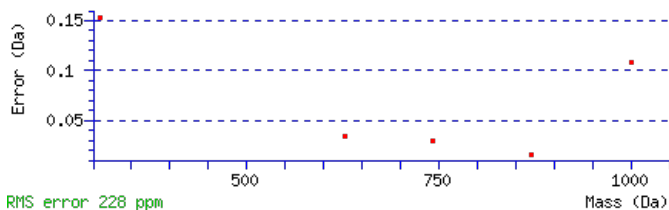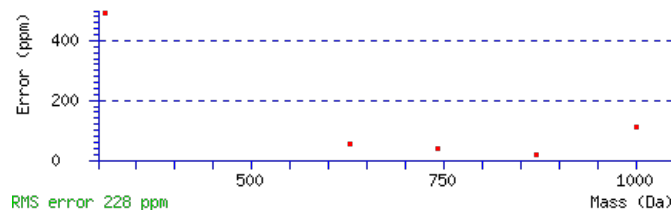NCBI **BLAST** search of **NDALEQLNTVER**

(Parameters: blastp, nr protein database, expect=20000, no filter, PAM30)

Other BLAST [web gateways](#)**All matches to this query**

AT2G27170.1

| Score | Mr(calc)  | Delta   | Sequence                     |
|-------|-----------|---------|------------------------------|
| 26.0  | 1418.6362 | 0.0029  | <a href="#">NDALEQLNTVER</a> |
| 17.5  | 1418.6418 | -0.0027 | <a href="#">LSPLEMDSLNR</a>  |
| 0.0   | 1418.6362 | 0.0029  | <a href="#">AEVLNEENTNLR</a> |

Mascot: <http://www.matrixscience.com/>

**Peptide View**MS/MS Fragmentation of **MESEWVGANGEAEK**Found in **AT2G27250.1** in **TAIR\_Arabidopsis**, Symbols: CLV3 | CLV3 (CLAVATA3); kinase activator/ receptor binding | chr2:11672264-11672548 REVERSE

Match to Query 6897: 1568.599878 from(785.307215,2+) index(1600)

Title: Elution from: 21.016 to 21.016 scan no 2141 cid35.00 polarity:+

Data file 0-2\_2.mgf

Click mouse within plot area to zoom in by factor of two about that point

Or,  to  Da Label all possible matches  Label matches used for scoring Show Y-axis 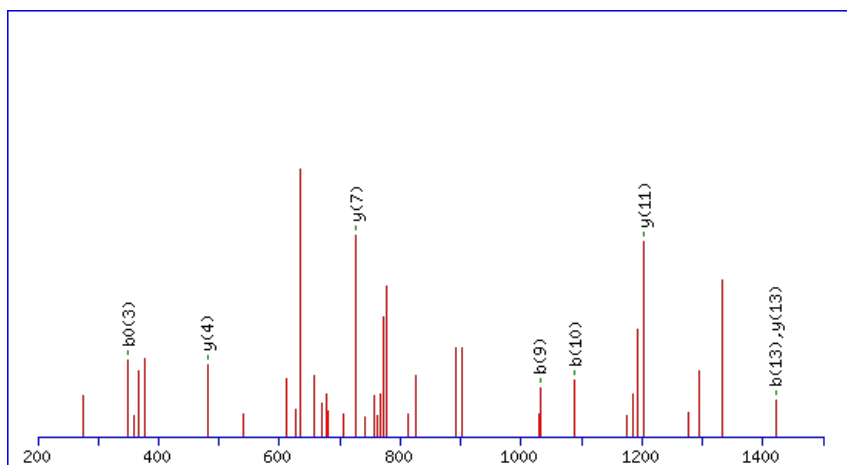Monoisotopic mass of neutral peptide  $M_r(\text{calc})$ : 1568.6007

Fixed modifications: Carbamidomethyl (C) (apply to specified residues or termini only)

Variable modifications:

M1 : Oxidation (M), with neutral losses 0.0000 (shown in table), 63.9983

Ions Score: 22 Expect: 0.0076

Matches : 8/196 fragment ions using 12 most intense peaks ([help](#))

| #  | b         | b <sup>++</sup> | b*        | b <sup>++</sup> * | b <sup>0</sup> | b <sup>0++</sup> | Seq. | y         | y <sup>++</sup> | y*        | y <sup>++</sup> * | y <sup>0</sup> | y <sup>0++</sup> | #  |
|----|-----------|-----------------|-----------|-------------------|----------------|------------------|------|-----------|-----------------|-----------|-------------------|----------------|------------------|----|
| 1  | 149.0397  | 75.0235         |           |                   |                |                  | M    |           |                 |           |                   |                |                  | 14 |
| 2  | 279.0793  | 140.0433        |           |                   | 261.0688       | 131.0380         | E    | 1421.5756 | 711.2914        | 1403.5520 | 702.2796          | 1403.5650      | 702.2861         | 13 |
| 3  | 367.1084  | 184.0578        |           |                   | 349.0978       | 175.0526         | S    | 1291.5359 | 646.2716        | 1273.5124 | 637.2598          | 1273.5254      | 637.2663         | 12 |
| 4  | 497.1480  | 249.0777        |           |                   | 479.1375       | 240.0724         | E    | 1203.5069 | 602.2571        | 1185.4833 | 593.2453          | 1185.4963      | 593.2518         | 11 |
| 5  | 685.2214  | 343.1143        |           |                   | 667.2108       | 334.1091         | W    | 1073.4673 | 537.2373        | 1055.4437 | 528.2255          | 1055.4567      | 528.2320         | 10 |
| 6  | 785.2869  | 393.1471        |           |                   | 767.2763       | 384.1418         | V    | 885.3939  | 443.2006        | 867.3703  | 434.1888          | 867.3833       | 434.1953         | 9  |
| 7  | 843.3054  | 422.1563        |           |                   | 825.2948       | 413.1510         | G    | 785.3284  | 393.1678        | 767.3048  | 384.1561          | 767.3179       | 384.1626         | 8  |
| 8  | 915.3395  | 458.1734        |           |                   | 897.3289       | 449.1681         | A    | 727.3099  | 364.1586        | 709.2863  | 355.1468          | 709.2994       | 355.1533         | 7  |
| 9  | 1031.3765 | 516.1919        | 1013.3529 | 507.1801          | 1013.3659      | 507.1866         | N    | 655.2758  | 328.1415        | 637.2522  | 319.1297          | 637.2652       | 319.1362         | 6  |
| 10 | 1089.3950 | 545.2011        | 1071.3714 | 536.1893          | 1071.3844      | 536.1959         | G    | 539.2388  | 270.1230        | 521.2152  | 261.1112          | 521.2282       | 261.1177         | 5  |
| 11 | 1219.4346 | 610.2210        | 1201.4110 | 601.2092          | 1201.4241      | 601.2157         | E    | 481.2203  | 241.1138        | 463.1967  | 232.1020          | 463.2097       | 232.1085         | 4  |
| 12 | 1291.4688 | 646.2380        | 1273.4452 | 637.2262          | 1273.4582      | 637.2327         | A    | 351.1807  | 176.0940        | 333.1571  | 167.0822          | 333.1701       | 167.0887         | 3  |
| 13 | 1421.5084 | 711.2578        | 1403.4848 | 702.2461          | 1403.4978      | 702.2526         | E    | 279.1465  | 140.0769        | 261.1229  | 131.0651          | 261.1359       | 131.0716         | 2  |
| 14 |           |                 |           |                   |                |                  | K    | 149.1069  | 75.0571         | 131.0833  | 66.0453           |                |                  | 1  |

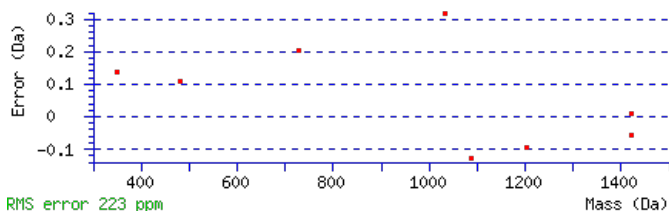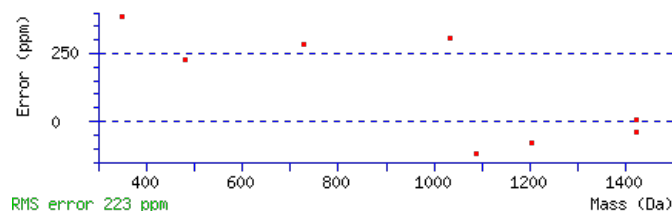

## AT2G27250.1

NCBI **BLAST** search of [MESEWVGANGEAEK](#)

(Parameters: blastp, nr protein database, expect=20000, no filter, PAM30)

Other BLAST [web gateways](#)

### All matches to this query

| Score | Mr(calc)  | Delta   | Sequence                        |
|-------|-----------|---------|---------------------------------|
| 22.2  | 1568.6007 | -0.0008 | <a href="#">MESEWVGANGEAEK</a>  |
| 0.2   | 1568.5985 | 0.0014  | <a href="#">DEEPSAEGMGTSVSR</a> |

**Mascot:** <http://www.matrixscience.com/>

**Peptide View**MS/MS Fragmentation of **KSNFLVK**

Found in **AT2G27280.1** in **TAIR\_Arabidopsis**, Symbols: | similar to unknown protein [Arabidopsis thaliana] (TAIR:AT2G27285.1); similar to hypothetical protein [Vitis vinifera] (GB:CAN79937.1) | chr:11680904-11682691 REVERSE

Match to Query 1319: 844.465754 from(423.240153,2+) index(489)

Title: Elution from: 10.458 to 10.458 scan no 757 cid35.00 polarity:+

Data file D12h-3\_1.mgf

Click mouse within plot area to zoom in by factor of two about that point

Or,   to  Da

Label all possible matches  Label matches used for scoring

Show Y-axis

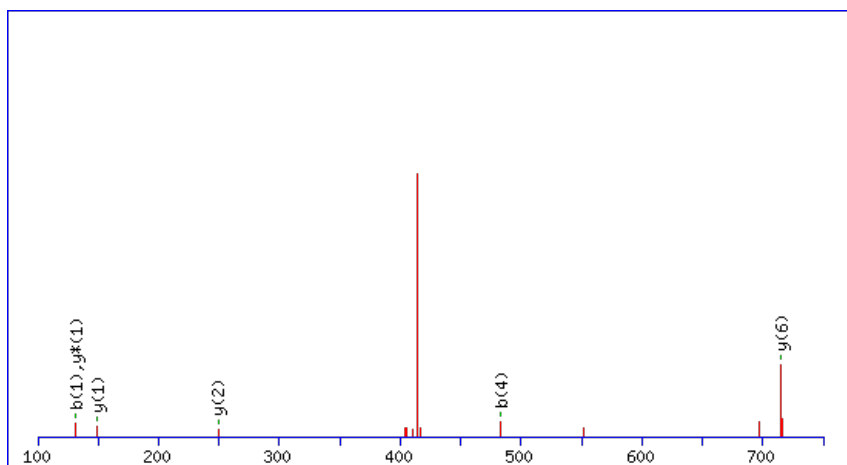

Monoisotopic mass of neutral peptide  $M_r(\text{calc})$ : 844.4667

Fixed modifications: Carbamidomethyl (C) (apply to specified residues or termini only)

Ions Score: 28 Expect: 0.0092

Matches : 6/60 fragment ions using 9 most intense peaks ([help](#))

| # | b               | b <sup>++</sup> | b*       | b <sup>*++</sup> | b <sup>0</sup> | b <sup>0++</sup> | Seq.     | y               | y <sup>++</sup> | y*              | y <sup>*++</sup> | y <sup>0</sup> | y <sup>0++</sup> | # |
|---|-----------------|-----------------|----------|------------------|----------------|------------------|----------|-----------------|-----------------|-----------------|------------------|----------------|------------------|---|
| 1 | <b>131.0963</b> | 66.0518         | 113.0727 | 57.0400          |                |                  | <b>K</b> |                 |                 |                 |                  |                |                  | 7 |
| 2 | 219.1254        | 110.0663        | 201.1018 | 101.0545         | 201.1148       | 101.0610         | <b>S</b> | <b>715.3849</b> | 358.1961        | 697.3613        | 349.1843         | 697.3744       | 349.1908         | 6 |
| 3 | 335.1624        | 168.0848        | 317.1388 | 159.0730         | 317.1518       | 159.0795         | <b>N</b> | 627.3559        | 314.1816        | 609.3323        | 305.1698         |                |                  | 5 |
| 4 | <b>483.2278</b> | 242.1175        | 465.2042 | 233.1058         | 465.2173       | 233.1123         | <b>F</b> | 511.3189        | 256.1631        | 493.2953        | 247.1513         |                |                  | 4 |
| 5 | 597.3089        | 299.1581        | 579.2853 | 290.1463         | 579.2984       | 290.1528         | <b>L</b> | 363.2534        | 182.1303        | 345.2298        | 173.1186         |                |                  | 3 |
| 6 | 697.3744        | 349.1908        | 679.3508 | 340.1790         | 679.3638       | 340.1855         | <b>V</b> | <b>249.1723</b> | 125.0898        | 231.1487        | 116.0780         |                |                  | 2 |
| 7 |                 |                 |          |                  |                |                  | <b>K</b> | <b>149.1069</b> | 75.0571         | <b>131.0833</b> | 66.0453          |                |                  | 1 |

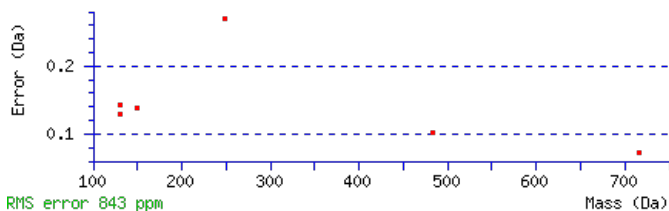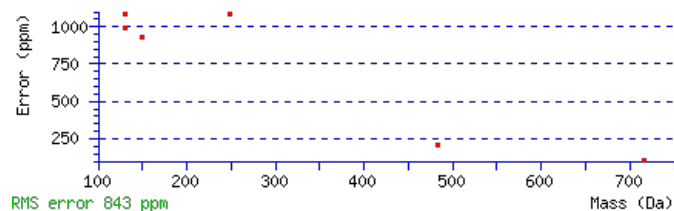

NCBI **BLAST** search of [KSNFLVK](#)

(Parameters: blastp, nr protein database, expect=20000, no filter, PAM30)

Other BLAST [web gateways](#)

**All matches to this query**

| Score | $M_r(\text{calc})$ | Delta   | Sequence                 |
|-------|--------------------|---------|--------------------------|
| 28.0  | 844.4667           | -0.0009 | <a href="#">KSNFLVK</a>  |
| 23.4  | 844.4667           | -0.0009 | <a href="#">KASAFIAK</a> |

## AT2G27280.1

|      |          |         |                          |
|------|----------|---------|--------------------------|
| 23.4 | 844.4667 | -0.0009 | <a href="#">KYNVAIK</a>  |
| 23.4 | 844.4667 | -0.0009 | <a href="#">KFSLNVK</a>  |
| 23.4 | 844.4667 | -0.0009 | <a href="#">KKEFGVK</a>  |
| 23.4 | 844.4667 | -0.0009 | <a href="#">KNSIFVK</a>  |
| 23.4 | 844.4667 | -0.0009 | <a href="#">KSIFNVK</a>  |
| 21.7 | 844.4667 | -0.0009 | <a href="#">EIVPHLK</a>  |
| 20.7 | 844.4667 | -0.0009 | <a href="#">KLVGGSFK</a> |
| 12.4 | 844.4667 | -0.0009 | <a href="#">YGQKLVK</a>  |

Mascot: <http://www.matrixscience.com/>



**Peptide View**MS/MS Fragmentation of **SYHAFLASESVIK**Found in **AT2G27530.1** in **TAIR\_Arabidopsis**, Symbols: PGY1 | 60S ribosomal protein L10A (RPL10aB) | chr2:11770520-11771647 REVERSE

Match to Query 5734: 1466.697033 from(489.906287,3+) index(4609)

Title: Elution from: 45.327 to 45.327 scan no 5921 cid35.00 polarity:+

Data file D1d-1\_1.mgf

Click mouse within plot area to zoom in by factor of two about that point

Or,   to  Da Label all possible matches  Label matches used for scoring Show Y-axis 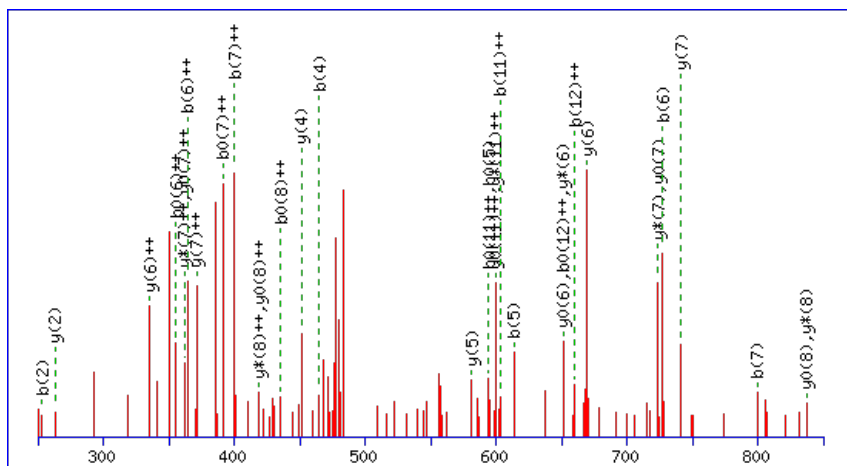**Monoisotopic mass of neutral peptide Mr(calc):** 1466.6982**Fixed modifications:** Carbamidomethyl (C) (apply to specified residues or termini only)**Ions Score:** 24 **Expect:** 0.035**Matches:** 34/114 fragment ions using 55 most intense peaks ([help](#))

| #  | b               | b <sup>++</sup> | b <sup>0</sup>  | b <sup>0++</sup> | Seq. | y               | y <sup>++</sup> | y*              | y <sup>*++</sup> | y <sup>0</sup>  | y <sup>0++</sup> | #  |
|----|-----------------|-----------------|-----------------|------------------|------|-----------------|-----------------|-----------------|------------------|-----------------|------------------|----|
| 1  | 89.0363         | 45.0218         | 71.0258         | 36.0165          | S    |                 |                 |                 |                  |                 |                  | 13 |
| 2  | <b>253.0967</b> | 127.0520        | 235.0861        | 118.0467         | Y    | 1379.6764       | 690.3418        | 1361.6528       | 681.3300         | 1361.6658       | 681.3366         | 12 |
| 3  | 393.1467        | 197.0770        | 375.1362        | 188.0717         | H    | 1215.6160       | 608.3117        | 1197.5925       | <b>599.2999</b>  | 1197.6055       | <b>599.3064</b>  | 11 |
| 4  | <b>465.1809</b> | 233.0941        | 447.1703        | 224.0888         | A    | 1075.5660       | 538.2866        | 1057.5424       | 529.2749         | 1057.5555       | 529.2814         | 10 |
| 5  | <b>613.2463</b> | 307.1268        | <b>595.2358</b> | 298.1215         | F    | 1003.5319       | 502.2696        | 985.5083        | 493.2578         | 985.5213        | 493.2643         | 9  |
| 6  | <b>727.3274</b> | <b>364.1673</b> | 709.3169        | <b>355.1621</b>  | L    | 855.4664        | 428.2368        | <b>837.4428</b> | <b>419.2251</b>  | <b>837.4559</b> | <b>419.2316</b>  | 8  |
| 7  | <b>799.3616</b> | <b>400.1844</b> | 781.3510        | <b>391.1791</b>  | A    | <b>741.3853</b> | <b>371.1963</b> | <b>723.3617</b> | <b>362.1845</b>  | <b>723.3748</b> | <b>362.1910</b>  | 7  |
| 8  | 887.3906        | 444.1990        | 869.3801        | <b>435.1937</b>  | S    | <b>669.3512</b> | <b>335.1792</b> | <b>651.3276</b> | 326.1674         | <b>651.3406</b> | 326.1739         | 6  |
| 9  | 1017.4303       | 509.2188        | 999.4197        | 500.2135         | E    | <b>581.3221</b> | 291.1647        | 563.2985        | 282.1529         | 563.3115        | 282.1594         | 5  |
| 10 | 1105.4593       | 553.2333        | 1087.4488       | 544.2280         | S    | <b>451.2825</b> | 226.1449        | 433.2589        | 217.1331         | 433.2719        | 217.1396         | 4  |
| 11 | 1205.5248       | <b>603.2660</b> | 1187.5142       | <b>594.2607</b>  | V    | 363.2534        | 182.1303        | 345.2298        | 173.1186         |                 |                  | 3  |
| 12 | 1319.6059       | <b>660.3066</b> | 1301.5953       | <b>651.3013</b>  | I    | <b>263.1880</b> | 132.0976        | 245.1644        | 123.0858         |                 |                  | 2  |
| 13 |                 |                 |                 |                  | K    | 149.1069        | 75.0571         | 131.0833        | 66.0453          |                 |                  | 1  |

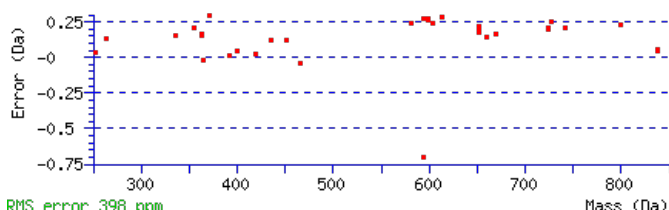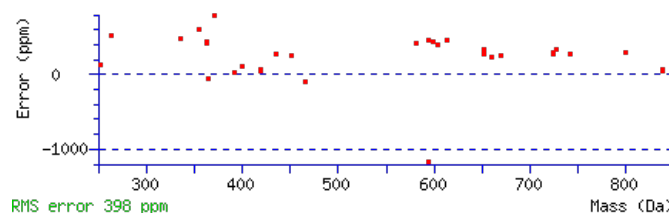NCBI **BLAST** search of [SYHAFLASESVIK](#)

(Parameters: blastp, nr protein database, expect=20000, no filter, PAM30)

Other BLAST [web gateways](#)

AT2G27530.1

All matches to this query

| Score | Mr(calc)  | Delta   | Sequence                      |
|-------|-----------|---------|-------------------------------|
| 23.6  | 1466.6982 | -0.0012 | <a href="#">SYHAFLASESVIK</a> |
| 6.0   | 1466.6959 | 0.0011  | <a href="#">QSAVIGSFEEQKK</a> |

Mascot: <http://www.matrixscience.com/>

**Peptide View**MS/MS Fragmentation of **MNQSGGGRKK**Found in **AT2G27660.1** in **TAIR\_Arabidopsis**, Symbols: | DC1 domain-containing protein | chr2:11805771-11807927 REVERSE

Match to Query 3754: 1152.500658 from(577.257605,2+) index(4344)

Title: Elution from: 40.011 to 40.011 scan no 5460 cid35.00 polarity:+

Data file C7-3\_3.mgf

Click mouse within plot area to zoom in by factor of two about that point

Or,   to  Da Label all possible matches  Label matches used for scoring Show Y-axis 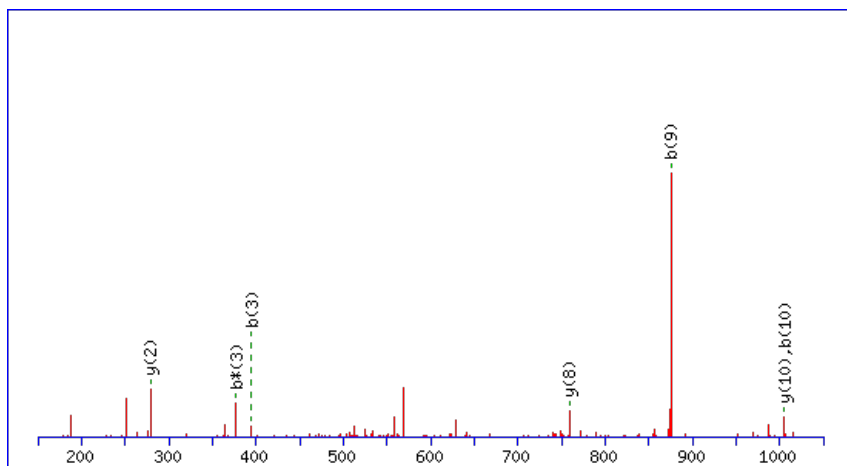**Monoisotopic mass of neutral peptide Mr(calc):** 1152.5030**Fixed modifications:** Carbamidomethyl (C) (apply to specified residues or termini only)**Variable modifications:****M1** : Oxidation (M), with neutral losses 0.0000 (shown in table), 63.9983**Ions Score:** 22 **Expect:** 0.046**Matches** : 7/148 fragment ions using 9 most intense peaks ([help](#))

| #  | b                | b <sup>++</sup> | b <sup>*</sup>  | b <sup>*++</sup> | b <sup>0</sup> | b <sup>0++</sup> | Seq. | y                | y <sup>++</sup> | y <sup>*</sup> | y <sup>*++</sup> | y <sup>0</sup> | y <sup>0++</sup> | #  |
|----|------------------|-----------------|-----------------|------------------|----------------|------------------|------|------------------|-----------------|----------------|------------------|----------------|------------------|----|
| 1  | 149.0397         | 75.0235         |                 |                  |                |                  | M    |                  |                 |                |                  |                |                  | 11 |
| 2  | 265.0767         | 133.0420        | 247.0531        | 124.0302         |                |                  | N    | <b>1005.4779</b> | 503.2426        | 987.4543       | 494.2308         | 987.4673       | 494.2373         | 10 |
| 3  | <b>395.1294</b>  | 198.0683        | <b>377.1058</b> | 189.0565         |                |                  | Q    | 889.4409         | 445.2241        | 871.4173       | 436.2123         | 871.4303       | 436.2188         | 9  |
| 4  | 453.1479         | 227.0776        | 435.1243        | 218.0658         |                |                  | G    | <b>759.3882</b>  | 380.1977        | 741.3646       | 371.1860         | 741.3777       | 371.1925         | 8  |
| 5  | 541.1769         | 271.0921        | 523.1533        | 262.0803         | 523.1664       | 262.0868         | S    | 701.3697         | 351.1885        | 683.3461       | 342.1767         | 683.3592       | 342.1832         | 7  |
| 6  | 599.1954         | 300.1013        | 581.1718        | 291.0896         | 581.1849       | 291.0961         | G    | 613.3407         | 307.1740        | 595.3171       | 298.1622         |                |                  | 6  |
| 7  | 657.2139         | 329.1106        | 639.1903        | 320.0988         | 639.2034       | 320.1053         | G    | 555.3222         | 278.1647        | 537.2986       | 269.1529         |                |                  | 5  |
| 8  | 715.2324         | 358.1198        | 697.2088        | 349.1081         | 697.2218       | 349.1146         | G    | 497.3037         | 249.1555        | 479.2801       | 240.1437         |                |                  | 4  |
| 9  | <b>875.3217</b>  | 438.1645        | 857.2981        | 429.1527         | 857.3111       | 429.1592         | R    | 439.2852         | 220.1462        | 421.2616       | 211.1344         |                |                  | 3  |
| 10 | <b>1005.4107</b> | 503.2090        | 987.3871        | 494.1972         | 987.4001       | 494.2037         | K    | <b>279.1959</b>  | 140.1016        | 261.1723       | 131.0898         |                |                  | 2  |
| 11 |                  |                 |                 |                  |                |                  | K    | 149.1069         | 75.0571         | 131.0833       | 66.0453          |                |                  | 1  |

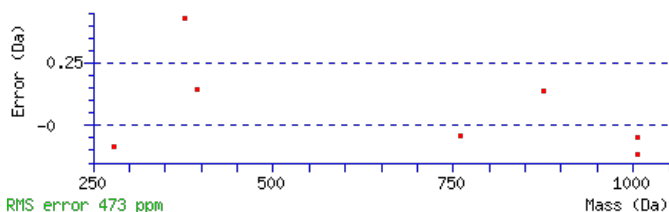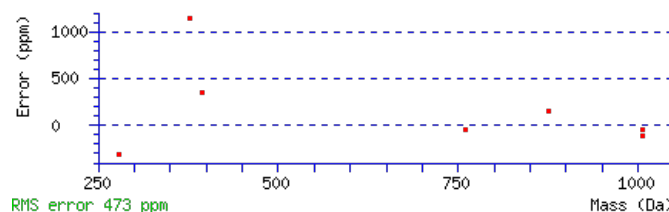NCBI **BLAST** search of **MNQSGGGRKK**

(Parameters: blastp, nr protein database, expect=20000, no filter, PAM30)

Other BLAST [web gateways](#)

AT2G27660.1

All matches to this query

| Score | Mr(calc)  | Delta   | Sequence                    |
|-------|-----------|---------|-----------------------------|
| 22.1  | 1152.5030 | -0.0023 | <a href="#">MNOGSGGGRKK</a> |
| 13.3  | 1152.4996 | 0.0010  | <a href="#">FQEDRRER</a>    |
| 12.8  | 1152.5026 | -0.0019 | <a href="#">QMDLLFSNR</a>   |
| 7.8   | 1152.5033 | -0.0026 | <a href="#">MESLSSITMK</a>  |
| 7.2   | 1152.4986 | 0.0021  | <a href="#">MMTINMKEK</a>   |
| 6.8   | 1152.5026 | -0.0019 | <a href="#">EAETRMFQK</a>   |
| 6.0   | 1152.5026 | -0.0019 | <a href="#">FQKCVDSK</a>    |
| 6.0   | 1152.5004 | 0.0003  | <a href="#">MATTANGNSKK</a> |
| 5.4   | 1152.5003 | 0.0003  | <a href="#">RSSSDVQMTK</a>  |
| 4.5   | 1152.5026 | -0.0019 | <a href="#">FEMKGGEVAR</a>  |

Mascot: <http://www.matrixscience.com/>

**Peptide View**MS/MS Fragmentation of **FLDTNLTIPFAGPR**Found in **AT2G27680.1** in **TAIR\_Arabidopsis**, Symbols: | aldo/keto reductase family protein | chr2:11811058-11813042 REVERSE

Match to Query 6719: 1578.774280 from(790.394416,2+) index(8999)

Title: Elution from: 82.242 to 82.242 scan no 12383 cid35.00 polarity:+

Data file D6h-2\_3.mgf

Click mouse within plot area to zoom in by factor of two about that point

Or,   to  Da Label all possible matches  Label matches used for scoring Show Y-axis 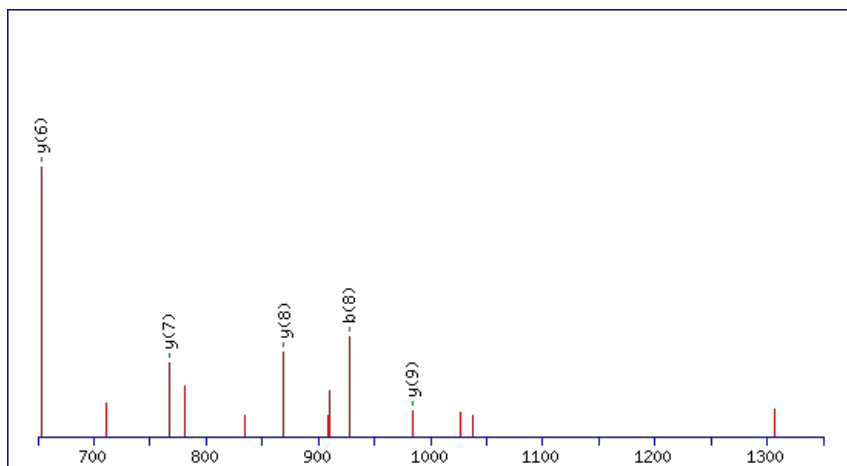Monoisotopic mass of neutral peptide  $M_r(\text{calc})$ : 1578.7766

Fixed modifications: Carbamidomethyl (C) (apply to specified residues or termini only)

Ions Score: 26 Expect: 0.026

Matches : 5/130 fragment ions using 9 most intense peaks ([help](#))

| #  | b               | b <sup>++</sup> | b <sup>*</sup> | b <sup>*++</sup> | b <sup>0</sup> | b <sup>0++</sup> | Seq. | y               | y <sup>++</sup> | y <sup>*</sup> | y <sup>*++</sup> | y <sup>0</sup> | y <sup>0++</sup> | #  |
|----|-----------------|-----------------|----------------|------------------|----------------|------------------|------|-----------------|-----------------|----------------|------------------|----------------|------------------|----|
| 1  | 149.0727        | 75.0400         |                |                  |                |                  | F    |                 |                 |                |                  |                |                  | 14 |
| 2  | 263.1538        | 132.0805        |                |                  |                |                  | L    | 1431.7185       | 716.3629        | 1413.6949      | 707.3511         | 1413.7079      | 707.3576         | 13 |
| 3  | 379.1778        | 190.0925        |                |                  | 361.1672       | 181.0873         | D    | 1317.6374       | 659.3223        | 1299.6138      | 650.3105         | 1299.6268      | 650.3170         | 12 |
| 4  | 481.2225        | 241.1149        |                |                  | 463.2120       | 232.1096         | T    | 1201.6134       | 601.3103        | 1183.5898      | 592.2985         | 1183.6028      | 592.3051         | 11 |
| 5  | 597.2595        | 299.1334        | 579.2359       | 290.1216         | 579.2489       | 290.1281         | N    | 1099.5687       | 550.2880        | 1081.5451      | 541.2762         | 1081.5581      | 541.2827         | 10 |
| 6  | 711.3406        | 356.1739        | 693.3170       | 347.1622         | 693.3300       | 347.1687         | L    | <b>983.5317</b> | 492.2695        | 965.5081       | 483.2577         | 965.5211       | 483.2642         | 9  |
| 7  | 813.3853        | 407.1963        | 795.3617       | 398.1845         | 795.3748       | 398.1910         | T    | <b>869.4506</b> | 435.2289        | 851.4270       | 426.2171         | 851.4400       | 426.2237         | 8  |
| 8  | <b>927.4664</b> | 464.2368        | 909.4428       | 455.2251         | 909.4559       | 455.2316         | I    | <b>767.4059</b> | 384.2066        | 749.3823       | 375.1948         |                |                  | 7  |
| 9  | 1025.5162       | 513.2617        | 1007.4926      | 504.2500         | 1007.5057      | 504.2565         | P    | <b>653.3248</b> | 327.1660        | 635.3012       | 318.1542         |                |                  | 6  |
| 10 | 1173.5817       | 587.2945        | 1155.5581      | 578.2827         | 1155.5711      | 578.2892         | F    | 555.2750        | 278.1411        | 537.2514       | 269.1293         |                |                  | 5  |
| 11 | 1245.6158       | 623.3115        | 1227.5922      | 614.2998         | 1227.6053      | 614.3063         | A    | 407.2095        | 204.1084        | 389.1860       | 195.0966         |                |                  | 4  |
| 12 | 1303.6343       | 652.3208        | 1285.6107      | 643.3090         | 1285.6238      | 643.3155         | G    | 335.1754        | 168.0913        | 317.1518       | 159.0795         |                |                  | 3  |
| 13 | 1401.6841       | 701.3457        | 1383.6605      | 692.3339         | 1383.6736      | 692.3404         | P    | 277.1569        | 139.0821        | 259.1333       | 130.0703         |                |                  | 2  |
| 14 |                 |                 |                |                  |                |                  | R    | 179.1071        | 90.0572         | 161.0835       | 81.0454          |                |                  | 1  |

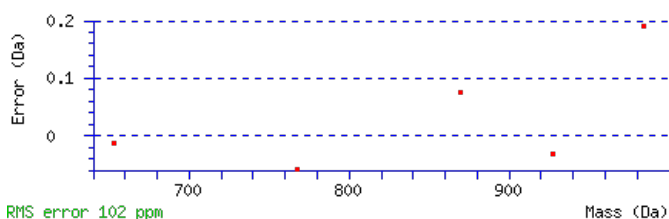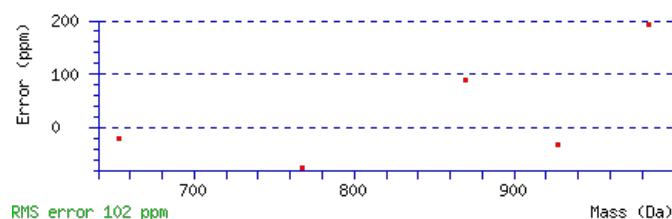NCBI BLAST search of **FLDTNLTIPFAGPR**

(Parameters: blastp, nr protein database, expect=20000, no filter, PAM30)

AT2G27680.1

Other BLAST [web gateways](#)

**All matches to this query**

| Score | Mr(calc)  | Delta   | Sequence                       |
|-------|-----------|---------|--------------------------------|
| 25.6  | 1578.7766 | -0.0024 | <a href="#">FLDTNLTIPFAGPR</a> |
| 7.2   | 1578.7701 | 0.0042  | <a href="#">AVSRRATLHEMIR</a>  |
| 2.9   | 1578.7778 | -0.0035 | <a href="#">ERKLPMSELLTDNK</a> |
| 2.6   | 1578.7778 | -0.0035 | <a href="#">LSSVPKLEDARAMK</a> |

**Mascot:** <http://www.matrixscience.com/>

## Peptide View

MS/MS Fragmentation of **TILGSVGAETEDSQIELLK**Found in **AT2G27710.1** in **TAIR\_Arabidopsis**, Symbols: | 60S acidic ribosomal protein P2 (RPP2B) | chr2:11824006-11824747 FORWARD

Match to Query 9769: 2137.064428 from(1069.539490,2+) index(10039)

Title: Elution from: 92.631 to 92.631 scan no 14026 cid35.00 polarity:+

Data file C7-1\_2.mgf

Click mouse within plot area to zoom in by factor of two about that point

Or, Plot from  to  Da Label all possible matches  Label matches used for scoring Show Y-axis 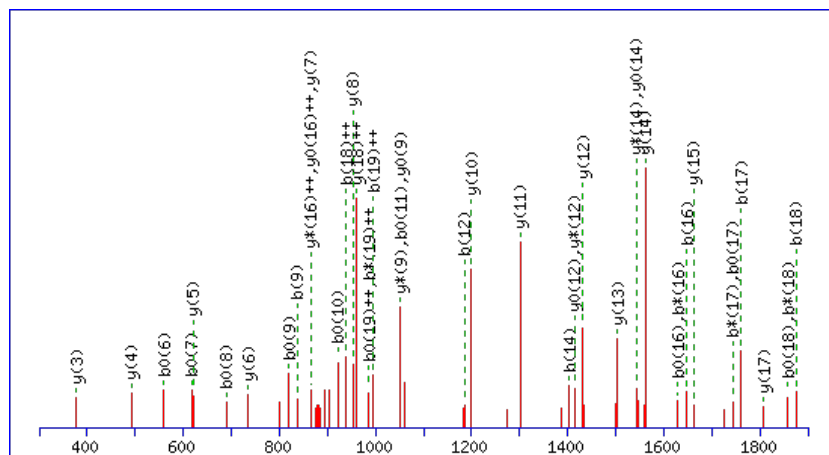

Monoisotopic mass of neutral peptide Mr(calc): 2137.0658

Fixed modifications: Carbamidomethyl (C) (apply to specified residues or termini only)

Ions Score: 103 Expect: 2.5e-010

Matches: 44/194 fragment ions using 43 most intense peaks ([help](#))

| #  | b         | b <sup>++</sup> | b <sup>*</sup> | b <sup>*++</sup> | b <sup>0</sup> | b <sup>0++</sup> | Seq | y         | y <sup>++</sup> | y <sup>*</sup> | y <sup>*++</sup> | y <sup>0</sup> | y <sup>0++</sup> | #  |
|----|-----------|-----------------|----------------|------------------|----------------|------------------|-----|-----------|-----------------|----------------|------------------|----------------|------------------|----|
| 1  | 103.0520  | 52.0296         |                |                  | 85.0414        | 43.0244          | T   |           |                 |                |                  |                |                  | 20 |
| 2  | 217.1331  | 109.0702        |                |                  | 199.1225       | 100.0649         | I   | 2036.0284 | 1018.5178       | 2018.0048      | 1009.5061        | 2018.0178      | 1009.5126        | 19 |
| 3  | 331.2142  | 166.1107        |                |                  | 313.2036       | 157.1054         | L   | 1921.9473 | 961.4773        | 1903.9237      | 952.4655         | 1903.9367      | 952.4720         | 18 |
| 4  | 389.2327  | 195.1200        |                |                  | 371.2221       | 186.1147         | G   | 1807.8662 | 904.4367        | 1789.8426      | 895.4250         | 1789.8556      | 895.4315         | 17 |
| 5  | 477.2617  | 239.1345        |                |                  | 459.2512       | 230.1292         | S   | 1749.8477 | 875.4275        | 1731.8241      | 866.4157         | 1731.8372      | 866.4222         | 16 |
| 6  | 577.3272  | 289.1672        |                |                  | 559.3166       | 280.1620         | V   | 1661.8187 | 831.4130        | 1643.7951      | 822.4012         | 1643.8081      | 822.4077         | 15 |
| 7  | 635.3457  | 318.1765        |                |                  | 617.3351       | 309.1712         | G   | 1561.7532 | 781.3802        | 1543.7296      | 772.3684         | 1543.7426      | 772.3750         | 14 |
| 8  | 707.3798  | 354.1936        |                |                  | 689.3693       | 345.1883         | A   | 1503.7347 | 752.3710        | 1485.7111      | 743.3592         | 1485.7241      | 743.3657         | 13 |
| 9  | 837.4195  | 419.2134        |                |                  | 819.4089       | 410.2081         | E   | 1431.7006 | 716.3539        | 1413.6770      | 707.3421         | 1413.6900      | 707.3486         | 12 |
| 10 | 939.4642  | 470.2357        |                |                  | 921.4536       | 461.2304         | T   | 1301.6609 | 651.3341        | 1283.6373      | 642.3223         | 1283.6504      | 642.3288         | 11 |
| 11 | 1069.5038 | 535.2555        |                |                  | 1051.4933      | 526.2503         | E   | 1199.6162 | 600.3117        | 1181.5926      | 591.3000         | 1181.6056      | 591.3065         | 10 |
| 12 | 1185.5278 | 593.2675        |                |                  | 1167.5172      | 584.2623         | D   | 1069.5766 | 535.2919        | 1051.5530      | 526.2801         | 1051.5660      | 526.2866         | 9  |
| 13 | 1273.5569 | 637.2821        |                |                  | 1255.5463      | 628.2768         | S   | 953.5526  | 477.2799        | 935.5290       | 468.2682         | 935.5420       | 468.2747         | 8  |
| 14 | 1403.6095 | 702.3084        | 1385.5859      | 693.2966         | 1385.5989      | 693.3031         | Q   | 865.5235  | 433.2654        | 847.5000       | 424.2536         | 847.5130       | 424.2601         | 7  |
| 15 | 1517.6906 | 759.3489        | 1499.6670      | 750.3371         | 1499.6800      | 750.3437         | I   | 735.4709  | 368.2391        | 717.4473       | 359.2273         | 717.4603       | 359.2338         | 6  |
| 16 | 1647.7302 | 824.3688        | 1629.7066      | 815.3570         | 1629.7197      | 815.3635         | E   | 621.3898  | 311.1985        | 603.3662       | 302.1867         | 603.3792       | 302.1933         | 5  |
| 17 | 1761.8113 | 881.4093        | 1743.7877      | 872.3975         | 1743.8008      | 872.4040         | L   | 491.3502  | 246.1787        | 473.3266       | 237.1669         |                |                  | 4  |
| 18 | 1875.8924 | 938.4499        | 1857.8688      | 929.4381         | 1857.8819      | 929.4446         | L   | 377.2691  | 189.1382        | 359.2455       | 180.1264         |                |                  | 3  |
| 19 | 1989.9735 | 995.4904        | 1971.9499      | 986.4786         | 1971.9630      | 986.4851         | L   | 263.1880  | 132.0976        | 245.1644       | 123.0858         |                |                  | 2  |
| 20 |           |                 |                |                  |                |                  | K   | 149.1069  | 75.0571         | 131.0833       | 66.0453          |                |                  | 1  |

# AT2G27710.1

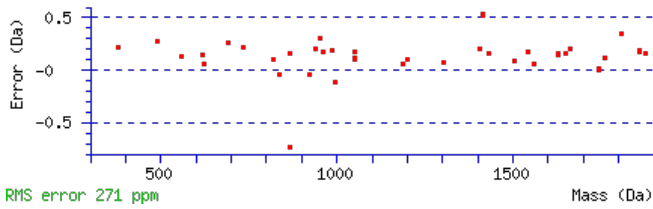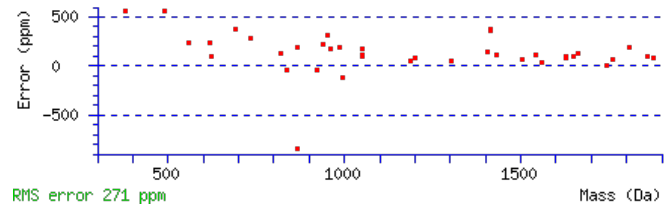

NCBI **BLAST** search of [TILGSVGAETEDSQIELLLK](#)  
 (Parameters: blastp, nr protein database, expect=20000, no filter, PAM30)  
 Other BLAST [web gateways](#)

## All matches to this query

| Score | Mr(calc)  | Delta   | Sequence                              |
|-------|-----------|---------|---------------------------------------|
| 103.4 | 2137.0658 | -0.0014 | <a href="#">TILGSVGAETEDSQIELLLK</a>  |
| 6.9   | 2137.0604 | 0.0040  | <a href="#">TIEVGAEQGALLWGALLSAGR</a> |
| 5.8   | 2137.0707 | -0.0063 | <a href="#">GISDIITIPGLVNVDFADVR</a>  |
| 4.4   | 2137.0638 | 0.0006  | <a href="#">DVKLLITLLNQNCESPVR</a>    |
| 1.3   | 2137.0660 | -0.0016 | <a href="#">MLHFKPGGVNSIIQVTDLK</a>   |
| 0.3   | 2137.0685 | -0.0041 | <a href="#">VLVATSIREAAAGAEDDALK</a>  |

Mascot: <http://www.matrixscience.com/>



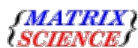

# Mascot Search Results

## Peptide View

MS/MS Fragmentation of **DILGSVGAETEDSQIELLK**

Found in **AT2G27720.1** in **TAIR\_Arabidopsis**, Symbols: | 60S acidic ribosomal protein P2 (RPP2A) | chr2:11825773-11826447 FORWARD

Match to Query 9717: 2151.042542 from(1076.528547,2+) index(10569)

Title: Elution from: 102.109 to 102.109 scan no 15174 cid35.00 polarity:+

Data file D12h-1\_2.mgf

Click mouse within plot area to zoom in by factor of two about that point

Or, Plot from  to  Da

Label all possible matches  Label matches used for scoring

Show Y-axis

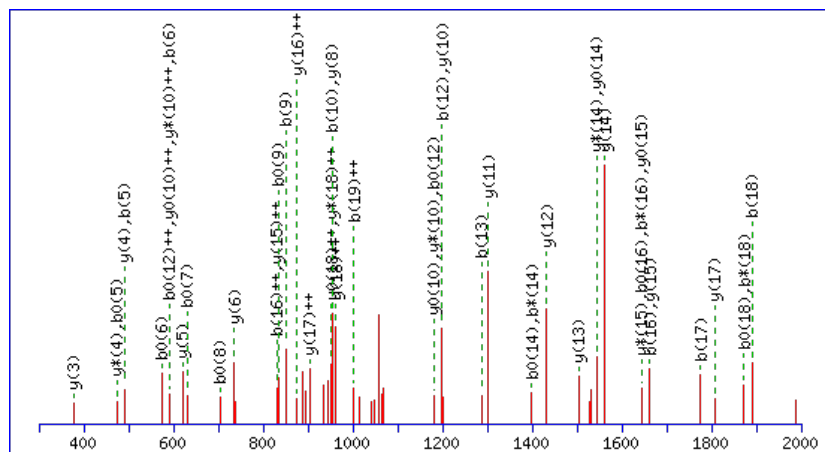

Monoisotopic mass of neutral peptide Mr(calc) : 2151.0451

Fixed modifications: Carbamidomethyl (C) (apply to specified residues or termini only)

Ions Score: 97 Expect: 1.4e-009

Matches : 51/194 fragment ions using 47 most intense peaks ([help](#))

| #  | b         | b <sup>++</sup> | b <sup>*</sup> | b <sup>*++</sup> | b <sup>0</sup> | b <sup>0++</sup> | Seq. | y         | y <sup>++</sup> | y <sup>*</sup> | y <sup>*++</sup> | y <sup>0</sup> | y <sup>0++</sup> | #  |
|----|-----------|-----------------|----------------|------------------|----------------|------------------|------|-----------|-----------------|----------------|------------------|----------------|------------------|----|
| 1  | 117.0313  | 59.0193         |                |                  | 99.0207        | 50.0140          | D    |           |                 |                |                  |                |                  | 20 |
| 2  | 231.1124  | 116.0598        |                |                  | 213.1018       | 107.0545         | I    | 2036.0284 | 1018.5178       | 2018.0048      | 1009.5061        | 2018.0178      | 1009.5126        | 19 |
| 3  | 345.1935  | 173.1004        |                |                  | 327.1829       | 164.0951         | L    | 1921.9473 | 961.4773        | 1903.9237      | 952.4655         | 1903.9367      | 952.4720         | 18 |
| 4  | 403.2120  | 202.1096        |                |                  | 385.2014       | 193.1043         | G    | 1807.8662 | 904.4367        | 1789.8426      | 895.4250         | 1789.8556      | 895.4315         | 17 |
| 5  | 491.2410  | 246.1241        |                |                  | 473.2304       | 237.1189         | S    | 1749.8477 | 875.4275        | 1731.8241      | 866.4157         | 1731.8372      | 866.4222         | 16 |
| 6  | 591.3065  | 296.1569        |                |                  | 573.2959       | 287.1516         | V    | 1661.8187 | 831.4130        | 1643.7951      | 822.4012         | 1643.8081      | 822.4077         | 15 |
| 7  | 649.3250  | 325.1661        |                |                  | 631.3144       | 316.1608         | G    | 1561.7532 | 781.3802        | 1543.7296      | 772.3684         | 1543.7426      | 772.3750         | 14 |
| 8  | 721.3591  | 361.1832        |                |                  | 703.3485       | 352.1779         | A    | 1503.7347 | 752.3710        | 1485.7111      | 743.3592         | 1485.7241      | 743.3657         | 13 |
| 9  | 851.3987  | 426.2030        |                |                  | 833.3882       | 417.1977         | E    | 1431.7006 | 716.3539        | 1413.6770      | 707.3421         | 1413.6900      | 707.3486         | 12 |
| 10 | 953.4435  | 477.2254        |                |                  | 935.4329       | 468.2201         | T    | 1301.6609 | 651.3341        | 1283.6373      | 642.3223         | 1283.6504      | 642.3288         | 11 |
| 11 | 1083.4831 | 542.2452        |                |                  | 1065.4725      | 533.2399         | E    | 1199.6162 | 600.3117        | 1181.5926      | 591.3000         | 1181.6056      | 591.3065         | 10 |
| 12 | 1199.5071 | 600.2572        |                |                  | 1181.4965      | 591.2519         | D    | 1069.5766 | 535.2919        | 1051.5530      | 526.2801         | 1051.5660      | 526.2866         | 9  |
| 13 | 1287.5361 | 644.2717        |                |                  | 1269.5256      | 635.2664         | S    | 953.5526  | 477.2799        | 935.5290       | 468.2681         | 935.5420       | 468.2747         | 8  |
| 14 | 1417.5888 | 709.2980        | 1399.5652      | 700.2862         | 1399.5782      | 700.2927         | Q    | 865.5235  | 433.2654        | 847.5000       | 424.2536         | 847.5130       | 424.2601         | 7  |
| 15 | 1531.6699 | 766.3386        | 1513.6463      | 757.3268         | 1513.6593      | 757.3333         | I    | 735.4709  | 368.2391        | 717.4473       | 359.2273         | 717.4603       | 359.2338         | 6  |
| 16 | 1661.7095 | 831.3584        | 1643.6859      | 822.3466         | 1643.6989      | 822.3531         | E    | 621.3898  | 311.1985        | 603.3662       | 302.1867         | 603.3792       | 302.1933         | 5  |
| 17 | 1775.7906 | 888.3989        | 1757.7670      | 879.3871         | 1757.7800      | 879.3937         | L    | 491.3502  | 246.1787        | 473.3266       | 237.1669         |                |                  | 4  |
| 18 | 1889.8717 | 945.4395        | 1871.8481      | 936.4277         | 1871.8611      | 936.4342         | L    | 377.2691  | 189.1382        | 359.2455       | 180.1264         |                |                  | 3  |
| 19 | 2003.9528 | 1002.4800       | 1985.9292      | 993.4682         | 1985.9422      | 993.4748         | L    | 263.1880  | 132.0976        | 245.1644       | 123.0858         |                |                  | 2  |
| 20 |           |                 |                |                  |                |                  | K    | 149.1069  | 75.0571         | 131.0833       | 66.0453          |                |                  | 1  |

AT2G27720.1

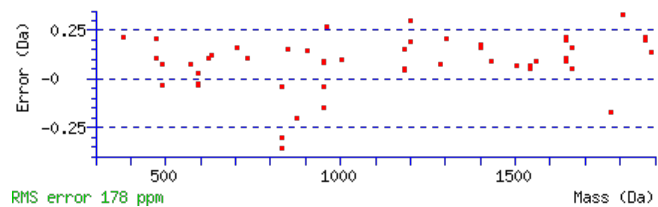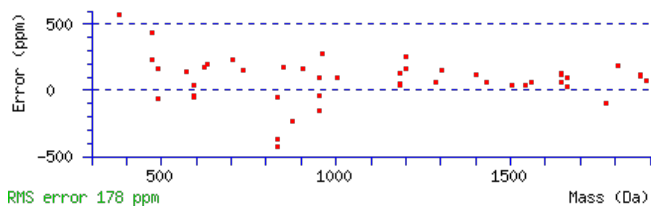

NCBI BLAST search of [DILGSVGAETEDSQIELLLK](#)  
(Parameters: blastp, nr protein database, expect=20000, no filter, PAM30)  
Other BLAST [web gateways](#)

**All matches to this query**

| Score | Mr(calc)  | Delta   | Sequence                             |
|-------|-----------|---------|--------------------------------------|
| 97.0  | 2151.0451 | -0.0025 | <a href="#">DILGSVGAETEDSQIELLLK</a> |
| 5.3   | 2151.0392 | 0.0033  | <a href="#">LIDDIDLFISKEDFYKR</a>    |
| 0.7   | 2151.0460 | -0.0034 | <a href="#">AELDIDGTVICALPMISALK</a> |
| 0.1   | 2151.0383 | 0.0042  | <a href="#">QMIISQRTLEVICRYSK</a>    |
| 0.1   | 2151.0430 | -0.0005 | <a href="#">IKAMLEEKIDELSQGLHR</a>   |

Mascot: <http://www.matrixscience.com/>

## Peptide View

MS/MS Fragmentation of **MPNGAFELAKGGKK**Found in **AT2G27840.1** in **TAIR\_Arabidopsis**, Symbols: HDA13, HDT04 | HDT4 (histone deacetylase 13) | chr2:11869162-11870784  
FORWARD

Match to Query 6250: 1480.709884 from (741.362218,2+) index(2507)

Title: Elution from: 26.513 to 26.513 scan no 3142 cid35.00 polarity:+

Data file C7-2\_2.mgf

Click mouse within plot area to zoom in by factor of two about that point

Or,  to  Da Label all possible matches  Label matches used for scoring Show Y-axis 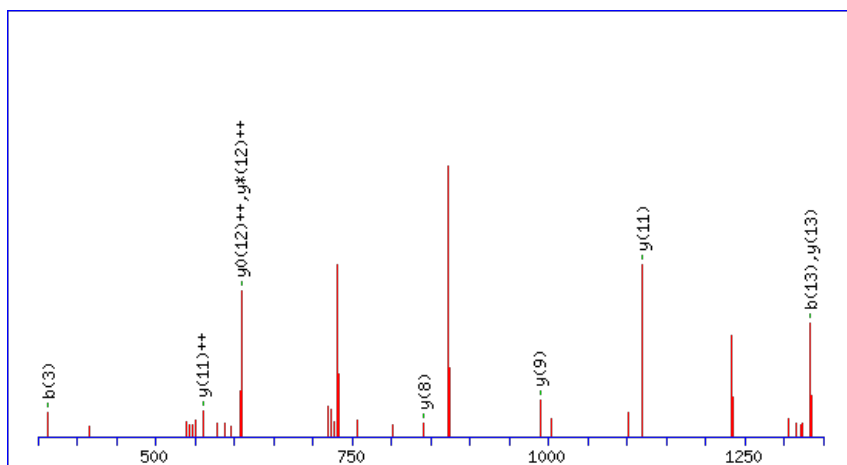Monoisotopic mass of neutral peptide  $M_r(\text{calc})$ : 1480.7069

Fixed modifications: Carbamidomethyl (C) (apply to specified residues or termini only)

Variable modifications:

M1 : Oxidation (M), with neutral losses 0.0000 (shown in table), 63.9983

Ions Score: 23 Expect: 0.045

Matches : 9/188 fragment ions using 10 most intense peaks ([help](#))

| #  | b                | b <sup>++</sup> | b <sup>*</sup> | b <sup>*++</sup> | b <sup>0</sup> | b <sup>0++</sup> | Seq. | y                | y <sup>++</sup> | y <sup>*</sup> | y <sup>*++</sup> | y <sup>0</sup> | y <sup>0++</sup> | #  |
|----|------------------|-----------------|----------------|------------------|----------------|------------------|------|------------------|-----------------|----------------|------------------|----------------|------------------|----|
| 1  | 149.0397         | 75.0235         |                |                  |                |                  | M    |                  |                 |                |                  |                |                  | 14 |
| 2  | 247.0895         | 124.0484        |                |                  |                |                  | P    | <b>1333.6817</b> | 667.3445        | 1315.6581      | 658.3327         | 1315.6711      | 658.3392         | 13 |
| 3  | <b>363.1265</b>  | 182.0669        | 345.1029       | 173.0551         |                |                  | N    | 1235.6319        | 618.3196        | 1217.6083      | <b>609.3078</b>  | 1217.6213      | <b>609.3143</b>  | 12 |
| 4  | 421.1450         | 211.0761        | 403.1214       | 202.0643         |                |                  | G    | <b>1119.5949</b> | <b>560.3011</b> | 1101.5713      | 551.2893         | 1101.5843      | 551.2958         | 11 |
| 5  | 493.1792         | 247.0932        | 475.1556       | 238.0814         |                |                  | A    | 1061.5764        | 531.2918        | 1043.5528      | 522.2801         | 1043.5658      | 522.2866         | 10 |
| 6  | 641.2446         | 321.1259        | 623.2210       | 312.1141         |                |                  | F    | <b>989.5423</b>  | 495.2748        | 971.5187       | 486.2630         | 971.5317       | 486.2695         | 9  |
| 7  | 771.2842         | 386.1458        | 753.2606       | 377.1340         | 753.2737       | 377.1405         | E    | <b>841.4768</b>  | 421.2420        | 823.4532       | 412.2303         | 823.4662       | 412.2368         | 8  |
| 8  | 885.3653         | 443.1863        | 867.3417       | 434.1745         | 867.3548       | 434.1810         | I    | 711.4372         | 356.2222        | 693.4136       | 347.2104         |                |                  | 7  |
| 9  | 957.3995         | 479.2034        | 939.3759       | 470.1916         | 939.3889       | 470.1981         | A    | 597.3561         | 299.1817        | 579.3325       | 290.1699         |                |                  | 6  |
| 10 | 1087.4885        | 544.2479        | 1069.4649      | 535.2361         | 1069.4779      | 535.2426         | K    | 525.3219         | 263.1646        | 507.2984       | 254.1528         |                |                  | 5  |
| 11 | 1145.5070        | 573.2571        | 1127.4834      | 564.2454         | 1127.4964      | 564.2519         | G    | 395.2329         | 198.1201        | 377.2093       | 189.1083         |                |                  | 4  |
| 12 | 1203.5255        | 602.2664        | 1185.5019      | 593.2546         | 1185.5149      | 593.2611         | G    | 337.2144         | 169.1108        | 319.1908       | 160.0990         |                |                  | 3  |
| 13 | <b>1333.6145</b> | 667.3109        | 1315.5910      | 658.2991         | 1315.6040      | 658.3056         | K    | 279.1959         | 140.1016        | 261.1723       | 131.0898         |                |                  | 2  |
| 14 |                  |                 |                |                  |                |                  | K    | 149.1069         | 75.0571         | 131.0833       | 66.0453          |                |                  | 1  |

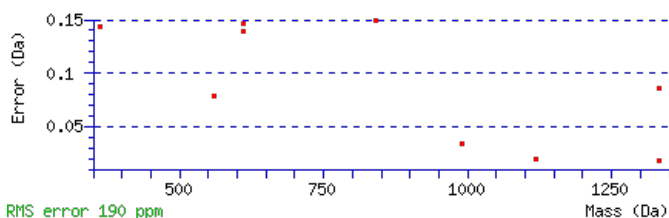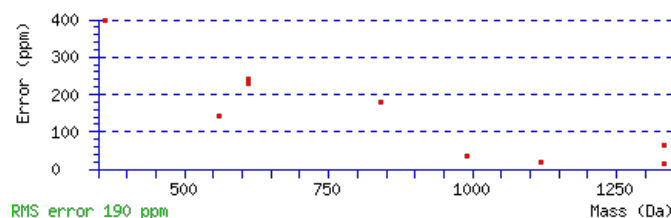

## AT2G27840.1

NCBI **BLAST** search of [MPNGAFEIAKGGKK](#)

(Parameters: blastp, nr protein database, expect=20000, no filter, PAM30)

Other BLAST [web gateways](#)

### All matches to this query

| Score | Mr(calc)  | Delta   | Sequence                        |
|-------|-----------|---------|---------------------------------|
| 23.2  | 1480.7069 | 0.0030  | <a href="#">MPNGAFEIAKGGKK</a>  |
| 9.5   | 1480.7116 | -0.0017 | <a href="#">TGAESAQYLGLLNK</a>  |
| 7.9   | 1480.7091 | 0.0008  | <a href="#">FTYNILIHGVCK</a>    |
| 6.9   | 1480.7129 | -0.0030 | <a href="#">IVMNMDGRRKPK</a>    |
| 4.5   | 1480.7068 | 0.0030  | <a href="#">LTYPKVMGVDNAR</a>   |
| 2.3   | 1480.7138 | -0.0039 | <a href="#">DTKHFFSETLLK</a>    |
| 2.1   | 1480.7094 | 0.0005  | <a href="#">VSSSASAQKSGDVIK</a> |
| 1.8   | 1480.7076 | 0.0023  | <a href="#">LDMTEKQMTLLK</a>    |
| 1.2   | 1480.7064 | 0.0034  | <a href="#">YPYVCLSEIPVK</a>    |
| 1.1   | 1480.7102 | -0.0004 | <a href="#">RLMISSIQMOK</a>     |

Mascot: <http://www.matrixscience.com/>

**Peptide View**MS/MS Fragmentation of **TVSVASSSKEESK**Found in **AT2G27880.1** in **TAIR\_Arabidopsis**, Symbols: | argonaute protein, putative / AGO, putative | chr2:11878565-11883789 FORWARD

Match to Query 5156: 1352.619490 from(677.317021,2+) index(1665)

Title: Elution from: 22.928 to 22.928 scan no 2274 cid35.00 polarity:+

Data file D6h-2\_1.mgf

Click mouse within plot area to zoom in by factor of two about that point

Or,  to  Da Label all possible matches  Label matches used for scoring Show Y-axis 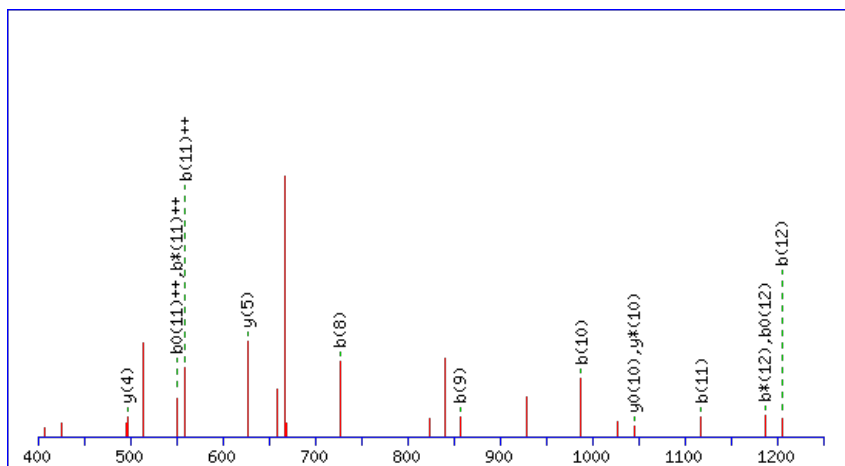Monoisotopic mass of neutral peptide  $M_r(\text{calc})$ : 1352.6230

Fixed modifications: Carbamidomethyl (C) (apply to specified residues or termini only)

Ions Score: 29 Expect: 0.013

Matches : 14/126 fragment ions using 20 most intense peaks ([help](#))

| #  | b         | b <sup>++</sup> | b <sup>*</sup> | b <sup>*++</sup> | b <sup>0</sup> | b <sup>0++</sup> | Seq. | y         | y <sup>++</sup> | y <sup>*</sup> | y <sup>*++</sup> | y <sup>0</sup> | y <sup>0++</sup> | #  |
|----|-----------|-----------------|----------------|------------------|----------------|------------------|------|-----------|-----------------|----------------|------------------|----------------|------------------|----|
| 1  | 103.0520  | 52.0296         |                |                  | 85.0414        | 43.0244          | T    |           |                 |                |                  |                |                  | 13 |
| 2  | 203.1174  | 102.0624        |                |                  | 185.1069       | 93.0571          | V    | 1251.5855 | 626.2964        | 1233.5619      | 617.2846         | 1233.5750      | 617.2911         | 12 |
| 3  | 291.1465  | 146.0769        |                |                  | 273.1359       | 137.0716         | S    | 1151.5201 | 576.2637        | 1133.4965      | 567.2519         | 1133.5095      | 567.2584         | 11 |
| 4  | 391.2120  | 196.1096        |                |                  | 373.2014       | 187.1043         | V    | 1063.4910 | 532.2491        | 1045.4674      | 523.2374         | 1045.4804      | 523.2439         | 10 |
| 5  | 463.2461  | 232.1267        |                |                  | 445.2355       | 223.1214         | A    | 963.4256  | 482.2164        | 945.4020       | 473.2046         | 945.4150       | 473.2111         | 9  |
| 6  | 551.2752  | 276.1412        |                |                  | 533.2646       | 267.1359         | S    | 891.3914  | 446.1993        | 873.3678       | 437.1876         | 873.3808       | 437.1941         | 8  |
| 7  | 639.3042  | 320.1558        |                |                  | 621.2937       | 311.1505         | S    | 803.3624  | 402.1848        | 785.3388       | 393.1730         | 785.3518       | 393.1795         | 7  |
| 8  | 727.3333  | 364.1703        |                |                  | 709.3227       | 355.1650         | S    | 715.3333  | 358.1703        | 697.3097       | 349.1585         | 697.3227       | 349.1650         | 6  |
| 9  | 857.4223  | 429.2148        | 839.3987       | 420.2030         | 839.4118       | 420.2095         | K    | 627.3042  | 314.1558        | 609.2806       | 305.1440         | 609.2937       | 305.1505         | 5  |
| 10 | 987.4619  | 494.2346        | 969.4384       | 485.2228         | 969.4514       | 485.2293         | E    | 497.2152  | 249.1112        | 479.1916       | 240.0994         | 479.2046       | 240.1060         | 4  |
| 11 | 1117.5016 | 559.2544        | 1099.4780      | 550.2426         | 1099.4910      | 550.2491         | E    | 367.1756  | 184.0914        | 349.1520       | 175.0796         | 349.1650       | 175.0861         | 3  |
| 12 | 1205.5306 | 603.2690        | 1187.5071      | 594.2572         | 1187.5201      | 594.2637         | S    | 237.1359  | 119.0716        | 219.1124       | 110.0598         | 219.1254       | 110.0663         | 2  |
| 13 |           |                 |                |                  |                |                  | K    | 149.1069  | 75.0571         | 131.0833       | 66.0453          |                |                  | 1  |

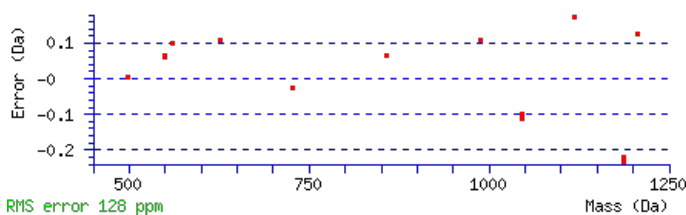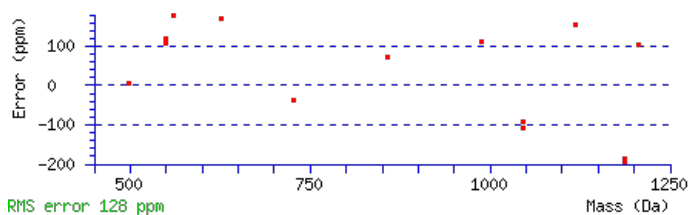NCBI **BLAST** search of **TVSVASSSKEESK**

(Parameters: blastp, nr protein database, expect=20000, no filter, PAM30)

Other BLAST [web gateways](#)

AT2G27880.1

All matches to this query

| Score | Mr(calc)  | Delta   | Sequence                      |
|-------|-----------|---------|-------------------------------|
| 28.6  | 1352.6230 | -0.0035 | <a href="#">TVSVASSSKEESK</a> |
| 28.5  | 1352.6161 | 0.0034  | <a href="#">CMQALVRVQGR</a>   |
| 19.9  | 1352.6182 | 0.0013  | <a href="#">TMPETKSGSGSKK</a> |
| 16.7  | 1352.6205 | -0.0010 | <a href="#">ESFQKLEVACK</a>   |
| 14.9  | 1352.6182 | 0.0013  | <a href="#">KMQVSGASDLASK</a> |
| 13.9  | 1352.6205 | -0.0010 | <a href="#">VENMFKDIQSK</a>   |
| 13.7  | 1352.6209 | -0.0014 | <a href="#">KSEQMVNAQKR</a>   |
| 12.3  | 1352.6198 | -0.0003 | <a href="#">YAQLWNEQRK</a>    |
| 11.1  | 1352.6182 | 0.0013  | <a href="#">MSSGQKEKVEAK</a>  |
| 9.3   | 1352.6175 | 0.0020  | <a href="#">QKVSRSNDWSK</a>   |

Mascot: <http://www.matrixscience.com/>

### Peptide View

 MS/MS Fragmentation of **CALQNAASVAGMVLTTQAIIVDKPKPK**

 Found in **AT2G28000.1** in **TAIR\_Arabidopsis**, Symbols: CH-CPN60A, SLP, CPN60A | CPN60A (chloroplast / 60 kDa chaperonin alpha subunit); ATP binding / protein binding / unfolded protein binding | chr2:11933680-11936261 FORWARD

Match to Query 10706: 2843.423908 from(711.863253,4+) index(9328)

Title: Elution from: 83.629 to 83.629 scan no 12656 cid35.00 polarity:+

Data file C7-3\_2.mgf

Click mouse within plot area to zoom in by factor of two about that point

 Or,   to  Da 

 Label all possible matches  Label matches used for scoring 

 Show Y-axis 
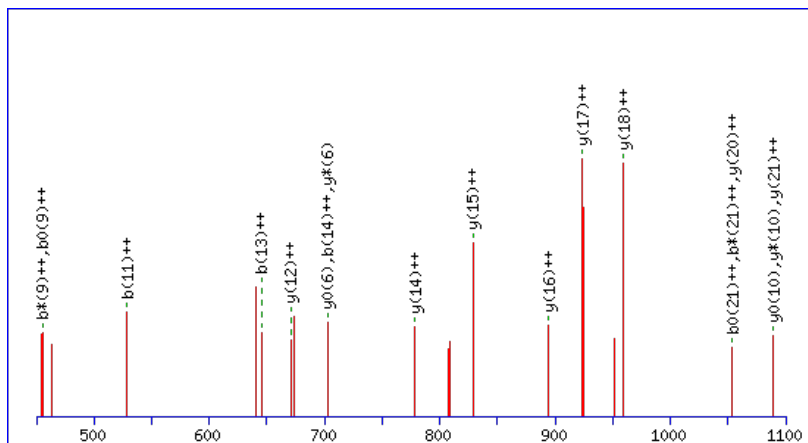
 Monoisotopic mass of neutral peptide  $M_r(\text{calc})$ : 2843.4186

Fixed modifications: Carbamidomethyl (C) (apply to specified residues or termini only)

Ions Score: 52 Expect: 2e-005

 Matches : 19/282 fragment ions using 17 most intense peaks ([help](#))

| #  | b         | b <sup>++</sup> | b <sup>*</sup> | b <sup>*++</sup> | b <sup>0</sup> | b <sup>0++</sup> | Seq | y         | y <sup>++</sup> | y <sup>*</sup> | y <sup>*++</sup> | y <sup>0</sup> | y <sup>0++</sup> | #  |
|----|-----------|-----------------|----------------|------------------|----------------|------------------|-----|-----------|-----------------|----------------|------------------|----------------|------------------|----|
| 1  | 163.0320  | 82.0196         |                |                  |                |                  | C   |           |                 |                |                  |                |                  | 27 |
| 2  | 235.0661  | 118.0367        |                |                  |                |                  | A   | 2682.4012 | 1341.7042       | 2664.3776      | 1332.6924        | 2664.3906      | 1332.6989        | 26 |
| 3  | 349.1472  | 175.0773        |                |                  |                |                  | L   | 2610.3670 | 1305.6871       | 2592.3434      | 1296.6753        | 2592.3564      | 1296.6819        | 25 |
| 4  | 479.1999  | 240.1036        | 461.1763       | 231.0918         |                |                  | Q   | 2496.2859 | 1248.6466       | 2478.2623      | 1239.6348        | 2478.2753      | 1239.6413        | 24 |
| 5  | 595.2369  | 298.1221        | 577.2133       | 289.1103         |                |                  | N   | 2366.2333 | 1183.6203       | 2348.2097      | 1174.6085        | 2348.2227      | 1174.6150        | 23 |
| 6  | 667.2710  | 334.1392        | 649.2475       | 325.1274         |                |                  | A   | 2250.1963 | 1125.6018       | 2232.1727      | 1116.5900        | 2232.1857      | 1116.5965        | 22 |
| 7  | 739.3052  | 370.1562        | 721.2816       | 361.1444         |                |                  | A   | 2178.1621 | 1089.5847       | 2160.1385      | 1080.5729        | 2160.1515      | 1080.5794        | 21 |
| 8  | 827.3342  | 414.1708        | 809.3107       | 405.1590         | 809.3237       | 405.1655         | S   | 2106.1280 | 1053.5676       | 2088.1044      | 1044.5558        | 2088.1174      | 1044.5623        | 20 |
| 9  | 927.3997  | 464.2035        | 909.3761       | 455.1917         | 909.3891       | 455.1982         | V   | 2018.0989 | 1009.5531       | 2000.0753      | 1000.5413        | 2000.0883      | 1000.5478        | 19 |
| 10 | 999.4338  | 500.2206        | 981.4103       | 491.2088         | 981.4233       | 491.2153         | A   | 1918.0335 | 959.5204        | 1900.0099      | 950.5086         | 1900.0229      | 950.5151         | 18 |
| 11 | 1057.4523 | 529.2298        | 1039.4288      | 520.2180         | 1039.4418      | 520.2245         | G   | 1845.9993 | 923.5033        | 1827.9757      | 914.4915         | 1827.9887      | 914.4980         | 17 |
| 12 | 1189.4899 | 595.2486        | 1171.4663      | 586.2368         | 1171.4793      | 586.2433         | M   | 1787.9808 | 894.4940        | 1769.9572      | 885.4822         | 1769.9702      | 885.4888         | 16 |
| 13 | 1289.5553 | 645.2813        | 1271.5317      | 636.2695         | 1271.5447      | 636.2760         | V   | 1655.9433 | 828.4753        | 1637.9197      | 819.4635         | 1637.9327      | 819.4700         | 15 |
| 14 | 1403.6364 | 702.3218        | 1385.6128      | 693.3101         | 1385.6258      | 693.3166         | L   | 1555.8778 | 778.4426        | 1537.8543      | 769.4308         | 1537.8673      | 769.4373         | 14 |
| 15 | 1505.6811 | 753.3442        | 1487.6575      | 744.3324         | 1487.6706      | 744.3389         | T   | 1441.7967 | 721.4020        | 1423.7732      | 712.3902         | 1423.7862      | 712.3967         | 13 |
| 16 | 1607.7258 | 804.3666        | 1589.7023      | 795.3548         | 1589.7153      | 795.3613         | T   | 1339.7520 | 670.3796        | 1321.7284      | 661.3679         | 1321.7415      | 661.3744         | 12 |
| 17 | 1737.7785 | 869.3929        | 1719.7549      | 860.3811         | 1719.7679      | 860.3876         | Q   | 1237.7073 | 619.3573        | 1219.6837      | 610.3455         | 1219.6967      | 610.3520         | 11 |
| 18 | 1809.8126 | 905.4100        | 1791.7890      | 896.3982         | 1791.8021      | 896.4047         | A   | 1107.6547 | 554.3310        | 1089.6311      | 545.3192         | 1089.6441      | 545.3257         | 10 |
| 19 | 1923.8937 | 962.4505        | 1905.8701      | 953.4387         | 1905.8832      | 953.4452         | I   | 1035.6205 | 518.3139        | 1017.5969      | 509.3021         | 1017.6099      | 509.3086         | 9  |
| 20 | 2023.9592 | 1012.4832       | 2005.9356      | 1003.4714        | 2005.9486      | 1003.4779        | V   | 921.5394  | 461.2733        | 903.5158       | 452.2616         | 903.5288       | 452.2681         | 8  |
| 21 | 2124.0246 | 1062.5160       | 2106.0010      | 1053.5042        | 2106.0141      | 1053.5107        | V   | 821.4740  | 411.2406        | 803.4504       | 402.2288         | 803.4634       | 402.2353         | 7  |
| 22 | 2240.0486 | 1120.5279       | 2222.0250      | 1111.5162        | 2222.0380      | 1111.5227        | D   | 721.4085  | 361.2079        | 703.3849       | 352.1961         | 703.3980       | 352.2026         | 6  |
| 23 | 2370.1376 | 1185.5725       | 2352.1141      | 1176.5607        | 2352.1271      | 1176.5672        | K   | 605.3845  | 303.1959        | 587.3610       | 294.1841         |                |                  | 5  |
| 24 | 2468.1874 | 1234.5974       | 2450.1639      | 1225.5856        | 2450.1769      | 1225.5921        | P   | 475.2955  | 238.1514        | 457.2719       | 229.1396         |                |                  | 4  |

# AT2G28000.1

|    |           |           |           |           |           |           |   |          |          |          |          |  |  |   |
|----|-----------|-----------|-----------|-----------|-----------|-----------|---|----------|----------|----------|----------|--|--|---|
| 25 | 2598.2765 | 1299.6419 | 2580.2529 | 1290.6301 | 2580.2659 | 1290.6366 | K | 377.2457 | 189.1265 | 359.2221 | 180.1147 |  |  | 3 |
| 26 | 2696.3263 | 1348.6668 | 2678.3027 | 1339.6550 | 2678.3157 | 1339.6615 | P | 247.1567 | 124.0820 | 229.1331 | 115.0702 |  |  | 2 |
| 27 |           |           |           |           |           |           | K | 149.1069 | 75.0571  | 131.0833 | 66.0453  |  |  | 1 |

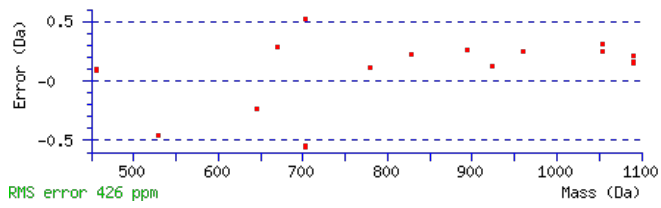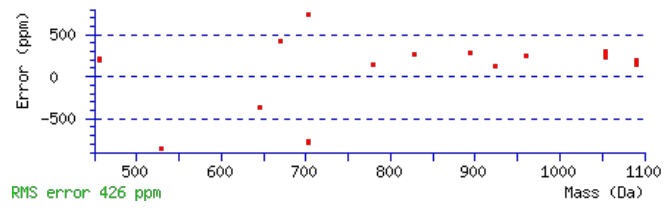

NCBI BLAST search of [CALQNAASVAGMVLTTQAIIVVDKPKPK](#)  
 (Parameters: blastp, nr protein database, expect=20000, no filter, PAM30)  
 Other BLAST [web gateways](#)

## All matches to this query

| Score | Mr(calc)  | Delta  | Sequence                                     |
|-------|-----------|--------|----------------------------------------------|
| 51.5  | 2843.4186 | 0.0053 | <a href="#">CALQNAASVAGMVLTTQAIIVVDKPKPK</a> |
| 5.6   | 2843.4226 | 0.0013 | <a href="#">SGRKQQLSVATEVFEVAPSLHVVELR</a>   |
| 1.8   | 2843.4201 | 0.0038 | <a href="#">LSQFSEAPRLAHQQAVMKILHYIK</a>     |
| 0.3   | 2843.4233 | 0.0006 | <a href="#">ARLLCTAEANPOELLEKIITISEAK</a>    |

Mascot: <http://www.matrixscience.com>



## Peptide View

MS/MS Fragmentation of **IYIFK**Found in **AT2G28720.1** in **TAIR\_Arabidopsis**

Match to Query 564: 682.404858 from(342.209705,2+) index(3928)

Title: Elution from: 36.577 to 36.577 scan no 4889 cid35.00 polarity:+

Data file D12h-1\_3.mgf

Click mouse within plot area to zoom in by factor of two about that point

Or,   to  Da Label all possible matches  Label matches used for scoring Show Y-axis 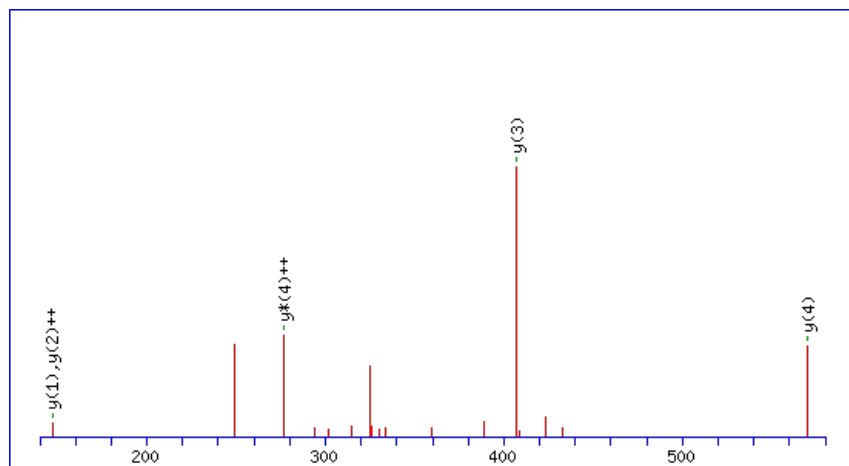Monoisotopic mass of neutral peptide **Mr(calc)**: 682.4054**Fixed modifications**: Carbamidomethyl (C) (apply to specified residues or termini only)**Ions Score**: 29 **Expect**: 0.0014**Matches** : 7/24 fragment ions using 4 most intense peaks ([help](#))

| # | b        | b <sup>++</sup> | Seq. | y        | y <sup>++</sup> | y*       | y <sup>++</sup> * | # |
|---|----------|-----------------|------|----------|-----------------|----------|-------------------|---|
| 1 | 114.0913 | 57.5493         | I    |          |                 |          |                   | 5 |
| 2 | 277.1547 | 139.0810        | Y    | 570.3286 | 285.6679        | 553.3021 | 277.1547          | 4 |
| 3 | 390.2387 | 195.6230        | I    | 407.2653 | 204.1363        | 390.2387 | 195.6230          | 3 |
| 4 | 537.3071 | 269.1572        | F    | 294.1812 | 147.5942        | 277.1547 | 139.0810          | 2 |
| 5 |          |                 | K    | 147.1128 | 74.0600         | 130.0863 | 65.5468           | 1 |

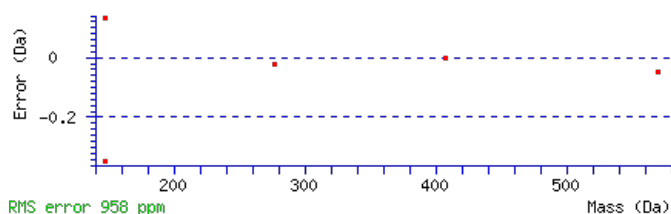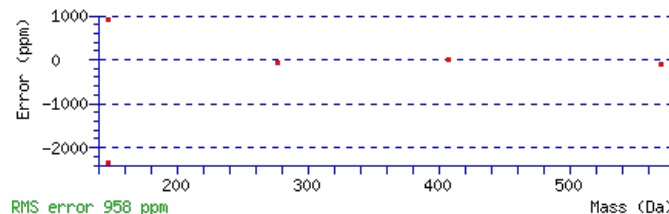NCBI **BLAST** search of **IYIFK**

(Parameters: blastp, nr protein database, expect=20000, no filter, PAM30)

Other BLAST [web gateways](#)

### All matches to this query

| Score | Mr(calc) | Delta   | Sequence              |
|-------|----------|---------|-----------------------|
| 29.3  | 682.4054 | -0.0005 | <a href="#">IYIFK</a> |
| 29.3  | 682.4054 | -0.0005 | <a href="#">IYLFK</a> |
| 18.9  | 682.4054 | -0.0005 | <a href="#">IELYK</a> |
| 13.5  | 682.4054 | -0.0005 | <a href="#">YLLFK</a> |
| 10.7  | 682.4054 | -0.0005 | <a href="#">LIFYK</a> |

# AT2G28720.1

|      |          |         |                        |
|------|----------|---------|------------------------|
| 10.7 | 682.4054 | -0.0005 | <a href="#">YLFLK</a>  |
| 5.2  | 682.4054 | -0.0005 | <a href="#">IFPPLP</a> |

**Mascot:** <http://www.matrixscience.com/>

## Peptide View

MS/MS Fragmentation of **YALQTLPAWITSR**

Found in **AT2G28820.1** in **TAIR\_Arabidopsis**, Symbols: | structural constituent of ribosome | chr2:12374078-12375141 REVERSE

Match to Query 7999: 1647.860772 from(824.937662,2+) index(9278)

Title: Elution from: 81.782 to 81.782 scan no 12286 cid35.00 polarity:+

Data file D12h-1\_1.mgf

Click mouse within plot area to zoom in by factor of two about that point

Or,   to  Da

Label all possible matches  Label matches used for scoring

Show Y-axis

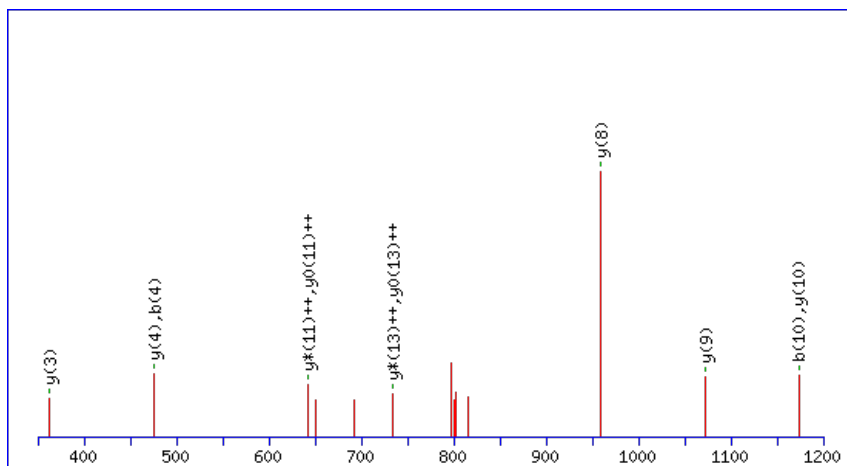

Monoisotopic mass of neutral peptide  $M_r(\text{calc})$ : 1647.8620

Fixed modifications: Carbamidomethyl (C) (apply to specified residues or termini only)

Ions Score: 41 Expect: 0.00041

Matches : 11/140 fragment ions using 8 most intense peaks ([help](#))

| #  | b         | b <sup>++</sup> | b*        | b <sup>*++</sup> | b <sup>0</sup> | b <sup>0++</sup> | Seq. | y         | y <sup>++</sup> | y*        | y <sup>*++</sup> | y <sup>0</sup> | y <sup>0++</sup> | #  |
|----|-----------|-----------------|-----------|------------------|----------------|------------------|------|-----------|-----------------|-----------|------------------|----------------|------------------|----|
| 1  | 164.0706  | 82.5389         |           |                  |                |                  | Y    |           |                 |           |                  |                |                  | 14 |
| 2  | 235.1077  | 118.0575        |           |                  |                |                  | A    | 1485.8060 | 743.4066        | 1468.7795 | 734.8934         | 1467.7954      | 734.4014         | 13 |
| 3  | 348.1918  | 174.5995        |           |                  |                |                  | L    | 1414.7689 | 707.8881        | 1397.7423 | 699.3748         | 1396.7583      | 698.8828         | 12 |
| 4  | 476.2504  | 238.6288        | 459.2238  | 230.1155         |                |                  | Q    | 1301.6848 | 651.3461        | 1284.6583 | 642.8328         | 1283.6743      | 642.3408         | 11 |
| 5  | 577.2980  | 289.1527        | 560.2715  | 280.6394         | 559.2875       | 280.1474         | T    | 1173.6263 | 587.3168        | 1156.5997 | 578.8035         | 1155.6157      | 578.3115         | 10 |
| 6  | 690.3821  | 345.6947        | 673.3556  | 337.1814         | 672.3715       | 336.6894         | L    | 1072.5786 | 536.7929        | 1055.5520 | 528.2796         | 1054.5680      | 527.7876         | 9  |
| 7  | 819.4247  | 410.2160        | 802.3981  | 401.7027         | 801.4141       | 401.2107         | E    | 959.4945  | 480.2509        | 942.4680  | 471.7376         | 941.4839       | 471.2456         | 8  |
| 8  | 916.4775  | 458.7424        | 899.4509  | 450.2291         | 898.4669       | 449.7371         | P    | 830.4519  | 415.7296        | 813.4254  | 407.2163         | 812.4413       | 406.7243         | 7  |
| 9  | 987.5146  | 494.2609        | 970.4880  | 485.7477         | 969.5040       | 485.2556         | A    | 733.3992  | 367.2032        | 716.3726  | 358.6899         | 715.3886       | 358.1979         | 6  |
| 10 | 1173.5939 | 587.3006        | 1156.5673 | 578.7873         | 1155.5833      | 578.2953         | W    | 662.3620  | 331.6847        | 645.3355  | 323.1714         | 644.3515       | 322.6794         | 5  |
| 11 | 1286.6780 | 643.8426        | 1269.6514 | 635.3293         | 1268.6674      | 634.8373         | I    | 476.2827  | 238.6450        | 459.2562  | 230.1317         | 458.2722       | 229.6397         | 4  |
| 12 | 1387.7256 | 694.3665        | 1370.6991 | 685.8532         | 1369.7151      | 685.3612         | T    | 363.1987  | 182.1030        | 346.1721  | 173.5897         | 345.1881       | 173.0977         | 3  |
| 13 | 1474.7577 | 737.8825        | 1457.7311 | 729.3692         | 1456.7471      | 728.8772         | S    | 262.1510  | 131.5791        | 245.1244  | 123.0659         | 244.1404       | 122.5738         | 2  |
| 14 |           |                 |           |                  |                |                  | R    | 175.1190  | 88.0631         | 158.0924  | 79.5498          |                |                  | 1  |

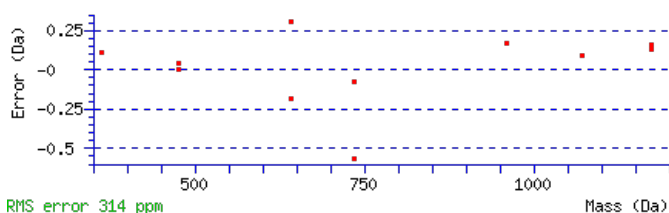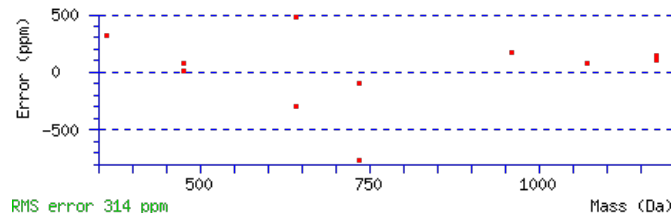

NCBI BLAST search of **YALQTLPAWITSR**

(Parameters: blastp, nr protein database, expect=20000, no filter, PAM30)

AT2G28820.1

Other BLAST [web gateways](#)

**All matches to this query**

| Score | Mr(calc)  | Delta   | Sequence                     |
|-------|-----------|---------|------------------------------|
| 41.3  | 1647.8620 | -0.0013 | <a href="#">YALQLEPAWTSR</a> |

Mascot: <http://www.matrixscience.com/>

**Peptide View**MS/MS Fragmentation of **KSFISLPCR**

Found in **AT2G28880.1** in **TAIR\_Arabidopsis**, Symbols: EMB1997 | EMB1997 (EMBRYO DEFECTIVE 1997); anthranilate synthase/ catalytic/ oxo-acid-lyase | chr2:12406014-12410185 REVERSE

Match to Query 3526: 1120.550356 from(561.282454,2+) index(3023)

Title: Elution from: 30.318 to 30.318 scan no 3761 cid35.00 polarity:+

Data file D12h-3\_2.mgf

Click mouse within plot area to zoom in by factor of two about that point

Or,   to  Da

Label all possible matches  Label matches used for scoring

Show Y-axis

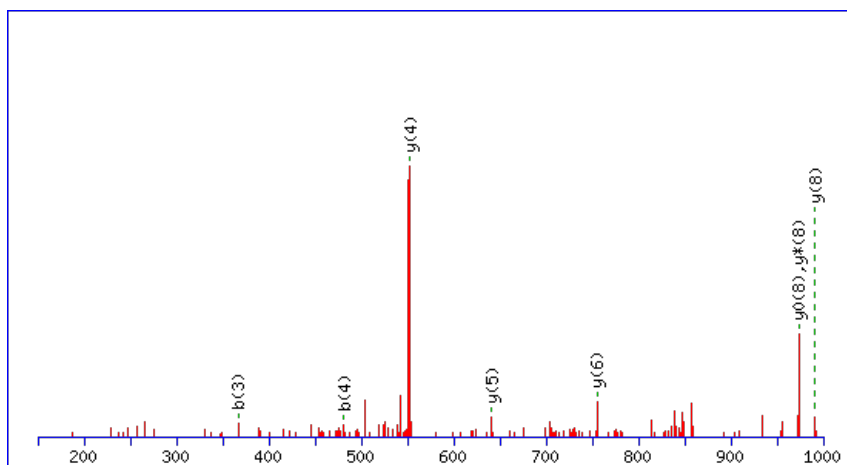

**Monoisotopic mass of neutral peptide Mr(calc):** 1120.5491

**Fixed modifications:** Carbamidomethyl (C) (apply to specified residues or termini only)

**Ions Score:** 27 **Expect:** 0.009

**Matches:** 8/86 fragment ions using 9 most intense peaks ([help](#))

| # | b               | b <sup>++</sup> | b*       | b <sup>*++</sup> | b <sup>0</sup> | b <sup>0++</sup> | Seq.     | y               | y <sup>++</sup> | y*              | y <sup>*++</sup> | y <sup>0</sup>  | y <sup>0++</sup> | #        |
|---|-----------------|-----------------|----------|------------------|----------------|------------------|----------|-----------------|-----------------|-----------------|------------------|-----------------|------------------|----------|
| 1 | 131.0963        | 66.0518         | 113.0727 | 57.0400          |                |                  | <b>K</b> |                 |                 |                 |                  |                 |                  | <b>9</b> |
| 2 | 219.1254        | 110.0663        | 201.1018 | 101.0545         | 201.1148       | 101.0610         | <b>S</b> | <b>991.4674</b> | 496.2373        | <b>973.4438</b> | 487.2255         | <b>973.4568</b> | 487.2320         | <b>8</b> |
| 3 | <b>367.1908</b> | 184.0990        | 349.1672 | 175.0873         | 349.1803       | 175.0938         | <b>F</b> | 903.4383        | 452.2228        | 885.4147        | 443.2110         | 885.4278        | 443.2175         | <b>7</b> |
| 4 | <b>481.2719</b> | 241.1396        | 463.2483 | 232.1278         | 463.2614       | 232.1343         | <b>I</b> | <b>755.3729</b> | 378.1901        | 737.3493        | 369.1783         | 737.3623        | 369.1848         | <b>6</b> |
| 5 | 569.3010        | 285.1541        | 551.2774 | 276.1423         | 551.2904       | 276.1488         | <b>S</b> | <b>641.2918</b> | 321.1495        | 623.2682        | 312.1377         | 623.2812        | 312.1442         | <b>5</b> |
| 6 | 683.3821        | 342.1947        | 665.3585 | 333.1829         | 665.3715       | 333.1894         | <b>L</b> | <b>553.2627</b> | 277.1350        | 535.2391        | 268.1232         |                 |                  | <b>4</b> |
| 7 | 781.4319        | 391.2196        | 763.4083 | 382.2078         | 763.4213       | 382.2143         | <b>P</b> | 439.1816        | 220.0944        | 421.1580        | 211.0827         |                 |                  | <b>3</b> |
| 8 | 943.4566        | 472.2319        | 925.4330 | 463.2201         | 925.4460       | 463.2267         | <b>C</b> | 341.1318        | 171.0695        | 323.1082        | 162.0578         |                 |                  | <b>2</b> |
| 9 |                 |                 |          |                  |                |                  | <b>R</b> | 179.1071        | 90.0572         | 161.0835        | 81.0454          |                 |                  | <b>1</b> |

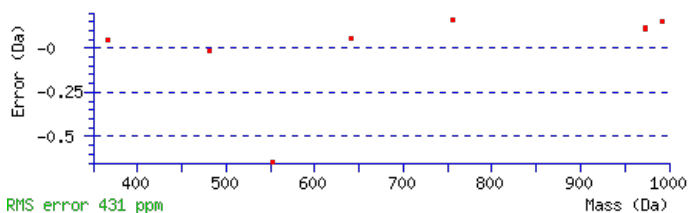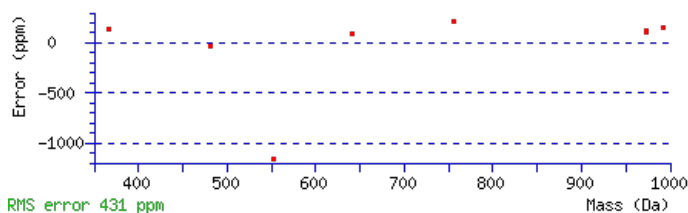

NCBI **BLAST** search of **KSFISLPCR**

(Parameters: blastp, nr protein database, expect=20000, no filter, PAM30)

Other BLAST [web gateways](#)

**All matches to this query**

| Score | Mr(calc) | Delta | Sequence |
|-------|----------|-------|----------|
|       |          |       |          |

**AT2G28880.1**

|      |           |         |                             |
|------|-----------|---------|-----------------------------|
| 27.0 | 1120.5491 | 0.0012  | <a href="#">KSFISLPCR</a>   |
| 8.6  | 1120.5517 | -0.0013 | <a href="#">QKIDSSSKSK</a>  |
| 8.6  | 1120.5516 | -0.0013 | <a href="#">KAATTGTSKDK</a> |
| 8.5  | 1120.5514 | -0.0010 | <a href="#">KAVGFMAAWK</a>  |
| 3.6  | 1120.5518 | -0.0014 | <a href="#">TGKMGLRWR</a>   |
| 3.4  | 1120.5514 | -0.0010 | <a href="#">FVMVNGWKK</a>   |
| 1.1  | 1120.5491 | 0.0012  | <a href="#">DFVQMLARK</a>   |
| 1.0  | 1120.5491 | 0.0012  | <a href="#">KSLICSFPR</a>   |
| 0.8  | 1120.5496 | 0.0008  | <a href="#">LVQRRMER</a>    |
| 0.6  | 1120.5491 | 0.0012  | <a href="#">FILTCNIAR</a>   |

**Mascot:** <http://www.matrixscience.com/>

**Peptide View**MS/MS Fragmentation of **NAMLAGAATGAVLSAVGK**Found in **AT2G28900.1** in **TAIR\_Arabidopsis**, Symbols: ATOEP16-L, ATOEP16-1, OEP16 | OEP16 (OUTER ENVELOPE PROTEIN 16); P-P-bond-hydrolysis-driven protein transmembrane transporter | chr:12421500-12422536 REVERSE

Match to Query 6937: 1600.860974 from(801.437763,2+) index(7905)

Title: Elution from: 70.431 to 70.431 scan no 10419 cid35.00 polarity:+

Data file C7-1\_3.mgf

Click mouse within plot area to zoom in by factor of two about that point

Or,   to  Da Label all possible matches  Label matches used for scoring Show Y-axis 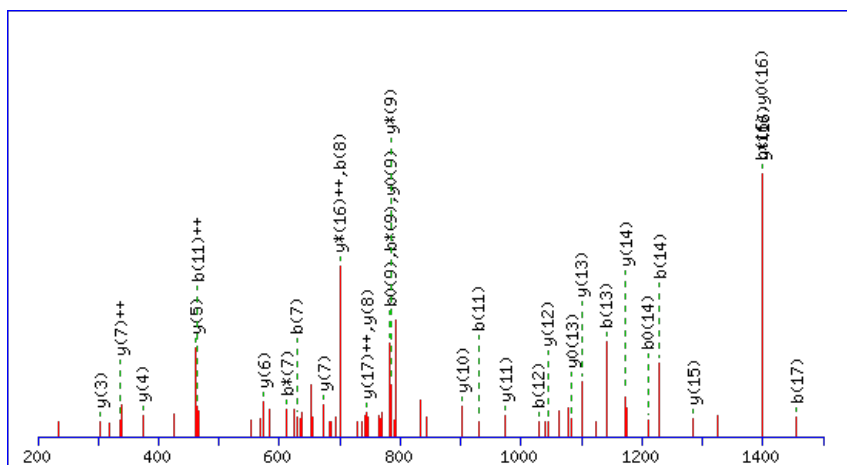Monoisotopic mass of neutral peptide  $M_r(\text{calc})$ : 1600.8607

Fixed modifications: Carbamidomethyl (C) (apply to specified residues or termini only)

Ions Score: 74 Expect: 1.4e-007

Matches : 33/180 fragment ions using 57 most intense peaks ([help](#))

| #  | b         | b <sup>++</sup> | b*        | b <sup>*++</sup> | b <sup>0</sup> | b <sup>0++</sup> | Seq. | y         | y <sup>++</sup> | y*        | y <sup>*++</sup> | y <sup>0</sup> | y <sup>0++</sup> | #  |
|----|-----------|-----------------|-----------|------------------|----------------|------------------|------|-----------|-----------------|-----------|------------------|----------------|------------------|----|
| 1  | 115.0502  | 58.0287         | 98.0237   | 49.5155          |                |                  | N    |           |                 |           |                  |                |                  | 18 |
| 2  | 186.0873  | 93.5473         | 169.0608  | 85.0340          |                |                  | A    | 1487.8250 | 744.4162        | 1470.7985 | 735.9029         | 1469.8145      | 735.4109         | 17 |
| 3  | 317.1278  | 159.0675        | 300.1013  | 150.5543         |                |                  | M    | 1416.7879 | 708.8976        | 1399.7614 | 700.3843         | 1398.7773      | 699.8923         | 16 |
| 4  | 430.2119  | 215.6096        | 413.1853  | 207.0963         |                |                  | L    | 1285.7474 | 643.3774        | 1268.7209 | 634.8641         | 1267.7369      | 634.3721         | 15 |
| 5  | 501.2490  | 251.1281        | 484.2224  | 242.6149         |                |                  | A    | 1172.6634 | 586.8353        | 1155.6368 | 578.3220         | 1154.6528      | 577.8300         | 14 |
| 6  | 558.2704  | 279.6389        | 541.2439  | 271.1256         |                |                  | G    | 1101.6263 | 551.3168        | 1084.5997 | 542.8035         | 1083.6157      | 542.3115         | 13 |
| 7  | 629.3076  | 315.1574        | 612.2810  | 306.6441         |                |                  | A    | 1044.6048 | 522.8060        | 1027.5782 | 514.2928         | 1026.5942      | 513.8007         | 12 |
| 8  | 700.3447  | 350.6760        | 683.3181  | 342.1627         |                |                  | A    | 973.5677  | 487.2875        | 956.5411  | 478.7742         | 955.5571       | 478.2822         | 11 |
| 9  | 801.3924  | 401.1998        | 784.3658  | 392.6865         | 783.3818       | 392.1945         | T    | 902.5306  | 451.7689        | 885.5040  | 443.2556         | 884.5200       | 442.7636         | 10 |
| 10 | 858.4138  | 429.7105        | 841.3873  | 421.1973         | 840.4033       | 420.7053         | G    | 801.4829  | 401.2451        | 784.4563  | 392.7318         | 783.4723       | 392.2398         | 9  |
| 11 | 929.4509  | 465.2291        | 912.4244  | 456.7158         | 911.4404       | 456.2238         | A    | 744.4614  | 372.7343        | 727.4349  | 364.2211         | 726.4509       | 363.7291         | 8  |
| 12 | 1028.5193 | 514.7633        | 1011.4928 | 506.2500         | 1010.5088      | 505.7580         | V    | 673.4243  | 337.2158        | 656.3978  | 328.7025         | 655.4137       | 328.2105         | 7  |
| 13 | 1141.6034 | 571.3053        | 1124.5769 | 562.7921         | 1123.5928      | 562.3001         | L    | 574.3559  | 287.6816        | 557.3293  | 279.1683         | 556.3453       | 278.6763         | 6  |
| 14 | 1228.6354 | 614.8214        | 1211.6089 | 606.3081         | 1210.6249      | 605.8161         | S    | 461.2718  | 231.1396        | 444.2453  | 222.6263         | 443.2613       | 222.1343         | 5  |
| 15 | 1299.6725 | 650.3399        | 1282.6460 | 641.8266         | 1281.6620      | 641.3346         | A    | 374.2398  | 187.6235        | 357.2132  | 179.1103         |                |                  | 4  |
| 16 | 1398.7410 | 699.8741        | 1381.7144 | 691.3608         | 1380.7304      | 690.8688         | V    | 303.2027  | 152.1050        | 286.1761  | 143.5917         |                |                  | 3  |
| 17 | 1455.7624 | 728.3849        | 1438.7359 | 719.8716         | 1437.7519      | 719.3796         | G    | 204.1343  | 102.5708        | 187.1077  | 94.0575          |                |                  | 2  |
| 18 |           |                 |           |                  |                |                  | K    | 147.1128  | 74.0600         | 130.0863  | 65.5468          |                |                  | 1  |

# AT2G28900.1

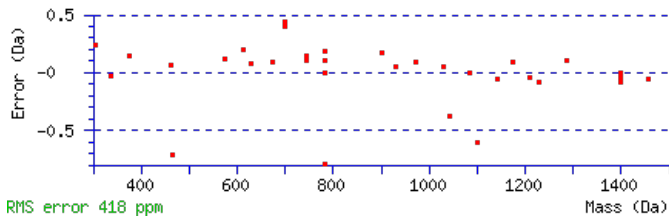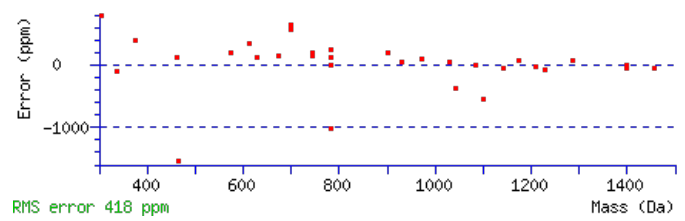

NCBI **BLAST** search of [NAMLAGAATGAVLSAVGK](#)  
(Parameters: blastp, nr protein database, expect=20000, no filter, PAM30)  
Other BLAST [web gateways](#)

## All matches to this query

| Score | Mr(calc)  | Delta  | Sequence                           |
|-------|-----------|--------|------------------------------------|
| 74.0  | 1600.8607 | 0.0003 | <a href="#">NAMLAGAATGAVLSAVGK</a> |
| 0.1   | 1600.8607 | 0.0003 | <a href="#">LGKEILECTPKGTR</a>     |
| 0.0   | 1600.8573 | 0.0037 | <a href="#">RDWVEKLITNAEK</a>      |

Mascot: <http://www.matrixscience.com/>



**Peptide View**MS/MS Fragmentation of **GWEGIGLEVITEEK**

Found in **AT2G29450.1** in **TAIR\_Arabidopsis**, Symbols: ATGSTU1, AT103-1A, ATGSTU5 | ATGSTU5 (Arabidopsis thaliana Glutathione S-transferase (class tau) 5); glutathione transferase | chr2:12631851-12632643 REVERSE

Match to Query 6685: 1558.789896 from(780.402224,2+) index(9008)

Title: Elution from: 81.359 to 81.359 scan no 12240 cid35.00 polarity:+

Data file D12h-3\_2.mgf

Click mouse within plot area to zoom in by factor of two about that point

Or,  to  Da

Label all possible matches  Label matches used for scoring

Show Y-axis

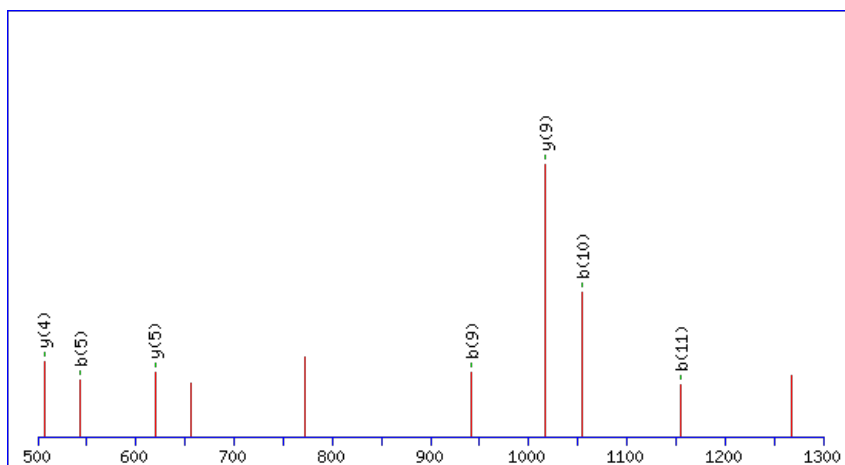

**Monoisotopic mass of neutral peptide Mr(calc):** 1558.7879

**Fixed modifications:** Carbamidomethyl (C) (apply to specified residues or termini only)

**Ions Score:** 29 **Expect:** 0.0034

**Matches:** 7/124 fragment ions using 10 most intense peaks ([help](#))

| #  | b                | b <sup>++</sup> | b <sup>0</sup> | b <sup>0++</sup> | Seq.     | y                | y <sup>++</sup> | y*        | y <sup>*++</sup> | y <sup>0</sup> | y <sup>0++</sup> | #  |
|----|------------------|-----------------|----------------|------------------|----------|------------------|-----------------|-----------|------------------|----------------|------------------|----|
| 1  | 58.0287          | 29.5180         |                |                  | <b>G</b> |                  |                 |           |                  |                |                  | 14 |
| 2  | 244.1081         | 122.5577        |                |                  | <b>W</b> | 1502.7737        | 751.8905        | 1485.7472 | 743.3772         | 1484.7631      | 742.8852         | 13 |
| 3  | 373.1506         | 187.0790        | 355.1401       | 178.0737         | <b>E</b> | 1316.6944        | 658.8508        | 1299.6678 | 650.3376         | 1298.6838      | 649.8456         | 12 |
| 4  | 430.1721         | 215.5897        | 412.1615       | 206.5844         | <b>G</b> | 1187.6518        | 594.3295        | 1170.6252 | 585.8163         | 1169.6412      | 585.3243         | 11 |
| 5  | <b>543.2562</b>  | 272.1317        | 525.2456       | 263.1264         | <b>I</b> | 1130.6303        | 565.8188        | 1113.6038 | 557.3055         | 1112.6198      | 556.8135         | 10 |
| 6  | 600.2776         | 300.6425        | 582.2671       | 291.6372         | <b>G</b> | <b>1017.5463</b> | 509.2768        | 1000.5197 | 500.7635         | 999.5357       | 500.2715         | 9  |
| 7  | 713.3617         | 357.1845        | 695.3511       | 348.1792         | <b>L</b> | 960.5248         | 480.7660        | 943.4983  | 472.2528         | 942.5142       | 471.7608         | 8  |
| 8  | 842.4043         | 421.7058        | 824.3937       | 412.7005         | <b>E</b> | 847.4407         | 424.2240        | 830.4142  | 415.7107         | 829.4302       | 415.2187         | 7  |
| 9  | <b>941.4727</b>  | 471.2400        | 923.4621       | 462.2347         | <b>V</b> | 718.3981         | 359.7027        | 701.3716  | 351.1894         | 700.3876       | 350.6974         | 6  |
| 10 | <b>1054.5568</b> | 527.7820        | 1036.5462      | 518.7767         | <b>I</b> | <b>619.3297</b>  | 310.1685        | 602.3032  | 301.6552         | 601.3192       | 301.1632         | 5  |
| 11 | <b>1155.6045</b> | 578.3059        | 1137.5939      | 569.3006         | <b>T</b> | <b>506.2457</b>  | 253.6265        | 489.2191  | 245.1132         | 488.2351       | 244.6212         | 4  |
| 12 | 1284.6470        | 642.8272        | 1266.6365      | 633.8219         | <b>E</b> | 405.1980         | 203.1026        | 388.1714  | 194.5894         | 387.1874       | 194.0974         | 3  |
| 13 | 1413.6896        | 707.3485        | 1395.6791      | 698.3432         | <b>E</b> | 276.1554         | 138.5813        | 259.1288  | 130.0681         | 258.1448       | 129.5761         | 2  |
| 14 |                  |                 |                |                  | <b>K</b> | 147.1128         | 74.0600         | 130.0863  | 65.5468          |                |                  | 1  |

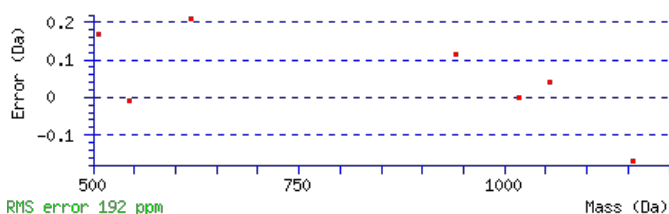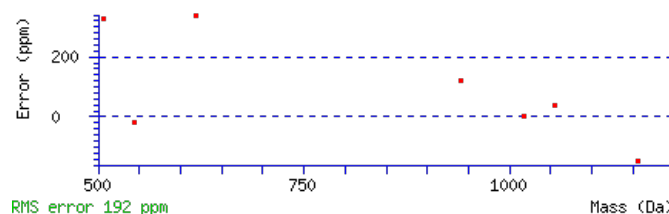

NCBI BLAST search of [GWEGIGLEVITEEK](#)

## AT2G29450.1

(Parameters: blastp, nr protein database, expect=20000, no filter, PAM30)

Other BLAST [web gateways](#)

### All matches to this query

| Score | Mr(calc)  | Delta  | Sequence                       |
|-------|-----------|--------|--------------------------------|
| 29.1  | 1558.7879 | 0.0020 | <a href="#">GWEGIGLEVITEEK</a> |

Mascot: <http://www.matrixscience.com/>

**Peptide View**MS/MS Fragmentation of **VDGIAENLNWEVFR**Found in **AT2G29630.1** in **TAIR\_Arabidopsis**, Symbols: | thiamine biosynthesis family protein / thiC family protein | chr2:12674472-12676646  
FORWARD

Match to Query 7977: 1660.817554 from(831.416053,2+) index(9678)

Title: Elution from: 88.088 to 88.088 scan no 13207 cid35.00 polarity:+

Data file D12h-3\_1.mgf

Click mouse within plot area to zoom in by factor of two about that point

Or,   to  Da Label all possible matches  Label matches used for scoring Show Y-axis 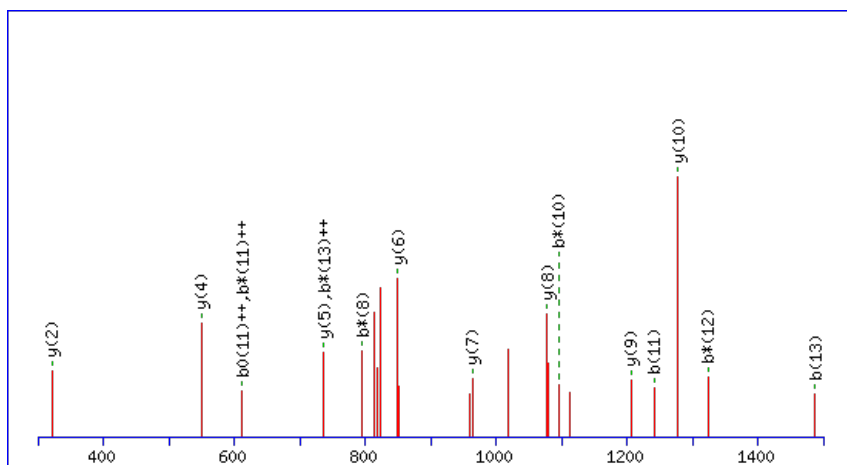Monoisotopic mass of neutral peptide  $M_r(\text{calc})$ : 1660.8209

Fixed modifications: Carbamidomethyl (C) (apply to specified residues or termini only)

Ions Score: 67 Expect: 8.9e-007

Matches : 16/136 fragment ions using 21 most intense peaks ([help](#))

| #  | b                | b <sup>++</sup> | b*               | b <sup>*++</sup> | b <sup>0</sup> | b <sup>0++</sup> | Seq. | y                | y <sup>++</sup> | y*        | y <sup>*++</sup> | y <sup>0</sup> | y <sup>0++</sup> | #  |
|----|------------------|-----------------|------------------|------------------|----------------|------------------|------|------------------|-----------------|-----------|------------------|----------------|------------------|----|
| 1  | 100.0757         | 50.5415         |                  |                  |                |                  | V    |                  |                 |           |                  |                |                  | 14 |
| 2  | 215.1026         | 108.0550        |                  |                  | 197.0921       | 99.0497          | D    | 1562.7598        | 781.8835        | 1545.7332 | 773.3703         | 1544.7492      | 772.8782         | 13 |
| 3  | 272.1241         | 136.5657        |                  |                  | 254.1135       | 127.5604         | G    | 1447.7328        | 724.3701        | 1430.7063 | 715.8568         | 1429.7223      | 715.3648         | 12 |
| 4  | 385.2082         | 193.1077        |                  |                  | 367.1976       | 184.1024         | I    | 1390.7114        | 695.8593        | 1373.6848 | 687.3461         | 1372.7008      | 686.8540         | 11 |
| 5  | 456.2453         | 228.6263        |                  |                  | 438.2347       | 219.6210         | A    | <b>1277.6273</b> | 639.3173        | 1260.6008 | 630.8040         | 1259.6167      | 630.3120         | 10 |
| 6  | 585.2879         | 293.1476        |                  |                  | 567.2773       | 284.1423         | E    | <b>1206.5902</b> | 603.7987        | 1189.5636 | 595.2855         | 1188.5796      | 594.7935         | 9  |
| 7  | 699.3308         | 350.1690        | 682.3042         | 341.6558         | 681.3202       | 341.1638         | N    | <b>1077.5476</b> | 539.2774        | 1060.5211 | 530.7642         | 1059.5370      | 530.2722         | 8  |
| 8  | 812.4149         | 406.7111        | <b>795.3883</b>  | 398.1978         | 794.4043       | 397.7058         | L    | <b>963.5047</b>  | 482.2560        | 946.4781  | 473.7427         | 945.4941       | 473.2507         | 7  |
| 9  | 926.4578         | 463.7325        | 909.4312         | 455.2193         | 908.4472       | 454.7272         | N    | <b>850.4206</b>  | 425.7139        | 833.3941  | 417.2007         | 832.4100       | 416.7087         | 6  |
| 10 | 1112.5371        | 556.7722        | <b>1095.5106</b> | 548.2589         | 1094.5265      | 547.7669         | W    | <b>736.3777</b>  | 368.6925        | 719.3511  | 360.1792         | 718.3671       | 359.6872         | 5  |
| 11 | <b>1241.5797</b> | 621.2935        | 1224.5531        | <b>612.7802</b>  | 1223.5691      | <b>612.2882</b>  | E    | <b>550.2984</b>  | 275.6528        | 533.2718  | 267.1396         | 532.2878       | 266.6475         | 4  |
| 12 | 1340.6481        | 670.8277        | <b>1323.6216</b> | 662.3144         | 1322.6375      | 661.8224         | V    | 421.2558         | 211.1315        | 404.2292  | 202.6183         |                |                  | 3  |
| 13 | <b>1487.7165</b> | 744.3619        | 1470.6900        | <b>735.8486</b>  | 1469.7060      | 735.3566         | F    | <b>322.1874</b>  | 161.5973        | 305.1608  | 153.0840         |                |                  | 2  |
| 14 |                  |                 |                  |                  |                |                  | R    | 175.1190         | 88.0631         | 158.0924  | 79.5498          |                |                  | 1  |

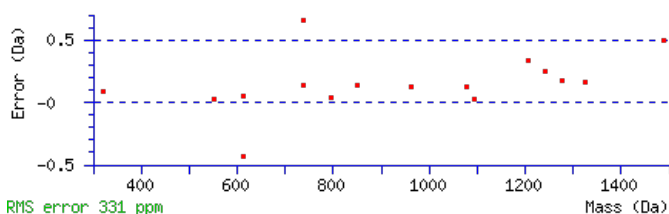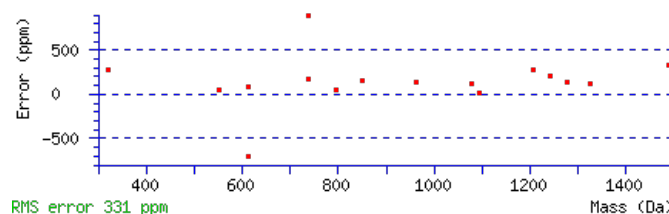NCBI BLAST search of [VDGIAENLNWEVFR](#)

## AT2G29630.1

(Parameters: blastp, nr protein database, expect=20000, no filter, PAM30)

Other BLAST [web gateways](#)

### All matches to this query

| Score | Mr(calc)  | Delta   | Sequence                       |
|-------|-----------|---------|--------------------------------|
| 66.5  | 1660.8209 | -0.0034 | <a href="#">VDGIAENLNWEVFR</a> |

Mascot: <http://www.matrixscience.com/>

**Peptide View**MS/MS Fragmentation of **LHEVMEKLLK**

Found in **AT2G29760.1** in **TAIR\_Arabidopsis**, Symbols: | pentatricopeptide (PPR) repeat-containing protein | chr2:12719961-12722177  
FORWARD

Match to Query 3914: 1154.581160 from(578.297856,2+) index(7360)

Title: Elution from: 65.825 to 65.825 scan no 9580 cid35.00 polarity:+

Data file 0-3\_1.mgf

Click mouse within plot area to zoom in by factor of two about that point

Or,   to  Da

Label all possible matches  Label matches used for scoring

Show Y-axis

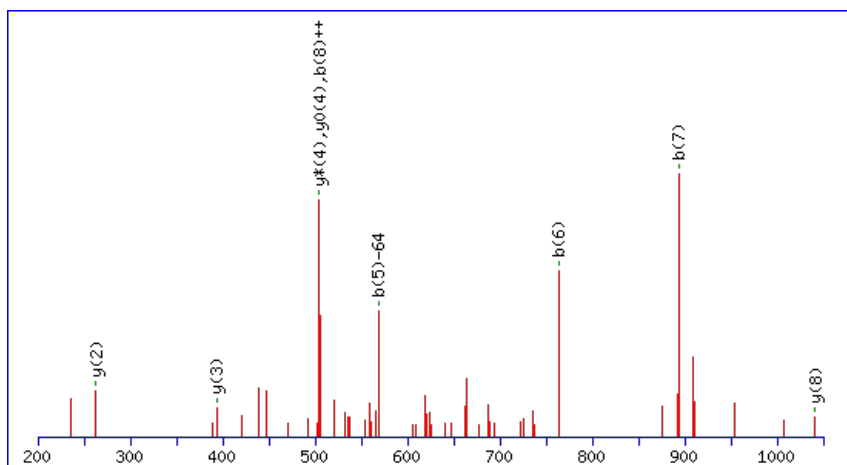

Monoisotopic mass of neutral peptide  $M_r(\text{calc})$ : 1154.5780

Fixed modifications: Carbamidomethyl (C) (apply to specified residues or termini only)

Variable modifications:

M5 : Oxidation (M), with neutral losses 0.0000 (shown in table), 63.9983

Ions Score: 18 Expect: 0.041

Matches : 9/118 fragment ions using 9 most intense peaks ([help](#))

| # | b         | b <sup>++</sup> | b <sup>*</sup> | b <sup>*++</sup> | b <sup>0</sup> | b <sup>0++</sup> | Seq. | y         | y <sup>++</sup> | y <sup>*</sup> | y <sup>*++</sup> | y <sup>0</sup> | y <sup>0++</sup> | # |
|---|-----------|-----------------|----------------|------------------|----------------|------------------|------|-----------|-----------------|----------------|------------------|----------------|------------------|---|
| 1 | 115.0884  | 58.0478         |                |                  |                |                  | L    |           |                 |                |                  |                |                  | 9 |
| 2 | 255.1384  | 128.0728        |                |                  |                |                  | H    | 1041.5042 | 521.2557        | 1023.4806      | 512.2439         | 1023.4936      | 512.2504         | 8 |
| 3 | 385.1780  | 193.0926        |                |                  | 367.1675       | 184.0874         | E    | 901.4541  | 451.2307        | 883.4306       | 442.2189         | 883.4436       | 442.2254         | 7 |
| 4 | 485.2435  | 243.1254        |                |                  | 467.2329       | 234.1201         | V    | 771.4145  | 386.2109        | 753.3909       | 377.1991         | 753.4040       | 377.2056         | 6 |
| 5 | 633.2759  | 317.1416        |                |                  | 615.2653       | 308.1363         | M    | 671.3491  | 336.1782        | 653.3255       | 327.1664         | 653.3385       | 327.1729         | 5 |
| 6 | 763.3155  | 382.1614        |                |                  | 745.3050       | 373.1561         | E    | 523.3166  | 262.1620        | 505.2930       | 253.1502         | 505.3061       | 253.1567         | 4 |
| 7 | 893.4046  | 447.2059        | 875.3810       | 438.1941         | 875.3940       | 438.2006         | K    | 393.2770  | 197.1421        | 375.2534       | 188.1303         |                |                  | 3 |
| 8 | 1007.4857 | 504.2465        | 989.4621       | 495.2347         | 989.4751       | 495.2412         | L    | 263.1880  | 132.0976        | 245.1644       | 123.0858         |                |                  | 2 |
| 9 |           |                 |                |                  |                |                  | K    | 149.1069  | 75.0571         | 131.0833       | 66.0453          |                |                  | 1 |

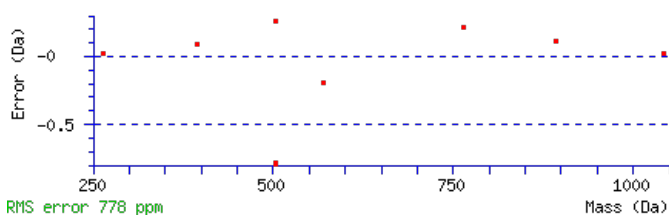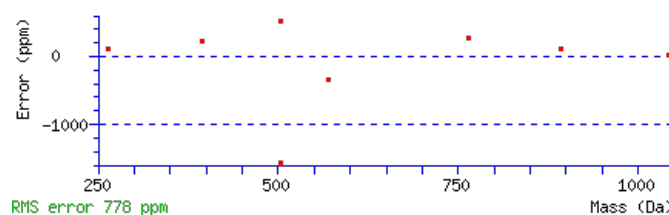

NCBI BLAST search of **LHEVMEKLLK**

(Parameters: blastp, nr protein database, expect=20000, no filter, PAM30)

Other BLAST [web gateways](#)

All matches to this query

## AT2G29760.1

| Score | Mr(calc)  | Delta   | Sequence                    |
|-------|-----------|---------|-----------------------------|
| 18.4  | 1154.5780 | 0.0032  | <a href="#">LHEVMEKLK</a>   |
| 12.0  | 1154.5827 | -0.0016 | <a href="#">TPTNIEEVLK</a>  |
| 6.9   | 1154.5827 | -0.0016 | <a href="#">LDDALNLIEK</a>  |
| 3.5   | 1154.5827 | -0.0016 | <a href="#">IPDTVASEAIK</a> |
| 3.2   | 1154.5827 | -0.0015 | <a href="#">QVADIEIVEK</a>  |
| 3.2   | 1154.5827 | -0.0015 | <a href="#">VPTVDGTVDLK</a> |
| 2.8   | 1154.5827 | -0.0016 | <a href="#">LAELEEALQK</a>  |
| 1.9   | 1154.5836 | -0.0024 | <a href="#">MKILKGMYP</a>   |
| 1.8   | 1154.5802 | 0.0009  | <a href="#">AIWMLDPGIK</a>  |
| 1.1   | 1154.5827 | -0.0016 | <a href="#">AVEAELAELAK</a> |

Mascot: <http://www.matrixscience.com/>

**Peptide View**MS/MS Fragmentation of **DPTGRIGIDEWMR**

Found in **AT2G29990.1** in **TAIR\_Arabidopsis**, Symbols: NDA2 | NDA2 (ALTERNATIVE NAD(P)H DEHYDROGENASE 2); NADH dehydrogenase | chr2:12800639-12802990 REVERSE

Match to Query 7011: 1580.678782 from(791.346667,2+) index(7207)

Title: Elution from: 64.060 to 64.060 scan no 9432 cid35.00 polarity:+

Data file 0-2\_2.mgf

Click mouse within plot area to zoom in by factor of two about that point

Or,   to  Da

Label all possible matches  Label matches used for scoring

Show Y-axis

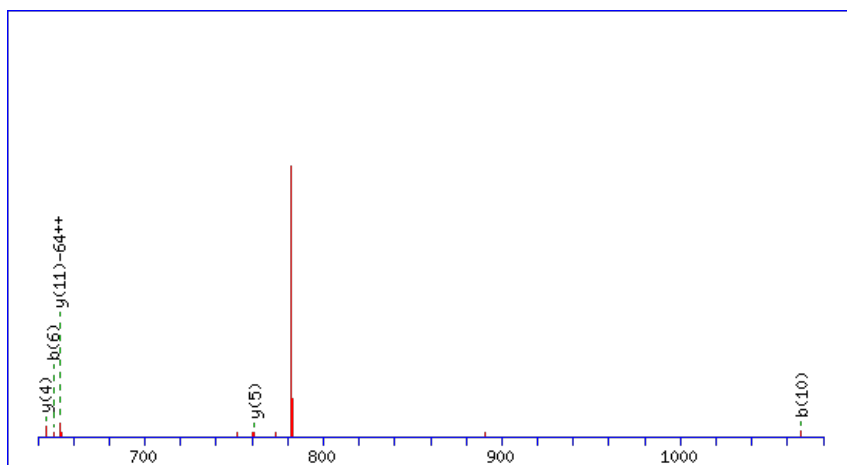

Monoisotopic mass of neutral peptide  $M_r(\text{calc})$ : 1580.6761

**Fixed modifications:** Carbamidomethyl (C) (apply to specified residues or termini only)

**Variable modifications:**

**M12** : Oxidation (M), with neutral losses 0.0000 (shown in table), 63.9983

**Ions Score:** 21 **Expect:** 0.041

**Matches** : 5/198 fragment ions using 8 most intense peaks ([help](#))

| #  | b                | b <sup>++</sup> | b <sup>*</sup> | b <sup>*++</sup> | b <sup>0</sup> | b <sup>0++</sup> | Seq. | y               | y <sup>++</sup> | y <sup>*</sup> | y <sup>*++</sup> | y <sup>0</sup> | y <sup>0++</sup> | #  |
|----|------------------|-----------------|----------------|------------------|----------------|------------------|------|-----------------|-----------------|----------------|------------------|----------------|------------------|----|
| 1  | 117.0313         | 59.0193         |                |                  | 99.0207        | 50.0140          | D    |                 |                 |                |                  |                |                  | 13 |
| 2  | 215.0811         | 108.0442        |                |                  | 197.0705       | 99.0389          | P    | 1465.6595       | 733.3334        | 1447.6359      | 724.3216         | 1447.6489      | 724.3281         | 12 |
| 3  | 317.1258         | 159.0665        |                |                  | 299.1152       | 150.0612         | T    | 1367.6097       | 684.3085        | 1349.5861      | 675.2967         | 1349.5991      | 675.3032         | 11 |
| 4  | 375.1443         | 188.0758        |                |                  | 357.1337       | 179.0705         | G    | 1265.5650       | 633.2861        | 1247.5414      | 624.2743         | 1247.5544      | 624.2808         | 10 |
| 5  | 535.2335         | 268.1204        | 517.2099       | 259.1086         | 517.2230       | 259.1151         | R    | 1207.5465       | 604.2769        | 1189.5229      | 595.2651         | 1189.5359      | 595.2716         | 9  |
| 6  | <b>649.3146</b>  | 325.1609        | 631.2910       | 316.1492         | 631.3040       | 316.1557         | I    | 1047.4572       | 524.2322        | 1029.4336      | 515.2205         | 1029.4466      | 515.2270         | 8  |
| 7  | 707.3331         | 354.1702        | 689.3095       | 345.1584         | 689.3225       | 345.1649         | G    | 933.3761        | 467.1917        | 915.3525       | 458.1799         | 915.3655       | 458.1864         | 7  |
| 8  | 821.4142         | 411.2107        | 803.3906       | 402.1990         | 803.4036       | 402.2055         | I    | 875.3576        | 438.1824        | 857.3340       | 429.1707         | 857.3470       | 429.1772         | 6  |
| 9  | 937.4382         | 469.2227        | 919.4146       | 460.2109         | 919.4276       | 460.2175         | D    | <b>761.2765</b> | 381.1419        | 743.2529       | 372.1301         | 743.2660       | 372.1366         | 5  |
| 10 | <b>1067.4778</b> | 534.2425        | 1049.4542      | 525.2308         | 1049.4673      | 525.2373         | E    | <b>645.2525</b> | 323.1299        | 627.2290       | 314.1181         | 627.2420       | 314.1246         | 4  |
| 11 | 1255.5512        | 628.2792        | 1237.5276      | 619.2674         | 1237.5406      | 619.2740         | W    | 515.2129        | 258.1101        | 497.1893       | 249.0983         |                |                  | 3  |
| 12 | 1403.5836        | 702.2955        | 1385.5601      | 693.2837         | 1385.5731      | 693.2902         | M    | 327.1395        | 164.0734        | 309.1159       | 155.0616         |                |                  | 2  |
| 13 |                  |                 |                |                  |                |                  | R    | 179.1071        | 90.0572         | 161.0835       | 81.0454          |                |                  | 1  |

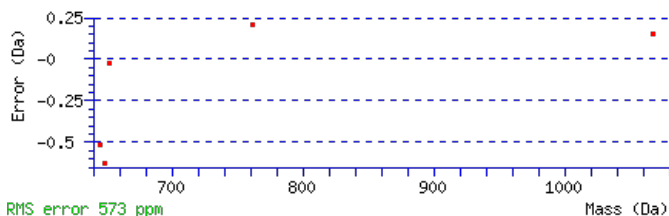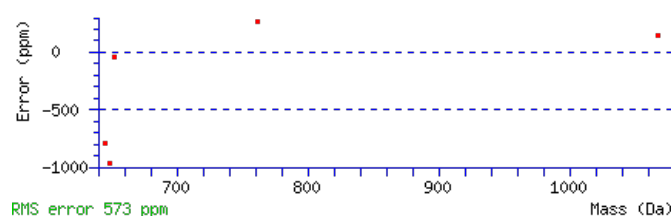

## AT2G29990.1

(Parameters: blastp, nr protein database, expect=20000, no filter, PAM30)

Other BLAST [web gateways](#)

### All matches to this query

| Score | Mr(calc)  | Delta   | Sequence                      |
|-------|-----------|---------|-------------------------------|
| 20.8  | 1580.6761 | 0.0026  | <a href="#">DPTGRIGIDEWMR</a> |
| 5.4   | 1580.6757 | 0.0030  | <a href="#">AMYQEYFESLLR</a>  |
| 5.1   | 1580.6795 | -0.0008 | <a href="#">MKKELQMEHDTR</a>  |
| 5.0   | 1580.6832 | -0.0044 | <a href="#">LGELFSPSNEWER</a> |
| 4.9   | 1580.6788 | -0.0001 | <a href="#">NQEITPHMRNYR</a>  |

Mascot: <http://www.matrixscience.com/>



## Peptide View

### MS/MS Fragmentation of **FNIEALQNR**

Found in **AT2G30110.1** in **TAIR\_Arabidopsis**, Symbols: MOS5, ATUBA1 | ATUBA1 (ARABIDOPSIS THALIANA UBIQUITIN-ACTIVATING ENZYME 1); ubiquitin activating enzyme | chr2:12859709-12864446 REVERSE

Match to Query 3170: 1103.571998 from(552.793275,2+) index(4886)

Title: Elution from: 43.493 to 43.493 scan no 6155 cid35.00 polarity:+

Data file D6h-3\_3.mgf

Click mouse within plot area to zoom in by factor of two about that point

Or,   to  Da

Label all possible matches  Label matches used for scoring

Show Y-axis

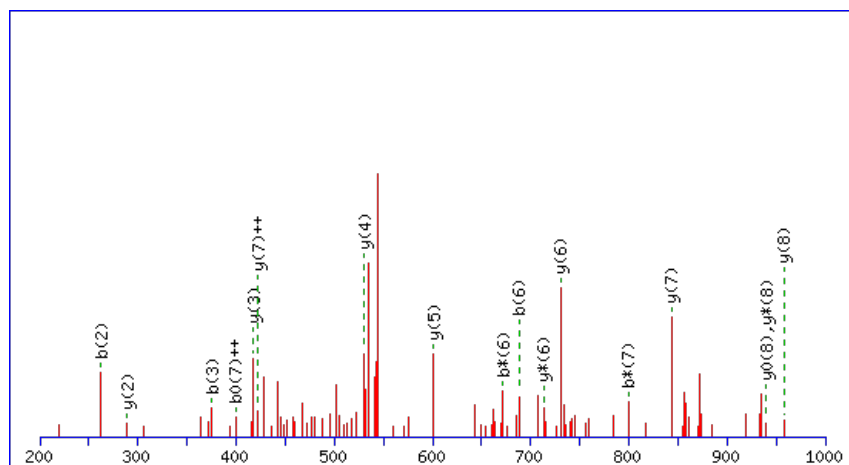

Monoisotopic mass of neutral peptide  $M_r(\text{calc})$ : 1103.5723

Fixed modifications: Carbamidomethyl (C) (apply to specified residues or termini only)

Ions Score: 39 Expect: 0.00042

Matches : 17/78 fragment ions using 38 most intense peaks ([help](#))

| # | b               | b <sup>++</sup> | b*              | b <sup>*++</sup> | b <sup>0</sup> | b <sup>0++</sup> | Seq. | y               | y <sup>++</sup> | y*              | y <sup>*++</sup> | y <sup>0</sup>  | y <sup>0++</sup> | # |
|---|-----------------|-----------------|-----------------|------------------|----------------|------------------|------|-----------------|-----------------|-----------------|------------------|-----------------|------------------|---|
| 1 | 148.0757        | 74.5415         |                 |                  |                |                  | F    |                 |                 |                 |                  |                 |                  | 9 |
| 2 | <b>262.1186</b> | 131.5629        | 245.0921        | 123.0497         |                |                  | N    | <b>957.5112</b> | 479.2592        | <b>940.4847</b> | 470.7460         | <b>939.5007</b> | 470.2540         | 8 |
| 3 | <b>375.2027</b> | 188.1050        | 358.1761        | 179.5917         |                |                  | I    | <b>843.4683</b> | <b>422.2378</b> | 826.4417        | 413.7245         | 825.4577        | 413.2325         | 7 |
| 4 | 504.2453        | 252.6263        | 487.2187        | 244.1130         | 486.2347       | 243.6210         | E    | <b>730.3842</b> | 365.6958        | <b>713.3577</b> | 357.1825         | 712.3737        | 356.6905         | 6 |
| 5 | 575.2824        | 288.1448        | 558.2558        | 279.6316         | 557.2718       | 279.1395         | A    | <b>601.3416</b> | 301.1745        | 584.3151        | 292.6612         |                 |                  | 5 |
| 6 | <b>688.3665</b> | 344.6869        | <b>671.3399</b> | 336.1736         | 670.3559       | 335.6816         | L    | <b>530.3045</b> | 265.6559        | 513.2780        | 257.1426         |                 |                  | 4 |
| 7 | 816.4250        | 408.7162        | <b>799.3985</b> | 400.2029         | 798.4145       | <b>399.7109</b>  | Q    | <b>417.2205</b> | 209.1139        | 400.1939        | 200.6006         |                 |                  | 3 |
| 8 | 930.4680        | 465.7376        | 913.4414        | 457.2243         | 912.4574       | 456.7323         | N    | <b>289.1619</b> | 145.0846        | 272.1353        | 136.5713         |                 |                  | 2 |
| 9 |                 |                 |                 |                  |                |                  | R    | 175.1190        | 88.0631         | 158.0924        | 79.5498          |                 |                  | 1 |

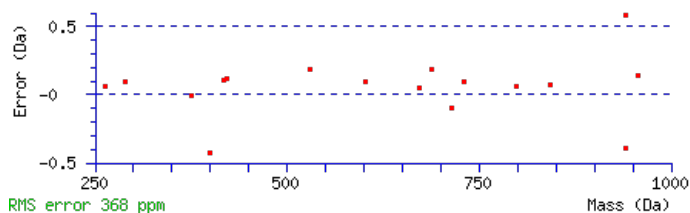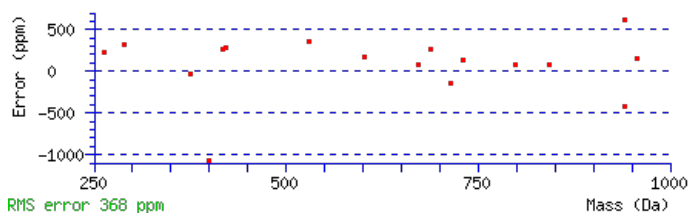

NCBI BLAST search of **FNIEALQNR**

(Parameters: blastp, nr protein database, expect=20000, no filter, PAM30)

Other BLAST [web gateways](#)

All matches to this query

| Score | $M_r(\text{calc})$ | Delta | Sequence |
|-------|--------------------|-------|----------|
|       |                    |       |          |

## AT2G30110.1

|      |           |         |                            |
|------|-----------|---------|----------------------------|
| 38.6 | 1103.5723 | -0.0003 | <a href="#">FNIEALQNR</a>  |
| 4.0  | 1103.5710 | 0.0010  | <a href="#">GLSLEEIESK</a> |
| 2.9  | 1103.5723 | -0.0003 | <a href="#">FNQLNEALR</a>  |
| 2.9  | 1103.5723 | -0.0003 | <a href="#">GSIALQSWSR</a> |

**Mascot:** <http://www.matrixscience.com/>

**Peptide View**MS/MS Fragmentation of **NVVFDFITGK**

Found in **AT2G30490.1** in **TAIR\_Arabidopsis**, Symbols: ATC4H, C4H, CYP73A5 | ATC4H/C4H/CYP73A5 (CINNAMATE 4-HYDROXYLASE, CINNAMATE-4-HYDROXYLASE); trans-cinnamate 4-monoxygenase | chr2:13000938-13002760 REVERSE

Match to Query 3534: 1138.601054 from(570.307803,2+) index(8747)

Title: Elution from: 78.445 to 78.445 scan no 11878 cid35.00 polarity:+

Data file 0-3\_3.mgf

Click mouse within plot area to zoom in by factor of two about that point

Or,   to  Da

Label all possible matches  Label matches used for scoring

Show Y-axis

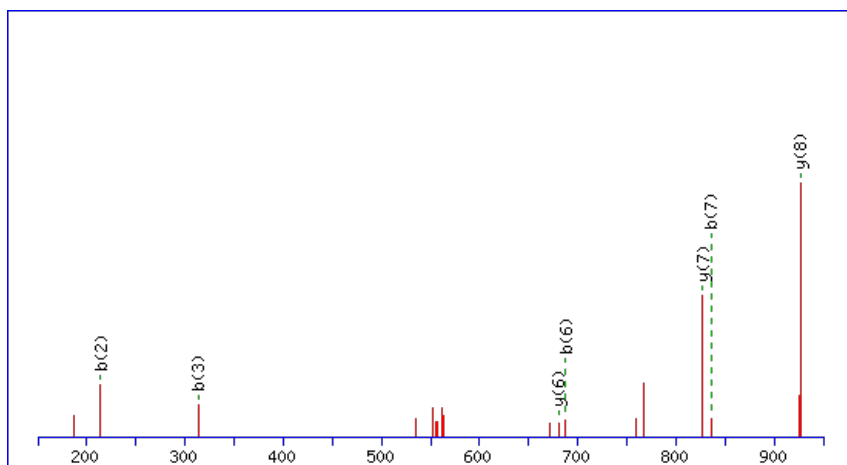

Monoisotopic mass of neutral peptide  $M_r(\text{calc})$ : 1138.6023

Fixed modifications: Carbamidomethyl (C) (apply to specified residues or termini only)

Ions Score: 27 Expect: 0.0069

Matches : 7/96 fragment ions using 15 most intense peaks ([help](#))

| #  | b               | b <sup>++</sup> | b*       | b <sup>*++</sup> | b <sup>0</sup> | b <sup>0++</sup> | Seq. | y               | y <sup>++</sup> | y*        | y <sup>*++</sup> | y <sup>0</sup> | y <sup>0++</sup> | #  |
|----|-----------------|-----------------|----------|------------------|----------------|------------------|------|-----------------|-----------------|-----------|------------------|----------------|------------------|----|
| 1  | 115.0502        | 58.0287         | 98.0237  | 49.5155          |                |                  | N    |                 |                 |           |                  |                |                  | 10 |
| 2  | <b>214.1186</b> | 107.5629        | 197.0921 | 99.0497          |                |                  | V    | 1025.5666       | 513.2869        | 1008.5401 | 504.7737         | 1007.5560      | 504.2817         | 9  |
| 3  | <b>313.1870</b> | 157.0972        | 296.1605 | 148.5839         |                |                  | V    | <b>926.4982</b> | 463.7527        | 909.4716  | 455.2395         | 908.4876       | 454.7475         | 8  |
| 4  | 460.2554        | 230.6314        | 443.2289 | 222.1181         |                |                  | F    | <b>827.4298</b> | 414.2185        | 810.4032  | 405.7053         | 809.4192       | 405.2132         | 7  |
| 5  | 575.2824        | 288.1448        | 558.2558 | 279.6316         | 557.2718       | 279.1395         | D    | <b>680.3614</b> | 340.6843        | 663.3348  | 332.1710         | 662.3508       | 331.6790         | 6  |
| 6  | <b>688.3665</b> | 344.6869        | 671.3399 | 336.1736         | 670.3559       | 335.6816         | I    | 565.3344        | 283.1709        | 548.3079  | 274.6576         | 547.3239       | 274.1656         | 5  |
| 7  | <b>835.4349</b> | 418.2211        | 818.4083 | 409.7078         | 817.4243       | 409.2158         | F    | 452.2504        | 226.6288        | 435.2238  | 218.1155         | 434.2398       | 217.6235         | 4  |
| 8  | 936.4825        | 468.7449        | 919.4560 | 460.2316         | 918.4720       | 459.7396         | T    | 305.1819        | 153.0946        | 288.1554  | 144.5813         | 287.1714       | 144.0893         | 3  |
| 9  | 993.5040        | 497.2556        | 976.4775 | 488.7424         | 975.4934       | 488.2504         | G    | 204.1343        | 102.5708        | 187.1077  | 94.0575          |                |                  | 2  |
| 10 |                 |                 |          |                  |                |                  | K    | 147.1128        | 74.0600         | 130.0863  | 65.5468          |                |                  | 1  |

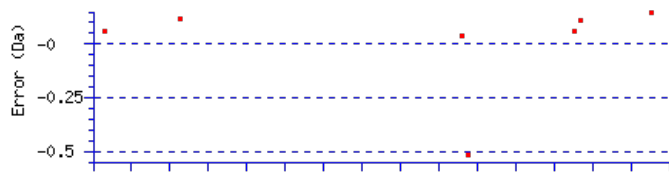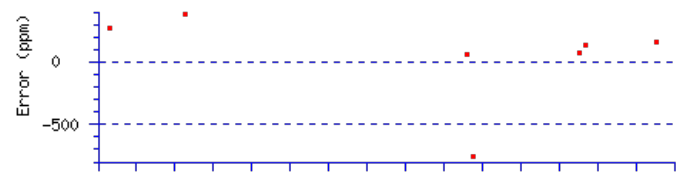NCBI BLAST search of **NVVFDFITGK**

(Parameters: blastp, nr protein database, expect=20000, no filter, PAM30)

Other BLAST [web gateways](#)

All matches to this query

AT2G30490.1

| Score | Mr(calc)  | Delta   | Sequence                  |
|-------|-----------|---------|---------------------------|
| 27.1  | 1138.6023 | -0.0012 | <a href="#">NVVFDIFGK</a> |

Mascot: <http://www.matrixscience.com/>

**Peptide View**MS/MS Fragmentation of **LLLVLNLK**Found in **AT2G30620.1** in **TAIR\_Arabidopsis**, Symbols: | histone H1.2 | chr2:13052437-13053344 FORWARD

Match to Query 1118: 820.526352 from(411.270452,2+) index(6088)

Title: Elution from: 54.592 to 54.592 scan no 7730 cid35.00 polarity:+

Data file 0-3\_1.mgf

Click mouse within plot area to zoom in by factor of two about that point

Or,   to  Da Label all possible matches  Label matches used for scoring Show Y-axis 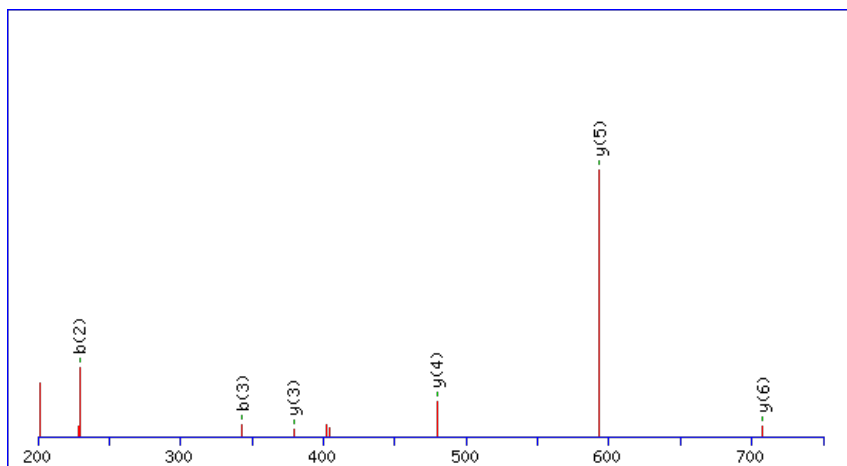Monoisotopic mass of neutral peptide **Mr(calc)**: 820.5264

Fixed modifications: Carbamidomethyl (C) (apply to specified residues or termini only)

Ions Score: 38 **Expect**: 0.00017Matches : 6/40 fragment ions using 9 most intense peaks ([help](#))

| # | b               | b <sup>++</sup> | b*       | b <sup>*++</sup> | Seq. | y               | y <sup>++</sup> | y*       | y <sup>*++</sup> | # |
|---|-----------------|-----------------|----------|------------------|------|-----------------|-----------------|----------|------------------|---|
| 1 | 115.0884        | 58.0478         |          |                  | L    |                 |                 |          |                  | 7 |
| 2 | <b>229.1695</b> | 115.0884        |          |                  | L    | <b>707.4526</b> | 354.2299        | 689.4290 | 345.2182         | 6 |
| 3 | <b>343.2506</b> | 172.1289        |          |                  | L    | <b>593.3715</b> | 297.1894        | 575.3479 | 288.1776         | 5 |
| 4 | 443.3160        | 222.1616        |          |                  | V    | <b>479.2904</b> | 240.1488        | 461.2668 | 231.1371         | 4 |
| 5 | 559.3530        | 280.1801        | 541.3294 | 271.1684         | N    | <b>379.2250</b> | 190.1161        | 361.2014 | 181.1043         | 3 |
| 6 | 673.4341        | 337.2207        | 655.4105 | 328.2089         | L    | 263.1880        | 132.0976        | 245.1644 | 123.0858         | 2 |
| 7 |                 |                 |          |                  | K    | 149.1069        | 75.0571         | 131.0833 | 66.0453          | 1 |

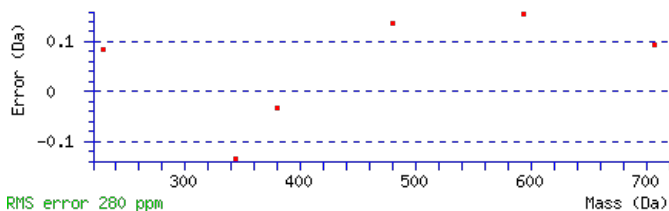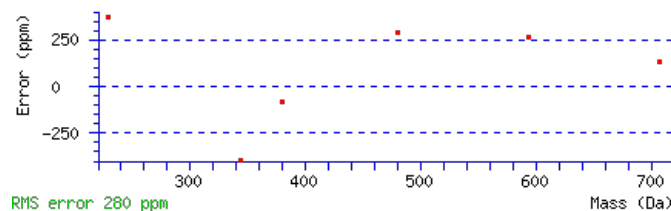NCBI **BLAST** search of [LLLVLNLK](#)

(Parameters: blastp, nr protein database, expect=20000, no filter, PAM30)

Other BLAST [web gateways](#)**All matches to this query**

| Score | Mr(calc) | Delta   | Sequence                 |
|-------|----------|---------|--------------------------|
| 37.7  | 820.5264 | -0.0001 | <a href="#">LLLVLNLK</a> |
| 18.8  | 820.5264 | -0.0001 | <a href="#">LIVLNLK</a>  |
| 9.5   | 820.5264 | -0.0001 | <a href="#">LIVQLK</a>   |

AT2G30620.1

|     |          |         |                          |
|-----|----------|---------|--------------------------|
| 9.5 | 820.5264 | -0.0001 | <a href="#">LLAIIAAK</a> |
|-----|----------|---------|--------------------------|

**Mascot:** <http://www.matrixscience.com/>

### Peptide View

 MS/MS Fragmentation of **SITDYGSPSEQFLSQVNYLLGK**

 Found in **AT2G30790.1** in **TAIR\_Arabidopsis**, Symbols: PSBP-2 | PSBP-2 (photosystem II subunit P-2); calcium ion binding | chr2:13126124-13127167  
 REVERSE

 Match to Query 9788: 2383.093064 from(1192.553808,2+) index(10571)  
 Title: Elution from: 120.434 to 120.434 scan no 16285 cid35.00 polarity:+  
 Data file D1d-1\_3.mgf

Click mouse within plot area to zoom in by factor of two about that point

 Or, Plot from  to  Da 

 Label all possible matches  Label matches used for scoring 

 Show Y-axis 
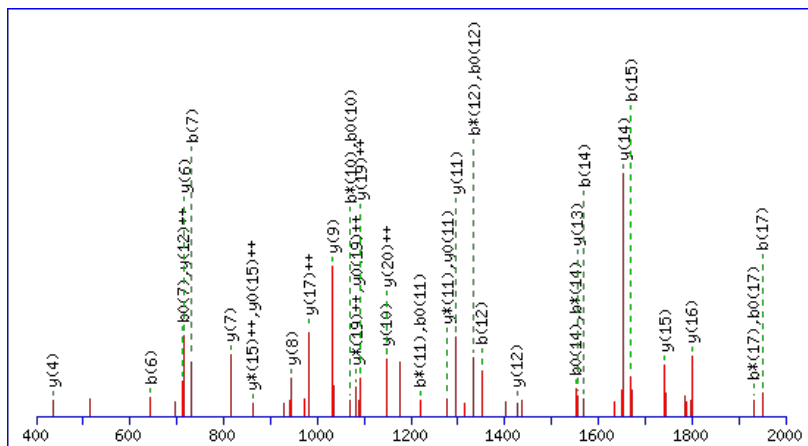
 Monoisotopic mass of neutral peptide  $M_r(\text{calc})$ : 2383.1002

Fixed modifications: Carbamidomethyl (C) (apply to specified residues or termini only)

Ions Score: 86 Expect: 1.4e-008

 Matches : 39/206 fragment ions using 46 most intense peaks ([help](#))

| #  | b                | b <sup>++</sup> | b <sup>*</sup>   | b <sup>*++</sup> | b <sup>0</sup>   | b <sup>0++</sup> | Seq | y                | y <sup>++</sup> | y <sup>*</sup>   | y <sup>*++</sup> | y <sup>0</sup>   | y <sup>0++</sup> | #  |
|----|------------------|-----------------|------------------|------------------|------------------|------------------|-----|------------------|-----------------|------------------|------------------|------------------|------------------|----|
| 1  | 89.0363          | 45.0218         |                  |                  | 71.0258          | 36.0165          | S   |                  |                 |                  |                  |                  |                  | 21 |
| 2  | 203.1174         | 102.0624        |                  |                  | 185.1069         | 93.0571          | I   | 2296.0784        | 1148.5429       | 2278.0548        | 1139.5311        | 2278.0679        | 1139.5376        | 20 |
| 3  | 305.1622         | 153.0847        |                  |                  | 287.1516         | 144.0794         | T   | 2181.9973        | 1091.5023       | 2163.9737        | 1082.4905        | 2163.9868        | 1082.4970        | 19 |
| 4  | 421.1861         | 211.0967        |                  |                  | 403.1756         | 202.0914         | D   | 2079.9526        | 1040.4799       | 2061.9290        | 1031.4682        | 2061.9421        | 1031.4747        | 18 |
| 5  | 585.2465         | 293.1269        |                  |                  | 567.2359         | 284.1216         | Y   | 1963.9286        | 982.4680        | 1945.9051        | 973.4562         | 1945.9181        | 973.4627         | 17 |
| 6  | <b>643.2650</b>  | 322.1361        |                  |                  | 625.2544         | 313.1309         | G   | <b>1799.8683</b> | 900.4378        | 1781.8447        | 891.4260         | 1781.8577        | 891.4325         | 16 |
| 7  | <b>731.2941</b>  | 366.1507        |                  |                  | <b>713.2835</b>  | 357.1454         | S   | <b>1741.8498</b> | 871.4285        | 1723.8262        | <b>862.4167</b>  | 1723.8392        | <b>862.4232</b>  | 15 |
| 8  | 829.3439         | 415.1756        |                  |                  | 811.3333         | 406.1703         | P   | <b>1653.8207</b> | 827.4140        | 1635.7971        | 818.4022         | 1635.8101        | 818.4087         | 14 |
| 9  | 959.3835         | 480.1954        |                  |                  | 941.3729         | 471.1901         | E   | <b>1555.7709</b> | 778.3891        | 1537.7473        | 769.3773         | 1537.7603        | 769.3838         | 13 |
| 10 | 1089.4361        | 545.2217        | <b>1071.4125</b> | 536.2099         | <b>1071.4256</b> | 536.2164         | Q   | <b>1425.7313</b> | <b>713.3693</b> | 1407.7077        | 704.3575         | 1407.7207        | 704.3640         | 12 |
| 11 | 1237.5016        | 619.2544        | <b>1219.4780</b> | 610.2426         | <b>1219.4910</b> | 610.2491         | F   | <b>1295.6786</b> | 648.3430        | <b>1277.6551</b> | 639.3312         | <b>1277.6681</b> | 639.3377         | 11 |
| 12 | <b>1351.5827</b> | 676.2950        | <b>1333.5591</b> | 667.2832         | <b>1333.5721</b> | 667.2897         | L   | <b>1147.6132</b> | 574.3102        | 1129.5896        | 565.2984         | 1129.6026        | 565.3050         | 10 |
| 13 | 1439.6117        | 720.3095        | 1421.5882        | 711.2977         | 1421.6012        | 711.3042         | S   | <b>1033.5321</b> | 517.2697        | 1015.5085        | 508.2579         | 1015.5215        | 508.2644         | 9  |
| 14 | <b>1569.6644</b> | 785.3358        | <b>1551.6408</b> | 776.3240         | <b>1551.6538</b> | 776.3305         | Q   | <b>945.5030</b>  | 473.2552        | 927.4794         | 464.2434         |                  |                  | 8  |
| 15 | <b>1669.7298</b> | 835.3686        | 1651.7063        | 826.3568         | 1651.7193        | 826.3633         | V   | <b>815.4504</b>  | 408.2288        | 797.4268         | 399.2170         |                  |                  | 7  |
| 16 | 1785.7668        | 893.3871        | 1767.7432        | 884.3753         | 1767.7563        | 884.3818         | N   | <b>715.3849</b>  | 358.1961        | 697.3613         | 349.1843         |                  |                  | 6  |
| 17 | <b>1949.8272</b> | 975.4172        | <b>1931.8036</b> | 966.4054         | <b>1931.8166</b> | 966.4120         | Y   | 599.3479         | 300.1776        | 581.3244         | 291.1658         |                  |                  | 5  |
| 18 | 2063.9083        | 1032.4578       | 2045.8847        | 1023.4460        | 2045.8977        | 1023.4525        | L   | <b>435.2876</b>  | 218.1474        | 417.2640         | 209.1356         |                  |                  | 4  |
| 19 | 2177.9894        | 1089.4983       | 2159.9658        | 1080.4865        | 2159.9788        | 1080.4931        | L   | 321.2065         | 161.1069        | 303.1829         | 152.0951         |                  |                  | 3  |
| 20 | 2236.0079        | 1118.5076       | 2217.9843        | 1109.4958        | 2217.9973        | 1109.5023        | G   | 207.1254         | 104.0663        | 189.1018         | 95.0545          |                  |                  | 2  |
| 21 |                  |                 |                  |                  |                  |                  | K   | 149.1069         | 75.0571         | 131.0833         | 66.0453          |                  |                  | 1  |

# AT2G30790.1

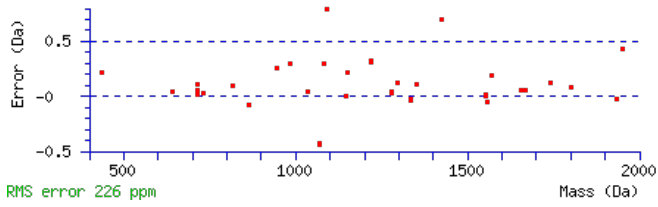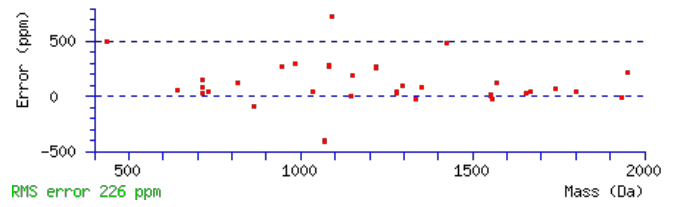

NCBI **BLAST** search of [SITDYGSPSEQFLSQVNYLLGK](#)  
(Parameters: blastp, nr protein database, expect=20000, no filter, PAM30)  
Other BLAST [web gateways](#)

## All matches to this query

| Score | Mr(calc)  | Delta   | Sequence                               |
|-------|-----------|---------|----------------------------------------|
| 86.5  | 2383.1002 | -0.0071 | <a href="#">SITDYGSPSEQFLSQVNYLLGK</a> |
| 84.3  | 2383.0872 | 0.0059  | <a href="#">SITDYGSPPEEFLSQVNYLLGK</a> |

Mascot: <http://www.matrixscience.com/>



**Peptide View**MS/MS Fragmentation of **RALVTLIEK**

Found in **AT2G30860.1** in **TAIR\_Arabidopsis**, Symbols: GLUTTR, ATGSTF7, ATGSTF9 | ATGSTF9 (Arabidopsis thaliana Glutathione S-transferase (class phi) 9); glutathione transferase | chr2:13146209-13147134 FORWARD

Match to Query 2875: 1054.616142 from(528.315347,2+) index(3293)

Title: Elution from: 33.565 to 33.565 scan no 4120 cid35.00 polarity:+

Data file D6h-2\_2.mgf

Click mouse within plot area to zoom in by factor of two about that point

Or,   to  Da

Label all possible matches  Label matches used for scoring

Show Y-axis

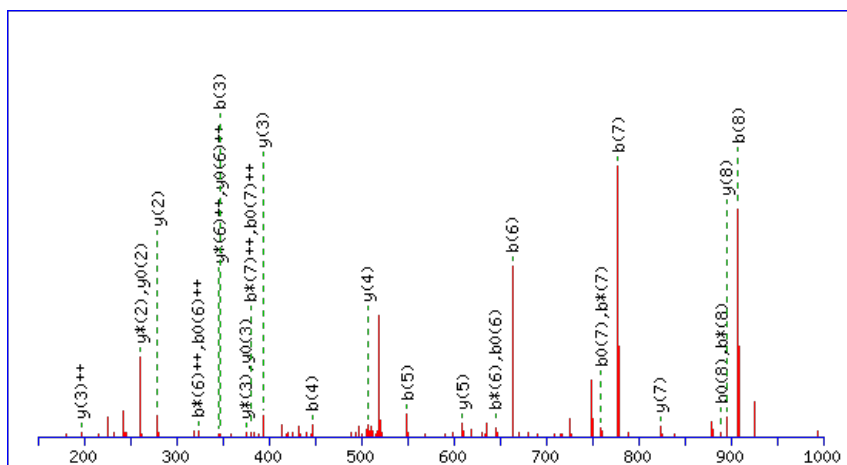

**Monoisotopic mass of neutral peptide Mr(calc):** 1054.6161

**Fixed modifications:** Carbamidomethyl (C) (apply to specified residues or termini only)

**Ions Score:** 30 **Expect:** 0.0046

**Matches:** 29/86 fragment ions using 57 most intense peaks ([help](#))

| # | b               | b <sup>++</sup> | b*              | b <sup>*++</sup> | b <sup>0</sup>  | b <sup>0++</sup> | Seq. | y               | y <sup>++</sup> | y*              | y <sup>*++</sup> | y <sup>0</sup>  | y <sup>0++</sup> | # |
|---|-----------------|-----------------|-----------------|------------------|-----------------|------------------|------|-----------------|-----------------|-----------------|------------------|-----------------|------------------|---|
| 1 | 161.0965        | 81.0519         | 143.0729        | 72.0401          |                 |                  | R    |                 |                 |                 |                  |                 |                  | 9 |
| 2 | 233.1307        | 117.0690        | 215.1071        | 108.0572         |                 |                  | A    | <b>895.5341</b> | 448.2707        | 877.5105        | 439.2589         | 877.5235        | 439.2654         | 8 |
| 3 | <b>347.2118</b> | 174.1095        | 329.1882        | 165.0977         |                 |                  | L    | <b>823.5000</b> | 412.2536        | 805.4764        | 403.2418         | 805.4894        | 403.2483         | 7 |
| 4 | <b>447.2772</b> | 224.1422        | 429.2536        | 215.1305         |                 |                  | V    | 709.4189        | 355.2131        | 691.3953        | <b>346.2013</b>  | 691.4083        | <b>346.2078</b>  | 6 |
| 5 | <b>549.3219</b> | 275.1646        | 531.2984        | 266.1528         | 531.3114        | 266.1593         | T    | <b>609.3534</b> | 305.1803        | 591.3298        | 296.1686         | 591.3428        | 296.1751         | 5 |
| 6 | <b>663.4030</b> | 332.2052        | <b>645.3795</b> | <b>323.1934</b>  | <b>645.3925</b> | <b>323.1999</b>  | L    | <b>507.3087</b> | 254.1580        | 489.2851        | 245.1462         | 489.2981        | 245.1527         | 4 |
| 7 | <b>777.4841</b> | 389.2457        | <b>759.4606</b> | <b>380.2339</b>  | <b>759.4736</b> | <b>380.2404</b>  | I    | <b>393.2276</b> | <b>197.1174</b> | <b>375.2040</b> | 188.1056         | <b>375.2170</b> | 188.1122         | 3 |
| 8 | <b>907.5238</b> | 454.2655        | <b>889.5002</b> | 445.2537         | <b>889.5132</b> | 445.2602         | E    | <b>279.1465</b> | 140.0769        | <b>261.1229</b> | 131.0651         | <b>261.1359</b> | 131.0716         | 2 |
| 9 |                 |                 |                 |                  |                 |                  | K    | 149.1069        | 75.0571         | 131.0833        | 66.0453          |                 |                  | 1 |

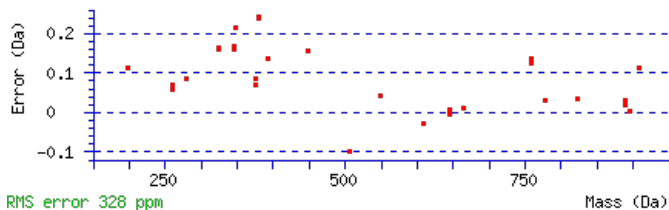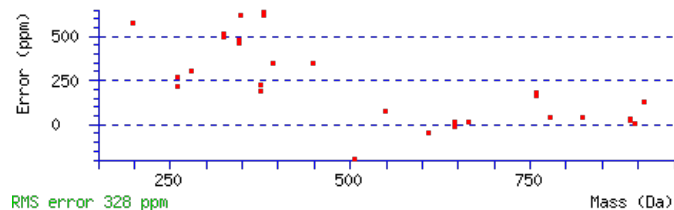

NCBI **BLAST** search of [RALVTLIEK](#)

(Parameters: blastp, nr protein database, expect=20000, no filter, PAM30)

Other BLAST [web gateways](#)

All matches to this query

| Score | Mr(calc) | Delta | Sequence |
|-------|----------|-------|----------|
|       |          |       |          |

**AT2G30860.1**

|      |           |         |                            |
|------|-----------|---------|----------------------------|
| 30.1 | 1054.6161 | 0.0001  | <a href="#">RALVTLIEK</a>  |
| 13.6 | 1054.6183 | -0.0022 | <a href="#">ELVKWLKK</a>   |
| 13.6 | 1054.6161 | 0.0001  | <a href="#">ISLVNKIQK</a>  |
| 13.6 | 1054.6161 | 0.0001  | <a href="#">ITNPKTLKK</a>  |
| 1.5  | 1054.6161 | 0.0001  | <a href="#">KQGLGILVSK</a> |
| 1.3  | 1054.6161 | 0.0001  | <a href="#">ILKLGNKEK</a>  |
| 1.3  | 1054.6161 | 0.0001  | <a href="#">LNIKLSVAGK</a> |
| 1.3  | 1054.6161 | 0.0001  | <a href="#">NIVKIAKEK</a>  |
| 1.3  | 1054.6161 | 0.0001  | <a href="#">TLLRIGEK</a>   |
| 1.3  | 1054.6161 | 0.0001  | <a href="#">TVKVLLNQK</a>  |

**Mascot:** <http://www.matrixscience.com/>

## Peptide View

MS/MS Fragmentation of **QPEYLAIQPFQK**

Found in **AT2G30870.1** in **TAIR\_Arabidopsis**, Symbols: ERD13, ATGSTF4, ATGSTF10 | ATGSTF10 (EARLY DEHYDRATION-INDUCED 13); glutathione transferase | chr:2:13148567-13149469 FORWARD

Match to Query 5236: 1404.688412 from(703.351482,2+) index(6836)

Title: Elution from: 60.000 to 60.000 scan no 8925 cid35.00 polarity:+

Data file 0-2\_3.mgf

Click mouse within plot area to zoom in by factor of two about that point

Or,   to  Da

Label all possible matches  Label matches used for scoring

Show Y-axis

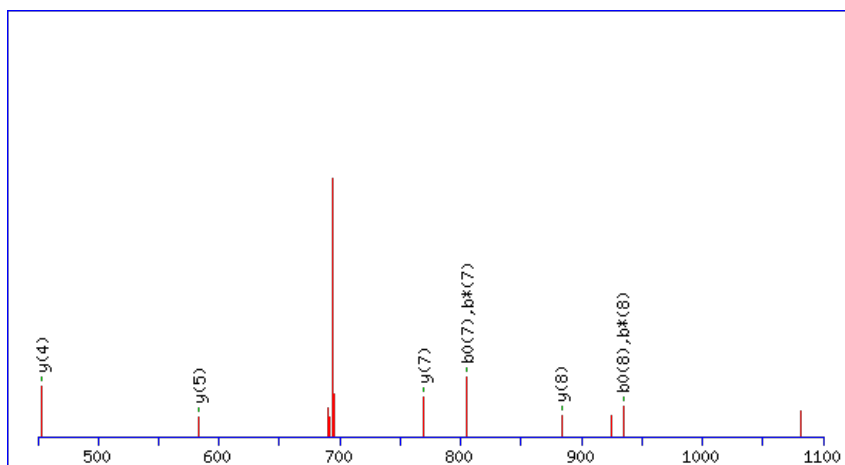

Monoisotopic mass of neutral peptide  $M_r(\text{calc})$ : 1404.6848

Fixed modifications: Carbamidomethyl (C) (apply to specified residues or termini only)

Ions Score: 26 Expect: 0.017

Matches : 8/110 fragment ions using 9 most intense peaks ([help](#))

| #  | b         | b <sup>++</sup> | b <sup>*</sup>  | b <sup>*++</sup> | b <sup>0</sup>  | b <sup>0++</sup> | Seq. | y               | y <sup>++</sup> | y <sup>*</sup> | y <sup>*++</sup> | y <sup>0</sup> | y <sup>0++</sup> | #  |
|----|-----------|-----------------|-----------------|------------------|-----------------|------------------|------|-----------------|-----------------|----------------|------------------|----------------|------------------|----|
| 1  | 131.0599  | 66.0336         | 113.0363        | 57.0218          |                 |                  | Q    |                 |                 |                |                  |                |                  | 12 |
| 2  | 229.1097  | 115.0585        | 211.0861        | 106.0467         |                 |                  | P    | 1275.6394       | 638.3233        | 1257.6158      | 629.3115         | 1257.6288      | 629.3181         | 11 |
| 3  | 359.1493  | 180.0783        | 341.1258        | 171.0665         | 341.1388        | 171.0730         | E    | 1177.5896       | 589.2984        | 1159.5660      | 580.2866         | 1159.5790      | 580.2932         | 10 |
| 4  | 523.2097  | 262.1085        | 505.1861        | 253.0967         | 505.1991        | 253.1032         | Y    | 1047.5500       | 524.2786        | 1029.5264      | 515.2668         |                |                  | 9  |
| 5  | 637.2908  | 319.1490        | 619.2672        | 310.1373         | 619.2802        | 310.1438         | L    | <b>883.4896</b> | 442.2484        | 865.4660       | 433.2367         |                |                  | 8  |
| 6  | 709.3250  | 355.1661        | 691.3014        | 346.1543         | 691.3144        | 346.1608         | A    | <b>769.4085</b> | 385.2079        | 751.3849       | 376.1961         |                |                  | 7  |
| 7  | 823.4061  | 412.2067        | <b>805.3825</b> | 403.1949         | <b>805.3955</b> | 403.2014         | I    | 697.3744        | 349.1908        | 679.3508       | 340.1790         |                |                  | 6  |
| 8  | 953.4587  | 477.2330        | <b>935.4351</b> | 468.2212         | <b>935.4481</b> | 468.2277         | Q    | <b>583.2933</b> | 292.1503        | 565.2697       | 283.1385         |                |                  | 5  |
| 9  | 1051.5085 | 526.2579        | 1033.4849       | 517.2461         | 1033.4979       | 517.2526         | P    | <b>453.2406</b> | 227.1239        | 435.2170       | 218.1122         |                |                  | 4  |
| 10 | 1199.5740 | 600.2906        | 1181.5504       | 591.2788         | 1181.5634       | 591.2853         | F    | 355.1908        | 178.0990        | 337.1672       | 169.0873         |                |                  | 3  |
| 11 | 1257.5925 | 629.2999        | 1239.5689       | 620.2881         | 1239.5819       | 620.2946         | G    | 207.1254        | 104.0663        | 189.1018       | 95.0545          |                |                  | 2  |
| 12 |           |                 |                 |                  |                 |                  | K    | 149.1069        | 75.0571         | 131.0833       | 66.0453          |                |                  | 1  |

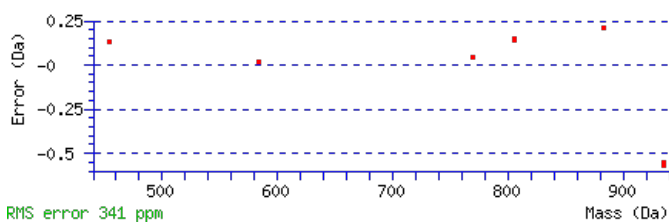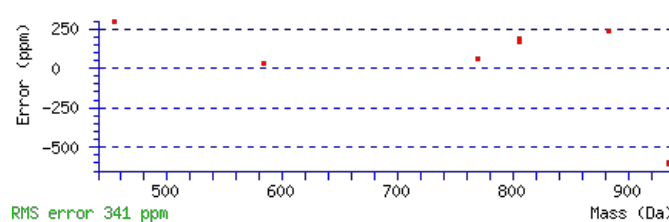

NCBI BLAST search of **QPEYLAIQPFQK**

(Parameters: blastp, nr protein database, expect=20000, no filter, PAM30)

Other BLAST [web gateways](#)

AT2G30870.1

All matches to this query

| Score | Mr(calc)  | Delta   | Sequence                      |
|-------|-----------|---------|-------------------------------|
| 26.2  | 1404.6848 | 0.0036  | <a href="#">QPEYLAIQPF GK</a> |
| 5.5   | 1404.6859 | 0.0025  | <a href="#">QQLQALMETLSK</a>  |
| 4.8   | 1404.6908 | -0.0024 | <a href="#">SMIRSGYLP HVK</a> |

Mascot: <http://www.matrixscience.com/>

**Peptide View**MS/MS Fragmentation of **TEAAAAPDKASGVSTQAK**Found in **AT2G30930.1** in **TAIR\_Arabidopsis**, Symbols: | similar to unknown protein [Arabidopsis thaliana] (TAIR:AT1G06540.1) | chr2:13169535-13170233 FORWARD

Match to Query 7626: 1701.853215 from(568.291681,3+) index(4959)

Title: Elution from: 47.757 to 47.757 scan no 6372 cid35.00 polarity:+

Data file D1d-2\_2.mgf

Click mouse within plot area to zoom in by factor of two about that point

Or,   to  Da Label all possible matches  Label matches used for scoring Show Y-axis 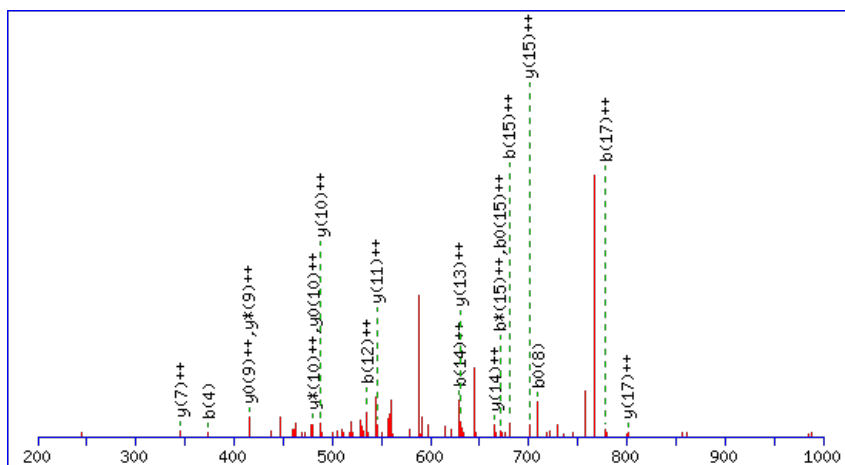Monoisotopic mass of neutral peptide  $M_r(\text{calc})$ : 1701.8533

Fixed modifications: Carbamidomethyl (C) (apply to specified residues or termini only)

Ions Score: 20 Expect: 0.046

Matches : 19/182 fragment ions using 43 most intense peaks ([help](#))

| #  | b         | b <sup>++</sup> | b <sup>*</sup> | b <sup>*++</sup> | b <sup>0</sup> | b <sup>0++</sup> | Seq. | y         | y <sup>++</sup> | y <sup>*</sup> | y <sup>*++</sup> | y <sup>0</sup> | y <sup>0++</sup> | #  |
|----|-----------|-----------------|----------------|------------------|----------------|------------------|------|-----------|-----------------|----------------|------------------|----------------|------------------|----|
| 1  | 102.0550  | 51.5311         |                |                  | 84.0444        | 42.5258          | T    |           |                 |                |                  |                |                  | 18 |
| 2  | 231.0975  | 116.0524        |                |                  | 213.0870       | 107.0471         | E    | 1601.8129 | 801.4101        | 1584.7864      | 792.8968         | 1583.8024      | 792.4048         | 17 |
| 3  | 302.1347  | 151.5710        |                |                  | 284.1241       | 142.5657         | A    | 1472.7703 | 736.8888        | 1455.7438      | 728.3755         | 1454.7598      | 727.8835         | 16 |
| 4  | 373.1718  | 187.0895        |                |                  | 355.1612       | 178.0842         | A    | 1401.7332 | 701.3703        | 1384.7067      | 692.8570         | 1383.7227      | 692.3650         | 15 |
| 5  | 444.2089  | 222.6081        |                |                  | 426.1983       | 213.6028         | A    | 1330.6961 | 665.8517        | 1313.6696      | 657.3384         | 1312.6856      | 656.8464         | 14 |
| 6  | 515.2460  | 258.1266        |                |                  | 497.2354       | 249.1214         | A    | 1259.6590 | 630.3331        | 1242.6325      | 621.8199         | 1241.6484      | 621.3279         | 13 |
| 7  | 612.2988  | 306.6530        |                |                  | 594.2882       | 297.6477         | P    | 1188.6219 | 594.8146        | 1171.5953      | 586.3013         | 1170.6113      | 585.8093         | 12 |
| 8  | 727.3257  | 364.1665        |                |                  | 709.3151       | 355.1612         | D    | 1091.5691 | 546.2882        | 1074.5426      | 537.7749         | 1073.5586      | 537.2829         | 11 |
| 9  | 855.4207  | 428.2140        | 838.3941       | 419.7007         | 837.4101       | 419.2087         | K    | 976.5422  | 488.7747        | 959.5156       | 480.2615         | 958.5316       | 479.7694         | 10 |
| 10 | 926.4578  | 463.7325        | 909.4312       | 455.2193         | 908.4472       | 454.7272         | A    | 848.4472  | 424.7272        | 831.4207       | 416.2140         | 830.4367       | 415.7220         | 9  |
| 11 | 1013.4898 | 507.2485        | 996.4633       | 498.7353         | 995.4793       | 498.2433         | S    | 777.4101  | 389.2087        | 760.3836       | 380.6954         | 759.3995       | 380.2034         | 8  |
| 12 | 1070.5113 | 535.7593        | 1053.4847      | 527.2460         | 1052.5007      | 526.7540         | G    | 690.3781  | 345.6927        | 673.3515       | 337.1794         | 672.3675       | 336.6874         | 7  |
| 13 | 1169.5797 | 585.2935        | 1152.5531      | 576.7802         | 1151.5691      | 576.2882         | V    | 633.3566  | 317.1819        | 616.3301       | 308.6687         | 615.3461       | 308.1767         | 6  |
| 14 | 1256.6117 | 628.8095        | 1239.5852      | 620.2962         | 1238.6012      | 619.8042         | S    | 534.2882  | 267.6477        | 517.2617       | 259.1345         | 516.2776       | 258.6425         | 5  |
| 15 | 1357.6594 | 679.3333        | 1340.6329      | 670.8201         | 1339.6488      | 670.3281         | T    | 447.2562  | 224.1317        | 430.2296       | 215.6185         | 429.2456       | 215.1264         | 4  |
| 16 | 1485.7180 | 743.3626        | 1468.6914      | 734.8494         | 1467.7074      | 734.3573         | Q    | 346.2085  | 173.6079        | 329.1819       | 165.0946         |                |                  | 3  |
| 17 | 1556.7551 | 778.8812        | 1539.7285      | 770.3679         | 1538.7445      | 769.8759         | A    | 218.1499  | 109.5786        | 201.1234       | 101.0653         |                |                  | 2  |
| 18 |           |                 |                |                  |                |                  | K    | 147.1128  | 74.0600         | 130.0863       | 65.5468          |                |                  | 1  |

AT2G30930.1

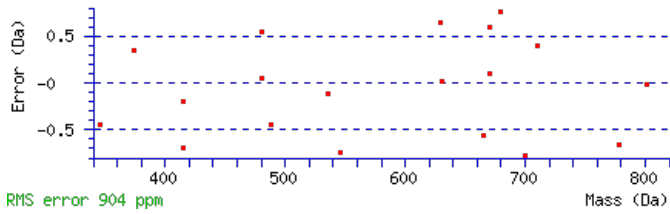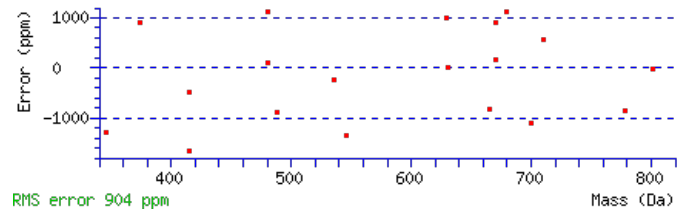

NCBI **BLAST** search of [TEAAAAPDKASGVSTQAK](#)  
(Parameters: blastp, nr protein database, expect=20000, no filter, PAM30)  
Other BLAST [web gateways](#)

**All matches to this query**

| Score | Mr(calc)  | Delta   | Sequence                           |
|-------|-----------|---------|------------------------------------|
| 19.6  | 1701.8533 | -0.0001 | <a href="#">TEAAAAPDKASGVSTQAK</a> |
| 7.2   | 1701.8547 | -0.0014 | <a href="#">SVDIINPNGNARGQYR</a>   |
| 2.8   | 1701.8508 | 0.0024  | <a href="#">KSDDLWKHCVSISK</a>     |
| 1.2   | 1701.8573 | -0.0041 | <a href="#">TSLEYVVGKQSNSVK</a>    |
| 0.9   | 1701.8508 | 0.0024  | <a href="#">GLIRDWDAMEDLLR</a>     |
| 0.4   | 1701.8508 | 0.0024  | <a href="#">AIGESTECCGIPVWRK</a>   |
| 0.2   | 1701.8573 | -0.0041 | <a href="#">HELLYSEDEVIISR</a>     |

Mascot: <http://www.matrixscience.com/>

## Peptide View

### MS/MS Fragmentation of QVSVDVPDVK

Found in **AT2G30950.1** in **TAIR\_Arabidopsis**, Symbols: FTSH2, VAR2 | VAR2 (VARIEGATED 2); ATP-dependent peptidase/ ATPase/ metallopeptidase/ zinc ion binding | chr2:13181769-13184141 FORWARD

Match to Query 3171: 1084.573878 from(543.294215,2+) index(3572)

Title: Elution from: 34.318 to 34.318 scan no 4455 cid35.00 polarity:+

Data file C7-1\_2.mgf

Click mouse within plot area to zoom in by factor of two about that point

Or,   to  Da

Label all possible matches  Label matches used for scoring

Show Y-axis

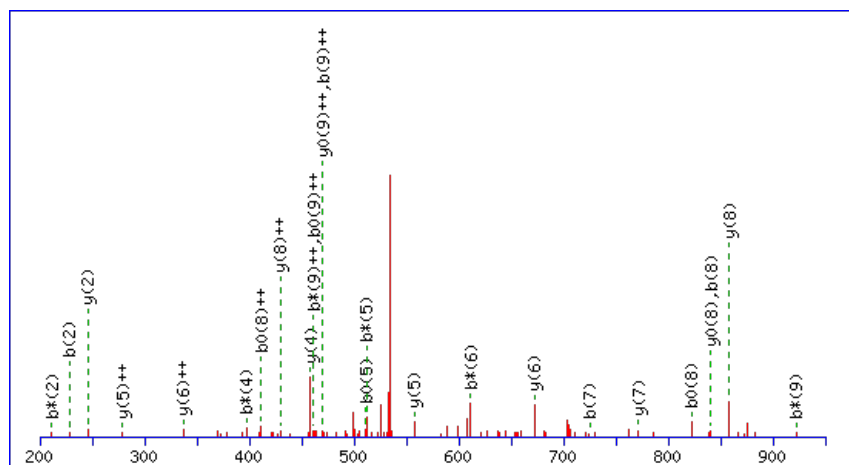

Monoisotopic mass of neutral peptide Mr(calc): 1084.5765

Fixed modifications: Carbamidomethyl (C) (apply to specified residues or termini only)

Ions Score: 32 Expect: 0.0013

Matches : 25/100 fragment ions using 46 most intense peaks ([help](#))

| #  | b               | b <sup>++</sup> | b*              | b <sup>*++</sup> | b <sup>0</sup>  | b <sup>0++</sup> | Seq. | y               | y <sup>++</sup> | y*       | y <sup>*++</sup> | y <sup>0</sup>  | y <sup>0++</sup> | #  |
|----|-----------------|-----------------|-----------------|------------------|-----------------|------------------|------|-----------------|-----------------|----------|------------------|-----------------|------------------|----|
| 1  | 129.0659        | 65.0366         | 112.0393        | 56.5233          |                 |                  | Q    |                 |                 |          |                  |                 |                  | 10 |
| 2  | <b>228.1343</b> | 114.5708        | <b>211.1077</b> | 106.0575         |                 |                  | V    | 957.5251        | 479.2662        | 940.4986 | 470.7529         | 939.5146        | <b>470.2609</b>  | 9  |
| 3  | 315.1663        | 158.0868        | 298.1397        | 149.5735         | 297.1557        | 149.0815         | S    | <b>858.4567</b> | <b>429.7320</b> | 841.4302 | 421.2187         | <b>840.4462</b> | 420.7267         | 8  |
| 4  | 414.2347        | 207.6210        | <b>397.2082</b> | 199.1077         | 396.2241        | 198.6157         | V    | <b>771.4247</b> | 386.2160        | 754.3981 | 377.7027         | 753.4141        | 377.2107         | 7  |
| 5  | 529.2617        | 265.1345        | <b>512.2351</b> | 256.6212         | <b>511.2511</b> | 256.1292         | D    | <b>672.3563</b> | <b>336.6818</b> | 655.3297 | 328.1685         | 654.3457        | 327.6765         | 6  |
| 6  | 628.3301        | 314.6687        | <b>611.3035</b> | 306.1554         | 610.3195        | 305.6634         | V    | <b>557.3293</b> | <b>279.1683</b> | 540.3028 | 270.6550         | 539.3188        | 270.1630         | 5  |
| 7  | <b>725.3828</b> | 363.1951        | 708.3563        | 354.6818         | 707.3723        | 354.1898         | P    | <b>458.2609</b> | 229.6341        | 441.2344 | 221.1208         | 440.2504        | 220.6288         | 4  |
| 8  | <b>840.4098</b> | 420.7085        | 823.3832        | 412.1953         | <b>822.3992</b> | <b>411.7032</b>  | D    | 361.2082        | 181.1077        | 344.1816 | 172.5944         | 343.1976        | 172.1024         | 3  |
| 9  | 939.4782        | <b>470.2427</b> | <b>922.4516</b> | <b>461.7295</b>  | 921.4676        | <b>461.2374</b>  | V    | <b>246.1812</b> | 123.5942        | 229.1547 | 115.0810         |                 |                  | 2  |
| 10 |                 |                 |                 |                  |                 |                  | K    | 147.1128        | 74.0600         | 130.0863 | 65.5468          |                 |                  | 1  |

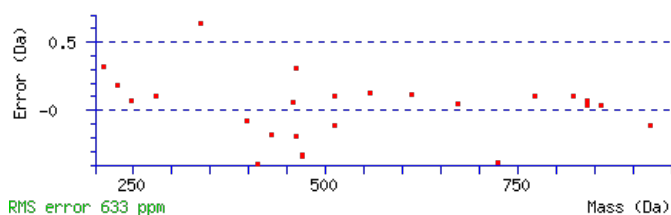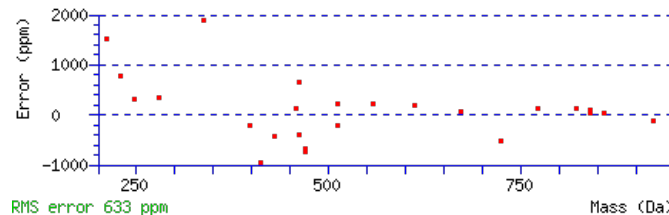

### NCBI BLAST search of QVSVDVPDVK

(Parameters: blastp, nr protein database, expect=20000, no filter, PAM30)

Other BLAST [web gateways](#)

All matches to this query

AT2G30950.1

| Score | Mr(calc)  | Delta   | Sequence                    |
|-------|-----------|---------|-----------------------------|
| 32.1  | 1084.5765 | -0.0026 | <a href="#">QVSVDVPDVK</a>  |
| 6.3   | 1084.5737 | 0.0002  | <a href="#">ADNLAAQRAR</a>  |
| 0.8   | 1084.5737 | 0.0001  | <a href="#">RASGGINSAPR</a> |

Mascot: <http://www.matrixscience.com/>



**Peptide View**MS/MS Fragmentation of **VGCLSVLCEDPK**Found in **AT2G30970.1** in **TAIR\_Arabidopsis**, Symbols: ASP1 | ASP1 (ASPARTATE AMINOTRANSFERASE 1) | chr2:13186089-13188763  
FORWARD

Match to Query 5530: 1375.644626 from(688.829589,2+) index(5032)

Title: Elution from: 45.655 to 45.655 scan no 6314 cid35.00 polarity:+

Data file 0-2\_1.mgf

Click mouse within plot area to zoom in by factor of two about that point

Or,   to  Da Label all possible matches  Label matches used for scoring Show Y-axis 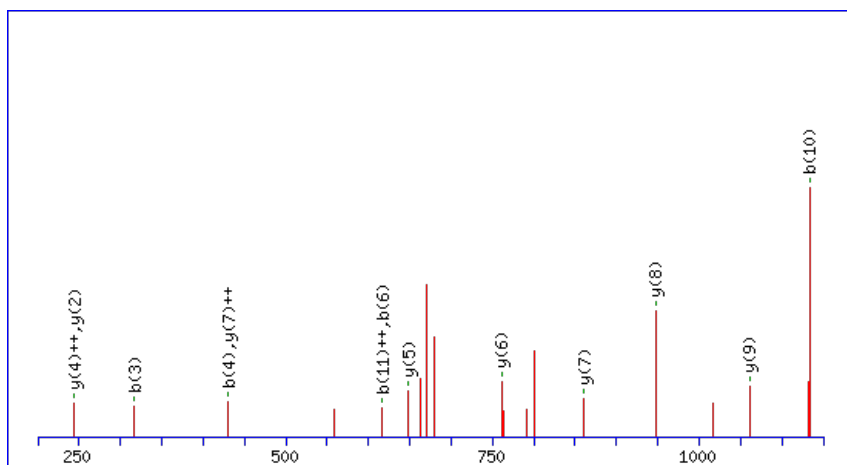Monoisotopic mass of neutral peptide  $M_r(\text{calc})$ : 1375.6476

Fixed modifications: Carbamidomethyl (C) (apply to specified residues or termini only)

Ions Score: 38 Expect: 0.00036

Matches : 13/98 fragment ions using 21 most intense peaks ([help](#))

| #  | b                | b <sup>++</sup> | b <sup>0</sup> | b <sup>0++</sup> | Seq. | y                | y <sup>++</sup> | y*        | y <sup>*++</sup> | y <sup>0</sup> | y <sup>0++</sup> | #  |
|----|------------------|-----------------|----------------|------------------|------|------------------|-----------------|-----------|------------------|----------------|------------------|----|
| 1  | 100.0757         | 50.5415         |                |                  | V    |                  |                 |           |                  |                |                  | 12 |
| 2  | 157.0972         | 79.0522         |                |                  | G    | 1277.5864        | 639.2969        | 1260.5599 | 630.7836         | 1259.5759      | 630.2916         | 11 |
| 3  | <b>317.1278</b>  | 159.0675        |                |                  | C    | 1220.5650        | 610.7861        | 1203.5384 | 602.2728         | 1202.5544      | 601.7808         | 10 |
| 4  | <b>430.2119</b>  | 215.6096        |                |                  | L    | <b>1060.5343</b> | 530.7708        | 1043.5078 | 522.2575         | 1042.5238      | 521.7655         | 9  |
| 5  | 517.2439         | 259.1256        | 499.2333       | 250.1203         | S    | <b>947.4503</b>  | 474.2288        | 930.4237  | 465.7155         | 929.4397       | 465.2235         | 8  |
| 6  | <b>616.3123</b>  | 308.6598        | 598.3017       | 299.6545         | V    | <b>860.4182</b>  | <b>430.7128</b> | 843.3917  | 422.1995         | 842.4077       | 421.7075         | 7  |
| 7  | 729.3964         | 365.2018        | 711.3858       | 356.1965         | L    | <b>761.3498</b>  | 381.1785        | 744.3233  | 372.6653         | 743.3393       | 372.1733         | 6  |
| 8  | 889.4270         | 445.2171        | 871.4165       | 436.2119         | C    | <b>648.2658</b>  | 324.6365        | 631.2392  | 316.1232         | 630.2552       | 315.6312         | 5  |
| 9  | 1018.4696        | 509.7384        | 1000.4591      | 500.7332         | E    | 488.2351         | <b>244.6212</b> | 471.2086  | 236.1079         | 470.2245       | 235.6159         | 4  |
| 10 | <b>1133.4966</b> | 567.2519        | 1115.4860      | 558.2466         | D    | 359.1925         | 180.0999        | 342.1660  | 171.5866         | 341.1819       | 171.0946         | 3  |
| 11 | 1230.5493        | <b>615.7783</b> | 1212.5388      | 606.7730         | P    | <b>244.1656</b>  | 122.5864        | 227.1390  | 114.0731         |                |                  | 2  |
| 12 |                  |                 |                |                  | K    | 147.1128         | 74.0600         | 130.0863  | 65.5468          |                |                  | 1  |

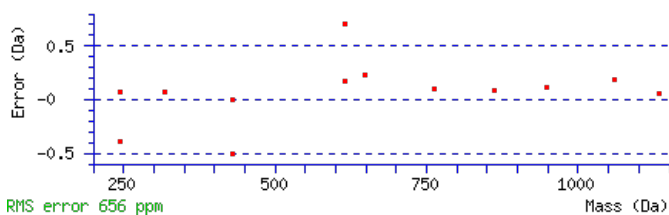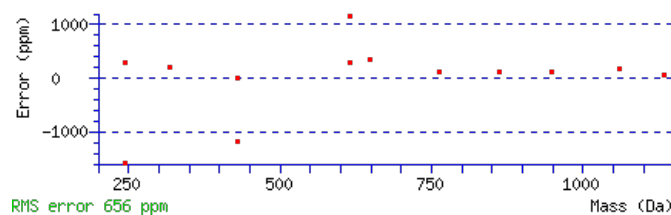NCBI BLAST search of **VGCLSVLCEDPK**

(Parameters: blastp, nr protein database, expect=20000, no filter, PAM30)

Other BLAST [web gateways](#)

AT2G30970.1

All matches to this query

| Score | Mr(calc)  | Delta   | Sequence                     |
|-------|-----------|---------|------------------------------|
| 38.2  | 1375.6476 | -0.0030 | <a href="#">VGCLSVLCEDPK</a> |
| 11.0  | 1375.6476 | -0.0029 | <a href="#">DENQMPLLCLK</a>  |
| 2.7   | 1375.6442 | 0.0004  | <a href="#">GGPECDSLFIGK</a> |

Mascot: <http://www.matrixscience.com/>

**Peptide View**MS/MS Fragmentation of **RLLLEDLR**Found in **AT2G31240.1** in **TAIR\_Arabidopsis**, Symbols: | tetratricopeptide repeat (TPR)-containing protein | chr2:13324647-13326595 REVERSE

Match to Query 1692: 913.534014 from(305.518614,3+) index(3261)

Title: Elution from: 32.163 to 32.163 scan no 4054 cid35.00 polarity:+

Data file D6h-1\_3.mgf

Click mouse within plot area to zoom in by factor of two about that point

Or,   to  Da Label all possible matches  Label matches used for scoring Show Y-axis 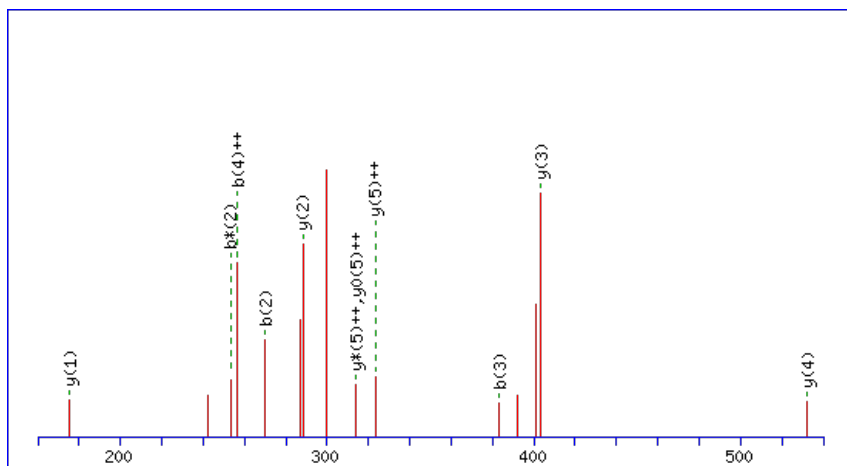Monoisotopic mass of neutral peptide **Mr(calc)**: 913.5345

Fixed modifications: Carbamidomethyl (C) (apply to specified residues or termini only)

Ions Score: 24 **Expect**: 0.024Matches : 12/62 fragment ions using 15 most intense peaks ([help](#))

| # | b               | b <sup>++</sup> | b*              | b <sup>*++</sup> | b <sup>0</sup> | b <sup>0++</sup> | Seq. | y               | y <sup>++</sup> | y*       | y <sup>*++</sup> | y <sup>0</sup> | y <sup>0++</sup> | # |
|---|-----------------|-----------------|-----------------|------------------|----------------|------------------|------|-----------------|-----------------|----------|------------------|----------------|------------------|---|
| 1 | 157.1084        | 79.0578         | 140.0818        | 70.5446          |                |                  | R    |                 |                 |          |                  |                |                  | 7 |
| 2 | <b>270.1925</b> | 135.5999        | <b>253.1659</b> | 127.0866         |                |                  | L    | 758.4407        | 379.7240        | 741.4141 | 371.2107         | 740.4301       | 370.7187         | 6 |
| 3 | <b>383.2765</b> | 192.1419        | 366.2500        | 183.6286         |                |                  | L    | 645.3566        | <b>323.1819</b> | 628.3301 | <b>314.6687</b>  | 627.3461       | <b>314.1767</b>  | 5 |
| 4 | 512.3191        | <b>256.6632</b> | 495.2926        | 248.1499         | 494.3085       | 247.6579         | E    | <b>532.2726</b> | 266.6399        | 515.2460 | 258.1266         | 514.2620       | 257.6346         | 4 |
| 5 | 627.3461        | <b>314.1767</b> | 610.3195        | 305.6634         | 609.3355       | 305.1714         | D    | <b>403.2300</b> | 202.1186        | 386.2034 | 193.6053         | 385.2194       | 193.1133         | 3 |
| 6 | 740.4301        | 370.7187        | 723.4036        | 362.2054         | 722.4196       | 361.7134         | L    | <b>288.2030</b> | 144.6051        | 271.1765 | 136.0919         |                |                  | 2 |
| 7 |                 |                 |                 |                  |                |                  | R    | <b>175.1190</b> | 88.0631         | 158.0924 | 79.5498          |                |                  | 1 |

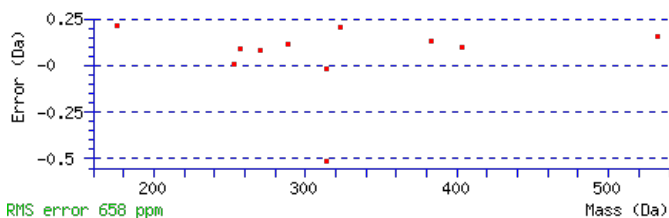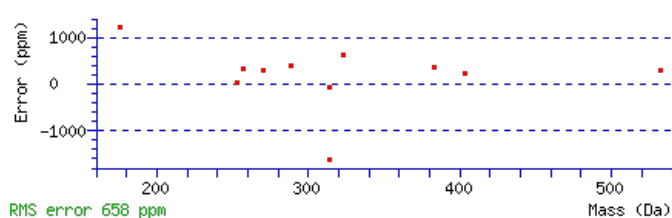NCBI **BLAST** search of [RLLLEDLR](#)

(Parameters: blastp, nr protein database, expect=20000, no filter, PAM30)

Other BLAST [web gateways](#)**All matches to this query**

| Score | Mr(calc) | Delta   | Sequence                 |
|-------|----------|---------|--------------------------|
| 24.4  | 913.5345 | -0.0005 | <a href="#">RLLLEDLR</a> |
| 13.6  | 913.5345 | -0.0005 | <a href="#">LRLVEER</a>  |
| 11.7  | 913.5345 | -0.0005 | <a href="#">NNIVVSLR</a> |

## AT2G31240.1

|     |          |         |                          |
|-----|----------|---------|--------------------------|
| 8.8 | 913.5345 | -0.0005 | <a href="#">IDREILR</a>  |
| 8.6 | 913.5345 | -0.0005 | <a href="#">LREEVIR</a>  |
| 7.3 | 913.5345 | -0.0005 | <a href="#">RVEELLR</a>  |
| 7.1 | 913.5345 | -0.0005 | <a href="#">LIDREIR</a>  |
| 6.5 | 913.5345 | -0.0005 | <a href="#">NQLASLLR</a> |
| 4.4 | 913.5345 | -0.0005 | <a href="#">GTQLNLR</a>  |
| 4.1 | 913.5345 | -0.0005 | <a href="#">KKTSSHVK</a> |

**Mascot:** <http://www.matrixscience.com/>

## Peptide View

MS/MS Fragmentation of **NPSADMLLRPDELNLDLIR**

Found in **AT2G31390.1** in **TAIR\_Arabidopsis**, Symbols: | pfkB-type carbohydrate kinase family protein | chr2:13390712-13393193 REVERSE

Match to Query 9547: 2194.139754 from(732.387194,3+) index(9749)

Title: Elution from 90.491 to 90.491 scan no 13626 cid35.00 polarity:+

Data file D12h-3\_2.mgf

Click mouse within plot area to zoom in by factor of two about that point

Or, Plot from  to  Da

Label all possible matches  Label matches used for scoring

Show Y-axis

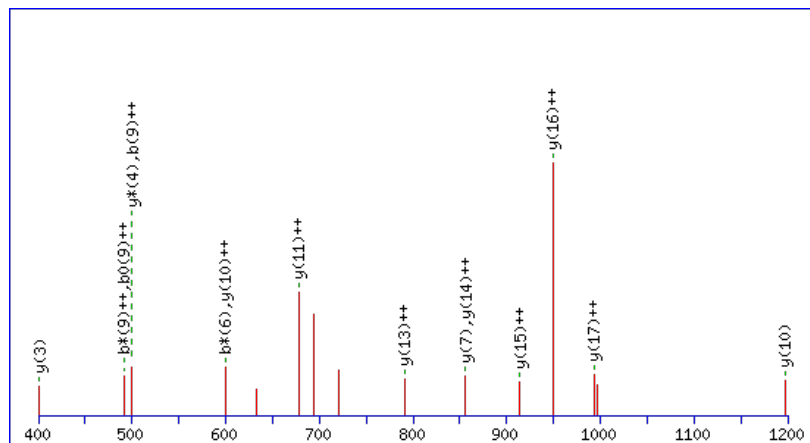

Monoisotopic mass of neutral peptide  $M_r(\text{calc})$ : 2194.1416

Fixed modifications: Carbamidomethyl (C) (apply to specified residues or termini only)

Ions Score: 49 Expect: 5e-005

Matches : 15/206 fragment ions using 14 most intense peaks ([help](#))

| #  | b         | b <sup>++</sup> | b <sup>*</sup> | b <sup>*++</sup> | b <sup>0</sup> | b <sup>0++</sup> | Seq. | y         | y <sup>++</sup> | y <sup>*</sup> | y <sup>*++</sup> | y <sup>0</sup> | y <sup>0++</sup> | #  |
|----|-----------|-----------------|----------------|------------------|----------------|------------------|------|-----------|-----------------|----------------|------------------|----------------|------------------|----|
| 1  | 115.0502  | 58.0287         | 98.0237        | 49.5155          |                |                  | N    |           |                 |                |                  |                |                  | 19 |
| 2  | 212.1030  | 106.5551        | 195.0764       | 98.0418          |                |                  | P    | 2081.1060 | 1041.0566       | 2064.0794      | 1032.5433        | 2063.0954      | 1032.0513        | 18 |
| 3  | 299.1350  | 150.0711        | 282.1084       | 141.5579         | 281.1244       | 141.0659         | S    | 1984.0532 | 992.5302        | 1967.0266      | 984.0170         | 1966.0426      | 983.5249         | 17 |
| 4  | 370.1721  | 185.5897        | 353.1456       | 177.0764         | 352.1615       | 176.5844         | A    | 1897.0212 | 949.0142        | 1879.9946      | 940.5009         | 1879.0106      | 940.0089         | 16 |
| 5  | 485.1991  | 243.1032        | 468.1725       | 234.5899         | 467.1885       | 234.0979         | D    | 1825.9840 | 913.4957        | 1808.9575      | 904.9824         | 1807.9735      | 904.4904         | 15 |
| 6  | 616.2395  | 308.6234        | 599.2130       | 300.1101         | 598.2290       | 299.6181         | M    | 1710.9571 | 855.9822        | 1693.9306      | 847.4689         | 1692.9465      | 846.9769         | 14 |
| 7  | 729.3236  | 365.1654        | 712.2971       | 356.6522         | 711.3130       | 356.1602         | L    | 1579.9166 | 790.4619        | 1562.8901      | 781.9487         | 1561.9061      | 781.4567         | 13 |
| 8  | 842.4077  | 421.7075        | 825.3811       | 413.1942         | 824.3971       | 412.7022         | L    | 1466.8326 | 733.9199        | 1449.8060      | 725.4066         | 1448.8220      | 724.9146         | 12 |
| 9  | 998.5088  | 499.7580        | 981.4822       | 491.2448         | 980.4982       | 490.7527         | R    | 1353.7485 | 677.3779        | 1336.7219      | 668.8646         | 1335.7379      | 668.3726         | 11 |
| 10 | 1095.5615 | 548.2844        | 1078.5350      | 539.7711         | 1077.5510      | 539.2791         | P    | 1197.6474 | 599.3273        | 1180.6208      | 590.8141         | 1179.6368      | 590.3220         | 10 |
| 11 | 1210.5885 | 605.7979        | 1193.5619      | 597.2846         | 1192.5779      | 596.7926         | D    | 1100.5946 | 550.8009        | 1083.5681      | 542.2877         | 1082.5840      | 541.7957         | 9  |
| 12 | 1339.6311 | 670.3192        | 1322.6045      | 661.8059         | 1321.6205      | 661.3139         | E    | 985.5677  | 493.2875        | 968.5411       | 484.7742         | 967.5571       | 484.2822         | 8  |
| 13 | 1452.7151 | 726.8612        | 1435.6886      | 718.3479         | 1434.7046      | 717.8559         | L    | 856.5251  | 428.7662        | 839.4985       | 420.2529         | 838.5145       | 419.7609         | 7  |
| 14 | 1566.7581 | 783.8827        | 1549.7315      | 775.3694         | 1548.7475      | 774.8774         | N    | 743.4410  | 372.2241        | 726.4145       | 363.7109         | 725.4304       | 363.2189         | 6  |
| 15 | 1679.8421 | 840.4247        | 1662.8156      | 831.9114         | 1661.8316      | 831.4194         | L    | 629.3981  | 315.2027        | 612.3715       | 306.6894         | 611.3875       | 306.1974         | 5  |
| 16 | 1794.8691 | 897.9382        | 1777.8425      | 889.4249         | 1776.8585      | 888.9329         | D    | 516.3140  | 258.6606        | 499.2875       | 250.1474         | 498.3035       | 249.6554         | 4  |
| 17 | 1907.9531 | 954.4802        | 1890.9266      | 945.9669         | 1889.9426      | 945.4749         | L    | 401.2871  | 201.1472        | 384.2605       | 192.6339         |                |                  | 3  |
| 18 | 2021.0372 | 1011.0222       | 2004.0107      | 1002.5090        | 2003.0266      | 1002.0170        | I    | 288.2030  | 144.6051        | 271.1765       | 136.0919         |                |                  | 2  |
| 19 |           |                 |                |                  |                |                  | R    | 175.1190  | 88.0631         | 158.0924       | 79.5498          |                |                  | 1  |

# AT2G31390.1

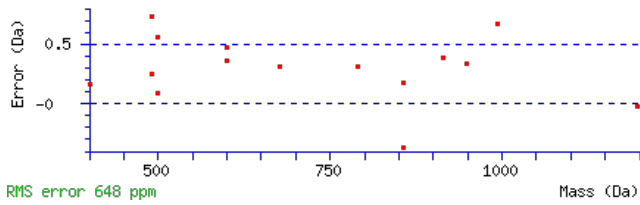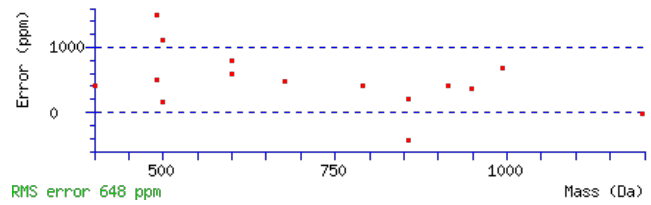

NCBI BLAST search of [NPSADMLLRPDELNLDLIR](#)  
(Parameters: blastp, nr protein database, expect=20000, no filter, PAM30)  
Other BLAST [web gateways](#)

## All matches to this query

| Score | Mr(calc)  | Delta   | Sequence                             |
|-------|-----------|---------|--------------------------------------|
| 49.0  | 2194.1416 | -0.0018 | <a href="#">NPSADMLLRPDELNLDLIR</a>  |
| 5.4   | 2194.1344 | 0.0054  | <a href="#">ALDLMGDSLEFLAKWALSAK</a> |
| 0.2   | 2194.1344 | 0.0054  | <a href="#">FMIEEDHTVATFIKLGSK</a>   |
| 0.2   | 2194.1456 | -0.0058 | <a href="#">RGMWELSVANALIVLYSK</a>   |

Mascot: <http://www.matrixscience.com/>

## Peptide View

### MS/MS Fragmentation of **SIYDFTVK**

Found in **AT2G31570.1** in **TAIR\_Arabidopsis**, Symbols: ATGPX2 | ATGPX2 (GLUTATHIONE PEROXIDASE 2); glutathione peroxidase | chr2:13445288-13446852 REVERSE

Match to Query 2093: 971.496476 from(486.755514,2+) index(5489)

Title: Elution from: 48.470 to 48.470 scan no 6956 cid35.00 polarity:+

Data file 0-3\_3.mgf

Click mouse within plot area to zoom in by factor of two about that point

Or,   to  Da

Label all possible matches  Label matches used for scoring

Show Y-axis

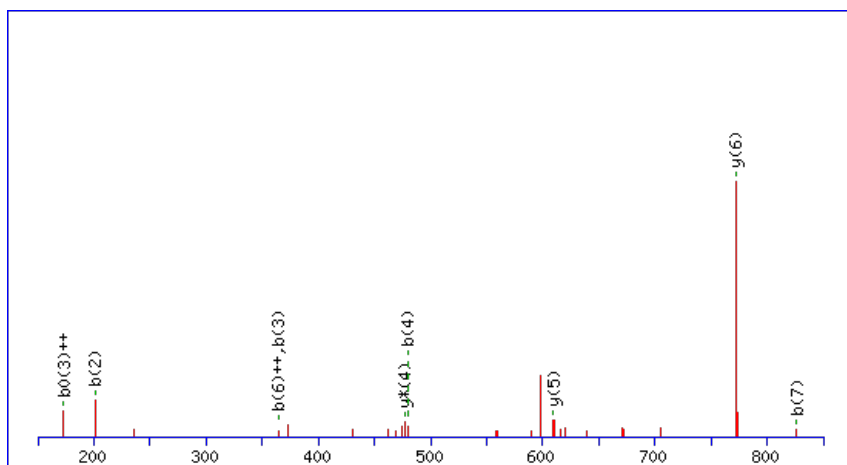

Monoisotopic mass of neutral peptide  $M_r(\text{calc})$ : 971.4964

Fixed modifications: Carbamidomethyl (C) (apply to specified residues or termini only)

Ions Score: 18 Expect: 0.024

Matches : 9/66 fragment ions using 22 most intense peaks ([help](#))

| # | b               | b <sup>++</sup> | b <sup>0</sup> | b <sup>0++</sup> | Seq. | y               | y <sup>++</sup> | y*              | y <sup>*++</sup> | y <sup>0</sup> | y <sup>0++</sup> | # |
|---|-----------------|-----------------|----------------|------------------|------|-----------------|-----------------|-----------------|------------------|----------------|------------------|---|
| 1 | 88.0393         | 44.5233         | 70.0287        | 35.5180          | S    |                 |                 |                 |                  |                |                  | 8 |
| 2 | <b>201.1234</b> | 101.0653        | 183.1128       | 92.0600          | I    | 885.4716        | 443.2395        | 868.4451        | 434.7262         | 867.4611       | 434.2342         | 7 |
| 3 | <b>364.1867</b> | 182.5970        | 346.1761       | <b>173.5917</b>  | Y    | <b>772.3876</b> | 386.6974        | 755.3610        | 378.1842         | 754.3770       | 377.6921         | 6 |
| 4 | <b>479.2136</b> | 240.1105        | 461.2031       | 231.1052         | D    | <b>609.3243</b> | 305.1658        | 592.2977        | 296.6525         | 591.3137       | 296.1605         | 5 |
| 5 | 626.2821        | 313.6447        | 608.2715       | 304.6394         | F    | 494.2973        | 247.6523        | <b>477.2708</b> | 239.1390         | 476.2867       | 238.6470         | 4 |
| 6 | 727.3297        | <b>364.1685</b> | 709.3192       | 355.1632         | T    | 347.2289        | 174.1181        | 330.2023        | 165.6048         | 329.2183       | 165.1128         | 3 |
| 7 | <b>826.3981</b> | 413.7027        | 808.3876       | 404.6974         | V    | 246.1812        | 123.5942        | 229.1547        | 115.0810         |                |                  | 2 |
| 8 |                 |                 |                |                  | K    | 147.1128        | 74.0600         | 130.0863        | 65.5468          |                |                  | 1 |

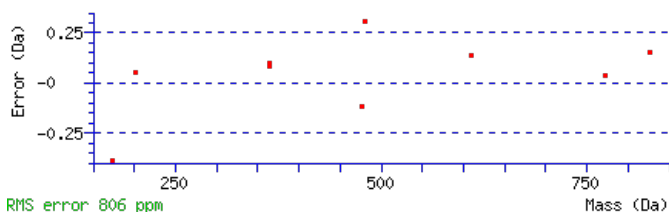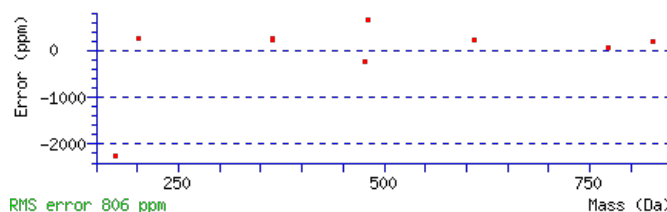

NCBI BLAST search of [SIYDFTVK](#)

(Parameters: blastp, nr protein database, expect=20000, no filter, PAM30)

Other BLAST [web gateways](#)

### All matches to this query

| Score | $M_r(\text{calc})$ | Delta  | Sequence                 |
|-------|--------------------|--------|--------------------------|
| 18.4  | 971.4964           | 0.0001 | <a href="#">SIYDFTVK</a> |

## AT2G31570.1

|      |          |        |                           |
|------|----------|--------|---------------------------|
| 18.4 | 971.4964 | 0.0001 | <a href="#">SLYDFIVK</a>  |
| 4.0  | 971.4937 | 0.0028 | <a href="#">WNGGRSPAK</a> |

**Mascot:** <http://www.matrixscience.com/>



**Peptide View**MS/MS Fragmentation of **GLCAIAQAESLR**Found in **AT2G31610.1** in **TAIR\_Arabidopsis**, Symbols: | 40S ribosomal protein S3 (RPS3A) | chr2:13457461-13458746 FORWARD

Match to Query 4905: 1287.658876 from(644.836714,2+) index(5641)

Title: Elution from: 50.286 to 50.286 scan no 7097 cid35.00 polarity:+

Data file 0-2\_1.mgf

Click mouse within plot area to zoom in by factor of two about that point

Or,   to  Da Label all possible matches  Label matches used for scoring Show Y-axis 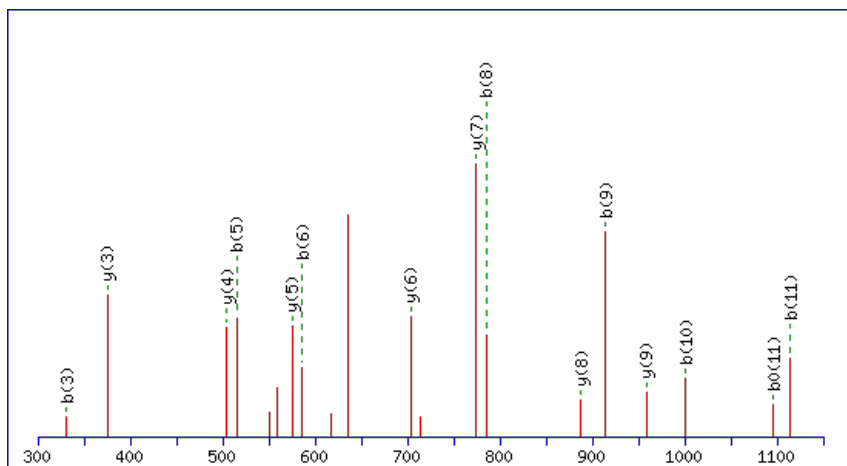**Monoisotopic mass of neutral peptide Mr(calc):** 1287.6605**Fixed modifications:** Carbamidomethyl (C) (apply to specified residues or termini only)**Ions Score:** 91 **Expect:** 4e-009**Matches:** 15/100 fragment ions using 16 most intense peaks ([help](#))

| #  | b                | b <sup>++</sup> | b*        | b <sup>*++</sup> | b <sup>0</sup>   | b <sup>0++</sup> | Seq. | y               | y <sup>++</sup> | y*        | y <sup>*++</sup> | y <sup>0</sup> | y <sup>0++</sup> | #  |
|----|------------------|-----------------|-----------|------------------|------------------|------------------|------|-----------------|-----------------|-----------|------------------|----------------|------------------|----|
| 1  | 58.0287          | 29.5180         |           |                  |                  |                  | G    |                 |                 |           |                  |                |                  | 12 |
| 2  | 171.1128         | 86.0600         |           |                  |                  |                  | L    | 1231.6463       | 616.3268        | 1214.6198 | 607.8135         | 1213.6358      | 607.3215         | 11 |
| 3  | <b>331.1435</b>  | 166.0754        |           |                  |                  |                  | C    | 1118.5623       | 559.7848        | 1101.5357 | 551.2715         | 1100.5517      | 550.7795         | 10 |
| 4  | 402.1806         | 201.5939        |           |                  |                  |                  | A    | <b>958.5316</b> | 479.7694        | 941.5051  | 471.2562         | 940.5211       | 470.7642         | 9  |
| 5  | <b>515.2646</b>  | 258.1360        |           |                  |                  |                  | I    | <b>887.4945</b> | 444.2509        | 870.4680  | 435.7376         | 869.4839       | 435.2456         | 8  |
| 6  | <b>586.3017</b>  | 293.6545        |           |                  |                  |                  | A    | <b>774.4104</b> | 387.7089        | 757.3839  | 379.1956         | 756.3999       | 378.7036         | 7  |
| 7  | 714.3603         | 357.6838        | 697.3338  | 349.1705         |                  |                  | Q    | <b>703.3733</b> | 352.1903        | 686.3468  | 343.6770         | 685.3628       | 343.1850         | 6  |
| 8  | <b>785.3974</b>  | 393.2024        | 768.3709  | 384.6891         |                  |                  | A    | <b>575.3148</b> | 288.1610        | 558.2882  | 279.6477         | 557.3042       | 279.1557         | 5  |
| 9  | <b>914.4400</b>  | 457.7237        | 897.4135  | 449.2104         | 896.4295         | 448.7184         | E    | <b>504.2776</b> | 252.6425        | 487.2511  | 244.1292         | 486.2671       | 243.6372         | 4  |
| 10 | <b>1001.4721</b> | 501.2397        | 984.4455  | 492.7264         | 983.4615         | 492.2344         | S    | <b>375.2350</b> | 188.1212        | 358.2085  | 179.6079         | 357.2245       | 179.1159         | 3  |
| 11 | <b>1114.5561</b> | 557.7817        | 1097.5296 | 549.2684         | <b>1096.5456</b> | 548.7764         | L    | 288.2030        | 144.6051        | 271.1765  | 136.0919         |                |                  | 2  |
| 12 |                  |                 |           |                  |                  |                  | R    | 175.1190        | 88.0631         | 158.0924  | 79.5498          |                |                  | 1  |

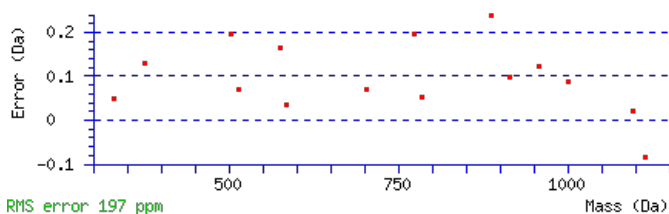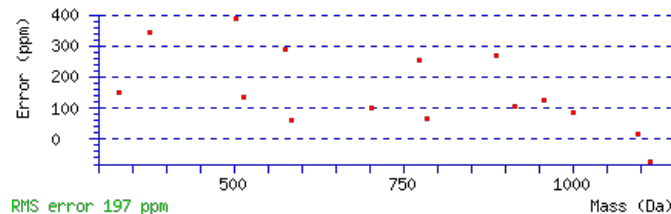NCBI **BLAST** search of **GLCAIAQAESLR**

(Parameters: blastp, nr protein database, expect=20000, no filter, PAM30)

Other BLAST [web gateways](#)**All matches to this query**

## AT2G31610.1

| Score | Mr(calc)  | Delta   | Sequence                      |
|-------|-----------|---------|-------------------------------|
| 90.6  | 1287.6605 | -0.0016 | <a href="#">GLCAIAQAESLR</a>  |
| 11.0  | 1287.6605 | -0.0016 | <a href="#">ASGSMSPGVQVLR</a> |
| 5.6   | 1287.6605 | -0.0016 | <a href="#">AGDMQGVVVEK</a>   |
| 3.0   | 1287.6606 | -0.0017 | <a href="#">VVVGMLGDGNGVR</a> |
| 3.0   | 1287.6571 | 0.0018  | <a href="#">KEFNLANPNNK</a>   |
| 2.5   | 1287.6571 | 0.0018  | <a href="#">ESLKGIDDAHR</a>   |
| 2.0   | 1287.6605 | -0.0016 | <a href="#">AGMINEANSLLR</a>  |
| 2.0   | 1287.6618 | -0.0030 | <a href="#">YHGRIMRSPR</a>    |
| 1.7   | 1287.6605 | -0.0016 | <a href="#">IPKNGDMSALSR</a>  |
| 1.3   | 1287.6571 | 0.0017  | <a href="#">QTEQVKNQWK</a>    |

Mascot: <http://www.matrixscience.com/>

**Peptide View**MS/MS Fragmentation of **RNAQLCVLAEDCNQPDYVK**Found in **AT2G32060.1** in **TAIR\_Arabidopsis**, Symbols: | 40S ribosomal protein S12 (RPS12C) | chr2:13646305-13647181 REVERSE

Match to Query 9931: 2292.063996 from(765.028608,3+) index(4464)

Title: Elution from: 41.452 to 41.452 scan no 5655 cid35.00 polarity:+

Data file 0-2\_2.mgf

Click mouse within plot area to zoom in by factor of two about that point

Or, Plot from  to  Da Label all possible matches  Label matches used for scoring Show Y-axis 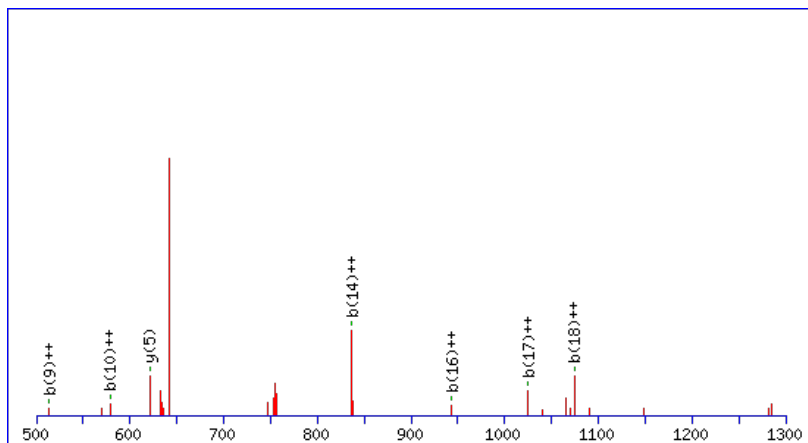

Monoisotopic mass of neutral peptide Mr(calc): 2292.0627

Fixed modifications: Carbamidomethyl (C) (apply to specified residues or termini only)

Ions Score: 25 Expect: 0.0079

Matches : 7/192 fragment ions using 14 most intense peaks ([help](#))

| #  | b         | b <sup>++</sup>  | b <sup>*</sup> | b <sup>*++</sup> | b <sup>0</sup> | b <sup>0++</sup> | Seq. | y               | y <sup>++</sup> | y <sup>*</sup> | y <sup>*++</sup> | y <sup>0</sup> | y <sup>0++</sup> | #  |
|----|-----------|------------------|----------------|------------------|----------------|------------------|------|-----------------|-----------------|----------------|------------------|----------------|------------------|----|
| 1  | 157.1084  | 79.0578          | 140.0818       | 70.5446          |                |                  | R    |                 |                 |                |                  |                |                  | 19 |
| 2  | 271.1513  | 136.0793         | 254.1248       | 127.5660         |                |                  | N    | 2136.9689       | 1068.9881       | 2119.9423      | 1060.4748        | 2118.9583      | 1059.9828        | 18 |
| 3  | 342.1884  | 171.5979         | 325.1619       | 163.0846         |                |                  | A    | 2022.9259       | 1011.9666       | 2005.8994      | 1003.4533        | 2004.9154      | 1002.9613        | 17 |
| 4  | 470.2470  | 235.6271         | 453.2205       | 227.1139         |                |                  | Q    | 1951.8888       | 976.4481        | 1934.8623      | 967.9348         | 1933.8783      | 967.4428         | 16 |
| 5  | 583.3311  | 292.1692         | 566.3045       | 283.6559         |                |                  | L    | 1823.8302       | 912.4188        | 1806.8037      | 903.9055         | 1805.8197      | 903.4135         | 15 |
| 6  | 743.3617  | 372.1845         | 726.3352       | 363.6712         |                |                  | C    | 1710.7462       | 855.8767        | 1693.7196      | 847.3635         | 1692.7356      | 846.8714         | 14 |
| 7  | 842.4301  | 421.7187         | 825.4036       | 413.2054         |                |                  | V    | 1550.7155       | 775.8614        | 1533.6890      | 767.3481         | 1532.7050      | 766.8561         | 13 |
| 8  | 955.5142  | 478.2607         | 938.4876       | 469.7475         |                |                  | L    | 1451.6471       | 726.3272        | 1434.6206      | 717.8139         | 1433.6366      | 717.3219         | 12 |
| 9  | 1026.5513 | <b>513.7793</b>  | 1009.5248      | 505.2660         |                |                  | A    | 1338.5631       | 669.7852        | 1321.5365      | 661.2719         | 1320.5525      | 660.7799         | 11 |
| 10 | 1155.5939 | <b>578.3006</b>  | 1138.5674      | 569.7873         | 1137.5833      | 569.2953         | E    | 1267.5259       | 634.2666        | 1250.4994      | 625.7533         | 1249.5154      | 625.2613         | 10 |
| 11 | 1270.6208 | 635.8141         | 1253.5943      | 627.3008         | 1252.6103      | 626.8088         | D    | 1138.4834       | 569.7453        | 1121.4568      | 561.2320         | 1120.4728      | 560.7400         | 9  |
| 12 | 1430.6515 | 715.8294         | 1413.6249      | 707.3161         | 1412.6409      | 706.8241         | C    | 1023.4564       | 512.2318        | 1006.4299      | 503.7186         | 1005.4458      | 503.2266         | 8  |
| 13 | 1544.6944 | 772.8508         | 1527.6679      | 764.3376         | 1526.6839      | 763.8456         | N    | 863.4258        | 432.2165        | 846.3992       | 423.7032         | 845.4152       | 423.2112         | 7  |
| 14 | 1672.7530 | <b>836.8801</b>  | 1655.7265      | 828.3669         | 1654.7424      | 827.8749         | Q    | 749.3828        | 375.1951        | 732.3563       | 366.6818         | 731.3723       | 366.1898         | 6  |
| 15 | 1769.8058 | 885.4065         | 1752.7792      | 876.8932         | 1751.7952      | 876.4012         | P    | <b>621.3243</b> | 311.1658        | 604.2977       | 302.6525         | 603.3137       | 302.1605         | 5  |
| 16 | 1884.8327 | <b>942.9200</b>  | 1867.8062      | 934.4067         | 1866.8221      | 933.9147         | D    | 524.2715        | 262.6394        | 507.2449       | 254.1261         | 506.2609       | 253.6341         | 4  |
| 17 | 2047.8960 | <b>1024.4517</b> | 2030.8695      | 1015.9384        | 2029.8855      | 1015.4464        | Y    | 409.2445        | 205.1259        | 392.2180       | 196.6126         |                |                  | 3  |
| 18 | 2146.9645 | <b>1073.9859</b> | 2129.9379      | 1065.4726        | 2128.9539      | 1064.9806        | V    | 246.1812        | 123.5942        | 229.1547       | 115.0810         |                |                  | 2  |
| 19 |           |                  |                |                  |                |                  | K    | 147.1128        | 74.0600         | 130.0863       | 65.5468          |                |                  | 1  |

# AT2G32060.1

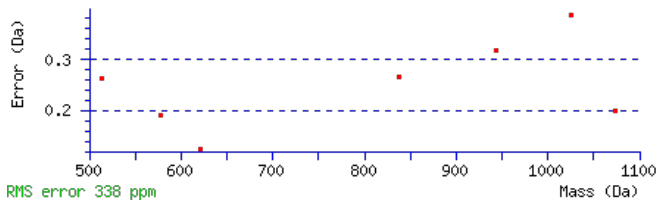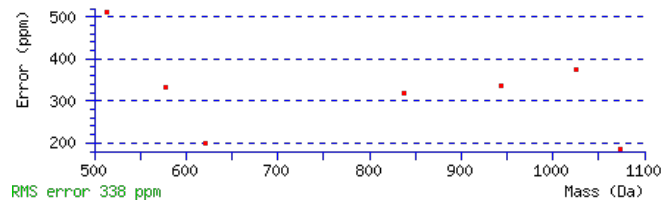

NCBI **BLAST** search of [RNAQLCVLAEDCNQPDYVK](#)  
 (Parameters: blastp, nr protein database, expect=20000, no filter, PAM30)  
 Other BLAST [web gateways](#)

## All matches to this query

| Score | Mr(calc)  | Delta   | Sequence                              |
|-------|-----------|---------|---------------------------------------|
| 24.9  | 2292.0627 | 0.0013  | <a href="#">RNAQLCVLAEDCNQPDYVK</a>   |
| 7.6   | 2292.0620 | 0.0020  | <a href="#">MDDWEAEDFQPLPSKVELK</a>   |
| 5.9   | 2292.0667 | -0.0027 | <a href="#">RSYDVCMQLYEKELWTR</a>     |
| 5.2   | 2292.0580 | 0.0060  | <a href="#">VAEVDESGTQPFVDSLQCPK</a>  |
| 2.8   | 2292.0692 | -0.0052 | <a href="#">KEAAAKDPSNAAMQLEFDDNK</a> |
| 1.9   | 2292.0588 | 0.0052  | <a href="#">KKFVADDSQCSICLMEYAK</a>   |

Mascot: <http://www.matrixscience.com>

**Peptide View**MS/MS Fragmentation of **AVILLQGR**Found in **AT2G32220.1** in **TAIR\_Arabidopsis**, Symbols: | 60S ribosomal protein L27 (RPL27A) | chr2:13686022-13686429 FORWARD

Match to Query 1405: 868.549248 from(435.281900,2+) index(3620)

Title: Elution from: 34.922 to 34.922 scan no 4529 cid35.00 polarity:+

Data file D6h-3\_1.mgf

Click mouse within plot area to zoom in by factor of two about that point

Or,  to  Da Label all possible matches  Label matches used for scoring Show Y-axis 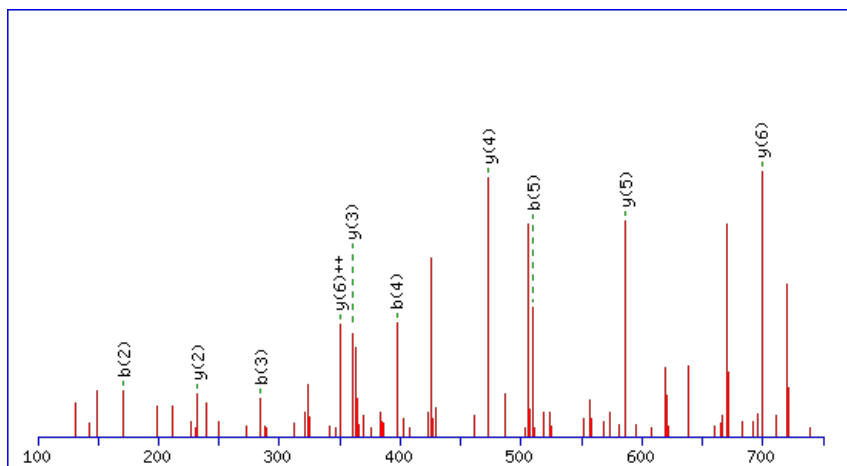Monoisotopic mass of neutral peptide  $M_r(\text{calc})$ : 868.5494

Fixed modifications: Carbamidomethyl (C) (apply to specified residues or termini only)

Ions Score: 23 Expect: 0.011

Matches : 10/46 fragment ions using 25 most intense peaks ([help](#))

| # | b               | b <sup>++</sup> | b*       | b <sup>*++</sup> | Seq. | y               | y <sup>++</sup> | y*       | y <sup>*++</sup> | # |
|---|-----------------|-----------------|----------|------------------|------|-----------------|-----------------|----------|------------------|---|
| 1 | 72.0444         | 36.5258         |          |                  | A    |                 |                 |          |                  | 8 |
| 2 | <b>171.1128</b> | 86.0600         |          |                  | V    | 798.5196        | 399.7634        | 781.4931 | 391.2502         | 7 |
| 3 | <b>284.1969</b> | 142.6021        |          |                  | I    | <b>699.4512</b> | <b>350.2292</b> | 682.4246 | 341.7160         | 6 |
| 4 | <b>397.2809</b> | 199.1441        |          |                  | L    | <b>586.3671</b> | 293.6872        | 569.3406 | 285.1739         | 5 |
| 5 | <b>510.3650</b> | 255.6861        |          |                  | L    | <b>473.2831</b> | 237.1452        | 456.2565 | 228.6319         | 4 |
| 6 | 638.4236        | 319.7154        | 621.3970 | 311.2022         | Q    | <b>360.1990</b> | 180.6031        | 343.1724 | 172.0899         | 3 |
| 7 | 695.4450        | 348.2262        | 678.4185 | 339.7129         | G    | <b>232.1404</b> | 116.5738        | 215.1139 | 108.0606         | 2 |
| 8 |                 |                 |          |                  | R    | 175.1190        | 88.0631         | 158.0924 | 79.5498          | 1 |

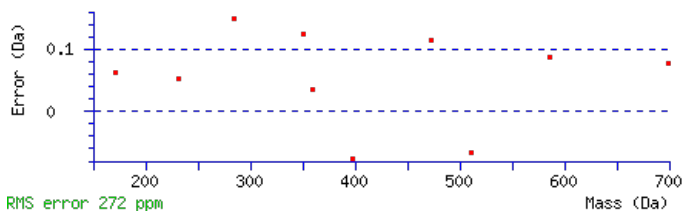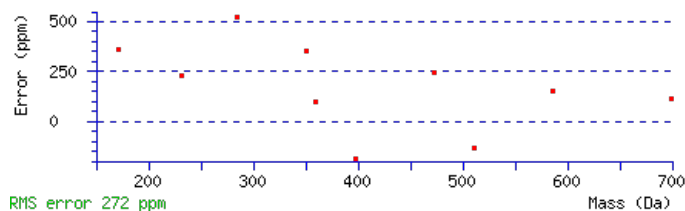NCBI **BLAST** search of **AVILLQGR**

(Parameters: blastp, nr protein database, expect=20000, no filter, PAM30)

Other BLAST [web gateways](#)**All matches to this query**

| Score | $M_r(\text{calc})$ | Delta   | Sequence        |
|-------|--------------------|---------|-----------------|
| 23.5  | 868.5494           | -0.0002 | <b>AVILLQGR</b> |



## Peptide View

MS/MS Fragmentation of **EMLKEKSSK**

Found in **AT2G32390.1** in **TAIR\_Arabidopsis**, Symbols: GLR3.5, GLR6, ATGLR3.5 | ATGLR3.5 (GLUTAMATE RECEPTOR 6) | chr2:13755545-13758834 REVERSE

Match to Query 3221: 1090.535756 from(546.275154,2+) index(1933)

Title: Elution from: 22.101 to 22.101 scan no 2478 cid35.00 polarity:+

Data file D12h-3\_3.mgf

Click mouse within plot area to zoom in by factor of two about that point

Or,   to  Da

Label all possible matches  Label matches used for scoring

Show Y-axis

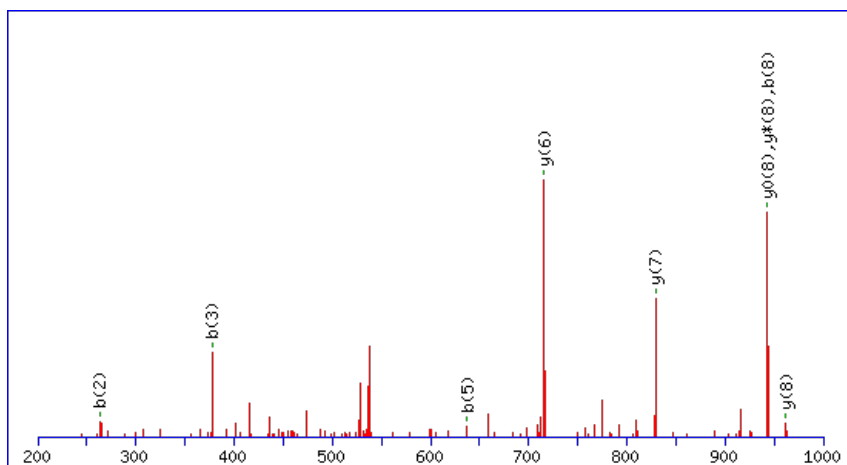

Monoisotopic mass of neutral peptide  $M_r(\text{calc})$ : 1090.5337

Fixed modifications: Carbamidomethyl (C) (apply to specified residues or termini only)

Ions Score: 41 Expect: 0.0011

Matches : 9/88 fragment ions using 8 most intense peaks ([help](#))

| # | b               | b <sup>++</sup> | b*       | b <sup>*++</sup> | b <sup>0</sup> | b <sup>0++</sup> | Seq. | y               | y <sup>++</sup> | y*              | y <sup>*++</sup> | y <sup>0</sup>  | y <sup>0++</sup> | # |
|---|-----------------|-----------------|----------|------------------|----------------|------------------|------|-----------------|-----------------|-----------------|------------------|-----------------|------------------|---|
| 1 | 131.0469        | 66.0271         |          |                  | 113.0363       | 57.0218          | E    |                 |                 |                 |                  |                 |                  | 9 |
| 2 | <b>263.0844</b> | 132.0458        |          |                  | 245.0739       | 123.0406         | M    | <b>961.5013</b> | 481.2543        | <b>943.4777</b> | 472.2425         | <b>943.4907</b> | 472.2490         | 8 |
| 3 | <b>377.1655</b> | 189.0864        |          |                  | 359.1550       | 180.0811         | L    | <b>829.4638</b> | 415.2355        | 811.4402        | 406.2237         | 811.4532        | 406.2303         | 7 |
| 4 | 507.2546        | 254.1309        | 489.2310 | 245.1191         | 489.2440       | 245.1256         | K    | <b>715.3827</b> | 358.1950        | 697.3591        | 349.1832         | 697.3721        | 349.1897         | 6 |
| 5 | <b>637.2942</b> | 319.1507        | 619.2706 | 310.1389         | 619.2836       | 310.1454         | E    | 585.2937        | 293.1505        | 567.2701        | 284.1387         | 567.2831        | 284.1452         | 5 |
| 6 | 767.3832        | 384.1952        | 749.3596 | 375.1835         | 749.3727       | 375.1900         | K    | 455.2540        | 228.1307        | 437.2304        | 219.1189         | 437.2435        | 219.1254         | 4 |
| 7 | 855.4123        | 428.2098        | 837.3887 | 419.1980         | 837.4017       | 419.2045         | S    | 325.1650        | 163.0861        | 307.1414        | 154.0743         | 307.1544        | 154.0809         | 3 |
| 8 | <b>943.4413</b> | 472.2243        | 925.4178 | 463.2125         | 925.4308       | 463.2190         | S    | 237.1359        | 119.0716        | 219.1124        | 110.0598         | 219.1254        | 110.0663         | 2 |
| 9 |                 |                 |          |                  |                |                  | K    | 149.1069        | 75.0571         | 131.0833        | 66.0453          |                 |                  | 1 |

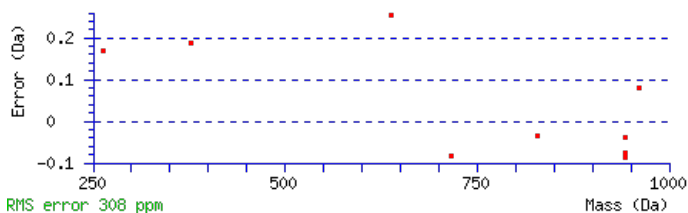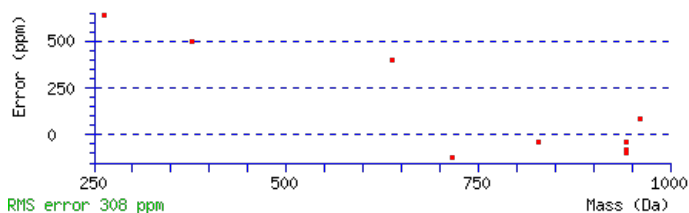

NCBI BLAST search of [EMLKEKSSK](#)

(Parameters: blastp, nr protein database, expect=20000, no filter, PAM30)

Other BLAST [web gateways](#)

All matches to this query

| Score | $M_r(\text{calc})$ | Delta | Sequence |
|-------|--------------------|-------|----------|
|       |                    |       |          |

**AT2G32390.1**

|      |           |         |                            |
|------|-----------|---------|----------------------------|
| 40.6 | 1090.5337 | 0.0021  | <a href="#">EMLKEKSSK</a>  |
| 27.8 | 1090.5359 | -0.0001 | <a href="#">EYMQGVLIK</a>  |
| 21.5 | 1090.5359 | -0.0001 | <a href="#">FLLAQMETK</a>  |
| 19.4 | 1090.5359 | -0.0001 | <a href="#">LYEAACLLK</a>  |
| 19.4 | 1090.5386 | -0.0028 | <a href="#">YRCPQLLK</a>   |
| 15.4 | 1090.5386 | -0.0028 | <a href="#">TRGMLGWLK</a>  |
| 11.6 | 1090.5325 | 0.0032  | <a href="#">EDAFFVKPK</a>  |
| 10.3 | 1090.5337 | 0.0021  | <a href="#">AMSLLSNSLK</a> |
| 10.2 | 1090.5363 | -0.0006 | <a href="#">QMVGEKRTK</a>  |
| 3.2  | 1090.5325 | 0.0032  | <a href="#">SPPYYNVIK</a>  |

Mascot: <http://www.matrixscience.com/>



**Peptide View**MS/MS Fragmentation of **MIATMKLK**

Found in **AT2G32940.1** in **TAIR\_Arabidopsis**, Symbols: AGO6 | AGO6 (ARGONAUTE 6); nucleic acid binding | chr2:13979295-13983933  
REVERSE

Match to Query 1811: 960.497186 from(481.255869,2+) index(2894)

Title: Elution from: 30.037 to 30.037 scan no 3663 cid35.00 polarity:+

Data file D1d-2\_3.mgf

Click mouse within plot area to zoom in by factor of two about that point

Or,   to  Da

Label all possible matches  Label matches used for scoring

Show Y-axis

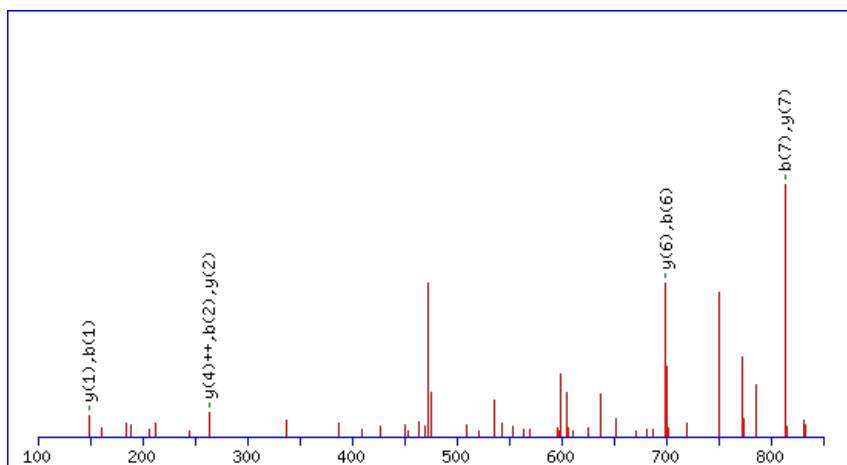

**Monoisotopic mass of neutral peptide Mr(calc):** 960.4996

**Fixed modifications:** Carbamidomethyl (C) (apply to specified residues or termini only)

**Variable modifications:**

**M1** : Oxidation (M), with neutral losses 0.0000 (shown in table), 63.9983

**Ions Score:** 31 **Expect:** 0.0045

**Matches** : 9/86 fragment ions using 7 most intense peaks ([help](#))

| # | b               | b <sup>++</sup> | b*       | b <sup>*++</sup> | b <sup>0</sup> | b <sup>0++</sup> | Seq.     | y               | y <sup>++</sup> | y*       | y <sup>*++</sup> | y <sup>0</sup> | y <sup>0++</sup> | #        |
|---|-----------------|-----------------|----------|------------------|----------------|------------------|----------|-----------------|-----------------|----------|------------------|----------------|------------------|----------|
| 1 | <b>149.0397</b> | 75.0235         |          |                  |                |                  | <b>M</b> |                 |                 |          |                  |                |                  | <b>8</b> |
| 2 | <b>263.1208</b> | 132.0640        |          |                  |                |                  | <b>I</b> | <b>813.4745</b> | 407.2409        | 795.4509 | 398.2291         | 795.4639       | 398.2356         | <b>7</b> |
| 3 | 335.1550        | 168.0811        |          |                  |                |                  | <b>A</b> | <b>699.3934</b> | 350.2003        | 681.3698 | 341.1885         | 681.3828       | 341.1950         | <b>6</b> |
| 4 | 437.1997        | 219.1035        |          |                  | 419.1891       | 210.0982         | <b>T</b> | 627.3592        | 314.1833        | 609.3357 | 305.1715         | 609.3487       | 305.1780         | <b>5</b> |
| 5 | 569.2372        | 285.1222        |          |                  | 551.2266       | 276.1170         | <b>M</b> | 525.3145        | <b>263.1609</b> | 507.2909 | 254.1491         |                |                  | <b>4</b> |
| 6 | <b>699.3262</b> | 350.1668        | 681.3026 | 341.1550         | 681.3157       | 341.1615         | <b>K</b> | 393.2770        | 197.1421        | 375.2534 | 188.1303         |                |                  | <b>3</b> |
| 7 | <b>813.4073</b> | 407.2073        | 795.3837 | 398.1955         | 795.3968       | 398.2020         | <b>L</b> | <b>263.1880</b> | 132.0976        | 245.1644 | 123.0858         |                |                  | <b>2</b> |
| 8 |                 |                 |          |                  |                |                  | <b>K</b> | <b>149.1069</b> | 75.0571         | 131.0833 | 66.0453          |                |                  | <b>1</b> |

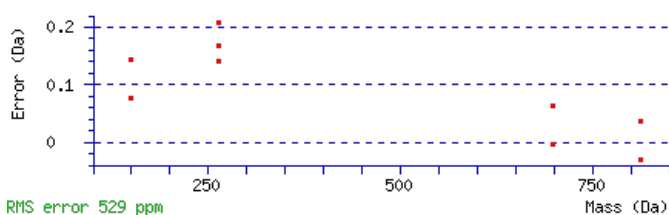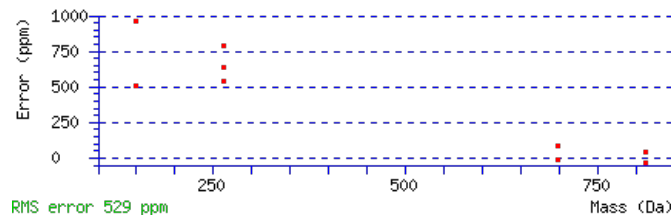

NCBI **BLAST** search of **MIATMKLK**

(Parameters: blastp, nr protein database, expect=20000, no filter, PAM30)

Other BLAST [web gateways](#)

**All matches to this query**

| Score | Mr(calc) | Delta | Sequence | Site Analysis |
|-------|----------|-------|----------|---------------|
|       |          |       |          |               |

## AT2G32940.1

|      |          |         |                           |                     |
|------|----------|---------|---------------------------|---------------------|
| 31.0 | 960.4996 | -0.0025 | <a href="#">MIATMKLK</a>  | Oxidation M1 99.01% |
| 21.8 | 960.4963 | 0.0009  | <a href="#">MKVFIGEK</a>  |                     |
| 20.5 | 960.4985 | -0.0013 | <a href="#">FLIWVMK</a>   |                     |
| 20.5 | 960.4963 | 0.0009  | <a href="#">FMKIGDLK</a>  |                     |
| 11.0 | 960.4963 | 0.0009  | <a href="#">IGKMDFLK</a>  |                     |
| 11.0 | 960.4963 | 0.0009  | <a href="#">LGMFTAAIK</a> |                     |
| 11.0 | 960.4963 | 0.0009  | <a href="#">MDGLFKLK</a>  |                     |
| 11.0 | 960.4967 | 0.0005  | <a href="#">MIARALTR</a>  |                     |
| 11.0 | 960.4996 | -0.0025 | <a href="#">MIATMKLK</a>  | Oxidation M5 0.99%  |
| 11.0 | 960.4996 | -0.0025 | <a href="#">MMKSTLIK</a>  |                     |

Mascot: <http://www.matrixscience.com/>

**Peptide View**MS/MS Fragmentation of **LQSSLYLK**

Found in **AT2G32970.1** in **TAIR\_Arabidopsis**, Symbols: | similar to unnamed protein product [Vitis vinifera] (GB:CAO24057.1) | chr2:13998821-14001159 REVERSE

Match to Query 2051: 960.512462 from(481.263507,2+) index(3124)

Title: Elution from: 30.635 to 30.635 scan no 3867 cid35.00 polarity:+

Data file D12h-1\_3.mgf

Click mouse within plot area to zoom in by factor of two about that point

Or,  to  Da

Label all possible matches  Label matches used for scoring

Show Y-axis

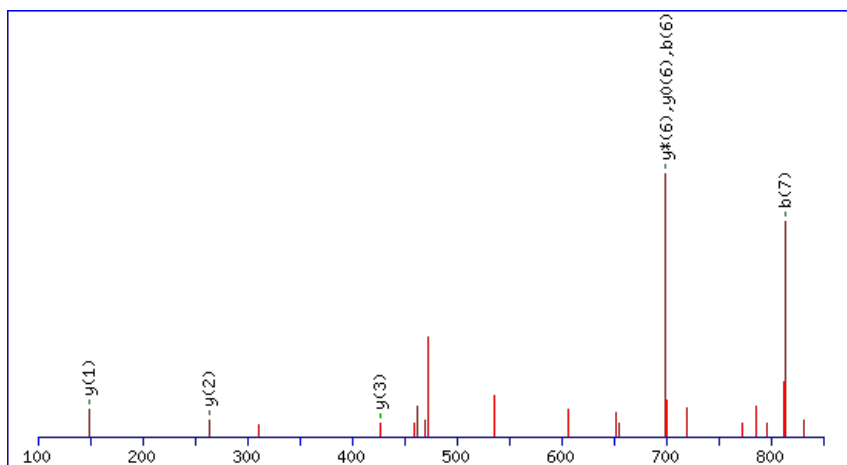

**Monoisotopic mass of neutral peptide Mr(calc):** 960.5140

**Fixed modifications:** Carbamidomethyl (C) (apply to specified residues or termini only)

**Ions Score:** 23 **Expect:** 0.021

**Matches:** 7/70 fragment ions using 7 most intense peaks ([help](#))

| # | b        | b <sup>++</sup> | b*       | b <sup>*++</sup> | b <sup>0</sup> | b <sup>0++</sup> | Seq. | y        | y <sup>++</sup> | y*       | y <sup>*++</sup> | y <sup>0</sup> | y <sup>0++</sup> | # |
|---|----------|-----------------|----------|------------------|----------------|------------------|------|----------|-----------------|----------|------------------|----------------|------------------|---|
| 1 | 115.0884 | 58.0478         |          |                  |                |                  | L    |          |                 |          |                  |                |                  | 8 |
| 2 | 245.1410 | 123.0741        | 227.1174 | 114.0624         |                |                  | Q    | 847.4402 | 424.2237        | 829.4166 | 415.2120         | 829.4296       | 415.2185         | 7 |
| 3 | 333.1701 | 167.0887        | 315.1465 | 158.0769         | 315.1595       | 158.0834         | S    | 717.3876 | 359.1974        | 699.3640 | 350.1856         | 699.3770       | 350.1921         | 6 |
| 4 | 421.1991 | 211.1032        | 403.1756 | 202.0914         | 403.1886       | 202.0979         | S    | 629.3585 | 315.1829        | 611.3349 | 306.1711         | 611.3479       | 306.1776         | 5 |
| 5 | 535.2802 | 268.1438        | 517.2567 | 259.1320         | 517.2697       | 259.1385         | L    | 541.3294 | 271.1684        | 523.3059 | 262.1566         |                |                  | 4 |
| 6 | 699.3406 | 350.1739        | 681.3170 | 341.1622         | 681.3300       | 341.1687         | Y    | 427.2483 | 214.1278        | 409.2248 | 205.1160         |                |                  | 3 |
| 7 | 813.4217 | 407.2145        | 795.3981 | 398.2027         | 795.4111       | 398.2092         | L    | 263.1880 | 132.0976        | 245.1644 | 123.0858         |                |                  | 2 |
| 8 |          |                 |          |                  |                |                  | K    | 149.1069 | 75.0571         | 131.0833 | 66.0453          |                |                  | 1 |

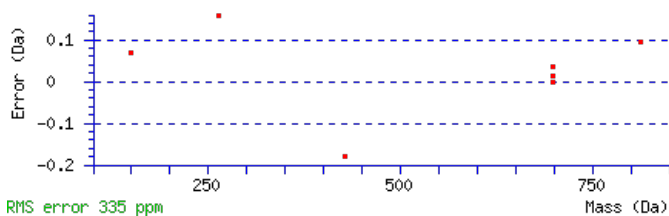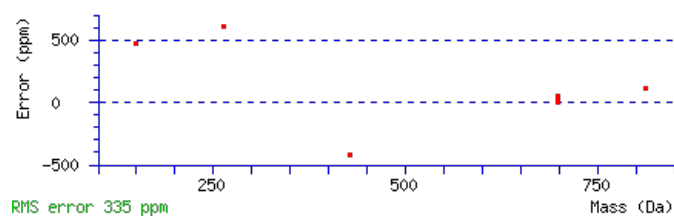

NCBI **BLAST** search of [LQSSLYLK](#)

(Parameters: blastp, nr protein database, expect=20000, no filter, PAM30)

Other BLAST [web gateways](#)

**All matches to this query**

| Score | Mr(calc) | Delta   | Sequence                 |
|-------|----------|---------|--------------------------|
| 23.3  | 960.5140 | -0.0016 | <a href="#">LQSSLYLK</a> |

## AT2G32970.1

|      |          |         |                           |
|------|----------|---------|---------------------------|
| 22.3 | 960.5140 | -0.0016 | <a href="#">FLKLDTSK</a>  |
| 22.3 | 960.5140 | -0.0016 | <a href="#">IFSSKELK</a>  |
| 12.8 | 960.5097 | 0.0027  | <a href="#">CLRRTLK</a>   |
| 12.8 | 960.5140 | -0.0016 | <a href="#">KSLESFLK</a>  |
| 12.8 | 960.5140 | -0.0016 | <a href="#">LASSYVALK</a> |
| 12.8 | 960.5140 | -0.0016 | <a href="#">LFKESVTK</a>  |
| 12.8 | 960.5140 | -0.0016 | <a href="#">SEKFSLIK</a>  |
| 12.8 | 960.5140 | -0.0016 | <a href="#">SEKISFIK</a>  |
| 12.8 | 960.5145 | -0.0020 | <a href="#">STRTNKLLK</a> |

Mascot: <http://www.matrixscience.com/>

**Peptide View**MS/MS Fragmentation of **NVEFDALR**

Found in **AT2G33040.1** in **TAIR\_Arabidopsis**, Symbols: | ATP synthase gamma chain, mitochondrial (ATPC) | chr2:14026055-14028124  
REVERSE

Match to Query 2132: 962.480562 from(482.247557,2+) index(4356)

Title: Elution from: 41.745 to 41.745 scan no 5504 cid35.00 polarity:+

Data file D6h-2\_1.mgf

Click mouse within plot area to zoom in by factor of two about that point

Or,   to  Da

Label all possible matches  Label matches used for scoring

Show Y-axis

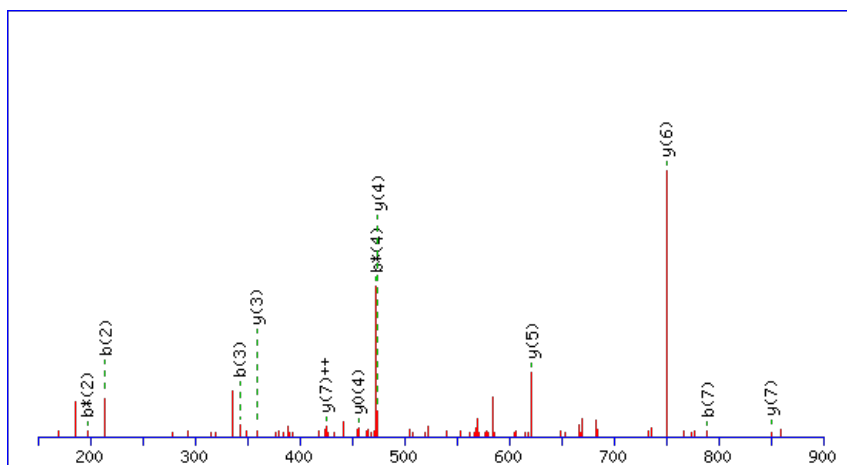

**Monoisotopic mass of neutral peptide Mr(calc):** 962.4821

**Fixed modifications:** Carbamidomethyl (C) (apply to specified residues or termini only)

**Ions Score:** 24 **Expect:** 0.018

**Matches:** 12/74 fragment ions using 28 most intense peaks ([help](#))

| # | b               | b <sup>++</sup> | b*              | b <sup>*++</sup> | b <sup>0</sup> | b <sup>0++</sup> | Seq. | y               | y <sup>++</sup> | y*       | y <sup>*++</sup> | y <sup>0</sup>  | y <sup>0++</sup> | # |
|---|-----------------|-----------------|-----------------|------------------|----------------|------------------|------|-----------------|-----------------|----------|------------------|-----------------|------------------|---|
| 1 | 115.0502        | 58.0287         | 98.0237         | 49.5155          |                |                  | N    |                 |                 |          |                  |                 |                  | 8 |
| 2 | <b>214.1186</b> | 107.5629        | <b>197.0921</b> | 99.0497          |                |                  | V    | <b>849.4465</b> | <b>425.2269</b> | 832.4199 | 416.7136         | 831.4359        | 416.2216         | 7 |
| 3 | <b>343.1612</b> | 172.0842        | 326.1347        | 163.5710         | 325.1506       | 163.0790         | E    | <b>750.3781</b> | 375.6927        | 733.3515 | 367.1794         | 732.3675        | 366.6874         | 6 |
| 4 | 490.2296        | 245.6185        | <b>473.2031</b> | 237.1052         | 472.2191       | 236.6132         | F    | <b>621.3355</b> | 311.1714        | 604.3089 | 302.6581         | 603.3249        | 302.1661         | 5 |
| 5 | 605.2566        | 303.1319        | 588.2300        | 294.6186         | 587.2460       | 294.1266         | D    | <b>474.2671</b> | 237.6372        | 457.2405 | 229.1239         | <b>456.2565</b> | 228.6319         | 4 |
| 6 | 676.2937        | 338.6505        | 659.2671        | 330.1372         | 658.2831       | 329.6452         | A    | <b>359.2401</b> | 180.1237        | 342.2136 | 171.6104         |                 |                  | 3 |
| 7 | <b>789.3777</b> | 395.1925        | 772.3512        | 386.6792         | 771.3672       | 386.1872         | L    | 288.2030        | 144.6051        | 271.1765 | 136.0919         |                 |                  | 2 |
| 8 |                 |                 |                 |                  |                |                  | R    | 175.1190        | 88.0631         | 158.0924 | 79.5498          |                 |                  | 1 |

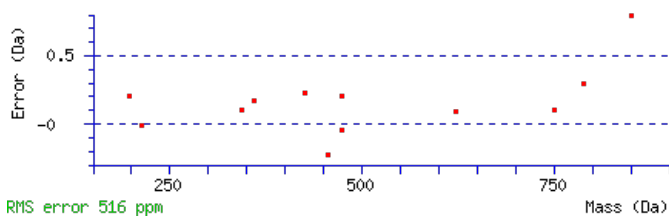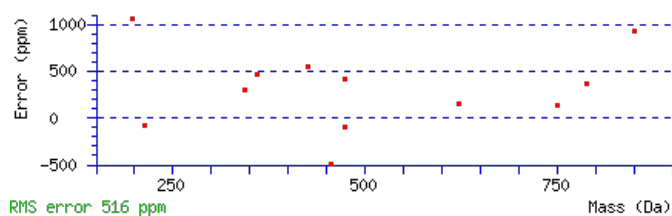

NCBI **BLAST** search of [NVEFDALR](#)

(Parameters: blastp, nr protein database, expect=20000, no filter, PAM30)

Other BLAST [web gateways](#)

**All matches to this query**

| Score | Mr(calc) | Delta   | Sequence                 |
|-------|----------|---------|--------------------------|
| 23.8  | 962.4821 | -0.0016 | <a href="#">NVEFDALR</a> |



**Peptide View**MS/MS Fragmentation of **DTYPDDLLAPVLR**

Found in **AT2G33150.1** in **TAIR\_Arabidopsis**, Symbols: PED1, KAT2 | KAT2/PED1 (PEROXISOME DEFECTIVE 1); acetyl-CoA C-acyltransferase | chr2:14054891-14058060 REVERSE

Match to Query 6273: 1486.764182 from(744.389367,2+) index(9710)

Title: Elution from: 88.375 to 88.375 scan no 13355 cid35.00 polarity:+

Data file D6h-3\_1.mgf

Click mouse within plot area to zoom in by factor of two about that point

Or,   to  Da

Label all possible matches  Label matches used for scoring

Show Y-axis

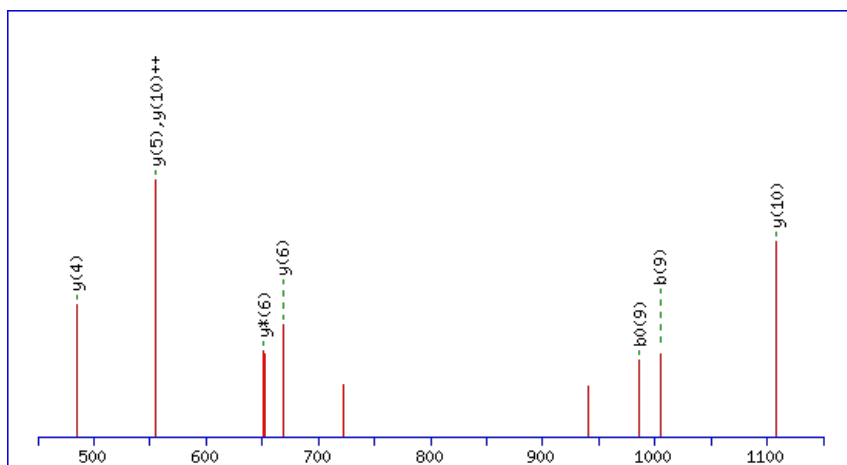

Monoisotopic mass of neutral peptide  $M_r(\text{calc})$ : 1486.7668

Fixed modifications: Carbamidomethyl (C) (apply to specified residues or termini only)

Ions Score: 23 Expect: 0.024

Matches : 8/106 fragment ions using 9 most intense peaks ([help](#))

| #  | b                | b <sup>++</sup> | b <sup>0</sup>  | b <sup>0++</sup> | Seq. | y                | y <sup>++</sup> | y*              | y <sup>*++</sup> | y <sup>0</sup> | y <sup>0++</sup> | #  |
|----|------------------|-----------------|-----------------|------------------|------|------------------|-----------------|-----------------|------------------|----------------|------------------|----|
| 1  | 116.0342         | 58.5207         | 98.0237         | 49.5155          | D    |                  |                 |                 |                  |                |                  | 13 |
| 2  | 217.0819         | 109.0446        | 199.0713        | 100.0393         | T    | 1372.7471        | 686.8772        | 1355.7205       | 678.3639         | 1354.7365      | 677.8719         | 12 |
| 3  | 380.1452         | 190.5763        | 362.1347        | 181.5710         | Y    | 1271.6994        | 636.3533        | 1254.6729       | 627.8401         | 1253.6888      | 627.3481         | 11 |
| 4  | 477.1980         | 239.1026        | 459.1874        | 230.0974         | P    | <b>1108.6361</b> | <b>554.8217</b> | 1091.6095       | 546.3084         | 1090.6255      | 545.8164         | 10 |
| 5  | 592.2249         | 296.6161        | 574.2144        | 287.6108         | D    | 1011.5833        | 506.2953        | 994.5568        | 497.7820         | 993.5728       | 497.2900         | 9  |
| 6  | 707.2519         | 354.1296        | 689.2413        | 345.1243         | D    | 896.5564         | 448.7818        | 879.5298        | 440.2686         | 878.5458       | 439.7765         | 8  |
| 7  | 820.3359         | 410.6716        | 802.3254        | 401.6663         | L    | 781.5294         | 391.2684        | 764.5029        | 382.7551         |                |                  | 7  |
| 8  | 933.4200         | 467.2136        | 915.4094        | 458.2084         | L    | <b>668.4454</b>  | 334.7263        | <b>651.4188</b> | 326.2130         |                |                  | 6  |
| 9  | <b>1004.4571</b> | 502.7322        | <b>986.4466</b> | 493.7269         | A    | <b>555.3613</b>  | 278.1843        | 538.3348        | 269.6710         |                |                  | 5  |
| 10 | 1101.5099        | 551.2586        | 1083.4993       | 542.2533         | P    | <b>484.3242</b>  | 242.6657        | 467.2976        | 234.1525         |                |                  | 4  |
| 11 | 1200.5783        | 600.7928        | 1182.5677       | 591.7875         | V    | 387.2714         | 194.1394        | 370.2449        | 185.6261         |                |                  | 3  |
| 12 | 1313.6624        | 657.3348        | 1295.6518       | 648.3295         | L    | 288.2030         | 144.6051        | 271.1765        | 136.0919         |                |                  | 2  |
| 13 |                  |                 |                 |                  | R    | 175.1190         | 88.0631         | 158.0924        | 79.5498          |                |                  | 1  |

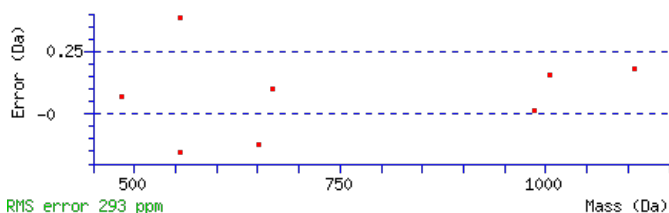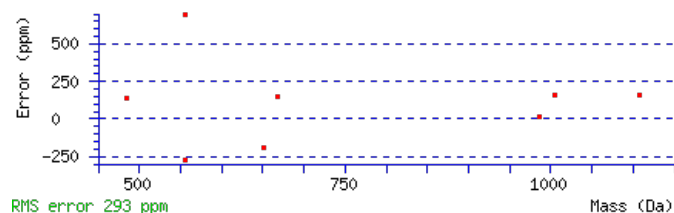

NCBI **BLAST** search of **DTYPDDLLAPVLR**

(Parameters: blastp, nr protein database, expect=20000, no filter, PAM30)

AT2G33150.1

Other BLAST [web gateways](#)

**All matches to this query**

| Score | Mr(calc)  | Delta   | Sequence                     |
|-------|-----------|---------|------------------------------|
| 23.5  | 1486.7668 | -0.0026 | <a href="#">DTYPDDLAPVLR</a> |

Mascot: <http://www.matrixscience.com/>



**Peptide View**MS/MS Fragmentation of **LLEQDNPDLYDAAK**Found in **AT2G33210.1** in **TAIR\_Arabidopsis**, Symbols: | chaperonin, putative | chr2:14082170-14085645 REVERSE

Match to Query 7619: 1660.790002 from(831.402277,2+) index(4375)

Title: Elution from: 40.367 to 40.367 scan no 5527 cid35.00 polarity:+

Data file D6h-3\_2.mgf

Click mouse within plot area to zoom in by factor of two about that point

Or,   to  Da Label all possible matches  Label matches used for scoring Show Y-axis 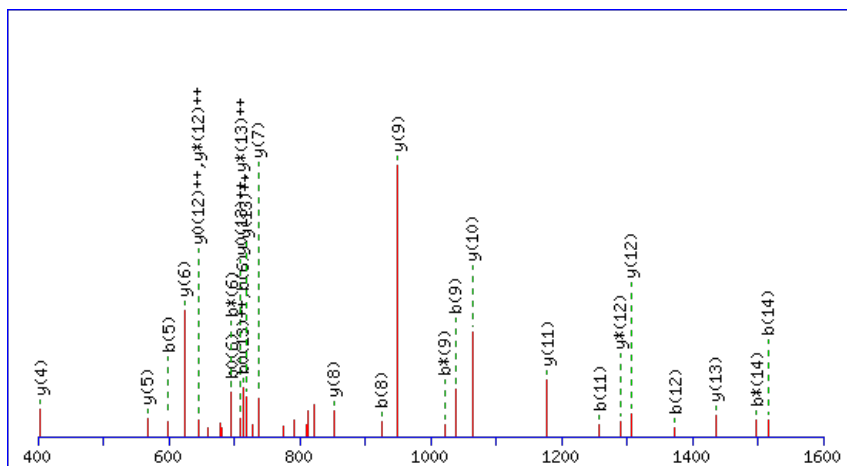Monoisotopic mass of neutral peptide  $M_r(\text{calc})$ : 1660.7944

Fixed modifications: Carbamidomethyl (C) (apply to specified residues or termini only)

Ions Score: 108 Expect: 5e-011

Matches : 28/152 fragment ions using 28 most intense peaks ([help](#))

| #  | b                | b <sup>++</sup> | b <sup>*</sup>   | b <sup>*++</sup> | b <sup>0</sup>  | b <sup>0++</sup> | Seq. | y                | y <sup>++</sup> | y <sup>*</sup>   | y <sup>*++</sup> | y <sup>0</sup> | y <sup>0++</sup> | #  |
|----|------------------|-----------------|------------------|------------------|-----------------|------------------|------|------------------|-----------------|------------------|------------------|----------------|------------------|----|
| 1  | 114.0913         | 57.5493         |                  |                  |                 |                  | L    |                  |                 |                  |                  |                |                  | 15 |
| 2  | 227.1754         | 114.0913        |                  |                  |                 |                  | L    | 1548.7176        | 774.8625        | 1531.6911        | 766.3492         | 1530.7071      | 765.8572         | 14 |
| 3  | 356.2180         | 178.6126        |                  |                  | 338.2074        | 169.6074         | E    | <b>1435.6336</b> | <b>718.3204</b> | 1418.6070        | <b>709.8072</b>  | 1417.6230      | <b>709.3151</b>  | 13 |
| 4  | 484.2766         | 242.6419        | 467.2500         | 234.1287         | 466.2660        | 233.6366         | Q    | <b>1306.5910</b> | 653.7991        | <b>1289.5644</b> | <b>645.2859</b>  | 1288.5804      | <b>644.7938</b>  | 12 |
| 5  | <b>599.3035</b>  | 300.1554        | 582.2770         | 291.6421         | 581.2930        | 291.1501         | D    | <b>1178.5324</b> | 589.7698        | 1161.5059        | 581.2566         | 1160.5218      | 580.7646         | 11 |
| 6  | <b>713.3464</b>  | 357.1769        | <b>696.3199</b>  | 348.6636         | <b>695.3359</b> | 348.1716         | N    | <b>1063.5055</b> | 532.2564        | 1046.4789        | 523.7431         | 1045.4949      | 523.2511         | 10 |
| 7  | 810.3992         | 405.7032        | 793.3727         | 397.1900         | 792.3886        | 396.6980         | P    | <b>949.4625</b>  | 475.2349        | 932.4360         | 466.7216         | 931.4520       | 466.2296         | 9  |
| 8  | <b>925.4262</b>  | 463.2167        | 908.3996         | 454.7034         | 907.4156        | 454.2114         | D    | <b>852.4098</b>  | 426.7085        | 835.3832         | 418.1953         | 834.3992       | 417.7032         | 8  |
| 9  | <b>1038.5102</b> | 519.7587        | <b>1021.4837</b> | 511.2455         | 1020.4997       | 510.7535         | L    | <b>737.3828</b>  | 369.1951        | 720.3563         | 360.6818         | 719.3723       | 360.1898         | 7  |
| 10 | 1095.5317        | 548.2695        | 1078.5051        | 539.7562         | 1077.5211       | 539.2642         | G    | <b>624.2988</b>  | 312.6530        | 607.2722         | 304.1397         | 606.2882       | 303.6477         | 6  |
| 11 | <b>1258.5950</b> | 629.8011        | 1241.5685        | 621.2879         | 1240.5844       | 620.7959         | Y    | <b>567.2773</b>  | 284.1423        | 550.2508         | 275.6290         | 549.2667       | 275.1370         | 5  |
| 12 | <b>1373.6220</b> | 687.3146        | 1356.5954        | 678.8013         | 1355.6114       | 678.3093         | D    | <b>404.2140</b>  | 202.6106        | 387.1874         | 194.0974         | 386.2034       | 193.6053         | 4  |
| 13 | 1444.6591        | 722.8332        | 1427.6325        | 714.3199         | 1426.6485       | <b>713.8279</b>  | A    | 289.1870         | 145.0972        | 272.1605         | 136.5839         |                |                  | 3  |
| 14 | <b>1515.6962</b> | 758.3517        | <b>1498.6696</b> | 749.8385         | 1497.6856       | 749.3464         | A    | 218.1499         | 109.5786        | 201.1234         | 101.0653         |                |                  | 2  |
| 15 |                  |                 |                  |                  |                 |                  | K    | 147.1128         | 74.0600         | 130.0863         | 65.5468          |                |                  | 1  |

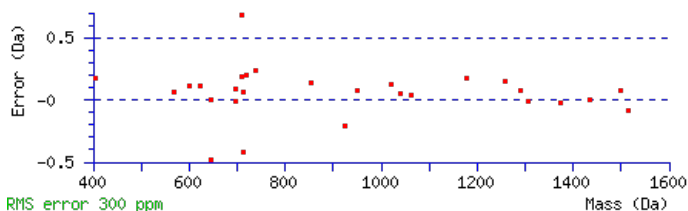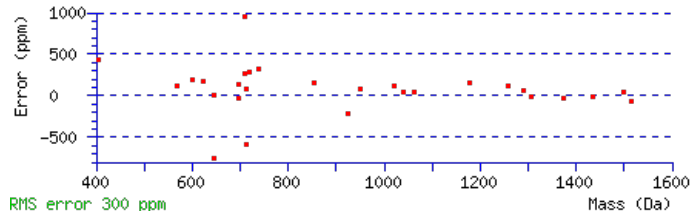NCBI BLAST search of [LLEQDNPDLYDAAK](#)

## AT2G33210.1

(Parameters: blastp, nr protein database, expect=20000, no filter, PAM30)

Other BLAST [web gateways](#)

### All matches to this query

| Score | Mr(calc)  | Delta   | Sequence                        |
|-------|-----------|---------|---------------------------------|
| 108.2 | 1660.7944 | -0.0044 | <a href="#">LLEQDNPDLGYDAAK</a> |
| 4.0   | 1660.7903 | -0.0003 | <a href="#">ELNQNLNSSEEEKK</a>  |

Mascot: <http://www.matrixscience.com/>

## Peptide View

MS/MS Fragmentation of **GFGFVAFSDPAVIDR**

Found in **AT2G33410.1** in **TAIR\_Arabidopsis**, Symbols: | heterogeneous nuclear ribonucleoprotein, putative / hnRNP, putative | chr2:14163161-14164511 FORWARD

Match to Query 7187: 1596.793192 from(799.403872,2+) index(9463)

Title: Elution from: 86.563 to 86.563 scan no 13005 cid35.00 polarity:+

Data file D6h-1\_2.mgf

Click mouse within plot area to zoom in by factor of two about that point

Or,   to  Da

Label all possible matches  Label matches used for scoring

Show Y-axis

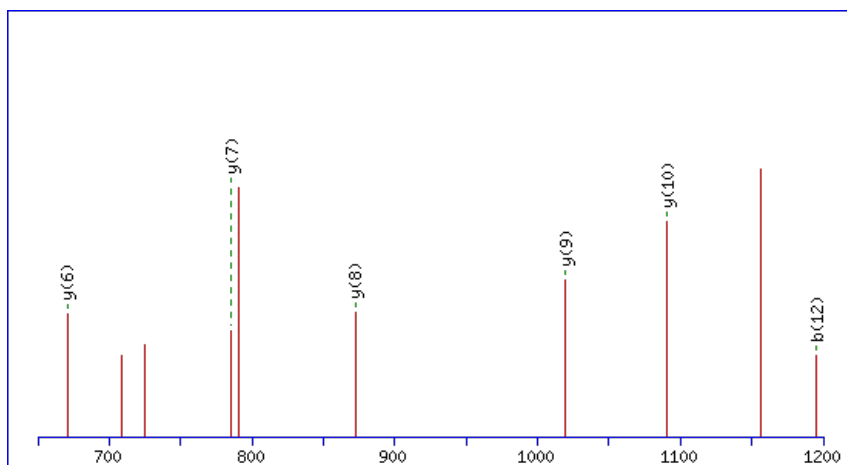

**Monoisotopic mass of neutral peptide Mr(calc):** 1596.7937

**Fixed modifications:** Carbamidomethyl (C) (apply to specified residues or termini only)

**Ions Score:** 34 **Expect:** 0.0015

**Matches:** 6/124 fragment ions using 9 most intense peaks ([help](#))

| #  | b                | b <sup>++</sup> | b <sup>0</sup> | b <sup>0++</sup> | Seq. | y                | y <sup>++</sup> | y*        | y <sup>*++</sup> | y <sup>0</sup> | y <sup>0++</sup> | #  |
|----|------------------|-----------------|----------------|------------------|------|------------------|-----------------|-----------|------------------|----------------|------------------|----|
| 1  | 58.0287          | 29.5180         |                |                  | G    |                  |                 |           |                  |                |                  | 15 |
| 2  | 205.0972         | 103.0522        |                |                  | F    | 1540.7795        | 770.8934        | 1523.7529 | 762.3801         | 1522.7689      | 761.8881         | 14 |
| 3  | 262.1186         | 131.5629        |                |                  | G    | 1393.7110        | 697.3592        | 1376.6845 | 688.8459         | 1375.7005      | 688.3539         | 13 |
| 4  | 409.1870         | 205.0972        |                |                  | F    | 1336.6896        | 668.8484        | 1319.6630 | 660.3352         | 1318.6790      | 659.8431         | 12 |
| 5  | 508.2554         | 254.6314        |                |                  | V    | 1189.6212        | 595.3142        | 1172.5946 | 586.8009         | 1171.6106      | 586.3089         | 11 |
| 6  | 579.2926         | 290.1499        |                |                  | A    | <b>1090.5527</b> | 545.7800        | 1073.5262 | 537.2667         | 1072.5422      | 536.7747         | 10 |
| 7  | 726.3610         | 363.6841        |                |                  | F    | <b>1019.5156</b> | 510.2615        | 1002.4891 | 501.7482         | 1001.5051      | 501.2562         | 9  |
| 8  | 813.3930         | 407.2001        | 795.3824       | 398.1949         | S    | <b>872.4472</b>  | 436.7272        | 855.4207  | 428.2140         | 854.4367       | 427.7220         | 8  |
| 9  | 928.4199         | 464.7136        | 910.4094       | 455.7083         | D    | <b>785.4152</b>  | 393.2112        | 768.3886  | 384.6980         | 767.4046       | 384.2060         | 7  |
| 10 | 1025.4727        | 513.2400        | 1007.4621      | 504.2347         | P    | <b>670.3883</b>  | 335.6978        | 653.3617  | 327.1845         | 652.3777       | 326.6925         | 6  |
| 11 | 1096.5098        | 548.7585        | 1078.4993      | 539.7533         | A    | 573.3355         | 287.1714        | 556.3089  | 278.6581         | 555.3249       | 278.1661         | 5  |
| 12 | <b>1195.5782</b> | 598.2928        | 1177.5677      | 589.2875         | V    | 502.2984         | 251.6528        | 485.2718  | 243.1395         | 484.2878       | 242.6475         | 4  |
| 13 | 1308.6623        | 654.8348        | 1290.6517      | 645.8295         | I    | 403.2300         | 202.1186        | 386.2034  | 193.6053         | 385.2194       | 193.1133         | 3  |
| 14 | 1423.6892        | 712.3483        | 1405.6787      | 703.3430         | D    | 290.1459         | 145.5766        | 273.1193  | 137.0633         | 272.1353       | 136.5713         | 2  |
| 15 |                  |                 |                |                  | R    | 175.1190         | 88.0631         | 158.0924  | 79.5498          |                |                  | 1  |

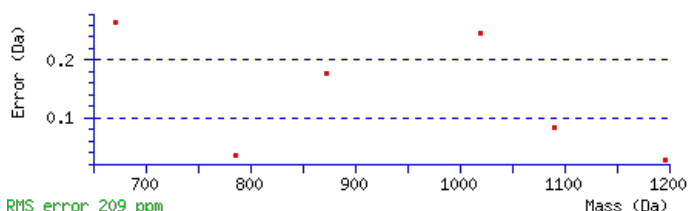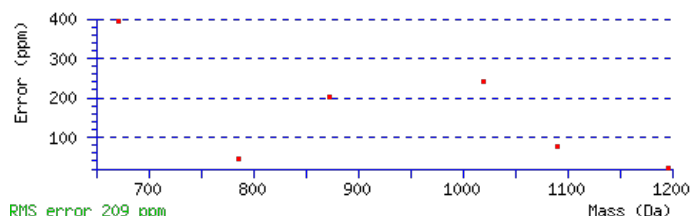

AT2G33410.1

NCBI **BLAST** search of [GFGFVAFSDPAVIDR](#)

(Parameters: blastp, nr protein database, expect=20000, no filter, PAM30)

Other BLAST [web gateways](#)

**All matches to this query**

| Score | Mr(calc)  | Delta   | Sequence                        |
|-------|-----------|---------|---------------------------------|
| 34.3  | 1596.7937 | -0.0005 | <a href="#">GFGFVAFSDPAVIDR</a> |

**Mascot:** <http://www.matrixscience.com/>

**Peptide View**MS/MS Fragmentation of **ELVSDNDDFPK**Found in **AT2G33540.1** in **TAIR\_Arabidopsis**, Symbols: CPL3 | CPL3 (C-TERMINAL DOMAIN PHOSPHATASE-LIKE 3); CTD phosphatase | chr2:14211157-14215873 REVERSE

Match to Query 4798: 1290.537690 from(646.276121,2+) index(4110)

Title: Elution from: 38.073 to 38.073 scan no 5121 cid35.00 polarity:+

Data file C7-2\_2.mgf

Click mouse within plot area to zoom in by factor of two about that point

Or,   to  Da Label all possible matches  Label matches used for scoring Show Y-axis 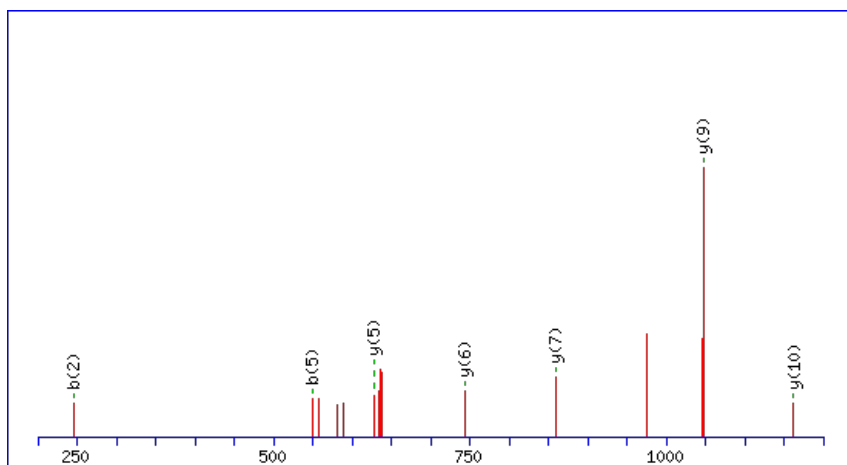Monoisotopic mass of neutral peptide  $M_r(\text{calc})$ : 1290.5390

Fixed modifications: Carbamidomethyl (C) (apply to specified residues or termini only)

Ions Score: 41 Expect: 0.00028

Matches : 7/104 fragment ions using 12 most intense peaks ([help](#))

| #  | b               | b <sup>++</sup> | b*        | b <sup>*++</sup> | b <sup>0</sup> | b <sup>0++</sup> | Seq. | y                | y <sup>++</sup> | y*        | y <sup>*++</sup> | y <sup>0</sup> | y <sup>0++</sup> | #  |
|----|-----------------|-----------------|-----------|------------------|----------------|------------------|------|------------------|-----------------|-----------|------------------|----------------|------------------|----|
| 1  | 131.0469        | 66.0271         |           |                  | 113.0363       | 57.0218          | E    |                  |                 |           |                  |                |                  | 11 |
| 2  | <b>245.1280</b> | 123.0676        |           |                  | 227.1174       | 114.0624         | L    | <b>1161.5067</b> | 581.2570        | 1143.4831 | 572.2452         | 1143.4961      | 572.2517         | 10 |
| 3  | 345.1935        | 173.1004        |           |                  | 327.1829       | 164.0951         | V    | <b>1047.4256</b> | 524.2164        | 1029.4020 | 515.2046         | 1029.4150      | 515.2111         | 9  |
| 4  | 433.2225        | 217.1149        |           |                  | 415.2120       | 208.1096         | S    | 947.3601         | 474.1837        | 929.3365  | 465.1719         | 929.3496       | 465.1784         | 8  |
| 5  | <b>549.2465</b> | 275.1269        |           |                  | 531.2359       | 266.1216         | D    | <b>859.3311</b>  | 430.1692        | 841.3075  | 421.1574         | 841.3205       | 421.1639         | 7  |
| 6  | 665.2835        | 333.1454        | 647.2599  | 324.1336         | 647.2729       | 324.1401         | N    | <b>743.3071</b>  | 372.1572        | 725.2835  | 363.1454         | 725.2965       | 363.1519         | 6  |
| 7  | 781.3075        | 391.1574        | 763.2839  | 382.1456         | 763.2969       | 382.1521         | D    | <b>627.2701</b>  | 314.1387        | 609.2465  | 305.1269         | 609.2595       | 305.1334         | 5  |
| 8  | 897.3314        | 449.1694        | 879.3079  | 440.1576         | 879.3209       | 440.1641         | D    | 511.2461         | 256.1267        | 493.2225  | 247.1149         | 493.2355       | 247.1214         | 4  |
| 9  | 1045.3969       | 523.2021        | 1027.3733 | 514.1903         | 1027.3863      | 514.1968         | F    | 395.2221         | 198.1147        | 377.1985  | 189.1029         |                |                  | 3  |
| 10 | 1143.4467       | 572.2270        | 1125.4231 | 563.2152         | 1125.4361      | 563.2217         | P    | 247.1567         | 124.0820        | 229.1331  | 115.0702         |                |                  | 2  |
| 11 |                 |                 |           |                  |                |                  | K    | 149.1069         | 75.0571         | 131.0833  | 66.0453          |                |                  | 1  |

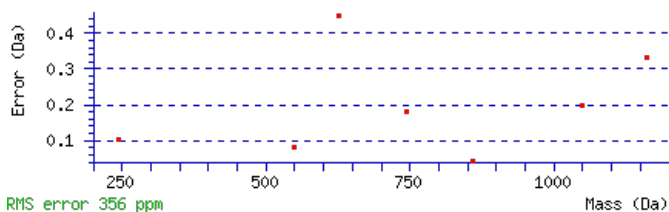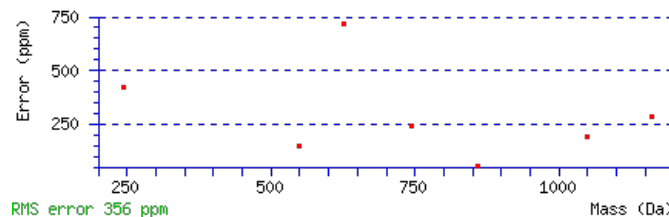NCBI **BLAST** search of **ELVSDNDDFPK**

(Parameters: blastp, nr protein database, expect=20000, no filter, PAM30)

Other BLAST [web gateways](#)**All matches to this query**

**AT2G33540.1**

| <b>Score</b> | <b>Mr(calc)</b> | <b>Delta</b> | <b>Sequence</b>              |
|--------------|-----------------|--------------|------------------------------|
| 41.1         | 1290.5390       | -0.0013      | <a href="#">ELVSDNDDFPK</a>  |
| 9.1          | 1290.5403       | -0.0026      | <a href="#">EMQHLATICR</a>   |
| 5.0          | 1290.5367       | 0.0009       | <a href="#">QLQVDDSTEDK</a>  |
| 1.5          | 1290.5395       | -0.0018      | <a href="#">SEPNSAQSTPTR</a> |
| 0.3          | 1290.5365       | 0.0012       | <a href="#">EWIMEQWEK</a>    |

**Mascot:** <http://www.matrixscience.com/>

**Peptide View**MS/MS Fragmentation of **CGSLEDGNLVFR**Found in **AT2G33680.1** in **TAIR\_Arabidopsis**, Symbols: | pentatricopeptide (PPR) repeat-containing protein | chr2:14256684-14258867  
FORWARD

Match to Query 5380: 1382.581610 from(692.298081,2+) index(3389)

Title: Elution from: 32.139 to 32.139 scan no 4186 cid35.00 polarity:+

Data file C7-3\_2.mgf

Click mouse within plot area to zoom in by factor of two about that point

Or,   to  Da Label all possible matches  Label matches used for scoring Show Y-axis 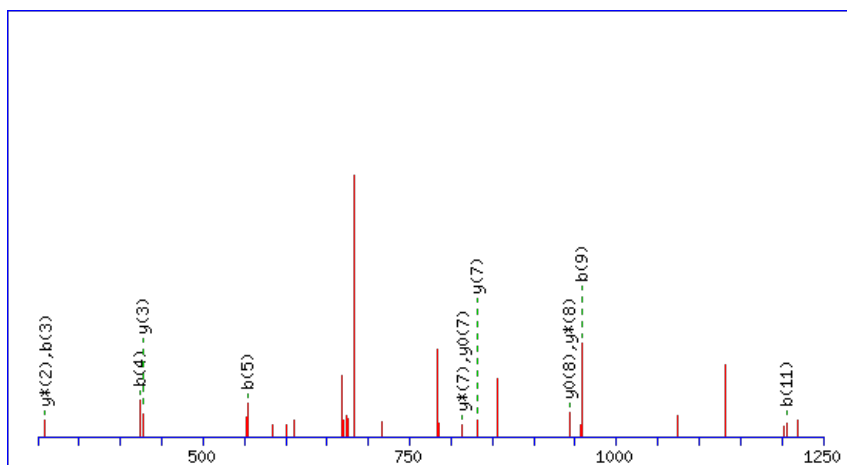Monoisotopic mass of neutral peptide  $M_r(\text{calc})$ : 1382.5843

Fixed modifications: Carbamidomethyl (C) (apply to specified residues or termini only)

Ions Score: 25 Expect: 0.014

Matches : 12/102 fragment ions using 23 most intense peaks ([help](#))

| #  | b                | b <sup>++</sup> | b*        | b <sup>*++</sup> | b <sup>0</sup> | b <sup>0++</sup> | Seq. | y               | y <sup>++</sup> | y*              | y <sup>*++</sup> | y <sup>0</sup>  | y <sup>0++</sup> | #  |
|----|------------------|-----------------|-----------|------------------|----------------|------------------|------|-----------------|-----------------|-----------------|------------------|-----------------|------------------|----|
| 1  | 163.0320         | 82.0196         |           |                  |                |                  | C    |                 |                 |                 |                  |                 |                  | 12 |
| 2  | 221.0505         | 111.0289        |           |                  |                |                  | G    | 1221.5669       | 611.2871        | 1203.5433       | 602.2753         | 1203.5563       | 602.2818         | 11 |
| 3  | <b>309.0796</b>  | 155.0434        |           |                  | 291.0690       | 146.0381         | S    | 1163.5484       | 582.2778        | 1145.5248       | 573.2660         | 1145.5378       | 573.2725         | 10 |
| 4  | <b>423.1607</b>  | 212.0840        |           |                  | 405.1501       | 203.0787         | L    | 1075.5193       | 538.2633        | 1057.4957       | 529.2515         | 1057.5087       | 529.2580         | 9  |
| 5  | <b>553.2003</b>  | 277.1038        |           |                  | 535.1897       | 268.0985         | E    | 961.4382        | 481.2227        | <b>943.4146</b> | 472.2109         | <b>943.4276</b> | 472.2175         | 8  |
| 6  | 669.2243         | 335.1158        |           |                  | 651.2137       | 326.1105         | D    | <b>831.3986</b> | 416.2029        | <b>813.3750</b> | 407.1911         | <b>813.3880</b> | 407.1976         | 7  |
| 7  | 727.2428         | 364.1250        |           |                  | 709.2322       | 355.1197         | G    | 715.3746        | 358.1909        | 697.3510        | 349.1791         |                 |                  | 6  |
| 8  | 843.2798         | 422.1435        | 825.2562  | 413.1317         | 825.2692       | 413.1382         | N    | 657.3561        | 329.1817        | 639.3325        | 320.1699         |                 |                  | 5  |
| 9  | <b>957.3609</b>  | 479.1841        | 939.3373  | 470.1723         | 939.3503       | 470.1788         | L    | 541.3191        | 271.1632        | 523.2955        | 262.1514         |                 |                  | 4  |
| 10 | 1057.4263        | 529.2168        | 1039.4027 | 520.2050         | 1039.4157      | 520.2115         | V    | <b>427.2380</b> | 214.1226        | 409.2144        | 205.1108         |                 |                  | 3  |
| 11 | <b>1205.4918</b> | 603.2495        | 1187.4682 | 594.2377         | 1187.4812      | 594.2442         | F    | 327.1725        | 164.0899        | <b>309.1490</b> | 155.0781         |                 |                  | 2  |
| 12 |                  |                 |           |                  |                |                  | R    | 179.1071        | 90.0572         | 161.0835        | 81.0454          |                 |                  | 1  |

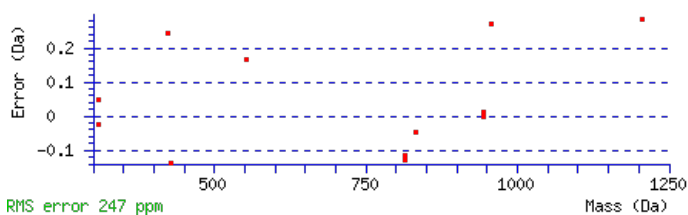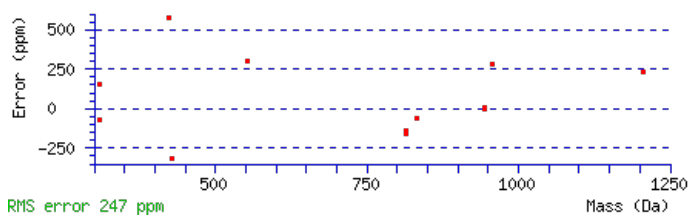NCBI BLAST search of **CGSLEDGNLVFR**

(Parameters: blastp, nr protein database, expect=20000, no filter, PAM30)

Other BLAST [web gateways](#)

## AT2G33680.1

All matches to this query

| Score | Mr(calc)  | Delta   | Sequence                        |
|-------|-----------|---------|---------------------------------|
| 25.4  | 1382.5843 | -0.0027 | <a href="#">CGSLEDGNLVER</a>    |
| 6.6   | 1382.5829 | -0.0013 | <a href="#">VMMNAMNAPSKR</a>    |
| 6.4   | 1382.5820 | -0.0004 | <a href="#">MEEERVDSSKR</a>     |
| 5.9   | 1382.5818 | -0.0001 | <a href="#">RGGRGGSGGGSGPSR</a> |
| 5.8   | 1382.5818 | -0.0002 | <a href="#">YPRAHYVGCLM</a>     |
| 5.0   | 1382.5794 | 0.0022  | <a href="#">TLMTSSEGEER</a>     |
| 4.4   | 1382.5787 | 0.0029  | <a href="#">GGSVWSSPSTSSAR</a>  |
| 4.2   | 1382.5829 | -0.0013 | <a href="#">VMMNAMNAPSKR</a>    |
| 4.2   | 1382.5829 | -0.0013 | <a href="#">VMMNAMNAPSKR</a>    |
| 2.4   | 1382.5843 | -0.0027 | <a href="#">ASRTIDWDGMAK</a>    |

Mascot: <http://www.matrixscience.com/>



## Peptide View

MS/MS Fragmentation of **VMLRPASPGTGVIAAGAVR**Found in **AT2G33800.1** in **TAIR\_Arabidopsis**, Symbols: | ribosomal protein S5 family protein | chr2:14308001-14309428 REVERSE

Match to Query 8412: 1848.926853 from(617.316227,3+) index(3413)

Title: Elution from: 34.172 to 34.172 scan no 4327 cid35.00 polarity:+

Data file D12h-2\_3.mgf

Click mouse within plot area to zoom in by factor of two about that point

Or,   to  Da Label all possible matches  Label matches used for scoring Show Y-axis 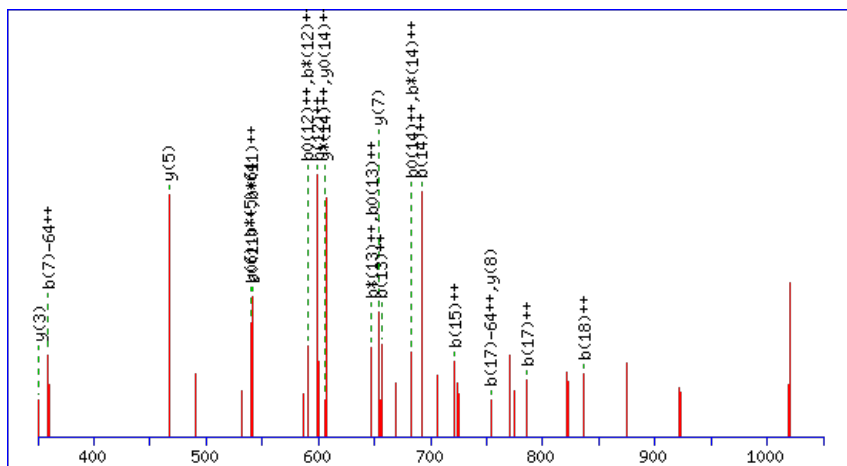Monoisotopic mass of neutral peptide  $M_r(\text{calc})$ : 1848.9298

Fixed modifications: Carbamidomethyl (C) (apply to specified residues or termini only)

Variable modifications:

M2 : Oxidation (M), with neutral losses 0.0000 (shown in table), 63.9983

Ions Score: 22 Expect: 0.041

Matches : 24/274 fragment ions using 34 most intense peaks ([help](#))

| #  | b         | b <sup>++</sup> | b*        | b <sup>*++</sup> | b <sup>0</sup> | b <sup>0++</sup> | Seq. | y         | y <sup>++</sup> | y*        | y <sup>*++</sup> | y <sup>0</sup> | y <sup>0++</sup> | #  |
|----|-----------|-----------------|-----------|------------------|----------------|------------------|------|-----------|-----------------|-----------|------------------|----------------|------------------|----|
| 1  | 101.0727  | 51.0400         |           |                  |                |                  | V    |           |                 |           |                  |                |                  | 19 |
| 2  | 249.1052  | 125.0562        |           |                  |                |                  | M    | 1749.8717 | 875.4395        | 1731.8481 | 866.4277         | 1731.8611      | 866.4342         | 18 |
| 3  | 363.1863  | 182.0968        |           |                  |                |                  | L    | 1601.8393 | 801.4233        | 1583.8157 | 792.4115         | 1583.8287      | 792.4180         | 17 |
| 4  | 523.2755  | 262.1414        | 505.2519  | 253.1296         |                |                  | R    | 1487.7582 | 744.3827        | 1469.7346 | 735.3709         | 1469.7476      | 735.3774         | 16 |
| 5  | 621.3253  | 311.1663        | 603.3017  | 302.1545         |                |                  | P    | 1327.6689 | 664.3381        | 1309.6453 | 655.3263         | 1309.6583      | 655.3328         | 15 |
| 6  | 693.3595  | 347.1834        | 675.3359  | 338.1716         |                |                  | A    | 1229.6191 | 615.3132        | 1211.5955 | 606.3014         | 1211.6085      | 606.3079         | 14 |
| 7  | 781.3885  | 391.1979        | 763.3649  | 382.1861         | 763.3780       | 382.1926         | S    | 1157.5850 | 579.2961        | 1139.5614 | 570.2843         | 1139.5744      | 570.2908         | 13 |
| 8  | 879.4383  | 440.2228        | 861.4147  | 431.2110         | 861.4278       | 431.2175         | P    | 1069.5559 | 535.2816        | 1051.5323 | 526.2698         | 1051.5453      | 526.2763         | 12 |
| 9  | 937.4568  | 469.2320        | 919.4332  | 460.2203         | 919.4463       | 460.2268         | G    | 971.5061  | 486.2567        | 953.4825  | 477.2449         | 953.4955       | 477.2514         | 11 |
| 10 | 1039.5015 | 520.2544        | 1021.4779 | 511.2426         | 1021.4910      | 511.2491         | T    | 913.4876  | 457.2474        | 895.4640  | 448.2356         | 895.4770       | 448.2422         | 10 |
| 11 | 1097.5200 | 549.2637        | 1079.4964 | 540.2519         | 1079.5095      | 540.2584         | G    | 811.4429  | 406.2251        | 793.4193  | 397.2133         |                |                  | 9  |
| 12 | 1197.5855 | 599.2964        | 1179.5619 | 590.2846         | 1179.5749      | 590.2911         | V    | 753.4244  | 377.2158        | 735.4008  | 368.2040         |                |                  | 8  |
| 13 | 1311.6666 | 656.3369        | 1293.6430 | 647.3251         | 1293.6560      | 647.3316         | I    | 653.3589  | 327.1831        | 635.3354  | 318.1713         |                |                  | 7  |
| 14 | 1383.7007 | 692.3540        | 1365.6771 | 683.3422         | 1365.6902      | 683.3487         | A    | 539.2778  | 270.1426        | 521.2543  | 261.1308         |                |                  | 6  |
| 15 | 1441.7192 | 721.3633        | 1423.6956 | 712.3515         | 1423.7087      | 712.3580         | G    | 467.2437  | 234.1255        | 449.2201  | 225.1137         |                |                  | 5  |
| 16 | 1499.7377 | 750.3725        | 1481.7141 | 741.3607         | 1481.7272      | 741.3672         | G    | 409.2252  | 205.1162        | 391.2016  | 196.1044         |                |                  | 4  |
| 17 | 1571.7719 | 786.3896        | 1553.7483 | 777.3778         | 1553.7613      | 777.3843         | A    | 351.2067  | 176.1070        | 333.1831  | 167.0952         |                |                  | 3  |
| 18 | 1671.8373 | 836.4223        | 1653.8137 | 827.4105         | 1653.8268      | 827.4170         | V    | 279.1725  | 140.0899        | 261.1490  | 131.0781         |                |                  | 2  |
| 19 |           |                 |           |                  |                |                  | R    | 179.1071  | 90.0572         | 161.0835  | 81.0454          |                |                  | 1  |

AT2G33800.1

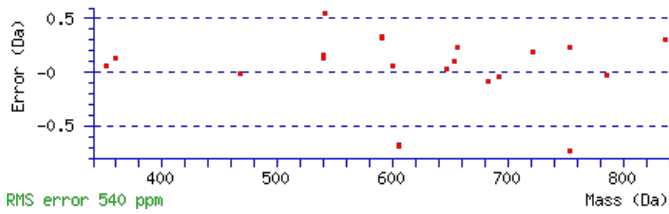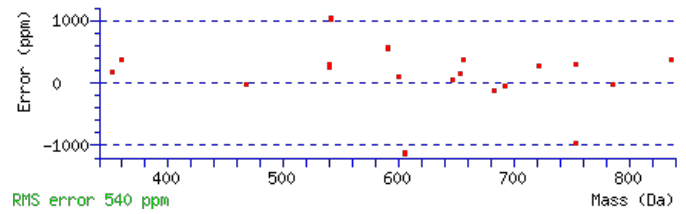

NCBI **BLAST** search of [VMLRPASPGTGVIAGGAVR](#)  
(Parameters: blastp, nr protein database, expect=20000, no filter, PAM30)  
Other BLAST [web gateways](#)

**All matches to this query**

| Score | Mr(calc)  | Delta   | Sequence                            |
|-------|-----------|---------|-------------------------------------|
| 21.7  | 1848.9298 | -0.0030 | <a href="#">VMLRPASPGTGVIAGGAVR</a> |
| 3.8   | 1848.9299 | -0.0030 | <a href="#">ALNSSCKKPPKPGNKAK</a>   |
| 3.7   | 1848.9225 | 0.0044  | <a href="#">LMALRSHVPIVTNMTK</a>    |
| 0.3   | 1848.9240 | 0.0029  | <a href="#">WKLEPRLVCLHFAR</a>      |

Mascot: <http://www.matrixscience.com/>

**Peptide View**MS/MS Fragmentation of **NSNAVVTVSETSTMANQMLK**

Found in **AT2G34230.1** in **TAIR\_Arabidopsis**, Symbols: | similar to MEE20 (maternal effect embryo arrest 20) [Arabidopsis thaliana] (TAIR:AT2G34220.1); contains InterPro domain Protein of unknown function DUF627 (InterPro:IPR006866); contains InterPro domain Protein of unknown function DUF629

Match to Query 10438: 2280.994398 from(761.338742,3+) index(6101)

Title: Elution from: 53.961 to 53.961 scan no 7717 cid35.00 polarity:+

Data file 0-2\_1.mgf

Click mouse within plot area to zoom in by factor of two about that point

Or, Plot from  to  Da Label all possible matches  Label matches used for scoring Show Y-axis 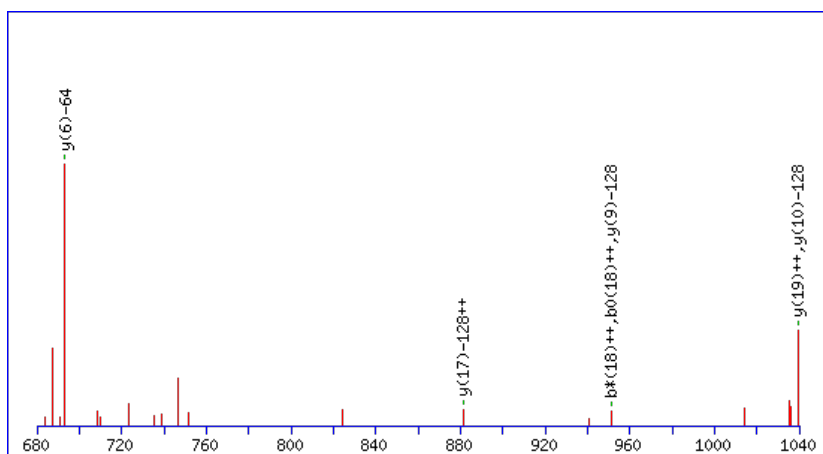**Monoisotopic mass of neutral peptide Mr(calc):** 2281.0003**Fixed modifications:** Carbamidomethyl (C) (apply to specified residues or termini only)**Variable modifications:****M14** : Oxidation (M), with neutral losses 63.9983(shown in table), 0.0000**M18** : Oxidation (M), with neutral losses 63.9983(shown in table), 0.0000**Ions Score:** 23 **Expect:** 0.033**Matches** : 7/356 fragment ions using 4 most intense peaks ([help](#))

| #  | b         | b <sup>++</sup> | b <sup>*</sup> | b <sup>*++</sup> | b <sup>0</sup> | b <sup>0++</sup> | Seq. | y         | y <sup>++</sup> | y <sup>*</sup> | y <sup>*++</sup> | y <sup>0</sup> | y <sup>0++</sup> | #  |
|----|-----------|-----------------|----------------|------------------|----------------|------------------|------|-----------|-----------------|----------------|------------------|----------------|------------------|----|
| 1  | 117.0443  | 59.0258         | 99.0207        | 50.0140          |                |                  | N    |           |                 |                |                  |                |                  | 21 |
| 2  | 205.0733  | 103.0403        | 187.0498       | 94.0285          | 187.0628       | 94.0350          | S    | 2037.9740 | 1019.4906       | 2019.9504      | 1010.4788        | 2019.9634      | 1010.4853        | 20 |
| 3  | 321.1103  | 161.0588        | 303.0867       | 152.0470         | 303.0998       | 152.0535         | N    | 1949.9449 | 975.4761        | 1931.9213      | 966.4643         | 1931.9343      | 966.4708         | 19 |
| 4  | 393.1445  | 197.0759        | 375.1209       | 188.0641         | 375.1339       | 188.0706         | A    | 1833.9079 | 917.4576        | 1815.8843      | 908.4458         | 1815.8973      | 908.4523         | 18 |
| 5  | 493.2099  | 247.1086        | 475.1863       | 238.0968         | 475.1994       | 238.1033         | V    | 1761.8738 | 881.4405        | 1743.8502      | 872.4287         | 1743.8632      | 872.4352         | 17 |
| 6  | 593.2754  | 297.1413        | 575.2518       | 288.1295         | 575.2648       | 288.1360         | V    | 1661.8083 | 831.4078        | 1643.7847      | 822.3960         | 1643.7977      | 822.4025         | 16 |
| 7  | 695.3201  | 348.1637        | 677.2965       | 339.1519         | 677.3095       | 339.1584         | T    | 1561.7429 | 781.3751        | 1543.7193      | 772.3633         | 1543.7323      | 772.3698         | 15 |
| 8  | 795.3855  | 398.1964        | 777.3620       | 389.1846         | 777.3750       | 389.1911         | V    | 1459.6981 | 730.3527        | 1441.6746      | 721.3409         | 1441.6876      | 721.3474         | 14 |
| 9  | 883.4146  | 442.2109        | 865.3910       | 433.1991         | 865.4040       | 433.2057         | S    | 1359.6327 | 680.3200        | 1341.6091      | 671.3082         | 1341.6221      | 671.3147         | 13 |
| 10 | 1013.4542 | 507.2308        | 995.4306       | 498.2190         | 995.4437       | 498.2255         | E    | 1271.6036 | 636.3055        | 1253.5800      | 627.2937         | 1253.5931      | 627.3002         | 12 |
| 11 | 1115.4989 | 558.2531        | 1097.4754      | 549.2413         | 1097.4884      | 549.2478         | T    | 1141.5640 | 571.2856        | 1123.5404      | 562.2738         | 1123.5534      | 562.2804         | 11 |
| 12 | 1203.5280 | 602.2676        | 1185.5044      | 593.2559         | 1185.5174      | 593.2624         | S    | 1039.5193 | 520.2633        | 1021.4957      | 511.2515         | 1021.5087      | 511.2580         | 10 |
| 13 | 1305.5727 | 653.2900        | 1287.5491      | 644.2782         | 1287.5622      | 644.2847         | T    | 951.4902  | 476.2488        | 933.4666       | 467.2370         | 933.4797       | 467.2435         | 9  |
| 14 | 1389.6069 | 695.3071        | 1371.5833      | 686.2953         | 1371.5963      | 686.3018         | M    | 849.4455  | 425.2264        | 831.4219       | 416.2146         |                |                  | 8  |
| 15 | 1461.6410 | 731.3241        | 1443.6174      | 722.3124         | 1443.6305      | 722.3189         | A    | 765.4114  | 383.2093        | 747.3878       | 374.1975         |                |                  | 7  |
| 16 | 1577.6780 | 789.3426        | 1559.6544      | 780.3309         | 1559.6675      | 780.3374         | N    | 693.3772  | 347.1922        | 675.3536       | 338.1805         |                |                  | 6  |
| 17 | 1707.7307 | 854.3690        | 1689.7071      | 845.3572         | 1689.7201      | 845.3637         | Q    | 577.3402  | 289.1737        | 559.3166       | 280.1620         |                |                  | 5  |
| 18 | 1791.7648 | 896.3860        | 1773.7412      | 887.3743         | 1773.7543      | 887.3808         | M    | 447.2876  | 224.1474        | 429.2640       | 215.1356         |                |                  | 4  |
| 19 | 1891.8303 | 946.4188        | 1873.8067      | 937.4070         | 1873.8197      | 937.4135         | V    | 363.2534  | 182.1303        | 345.2298       | 173.1186         |                |                  | 3  |
| 20 | 2005.9114 | 1003.4593       | 1987.8878      | 994.4475         | 1987.9008      | 994.4540         | L    | 263.1880  | 132.0976        | 245.1644       | 123.0858         |                |                  | 2  |
| 21 |           |                 |                |                  |                |                  | K    | 149.1069  | 75.0571         | 131.0833       | 66.0453          |                |                  | 1  |

# AT2G34230.1

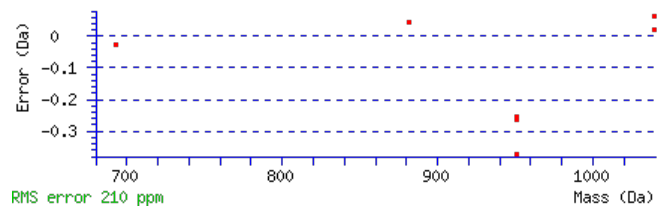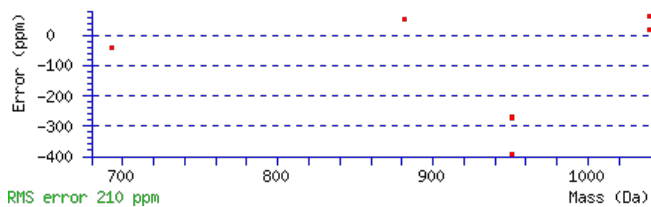

NCBI BLAST search of [NSNAVVTVSETSTMANQMVLK](#)  
 (Parameters: blastp, nr protein database, expect=20000, no filter, PAM30)  
 Other BLAST [web gateways](#)

## All matches to this query

| Score | Mr(calc)  | Delta   | Sequence                              |
|-------|-----------|---------|---------------------------------------|
| 22.5  | 2281.0003 | -0.0059 | <a href="#">NSNAVVTVSETSTMANQMVLK</a> |
| 3.5   | 2280.9914 | 0.0030  | <a href="#">FHGATVSASAQGSPSCIQYKR</a> |
| 2.4   | 2280.9998 | -0.0054 | <a href="#">EAVDSFIEKAIMTIDTEMGK</a>  |
| 1.5   | 2280.9928 | 0.0016  | <a href="#">GYFVWSEMDLYELLNGYK</a>    |
| 1.1   | 2280.9978 | -0.0034 | <a href="#">MYHDKIMGERSVDISSLMK</a>   |

Mascot: <http://www.matrixscience.com/>

### Peptide View

 MS/MS Fragmentation of **EADSTSSLEIPALDSVKPMGSSVSKVVMSDKSK**

 Found in **AT2G34310.1** in **TAIR\_Arabidopsis**, Symbols: | similar to unknown protein [Arabidopsis thaliana] (TAIR:ATIG29530.1) | chr2:14485643-14486891 REVERSE

Match to Query 10841: 3511.724379 from(1171.582069,3+) index(10419)

Title: Elution from: 100.091 to 100.091 scan no 14697 cid35.00 polarity:+

Data file D6h-2\_2.mgf

Click mouse within plot area to zoom in by factor of two about that point

 Or, Plot from  to  Da 

 Label all possible matches  Label matches used for scoring 

 Show Y-axis 
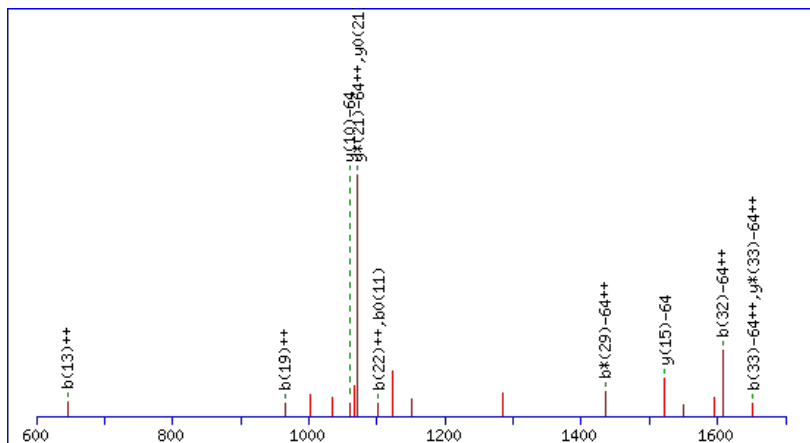
 Monoisotopic mass of neutral peptide  $M_r(\text{calc})$ : 3511.7273

Fixed modifications: Carbamidomethyl (C) (apply to specified residues or termini only)

Variable modifications:

M29 : Oxidation (M), with neutral losses 63.9983 (shown in table), 0.0000

Ions Score: 19 Expect: 0.044

 Matches : 12/558 fragment ions using 18 most intense peaks ([help](#))

| #  | b         | b <sup>++</sup> | b*        | b <sup>*++</sup> | b <sup>0</sup> | b <sup>0++</sup> | Seq | y         | y <sup>++</sup> | y*        | y <sup>*++</sup> | y <sup>0</sup> | y <sup>0++</sup> | #  |
|----|-----------|-----------------|-----------|------------------|----------------|------------------|-----|-----------|-----------------|-----------|------------------|----------------|------------------|----|
| 1  | 130.0499  | 65.5286         |           |                  | 112.0393       | 56.5233          | E   |           |                 |           |                  |                |                  | 34 |
| 2  | 201.0870  | 101.0471        |           |                  | 183.0764       | 92.0418          | A   | 3319.6937 | 1660.3505       | 3302.6672 | 1651.8372        | 3301.6832      | 1651.3452        | 33 |
| 3  | 316.1139  | 158.5606        |           |                  | 298.1034       | 149.5553         | D   | 3248.6566 | 1624.8320       | 3231.6301 | 1616.3187        | 3230.6461      | 1615.8267        | 32 |
| 4  | 403.1460  | 202.0766        |           |                  | 385.1354       | 193.0713         | S   | 3133.6297 | 1567.3185       | 3116.6031 | 1558.8052        | 3115.6191      | 1558.3132        | 31 |
| 5  | 504.1936  | 252.6005        |           |                  | 486.1831       | 243.5952         | T   | 3046.5977 | 1523.8025       | 3029.5711 | 1515.2892        | 3028.5871      | 1514.7972        | 30 |
| 6  | 591.2257  | 296.1165        |           |                  | 573.2151       | 287.1112         | S   | 2945.5500 | 1473.2786       | 2928.5234 | 1464.7654        | 2927.5394      | 1464.2733        | 29 |
| 7  | 678.2577  | 339.6325        |           |                  | 660.2471       | 330.6272         | S   | 2858.5179 | 1429.7626       | 2841.4914 | 1421.2493        | 2840.5074      | 1420.7573        | 28 |
| 8  | 791.3418  | 396.1745        |           |                  | 773.3312       | 387.1692         | L   | 2771.4859 | 1386.2466       | 2754.4594 | 1377.7333        | 2753.4754      | 1377.2413        | 27 |
| 9  | 920.3843  | 460.6958        |           |                  | 902.3738       | 451.6905         | E   | 2658.4019 | 1329.7046       | 2641.3753 | 1321.1913        | 2640.3913      | 1320.6993        | 26 |
| 10 | 1033.4684 | 517.2378        |           |                  | 1015.4578      | 508.2326         | I   | 2529.3593 | 1265.1833       | 2512.3327 | 1256.6700        | 2511.3487      | 1256.1780        | 25 |
| 11 | 1120.5004 | 560.7539        |           |                  | 1102.4899      | 551.7486         | S   | 2416.2752 | 1208.6412       | 2399.2487 | 1200.1280        | 2398.2646      | 1199.6360        | 24 |
| 12 | 1217.5532 | 609.2802        |           |                  | 1199.5426      | 600.2750         | P   | 2329.2432 | 1165.1252       | 2312.2166 | 1156.6119        | 2311.2326      | 1156.1199        | 23 |
| 13 | 1288.5903 | 644.7988        |           |                  | 1270.5798      | 635.7935         | A   | 2232.1904 | 1116.5988       | 2215.1639 | 1108.0856        | 2214.1798      | 1107.5936        | 22 |
| 14 | 1401.6744 | 701.3408        |           |                  | 1383.6638      | 692.3355         | L   | 2161.1533 | 1081.0803       | 2144.1267 | 1072.5670        | 2143.1427      | 1072.0750        | 21 |
| 15 | 1516.7013 | 758.8543        |           |                  | 1498.6908      | 749.8490         | D   | 2048.0692 | 1024.5383       | 2031.0427 | 1016.0250        | 2030.0587      | 1015.5330        | 20 |
| 16 | 1603.7334 | 802.3703        |           |                  | 1585.7228      | 793.3650         | S   | 1933.0423 | 967.0248        | 1916.0157 | 958.5115         | 1915.0317      | 958.0195         | 19 |
| 17 | 1702.8018 | 851.9045        |           |                  | 1684.7912      | 842.8992         | V   | 1846.0103 | 923.5088        | 1828.9837 | 914.9955         | 1827.9997      | 914.5035         | 18 |
| 18 | 1830.8967 | 915.9520        | 1813.8702 | 907.4387         | 1812.8862      | 906.9467         | K   | 1746.9418 | 873.9746        | 1729.9153 | 865.4613         | 1728.9313      | 864.9693         | 17 |
| 19 | 1927.9495 | 964.4784        | 1910.9229 | 955.9651         | 1909.9389      | 955.4731         | P   | 1618.8469 | 809.9271        | 1601.8203 | 801.4138         | 1600.8363      | 800.9218         | 16 |
| 20 | 2058.9900 | 1029.9986       | 2041.9634 | 1021.4854        | 2040.9794      | 1020.9933        | M   | 1521.7941 | 761.4007        | 1504.7676 | 752.8874         | 1503.7836      | 752.3954         | 15 |
| 21 | 2116.0114 | 1058.5094       | 2098.9849 | 1049.9961        | 2098.0009      | 1049.5041        | G   | 1390.7536 | 695.8805        | 1373.7271 | 687.3672         | 1372.7431      | 686.8752         | 14 |
| 22 | 2203.0435 | 1102.0254       | 2186.0169 | 1093.5121        | 2185.0329      | 1093.0201        | S   | 1333.7322 | 667.3697        | 1316.7056 | 658.8564         | 1315.7216      | 658.3644         | 13 |
| 23 | 2290.0755 | 1145.5414       | 2273.0489 | 1137.0281        | 2272.0649      | 1136.5361        | S   | 1246.7001 | 623.8537        | 1229.6736 | 615.3404         | 1228.6896      | 614.8484         | 12 |

AT2G34310.1

|    |           |           |           |           |           |           |   |           |          |           |          |           |          |    |
|----|-----------|-----------|-----------|-----------|-----------|-----------|---|-----------|----------|-----------|----------|-----------|----------|----|
| 24 | 2389.1439 | 1195.0756 | 2372.1174 | 1186.5623 | 2371.1333 | 1186.0703 | V | 1159.6681 | 580.3377 | 1142.6416 | 571.8244 | 1141.6575 | 571.3324 | 11 |
| 25 | 2476.1759 | 1238.5916 | 2459.1494 | 1230.0783 | 2458.1654 | 1229.5863 | S | 1060.5997 | 530.8035 | 1043.5732 | 522.2902 | 1042.5891 | 521.7982 | 10 |
| 26 | 2604.2709 | 1302.6391 | 2587.2444 | 1294.1258 | 2586.2603 | 1293.6338 | K | 973.5677  | 487.2875 | 956.5411  | 478.7742 | 955.5571  | 478.2822 | 9  |
| 27 | 2703.3393 | 1352.1733 | 2686.3128 | 1343.6600 | 2685.3288 | 1343.1680 | V | 845.4727  | 423.2400 | 828.4462  | 414.7267 | 827.4621  | 414.2347 | 8  |
| 28 | 2802.4077 | 1401.7075 | 2785.3812 | 1393.1942 | 2784.3972 | 1392.7022 | V | 746.4043  | 373.7058 | 729.3777  | 365.1925 | 728.3937  | 364.7005 | 7  |
| 29 | 2885.4448 | 1443.2261 | 2868.4183 | 1434.7128 | 2867.4343 | 1434.2208 | M | 647.3359  | 324.1716 | 630.3093  | 315.6583 | 629.3253  | 315.1663 | 6  |
| 30 | 2972.4769 | 1486.7421 | 2955.4503 | 1478.2288 | 2954.4663 | 1477.7368 | S | 564.2988  | 282.6530 | 547.2722  | 274.1397 | 546.2882  | 273.6477 | 5  |
| 31 | 3087.5038 | 1544.2555 | 3070.4773 | 1535.7423 | 3069.4933 | 1535.2503 | D | 477.2667  | 239.1370 | 460.2402  | 230.6237 | 459.2562  | 230.1317 | 4  |
| 32 | 3215.5988 | 1608.3030 | 3198.5722 | 1599.7898 | 3197.5882 | 1599.2977 | K | 362.2398  | 181.6235 | 345.2132  | 173.1103 | 344.2292  | 172.6183 | 3  |
| 33 | 3302.6308 | 1651.8190 | 3285.6043 | 1643.3058 | 3284.6202 | 1642.8138 | S | 234.1448  | 117.5761 | 217.1183  | 109.0628 | 216.1343  | 108.5708 | 2  |
| 34 |           |           |           |           |           |           | K | 147.1128  | 74.0600  | 130.0863  | 65.5468  |           |          | 1  |

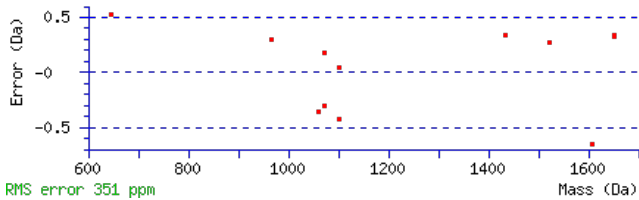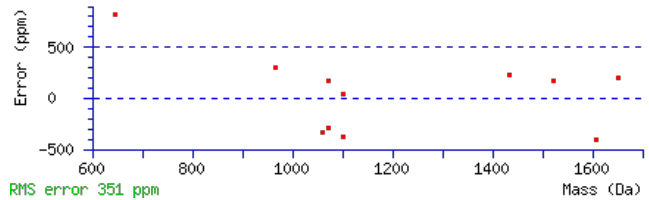

NCBI BLAST search of [EADSTSSLEISPALDSVKPMGSSVSKVVM SDKSK](#)  
 (Parameters: blastp, nr protein database, expect=20000, no filter, PAM30)  
 Other BLAST [web gateways](#)

All matches to this query

| Score | Mr(calc)  | Delta   | Sequence                                            | Site Analysis        |
|-------|-----------|---------|-----------------------------------------------------|----------------------|
| 19.1  | 3511.7273 | -0.0029 | <a href="#">EADSTSSLEISPALDSVKPMGSSVSKVVM SDKSK</a> | Oxidation M29 89.27% |
| 9.9   | 3511.7273 | -0.0029 | <a href="#">EADSTSSLEISPALDSVKPMGSSVSKVVM SDKSK</a> | Oxidation M20 10.73% |
| 3.0   | 3511.7161 | 0.0083  | <a href="#">YSTIIVHIVYLGEKQHDDPEFV TESHHR</a>       |                      |
| 1.5   | 3511.7149 | 0.0095  | <a href="#">MSIIELKPGGKDTSVTNENKMQYIHAMADYK</a>     |                      |
| 1.0   | 3511.7228 | 0.0016  | <a href="#">VCNHPYLIPGTEPESGSLEFLHDMRIKASAK</a>     |                      |
| 0.9   | 3511.7334 | -0.0090 | <a href="#">EQLVQLMFETENVSGFYASEQAVLSLYAVGR</a>     |                      |

Mascot: <http://www.matrixscience.com/>

**Peptide View**MS/MS Fragmentation of **MLIKPEK**Found in **AT2G34400.1** in **TAIR\_Arabidopsis**, Symbols: | pentatricopeptide (PPR) repeat-containing protein | chr2:14523317-14525265  
FORWARD

Match to Query 1476: 882.473940 from(442.244246,2+) index(1833)

Title: Elution from: 22.344 to 22.344 scan no 2388 cid35.00 polarity:+

Data file D12h-3\_2.mgf

Click mouse within plot area to zoom in by factor of two about that point

Or,  to  Da Label all possible matches  Label matches used for scoring Show Y-axis 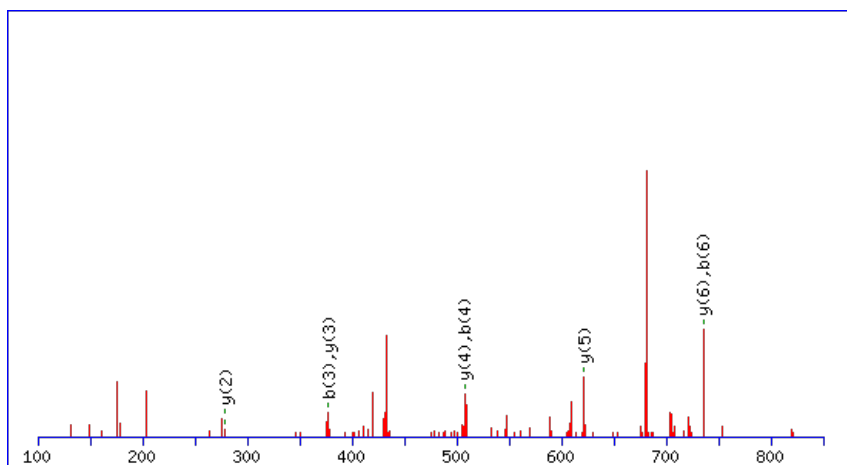Monoisotopic mass of neutral peptide  $M_r(\text{calc})$ : 882.4727

Fixed modifications: Carbamidomethyl (C) (apply to specified residues or termini only)

Variable modifications:

M1 : Oxidation (M), with neutral losses 0.0000 (shown in table), 63.9983

Ions Score: 26 Expect: 0.0092

Matches : 8/74 fragment ions using 14 most intense peaks ([help](#))

| # | b        | b <sup>++</sup> | b*       | b <sup>*++</sup> | b <sup>0</sup> | b <sup>0++</sup> | Seq. | y        | y <sup>++</sup> | y*       | y <sup>*++</sup> | y <sup>0</sup> | y <sup>0++</sup> | # |
|---|----------|-----------------|----------|------------------|----------------|------------------|------|----------|-----------------|----------|------------------|----------------|------------------|---|
| 1 | 149.0397 | 75.0235         |          |                  |                |                  | M    |          |                 |          |                  |                |                  | 7 |
| 2 | 263.1208 | 132.0640        |          |                  |                |                  | L    | 735.4475 | 368.2274        | 717.4239 | 359.2156         | 717.4370       | 359.2221         | 6 |
| 3 | 377.2019 | 189.1046        |          |                  |                |                  | I    | 621.3664 | 311.1869        | 603.3428 | 302.1751         | 603.3559       | 302.1816         | 5 |
| 4 | 507.2909 | 254.1491        | 489.2674 | 245.1373         |                |                  | K    | 507.2853 | 254.1463        | 489.2617 | 245.1345         | 489.2748       | 245.1410         | 4 |
| 5 | 605.3407 | 303.1740        | 587.3172 | 294.1622         |                |                  | P    | 377.1963 | 189.1018        | 359.1727 | 180.0900         | 359.1857       | 180.0965         | 3 |
| 6 | 735.3804 | 368.1938        | 717.3568 | 359.1820         | 717.3698       | 359.1885         | E    | 279.1465 | 140.0769        | 261.1229 | 131.0651         | 261.1359       | 131.0716         | 2 |
| 7 |          |                 |          |                  |                |                  | K    | 149.1069 | 75.0571         | 131.0833 | 66.0453          |                |                  | 1 |

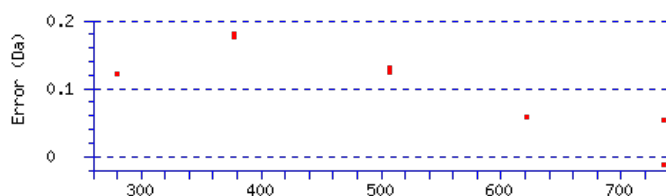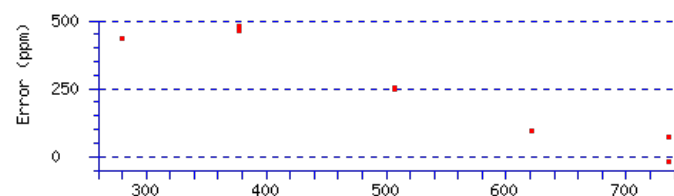NCBI BLAST search of [MLIKPEK](#)

(Parameters: blastp, nr protein database, expect=20000, no filter, PAM30)

Other BLAST [web gateways](#)**All matches to this query**

| Score | $M_r(\text{calc})$ | Delta  | Sequence                |
|-------|--------------------|--------|-------------------------|
| 26.4  | 882.4727           | 0.0012 | <a href="#">MLIKPEK</a> |

## AT2G34400.1

|     |          |        |                          |
|-----|----------|--------|--------------------------|
| 9.4 | 882.4727 | 0.0013 | <a href="#">ICLDILK</a>  |
| 6.1 | 882.4727 | 0.0013 | <a href="#">LMAEGILK</a> |
| 3.9 | 882.4720 | 0.0020 | <a href="#">FHKALQK</a>  |
| 2.1 | 882.4720 | 0.0020 | <a href="#">KFAHLQK</a>  |
| 1.5 | 882.4727 | 0.0013 | <a href="#">CIEIVK</a>   |
| 1.1 | 882.4720 | 0.0019 | <a href="#">KPPNLFK</a>  |

**Mascot:** <http://www.matrixscience.com/>



### Peptide View

 MS/MS Fragmentation of **GPLENLADHLADPVNNAWAFATNFVPGK**

 Found in **AT2G34420.1** in **TAIR Arabidopsis**, Symbols: LHC1.5, LHB1B2 | LHB1B2 (Photosystem II light harvesting complex gene 1.5); chlorophyll binding | chr2:14529795-14530592 REVERSE

Match to Query 11215: 3091.517241 from(1031.513023,3+) index(11188)

Title: Elution from: 112.196 to 112.196 scan no 16172 cid35.00 polarity:+

Data file 0-2\_1.mgf

Click mouse within plot area to zoom in by factor of two about that point

 Or,   to  Da 

 Label all possible matches  Label matches used for scoring 

 Show Y-axis 
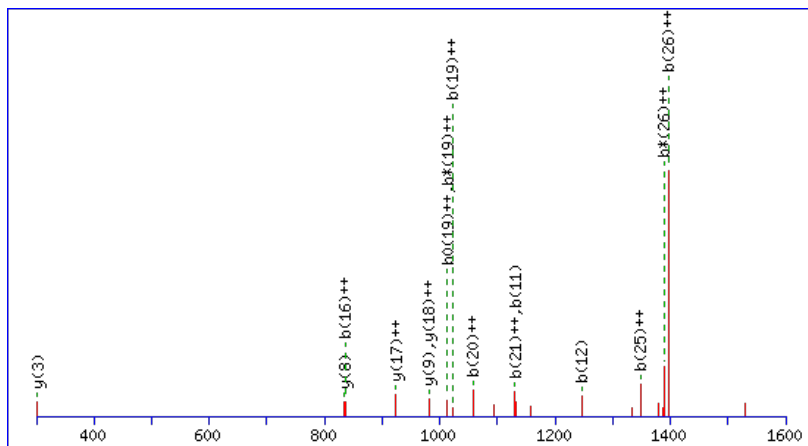
 Monoisotopic mass of neutral peptide  $M_r(\text{calc})$ : 3091.5152

Fixed modifications: Carbamidomethyl (C) (apply to specified residues or termini only)

Ions Score: 40 Expect: 0.00032

 Matches : 16/310 fragment ions using 18 most intense peaks ([help](#))

| #  | b                | b <sup>++</sup>  | b <sup>*</sup> | b <sup>*++</sup> | b <sup>0</sup> | b <sup>0++</sup> | Seq | y               | y <sup>++</sup> | y <sup>*</sup> | y <sup>*++</sup> | y <sup>0</sup> | y <sup>0++</sup> | #  |
|----|------------------|------------------|----------------|------------------|----------------|------------------|-----|-----------------|-----------------|----------------|------------------|----------------|------------------|----|
| 1  | 58.0287          | 29.5180          |                |                  |                |                  | G   |                 |                 |                |                  |                |                  | 29 |
| 2  | 155.0815         | 78.0444          |                |                  |                |                  | P   | 3035.5010       | 1518.2541       | 3018.4744      | 1509.7409        | 3017.4904      | 1509.2489        | 28 |
| 3  | 268.1656         | 134.5864         |                |                  |                |                  | L   | 2938.4482       | 1469.7278       | 2921.4217      | 1461.2145        | 2920.4377      | 1460.7225        | 27 |
| 4  | 397.2082         | 199.1077         |                |                  | 379.1976       | 190.1024         | E   | 2825.3642       | 1413.1857       | 2808.3376      | 1404.6724        | 2807.3536      | 1404.1804        | 26 |
| 5  | 511.2511         | 256.1292         | 494.2245       | 247.6159         | 493.2405       | 247.1239         | N   | 2696.3216       | 1348.6644       | 2679.2950      | 1340.1512        | 2678.3110      | 1339.6591        | 25 |
| 6  | 624.3352         | 312.6712         | 607.3086       | 304.1579         | 606.3246       | 303.6659         | L   | 2582.2786       | 1291.6430       | 2565.2521      | 1283.1297        | 2564.2681      | 1282.6377        | 24 |
| 7  | 695.3723         | 348.1898         | 678.3457       | 339.6765         | 677.3617       | 339.1845         | A   | 2469.1946       | 1235.1009       | 2452.1680      | 1226.5877        | 2451.1840      | 1226.0956        | 23 |
| 8  | 810.3992         | 405.7032         | 793.3727       | 397.1900         | 792.3886       | 396.6980         | D   | 2398.1575       | 1199.5824       | 2381.1309      | 1191.0691        | 2380.1469      | 1190.5771        | 22 |
| 9  | 947.4581         | 474.2327         | 930.4316       | 465.7194         | 929.4476       | 465.2274         | H   | 2283.1305       | 1142.0689       | 2266.1040      | 1133.5556        | 2265.1200      | 1133.0636        | 21 |
| 10 | 1060.5422        | 530.7747         | 1043.5156      | 522.2615         | 1042.5316      | 521.7694         | L   | 2146.0716       | 1073.5394       | 2129.0451      | 1065.0262        | 2128.0610      | 1064.5342        | 20 |
| 11 | <b>1131.5793</b> | 566.2933         | 1114.5528      | 557.7800         | 1113.5687      | 557.2880         | A   | 2032.9876       | 1016.9974       | 2015.9610      | 1008.4841        | 2014.9770      | 1007.9921        | 19 |
| 12 | <b>1246.6062</b> | 623.8068         | 1229.5797      | 615.2935         | 1228.5957      | 614.8015         | D   | 1961.9504       | <b>981.4789</b> | 1944.9239      | 972.9656         | 1943.9399      | 972.4736         | 18 |
| 13 | 1343.6590        | 672.3331         | 1326.6325      | 663.8199         | 1325.6484      | 663.3279         | P   | 1846.9235       | <b>923.9654</b> | 1829.8969      | 915.4521         | 1828.9129      | 914.9601         | 17 |
| 14 | 1442.7274        | 721.8673         | 1425.7009      | 713.3541         | 1424.7169      | 712.8621         | V   | 1749.8707       | 875.4390        | 1732.8442      | 866.9257         | 1731.8602      | 866.4337         | 16 |
| 15 | 1556.7703        | 778.8888         | 1539.7438      | 770.3755         | 1538.7598      | 769.8835         | N   | 1650.8023       | 825.9048        | 1633.7758      | 817.3915         | 1632.7918      | 816.8995         | 15 |
| 16 | 1670.8133        | <b>835.9103</b>  | 1653.7867      | 827.3970         | 1652.8027      | 826.9050         | N   | 1536.7594       | 768.8833        | 1519.7328      | 760.3701         | 1518.7488      | 759.8780         | 14 |
| 17 | 1784.8562        | 892.9317         | 1767.8297      | 884.4185         | 1766.8456      | 883.9265         | N   | 1422.7165       | 711.8619        | 1405.6899      | 703.3486         | 1404.7059      | 702.8566         | 13 |
| 18 | 1855.8933        | 928.4503         | 1838.8668      | 919.9370         | 1837.8828      | 919.4450         | A   | 1308.6735       | 654.8404        | 1291.6470      | 646.3271         | 1290.6630      | 645.8351         | 12 |
| 19 | 2041.9726        | <b>1021.4900</b> | 2024.9461      | <b>1012.9767</b> | 2023.9621      | <b>1012.4847</b> | W   | 1237.6364       | 619.3218        | 1220.6099      | 610.8086         | 1219.6259      | 610.3166         | 11 |
| 20 | 2113.0097        | <b>1057.0085</b> | 2095.9832      | 1048.4952        | 2094.9992      | 1048.0032        | A   | 1051.5571       | 526.2822        | 1034.5306      | 517.7689         | 1033.5465      | 517.2769         | 10 |
| 21 | 2260.0782        | <b>1130.5427</b> | 2243.0516      | 1122.0294        | 2242.0676      | 1121.5374        | F   | <b>980.5200</b> | 490.7636        | 963.4934       | 482.2504         | 962.5094       | 481.7584         | 9  |
| 22 | 2331.1153        | 1166.0613        | 2314.0887      | 1157.5480        | 2313.1047      | 1157.0560        | A   | <b>833.4516</b> | 417.2294        | 816.4250       | 408.7162         | 815.4410       | 408.2241         | 8  |
| 23 | 2432.1629        | 1216.5851        | 2415.1364      | 1208.0718        | 2414.1524      | 1207.5798        | T   | 762.4145        | 381.7109        | 745.3879       | 373.1976         | 744.4039       | 372.7056         | 7  |
| 24 | 2546.2059        | 1273.6066        | 2529.1793      | 1265.0933        | 2528.1953      | 1264.6013        | N   | 661.3668        | 331.1870        | 644.3402       | 322.6738         |                |                  | 6  |

AT2G34420.1

|    |           |                  |           |                  |           |           |   |                 |          |          |          |  |  |   |
|----|-----------|------------------|-----------|------------------|-----------|-----------|---|-----------------|----------|----------|----------|--|--|---|
| 25 | 2693.2743 | <b>1347.1408</b> | 2676.2477 | 1338.6275        | 2675.2637 | 1338.1355 | F | 547.3239        | 274.1656 | 530.2973 | 265.6523 |  |  | 5 |
| 26 | 2792.3427 | <b>1396.6750</b> | 2775.3162 | <b>1388.1617</b> | 2774.3321 | 1387.6697 | V | 400.2554        | 200.6314 | 383.2289 | 192.1181 |  |  | 4 |
| 27 | 2889.3955 | 1445.2014        | 2872.3689 | 1436.6881        | 2871.3849 | 1436.1961 | P | <b>301.1870</b> | 151.0972 | 284.1605 | 142.5839 |  |  | 3 |
| 28 | 2946.4169 | 1473.7121        | 2929.3904 | 1465.1988        | 2928.4064 | 1464.7068 | G | 204.1343        | 102.5708 | 187.1077 | 94.0575  |  |  | 2 |
| 29 |           |                  |           |                  |           |           | K | 147.1128        | 74.0600  | 130.0863 | 65.5468  |  |  | 1 |

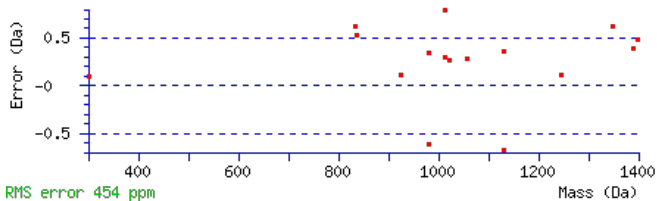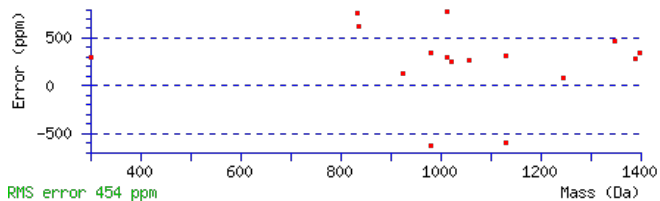

NCBI BLAST search of [GPIENLADHLADPVNNNAWAFATNFVPGK](#)

(Parameters: blastp, nr protein database, expect=20000, no filter, PAM30)

Other BLAST [web gateways](#)

All matches to this query

| Score | Mr(calc)  | Delta  | Sequence                                      |
|-------|-----------|--------|-----------------------------------------------|
| 39.5  | 3091.5152 | 0.0021 | <a href="#">GPIENLADHLADPVNNNAWAFATNFVPGK</a> |
| 39.5  | 3091.5152 | 0.0021 | <a href="#">GPIENLADHLADPVNNNAWAFATNFVPGK</a> |

Mascot: <http://www.matrixscience.com>

**Peptide View**MS/MS Fragmentation of **ASKPTGPSGSPWYGSDR**

Found in **AT2G34430.1** in **TAIR\_Arabidopsis**, Symbols: LHCBI.4, LHB1B1 | LHB1B1 (Photosystem II light harvesting complex gene 1.4); chlorophyll binding | chr2:14531897-14532697 FORWARD

Match to Query 8852: 1770.744810 from(591.255546,3+) index(2367)

Title: Elution from: 26.380 to 26.380 scan no 3022 cid35.00 polarity:+

Data file D12h-1\_1.mgf

Click mouse within plot area to zoom in by factor of two about that point

Or,   to  Da

Label all possible matches  Label matches used for scoring

Show Y-axis

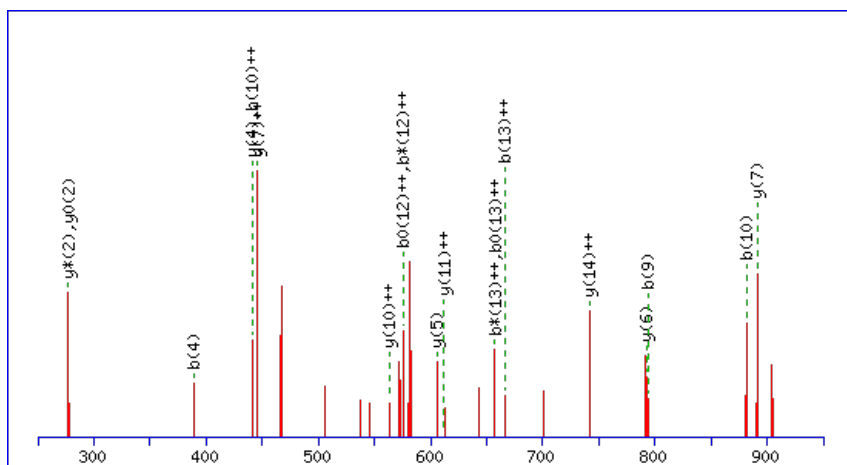

**Monoisotopic mass of neutral peptide Mr(calc):** 1770.7466

**Fixed modifications:** Carbamidomethyl (C) (apply to specified residues or termini only)

**Ions Score:** 20 **Expect:** 0.039

**Matches:** 19/184 fragment ions using 34 most intense peaks ([help](#))

| #  | b               | b <sup>++</sup> | b*        | b* <sup>++</sup> | b <sup>0</sup> | b <sup>0++</sup> | Seq. | y               | y <sup>++</sup> | y*              | y* <sup>++</sup> | y <sup>0</sup>  | y <sup>0++</sup> | #  |
|----|-----------------|-----------------|-----------|------------------|----------------|------------------|------|-----------------|-----------------|-----------------|------------------|-----------------|------------------|----|
| 1  | 73.0414         | 37.0244         |           |                  |                |                  | A    |                 |                 |                 |                  |                 |                  | 17 |
| 2  | 161.0705        | 81.0389         |           |                  | 143.0599       | 72.0336          | S    | 1699.7197       | 850.3635        | 1681.6961       | 841.3517         | 1681.7091       | 841.3582         | 16 |
| 3  | 291.1595        | 146.0834        | 273.1359  | 137.0716         | 273.1490       | 137.0781         | K    | 1611.6906       | 806.3490        | 1593.6671       | 797.3372         | 1593.6801       | 797.3437         | 15 |
| 4  | <b>389.2093</b> | 195.1083        | 371.1857  | 186.0965         | 371.1988       | 186.1030         | P    | 1481.6016       | <b>741.3044</b> | 1463.5780       | 732.2927         | 1463.5910       | 732.2992         | 14 |
| 5  | 491.2540        | 246.1307        | 473.2304  | 237.1189         | 473.2435       | 237.1254         | T    | 1383.5518       | 692.2795        | 1365.5282       | 683.2678         | 1365.5412       | 683.2743         | 13 |
| 6  | 549.2725        | 275.1399        | 531.2489  | 266.1281         | 531.2620       | 266.1346         | G    | 1281.5071       | 641.2572        | 1263.4835       | 632.2454         | 1263.4965       | 632.2519         | 12 |
| 7  | 647.3223        | 324.1648        | 629.2987  | 315.1530         | 629.3118       | 315.1595         | P    | 1223.4886       | <b>612.2479</b> | 1205.4650       | 603.2361         | 1205.4780       | 603.2427         | 11 |
| 8  | 735.3514        | 368.1793        | 717.3278  | 359.1675         | 717.3408       | 359.1741         | S    | 1125.4388       | <b>563.2230</b> | 1107.4152       | 554.2112         | 1107.4282       | 554.2178         | 10 |
| 9  | <b>793.3699</b> | 397.1886        | 775.3463  | 388.1768         | 775.3593       | 388.1833         | G    | 1037.4097       | 519.2085        | 1019.3862       | 510.1967         | 1019.3992       | 510.2032         | 9  |
| 10 | <b>881.3990</b> | <b>441.2031</b> | 863.3754  | 432.1913         | 863.3884       | 432.1978         | S    | 979.3912        | 490.1993        | 961.3677        | 481.1875         | 961.3807        | 481.1940         | 8  |
| 11 | 979.4488        | 490.2280        | 961.4252  | 481.2162         | 961.4382       | 481.2227         | P    | <b>891.3622</b> | <b>446.1847</b> | 873.3386        | 437.1729         | 873.3516        | 437.1794         | 7  |
| 12 | 1167.5221       | 584.2647        | 1149.4986 | <b>575.2529</b>  | 1149.5116      | <b>575.2594</b>  | W    | <b>793.3124</b> | 397.1598        | 775.2888        | 388.1480         | 775.3018        | 388.1545         | 6  |
| 13 | 1331.5825       | <b>666.2949</b> | 1313.5589 | <b>657.2831</b>  | 1313.5719      | <b>657.2896</b>  | Y    | <b>605.2390</b> | 303.1231        | 587.2154        | 294.1113         | 587.2284        | 294.1179         | 5  |
| 14 | 1389.6010       | 695.3041        | 1371.5774 | 686.2923         | 1371.5904      | 686.2989         | G    | <b>441.1786</b> | 221.0930        | 423.1550        | 212.0812         | 423.1681        | 212.0877         | 4  |
| 15 | 1477.6301       | 739.3187        | 1459.6065 | 730.3069         | 1459.6195      | 730.3134         | S    | 383.1601        | 192.0837        | 365.1365        | 183.0719         | 365.1496        | 183.0784         | 3  |
| 16 | 1593.6540       | 797.3307        | 1575.6305 | 788.3189         | 1575.6435      | 788.3254         | D    | 295.1311        | 148.0692        | <b>277.1075</b> | 139.0574         | <b>277.1205</b> | 139.0639         | 2  |
| 17 |                 |                 |           |                  |                |                  | R    | 179.1071        | 90.0572         | 161.0835        | 81.0454          |                 |                  | 1  |

AT2G34430.1

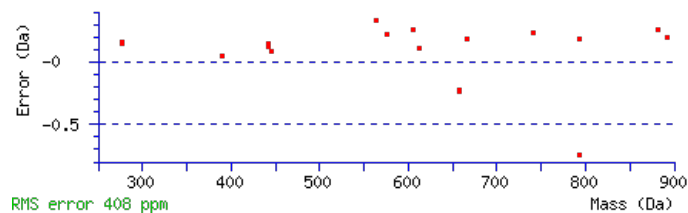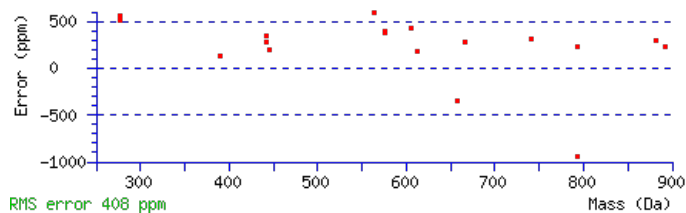

NCBI **BLAST** search of [ASKPTGPSGSPWYGSDR](#)

(Parameters: blastp, nr protein database, expect=20000, no filter, PAM30)

Other BLAST [web gateways](#)

**All matches to this query**

| Score | Mr(calc)  | Delta   | Sequence                          |
|-------|-----------|---------|-----------------------------------|
| 20.4  | 1770.7466 | -0.0018 | <a href="#">ASKPTGPSGSPWYGSDR</a> |
| 0.7   | 1770.7473 | -0.0025 | <a href="#">VVYMDEPSTGLDPASR</a>  |
| 0.6   | 1770.7427 | 0.0021  | <a href="#">RHMIKWVCECWK</a>      |

Mascot: <http://www.matrixscience.com/>

**Peptide View**MS/MS Fragmentation of **VFVAGATGQTGK**Found in **AT2G34460.1** in **TAIR\_Arabidopsis**, Symbols: | flavin reductase-related | chr2:14536714-14537811 FORWARD

Match to Query 3858: 1148.560072 from(575.287312,2+) index(1152)

Title: Elution from: 17.513 to 17.513 scan no 1616 cid35.00 polarity:+

Data file D12h-1\_2.mgf

Click mouse within plot area to zoom in by factor of two about that point

Or,   to  Da Label all possible matches  Label matches used for scoring Show Y-axis 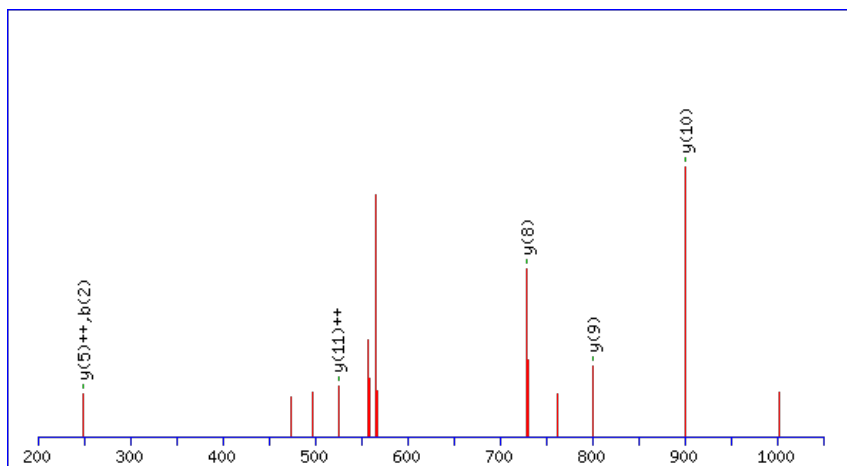Monoisotopic mass of neutral peptide  $M_r(\text{calc})$ : 1148.5618

Fixed modifications: Carbamidomethyl (C) (apply to specified residues or termini only)

Ions Score: 27 Expect: 0.019

Matches : 6/100 fragment ions using 7 most intense peaks ([help](#))

| #  | b         | b <sup>++</sup> | b*       | b <sup>*++</sup> | b <sup>0</sup> | b <sup>0++</sup> | Seq. | y         | y <sup>++</sup> | y*        | y <sup>*++</sup> | y <sup>0</sup> | y <sup>0++</sup> | #  |
|----|-----------|-----------------|----------|------------------|----------------|------------------|------|-----------|-----------------|-----------|------------------|----------------|------------------|----|
| 1  | 101.0727  | 51.0400         |          |                  |                |                  | V    |           |                 |           |                  |                |                  | 12 |
| 2  | 249.1382  | 125.0727        |          |                  |                |                  | F    | 1049.5036 | 525.2555        | 1031.4801 | 516.2437         | 1031.4931      | 516.2502         | 11 |
| 3  | 349.2036  | 175.1054        |          |                  |                |                  | V    | 901.4382  | 451.2227        | 883.4146  | 442.2109         | 883.4276       | 442.2175         | 10 |
| 4  | 421.2378  | 211.1225        |          |                  |                |                  | A    | 801.3727  | 401.1900        | 783.3492  | 392.1782         | 783.3622       | 392.1847         | 9  |
| 5  | 479.2563  | 240.1318        |          |                  |                |                  | G    | 729.3386  | 365.1729        | 711.3150  | 356.1611         | 711.3280       | 356.1677         | 8  |
| 6  | 551.2904  | 276.1488        |          |                  |                |                  | A    | 671.3201  | 336.1637        | 653.2965  | 327.1519         | 653.3095       | 327.1584         | 7  |
| 7  | 653.3351  | 327.1712        |          |                  | 635.3246       | 318.1659         | T    | 599.2859  | 300.1466        | 581.2624  | 291.1348         | 581.2754       | 291.1413         | 6  |
| 8  | 711.3536  | 356.1805        |          |                  | 693.3431       | 347.1752         | G    | 497.2412  | 249.1243        | 479.2176  | 240.1125         | 479.2307       | 240.1190         | 5  |
| 9  | 841.4063  | 421.2068        | 823.3827 | 412.1950         | 823.3957       | 412.2015         | Q    | 439.2227  | 220.1150        | 421.1991  | 211.1032         | 421.2122       | 211.1097         | 4  |
| 10 | 943.4510  | 472.2291        | 925.4274 | 463.2173         | 925.4404       | 463.2239         | T    | 309.1701  | 155.0887        | 291.1465  | 146.0769         | 291.1595       | 146.0834         | 3  |
| 11 | 1001.4695 | 501.2384        | 983.4459 | 492.2266         | 983.4589       | 492.2331         | G    | 207.1254  | 104.0663        | 189.1018  | 95.0545          |                |                  | 2  |
| 12 |           |                 |          |                  |                |                  | K    | 149.1069  | 75.0571         | 131.0833  | 66.0453          |                |                  | 1  |

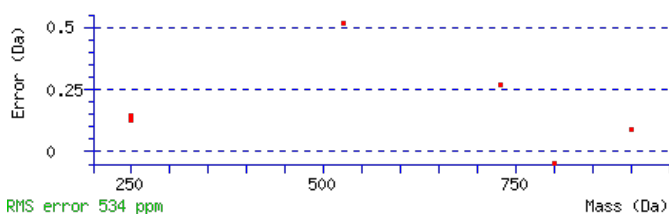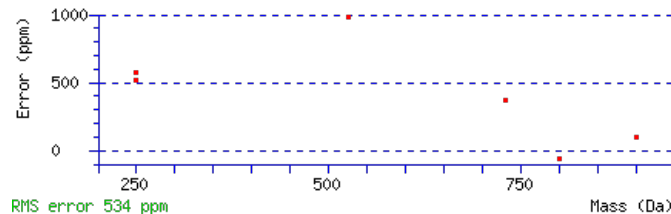NCBI BLAST search of **VFVAGATGQTGK**

(Parameters: blastp, nr protein database, expect=20000, no filter, PAM30)

Other BLAST [web gateways](#)**All matches to this query**

## AT2G34460.1

| Score | Mr(calc)  | Delta   | Sequence                     |
|-------|-----------|---------|------------------------------|
| 27.4  | 1148.5618 | -0.0017 | <a href="#">VFVAGATGQTGK</a> |
| 6.2   | 1148.5578 | 0.0023  | <a href="#">DMMKEKLVK</a>    |
| 3.7   | 1148.5618 | -0.0017 | <a href="#">QNEKYQVVK</a>    |
| 3.0   | 1148.5575 | 0.0026  | <a href="#">RQEMARLAR</a>    |
| 1.9   | 1148.5604 | -0.0004 | <a href="#">MVNICTIKR</a>    |
| 0.9   | 1148.5618 | -0.0017 | <a href="#">VRFIEENTK</a>    |
| 0.1   | 1148.5571 | 0.0030  | <a href="#">RVTGCLFPGK</a>   |
| 0.1   | 1148.5593 | 0.0008  | <a href="#">HQFLGFMKK</a>    |

Mascot: <http://www.matrixscience.com/>

**Peptide View**MS/MS Fragmentation of **FWYFLR**Found in **AT2G34480.1** in **TAIR\_Arabidopsis**, Symbols: | 60S ribosomal protein L18A (RPL18aB) | chr2:14539995-14541240 REVERSE

Match to Query 1994: 930.473784 from(466.244168,2+) index(8964)

Title: Elution from: 79.720 to 79.720 scan no 11915 cid35.00 polarity:+

Data file C7-3\_1.mgf

Click mouse within plot area to zoom in by factor of two about that point

Or,   to  Da Label all possible matches  Label matches used for scoring Show Y-axis 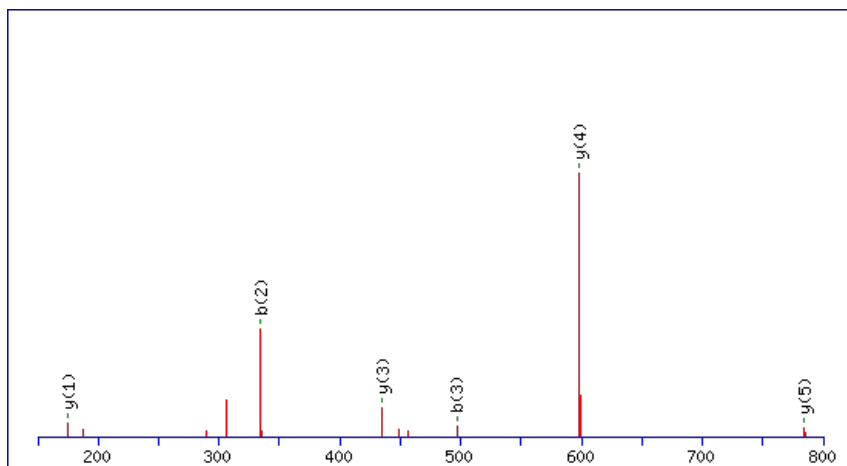Monoisotopic mass of neutral peptide **Mr(calc)**: 930.4752**Fixed modifications**: Carbamidomethyl (C) (apply to specified residues or termini only)**Ions Score**: 40 **Expect**: 9.1e-005**Matches**: 6/30 fragment ions using 6 most intense peaks ([help](#))

| # | b               | b <sup>++</sup> | Seq. | y               | y <sup>++</sup> | y*       | y <sup>*++</sup> | # |
|---|-----------------|-----------------|------|-----------------|-----------------|----------|------------------|---|
| 1 | 148.0757        | 74.5415         | F    |                 |                 |          |                  | 6 |
| 2 | <b>334.1550</b> | 167.5811        | W    | <b>784.4141</b> | 392.7107        | 767.3875 | 384.1974         | 5 |
| 3 | <b>497.2183</b> | 249.1128        | Y    | <b>598.3348</b> | 299.6710        | 581.3082 | 291.1577         | 4 |
| 4 | 644.2867        | 322.6470        | F    | <b>435.2714</b> | 218.1394        | 418.2449 | 209.6261         | 3 |
| 5 | 757.3708        | 379.1890        | L    | 288.2030        | 144.6051        | 271.1765 | 136.0919         | 2 |
| 6 |                 |                 | R    | <b>175.1190</b> | 88.0631         | 158.0924 | 79.5498          | 1 |

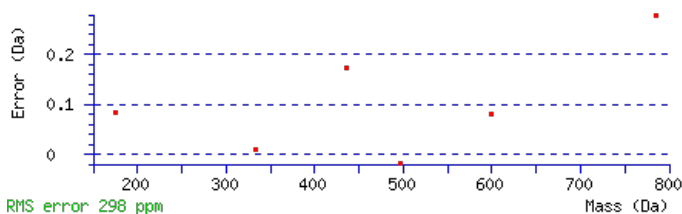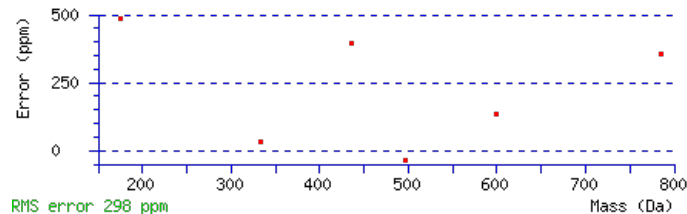NCBI **BLAST** search of **FWYFLR**

(Parameters: blastp, nr protein database, expect=20000, no filter, PAM30)

Other BLAST [web gateways](#)**All matches to this query**

| Score | Mr(calc) | Delta   | Sequence               |
|-------|----------|---------|------------------------|
| 40.4  | 930.4752 | -0.0014 | <a href="#">FWYFLR</a> |

**Peptide View**MS/MS Fragmentation of **MSITPK**

Found in **AT2G34750.1** in **TAIR\_Arabidopsis**, Symbols: | RNA polymerase I specific transcription initiation factor RRN3 family protein | chr2:14667528-14670871 REVERSE

Match to Query 569: 682.343760 from(342.179156,2+) index(1801)

Title: Elution from: 21.460 to 21.460 scan no 2330 cid35.00 polarity:+

Data file 0-3\_3.mgf

Click mouse within plot area to zoom in by factor of two about that point

Or,  to  Da

Label all possible matches  Label matches used for scoring

Show Y-axis

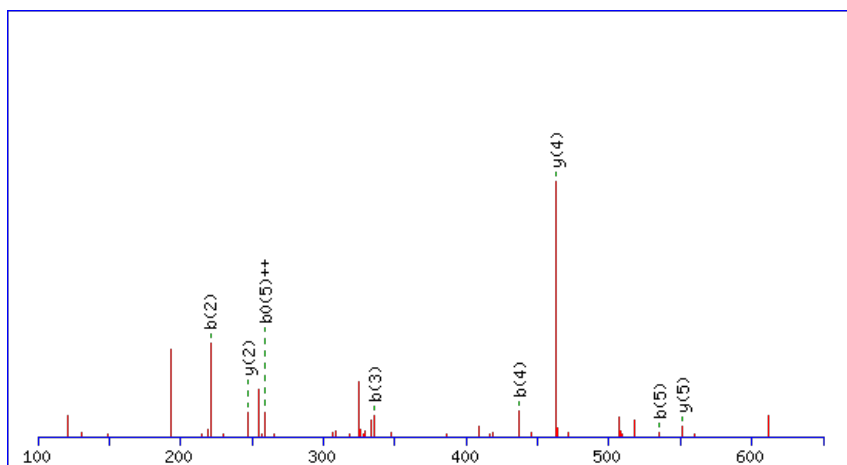

Monoisotopic mass of neutral peptide  $M_r(\text{calc})$ : 682.3418

Fixed modifications: Carbamidomethyl (C) (apply to specified residues or termini only)

Ions Score: 30 Expect: 0.004

Matches : 8/44 fragment ions using 15 most intense peaks ([help](#))

| # | b               | b <sup>++</sup> | b <sup>0</sup> | b <sup>0++</sup> | Seq. | y               | y <sup>++</sup> | y*       | y <sup>*++</sup> | y <sup>0</sup> | y <sup>0++</sup> | # |
|---|-----------------|-----------------|----------------|------------------|------|-----------------|-----------------|----------|------------------|----------------|------------------|---|
| 1 | 133.0448        | 67.0260         |                |                  | M    |                 |                 |          |                  |                |                  | 6 |
| 2 | <b>221.0739</b> | 111.0406        | 203.0633       | 102.0353         | S    | <b>551.3115</b> | 276.1594        | 533.2880 | 267.1476         | 533.3010       | 267.1541         | 5 |
| 3 | <b>335.1550</b> | 168.0811        | 317.1444       | 159.0758         | I    | <b>463.2825</b> | 232.1449        | 445.2589 | 223.1331         | 445.2719       | 223.1396         | 4 |
| 4 | <b>437.1997</b> | 219.1035        | 419.1891       | 210.0982         | T    | 349.2014        | 175.1043        | 331.1778 | 166.0925         | 331.1908       | 166.0990         | 3 |
| 5 | <b>535.2495</b> | 268.1284        | 517.2389       | <b>259.1231</b>  | P    | <b>247.1567</b> | 124.0820        | 229.1331 | 115.0702         |                |                  | 2 |
| 6 |                 |                 |                |                  | K    | 149.1069        | 75.0571         | 131.0833 | 66.0453          |                |                  | 1 |

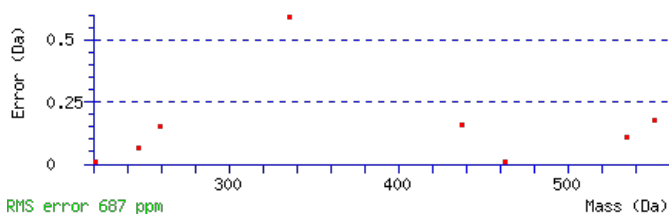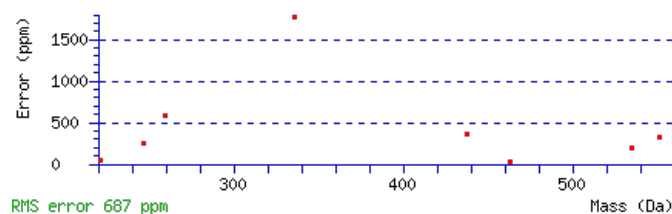

NCBI BLAST search of [MSITPK](#)

(Parameters: blastp, nr protein database, expect=20000, no filter, PAM30)

Other BLAST [web gateways](#)

**All matches to this query**

| Score | $M_r(\text{calc})$ | Delta  | Sequence               |
|-------|--------------------|--------|------------------------|
| 29.8  | 682.3418           | 0.0020 | <a href="#">MSITPK</a> |
| 20.6  | 682.3418           | 0.0020 | <a href="#">MIDVAK</a> |
| 16.3  | 682.3418           | 0.0020 | <a href="#">MSLPTK</a> |



## AT2G34750.1

|      |          |        |                        |
|------|----------|--------|------------------------|
| 16.3 | 682.3418 | 0.0020 | <a href="#">MVDLAK</a> |
| 9.5  | 682.3418 | 0.0020 | <a href="#">VMDLAK</a> |
| 9.4  | 682.3418 | 0.0020 | <a href="#">MSTPLK</a> |
| 9.4  | 682.3418 | 0.0020 | <a href="#">MVEVAK</a> |
| 7.4  | 682.3418 | 0.0020 | <a href="#">MAPTIK</a> |
| 2.2  | 682.3418 | 0.0020 | <a href="#">MIEVGK</a> |
| 2.2  | 682.3418 | 0.0020 | <a href="#">MLDLGK</a> |

**Mascot:** <http://www.matrixscience.com/>

**Peptide View**MS/MS Fragmentation of **TISFQELMHK**Found in **AT2G35050.1** in **TAIR\_Arabidopsis**, Symbols: | protein kinase family protein | chr2:14776787-14781875 FORWARD

Match to Query 4592: 1246.583540 from(624,299046,2+) index(2242)

Title: Elution from: 25.520 to 25.520 scan no 2863 cid35.00 polarity:+

Data file 0-2\_1.mgf

Click mouse within plot area to zoom in by factor of two about that point

Or,   to  Da Label all possible matches  Label matches used for scoring Show Y-axis 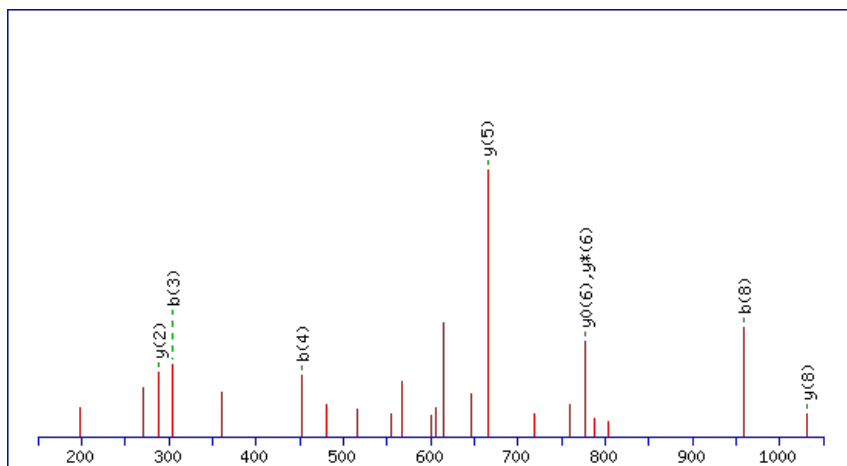Monoisotopic mass of neutral peptide **Mr(calc)**: 1246.5808**Fixed modifications**: Carbamidomethyl (C) (apply to specified residues or termini only)**Ions Score**: 27 **Expect**: 0.017**Matches**: 8/92 fragment ions using 9 most intense peaks ([help](#))

| #  | b               | b <sup>++</sup> | b*        | b <sup>*++</sup> | b <sup>0</sup> | b <sup>0++</sup> | Seq. | y                | y <sup>++</sup> | y*              | y <sup>*++</sup> | y <sup>0</sup>  | y <sup>0++</sup> | #  |
|----|-----------------|-----------------|-----------|------------------|----------------|------------------|------|------------------|-----------------|-----------------|------------------|-----------------|------------------|----|
| 1  | 103.0520        | 52.0296         |           |                  | 85.0414        | 43.0244          | T    |                  |                 |                 |                  |                 |                  | 10 |
| 2  | 217.1331        | 109.0702        |           |                  | 199.1225       | 100.0649         | I    | 1145.5434        | 573.2753        | 1127.5198       | 564.2635         | 1127.5328       | 564.2701         | 9  |
| 3  | <b>305.1622</b> | 153.0847        |           |                  | 287.1516       | 144.0794         | S    | <b>1031.4623</b> | 516.2348        | 1013.4387       | 507.2230         | 1013.4517       | 507.2295         | 8  |
| 4  | <b>453.2276</b> | 227.1174        |           |                  | 435.2170       | 218.1122         | F    | 943.4332         | 472.2203        | 925.4097        | 463.2085         | 925.4227        | 463.2150         | 7  |
| 5  | 583.2802        | 292.1438        | 565.2567  | 283.1320         | 565.2697       | 283.1385         | Q    | 795.3678         | 398.1875        | <b>777.3442</b> | 389.1757         | <b>777.3572</b> | 389.1822         | 6  |
| 6  | 713.3199        | 357.1636        | 695.2963  | 348.1518         | 695.3093       | 348.1583         | E    | <b>665.3151</b>  | 333.1612        | 647.2916        | 324.1494         | 647.3046        | 324.1559         | 5  |
| 7  | 827.4010        | 414.2041        | 809.3774  | 405.1923         | 809.3904       | 405.1988         | L    | 535.2755         | 268.1414        | 517.2519        | 259.1296         |                 |                  | 4  |
| 8  | <b>959.4385</b> | 480.2229        | 941.4149  | 471.2111         | 941.4279       | 471.2176         | M    | 421.1944         | 211.1008        | 403.1708        | 202.0891         |                 |                  | 3  |
| 9  | 1099.4885       | 550.2479        | 1081.4649 | 541.2361         | 1081.4779      | 541.2426         | H    | <b>289.1569</b>  | 145.0821        | 271.1333        | 136.0703         |                 |                  | 2  |
| 10 |                 |                 |           |                  |                |                  | K    | 149.1069         | 75.0571         | 131.0833        | 66.0453          |                 |                  | 1  |

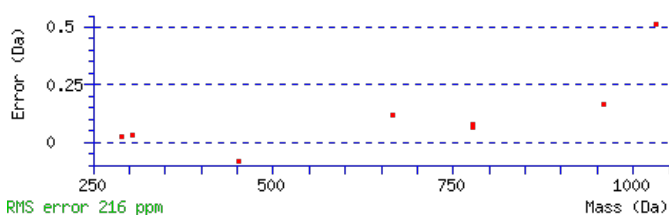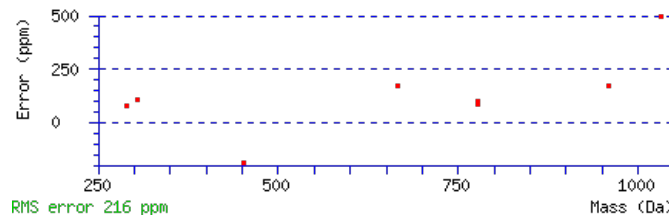NCBI **BLAST** search of **TISFQELMHK**

(Parameters: blastp, nr protein database, expect=20000, no filter, PAM30)

Other BLAST [web gateways](#)**All matches to this query**

| Score | Mr(calc) | Delta | Sequence |
|-------|----------|-------|----------|
|       |          |       |          |

**AT2G35050.1**

|      |           |         |                              |
|------|-----------|---------|------------------------------|
| 27.2 | 1246.5808 | 0.0027  | <a href="#">TISFQELMHK</a>   |
| 16.9 | 1246.5860 | -0.0024 | <a href="#">DVADEGSLLRR</a>  |
| 2.2  | 1246.5860 | -0.0024 | <a href="#">DSVLANGKDVGR</a> |
| 1.1  | 1246.5813 | 0.0023  | <a href="#">MNGEKPLRER</a>   |
| 0.8  | 1246.5801 | 0.0034  | <a href="#">DWFKHRDVK</a>    |
| 0.3  | 1246.5835 | 0.0000  | <a href="#">MPKHYPRTGK</a>   |

**Mascot:** <http://www.matrixscience.com/>

**Peptide View**MS/MS Fragmentation of **LGKVGCTQPR**

Found in **AT2G35340.1** in **TAIR\_Arabidopsis**, Symbols: MEE29 | MEE29 (maternal effect embryo arrest 29); ATP-dependent RNA helicase | chr2:14879807-14886694 FORWARD

Match to Query 3619: 1130.547302 from(566.280927,2+) index(5523)

Title: Elution from: 49.654 to 49.654 scan no 7042 cid35.00 polarity:+

Data file 0-2\_2.mgf

Click mouse within plot area to zoom in by factor of two about that point

Or,   to  Da

Label all possible matches  Label matches used for scoring

Show Y-axis

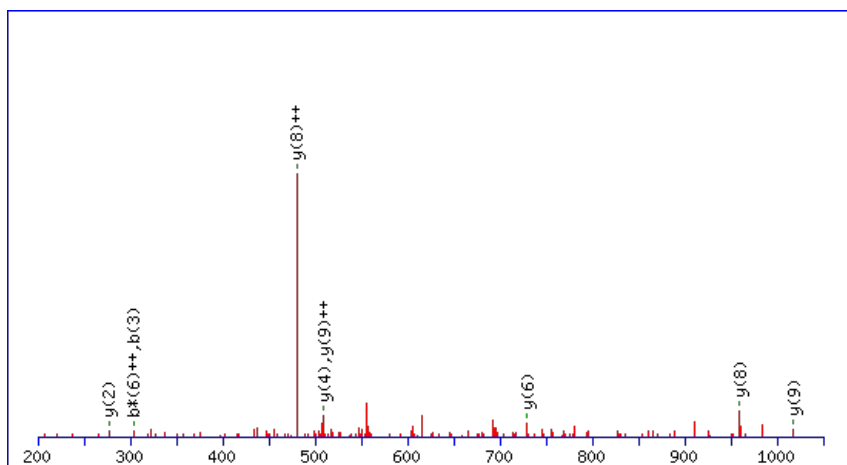

Monoisotopic mass of neutral peptide  $M_r(\text{calc})$ : 1130.5442

Fixed modifications: Carbamidomethyl (C) (apply to specified residues or termini only)

Ions Score: 25 Expect: 0.031

Matches : 9/86 fragment ions using 18 most intense peaks ([help](#))

| #  | b        | b <sup>++</sup> | b*       | b <sup>*++</sup> | b <sup>0</sup> | b <sup>0++</sup> | Seq. | y         | y <sup>++</sup> | y*       | y <sup>*++</sup> | y <sup>0</sup> | y <sup>0++</sup> | #  |
|----|----------|-----------------|----------|------------------|----------------|------------------|------|-----------|-----------------|----------|------------------|----------------|------------------|----|
| 1  | 115.0884 | 58.0478         |          |                  |                |                  | L    |           |                 |          |                  |                |                  | 10 |
| 2  | 173.1069 | 87.0571         |          |                  |                |                  | G    | 1017.4704 | 509.2389        | 999.4469 | 500.2271         | 999.4599       | 500.2336         | 9  |
| 3  | 303.1959 | 152.1016        | 285.1723 | 143.0898         |                |                  | K    | 959.4520  | 480.2296        | 941.4284 | 471.2178         | 941.4414       | 471.2243         | 8  |
| 4  | 403.2614 | 202.1343        | 385.2378 | 193.1225         |                |                  | V    | 829.3629  | 415.1851        | 811.3393 | 406.1733         | 811.3524       | 406.1798         | 7  |
| 5  | 461.2799 | 231.1436        | 443.2563 | 222.1318         |                |                  | G    | 729.2975  | 365.1524        | 711.2739 | 356.1406         | 711.2869       | 356.1471         | 6  |
| 6  | 623.3046 | 312.1559        | 605.2810 | 303.1441         |                |                  | C    | 671.2790  | 336.1431        | 653.2554 | 327.1313         | 653.2684       | 327.1378         | 5  |
| 7  | 725.3493 | 363.1783        | 707.3257 | 354.1665         | 707.3387       | 354.1730         | T    | 509.2543  | 255.1308        | 491.2307 | 246.1190         | 491.2437       | 246.1255         | 4  |
| 8  | 855.4019 | 428.2046        | 837.3783 | 419.1928         | 837.3914       | 419.1993         | Q    | 407.2095  | 204.1084        | 389.1860 | 195.0966         |                |                  | 3  |
| 9  | 953.4517 | 477.2295        | 935.4281 | 468.2177         | 935.4412       | 468.2242         | P    | 277.1569  | 139.0821        | 259.1333 | 130.0703         |                |                  | 2  |
| 10 |          |                 |          |                  |                |                  | R    | 179.1071  | 90.0572         | 161.0835 | 81.0454          |                |                  | 1  |

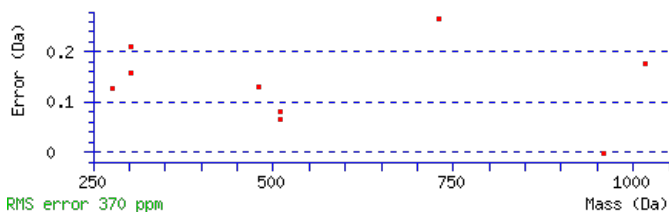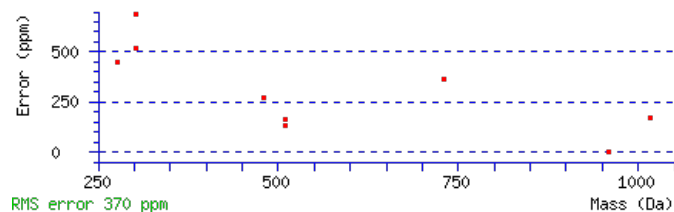NCBI BLAST search of **LGKVGCTQPR**

(Parameters: blastp, nr protein database, expect=20000, no filter, PAM30)

Other BLAST [web gateways](#)

All matches to this query

## AT2G35340.1

| Score | Mr(calc)  | Delta   | Sequence                   |
|-------|-----------|---------|----------------------------|
| 24.5  | 1130.5442 | 0.0031  | <a href="#">LGKVGCTQPR</a> |
| 9.7   | 1130.5490 | -0.0017 | <a href="#">DKGNKLEQK</a>  |
| 9.4   | 1130.5472 | 0.0001  | <a href="#">VAMLMDLQAK</a> |
| 8.2   | 1130.5463 | 0.0010  | <a href="#">LSTDQIDLSK</a> |
| 7.0   | 1130.5490 | -0.0017 | <a href="#">IEEEKRQK</a>   |
| 4.8   | 1130.5490 | -0.0017 | <a href="#">QKLREEEGK</a>  |
| 3.9   | 1130.5490 | -0.0017 | <a href="#">KDPREGSISK</a> |
| 3.8   | 1130.5490 | -0.0017 | <a href="#">IEEKRNAEK</a>  |
| 3.4   | 1130.5486 | -0.0013 | <a href="#">LGDYLIEQGL</a> |
| 3.4   | 1130.5486 | -0.0013 | <a href="#">LGDYLLEQGL</a> |

Mascot: <http://www.matrixscience.com/>

### Peptide View

MS/MS Fragmentation of **KLTESPGLINSSPYEDGWMIK**Found in **AT2G35370.1** in **TAIR\_Arabidopsis**, Symbols: GDCH | GDCH (Glycine decarboxylase complex H) | chr2:14898318-14899129 FORWARD

Match to Query 9940: 2389.093902 from(797.371910,3+) index(7472)

Title: Elution from: 66.904 to 66.904 scan no 9830 cid35.00 polarity:+

Data file D12h-2\_3.mgf

Click mouse within plot area to zoom in by factor of two about that point

Or, Plot from  to  Da Label all possible matches  Label matches used for scoring Show Y-axis 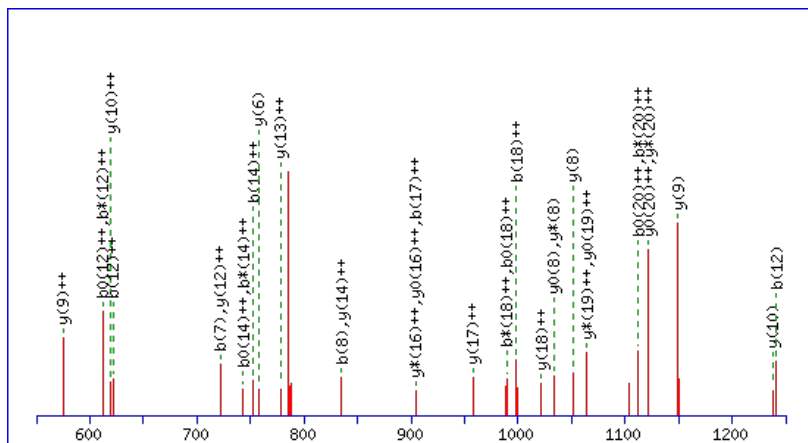

Monoisotopic mass of neutral peptide Mr(calc): 2389.0930

Fixed modifications: Carbamidomethyl (C) (apply to specified residues or termini only)

Ions Score: 62 Expect: 5.3e-006

Matches : 36/226 fragment ions using 30 most intense peaks ([help](#))

| #  | b                | b <sup>++</sup>  | b <sup>*</sup> | b <sup>*++</sup> | b <sup>0</sup> | b <sup>0++</sup> | Seq.     | y                | y <sup>++</sup> | y <sup>*</sup>   | y <sup>*++</sup> | y <sup>0</sup>   | y <sup>0++</sup> | #  |
|----|------------------|------------------|----------------|------------------|----------------|------------------|----------|------------------|-----------------|------------------|------------------|------------------|------------------|----|
| 1  | 131.0963         | 66.0518          | 113.0727       | 57.0400          |                |                  | <b>K</b> |                  |                 |                  |                  |                  |                  | 21 |
| 2  | 245.1774         | 123.0923         | 227.1538       | 114.0805         |                |                  | <b>L</b> | 2260.0113        | 1130.5093       | 2241.9877        | 1121.4975        | 2242.0007        | 1121.5040        | 20 |
| 3  | 347.2221         | 174.1147         | 329.1985       | 165.1029         | 329.2116       | 165.1094         | <b>T</b> | 2145.9302        | 1073.4687       | 2127.9066        | 1064.4569        | 2127.9196        | 1064.4634        | 19 |
| 4  | 477.2617         | 239.1345         | 459.2382       | 230.1227         | 459.2512       | 230.1292         | <b>E</b> | 2043.8855        | 1022.4464       | 2025.8619        | 1013.4346        | 2025.8749        | 1013.4411        | 18 |
| 5  | 565.2908         | 283.1490         | 547.2672       | 274.1373         | 547.2802       | 274.1438         | <b>S</b> | 1913.8458        | 957.4266        | 1895.8222        | 948.4148         | 1895.8353        | 948.4213         | 17 |
| 6  | 663.3406         | 332.1739         | 645.3170       | 323.1622         | 645.3300       | 323.1687         | <b>P</b> | 1825.8168        | 913.4120        | 1807.7932        | 904.4002         | 1807.8062        | 904.4067         | 16 |
| 7  | <b>721.3591</b>  | 361.1832         | 703.3355       | 352.1714         | 703.3485       | 352.1779         | <b>G</b> | 1727.7670        | 864.3871        | 1709.7434        | 855.3753         | 1709.7564        | 855.3818         | 15 |
| 8  | <b>835.4402</b>  | 418.2237         | 817.4166       | 409.2120         | 817.4296       | 409.2185         | <b>L</b> | 1669.7485        | 835.3779        | 1651.7249        | 826.3661         | 1651.7379        | 826.3726         | 14 |
| 9  | 949.5213         | 475.2643         | 931.4977       | 466.2525         | 931.5107       | 466.2590         | <b>I</b> | 1555.6674        | 778.3373        | 1537.6438        | 769.3255         | 1537.6568        | 769.3320         | 13 |
| 10 | 1065.5583        | 533.2828         | 1047.5347      | 524.2710         | 1047.5477      | 524.2775         | <b>N</b> | 1441.5863        | 721.2968        | 1423.5627        | 712.2850         | 1423.5757        | 712.2915         | 12 |
| 11 | 1153.5874        | 577.2973         | 1135.5638      | 568.2855         | 1135.5768      | 568.2920         | <b>S</b> | 1325.5493        | 663.2783        | 1307.5257        | 654.2665         | 1307.5387        | 654.2730         | 11 |
| 12 | <b>1241.6164</b> | <b>621.3119</b>  | 1223.5928      | 612.3001         | 1223.6059      | 612.3066         | <b>S</b> | <b>1237.5202</b> | <b>619.2637</b> | 1219.4966        | 610.2519         | 1219.5096        | 610.2585         | 10 |
| 13 | 1339.6662        | 670.3368         | 1321.6426      | 661.3250         | 1321.6557      | 661.3315         | <b>P</b> | <b>1149.4911</b> | <b>575.2492</b> | 1131.4676        | 566.2374         | 1131.4806        | 566.2439         | 9  |
| 14 | 1503.7266        | <b>752.3669</b>  | 1485.7030      | <b>743.3551</b>  | 1485.7160      | <b>743.3617</b>  | <b>Y</b> | <b>1051.4413</b> | 526.2243        | <b>1033.4178</b> | 517.2125         | <b>1033.4308</b> | 517.2190         | 8  |
| 15 | 1633.7662        | 817.3867         | 1615.7426      | 808.3750         | 1615.7557      | 808.3815         | <b>E</b> | 887.3810         | 444.1941        | 869.3574         | 435.1823         | 869.3704         | 435.1888         | 7  |
| 16 | 1749.7902        | 875.3987         | 1731.7666      | 866.3869         | 1731.7796      | 866.3935         | <b>D</b> | <b>757.3414</b>  | 379.1743        | 739.3178         | 370.1625         | 739.3308         | 370.1690         | 6  |
| 17 | 1807.8087        | <b>904.4080</b>  | 1789.7851      | 895.3962         | 1789.7981      | 895.4027         | <b>G</b> | 641.3174         | 321.1623        | 623.2938         | 312.1505         |                  |                  | 5  |
| 18 | 1995.8821        | <b>998.4447</b>  | 1977.8585      | <b>989.4329</b>  | 1977.8715      | <b>989.4394</b>  | <b>W</b> | 583.2989         | 292.1531        | 565.2753         | 283.1413         |                  |                  | 4  |
| 19 | 2127.9196        | <b>1064.4634</b> | 2109.8960      | 1055.4516        | 2109.9090      | 1055.4582        | <b>M</b> | 395.2255         | 198.1164        | 377.2019         | 189.1046         |                  |                  | 3  |
| 20 | 2242.0007        | <b>1121.5040</b> | 2223.9771      | <b>1112.4922</b> | 2223.9901      | <b>1112.4987</b> | <b>I</b> | 263.1880         | 132.0976        | 245.1644         | 123.0858         |                  |                  | 2  |
| 21 |                  |                  |                |                  |                |                  | <b>K</b> | 149.1069         | 75.0571         | 131.0833         | 66.0453          |                  |                  | 1  |

# AT2G35370.1

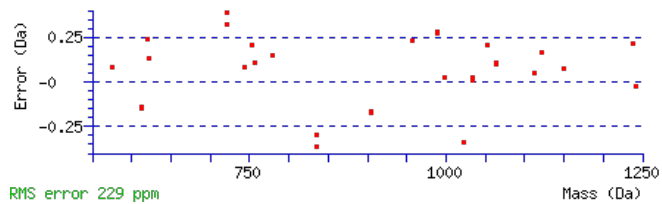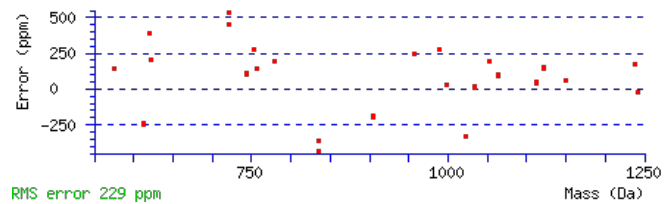

NCBI **BLAST** search of [KLTESPGLINSSPYEDGWMIK](#)  
(Parameters: blastp, nr protein database, expect=20000, no filter, PAM30)  
Other BLAST [web gateways](#)

## All matches to this query

| Score | Mr(calc)  | Delta   | Sequence                              |
|-------|-----------|---------|---------------------------------------|
| 62.4  | 2389.0930 | 0.0009  | <a href="#">KLTESPGLINSSPYEDGWMIK</a> |
| 1.6   | 2389.0991 | -0.0052 | <a href="#">SKIQLLNQTNMVDYAMDIHK</a>  |
| 1.2   | 2389.0935 | 0.0004  | <a href="#">IQGTALIAHFQNSSLMNEDK</a>  |
| 0.8   | 2389.0940 | -0.0001 | <a href="#">TVMVHQPGRACLLRNQGNR</a>   |
| 0.1   | 2389.0977 | -0.0038 | <a href="#">FLARSAIPGNHLLGQQSHGYR</a> |

Mascot: <http://www.matrixscience.com/>

## Peptide View

### MS/MS Fragmentation of **SSGYGFVSFATR**

Found in **AT2G35410.1** in **TAIR\_Arabidopsis**, Symbols: | 33 kDa ribonucleoprotein, chloroplast, putative / RNA-binding protein cp33, putative | chr2:14905420-14906669 FORWARD

Match to Query 4773: 1292.561966 from(647.288259,2+) index(6399)

Title: Elution from: 55.792 to 55.792 scan no 8172 cid35.00 polarity:+

Data file C7-3\_2.mgf

Click mouse within plot area to zoom in by factor of two about that point

Or,   to  Da

Label all possible matches  Label matches used for scoring

Show Y-axis

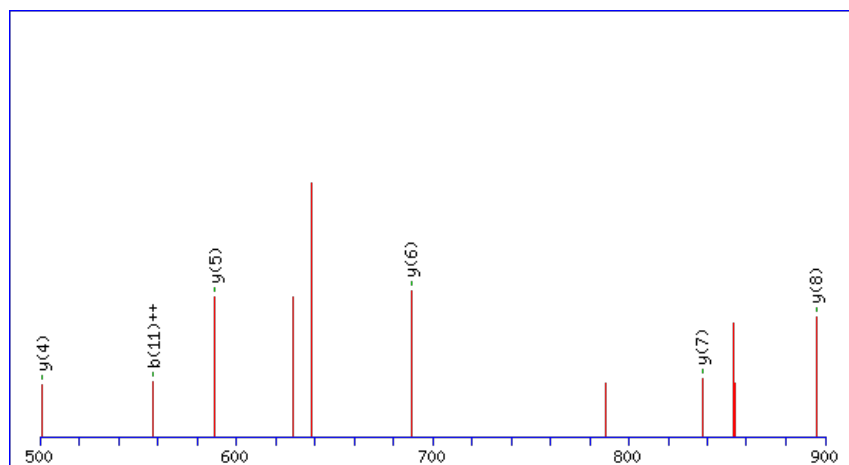

Monoisotopic mass of neutral peptide  $M_r(\text{calc})$ : 1292.5596

Fixed modifications: Carbamidomethyl (C) (apply to specified residues or termini only)

Ions Score: 34 Expect: 0.0024

Matches : 6/108 fragment ions using 10 most intense peaks ([help](#))

| #  | b         | b <sup>++</sup> | b <sup>0</sup> | b <sup>0++</sup> | Seq. | y               | y <sup>++</sup> | y*        | y <sup>*++</sup> | y <sup>0</sup> | y <sup>0++</sup> | #  |
|----|-----------|-----------------|----------------|------------------|------|-----------------|-----------------|-----------|------------------|----------------|------------------|----|
| 1  | 89.0363   | 45.0218         | 71.0258        | 36.0165          | S    |                 |                 |           |                  |                |                  | 12 |
| 2  | 177.0654  | 89.0363         | 159.0548       | 80.0311          | S    | 1205.5378       | 603.2725        | 1187.5142 | 594.2607         | 1187.5272      | 594.2672         | 11 |
| 3  | 235.0839  | 118.0456        | 217.0733       | 109.0403         | G    | 1117.5087       | 559.2580        | 1099.4851 | 550.2462         | 1099.4982      | 550.2527         | 10 |
| 4  | 399.1443  | 200.0758        | 381.1337       | 191.0705         | Y    | 1059.4902       | 530.2488        | 1041.4666 | 521.2370         | 1041.4797      | 521.2435         | 9  |
| 5  | 457.1628  | 229.0850        | 439.1522       | 220.0797         | G    | <b>895.4299</b> | 448.2186        | 877.4063  | 439.2068         | 877.4193       | 439.2133         | 8  |
| 6  | 605.2282  | 303.1177        | 587.2176       | 294.1125         | F    | <b>837.4114</b> | 419.2093        | 819.3878  | 410.1975         | 819.4008       | 410.2040         | 7  |
| 7  | 705.2937  | 353.1505        | 687.2831       | 344.1452         | V    | <b>689.3459</b> | 345.1766        | 671.3223  | 336.1648         | 671.3353       | 336.1713         | 6  |
| 8  | 793.3227  | 397.1650        | 775.3122       | 388.1597         | S    | <b>589.2805</b> | 295.1439        | 571.2569  | 286.1321         | 571.2699       | 286.1386         | 5  |
| 9  | 941.3882  | 471.1977        | 923.3776       | 462.1924         | F    | <b>501.2514</b> | 251.1293        | 483.2278  | 242.1175         | 483.2408       | 242.1241         | 4  |
| 10 | 1013.4223 | 507.2148        | 995.4118       | 498.2095         | A    | 353.1860        | 177.0966        | 335.1624  | 168.0848         | 335.1754       | 168.0913         | 3  |
| 11 | 1115.4670 | <b>558.2372</b> | 1097.4565      | 549.2319         | T    | 281.1518        | 141.0795        | 263.1282  | 132.0677         | 263.1412       | 132.0743         | 2  |
| 12 |           |                 |                |                  | R    | 179.1071        | 90.0572         | 161.0835  | 81.0454          |                |                  | 1  |

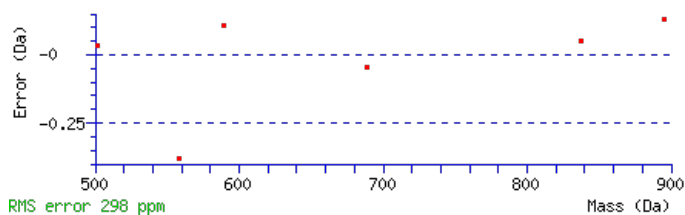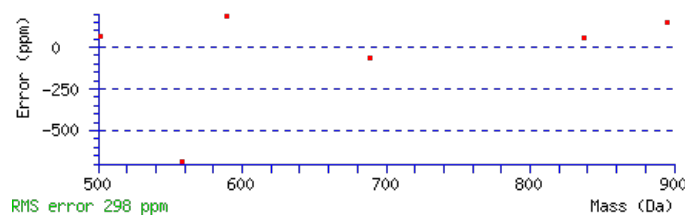

NCBI BLAST search of [SSGYGFVSFATR](#)

(Parameters: blastp, nr protein database, expect=20000, no filter, PAM30)

Other BLAST [web gateways](#)



**AT2G35410.1**

All matches to this query

| Score | Mr(calc)  | Delta   | Sequence                     |
|-------|-----------|---------|------------------------------|
| 33.9  | 1292.5596 | 0.0024  | <a href="#">SSGYGFVSFATR</a> |
| 10.4  | 1292.5596 | 0.0024  | <a href="#">HVYVPTDYER</a>   |
| 3.8   | 1292.5656 | -0.0036 | <a href="#">LPNQQVNFCR</a>   |
| 3.0   | 1292.5607 | 0.0013  | <a href="#">ETNNVVGEMIR</a>  |
| 2.1   | 1292.5607 | 0.0013  | <a href="#">DMRLEEESLR</a>   |
| 2.1   | 1292.5607 | 0.0013  | <a href="#">NMEVLGSQDLR</a>  |
| 0.7   | 1292.5602 | 0.0018  | <a href="#">HFCHKHHLR</a>    |
| 0.7   | 1292.5656 | -0.0037 | <a href="#">MNAFANVHSLR</a>  |
| 0.7   | 1292.5654 | -0.0035 | <a href="#">TSSEESQILR</a>   |

Mascot: <http://www.matrixscience.com/>



# Mascot Search Results

## Peptide View

MS/MS Fragmentation of **QSLNPLQDVAANISR**

Found in **AT2G35490.1** in **TAIR\_Arabidopsis**, Symbols: | plastid-lipid associated protein PAP, putative | chr2:14919388-14920876 REVERSE

Match to Query 7356: 1624.851722 from(813.433137,2+) index(8209)

Title: Elution from: 74.490 to 74.490 scan no 10879 cid35.00 polarity:+

Data file D1d-2\_1.mgf

Click mouse within plot area to zoom in by factor of two about that point

Or,   to  Da

Label all possible matches  Label matches used for scoring

Show Y-axis

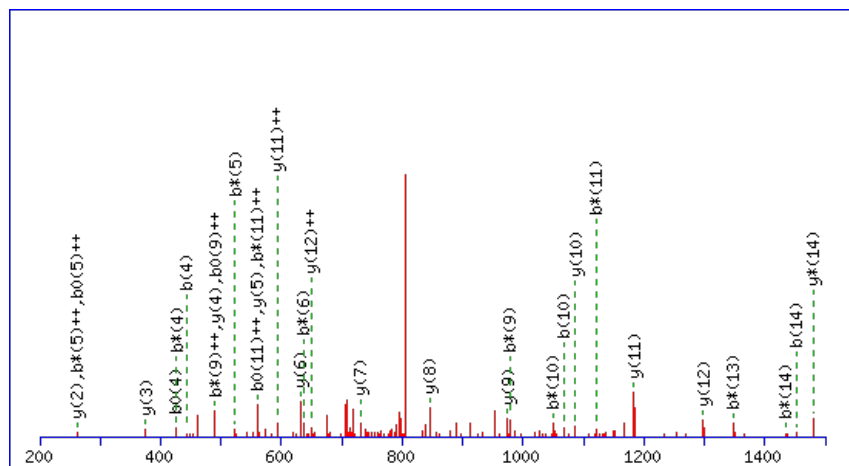

Monoisotopic mass of neutral peptide  $M_r(\text{calc})$ : 1624.8533

Fixed modifications: Carbamidomethyl (C) (apply to specified residues or termini only)

Ions Score: 65 Expect: 1.2e-006

Matches : 32/164 fragment ions using 57 most intense peaks [\(help\)](#)

| #  | b         | b <sup>++</sup> | b*        | b <sup>*++</sup> | b <sup>0</sup> | b <sup>0++</sup> | Seq. | y         | y <sup>++</sup> | y*        | y <sup>*++</sup> | y <sup>0</sup> | y <sup>0++</sup> | #  |
|----|-----------|-----------------|-----------|------------------|----------------|------------------|------|-----------|-----------------|-----------|------------------|----------------|------------------|----|
| 1  | 129.0659  | 65.0366         | 112.0393  | 56.5233          |                |                  | Q    |           |                 |           |                  |                |                  | 15 |
| 2  | 216.0979  | 108.5526        | 199.0713  | 100.0393         | 198.0873       | 99.5473          | S    | 1497.8020 | 749.4046        | 1480.7754 | 740.8914         | 1479.7914      | 740.3993         | 14 |
| 3  | 329.1819  | 165.0946        | 312.1554  | 156.5813         | 311.1714       | 156.0893         | L    | 1410.7700 | 705.8886        | 1393.7434 | 697.3753         | 1392.7594      | 696.8833         | 13 |
| 4  | 443.2249  | 222.1161        | 426.1983  | 213.6028         | 425.2143       | 213.1108         | N    | 1297.6859 | 649.3466        | 1280.6593 | 640.8333         | 1279.6753      | 640.3413         | 12 |
| 5  | 540.2776  | 270.6425        | 523.2511  | 262.1292         | 522.2671       | 261.6372         | P    | 1183.6430 | 592.3251        | 1166.6164 | 583.8118         | 1165.6324      | 583.3198         | 11 |
| 6  | 653.3617  | 327.1845        | 636.3352  | 318.6712         | 635.3511       | 318.1792         | L    | 1086.5902 | 543.7987        | 1069.5636 | 535.2855         | 1068.5796      | 534.7935         | 10 |
| 7  | 781.4203  | 391.2138        | 764.3937  | 382.7005         | 763.4097       | 382.2085         | Q    | 973.5061  | 487.2567        | 956.4796  | 478.7434         | 955.4956       | 478.2514         | 9  |
| 8  | 896.4472  | 448.7272        | 879.4207  | 440.2140         | 878.4367       | 439.7220         | D    | 845.4476  | 423.2274        | 828.4210  | 414.7141         | 827.4370       | 414.2221         | 8  |
| 9  | 995.5156  | 498.2615        | 978.4891  | 489.7482         | 977.5051       | 489.2562         | V    | 730.4206  | 365.7139        | 713.3941  | 357.2007         | 712.4100       | 356.7087         | 7  |
| 10 | 1066.5528 | 533.7800        | 1049.5262 | 525.2667         | 1048.5422      | 524.7747         | A    | 631.3522  | 316.1797        | 614.3257  | 307.6665         | 613.3416       | 307.1745         | 6  |
| 11 | 1137.5899 | 569.2986        | 1120.5633 | 560.7853         | 1119.5793      | 560.2933         | A    | 560.3151  | 280.6612        | 543.2885  | 272.1479         | 542.3045       | 271.6559         | 5  |
| 12 | 1251.6328 | 626.3200        | 1234.6062 | 617.8068         | 1233.6222      | 617.3148         | N    | 489.2780  | 245.1426        | 472.2514  | 236.6293         | 471.2674       | 236.1373         | 4  |
| 13 | 1364.7169 | 682.8621        | 1347.6903 | 674.3488         | 1346.7063      | 673.8568         | I    | 375.2350  | 188.1212        | 358.2085  | 179.6079         | 357.2245       | 179.1159         | 3  |
| 14 | 1451.7489 | 726.3781        | 1434.7223 | 717.8648         | 1433.7383      | 717.3728         | S    | 262.1510  | 131.5791        | 245.1244  | 123.0659         | 244.1404       | 122.5738         | 2  |
| 15 |           |                 |           |                  |                |                  | R    | 175.1190  | 88.0631         | 158.0924  | 79.5498          |                |                  | 1  |

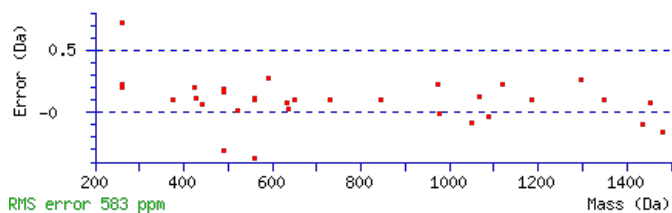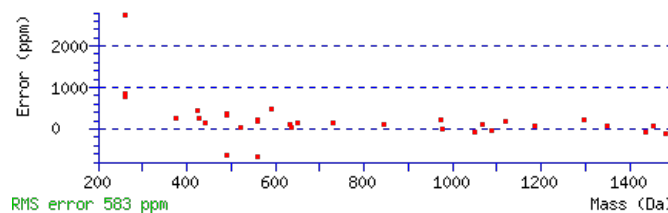

NCBI BLAST search of [QSLNPLQDVAANISR](#)

## AT2G35490.1

(Parameters: blastp, nr protein database, expect=20000, no filter, PAM30)

Other BLAST [web gateways](#)

### All matches to this query

| Score | Mr(calc)  | Delta   | Sequence                        |
|-------|-----------|---------|---------------------------------|
| 65.0  | 1624.8533 | -0.0015 | <a href="#">QSLNPLQDVAANISR</a> |
| 5.1   | 1624.8494 | 0.0023  | <a href="#">LKSLESFLSNCSK</a>   |
| 4.3   | 1624.8469 | 0.0048  | <a href="#">MLLTPKMFSSWLR</a>   |
| 2.0   | 1624.8533 | -0.0015 | <a href="#">NVDNVSPPKTRSSK</a>  |

Mascot: <http://www.matrixscience.com/>

**Peptide View**MS/MS Fragmentation of **IMKEHKNPK**Found in **AT2G35630.1** in **TAIR\_Arabidopsis**, Symbols: GEM1, MOR1 | MOR1 (MICROTUBULE ORGANIZATION 1) | chr2:14973907-14987440 FORWARD

Match to Query 4047: 1154.566758 from(578.290655,2+) index(7376)

Title: Elution from: 64.751 to 64.751 scan no 9496 cid35.00 polarity:+

Data file C7-3\_1.mgf

Click mouse within plot area to zoom in by factor of two about that point

Or,   to  Da Label all possible matches  Label matches used for scoring Show Y-axis 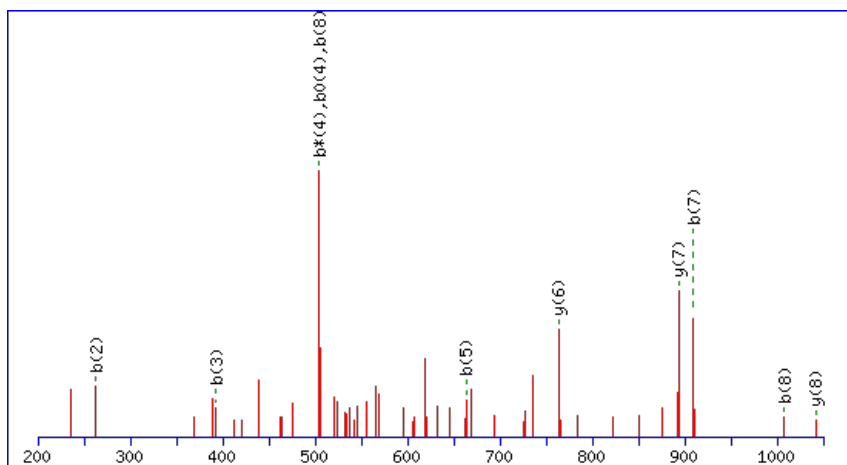Monoisotopic mass of neutral peptide  $M_r(\text{calc})$ : 1154.5677

Fixed modifications: Carbamidomethyl (C) (apply to specified residues or termini only)

Variable modifications:

M2 : Oxidation (M), with neutral losses 0.0000 (shown in table), 63.9983

Ions Score: 31 Expect: 0.0047

Matches : 11/118 fragment ions using 16 most intense peaks ([help](#))

| # | b                | b <sup>++</sup> | b <sup>*</sup>  | b <sup>*++</sup> | b <sup>0</sup>  | b <sup>0++</sup> | Seq. | y                | y <sup>++</sup> | y <sup>*</sup> | y <sup>*++</sup> | y <sup>0</sup> | y <sup>0++</sup> | # |
|---|------------------|-----------------|-----------------|------------------|-----------------|------------------|------|------------------|-----------------|----------------|------------------|----------------|------------------|---|
| 1 | 115.0884         | 58.0478         |                 |                  |                 |                  | I    |                  |                 |                |                  |                |                  | 9 |
| 2 | <b>263.1208</b>  | 132.0640        |                 |                  |                 |                  | M    | <b>1041.4938</b> | 521.2505        | 1023.4702      | 512.2388         | 1023.4833      | 512.2453         | 8 |
| 3 | <b>393.2098</b>  | 197.1086        | 375.1863        | 188.0968         |                 |                  | K    | <b>893.4614</b>  | 447.2343        | 875.4378       | 438.2225         | 875.4508       | 438.2290         | 7 |
| 4 | 523.2495         | 262.1284        | <b>505.2259</b> | 253.1166         | <b>505.2389</b> | 253.1231         | E    | <b>763.3723</b>  | 382.1898        | 745.3488       | 373.1780         | 745.3618       | 373.1845         | 6 |
| 5 | <b>663.2995</b>  | 332.1534        | 645.2759        | 323.1416         | 645.2889        | 323.1481         | H    | 633.3327         | 317.1700        | 615.3091       | 308.1582         |                |                  | 5 |
| 6 | 793.3885         | 397.1979        | 775.3649        | 388.1861         | 775.3780        | 388.1926         | K    | 493.2827         | 247.1450        | 475.2591       | 238.1332         |                |                  | 4 |
| 7 | <b>909.4255</b>  | 455.2164        | 891.4019        | 446.2046         | 891.4150        | 446.2111         | N    | 363.1937         | 182.1005        | 345.1701       | 173.0887         |                |                  | 3 |
| 8 | <b>1007.4753</b> | <b>504.2413</b> | 989.4517        | 495.2295         | 989.4648        | 495.2360         | P    | 247.1567         | 124.0820        | 229.1331       | 115.0702         |                |                  | 2 |
| 9 |                  |                 |                 |                  |                 |                  | K    | 149.1069         | 75.0571         | 131.0833       | 66.0453          |                |                  | 1 |

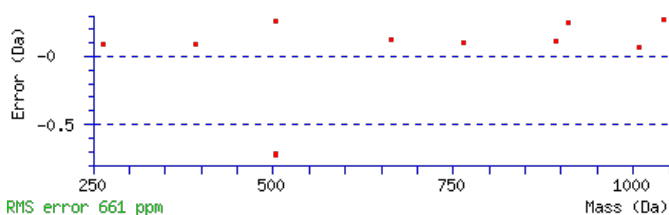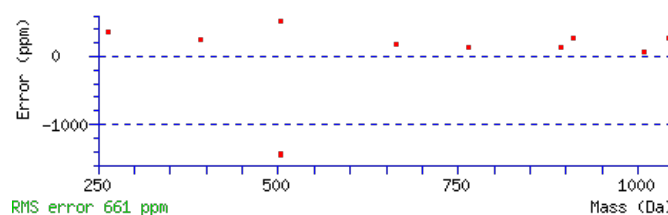NCBI BLAST search of **IMKEHKNPK**

(Parameters: blastp, nr protein database, expect=20000, no filter, PAM30)

Other BLAST [web gateways](#)

All matches to this query

## AT2G35630.1

| Score | Mr(calc)  | Delta   | Sequence                   |
|-------|-----------|---------|----------------------------|
| 30.5  | 1154.5677 | -0.0009 | <a href="#">IMKEHKNP</a>   |
| 25.6  | 1154.5638 | 0.0029  | <a href="#">LFQVEYAFK</a>  |
| 17.3  | 1154.5699 | -0.0031 | <a href="#">LMHFGAPQIK</a> |
| 8.8   | 1154.5676 | -0.0009 | <a href="#">FIQSKSMKR</a>  |
| 8.8   | 1154.5676 | -0.0009 | <a href="#">GEHPKMGKIK</a> |
| 8.6   | 1154.5650 | 0.0018  | <a href="#">SKMSYASILK</a> |
| 6.6   | 1154.5672 | -0.0004 | <a href="#">IFDKAIMYK</a>  |
| 6.4   | 1154.5650 | 0.0018  | <a href="#">KMOEDGLLPL</a> |
| 2.1   | 1154.5699 | -0.0031 | <a href="#">FGLMRNYIK</a>  |
| 1.8   | 1154.5638 | 0.0029  | <a href="#">APSFYYVGLK</a> |

Mascot: <http://www.matrixscience.com/>

**Peptide View**MS/MS Fragmentation of **EIFMIQKKAK**Found in **AT2G35760.1** in **TAIR\_Arabidopsis**, Symbols: | integral membrane family protein | chr2:15039138-15040173 FORWARD

Match to Query 4881: 1264.664926 from(633.339739,2+) index(1900)

Title: Elution from: 22.693 to 22.693 scan no 2465 cid35.00 polarity:+

Data file D6h-1\_1.mgf

Click mouse within plot area to zoom in by factor of two about that point

Or,   to  Da Label all possible matches  Label matches used for scoring Show Y-axis 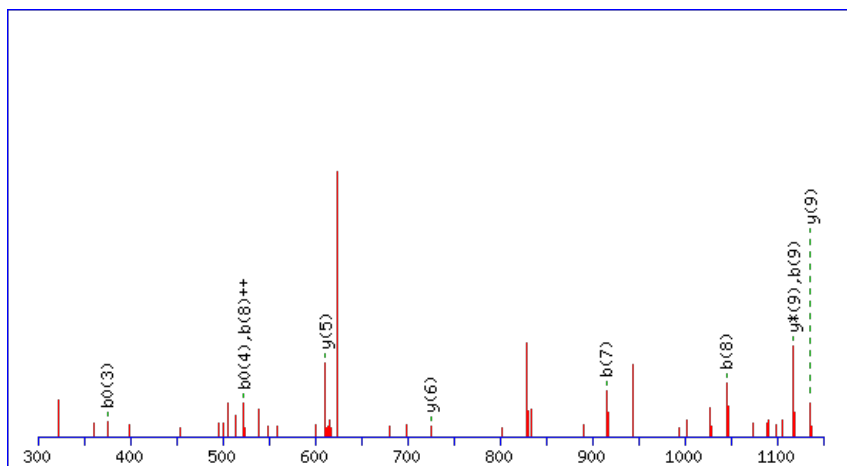**Monoisotopic mass of neutral peptide Mr(calc):** 1264.6642**Fixed modifications:** Carbamidomethyl (C) (apply to specified residues or termini only)**Variable modifications:****M4** : Oxidation (M), with neutral losses 0.0000 (shown in table), 63.9983**Ions Score:** 20 **Expect:** 0.038**Matches** : 10/124 fragment ions using 18 most intense peaks ([help](#))

| #  | b                | b <sup>++</sup> | b*        | b <sup>*++</sup> | b <sup>0</sup>  | b <sup>0++</sup> | Seq. | y                | y <sup>++</sup> | y*               | y <sup>*++</sup> | #  |
|----|------------------|-----------------|-----------|------------------|-----------------|------------------|------|------------------|-----------------|------------------|------------------|----|
| 1  | 131.0469         | 66.0271         |           |                  | 113.0363        | 57.0218          | E    |                  |                 |                  |                  | 10 |
| 2  | 245.1280         | 123.0676        |           |                  | 227.1174        | 114.0624         | I    | <b>1135.6318</b> | 568.3195        | <b>1117.6082</b> | 559.3078         | 9  |
| 3  | 393.1935         | 197.1004        |           |                  | <b>375.1829</b> | 188.0951         | F    | 1021.5507        | 511.2790        | 1003.5271        | 502.2672         | 8  |
| 4  | 541.2259         | 271.1166        |           |                  | <b>523.2153</b> | 262.1113         | M    | 873.4853         | 437.2463        | 855.4617         | 428.2345         | 7  |
| 5  | 655.3070         | 328.1571        |           |                  | 637.2964        | 319.1518         | I    | <b>725.4528</b>  | 363.2301        | 707.4293         | 354.2183         | 6  |
| 6  | 785.3596         | 393.1835        | 767.3360  | 384.1717         | 767.3491        | 384.1782         | Q    | <b>611.3717</b>  | 306.1895        | 593.3482         | 297.1777         | 5  |
| 7  | <b>915.4487</b>  | 458.2280        | 897.4251  | 449.2162         | 897.4381        | 449.2227         | K    | 481.3191         | 241.1632        | 463.2955         | 232.1514         | 4  |
| 8  | <b>1045.5377</b> | <b>523.2725</b> | 1027.5141 | 514.2607         | 1027.5271       | 514.2672         | K    | 351.2301         | 176.1187        | 333.2065         | 167.1069         | 3  |
| 9  | <b>1117.5718</b> | 559.2896        | 1099.5483 | 550.2778         | 1099.5613       | 550.2843         | A    | 221.1410         | 111.0741        | 203.1174         | 102.0624         | 2  |
| 10 |                  |                 |           |                  |                 |                  | K    | 149.1069         | 75.0571         | 131.0833         | 66.0453          | 1  |

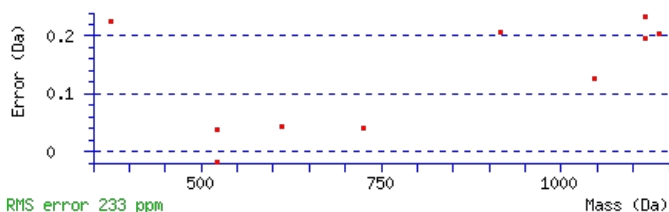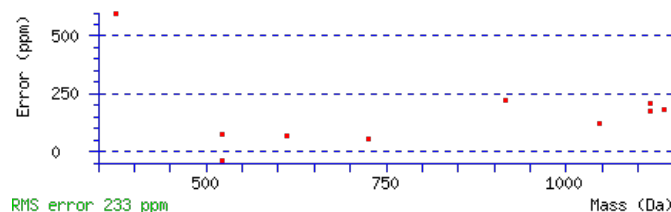NCBI **BLAST** search of **EIFMIQKKAK**

(Parameters: blastp, nr protein database, expect=20000, no filter, PAM30)

Other BLAST [web gateways](#)**All matches to this query**

## AT2G35760.1

| Score | Mr(calc)  | Delta   | Sequence                      |
|-------|-----------|---------|-------------------------------|
| 20.3  | 1264.6642 | 0.0008  | <a href="#">EIFMIQKKAK</a>    |
| 12.1  | 1264.6612 | 0.0037  | <a href="#">KGFVAVASRGGAK</a> |
| 10.4  | 1264.6612 | 0.0037  | <a href="#">KQNENTVRLK</a>    |
| 6.5   | 1264.6642 | 0.0008  | <a href="#">MVTELFRLK</a>     |
| 0.5   | 1264.6668 | -0.0019 | <a href="#">MRGLLFNIIR</a>    |
| 0.5   | 1264.6635 | 0.0015  | <a href="#">YISIKRFHGK</a>    |
| 0.5   | 1264.6661 | -0.0012 | <a href="#">KGLHVPPWRR</a>    |
| 0.4   | 1264.6612 | 0.0037  | <a href="#">QEFIASLRRK</a>    |
| 0.2   | 1264.6664 | -0.0015 | <a href="#">KTIPFMQFIK</a>    |
| 0.1   | 1264.6612 | 0.0037  | <a href="#">SRFGILNKNAK</a>   |

Mascot: <http://www.matrixscience.com/>

**Peptide View**MS/MS Fragmentation of **WDLGIVK**Found in **AT2G35840.1** in **TAIR\_Arabidopsis**, Symbols: | sucrose-phosphatase 1 (SPP1) | chr2:15061031-15062855 FORWARD

Match to Query 1184: 838.443556 from(420.229054,2+) index(6310)

Title: Elution from: 55.683 to 55.683 scan no 8111 cid35.00 polarity:+

Data file D12h-1\_3.mgf

Click mouse within plot area to zoom in by factor of two about that point

Or,   to  Da Label all possible matches  Label matches used for scoring Show Y-axis 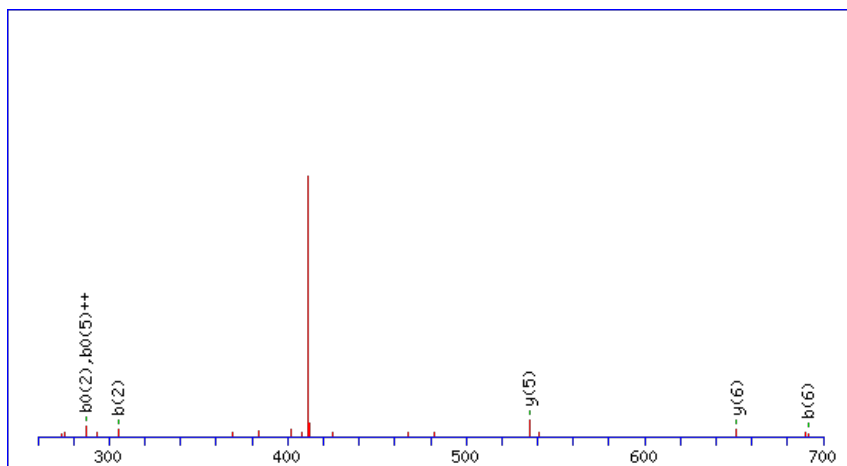Monoisotopic mass of neutral peptide **Mr(calc)**: 838.4431

Fixed modifications: Carbamidomethyl (C) (apply to specified residues or termini only)

Ions Score: 18 **Expect**: 0.047Matches : 6/48 fragment ions using 9 most intense peaks ([help](#))

| # | b               | b <sup>++</sup> | b <sup>0</sup>  | b <sup>0++</sup> | Seq. | y               | y <sup>++</sup> | y*       | y <sup>*++</sup> | y <sup>0</sup> | y <sup>0++</sup> | # |
|---|-----------------|-----------------|-----------------|------------------|------|-----------------|-----------------|----------|------------------|----------------|------------------|---|
| 1 | 189.0807        | 95.0440         |                 |                  | W    |                 |                 |          |                  |                |                  | 7 |
| 2 | <b>305.1046</b> | 153.0560        | <b>287.0941</b> | 144.0507         | D    | <b>651.3770</b> | 326.1921        | 633.3534 | 317.1803         | 633.3664       | 317.1869         | 6 |
| 3 | 419.1857        | 210.0965        | 401.1752        | 201.0912         | L    | <b>535.3530</b> | 268.1801        | 517.3294 | 259.1684         |                |                  | 5 |
| 4 | 477.2042        | 239.1058        | 459.1937        | 230.1005         | G    | 421.2719        | 211.1396        | 403.2483 | 202.1278         |                |                  | 4 |
| 5 | 591.2853        | 296.1463        | 573.2748        | <b>287.1410</b>  | I    | 363.2534        | 182.1303        | 345.2298 | 173.1186         |                |                  | 3 |
| 6 | <b>691.3508</b> | 346.1790        | 673.3402        | 337.1737         | V    | 249.1723        | 125.0898        | 231.1487 | 116.0780         |                |                  | 2 |
| 7 |                 |                 |                 |                  | K    | 149.1069        | 75.0571         | 131.0833 | 66.0453          |                |                  | 1 |

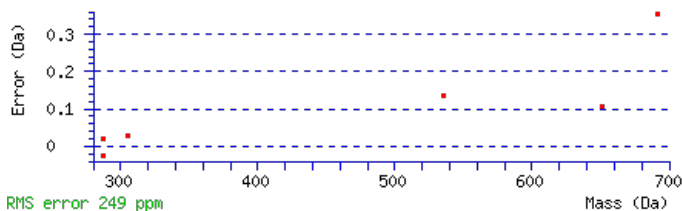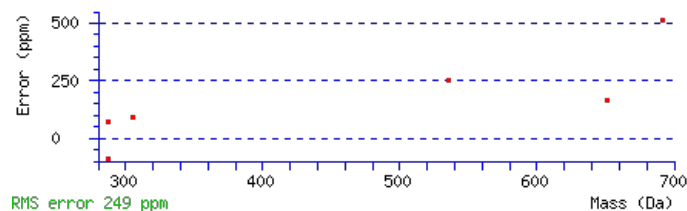NCBI **BLAST** search of [WDLGIVK](#)

(Parameters: blastp, nr protein database, expect=20000, no filter, PAM30)

Other BLAST [web gateways](#)**All matches to this query**

| Score | Mr(calc) | Delta  | Sequence                |
|-------|----------|--------|-------------------------|
| 18.0  | 838.4431 | 0.0005 | <a href="#">WDLGIVK</a> |
| 5.6   | 838.4431 | 0.0005 | <a href="#">DWVVALK</a> |
| 5.1   | 838.4431 | 0.0004 | <a href="#">VPLPNYK</a> |



AT2G35840.1

|     |          |        |                         |
|-----|----------|--------|-------------------------|
| 3.0 | 838.4435 | 0.0000 | <a href="#">RLPDGIR</a> |
|-----|----------|--------|-------------------------|

**Mascot:** <http://www.matrixscience.com/>

### Peptide View

 MS/MS Fragmentation of **ADREDESSPYAAMLAQDVAQR**

 Found in **AT2G36160.1** in **TAIR\_Arabidopsis**, Symbols: | 40S ribosomal protein S14 (RPS14A) | chr2:15177004-15178238 FORWARD

Match to Query 9804: 2264.053053 from(755.691627,3+) index(6650)

Title: Elution from: 58.511 to 58.511 scan no 8581 cid35.00 polarity:+

Data file D12h-1\_3.mgf

Click mouse within plot area to zoom in by factor of two about that point

 Or,  to  Da 

 Label all possible matches  Label matches used for scoring 

 Show Y-axis 
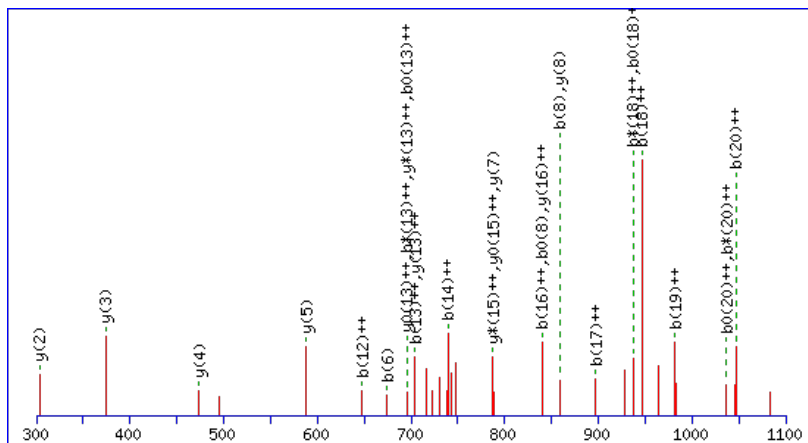
 Monoisotopic mass of neutral peptide  $M_r(\text{calc})$ : 2264.0491

Fixed modifications: Carbamidomethyl (C) (apply to specified residues or termini only)

Ions Score: 71 Expect: 1.6e-007

 Matches : 29/226 fragment ions using 20 most intense peaks ([help](#))

| #  | b               | b <sup>++</sup>  | b <sup>*</sup> | b <sup>*++</sup> | b <sup>0</sup>  | b <sup>0++</sup> | Seq. | y               | y <sup>++</sup> | y <sup>*</sup> | y <sup>*++</sup> | y <sup>0</sup> | y <sup>0++</sup> | #  |
|----|-----------------|------------------|----------------|------------------|-----------------|------------------|------|-----------------|-----------------|----------------|------------------|----------------|------------------|----|
| 1  | 72.0444         | 36.5258          |                |                  |                 |                  | A    |                 |                 |                |                  |                |                  | 21 |
| 2  | 187.0713        | 94.0393          |                |                  | 169.0608        | 85.0340          | D    | 2194.0193       | 1097.5133       | 2176.9928      | 1089.0000        | 2176.0088      | 1088.5080        | 20 |
| 3  | 343.1724        | 172.0899         | 326.1459       | 163.5766         | 325.1619        | 163.0846         | R    | 2078.9924       | 1039.9998       | 2061.9658      | 1031.4866        | 2060.9818      | 1030.9945        | 19 |
| 4  | 458.1994        | 229.6033         | 441.1728       | 221.0901         | 440.1888        | 220.5980         | D    | 1922.8913       | 961.9493        | 1905.8647      | 953.4360         | 1904.8807      | 952.9440         | 18 |
| 5  | 587.2420        | 294.1246         | 570.2154       | 285.6114         | 569.2314        | 285.1193         | E    | 1807.8643       | 904.4358        | 1790.8378      | 895.9225         | 1789.8538      | 895.4305         | 17 |
| 6  | <b>674.2740</b> | 337.6406         | 657.2475       | 329.1274         | 656.2634        | 328.6354         | S    | 1678.8217       | <b>839.9145</b> | 1661.7952      | 831.4012         | 1660.8112      | 830.9092         | 16 |
| 7  | 761.3060        | 381.1567         | 744.2795       | 372.6434         | 743.2955        | 372.1514         | S    | 1591.7897       | 796.3985        | 1574.7632      | <b>787.8852</b>  | 1573.7791      | <b>787.3932</b>  | 15 |
| 8  | <b>858.3588</b> | 429.6830         | 841.3323       | 421.1698         | <b>840.3482</b> | 420.6778         | P    | 1504.7577       | 752.8825        | 1487.7311      | 744.3692         | 1486.7471      | 743.8772         | 14 |
| 9  | 1021.4221       | 511.2147         | 1004.3956      | 502.7014         | 1003.4116       | 502.2094         | Y    | 1407.7049       | <b>704.3561</b> | 1390.6784      | <b>695.8428</b>  | 1389.6943      | <b>695.3508</b>  | 13 |
| 10 | 1092.4592       | 546.7333         | 1075.4327      | 538.2200         | 1074.4487       | 537.7280         | A    | 1244.6416       | 622.8244        | 1227.6150      | 614.3112         | 1226.6310      | 613.8191         | 12 |
| 11 | 1163.4964       | 582.2518         | 1146.4698      | 573.7385         | 1145.4858       | 573.2465         | A    | 1173.6045       | 587.3059        | 1156.5779      | 578.7926         | 1155.5939      | 578.3006         | 11 |
| 12 | 1294.5368       | <b>647.7721</b>  | 1277.5103      | 639.2588         | 1276.5263       | 638.7668         | M    | 1102.5674       | 551.7873        | 1085.5408      | 543.2740         | 1084.5568      | 542.7820         | 10 |
| 13 | 1407.6209       | <b>704.3141</b>  | 1390.5944      | <b>695.8008</b>  | 1389.6103       | <b>695.3088</b>  | L    | 971.5269        | 486.2671        | 954.5003       | 477.7538         | 953.5163       | 477.2618         | 9  |
| 14 | 1478.6580       | <b>739.8326</b>  | 1461.6315      | 731.3194         | 1460.6475       | 730.8274         | A    | <b>858.4428</b> | 429.7250        | 841.4163       | 421.2118         | 840.4322       | 420.7198         | 8  |
| 15 | 1549.6951       | 775.3512         | 1532.6686      | 766.8379         | 1531.6846       | 766.3459         | A    | <b>787.4057</b> | 394.2065        | 770.3791       | 385.6932         | 769.3951       | 385.2012         | 7  |
| 16 | 1677.7537       | <b>839.3805</b>  | 1660.7272      | 830.8672         | 1659.7431       | 830.3752         | Q    | 716.3686        | 358.6879        | 699.3420       | 350.1747         | 698.3580       | 349.6826         | 6  |
| 17 | 1792.7807       | <b>896.8940</b>  | 1775.7541      | 888.3807         | 1774.7701       | 887.8887         | D    | <b>588.3100</b> | 294.6586        | 571.2835       | 286.1454         | 570.2994       | 285.6534         | 5  |
| 18 | 1891.8491       | <b>946.4282</b>  | 1874.8225      | <b>937.9149</b>  | 1873.8385       | <b>937.4229</b>  | V    | <b>473.2831</b> | 237.1452        | 456.2565       | 228.6319         |                |                  | 4  |
| 19 | 1962.8862       | <b>981.9467</b>  | 1945.8596      | 973.4335         | 1944.8756       | 972.9414         | A    | <b>374.2146</b> | 187.6110        | 357.1881       | 179.0977         |                |                  | 3  |
| 20 | 2090.9448       | <b>1045.9760</b> | 2073.9182      | <b>1037.4627</b> | 2072.9342       | <b>1036.9707</b> | Q    | <b>303.1775</b> | 152.0924        | 286.1510       | 143.5791         |                |                  | 2  |
| 21 |                 |                  |                |                  |                 |                  | R    | 175.1190        | 88.0631         | 158.0924       | 79.5498          |                |                  | 1  |

# AT2G36160.1

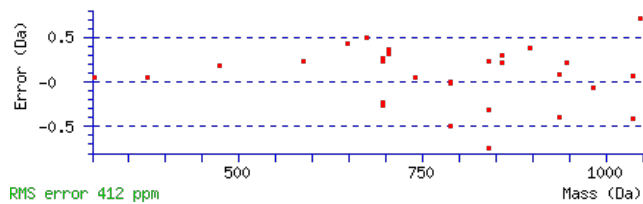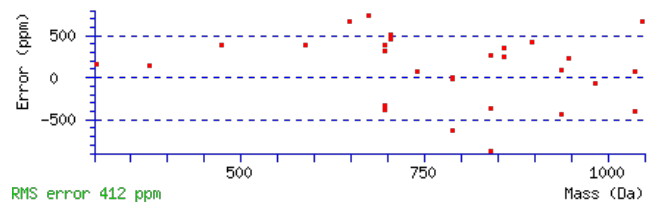

NCBI **BLAST** search of [ADRDESSPYAAMLAAQDVAQR](#)  
(Parameters: blastp, nr protein database, expect=20000, no filter, PAM30)  
Other BLAST [web gateways](#)

## All matches to this query

| Score | Mr(calc)  | Delta   | Sequence                              |
|-------|-----------|---------|---------------------------------------|
| 70.8  | 2264.0491 | 0.0039  | <a href="#">ADRDESSPYAAMLAAQDVAQR</a> |
| 6.2   | 2264.0565 | -0.0034 | <a href="#">RSYEIPPPKGESLEMCAER</a>   |

Mascot: <http://www.matrixscience.com/>

**Peptide View**MS/MS Fragmentation of **VIGVGGGGSNAVNR**

Found in **AT2G36250.1** in **TAIR\_Arabidopsis**, Symbols: ATFTSZ2-1, FTSZ2-1 | FTSZ2-1 (FtsZ homolog 2-1); structural molecule | chr2:15204740-15207011 REVERSE

Match to Query 4534: 1255.659668 from(628.837110,2+) index(1464)

Title: Elution from: 19.702 to 19.702 scan no 1973 cid35.00 polarity:+

Data file C7-2\_2.mgf

Click mouse within plot area to zoom in by factor of two about that point

Or,   to  Da

Label all possible matches  Label matches used for scoring

Show Y-axis

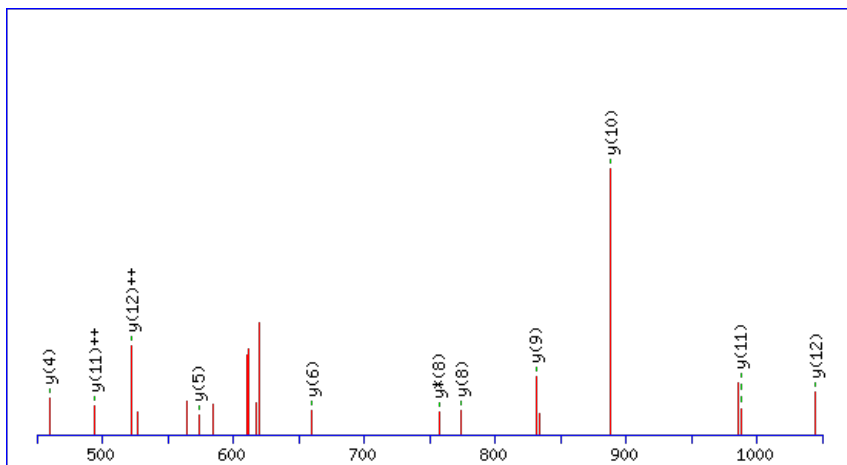

**Monoisotopic mass of neutral peptide Mr(calc):** 1255.6633

**Fixed modifications:** Carbamidomethyl (C) (apply to specified residues or termini only)

**Ions Score:** 56 **Expect:** 1.1e-005

**Matches:** 11/112 fragment ions using 20 most intense peaks ([help](#))

| #  | b         | b <sup>++</sup> | b*        | b <sup>*++</sup> | b <sup>0</sup> | b <sup>0++</sup> | Seq. | y                | y <sup>++</sup> | y*              | y <sup>*++</sup> | y <sup>0</sup> | y <sup>0++</sup> | #  |
|----|-----------|-----------------|-----------|------------------|----------------|------------------|------|------------------|-----------------|-----------------|------------------|----------------|------------------|----|
| 1  | 100.0757  | 50.5415         |           |                  |                |                  | V    |                  |                 |                 |                  |                |                  | 14 |
| 2  | 213.1598  | 107.0835        |           |                  |                |                  | I    | 1157.6022        | 579.3047        | 1140.5756       | 570.7914         | 1139.5916      | 570.2994         | 13 |
| 3  | 270.1812  | 135.5942        |           |                  |                |                  | G    | <b>1044.5181</b> | <b>522.7627</b> | 1027.4915       | 514.2494         | 1026.5075      | 513.7574         | 12 |
| 4  | 369.2496  | 185.1285        |           |                  |                |                  | V    | <b>987.4966</b>  | <b>494.2520</b> | 970.4701        | 485.7387         | 969.4861       | 485.2467         | 11 |
| 5  | 426.2711  | 213.6392        |           |                  |                |                  | G    | <b>888.4282</b>  | 444.7177        | 871.4017        | 436.2045         | 870.4177       | 435.7125         | 10 |
| 6  | 483.2926  | 242.1499        |           |                  |                |                  | G    | <b>831.4068</b>  | 416.2070        | 814.3802        | 407.6937         | 813.3962       | 407.2017         | 9  |
| 7  | 540.3140  | 270.6607        |           |                  |                |                  | G    | <b>774.3853</b>  | 387.6963        | <b>757.3587</b> | 379.1830         | 756.3747       | 378.6910         | 8  |
| 8  | 597.3355  | 299.1714        |           |                  |                |                  | G    | 717.3638         | 359.1856        | 700.3373        | 350.6723         | 699.3533       | 350.1803         | 7  |
| 9  | 684.3675  | 342.6874        |           |                  | 666.3570       | 333.6821         | S    | <b>660.3424</b>  | 330.6748        | 643.3158        | 322.1615         | 642.3318       | 321.6695         | 6  |
| 10 | 798.4104  | 399.7089        | 781.3839  | 391.1956         | 780.3999       | 390.7036         | N    | <b>573.3103</b>  | 287.1588        | 556.2838        | 278.6455         |                |                  | 5  |
| 11 | 869.4476  | 435.2274        | 852.4210  | 426.7141         | 851.4370       | 426.2221         | A    | <b>459.2674</b>  | 230.1373        | 442.2409        | 221.6241         |                |                  | 4  |
| 12 | 968.5160  | 484.7616        | 951.4894  | 476.2483         | 950.5054       | 475.7563         | V    | 388.2303         | 194.6188        | 371.2037        | 186.1055         |                |                  | 3  |
| 13 | 1082.5589 | 541.7831        | 1065.5323 | 533.2698         | 1064.5483      | 532.7778         | N    | 289.1619         | 145.0846        | 272.1353        | 136.5713         |                |                  | 2  |
| 14 |           |                 |           |                  |                |                  | R    | 175.1190         | 88.0631         | 158.0924        | 79.5498          |                |                  | 1  |

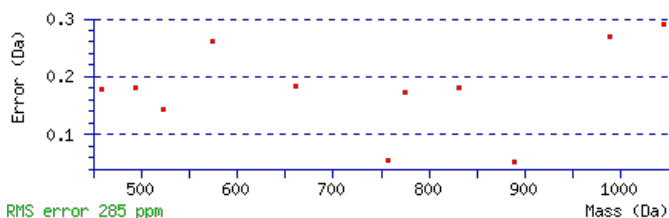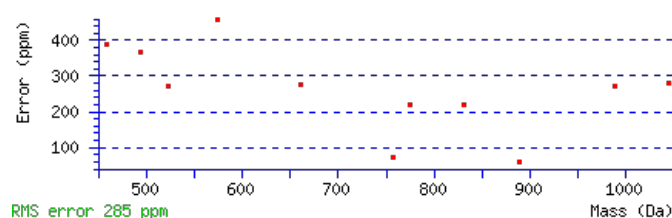

NCBI BLAST search of [VIGVGGGGSNAVNR](#)

## AT2G36250.1

(Parameters: blastp, nr protein database, expect=20000, no filter, PAM30)

Other BLAST [web gateways](#)

### All matches to this query

| Score | Mr(calc)  | Delta   | Sequence                       |
|-------|-----------|---------|--------------------------------|
| 56.3  | 1255.6633 | -0.0036 | <a href="#">VIGVGGGGSNAVNR</a> |
| 8.2   | 1255.6633 | -0.0036 | <a href="#">GALLAGNGENGKR</a>  |

Mascot: <http://www.matrixscience.com/>

**Peptide View**MS/MS Fragmentation of **ANSEATLGAYK**Found in **AT2G36460.1** in **TAIR\_Arabidopsis**, Symbols: | fructose-bisphosphate aldolase, putative | chr2:15304008-15305466 REVERSE

Match to Query 3756: 1123.549752 from(562.782152,2+) index(1518)

Title: Elution from: 19.168 to 19.168 scan no 1993 cid35.00 polarity:+

Data file D1d-3\_2.mgf

Click mouse within plot area to zoom in by factor of two about that point

Or,   to  Da Label all possible matches  Label matches used for scoring Show Y-axis 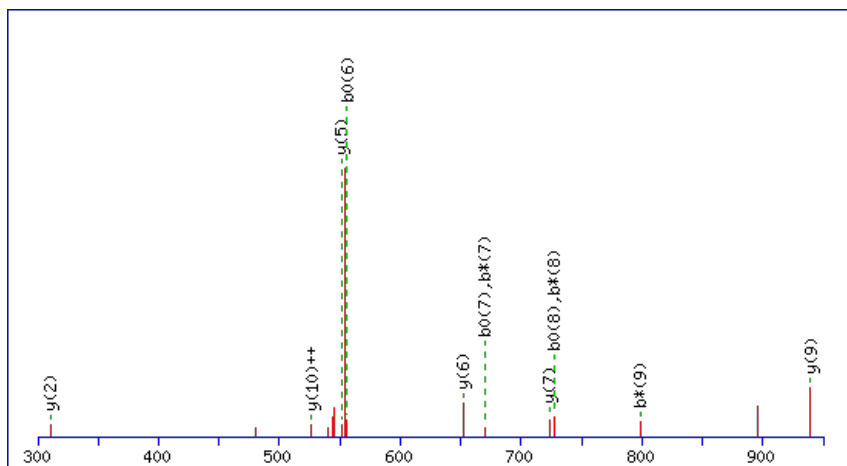Monoisotopic mass of neutral peptide **Mr(calc)**: 1123.5509**Fixed modifications**: Carbamidomethyl (C) (apply to specified residues or termini only)**Ions Score**: 27 **Expect**: 0.007**Matches**: 12/104 fragment ions using 16 most intense peaks ([help](#))

| #  | b        | b <sup>++</sup> | b*       | b <sup>*++</sup> | b <sup>0</sup> | b <sup>0++</sup> | Seq. | y         | y <sup>++</sup> | y*        | y <sup>*++</sup> | y <sup>0</sup> | y <sup>0++</sup> | #  |
|----|----------|-----------------|----------|------------------|----------------|------------------|------|-----------|-----------------|-----------|------------------|----------------|------------------|----|
| 1  | 72.0444  | 36.5258         |          |                  |                |                  | A    |           |                 |           |                  |                |                  | 11 |
| 2  | 186.0873 | 93.5473         | 169.0608 | 85.0340          |                |                  | N    | 1053.5211 | 527.2642        | 1036.4946 | 518.7509         | 1035.5106      | 518.2589         | 10 |
| 3  | 273.1193 | 137.0633        | 256.0928 | 128.5500         | 255.1088       | 128.0580         | S    | 939.4782  | 470.2427        | 922.4516  | 461.7295         | 921.4676       | 461.2375         | 9  |
| 4  | 402.1619 | 201.5846        | 385.1354 | 193.0713         | 384.1514       | 192.5793         | E    | 852.4462  | 426.7267        | 835.4196  | 418.2134         | 834.4356       | 417.7214         | 8  |
| 5  | 473.1991 | 237.1032        | 456.1725 | 228.5899         | 455.1885       | 228.0979         | A    | 723.4036  | 362.2054        | 706.3770  | 353.6921         | 705.3930       | 353.2001         | 7  |
| 6  | 574.2467 | 287.6270        | 557.2202 | 279.1137         | 556.2362       | 278.6217         | T    | 652.3665  | 326.6869        | 635.3399  | 318.1736         | 634.3559       | 317.6816         | 6  |
| 7  | 687.3308 | 344.1690        | 670.3042 | 335.6558         | 669.3202       | 335.1638         | L    | 551.3188  | 276.1630        | 534.2922  | 267.6498         |                |                  | 5  |
| 8  | 744.3523 | 372.6798        | 727.3257 | 364.1665         | 726.3417       | 363.6745         | G    | 438.2347  | 219.6210        | 421.2082  | 211.1077         |                |                  | 4  |
| 9  | 815.3894 | 408.1983        | 798.3628 | 399.6851         | 797.3788       | 399.1930         | A    | 381.2132  | 191.1103        | 364.1867  | 182.5970         |                |                  | 3  |
| 10 | 978.4527 | 489.7300        | 961.4262 | 481.2167         | 960.4421       | 480.7247         | Y    | 310.1761  | 155.5917        | 293.1496  | 147.0784         |                |                  | 2  |
| 11 |          |                 |          |                  |                |                  | K    | 147.1128  | 74.0600         | 130.0863  | 65.5468          |                |                  | 1  |

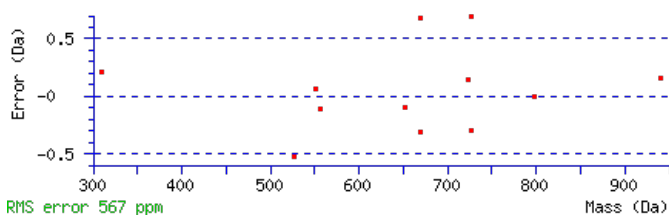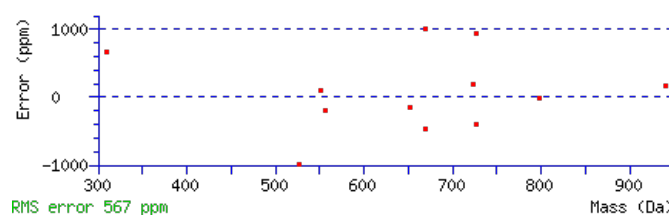NCBI **BLAST** search of **ANSEATLGAYK**

(Parameters: blastp, nr protein database, expect=20000, no filter, PAM30)

Other BLAST [web gateways](#)**All matches to this query**

AT2G36460.1

| Score | Mr(calc)  | Delta   | Sequence                    |
|-------|-----------|---------|-----------------------------|
| 26.7  | 1123.5509 | -0.0012 | <a href="#">ANSEATLGAYK</a> |
| 14.5  | 1123.5509 | -0.0012 | <a href="#">TANDAATSVFK</a> |

Mascot: <http://www.matrixscience.com/>

## Peptide View

MS/MS Fragmentation of **MGVEVYHHLK**

Found in **AT2G36530.1** in **TAIR\_Arabidopsis**, Symbols: LOS2 | LOS2 (Low expression of osmotically responsive genes 1); phosphopyruvate hydratase | chr2:15328160-15330865 REVERSE

Match to Query 4561: 1226.565034 from(614.289793,2+) index(1812)

Title: Elution from: 22.770 to 22.770 scan no 2406 cid35.00 polarity:+

Data file D12h-1\_1.mgf

Click mouse within plot area to zoom in by factor of two about that point

Or,   to  Da

Label all possible matches  Label matches used for scoring

Show Y-axis

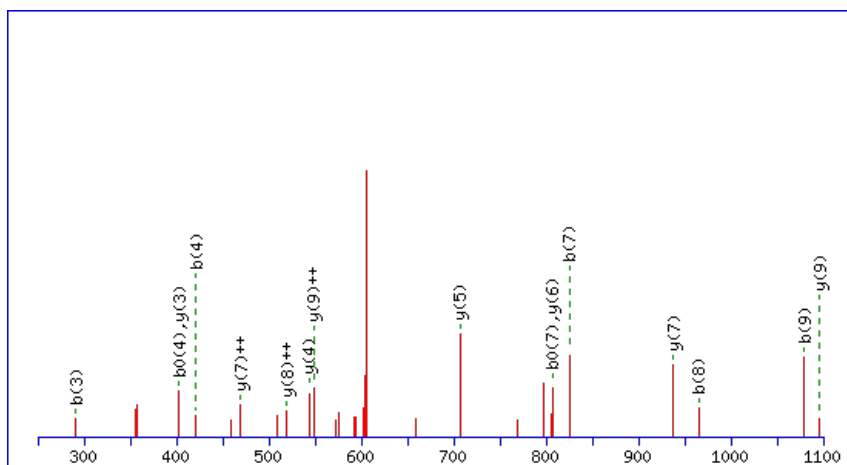

Monoisotopic mass of neutral peptide  $M_r(\text{calc})$ : 1226.5676

Fixed modifications: Carbamidomethyl (C) (apply to specified residues or termini only)

Ions Score: 52 Expect: 3.9e-005

Matches : 16/72 fragment ions using 21 most intense peaks ([help](#))

| #  | b         | b <sup>++</sup> | b <sup>0</sup> | b <sup>0++</sup> | Seq. | y         | y <sup>++</sup> | y*        | y <sup>*++</sup> | y <sup>0</sup> | y <sup>0++</sup> | #  |
|----|-----------|-----------------|----------------|------------------|------|-----------|-----------------|-----------|------------------|----------------|------------------|----|
| 1  | 133.0448  | 67.0260         |                |                  | M    |           |                 |           |                  |                |                  | 10 |
| 2  | 191.0633  | 96.0353         |                |                  | G    | 1095.5374 | 548.2723        | 1077.5138 | 539.2605         | 1077.5268      | 539.2671         | 9  |
| 3  | 291.1287  | 146.0680        |                |                  | V    | 1037.5189 | 519.2631        | 1019.4953 | 510.2513         | 1019.5083      | 510.2578         | 8  |
| 4  | 421.1684  | 211.0878        | 403.1578       | 202.0825         | E    | 937.4534  | 469.2304        | 919.4299  | 460.2186         | 919.4429       | 460.2251         | 7  |
| 5  | 521.2338  | 261.1205        | 503.2233       | 252.1153         | V    | 807.4138  | 404.2105        | 789.3902  | 395.1988         |                |                  | 6  |
| 6  | 685.2942  | 343.1507        | 667.2836       | 334.1454         | Y    | 707.3484  | 354.1778        | 689.3248  | 345.1660         |                |                  | 5  |
| 7  | 825.3442  | 413.1757        | 807.3336       | 404.1705         | H    | 543.2880  | 272.1476        | 525.2644  | 263.1358         |                |                  | 4  |
| 8  | 965.3942  | 483.2007        | 947.3837       | 474.1955         | H    | 403.2380  | 202.1226        | 385.2144  | 193.1108         |                |                  | 3  |
| 9  | 1079.4753 | 540.2413        | 1061.4648      | 531.2360         | L    | 263.1880  | 132.0976        | 245.1644  | 123.0858         |                |                  | 2  |
| 10 |           |                 |                |                  | K    | 149.1069  | 75.0571         | 131.0833  | 66.0453          |                |                  | 1  |

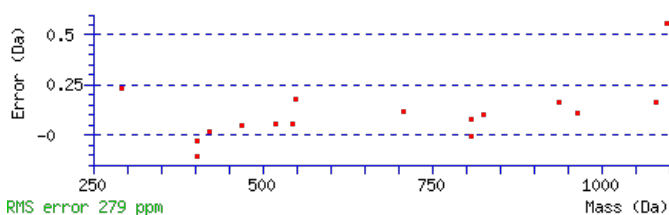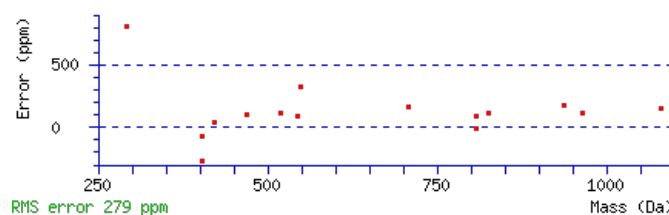

NCBI BLAST search of **MGVEVYHHLK**

(Parameters: blastp, nr protein database, expect=20000, no filter, PAM30)

Other BLAST [web gateways](#)

All matches to this query



## AT2G36530.1

| Score | Mr(calc)  | Delta   | Sequence                    |
|-------|-----------|---------|-----------------------------|
| 52.2  | 1226.5676 | -0.0026 | <a href="#">MGVEVYHHLK</a>  |
| 14.8  | 1226.5650 | 0.0001  | <a href="#">MGVDYYNILK</a>  |
| 9.6   | 1226.5620 | 0.0030  | <a href="#">DEHSAFLHK</a>   |
| 6.1   | 1226.5650 | 0.0001  | <a href="#">LMATVFENYK</a>  |
| 3.4   | 1226.5675 | -0.0024 | <a href="#">EATPEGEELIK</a> |
| 1.6   | 1226.5649 | 0.0001  | <a href="#">LFMTQGEVYK</a>  |
| 1.4   | 1226.5676 | -0.0026 | <a href="#">QRWIAMYTK</a>   |
| 0.7   | 1226.5627 | 0.0023  | <a href="#">KCSYTEVSLK</a>  |
| 0.6   | 1226.5620 | 0.0030  | <a href="#">SQTQPFYGRK</a>  |
| 0.6   | 1226.5643 | 0.0008  | <a href="#">ATHSLSFFER</a>  |

Mascot: <http://www.matrixscience.com/>

**Peptide View**MS/MS Fragmentation of **SIVGATLEVIQK**

Found in **AT2G36620.1** in **TAIR\_Arabidopsis**, Symbols: RPL24A | RPL24A (RIBOSOMAL PROTEIN L24); structural constituent of ribosome | chr2:15357627-15358898 REVERSE

Match to Query 4255: 1256.733639 from(419.918489,3+) index(7137)

Title: Elution from: 63.547 to 63.547 scan no 9293 cid35.00 polarity:+

Data file C7-1\_3.mgf

Click mouse within plot area to zoom in by factor of two about that point

Or,   to  Da

Label all possible matches  Label matches used for scoring

Show Y-axis

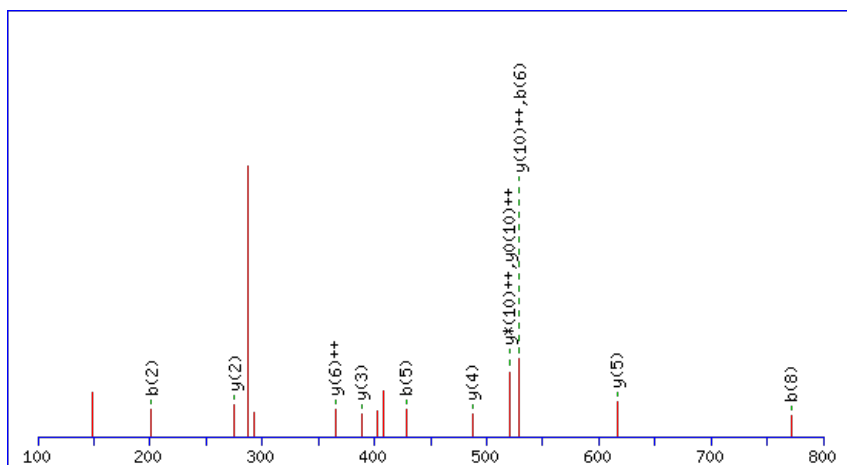

Monoisotopic mass of neutral peptide  $M_r(\text{calc})$ : 1256.7340

Fixed modifications: Carbamidomethyl (C) (apply to specified residues or termini only)

Ions Score: 34 Expect: 0.0011

Matches : 12/104 fragment ions using 15 most intense peaks ([help](#))

| #  | b               | b <sup>++</sup> | b*        | b <sup>*++</sup> | b <sup>0</sup> | b <sup>0++</sup> | Seq. | y               | y <sup>++</sup> | y*        | y <sup>*++</sup> | y <sup>0</sup> | y <sup>0++</sup> | #  |
|----|-----------------|-----------------|-----------|------------------|----------------|------------------|------|-----------------|-----------------|-----------|------------------|----------------|------------------|----|
| 1  | 88.0393         | 44.5233         |           |                  | 70.0287        | 35.5180          | S    |                 |                 |           |                  |                |                  | 12 |
| 2  | <b>201.1234</b> | 101.0653        |           |                  | 183.1128       | 92.0600          | I    | 1170.7093       | 585.8583        | 1153.6827 | 577.3450         | 1152.6987      | 576.8530         | 11 |
| 3  | 300.1918        | 150.5995        |           |                  | 282.1812       | 141.5942         | V    | 1057.6252       | <b>529.3162</b> | 1040.5986 | <b>520.8030</b>  | 1039.6146      | <b>520.3109</b>  | 10 |
| 4  | 357.2132        | 179.1103        |           |                  | 339.2027       | 170.1050         | G    | 958.5568        | 479.7820        | 941.5302  | 471.2688         | 940.5462       | 470.7767         | 9  |
| 5  | <b>428.2504</b> | 214.6288        |           |                  | 410.2398       | 205.6235         | A    | 901.5353        | 451.2713        | 884.5088  | 442.7580         | 883.5247       | 442.2660         | 8  |
| 6  | <b>529.2980</b> | 265.1527        |           |                  | 511.2875       | 256.1474         | T    | 830.4982        | 415.7527        | 813.4716  | 407.2395         | 812.4876       | 406.7475         | 7  |
| 7  | 642.3821        | 321.6947        |           |                  | 624.3715       | 312.6894         | L    | 729.4505        | <b>365.2289</b> | 712.4240  | 356.7156         | 711.4400       | 356.2236         | 6  |
| 8  | <b>771.4247</b> | 386.2160        |           |                  | 753.4141       | 377.2107         | E    | <b>616.3665</b> | 308.6869        | 599.3399  | 300.1736         | 598.3559       | 299.6816         | 5  |
| 9  | 870.4931        | 435.7502        |           |                  | 852.4825       | 426.7449         | V    | <b>487.3239</b> | 244.1656        | 470.2973  | 235.6523         |                |                  | 4  |
| 10 | 983.5772        | 492.2922        |           |                  | 965.5666       | 483.2869         | I    | <b>388.2554</b> | 194.6314        | 371.2289  | 186.1181         |                |                  | 3  |
| 11 | 1111.6358       | 556.3215        | 1094.6092 | 547.8082         | 1093.6252      | 547.3162         | Q    | <b>275.1714</b> | 138.0893        | 258.1448  | 129.5761         |                |                  | 2  |
| 12 |                 |                 |           |                  |                |                  | K    | 147.1128        | 74.0600         | 130.0863  | 65.5468          |                |                  | 1  |

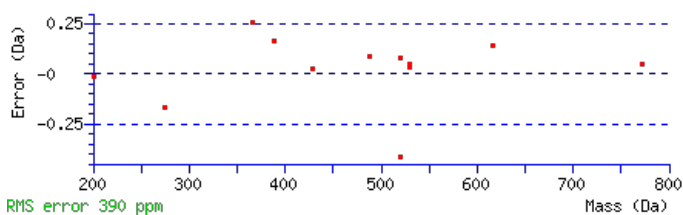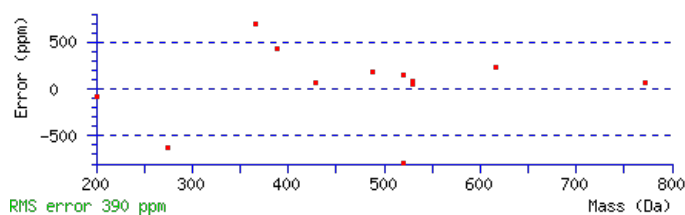

NCBI BLAST search of **SIVGATLEVIQK**

(Parameters: blastp, nr protein database, expect=20000, no filter, PAM30)

Other BLAST [web gateways](#)

AT2G36620.1

All matches to this query

| Score | Mr(calc)  | Delta   | Sequence                      |
|-------|-----------|---------|-------------------------------|
| 34.5  | 1256.7340 | -0.0004 | <a href="#">SIVGATLEVIQK</a>  |
| 11.9  | 1256.7340 | -0.0004 | <a href="#">LGLTADIGLSVAK</a> |
| 4.5   | 1256.7340 | -0.0003 | <a href="#">ISIIGDSSKLPK</a>  |
| 4.3   | 1256.7313 | 0.0023  | <a href="#">AITKNTGARGLR</a>  |
| 4.0   | 1256.7313 | 0.0023  | <a href="#">VTNTVVARRNK</a>   |
| 3.6   | 1256.7339 | -0.0003 | <a href="#">EIISKNEIALK</a>   |
| 3.6   | 1256.7340 | -0.0003 | <a href="#">IKLSEDKIPSK</a>   |
| 0.8   | 1256.7340 | -0.0003 | <a href="#">KPSSLEEVLK</a>    |
| 0.5   | 1256.7340 | -0.0004 | <a href="#">TSSSTPLALVGAK</a> |

Mascot: <http://www.matrixscience.com/>

**Peptide View**MS/MS Fragmentation of **FMEKDIDTAAFVQK**

Found in **AT2G36680.1** in **TAIR\_Arabidopsis**, Symbols: | similar to unknown protein [Arabidopsis thaliana] (TAIR:AT3G53120.1); similar to unnamed protein product [Vitis vinifera] (GB:CAO62968.1); contains InterPro domain Modifier of rudimentary, Modr (InterPro:IPR009851) | chr2:15376059-15377

Match to Query 7882: 1674.749154 from(838.381853,2+) index(10722)

Title: Elution from: 107.897 to 107.897 scan no 15637 cid35.00 polarity:+

Data file D6h-1\_2.mgf

Click mouse within plot area to zoom in by factor of two about that point

Or,   to  Da

Label all possible matches  Label matches used for scoring

Show Y-axis

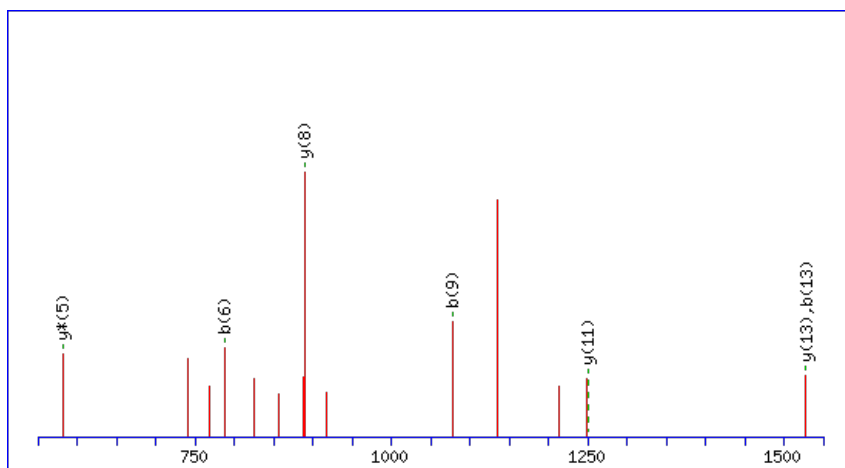

**Monoisotopic mass of neutral peptide Mr(calc):** 1674.7517

**Fixed modifications:** Carbamidomethyl (C) (apply to specified residues or termini only)

**Variable modifications:**

**M2** : Oxidation (M), with neutral losses 0.0000 (shown in table), 63.9983

**Ions Score:** 22 **Expect:** 0.043

**Matches** : 7/206 fragment ions using 8 most intense peaks ([help](#))

| #  | b                | b <sup>++</sup> | b <sup>*</sup> | b <sup>*++</sup> | b <sup>0</sup> | b <sup>0++</sup> | Seq. | y                | y <sup>++</sup> | y <sup>*</sup>  | y <sup>*++</sup> | y <sup>0</sup> | y <sup>0++</sup> | #  |
|----|------------------|-----------------|----------------|------------------|----------------|------------------|------|------------------|-----------------|-----------------|------------------|----------------|------------------|----|
| 1  | 149.0727         | 75.0400         |                |                  |                |                  | F    |                  |                 |                 |                  |                |                  | 14 |
| 2  | 297.1052         | 149.0562        |                |                  |                |                  | M    | <b>1527.6936</b> | 764.3504        | 1509.6700       | 755.3386         | 1509.6830      | 755.3451         | 13 |
| 3  | 427.1448         | 214.0760        |                |                  | 409.1342       | 205.0707         | E    | 1379.6611        | 690.3342        | 1361.6376       | 681.3224         | 1361.6506      | 681.3289         | 12 |
| 4  | 557.2338         | 279.1205        | 539.2102       | 270.1088         | 539.2233       | 270.1153         | K    | <b>1249.6215</b> | 625.3144        | 1231.5979       | 616.3026         | 1231.6110      | 616.3091         | 11 |
| 5  | 673.2578         | 337.1325        | 655.2342       | 328.1207         | 655.2472       | 328.1273         | D    | 1119.5325        | 560.2699        | 1101.5089       | 551.2581         | 1101.5219      | 551.2646         | 10 |
| 6  | <b>787.3389</b>  | 394.1731        | 769.3153       | 385.1613         | 769.3283       | 385.1678         | I    | 1003.5085        | 502.2579        | 985.4849        | 493.2461         | 985.4979       | 493.2526         | 9  |
| 7  | 903.3629         | 452.1851        | 885.3393       | 443.1733         | 885.3523       | 443.1798         | D    | <b>889.4274</b>  | 445.2173        | 871.4038        | 436.2056         | 871.4168       | 436.2121         | 8  |
| 8  | 1005.4076        | 503.2074        | 987.3840       | 494.1956         | 987.3970       | 494.2021         | T    | 773.4034         | 387.2054        | 755.3798        | 378.1936         | 755.3929       | 378.2001         | 7  |
| 9  | <b>1077.4417</b> | 539.2245        | 1059.4182      | 530.2127         | 1059.4312      | 530.2192         | A    | 671.3587         | 336.1830        | 653.3351        | 327.1712         |                |                  | 6  |
| 10 | 1149.4759        | 575.2416        | 1131.4523      | 566.2298         | 1131.4653      | 566.2363         | A    | 599.3246         | 300.1659        | <b>581.3010</b> | 291.1541         |                |                  | 5  |
| 11 | 1297.5413        | 649.2743        | 1279.5178      | 640.2625         | 1279.5308      | 640.2690         | F    | 527.2904         | 264.1488        | 509.2668        | 255.1371         |                |                  | 4  |
| 12 | 1397.6068        | 699.3070        | 1379.5832      | 690.2952         | 1379.5962      | 690.3017         | V    | 379.2250         | 190.1161        | 361.2014        | 181.1043         |                |                  | 3  |
| 13 | <b>1527.6594</b> | 764.3334        | 1509.6358      | 755.3216         | 1509.6489      | 755.3281         | Q    | 279.1595         | 140.0834        | 261.1359        | 131.0716         |                |                  | 2  |
| 14 |                  |                 |                |                  |                |                  | K    | 149.1069         | 75.0571         | 131.0833        | 66.0453          |                |                  | 1  |

# AT2G36680.1

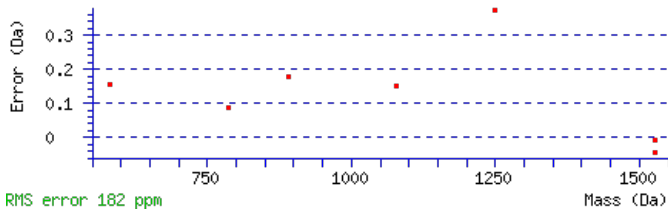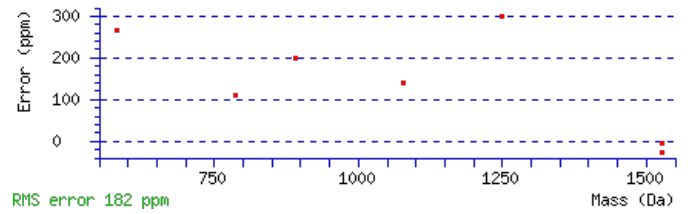

NCBI **BLAST** search of [FMEKIDITAAFVQK](#)

(Parameters: blastp, nr protein database, expect=20000, no filter, PAM30)

Other BLAST [web gateways](#)

## All matches to this query

| Score | Mr(calc)  | Delta   | Sequence                           |
|-------|-----------|---------|------------------------------------|
| 22.3  | 1674.7517 | -0.0026 | <a href="#">FMEKIDITAAFVQK</a>     |
| 20.2  | 1674.7504 | -0.0012 | <a href="#">VIRMDYTMLCDIK</a>      |
| 9.9   | 1674.7519 | -0.0027 | <a href="#">NRGRNFQONGTVTR</a>     |
| 9.7   | 1674.7533 | -0.0041 | <a href="#">SNWFFPSYPIDRK</a>      |
| 8.8   | 1674.7519 | -0.0028 | <a href="#">MWWEIFRCVKGK</a>       |
| 2.0   | 1674.7510 | -0.0019 | <a href="#">FKTRSWISDWDSK</a>      |
| 1.4   | 1674.7473 | 0.0019  | <a href="#">MASLSVSSSSTIISR</a>    |
| 1.4   | 1674.7448 | 0.0044  | <a href="#">VYRTQKDMDELK</a>       |
| 0.7   | 1674.7492 | -0.0001 | <a href="#">GLGLHLGDAGDGGREAR</a>  |
| 0.7   | 1674.7519 | -0.0028 | <a href="#">SPPHNGSRVRSRSGSPGR</a> |

Mascot: <http://www.matrixscience.com/>

**Peptide View**MS/MS Fragmentation of **NIAIGRPDEATRPDALK**

Found in **AT2G36830.1** in **TAIR\_Arabidopsis**, Symbols: TIP1;1, GAMMA-TIP1, GAMMA-TIP | GAMMA-TIP (Tonoplast intrinsic protein (TIP) gamma); water channel | chr2:15452569-15453415 FORWARD

Match to Query 8917: 1835.982801 from(613.001543,3+) index(3289)

Title: Elution from: 33.900 to 33.900 scan no 4156 cid35.00 polarity:+

Data file D6h-2\_1.mgf

Click mouse within plot area to zoom in by factor of two about that point

Or,   to  Da

Label all possible matches  Label matches used for scoring

Show Y-axis

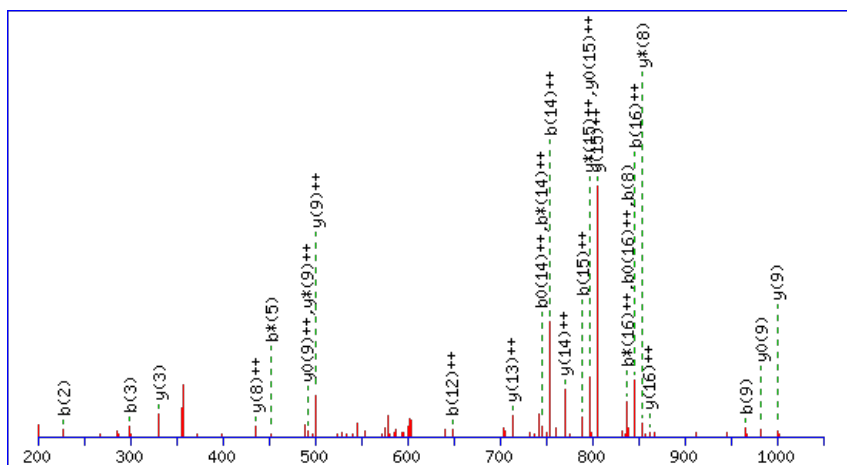

**Monoisotopic mass of neutral peptide Mr(calc):** 1835.9853

**Fixed modifications:** Carbamidomethyl (C) (apply to specified residues or termini only)

**Ions Score:** 20 **Expect:** 0.027

**Matches:** 27/172 fragment ions using 58 most intense peaks ([help](#))

| #  | b               | b <sup>++</sup> | b*              | b <sup>*++</sup> | b <sup>0</sup> | b <sup>0++</sup> | Seq. | y                | y <sup>++</sup> | y*              | y <sup>*++</sup> | y <sup>0</sup>  | y <sup>0++</sup> | #  |
|----|-----------------|-----------------|-----------------|------------------|----------------|------------------|------|------------------|-----------------|-----------------|------------------|-----------------|------------------|----|
| 1  | 115.0502        | 58.0287         | 98.0237         | 49.5155          |                |                  | N    |                  |                 |                 |                  |                 |                  | 17 |
| 2  | <b>228.1343</b> | 114.5708        | 211.1077        | 106.0575         |                |                  | I    | 1722.9497        | <b>861.9785</b> | 1705.9232       | 853.4652         | 1704.9391       | 852.9732         | 16 |
| 3  | <b>299.1714</b> | 150.0893        | 282.1448        | 141.5761         |                |                  | A    | 1609.8656        | <b>805.4365</b> | 1592.8391       | <b>796.9232</b>  | 1591.8551       | <b>796.4312</b>  | 15 |
| 4  | 412.2554        | 206.6314        | 395.2289        | 198.1181         |                |                  | I    | 1538.8285        | <b>769.9179</b> | 1521.8020       | 761.4046         | 1520.8180       | 760.9126         | 14 |
| 5  | 469.2769        | 235.1421        | <b>452.2504</b> | 226.6288         |                |                  | G    | 1425.7445        | <b>713.3759</b> | 1408.7179       | 704.8626         | 1407.7339       | 704.3706         | 13 |
| 6  | 625.3780        | 313.1926        | 608.3515        | 304.6794         |                |                  | R    | 1368.7230        | 684.8651        | 1351.6965       | 676.3519         | 1350.7124       | 675.8599         | 12 |
| 7  | 722.4308        | 361.7190        | 705.4042        | 353.2058         |                |                  | P    | 1212.6219        | 606.8146        | 1195.5953       | 598.3013         | 1194.6113       | 597.8093         | 11 |
| 8  | <b>837.4577</b> | 419.2325        | 820.4312        | 410.7192         | 819.4472       | 410.2272         | D    | 1115.5691        | 558.2882        | 1098.5426       | 549.7749         | 1097.5586       | 549.2829         | 10 |
| 9  | <b>966.5003</b> | 483.7538        | 949.4738        | 475.2405         | 948.4898       | 474.7485         | E    | <b>1000.5422</b> | <b>500.7747</b> | 983.5156        | <b>492.2615</b>  | <b>982.5316</b> | <b>491.7694</b>  | 9  |
| 10 | 1037.5374       | 519.2724        | 1020.5109       | 510.7591         | 1019.5269      | 510.2671         | A    | 871.4996         | <b>436.2534</b> | <b>854.4730</b> | 427.7402         | 853.4890        | 427.2482         | 8  |
| 11 | 1138.5851       | 569.7962        | 1121.5586       | 561.2829         | 1120.5745      | 560.7909         | T    | 800.4625         | 400.7349        | 783.4359        | 392.2216         | 782.4519        | 391.7296         | 7  |
| 12 | 1294.6862       | <b>647.8468</b> | 1277.6597       | 639.3335         | 1276.6757      | 638.8415         | R    | 699.4148         | 350.2110        | 682.3883        | 341.6978         | 681.4042        | 341.2058         | 6  |
| 13 | 1391.7390       | 696.3731        | 1374.7124       | 687.8599         | 1373.7284      | 687.3678         | P    | 543.3137         | 272.1605        | 526.2871        | 263.6472         | 525.3031        | 263.1552         | 5  |
| 14 | 1506.7659       | <b>753.8866</b> | 1489.7394       | <b>745.3733</b>  | 1488.7554      | <b>744.8813</b>  | D    | 446.2609         | 223.6341        | 429.2344        | 215.1208         | 428.2504        | 214.6288         | 4  |
| 15 | 1577.8030       | <b>789.4052</b> | 1560.7765       | 780.8919         | 1559.7925      | 780.3999         | A    | <b>331.2340</b>  | 166.1206        | 314.2074        | 157.6074         |                 |                  | 3  |
| 16 | 1690.8871       | <b>845.9472</b> | 1673.8606       | <b>837.4339</b>  | 1672.8765      | <b>836.9419</b>  | L    | 260.1969         | 130.6021        | 243.1703        | 122.0888         |                 |                  | 2  |
| 17 |                 |                 |                 |                  |                |                  | K    | 147.1128         | 74.0600         | 130.0863        | 65.5468          |                 |                  | 1  |

AT2G36830.1

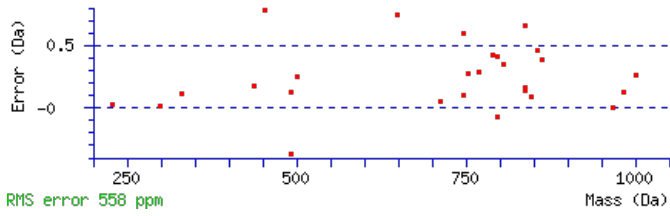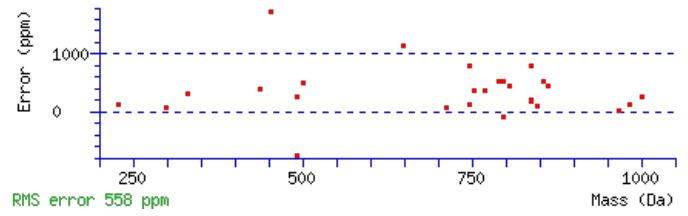

NCBI **BLAST** search of [NIAIGRPDEATRPDALK](#)

(Parameters: blastp, nr protein database, expect=20000, no filter, PAM30)

Other BLAST [web gateways](#)

**All matches to this query**

| Score | Mr(calc)  | Delta   | Sequence                          |
|-------|-----------|---------|-----------------------------------|
| 20.4  | 1835.9853 | -0.0025 | <a href="#">NIAIGRPDEATRPDALK</a> |
| 0.4   | 1835.9781 | 0.0047  | <a href="#">LIIDIDFRSEFEIAR</a>   |

Mascot: <http://www.matrixscience.com/>

## Peptide View

MS/MS Fragmentation of **TNMVMVFGEITTAAK**

Found in **AT2G36880.1** in **TAIR\_Arabidopsis**, Symbols: MAT3 | MAT3 (METHIONINE ADENOSYLTRANSFERASE 3); methionine adenosyltransferase | chr2:15486800-15487972 REVERSE

Match to Query 7362: 1628.746960 from(815.380756,2+) index(9270)

Title: Elution from: 84.263 to 84.263 scan no 12503 cid35.00 polarity:+

Data file D6h-2\_2.mgf

Click mouse within plot area to zoom in by factor of two about that point

Or,  to  Da

Label all possible matches  Label matches used for scoring

Show Y-axis

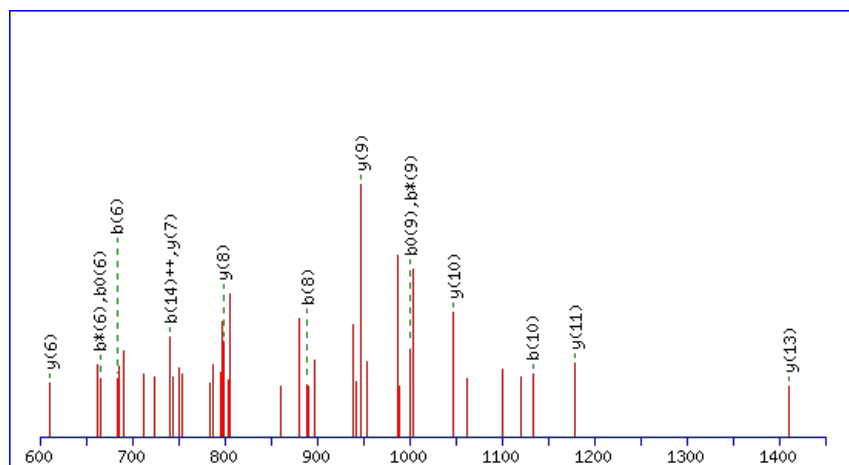

Monoisotopic mass of neutral peptide  $M_r(\text{calc})$ : 1628.7496

Fixed modifications: Carbamidomethyl (C) (apply to specified residues or termini only)

Ions Score: 31 Expect: 0.0082

Matches : 15/160 fragment ions using 31 most intense peaks [\(help\)](#)

| #  | b         | b <sup>++</sup> | b*        | b <sup>*++</sup> | b <sup>0</sup> | b <sup>0++</sup> | Seq. | y         | y <sup>++</sup> | y*        | y <sup>*++</sup> | y <sup>0</sup> | y <sup>0++</sup> | #  |
|----|-----------|-----------------|-----------|------------------|----------------|------------------|------|-----------|-----------------|-----------|------------------|----------------|------------------|----|
| 1  | 103.0520  | 52.0296         |           |                  | 85.0414        | 43.0244          | T    |           |                 |           |                  |                |                  | 15 |
| 2  | 219.0890  | 110.0481        | 201.0654  | 101.0363         | 201.0784       | 101.0428         | N    | 1527.7122 | 764.3597        | 1509.6886 | 755.3480         | 1509.7016      | 755.3545         | 14 |
| 3  | 351.1265  | 176.0669        | 333.1029  | 167.0551         | 333.1159       | 167.0616         | M    | 1411.6752 | 706.3412        | 1393.6516 | 697.3295         | 1393.6646      | 697.3360         | 13 |
| 4  | 451.1920  | 226.0996        | 433.1684  | 217.0878         | 433.1814       | 217.0943         | V    | 1279.6377 | 640.3225        | 1261.6141 | 631.3107         | 1261.6271      | 631.3172         | 12 |
| 5  | 583.2295  | 292.1184        | 565.2059  | 283.1066         | 565.2189       | 283.1131         | M    | 1179.5722 | 590.2898        | 1161.5487 | 581.2780         | 1161.5617      | 581.2845         | 11 |
| 6  | 683.2949  | 342.1511        | 665.2713  | 333.1393         | 665.2844       | 333.1458         | V    | 1047.5347 | 524.2710        | 1029.5111 | 515.2592         | 1029.5242      | 515.2657         | 10 |
| 7  | 831.3604  | 416.1838        | 813.3368  | 407.1720         | 813.3498       | 407.1785         | F    | 947.4693  | 474.2383        | 929.4457  | 465.2265         | 929.4587       | 465.2330         | 9  |
| 8  | 889.3789  | 445.1931        | 871.3553  | 436.1813         | 871.3683       | 436.1878         | G    | 799.4038  | 400.2056        | 781.3802  | 391.1938         | 781.3933       | 391.2003         | 8  |
| 9  | 1019.4185 | 510.2129        | 1001.3949 | 501.2011         | 1001.4079      | 501.2076         | E    | 741.3853  | 371.1963        | 723.3617  | 362.1845         | 723.3748       | 362.1910         | 7  |
| 10 | 1133.4996 | 567.2534        | 1115.4760 | 558.2416         | 1115.4890      | 558.2482         | I    | 611.3457  | 306.1765        | 593.3221  | 297.1647         | 593.3351       | 297.1712         | 6  |
| 11 | 1235.5443 | 618.2758        | 1217.5207 | 609.2640         | 1217.5337      | 609.2705         | T    | 497.2646  | 249.1359        | 479.2410  | 240.1241         | 479.2540       | 240.1307         | 5  |
| 12 | 1337.5890 | 669.2982        | 1319.5654 | 660.2864         | 1319.5785      | 660.2929         | T    | 395.2199  | 198.1136        | 377.1963  | 189.1018         | 377.2093       | 189.1083         | 4  |
| 13 | 1409.6232 | 705.3152        | 1391.5996 | 696.3034         | 1391.6126      | 696.3099         | A    | 293.1752  | 147.0912        | 275.1516  | 138.0794         |                |                  | 3  |
| 14 | 1481.6573 | 741.3323        | 1463.6337 | 732.3205         | 1463.6468      | 732.3270         | A    | 221.1410  | 111.0741        | 203.1174  | 102.0624         |                |                  | 2  |
| 15 |           |                 |           |                  |                |                  | K    | 149.1069  | 75.0571         | 131.0833  | 66.0453          |                |                  | 1  |

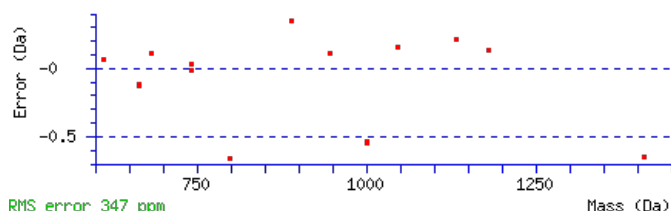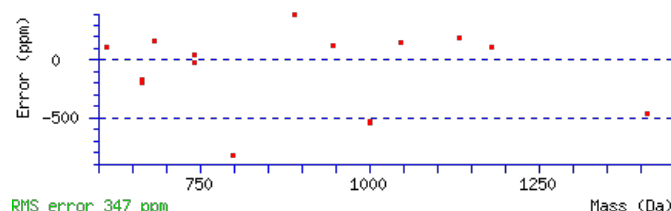



## AT2G36880.1

NCBI **BLAST** search of [TNMVMVFEITTAAK](#)

(Parameters: blastp, nr protein database, expect=20000, no filter, PAM30)

Other BLAST [web gateways](#)

### All matches to this query

| Score | Mr(calc)  | Delta   | Sequence                       |
|-------|-----------|---------|--------------------------------|
| 31.2  | 1628.7496 | -0.0027 | <a href="#">TNMVMVFEITTAAK</a> |
| 3.2   | 1628.7516 | -0.0046 | <a href="#">GQWVMNLKHGHGVK</a> |

**Mascot:** <http://www.matrixscience.com/>

**Peptide View**MS/MS Fragmentation of **LAGISSGFFDLQPK**Found in **AT2G37040.1** in **TAIR\_Arabidopsis**, Symbols: PAL1 | PAL1 (PHE AMMONIA LYASE 1); phenylalanine ammonia-lyase | chr2:15564681-15567316 REVERSE

Match to Query 6454: 1478.773720 from(740.394136,2+) index(9287)

Title: Elution from: 81.114 to 81.114 scan no 12295 cid35.00 polarity:+

Data file C7-1\_1.mgf

Click mouse within plot area to zoom in by factor of two about that point

Or,   to  Da Label all possible matches  Label matches used for scoring Show Y-axis 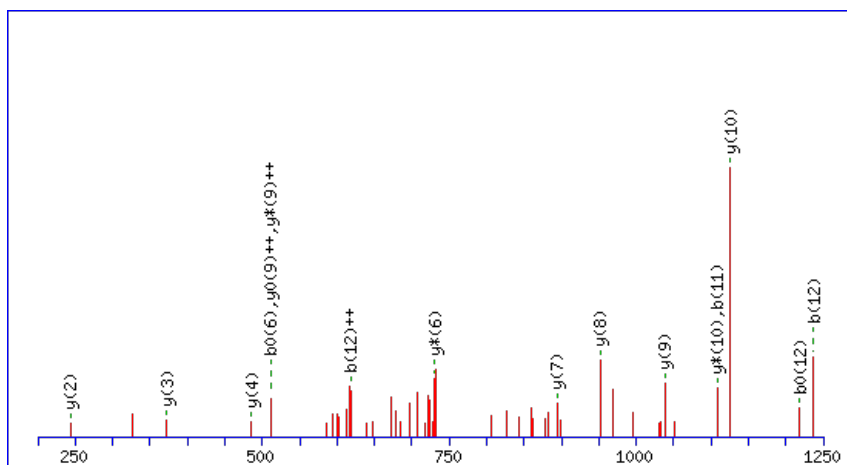Monoisotopic mass of neutral peptide  $M_r(\text{calc})$ : 1478.7769

Fixed modifications: Carbamidomethyl (C) (apply to specified residues or termini only)

Ions Score: 49 Expect: 6e-005

Matches : 16/118 fragment ions using 19 most intense peaks ([help](#))

| #  | b                | b <sup>++</sup> | b*        | b <sup>*++</sup> | b <sup>0</sup>   | b <sup>0++</sup> | Seq. | y                | y <sup>++</sup> | y*               | y <sup>*++</sup> | y <sup>0</sup> | y <sup>0++</sup> | #  |
|----|------------------|-----------------|-----------|------------------|------------------|------------------|------|------------------|-----------------|------------------|------------------|----------------|------------------|----|
| 1  | 114.0913         | 57.5493         |           |                  |                  |                  | L    |                  |                 |                  |                  |                |                  | 14 |
| 2  | 185.1285         | 93.0679         |           |                  |                  |                  | A    | 1366.7001        | 683.8537        | 1349.6736        | 675.3404         | 1348.6896      | 674.8484         | 13 |
| 3  | 242.1499         | 121.5786        |           |                  |                  |                  | G    | 1295.6630        | 648.3352        | 1278.6365        | 639.8219         | 1277.6525      | 639.3299         | 12 |
| 4  | 355.2340         | 178.1206        |           |                  |                  |                  | I    | 1238.6416        | 619.8244        | 1221.6150        | 611.3111         | 1220.6310      | 610.8191         | 11 |
| 5  | 442.2660         | 221.6366        |           |                  | 424.2554         | 212.6314         | S    | <b>1125.5575</b> | 563.2824        | <b>1108.5310</b> | 554.7691         | 1107.5469      | 554.2771         | 10 |
| 6  | 529.2980         | 265.1527        |           |                  | <b>511.2875</b>  | 256.1474         | S    | <b>1038.5255</b> | 519.7664        | 1021.4989        | <b>511.2531</b>  | 1020.5149      | <b>510.7611</b>  | 9  |
| 7  | 586.3195         | 293.6634        |           |                  | 568.3089         | 284.6581         | G    | <b>951.4934</b>  | 476.2504        | 934.4669         | 467.7371         | 933.4829       | 467.2451         | 8  |
| 8  | 733.3879         | 367.1976        |           |                  | 715.3774         | 358.1923         | F    | <b>894.4720</b>  | 447.7396        | 877.4454         | 439.2264         | 876.4614       | 438.7343         | 7  |
| 9  | 880.4563         | 440.7318        |           |                  | 862.4458         | 431.7265         | F    | 747.4036         | 374.2054        | <b>730.3770</b>  | 365.6921         | 729.3930       | 365.2001         | 6  |
| 10 | 995.4833         | 498.2453        |           |                  | 977.4727         | 489.2400         | D    | 600.3352         | 300.6712        | 583.3086         | 292.1579         | 582.3246       | 291.6659         | 5  |
| 11 | <b>1108.5673</b> | 554.7873        |           |                  | 1090.5568        | 545.7820         | L    | <b>485.3082</b>  | 243.1577        | 468.2817         | 234.6445         |                |                  | 4  |
| 12 | <b>1236.6259</b> | <b>618.8166</b> | 1219.5994 | 610.3033         | <b>1218.6153</b> | 609.8113         | Q    | <b>372.2241</b>  | 186.6157        | 355.1976         | 178.1024         |                |                  | 3  |
| 13 | 1333.6787        | 667.3430        | 1316.6521 | 658.8297         | 1315.6681        | 658.3377         | P    | <b>244.1656</b>  | 122.5864        | 227.1390         | 114.0731         |                |                  | 2  |
| 14 |                  |                 |           |                  |                  |                  | K    | 147.1128         | 74.0600         | 130.0863         | 65.5468          |                |                  | 1  |

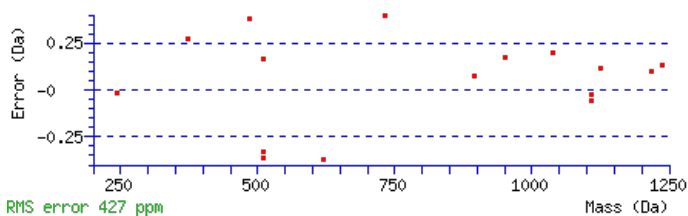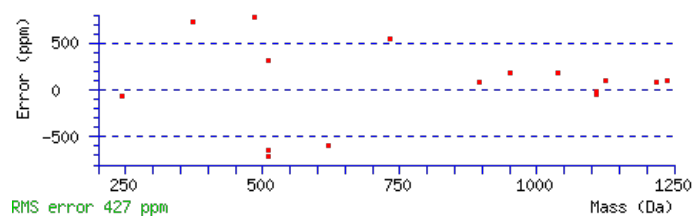NCBI BLAST search of [LAGISSGFFDLQPK](#)

## AT2G37040.1

(Parameters: blastp, nr protein database, expect=20000, no filter, PAM30)

Other BLAST [web gateways](#)

### All matches to this query

| Score | Mr(calc)  | Delta   | Sequence                       |
|-------|-----------|---------|--------------------------------|
| 49.4  | 1478.7769 | -0.0032 | <a href="#">LAGISSGFFDLQPK</a> |
| 7.5   | 1478.7729 | 0.0009  | <a href="#">IIKEHEEDPNKK</a>   |

Mascot: <http://www.matrixscience.com/>

**Peptide View**MS/MS Fragmentation of **EQLSASEALK**Found in **AT2G37080.1** in **TAIR\_Arabidopsis**, Symbols: | myosin heavy chain-related | chr2:15588644-15591136 REVERSE

Match to Query 3189: 1086.519862 from(544.267207,2+) index(2414)

Title: Elution from: 25.287 to 25.287 scan no 3028 cid35.00 polarity:+

Data file D12h-3\_3.mgf

Click mouse within plot area to zoom in by factor of two about that point

Or,   to  Da Label all possible matches  Label matches used for scoring Show Y-axis 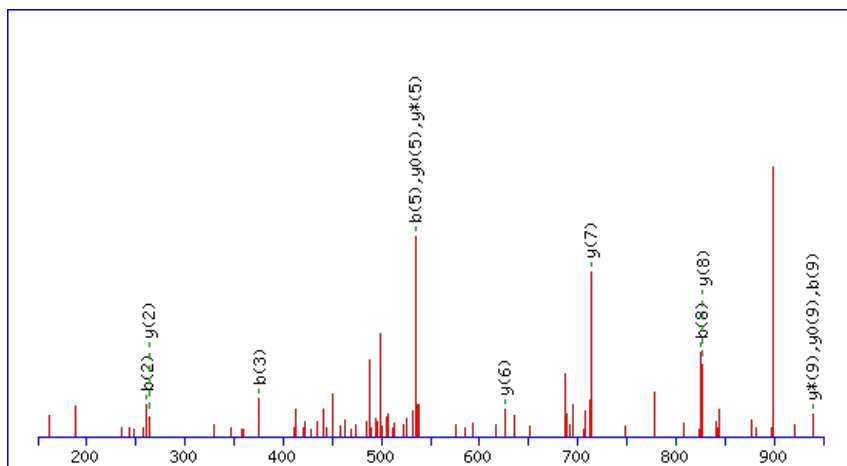

Monoisotopic mass of neutral peptide Mr(calc): 1086.5201

Fixed modifications: Carbamidomethyl (C) (apply to specified residues or termini only)

Ions Score: 33 Expect: 0.0047

Matches : 13/100 fragment ions using 16 most intense peaks ([help](#))

| #  | b               | b <sup>++</sup> | b*       | b <sup>*++</sup> | b <sup>0</sup> | b <sup>0++</sup> | Seq. | y               | y <sup>++</sup> | y*              | y <sup>*++</sup> | y <sup>0</sup>  | y <sup>0++</sup> | #  |
|----|-----------------|-----------------|----------|------------------|----------------|------------------|------|-----------------|-----------------|-----------------|------------------|-----------------|------------------|----|
| 1  | 131.0469        | 66.0271         |          |                  | 113.0363       | 57.0218          | E    |                 |                 |                 |                  |                 |                  | 10 |
| 2  | <b>261.0996</b> | 131.0534        | 243.0760 | 122.0416         | 243.0890       | 122.0481         | Q    | 957.4878        | 479.2475        | <b>939.4642</b> | 470.2357         | <b>939.4772</b> | 470.2422         | 9  |
| 3  | <b>375.1806</b> | 188.0940        | 357.1571 | 179.0822         | 357.1701       | 179.0887         | L    | <b>827.4351</b> | 414.2212        | 809.4115        | 405.2094         | 809.4246        | 405.2159         | 8  |
| 4  | 463.2097        | 232.1085        | 445.1861 | 223.0967         | 445.1991       | 223.1032         | S    | <b>713.3540</b> | 357.1807        | 695.3304        | 348.1689         | 695.3435        | 348.1754         | 7  |
| 5  | <b>535.2439</b> | 268.1256        | 517.2203 | 259.1138         | 517.2333       | 259.1203         | A    | <b>625.3250</b> | 313.1661        | 607.3014        | 304.1543         | 607.3144        | 304.1608         | 6  |
| 6  | 623.2729        | 312.1401        | 605.2493 | 303.1283         | 605.2624       | 303.1348         | S    | 553.2908        | 277.1490        | <b>535.2672</b> | 268.1373         | <b>535.2802</b> | 268.1438         | 5  |
| 7  | 753.3126        | 377.1599        | 735.2890 | 368.1481         | 735.3020       | 368.1546         | E    | 465.2618        | 233.1345        | 447.2382        | 224.1227         | 447.2512        | 224.1292         | 4  |
| 8  | <b>825.3467</b> | 413.1770        | 807.3231 | 404.1652         | 807.3361       | 404.1717         | A    | 335.2221        | 168.1147        | 317.1985        | 159.1029         |                 |                  | 3  |
| 9  | <b>939.4278</b> | 470.2175        | 921.4042 | 461.2057         | 921.4172       | 461.2123         | L    | <b>263.1880</b> | 132.0976        | 245.1644        | 123.0858         |                 |                  | 2  |
| 10 |                 |                 |          |                  |                |                  | K    | 149.1069        | 75.0571         | 131.0833        | 66.0453          |                 |                  | 1  |

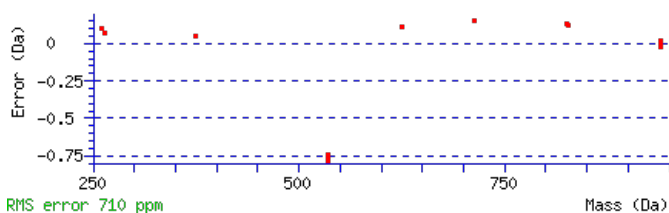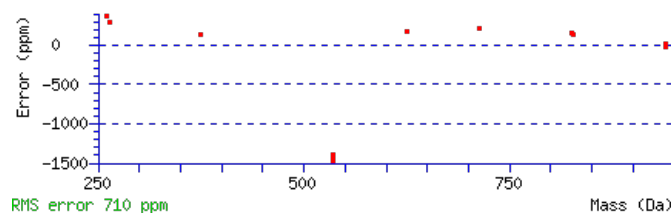NCBI **BLAST** search of **EQLSASEALK**

(Parameters: blastp, nr protein database, expect=20000, no filter, PAM30)

Other BLAST [web gateways](#)

All matches to this query

| Score | Mr(calc) | Delta | Sequence |
|-------|----------|-------|----------|
|       |          |       |          |

**AT2G37080.1**

|      |           |         |                            |
|------|-----------|---------|----------------------------|
| 32.7 | 1086.5201 | -0.0003 | <a href="#">EQLSASEALK</a> |
| 22.2 | 1086.5201 | -0.0003 | <a href="#">VSAVNESEIK</a> |
| 21.8 | 1086.5176 | 0.0023  | <a href="#">WCLTGPIK</a>   |
| 12.7 | 1086.5201 | -0.0002 | <a href="#">SVKDVVDDAK</a> |
| 6.3  | 1086.5228 | -0.0029 | <a href="#">RVLTSFDER</a>  |
| 5.3  | 1086.5201 | -0.0003 | <a href="#">SLISEDNGLK</a> |
| 4.5  | 1086.5201 | -0.0002 | <a href="#">LEEEKGKDK</a>  |
| 4.5  | 1086.5201 | -0.0002 | <a href="#">ATVVEEGKDK</a> |
| 3.8  | 1086.5201 | -0.0003 | <a href="#">NGEDISSILK</a> |
| 3.1  | 1086.5228 | -0.0029 | <a href="#">QKAQAELER</a>  |

**Mascot:** <http://www.matrixscience.com/>

## Peptide View

MS/MS Fragmentation of **VTGGEVGAASSLAPK**

Found in **AT2G37190.1** in **TAIR\_Arabidopsis**, Symbols: | 60S ribosomal protein L12 (RPL12A) | chr2:15626638-15627138 REVERSE

Match to Query 5434: 1342.708242 from(672.361397,2+) index(3088)

Title: Elution from: 30.679 to 30.679 scan no 3842 cid35.00 polarity:+

Data file D6h-1\_1.mgf

Click mouse within plot area to zoom in by factor of two about that point

Or,   to  Da

Label all possible matches  Label matches used for scoring

Show Y-axis

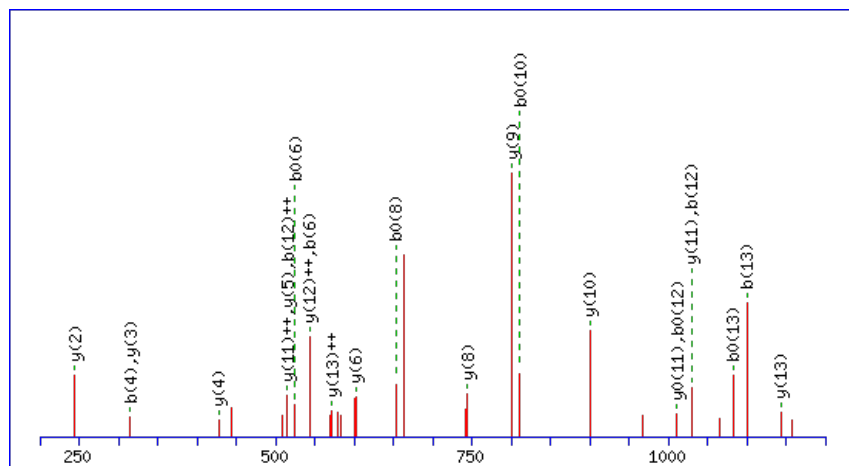

Monoisotopic mass of neutral peptide  $M_r(\text{calc})$ : 1342.7092

Fixed modifications: Carbamidomethyl (C) (apply to specified residues or termini only)

Ions Score: 100 Expect: 3.8e-010

Matches : 24/130 fragment ions using 23 most intense peaks ([help](#))

| #  | b                | b <sup>++</sup> | b <sup>0</sup>   | b <sup>0++</sup> | Seq. | y                | y <sup>++</sup> | y*        | y <sup>*++</sup> | y <sup>0</sup>   | y <sup>0++</sup> | #  |
|----|------------------|-----------------|------------------|------------------|------|------------------|-----------------|-----------|------------------|------------------|------------------|----|
| 1  | 100.0757         | 50.5415         |                  |                  | V    |                  |                 |           |                  |                  |                  | 15 |
| 2  | 201.1234         | 101.0653        | 183.1128         | 92.0600          | T    | 1244.6481        | 622.8277        | 1227.6216 | 614.3144         | 1226.6375        | 613.8224         | 14 |
| 3  | 258.1448         | 129.5761        | 240.1343         | 120.5708         | G    | <b>1143.6004</b> | <b>572.3039</b> | 1126.5739 | 563.7906         | 1125.5899        | 563.2986         | 13 |
| 4  | <b>315.1663</b>  | 158.0868        | 297.1557         | 149.0815         | G    | 1086.5790        | <b>543.7931</b> | 1069.5524 | 535.2798         | 1068.5684        | 534.7878         | 12 |
| 5  | 444.2089         | 222.6081        | 426.1983         | 213.6028         | E    | <b>1029.5575</b> | <b>515.2824</b> | 1012.5310 | 506.7691         | <b>1011.5469</b> | 506.2771         | 11 |
| 6  | <b>543.2773</b>  | 272.1423        | <b>525.2667</b>  | 263.1370         | V    | <b>900.5149</b>  | 450.7611        | 883.4884  | 442.2478         | 882.5043         | 441.7558         | 10 |
| 7  | 600.2988         | 300.6530        | 582.2882         | 291.6477         | G    | <b>801.4465</b>  | 401.2269        | 784.4199  | 392.7136         | 783.4359         | 392.2216         | 9  |
| 8  | 671.3359         | 336.1716        | <b>653.3253</b>  | 327.1663         | A    | <b>744.4250</b>  | 372.7162        | 727.3985  | 364.2029         | 726.4145         | 363.7109         | 8  |
| 9  | 742.3730         | 371.6901        | 724.3624         | 362.6849         | A    | 673.3879         | 337.1976        | 656.3614  | 328.6843         | 655.3774         | 328.1923         | 7  |
| 10 | 829.4050         | 415.2062        | <b>811.3945</b>  | 406.2009         | S    | <b>602.3508</b>  | 301.6790        | 585.3243  | 293.1658         | 584.3402         | 292.6738         | 6  |
| 11 | 916.4371         | 458.7222        | 898.4265         | 449.7169         | S    | <b>515.3188</b>  | 258.1630        | 498.2922  | 249.6498         | 497.3082         | 249.1577         | 5  |
| 12 | <b>1029.5211</b> | <b>515.2642</b> | <b>1011.5106</b> | 506.2589         | L    | <b>428.2867</b>  | 214.6470        | 411.2602  | 206.1337         |                  |                  | 4  |
| 13 | <b>1100.5582</b> | 550.7828        | <b>1082.5477</b> | 541.7775         | A    | <b>315.2027</b>  | 158.1050        | 298.1761  | 149.5917         |                  |                  | 3  |
| 14 | 1197.6110        | 599.3091        | 1179.6004        | 590.3039         | P    | <b>244.1656</b>  | 122.5864        | 227.1390  | 114.0731         |                  |                  | 2  |
| 15 |                  |                 |                  |                  | K    | 147.1128         | 74.0600         | 130.0863  | 65.5468          |                  |                  | 1  |

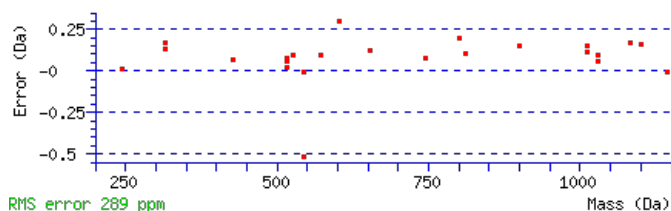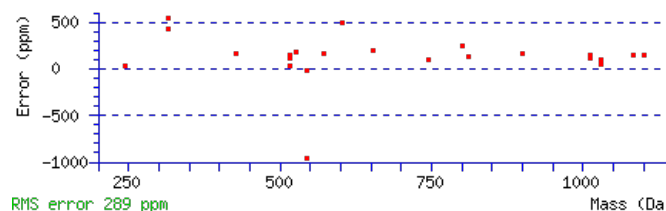

NCBI BLAST search of [VTGGEVGAASSLAPK](#)

## AT2G37190.1

(Parameters: blastp, nr protein database, expect=20000, no filter, PAM30)

Other BLAST [web gateways](#)

### All matches to this query

| Score | Mr(calc)  | Delta   | Sequence                        |
|-------|-----------|---------|---------------------------------|
| 100.2 | 1342.7092 | -0.0010 | <a href="#">VTGGEVGAASSLAPK</a> |
| 14.6  | 1342.7067 | 0.0015  | <a href="#">WGLQMGQSVLPK</a>    |
| 7.4   | 1342.7092 | -0.0010 | <a href="#">ALDAENKIDNLK</a>    |
| 1.0   | 1342.7092 | -0.0010 | <a href="#">TRTDEVGIDLPK</a>    |
| 0.4   | 1342.7092 | -0.0010 | <a href="#">DVS GEGVQQALLK</a>  |

Mascot: <http://www.matrixscience.com/>

## Peptide View

MS/MS Fragmentation of **GFGFVTDSSQEVQNAIK**

Found in **AT2G37220.1** in **TAIR\_Arabidopsis**, Symbols: | 29 kDa ribonucleoprotein, chloroplast, putative / RNA-binding protein cp29, putative | chr2:15642059-15643410 REVERSE

Match to Query 8930: 1988.947138 from(995.480845,2+) index(7722)

Title: Elution from: 68.155 to 68.155 scan no 10207 cid35.00 polarity:+

Data file 0-3\_3.mgf

Click mouse within plot area to zoom in by factor of two about that point

Or,   to  Da

Label all possible matches  Label matches used for scoring

Show Y-axis

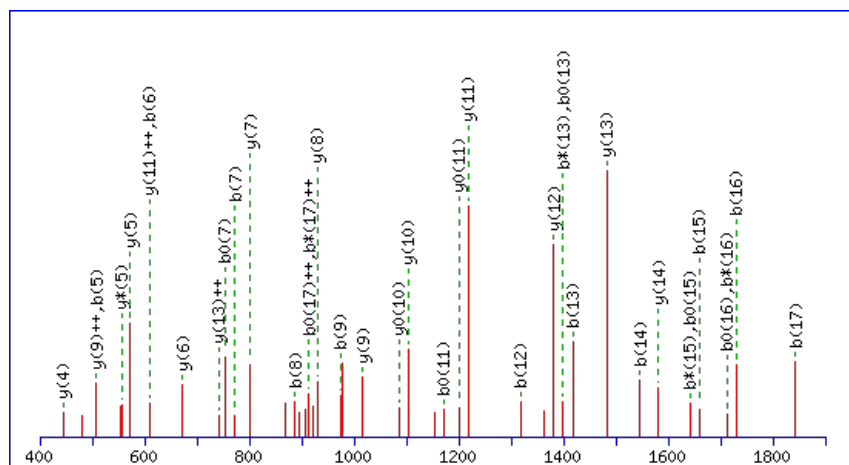

Monoisotopic mass of neutral peptide  $M_r(\text{calc})$ : 1988.9480

Fixed modifications: Carbamidomethyl (C) (apply to specified residues or termini only)

Ions Score: 135 Expect: 1.3e-013

Matches : 38/162 fragment ions using 34 most intense peaks ([help](#))

| #  | b                | b <sup>++</sup> | b <sup>*</sup>   | b <sup>*++</sup> | b <sup>0</sup>   | b <sup>0++</sup> | Seq. | y                | y <sup>++</sup> | y <sup>*</sup>  | y <sup>*++</sup> | y <sup>0</sup>   | y <sup>0++</sup> | #  |
|----|------------------|-----------------|------------------|------------------|------------------|------------------|------|------------------|-----------------|-----------------|------------------|------------------|------------------|----|
| 1  | 58.0287          | 29.5180         |                  |                  |                  |                  | G    |                  |                 |                 |                  |                  |                  | 18 |
| 2  | 205.0972         | 103.0522        |                  |                  |                  |                  | F    | 1932.9338        | 966.9705        | 1915.9072       | 958.4573         | 1914.9232        | 957.9652         | 17 |
| 3  | 262.1186         | 131.5629        |                  |                  |                  |                  | G    | 1785.8654        | 893.4363        | 1768.8388       | 884.9230         | 1767.8548        | 884.4310         | 16 |
| 4  | 409.1870         | 205.0972        |                  |                  |                  |                  | F    | 1728.8439        | 864.9256        | 1711.8174       | 856.4123         | 1710.8333        | 855.9203         | 15 |
| 5  | <b>508.2554</b>  | 254.6314        |                  |                  |                  |                  | V    | <b>1581.7755</b> | 791.3914        | 1564.7489       | 782.8781         | 1563.7649        | 782.3861         | 14 |
| 6  | <b>609.3031</b>  | 305.1552        |                  |                  | 591.2926         | 296.1499         | T    | <b>1482.7071</b> | <b>741.8572</b> | 1465.6805       | 733.3439         | 1464.6965        | 732.8519         | 13 |
| 7  | <b>772.3665</b>  | 386.6869        |                  |                  | <b>754.3559</b>  | 377.6816         | Y    | <b>1381.6594</b> | 691.3333        | 1364.6329       | 682.8201         | 1363.6488        | 682.3281         | 12 |
| 8  | <b>887.3934</b>  | 444.2003        |                  |                  | 869.3828         | 435.1951         | D    | <b>1218.5961</b> | <b>609.8017</b> | 1201.5695       | 601.2884         | <b>1200.5855</b> | 600.7964         | 11 |
| 9  | <b>974.4254</b>  | 487.7164        |                  |                  | 956.4149         | 478.7111         | S    | <b>1103.5691</b> | 552.2882        | 1086.5426       | 543.7749         | <b>1085.5586</b> | 543.2829         | 10 |
| 10 | 1061.4575        | 531.2324        |                  |                  | 1043.4469        | 522.2271         | S    | <b>1016.5371</b> | <b>508.7722</b> | 999.5106        | 500.2589         | 998.5265         | 499.7669         | 9  |
| 11 | 1189.5160        | 595.2617        | 1172.4895        | 586.7484         | <b>1171.5055</b> | 586.2564         | Q    | <b>929.5051</b>  | 465.2562        | 912.4785        | 456.7429         | 911.4945         | 456.2509         | 8  |
| 12 | <b>1318.5586</b> | 659.7830        | 1301.5321        | 651.2697         | 1300.5481        | 650.7777         | E    | <b>801.4465</b>  | 401.2269        | 784.4199        | 392.7136         | 783.4359         | 392.2216         | 7  |
| 13 | <b>1417.6270</b> | 709.3172        | <b>1400.6005</b> | 700.8039         | <b>1399.6165</b> | 700.3119         | V    | <b>672.4039</b>  | 336.7056        | 655.3774        | 328.1923         |                  |                  | 6  |
| 14 | <b>1545.6856</b> | 773.3464        | 1528.6591        | 764.8332         | 1527.6751        | 764.3412         | Q    | <b>573.3355</b>  | 287.1714        | <b>556.3089</b> | 278.6581         |                  |                  | 5  |
| 15 | <b>1659.7285</b> | 830.3679        | <b>1642.7020</b> | 821.8546         | <b>1641.7180</b> | 821.3626         | N    | <b>445.2769</b>  | 223.1421        | 428.2504        | 214.6288         |                  |                  | 4  |
| 16 | <b>1730.7657</b> | 865.8865        | <b>1713.7391</b> | 857.3732         | <b>1712.7551</b> | 856.8812         | A    | 331.2340         | 166.1206        | 314.2074        | 157.6074         |                  |                  | 3  |
| 17 | <b>1843.8497</b> | 922.4285        | 1826.8232        | <b>913.9152</b>  | 1825.8392        | <b>913.4232</b>  | I    | 260.1969         | 130.6021        | 243.1703        | 122.0888         |                  |                  | 2  |
| 18 |                  |                 |                  |                  |                  |                  | K    | 147.1128         | 74.0600         | 130.0863        | 65.5468          |                  |                  | 1  |



AT2G37220.1

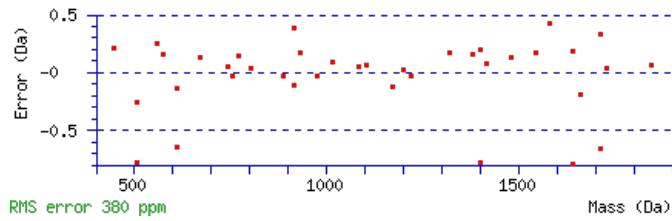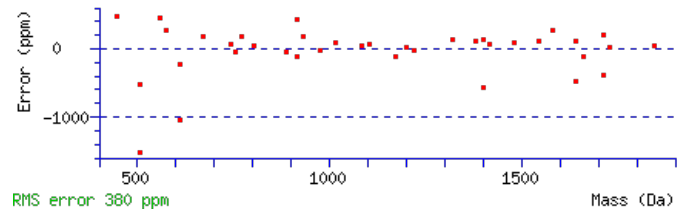

NCBI **BLAST** search of [GFGFVITYDSSQEVQNAIK](#)  
(Parameters: blastp, nr protein database, expect=20000, no filter, PAM30)  
Other BLAST [web gateways](#)

**All matches to this query**

| Score | Mr(calc)  | Delta   | Sequence                            |
|-------|-----------|---------|-------------------------------------|
| 134.6 | 1988.9480 | -0.0008 | <a href="#">GFGFVITYDSSQEVQNAIK</a> |
| 8.9   | 1988.9482 | -0.0010 | <a href="#">LPDTMREQMLAHMQLK</a>    |
| 2.6   | 1988.9488 | -0.0017 | <a href="#">MDWDVLEHMIKNWIK</a>     |
| 0.3   | 1988.9522 | -0.0051 | <a href="#">EFHCDMALCTVPLGVLK</a>   |

Mascot: <http://www.matrixscience.com/>

## Peptide View

### MS/MS Fragmentation of **QAVDISPLR**

Found in **AT2G37270.1** in **TAIR\_Arabidopsis**, Symbols: ATRPS5B | ATRPS5B (RIBOSOMAL PROTEIN 5B); structural constituent of ribosome | chr2:15654962-15656121 REVERSE

Match to Query 2592: 997.555002 from(499.784777,2+) index(3871)

Title: Elution from: 36.917 to 36.917 scan no 4793 cid35.00 polarity:+

Data file 0-1\_1.mgf

Click mouse within plot area to zoom in by factor of two about that point

Or,   to  Da

Label all possible matches  Label matches used for scoring

Show Y-axis

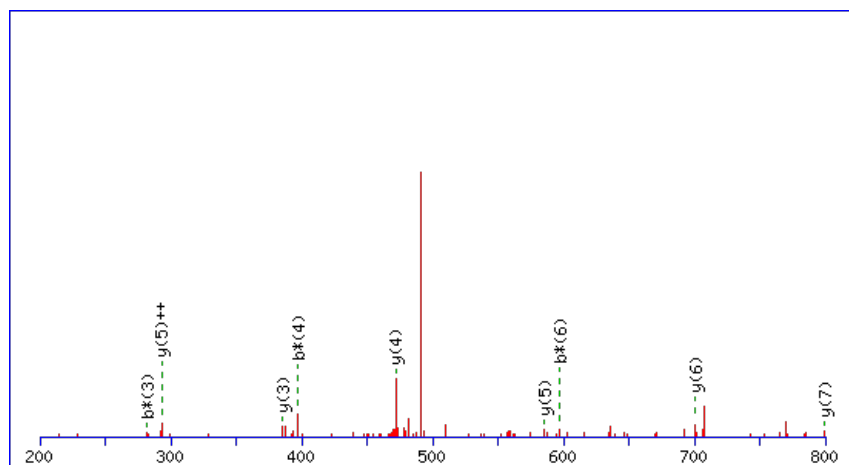

Monoisotopic mass of neutral peptide  $M_r(\text{calc})$ : 997.5556

Fixed modifications: Carbamidomethyl (C) (apply to specified residues or termini only)

Ions Score: 23 Expect: 0.016

Matches : 9/84 fragment ions using 18 most intense peaks ([help](#))

| # | b        | b <sup>++</sup> | b*       | b <sup>*++</sup> | b <sup>0</sup> | b <sup>0++</sup> | Seq.     | y        | y <sup>++</sup> | y*       | y <sup>*++</sup> | y <sup>0</sup> | y <sup>0++</sup> | #        |
|---|----------|-----------------|----------|------------------|----------------|------------------|----------|----------|-----------------|----------|------------------|----------------|------------------|----------|
| 1 | 129.0659 | 65.0366         | 112.0393 | 56.5233          |                |                  | <b>Q</b> |          |                 |          |                  |                |                  | <b>9</b> |
| 2 | 200.1030 | 100.5551        | 183.0764 | 92.0418          |                |                  | <b>A</b> | 870.5043 | 435.7558        | 853.4778 | 427.2425         | 852.4938       | 426.7505         | <b>8</b> |
| 3 | 299.1714 | 150.0893        | 282.1448 | 141.5761         |                |                  | <b>V</b> | 799.4672 | 400.2373        | 782.4407 | 391.7240         | 781.4567       | 391.2320         | <b>7</b> |
| 4 | 414.1983 | 207.6028        | 397.1718 | 199.0895         | 396.1878       | 198.5975         | <b>D</b> | 700.3988 | 350.7030        | 683.3723 | 342.1898         | 682.3883       | 341.6978         | <b>6</b> |
| 5 | 527.2824 | 264.1448        | 510.2558 | 255.6316         | 509.2718       | 255.1396         | <b>I</b> | 585.3719 | 293.1896        | 568.3453 | 284.6763         | 567.3613       | 284.1843         | <b>5</b> |
| 6 | 614.3144 | 307.6608        | 597.2879 | 299.1476         | 596.3039       | 298.6556         | <b>S</b> | 472.2878 | 236.6475        | 455.2613 | 228.1343         | 454.2772       | 227.6423         | <b>4</b> |
| 7 | 711.3672 | 356.1872        | 694.3406 | 347.6740         | 693.3566       | 347.1819         | <b>P</b> | 385.2558 | 193.1315        | 368.2292 | 184.6183         |                |                  | <b>3</b> |
| 8 | 824.4512 | 412.7293        | 807.4247 | 404.2160         | 806.4407       | 403.7240         | <b>L</b> | 288.2030 | 144.6051        | 271.1765 | 136.0919         |                |                  | <b>2</b> |
| 9 |          |                 |          |                  |                |                  | <b>R</b> | 175.1190 | 88.0631         | 158.0924 | 79.5498          |                |                  | <b>1</b> |

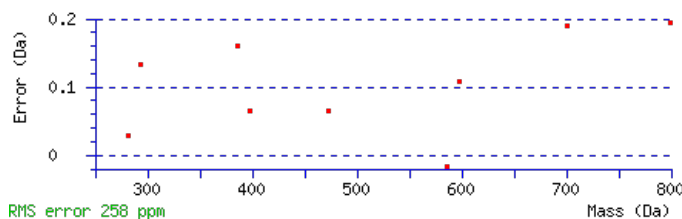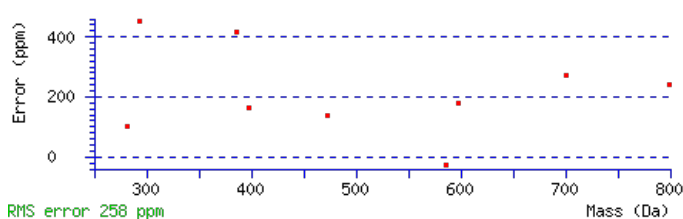

NCBI **BLAST** search of **QAVDISPLR**

(Parameters: blastp, nr protein database, expect=20000, no filter, PAM30)

Other BLAST [web gateways](#)

All matches to this query

| Score | $M_r(\text{calc})$ | Delta | Sequence |
|-------|--------------------|-------|----------|
|       |                    |       |          |

## AT2G37270.1

|      |          |         |                            |
|------|----------|---------|----------------------------|
| 23.2 | 997.5556 | -0.0006 | <a href="#">QAVDISPLR</a>  |
| 3.9  | 997.5556 | -0.0006 | <a href="#">EAPVEARVK</a>  |
| 3.8  | 997.5556 | -0.0006 | <a href="#">TQVSPPIR</a>   |
| 2.7  | 997.5556 | -0.0006 | <a href="#">LVGAEGSPIR</a> |
| 1.6  | 997.5556 | -0.0006 | <a href="#">VNISPVDVR</a>  |
| 1.3  | 997.5556 | -0.0006 | <a href="#">VNLAEPSLR</a>  |
| 0.4  | 997.5556 | -0.0006 | <a href="#">DGDIPVRVK</a>  |
| 0.3  | 997.5556 | -0.0006 | <a href="#">ILEGSGIPR</a>  |

Mascot: <http://www.matrixscience.com/>



# Mascot Search Results

## Peptide View

MS/MS Fragmentation of **NSGRAIDRHNPIIK**

Found in **AT2G37390.1** in **TAIR\_Arabidopsis**, Symbols: | heavy-metal-associated domain-containing protein | chr2:15701379-15702540  
FORWARD

Match to Query 7012: 1614.798812 from(808.406682,2+) index(4285)  
Title: Elution from: 39.148 to 39.148 scan no 5378 cid35.00 polarity:+  
Data file 0-3\_3.mgf

Click mouse within plot area to zoom in by factor of two about that point

Or,  to  Da

Label all possible matches  Label matches used for scoring

Show Y-axis

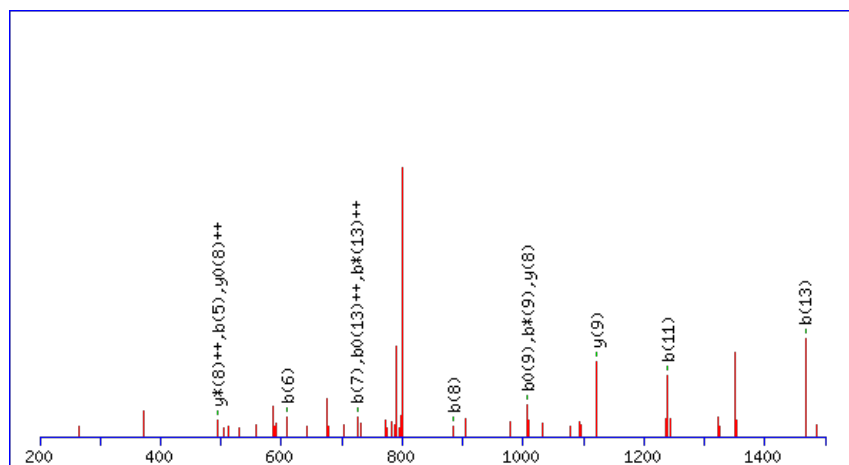

Monoisotopic mass of neutral peptide **Mr(calc)**: 1614.8009

**Fixed modifications**: Carbamidomethyl (C) (apply to specified residues or termini only)

**Ions Score**: 27 **Expect**: 0.012

**Matches** : 14/140 fragment ions using 22 most intense peaks [\(help\)](#)

| #  | b                | b <sup>++</sup> | b*               | b <sup>*++</sup> | b <sup>0</sup>   | b <sup>0++</sup> | Seq. | y                | y <sup>++</sup> | y*        | y <sup>*++</sup> | y <sup>0</sup> | y <sup>0++</sup> | #  |
|----|------------------|-----------------|------------------|------------------|------------------|------------------|------|------------------|-----------------|-----------|------------------|----------------|------------------|----|
| 1  | 117.0443         | 59.0258         | 99.0207          | 50.0140          |                  |                  | N    |                  |                 |           |                  |                |                  | 14 |
| 2  | 205.0733         | 103.0403        | 187.0498         | 94.0285          | 187.0628         | 94.0350          | S    | 1499.7712        | 750.3892        | 1481.7476 | 741.3774         | 1481.7606      | 741.3839         | 13 |
| 3  | 263.0918         | 132.0496        | 245.0683         | 123.0378         | 245.0813         | 123.0443         | G    | 1411.7421        | 706.3747        | 1393.7185 | 697.3629         | 1393.7315      | 697.3694         | 12 |
| 4  | 423.1811         | 212.0942        | 405.1575         | 203.0824         | 405.1705         | 203.0889         | R    | 1353.7236        | 677.3654        | 1335.7000 | 668.3537         | 1335.7130      | 668.3602         | 11 |
| 5  | <b>495.2152</b>  | 248.1113        | 477.1917         | 239.0995         | 477.2047         | 239.1060         | A    | 1193.6344        | 597.3208        | 1175.6108 | 588.3090         | 1175.6238      | 588.3155         | 10 |
| 6  | <b>609.2963</b>  | 305.1518        | 591.2728         | 296.1400         | 591.2858         | 296.1465         | I    | <b>1121.6002</b> | 561.3037        | 1103.5766 | 552.2920         | 1103.5896      | 552.2985         | 9  |
| 7  | <b>725.3203</b>  | 363.1638        | 707.2967         | 354.1520         | 707.3097         | 354.1585         | D    | <b>1007.5191</b> | 504.2632        | 989.4955  | <b>495.2514</b>  | 989.5085       | <b>495.2579</b>  | 8  |
| 8  | <b>885.4096</b>  | 443.2084        | 867.3860         | 434.1966         | 867.3990         | 434.2031         | R    | 891.4951         | 446.2512        | 873.4716  | 437.2394         |                |                  | 7  |
| 9  | 1025.4596        | 513.2334        | <b>1007.4360</b> | 504.2216         | <b>1007.4490</b> | 504.2281         | H    | 731.4059         | 366.2066        | 713.3823  | 357.1948         |                |                  | 6  |
| 10 | 1141.4966        | 571.2519        | 1123.4730        | 562.2401         | 1123.4860        | 562.2466         | N    | 591.3559         | 296.1816        | 573.3323  | 287.1698         |                |                  | 5  |
| 11 | <b>1239.5464</b> | 620.2768        | 1221.5228        | 611.2650         | 1221.5358        | 611.2715         | P    | 475.3189         | 238.1631        | 457.2953  | 229.1513         |                |                  | 4  |
| 12 | 1353.6275        | 677.3174        | 1335.6039        | 668.3056         | 1335.6169        | 668.3121         | I    | 377.2691         | 189.1382        | 359.2455  | 180.1264         |                |                  | 3  |
| 13 | <b>1467.7086</b> | 734.3579        | 1449.6850        | <b>725.3461</b>  | 1449.6980        | <b>725.3526</b>  | I    | 263.1880         | 132.0976        | 245.1644  | 123.0858         |                |                  | 2  |
| 14 |                  |                 |                  |                  |                  |                  | K    | 149.1069         | 75.0571         | 131.0833  | 66.0453          |                |                  | 1  |

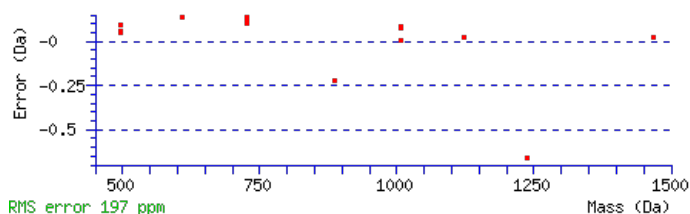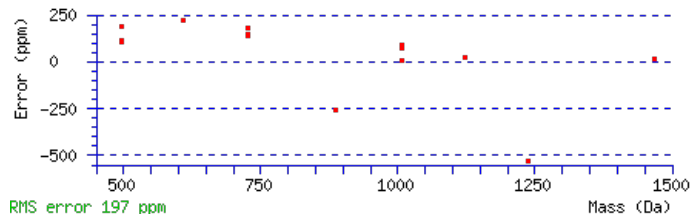

NCBI BLAST search of [NSGRAIDRHNPIIK](#)

## AT2G37390.1

(Parameters: blastp, nr protein database, expect=20000, no filter, PAM30)

Other BLAST [web gateways](#)

### All matches to this query

| Score | Mr(calc)  | Delta   | Sequence                        |
|-------|-----------|---------|---------------------------------|
| 27.0  | 1614.8009 | -0.0021 | <a href="#">NSGRAIDRHNPIIK</a>  |
| 6.2   | 1614.7955 | 0.0033  | <a href="#">IEQQQLLNPASEVK</a>  |
| 6.0   | 1614.8005 | -0.0016 | <a href="#">NFISGRNYGINVLK</a>  |
| 5.7   | 1614.8034 | -0.0046 | <a href="#">GKIYFLMPATKSDK</a>  |
| 4.5   | 1614.7955 | 0.0033  | <a href="#">KIAKEDHVTEALDK</a>  |
| 3.8   | 1614.8004 | -0.0016 | <a href="#">SRVKFYNVLDPTR</a>   |
| 1.4   | 1614.7964 | 0.0024  | <a href="#">MVRGLMKFPGISTK</a>  |
| 1.3   | 1614.8005 | -0.0016 | <a href="#">RESPHISKWVDLK</a>   |
| 0.7   | 1614.7955 | 0.0033  | <a href="#">HVSGLEKEVQETIK</a>  |
| 0.4   | 1614.7977 | 0.0011  | <a href="#">KVYVVGQDGSVVYVK</a> |

Mascot: <http://www.matrixscience.com/>

**Peptide View**MS/MS Fragmentation of **AEQYLADSGIPYTHR**Found in **AT2G37660.1** in **TAIR\_Arabidopsis**, Symbols: | binding / catalytic / coenzyme binding | chr2:15802559-15804055 REVERSE

Match to Query 8164: 1808.934066 from(905.474309,2+) index(7955)

Title: Elution from: 74.650 to 74.650 scan no 10734 cid35.00 polarity:+

Data file D1d-1-2.mgf

Click mouse within plot area to zoom in by factor of two about that point

Or,  to  Da Label all possible matches  Label matches used for scoring Show Y-axis 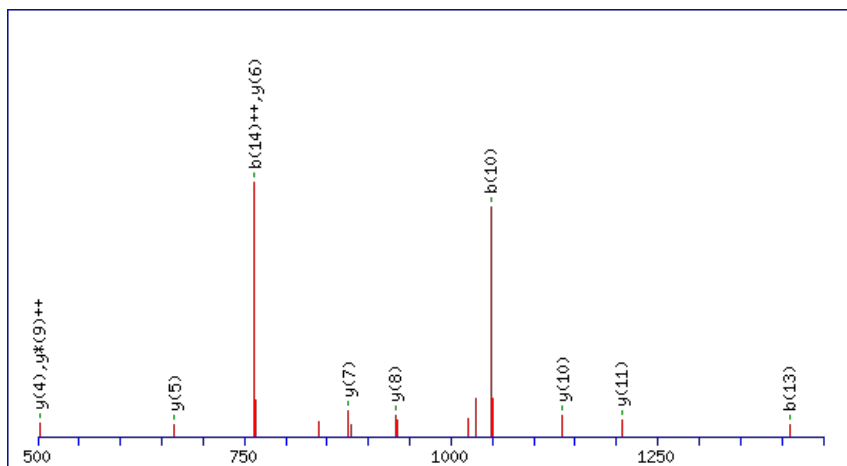Monoisotopic mass of neutral peptide **Mr(calc)**: 1808.9308

Fixed modifications: Carbamidomethyl (C) (apply to specified residues or termini only)

Ions Score: 68 **Expect**: 4.6e-007Matches : 11/168 fragment ions using 9 most intense peaks ([help](#))

| #  | b                | b <sup>++</sup> | b*        | b <sup>*++</sup> | b <sup>0</sup> | b <sup>0++</sup> | Seq. | y                | y <sup>++</sup> | y*        | y <sup>*++</sup> | y <sup>0</sup> | y <sup>0++</sup> | #  |
|----|------------------|-----------------|-----------|------------------|----------------|------------------|------|------------------|-----------------|-----------|------------------|----------------|------------------|----|
| 1  | 72.0444          | 36.5258         |           |                  |                |                  | A    |                  |                 |           |                  |                |                  | 16 |
| 2  | 201.0870         | 101.0471        |           |                  | 183.0764       | 92.0418          | E    | 1738.9010        | 869.9542        | 1721.8745 | 861.4409         | 1720.8905      | 860.9489         | 15 |
| 3  | 329.1456         | 165.0764        | 312.1190  | 156.5631         | 311.1350       | 156.0711         | Q    | 1609.8584        | 805.4329        | 1592.8319 | 796.9196         | 1591.8479      | 796.4276         | 14 |
| 4  | 492.2089         | 246.6081        | 475.1823  | 238.0948         | 474.1983       | 237.6028         | Y    | 1481.7999        | 741.4036        | 1464.7733 | 732.8903         | 1463.7893      | 732.3983         | 13 |
| 5  | 605.2930         | 303.1501        | 588.2664  | 294.6368         | 587.2824       | 294.1448         | L    | 1318.7365        | 659.8719        | 1301.7100 | 651.3586         | 1300.7260      | 650.8666         | 12 |
| 6  | 676.3301         | 338.6687        | 659.3035  | 330.1554         | 658.3195       | 329.6634         | A    | <b>1205.6525</b> | 603.3299        | 1188.6259 | 594.8166         | 1187.6419      | 594.3246         | 11 |
| 7  | 791.3570         | 396.1821        | 774.3305  | 387.6689         | 773.3464       | 387.1769         | D    | <b>1134.6154</b> | 567.8113        | 1117.5888 | 559.2980         | 1116.6048      | 558.8060         | 10 |
| 8  | 878.3890         | 439.6982        | 861.3625  | 431.1849         | 860.3785       | 430.6929         | S    | 1019.5884        | 510.2978        | 1002.5619 | <b>501.7846</b>  | 1001.5778      | 501.2926         | 9  |
| 9  | 935.4105         | 468.2089        | 918.3840  | 459.6956         | 917.3999       | 459.2036         | G    | <b>932.5564</b>  | 466.7818        | 915.5298  | 458.2686         | 914.5458       | 457.7765         | 8  |
| 10 | <b>1048.4946</b> | 524.7509        | 1031.4680 | 516.2376         | 1030.4840      | 515.7456         | I    | <b>875.5349</b>  | 438.2711        | 858.5084  | 429.7578         | 857.5244       | 429.2658         | 7  |
| 11 | 1145.5473        | 573.2773        | 1128.5208 | 564.7640         | 1127.5368      | 564.2720         | P    | <b>762.4509</b>  | 381.7291        | 745.4243  | 373.2158         | 744.4403       | 372.7238         | 6  |
| 12 | 1308.6107        | 654.8090        | 1291.5841 | 646.2957         | 1290.6001      | 645.8037         | Y    | <b>665.3981</b>  | 333.2027        | 648.3715  | 324.6894         | 647.3875       | 324.1974         | 5  |
| 13 | <b>1409.6583</b> | 705.3328        | 1392.6318 | 696.8195         | 1391.6478      | 696.3275         | T    | <b>502.3348</b>  | 251.6710        | 485.3082  | 243.1577         | 484.3242       | 242.6657         | 4  |
| 14 | 1522.7424        | <b>761.8748</b> | 1505.7159 | 753.3616         | 1504.7318      | 752.8696         | I    | 401.2871         | 201.1472        | 384.2605  | 192.6339         |                |                  | 3  |
| 15 | 1635.8265        | 818.4169        | 1618.7999 | 809.9036         | 1617.8159      | 809.4116         | I    | 288.2030         | 144.6051        | 271.1765  | 136.0919         |                |                  | 2  |
| 16 |                  |                 |           |                  |                |                  | R    | 175.1190         | 88.0631         | 158.0924  | 79.5498          |                |                  | 1  |

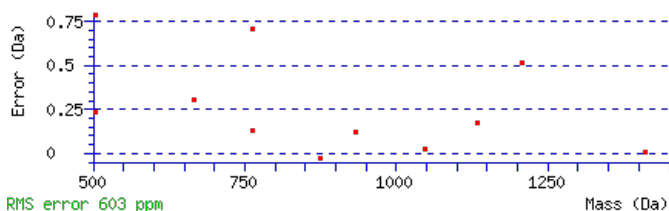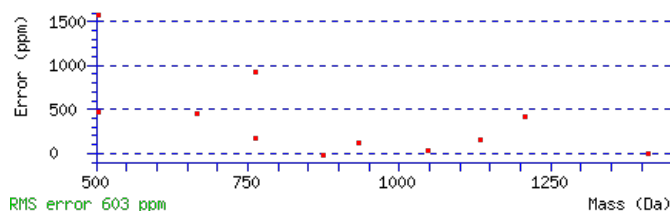

## AT2G37660.1

NCBI **BLAST** search of [AEQYLADSGIPYTIIR](#)

(Parameters: blastp, nr protein database, expect=20000, no filter, PAM30)

Other BLAST [web gateways](#)

### All matches to this query

| Score | Mr(calc)  | Delta  | Sequence                         |
|-------|-----------|--------|----------------------------------|
| 68.5  | 1808.9308 | 0.0032 | <a href="#">AEQYLADSGIPYTIIR</a> |
| 1.2   | 1808.9308 | 0.0032 | <a href="#">EGVYEETVRVPFEKK</a>  |

**Mascot:** <http://www.matrixscience.com/>



# Mascot Search Results

## Peptide View

MS/MS Fragmentation of **IAINENMNEFGK**

Found in **AT2G38040.1** in **TAIR\_Arabidopsis**, Symbols: CAC3 | CAC3 (acetyl co-enzyme A carboxylase carboxyltransferase alpha subunit); acetyl-CoA carboxylase | chr2:15924690-15927827 FORWARD

Match to Query 4861: 1394.608990 from(698.311771,2+) index(4667)

Title: Elution from: 45.130 to 45.130 scan no 5945 cid35.00 polarity:+

Data file D12h-2\_2.mgf

Click mouse within plot area to zoom in by factor of two about that point

Or,   to  Da

Label all possible matches  Label matches used for scoring

Show Y-axis

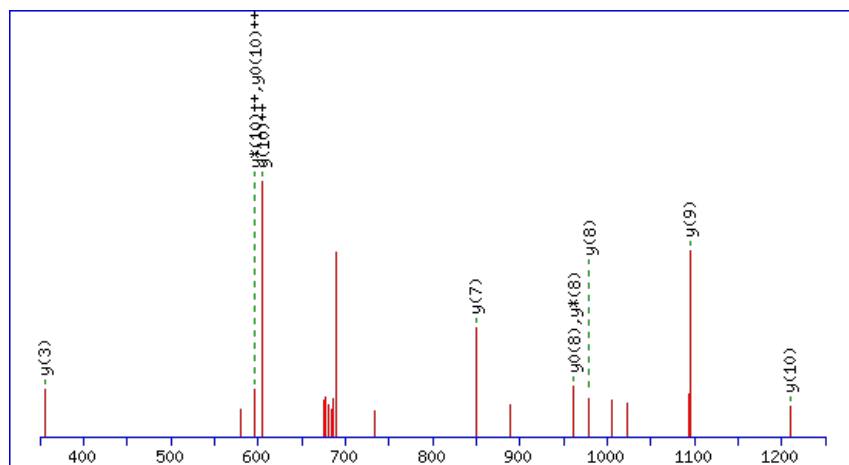

**Monoisotopic mass of neutral peptide Mr(calc):** 1394.6077

**Fixed modifications:** Carbamidomethyl (C) (apply to specified residues or termini only)

**Ions Score:** 40 **Expect:** 0.00083

**Matches:** 10/112 fragment ions using 12 most intense peaks ([help](#))

| #  | b         | b <sup>++</sup> | b <sup>*</sup> | b <sup>*++</sup> | b <sup>0</sup> | b <sup>0++</sup> | Seq. | y         | y <sup>++</sup> | y <sup>*</sup> | y <sup>*++</sup> | y <sup>0</sup> | y <sup>0++</sup> | #  |
|----|-----------|-----------------|----------------|------------------|----------------|------------------|------|-----------|-----------------|----------------|------------------|----------------|------------------|----|
| 1  | 115.0884  | 58.0478         |                |                  |                |                  | I    |           |                 |                |                  |                |                  | 12 |
| 2  | 187.1225  | 94.0649         |                |                  |                |                  | A    | 1281.5338 | 641.2706        | 1263.5103      | 632.2588         | 1263.5233      | 632.2653         | 11 |
| 3  | 301.2036  | 151.1054        |                |                  |                |                  | I    | 1209.4997 | 605.2535        | 1191.4761      | 596.2417         | 1191.4891      | 596.2482         | 10 |
| 4  | 417.2406  | 209.1239        | 399.2170       | 200.1122         |                |                  | N    | 1095.4186 | 548.2129        | 1077.3950      | 539.2011         | 1077.4080      | 539.2076         | 9  |
| 5  | 547.2802  | 274.1438        | 529.2567       | 265.1320         | 529.2697       | 265.1385         | E    | 979.3816  | 490.1944        | 961.3580       | 481.1826         | 961.3710       | 481.1892         | 8  |
| 6  | 663.3172  | 332.1623        | 645.2937       | 323.1505         | 645.3067       | 323.1570         | N    | 849.3420  | 425.1746        | 831.3184       | 416.1628         | 831.3314       | 416.1693         | 7  |
| 7  | 795.3548  | 398.1810        | 777.3312       | 389.1692         | 777.3442       | 389.1757         | M    | 733.3050  | 367.1561        | 715.2814       | 358.1443         | 715.2944       | 358.1508         | 6  |
| 8  | 911.3918  | 456.1995        | 893.3682       | 447.1877         | 893.3812       | 447.1942         | N    | 601.2674  | 301.1374        | 583.2439       | 292.1256         | 583.2569       | 292.1321         | 5  |
| 9  | 1041.4314 | 521.2193        | 1023.4078      | 512.2075         | 1023.4208      | 512.2141         | E    | 485.2304  | 243.1189        | 467.2069       | 234.1071         | 467.2199       | 234.1136         | 4  |
| 10 | 1189.4968 | 595.2521        | 1171.4733      | 586.2403         | 1171.4863      | 586.2468         | F    | 355.1908  | 178.0990        | 337.1672       | 169.0873         |                |                  | 3  |
| 11 | 1247.5153 | 624.2613        | 1229.4918      | 615.2495         | 1229.5048      | 615.2560         | G    | 207.1254  | 104.0663        | 189.1018       | 95.0545          |                |                  | 2  |
| 12 |           |                 |                |                  |                |                  | K    | 149.1069  | 75.0571         | 131.0833       | 66.0453          |                |                  | 1  |

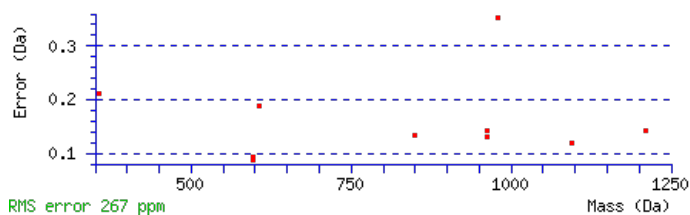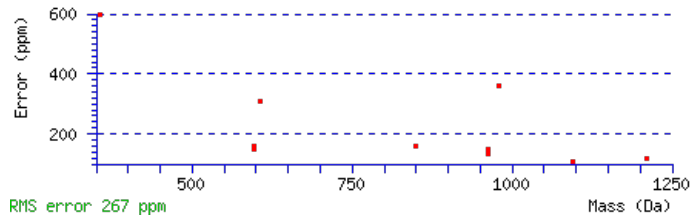

NCBI BLAST search of **IAINENMNEFGK**

(Parameters: blastp, nr protein database, expect=20000, no filter, PAM30)

Other BLAST [web gateways](#)



AT2G38040.1

All matches to this query

| Score | Mr(calc)  | Delta   | Sequence                      |
|-------|-----------|---------|-------------------------------|
| 40.2  | 1394.6077 | 0.0013  | <a href="#">IAINENMNEFGK</a>  |
| 3.3   | 1394.6110 | -0.0020 | <a href="#">SMVLSLAMSPDGR</a> |
| 1.7   | 1394.6070 | 0.0020  | <a href="#">LAFDHNNLYNR</a>   |
| 0.8   | 1394.6108 | -0.0018 | <a href="#">GRGIMHSRESSR</a>  |
| 0.8   | 1394.6124 | -0.0034 | <a href="#">LGSKPDTFESDGK</a> |

Mascot: <http://www.matrixscience.com/>

**Peptide View**MS/MS Fragmentation of **GGVIMDVVNAEQAR**Found in **AT2G38230.1** in **TAIR\_Arabidopsis**, Symbols: ATPDX1.1 | ATPDX1.1 (PYRIDOXINE BIOSYNTHESIS 1.1); protein heterodimerization | chr2:16018553-16019482 FORWARD

Match to Query 5866: 1457.730780 from(729.872666,2+) index(6350)

Title: Elution from: 56.773 to 56.773 scan no 8185 cid35.00 polarity:+

Data file D6h-1\_2.mgf

Click mouse within plot area to zoom in by factor of two about that point

Or,   to  Da Label all possible matches  Label matches used for scoring Show Y-axis 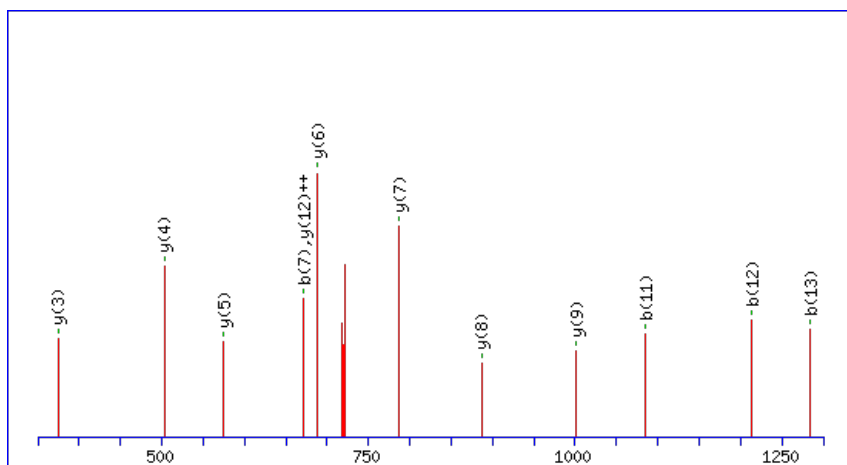Monoisotopic mass of neutral peptide  $M_r(\text{calc})$ : 1457.7297

Fixed modifications: Carbamidomethyl (C) (apply to specified residues or termini only)

Ions Score: 74 Expect: 8.3e-008

Matches : 12/124 fragment ions using 12 most intense peaks ([help](#))

| #  | b         | b <sup>++</sup> | b <sup>*</sup> | b <sup>*++</sup> | b <sup>0</sup> | b <sup>0++</sup> | Seq. | y         | y <sup>++</sup> | y <sup>*</sup> | y <sup>*++</sup> | y <sup>0</sup> | y <sup>0++</sup> | #  |
|----|-----------|-----------------|----------------|------------------|----------------|------------------|------|-----------|-----------------|----------------|------------------|----------------|------------------|----|
| 1  | 58.0287   | 29.5180         |                |                  |                |                  | G    |           |                 |                |                  |                |                  | 14 |
| 2  | 115.0502  | 58.0287         |                |                  |                |                  | G    | 1401.7155 | 701.3614        | 1384.6889      | 692.8481         | 1383.7049      | 692.3561         | 13 |
| 3  | 214.1186  | 107.5629        |                |                  |                |                  | V    | 1344.6940 | 672.8506        | 1327.6675      | 664.3374         | 1326.6834      | 663.8454         | 12 |
| 4  | 327.2027  | 164.1050        |                |                  |                |                  | I    | 1245.6256 | 623.3164        | 1228.5990      | 614.8032         | 1227.6150      | 614.3112         | 11 |
| 5  | 458.2432  | 229.6252        |                |                  |                |                  | M    | 1132.5415 | 566.7744        | 1115.5150      | 558.2611         | 1114.5310      | 557.7691         | 10 |
| 6  | 573.2701  | 287.1387        |                |                  | 555.2595       | 278.1334         | D    | 1001.5010 | 501.2542        | 984.4745       | 492.7409         | 983.4905       | 492.2489         | 9  |
| 7  | 672.3385  | 336.6729        |                |                  | 654.3280       | 327.6676         | V    | 886.4741  | 443.7407        | 869.4476       | 435.2274         | 868.4635       | 434.7354         | 8  |
| 8  | 771.4069  | 386.2071        |                |                  | 753.3964       | 377.2018         | V    | 787.4057  | 394.2065        | 770.3791       | 385.6932         | 769.3951       | 385.2012         | 7  |
| 9  | 885.4499  | 443.2286        | 868.4233       | 434.7153         | 867.4393       | 434.2233         | N    | 688.3373  | 344.6723        | 671.3107       | 336.1590         | 670.3267       | 335.6670         | 6  |
| 10 | 956.4870  | 478.7471        | 939.4604       | 470.2339         | 938.4764       | 469.7418         | A    | 574.2944  | 287.6508        | 557.2678       | 279.1375         | 556.2838       | 278.6455         | 5  |
| 11 | 1085.5296 | 543.2684        | 1068.5030      | 534.7551         | 1067.5190      | 534.2631         | E    | 503.2572  | 252.1323        | 486.2307       | 243.6190         | 485.2467       | 243.1270         | 4  |
| 12 | 1213.5881 | 607.2977        | 1196.5616      | 598.7844         | 1195.5776      | 598.2924         | Q    | 374.2146  | 187.6110        | 357.1881       | 179.0977         |                |                  | 3  |
| 13 | 1284.6253 | 642.8163        | 1267.5987      | 634.3030         | 1266.6147      | 633.8110         | A    | 246.1561  | 123.5817        | 229.1295       | 115.0684         |                |                  | 2  |
| 14 |           |                 |                |                  |                |                  | R    | 175.1190  | 88.0631         | 158.0924       | 79.5498          |                |                  | 1  |

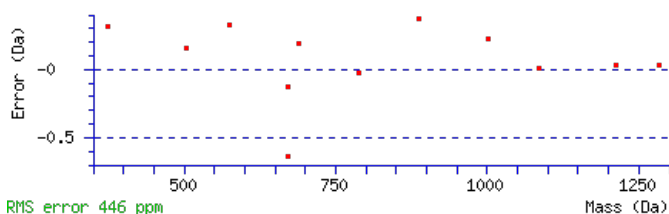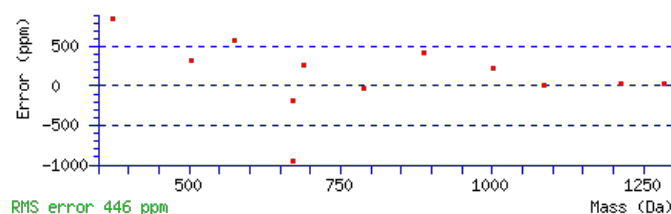NCBI BLAST search of [GGVIMDVVNAEQAR](#)

## AT2G38230.1

(Parameters: blastp, nr protein database, expect=20000, no filter, PAM30)

Other BLAST [web gateways](#)

### All matches to this query

| Score | Mr(calc)  | Delta  | Sequence                       |
|-------|-----------|--------|--------------------------------|
| 74.4  | 1457.7297 | 0.0011 | <a href="#">GGVIMDVVNAEQAR</a> |

Mascot: <http://www.matrixscience.com/>

**Peptide View**MS/MS Fragmentation of **LMQALGGGDK**

Found in **AT2G38240.1** in **TAIR\_Arabidopsis**, Symbols: | oxidoreductase, 2OG-Fe(II) oxygenase family protein | chr2:16019801-16021744  
REVERSE

Match to Query 2467: 1000.463258 from(501.238905,2+) index(2535)

Title: Elution from: 26.758 to 26.758 scan no 3178 cid35.00 polarity:+

Data file 0-1\_3.mgf

Click mouse within plot area to zoom in by factor of two about that point

Or,   to  Da

Label all possible matches  Label matches used for scoring

Show Y-axis

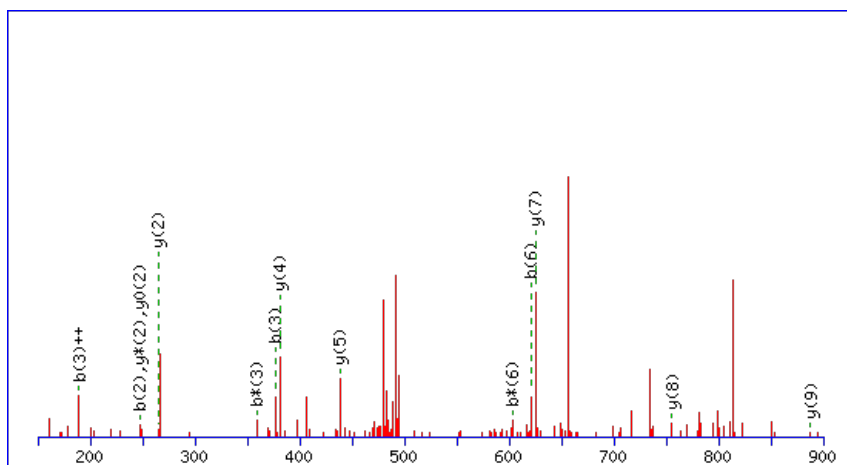

**Monoisotopic mass of neutral peptide Mr(calc):** 1000.4656

**Fixed modifications:** Carbamidomethyl (C) (apply to specified residues or termini only)

**Ions Score:** 28 **Expect:** 0.014

**Matches:** 14/86 fragment ions using 30 most intense peaks ([help](#))

| #  | b               | b <sup>++</sup> | b*              | b <sup>*++</sup> | b <sup>0</sup> | b <sup>0++</sup> | Seq. | y               | y <sup>++</sup> | y*              | y <sup>*++</sup> | y <sup>0</sup>  | y <sup>0++</sup> | #  |
|----|-----------------|-----------------|-----------------|------------------|----------------|------------------|------|-----------------|-----------------|-----------------|------------------|-----------------|------------------|----|
| 1  | 115.0884        | 58.0478         |                 |                  |                |                  | L    |                 |                 |                 |                  |                 |                  | 10 |
| 2  | <b>247.1259</b> | 124.0666        |                 |                  |                |                  | M    | <b>887.3918</b> | 444.1995        | 869.3682        | 435.1877         | 869.3812        | 435.1942         | 9  |
| 3  | <b>377.1785</b> | <b>189.0929</b> | <b>359.1550</b> | 180.0811         |                |                  | Q    | <b>755.3542</b> | 378.1808        | 737.3307        | 369.1690         | 737.3437        | 369.1755         | 8  |
| 4  | 449.2127        | 225.1100        | 431.1891        | 216.0982         |                |                  | A    | <b>625.3016</b> | 313.1544        | 607.2780        | 304.1426         | 607.2910        | 304.1492         | 7  |
| 5  | 563.2938        | 282.1505        | 545.2702        | 273.1387         |                |                  | L    | 553.2674        | 277.1374        | 535.2439        | 268.1256         | 535.2569        | 268.1321         | 6  |
| 6  | <b>621.3123</b> | 311.1598        | <b>603.2887</b> | 302.1480         |                |                  | G    | <b>439.1863</b> | 220.0968        | 421.1628        | 211.0850         | 421.1758        | 211.0915         | 5  |
| 7  | 679.3308        | 340.1690        | 661.3072        | 331.1572         |                |                  | G    | <b>381.1679</b> | 191.0876        | 363.1443        | 182.0758         | 363.1573        | 182.0823         | 4  |
| 8  | 737.3493        | 369.1783        | 719.3257        | 360.1665         |                |                  | G    | 323.1494        | 162.0783        | 305.1258        | 153.0665         | 305.1388        | 153.0730         | 3  |
| 9  | 853.3733        | 427.1903        | 835.3497        | 418.1785         | 835.3627       | 418.1850         | D    | <b>265.1309</b> | 133.0691        | <b>247.1073</b> | 124.0573         | <b>247.1203</b> | 124.0638         | 2  |
| 10 |                 |                 |                 |                  |                |                  | K    | 149.1069        | 75.0571         | 131.0833        | 66.0453          |                 |                  | 1  |

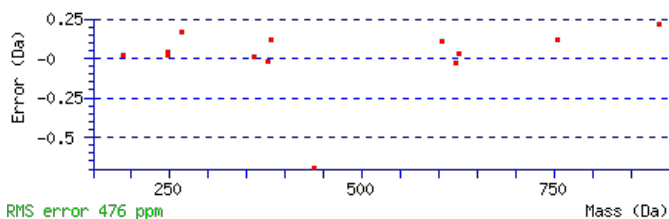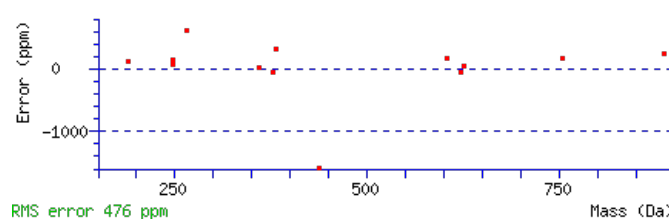NCBI BLAST search of **LMQALGGGDK**

(Parameters: blastp, nr protein database, expect=20000, no filter, PAM30)

Other BLAST [web gateways](#)

All matches to this query

## AT2G38240.1

| Score | Mr(calc)  | Delta   | Sequence                   |
|-------|-----------|---------|----------------------------|
| 28.2  | 1000.4656 | -0.0023 | <a href="#">LMQALGGGDK</a> |
| 8.6   | 1000.4656 | -0.0023 | <a href="#">QIMPELSR</a>   |
| 8.3   | 1000.4622 | 0.0011  | <a href="#">ELLEWGSR</a>   |
| 5.5   | 1000.4656 | -0.0023 | <a href="#">LMLDQVDR</a>   |
| 5.3   | 1000.4644 | -0.0012 | <a href="#">ITYQFYR</a>    |
| 5.3   | 1000.4653 | -0.0021 | <a href="#">SRSPRHSR</a>   |
| 4.7   | 1000.4622 | 0.0011  | <a href="#">IWGLSEER</a>   |
| 4.6   | 1000.4656 | -0.0023 | <a href="#">ISGMTHVK</a>   |
| 4.4   | 1000.4626 | 0.0006  | <a href="#">NAAGNTGRPK</a> |
| 4.3   | 1000.4626 | 0.0006  | <a href="#">SQHASKATR</a>  |

Mascot: <http://www.matrixscience.com/>

**Peptide View**MS/MS Fragmentation of **HVELTVPLEELIDR**

Found in **AT2G38270.1** in **TAIR\_Arabidopsis**, Symbols: CXIP2 | CXIP2 (CAX-INTERACTING PROTEIN 2); electron carrier/ protein disulfide oxidoreductase | chr2:16038425-16040132 REVERSE

Match to Query 7865: 1680.841896 from(561.287908,3+) index(9130)

Title: Elution from: 82.504 to 82.504 scan no 12432 cid35.00 polarity:+

Data file 0-1\_3.mgf

Click mouse within plot area to zoom in by factor of two about that point

Or,   to  Da

Label all possible matches  Label matches used for scoring

Show Y-axis

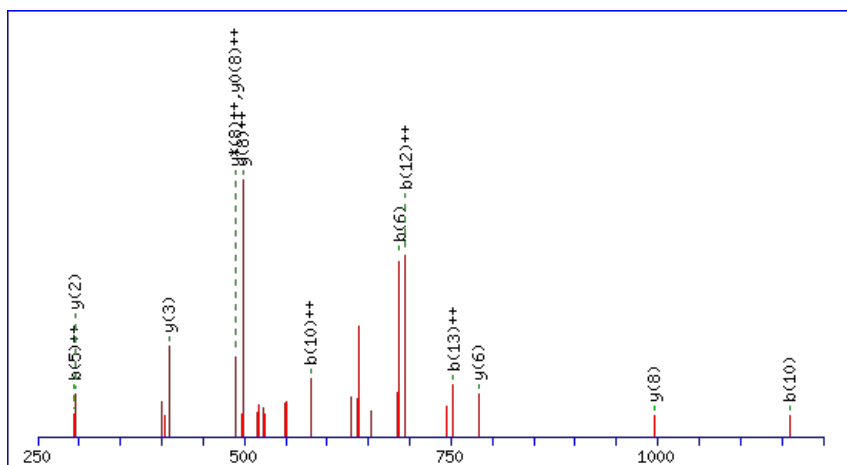

**Monoisotopic mass of neutral peptide Mr(calc):** 1680.8425

**Fixed modifications:** Carbamidomethyl (C) (apply to specified residues or termini only)

**Ions Score:** 44 **Expect:** 0.00028

**Matches:** 13/124 fragment ions using 12 most intense peaks ([help](#))

| #  | b                | b <sup>++</sup> | b <sup>0</sup> | b <sup>0++</sup> | Seq. | y               | y <sup>++</sup> | y <sup>*</sup> | y <sup>*++</sup> | y <sup>0</sup> | y <sup>0++</sup> | #  |
|----|------------------|-----------------|----------------|------------------|------|-----------------|-----------------|----------------|------------------|----------------|------------------|----|
| 1  | 141.0573         | 71.0323         |                |                  | H    |                 |                 |                |                  |                |                  | 14 |
| 2  | 241.1227         | 121.0650        |                |                  | V    | 1541.7998       | 771.4035        | 1523.7762      | 762.3917         | 1523.7892      | 762.3982         | 13 |
| 3  | 371.1624         | 186.0848        | 353.1518       | 177.0795         | E    | 1441.7343       | 721.3708        | 1423.7107      | 712.3590         | 1423.7237      | 712.3655         | 12 |
| 4  | 485.2435         | 243.1254        | 467.2329       | 234.1201         | L    | 1311.6947       | 656.3510        | 1293.6711      | 647.3392         | 1293.6841      | 647.3457         | 11 |
| 5  | 587.2882         | <b>294.1477</b> | 569.2776       | 285.1424         | T    | 1197.6136       | 599.3104        | 1179.5900      | 590.2986         | 1179.6030      | 590.3051         | 10 |
| 6  | <b>687.3536</b>  | 344.1805        | 669.3431       | 335.1752         | V    | 1095.5689       | 548.2881        | 1077.5453      | 539.2763         | 1077.5583      | 539.2828         | 9  |
| 7  | 785.4034         | 393.2054        | 767.3929       | 384.2001         | P    | <b>995.5034</b> | <b>498.2553</b> | 977.4798       | <b>489.2436</b>  | 977.4929       | <b>489.2501</b>  | 8  |
| 8  | 899.4845         | 450.2459        | 881.4740       | 441.2406         | L    | 897.4536        | 449.2304        | 879.4300       | 440.2187         | 879.4431       | 440.2252         | 7  |
| 9  | 1029.5242        | 515.2657        | 1011.5136      | 506.2604         | E    | <b>783.3725</b> | 392.1899        | 765.3489       | 383.1781         | 765.3620       | 383.1846         | 6  |
| 10 | <b>1159.5638</b> | <b>580.2855</b> | 1141.5532      | 571.2802         | E    | 653.3329        | 327.1701        | 635.3093       | 318.1583         | 635.3223       | 318.1648         | 5  |
| 11 | 1273.6449        | 637.3261        | 1255.6343      | 628.3208         | L    | 523.2933        | 262.1503        | 505.2697       | 253.1385         | 505.2827       | 253.1450         | 4  |
| 12 | 1387.7260        | <b>694.3666</b> | 1369.7154      | 685.3613         | I    | <b>409.2122</b> | 205.1097        | 391.1886       | 196.0979         | 391.2016       | 196.1044         | 3  |
| 13 | 1503.7500        | <b>752.3786</b> | 1485.7394      | 743.3733         | D    | <b>295.1311</b> | 148.0692        | 277.1075       | 139.0574         | 277.1205       | 139.0639         | 2  |
| 14 |                  |                 |                |                  | R    | 179.1071        | 90.0572         | 161.0835       | 81.0454          |                |                  | 1  |

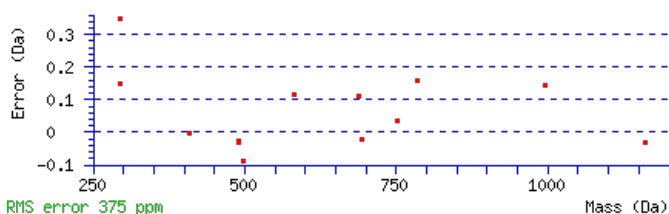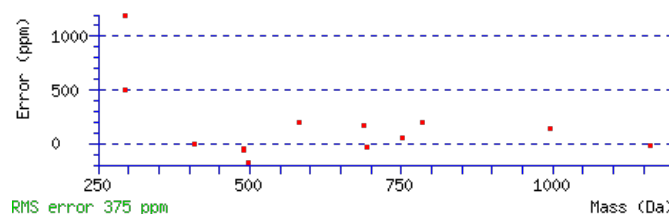

NCBI BLAST search of [HVELTVPLEELIDR](#)

## AT2G38270.1

(Parameters: blastp, nr protein database, expect=20000, no filter, PAM30)

Other BLAST [web gateways](#)

### All matches to this query

| Score | Mr(calc)  | Delta   | Sequence                        |
|-------|-----------|---------|---------------------------------|
| 44.0  | 1680.8425 | -0.0006 | <a href="#">HVELTVPLEELIDR</a>  |
| 9.2   | 1680.8429 | -0.0010 | <a href="#">SIQRLKDQISSLDR</a>  |
| 8.3   | 1680.8452 | -0.0033 | <a href="#">NRLQIFGANKLEEK</a>  |
| 4.0   | 1680.8378 | 0.0041  | <a href="#">QIVNFPLLGMLSSAR</a> |
| 1.1   | 1680.8459 | -0.0040 | <a href="#">LMSEELKVSVEVQR</a>  |

Mascot: <http://www.matrixscience.com/>

## Peptide View

### MS/MS Fragmentation of **ALGSGLNAGR**

Found in **AT2G38540.1** in **TAIR\_Arabidopsis**, Symbols: LTP1, ATLTP1, LP1 | LP1 (nonspecific lipid transfer protein 1) | chr2:16137496-16137971 FORWARD

Match to Query 1892: 914.493920 from(458.254236,2+) index(1293)

Title: Elution from: 19.133 to 19.133 scan no 1820 cid35.00 polarity:+

Data file D12h-1\_1.mgf

Click mouse within plot area to zoom in by factor of two about that point

Or,   to  Da

Label all possible matches  Label matches used for scoring

Show Y-axis

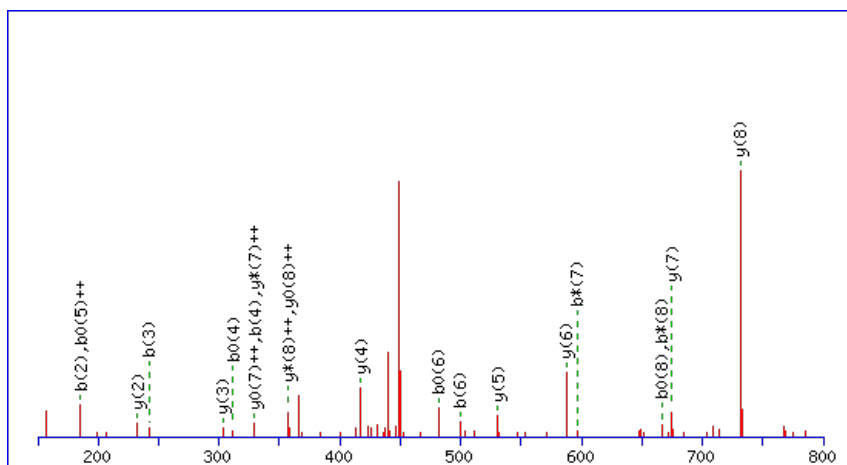

**Monoisotopic mass of neutral peptide Mr(calc):** 914.4934

**Fixed modifications:** Carbamidomethyl (C) (apply to specified residues or termini only)

**Ions Score:** 54 **Expect:** 1.8e-005

**Matches:** 21/78 fragment ions using 28 most intense peaks ([help](#))

| #  | b               | b <sup>++</sup> | b*              | b <sup>*++</sup> | b <sup>0</sup>  | b <sup>0++</sup> | Seq. | y               | y <sup>++</sup> | y*       | y <sup>*++</sup> | y <sup>0</sup> | y <sup>0++</sup> | #  |
|----|-----------------|-----------------|-----------------|------------------|-----------------|------------------|------|-----------------|-----------------|----------|------------------|----------------|------------------|----|
| 1  | 72.0444         | 36.5258         |                 |                  |                 |                  | A    |                 |                 |          |                  |                |                  | 10 |
| 2  | <b>185.1285</b> | 93.0679         |                 |                  |                 |                  | L    | 844.4635        | 422.7354        | 827.4370 | 414.2221         | 826.4530       | 413.7301         | 9  |
| 3  | <b>242.1499</b> | 121.5786        |                 |                  |                 |                  | G    | <b>731.3795</b> | 366.1934        | 714.3529 | <b>357.6801</b>  | 713.3689       | <b>357.1881</b>  | 8  |
| 4  | <b>329.1819</b> | 165.0946        |                 |                  | 311.1714        | 156.0893         | S    | <b>674.3580</b> | 337.6826        | 657.3315 | <b>329.1694</b>  | 656.3474       | <b>328.6774</b>  | 7  |
| 5  | 386.2034        | 193.6053        |                 |                  | 368.1928        | <b>184.6001</b>  | G    | <b>587.3260</b> | 294.1666        | 570.2994 | 285.6534         |                |                  | 6  |
| 6  | <b>499.2875</b> | 250.1474        |                 |                  | <b>481.2769</b> | 241.1421         | L    | <b>530.3045</b> | 265.6559        | 513.2780 | 257.1426         |                |                  | 5  |
| 7  | 613.3304        | 307.1688        | <b>596.3039</b> | 298.6556         | 595.3198        | 298.1636         | N    | <b>417.2205</b> | 209.1139        | 400.1939 | 200.6006         |                |                  | 4  |
| 8  | 684.3675        | 342.6874        | <b>667.3410</b> | 334.1741         | <b>666.3569</b> | 333.6821         | A    | <b>303.1775</b> | 152.0924        | 286.1510 | 143.5791         |                |                  | 3  |
| 9  | 741.3890        | 371.1981        | 724.3624        | 362.6849         | 723.3784        | 362.1928         | G    | <b>232.1404</b> | 116.5738        | 215.1139 | 108.0606         |                |                  | 2  |
| 10 |                 |                 |                 |                  |                 |                  | R    | 175.1190        | 88.0631         | 158.0924 | 79.5498          |                |                  | 1  |

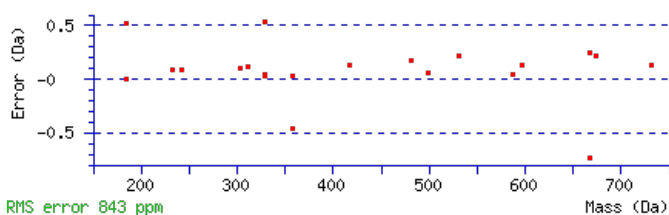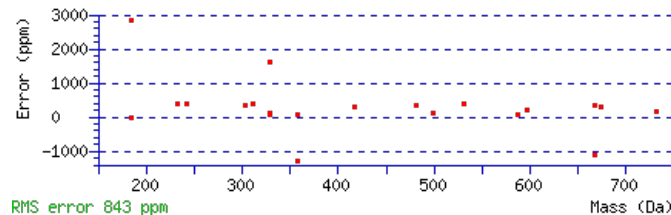

NCBI BLAST search of [ALGSGLNAGR](#)

(Parameters: blastp, nr protein database, expect=20000, no filter, PAM30)

Other BLAST [web gateways](#)

All matches to this query



AT2G38540.1

| Score | Mr(calc) | Delta   | Sequence                  |
|-------|----------|---------|---------------------------|
| 53.8  | 914.4934 | 0.0006  | <a href="#">ALGSLNAGR</a> |
| 12.4  | 914.4934 | 0.0006  | <a href="#">RGDGLIER</a>  |
| 5.4   | 914.4947 | -0.0008 | <a href="#">GVHHRPGR</a>  |
| 1.5   | 914.4933 | 0.0006  | <a href="#">ALEQRNGK</a>  |

Mascot: <http://www.matrixscience.com/>

**Peptide View**MS/MS Fragmentation of **SFGAAVIYNNQK**Found in **AT2G39010.1** in **TAIR\_Arabidopsis**, Symbols: PIP2E, PIP2;6 | PIP2;6/PIP2E (plasma membrane intrinsic protein 2;6); water channel | chr2:16298642-16300824 FORWARD

Match to Query 4753: 1326.613480 from(664.314016,2+) index(3868)

Title: Elution from: 35.652 to 35.652 scan no 4841 cid35.00 polarity:+

Data file 0-2\_3.mgf

Click mouse within plot area to zoom in by factor of two about that point

Or,  to  Da Label all possible matches  Label matches used for scoring Show Y-axis 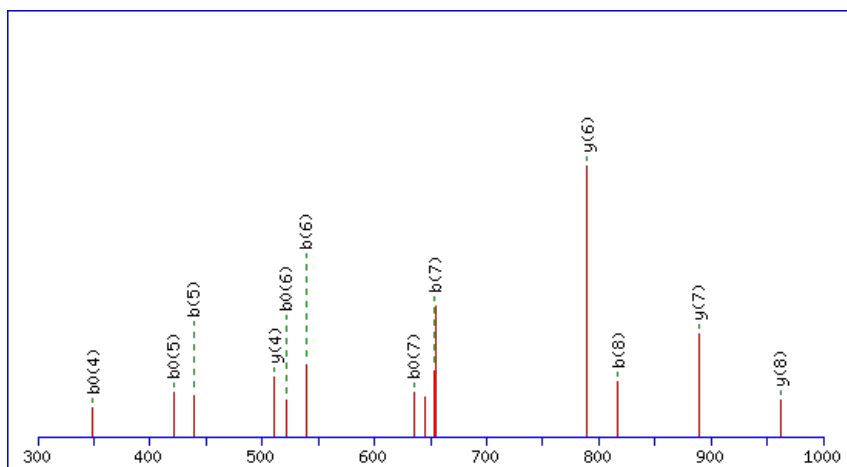Monoisotopic mass of neutral peptide  $M_r(\text{calc})$ : 1326.6145

Fixed modifications: Carbamidomethyl (C) (apply to specified residues or termini only)

Ions Score: 47 Expect: 0.0002

Matches : 12/94 fragment ions using 14 most intense peaks ([help](#))

| #  | b         | b <sup>++</sup> | b <sup>*</sup> | b <sup>*++</sup> | b <sup>0</sup> | b <sup>0++</sup> | Seq. | y         | y <sup>++</sup> | y <sup>*</sup> | y <sup>*++</sup> | #  |
|----|-----------|-----------------|----------------|------------------|----------------|------------------|------|-----------|-----------------|----------------|------------------|----|
| 1  | 89.0363   | 45.0218         |                |                  | 71.0258        | 36.0165          | S    |           |                 |                |                  | 12 |
| 2  | 237.1018  | 119.0545        |                |                  | 219.0912       | 110.0492         | F    | 1239.5927 | 620.3000        | 1221.5691      | 611.2882         | 11 |
| 3  | 295.1203  | 148.0638        |                |                  | 277.1097       | 139.0585         | G    | 1091.5272 | 546.2673        | 1073.5036      | 537.2555         | 10 |
| 4  | 367.1544  | 184.0809        |                |                  | 349.1439       | 175.0756         | A    | 1033.5087 | 517.2580        | 1015.4851      | 508.2462         | 9  |
| 5  | 439.1886  | 220.0979        |                |                  | 421.1780       | 211.0926         | A    | 961.4746  | 481.2409        | 943.4510       | 472.2291         | 8  |
| 6  | 539.2540  | 270.1307        |                |                  | 521.2435       | 261.1254         | V    | 889.4404  | 445.2239        | 871.4168       | 436.2121         | 7  |
| 7  | 653.3351  | 327.1712        |                |                  | 635.3246       | 318.1659         | I    | 789.3750  | 395.1911        | 771.3514       | 386.1793         | 6  |
| 8  | 817.3955  | 409.2014        |                |                  | 799.3849       | 400.1961         | Y    | 675.2939  | 338.1506        | 657.2703       | 329.1388         | 5  |
| 9  | 933.4325  | 467.2199        | 915.4089       | 458.2081         | 915.4219       | 458.2146         | N    | 511.2335  | 256.1204        | 493.2099       | 247.1086         | 4  |
| 10 | 1049.4695 | 525.2384        | 1031.4459      | 516.2266         | 1031.4589      | 516.2331         | N    | 395.1965  | 198.1019        | 377.1729       | 189.0901         | 3  |
| 11 | 1179.5221 | 590.2647        | 1161.4986      | 581.2529         | 1161.5116      | 581.2594         | Q    | 279.1595  | 140.0834        | 261.1359       | 131.0716         | 2  |
| 12 |           |                 |                |                  |                |                  | K    | 149.1069  | 75.0571         | 131.0833       | 66.0453          | 1  |

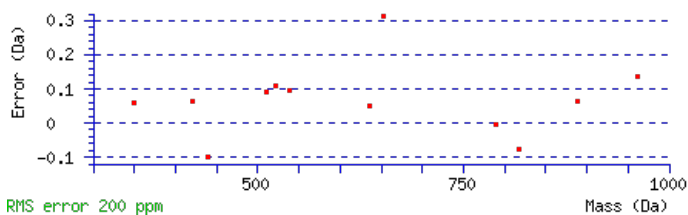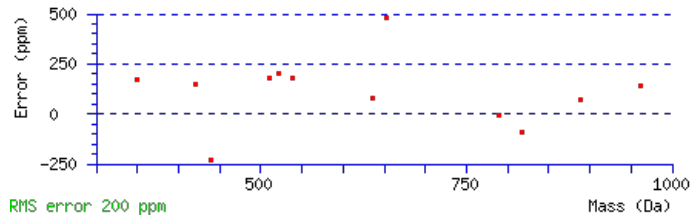NCBI BLAST search of **SFGAAVIYNNQK**

(Parameters: blastp, nr protein database, expect=20000, no filter, PAM30)

Other BLAST [web gateways](#)

# AT2G39010.1

All matches to this query

| Score | Mr(calc)  | Delta   | Sequence                     |
|-------|-----------|---------|------------------------------|
| 46.5  | 1326.6145 | -0.0010 | <a href="#">SEGAAYIYNNQK</a> |
| 31.5  | 1326.6144 | -0.0010 | <a href="#">DFIRQFAAESK</a>  |
| 15.4  | 1326.6144 | -0.0010 | <a href="#">YVDKDFIAANR</a>  |
| 3.6   | 1326.6122 | 0.0013  | <a href="#">NQNGVQIPPTK</a>  |
| 1.8   | 1326.6109 | 0.0026  | <a href="#">LVMSNTGRIR</a>   |
| 1.2   | 1326.6138 | -0.0003 | <a href="#">KMMVLTQMSTK</a>  |

Mascot: <http://www.matrixscience.com/>

**Peptide View**MS/MS Fragmentation of **AKIEQLEQGVTELK**Found in **AT2G39280.1** in **TAIR\_Arabidopsis**, Symbols: | RAB GTPase activator | chr2:16409079-16413728 REVERSE

Match to Query 7255: 1612.876228 from(807.445390,2+) index(7377)

Title: Elution from: 67.405 to 67.405 scan no 9718 cid35.00 polarity:+

Data file D1d-2\_1.mgf

Click mouse within plot area to zoom in by factor of two about that point

Or,   to  Da Label all possible matches  Label matches used for scoring Show Y-axis 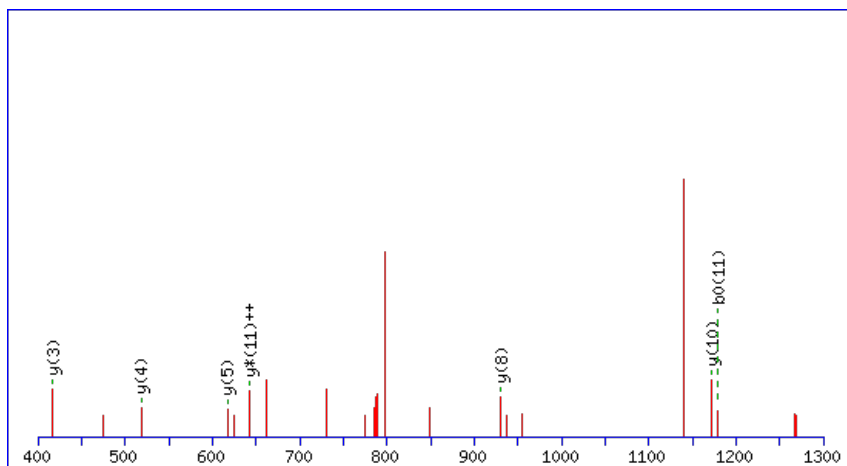Monoisotopic mass of neutral peptide  $M_r(\text{calc})$ : 1612.8784

Fixed modifications: Carbamidomethyl (C) (apply to specified residues or termini only)

Ions Score: 19 Expect: 0.041

Matches : 7/144 fragment ions using 18 most intense peaks ([help](#))

| #  | b         | b <sup>++</sup> | b <sup>*</sup> | b <sup>*++</sup> | b <sup>0</sup> | b <sup>0++</sup> | Seq. | y         | y <sup>++</sup> | y <sup>*</sup> | y <sup>*++</sup> | y <sup>0</sup> | y <sup>0++</sup> | #  |
|----|-----------|-----------------|----------------|------------------|----------------|------------------|------|-----------|-----------------|----------------|------------------|----------------|------------------|----|
| 1  | 72.0444   | 36.5258         |                |                  |                |                  | A    |           |                 |                |                  |                |                  | 14 |
| 2  | 200.1394  | 100.5733        | 183.1128       | 92.0600          |                |                  | K    | 1542.8486 | 771.9279        | 1525.8221      | 763.4147         | 1524.8380      | 762.9227         | 13 |
| 3  | 313.2234  | 157.1153        | 296.1969       | 148.6021         |                |                  | I    | 1414.7536 | 707.8805        | 1397.7271      | 699.3672         | 1396.7431      | 698.8752         | 12 |
| 4  | 442.2660  | 221.6366        | 425.2395       | 213.1234         | 424.2554       | 212.6314         | E    | 1301.6696 | 651.3384        | 1284.6430      | 642.8251         | 1283.6590      | 642.3331         | 11 |
| 5  | 570.3246  | 285.6659        | 553.2980       | 277.1527         | 552.3140       | 276.6606         | Q    | 1172.6270 | 586.8171        | 1155.6004      | 578.3039         | 1154.6164      | 577.8118         | 10 |
| 6  | 683.4087  | 342.2080        | 666.3821       | 333.6947         | 665.3981       | 333.2027         | L    | 1044.5684 | 522.7878        | 1027.5419      | 514.2746         | 1026.5578      | 513.7826         | 9  |
| 7  | 812.4512  | 406.7293        | 795.4247       | 398.2160         | 794.4407       | 397.7240         | E    | 931.4843  | 466.2458        | 914.4578       | 457.7325         | 913.4738       | 457.2405         | 8  |
| 8  | 940.5098  | 470.7585        | 923.4833       | 462.2453         | 922.4993       | 461.7533         | Q    | 802.4417  | 401.7245        | 785.4152       | 393.2112         | 784.4312       | 392.7192         | 7  |
| 9  | 997.5313  | 499.2693        | 980.5047       | 490.7560         | 979.5207       | 490.2640         | G    | 674.3832  | 337.6952        | 657.3566       | 329.1819         | 656.3726       | 328.6899         | 6  |
| 10 | 1096.5997 | 548.8035        | 1079.5732      | 540.2902         | 1078.5891      | 539.7982         | V    | 617.3617  | 309.1845        | 600.3352       | 300.6712         | 599.3511       | 300.1792         | 5  |
| 11 | 1197.6474 | 599.3273        | 1180.6208      | 590.8141         | 1179.6368      | 590.3220         | T    | 518.2933  | 259.6503        | 501.2667       | 251.1370         | 500.2827       | 250.6450         | 4  |
| 12 | 1326.6900 | 663.8486        | 1309.6634      | 655.3354         | 1308.6794      | 654.8433         | E    | 417.2456  | 209.1264        | 400.2191       | 200.6132         | 399.2350       | 200.1212         | 3  |
| 13 | 1439.7740 | 720.3907        | 1422.7475      | 711.8774         | 1421.7635      | 711.3854         | L    | 288.2030  | 144.6051        | 271.1765       | 136.0919         |                |                  | 2  |
| 14 |           |                 |                |                  |                |                  | R    | 175.1190  | 88.0631         | 158.0924       | 79.5498          |                |                  | 1  |

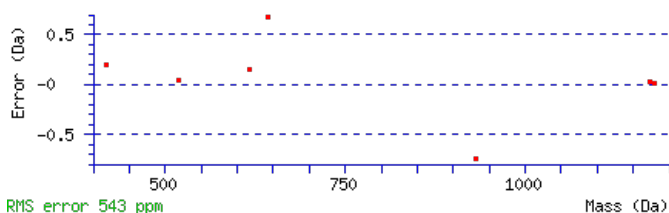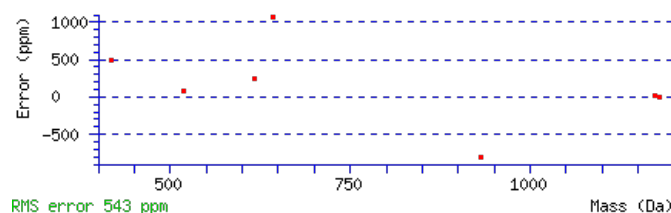NCBI BLAST search of **AKIEQLEQGVTELK**

(Parameters: blastp, nr protein database, expect=20000, no filter, PAM30)

AT2G39280.1

Other BLAST [web gateways](#)

**All matches to this query**

| Score | Mr(calc)  | Delta   | Sequence                          |
|-------|-----------|---------|-----------------------------------|
| 18.5  | 1612.8784 | -0.0022 | <a href="#">AKIEQLEQGVTEL</a>     |
| 7.6   | 1612.8719 | 0.0043  | <a href="#">RAGSHLLTAKPTSMK</a>   |
| 0.8   | 1612.8784 | -0.0021 | <a href="#">LPSASAKASSPKAAAEK</a> |
| 0.6   | 1612.8766 | -0.0003 | <a href="#">SPFWKLLYERFK</a>      |

**Mascot:** <http://www.matrixscience.com/>

**Peptide View**MS/MS Fragmentation of **VNTLIRPDGTK**

Found in **AT2G39460.1** in **TAIR\_Arabidopsis**, Symbols: RPL23A, ATRPL23A | ATRPL23A (RIBOSOMAL PROTEIN L23A); RNA binding/ structural constituent of ribosome | chr2:16482127-16482982 FORWARD

Match to Query 4600: 1228.634914 from(615.324733,2+) index(1453)

Title: Elution from: 19.742 to 19.742 scan no 1969 cid35.00 polarity:+

Data file D6h-1\_1.mgf

Click mouse within plot area to zoom in by factor of two about that point

Or,  to  Da

Label all possible matches  Label matches used for scoring

Show Y-axis

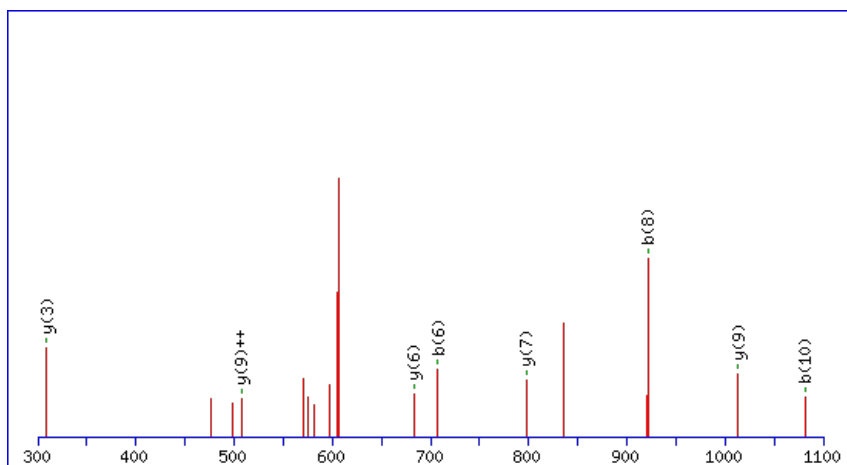

Monoisotopic mass of neutral peptide  $M_r(\text{calc})$ : 1228.6352

Fixed modifications: Carbamidomethyl (C) (apply to specified residues or termini only)

Ions Score: 31 Expect: 0.0063

Matches : 8/112 fragment ions using 13 most intense peaks ([help](#))

| #  | b                | b <sup>++</sup> | b*        | b <sup>*++</sup> | b <sup>0</sup> | b <sup>0++</sup> | Seq. | y                | y <sup>++</sup> | y*        | y <sup>*++</sup> | y <sup>0</sup> | y <sup>0++</sup> | #  |
|----|------------------|-----------------|-----------|------------------|----------------|------------------|------|------------------|-----------------|-----------|------------------|----------------|------------------|----|
| 1  | 101.0727         | 51.0400         |           |                  |                |                  | V    |                  |                 |           |                  |                |                  | 11 |
| 2  | 217.1097         | 109.0585        | 199.0861  | 100.0467         |                |                  | N    | 1129.5770        | 565.2921        | 1111.5534 | 556.2804         | 1111.5665      | 556.2869         | 10 |
| 3  | 319.1544         | 160.0809        | 301.1309  | 151.0691         | 301.1439       | 151.0756         | T    | <b>1013.5400</b> | <b>507.2737</b> | 995.5164  | 498.2619         | 995.5295       | 498.2684         | 9  |
| 4  | 433.2355         | 217.1214        | 415.2120  | 208.1096         | 415.2250       | 208.1161         | L    | 911.4953         | 456.2513        | 893.4717  | 447.2395         | 893.4847       | 447.2460         | 8  |
| 5  | 547.3166         | 274.1620        | 529.2930  | 265.1502         | 529.3061       | 265.1567         | I    | <b>797.4142</b>  | 399.2107        | 779.3906  | 390.1990         | 779.4036       | 390.2055         | 7  |
| 6  | <b>707.4059</b>  | 354.2066        | 689.3823  | 345.1948         | 689.3953       | 345.2013         | R    | <b>683.3331</b>  | 342.1702        | 665.3095  | 333.1584         | 665.3225       | 333.1649         | 6  |
| 7  | 805.4557         | 403.2315        | 787.4321  | 394.2197         | 787.4451       | 394.2262         | P    | 523.2439         | 262.1256        | 505.2203  | 253.1138         | 505.2333       | 253.1203         | 5  |
| 8  | <b>921.4797</b>  | 461.2435        | 903.4561  | 452.2317         | 903.4691       | 452.2382         | D    | 425.1941         | 213.1007        | 407.1705  | 204.0889         | 407.1835       | 204.0954         | 4  |
| 9  | 979.4982         | 490.2527        | 961.4746  | 481.2409         | 961.4876       | 481.2474         | G    | <b>309.1701</b>  | 155.0887        | 291.1465  | 146.0769         | 291.1595       | 146.0834         | 3  |
| 10 | <b>1081.5429</b> | 541.2751        | 1063.5193 | 532.2633         | 1063.5323      | 532.2698         | T    | 251.1516         | 126.0794        | 233.1280  | 117.0676         | 233.1410       | 117.0741         | 2  |
| 11 |                  |                 |           |                  |                |                  | K    | 149.1069         | 75.0571         | 131.0833  | 66.0453          |                |                  | 1  |

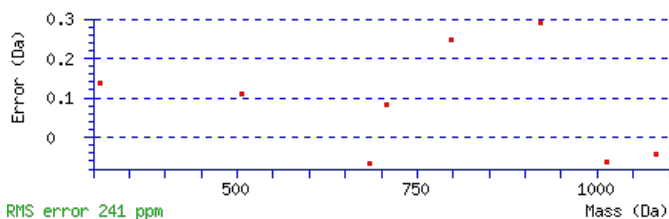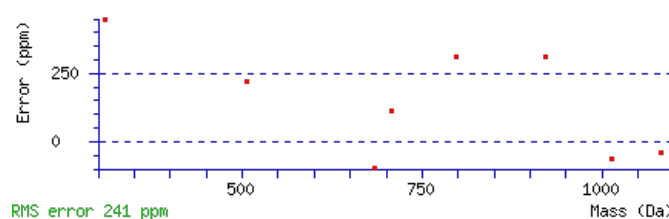NCBI **BLAST** search of **VNTLIRPDGTK**

(Parameters: blastp, nr protein database, expect=20000, no filter, PAM30)

Other BLAST [web gateways](#)

All matches to this query

## AT2G39460.1

| Score | Mr(calc)  | Delta   | Sequence                    |
|-------|-----------|---------|-----------------------------|
| 30.9  | 1228.6352 | -0.0003 | <a href="#">VNTLIRPDGK</a>  |
| 15.1  | 1228.6379 | -0.0029 | <a href="#">SSEHRVVLK</a>   |
| 5.1   | 1228.6352 | -0.0003 | <a href="#">LVQKELEAQR</a>  |
| 4.3   | 1228.6381 | -0.0032 | <a href="#">MTEVLLLPGTK</a> |
| 4.2   | 1228.6374 | -0.0025 | <a href="#">YGAERL</a>      |
| 3.4   | 1228.6352 | -0.0003 | <a href="#">RPTIEKGSPTK</a> |
| 2.7   | 1228.6381 | -0.0032 | <a href="#">ILDEVKMLEK</a>  |
| 2.0   | 1228.6325 | 0.0024  | <a href="#">EKIGDLSVK</a>   |
| 1.8   | 1228.6352 | -0.0003 | <a href="#">ALENQILK</a>    |
| 1.8   | 1228.6352 | -0.0003 | <a href="#">ESQEVKPRK</a>   |

Mascot: <http://www.matrixscience.com/>



# Mascot Search Results

## Peptide View

MS/MS Fragmentation of **LMEYGNMLVMEQENVK**

Found in **AT2G39730.1** in **TAIR\_Arabidopsis**, Symbols: RCA | RCA (RUBISCO ACTIVASE) | chr2:16578029-16580423 REVERSE

Match to Query 8978: 1946.830714 from(974.422633,2+) index(7688)

Title: Elution from: 68.505 to 68.505 scan no 10135 cid35.00 polarity:+

Data file D6h-1\_3.mgf

Click mouse within plot area to zoom in by factor of two about that point

Or,  to  Da

Label all possible matches  Label matches used for scoring

Show Y-axis

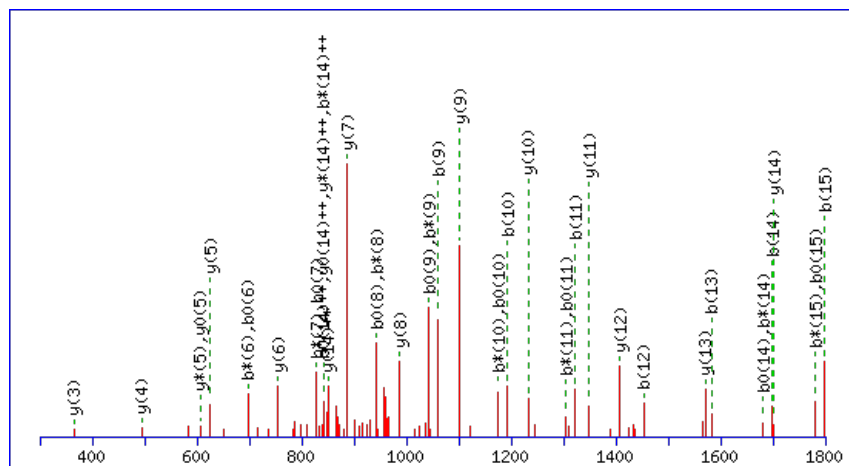

**Monoisotopic mass of neutral peptide Mr(calc):** 1946.8296

**Fixed modifications:** Carbamidomethyl (C) (apply to specified residues or termini only)

**Ions Score:** 117 **Expect:** 1.1e-011

**Matches:** 42/160 fragment ions using 37 most intense peaks ([help](#))

| #  | b         | b <sup>++</sup> | b*        | b <sup>*++</sup> | b <sup>0</sup> | b <sup>0++</sup> | Seq. | y         | y <sup>++</sup> | y*        | y <sup>*++</sup> | y <sup>0</sup> | y <sup>0++</sup> | #  |
|----|-----------|-----------------|-----------|------------------|----------------|------------------|------|-----------|-----------------|-----------|------------------|----------------|------------------|----|
| 1  | 115.0884  | 58.0478         |           |                  |                |                  | L    |           |                 |           |                  |                |                  | 16 |
| 2  | 247.1259  | 124.0666        |           |                  |                |                  | M    | 1833.7558 | 917.3815        | 1815.7322 | 908.3698         | 1815.7453      | 908.3763         | 15 |
| 3  | 377.1655  | 189.0864        |           |                  | 359.1550       | 180.0811         | E    | 1701.7183 | 851.3628        | 1683.6947 | 842.3510         | 1683.7077      | 842.3575         | 14 |
| 4  | 541.2259  | 271.1166        |           |                  | 523.2153       | 262.1113         | Y    | 1571.6787 | 786.3430        | 1553.6551 | 777.3312         | 1553.6681      | 777.3377         | 13 |
| 5  | 599.2444  | 300.1258        |           |                  | 581.2338       | 291.1205         | G    | 1407.6183 | 704.3128        | 1389.5947 | 695.3010         | 1389.6077      | 695.3075         | 12 |
| 6  | 715.2814  | 358.1443        | 697.2578  | 349.1325         | 697.2708       | 349.1390         | N    | 1349.5998 | 675.3035        | 1331.5762 | 666.2917         | 1331.5892      | 666.2983         | 11 |
| 7  | 847.3189  | 424.1631        | 829.2953  | 415.1513         | 829.3083       | 415.1578         | M    | 1233.5628 | 617.2850        | 1215.5392 | 608.2733         | 1215.5522      | 608.2798         | 10 |
| 8  | 961.4000  | 481.2036        | 943.3764  | 472.1918         | 943.3894       | 472.1984         | L    | 1101.5253 | 551.2663        | 1083.5017 | 542.2545         | 1083.5147      | 542.2610         | 9  |
| 9  | 1061.4655 | 531.2364        | 1043.4419 | 522.2246         | 1043.4549      | 522.2311         | V    | 987.4442  | 494.2257        | 969.4206  | 485.2139         | 969.4336       | 485.2205         | 8  |
| 10 | 1193.5030 | 597.2551        | 1175.4794 | 588.2433         | 1175.4924      | 588.2498         | M    | 887.3787  | 444.1930        | 869.3552  | 435.1812         | 869.3682       | 435.1877         | 7  |
| 11 | 1323.5426 | 662.2749        | 1305.5190 | 653.2631         | 1305.5320      | 653.2697         | E    | 755.3412  | 378.1742        | 737.3176  | 369.1625         | 737.3307       | 369.1690         | 6  |
| 12 | 1453.5952 | 727.3013        | 1435.5717 | 718.2895         | 1435.5847      | 718.2960         | Q    | 625.3016  | 313.1544        | 607.2780  | 304.1426         | 607.2910       | 304.1492         | 5  |
| 13 | 1583.6349 | 792.3211        | 1565.6113 | 783.3093         | 1565.6243      | 783.3158         | E    | 495.2489  | 248.1281        | 477.2254  | 239.1163         | 477.2384       | 239.1228         | 4  |
| 14 | 1699.6719 | 850.3396        | 1681.6483 | 841.3278         | 1681.6613      | 841.3343         | N    | 365.2093  | 183.1083        | 347.1857  | 174.0965         |                |                  | 3  |
| 15 | 1799.7373 | 900.3723        | 1781.7137 | 891.3605         | 1781.7268      | 891.3670         | V    | 249.1723  | 125.0898        | 231.1487  | 116.0780         |                |                  | 2  |
| 16 |           |                 |           |                  |                |                  | K    | 149.1069  | 75.0571         | 131.0833  | 66.0453          |                |                  | 1  |

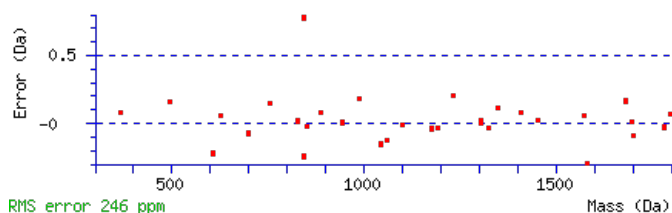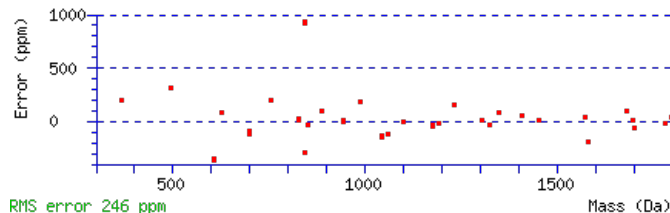



## AT2G39730.1

NCBI **BLAST** search of [LMEYGNMLVMEQENVK](#)

(Parameters: blastp, nr protein database, expect=20000, no filter, PAM30)

Other BLAST [web gateways](#)

### All matches to this query

| Score | Mr(calc)  | Delta   | Sequence                          |
|-------|-----------|---------|-----------------------------------|
| 117.3 | 1946.8296 | 0.0011  | <a href="#">LMEYGNMLVMEQENVK</a>  |
| 10.4  | 1946.8341 | -0.0034 | <a href="#">QIRCNWATKGATSGEDK</a> |
| 10.2  | 1946.8255 | 0.0052  | <a href="#">DTAAWNSMVHGYLQFGK</a> |
| 8.6   | 1946.8255 | 0.0052  | <a href="#">DYSDHMALVRAFEGWK</a>  |
| 4.3   | 1946.8265 | 0.0042  | <a href="#">LCKSQDLTESLSDESSK</a> |

Mascot: <http://www.matrixscience.com/>

**Peptide View**MS/MS Fragmentation of **VGSSEALLAK**Found in **AT2G40010.1** in **TAIR\_Arabidopsis**, Symbols: | 60S acidic ribosomal protein P0 (RPP0A) | chr2:16715656-16717526 REVERSE

Match to Query 2996: 1056.546884 from(529.280718,2+) index(2382)

Title: Elution from: 25.735 to 25.735 scan no 2999 cid35.00 polarity:+

Data file 0-1\_3.mgf

Click mouse within plot area to zoom in by factor of two about that point

Or,   to  Da Label all possible matches  Label matches used for scoring Show Y-axis 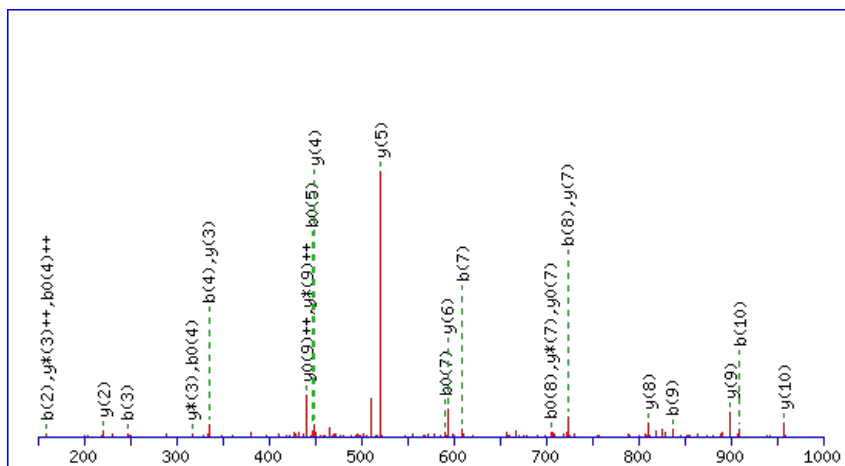**Monoisotopic mass of neutral peptide Mr(calc):** 1056.5459**Fixed modifications:** Carbamidomethyl (C) (apply to specified residues or termini only)**Ions Score:** 96 **Expect:** 2.5e-009**Matches:** 27/84 fragment ions using 24 most intense peaks ([help](#))

| #  | b               | b <sup>++</sup> | b <sup>0</sup>  | b <sup>0++</sup> | Seq. | y               | y <sup>++</sup> | y*              | y <sup>*++</sup> | y <sup>0</sup>  | y <sup>0++</sup> | #  |
|----|-----------------|-----------------|-----------------|------------------|------|-----------------|-----------------|-----------------|------------------|-----------------|------------------|----|
| 1  | 101.0727        | 51.0400         |                 |                  | V    |                 |                 |                 |                  |                 |                  | 11 |
| 2  | <b>159.0912</b> | 80.0492         |                 |                  | G    | <b>957.4878</b> | 479.2475        | 939.4642        | 470.2357         | 939.4772        | 470.2422         | 10 |
| 3  | <b>247.1203</b> | 124.0638        | 229.1097        | 115.0585         | S    | <b>899.4693</b> | 450.2383        | 881.4457        | <b>441.2265</b>  | 881.4587        | <b>441.2330</b>  | 9  |
| 4  | <b>335.1493</b> | 168.0783        | <b>317.1388</b> | <b>159.0730</b>  | S    | <b>811.4402</b> | 406.2237        | 793.4166        | 397.2120         | 793.4296        | 397.2185         | 8  |
| 5  | 465.1890        | 233.0981        | <b>447.1784</b> | 224.0928         | E    | <b>723.4111</b> | 362.2092        | <b>705.3876</b> | 353.1974         | <b>705.4006</b> | 353.2039         | 7  |
| 6  | 537.2231        | 269.1152        | 519.2126        | 260.1099         | A    | <b>593.3715</b> | 297.1894        | 575.3479        | 288.1776         |                 |                  | 6  |
| 7  | <b>609.2573</b> | 305.1323        | <b>591.2467</b> | 296.1270         | A    | <b>521.3374</b> | 261.1723        | 503.3138        | 252.1605         |                 |                  | 5  |
| 8  | <b>723.3384</b> | 362.1728        | <b>705.3278</b> | 353.1675         | L    | <b>449.3032</b> | 225.1552        | 431.2796        | 216.1435         |                 |                  | 4  |
| 9  | <b>837.4195</b> | 419.2134        | 819.4089        | 410.2081         | L    | <b>335.2221</b> | 168.1147        | <b>317.1985</b> | <b>159.1029</b>  |                 |                  | 3  |
| 10 | <b>909.4536</b> | 455.2304        | 891.4431        | 446.2252         | A    | <b>221.1410</b> | 111.0741        | 203.1174        | 102.0624         |                 |                  | 2  |
| 11 |                 |                 |                 |                  | K    | 149.1069        | 75.0571         | 131.0833        | 66.0453          |                 |                  | 1  |

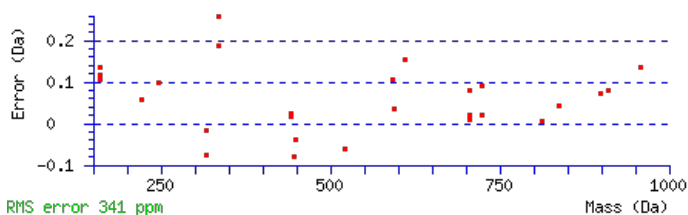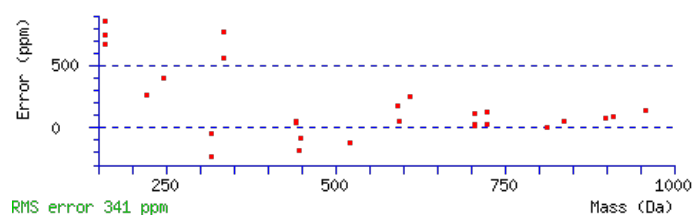NCBI **BLAST** search of **VGSSEALLAK**

(Parameters: blastp, nr protein database, expect=20000, no filter, PAM30)

Other BLAST [web gateways](#)**All matches to this query**

## AT2G40010.1

| Score | Mr(calc)  | Delta   | Sequence                    |
|-------|-----------|---------|-----------------------------|
| 95.9  | 1056.5459 | 0.0009  | <a href="#">VGSSEAALLAK</a> |
| 17.8  | 1056.5482 | -0.0013 | <a href="#">LFALDDKPK</a>   |
| 16.6  | 1056.5459 | 0.0009  | <a href="#">VSAEEKAAALK</a> |
| 11.7  | 1056.5459 | 0.0010  | <a href="#">GSTLQDLALK</a>  |
| 10.0  | 1056.5482 | -0.0013 | <a href="#">LPGGDLYLAK</a>  |
| 8.5   | 1056.5482 | -0.0013 | <a href="#">VFITDNLPK</a>   |
| 8.5   | 1056.5482 | -0.0013 | <a href="#">VNLFLSEPK</a>   |
| 8.3   | 1056.5459 | 0.0010  | <a href="#">GVKSVDVDVK</a>  |
| 6.6   | 1056.5459 | 0.0009  | <a href="#">LSSEVLAGAAK</a> |
| 6.0   | 1056.5459 | 0.0009  | <a href="#">QLAEEKLSK</a>   |

Mascot: <http://www.matrixscience.com/>

## Peptide View

MS/MS Fragmentation of **ILVTDPPDPSVLGPLTR**

Found in **AT2G40290.1** in **TAIR\_Arabidopsis**, Symbols: | eukaryotic translation initiation factor 2 subunit 1, putative / eIF-2A, putative / eIF-2-alpha, putative | chr2:16836108-16837967 REVERSE

Match to Query 7257: 1594.890686 from(798.452619,2+) index(8926)

Title: Elution from: 78.454 to 78.454 scan no 11917 cid35.00 polarity:+

Data file D1d-3\_2.mgf

Click mouse within plot area to zoom in by factor of two about that point

Or,  to  Da

Label all possible matches  Label matches used for scoring

Show Y-axis

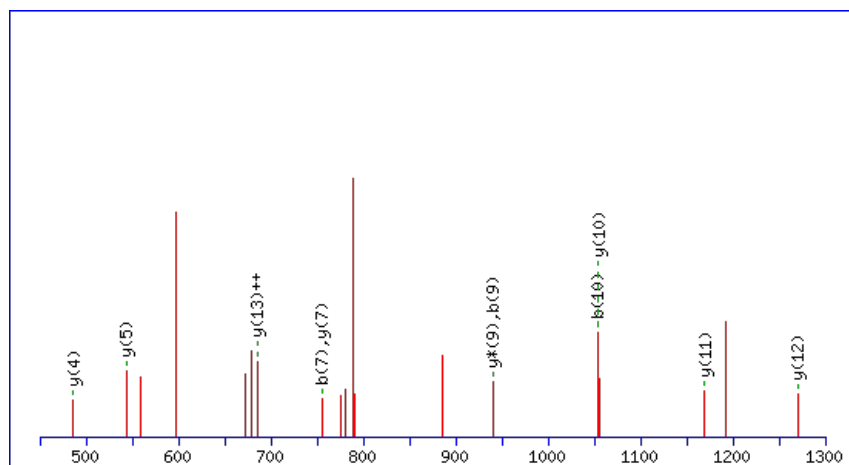

Monoisotopic mass of neutral peptide  $M_r(\text{calc})$ : 1594.8930

Fixed modifications: Carbamidomethyl (C) (apply to specified residues or termini only)

Ions Score: 32 Expect: 0.0011

Matches : 11/132 fragment ions using 19 most intense peaks ([help](#))

| #  | b         | b <sup>++</sup> | b <sup>0</sup> | b <sup>0++</sup> | Seq. | y         | y <sup>++</sup> | y*        | y <sup>*++</sup> | y <sup>0</sup> | y <sup>0++</sup> | #  |
|----|-----------|-----------------|----------------|------------------|------|-----------|-----------------|-----------|------------------|----------------|------------------|----|
| 1  | 114.0913  | 57.5493         |                |                  | I    |           |                 |           |                  |                |                  | 15 |
| 2  | 227.1754  | 114.0913        |                |                  | L    | 1482.8162 | 741.9118        | 1465.7897 | 733.3985         | 1464.8057      | 732.9065         | 14 |
| 3  | 326.2438  | 163.6255        |                |                  | V    | 1369.7322 | 685.3697        | 1352.7056 | 676.8564         | 1351.7216      | 676.3644         | 13 |
| 4  | 427.2915  | 214.1494        | 409.2809       | 205.1441         | T    | 1270.6638 | 635.8355        | 1253.6372 | 627.3222         | 1252.6532      | 626.8302         | 12 |
| 5  | 542.3184  | 271.6629        | 524.3079       | 262.6576         | D    | 1169.6161 | 585.3117        | 1152.5895 | 576.7984         | 1151.6055      | 576.3064         | 11 |
| 6  | 639.3712  | 320.1892        | 621.3606       | 311.1840         | P    | 1054.5891 | 527.7982        | 1037.5626 | 519.2849         | 1036.5786      | 518.7929         | 10 |
| 7  | 754.3981  | 377.7027        | 736.3876       | 368.6974         | D    | 957.5364  | 479.2718        | 940.5098  | 470.7585         | 939.5258       | 470.2665         | 9  |
| 8  | 841.4302  | 421.2187        | 823.4196       | 412.2134         | S    | 842.5094  | 421.7584        | 825.4829  | 413.2451         | 824.4989       | 412.7531         | 8  |
| 9  | 940.4986  | 470.7529        | 922.4880       | 461.7476         | V    | 755.4774  | 378.2423        | 738.4509  | 369.7291         | 737.4668       | 369.2371         | 7  |
| 10 | 1053.5827 | 527.2950        | 1035.5721      | 518.2897         | L    | 656.4090  | 328.7081        | 639.3824  | 320.1949         | 638.3984       | 319.7028         | 6  |
| 11 | 1110.6041 | 555.8057        | 1092.5936      | 546.8004         | G    | 543.3249  | 272.1661        | 526.2984  | 263.6528         | 525.3144       | 263.1608         | 5  |
| 12 | 1207.6569 | 604.3321        | 1189.6463      | 595.3268         | P    | 486.3035  | 243.6554        | 469.2769  | 235.1421         | 468.2929       | 234.6501         | 4  |
| 13 | 1320.7409 | 660.8741        | 1302.7304      | 651.8688         | L    | 389.2507  | 195.1290        | 372.2241  | 186.6157         | 371.2401       | 186.1237         | 3  |
| 14 | 1421.7886 | 711.3979        | 1403.7781      | 702.3927         | T    | 276.1666  | 138.5870        | 259.1401  | 130.0737         | 258.1561       | 129.5817         | 2  |
| 15 |           |                 |                |                  | R    | 175.1190  | 88.0631         | 158.0924  | 79.5498          |                |                  | 1  |

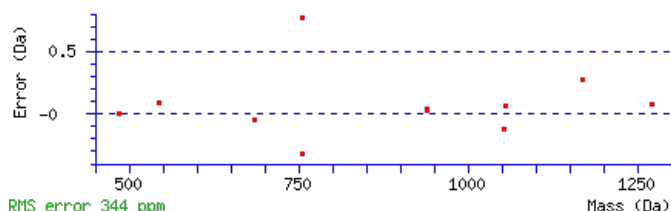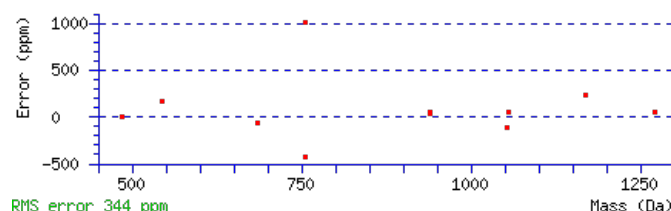

## AT2G40290.1

NCBI **BLAST** search of [ILVTDPSVLGPLTR](#)

(Parameters: blastp, nr protein database, expect=20000, no filter, PAM30)

Other BLAST [web gateways](#)

### All matches to this query

| Score | Mr(calc)  | Delta   | Sequence                       |
|-------|-----------|---------|--------------------------------|
| 31.8  | 1594.8930 | -0.0024 | <a href="#">ILVTDPSVLGPLTR</a> |
| 0.3   | 1594.8912 | -0.0005 | <a href="#">KLYLVYSFFFLR</a>   |
| 0.3   | 1594.8939 | -0.0032 | <a href="#">KLCLAFSAMGKIIK</a> |
| 0.1   | 1594.8885 | 0.0022  | <a href="#">HIPHIRFYKAWK</a>   |

Mascot: <http://www.matrixscience.com/>

## Peptide View

MS/MS Fragmentation of **DIAVQGNVDPGVLFQSK**

Found in **AT2G40490.1** in **TAIR\_Arabidopsis**, Symbols: HEME2 | HEME2; uroporphyrinogen decarboxylase | chr2:16920039-16922066

FORWARD

Match to Query 8000: 1734.824672 from(868.419612,2+) index(8081)

Title: Elution from: 71.490 to 71.490 scan no 10796 cid35.00 polarity:+

Data file 0-2\_3.mgf

Click mouse within plot area to zoom in by factor of two about that point

Or,   to  Da

Label all possible matches  Label matches used for scoring

Show Y-axis

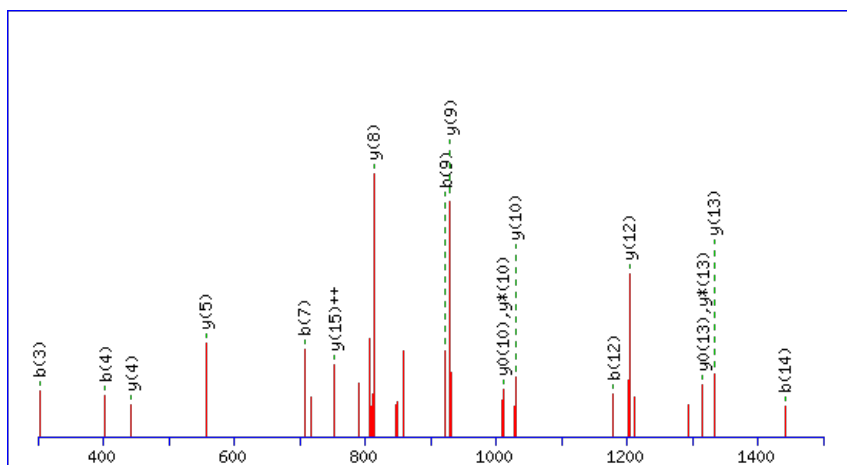

Monoisotopic mass of neutral peptide  $M_r(\text{calc})$ : 1734.8297

Fixed modifications: Carbamidomethyl (C) (apply to specified residues or termini only)

Ions Score: 67 Expect: 1.4e-006

Matches : 18/182 fragment ions using 18 most intense peaks ([help](#))

| #  | b                | b <sup>++</sup> | b*        | b <sup>*++</sup> | b <sup>0</sup> | b <sup>0++</sup> | Seq. | y                | y <sup>++</sup> | y*               | y <sup>*++</sup> | y <sup>0</sup>   | y <sup>0++</sup> | #  |
|----|------------------|-----------------|-----------|------------------|----------------|------------------|------|------------------|-----------------|------------------|------------------|------------------|------------------|----|
| 1  | 117.0313         | 59.0193         |           |                  | 99.0207        | 50.0140          | D    |                  |                 |                  |                  |                  |                  | 17 |
| 2  | 231.1124         | 116.0598        |           |                  | 213.1018       | 107.0545         | I    | 1619.8130        | 810.4101        | 1601.7894        | 801.3983         | 1601.8024        | 801.4049         | 16 |
| 3  | <b>303.1465</b>  | 152.0769        |           |                  | 285.1359       | 143.0716         | A    | 1505.7319        | <b>753.3696</b> | 1487.7083        | 744.3578         | 1487.7213        | 744.3643         | 15 |
| 4  | <b>403.2120</b>  | 202.1096        |           |                  | 385.2014       | 193.1043         | V    | 1433.6977        | 717.3525        | 1415.6742        | 708.3407         | 1415.6872        | 708.3472         | 14 |
| 5  | 533.2646         | 267.1359        | 515.2410  | 258.1241         | 515.2540       | 258.1307         | Q    | <b>1333.6323</b> | 667.3198        | <b>1315.6087</b> | 658.3080         | <b>1315.6217</b> | 658.3145         | 13 |
| 6  | 591.2831         | 296.1452        | 573.2595  | 287.1334         | 573.2725       | 287.1399         | G    | <b>1203.5797</b> | 602.2935        | 1185.5561        | 593.2817         | 1185.5691        | 593.2882         | 12 |
| 7  | <b>707.3201</b>  | 354.1637        | 689.2965  | 345.1519         | 689.3095       | 345.1584         | N    | 1145.5612        | 573.2842        | 1127.5376        | 564.2724         | 1127.5506        | 564.2789         | 11 |
| 8  | 807.3855         | 404.1964        | 789.3620  | 395.1846         | 789.3750       | 395.1911         | V    | <b>1029.5242</b> | 515.2657        | <b>1011.5006</b> | 506.2539         | <b>1011.5136</b> | 506.2604         | 10 |
| 9  | <b>923.4095</b>  | 462.2084        | 905.3859  | 453.1966         | 905.3990       | 453.2031         | D    | <b>929.4587</b>  | 465.2330        | 911.4351         | 456.2212         | 911.4481         | 456.2277         | 9  |
| 10 | 1021.4593        | 511.2333        | 1003.4357 | 502.2215         | 1003.4488      | 502.2280         | P    | <b>813.4347</b>  | 407.2210        | 795.4111         | 398.2092         | 795.4242         | 398.2157         | 8  |
| 11 | 1079.4778        | 540.2425        | 1061.4542 | 531.2308         | 1061.4673      | 531.2373         | G    | 715.3849         | 358.1961        | 697.3613         | 349.1843         | 697.3744         | 349.1908         | 7  |
| 12 | <b>1179.5433</b> | 590.2753        | 1161.5197 | 581.2635         | 1161.5327      | 581.2700         | V    | 657.3664         | 329.1869        | 639.3428         | 320.1751         | 639.3559         | 320.1816         | 6  |
| 13 | 1293.6244        | 647.3158        | 1275.6008 | 638.3040         | 1275.6138      | 638.3105         | L    | <b>557.3010</b>  | 279.1541        | 539.2774         | 270.1423         | 539.2904         | 270.1488         | 5  |
| 14 | <b>1441.6898</b> | 721.3485        | 1423.6662 | 712.3368         | 1423.6793      | 712.3433         | F    | <b>443.2199</b>  | 222.1136        | 425.1963         | 213.1018         | 425.2093         | 213.1083         | 4  |
| 15 | 1499.7083        | 750.3578        | 1481.6847 | 741.3460         | 1481.6977      | 741.3525         | G    | 295.1544         | 148.0809        | 277.1309         | 139.0691         | 277.1439         | 139.0756         | 3  |
| 16 | 1587.7374        | 794.3723        | 1569.7138 | 785.3605         | 1569.7268      | 785.3670         | S    | 237.1359         | 119.0716        | 219.1124         | 110.0598         | 219.1254         | 110.0663         | 2  |
| 17 |                  |                 |           |                  |                |                  | K    | 149.1069         | 75.0571         | 131.0833         | 66.0453          |                  |                  | 1  |

# AT2G40490.1

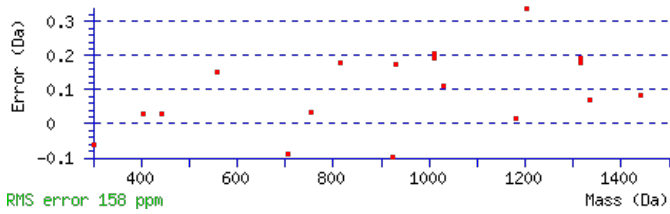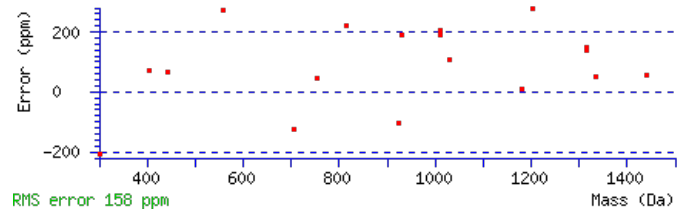

NCBI **BLAST** search of [DIAVOGNVDPGVLEFGSK](#)  
(Parameters: blastp, nr protein database, expect=20000, no filter, PAM30)  
Other BLAST [web gateways](#)

## All matches to this query

| Score | Mr(calc)  | Delta   | Sequence                           |
|-------|-----------|---------|------------------------------------|
| 67.0  | 1734.8297 | -0.0050 | <a href="#">DIAVOGNVDPGVLEFGSK</a> |
| 0.9   | 1734.8274 | -0.0028 | <a href="#">VEVEDKNVLOISGER</a>    |

Mascot: <http://www.matrixscience.com/>

**Peptide View**MS/MS Fragmentation of **NIVEQAAIR**Found in **AT2G40510.1** in **TAIR\_Arabidopsis**, Symbols: | 40S ribosomal protein S26 (RPS26A) | chr2:16925584-16926701 FORWARD

Match to Query 2880: 1026.525782 from(514.270167,2+) index(2771)

Title: Elution from: 29.232 to 29.232 scan no 3473 cid35.00 polarity:+

Data file 0-1\_1.mgf

Click mouse within plot area to zoom in by factor of two about that point

Or,   to  Da Label all possible matches  Label matches used for scoring Show Y-axis 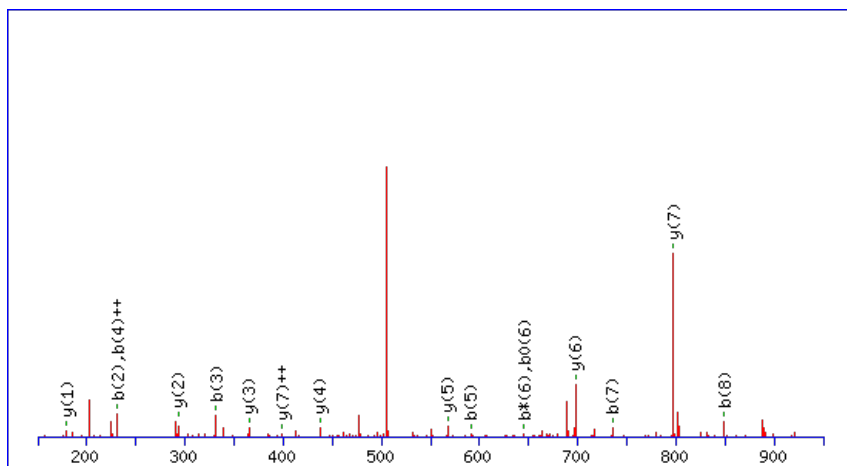Monoisotopic mass of neutral peptide **Mr(calc)**: 1026.5250

Fixed modifications: Carbamidomethyl (C) (apply to specified residues or termini only)

Ions Score: 43 **Expect**: 0.00037Matches : 16/80 fragment ions using 32 most intense peaks ([help](#))

| # | b               | b <sup>++</sup> | b*              | b <sup>+++</sup> | b <sup>0</sup>  | b <sup>0++</sup> | Seq. | y               | y <sup>++</sup> | y*       | y <sup>+++</sup> | y <sup>0</sup> | y <sup>0++</sup> | # |
|---|-----------------|-----------------|-----------------|------------------|-----------------|------------------|------|-----------------|-----------------|----------|------------------|----------------|------------------|---|
| 1 | 117.0443        | 59.0258         | 99.0207         | 50.0140          |                 |                  | N    |                 |                 |          |                  |                |                  | 9 |
| 2 | <b>231.1254</b> | 116.0663        | 213.1018        | 107.0545         |                 |                  | I    | 911.4953        | 456.2513        | 893.4717 | 447.2395         | 893.4847       | 447.2460         | 8 |
| 3 | <b>331.1908</b> | 166.0990        | 313.1672        | 157.0873         |                 |                  | V    | <b>797.4142</b> | <b>399.2107</b> | 779.3906 | 390.1990         | 779.4036       | 390.2055         | 7 |
| 4 | 461.2304        | <b>231.1189</b> | 443.2069        | 222.1071         | 443.2199        | 222.1136         | E    | <b>697.3488</b> | 349.1780        | 679.3252 | 340.1662         | 679.3382       | 340.1727         | 6 |
| 5 | <b>591.2831</b> | 296.1452        | 573.2595        | 287.1334         | 573.2725        | 287.1399         | Q    | <b>567.3091</b> | 284.1582        | 549.2856 | 275.1464         |                |                  | 5 |
| 6 | 663.3172        | 332.1623        | <b>645.2937</b> | 323.1505         | <b>645.3067</b> | 323.1570         | A    | <b>437.2565</b> | 219.1319        | 419.2329 | 210.1201         |                |                  | 4 |
| 7 | <b>735.3514</b> | 368.1793        | 717.3278        | 359.1675         | 717.3408        | 359.1741         | A    | <b>365.2223</b> | 183.1148        | 347.1988 | 174.1030         |                |                  | 3 |
| 8 | <b>849.4325</b> | 425.2199        | 831.4089        | 416.2081         | 831.4219        | 416.2146         | I    | <b>293.1882</b> | 147.0977        | 275.1646 | 138.0859         |                |                  | 2 |
| 9 |                 |                 |                 |                  |                 |                  | R    | <b>179.1071</b> | 90.0572         | 161.0835 | 81.0454          |                |                  | 1 |

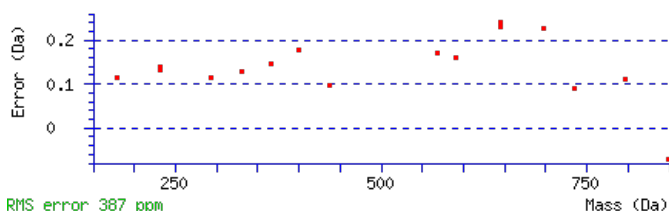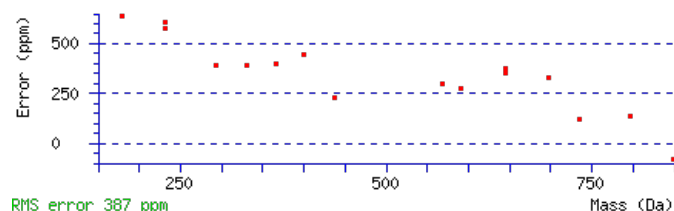NCBI **BLAST** search of [NIVEQAAIR](#)

(Parameters: blastp, nr protein database, expect=20000, no filter, PAM30)

Other BLAST [web gateways](#)**All matches to this query**

| Score | Mr(calc)  | Delta  | Sequence                  |
|-------|-----------|--------|---------------------------|
| 42.8  | 1026.5250 | 0.0008 | <a href="#">NIVEQAAIR</a> |



## AT2G40510.1

|     |           |         |                            |
|-----|-----------|---------|----------------------------|
| 8.5 | 1026.5277 | -0.0019 | <a href="#">NLNQPRIR</a>   |
| 7.1 | 1026.5250 | 0.0008  | <a href="#">GGLTVPSNLR</a> |
| 6.9 | 1026.5250 | 0.0007  | <a href="#">NLDASKPLR</a>  |
| 6.9 | 1026.5250 | 0.0008  | <a href="#">VKVNSVDPR</a>  |
| 4.1 | 1026.5250 | 0.0008  | <a href="#">EQLLNQLR</a>   |
| 3.3 | 1026.5273 | -0.0015 | <a href="#">NLEIWLAR</a>   |
| 3.3 | 1026.5250 | 0.0008  | <a href="#">VEQGLQLAR</a>  |
| 2.8 | 1026.5250 | 0.0008  | <a href="#">QQLQDIIR</a>   |
| 0.3 | 1026.5250 | 0.0008  | <a href="#">NGELQLALR</a>  |

Mascot: <http://www.matrixscience.com/>

**Peptide View**MS/MS Fragmentation of **TALIDMYFK**Found in **AT2G40720.1** in **TAIR\_Arabidopsis**, Symbols: | pentatricopeptide (PPR) repeat-containing protein | chr2:16994347-16996929  
FORWARD

Match to Query 3136: 1110.530516 from(556.272534,2+) index(3641)

Title: Elution from: 37.759 to 37.759 scan no 4675 cid35.00 polarity:+

Data file D12h-2\_1.mgf

Click mouse within plot area to zoom in by factor of two about that point

Or,   to  Da Label all possible matches  Label matches used for scoring Show Y-axis 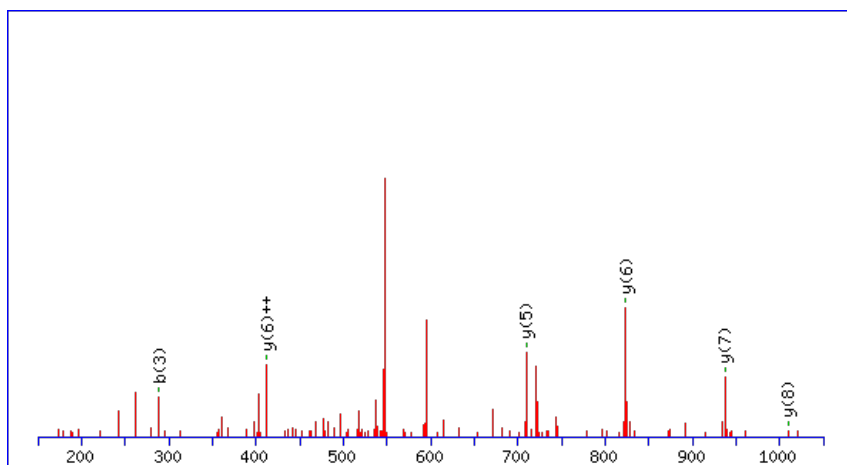

Monoisotopic mass of neutral peptide Mr(calc): 1110.5280

Fixed modifications: Carbamidomethyl (C) (apply to specified residues or termini only)

Ions Score: 22 Expect: 0.039

Matches : 6/72 fragment ions using 9 most intense peaks ([help](#))

| # | b               | b <sup>++</sup> | b <sup>0</sup> | b <sup>0++</sup> | Seq. | y                | y <sup>++</sup> | y*       | y <sup>*++</sup> | y <sup>0</sup> | y <sup>0++</sup> | # |
|---|-----------------|-----------------|----------------|------------------|------|------------------|-----------------|----------|------------------|----------------|------------------|---|
| 1 | 103.0520        | 52.0296         | 85.0414        | 43.0244          | T    |                  |                 |          |                  |                |                  | 9 |
| 2 | 175.0861        | 88.0467         | 157.0756       | 79.0414          | A    | <b>1009.4905</b> | 505.2489        | 991.4669 | 496.2371         | 991.4800       | 496.2436         | 8 |
| 3 | <b>289.1672</b> | 145.0873        | 271.1567       | 136.0820         | L    | <b>937.4564</b>  | 469.2318        | 919.4328 | 460.2200         | 919.4458       | 460.2265         | 7 |
| 4 | 403.2483        | 202.1278        | 385.2378       | 193.1225         | I    | <b>823.3753</b>  | <b>412.1913</b> | 805.3517 | 403.1795         | 805.3647       | 403.1860         | 6 |
| 5 | 519.2723        | 260.1398        | 501.2617       | 251.1345         | D    | <b>709.2942</b>  | 355.1507        | 691.2706 | 346.1389         | 691.2836       | 346.1454         | 5 |
| 6 | 651.3098        | 326.1586        | 633.2993       | 317.1533         | M    | 593.2702         | 297.1387        | 575.2466 | 288.1269         |                |                  | 4 |
| 7 | 815.3702        | 408.1887        | 797.3596       | 399.1835         | Y    | 461.2327         | 231.1200        | 443.2091 | 222.1082         |                |                  | 3 |
| 8 | 963.4356        | 482.2215        | 945.4251       | 473.2162         | F    | 297.1723         | 149.0898        | 279.1487 | 140.0780         |                |                  | 2 |
| 9 |                 |                 |                |                  | K    | 149.1069         | 75.0571         | 131.0833 | 66.0453          |                |                  | 1 |

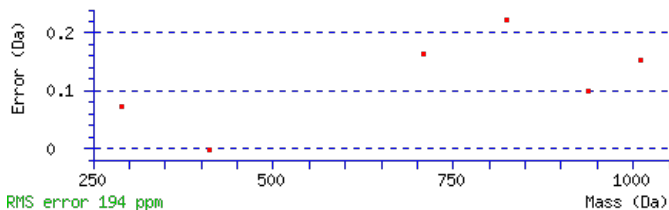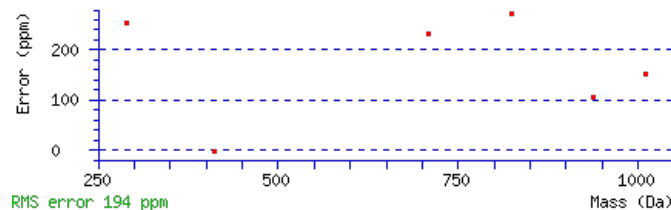NCBI **BLAST** search of **TALIDMYFK**

(Parameters: blastp, nr protein database, expect=20000, no filter, PAM30)

Other BLAST [web gateways](#)**All matches to this query**

| Score | Mr(calc) | Delta | Sequence |
|-------|----------|-------|----------|
|       |          |       |          |

**AT2G40720.1**

|      |           |         |                            |
|------|-----------|---------|----------------------------|
| 21.9 | 1110.5280 | 0.0026  | <a href="#">TALIDMYFK</a>  |
| 8.1  | 1110.5331 | -0.0026 | <a href="#">EDLKEVTHK</a>  |
| 5.0  | 1110.5331 | -0.0026 | <a href="#">GDIAEILDPR</a> |
| 2.4  | 1110.5306 | -0.0001 | <a href="#">VMFNTAFIR</a>  |
| 1.2  | 1110.5284 | 0.0021  | <a href="#">ATLCSRYVK</a>  |
| 0.8  | 1110.5331 | -0.0026 | <a href="#">TGDVVTEHK</a>  |
| 0.3  | 1110.5284 | 0.0021  | <a href="#">MHPSALAQVK</a> |

**Mascot:** <http://www.matrixscience.com/>

**Peptide View**MS/MS Fragmentation of **LLSENFSQLDTTK**

Found in **AT2G41530.1** in **TAIR\_Arabidopsis**, Symbols: ATSEFGH | ATSEFGH (ARABIDOPSIS THALIANA S-FORMYLGLUTATHIONE HYDROLASE); S-formylglutathione hydrolase/ hydrolase, acting on ester bonds | chr2:17330734-17332508 REVERSE

Match to Query 6269: 1510.706390 from(756.360471,2+) index(5556)

Title: Elution from: 49.568 to 49.568 scan no 7044 cid35.00 polarity:+

Data file D12h-3\_2.mgf

Click mouse within plot area to zoom in by factor of two about that point

Or,   to  Da

Label all possible matches  Label matches used for scoring

Show Y-axis

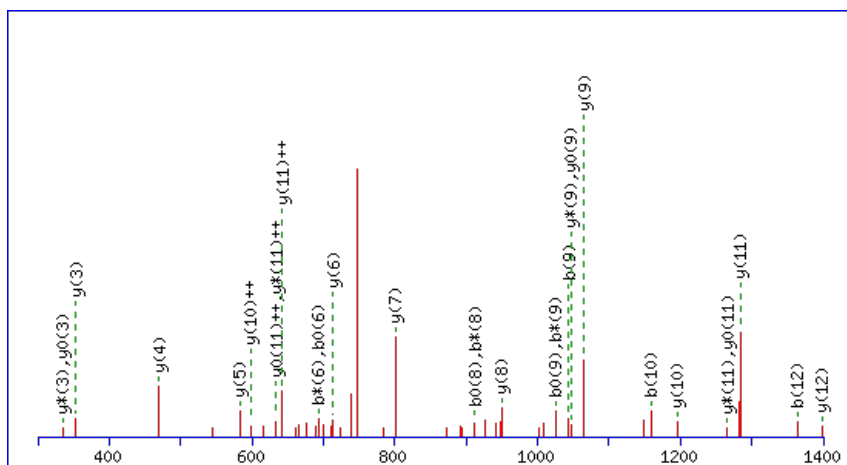

**Monoisotopic mass of neutral peptide Mr(calc):** 1510.7091

**Fixed modifications:** Carbamidomethyl (C) (apply to specified residues or termini only)

**Ions Score:** 95 **Expect:** 2.7e-009

**Matches:** 29/130 fragment ions using 30 most intense peaks ([help](#))

| #  | b                | b <sup>++</sup> | b*               | b* <sup>++</sup> | b <sup>0</sup>   | b <sup>0++</sup> | Seq. | y                | y <sup>++</sup> | y*               | y* <sup>++</sup> | y <sup>0</sup>   | y <sup>0++</sup> | #  |
|----|------------------|-----------------|------------------|------------------|------------------|------------------|------|------------------|-----------------|------------------|------------------|------------------|------------------|----|
| 1  | 115.0884         | 58.0478         |                  |                  |                  |                  | L    |                  |                 |                  |                  |                  |                  | 13 |
| 2  | 229.1695         | 115.0884        |                  |                  |                  |                  | L    | <b>1397.6353</b> | 699.3213        | 1379.6117        | 690.3095         | 1379.6248        | 690.3160         | 12 |
| 3  | 317.1985         | 159.1029        |                  |                  | 299.1880         | 150.0976         | S    | <b>1283.5542</b> | <b>642.2808</b> | <b>1265.5306</b> | <b>633.2690</b>  | <b>1265.5437</b> | <b>633.2755</b>  | 11 |
| 4  | 447.2382         | 224.1227        |                  |                  | 429.2276         | 215.1174         | E    | <b>1195.5252</b> | <b>598.2662</b> | 1177.5016        | 589.2544         | 1177.5146        | 589.2609         | 10 |
| 5  | 563.2752         | 282.1412        | 545.2516         | 273.1294         | 545.2646         | 273.1359         | N    | <b>1065.4855</b> | 533.2464        | <b>1047.4619</b> | 524.2346         | <b>1047.4750</b> | 524.2411         | 9  |
| 6  | 711.3406         | 356.1739        | <b>693.3170</b>  | 347.1622         | <b>693.3300</b>  | 347.1687         | F    | <b>949.4485</b>  | 475.2279        | 931.4250         | 466.2161         | 931.4380         | 466.2226         | 8  |
| 7  | 799.3697         | 400.1885        | 781.3461         | 391.1767         | 781.3591         | 391.1832         | S    | <b>801.3831</b>  | 401.1952        | 783.3595         | 392.1834         | 783.3725         | 392.1899         | 7  |
| 8  | 929.4223         | 465.2148        | <b>911.3987</b>  | 456.2030         | <b>911.4118</b>  | 456.2095         | Q    | <b>713.3540</b>  | 357.1807        | 695.3304         | 348.1689         | 695.3435         | 348.1754         | 6  |
| 9  | <b>1043.5034</b> | 522.2553        | <b>1025.4798</b> | 513.2436         | <b>1025.4929</b> | 513.2501         | L    | <b>583.3014</b>  | 292.1543        | 565.2778         | 283.1425         | 565.2908         | 283.1490         | 5  |
| 10 | <b>1159.5274</b> | 580.2673        | 1141.5038        | 571.2555         | 1141.5168        | 571.2621         | D    | <b>469.2203</b>  | 235.1138        | 451.1967         | 226.1020         | 451.2097         | 226.1085         | 4  |
| 11 | 1261.5721        | 631.2897        | 1243.5485        | 622.2779         | 1243.5615        | 622.2844         | T    | <b>353.1963</b>  | 177.1018        | <b>335.1727</b>  | 168.0900         | <b>335.1857</b>  | 168.0965         | 3  |
| 12 | <b>1363.6168</b> | 682.3121        | 1345.5932        | 673.3003         | 1345.6063        | 673.3068         | T    | 251.1516         | 126.0794        | 233.1280         | 117.0676         | 233.1410         | 117.0741         | 2  |
| 13 |                  |                 |                  |                  |                  |                  | K    | 149.1069         | 75.0571         | 131.0833         | 66.0453          |                  |                  | 1  |

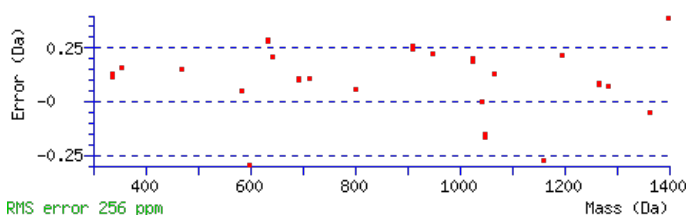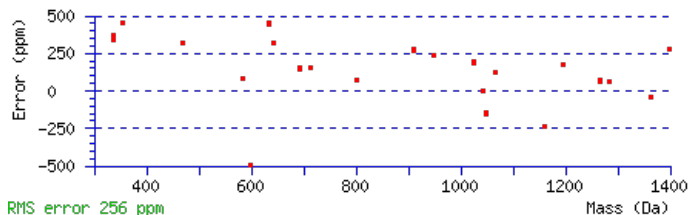

NCBI **BLAST** search of **LLSENFSQLDTTK**

(Parameters: blastp, nr protein database, expect=20000, no filter, PAM30)

# AT2G41530.1

Other BLAST [web gateways](#)

## All matches to this query

| Score | Mr(calc)  | Delta   | Sequence                         |
|-------|-----------|---------|----------------------------------|
| 95.4  | 1510.7091 | -0.0027 | <a href="#">LLENFSQLDTTK</a>     |
| 7.3   | 1510.7044 | 0.0020  | <a href="#">MLEDQVAYLLQR</a>     |
| 7.1   | 1510.7053 | 0.0011  | <a href="#">KIEWACLMKMGK</a>     |
| 5.8   | 1510.7100 | -0.0036 | <a href="#">LLEVACSM LGAF GK</a> |
| 3.9   | 1510.7044 | 0.0020  | <a href="#">YSSVGLLAPNMQAK</a>   |
| 3.6   | 1510.7048 | 0.0016  | <a href="#">QCSSLVERLRDK</a>     |
| 3.4   | 1510.7048 | 0.0016  | <a href="#">VTCRQVAVAGTNSK</a>   |
| 1.2   | 1510.7044 | 0.0020  | <a href="#">ACSTNGVTTF LVPK</a>  |
| 0.4   | 1510.7077 | -0.0014 | <a href="#">VTMEDMSTVVVKR</a>    |
| 0.2   | 1510.7100 | -0.0036 | <a href="#">MKMEGISEKWK</a>      |

Mascot: <http://www.matrixscience.com/>

**Peptide View**MS/MS Fragmentation of **SHPEAVVKTVVK**Found in **AT2G41550.1** in **TAIR\_Arabidopsis**, Symbols: | transcription termination factor | chr2:17336164-17337908 REVERSE

Match to Query 4732: 1308.696888 from(437.239572,3+) index(4485)

Title: Elution from: 41.163 to 41.163 scan no 5621 cid35.00 polarity:+

Data file D12h-3\_2.mgf

Click mouse within plot area to zoom in by factor of two about that point

Or,   to  Da Label all possible matches  Label matches used for scoring Show Y-axis 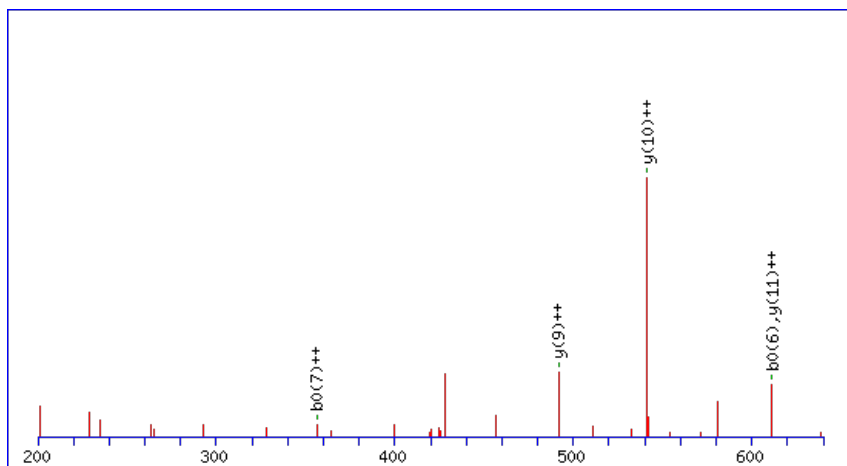Monoisotopic mass of neutral peptide  $M_r(\text{calc})$ : 1308.6978

Fixed modifications: Carbamidomethyl (C) (apply to specified residues or termini only)

Ions Score: 18 Expect: 0.046

Matches : 5/112 fragment ions using 5 most intense peaks ([help](#))

| #  | b         | b <sup>++</sup> | b*        | b <sup>*++</sup> | b <sup>0</sup> | b <sup>0++</sup> | Seq. | y         | y <sup>++</sup> | y*        | y <sup>*++</sup> | y <sup>0</sup> | y <sup>0++</sup> | #  |
|----|-----------|-----------------|-----------|------------------|----------------|------------------|------|-----------|-----------------|-----------|------------------|----------------|------------------|----|
| 1  | 89.0363   | 45.0218         |           |                  | 71.0258        | 36.0165          | S    |           |                 |           |                  |                |                  | 12 |
| 2  | 229.0864  | 115.0468        |           |                  | 211.0758       | 106.0415         | H    | 1221.6760 | 611.3416        | 1203.6524 | 602.3299         | 1203.6654      | 602.3364         | 11 |
| 3  | 327.1362  | 164.0717        |           |                  | 309.1256       | 155.0664         | P    | 1081.6260 | 541.3166        | 1063.6024 | 532.3048         | 1063.6154      | 532.3114         | 10 |
| 4  | 457.1758  | 229.0915        |           |                  | 439.1652       | 220.0862         | E    | 983.5762  | 492.2917        | 965.5526  | 483.2799         | 965.5656       | 483.2865         | 9  |
| 5  | 529.2099  | 265.1086        |           |                  | 511.1994       | 256.1033         | A    | 853.5366  | 427.2719        | 835.5130  | 418.2601         | 835.5260       | 418.2666         | 8  |
| 6  | 629.2754  | 315.1413        |           |                  | 611.2648       | 306.1360         | V    | 781.5024  | 391.2548        | 763.4788  | 382.2431         | 763.4919       | 382.2496         | 7  |
| 7  | 729.3408  | 365.1741        |           |                  | 711.3303       | 356.1688         | V    | 681.4370  | 341.2221        | 663.4134  | 332.2103         | 663.4264       | 332.2168         | 6  |
| 8  | 859.4299  | 430.2186        | 841.4063  | 421.2068         | 841.4193       | 421.2133         | K    | 581.3715  | 291.1894        | 563.3479  | 282.1776         | 563.3610       | 282.1841         | 5  |
| 9  | 961.4746  | 481.2409        | 943.4510  | 472.2291         | 943.4640       | 472.2356         | T    | 451.2825  | 226.1449        | 433.2589  | 217.1331         | 433.2719       | 217.1396         | 4  |
| 10 | 1061.5400 | 531.2737        | 1043.5164 | 522.2619         | 1043.5295      | 522.2684         | V    | 349.2378  | 175.1225        | 331.2142  | 166.1107         |                |                  | 3  |
| 11 | 1161.6055 | 581.3064        | 1143.5819 | 572.2946         | 1143.5949      | 572.3011         | V    | 249.1723  | 125.0898        | 231.1487  | 116.0780         |                |                  | 2  |
| 12 |           |                 |           |                  |                |                  | K    | 149.1069  | 75.0571         | 131.0833  | 66.0453          |                |                  | 1  |

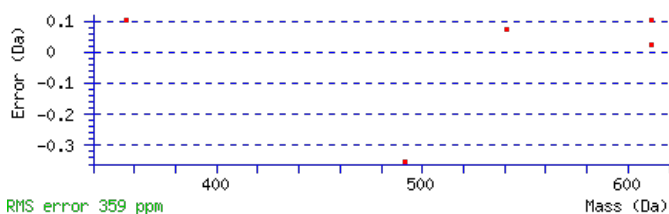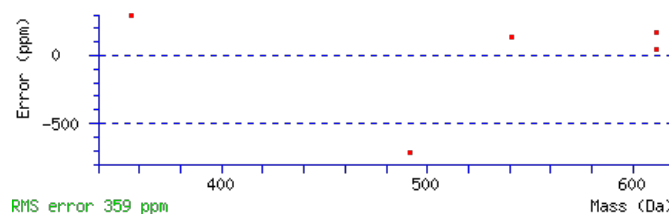NCBI **BLAST** search of **SHPEAVVKTVVK**

(Parameters: blastp, nr protein database, expect=20000, no filter, PAM30)

Other BLAST [web gateways](#)**All matches to this query**

## AT2G41550.1

| Score | Mr(calc)  | Delta   | Sequence                     |
|-------|-----------|---------|------------------------------|
| 17.7  | 1308.6978 | -0.0009 | <a href="#">SHPEAVVKTVVK</a> |
| 2.5   | 1308.6931 | 0.0038  | <a href="#">ILGPRGLMPNPK</a> |
| 1.9   | 1308.6964 | 0.0004  | <a href="#">MLKMLSILRR</a>   |
| 0.4   | 1308.6974 | -0.0005 | <a href="#">AVELYSVIYIK</a>  |
| 0.2   | 1308.7000 | -0.0031 | <a href="#">IIFSLFAAIGSR</a> |

Mascot: <http://www.matrixscience.com/>

**Peptide View**MS/MS Fragmentation of **VQERQEGSK**

Found in **AT2G41560.1** in **TAIR\_Arabidopsis**, Symbols: ACA4 | ACA4 (AUTO-INHIBITED CA(2+)-ATPASE, ISOFORM 4); calcium-transporting ATPase/ calmodulin binding | chr2:17339334-17344257 REVERSE

Match to Query 3027: 1074.487944 from(538.251248,2+) index(5488)

Title: Elution from: 49.396 to 49.396 scan no 6958 cid35.00 polarity:+

Data file C7-1\_3.mgf

Click mouse within plot area to zoom in by factor of two about that point

Or,   to  Da

Label all possible matches  Label matches used for scoring

Show Y-axis

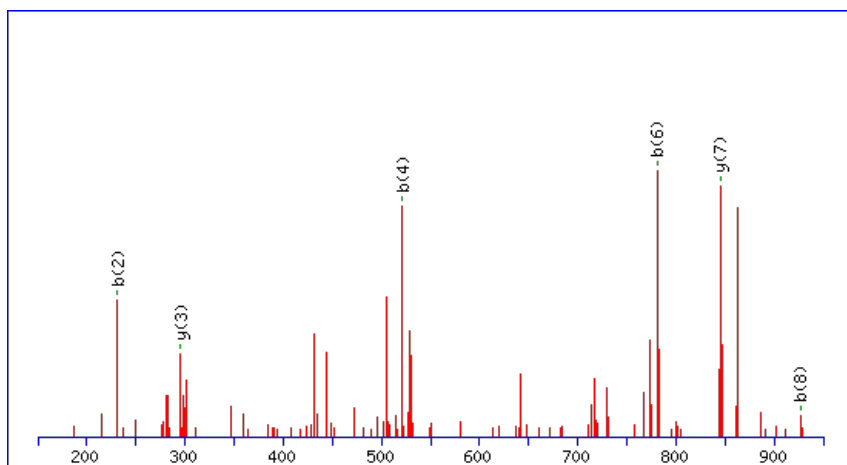

**Monoisotopic mass of neutral peptide Mr(calc):** 1074.4864

**Fixed modifications:** Carbamidomethyl (C) (apply to specified residues or termini only)

**Ions Score:** 27 **Expect:** 0.019

**Matches:** 6/88 fragment ions using 8 most intense peaks ([help](#))

| # | b               | b <sup>++</sup> | b*       | b <sup>*++</sup> | b <sup>0</sup> | b <sup>0++</sup> | Seq. | y               | y <sup>++</sup> | y*       | y <sup>*++</sup> | y <sup>0</sup> | y <sup>0++</sup> | # |
|---|-----------------|-----------------|----------|------------------|----------------|------------------|------|-----------------|-----------------|----------|------------------|----------------|------------------|---|
| 1 | 101.0727        | 51.0400         |          |                  |                |                  | V    |                 |                 |          |                  |                |                  | 9 |
| 2 | <b>231.1254</b> | 116.0663        | 213.1018 | 107.0545         |                |                  | Q    | 975.4282        | 488.2178        | 957.4047 | 479.2060         | 957.4177       | 479.2125         | 8 |
| 3 | 361.1650        | 181.0861        | 343.1414 | 172.0743         | 343.1544       | 172.0809         | E    | <b>845.3756</b> | 423.1914        | 827.3520 | 414.1796         | 827.3650       | 414.1862         | 7 |
| 4 | <b>521.2543</b> | 261.1308        | 503.2307 | 252.1190         | 503.2437       | 252.1255         | R    | 715.3360        | 358.1716        | 697.3124 | 349.1598         | 697.3254       | 349.1663         | 6 |
| 5 | 651.3069        | 326.1571        | 633.2833 | 317.1453         | 633.2963       | 317.1518         | Q    | 555.2467        | 278.1270        | 537.2231 | 269.1152         | 537.2361       | 269.1217         | 5 |
| 6 | <b>781.3465</b> | 391.1769        | 763.3229 | 382.1651         | 763.3360       | 382.1716         | E    | 425.1941        | 213.1007        | 407.1705 | 204.0889         | 407.1835       | 204.0954         | 4 |
| 7 | 839.3650        | 420.1862        | 821.3414 | 411.1744         | 821.3545       | 411.1809         | G    | <b>295.1544</b> | 148.0809        | 277.1309 | 139.0691         | 277.1439       | 139.0756         | 3 |
| 8 | <b>927.3941</b> | 464.2007        | 909.3705 | 455.1889         | 909.3835       | 455.1954         | S    | 237.1359        | 119.0716        | 219.1124 | 110.0598         | 219.1254       | 110.0663         | 2 |
| 9 |                 |                 |          |                  |                |                  | K    | 149.1069        | 75.0571         | 131.0833 | 66.0453          |                |                  | 1 |

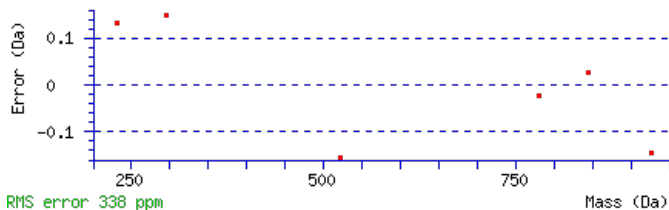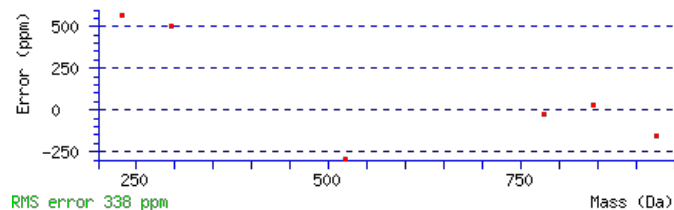

NCBI **BLAST** search of [VQERQEGSK](#)

(Parameters: blastp, nr protein database, expect=20000, no filter, PAM30)

Other BLAST [web gateways](#)

**All matches to this query**

| Score | Mr(calc) | Delta | Sequence |
|-------|----------|-------|----------|
|       |          |       |          |



## AT2G41560.1

|      |           |         |                           |
|------|-----------|---------|---------------------------|
| 27.1 | 1074.4864 | 0.0016  | <a href="#">VQERQEGSK</a> |
| 8.6  | 1074.4861 | 0.0018  | <a href="#">MPTWWGRK</a>  |
| 3.1  | 1074.4893 | -0.0014 | <a href="#">IDDVEKSMK</a> |

**Mascot:** <http://www.matrixscience.com/>

**Peptide View**MS/MS Fragmentation of **FDITLTK**

Found in **AT2G41680.1** in **TAIR\_Arabidopsis**, Symbols: | thioredoxin reductase, putative / NADPH-dependent thioredoxin reductase, putative | chr2:17383427-17386106 REVERSE

Match to Query 1278: 844.440738 from(423.227645,2+) index(4579)

Title: Elution from: 41.782 to 41.782 scan no 5761 cid35.00 polarity:+

Data file C7-3\_3.mgf

Click mouse within plot area to zoom in by factor of two about that point

Or,  to  Da

Label all possible matches  Label matches used for scoring

Show Y-axis

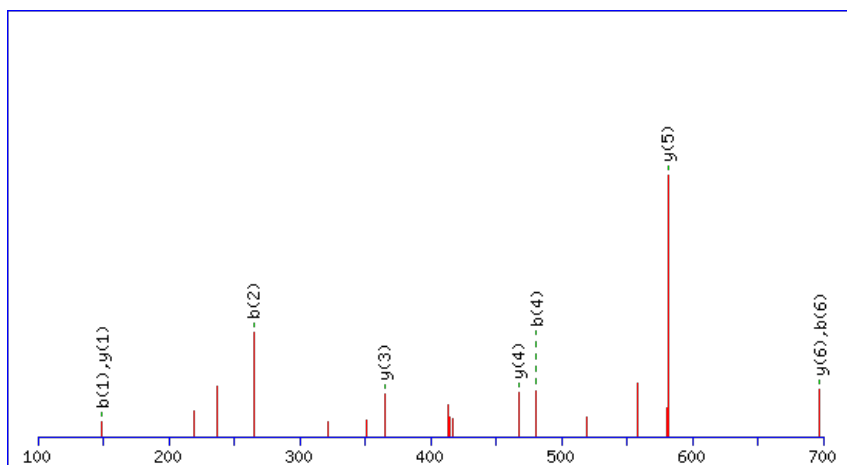

Monoisotopic mass of neutral peptide  $M_r(\text{calc})$ : 844.4406

Fixed modifications: Carbamidomethyl (C) (apply to specified residues or termini only)

Ions Score: 34 Expect: 0.0022

Matches : 9/56 fragment ions using 15 most intense peaks ([help](#))

| # | b        | b <sup>++</sup> | b <sup>0</sup> | b <sup>0++</sup> | Seq. | y        | y <sup>++</sup> | y*       | y <sup>*++</sup> | y <sup>0</sup> | y <sup>0++</sup> | # |
|---|----------|-----------------|----------------|------------------|------|----------|-----------------|----------|------------------|----------------|------------------|---|
| 1 | 149.0727 | 75.0400         |                |                  | F    |          |                 |          |                  |                |                  | 7 |
| 2 | 265.0967 | 133.0520        | 247.0861       | 124.0467         | D    | 697.3825 | 349.1949        | 679.3589 | 340.1831         | 679.3719       | 340.1896         | 6 |
| 3 | 379.1778 | 190.0925        | 361.1672       | 181.0873         | I    | 581.3585 | 291.1829        | 563.3349 | 282.1711         | 563.3479       | 282.1776         | 5 |
| 4 | 481.2225 | 241.1149        | 463.2120       | 232.1096         | T    | 467.2774 | 234.1423        | 449.2538 | 225.1305         | 449.2668       | 225.1371         | 4 |
| 5 | 595.3036 | 298.1554        | 577.2930       | 289.1502         | L    | 365.2327 | 183.1200        | 347.2091 | 174.1082         | 347.2221       | 174.1147         | 3 |
| 6 | 697.3483 | 349.1778        | 679.3378       | 340.1725         | T    | 251.1516 | 126.0794        | 233.1280 | 117.0676         | 233.1410       | 117.0741         | 2 |
| 7 |          |                 |                |                  | K    | 149.1069 | 75.0571         | 131.0833 | 66.0453          |                |                  | 1 |

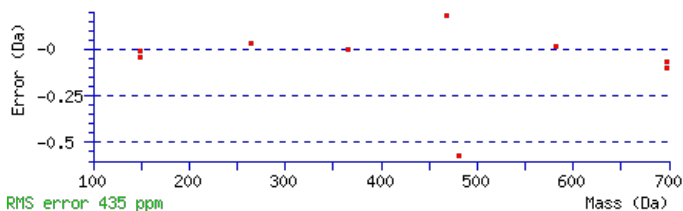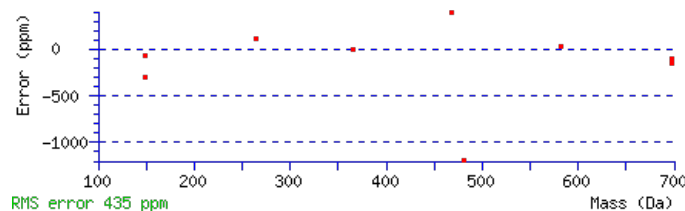NCBI **BLAST** search of **FDITLTK**

(Parameters: blastp, nr protein database, expect=20000, no filter, PAM30)

Other BLAST [web gateways](#)

**All matches to this query**

| Score | $M_r(\text{calc})$ | Delta  | Sequence                |
|-------|--------------------|--------|-------------------------|
| 34.0  | 844.4406           | 0.0001 | <a href="#">FDITLTK</a> |
| 24.1  | 844.4393           | 0.0015 | <a href="#">MMVKVTK</a> |

## AT2G41680.1

|      |          |         |                         |
|------|----------|---------|-------------------------|
| 24.1 | 844.4384 | 0.0023  | <a href="#">SSSTLTK</a> |
| 24.1 | 844.4406 | 0.0001  | <a href="#">TVYLVDK</a> |
| 19.1 | 844.4406 | 0.0001  | <a href="#">SFLEITK</a> |
| 19.1 | 844.4406 | 0.0001  | <a href="#">SFLEITK</a> |
| 18.8 | 844.4406 | 0.0001  | <a href="#">FSEILTK</a> |
| 14.4 | 844.4411 | -0.0003 | <a href="#">QSRTLTK</a> |
| 11.4 | 844.4411 | -0.0003 | <a href="#">DRSIKSK</a> |
| 11.4 | 844.4406 | 0.0001  | <a href="#">TFLLESK</a> |

Mascot: <http://www.matrixscience.com/>

## Peptide View

MS/MS Fragmentation of **TYGFLTPEFWK**Found in **AT2G41840.1** in **TAIR\_Arabidopsis**, Symbols: | 40S ribosomal protein S2 (RPS2C) | chr2:17467094-17468476 REVERSE

Match to Query 5098: 1387.679708 from(694.847130,2+) index(9410)

Title: Elution from: 86.518 to 86.518 scan no 13122 cid35.00 polarity:+

Data file 0-3\_3.mgf

Click mouse within plot area to zoom in by factor of two about that point

Or,   to  Da Label all possible matches  Label matches used for scoring Show Y-axis 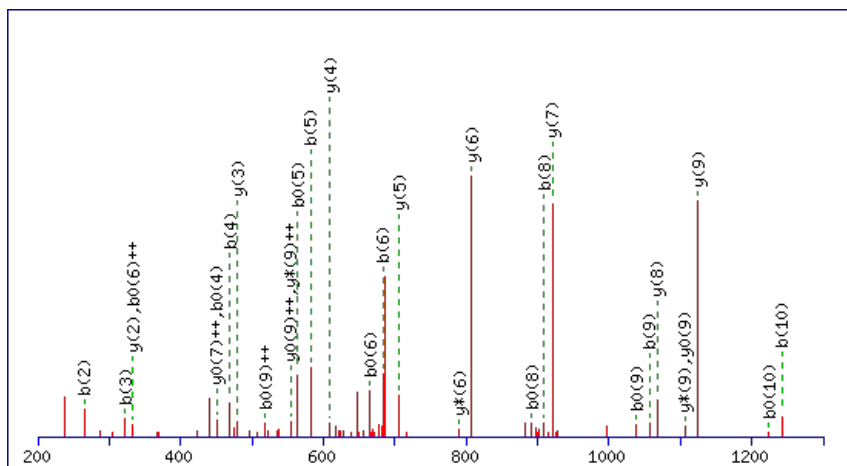Monoisotopic mass of neutral peptide  $M_r(\text{calc})$ : 1387.6812

Fixed modifications: Carbamidomethyl (C) (apply to specified residues or termini only)

Ions Score: 64 Expect: 1.4e-006

Matches : 30/94 fragment ions using 38 most intense peaks ([help](#))

| #  | b                | b <sup>++</sup> | b <sup>0</sup>   | b <sup>0++</sup> | Seq. | y                | y <sup>++</sup> | y*               | y <sup>*++</sup> | y <sup>0</sup>   | y <sup>0++</sup> | #  |
|----|------------------|-----------------|------------------|------------------|------|------------------|-----------------|------------------|------------------|------------------|------------------|----|
| 1  | 102.0550         | 51.5311         | 84.0444          | 42.5258          | T    |                  |                 |                  |                  |                  |                  | 11 |
| 2  | <b>265.1183</b>  | 133.0628        | 247.1077         | 124.0575         | Y    | 1287.6408        | 644.3241        | 1270.6143        | 635.8108         | 1269.6303        | 635.3188         | 10 |
| 3  | <b>322.1397</b>  | 161.5735        | 304.1292         | 152.5682         | G    | <b>1124.5775</b> | 562.7924        | <b>1107.5510</b> | <b>554.2791</b>  | <b>1106.5669</b> | <b>553.7871</b>  | 9  |
| 4  | <b>469.2082</b>  | 235.1077        | <b>451.1976</b>  | 226.1024         | F    | <b>1067.5560</b> | 534.2817        | 1050.5295        | 525.7684         | 1049.5455        | 525.2764         | 8  |
| 5  | <b>582.2922</b>  | 291.6498        | <b>564.2817</b>  | 282.6445         | L    | <b>920.4876</b>  | 460.7475        | 903.4611         | 452.2342         | 902.4771         | <b>451.7422</b>  | 7  |
| 6  | <b>683.3399</b>  | 342.1736        | <b>665.3293</b>  | <b>333.1683</b>  | T    | <b>807.4036</b>  | 404.2054        | <b>790.3770</b>  | 395.6921         | 789.3930         | 395.2001         | 6  |
| 7  | 780.3927         | 390.7000        | 762.3821         | 381.6947         | P    | <b>706.3559</b>  | 353.6816        | 689.3293         | 345.1683         | 688.3453         | 344.6763         | 5  |
| 8  | <b>909.4353</b>  | 455.2213        | <b>891.4247</b>  | 446.2160         | E    | <b>609.3031</b>  | 305.1552        | 592.2766         | 296.6419         | 591.2926         | 296.1499         | 4  |
| 9  | <b>1056.5037</b> | 528.7555        | <b>1038.4931</b> | <b>519.7502</b>  | F    | <b>480.2605</b>  | 240.6339        | 463.2340         | 232.1206         |                  |                  | 3  |
| 10 | <b>1242.5830</b> | 621.7951        | <b>1224.5724</b> | 612.7899         | W    | <b>333.1921</b>  | 167.0997        | 316.1656         | 158.5864         |                  |                  | 2  |
| 11 |                  |                 |                  |                  | K    | 147.1128         | 74.0600         | 130.0863         | 65.5468          |                  |                  | 1  |

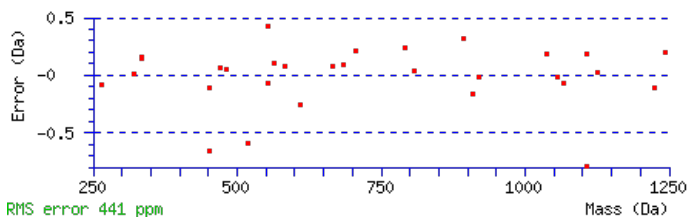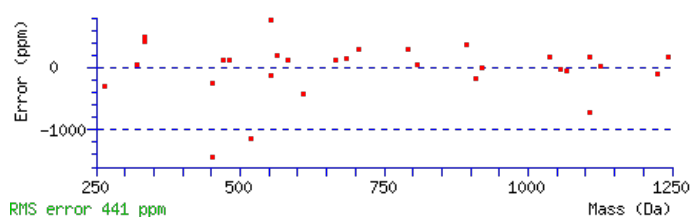NCBI BLAST search of **TYGFLTPEFWK**

(Parameters: blastp, nr protein database, expect=20000, no filter, PAM30)

Other BLAST [web gateways](#)

All matches to this query

AT2G41840.1

| Score | Mr(calc)  | Delta   | Sequence                    |
|-------|-----------|---------|-----------------------------|
| 63.7  | 1387.6812 | -0.0015 | <a href="#">TYGFLTPEFWK</a> |
| 3.3   | 1387.6765 | 0.0032  | <a href="#">AMVNGEEKPLR</a> |

Mascot: <http://www.matrixscience.com/>

**Peptide View**MS/MS Fragmentation of **SALGQAATLQQLPALIK**

Found in **AT2G42130.1** in **TAIR\_Arabidopsis**, Symbols: | Identical to Probable plastid-lipid-associated protein 13, chloroplast precursor (PAP13) [Arabidopsis Thaliana] (GB:Q8S9M1;GB:O48521;GB:Q84X37;GB:Q84X38;GB:Q84X39;GB:Q8GY49); similar to unknown protein [Arabidopsis thaliana] (TAIR:AT3G

Match to Query 8242: 1823.056060 from(912.535306,2+) index(9650)

Title: Elution from: 94.247 to 94.247 scan no 13790 cid35.00 polarity:+

Data file D1d-1-2.mgf

Click mouse within plot area to zoom in by factor of two about that point

Or,  to  Da

Label all possible matches  Label matches used for scoring

Show Y-axis

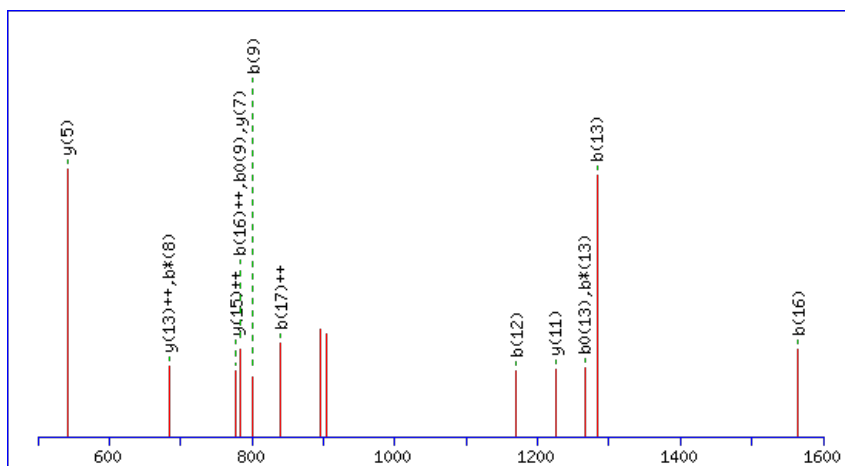

**Monoisotopic mass of neutral peptide Mr(calc):** 1823.0516

**Fixed modifications:** Carbamidomethyl (C) (apply to specified residues or termini only)

**Ions Score:** 38 **Expect:** 0.00015

**Matches:** 15/178 fragment ions using 14 most intense peaks ([help](#))

| #  | b         | b <sup>++</sup> | b <sup>*</sup> | b <sup>*++</sup> | b <sup>0</sup> | b <sup>0++</sup> | Seq. | y         | y <sup>++</sup> | y <sup>*</sup> | y <sup>*++</sup> | y <sup>0</sup> | y <sup>0++</sup> | #  |
|----|-----------|-----------------|----------------|------------------|----------------|------------------|------|-----------|-----------------|----------------|------------------|----------------|------------------|----|
| 1  | 88.0393   | 44.5233         |                |                  | 70.0287        | 35.5180          | S    |           |                 |                |                  |                |                  | 18 |
| 2  | 159.0764  | 80.0418         |                |                  | 141.0659       | 71.0366          | A    | 1737.0269 | 869.0171        | 1720.0004      | 860.5038         | 1719.0163      | 860.0118         | 17 |
| 3  | 272.1605  | 136.5839        |                |                  | 254.1499       | 127.5786         | L    | 1665.9898 | 833.4985        | 1648.9632      | 824.9853         | 1647.9792      | 824.4932         | 16 |
| 4  | 329.1819  | 165.0946        |                |                  | 311.1714       | 156.0893         | G    | 1552.9057 | 776.9565        | 1535.8792      | 768.4432         | 1534.8952      | 767.9512         | 15 |
| 5  | 457.2405  | 229.1239        | 440.2140       | 220.6106         | 439.2300       | 220.1186         | Q    | 1495.8843 | 748.4458        | 1478.8577      | 739.9325         | 1477.8737      | 739.4405         | 14 |
| 6  | 528.2776  | 264.6425        | 511.2511       | 256.1292         | 510.2671       | 255.6372         | A    | 1367.8257 | 684.4165        | 1350.7991      | 675.9032         | 1349.8151      | 675.4112         | 13 |
| 7  | 599.3148  | 300.1610        | 582.2882       | 291.6477         | 581.3042       | 291.1557         | A    | 1296.7886 | 648.8979        | 1279.7620      | 640.3846         | 1278.7780      | 639.8926         | 12 |
| 8  | 700.3624  | 350.6849        | 683.3359       | 342.1716         | 682.3519       | 341.6796         | T    | 1225.7515 | 613.3794        | 1208.7249      | 604.8661         | 1207.7409      | 604.3741         | 11 |
| 9  | 801.4101  | 401.2087        | 784.3836       | 392.6954         | 783.3995       | 392.2034         | T    | 1124.7038 | 562.8555        | 1107.6772      | 554.3422         | 1106.6932      | 553.8502         | 10 |
| 10 | 914.4942  | 457.7507        | 897.4676       | 449.2375         | 896.4836       | 448.7454         | L    | 1023.6561 | 512.3317        | 1006.6295      | 503.8184         |                |                  | 9  |
| 11 | 1042.5528 | 521.7800        | 1025.5262      | 513.2667         | 1024.5422      | 512.7747         | Q    | 910.5720  | 455.7897        | 893.5455       | 447.2764         |                |                  | 8  |
| 12 | 1170.6113 | 585.8093        | 1153.5848      | 577.2960         | 1152.6008      | 576.8040         | Q    | 782.5135  | 391.7604        | 765.4869       | 383.2471         |                |                  | 7  |
| 13 | 1283.6954 | 642.3513        | 1266.6688      | 633.8381         | 1265.6848      | 633.3461         | L    | 654.4549  | 327.7311        | 637.4283       | 319.2178         |                |                  | 6  |
| 14 | 1380.7482 | 690.8777        | 1363.7216      | 682.3644         | 1362.7376      | 681.8724         | P    | 541.3708  | 271.1890        | 524.3443       | 262.6758         |                |                  | 5  |
| 15 | 1451.7853 | 726.3963        | 1434.7587      | 717.8830         | 1433.7747      | 717.3910         | A    | 444.3180  | 222.6627        | 427.2915       | 214.1494         |                |                  | 4  |
| 16 | 1564.8693 | 782.9383        | 1547.8428      | 774.4250         | 1546.8588      | 773.9330         | L    | 373.2809  | 187.1441        | 356.2544       | 178.6308         |                |                  | 3  |
| 17 | 1677.9534 | 839.4803        | 1660.9269      | 830.9671         | 1659.9428      | 830.4751         | I    | 260.1969  | 130.6021        | 243.1703       | 122.0888         |                |                  | 2  |
| 18 |           |                 |                |                  |                |                  | K    | 147.1128  | 74.0600         | 130.0863       | 65.5468          |                |                  | 1  |

AT2G42130.1

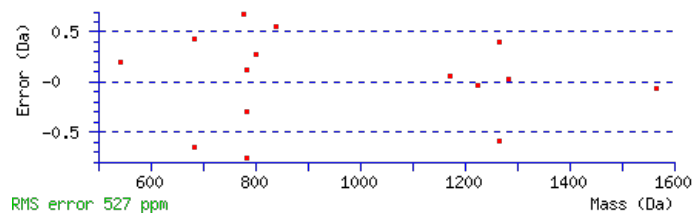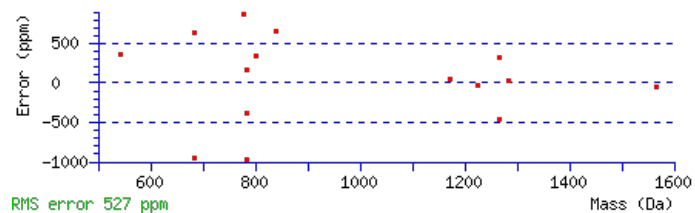

NCBI **BLAST** search of [SALGQAATTLOQLPALIK](#)  
(Parameters: blastp, nr protein database, expect=20000, no filter, PAM30)  
Other BLAST [web gateways](#)

**All matches to this query**

| Score | Mr(calc)  | Delta   | Sequence                           |
|-------|-----------|---------|------------------------------------|
| 38.1  | 1823.0516 | 0.0044  | <a href="#">SALGQAATTLOQLPALIK</a> |
| 7.3   | 1823.0603 | -0.0043 | <a href="#">TGLLVAKAHSLRMWLK</a>   |
| 3.2   | 1823.0516 | 0.0045  | <a href="#">DVKPTNILINEKLQAK</a>   |
| 3.2   | 1823.0516 | 0.0045  | <a href="#">DVKPTNILLNEKLOAK</a>   |

Mascot: <http://www.matrixscience.com/>

## Peptide View

### MS/MS Fragmentation of EDIIQQLHK

Found in **AT2G42370.1** in **TAIR\_Arabidopsis**, Symbols: | similar to unknown protein [Arabidopsis thaliana] (TAIR:AT3G58110.1); similar to hypothetical protein [Vitis vinifera] (GB:CAN63361.1) | chr2:17650412-17652611 FORWARD

Match to Query 3186: 1136.560388 from(569.287470,2+) index(1235)

Title: Elution from: 20.814 to 20.814 scan no 1804 cid35.00 polarity:+

Data file D12h-2\_2.mgf

Click mouse within plot area to zoom in by factor of two about that point

Or,  to  Da

Label all possible matches  Label matches used for scoring

Show Y-axis

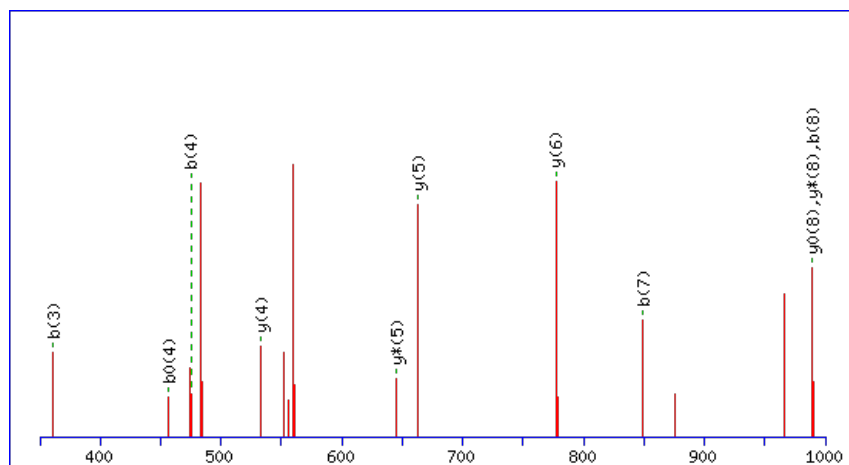

Monoisotopic mass of neutral peptide Mr(calc): 1136.5618

Fixed modifications: Carbamidomethyl (C) (apply to specified residues or termini only)

Ions Score: 23 Expect: 0.03

Matches : 11/74 fragment ions using 20 most intense peaks ([help](#))

| # | b        | b <sup>++</sup> | b*       | b <sup>*++</sup> | b <sup>0</sup> | b <sup>0++</sup> | Seq. | y         | y <sup>++</sup> | y*       | y <sup>*++</sup> | y <sup>0</sup> | y <sup>0++</sup> | # |
|---|----------|-----------------|----------|------------------|----------------|------------------|------|-----------|-----------------|----------|------------------|----------------|------------------|---|
| 1 | 131.0469 | 66.0271         |          |                  | 113.0363       | 57.0218          | E    |           |                 |          |                  |                |                  | 9 |
| 2 | 247.0709 | 124.0391        |          |                  | 229.0603       | 115.0338         | D    | 1007.5295 | 504.2684        | 989.5059 | 495.2566         | 989.5189       | 495.2631         | 8 |
| 3 | 361.1520 | 181.0796        |          |                  | 343.1414       | 172.0743         | I    | 891.5055  | 446.2564        | 873.4819 | 437.2446         |                |                  | 7 |
| 4 | 475.2331 | 238.1202        |          |                  | 457.2225       | 229.1149         | I    | 777.4244  | 389.2158        | 759.4008 | 380.2040         |                |                  | 6 |
| 5 | 605.2857 | 303.1465        | 587.2621 | 294.1347         | 587.2752       | 294.1412         | Q    | 663.3433  | 332.1753        | 645.3197 | 323.1635         |                |                  | 5 |
| 6 | 735.3384 | 368.1728        | 717.3148 | 359.1610         | 717.3278       | 359.1675         | Q    | 533.2906  | 267.1490        | 515.2671 | 258.1372         |                |                  | 4 |
| 7 | 849.4195 | 425.2134        | 831.3959 | 416.2016         | 831.4089       | 416.2081         | L    | 403.2380  | 202.1226        | 385.2144 | 193.1108         |                |                  | 3 |
| 8 | 989.4695 | 495.2384        | 971.4459 | 486.2266         | 971.4589       | 486.2331         | H    | 289.1569  | 145.0821        | 271.1333 | 136.0703         |                |                  | 2 |
| 9 |          |                 |          |                  |                |                  | K    | 149.1069  | 75.0571         | 131.0833 | 66.0453          |                |                  | 1 |

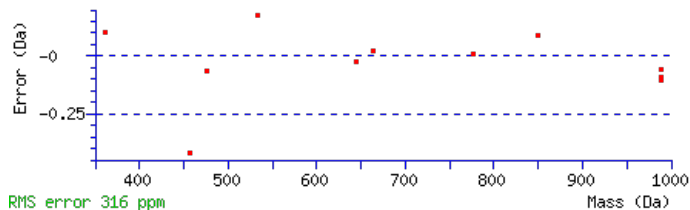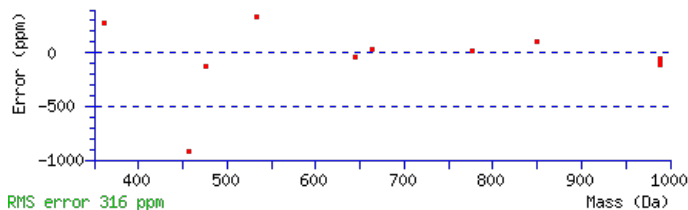

NCBI BLAST search of [EDIIQQLHK](#)

(Parameters: blastp, nr protein database, expect=20000, no filter, PAM30)

Other BLAST [web gateways](#)

All matches to this query

| Score | Mr(calc) | Delta | Sequence |
|-------|----------|-------|----------|
|       |          |       |          |



**AT2G42370.1**

|      |           |         |                             |
|------|-----------|---------|-----------------------------|
| 22.7 | 1136.5618 | -0.0014 | <a href="#">EDIIQQLHK</a>   |
| 2.2  | 1136.5618 | -0.0014 | <a href="#">KKVNDAAASYK</a> |
| 2.2  | 1136.5571 | 0.0033  | <a href="#">LMLGNGRFSK</a>  |
| 2.1  | 1136.5571 | 0.0033  | <a href="#">RTPTMVYVR</a>   |
| 1.5  | 1136.5578 | 0.0026  | <a href="#">MATTMKGLLK</a>  |
| 0.8  | 1136.5571 | 0.0033  | <a href="#">FLSKQNVMR</a>   |
| 0.6  | 1136.5618 | -0.0014 | <a href="#">DGLAKTIYSR</a>  |
| 0.5  | 1136.5578 | 0.0026  | <a href="#">VIEMKSKMK</a>   |
| 0.4  | 1136.5618 | -0.0014 | <a href="#">FVTSITSVNR</a>  |
| 0.2  | 1136.5618 | -0.0014 | <a href="#">EEHNLIGALK</a>  |

**Mascot:** <http://www.matrixscience.com/>

**Peptide View**MS/MS Fragmentation of **AAEFVEGK**Found in **AT2G42530.1** in **TAIR\_Arabidopsis**, Symbols: COR15B | COR15B | chr2:17716269-17716951 REVERSE

Match to Query 1314: 849.422786 from(425.718669,2+) index(782)

Title: Elution from: 13.626 to 13.626 scan no 1136 cid35.00 polarity:+

Data file D12h-1\_2.mgf

Click mouse within plot area to zoom in by factor of two about that point

Or,  to  Da Label all possible matches  Label matches used for scoring Show Y-axis 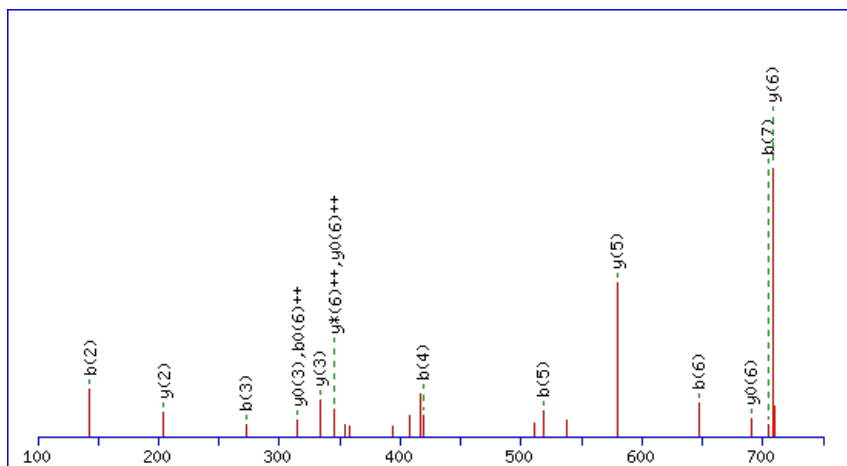Monoisotopic mass of neutral peptide **Mr(calc)**: 849.4232

Fixed modifications: Carbamidomethyl (C) (apply to specified residues or termini only)

Ions Score: 58 **Expect**: 5.5e-006Matches : 15/62 fragment ions using 19 most intense peaks ([help](#))

| # | b               | b <sup>++</sup> | b <sup>0</sup> | b <sup>0++</sup> | Seq. | y               | y <sup>++</sup> | y*       | y <sup>*++</sup> | y <sup>0</sup>  | y <sup>0++</sup> | # |
|---|-----------------|-----------------|----------------|------------------|------|-----------------|-----------------|----------|------------------|-----------------|------------------|---|
| 1 | 72.0444         | 36.5258         |                |                  | A    |                 |                 |          |                  |                 |                  | 8 |
| 2 | <b>143.0815</b> | 72.0444         |                |                  | A    | 779.3934        | 390.2003        | 762.3668 | 381.6871         | 761.3828        | 381.1951         | 7 |
| 3 | <b>272.1241</b> | 136.5657        | 254.1135       | 127.5604         | E    | <b>708.3563</b> | 354.6818        | 691.3297 | <b>346.1685</b>  | <b>690.3457</b> | <b>345.6765</b>  | 6 |
| 4 | <b>419.1925</b> | 210.0999        | 401.1819       | 201.0946         | F    | <b>579.3137</b> | 290.1605        | 562.2871 | 281.6472         | 561.3031        | 281.1552         | 5 |
| 5 | <b>518.2609</b> | 259.6341        | 500.2504       | 250.6288         | V    | 432.2453        | 216.6263        | 415.2187 | 208.1130         | 414.2347        | 207.6210         | 4 |
| 6 | <b>647.3035</b> | 324.1554        | 629.2930       | <b>315.1501</b>  | E    | <b>333.1769</b> | 167.0921        | 316.1503 | 158.5788         | <b>315.1663</b> | 158.0868         | 3 |
| 7 | <b>704.3250</b> | 352.6661        | 686.3144       | 343.6608         | G    | <b>204.1343</b> | 102.5708        | 187.1077 | 94.0575          |                 |                  | 2 |
| 8 |                 |                 |                |                  | K    | 147.1128        | 74.0600         | 130.0863 | 65.5468          |                 |                  | 1 |

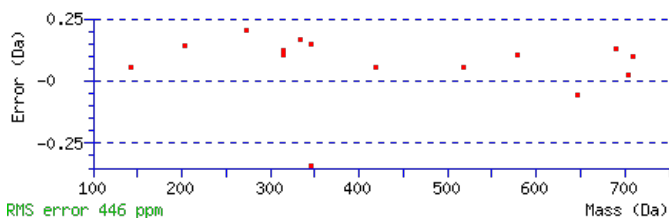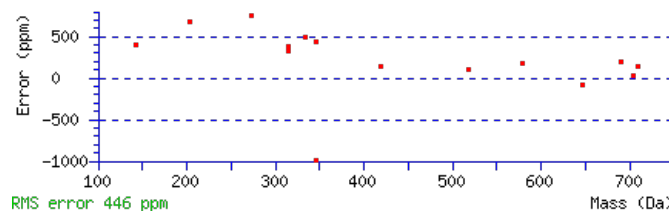NCBI **BLAST** search of [AAEFVEGK](#)

(Parameters: blastp, nr protein database, expect=20000, no filter, PAM30)

Other BLAST [web gateways](#)**All matches to this query**

| Score | Mr(calc) | Delta   | Sequence                 |
|-------|----------|---------|--------------------------|
| 58.1  | 849.4232 | -0.0004 | <a href="#">AAEFVEGK</a> |



**Peptide View**MS/MS Fragmentation of **KASDFVTDK**Found in **AT2G42540.1** in **TAIR\_Arabidopsis**, Symbols: COR15, COR15A | COR15A (COLD-REGULATED 15A) | chr2:17718319-17719008 REVERSE

Match to Query 2456: 1009.507524 from(505.761038,2+) index(480)

Title: Elution from: 10.205 to 10.205 scan no 746 cid35.00 polarity:+

Data file C7-3\_3.mgf

Click mouse within plot area to zoom in by factor of two about that point

Or,   to  Da Label all possible matches  Label matches used for scoring Show Y-axis 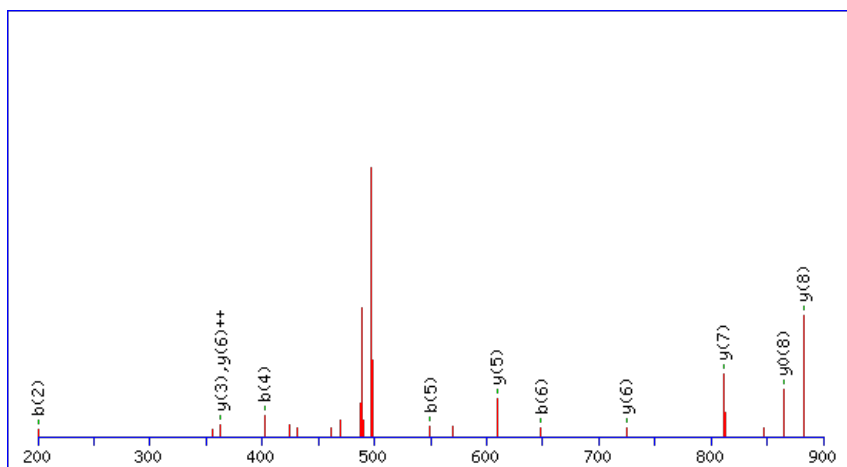Monoisotopic mass of neutral peptide **Mr(calc)**: 1009.5080

Fixed modifications: Carbamidomethyl (C) (apply to specified residues or termini only)

Ions Score: 49 Expect: 4.5e-005

Matches : 12/90 fragment ions using 18 most intense peaks ([help](#))

| # | b               | b <sup>++</sup> | b*       | b <sup>*++</sup> | b <sup>0</sup> | b <sup>0++</sup> | Seq.     | y               | y <sup>++</sup> | y*       | y <sup>*++</sup> | y <sup>0</sup>  | y <sup>0++</sup> | #        |
|---|-----------------|-----------------|----------|------------------|----------------|------------------|----------|-----------------|-----------------|----------|------------------|-----------------|------------------|----------|
| 1 | 129.1022        | 65.0548         | 112.0757 | 56.5415          |                |                  | <b>K</b> |                 |                 |          |                  |                 |                  | <b>9</b> |
| 2 | <b>200.1394</b> | 100.5733        | 183.1128 | 92.0600          |                |                  | <b>A</b> | <b>882.4203</b> | 441.7138        | 865.3938 | 433.2005         | <b>864.4098</b> | 432.7085         | <b>8</b> |
| 3 | 287.1714        | 144.0893        | 270.1448 | 135.5761         | 269.1608       | 135.0840         | <b>S</b> | <b>811.3832</b> | 406.1953        | 794.3567 | 397.6820         | 793.3727        | 397.1900         | <b>7</b> |
| 4 | <b>402.1983</b> | 201.6028        | 385.1718 | 193.0895         | 384.1878       | 192.5975         | <b>D</b> | <b>724.3512</b> | <b>362.6792</b> | 707.3246 | 354.1660         | 706.3406        | 353.6740         | <b>6</b> |
| 5 | <b>549.2667</b> | 275.1370        | 532.2402 | 266.6237         | 531.2562       | 266.1317         | <b>F</b> | <b>609.3243</b> | 305.1658        | 592.2977 | 296.6525         | 591.3137        | 296.1605         | <b>5</b> |
| 6 | <b>648.3352</b> | 324.6712        | 631.3086 | 316.1579         | 630.3246       | 315.6659         | <b>V</b> | 462.2558        | 231.6316        | 445.2293 | 223.1183         | 444.2453        | 222.6263         | <b>4</b> |
| 7 | 749.3828        | 375.1951        | 732.3563 | 366.6818         | 731.3723       | 366.1898         | <b>T</b> | <b>363.1874</b> | 182.0974        | 346.1609 | 173.5841         | 345.1769        | 173.0921         | <b>3</b> |
| 8 | <b>864.4098</b> | 432.7085        | 847.3832 | 424.1953         | 846.3992       | 423.7032         | <b>D</b> | 262.1397        | 131.5735        | 245.1132 | 123.0602         | 244.1292        | 122.5682         | <b>2</b> |
| 9 |                 |                 |          |                  |                |                  | <b>K</b> | 147.1128        | 74.0600         | 130.0863 | 65.5468          |                 |                  | <b>1</b> |

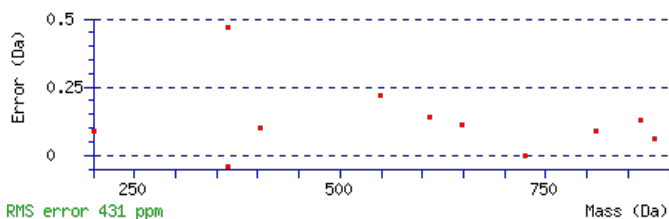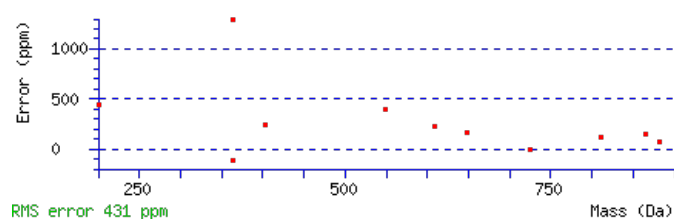NCBI **BLAST** search of **KASDFVTDK**

(Parameters: blastp, nr protein database, expect=20000, no filter, PAM30)

Other BLAST [web gateways](#)**All matches to this query**

| Score | Mr(calc) | Delta | Sequence |
|-------|----------|-------|----------|
|       |          |       |          |

**AT2G42540.1**

|      |           |         |                            |
|------|-----------|---------|----------------------------|
| 49.4 | 1009.5080 | -0.0005 | <a href="#">KASDFVTDK</a>  |
| 7.5  | 1009.5049 | 0.0027  | <a href="#">MSNLMKVR</a>   |
| 6.0  | 1009.5080 | -0.0005 | <a href="#">YEKEAKDK</a>   |
| 1.4  | 1009.5049 | 0.0027  | <a href="#">MTNMTLRK</a>   |
| 1.3  | 1009.5080 | -0.0005 | <a href="#">GKDTDSFIK</a>  |
| 1.3  | 1009.5048 | 0.0027  | <a href="#">REMATMKK</a>   |
| 1.3  | 1009.5080 | -0.0005 | <a href="#">FSSLDQVSK</a>  |
| 1.3  | 1009.5080 | -0.0005 | <a href="#">TVSVYEQ GK</a> |
| 0.9  | 1009.5080 | -0.0005 | <a href="#">YETELSLR</a>   |
| 0.7  | 1009.5048 | 0.0027  | <a href="#">AAKKACSMK</a>  |

**Mascot:** <http://www.matrixscience.com/>

**Peptide View**MS/MS Fragmentation of **AYEIATTAEEAK**

Found in **AT2G42590.1** in **TAIR\_Arabidopsis**, Symbols: GF14 MU, GRF9 | GRF9 (GENERAL REGULATORY FACTOR 9); protein phosphorylated amino acid binding | chr2:17739196-17740853 REVERSE

Match to Query 3843: 1237.619290 from(619.816921,2+) index(2168)

Title: Elution from: 25.331 to 25.331 scan no 2806 cid35.00 polarity:+

Data file D12h-2\_3.mgf

Click mouse within plot area to zoom in by factor of two about that point

Or,   to  Da

Label all possible matches  Label matches used for scoring

Show Y-axis

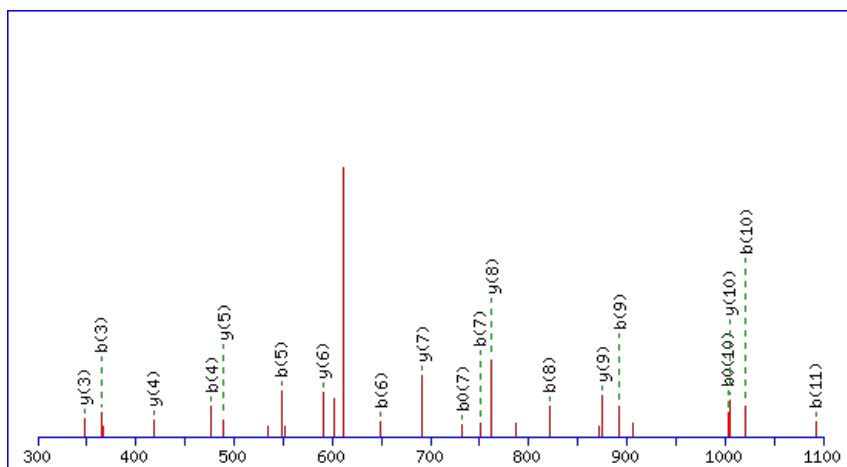

**Monoisotopic mass of neutral peptide Mr(calc):** 1237.6190

**Fixed modifications:** Carbamidomethyl (C) (apply to specified residues or termini only)

**Ions Score:** 97 **Expect:** 8.9e-010

**Matches:** 19/102 fragment ions using 22 most intense peaks ([help](#))

| #  | b                | b <sup>++</sup> | b <sup>0</sup>   | b <sup>0++</sup> | Seq. | y                | y <sup>++</sup> | y*        | y <sup>*++</sup> | y <sup>0</sup> | y <sup>0++</sup> | #  |
|----|------------------|-----------------|------------------|------------------|------|------------------|-----------------|-----------|------------------|----------------|------------------|----|
| 1  | 72.0444          | 36.5258         |                  |                  | A    |                  |                 |           |                  |                |                  | 12 |
| 2  | 235.1077         | 118.0575        |                  |                  | Y    | 1167.5892        | 584.2982        | 1150.5626 | 575.7850         | 1149.5786      | 575.2930         | 11 |
| 3  | <b>364.1503</b>  | 182.5788        | 346.1397         | 173.5735         | E    | <b>1004.5259</b> | 502.7666        | 987.4993  | 494.2533         | 986.5153       | 493.7613         | 10 |
| 4  | <b>477.2344</b>  | 239.1208        | 459.2238         | 230.1155         | I    | <b>875.4833</b>  | 438.2453        | 858.4567  | 429.7320         | 857.4727       | 429.2400         | 9  |
| 5  | <b>548.2715</b>  | 274.6394        | 530.2609         | 265.6341         | A    | <b>762.3992</b>  | 381.7032        | 745.3727  | 373.1900         | 744.3886       | 372.6980         | 8  |
| 6  | <b>649.3192</b>  | 325.1632        | 631.3086         | 316.1579         | T    | <b>691.3621</b>  | 346.1847        | 674.3355  | 337.6714         | 673.3515       | 337.1794         | 7  |
| 7  | <b>750.3668</b>  | 375.6871        | <b>732.3563</b>  | 366.6818         | T    | <b>590.3144</b>  | 295.6608        | 573.2879  | 287.1476         | 572.3039       | 286.6556         | 6  |
| 8  | <b>821.4040</b>  | 411.2056        | 803.3934         | 402.2003         | A    | <b>489.2667</b>  | 245.1370        | 472.2402  | 236.6237         | 471.2562       | 236.1317         | 5  |
| 9  | <b>892.4411</b>  | 446.7242        | 874.4305         | 437.7189         | A    | <b>418.2296</b>  | 209.6185        | 401.2031  | 201.1052         | 400.2191       | 200.6132         | 4  |
| 10 | <b>1021.4837</b> | 511.2455        | <b>1003.4731</b> | 502.2402         | E    | <b>347.1925</b>  | 174.0999        | 330.1660  | 165.5866         | 329.1819       | 165.0946         | 3  |
| 11 | <b>1092.5208</b> | 546.7640        | 1074.5102        | 537.7587         | A    | 218.1499         | 109.5786        | 201.1234  | 101.0653         |                |                  | 2  |
| 12 |                  |                 |                  |                  | K    | 147.1128         | 74.0600         | 130.0863  | 65.5468          |                |                  | 1  |

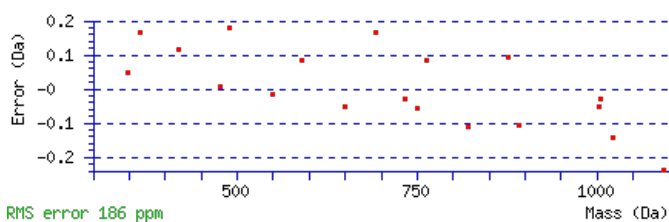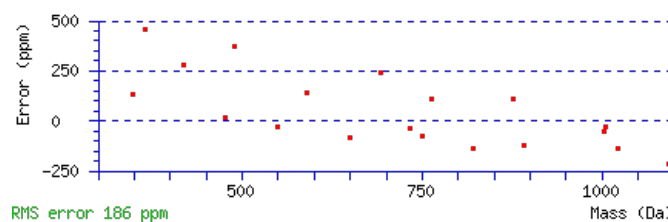

NCBI **BLAST** search of **AYEIATTAEEAK**

(Parameters: blastp, nr protein database, expect=20000, no filter, PAM30)

Other BLAST [web gateways](#)

AT2G42590.1

All matches to this query

| Score | Mr(calc)  | Delta   | Sequence                     |
|-------|-----------|---------|------------------------------|
| 96.7  | 1237.6190 | 0.0003  | <a href="#">AYEIATTAAEAK</a> |
| 11.7  | 1237.6190 | 0.0003  | <a href="#">DYTAEKAIIEAK</a> |
| 9.1   | 1237.6159 | 0.0034  | <a href="#">MAVTCAKNLSK</a>  |
| 2.3   | 1237.6204 | -0.0011 | <a href="#">GRFGNFLDNAK</a>  |
| 2.0   | 1237.6190 | 0.0002  | <a href="#">FSPGTIVEVSSK</a> |
| 2.0   | 1237.6159 | 0.0034  | <a href="#">MSTKQMDLIR</a>   |
| 1.9   | 1237.6203 | -0.0011 | <a href="#">IRDYRSDWK</a>    |
| 1.0   | 1237.6204 | -0.0011 | <a href="#">DGNFLGRNAFK</a>  |
| 0.9   | 1237.6159 | 0.0034  | <a href="#">RLKDVMMAK</a>    |
| 0.8   | 1237.6224 | -0.0031 | <a href="#">EKDSLAMTVTK</a>  |

Mascot: <http://www.matrixscience.com/>

**Peptide View**MS/MS Fragmentation of **IFSSIEQK**

Found in **AT2G42590.3** in **TAIR\_Arabidopsis**, Symbols: GF14 MU, GRF9 | GRF9 (GENERAL REGULATORY FACTOR 9); protein phosphorylated amino acid binding | chr2:17739242-17740853 REVERSE

Match to Query 2255: 960.476048 from(481.245300,2+) index(2221)

Title: Elution from: 25.625 to 25.625 scan no 2850 cid35.00 polarity:+

Data file 0-1\_1.mgf

Click mouse within plot area to zoom in by factor of two about that point

Or,   to  Da

Label all possible matches  Label matches used for scoring

Show Y-axis

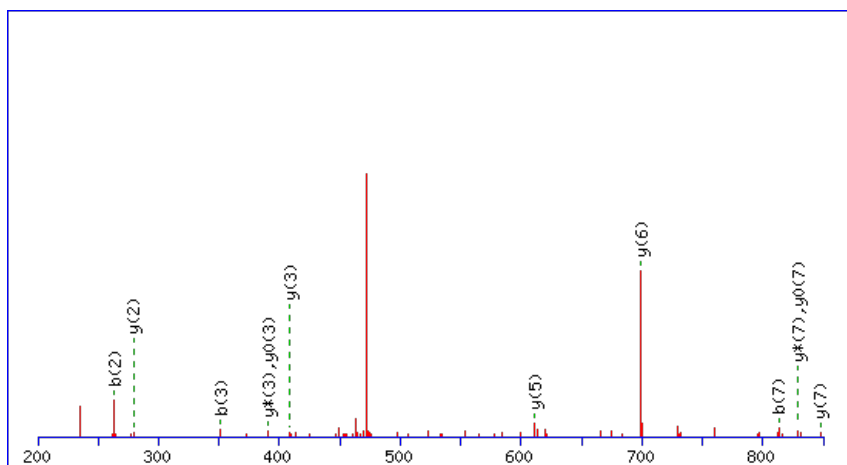

Monoisotopic mass of neutral peptide  $M_r(\text{calc})$ : 960.4776

Fixed modifications: Carbamidomethyl (C) (apply to specified residues or termini only)

Ions Score: 36 Expect: 0.0024

Matches : 12/64 fragment ions using 19 most intense peaks ([help](#))

| # | b               | b <sup>++</sup> | b*       | b <sup>*++</sup> | b <sup>0</sup> | b <sup>0++</sup> | Seq. | y               | y <sup>++</sup> | y*              | y <sup>*++</sup> | y <sup>0</sup>  | y <sup>0++</sup> | # |
|---|-----------------|-----------------|----------|------------------|----------------|------------------|------|-----------------|-----------------|-----------------|------------------|-----------------|------------------|---|
| 1 | 115.0884        | 58.0478         |          |                  |                |                  | I    |                 |                 |                 |                  |                 |                  | 8 |
| 2 | <b>263.1538</b> | 132.0805        |          |                  |                |                  | F    | <b>847.4038</b> | 424.2055        | <b>829.3802</b> | 415.1938         | <b>829.3933</b> | 415.2003         | 7 |
| 3 | <b>351.1829</b> | 176.0951        |          |                  | 333.1723       | 167.0898         | S    | <b>699.3384</b> | 350.1728        | 681.3148        | 341.1610         | 681.3278        | 341.1675         | 6 |
| 4 | 439.2120        | 220.1096        |          |                  | 421.2014       | 211.1043         | S    | <b>611.3093</b> | 306.1583        | 593.2857        | 297.1465         | 593.2987        | 297.1530         | 5 |
| 5 | 553.2930        | 277.1502        |          |                  | 535.2825       | 268.1449         | I    | 523.2802        | 262.1438        | 505.2567        | 253.1320         | 505.2697        | 253.1385         | 4 |
| 6 | 683.3327        | 342.1700        |          |                  | 665.3221       | 333.1647         | E    | <b>409.1991</b> | 205.1032        | <b>391.1756</b> | 196.0914         | <b>391.1886</b> | 196.0979         | 3 |
| 7 | <b>813.3853</b> | 407.1963        | 795.3617 | 398.1845         | 795.3748       | 398.1910         | Q    | <b>279.1595</b> | 140.0834        | 261.1359        | 131.0716         |                 |                  | 2 |
| 8 |                 |                 |          |                  |                |                  | K    | 149.1069        | 75.0571         | 131.0833        | 66.0453          |                 |                  | 1 |

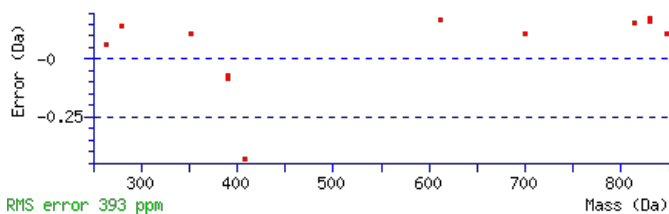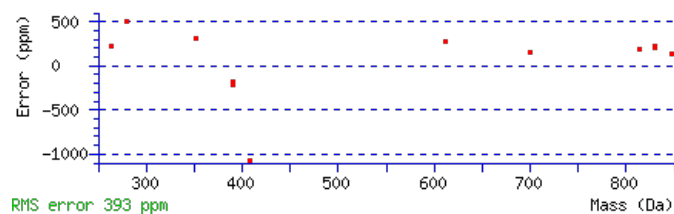

NCBI BLAST search of **IFSSIEQK**

(Parameters: blastp, nr protein database, expect=20000, no filter, PAM30)

Other BLAST [web gateways](#)

**All matches to this query**

| Score | $M_r(\text{calc})$ | Delta   | Sequence                 |
|-------|--------------------|---------|--------------------------|
| 36.4  | 960.4776           | -0.0016 | <a href="#">IFSSIEQK</a> |



## AT2G42590.3

|      |          |         |                           |
|------|----------|---------|---------------------------|
| 19.6 | 960.4781 | -0.0020 | <a href="#">RTTVGSAQK</a> |
| 19.0 | 960.4777 | -0.0016 | <a href="#">SYKEPSLK</a>  |
| 17.3 | 960.4776 | -0.0016 | <a href="#">AEEFKSLK</a>  |
| 15.4 | 960.4763 | -0.0002 | <a href="#">MIMNGKLK</a>  |
| 13.9 | 960.4733 | 0.0027  | <a href="#">MAARNKQK</a>  |
| 13.6 | 960.4733 | 0.0027  | <a href="#">QMREKVR</a>   |
| 12.9 | 960.4776 | -0.0016 | <a href="#">VFTSIQEK</a>  |
| 12.9 | 960.4776 | -0.0016 | <a href="#">VFDSLQEK</a>  |
| 11.4 | 960.4776 | -0.0016 | <a href="#">LFDQLTSK</a>  |

Mascot: <http://www.matrixscience.com/>

**Peptide View**MS/MS Fragmentation of **LFSIEWYR**

Found in **AT2G42600.1** in **TAIR\_Arabidopsis**, Symbols: ATPPC2 | ATPPC2 (PHOSPHOENOLPYRUVATE CARBOXYLASE 2); phosphoenolpyruvate carboxylase | chr2:17742234-17745756 REVERSE

Match to Query 3580: 1124.529892 from(563.272222,2+) index(8750)

Title: Elution from: 77.803 to 77.803 scan no 11662 cid35.00 polarity:+

Data file D6h-3\_1.mgf

Click mouse within plot area to zoom in by factor of two about that point

Or,   to  Da

Label all possible matches  Label matches used for scoring

Show Y-axis

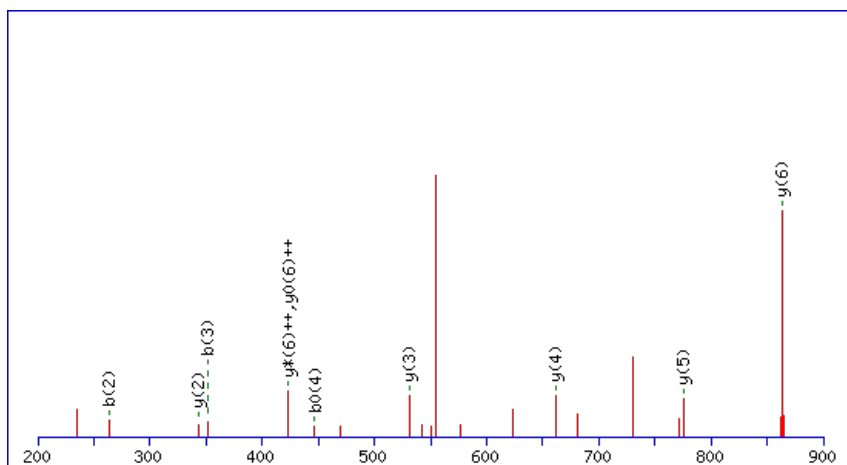

Monoisotopic mass of neutral peptide  $M_r(\text{calc})$ : 1124.5299

Fixed modifications: Carbamidomethyl (C) (apply to specified residues or termini only)

Ions Score: 30 Expect: 0.0062

Matches : 10/60 fragment ions using 19 most intense peaks ([help](#))

| # | b               | b <sup>++</sup> | b <sup>0</sup>  | b <sup>0++</sup> | Seq. | y               | y <sup>++</sup> | y*       | y <sup>*++</sup> | y <sup>0</sup> | y <sup>0++</sup> | # |
|---|-----------------|-----------------|-----------------|------------------|------|-----------------|-----------------|----------|------------------|----------------|------------------|---|
| 1 | 115.0884        | 58.0478         |                 |                  | L    |                 |                 |          |                  |                |                  | 8 |
| 2 | <b>263.1538</b> | 132.0805        |                 |                  | F    | 1011.4561       | 506.2317        | 993.4325 | 497.2199         | 993.4455       | 497.2264         | 7 |
| 3 | <b>351.1829</b> | 176.0951        | 333.1723        | 167.0898         | S    | <b>863.3906</b> | 432.1990        | 845.3670 | <b>423.1872</b>  | 845.3801       | <b>423.1937</b>  | 6 |
| 4 | 465.2640        | 233.1356        | <b>447.2534</b> | 224.1303         | I    | <b>775.3616</b> | 388.1844        | 757.3380 | 379.1726         | 757.3510       | 379.1791         | 5 |
| 5 | 595.3036        | 298.1554        | 577.2930        | 289.1502         | E    | <b>661.2805</b> | 331.1439        | 643.2569 | 322.1321         | 643.2699       | 322.1386         | 4 |
| 6 | 783.3770        | 392.1921        | 765.3664        | 383.1869         | W    | <b>531.2408</b> | 266.1241        | 513.2173 | 257.1123         |                |                  | 3 |
| 7 | 947.4374        | 474.2223        | 929.4268        | 465.2170         | Y    | <b>343.1675</b> | 172.0874        | 325.1439 | 163.0756         |                |                  | 2 |
| 8 |                 |                 |                 |                  | R    | 179.1071        | 90.0572         | 161.0835 | 81.0454          |                |                  | 1 |

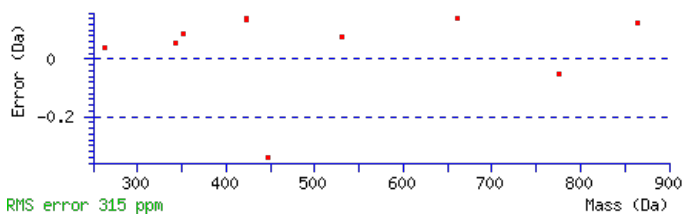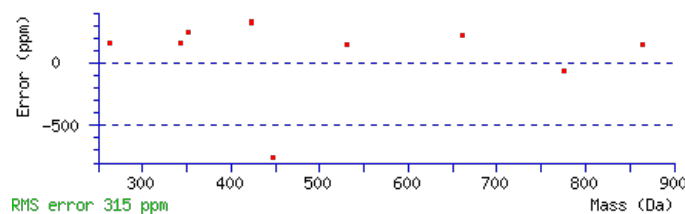

NCBI BLAST search of [LFSIEWYR](#)

(Parameters: blastp, nr protein database, expect=20000, no filter, PAM30)

Other BLAST [web gateways](#)

All matches to this query

| Score | $M_r(\text{calc})$ | Delta  | Sequence                 |
|-------|--------------------|--------|--------------------------|
| 30.1  | 1124.5299          | 0.0000 | <a href="#">LFSIEWYR</a> |

**AT2G42600.1**

|      |           |         |                            |
|------|-----------|---------|----------------------------|
| 22.3 | 1124.5288 | 0.0011  | <a href="#">MISSSRSLK</a>  |
| 11.7 | 1124.5333 | -0.0034 | <a href="#">FISALQCFK</a>  |
| 2.5  | 1124.5276 | 0.0022  | <a href="#">IFIDYTANR</a>  |
| 2.2  | 1124.5276 | 0.0023  | <a href="#">RGFTFDELK</a>  |
| 1.8  | 1124.5310 | -0.0011 | <a href="#">MTTTSVFLGR</a> |
| 1.7  | 1124.5330 | -0.0031 | <a href="#">RTRGQFWR</a>   |
| 1.7  | 1124.5276 | 0.0022  | <a href="#">LPEWTPDVR</a>  |

**Mascot:** <http://www.matrixscience.com/>

**Peptide View**MS/MS Fragmentation of **SDVDDSSSKSVKTK**Found in **AT2G42650.1** in **TAIR\_Arabidopsis**, Symbols: | 60S ribosomal protein-related | chr2:17772607-17773725 FORWARD

Match to Query 6172: 1498.668408 from(750.341480,2+) index(4750)

Title: Elution from: 43.190 to 43.190 scan no 5966 cid35.00 polarity:+

Data file D12h-3\_2.mgf

Click mouse within plot area to zoom in by factor of two about that point

Or,   to  Da Label all possible matches  Label matches used for scoring Show Y-axis 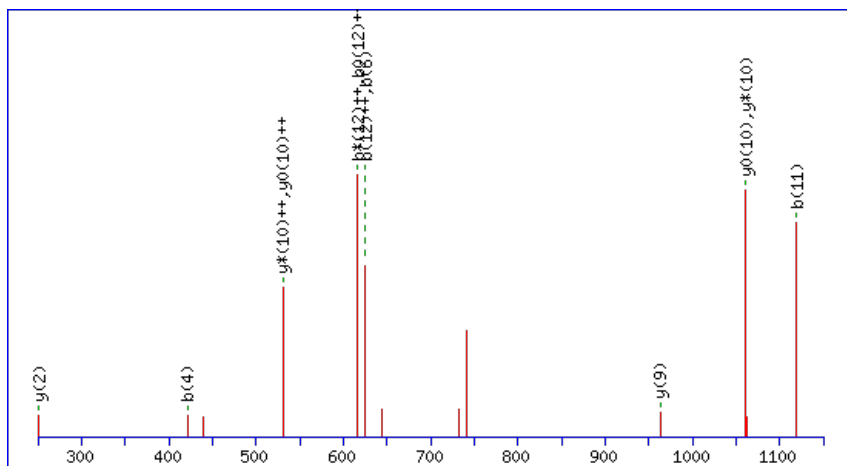Monoisotopic mass of neutral peptide  $M_r(\text{calc})$ : 1498.6705

Fixed modifications: Carbamidomethyl (C) (apply to specified residues or termini only)

Ions Score: 28 Expect: 0.01

Matches : 12/138 fragment ions using 11 most intense peaks ([help](#))

| #  | b                | b <sup>++</sup> | b*        | b <sup>++</sup> * | b <sup>0</sup> | b <sup>0++</sup> | Seq. | y               | y <sup>++</sup> | y*               | y <sup>++</sup> * | y <sup>0</sup>   | y <sup>0++</sup> | #  |
|----|------------------|-----------------|-----------|-------------------|----------------|------------------|------|-----------------|-----------------|------------------|-------------------|------------------|------------------|----|
| 1  | 89.0363          | 45.0218         |           |                   | 71.0258        | 36.0165          | S    |                 |                 |                  |                   |                  |                  | 14 |
| 2  | 205.0603         | 103.0338        |           |                   | 187.0498       | 94.0285          | D    | 1411.6487       | 706.3280        | 1393.6252        | 697.3162          | 1393.6382        | 697.3227         | 13 |
| 3  | 305.1258         | 153.0665        |           |                   | 287.1152       | 144.0612         | V    | 1295.6248       | 648.3160        | 1277.6012        | 639.3042          | 1277.6142        | 639.3107         | 12 |
| 4  | <b>421.1497</b>  | 211.0785        |           |                   | 403.1392       | 202.0732         | D    | 1195.5593       | 598.2833        | 1177.5357        | 589.2715          | 1177.5487        | 589.2780         | 11 |
| 5  | 537.1737         | 269.0905        |           |                   | 519.1632       | 260.0852         | D    | 1079.5353       | 540.2713        | <b>1061.5117</b> | <b>531.2595</b>   | <b>1061.5248</b> | <b>531.2660</b>  | 10 |
| 6  | <b>625.2028</b>  | 313.1050        |           |                   | 607.1922       | 304.0997         | S    | <b>963.5114</b> | 482.2593        | 945.4878         | 473.2475          | 945.5008         | 473.2540         | 9  |
| 7  | 713.2318         | 357.1196        |           |                   | 695.2213       | 348.1143         | S    | 875.4823        | 438.2448        | 857.4587         | 429.2330          | 857.4717         | 429.2395         | 8  |
| 8  | 801.2609         | 401.1341        |           |                   | 783.2503       | 392.1288         | S    | 787.4532        | 394.2303        | 769.4296         | 385.2185          | 769.4427         | 385.2250         | 7  |
| 9  | 931.3499         | 466.1786        | 913.3264  | 457.1668          | 913.3394       | 457.1733         | K    | 699.4242        | 350.2157        | 681.4006         | 341.2039          | 681.4136         | 341.2104         | 6  |
| 10 | 1019.3790        | 510.1931        | 1001.3554 | 501.1813          | 1001.3684      | 501.1879         | S    | 569.3351        | 285.1712        | 551.3115         | 276.1594          | 551.3246         | 276.1659         | 5  |
| 11 | <b>1119.4445</b> | 560.2259        | 1101.4209 | 551.2141          | 1101.4339      | 551.2206         | V    | 481.3061        | 241.1567        | 463.2825         | 232.1449          | 463.2955         | 232.1514         | 4  |
| 12 | 1249.5335        | <b>625.2704</b> | 1231.5099 | <b>616.2586</b>   | 1231.5229      | <b>616.2651</b>  | K    | 381.2406        | 191.1239        | 363.2170         | 182.1122          | 363.2301         | 182.1187         | 3  |
| 13 | 1351.5782        | 676.2927        | 1333.5546 | 667.2809          | 1333.5676      | 667.2875         | T    | <b>251.1516</b> | 126.0794        | 233.1280         | 117.0676          | 233.1410         | 117.0741         | 2  |
| 14 |                  |                 |           |                   |                |                  | K    | 149.1069        | 75.0571         | 131.0833         | 66.0453           |                  |                  | 1  |

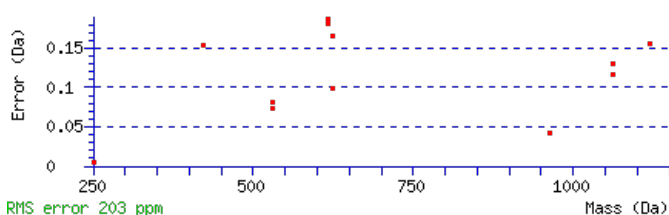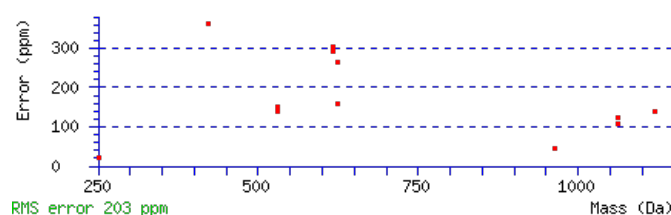NCBI BLAST search of [SDVDDSSSKSVKTK](#)

(Parameters: blastp, nr protein database, expect=20000, no filter, PAM30)

AT2G42650.1

Other BLAST [web gateways](#)

**All matches to this query**

| Score | Mr(calc)  | Delta   | Sequence                       |
|-------|-----------|---------|--------------------------------|
| 28.1  | 1498.6705 | -0.0021 | <a href="#">SDVDDSSKSVKTK</a>  |
| 3.3   | 1498.6669 | 0.0015  | <a href="#">SEFALAISHGFFSA</a> |
| 3.0   | 1498.6707 | -0.0023 | <a href="#">DAFSLCVQQAKR</a>   |
| 2.9   | 1498.6651 | 0.0033  | <a href="#">HHVGKESASNDAVK</a> |
| 2.1   | 1498.6680 | 0.0004  | <a href="#">ITVGGEDVRMFDK</a>  |
| 1.6   | 1498.6680 | 0.0004  | <a href="#">TFTMSGPRDLTEK</a>  |

Mascot: <http://www.matrixscience.com/>

**Peptide View**MS/MS Fragmentation of **AMQLLESGLK**

Found in **AT2G42740.1** in **TAIR\_Arabidopsis**, Symbols: RPL16A | RPL16A (ribosomal protein large subunit 16A); structural constituent of ribosome | chr2:17798871-17800023 FORWARD

Match to Query 3552: 1116.547444 from(559.280998,2+) index(3203)

Title: Elution from: 31.496 to 31.496 scan no 3961 cid35.00 polarity:+

Data file D12h-1\_2.mgf

Click mouse within plot area to zoom in by factor of two about that point

Or,   to  Da

Label all possible matches  Label matches used for scoring

Show Y-axis

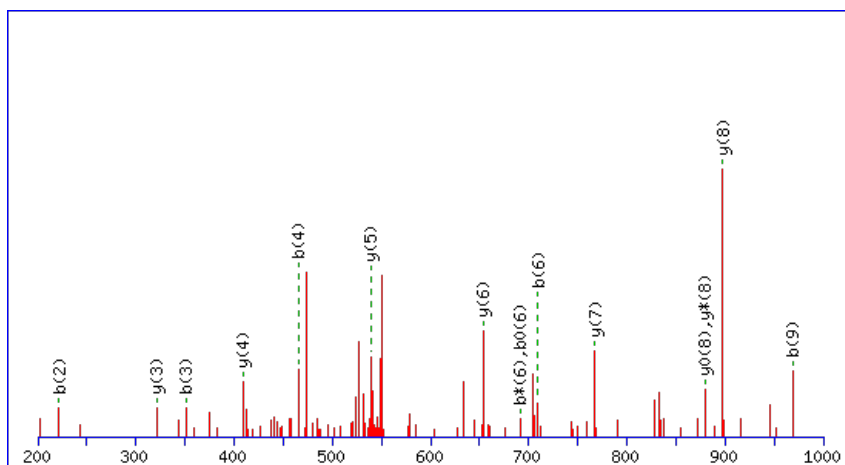

Monoisotopic mass of neutral peptide  $M_r(\text{calc})$ : 1116.5493

**Fixed modifications:** Carbamidomethyl (C) (apply to specified residues or termini only)

**Variable modifications:**

**M2** : Oxidation (M), with neutral losses 0.0000 (shown in table), 63.9983

**Ions Score:** 41 **Expect:** 0.00096

**Matches** : 15/132 fragment ions using 24 most intense peaks ([help](#))

| #  | b               | b <sup>++</sup> | b <sup>*</sup>  | b <sup>*++</sup> | b <sup>0</sup>  | b <sup>0++</sup> | Seq. | y               | y <sup>++</sup> | y <sup>*</sup>  | y <sup>*++</sup> | y <sup>0</sup>  | y <sup>0++</sup> | #  |
|----|-----------------|-----------------|-----------------|------------------|-----------------|------------------|------|-----------------|-----------------|-----------------|------------------|-----------------|------------------|----|
| 1  | 73.0414         | 37.0244         |                 |                  |                 |                  | A    |                 |                 |                 |                  |                 |                  | 10 |
| 2  | <b>221.0739</b> | 111.0406        |                 |                  |                 |                  | M    | 1045.5224       | 523.2649        | 1027.4989       | 514.2531         | 1027.5119       | 514.2596         | 9  |
| 3  | <b>351.1265</b> | 176.0669        | 333.1029        | 167.0551         |                 |                  | Q    | <b>897.4900</b> | 449.2486        | <b>879.4664</b> | 440.2369         | <b>879.4794</b> | 440.2434         | 8  |
| 4  | <b>465.2076</b> | 233.1074        | 447.1840        | 224.0956         |                 |                  | L    | <b>767.4374</b> | 384.2223        | 749.4138        | 375.2105         | 749.4268        | 375.2170         | 7  |
| 5  | 579.2887        | 290.1480        | 561.2651        | 281.1362         |                 |                  | L    | <b>653.3563</b> | 327.1818        | 635.3327        | 318.1700         | 635.3457        | 318.1765         | 6  |
| 6  | <b>709.3283</b> | 355.1678        | <b>691.3047</b> | 346.1560         | <b>691.3178</b> | 346.1625         | E    | <b>539.2752</b> | 270.1412        | 521.2516        | 261.1294         | 521.2646        | 261.1359         | 5  |
| 7  | 797.3574        | 399.1823        | 779.3338        | 390.1705         | 779.3468        | 390.1771         | S    | <b>409.2355</b> | 205.1214        | 391.2120        | 196.1096         | 391.2250        | 196.1161         | 4  |
| 8  | 855.3759        | 428.1916        | 837.3523        | 419.1798         | 837.3653        | 419.1863         | G    | <b>321.2065</b> | 161.1069        | 303.1829        | 152.0951         |                 |                  | 3  |
| 9  | <b>969.4570</b> | 485.2321        | 951.4334        | 476.2203         | 951.4464        | 476.2269         | L    | 263.1880        | 132.0976        | 245.1644        | 123.0858         |                 |                  | 2  |
| 10 |                 |                 |                 |                  |                 |                  | K    | 149.1069        | 75.0571         | 131.0833        | 66.0453          |                 |                  | 1  |

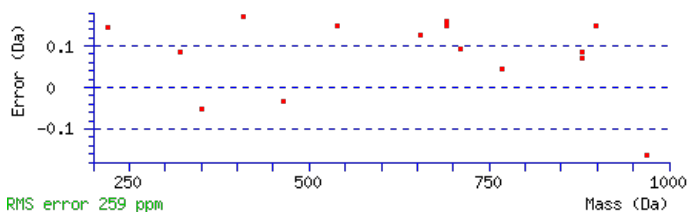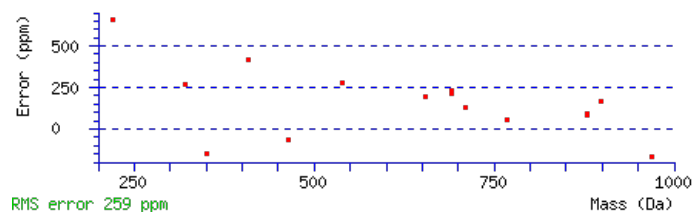

NCBI **BLAST** search of **AMQLLESGLK**

(Parameters: blastp, nr protein database, expect=20000, no filter, PAM30)

Other BLAST [web gateways](#)

**All matches to this query**

## AT2G42740.1

| Score | Mr(calc)  | Delta   | Sequence                    |
|-------|-----------|---------|-----------------------------|
| 41.3  | 1116.5493 | -0.0019 | <a href="#">AMQLLESLK</a>   |
| 27.7  | 1116.5493 | -0.0019 | <a href="#">AKEMVSLAEK</a>  |
| 25.2  | 1116.5493 | -0.0019 | <a href="#">AMQIEEKLK</a>   |
| 21.2  | 1116.5459 | 0.0015  | <a href="#">FASGIPESAVK</a> |
| 19.7  | 1116.5459 | 0.0015  | <a href="#">AEFVLDNVAK</a>  |
| 18.5  | 1116.5493 | -0.0019 | <a href="#">MIEKLQEAK</a>   |
| 16.2  | 1116.5459 | 0.0015  | <a href="#">IAVFEAQEAK</a>  |
| 12.3  | 1116.5493 | -0.0019 | <a href="#">KLSMADIAEK</a>  |
| 8.1   | 1116.5493 | -0.0019 | <a href="#">DMIVNGITVK</a>  |
| 8.0   | 1116.5493 | -0.0019 | <a href="#">TVIQMEKEK</a>   |

Mascot: <http://www.matrixscience.com/>


**Mascot Search Results**
**Peptide View**MS/MS Fragmentation of **LTNIEGFEPNQK**Found in **AT2G43030.1** in **TAIR\_Arabidopsis**, Symbols: | ribosomal protein L3 family protein | chr2:17901975-17902790 FORWARD

Match to Query 5580: 1404.645570 from(703.330061,2+) index(4201)

Title: Elution from: 38.077 to 38.077 scan no 5233 cid35.00 polarity:+

Data file D1d-3\_2.mgf

Click mouse within plot area to zoom in by factor of two about that point

Or,  to  Da Label all possible matches  Label matches used for scoring Show Y-axis 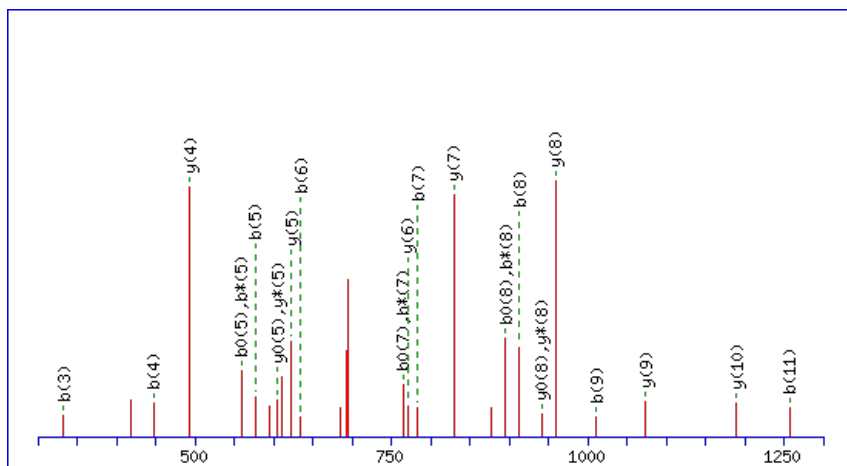Monoisotopic mass of neutral peptide  $M_r(\text{calc})$ : 1404.6461

Fixed modifications: Carbamidomethyl (C) (apply to specified residues or termini only)

Ions Score: 78 Expect: 1.6e-007

Matches : 25/118 fragment ions using 26 most intense peaks ([help](#))

| #  | b                | b <sup>++</sup> | b*              | b* <sup>++</sup> | b <sup>0</sup>  | b <sup>0++</sup> | Seq. | y                | y <sup>++</sup> | y*              | y* <sup>++</sup> | y <sup>0</sup>  | y <sup>0++</sup> | #  |
|----|------------------|-----------------|-----------------|------------------|-----------------|------------------|------|------------------|-----------------|-----------------|------------------|-----------------|------------------|----|
| 1  | 115.0884         | 58.0478         |                 |                  |                 |                  | L    |                  |                 |                 |                  |                 |                  | 12 |
| 2  | 217.1331         | 109.0702        |                 |                  | 199.1225        | 100.0649         | T    | 1291.5723        | 646.2898        | 1273.5487       | 637.2780         | 1273.5618       | 637.2845         | 11 |
| 3  | <b>333.1701</b>  | 167.0887        | 315.1465        | 158.0769         | 315.1595        | 158.0834         | N    | <b>1189.5276</b> | 595.2674        | 1171.5040       | 586.2557         | 1171.5171       | 586.2622         | 10 |
| 4  | <b>447.2512</b>  | 224.1292        | 429.2276        | 215.1174         | 429.2406        | 215.1239         | I    | <b>1073.4906</b> | 537.2489        | 1055.4670       | 528.2372         | 1055.4801       | 528.2437         | 9  |
| 5  | <b>577.2908</b>  | 289.1490        | <b>559.2672</b> | 280.1373         | <b>559.2802</b> | 280.1438         | E    | <b>959.4095</b>  | 480.2084        | <b>941.3859</b> | 471.1966         | <b>941.3990</b> | 471.2031         | 8  |
| 6  | <b>635.3093</b>  | 318.1583        | 617.2857        | 309.1465         | 617.2987        | 309.1530         | G    | <b>829.3699</b>  | 415.1886        | 811.3463        | 406.1768         | 811.3593        | 406.1833         | 7  |
| 7  | <b>783.3748</b>  | 392.1910        | <b>765.3512</b> | 383.1792         | <b>765.3642</b> | 383.1857         | F    | <b>771.3514</b>  | 386.1793        | 753.3278        | 377.1675         | 753.3408        | 377.1741         | 6  |
| 8  | <b>913.4144</b>  | 457.2108        | <b>895.3908</b> | 448.1990         | <b>895.4038</b> | 448.2055         | E    | <b>623.2859</b>  | 312.1466        | <b>605.2624</b> | 303.1348         | <b>605.2754</b> | 303.1413         | 5  |
| 9  | <b>1011.4642</b> | 506.2357        | 993.4406        | 497.2239         | 993.4536        | 497.2304         | P    | <b>493.2463</b>  | 247.1268        | 475.2227        | 238.1150         |                 |                  | 4  |
| 10 | 1127.5012        | 564.2542        | 1109.4776       | 555.2424         | 1109.4906       | 555.2489         | N    | 395.1965         | 198.1019        | 377.1729        | 189.0901         |                 |                  | 3  |
| 11 | <b>1257.5538</b> | 629.2806        | 1239.5302       | 620.2688         | 1239.5433       | 620.2753         | Q    | 279.1595         | 140.0834        | 261.1359        | 131.0716         |                 |                  | 2  |
| 12 |                  |                 |                 |                  |                 |                  | K    | 149.1069         | 75.0571         | 131.0833        | 66.0453          |                 |                  | 1  |

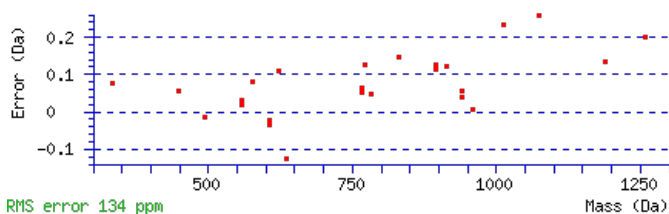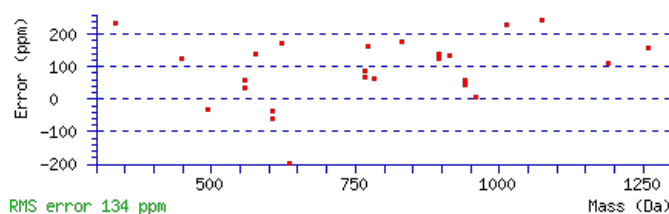NCBI BLAST search of **LTNIEGFEPNQK**

(Parameters: blastp, nr protein database, expect=20000, no filter, PAM30)

Other BLAST [web gateways](#)**All matches to this query**



## AT2G43030.1

| Score | Mr(calc)  | Delta   | Sequence                       |
|-------|-----------|---------|--------------------------------|
| 77.7  | 1404.6461 | -0.0006 | <a href="#">LTNIEGFEPNQK</a>   |
| 15.0  | 1404.6495 | -0.0040 | <a href="#">LSDSHSMKEVLK</a>   |
| 13.7  | 1404.6439 | 0.0016  | <a href="#">KLAEEENNGADSIK</a> |
| 13.7  | 1404.6414 | 0.0042  | <a href="#">QSPQELMWKKNK</a>   |
| 10.4  | 1404.6469 | -0.0013 | <a href="#">EIEVMASLDELK</a>   |
| 6.6   | 1404.6495 | -0.0039 | <a href="#">VQELTGVCENLK</a>   |
| 5.5   | 1404.6495 | -0.0040 | <a href="#">NLKNVGMEEVK</a>    |
| 5.5   | 1404.6436 | 0.0019  | <a href="#">ILFQNFDMHPK</a>    |
| 3.6   | 1404.6495 | -0.0040 | <a href="#">AKEALNNAEGLLM</a>  |
| 3.5   | 1404.6468 | -0.0013 | <a href="#">LDTDIAILEDK</a>    |

Mascot: <http://www.matrixscience.com/>

**Peptide View**MS/MS Fragmentation of **LKPIGDAGPVIDAGGIFAYAR**Found in **AT2G43090.1** in **TAIR\_Arabidopsis**, Symbols: | aconitase C-terminal domain-containing protein | chr2:17926034-17926789 FORWARD

Match to Query 9861: 2125.066392 from(709.362740,3+) index(9074)

Title: Elution from: 83.189 to 83.189 scan no 12220 cid35.00 polarity:+

Data file D12h-2\_1.mgf

Click mouse within plot area to zoom in by factor of two about that point

Or,   to  Da Label all possible matches  Label matches used for scoring Show Y-axis 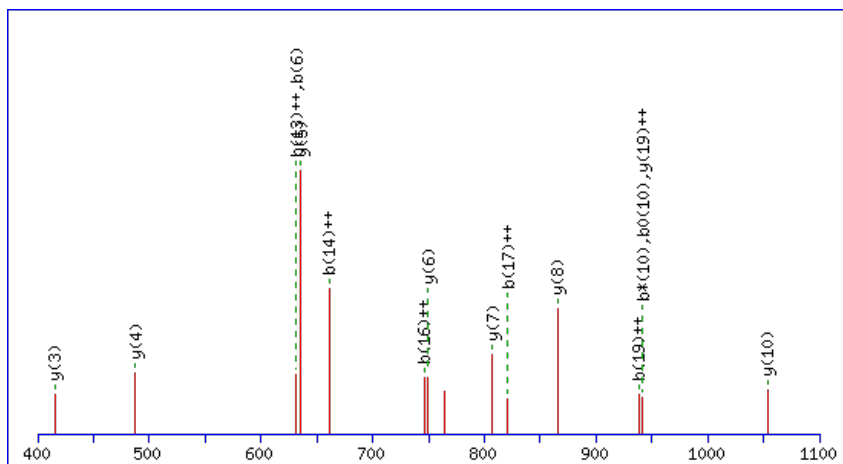Monoisotopic mass of neutral peptide  $M_r(\text{calc})$ : 2125.0626

Fixed modifications: Carbamidomethyl (C) (apply to specified residues or termini only)

Ions Score: 62 Expect: 3e-006

Matches : 16/210 fragment ions using 13 most intense peaks ([help](#))

| #  | b         | b <sup>++</sup> | b*        | b <sup>*++</sup> | b <sup>0</sup> | b <sup>0++</sup> | Seq. | y         | y <sup>++</sup> | y*        | y <sup>*++</sup> | y <sup>0</sup> | y <sup>0++</sup> | #  |
|----|-----------|-----------------|-----------|------------------|----------------|------------------|------|-----------|-----------------|-----------|------------------|----------------|------------------|----|
| 1  | 115.0884  | 58.0478         |           |                  |                |                  | L    |           |                 |           |                  |                |                  | 21 |
| 2  | 245.1774  | 123.0923        | 227.1538  | 114.0805         |                |                  | K    | 2011.9888 | 1006.4981       | 1993.9652 | 997.4863         | 1993.9783      | 997.4928         | 20 |
| 3  | 343.2272  | 172.1172        | 325.2036  | 163.1054         |                |                  | P    | 1881.8998 | 941.4535        | 1863.8762 | 932.4417         | 1863.8892      | 932.4483         | 19 |
| 4  | 457.3083  | 229.1578        | 439.2847  | 220.1460         |                |                  | I    | 1783.8500 | 892.4286        | 1765.8264 | 883.4168         | 1765.8394      | 883.4234         | 18 |
| 5  | 515.3268  | 258.1670        | 497.3032  | 249.1552         |                |                  | G    | 1669.7689 | 835.3881        | 1651.7453 | 826.3763         | 1651.7583      | 826.3828         | 17 |
| 6  | 631.3508  | 316.1790        | 613.3272  | 307.1672         | 613.3402       | 307.1737         | D    | 1611.7504 | 806.3788        | 1593.7268 | 797.3670         | 1593.7398      | 797.3736         | 16 |
| 7  | 703.3849  | 352.1961        | 685.3613  | 343.1843         | 685.3744       | 343.1908         | A    | 1495.7264 | 748.3668        | 1477.7028 | 739.3551         | 1477.7159      | 739.3616         | 15 |
| 8  | 761.4034  | 381.2054        | 743.3798  | 372.1936         | 743.3929       | 372.2001         | G    | 1423.6923 | 712.3498        | 1405.6687 | 703.3380         | 1405.6817      | 703.3445         | 14 |
| 9  | 859.4532  | 430.2303        | 841.4296  | 421.2185         | 841.4427       | 421.2250         | P    | 1365.6738 | 683.3405        | 1347.6502 | 674.3287         | 1347.6632      | 674.3352         | 13 |
| 10 | 959.5187  | 480.2630        | 941.4951  | 471.2512         | 941.5081       | 471.2577         | V    | 1267.6240 | 634.3156        | 1249.6004 | 625.3038         | 1249.6134      | 625.3103         | 12 |
| 11 | 1073.5998 | 537.3035        | 1055.5762 | 528.2917         | 1055.5892      | 528.2982         | I    | 1167.5585 | 584.2829        | 1149.5349 | 575.2711         | 1149.5480      | 575.2776         | 11 |
| 12 | 1189.6238 | 595.3155        | 1171.6002 | 586.3037         | 1171.6132      | 586.3102         | D    | 1053.4774 | 527.2424        | 1035.4538 | 518.2306         | 1035.4669      | 518.2371         | 10 |
| 13 | 1261.6579 | 631.3326        | 1243.6343 | 622.3208         | 1243.6473      | 622.3273         | A    | 937.4534  | 469.2304        | 919.4299  | 460.2186         |                |                  | 9  |
| 14 | 1319.6764 | 660.3418        | 1301.6528 | 651.3300         | 1301.6658      | 651.3366         | G    | 865.4193  | 433.2133        | 847.3957  | 424.2015         |                |                  | 8  |
| 15 | 1377.6949 | 689.3511        | 1359.6713 | 680.3393         | 1359.6843      | 680.3458         | G    | 807.4008  | 404.2040        | 789.3772  | 395.1922         |                |                  | 7  |
| 16 | 1491.7760 | 746.3916        | 1473.7524 | 737.3798         | 1473.7654      | 737.3864         | I    | 749.3823  | 375.1948        | 731.3587  | 366.1830         |                |                  | 6  |
| 17 | 1639.8415 | 820.4244        | 1621.8179 | 811.4126         | 1621.8309      | 811.4191         | F    | 635.3012  | 318.1542        | 617.2776  | 309.1424         |                |                  | 5  |
| 18 | 1711.8756 | 856.4414        | 1693.8520 | 847.4296         | 1693.8650      | 847.4362         | A    | 487.2358  | 244.1215        | 469.2122  | 235.1097         |                |                  | 4  |
| 19 | 1875.9360 | 938.4716        | 1857.9124 | 929.4598         | 1857.9254      | 929.4663         | Y    | 415.2016  | 208.1044        | 397.1780  | 199.0926         |                |                  | 3  |
| 20 | 1947.9701 | 974.4887        | 1929.9465 | 965.4769         | 1929.9595      | 965.4834         | A    | 251.1412  | 126.0743        | 233.1177  | 117.0625         |                |                  | 2  |
| 21 |           |                 |           |                  |                |                  | R    | 179.1071  | 90.0572         | 161.0835  | 81.0454          |                |                  | 1  |

AT2G43090.1

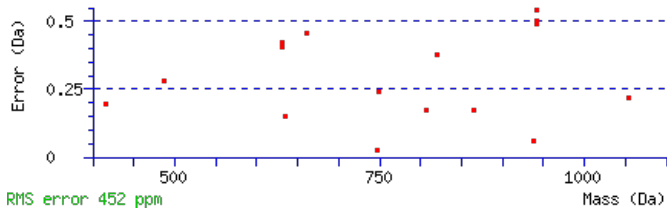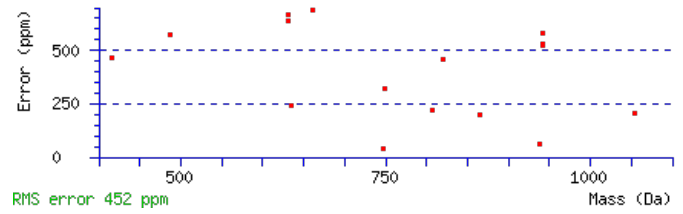

NCBI **BLAST** search of [LKPIGDAGPVIDAGGIFAYAR](#)  
(Parameters: blastp, nr protein database, expect=20000, no filter, PAM30)  
Other BLAST [web gateways](#)

**All matches to this query**

| Score | Mr(calc)  | Delta   | Sequence                              |
|-------|-----------|---------|---------------------------------------|
| 62.4  | 2125.0626 | 0.0038  | <a href="#">LKPIGDAGPVIDAGGIFAYAR</a> |
| 62.4  | 2125.0626 | 0.0038  | <a href="#">LKPLGDAGPVIDAGGIFAYAR</a> |
| 2.8   | 2125.0653 | 0.0011  | <a href="#">FLDNHIPRQRILTEAFK</a>     |
| 0.2   | 2125.0712 | -0.0048 | <a href="#">VEIIPSSKQAIQKATNTR</a>    |

Mascot: <http://www.matrixscience.com/>

**Peptide View**MS/MS Fragmentation of **KVENVVNNLK**Found in **AT2G43280.1** in **TAIR\_Arabidopsis**, Symbols: | far-red impaired responsive family protein / FAR1 family protein | chr2:17996816-17997938 FORWARD

Match to Query 3931: 1170.615744 from(586.315148,2+) index(4462)

Title: Elution from: 40.884 to 40.884 scan no 5598 cid35.00 polarity:+

Data file 0-1\_3.mgf

Click mouse within plot area to zoom in by factor of two about that point

Or,   to  Da Label all possible matches  Label matches used for scoring Show Y-axis 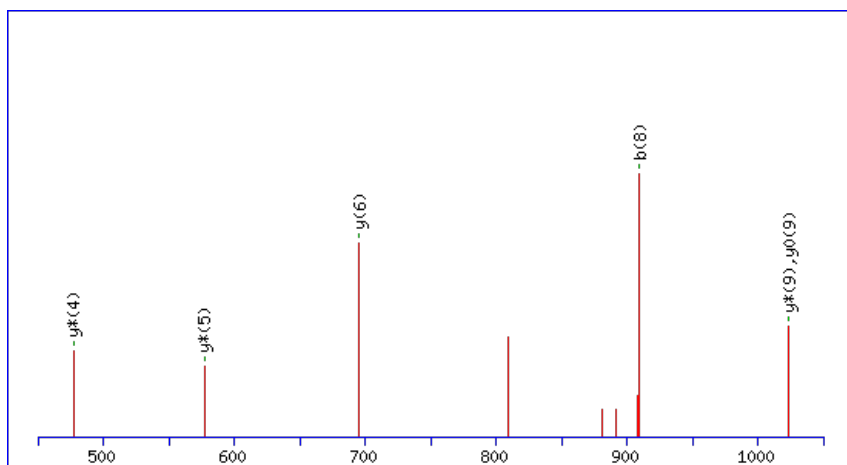Monoisotopic mass of neutral peptide  $M_r(\text{calc})$ : 1170.6167

Fixed modifications: Carbamidomethyl (C) (apply to specified residues or termini only)

Ions Score: 31 Expect: 0.0049

Matches : 9/90 fragment ions using 8 most intense peaks ([help](#))

| #  | b                | b <sup>++</sup> | b*        | b <sup>*++</sup> | b <sup>0</sup> | b <sup>0++</sup> | Seq.     | y               | y <sup>++</sup> | y*               | y <sup>*++</sup> | y <sup>0</sup>   | y <sup>0++</sup> | #         |
|----|------------------|-----------------|-----------|------------------|----------------|------------------|----------|-----------------|-----------------|------------------|------------------|------------------|------------------|-----------|
| 1  | 131.0963         | 66.0518         | 113.0727  | 57.0400          |                |                  | <b>K</b> |                 |                 |                  |                  |                  |                  | <b>10</b> |
| 2  | 231.1618         | 116.0845        | 213.1382  | 107.0727         |                |                  | <b>V</b> | 1041.5349       | 521.2711        | <b>1023.5114</b> | 512.2593         | <b>1023.5244</b> | 512.2658         | <b>9</b>  |
| 3  | 361.2014         | 181.1043        | 343.1778  | 172.0925         | 343.1908       | 172.0990         | <b>E</b> | 941.4695        | 471.2384        | 923.4459         | 462.2266         | 923.4589         | 462.2331         | <b>8</b>  |
| 4  | <b>477.2384</b>  | 239.1228        | 459.2148  | 230.1110         | 459.2278       | 230.1175         | <b>N</b> | 811.4299        | 406.2186        | 793.4063         | 397.2068         |                  |                  | <b>7</b>  |
| 5  | <b>577.3038</b>  | 289.1556        | 559.2802  | 280.1438         | 559.2933       | 280.1503         | <b>V</b> | <b>695.3929</b> | 348.2001        | 677.3693         | 339.1883         |                  |                  | <b>6</b>  |
| 6  | 677.3693         | 339.1883        | 659.3457  | 330.1765         | 659.3587       | 330.1830         | <b>V</b> | 595.3274        | 298.1673        | <b>577.3038</b>  | 289.1556         |                  |                  | <b>5</b>  |
| 7  | 793.4063         | 397.2068        | 775.3827  | 388.1950         | 775.3957       | 388.2015         | <b>N</b> | 495.2620        | 248.1346        | <b>477.2384</b>  | 239.1228         |                  |                  | <b>4</b>  |
| 8  | <b>909.4433</b>  | 455.2253        | 891.4197  | 446.2135         | 891.4327       | 446.2200         | <b>N</b> | 379.2250        | 190.1161        | 361.2014         | 181.1043         |                  |                  | <b>3</b>  |
| 9  | <b>1023.5244</b> | 512.2658        | 1005.5008 | 503.2540         | 1005.5138      | 503.2605         | <b>L</b> | 263.1880        | 132.0976        | 245.1644         | 123.0858         |                  |                  | <b>2</b>  |
| 10 |                  |                 |           |                  |                |                  | <b>K</b> | 149.1069        | 75.0571         | 131.0833         | 66.0453          |                  |                  | <b>1</b>  |

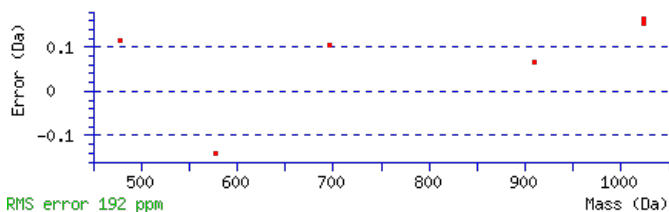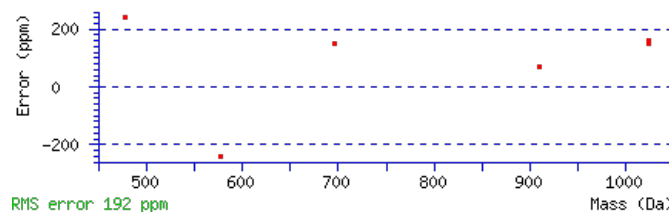NCBI BLAST search of **KVENVVNNLK**

(Parameters: blastp, nr protein database, expect=20000, no filter, PAM30)

Other BLAST [web gateways](#)**All matches to this query**

## AT2G43280.1

| Score | Mr(calc)  | Delta   | Sequence                    |
|-------|-----------|---------|-----------------------------|
| 30.9  | 1170.6167 | -0.0010 | <a href="#">KVENVVNNLK</a>  |
| 30.4  | 1170.6167 | -0.0009 | <a href="#">TRVLSLDQPK</a>  |
| 30.0  | 1170.6167 | -0.0010 | <a href="#">QPSRIESVLK</a>  |
| 17.1  | 1170.6167 | -0.0009 | <a href="#">RLDAIEAQIK</a>  |
| 4.8   | 1170.6140 | 0.0017  | <a href="#">SELKAELELK</a>  |
| 4.5   | 1170.6167 | -0.0009 | <a href="#">GDVSLALNVLR</a> |
| 4.2   | 1170.6189 | -0.0032 | <a href="#">AQAHLYTIK</a>   |
| 4.2   | 1170.6167 | -0.0010 | <a href="#">ASKTANNPLLK</a> |
| 4.2   | 1170.6140 | 0.0017  | <a href="#">ELEADKLTIK</a>  |
| 4.2   | 1170.6167 | -0.0009 | <a href="#">ELIQOERIK</a>   |

Mascot: <http://www.matrixscience.com/>

**Peptide View**MS/MS Fragmentation of **LFNNPRIK**Found in **AT2G43410.1** in **TAIR\_Arabidopsis**, Symbols: FPA | FPA; RNA binding | chr2:18033474-18038066 REVERSE

Match to Query 2659: 1014.539688 from(508.277120,2+) index(4013)

Title: Elution from: 38.304 to 38.304 scan no 5030 cid35.00 polarity:+

Data file D12h-3\_1.mgf

Click mouse within plot area to zoom in by factor of two about that point

Or,   to  Da Label all possible matches  Label matches used for scoring Show Y-axis 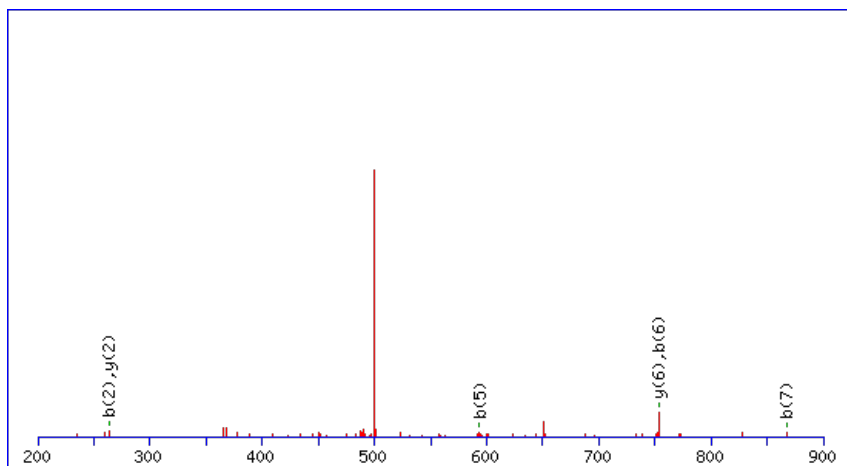Monoisotopic mass of neutral peptide **Mr(calc)**: 1014.5403

Fixed modifications: Carbamidomethyl (C) (apply to specified residues or termini only)

Ions Score: 31 Expect: 0.011

Matches : 6/52 fragment ions using 7 most intense peaks ([help](#))

| # | b               | b <sup>++</sup> | b*       | b <sup>+++</sup> | Seq. | y               | y <sup>++</sup> | y*       | y <sup>+++</sup> | # |
|---|-----------------|-----------------|----------|------------------|------|-----------------|-----------------|----------|------------------|---|
| 1 | 115.0884        | 58.0478         |          |                  | L    |                 |                 |          |                  | 8 |
| 2 | <b>263.1538</b> | 132.0805        |          |                  | F    | 901.4665        | 451.2369        | 883.4429 | 442.2251         | 7 |
| 3 | 379.1908        | 190.0990        | 361.1672 | 181.0873         | N    | <b>753.4010</b> | 377.2041        | 735.3774 | 368.1924         | 6 |
| 4 | 495.2278        | 248.1175        | 477.2042 | 239.1058         | N    | 637.3640        | 319.1856        | 619.3404 | 310.1739         | 5 |
| 5 | <b>593.2776</b> | 297.1424        | 575.2540 | 288.1307         | P    | 521.3270        | 261.1671        | 503.3034 | 252.1554         | 4 |
| 6 | <b>753.3669</b> | 377.1871        | 735.3433 | 368.1753         | R    | 423.2772        | 212.1422        | 405.2536 | 203.1305         | 3 |
| 7 | <b>867.4480</b> | 434.2276        | 849.4244 | 425.2158         | I    | <b>263.1880</b> | 132.0976        | 245.1644 | 123.0858         | 2 |
| 8 |                 |                 |          |                  | K    | 149.1069        | 75.0571         | 131.0833 | 66.0453          | 1 |

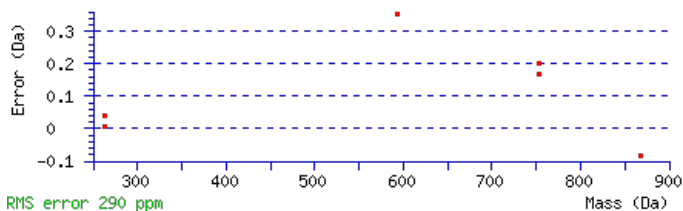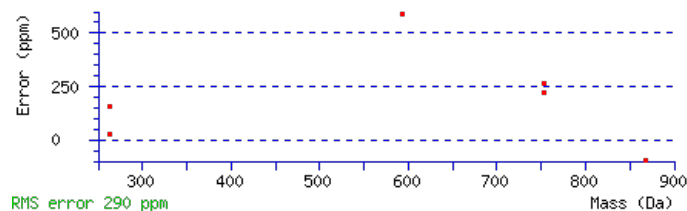NCBI **BLAST** search of [LFNNPRIK](#)

(Parameters: blastp, nr protein database, expect=20000, no filter, PAM30)

Other BLAST [web gateways](#)**All matches to this query**

| Score | Mr(calc)  | Delta   | Sequence                   |
|-------|-----------|---------|----------------------------|
| 30.6  | 1014.5403 | -0.0006 | <a href="#">LFNNPRIK</a>   |
| 23.9  | 1014.5410 | -0.0013 | <a href="#">IMLSGAATLK</a> |

## AT2G43410.1

|      |           |         |                           |
|------|-----------|---------|---------------------------|
| 23.9 | 1014.5376 | 0.0021  | <a href="#">LFTPSLAQK</a> |
| 18.2 | 1014.5376 | 0.0021  | <a href="#">LFQLNELK</a>  |
| 18.2 | 1014.5403 | -0.0006 | <a href="#">RTFLSHIK</a>  |
| 15.7 | 1014.5403 | -0.0006 | <a href="#">TFLSHLRK</a>  |
| 15.3 | 1014.5410 | -0.0013 | <a href="#">MIVLEKQK</a>  |
| 13.9 | 1014.5380 | 0.0016  | <a href="#">SDGIRLALR</a> |
| 13.5 | 1014.5403 | -0.0006 | <a href="#">GQWKKNLK</a>  |
| 13.0 | 1014.5376 | 0.0021  | <a href="#">EIFKDPKK</a>  |

Mascot: <http://www.matrixscience.com/>

**Peptide View**MS/MS Fragmentation of **YLYTLCVFDQEK**Found in **AT2G43460.1** in **TAIR\_Arabidopsis**, Symbols: | 60S ribosomal protein L38 (RPL38A) | chr2:18053362-18054369 REVERSE

Match to Query 6418: 1577.746768 from(789.880660,2+) index(7814)

Title: Elution from: 71.463 to 71.463 scan no 10433 cid35.00 polarity:+

Data file D1d-1\_3.mgf

Click mouse within plot area to zoom in by factor of two about that point

Or,   to  Da Label all possible matches  Label matches used for scoring Show Y-axis 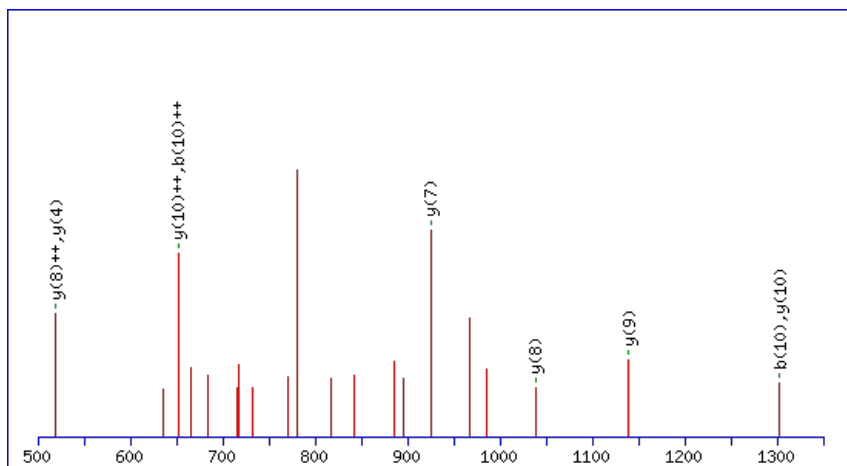Monoisotopic mass of neutral peptide **Mr(calc)**: 1577.7436

Fixed modifications: Carbamidomethyl (C) (apply to specified residues or termini only)

Ions Score: 40 Expect: 0.0003

Matches : 9/106 fragment ions using 8 most intense peaks ([help](#))

| #  | b                | b <sup>++</sup> | b <sup>*</sup> | b <sup>*++</sup> | b <sup>0</sup> | b <sup>0++</sup> | Seq. | y                | y <sup>++</sup> | y <sup>*</sup> | y <sup>*++</sup> | y <sup>0</sup> | y <sup>0++</sup> | #  |
|----|------------------|-----------------|----------------|------------------|----------------|------------------|------|------------------|-----------------|----------------|------------------|----------------|------------------|----|
| 1  | 164.0706         | 82.5389         |                |                  |                |                  | Y    |                  |                 |                |                  |                |                  | 12 |
| 2  | 277.1547         | 139.0810        |                |                  |                |                  | L    | 1415.6875        | 708.3474        | 1398.6610      | 699.8341         | 1397.6770      | 699.3421         | 11 |
| 3  | 440.2180         | 220.6126        |                |                  |                |                  | Y    | <b>1302.6035</b> | <b>651.8054</b> | 1285.5769      | 643.2921         | 1284.5929      | 642.8001         | 10 |
| 4  | 541.2657         | 271.1365        |                |                  | 523.2551       | 262.1312         | T    | <b>1139.5401</b> | 570.2737        | 1122.5136      | 561.7604         | 1121.5296      | 561.2684         | 9  |
| 5  | 654.3497         | 327.6785        |                |                  | 636.3392       | 318.6732         | L    | <b>1038.4925</b> | <b>519.7499</b> | 1021.4659      | 511.2366         | 1020.4819      | 510.7446         | 8  |
| 6  | 814.3804         | 407.6938        |                |                  | 796.3698       | 398.6886         | C    | <b>925.4084</b>  | 463.2078        | 908.3818       | 454.6946         | 907.3978       | 454.2026         | 7  |
| 7  | 913.4488         | 457.2280        |                |                  | 895.4382       | 448.2228         | V    | 765.3777         | 383.1925        | 748.3512       | 374.6792         | 747.3672       | 374.1872         | 6  |
| 8  | 1060.5172        | 530.7622        |                |                  | 1042.5067      | 521.7570         | F    | 666.3093         | 333.6583        | 649.2828       | 325.1450         | 648.2988       | 324.6530         | 5  |
| 9  | 1175.5442        | 588.2757        |                |                  | 1157.5336      | 579.2704         | D    | <b>519.2409</b>  | 260.1241        | 502.2144       | 251.6108         | 501.2304       | 251.1188         | 4  |
| 10 | <b>1303.6027</b> | <b>652.3050</b> | 1286.5762      | 643.7917         | 1285.5922      | 643.2997         | Q    | 404.2140         | 202.6106        | 387.1874       | 194.0974         | 386.2034       | 193.6053         | 3  |
| 11 | 1432.6453        | 716.8263        | 1415.6188      | 708.3130         | 1414.6348      | 707.8210         | E    | 276.1554         | 138.5813        | 259.1288       | 130.0681         | 258.1448       | 129.5761         | 2  |
| 12 |                  |                 |                |                  |                |                  | K    | 147.1128         | 74.0600         | 130.0863       | 65.5468          |                |                  | 1  |

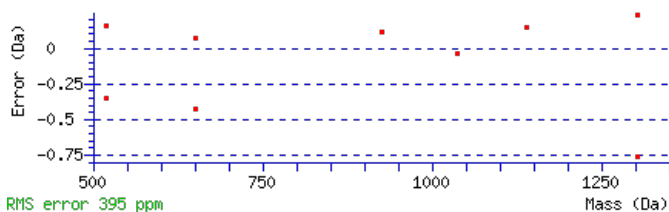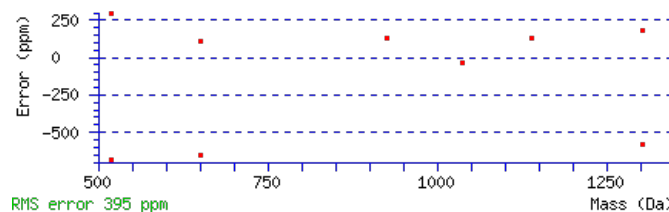NCBI **BLAST** search of **YLYTLCVFDQEK**

(Parameters: blastp, nr protein database, expect=20000, no filter, PAM30)

Other BLAST [web gateways](#)**All matches to this query**



## AT2G43460.1

| Score | Mr(calc)  | Delta   | Sequence                        |
|-------|-----------|---------|---------------------------------|
| 40.1  | 1577.7436 | 0.0032  | <a href="#">YLYTLCVFDQEK</a>    |
| 7.5   | 1577.7467 | 0.0000  | <a href="#">LSMGNGARNVSEAEK</a> |
| 4.2   | 1577.7508 | -0.0040 | <a href="#">LEIYDHGSEMRTK</a>   |
| 2.9   | 1577.7481 | -0.0013 | <a href="#">NAHQSGVNCLHVSR</a>  |
| 0.9   | 1577.7481 | -0.0013 | <a href="#">GGPENSRCSEFRGVR</a> |
| 0.7   | 1577.7436 | 0.0032  | <a href="#">DFEETYEOKLMK</a>    |
| 0.2   | 1577.7468 | 0.0000  | <a href="#">ERMDRTPVSTNEK</a>   |
| 0.2   | 1577.7494 | -0.0027 | <a href="#">EVEELTSCLELEK</a>   |

Mascot: <http://www.matrixscience.com/>

**Peptide View**MS/MS Fragmentation of **GLDEGILSMK**

Found in **AT2G43560.1** in **TAIR\_Arabidopsis**, Symbols: | immunophilin / FKBP-type peptidyl-prolyl cis-trans isomerase family protein | chr2:18081072-18082462 REVERSE

Match to Query 3000: 1061.544442 from(531.779497,2+) index(5976)

Title: Elution from: 52.432 to 52.432 scan no 7674 cid35.00 polarity:+

Data file 0-2\_3.mgf

Click mouse within plot area to zoom in by factor of two about that point

Or,   to  Da

Label all possible matches  Label matches used for scoring

Show Y-axis

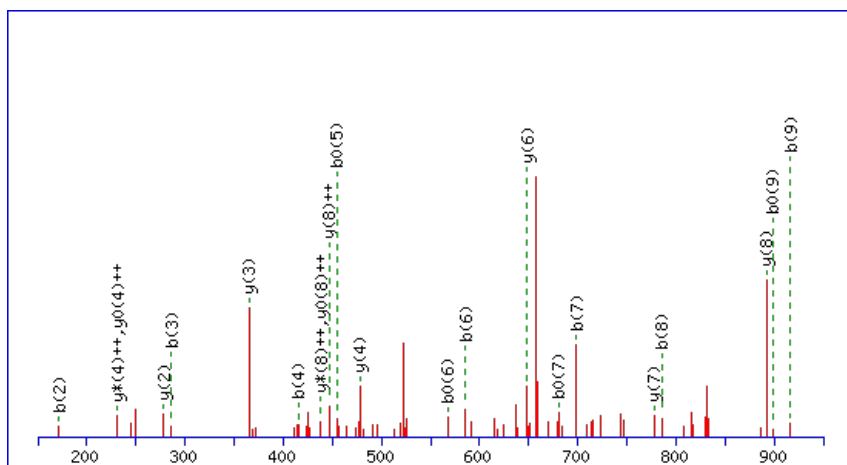

**Monoisotopic mass of neutral peptide Mr(calc):** 1061.5427

**Fixed modifications:** Carbamidomethyl (C) (apply to specified residues or termini only)

**Ions Score:** 42 **Expect:** 0.00025

**Matches:** 22/82 fragment ions using 38 most intense peaks ([help](#))

| #  | b               | b <sup>++</sup> | b <sup>0</sup>  | b <sup>0++</sup> | Seq.     | y               | y <sup>++</sup> | y*       | y <sup>*++</sup> | y <sup>0</sup> | y <sup>0++</sup> | #  |
|----|-----------------|-----------------|-----------------|------------------|----------|-----------------|-----------------|----------|------------------|----------------|------------------|----|
| 1  | 58.0287         | 29.5180         |                 |                  | <b>G</b> |                 |                 |          |                  |                |                  | 10 |
| 2  | <b>171.1128</b> | 86.0600         |                 |                  | <b>L</b> | 1005.5285       | 503.2679        | 988.5020 | 494.7546         | 987.5179       | 494.2626         | 9  |
| 3  | <b>286.1397</b> | 143.5735        | 268.1292        | 134.5682         | <b>D</b> | <b>892.4444</b> | <b>446.7259</b> | 875.4179 | <b>438.2126</b>  | 874.4339       | <b>437.7206</b>  | 8  |
| 4  | <b>415.1823</b> | 208.0948        | 397.1718        | 199.0895         | <b>E</b> | <b>777.4175</b> | 389.2124        | 760.3910 | 380.6991         | 759.4069       | 380.2071         | 7  |
| 5  | 472.2038        | 236.6055        | <b>454.1932</b> | 227.6003         | <b>G</b> | <b>648.3749</b> | 324.6911        | 631.3484 | 316.1778         | 630.3643       | 315.6858         | 6  |
| 6  | <b>585.2879</b> | 293.1476        | <b>567.2773</b> | 284.1423         | <b>I</b> | 591.3534        | 296.1804        | 574.3269 | 287.6671         | 573.3429       | 287.1751         | 5  |
| 7  | <b>698.3719</b> | 349.6896        | <b>680.3614</b> | 340.6843         | <b>L</b> | <b>478.2694</b> | 239.6383        | 461.2428 | <b>231.1251</b>  | 460.2588       | <b>230.6330</b>  | 4  |
| 8  | <b>785.4040</b> | 393.2056        | 767.3934        | 384.2003         | <b>S</b> | <b>365.1853</b> | 183.0963        | 348.1588 | 174.5830         | 347.1748       | 174.0910         | 3  |
| 9  | <b>916.4444</b> | 458.7259        | <b>898.4339</b> | 449.7206         | <b>M</b> | <b>278.1533</b> | 139.5803        | 261.1267 | 131.0670         |                |                  | 2  |
| 10 |                 |                 |                 |                  | <b>K</b> | 147.1128        | 74.0600         | 130.0863 | 65.5468          |                |                  | 1  |

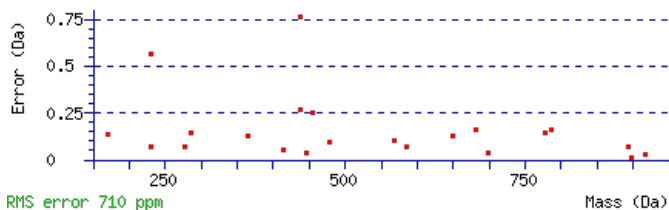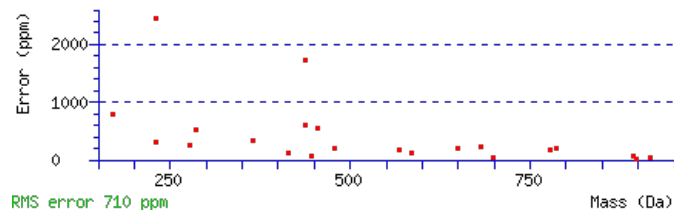

NCBI **BLAST** search of **GLDEGILSMK**

(Parameters: blastp, nr protein database, expect=20000, no filter, PAM30)

Other BLAST [web gateways](#)

**All matches to this query**

AT2G43560.1

| Score | Mr(calc)  | Delta  | Sequence                   |
|-------|-----------|--------|----------------------------|
| 42.2  | 1061.5427 | 0.0018 | <a href="#">GLDEGILSMK</a> |

Mascot: <http://www.matrixscience.com/>

**Peptide View**MS/MS Fragmentation of **IQDLTGLSGEGNK**

Found in **AT2G43710.1** in **TAIR\_Arabidopsis**, Symbols: FAB2, SS12 | SS12 (fatty acid biosynthesis 2); acyl-[acyl-carrier-protein] desaturase | chr2:18127184-18129572 FORWARD

Match to Query 5446: 1346.621492 from(674.318022,2+) index(3742)

Title: Elution from: 35.595 to 35.595 scan no 4606 cid35.00 polarity:+

Data file D12h-1\_1.mgf

Click mouse within plot area to zoom in by factor of two about that point

Or,   to  Da

Label all possible matches  Label matches used for scoring

Show Y-axis

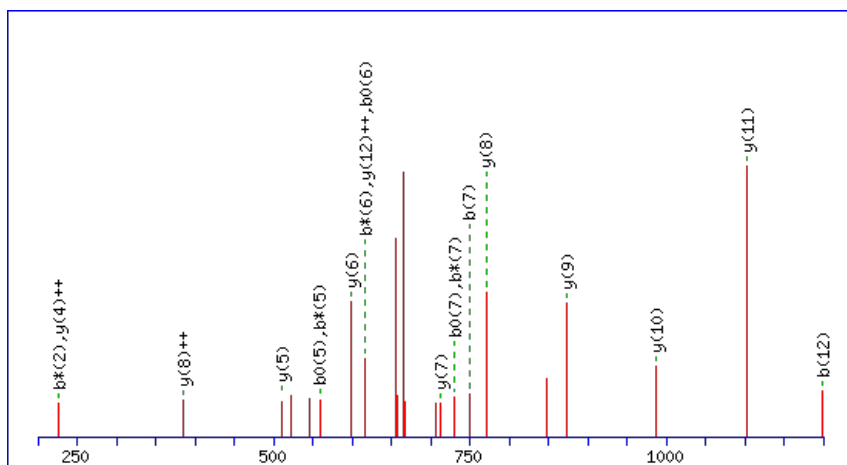

Monoisotopic mass of neutral peptide  $M_r(\text{calc})$ : 1346.6254

Fixed modifications: Carbamidomethyl (C) (apply to specified residues or termini only)

Ions Score: 59 Expect: 8.2e-006

Matches : 19/132 fragment ions using 23 most intense peaks ([help](#))

| #  | b         | b <sup>++</sup> | b*        | b <sup>*++</sup> | b <sup>0</sup> | b <sup>0++</sup> | Seq. | y         | y <sup>++</sup> | y*        | y <sup>*++</sup> | y <sup>0</sup> | y <sup>0++</sup> | #  |
|----|-----------|-----------------|-----------|------------------|----------------|------------------|------|-----------|-----------------|-----------|------------------|----------------|------------------|----|
| 1  | 115.0884  | 58.0478         |           |                  |                |                  | I    |           |                 |           |                  |                |                  | 13 |
| 2  | 245.1410  | 123.0741        | 227.1174  | 114.0624         |                |                  | Q    | 1233.5516 | 617.2794        | 1215.5280 | 608.2676         | 1215.5410      | 608.2742         | 12 |
| 3  | 361.1650  | 181.0861        | 343.1414  | 172.0743         | 343.1544       | 172.0809         | D    | 1103.4989 | 552.2531        | 1085.4754 | 543.2413         | 1085.4884      | 543.2478         | 11 |
| 4  | 475.2461  | 238.1267        | 457.2225  | 229.1149         | 457.2355       | 229.1214         | L    | 987.4750  | 494.2411        | 969.4514  | 485.2293         | 969.4644       | 485.2358         | 10 |
| 5  | 577.2908  | 289.1490        | 559.2672  | 280.1373         | 559.2802       | 280.1438         | T    | 873.3939  | 437.2006        | 855.3703  | 428.1888         | 855.3833       | 428.1953         | 9  |
| 6  | 635.3093  | 318.1583        | 617.2857  | 309.1465         | 617.2987       | 309.1530         | G    | 771.3492  | 386.1782        | 753.3256  | 377.1664         | 753.3386       | 377.1729         | 8  |
| 7  | 749.3904  | 375.1988        | 731.3668  | 366.1871         | 731.3798       | 366.1936         | L    | 713.3307  | 357.1690        | 695.3071  | 348.1572         | 695.3201       | 348.1637         | 7  |
| 8  | 837.4195  | 419.2134        | 819.3959  | 410.2016         | 819.4089       | 410.2081         | S    | 599.2496  | 300.1284        | 581.2260  | 291.1166         | 581.2390       | 291.1231         | 6  |
| 9  | 895.4380  | 448.2226        | 877.4144  | 439.2108         | 877.4274       | 439.2173         | G    | 511.2205  | 256.1139        | 493.1969  | 247.1021         | 493.2099       | 247.1086         | 5  |
| 10 | 1025.4776 | 513.2424        | 1007.4540 | 504.2306         | 1007.4670      | 504.2372         | E    | 453.2020  | 227.1046        | 435.1784  | 218.0928         | 435.1914       | 218.0994         | 4  |
| 11 | 1083.4961 | 542.2517        | 1065.4725 | 533.2399         | 1065.4855      | 533.2464         | G    | 323.1624  | 162.0848        | 305.1388  | 153.0730         |                |                  | 3  |
| 12 | 1199.5331 | 600.2702        | 1181.5095 | 591.2584         | 1181.5225      | 591.2649         | N    | 265.1439  | 133.0756        | 247.1203  | 124.0638         |                |                  | 2  |
| 13 |           |                 |           |                  |                |                  | K    | 149.1069  | 75.0571         | 131.0833  | 66.0453          |                |                  | 1  |

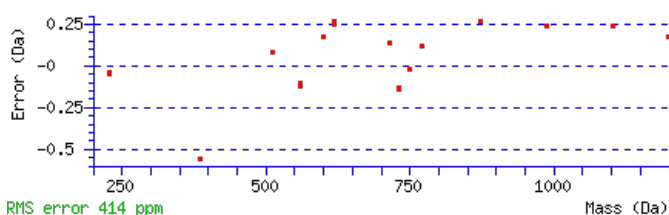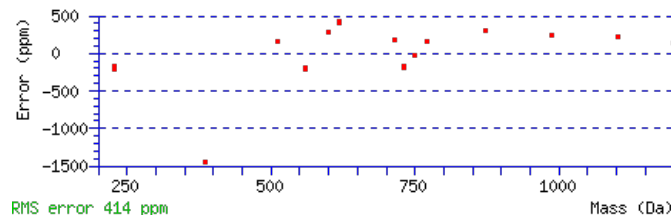

NCBI **BLAST** search of **IQDLTGLSGEGNK**

(Parameters: blastp, nr protein database, expect=20000, no filter, PAM30)

AT2G43710.1

Other BLAST [web gateways](#)

All matches to this query

| Score | Mr(calc)  | Delta   | Sequence                      |
|-------|-----------|---------|-------------------------------|
| 59.0  | 1346.6254 | -0.0039 | <a href="#">IQDLTGLSGEGNK</a> |
| 11.9  | 1346.6254 | -0.0039 | <a href="#">DGQTILLDGNTGK</a> |
| 8.2   | 1346.6254 | -0.0039 | <a href="#">LEDESRNLLDK</a>   |
| 6.9   | 1346.6180 | 0.0035  | <a href="#">LESIENMLS KGP</a> |
| 3.3   | 1346.6229 | -0.0014 | <a href="#">ACSGQSWLPVVK</a>  |
| 2.9   | 1346.6180 | 0.0035  | <a href="#">MSTDQAIVEPVK</a>  |
| 1.9   | 1346.6254 | -0.0039 | <a href="#">ELGPSSEISEKR</a>  |
| 1.4   | 1346.6180 | 0.0035  | <a href="#">IEDNMQVIVEK</a>   |
| 1.0   | 1346.6207 | 0.0008  | <a href="#">MTGHSIISSLER</a>  |
| 0.3   | 1346.6180 | 0.0035  | <a href="#">CLALLSGELDDK</a>  |

Mascot: <http://www.matrixscience.com/>

## Peptide View

MS/MS Fragmentation of **KTPNSYMLQQFDNPANPK**

Found in **AT2G43750.1** in **TAIR\_Arabidopsis**, Symbols: ACS1, CPACS1, ATCS-B, OASB | OASB (O-ACETYL SERINE (THIOL) LYASE B); cysteine synthase | chr2:18136681-18139399 REVERSE

Match to Query 9214: 2092.005984 from(698.342604,3+) index(4957)

Title: Elution from: 43.405 to 43.405 scan no 6207 cid35.00 polarity:+

Data file D1d-3\_3.mgf

Click mouse within plot area to zoom in by factor of two about that point

Or,   to  Da

Label all possible matches  Label matches used for scoring

Show Y-axis

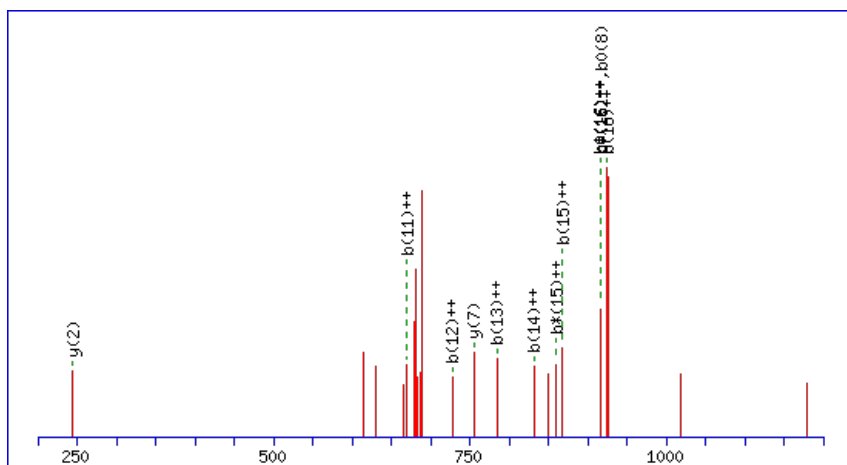

Monoisotopic mass of neutral peptide  $M_r(\text{calc})$ : 2092.0047

Fixed modifications: Carbamidomethyl (C) (apply to specified residues or termini only)

Ions Score: 23 Expect: 0.025

Matches : 12/190 fragment ions using 22 most intense peaks ([help](#))

| #  | b         | b <sup>++</sup> | b*        | b <sup>*++</sup> | b <sup>0</sup>  | b <sup>0++</sup> | Seq.     | y               | y <sup>++</sup> | y*        | y <sup>*++</sup> | y <sup>0</sup> | y <sup>0++</sup> | #         |
|----|-----------|-----------------|-----------|------------------|-----------------|------------------|----------|-----------------|-----------------|-----------|------------------|----------------|------------------|-----------|
| 1  | 129.1022  | 65.0548         | 112.0757  | 56.5415          |                 |                  | <b>K</b> |                 |                 |           |                  |                |                  | <b>18</b> |
| 2  | 230.1499  | 115.5786        | 213.1234  | 107.0653         | 212.1394        | 106.5733         | <b>T</b> | 1964.9171       | 982.9622        | 1947.8905 | 974.4489         | 1946.9065      | 973.9569         | <b>17</b> |
| 3  | 327.2027  | 164.1050        | 310.1761  | 155.5917         | 309.1921        | 155.0997         | <b>P</b> | 1863.8694       | 932.4383        | 1846.8429 | 923.9251         | 1845.8588      | 923.4331         | <b>16</b> |
| 4  | 441.2456  | 221.1264        | 424.2191  | 212.6132         | 423.2350        | 212.1212         | <b>N</b> | 1766.8166       | 883.9120        | 1749.7901 | 875.3987         | 1748.8061      | 874.9067         | <b>15</b> |
| 5  | 528.2776  | 264.6425        | 511.2511  | 256.1292         | 510.2671        | 255.6372         | <b>S</b> | 1652.7737       | 826.8905        | 1635.7472 | 818.3772         | 1634.7632      | 817.8852         | <b>14</b> |
| 6  | 691.3410  | 346.1741        | 674.3144  | 337.6608         | 673.3304        | 337.1688         | <b>Y</b> | 1565.7417       | 783.3745        | 1548.7151 | 774.8612         | 1547.7311      | 774.3692         | <b>13</b> |
| 7  | 822.3815  | 411.6944        | 805.3549  | 403.1811         | 804.3709        | 402.6891         | <b>M</b> | 1402.6784       | 701.8428        | 1385.6518 | 693.3295         | 1384.6678      | 692.8375         | <b>12</b> |
| 8  | 935.4655  | 468.2364        | 918.4390  | 459.7231         | <b>917.4550</b> | 459.2311         | <b>L</b> | 1271.6379       | 636.3226        | 1254.6113 | 627.8093         | 1253.6273      | 627.3173         | <b>11</b> |
| 9  | 1063.5241 | 532.2657        | 1046.4975 | 523.7524         | 1045.5135       | 523.2604         | <b>Q</b> | 1158.5538       | 579.7805        | 1141.5273 | 571.2673         | 1140.5432      | 570.7753         | <b>10</b> |
| 10 | 1191.5827 | 596.2950        | 1174.5561 | 587.7817         | 1173.5721       | 587.2897         | <b>Q</b> | 1030.4952       | 515.7513        | 1013.4687 | 507.2380         | 1012.4847      | 506.7460         | <b>9</b>  |
| 11 | 1338.6511 | <b>669.8292</b> | 1321.6245 | 661.3159         | 1320.6405       | 660.8239         | <b>F</b> | 902.4367        | 451.7220        | 885.4101  | 443.2087         | 884.4261       | 442.7167         | <b>8</b>  |
| 12 | 1453.6780 | <b>727.3427</b> | 1436.6515 | 718.8294         | 1435.6675       | 718.3374         | <b>D</b> | <b>755.3682</b> | 378.1878        | 738.3417  | 369.6745         | 737.3577       | 369.1825         | <b>7</b>  |
| 13 | 1567.7210 | <b>784.3641</b> | 1550.6944 | 775.8508         | 1549.7104       | 775.3588         | <b>N</b> | 640.3413        | 320.6743        | 623.3148  | 312.1610         |                |                  | <b>6</b>  |
| 14 | 1664.7737 | <b>832.8905</b> | 1647.7472 | 824.3772         | 1646.7632       | 823.8852         | <b>P</b> | 526.2984        | 263.6528        | 509.2718  | 255.1395         |                |                  | <b>5</b>  |
| 15 | 1735.8108 | <b>868.4091</b> | 1718.7843 | <b>859.8958</b>  | 1717.8003       | 859.4038         | <b>A</b> | 429.2456        | 215.1264        | 412.2191  | 206.6132         |                |                  | <b>4</b>  |
| 16 | 1849.8538 | <b>925.4305</b> | 1832.8272 | <b>916.9172</b>  | 1831.8432       | <b>916.4252</b>  | <b>N</b> | 358.2085        | 179.6079        | 341.1819  | 171.0946         |                |                  | <b>3</b>  |
| 17 | 1946.9065 | 973.9569        | 1929.8800 | 965.4436         | 1928.8960       | 964.9516         | <b>P</b> | <b>244.1656</b> | 122.5864        | 227.1390  | 114.0731         |                |                  | <b>2</b>  |
| 18 |           |                 |           |                  |                 |                  | <b>K</b> | 147.1128        | 74.0600         | 130.0863  | 65.5468          |                |                  | <b>1</b>  |

# AT2G43750.1

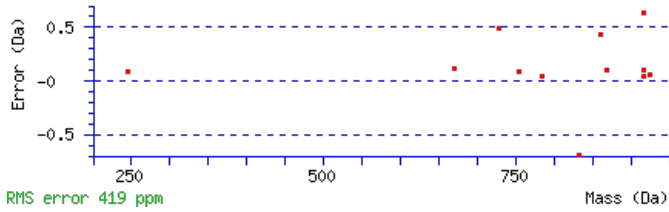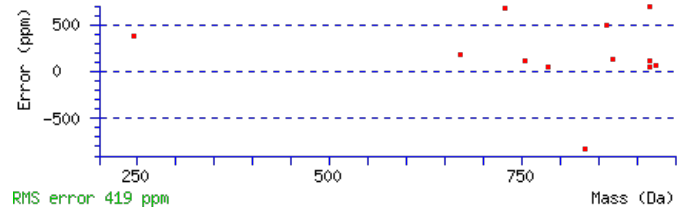

NCBI **BLAST** search of [KTPNSYMLQQFDNPANPK](#)  
 (Parameters: blastp, nr protein database, expect=20000, no filter, PAM30)  
 Other BLAST [web gateways](#)

## All matches to this query

| Score | Mr(calc)  | Delta   | Sequence                             |
|-------|-----------|---------|--------------------------------------|
| 22.6  | 2092.0047 | 0.0012  | <a href="#">KTPNSYMLQQFDNPANPK</a>   |
| 7.8   | 2092.0054 | 0.0006  | <a href="#">GWWAEDIAELGIDLYWR</a>    |
| 7.0   | 2092.0081 | -0.0021 | <a href="#">NPIYVMEAASRMIEPSR</a>    |
| 5.9   | 2092.0106 | -0.0047 | <a href="#">KSSKGKPEHSVDTTCNDII</a>  |
| 2.5   | 2092.0081 | -0.0021 | <a href="#">MGGCTSKPSSSVKPNPYAPK</a> |
| 0.4   | 2092.0048 | 0.0012  | <a href="#">YLDSLGLWCTALGGNEPR</a>   |
| 0.2   | 2092.0113 | -0.0053 | <a href="#">QDGSKDFEGYTTNLKYVK</a>   |
| 0.1   | 2092.0047 | 0.0012  | <a href="#">ECINLGAFGWAASLLEDAR</a>  |

Mascot: <http://www.matrixscience.com/>

**Peptide View**MS/MS Fragmentation of **AEYFSFVK**Found in **AT2G43910.1** in **TAIR\_Arabidopsis**, Symbols: | thiol methyltransferase, putative | chr2:18191734-18194027 REVERSE

Match to Query 2338: 989.485828 from(495.750190,2+) index(5826)

Title: Elution from: 52.169 to 52.169 scan no 7444 cid35.00 polarity:+

Data file D6h-1\_3.mgf

Click mouse within plot area to zoom in by factor of two about that point

Or,   to  Da Label all possible matches  Label matches used for scoring Show Y-axis 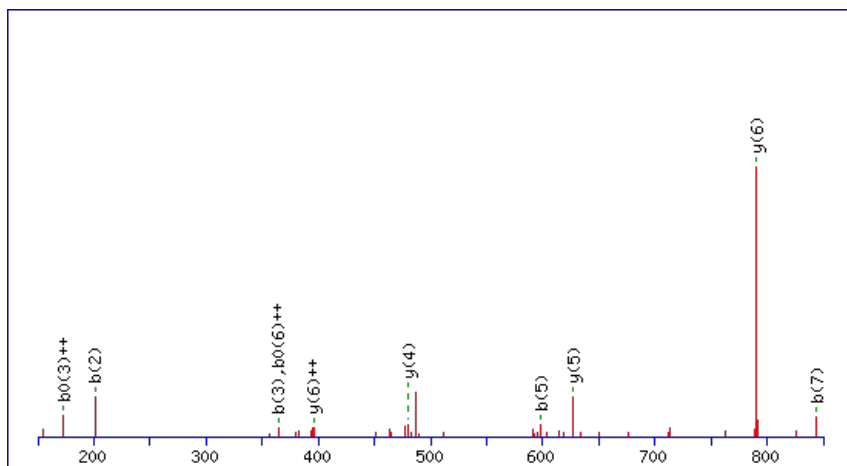Monoisotopic mass of neutral peptide **Mr(calc)**: 989.4858

Fixed modifications: Carbamidomethyl (C) (apply to specified residues or termini only)

Ions Score: 32 **Expect**: 0.0018Matches : 10/62 fragment ions using 12 most intense peaks ([help](#))

| # | b               | b <sup>++</sup> | b <sup>0</sup> | b <sup>0++</sup> | Seq. | y               | y <sup>++</sup> | y*       | y <sup>*++</sup> | y <sup>0</sup> | y <sup>0++</sup> | # |
|---|-----------------|-----------------|----------------|------------------|------|-----------------|-----------------|----------|------------------|----------------|------------------|---|
| 1 | 72.0444         | 36.5258         |                |                  | A    |                 |                 |          |                  |                |                  | 8 |
| 2 | <b>201.0870</b> | 101.0471        | 183.0764       | 92.0418          | E    | 919.4560        | 460.2316        | 902.4294 | 451.7184         | 901.4454       | 451.2264         | 7 |
| 3 | <b>364.1503</b> | 182.5788        | 346.1397       | <b>173.5735</b>  | Y    | <b>790.4134</b> | <b>395.7103</b> | 773.3869 | 387.1971         | 772.4028       | 386.7051         | 6 |
| 4 | 511.2187        | 256.1130        | 493.2082       | 247.1077         | F    | <b>627.3501</b> | 314.1787        | 610.3235 | 305.6654         | 609.3395       | 305.1734         | 5 |
| 5 | <b>598.2508</b> | 299.6290        | 580.2402       | 290.6237         | S    | <b>480.2817</b> | 240.6445        | 463.2551 | 232.1312         | 462.2711       | 231.6392         | 4 |
| 6 | 745.3192        | 373.1632        | 727.3086       | <b>364.1579</b>  | F    | 393.2496        | 197.1285        | 376.2231 | 188.6152         |                |                  | 3 |
| 7 | <b>844.3876</b> | 422.6974        | 826.3770       | 413.6921         | V    | 246.1812        | 123.5942        | 229.1547 | 115.0810         |                |                  | 2 |
| 8 |                 |                 |                |                  | K    | 147.1128        | 74.0600         | 130.0863 | 65.5468          |                |                  | 1 |

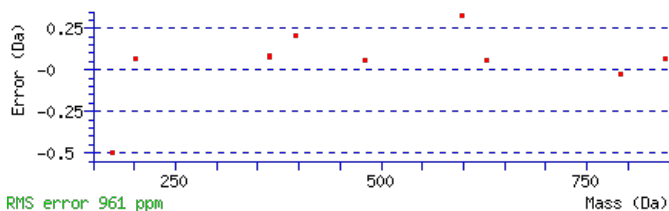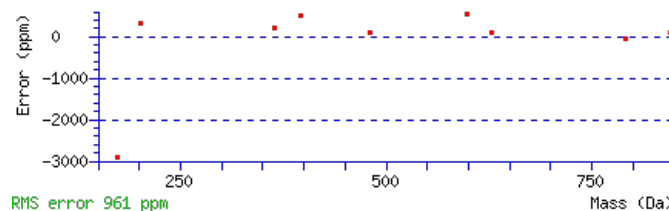NCBI **BLAST** search of [AEYFSFVK](#)

(Parameters: blastp, nr protein database, expect=20000, no filter, PAM30)

Other BLAST [web gateways](#)**All matches to this query**

| Score | Mr(calc) | Delta  | Sequence                  |
|-------|----------|--------|---------------------------|
| 32.4  | 989.4858 | 0.0000 | <a href="#">AEYFSFVK</a>  |
| 5.6   | 989.4852 | 0.0007 | <a href="#">DGLVQEAMK</a> |



## AT2G43910.1

|     |          |        |                           |
|-----|----------|--------|---------------------------|
| 5.2 | 989.4852 | 0.0006 | <a href="#">VGNVEVDMK</a> |
| 0.6 | 989.4852 | 0.0007 | <a href="#">EQEVMNLK</a>  |

**Mascot:** <http://www.matrixscience.com/>

## Peptide View

MS/MS Fragmentation of **STYNDINPGMIHPYR**

Found in **AT2G44060.1** in **TAIR\_Arabidopsis**, Symbols: | late embryogenesis abundant family protein / LEA family protein | chr2:18233998-18235064 FORWARD

Match to Query 8238: 1752.850826 from(877.432689,2+) index(7987)

Title: Elution from: 73.391 to 73.391 scan no 10597 cid35.00 polarity:+

Data file D1d-1\_1.mgf

Click mouse within plot area to zoom in by factor of two about that point

Or,  to  Da

Label all possible matches  Label matches used for scoring

Show Y-axis

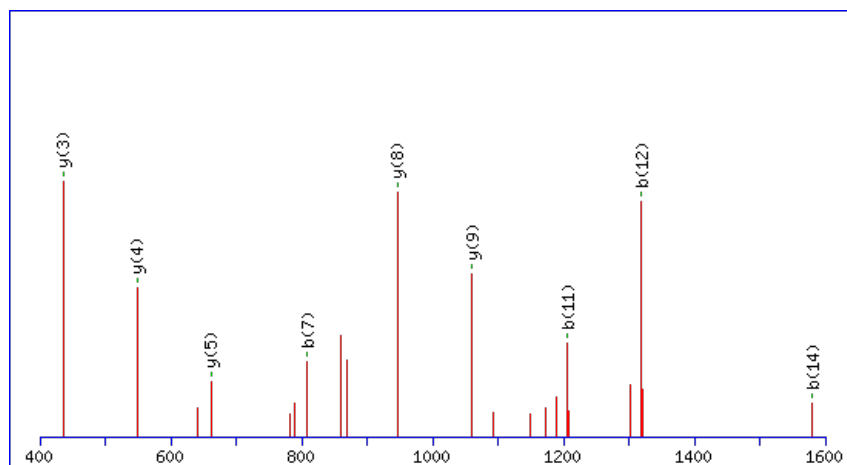

Monoisotopic mass of neutral peptide  $M_r(\text{calc})$ : 1752.8505

Fixed modifications: Carbamidomethyl (C) (apply to specified residues or termini only)

Ions Score: 51 Expect: 3.6e-005

Matches : 9/142 fragment ions using 10 most intense peaks ([help](#))

| #  | b                | b <sup>++</sup> | b*        | b <sup>*++</sup> | b <sup>0</sup> | b <sup>0++</sup> | Seq. | y                | y <sup>++</sup> | y*        | y <sup>*++</sup> | y <sup>0</sup> | y <sup>0++</sup> | #  |
|----|------------------|-----------------|-----------|------------------|----------------|------------------|------|------------------|-----------------|-----------|------------------|----------------|------------------|----|
| 1  | 88.0393          | 44.5233         |           |                  | 70.0287        | 35.5180          | S    |                  |                 |           |                  |                |                  | 15 |
| 2  | 189.0870         | 95.0471         |           |                  | 171.0764       | 86.0418          | T    | 1666.8258        | 833.9165        | 1649.7992 | 825.4032         | 1648.8152      | 824.9112         | 14 |
| 3  | 352.1503         | 176.5788        |           |                  | 334.1397       | 167.5735         | Y    | 1565.7781        | 783.3927        | 1548.7515 | 774.8794         | 1547.7675      | 774.3874         | 13 |
| 4  | 466.1932         | 233.6003        | 449.1667  | 225.0870         | 448.1827       | 224.5950         | N    | 1402.7147        | 701.8610        | 1385.6882 | 693.3477         | 1384.7042      | 692.8557         | 12 |
| 5  | 581.2202         | 291.1137        | 564.1936  | 282.6005         | 563.2096       | 282.1084         | D    | 1288.6718        | 644.8395        | 1271.6453 | 636.3263         | 1270.6613      | 635.8343         | 11 |
| 6  | 694.3042         | 347.6558        | 677.2777  | 339.1425         | 676.2937       | 338.6505         | I    | 1173.6449        | 587.3261        | 1156.6183 | 578.8128         |                |                  | 10 |
| 7  | <b>808.3472</b>  | 404.6772        | 791.3206  | 396.1640         | 790.3366       | 395.6719         | N    | <b>1060.5608</b> | 530.7840        | 1043.5343 | 522.2708         |                |                  | 9  |
| 8  | 905.3999         | 453.2036        | 888.3734  | 444.6903         | 887.3894       | 444.1983         | P    | <b>946.5179</b>  | 473.7626        | 929.4913  | 465.2493         |                |                  | 8  |
| 9  | 962.4214         | 481.7143        | 945.3949  | 473.2011         | 944.4108       | 472.7091         | G    | 849.4651         | 425.2362        | 832.4386  | 416.7229         |                |                  | 7  |
| 10 | 1093.4619        | 547.2346        | 1076.4353 | 538.7213         | 1075.4513      | 538.2293         | M    | 792.4437         | 396.7255        | 775.4171  | 388.2122         |                |                  | 6  |
| 11 | <b>1206.5459</b> | 603.7766        | 1189.5194 | 595.2633         | 1188.5354      | 594.7713         | I    | <b>661.4032</b>  | 331.2052        | 644.3766  | 322.6919         |                |                  | 5  |
| 12 | <b>1319.6300</b> | 660.3186        | 1302.6035 | 651.8054         | 1301.6194      | 651.3134         | I    | <b>548.3191</b>  | 274.6632        | 531.2926  | 266.1499         |                |                  | 4  |
| 13 | 1416.6828        | 708.8450        | 1399.6562 | 700.3318         | 1398.6722      | 699.8397         | P    | <b>435.2350</b>  | 218.1212        | 418.2085  | 209.6079         |                |                  | 3  |
| 14 | <b>1579.7461</b> | 790.3767        | 1562.7196 | 781.8634         | 1561.7355      | 781.3714         | Y    | 338.1823         | 169.5948        | 321.1557  | 161.0815         |                |                  | 2  |
| 15 |                  |                 |           |                  |                |                  | R    | 175.1190         | 88.0631         | 158.0924  | 79.5498          |                |                  | 1  |

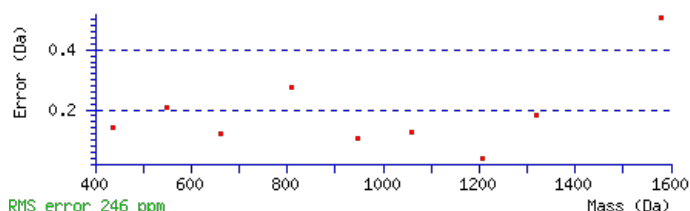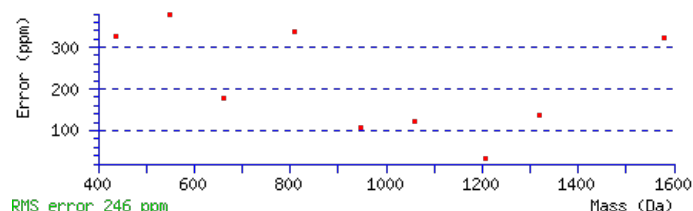

## AT2G44060.1

NCBI BLAST search of [STYNDINPGMIIPYR](#)

(Parameters: blastp, nr protein database, expect=20000, no filter, PAM30)

Other BLAST [web gateways](#)

### All matches to this query

| Score | Mr(calc)  | Delta   | Sequence                         |
|-------|-----------|---------|----------------------------------|
| 50.6  | 1752.8505 | 0.0003  | <a href="#">STYNDINPGMIIPYR</a>  |
| 3.0   | 1752.8465 | 0.0043  | <a href="#">ATINFTQNGISVEGMR</a> |
| 2.3   | 1752.8539 | -0.0031 | <a href="#">STFVFNVLMGMOELR</a>  |
| 1.4   | 1752.8505 | 0.0003  | <a href="#">YKFLLPGNCLRDEE</a>   |
| 1.0   | 1752.8460 | 0.0049  | <a href="#">SLMEEEMELVLMR</a>    |

Mascot: <http://www.matrixscience.com/>

**Peptide View**MS/MS Fragmentation of **IALTDNSIVDQALGK**Found in **AT2G44120.1** in **TAIR\_Arabidopsis**, Symbols: | 60S ribosomal protein L7 (RPL7C) | chr2:18256303-18257478 REVERSE

Match to Query 6785: 1556.843340 from(779.428946,2+) index(8143)

Title: Elution from: 72.821 to 72.821 scan no 10862 cid35.00 polarity:+

Data file 0-2\_2.mgf

Click mouse within plot area to zoom in by factor of two about that point

Or,   to  Da Label all possible matches  Label matches used for scoring Show Y-axis 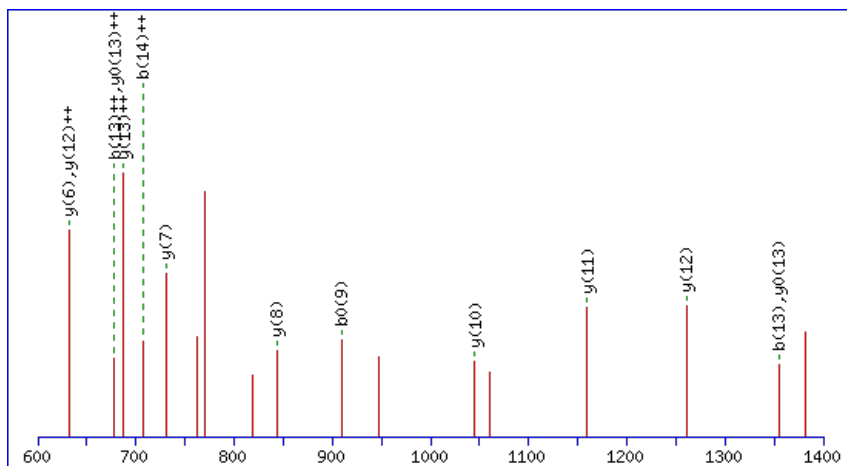Monoisotopic mass of neutral peptide  $M_r(\text{calc})$ : 1556.8410

Fixed modifications: Carbamidomethyl (C) (apply to specified residues or termini only)

Ions Score: 39 Expect: 0.00049

Matches : 14/142 fragment ions using 17 most intense peaks ([help](#))

| #  | b         | b <sup>++</sup> | b <sup>*</sup> | b <sup>*++</sup> | b <sup>0</sup> | b <sup>0++</sup> | Seq. | y         | y <sup>++</sup> | y <sup>*</sup> | y <sup>*++</sup> | y <sup>0</sup> | y <sup>0++</sup> | #  |
|----|-----------|-----------------|----------------|------------------|----------------|------------------|------|-----------|-----------------|----------------|------------------|----------------|------------------|----|
| 1  | 114.0913  | 57.5493         |                |                  |                |                  | I    |           |                 |                |                  |                |                  | 15 |
| 2  | 185.1285  | 93.0679         |                |                  |                |                  | A    | 1444.7642 | 722.8857        | 1427.7377      | 714.3725         | 1426.7536      | 713.8805         | 14 |
| 3  | 298.2125  | 149.6099        |                |                  |                |                  | L    | 1373.7271 | 687.3672        | 1356.7005      | 678.8539         | 1355.7165      | 678.3619         | 13 |
| 4  | 399.2602  | 200.1337        |                |                  | 381.2496       | 191.1285         | T    | 1260.6430 | 630.8251        | 1243.6165      | 622.3119         | 1242.6325      | 621.8199         | 12 |
| 5  | 514.2871  | 257.6472        |                |                  | 496.2766       | 248.6419         | D    | 1159.5953 | 580.3013        | 1142.5688      | 571.7880         | 1141.5848      | 571.2960         | 11 |
| 6  | 628.3301  | 314.6687        | 611.3035       | 306.1554         | 610.3195       | 305.6634         | N    | 1044.5684 | 522.7878        | 1027.5419      | 514.2746         | 1026.5578      | 513.7826         | 10 |
| 7  | 715.3621  | 358.1847        | 698.3355       | 349.6714         | 697.3515       | 349.1794         | S    | 930.5255  | 465.7664        | 913.4989       | 457.2531         | 912.5149       | 456.7611         | 9  |
| 8  | 828.4462  | 414.7267        | 811.4196       | 406.2134         | 810.4356       | 405.7214         | I    | 843.4934  | 422.2504        | 826.4669       | 413.7371         | 825.4829       | 413.2451         | 8  |
| 9  | 927.5146  | 464.2609        | 910.4880       | 455.7476         | 909.5040       | 455.2556         | V    | 730.4094  | 365.7083        | 713.3828       | 357.1951         | 712.3988       | 356.7030         | 7  |
| 10 | 1042.5415 | 521.7744        | 1025.5150      | 513.2611         | 1024.5310      | 512.7691         | D    | 631.3410  | 316.1741        | 614.3144       | 307.6608         | 613.3304       | 307.1688         | 6  |
| 11 | 1170.6001 | 585.8037        | 1153.5735      | 577.2904         | 1152.5895      | 576.7984         | Q    | 516.3140  | 258.6607        | 499.2875       | 250.1474         |                |                  | 5  |
| 12 | 1241.6372 | 621.3222        | 1224.6107      | 612.8090         | 1223.6266      | 612.3170         | A    | 388.2554  | 194.6314        | 371.2289       | 186.1181         |                |                  | 4  |
| 13 | 1354.7213 | 677.8643        | 1337.6947      | 669.3510         | 1336.7107      | 668.8590         | L    | 317.2183  | 159.1128        | 300.1918       | 150.5995         |                |                  | 3  |
| 14 | 1411.7427 | 706.3750        | 1394.7162      | 697.8617         | 1393.7322      | 697.3697         | G    | 204.1343  | 102.5708        | 187.1077       | 94.0575          |                |                  | 2  |
| 15 |           |                 |                |                  |                |                  | K    | 147.1128  | 74.0600         | 130.0863       | 65.5468          |                |                  | 1  |

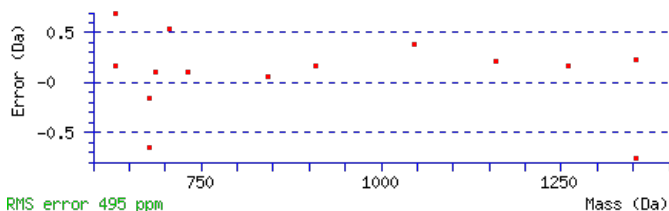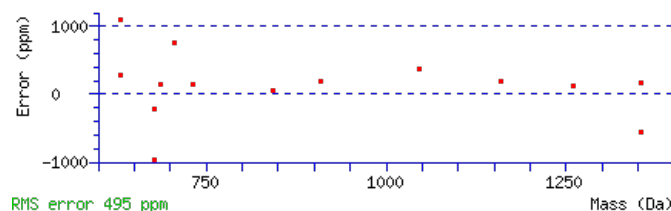NCBI BLAST search of [IALTDNSIVDQALGK](#)

## AT2G44120.1

(Parameters: blastp, nr protein database, expect=20000, no filter, PAM30)

Other BLAST [web gateways](#)

### All matches to this query

| Score | Mr(calc)  | Delta   | Sequence                        |
|-------|-----------|---------|---------------------------------|
| 39.1  | 1556.8410 | 0.0024  | <a href="#">IALTDNSIVDQALGK</a> |
| 9.4   | 1556.8457 | -0.0023 | <a href="#">IVREQMAVREAAGK</a>  |
| 3.5   | 1556.8410 | 0.0024  | <a href="#">AGLEKEAEVASQVVK</a> |
| 0.2   | 1556.8457 | -0.0023 | <a href="#">DVLDLMRIGQKNR</a>   |

Mascot: <http://www.matrixscience.com/>

**Peptide View**MS/MS Fragmentation of **ALGLALERPK**Found in **AT2G44350.1** in **TAIR\_Arabidopsis**, Symbols: CSY4, ATCS | ATCS (CITRATE SYNTHASE 4); citrate (SI)-synthase | chr2:18323749-18327600 FORWARD

Match to Query 2783: 1080.608658 from(361.210162,3+) index(2957)

Title: Elution from: 30.502 to 30.502 scan no 3739 cid35.00 polarity:+

Data file D1d-2\_3.mgf

Click mouse within plot area to zoom in by factor of two about that point

Or,   to  Da Label all possible matches  Label matches used for scoring Show Y-axis 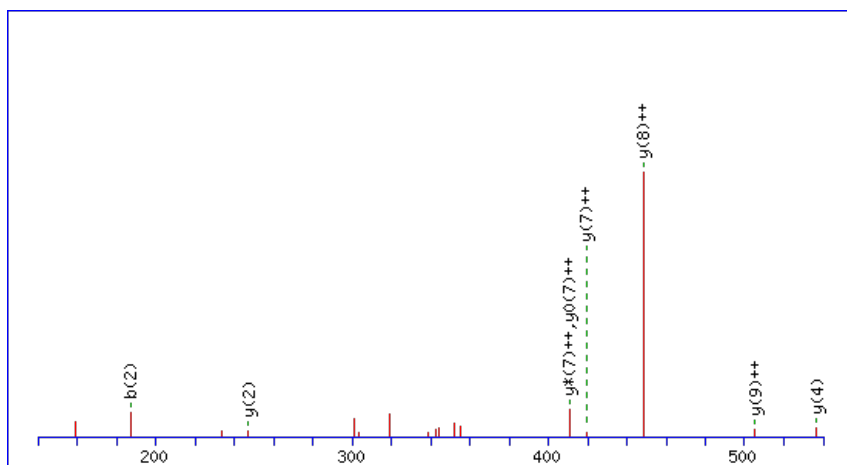Monoisotopic mass of neutral peptide  $M_r(\text{calc})$ : 1080.6084

Fixed modifications: Carbamidomethyl (C) (apply to specified residues or termini only)

Ions Score: 20 Expect: 0.028

Matches : 8/76 fragment ions using 11 most intense peaks ([help](#))

| #  | b        | b <sup>++</sup> | b*       | b <sup>*++</sup> | b <sup>0</sup> | b <sup>0++</sup> | Seq. | y         | y <sup>++</sup> | y*       | y <sup>*++</sup> | y <sup>0</sup> | y <sup>0++</sup> | #  |
|----|----------|-----------------|----------|------------------|----------------|------------------|------|-----------|-----------------|----------|------------------|----------------|------------------|----|
| 1  | 73.0414  | 37.0244         |          |                  |                |                  | A    |           |                 |          |                  |                |                  | 10 |
| 2  | 187.1225 | 94.0649         |          |                  |                |                  | L    | 1009.5815 | 505.2944        | 991.5579 | 496.2826         | 991.5709       | 496.2891         | 9  |
| 3  | 245.1410 | 123.0741        |          |                  |                |                  | G    | 895.5004  | 448.2538        | 877.4768 | 439.2420         | 877.4898       | 439.2486         | 8  |
| 4  | 359.2221 | 180.1147        |          |                  |                |                  | L    | 837.4819  | 419.2446        | 819.4583 | 410.2328         | 819.4713       | 410.2393         | 7  |
| 5  | 431.2563 | 216.1318        |          |                  |                |                  | A    | 723.4008  | 362.2040        | 705.3772 | 353.1922         | 705.3902       | 353.1988         | 6  |
| 6  | 545.3374 | 273.1723        |          |                  |                |                  | L    | 651.3667  | 326.1870        | 633.3431 | 317.1752         | 633.3561       | 317.1817         | 5  |
| 7  | 675.3770 | 338.1921        |          |                  | 657.3664       | 329.1869         | E    | 537.2856  | 269.1464        | 519.2620 | 260.1346         | 519.2750       | 260.1411         | 4  |
| 8  | 835.4662 | 418.2368        | 817.4427 | 409.2250         | 817.4557       | 409.2315         | R    | 407.2459  | 204.1266        | 389.2223 | 195.1148         |                |                  | 3  |
| 9  | 933.5160 | 467.2617        | 915.4925 | 458.2499         | 915.5055       | 458.2564         | P    | 247.1567  | 124.0820        | 229.1331 | 115.0702         |                |                  | 2  |
| 10 |          |                 |          |                  |                |                  | K    | 149.1069  | 75.0571         | 131.0833 | 66.0453          |                |                  | 1  |

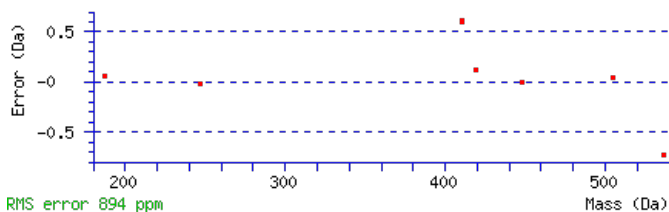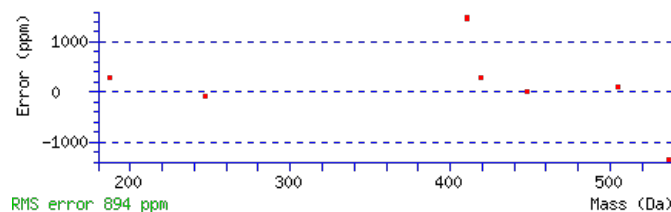NCBI BLAST search of **ALGLALERPK**

(Parameters: blastp, nr protein database, expect=20000, no filter, PAM30)

Other BLAST [web gateways](#)

All matches to this query

## AT2G44350.1

| Score | Mr(calc)  | Delta   | Sequence                    |
|-------|-----------|---------|-----------------------------|
| 20.5  | 1080.6084 | 0.0003  | <a href="#">ALGLALERP</a> K |
| 4.8   | 1080.6084 | 0.0003  | <a href="#">LRIPSSVAP</a> K |
| 4.8   | 1080.6057 | 0.0030  | <a href="#">IAIELIGDV</a> K |
| 4.7   | 1080.6111 | -0.0024 | <a href="#">IAIKPRPNR</a>   |
| 4.5   | 1080.6084 | 0.0003  | <a href="#">AIVVDAKP</a> V  |

Mascot: <http://www.matrixscience.com/>

**Peptide View**MS/MS Fragmentation of **VNLTNANLEGATVTGNTSFK**Found in **AT2G44920.1** in **TAIR\_Arabidopsis**, Symbols: | thylakoid luminal 15 kDa protein, chloroplast | chr2:18531494-18533311 FORWARD

Match to Query 9454: 2074.960058 from(1038.487305,2+) index(6005)

Title: Elution from: 53.153 to 53.153 scan no 7651 cid35.00 polarity:+

Data file 0-3\_2.mgf

Click mouse within plot area to zoom in by factor of two about that point

Or,   to  Da Label all possible matches  Label matches used for scoring Show Y-axis 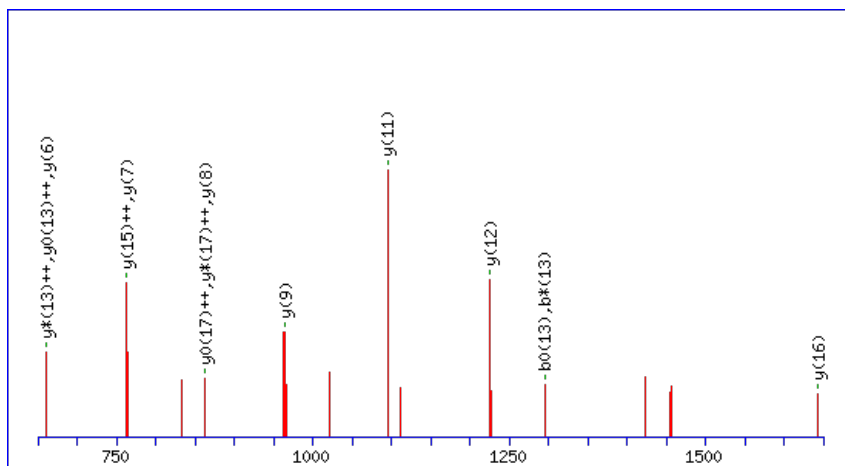**Monoisotopic mass of neutral peptide Mr(calc):** 2074.9590**Fixed modifications:** Carbamidomethyl (C) (apply to specified residues or termini only)**Ions Score:** 53 **Expect:** 4.3e-005**Matches:** 14/216 fragment ions using 9 most intense peaks ([help](#))

| #  | b         | b <sup>++</sup> | b <sup>*</sup> | b <sup>*++</sup> | b <sup>0</sup> | b <sup>0++</sup> | Seq. | y         | y <sup>++</sup> | y <sup>*</sup> | y <sup>*++</sup> | y <sup>0</sup> | y <sup>0++</sup> | #  |
|----|-----------|-----------------|----------------|------------------|----------------|------------------|------|-----------|-----------------|----------------|------------------|----------------|------------------|----|
| 1  | 101.0727  | 51.0400         |                |                  |                |                  | V    |           |                 |                |                  |                |                  | 20 |
| 2  | 217.1097  | 109.0585        | 199.0861       | 100.0467         |                |                  | N    | 1975.9008 | 988.4540        | 1957.8772      | 979.4422         | 1957.8902      | 979.4488         | 19 |
| 3  | 331.1908  | 166.0990        | 313.1672       | 157.0873         |                |                  | L    | 1859.8638 | 930.4355        | 1841.8402      | 921.4237         | 1841.8532      | 921.4303         | 18 |
| 4  | 433.2355  | 217.1214        | 415.2120       | 208.1096         | 415.2250       | 208.1161         | T    | 1745.7827 | 873.3950        | 1727.7591      | 864.3832         | 1727.7721      | 864.3897         | 17 |
| 5  | 549.2725  | 275.1399        | 531.2489       | 266.1281         | 531.2620       | 266.1346         | N    | 1643.7380 | 822.3726        | 1625.7144      | 813.3608         | 1625.7274      | 813.3673         | 16 |
| 6  | 621.3067  | 311.1570        | 603.2831       | 302.1452         | 603.2961       | 302.1517         | A    | 1527.7010 | 764.3541        | 1509.6774      | 755.3423         | 1509.6904      | 755.3489         | 15 |
| 7  | 737.3437  | 369.1755        | 719.3201       | 360.1637         | 719.3331       | 360.1702         | N    | 1455.6668 | 728.3371        | 1437.6433      | 719.3253         | 1437.6563      | 719.3318         | 14 |
| 8  | 851.4248  | 426.2160        | 833.4012       | 417.2042         | 833.4142       | 417.2107         | L    | 1339.6298 | 670.3186        | 1321.6063      | 661.3068         | 1321.6193      | 661.3133         | 13 |
| 9  | 981.4644  | 491.2358        | 963.4408       | 482.2240         | 963.4538       | 482.2306         | E    | 1225.5487 | 613.2780        | 1207.5252      | 604.2662         | 1207.5382      | 604.2727         | 12 |
| 10 | 1039.4829 | 520.2451        | 1021.4593      | 511.2333         | 1021.4723      | 511.2398         | G    | 1095.5091 | 548.2582        | 1077.4855      | 539.2464         | 1077.4986      | 539.2529         | 11 |
| 11 | 1111.5171 | 556.2622        | 1093.4935      | 547.2504         | 1093.5065      | 547.2569         | A    | 1037.4906 | 519.2489        | 1019.4670      | 510.2372         | 1019.4801      | 510.2437         | 10 |
| 12 | 1213.5618 | 607.2845        | 1195.5382      | 598.2727         | 1195.5512      | 598.2792         | T    | 965.4565  | 483.2319        | 947.4329       | 474.2201         | 947.4459       | 474.2266         | 9  |
| 13 | 1313.6272 | 657.3172        | 1295.6036      | 648.3055         | 1295.6166      | 648.3120         | V    | 863.4118  | 432.2095        | 845.3882       | 423.1977         | 845.4012       | 423.2042         | 8  |
| 14 | 1415.6719 | 708.3396        | 1397.6483      | 699.3278         | 1397.6614      | 699.3343         | T    | 763.3463  | 382.1768        | 745.3227       | 373.1650         | 745.3357       | 373.1715         | 7  |
| 15 | 1473.6904 | 737.3489        | 1455.6668      | 728.3371         | 1455.6799      | 728.3436         | G    | 661.3016  | 331.1544        | 643.2780       | 322.1426         | 643.2910       | 322.1492         | 6  |
| 16 | 1589.7274 | 795.3673        | 1571.7038      | 786.3556         | 1571.7169      | 786.3621         | N    | 603.2831  | 302.1452        | 585.2595       | 293.1334         | 585.2725       | 293.1399         | 5  |
| 17 | 1691.7721 | 846.3897        | 1673.7486      | 837.3779         | 1673.7616      | 837.3844         | T    | 487.2461  | 244.1267        | 469.2225       | 235.1149         | 469.2355       | 235.1214         | 4  |
| 18 | 1779.8012 | 890.4042        | 1761.7776      | 881.3924         | 1761.7906      | 881.3990         | S    | 385.2014  | 193.1043        | 367.1778       | 184.0925         | 367.1908       | 184.0990         | 3  |
| 19 | 1927.8666 | 964.4370        | 1909.8431      | 955.4252         | 1909.8561      | 955.4317         | F    | 297.1723  | 149.0898        | 279.1487       | 140.0780         |                |                  | 2  |
| 20 |           |                 |                |                  |                |                  | K    | 149.1069  | 75.0571         | 131.0833       | 66.0453          |                |                  | 1  |



AT2G44920.1

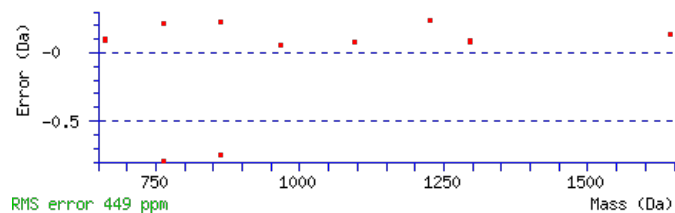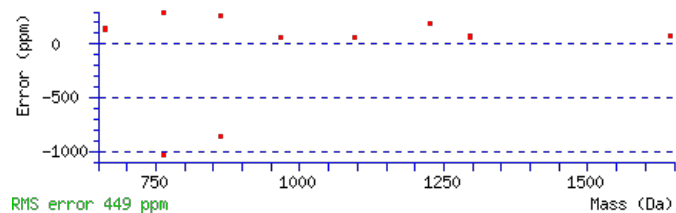

NCBI **BLAST** search of [VNLTNANLEGATVTGNTSEK](#)  
(Parameters: blastp, nr protein database, expect=20000, no filter, PAM30)

Other BLAST [web gateways](#)

**All matches to this query**

| Score | Mr(calc)  | Delta  | Sequence                             |
|-------|-----------|--------|--------------------------------------|
| 53.3  | 2074.9590 | 0.0011 | <a href="#">VNLTNANLEGATVTGNTSEK</a> |
| 1.4   | 2074.9549 | 0.0051 | <a href="#">NIELSREVAEMKTEMIK</a>    |
| 1.2   | 2074.9542 | 0.0058 | <a href="#">CAVSPTLIKTFDSDPSRR</a>   |

Mascot: <http://www.matrixscience.com/>

**Peptide View**MS/MS Fragmentation of **FGNTKVMK**Found in **AT2G44990.1** in **TAIR\_Arabidopsis**, Symbols: MAX3, CCD7 | CCD7 (more axillary growth 3) | chr2:18566013-18568408 FORWARD

Match to Query 1860: 934.458382 from(468.236467,2+) index(7877)

Title: Elution from: 70.585 to 70.585 scan no 10311 cid35.00 polarity:+

Data file D6h-2\_2.mgf

Click mouse within plot area to zoom in by factor of two about that point

Or,   to  Da Label all possible matches  Label matches used for scoring Show Y-axis 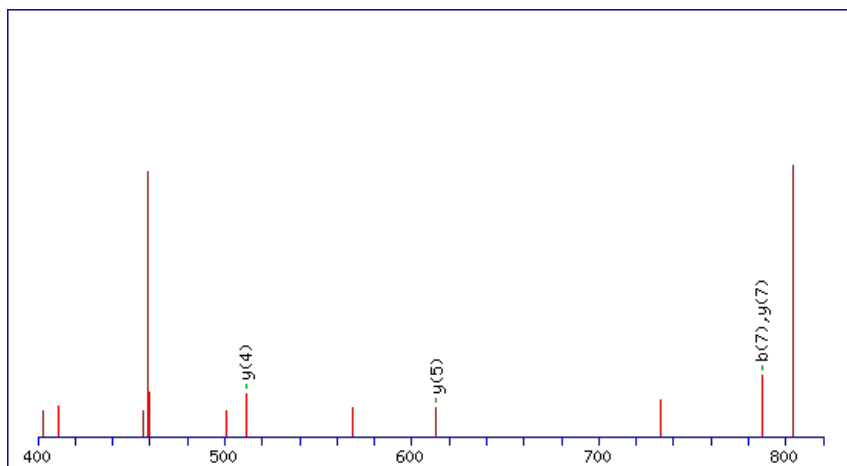Monoisotopic mass of neutral peptide **Mr(calc)**: 934.4572

Fixed modifications: Carbamidomethyl (C) (apply to specified residues or termini only)

Ions Score: 22 **Expect**: 0.036Matches : 4/66 fragment ions using 5 most intense peaks ([help](#))

| # | b        | b <sup>++</sup> | b*       | b <sup>*++</sup> | b <sup>0</sup> | b <sup>0++</sup> | Seq. | y        | y <sup>++</sup> | y*       | y <sup>*++</sup> | y <sup>0</sup> | y <sup>0++</sup> | # |
|---|----------|-----------------|----------|------------------|----------------|------------------|------|----------|-----------------|----------|------------------|----------------|------------------|---|
| 1 | 149.0727 | 75.0400         |          |                  |                |                  | F    |          |                 |          |                  |                |                  | 8 |
| 2 | 207.0912 | 104.0492        |          |                  |                |                  | G    | 787.3991 | 394.2032        | 769.3755 | 385.1914         | 769.3885       | 385.1979         | 7 |
| 3 | 323.1282 | 162.0677        | 305.1046 | 153.0560         |                |                  | N    | 729.3806 | 365.1939        | 711.3570 | 356.1821         | 711.3700       | 356.1886         | 6 |
| 4 | 425.1729 | 213.0901        | 407.1494 | 204.0783         | 407.1624       | 204.0848         | T    | 613.3436 | 307.1754        | 595.3200 | 298.1636         | 595.3330       | 298.1702         | 5 |
| 5 | 555.2620 | 278.1346        | 537.2384 | 269.1228         | 537.2514       | 269.1293         | K    | 511.2989 | 256.1531        | 493.2753 | 247.1413         |                |                  | 4 |
| 6 | 655.3274 | 328.1673        | 637.3038 | 319.1556         | 637.3169       | 319.1621         | V    | 381.2098 | 191.1086        | 363.1863 | 182.0968         |                |                  | 3 |
| 7 | 787.3649 | 394.1861        | 769.3414 | 385.1743         | 769.3544       | 385.1808         | M    | 281.1444 | 141.0758        | 263.1208 | 132.0640         |                |                  | 2 |
| 8 |          |                 |          |                  |                |                  | K    | 149.1069 | 75.0571         | 131.0833 | 66.0453          |                |                  | 1 |

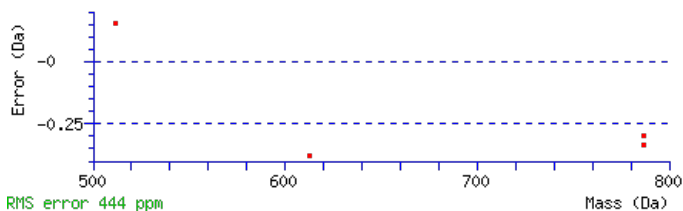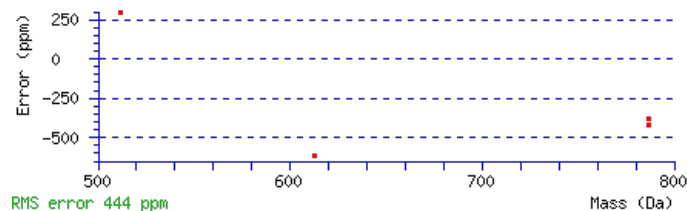NCBI **BLAST** search of **FGNTKVMK**

(Parameters: blastp, nr protein database, expect=20000, no filter, PAM30)

Other BLAST [web gateways](#)**All matches to this query**

| Score | Mr(calc) | Delta  | Sequence                 |
|-------|----------|--------|--------------------------|
| 21.9  | 934.4572 | 0.0011 | <a href="#">FGNTKVMK</a> |
| 9.6   | 934.4572 | 0.0011 | <a href="#">FDRIMVK</a>  |

## AT2G44990.1

|     |          |        |                          |
|-----|----------|--------|--------------------------|
| 9.6 | 934.4577 | 0.0007 | <a href="#">MGRGSLRK</a> |
| 9.6 | 934.4577 | 0.0007 | <a href="#">MRNTVRK</a>  |
| 4.2 | 934.4577 | 0.0007 | <a href="#">ARARMATK</a> |
| 3.9 | 934.4573 | 0.0011 | <a href="#">HAMLPEVK</a> |
| 3.4 | 934.4573 | 0.0011 | <a href="#">FKKNMEK</a>  |

**Mascot:** <http://www.matrixscience.com/>

**Peptide View**MS/MS Fragmentation of **MDSLAI SPRK**

Found in **AT2G45080.1** in **TAIR\_Arabidopsis**, Symbols: CYCP3;1 | CYCP3;1 (cyclin p3;1); cyclin-dependent protein kinase | chr2:18598763-18599518 FORWARD

Match to Query 3597: 1146.552176 from(574.283364,2+) index(6539)

Title: Elution from: 57.153 to 57.153 scan no 8448 cid35.00 polarity:+

Data file D6h-3\_3.mgf

Click mouse within plot area to zoom in by factor of two about that point

Or,   to  Da

Label all possible matches  Label matches used for scoring

Show Y-axis

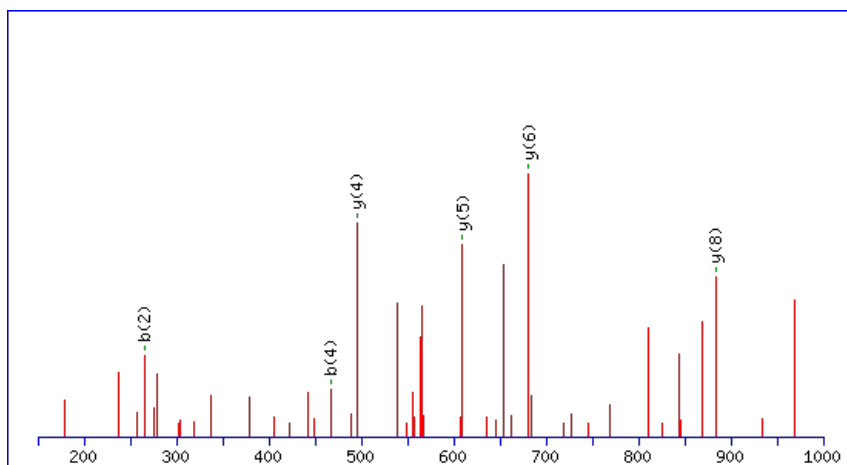

**Monoisotopic mass of neutral peptide Mr(calc):** 1146.5495

**Fixed modifications:** Carbamidomethyl (C) (apply to specified residues or termini only)

**Variable modifications:**

**M1** : Oxidation (M), with neutral losses 0.0000 (shown in table), 63.9983

**Ions Score:** 27 **Expect:** 0.023

**Matches** : 6/120 fragment ions using 8 most intense peaks ([help](#))

| #  | b               | b <sup>++</sup> | b*       | b <sup>*++</sup> | b <sup>0</sup> | b <sup>0++</sup> | Seq. | y               | y <sup>++</sup> | y*       | y <sup>*++</sup> | y <sup>0</sup> | y <sup>0++</sup> | #  |
|----|-----------------|-----------------|----------|------------------|----------------|------------------|------|-----------------|-----------------|----------|------------------|----------------|------------------|----|
| 1  | 149.0397        | 75.0235         |          |                  |                |                  | M    |                 |                 |          |                  |                |                  | 10 |
| 2  | <b>265.0637</b> | 133.0355        |          |                  | 247.0531       | 124.0302         | D    | 999.5244        | 500.2658        | 981.5008 | 491.2540         | 981.5138       | 491.2605         | 9  |
| 3  | 353.0928        | 177.0500        |          |                  | 335.0822       | 168.0447         | S    | <b>883.5004</b> | 442.2538        | 865.4768 | 433.2420         | 865.4898       | 433.2486         | 8  |
| 4  | <b>467.1739</b> | 234.0906        |          |                  | 449.1633       | 225.0853         | L    | 795.4713        | 398.2393        | 777.4478 | 389.2275         | 777.4608       | 389.2340         | 7  |
| 5  | 539.2080        | 270.1076        |          |                  | 521.1974       | 261.1024         | A    | <b>681.3902</b> | 341.1988        | 663.3667 | 332.1870         | 663.3797       | 332.1935         | 6  |
| 6  | 653.2891        | 327.1482        |          |                  | 635.2785       | 318.1429         | I    | <b>609.3561</b> | 305.1817        | 591.3325 | 296.1699         | 591.3455       | 296.1764         | 5  |
| 7  | 741.3182        | 371.1627        |          |                  | 723.3076       | 362.1574         | S    | <b>495.2750</b> | 248.1411        | 477.2514 | 239.1293         | 477.2644       | 239.1358         | 4  |
| 8  | 839.3680        | 420.1876        |          |                  | 821.3574       | 411.1823         | P    | 407.2459        | 204.1266        | 389.2223 | 195.1148         |                |                  | 3  |
| 9  | 999.4572        | 500.2322        | 981.4336 | 491.2205         | 981.4466       | 491.2270         | R    | 309.1961        | 155.1017        | 291.1725 | 146.0899         |                |                  | 2  |
| 10 |                 |                 |          |                  |                |                  | K    | 149.1069        | 75.0571         | 131.0833 | 66.0453          |                |                  | 1  |

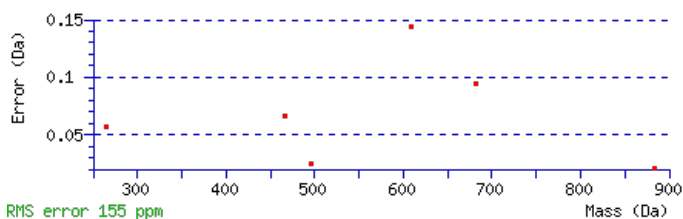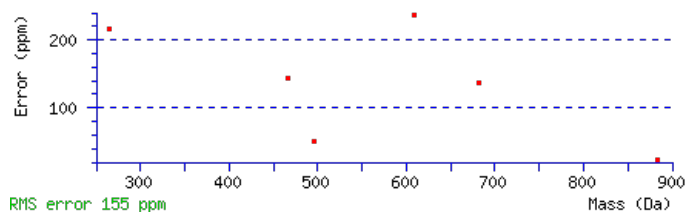

NCBI **BLAST** search of [MDSLAI SPRK](#)

(Parameters: blastp, nr protein database, expect=20000, no filter, PAM30)

Other BLAST [web gateways](#)

**All matches to this query**

## AT2G45080.1

| Score | Mr(calc)  | Delta   | Sequence                    |
|-------|-----------|---------|-----------------------------|
| 26.8  | 1146.5495 | 0.0026  | <a href="#">MDSLAI SPRK</a> |
| 13.5  | 1146.5495 | 0.0026  | <a href="#">IMRDLNVEK</a>   |
| 11.9  | 1146.5518 | 0.0004  | <a href="#">KVFDLMPER</a>   |
| 10.6  | 1146.5495 | 0.0026  | <a href="#">IMQAAAASNLK</a> |
| 9.0   | 1146.5549 | -0.0027 | <a href="#">TRHAIARMR</a>   |
| 6.7   | 1146.5495 | 0.0026  | <a href="#">GESMEILAKR</a>  |
| 6.3   | 1146.5522 | -0.0000 | <a href="#">KCNQLKPSR</a>   |
| 6.3   | 1146.5522 | -0.0000 | <a href="#">MRKGGLTPDR</a>  |
| 5.3   | 1146.5488 | 0.0034  | <a href="#">AYRVDGHGKK</a>  |
| 5.0   | 1146.5542 | -0.0021 | <a href="#">ATEGKDVTVSK</a> |

Mascot: <http://www.matrixscience.com/>

**Peptide View**MS/MS Fragmentation of **AFGNFQK**Found in **AT2G45290.1** in **TAIR\_Arabidopsis**, Symbols: | transketolase, putative | chr2:18679811-18682663 FORWARD

Match to Query 1083: 820.372478 from(411.193515,2+) index(2261)

Title: Elution from: 25.130 to 25.130 scan no 2866 cid35.00 polarity:+

Data file D12h-3\_2.mgf

Click mouse within plot area to zoom in by factor of two about that point

Or,  to  Da Label all possible matches  Label matches used for scoring Show Y-axis 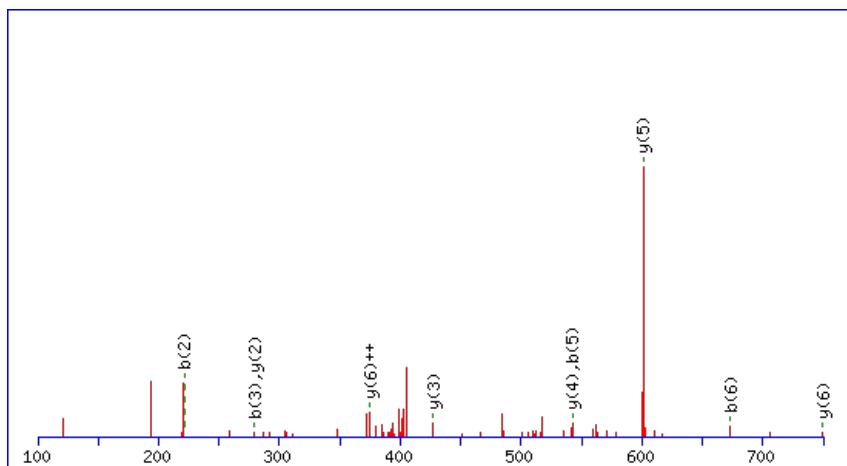Monoisotopic mass of neutral peptide **Mr(calc)**: 820.3728**Fixed modifications**: Carbamidomethyl (C) (apply to specified residues or termini only)**Ions Score**: 26 **Expect**: 0.015**Matches** : 10/42 fragment ions using 23 most intense peaks ([help](#))

| # | b               | b <sup>++</sup> | b*       | b <sup>*++</sup> | Seq. | y               | y <sup>++</sup> | y*       | y <sup>*++</sup> | # |
|---|-----------------|-----------------|----------|------------------|------|-----------------|-----------------|----------|------------------|---|
| 1 | 73.0414         | 37.0244         |          |                  | A    |                 |                 |          |                  | 7 |
| 2 | <b>221.1069</b> | 111.0571        |          |                  | F    | <b>749.3459</b> | <b>375.1766</b> | 731.3223 | 366.1648         | 6 |
| 3 | <b>279.1254</b> | 140.0663        |          |                  | G    | <b>601.2805</b> | 301.1439        | 583.2569 | 292.1321         | 5 |
| 4 | 395.1624        | 198.0848        | 377.1388 | 189.0730         | N    | <b>543.2620</b> | 272.1346        | 525.2384 | 263.1228         | 4 |
| 5 | <b>543.2278</b> | 272.1175        | 525.2042 | 263.1058         | F    | <b>427.2250</b> | 214.1161        | 409.2014 | 205.1043         | 3 |
| 6 | <b>673.2805</b> | 337.1439        | 655.2569 | 328.1321         | Q    | <b>279.1595</b> | 140.0834        | 261.1359 | 131.0716         | 2 |
| 7 |                 |                 |          |                  | K    | 149.1069        | 75.0571         | 131.0833 | 66.0453          | 1 |

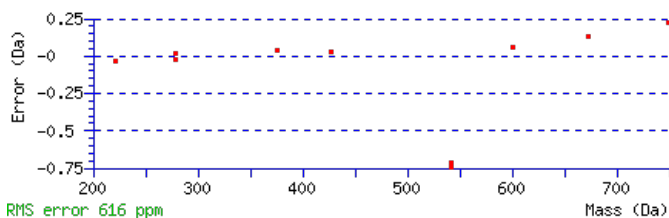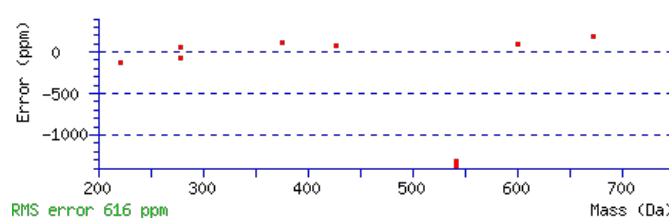NCBI **BLAST** search of **AFGNFQK**

(Parameters: blastp, nr protein database, expect=20000, no filter, PAM30)

Other BLAST [web gateways](#)**All matches to this query**

| Score | Mr(calc) | Delta   | Sequence                |
|-------|----------|---------|-------------------------|
| 25.9  | 820.3728 | -0.0003 | <a href="#">AFGNFQK</a> |
| 12.0  | 820.3739 | -0.0014 | <a href="#">AMSRTTK</a> |
| 8.6   | 820.3739 | -0.0014 | <a href="#">MASRTTK</a> |

## AT2G45290.1

|     |          |         |                         |
|-----|----------|---------|-------------------------|
| 8.0 | 820.3739 | -0.0014 | <a href="#">MATRSK</a>  |
| 3.2 | 820.3721 | 0.0003  | <a href="#">MIMMKK</a>  |
| 2.6 | 820.3705 | 0.0019  | <a href="#">EGRSYAK</a> |
| 2.6 | 820.3705 | 0.0019  | <a href="#">RADSYAK</a> |
| 1.9 | 820.3705 | 0.0019  | <a href="#">GYERSAK</a> |
| 1.8 | 820.3728 | -0.0003 | <a href="#">AFPSSFR</a> |
| 1.8 | 820.3705 | 0.0019  | <a href="#">AFSDKSR</a> |

**Mascot:** <http://www.matrixscience.com/>

## Peptide View

### MS/MS Fragmentation of IDALGR

Found in **AT2G45330.1** in **TAIR\_Arabidopsis**, Symbols: EMB1067 | EMB1067 (EMBRYO DEFECTIVE 1067); tRNA 2'-phosphotransferase | chr2:18693414-18694948 FORWARD

Match to Query 563: 643.366262 from(322.690407,2+) index(1243)

Title: Elution from: 18.012 to 18.012 scan no 1715 cid35.00 polarity:+

Data file C7-2\_2.mgf

Click mouse within plot area to zoom in by factor of two about that point

Or,   to  Da

Label all possible matches  Label matches used for scoring

Show Y-axis

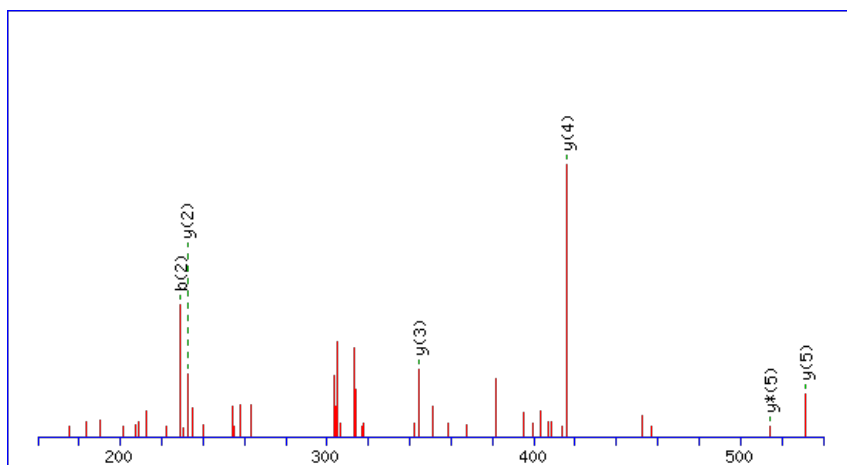

Monoisotopic mass of neutral peptide  $M_r(\text{calc})$ : 643.3653

Fixed modifications: Carbamidomethyl (C) (apply to specified residues or termini only)

Ions Score: 28 Expect: 0.03

Matches : 6/40 fragment ions using 11 most intense peaks ([help](#))

| # | b        | b <sup>++</sup> | b <sup>0</sup> | b <sup>0++</sup> | Seq. | y        | y <sup>++</sup> | y*       | y <sup>*++</sup> | y <sup>0</sup> | y <sup>0++</sup> | # |
|---|----------|-----------------|----------------|------------------|------|----------|-----------------|----------|------------------|----------------|------------------|---|
| 1 | 114.0913 | 57.5493         |                |                  | I    |          |                 |          |                  |                |                  | 6 |
| 2 | 229.1183 | 115.0628        | 211.1077       | 106.0575         | D    | 531.2885 | 266.1479        | 514.2620 | 257.6346         | 513.2780       | 257.1426         | 5 |
| 3 | 300.1554 | 150.5813        | 282.1448       | 141.5761         | A    | 416.2616 | 208.6344        | 399.2350 | 200.1212         |                |                  | 4 |
| 4 | 413.2395 | 207.1234        | 395.2289       | 198.1181         | L    | 345.2245 | 173.1159        | 328.1979 | 164.6026         |                |                  | 3 |
| 5 | 470.2609 | 235.6341        | 452.2504       | 226.6288         | G    | 232.1404 | 116.5738        | 215.1139 | 108.0606         |                |                  | 2 |
| 6 |          |                 |                |                  | R    | 175.1190 | 88.0631         | 158.0924 | 79.5498          |                |                  | 1 |

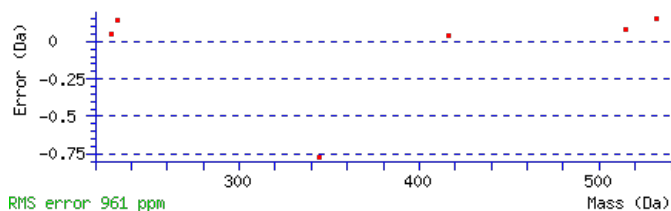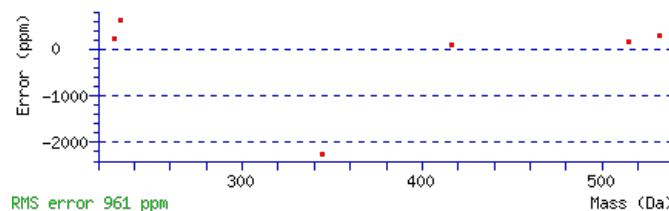

NCBI BLAST search of [IDALGR](#)

(Parameters: blastp, nr protein database, expect=20000, no filter, PAM30)

Other BLAST [web gateways](#)

### All matches to this query

| Score | $M_r(\text{calc})$ | Delta  | Sequence               |
|-------|--------------------|--------|------------------------|
| 27.7  | 643.3653           | 0.0010 | <a href="#">IDALGR</a> |
| 25.9  | 643.3653           | 0.0010 | <a href="#">LDLAGR</a> |
| 11.1  | 643.3653           | 0.0010 | <a href="#">LEGGLR</a> |



## AT2G45330.1

|      |          |        |                        |
|------|----------|--------|------------------------|
| 10.0 | 643.3653 | 0.0010 | <a href="#">IEVQR</a>  |
| 9.4  | 643.3653 | 0.0010 | <a href="#">EIGIGR</a> |
| 9.3  | 643.3653 | 0.0010 | <a href="#">IDQLR</a>  |
| 9.3  | 643.3653 | 0.0010 | <a href="#">LDQIR</a>  |
| 9.3  | 643.3653 | 0.0010 | <a href="#">LDQLR</a>  |
| 8.4  | 643.3653 | 0.0010 | <a href="#">LGAVER</a> |
| 8.0  | 643.3653 | 0.0010 | <a href="#">DLAVAR</a> |

**Mascot:** <http://www.matrixscience.com/>

## Peptide View

MS/MS Fragmentation of **VGFGSAASGSK**

Found in **AT2G45470.1** in **TAIR\_Arabidopsis**, Symbols: AGP8, FLA8 | FLA8 (Arabinogalactan protein 8) | chr2:18749871-18751133 REVERSE

Match to Query 2265: 978.441156 from(490.227854,2+) index(759)

Title: Elution from: 13.337 to 13.337 scan no 1098 cid35.00 polarity:+

Data file D6h-3\_1.mgf

Click mouse within plot area to zoom in by factor of two about that point

Or,   to  Da

Label all possible matches  Label matches used for scoring

Show Y-axis

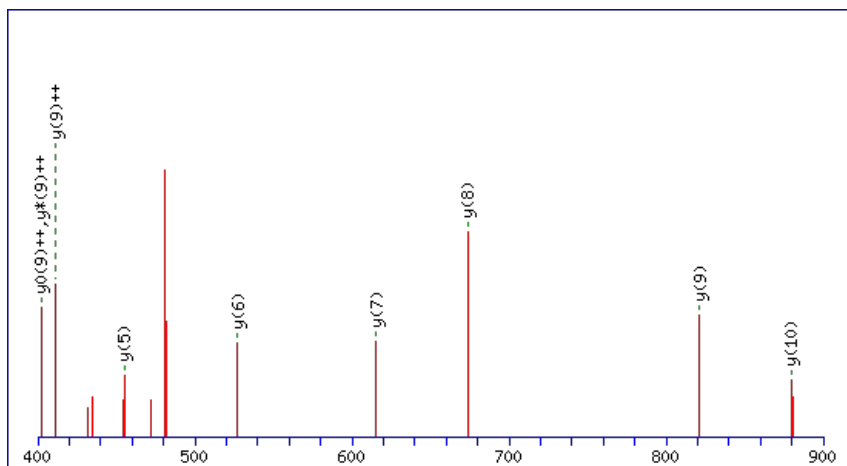

Monoisotopic mass of neutral peptide  $M_r(\text{calc})$ : 978.4415

Fixed modifications: Carbamidomethyl (C) (apply to specified residues or termini only)

Ions Score: 50 Expect: 4.9e-005

Matches : 9/90 fragment ions using 11 most intense peaks ([help](#))

| #  | b        | b <sup>++</sup> | b <sup>0</sup> | b <sup>0++</sup> | Seq. | y        | y <sup>++</sup> | y <sup>*</sup> | y <sup>*++</sup> | y <sup>0</sup> | y <sup>0++</sup> | #  |
|----|----------|-----------------|----------------|------------------|------|----------|-----------------|----------------|------------------|----------------|------------------|----|
| 1  | 101.0727 | 51.0400         |                |                  | V    |          |                 |                |                  |                |                  | 11 |
| 2  | 159.0912 | 80.0492         |                |                  | G    | 879.3833 | 440.1953        | 861.3597       | 431.1835         | 861.3727       | 431.1900         | 10 |
| 3  | 307.1567 | 154.0820        |                |                  | F    | 821.3648 | 411.1860        | 803.3412       | 402.1743         | 803.3542       | 402.1808         | 9  |
| 4  | 365.1752 | 183.0912        |                |                  | G    | 673.2994 | 337.1533        | 655.2758       | 328.1415         | 655.2888       | 328.1480         | 8  |
| 5  | 453.2042 | 227.1058        | 435.1937       | 218.1005         | S    | 615.2809 | 308.1441        | 597.2573       | 299.1323         | 597.2703       | 299.1388         | 7  |
| 6  | 525.2384 | 263.1228        | 507.2278       | 254.1175         | A    | 527.2518 | 264.1295        | 509.2282       | 255.1177         | 509.2412       | 255.1243         | 6  |
| 7  | 597.2725 | 299.1399        | 579.2620       | 290.1346         | A    | 455.2176 | 228.1125        | 437.1941       | 219.1007         | 437.2071       | 219.1072         | 5  |
| 8  | 685.3016 | 343.1544        | 667.2910       | 334.1492         | S    | 383.1835 | 192.0954        | 365.1599       | 183.0836         | 365.1729       | 183.0901         | 4  |
| 9  | 743.3201 | 372.1637        | 725.3095       | 363.1584         | G    | 295.1544 | 148.0809        | 277.1309       | 139.0691         | 277.1439       | 139.0756         | 3  |
| 10 | 831.3492 | 416.1782        | 813.3386       | 407.1729         | S    | 237.1359 | 119.0716        | 219.1124       | 110.0598         | 219.1254       | 110.0663         | 2  |
| 11 |          |                 |                |                  | K    | 149.1069 | 75.0571         | 131.0833       | 66.0453          |                |                  | 1  |

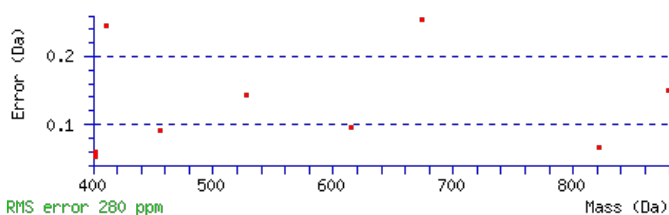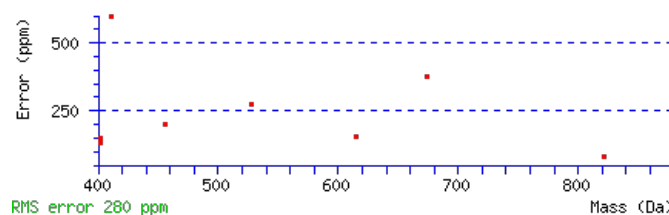

NCBI BLAST search of **VGFGSAASGSK**

(Parameters: blastp, nr protein database, expect=20000, no filter, PAM30)

Other BLAST [web gateways](#)

All matches to this query

# AT2G45470.1

| Score | Mr(calc) | Delta   | Sequence                    |
|-------|----------|---------|-----------------------------|
| 50.1  | 978.4415 | -0.0003 | <a href="#">VGFGSAASGSK</a> |
| 3.7   | 978.4415 | -0.0003 | <a href="#">VGSAYGSAQK</a>  |
| 2.0   | 978.4393 | 0.0019  | <a href="#">SSAGKSSQSK</a>  |
| 0.1   | 978.4428 | -0.0016 | <a href="#">CKARCIR</a>     |

Mascot: <http://www.matrixscience.com/>

## Peptide View

### MS/MS Fragmentation of **FIDPLWKLK**

Found in **AT2G45510.1** in **TAIR\_Arabidopsis**, Symbols: CYP704A2 | CYP704A2 (cytochrome P450, family 704, subfamily A, polypeptide 2); oxygen binding | chr2:18760159-18762018 FORWARD

Match to Query 3870: 1170.642132 from(586.328342,2+) index(4485)

Title: Elution from: 41.193 to 41.193 scan no 5668 cid35.00 polarity:+

Data file D6h-3\_2.mgf

Click mouse within plot area to zoom in by factor of two about that point

Or,   to  Da

Label all possible matches  Label matches used for scoring

Show Y-axis

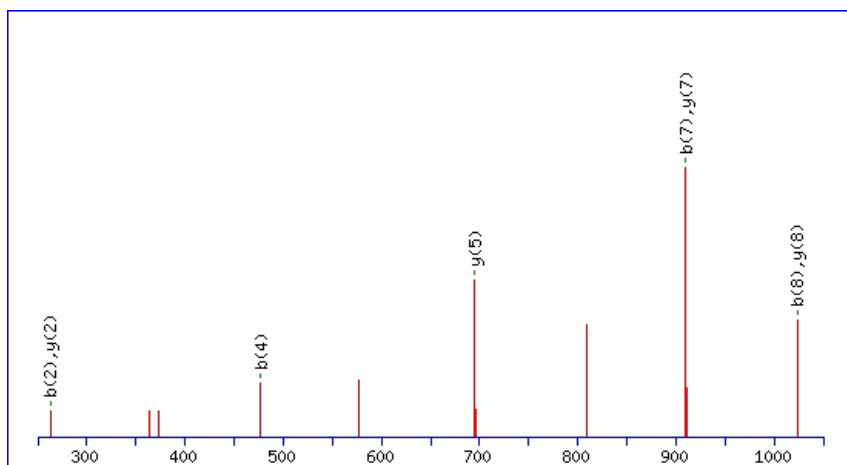

Monoisotopic mass of neutral peptide  $M_r(\text{calc})$ : 1170.6445

Fixed modifications: Carbamidomethyl (C) (apply to specified residues or termini only)

Ions Score: 33 Expect: 0.003

Matches : 8/68 fragment ions using 8 most intense peaks ([help](#))

| # | b                | b <sup>++</sup> | b*        | b <sup>*++</sup> | b <sup>0</sup> | b <sup>0++</sup> | Seq. | y                | y <sup>++</sup> | y*        | y <sup>*++</sup> | y <sup>0</sup> | y <sup>0++</sup> | # |
|---|------------------|-----------------|-----------|------------------|----------------|------------------|------|------------------|-----------------|-----------|------------------|----------------|------------------|---|
| 1 | 149.0727         | 75.0400         |           |                  |                |                  | F    |                  |                 |           |                  |                |                  | 9 |
| 2 | <b>263.1538</b>  | 132.0805        |           |                  |                |                  | I    | <b>1023.5864</b> | 512.2968        | 1005.5628 | 503.2850         | 1005.5758      | 503.2915         | 8 |
| 3 | 379.1778         | 190.0925        |           |                  | 361.1672       | 181.0873         | D    | <b>909.5053</b>  | 455.2563        | 891.4817  | 446.2445         | 891.4947       | 446.2510         | 7 |
| 4 | <b>477.2276</b>  | 239.1174        |           |                  | 459.2170       | 230.1122         | P    | 793.4813         | 397.2443        | 775.4577  | 388.2325         |                |                  | 6 |
| 5 | 591.3087         | 296.1580        |           |                  | 573.2981       | 287.1527         | L    | <b>695.4315</b>  | 348.2194        | 677.4079  | 339.2076         |                |                  | 5 |
| 6 | 779.3821         | 390.1947        |           |                  | 761.3715       | 381.1894         | W    | 581.3504         | 291.1788        | 563.3268  | 282.1670         |                |                  | 4 |
| 7 | <b>909.4711</b>  | 455.2392        | 891.4475  | 446.2274         | 891.4606       | 446.2339         | K    | 393.2770         | 197.1421        | 375.2534  | 188.1303         |                |                  | 3 |
| 8 | <b>1023.5522</b> | 512.2797        | 1005.5286 | 503.2680         | 1005.5417      | 503.2745         | L    | <b>263.1880</b>  | 132.0976        | 245.1644  | 123.0858         |                |                  | 2 |
| 9 |                  |                 |           |                  |                |                  | K    | 149.1069         | 75.0571         | 131.0833  | 66.0453          |                |                  | 1 |

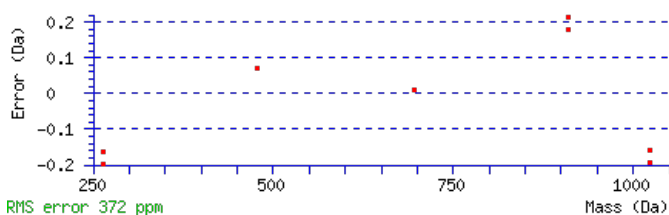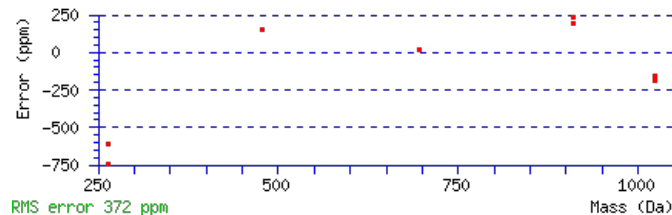

NCBI **BLAST** search of **FIDPLWKLK**

(Parameters: blastp, nr protein database, expect=20000, no filter, PAM30)

Other BLAST [web gateways](#)

All matches to this query

| Score | $M_r(\text{calc})$ | Delta | Sequence |
|-------|--------------------|-------|----------|
|       |                    |       |          |

**AT2G45510.1**

|      |           |         |                              |
|------|-----------|---------|------------------------------|
| 33.0 | 1170.6445 | -0.0024 | <a href="#">FIDPLWKLK</a>    |
| 15.1 | 1170.6401 | 0.0021  | <a href="#">LAEERSVIK</a>    |
| 15.1 | 1170.6401 | 0.0021  | <a href="#">LRSIEDLIK</a>    |
| 15.1 | 1170.6401 | 0.0021  | <a href="#">STAVPVINTKK</a>  |
| 15.1 | 1170.6427 | -0.0006 | <a href="#">LGSVNVPRGKK</a>  |
| 12.7 | 1170.6400 | 0.0021  | <a href="#">LRDAITELVK</a>   |
| 4.8  | 1170.6423 | -0.0002 | <a href="#">YNVLLAQPLK</a>   |
| 4.2  | 1170.6423 | -0.0002 | <a href="#">VADFGLAKPLK</a>  |
| 3.2  | 1170.6400 | 0.0021  | <a href="#">GVIDGGTKVAIK</a> |
| 3.2  | 1170.6400 | 0.0021  | <a href="#">KLQGEVDKLL</a>   |

**Mascot:** <http://www.matrixscience.com/>

## Peptide View

MS/MS Fragmentation of **IPTTNADSDMGENLMK**

Found in **AT2G45680.1** in **TAIR\_Arabidopsis**, Symbols: | TCP family transcription factor, putative | chr2:18827791-18828861 REVERSE

Match to Query 8301: 1836.827830 from(919.421191,2+) index(4619)

Title: Elution from: 45.802 to 45.802 scan no 5953 cid35.00 polarity:+

Data file D1d-1-2.mgf

Click mouse within plot area to zoom in by factor of two about that point

Or,   to  Da

Label all possible matches  Label matches used for scoring

Show Y-axis

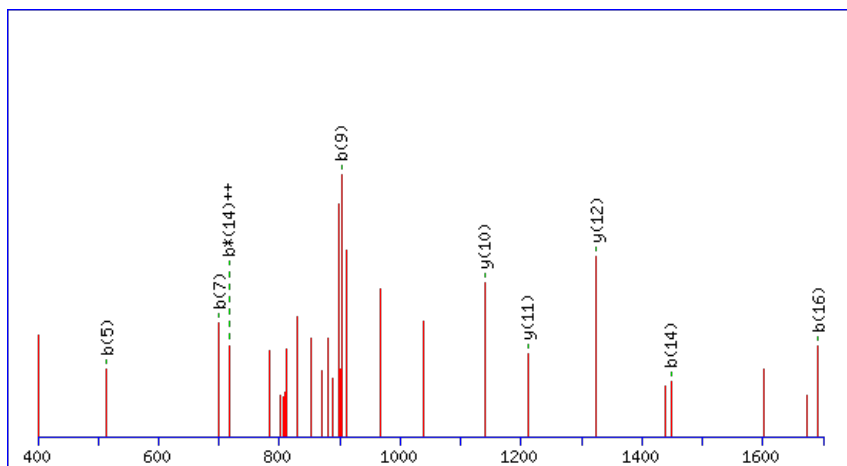

Monoisotopic mass of neutral peptide  $M_r(\text{calc})$ : 1836.8233

Fixed modifications: Carbamidomethyl (C) (apply to specified residues or termini only)

Ions Score: 31 Expect: 0.0013

Matches : 9/170 fragment ions using 12 most intense peaks ([help](#))

| #  | b                | b <sup>++</sup> | b <sup>*</sup> | b <sup>*++</sup> | b <sup>0</sup> | b <sup>0++</sup> | Seq. | y                | y <sup>++</sup> | y <sup>*</sup> | y <sup>*++</sup> | y <sup>0</sup> | y <sup>0++</sup> | #  |
|----|------------------|-----------------|----------------|------------------|----------------|------------------|------|------------------|-----------------|----------------|------------------|----------------|------------------|----|
| 1  | 114.0913         | 57.5493         |                |                  |                |                  | I    |                  |                 |                |                  |                |                  | 17 |
| 2  | 211.1441         | 106.0757        |                |                  |                |                  | P    | 1724.7466        | 862.8769        | 1707.7200      | 854.3637         | 1706.7360      | 853.8716         | 16 |
| 3  | 312.1918         | 156.5995        |                |                  | 294.1812       | 147.5942         | T    | 1627.6938        | 814.3505        | 1610.6673      | 805.8373         | 1609.6832      | 805.3453         | 15 |
| 4  | 413.2395         | 207.1234        |                |                  | 395.2289       | 198.1181         | T    | 1526.6461        | 763.8267        | 1509.6196      | 755.3134         | 1508.6356      | 754.8214         | 14 |
| 5  | <b>514.2871</b>  | 257.6472        |                |                  | 496.2766       | 248.6419         | T    | 1425.5985        | 713.3029        | 1408.5719      | 704.7896         | 1407.5879      | 704.2976         | 13 |
| 6  | 628.3301         | 314.6687        | 611.3035       | 306.1554         | 610.3195       | 305.6634         | N    | <b>1324.5508</b> | 662.7790        | 1307.5242      | 654.2658         | 1306.5402      | 653.7737         | 12 |
| 7  | <b>699.3672</b>  | 350.1872        | 682.3406       | 341.6740         | 681.3566       | 341.1819         | A    | <b>1210.5079</b> | 605.7576        | 1193.4813      | 597.2443         | 1192.4973      | 596.7523         | 11 |
| 8  | 814.3941         | 407.7007        | 797.3676       | 399.1874         | 796.3836       | 398.6954         | D    | <b>1139.4707</b> | 570.2390        | 1122.4442      | 561.7257         | 1121.4602      | 561.2337         | 10 |
| 9  | <b>901.4262</b>  | 451.2167        | 884.3996       | 442.7034         | 883.4156       | 442.2114         | S    | 1024.4438        | 512.7255        | 1007.4172      | 504.2123         | 1006.4332      | 503.7203         | 9  |
| 10 | 1016.4531        | 508.7302        | 999.4265       | 500.2169         | 998.4425       | 499.7249         | D    | 937.4118         | 469.2095        | 920.3852       | 460.6962         | 919.4012       | 460.2042         | 8  |
| 11 | 1147.4936        | 574.2504        | 1130.4670      | 565.7372         | 1129.4830      | 565.2451         | M    | 822.3848         | 411.6960        | 805.3583       | 403.1828         | 804.3743       | 402.6908         | 7  |
| 12 | 1204.5150        | 602.7612        | 1187.4885      | 594.2479         | 1186.5045      | 593.7559         | G    | 691.3443         | 346.1758        | 674.3178       | 337.6625         | 673.3338       | 337.1705         | 6  |
| 13 | 1333.5576        | 667.2825        | 1316.5311      | 658.7692         | 1315.5471      | 658.2772         | E    | 634.3229         | 317.6651        | 617.2963       | 309.1518         | 616.3123       | 308.6598         | 5  |
| 14 | <b>1447.6006</b> | 724.3039        | 1430.5740      | <b>715.7906</b>  | 1429.5900      | 715.2986         | N    | 505.2803         | 253.1438        | 488.2537       | 244.6305         |                |                  | 4  |
| 15 | 1560.6846        | 780.8460        | 1543.6581      | 772.3327         | 1542.6741      | 771.8407         | L    | 391.2374         | 196.1223        | 374.2108       | 187.6090         |                |                  | 3  |
| 16 | <b>1691.7251</b> | 846.3662        | 1674.6986      | 837.8529         | 1673.7145      | 837.3609         | M    | 278.1533         | 139.5803        | 261.1267       | 131.0670         |                |                  | 2  |
| 17 |                  |                 |                |                  |                |                  | K    | 147.1128         | 74.0600         | 130.0863       | 65.5468          |                |                  | 1  |

AT2G45680.1

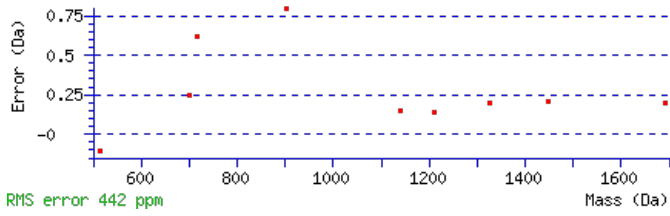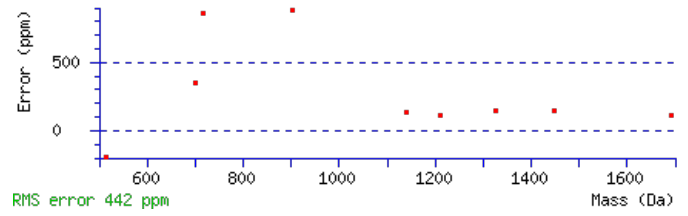

NCBI **BLAST** search of [IPTTTNADSDMGENLMK](#)  
(Parameters: blastp, nr protein database, expect=20000, no filter, PAM30)  
Other BLAST [web gateways](#)

**All matches to this query**

| Score | Mr(calc)  | Delta  | Sequence                          |
|-------|-----------|--------|-----------------------------------|
| 31.3  | 1836.8233 | 0.0045 | <a href="#">IPTTTNADSDMGENLMK</a> |

Mascot: <http://www.matrixscience.com/>

**Peptide View**MS/MS Fragmentation of **LTEGCSFR**Found in **AT2G45710.1** in **TAIR\_Arabidopsis**, Symbols: | 40S ribosomal protein S27 (RPS27A) | chr2:18838317-18839073 FORWARD

Match to Query 2235: 968.438958 from(485.226755,2+) index(1068)

Title: Elution from: 17.107 to 17.107 scan no 1518 cid35.00 polarity:+

Data file D12h-3\_1.mgf

Click mouse within plot area to zoom in by factor of two about that point

Or,   to  Da Label all possible matches  Label matches used for scoring Show Y-axis 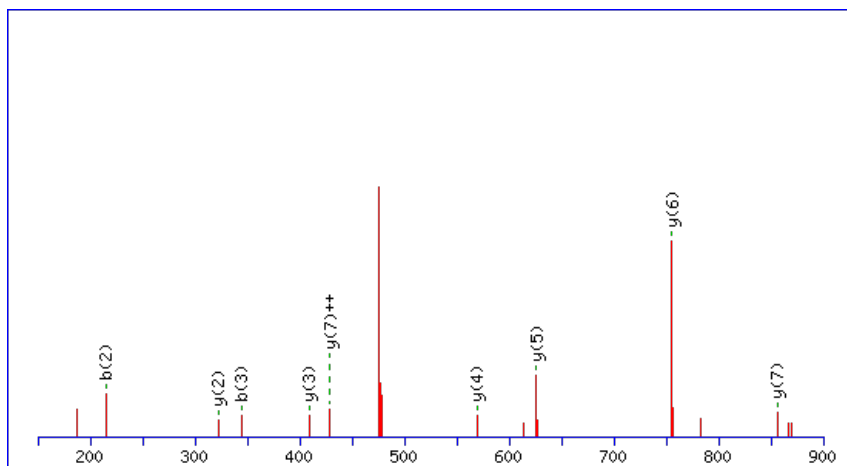Monoisotopic mass of neutral peptide **Mr(calc)**: 968.4386**Fixed modifications**: Carbamidomethyl (C) (apply to specified residues or termini only)**Ions Score**: 41 **Expect**: 0.00022**Matches** : 9/64 fragment ions using 19 most intense peaks ([help](#))

| # | b               | b <sup>++</sup> | b <sup>0</sup> | b <sup>0++</sup> | Seq. | y               | y <sup>++</sup> | y*       | y <sup>*++</sup> | y <sup>0</sup> | y <sup>0++</sup> | # |
|---|-----------------|-----------------|----------------|------------------|------|-----------------|-----------------|----------|------------------|----------------|------------------|---|
| 1 | 114.0913        | 57.5493         |                |                  | L    |                 |                 |          |                  |                |                  | 8 |
| 2 | <b>215.1390</b> | 108.0731        | 197.1285       | 99.0679          | T    | <b>856.3618</b> | <b>428.6845</b> | 839.3352 | 420.1713         | 838.3512       | 419.6792         | 7 |
| 3 | <b>344.1816</b> | 172.5944        | 326.1710       | 163.5892         | E    | <b>755.3141</b> | 378.1607        | 738.2876 | 369.6474         | 737.3035       | 369.1554         | 6 |
| 4 | 401.2031        | 201.1052        | 383.1925       | 192.0999         | G    | <b>626.2715</b> | 313.6394        | 609.2450 | 305.1261         | 608.2609       | 304.6341         | 5 |
| 5 | 561.2337        | 281.1205        | 543.2232       | 272.1152         | C    | <b>569.2500</b> | 285.1287        | 552.2235 | 276.6154         | 551.2395       | 276.1234         | 4 |
| 6 | 648.2658        | 324.6365        | 630.2552       | 315.6312         | S    | <b>409.2194</b> | 205.1133        | 392.1928 | 196.6001         | 391.2088       | 196.1081         | 3 |
| 7 | 795.3342        | 398.1707        | 777.3236       | 389.1654         | F    | <b>322.1874</b> | 161.5973        | 305.1608 | 153.0840         |                |                  | 2 |
| 8 |                 |                 |                |                  | R    | 175.1190        | 88.0631         | 158.0924 | 79.5498          |                |                  | 1 |

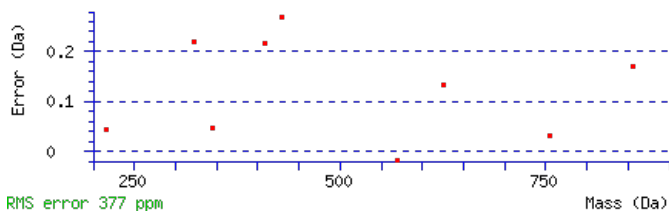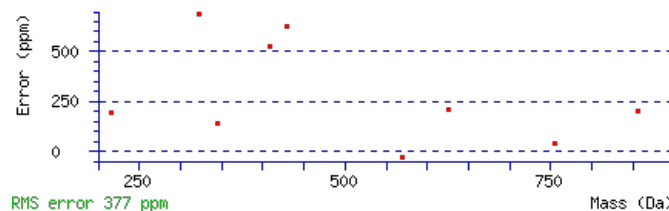NCBI **BLAST** search of [LTEGCSFR](#)

(Parameters: blastp, nr protein database, expect=20000, no filter, PAM30)

Other BLAST [web gateways](#)**All matches to this query**

| Score | Mr(calc) | Delta  | Sequence                 |
|-------|----------|--------|--------------------------|
| 41.4  | 968.4386 | 0.0004 | <a href="#">LTEGCSFR</a> |
| 1.4   | 968.4386 | 0.0004 | <a href="#">DINSFAMR</a> |





**Peptide View**MS/MS Fragmentation of **FLSGGQPGTAQNVDK**Found in **AT2G45740.1** in **TAIR\_Arabidopsis**, Symbols: PEX11D | PEX11D | chr2:18846939-18848176 FORWARD

Match to Query 7036: 1536.690048 from(769.352300,2+) index(2119)

Title: Elution from: 24.738 to 24.738 scan no 2744 cid35.00 polarity:+

Data file D12h-1\_1.mgf

Click mouse within plot area to zoom in by factor of two about that point

Or,   to  Da Label all possible matches  Label matches used for scoring Show Y-axis 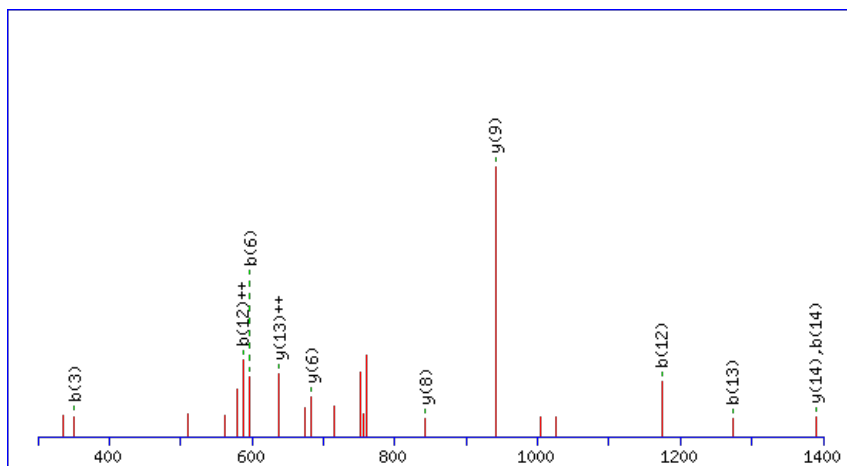Monoisotopic mass of neutral peptide  $M_r(\text{calc})$ : 1536.6911

Fixed modifications: Carbamidomethyl (C) (apply to specified residues or termini only)

Ions Score: 35 Expect: 0.0031

Matches : 11/152 fragment ions using 17 most intense peaks ([help](#))

| #  | b                | b <sup>++</sup> | b*        | b <sup>*++</sup> | b <sup>0</sup> | b <sup>0++</sup> | Seq. | y                | y <sup>++</sup> | y*        | y <sup>*++</sup> | y <sup>0</sup> | y <sup>0++</sup> | #  |
|----|------------------|-----------------|-----------|------------------|----------------|------------------|------|------------------|-----------------|-----------|------------------|----------------|------------------|----|
| 1  | 149.0727         | 75.0400         |           |                  |                |                  | F    |                  |                 |           |                  |                |                  | 15 |
| 2  | 263.1538         | 132.0805        |           |                  |                |                  | L    | <b>1389.6329</b> | 695.3201        | 1371.6093 | 686.3083         | 1371.6223      | 686.3148         | 14 |
| 3  | <b>351.1829</b>  | 176.0951        |           |                  | 333.1723       | 167.0898         | S    | 1275.5518        | <b>638.2795</b> | 1257.5282 | 629.2678         | 1257.5412      | 629.2743         | 13 |
| 4  | 409.2014         | 205.1043        |           |                  | 391.1908       | 196.0990         | G    | 1187.5227        | 594.2650        | 1169.4992 | 585.2532         | 1169.5122      | 585.2597         | 12 |
| 5  | 467.2199         | 234.1136        |           |                  | 449.2093       | 225.1083         | G    | 1129.5043        | 565.2558        | 1111.4807 | 556.2440         | 1111.4937      | 556.2505         | 11 |
| 6  | <b>597.2725</b>  | 299.1399        | 579.2489  | 290.1281         | 579.2620       | 290.1346         | Q    | 1071.4858        | 536.2465        | 1053.4622 | 527.2347         | 1053.4752      | 527.2412         | 10 |
| 7  | 695.3223         | 348.1648        | 677.2987  | 339.1530         | 677.3118       | 339.1595         | P    | <b>941.4331</b>  | 471.2202        | 923.4095  | 462.2084         | 923.4225       | 462.2149         | 9  |
| 8  | 753.3408         | 377.1741        | 735.3172  | 368.1623         | 735.3303       | 368.1688         | G    | <b>843.3833</b>  | 422.1953        | 825.3597  | 413.1835         | 825.3727       | 413.1900         | 8  |
| 9  | 855.3855         | 428.1964        | 837.3620  | 419.1846         | 837.3750       | 419.1911         | T    | 785.3648         | 393.1860        | 767.3412  | 384.1742         | 767.3542       | 384.1808         | 7  |
| 10 | 927.4197         | 464.2135        | 909.3961  | 455.2017         | 909.4091       | 455.2082         | A    | <b>683.3201</b>  | 342.1637        | 665.2965  | 333.1519         | 665.3095       | 333.1584         | 6  |
| 11 | 1057.4723        | 529.2398        | 1039.4488 | 520.2280         | 1039.4618      | 520.2345         | Q    | 611.2859         | 306.1466        | 593.2624  | 297.1348         | 593.2754       | 297.1413         | 5  |
| 12 | <b>1173.5093</b> | <b>587.2583</b> | 1155.4858 | 578.2465         | 1155.4988      | 578.2530         | N    | 481.2333         | 241.1203        | 463.2097  | 232.1085         | 463.2227       | 232.1150         | 4  |
| 13 | <b>1273.5748</b> | 637.2910        | 1255.5512 | 628.2792         | 1255.5642      | 628.2857         | V    | 365.1963         | 183.1018        | 347.1727  | 174.0900         | 347.1857       | 174.0965         | 3  |
| 14 | <b>1389.5988</b> | 695.3030        | 1371.5752 | 686.2912         | 1371.5882      | 686.2977         | D    | 265.1309         | 133.0691        | 247.1073  | 124.0573         | 247.1203       | 124.0638         | 2  |
| 15 |                  |                 |           |                  |                |                  | K    | 149.1069         | 75.0571         | 131.0833  | 66.0453          |                |                  | 1  |

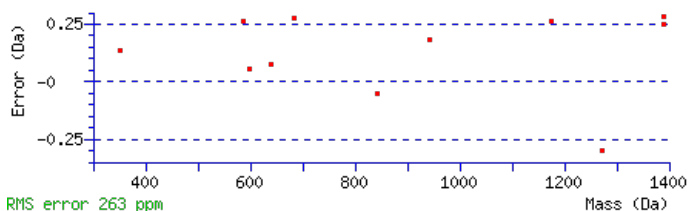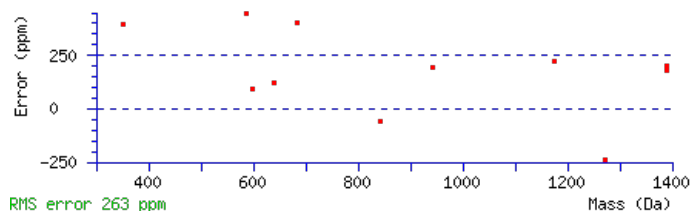NCBI BLAST search of [FLSGGQPGTAQNVDK](#)

## AT2G45740.1

(Parameters: blastp, nr protein database, expect=20000, no filter, PAM30)

Other BLAST [web gateways](#)

### All matches to this query

| Score | Mr(calc)  | Delta   | Sequence                        |
|-------|-----------|---------|---------------------------------|
| 35.0  | 1536.6911 | -0.0010 | <a href="#">FLSGGQPGTAQNVDK</a> |
| 10.9  | 1536.6884 | 0.0016  | <a href="#">SAPSSVLAAFVDDDK</a> |
| 7.5   | 1536.6897 | 0.0003  | <a href="#">TASTGYMSRRLMK</a>   |
| 7.0   | 1536.6888 | 0.0012  | <a href="#">DESRNDGSLANVLK</a>  |
| 5.3   | 1536.6920 | -0.0019 | <a href="#">KWNVALMSMSAHK</a>   |
| 4.6   | 1536.6897 | 0.0003  | <a href="#">LRACLADTNVCPK</a>   |
| 2.8   | 1536.6884 | 0.0017  | <a href="#">EFLDEQSQLADVK</a>   |
| 2.8   | 1536.6884 | 0.0017  | <a href="#">LNDVESLDAFGVDK</a>  |
| 1.6   | 1536.6897 | 0.0003  | <a href="#">TASTGYMSRRLMK</a>   |
| 0.9   | 1536.6933 | -0.0033 | <a href="#">NSIYISGFDYGRK</a>   |

Mascot: <http://www.matrixscience.com/>

**Peptide View**MS/MS Fragmentation of **EATPELLDFIR**Found in **AT2G45790.1** in **TAIR\_Arabidopsis**, Symbols: ATPMM | ATPMM; phosphomannomutase | chr2:18862950-18864827 FORWARD

Match to Query 4796: 1316.637870 from(659.326211,2+) index(9444)

Title: Elution from: 86.824 to 86.824 scan no 13056 cid35.00 polarity:+

Data file 0-2\_2.mgf

Click mouse within plot area to zoom in by factor of two about that point

Or,   to  Da Label all possible matches  Label matches used for scoring Show Y-axis 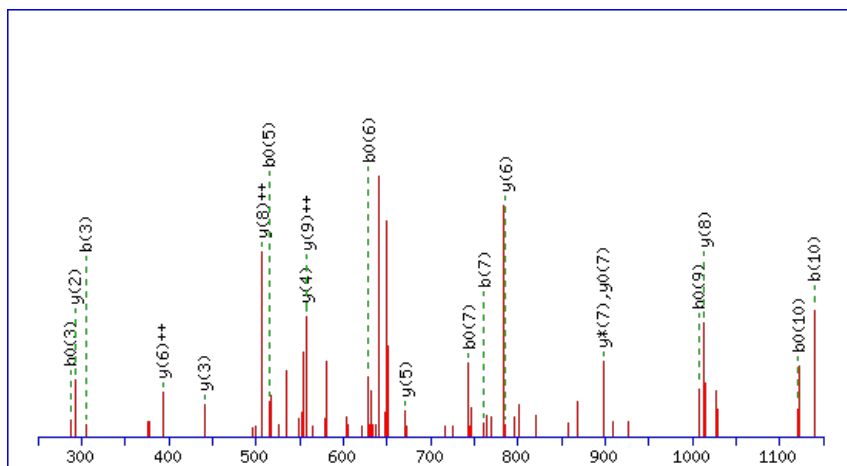Monoisotopic mass of neutral peptide **Mr(calc)**: 1316.6404

Fixed modifications: Carbamidomethyl (C) (apply to specified residues or termini only)

Ions Score: 23 **Expect**: 0.036Matches : 20/94 fragment ions using 50 most intense peaks ([help](#))

| #  | b                | b <sup>++</sup> | b <sup>0</sup>   | b <sup>0++</sup> | Seq. | y                | y <sup>++</sup> | y*              | y <sup>*++</sup> | y <sup>0</sup>  | y <sup>0++</sup> | #  |
|----|------------------|-----------------|------------------|------------------|------|------------------|-----------------|-----------------|------------------|-----------------|------------------|----|
| 1  | 131.0469         | 66.0271         | 113.0363         | 57.0218          | E    |                  |                 |                 |                  |                 |                  | 11 |
| 2  | 203.0811         | 102.0442        | 185.0705         | 93.0389          | A    | 1187.6081        | 594.3077        | 1169.5845       | 585.2959         | 1169.5975       | 585.3024         | 10 |
| 3  | <b>305.1258</b>  | 153.0665        | <b>287.1152</b>  | 144.0612         | T    | 1115.5740        | <b>558.2906</b> | 1097.5504       | 549.2788         | 1097.5634       | 549.2853         | 9  |
| 4  | 403.1756         | 202.0914        | 385.1650         | 193.0861         | P    | <b>1013.5292</b> | <b>507.2683</b> | 995.5057        | 498.2565         | 995.5187        | 498.2630         | 8  |
| 5  | 533.2152         | 267.1112        | <b>515.2046</b>  | 258.1060         | E    | 915.4794         | 458.2434        | <b>897.4559</b> | 449.2316         | <b>897.4689</b> | 449.2381         | 7  |
| 6  | 647.2963         | 324.1518        | <b>629.2857</b>  | 315.1465         | L    | <b>785.4398</b>  | <b>393.2235</b> | 767.4162        | 384.2118         | 767.4293        | 384.2183         | 6  |
| 7  | <b>761.3774</b>  | 381.1923        | <b>743.3668</b>  | 372.1871         | L    | <b>671.3587</b>  | 336.1830        | 653.3351        | 327.1712         | 653.3482        | 327.1777         | 5  |
| 8  | 877.4014         | 439.2043        | 859.3908         | 430.1990         | D    | <b>557.2776</b>  | 279.1424        | 539.2540        | 270.1307         | 539.2671        | 270.1372         | 4  |
| 9  | 1025.4668        | 513.2370        | <b>1007.4563</b> | 504.2318         | F    | <b>441.2536</b>  | 221.1305        | 423.2301        | 212.1187         |                 |                  | 3  |
| 10 | <b>1139.5479</b> | 570.2776        | <b>1121.5374</b> | 561.2723         | I    | <b>293.1882</b>  | 147.0977        | 275.1646        | 138.0859         |                 |                  | 2  |
| 11 |                  |                 |                  |                  | R    | 179.1071         | 90.0572         | 161.0835        | 81.0454          |                 |                  | 1  |

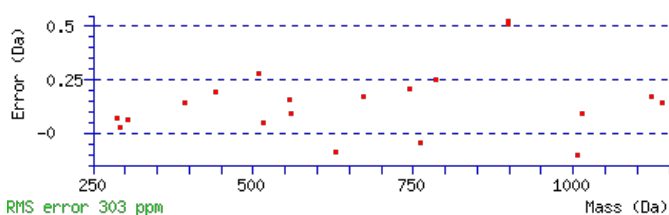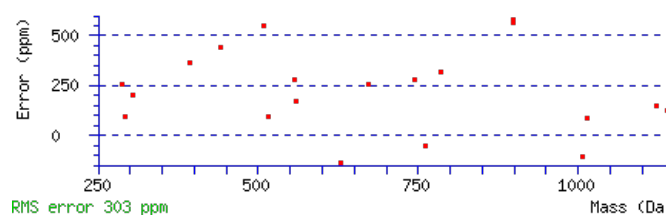NCBI **BLAST** search of **EATPELLDFIR**

(Parameters: blastp, nr protein database, expect=20000, no filter, PAM30)

Other BLAST [web gateways](#)

All matches to this query

AT2G45790.1

| Score | Mr(calc)  | Delta   | Sequence                     |
|-------|-----------|---------|------------------------------|
| 22.7  | 1316.6404 | -0.0026 | <a href="#">EATPELLDFIR</a>  |
| 9.9   | 1316.6361 | 0.0017  | <a href="#">HTMRDLVASIR</a>  |
| 2.3   | 1316.6382 | -0.0003 | <a href="#">SNVLEQELAATK</a> |

Mascot: <http://www.matrixscience.com/>

**Peptide View**MS/MS Fragmentation of **QYQALGGGANTIAHGYTK**Found in **AT2G45960.1** in **TAIR\_Arabidopsis**, Symbols: TMP-A, ATHH2, PIP1;2, PIP1B | PIP1B (plasma membrane intrinsic protein 1;2); water channel | chr2:18917523-18918776 FORWARD

Match to Query 9393: 1848.908532 from(617.310120,3+) index(3525)

Title: Elution from: 34.321 to 34.321 scan no 4346 cid35.00 polarity:+

Data file 0-1\_1.mgf

Click mouse within plot area to zoom in by factor of two about that point

Or,   to  Da Label all possible matches  Label matches used for scoring Show Y-axis 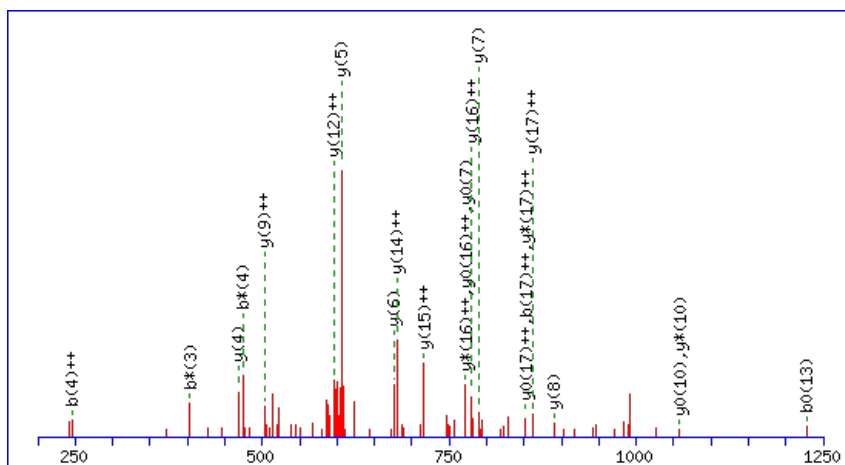Monoisotopic mass of neutral peptide  $M_r(\text{calc})$ : 1848.9119

Fixed modifications: Carbamidomethyl (C) (apply to specified residues or termini only)

Ions Score: 36 Expect: 0.0014

Matches : 23/182 fragment ions using 31 most intense peaks ([help](#))

| #  | b         | b <sup>++</sup> | b*        | b <sup>*++</sup> | b <sup>0</sup> | b <sup>0++</sup> | Seq. | y         | y <sup>++</sup> | y*        | y <sup>*++</sup> | y <sup>0</sup> | y <sup>0++</sup> | #  |
|----|-----------|-----------------|-----------|------------------|----------------|------------------|------|-----------|-----------------|-----------|------------------|----------------|------------------|----|
| 1  | 129.0659  | 65.0366         | 112.0393  | 56.5233          |                |                  | Q    |           |                 |           |                  |                |                  | 18 |
| 2  | 292.1292  | 146.5682        | 275.1026  | 138.0550         |                |                  | Y    | 1721.8606 | 861.4339        | 1704.8340 | 852.9206         | 1703.8500      | 852.4286         | 17 |
| 3  | 420.1878  | 210.5975        | 403.1612  | 202.0842         |                |                  | Q    | 1558.7972 | 779.9023        | 1541.7707 | 771.3890         | 1540.7867      | 770.8970         | 16 |
| 4  | 491.2249  | 246.1161        | 474.1983  | 237.6028         |                |                  | A    | 1430.7387 | 715.8730        | 1413.7121 | 707.3597         | 1412.7281      | 706.8677         | 15 |
| 5  | 604.3089  | 302.6581        | 587.2824  | 294.1448         |                |                  | L    | 1359.7015 | 680.3544        | 1342.6750 | 671.8411         | 1341.6910      | 671.3491         | 14 |
| 6  | 661.3304  | 331.1688        | 644.3039  | 322.6556         |                |                  | G    | 1246.6175 | 623.8124        | 1229.5909 | 615.2991         | 1228.6069      | 614.8071         | 13 |
| 7  | 718.3519  | 359.6796        | 701.3253  | 351.1663         |                |                  | G    | 1189.5960 | 595.3016        | 1172.5695 | 586.7884         | 1171.5854      | 586.2964         | 12 |
| 8  | 775.3733  | 388.1903        | 758.3468  | 379.6770         |                |                  | G    | 1132.5746 | 566.7909        | 1115.5480 | 558.2776         | 1114.5640      | 557.7856         | 11 |
| 9  | 846.4104  | 423.7089        | 829.3839  | 415.1956         |                |                  | A    | 1075.5531 | 538.2802        | 1058.5265 | 529.7669         | 1057.5425      | 529.2749         | 10 |
| 10 | 960.4534  | 480.7303        | 943.4268  | 472.2170         |                |                  | N    | 1004.5160 | 502.7616        | 987.4894  | 494.2483         | 986.5054       | 493.7563         | 9  |
| 11 | 1061.5011 | 531.2542        | 1044.4745 | 522.7409         | 1043.4905      | 522.2489         | T    | 890.4730  | 445.7402        | 873.4465  | 437.2269         | 872.4625       | 436.7349         | 8  |
| 12 | 1174.5851 | 587.7962        | 1157.5586 | 579.2829         | 1156.5746      | 578.7909         | I    | 789.4254  | 395.2163        | 772.3988  | 386.7030         | 771.4148       | 386.2110         | 7  |
| 13 | 1245.6222 | 623.3148        | 1228.5957 | 614.8015         | 1227.6117      | 614.3095         | A    | 676.3413  | 338.6743        | 659.3148  | 330.1610         | 658.3307       | 329.6690         | 6  |
| 14 | 1382.6811 | 691.8442        | 1365.6546 | 683.3309         | 1364.6706      | 682.8389         | H    | 605.3042  | 303.1557        | 588.2776  | 294.6425         | 587.2936       | 294.1504         | 5  |
| 15 | 1439.7026 | 720.3549        | 1422.6761 | 711.8417         | 1421.6920      | 711.3497         | G    | 468.2453  | 234.6263        | 451.2187  | 226.1130         | 450.2347       | 225.6210         | 4  |
| 16 | 1602.7659 | 801.8866        | 1585.7394 | 793.3733         | 1584.7554      | 792.8813         | Y    | 411.2238  | 206.1155        | 394.1973  | 197.6023         | 393.2132       | 197.1103         | 3  |
| 17 | 1703.8136 | 852.4104        | 1686.7871 | 843.8972         | 1685.8030      | 843.4052         | T    | 248.1605  | 124.5839        | 231.1339  | 116.0706         | 230.1499       | 115.5786         | 2  |
| 18 |           |                 |           |                  |                |                  | K    | 147.1128  | 74.0600         | 130.0863  | 65.5468          |                |                  | 1  |

# AT2G45960.1

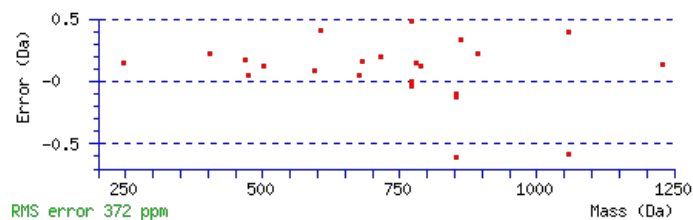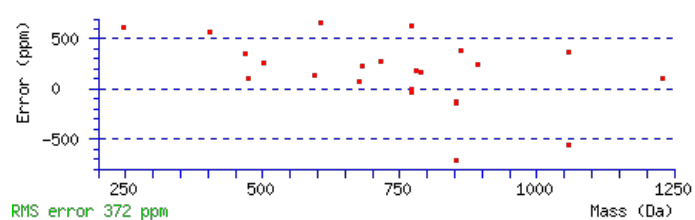

NCBI **BLAST** search of [QYQALGGGANTIAHGYTK](#)  
(Parameters: blastp, nr protein database, expect=20000, no filter, PAM30)  
Other BLAST [web gateways](#)

## All matches to this query

| Score | Mr(calc)  | Delta   | Sequence                           |
|-------|-----------|---------|------------------------------------|
| 35.5  | 1848.9119 | -0.0033 | <a href="#">QYQALGGGANTIAHGYTK</a> |
| 4.4   | 1848.9047 | 0.0039  | <a href="#">MGGAAVLLSNRSSDRCR</a>  |
| 3.0   | 1848.9087 | -0.0001 | <a href="#">MASIRRTLSPMYHDR</a>    |
| 0.6   | 1848.9078 | 0.0007  | <a href="#">FRSDNNAGKPTSVEATR</a>  |

Mascot: <http://www.matrixscience.com/>

## Peptide View

MS/MS Fragmentation of **MGMVGSSSVGK**

Found in **AT2G46020.1** in **TAIR Arabidopsis**, Symbols: ATBRM, CHR2, BRM | ATBRM/BRM/CHR2 (ARABIDOPSIS THALIANA BRAHMA); ATP binding / DNA binding / helicase / transcription regulator | chr2:18930377-18938842 FORWARD

Match to Query 2474: 1050.450684 from(526.232618,2+) index(3877)

Title: Elution from: 37.666 to 37.666 scan no 4927 cid35.00 polarity:+

Data file D12h-2\_3.mgf

Click mouse within plot area to zoom in by factor of two about that point

Or,   to  Da

Label all possible matches  Label matches used for scoring

Show Y-axis

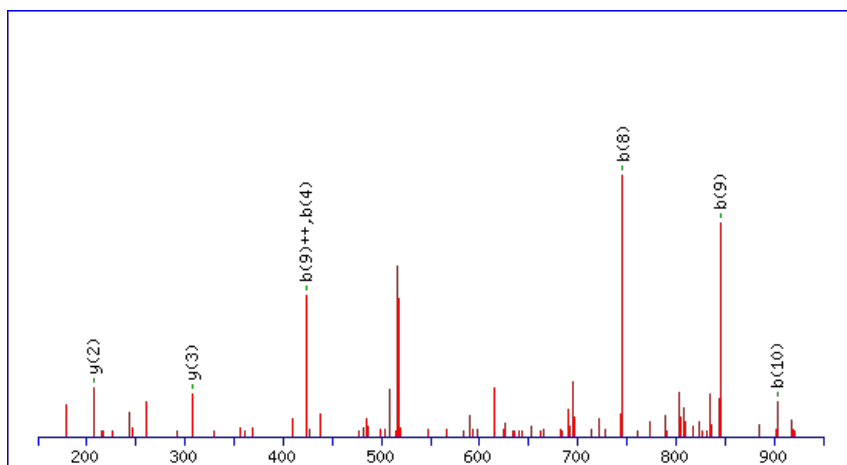

Monoisotopic mass of neutral peptide  $M_r(\text{calc})$ : 1050.4482

Fixed modifications: Carbamidomethyl (C) (apply to specified residues or termini only)

Ions Score: 32 Expect: 0.0043

Matches : 7/84 fragment ions using 8 most intense peaks ([help](#))

| #  | b               | b <sup>++</sup> | b <sup>0</sup> | b <sup>0++</sup> | Seq. | y               | y <sup>++</sup> | y*       | y <sup>*++</sup> | y <sup>0</sup> | y <sup>0++</sup> | #  |
|----|-----------------|-----------------|----------------|------------------|------|-----------------|-----------------|----------|------------------|----------------|------------------|----|
| 1  | 133.0448        | 67.0260         |                |                  | M    |                 |                 |          |                  |                |                  | 11 |
| 2  | 191.0633        | 96.0353         |                |                  | G    | 919.4180        | 460.2126        | 901.3944 | 451.2008         | 901.4074       | 451.2073         | 10 |
| 3  | 323.1008        | 162.0540        |                |                  | M    | 861.3995        | 431.2034        | 843.3759 | 422.1916         | 843.3889       | 422.1981         | 9  |
| 4  | <b>423.1663</b> | 212.0868        |                |                  | V    | 729.3620        | 365.1846        | 711.3384 | 356.1728         | 711.3514       | 356.1793         | 8  |
| 5  | 481.1848        | 241.0960        |                |                  | G    | 629.2965        | 315.1519        | 611.2729 | 306.1401         | 611.2859       | 306.1466         | 7  |
| 6  | 569.2138        | 285.1106        | 551.2033       | 276.1053         | S    | 571.2780        | 286.1426        | 553.2544 | 277.1309         | 553.2674       | 277.1374         | 6  |
| 7  | 657.2429        | 329.1251        | 639.2323       | 320.1198         | S    | 483.2489        | 242.1281        | 465.2254 | 233.1163         | 465.2384       | 233.1228         | 5  |
| 8  | <b>745.2720</b> | 373.1396        | 727.2614       | 364.1343         | S    | 395.2199        | 198.1136        | 377.1963 | 189.1018         | 377.2093       | 189.1083         | 4  |
| 9  | <b>845.3374</b> | <b>423.1723</b> | 827.3268       | 414.1671         | V    | <b>307.1908</b> | 154.0990        | 289.1672 | 145.0873         |                |                  | 3  |
| 10 | <b>903.3559</b> | 452.1816        | 885.3453       | 443.1763         | G    | <b>207.1254</b> | 104.0663        | 189.1018 | 95.0545          |                |                  | 2  |
| 11 |                 |                 |                |                  | K    | 149.1069        | 75.0571         | 131.0833 | 66.0453          |                |                  | 1  |

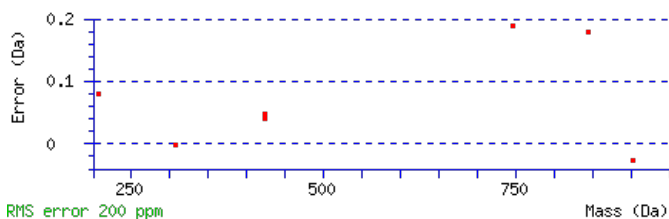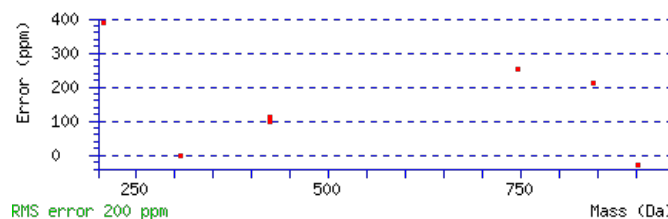

NCBI BLAST search of **MGMVGSSSVGK**

(Parameters: blastp, nr protein database, expect=20000, no filter, PAM30)

Other BLAST [web gateways](#)

All matches to this query



## AT2G46020.1

| Score | Mr(calc)  | Delta   | Sequence                    |
|-------|-----------|---------|-----------------------------|
| 31.8  | 1050.4482 | 0.0025  | <a href="#">MGMVGSSSVGK</a> |
| 27.8  | 1050.4518 | -0.0011 | <a href="#">GFVEEDFAK</a>   |
| 15.0  | 1050.4500 | 0.0007  | <a href="#">TSGGKDSASAR</a> |
| 7.9   | 1050.4500 | 0.0007  | <a href="#">GSTRTGEGSGK</a> |
| 4.4   | 1050.4522 | -0.0015 | <a href="#">GFTVNGETGR</a>  |
| 3.1   | 1050.4482 | 0.0025  | <a href="#">VQENMKMK</a>    |
| 3.1   | 1050.4482 | 0.0025  | <a href="#">VSAMVQCTK</a>   |
| 2.8   | 1050.4518 | -0.0011 | <a href="#">FVENEFEK</a>    |
| 1.5   | 1050.4530 | -0.0023 | <a href="#">IMSSSLSDGK</a>  |
| 1.1   | 1050.4522 | -0.0016 | <a href="#">TLGQNYGER</a>   |

Mascot: <http://www.matrixscience.com/>

**Peptide View**MS/MS Fragmentation of **HHVGKESASNDAVK**Found in **AT2G46040.1** in **TAIR\_Arabidopsis**, Symbols: | ARID/BRIGHT DNA-binding domain-containing protein / ELM2 domain-containing protein | chr2:18942757-18944880 REVERSE

Match to Query 6239: 1498.667802 from(750.341177,2+) index(4842)

Title: Elution from: 45.053 to 45.053 scan no 6085 cid35.00 polarity:+

Data file D6h-2\_2.mgf

Click mouse within plot area to zoom in by factor of two about that point

Or,  to  Da Label all possible matches  Label matches used for scoring Show Y-axis 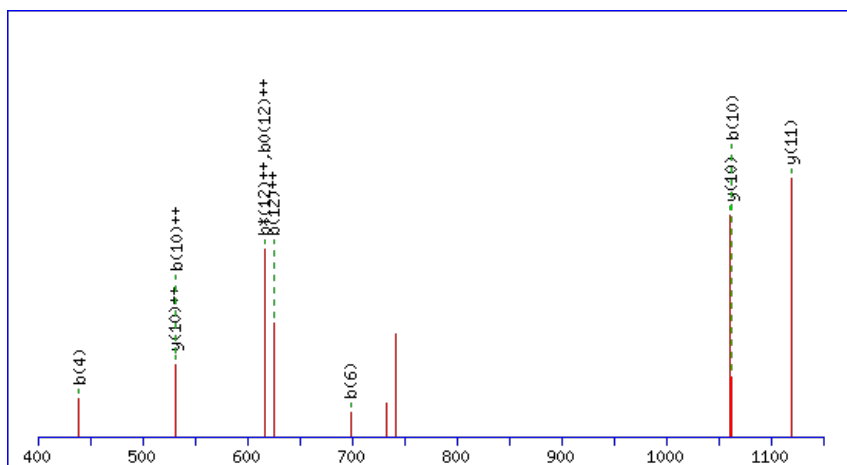Monoisotopic mass of neutral peptide  $M_r(\text{calc})$ : 1498.6651

Fixed modifications: Carbamidomethyl (C) (apply to specified residues or termini only)

Ions Score: 26 Expect: 0.015

Matches : 10/132 fragment ions using 11 most intense peaks ([help](#))

| #  | b                | b <sup>++</sup> | b <sup>*</sup> | b <sup>*++</sup> | b <sup>0</sup> | b <sup>0++</sup> | Seq. | y                | y <sup>++</sup> | y <sup>*</sup> | y <sup>*++</sup> | y <sup>0</sup> | y <sup>0++</sup> | #  |
|----|------------------|-----------------|----------------|------------------|----------------|------------------|------|------------------|-----------------|----------------|------------------|----------------|------------------|----|
| 1  | 141.0573         | 71.0323         |                |                  |                |                  | H    |                  |                 |                |                  |                |                  | 14 |
| 2  | 281.1073         | 141.0573        |                |                  |                |                  | H    | 1359.6223        | 680.3148        | 1341.5988      | 671.3030         | 1341.6118      | 671.3095         | 13 |
| 3  | 381.1728         | 191.0900        |                |                  |                |                  | V    | 1219.5723        | 610.2898        | 1201.5487      | 601.2780         | 1201.5618      | 601.2845         | 12 |
| 4  | <b>439.1913</b>  | 220.0993        |                |                  |                |                  | G    | <b>1119.5069</b> | 560.2571        | 1101.4833      | 551.2453         | 1101.4963      | 551.2518         | 11 |
| 5  | 569.2803         | 285.1438        | 551.2567       | 276.1320         |                |                  | K    | <b>1061.4884</b> | <b>531.2478</b> | 1043.4648      | 522.2360         | 1043.4778      | 522.2425         | 10 |
| 6  | <b>699.3199</b>  | 350.1636        | 681.2963       | 341.1518         | 681.3094       | 341.1583         | E    | 931.3993         | 466.2033        | 913.3758       | 457.1915         | 913.3888       | 457.1980         | 9  |
| 7  | 787.3490         | 394.1781        | 769.3254       | 385.1663         | 769.3384       | 385.1728         | S    | 801.3597         | 401.1835        | 783.3361       | 392.1717         | 783.3492       | 392.1782         | 8  |
| 8  | 859.3831         | 430.1952        | 841.3595       | 421.1834         | 841.3726       | 421.1899         | A    | 713.3307         | 357.1690        | 695.3071       | 348.1572         | 695.3201       | 348.1637         | 7  |
| 9  | 947.4122         | 474.2097        | 929.3886       | 465.1979         | 929.4016       | 465.2045         | S    | 641.2965         | 321.1519        | 623.2729       | 312.1401         | 623.2859       | 312.1466         | 6  |
| 10 | <b>1063.4492</b> | <b>532.2282</b> | 1045.4256      | 523.2164         | 1045.4386      | 523.2230         | N    | 553.2674         | 277.1374        | 535.2439       | 268.1256         | 535.2569       | 268.1321         | 5  |
| 11 | 1179.4732        | 590.2402        | 1161.4496      | 581.2284         | 1161.4626      | 581.2349         | D    | 437.2304         | 219.1189        | 419.2069       | 210.1071         | 419.2199       | 210.1136         | 4  |
| 12 | 1251.5073        | <b>626.2573</b> | 1233.4837      | <b>617.2455</b>  | 1233.4968      | <b>617.2520</b>  | A    | 321.2065         | 161.1069        | 303.1829       | 152.0951         |                |                  | 3  |
| 13 | 1351.5728        | 676.2900        | 1333.5492      | 667.2782         | 1333.5622      | 667.2847         | V    | 249.1723         | 125.0898        | 231.1487       | 116.0780         |                |                  | 2  |
| 14 |                  |                 |                |                  |                |                  | K    | 149.1069         | 75.0571         | 131.0833       | 66.0453          |                |                  | 1  |

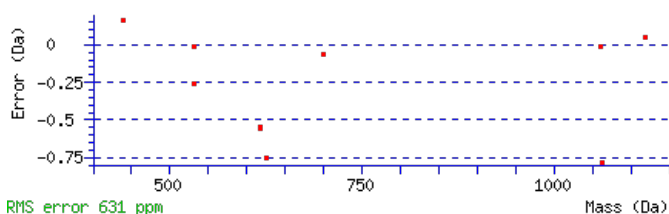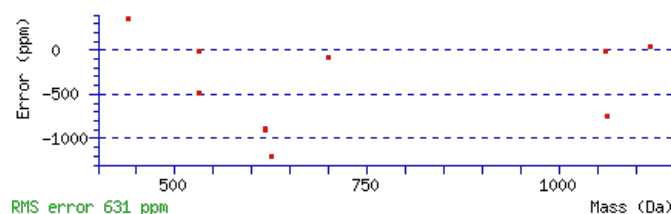NCBI BLAST search of [HHVGKESASNDAVK](#)

## AT2G46040.1

(Parameters: blastp, nr protein database, expect=20000, no filter, PAM30)

Other BLAST [web gateways](#)

### All matches to this query

| Score | Mr(calc)  | Delta   | Sequence                        |
|-------|-----------|---------|---------------------------------|
| 26.4  | 1498.6651 | 0.0027  | <a href="#">HHVGKESASNDAVK</a>  |
| 12.8  | 1498.6707 | -0.0029 | <a href="#">DAFSLCVQOGAKR</a>   |
| 4.6   | 1498.6705 | -0.0027 | <a href="#">SDVDDSSSKSVKTK</a>  |
| 3.2   | 1498.6669 | 0.0009  | <a href="#">SEFALAISHGFFSA</a>  |
| 3.0   | 1498.6680 | -0.0002 | <a href="#">NVVSWTTMISSNK</a>   |
| 3.0   | 1498.6680 | -0.0002 | <a href="#">ITVGGEDVRMFDK</a>   |
| 2.6   | 1498.6637 | 0.0041  | <a href="#">MGGGNAQKSAMARAK</a> |
| 2.2   | 1498.6680 | -0.0002 | <a href="#">EFELEMEQKRK</a>     |
| 2.2   | 1498.6680 | -0.0002 | <a href="#">MQRLVFEASEEK</a>    |
| 2.1   | 1498.6680 | -0.0002 | <a href="#">TFTMSGPRDLTEK</a>   |

Mascot: <http://www.matrixscience.com/>

**Peptide View**MS/MS Fragmentation of **SFSSGGEDGYVR**

Found in **AT2G46280.1** in **TAIR\_Arabidopsis**, Symbols: TIF311, TRIP-1 | TRIP-1 (TGF-BETA RECEPTOR INTERACTING PROTEIN 1); nucleotide binding / protein binding | chr2:19010729-19012466 REVERSE

Match to Query 4575: 1274.500646 from(638.257599,2+) index(2107)

Title: Elution from: 23.831 to 23.831 scan no 2681 cid35.00 polarity:+

Data file D6h-3\_2.mgf

Click mouse within plot area to zoom in by factor of two about that point

Or,   to  Da

Label all possible matches  Label matches used for scoring

Show Y-axis

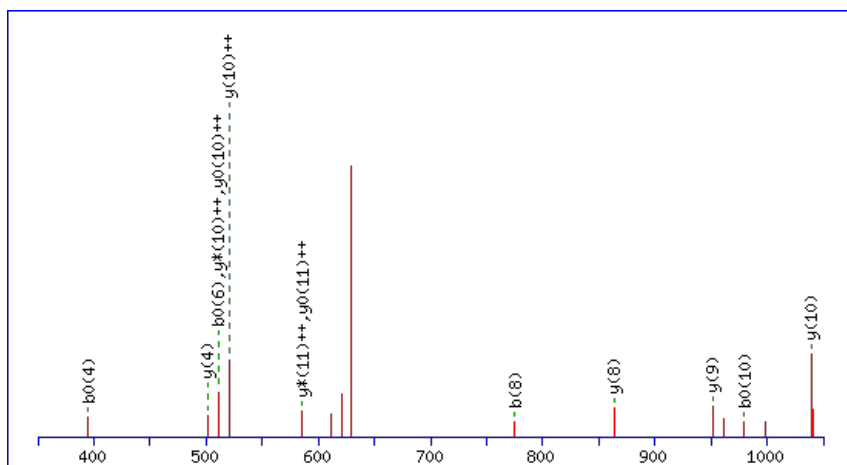

**Monoisotopic mass of neutral peptide Mr(calc):** 1274.4973

**Fixed modifications:** Carbamidomethyl (C) (apply to specified residues or termini only)

**Ions Score:** 18 **Expect:** 0.033

**Matches:** 13/102 fragment ions using 18 most intense peaks ([help](#))

| #  | b         | b <sup>++</sup> | b <sup>0</sup> | b <sup>0++</sup> | Seq. | y         | y <sup>++</sup> | y*        | y* <sup>++</sup> | y <sup>0</sup> | y <sup>0++</sup> | #  |
|----|-----------|-----------------|----------------|------------------|------|-----------|-----------------|-----------|------------------|----------------|------------------|----|
| 1  | 89.0363   | 45.0218         | 71.0258        | 36.0165          | S    |           |                 |           |                  |                |                  | 12 |
| 2  | 237.1018  | 119.0545        | 219.0912       | 110.0492         | F    | 1187.4756 | 594.2414        | 1169.4520 | 585.2296         | 1169.4650      | 585.2361         | 11 |
| 3  | 325.1309  | 163.0691        | 307.1203       | 154.0638         | S    | 1039.4101 | 520.2087        | 1021.3866 | 511.1969         | 1021.3996      | 511.2034         | 10 |
| 4  | 413.1599  | 207.0836        | 395.1493       | 198.0783         | S    | 951.3811  | 476.1942        | 933.3575  | 467.1824         | 933.3705       | 467.1889         | 9  |
| 5  | 471.1784  | 236.0928        | 453.1678       | 227.0876         | G    | 863.3520  | 432.1796        | 845.3284  | 423.1679         | 845.3414       | 423.1744         | 8  |
| 6  | 529.1969  | 265.1021        | 511.1863       | 256.0968         | G    | 805.3335  | 403.1704        | 787.3099  | 394.1586         | 787.3229       | 394.1651         | 7  |
| 7  | 659.2365  | 330.1219        | 641.2260       | 321.1166         | E    | 747.3150  | 374.1611        | 729.2914  | 365.1494         | 729.3044       | 365.1559         | 6  |
| 8  | 775.2605  | 388.1339        | 757.2500       | 379.1286         | D    | 617.2754  | 309.1413        | 599.2518  | 300.1295         | 599.2648       | 300.1360         | 5  |
| 9  | 833.2790  | 417.1431        | 815.2685       | 408.1379         | G    | 501.2514  | 251.1293        | 483.2278  | 242.1175         |                |                  | 4  |
| 10 | 997.3394  | 499.1733        | 979.3288       | 490.1680         | Y    | 443.2329  | 222.1201        | 425.2093  | 213.1083         |                |                  | 3  |
| 11 | 1097.4048 | 549.2061        | 1079.3943      | 540.2008         | V    | 279.1725  | 140.0899        | 261.1490  | 131.0781         |                |                  | 2  |
| 12 |           |                 |                |                  | R    | 179.1071  | 90.0572         | 161.0835  | 81.0454          |                |                  | 1  |

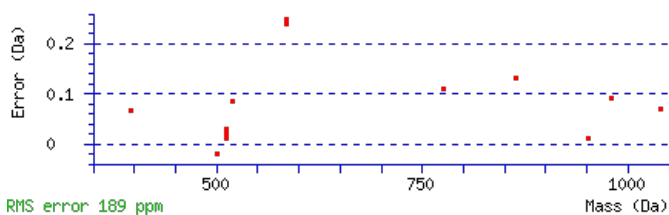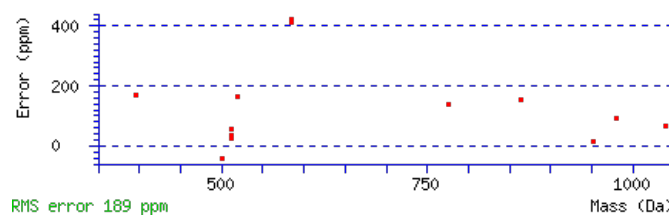

NCBI **BLAST** search of **SFSSGGEDGYVR**

(Parameters: blastp, nr protein database, expect=20000, no filter, PAM30)

Other BLAST [web gateways](#)

AT2G46280.1

All matches to this query

| Score | Mr(calc)  | Delta   | Sequence                     |
|-------|-----------|---------|------------------------------|
| 18.0  | 1274.4973 | 0.0033  | <a href="#">SFSSGGEDGYVR</a> |
| 8.3   | 1274.4969 | 0.0037  | <a href="#">ADDDYDYLFK</a>   |
| 4.5   | 1274.5030 | -0.0023 | <a href="#">MQYLFDESGR</a>   |
| 4.5   | 1274.5030 | -0.0023 | <a href="#">MQYLYDESGR</a>   |

Mascot: <http://www.matrixscience.com/>

**Peptide View**MS/MS Fragmentation of **NLVFKPDR**

Found in **AT2G46820.1** in **TAIR\_Arabidopsis**, Symbols: PTAC8, TMP14, PSAP, PSI-P | PSAP/PSI-P/PTAC8/TMP14 (THYLAKOID MEMBRANE PHOSPHOPROTEIN OF 14 KDA); DNA binding | chr2:19250798-19251939 FORWARD

Match to Query 2348: 987.550290 from(494.782421,2+) index(1878)

Title: Elution from: 23.481 to 23.481 scan no 2482 cid35.00 polarity:+

Data file 0-1\_2.mgf

Click mouse within plot area to zoom in by factor of two about that point

Or,   to  Da

Label all possible matches  Label matches used for scoring

Show Y-axis

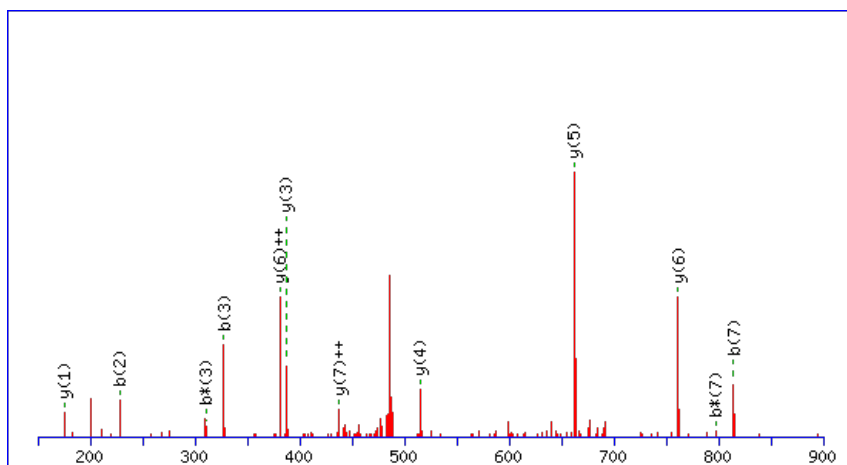

**Monoisotopic mass of neutral peptide Mr(calc):** 987.5502

**Fixed modifications:** Carbamidomethyl (C) (apply to specified residues or termini only)

**Ions Score:** 33 **Expect:** 0.0014

**Matches:** 12/70 fragment ions using 22 most intense peaks ([help](#))

| # | b               | b <sup>++</sup> | b*              | b <sup>*++</sup> | b <sup>0</sup> | b <sup>0++</sup> | Seq. | y               | y <sup>++</sup> | y*       | y <sup>*++</sup> | y <sup>0</sup> | y <sup>0++</sup> | # |
|---|-----------------|-----------------|-----------------|------------------|----------------|------------------|------|-----------------|-----------------|----------|------------------|----------------|------------------|---|
| 1 | 115.0502        | 58.0287         | 98.0237         | 49.5155          |                |                  | N    |                 |                 |          |                  |                |                  | 8 |
| 2 | <b>228.1343</b> | 114.5708        | 211.1077        | 106.0575         |                |                  | L    | 874.5145        | <b>437.7609</b> | 857.4880 | 429.2476         | 856.5039       | 428.7556         | 7 |
| 3 | <b>327.2027</b> | 164.1050        | <b>310.1761</b> | 155.5917         |                |                  | V    | <b>761.4305</b> | <b>381.2189</b> | 744.4039 | 372.7056         | 743.4199       | 372.2136         | 6 |
| 4 | 474.2711        | 237.6392        | 457.2445        | 229.1259         |                |                  | F    | <b>662.3620</b> | 331.6847        | 645.3355 | 323.1714         | 644.3515       | 322.6794         | 5 |
| 5 | 602.3661        | 301.6867        | 585.3395        | 293.1734         |                |                  | K    | <b>515.2936</b> | 258.1504        | 498.2671 | 249.6372         | 497.2831       | 249.1452         | 4 |
| 6 | 699.4188        | 350.2130        | 682.3923        | 341.6998         |                |                  | P    | <b>387.1987</b> | 194.1030        | 370.1721 | 185.5897         | 369.1881       | 185.0977         | 3 |
| 7 | <b>814.4458</b> | 407.7265        | <b>797.4192</b> | 399.2132         | 796.4352       | 398.7212         | D    | 290.1459        | 145.5766        | 273.1193 | 137.0633         | 272.1353       | 136.5713         | 2 |
| 8 |                 |                 |                 |                  |                |                  | R    | <b>175.1190</b> | 88.0631         | 158.0924 | 79.5498          |                |                  | 1 |

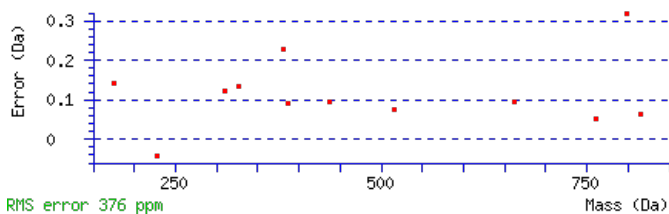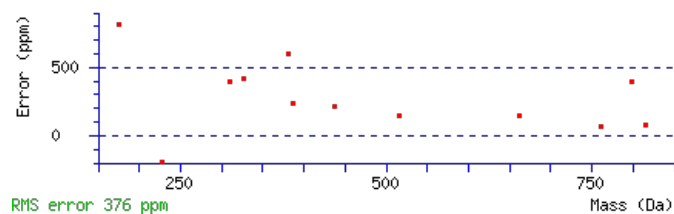

NCBI **BLAST** search of [NLVFKPDR](#)

(Parameters: blastp, nr protein database, expect=20000, no filter, PAM30)

Other BLAST [web gateways](#)

**All matches to this query**

| Score | Mr(calc) | Delta  | Sequence                 |
|-------|----------|--------|--------------------------|
| 33.1  | 987.5502 | 0.0001 | <a href="#">NLVFKPDR</a> |

## AT2G46820.1

|      |          |        |                           |
|------|----------|--------|---------------------------|
| 13.1 | 987.5502 | 0.0001 | <a href="#">AGVVPVQYR</a> |
| 6.7  | 987.5501 | 0.0001 | <a href="#">NLSSWLR</a>   |
| 2.2  | 987.5501 | 0.0001 | <a href="#">SINWSIR</a>   |

**Mascot:** <http://www.matrixscience.com/>

## Peptide View

### MS/MS Fragmentation of YINVSKSDLVNGIVTK

Found in **AT2G46915.1** in **TAIR\_Arabidopsis**, Symbols: | similar to sodiumdicarboxylate symporter [Arabidopsis thaliana] (TAIR:AT3G19340.1); similar to unnamed protein product [Vitis vinifera] (GB:CAO24360.1) | chr2:19281087-19284776 REVERSE

Match to Query 8760: 1768.912368 from(885.463460,2+) index(7668)

Title: Elution from: 67.341 to 67.341 scan no 9915 cid35.00 polarity:+

Data file C7-2\_1.mgf

Click mouse within plot area to zoom in by factor of two about that point

Or,  to  Da

Label all possible matches  Label matches used for scoring

Show Y-axis

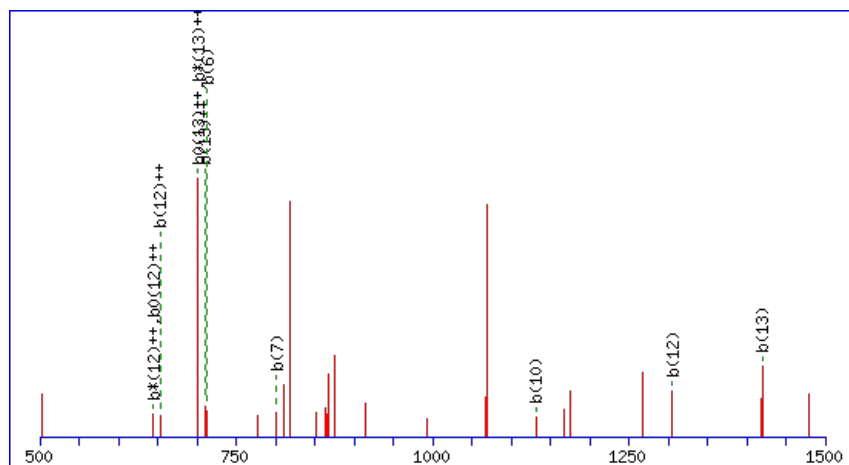

Monoisotopic mass of neutral peptide  $M_r(\text{calc})$ : 1768.9079

Fixed modifications: Carbamidomethyl (C) (apply to specified residues or termini only)

Ions Score: 20 Expect: 0.041

Matches : 11/166 fragment ions using 25 most intense peaks ([help](#))

| #  | b                | b <sup>++</sup> | b*        | b <sup>*++</sup> | b <sup>0</sup> | b <sup>0++</sup> | Seq. | y         | y <sup>++</sup> | y*        | y <sup>*++</sup> | y <sup>0</sup> | y <sup>0++</sup> | #  |
|----|------------------|-----------------|-----------|------------------|----------------|------------------|------|-----------|-----------------|-----------|------------------|----------------|------------------|----|
| 1  | 165.0676         | 83.0375         |           |                  |                |                  | Y    |           |                 |           |                  |                |                  | 16 |
| 2  | 279.1487         | 140.0780        |           |                  |                |                  | I    | 1605.8549 | 803.4311        | 1587.8313 | 794.4193         | 1587.8443      | 794.4258         | 15 |
| 3  | 395.1857         | 198.0965        | 377.1622  | 189.0847         |                |                  | N    | 1491.7738 | 746.3905        | 1473.7502 | 737.3787         | 1473.7632      | 737.3852         | 14 |
| 4  | 495.2512         | 248.1292        | 477.2276  | 239.1174         |                |                  | V    | 1375.7368 | 688.3720        | 1357.7132 | 679.3602         | 1357.7262      | 679.3667         | 13 |
| 5  | 583.2802         | 292.1438        | 565.2567  | 283.1320         | 565.2697       | 283.1385         | S    | 1275.6713 | 638.3393        | 1257.6477 | 629.3275         | 1257.6608      | 629.3340         | 12 |
| 6  | <b>713.3693</b>  | 357.1883        | 695.3457  | 348.1765         | 695.3587       | 348.1830         | K    | 1187.6423 | 594.3248        | 1169.6187 | 585.3130         | 1169.6317      | 585.3195         | 11 |
| 7  | <b>801.3983</b>  | 401.2028        | 783.3748  | 392.1910         | 783.3878       | 392.1975         | S    | 1057.5532 | 529.2802        | 1039.5296 | 520.2685         | 1039.5427      | 520.2750         | 10 |
| 8  | 917.4223         | 459.2148        | 899.3987  | 450.2030         | 899.4118       | 450.2095         | D    | 969.5242  | 485.2657        | 951.5006  | 476.2539         | 951.5136       | 476.2604         | 9  |
| 9  | 1031.5034        | 516.2553        | 1013.4798 | 507.2436         | 1013.4929      | 507.2501         | L    | 853.5002  | 427.2537        | 835.4766  | 418.2419         | 835.4896       | 418.2484         | 8  |
| 10 | <b>1131.5689</b> | 566.2881        | 1113.5453 | 557.2763         | 1113.5583      | 557.2828         | V    | 739.4191  | 370.2132        | 721.3955  | 361.2014         | 721.4085       | 361.2079         | 7  |
| 11 | 1247.6059        | 624.3066        | 1229.5823 | 615.2948         | 1229.5953      | 615.3013         | N    | 639.3536  | 320.1805        | 621.3300  | 311.1687         | 621.3431       | 311.1752         | 6  |
| 12 | <b>1305.6244</b> | <b>653.3158</b> | 1287.6008 | <b>644.3040</b>  | 1287.6138      | <b>644.3105</b>  | G    | 523.3166  | 262.1620        | 505.2930  | 253.1502         | 505.3061       | 253.1567         | 5  |
| 13 | <b>1419.7055</b> | <b>710.3564</b> | 1401.6819 | <b>701.3446</b>  | 1401.6949      | <b>701.3511</b>  | I    | 465.2981  | 233.1527        | 447.2746  | 224.1409         | 447.2876       | 224.1474         | 4  |
| 14 | 1519.7709        | 760.3891        | 1501.7473 | 751.3773         | 1501.7603      | 751.3838         | V    | 351.2170  | 176.1122        | 333.1935  | 167.1004         | 333.2065       | 167.1069         | 3  |
| 15 | 1621.8156        | 811.4115        | 1603.7920 | 802.3997         | 1603.8051      | 802.4062         | T    | 251.1516  | 126.0794        | 233.1280  | 117.0676         | 233.1410       | 117.0741         | 2  |
| 16 |                  |                 |           |                  |                |                  | K    | 149.1069  | 75.0571         | 131.0833  | 66.0453          |                |                  | 1  |



AT2G46915.1

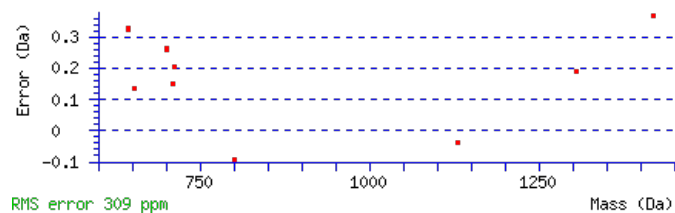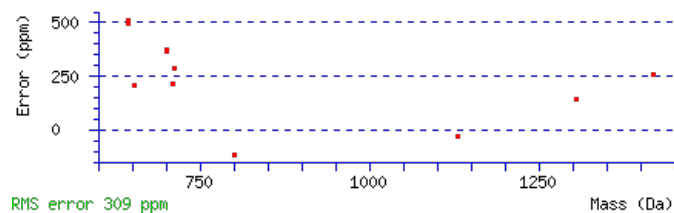

NCBI **BLAST** search of [YINVSKSDLVNGIVTK](#)

(Parameters: blastp, nr protein database, expect=20000, no filter, PAM30)

Other BLAST [web gateways](#)

**All matches to this query**

| Score | Mr(calc)  | Delta   | Sequence                         |
|-------|-----------|---------|----------------------------------|
| 20.3  | 1768.9079 | 0.0044  | <a href="#">YINVSKSDLVNGIVTK</a> |
| 1.5   | 1768.9079 | 0.0044  | <a href="#">LSDFERLTAEIKSLK</a>  |
| 1.5   | 1768.9162 | -0.0038 | <a href="#">MGARDLLALVATVVER</a> |
| 1.5   | 1768.9106 | 0.0018  | <a href="#">SIRPTTVGFTARLEAK</a> |
| 0.3   | 1768.9129 | -0.0005 | <a href="#">IPKRKPYQENFTVK</a>   |

Mascot: <http://www.matrixscience.com/>

## Peptide View

### MS/MS Fragmentation of **TFYDLLER**

Found in **AT2G47380.1** in **TAIR\_Arabidopsis**, Symbols: | cytochrome c oxidase subunit Vc family protein / COX5C family protein | chr2:19448764-19448958 FORWARD

Match to Query 3153: 1055.529038 from(528.771795,2+) index(8104)

Title: Elution from: 70.430 to 70.430 scan no 10407 cid35.00 polarity:+

Data file 0-1\_1.mgf

Click mouse within plot area to zoom in by factor of two about that point

Or,   to  Da

Label all possible matches  Label matches used for scoring

Show Y-axis

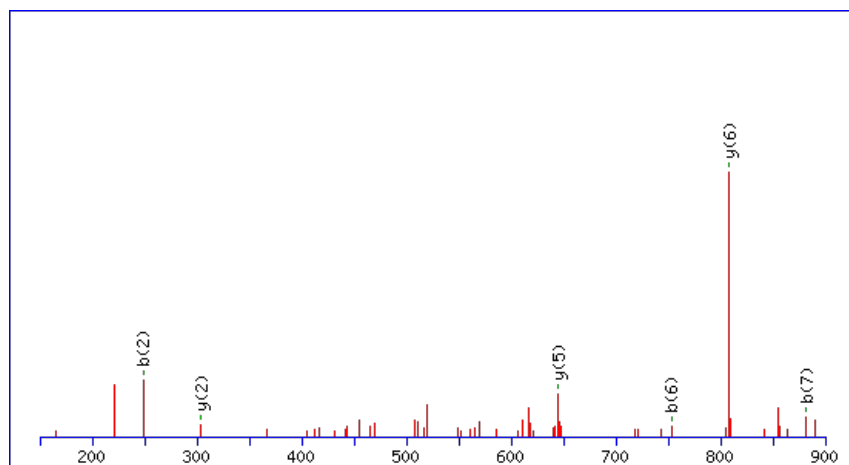

Monoisotopic mass of neutral peptide **Mr(calc)**: 1055.5287

**Fixed modifications:** Carbamidomethyl (C) (apply to specified residues or termini only)

**Ions Score:** 28 **Expect:** 0.0041

**Matches** : 6/68 fragment ions using 8 most intense peaks ([help](#))

| # | b               | b <sup>++</sup> | b <sup>0</sup> | b <sup>0++</sup> | Seq. | y               | y <sup>++</sup> | y*       | y <sup>*++</sup> | y <sup>0</sup> | y <sup>0++</sup> | # |
|---|-----------------|-----------------|----------------|------------------|------|-----------------|-----------------|----------|------------------|----------------|------------------|---|
| 1 | 102.0550        | 51.5311         | 84.0444        | 42.5258          | T    |                 |                 |          |                  |                |                  | 8 |
| 2 | <b>249.1234</b> | 125.0653        | 231.1128       | 116.0600         | F    | 955.4884        | 478.2478        | 938.4618 | 469.7345         | 937.4778       | 469.2425         | 7 |
| 3 | 412.1867        | 206.5970        | 394.1761       | 197.5917         | Y    | <b>808.4199</b> | 404.7136        | 791.3934 | 396.2003         | 790.4094       | 395.7083         | 6 |
| 4 | 527.2136        | 264.1105        | 509.2031       | 255.1052         | D    | <b>645.3566</b> | 323.1819        | 628.3301 | 314.6687         | 627.3461       | 314.1767         | 5 |
| 5 | 640.2977        | 320.6525        | 622.2871       | 311.6472         | L    | 530.3297        | 265.6685        | 513.3031 | 257.1552         | 512.3191       | 256.6632         | 4 |
| 6 | <b>753.3818</b> | 377.1945        | 735.3712       | 368.1892         | L    | 417.2456        | 209.1264        | 400.2191 | 200.6132         | 399.2350       | 200.1212         | 3 |
| 7 | <b>882.4244</b> | 441.7158        | 864.4138       | 432.7105         | E    | <b>304.1615</b> | 152.5844        | 287.1350 | 144.0711         | 286.1510       | 143.5791         | 2 |
| 8 |                 |                 |                |                  | R    | 175.1190        | 88.0631         | 158.0924 | 79.5498          |                |                  | 1 |

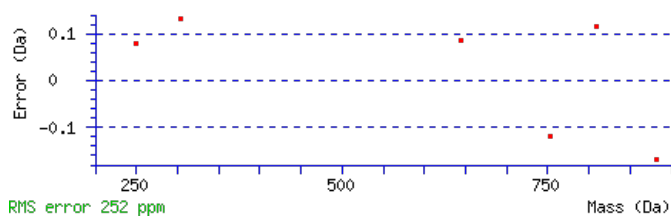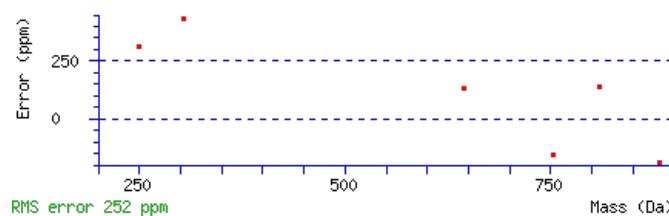

### NCBI BLAST search of **TFYDLLER**

(Parameters: blastp, nr protein database, expect=20000, no filter, PAM30)

Other BLAST [web gateways](#)

### All matches to this query

| Score | Mr(calc)  | Delta  | Sequence                 |
|-------|-----------|--------|--------------------------|
| 27.7  | 1055.5287 | 0.0003 | <a href="#">TFYDLLER</a> |

AT2G47380.1

|     |           |        |                           |
|-----|-----------|--------|---------------------------|
| 2.8 | 1055.5288 | 0.0003 | <a href="#">FTFTNIDAK</a> |
|-----|-----------|--------|---------------------------|

**Mascot:** <http://www.matrixscience.com/>

**Peptide View**MS/MS Fragmentation of **TWVISPGSNDVSPR**Found in **AT2G47390.1** in **TAIR\_Arabidopsis**, Symbols: | serine-type endopeptidase/ serine-type peptidase | chr2:19449348-19453323 REVERSE

Match to Query 6316: 1513.754802 from(757.884677,2+) index(5020)

Title: Elution from: 45.562 to 45.562 scan no 6331 cid35.00 polarity:+

Data file D6h-1\_3.mgf

Click mouse within plot area to zoom in by factor of two about that point

Or,   to  Da Label all possible matches  Label matches used for scoring Show Y-axis 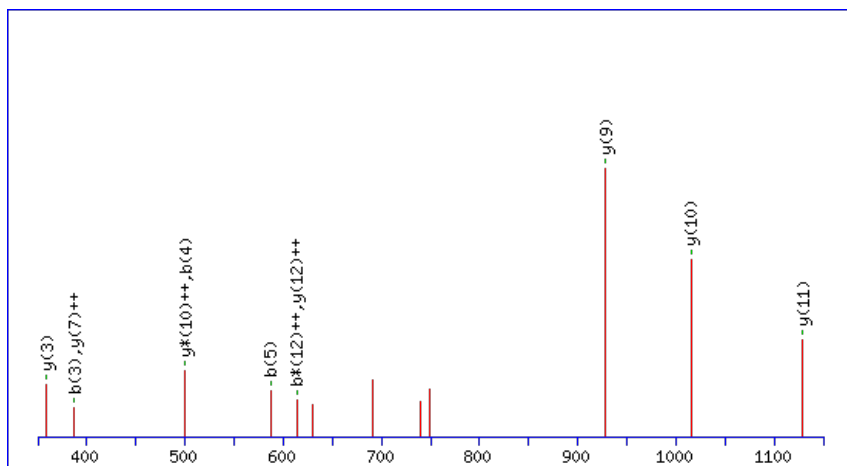Monoisotopic mass of neutral peptide **Mr(calc)**: 1513.7525

Fixed modifications: Carbamidomethyl (C) (apply to specified residues or termini only)

Ions Score: 33 Expect: 0.0018

Matches : 11/136 fragment ions using 10 most intense peaks ([help](#))

| #  | b               | b <sup>++</sup> | b <sup>*</sup> | b <sup>*++</sup> | b <sup>0</sup> | b <sup>0++</sup> | Seq. | y                | y <sup>++</sup> | y <sup>*</sup> | y <sup>*++</sup> | y <sup>0</sup> | y <sup>0++</sup> | #  |
|----|-----------------|-----------------|----------------|------------------|----------------|------------------|------|------------------|-----------------|----------------|------------------|----------------|------------------|----|
| 1  | 102.0550        | 51.5311         |                |                  | 84.0444        | 42.5258          | T    |                  |                 |                |                  |                |                  | 14 |
| 2  | 288.1343        | 144.5708        |                |                  | 270.1237       | 135.5655         | W    | 1413.7121        | 707.3597        | 1396.6856      | 698.8464         | 1395.7015      | 698.3544         | 13 |
| 3  | <b>387.2027</b> | 194.1050        |                |                  | 369.1921       | 185.0997         | V    | 1227.6328        | <b>614.3200</b> | 1210.6062      | 605.8068         | 1209.6222      | 605.3148         | 12 |
| 4  | <b>500.2867</b> | 250.6470        |                |                  | 482.2762       | 241.6417         | I    | <b>1128.5644</b> | 564.7858        | 1111.5378      | 556.2726         | 1110.5538      | 555.7805         | 11 |
| 5  | <b>587.3188</b> | 294.1630        |                |                  | 569.3082       | 285.1577         | S    | <b>1015.4803</b> | 508.2438        | 998.4538       | <b>499.7305</b>  | 997.4697       | 499.2385         | 10 |
| 6  | 684.3715        | 342.6894        |                |                  | 666.3610       | 333.6841         | P    | <b>928.4483</b>  | 464.7278        | 911.4217       | 456.2145         | 910.4377       | 455.7225         | 9  |
| 7  | 741.3930        | 371.2001        |                |                  | 723.3824       | 362.1949         | G    | 831.3955         | 416.2014        | 814.3690       | 407.6881         | 813.3850       | 407.1961         | 8  |
| 8  | 828.4250        | 414.7162        |                |                  | 810.4145       | 405.7109         | S    | 774.3741         | <b>387.6907</b> | 757.3475       | 379.1774         | 756.3635       | 378.6854         | 7  |
| 9  | 942.4680        | 471.7376        | 925.4414       | 463.2243         | 924.4574       | 462.7323         | N    | 687.3420         | 344.1747        | 670.3155       | 335.6614         | 669.3315       | 335.1694         | 6  |
| 10 | 1057.4949       | 529.2511        | 1040.4684      | 520.7378         | 1039.4843      | 520.2458         | D    | 573.2991         | 287.1532        | 556.2726       | 278.6399         | 555.2885       | 278.1479         | 5  |
| 11 | 1156.5633       | 578.7853        | 1139.5368      | 570.2720         | 1138.5527      | 569.7800         | V    | 458.2722         | 229.6397        | 441.2456       | 221.1264         | 440.2616       | 220.6344         | 4  |
| 12 | 1243.5953       | 622.3013        | 1226.5688      | <b>613.7880</b>  | 1225.5848      | 613.2960         | S    | <b>359.2037</b>  | 180.1055        | 342.1772       | 171.5922         | 341.1932       | 171.1002         | 3  |
| 13 | 1340.6481       | 670.8277        | 1323.6216      | 662.3144         | 1322.6375      | 661.8224         | P    | 272.1717         | 136.5895        | 255.1452       | 128.0762         |                |                  | 2  |
| 14 |                 |                 |                |                  |                |                  | R    | 175.1190         | 88.0631         | 158.0924       | 79.5498          |                |                  | 1  |

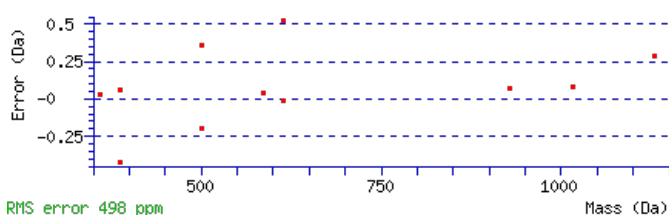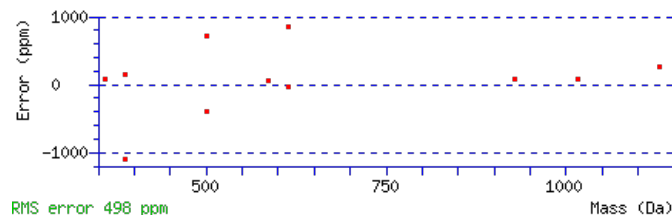NCBI BLAST search of **TWVISPGSNDVSPR**

(Parameters: blastp, nr protein database, expect=20000, no filter, PAM30)

AT2G47390.1

Other BLAST [web gateways](#)

**All matches to this query**

| Score | Mr(calc)  | Delta  | Sequence                       |
|-------|-----------|--------|--------------------------------|
| 32.5  | 1513.7525 | 0.0023 | <a href="#">TWVISPGSNDVSPR</a> |

Mascot: <http://www.matrixscience.com/>

**Peptide View**MS/MS Fragmentation of **AGIVESLDALVK**

Found in **AT2G47470.1** in **TAIR\_Arabidopsis**, Symbols: ATPDIL2-1, UNE5, MEE30 | ATPDIL2-1/MEE30/UNE5 (PDI-LIKE 2-1); thiol-disulfide exchange intermediate | chr2:19488573-19490753 FORWARD

Match to Query 4131: 1213.690930 from(607.852741,2+) index(9047)

Title: Elution from: 80.189 to 80.189 scan no 12114 cid35.00 polarity:+

Data file D6h-3\_2.mgf

Click mouse within plot area to zoom in by factor of two about that point

Or,   to  Da

Label all possible matches  Label matches used for scoring

Show Y-axis

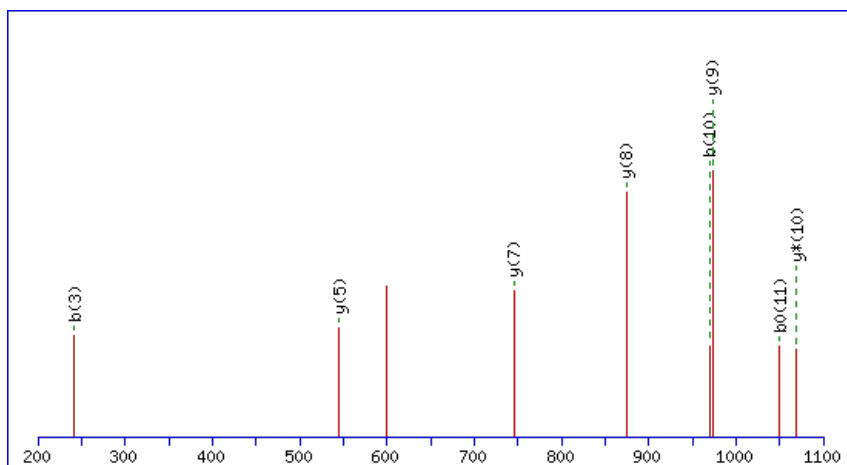

Monoisotopic mass of neutral peptide  $M_r(\text{calc})$ : 1213.6918

Fixed modifications: Carbamidomethyl (C) (apply to specified residues or termini only)

Ions Score: 34 Expect: 0.0015

Matches : 8/94 fragment ions using 10 most intense peaks ([help](#))

| #  | b               | b <sup>++</sup> | b <sup>0</sup>   | b <sup>0++</sup> | Seq. | y               | y <sup>++</sup> | y*               | y <sup>*++</sup> | y <sup>0</sup> | y <sup>0++</sup> | #  |
|----|-----------------|-----------------|------------------|------------------|------|-----------------|-----------------|------------------|------------------|----------------|------------------|----|
| 1  | 72.0444         | 36.5258         |                  |                  | A    |                 |                 |                  |                  |                |                  | 12 |
| 2  | 129.0659        | 65.0366         |                  |                  | G    | 1143.6620       | 572.3346        | 1126.6354        | 563.8213         | 1125.6514      | 563.3293         | 11 |
| 3  | <b>242.1499</b> | 121.5786        |                  |                  | I    | 1086.6405       | 543.8239        | <b>1069.6140</b> | 535.3106         | 1068.6299      | 534.8186         | 10 |
| 4  | 341.2183        | 171.1128        |                  |                  | V    | <b>973.5564</b> | 487.2819        | 956.5299         | 478.7686         | 955.5459       | 478.2766         | 9  |
| 5  | 470.2609        | 235.6341        | 452.2504         | 226.6288         | E    | <b>874.4880</b> | 437.7477        | 857.4615         | 429.2344         | 856.4775       | 428.7424         | 8  |
| 6  | 557.2930        | 279.1501        | 539.2824         | 270.1448         | S    | <b>745.4454</b> | 373.2264        | 728.4189         | 364.7131         | 727.4349       | 364.2211         | 7  |
| 7  | 670.3770        | 335.6921        | 652.3665         | 326.6869         | L    | 658.4134        | 329.7103        | 641.3869         | 321.1971         | 640.4028       | 320.7051         | 6  |
| 8  | 785.4040        | 393.2056        | 767.3934         | 384.2003         | D    | <b>545.3293</b> | 273.1683        | 528.3028         | 264.6550         | 527.3188       | 264.1630         | 5  |
| 9  | 856.4411        | 428.7242        | 838.4305         | 419.7189         | A    | 430.3024        | 215.6548        | 413.2758         | 207.1416         |                |                  | 4  |
| 10 | <b>969.5251</b> | 485.2662        | 951.5146         | 476.2609         | L    | 359.2653        | 180.1363        | 342.2387         | 171.6230         |                |                  | 3  |
| 11 | 1068.5936       | 534.8004        | <b>1050.5830</b> | 525.7951         | V    | 246.1812        | 123.5942        | 229.1547         | 115.0810         |                |                  | 2  |
| 12 |                 |                 |                  |                  | K    | 147.1128        | 74.0600         | 130.0863         | 65.5468          |                |                  | 1  |

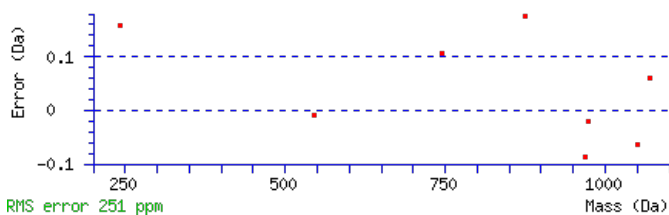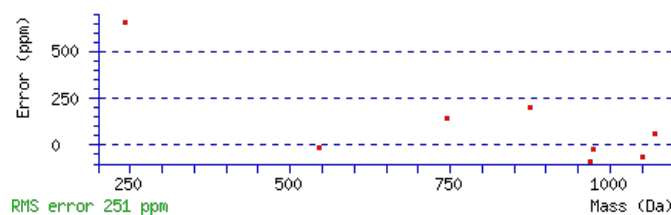NCBI BLAST search of **AGIVESLDALVK**

(Parameters: blastp, nr protein database, expect=20000, no filter, PAM30)

Other BLAST [web gateways](#)

AT2G47470.1

All matches to this query

| Score | Mr(calc)  | Delta   | Sequence                     |
|-------|-----------|---------|------------------------------|
| 34.2  | 1213.6918 | -0.0009 | <a href="#">AGIVESLDALVK</a> |
| 12.4  | 1213.6918 | -0.0009 | <a href="#">IQLDSLEGVIK</a>  |
| 8.9   | 1213.6931 | -0.0022 | <a href="#">RALQFNPLAGK</a>  |
| 3.1   | 1213.6891 | 0.0018  | <a href="#">IQNKNGAVKSR</a>  |
| 2.9   | 1213.6918 | -0.0008 | <a href="#">KLEELDQVK</a>    |
| 2.4   | 1213.6918 | -0.0008 | <a href="#">LQVLLDEEK</a>    |
| 1.5   | 1213.6891 | 0.0018  | <a href="#">RLAQTKVENR</a>   |

Mascot: <http://www.matrixscience.com/>

**Peptide View**MS/MS Fragmentation of **SLQNFEIGGER**

Found in **AT2G47510.1** in **TAIR\_Arabidopsis**, Symbols: FUM1 | FUM1 (FUMARASE 1); fumarate hydratase | chr2:19505684-19509090  
FORWARD

Match to Query 4031: 1248.609238 from(625.311895,2+) index(4451)

Title: Elution from: 44.114 to 44.114 scan no 5716 cid35.00 polarity:+

Data file D1d-1\_1.mgf

Click mouse within plot area to zoom in by factor of two about that point

Or,   to  Da

Label all possible matches  Label matches used for scoring

Show Y-axis

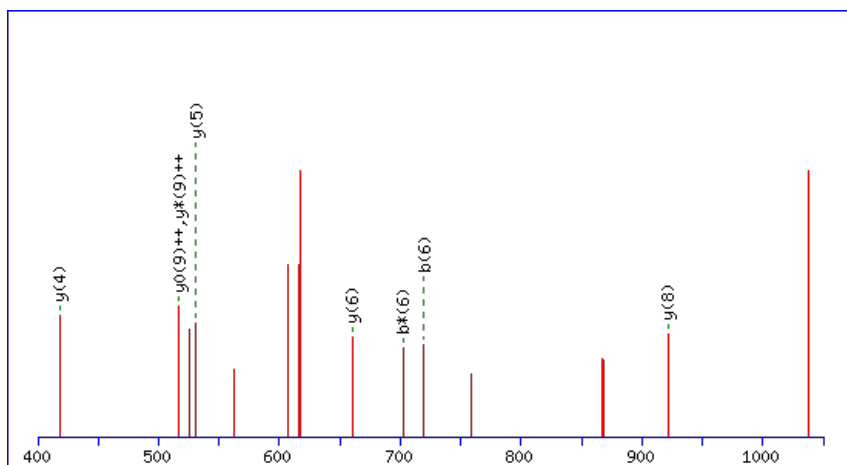

Monoisotopic mass of neutral peptide  $M_r(\text{calc})$ : 1248.6098

Fixed modifications: Carbamidomethyl (C) (apply to specified residues or termini only)

Ions Score: 19 Expect: 0.036

Matches : 8/114 fragment ions using 14 most intense peaks ([help](#))

| #  | b         | b <sup>++</sup> | b*        | b <sup>*++</sup> | b <sup>0</sup> | b <sup>0++</sup> | Seq. | y         | y <sup>++</sup> | y*        | y <sup>*++</sup> | y <sup>0</sup> | y <sup>0++</sup> | #  |
|----|-----------|-----------------|-----------|------------------|----------------|------------------|------|-----------|-----------------|-----------|------------------|----------------|------------------|----|
| 1  | 88.0393   | 44.5233         |           |                  | 70.0287        | 35.5180          | S    |           |                 |           |                  |                |                  | 11 |
| 2  | 201.1234  | 101.0653        |           |                  | 183.1128       | 92.0600          | L    | 1162.5851 | 581.7962        | 1145.5586 | 573.2829         | 1144.5745      | 572.7909         | 10 |
| 3  | 329.1819  | 165.0946        | 312.1554  | 156.5813         | 311.1714       | 156.0893         | Q    | 1049.5010 | 525.2542        | 1032.4745 | 516.7409         | 1031.4905      | 516.2489         | 9  |
| 4  | 443.2249  | 222.1161        | 426.1983  | 213.6028         | 425.2143       | 213.1108         | N    | 921.4425  | 461.2249        | 904.4159  | 452.7116         | 903.4319       | 452.2196         | 8  |
| 5  | 590.2933  | 295.6503        | 573.2667  | 287.1370         | 572.2827       | 286.6450         | F    | 807.3995  | 404.2034        | 790.3730  | 395.6901         | 789.3890       | 395.1981         | 7  |
| 6  | 719.3359  | 360.1716        | 702.3093  | 351.6583         | 701.3253       | 351.1663         | E    | 660.3311  | 330.6692        | 643.3046  | 322.1559         | 642.3206       | 321.6639         | 6  |
| 7  | 832.4199  | 416.7136        | 815.3934  | 408.2003         | 814.4094       | 407.7083         | I    | 531.2885  | 266.1479        | 514.2620  | 257.6346         | 513.2780       | 257.1426         | 5  |
| 8  | 889.4414  | 445.2243        | 872.4149  | 436.7111         | 871.4308       | 436.2191         | G    | 418.2045  | 209.6059        | 401.1779  | 201.0926         | 400.1939       | 200.6006         | 4  |
| 9  | 946.4629  | 473.7351        | 929.4363  | 465.2218         | 928.4523       | 464.7298         | G    | 361.1830  | 181.0951        | 344.1565  | 172.5819         | 343.1724       | 172.0899         | 3  |
| 10 | 1075.5055 | 538.2564        | 1058.4789 | 529.7431         | 1057.4949      | 529.2511         | E    | 304.1615  | 152.5844        | 287.1350  | 144.0711         | 286.1510       | 143.5791         | 2  |
| 11 |           |                 |           |                  |                |                  | R    | 175.1190  | 88.0631         | 158.0924  | 79.5498          |                |                  | 1  |

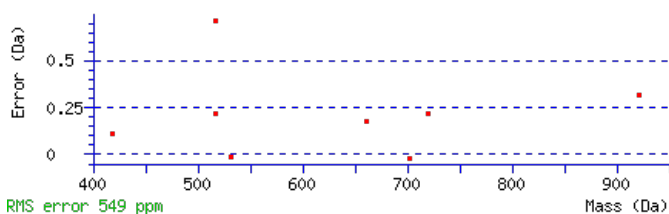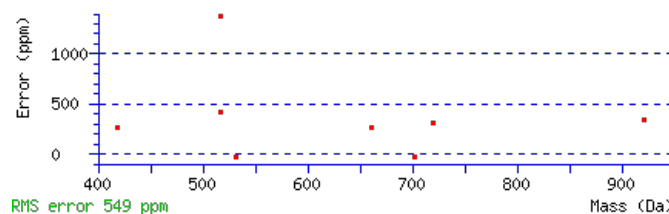NCBI **BLAST** search of **SLQNFEIGGER**

(Parameters: blastp, nr protein database, expect=20000, no filter, PAM30)

Other BLAST [web gateways](#)

All matches to this query



AT2G47510.1

| Score | Mr(calc)  | Delta   | Sequence                    |
|-------|-----------|---------|-----------------------------|
| 19.3  | 1248.6098 | -0.0006 | <a href="#">SLQNFEEGGER</a> |
| 0.7   | 1248.6098 | -0.0006 | <a href="#">GAATDQSLYAR</a> |

Mascot: <http://www.matrixscience.com/>

**Peptide View**MS/MS Fragmentation of **ILEAIK**Found in **AT2G47610.1** in **TAIR\_Arabidopsis**, Symbols: | 60S ribosomal protein L7A (RPL7aA) | chr2:19536924-19538471 FORWARD

Match to Query 626: 692.417206 from(347.215879,2+) index(1943)

Title: Elution from: 23.735 to 23.735 scan no 2530 cid35.00 polarity:+

Data file D12h-3\_1.mgf

Click mouse within plot area to zoom in by factor of two about that point

Or,   to  Da Label all possible matches  Label matches used for scoring Show Y-axis 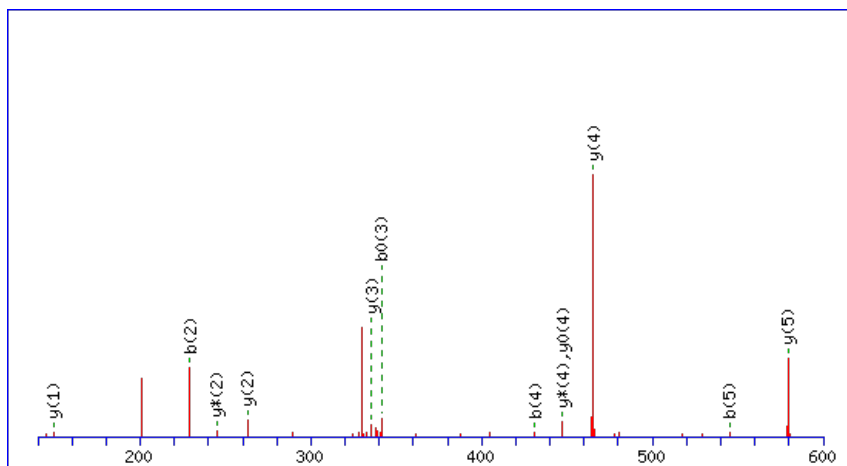Monoisotopic mass of neutral peptide **Mr(calc)**: 692.4167

Fixed modifications: Carbamidomethyl (C) (apply to specified residues or termini only)

Ions Score: 39 **Expect**: 0.00039Matches : 12/40 fragment ions using 23 most intense peaks ([help](#))

| # | b               | b <sup>++</sup> | b <sup>0</sup>  | b <sup>0++</sup> | Seq. | y               | y <sup>++</sup> | y*              | y <sup>*++</sup> | y <sup>0</sup>  | y <sup>0++</sup> | # |
|---|-----------------|-----------------|-----------------|------------------|------|-----------------|-----------------|-----------------|------------------|-----------------|------------------|---|
| 1 | 115.0884        | 58.0478         |                 |                  | I    |                 |                 |                 |                  |                 |                  | 6 |
| 2 | <b>229.1695</b> | 115.0884        |                 |                  | L    | <b>579.3428</b> | 290.1751        | 561.3193        | 281.1633         | 561.3323        | 281.1698         | 5 |
| 3 | 359.2091        | 180.1082        | <b>341.1985</b> | 171.1029         | E    | <b>465.2618</b> | 233.1345        | <b>447.2382</b> | 224.1227         | <b>447.2512</b> | 224.1292         | 4 |
| 4 | <b>431.2433</b> | 216.1253        | 413.2327        | 207.1200         | A    | <b>335.2221</b> | 168.1147        | 317.1985        | 159.1029         |                 |                  | 3 |
| 5 | <b>545.3244</b> | 273.1658        | 527.3138        | 264.1605         | I    | <b>263.1880</b> | 132.0976        | <b>245.1644</b> | 123.0858         |                 |                  | 2 |
| 6 |                 |                 |                 |                  | K    | <b>149.1069</b> | 75.0571         | 131.0833        | 66.0453          |                 |                  | 1 |

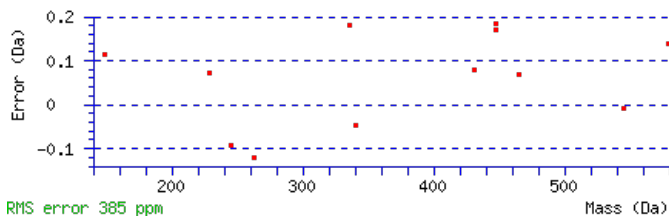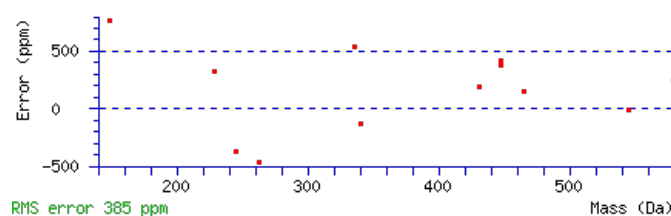NCBI **BLAST** search of **ILEAIK**

(Parameters: blastp, nr protein database, expect=20000, no filter, PAM30)

Other BLAST [web gateways](#)**All matches to this query**

| Score | Mr(calc) | Delta  | Sequence               |
|-------|----------|--------|------------------------|
| 39.5  | 692.4167 | 0.0005 | <a href="#">ILEALK</a> |
| 39.5  | 692.4167 | 0.0005 | <a href="#">ILEAIK</a> |
| 39.5  | 692.4167 | 0.0005 | <a href="#">ILEALK</a> |
| 39.5  | 692.4167 | 0.0005 | <a href="#">LIEALK</a> |

## AT2G47610.1

|      |          |        |                         |
|------|----------|--------|-------------------------|
| 25.6 | 692.4167 | 0.0005 | <a href="#">ILAEIK</a>  |
| 25.6 | 692.4167 | 0.0005 | <a href="#">ILAEIK</a>  |
| 24.5 | 692.4167 | 0.0005 | <a href="#">LLEIAK</a>  |
| 21.0 | 692.4167 | 0.0005 | <a href="#">LEIAIK</a>  |
| 19.6 | 692.4167 | 0.0006 | <a href="#">LLVDVK</a>  |
| 12.4 | 692.4167 | 0.0005 | <a href="#">LLAVSAI</a> |

Mascot: <http://www.matrixscience.com/>

**Peptide View**MS/MS Fragmentation of **AITQYLAEYSEK**Found in **AT2G47730.1** in **TAIR\_Arabidopsis**, Symbols: GST6, ATGSTF5, GSTF8, ATGSTF8 | ATGSTF8 (GLUTATHIONE S-TRANSFERASE 8); glutathione transferase | chr2:19565283-19566336 FORWARD

Match to Query 6792: 1543.739512 from(772.877032,2+) index(5893)

Title: Elution from: 51.152 to 51.152 scan no 7443 cid35.00 polarity:+

Data file D1d-3\_2.mgf

Click mouse within plot area to zoom in by factor of two about that point

Or,  to  Da Label all possible matches  Label matches used for scoring Show Y-axis 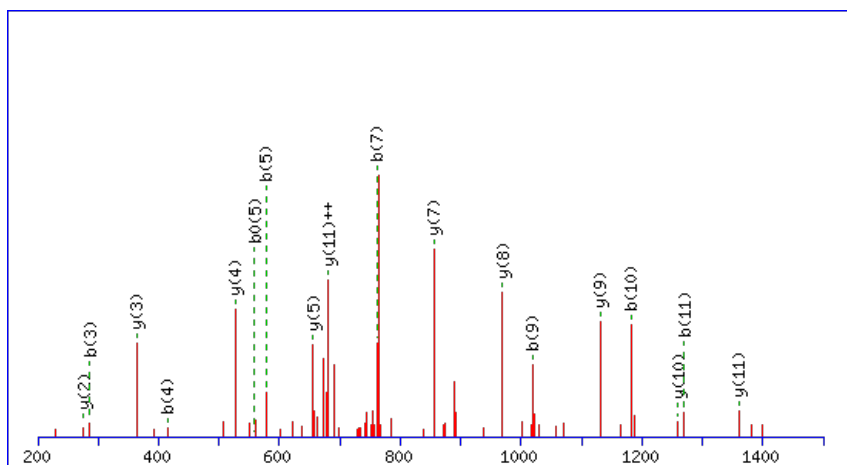Monoisotopic mass of neutral peptide  $M_r(\text{calc})$ : 1543.7406

Fixed modifications: Carbamidomethyl (C) (apply to specified residues or termini only)

Ions Score: 74 Expect: 8.9e-008

Matches : 18/132 fragment ions using 24 most intense peaks ([help](#))

| #  | b                | b <sup>++</sup> | b*        | b <sup>*++</sup> | b <sup>0</sup>  | b <sup>0++</sup> | Seq. | y                | y <sup>++</sup> | y*        | y <sup>*++</sup> | y <sup>0</sup> | y <sup>0++</sup> | #  |
|----|------------------|-----------------|-----------|------------------|-----------------|------------------|------|------------------|-----------------|-----------|------------------|----------------|------------------|----|
| 1  | 72.0444          | 36.5258         |           |                  |                 |                  | A    |                  |                 |           |                  |                |                  | 13 |
| 2  | 185.1285         | 93.0679         |           |                  |                 |                  | I    | 1473.7108        | 737.3590        | 1456.6842 | 728.8457         | 1455.7002      | 728.3537         | 12 |
| 3  | <b>286.1761</b>  | 143.5917        |           |                  | 268.1656        | 134.5864         | T    | <b>1360.6267</b> | <b>680.8170</b> | 1343.6002 | 672.3037         | 1342.6161      | 671.8117         | 11 |
| 4  | <b>414.2347</b>  | 207.6210        | 397.2082  | 199.1077         | 396.2241        | 198.6157         | Q    | <b>1259.5790</b> | 630.2932        | 1242.5525 | 621.7799         | 1241.5685      | 621.2879         | 10 |
| 5  | <b>577.2980</b>  | 289.1527        | 560.2715  | 280.6394         | <b>559.2875</b> | 280.1474         | Y    | <b>1131.5204</b> | 566.2639        | 1114.4939 | 557.7506         | 1113.5099      | 557.2586         | 9  |
| 6  | 690.3821         | 345.6947        | 673.3556  | 337.1814         | 672.3715        | 336.6894         | L    | <b>968.4571</b>  | 484.7322        | 951.4306  | 476.2189         | 950.4466       | 475.7269         | 8  |
| 7  | <b>761.4192</b>  | 381.2132        | 744.3927  | 372.7000         | 743.4087        | 372.2080         | A    | <b>855.3731</b>  | 428.1902        | 838.3465  | 419.6769         | 837.3625       | 419.1849         | 7  |
| 8  | 890.4618         | 445.7345        | 873.4353  | 437.2213         | 872.4512        | 436.7293         | E    | 784.3359         | 392.6716        | 767.3094  | 384.1583         | 766.3254       | 383.6663         | 6  |
| 9  | <b>1019.5044</b> | 510.2558        | 1002.4779 | 501.7426         | 1001.4938       | 501.2506         | E    | <b>655.2933</b>  | 328.1503        | 638.2668  | 319.6370         | 637.2828       | 319.1450         | 5  |
| 10 | <b>1182.5677</b> | 591.7875        | 1165.5412 | 583.2742         | 1164.5572       | 582.7822         | Y    | <b>526.2508</b>  | 263.6290        | 509.2242  | 255.1157         | 508.2402       | 254.6237         | 4  |
| 11 | <b>1269.5998</b> | 635.3035        | 1252.5732 | 626.7902         | 1251.5892       | 626.2982         | S    | <b>363.1874</b>  | 182.0974        | 346.1609  | 173.5841         | 345.1769       | 173.0921         | 3  |
| 12 | 1398.6424        | 699.8248        | 1381.6158 | 691.3115         | 1380.6318       | 690.8195         | E    | <b>276.1554</b>  | 138.5813        | 259.1288  | 130.0681         | 258.1448       | 129.5761         | 2  |
| 13 |                  |                 |           |                  |                 |                  | K    | 147.1128         | 74.0600         | 130.0863  | 65.5468          |                |                  | 1  |

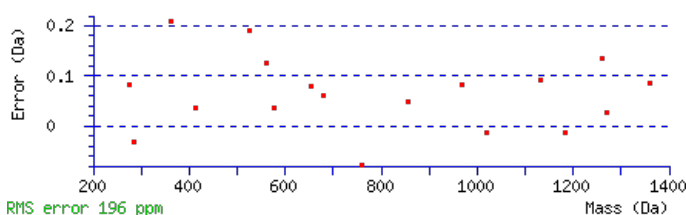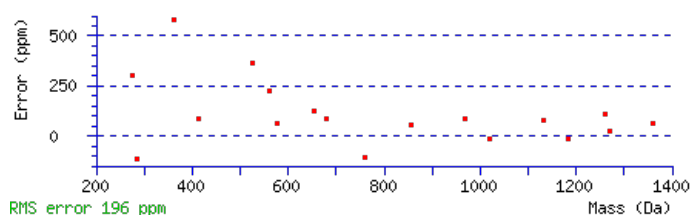NCBI **BLAST** search of **AITQYLAEYSEK**

(Parameters: blastp, nr protein database, expect=20000, no filter, PAM30)

AT2G47730.1

Other BLAST [web gateways](#)

**All matches to this query**

| Score | Mr(calc)  | Delta   | Sequence                     |
|-------|-----------|---------|------------------------------|
| 73.9  | 1543.7406 | -0.0010 | <a href="#">AITQYLAEYSEK</a> |

Mascot: <http://www.matrixscience.com/>

**Peptide View**MS/MS Fragmentation of **ATMRALK**Found in **AT2G47970.1** in **TAIR\_Arabidopsis**, Symbols: | NPL4 family protein | chr2:19636595-19638043 FORWARD

Match to Query 995: 800.420670 from(401.217611,2+) index(5656)

Title: Elution from: 50.637 to 50.637 scan no 7209 cid35.00 polarity:+

Data file 0-2\_2.mgf

Click mouse within plot area to zoom in by factor of two about that point

Or,   to  Da Label all possible matches  Label matches used for scoring Show Y-axis 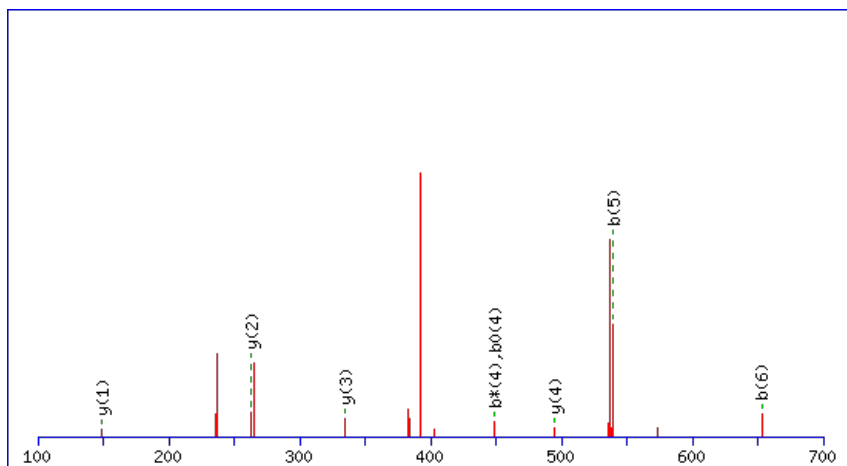Monoisotopic mass of neutral peptide **Mr(calc)**: 800.4205**Fixed modifications:** Carbamidomethyl (C) (apply to specified residues or termini only)**Ions Score:** 24 **Expect:** 0.032**Matches** : 8/54 fragment ions using 17 most intense peaks ([help](#))

| # | b        | b <sup>++</sup> | b*       | b <sup>*++</sup> | b <sup>0</sup> | b <sup>0++</sup> | Seq. | y        | y <sup>++</sup> | y*       | y <sup>*++</sup> | y <sup>0</sup> | y <sup>0++</sup> | # |
|---|----------|-----------------|----------|------------------|----------------|------------------|------|----------|-----------------|----------|------------------|----------------|------------------|---|
| 1 | 73.0414  | 37.0244         |          |                  |                |                  | A    |          |                 |          |                  |                |                  | 7 |
| 2 | 175.0861 | 88.0467         |          |                  | 157.0756       | 79.0414          | T    | 729.3936 | 365.2004        | 711.3700 | 356.1886         | 711.3830       | 356.1952         | 6 |
| 3 | 307.1237 | 154.0655        |          |                  | 289.1131       | 145.0602         | M    | 627.3489 | 314.1781        | 609.3253 | 305.1663         |                |                  | 5 |
| 4 | 467.2129 | 234.1101        | 449.1893 | 225.0983         | 449.2023       | 225.1048         | R    | 495.3114 | 248.1593        | 477.2878 | 239.1475         |                |                  | 4 |
| 5 | 539.2471 | 270.1272        | 521.2235 | 261.1154         | 521.2365       | 261.1219         | A    | 335.2221 | 168.1147        | 317.1985 | 159.1029         |                |                  | 3 |
| 6 | 653.3282 | 327.1677        | 635.3046 | 318.1559         | 635.3176       | 318.1624         | L    | 263.1880 | 132.0976        | 245.1644 | 123.0858         |                |                  | 2 |
| 7 |          |                 |          |                  |                |                  | K    | 149.1069 | 75.0571         | 131.0833 | 66.0453          |                |                  | 1 |

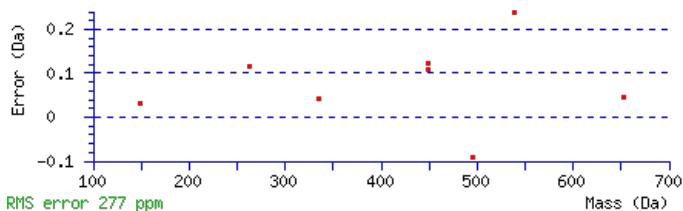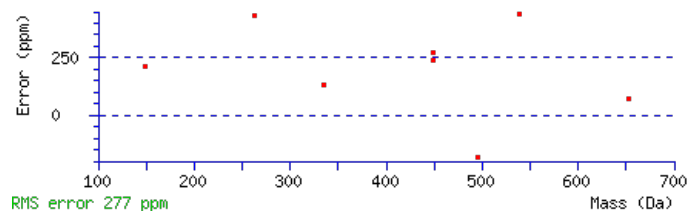NCBI **BLAST** search of **ATMRALK**

(Parameters: blastp, nr protein database, expect=20000, no filter, PAM30)

Other BLAST [web gateways](#)**All matches to this query**

| Score | Mr(calc) | Delta  | Sequence                |
|-------|----------|--------|-------------------------|
| 24.0  | 800.4205 | 0.0002 | <a href="#">ATMRALK</a> |
| 21.0  | 800.4205 | 0.0002 | <a href="#">KMRLDK</a>  |
| 21.0  | 800.4205 | 0.0002 | <a href="#">NMRILK</a>  |

## AT2G47970.1

|      |          |        |                         |
|------|----------|--------|-------------------------|
| 18.0 | 800.4205 | 0.0002 | <a href="#">AMKKANK</a> |
| 16.3 | 800.4205 | 0.0002 | <a href="#">LMRNLK</a>  |
| 11.5 | 800.4205 | 0.0002 | <a href="#">LMAVKGR</a> |
| 10.6 | 800.4205 | 0.0002 | <a href="#">RLLMNK</a>  |
| 10.6 | 800.4205 | 0.0002 | <a href="#">RMLLNK</a>  |
| 9.9  | 800.4205 | 0.0002 | <a href="#">DKMRLK</a>  |
| 8.6  | 800.4205 | 0.0002 | <a href="#">LCRTLK</a>  |

**Mascot:** <http://www.matrixscience.com/>

## Peptide View

MS/MS Fragmentation of **TAEIDFK**Found in **AT3G01120.1** in **TAIR\_Arabidopsis**, Symbols: CGS, ATCYS1, CGS1, MTO1 | MTO1 (METHIONINE OVERACCUMULATION 1) | chr3:39241-41872 REVERSE

Match to Query 2087: 935.496106 from(468.755329,2+) index(5027)

Title: Elution from: 44.215 to 44.215 scan no 6273 cid35.00 polarity:+

Data file D1d-3\_2.mgf

Click mouse within plot area to zoom in by factor of two about that point

Or,   to  Da Label all possible matches  Label matches used for scoring Show Y-axis 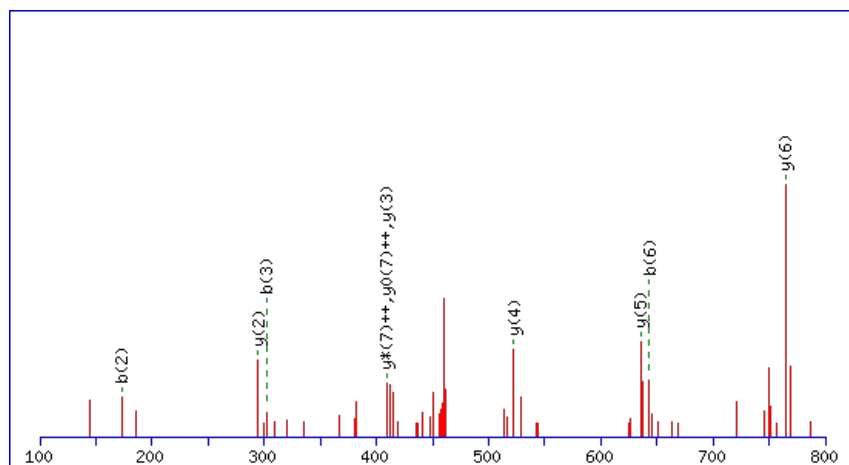Monoisotopic mass of neutral peptide  $M_r(\text{calc})$ : 935.4964

Fixed modifications: Carbamidomethyl (C) (apply to specified residues or termini only)

Ions Score: 35 Expect: 0.0013

Matches : 10/66 fragment ions using 14 most intense peaks ([help](#))

| # | b               | b <sup>++</sup> | b <sup>0</sup> | b <sup>0++</sup> | Seq. | y               | y <sup>++</sup> | y*       | y <sup>*++</sup> | y <sup>0</sup> | y <sup>0++</sup> | # |
|---|-----------------|-----------------|----------------|------------------|------|-----------------|-----------------|----------|------------------|----------------|------------------|---|
| 1 | 102.0550        | 51.5311         | 84.0444        | 42.5258          | T    |                 |                 |          |                  |                |                  | 8 |
| 2 | <b>173.0921</b> | 87.0497         | 155.0815       | 78.0444          | A    | 835.4560        | 418.2316        | 818.4294 | <b>409.7184</b>  | 817.4454       | <b>409.2264</b>  | 7 |
| 3 | <b>302.1347</b> | 151.5710        | 284.1241       | 142.5657         | E    | <b>764.4189</b> | 382.7131        | 747.3923 | 374.1998         | 746.4083       | 373.7078         | 6 |
| 4 | 415.2187        | 208.1130        | 397.2082       | 199.1077         | L    | <b>635.3763</b> | 318.1918        | 618.3497 | 309.6785         | 617.3657       | 309.1865         | 5 |
| 5 | 528.3028        | 264.6550        | 510.2922       | 255.6498         | I    | <b>522.2922</b> | 261.6498        | 505.2657 | 253.1365         | 504.2817       | 252.6445         | 4 |
| 6 | <b>643.3297</b> | 322.1685        | 625.3192       | 313.1632         | D    | <b>409.2082</b> | 205.1077        | 392.1816 | 196.5944         | 391.1976       | 196.1024         | 3 |
| 7 | 790.3981        | 395.7027        | 772.3876       | 386.6974         | F    | <b>294.1812</b> | 147.5942        | 277.1547 | 139.0810         |                |                  | 2 |
| 8 |                 |                 |                |                  | K    | 147.1128        | 74.0600         | 130.0863 | 65.5468          |                |                  | 1 |

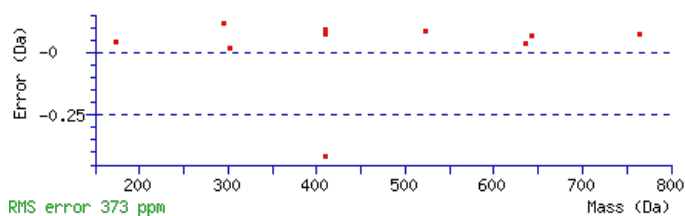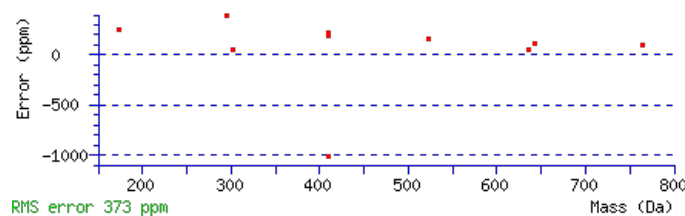NCBI BLAST search of **TAEIDFK**

(Parameters: blastp, nr protein database, expect=20000, no filter, PAM30)

Other BLAST [web gateways](#)

All matches to this query

| Score | $M_r(\text{calc})$ | Delta   | Sequence       |
|-------|--------------------|---------|----------------|
| 34.6  | 935.4964           | -0.0003 | <b>TAEIDFK</b> |





## Peptide View

MS/MS Fragmentation of **VGLALALKP**

Found in **AT3G01280.1** in **TAIR\_Arabidopsis**, Symbols: | porin, putative | chr3:85761-87619 FORWARD

Match to Query 1469: 880.574154 from(441.294353,2+) index(5940)

Title: Elution from: 52.736 to 52.736 scan no 7575 cid35.00 polarity:+

Data file D12h-3\_2.mgf

Click mouse within plot area to zoom in by factor of two about that point

Or,   to  Da

Label all possible matches  Label matches used for scoring

Show Y-axis

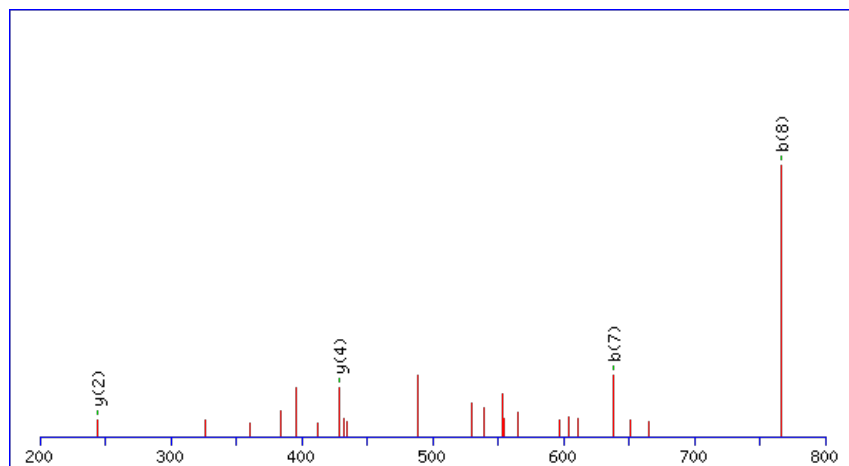

Monoisotopic mass of neutral peptide **Mr(calc)**: 880.5746

**Fixed modifications**: Carbamidomethyl (C) (apply to specified residues or termini only)

**Ions Score**: 14 **Expect**: 0.037

**Matches** : 4/48 fragment ions using 6 most intense peaks ([help](#))

| # | b               | b <sup>++</sup> | b*       | b <sup>*++</sup> | Seq. | y               | y <sup>++</sup> | y*       | y <sup>*++</sup> | # |
|---|-----------------|-----------------|----------|------------------|------|-----------------|-----------------|----------|------------------|---|
| 1 | 100.0757        | 50.5415         |          |                  | V    |                 |                 |          |                  | 9 |
| 2 | 157.0972        | 79.0522         |          |                  | G    | 782.5135        | 391.7604        | 765.4869 | 383.2471         | 8 |
| 3 | 270.1812        | 135.5942        |          |                  | L    | 725.4920        | 363.2496        | 708.4654 | 354.7364         | 7 |
| 4 | 341.2183        | 171.1128        |          |                  | A    | 612.4079        | 306.7076        | 595.3814 | 298.1943         | 6 |
| 5 | 454.3024        | 227.6548        |          |                  | L    | 541.3708        | 271.1890        | 524.3443 | 262.6758         | 5 |
| 6 | 525.3395        | 263.1734        |          |                  | A    | <b>428.2867</b> | 214.6470        | 411.2602 | 206.1337         | 4 |
| 7 | <b>638.4236</b> | 319.7154        |          |                  | L    | 357.2496        | 179.1285        | 340.2231 | 170.6152         | 3 |
| 8 | <b>766.5185</b> | 383.7629        | 749.4920 | 375.2496         | K    | <b>244.1656</b> | 122.5864        | 227.1390 | 114.0731         | 2 |
| 9 |                 |                 |          |                  | P    | 116.0706        | 58.5389         |          |                  | 1 |

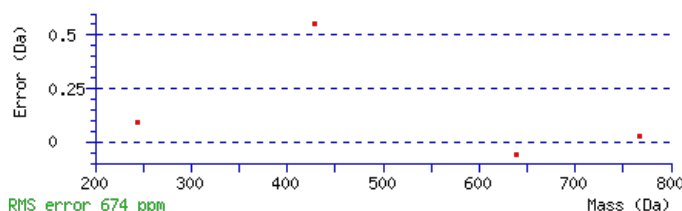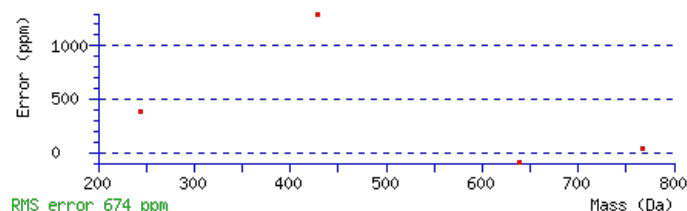

NCBI **BLAST** search of **VGLALALKP**

(Parameters: blastp, nr protein database, expect=20000, no filter, PAM30)

Other BLAST [web gateways](#)

All matches to this query

| Score | Mr(calc) | Delta   | Sequence         |
|-------|----------|---------|------------------|
| 14.4  | 880.5746 | -0.0004 | <b>VGLALALKP</b> |

AT3G01280.1

|      |          |         |                           |
|------|----------|---------|---------------------------|
| 14.4 | 880.5746 | -0.0004 | <a href="#">VGLALALKP</a> |
|------|----------|---------|---------------------------|

**Mascot:** <http://www.matrixscience.com/>

### Peptide View

 MS/MS Fragmentation of **GQGSIQQLLAAEVEAQHIVNAAR**

 Found in **AT3G01390.1** in **TAIR\_Arabidopsis**, Symbols: AVMA10, VMA10 | VMA10 (VACUOLAR MEMBRANE ATPASE 10) | chr3:150272-150929 REVERSE

Match to Query 10212: 2435.172123 from(812.731317,3+) index(9756)

Title: Elution from: 90.251 to 90.251 scan no 13612 cid35.00 polarity:+

Data file 0-1\_3.mgf

Click mouse within plot area to zoom in by factor of two about that point

 Or, Plot from  to  Da 

 Label all possible matches  Label matches used for scoring 

 Show Y-axis 
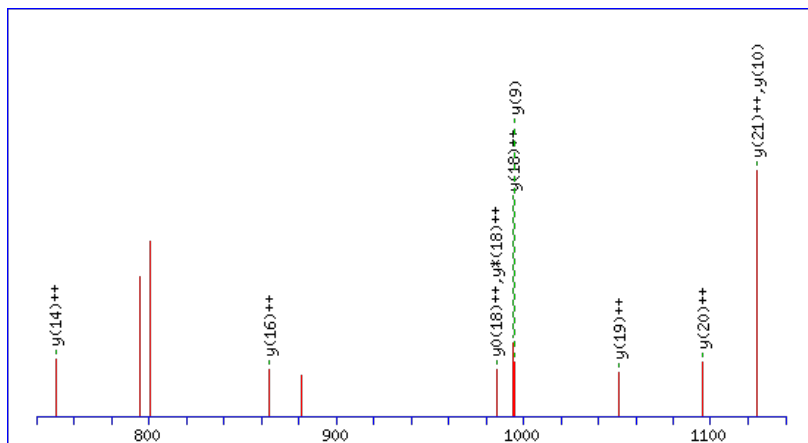
 Monoisotopic mass of neutral peptide  $M_r(\text{calc})$ : 2435.1687

Fixed modifications: Carbamidomethyl (C) (apply to specified residues or termini only)

Ions Score: 39 Expect: 0.00078

 Matches : 10/238 fragment ions using 11 most intense peaks ([help](#))

| #  | b         | b <sup>++</sup> | b <sup>*</sup> | b <sup>*++</sup> | b <sup>0</sup> | b <sup>0++</sup> | Seq | y         | y <sup>++</sup> | y <sup>*</sup> | y <sup>*++</sup> | y <sup>0</sup> | y <sup>0++</sup> | #  |
|----|-----------|-----------------|----------------|------------------|----------------|------------------|-----|-----------|-----------------|----------------|------------------|----------------|------------------|----|
| 1  | 59.0258   | 30.0165         |                |                  |                |                  | G   |           |                 |                |                  |                |                  | 23 |
| 2  | 189.0784  | 95.0428         | 171.0548       | 86.0311          |                |                  | Q   | 2378.1576 | 1189.5824       | 2360.1340      | 1180.5706        | 2360.1470      | 1180.5771        | 22 |
| 3  | 247.0969  | 124.0521        | 229.0733       | 115.0403         |                |                  | G   | 2248.1049 | 1124.5561       | 2230.0813      | 1115.5443        | 2230.0943      | 1115.5508        | 21 |
| 4  | 335.1260  | 168.0666        | 317.1024       | 159.0548         | 317.1154       | 159.0613         | S   | 2190.0864 | 1095.5468       | 2172.0628      | 1086.5350        | 2172.0758      | 1086.5416        | 20 |
| 5  | 449.2071  | 225.1072        | 431.1835       | 216.0954         | 431.1965       | 216.1019         | I   | 2102.0573 | 1051.5323       | 2084.0338      | 1042.5205        | 2084.0468      | 1042.5270        | 19 |
| 6  | 579.2597  | 290.1335        | 561.2361       | 281.1217         | 561.2492       | 281.1282         | Q   | 1987.9762 | 994.4918        | 1969.9527      | 985.4800         | 1969.9657      | 985.4865         | 18 |
| 7  | 709.3124  | 355.1598        | 691.2888       | 346.1480         | 691.3018       | 346.1545         | Q   | 1857.9236 | 929.4654        | 1839.9000      | 920.4536         | 1839.9130      | 920.4602         | 17 |
| 8  | 823.3935  | 412.2004        | 805.3699       | 403.1886         | 805.3829       | 403.1951         | L   | 1727.8709 | 864.4391        | 1709.8474      | 855.4273         | 1709.8604      | 855.4338         | 16 |
| 9  | 937.4746  | 469.2409        | 919.4510       | 460.2291         | 919.4640       | 460.2356         | L   | 1613.7898 | 807.3986        | 1595.7663      | 798.3868         | 1595.7793      | 798.3933         | 15 |
| 10 | 1009.5087 | 505.2580        | 991.4851       | 496.2462         | 991.4982       | 496.2527         | A   | 1499.7088 | 750.3580        | 1481.6852      | 741.3462         | 1481.6982      | 741.3527         | 14 |
| 11 | 1081.5429 | 541.2751        | 1063.5193      | 532.2633         | 1063.5323      | 532.2698         | A   | 1427.6746 | 714.3409        | 1409.6510      | 705.3291         | 1409.6640      | 705.3357         | 13 |
| 12 | 1211.5825 | 606.2949        | 1193.5589      | 597.2831         | 1193.5719      | 597.2896         | E   | 1355.6405 | 678.3239        | 1337.6169      | 669.3121         | 1337.6299      | 669.3186         | 12 |
| 13 | 1311.6479 | 656.3276        | 1293.6244      | 647.3158         | 1293.6374      | 647.3223         | V   | 1225.6008 | 613.3041        | 1207.5772      | 604.2923         | 1207.5903      | 604.2988         | 11 |
| 14 | 1441.6876 | 721.3474        | 1423.6640      | 712.3356         | 1423.6770      | 712.3421         | E   | 1125.5354 | 563.2713        | 1107.5118      | 554.2595         | 1107.5248      | 554.2660         | 10 |
| 15 | 1513.7217 | 757.3645        | 1495.6981      | 748.3527         | 1495.7112      | 748.3592         | A   | 995.4957  | 498.2515        | 977.4722       | 489.2397         |                |                  | 9  |
| 16 | 1643.7744 | 822.3908        | 1625.7508      | 813.3790         | 1625.7638      | 813.3855         | Q   | 923.4616  | 462.2344        | 905.4380       | 453.2226         |                |                  | 8  |
| 17 | 1783.8244 | 892.4158        | 1765.8008      | 883.4040         | 1765.8138      | 883.4106         | H   | 793.4090  | 397.2081        | 775.3854       | 388.1963         |                |                  | 7  |
| 18 | 1897.9055 | 949.4564        | 1879.8819      | 940.4446         | 1879.8949      | 940.4511         | I   | 653.3589  | 327.1831        | 635.3354       | 318.1713         |                |                  | 6  |
| 19 | 1997.9709 | 999.4891        | 1979.9474      | 990.4773         | 1979.9604      | 990.4838         | V   | 539.2778  | 270.1426        | 521.2543       | 261.1308         |                |                  | 5  |
| 20 | 2114.0079 | 1057.5076       | 2095.9844      | 1048.4958        | 2095.9974      | 1048.5023        | N   | 439.2124  | 220.1098        | 421.1888       | 211.0980         |                |                  | 4  |
| 21 | 2186.0421 | 1093.5247       | 2168.0185      | 1084.5129        | 2168.0315      | 1084.5194        | A   | 323.1754  | 162.0913        | 305.1518       | 153.0795         |                |                  | 3  |
| 22 | 2258.0762 | 1129.5418       | 2240.0526      | 1120.5300        | 2240.0657      | 1120.5365        | A   | 251.1412  | 126.0743        | 233.1177       | 117.0625         |                |                  | 2  |
| 23 |           |                 |                |                  |                |                  | R   | 179.1071  | 90.0572         | 161.0835       | 81.0454          |                |                  | 1  |

# AT3G01390.1

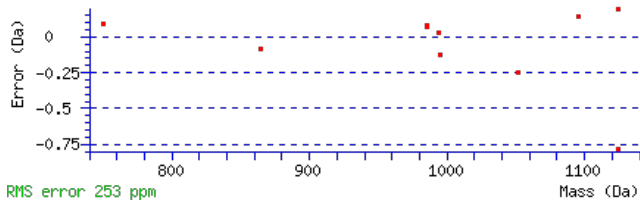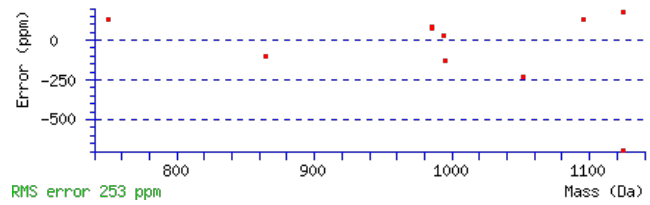

NCBI BLAST search of [GQGSIQQLLAAEVEAQHIVNAAR](#)  
(Parameters: blastp, nr protein database, expect=20000, no filter, PAM30)  
Other BLAST [web gateways](#)

## All matches to this query

| Score | Mr(calc)  | Delta   | Sequence                                |
|-------|-----------|---------|-----------------------------------------|
| 39.4  | 2435.1687 | 0.0034  | <a href="#">GQGSIQQLLAAEVEAQHIVNAAR</a> |
| 1.5   | 2435.1732 | -0.0011 | <a href="#">HLLYNVYNQESANVQHLLWK</a>    |
| 1.2   | 2435.1754 | -0.0033 | <a href="#">WGIQVLTVEAFSTDNWRPR</a>     |

Mascot: <http://www.matrixscience.com/>

**Peptide View**MS/MS Fragmentation of **ESELTPSNSNILDGR**Found in **AT3G01480.1** in **TAIR\_Arabidopsis**, Symbols: CYP38 | CYP38 (CYCLOPHILIN 38); peptidyl-prolyl cis-trans isomerase | chr3:188576-190681 FORWARD

Match to Query 7420: 1630.780434 from(816.397493,2+) index(4478)

Title: Elution from: 41.538 to 41.538 scan no 5670 cid35.00 polarity:+

Data file 0-2\_2.mgf

Click mouse within plot area to zoom in by factor of two about that point

Or,   to  Da Label all possible matches  Label matches used for scoring Show Y-axis 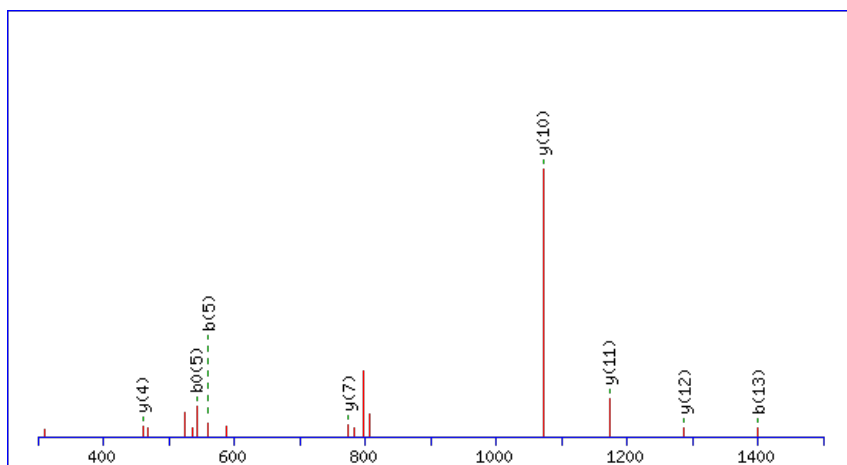Monoisotopic mass of neutral peptide  $M_r(\text{calc})$ : 1630.7798

Fixed modifications: Carbamidomethyl (C) (apply to specified residues or termini only)

Ions Score: 36 Expect: 0.00082

Matches : 8/150 fragment ions using 13 most intense peaks ([help](#))

| #  | b         | b <sup>++</sup> | b*        | b <sup>*++</sup> | b <sup>0</sup> | b <sup>0++</sup> | Seq. | y         | y <sup>++</sup> | y*        | y <sup>*++</sup> | y <sup>0</sup> | y <sup>0++</sup> | #  |
|----|-----------|-----------------|-----------|------------------|----------------|------------------|------|-----------|-----------------|-----------|------------------|----------------|------------------|----|
| 1  | 130.0499  | 65.5286         |           |                  | 112.0393       | 56.5233          | E    |           |                 |           |                  |                |                  | 15 |
| 2  | 217.0819  | 109.0446        |           |                  | 199.0713       | 100.0393         | S    | 1502.7445 | 751.8759        | 1485.7180 | 743.3626         | 1484.7340      | 742.8706         | 14 |
| 3  | 346.1245  | 173.5659        |           |                  | 328.1139       | 164.5606         | E    | 1415.7125 | 708.3599        | 1398.6859 | 699.8466         | 1397.7019      | 699.3546         | 13 |
| 4  | 459.2086  | 230.1079        |           |                  | 441.1980       | 221.1026         | L    | 1286.6699 | 643.8386        | 1269.6434 | 635.3253         | 1268.6593      | 634.8333         | 12 |
| 5  | 560.2562  | 280.6318        |           |                  | 542.2457       | 271.6265         | T    | 1173.5858 | 587.2966        | 1156.5593 | 578.7833         | 1155.5753      | 578.2913         | 11 |
| 6  | 657.3090  | 329.1581        |           |                  | 639.2984       | 320.1529         | P    | 1072.5382 | 536.7727        | 1055.5116 | 528.2594         | 1054.5276      | 527.7674         | 10 |
| 7  | 744.3410  | 372.6742        |           |                  | 726.3305       | 363.6689         | S    | 975.4854  | 488.2463        | 958.4588  | 479.7331         | 957.4748       | 479.2411         | 9  |
| 8  | 858.3840  | 429.6956        | 841.3574  | 421.1823         | 840.3734       | 420.6903         | N    | 888.4534  | 444.7303        | 871.4268  | 436.2170         | 870.4428       | 435.7250         | 8  |
| 9  | 945.4160  | 473.2116        | 928.3894  | 464.6984         | 927.4054       | 464.2063         | S    | 774.4104  | 387.7089        | 757.3839  | 379.1956         | 756.3999       | 378.7036         | 7  |
| 10 | 1059.4589 | 530.2331        | 1042.4324 | 521.7198         | 1041.4483      | 521.2278         | N    | 687.3784  | 344.1928        | 670.3519  | 335.6796         | 669.3678       | 335.1876         | 6  |
| 11 | 1172.5430 | 586.7751        | 1155.5164 | 578.2618         | 1154.5324      | 577.7698         | I    | 573.3355  | 287.1714        | 556.3089  | 278.6581         | 555.3249       | 278.1661         | 5  |
| 12 | 1285.6270 | 643.3172        | 1268.6005 | 634.8039         | 1267.6165      | 634.3119         | L    | 460.2514  | 230.6293        | 443.2249  | 222.1161         | 442.2409       | 221.6241         | 4  |
| 13 | 1400.6540 | 700.8306        | 1383.6274 | 692.3174         | 1382.6434      | 691.8253         | D    | 347.1674  | 174.0873        | 330.1408  | 165.5740         | 329.1568       | 165.0820         | 3  |
| 14 | 1457.6754 | 729.3414        | 1440.6489 | 720.8281         | 1439.6649      | 720.3361         | G    | 232.1404  | 116.5738        | 215.1139  | 108.0606         |                |                  | 2  |
| 15 |           |                 |           |                  |                |                  | R    | 175.1190  | 88.0631         | 158.0924  | 79.5498          |                |                  | 1  |

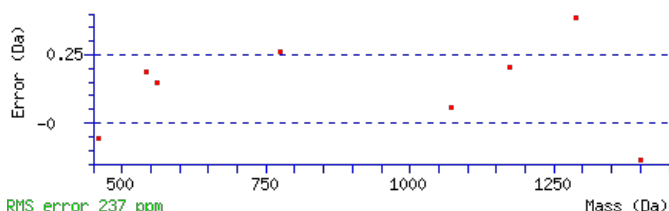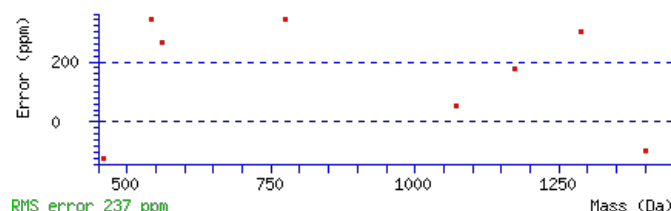

## AT3G01480.1

NCBI **BLAST** search of [ESELTPSNSNILDGR](#)

(Parameters: blastp, nr protein database, expect=20000, no filter, PAM30)

Other BLAST [web gateways](#)

### All matches to this query

| Score | Mr(calc)  | Delta  | Sequence                        |
|-------|-----------|--------|---------------------------------|
| 36.4  | 1630.7798 | 0.0006 | <a href="#">ESELTPSNSNILDGR</a> |
| 3.1   | 1630.7773 | 0.0031 | <a href="#">KEATIANEEWGMPR</a>  |

**Mascot:** <http://www.matrixscience.com/>

**Peptide View**MS/MS Fragmentation of **VEQITAALQTGTSSDKK**Found in **AT3G01500.1** in **TAIR\_Arabidopsis**, Symbols: CA1 | CA1 (CARBONIC ANHYDRASE 1); carbonate dehydratase/ zinc ion binding | chr3:194860-196723 REVERSE

Match to Query 8410: 1796.863431 from(599.961753,3+) index(2936)

Title: Elution from: 29.935 to 29.935 scan no 3676 cid35.00 polarity:+

Data file D6h-1\_3.mgf

Click mouse within plot area to zoom in by factor of two about that point

Or,  to  Da Label all possible matches  Label matches used for scoring Show Y-axis 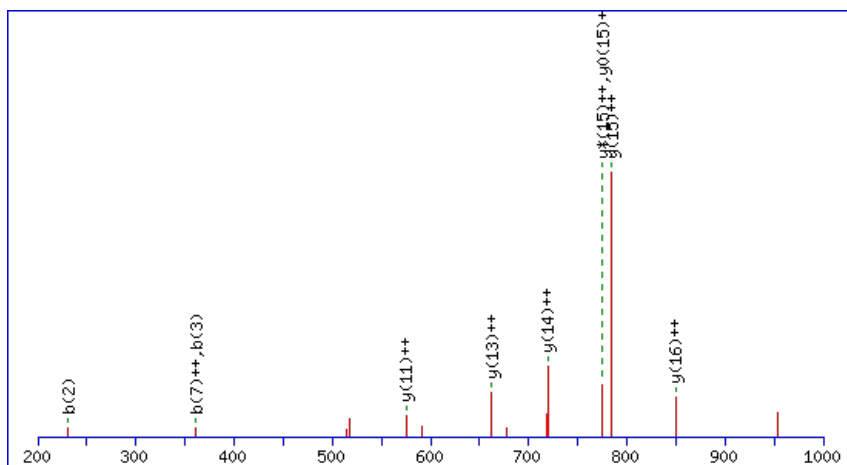Monoisotopic mass of neutral peptide  $M_r(\text{calc})$ : 1796.8642

Fixed modifications: Carbamidomethyl (C) (apply to specified residues or termini only)

Ions Score: 29 Expect: 0.012

Matches : 10/182 fragment ions using 12 most intense peaks ([help](#))

| #  | b               | b <sup>++</sup> | b*        | b <sup>*++</sup> | b <sup>0</sup> | b <sup>0++</sup> | Seq. | y         | y <sup>++</sup> | y*        | y <sup>*++</sup> | y <sup>0</sup> | y <sup>0++</sup> | #  |
|----|-----------------|-----------------|-----------|------------------|----------------|------------------|------|-----------|-----------------|-----------|------------------|----------------|------------------|----|
| 1  | 101.0727        | 51.0400         |           |                  |                |                  | V    |           |                 |           |                  |                |                  | 17 |
| 2  | <b>231.1124</b> | 116.0598        |           |                  | 213.1018       | 107.0545         | E    | 1697.8061 | <b>849.4067</b> | 1679.7825 | 840.3949         | 1679.7955      | 840.4014         | 16 |
| 3  | <b>361.1650</b> | 181.0861        | 343.1414  | 172.0743         | 343.1544       | 172.0809         | Q    | 1567.7664 | <b>784.3869</b> | 1549.7429 | <b>775.3751</b>  | 1549.7559      | <b>775.3816</b>  | 15 |
| 4  | 475.2461        | 238.1267        | 457.2225  | 229.1149         | 457.2355       | 229.1214         | I    | 1437.7138 | <b>719.3605</b> | 1419.6902 | 710.3487         | 1419.7032      | 710.3553         | 14 |
| 5  | 577.2908        | 289.1490        | 559.2672  | 280.1373         | 559.2802       | 280.1438         | T    | 1323.6327 | <b>662.3200</b> | 1305.6091 | 653.3082         | 1305.6221      | 653.3147         | 13 |
| 6  | 649.3250        | 325.1661        | 631.3014  | 316.1543         | 631.3144       | 316.1608         | A    | 1221.5880 | 611.2976        | 1203.5644 | 602.2858         | 1203.5774      | 602.2923         | 12 |
| 7  | 721.3591        | <b>361.1832</b> | 703.3355  | 352.1714         | 703.3485       | 352.1779         | A    | 1149.5538 | <b>575.2806</b> | 1131.5302 | 566.2688         | 1131.5433      | 566.2753         | 11 |
| 8  | 835.4402        | 418.2237        | 817.4166  | 409.2120         | 817.4296       | 409.2185         | L    | 1077.5197 | 539.2635        | 1059.4961 | 530.2517         | 1059.5091      | 530.2582         | 10 |
| 9  | 965.4929        | 483.2501        | 947.4693  | 474.2383         | 947.4823       | 474.2448         | Q    | 963.4386  | 482.2229        | 945.4150  | 473.2111         | 945.4280       | 473.2176         | 9  |
| 10 | 1067.5376       | 534.2724        | 1049.5140 | 525.2606         | 1049.5270      | 525.2671         | T    | 833.3859  | 417.1966        | 815.3624  | 408.1848         | 815.3754       | 408.1913         | 8  |
| 11 | 1125.5561       | 563.2817        | 1107.5325 | 554.2699         | 1107.5455      | 554.2764         | G    | 731.3412  | 366.1742        | 713.3176  | 357.1625         | 713.3307       | 357.1690         | 7  |
| 12 | 1227.6008       | 614.3040        | 1209.5772 | 605.2922         | 1209.5902      | 605.2987         | T    | 673.3227  | 337.1650        | 655.2991  | 328.1532         | 655.3122       | 328.1597         | 6  |
| 13 | 1315.6298       | 658.3186        | 1297.6063 | 649.3068         | 1297.6193      | 649.3133         | S    | 571.2780  | 286.1426        | 553.2544  | 277.1309         | 553.2674       | 277.1374         | 5  |
| 14 | 1403.6589       | 702.3331        | 1385.6353 | 693.3213         | 1385.6483      | 693.3278         | S    | 483.2489  | 242.1281        | 465.2254  | 233.1163         | 465.2384       | 233.1228         | 4  |
| 15 | 1519.6829       | 760.3451        | 1501.6593 | 751.3333         | 1501.6723      | 751.3398         | D    | 395.2199  | 198.1136        | 377.1963  | 189.1018         | 377.2093       | 189.1083         | 3  |
| 16 | 1649.7719       | 825.3896        | 1631.7483 | 816.3778         | 1631.7614      | 816.3843         | K    | 279.1959  | 140.1016        | 261.1723  | 131.0898         |                |                  | 2  |
| 17 |                 |                 |           |                  |                |                  | K    | 149.1069  | 75.0571         | 131.0833  | 66.0453          |                |                  | 1  |



# AT3G01500.1

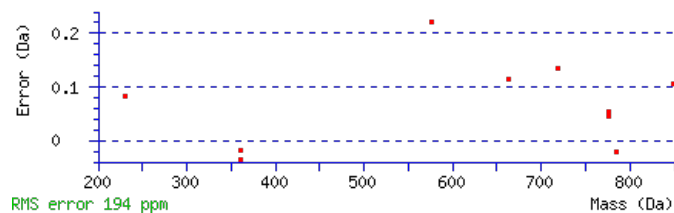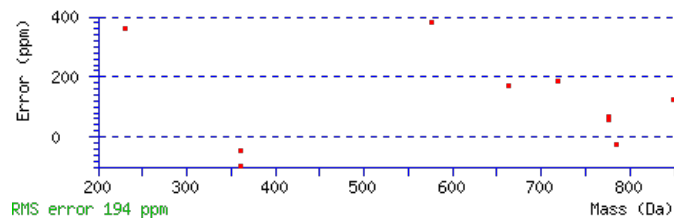

NCBI **BLAST** search of [VEQITAALQTGTSSDKK](#)

(Parameters: blastp, nr protein database, expect=20000, no filter, PAM30)

Other BLAST [web gateways](#)

## All matches to this query

| Score | Mr(calc)  | Delta   | Sequence                          |
|-------|-----------|---------|-----------------------------------|
| 29.2  | 1796.8642 | -0.0008 | <a href="#">VEQITAALQTGTSSDKK</a> |
| 19.7  | 1796.8644 | -0.0010 | <a href="#">KVAGHDMELYLGR</a>     |
| 15.6  | 1796.8665 | -0.0030 | <a href="#">DLKTANILLDEGYN</a>    |
| 15.3  | 1796.8624 | 0.0010  | <a href="#">DLKEMIMKDLESAL</a>    |
| 9.0   | 1796.8665 | -0.0030 | <a href="#">DIKSSNVLIFDNDV</a>    |
| 7.5   | 1796.8624 | 0.0010  | <a href="#">DLKEMIMKDLESAL</a>    |
| 6.0   | 1796.8617 | 0.0017  | <a href="#">DLLQWVREMTTIQ</a>     |
| 3.9   | 1796.8617 | 0.0017  | <a href="#">NLVRLGFCLEGEK</a>     |
| 3.4   | 1796.8651 | -0.0017 | <a href="#">VQRVNTMMTILDDL</a>    |
| 2.2   | 1796.8651 | -0.0017 | <a href="#">EKVIAAMVSNVEAM</a>    |

Mascot: <http://www.matrixscience.com/>

## Peptide View

MS/MS Fragmentation of **VCPSHVLDFQPGDAFVVR**

Found in **AT3G01500.2** in **TAIR\_Arabidopsis**, Symbols: CA1 | CA1 (CARBONIC ANHYDRASE 1); carbonate dehydratase/ zinc ion binding | chr3:194860-197880 REVERSE

Match to Query 9550: 2042.004638 from(1022.009595,2+) index(8276)

Title: Elution from: 72.920 to 72.920 scan no 10825 cid35.00 polarity:+

Data file C7-3\_1.mgf

Click mouse within plot area to zoom in by factor of two about that point

Or,  to  Da

Label all possible matches  Label matches used for scoring

Show Y-axis

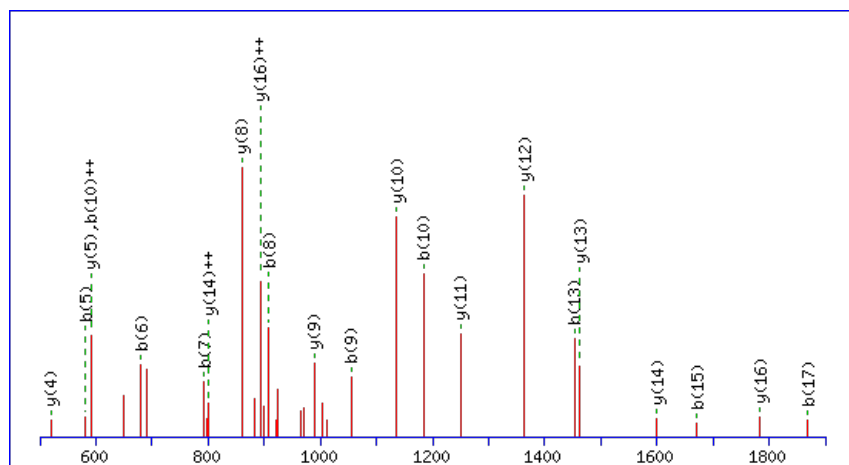

Monoisotopic mass of neutral peptide  $M_r(\text{calc})$ : 2042.0044

Fixed modifications: Carbamidomethyl (C) (apply to specified residues or termini only)

Ions Score: 95 Expect: 1.5e-009

Matches : 22/170 fragment ions using 26 most intense peaks ([help](#))

| #  | b                | b <sup>++</sup> | b*        | b <sup>*++</sup> | b <sup>0</sup> | b <sup>0++</sup> | Seq. | y                | y <sup>++</sup> | y*        | y <sup>*++</sup> | y <sup>0</sup> | y <sup>0++</sup> | #  |
|----|------------------|-----------------|-----------|------------------|----------------|------------------|------|------------------|-----------------|-----------|------------------|----------------|------------------|----|
| 1  | 100.0757         | 50.5415         |           |                  |                |                  | V    |                  |                 |           |                  |                |                  | 18 |
| 2  | 260.1063         | 130.5568        |           |                  |                |                  | C    | 1943.9432        | 972.4753        | 1926.9167 | 963.9620         | 1925.9327      | 963.4700         | 17 |
| 3  | 357.1591         | 179.0832        |           |                  |                |                  | P    | <b>1783.9126</b> | <b>892.4599</b> | 1766.8860 | 883.9467         | 1765.9020      | 883.4547         | 16 |
| 4  | 444.1911         | 222.5992        |           |                  | 426.1806       | 213.5939         | S    | 1686.8598        | 843.9336        | 1669.8333 | 835.4203         | 1668.8493      | 834.9283         | 15 |
| 5  | <b>581.2500</b>  | 291.1287        |           |                  | 563.2395       | 282.1234         | H    | <b>1599.8278</b> | <b>800.4175</b> | 1582.8013 | 791.9043         | 1581.8172      | 791.4123         | 14 |
| 6  | <b>680.3185</b>  | 340.6629        |           |                  | 662.3079       | 331.6576         | V    | <b>1462.7689</b> | 731.8881        | 1445.7423 | 723.3748         | 1444.7583      | 722.8828         | 13 |
| 7  | <b>793.4025</b>  | 397.2049        |           |                  | 775.3920       | 388.1996         | L    | <b>1363.7005</b> | 682.3539        | 1346.6739 | 673.8406         | 1345.6899      | 673.3486         | 12 |
| 8  | <b>908.4295</b>  | 454.7184        |           |                  | 890.4189       | 445.7131         | D    | <b>1250.6164</b> | 625.8118        | 1233.5899 | 617.2986         | 1232.6058      | 616.8066         | 11 |
| 9  | <b>1055.4979</b> | 528.2526        |           |                  | 1037.4873      | 519.2473         | F    | <b>1135.5895</b> | 568.2984        | 1118.5629 | 559.7851         | 1117.5789      | 559.2931         | 10 |
| 10 | <b>1183.5565</b> | <b>592.2819</b> | 1166.5299 | 583.7686         | 1165.5459      | 583.2766         | Q    | <b>988.5211</b>  | 494.7642        | 971.4945  | 486.2509         | 970.5105       | 485.7589         | 9  |
| 11 | 1280.6092        | 640.8082        | 1263.5827 | 632.2950         | 1262.5987      | 631.8030         | P    | <b>860.4625</b>  | 430.7349        | 843.4359  | 422.2216         | 842.4519       | 421.7296         | 8  |
| 12 | 1337.6307        | 669.3190        | 1320.6041 | 660.8057         | 1319.6201      | 660.3137         | G    | 763.4097         | 382.2085        | 746.3832  | 373.6952         | 745.3992       | 373.2032         | 7  |
| 13 | <b>1452.6576</b> | 726.8325        | 1435.6311 | 718.3192         | 1434.6471      | 717.8272         | D    | 706.3883         | 353.6978        | 689.3617  | 345.1845         | 688.3777       | 344.6925         | 6  |
| 14 | 1523.6947        | 762.3510        | 1506.6682 | 753.8377         | 1505.6842      | 753.3457         | A    | <b>591.3613</b>  | 296.1843        | 574.3348  | 287.6710         |                |                  | 5  |
| 15 | <b>1670.7632</b> | 835.8852        | 1653.7366 | 827.3719         | 1652.7526      | 826.8799         | F    | <b>520.3242</b>  | 260.6657        | 503.2976  | 252.1525         |                |                  | 4  |
| 16 | 1769.8316        | 885.4194        | 1752.8050 | 876.9061         | 1751.8210      | 876.4141         | V    | 373.2558         | 187.1315        | 356.2292  | 178.6183         |                |                  | 3  |
| 17 | <b>1868.9000</b> | 934.9536        | 1851.8734 | 926.4404         | 1850.8894      | 925.9483         | V    | 274.1874         | 137.5973        | 257.1608  | 129.0840         |                |                  | 2  |
| 18 |                  |                 |           |                  |                |                  | R    | 175.1190         | 88.0631         | 158.0924  | 79.5498          |                |                  | 1  |

# AT3G01500.2

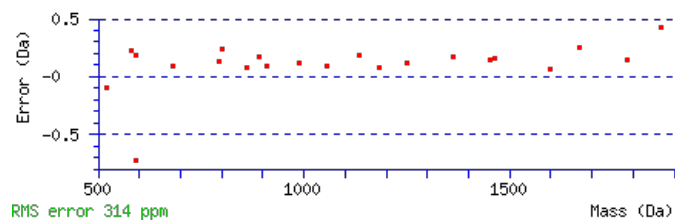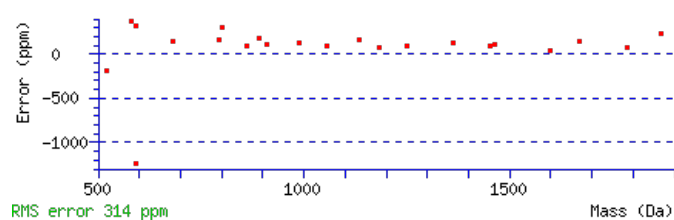

NCBI **BLAST** search of [VCPSHVLDFQPGDAFVVR](#)  
(Parameters: blastp, nr protein database, expect=20000, no filter, PAM30)  
Other BLAST [web gateways](#)

## All matches to this query

| Score | Mr(calc)  | Delta  | Sequence                           |
|-------|-----------|--------|------------------------------------|
| 95.0  | 2042.0044 | 0.0002 | <a href="#">VCPSHVLDFQPGDAFVVR</a> |
| 3.6   | 2042.0005 | 0.0041 | <a href="#">EMQMIKHFLDYFPSLK</a>   |
| 3.6   | 2042.0005 | 0.0041 | <a href="#">EMQMIKHFLDYFPSLK</a>   |

Mascot: <http://www.matrixscience.com/>

**Peptide View**MS/MS Fragmentation of **GGLGVGAFR**Found in **AT3G02080.1** in **TAIR\_Arabidopsis**, Symbols: | 40S ribosomal protein S19 (RPS19A) | chr3:364145-365168 REVERSE

Match to Query 1213: 832.454726 from(417.234639,2+) index(3666)

Title: Elution from: 33.849 to 33.849 scan no 4529 cid35.00 polarity:+

Data file C7-2\_3.mgf

Click mouse within plot area to zoom in by factor of two about that point

Or,   to  Da Label all possible matches  Label matches used for scoring Show Y-axis 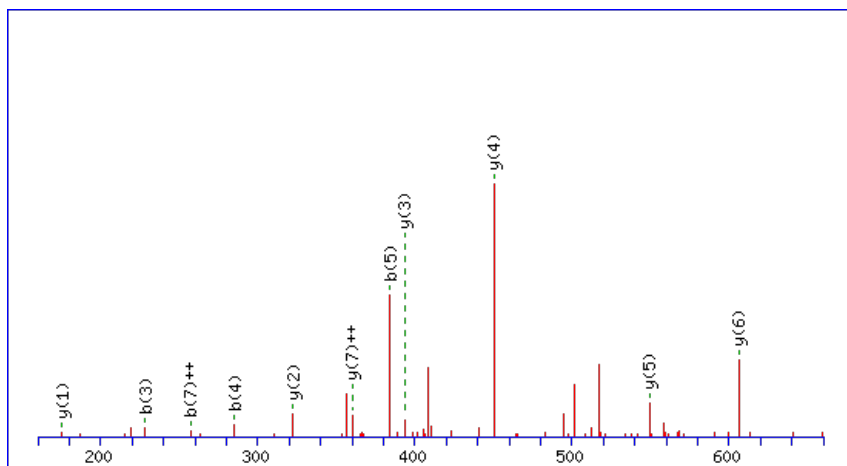**Monoisotopic mass of neutral peptide Mr(calc):** 832.4556**Fixed modifications:** Carbamidomethyl (C) (apply to specified residues or termini only)**Ions Score:** 39 **Expect:** 0.00036**Matches:** 11/48 fragment ions using 20 most intense peaks ([help](#))

| # | b               | b <sup>++</sup> | Seq. | y               | y <sup>++</sup> | y*       | y <sup>*++</sup> | # |
|---|-----------------|-----------------|------|-----------------|-----------------|----------|------------------|---|
| 1 | 58.0287         | 29.5180         | G    |                 |                 |          |                  | 9 |
| 2 | 115.0502        | 58.0287         | G    | 776.4413        | 388.7243        | 759.4148 | 380.2110         | 8 |
| 3 | <b>228.1343</b> | 114.5708        | L    | 719.4199        | <b>360.2136</b> | 702.3933 | 351.7003         | 7 |
| 4 | <b>285.1557</b> | 143.0815        | G    | <b>606.3358</b> | 303.6715        | 589.3093 | 295.1583         | 6 |
| 5 | <b>384.2241</b> | 192.6157        | V    | <b>549.3144</b> | 275.1608        | 532.2878 | 266.6475         | 5 |
| 6 | 441.2456        | 221.1264        | G    | <b>450.2459</b> | 225.6266        | 433.2194 | 217.1133         | 4 |
| 7 | 512.2827        | <b>256.6450</b> | A    | <b>393.2245</b> | 197.1159        | 376.1979 | 188.6026         | 3 |
| 8 | 659.3511        | 330.1792        | F    | <b>322.1874</b> | 161.5973        | 305.1608 | 153.0840         | 2 |
| 9 |                 |                 | R    | <b>175.1190</b> | 88.0631         | 158.0924 | 79.5498          | 1 |

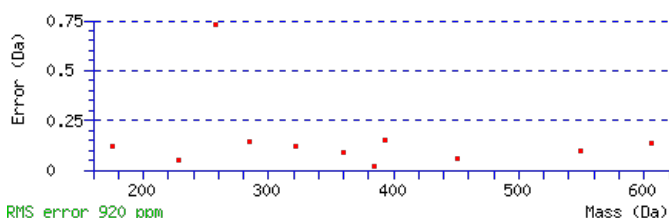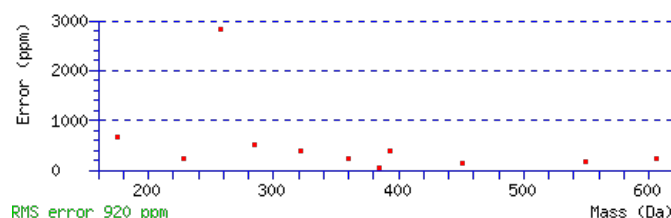NCBI **BLAST** search of [GGLGVGAFR](#)

(Parameters: blastp, nr protein database, expect=20000, no filter, PAM30)

Other BLAST [web gateways](#)**All matches to this query**

| Score | Mr(calc) | Delta   | Sequence                  |
|-------|----------|---------|---------------------------|
| 39.0  | 832.4556 | -0.0008 | <a href="#">GGLGVGAFR</a> |

AT3G02080.1

|     |          |         |                         |
|-----|----------|---------|-------------------------|
| 7.3 | 832.4555 | -0.0008 | <a href="#">AAQLQFR</a> |
|-----|----------|---------|-------------------------|

**Mascot:** <http://www.matrixscience.com/>

**Peptide View**MS/MS Fragmentation of **MVIAAAGAVK**Found in **AT3G02090.1** in **TAIR\_Arabidopsis**, Symbols: MPPBETA | MPPBETA; metalloendopeptidase | chr3:365631-368533 FORWARD

Match to Query 1972: 940.504298 from(471.259425,2+) index(2721)

Title: Elution from: 27.916 to 27.916 scan no 3390 cid35.00 polarity:+

Data file C7-1\_1.mgf

Click mouse within plot area to zoom in by factor of two about that point

Or,   to  Da Label all possible matches  Label matches used for scoring Show Y-axis 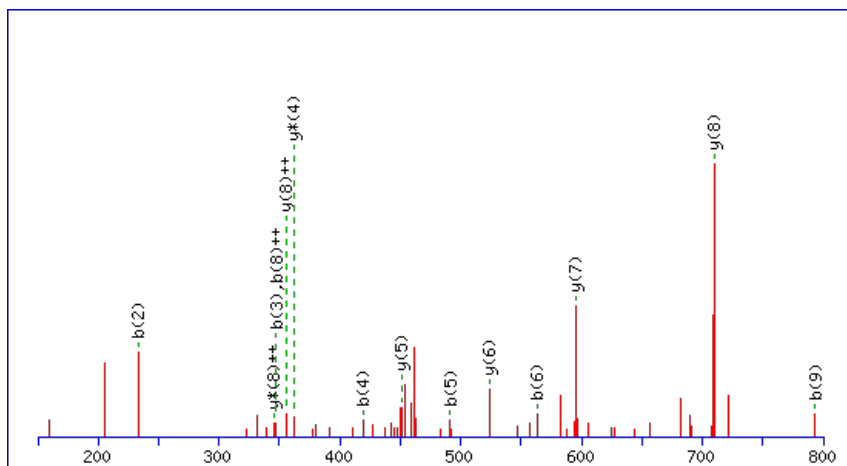Monoisotopic mass of neutral peptide **Mr(calc)**: 940.5042**Fixed modifications**: Carbamidomethyl (C) (apply to specified residues or termini only)**Ions Score**: 36 **Expect**: 0.0008**Matches**: 14/54 fragment ions using 29 most intense peaks ([help](#))

| #  | b               | b <sup>++</sup> | Seq. | y               | y <sup>++</sup> | y*              | y <sup>*++</sup> | #  |
|----|-----------------|-----------------|------|-----------------|-----------------|-----------------|------------------|----|
| 1  | 133.0448        | 67.0260         | M    |                 |                 |                 |                  | 10 |
| 2  | <b>233.1102</b> | 117.0588        | V    | 809.4740        | 405.2406        | 791.4504        | 396.2288         | 9  |
| 3  | <b>347.1913</b> | 174.0993        | I    | <b>709.4085</b> | <b>355.2079</b> | 691.3849        | <b>346.1961</b>  | 8  |
| 4  | <b>419.2255</b> | 210.1164        | A    | <b>595.3274</b> | 298.1673        | 577.3038        | 289.1556         | 7  |
| 5  | <b>491.2596</b> | 246.1335        | A    | <b>523.2933</b> | 262.1503        | 505.2697        | 253.1385         | 6  |
| 6  | <b>563.2938</b> | 282.1505        | A    | <b>451.2591</b> | 226.1332        | 433.2355        | 217.1214         | 5  |
| 7  | 621.3123        | 311.1598        | G    | 379.2250        | 190.1161        | <b>361.2014</b> | 181.1043         | 4  |
| 8  | 693.3464        | <b>347.1769</b> | A    | 321.2065        | 161.1069        | 303.1829        | 152.0951         | 3  |
| 9  | <b>793.4119</b> | 397.2096        | V    | 249.1723        | 125.0898        | 231.1487        | 116.0780         | 2  |
| 10 |                 |                 | K    | 149.1069        | 75.0571         | 131.0833        | 66.0453          | 1  |

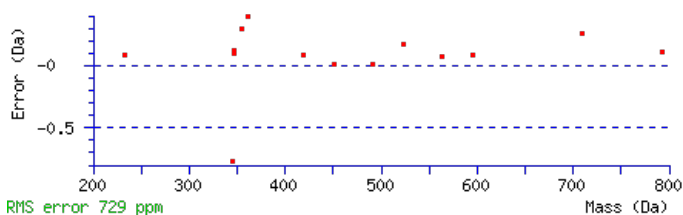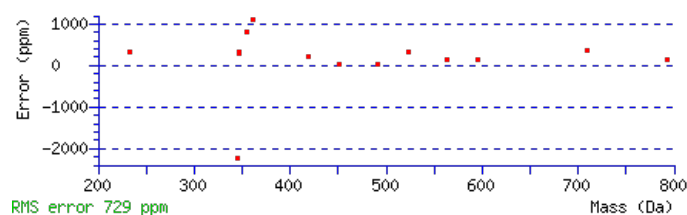NCBI **BLAST** search of [MVIAAAGAVK](#)

(Parameters: blastp, nr protein database, expect=20000, no filter, PAM30)

Other BLAST [web gateways](#)**All matches to this query**

| Score | Mr(calc) | Delta | Sequence |
|-------|----------|-------|----------|
|       |          |       |          |

# AT3G02090.1

|      |          |        |                            |
|------|----------|--------|----------------------------|
| 35.9 | 940.5042 | 0.0001 | <a href="#">MVIAAAGAVK</a> |
| 2.9  | 940.5042 | 0.0001 | <a href="#">MVAGVTPKK</a>  |
| 2.9  | 940.5042 | 0.0001 | <a href="#">MVNIPKTK</a>   |
| 0.0  | 940.5042 | 0.0001 | <a href="#">MAQPLVKK</a>   |

**Mascot:** <http://www.matrixscience.com/>

**Peptide View**MS/MS Fragmentation of **ILFNLYNLVDHPYAR**Found in **AT3G02200.1** in **TAIR\_Arabidopsis**, Symbols: | proteasome family protein | chr3:406699-408682 FORWARD

Match to Query 8447: 1846.975863 from(616.665897,3+) index(9420)

Title: Elution from: 87.238 to 87.238 scan no 13159 cid35.00 polarity:+

Data file D6h-2\_3.mgf

Click mouse within plot area to zoom in by factor of two about that point

Or,  to  Da Label all possible matches  Label matches used for scoring Show Y-axis 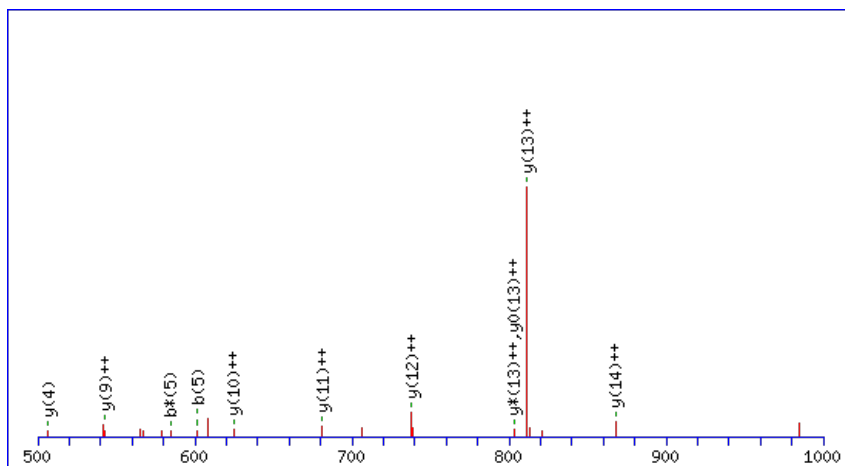Monoisotopic mass of neutral peptide **Mr(calc)**: 1846.9730

Fixed modifications: Carbamidomethyl (C) (apply to specified residues or termini only)

Ions Score: 25 Expect: 0.011

Matches : 11/134 fragment ions using 20 most intense peaks ([help](#))

| #  | b         | b <sup>++</sup> | b <sup>*</sup> | b <sup>*++</sup> | b <sup>0</sup> | b <sup>0++</sup> | Seq. | y         | y <sup>++</sup> | y <sup>*</sup> | y <sup>*++</sup> | y <sup>0</sup> | y <sup>0++</sup> | #  |
|----|-----------|-----------------|----------------|------------------|----------------|------------------|------|-----------|-----------------|----------------|------------------|----------------|------------------|----|
| 1  | 114.0913  | 57.5493         |                |                  |                |                  | I    |           |                 |                |                  |                |                  | 15 |
| 2  | 227.1754  | 114.0913        |                |                  |                |                  | L    | 1734.8962 | 867.9517        | 1717.8697      | 859.4385         | 1716.8857      | 858.9465         | 14 |
| 3  | 374.2438  | 187.6255        |                |                  |                |                  | F    | 1621.8122 | 811.4097        | 1604.7856      | 802.8964         | 1603.8016      | 802.4044         | 13 |
| 4  | 488.2867  | 244.6470        | 471.2602       | 236.1337         |                |                  | N    | 1474.7437 | 737.8755        | 1457.7172      | 729.3622         | 1456.7332      | 728.8702         | 12 |
| 5  | 601.3708  | 301.1890        | 584.3443       | 292.6758         |                |                  | L    | 1360.7008 | 680.8540        | 1343.6743      | 672.3408         | 1342.6902      | 671.8488         | 11 |
| 6  | 764.4341  | 382.7207        | 747.4076       | 374.2074         |                |                  | Y    | 1247.6167 | 624.3120        | 1230.5902      | 615.7987         | 1229.6062      | 615.3067         | 10 |
| 7  | 878.4771  | 439.7422        | 861.4505       | 431.2289         |                |                  | N    | 1084.5534 | 542.7803        | 1067.5269      | 534.2671         | 1066.5429      | 533.7751         | 9  |
| 8  | 991.5611  | 496.2842        | 974.5346       | 487.7709         |                |                  | L    | 970.5105  | 485.7589        | 953.4839       | 477.2456         | 952.4999       | 476.7536         | 8  |
| 9  | 1090.6295 | 545.8184        | 1073.6030      | 537.3051         |                |                  | V    | 857.4264  | 429.2169        | 840.3999       | 420.7036         | 839.4159       | 420.2116         | 7  |
| 10 | 1205.6565 | 603.3319        | 1188.6299      | 594.8186         | 1187.6459      | 594.3266         | D    | 758.3580  | 379.6826        | 741.3315       | 371.1694         | 740.3474       | 370.6774         | 6  |
| 11 | 1342.7154 | 671.8613        | 1325.6888      | 663.3481         | 1324.7048      | 662.8561         | H    | 643.3311  | 322.1692        | 626.3045       | 313.6559         |                |                  | 5  |
| 12 | 1439.7682 | 720.3877        | 1422.7416      | 711.8744         | 1421.7576      | 711.3824         | P    | 506.2722  | 253.6397        | 489.2456       | 245.1264         |                |                  | 4  |
| 13 | 1602.8315 | 801.9194        | 1585.8049      | 793.4061         | 1584.8209      | 792.9141         | Y    | 409.2194  | 205.1133        | 392.1928       | 196.6001         |                |                  | 3  |
| 14 | 1673.8686 | 837.4379        | 1656.8421      | 828.9247         | 1655.8580      | 828.4327         | A    | 246.1561  | 123.5817        | 229.1295       | 115.0684         |                |                  | 2  |
| 15 |           |                 |                |                  |                |                  | R    | 175.1190  | 88.0631         | 158.0924       | 79.5498          |                |                  | 1  |

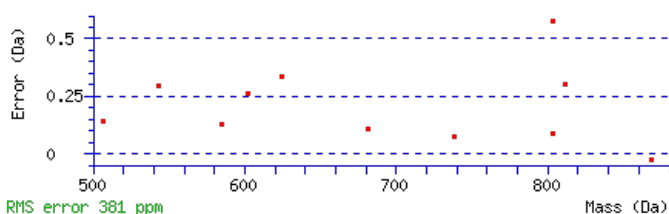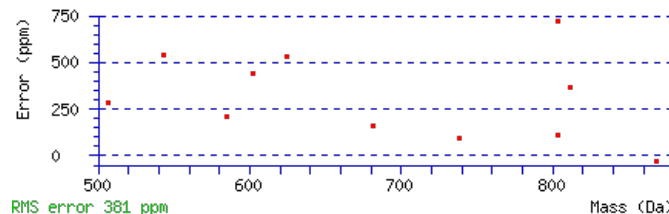NCBI **BLAST** search of [ILFNLYNLVDHPYAR](#)



## AT3G02200.1

(Parameters: blastp, nr protein database, expect=20000, no filter, PAM30)

Other BLAST [web gateways](#)

### All matches to this query

| Score | Mr(calc)  | Delta   | Sequence                         |
|-------|-----------|---------|----------------------------------|
| 25.0  | 1846.9730 | 0.0029  | <a href="#">ILFNLYNLVDHPYAR</a>  |
| 7.9   | 1846.9789 | -0.0030 | <a href="#">LIETGDSEQIFQKAIR</a> |
| 7.3   | 1846.9723 | 0.0036  | <a href="#">LFLLRAADNESAMQR</a>  |
| 4.3   | 1846.9788 | -0.0030 | <a href="#">QLISQIEANSEFVNKK</a> |
| 4.2   | 1846.9763 | -0.0005 | <a href="#">INKFSGMIEGLIWSPR</a> |
| 3.7   | 1846.9757 | 0.0002  | <a href="#">GVAQOSMLNIVMQLRK</a> |
| 0.8   | 1846.9723 | 0.0036  | <a href="#">RYNMNGVAEVLALER</a>  |

Mascot: <http://www.matrixscience.com/>

## Peptide View

MS/MS Fragmentation of **EAVTVQQCYMELSK**

Found in **AT3G02230.1** in **TAIR\_Arabidopsis**, Symbols: ATRGP1, ATRGP, RGP1 | RGP1 (REVERSIBLY GLYCOSYLATED POLYPEPTIDE 1) | chr3:415470-417311 FORWARD

Match to Query 7535: 1684.779822 from(843.397187,2+) index(5301)

Title: Elution from: 50.630 to 50.630 scan no 6857 cid35.00 polarity:+

Data file D1d-2\_2.mgf

Click mouse within plot area to zoom in by factor of two about that point

Or,   to  Da

Label all possible matches  Label matches used for scoring

Show Y-axis

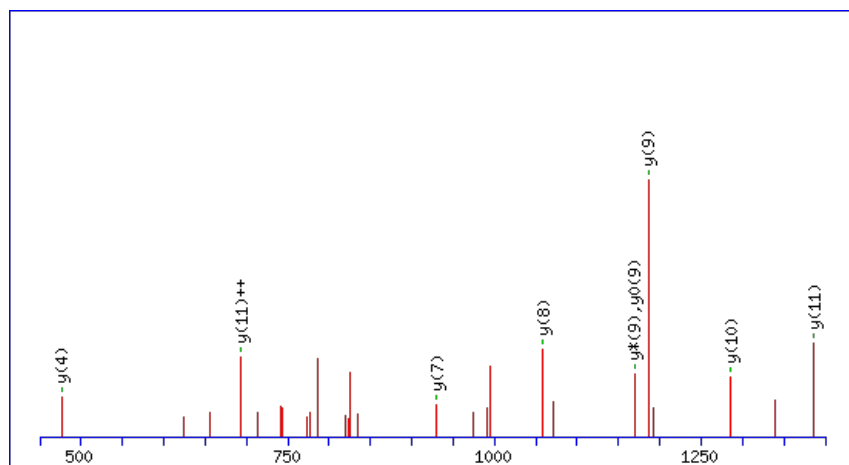

Monoisotopic mass of neutral peptide  $M_r(\text{calc})$ : 1684.7800

Fixed modifications: Carbamidomethyl (C) (apply to specified residues or termini only)

Ions Score: 43 Expect: 0.00019

Matches : 9/144 fragment ions using 10 most intense peaks ([help](#))

| #  | b         | b <sup>++</sup> | b*        | b <sup>*++</sup> | b <sup>0</sup> | b <sup>0++</sup> | Seq. | y                | y <sup>++</sup> | y*               | y <sup>*++</sup> | y <sup>0</sup>   | y <sup>0++</sup> | #  |
|----|-----------|-----------------|-----------|------------------|----------------|------------------|------|------------------|-----------------|------------------|------------------|------------------|------------------|----|
| 1  | 130.0499  | 65.5286         |           |                  | 112.0393       | 56.5233          | E    |                  |                 |                  |                  |                  |                  | 14 |
| 2  | 201.0870  | 101.0471        |           |                  | 183.0764       | 92.0418          | A    | 1556.7447        | 778.8760        | 1539.7182        | 770.3627         | 1538.7342        | 769.8707         | 13 |
| 3  | 300.1554  | 150.5813        |           |                  | 282.1448       | 141.5761         | V    | 1485.7076        | 743.3574        | 1468.6811        | 734.8442         | 1467.6971        | 734.3522         | 12 |
| 4  | 401.2031  | 201.1052        |           |                  | 383.1925       | 192.0999         | T    | <b>1386.6392</b> | <b>693.8232</b> | 1369.6127        | 685.3100         | 1368.6286        | 684.8180         | 11 |
| 5  | 500.2715  | 250.6394        |           |                  | 482.2609       | 241.6341         | V    | <b>1285.5915</b> | 643.2994        | 1268.5650        | 634.7861         | 1267.5810        | 634.2941         | 10 |
| 6  | 628.3301  | 314.6687        | 611.3035  | 306.1554         | 610.3195       | 305.6634         | Q    | <b>1186.5231</b> | 593.7652        | <b>1169.4966</b> | 585.2519         | <b>1168.5125</b> | 584.7599         | 9  |
| 7  | 756.3886  | 378.6980        | 739.3621  | 370.1847         | 738.3781       | 369.6927         | Q    | <b>1058.4645</b> | 529.7359        | 1041.4380        | 521.2226         | 1040.4540        | 520.7306         | 8  |
| 8  | 916.4193  | 458.7133        | 899.3927  | 450.2000         | 898.4087       | 449.7080         | C    | <b>930.4060</b>  | 465.7066        | 913.3794         | 457.1933         | 912.3954         | 456.7013         | 7  |
| 9  | 1079.4826 | 540.2450        | 1062.4561 | 531.7317         | 1061.4721      | 531.2397         | Y    | 770.3753         | 385.6913        | 753.3488         | 377.1780         | 752.3647         | 376.6860         | 6  |
| 10 | 1210.5231 | 605.7652        | 1193.4966 | 597.2519         | 1192.5125      | 596.7599         | M    | 607.3120         | 304.1596        | 590.2854         | 295.6464         | 589.3014         | 295.1543         | 5  |
| 11 | 1339.5657 | 670.2865        | 1322.5392 | 661.7732         | 1321.5551      | 661.2812         | E    | <b>476.2715</b>  | 238.6394        | 459.2449         | 230.1261         | 458.2609         | 229.6341         | 4  |
| 12 | 1452.6498 | 726.8285        | 1435.6232 | 718.3152         | 1434.6392      | 717.8232         | L    | 347.2289         | 174.1181        | 330.2023         | 165.6048         | 329.2183         | 165.1128         | 3  |
| 13 | 1539.6818 | 770.3445        | 1522.6552 | 761.8313         | 1521.6712      | 761.3393         | S    | 234.1448         | 117.5761        | 217.1183         | 109.0628         | 216.1343         | 108.5708         | 2  |
| 14 |           |                 |           |                  |                |                  | K    | 147.1128         | 74.0600         | 130.0863         | 65.5468          |                  |                  | 1  |

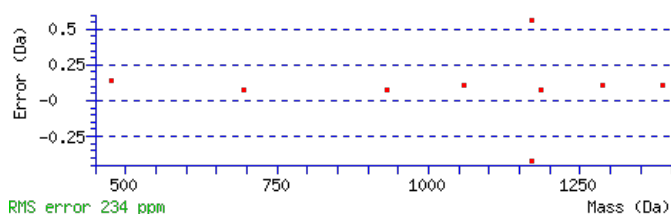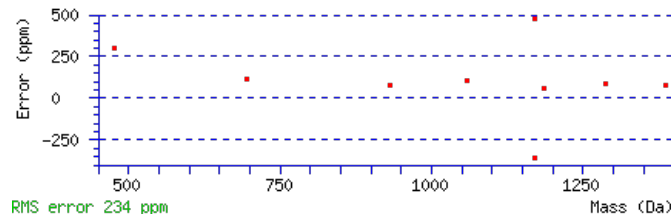

NCBI BLAST search of [EAVTVQQCYMELSK](#)

## AT3G02230.1

(Parameters: blastp, nr protein database, expect=20000, no filter, PAM30)

Other BLAST [web gateways](#)

### All matches to this query

| Score | Mr(calc)  | Delta   | Sequence                       |
|-------|-----------|---------|--------------------------------|
| 42.5  | 1684.7800 | -0.0002 | <a href="#">EAVTVQQCYMELSK</a> |

Mascot: <http://www.matrixscience.com/>

**Peptide View**MS/MS Fragmentation of **LLELLGK**

Found in **AT3G02260.1** in **TAIR\_Arabidopsis**, Symbols: DOC1, TIR3, UMB1, LPR1, ASA1, CRM1, BIG | BIG (DARK OVER-EXPRESSION OF CAB 1); binding / ubiquitin-protein ligase/ zinc ion binding | chr3:431159-448496 REVERSE

Match to Query 975: 792.482428 from(397.248490,2+) index(5473)

Title: Elution from: 49.142 to 49.142 scan no 6861 cid35.00 polarity:+

Data file D12h-3\_1.mgf

Click mouse within plot area to zoom in by factor of two about that point

Or,   to  Da

Label all possible matches  Label matches used for scoring

Show Y-axis

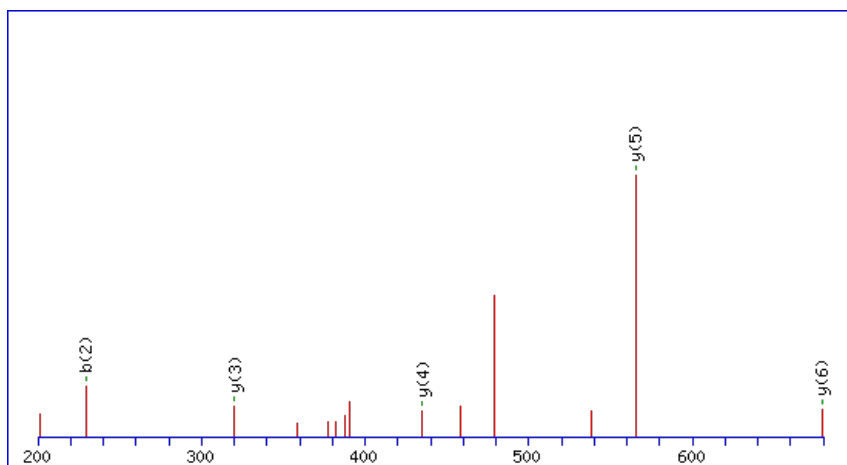

**Monoisotopic mass of neutral peptide Mr(calc):** 792.4821

**Fixed modifications:** Carbamidomethyl (C) (apply to specified residues or termini only)

**Ions Score:** 23 **Expect:** 0.015

**Matches:** 5/48 fragment ions using 11 most intense peaks ([help](#))

| # | b        | b <sup>++</sup> | b <sup>0</sup> | b <sup>0++</sup> | Seq. | y        | y <sup>++</sup> | y*       | y <sup>*++</sup> | y <sup>0</sup> | y <sup>0++</sup> | # |
|---|----------|-----------------|----------------|------------------|------|----------|-----------------|----------|------------------|----------------|------------------|---|
| 1 | 115.0884 | 58.0478         |                |                  | L    |          |                 |          |                  |                |                  | 7 |
| 2 | 229.1695 | 115.0884        |                |                  | L    | 679.4083 | 340.2078        | 661.3847 | 331.1960         | 661.3977       | 331.2025         | 6 |
| 3 | 359.2091 | 180.1082        | 341.1985       | 171.1029         | E    | 565.3272 | 283.1672        | 547.3036 | 274.1554         | 547.3166       | 274.1620         | 5 |
| 4 | 473.2902 | 237.1487        | 455.2796       | 228.1435         | L    | 435.2876 | 218.1474        | 417.2640 | 209.1356         |                |                  | 4 |
| 5 | 587.3713 | 294.1893        | 569.3607       | 285.1840         | L    | 321.2065 | 161.1069        | 303.1829 | 152.0951         |                |                  | 3 |
| 6 | 645.3898 | 323.1985        | 627.3792       | 314.1933         | G    | 207.1254 | 104.0663        | 189.1018 | 95.0545          |                |                  | 2 |
| 7 |          |                 |                |                  | K    | 149.1069 | 75.0571         | 131.0833 | 66.0453          |                |                  | 1 |

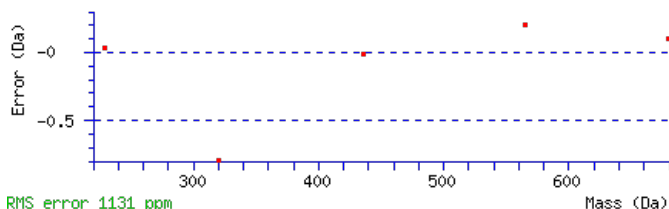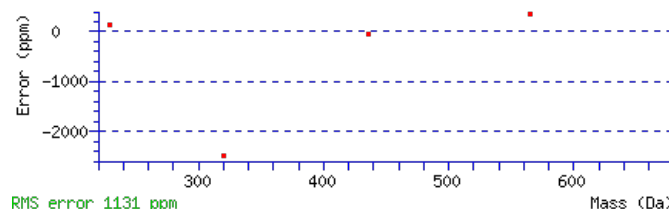

NCBI **BLAST** search of **LLELLGK**

(Parameters: blastp, nr protein database, expect=20000, no filter, PAM30)

Other BLAST [web gateways](#)

**All matches to this query**

| Score | Mr(calc) | Delta  | Sequence                |
|-------|----------|--------|-------------------------|
| 23.1  | 792.4821 | 0.0003 | <a href="#">LLEILGK</a> |
| 23.1  | 792.4821 | 0.0003 | <a href="#">LLELGLK</a> |

# AT3G02260.1

|      |          |        |                         |
|------|----------|--------|-------------------------|
| 23.1 | 792.4821 | 0.0003 | <a href="#">LLELLGK</a> |
| 23.1 | 792.4821 | 0.0003 | <a href="#">LLELVAK</a> |
| 22.9 | 792.4821 | 0.0003 | <a href="#">ILEGLLK</a> |
| 13.0 | 792.4821 | 0.0003 | <a href="#">LLEAVLK</a> |
| 10.6 | 792.4821 | 0.0003 | <a href="#">LIGELLK</a> |
| 10.6 | 792.4821 | 0.0003 | <a href="#">LLADILK</a> |
| 10.6 | 792.4821 | 0.0003 | <a href="#">LLGELIK</a> |
| 10.6 | 792.4821 | 0.0003 | <a href="#">LLVELAK</a> |

Mascot: <http://www.matrixscience.com/>

**Peptide View**MS/MS Fragmentation of **NAELANLLVDPEFAK**Found in **AT3G02360.1** in **TAIR\_Arabidopsis**, Symbols: | 6-phosphogluconate dehydrogenase family protein | chr3:482505-483965 FORWARD

Match to Query 7568: 1660.807614 from(831.411083,2+) index(9070)

Title: Elution from: 81.966 to 81.966 scan no 12395 cid35.00 polarity:+

Data file D12h-1\_3.mgf

Click mouse within plot area to zoom in by factor of two about that point

Or,   to  Da Label all possible matches  Label matches used for scoring Show Y-axis 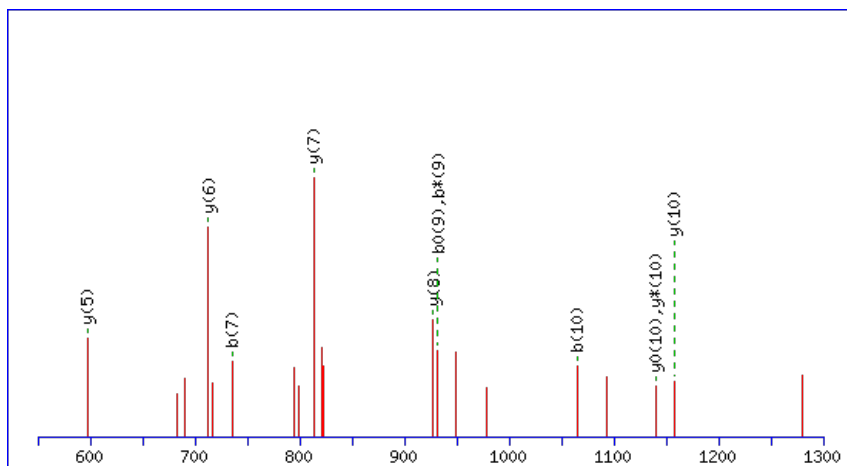Monoisotopic mass of neutral peptide  $M_r(\text{calc})$ : 1660.8033

Fixed modifications: Carbamidomethyl (C) (apply to specified residues or termini only)

Ions Score: 35 Expect: 0.0021

Matches : 11/158 fragment ions using 13 most intense peaks ([help](#))

| #  | b                | b <sup>++</sup> | b*              | b <sup>*++</sup> | b <sup>0</sup>  | b <sup>0++</sup> | Seq. | y                | y <sup>++</sup> | y*               | y <sup>*++</sup> | y <sup>0</sup>   | y <sup>0++</sup> | #  |
|----|------------------|-----------------|-----------------|------------------|-----------------|------------------|------|------------------|-----------------|------------------|------------------|------------------|------------------|----|
| 1  | 117.0443         | 59.0258         | 99.0207         | 50.0140          |                 |                  | N    |                  |                 |                  |                  |                  |                  | 15 |
| 2  | 189.0784         | 95.0428         | 171.0548        | 86.0311          |                 |                  | A    | 1545.7735        | 773.3904        | 1527.7500        | 764.3786         | 1527.7630        | 764.3851         | 14 |
| 3  | 319.1180         | 160.0627        | 301.0945        | 151.0509         | 301.1075        | 151.0574         | E    | 1473.7394        | 737.3733        | 1455.7158        | 728.3615         | 1455.7288        | 728.3681         | 13 |
| 4  | 433.1991         | 217.1032        | 415.1756        | 208.0914         | 415.1886        | 208.0979         | L    | 1343.6998        | 672.3535        | 1325.6762        | 663.3417         | 1325.6892        | 663.3482         | 12 |
| 5  | 505.2333         | 253.1203        | 487.2097        | 244.1085         | 487.2227        | 244.1150         | A    | 1229.6187        | 615.3130        | 1211.5951        | 606.3012         | 1211.6081        | 606.3077         | 11 |
| 6  | 621.2703         | 311.1388        | 603.2467        | 302.1270         | 603.2597        | 302.1335         | N    | <b>1157.5845</b> | 579.2959        | <b>1139.5609</b> | 570.2841         | <b>1139.5740</b> | 570.2906         | 10 |
| 7  | <b>735.3514</b>  | 368.1793        | 717.3278        | 359.1675         | 717.3408        | 359.1741         | L    | 1041.5475        | 521.2774        | 1023.5239        | 512.2656         | 1023.5370        | 512.2721         | 9  |
| 8  | 849.4325         | 425.2199        | 831.4089        | 416.2081         | 831.4219        | 416.2146         | L    | <b>927.4664</b>  | 464.2369        | 909.4428         | 455.2251         | 909.4559         | 455.2316         | 8  |
| 9  | 949.4979         | 475.2526        | <b>931.4744</b> | 466.2408         | <b>931.4874</b> | 466.2473         | V    | <b>813.3853</b>  | 407.1963        | 795.3617         | 398.1845         | 795.3748         | 398.1910         | 7  |
| 10 | <b>1065.5219</b> | 533.2646        | 1047.4983       | 524.2528         | 1047.5114       | 524.2593         | D    | <b>713.3199</b>  | 357.1636        | 695.2963         | 348.1518         | 695.3093         | 348.1583         | 6  |
| 11 | 1163.5717        | 582.2895        | 1145.5481       | 573.2777         | 1145.5612       | 573.2842         | P    | <b>597.2959</b>  | 299.1516        | 579.2723         | 290.1398         | 579.2853         | 290.1463         | 5  |
| 12 | 1293.6113        | 647.3093        | 1275.5878       | 638.2975         | 1275.6008       | 638.3040         | E    | 499.2461         | 250.1267        | 481.2225         | 241.1149         | 481.2355         | 241.1214         | 4  |
| 13 | 1441.6768        | 721.3420        | 1423.6532       | 712.3302         | 1423.6662       | 712.3368         | F    | 369.2065         | 185.1069        | 351.1829         | 176.0951         |                  |                  | 3  |
| 14 | 1513.7109        | 757.3591        | 1495.6874       | 748.3473         | 1495.7004       | 748.3538         | A    | 221.1410         | 111.0741        | 203.1174         | 102.0624         |                  |                  | 2  |
| 15 |                  |                 |                 |                  |                 |                  | K    | 149.1069         | 75.0571         | 131.0833         | 66.0453          |                  |                  | 1  |

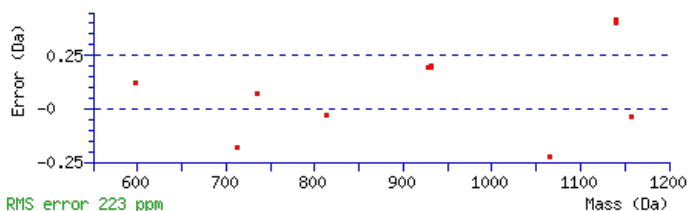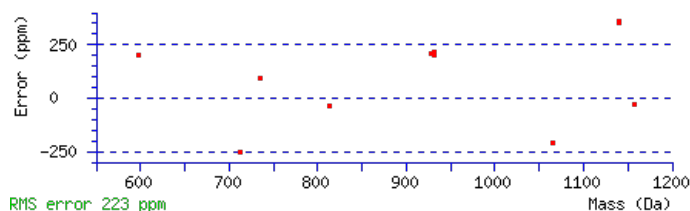NCBI BLAST search of [NAELANLLVDPEFAK](#)

## AT3G02360.1

(Parameters: blastp, nr protein database, expect=20000, no filter, PAM30)

Other BLAST [web gateways](#)

### All matches to this query

| Score | Mr(calc)  | Delta   | Sequence                        |
|-------|-----------|---------|---------------------------------|
| 35.0  | 1660.8033 | 0.0043  | <a href="#">NAELANLLVDPEFAK</a> |
| 11.3  | 1660.8120 | -0.0044 | <a href="#">SRCSVIVLHPSVQR</a>  |
| 3.7   | 1660.8123 | -0.0047 | <a href="#">CLESSPLMPLEKK</a>   |
| 1.4   | 1660.8115 | -0.0039 | <a href="#">ETAKAFKYMGQIVR</a>  |
| 0.8   | 1660.8059 | 0.0017  | <a href="#">VPLGQHASQVSDKFK</a> |
| 0.0   | 1660.8046 | 0.0030  | <a href="#">KMGGIVQALNMVHNK</a> |

Mascot: <http://www.matrixscience.com/>

**Peptide View**MS/MS Fragmentation of **TVDTDELTVVEER**

Found in **AT3G02520.1** in **TAIR\_Arabidopsis**, Symbols: GF14 NU, GRF7 | GRF7 (GENERAL REGULATORY FACTOR 7); protein phosphorylated amino acid binding | chr3:526807-527922 REVERSE

Match to Query 5358: 1405.657450 from(703.836001,2+) index(3141)

Title: Elution from: 31.327 to 31.327 scan no 3913 cid35.00 polarity:+

Data file D6h-1\_3.mgf

Click mouse within plot area to zoom in by factor of two about that point

Or,   to  Da

Label all possible matches  Label matches used for scoring

Show Y-axis

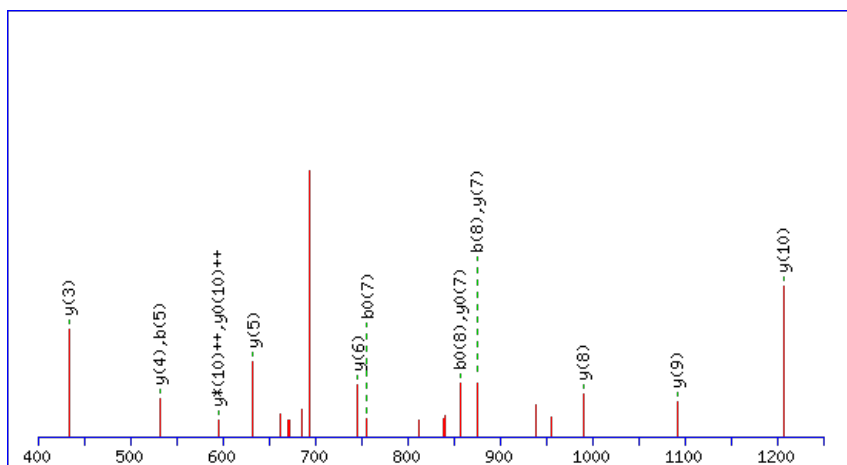

**Monoisotopic mass of neutral peptide Mr(calc):** 1405.6573

**Fixed modifications:** Carbamidomethyl (C) (apply to specified residues or termini only)

**Ions Score:** 81 **Expect:** 1.3e-008

**Matches:** 15/108 fragment ions using 14 most intense peaks ([help](#))

| #  | b               | b <sup>++</sup> | b <sup>0</sup>  | b <sup>0++</sup> | Seq. | y                | y <sup>++</sup> | y*        | y <sup>*++</sup> | y <sup>0</sup>  | y <sup>0++</sup> | #  |
|----|-----------------|-----------------|-----------------|------------------|------|------------------|-----------------|-----------|------------------|-----------------|------------------|----|
| 1  | 102.0550        | 51.5311         | 84.0444         | 42.5258          | T    |                  |                 |           |                  |                 |                  | 12 |
| 2  | 201.1234        | 101.0653        | 183.1128        | 92.0600          | V    | 1305.6169        | 653.3121        | 1288.5903 | 644.7988         | 1287.6063       | 644.3068         | 11 |
| 3  | 316.1503        | 158.5788        | 298.1397        | 149.5735         | D    | <b>1206.5485</b> | 603.7779        | 1189.5219 | <b>595.2646</b>  | 1188.5379       | <b>594.7726</b>  | 10 |
| 4  | 417.1980        | 209.1026        | 399.1874        | 200.0974         | T    | <b>1091.5215</b> | 546.2644        | 1074.4950 | 537.7511         | 1073.5109       | 537.2591         | 9  |
| 5  | <b>532.2249</b> | 266.6161        | 514.2144        | 257.6108         | D    | <b>990.4738</b>  | 495.7406        | 973.4473  | 487.2273         | 972.4633        | 486.7353         | 8  |
| 6  | 661.2675        | 331.1374        | 643.2570        | 322.1321         | E    | <b>875.4469</b>  | 438.2271        | 858.4203  | 429.7138         | <b>857.4363</b> | 429.2218         | 7  |
| 7  | 774.3516        | 387.6794        | <b>756.3410</b> | 378.6742         | L    | <b>746.4043</b>  | 373.7058        | 729.3777  | 365.1925         | 728.3937        | 364.7005         | 6  |
| 8  | <b>875.3993</b> | 438.2033        | <b>857.3887</b> | 429.1980         | T    | <b>633.3202</b>  | 317.1638        | 616.2937  | 308.6505         | 615.3097        | 308.1585         | 5  |
| 9  | 974.4677        | 487.7375        | 956.4571        | 478.7322         | V    | <b>532.2726</b>  | 266.6399        | 515.2460  | 258.1266         | 514.2620        | 257.6346         | 4  |
| 10 | 1103.5103       | 552.2588        | 1085.4997       | 543.2535         | E    | <b>433.2041</b>  | 217.1057        | 416.1776  | 208.5924         | 415.1936        | 208.1004         | 3  |
| 11 | 1232.5529       | 616.7801        | 1214.5423       | 607.7748         | E    | 304.1615         | 152.5844        | 287.1350  | 144.0711         | 286.1510        | 143.5791         | 2  |
| 12 |                 |                 |                 |                  | R    | 175.1190         | 88.0631         | 158.0924  | 79.5498          |                 |                  | 1  |

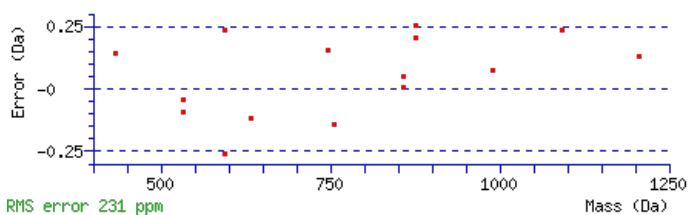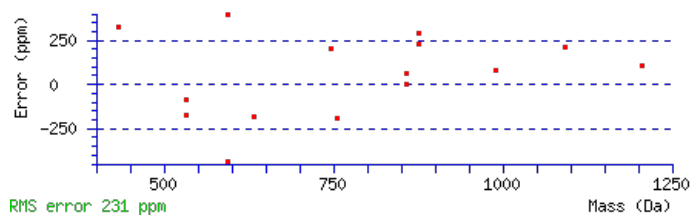

NCBI **BLAST** search of **TVDTDELTVVEER**

(Parameters: blastp, nr protein database, expect=20000, no filter, PAM30)

Other BLAST [web gateways](#)



AT3G02520.1

All matches to this query

| Score | Mr(calc)  | Delta  | Sequence                      |
|-------|-----------|--------|-------------------------------|
| 81.1  | 1405.6573 | 0.0002 | <a href="#">TVDTDELTV EER</a> |
| 13.5  | 1405.6573 | 0.0002 | <a href="#">SIDESDGLQSDLK</a> |

Mascot: <http://www.matrixscience.com/>

**Peptide View**MS/MS Fragmentation of **DVIFVATR**Found in **AT3G02560.1** in **TAIR\_Arabidopsis**, Symbols: | 40S ribosomal protein S7 (RPS7B) | chr3:542348-543175 FORWARD

Match to Query 1588: 930.480484 from(466.247518,2+) index(4067)

Title: Elution from: 41.013 to 41.013 scan no 5236 cid35.00 polarity:+

Data file D1d-2\_2.mgf

Click mouse within plot area to zoom in by factor of two about that point

Or,   to  Da Label all possible matches  Label matches used for scoring Show Y-axis 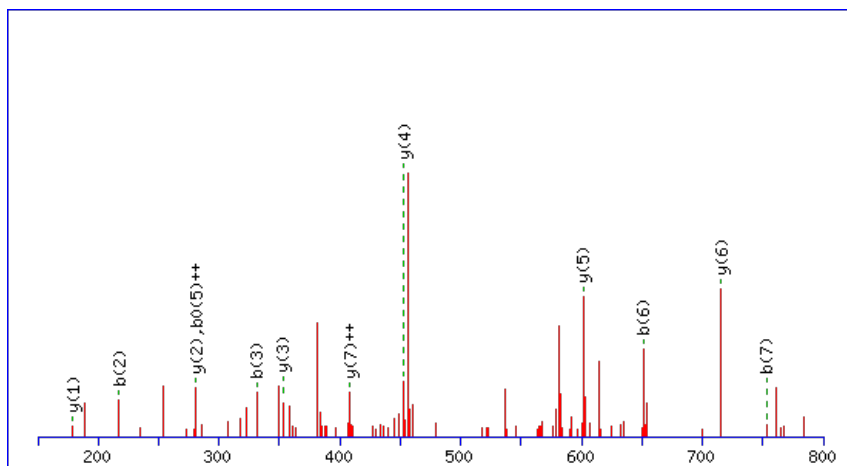Monoisotopic mass of neutral peptide  $M_r(\text{calc})$ : 930.4801

Fixed modifications: Carbamidomethyl (C) (apply to specified residues or termini only)

Ions Score: 33 Expect: 0.0074

Matches : 12/68 fragment ions using 26 most intense peaks ([help](#))

| # | b               | b <sup>++</sup> | b <sup>0</sup> | b <sup>0++</sup> | Seq. | y               | y <sup>++</sup> | y*       | y <sup>*++</sup> | y <sup>0</sup> | y <sup>0++</sup> | # |
|---|-----------------|-----------------|----------------|------------------|------|-----------------|-----------------|----------|------------------|----------------|------------------|---|
| 1 | 117.0313        | 59.0193         | 99.0207        | 50.0140          | D    |                 |                 |          |                  |                |                  | 8 |
| 2 | <b>217.0967</b> | 109.0520        | 199.0861       | 100.0467         | V    | 815.4634        | <b>408.2353</b> | 797.4398 | 399.2235         | 797.4528       | 399.2301         | 7 |
| 3 | <b>331.1778</b> | 166.0925        | 313.1672       | 157.0873         | I    | <b>715.3980</b> | 358.2026        | 697.3744 | 349.1908         | 697.3874       | 349.1973         | 6 |
| 4 | 479.2433        | 240.1253        | 461.2327       | 231.1200         | F    | <b>601.3169</b> | 301.1621        | 583.2933 | 292.1503         | 583.3063       | 292.1568         | 5 |
| 5 | 579.3087        | 290.1580        | 561.2981       | <b>281.1527</b>  | V    | <b>453.2514</b> | 227.1293        | 435.2278 | 218.1175         | 435.2408       | 218.1241         | 4 |
| 6 | <b>651.3428</b> | 326.1751        | 633.3323       | 317.1698         | A    | <b>353.1860</b> | 177.0966        | 335.1624 | 168.0848         | 335.1754       | 168.0913         | 3 |
| 7 | <b>753.3876</b> | 377.1974        | 735.3770       | 368.1921         | T    | <b>281.1518</b> | 141.0795        | 263.1282 | 132.0677         | 263.1412       | 132.0743         | 2 |
| 8 |                 |                 |                |                  | R    | <b>179.1071</b> | 90.0572         | 161.0835 | 81.0454          |                |                  | 1 |

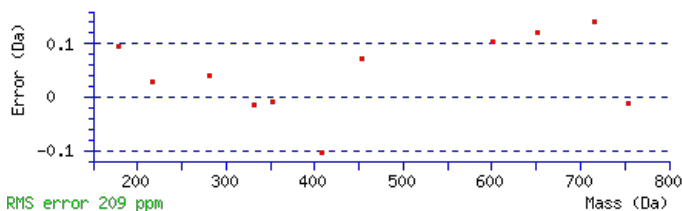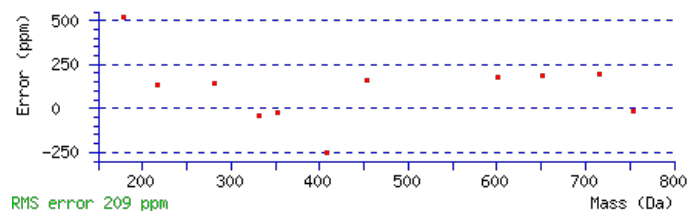NCBI **BLAST** search of [DVIFVATR](#)

(Parameters: blastp, nr protein database, expect=20000, no filter, PAM30)

Other BLAST [web gateways](#)**All matches to this query**

| Score | $M_r(\text{calc})$ | Delta  | Sequence                 |
|-------|--------------------|--------|--------------------------|
| 33.4  | 930.4801           | 0.0004 | <a href="#">DVIFVATR</a> |
| 11.6  | 930.4801           | 0.0004 | <a href="#">YIAGLQK</a>  |

**AT3G02560.1**

|     |          |         |                          |
|-----|----------|---------|--------------------------|
| 8.5 | 930.4801 | 0.0004  | <a href="#">FAVLDVTR</a> |
| 8.3 | 930.4828 | -0.0023 | <a href="#">VNLHGIHK</a> |
| 8.2 | 930.4805 | -0.0000 | <a href="#">NSRVLATR</a> |
| 7.9 | 930.4801 | 0.0004  | <a href="#">FKAVAEQK</a> |
| 6.6 | 930.4801 | 0.0004  | <a href="#">FLLADSVR</a> |
| 3.8 | 930.4801 | 0.0004  | <a href="#">FQEQLKK</a>  |
| 3.4 | 930.4801 | 0.0004  | <a href="#">EFVIASVR</a> |
| 3.0 | 930.4801 | 0.0004  | <a href="#">FSLGDILR</a> |

**Mascot:** <http://www.matrixscience.com/>

**Peptide View**MS/MS Fragmentation of **YDDVVFLK**

Found in **AT3G02730.1** in **TAIR\_Arabidopsis**, Symbols: TRXF1, ATF1 | ATF1/TRXF1 (THIOREDOXIN F-TYPE 1); thiol-disulfide exchange intermediate | chr3:588577-589598 REVERSE

Match to Query 2634: 997.514316 from(499.764434,2+) index(5699)

Title: Elution from: 49.644 to 49.644 scan no 7190 cid35.00 polarity:+

Data file D1d-3\_2.mgf

Click mouse within plot area to zoom in by factor of two about that point

Or,   to  Da

Label all possible matches  Label matches used for scoring

Show Y-axis

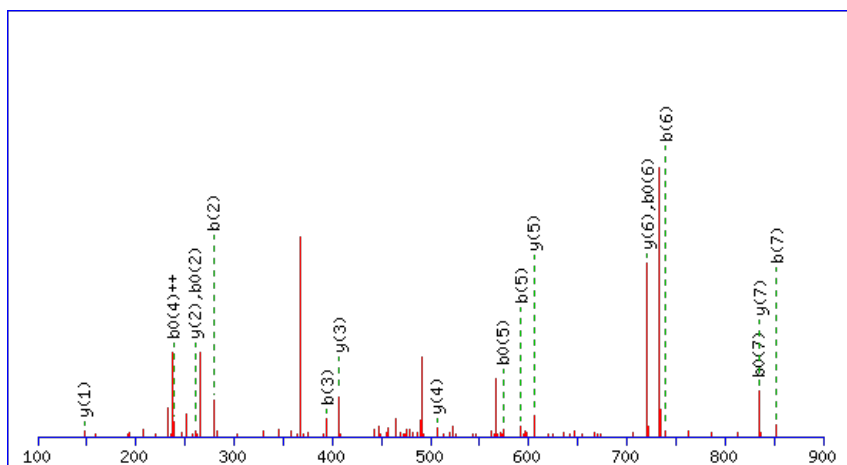

**Monoisotopic mass of neutral peptide Mr(calc):** 997.5121

**Fixed modifications:** Carbamidomethyl (C) (apply to specified residues or termini only)

**Ions Score:** 35 **Expect:** 0.00074

**Matches:** 17/58 fragment ions using 43 most intense peaks ([help](#))

| # | b               | b <sup>++</sup> | b <sup>0</sup>  | b <sup>0++</sup> | Seq. | y               | y <sup>++</sup> | y*       | y <sup>*++</sup> | y <sup>0</sup> | y <sup>0++</sup> | # |
|---|-----------------|-----------------|-----------------|------------------|------|-----------------|-----------------|----------|------------------|----------------|------------------|---|
| 1 | 164.0706        | 82.5389         |                 |                  | Y    |                 |                 |          |                  |                |                  | 8 |
| 2 | <b>279.0975</b> | 140.0524        | <b>261.0870</b> | 131.0471         | D    | <b>835.4560</b> | 418.2316        | 818.4294 | 409.7184         | 817.4454       | 409.2264         | 7 |
| 3 | <b>394.1245</b> | 197.5659        | 376.1139        | 188.5606         | D    | <b>720.4291</b> | 360.7182        | 703.4025 | 352.2049         | 702.4185       | 351.7129         | 6 |
| 4 | 493.1929        | 247.1001        | 475.1823        | <b>238.0948</b>  | V    | <b>605.4021</b> | 303.2047        | 588.3756 | 294.6914         |                |                  | 5 |
| 5 | <b>592.2613</b> | 296.6343        | <b>574.2508</b> | 287.6290         | V    | <b>506.3337</b> | 253.6705        | 489.3071 | 245.1572         |                |                  | 4 |
| 6 | <b>739.3297</b> | 370.1685        | <b>721.3192</b> | 361.1632         | F    | <b>407.2653</b> | 204.1363        | 390.2387 | 195.6230         |                |                  | 3 |
| 7 | <b>852.4138</b> | 426.7105        | <b>834.4032</b> | 417.7053         | L    | <b>260.1969</b> | 130.6021        | 243.1703 | 122.0888         |                |                  | 2 |
| 8 |                 |                 |                 |                  | K    | <b>147.1128</b> | 74.0600         | 130.0863 | 65.5468          |                |                  | 1 |

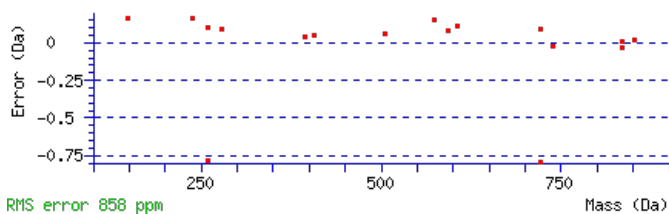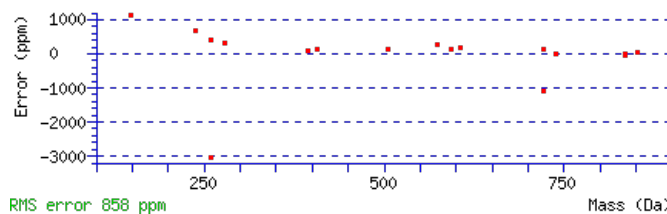

NCBI **BLAST** search of [YDDVVFLK](#)

(Parameters: blastp, nr protein database, expect=20000, no filter, PAM30)

Other BLAST [web gateways](#)

**All matches to this query**

| Score | Mr(calc) | Delta  | Sequence                 |
|-------|----------|--------|--------------------------|
| 34.6  | 997.5121 | 0.0023 | <a href="#">YDDVVFLK</a> |

AT3G02730.1

|     |          |        |                         |
|-----|----------|--------|-------------------------|
| 5.3 | 997.5122 | 0.0021 | <a href="#">MMMKKTK</a> |
|-----|----------|--------|-------------------------|

**Mascot:** <http://www.matrixscience.com/>

**Peptide View**MS/MS Fragmentation of **NSKKRPGSR**Found in **AT3G02750.1** in **TAIR\_Arabidopsis**, Symbols: | protein phosphatase 2C family protein / PP2C family protein | chr3:593608-595464  
REVERSE

Match to Query 3071: 1046.529706 from(524.272129,2+) index(1429)

Title: Elution from: 19.574 to 19.574 scan no 1941 cid35.00 polarity:+

Data file D6h-1\_1.mgf

Click mouse within plot area to zoom in by factor of two about that point

Or,   to  Da Label all possible matches  Label matches used for scoring Show Y-axis 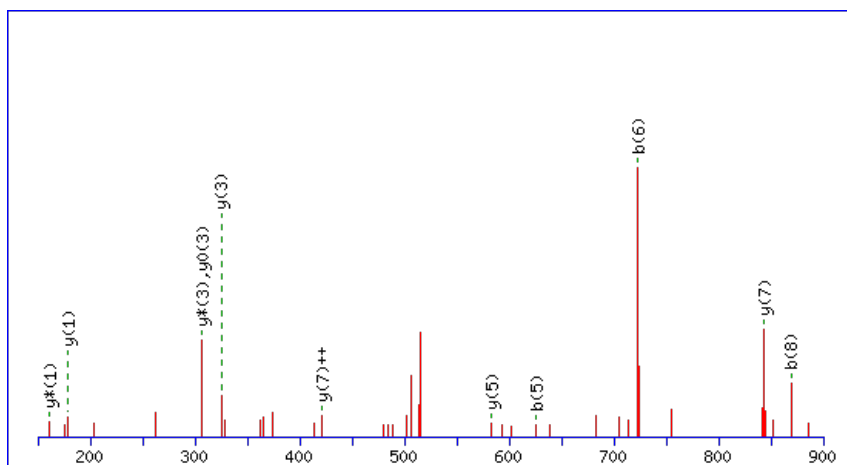Monoisotopic mass of neutral peptide  $M_r(\text{calc})$ : 1046.5306

Fixed modifications: Carbamidomethyl (C) (apply to specified residues or termini only)

Ions Score: 25 Expect: 0.043

Matches : 11/92 fragment ions using 16 most intense peaks ([help](#))

| # | b               | b <sup>++</sup> | b*       | b <sup>*++</sup> | b <sup>0</sup> | b <sup>0++</sup> | Seq. | y               | y <sup>++</sup> | y*              | y <sup>*++</sup> | y <sup>0</sup>  | y <sup>0++</sup> | # |
|---|-----------------|-----------------|----------|------------------|----------------|------------------|------|-----------------|-----------------|-----------------|------------------|-----------------|------------------|---|
| 1 | 117.0443        | 59.0258         | 99.0207  | 50.0140          |                |                  | N    |                 |                 |                 |                  |                 |                  | 9 |
| 2 | 205.0733        | 103.0403        | 187.0498 | 94.0285          | 187.0628       | 94.0350          | S    | 931.5008        | 466.2541        | 913.4772        | 457.2423         | 913.4903        | 457.2488         | 8 |
| 3 | 335.1624        | 168.0848        | 317.1388 | 159.0730         | 317.1518       | 159.0795         | K    | <b>843.4718</b> | <b>422.2395</b> | 825.4482        | 413.2277         | 825.4612        | 413.2342         | 7 |
| 4 | 465.2514        | 233.1293        | 447.2278 | 224.1175         | 447.2408       | 224.1241         | K    | 713.3827        | 357.1950        | 695.3592        | 348.1832         | 695.3722        | 348.1897         | 6 |
| 5 | <b>625.3407</b> | 313.1740        | 607.3171 | 304.1622         | 607.3301       | 304.1687         | R    | <b>583.2937</b> | 292.1505        | 565.2701        | 283.1387         | 565.2831        | 283.1452         | 5 |
| 6 | <b>723.3905</b> | 362.1989        | 705.3669 | 353.1871         | 705.3799       | 353.1936         | P    | 423.2045        | 212.1059        | 405.1809        | 203.0941         | 405.1939        | 203.1006         | 4 |
| 7 | 781.4090        | 391.2081        | 763.3854 | 382.1963         | 763.3984       | 382.2028         | G    | <b>325.1547</b> | 163.0810        | <b>307.1311</b> | 154.0692         | <b>307.1441</b> | 154.0757         | 3 |
| 8 | <b>869.4380</b> | 435.2226        | 851.4144 | 426.2109         | 851.4274       | 426.2174         | S    | 267.1362        | 134.0717        | 249.1126        | 125.0599         | 249.1256        | 125.0664         | 2 |
| 9 |                 |                 |          |                  |                |                  | R    | <b>179.1071</b> | 90.0572         | <b>161.0835</b> | 81.0454          |                 |                  | 1 |

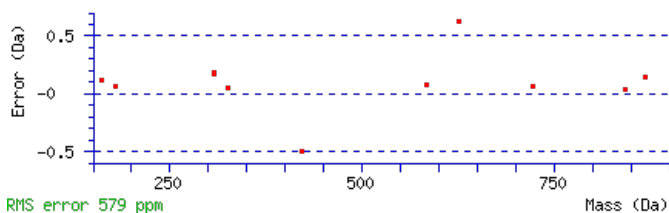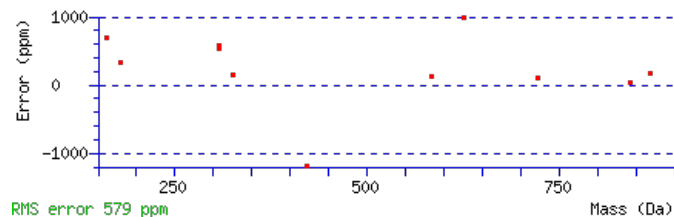NCBI **BLAST** search of [NSKKRPGSR](#)

(Parameters: blastp, nr protein database, expect=20000, no filter, PAM30)

Other BLAST [web gateways](#)**All matches to this query**

| Score | $M_r(\text{calc})$ | Delta | Sequence |
|-------|--------------------|-------|----------|
|       |                    |       |          |

## AT3G02750.1

|      |           |         |                             |
|------|-----------|---------|-----------------------------|
| 24.6 | 1046.5306 | -0.0009 | <a href="#">NSKKRPGSR</a>   |
| 7.7  | 1046.5305 | -0.0008 | <a href="#">NSRRVIER</a>    |
| 6.6  | 1046.5279 | 0.0018  | <a href="#">SSKDKPSKR</a>   |
| 6.4  | 1046.5305 | -0.0008 | <a href="#">RVNERSLR</a>    |
| 6.1  | 1046.5305 | -0.0008 | <a href="#">RTELAQRR</a>    |
| 4.5  | 1046.5278 | 0.0019  | <a href="#">TGIVGRTGSGK</a> |
| 3.9  | 1046.5279 | 0.0018  | <a href="#">ADSSQKKIR</a>   |
| 3.7  | 1046.5279 | 0.0018  | <a href="#">EARSLLTSR</a>   |
| 3.1  | 1046.5306 | -0.0009 | <a href="#">SLSRRAPSR</a>   |
| 0.3  | 1046.5305 | -0.0008 | <a href="#">RDNITRVR</a>    |

Mascot: <http://www.matrixscience.com/>

## Peptide View

MS/MS Fragmentation of **VTIPLVWINTCCSHPLYR**

Found in **AT3G02780.1** in **TAIR\_Arabidopsis**, Symbols: IPP2, IPIAT1, IDI2 | IDI2/IPIAT1/IPP2 (ISOPENTENYL DIPHOSPHATE ISOMERASE 2, ISOPENTENYL PYROPHOSPHATE:DIMETHYLLALLYL PYROPHOSPHATE ISOMERASE 2); isopentenyl-diphosphate delta-isomerase | chr3:602585-604655 REVERSE

Match to Query 10382:2250.073227 from(751.031685,3+) index(8949)

Title: Elution from: 78.598 to 78.598 scan no 11776 cid35.00 polarity:+

Data file D12h-1\_1.mgf

Click mouse within plot area to zoom in by factor of two about that point

Or, Plot from  to  Da

Label all possible matches  Label matches used for scoring

Show Y-axis

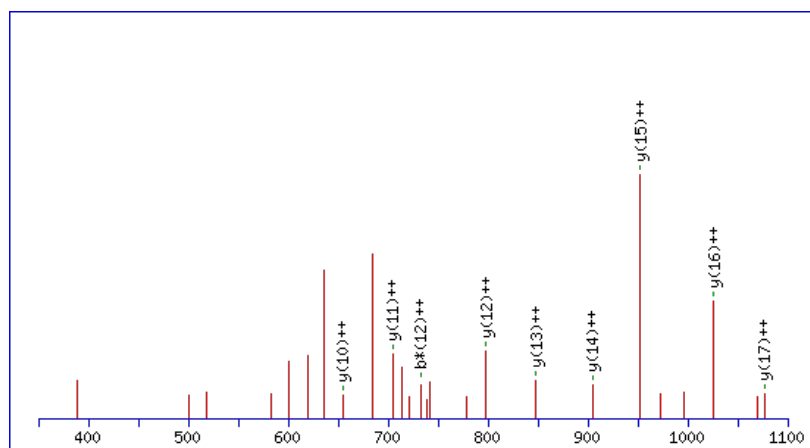

**Monoisotopic mass of neutral peptide Mr(calc):** 2250.0714

**Fixed modifications:** Carbamidomethyl (C) (apply to specified residues or termini only)

**Ions Score:** 32 **Expect:** 0.0019

**Matches:** 9/176 fragment ions using 23 most intense peaks ([help](#))

| #  | b         | b <sup>++</sup> | b <sup>*</sup> | b <sup>*++</sup> | b <sup>0</sup> | b <sup>0++</sup> | Seq | y         | y <sup>++</sup> | y <sup>*</sup> | y <sup>*++</sup> | y <sup>0</sup> | y <sup>0++</sup> | #  |
|----|-----------|-----------------|----------------|------------------|----------------|------------------|-----|-----------|-----------------|----------------|------------------|----------------|------------------|----|
| 1  | 100.0757  | 50.5415         |                |                  |                |                  | V   |           |                 |                |                  |                |                  | 18 |
| 2  | 201.1234  | 101.0653        |                |                  | 183.1128       | 92.0600          | T   | 2152.0103 | 1076.5088       | 2134.9837      | 1067.9955        | 2133.9997      | 1067.5035        | 17 |
| 3  | 348.1918  | 174.5995        |                |                  | 330.1812       | 165.5942         | F   | 2050.9626 | 1025.9849       | 2033.9361      | 1017.4717        | 2032.9520      | 1016.9797        | 16 |
| 4  | 445.2445  | 223.1259        |                |                  | 427.2340       | 214.1206         | P   | 1903.8942 | 952.4507        | 1886.8676      | 943.9375         | 1885.8836      | 943.4454         | 15 |
| 5  | 558.3286  | 279.6679        |                |                  | 540.3180       | 270.6627         | L   | 1806.8414 | 903.9243        | 1789.8149      | 895.4111         | 1788.8309      | 894.9191         | 14 |
| 6  | 657.3970  | 329.2022        |                |                  | 639.3865       | 320.1969         | V   | 1693.7574 | 847.3823        | 1676.7308      | 838.8690         | 1675.7468      | 838.3770         | 13 |
| 7  | 843.4763  | 422.2418        |                |                  | 825.4658       | 413.2365         | W   | 1594.6889 | 797.8481        | 1577.6624      | 789.3348         | 1576.6784      | 788.8428         | 12 |
| 8  | 944.5240  | 472.7656        |                |                  | 926.5135       | 463.7604         | T   | 1408.6096 | 704.8085        | 1391.5831      | 696.2952         | 1390.5991      | 695.8032         | 11 |
| 9  | 1058.5669 | 529.7871        | 1041.5404      | 521.2738         | 1040.5564      | 520.7818         | N   | 1307.5620 | 654.2846        | 1290.5354      | 645.7713         | 1289.5514      | 645.2793         | 10 |
| 10 | 1159.6146 | 580.3109        | 1142.5881      | 571.7977         | 1141.6041      | 571.3057         | T   | 1193.5190 | 597.2632        | 1176.4925      | 588.7499         | 1175.5085      | 588.2579         | 9  |
| 11 | 1319.6453 | 660.3263        | 1302.6187      | 651.8130         | 1301.6347      | 651.3210         | C   | 1092.4713 | 546.7393        | 1075.4448      | 538.2260         | 1074.4608      | 537.7340         | 8  |
| 12 | 1479.6759 | 740.3416        | 1462.6494      | 731.8283         | 1461.6654      | 731.3363         | C   | 932.4407  | 466.7240        | 915.4141       | 458.2107         | 914.4301       | 457.7187         | 7  |
| 13 | 1566.7079 | 783.8576        | 1549.6814      | 775.3443         | 1548.6974      | 774.8523         | S   | 772.4100  | 386.7087        | 755.3835       | 378.1954         | 754.3995       | 377.7034         | 6  |
| 14 | 1703.7669 | 852.3871        | 1686.7403      | 843.8738         | 1685.7563      | 843.3818         | H   | 685.3780  | 343.1926        | 668.3515       | 334.6794         |                |                  | 5  |
| 15 | 1800.8196 | 900.9135        | 1783.7931      | 892.4002         | 1782.8091      | 891.9082         | P   | 548.3191  | 274.6632        | 531.2926       | 266.1499         |                |                  | 4  |
| 16 | 1913.9037 | 957.4555        | 1896.8771      | 948.9422         | 1895.8931      | 948.4502         | L   | 451.2663  | 226.1368        | 434.2398       | 217.6235         |                |                  | 3  |
| 17 | 2076.9670 | 1038.9871       | 2059.9405      | 1030.4739        | 2058.9565      | 1029.9819        | Y   | 338.1823  | 169.5948        | 321.1557       | 161.0815         |                |                  | 2  |
| 18 |           |                 |                |                  |                |                  | R   | 175.1190  | 88.0631         | 158.0924       | 79.5498          |                |                  | 1  |



# AT3G02780.1

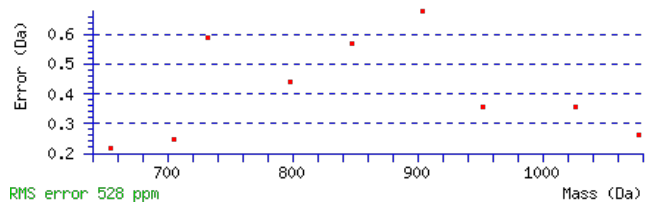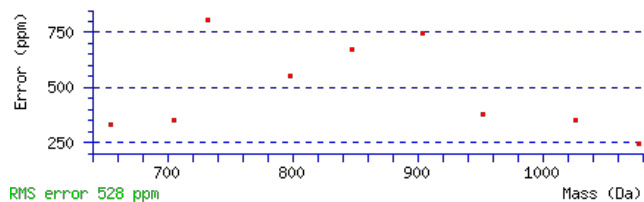

NCBI **BLAST** search of [VTFPLVWTNTCCSHPLYR](#)  
 (Parameters: blastp, nr protein database, expect=20000, no filter, PAM30)  
 Other BLAST [web gateways](#)

## All matches to this query

| Score | Mr(calc)  | Delta   | Sequence                               |
|-------|-----------|---------|----------------------------------------|
| 32.0  | 2250.0714 | 0.0018  | <a href="#">VTFPLVWTNTCCSHPLYR</a>     |
| 2.1   | 2250.0692 | 0.0040  | <a href="#">EIPEDLTPGLYGFTEADLDR</a>   |
| 1.5   | 2250.0685 | 0.0047  | <a href="#">IEELEKVC TLNSGEGEASASK</a> |
| 1.1   | 2250.0733 | -0.0001 | <a href="#">IETGVCQGQKVVSCDVQSTR</a>   |
| 1.0   | 2250.0726 | 0.0006  | <a href="#">VKTLEGMLGEWITDGEVDDK</a>   |

Mascot: <http://www.matrixscience.com/>

## Peptide View

### MS/MS Fragmentation of **VVADEFVPWPSK**

Found in **AT3G03250.1** in **TAIR\_Arabidopsis**, Symbols: UGP | UGP (UDP-glucose pyrophosphorylase); UTP:glucose-1-phosphate uridylyltransferase | chr3:749768-754021 REVERSE

Match to Query 5394: 1386.660692 from(694.337622,2+) index(7881)

Title: Elution from: 69.630 to 69.630 scan no 10338 cid35.00 polarity:+

Data file D6h-3\_1.mgf

Click mouse within plot area to zoom in by factor of two about that point

Or,   to  Da

Label all possible matches  Label matches used for scoring

Show Y-axis

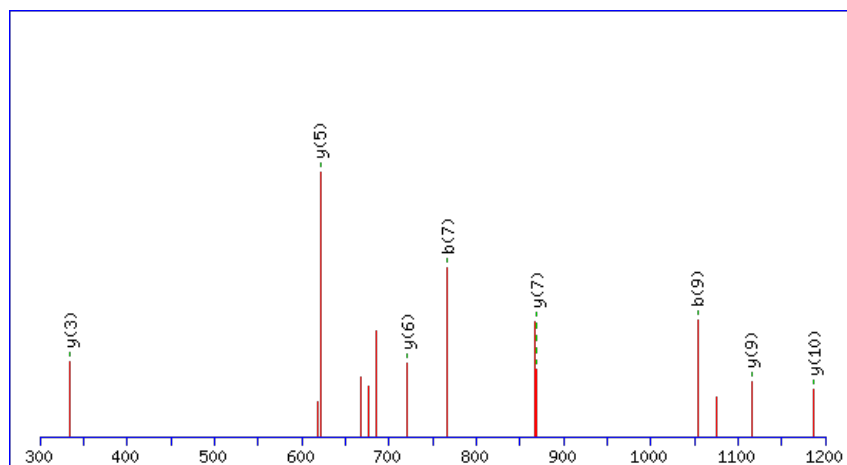

Monoisotopic mass of neutral peptide  $M_r(\text{calc})$ : 1386.6612

Fixed modifications: Carbamidomethyl (C) (apply to specified residues or termini only)

Ions Score: 48 Expect: 0.00013

Matches : 8/102 fragment ions using 12 most intense peaks ([help](#))

| #  | b                | b <sup>++</sup> | b <sup>0</sup> | b <sup>0++</sup> | Seq. | y                | y <sup>++</sup> | y*        | y <sup>*++</sup> | y <sup>0</sup> | y <sup>0++</sup> | #  |
|----|------------------|-----------------|----------------|------------------|------|------------------|-----------------|-----------|------------------|----------------|------------------|----|
| 1  | 101.0727         | 51.0400         |                |                  | V    |                  |                 |           |                  |                |                  | 12 |
| 2  | 201.1382         | 101.0727        |                |                  | V    | 1287.6030        | 644.3051        | 1269.5794 | 635.2934         | 1269.5925      | 635.2999         | 11 |
| 3  | 273.1723         | 137.0898        |                |                  | A    | <b>1187.5376</b> | 594.2724        | 1169.5140 | 585.2606         | 1169.5270      | 585.2671         | 10 |
| 4  | 389.1963         | 195.1018        | 371.1857       | 186.0965         | D    | <b>1115.5034</b> | 558.2553        | 1097.4798 | 549.2436         | 1097.4929      | 549.2501         | 9  |
| 5  | 519.2359         | 260.1216        | 501.2254       | 251.1163         | E    | 999.4794         | 500.2434        | 981.4559  | 491.2316         | 981.4689       | 491.2381         | 8  |
| 6  | 667.3014         | 334.1543        | 649.2908       | 325.1490         | F    | <b>869.4398</b>  | 435.2235        | 851.4162  | 426.2118         | 851.4293       | 426.2183         | 7  |
| 7  | <b>767.3668</b>  | 384.1871        | 749.3563       | 375.1818         | V    | <b>721.3744</b>  | 361.1908        | 703.3508  | 352.1790         | 703.3638       | 352.1855         | 6  |
| 8  | 865.4166         | 433.2120        | 847.4061       | 424.2067         | P    | <b>621.3089</b>  | 311.1581        | 603.2853  | 302.1463         | 603.2984       | 302.1528         | 5  |
| 9  | <b>1053.4900</b> | 527.2486        | 1035.4794      | 518.2434         | W    | 523.2591         | 262.1332        | 505.2355  | 253.1214         | 505.2486       | 253.1279         | 4  |
| 10 | 1151.5398        | 576.2735        | 1133.5292      | 567.2683         | P    | <b>335.1857</b>  | 168.0965        | 317.1622  | 159.0847         | 317.1752       | 159.0912         | 3  |
| 11 | 1239.5689        | 620.2881        | 1221.5583      | 611.2828         | S    | 237.1359         | 119.0716        | 219.1124  | 110.0598         | 219.1254       | 110.0663         | 2  |
| 12 |                  |                 |                |                  | K    | 149.1069         | 75.0571         | 131.0833  | 66.0453          |                |                  | 1  |

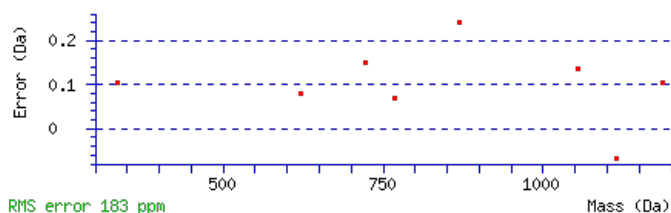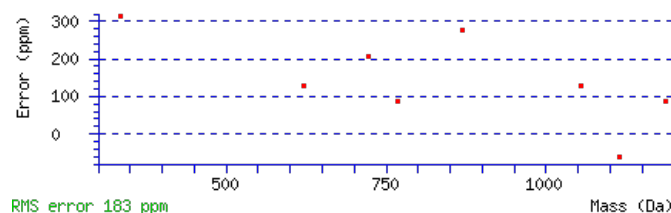

NCBI BLAST search of **VVADEFVPWPSK**

(Parameters: blastp, nr protein database, expect=20000, no filter, PAM30)

Other BLAST [web gateways](#)

# AT3G03250.1

All matches to this query

| Score | Mr(calc)  | Delta   | Sequence                       |
|-------|-----------|---------|--------------------------------|
| 47.6  | 1386.6612 | -0.0005 | <a href="#">VVADEFVPWPSK</a>   |
| 12.2  | 1386.6594 | 0.0013  | <a href="#">LREVNIDEAPGR</a>   |
| 11.5  | 1386.6616 | -0.0009 | <a href="#">DAGVSAIVFHPTR</a>  |
| 4.4   | 1386.6616 | -0.0009 | <a href="#">RNQLVSFSGFSK</a>   |
| 4.3   | 1386.6567 | 0.0040  | <a href="#">GQEGAGIVTSPEK</a>  |
| 1.8   | 1386.6616 | -0.0009 | <a href="#">FALPVDSEHRAK</a>   |
| 0.3   | 1386.6567 | 0.0040  | <a href="#">AQIAEAGAPTDISK</a> |

Mascot: <http://www.matrixscience.com/>

**Peptide View**MS/MS Fragmentation of **SFDLLSLLPK**

Found in **AT3G03780.1** in **TAIR\_Arabidopsis**, Symbols: AtMS2 | AtMS2 (Arabidopsis thaliana methionine synthase 2); 5-methyltetrahydropteroyltriglutamate-homocysteine S-methyltransferase | chr3:957609-960747 FORWARD

Match to Query 3610: 1131.654666 from(566.834609,2+) index(10884)

Title: Elution from: 108.612 to 108.612 scan no 15886 cid35.00 polarity:+

Data file C7-1\_2.mgf

Click mouse within plot area to zoom in by factor of two about that point

Or,   to  Da

Label all possible matches  Label matches used for scoring

Show Y-axis

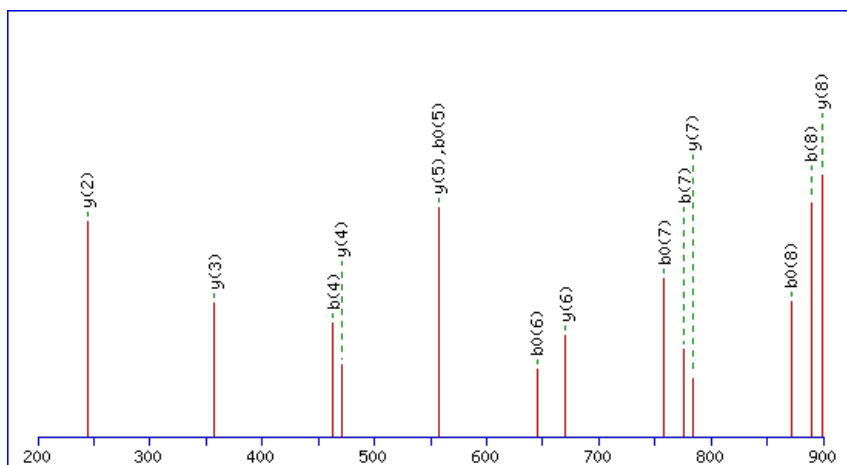

Monoisotopic mass of neutral peptide  $M_r(\text{calc})$ : 1131.6539

Fixed modifications: Carbamidomethyl (C) (apply to specified residues or termini only)

Ions Score: 78 Expect: 2.4e-008

Matches : 14/82 fragment ions using 13 most intense peaks ([help](#))

| #  | b               | b <sup>++</sup> | b <sup>0</sup>  | b <sup>0++</sup> | Seq. | y               | y <sup>++</sup> | y*        | y <sup>*++</sup> | y <sup>0</sup> | y <sup>0++</sup> | #  |
|----|-----------------|-----------------|-----------------|------------------|------|-----------------|-----------------|-----------|------------------|----------------|------------------|----|
| 1  | 88.0393         | 44.5233         | 70.0287         | 35.5180          | S    |                 |                 |           |                  |                |                  | 10 |
| 2  | 235.1077        | 118.0575        | 217.0972        | 109.0522         | F    | 1045.6292       | 523.3182        | 1028.6027 | 514.8050         | 1027.6186      | 514.3130         | 9  |
| 3  | 350.1347        | 175.5710        | 332.1241        | 166.5657         | D    | <b>898.5608</b> | 449.7840        | 881.5342  | 441.2708         | 880.5502       | 440.7788         | 8  |
| 4  | <b>463.2187</b> | 232.1130        | 445.2082        | 223.1077         | L    | <b>783.5339</b> | 392.2706        | 766.5073  | 383.7573         | 765.5233       | 383.2653         | 7  |
| 5  | 576.3028        | 288.6550        | <b>558.2922</b> | 279.6498         | L    | <b>670.4498</b> | 335.7285        | 653.4232  | 327.2153         | 652.4392       | 326.7232         | 6  |
| 6  | 663.3348        | 332.1710        | <b>645.3243</b> | 323.1658         | S    | <b>557.3657</b> | 279.1865        | 540.3392  | 270.6732         | 539.3552       | 270.1812         | 5  |
| 7  | <b>776.4189</b> | 388.7131        | <b>758.4083</b> | 379.7078         | L    | <b>470.3337</b> | 235.6705        | 453.3071  | 227.1572         |                |                  | 4  |
| 8  | <b>889.5029</b> | 445.2551        | <b>871.4924</b> | 436.2498         | L    | <b>357.2496</b> | 179.1285        | 340.2231  | 170.6152         |                |                  | 3  |
| 9  | 986.5557        | 493.7815        | 968.5451        | 484.7762         | P    | <b>244.1656</b> | 122.5864        | 227.1390  | 114.0731         |                |                  | 2  |
| 10 |                 |                 |                 |                  | K    | 147.1128        | 74.0600         | 130.0863  | 65.5468          |                |                  | 1  |

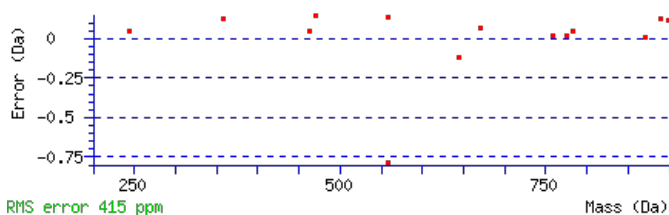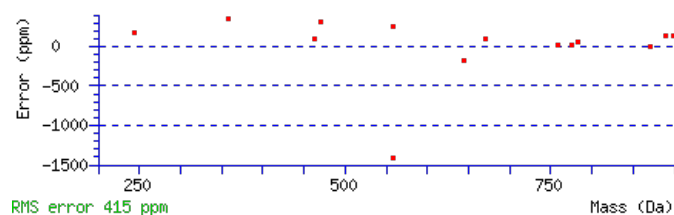

NCBI BLAST search of **SFDLLSLLPK**

(Parameters: blastp, nr protein database, expect=20000, no filter, PAM30)

Other BLAST [web gateways](#)

All matches to this query

AT3G03780.1

| Score | Mr(calc)  | Delta  | Sequence                  |
|-------|-----------|--------|---------------------------|
| 77.7  | 1131.6539 | 0.0007 | <a href="#">SFDLLSLPK</a> |

Mascot: <http://www.matrixscience.com/>

## Peptide View

MS/MS Fragmentation of **IPHFNAPIYLENK**Found in **AT3G03920.1** in **TAIR\_Arabidopsis**, Symbols: | Gar1 RNA-binding region family protein | chr3:1009130-1010386 REVERSE

Match to Query 6946: 1572.764838 from(525.262222,3+) index(6068)

Title: Elution from: 54.164 to 54.164 scan no 7801 cid35.00 polarity:+

Data file 0-2\_2.mgf

Click mouse within plot area to zoom in by factor of two about that point

Or,   to  Da Label all possible matches  Label matches used for scoring Show Y-axis 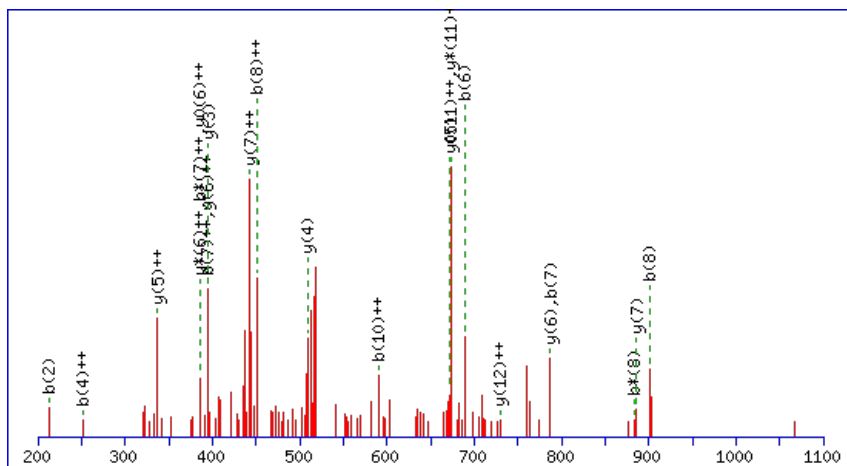Monoisotopic mass of neutral peptide  $M_r(\text{calc})$ : 1572.7661

Fixed modifications: Carbamidomethyl (C) (apply to specified residues or termini only)

Ions Score: 24 Expect: 0.03

Matches : 23/112 fragment ions using 33 most intense peaks ([help](#))

| #  | b               | b <sup>++</sup> | b <sup>*</sup>  | b <sup>*++</sup> | b <sup>0</sup> | b <sup>0++</sup> | Seq. | y               | y <sup>++</sup> | y <sup>*</sup> | y <sup>*++</sup> | y <sup>0</sup> | y <sup>0++</sup> | #  |
|----|-----------------|-----------------|-----------------|------------------|----------------|------------------|------|-----------------|-----------------|----------------|------------------|----------------|------------------|----|
| 1  | 115.0884        | 58.0478         |                 |                  |                |                  | I    |                 |                 |                |                  |                |                  | 13 |
| 2  | <b>213.1382</b> | 107.0727        |                 |                  |                |                  | P    | 1459.6923       | <b>730.3498</b> | 1441.6687      | 721.3380         | 1441.6817      | 721.3445         | 12 |
| 3  | 353.1882        | 177.0977        |                 |                  |                |                  | H    | 1361.6425       | 681.3249        | 1343.6189      | <b>672.3131</b>  | 1343.6319      | <b>672.3196</b>  | 11 |
| 4  | 501.2536        | <b>251.1305</b> |                 |                  |                |                  | F    | 1221.5925       | 611.2999        | 1203.5689      | 602.2881         | 1203.5819      | 602.2946         | 10 |
| 5  | 617.2906        | 309.1490        | 599.2671        | 300.1372         |                |                  | N    | 1073.5270       | 537.2671        | 1055.5034      | 528.2553         | 1055.5164      | 528.2619         | 9  |
| 6  | <b>689.3248</b> | 345.1660        | 671.3012        | 336.1542         |                |                  | A    | 957.4900        | 479.2486        | 939.4664       | 470.2369         | 939.4794       | 470.2434         | 8  |
| 7  | <b>787.3746</b> | <b>394.1909</b> | 769.3510        | <b>385.1791</b>  |                |                  | P    | <b>885.4559</b> | <b>443.2316</b> | 867.4323       | 434.2198         | 867.4453       | 434.2263         | 7  |
| 8  | <b>901.4557</b> | <b>451.2315</b> | <b>883.4321</b> | 442.2197         |                |                  | I    | <b>787.4061</b> | <b>394.2067</b> | 769.3825       | <b>385.1949</b>  | 769.3955       | <b>385.2014</b>  | 6  |
| 9  | 1065.5160       | 533.2617        | 1047.4925       | 524.2499         |                |                  | Y    | <b>673.3250</b> | <b>337.1661</b> | 655.3014       | 328.1543         | 655.3144       | 328.1608         | 5  |
| 10 | 1179.5971       | <b>590.3022</b> | 1161.5736       | 581.2904         |                |                  | L    | <b>509.2646</b> | 255.1359        | 491.2410       | 246.1241         | 491.2540       | 246.1307         | 4  |
| 11 | 1309.6368       | 655.3220        | 1291.6132       | 646.3102         | 1291.6262      | 646.3167         | E    | <b>395.1835</b> | 198.0954        | 377.1599       | 189.0836         | 377.1729       | 189.0901         | 3  |
| 12 | 1425.6738       | 713.3405        | 1407.6502       | 704.3287         | 1407.6632      | 704.3352         | N    | 265.1439        | 133.0756        | 247.1203       | 124.0638         |                |                  | 2  |
| 13 |                 |                 |                 |                  |                |                  | K    | 149.1069        | 75.0571         | 131.0833       | 66.0453          |                |                  | 1  |

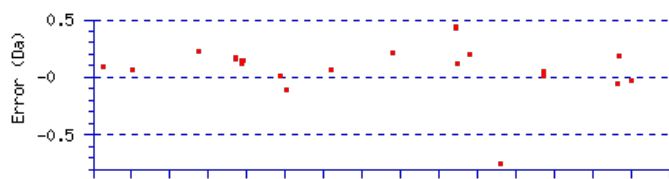

RMS error 408 ppm

Mass (Da)

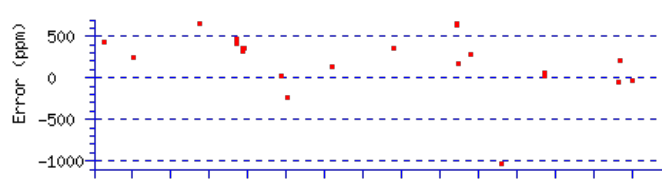

RMS error 408 ppm

Mass (Da)

NCBI BLAST search of **IPHFNAPIYLENK**

(Parameters: blastp, nr protein database, expect=20000, no filter, PAM30)

Other BLAST [web gateways](#)

AT3G03920.1

All matches to this query

| Score | Mr(calc)  | Delta   | Sequence                       |
|-------|-----------|---------|--------------------------------|
| 23.8  | 1572.7661 | -0.0013 | <a href="#">IPHENAPIYLENK</a>  |
| 1.2   | 1572.7695 | -0.0046 | <a href="#">LLHAKNVEFEPK</a>   |
| 0.7   | 1572.7612 | 0.0037  | <a href="#">SLTYALEDDFKKK</a>  |
| 0.3   | 1572.7616 | 0.0032  | <a href="#">DLEPPSQRPKTSAK</a> |

Mascot: <http://www.matrixscience.com/>

**Peptide View**MS/MS Fragmentation of **IVPGAAATEIELAQR**Found in **AT3G03960.1** in **TAIR\_Arabidopsis**, Symbols: | chaperonin, putative | chr3:1024439-1027611 FORWARD

Match to Query 6842: 1537.845362 from(769.929957,2+) index(5866)

Title: Elution from: 52.370 to 52.370 scan no 7407 cid35.00 polarity:+

Data file D12h-3\_1.mgf

Click mouse within plot area to zoom in by factor of two about that point

Or,  to  Da Label all possible matches  Label matches used for scoring Show Y-axis 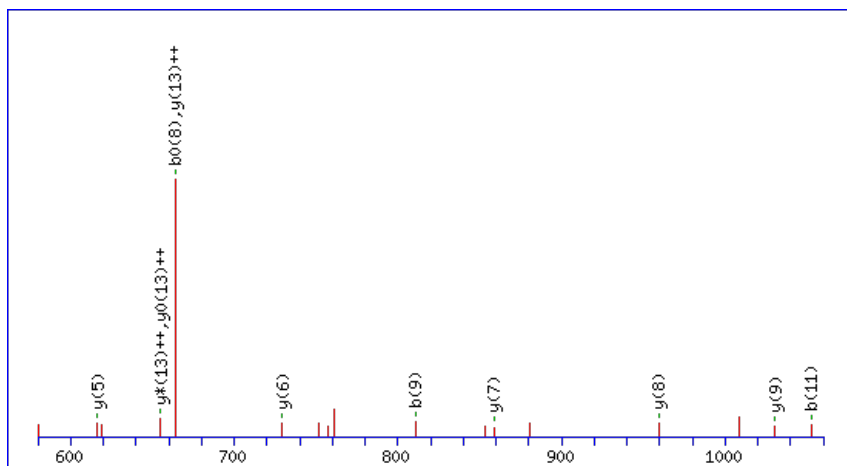Monoisotopic mass of neutral peptide **Mr(calc)**: 1537.8464

Fixed modifications: Carbamidomethyl (C) (apply to specified residues or termini only)

Ions Score: 37 **Expect**: 0.00038Matches : 11/120 fragment ions using 14 most intense peaks ([help](#))

| #  | b         | b <sup>++</sup> | b*        | b <sup>*++</sup> | b <sup>0</sup> | b <sup>0++</sup> | Seq. | y         | y <sup>++</sup> | y*        | y <sup>*++</sup> | y <sup>0</sup> | y <sup>0++</sup> | #  |
|----|-----------|-----------------|-----------|------------------|----------------|------------------|------|-----------|-----------------|-----------|------------------|----------------|------------------|----|
| 1  | 114.0913  | 57.5493         |           |                  |                |                  | I    |           |                 |           |                  |                |                  | 15 |
| 2  | 213.1598  | 107.0835        |           |                  |                |                  | V    | 1425.7696 | 713.3884        | 1408.7431 | 704.8752         | 1407.7591      | 704.3832         | 14 |
| 3  | 310.2125  | 155.6099        |           |                  |                |                  | P    | 1326.7012 | 663.8542        | 1309.6747 | 655.3410         | 1308.6906      | 654.8490         | 13 |
| 4  | 367.2340  | 184.1206        |           |                  |                |                  | G    | 1229.6484 | 615.3279        | 1212.6219 | 606.8146         | 1211.6379      | 606.3226         | 12 |
| 5  | 438.2711  | 219.6392        |           |                  |                |                  | A    | 1172.6270 | 586.8171        | 1155.6004 | 578.3039         | 1154.6164      | 577.8118         | 11 |
| 6  | 509.3082  | 255.1577        |           |                  |                |                  | A    | 1101.5899 | 551.2986        | 1084.5633 | 542.7853         | 1083.5793      | 542.2933         | 10 |
| 7  | 580.3453  | 290.6763        |           |                  |                |                  | A    | 1030.5528 | 515.7800        | 1013.5262 | 507.2667         | 1012.5422      | 506.7747         | 9  |
| 8  | 681.3930  | 341.2001        |           |                  | 663.3824       | 332.1949         | T    | 959.5156  | 480.2615        | 942.4891  | 471.7482         | 941.5051       | 471.2562         | 8  |
| 9  | 810.4356  | 405.7214        |           |                  | 792.4250       | 396.7162         | E    | 858.4680  | 429.7376        | 841.4414  | 421.2243         | 840.4574       | 420.7323         | 7  |
| 10 | 923.5197  | 462.2635        |           |                  | 905.5091       | 453.2582         | I    | 729.4254  | 365.2163        | 712.3988  | 356.7030         | 711.4148       | 356.2110         | 6  |
| 11 | 1052.5623 | 526.7848        |           |                  | 1034.5517      | 517.7795         | E    | 616.3413  | 308.6743        | 599.3148  | 300.1610         | 598.3307       | 299.6690         | 5  |
| 12 | 1165.6463 | 583.3268        |           |                  | 1147.6358      | 574.3215         | L    | 487.2987  | 244.1530        | 470.2722  | 235.6397         |                |                  | 4  |
| 13 | 1236.6834 | 618.8454        |           |                  | 1218.6729      | 609.8401         | A    | 374.2146  | 187.6110        | 357.1881  | 179.0977         |                |                  | 3  |
| 14 | 1364.7420 | 682.8746        | 1347.7155 | 674.3614         | 1346.7314      | 673.8694         | Q    | 303.1775  | 152.0924        | 286.1510  | 143.5791         |                |                  | 2  |
| 15 |           |                 |           |                  |                |                  | R    | 175.1190  | 88.0631         | 158.0924  | 79.5498          |                |                  | 1  |

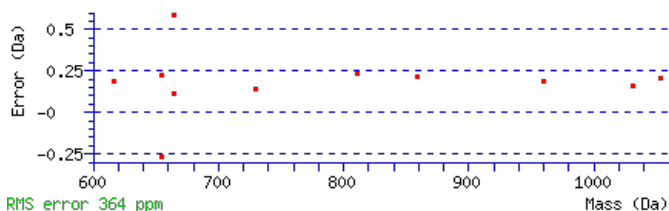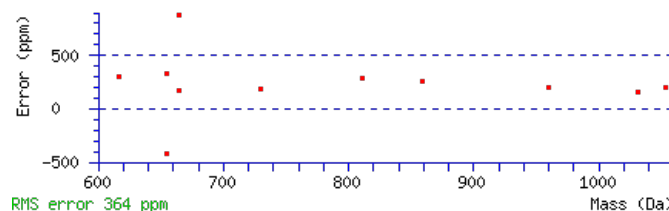NCBI **BLAST** search of [IVPGAAATEIELAQR](#)



## AT3G03960.1

(Parameters: blastp, nr protein database, expect=20000, no filter, PAM30)

Other BLAST [web gateways](#)

### All matches to this query

| Score | Mr(calc)  | Delta   | Sequence                        |
|-------|-----------|---------|---------------------------------|
| 36.5  | 1537.8464 | -0.0010 | <a href="#">IVPGAAATEIELAQR</a> |

Mascot: <http://www.matrixscience.com/>

**Peptide View**MS/MS Fragmentation of **AASFNIIPSTGAAK**

Found in **AT3G04120.1** in **TAIR\_Arabidopsis**, Symbols: GAPC-1, GAPC | GAPC (GLYCERALDEHYDE-3-PHOSPHATE DEHYDROGENASE C SUBUNIT); glyceraldehyde-3-phosphate dehydrogenase | chr3:1081084-1083138 FORWARD

Match to Query 5711: 1433.749810 from(717.882181,2+) index(5345)

Title: Elution from: 47.725 to 47.725 scan no 6739 cid35.00 polarity:+

Data file C7-1\_2.mgf

Click mouse within plot area to zoom in by factor of two about that point

Or,  to  Da

Label all possible matches  Label matches used for scoring

Show Y-axis

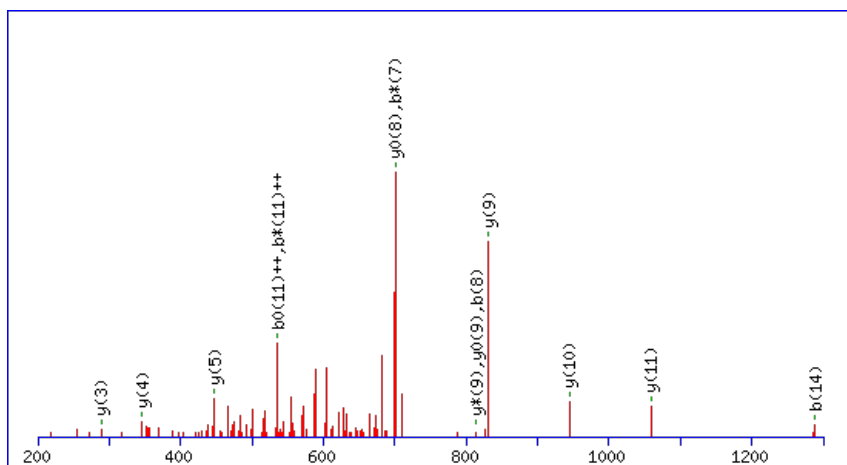

Monoisotopic mass of neutral peptide  $M_r(\text{calc})$ : 1433.7514

Fixed modifications: Carbamidomethyl (C) (apply to specified residues or termini only)

Ions Score: 56 Expect: 1.3e-005

Matches : 14/148 fragment ions using 10 most intense peaks ([help](#))

| #  | b                | b <sup>++</sup> | b*              | b <sup>*++</sup> | b <sup>0</sup> | b <sup>0++</sup> | Seq. | y                | y <sup>++</sup> | y*              | y <sup>*++</sup> | y <sup>0</sup>  | y <sup>0++</sup> | #  |
|----|------------------|-----------------|-----------------|------------------|----------------|------------------|------|------------------|-----------------|-----------------|------------------|-----------------|------------------|----|
| 1  | 72.0444          | 36.5258         |                 |                  |                |                  | A    |                  |                 |                 |                  |                 |                  | 15 |
| 2  | 143.0815         | 72.0444         |                 |                  |                |                  | A    | 1363.7216        | 682.3644        | 1346.6951       | 673.8512         | 1345.7110       | 673.3592         | 14 |
| 3  | 230.1135         | 115.5604        |                 |                  | 212.1030       | 106.5551         | S    | 1292.6845        | 646.8459        | 1275.6579       | 638.3326         | 1274.6739       | 637.8406         | 13 |
| 4  | 377.1819         | 189.0946        |                 |                  | 359.1714       | 180.0893         | F    | 1205.6525        | 603.3299        | 1188.6259       | 594.8166         | 1187.6419       | 594.3246         | 12 |
| 5  | 491.2249         | 246.1161        | 474.1983        | 237.6028         | 473.2143       | 237.1108         | N    | <b>1058.5840</b> | 529.7957        | 1041.5575       | 521.2824         | 1040.5735       | 520.7904         | 11 |
| 6  | 604.3089         | 302.6581        | 587.2824        | 294.1448         | 586.2984       | 293.6528         | I    | <b>944.5411</b>  | 472.7742        | 927.5146        | 464.2609         | 926.5306        | 463.7689         | 10 |
| 7  | 717.3930         | 359.2001        | <b>700.3665</b> | 350.6869         | 699.3824       | 350.1949         | I    | <b>831.4571</b>  | 416.2322        | <b>814.4305</b> | 407.7189         | <b>813.4465</b> | 407.2269         | 9  |
| 8  | <b>814.4458</b>  | 407.7265        | 797.4192        | 399.2132         | 796.4352       | 398.7212         | P    | 718.3730         | 359.6901        | 701.3464        | 351.1769         | <b>700.3624</b> | 350.6849         | 8  |
| 9  | 901.4778         | 451.2425        | 884.4512        | 442.7293         | 883.4672       | 442.2373         | S    | 621.3202         | 311.1638        | 604.2937        | 302.6505         | 603.3097        | 302.1585         | 7  |
| 10 | 988.5098         | 494.7585        | 971.4833        | 486.2453         | 970.4993       | 485.7533         | S    | 534.2882         | 267.6477        | 517.2617        | 259.1345         | 516.2776        | 258.6425         | 6  |
| 11 | 1089.5575        | 545.2824        | 1072.5310       | <b>536.7691</b>  | 1071.5469      | <b>536.2771</b>  | T    | <b>447.2562</b>  | 224.1317        | 430.2296        | 215.6185         | 429.2456        | 215.1264         | 5  |
| 12 | 1146.5790        | 573.7931        | 1129.5524       | 565.2798         | 1128.5684      | 564.7878         | G    | <b>346.2085</b>  | 173.6079        | 329.1819        | 165.0946         |                 |                  | 4  |
| 13 | 1217.6161        | 609.3117        | 1200.5895       | 600.7984         | 1199.6055      | 600.3064         | A    | <b>289.1870</b>  | 145.0972        | 272.1605        | 136.5839         |                 |                  | 3  |
| 14 | <b>1288.6532</b> | 644.8302        | 1271.6266       | 636.3170         | 1270.6426      | 635.8250         | A    | 218.1499         | 109.5786        | 201.1234        | 101.0653         |                 |                  | 2  |
| 15 |                  |                 |                 |                  |                |                  | K    | 147.1128         | 74.0600         | 130.0863        | 65.5468          |                 |                  | 1  |

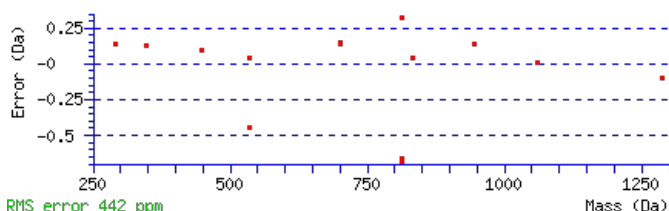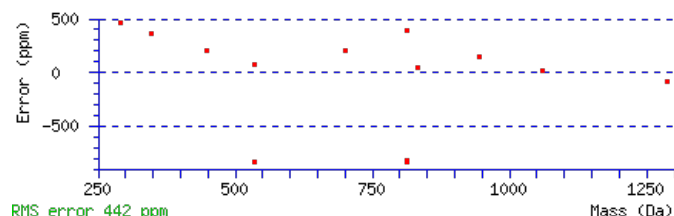

## AT3G04120.1

NCBI **BLAST** search of [AASFNIIPSSTGAAK](#)

(Parameters: blastp, nr protein database, expect=20000, no filter, PAM30)

Other BLAST [web gateways](#)

### All matches to this query

| Score | Mr(calc)  | Delta   | Sequence                        |
|-------|-----------|---------|---------------------------------|
| 55.6  | 1433.7514 | -0.0016 | <a href="#">AASFNIIPSSTGAAK</a> |

Mascot: <http://www.matrixscience.com/>

**Peptide View**MS/MS Fragmentation of **ILEAPMEIAGGDFK**

Found in **AT3G04550.1** in **TAIR\_Arabidopsis**, Symbols: | similar to unknown protein [Arabidopsis thaliana] (TAIR:AT5G28500.1); similar to unnamed protein product [Vitis vinifera] (GB:CAO65032.1) | chr3:1225967-1227316 FORWARD

Match to Query 7411: 1618.788634 from(810.401593,2+) index(9669)

Title: Elution from: 86.741 to 86.741 scan no 13214 cid35.00 polarity:+

Data file D1d-3\_2.mgf

Click mouse within plot area to zoom in by factor of two about that point

Or,   to  Da

Label all possible matches  Label matches used for scoring

Show Y-axis

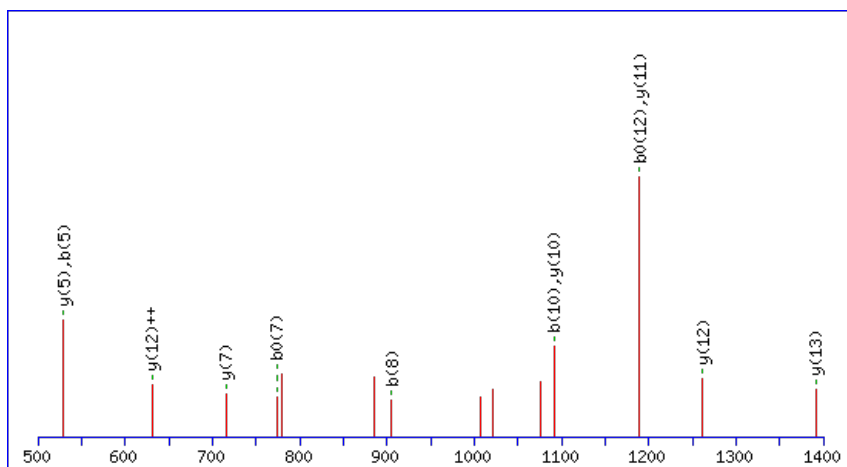

Monoisotopic mass of neutral peptide  $M_r(\text{calc})$ : 1618.7853

Fixed modifications: Carbamidomethyl (C) (apply to specified residues or termini only)

Ions Score: 38 Expect: 0.001

Matches : 12/132 fragment ions using 14 most intense peaks ([help](#))

| #  | b                | b <sup>++</sup> | b <sup>0</sup>   | b <sup>0++</sup> | Seq. | y                | y <sup>++</sup> | y*        | y <sup>*++</sup> | y <sup>0</sup> | y <sup>0++</sup> | #  |
|----|------------------|-----------------|------------------|------------------|------|------------------|-----------------|-----------|------------------|----------------|------------------|----|
| 1  | 115.0884         | 58.0478         |                  |                  | I    |                  |                 |           |                  |                |                  | 15 |
| 2  | 229.1695         | 115.0884        |                  |                  | L    | 1505.7115        | 753.3594        | 1487.6879 | 744.3476         | 1487.7009      | 744.3541         | 14 |
| 3  | 359.2091         | 180.1082        | 341.1985         | 171.1029         | E    | <b>1391.6304</b> | 696.3188        | 1373.6068 | 687.3070         | 1373.6198      | 687.3135         | 13 |
| 4  | 431.2433         | 216.1253        | 413.2327         | 207.1200         | A    | <b>1261.5907</b> | <b>631.2990</b> | 1243.5672 | 622.2872         | 1243.5802      | 622.2937         | 12 |
| 5  | <b>529.2930</b>  | 265.1502        | 511.2825         | 256.1449         | P    | <b>1189.5566</b> | 595.2819        | 1171.5330 | 586.2701         | 1171.5460      | 586.2767         | 11 |
| 6  | 661.3306         | 331.1689        | 643.3200         | 322.1636         | M    | <b>1091.5068</b> | 546.2570        | 1073.4832 | 537.2452         | 1073.4962      | 537.2518         | 10 |
| 7  | 791.3702         | 396.1887        | <b>773.3596</b>  | 387.1835         | E    | 959.4693         | 480.2383        | 941.4457  | 471.2265         | 941.4587       | 471.2330         | 9  |
| 8  | <b>905.4513</b>  | 453.2293        | 887.4407         | 444.2240         | I    | 829.4296         | 415.2185        | 811.4061  | 406.2067         | 811.4191       | 406.2132         | 8  |
| 9  | 1019.5324        | 510.2698        | 1001.5218        | 501.2646         | I    | <b>715.3485</b>  | 358.1779        | 697.3250  | 349.1661         | 697.3380       | 349.1726         | 7  |
| 10 | <b>1091.5665</b> | 546.2869        | 1073.5560        | 537.2816         | A    | 601.2674         | 301.1374        | 583.2439  | 292.1256         | 583.2569       | 292.1321         | 6  |
| 11 | 1149.5850        | 575.2962        | 1131.5745        | 566.2909         | G    | <b>529.2333</b>  | 265.1203        | 511.2097  | 256.1085         | 511.2227       | 256.1150         | 5  |
| 12 | 1207.6035        | 604.3054        | <b>1189.5930</b> | 595.3001         | G    | 471.2148         | 236.1110        | 453.1912  | 227.0992         | 453.2042       | 227.1058         | 4  |
| 13 | 1323.6275        | 662.3174        | 1305.6170        | 653.3121         | D    | 413.1963         | 207.1018        | 395.1727  | 198.0900         | 395.1857       | 198.0965         | 3  |
| 14 | 1471.6930        | 736.3501        | 1453.6824        | 727.3448         | F    | 297.1723         | 149.0898        | 279.1487  | 140.0780         |                |                  | 2  |
| 15 |                  |                 |                  |                  | K    | 149.1069         | 75.0571         | 131.0833  | 66.0453          |                |                  | 1  |

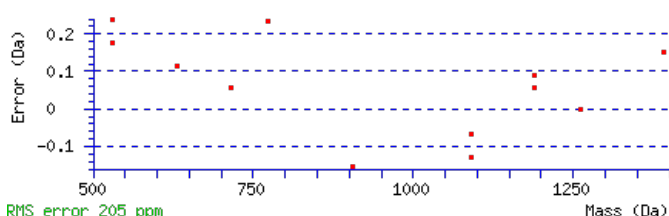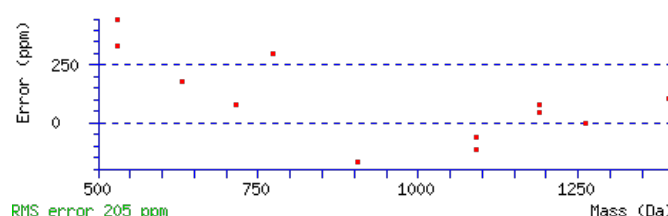

## AT3G04550.1

NCBI **BLAST** search of [ILEAPMEIAGGDFK](#)

(Parameters: blastp, nr protein database, expect=20000, no filter, PAM30)

Other BLAST [web gateways](#)

### All matches to this query

| Score | M <sub>r</sub> (calc) | Delta  | Sequence                       |
|-------|-----------------------|--------|--------------------------------|
| 37.6  | 1618.7853             | 0.0034 | <a href="#">ILEAPMEIAGGDFK</a> |

Mascot: <http://www.matrixscience.com/>

**Peptide View**MS/MS Fragmentation of **SLGIPLVGLDTHPR**Found in **AT3G04790.1** in **TAIR\_Arabidopsis**, Symbols: | ribose 5-phosphate isomerase-related | chr3:1313371-1314201 FORWARD

Match to Query 6142: 1492.771424 from(747.392988,2+) index(7137)

Title: Elution from: 63.109 to 63.109 scan no 9294 cid35.00 polarity:+

Data file 0-3\_2.mgf

Click mouse within plot area to zoom in by factor of two about that point

Or,   to  Da Label all possible matches  Label matches used for scoring Show Y-axis 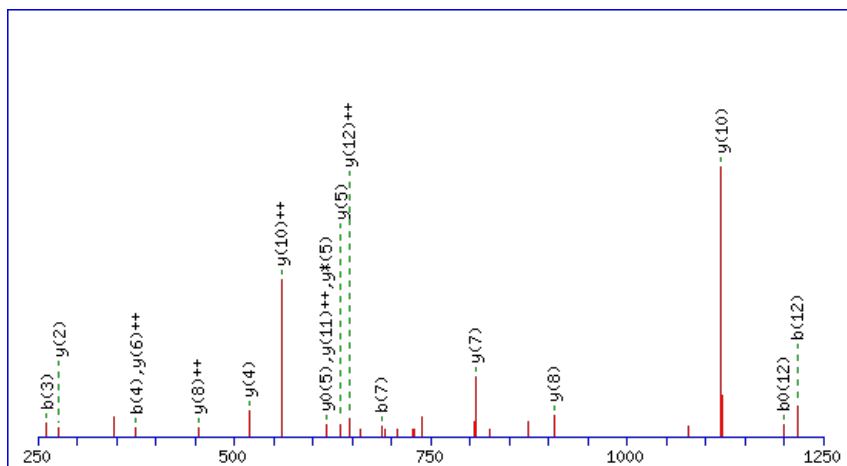Monoisotopic mass of neutral peptide  $M_r(\text{calc})$ : 1492.7740

Fixed modifications: Carbamidomethyl (C) (apply to specified residues or termini only)

Ions Score: 58 Expect: 8.9e-006

Matches : 18/124 fragment ions using 24 most intense peaks ([help](#))

| #  | b                | b <sup>++</sup> | b <sup>0</sup>   | b <sup>0++</sup> | Seq. | y                | y <sup>++</sup> | y*              | y <sup>*++</sup> | y <sup>0</sup>  | y <sup>0++</sup> | #  |
|----|------------------|-----------------|------------------|------------------|------|------------------|-----------------|-----------------|------------------|-----------------|------------------|----|
| 1  | 89.0363          | 45.0218         | 71.0258          | 36.0165          | S    |                  |                 |                 |                  |                 |                  | 14 |
| 2  | 203.1174         | 102.0624        | 185.1069         | 93.0571          | L    | 1405.7522        | 703.3798        | 1387.7287       | 694.3680         | 1387.7417       | 694.3745         | 13 |
| 3  | <b>261.1359</b>  | 131.0716        | 243.1254         | 122.0663         | G    | 1291.6711        | <b>646.3392</b> | 1273.6476       | 637.3274         | 1273.6606       | 637.3339         | 12 |
| 4  | <b>375.2170</b>  | 188.1122        | 357.2065         | 179.1069         | I    | 1233.6526        | <b>617.3300</b> | 1215.6291       | 608.3182         | 1215.6421       | 608.3247         | 11 |
| 5  | 473.2668         | 237.1371        | 455.2563         | 228.1318         | P    | <b>1119.5715</b> | <b>560.2894</b> | 1101.5480       | 551.2776         | 1101.5610       | 551.2841         | 10 |
| 6  | 587.3479         | 294.1776        | 569.3374         | 285.1723         | L    | 1021.5217        | 511.2645        | 1003.4982       | 502.2527         | 1003.5112       | 502.2592         | 9  |
| 7  | <b>687.4134</b>  | 344.2103        | 669.4028         | 335.2050         | V    | <b>907.4406</b>  | <b>454.2240</b> | 889.4171        | 445.2122         | 889.4301        | 445.2187         | 8  |
| 8  | 745.4319         | 373.2196        | 727.4213         | 364.2143         | G    | <b>807.3752</b>  | 404.1912        | 789.3516        | 395.1794         | 789.3646        | 395.1860         | 7  |
| 9  | 859.5130         | 430.2601        | 841.5024         | 421.2548         | L    | 749.3567         | <b>375.1820</b> | 731.3331        | 366.1702         | 731.3461        | 366.1767         | 6  |
| 10 | 975.5370         | 488.2721        | 957.5264         | 479.2668         | D    | <b>635.2756</b>  | 318.1414        | <b>617.2520</b> | 309.1296         | <b>617.2650</b> | 309.1362         | 5  |
| 11 | 1077.5817        | 539.2945        | 1059.5711        | 530.2892         | T    | <b>519.2516</b>  | 260.1294        | 501.2280        | 251.1177         | 501.2411        | 251.1242         | 4  |
| 12 | <b>1217.6317</b> | 609.3195        | <b>1199.6211</b> | 600.3142         | H    | 417.2069         | 209.1071        | 399.1833        | 200.0953         |                 |                  | 3  |
| 13 | 1315.6815        | 658.3444        | 1297.6709        | 649.3391         | P    | <b>277.1569</b>  | 139.0821        | 259.1333        | 130.0703         |                 |                  | 2  |
| 14 |                  |                 |                  |                  | R    | 179.1071         | 90.0572         | 161.0835        | 81.0454          |                 |                  | 1  |

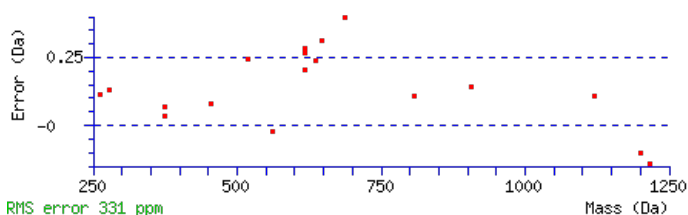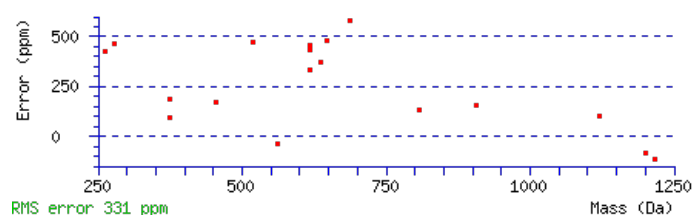NCBI BLAST search of **SLGIPLVGLDTHPR**

(Parameters: blastp, nr protein database, expect=20000, no filter, PAM30)

AT3G04790.1

Other BLAST [web gateways](#)

**All matches to this query**

| Score | Mr(calc)  | Delta   | Sequence                       |
|-------|-----------|---------|--------------------------------|
| 57.9  | 1492.7740 | -0.0026 | <a href="#">SLGIPLVGLDTHPR</a> |
| 4.4   | 1492.7713 | 0.0001  | <a href="#">TLVGVISQEKFEK</a>  |
| 1.9   | 1492.7722 | -0.0008 | <a href="#">VPMDILVFKLMR</a>   |

Mascot: <http://www.matrixscience.com/>

### Peptide View

 MS/MS Fragmentation of **VFEVSLADLQGEDNAYRK**

 Found in **AT3G04840.1** in **TAIR\_Arabidopsis**, Symbols: | 40S ribosomal protein S3A (RPS3aA) | chr3:1329757-1331424 FORWARD

Match to Query 9735: 2168.034960 from(723.685596,3+) index(7716)

Title: Elution from: 66.912 to 66.912 scan no 10046 cid35.00 polarity:+

Data file D1d-3\_2.mgf

Click mouse within plot area to zoom in by factor of two about that point

 Or, Plot from  to  Da 

 Label all possible matches  Label matches used for scoring 

 Show Y-axis 
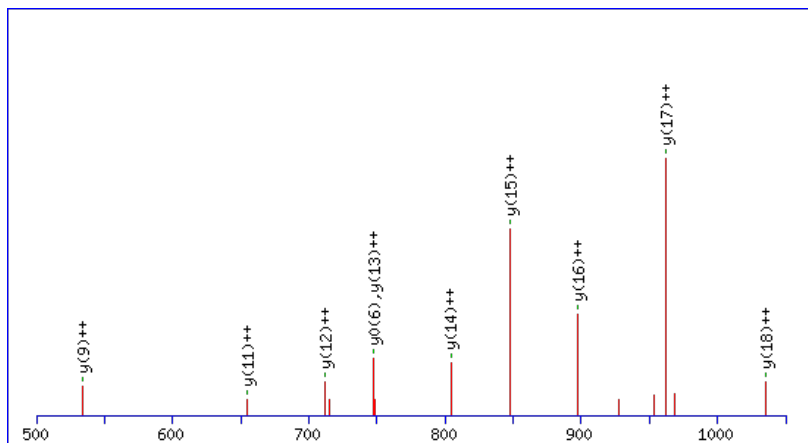
 Monoisotopic mass of neutral peptide **Mr(calc)**: 2168.0386

Fixed modifications: Carbamidomethyl (C) (apply to specified residues or termini only)

 Ions Score: 83 **Expect**: 1.1e-008

 Matches : 10/184 fragment ions using 10 most intense peaks ([help](#))

| #  | b         | b <sup>++</sup> | b <sup>*</sup> | b <sup>*++</sup> | b <sup>0</sup> | b <sup>0++</sup> | Seq. | y         | y <sup>++</sup> | y <sup>*</sup> | y <sup>*++</sup> | y <sup>0</sup> | y <sup>0++</sup> | #  |
|----|-----------|-----------------|----------------|------------------|----------------|------------------|------|-----------|-----------------|----------------|------------------|----------------|------------------|----|
| 1  | 100.0757  | 50.5415         |                |                  |                |                  | V    |           |                 |                |                  |                |                  | 19 |
| 2  | 247.1441  | 124.0757        |                |                  |                |                  | F    | 2069.9774 | 1035.4924       | 2052.9509      | 1026.9791        | 2051.9669      | 1026.4871        | 18 |
| 3  | 376.1867  | 188.5970        |                |                  | 358.1761       | 179.5917         | E    | 1922.9090 | 961.9582        | 1905.8825      | 953.4449         | 1904.8985      | 952.9529         | 17 |
| 4  | 475.2551  | 238.1312        |                |                  | 457.2445       | 229.1259         | V    | 1793.8664 | 897.4369        | 1776.8399      | 888.9236         | 1775.8559      | 888.4316         | 16 |
| 5  | 562.2871  | 281.6472        |                |                  | 544.2766       | 272.6419         | S    | 1694.7980 | 847.9026        | 1677.7715      | 839.3894         | 1676.7875      | 838.8974         | 15 |
| 6  | 675.3712  | 338.1892        |                |                  | 657.3606       | 329.1840         | L    | 1607.7660 | 804.3866        | 1590.7394      | 795.8734         | 1589.7554      | 795.3814         | 14 |
| 7  | 746.4083  | 373.7078        |                |                  | 728.3978       | 364.7025         | A    | 1494.6819 | 747.8446        | 1477.6554      | 739.3313         | 1476.6714      | 738.8393         | 13 |
| 8  | 861.4353  | 431.2213        |                |                  | 843.4247       | 422.2160         | D    | 1423.6448 | 712.3260        | 1406.6183      | 703.8128         | 1405.6342      | 703.3208         | 12 |
| 9  | 974.5193  | 487.7633        |                |                  | 956.5088       | 478.7580         | L    | 1308.6179 | 654.8126        | 1291.5913      | 646.2993         | 1290.6073      | 645.8073         | 11 |
| 10 | 1102.5779 | 551.7926        | 1085.5514      | 543.2793         | 1084.5673      | 542.7873         | Q    | 1195.5338 | 598.2705        | 1178.5073      | 589.7573         | 1177.5232      | 589.2653         | 10 |
| 11 | 1159.5994 | 580.3033        | 1142.5728      | 571.7900         | 1141.5888      | 571.2980         | G    | 1067.4752 | 534.2413        | 1050.4487      | 525.7280         | 1049.4647      | 525.2360         | 9  |
| 12 | 1274.6263 | 637.8168        | 1257.5998      | 629.3035         | 1256.6157      | 628.8115         | D    | 1010.4538 | 505.7305        | 993.4272       | 497.2172         | 992.4432       | 496.7252         | 8  |
| 13 | 1403.6689 | 702.3381        | 1386.6424      | 693.8248         | 1385.6583      | 693.3328         | E    | 895.4268  | 448.2170        | 878.4003       | 439.7038         | 877.4163       | 439.2118         | 7  |
| 14 | 1518.6958 | 759.8516        | 1501.6693      | 751.3383         | 1500.6853      | 750.8463         | D    | 766.3842  | 383.6958        | 749.3577       | 375.1825         | 748.3737       | 374.6905         | 6  |
| 15 | 1632.7388 | 816.8730        | 1615.7122      | 808.3597         | 1614.7282      | 807.8677         | N    | 651.3573  | 326.1823        | 634.3307       | 317.6690         |                |                  | 5  |
| 16 | 1703.7759 | 852.3916        | 1686.7493      | 843.8783         | 1685.7653      | 843.3863         | A    | 537.3144  | 269.1608        | 520.2878       | 260.6475         |                |                  | 4  |
| 17 | 1866.8392 | 933.9232        | 1849.8127      | 925.4100         | 1848.8287      | 924.9180         | Y    | 466.2772  | 233.6423        | 449.2507       | 225.1290         |                |                  | 3  |
| 18 | 2022.9403 | 1011.9738       | 2005.9138      | 1003.4605        | 2004.9298      | 1002.9685        | R    | 303.2139  | 152.1106        | 286.1874       | 143.5973         |                |                  | 2  |
| 19 |           |                 |                |                  |                |                  | K    | 147.1128  | 74.0600         | 130.0863       | 65.5468          |                |                  | 1  |



# AT3G04840.1

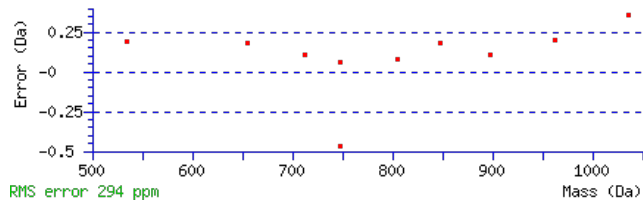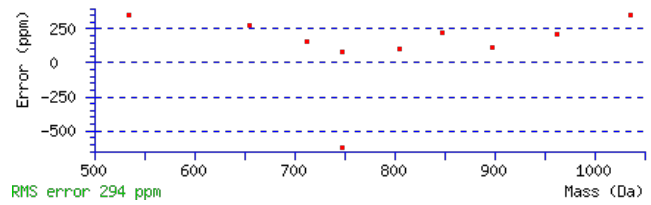

NCBI **BLAST** search of [VFEVSLADLOGDEDNAYRK](#)  
(Parameters: blastp, nr protein database, expect=20000, no filter, PAM30)  
Other BLAST [web gateways](#)

## All matches to this query

| Score | Mr(calc)  | Delta   | Sequence                            |
|-------|-----------|---------|-------------------------------------|
| 83.4  | 2168.0386 | -0.0036 | <a href="#">VFEVSLADLOGDEDNAYRK</a> |
| 4.6   | 2168.0289 | 0.0061  | <a href="#">SCNLAMCLIKQGRFEEGR</a>  |
| 2.4   | 2168.0368 | -0.0018 | <a href="#">RLGAFEQHTTGFGSRMMAR</a> |
| 2.0   | 2168.0287 | 0.0063  | <a href="#">FLSQLSKDYHAWASGDTSR</a> |
| 1.5   | 2168.0307 | 0.0043  | <a href="#">TAQEAMPIESTFSLDVNSK</a> |

Mascot: <http://www.matrixscience.com/>

**Peptide View**MS/MS Fragmentation of **NLDSISFSDWFLSK**Found in **AT3G04870.1** in **TAIR\_Arabidopsis**, Symbols: PDE181, ZDS | ZDS (ZETA-CAROTENE DESATURASE); carotene 7,8-desaturase | chr3:1342848-1346195 FORWARD

Match to Query 7908: 1674.748558 from(838.381555,2+) index(10717)

Title: Elution from: 103.207 to 103.207 scan no 15434 cid35.00 polarity:+

Data file C7-1\_2.mgf

Click mouse within plot area to zoom in by factor of two about that point

Or,  to  Da Label all possible matches  Label matches used for scoring Show Y-axis 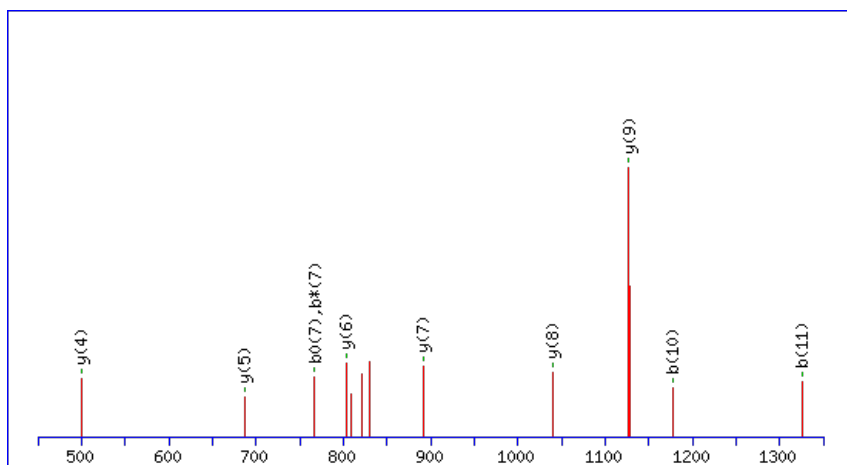Monoisotopic mass of neutral peptide  $M_r(\text{calc})$ : 1674.7484

Fixed modifications: Carbamidomethyl (C) (apply to specified residues or termini only)

Ions Score: 53 Expect: 4.3e-005

Matches : 10/150 fragment ions using 12 most intense peaks ([help](#))

| #  | b                | b <sup>++</sup> | b*              | b <sup>*++</sup> | b <sup>0</sup>  | b <sup>0++</sup> | Seq. | y                | y <sup>++</sup> | y*        | y <sup>*++</sup> | y <sup>0</sup> | y <sup>0++</sup> | #  |
|----|------------------|-----------------|-----------------|------------------|-----------------|------------------|------|------------------|-----------------|-----------|------------------|----------------|------------------|----|
| 1  | 117.0443         | 59.0258         | 99.0207         | 50.0140          |                 |                  | N    |                  |                 |           |                  |                |                  | 14 |
| 2  | 231.1254         | 116.0663        | 213.1018        | 107.0545         |                 |                  | L    | 1559.7187        | 780.3630        | 1541.6951 | 771.3512         | 1541.7081      | 771.3577         | 13 |
| 3  | 347.1493         | 174.0783        | 329.1258        | 165.0665         | 329.1388        | 165.0730         | D    | 1445.6376        | 723.3224        | 1427.6140 | 714.3106         | 1427.6270      | 714.3171         | 12 |
| 4  | 435.1784         | 218.0928        | 417.1548        | 209.0811         | 417.1678        | 209.0876         | S    | 1329.6136        | 665.3104        | 1311.5900 | 656.2986         | 1311.6030      | 656.3051         | 11 |
| 5  | 549.2595         | 275.1334        | 531.2359        | 266.1216         | 531.2489        | 266.1281         | I    | 1241.5845        | 621.2959        | 1223.5609 | 612.2841         | 1223.5740      | 612.2906         | 10 |
| 6  | 637.2886         | 319.1479        | 619.2650        | 310.1361         | 619.2780        | 310.1426         | S    | <b>1127.5034</b> | 564.2553        | 1109.4798 | 555.2436         | 1109.4929      | 555.2501         | 9  |
| 7  | 785.3540         | 393.1807        | <b>767.3304</b> | 384.1689         | <b>767.3435</b> | 384.1754         | F    | <b>1039.4744</b> | 520.2408        | 1021.4508 | 511.2290         | 1021.4638      | 511.2355         | 8  |
| 8  | 873.3831         | 437.1952        | 855.3595        | 428.1834         | 855.3725        | 428.1899         | S    | <b>891.4089</b>  | 446.2081        | 873.3853  | 437.1963         | 873.3983       | 437.2028         | 7  |
| 9  | 989.4071         | 495.2072        | 971.3835        | 486.1954         | 971.3965        | 486.2019         | D    | <b>803.3798</b>  | 402.1936        | 785.3563  | 393.1818         | 785.3693       | 393.1883         | 6  |
| 10 | <b>1177.4804</b> | 589.2439        | 1159.4569       | 580.2321         | 1159.4699       | 580.2386         | W    | <b>687.3559</b>  | 344.1816        | 669.3323  | 335.1698         | 669.3453       | 335.1763         | 5  |
| 11 | <b>1325.5459</b> | 663.2766        | 1307.5223       | 654.2648         | 1307.5353       | 654.2713         | F    | <b>499.2825</b>  | 250.1449        | 481.2589  | 241.1331         | 481.2719       | 241.1396         | 4  |
| 12 | 1439.6270        | 720.3171        | 1421.6034       | 711.3053         | 1421.6164       | 711.3119         | L    | 351.2170         | 176.1122        | 333.1935  | 167.1004         | 333.2065       | 167.1069         | 3  |
| 13 | 1527.6561        | 764.3317        | 1509.6325       | 755.3199         | 1509.6455       | 755.3264         | S    | 237.1359         | 119.0716        | 219.1124  | 110.0598         | 219.1254       | 110.0663         | 2  |
| 14 |                  |                 |                 |                  |                 |                  | K    | 149.1069         | 75.0571         | 131.0833  | 66.0453          |                |                  | 1  |

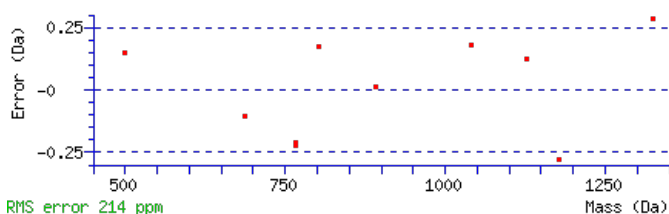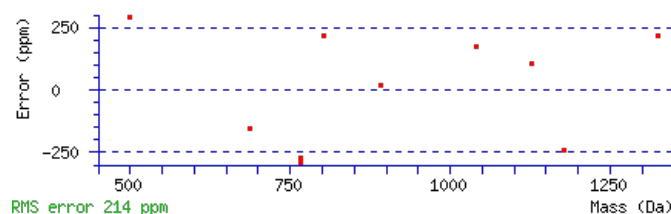NCBI BLAST search of [NLDSISFSDWFLSK](#)

## AT3G04870.1

(Parameters: blastp, nr protein database, expect=20000, no filter, PAM30)

Other BLAST [web gateways](#)

### All matches to this query

| Score | Mr(calc)  | Delta  | Sequence                        |
|-------|-----------|--------|---------------------------------|
| 52.7  | 1674.7484 | 0.0002 | <a href="#">NLDSISFSDWFLSK</a>  |
| 3.3   | 1674.7466 | 0.0020 | <a href="#">TSSVPRFDSSINLSR</a> |

Mascot: <http://www.matrixscience.com/>

**Peptide View**MS/MS Fragmentation of **QFVIDVLHPGR**Found in **AT3G04920.1** in **TAIR\_Arabidopsis**, Symbols: | 40S ribosomal protein S24 (RPS24A) | chr3:1360995-1362071 FORWARD

Match to Query 4628: 1279.702974 from(427.574934,3+) index(6655)

Title: Elution from: 58.670 to 58.670 scan no 8595 cid35.00 polarity:+

Data file D6h-3\_2.mgf

Click mouse within plot area to zoom in by factor of two about that point

Or,   to  Da Label all possible matches  Label matches used for scoring Show Y-axis 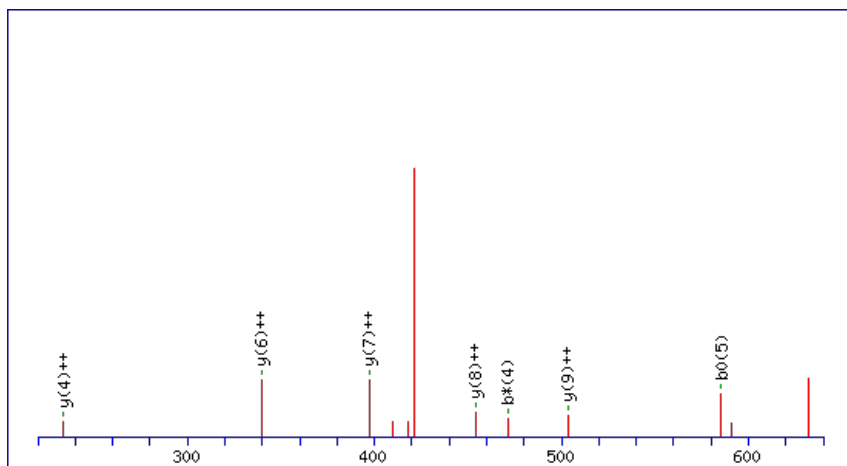Monoisotopic mass of neutral peptide **Mr(calc)**: 1279.7037

Fixed modifications: Carbamidomethyl (C) (apply to specified residues or termini only)

Ions Score: 28 **Expect**: 0.0037Matches : 7/100 fragment ions using 10 most intense peaks ([help](#))

| #  | b         | b <sup>++</sup> | b <sup>*</sup> | b <sup>*++</sup> | b <sup>0</sup> | b <sup>0++</sup> | Seq. | y         | y <sup>++</sup> | y <sup>*</sup> | y <sup>*++</sup> | y <sup>0</sup> | y <sup>0++</sup> | #  |
|----|-----------|-----------------|----------------|------------------|----------------|------------------|------|-----------|-----------------|----------------|------------------|----------------|------------------|----|
| 1  | 129.0659  | 65.0366         | 112.0393       | 56.5233          |                |                  | Q    |           |                 |                |                  |                |                  | 11 |
| 2  | 276.1343  | 138.5708        | 259.1077       | 130.0575         |                |                  | F    | 1152.6524 | 576.8298        | 1135.6259      | 568.3166         | 1134.6418      | 567.8246         | 10 |
| 3  | 375.2027  | 188.1050        | 358.1761       | 179.5917         |                |                  | V    | 1005.5840 | 503.2956        | 988.5574       | 494.7824         | 987.5734       | 494.2904         | 9  |
| 4  | 488.2867  | 244.6470        | 471.2602       | 236.1337         |                |                  | I    | 906.5156  | 453.7614        | 889.4890       | 445.2482         | 888.5050       | 444.7561         | 8  |
| 5  | 603.3137  | 302.1605        | 586.2871       | 293.6472         | 585.3031       | 293.1552         | D    | 793.4315  | 397.2194        | 776.4050       | 388.7061         | 775.4209       | 388.2141         | 7  |
| 6  | 702.3821  | 351.6947        | 685.3556       | 343.1814         | 684.3715       | 342.6894         | V    | 678.4046  | 339.7059        | 661.3780       | 331.1926         |                |                  | 6  |
| 7  | 815.4662  | 408.2367        | 798.4396       | 399.7234         | 797.4556       | 399.2314         | L    | 579.3362  | 290.1717        | 562.3096       | 281.6584         |                |                  | 5  |
| 8  | 952.5251  | 476.7662        | 935.4985       | 468.2529         | 934.5145       | 467.7609         | H    | 466.2521  | 233.6297        | 449.2255       | 225.1164         |                |                  | 4  |
| 9  | 1049.5778 | 525.2926        | 1032.5513      | 516.7793         | 1031.5673      | 516.2873         | P    | 329.1932  | 165.1002        | 312.1666       | 156.5870         |                |                  | 3  |
| 10 | 1106.5993 | 553.8033        | 1089.5728      | 545.2900         | 1088.5887      | 544.7980         | G    | 232.1404  | 116.5738        | 215.1139       | 108.0606         |                |                  | 2  |
| 11 |           |                 |                |                  |                |                  | R    | 175.1190  | 88.0631         | 158.0924       | 79.5498          |                |                  | 1  |

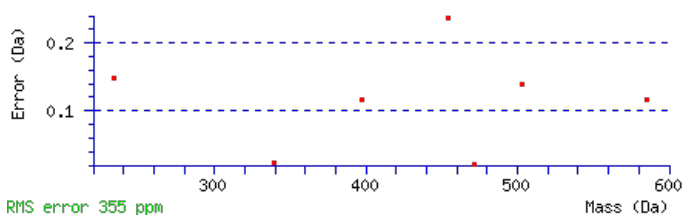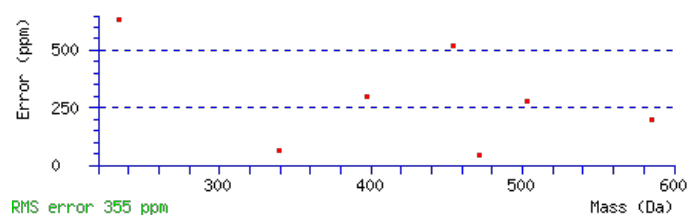NCBI **BLAST** search of **QFVIDVLHPGR**

(Parameters: blastp, nr protein database, expect=20000, no filter, PAM30)

Other BLAST [web gateways](#)**All matches to this query**

## AT3G04920.1

| Score | Mr(calc)  | Delta   | Sequence                    |
|-------|-----------|---------|-----------------------------|
| 28.3  | 1279.7037 | -0.0007 | <a href="#">QFVIDVLHPGR</a> |
| 4.5   | 1279.6997 | 0.0033  | <a href="#">SKSHHTNTKLK</a> |
| 1.0   | 1279.7037 | -0.0007 | <a href="#">AFSVENQLRAK</a> |
| 1.0   | 1279.6999 | 0.0031  | <a href="#">FLANVTFLMPK</a> |
| 1.0   | 1279.6997 | 0.0033  | <a href="#">GRKHSPETLQK</a> |

Mascot: <http://www.matrixscience.com/>

**Peptide View**MS/MS Fragmentation of **FDNTSEALEAVAK**Found in **AT3G05060.1** in **TAIR\_Arabidopsis**, Symbols: | SAR DNA-binding protein, putative | chr3:1413180-1415570 REVERSE

Match to Query 5227: 1393.672842 from(697.843697,2+) index(4899)

Title: Elution from: 47.397 to 47.397 scan no 6308 cid35.00 polarity:+

Data file D12h-2\_1.mgf

Click mouse within plot area to zoom in by factor of two about that point

Or,   to  Da Label all possible matches  Label matches used for scoring Show Y-axis 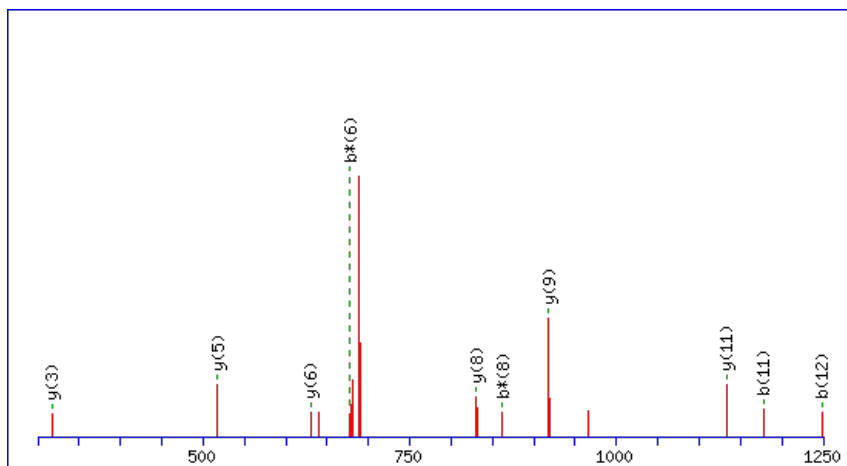Monoisotopic mass of neutral peptide  $M_r(\text{calc})$ : 1393.6725

Fixed modifications: Carbamidomethyl (C) (apply to specified residues or termini only)

Ions Score: 47 Expect: 9.5e-005

Matches : 10/130 fragment ions using 18 most intense peaks ([help](#))

| #  | b                | b <sup>++</sup> | b*              | b <sup>*++</sup> | b <sup>0</sup> | b <sup>0++</sup> | Seq. | y                | y <sup>++</sup> | y*        | y <sup>*++</sup> | y <sup>0</sup> | y <sup>0++</sup> | #  |
|----|------------------|-----------------|-----------------|------------------|----------------|------------------|------|------------------|-----------------|-----------|------------------|----------------|------------------|----|
| 1  | 148.0757         | 74.5415         |                 |                  |                |                  | F    |                  |                 |           |                  |                |                  | 13 |
| 2  | 263.1026         | 132.0550        |                 |                  | 245.0921       | 123.0497         | D    | 1247.6114        | 624.3093        | 1230.5848 | 615.7961         | 1229.6008      | 615.3040         | 12 |
| 3  | 377.1456         | 189.0764        | 360.1190        | 180.5631         | 359.1350       | 180.0711         | N    | <b>1132.5844</b> | 566.7959        | 1115.5579 | 558.2826         | 1114.5739      | 557.7906         | 11 |
| 4  | 478.1932         | 239.6003        | 461.1667        | 231.0870         | 460.1827       | 230.5950         | T    | 1018.5415        | 509.7744        | 1001.5150 | 501.2611         | 1000.5310      | 500.7691         | 10 |
| 5  | 565.2253         | 283.1163        | 548.1987        | 274.6030         | 547.2147       | 274.1110         | S    | <b>917.4938</b>  | 459.2506        | 900.4673  | 450.7373         | 899.4833       | 450.2453         | 9  |
| 6  | 694.2679         | 347.6376        | <b>677.2413</b> | 339.1243         | 676.2573       | 338.6323         | E    | <b>830.4618</b>  | 415.7345        | 813.4353  | 407.2213         | 812.4512       | 406.7293         | 8  |
| 7  | 765.3050         | 383.1561        | 748.2784        | 374.6429         | 747.2944       | 374.1508         | A    | 701.4192         | 351.2132        | 684.3927  | 342.7000         | 683.4087       | 342.2080         | 7  |
| 8  | 878.3890         | 439.6982        | <b>861.3625</b> | 431.1849         | 860.3785       | 430.6929         | L    | <b>630.3821</b>  | 315.6947        | 613.3556  | 307.1814         | 612.3715       | 306.6894         | 6  |
| 9  | 1007.4316        | 504.2195        | 990.4051        | 495.7062         | 989.4211       | 495.2142         | E    | <b>517.2980</b>  | 259.1527        | 500.2715  | 250.6394         | 499.2875       | 250.1474         | 5  |
| 10 | 1078.4687        | 539.7380        | 1061.4422       | 531.2247         | 1060.4582      | 530.7327         | A    | 388.2554         | 194.6314        | 371.2289  | 186.1181         |                |                  | 4  |
| 11 | <b>1177.5372</b> | 589.2722        | 1160.5106       | 580.7589         | 1159.5266      | 580.2669         | V    | <b>317.2183</b>  | 159.1128        | 300.1918  | 150.5995         |                |                  | 3  |
| 12 | <b>1248.5743</b> | 624.7908        | 1231.5477       | 616.2775         | 1230.5637      | 615.7855         | A    | 218.1499         | 109.5786        | 201.1234  | 101.0653         |                |                  | 2  |
| 13 |                  |                 |                 |                  |                |                  | K    | 147.1128         | 74.0600         | 130.0863  | 65.5468          |                |                  | 1  |

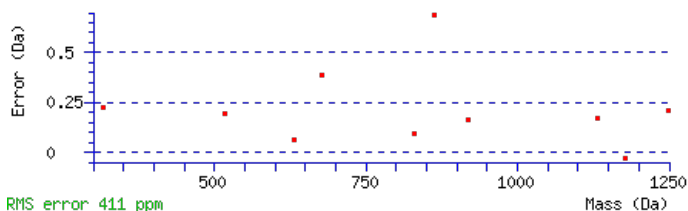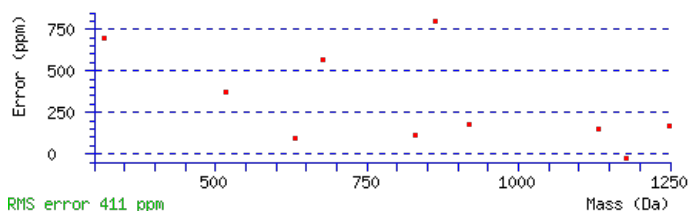NCBI **BLAST** search of **FDNTSEALEAVAK**

(Parameters: blastp, nr protein database, expect=20000, no filter, PAM30)

Other BLAST [web gateways](#)

**AT3G05060.1**

All matches to this query

| Score | Mr(calc)  | Delta   | Sequence                      |
|-------|-----------|---------|-------------------------------|
| 46.9  | 1393.6725 | 0.0003  | <a href="#">FDNTSEALEAVAK</a> |
| 12.0  | 1393.6732 | -0.0004 | <a href="#">CRIGRQSTVSDK</a>  |
| 6.4   | 1393.6693 | 0.0035  | <a href="#">DLMNRMTLOEK</a>   |
| 4.7   | 1393.6725 | 0.0004  | <a href="#">NFNEITSIEEAK</a>  |
| 4.2   | 1393.6725 | 0.0003  | <a href="#">LESFTEAVADANK</a> |
| 3.9   | 1393.6707 | 0.0022  | <a href="#">VMAEQWRMRR</a>    |
| 2.9   | 1393.6759 | -0.0030 | <a href="#">IKMTGIDEQTDK</a>  |
| 2.8   | 1393.6738 | -0.0010 | <a href="#">YRALEETGNWR</a>   |
| 2.5   | 1393.6767 | -0.0039 | <a href="#">EMVKLCENLMK</a>   |
| 2.5   | 1393.6734 | -0.0005 | <a href="#">KMEEDMGWLKK</a>   |

Mascot: <http://www.matrixscience.com/>

**Peptide View**MS/MS Fragmentation of **LSAPRILR**

Found in **AT3G05090.1** in **TAIR\_Arabidopsis**, Symbols: | transducin family protein / WD-40 repeat family protein | chr3:1418579-1422729  
REVERSE

Match to Query 1718: 924.587643 from(309.203157,3+) index(1417)

Title: Elution from: 18.948 to 18.948 scan no 1905 cid35.00 polarity:+

Data file 0-3\_3.mgf

Click mouse within plot area to zoom in by factor of two about that point

Or,   to  Da

Label all possible matches  Label matches used for scoring

Show Y-axis

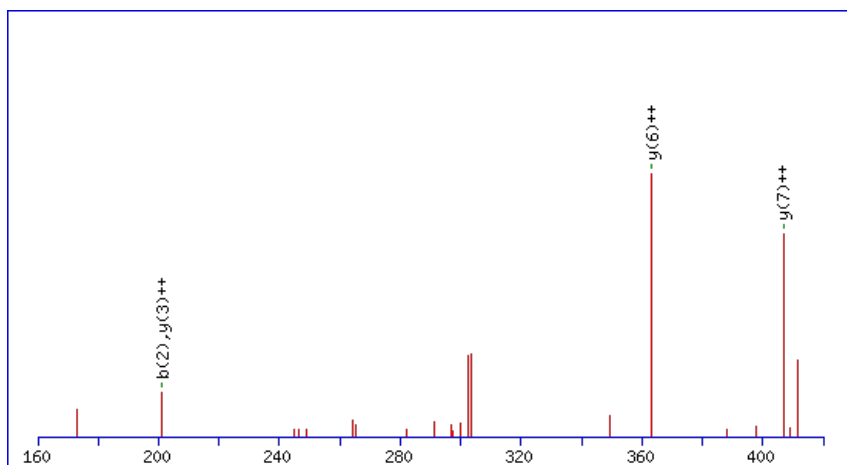

Monoisotopic mass of neutral peptide  $M_r(\text{calc})$ : 924.5869

Fixed modifications: Carbamidomethyl (C) (apply to specified residues or termini only)

Ions Score: 27 Expect: 0.0021

Matches : 4/62 fragment ions using 3 most intense peaks ([help](#))

| # | b               | b <sup>++</sup> | b*       | b <sup>*++</sup> | b <sup>0</sup> | b <sup>0++</sup> | Seq. | y        | y <sup>++</sup> | y*       | y <sup>*++</sup> | y <sup>0</sup> | y <sup>0++</sup> | # |
|---|-----------------|-----------------|----------|------------------|----------------|------------------|------|----------|-----------------|----------|------------------|----------------|------------------|---|
| 1 | 114.0913        | 57.5493         |          |                  |                |                  | L    |          |                 |          |                  |                |                  | 8 |
| 2 | <b>201.1234</b> | 101.0653        |          |                  | 183.1128       | 92.0600          | S    | 812.5101 | <b>406.7587</b> | 795.4835 | 398.2454         | 794.4995       | 397.7534         | 7 |
| 3 | 272.1605        | 136.5839        |          |                  | 254.1499       | 127.5786         | A    | 725.4781 | <b>363.2427</b> | 708.4515 | 354.7294         |                |                  | 6 |
| 4 | 369.2132        | 185.1103        |          |                  | 351.2027       | 176.1050         | P    | 654.4410 | 327.7241        | 637.4144 | 319.2108         |                |                  | 5 |
| 5 | 525.3144        | 263.1608        | 508.2878 | 254.6475         | 507.3038       | 254.1555         | R    | 557.3882 | 279.1977        | 540.3616 | 270.6845         |                |                  | 4 |
| 6 | 638.3984        | 319.7028        | 621.3719 | 311.1896         | 620.3879       | 310.6976         | I    | 401.2871 | <b>201.1472</b> | 384.2605 | 192.6339         |                |                  | 3 |
| 7 | 751.4825        | 376.2449        | 734.4559 | 367.7316         | 733.4719       | 367.2396         | L    | 288.2030 | 144.6051        | 271.1765 | 136.0919         |                |                  | 2 |
| 8 |                 |                 |          |                  |                |                  | R    | 175.1190 | 88.0631         | 158.0924 | 79.5498          |                |                  | 1 |

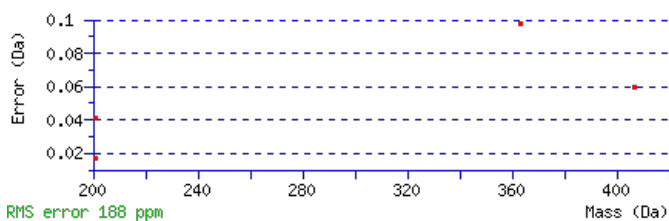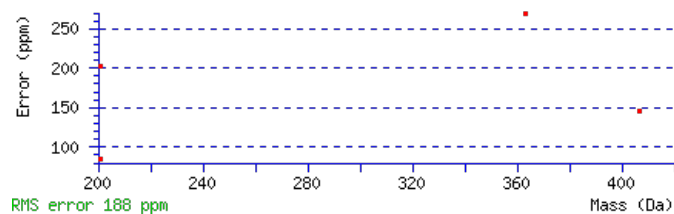NCBI BLAST search of **LSAPRILR**

(Parameters: blastp, nr protein database, expect=20000, no filter, PAM30)

Other BLAST [web gateways](#)

**All matches to this query**

| Score | $M_r(\text{calc})$ | Delta  | Sequence                 |
|-------|--------------------|--------|--------------------------|
| 27.0  | 924.5869           | 0.0008 | <a href="#">LSAPRILR</a> |



# AT3G05090.1

|      |          |        |                          |
|------|----------|--------|--------------------------|
| 16.1 | 924.5869 | 0.0008 | <a href="#">LSVVPVRR</a> |
| 1.1  | 924.5869 | 0.0008 | <a href="#">NIPGLKRK</a> |

**Mascot:** <http://www.matrixscience.com/>

**Peptide View**MS/MS Fragmentation of **MSPDNKLLPK**Found in **AT3G05170.1** in **TAIR\_Arabidopsis**, Symbols: | phosphoglycerate/bisphosphoglycerate mutase family protein | chr3:1466744-1468225  
FORWARD

Match to Query 3885: 1154.578588 from(578.296570,2+) index(9318)

Title: Elution from: 83.679 to 83.679 scan no 12610 cid35.00 polarity:+

Data file D6h-3\_1.mgf

Click mouse within plot area to zoom in by factor of two about that point

Or,  to  Da Label all possible matches  Label matches used for scoring Show Y-axis 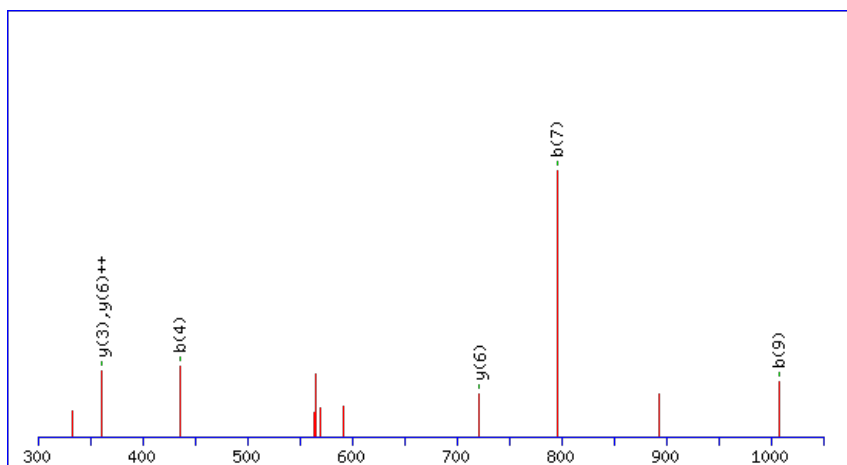Monoisotopic mass of neutral peptide  $M_r(\text{calc})$ : 1154.5780

Fixed modifications: Carbamidomethyl (C) (apply to specified residues or termini only)

Ions Score: 20 Expect: 0.024

Matches : 6/86 fragment ions using 7 most intense peaks ([help](#))

| #  | b                | b <sup>++</sup> | b*       | b <sup>*++</sup> | b <sup>0</sup> | b <sup>0++</sup> | Seq. | y               | y <sup>++</sup> | y*        | y <sup>*++</sup> | y <sup>0</sup> | y <sup>0++</sup> | #  |
|----|------------------|-----------------|----------|------------------|----------------|------------------|------|-----------------|-----------------|-----------|------------------|----------------|------------------|----|
| 1  | 133.0448         | 67.0260         |          |                  |                |                  | M    |                 |                 |           |                  |                |                  | 10 |
| 2  | 221.0739         | 111.0406        |          |                  | 203.0633       | 102.0353         | S    | 1023.5477       | 512.2775        | 1005.5242 | 503.2657         | 1005.5372      | 503.2722         | 9  |
| 3  | 319.1237         | 160.0655        |          |                  | 301.1131       | 151.0602         | P    | 935.5187        | 468.2630        | 917.4951  | 459.2512         | 917.5081       | 459.2577         | 8  |
| 4  | <b>435.1476</b>  | 218.0775        |          |                  | 417.1371       | 209.0722         | D    | 837.4689        | 419.2381        | 819.4453  | 410.2263         | 819.4583       | 410.2328         | 7  |
| 5  | 551.1846         | 276.0960        | 533.1610 | 267.0842         | 533.1741       | 267.0907         | N    | <b>721.4449</b> | <b>361.2261</b> | 703.4213  | 352.2143         |                |                  | 6  |
| 6  | 681.2737         | 341.1405        | 663.2501 | 332.1287         | 663.2631       | 332.1352         | K    | 605.4079        | 303.2076        | 587.3843  | 294.1958         |                |                  | 5  |
| 7  | <b>795.3548</b>  | 398.1810        | 777.3312 | 389.1692         | 777.3442       | 389.1757         | L    | 475.3189        | 238.1631        | 457.2953  | 229.1513         |                |                  | 4  |
| 8  | 909.4359         | 455.2216        | 891.4123 | 446.2098         | 891.4253       | 446.2163         | L    | <b>361.2378</b> | 181.1225        | 343.2142  | 172.1107         |                |                  | 3  |
| 9  | <b>1007.4857</b> | 504.2465        | 989.4621 | 495.2347         | 989.4751       | 495.2412         | P    | 247.1567        | 124.0820        | 229.1331  | 115.0702         |                |                  | 2  |
| 10 |                  |                 |          |                  |                |                  | K    | 149.1069        | 75.0571         | 131.0833  | 66.0453          |                |                  | 1  |

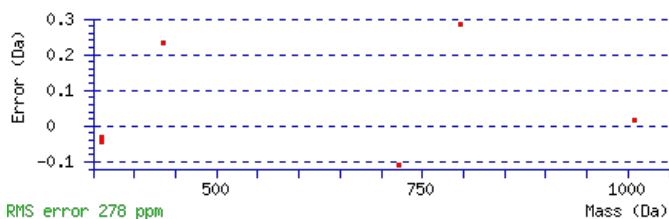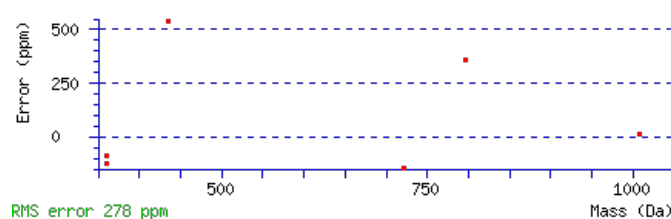NCBI BLAST search of **MSPDNKLLPK**

(Parameters: blastp, nr protein database, expect=20000, no filter, PAM30)

Other BLAST [web gateways](#)**All matches to this query**

**AT3G05170.1**

| <b>Score</b> | <b>Mr(calc)</b> | <b>Delta</b> | <b>Sequence</b>            |
|--------------|-----------------|--------------|----------------------------|
| 20.2         | 1154.5780       | 0.0006       | <a href="#">MSPDNKLLPK</a> |
| 5.4          | 1154.5773       | 0.0013       | <a href="#">FHALPLASQR</a> |
| 3.6          | 1154.5807       | -0.0021      | <a href="#">TVRAMALHPK</a> |

**Mascot:** <http://www.matrixscience.com/>

**Peptide View**MS/MS Fragmentation of **ITVTADGQFSK**Found in **AT3G05560.1** in **TAIR\_Arabidopsis**, Symbols: | 60S ribosomal protein L22-2 (RPL22B) | chr3:1614647-1615210 FORWARD

Match to Query 3906: 1178.557812 from(590.286182,2+) index(3104)

Title: Elution from: 32.210 to 32.210 scan no 3892 cid35.00 polarity:+

Data file D6h-2\_2.mgf

Click mouse within plot area to zoom in by factor of two about that point

Or,   to  Da Label all possible matches  Label matches used for scoring Show Y-axis 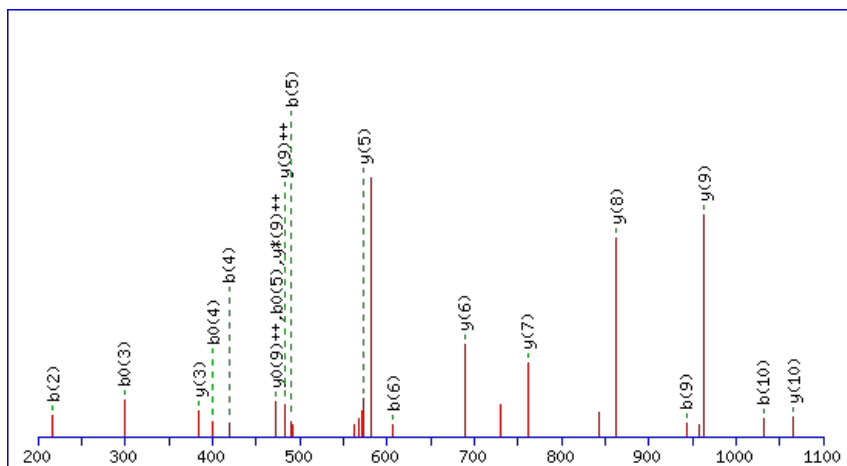Monoisotopic mass of neutral peptide **Mr(calc)**: 1178.5593**Fixed modifications**: Carbamidomethyl (C) (apply to specified residues or termini only)**Ions Score**: 65 **Expect**: 3.1e-006**Matches**: 19/102 fragment ions using 25 most intense peaks ([help](#))

| #  | b                | b <sup>++</sup> | b <sup>*</sup> | b <sup>*++</sup> | b <sup>0</sup>  | b <sup>0++</sup> | Seq. | y                | y <sup>++</sup> | y <sup>*</sup> | y <sup>*++</sup> | y <sup>0</sup> | y <sup>0++</sup> | #  |
|----|------------------|-----------------|----------------|------------------|-----------------|------------------|------|------------------|-----------------|----------------|------------------|----------------|------------------|----|
| 1  | 115.0884         | 58.0478         |                |                  |                 |                  | I    |                  |                 |                |                  |                |                  | 11 |
| 2  | <b>217.1331</b>  | 109.0702        |                |                  | 199.1225        | 100.0649         | T    | <b>1065.4855</b> | 533.2464        | 1047.4619      | 524.2346         | 1047.4750      | 524.2411         | 10 |
| 3  | 317.1985         | 159.1029        |                |                  | 299.1880        | 150.0976         | V    | <b>963.4408</b>  | <b>482.2240</b> | 945.4172       | <b>473.2123</b>  | 945.4303       | <b>473.2188</b>  | 9  |
| 4  | <b>419.2432</b>  | 210.1253        |                |                  | <b>401.2327</b> | 201.1200         | T    | <b>863.3754</b>  | 432.1913        | 845.3518       | 423.1795         | 845.3648       | 423.1860         | 8  |
| 5  | <b>491.2774</b>  | 246.1423        |                |                  | <b>473.2668</b> | 237.1371         | A    | <b>761.3307</b>  | 381.1690        | 743.3071       | 372.1572         | 743.3201       | 372.1637         | 7  |
| 6  | <b>607.3014</b>  | 304.1543        |                |                  | 589.2908        | 295.1490         | D    | <b>689.2965</b>  | 345.1519        | 671.2729       | 336.1401         | 671.2859       | 336.1466         | 6  |
| 7  | 665.3199         | 333.1636        |                |                  | 647.3093        | 324.1583         | G    | <b>573.2725</b>  | 287.1399        | 555.2489       | 278.1281         | 555.2620       | 278.1346         | 5  |
| 8  | 795.3725         | 398.1899        | 777.3489       | 389.1781         | 777.3620        | 389.1846         | Q    | 515.2540         | 258.1307        | 497.2304       | 249.1189         | 497.2435       | 249.1254         | 4  |
| 9  | <b>943.4380</b>  | 472.2226        | 925.4144       | 463.2108         | 925.4274        | 463.2173         | F    | <b>385.2014</b>  | 193.1043        | 367.1778       | 184.0925         | 367.1908       | 184.0990         | 3  |
| 10 | <b>1031.4670</b> | 516.2372        | 1013.4435      | 507.2254         | 1013.4565       | 507.2319         | S    | 237.1359         | 119.0716        | 219.1124       | 110.0598         | 219.1254       | 110.0663         | 2  |
| 11 |                  |                 |                |                  |                 |                  | K    | 149.1069         | 75.0571         | 131.0833       | 66.0453          |                |                  | 1  |

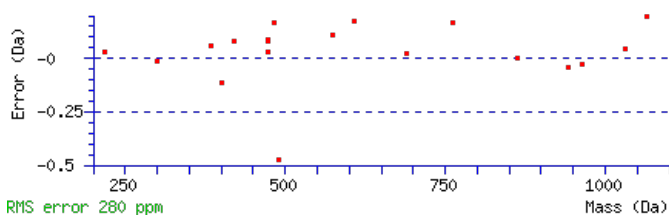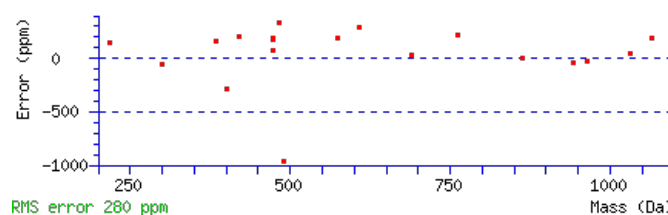NCBI **BLAST** search of **ITVTADGQFSK**

(Parameters: blastp, nr protein database, expect=20000, no filter, PAM30)

Other BLAST [web gateways](#)**All matches to this query**

## AT3G05560.1

| Score | Mr(calc)  | Delta   | Sequence                     |
|-------|-----------|---------|------------------------------|
| 64.9  | 1178.5593 | -0.0015 | <a href="#">ITVTADGQFSK</a>  |
| 9.5   | 1178.5594 | -0.0015 | <a href="#">SKPTEKFDSK</a>   |
| 8.8   | 1178.5546 | 0.0032  | <a href="#">ITACDGLLFR</a>   |
| 6.9   | 1178.5550 | 0.0028  | <a href="#">VDNLRRCTK</a>    |
| 2.0   | 1178.5594 | -0.0015 | <a href="#">LLSEHLDDPK</a>   |
| 1.8   | 1178.5593 | -0.0015 | <a href="#">SFTGNTLLGEK</a>  |
| 0.9   | 1178.5580 | -0.0002 | <a href="#">LEMLKQTMR</a>    |
| 0.8   | 1178.5602 | -0.0024 | <a href="#">MLGIFGMGGVGK</a> |
| 0.8   | 1178.5594 | -0.0016 | <a href="#">SSAESLFNLAK</a>  |
| 0.6   | 1178.5602 | -0.0024 | <a href="#">MQKLGFPAMK</a>   |

Mascot: <http://www.matrixscience.com/>

## Peptide View

### MS/MS Fragmentation of IAVLVGTTDDLRL

Found in **AT3G05590.1** in **TAIR\_Arabidopsis**, Symbols: RPL18 | RPL18 (RIBOSOMAL PROTEIN L18); structural constituent of ribosome | chr3:1621517-1622781 FORWARD

Match to Query 5435: 1400.744918 from(701.379735,2+) index(8506)

Title: Elution from: 75.339 to 75.339 scan no 11298 cid35.00 polarity:+

Data file C7-1\_2.mgf

Click mouse within plot area to zoom in by factor of two about that point

Or,   to  Da

Label all possible matches  Label matches used for scoring

Show Y-axis

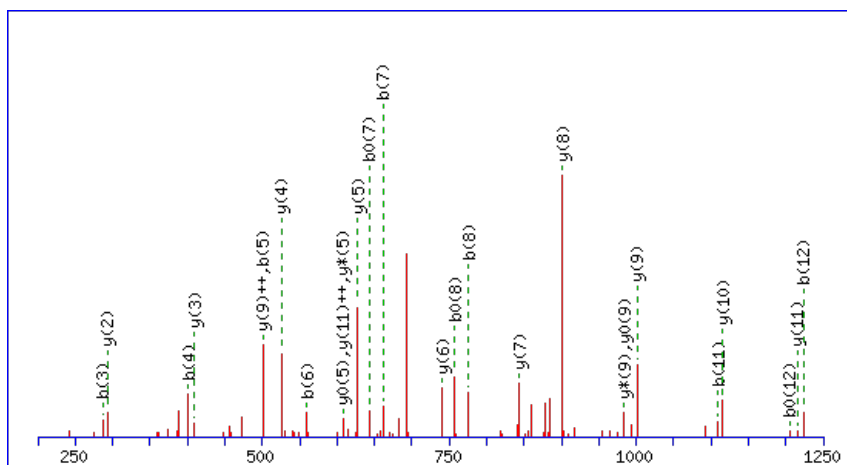

Monoisotopic mass of neutral peptide Mr(calc): 1400.7451

Fixed modifications: Carbamidomethyl (C) (apply to specified residues or termini only)

Ions Score: 101 Expect: 2.9e-010

Matches : 27/104 fragment ions using 30 most intense peaks ([help](#))

| #  | b                | b <sup>++</sup> | b <sup>0</sup>   | b <sup>0++</sup> | Seq. | y                | y <sup>++</sup> | y*              | y <sup>*++</sup> | y <sup>0</sup>  | y <sup>0++</sup> | #  |
|----|------------------|-----------------|------------------|------------------|------|------------------|-----------------|-----------------|------------------|-----------------|------------------|----|
| 1  | 115.0884         | 58.0478         |                  |                  | I    |                  |                 |                 |                  |                 |                  | 13 |
| 2  | 187.1225         | 94.0649         |                  |                  | A    | 1287.6713        | 644.3393        | 1269.6477       | 635.3275         | 1269.6608       | 635.3340         | 12 |
| 3  | <b>287.1880</b>  | 144.0976        |                  |                  | V    | <b>1215.6372</b> | <b>608.3222</b> | 1197.6136       | 599.3104         | 1197.6266       | 599.3169         | 11 |
| 4  | <b>401.2691</b>  | 201.1382        |                  |                  | L    | <b>1115.5717</b> | 558.2895        | 1097.5481       | 549.2777         | 1097.5612       | 549.2842         | 10 |
| 5  | <b>501.3345</b>  | 251.1709        |                  |                  | V    | <b>1001.4906</b> | <b>501.2489</b> | <b>983.4670</b> | 492.2372         | <b>983.4801</b> | 492.2437         | 9  |
| 6  | <b>559.3530</b>  | 280.1801        |                  |                  | G    | <b>901.4252</b>  | 451.2162        | 883.4016        | 442.2044         | 883.4146        | 442.2109         | 8  |
| 7  | <b>661.3977</b>  | 331.2025        | <b>643.3872</b>  | 322.1972         | T    | <b>843.4067</b>  | 422.2070        | 825.3831        | 413.1952         | 825.3961        | 413.2017         | 7  |
| 8  | <b>775.4788</b>  | 388.2431        | <b>757.4683</b>  | 379.2378         | I    | <b>741.3620</b>  | 371.1846        | 723.3384        | 362.1728         | 723.3514        | 362.1793         | 6  |
| 9  | 877.5235         | 439.2654        | 859.5130         | 430.2601         | T    | <b>627.2809</b>  | 314.1441        | <b>609.2573</b> | 305.1323         | <b>609.2703</b> | 305.1388         | 5  |
| 10 | 993.5475         | 497.2774        | 975.5370         | 488.2721         | D    | <b>525.2361</b>  | 263.1217        | 507.2126        | 254.1099         | 507.2256        | 254.1164         | 4  |
| 11 | <b>1109.5715</b> | 555.2894        | 1091.5609        | 546.2841         | D    | <b>409.2122</b>  | 205.1097        | 391.1886        | 196.0979         | 391.2016        | 196.1044         | 3  |
| 12 | <b>1223.6526</b> | 612.3299        | <b>1205.6420</b> | 603.3247         | L    | <b>293.1882</b>  | 147.0977        | 275.1646        | 138.0859         |                 |                  | 2  |
| 13 |                  |                 |                  |                  | R    | 179.1071         | 90.0572         | 161.0835        | 81.0454          |                 |                  | 1  |

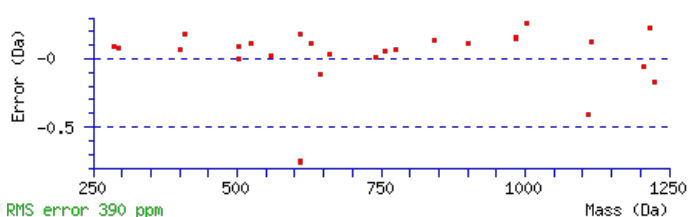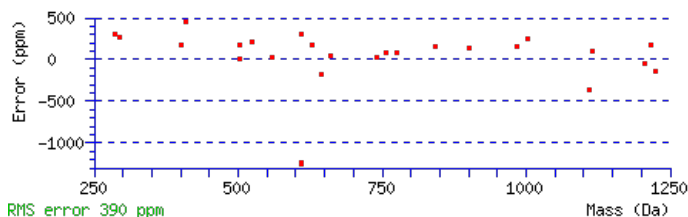

NCBI BLAST search of [IAVLVGTITDDLRL](#)

(Parameters: blastp, nr protein database, expect=20000, no filter, PAM30)

AT3G05590.1

Other BLAST [web gateways](#)

**All matches to this query**

| Score | Mr(calc)  | Delta   | Sequence                       |
|-------|-----------|---------|--------------------------------|
| 101.2 | 1400.7451 | -0.0002 | <a href="#">IAVLVGIITDDL</a>   |
| 14.2  | 1400.7451 | -0.0002 | <a href="#">SVPLVETAKNSLK</a>  |
| 3.6   | 1400.7478 | -0.0029 | <a href="#">SVVLGGKSGVPNIR</a> |
| 3.2   | 1400.7451 | -0.0002 | <a href="#">AILSSEIAVVDLR</a>  |
| 1.5   | 1400.7451 | -0.0002 | <a href="#">ITVLELSDINIR</a>   |

Mascot: <http://www.matrixscience.com/>

**Peptide View**MS/MS Fragmentation of **EAQGLKKMR**

Found in **AT3G05750.1** in **TAIR\_Arabidopsis**, Symbols: | similar to unknown protein [Arabidopsis thaliana] (TAIR:AT5G26910.1); similar to unnamed protein product [Vitis vinifera] (GB:CAO17458.1); contains InterPro domain Homeodomain-like (InterPro:IPR009057) | chr3:1704683-1707552 FORWARD

Match to Query 3121: 1090.533884 from(546.274218,2+) index(4411)

Title: Elution from: 40.030 to 40.030 scan no 5529 cid35.00 polarity:+

Data file 0-3\_3.mgf

Click mouse within plot area to zoom in by factor of two about that point

Or,   to  Da

Label all possible matches  Label matches used for scoring

Show Y-axis

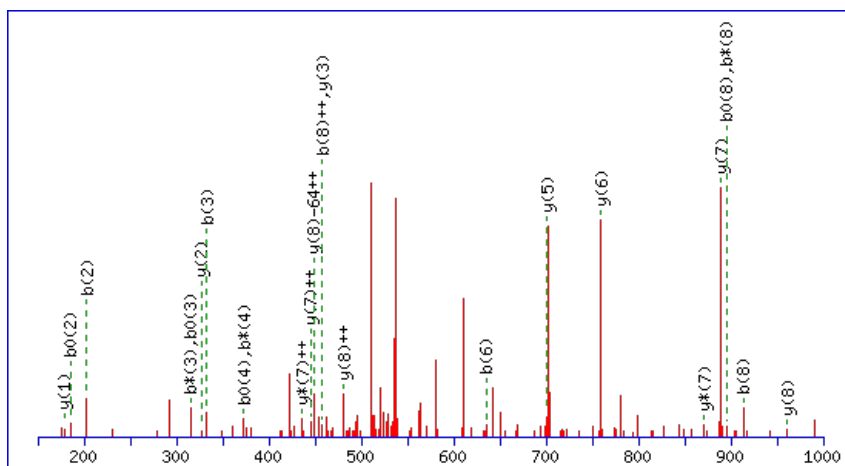

**Monoisotopic mass of neutral peptide Mr(calc):** 1090.5363

**Fixed modifications:** Carbamidomethyl (C) (apply to specified residues or termini only)

**Variable modifications:**

**M8** : Oxidation (M), with neutral losses 0.0000 (shown in table), 63.9983

**Ions Score:** 26 **Expect:** 0.035

**Matches** : 24/110 fragment ions using 62 most intense peaks ([help](#))

| # | b               | b <sup>++</sup> | b <sup>*</sup>  | b <sup>*++</sup> | b <sup>0</sup>  | b <sup>0++</sup> | Seq. | y               | y <sup>++</sup> | y <sup>*</sup>  | y <sup>*++</sup> | # |
|---|-----------------|-----------------|-----------------|------------------|-----------------|------------------|------|-----------------|-----------------|-----------------|------------------|---|
| 1 | 131.0469        | 66.0271         |                 |                  | 113.0363        | 57.0218          | E    |                 |                 |                 |                  | 9 |
| 2 | <b>203.0811</b> | 102.0442        |                 |                  | <b>185.0705</b> | 93.0389          | A    | <b>961.5040</b> | <b>481.2556</b> | 943.4804        | 472.2438         | 8 |
| 3 | <b>333.1337</b> | 167.0705        | <b>315.1101</b> | 158.0587         | <b>315.1231</b> | 158.0652         | Q    | <b>889.4698</b> | <b>445.2386</b> | <b>871.4463</b> | <b>436.2268</b>  | 7 |
| 4 | 391.1522        | 196.0797        | <b>373.1286</b> | 187.0679         | <b>373.1416</b> | 187.0745         | G    | <b>759.4172</b> | 380.2122        | 741.3936        | 371.2004         | 6 |
| 5 | 505.2333        | 253.1203        | 487.2097        | 244.1085         | 487.2227        | 244.1150         | L    | <b>701.3987</b> | 351.2030        | 683.3751        | 342.1912         | 5 |
| 6 | <b>635.3223</b> | 318.1648        | 617.2987        | 309.1530         | 617.3118        | 309.1595         | K    | 587.3176        | 294.1624        | 569.2940        | 285.1506         | 4 |
| 7 | 765.4114        | 383.2093        | 747.3878        | 374.1975         | 747.4008        | 374.2040         | K    | <b>457.2286</b> | 229.1179        | 439.2050        | 220.1061         | 3 |
| 8 | <b>913.4438</b> | <b>457.2255</b> | <b>895.4202</b> | 448.2137         | <b>895.4332</b> | 448.2203         | M    | <b>327.1395</b> | 164.0734        | 309.1159        | 155.0616         | 2 |
| 9 |                 |                 |                 |                  |                 |                  | R    | <b>179.1071</b> | 90.0572         | 161.0835        | 81.0454          | 1 |

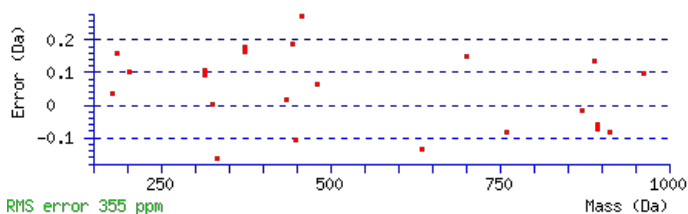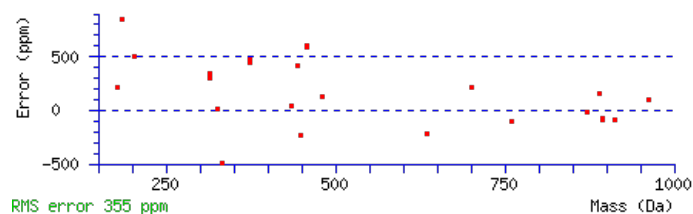

NCBI **BLAST** search of **EAQGLKKMR**

(Parameters: blastp, nr protein database, expect=20000, no filter, PAM30)

Other BLAST [web gateways](#)

**All matches to this query**



## AT3G05750.1

| Score | Mr(calc)  | Delta   | Sequence                   |
|-------|-----------|---------|----------------------------|
| 26.1  | 1090.5363 | -0.0024 | <a href="#">EAQGLKKMR</a>  |
| 25.6  | 1090.5363 | -0.0025 | <a href="#">KAGAMNSLIR</a> |
| 13.2  | 1090.5329 | 0.0009  | <a href="#">LSWAGKGTR</a>  |
| 7.2   | 1090.5307 | 0.0032  | <a href="#">SIEARGLSSR</a> |
| 7.2   | 1090.5363 | -0.0025 | <a href="#">SLKMEAKNR</a>  |
| 7.1   | 1090.5363 | -0.0024 | <a href="#">KKAQMLDAR</a>  |
| 5.9   | 1090.5363 | -0.0024 | <a href="#">NKTCTAILR</a>  |
| 5.8   | 1090.5330 | 0.0009  | <a href="#">QANIFRAEK</a>  |
| 5.1   | 1090.5337 | 0.0002  | <a href="#">SSNKLIMSSL</a> |
| 4.5   | 1090.5334 | 0.0005  | <a href="#">LGRNRSDVR</a>  |

Mascot: <http://www.matrixscience.com/>

**Peptide View**MS/MS Fragmentation of **LNTGSWNVYR**

Found in **AT3G05970.1** in **TAIR\_Arabidopsis**, Symbols: LACS6 | LACS6 (LONG-CHAIN ACYL-COA SYNTHETASE 6) | chr3:1786516-1791752 REVERSE

Match to Query 4078: 1224.548406 from(613.281479,2+) index(6152)

Title: Elution from: 54.804 to 54.804 scan no 7935 cid35.00 polarity:+

Data file C7-3\_3.mgf

Click mouse within plot area to zoom in by factor of two about that point

Or,   to  Da

Label all possible matches  Label matches used for scoring

Show Y-axis

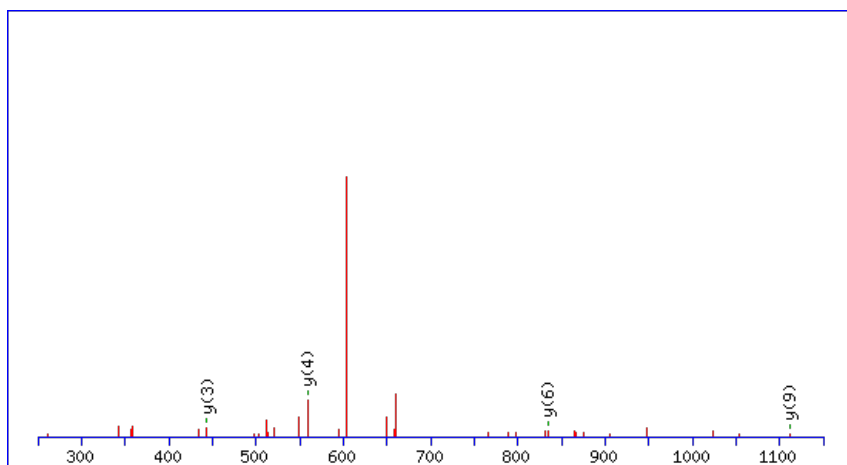

Monoisotopic mass of neutral peptide  $M_r(\text{calc})$ : 1224.5464

Fixed modifications: Carbamidomethyl (C) (apply to specified residues or termini only)

Ions Score: 25 Expect: 0.023

Matches : 4/92 fragment ions using 8 most intense peaks ([help](#))

| #  | b         | b <sup>++</sup> | b*        | b <sup>*++</sup> | b <sup>0</sup> | b <sup>0++</sup> | Seq. | y                | y <sup>++</sup> | y*        | y <sup>*++</sup> | y <sup>0</sup> | y <sup>0++</sup> | #  |
|----|-----------|-----------------|-----------|------------------|----------------|------------------|------|------------------|-----------------|-----------|------------------|----------------|------------------|----|
| 1  | 115.0884  | 58.0478         |           |                  |                |                  | L    |                  |                 |           |                  |                |                  | 10 |
| 2  | 231.1254  | 116.0663        | 213.1018  | 107.0545         |                |                  | N    | <b>1111.4726</b> | 556.2399        | 1093.4490 | 547.2281         | 1093.4620      | 547.2346         | 9  |
| 3  | 333.1701  | 167.0887        | 315.1465  | 158.0769         | 315.1595       | 158.0834         | T    | 995.4356         | 498.2214        | 977.4120  | 489.2096         | 977.4250       | 489.2161         | 8  |
| 4  | 391.1886  | 196.0979        | 373.1650  | 187.0861         | 373.1780       | 187.0926         | G    | 893.3908         | 447.1991        | 875.3673  | 438.1873         | 875.3803       | 438.1938         | 7  |
| 5  | 479.2176  | 240.1125        | 461.1941  | 231.1007         | 461.2071       | 231.1072         | S    | <b>835.3723</b>  | 418.1898        | 817.3488  | 409.1780         | 817.3618       | 409.1845         | 6  |
| 6  | 667.2910  | 334.1492        | 649.2674  | 325.1374         | 649.2805       | 325.1439         | W    | 747.3433         | 374.1753        | 729.3197  | 365.1635         |                |                  | 5  |
| 7  | 783.3280  | 392.1677        | 765.3044  | 383.1559         | 765.3175       | 383.1624         | N    | <b>559.2699</b>  | 280.1386        | 541.2463  | 271.1268         |                |                  | 4  |
| 8  | 883.3935  | 442.2004        | 865.3699  | 433.1886         | 865.3829       | 433.1951         | V    | <b>443.2329</b>  | 222.1201        | 425.2093  | 213.1083         |                |                  | 3  |
| 9  | 1047.4538 | 524.2306        | 1029.4303 | 515.2188         | 1029.4433      | 515.2253         | Y    | 343.1675         | 172.0874        | 325.1439  | 163.0756         |                |                  | 2  |
| 10 |           |                 |           |                  |                |                  | R    | 179.1071         | 90.0572         | 161.0835  | 81.0454          |                |                  | 1  |

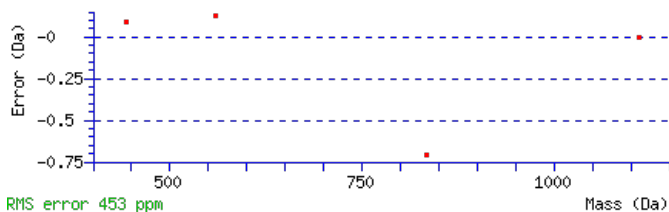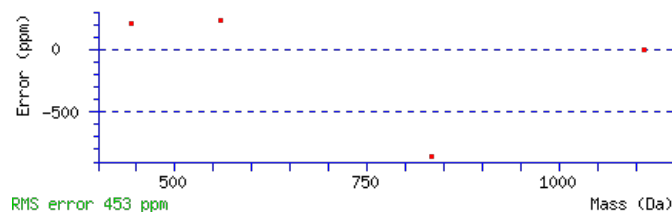NCBI BLAST search of **LNTGSWNVYR**

(Parameters: blastp, nr protein database, expect=20000, no filter, PAM30)

Other BLAST [web gateways](#)

All matches to this query

## AT3G05970.1

| Score | Mr(calc)  | Delta   | Sequence                     |
|-------|-----------|---------|------------------------------|
| 25.5  | 1224.5464 | 0.0020  | <a href="#">LNTGSWNVYR</a>   |
| 3.8   | 1224.5448 | 0.0036  | <a href="#">SLDASTMTLR</a>   |
| 3.7   | 1224.5513 | -0.0029 | <a href="#">IMKISMAMCK</a>   |
| 3.7   | 1224.5471 | 0.0013  | <a href="#">MAPSSSSGLTFK</a> |
| 3.1   | 1224.5475 | 0.0009  | <a href="#">LLRNDSMTR</a>    |
| 2.4   | 1224.5448 | 0.0036  | <a href="#">SIGDMSSKDKK</a>  |
| 2.0   | 1224.5497 | -0.0013 | <a href="#">NAEMAQRVEK</a>   |
| 2.0   | 1224.5486 | -0.0002 | <a href="#">FQHFTDLR</a>     |
| 1.5   | 1224.5497 | -0.0013 | <a href="#">LQDKLGGYCR</a>   |
| 1.4   | 1224.5471 | 0.0013  | <a href="#">EVQMASVSAFK</a>  |

Mascot: <http://www.matrixscience.com/>

**Peptide View**MS/MS Fragmentation of **LAEGTDITSAAPGVSLQK**Found in **AT3G06050.1** in **TAIR\_Arabidopsis**, Symbols: PRXIIF, ATPRXIIF | ATPRXIIF/PRXIIF (PEROXIREDOXIN IIF); antioxidant/ peroxidase | chr3:1826317-1827815 REVERSE

Match to Query 8794: 1776.859740 from(889.437146,2+) index(5347)

Title: Elution from: 47.944 to 47.944 scan no 6694 cid35.00 polarity:+

Data file C7-2\_1.mgf

Click mouse within plot area to zoom in by factor of two about that point

Or,   to  Da Label all possible matches  Label matches used for scoring Show Y-axis 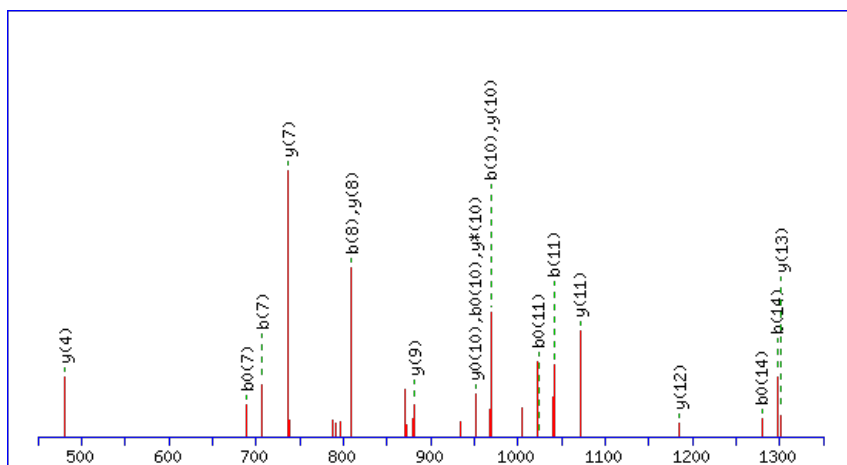Monoisotopic mass of neutral peptide  $M_r(\text{calc})$ : 1776.8614

Fixed modifications: Carbamidomethyl (C) (apply to specified residues or termini only)

Ions Score: 80 Expect: 6.3e-008

Matches : 19/162 fragment ions using 21 most intense peaks ([help](#))

| #  | b                | b <sup>++</sup> | b*        | b <sup>*++</sup> | b <sup>0</sup>   | b <sup>0++</sup> | Seq. | y                | y <sup>++</sup> | y*              | y <sup>*++</sup> | y <sup>0</sup>  | y <sup>0++</sup> | #  |
|----|------------------|-----------------|-----------|------------------|------------------|------------------|------|------------------|-----------------|-----------------|------------------|-----------------|------------------|----|
| 1  | 115.0884         | 58.0478         |           |                  |                  |                  | L    |                  |                 |                 |                  |                 |                  | 18 |
| 2  | 187.1225         | 94.0649         |           |                  |                  |                  | A    | 1663.7876        | 832.3974        | 1645.7640       | 823.3856         | 1645.7770       | 823.3921         | 17 |
| 3  | 317.1622         | 159.0847        |           |                  | 299.1516         | 150.0794         | E    | 1591.7534        | 796.3803        | 1573.7298       | 787.3686         | 1573.7429       | 787.3751         | 16 |
| 4  | 375.1807         | 188.0940        |           |                  | 357.1701         | 179.0887         | G    | 1461.7138        | 731.3605        | 1443.6902       | 722.3487         | 1443.7032       | 722.3553         | 15 |
| 5  | 477.2254         | 239.1163        |           |                  | 459.2148         | 230.1110         | T    | 1403.6953        | 702.3513        | 1385.6717       | 693.3395         | 1385.6847       | 693.3460         | 14 |
| 6  | 593.2493         | 297.1283        |           |                  | 575.2388         | 288.1230         | D    | <b>1301.6506</b> | 651.3289        | 1283.6270       | 642.3171         | 1283.6400       | 642.3236         | 13 |
| 7  | <b>707.3304</b>  | 354.1689        |           |                  | <b>689.3199</b>  | 345.1636         | I    | <b>1185.6266</b> | 593.3169        | 1167.6030       | 584.3051         | 1167.6160       | 584.3117         | 12 |
| 8  | <b>809.3752</b>  | 405.1912        |           |                  | 791.3646         | 396.1859         | T    | <b>1071.5455</b> | 536.2764        | 1053.5219       | 527.2646         | 1053.5349       | 527.2711         | 11 |
| 9  | 897.4042         | 449.2057        |           |                  | 879.3937         | 440.2005         | S    | <b>969.5008</b>  | 485.2540        | <b>951.4772</b> | 476.2422         | <b>951.4902</b> | 476.2488         | 10 |
| 10 | <b>969.4384</b>  | 485.2228        |           |                  | <b>951.4278</b>  | 476.2175         | A    | <b>881.4717</b>  | 441.2395        | 863.4481        | 432.2277         | 863.4612        | 432.2342         | 9  |
| 11 | <b>1041.4725</b> | 521.2399        |           |                  | <b>1023.4619</b> | 512.2346         | A    | <b>809.4376</b>  | 405.2224        | 791.4140        | 396.2106         | 791.4270        | 396.2171         | 8  |
| 12 | 1139.5223        | 570.2648        |           |                  | 1121.5117        | 561.2595         | P    | <b>737.4034</b>  | 369.2054        | 719.3798        | 360.1936         | 719.3929        | 360.2001         | 7  |
| 13 | 1197.5408        | 599.2740        |           |                  | 1179.5302        | 590.2688         | G    | 639.3536         | 320.1805        | 621.3300        | 311.1687         | 621.3431        | 311.1752         | 6  |
| 14 | <b>1297.6063</b> | 649.3068        |           |                  | <b>1279.5957</b> | 640.3015         | V    | 581.3351         | 291.1712        | 563.3115        | 282.1594         | 563.3246        | 282.1659         | 5  |
| 15 | 1385.6353        | 693.3213        |           |                  | 1367.6248        | 684.3160         | S    | <b>481.2697</b>  | 241.1385        | 463.2461        | 232.1267         | 463.2591        | 232.1332         | 4  |
| 16 | 1499.7164        | 750.3618        |           |                  | 1481.7059        | 741.3566         | L    | 393.2406         | 197.1239        | 375.2170        | 188.1122         |                 |                  | 3  |
| 17 | 1629.7691        | 815.3882        | 1611.7455 | 806.3764         | 1611.7585        | 806.3829         | Q    | 279.1595         | 140.0834        | 261.1359        | 131.0716         |                 |                  | 2  |
| 18 |                  |                 |           |                  |                  |                  | K    | 149.1069         | 75.0571         | 131.0833        | 66.0453          |                 |                  | 1  |

# AT3G06050.1

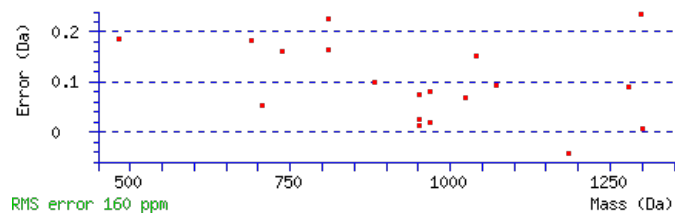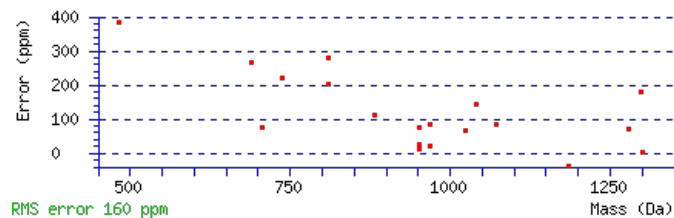

NCBI **BLAST** search of [LAEGTDITSAAPGVSLOK](#)  
 (Parameters: blastp, nr protein database, expect=20000, no filter, PAM30)

Other BLAST [web gateways](#)

## All matches to this query

| Score | Mr(calc)  | Delta   | Sequence                           |
|-------|-----------|---------|------------------------------------|
| 80.2  | 1776.8614 | -0.0016 | <a href="#">LAEGTDITSAAPGVSLOK</a> |
| 6.8   | 1776.8555 | 0.0042  | <a href="#">LOSYFRYLPDLSAGK</a>    |
| 4.5   | 1776.8577 | 0.0020  | <a href="#">RLGFDVEYVWTVFK</a>     |
| 1.6   | 1776.8640 | -0.0043 | <a href="#">TDTRLANNGLPVEVQK</a>   |

Mascot: <http://www.matrixscience.com/>

### Peptide View

 MS/MS Fragmentation of **WKRLVTDQIVQFVFSFGLSGWMLR**

 Found in **AT3G06470.1** in **TAIR\_Arabidopsis**, Symbols: | GNS1/SUR4 membrane family protein | chr3:1984212-1985048 FORWARD

Match to Query 10800: 3072.592101 from(1025.204643,3+) index(10207)

Title: Elution from: 94.500 to 94.500 scan no 14295 cid35.00 polarity:+

Data file D1d-3\_2.mgf

Click mouse within plot area to zoom in by factor of two about that point

 Or,  to  Da 

 Label all possible matches  Label matches used for scoring 

 Show Y-axis 
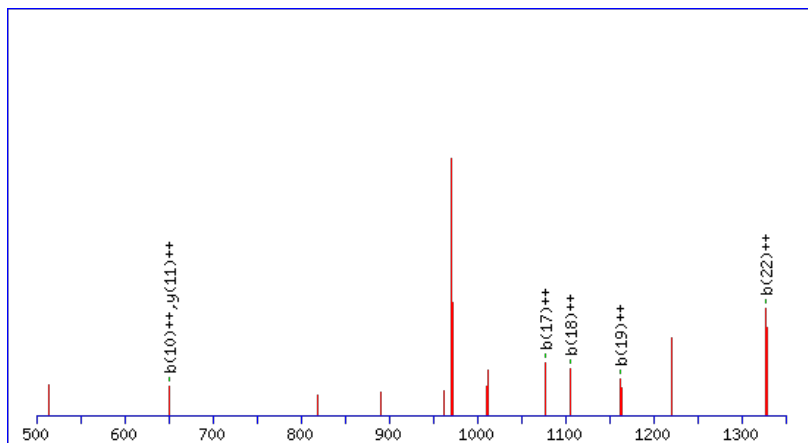
 Monoisotopic mass of neutral peptide  $M_r(\text{calc})$ : 3072.5830

Fixed modifications: Carbamidomethyl (C) (apply to specified residues or termini only)

Ions Score: 19 Expect: 0.027

 Matches : 6/266 fragment ions using 13 most intense peaks ([help](#))

| #  | b         | b <sup>++</sup>  | b <sup>*</sup> | b <sup>*++</sup> | b <sup>0</sup> | b <sup>0++</sup> | Seq. | y         | y <sup>++</sup> | y <sup>*</sup> | y <sup>*++</sup> | y <sup>0</sup> | y <sup>0++</sup> | #  |
|----|-----------|------------------|----------------|------------------|----------------|------------------|------|-----------|-----------------|----------------|------------------|----------------|------------------|----|
| 1  | 187.0866  | 94.0469          |                |                  |                |                  | W    |           |                 |                |                  |                |                  | 25 |
| 2  | 315.1816  | 158.0944         | 298.1550       | 149.5811         |                |                  | K    | 2887.5110 | 1444.2591       | 2870.4844      | 1435.7459        | 2869.5004      | 1435.2538        | 24 |
| 3  | 471.2827  | 236.1450         | 454.2561       | 227.6317         |                |                  | R    | 2759.4160 | 1380.2116       | 2742.3895      | 1371.6984        | 2741.4054      | 1371.2064        | 23 |
| 4  | 584.3667  | 292.6870         | 567.3402       | 284.1737         |                |                  | L    | 2603.3149 | 1302.1611       | 2586.2884      | 1293.6478        | 2585.3043      | 1293.1558        | 22 |
| 5  | 683.4351  | 342.2212         | 666.4086       | 333.7079         |                |                  | V    | 2490.2308 | 1245.6191       | 2473.2043      | 1237.1058        | 2472.2203      | 1236.6138        | 21 |
| 6  | 784.4828  | 392.7450         | 767.4563       | 384.2318         | 766.4723       | 383.7398         | T    | 2391.1624 | 1196.0848       | 2374.1359      | 1187.5716        | 2373.1519      | 1187.0796        | 20 |
| 7  | 899.5098  | 450.2585         | 882.4832       | 441.7452         | 881.4992       | 441.2532         | D    | 2290.1147 | 1145.5610       | 2273.0882      | 1137.0477        | 2272.1042      | 1136.5557        | 19 |
| 8  | 1059.5404 | 530.2738         | 1042.5139      | 521.7606         | 1041.5298      | 521.2686         | C    | 2175.0878 | 1088.0475       | 2158.0613      | 1079.5343        | 2157.0772      | 1079.0423        | 18 |
| 9  | 1187.5990 | 594.3031         | 1170.5724      | 585.7899         | 1169.5884      | 585.2979         | Q    | 2015.0572 | 1008.0322       | 1998.0306      | 999.5189         | 1997.0466      | 999.0269         | 17 |
| 10 | 1300.6831 | <b>650.8452</b>  | 1283.6565      | 642.3319         | 1282.6725      | 641.8399         | I    | 1886.9986 | 944.0029        | 1869.9720      | 935.4897         | 1868.9880      | 934.9976         | 16 |
| 11 | 1399.7515 | 700.3794         | 1382.7249      | 691.8661         | 1381.7409      | 691.3741         | V    | 1773.9145 | 887.4609        | 1756.8880      | 878.9476         | 1755.9039      | 878.4556         | 15 |
| 12 | 1527.8100 | 764.4087         | 1510.7835      | 755.8954         | 1509.7995      | 755.4034         | Q    | 1674.8461 | 837.9267        | 1657.8195      | 829.4134         | 1656.8355      | 828.9214         | 14 |
| 13 | 1674.8785 | 837.9429         | 1657.8519      | 829.4296         | 1656.8679      | 828.9376         | F    | 1546.7875 | 773.8974        | 1529.7610      | 765.3841         | 1528.7770      | 764.8921         | 13 |
| 14 | 1773.9469 | 887.4771         | 1756.9203      | 878.9638         | 1755.9363      | 878.4718         | V    | 1399.7191 | 700.3632        | 1382.6926      | 691.8499         | 1381.7085      | 691.3579         | 12 |
| 15 | 1921.0153 | 961.0113         | 1903.9887      | 952.4980         | 1903.0047      | 952.0060         | F    | 1300.6507 | <b>650.8290</b> | 1283.6241      | 642.3157         | 1282.6401      | 641.8237         | 11 |
| 16 | 2008.0473 | 1004.5273        | 1991.0208      | 996.0140         | 1990.0368      | 995.5220         | S    | 1153.5823 | 577.2948        | 1136.5557      | 568.7815         | 1135.5717      | 568.2895         | 10 |
| 17 | 2155.1157 | <b>1078.0615</b> | 2138.0892      | 1069.5482        | 2137.1052      | 1069.0562        | F    | 1066.5502 | 533.7788        | 1049.5237      | 525.2655         | 1048.5397      | 524.7735         | 9  |
| 18 | 2212.1372 | <b>1106.5722</b> | 2195.1106      | 1098.0590        | 2194.1266      | 1097.5670        | G    | 919.4818  | 460.2446        | 902.4553       | 451.7313         | 901.4713       | 451.2393         | 8  |
| 19 | 2325.2213 | <b>1163.1143</b> | 2308.1947      | 1154.6010        | 2307.2107      | 1154.1090        | L    | 862.4604  | 431.7338        | 845.4338       | 423.2205         | 844.4498       | 422.7285         | 7  |
| 20 | 2412.2533 | 1206.6303        | 2395.2267      | 1198.1170        | 2394.2427      | 1197.6250        | S    | 749.3763  | 375.1918        | 732.3498       | 366.6785         | 731.3657       | 366.1865         | 6  |
| 21 | 2469.2748 | 1235.1410        | 2452.2482      | 1226.6277        | 2451.2642      | 1226.1357        | G    | 662.3443  | 331.6758        | 645.3177       | 323.1625         |                |                  | 5  |
| 22 | 2655.3541 | <b>1328.1807</b> | 2638.3275      | 1319.6674        | 2637.3435      | 1319.1754        | W    | 605.3228  | 303.1650        | 588.2963       | 294.6518         |                |                  | 4  |
| 23 | 2786.3945 | 1393.7009        | 2769.3680      | 1385.1876        | 2768.3840      | 1384.6956        | M    | 419.2435  | 210.1254        | 402.2170       | 201.6121         |                |                  | 3  |
| 24 | 2899.4786 | 1450.2429        | 2882.4521      | 1441.7297        | 2881.4680      | 1441.2377        | L    | 288.2030  | 144.6051        | 271.1765       | 136.0919         |                |                  | 2  |
| 25 |           |                  |                |                  |                |                  | R    | 175.1190  | 88.0631         | 158.0924       | 79.5498          |                |                  | 1  |

# AT3G06470.1

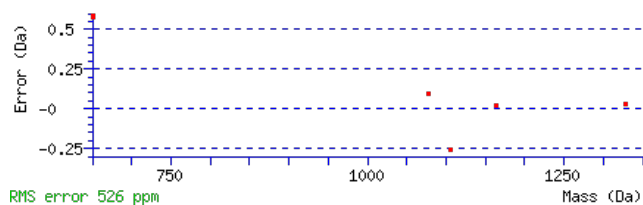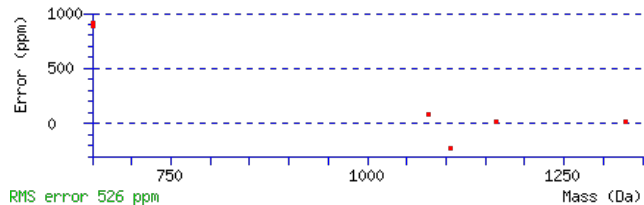

NCBI **BLAST** search of [WKRLVTDQIQVFVFSFGLSGWMLR](#)  
(Parameters: blastp, nr protein database, expect=20000, no filter, PAM30)  
Other BLAST [web gateways](#)

## All matches to this query

| Score | Mr(calc)  | Delta   | Sequence                                    |
|-------|-----------|---------|---------------------------------------------|
| 18.5  | 3072.5830 | 0.0091  | <a href="#">WKRLVTDQIQVFVFSFGLSGWMLR</a>    |
| 3.3   | 3072.5949 | -0.0028 | <a href="#">LGILDMTTDVYIFGMILLELLMGSKDR</a> |
| 2.6   | 3072.5949 | -0.0028 | <a href="#">LGILDMTTDVYIFGMILLELLMGSKDR</a> |
| 1.7   | 3072.5848 | 0.0073  | <a href="#">NMLSLGILLQGHRCLEGGKFSLEADLR</a> |

Mascot: <http://www.matrixscience.com/>

**Peptide View**MS/MS Fragmentation of **WNLSRCAGLQR**

Found in **AT3G06490.1** in **TAIR\_Arabidopsis**, Symbols: AtMYB108, BOS1, MYB108 | MYB108 (MYB DOMAIN PROTEIN 108); DNA binding / transcription factor | chr3:2004304-2006364 FORWARD

Match to Query 5689: 1468.646558 from(735.330555,2+) index(7253)

Title: Elution from: 64.606 to 64.606 scan no 9550 cid35.00 polarity:+

Data file C7-3\_3.mgf

Click mouse within plot area to zoom in by factor of two about that point

Or,   to  Da

Label all possible matches  Label matches used for scoring

Show Y-axis

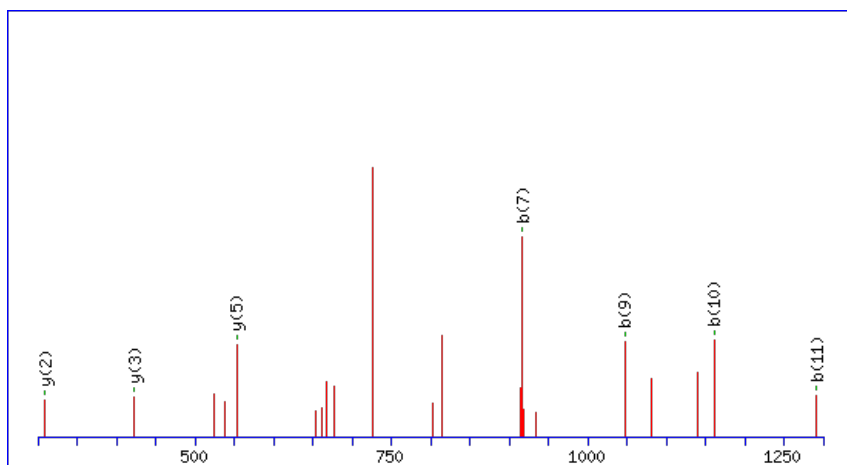

**Monoisotopic mass of neutral peptide Mr(calc):** 1468.6498

**Fixed modifications:** Carbamidomethyl (C) (apply to specified residues or termini only)

**Ions Score:** 28 **Expect:** 0.014

**Matches:** 7/112 fragment ions using 10 most intense peaks ([help](#))

| #  | b                | b <sup>++</sup> | b*        | b <sup>*++</sup> | b <sup>0</sup> | b <sup>0++</sup> | Seq. | y               | y <sup>++</sup> | y*        | y <sup>*++</sup> | y <sup>0</sup> | y <sup>0++</sup> | #  |
|----|------------------|-----------------|-----------|------------------|----------------|------------------|------|-----------------|-----------------|-----------|------------------|----------------|------------------|----|
| 1  | 189.0807         | 95.0440         |           |                  |                |                  | W    |                 |                 |           |                  |                |                  | 12 |
| 2  | 305.1177         | 153.0625        | 287.0941  | 144.0507         |                |                  | N    | 1281.5837       | 641.2955        | 1263.5601 | 632.2837         | 1263.5731      | 632.2902         | 11 |
| 3  | 393.1467         | 197.0770        | 375.1231  | 188.0652         | 375.1362       | 188.0717         | S    | 1165.5467       | 583.2770        | 1147.5231 | 574.2652         | 1147.5361      | 574.2717         | 10 |
| 4  | 507.2278         | 254.1175        | 489.2042  | 245.1058         | 489.2173       | 245.1123         | L    | 1077.5176       | 539.2624        | 1059.4940 | 530.2507         | 1059.5071      | 530.2572         | 9  |
| 5  | 595.2569         | 298.1321        | 577.2333  | 289.1203         | 577.2463       | 289.1268         | S    | 963.4365        | 482.2219        | 945.4129  | 473.2101         | 945.4260       | 473.2166         | 8  |
| 6  | 755.3461         | 378.1767        | 737.3225  | 369.1649         | 737.3356       | 369.1714         | R    | 875.4075        | 438.2074        | 857.3839  | 429.1956         |                |                  | 7  |
| 7  | <b>917.3709</b>  | 459.1891        | 899.3473  | 450.1773         | 899.3603       | 450.1838         | C    | 715.3182        | 358.1627        | 697.2946  | 349.1509         |                |                  | 6  |
| 8  | 989.4050         | 495.2061        | 971.3814  | 486.1943         | 971.3944       | 486.2009         | A    | <b>553.2935</b> | 277.1504        | 535.2699  | 268.1386         |                |                  | 5  |
| 9  | <b>1047.4235</b> | 524.2154        | 1029.3999 | 515.2036         | 1029.4129      | 515.2101         | G    | 481.2593        | 241.1333        | 463.2358  | 232.1215         |                |                  | 4  |
| 10 | <b>1161.5046</b> | 581.2559        | 1143.4810 | 572.2441         | 1143.4940      | 572.2507         | L    | <b>423.2408</b> | 212.1241        | 405.2173  | 203.1123         |                |                  | 3  |
| 11 | <b>1291.5572</b> | 646.2823        | 1273.5337 | 637.2705         | 1273.5467      | 637.2770         | Q    | <b>309.1597</b> | 155.0835        | 291.1362  | 146.0717         |                |                  | 2  |
| 12 |                  |                 |           |                  |                |                  | R    | 179.1071        | 90.0572         | 161.0835  | 81.0454          |                |                  | 1  |

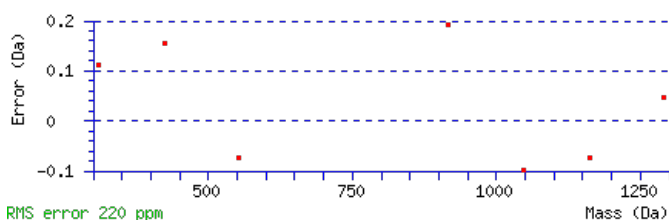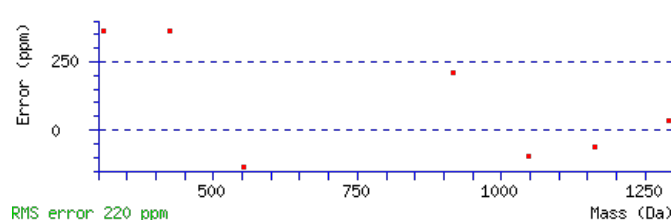

NCBI **BLAST** search of **WNLSRCAGLQR**

(Parameters: blastp, nr protein database, expect=20000, no filter, PAM30)

Other BLAST [web gateways](#)



AT3G06490.1

All matches to this query

| Score | Mr(calc)  | Delta   | Sequence                        |
|-------|-----------|---------|---------------------------------|
| 27.5  | 1468.6498 | -0.0032 | <a href="#">WNSLSRCAGLQR</a>    |
| 15.3  | 1468.6505 | -0.0039 | <a href="#">LPSMSTMDRIQR</a>    |
| 15.3  | 1468.6505 | -0.0039 | <a href="#">LPSMSTMDRIQR</a>    |
| 15.3  | 1468.6422 | 0.0044  | <a href="#">SSDMKDLKDIER</a>    |
| 12.8  | 1468.6471 | -0.0006 | <a href="#">SMLSDYSNIHKR</a>    |
| 6.8   | 1468.6449 | 0.0017  | <a href="#">RKASTAMGIDEDR</a>   |
| 4.3   | 1468.6449 | 0.0017  | <a href="#">CETQVNNTSIRK</a>    |
| 4.1   | 1468.6496 | -0.0030 | <a href="#">RSSVDSGAGSLTGEK</a> |
| 3.4   | 1468.6478 | -0.0013 | <a href="#">DVMRMEAESLLK</a>    |
| 2.0   | 1468.6442 | 0.0024  | <a href="#">DLQRFNQNQQR</a>     |

Mascot: <http://www.matrixscience.com/>

## Peptide View

MS/MS Fragmentation of **MLSLRSVK**

Found in **AT3G06530.1** in **TAIR\_Arabidopsis**, Symbols: | BAP28-related | chr3:2022602-2033643 FORWARD

Match to Query 2326: 960.507378 from(481.260965,2+) index(3551)

Title: Elution from: 34.219 to 34.219 scan no 4371 cid35.00 polarity:+

Data file D12h-1\_1.mgf

Click mouse within plot area to zoom in by factor of two about that point

Or,   to  Da

Label all possible matches  Label matches used for scoring

Show Y-axis

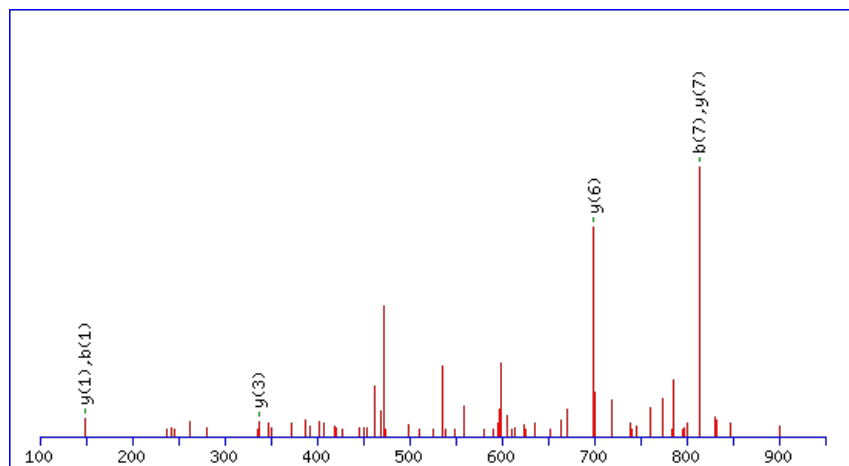

Monoisotopic mass of neutral peptide  $M_r(\text{calc})$ : 960.5071

Fixed modifications: Carbamidomethyl (C) (apply to specified residues or termini only)

Variable modifications:

M1 : Oxidation (M), with neutral losses 0.0000 (shown in table), 63.9983

Ions Score: 26 Expect: 0.008

Matches : 6/98 fragment ions using 8 most intense peaks ([help](#))

| # | b               | b <sup>++</sup> | b*       | b <sup>*++</sup> | b <sup>0</sup> | b <sup>0++</sup> | Seq. | y               | y <sup>++</sup> | y*       | y <sup>*++</sup> | y <sup>0</sup> | y <sup>0++</sup> | # |
|---|-----------------|-----------------|----------|------------------|----------------|------------------|------|-----------------|-----------------|----------|------------------|----------------|------------------|---|
| 1 | <b>149.0397</b> | 75.0235         |          |                  |                |                  | M    |                 |                 |          |                  |                |                  | 8 |
| 2 | 263.1208        | 132.0640        |          |                  |                |                  | L    | <b>813.4819</b> | 407.2446        | 795.4583 | 398.2328         | 795.4713       | 398.2393         | 7 |
| 3 | 351.1499        | 176.0786        |          |                  | 333.1393       | 167.0733         | S    | <b>699.4008</b> | 350.2040        | 681.3772 | 341.1922         | 681.3902       | 341.1988         | 6 |
| 4 | 465.2310        | 233.1191        |          |                  | 447.2204       | 224.1138         | L    | 611.3717        | 306.1895        | 593.3482 | 297.1777         | 593.3612       | 297.1842         | 5 |
| 5 | 625.3202        | 313.1637        | 607.2966 | 304.1520         | 607.3097       | 304.1585         | R    | 497.2906        | 249.1490        | 479.2671 | 240.1372         | 479.2801       | 240.1437         | 4 |
| 6 | 713.3493        | 357.1783        | 695.3257 | 348.1665         | 695.3387       | 348.1730         | S    | <b>337.2014</b> | 169.1043        | 319.1778 | 160.0925         | 319.1908       | 160.0990         | 3 |
| 7 | <b>813.4147</b> | 407.2110        | 795.3912 | 398.1992         | 795.4042       | 398.2057         | V    | 249.1723        | 125.0898        | 231.1487 | 116.0780         |                |                  | 2 |
| 8 |                 |                 |          |                  |                |                  | K    | <b>149.1069</b> | 75.0571         | 131.0833 | 66.0453          |                |                  | 1 |

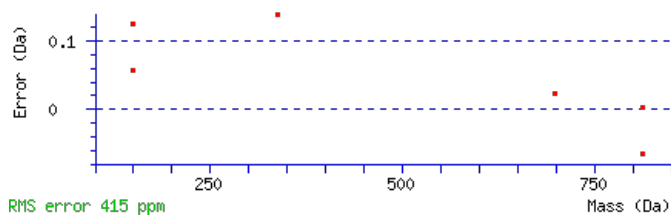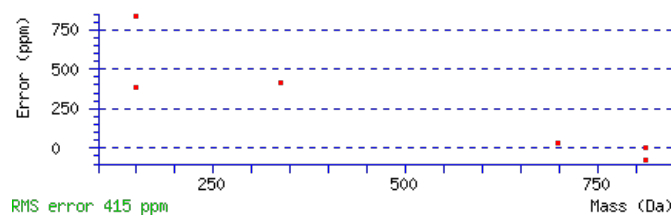

NCBI **BLAST** search of [MLSLRSVK](#)

(Parameters: blastp, nr protein database, expect=20000, no filter, PAM30)

Other BLAST [web gateways](#)

### All matches to this query

| Score | $M_r(\text{calc})$ | Delta  | Sequence                 |
|-------|--------------------|--------|--------------------------|
| 26.0  | 960.5071           | 0.0003 | <a href="#">MLSLRSVK</a> |

## AT3G06530.1

|      |          |         |                           |
|------|----------|---------|---------------------------|
| 10.3 | 960.5071 | 0.0003  | <a href="#">KLSQKSMK</a>  |
| 8.0  | 960.5097 | -0.0023 | <a href="#">CLRRTLK</a>   |
| 4.3  | 960.5071 | 0.0003  | <a href="#">NTALKKMK</a>  |
| 3.4  | 960.5071 | 0.0003  | <a href="#">MSIVSKLR</a>  |
| 2.8  | 960.5097 | -0.0023 | <a href="#">MRRGLVAK</a>  |
| 2.8  | 960.5071 | 0.0003  | <a href="#">MSRVLISK</a>  |
| 2.2  | 960.5071 | 0.0003  | <a href="#">AMKKQSLK</a>  |
| 0.7  | 960.5071 | 0.0003  | <a href="#">AMKASIKGK</a> |
| 0.7  | 960.5097 | -0.0023 | <a href="#">MRVRASVK</a>  |

Mascot: <http://www.matrixscience.com/>

## Peptide View

### MS/MS Fragmentation of **DKSLTLEK**

Found in **AT3G06540.1** in **TAIR\_Arabidopsis**, Symbols: | GDP dissociation inhibitor family protein / Rab GTPase activator family protein | chr3:2035207-2037668 REVERSE

Match to Query 3181: 1056.567730 from(529.291141,2+) index(8546)

Title: Elution from: 74.884 to 74.884 scan no 11339 cid35.00 polarity:+

Data file D1d-3\_2.mgf

Click mouse within plot area to zoom in by factor of two about that point

Or,   to  Da

Label all possible matches  Label matches used for scoring

Show Y-axis

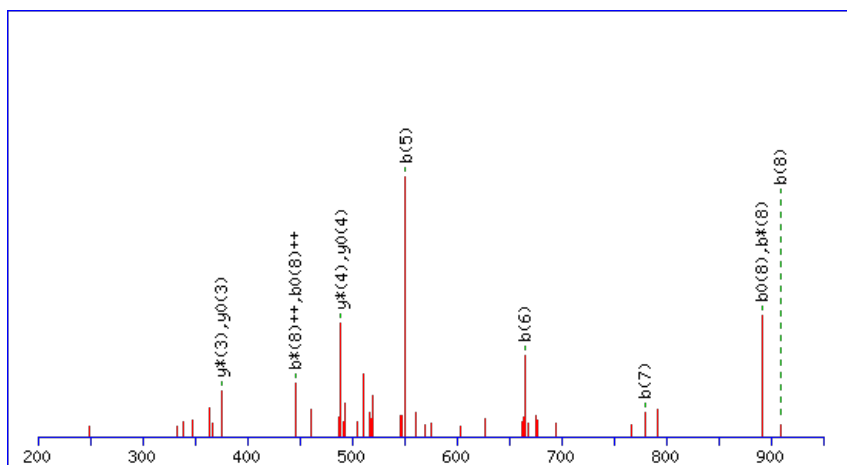

Monoisotopic mass of neutral peptide  $M_r(\text{calc})$ : 1056.5693

Fixed modifications: Carbamidomethyl (C) (apply to specified residues or termini only)

Ions Score: 20 Expect: 0.027

Matches : 12/92 fragment ions using 14 most intense peaks ([help](#))

| # | b               | b <sup>++</sup> | b*              | b <sup>*++</sup> | b <sup>0</sup>  | b <sup>0++</sup> | Seq.     | y        | y <sup>++</sup> | y*              | y <sup>*++</sup> | y <sup>0</sup>  | y <sup>0++</sup> | #        |
|---|-----------------|-----------------|-----------------|------------------|-----------------|------------------|----------|----------|-----------------|-----------------|------------------|-----------------|------------------|----------|
| 1 | 117.0313        | 59.0193         |                 |                  | 99.0207         | 50.0140          | <b>D</b> |          |                 |                 |                  |                 |                  | <b>9</b> |
| 2 | 247.1203        | 124.0638        | 229.0967        | 115.0520         | 229.1097        | 115.0585         | <b>K</b> | 941.5526 | 471.2799        | 923.5290        | 462.2682         | 923.5420        | 462.2747         | <b>8</b> |
| 3 | 335.1493        | 168.0783        | 317.1258        | 159.0665         | 317.1388        | 159.0730         | <b>S</b> | 811.4636 | 406.2354        | 793.4400        | 397.2236         | 793.4530        | 397.2301         | <b>7</b> |
| 4 | 449.2304        | 225.1189        | 431.2069        | 216.1071         | 431.2199        | 216.1136         | <b>L</b> | 723.4345 | 362.2209        | 705.4109        | 353.2091         | 705.4239        | 353.2156         | <b>6</b> |
| 5 | <b>551.2752</b> | 276.1412        | 533.2516        | 267.1294         | 533.2646        | 267.1359         | <b>T</b> | 609.3534 | 305.1803        | 591.3298        | 296.1686         | 591.3428        | 296.1751         | <b>5</b> |
| 6 | <b>665.3563</b> | 333.1818        | 647.3327        | 324.1700         | 647.3457        | 324.1765         | <b>L</b> | 507.3087 | 254.1580        | <b>489.2851</b> | 245.1462         | <b>489.2981</b> | 245.1527         | <b>4</b> |
| 7 | <b>779.4374</b> | 390.2223        | 761.4138        | 381.2105         | 761.4268        | 381.2170         | <b>L</b> | 393.2276 | 197.1174        | <b>375.2040</b> | 188.1056         | <b>375.2170</b> | 188.1122         | <b>3</b> |
| 8 | <b>909.4770</b> | 455.2421        | <b>891.4534</b> | <b>446.2303</b>  | <b>891.4664</b> | <b>446.2368</b>  | <b>E</b> | 279.1465 | 140.0769        | 261.1229        | 131.0651         | 261.1359        | 131.0716         | <b>2</b> |
| 9 |                 |                 |                 |                  |                 |                  | <b>K</b> | 149.1069 | 75.0571         | 131.0833        | 66.0453          |                 |                  | <b>1</b> |

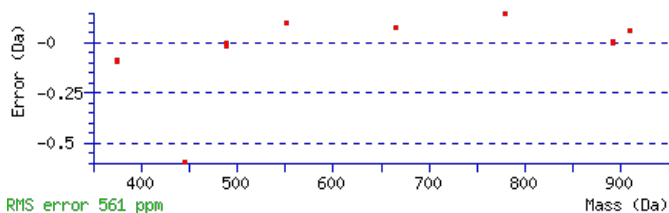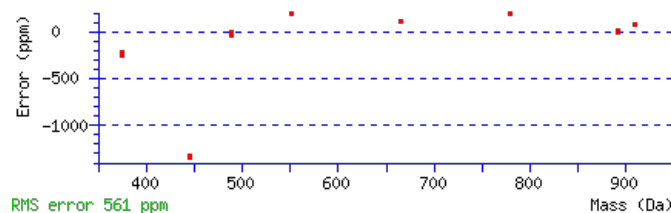

NCBI **BLAST** search of **DKSLTLEK**

(Parameters: blastp, nr protein database, expect=20000, no filter, PAM30)

Other BLAST [web gateways](#)

All matches to this query

| Score | $M_r(\text{calc})$ | Delta | Sequence |
|-------|--------------------|-------|----------|
|       |                    |       |          |

**AT3G06540.1**

|      |           |         |                            |
|------|-----------|---------|----------------------------|
| 20.0 | 1056.5693 | -0.0016 | <a href="#">DKSLTLEK</a>   |
| 14.0 | 1056.5693 | -0.0016 | <a href="#">SISALSLEVK</a> |
| 13.6 | 1056.5646 | 0.0032  | <a href="#">IKNMGIEIK</a>  |
| 9.4  | 1056.5693 | -0.0016 | <a href="#">ISLGLSTIDK</a> |
| 9.3  | 1056.5646 | 0.0032  | <a href="#">KGIALMDIGK</a> |
| 8.6  | 1056.5646 | 0.0032  | <a href="#">AVQMVKLEK</a>  |
| 8.6  | 1056.5646 | 0.0032  | <a href="#">MISQPTLKK</a>  |
| 8.6  | 1056.5693 | -0.0016 | <a href="#">DTILSLKEK</a>  |
| 5.3  | 1056.5693 | -0.0016 | <a href="#">LDTEISKLK</a>  |
| 4.0  | 1056.5646 | 0.0032  | <a href="#">VQMKLIDAK</a>  |

**Mascot:** <http://www.matrixscience.com/>

**Peptide View**MS/MS Fragmentation of **TGFAELIDFPVR**

Found in **AT3G06580.1** in **TAIR Arabidopsis**, Symbols: GALK, GAL1 | GAL1 (GALACTOSE KINASE 1); ATP binding/ galactokinase | chr3:2049147-2051873 REVERSE

Match to Query 6251: 1494.703568 from(748.359060,2+) index(9721)

Title: Elution from: 90.161 to 90.161 scan no 13553 cid35.00 polarity:+

Data file 0-2\_2.mgf

Click mouse within plot area to zoom in by factor of two about that point

Or,   to  Da

Label all possible matches  Label matches used for scoring

Show Y-axis

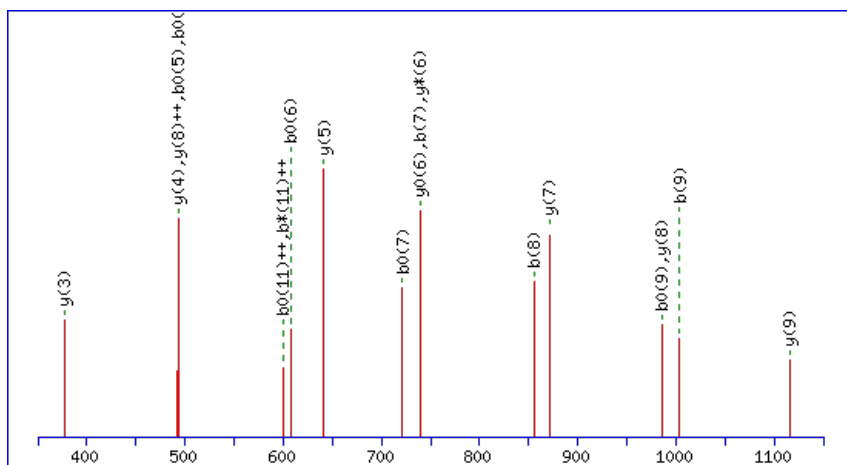

Monoisotopic mass of neutral peptide  $M_r(\text{calc})$ : 1494.7061

Fixed modifications: Carbamidomethyl (C) (apply to specified residues or termini only)

Ions Score: 61 Expect: 1e-005

Matches : 19/116 fragment ions using 13 most intense peaks ([help](#))

| #  | b         | b <sup>++</sup> | b*        | b <sup>*++</sup> | b <sup>0</sup> | b <sup>0++</sup> | Seq. | y         | y <sup>++</sup> | y*        | y <sup>*++</sup> | y <sup>0</sup> | y <sup>0++</sup> | #  |
|----|-----------|-----------------|-----------|------------------|----------------|------------------|------|-----------|-----------------|-----------|------------------|----------------|------------------|----|
| 1  | 103.0520  | 52.0296         |           |                  | 85.0414        | 43.0244          | T    |           |                 |           |                  |                |                  | 13 |
| 2  | 161.0705  | 81.0389         |           |                  | 143.0599       | 72.0336          | G    | 1393.6687 | 697.3380        | 1375.6451 | 688.3262         | 1375.6581      | 688.3327         | 12 |
| 3  | 309.1359  | 155.0716        |           |                  | 291.1254       | 146.0663         | F    | 1335.6502 | 668.3287        | 1317.6266 | 659.3169         | 1317.6396      | 659.3234         | 11 |
| 4  | 381.1701  | 191.0887        |           |                  | 363.1595       | 182.0834         | A    | 1187.5847 | 594.2960        | 1169.5612 | 585.2842         | 1169.5742      | 585.2907         | 10 |
| 5  | 511.2097  | 256.1085        |           |                  | 493.1991       | 247.1032         | E    | 1115.5506 | 558.2789        | 1097.5270 | 549.2671         | 1097.5400      | 549.2737         | 9  |
| 6  | 625.2908  | 313.1490        |           |                  | 607.2802       | 304.1438         | L    | 985.5110  | 493.2591        | 967.4874  | 484.2473         | 967.5004       | 484.2538         | 8  |
| 7  | 739.3719  | 370.1896        |           |                  | 721.3613       | 361.1843         | I    | 871.4299  | 436.2186        | 853.4063  | 427.2068         | 853.4193       | 427.2133         | 7  |
| 8  | 855.3959  | 428.2016        |           |                  | 837.3853       | 419.1963         | D    | 757.3488  | 379.1780        | 739.3252  | 370.1662         | 739.3382       | 370.1727         | 6  |
| 9  | 1003.4613 | 502.2343        |           |                  | 985.4508       | 493.2290         | F    | 641.3248  | 321.1660        | 623.3012  | 312.1542         |                |                  | 5  |
| 10 | 1119.4983 | 560.2528        | 1101.4748 | 551.2410         | 1101.4878      | 551.2475         | N    | 493.2593  | 247.1333        | 475.2358  | 238.1215         |                |                  | 4  |
| 11 | 1217.5481 | 609.2777        | 1199.5246 | 600.2659         | 1199.5376      | 600.2724         | P    | 377.2223  | 189.1148        | 359.1988  | 180.1030         |                |                  | 3  |
| 12 | 1317.6136 | 659.3104        | 1299.5900 | 650.2986         | 1299.6030      | 650.3051         | V    | 279.1725  | 140.0899        | 261.1490  | 131.0781         |                |                  | 2  |
| 13 |           |                 |           |                  |                |                  | R    | 179.1071  | 90.0572         | 161.0835  | 81.0454          |                |                  | 1  |

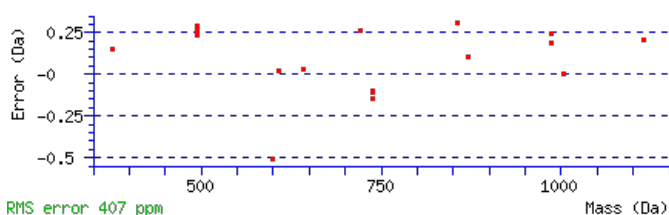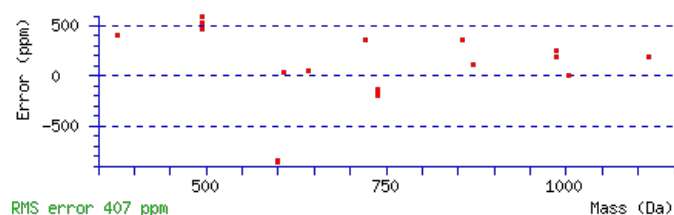

NCBI **BLAST** search of **TGFAELIDFPVR**

(Parameters: blastp, nr protein database, expect=20000, no filter, PAM30)

# AT3G06580.1

Other BLAST [web gateways](#)

## All matches to this query

| Score | Mr(calc)  | Delta   | Sequence                       |
|-------|-----------|---------|--------------------------------|
| 60.6  | 1494.7061 | -0.0025 | <a href="#">TGFAELIDFNPVR</a>  |
| 13.6  | 1494.7073 | -0.0037 | <a href="#">KENDIKANGTLMK</a>  |
| 8.9   | 1494.7025 | 0.0011  | <a href="#">VGVGEQICLARMK</a>  |
| 7.0   | 1494.7043 | -0.0007 | <a href="#">NASNVSLGETVRAR</a> |
| 5.8   | 1494.7018 | 0.0017  | <a href="#">RLESILHHMGHK</a>   |
| 5.8   | 1494.7016 | 0.0019  | <a href="#">TLDRLISTGESER</a>  |
| 5.4   | 1494.7068 | -0.0032 | <a href="#">EYTMEDILVQLK</a>   |
| 4.7   | 1494.7061 | -0.0025 | <a href="#">TEEFLIGKNWNK</a>   |
| 3.2   | 1494.7025 | 0.0011  | <a href="#">QLVMMARDVLER</a>   |
| 3.2   | 1494.7061 | -0.0025 | <a href="#">LYDPGYLNTAPVR</a>  |

Mascot: <http://www.matrixscience.com/>

## Peptide View

MS/MS Fragmentation of **ETPSVAGIINPGSEGFQK**

Found in **AT3G06650.1** in **TAIR\_Arabidopsis**, Symbols: ACLB-1 | ACLB-1 (ATP-citrate lyase B-1) | chr3:2079253-2082639 REVERSE

Match to Query 8355: 1829.919366 from(915.966959,2+) index(6581)

Title: Elution from: 58.206 to 58.206 scan no 8616 cid35.00 polarity:+

Data file D12h-3\_3.mgf

Click mouse within plot area to zoom in by factor of two about that point

Or,   to  Da

Label all possible matches  Label matches used for scoring

Show Y-axis

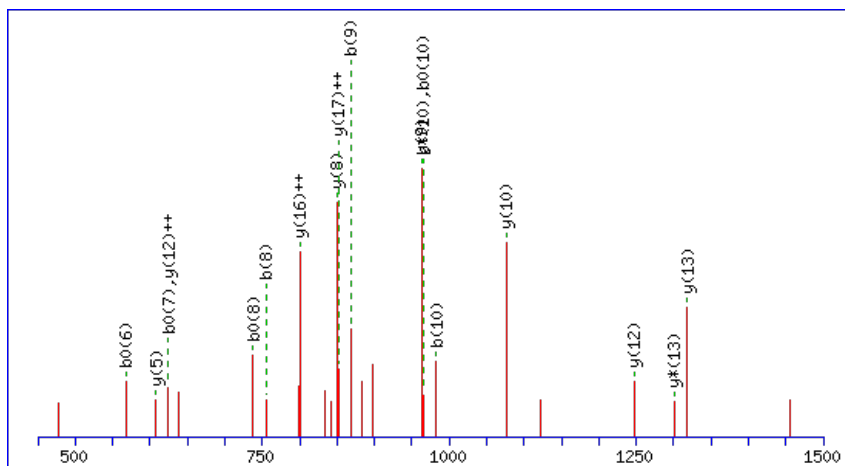

Monoisotopic mass of neutral peptide  $M_r(\text{calc})$ : 1829.9159

Fixed modifications: Carbamidomethyl (C) (apply to specified residues or termini only)

Ions Score: 41 Expect: 0.00034

Matches : 18/178 fragment ions using 22 most intense peaks ([help](#))

| #  | b         | b <sup>++</sup> | b <sup>*</sup> | b <sup>*++</sup> | b <sup>0</sup> | b <sup>0++</sup> | Seq. | y         | y <sup>++</sup> | y <sup>*</sup> | y <sup>*++</sup> | y <sup>0</sup> | y <sup>0++</sup> | #  |
|----|-----------|-----------------|----------------|------------------|----------------|------------------|------|-----------|-----------------|----------------|------------------|----------------|------------------|----|
| 1  | 130.0499  | 65.5286         |                |                  | 112.0393       | 56.5233          | E    |           |                 |                |                  |                |                  | 18 |
| 2  | 231.0975  | 116.0524        |                |                  | 213.0870       | 107.0471         | T    | 1701.8806 | 851.4440        | 1684.8541      | 842.9307         | 1683.8701      | 842.4387         | 17 |
| 3  | 328.1503  | 164.5788        |                |                  | 310.1397       | 155.5735         | P    | 1600.8329 | 800.9201        | 1583.8064      | 792.4068         | 1582.8224      | 791.9148         | 16 |
| 4  | 415.1823  | 208.0948        |                |                  | 397.1718       | 199.0895         | S    | 1503.7802 | 752.3937        | 1486.7536      | 743.8805         | 1485.7696      | 743.3884         | 15 |
| 5  | 514.2508  | 257.6290        |                |                  | 496.2402       | 248.6237         | V    | 1416.7482 | 708.8777        | 1399.7216      | 700.3644         | 1398.7376      | 699.8724         | 14 |
| 6  | 585.2879  | 293.1476        |                |                  | 567.2773       | 284.1423         | A    | 1317.6797 | 659.3435        | 1300.6532      | 650.8302         | 1299.6692      | 650.3382         | 13 |
| 7  | 642.3093  | 321.6583        |                |                  | 624.2988       | 312.6530         | G    | 1246.6426 | 623.8250        | 1229.6161      | 615.3117         | 1228.6321      | 614.8197         | 12 |
| 8  | 755.3934  | 378.2003        |                |                  | 737.3828       | 369.1951         | I    | 1189.6212 | 595.3142        | 1172.5946      | 586.8009         | 1171.6106      | 586.3089         | 11 |
| 9  | 868.4775  | 434.7424        |                |                  | 850.4669       | 425.7371         | I    | 1076.5371 | 538.7722        | 1059.5106      | 530.2589         | 1058.5265      | 529.7669         | 10 |
| 10 | 982.5204  | 491.7638        | 965.4938       | 483.2506         | 964.5098       | 482.7585         | N    | 963.4530  | 482.2302        | 946.4265       | 473.7169         | 945.4425       | 473.2249         | 9  |
| 11 | 1079.5732 | 540.2902        | 1062.5466      | 531.7769         | 1061.5626      | 531.2849         | P    | 849.4101  | 425.2087        | 832.3836       | 416.6954         | 831.3995       | 416.2034         | 8  |
| 12 | 1136.5946 | 568.8009        | 1119.5681      | 560.2877         | 1118.5840      | 559.7957         | G    | 752.3573  | 376.6823        | 735.3308       | 368.1690         | 734.3468       | 367.6770         | 7  |
| 13 | 1223.6266 | 612.3170        | 1206.6001      | 603.8037         | 1205.6161      | 603.3117         | S    | 695.3359  | 348.1716        | 678.3093       | 339.6583         | 677.3253       | 339.1663         | 6  |
| 14 | 1352.6692 | 676.8383        | 1335.6427      | 668.3250         | 1334.6587      | 667.8330         | E    | 608.3039  | 304.6556        | 591.2773       | 296.1423         | 590.2933       | 295.6503         | 5  |
| 15 | 1409.6907 | 705.3490        | 1392.6642      | 696.8357         | 1391.6801      | 696.3437         | G    | 479.2613  | 240.1343        | 462.2347       | 231.6210         |                |                  | 4  |
| 16 | 1556.7591 | 778.8832        | 1539.7326      | 770.3699         | 1538.7485      | 769.8779         | F    | 422.2398  | 211.6235        | 405.2132       | 203.1103         |                |                  | 3  |
| 17 | 1684.8177 | 842.9125        | 1667.7911      | 834.3992         | 1666.8071      | 833.9072         | Q    | 275.1714  | 138.0893        | 258.1448       | 129.5761         |                |                  | 2  |
| 18 |           |                 |                |                  |                |                  | K    | 147.1128  | 74.0600         | 130.0863       | 65.5468          |                |                  | 1  |



AT3G06650.1

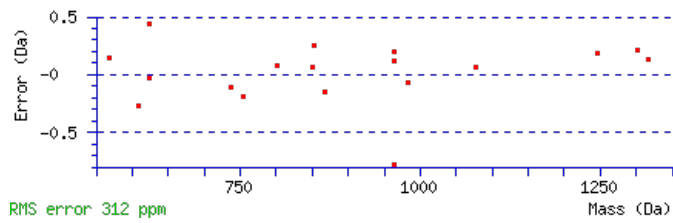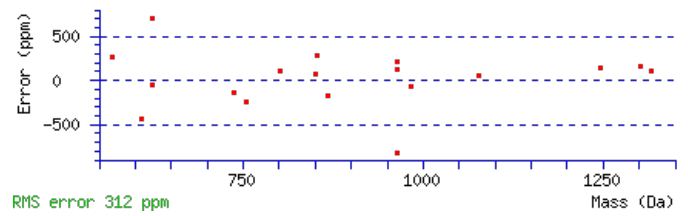

NCBI **BLAST** search of [ETPSVAGIINPGSEGFQK](#)

(Parameters: blastp, nr protein database, expect=20000, no filter, PAM30)

Other BLAST [web gateways](#)

All matches to this query

| Score | Mr(calc)  | Delta  | Sequence                           |
|-------|-----------|--------|------------------------------------|
| 40.5  | 1829.9159 | 0.0034 | <a href="#">ETPSVAGIINPGSEGFQK</a> |

Mascot: <http://www.matrixscience.com/>

**Peptide View**MS/MS Fragmentation of **EQAVWALGNVAGDSPR**Found in **AT3G06720.1** in **TAIR\_Arabidopsis**, Symbols: ATKAP ALPHA, AT-IMP | AT-IMP (Arabidopsis thaliana importin alpha); protein transporter | chr3:2120565-2123561 FORWARD

Match to Query 8026: 1690.757586 from(846.386069,2+) index(6852)

Title: Elution from: 61.280 to 61.280 scan no 8903 cid35.00 polarity:+

Data file 0-1\_2.mgf

Click mouse within plot area to zoom in by factor of two about that point

Or,   to  Da Label all possible matches  Label matches used for scoring Show Y-axis 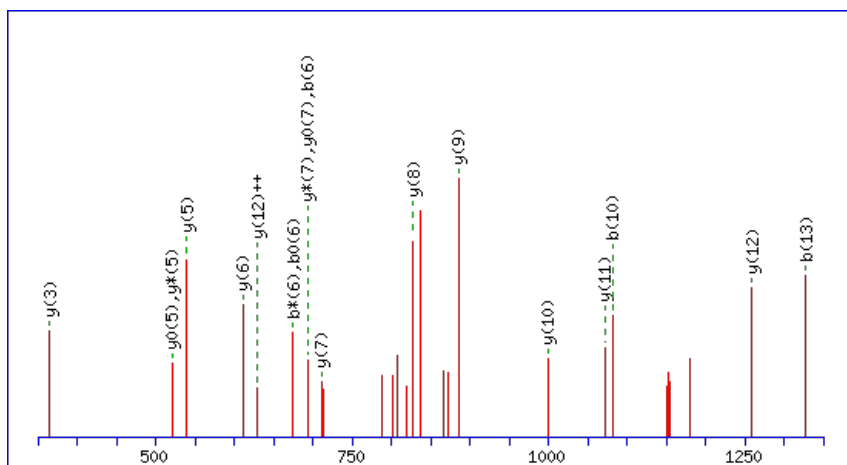Monoisotopic mass of neutral peptide  $M_r(\text{calc})$ : 1690.7567

Fixed modifications: Carbamidomethyl (C) (apply to specified residues or termini only)

Ions Score: 74 Expect: 2.8e-007

Matches : 19/174 fragment ions using 21 most intense peaks ([help](#))

| #  | b                | b <sup>++</sup> | b*              | b <sup>*++</sup> | b <sup>0</sup>  | b <sup>0++</sup> | Seq. | y                | y <sup>++</sup> | y*              | y <sup>*++</sup> | y <sup>0</sup>  | y <sup>0++</sup> | #  |
|----|------------------|-----------------|-----------------|------------------|-----------------|------------------|------|------------------|-----------------|-----------------|------------------|-----------------|------------------|----|
| 1  | 131.0469         | 66.0271         |                 |                  | 113.0363        | 57.0218          | E    |                  |                 |                 |                  |                 |                  | 16 |
| 2  | 261.0996         | 131.0534        | 243.0760        | 122.0416         | 243.0890        | 122.0481         | Q    | 1561.7244        | 781.3658        | 1543.7008       | 772.3540         | 1543.7138       | 772.3606         | 15 |
| 3  | 333.1337         | 167.0705        | 315.1101        | 158.0587         | 315.1231        | 158.0652         | A    | 1431.6718        | 716.3395        | 1413.6482       | 707.3277         | 1413.6612       | 707.3342         | 14 |
| 4  | 433.1991         | 217.1032        | 415.1756        | 208.0914         | 415.1886        | 208.0979         | V    | 1359.6376        | 680.3224        | 1341.6140       | 671.3106         | 1341.6270       | 671.3172         | 13 |
| 5  | 621.2725         | 311.1399        | 603.2489        | 302.1281         | 603.2620        | 302.1346         | W    | <b>1259.5722</b> | <b>630.2897</b> | 1241.5486       | 621.2779         | 1241.5616       | 621.2844         | 12 |
| 6  | <b>693.3067</b>  | 347.1570        | <b>675.2831</b> | 338.1452         | <b>675.2961</b> | 338.1517         | A    | <b>1071.4988</b> | 536.2530        | 1053.4752       | 527.2412         | 1053.4882       | 527.2477         | 11 |
| 7  | 807.3878         | 404.1975        | 789.3642        | 395.1857         | 789.3772        | 395.1922         | L    | <b>999.4646</b>  | 500.2360        | 981.4410        | 491.2242         | 981.4541        | 491.2307         | 10 |
| 8  | 865.4063         | 433.2068        | 847.3827        | 424.1950         | 847.3957        | 424.2015         | G    | <b>885.3835</b>  | 443.1954        | 867.3599        | 434.1836         | 867.3730        | 434.1901         | 9  |
| 9  | 981.4433         | 491.2253        | 963.4197        | 482.2135         | 963.4327        | 482.2200         | N    | <b>827.3650</b>  | 414.1862        | 809.3414        | 405.1744         | 809.3545        | 405.1809         | 8  |
| 10 | <b>1081.5087</b> | 541.2580        | 1063.4851       | 532.2462         | 1063.4982       | 532.2527         | V    | <b>711.3280</b>  | 356.1677        | <b>693.3044</b> | 347.1559         | <b>693.3175</b> | 347.1624         | 7  |
| 11 | 1153.5429        | 577.2751        | 1135.5193       | 568.2633         | 1135.5323       | 568.2698         | A    | <b>611.2626</b>  | 306.1349        | 593.2390        | 297.1231         | 593.2520        | 297.1296         | 6  |
| 12 | 1211.5614        | 606.2843        | 1193.5378       | 597.2725         | 1193.5508       | 597.2790         | G    | <b>539.2284</b>  | 270.1179        | <b>521.2048</b> | 261.1061         | <b>521.2179</b> | 261.1126         | 5  |
| 13 | <b>1327.5854</b> | 664.2963        | 1309.5618       | 655.2845         | 1309.5748       | 655.2910         | D    | 481.2099         | 241.1086        | 463.1863        | 232.0968         | 463.1994        | 232.1033         | 4  |
| 14 | 1415.6144        | 708.3108        | 1397.5908       | 699.2991         | 1397.6038       | 699.3056         | S    | <b>365.1860</b>  | 183.0966        | 347.1624        | 174.0848         | 347.1754        | 174.0913         | 3  |
| 15 | 1513.6642        | 757.3357        | 1495.6406       | 748.3240         | 1495.6536       | 748.3305         | P    | 277.1569         | 139.0821        | 259.1333        | 130.0703         |                 |                  | 2  |
| 16 |                  |                 |                 |                  |                 |                  | R    | 179.1071         | 90.0572         | 161.0835        | 81.0454          |                 |                  | 1  |

AT3G06720.1

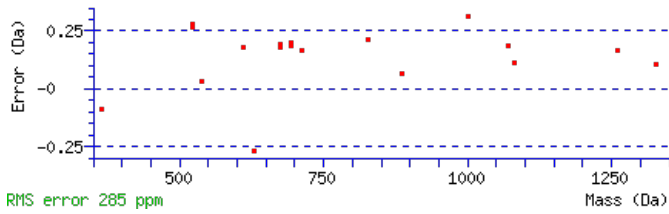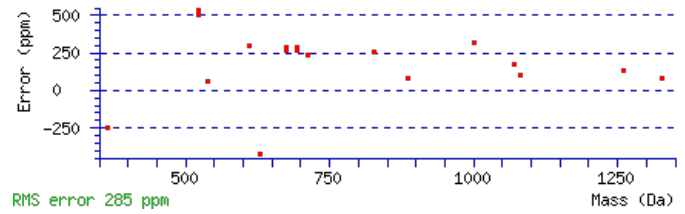

NCBI **BLAST** search of [EQAVWALGNVAGDSPR](#)  
(Parameters: blastp, nr protein database, expect=20000, no filter, PAM30)  
Other BLAST [web gateways](#)

**All matches to this query**

| Score | Mr(calc)  | Delta   | Sequence                         |
|-------|-----------|---------|----------------------------------|
| 73.7  | 1690.7567 | 0.0009  | <a href="#">EQAVWALGNVAGDSPR</a> |
| 10.1  | 1690.7527 | 0.0049  | <a href="#">VPMDPOLCKAAEOGK</a>  |
| 8.5   | 1690.7601 | -0.0026 | <a href="#">LMSNATAFSINNSKR</a>  |
| 0.6   | 1690.7597 | -0.0021 | <a href="#">VVYDYLGGMEDIRK</a>   |
| 0.1   | 1690.7576 | -0.0000 | <a href="#">MLNRPYAFNCVLR</a>    |

Mascot: <http://www.matrixscience.com/>

## Peptide View

MS/MS Fragmentation of **GLPTLFFISPDPSK**Found in **AT3G06730.1** in **TAIR\_Arabidopsis**, Symbols: | thioredoxin family protein | chr3:2124282-2125851 FORWARD

Match to Query 7017: 1532.767456 from(767.391004,2+) index(10497)

Title: Elution from: 96.573 to 96.573 scan no 14534 cid35.00 polarity:+

Data file D12h-1\_1.mgf

Click mouse within plot area to zoom in by factor of two about that point

Or,  to  Da Label all possible matches  Label matches used for scoring Show Y-axis 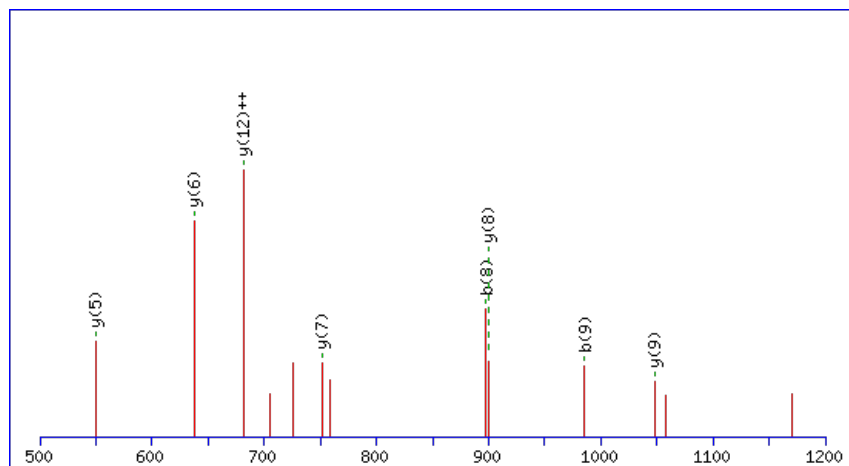Monoisotopic mass of neutral peptide  $M_r(\text{calc})$ : 1532.7685

Fixed modifications: Carbamidomethyl (C) (apply to specified residues or termini only)

Ions Score: 34 Expect: 0.0031

Matches : 8/122 fragment ions using 12 most intense peaks ([help](#))

| #  | b         | b <sup>++</sup> | b <sup>0</sup> | b <sup>0++</sup> | Seq. | y         | y <sup>++</sup> | y*        | y <sup>*++</sup> | y <sup>0</sup> | y <sup>0++</sup> | #  |
|----|-----------|-----------------|----------------|------------------|------|-----------|-----------------|-----------|------------------|----------------|------------------|----|
| 1  | 59.0258   | 30.0165         |                |                  | G    |           |                 |           |                  |                |                  | 14 |
| 2  | 173.1069  | 87.0571         |                |                  | L    | 1475.7573 | 738.3823        | 1457.7337 | 729.3705         | 1457.7467      | 729.3770         | 13 |
| 3  | 271.1567  | 136.0820        |                |                  | P    | 1361.6762 | 681.3417        | 1343.6526 | 672.3299         | 1343.6656      | 672.3364         | 12 |
| 4  | 373.2014  | 187.1043        | 355.1908       | 178.0990         | T    | 1263.6264 | 632.3168        | 1245.6028 | 623.3050         | 1245.6158      | 623.3115         | 11 |
| 5  | 487.2825  | 244.1449        | 469.2719       | 235.1396         | L    | 1161.5817 | 581.2945        | 1143.5581 | 572.2827         | 1143.5711      | 572.2892         | 10 |
| 6  | 635.3479  | 318.1776        | 617.3374       | 309.1723         | F    | 1047.5006 | 524.2539        | 1029.4770 | 515.2421         | 1029.4900      | 515.2486         | 9  |
| 7  | 783.4134  | 392.2103        | 765.4028       | 383.2050         | F    | 899.4351  | 450.2212        | 881.4115  | 441.2094         | 881.4246       | 441.2159         | 8  |
| 8  | 897.4945  | 449.2509        | 879.4839       | 440.2456         | I    | 751.3697  | 376.1885        | 733.3461  | 367.1767         | 733.3591       | 367.1832         | 7  |
| 9  | 985.5235  | 493.2654        | 967.5130       | 484.2601         | S    | 637.2886  | 319.1479        | 619.2650  | 310.1361         | 619.2780       | 310.1426         | 6  |
| 10 | 1083.5733 | 542.2903        | 1065.5628      | 533.2850         | P    | 549.2595  | 275.1334        | 531.2359  | 266.1216         | 531.2489       | 266.1281         | 5  |
| 11 | 1199.5973 | 600.3023        | 1181.5868      | 591.2970         | D    | 451.2097  | 226.1085        | 433.1861  | 217.0967         | 433.1991       | 217.1032         | 4  |
| 12 | 1297.6471 | 649.3272        | 1279.6366      | 640.3219         | P    | 335.1857  | 168.0965        | 317.1622  | 159.0847         | 317.1752       | 159.0912         | 3  |
| 13 | 1385.6762 | 693.3417        | 1367.6656      | 684.3364         | S    | 237.1359  | 119.0716        | 219.1124  | 110.0598         | 219.1254       | 110.0663         | 2  |
| 14 |           |                 |                |                  | K    | 149.1069  | 75.0571         | 131.0833  | 66.0453          |                |                  | 1  |

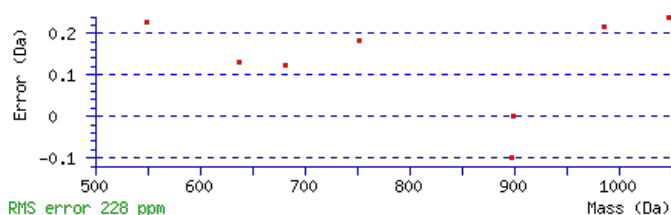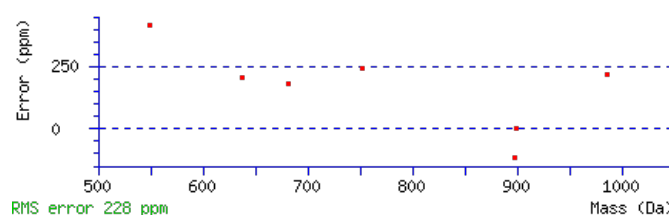NCBI BLAST search of **GLPTLFFISPDPSK**

(Parameters: blastp, nr protein database, expect=20000, no filter, PAM30)

# AT3G06730.1

Other BLAST [web gateways](#)

## All matches to this query

| Score | Mr(calc)  | Delta   | Sequence                       |
|-------|-----------|---------|--------------------------------|
| 33.9  | 1532.7685 | -0.0011 | <a href="#">GLPTLFFISPDPSK</a> |
| 2.0   | 1532.7667 | 0.0008  | <a href="#">GNEVNDIKALSVVR</a> |
| 2.0   | 1532.7667 | 0.0008  | <a href="#">REDVELNIKELR</a>   |
| 1.7   | 1532.7663 | 0.0012  | <a href="#">VEEAFKPSAELAVK</a> |
| 1.6   | 1532.7667 | 0.0007  | <a href="#">KNNLSAGDKITPQK</a> |
| 0.4   | 1532.7716 | -0.0042 | <a href="#">EKPGYSRPGKCHK</a>  |
| 0.4   | 1532.7640 | 0.0034  | <a href="#">EKELKTAVVENEK</a>  |

Mascot: <http://www.matrixscience.com/>

**Peptide View**MS/MS Fragmentation of **LDLQVTKAGEYNK**Found in **AT3G07000.1** in **TAIR\_Arabidopsis**, Symbols: | DC1 domain-containing protein | chr3:2209509-2211233 FORWARD

Match to Query 6161: 1494.725742 from(748.370147,2+) index(6268)

Title: Elution from: 55.515 to 55.515 scan no 8044 cid35.00 polarity:+

Data file 0-3\_2.mgf

Click mouse within plot area to zoom in by factor of two about that point

Or,   to  Da Label all possible matches  Label matches used for scoring Show Y-axis 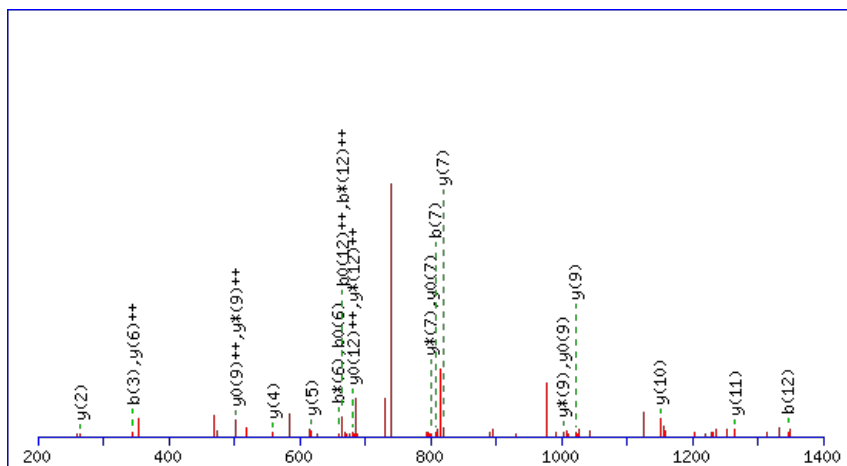Monoisotopic mass of neutral peptide  $M_r(\text{calc})$ : 1494.7272

Fixed modifications: Carbamidomethyl (C) (apply to specified residues or termini only)

Ions Score: 24 Expect: 0.037

Matches : 23/130 fragment ions using 56 most intense peaks ([help](#))

| #  | b         | b <sup>++</sup> | b*        | b <sup>*++</sup> | b <sup>0</sup> | b <sup>0++</sup> | Seq. | y         | y <sup>++</sup> | y*        | y <sup>*++</sup> | y <sup>0</sup> | y <sup>0++</sup> | #  |
|----|-----------|-----------------|-----------|------------------|----------------|------------------|------|-----------|-----------------|-----------|------------------|----------------|------------------|----|
| 1  | 115.0884  | 58.0478         |           |                  |                |                  | L    |           |                 |           |                  |                |                  | 13 |
| 2  | 231.1124  | 116.0598        |           |                  | 213.1018       | 107.0545         | D    | 1381.6534 | 691.3304        | 1363.6298 | 682.3186         | 1363.6429      | 682.3251         | 12 |
| 3  | 345.1935  | 173.1004        |           |                  | 327.1829       | 164.0951         | L    | 1265.6295 | 633.3184        | 1247.6059 | 624.3066         | 1247.6189      | 624.3131         | 11 |
| 4  | 475.2461  | 238.1267        | 457.2225  | 229.1149         | 457.2355       | 229.1214         | Q    | 1151.5484 | 576.2778        | 1133.5248 | 567.2660         | 1133.5378      | 567.2725         | 10 |
| 5  | 575.3115  | 288.1594        | 557.2880  | 279.1476         | 557.3010       | 279.1541         | V    | 1021.4957 | 511.2515        | 1003.4721 | 502.2397         | 1003.4851      | 502.2462         | 9  |
| 6  | 677.3563  | 339.1818        | 659.3327  | 330.1700         | 659.3457       | 330.1765         | T    | 921.4303  | 461.2188        | 903.4067  | 452.2070         | 903.4197       | 452.2135         | 8  |
| 7  | 807.4453  | 404.2263        | 789.4217  | 395.2145         | 789.4347       | 395.2210         | K    | 819.3855  | 410.1964        | 801.3620  | 401.1846         | 801.3750       | 401.1911         | 7  |
| 8  | 879.4794  | 440.2434        | 861.4559  | 431.2316         | 861.4689       | 431.2381         | A    | 689.2965  | 345.1519        | 671.2729  | 336.1401         | 671.2859       | 336.1466         | 6  |
| 9  | 937.4979  | 469.2526        | 919.4744  | 460.2408         | 919.4874       | 460.2473         | G    | 617.2624  | 309.1348        | 599.2388  | 300.1230         | 599.2518       | 300.1295         | 5  |
| 10 | 1067.5376 | 534.2724        | 1049.5140 | 525.2606         | 1049.5270      | 525.2671         | E    | 559.2439  | 280.1256        | 541.2203  | 271.1138         | 541.2333       | 271.1203         | 4  |
| 11 | 1231.5979 | 616.3026        | 1213.5744 | 607.2908         | 1213.5874      | 607.2973         | Y    | 429.2042  | 215.1058        | 411.1807  | 206.0940         |                |                  | 3  |
| 12 | 1347.6349 | 674.3211        | 1329.6113 | 665.3093         | 1329.6244      | 665.3158         | N    | 265.1439  | 133.0756        | 247.1203  | 124.0638         |                |                  | 2  |
| 13 |           |                 |           |                  |                |                  | K    | 149.1069  | 75.0571         | 131.0833  | 66.0453          |                |                  | 1  |

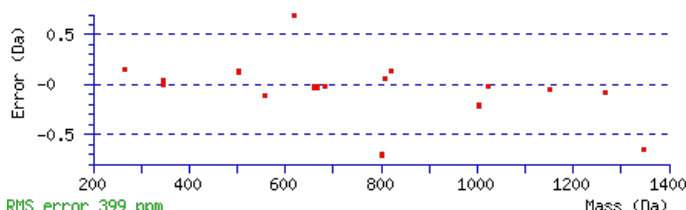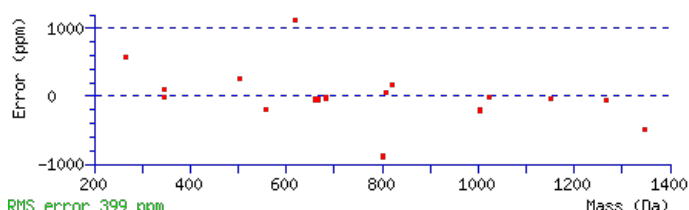NCBI BLAST search of **LDLQVTKAGEYNK**

(Parameters: blastp, nr protein database, expect=20000, no filter, PAM30)

Other BLAST [web gateways](#)

AT3G07000.1

All matches to this query

| Score | Mr(calc)  | Delta   | Sequence                      |
|-------|-----------|---------|-------------------------------|
| 24.4  | 1494.7272 | -0.0015 | <a href="#">LDLQVTKAGEYNK</a> |
| 2.4   | 1494.7225 | 0.0033  | <a href="#">VEDAVMLAFAQKR</a> |
| 2.3   | 1494.7299 | -0.0042 | <a href="#">INLNHISVVDSHK</a> |
| 1.3   | 1494.7299 | -0.0042 | <a href="#">RRLEEIEVEFR</a>   |
| 1.0   | 1494.7247 | 0.0010  | <a href="#">AACYLKLDHFIK</a>  |
| 0.9   | 1494.7295 | -0.0037 | <a href="#">KYSSSKFGYIATK</a> |
| 0.6   | 1494.7272 | -0.0015 | <a href="#">DLEEKIRVYEGK</a>  |
| 0.6   | 1494.7272 | -0.0015 | <a href="#">IEREEGSTLFAVK</a> |
| 0.3   | 1494.7246 | 0.0012  | <a href="#">VIELSTYIDSDVK</a> |
| 0.2   | 1494.7295 | -0.0037 | <a href="#">NSQYDISILIWK</a>  |

Mascot: <http://www.matrixscience.com/>

## Peptide View

### MS/MS Fragmentation of **QLSQSLGK**

Found in **AT3G07090.1** in **TAIR\_Arabidopsis**, Symbols: | similar to unknown protein [Arabidopsis thaliana] (TAIR:AT5G25170.1); similar to unnamed protein product [Vitis vinifera] (GB:CAO46108.1); contains InterPro domain Protein of unknown function DUF862, eukaryotic (InterPro:IPR008580) | ch

Match to Query 2446: 984.523032 from(493.268792,2+) index(1939)

Title: Elution from: 22.812 to 22.812 scan no 2503 cid35.00 polarity:+

Data file C7-2\_2.mgf

Click mouse within plot area to zoom in by factor of two about that point

Or,   to  Da

Label all possible matches  Label matches used for scoring

Show Y-axis

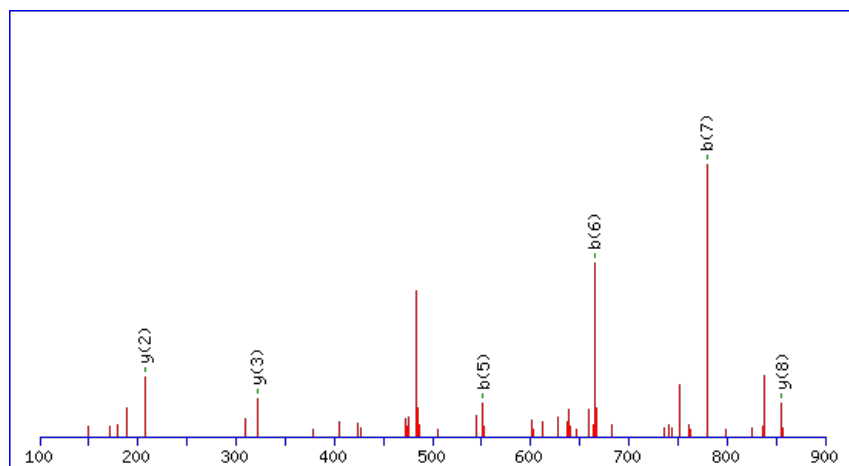

Monoisotopic mass of neutral peptide  $M_r(\text{calc})$ : 984.5248

Fixed modifications: Carbamidomethyl (C) (apply to specified residues or termini only)

Ions Score: 29 Expect: 0.011

Matches : 6/84 fragment ions using 8 most intense peaks ([help](#))

| # | b        | b <sup>++</sup> | b*       | b <sup>*++</sup> | b <sup>0</sup> | b <sup>0++</sup> | Seq. | y        | y <sup>++</sup> | y*       | y <sup>*++</sup> | y <sup>0</sup> | y <sup>0++</sup> | # |
|---|----------|-----------------|----------|------------------|----------------|------------------|------|----------|-----------------|----------|------------------|----------------|------------------|---|
| 1 | 131.0599 | 66.0336         | 113.0363 | 57.0218          |                |                  | Q    |          |                 |          |                  |                |                  | 9 |
| 2 | 245.1410 | 123.0741        | 227.1174 | 114.0624         |                |                  | L    | 855.4794 | 428.2434        | 837.4559 | 419.2316         | 837.4689       | 419.2381         | 8 |
| 3 | 333.1701 | 167.0887        | 315.1465 | 158.0769         | 315.1595       | 158.0834         | S    | 741.3983 | 371.2028        | 723.3748 | 362.1910         | 723.3878       | 362.1975         | 7 |
| 4 | 463.2227 | 232.1150        | 445.1991 | 223.1032         | 445.2122       | 223.1097         | Q    | 653.3693 | 327.1883        | 635.3457 | 318.1765         | 635.3587       | 318.1830         | 6 |
| 5 | 551.2518 | 276.1295        | 533.2282 | 267.1177         | 533.2412       | 267.1243         | S    | 523.3166 | 262.1620        | 505.2930 | 253.1502         | 505.3061       | 253.1567         | 5 |
| 6 | 665.3329 | 333.1701        | 647.3093 | 324.1583         | 647.3223       | 324.1648         | L    | 435.2876 | 218.1474        | 417.2640 | 209.1356         |                |                  | 4 |
| 7 | 779.4140 | 390.2106        | 761.3904 | 381.1988         | 761.4034       | 381.2054         | L    | 321.2065 | 161.1069        | 303.1829 | 152.0951         |                |                  | 3 |
| 8 | 837.4325 | 419.2199        | 819.4089 | 410.2081         | 819.4219       | 410.2146         | G    | 207.1254 | 104.0663        | 189.1018 | 95.0545          |                |                  | 2 |
| 9 |          |                 |          |                  |                |                  | K    | 149.1069 | 75.0571         | 131.0833 | 66.0453          |                |                  | 1 |

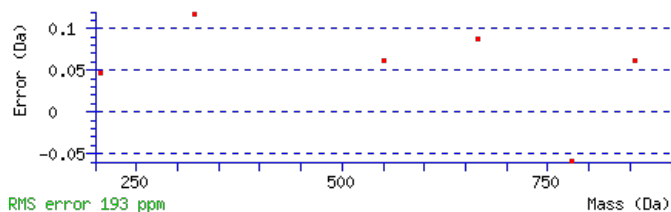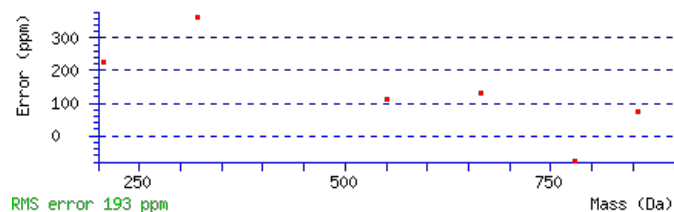

NCBI **BLAST** search of **QLSQSLGK**

(Parameters: blastp, nr protein database, expect=20000, no filter, PAM30)

Other BLAST [web gateways](#)

All matches to this query



## AT3G07090.1

| Score | Mr(calc) | Delta   | Sequence                  |
|-------|----------|---------|---------------------------|
| 28.6  | 984.5248 | -0.0018 | <a href="#">QLSQSLLGK</a> |
| 19.9  | 984.5248 | -0.0018 | <a href="#">REIEKLSV</a>  |
| 9.6   | 984.5248 | -0.0018 | <a href="#">LEEVS�KR</a>  |
| 7.9   | 984.5248 | -0.0018 | <a href="#">NIKSLDVGK</a> |
| 6.6   | 984.5248 | -0.0018 | <a href="#">ELSTVGVR</a>  |
| 5.8   | 984.5248 | -0.0018 | <a href="#">SINQITGLK</a> |
| 5.5   | 984.5248 | -0.0018 | <a href="#">KESLVAAQK</a> |
| 5.5   | 984.5248 | -0.0018 | <a href="#">QSKVIAEAK</a> |
| 4.5   | 984.5248 | -0.0018 | <a href="#">KIEVGGDKK</a> |
| 3.1   | 984.5248 | -0.0018 | <a href="#">KLLQEEAK</a>  |

Mascot: <http://www.matrixscience.com/>

**Peptide View**MS/MS Fragmentation of **LSSEVGWNHYDTIK**Found in **AT3G07110.1** in **TAIR\_Arabidopsis**, Symbols: | 60S ribosomal protein L13A (RPL13aA) | chr3:2252098-2253338 FORWARD

Match to Query 7472: 1647.787214 from(824.900883,2+) index(4184)

Title: Elution from: 42.199 to 42.199 scan no 5392 cid35.00 polarity:+

Data file D1d-1\_1.mgf

Click mouse within plot area to zoom in by factor of two about that point

Or,  to  Da Label all possible matches  Label matches used for scoring Show Y-axis 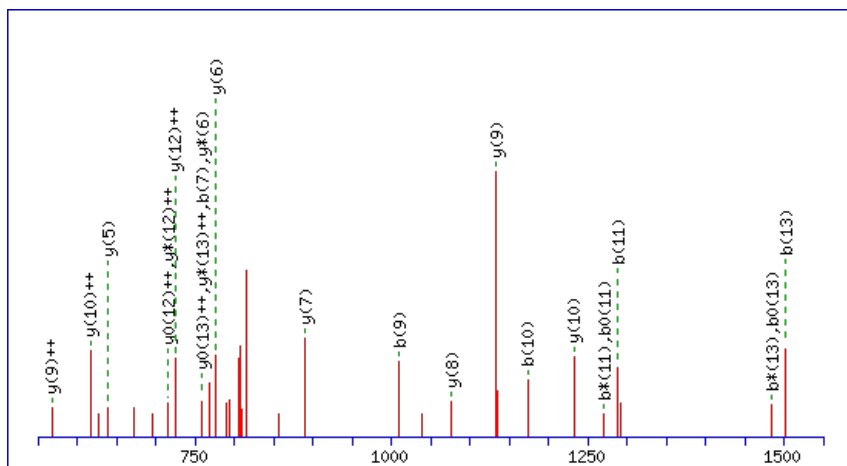Monoisotopic mass of neutral peptide  $M_r(\text{calc})$ : 1647.7893

Fixed modifications: Carbamidomethyl (C) (apply to specified residues or termini only)

Ions Score: 59 Expect: 3.3e-006

Matches : 23/136 fragment ions using 22 most intense peaks ([help](#))

| #  | b         | b <sup>++</sup> | b <sup>*</sup> | b <sup>*++</sup> | b <sup>0</sup> | b <sup>0++</sup> | Seq. | y         | y <sup>++</sup> | y <sup>*</sup> | y <sup>*++</sup> | y <sup>0</sup> | y <sup>0++</sup> | #  |
|----|-----------|-----------------|----------------|------------------|----------------|------------------|------|-----------|-----------------|----------------|------------------|----------------|------------------|----|
| 1  | 114.0913  | 57.5493         |                |                  |                |                  | L    |           |                 |                |                  |                |                  | 14 |
| 2  | 201.1234  | 101.0653        |                |                  | 183.1128       | 92.0600          | S    | 1535.7125 | 768.3599        | 1518.6859      | 759.8466         | 1517.7019      | 759.3546         | 13 |
| 3  | 288.1554  | 144.5813        |                |                  | 270.1448       | 135.5761         | S    | 1448.6805 | 724.8439        | 1431.6539      | 716.3306         | 1430.6699      | 715.8386         | 12 |
| 4  | 417.1980  | 209.1026        |                |                  | 399.1874       | 200.0973         | E    | 1361.6484 | 681.3279        | 1344.6219      | 672.8146         | 1343.6379      | 672.3226         | 11 |
| 5  | 516.2664  | 258.6368        |                |                  | 498.2558       | 249.6316         | V    | 1232.6058 | 616.8066        | 1215.5793      | 608.2933         | 1214.5953      | 607.8013         | 10 |
| 6  | 573.2879  | 287.1476        |                |                  | 555.2773       | 278.1423         | G    | 1133.5374 | 567.2724        | 1116.5109      | 558.7591         | 1115.5269      | 558.2671         | 9  |
| 7  | 759.3672  | 380.1872        |                |                  | 741.3566       | 371.1819         | W    | 1076.5160 | 538.7616        | 1059.4894      | 530.2483         | 1058.5054      | 529.7563         | 8  |
| 8  | 873.4101  | 437.2087        | 856.3836       | 428.6954         | 855.3995       | 428.2034         | N    | 890.4367  | 445.7220        | 873.4101       | 437.2087         | 872.4261       | 436.7167         | 7  |
| 9  | 1010.4690 | 505.7381        | 993.4425       | 497.2249         | 992.4585       | 496.7329         | H    | 776.3937  | 388.7005        | 759.3672       | 380.1872         | 758.3832       | 379.6952         | 6  |
| 10 | 1173.5323 | 587.2698        | 1156.5058      | 578.7565         | 1155.5218      | 578.2645         | Y    | 639.3348  | 320.1710        | 622.3083       | 311.6578         | 621.3243       | 311.1658         | 5  |
| 11 | 1288.5593 | 644.7833        | 1271.5327      | 636.2700         | 1270.5487      | 635.7780         | D    | 476.2715  | 238.6394        | 459.2449       | 230.1261         | 458.2609       | 229.6341         | 4  |
| 12 | 1389.6070 | 695.3071        | 1372.5804      | 686.7938         | 1371.5964      | 686.3018         | T    | 361.2445  | 181.1259        | 344.2180       | 172.6126         | 343.2340       | 172.1206         | 3  |
| 13 | 1502.6910 | 751.8492        | 1485.6645      | 743.3359         | 1484.6805      | 742.8439         | I    | 260.1969  | 130.6021        | 243.1703       | 122.0888         |                |                  | 2  |
| 14 |           |                 |                |                  |                |                  | K    | 147.1128  | 74.0600         | 130.0863       | 65.5468          |                |                  | 1  |

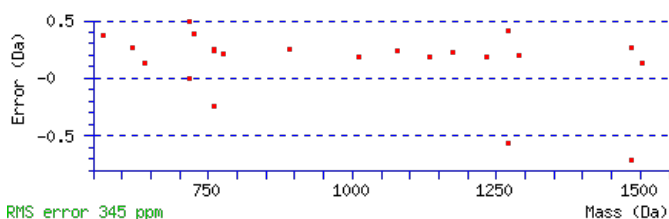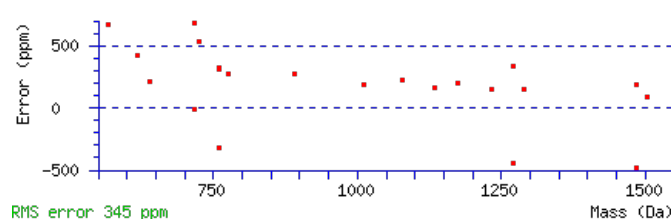NCBI BLAST search of **LSSEVGWNHYDTIK**

(Parameters: blastp, nr protein database, expect=20000, no filter, PAM30)

AT3G07110.1

Other BLAST [web gateways](#)

**All matches to this query**

| Score | Mr(calc)  | Delta   | Sequence                         |
|-------|-----------|---------|----------------------------------|
| 58.8  | 1647.7893 | -0.0021 | <a href="#">LSSEVGWNHYDTIK</a>   |
| 7.7   | 1647.7886 | -0.0014 | <a href="#">DVETASLRMDNLER</a>   |
| 0.3   | 1647.7886 | -0.0014 | <a href="#">QALTNVGNIAGECSSK</a> |
| 0.3   | 1647.7895 | -0.0023 | <a href="#">DKRCGVCGPVLMEK</a>   |

**Mascot:** <http://www.matrixscience.com/>

**Peptide View**MS/MS Fragmentation of **GDDLKRILR**

Found in **AT3G07350.1** in **TAIR\_Arabidopsis**, Symbols: | similar to unknown protein [Arabidopsis thaliana] (TAIR:AT3G25240.1); similar to unnamed protein product [Vitis vinifera] (GB:CAO38687.1); contains InterPro domain Protein of unknown function DUF506, plant (InterPro:IPR006502) | chr3:23

Match to Query 3426: 1084.633508 from(543.324030,2+) index(8660)

Title: Elution from: 76.578 to 76.578 scan no 11414 cid35.00 polarity:+

Data file C7-3\_1.mgf

Click mouse within plot area to zoom in by factor of two about that point

Or,   to  Da

Label all possible matches  Label matches used for scoring

Show Y-axis

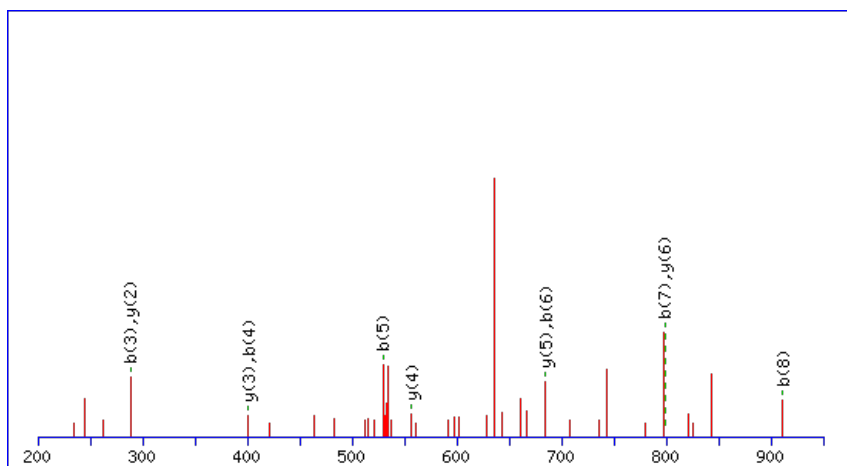

Monoisotopic mass of neutral peptide  $M_r(\text{calc})$ : 1084.6353

Fixed modifications: Carbamidomethyl (C) (apply to specified residues or termini only)

Ions Score: 40 Expect: 0.00045

Matches : 11/74 fragment ions using 14 most intense peaks ([help](#))

| # | b               | b <sup>++</sup> | b*       | b <sup>+++</sup> | b <sup>0</sup> | b <sup>0++</sup> | Seq.     | y               | y <sup>++</sup> | y*        | y <sup>+++</sup> | y <sup>0</sup> | y <sup>0++</sup> | #        |
|---|-----------------|-----------------|----------|------------------|----------------|------------------|----------|-----------------|-----------------|-----------|------------------|----------------|------------------|----------|
| 1 | 58.0287         | 29.5180         |          |                  |                |                  | <b>G</b> |                 |                 |           |                  |                |                  | <b>9</b> |
| 2 | 173.0557        | 87.0315         |          |                  | 155.0451       | 78.0262          | <b>D</b> | 1028.6211       | 514.8142        | 1011.5946 | 506.3009         | 1010.6105      | 505.8089         | <b>8</b> |
| 3 | <b>288.0826</b> | 144.5450        |          |                  | 270.0721       | 135.5397         | <b>D</b> | 913.5942        | 457.3007        | 896.5676  | 448.7874         | 895.5836       | 448.2954         | <b>7</b> |
| 4 | <b>401.1667</b> | 201.0870        |          |                  | 383.1561       | 192.0817         | <b>L</b> | <b>798.5672</b> | 399.7872        | 781.5407  | 391.2740         |                |                  | <b>6</b> |
| 5 | <b>529.2617</b> | 265.1345        | 512.2351 | 256.6212         | 511.2511       | 256.1292         | <b>K</b> | <b>685.4832</b> | 343.2452        | 668.4566  | 334.7319         |                |                  | <b>5</b> |
| 6 | <b>685.3628</b> | 343.1850        | 668.3362 | 334.6717         | 667.3522       | 334.1797         | <b>R</b> | <b>557.3882</b> | 279.1977        | 540.3616  | 270.6845         |                |                  | <b>4</b> |
| 7 | <b>798.4468</b> | 399.7271        | 781.4203 | 391.2138         | 780.4363       | 390.7218         | <b>I</b> | <b>401.2871</b> | 201.1472        | 384.2605  | 192.6339         |                |                  | <b>3</b> |
| 8 | <b>911.5309</b> | 456.2691        | 894.5043 | 447.7558         | 893.5203       | 447.2638         | <b>L</b> | <b>288.2030</b> | 144.6051        | 271.1765  | 136.0919         |                |                  | <b>2</b> |
| 9 |                 |                 |          |                  |                |                  | <b>R</b> | 175.1190        | 88.0631         | 158.0924  | 79.5498          |                |                  | <b>1</b> |

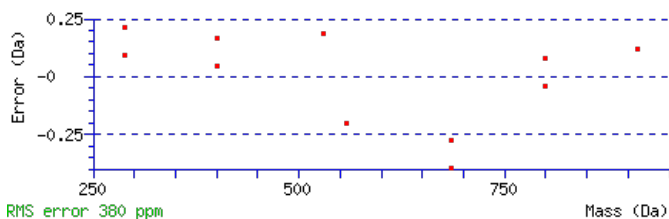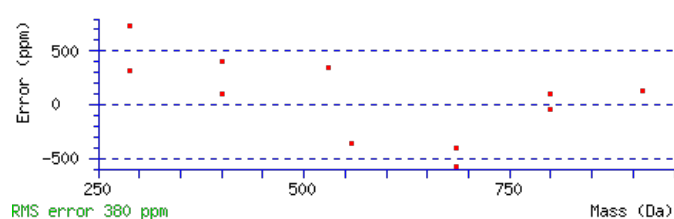

NCBI **BLAST** search of [GDDLKRILR](#)

(Parameters: blastp, nr protein database, expect=20000, no filter, PAM30)

Other BLAST [web gateways](#)

All matches to this query

**AT3G07350.1**

| <b>Score</b> | <b>Mr(calc)</b> | <b>Delta</b> | <b>Sequence</b>            |
|--------------|-----------------|--------------|----------------------------|
| 39.7         | 1084.6353       | -0.0018      | <a href="#">GDDLKRILR</a>  |
| 9.5          | 1084.6353       | -0.0018      | <a href="#">GQRTLELIR</a>  |
| 3.5          | 1084.6353       | -0.0018      | <a href="#">GARLEGTIR</a>  |
| 2.7          | 1084.6353       | -0.0018      | <a href="#">IRTGKQSAPK</a> |
| 1.3          | 1084.6353       | -0.0017      | <a href="#">LRTEAINLR</a>  |

**Mascot:** <http://www.matrixscience.com/>



# Mascot Search Results

## Peptide View

MS/MS Fragmentation of **MAGSQAFLAYR**

Found in **AT3G07390.1** in **TAIR\_Arabidopsis**, Symbols: AIR12 | AIR12 (Auxin-Induced in Root cultures 12); extracellular matrix structural constituent | chr3:2365458-2366279 FORWARD

Match to Query 3689: 1213.589984 from(607.802268,2+) index(4606)

Title: Elution from: 43.302 to 43.302 scan no 5884 cid35.00 polarity:+

Data file D12h-2\_3.mgf

Click mouse within plot area to zoom in by factor of two about that point

Or,   to  Da

Label all possible matches  Label matches used for scoring

Show Y-axis

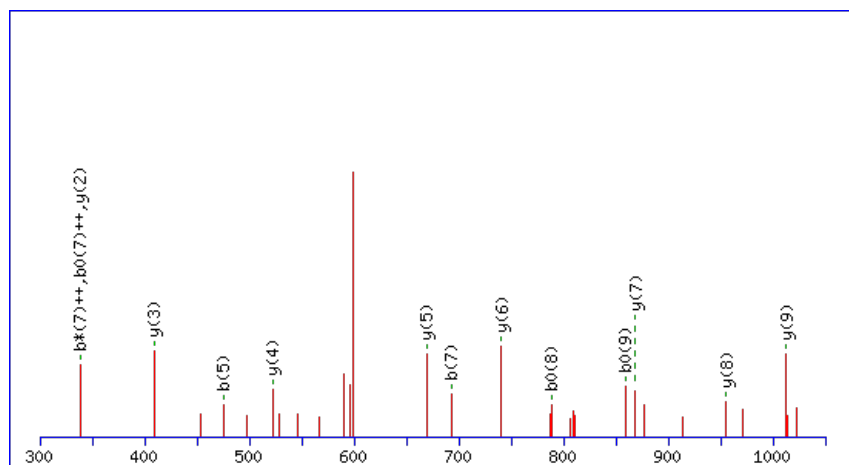

Monoisotopic mass of neutral peptide  $M_r(\text{calc})$ : 1213.5914

Fixed modifications: Carbamidomethyl (C) (apply to specified residues or termini only)

Ions Score: 90 Expect: 1.7e-009

Matches : 14/92 fragment ions using 14 most intense peaks [\(help\)](#)

| #  | b               | b <sup>++</sup> | b*        | b <sup>*++</sup> | b <sup>0</sup>  | b <sup>0++</sup> | Seq. | y                | y <sup>++</sup> | y*        | y <sup>*++</sup> | y <sup>0</sup> | y <sup>0++</sup> | #  |
|----|-----------------|-----------------|-----------|------------------|-----------------|------------------|------|------------------|-----------------|-----------|------------------|----------------|------------------|----|
| 1  | 132.0478        | 66.5275         |           |                  |                 |                  | M    |                  |                 |           |                  |                |                  | 11 |
| 2  | 203.0849        | 102.0461        |           |                  |                 |                  | A    | 1083.5582        | 542.2827        | 1066.5316 | 533.7694         | 1065.5476      | 533.2774         | 10 |
| 3  | 260.1063        | 130.5568        |           |                  |                 |                  | G    | <b>1012.5211</b> | 506.7642        | 995.4945  | 498.2509         | 994.5105       | 497.7589         | 9  |
| 4  | 347.1384        | 174.0728        |           |                  | 329.1278        | 165.0675         | S    | <b>955.4996</b>  | 478.2534        | 938.4730  | 469.7402         | 937.4890       | 469.2482         | 8  |
| 5  | <b>475.1969</b> | 238.1021        | 458.1704  | 229.5888         | 457.1864        | 229.0968         | Q    | <b>868.4676</b>  | 434.7374        | 851.4410  | 426.2241         |                |                  | 7  |
| 6  | 546.2341        | 273.6207        | 529.2075  | 265.1074         | 528.2235        | 264.6154         | A    | <b>740.4090</b>  | 370.7081        | 723.3824  | 362.1949         |                |                  | 6  |
| 7  | <b>693.3025</b> | 347.1549        | 676.2759  | <b>338.6416</b>  | 675.2919        | <b>338.1496</b>  | F    | <b>669.3719</b>  | 335.1896        | 652.3453  | 326.6763         |                |                  | 5  |
| 8  | 806.3865        | 403.6969        | 789.3600  | 395.1836         | <b>788.3760</b> | 394.6916         | L    | <b>522.3035</b>  | 261.6554        | 505.2769  | 253.1421         |                |                  | 4  |
| 9  | 877.4237        | 439.2155        | 860.3971  | 430.7022         | <b>859.4131</b> | 430.2102         | A    | <b>409.2194</b>  | 205.1133        | 392.1928  | 196.6001         |                |                  | 3  |
| 10 | 1040.4870       | 520.7471        | 1023.4604 | 512.2339         | 1022.4764       | 511.7418         | Y    | <b>338.1823</b>  | 169.5948        | 321.1557  | 161.0815         |                |                  | 2  |
| 11 |                 |                 |           |                  |                 |                  | R    | 175.1190         | 88.0631         | 158.0924  | 79.5498          |                |                  | 1  |

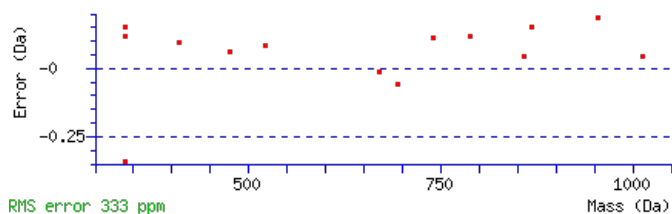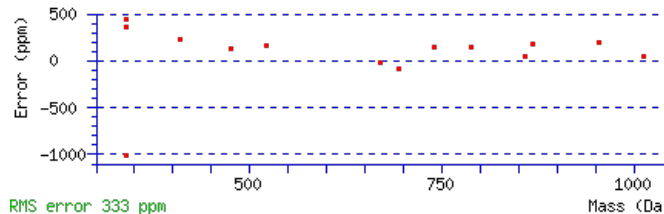

NCBI BLAST search of **MAGSQAFLAYR**

(Parameters: blastp, nr protein database, expect=20000, no filter, PAM30)

Other BLAST [web gateways](#)

All matches to this query

AT3G07390.1

| Score | Mr(calc)  | Delta   | Sequence                    |
|-------|-----------|---------|-----------------------------|
| 90.3  | 1213.5914 | -0.0014 | <a href="#">MAGSQAFLAYR</a> |
| 0.1   | 1213.5900 | -0.0000 | <a href="#">MVEYDITSLK</a>  |

Mascot: <http://www.matrixscience.com/>

**Peptide View**MS/MS Fragmentation of **MSLKGGK**

Found in **AT3G07590.1** in **TAIR\_Arabidopsis**, Symbols: | small nuclear ribonucleoprotein D1, putative / snRNP core protein D1, putative / Sm protein D1, putative | chr3:2423152-2423964 FORWARD

Match to Query 639: 686.348588 from(344.181570,2+) index(5138)

Title: Elution from: 46.470 to 46.470 scan no 6452 cid35.00 polarity:+

Data file 0-2\_1.mgf

Click mouse within plot area to zoom in by factor of two about that point

Or,   to  Da

Label all possible matches  Label matches used for scoring

Show Y-axis

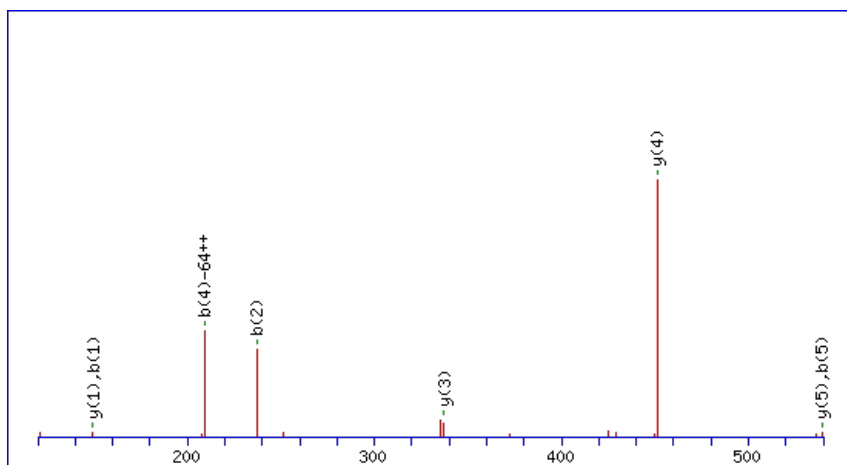

**Monoisotopic mass of neutral peptide Mr(calc):** 686.3497

**Fixed modifications:** Carbamidomethyl (C) (apply to specified residues or termini only)

**Variable modifications:**

**M1** : Oxidation (M), with neutral losses 0.0000 (shown in table), 63.9983

**Ions Score:** 33 **Expect:** 0.0079

**Matches** : 8/66 fragment ions using 10 most intense peaks ([help](#))

| # | b        | b <sup>++</sup> | b*       | b <sup>*++</sup> | b <sup>0</sup> | b <sup>0++</sup> | Seq. | y        | y <sup>++</sup> | y*       | y <sup>*++</sup> | y <sup>0</sup> | y <sup>0++</sup> | # |
|---|----------|-----------------|----------|------------------|----------------|------------------|------|----------|-----------------|----------|------------------|----------------|------------------|---|
| 1 | 149.0397 | 75.0235         |          |                  |                |                  | M    |          |                 |          |                  |                |                  | 6 |
| 2 | 237.0688 | 119.0380        |          |                  | 219.0582       | 110.0327         | S    | 539.3246 | 270.1659        | 521.3010 | 261.1541         | 521.3140       | 261.1606         | 5 |
| 3 | 351.1499 | 176.0786        |          |                  | 333.1393       | 167.0733         | L    | 451.2955 | 226.1514        | 433.2719 | 217.1396         |                |                  | 4 |
| 4 | 481.2389 | 241.1231        | 463.2153 | 232.1113         | 463.2283       | 232.1178         | K    | 337.2144 | 169.1108        | 319.1908 | 160.0990         |                |                  | 3 |
| 5 | 539.2574 | 270.1323        | 521.2338 | 261.1205         | 521.2468       | 261.1271         | G    | 207.1254 | 104.0663        | 189.1018 | 95.0545          |                |                  | 2 |
| 6 |          |                 |          |                  |                |                  | K    | 149.1069 | 75.0571         | 131.0833 | 66.0453          |                |                  | 1 |

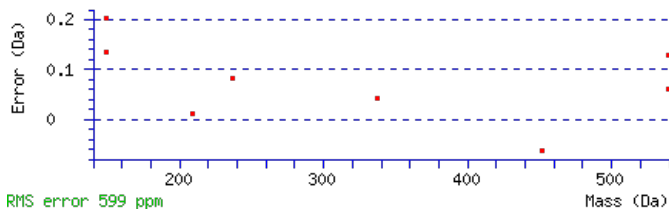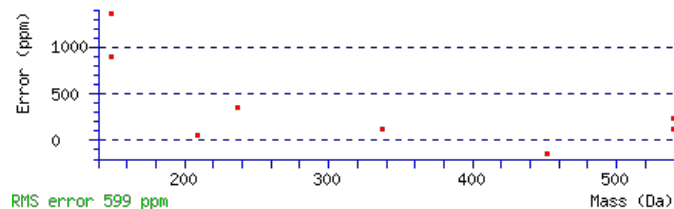

NCBI **BLAST** search of [MSLKGGK](#)

(Parameters: blastp, nr protein database, expect=20000, no filter, PAM30)

Other BLAST [web gateways](#)

**All matches to this query**

| Score | Mr(calc) | Delta   | Sequence                |
|-------|----------|---------|-------------------------|
| 33.4  | 686.3497 | -0.0011 | <a href="#">MSLKGGK</a> |
| 29.7  | 686.3486 | 0.0000  | <a href="#">FSLWK</a>   |



## AT3G07590.1

|      |          |         |                        |
|------|----------|---------|------------------------|
| 29.7 | 686.3497 | -0.0011 | <a href="#">MAKVSK</a> |
| 25.6 | 686.3497 | -0.0011 | <a href="#">MLSKGK</a> |
| 19.7 | 686.3497 | -0.0011 | <a href="#">AKMVSK</a> |
| 19.7 | 686.3497 | -0.0011 | <a href="#">KGMLSK</a> |
| 19.7 | 686.3486 | 0.0000  | <a href="#">SFLWK</a>  |
| 19.7 | 686.3486 | 0.0000  | <a href="#">WFISK</a>  |
| 19.6 | 686.3486 | 0.0000  | <a href="#">YAWIK</a>  |
| 18.7 | 686.3497 | -0.0011 | <a href="#">MGLKSK</a> |

Mascot: <http://www.matrixscience.com/>

**Peptide View**MS/MS Fragmentation of **WVHCHCDGISDDK**Found in **AT3G08020.1** in **TAIR\_Arabidopsis**, Symbols: | protein binding / zinc ion binding | chr3:2557759-2561540 REVERSE

Match to Query 7595: 1648.590638 from(825.302595,2+) index(2837)

Title: Elution from: 29.365 to 29.365 scan no 3588 cid35.00 polarity:+

Data file 0-2\_2.mgf

Click mouse within plot area to zoom in by factor of two about that point

Or,   to  Da Label all possible matches  Label matches used for scoring Show Y-axis 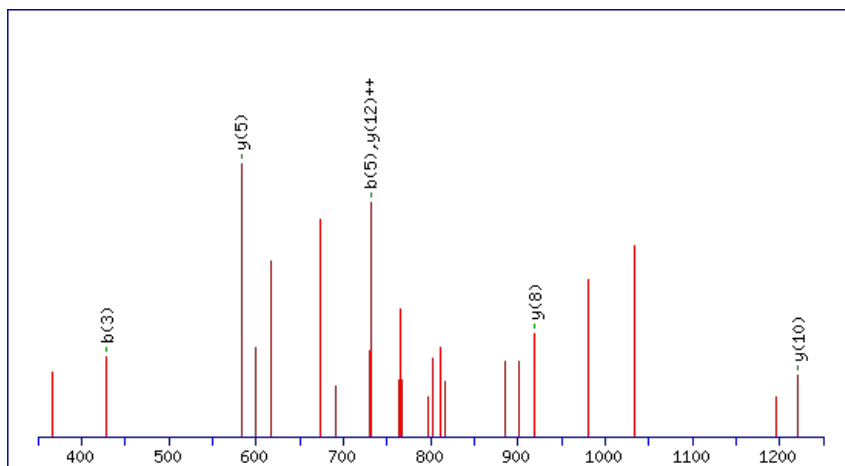

Monoisotopic mass of neutral peptide Mr(calc): 1648.5885

Fixed modifications: Carbamidomethyl (C) (apply to specified residues or termini only)

Ions Score: 15 Expect: 0.032

Matches : 6/106 fragment ions using 7 most intense peaks ([help](#))

| #  | b         | b <sup>++</sup> | b <sup>0</sup> | b <sup>0++</sup> | Seq. | y         | y <sup>++</sup> | y*        | y <sup>*++</sup> | y <sup>0</sup> | y <sup>0++</sup> | #  |
|----|-----------|-----------------|----------------|------------------|------|-----------|-----------------|-----------|------------------|----------------|------------------|----|
| 1  | 189.0807  | 95.0440         |                |                  | W    |           |                 |           |                  |                |                  | 13 |
| 2  | 289.1461  | 145.0767        |                |                  | V    | 1461.5224 | 731.2648        | 1443.4988 | 722.2530         | 1443.5118      | 722.2595         | 12 |
| 3  | 429.1961  | 215.1017        |                |                  | H    | 1361.4569 | 681.2321        | 1343.4334 | 672.2203         | 1343.4464      | 672.2268         | 11 |
| 4  | 591.2208  | 296.1141        |                |                  | C    | 1221.4069 | 611.2071        | 1203.3833 | 602.1953         | 1203.3964      | 602.2018         | 10 |
| 5  | 731.2709  | 366.1391        |                |                  | H    | 1059.3822 | 530.1947        | 1041.3586 | 521.1829         | 1041.3716      | 521.1895         | 9  |
| 6  | 893.2956  | 447.1514        |                |                  | C    | 919.3322  | 460.1697        | 901.3086  | 451.1579         | 901.3216       | 451.1644         | 8  |
| 7  | 1009.3196 | 505.1634        | 991.3090       | 496.1581         | D    | 757.3075  | 379.1574        | 739.2839  | 370.1456         | 739.2969       | 370.1521         | 7  |
| 8  | 1067.3381 | 534.1727        | 1049.3275      | 525.1674         | G    | 641.2835  | 321.1454        | 623.2599  | 312.1336         | 623.2729       | 312.1401         | 6  |
| 9  | 1181.4192 | 591.2132        | 1163.4086      | 582.2079         | I    | 583.2650  | 292.1361        | 565.2414  | 283.1243         | 565.2544       | 283.1309         | 5  |
| 10 | 1269.4482 | 635.2277        | 1251.4377      | 626.2225         | S    | 469.1839  | 235.0956        | 451.1603  | 226.0838         | 451.1733       | 226.0903         | 4  |
| 11 | 1385.4722 | 693.2397        | 1367.4616      | 684.2345         | D    | 381.1548  | 191.0811        | 363.1312  | 182.0693         | 363.1443       | 182.0758         | 3  |
| 12 | 1501.4962 | 751.2517        | 1483.4856      | 742.2464         | D    | 265.1309  | 133.0691        | 247.1073  | 124.0573         | 247.1203       | 124.0638         | 2  |
| 13 |           |                 |                |                  | K    | 149.1069  | 75.0571         | 131.0833  | 66.0453          |                |                  | 1  |

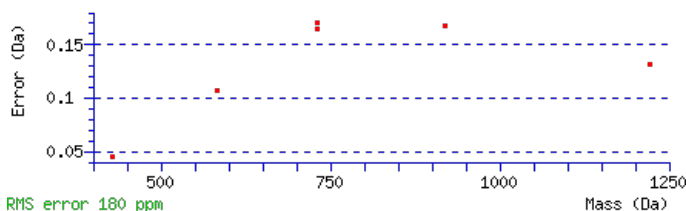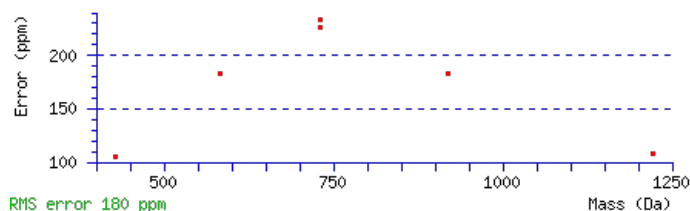NCBI BLAST search of [WVHCHCDGISDDK](#)

(Parameters: blastp, nr protein database, expect=20000, no filter, PAM30)

Other BLAST [web gateways](#)

AT3G08020.1

All matches to this query

| Score | Mr(calc)  | Delta  | Sequence                      |
|-------|-----------|--------|-------------------------------|
| 14.9  | 1648.5885 | 0.0022 | <a href="#">WVHCHCDGISDDK</a> |

Mascot: <http://www.matrixscience.com/>

### Peptide View

#### MS/MS Fragmentation of **TSPGQTYILSFVVGDAK**

Found in **AT3G08030.1** in **TAIR\_Arabidopsis**, Symbols: | similar to unknown protein [Arabidopsis thaliana] (TAIR:AT2G41800.1); similar to unnamed protein product [Vitis vinifera] (GB:CAO40802.1); contains InterPro domain Protein of unknown function DUF642 (InterPro:IPR006946) | chr3:2564197-2

Match to Query 7994: 1788.823760 from(895.419156,2+) index(6940)

Title: Elution from: 62.717 to 62.717 scan no 9152 cid35.00 polarity:+

Data file D1d-2\_3.mgf

Click mouse within plot area to zoom in by factor of two about that point

Or,   to  Da

Label all possible matches  Label matches used for scoring

Show Y-axis

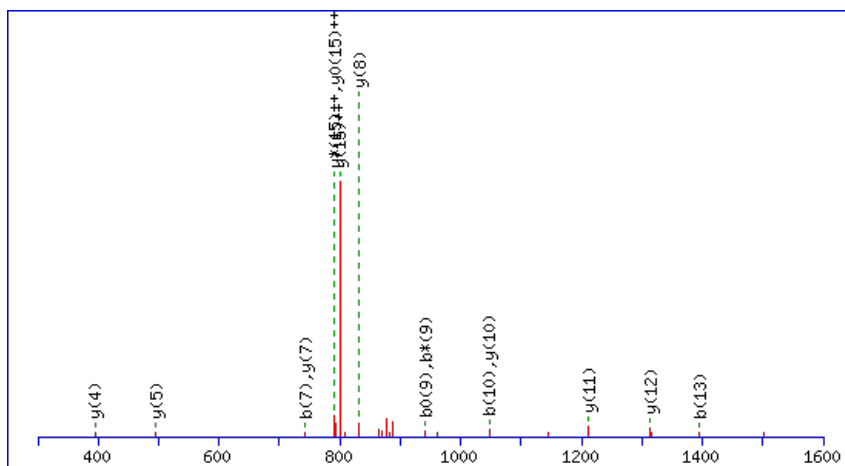

**Monoisotopic mass of neutral peptide Mr(calc):** 1788.8272

**Fixed modifications:** Carbamidomethyl (C) (apply to specified residues or termini only)

**Ions Score:** 48 **Expect:** 0.00012

**Matches:** 15/180 fragment ions using 19 most intense peaks ([help](#))

| #  | b         | b <sup>++</sup> | b*        | b <sup>*++</sup> | b <sup>0</sup> | b <sup>0++</sup> | Seq. | y         | y <sup>++</sup> | y*        | y <sup>*++</sup> | y <sup>0</sup> | y <sup>0++</sup> | #  |
|----|-----------|-----------------|-----------|------------------|----------------|------------------|------|-----------|-----------------|-----------|------------------|----------------|------------------|----|
| 1  | 103.0520  | 52.0296         |           |                  | 85.0414        | 43.0244          | T    |           |                 |           |                  |                |                  | 17 |
| 2  | 191.0811  | 96.0442         |           |                  | 173.0705       | 87.0389          | S    | 1687.7898 | 844.3985        | 1669.7662 | 835.3867         | 1669.7792      | 835.3933         | 16 |
| 3  | 289.1309  | 145.0691        |           |                  | 271.1203       | 136.0638         | P    | 1599.7607 | 800.3840        | 1581.7372 | 791.3722         | 1581.7502      | 791.3787         | 15 |
| 4  | 347.1494  | 174.0783        |           |                  | 329.1388       | 165.0730         | G    | 1501.7109 | 751.3591        | 1483.6874 | 742.3473         | 1483.7004      | 742.3538         | 14 |
| 5  | 477.2020  | 239.1046        | 459.1784  | 230.0928         | 459.1914       | 230.0994         | Q    | 1443.6924 | 722.3499        | 1425.6689 | 713.3381         | 1425.6819      | 713.3446         | 13 |
| 6  | 579.2467  | 290.1270        | 561.2231  | 281.1152         | 561.2361       | 281.1217         | T    | 1313.6398 | 657.3235        | 1295.6162 | 648.3117         | 1295.6292      | 648.3183         | 12 |
| 7  | 743.3071  | 372.1572        | 725.2835  | 363.1454         | 725.2965       | 363.1519         | Y    | 1211.5951 | 606.3012        | 1193.5715 | 597.2894         | 1193.5845      | 597.2959         | 11 |
| 8  | 845.3518  | 423.1795        | 827.3282  | 414.1677         | 827.3412       | 414.1742         | T    | 1047.5347 | 524.2710        | 1029.5111 | 515.2592         | 1029.5242      | 515.2657         | 10 |
| 9  | 959.4329  | 480.2201        | 941.4093  | 471.2083         | 941.4223       | 471.2148         | L    | 945.4900  | 473.2486        | 927.4664  | 464.2369         | 927.4794       | 464.2434         | 9  |
| 10 | 1047.4619 | 524.2346        | 1029.4384 | 515.2228         | 1029.4514      | 515.2293         | S    | 831.4089  | 416.2081        | 813.3853  | 407.1963         | 813.3983       | 407.2028         | 8  |
| 11 | 1195.5274 | 598.2673        | 1177.5038 | 589.2555         | 1177.5168      | 589.2621         | F    | 743.3798  | 372.1936        | 725.3563  | 363.1818         | 725.3693       | 363.1883         | 7  |
| 12 | 1295.5928 | 648.3001        | 1277.5693 | 639.2883         | 1277.5823      | 639.2948         | V    | 595.3144  | 298.1608        | 577.2908  | 289.1490         | 577.3038       | 289.1556         | 6  |
| 13 | 1395.6583 | 698.3328        | 1377.6347 | 689.3210         | 1377.6477      | 689.3275         | V    | 495.2489  | 248.1281        | 477.2254  | 239.1163         | 477.2384       | 239.1228         | 5  |
| 14 | 1453.6768 | 727.3420        | 1435.6532 | 718.3302         | 1435.6662      | 718.3368         | G    | 395.1835  | 198.0954        | 377.1599  | 189.0836         | 377.1729       | 189.0901         | 4  |
| 15 | 1569.7008 | 785.3540        | 1551.6772 | 776.3422         | 1551.6902      | 776.3487         | D    | 337.1650  | 169.0861        | 319.1414  | 160.0743         | 319.1544       | 160.0809         | 3  |
| 16 | 1641.7349 | 821.3711        | 1623.7113 | 812.3593         | 1623.7244      | 812.3658         | A    | 221.1410  | 111.0741        | 203.1174  | 102.0624         |                |                  | 2  |
| 17 |           |                 |           |                  |                |                  | K    | 149.1069  | 75.0571         | 131.0833  | 66.0453          |                |                  | 1  |

AT3G08030.1

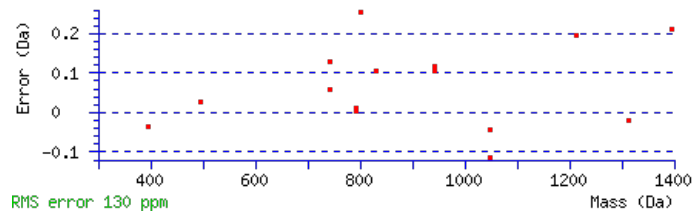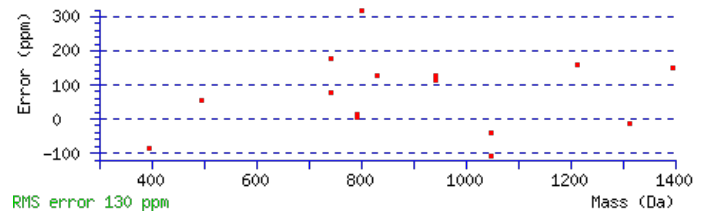

NCBI **BLAST** search of [TSPGQTYTLSEFVVGDAK](#)

(Parameters: blastp, nr protein database, expect=20000, no filter, PAM30)

Other BLAST [web gateways](#)

**All matches to this query**

| Score | Mr(calc)  | Delta   | Sequence                           |
|-------|-----------|---------|------------------------------------|
| 48.3  | 1788.8272 | -0.0034 | <a href="#">TSPGQTYTLSEFVVGDAK</a> |
| 3.0   | 1788.8237 | 0.0001  | <a href="#">MKSNIELMVSTNGGKK</a>   |
| 2.0   | 1788.8203 | 0.0035  | <a href="#">MGITNTVVSNYNINTK</a>   |
| 1.9   | 1788.8218 | 0.0020  | <a href="#">GKNQYSWKGFGEIPR</a>    |

Mascot: <http://www.matrixscience.com/>

## Peptide View

MS/MS Fragmentation of **LQQFQGA~~V~~DAAR**

Found in **AT3G08530.1** in **TAIR\_Arabidopsis**, Symbols: | clathrin heavy chain, putative | chr3:2587177-2595417 REVERSE

Match to Query 4817: 1320.613116 from(661.313834,2+) index(2952)

Title: Elution from: 28.653 to 28.653 scan no 3640 cid35.00 polarity:+

Data file C7-2\_3.mgf

Click mouse within plot area to zoom in by factor of two about that point

Or,   to  Da

Label all possible matches  Label matches used for scoring

Show Y-axis

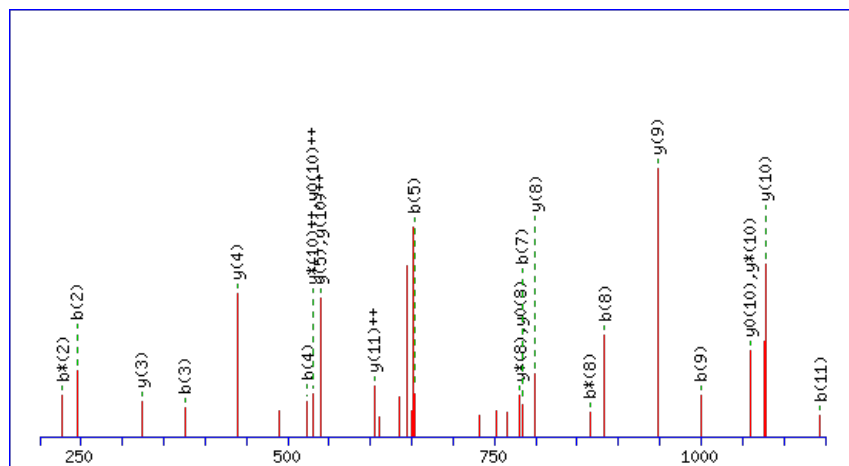

Monoisotopic mass of neutral peptide  $M_r(\text{calc})$ : 1320.6146

**Fixed modifications:** Carbamidomethyl (C) (apply to specified residues or termini only)

**Ions Score:** 84 **Expect:** 4.1e-008

**Matches:** 24/108 fragment ions using 24 most intense peaks ([help](#))

| #  | b                | b <sup>++</sup> | b*              | b <sup>*++</sup> | b <sup>0</sup> | b <sup>0++</sup> | Seq. | y                | y <sup>++</sup> | y*               | y <sup>*++</sup> | y <sup>0</sup>   | y <sup>0++</sup> | #  |
|----|------------------|-----------------|-----------------|------------------|----------------|------------------|------|------------------|-----------------|------------------|------------------|------------------|------------------|----|
| 1  | 115.0884         | 58.0478         |                 |                  |                |                  | L    |                  |                 |                  |                  |                  |                  | 12 |
| 2  | <b>245.1410</b>  | 123.0741        | <b>227.1174</b> | 114.0624         |                |                  | Q    | 1207.5409        | <b>604.2741</b> | 1189.5173        | 595.2623         | 1189.5303        | 595.2688         | 11 |
| 3  | <b>375.1937</b>  | 188.1005        | 357.1701        | 179.0887         |                |                  | Q    | <b>1077.4882</b> | <b>539.2477</b> | <b>1059.4646</b> | <b>530.2360</b>  | <b>1059.4776</b> | <b>530.2425</b>  | 10 |
| 4  | <b>523.2591</b>  | 262.1332        | 505.2355        | 253.1214         |                |                  | F    | <b>947.4356</b>  | 474.2214        | 929.4120         | 465.2096         | 929.4250         | 465.2161         | 9  |
| 5  | <b>653.3118</b>  | 327.1595        | 635.2882        | 318.1477         |                |                  | Q    | <b>799.3701</b>  | 400.1887        | <b>781.3465</b>  | 391.1769         | <b>781.3595</b>  | 391.1834         | 8  |
| 6  | 711.3303         | 356.1688        | 693.3067        | 347.1570         |                |                  | G    | 669.3175         | 335.1624        | 651.2939         | 326.1506         | 651.3069         | 326.1571         | 7  |
| 7  | <b>783.3644</b>  | 392.1858        | 765.3408        | 383.1741         |                |                  | A    | 611.2990         | 306.1531        | 593.2754         | 297.1413         | 593.2884         | 297.1478         | 6  |
| 8  | <b>883.4299</b>  | 442.2186        | <b>865.4063</b> | 433.2068         |                |                  | V    | <b>539.2648</b>  | 270.1360        | 521.2412         | 261.1243         | 521.2543         | 261.1308         | 5  |
| 9  | <b>999.4538</b>  | 500.2306        | 981.4303        | 491.2188         | 981.4433       | 491.2253         | D    | <b>439.1994</b>  | 220.1033        | 421.1758         | 211.0915         | 421.1888         | 211.0980         | 4  |
| 10 | 1071.4880        | 536.2476        | 1053.4644       | 527.2358         | 1053.4774      | 527.2423         | A    | <b>323.1754</b>  | 162.0913        | 305.1518         | 153.0795         |                  |                  | 3  |
| 11 | <b>1143.5221</b> | 572.2647        | 1125.4986       | 563.2529         | 1125.5116      | 563.2594         | A    | 251.1412         | 126.0743        | 233.1177         | 117.0625         |                  |                  | 2  |
| 12 |                  |                 |                 |                  |                |                  | R    | 179.1071         | 90.0572         | 161.0835         | 81.0454          |                  |                  | 1  |

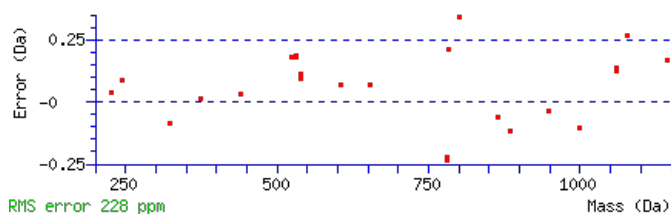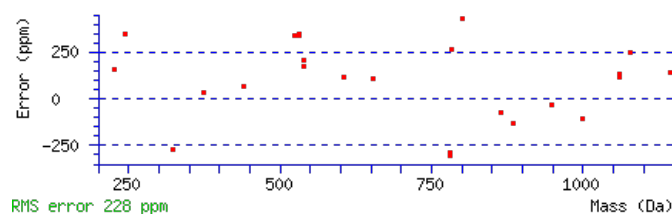

NCBI **BLAST** search of **LQQFQGA~~V~~DAAR**

(Parameters: blastp, nr protein database, expect=20000, no filter, PAM30)

Other BLAST [web gateways](#)

All matches to this query

## AT3G08530.1

| Score | Mr(calc)  | Delta   | Sequence                     |
|-------|-----------|---------|------------------------------|
| 83.9  | 1320.6146 | -0.0015 | <a href="#">LQQFQGAVDAAR</a> |
| 16.5  | 1320.6154 | -0.0023 | <a href="#">ELEAMLDKSVR</a>  |
| 16.5  | 1320.6154 | -0.0023 | <a href="#">ELKDMEKEIR</a>   |
| 14.2  | 1320.6169 | -0.0038 | <a href="#">QIEVNFYVHR</a>   |
| 11.9  | 1320.6147 | -0.0016 | <a href="#">RNYPAANVVDGK</a> |
| 10.8  | 1320.6154 | -0.0023 | <a href="#">LEERKLEDMK</a>   |
| 6.9   | 1320.6133 | -0.0002 | <a href="#">LPQICMNVRR</a>   |
| 4.9   | 1320.6133 | -0.0002 | <a href="#">MKAAIERACPR</a>  |
| 4.9   | 1320.6124 | 0.0007  | <a href="#">IENDTKEAARR</a>  |
| 2.3   | 1320.6154 | -0.0023 | <a href="#">ELNISGCSSLVK</a> |

Mascot: <http://www.matrixscience.com/>

**Peptide View**MS/MS Fragmentation of **DEGFGSLWR**

Found in **AT3G08580.1** in **TAIR\_Arabidopsis**, Symbols: AAC1 | AAC1 (ADP/ATP CARRIER 1); ATP:ADP antiporter/ binding | chr3:2605712-2607036 REVERSE

Match to Query 3151: 1065.487938 from(533.751245,2+) index(7301)

Title: Elution from: 63.505 to 63.505 scan no 9551 cid35.00 polarity:+

Data file D1d-3\_3.mgf

Click mouse within plot area to zoom in by factor of two about that point

Or,   to  Da

Label all possible matches  Label matches used for scoring

Show Y-axis

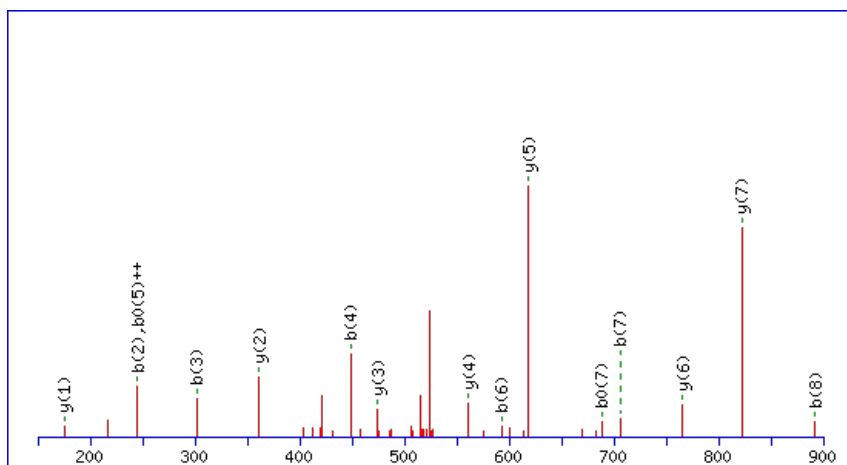

**Monoisotopic mass of neutral peptide Mr(calc):** 1065.4880

**Fixed modifications:** Carbamidomethyl (C) (apply to specified residues or termini only)

**Ions Score:** 70 **Expect:** 2e-007

**Matches:** 15/74 fragment ions using 19 most intense peaks ([help](#))

| # | b               | b <sup>++</sup> | b <sup>0</sup>  | b <sup>0++</sup> | Seq. | y               | y <sup>++</sup> | y*       | y <sup>*++</sup> | y <sup>0</sup> | y <sup>0++</sup> | # |
|---|-----------------|-----------------|-----------------|------------------|------|-----------------|-----------------|----------|------------------|----------------|------------------|---|
| 1 | 116.0342        | 58.5207         | 98.0237         | 49.5155          | D    |                 |                 |          |                  |                |                  | 9 |
| 2 | <b>245.0768</b> | 123.0420        | 227.0662        | 114.0368         | E    | 951.4683        | 476.2378        | 934.4417 | 467.7245         | 933.4577       | 467.2325         | 8 |
| 3 | <b>302.0983</b> | 151.5528        | 284.0877        | 142.5475         | G    | <b>822.4257</b> | 411.7165        | 805.3992 | 403.2032         | 804.4151       | 402.7112         | 7 |
| 4 | <b>449.1667</b> | 225.0870        | 431.1561        | 216.0817         | F    | <b>765.4042</b> | 383.2058        | 748.3777 | 374.6925         | 747.3937       | 374.2005         | 6 |
| 5 | 506.1882        | 253.5977        | 488.1776        | <b>244.5924</b>  | G    | <b>618.3358</b> | 309.6715        | 601.3093 | 301.1583         | 600.3253       | 300.6663         | 5 |
| 6 | <b>593.2202</b> | 297.1137        | 575.2096        | 288.1084         | S    | <b>561.3144</b> | 281.1608        | 544.2878 | 272.6475         | 543.3038       | 272.1555         | 4 |
| 7 | <b>706.3042</b> | 353.6558        | <b>688.2937</b> | 344.6505         | L    | <b>474.2823</b> | 237.6448        | 457.2558 | 229.1315         |                |                  | 3 |
| 8 | <b>892.3836</b> | 446.6954        | 874.3730        | 437.6901         | W    | <b>361.1983</b> | 181.1028        | 344.1717 | 172.5895         |                |                  | 2 |
| 9 |                 |                 |                 |                  | R    | <b>175.1190</b> | 88.0631         | 158.0924 | 79.5498          |                |                  | 1 |

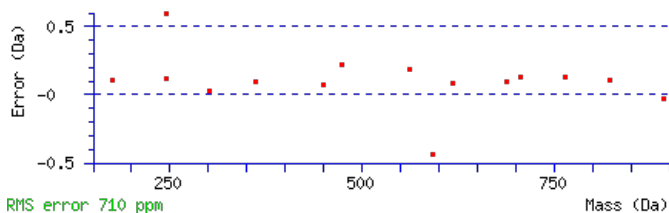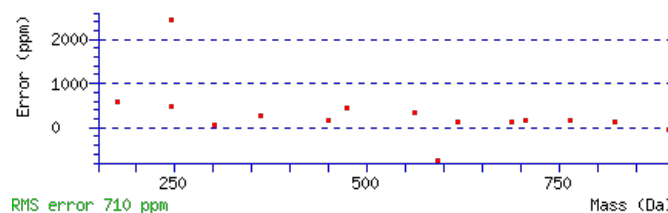

NCBI **BLAST** search of [DEGFGSLWR](#)

(Parameters: blastp, nr protein database, expect=20000, no filter, PAM30)

Other BLAST [web gateways](#)

All matches to this query

| Score | Mr(calc) | Delta | Sequence |
|-------|----------|-------|----------|
|       |          |       |          |



## AT3G08580.1

|      |           |         |                            |
|------|-----------|---------|----------------------------|
| 69.9 | 1065.4880 | -0.0000 | <a href="#">DEGFGSLWR</a>  |
| 7.1  | 1065.4873 | 0.0006  | <a href="#">AQMSGSDKSR</a> |
| 5.1  | 1065.4880 | -0.0000 | <a href="#">SDNPFSEFR</a>  |
| 3.5  | 1065.4880 | -0.0000 | <a href="#">DWNTVFER</a>   |
| 2.9  | 1065.4873 | 0.0006  | <a href="#">AVSSTSMNNR</a> |
| 2.3  | 1065.4879 | -0.0000 | <a href="#">FEDGWEKR</a>   |
| 2.0  | 1065.4873 | 0.0006  | <a href="#">ECSKVSNSR</a>  |

**Mascot:** <http://www.matrixscience.com/>

## Peptide View

### MS/MS Fragmentation of **LVDLALASGK**

Found in **AT3G08590.1** in **TAIR\_Arabidopsis**, Symbols: | 2,3-biphosphoglycerate-independent phosphoglycerate mutase, putative / phosphoglyceromutase, putative | chr3:2608689-2611243 REVERSE

Match to Query 2580: 996.548316 from(499.281434,2+) index(4672)

Title: Elution from: 42.619 to 42.619 scan no 5823 cid35.00 polarity:+

Data file C7-3\_1.mgf

Click mouse within plot area to zoom in by factor of two about that point

Or,   to  Da

Label all possible matches  Label matches used for scoring

Show Y-axis

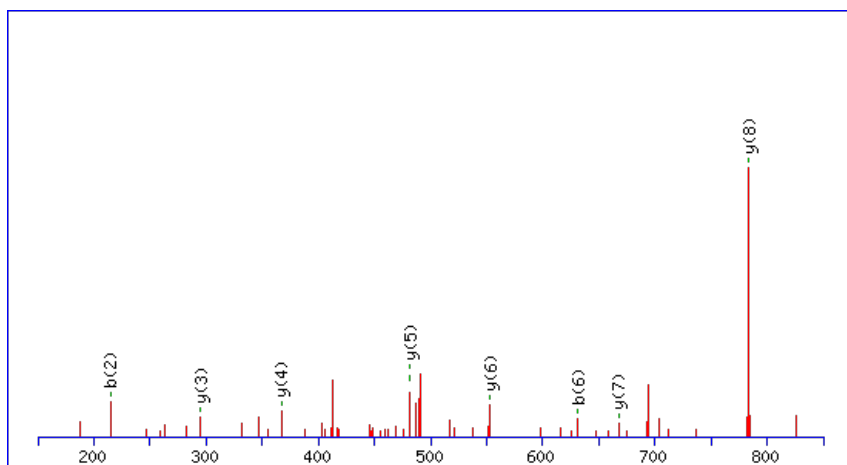

Monoisotopic mass of neutral peptide  $M_r(\text{calc})$ : 996.5482

Fixed modifications: Carbamidomethyl (C) (apply to specified residues or termini only)

Ions Score: 38 Expect: 0.00095

Matches : 8/82 fragment ions using 19 most intense peaks ([help](#))

| #  | b               | b <sup>++</sup> | b <sup>0</sup> | b <sup>0++</sup> | Seq. | y               | y <sup>++</sup> | y*       | y <sup>*++</sup> | y <sup>0</sup> | y <sup>0++</sup> | #  |
|----|-----------------|-----------------|----------------|------------------|------|-----------------|-----------------|----------|------------------|----------------|------------------|----|
| 1  | 115.0884        | 58.0478         |                |                  | L    |                 |                 |          |                  |                |                  | 10 |
| 2  | <b>215.1538</b> | 108.0805        |                |                  | V    | 883.4744        | 442.2408        | 865.4508 | 433.2290         | 865.4638       | 433.2355         | 9  |
| 3  | 331.1778        | 166.0925        | 313.1672       | 157.0873         | D    | <b>783.4089</b> | 392.2081        | 765.3853 | 383.1963         | 765.3983       | 383.2028         | 8  |
| 4  | 445.2589        | 223.1331        | 427.2483       | 214.1278         | L    | <b>667.3849</b> | 334.1961        | 649.3613 | 325.1843         | 649.3744       | 325.1908         | 7  |
| 5  | 517.2930        | 259.1502        | 499.2825       | 250.1449         | A    | <b>553.3038</b> | 277.1556        | 535.2802 | 268.1438         | 535.2933       | 268.1503         | 6  |
| 6  | <b>631.3741</b> | 316.1907        | 613.3636       | 307.1854         | L    | <b>481.2697</b> | 241.1385        | 463.2461 | 232.1267         | 463.2591       | 232.1332         | 5  |
| 7  | 703.4083        | 352.2078        | 685.3977       | 343.2025         | A    | <b>367.1886</b> | 184.0979        | 349.1650 | 175.0861         | 349.1780       | 175.0926         | 4  |
| 8  | 791.4374        | 396.2223        | 773.4268       | 387.2170         | S    | <b>295.1544</b> | 148.0809        | 277.1309 | 139.0691         | 277.1439       | 139.0756         | 3  |
| 9  | 849.4559        | 425.2316        | 831.4453       | 416.2263         | G    | 207.1254        | 104.0663        | 189.1018 | 95.0545          |                |                  | 2  |
| 10 |                 |                 |                |                  | K    | 149.1069        | 75.0571         | 131.0833 | 66.0453          |                |                  | 1  |

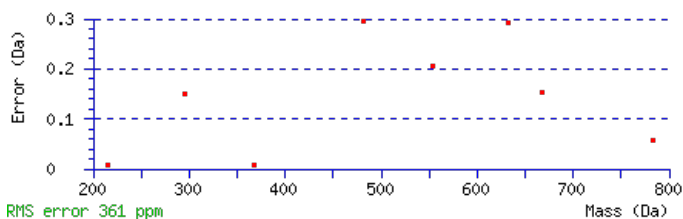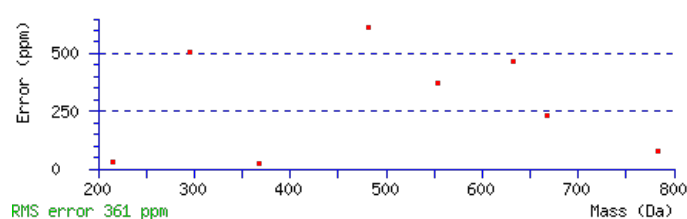

NCBI BLAST search of **LVDLALASGK**

(Parameters: blastp, nr protein database, expect=20000, no filter, PAM30)

Other BLAST [web gateways](#)

All matches to this query

AT3G08590.1

| Score | Mr(calc) | Delta  | Sequence                   |
|-------|----------|--------|----------------------------|
| 37.6  | 996.5482 | 0.0001 | <a href="#">LVDLALASGK</a> |

Mascot: <http://www.matrixscience.com/>

**Peptide View**MS/MS Fragmentation of **AGTNIQVDGAPWR**Found in **AT3G08740.1** in **TAIR\_Arabidopsis**, Symbols: | elongation factor P (EF-P) family protein | chr3:2654794-2656160 REVERSE

Match to Query 5426: 1384.674026 from(693.344289,2+) index(5332)

Title: Elution from: 47.142 to 47.142 scan no 6652 cid35.00 polarity:+

Data file C7-2\_2.mgf

Click mouse within plot area to zoom in by factor of two about that point

Or,   to  Da Label all possible matches  Label matches used for scoring Show Y-axis 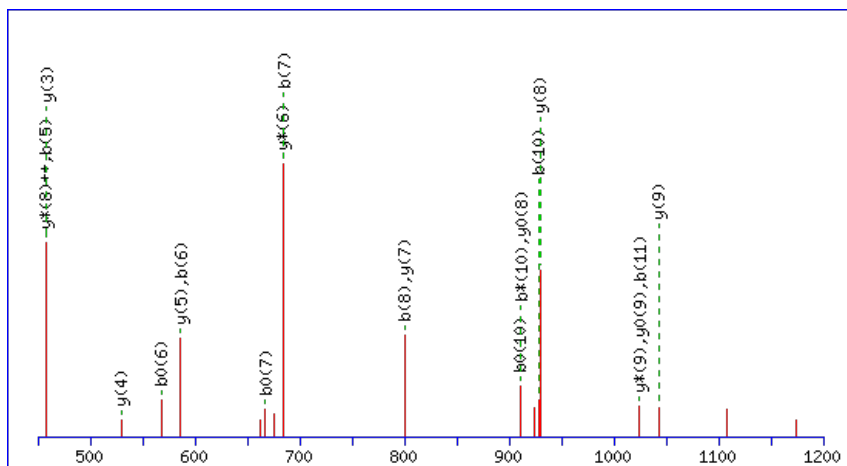Monoisotopic mass of neutral peptide  $M_r(\text{calc})$ : 1384.6735

Fixed modifications: Carbamidomethyl (C) (apply to specified residues or termini only)

Ions Score: 65 Expect: 1.3e-006

Matches : 21/124 fragment ions using 18 most intense peaks ([help](#))

| #  | b                | b <sup>++</sup> | b*              | b <sup>*++</sup> | b <sup>0</sup>  | b <sup>0++</sup> | Seq. | y                | y <sup>++</sup> | y*               | y <sup>*++</sup> | y <sup>0</sup>   | y <sup>0++</sup> | #  |
|----|------------------|-----------------|-----------------|------------------|-----------------|------------------|------|------------------|-----------------|------------------|------------------|------------------|------------------|----|
| 1  | 72.0444          | 36.5258         |                 |                  |                 |                  | A    |                  |                 |                  |                  |                  |                  | 13 |
| 2  | 129.0659         | 65.0366         |                 |                  |                 |                  | G    | 1314.6437        | 657.8255        | 1297.6171        | 649.3122         | 1296.6331        | 648.8202         | 12 |
| 3  | 230.1135         | 115.5604        |                 |                  | 212.1030        | 106.5551         | T    | 1257.6222        | 629.3148        | 1240.5957        | 620.8015         | 1239.6117        | 620.3095         | 11 |
| 4  | 344.1565         | 172.5819        | 327.1299        | 164.0686         | 326.1459        | 163.5766         | N    | 1156.5745        | 578.7909        | 1139.5480        | 570.2776         | 1138.5640        | 569.7856         | 10 |
| 5  | <b>457.2405</b>  | 229.1239        | 440.2140        | 220.6106         | 439.2300        | 220.1186         | I    | <b>1042.5316</b> | 521.7694        | <b>1025.5051</b> | 513.2562         | <b>1024.5211</b> | 512.7642         | 9  |
| 6  | <b>586.2831</b>  | 293.6452        | 569.2566        | 285.1319         | <b>568.2726</b> | 284.6399         | E    | <b>929.4476</b>  | 465.2274        | 912.4210         | <b>456.7141</b>  | <b>911.4370</b>  | 456.2221         | 8  |
| 7  | <b>685.3515</b>  | 343.1794        | 668.3250        | 334.6661         | <b>667.3410</b> | 334.1741         | V    | <b>800.4050</b>  | 400.7061        | 783.3784         | 392.1928         | 782.3944         | 391.7008         | 7  |
| 8  | <b>800.3785</b>  | 400.6929        | 783.3519        | 392.1796         | 782.3679        | 391.6876         | D    | 701.3365         | 351.1719        | <b>684.3100</b>  | 342.6586         | 683.3260         | 342.1666         | 6  |
| 9  | 857.3999         | 429.2036        | 840.3734        | 420.6903         | 839.3894        | 420.1983         | G    | <b>586.3096</b>  | 293.6584        | 569.2831         | 285.1452         |                  |                  | 5  |
| 10 | <b>928.4371</b>  | 464.7222        | <b>911.4105</b> | 456.2089         | <b>910.4265</b> | 455.7169         | A    | <b>529.2881</b>  | 265.1477        | 512.2616         | 256.6344         |                  |                  | 4  |
| 11 | <b>1025.4898</b> | 513.2485        | 1008.4633       | 504.7353         | 1007.4793       | 504.2433         | P    | <b>458.2510</b>  | 229.6292        | 441.2245         | 221.1159         |                  |                  | 3  |
| 12 | 1211.5691        | 606.2882        | 1194.5426       | 597.7749         | 1193.5586       | 597.2829         | W    | 361.1983         | 181.1028        | 344.1717         | 172.5895         |                  |                  | 2  |
| 13 |                  |                 |                 |                  |                 |                  | R    | 175.1190         | 88.0631         | 158.0924         | 79.5498          |                  |                  | 1  |

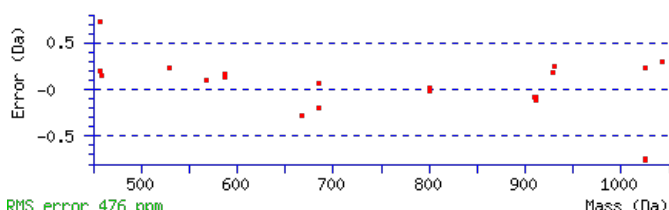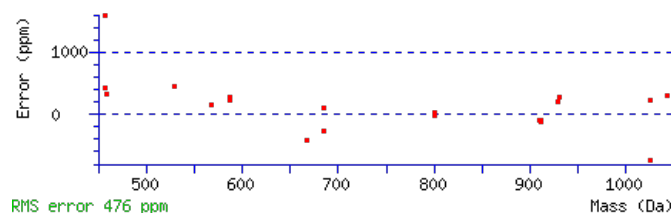NCBI BLAST search of [AGTNIQVDGAPWR](#)

(Parameters: blastp, nr protein database, expect=20000, no filter, PAM30)

Other BLAST [web gateways](#)

AT3G08740.1

All matches to this query

| Score | Mr(calc)  | Delta   | Sequence                      |
|-------|-----------|---------|-------------------------------|
| 64.5  | 1384.6735 | 0.0005  | <a href="#">AGTNIEVDGAPWR</a> |
| 0.4   | 1384.6769 | -0.0029 | <a href="#">ALQESMNVGSPPR</a> |
| 0.2   | 1384.6744 | -0.0004 | <a href="#">KLGVMGFCFGGGR</a> |

Mascot: <http://www.matrixscience.com/>

## Peptide View

### MS/MS Fragmentation of STPFQPYSEVFGLQR

Found in **AT3G08940.1** in **TAIR\_Arabidopsis**, Symbols: LHC4.2 | LHC4.2 (LIGHT HARVESTING COMPLEX PSII); chlorophyll binding | chr3:2717722-2718405 FORWARD

Match to Query 8451: 1774.803370 from(888.408961,2+) index(8466)

Title: Elution from: 74.890 to 74.890 scan no 11207 cid35.00 polarity:+

Data file D12h-1\_2.mgf

Click mouse within plot area to zoom in by factor of two about that point

Or,  to  Da

Label all possible matches  Label matches used for scoring

Show Y-axis

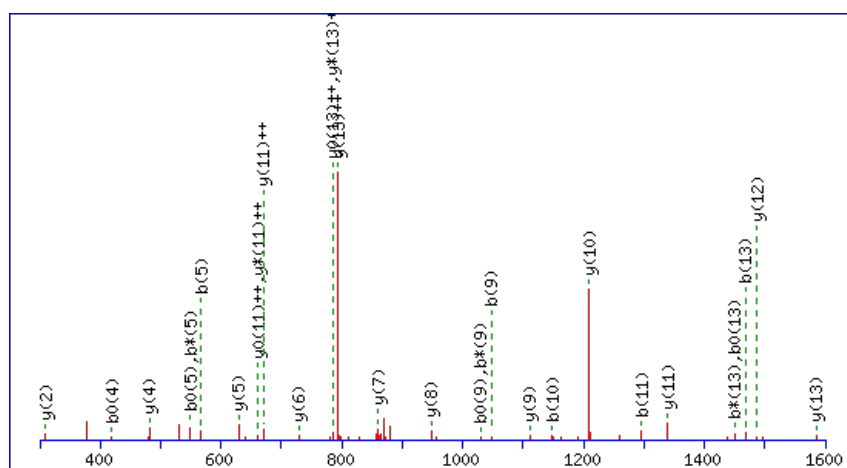

Monoisotopic mass of neutral peptide  $M_r(\text{calc})$ : 1774.8035

Fixed modifications: Carbamidomethyl (C) (apply to specified residues or termini only)

Ions Score: 93 Expect: 4.9e-009

Matches : 29/148 fragment ions using 32 most intense peaks ([help](#))

| #  | b         | b <sup>++</sup> | b*        | b <sup>*++</sup> | b <sup>0</sup> | b <sup>0++</sup> | Seq. | y         | y <sup>++</sup> | y*        | y <sup>*++</sup> | y <sup>0</sup> | y <sup>0++</sup> | #  |
|----|-----------|-----------------|-----------|------------------|----------------|------------------|------|-----------|-----------------|-----------|------------------|----------------|------------------|----|
| 1  | 89.0363   | 45.0218         |           |                  | 71.0258        | 36.0165          | S    |           |                 |           |                  |                |                  | 15 |
| 2  | 191.0811  | 96.0442         |           |                  | 173.0705       | 87.0389          | T    | 1687.7817 | 844.3945        | 1669.7581 | 835.3827         | 1669.7711      | 835.3892         | 14 |
| 3  | 289.1309  | 145.0691        |           |                  | 271.1203       | 136.0638         | P    | 1585.7370 | 793.3721        | 1567.7134 | 784.3603         | 1567.7264      | 784.3668         | 13 |
| 4  | 437.1963  | 219.1018        |           |                  | 419.1857       | 210.0965         | F    | 1487.6872 | 744.3472        | 1469.6636 | 735.3354         | 1469.6766      | 735.3419         | 12 |
| 5  | 567.2489  | 284.1281        | 549.2254  | 275.1163         | 549.2384       | 275.1228         | Q    | 1339.6217 | 670.3145        | 1321.5982 | 661.3027         | 1321.6112      | 661.3092         | 11 |
| 6  | 665.2987  | 333.1530        | 647.2752  | 324.1412         | 647.2882       | 324.1477         | P    | 1209.5691 | 605.2882        | 1191.5455 | 596.2764         | 1191.5585      | 596.2829         | 10 |
| 7  | 829.3591  | 415.1832        | 811.3355  | 406.1714         | 811.3485       | 406.1779         | Y    | 1111.5193 | 556.2633        | 1093.4957 | 547.2515         | 1093.5087      | 547.2580         | 9  |
| 8  | 917.3882  | 459.1977        | 899.3646  | 450.1859         | 899.3776       | 450.1924         | S    | 947.4589  | 474.2331        | 929.4353  | 465.2213         | 929.4484       | 465.2278         | 8  |
| 9  | 1047.4278 | 524.2175        | 1029.4042 | 515.2057         | 1029.4172      | 515.2123         | E    | 859.4299  | 430.2186        | 841.4063  | 421.2068         | 841.4193       | 421.2133         | 7  |
| 10 | 1147.4933 | 574.2503        | 1129.4697 | 565.2385         | 1129.4827      | 565.2450         | V    | 729.3902  | 365.1988        | 711.3667  | 356.1870         |                |                  | 6  |
| 11 | 1295.5587 | 648.2830        | 1277.5351 | 639.2712         | 1277.5481      | 639.2777         | F    | 629.3248  | 315.1660        | 611.3012  | 306.1542         |                |                  | 5  |
| 12 | 1353.5772 | 677.2922        | 1335.5536 | 668.2804         | 1335.5666      | 668.2870         | G    | 481.2593  | 241.1333        | 463.2358  | 232.1215         |                |                  | 4  |
| 13 | 1467.6583 | 734.3328        | 1449.6347 | 725.3210         | 1449.6477      | 725.3275         | L    | 423.2408  | 212.1241        | 405.2173  | 203.1123         |                |                  | 3  |
| 14 | 1597.7109 | 799.3591        | 1579.6874 | 790.3473         | 1579.7004      | 790.3538         | Q    | 309.1597  | 155.0835        | 291.1362  | 146.0717         |                |                  | 2  |
| 15 |           |                 |           |                  |                |                  | R    | 179.1071  | 90.0572         | 161.0835  | 81.0454          |                |                  | 1  |

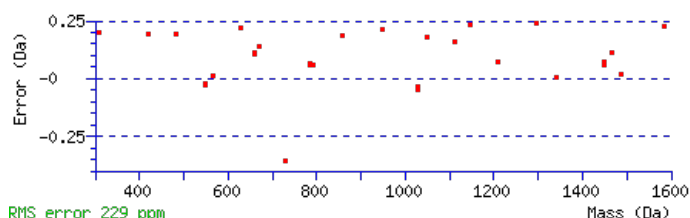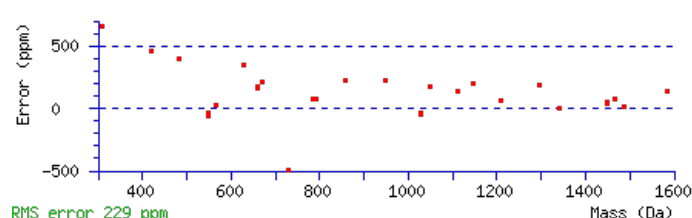

## AT3G08940.1

NCBI BLAST search of [STPFQPYSEVFGIQR](#)

(Parameters: blastp, nr protein database, expect=20000, no filter, PAM30)

Other BLAST [web gateways](#)

### All matches to this query

| Score | Mr(calc)  | Delta   | Sequence                         |
|-------|-----------|---------|----------------------------------|
| 92.7  | 1774.8035 | -0.0001 | <a href="#">STPFQPYSEVFGIQR</a>  |
| 92.7  | 1774.8035 | -0.0001 | <a href="#">STPFQPYSEVFGIQR</a>  |
| 3.0   | 1774.8046 | -0.0013 | <a href="#">MKENAASVLADLFSSR</a> |
| 2.7   | 1774.7992 | 0.0042  | <a href="#">MGWDNKSGGFNRILR</a>  |
| 1.0   | 1774.8013 | 0.0021  | <a href="#">AVQSPNWSLLPEEER</a>  |
| 0.7   | 1774.8055 | -0.0021 | <a href="#">GMQRLLVYELMCNK</a>   |
| 0.5   | 1774.8008 | 0.0026  | <a href="#">EEIDDPKFFYSIQK</a>   |

Mascot: <http://www.matrixscience.com/>

**Peptide View**MS/MS Fragmentation of **FFDPLGLASDPVKK**

Found in **AT3G08940.2** in **TAIR\_Arabidopsis**, Symbols: LHC4.2 | LHC4.2 (LIGHT HARVESTING COMPLEX PSII) | chr3:2717722-2718670 FORWARD

Match to Query 6518: 1532.824308 from(511.948712,3+) index(8023)

Title: Elution from: 70.257 to 70.257 scan no 10497 cid35.00 polarity:+

Data file D6h-3\_2.mgf

Click mouse within plot area to zoom in by factor of two about that point

Or,   to  Da

Label all possible matches  Label matches used for scoring

Show Y-axis

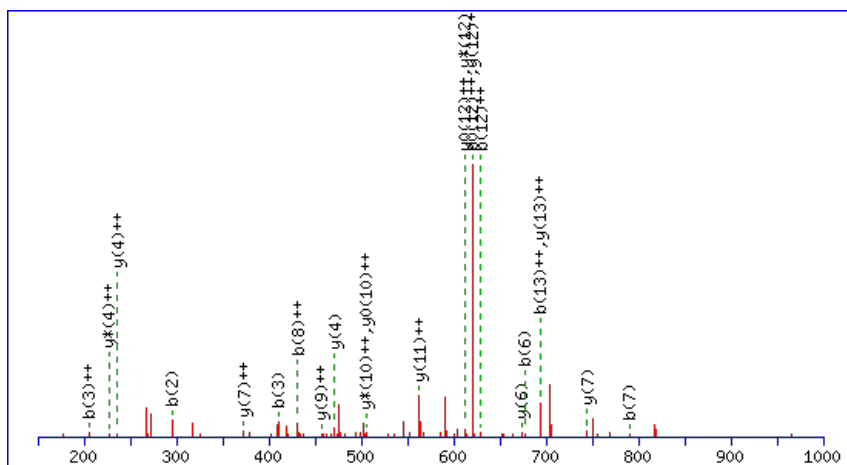

**Monoisotopic mass of neutral peptide Mr(calc):** 1532.8239

**Fixed modifications:** Carbamidomethyl (C) (apply to specified residues or termini only)

**Ions Score:** 23 **Expect:** 0.022

**Matches:** 24/120 fragment ions using 56 most intense peaks ([help](#))

| #  | b               | b <sup>++</sup> | b*        | b <sup>*++</sup> | b <sup>0</sup> | b <sup>0++</sup> | Seq. | y               | y <sup>++</sup> | y*        | y <sup>*++</sup> | y <sup>0</sup> | y <sup>0++</sup> | #  |
|----|-----------------|-----------------|-----------|------------------|----------------|------------------|------|-----------------|-----------------|-----------|------------------|----------------|------------------|----|
| 1  | 148.0757        | 74.5415         |           |                  |                |                  | F    |                 |                 |           |                  |                |                  | 14 |
| 2  | <b>295.1441</b> | 148.0757        |           |                  |                |                  | F    | 1386.7627       | <b>693.8850</b> | 1369.7362 | 685.3717         | 1368.7522      | 684.8797         | 13 |
| 3  | <b>410.1710</b> | <b>205.5892</b> |           |                  | 392.1605       | 196.5839         | D    | 1239.6943       | <b>620.3508</b> | 1222.6678 | <b>611.8375</b>  | 1221.6838      | <b>611.3455</b>  | 12 |
| 4  | 507.2238        | 254.1155        |           |                  | 489.2132       | 245.1103         | P    | 1124.6674       | <b>562.8373</b> | 1107.6408 | 554.3241         | 1106.6568      | 553.8320         | 11 |
| 5  | <b>620.3079</b> | 310.6576        |           |                  | 602.2973       | 301.6523         | L    | 1027.6146       | 514.3109        | 1010.5881 | <b>505.7977</b>  | 1009.6041      | <b>505.3057</b>  | 10 |
| 6  | <b>677.3293</b> | 339.1683        |           |                  | 659.3188       | 330.1630         | G    | 914.5306        | <b>457.7689</b> | 897.5040  | 449.2556         | 896.5200       | 448.7636         | 9  |
| 7  | <b>790.4134</b> | 395.7103        |           |                  | 772.4028       | 386.7051         | L    | 857.5091        | 429.2582        | 840.4825  | 420.7449         | 839.4985       | 420.2529         | 8  |
| 8  | 861.4505        | <b>431.2289</b> |           |                  | 843.4400       | 422.2236         | A    | <b>744.4250</b> | <b>372.7162</b> | 727.3985  | 364.2029         | 726.4145       | 363.7109         | 7  |
| 9  | 948.4825        | 474.7449        |           |                  | 930.4720       | 465.7396         | S    | <b>673.3879</b> | 337.1976        | 656.3614  | 328.6843         | 655.3774       | 328.1923         | 6  |
| 10 | 1063.5095       | 532.2584        |           |                  | 1045.4989      | 523.2531         | D    | 586.3559        | 293.6816        | 569.3293  | 285.1683         | 568.3453       | 284.6763         | 5  |
| 11 | 1160.5623       | 580.7848        |           |                  | 1142.5517      | 571.7795         | P    | <b>471.3289</b> | <b>236.1681</b> | 454.3024  | <b>227.6548</b>  |                |                  | 4  |
| 12 | 1259.6307       | <b>630.3190</b> |           |                  | 1241.6201      | <b>621.3137</b>  | V    | 374.2762        | 187.6417        | 357.2496  | 179.1285         |                |                  | 3  |
| 13 | 1387.7256       | <b>694.3665</b> | 1370.6991 | 685.8532         | 1369.7151      | 685.3612         | K    | 275.2078        | 138.1075        | 258.1812  | 129.5942         |                |                  | 2  |
| 14 |                 |                 |           |                  |                |                  | K    | 147.1128        | 74.0600         | 130.0863  | 65.5468          |                |                  | 1  |

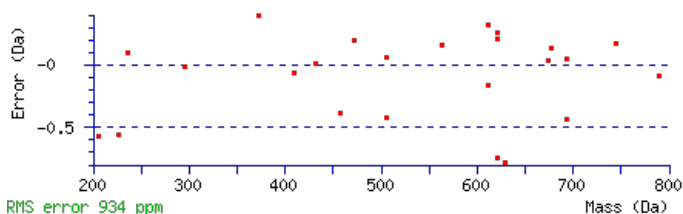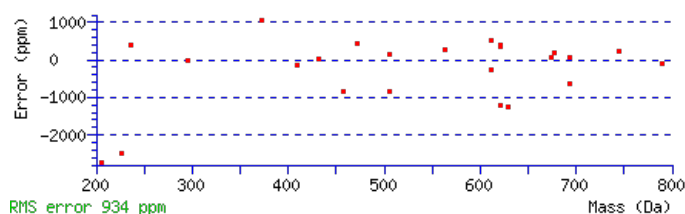

NCBI **BLAST** search of [FFDPLGLASDPVKK](#)



## AT3G08940.2

(Parameters: blastp, nr protein database, expect=20000, no filter, PAM30)

Other BLAST [web gateways](#)

### All matches to this query

| Score | Mr(calc)  | Delta   | Sequence                        |
|-------|-----------|---------|---------------------------------|
| 22.9  | 1532.8239 | 0.0004  | <a href="#">FFDPLGLASDPVKK</a>  |
| 4.0   | 1532.8232 | 0.0011  | <a href="#">LLERTALAEKDMK</a>   |
| 3.1   | 1532.8272 | -0.0029 | <a href="#">EENLVFLPGKIMK</a>   |
| 3.0   | 1532.8272 | -0.0029 | <a href="#">LVIDAMGNFSPILK</a>  |
| 1.7   | 1532.8232 | 0.0011  | <a href="#">QVAELATISGAKSMK</a> |
| 1.0   | 1532.8232 | 0.0011  | <a href="#">ELMLIKVAADTSAR</a>  |

Mascot: <http://www.matrixscience.com/>

**Peptide View**MS/MS Fragmentation of **KVNGLDRR**Found in **AT3G09070.1** in **TAIR\_Arabidopsis**, Symbols: | glycine-rich protein | chr3:2768885-2770942 REVERSE

Match to Query 1845: 956.550876 from(479.282714,2+) index(4971)

Title: Elution from: 47.085 to 47.085 scan no 6335 cid35.00 polarity:+

Data file D1d-2\_1.mgf

Click mouse within plot area to zoom in by factor of two about that point

Or,   to  Da Label all possible matches  Label matches used for scoring Show Y-axis 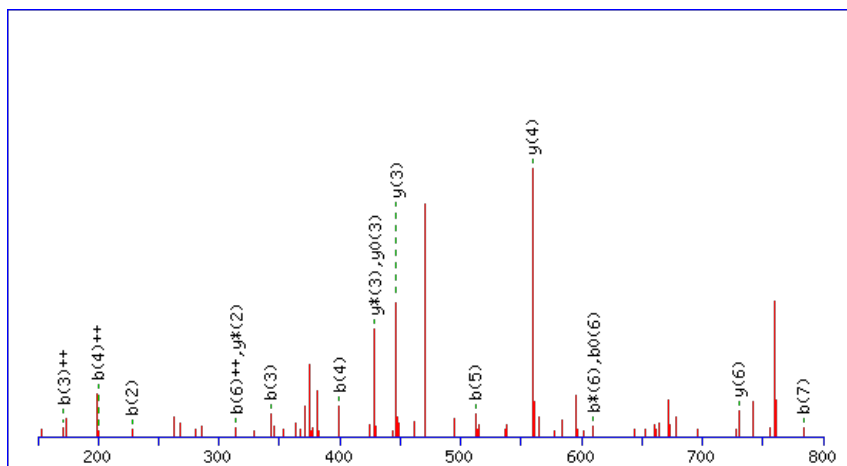

Monoisotopic mass of neutral peptide Mr(calc): 956.5515

Fixed modifications: Carbamidomethyl (C) (apply to specified residues or termini only)

Ions Score: 20 Expect: 0.045

Matches : 16/70 fragment ions using 40 most intense peaks ([help](#))

| # | b               | b <sup>++</sup> | b*              | b <sup>*++</sup> | b <sup>0</sup>  | b <sup>0++</sup> | Seq.     | y               | y <sup>++</sup> | y*              | y <sup>*++</sup> | y <sup>0</sup>  | y <sup>0++</sup> | #        |
|---|-----------------|-----------------|-----------------|------------------|-----------------|------------------|----------|-----------------|-----------------|-----------------|------------------|-----------------|------------------|----------|
| 1 | 129.1022        | 65.0548         | 112.0757        | 56.5415          |                 |                  | <b>K</b> |                 |                 |                 |                  |                 |                  | <b>8</b> |
| 2 | <b>228.1707</b> | 114.5890        | 211.1441        | 106.0757         |                 |                  | <b>V</b> | 829.4639        | 415.2356        | 812.4373        | 406.7223         | 811.4533        | 406.2303         | <b>7</b> |
| 3 | <b>342.2136</b> | <b>171.6104</b> | 325.1870        | 163.0972         |                 |                  | <b>N</b> | <b>730.3955</b> | 365.7014        | 713.3689        | 357.1881         | 712.3849        | 356.6961         | <b>6</b> |
| 4 | <b>399.2350</b> | <b>200.1212</b> | 382.2085        | 191.6079         |                 |                  | <b>G</b> | 616.3525        | 308.6799        | 599.3260        | 300.1666         | 598.3420        | 299.6746         | <b>5</b> |
| 5 | <b>512.3191</b> | 256.6632        | 495.2926        | 248.1499         |                 |                  | <b>L</b> | <b>559.3311</b> | 280.1692        | 542.3045        | 271.6559         | 541.3205        | 271.1639         | <b>4</b> |
| 6 | 627.3461        | <b>314.1767</b> | <b>610.3195</b> | 305.6634         | <b>609.3355</b> | 305.1714         | <b>D</b> | <b>446.2470</b> | 223.6271        | <b>429.2205</b> | 215.1139         | <b>428.2364</b> | 214.6219         | <b>3</b> |
| 7 | <b>783.4472</b> | 392.2272        | 766.4206        | 383.7139         | 765.4366        | 383.2219         | <b>R</b> | 331.2201        | 166.1137        | <b>314.1935</b> | 157.6004         |                 |                  | <b>2</b> |
| 8 |                 |                 |                 |                  |                 |                  | <b>R</b> | 175.1190        | 88.0631         | 158.0924        | 79.5498          |                 |                  | <b>1</b> |

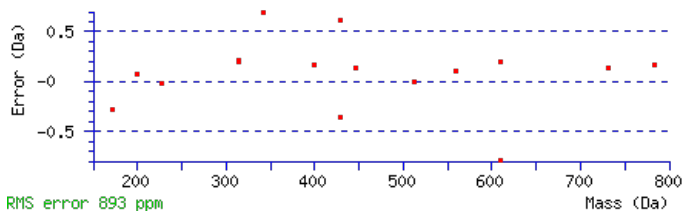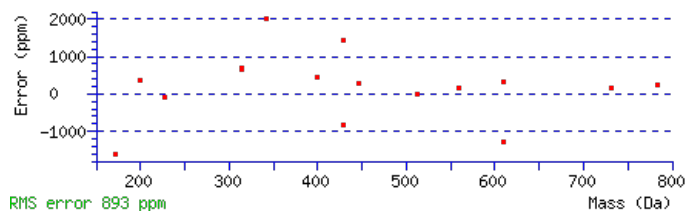NCBI **BLAST** search of [KVNGLDRR](#)

(Parameters: blastp, nr protein database, expect=20000, no filter, PAM30)

Other BLAST [web gateways](#)**All matches to this query**

| Score | Mr(calc) | Delta   | Sequence                  |
|-------|----------|---------|---------------------------|
| 19.5  | 956.5515 | -0.0007 | <a href="#">KVNGLDRR</a>  |
| 4.7   | 956.5515 | -0.0007 | <a href="#">IGGSRPSKR</a> |

## AT3G09070.1

|     |          |         |                          |
|-----|----------|---------|--------------------------|
| 2.1 | 956.5515 | -0.0007 | <a href="#">ERLRVER</a>  |
| 1.3 | 956.5515 | -0.0007 | <a href="#">VQSQIRAR</a> |
| 0.2 | 956.5515 | -0.0007 | <a href="#">RNKSLPSR</a> |

**Mascot:** <http://www.matrixscience.com/>

### Peptide View

 MS/MS Fragmentation of **IHSENTGNTAILNLLPLLQGNVGLIFTK**

 Found in **AT3G09200.1** in **TAIR\_Arabidopsis**, Symbols: | 60S acidic ribosomal protein P0 (RPP0B) | chr3:2823370-2825026 REVERSE

Match to Query 10859: 2989.654140 from(997.558656,3+) index(11086)

Title: Elution from: 124.013 to 124.013 scan no 16823 cid35.00 polarity:+

Data file D6h-3\_2.mgf

Click mouse within plot area to zoom in by factor of two about that point

 Or,   to  Da 

 Label all possible matches  Label matches used for scoring 

 Show Y-axis 
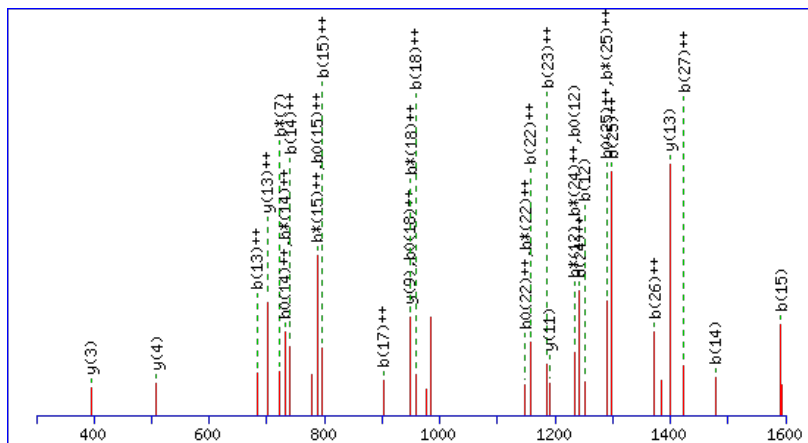
 Monoisotopic mass of neutral peptide  $M_r(\text{calc})$ : 2989.6600

Fixed modifications: Carbamidomethyl (C) (apply to specified residues or termini only)

Ions Score: 85 Expect: 5.3e-009

 Matches : 34/310 fragment ions using 31 most intense peaks ([help](#))

| #  | b         | b <sup>++</sup> | b <sup>*</sup> | b <sup>*++</sup> | b <sup>0</sup> | b <sup>0++</sup> | Seq. | y         | y <sup>++</sup> | y <sup>*</sup> | y <sup>*++</sup> | y <sup>0</sup> | y <sup>0++</sup> | #  |
|----|-----------|-----------------|----------------|------------------|----------------|------------------|------|-----------|-----------------|----------------|------------------|----------------|------------------|----|
| 1  | 114.0913  | 57.5493         |                |                  |                |                  | I    |           |                 |                |                  |                |                  | 28 |
| 2  | 251.1503  | 126.0788        |                |                  |                |                  | H    | 2877.5833 | 1439.2953       | 2860.5567      | 1430.7820        | 2859.5727      | 1430.2900        | 27 |
| 3  | 338.1823  | 169.5948        |                |                  | 320.1717       | 160.5895         | S    | 2740.5244 | 1370.7658       | 2723.4978      | 1362.2525        | 2722.5138      | 1361.7605        | 26 |
| 4  | 467.2249  | 234.1161        |                |                  | 449.2143       | 225.1108         | E    | 2653.4923 | 1327.2498       | 2636.4658      | 1318.7365        | 2635.4818      | 1318.2445        | 25 |
| 5  | 581.2678  | 291.1375        | 564.2413       | 282.6243         | 563.2572       | 282.1323         | N    | 2524.4497 | 1262.7285       | 2507.4232      | 1254.2152        | 2506.4392      | 1253.7232        | 24 |
| 6  | 682.3155  | 341.6614        | 665.2889       | 333.1481         | 664.3049       | 332.6561         | T    | 2410.4068 | 1205.7070       | 2393.3803      | 1197.1938        | 2392.3962      | 1196.7018        | 23 |
| 7  | 739.3369  | 370.1721        | 722.3104       | 361.6588         | 721.3264       | 361.1668         | G    | 2309.3591 | 1155.1832       | 2292.3326      | 1146.6699        | 2291.3486      | 1146.1779        | 22 |
| 8  | 853.3799  | 427.1936        | 836.3533       | 418.6803         | 835.3693       | 418.1883         | N    | 2252.3377 | 1126.6725       | 2235.3111      | 1118.1592        | 2234.3271      | 1117.6672        | 21 |
| 9  | 954.4275  | 477.7174        | 937.4010       | 469.2041         | 936.4170       | 468.7121         | T    | 2138.2947 | 1069.6510       | 2121.2682      | 1061.1377        | 2120.2842      | 1060.6457        | 20 |
| 10 | 1025.4647 | 513.2360        | 1008.4381      | 504.7227         | 1007.4541      | 504.2307         | A    | 2037.2471 | 1019.1272       | 2020.2205      | 1010.6139        | 2019.2365      | 1010.1219        | 19 |
| 11 | 1138.5487 | 569.7780        | 1121.5222      | 561.2647         | 1120.5382      | 560.7727         | I    | 1966.2099 | 983.6086        | 1949.1834      | 975.0953         | 1948.1994      | 974.6033         | 18 |
| 12 | 1251.6328 | 626.3200        | 1234.6062      | 617.8068         | 1233.6222      | 617.3148         | L    | 1853.1259 | 927.0666        | 1836.0993      | 918.5533         | 1835.1153      | 918.0613         | 17 |
| 13 | 1365.6757 | 683.3415        | 1348.6492      | 674.8282         | 1347.6652      | 674.3362         | N    | 1740.0418 | 870.5245        | 1723.0153      | 862.0113         | 1722.0313      | 861.5193         | 16 |
| 14 | 1478.7598 | 739.8835        | 1461.7332      | 731.3703         | 1460.7492      | 730.8782         | L    | 1625.9989 | 813.5031        | 1608.9723      | 804.9898         | 1607.9883      | 804.4978         | 15 |
| 15 | 1591.8438 | 796.4256        | 1574.8173      | 787.9123         | 1573.8333      | 787.4203         | L    | 1512.9148 | 756.9611        | 1495.8883      | 748.4478         | 1494.9043      | 747.9558         | 14 |
| 16 | 1688.8966 | 844.9519        | 1671.8701      | 836.4387         | 1670.8860      | 835.9467         | P    | 1399.8308 | 700.4190        | 1382.8042      | 691.9057         | 1381.8202      | 691.4137         | 13 |
| 17 | 1801.9807 | 901.4940        | 1784.9541      | 892.9807         | 1783.9701      | 892.4887         | L    | 1302.7780 | 651.8926        | 1285.7515      | 643.3794         | 1284.7674      | 642.8874         | 12 |
| 18 | 1915.0647 | 958.0360        | 1898.0382      | 949.5227         | 1897.0542      | 949.0307         | L    | 1189.6939 | 595.3506        | 1172.6674      | 586.8373         | 1171.6834      | 586.3453         | 11 |
| 19 | 2043.1233 | 1022.0653       | 2026.0968      | 1013.5520        | 2025.1128      | 1013.0600        | Q    | 1076.6099 | 538.8086        | 1059.5833      | 530.2953         | 1058.5993      | 529.8033         | 10 |
| 20 | 2100.1448 | 1050.5760       | 2083.1182      | 1042.0628        | 2082.1342      | 1041.5707        | G    | 948.5513  | 474.7793        | 931.5247       | 466.2660         | 930.5407       | 465.7740         | 9  |
| 21 | 2214.1877 | 1107.5975       | 2197.1612      | 1099.0842        | 2196.1771      | 1098.5922        | N    | 891.5298  | 446.2686        | 874.5033       | 437.7553         | 873.5193       | 437.2633         | 8  |
| 22 | 2313.2561 | 1157.1317       | 2296.2296      | 1148.6184        | 2295.2456      | 1148.1264        | V    | 777.4869  | 389.2471        | 760.4604       | 380.7338         | 759.4763       | 380.2418         | 7  |
| 23 | 2370.2776 | 1185.6424       | 2353.2510      | 1177.1292        | 2352.2670      | 1176.6371        | G    | 678.4185  | 339.7129        | 661.3919       | 331.1996         | 660.4079       | 330.7076         | 6  |
| 24 | 2483.3616 | 1242.1845       | 2466.3351      | 1233.6712        | 2465.3511      | 1233.1792        | L    | 621.3970  | 311.2022        | 604.3705       | 302.6889         | 603.3865       | 302.1969         | 5  |
| 25 | 2596.4457 | 1298.7265       | 2579.4192      | 1290.2132        | 2578.4351      | 1289.7212        | I    | 508.3130  | 254.6601        | 491.2864       | 246.1468         | 490.3024       | 245.6548         | 4  |

AT3G09200.1

|    |           |                  |           |           |           |           |          |                 |          |          |          |          |          |          |
|----|-----------|------------------|-----------|-----------|-----------|-----------|----------|-----------------|----------|----------|----------|----------|----------|----------|
| 26 | 2743.5141 | <b>1372.2607</b> | 2726.4876 | 1363.7474 | 2725.5036 | 1363.2554 | <b>F</b> | <b>395.2289</b> | 198.1181 | 378.2023 | 189.6048 | 377.2183 | 189.1128 | <b>3</b> |
| 27 | 2844.5618 | <b>1422.7845</b> | 2827.5353 | 1414.2713 | 2826.5512 | 1413.7793 | <b>T</b> | 248.1605        | 124.5839 | 231.1339 | 116.0706 | 230.1499 | 115.5786 | <b>2</b> |
| 28 |           |                  |           |           |           |           | <b>K</b> | 147.1128        | 74.0600  | 130.0863 | 65.5468  |          |          | <b>1</b> |

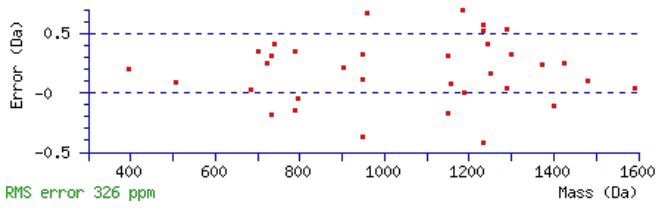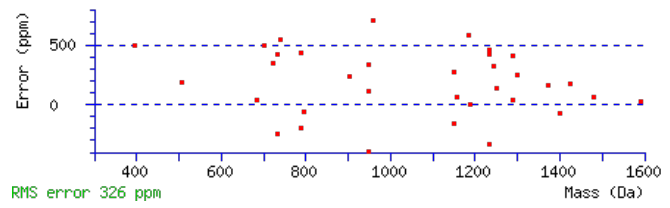

NCBI BLAST search of [IHSENTGNTAILNLLPLQGNVGLIFTK](#)  
 (Parameters: blastp, nr protein database, expect=20000, no filter, PAM30)  
 Other BLAST [web gateways](#)

All matches to this query

| Score | Mr(calc)  | Delta   | Sequence                                    |
|-------|-----------|---------|---------------------------------------------|
| 84.5  | 2989.6600 | -0.0059 | <a href="#">IHSENTGNTAILNLLPLQGNVGLIFTK</a> |
| 4.4   | 2989.6463 | 0.0078  | <a href="#">LVTQFVPM LGTYIFNGIDHKSQLLK</a>  |
| 0.8   | 2989.6562 | -0.0021 | <a href="#">LRFDYLLITALAISTVSVVMAQVPPEK</a> |

Mascot: <http://www.matrixscience.com/>

## Peptide View

### MS/MS Fragmentation of **MSIAWPR**

Found in **AT3G09260.1** in **TAIR\_Arabidopsis**, Symbols: PSR3.1, PYK10 | PYK10 (phosphate starvation-response 3.1); hydrolase, hydrolyzing O-glycosyl compounds | chr3:2840663-2843736 REVERSE

Match to Query 1263: 859.437322 from(430.725937,2+) index(5176)

Title: Elution from: 45.802 to 45.802 scan no 6508 cid35.00 polarity:+

Data file 0-3\_3.mgf

Click mouse within plot area to zoom in by factor of two about that point

Or,   to  Da

Label all possible matches  Label matches used for scoring

Show Y-axis

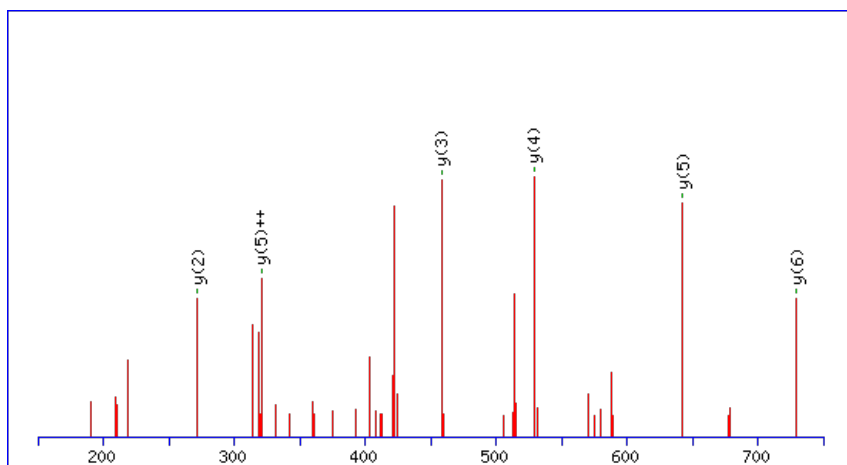

**Monoisotopic mass of neutral peptide Mr(calc):** 859.4374

**Fixed modifications:** Carbamidomethyl (C) (apply to specified residues or termini only)

**Ions Score:** 46 **Expect:** 2.3e-005

**Matches:** 6/48 fragment ions using 6 most intense peaks ([help](#))

| # | b        | b <sup>++</sup> | b <sup>0</sup> | b <sup>0++</sup> | Seq. | y        | y <sup>++</sup> | y*       | y <sup>*++</sup> | y <sup>0</sup> | y <sup>0++</sup> | # |
|---|----------|-----------------|----------------|------------------|------|----------|-----------------|----------|------------------|----------------|------------------|---|
| 1 | 132.0478 | 66.5275         |                |                  | M    |          |                 |          |                  |                |                  | 7 |
| 2 | 219.0798 | 110.0435        | 201.0692       | 101.0382         | S    | 729.4042 | 365.2058        | 712.3777 | 356.6925         | 711.3937       | 356.2005         | 6 |
| 3 | 332.1639 | 166.5856        | 314.1533       | 157.5803         | I    | 642.3722 | 321.6897        | 625.3457 | 313.1765         |                |                  | 5 |
| 4 | 403.2010 | 202.1041        | 385.1904       | 193.0988         | A    | 529.2881 | 265.1477        | 512.2616 | 256.6344         |                |                  | 4 |
| 5 | 589.2803 | 295.1438        | 571.2697       | 286.1385         | W    | 458.2510 | 229.6292        | 441.2245 | 221.1159         |                |                  | 3 |
| 6 | 686.3330 | 343.6702        | 668.3225       | 334.6649         | P    | 272.1717 | 136.5895        | 255.1452 | 128.0762         |                |                  | 2 |
| 7 |          |                 |                |                  | R    | 175.1190 | 88.0631         | 158.0924 | 79.5498          |                |                  | 1 |

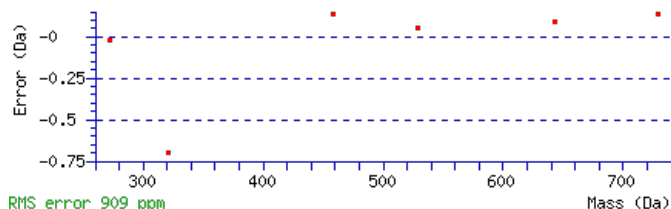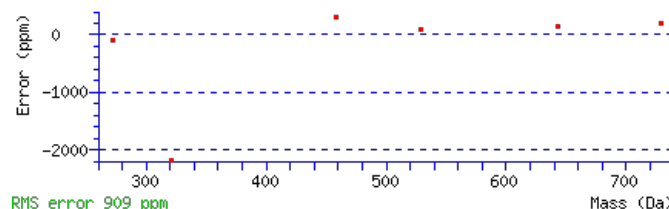

NCBI **BLAST** search of [MSIAWPR](#)

(Parameters: blastp, nr protein database, expect=20000, no filter, PAM30)

Other BLAST [web gateways](#)

### All matches to this query

| Score | Mr(calc) | Delta   | Sequence                |
|-------|----------|---------|-------------------------|
| 46.4  | 859.4374 | -0.0001 | <a href="#">MSIAWPR</a> |



**Peptide View**MS/MS Fragmentation of **ARFELNIDLFR**Found in **AT3G09440.1** in **TAIR\_Arabidopsis**, Symbols: | heat shock cognate 70 kDa protein 3 (HSC70-3) (HSP70-3) | chr3:2903440-2905638  
REVERSE

Match to Query 6586: 1521.794208 from(761.904380,2+) index(8552)

Title: Elution from: 75.312 to 75.312 scan no 11350 cid35.00 polarity:+

Data file C7-3\_2.mgf

Click mouse within plot area to zoom in by factor of two about that point

Or,   to  Da Label all possible matches  Label matches used for scoring Show Y-axis 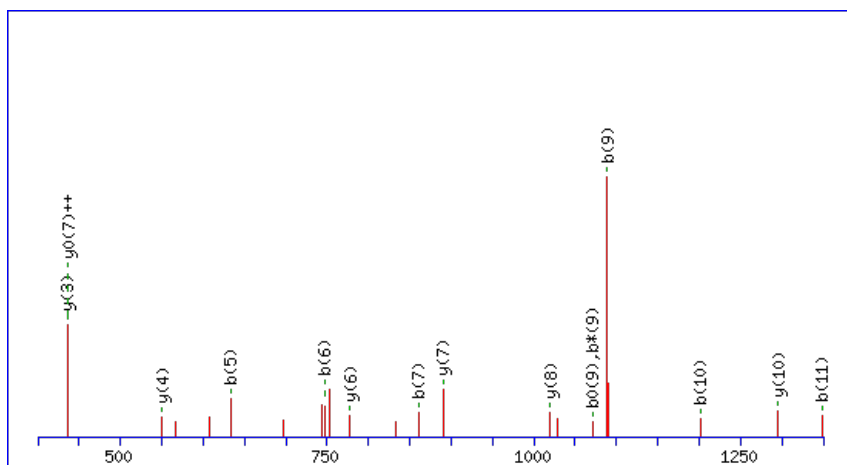Monoisotopic mass of neutral peptide  $M_r(\text{calc})$ : 1521.7939

Fixed modifications: Carbamidomethyl (C) (apply to specified residues or termini only)

Ions Score: 58 Expect: 6.9e-006

Matches : 15/118 fragment ions using 21 most intense peaks ([help](#))

| #  | b                | b <sup>++</sup> | b*               | b <sup>*++</sup> | b <sup>0</sup>   | b <sup>0++</sup> | Seq. | y                | y <sup>++</sup> | y*        | y <sup>*++</sup> | y <sup>0</sup> | y <sup>0++</sup> | #  |
|----|------------------|-----------------|------------------|------------------|------------------|------------------|------|------------------|-----------------|-----------|------------------|----------------|------------------|----|
| 1  | 72.0444          | 36.5258         |                  |                  |                  |                  | A    |                  |                 |           |                  |                |                  | 12 |
| 2  | 228.1455         | 114.5764        | 211.1190         | 106.0631         |                  |                  | R    | 1451.7641        | 726.3857        | 1434.7376 | 717.8724         | 1433.7536      | 717.3804         | 11 |
| 3  | 375.2139         | 188.1106        | 358.1874         | 179.5973         |                  |                  | F    | <b>1295.6630</b> | 648.3352        | 1278.6365 | 639.8219         | 1277.6525      | 639.3299         | 10 |
| 4  | 504.2565         | 252.6319        | 487.2300         | 244.1186         | 486.2459         | 243.6266         | E    | 1148.5946        | 574.8009        | 1131.5681 | 566.2877         | 1130.5840      | 565.7957         | 9  |
| 5  | <b>633.2991</b>  | 317.1532        | 616.2726         | 308.6399         | 615.2885         | 308.1479         | E    | <b>1019.5520</b> | 510.2796        | 1002.5255 | 501.7664         | 1001.5415      | 501.2744         | 8  |
| 6  | <b>746.3832</b>  | 373.6952        | 729.3566         | 365.1819         | 728.3726         | 364.6899         | L    | <b>890.5094</b>  | 445.7584        | 873.4829  | 437.2451         | 872.4989       | <b>436.7531</b>  | 7  |
| 7  | <b>860.4261</b>  | 430.7167        | 843.3995         | 422.2034         | 842.4155         | 421.7114         | N    | <b>777.4254</b>  | 389.2163        | 760.3988  | 380.7030         | 759.4148       | 380.2110         | 6  |
| 8  | 973.5102         | 487.2587        | 956.4836         | 478.7454         | 955.4996         | 478.2534         | I    | 663.3824         | 332.1949        | 646.3559  | 323.6816         | 645.3719       | 323.1896         | 5  |
| 9  | <b>1088.5371</b> | 544.7722        | <b>1071.5106</b> | 536.2589         | <b>1070.5265</b> | 535.7669         | D    | <b>550.2984</b>  | 275.6528        | 533.2718  | 267.1396         | 532.2878       | 266.6475         | 4  |
| 10 | <b>1201.6212</b> | 601.3142        | 1184.5946        | 592.8009         | 1183.6106        | 592.3089         | L    | <b>435.2714</b>  | 218.1394        | 418.2449  | 209.6261         |                |                  | 3  |
| 11 | <b>1348.6896</b> | 674.8484        | 1331.6630        | 666.3352         | 1330.6790        | 665.8431         | F    | 322.1874         | 161.5973        | 305.1608  | 153.0840         |                |                  | 2  |
| 12 |                  |                 |                  |                  |                  |                  | R    | 175.1190         | 88.0631         | 158.0924  | 79.5498          |                |                  | 1  |

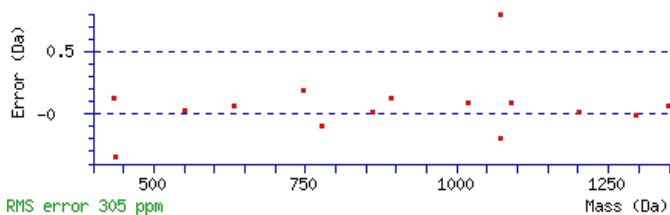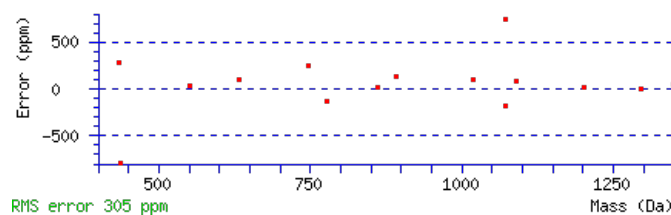NCBI BLAST search of **ARFELNIDLFR**

(Parameters: blastp, nr protein database, expect=20000, no filter, PAM30)

Other BLAST [web gateways](#)



AT3G09440.1

All matches to this query

| Score | Mr(calc)  | Delta   | Sequence                      |
|-------|-----------|---------|-------------------------------|
| 58.1  | 1521.7939 | 0.0003  | <a href="#">ARFEELNIDLFK</a>  |
| 1.9   | 1521.7899 | 0.0043  | <a href="#">RSIGENFKSSELR</a> |
| 0.2   | 1521.7980 | -0.0038 | <a href="#">YLGLWIDDPREK</a>  |

Mascot: <http://www.matrixscience.com/>

**Peptide View**MS/MS Fragmentation of **NFLNNLK**Found in **AT3G09560.1** in **TAIR\_Arabidopsis**, Symbols: | lipin family protein | chr3:2934958-2938678 REVERSE

Match to Query 1375: 872.44046 from(437.227299,2+) index(4216)

Title: Elution from: 38.845 to 38.845 scan no 5278 cid35.00 polarity:+

Data file D12h-1\_3.mgf

Click mouse within plot area to zoom in by factor of two about that point

Or,  to  Da Label all possible matches  Label matches used for scoring Show Y-axis 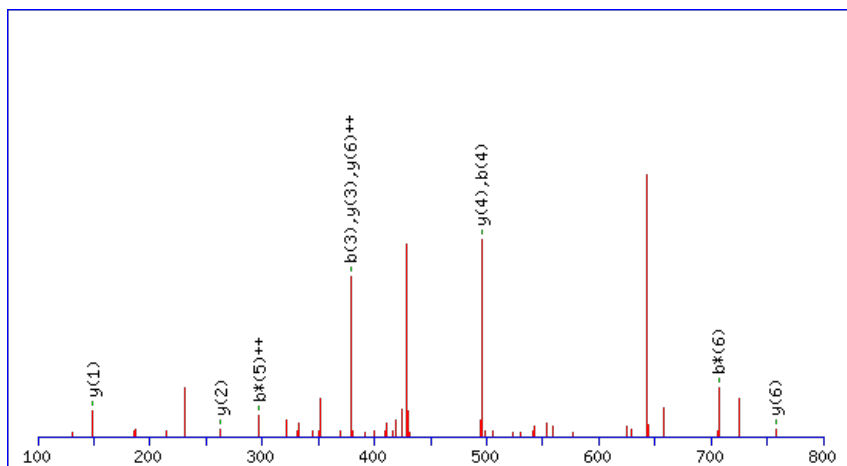**Monoisotopic mass of neutral peptide Mr(calc):** 872.4382**Fixed modifications:** Carbamidomethyl (C) (apply to specified residues or termini only)**Ions Score:** 27 **Expect:** 0.043**Matches:** 10/48 fragment ions using 19 most intense peaks ([help](#))

| # | b        | b <sup>++</sup> | b*       | b <sup>*++</sup> | Seq. | y        | y <sup>++</sup> | y*       | y <sup>*++</sup> | # |
|---|----------|-----------------|----------|------------------|------|----------|-----------------|----------|------------------|---|
| 1 | 117.0443 | 59.0258         | 99.0207  | 50.0140          | N    |          |                 |          |                  | 7 |
| 2 | 265.1097 | 133.0585        | 247.0861 | 124.0467         | F    | 757.4085 | 379.2079        | 739.3849 | 370.1961         | 6 |
| 3 | 379.1908 | 190.0990        | 361.1672 | 181.0873         | L    | 609.3431 | 305.1752        | 591.3195 | 296.1634         | 5 |
| 4 | 495.2278 | 248.1175        | 477.2042 | 239.1058         | N    | 495.2620 | 248.1346        | 477.2384 | 239.1228         | 4 |
| 5 | 611.2648 | 306.1360        | 593.2412 | 297.1243         | N    | 379.2250 | 190.1161        | 361.2014 | 181.1043         | 3 |
| 6 | 725.3459 | 363.1766        | 707.3223 | 354.1648         | L    | 263.1880 | 132.0976        | 245.1644 | 123.0858         | 2 |
| 7 |          |                 |          |                  | K    | 149.1069 | 75.0571         | 131.0833 | 66.0453          | 1 |

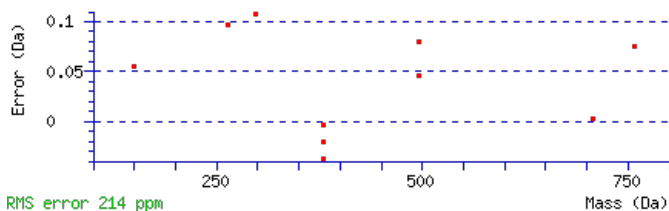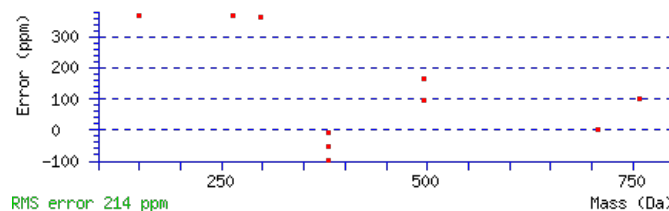NCBI **BLAST** search of [NFLNNLK](#)

(Parameters: blastp, nr protein database, expect=20000, no filter, PAM30)

Other BLAST [web gateways](#)**All matches to this query**

| Score | Mr(calc) | Delta   | Sequence                |
|-------|----------|---------|-------------------------|
| 26.7  | 872.4382 | 0.0018  | <a href="#">NFLNNLK</a> |
| 17.1  | 872.4416 | -0.0016 | <a href="#">RSMLDIK</a> |
| 16.6  | 872.4416 | -0.0016 | <a href="#">DMRISLK</a> |

# AT3G09560.1

|      |          |         |                          |
|------|----------|---------|--------------------------|
| 15.6 | 872.4416 | -0.0016 | <a href="#">NKMGTALK</a> |
| 13.3 | 872.4416 | -0.0016 | <a href="#">VMKNLNK</a>  |
| 12.9 | 872.4416 | -0.0016 | <a href="#">MERIGLK</a>  |
| 12.2 | 872.4382 | 0.0018  | <a href="#">NNIQVFK</a>  |
| 12.1 | 872.4416 | -0.0015 | <a href="#">EVTMVRK</a>  |
| 11.2 | 872.4416 | -0.0016 | <a href="#">DALLRMK</a>  |
| 10.7 | 872.4416 | -0.0016 | <a href="#">DLLMRAK</a>  |

**Mascot:** <http://www.matrixscience.com/>

**Peptide View**MS/MS Fragmentation of **AGHQ TSAESWGTGR**Found in **AT3G09630.1** in **TAIR\_Arabidopsis**, Symbols: | 60S ribosomal protein L4/L1 (RPL4A) | chr3:2953818-2955449 FORWARD

Match to Query 5521: 1443.649155 from(482.223661,3+) index(530)

Title: Elution from: 10.570 to 10.570 scan no 791 cid35.00 polarity:+

Data file D6h-2\_3.mgf

Click mouse within plot area to zoom in by factor of two about that point

Or,   to  Da Label all possible matches  Label matches used for scoring Show Y-axis 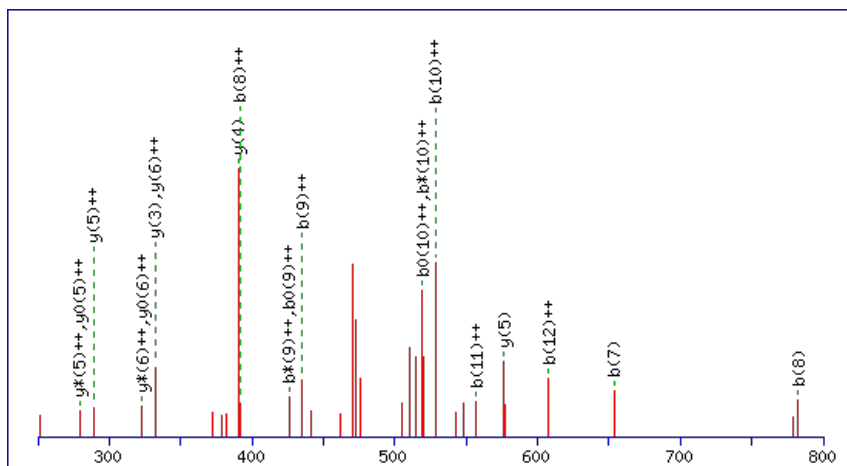Monoisotopic mass of neutral peptide **Mr(calc)**: 1443.6491**Fixed modifications**: Carbamidomethyl (C) (apply to specified residues or termini only)**Ions Score**: 34 **Expect**: 0.00058**Matches**: 20/138 fragment ions using 19 most intense peaks ([help](#))

| #  | b               | b <sup>++</sup> | b*        | b <sup>*++</sup> | b <sup>0</sup> | b <sup>0++</sup> | Seq. | y               | y <sup>++</sup> | y*        | y <sup>*++</sup> | y <sup>0</sup> | y <sup>0++</sup> | #  |
|----|-----------------|-----------------|-----------|------------------|----------------|------------------|------|-----------------|-----------------|-----------|------------------|----------------|------------------|----|
| 1  | 72.0444         | 36.5258         |           |                  |                |                  | A    |                 |                 |           |                  |                |                  | 14 |
| 2  | 129.0659        | 65.0366         |           |                  |                |                  | G    | 1373.6193       | 687.3133        | 1356.5927 | 678.8000         | 1355.6087      | 678.3080         | 13 |
| 3  | 266.1248        | 133.5660        |           |                  |                |                  | H    | 1316.5978       | 658.8025        | 1299.5713 | 650.2893         | 1298.5872      | 649.7973         | 12 |
| 4  | 394.1833        | 197.5953        | 377.1568  | 189.0820         |                |                  | Q    | 1179.5389       | 590.2731        | 1162.5123 | 581.7598         | 1161.5283      | 581.2678         | 11 |
| 5  | 495.2310        | 248.1191        | 478.2045  | 239.6059         | 477.2205       | 239.1139         | T    | 1051.4803       | 526.2438        | 1034.4538 | 517.7305         | 1033.4697      | 517.2385         | 10 |
| 6  | 582.2631        | 291.6352        | 565.2365  | 283.1219         | 564.2525       | 282.6299         | S    | 950.4326        | 475.7200        | 933.4061  | 467.2067         | 932.4221       | 466.7147         | 9  |
| 7  | <b>653.3002</b> | 327.1537        | 636.2736  | 318.6404         | 635.2896       | 318.1484         | A    | 863.4006        | 432.2039        | 846.3741  | 423.6907         | 845.3900       | 423.1987         | 8  |
| 8  | <b>782.3428</b> | <b>391.6750</b> | 765.3162  | 383.1617         | 764.3322       | 382.6697         | E    | 792.3635        | 396.6854        | 775.3369  | 388.1721         | 774.3529       | 387.6801         | 7  |
| 9  | 869.3748        | <b>435.1910</b> | 852.3482  | <b>426.6778</b>  | 851.3642       | <b>426.1857</b>  | S    | 663.3209        | <b>332.1641</b> | 646.2944  | <b>323.6508</b>  | 645.3103       | <b>323.1588</b>  | 6  |
| 10 | 1055.4541       | <b>528.2307</b> | 1038.4276 | <b>519.7174</b>  | 1037.4435      | <b>519.2254</b>  | W    | <b>576.2889</b> | <b>288.6481</b> | 559.2623  | <b>280.1348</b>  | 558.2783       | <b>279.6428</b>  | 5  |
| 11 | 1112.4756       | <b>556.7414</b> | 1095.4490 | 548.2281         | 1094.4650      | 547.7361         | G    | <b>390.2096</b> | 195.6084        | 373.1830  | 187.0951         | 372.1990       | 186.6031         | 4  |
| 12 | 1213.5232       | <b>607.2653</b> | 1196.4967 | 598.7520         | 1195.5127      | 598.2600         | T    | <b>333.1881</b> | 167.0977        | 316.1615  | 158.5844         | 315.1775       | 158.0924         | 3  |
| 13 | 1270.5447       | 635.7760        | 1253.5182 | 627.2627         | 1252.5341      | 626.7707         | G    | 232.1404        | 116.5738        | 215.1139  | 108.0606         |                |                  | 2  |
| 14 |                 |                 |           |                  |                |                  | R    | 175.1190        | 88.0631         | 158.0924  | 79.5498          |                |                  | 1  |

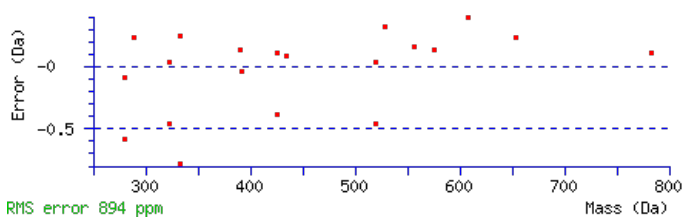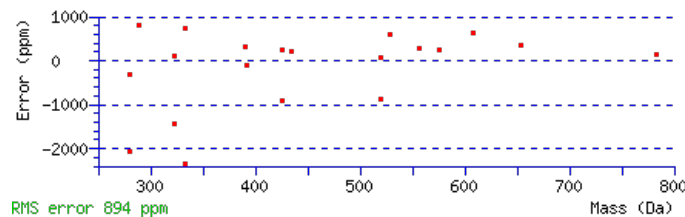NCBI **BLAST** search of **AGHQ TSAESWGTGR**

(Parameters: blastp, nr protein database, expect=20000, no filter, PAM30)

AT3G09630.1

Other BLAST [web gateways](#)

**All matches to this query**

| Score | Mr(calc)  | Delta   | Sequence                         |
|-------|-----------|---------|----------------------------------|
| 34.0  | 1443.6491 | 0.0000  | <a href="#">AGHQ TSAESWG TGR</a> |
| 2.2   | 1443.6486 | 0.0006  | <a href="#">MEAKYREMENK</a>      |
| 1.1   | 1443.6493 | -0.0001 | <a href="#">EGILGFY GDCWK</a>    |

Mascot: <http://www.matrixscience.com/>

**Peptide View**MS/MS Fragmentation of **ISYTTLMK**

Found in **AT3G09650.1** in **TAIR\_Arabidopsis**, Symbols: CRM3, HCF152 | HCF152 (HIGH CHLOROPHYLL FLUORESCENCE 152) | chr3:2958709-2961045 FORWARD

Match to Query 2211: 971.497556 from(486.756054,2+) index(5539)

Title: Elution from: 49.760 to 49.760 scan no 7060 cid35.00 polarity:+

Data file 0-2\_2.mgf

Click mouse within plot area to zoom in by factor of two about that point

Or,   to  Da

Label all possible matches  Label matches used for scoring

Show Y-axis

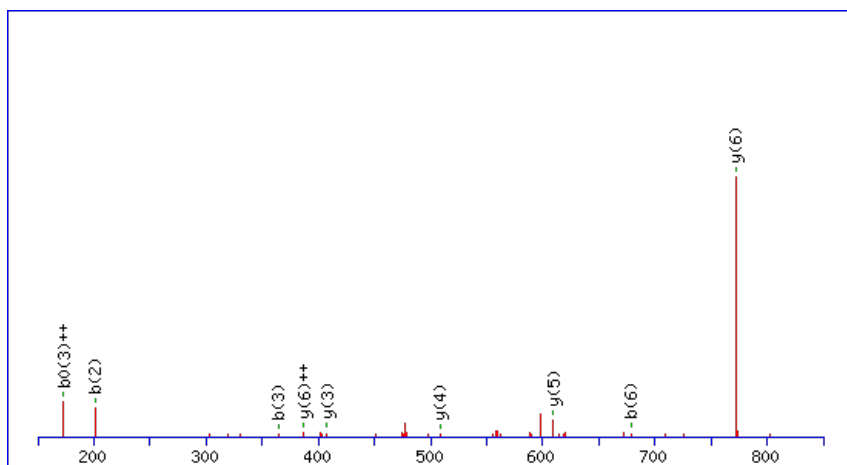

**Monoisotopic mass of neutral peptide Mr(calc):** 971.4998

**Fixed modifications:** Carbamidomethyl (C) (apply to specified residues or termini only)

**Variable modifications:**

**M7** : Oxidation (M), with neutral losses 0.0000 (shown in table), 63.9983

**Ions Score:** 14 **Expect:** 0.044

**Matches** : 9/98 fragment ions using 33 most intense peaks ([help](#))

| # | b               | b <sup>++</sup> | b <sup>0</sup> | b <sup>0++</sup> | Seq. | y               | y <sup>++</sup> | y <sup>*</sup> | y <sup>*++</sup> | y <sup>0</sup> | y <sup>0++</sup> | # |
|---|-----------------|-----------------|----------------|------------------|------|-----------------|-----------------|----------------|------------------|----------------|------------------|---|
| 1 | 114.0913        | 57.5493         |                |                  | I    |                 |                 |                |                  |                |                  | 8 |
| 2 | <b>201.1234</b> | 101.0653        | 183.1128       | 92.0600          | S    | 859.4230        | 430.2151        | 842.3964       | 421.7019         | 841.4124       | 421.2098         | 7 |
| 3 | <b>364.1867</b> | 182.5970        | 346.1761       | <b>173.5917</b>  | Y    | <b>772.3910</b> | <b>386.6991</b> | 755.3644       | 378.1858         | 754.3804       | 377.6938         | 6 |
| 4 | 465.2344        | 233.1208        | 447.2238       | 224.1155         | T    | <b>609.3276</b> | 305.1675        | 592.3011       | 296.6542         | 591.3171       | 296.1622         | 5 |
| 5 | 566.2821        | 283.6447        | 548.2715       | 274.6394         | T    | <b>508.2799</b> | 254.6436        | 491.2534       | 246.1303         | 490.2694       | 245.6383         | 4 |
| 6 | <b>679.3661</b> | 340.1867        | 661.3556       | 331.1814         | L    | <b>407.2323</b> | 204.1198        | 390.2057       | 195.6065         |                |                  | 3 |
| 7 | 826.4015        | 413.7044        | 808.3910       | 404.6991         | M    | 294.1482        | 147.5777        | 277.1217       | 139.0645         |                |                  | 2 |
| 8 |                 |                 |                |                  | K    | 147.1128        | 74.0600         | 130.0863       | 65.5468          |                |                  | 1 |

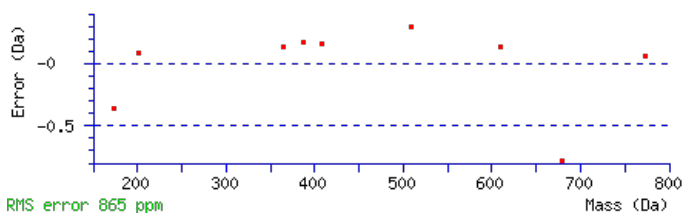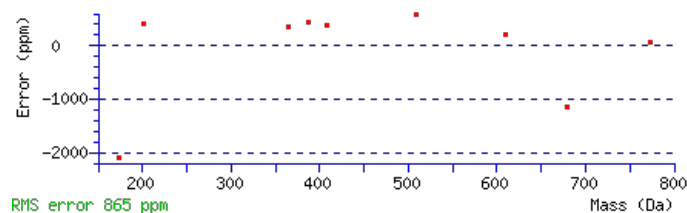

NCBI **BLAST** search of **ISYTTLMK**

(Parameters: blastp, nr protein database, expect=20000, no filter, PAM30)

Other BLAST [web gateways](#)

**All matches to this query**

| Score | Mr(calc) | Delta | Sequence |
|-------|----------|-------|----------|
|       |          |       |          |

# AT3G09650.1

|      |          |         |                          |
|------|----------|---------|--------------------------|
| 13.8 | 971.4998 | -0.0022 | <a href="#">ISYTLMK</a>  |
| 6.2  | 971.4964 | 0.0012  | <a href="#">SIYDFTVK</a> |
| 6.2  | 971.4964 | 0.0012  | <a href="#">SLYDFTVK</a> |
| 3.0  | 971.4998 | -0.0022 | <a href="#">VTITLYMK</a> |

**Mascot:** <http://www.matrixscience.com/>

## Peptide View

MS/MS Fragmentation of **SLIANLSAANCYK**Found in **AT3G09820.1** in **TAIR\_Arabidopsis**, Symbols: ADK1 | ADK1 (ADENOSINE KINASE 1) | chr3:3012127-3014629 FORWARD

Match to Query 5526: 1423.709982 from(712.862267,2+) index(5789)

Title: Elution from: 52.497 to 52.497 scan no 7338 cid35.00 polarity:+

Data file D6h-2\_2.mgf

Click mouse within plot area to zoom in by factor of two about that point

Or,   to  Da Label all possible matches  Label matches used for scoring Show Y-axis 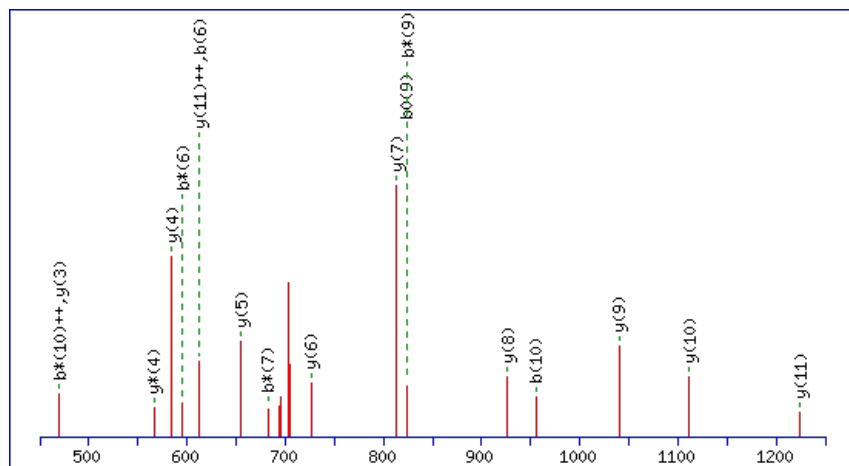Monoisotopic mass of neutral peptide  $M_r(\text{calc})$ : 1423.7129

Fixed modifications: Carbamidomethyl (C) (apply to specified residues or termini only)

Ions Score: 102 Expect: 3.3e-010

Matches : 18/124 fragment ions using 20 most intense peaks ([help](#))

| #  | b               | b <sup>++</sup> | b*              | b <sup>*++</sup> | b <sup>0</sup>  | b <sup>0++</sup> | Seq. | y                | y <sup>++</sup> | y*              | y <sup>*++</sup> | y <sup>0</sup> | y <sup>0++</sup> | #  |
|----|-----------------|-----------------|-----------------|------------------|-----------------|------------------|------|------------------|-----------------|-----------------|------------------|----------------|------------------|----|
| 1  | 88.0393         | 44.5233         |                 |                  | 70.0287         | 35.5180          | S    |                  |                 |                 |                  |                |                  | 13 |
| 2  | 201.1234        | 101.0653        |                 |                  | 183.1128        | 92.0600          | L    | 1337.6882        | 669.3477        | 1320.6616       | 660.8345         | 1319.6776      | 660.3425         | 12 |
| 3  | 314.2074        | 157.6074        |                 |                  | 296.1969        | 148.6021         | I    | <b>1224.6041</b> | <b>612.8057</b> | 1207.5776       | 604.2924         | 1206.5936      | 603.8004         | 11 |
| 4  | 385.2445        | 193.1259        |                 |                  | 367.2340        | 184.1206         | A    | <b>1111.5201</b> | 556.2637        | 1094.4935       | 547.7504         | 1093.5095      | 547.2584         | 10 |
| 5  | 499.2875        | 250.1474        | 482.2609        | 241.6341         | 481.2769        | 241.1421         | N    | <b>1040.4830</b> | 520.7451        | 1023.4564       | 512.2318         | 1022.4724      | 511.7398         | 9  |
| 6  | <b>612.3715</b> | 306.6894        | <b>595.3450</b> | 298.1761         | 594.3610        | 297.6841         | L    | <b>926.4400</b>  | 463.7237        | 909.4135        | 455.2104         | 908.4295       | 454.7184         | 8  |
| 7  | 699.4036        | 350.2054        | <b>682.3770</b> | 341.6921         | 681.3930        | 341.2001         | S    | <b>813.3560</b>  | 407.1816        | 796.3294        | 398.6683         | 795.3454       | 398.1763         | 7  |
| 8  | 770.4407        | 385.7240        | 753.4141        | 377.2107         | 752.4301        | 376.7187         | A    | <b>726.3239</b>  | 363.6656        | 709.2974        | 355.1523         |                |                  | 6  |
| 9  | 841.4778        | 421.2425        | <b>824.4512</b> | 412.7293         | <b>823.4672</b> | 412.2373         | A    | <b>655.2868</b>  | 328.1470        | 638.2603        | 319.6338         |                |                  | 5  |
| 10 | <b>955.5207</b> | 478.2640        | 938.4942        | <b>469.7507</b>  | 937.5102        | 469.2587         | N    | <b>584.2497</b>  | 292.6285        | <b>567.2232</b> | 284.1152         |                |                  | 4  |
| 11 | 1115.5514       | 558.2793        | 1098.5248       | 549.7660         | 1097.5408       | 549.2740         | C    | <b>470.2068</b>  | 235.6070        | 453.1802        | 227.0938         |                |                  | 3  |
| 12 | 1278.6147       | 639.8110        | 1261.5881       | 631.2977         | 1260.6041       | 630.8057         | Y    | 310.1761         | 155.5917        | 293.1496        | 147.0784         |                |                  | 2  |
| 13 |                 |                 |                 |                  |                 |                  | K    | 147.1128         | 74.0600         | 130.0863        | 65.5468          |                |                  | 1  |

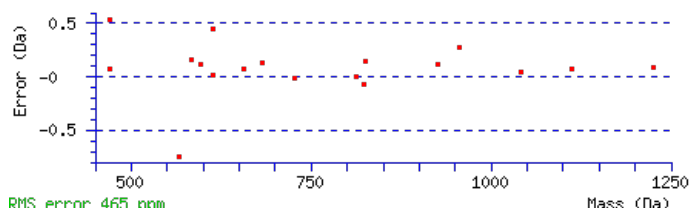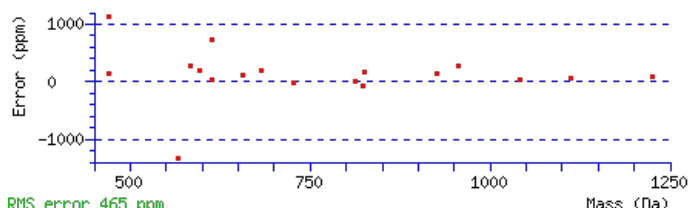NCBI BLAST search of [SLIANLSAANCYK](#)

(Parameters: blastp, nr protein database, expect=20000, no filter, PAM30)

Other BLAST [web gateways](#)



AT3G09820.1

All matches to this query

| Score | Mr(calc)  | Delta   | Sequence                      |
|-------|-----------|---------|-------------------------------|
| 101.7 | 1423.7129 | -0.0029 | <a href="#">SLIANLSAANCYK</a> |
| 1.9   | 1423.7129 | -0.0029 | <a href="#">ASNILLDADMHPK</a> |
| 0.5   | 1423.7129 | -0.0029 | <a href="#">ADALNATCKYIGK</a> |

Mascot: <http://www.matrixscience.com/>

## Peptide View

MS/MS Fragmentation of **SGCTYPEKPDFN**

Found in **AT3G09820.2** in **TAIR\_Arabidopsis**, Symbols: ADK1 | ADK1 (ADENOSINE KINASE 1) | chr3:3012650-3014629 FORWARD

Match to Query 5697: 1413.585926 from(707.800239,2+) index(2691)

Title: Elution from: 28.665 to 28.665 scan no 3378 cid35.00 polarity:+

Data file D12h-3\_1.mgf

Click mouse within plot area to zoom in by factor of two about that point

Or,   to  Da

Label all possible matches  Label matches used for scoring

Show Y-axis

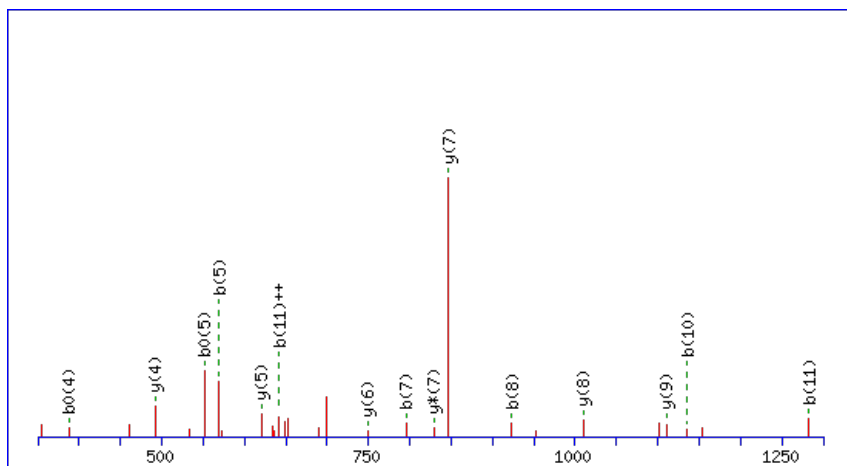

Monoisotopic mass of neutral peptide  $M_r(\text{calc})$ : 1413.5871

Fixed modifications: Carbamidomethyl (C) (apply to specified residues or termini only)

Ions Score: 45 Expect: 2.9e-005

Matches : 15/114 fragment ions using 24 most intense peaks ([help](#))

| #  | b         | b <sup>++</sup> | b*        | b <sup>*++</sup> | b <sup>0</sup> | b <sup>0++</sup> | Seq. | y         | y <sup>++</sup> | y*        | y <sup>*++</sup> | y <sup>0</sup> | y <sup>0++</sup> | #  |
|----|-----------|-----------------|-----------|------------------|----------------|------------------|------|-----------|-----------------|-----------|------------------|----------------|------------------|----|
| 1  | 88.0393   | 44.5233         |           |                  | 70.0287        | 35.5180          | S    |           |                 |           |                  |                |                  | 12 |
| 2  | 145.0608  | 73.0340         |           |                  | 127.0502       | 64.0287          | G    | 1327.5623 | 664.2848        | 1310.5358 | 655.7715         | 1309.5518      | 655.2795         | 11 |
| 3  | 305.0914  | 153.0493        |           |                  | 287.0809       | 144.0441         | C    | 1270.5409 | 635.7741        | 1253.5143 | 627.2608         | 1252.5303      | 626.7688         | 10 |
| 4  | 406.1391  | 203.5732        |           |                  | 388.1285       | 194.5679         | T    | 1110.5102 | 555.7587        | 1093.4837 | 547.2455         | 1092.4997      | 546.7535         | 9  |
| 5  | 569.2024  | 285.1049        |           |                  | 551.1919       | 276.0996         | Y    | 1009.4625 | 505.2349        | 992.4360  | 496.7216         | 991.4520       | 496.2296         | 8  |
| 6  | 666.2552  | 333.6312        |           |                  | 648.2446       | 324.6260         | P    | 846.3992  | 423.7032        | 829.3727  | 415.1900         | 828.3886       | 414.6980         | 7  |
| 7  | 795.2978  | 398.1525        |           |                  | 777.2872       | 389.1472         | E    | 749.3464  | 375.1769        | 732.3199  | 366.6636         | 731.3359       | 366.1716         | 6  |
| 8  | 923.3927  | 462.2000        | 906.3662  | 453.6867         | 905.3822       | 453.1947         | K    | 620.3039  | 310.6556        | 603.2773  | 302.1423         | 602.2933       | 301.6503         | 5  |
| 9  | 1020.4455 | 510.7264        | 1003.4190 | 502.2131         | 1002.4349      | 501.7211         | P    | 492.2089  | 246.6081        | 475.1823  | 238.0948         | 474.1983       | 237.6028         | 4  |
| 10 | 1135.4725 | 568.2399        | 1118.4459 | 559.7266         | 1117.4619      | 559.2346         | D    | 395.1561  | 198.0817        | 378.1296  | 189.5684         | 377.1456       | 189.0764         | 3  |
| 11 | 1282.5409 | 641.7741        | 1265.5143 | 633.2608         | 1264.5303      | 632.7688         | F    | 280.1292  | 140.5682        | 263.1026  | 132.0550         |                |                  | 2  |
| 12 |           |                 |           |                  |                |                  | N    | 133.0608  | 67.0340         | 116.0342  | 58.5207          |                |                  | 1  |

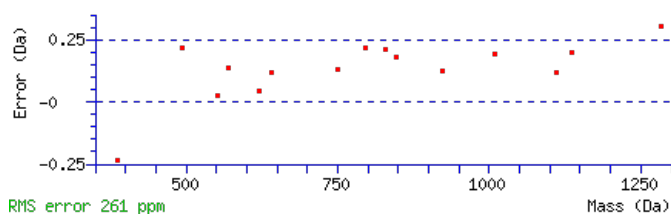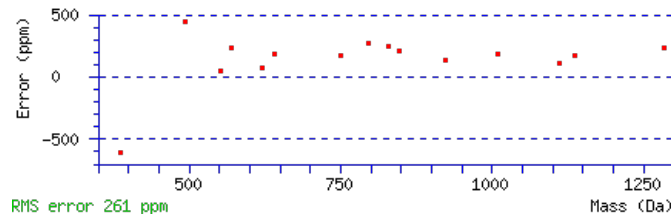

NCBI BLAST search of **SGCTYPEKPDFN**

(Parameters: blastp, nr protein database, expect=20000, no filter, PAM30)

Other BLAST [web gateways](#)

All matches to this query

AT3G09820.2

| Score | Mr(calc)  | Delta   | Sequence                     |
|-------|-----------|---------|------------------------------|
| 45.4  | 1413.5871 | -0.0012 | <a href="#">SGCTYPEKPDFN</a> |
| 1.8   | 1413.5830 | 0.0029  | <a href="#">KESFQCSDEER</a>  |

Mascot: <http://www.matrixscience.com/>

## Peptide View

MS/MS Fragmentation of **LVVDEAINDDNSVVSLHPATMEK**

Found in **AT3G09840.1** in **TAIR\_Arabidopsis**, Symbols: ATCDC48, CDC48A, CDC48 | CDC48 (CELL DIVISION CYCLE 48); ATPase | chr3:3019499-3022837 FORWARD

Match to Query 10993: 2523.144024 from(842.055284,3+) index(7515)

Title: Elution from: 65.013 to 65.013 scan no 9675 cid35.00 polarity:+

Data file C7-1\_1.mgf

Click mouse within plot area to zoom in by factor of two about that point

Or, Plot from  to  Da

Label all possible matches  Label matches used for scoring

Show Y-axis

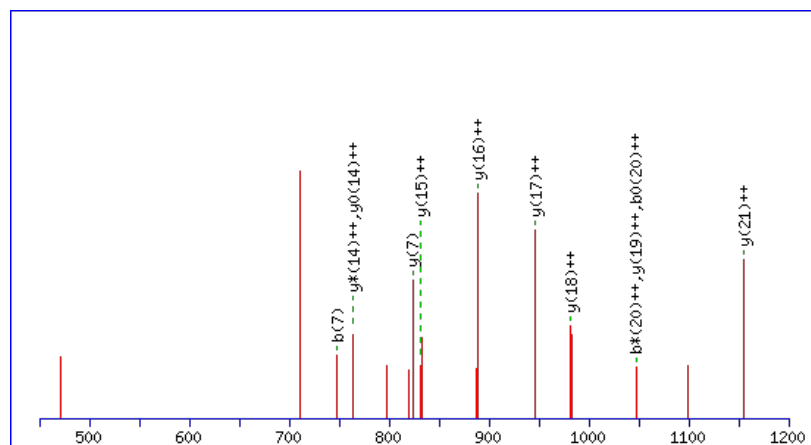

Monoisotopic mass of neutral peptide  $M_r(\text{calc})$ : 2523.1383

Fixed modifications: Carbamidomethyl (C) (apply to specified residues or termini only)

Ions Score: 27 Expect: 0.016

Matches : 12/242 fragment ions using 17 most intense peaks ([help](#))

| #  | b         | b <sup>++</sup> | b <sup>*</sup> | b <sup>*++</sup> | b <sup>0</sup> | b <sup>0++</sup> | Seq | y         | y <sup>++</sup> | y <sup>*</sup> | y <sup>*++</sup> | y <sup>0</sup> | y <sup>0++</sup> | #  |
|----|-----------|-----------------|----------------|------------------|----------------|------------------|-----|-----------|-----------------|----------------|------------------|----------------|------------------|----|
| 1  | 115.0884  | 58.0478         |                |                  |                |                  | L   |           |                 |                |                  |                |                  | 23 |
| 2  | 215.1538  | 108.0805        |                |                  |                |                  | V   | 2410.0645 | 1205.5359       | 2392.0409      | 1196.5241        | 2392.0540      | 1196.5306        | 22 |
| 3  | 315.2193  | 158.1133        |                |                  |                |                  | V   | 2309.9991 | 1155.5032       | 2291.9755      | 1146.4914        | 2291.9885      | 1146.4979        | 21 |
| 4  | 431.2433  | 216.1253        |                |                  | 413.2327       | 207.1200         | D   | 2209.9336 | 1105.4705       | 2191.9100      | 1096.4587        | 2191.9231      | 1096.4652        | 20 |
| 5  | 561.2829  | 281.1451        |                |                  | 543.2723       | 272.1398         | E   | 2093.9096 | 1047.4585       | 2075.8861      | 1038.4467        | 2075.8991      | 1038.4532        | 19 |
| 6  | 633.3170  | 317.1622        |                |                  | 615.3065       | 308.1569         | A   | 1963.8700 | 982.4386        | 1945.8464      | 973.4269         | 1945.8595      | 973.4334         | 18 |
| 7  | 747.3981  | 374.2027        |                |                  | 729.3876       | 365.1974         | I   | 1891.8359 | 946.4216        | 1873.8123      | 937.4098         | 1873.8253      | 937.4163         | 17 |
| 8  | 863.4351  | 432.2212        | 845.4115       | 423.2094         | 845.4246       | 423.2159         | N   | 1777.7548 | 889.3810        | 1759.7312      | 880.3692         | 1759.7442      | 880.3757         | 16 |
| 9  | 979.4591  | 490.2332        | 961.4355       | 481.2214         | 961.4485       | 481.2279         | D   | 1661.7178 | 831.3625        | 1643.6942      | 822.3507         | 1643.7072      | 822.3572         | 15 |
| 10 | 1095.4831 | 548.2452        | 1077.4595      | 539.2334         | 1077.4725      | 539.2399         | D   | 1545.6938 | 773.3505        | 1527.6702      | 764.3387         | 1527.6832      | 764.3453         | 14 |
| 11 | 1211.5201 | 606.2637        | 1193.4965      | 597.2519         | 1193.5095      | 597.2584         | N   | 1429.6698 | 715.3385        | 1411.6462      | 706.3268         | 1411.6593      | 706.3333         | 13 |
| 12 | 1299.5491 | 650.2782        | 1281.5256      | 641.2664         | 1281.5386      | 641.2729         | S   | 1313.6328 | 657.3200        | 1295.6092      | 648.3083         | 1295.6223      | 648.3148         | 12 |
| 13 | 1399.6146 | 700.3109        | 1381.5910      | 691.2991         | 1381.6040      | 691.3056         | V   | 1225.6038 | 613.3055        | 1207.5802      | 604.2937         | 1207.5932      | 604.3002         | 11 |
| 14 | 1499.6800 | 750.3437        | 1481.6565      | 741.3319         | 1481.6695      | 741.3384         | V   | 1125.5383 | 563.2728        | 1107.5147      | 554.2610         | 1107.5277      | 554.2675         | 10 |
| 15 | 1587.7091 | 794.3582        | 1569.6855      | 785.3464         | 1569.6985      | 785.3529         | S   | 1025.4729 | 513.2401        | 1007.4493      | 504.2283         | 1007.4623      | 504.2348         | 9  |
| 16 | 1701.7902 | 851.3987        | 1683.7666      | 842.3869         | 1683.7796      | 842.3935         | L   | 937.4438  | 469.2255        | 919.4202       | 460.2137         | 919.4332       | 460.2203         | 8  |
| 17 | 1841.8402 | 921.4237        | 1823.8166      | 912.4120         | 1823.8297      | 912.4185         | H   | 823.3627  | 412.1850        | 805.3391       | 403.1732         | 805.3521       | 403.1797         | 7  |
| 18 | 1939.8900 | 970.4486        | 1921.8664      | 961.4369         | 1921.8795      | 961.4434         | P   | 683.3127  | 342.1600        | 665.2891       | 333.1482         | 665.3021       | 333.1547         | 6  |
| 19 | 2011.9242 | 1006.4657       | 1993.9006      | 997.4539         | 1993.9136      | 997.4604         | A   | 585.2629  | 293.1351        | 567.2393       | 284.1233         | 567.2523       | 284.1298         | 5  |
| 20 | 2113.9689 | 1057.4881       | 2095.9453      | 1048.4763        | 2095.9583      | 1048.4828        | T   | 513.2287  | 257.1180        | 495.2052       | 248.1062         | 495.2182       | 248.1127         | 4  |
| 21 | 2246.0064 | 1123.5068       | 2227.9828      | 1114.4950        | 2227.9958      | 1114.5016        | M   | 411.1840  | 206.0956        | 393.1604       | 197.0839         | 393.1735       | 197.0904         | 3  |
| 22 | 2376.0460 | 1188.5267       | 2358.0224      | 1179.5149        | 2358.0355      | 1179.5214        | E   | 279.1465  | 140.0769        | 261.1229       | 131.0651         | 261.1359       | 131.0716         | 2  |
| 23 |           |                 |                |                  |                |                  | K   | 149.1069  | 75.0571         | 131.0833       | 66.0453          |                |                  | 1  |

# AT3G09840.1

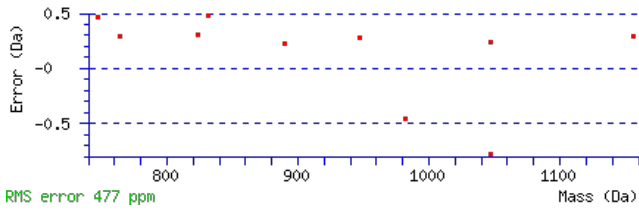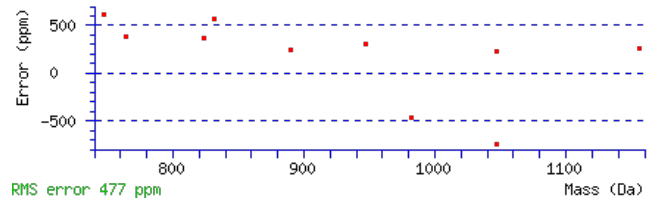

NCBI **BLAST** search of [LVVDEAINDDNSVVSLHPATMEK](#)  
 (Parameters: blastp, nr protein database, expect=20000, no filter, PAM30)  
 Other BLAST [web gateways](#)

## All matches to this query

| Score | Mr(calc)  | Delta   | Sequence                                |
|-------|-----------|---------|-----------------------------------------|
| 26.8  | 2523.1383 | 0.0057  | <a href="#">LVVDEAINDDNSVVSLHPATMEK</a> |
| 4.9   | 2523.1381 | 0.0059  | <a href="#">NPLFIVWNEDNSAMYCLGILK</a>   |
| 4.5   | 2523.1436 | 0.0004  | <a href="#">AVVHGKDVADIVTQLNGSYMRGR</a> |
| 1.2   | 2523.1467 | -0.0026 | <a href="#">NENLKKIFNESMTNHTSIVMK</a>   |
| 1.2   | 2523.1460 | -0.0019 | <a href="#">AGPGSSRWSMYSIPAKEELRPR</a>  |
| 0.6   | 2523.1387 | 0.0053  | <a href="#">LVDQTOQDVSKASCNSVKLDTR</a>  |
| 0.6   | 2523.1444 | -0.0004 | <a href="#">RPTMSQVTNELKQCLTLENSK</a>   |
| 0.4   | 2523.1432 | 0.0008  | <a href="#">DKFTWTAMVVGLANNGQGQEAIK</a> |
| 0.3   | 2523.1388 | 0.0052  | <a href="#">MLTASSSSSTTANIVYKRSQSTR</a> |

Mascot: <http://www.matrixscience.com/>

**Peptide View**MS/MS Fragmentation of **GLDLGVEGMR**

Found in **AT3G10060.1** in **TAIR\_Arabidopsis**, Symbols: | immunophilin, putative / FKBP-type peptidyl-prolyl cis-trans isomerase, putative | chr3:3102296-3103806 FORWARD

Match to Query 2864: 1045.523706 from(523.769129,2+) index(5243)

Title: Elution from: 47.273 to 47.273 scan no 6638 cid35.00 polarity:+

Data file 0-2\_2.mgf

Click mouse within plot area to zoom in by factor of two about that point

Or,   to  Da

Label all possible matches  Label matches used for scoring

Show Y-axis

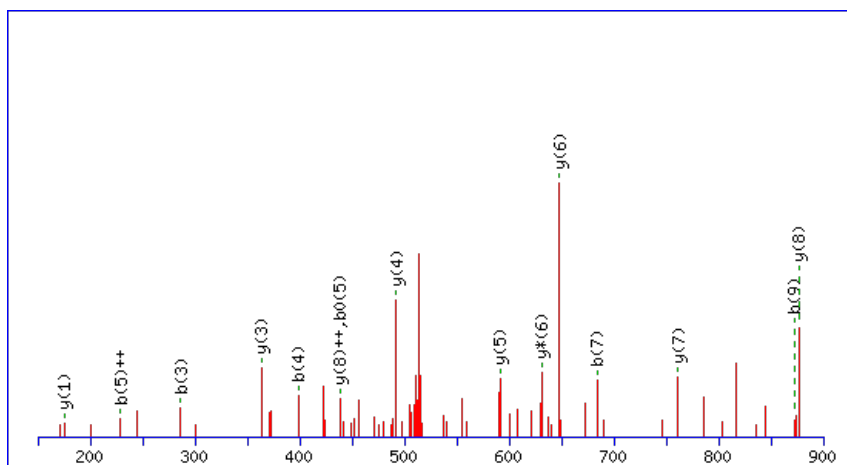

**Monoisotopic mass of neutral peptide Mr(calc):** 1045.5226

**Fixed modifications:** Carbamidomethyl (C) (apply to specified residues or termini only)

**Ions Score:** 49 **Expect:** 5.8e-005

**Matches:** 15/80 fragment ions using 24 most intense peaks ([help](#))

| #  | b               | b <sup>++</sup> | b <sup>0</sup>  | b <sup>0++</sup> | Seq. | y               | y <sup>++</sup> | y*              | y <sup>*++</sup> | y <sup>0</sup> | y <sup>0++</sup> | #  |
|----|-----------------|-----------------|-----------------|------------------|------|-----------------|-----------------|-----------------|------------------|----------------|------------------|----|
| 1  | 58.0287         | 29.5180         |                 |                  | G    |                 |                 |                 |                  |                |                  | 10 |
| 2  | 171.1128        | 86.0600         |                 |                  | L    | 989.5084        | 495.2579        | 972.4819        | 486.7446         | 971.4979       | 486.2526         | 9  |
| 3  | <b>286.1397</b> | 143.5735        | 268.1292        | 134.5682         | D    | <b>876.4244</b> | <b>438.7158</b> | 859.3978        | 430.2026         | 858.4138       | 429.7105         | 8  |
| 4  | <b>399.2238</b> | 200.1155        | 381.2132        | 191.1103         | L    | <b>761.3974</b> | 381.2024        | 744.3709        | 372.6891         | 743.3869       | 372.1971         | 7  |
| 5  | 456.2453        | <b>228.6263</b> | <b>438.2347</b> | 219.6210         | G    | <b>648.3134</b> | 324.6603        | <b>631.2868</b> | 316.1470         | 630.3028       | 315.6550         | 6  |
| 6  | 555.3137        | 278.1605        | 537.3031        | 269.1552         | V    | <b>591.2919</b> | 296.1496        | 574.2654        | 287.6363         | 573.2813       | 287.1443         | 5  |
| 7  | <b>684.3563</b> | 342.6818        | 666.3457        | 333.6765         | E    | <b>492.2235</b> | 246.6154        | 475.1969        | 238.1021         | 474.2129       | 237.6101         | 4  |
| 8  | 741.3777        | 371.1925        | 723.3672        | 362.1872         | G    | <b>363.1809</b> | 182.0941        | 346.1544        | 173.5808         |                |                  | 3  |
| 9  | <b>872.4182</b> | 436.7128        | 854.4077        | 427.7075         | M    | 306.1594        | 153.5834        | 289.1329        | 145.0701         |                |                  | 2  |
| 10 |                 |                 |                 |                  | R    | <b>175.1190</b> | 88.0631         | 158.0924        | 79.5498          |                |                  | 1  |

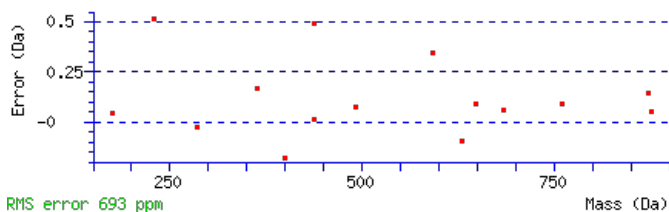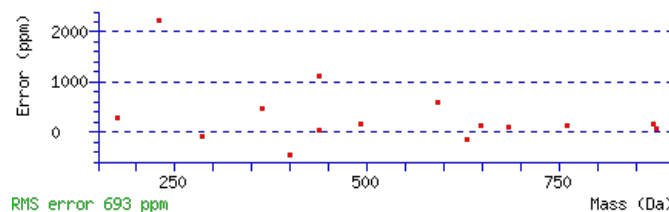

NCBI BLAST search of **GLDLGVEGMR**

(Parameters: blastp, nr protein database, expect=20000, no filter, PAM30)

Other BLAST [web gateways](#)

**All matches to this query**

AT3G10060.1

| Score | Mr(calc)  | Delta   | Sequence                   |
|-------|-----------|---------|----------------------------|
| 48.8  | 1045.5226 | 0.0011  | <a href="#">GLDLGVEGMR</a> |
| 0.7   | 1045.5264 | -0.0027 | <a href="#">ERSIDRDR</a>   |
| 0.6   | 1045.5226 | 0.0011  | <a href="#">GLESPALMGR</a> |

Mascot: <http://www.matrixscience.com/>

**Peptide View**MS/MS Fragmentation of **EGDILTLESER**Found in **AT3G10090.1** in **TAIR\_Arabidopsis**, Symbols: | 40S ribosomal protein S28 (RPS28A) | chr3:3108965-3109159 REVERSE

Match to Query 5215: 1373.703474 from(687.859013,2+) index(9647)

Title: Elution from: 88.865 to 88.865 scan no 13320 cid35.00 polarity:+

Data file 0-1\_2.mgf

Click mouse within plot area to zoom in by factor of two about that point

Or,   to  Da Label all possible matches  Label matches used for scoring Show Y-axis 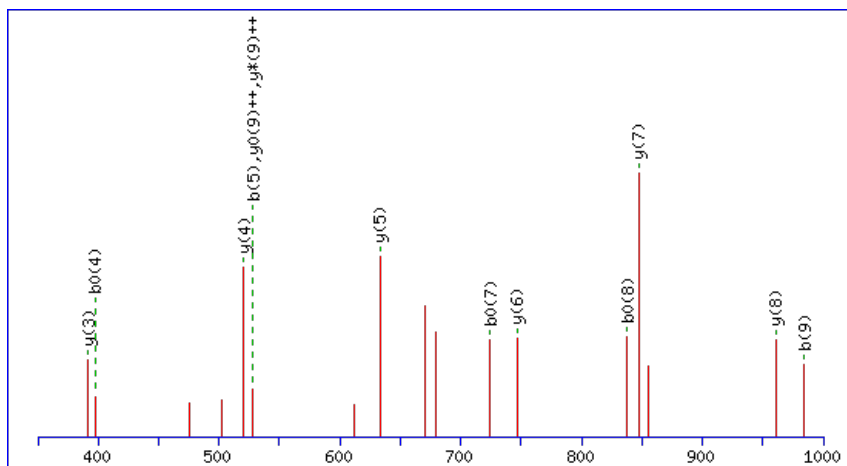Monoisotopic mass of neutral peptide  $M_r(\text{calc})$ : 1373.7038

Fixed modifications: Carbamidomethyl (C) (apply to specified residues or termini only)

Ions Score: 61 Expect: 3.8e-006

Matches : 13/108 fragment ions using 12 most intense peaks ([help](#))

| #  | b         | b <sup>++</sup> | b <sup>0</sup> | b <sup>0++</sup> | Seq. | y         | y <sup>++</sup> | y*        | y <sup>*++</sup> | y <sup>0</sup> | y <sup>0++</sup> | #  |
|----|-----------|-----------------|----------------|------------------|------|-----------|-----------------|-----------|------------------|----------------|------------------|----|
| 1  | 130.0499  | 65.5286         | 112.0393       | 56.5233          | E    |           |                 |           |                  |                |                  | 12 |
| 2  | 187.0713  | 94.0393         | 169.0608       | 85.0340          | G    | 1245.6685 | 623.3379        | 1228.6420 | 614.8246         | 1227.6579      | 614.3326         | 11 |
| 3  | 302.0983  | 151.5528        | 284.0877       | 142.5475         | D    | 1188.6470 | 594.8272        | 1171.6205 | 586.3139         | 1170.6365      | 585.8219         | 10 |
| 4  | 415.1823  | 208.0948        | 397.1718       | 199.0895         | I    | 1073.6201 | 537.3137        | 1056.5936 | 528.8004         | 1055.6095      | 528.3084         | 9  |
| 5  | 528.2664  | 264.6368        | 510.2558       | 255.6316         | L    | 960.5360  | 480.7717        | 943.5095  | 472.2584         | 942.5255       | 471.7664         | 8  |
| 6  | 629.3141  | 315.1607        | 611.3035       | 306.1554         | T    | 847.4520  | 424.2296        | 830.4254  | 415.7164         | 829.4414       | 415.2243         | 7  |
| 7  | 742.3981  | 371.7027        | 724.3876       | 362.6974         | L    | 746.4043  | 373.7058        | 729.3777  | 365.1925         | 728.3937       | 364.7005         | 6  |
| 8  | 855.4822  | 428.2447        | 837.4716       | 419.2395         | L    | 633.3202  | 317.1638        | 616.2937  | 308.6505         | 615.3097       | 308.1585         | 5  |
| 9  | 984.5248  | 492.7660        | 966.5142       | 483.7608         | E    | 520.2362  | 260.6217        | 503.2096  | 252.1084         | 502.2256       | 251.6164         | 4  |
| 10 | 1071.5568 | 536.2821        | 1053.5463      | 527.2768         | S    | 391.1936  | 196.1004        | 374.1670  | 187.5871         | 373.1830       | 187.0951         | 3  |
| 11 | 1200.5994 | 600.8034        | 1182.5889      | 591.7981         | E    | 304.1615  | 152.5844        | 287.1350  | 144.0711         | 286.1510       | 143.5791         | 2  |
| 12 |           |                 |                |                  | R    | 175.1190  | 88.0631         | 158.0924  | 79.5498          |                |                  | 1  |

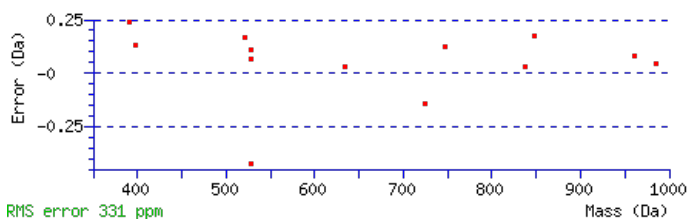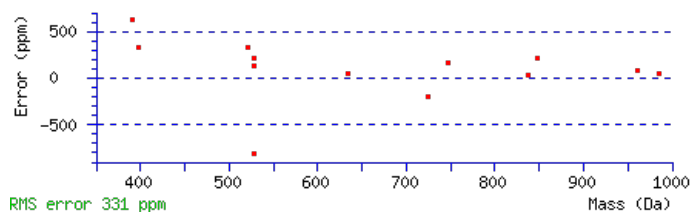NCBI BLAST search of **EGDILTLESER**

(Parameters: blastp, nr protein database, expect=20000, no filter, PAM30)

Other BLAST [web gateways](#)

All matches to this query



AT3G10090.1

| Score | Mr(calc)  | Delta   | Sequence                    |
|-------|-----------|---------|-----------------------------|
| 60.9  | 1373.7038 | -0.0003 | <a href="#">EGDILTLESER</a> |

Mascot: <http://www.matrixscience.com/>

**Peptide View**MS/MS Fragmentation of **DLIDRLLDTPSR**Found in **AT3G10540.1** in **TAIR\_Arabidopsis**, Symbols: | 3-phosphoinositide-dependent protein kinase, putative | chr3:3289921-3292434  
FORWARD

Match to Query 6452: 1546.733002 from(774.373777,2+) index(10094)

Title: Elution from: 95.353 to 95.353 scan no 14484 cid35.00 polarity:+

Data file D6h-3\_3.mgf

Click mouse within plot area to zoom in by factor of two about that point

Or,   to  Da Label all possible matches  Label matches used for scoring Show Y-axis 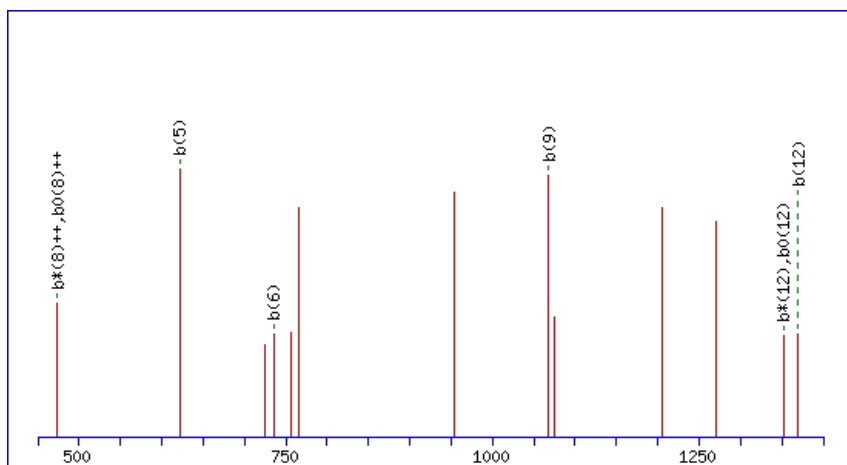Monoisotopic mass of neutral peptide  $M_r(\text{calc})$ : 1546.7329

Fixed modifications: Carbamidomethyl (C) (apply to specified residues or termini only)

Ions Score: 22 Expect: 0.031

Matches : 8/134 fragment ions using 13 most intense peaks ([help](#))

| #  | b                | b <sup>++</sup> | b*               | b <sup>*++</sup> | b <sup>0</sup>   | b <sup>0++</sup> | Seq. | y         | y <sup>++</sup> | y*        | y <sup>*++</sup> | y <sup>0</sup> | y <sup>0++</sup> | #  |
|----|------------------|-----------------|------------------|------------------|------------------|------------------|------|-----------|-----------------|-----------|------------------|----------------|------------------|----|
| 1  | 117.0313         | 59.0193         |                  |                  | 99.0207          | 50.0140          | D    |           |                 |           |                  |                |                  | 13 |
| 2  | 231.1124         | 116.0598        |                  |                  | 213.1018         | 107.0545         | L    | 1431.7162 | 716.3618        | 1413.6927 | 707.3500         | 1413.7057      | 707.3565         | 12 |
| 3  | 345.1935         | 173.1004        |                  |                  | 327.1829         | 164.0951         | I    | 1317.6351 | 659.3212        | 1299.6116 | 650.3094         | 1299.6246      | 650.3159         | 11 |
| 4  | 461.2174         | 231.1124        |                  |                  | 443.2069         | 222.1071         | D    | 1203.5540 | 602.2807        | 1185.5305 | 593.2689         | 1185.5435      | 593.2754         | 10 |
| 5  | <b>621.3067</b>  | 311.1570        | 603.2831         | 302.1452         | 603.2961         | 302.1517         | R    | 1087.5301 | 544.2687        | 1069.5065 | 535.2569         | 1069.5195      | 535.2634         | 9  |
| 6  | <b>735.3878</b>  | 368.1975        | 717.3642         | 359.1857         | 717.3772         | 359.1922         | L    | 927.4408  | 464.2240        | 909.4172  | 455.2123         | 909.4303       | 455.2188         | 8  |
| 7  | 849.4689         | 425.2381        | 831.4453         | 416.2263         | 831.4583         | 416.2328         | L    | 813.3597  | 407.1835        | 795.3361  | 398.1717         | 795.3492       | 398.1782         | 7  |
| 8  | 965.4929         | 483.2501        | 947.4693         | <b>474.2383</b>  | 947.4823         | <b>474.2448</b>  | D    | 699.2786  | 350.1429        | 681.2550  | 341.1312         | 681.2681       | 341.1377         | 6  |
| 9  | <b>1067.5376</b> | 534.2724        | 1049.5140        | 525.2606         | 1049.5270        | 525.2671         | T    | 583.2546  | 292.1310        | 565.2311  | 283.1192         | 565.2441       | 283.1257         | 5  |
| 10 | 1183.5615        | 592.2844        | 1165.5380        | 583.2726         | 1165.5510        | 583.2791         | D    | 481.2099  | 241.1086        | 463.1863  | 232.0968         | 463.1994       | 232.1033         | 4  |
| 11 | 1281.6113        | 641.3093        | 1263.5878        | 632.2975         | 1263.6008        | 632.3040         | P    | 365.1860  | 183.0966        | 347.1624  | 174.0848         | 347.1754       | 174.0913         | 3  |
| 12 | <b>1369.6404</b> | 685.3238        | <b>1351.6168</b> | 676.3121         | <b>1351.6298</b> | 676.3186         | S    | 267.1362  | 134.0717        | 249.1126  | 125.0599         | 249.1256       | 125.0664         | 2  |
| 13 |                  |                 |                  |                  |                  |                  | R    | 179.1071  | 90.0572         | 161.0835  | 81.0454          |                |                  | 1  |

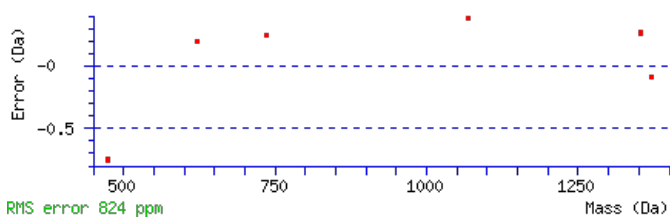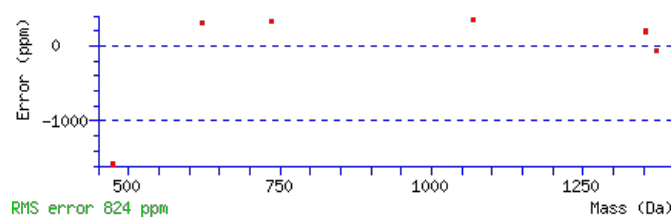NCBI **BLAST** search of [DLIDRLLDTPSR](#)

(Parameters: blastp, nr protein database, expect=20000, no filter, PAM30)

# AT3G10540.1

Other BLAST [web gateways](#)

## All matches to this query

| Score | Mr(calc)  | Delta   | Sequence                       |
|-------|-----------|---------|--------------------------------|
| 22.1  | 1546.7329 | 0.0001  | <a href="#">DLIDRLDTPSR</a>    |
| 2.4   | 1546.7303 | 0.0027  | <a href="#">SSEATVTOPLLEEK</a> |
| 2.0   | 1546.7352 | -0.0022 | <a href="#">EWILEGGALVLADR</a> |
| 1.7   | 1546.7303 | 0.0027  | <a href="#">IQELEEQVSSLEK</a>  |
| 1.6   | 1546.7352 | -0.0022 | <a href="#">FSPEEKIHSQTVK</a>  |
| 1.5   | 1546.7352 | -0.0022 | <a href="#">LEPEVEASSRWVK</a>  |
| 1.3   | 1546.7300 | 0.0030  | <a href="#">IYEAFGMYGQILK</a>  |
| 0.4   | 1546.7303 | 0.0027  | <a href="#">EVESKDLAAAEIEK</a> |

Mascot: <http://www.matrixscience.com/>

### Peptide View

#### MS/MS Fragmentation of **LVVDTTANQDPLVTK**

Found in **AT3G10920.1** in **TAIR\_Arabidopsis**, Symbols: MEE33, MSD1 | MSD1 (MANGANESE SUPEROXIDE DISMUTASE 1); manganese superoxide dismutase | chr3:3418020-3419586 FORWARD

Match to Query 7254: 1612.864566 from(807.439559,2+) index(4784)

Title: Elution from: 45.645 to 45.645 scan no 6093 cid35.00 polarity:+

Data file D1d-2\_1.mgf

Click mouse within plot area to zoom in by factor of two about that point

Or,   to  Da

Label all possible matches  Label matches used for scoring

Show Y-axis

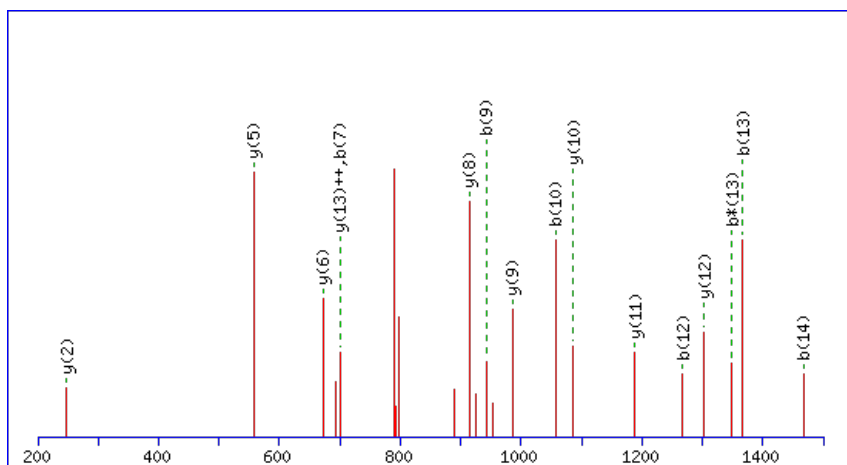

Monoisotopic mass of neutral peptide  $M_r(\text{calc})$ : 1612.8672

Fixed modifications: Carbamidomethyl (C) (apply to specified residues or termini only)

Ions Score: 84 Expect: 1.2e-008

Matches : 16/146 fragment ions using 18 most intense peaks ([help](#))

| #  | b         | b <sup>++</sup> | b*        | b <sup>*++</sup> | b <sup>0</sup> | b <sup>0++</sup> | Seq. | y         | y <sup>++</sup> | y*        | y <sup>*++</sup> | y <sup>0</sup> | y <sup>0++</sup> | #  |
|----|-----------|-----------------|-----------|------------------|----------------|------------------|------|-----------|-----------------|-----------|------------------|----------------|------------------|----|
| 1  | 114.0913  | 57.5493         |           |                  |                |                  | L    |           |                 |           |                  |                |                  | 15 |
| 2  | 213.1598  | 107.0835        |           |                  |                |                  | V    | 1500.7904 | 750.8988        | 1483.7639 | 742.3856         | 1482.7799      | 741.8936         | 14 |
| 3  | 312.2282  | 156.6177        |           |                  |                |                  | V    | 1401.7220 | 701.3646        | 1384.6955 | 692.8514         | 1383.7114      | 692.3594         | 13 |
| 4  | 427.2551  | 214.1312        |           |                  | 409.2445       | 205.1259         | D    | 1302.6536 | 651.8304        | 1285.6270 | 643.3172         | 1284.6430      | 642.8251         | 12 |
| 5  | 528.3028  | 264.6550        |           |                  | 510.2922       | 255.6498         | T    | 1187.6266 | 594.3170        | 1170.6001 | 585.8037         | 1169.6161      | 585.3117         | 11 |
| 6  | 629.3505  | 315.1789        |           |                  | 611.3399       | 306.1736         | T    | 1086.5790 | 543.7931        | 1069.5524 | 535.2798         | 1068.5684      | 534.7878         | 10 |
| 7  | 700.3876  | 350.6974        |           |                  | 682.3770       | 341.6921         | A    | 985.5313  | 493.2693        | 968.5047  | 484.7560         | 967.5207       | 484.2640         | 9  |
| 8  | 814.4305  | 407.7189        | 797.4040  | 399.2056         | 796.4199       | 398.7136         | N    | 914.4942  | 457.7507        | 897.4676  | 449.2375         | 896.4836       | 448.7454         | 8  |
| 9  | 942.4891  | 471.7482        | 925.4625  | 463.2349         | 924.4785       | 462.7429         | Q    | 800.4512  | 400.7293        | 783.4247  | 392.2160         | 782.4407       | 391.7240         | 7  |
| 10 | 1057.5160 | 529.2617        | 1040.4895 | 520.7484         | 1039.5055      | 520.2564         | D    | 672.3927  | 336.7000        | 655.3661  | 328.1867         | 654.3821       | 327.6947         | 6  |
| 11 | 1154.5688 | 577.7880        | 1137.5422 | 569.2748         | 1136.5582      | 568.7828         | P    | 557.3657  | 279.1865        | 540.3392  | 270.6732         | 539.3552       | 270.1812         | 5  |
| 12 | 1267.6529 | 634.3301        | 1250.6263 | 625.8168         | 1249.6423      | 625.3248         | L    | 460.3130  | 230.6601        | 443.2864  | 222.1468         | 442.3024       | 221.6548         | 4  |
| 13 | 1366.7213 | 683.8643        | 1349.6947 | 675.3510         | 1348.7107      | 674.8590         | V    | 347.2289  | 174.1181        | 330.2023  | 165.6048         | 329.2183       | 165.1128         | 3  |
| 14 | 1467.7690 | 734.3881        | 1450.7424 | 725.8748         | 1449.7584      | 725.3828         | T    | 248.1605  | 124.5839        | 231.1339  | 116.0706         | 230.1499       | 115.5786         | 2  |
| 15 |           |                 |           |                  |                |                  | K    | 147.1128  | 74.0600         | 130.0863  | 65.5468          |                |                  | 1  |

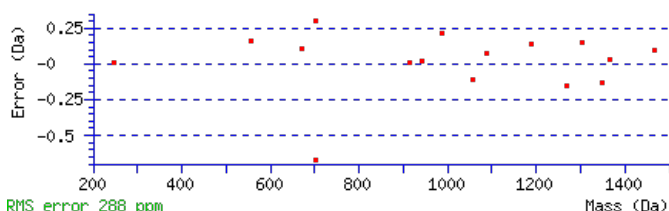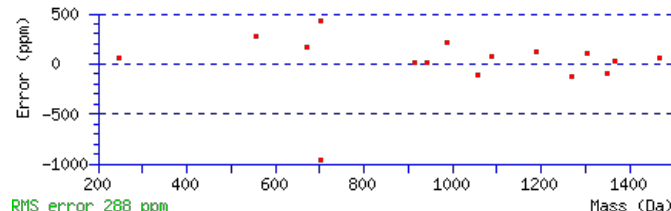

## AT3G10920.1

NCBI **BLAST** search of [LVVDTTANQDPLVTK](#)

(Parameters: blastp, nr protein database, expect=20000, no filter, PAM30)

Other BLAST [web gateways](#)

### All matches to this query

| Score | Mr(calc)  | Delta   | Sequence                        |
|-------|-----------|---------|---------------------------------|
| 84.3  | 1612.8672 | -0.0027 | <a href="#">LVVDTTANQDPLVTK</a> |
| 4.1   | 1612.8647 | -0.0001 | <a href="#">HNELVPTLMAIFTK</a>  |
| 1.4   | 1612.8685 | -0.0040 | <a href="#">GEDVRKGFLSHIQK</a>  |
| 0.4   | 1612.8672 | -0.0026 | <a href="#">KEDAIAQAGIVIEEK</a> |

**Mascot:** <http://www.matrixscience.com/>

## Peptide View

MS/MS Fragmentation of **IIIDSNNPEHFLITNPYYDSK**

Found in **AT3G1130.1** in **TAIR\_Arabidopsis**, Symbols: | clathrin heavy chain, putative | chr3:3482581-3491673 REVERSE

Match to Query 10853: 2623.142958 from(875.388262,3+) index(8258)

Title: Elution from 73.854 to 73.854 scan no 10891 cid35.00 polarity:+

Data file 0-3\_1.mgf

Click mouse within plot area to zoom in by factor of two about that point

Or,   to  Da

Label all possible matches  Label matches used for scoring

Show Y-axis

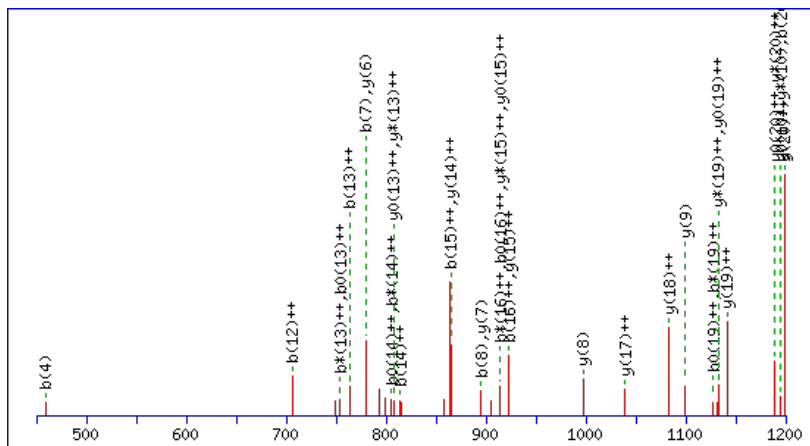

**Monoisotopic mass of neutral peptide Mr(calc):** 2623.1429

**Fixed modifications:** Carbamidomethyl (C) (apply to specified residues or termini only)

**Ions Score:** 52 **Expect:** 4.5e-005

**Matches :** 37/234 fragment ions using 30 most intense peaks ([help](#))

| #  | b         | b <sup>++</sup> | b <sup>*</sup> | b <sup>*++</sup> | b <sup>0</sup> | b <sup>0++</sup> | Seq. | y         | y <sup>++</sup> | y <sup>*</sup> | y <sup>*++</sup> | y <sup>0</sup> | y <sup>0++</sup> | #  |
|----|-----------|-----------------|----------------|------------------|----------------|------------------|------|-----------|-----------------|----------------|------------------|----------------|------------------|----|
| 1  | 115.0884  | 58.0478         |                |                  |                |                  | I    |           |                 |                |                  |                |                  | 22 |
| 2  | 229.1695  | 115.0884        |                |                  |                |                  | I    | 2510.0691 | 1255.5382       | 2492.0455      | 1246.5264        | 2492.0585      | 1246.5329        | 21 |
| 3  | 343.2506  | 172.1289        |                |                  |                |                  | I    | 2395.9880 | 1198.4976       | 2377.9644      | 1189.4858        | 2377.9774      | 1189.4923        | 20 |
| 4  | 459.2746  | 230.1409        |                |                  | 441.2640       | 221.1356         | D    | 2281.9069 | 1141.4571       | 2263.8833      | 1132.4453        | 2263.8963      | 1132.4518        | 19 |
| 5  | 547.3036  | 274.1554        |                |                  | 529.2930       | 265.1502         | S    | 2165.8829 | 1083.4451       | 2147.8593      | 1074.4333        | 2147.8723      | 1074.4398        | 18 |
| 6  | 663.3406  | 332.1739        | 645.3170       | 323.1622         | 645.3300       | 323.1687         | N    | 2077.8538 | 1039.4306       | 2059.8303      | 1030.4188        | 2059.8433      | 1030.4253        | 17 |
| 7  | 779.3776  | 390.1924        | 761.3540       | 381.1807         | 761.3670       | 381.1872         | N    | 1961.8169 | 981.4121        | 1943.7933      | 972.4003         | 1943.8063      | 972.4068         | 16 |
| 8  | 895.4146  | 448.2109        | 877.3910       | 439.1991         | 877.4040       | 439.2057         | N    | 1845.7799 | 923.3936        | 1827.7563      | 914.3818         | 1827.7693      | 914.3883         | 15 |
| 9  | 993.4644  | 497.2358        | 975.4408       | 488.2240         | 975.4538       | 488.2306         | P    | 1729.7429 | 865.3751        | 1711.7193      | 856.3633         | 1711.7323      | 856.3698         | 14 |
| 10 | 1123.5040 | 562.2557        | 1105.4804      | 553.2439         | 1105.4935      | 553.2504         | E    | 1631.6931 | 816.3502        | 1613.6695      | 807.3384         | 1613.6825      | 807.3449         | 13 |
| 11 | 1263.5540 | 632.2807        | 1245.5305      | 623.2689         | 1245.5435      | 623.2754         | H    | 1501.6534 | 751.3304        | 1483.6298      | 742.3186         | 1483.6429      | 742.3251         | 12 |
| 12 | 1411.6195 | 706.3134        | 1393.5959      | 697.3016         | 1393.6089      | 697.3081         | F    | 1361.6034 | 681.3053        | 1343.5798      | 672.2936         | 1343.5928      | 672.3001         | 11 |
| 13 | 1525.7006 | 763.3539        | 1507.6770      | 754.3421         | 1507.6900      | 754.3487         | L    | 1213.5380 | 607.2726        | 1195.5144      | 598.2608         | 1195.5274      | 598.2673         | 10 |
| 14 | 1627.7453 | 814.3763        | 1609.7217      | 805.3645         | 1609.7347      | 805.3710         | T    | 1099.4569 | 550.2321        | 1081.4333      | 541.2203         | 1081.4463      | 541.2268         | 9  |
| 15 | 1729.7900 | 865.3986        | 1711.7664      | 856.3869         | 1711.7795      | 856.3934         | T    | 997.4122  | 499.2097        | 979.3886       | 490.1979         | 979.4016       | 490.2044         | 8  |
| 16 | 1845.8270 | 923.4171        | 1827.8034      | 914.4054         | 1827.8165      | 914.4119         | N    | 895.3674  | 448.1874        | 877.3439       | 439.1756         | 877.3569       | 439.1821         | 7  |
| 17 | 1943.8768 | 972.4420        | 1925.8532      | 963.4303         | 1925.8663      | 963.4368         | P    | 779.3304  | 390.1689        | 761.3069       | 381.1571         | 761.3199       | 381.1636         | 6  |
| 18 | 2107.9372 | 1054.4722       | 2089.9136      | 1045.4604        | 2089.9266      | 1045.4669        | Y    | 681.2806  | 341.1440        | 663.2571       | 332.1322         | 663.2701       | 332.1387         | 5  |
| 19 | 2271.9975 | 1136.5024       | 2253.9740      | 1127.4906        | 2253.9870      | 1127.4971        | Y    | 517.2203  | 259.1138        | 499.1967       | 250.1020         | 499.2097       | 250.1085         | 4  |
| 20 | 2388.0215 | 1194.5144       | 2369.9979      | 1185.5026        | 2370.0110      | 1185.5091        | D    | 353.1599  | 177.0836        | 335.1363       | 168.0718         | 335.1494       | 168.0783         | 3  |
| 21 | 2476.0506 | 1238.5289       | 2458.0270      | 1229.5171        | 2458.0400      | 1229.5236        | S    | 237.1359  | 119.0716        | 219.1124       | 110.0598         | 219.1254       | 110.0663         | 2  |
| 22 |           |                 |                |                  |                |                  | K    | 149.1069  | 75.0571         | 131.0833       | 66.0453          |                |                  | 1  |

# AT3G11130.1

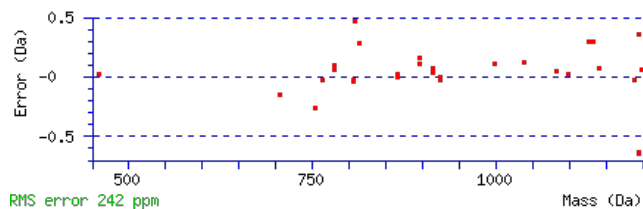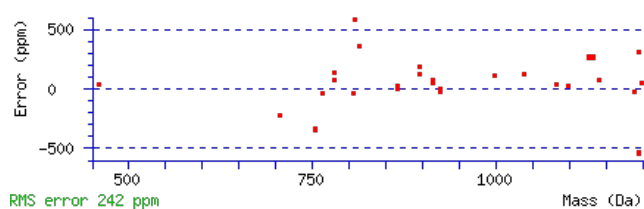

NCBI **BLAST** search of [IIIDSNNNPEHFLTTPYYDSK](#)  
 (Parameters: blastp, nr protein database, expect=20000, no filter, PAM30)  
 Other BLAST [web gateways](#)

## All matches to this query

| Score | Mr(calc)  | Delta   | Sequence                                |
|-------|-----------|---------|-----------------------------------------|
| 51.6  | 2623.1429 | 0.0000  | <a href="#">IIIDSNNNPEHFLTTPYYDSK</a>   |
| 4.4   | 2623.1420 | 0.0010  | <a href="#">ENRHMVIVIAEGAGQDYVAQSMR</a> |
| 0.6   | 2623.1449 | -0.0020 | <a href="#">VFDRMPERSLVSSTAMITCYAK</a>  |
| 0.2   | 2623.1488 | -0.0058 | <a href="#">TLSIDLDEDSNLPVTFSDNSGSR</a> |

Mascot: <http://www.matrixscience.com/>

**Peptide View**MS/MS Fragmentation of **RKLEMHLK**

Found in **AT3G11240.1** in **TAIR\_Arabidopsis**, Symbols: | arginine-tRNA-protein transferase, putative / arginyltransferase, putative / arginyl-tRNA-protein transferase, putative | chr3:3518671-3521098 REVERSE

Match to Query 3486: 1084.563118 from(543.288835,2+) index(8515)

Title: Elution from: 74.459 to 74.459 scan no 11104 cid35.00 polarity:+

Data file D12h-1\_1.mgf

Click mouse within plot area to zoom in by factor of two about that point

Or,   to  Da

Label all possible matches  Label matches used for scoring

Show Y-axis

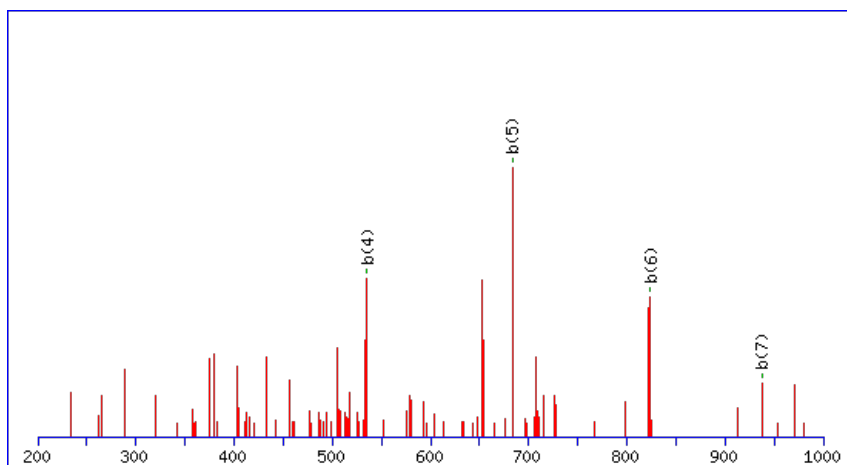

**Monoisotopic mass of neutral peptide Mr(calc):** 1084.5622

**Fixed modifications:** Carbamidomethyl (C) (apply to specified residues or termini only)

**Variable modifications:**

**M5** : Oxidation (M), with neutral losses 0.0000 (shown in table), 63.9983

**Ions Score:** 21 **Expect:** 0.018

**Matches** : 4/110 fragment ions using 8 most intense peaks ([help](#))

| # | b               | b <sup>++</sup> | b*       | b <sup>*++</sup> | b <sup>0</sup> | b <sup>0++</sup> | Seq.     | y        | y <sup>++</sup> | y*       | y <sup>*++</sup> | y <sup>0</sup> | y <sup>0++</sup> | # |
|---|-----------------|-----------------|----------|------------------|----------------|------------------|----------|----------|-----------------|----------|------------------|----------------|------------------|---|
| 1 | 161.0965        | 81.0519         | 143.0729 | 72.0401          |                |                  | <b>R</b> |          |                 |          |                  |                |                  | 8 |
| 2 | 291.1856        | 146.0964        | 273.1620 | 137.0846         |                |                  | <b>K</b> | 925.4802 | 463.2437        | 907.4566 | 454.2319         | 907.4696       | 454.2384         | 7 |
| 3 | 405.2667        | 203.1370        | 387.2431 | 194.1252         |                |                  | <b>L</b> | 795.3912 | 398.1992        | 777.3676 | 389.1874         | 777.3806       | 389.1939         | 6 |
| 4 | <b>535.3063</b> | 268.1568        | 517.2827 | 259.1450         | 517.2957       | 259.1515         | <b>E</b> | 681.3101 | 341.1587        | 663.2865 | 332.1469         | 663.2995       | 332.1534         | 5 |
| 5 | <b>683.3387</b> | 342.1730        | 665.3151 | 333.1612         | 665.3282       | 333.1677         | <b>M</b> | 551.2704 | 276.1389        | 533.2468 | 267.1271         |                |                  | 4 |
| 6 | <b>823.3887</b> | 412.1980        | 805.3652 | 403.1862         | 805.3782       | 403.1927         | <b>H</b> | 403.2380 | 202.1226        | 385.2144 | 193.1108         |                |                  | 3 |
| 7 | <b>937.4698</b> | 469.2386        | 919.4463 | 460.2268         | 919.4593       | 460.2333         | <b>L</b> | 263.1880 | 132.0976        | 245.1644 | 123.0858         |                |                  | 2 |
| 8 |                 |                 |          |                  |                |                  | <b>K</b> | 149.1069 | 75.0571         | 131.0833 | 66.0453          |                |                  | 1 |

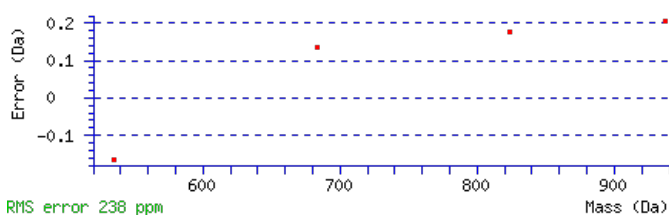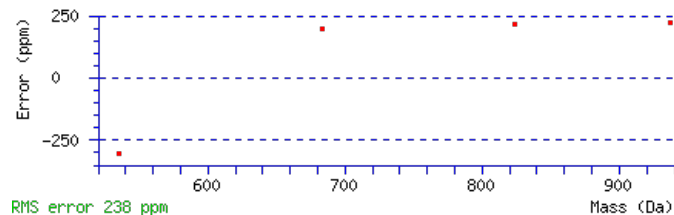

NCBI **BLAST** search of **RKLEMHLK**

(Parameters: blastp, nr protein database, expect=20000, no filter, PAM30)

Other BLAST [web gateways](#)

All matches to this query

| Score | Mr(calc) | Delta | Sequence |
|-------|----------|-------|----------|
|       |          |       |          |



**AT3G11240.1**

|      |           |         |                           |
|------|-----------|---------|---------------------------|
| 20.6 | 1084.5622 | 0.0010  | <a href="#">RKLEMLK</a>   |
| 11.2 | 1084.5622 | 0.0010  | <a href="#">MLHRSGLK</a>  |
| 9.9  | 1084.5621 | 0.0010  | <a href="#">GKVLMIHR</a>  |
| 9.2  | 1084.5642 | -0.0011 | <a href="#">EEKSDLK</a>   |
| 2.3  | 1084.5651 | -0.0020 | <a href="#">LMMIVDKPK</a> |
| 0.1  | 1084.5642 | -0.0011 | <a href="#">LGLSLDDLK</a> |

**Mascot:** <http://www.matrixscience.com/>

**Peptide View**MS/MS Fragmentation of **LNKRAMER**

Found in **AT3G11400.1** in **TAIR\_Arabidopsis**, Symbols: ATEIF3G1, EIF3G1 | EIF3G1 (eukaryotic translation initiation factor 3G1); RNA binding / translation initiation factor | chr3:3578542-3580372 FORWARD

Match to Query 2818: 1048.503094 from(525.258823,2+) index(4815)

Title: Elution from: 44.852 to 44.852 scan no 6050 cid35.00 polarity:+

Data file D6h-2\_2.mgf

Click mouse within plot area to zoom in by factor of two about that point

Or,   to  Da

Label all possible matches  Label matches used for scoring

Show Y-axis

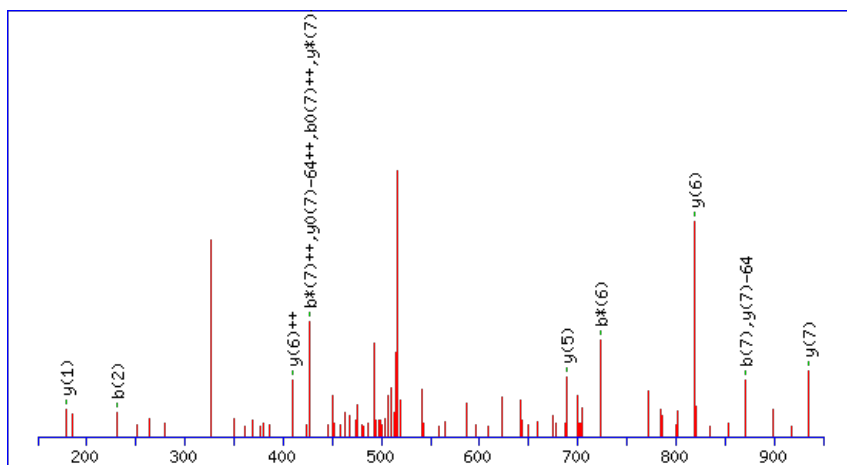

Monoisotopic mass of neutral peptide  $M_r(\text{calc})$ : 1048.5024

Fixed modifications: Carbamidomethyl (C) (apply to specified residues or termini only)

Variable modifications:

M6 : Oxidation (M), with neutral losses 0.0000 (shown in table), 63.9983

Ions Score: 22 Expect: 0.045

Matches : 13/108 fragment ions using 16 most intense peaks ([help](#))

| # | b               | b <sup>++</sup> | b*              | b <sup>*++</sup> | b <sup>0</sup> | b <sup>0++</sup> | Seq. | y               | y <sup>++</sup> | y*       | y <sup>*++</sup> | y <sup>0</sup> | y <sup>0++</sup> | # |
|---|-----------------|-----------------|-----------------|------------------|----------------|------------------|------|-----------------|-----------------|----------|------------------|----------------|------------------|---|
| 1 | 115.0884        | 58.0478         |                 |                  |                |                  | L    |                 |                 |          |                  |                |                  | 8 |
| 2 | <b>231.1254</b> | 116.0663        | 213.1018        | 107.0545         |                |                  | N    | <b>935.4286</b> | 468.2179        | 917.4050 | 459.2061         | 917.4180       | 459.2126         | 7 |
| 3 | 361.2144        | 181.1108        | 343.1908        | 172.0990         |                |                  | K    | <b>819.3916</b> | <b>410.1994</b> | 801.3680 | 401.1876         | 801.3810       | 401.1941         | 6 |
| 4 | 521.3037        | 261.1555        | 503.2801        | 252.1437         |                |                  | R    | <b>689.3026</b> | 345.1549        | 671.2790 | 336.1431         | 671.2920       | 336.1496         | 5 |
| 5 | 593.3378        | 297.1725        | 575.3142        | 288.1607         |                |                  | A    | 529.2133        | 265.1103        | 511.1897 | 256.0985         | 511.2027       | 256.1050         | 4 |
| 6 | 741.3702        | 371.1888        | <b>723.3467</b> | 362.1770         |                |                  | M    | 457.1792        | 229.0932        | 439.1556 | 220.0814         | 439.1686       | 220.0879         | 3 |
| 7 | <b>871.4099</b> | 436.2086        | 853.3863        | <b>427.1968</b>  | 853.3993       | <b>427.2033</b>  | E    | 309.1467        | 155.0770        | 291.1231 | 146.0652         | 291.1362       | 146.0717         | 2 |
| 8 |                 |                 |                 |                  |                |                  | R    | <b>179.1071</b> | 90.0572         | 161.0835 | 81.0454          |                |                  | 1 |

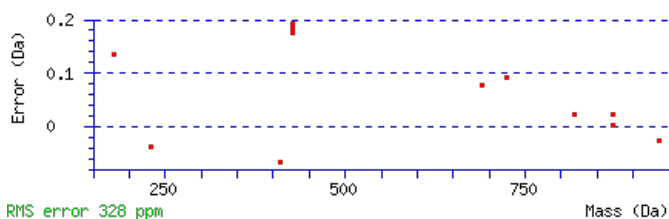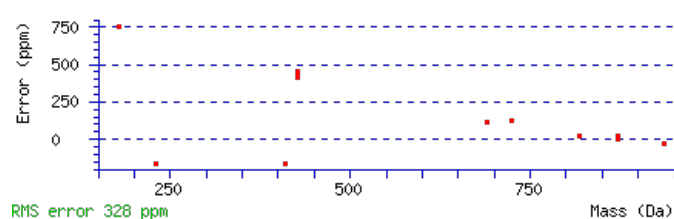

NCBI **BLAST** search of **LNKRAMER**

(Parameters: blastp, nr protein database, expect=20000, no filter, PAM30)

Other BLAST [web gateways](#)

All matches to this query

| Score | $M_r(\text{calc})$ | Delta | Sequence |
|-------|--------------------|-------|----------|
|       |                    |       |          |

## AT3G11400.1

|      |           |         |                           |
|------|-----------|---------|---------------------------|
| 22.2 | 1048.5024 | 0.0007  | <a href="#">LNKRAMER</a>  |
| 12.9 | 1048.5053 | -0.0022 | <a href="#">LKEMITMR</a>  |
| 12.9 | 1048.5020 | 0.0011  | <a href="#">LTPEKMFR</a>  |
| 12.5 | 1048.5046 | -0.0015 | <a href="#">MPFSRIGAR</a> |
| 12.3 | 1048.5020 | 0.0011  | <a href="#">MLDINLFR</a>  |
| 10.4 | 1048.5053 | -0.0022 | <a href="#">KMGKGIMEK</a> |
| 9.9  | 1048.5053 | -0.0022 | <a href="#">RTIMLMEK</a>  |
| 9.5  | 1048.5020 | 0.0011  | <a href="#">LFNIDMIR</a>  |
| 9.1  | 1048.5024 | 0.0007  | <a href="#">EVKRCVSR</a>  |
| 8.7  | 1048.5024 | 0.0007  | <a href="#">KQNNKMVR</a>  |

Mascot: <http://www.matrixscience.com/>

## Peptide View

### MS/MS Fragmentation of **GLFIIDK**

Found in **AT3G11630.1** in **TAIR\_Arabidopsis**, Symbols: | 2-cys peroxiredoxin, chloroplast (BAS1) | chr3:3672195-3673943 FORWARD

Match to Query 993: 804.474568 from(403.244560,2+) index(5939)

Title: Elution from: 53.248 to 53.248 scan no 7595 cid35.00 polarity:+

Data file D6h-1\_2.mgf

Click mouse within plot area to zoom in by factor of two about that point

Or,   to  Da

Label all possible matches  Label matches used for scoring

Show Y-axis

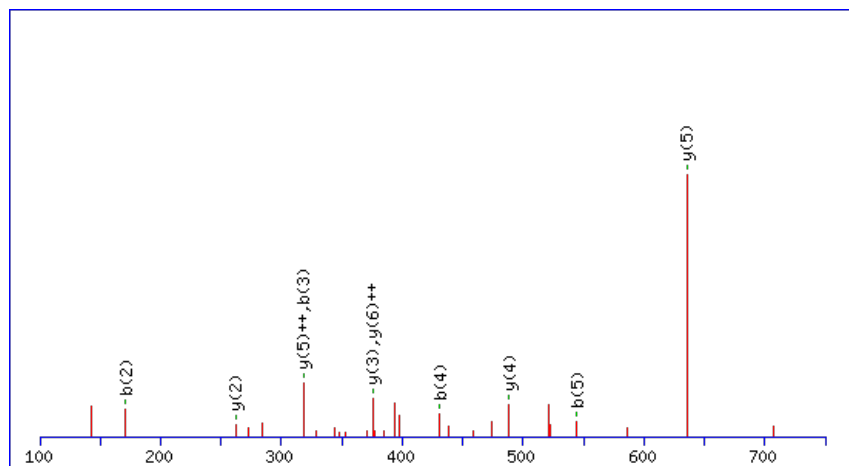

Monoisotopic mass of neutral peptide **Mr(calc)**: 804.4745

**Fixed modifications**: Carbamidomethyl (C) (apply to specified residues or termini only)

**Ions Score**: 27 **Expect**: 0.0053

**Matches**: 10/48 fragment ions using 15 most intense peaks ([help](#))

| # | b               | b <sup>++</sup> | b <sup>0</sup> | b <sup>0++</sup> | Seq.     | y               | y <sup>++</sup> | y*       | y <sup>*++</sup> | y <sup>0</sup> | y <sup>0++</sup> | # |
|---|-----------------|-----------------|----------------|------------------|----------|-----------------|-----------------|----------|------------------|----------------|------------------|---|
| 1 | 58.0287         | 29.5180         |                |                  | <b>G</b> |                 |                 |          |                  |                |                  | 7 |
| 2 | <b>171.1128</b> | 86.0600         |                |                  | <b>L</b> | 748.4604        | <b>374.7338</b> | 731.4338 | 366.2205         | 730.4498       | 365.7285         | 6 |
| 3 | <b>318.1812</b> | 159.5942        |                |                  | <b>F</b> | <b>635.3763</b> | <b>318.1918</b> | 618.3497 | 309.6785         | 617.3657       | 309.1865         | 5 |
| 4 | <b>431.2653</b> | 216.1363        |                |                  | <b>I</b> | <b>488.3079</b> | 244.6576        | 471.2813 | 236.1443         | 470.2973       | 235.6523         | 4 |
| 5 | <b>544.3493</b> | 272.6783        |                |                  | <b>I</b> | <b>375.2238</b> | 188.1155        | 358.1973 | 179.6023         | 357.2132       | 179.1103         | 3 |
| 6 | 659.3763        | 330.1918        | 641.3657       | 321.1865         | <b>D</b> | <b>262.1397</b> | 131.5735        | 245.1132 | 123.0602         | 244.1292       | 122.5682         | 2 |
| 7 |                 |                 |                |                  | <b>K</b> | 147.1128        | 74.0600         | 130.0863 | 65.5468          |                |                  | 1 |

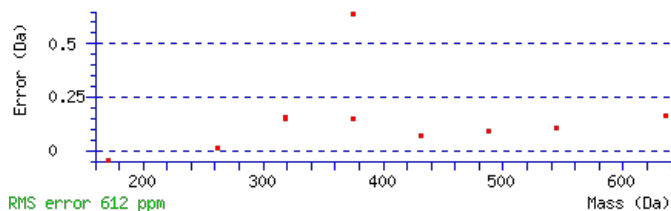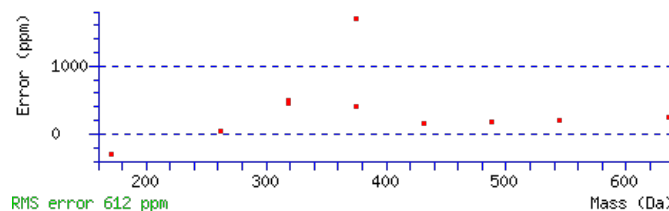

### NCBI BLAST search of **GLFIIDK**

(Parameters: blastp, nr protein database, expect=20000, no filter, PAM30)

Other BLAST [web gateways](#)

### All matches to this query

| Score | Mr(calc) | Delta  | Sequence                |
|-------|----------|--------|-------------------------|
| 26.8  | 804.4745 | 0.0000 | <a href="#">GLFIIDK</a> |
| 25.3  | 804.4745 | 0.0000 | <a href="#">LGILFDK</a> |
| 16.8  | 804.4745 | 0.0000 | <a href="#">AVFLVEK</a> |

## AT3G11630.1

|      |          |        |                         |
|------|----------|--------|-------------------------|
| 13.1 | 804.4745 | 0.0000 | <a href="#">GLLVFEK</a> |
| 13.0 | 804.4745 | 0.0000 | <a href="#">VALLDFK</a> |
| 5.0  | 804.4745 | 0.0000 | <a href="#">AVIEFVK</a> |
| 4.5  | 804.4745 | 0.0000 | <a href="#">IAVFDLK</a> |
| 1.7  | 804.4745 | 0.0000 | <a href="#">AVDIFLK</a> |

**Mascot:** <http://www.matrixscience.com/>

## Peptide View

### MS/MS Fragmentation of **VQGVDTIPYIAR**

Found in **AT3G11780.1** in **TAIR\_Arabidopsis**, Symbols: | MD-2-related lipid recognition domain-containing protein / ML domain-containing protein | chr3:3724332-3725482 REVERSE

Match to Query 6049: 1444.724682 from(723.369617,2+) index(6277)

Title: Elution from: 55.280 to 55.280 scan no 7929 cid35.00 polarity:+

Data file C7-2\_1.mgf

Click mouse within plot area to zoom in by factor of two about that point

Or,   to  Da

Label all possible matches  Label matches used for scoring

Show Y-axis

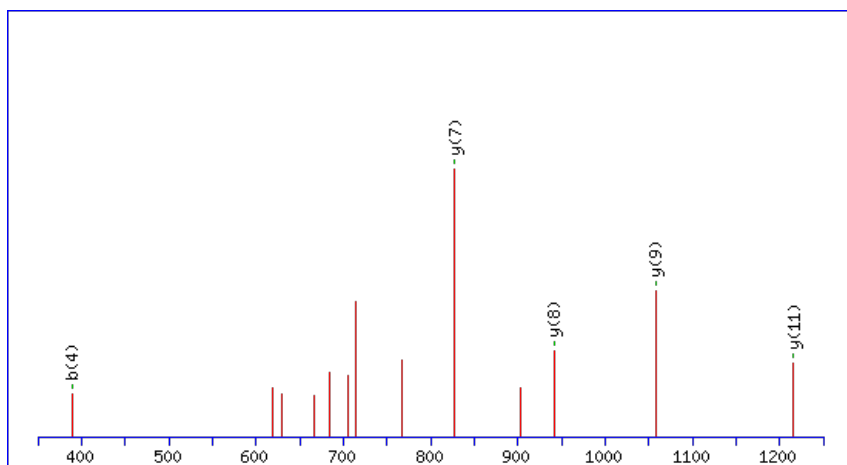

Monoisotopic mass of neutral peptide  $M_r(\text{calc})$ : 1444.7268

Fixed modifications: Carbamidomethyl (C) (apply to specified residues or termini only)

Ions Score: 28 Expect: 0.0097

Matches : 5/122 fragment ions using 7 most intense peaks ([help](#))

| #  | b               | b <sup>++</sup> | b*        | b <sup>*++</sup> | b <sup>0</sup> | b <sup>0++</sup> | Seq. | y                | y <sup>++</sup> | y*        | y <sup>*++</sup> | y <sup>0</sup> | y <sup>0++</sup> | #  |
|----|-----------------|-----------------|-----------|------------------|----------------|------------------|------|------------------|-----------------|-----------|------------------|----------------|------------------|----|
| 1  | 101.0727        | 51.0400         |           |                  |                |                  | V    |                  |                 |           |                  |                |                  | 13 |
| 2  | 231.1254        | 116.0663        | 213.1018  | 107.0545         |                |                  | Q    | 1345.6687        | 673.3380        | 1327.6451 | 664.3262         | 1327.6581      | 664.3327         | 12 |
| 3  | 289.1439        | 145.0756        | 271.1203  | 136.0638         |                |                  | G    | <b>1215.6160</b> | 608.3117        | 1197.5925 | 599.2999         | 1197.6055      | 599.3064         | 11 |
| 4  | <b>389.2093</b> | 195.1083        | 371.1857  | 186.0965         |                |                  | V    | 1157.5975        | 579.3024        | 1139.5740 | 570.2906         | 1139.5870      | 570.2971         | 10 |
| 5  | 505.2333        | 253.1203        | 487.2097  | 244.1085         | 487.2227       | 244.1150         | D    | <b>1057.5321</b> | 529.2697        | 1039.5085 | 520.2579         | 1039.5215      | 520.2644         | 9  |
| 6  | 619.3144        | 310.1608        | 601.2908  | 301.1490         | 601.3038       | 301.1556         | I    | <b>941.5081</b>  | 471.2577        | 923.4845  | 462.2459         | 923.4975       | 462.2524         | 8  |
| 7  | 721.3591        | 361.1832        | 703.3355  | 352.1714         | 703.3485       | 352.1779         | T    | <b>827.4270</b>  | 414.2171        | 809.4034  | 405.2054         | 809.4165       | 405.2119         | 7  |
| 8  | 819.4089        | 410.2081        | 801.3853  | 401.1963         | 801.3983       | 401.2028         | P    | 725.3823         | 363.1948        | 707.3587  | 354.1830         |                |                  | 6  |
| 9  | 983.4693        | 492.2383        | 965.4457  | 483.2265         | 965.4587       | 483.2330         | Y    | 627.3325         | 314.1699        | 609.3089  | 305.1581         |                |                  | 5  |
| 10 | 1081.5191       | 541.2632        | 1063.4955 | 532.2514         | 1063.5085      | 532.2579         | P    | 463.2721         | 232.1397        | 445.2486  | 223.1279         |                |                  | 4  |
| 11 | 1195.6002       | 598.3037        | 1177.5766 | 589.2919         | 1177.5896      | 589.2984         | I    | 365.2223         | 183.1148        | 347.1988  | 174.1030         |                |                  | 3  |
| 12 | 1267.6343       | 634.3208        | 1249.6107 | 625.3090         | 1249.6238      | 625.3155         | A    | 251.1412         | 126.0743        | 233.1177  | 117.0625         |                |                  | 2  |
| 13 |                 |                 |           |                  |                |                  | R    | 179.1071         | 90.0572         | 161.0835  | 81.0454          |                |                  | 1  |

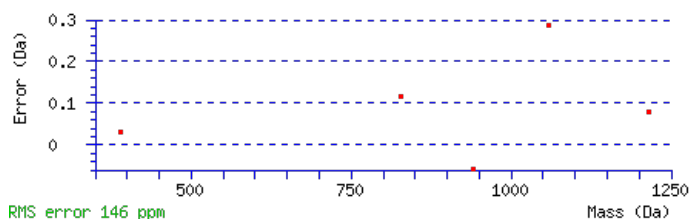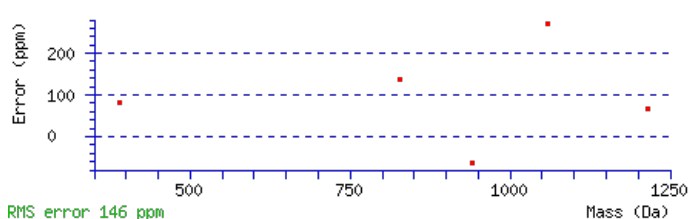

NCBI **BLAST** search of **VQGVDTIPYIAR**

(Parameters: blastp, nr protein database, expect=20000, no filter, PAM30)

# AT3G11780.1

Other BLAST [web gateways](#)

## All matches to this query

| Score | Mr(calc)  | Delta   | Sequence                      |
|-------|-----------|---------|-------------------------------|
| 27.6  | 1444.7268 | -0.0022 | <a href="#">VQGVDTIPYPIAR</a> |
| 12.5  | 1444.7246 | 0.0001  | <a href="#">IAEDALLNAIQTR</a> |
| 2.3   | 1444.7225 | 0.0021  | <a href="#">ACHAIGLIGVTRR</a> |
| 1.3   | 1444.7273 | -0.0026 | <a href="#">LLPSDSRLRPDR</a>  |

Mascot: <http://www.matrixscience.com/>

## Peptide View

MS/MS Fragmentation of **QPETTTEAEAPSLTTK**

Found in **AT3G11930.1** in **TAIR\_Arabidopsis**, Symbols: | universal stress protein (USP) family protein | chr3:3776377-3777399 FORWARD

Match to Query 8625: 1702.821852 from(852.418202,2+) index(2493)

Title: Elution from: 27.400 to 27.400 scan no 3158 cid35.00 polarity:+

Data file 0-1\_1.mgf

Click mouse within plot area to zoom in by factor of two about that point

Or,   to  Da

Label all possible matches  Label matches used for scoring

Show Y-axis

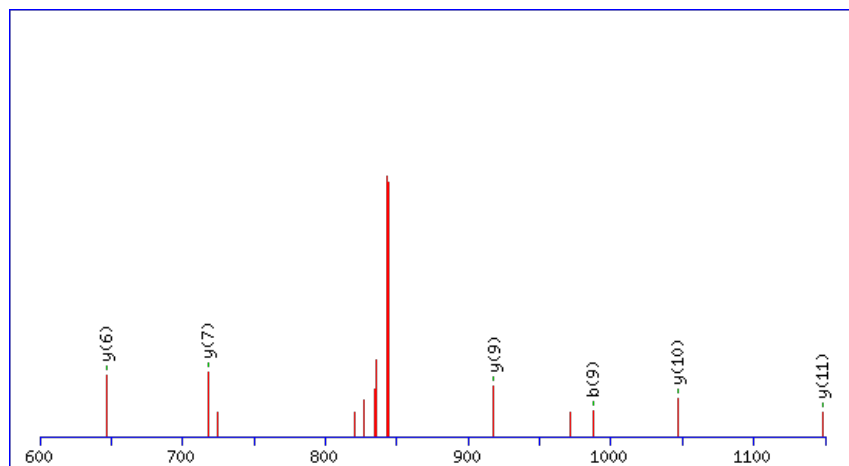

Monoisotopic mass of neutral peptide  $M_r(\text{calc})$ : 1702.8261

Fixed modifications: Carbamidomethyl (C) (apply to specified residues or termini only)

Ions Score: 37 Expect: 0.00078

Matches : 6/174 fragment ions using 9 most intense peaks ([help](#))

| #  | b               | b <sup>++</sup> | b <sup>*</sup> | b <sup>*++</sup> | b <sup>0</sup> | b <sup>0++</sup> | Seq. | y                | y <sup>++</sup> | y <sup>*</sup> | y <sup>*++</sup> | y <sup>0</sup> | y <sup>0++</sup> | #  |
|----|-----------------|-----------------|----------------|------------------|----------------|------------------|------|------------------|-----------------|----------------|------------------|----------------|------------------|----|
| 1  | 129.0659        | 65.0366         | 112.0393       | 56.5233          |                |                  | Q    |                  |                 |                |                  |                |                  | 16 |
| 2  | 226.1186        | 113.5629        | 209.0921       | 105.0497         |                |                  | P    | 1575.7748        | 788.3911        | 1558.7483      | 779.8778         | 1557.7643      | 779.3858         | 15 |
| 3  | 355.1612        | 178.0842        | 338.1347       | 169.5710         | 337.1506       | 169.0790         | E    | 1478.7221        | 739.8647        | 1461.6955      | 731.3514         | 1460.7115      | 730.8594         | 14 |
| 4  | 456.2089        | 228.6081        | 439.1823       | 220.0948         | 438.1983       | 219.6028         | T    | 1349.6795        | 675.3434        | 1332.6529      | 666.8301         | 1331.6689      | 666.3381         | 13 |
| 5  | 557.2566        | 279.1319        | 540.2300       | 270.6186         | 539.2460       | 270.1266         | T    | 1248.6318        | 624.8195        | 1231.6052      | 616.3063         | 1230.6212      | 615.8143         | 12 |
| 6  | 658.3042        | 329.6558        | 641.2777       | 321.1425         | 640.2937       | 320.6505         | T    | <b>1147.5841</b> | 574.2957        | 1130.5576      | 565.7824         | 1129.5735      | 565.2904         | 11 |
| 7  | 787.3468        | 394.1771        | 770.3203       | 385.6638         | 769.3363       | 385.1718         | E    | <b>1046.5364</b> | 523.7719        | 1029.5099      | 515.2586         | 1028.5259      | 514.7666         | 10 |
| 8  | 858.3840        | 429.6956        | 841.3574       | 421.1823         | 840.3734       | 420.6903         | A    | <b>917.4938</b>  | 459.2506        | 900.4673       | 450.7373         | 899.4833       | 450.2453         | 9  |
| 9  | <b>987.4265</b> | 494.2169        | 970.4000       | 485.7036         | 969.4160       | 485.2116         | E    | 846.4567         | 423.7320        | 829.4302       | 415.2187         | 828.4462       | 414.7267         | 8  |
| 10 | 1058.4637       | 529.7355        | 1041.4371      | 521.2222         | 1040.4531      | 520.7302         | A    | <b>717.4141</b>  | 359.2107        | 700.3876       | 350.6974         | 699.4036       | 350.2054         | 7  |
| 11 | 1155.5164       | 578.2619        | 1138.4899      | 569.7486         | 1137.5059      | 569.2566         | P    | <b>646.3770</b>  | 323.6921        | 629.3505       | 315.1789         | 628.3665       | 314.6869         | 6  |
| 12 | 1242.5485       | 621.7779        | 1225.5219      | 613.2646         | 1224.5379      | 612.7726         | S    | 549.3243         | 275.1658        | 532.2977       | 266.6525         | 531.3137       | 266.1605         | 5  |
| 13 | 1355.6325       | 678.3199        | 1338.6060      | 669.8066         | 1337.6220      | 669.3146         | L    | 462.2922         | 231.6498        | 445.2657       | 223.1365         | 444.2817       | 222.6445         | 4  |
| 14 | 1456.6802       | 728.8437        | 1439.6536      | 720.3305         | 1438.6696      | 719.8385         | T    | 349.2082         | 175.1077        | 332.1816       | 166.5944         | 331.1976       | 166.1024         | 3  |
| 15 | 1557.7279       | 779.3676        | 1540.7013      | 770.8543         | 1539.7173      | 770.3623         | T    | 248.1605         | 124.5839        | 231.1339       | 116.0706         | 230.1499       | 115.5786         | 2  |
| 16 |                 |                 |                |                  |                |                  | K    | 147.1128         | 74.0600         | 130.0863       | 65.5468          |                |                  | 1  |

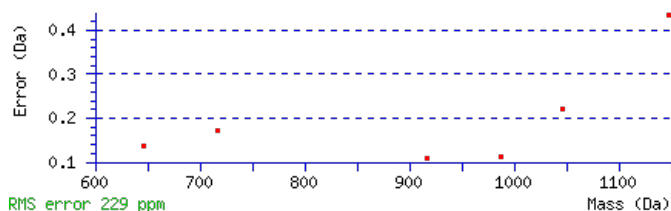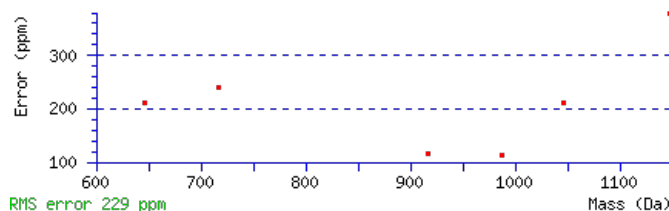



## AT3G11930.1

NCBI BLAST search of [QPETTEAEAPSLTK](#)

(Parameters: blastp, nr protein database, expect=20000, no filter, PAM30)

Other BLAST [web gateways](#)

### All matches to this query

| Score | Mr(calc)  | Delta   | Sequence                         |
|-------|-----------|---------|----------------------------------|
| 37.4  | 1702.8261 | -0.0043 | <a href="#">QPETTEAEAPSLTK</a>   |
| 5.0   | 1702.8195 | 0.0023  | <a href="#">QLEELLMNANDEL</a>    |
| 5.0   | 1702.8195 | 0.0023  | <a href="#">QLEEMIKDANDEL</a>    |
| 4.0   | 1702.8261 | -0.0043 | <a href="#">QDDGLSDLSLILGDLK</a> |
| 3.6   | 1702.8196 | 0.0023  | <a href="#">TIMEEKQNNSPVGEK</a>  |

Mascot: <http://www.matrixscience.com/>

## Peptide View

MS/MS Fragmentation of **SFDVGLPEEVSEADLISK**

Found in **AT3G12290.1** in **TAIR\_Arabidopsis**, Symbols: | tetrahydrofolate dehydrogenase/cyclohydrolase, putative | chr3:3919598-3921333  
FORWARD

Match to Query 9152: 1952.900406 from(977.457479,2+) index(9169)

Title: Elution from: 81.710 to 81.710 scan no 12358 cid35.00 polarity:+

Data file D6h-3\_2.mgf

Click mouse within plot area to zoom in by factor of two about that point

Or,   to  Da

Label all possible matches  Label matches used for scoring

Show Y-axis

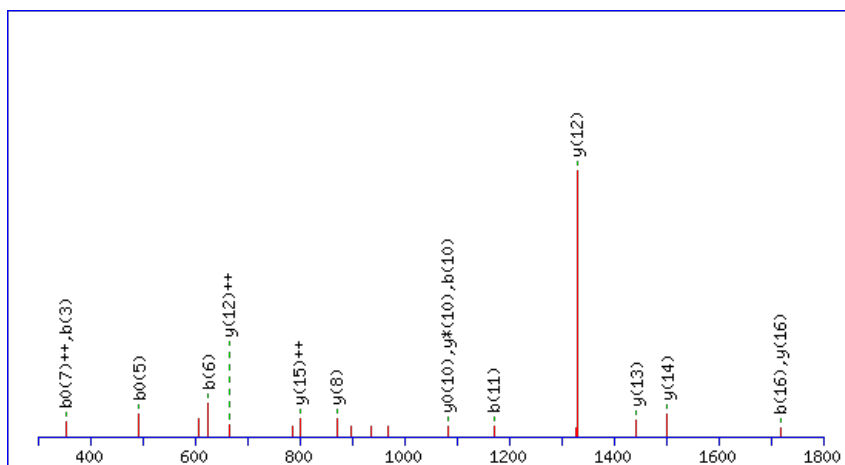

Monoisotopic mass of neutral peptide  $M_r(\text{calc})$ : 1952.8957

Fixed modifications: Carbamidomethyl (C) (apply to specified residues or termini only)

Ions Score: 57 Expect: 1.6e-005

Matches : 16/168 fragment ions using 13 most intense peaks ([help](#))

| #  | b                | b <sup>++</sup> | b <sup>0</sup>  | b <sup>0++</sup> | Seq. | y                | y <sup>++</sup> | y*               | y <sup>*++</sup> | y <sup>0</sup>   | y <sup>0++</sup> | #  |
|----|------------------|-----------------|-----------------|------------------|------|------------------|-----------------|------------------|------------------|------------------|------------------|----|
| 1  | 89.0363          | 45.0218         | 71.0258         | 36.0165          | S    |                  |                 |                  |                  |                  |                  | 18 |
| 2  | 237.1018         | 119.0545        | 219.0912        | 110.0492         | F    | 1865.8739        | 933.4406        | 1847.8503        | 924.4288         | 1847.8634        | 924.4353         | 17 |
| 3  | <b>353.1258</b>  | 177.0665        | 335.1152        | 168.0612         | D    | <b>1717.8085</b> | 859.4079        | 1699.7849        | 850.3961         | 1699.7979        | 850.4026         | 16 |
| 4  | 453.1912         | 227.0992        | 435.1807        | 218.0940         | V    | 1601.7845        | <b>801.3959</b> | 1583.7609        | 792.3841         | 1583.7739        | 792.3906         | 15 |
| 5  | 511.2097         | 256.1085        | <b>493.1991</b> | 247.1032         | G    | <b>1501.7191</b> | 751.3632        | 1483.6955        | 742.3514         | 1483.7085        | 742.3579         | 14 |
| 6  | <b>625.2908</b>  | 313.1490        | 607.2802        | 304.1438         | L    | <b>1443.7006</b> | 722.3539        | 1425.6770        | 713.3421         | 1425.6900        | 713.3486         | 13 |
| 7  | 723.3406         | 362.1739        | 705.3300        | <b>353.1687</b>  | P    | <b>1329.6195</b> | <b>665.3134</b> | 1311.5959        | 656.3016         | 1311.6089        | 656.3081         | 12 |
| 8  | 853.3802         | 427.1938        | 835.3697        | 418.1885         | E    | 1231.5697        | 616.2885        | 1213.5461        | 607.2767         | 1213.5591        | 607.2832         | 11 |
| 9  | 983.4199         | 492.2136        | 965.4093        | 483.2083         | E    | 1101.5300        | 551.2687        | <b>1083.5064</b> | 542.2569         | <b>1083.5195</b> | 542.2634         | 10 |
| 10 | <b>1083.4853</b> | 542.2463        | 1065.4748       | 533.2410         | V    | 971.4904         | 486.2488        | 953.4668         | 477.2370         | 953.4798         | 477.2436         | 9  |
| 11 | <b>1171.5144</b> | 586.2608        | 1153.5038       | 577.2555         | S    | <b>871.4250</b>  | 436.2161        | 853.4014         | 427.2043         | 853.4144         | 427.2108         | 8  |
| 12 | 1301.5540        | 651.2806        | 1283.5434       | 642.2754         | E    | 783.3959         | 392.2016        | 765.3723         | 383.1898         | 765.3853         | 383.1963         | 7  |
| 13 | 1373.5882        | 687.2977        | 1355.5776       | 678.2924         | A    | 653.3563         | 327.1818        | 635.3327         | 318.1700         | 635.3457         | 318.1765         | 6  |
| 14 | 1489.6121        | 745.3097        | 1471.6016       | 736.3044         | D    | 581.3221         | 291.1647        | 563.2985         | 282.1529         | 563.3115         | 282.1594         | 5  |
| 15 | 1603.6932        | 802.3503        | 1585.6827       | 793.3450         | L    | 465.2981         | 233.1527        | 447.2746         | 224.1409         | 447.2876         | 224.1474         | 4  |
| 16 | <b>1717.7743</b> | 859.3908        | 1699.7638       | 850.3855         | I    | 351.2170         | 176.1122        | 333.1935         | 167.1004         | 333.2065         | 167.1069         | 3  |
| 17 | 1805.8034        | 903.4053        | 1787.7928       | 894.4001         | S    | 237.1359         | 119.0716        | 219.1124         | 110.0598         | 219.1254         | 110.0663         | 2  |
| 18 |                  |                 |                 |                  | K    | 149.1069         | 75.0571         | 131.0833         | 66.0453          |                  |                  | 1  |

# AT3G12290.1

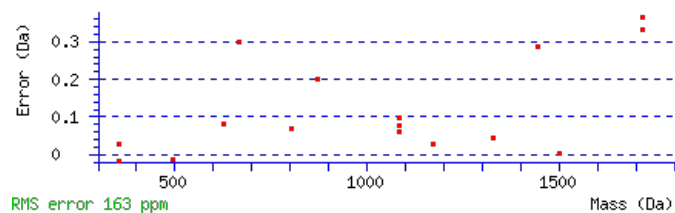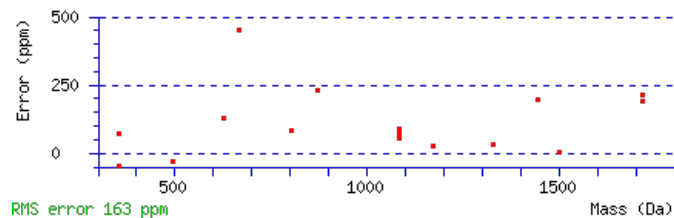

NCBI **BLAST** search of [SFDVGLPEEVSEADLISK](#)

(Parameters: blastp, nr protein database, expect=20000, no filter, PAM30)

Other BLAST [web gateways](#)

## All matches to this query

| Score | Mr(calc)  | Delta   | Sequence                           |
|-------|-----------|---------|------------------------------------|
| 57.0  | 1952.8957 | 0.0047  | <a href="#">SFDVGLPEEVSEADLISK</a> |
| 8.6   | 1952.9040 | -0.0036 | <a href="#">GSMDDITVVIIDLNHYK</a>  |
| 3.8   | 1952.8957 | 0.0047  | <a href="#">EDEVFPTINILDTSVDK</a>  |
| 1.7   | 1952.8959 | 0.0045  | <a href="#">AVSGHIDMLYDLLHYGK</a>  |

Mascot: <http://www.matrixscience.com/>

## Peptide View

MS/MS Fragmentation of **IEDLSSQIQSQAAEQFK**

Found in **AT3G12390.1** in **TAIR\_Arabidopsis**, Symbols: | nascent polypeptide associated complex alpha chain protein, putative / alpha-NAC, putative | chr3:3942351-3943602 FORWARD

Match to Query 9301: 1942.881732 from(972.448142,2+) index(7341)

Title: Elution from: 66.010 to 66.010 scan no 9567 cid35.00 polarity:+

Data file D6h-2\_1.mgf

Click mouse within plot area to zoom in by factor of two about that point

Or,   to  Da

Label all possible matches  Label matches used for scoring

Show Y-axis

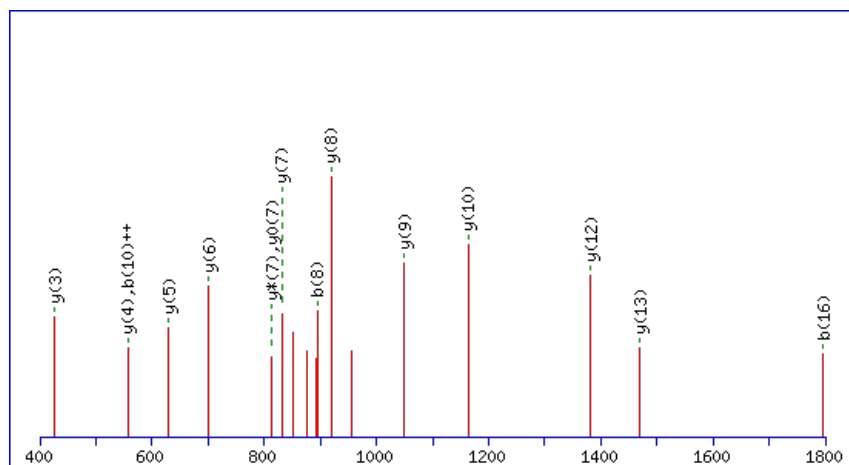

Monoisotopic mass of neutral peptide  $M_r(\text{calc})$ : 1942.8776

Fixed modifications: Carbamidomethyl (C) (apply to specified residues or termini only)

Ions Score: 99 Expect: 1.3e-009

Matches : 15/172 fragment ions using 14 most intense peaks ([help](#))

| #  | b                | b <sup>++</sup> | b*        | b <sup>*++</sup> | b <sup>0</sup> | b <sup>0++</sup> | Seq. | y                | y <sup>++</sup> | y*              | y <sup>*++</sup> | y <sup>0</sup>  | y <sup>0++</sup> | #  |
|----|------------------|-----------------|-----------|------------------|----------------|------------------|------|------------------|-----------------|-----------------|------------------|-----------------|------------------|----|
| 1  | 115.0884         | 58.0478         |           |                  |                |                  | I    |                  |                 |                 |                  |                 |                  | 17 |
| 2  | 245.1280         | 123.0676        |           |                  | 227.1174       | 114.0624         | E    | 1829.8038        | 915.4056        | 1811.7802       | 906.3938         | 1811.7933       | 906.4003         | 16 |
| 3  | 361.1520         | 181.0796        |           |                  | 343.1414       | 172.0743         | D    | 1699.7642        | 850.3857        | 1681.7406       | 841.3739         | 1681.7536       | 841.3805         | 15 |
| 4  | 475.2331         | 238.1202        |           |                  | 457.2225       | 229.1149         | L    | 1583.7402        | 792.3738        | 1565.7166       | 783.3620         | 1565.7297       | 783.3685         | 14 |
| 5  | 563.2621         | 282.1347        |           |                  | 545.2516       | 273.1294         | S    | <b>1469.6591</b> | 735.3332        | 1451.6355       | 726.3214         | 1451.6486       | 726.3279         | 13 |
| 6  | 651.2912         | 326.1492        |           |                  | 633.2806       | 317.1440         | S    | <b>1381.6301</b> | 691.3187        | 1363.6065       | 682.3069         | 1363.6195       | 682.3134         | 12 |
| 7  | 781.3439         | 391.1756        | 763.3203  | 382.1638         | 763.3333       | 382.1703         | Q    | 1293.6010        | 647.3041        | 1275.5774       | 638.2923         | 1275.5904       | 638.2989         | 11 |
| 8  | <b>895.4250</b>  | 448.2161        | 877.4014  | 439.2043         | 877.4144       | 439.2108         | I    | <b>1163.5484</b> | 582.2778        | 1145.5248       | 573.2660         | 1145.5378       | 573.2725         | 10 |
| 9  | 1025.4776        | 513.2424        | 1007.4540 | 504.2306         | 1007.4670      | 504.2372         | Q    | <b>1049.4673</b> | 525.2373        | 1031.4437       | 516.2255         | 1031.4567       | 516.2320         | 9  |
| 10 | 1113.5067        | <b>557.2570</b> | 1095.4831 | 548.2452         | 1095.4961      | 548.2517         | S    | <b>919.4146</b>  | 460.2109        | 901.3910        | 451.1991         | 901.4040        | 451.2057         | 8  |
| 11 | 1243.5593        | 622.2833        | 1225.5357 | 613.2715         | 1225.5487      | 613.2780         | Q    | <b>831.3855</b>  | 416.1964        | <b>813.3620</b> | 407.1846         | <b>813.3750</b> | 407.1911         | 7  |
| 12 | 1315.5935        | 658.3004        | 1297.5699 | 649.2886         | 1297.5829      | 649.2951         | A    | <b>701.3329</b>  | 351.1701        | 683.3093        | 342.1583         | 683.3223        | 342.1648         | 6  |
| 13 | 1387.6276        | 694.3174        | 1369.6040 | 685.3056         | 1369.6170      | 685.3122         | A    | <b>629.2987</b>  | 315.1530        | 611.2752        | 306.1412         | 611.2882        | 306.1477         | 5  |
| 14 | 1517.6672        | 759.3373        | 1499.6437 | 750.3255         | 1499.6567      | 750.3320         | E    | <b>557.2646</b>  | 279.1359        | 539.2410        | 270.1241         | 539.2540        | 270.1307         | 4  |
| 15 | 1647.7199        | 824.3636        | 1629.6963 | 815.3518         | 1629.7093      | 815.3583         | Q    | <b>427.2250</b>  | 214.1161        | 409.2014        | 205.1043         |                 |                  | 3  |
| 16 | <b>1795.7853</b> | 898.3963        | 1777.7617 | 889.3845         | 1777.7748      | 889.3910         | F    | 297.1723         | 149.0898        | 279.1487        | 140.0780         |                 |                  | 2  |
| 17 |                  |                 |           |                  |                |                  | K    | 149.1069         | 75.0571         | 131.0833        | 66.0453          |                 |                  | 1  |

# AT3G12390.1

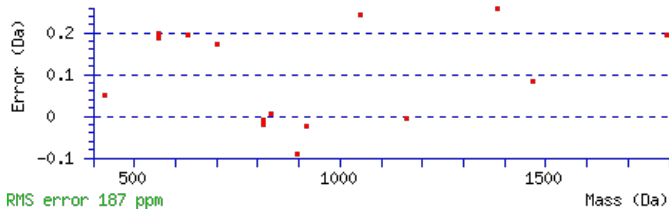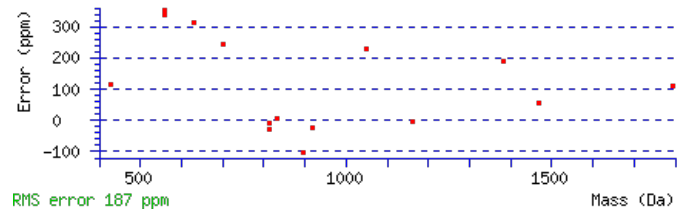

NCBI **BLAST** search of [IEDLSSQIQSQAAEQFK](#)  
(Parameters: blastp, nr protein database, expect=20000, no filter, PAM30)  
Other BLAST [web gateways](#)

## All matches to this query

| Score | Mr(calc)  | Delta  | Sequence                          |
|-------|-----------|--------|-----------------------------------|
| 98.7  | 1942.8776 | 0.0041 | <a href="#">IEDLSSQIQSQAAEQFK</a> |
| 98.7  | 1942.8776 | 0.0041 | <a href="#">IEDLSSQIQSQAAEQFK</a> |
| 3.1   | 1942.8778 | 0.0039 | <a href="#">ARWARDALQLWEEMK</a>   |
| 0.6   | 1942.8774 | 0.0044 | <a href="#">RIYECYTWKIYAEK</a>    |

Mascot: <http://www.matrixscience.com/>

**Peptide View**MS/MS Fragmentation of **ENALLEFAR**Found in **AT3G12490.1** in **TAIR\_Arabidopsis**, Symbols: | cysteine protease inhibitor, putative / cystatin, putative | chr3:3960530-3961784 REVERSE

Match to Query 3117: 1061.549960 from(531.782256,2+) index(6293)

Title: Elution from: 54.475 to 54.475 scan no 8062 cid35.00 polarity:+

Data file D1d-3\_3.mgf

Click mouse within plot area to zoom in by factor of two about that point

Or,   to  Da Label all possible matches  Label matches used for scoring Show Y-axis 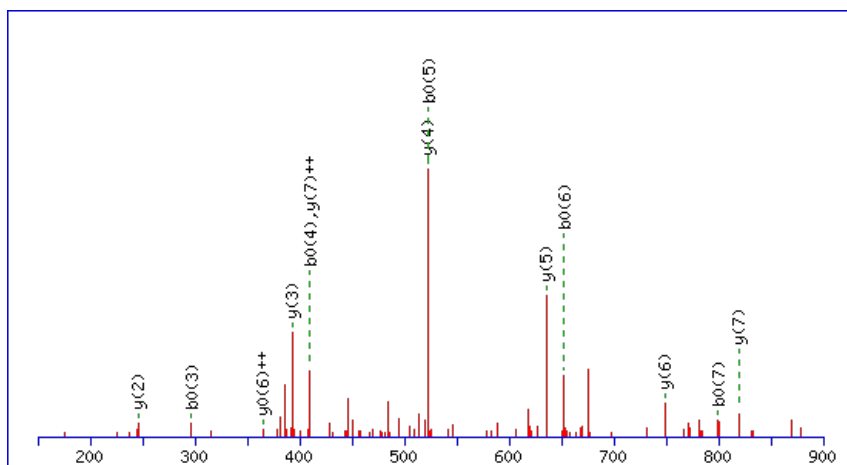Monoisotopic mass of neutral peptide  $M_r(\text{calc})$ : 1061.5505

Fixed modifications: Carbamidomethyl (C) (apply to specified residues or termini only)

Ions Score: 41 Expect: 0.00032

Matches : 13/88 fragment ions using 15 most intense peaks ([help](#))

| # | b        | b <sup>++</sup> | b*       | b <sup>*++</sup> | b <sup>0</sup> | b <sup>0++</sup> | Seq. | y        | y <sup>++</sup> | y*       | y <sup>*++</sup> | y <sup>0</sup> | y <sup>0++</sup> | # |
|---|----------|-----------------|----------|------------------|----------------|------------------|------|----------|-----------------|----------|------------------|----------------|------------------|---|
| 1 | 130.0499 | 65.5286         |          |                  | 112.0393       | 56.5233          | E    |          |                 |          |                  |                |                  | 9 |
| 2 | 244.0928 | 122.5500        | 227.0662 | 114.0368         | 226.0822       | 113.5448         | N    | 933.5152 | 467.2613        | 916.4887 | 458.7480         | 915.5047       | 458.2560         | 8 |
| 3 | 315.1299 | 158.0686        | 298.1034 | 149.5553         | 297.1193       | 149.0633         | A    | 819.4723 | 410.2398        | 802.4458 | 401.7265         | 801.4617       | 401.2345         | 7 |
| 4 | 428.2140 | 214.6106        | 411.1874 | 206.0974         | 410.2034       | 205.6053         | L    | 748.4352 | 374.7212        | 731.4087 | 366.2080         | 730.4246       | 365.7160         | 6 |
| 5 | 541.2980 | 271.1527        | 524.2715 | 262.6394         | 523.2875       | 262.1474         | L    | 635.3511 | 318.1792        | 618.3246 | 309.6659         | 617.3406       | 309.1739         | 5 |
| 6 | 670.3406 | 335.6740        | 653.3141 | 327.1607         | 652.3301       | 326.6687         | E    | 522.2671 | 261.6372        | 505.2405 | 253.1239         | 504.2565       | 252.6319         | 4 |
| 7 | 817.4090 | 409.2082        | 800.3825 | 400.6949         | 799.3985       | 400.2029         | F    | 393.2245 | 197.1159        | 376.1979 | 188.6026         |                |                  | 3 |
| 8 | 888.4462 | 444.7267        | 871.4196 | 436.2134         | 870.4356       | 435.7214         | A    | 246.1561 | 123.5817        | 229.1295 | 115.0684         |                |                  | 2 |
| 9 |          |                 |          |                  |                |                  | R    | 175.1190 | 88.0631         | 158.0924 | 79.5498          |                |                  | 1 |

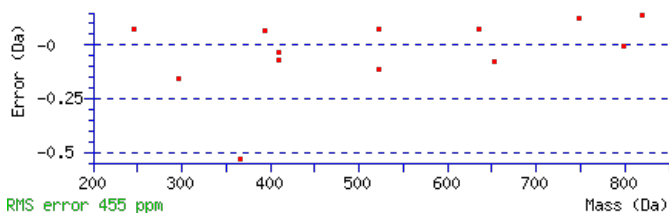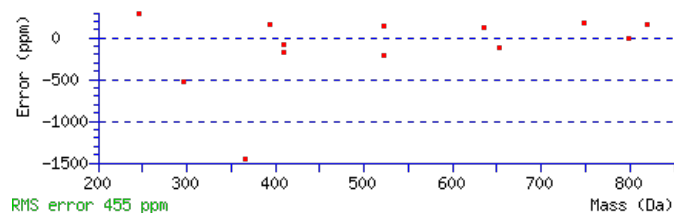NCBI **BLAST** search of [ENALLEFAR](#)

(Parameters: blastp, nr protein database, expect=20000, no filter, PAM30)

Other BLAST [web gateways](#)

All matches to this query

| Score | $M_r(\text{calc})$ | Delta | Sequence |
|-------|--------------------|-------|----------|
|       |                    |       |          |

# AT3G12490.1

|      |           |         |                            |
|------|-----------|---------|----------------------------|
| 40.5 | 1061.5505 | -0.0006 | <a href="#">ENALLEFAR</a>  |
| 1.6  | 1061.5506 | -0.0006 | <a href="#">FPEISTNVR</a>  |
| 1.3  | 1061.5505 | -0.0006 | <a href="#">KDAHTSIYK</a>  |
| 0.9  | 1061.5505 | -0.0006 | <a href="#">LFDAAVEAAR</a> |

**Mascot:** <http://www.matrixscience.com/>

**Peptide View**MS/MS Fragmentation of **LASLADLYVNDAFGTAHR**

Found in **AT3G12780.1** in **TAIR\_Arabidopsis**, Symbols: PGK1 | PGK1 (PHOSPHOGLYCERATE KINASE 1); phosphoglycerate kinase | chr3:4061134-4063147 REVERSE

Match to Query 9211: 1956.894112 from(979.454332,2+) index(8723)

Title: Elution from: 77.089 to 77.089 scan no 11629 cid35.00 polarity:+

Data file C7-3\_2.mgf

Click mouse within plot area to zoom in by factor of two about that point

Or,   to  Da

Label all possible matches  Label matches used for scoring

Show Y-axis

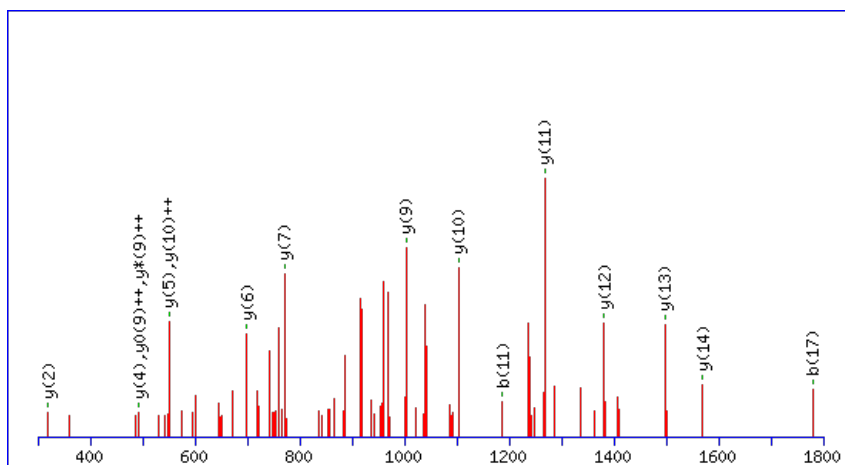

**Monoisotopic mass of neutral peptide Mr(calc):** 1956.8982

**Fixed modifications:** Carbamidomethyl (C) (apply to specified residues or termini only)

**Ions Score:** 107 **Expect:** 1.5e-010

**Matches:** 16/176 fragment ions using 14 most intense peaks ([help](#))

| #  | b                | b <sup>++</sup> | b*        | b <sup>*++</sup> | b <sup>0</sup> | b <sup>0++</sup> | Seq. | y                | y <sup>++</sup> | y*        | y <sup>*++</sup> | y <sup>0</sup> | y <sup>0++</sup> | #  |
|----|------------------|-----------------|-----------|------------------|----------------|------------------|------|------------------|-----------------|-----------|------------------|----------------|------------------|----|
| 1  | 115.0884         | 58.0478         |           |                  |                |                  | L    |                  |                 |           |                  |                |                  | 18 |
| 2  | 187.1225         | 94.0649         |           |                  |                |                  | A    | 1843.8244        | 922.4158        | 1825.8008 | 913.4040         | 1825.8138      | 913.4106         | 17 |
| 3  | 275.1516         | 138.0794        |           |                  | 257.1410       | 129.0741         | S    | 1771.7902        | 886.3988        | 1753.7667 | 877.3870         | 1753.7797      | 877.3935         | 16 |
| 4  | 389.2327         | 195.1200        |           |                  | 371.2221       | 186.1147         | L    | 1683.7612        | 842.3842        | 1665.7376 | 833.3724         | 1665.7506      | 833.3789         | 15 |
| 5  | 461.2668         | 231.1371        |           |                  | 443.2563       | 222.1318         | A    | <b>1569.6801</b> | 785.3437        | 1551.6565 | 776.3319         | 1551.6695      | 776.3384         | 14 |
| 6  | 577.2908         | 289.1490        |           |                  | 559.2802       | 280.1438         | D    | <b>1497.6459</b> | 749.3266        | 1479.6223 | 740.3148         | 1479.6354      | 740.3213         | 13 |
| 7  | 691.3719         | 346.1896        |           |                  | 673.3613       | 337.1843         | L    | <b>1381.6220</b> | 691.3146        | 1363.5984 | 682.3028         | 1363.6114      | 682.3093         | 12 |
| 8  | 855.4323         | 428.2198        |           |                  | 837.4217       | 419.2145         | Y    | <b>1267.5409</b> | 634.2741        | 1249.5173 | 625.2623         | 1249.5303      | 625.2688         | 11 |
| 9  | 955.4977         | 478.2525        |           |                  | 937.4872       | 469.2472         | V    | <b>1103.4805</b> | <b>552.2439</b> | 1085.4569 | 543.2321         | 1085.4699      | 543.2386         | 10 |
| 10 | 1071.5347        | 536.2710        | 1053.5111 | 527.2592         | 1053.5242      | 527.2657         | N    | <b>1003.4150</b> | 502.2112        | 985.3915  | <b>493.1994</b>  | 985.4045       | <b>493.2059</b>  | 9  |
| 11 | <b>1187.5587</b> | 594.2830        | 1169.5351 | 585.2712         | 1169.5481      | 585.2777         | D    | 887.3780         | 444.1927        | 869.3545  | 435.1809         | 869.3675       | 435.1874         | 8  |
| 12 | 1259.5928        | 630.3001        | 1241.5693 | 621.2883         | 1241.5823      | 621.2948         | A    | <b>771.3541</b>  | 386.1807        | 753.3305  | 377.1689         | 753.3435       | 377.1754         | 7  |
| 13 | 1407.6583        | 704.3328        | 1389.6347 | 695.3210         | 1389.6477      | 695.3275         | F    | <b>699.3199</b>  | 350.1636        | 681.2963  | 341.1518         | 681.3094       | 341.1583         | 6  |
| 14 | 1465.6768        | 733.3420        | 1447.6532 | 724.3302         | 1447.6662      | 724.3368         | G    | <b>551.2545</b>  | 276.1309        | 533.2309  | 267.1191         | 533.2439       | 267.1256         | 5  |
| 15 | 1567.7215        | 784.3644        | 1549.6979 | 775.3526         | 1549.7109      | 775.3591         | T    | <b>493.2360</b>  | 247.1216        | 475.2124  | 238.1098         | 475.2254       | 238.1163         | 4  |
| 16 | 1639.7557        | 820.3815        | 1621.7321 | 811.3697         | 1621.7451      | 811.3762         | A    | 391.1913         | 196.0993        | 373.1677  | 187.0875         |                |                  | 3  |
| 17 | <b>1779.8057</b> | 890.4065        | 1761.7821 | 881.3947         | 1761.7951      | 881.4012         | H    | <b>319.1571</b>  | 160.0822        | 301.1335  | 151.0704         |                |                  | 2  |
| 18 |                  |                 |           |                  |                |                  | R    | 179.1071         | 90.0572         | 161.0835  | 81.0454          |                |                  | 1  |



AT3G12780.1

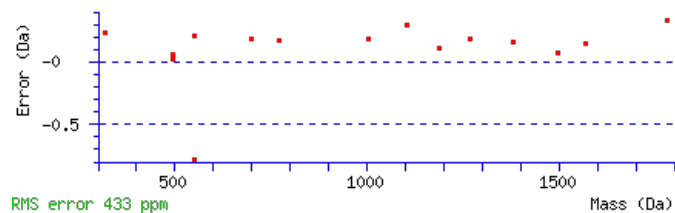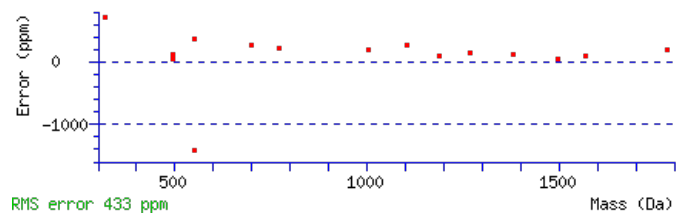

NCBI **BLAST** search of [LASLADLYVNDAFGTAHR](#)

(Parameters: blastp, nr protein database, expect=20000, no filter, PAM30)

Other BLAST [web gateways](#)

**All matches to this query**

| Score | Mr(calc)  | Delta   | Sequence                           |
|-------|-----------|---------|------------------------------------|
| 107.3 | 1956.8982 | -0.0041 | <a href="#">LASLADLYVNDAFGTAHR</a> |
| 4.9   | 1956.8987 | -0.0046 | <a href="#">PSESSYKVHRPAKSGGSR</a> |

Mascot: <http://www.matrixscience.com/>

**Peptide View**MS/MS Fragmentation of **QILDAAR**Found in **AT3G13120.1** in **TAIR\_Arabidopsis**, Symbols: | 30S ribosomal protein S10, chloroplast, putative | chr3:4220317-4221533 REVERSE

Match to Query 999: 796.405428 from(399.209990,2+) index(1181)

Title: Elution from: 17.893 to 17.893 scan no 1648 cid35.00 polarity:+

Data file D6h-3\_1.mgf

Click mouse within plot area to zoom in by factor of two about that point

Or,   to  Da Label all possible matches  Label matches used for scoring Show Y-axis 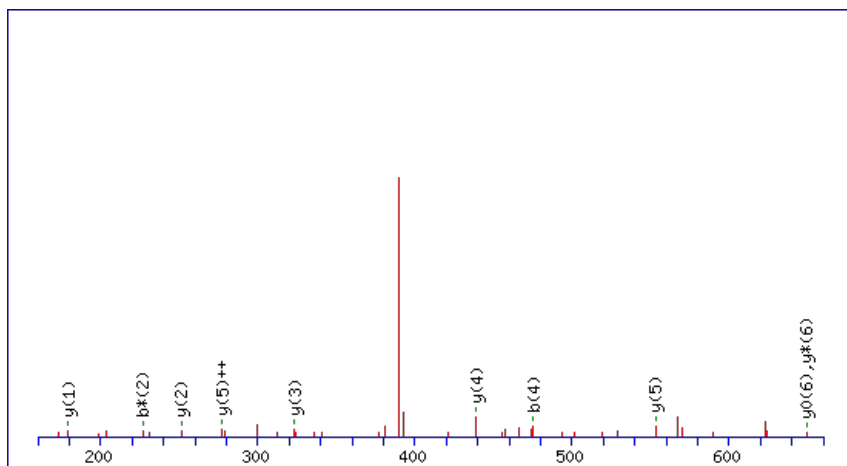Monoisotopic mass of neutral peptide **Mr(calc)**: 796.4069

Fixed modifications: Carbamidomethyl (C) (apply to specified residues or termini only)

Ions Score: 25 Expect: 0.031

Matches : 10/60 fragment ions using 20 most intense peaks ([help](#))

| # | b        | b <sup>++</sup> | b*       | b <sup>*++</sup> | b <sup>0</sup> | b <sup>0++</sup> | Seq. | y        | y <sup>++</sup> | y*       | y <sup>*++</sup> | y <sup>0</sup> | y <sup>0++</sup> | # |
|---|----------|-----------------|----------|------------------|----------------|------------------|------|----------|-----------------|----------|------------------|----------------|------------------|---|
| 1 | 131.0599 | 66.0336         | 113.0363 | 57.0218          |                |                  | Q    |          |                 |          |                  |                |                  | 7 |
| 2 | 245.1410 | 123.0741        | 227.1174 | 114.0624         |                |                  | I    | 667.3616 | 334.1844        | 649.3380 | 325.1726         | 649.3510       | 325.1791         | 6 |
| 3 | 359.2221 | 180.1147        | 341.1985 | 171.1029         |                |                  | L    | 553.2805 | 277.1439        | 535.2569 | 268.1321         | 535.2699       | 268.1386         | 5 |
| 4 | 475.2461 | 238.1267        | 457.2225 | 229.1149         | 457.2355       | 229.1214         | D    | 439.1994 | 220.1033        | 421.1758 | 211.0915         | 421.1888       | 211.0980         | 4 |
| 5 | 547.2802 | 274.1438        | 529.2567 | 265.1320         | 529.2697       | 265.1385         | A    | 323.1754 | 162.0913        | 305.1518 | 153.0795         |                |                  | 3 |
| 6 | 619.3144 | 310.1608        | 601.2908 | 301.1490         | 601.3038       | 301.1556         | A    | 251.1412 | 126.0743        | 233.1177 | 117.0625         |                |                  | 2 |
| 7 |          |                 |          |                  |                |                  | R    | 179.1071 | 90.0572         | 161.0835 | 81.0454          |                |                  | 1 |

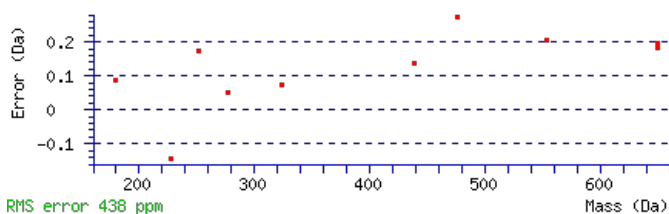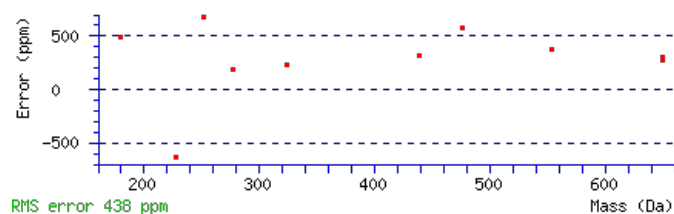NCBI **BLAST** search of **QILDAAR**

(Parameters: blastp, nr protein database, expect=20000, no filter, PAM30)

Other BLAST [web gateways](#)**All matches to this query**

| Score | Mr(calc) | Delta   | Sequence                |
|-------|----------|---------|-------------------------|
| 24.9  | 796.4069 | -0.0015 | <a href="#">QILDAAR</a> |
| 13.7  | 796.4069 | -0.0015 | <a href="#">LDIQAAR</a> |
| 13.7  | 796.4069 | -0.0015 | <a href="#">NLIEAAR</a> |

## AT3G13120.1

|      |          |         |                          |
|------|----------|---------|--------------------------|
| 13.6 | 796.4069 | -0.0015 | <a href="#">ALVADAAR</a> |
| 12.6 | 796.4043 | 0.0012  | <a href="#">ELLNTSL</a>  |
| 12.6 | 796.4043 | 0.0012  | <a href="#">DILEATK</a>  |
| 10.8 | 796.4069 | -0.0015 | <a href="#">EIGSKPR</a>  |
| 10.8 | 796.4069 | -0.0015 | <a href="#">KLDTGPR</a>  |
| 9.8  | 796.4069 | -0.0015 | <a href="#">STLNPVR</a>  |
| 9.7  | 796.4069 | -0.0015 | <a href="#">SKLADPR</a>  |

**Mascot:** <http://www.matrixscience.com/>

## Peptide View

MS/MS Fragmentation of **YAFLSAALIELSPPK**

Found in **AT3G13330.1** in **TAIR\_Arabidopsis**, Symbols: | binding | chr3:4319811-4330068 REVERSE

Match to Query 7422: 1634.846500 from(818.430526,2+) index(7966)

Title: Elution from: 71.416 to 71.416 scan no 10443 cid35.00 polarity:+

Data file D6h-2\_2.mgf

Click mouse within plot area to zoom in by factor of two about that point

Or,   to  Da

Label all possible matches  Label matches used for scoring

Show Y-axis

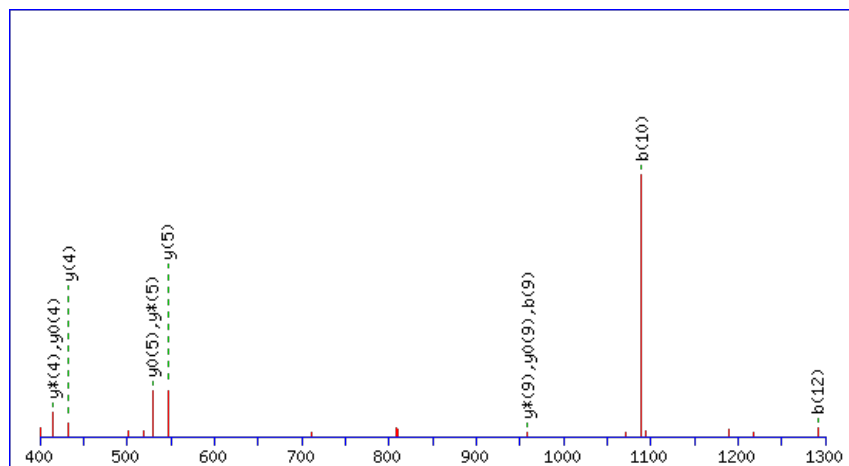

**Monoisotopic mass of neutral peptide Mr(calc):** 1634.8496

**Fixed modifications:** Carbamidomethyl (C) (apply to specified residues or termini only)

**Ions Score:** 20 **Expect:** 0.045

**Matches:** 11/126 fragment ions using 13 most intense peaks ([help](#))

| #  | b         | b <sup>++</sup> | b <sup>0</sup> | b <sup>0++</sup> | Seq. | y         | y <sup>++</sup> | y*        | y <sup>*++</sup> | y <sup>0</sup> | y <sup>0++</sup> | #  |
|----|-----------|-----------------|----------------|------------------|------|-----------|-----------------|-----------|------------------|----------------|------------------|----|
| 1  | 165.0676  | 83.0375         |                |                  | Y    |           |                 |           |                  |                |                  | 15 |
| 2  | 237.1018  | 119.0545        |                |                  | A    | 1471.7965 | 736.4019        | 1453.7729 | 727.3901         | 1453.7860      | 727.3966         | 14 |
| 3  | 385.1672  | 193.0873        |                |                  | F    | 1399.7624 | 700.3848        | 1381.7388 | 691.3730         | 1381.7518      | 691.3795         | 13 |
| 4  | 499.2483  | 250.1278        |                |                  | L    | 1251.6969 | 626.3521        | 1233.6733 | 617.3403         | 1233.6864      | 617.3468         | 12 |
| 5  | 587.2774  | 294.1423        | 569.2668       | 285.1371         | S    | 1137.6158 | 569.3115        | 1119.5922 | 560.2998         | 1119.6053      | 560.3063         | 11 |
| 6  | 659.3115  | 330.1594        | 641.3010       | 321.1541         | A    | 1049.5868 | 525.2970        | 1031.5632 | 516.2852         | 1031.5762      | 516.2917         | 10 |
| 7  | 731.3457  | 366.1765        | 713.3351       | 357.1712         | A    | 977.5526  | 489.2799        | 959.5290  | 480.2682         | 959.5420       | 480.2747         | 9  |
| 8  | 845.4268  | 423.2170        | 827.4162       | 414.2118         | L    | 905.5185  | 453.2629        | 887.4949  | 444.2511         | 887.5079       | 444.2576         | 8  |
| 9  | 959.5079  | 480.2576        | 941.4973       | 471.2523         | I    | 791.4374  | 396.2223        | 773.4138  | 387.2105         | 773.4268       | 387.2170         | 7  |
| 10 | 1089.5475 | 545.2774        | 1071.5370      | 536.2721         | E    | 677.3563  | 339.1818        | 659.3327  | 330.1700         | 659.3457       | 330.1765         | 6  |
| 11 | 1203.6286 | 602.3179        | 1185.6181      | 593.3127         | L    | 547.3166  | 274.1620        | 529.2930  | 265.1502         | 529.3061       | 265.1567         | 5  |
| 12 | 1291.6577 | 646.3325        | 1273.6471      | 637.3272         | S    | 433.2355  | 217.1214        | 415.2120  | 208.1096         | 415.2250       | 208.1161         | 4  |
| 13 | 1389.7075 | 695.3574        | 1371.6969      | 686.3521         | P    | 345.2065  | 173.1069        | 327.1829  | 164.0951         |                |                  | 3  |
| 14 | 1487.7573 | 744.3823        | 1469.7467      | 735.3770         | P    | 247.1567  | 124.0820        | 229.1331  | 115.0702         |                |                  | 2  |
| 15 |           |                 |                |                  | K    | 149.1069  | 75.0571         | 131.0833  | 66.0453          |                |                  | 1  |

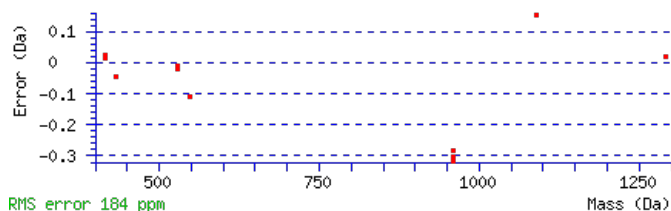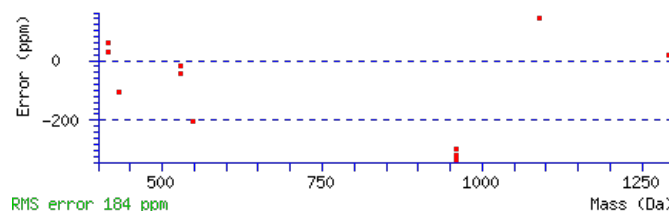

NCBI **BLAST** search of [YAFLSAALIELSPPK](#)

## AT3G13330.1

(Parameters: blastp, nr protein database, expect=20000, no filter, PAM30)

Other BLAST [web gateways](#)

### All matches to this query

| Score | Mr(calc)  | Delta   | Sequence                        |
|-------|-----------|---------|---------------------------------|
| 20.1  | 1634.8496 | -0.0031 | <a href="#">YAFLSAALIELSPPK</a> |
| 17.2  | 1634.8474 | -0.0009 | <a href="#">IDITVPTGAQIIYSK</a> |
| 4.3   | 1634.8453 | 0.0012  | <a href="#">IIEWMELQKRIR</a>    |

Mascot: <http://www.matrixscience.com/>

**Peptide View**MS/MS Fragmentation of **EMTTIVGDGTTQEAVNK**Found in **AT3G13470.1** in **TAIR\_Arabidopsis**, Symbols: | chaperonin, putative | chr3:4389692-4392631 FORWARD

Match to Query 8458: 1792.850062 from(897.432307,2+) index(3260)

Title: Elution from: 35.164 to 35.164 scan no 4188 cid35.00 polarity:+

Data file D1d-1\_1.mgf

Click mouse within plot area to zoom in by factor of two about that point

Or,   to  Da Label all possible matches  Label matches used for scoring Show Y-axis 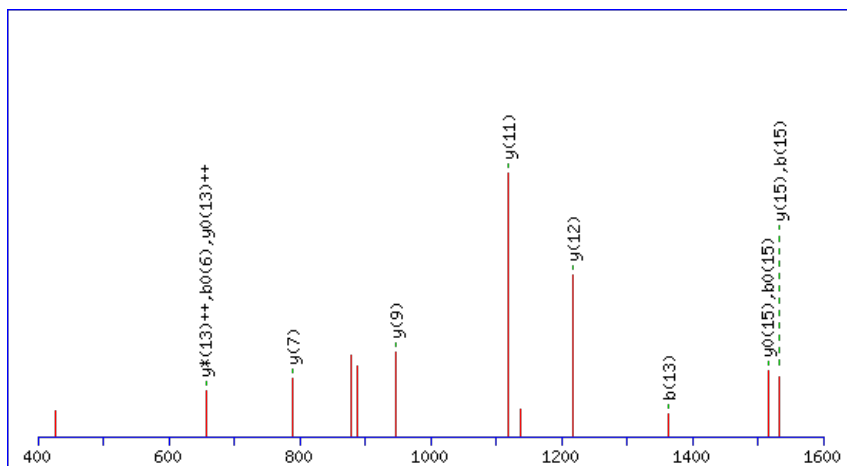Monoisotopic mass of neutral peptide **Mr(calc)**: 1792.8513**Fixed modifications**: Carbamidomethyl (C) (apply to specified residues or termini only)**Ions Score**: 41 **Expect**: 0.00029**Matches**: 12/162 fragment ions using 10 most intense peaks ([help](#))

| #  | b                | b <sup>++</sup> | b <sup>*</sup> | b <sup>*++</sup> | b <sup>0</sup>   | b <sup>0++</sup> | Seq. | y                | y <sup>++</sup> | y <sup>*</sup> | y <sup>*++</sup> | y <sup>0</sup>   | y <sup>0++</sup> | #  |
|----|------------------|-----------------|----------------|------------------|------------------|------------------|------|------------------|-----------------|----------------|------------------|------------------|------------------|----|
| 1  | 130.0499         | 65.5286         |                |                  | 112.0393         | 56.5233          | E    |                  |                 |                |                  |                  |                  | 17 |
| 2  | 261.0904         | 131.0488        |                |                  | 243.0798         | 122.0435         | M    | 1664.8160        | 832.9116        | 1647.7894      | 824.3984         | 1646.8054        | 823.9063         | 16 |
| 3  | 362.1380         | 181.5727        |                |                  | 344.1275         | 172.5674         | T    | <b>1533.7755</b> | 767.3914        | 1516.7489      | 758.8781         | <b>1515.7649</b> | 758.3861         | 15 |
| 4  | 463.1857         | 232.0965        |                |                  | 445.1751         | 223.0912         | T    | 1432.7278        | 716.8675        | 1415.7013      | 708.3543         | 1414.7173        | 707.8623         | 14 |
| 5  | 576.2698         | 288.6385        |                |                  | 558.2592         | 279.6332         | I    | 1331.6801        | 666.3437        | 1314.6536      | <b>657.8304</b>  | 1313.6696        | <b>657.3384</b>  | 13 |
| 6  | 675.3382         | 338.1727        |                |                  | <b>657.3276</b>  | 329.1675         | V    | <b>1218.5961</b> | 609.8017        | 1201.5695      | 601.2884         | 1200.5855        | 600.7964         | 12 |
| 7  | 732.3597         | 366.6835        |                |                  | 714.3491         | 357.6782         | G    | <b>1119.5277</b> | 560.2675        | 1102.5011      | 551.7542         | 1101.5171        | 551.2622         | 11 |
| 8  | 847.3866         | 424.1969        |                |                  | 829.3760         | 415.1917         | D    | 1062.5062        | 531.7567        | 1045.4796      | 523.2435         | 1044.4956        | 522.7515         | 10 |
| 9  | 904.4081         | 452.7077        |                |                  | 886.3975         | 443.7024         | G    | <b>947.4793</b>  | 474.2433        | 930.4527       | 465.7300         | 929.4687         | 465.2380         | 9  |
| 10 | 1005.4557        | 503.2315        |                |                  | 987.4452         | 494.2262         | T    | 890.4578         | 445.7325        | 873.4312       | 437.2193         | 872.4472         | 436.7272         | 8  |
| 11 | 1106.5034        | 553.7553        |                |                  | 1088.4929        | 544.7501         | T    | <b>789.4101</b>  | 395.2087        | 772.3836       | 386.6954         | 771.3995         | 386.2034         | 7  |
| 12 | 1234.5620        | 617.7846        | 1217.5354      | 609.2714         | 1216.5514        | 608.7794         | Q    | 688.3624         | 344.6849        | 671.3359       | 336.1716         | 670.3519         | 335.6796         | 6  |
| 13 | <b>1363.6046</b> | 682.3059        | 1346.5780      | 673.7927         | 1345.5940        | 673.3007         | E    | 560.3039         | 280.6556        | 543.2773       | 272.1423         | 542.2933         | 271.6503         | 5  |
| 14 | 1434.6417        | 717.8245        | 1417.6152      | 709.3112         | 1416.6311        | 708.8192         | A    | 431.2613         | 216.1343        | 414.2347       | 207.6210         |                  |                  | 4  |
| 15 | <b>1533.7101</b> | 767.3587        | 1516.6836      | 758.8454         | <b>1515.6996</b> | 758.3534         | V    | 360.2241         | 180.6157        | 343.1976       | 172.1024         |                  |                  | 3  |
| 16 | 1647.7530        | 824.3802        | 1630.7265      | 815.8669         | 1629.7425        | 815.3749         | N    | 261.1557         | 131.0815        | 244.1292       | 122.5682         |                  |                  | 2  |
| 17 |                  |                 |                |                  |                  |                  | K    | 147.1128         | 74.0600         | 130.0863       | 65.5468          |                  |                  | 1  |

# AT3G13470.1

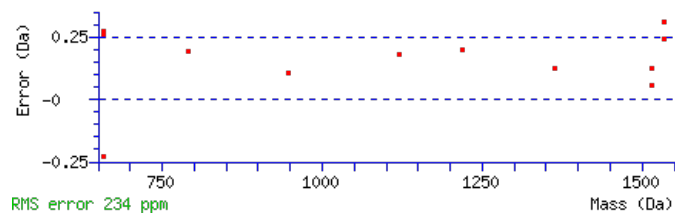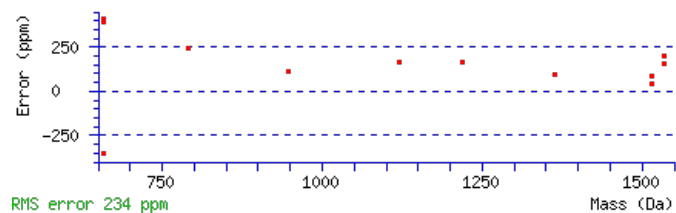

NCBI **BLAST** search of [EMTTIVGDGTTQEAVNK](#)

(Parameters: blastp, nr protein database, expect=20000, no filter, PAM30)

Other BLAST [web gateways](#)

## All matches to this query

| Score | Mr(calc)  | Delta   | Sequence                          |
|-------|-----------|---------|-----------------------------------|
| 41.1  | 1792.8513 | -0.0012 | <a href="#">EMTTIVGDGTTQEAVNK</a> |
| 2.4   | 1792.8488 | 0.0013  | <a href="#">MATLSRDQYVYMAK</a>    |

Mascot: <http://www.matrixscience.com/>

## Peptide View

MS/MS Fragmentation of **MEDGDTFAGLMWK**

Found in **AT3G13840.1** in **TAIR\_Arabidopsis**, Symbols: | scarecrow transcription factor family protein | chr3:4555312-4556844 REVERSE

Match to Query 6686: 1530.594766 from(766.304659,2+) index(2188)

Title: Elution from: 25.858 to 25.858 scan no 2848 cid35.00 polarity:+

Data file 0-3\_1.mgf

Click mouse within plot area to zoom in by factor of two about that point

Or,   to  Da

Label all possible matches  Label matches used for scoring

Show Y-axis

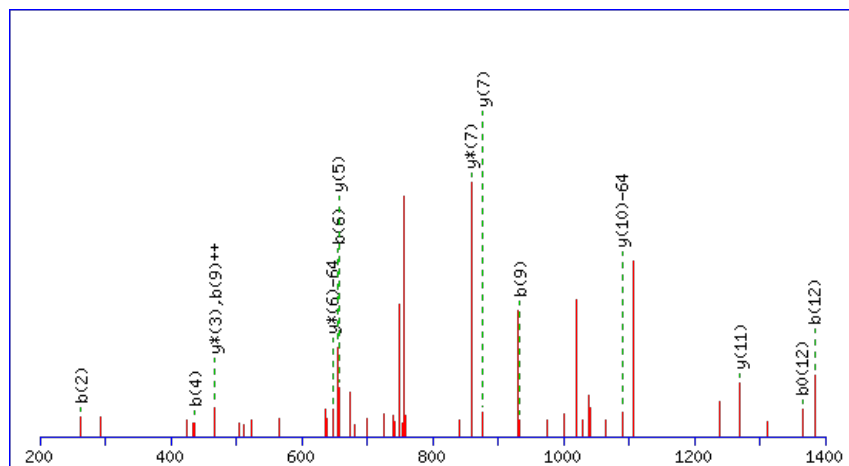

Monoisotopic mass of neutral peptide  $M_r(\text{calc})$ : 1530.5929

Fixed modifications: Carbamidomethyl (C) (apply to specified residues or termini only)

Variable modifications:

M11 : Oxidation (M), with neutral losses 0.0000 (shown in table), 63.9983

Ions Score: 18 Expect: 0.036

Matches : 14/162 fragment ions using 31 most intense peaks ([help](#))

| #  | b                | b <sup>++</sup> | b <sup>0</sup>   | b <sup>0++</sup> | Seq. | y                | y <sup>++</sup> | y <sup>*</sup>  | y <sup>*++</sup> | y <sup>0</sup> | y <sup>0++</sup> | #  |
|----|------------------|-----------------|------------------|------------------|------|------------------|-----------------|-----------------|------------------|----------------|------------------|----|
| 1  | 133.0448         | 67.0260         |                  |                  | M    |                  |                 |                 |                  |                |                  | 13 |
| 2  | <b>263.0844</b>  | 132.0458        | 245.0739         | 123.0406         | E    | 1399.5627        | 700.2850        | 1381.5391       | 691.2732         | 1381.5521      | 691.2797         | 12 |
| 3  | 379.1084         | 190.0578        | 361.0978         | 181.0526         | D    | <b>1269.5231</b> | 635.2652        | 1251.4995       | 626.2534         | 1251.5125      | 626.2599         | 11 |
| 4  | <b>437.1269</b>  | 219.0671        | 419.1163         | 210.0618         | G    | 1153.4991        | 577.2532        | 1135.4755       | 568.2414         | 1135.4885      | 568.2479         | 10 |
| 5  | 553.1509         | 277.0791        | 535.1403         | 268.0738         | D    | 1095.4806        | 548.2439        | 1077.4570       | 539.2321         | 1077.4700      | 539.2386         | 9  |
| 6  | <b>655.1956</b>  | 328.1014        | 637.1850         | 319.0962         | T    | 979.4566         | 490.2319        | 961.4330        | 481.2201         | 961.4460       | 481.2267         | 8  |
| 7  | 803.2610         | 402.1342        | 785.2505         | 393.1289         | F    | <b>877.4119</b>  | 439.2096        | <b>859.3883</b> | 430.1978         |                |                  | 7  |
| 8  | 875.2952         | 438.1512        | 857.2846         | 429.1460         | A    | 729.3464         | 365.1769        | 711.3229        | 356.1651         |                |                  | 6  |
| 9  | <b>933.3137</b>  | <b>467.1605</b> | 915.3031         | 458.1552         | G    | <b>657.3123</b>  | 329.1598        | 639.2887        | 320.1480         |                |                  | 5  |
| 10 | 1047.3948        | 524.2010        | 1029.3842        | 515.1957         | L    | 599.2938         | 300.1505        | 581.2702        | 291.1387         |                |                  | 4  |
| 11 | 1195.4272        | 598.2172        | 1177.4167        | 589.2120         | M    | 485.2127         | 243.1100        | <b>467.1891</b> | 234.0982         |                |                  | 3  |
| 12 | <b>1383.5006</b> | 692.2539        | <b>1365.4900</b> | 683.2487         | W    | 337.1803         | 169.0938        | 319.1567        | 160.0820         |                |                  | 2  |
| 13 |                  |                 |                  |                  | K    | 149.1069         | 75.0571         | 131.0833        | 66.0453          |                |                  | 1  |

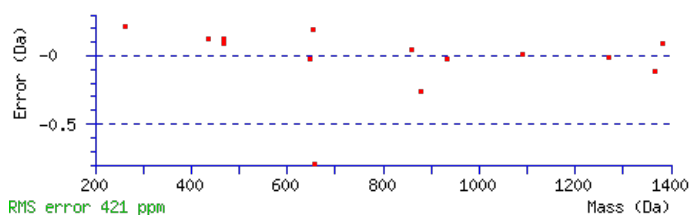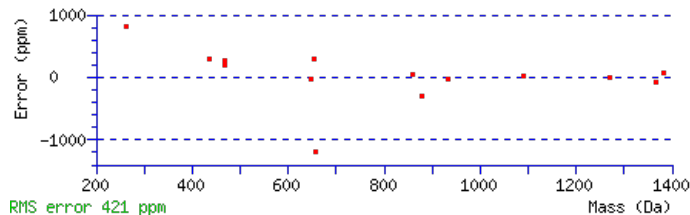

NCBI BLAST search of **MEDGDTFAGLMWK**

(Parameters: blastp, nr protein database, expect=20000, no filter, PAM30)



# AT3G13840.1

Other BLAST [web gateways](#)

## All matches to this query

| Score | Mr(calc)  | Delta  | Sequence                       |
|-------|-----------|--------|--------------------------------|
| 18.4  | 1530.5929 | 0.0019 | <a href="#">MEDGDTFAGLMWK</a>  |
| 8.6   | 1530.5929 | 0.0019 | <a href="#">ECFLDMGAFPEGK</a>  |
| 1.7   | 1530.5941 | 0.0007 | <a href="#">SIMNADQMGMIEK</a>  |
| 1.4   | 1530.5932 | 0.0016 | <a href="#">EDATSGSTEEKSMK</a> |

Mascot: <http://www.matrixscience.com/>

## Peptide View

### MS/MS Fragmentation of **VLITDDLAR**

Found in **AT3G13920.1** in **TAIR\_Arabidopsis**, Symbols: RH4, TIF4A1, EIF4A1 | EIF4A1 (eukaryotic translation initiation factor 4A-1); ATP-dependent helicase | chr3:4592642-4594135 REVERSE

Match to Query 3091: 1126.635826 from(564.325189,2+) index(6765)

Title: Elution from: 62.555 to 62.555 scan no 8847 cid35.00 polarity:+

Data file D12h-2\_2.mgf

Click mouse within plot area to zoom in by factor of two about that point

Or,   to  Da

Label all possible matches  Label matches used for scoring

Show Y-axis

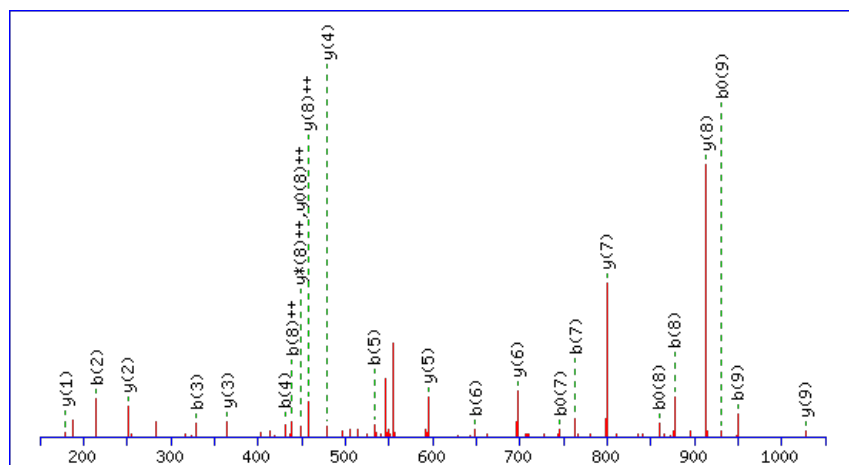

Monoisotopic mass of neutral peptide  $M_r(\text{calc})$ : 1126.6372

Fixed modifications: Carbamidomethyl (C) (apply to specified residues or termini only)

Ions Score: 78 Expect: 4.8e-008

Matches : 24/76 fragment ions using 33 most intense peaks ([help](#))

| #  | b               | b <sup>++</sup> | b <sup>0</sup>  | b <sup>0++</sup> | Seq. | y                | y <sup>++</sup> | y <sup>*</sup> | y <sup>*++</sup> | y <sup>0</sup> | y <sup>0++</sup> | #  |
|----|-----------------|-----------------|-----------------|------------------|------|------------------|-----------------|----------------|------------------|----------------|------------------|----|
| 1  | 101.0727        | 51.0400         |                 |                  | V    |                  |                 |                |                  |                |                  | 10 |
| 2  | <b>215.1538</b> | 108.0805        |                 |                  | L    | <b>1027.5790</b> | 514.2932        | 1009.5555      | 505.2814         | 1009.5685      | 505.2879         | 9  |
| 3  | <b>329.2349</b> | 165.1211        |                 |                  | I    | <b>913.4979</b>  | <b>457.2526</b> | 895.4744       | <b>448.2408</b>  | 895.4874       | <b>448.2473</b>  | 8  |
| 4  | <b>431.2796</b> | 216.1435        | 413.2691        | 207.1382         | T    | <b>799.4168</b>  | 400.2121        | 781.3933       | 391.2003         | 781.4063       | 391.2068         | 7  |
| 5  | <b>533.3243</b> | 267.1658        | 515.3138        | 258.1605         | T    | <b>697.3721</b>  | 349.1897        | 679.3485       | 340.1779         | 679.3616       | 340.1844         | 6  |
| 6  | <b>649.3483</b> | 325.1778        | 631.3378        | 316.1725         | D    | <b>595.3274</b>  | 298.1673        | 577.3038       | 289.1556         | 577.3169       | 289.1621         | 5  |
| 7  | <b>763.4294</b> | 382.2184        | <b>745.4189</b> | 373.2131         | L    | <b>479.3034</b>  | 240.1554        | 461.2799       | 231.1436         |                |                  | 4  |
| 8  | <b>877.5105</b> | <b>439.2589</b> | <b>859.5000</b> | 430.2536         | L    | <b>365.2223</b>  | 183.1148        | 347.1988       | 174.1030         |                |                  | 3  |
| 9  | <b>949.5447</b> | 475.2760        | <b>931.5341</b> | 466.2707         | A    | <b>251.1412</b>  | 126.0743        | 233.1177       | 117.0625         |                |                  | 2  |
| 10 |                 |                 |                 |                  | R    | <b>179.1071</b>  | 90.0572         | 161.0835       | 81.0454          |                |                  | 1  |

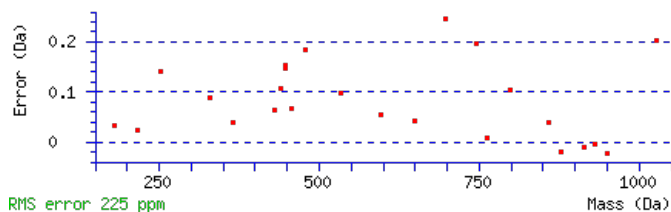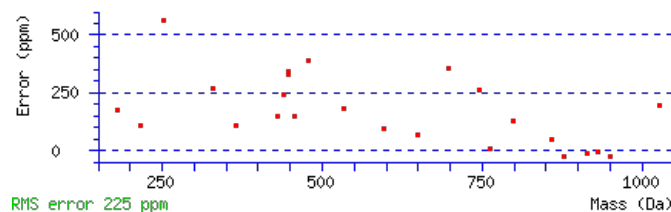

NCBI BLAST search of **VLITDDLAR**

(Parameters: blastp, nr protein database, expect=20000, no filter, PAM30)

Other BLAST [web gateways](#)

All matches to this query

**AT3G13920.1**

| <b>Score</b> | <b>Mr(calc)</b> | <b>Delta</b> | <b>Sequence</b>            |
|--------------|-----------------|--------------|----------------------------|
| 77.8         | 1126.6372       | -0.0014      | <a href="#">VLITDLLAR</a>  |
| 2.1          | 1126.6372       | -0.0014      | <a href="#">VIAEAKKLDK</a> |
| 2.1          | 1126.6372       | -0.0014      | <a href="#">VLKKADEALK</a> |

**Mascot:** <http://www.matrixscience.com/>

## Peptide View

MS/MS Fragmentation of **ALGDYLGVK**

Found in **AT3G13920.3** in **TAIR\_Arabidopsis**, Symbols: RH4, TIF4A1, EIF4A1 | EIF4A1 (eukaryotic translation initiation factor 4A-1) | chr3:4592642-4594101 REVERSE

Match to Query 1880: 934.512690 from(468.263621,2+) index(5081)

Title: Elution from: 45.435 to 45.435 scan no 6482 cid35.00 polarity:+

Data file D12h-3\_3.mgf

Click mouse within plot area to zoom in by factor of two about that point

Or,   to  Da

Label all possible matches  Label matches used for scoring

Show Y-axis

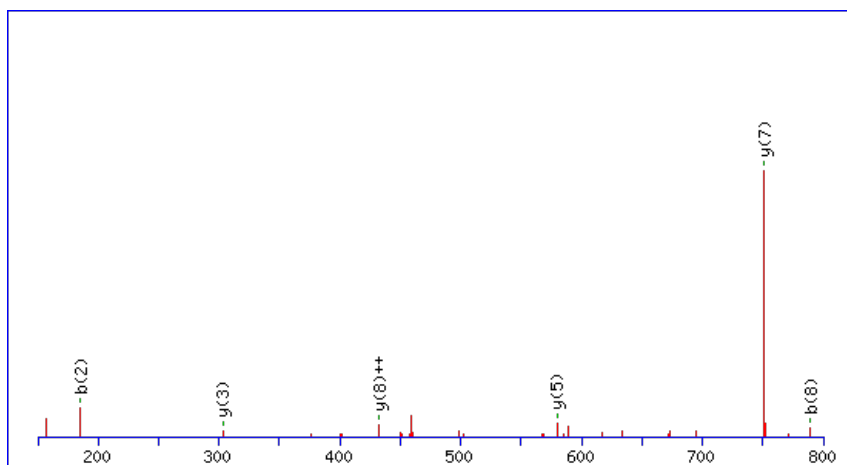

Monoisotopic mass of neutral peptide  $M_r(\text{calc})$ : 934.5124

Fixed modifications: Carbamidomethyl (C) (apply to specified residues or termini only)

Ions Score: 27 Expect: 0.011

Matches : 6/64 fragment ions using 7 most intense peaks ([help](#))

| # | b               | b <sup>++</sup> | b <sup>0</sup> | b <sup>0++</sup> | Seq. | y               | y <sup>++</sup> | y*       | y <sup>*++</sup> | y <sup>0</sup> | y <sup>0++</sup> | # |
|---|-----------------|-----------------|----------------|------------------|------|-----------------|-----------------|----------|------------------|----------------|------------------|---|
| 1 | 72.0444         | 36.5258         |                |                  | A    |                 |                 |          |                  |                |                  | 9 |
| 2 | <b>185.1285</b> | 93.0679         |                |                  | L    | 864.4825        | <b>432.7449</b> | 847.4560 | 424.2316         | 846.4720       | 423.7396         | 8 |
| 3 | 242.1499        | 121.5786        |                |                  | G    | <b>751.3985</b> | 376.2029        | 734.3719 | 367.6896         | 733.3879       | 367.1976         | 7 |
| 4 | 357.1769        | 179.0921        | 339.1663       | 170.0868         | D    | 694.3770        | 347.6921        | 677.3505 | 339.1789         | 676.3665       | 338.6869         | 6 |
| 5 | 520.2402        | 260.6237        | 502.2296       | 251.6185         | Y    | <b>579.3501</b> | 290.1787        | 562.3235 | 281.6654         |                |                  | 5 |
| 6 | 633.3243        | 317.1658        | 615.3137       | 308.1605         | L    | 416.2867        | 208.6470        | 399.2602 | 200.1337         |                |                  | 4 |
| 7 | 690.3457        | 345.6765        | 672.3352       | 336.6712         | G    | <b>303.2027</b> | 152.1050        | 286.1761 | 143.5917         |                |                  | 3 |
| 8 | <b>789.4141</b> | 395.2107        | 771.4036       | 386.2054         | V    | 246.1812        | 123.5942        | 229.1547 | 115.0810         |                |                  | 2 |
| 9 |                 |                 |                |                  | K    | 147.1128        | 74.0600         | 130.0863 | 65.5468          |                |                  | 1 |

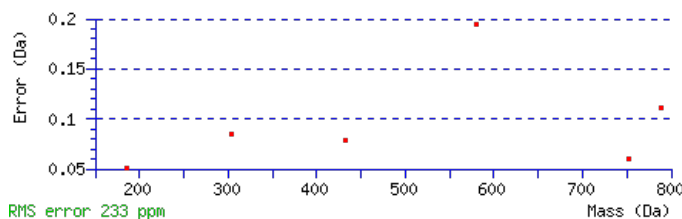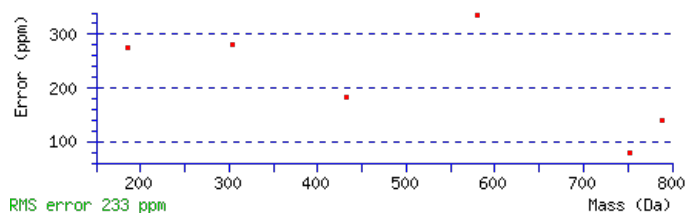

NCBI BLAST search of [ALGDYLGVK](#)

(Parameters: blastp, nr protein database, expect=20000, no filter, PAM30)

Other BLAST [web gateways](#)

All matches to this query

| Score | $M_r(\text{calc})$ | Delta | Sequence |
|-------|--------------------|-------|----------|
|       |                    |       |          |

### AT3G13920.3

|      |          |        |                           |
|------|----------|--------|---------------------------|
| 26.6 | 934.5124 | 0.0003 | <a href="#">ALGDYLGVK</a> |
| 16.2 | 934.5123 | 0.0003 | <a href="#">ALYEALQK</a>  |
| 5.5  | 934.5124 | 0.0003 | <a href="#">AIEIFTNK</a>  |
| 5.4  | 934.5124 | 0.0003 | <a href="#">LASSFSPVK</a> |
| 5.4  | 934.5124 | 0.0003 | <a href="#">SPSVGFITK</a> |
| 2.7  | 934.5124 | 0.0003 | <a href="#">AFLDVSGVK</a> |
| 2.3  | 934.5124 | 0.0003 | <a href="#">ATAELFGVK</a> |

**Mascot:** <http://www.matrixscience.com/>

**Peptide View**MS/MS Fragmentation of **VPALDYVDIPHTQIR**Found in **AT3G13930.1** in **TAIR\_Arabidopsis**, Symbols: | dihydrolipoamide S-acetyltransferase, putative | chr3:4596247-4600150 FORWARD

Match to Query 8253: 1735.925178 from(579.649002,3+) index(6765)

Title: Elution from: 60.059 to 60.059 scan no 8776 cid35.00 polarity:+

Data file 0-2\_2.mgf

Click mouse within plot area to zoom in by factor of two about that point

Or,   to  Da Label all possible matches  Label matches used for scoring Show Y-axis 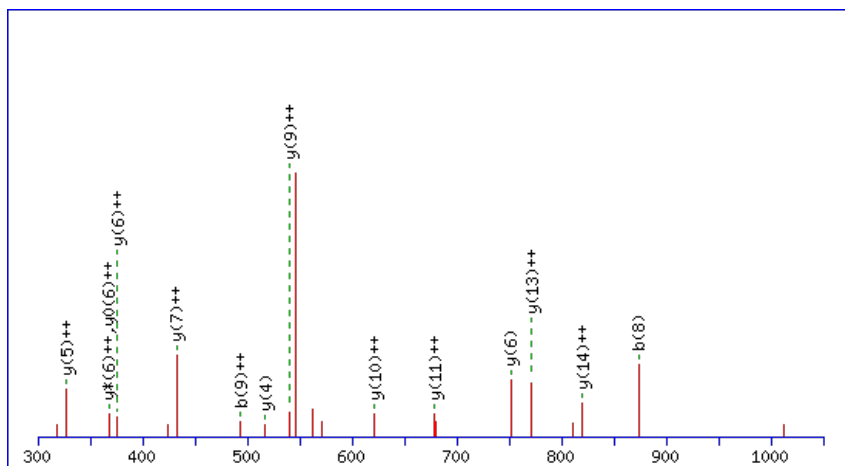Monoisotopic mass of neutral peptide **Mr(calc)**: 1735.9257**Fixed modifications**: Carbamidomethyl (C) (apply to specified residues or termini only)**Ions Score**: 55 **Expect**: 1.3e-005**Matches**: 14/130 fragment ions using 19 most intense peaks ([help](#))

| #  | b         | b <sup>++</sup> | b <sup>*</sup> | b <sup>*++</sup> | b <sup>0</sup> | b <sup>0++</sup> | Seq. | y         | y <sup>++</sup> | y <sup>*</sup> | y <sup>*++</sup> | y <sup>0</sup> | y <sup>0++</sup> | #  |
|----|-----------|-----------------|----------------|------------------|----------------|------------------|------|-----------|-----------------|----------------|------------------|----------------|------------------|----|
| 1  | 100.0757  | 50.5415         |                |                  |                |                  | V    |           |                 |                |                  |                |                  | 15 |
| 2  | 197.1285  | 99.0679         |                |                  |                |                  | P    | 1637.8646 | 819.4359        | 1620.8380      | 810.9227         | 1619.8540      | 810.4306         | 14 |
| 3  | 268.1656  | 134.5864        |                |                  |                |                  | A    | 1540.8118 | 770.9095        | 1523.7853      | 762.3963         | 1522.8013      | 761.9043         | 13 |
| 4  | 381.2496  | 191.1285        |                |                  |                |                  | L    | 1469.7747 | 735.3910        | 1452.7482      | 726.8777         | 1451.7641      | 726.3857         | 12 |
| 5  | 496.2766  | 248.6419        |                |                  | 478.2660       | 239.6366         | D    | 1356.6906 | 678.8490        | 1339.6641      | 670.3357         | 1338.6801      | 669.8437         | 11 |
| 6  | 659.3399  | 330.1736        |                |                  | 641.3293       | 321.1683         | Y    | 1241.6637 | 621.3355        | 1224.6371      | 612.8222         | 1223.6531      | 612.3302         | 10 |
| 7  | 758.4083  | 379.7078        |                |                  | 740.3978       | 370.7025         | V    | 1078.6004 | 539.8038        | 1061.5738      | 531.2905         | 1060.5898      | 530.7985         | 9  |
| 8  | 873.4353  | 437.2213        |                |                  | 855.4247       | 428.2160         | D    | 979.5320  | 490.2696        | 962.5054       | 481.7563         | 961.5214       | 481.2643         | 8  |
| 9  | 986.5193  | 493.7633        |                |                  | 968.5088       | 484.7580         | I    | 864.5050  | 432.7561        | 847.4785       | 424.2429         | 846.4944       | 423.7509         | 7  |
| 10 | 1083.5721 | 542.2897        |                |                  | 1065.5615      | 533.2844         | P    | 751.4209  | 376.2141        | 734.3944       | 367.7008         | 733.4104       | 367.2088         | 6  |
| 11 | 1220.6310 | 610.8191        |                |                  | 1202.6204      | 601.8139         | H    | 654.3682  | 327.6877        | 637.3416       | 319.1745         | 636.3576       | 318.6824         | 5  |
| 12 | 1321.6787 | 661.3430        |                |                  | 1303.6681      | 652.3377         | T    | 517.3093  | 259.1583        | 500.2827       | 250.6450         | 499.2987       | 250.1530         | 4  |
| 13 | 1449.7373 | 725.3723        | 1432.7107      | 716.8590         | 1431.7267      | 716.3670         | Q    | 416.2616  | 208.6344        | 399.2350       | 200.1212         |                |                  | 3  |
| 14 | 1562.8213 | 781.9143        | 1545.7948      | 773.4010         | 1544.8108      | 772.9090         | I    | 288.2030  | 144.6051        | 271.1765       | 136.0919         |                |                  | 2  |
| 15 |           |                 |                |                  |                |                  | R    | 175.1190  | 88.0631         | 158.0924       | 79.5498          |                |                  | 1  |

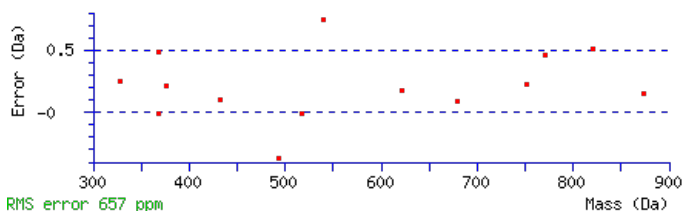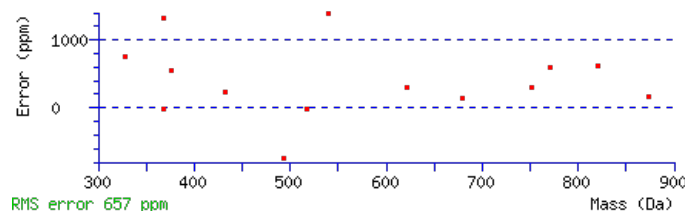NCBI **BLAST** search of [VPALDYVDIPHTQIR](#)

## AT3G13930.1

(Parameters: blastp, nr protein database, expect=20000, no filter, PAM30)

Other BLAST [web gateways](#)

### All matches to this query

| Score | Mr(calc)  | Delta   | Sequence                         |
|-------|-----------|---------|----------------------------------|
| 54.9  | 1735.9257 | -0.0005 | <a href="#">VPALDYVDIPHTQIR</a>  |
| 10.4  | 1735.9291 | -0.0039 | <a href="#">SMKARDVISWTSIVK</a>  |
| 2.2   | 1735.9217 | 0.0035  | <a href="#">ARTEYLEASIGVSGRK</a> |

Mascot: <http://www.matrixscience.com/>

## Peptide View

MS/MS Fragmentation of **SPANVEIDVSPSK**Found in **AT3G14067.1** in **TAIR\_Arabidopsis**, Symbols: | subtilase family protein | chr3:4658428-4660761 REVERSE

Match to Query 4849: 1341.675664 from(671.845108,2+) index(2969)

Title: Elution from: 32.152 to 32.152 scan no 3794 cid35.00 polarity:+

Data file D1d-2\_1.mgf

Click mouse within plot area to zoom in by factor of two about that point

Or,   to  Da Label all possible matches  Label matches used for scoring Show Y-axis 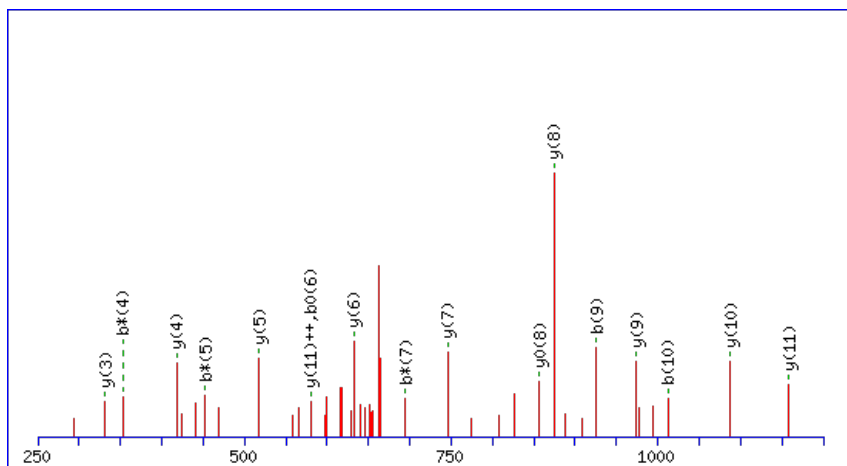Monoisotopic mass of neutral peptide  $M_r(\text{calc})$ : 1341.6776

Fixed modifications: Carbamidomethyl (C) (apply to specified residues or termini only)

Ions Score: 100 Expect: 3.3e-010

Matches : 17/136 fragment ions using 17 most intense peaks ([help](#))

| #  | b                | b <sup>++</sup> | b <sup>*</sup>  | b <sup>*++</sup> | b <sup>0</sup>  | b <sup>0++</sup> | Seq. | y                | y <sup>++</sup> | y <sup>*</sup> | y <sup>*++</sup> | y <sup>0</sup>  | y <sup>0++</sup> | #  |
|----|------------------|-----------------|-----------------|------------------|-----------------|------------------|------|------------------|-----------------|----------------|------------------|-----------------|------------------|----|
| 1  | 88.0393          | 44.5233         |                 |                  | 70.0287         | 35.5180          | S    |                  |                 |                |                  |                 |                  | 13 |
| 2  | 185.0921         | 93.0497         |                 |                  | 167.0815        | 84.0444          | P    | 1255.6529        | 628.3301        | 1238.6263      | 619.8168         | 1237.6423       | 619.3248         | 12 |
| 3  | 256.1292         | 128.5682        |                 |                  | 238.1186        | 119.5629         | A    | <b>1158.6001</b> | <b>579.8037</b> | 1141.5735      | 571.2904         | 1140.5895       | 570.7984         | 11 |
| 4  | 370.1721         | 185.5897        | <b>353.1456</b> | 177.0764         | 352.1615        | 176.5844         | N    | <b>1087.5630</b> | 544.2851        | 1070.5364      | 535.7719         | 1069.5524       | 535.2798         | 10 |
| 5  | 469.2405         | 235.1239        | <b>452.2140</b> | 226.6106         | 451.2300        | 226.1186         | V    | <b>973.5201</b>  | 487.2637        | 956.4935       | 478.7504         | 955.5095        | 478.2584         | 9  |
| 6  | 598.2831         | 299.6452        | 581.2566        | 291.1319         | <b>580.2726</b> | 290.6399         | E    | <b>874.4516</b>  | 437.7295        | 857.4251       | 429.2162         | <b>856.4411</b> | 428.7242         | 8  |
| 7  | 711.3672         | 356.1872        | <b>694.3406</b> | 347.6740         | 693.3566        | 347.1819         | I    | <b>745.4090</b>  | 373.2082        | 728.3825       | 364.6949         | 727.3985        | 364.2029         | 7  |
| 8  | 826.3941         | 413.7007        | 809.3676        | 405.1874         | 808.3836        | 404.6954         | D    | <b>632.3250</b>  | 316.6661        | 615.2984       | 308.1529         | 614.3144        | 307.6608         | 6  |
| 9  | <b>925.4625</b>  | 463.2349        | 908.4360        | 454.7216         | 907.4520        | 454.2296         | V    | <b>517.2980</b>  | 259.1527        | 500.2715       | 250.6394         | 499.2875        | 250.1474         | 5  |
| 10 | <b>1012.4946</b> | 506.7509        | 995.4680        | 498.2376         | 994.4840        | 497.7456         | S    | <b>418.2296</b>  | 209.6185        | 401.2031       | 201.1052         | 400.2191        | 200.6132         | 4  |
| 11 | 1109.5473        | 555.2773        | 1092.5208       | 546.7640         | 1091.5368       | 546.2720         | P    | <b>331.1976</b>  | 166.1024        | 314.1710       | 157.5892         | 313.1870        | 157.0972         | 3  |
| 12 | 1196.5794        | 598.7933        | 1179.5528       | 590.2800         | 1178.5688       | 589.7880         | S    | 234.1448         | 117.5761        | 217.1183       | 109.0628         | 216.1343        | 108.5708         | 2  |
| 13 |                  |                 |                 |                  |                 |                  | K    | 147.1128         | 74.0600         | 130.0863       | 65.5468          |                 |                  | 1  |

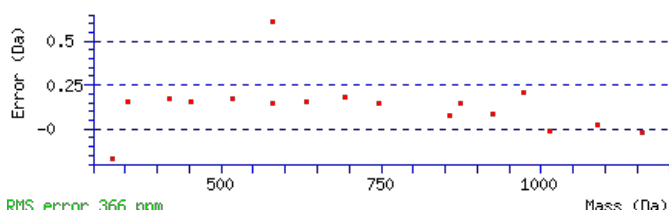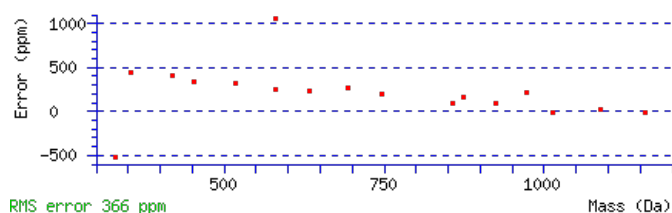NCBI BLAST search of [SPANVEIDVSPSK](#)

(Parameters: blastp, nr protein database, expect=20000, no filter, PAM30)

Other BLAST [web gateways](#)



AT3G14067.1

All matches to this query

| Score | Mr(calc)  | Delta   | Sequence                      |
|-------|-----------|---------|-------------------------------|
| 99.9  | 1341.6776 | -0.0019 | <a href="#">SPANVEIDVSPSK</a> |

Mascot: <http://www.matrixscience.com/>

## Peptide View

MS/MS Fragmentation of **KSAMEAIFK**

Found in **AT3G14090.1** in **TAIR\_Arabidopsis**, Symbols: ATEXO70D3 | ATEXO70D3 (exocyst subunit EXO70 family protein D3); protein binding | chr3:4669515-4671386 REVERSE

Match to Query 2696: 1039.535241 from(347.519023,3+) index(2168)

Title: Elution from: 24.128 to 24.128 scan no 2739 cid35.00 polarity:+

Data file D12h-1\_3.mgf

Click mouse within plot area to zoom in by factor of two about that point

Or,   to  Da

Label all possible matches  Label matches used for scoring

Show Y-axis

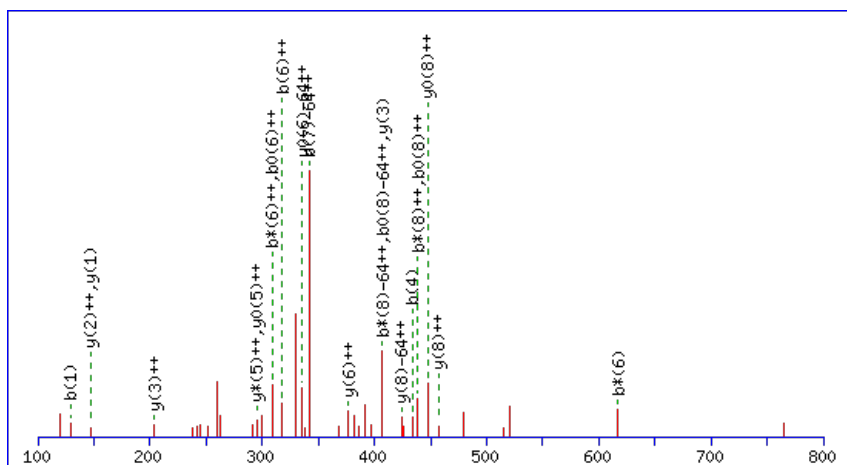

Monoisotopic mass of neutral peptide  $M_r(\text{calc})$ : 1039.5372

Fixed modifications: Carbamidomethyl (C) (apply to specified residues or termini only)

Variable modifications:

M4 : Oxidation (M), with neutral losses 0.0000 (shown in table), 63.9983

Ions Score: 23 Expect: 0.015

Matches : 23/134 fragment ions using 25 most intense peaks ([help](#))

| # | b               | b <sup>++</sup> | b*              | b <sup>*++</sup> | b <sup>0</sup> | b <sup>0++</sup> | Seq.     | y               | y <sup>++</sup> | y*       | y <sup>*++</sup> | y <sup>0</sup> | y <sup>0++</sup> | #        |
|---|-----------------|-----------------|-----------------|------------------|----------------|------------------|----------|-----------------|-----------------|----------|------------------|----------------|------------------|----------|
| 1 | <b>129.1022</b> | 65.0548         | 112.0757        | 56.5415          |                |                  | <b>K</b> |                 |                 |          |                  |                |                  | <b>9</b> |
| 2 | 216.1343        | 108.5708        | 199.1077        | 100.0575         | 198.1237       | 99.5655          | <b>S</b> | 912.4495        | <b>456.7284</b> | 895.4230 | 448.2151         | 894.4390       | <b>447.7231</b>  | <b>8</b> |
| 3 | 287.1714        | 144.0893        | 270.1448        | 135.5761         | 269.1608       | 135.0840         | <b>A</b> | 825.4175        | 413.2124        | 808.3910 | 404.6991         | 807.4069       | 404.2071         | <b>7</b> |
| 4 | <b>434.2068</b> | 217.6070        | 417.1802        | 209.0938         | 416.1962       | 208.6017         | <b>M</b> | 754.3804        | <b>377.6938</b> | 737.3538 | 369.1806         | 736.3698       | 368.6885         | <b>6</b> |
| 5 | 563.2494        | 282.1283        | 546.2228        | 273.6151         | 545.2388       | 273.1230         | <b>E</b> | 607.3450        | 304.1761        | 590.3184 | <b>295.6629</b>  | 589.3344       | <b>295.1708</b>  | <b>5</b> |
| 6 | 634.2865        | <b>317.6469</b> | <b>617.2599</b> | <b>309.1336</b>  | 616.2759       | <b>308.6416</b>  | <b>A</b> | 478.3024        | 239.6548        | 461.2758 | 231.1416         |                |                  | <b>4</b> |
| 7 | 747.3706        | 374.1889        | 730.3440        | 365.6756         | 729.3600       | 365.1836         | <b>I</b> | <b>407.2653</b> | <b>204.1363</b> | 390.2387 | 195.6230         |                |                  | <b>3</b> |
| 8 | 894.4390        | <b>447.7231</b> | 877.4124        | <b>439.2098</b>  | 876.4284       | <b>438.7178</b>  | <b>F</b> | 294.1812        | <b>147.5942</b> | 277.1547 | 139.0810         |                |                  | <b>2</b> |
| 9 |                 |                 |                 |                  |                |                  | <b>K</b> | <b>147.1128</b> | 74.0600         | 130.0863 | 65.5468          |                |                  | <b>1</b> |

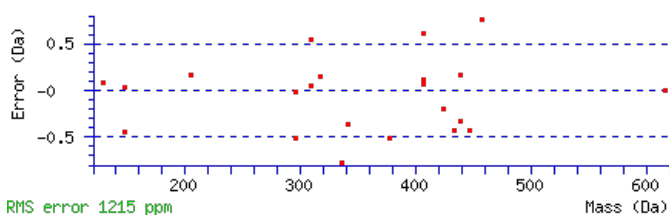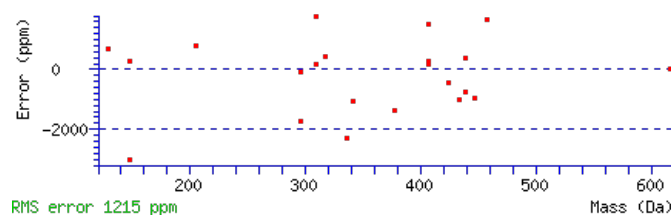

NCBI **BLAST** search of **KSAMEAIFK**

(Parameters: blastp, nr protein database, expect=20000, no filter, PAM30)

Other BLAST [web gateways](#)

All matches to this query

## AT3G14090.1

| Score | Mr(calc)  | Delta   | Sequence                  |
|-------|-----------|---------|---------------------------|
| 22.8  | 1039.5372 | -0.0019 | <a href="#">KSAMEAIFK</a> |
| 19.3  | 1039.5372 | -0.0019 | <a href="#">KIVEMYNK</a>  |
| 17.6  | 1039.5338 | 0.0014  | <a href="#">FKDENFIK</a>  |
| 13.7  | 1039.5338 | 0.0014  | <a href="#">STFPSLNEK</a> |
| 11.3  | 1039.5338 | 0.0014  | <a href="#">YIFDKNQL</a>  |
| 10.3  | 1039.5372 | -0.0020 | <a href="#">SALSYLCVK</a> |
| 5.5   | 1039.5372 | -0.0020 | <a href="#">LDLKYCTK</a>  |
| 5.4   | 1039.5338 | 0.0014  | <a href="#">FDLQNYLK</a>  |
| 4.6   | 1039.5372 | -0.0019 | <a href="#">KTFEEMKK</a>  |
| 3.1   | 1039.5372 | -0.0020 | <a href="#">METLQKFK</a>  |

Mascot: <http://www.matrixscience.com/>

**Peptide View**MS/MS Fragmentation of **IGPMLNEFAK**Found in **AT3G14210.1** in **TAIR\_Arabidopsis**, Symbols: ESM1 | ESM1 (EPITHIOSPECIFIER MODIFIER 1); carboxylesterase | chr3:4729893-4731569 FORWARD

Match to Query 3865: 1130.542720 from(566.278636,2+) index(6215)

Title: Elution from: 54.344 to 54.344 scan no 7746 cid35.00 polarity:+

Data file 0-1\_1.mgf

Click mouse within plot area to zoom in by factor of two about that point

Or,   to  Da Label all possible matches  Label matches used for scoring Show Y-axis 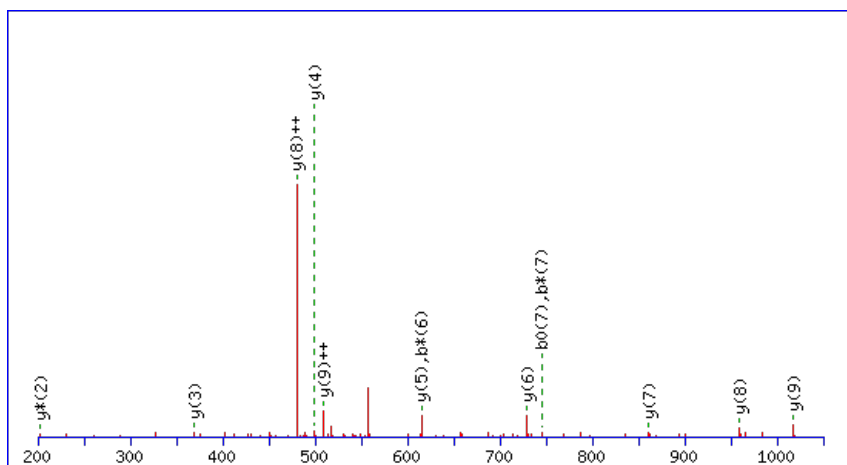**Monoisotopic mass of neutral peptide Mr(calc):** 1130.5438**Fixed modifications:** Carbamidomethyl (C) (apply to specified residues or termini only)**Ions Score:** 58 **Expect:** 1.3e-005**Matches:** 13/80 fragment ions using 18 most intense peaks ([help](#))

| #  | b        | b <sup>++</sup> | b*       | b <sup>*++</sup> | b <sup>0</sup> | b <sup>0++</sup> | Seq. | y         | y <sup>++</sup> | y*       | y <sup>*++</sup> | y <sup>0</sup> | y <sup>0++</sup> | #  |
|----|----------|-----------------|----------|------------------|----------------|------------------|------|-----------|-----------------|----------|------------------|----------------|------------------|----|
| 1  | 115.0884 | 58.0478         |          |                  |                |                  | I    |           |                 |          |                  |                |                  | 10 |
| 2  | 173.1069 | 87.0571         |          |                  |                |                  | G    | 1017.4700 | 509.2386        | 999.4464 | 500.2269         | 999.4594       | 500.2334         | 9  |
| 3  | 271.1567 | 136.0820        |          |                  |                |                  | P    | 959.4515  | 480.2294        | 941.4279 | 471.2176         | 941.4410       | 471.2241         | 8  |
| 4  | 403.1942 | 202.1007        |          |                  |                |                  | M    | 861.4017  | 431.2045        | 843.3781 | 422.1927         | 843.3912       | 422.1992         | 7  |
| 5  | 517.2753 | 259.1413        |          |                  |                |                  | L    | 729.3642  | 365.1857        | 711.3406 | 356.1739         | 711.3536       | 356.1805         | 6  |
| 6  | 633.3123 | 317.1598        | 615.2887 | 308.1480         |                |                  | N    | 615.2831  | 308.1452        | 597.2595 | 299.1334         | 597.2725       | 299.1399         | 5  |
| 7  | 763.3519 | 382.1796        | 745.3283 | 373.1678         | 745.3414       | 373.1743         | E    | 499.2461  | 250.1267        | 481.2225 | 241.1149         | 481.2355       | 241.1214         | 4  |
| 8  | 911.4174 | 456.2123        | 893.3938 | 447.2005         | 893.4068       | 447.2070         | F    | 369.2065  | 185.1069        | 351.1829 | 176.0951         |                |                  | 3  |
| 9  | 983.4515 | 492.2294        | 965.4279 | 483.2176         | 965.4410       | 483.2241         | A    | 221.1410  | 111.0741        | 203.1174 | 102.0624         |                |                  | 2  |
| 10 |          |                 |          |                  |                |                  | K    | 149.1069  | 75.0571         | 131.0833 | 66.0453          |                |                  | 1  |

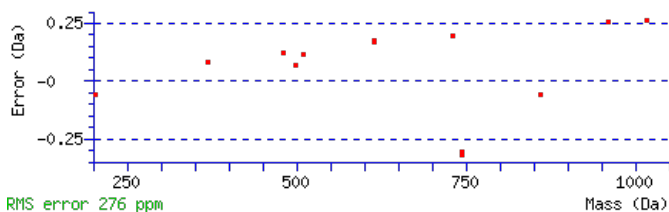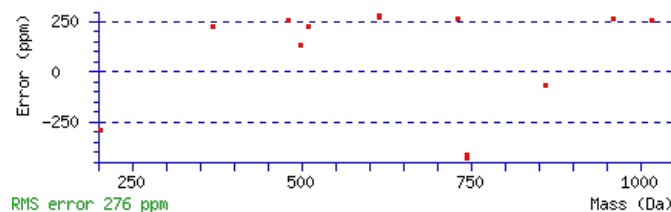NCBI **BLAST** search of **IGPMLNEFAK**

(Parameters: blastp, nr protein database, expect=20000, no filter, PAM30)

Other BLAST [web gateways](#)**All matches to this query**

## AT3G14210.1

| Score | Mr(calc)  | Delta   | Sequence                     |
|-------|-----------|---------|------------------------------|
| 57.9  | 1130.5438 | -0.0011 | <a href="#">IGPMLNEFAK</a>   |
| 19.6  | 1130.5442 | -0.0015 | <a href="#">LGKVGCTQPR</a>   |
| 12.4  | 1130.5416 | 0.0011  | <a href="#">IGDQGLMSVAK</a>  |
| 11.9  | 1130.5416 | 0.0011  | <a href="#">AVGGLEMKEGK</a>  |
| 9.8   | 1130.5416 | 0.0011  | <a href="#">LNLEGCTALK</a>   |
| 4.4   | 1130.5416 | 0.0011  | <a href="#">LGETLGICAGK</a>  |
| 4.3   | 1130.5416 | 0.0011  | <a href="#">LGMSITSPQ GK</a> |
| 4.1   | 1130.5416 | 0.0011  | <a href="#">GIVQMISENK</a>   |
| 3.7   | 1130.5405 | 0.0023  | <a href="#">INLWFDPSK</a>    |
| 3.5   | 1130.5438 | -0.0011 | <a href="#">AVWDEMIKK</a>    |

Mascot: <http://www.matrixscience.com/>

**Peptide View**MS/MS Fragmentation of **VITAAAEAQK**Found in **AT3G14310.1** in **TAIR\_Arabidopsis**, Symbols: ATPME3 | ATPME3 (Arabidopsis thaliana pectin methylesterase 3) | chr3:477221-4775102 REVERSE

Match to Query 2736: 1012.519616 from(507.267084,2+) index(443)

Title: Elution from: 10.383 to 10.383 scan no 729 cid35.00 polarity:+

Data file C7-2\_1.mgf

Click mouse within plot area to zoom in by factor of two about that point

Or,  to  Da Label all possible matches  Label matches used for scoring Show Y-axis 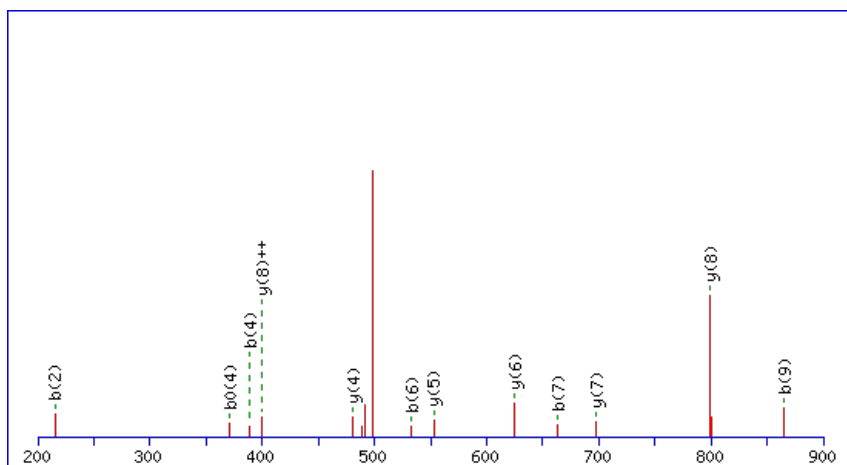Monoisotopic mass of neutral peptide **Mr(calc)**: 1012.5197**Fixed modifications**: Carbamidomethyl (C) (apply to specified residues or termini only)**Ions Score**: 53 **Expect**: 5e-005**Matches**: 12/82 fragment ions using 17 most intense peaks ([help](#))

| #  | b               | b <sup>++</sup> | b*       | b <sup>*++</sup> | b <sup>0</sup>  | b <sup>0++</sup> | Seq. | y               | y <sup>++</sup> | y*       | y <sup>*++</sup> | y <sup>0</sup> | y <sup>0++</sup> | #  |
|----|-----------------|-----------------|----------|------------------|-----------------|------------------|------|-----------------|-----------------|----------|------------------|----------------|------------------|----|
| 1  | 101.0727        | 51.0400         |          |                  |                 |                  | V    |                 |                 |          |                  |                |                  | 10 |
| 2  | <b>215.1538</b> | 108.0805        |          |                  |                 |                  | I    | 913.4616        | 457.2344        | 895.4380 | 448.2226         | 895.4510       | 448.2291         | 9  |
| 3  | 317.1985        | 159.1029        |          |                  | 299.1880        | 150.0976         | T    | <b>799.3805</b> | <b>400.1939</b> | 781.3569 | 391.1821         | 781.3699       | 391.1886         | 8  |
| 4  | <b>389.2327</b> | 195.1200        |          |                  | <b>371.2221</b> | 186.1147         | A    | <b>697.3357</b> | 349.1715        | 679.3122 | 340.1597         | 679.3252       | 340.1662         | 7  |
| 5  | 461.2668        | 231.1371        |          |                  | 443.2563        | 222.1318         | A    | <b>625.3016</b> | 313.1544        | 607.2780 | 304.1426         | 607.2910       | 304.1492         | 6  |
| 6  | <b>533.3010</b> | 267.1541        |          |                  | 515.2904        | 258.1488         | A    | <b>553.2674</b> | 277.1374        | 535.2439 | 268.1256         | 535.2569       | 268.1321         | 5  |
| 7  | <b>663.3406</b> | 332.1739        |          |                  | 645.3300        | 323.1687         | E    | <b>481.2333</b> | 241.1203        | 463.2097 | 232.1085         | 463.2227       | 232.1150         | 4  |
| 8  | 735.3748        | 368.1910        |          |                  | 717.3642        | 359.1857         | A    | 351.1937        | 176.1005        | 333.1701 | 167.0887         |                |                  | 3  |
| 9  | <b>865.4274</b> | 433.2173        | 847.4038 | 424.2056         | 847.4168        | 424.2121         | Q    | 279.1595        | 140.0834        | 261.1359 | 131.0716         |                |                  | 2  |
| 10 |                 |                 |          |                  |                 |                  | K    | 149.1069        | 75.0571         | 131.0833 | 66.0453          |                |                  | 1  |

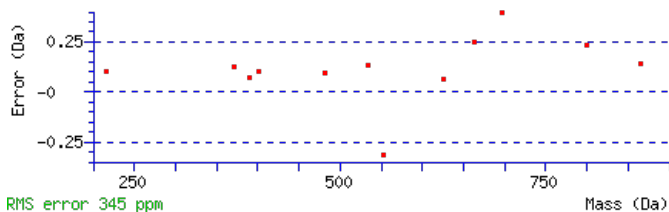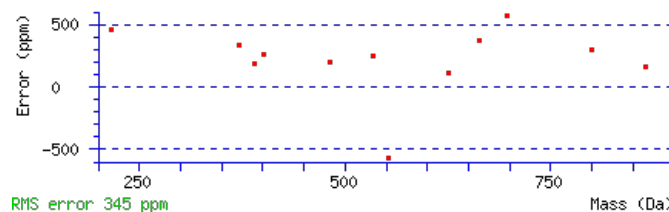NCBI **BLAST** search of **VITAAAEAQK**

(Parameters: blastp, nr protein database, expect=20000, no filter, PAM30)

Other BLAST [web gateways](#)**All matches to this query**

## AT3G14310.1

| Score | Mr(calc)  | Delta   | Sequence                   |
|-------|-----------|---------|----------------------------|
| 52.6  | 1012.5197 | -0.0001 | <a href="#">VTAAAEAQK</a>  |
| 16.3  | 1012.5197 | -0.0001 | <a href="#">DPTTAQKIK</a>  |
| 7.3   | 1012.5197 | -0.0001 | <a href="#">VIDREIEK</a>   |
| 5.3   | 1012.5220 | -0.0023 | <a href="#">DPPKTIGFK</a>  |
| 5.3   | 1012.5220 | -0.0023 | <a href="#">IVPNFDVAK</a>  |
| 5.3   | 1012.5197 | -0.0001 | <a href="#">LVDVKGADGK</a> |
| 5.3   | 1012.5197 | -0.0001 | <a href="#">VLVQDDGKK</a>  |
| 4.1   | 1012.5220 | -0.0023 | <a href="#">GAFLPAVAEK</a> |
| 4.1   | 1012.5220 | -0.0023 | <a href="#">IDLWEAKK</a>   |
| 4.1   | 1012.5197 | -0.0001 | <a href="#">LDDALKAQK</a>  |

Mascot: <http://www.matrixscience.com/>

**Peptide View**MS/MS Fragmentation of **DLNLIIEPGR**Found in **AT3G14390.1** in **TAIR\_Arabidopsis**, Symbols: | diaminopimelate decarboxylase, putative / DAP carboxylase, putative | chr3:4806778-4808961 FORWARD

Match to Query 3854: 1138.634408 from(570.324480,2+) index(7354)

Title: Elution from: 65.333 to 65.333 scan no 9553 cid35.00 polarity:+

Data file D12h-3\_1.mgf

Click mouse within plot area to zoom in by factor of two about that point

Or,  to  Da Label all possible matches  Label matches used for scoring Show Y-axis 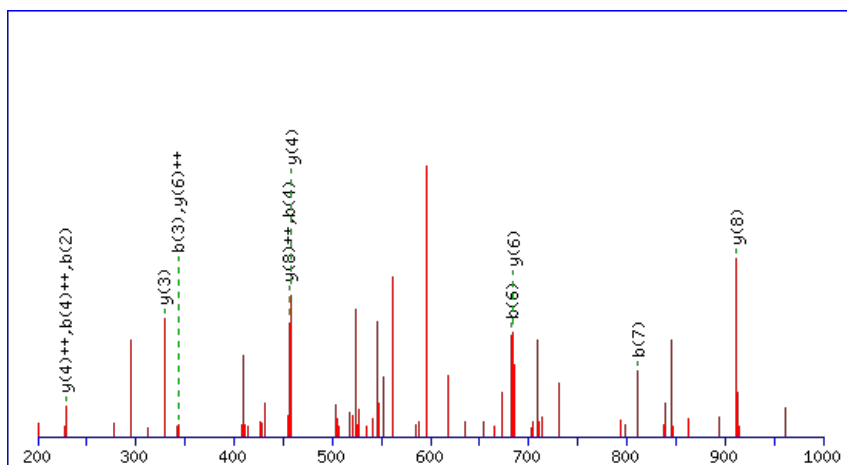Monoisotopic mass of neutral peptide  $M_r(\text{calc})$ : 1138.6346

Fixed modifications: Carbamidomethyl (C) (apply to specified residues or termini only)

Ions Score: 30 Expect: 0.0023

Matches : 13/98 fragment ions using 16 most intense peaks ([help](#))

| #  | b               | b <sup>++</sup> | b*       | b <sup>*++</sup> | b <sup>0</sup> | b <sup>0++</sup> | Seq. | y               | y <sup>++</sup> | y*        | y <sup>*++</sup> | y <sup>0</sup> | y <sup>0++</sup> | #  |
|----|-----------------|-----------------|----------|------------------|----------------|------------------|------|-----------------|-----------------|-----------|------------------|----------------|------------------|----|
| 1  | 116.0342        | 58.5207         |          |                  | 98.0237        | 49.5155          | D    |                 |                 |           |                  |                |                  | 10 |
| 2  | <b>229.1183</b> | 115.0628        |          |                  | 211.1077       | 106.0575         | L    | 1024.6150       | 512.8111        | 1007.5884 | 504.2978         | 1006.6044      | 503.8058         | 9  |
| 3  | <b>343.1612</b> | 172.0842        | 326.1347 | 163.5710         | 325.1506       | 163.0790         | N    | <b>911.5309</b> | <b>456.2691</b> | 894.5043  | 447.7558         | 893.5203       | 447.2638         | 8  |
| 4  | <b>456.2453</b> | <b>228.6263</b> | 439.2187 | 220.1130         | 438.2347       | 219.6210         | L    | 797.4880        | 399.2476        | 780.4614  | 390.7343         | 779.4774       | 390.2423         | 7  |
| 5  | 569.3293        | 285.1683        | 552.3028 | 276.6550         | 551.3188       | 276.1630         | I    | <b>684.4039</b> | <b>342.7056</b> | 667.3774  | 334.1923         | 666.3933       | 333.7003         | 6  |
| 6  | <b>682.4134</b> | 341.7103        | 665.3869 | 333.1971         | 664.4028       | 332.7051         | I    | 571.3198        | 286.1636        | 554.2933  | 277.6503         | 553.3093       | 277.1583         | 5  |
| 7  | <b>811.4560</b> | 406.2316        | 794.4294 | 397.7184         | 793.4454       | 397.2264         | E    | <b>458.2358</b> | <b>229.6215</b> | 441.2092  | 221.1083         | 440.2252       | 220.6162         | 4  |
| 8  | 908.5088        | 454.7580        | 891.4822 | 446.2447         | 890.4982       | 445.7527         | P    | <b>329.1932</b> | 165.1002        | 312.1666  | 156.5870         |                |                  | 3  |
| 9  | 965.5302        | 483.2687        | 948.5037 | 474.7555         | 947.5197       | 474.2635         | G    | 232.1404        | 116.5738        | 215.1139  | 108.0606         |                |                  | 2  |
| 10 |                 |                 |          |                  |                |                  | R    | 175.1190        | 88.0631         | 158.0924  | 79.5498          |                |                  | 1  |

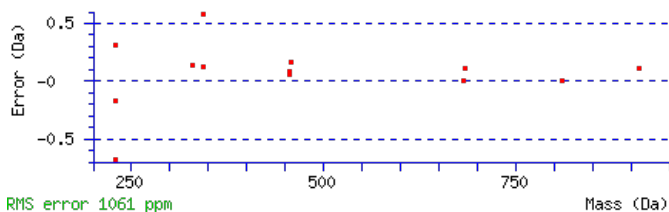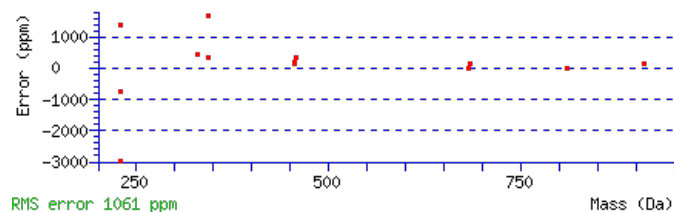NCBI BLAST search of [DLNLIIEPGR](#)

(Parameters: blastp, nr protein database, expect=20000, no filter, PAM30)

Other BLAST [web gateways](#)

All matches to this query



AT3G14390.1

| Score | Mr(calc)  | Delta   | Sequence                   |
|-------|-----------|---------|----------------------------|
| 29.7  | 1138.6346 | -0.0002 | <a href="#">DLNLIIEPGR</a> |
| 11.6  | 1138.6346 | -0.0002 | <a href="#">LIDLPLDQR</a>  |

Mascot: <http://www.matrixscience.com/>

**Peptide View**MS/MS Fragmentation of **IDMATTVLGFK**

Found in **AT3G14415.1** in **TAIR\_Arabidopsis**, Symbols: | (S)-2-hydroxy-acid oxidase, peroxisomal, putative / glycolate oxidase, putative / short chain alpha-hydroxy acid oxidase, putative | chr3:4818674-4820755 FORWARD

Match to Query 3878: 1194.632456 from(598.323504,2+) index(7868)

Title: Elution from: 68.515 to 68.515 scan no 10310 cid35.00 polarity:+

Data file D6h-3\_3.mgf

Click mouse within plot area to zoom in by factor of two about that point

Or,   to  Da

Label all possible matches  Label matches used for scoring

Show Y-axis

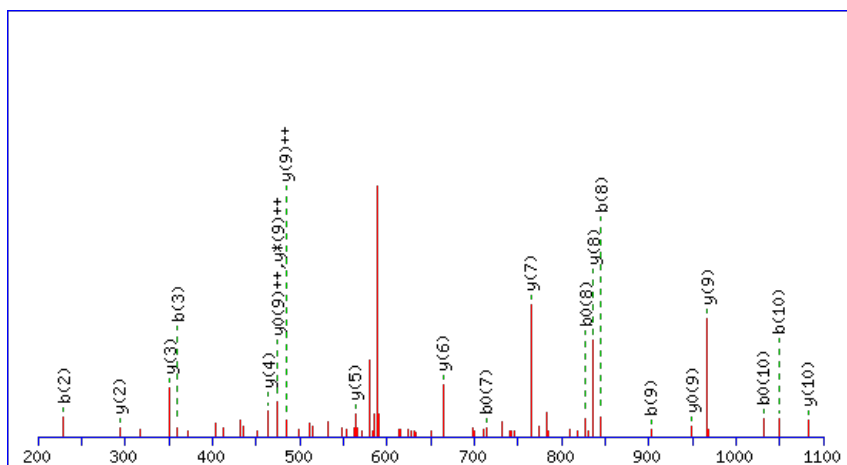

**Monoisotopic mass of neutral peptide Mr(calc):** 1194.6319

**Fixed modifications:** Carbamidomethyl (C) (apply to specified residues or termini only)

**Ions Score:** 83 **Expect:** 1.6e-008

**Matches:** 21/88 fragment ions using 27 most intense peaks ([help](#))

| #  | b                | b <sup>++</sup> | b <sup>0</sup>   | b <sup>0++</sup> | Seq. | y                | y <sup>++</sup> | y*        | y <sup>*++</sup> | y <sup>0</sup>  | y <sup>0++</sup> | #  |
|----|------------------|-----------------|------------------|------------------|------|------------------|-----------------|-----------|------------------|-----------------|------------------|----|
| 1  | 114.0913         | 57.5493         |                  |                  | I    |                  |                 |           |                  |                 |                  | 11 |
| 2  | <b>229.1183</b>  | 115.0628        | 211.1077         | 106.0575         | D    | <b>1082.5551</b> | 541.7812        | 1065.5285 | 533.2679         | 1064.5445       | 532.7759         | 10 |
| 3  | <b>360.1588</b>  | 180.5830        | 342.1482         | 171.5777         | M    | <b>967.5281</b>  | <b>484.2677</b> | 950.5016  | <b>475.7544</b>  | <b>949.5176</b> | <b>475.2624</b>  | 9  |
| 4  | 431.1959         | 216.1016        | 413.1853         | 207.0963         | A    | <b>836.4876</b>  | 418.7475        | 819.4611  | 410.2342         | 818.4771        | 409.7422         | 8  |
| 5  | 532.2436         | 266.6254        | 514.2330         | 257.6201         | T    | <b>765.4505</b>  | 383.2289        | 748.4240  | 374.7156         | 747.4400        | 374.2236         | 7  |
| 6  | 633.2912         | 317.1493        | 615.2807         | 308.1440         | T    | <b>664.4028</b>  | 332.7051        | 647.3763  | 324.1918         | 646.3923        | 323.6998         | 6  |
| 7  | 732.3597         | 366.6835        | <b>714.3491</b>  | 357.6782         | V    | <b>563.3552</b>  | 282.1812        | 546.3286  | 273.6679         |                 |                  | 5  |
| 8  | <b>845.4437</b>  | 423.2255        | <b>827.4332</b>  | 414.2202         | L    | <b>464.2867</b>  | 232.6470        | 447.2602  | 224.1337         |                 |                  | 4  |
| 9  | <b>902.4652</b>  | 451.7362        | 884.4546         | 442.7309         | G    | <b>351.2027</b>  | 176.1050        | 334.1761  | 167.5917         |                 |                  | 3  |
| 10 | <b>1049.5336</b> | 525.2704        | <b>1031.5230</b> | 516.2652         | F    | <b>294.1812</b>  | 147.5942        | 277.1547  | 139.0810         |                 |                  | 2  |
| 11 |                  |                 |                  |                  | K    | 147.1128         | 74.0600         | 130.0863  | 65.5468          |                 |                  | 1  |

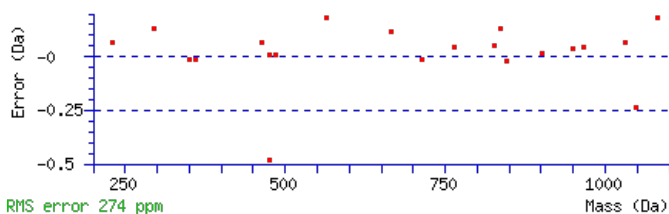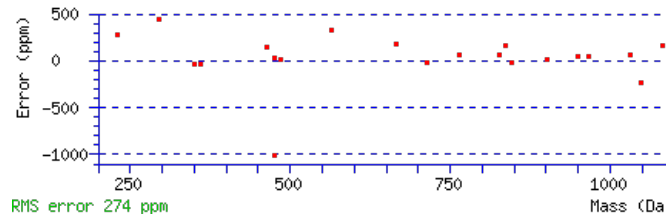

NCBI **BLAST** search of **IDMATTVLGFK**

(Parameters: blastp, nr protein database, expect=20000, no filter, PAM30)

Other BLAST [web gateways](#)

**All matches to this query**

## AT3G14415.1

| Score | Mr(calc)  | Delta  | Sequence                    |
|-------|-----------|--------|-----------------------------|
| 83.2  | 1194.6319 | 0.0006 | <a href="#">IDMATTVLGFK</a> |
| 11.8  | 1194.6318 | 0.0006 | <a href="#">MDPAITKLYK</a>  |
| 1.1   | 1194.6292 | 0.0033 | <a href="#">MVRSFREVR</a>   |
| 0.7   | 1194.6318 | 0.0006 | <a href="#">DLITPSYKMK</a>  |
| 0.3   | 1194.6318 | 0.0006 | <a href="#">VGITSMPLYAK</a> |
| 0.2   | 1194.6318 | 0.0006 | <a href="#">YNSILDMVLK</a>  |

Mascot: <http://www.matrixscience.com/>

**Peptide View**MS/MS Fragmentation of **IDMTTIVLGFK**

Found in **AT3G14420.1** in **TAIR\_Arabidopsis**, Symbols: | (S)-2-hydroxy-acid oxidase, peroxisomal, putative / glycolate oxidase, putative / short chain alpha-hydroxy acid oxidase, putative | chr3:4821811-4823906 FORWARD

Match to Query 4269: 1224.640630 from(613.327591,2+) index(8146)

Title: Elution from: 71.918 to 71.918 scan no 10712 cid35.00 polarity:+

Data file D6h-3\_1.mgf

Click mouse within plot area to zoom in by factor of two about that point

Or,   to  Da

Label all possible matches  Label matches used for scoring

Show Y-axis

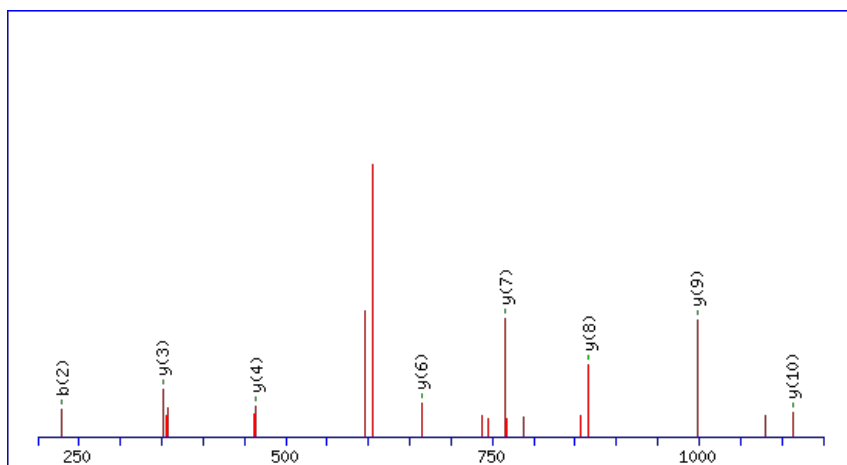

Monoisotopic mass of neutral peptide **Mr(calc)**: 1224.6424

**Fixed modifications**: Carbamidomethyl (C) (apply to specified residues or termini only)

**Ions Score**: 68 **Expect**: 3.7e-007

**Matches**: 8/88 fragment ions using 9 most intense peaks ([help](#))

| #  | b               | b <sup>++</sup> | b <sup>0</sup> | b <sup>0++</sup> | Seq. | y                | y <sup>++</sup> | y*        | y <sup>*++</sup> | y <sup>0</sup> | y <sup>0++</sup> | #  |
|----|-----------------|-----------------|----------------|------------------|------|------------------|-----------------|-----------|------------------|----------------|------------------|----|
| 1  | 114.0913        | 57.5493         |                |                  | I    |                  |                 |           |                  |                |                  | 11 |
| 2  | <b>229.1183</b> | 115.0628        | 211.1077       | 106.0575         | D    | <b>1112.5656</b> | 556.7865        | 1095.5391 | 548.2732         | 1094.5551      | 547.7812         | 10 |
| 3  | 360.1588        | 180.5830        | 342.1482       | 171.5777         | M    | <b>997.5387</b>  | 499.2730        | 980.5121  | 490.7597         | 979.5281       | 490.2677         | 9  |
| 4  | 461.2064        | 231.1069        | 443.1959       | 222.1016         | T    | <b>866.4982</b>  | 433.7527        | 849.4716  | 425.2395         | 848.4876       | 424.7475         | 8  |
| 5  | 562.2541        | 281.6307        | 544.2436       | 272.6254         | T    | <b>765.4505</b>  | 383.2289        | 748.4240  | 374.7156         | 747.4400       | 374.2236         | 7  |
| 6  | 663.3018        | 332.1545        | 645.2912       | 323.1493         | T    | <b>664.4028</b>  | 332.7051        | 647.3763  | 324.1918         | 646.3923       | 323.6998         | 6  |
| 7  | 762.3702        | 381.6887        | 744.3597       | 372.6835         | V    | 563.3552         | 282.1812        | 546.3286  | 273.6679         |                |                  | 5  |
| 8  | 875.4543        | 438.2308        | 857.4437       | 429.2255         | L    | <b>464.2867</b>  | 232.6470        | 447.2602  | 224.1337         |                |                  | 4  |
| 9  | 932.4757        | 466.7415        | 914.4652       | 457.7362         | G    | <b>351.2027</b>  | 176.1050        | 334.1761  | 167.5917         |                |                  | 3  |
| 10 | 1079.5442       | 540.2757        | 1061.5336      | 531.2704         | F    | 294.1812         | 147.5942        | 277.1547  | 139.0810         |                |                  | 2  |
| 11 |                 |                 |                |                  | K    | 147.1128         | 74.0600         | 130.0863  | 65.5468          |                |                  | 1  |

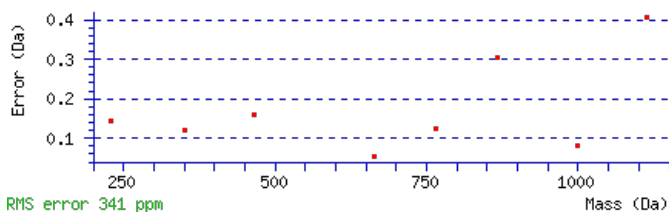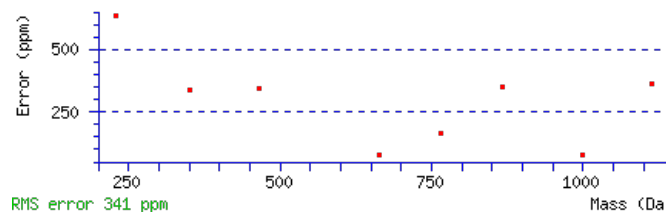

NCBI **BLAST** search of **IDMTTIVLGFK**

(Parameters: blastp, nr protein database, expect=20000, no filter, PAM30)

Other BLAST [web gateways](#)

**All matches to this query**

## AT3G14420.1

| Score | Mr(calc)  | Delta   | Sequence                    |
|-------|-----------|---------|-----------------------------|
| 68.3  | 1224.6424 | -0.0018 | <a href="#">IDMTTVLGFK</a>  |
| 14.1  | 1224.6391 | 0.0016  | <a href="#">LDFADVATFVK</a> |
| 12.5  | 1224.6390 | 0.0016  | <a href="#">LDQVFESLFK</a>  |
| 8.6   | 1224.6397 | 0.0009  | <a href="#">EVMQGHQRLK</a>  |
| 5.3   | 1224.6424 | -0.0018 | <a href="#">FKETMETLVK</a>  |
| 2.1   | 1224.6424 | -0.0018 | <a href="#">EVILYNVTMK</a>  |
| 2.1   | 1224.6424 | -0.0018 | <a href="#">TGELFMALVTK</a> |
| 0.2   | 1224.6424 | -0.0018 | <a href="#">YTMISALDALK</a> |

Mascot: <http://www.matrixscience.com/>

**Peptide View**MS/MS Fragmentation of **NVVEQLVR**

Found in **AT3G14420.6** in **TAIR\_Arabidopsis**, Symbols: | (S)-2-hydroxy-acid oxidase, peroxisomal, putative / glycolate oxidase, putative / short chain alpha-hydroxy acid oxidase, putative | chr3:4821906-4823906 FORWARD

Match to Query 2394: 968.508070 from(485.261311,2+) index(4467)

Title: Elution from: 40.922 to 40.922 scan no 5512 cid35.00 polarity:+

Data file D12h-1\_1.mgf

Click mouse within plot area to zoom in by factor of two about that point

Or,   to  Da

Label all possible matches  Label matches used for scoring

Show Y-axis

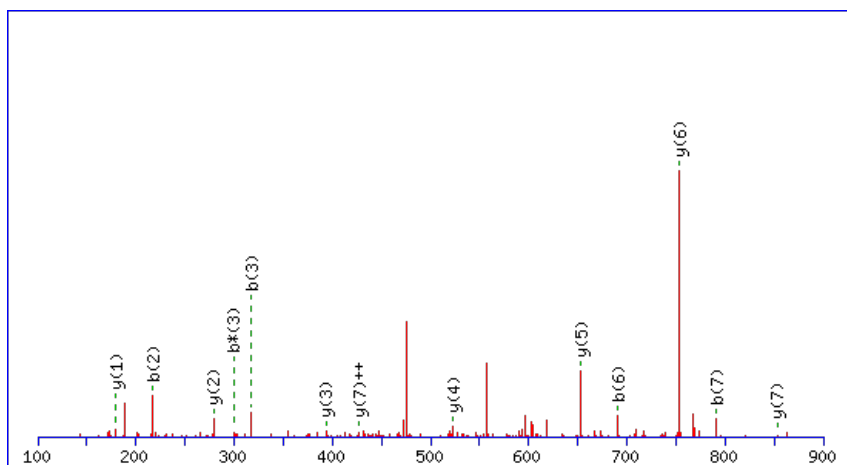

**Monoisotopic mass of neutral peptide Mr(calc):** 968.5065

**Fixed modifications:** Carbamidomethyl (C) (apply to specified residues or termini only)

**Ions Score:** 46 **Expect:** 0.00015

**Matches:** 13/70 fragment ions using 30 most intense peaks ([help](#))

| # | b               | b <sup>++</sup> | b*              | b <sup>*++</sup> | b <sup>0</sup> | b <sup>0++</sup> | Seq. | y               | y <sup>++</sup> | y*       | y <sup>*++</sup> | y <sup>0</sup> | y <sup>0++</sup> | # |
|---|-----------------|-----------------|-----------------|------------------|----------------|------------------|------|-----------------|-----------------|----------|------------------|----------------|------------------|---|
| 1 | 117.0443        | 59.0258         | 99.0207         | 50.0140          |                |                  | N    |                 |                 |          |                  |                |                  | 8 |
| 2 | <b>217.1097</b> | 109.0585        | 199.0861        | 100.0467         |                |                  | V    | <b>853.4768</b> | <b>427.2420</b> | 835.4532 | 418.2303         | 835.4662       | 418.2368         | 7 |
| 3 | <b>317.1752</b> | 159.0912        | <b>299.1516</b> | 150.0794         |                |                  | V    | <b>753.4114</b> | 377.2093        | 735.3878 | 368.1975         | 735.4008       | 368.2040         | 6 |
| 4 | 447.2148        | 224.1110        | 429.1912        | 215.0992         | 429.2042       | 215.1058         | E    | <b>653.3459</b> | 327.1766        | 635.3223 | 318.1648         | 635.3354       | 318.1713         | 5 |
| 5 | 577.2674        | 289.1374        | 559.2439        | 280.1256         | 559.2569       | 280.1321         | Q    | <b>523.3063</b> | 262.1568        | 505.2827 | 253.1450         |                |                  | 4 |
| 6 | <b>691.3485</b> | 346.1779        | 673.3250        | 337.1661         | 673.3380       | 337.1726         | L    | <b>393.2536</b> | 197.1305        | 375.2301 | 188.1187         |                |                  | 3 |
| 7 | <b>791.4140</b> | 396.2106        | 773.3904        | 387.1988         | 773.4034       | 387.2054         | V    | <b>279.1725</b> | 140.0899        | 261.1490 | 131.0781         |                |                  | 2 |
| 8 |                 |                 |                 |                  |                |                  | R    | <b>179.1071</b> | 90.0572         | 161.0835 | 81.0454          |                |                  | 1 |

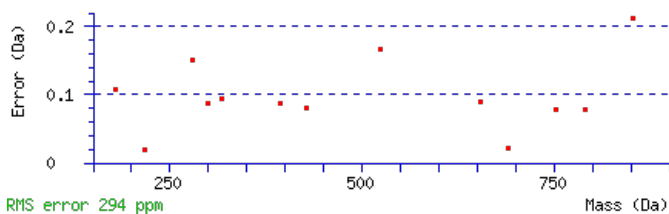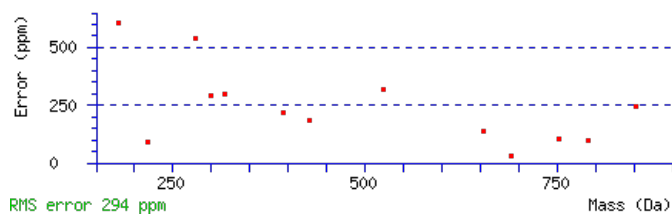

NCBI **BLAST** search of [NVVEQLVR](#)

(Parameters: blastp, nr protein database, expect=20000, no filter, PAM30)

Other BLAST [web gateways](#)

**All matches to this query**

| Score | Mr(calc) | Delta  | Sequence                 |
|-------|----------|--------|--------------------------|
| 45.6  | 968.5065 | 0.0016 | <a href="#">NVVEQLVR</a> |

**AT3G14420.6**

|     |          |         |                            |
|-----|----------|---------|----------------------------|
| 6.5 | 968.5065 | 0.0016  | <a href="#">NVGLIGLDR</a>  |
| 5.1 | 968.5065 | 0.0015  | <a href="#">TNPEIVKR</a>   |
| 4.3 | 968.5065 | 0.0015  | <a href="#">LSVVATPNR</a>  |
| 1.3 | 968.5065 | 0.0015  | <a href="#">QQQISPKK</a>   |
| 0.6 | 968.5065 | 0.0016  | <a href="#">TLTVAAGPAR</a> |
| 0.3 | 968.5088 | -0.0007 | <a href="#">VPSLWTVR</a>   |

**Mascot:** <http://www.matrixscience.com/>

## Peptide View

### MS/MS Fragmentation of **KLNFTESLQPTR**

Found in **AT3G14460.1** in **TAIR\_Arabidopsis**, Symbols: | disease resistance protein (NBS-LRR class), putative | chr3:4851997-4856271  
REVERSE

Match to Query 5326: 1450.714306 from(726.364429,2+) index(9724)

Title: Elution from: 95.296 to 95.296 scan no 13947 cid35.00 polarity:+

Data file D1d-1-2.mgf

Click mouse within plot area to zoom in by factor of two about that point

Or,   to  Da

Label all possible matches  Label matches used for scoring

Show Y-axis

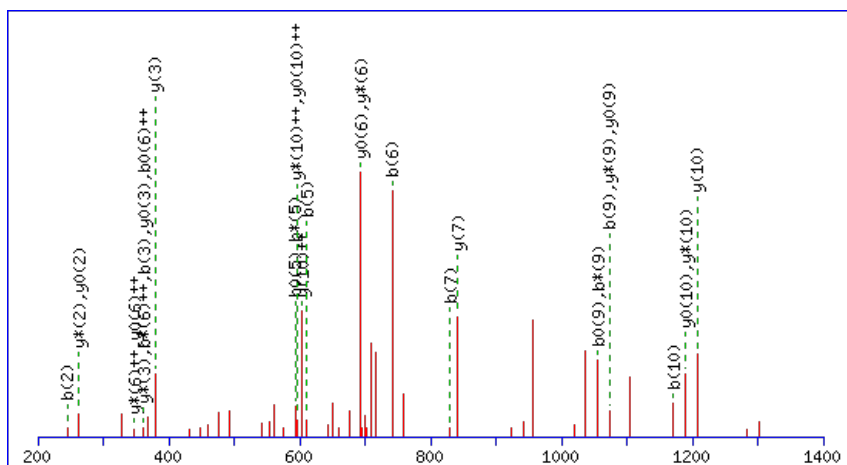

Monoisotopic mass of neutral peptide  $M_r(\text{calc})$ : 1450.7141

Fixed modifications: Carbamidomethyl (C) (apply to specified residues or termini only)

Ions Score: 32 Expect: 0.0058

Matches : 31/122 fragment ions using 42 most intense peaks ([help](#))

| #  | b                | b <sup>++</sup> | b*               | b <sup>*++</sup> | b <sup>0</sup>   | b <sup>0++</sup> | Seq. | y                | y <sup>++</sup> | y*               | y <sup>*++</sup> | y <sup>0</sup>   | y <sup>0++</sup> | #  |
|----|------------------|-----------------|------------------|------------------|------------------|------------------|------|------------------|-----------------|------------------|------------------|------------------|------------------|----|
| 1  | 131.0963         | 66.0518         | 113.0727         | 57.0400          |                  |                  | K    |                  |                 |                  |                  |                  |                  | 12 |
| 2  | <b>245.1774</b>  | 123.0923        | 227.1538         | 114.0805         |                  |                  | L    | 1321.6323        | 661.3198        | 1303.6087        | 652.3080         | 1303.6217        | 652.3145         | 11 |
| 3  | <b>361.2144</b>  | 181.1108        | 343.1908         | 172.0990         |                  |                  | N    | <b>1207.5512</b> | <b>604.2792</b> | <b>1189.5276</b> | <b>595.2674</b>  | <b>1189.5406</b> | <b>595.2740</b>  | 10 |
| 4  | 509.2799         | 255.1436        | 491.2563         | 246.1318         |                  |                  | F    | 1091.5142        | 546.2607        | <b>1073.4906</b> | 537.2489         | <b>1073.5036</b> | 537.2555         | 9  |
| 5  | <b>611.3246</b>  | 306.1659        | <b>593.3010</b>  | 297.1541         | <b>593.3140</b>  | 297.1606         | T    | 943.4488         | 472.2280        | 925.4252         | 463.2162         | 925.4382         | 463.2227         | 8  |
| 6  | <b>741.3642</b>  | 371.1857        | 723.3406         | <b>362.1739</b>  | 723.3536         | <b>362.1805</b>  | E    | <b>841.4040</b>  | 421.2057        | 823.3805         | 412.1939         | 823.3935         | 412.2004         | 7  |
| 7  | <b>829.3933</b>  | 415.2003        | 811.3697         | 406.1885         | 811.3827         | 406.1950         | S    | 711.3644         | 356.1858        | <b>693.3408</b>  | <b>347.1741</b>  | <b>693.3538</b>  | <b>347.1806</b>  | 6  |
| 8  | 943.4744         | 472.2408        | 925.4508         | 463.2290         | 925.4638         | 463.2355         | L    | 623.3353         | 312.1713        | 605.3118         | 303.1595         | 605.3248         | 303.1660         | 5  |
| 9  | <b>1073.5270</b> | 537.2671        | <b>1055.5034</b> | 528.2553         | <b>1055.5164</b> | 528.2619         | Q    | 509.2543         | 255.1308        | 491.2307         | 246.1190         | 491.2437         | 246.1255         | 4  |
| 10 | <b>1171.5768</b> | 586.2920        | 1153.5532        | 577.2802         | 1153.5662        | 577.2868         | P    | <b>379.2016</b>  | 190.1044        | <b>361.1780</b>  | 181.0926         | <b>361.1910</b>  | 181.0992         | 3  |
| 11 | 1273.6215        | 637.3144        | 1255.5979        | 628.3026         | 1255.6110        | 628.3091         | T    | 281.1518         | 141.0795        | <b>263.1282</b>  | 132.0677         | <b>263.1412</b>  | 132.0743         | 2  |
| 12 |                  |                 |                  |                  |                  |                  | R    | 179.1071         | 90.0572         | 161.0835         | 81.0454          |                  |                  | 1  |

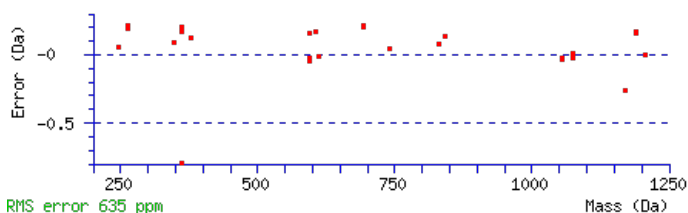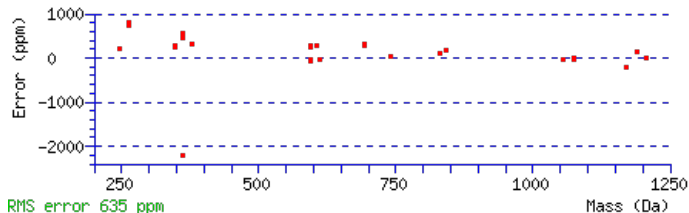

NCBI BLAST search of **KLNFTESLQPTR**

(Parameters: blastp, nr protein database, expect=20000, no filter, PAM30)

Other BLAST [web gateways](#)



**AT3G14460.1**

All matches to this query

| Score | Mr(calc)  | Delta   | Sequence                        |
|-------|-----------|---------|---------------------------------|
| 32.4  | 1450.7141 | 0.0003  | <a href="#">KLNFTESLOPTR</a>    |
| 12.6  | 1450.7145 | -0.0002 | <a href="#">AWIGIFNMLML</a>     |
| 11.9  | 1450.7141 | 0.0003  | <a href="#">DNFEVKTI PRSK</a>   |
| 11.4  | 1450.7127 | 0.0016  | <a href="#">MNKNVDKAMLLR</a>    |
| 7.9   | 1450.7118 | 0.0025  | <a href="#">SERETGIKTGNLK</a>   |
| 4.0   | 1450.7118 | 0.0025  | <a href="#">SAIAGANGESAKKTK</a> |
| 0.3   | 1450.7100 | 0.0043  | <a href="#">MLDAGKSLCSLLK</a>   |

**Mascot:** <http://www.matrixscience.com/>

**Peptide View**MS/MS Fragmentation of **EVFNKVNDFEK**

Found in **AT3G14610.1** in **TAIR\_Arabidopsis**, Symbols: CYP72A7 | CYP72A7 (cytochrome P450, family 72, subfamily A, polypeptide 7); oxygen binding | chr3:4912572-4914510 FORWARD

Match to Query 5704: 1382.629882 from(692.322217,2+) index(2420)

Title: Elution from: 26.929 to 26.929 scan no 3075 cid35.00 polarity:+

Data file 0-1\_1.mgf

Click mouse within plot area to zoom in by factor of two about that point

Or,   to  Da

Label all possible matches  Label matches used for scoring

Show Y-axis

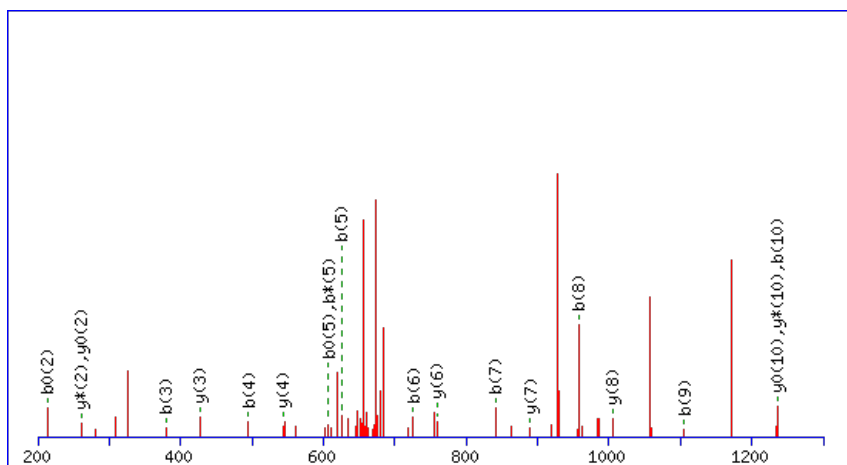

Monoisotopic mass of neutral peptide  $M_r(\text{calc})$ : 1382.6276

Fixed modifications: Carbamidomethyl (C) (apply to specified residues or termini only)

Ions Score: 32 Expect: 0.0066

Matches : 20/112 fragment ions using 50 most intense peaks ([help](#))

| #  | b         | b <sup>++</sup> | b*        | b <sup>*++</sup> | b <sup>0</sup> | b <sup>0++</sup> | Seq. | y         | y <sup>++</sup> | y*        | y <sup>*++</sup> | y <sup>0</sup> | y <sup>0++</sup> | #  |
|----|-----------|-----------------|-----------|------------------|----------------|------------------|------|-----------|-----------------|-----------|------------------|----------------|------------------|----|
| 1  | 131.0469  | 66.0271         |           |                  | 113.0363       | 57.0218          | E    |           |                 |           |                  |                |                  | 11 |
| 2  | 231.1124  | 116.0598        |           |                  | 213.1018       | 107.0545         | V    | 1253.5953 | 627.3013        | 1235.5717 | 618.2895         | 1235.5847      | 618.2960         | 10 |
| 3  | 379.1778  | 190.0925        |           |                  | 361.1672       | 181.0873         | F    | 1153.5299 | 577.2686        | 1135.5063 | 568.2568         | 1135.5193      | 568.2633         | 9  |
| 4  | 495.2148  | 248.1110        | 477.1912  | 239.0992         | 477.2042       | 239.1058         | N    | 1005.4644 | 503.2358        | 987.4408  | 494.2240         | 987.4538       | 494.2306         | 8  |
| 5  | 625.3038  | 313.1556        | 607.2802  | 304.1438         | 607.2933       | 304.1503         | K    | 889.4274  | 445.2173        | 871.4038  | 436.2056         | 871.4168       | 436.2121         | 7  |
| 6  | 725.3693  | 363.1883        | 707.3457  | 354.1765         | 707.3587       | 354.1830         | V    | 759.3384  | 380.1728        | 741.3148  | 371.1610         | 741.3278       | 371.1675         | 6  |
| 7  | 841.4063  | 421.2068        | 823.3827  | 412.1950         | 823.3957       | 412.2015         | N    | 659.2729  | 330.1401        | 641.2493  | 321.1283         | 641.2624       | 321.1348         | 5  |
| 8  | 957.4303  | 479.2188        | 939.4067  | 470.2070         | 939.4197       | 470.2135         | D    | 543.2359  | 272.1216        | 525.2123  | 263.1098         | 525.2254       | 263.1163         | 4  |
| 9  | 1105.4957 | 553.2515        | 1087.4721 | 544.2397         | 1087.4851      | 544.2462         | F    | 427.2120  | 214.1096        | 409.1884  | 205.0978         | 409.2014       | 205.1043         | 3  |
| 10 | 1235.5353 | 618.2713        | 1217.5117 | 609.2595         | 1217.5248      | 609.2660         | E    | 279.1465  | 140.0769        | 261.1229  | 131.0651         | 261.1359       | 131.0716         | 2  |
| 11 |           |                 |           |                  |                |                  | K    | 149.1069  | 75.0571         | 131.0833  | 66.0453          |                |                  | 1  |

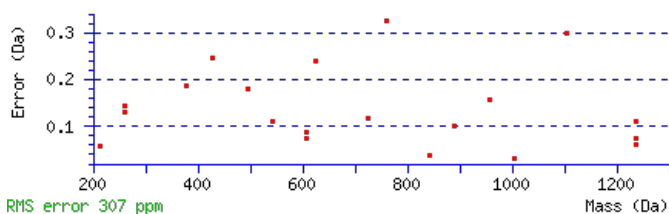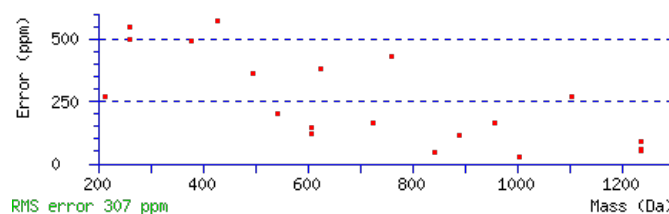

NCBI BLAST search of [EVFNKVNDFEK](#)

(Parameters: blastp, nr protein database, expect=20000, no filter, PAM30)

Other BLAST [web gateways](#)

All matches to this query

## AT3G14610.1

| Score | Mr(calc)  | Delta   | Sequence                      |
|-------|-----------|---------|-------------------------------|
| 31.9  | 1382.6276 | 0.0022  | <a href="#">EVFNKVNDFEK</a>   |
| 8.0   | 1382.6288 | 0.0011  | <a href="#">SSSAATLTLMNQK</a> |
| 5.3   | 1382.6276 | 0.0022  | <a href="#">TWSFTQVPTSSK</a>  |
| 3.7   | 1382.6330 | -0.0031 | <a href="#">ESSKSHGFRPGR</a>  |
| 1.8   | 1382.6288 | 0.0011  | <a href="#">VRDMLISSESSK</a>  |
| 0.2   | 1382.6310 | -0.0011 | <a href="#">QTMSGEVGFGVLK</a> |

Mascot: <http://www.matrixscience.com/>


**Mascot Search Results**
**Peptide View**MS/MS Fragmentation of **KLAESLFYR**

Found in **AT3G14900.1** in **TAIR\_Arabidopsis**, Symbols: | similar to unnamed protein product [Vitis vinifera] (GB:CAO39402.1); contains domain PTHR12839 (PTHR12839) | chr3:5013449-5015284 REVERSE

Match to Query 3283: 1138.581766 from(570.298159,2+) index(1601)

Title: Elution from: 23.643 to 23.643 scan no 2223 cid35.00 polarity:+

Data file D1d-1\_1.mgf

Click mouse within plot area to zoom in by factor of two about that point

Or,   to  Da

Label all possible matches  Label matches used for scoring

Show Y-axis

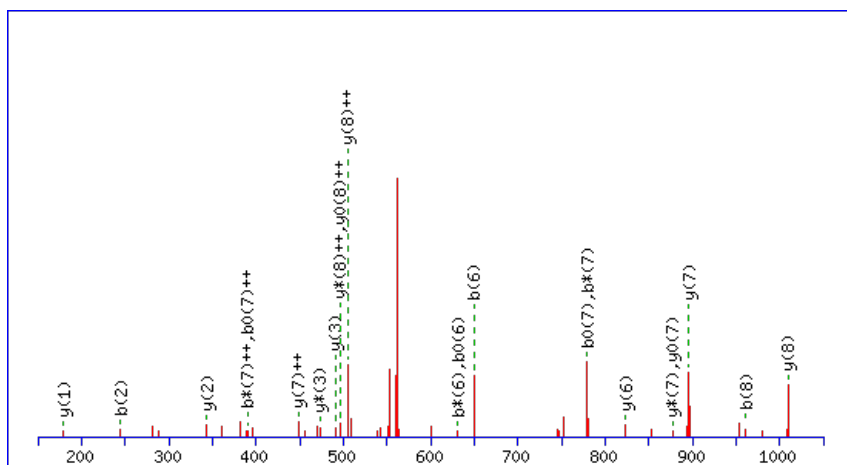

**Monoisotopic mass of neutral peptide Mr(calc):** 1138.5797

**Fixed modifications:** Carbamidomethyl (C) (apply to specified residues or termini only)

**Ions Score:** 28 **Expect:** 0.006

**Matches:** 22/82 fragment ions using 46 most intense peaks ([help](#))

| # | b               | b <sup>++</sup> | b*              | b <sup>*++</sup> | b <sup>0</sup>  | b <sup>0++</sup> | Seq. | y                | y <sup>++</sup> | y*              | y <sup>*++</sup> | y <sup>0</sup>  | y <sup>0++</sup> | # |
|---|-----------------|-----------------|-----------------|------------------|-----------------|------------------|------|------------------|-----------------|-----------------|------------------|-----------------|------------------|---|
| 1 | 131.0963        | 66.0518         | 113.0727        | 57.0400          |                 |                  | K    |                  |                 |                 |                  |                 |                  | 9 |
| 2 | <b>245.1774</b> | 123.0923        | 227.1538        | 114.0805         |                 |                  | L    | <b>1009.4979</b> | <b>505.2526</b> | 991.4744        | <b>496.2408</b>  | 991.4874        | <b>496.2473</b>  | 8 |
| 3 | 317.2116        | 159.1094        | 299.1880        | 150.0976         |                 |                  | A    | <b>895.4168</b>  | <b>448.2121</b> | <b>877.3933</b> | 439.2003         | <b>877.4063</b> | 439.2068         | 7 |
| 4 | 447.2512        | 224.1292        | 429.2276        | 215.1174         | 429.2406        | 215.1239         | E    | <b>823.3827</b>  | 412.1950        | 805.3591        | 403.1832         | 805.3721        | 403.1897         | 6 |
| 5 | 535.2802        | 268.1438        | 517.2567        | 259.1320         | 517.2697        | 259.1385         | S    | 693.3431         | 347.1752        | 675.3195        | 338.1634         | 675.3325        | 338.1699         | 5 |
| 6 | <b>649.3613</b> | 325.1843        | <b>631.3378</b> | 316.1725         | <b>631.3508</b> | 316.1790         | L    | 605.3140         | 303.1606        | 587.2904        | 294.1488         |                 |                  | 4 |
| 7 | 797.4268        | 399.2170        | <b>779.4032</b> | <b>390.2052</b>  | <b>779.4162</b> | <b>390.2118</b>  | F    | <b>491.2329</b>  | 246.1201        | <b>473.2093</b> | 237.1083         |                 |                  | 3 |
| 8 | <b>961.4872</b> | 481.2472        | 943.4636        | 472.2354         | 943.4766        | 472.2419         | Y    | <b>343.1675</b>  | 172.0874        | 325.1439        | 163.0756         |                 |                  | 2 |
| 9 |                 |                 |                 |                  |                 |                  | R    | <b>179.1071</b>  | 90.0572         | 161.0835        | 81.0454          |                 |                  | 1 |

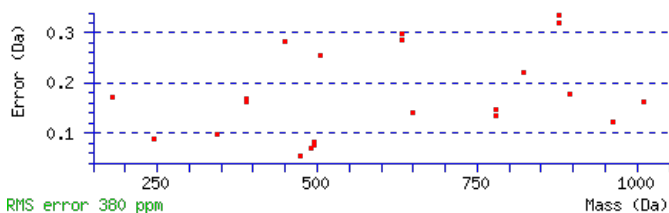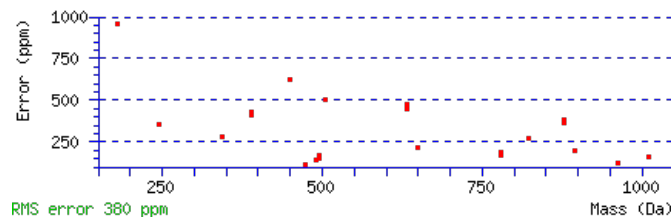

NCBI **BLAST** search of **KLAESLFYR**

(Parameters: blastp, nr protein database, expect=20000, no filter, PAM30)

Other BLAST [web gateways](#)

All matches to this query

| Score | Mr(calc) | Delta | Sequence |
|-------|----------|-------|----------|
|       |          |       |          |

**AT3G14900.1**

|      |           |         |                             |
|------|-----------|---------|-----------------------------|
| 28.1 | 1138.5797 | 0.0021  | <a href="#">KLAESLFYR</a>   |
| 11.5 | 1138.5801 | 0.0016  | <a href="#">ARGKSSFLTR</a>  |
| 9.1  | 1138.5828 | -0.0010 | <a href="#">KQAHLRNPR</a>   |
| 7.9  | 1138.5801 | 0.0016  | <a href="#">QNLRPEIPR</a>   |
| 7.7  | 1138.5801 | 0.0016  | <a href="#">QLOHITNIR</a>   |
| 3.8  | 1138.5797 | 0.0021  | <a href="#">NVYLTFTR</a>    |
| 1.4  | 1138.5831 | -0.0013 | <a href="#">IPASICQLPK</a>  |
| 0.8  | 1138.5801 | 0.0016  | <a href="#">IGRPGSSLAHK</a> |
| 0.5  | 1138.5797 | 0.0021  | <a href="#">IIVFTNYR</a>    |

**Mascot:** <http://www.matrixscience.com/>

**Peptide View**MS/MS Fragmentation of **FVEYFR**

Found in **AT3G14940.1** in **TAIR\_Arabidopsis**, Symbols: ATPPC3 | ATPPC3 (PHOSPHOENOLPYRUVATE CARBOXYLASE 3); phosphoenolpyruvate carboxylase | chr3:5025591-5029483 FORWARD

Match to Query 1335: 859.422570 from(430.718561,2+) index(4116)

Title: Elution from: 38.503 to 38.503 scan no 5167 cid35.00 polarity:+

Data file D12h-3\_2.mgf

Click mouse within plot area to zoom in by factor of two about that point

Or,   to  Da

Label all possible matches  Label matches used for scoring

Show Y-axis

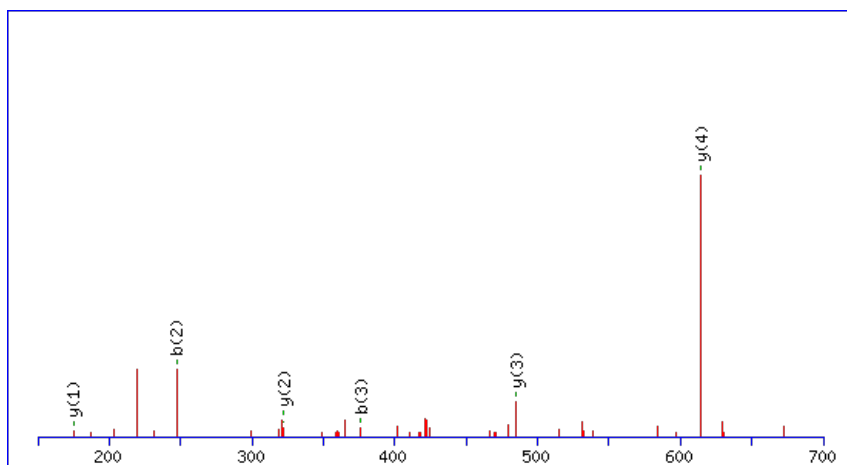

**Monoisotopic mass of neutral peptide Mr(calc):** 859.4228

**Fixed modifications:** Carbamidomethyl (C) (apply to specified residues or termini only)

**Ions Score:** 18 **Expect:** 0.031

**Matches:** 6/40 fragment ions using 20 most intense peaks ([help](#))

| # | b               | b <sup>++</sup> | b <sup>0</sup> | b <sup>0++</sup> | Seq. | y               | y <sup>++</sup> | y*       | y <sup>*++</sup> | y <sup>0</sup> | y <sup>0++</sup> | # |
|---|-----------------|-----------------|----------------|------------------|------|-----------------|-----------------|----------|------------------|----------------|------------------|---|
| 1 | 148.0757        | 74.5415         |                |                  | F    |                 |                 |          |                  |                |                  | 6 |
| 2 | <b>247.1441</b> | 124.0757        |                |                  | V    | 713.3617        | 357.1845        | 696.3352 | 348.6712         | 695.3511       | 348.1792         | 5 |
| 3 | <b>376.1867</b> | 188.5970        | 358.1761       | 179.5917         | E    | <b>614.2933</b> | 307.6503        | 597.2667 | 299.1370         | 596.2827       | 298.6450         | 4 |
| 4 | 539.2500        | 270.1287        | 521.2395       | 261.1234         | Y    | <b>485.2507</b> | 243.1290        | 468.2241 | 234.6157         |                |                  | 3 |
| 5 | 686.3184        | 343.6629        | 668.3079       | 334.6576         | F    | <b>322.1874</b> | 161.5973        | 305.1608 | 153.0840         |                |                  | 2 |
| 6 |                 |                 |                |                  | R    | <b>175.1190</b> | 88.0631         | 158.0924 | 79.5498          |                |                  | 1 |

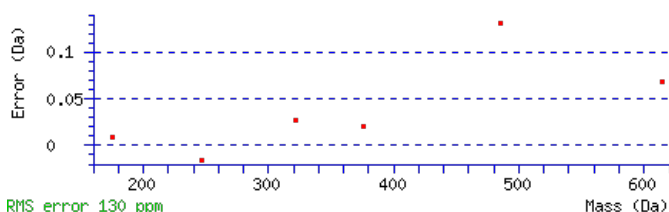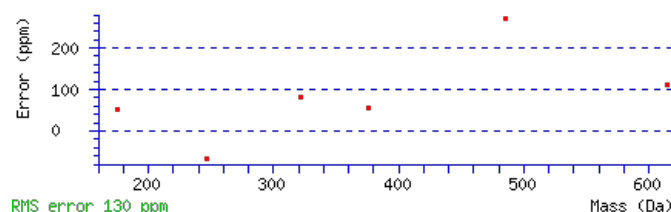NCBI **BLAST** search of **FVEYFR**

(Parameters: blastp, nr protein database, expect=20000, no filter, PAM30)

Other BLAST [web gateways](#)

**All matches to this query**

| Score | Mr(calc) | Delta   | Sequence                |
|-------|----------|---------|-------------------------|
| 18.3  | 859.4228 | -0.0003 | <a href="#">FVEYFR</a>  |
| 0.7   | 859.4222 | 0.0004  | <a href="#">MLTNPER</a> |



**Peptide View**MS/MS Fragmentation of **APGTAMEFSLAIVEK**Found in **AT3G14990.1** in **TAIR\_Arabidopsis**, Symbols: | 4-methyl-5(b-hydroxyethyl)-thiazole monophosphate biosynthesis protein, putative | chr3:5047517-5049628 FORWARD

Match to Query 6837: 1562.799608 from(782.407080,2+) index(8759)

Title: Elution from: 80.429 to 80.429 scan no 11770 cid35.00 polarity:+

Data file D12h-2\_1.mgf

Click mouse within plot area to zoom in by factor of two about that point

Or,   to  Da Label all possible matches  Label matches used for scoring Show Y-axis 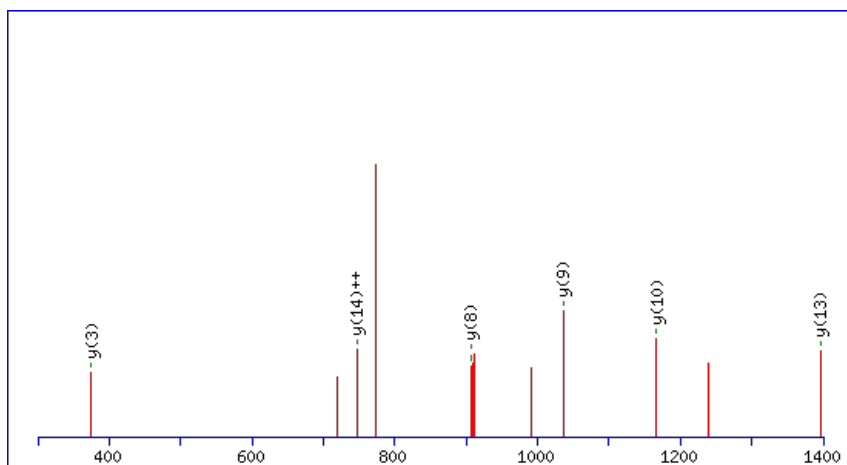Monoisotopic mass of neutral peptide  $M_r(\text{calc})$ : 1562.8014

Fixed modifications: Carbamidomethyl (C) (apply to specified residues or termini only)

Ions Score: 27 Expect: 0.0085

Matches : 6/132 fragment ions using 12 most intense peaks ([help](#))

| #  | b         | b <sup>++</sup> | b <sup>0</sup> | b <sup>0++</sup> | Seq. | y         | y <sup>++</sup> | y*        | y <sup>*++</sup> | y <sup>0</sup> | y <sup>0++</sup> | #  |
|----|-----------|-----------------|----------------|------------------|------|-----------|-----------------|-----------|------------------|----------------|------------------|----|
| 1  | 72.0444   | 36.5258         |                |                  | A    |           |                 |           |                  |                |                  | 15 |
| 2  | 169.0972  | 85.0522         |                |                  | P    | 1492.7716 | 746.8894        | 1475.7450 | 738.3762         | 1474.7610      | 737.8842         | 14 |
| 3  | 226.1186  | 113.5629        |                |                  | G    | 1395.7188 | 698.3631        | 1378.6923 | 689.8498         | 1377.7083      | 689.3578         | 13 |
| 4  | 327.1663  | 164.0868        | 309.1557       | 155.0815         | T    | 1338.6974 | 669.8523        | 1321.6708 | 661.3390         | 1320.6868      | 660.8470         | 12 |
| 5  | 398.2034  | 199.6053        | 380.1928       | 190.6001         | A    | 1237.6497 | 619.3285        | 1220.6231 | 610.8152         | 1219.6391      | 610.3232         | 11 |
| 6  | 529.2439  | 265.1256        | 511.2333       | 256.1203         | M    | 1166.6126 | 583.8099        | 1149.5860 | 575.2967         | 1148.6020      | 574.8046         | 10 |
| 7  | 658.2865  | 329.6469        | 640.2759       | 320.6416         | E    | 1035.5721 | 518.2897        | 1018.5455 | 509.7764         | 1017.5615      | 509.2844         | 9  |
| 8  | 805.3549  | 403.1811        | 787.3443       | 394.1758         | F    | 906.5295  | 453.7684        | 889.5029  | 445.2551         | 888.5189       | 444.7631         | 8  |
| 9  | 892.3869  | 446.6971        | 874.3764       | 437.6918         | S    | 759.4611  | 380.2342        | 742.4345  | 371.7209         | 741.4505       | 371.2289         | 7  |
| 10 | 1005.4710 | 503.2391        | 987.4604       | 494.2339         | L    | 672.4291  | 336.7182        | 655.4025  | 328.2049         | 654.4185       | 327.7129         | 6  |
| 11 | 1076.5081 | 538.7577        | 1058.4975      | 529.7524         | A    | 559.3450  | 280.1761        | 542.3184  | 271.6629         | 541.3344       | 271.1709         | 5  |
| 12 | 1189.5922 | 595.2997        | 1171.5816      | 586.2944         | I    | 488.3079  | 244.6576        | 471.2813  | 236.1443         | 470.2973       | 235.6523         | 4  |
| 13 | 1288.6606 | 644.8339        | 1270.6500      | 635.8286         | V    | 375.2238  | 188.1155        | 358.1973  | 179.6023         | 357.2132       | 179.1103         | 3  |
| 14 | 1417.7032 | 709.3552        | 1399.6926      | 700.3499         | E    | 276.1554  | 138.5813        | 259.1288  | 130.0681         | 258.1448       | 129.5761         | 2  |
| 15 |           |                 |                |                  | K    | 147.1128  | 74.0600         | 130.0863  | 65.5468          |                |                  | 1  |

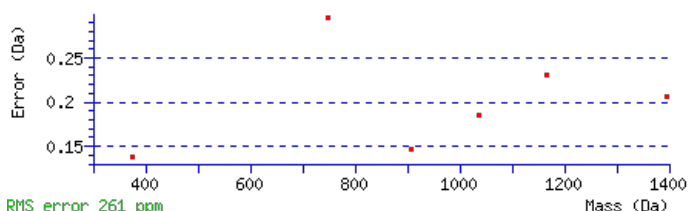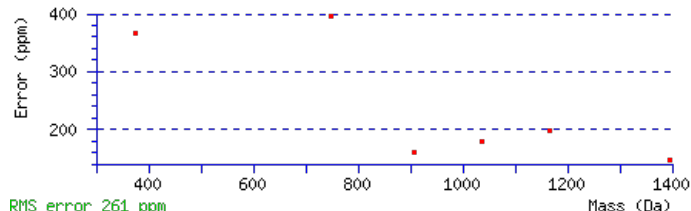



## AT3G14990.1

NCBI **BLAST** search of [APGTAMEFSLAIVEK](#)

(Parameters: blastp, nr protein database, expect=20000, no filter, PAM30)

Other BLAST [web gateways](#)

### All matches to this query

| Score | Mr(calc)  | Delta   | Sequence                        |
|-------|-----------|---------|---------------------------------|
| 27.4  | 1562.8014 | -0.0018 | <a href="#">APGTAMEFSLAIVEK</a> |
| 3.4   | 1562.7987 | 0.0009  | <a href="#">APEVMETRKHTHK</a>   |

**Mascot:** <http://www.matrixscience.com/>

**Peptide View**MS/MS Fragmentation of **TLAQVGSSEAR**

Found in **AT3G15000.1** in **TAIR\_Arabidopsis**, Symbols: | Identical to Uncharacterized mitochondrial protein At3g15000 [Arabidopsis thaliana] (GB:Q9LKA5); similar to plastid developmental protein DAG, putative [Arabidopsis thaliana] (TAIR:AT3G06790.2); similar to unnamed protein product [Vitis]

Match to Query 5507: 1387.693134 from(694.853843,2+) index(4438)

Title: Elution from: 41.474 to 41.474 scan no 5573 cid35.00 polarity:+

Data file D12h-3\_1.mgf

Click mouse within plot area to zoom in by factor of two about that point

Or,   to  Da

Label all possible matches  Label matches used for scoring

Show Y-axis

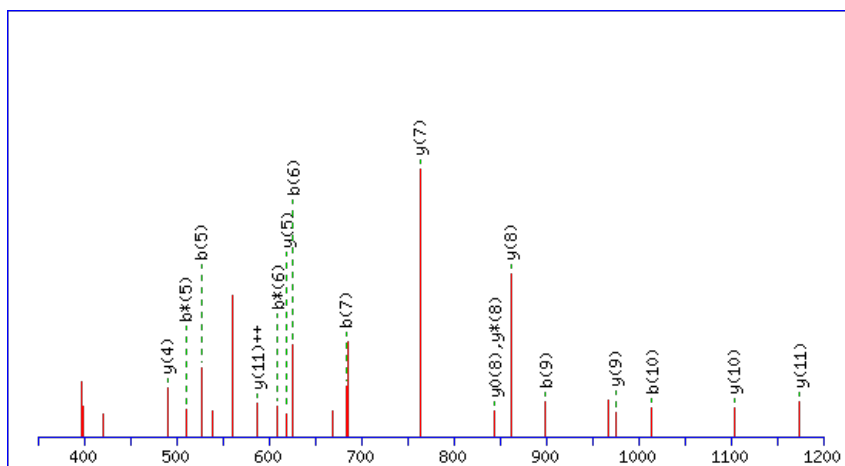

**Monoisotopic mass of neutral peptide Mr(calc):** 1387.6943

**Fixed modifications:** Carbamidomethyl (C) (apply to specified residues or termini only)

**Ions Score:** 51 **Expect:** 2.2e-005

**Matches:** 17/134 fragment ions using 25 most intense peaks ([help](#))

| #  | b                | b <sup>++</sup> | b*              | b <sup>*++</sup> | b <sup>0</sup> | b <sup>0++</sup> | Seq. | y                | y <sup>++</sup> | y*              | y <sup>*++</sup> | y <sup>0</sup>  | y <sup>0++</sup> | #  |
|----|------------------|-----------------|-----------------|------------------|----------------|------------------|------|------------------|-----------------|-----------------|------------------|-----------------|------------------|----|
| 1  | 102.0550         | 51.5311         |                 |                  | 84.0444        | 42.5258          | T    |                  |                 |                 |                  |                 |                  | 13 |
| 2  | 215.1390         | 108.0731        |                 |                  | 197.1285       | 99.0679          | L    | 1287.6539        | 644.3306        | 1270.6274       | 635.8173         | 1269.6434       | 635.3253         | 12 |
| 3  | 286.1761         | 143.5917        |                 |                  | 268.1656       | 134.5864         | A    | <b>1174.5699</b> | <b>587.7886</b> | 1157.5433       | 579.2753         | 1156.5593       | 578.7833         | 11 |
| 4  | 414.2347         | 207.6210        | 397.2082        | 199.1077         | 396.2241       | 198.6157         | Q    | <b>1103.5327</b> | 552.2700        | 1086.5062       | 543.7567         | 1085.5222       | 543.2647         | 10 |
| 5  | <b>527.3188</b>  | 264.1630        | <b>510.2922</b> | 255.6498         | 509.3082       | 255.1577         | I    | <b>975.4742</b>  | 488.2407        | 958.4476        | 479.7274         | 957.4636        | 479.2354         | 9  |
| 6  | <b>626.3872</b>  | 313.6972        | <b>609.3606</b> | 305.1840         | 608.3766       | 304.6920         | V    | <b>862.3901</b>  | 431.6987        | <b>845.3636</b> | 423.1854         | <b>844.3795</b> | 422.6934         | 8  |
| 7  | <b>683.4087</b>  | 342.2080        | 666.3821        | 333.6947         | 665.3981       | 333.2027         | G    | <b>763.3217</b>  | 382.1645        | 746.2951        | 373.6512         | 745.3111        | 373.1592         | 7  |
| 8  | 770.4407         | 385.7240        | 753.4141        | 377.2107         | 752.4301       | 376.7187         | S    | 706.3002         | 353.6537        | 689.2737        | 345.1405         | 688.2897        | 344.6485         | 6  |
| 9  | <b>899.4833</b>  | 450.2453        | 882.4567        | 441.7320         | 881.4727       | 441.2400         | E    | <b>619.2682</b>  | 310.1377        | 602.2416        | 301.6245         | 601.2576        | 301.1325         | 5  |
| 10 | <b>1014.5102</b> | 507.7587        | 997.4837        | 499.2455         | 996.4997       | 498.7535         | D    | <b>490.2256</b>  | 245.6164        | 473.1991        | 237.1032         | 472.2150        | 236.6112         | 4  |
| 11 | 1143.5528        | 572.2800        | 1126.5263       | 563.7668         | 1125.5422      | 563.2748         | E    | 375.1987         | 188.1030        | 358.1721        | 179.5897         | 357.1881        | 179.0977         | 3  |
| 12 | 1214.5899        | 607.7986        | 1197.5634       | 599.2853         | 1196.5794      | 598.7933         | A    | 246.1561         | 123.5817        | 229.1295        | 115.0684         |                 |                  | 2  |
| 13 |                  |                 |                 |                  |                |                  | R    | 175.1190         | 88.0631         | 158.0924        | 79.5498          |                 |                  | 1  |

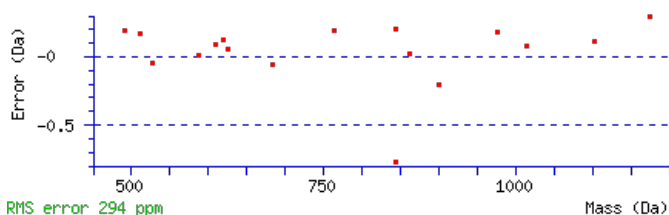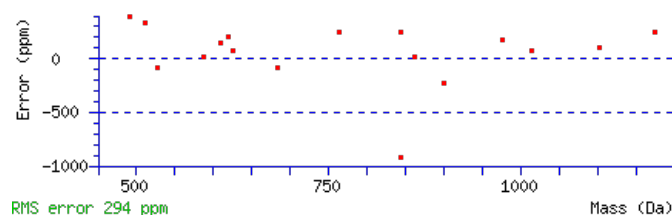

NCBI **BLAST** search of [TLAQVGSSEAR](#)

## AT3G15000.1

(Parameters: blastp, nr protein database, expect=20000, no filter, PAM30)

Other BLAST [web gateways](#)

### All matches to this query

| Score | Mr(calc)  | Delta   | Sequence                      |
|-------|-----------|---------|-------------------------------|
| 50.5  | 1387.6943 | -0.0012 | <a href="#">TLAQIVGSEDEAR</a> |
| 0.0   | 1387.6943 | -0.0012 | <a href="#">RGGDDVAVETELK</a> |

Mascot: <http://www.matrixscience.com/>

## Peptide View

MS/MS Fragmentation of **MKTEKK**Found in **AT3G15095.3** in **TAIR\_Arabidopsis**, Symbols: | similar to unnamed protein product [Vitis vinifera] (GB:CAO39345.1) | chr3:5082837-5084057 FORWARD

Match to Query 905: 788.396322 from(395.205437,2+) index(1478)

Title: Elution from: 18.865 to 18.865 scan no 1939 cid35.00 polarity:+

Data file D6h-3\_3.mgf

Click mouse within plot area to zoom in by factor of two about that point

Or,  to  Da Label all possible matches  Label matches used for scoring Show Y-axis 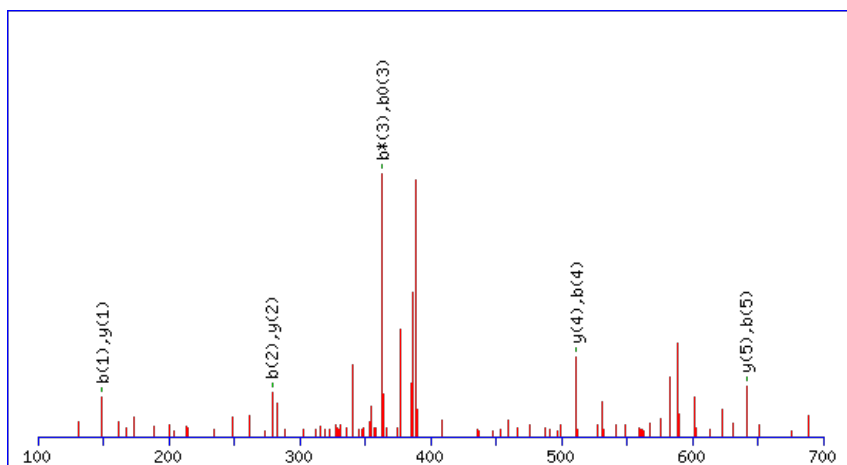Monoisotopic mass of neutral peptide  $M_r(\text{calc})$ : 788.3944

Fixed modifications: Carbamidomethyl (C) (apply to specified residues or termini only)

Variable modifications:

M1 : Oxidation (M), with neutral losses 0.0000 (shown in table), 63.9983

Ions Score: 34 Expect: 0.0034

Matches : 10/74 fragment ions using 6 most intense peaks ([help](#))

| # | b               | b <sup>++</sup> | b*              | b <sup>*++</sup> | b <sup>0</sup>  | b <sup>0++</sup> | Seq.     | y               | y <sup>++</sup> | y*       | y <sup>*++</sup> | y <sup>0</sup> | y <sup>0++</sup> | #        |
|---|-----------------|-----------------|-----------------|------------------|-----------------|------------------|----------|-----------------|-----------------|----------|------------------|----------------|------------------|----------|
| 1 | <b>149.0397</b> | 75.0235         |                 |                  |                 |                  | <b>M</b> |                 |                 |          |                  |                |                  | <b>6</b> |
| 2 | <b>279.1287</b> | 140.0680        | 261.1052        | 131.0562         |                 |                  | <b>K</b> | <b>641.3693</b> | 321.1883        | 623.3457 | 312.1765         | 623.3587       | 312.1830         | <b>5</b> |
| 3 | 381.1735        | 191.0904        | <b>363.1499</b> | 182.0786         | <b>363.1629</b> | 182.0851         | <b>T</b> | <b>511.2802</b> | 256.1438        | 493.2567 | 247.1320         | 493.2697       | 247.1385         | <b>4</b> |
| 4 | <b>511.2131</b> | 256.1102        | 493.1895        | 247.0984         | 493.2025        | 247.1049         | <b>E</b> | 409.2355        | 205.1214        | 391.2120 | 196.1096         | 391.2250       | 196.1161         | <b>3</b> |
| 5 | <b>641.3021</b> | 321.1547        | 623.2785        | 312.1429         | 623.2916        | 312.1494         | <b>K</b> | <b>279.1959</b> | 140.1016        | 261.1723 | 131.0898         |                |                  | <b>2</b> |
| 6 |                 |                 |                 |                  |                 |                  | <b>K</b> | <b>149.1069</b> | 75.0571         | 131.0833 | 66.0453          |                |                  | <b>1</b> |

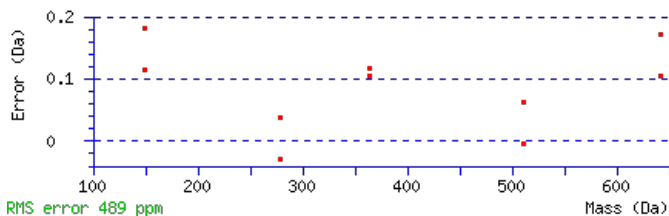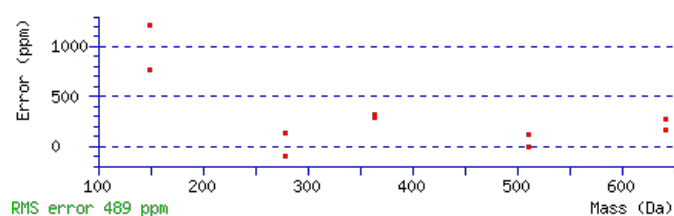NCBI **BLAST** search of [MKTEKK](#)

(Parameters: blastp, nr protein database, expect=20000, no filter, PAM30)

Other BLAST [web gateways](#)

### All matches to this query

| Score | $M_r(\text{calc})$ | Delta  | Sequence               |
|-------|--------------------|--------|------------------------|
| 33.9  | 788.3944           | 0.0019 | <a href="#">MKTEKK</a> |
| 22.4  | 788.3944           | 0.0019 | <a href="#">KMKTEK</a> |

### AT3G15095.3

|      |          |         |                         |
|------|----------|---------|-------------------------|
| 22.4 | 788.3945 | 0.0019  | <a href="#">MASSLKK</a> |
| 22.4 | 788.3944 | 0.0019  | <a href="#">MEKKTk</a>  |
| 22.4 | 788.3944 | 0.0019  | <a href="#">MKVTASK</a> |
| 22.4 | 788.3967 | -0.0003 | <a href="#">MQIFVK</a>  |
| 20.3 | 788.3971 | -0.0008 | <a href="#">ARQMkK</a>  |
| 20.3 | 788.3944 | 0.0019  | <a href="#">ETkMkK</a>  |
| 20.3 | 788.3944 | 0.0019  | <a href="#">TEkMkK</a>  |
| 17.8 | 788.3971 | -0.0008 | <a href="#">RMkSAGk</a> |

Mascot: <http://www.matrixscience.com/>

**Peptide View**MS/MS Fragmentation of **MLSEGAVLK**Found in **AT3G15140.1** in **TAIR\_Arabidopsis**, Symbols: | exonuclease family protein | chr3:5099719-5101724 REVERSE

Match to Query 2195: 972.479654 from(487.247103,2+) index(1296)

Title: Elution from: 18.677 to 18.677 scan no 1792 cid35.00 polarity:+

Data file C7-1\_2.mgf

Click mouse within plot area to zoom in by factor of two about that point

Or,   to  Da Label all possible matches  Label matches used for scoring Show Y-axis 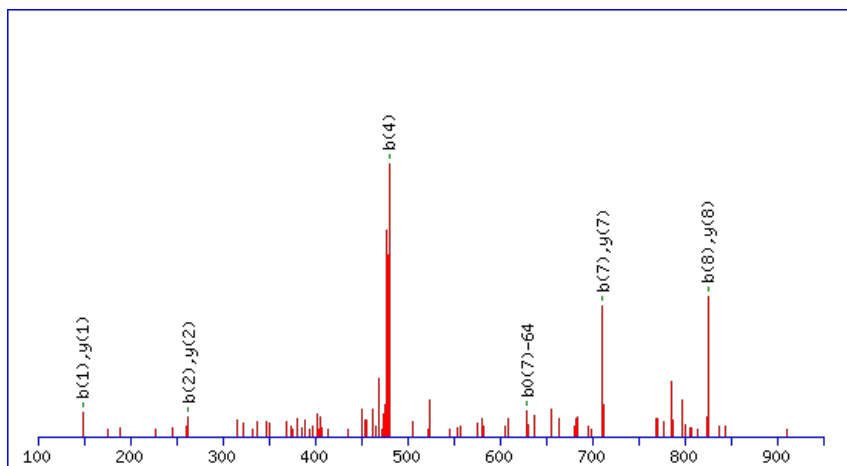Monoisotopic mass of neutral peptide  $M_r(\text{calc})$ : 972.4810

Fixed modifications: Carbamidomethyl (C) (apply to specified residues or termini only)

Variable modifications:

M1 : Oxidation (M), with neutral losses 0.0000 (shown in table), 63.9983

Ions Score: 35 Expect: 0.0046

Matches : 10/94 fragment ions using 8 most intense peaks ([help](#))

| # | b               | b <sup>++</sup> | b <sup>0</sup> | b <sup>0++</sup> | Seq.     | y               | y <sup>++</sup> | y <sup>*</sup> | y <sup>*++</sup> | y <sup>0</sup> | y <sup>0++</sup> | #        |
|---|-----------------|-----------------|----------------|------------------|----------|-----------------|-----------------|----------------|------------------|----------------|------------------|----------|
| 1 | <b>149.0397</b> | 75.0235         |                |                  | <b>M</b> |                 |                 |                |                  |                |                  | <b>9</b> |
| 2 | <b>263.1208</b> | 132.0640        |                |                  | <b>L</b> | <b>825.4559</b> | 413.2316        | 807.4323       | 404.2198         | 807.4453       | 404.2263         | <b>8</b> |
| 3 | 351.1499        | 176.0786        | 333.1393       | 167.0733         | <b>S</b> | <b>711.3748</b> | 356.1910        | 693.3512       | 347.1792         | 693.3642       | 347.1857         | <b>7</b> |
| 4 | <b>481.1895</b> | 241.0984        | 463.1789       | 232.0931         | <b>E</b> | 623.3457        | 312.1765        | 605.3221       | 303.1647         | 605.3351       | 303.1712         | <b>6</b> |
| 5 | 539.2080        | 270.1076        | 521.1974       | 261.1024         | <b>G</b> | 493.3061        | 247.1567        | 475.2825       | 238.1449         |                |                  | <b>5</b> |
| 6 | 611.2421        | 306.1247        | 593.2316       | 297.1194         | <b>A</b> | 435.2876        | 218.1474        | 417.2640       | 209.1356         |                |                  | <b>4</b> |
| 7 | <b>711.3076</b> | 356.1574        | 693.2970       | 347.1522         | <b>V</b> | 363.2534        | 182.1303        | 345.2298       | 173.1186         |                |                  | <b>3</b> |
| 8 | <b>825.3887</b> | 413.1980        | 807.3781       | 404.1927         | <b>L</b> | <b>263.1880</b> | 132.0976        | 245.1644       | 123.0858         |                |                  | <b>2</b> |
| 9 |                 |                 |                |                  | <b>K</b> | <b>149.1069</b> | 75.0571         | 131.0833       | 66.0453          |                |                  | <b>1</b> |

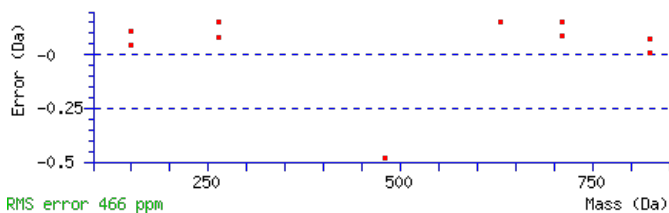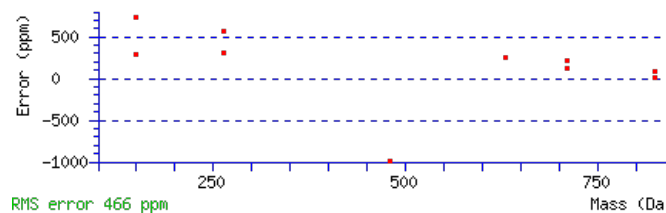NCBI **BLAST** search of **MLSEGAVLK**

(Parameters: blastp, nr protein database, expect=20000, no filter, PAM30)

Other BLAST [web gateways](#)

All matches to this query

| Score | $M_r(\text{calc})$ | Delta | Sequence |
|-------|--------------------|-------|----------|
|-------|--------------------|-------|----------|

**AT3G15140.1**

|      |          |         |                           |
|------|----------|---------|---------------------------|
| 35.3 | 972.4810 | -0.0014 | <a href="#">MLSEGAVLK</a> |
| 17.3 | 972.4810 | -0.0014 | <a href="#">EMEKLVSQ</a>  |
| 17.2 | 972.4776 | 0.0020  | <a href="#">DFDVLNLK</a>  |
| 17.2 | 972.4776 | 0.0020  | <a href="#">IFTKPDDK</a>  |
| 15.2 | 972.4810 | -0.0014 | <a href="#">MKESLLDK</a>  |
| 15.2 | 972.4776 | 0.0020  | <a href="#">VPYEQSLK</a>  |
| 14.7 | 972.4799 | -0.0002 | <a href="#">LFEEWLK</a>   |
| 12.0 | 972.4776 | 0.0020  | <a href="#">FLGLDVGDK</a> |
| 12.0 | 972.4810 | -0.0014 | <a href="#">MAEDKILK</a>  |
| 10.8 | 972.4810 | -0.0013 | <a href="#">EMTKEVVK</a>  |

**Mascot:** <http://www.matrixscience.com/>

**Peptide View**MS/MS Fragmentation of **LIGEAYSAIDK**Found in **AT3G15190.1** in **TAIR\_Arabidopsis**, Symbols: | chloroplast 30S ribosomal protein S20, putative | chr3:5116223-5117419 FORWARD

Match to Query 4255: 1178.615762 from(590.315157,2+) index(4496)

Title: Elution from: 41.572 to 41.572 scan no 5590 cid35.00 polarity:+

Data file 0-1\_1.mgf

Click mouse within plot area to zoom in by factor of two about that point

Or,   to  Da Label all possible matches  Label matches used for scoring Show Y-axis 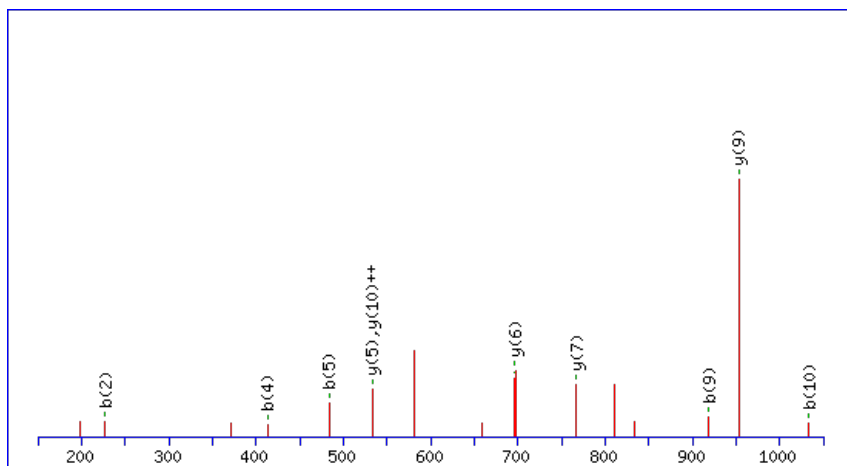Monoisotopic mass of neutral peptide **Mr(calc)**: 1178.6183**Fixed modifications**: Carbamidomethyl (C) (apply to specified residues or termini only)**Ions Score**: 33 **Expect**: 0.0019**Matches**: 10/92 fragment ions using 18 most intense peaks ([help](#))

| #  | b                | b <sup>++</sup> | b <sup>0</sup> | b <sup>0++</sup> | Seq. | y               | y <sup>++</sup> | y*        | y <sup>*++</sup> | y <sup>0</sup> | y <sup>0++</sup> | #  |
|----|------------------|-----------------|----------------|------------------|------|-----------------|-----------------|-----------|------------------|----------------|------------------|----|
| 1  | 114.0913         | 57.5493         |                |                  | L    |                 |                 |           |                  |                |                  | 11 |
| 2  | <b>227.1754</b>  | 114.0913        |                |                  | I    | 1066.5415       | <b>533.7744</b> | 1049.5150 | 525.2611         | 1048.5310      | 524.7691         | 10 |
| 3  | 284.1969         | 142.6021        |                |                  | G    | <b>953.4575</b> | 477.2324        | 936.4309  | 468.7191         | 935.4469       | 468.2271         | 9  |
| 4  | <b>413.2395</b>  | 207.1234        | 395.2289       | 198.1181         | E    | 896.4360        | 448.7216        | 879.4094  | 440.2084         | 878.4254       | 439.7164         | 8  |
| 5  | <b>484.2766</b>  | 242.6419        | 466.2660       | 233.6366         | A    | <b>767.3934</b> | 384.2003        | 750.3668  | 375.6871         | 749.3828       | 375.1951         | 7  |
| 6  | 647.3399         | 324.1736        | 629.3293       | 315.1683         | Y    | <b>696.3563</b> | 348.6818        | 679.3297  | 340.1685         | 678.3457       | 339.6765         | 6  |
| 7  | 734.3719         | 367.6896        | 716.3614       | 358.6843         | S    | <b>533.2930</b> | 267.1501        | 516.2664  | 258.6368         | 515.2824       | 258.1448         | 5  |
| 8  | 805.4090         | 403.2082        | 787.3985       | 394.2029         | A    | 446.2609        | 223.6341        | 429.2344  | 215.1208         | 428.2504       | 214.6288         | 4  |
| 9  | <b>918.4931</b>  | 459.7502        | 900.4825       | 450.7449         | I    | 375.2238        | 188.1155        | 358.1973  | 179.6023         | 357.2132       | 179.1103         | 3  |
| 10 | <b>1033.5201</b> | 517.2637        | 1015.5095      | 508.2584         | D    | 262.1397        | 131.5735        | 245.1132  | 123.0602         | 244.1292       | 122.5682         | 2  |
| 11 |                  |                 |                |                  | K    | 147.1128        | 74.0600         | 130.0863  | 65.5468          |                |                  | 1  |

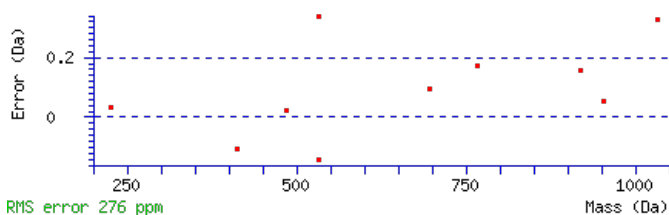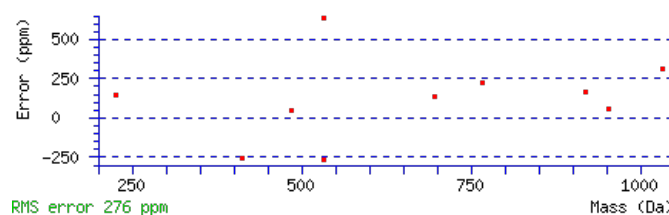NCBI **BLAST** search of **LIGEAYSAIDK**

(Parameters: blastp, nr protein database, expect=20000, no filter, PAM30)

Other BLAST [web gateways](#)**All matches to this query**



## AT3G15190.1

| Score | Mr(calc)  | Delta   | Sequence                    |
|-------|-----------|---------|-----------------------------|
| 33.1  | 1178.6183 | -0.0025 | <a href="#">LIGEAYSAIDK</a> |
| 6.3   | 1178.6151 | 0.0006  | <a href="#">IIEITMCRK</a>   |
| 2.1   | 1178.6151 | 0.0006  | <a href="#">LKILNMSGCK</a>  |
| 1.0   | 1178.6183 | -0.0025 | <a href="#">LIDEFALSGSK</a> |
| 1.0   | 1178.6158 | -0.0000 | <a href="#">LLVYEFMHK</a>   |

Mascot: <http://www.matrixscience.com/>

**Peptide View**MS/MS Fragmentation of **IKMLR**Found in **AT3G15340.1** in **TAIR\_Arabidopsis**

Match to Query 568: 684.383666 from(343.199109,2+) index(2870)

Title: Elution from: 28.884 to 28.884 scan no 3567 cid35.00 polarity:+

Data file D12h-1\_3.mgf

Click mouse within plot area to zoom in by factor of two about that point

Or,   to  Da Label all possible matches  Label matches used for scoring Show Y-axis 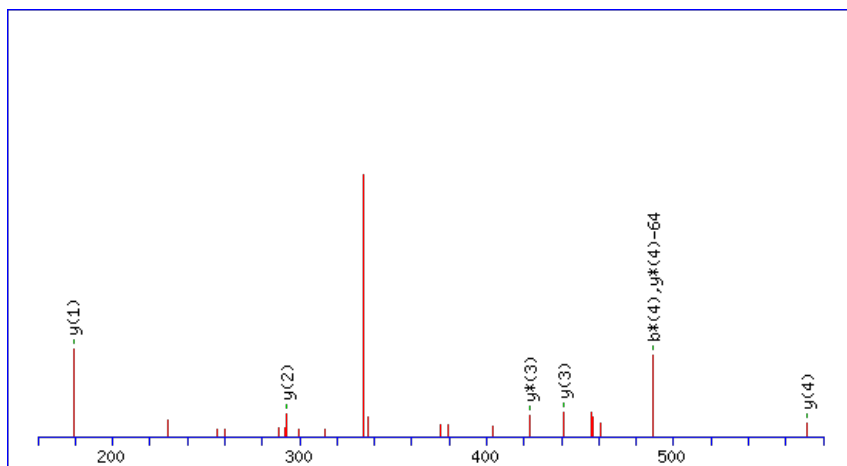**Monoisotopic mass of neutral peptide Mr(calc):** 684.3835**Fixed modifications:** Carbamidomethyl (C) (apply to specified residues or termini only)**Variable modifications:****M3** : Oxidation (M), with neutral losses 0.0000 (shown in table), 63.9983**Ions Score:** 25 **Expect:** 0.018**Matches** : 7/46 fragment ions using 12 most intense peaks ([help](#))

| # | b        | b <sup>++</sup> | b*              | b <sup>+++</sup> | Seq. | y               | y <sup>++</sup> | y*              | y <sup>+++</sup> | # |
|---|----------|-----------------|-----------------|------------------|------|-----------------|-----------------|-----------------|------------------|---|
| 1 | 115.0884 | 58.0478         |                 |                  | I    |                 |                 |                 |                  | 5 |
| 2 | 245.1774 | 123.0923        | 227.1538        | 114.0805         | K    | <b>571.3097</b> | 286.1585        | 553.2861        | 277.1467         | 4 |
| 3 | 393.2098 | 197.1086        | 375.1863        | 188.0968         | M    | <b>441.2206</b> | 221.1140        | <b>423.1970</b> | 212.1022         | 3 |
| 4 | 507.2909 | 254.1491        | <b>489.2674</b> | 245.1373         | L    | <b>293.1882</b> | 147.0977        | 275.1646        | 138.0859         | 2 |
| 5 |          |                 |                 |                  | R    | <b>179.1071</b> | 90.0572         | 161.0835        | 81.0454          | 1 |

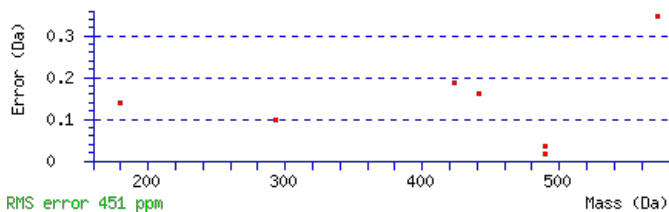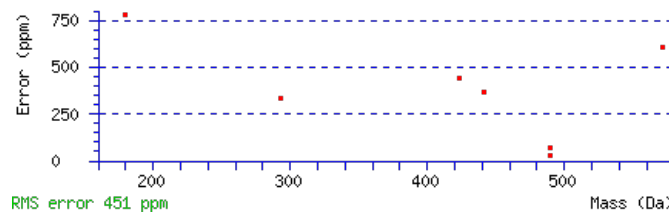NCBI **BLAST** search of **IKMLR**

(Parameters: blastp, nr protein database, expect=20000, no filter, PAM30)

Other BLAST [web gateways](#)**All matches to this query**

| Score | Mr(calc) | Delta  | Sequence              |
|-------|----------|--------|-----------------------|
| 25.3  | 684.3835 | 0.0002 | <a href="#">IKMLR</a> |
| 25.3  | 684.3835 | 0.0002 | <a href="#">LKMR</a>  |
| 25.3  | 684.3835 | 0.0002 | <a href="#">LKMLR</a> |
| 22.8  | 684.3835 | 0.0002 | <a href="#">LMKLR</a> |

# AT3G15340.1

|      |          |        |                       |
|------|----------|--------|-----------------------|
| 17.5 | 684.3835 | 0.0002 | <a href="#">KLMLR</a> |
| 14.3 | 684.3835 | 0.0002 | <a href="#">LKIMR</a> |
| 14.3 | 684.3835 | 0.0002 | <a href="#">LKLMR</a> |
| 14.3 | 684.3835 | 0.0002 | <a href="#">MKIR</a>  |
| 14.3 | 684.3835 | 0.0002 | <a href="#">MLKLR</a> |
| 12.4 | 684.3835 | 0.0002 | <a href="#">LMIKR</a> |

**Mascot:** <http://www.matrixscience.com/>

## Peptide View

### MS/MS Fragmentation of **DDEVLNKIDK**

Found in **AT3G15350.1** in **TAIR\_Arabidopsis**, Symbols: | glycosyltransferase family 14 protein / core-2/I-branching enzyme family protein | chr3:5167257-5168889 FORWARD

Match to Query 4297: 1200.566544 from(601.290548,2+) index(4013)

Title: Elution from: 37.724 to 37.724 scan no 4988 cid35.00 polarity:+

Data file C7-3\_1.mgf

Click mouse within plot area to zoom in by factor of two about that point

Or,   to  Da

Label all possible matches  Label matches used for scoring

Show Y-axis

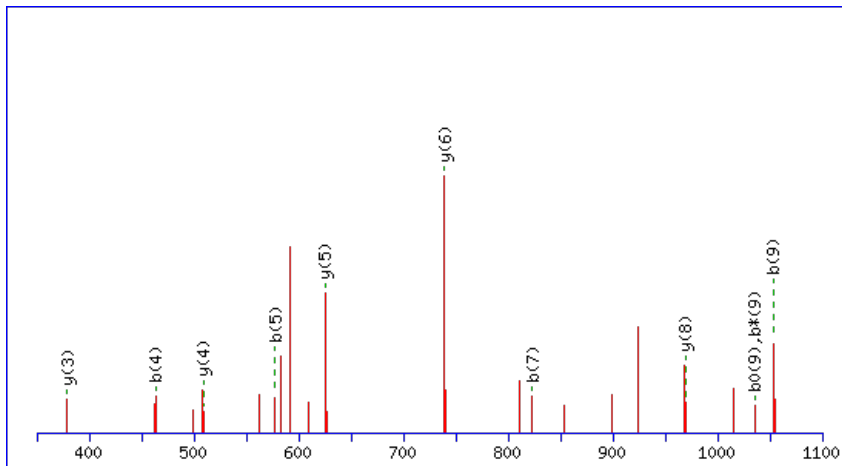

**Monoisotopic mass of neutral peptide Mr(calc):** 1200.5648

**Fixed modifications:** Carbamidomethyl (C) (apply to specified residues or termini only)

**Ions Score:** 26 **Expect:** 0.014

**Matches:** 11/96 fragment ions using 28 most intense peaks ([help](#))

| #  | b                | b <sup>++</sup> | b*               | b <sup>*++</sup> | b <sup>0</sup>   | b <sup>0++</sup> | Seq. | y               | y <sup>++</sup> | y*        | y <sup>*++</sup> | y <sup>0</sup> | y <sup>0++</sup> | #  |
|----|------------------|-----------------|------------------|------------------|------------------|------------------|------|-----------------|-----------------|-----------|------------------|----------------|------------------|----|
| 1  | 117.0313         | 59.0193         |                  |                  | 99.0207          | 50.0140          | D    |                 |                 |           |                  |                |                  | 10 |
| 2  | 233.0552         | 117.0313        |                  |                  | 215.0447         | 108.0260         | D    | 1085.5481       | 543.2777        | 1067.5246 | 534.2659         | 1067.5376      | 534.2724         | 9  |
| 3  | 363.0949         | 182.0511        |                  |                  | 345.0843         | 173.0458         | E    | <b>969.5242</b> | 485.2657        | 951.5006  | 476.2539         | 951.5136       | 476.2604         | 8  |
| 4  | <b>463.1603</b>  | 232.0838        |                  |                  | 445.1497         | 223.0785         | V    | 839.4845        | 420.2459        | 821.4609  | 411.2341         | 821.4740       | 411.2406         | 7  |
| 5  | <b>577.2414</b>  | 289.1243        |                  |                  | 559.2308         | 280.1191         | L    | <b>739.4191</b> | 370.2132        | 721.3955  | 361.2014         | 721.4085       | 361.2079         | 6  |
| 6  | 693.2784         | 347.1428        | 675.2548         | 338.1310         | 675.2678         | 338.1376         | N    | <b>625.3380</b> | 313.1726        | 607.3144  | 304.1608         | 607.3274       | 304.1673         | 5  |
| 7  | <b>823.3674</b>  | 412.1874        | 805.3439         | 403.1756         | 805.3569         | 403.1821         | K    | <b>509.3010</b> | 255.1541        | 491.2774  | 246.1423         | 491.2904       | 246.1488         | 4  |
| 8  | 937.4485         | 469.2279        | 919.4250         | 460.2161         | 919.4380         | 460.2226         | I    | <b>379.2120</b> | 190.1096        | 361.1884  | 181.0978         | 361.2014       | 181.1043         | 3  |
| 9  | <b>1053.4725</b> | 527.2399        | <b>1035.4489</b> | 518.2281         | <b>1035.4620</b> | 518.2346         | D    | 265.1309        | 133.0691        | 247.1073  | 124.0573         | 247.1203       | 124.0638         | 2  |
| 10 |                  |                 |                  |                  |                  |                  | K    | 149.1069        | 75.0571         | 131.0833  | 66.0453          |                |                  | 1  |

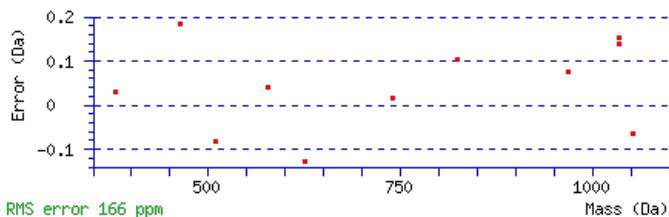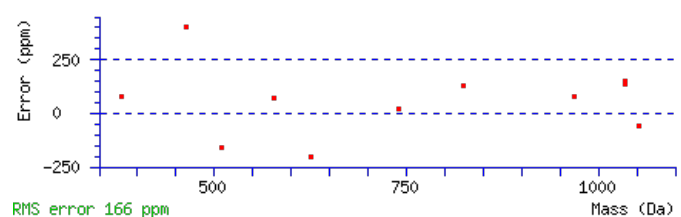

### NCBI BLAST search of **DDEVLNKIDK**

(Parameters: blastp, nr protein database, expect=20000, no filter, PAM30)

Other BLAST [web gateways](#)

All matches to this query

## AT3G15350.1

| Score | Mr(calc)  | Delta   | Sequence                    |
|-------|-----------|---------|-----------------------------|
| 26.4  | 1200.5648 | 0.0017  | <a href="#">DDEVLNKIDK</a>  |
| 15.2  | 1200.5648 | 0.0017  | <a href="#">VQASLGEELDK</a> |
| 9.3   | 1200.5648 | 0.0017  | <a href="#">TDEIIEALER</a>  |
| 8.1   | 1200.5648 | 0.0017  | <a href="#">KLEEANEEVK</a>  |
| 5.2   | 1200.5675 | -0.0010 | <a href="#">DRPSANLIDGK</a> |
| 2.1   | 1200.5671 | -0.0005 | <a href="#">FEIVQPEEAK</a>  |
| 2.0   | 1200.5646 | 0.0020  | <a href="#">VFEMFFNKK</a>   |
| 1.3   | 1200.5648 | 0.0017  | <a href="#">LEDSLQEINK</a>  |
| 0.7   | 1200.5693 | -0.0028 | <a href="#">EYSKIFFEK</a>   |
| 0.4   | 1200.5675 | -0.0010 | <a href="#">ATKSKEHEQK</a>  |

Mascot: <http://www.matrixscience.com/>

## Peptide View

### MS/MS Fragmentation of **KDSIIGAVPR**

Found in **AT3G15360.1** in **TAIR\_Arabidopsis**, Symbols: ATM4, TRX-M4, ATHM4 | ATHM4 (Arabidopsis thioredoxin M-type 4); thiol-disulfide exchange intermediate | chr3:5188455-5189464 FORWARD

Match to Query 2987: 1068.572988 from(357.198272,3+) index(2151)

Title: Elution from: 24.784 to 24.784 scan no 2757 cid35.00 polarity:+

Data file C7-1\_3.mgf

Click mouse within plot area to zoom in by factor of two about that point

Or,  to  Da

Label all possible matches  Label matches used for scoring

Show Y-axis

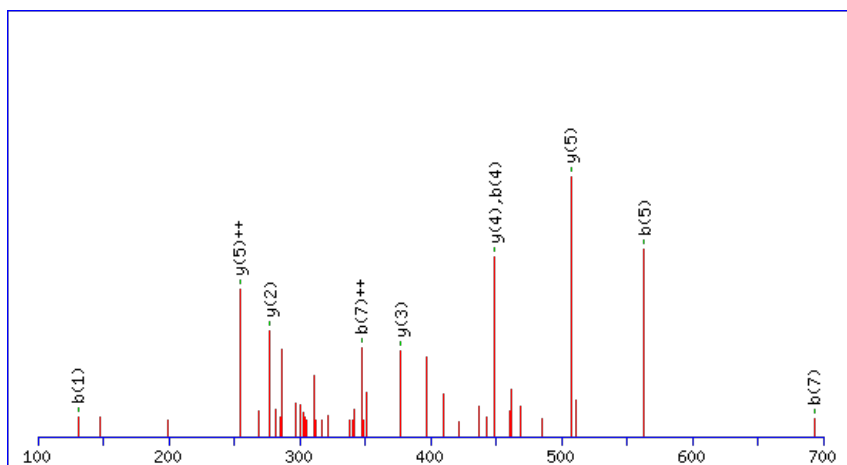

Monoisotopic mass of neutral peptide  $M_r(\text{calc})$ : 1068.5720

Fixed modifications: Carbamidomethyl (C) (apply to specified residues or termini only)

Ions Score: 31 Expect: 0.0046

Matches : 10/92 fragment ions using 11 most intense peaks ([help](#))

| #  | b               | b <sup>++</sup> | b*       | b <sup>*++</sup> | b <sup>0</sup> | b <sup>0++</sup> | Seq.     | y               | y <sup>++</sup> | y*       | y <sup>*++</sup> | y <sup>0</sup> | y <sup>0++</sup> | #         |
|----|-----------------|-----------------|----------|------------------|----------------|------------------|----------|-----------------|-----------------|----------|------------------|----------------|------------------|-----------|
| 1  | <b>131.0963</b> | 66.0518         | 113.0727 | 57.0400          |                |                  | <b>K</b> |                 |                 |          |                  |                |                  | <b>10</b> |
| 2  | 247.1203        | 124.0638        | 229.0967 | 115.0520         | 229.1097       | 115.0585         | <b>D</b> | 939.4902        | 470.2488        | 921.4666 | 461.2370         | 921.4797       | 461.2435         | <b>9</b>  |
| 3  | 335.1493        | 168.0783        | 317.1258 | 159.0665         | 317.1388       | 159.0730         | <b>S</b> | 823.4662        | 412.2368        | 805.4427 | 403.2250         | 805.4557       | 403.2315         | <b>8</b>  |
| 4  | <b>449.2304</b> | 225.1189        | 431.2069 | 216.1071         | 431.2199       | 216.1136         | <b>I</b> | 735.4372        | 368.2222        | 717.4136 | 359.2104         |                |                  | <b>7</b>  |
| 5  | <b>563.3115</b> | 282.1594        | 545.2880 | 273.1476         | 545.3010       | 273.1541         | <b>I</b> | 621.3561        | 311.1817        | 603.3325 | 302.1699         |                |                  | <b>6</b>  |
| 6  | 621.3300        | 311.1687        | 603.3065 | 302.1569         | 603.3195       | 302.1634         | <b>G</b> | <b>507.2750</b> | <b>254.1411</b> | 489.2514 | 245.1293         |                |                  | <b>5</b>  |
| 7  | <b>693.3642</b> | <b>347.1857</b> | 675.3406 | 338.1739         | 675.3536       | 338.1805         | <b>A</b> | <b>449.2565</b> | 225.1319        | 431.2329 | 216.1201         |                |                  | <b>4</b>  |
| 8  | 793.4296        | 397.2185        | 775.4061 | 388.2067         | 775.4191       | 388.2132         | <b>V</b> | <b>377.2223</b> | 189.1148        | 359.1988 | 180.1030         |                |                  | <b>3</b>  |
| 9  | 891.4794        | 446.2434        | 873.4559 | 437.2316         | 873.4689       | 437.2381         | <b>P</b> | <b>277.1569</b> | 139.0821        | 259.1333 | 130.0703         |                |                  | <b>2</b>  |
| 10 |                 |                 |          |                  |                |                  | <b>R</b> | 179.1071        | 90.0572         | 161.0835 | 81.0454          |                |                  | <b>1</b>  |

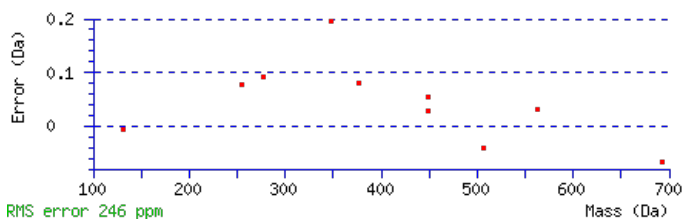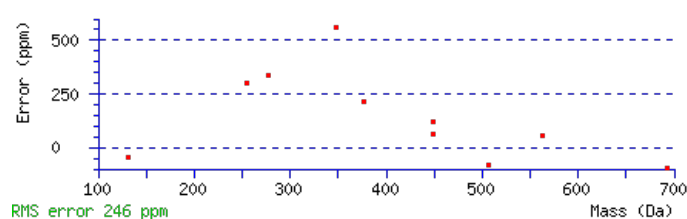

NCBI BLAST search of **KDSIIGAVPR**

(Parameters: blastp, nr protein database, expect=20000, no filter, PAM30)

Other BLAST [web gateways](#)

All matches to this query

**AT3G15360.1**

| <b>Score</b> | <b>Mr(calc)</b> | <b>Delta</b> | <b>Sequence</b>            |
|--------------|-----------------|--------------|----------------------------|
| 30.8         | 1068.5720       | 0.0010       | <a href="#">KDSIIGAVPR</a> |
| 9.3          | 1068.5746       | -0.0017      | <a href="#">KNKHVTGLR</a>  |
| 4.1          | 1068.5720       | 0.0010       | <a href="#">DGQAVIALR</a>  |
| 3.6          | 1068.5720       | 0.0010       | <a href="#">LLKDSPNLR</a>  |
| 2.6          | 1068.5749       | -0.0019      | <a href="#">IPSMLEIK</a>   |
| 1.5          | 1068.5720       | 0.0010       | <a href="#">SIPRTPEKK</a>  |

**Mascot:** <http://www.matrixscience.com/>

**Peptide View**MS/MS Fragmentation of **LEGPIAWDVMYNFEQR**

Found in **AT3G15730.1** in **TAIR\_Arabidopsis**, Symbols: PLD, PLDALPHA1 | PLDALPHA1 (PHOSPHOLIPASE D ALPHA 1); phospholipase D | chr3:5330842-5333481 FORWARD

Match to Query 9275: 1988.854740 from(995.434646,2+) index(10386)

Title: Elution from: 98.645 to 98.645 scan no 14785 cid35.00 polarity:+

Data file D12h-1\_2.mgf

Click mouse within plot area to zoom in by factor of two about that point

Or,   to  Da

Label all possible matches  Label matches used for scoring

Show Y-axis

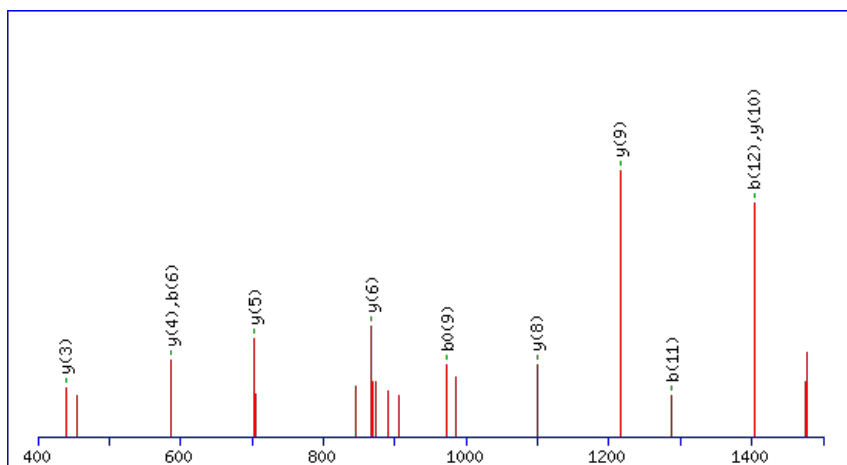

**Monoisotopic mass of neutral peptide Mr(calc):** 1988.8595

**Fixed modifications:** Carbamidomethyl (C) (apply to specified residues or termini only)

**Ions Score:** 60 **Expect:** 5.7e-006

**Matches:** 11/152 fragment ions using 10 most intense peaks ([help](#))

| #  | b                | b <sup>++</sup> | b*        | b <sup>*++</sup> | b <sup>0</sup>  | b <sup>0++</sup> | Seq. | y                | y <sup>++</sup> | y*        | y <sup>*++</sup> | y <sup>0</sup> | y <sup>0++</sup> | #  |
|----|------------------|-----------------|-----------|------------------|-----------------|------------------|------|------------------|-----------------|-----------|------------------|----------------|------------------|----|
| 1  | 115.0884         | 58.0478         |           |                  |                 |                  | L    |                  |                 |           |                  |                |                  | 16 |
| 2  | 245.1280         | 123.0676        |           |                  | 227.1174        | 114.0624         | E    | 1875.7857        | 938.3965        | 1857.7621 | 929.3847         | 1857.7751      | 929.3912         | 15 |
| 3  | 303.1465         | 152.0769        |           |                  | 285.1359        | 143.0716         | G    | 1745.7461        | 873.3767        | 1727.7225 | 864.3649         | 1727.7355      | 864.3714         | 14 |
| 4  | 401.1963         | 201.1018        |           |                  | 383.1857        | 192.0965         | P    | 1687.7276        | 844.3674        | 1669.7040 | 835.3556         | 1669.7170      | 835.3621         | 13 |
| 5  | 515.2774         | 258.1423        |           |                  | 497.2668        | 249.1371         | I    | 1589.6778        | 795.3425        | 1571.6542 | 786.3307         | 1571.6672      | 786.3372         | 12 |
| 6  | <b>587.3115</b>  | 294.1594        |           |                  | 569.3010        | 285.1541         | A    | 1475.5967        | 738.3020        | 1457.5731 | 729.2902         | 1457.5861      | 729.2967         | 11 |
| 7  | 775.3849         | 388.1961        |           |                  | 757.3744        | 379.1908         | W    | <b>1403.5625</b> | 702.2849        | 1385.5389 | 693.2731         | 1385.5519      | 693.2796         | 10 |
| 8  | 891.4089         | 446.2081        |           |                  | 873.3983        | 437.2028         | D    | <b>1215.4891</b> | 608.2482        | 1197.4655 | 599.2364         | 1197.4786      | 599.2429         | 9  |
| 9  | 991.4744         | 496.2408        |           |                  | <b>973.4638</b> | 487.2355         | V    | <b>1099.4651</b> | 550.2362        | 1081.4416 | 541.2244         | 1081.4546      | 541.2309         | 8  |
| 10 | 1123.5119        | 562.2596        |           |                  | 1105.5013       | 553.2543         | M    | 999.3997         | 500.2035        | 981.3761  | 491.1917         | 981.3891       | 491.1982         | 7  |
| 11 | <b>1287.5722</b> | 644.2898        |           |                  | 1269.5617       | 635.2845         | Y    | <b>867.3622</b>  | 434.1847        | 849.3386  | 425.1729         | 849.3516       | 425.1794         | 6  |
| 12 | <b>1403.6092</b> | 702.3083        | 1385.5857 | 693.2965         | 1385.5987       | 693.3030         | N    | <b>703.3018</b>  | 352.1545        | 685.2782  | 343.1428         | 685.2912       | 343.1493         | 5  |
| 13 | 1551.6747        | 776.3410        | 1533.6511 | 767.3292         | 1533.6641       | 767.3357         | F    | <b>587.2648</b>  | 294.1360        | 569.2412  | 285.1243         | 569.2543       | 285.1308         | 4  |
| 14 | 1681.7143        | 841.3608        | 1663.6907 | 832.3490         | 1663.7038       | 832.3555         | E    | <b>439.1994</b>  | 220.1033        | 421.1758  | 211.0915         | 421.1888       | 211.0980         | 3  |
| 15 | 1811.7670        | 906.3871        | 1793.7434 | 897.3753         | 1793.7564       | 897.3818         | Q    | 309.1597         | 155.0835        | 291.1362  | 146.0717         |                |                  | 2  |
| 16 |                  |                 |           |                  |                 |                  | R    | 179.1071         | 90.0572         | 161.0835  | 81.0454          |                |                  | 1  |



# AT3G15730.1

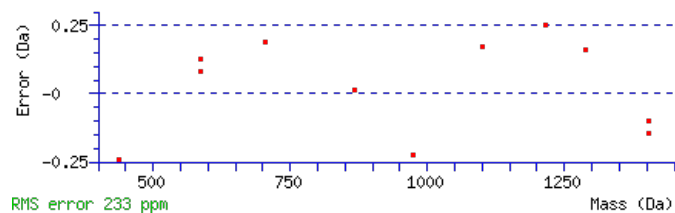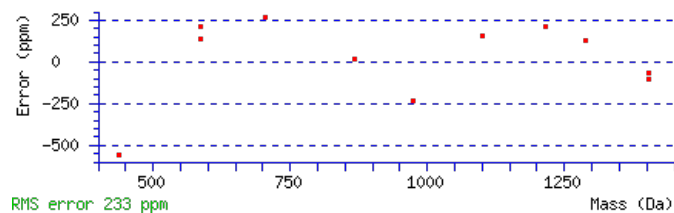

NCBI BLAST search of [LEGPIAWDVMYNFEQR](#)

(Parameters: blastp, nr protein database, expect=20000, no filter, PAM30)

Other BLAST [web gateways](#)

## All matches to this query

| Score | Mr(calc)  | Delta   | Sequence                         |
|-------|-----------|---------|----------------------------------|
| 60.3  | 1988.8595 | -0.0047 | <a href="#">LEGPIAWDVMYNFEQR</a> |
| 0.7   | 1988.8573 | -0.0025 | <a href="#">SSSTSWSIMFRTEYLR</a> |

Mascot: <http://www.matrixscience.com/>

**Peptide View**MS/MS Fragmentation of **VTDSPFPLR**

Found in **AT3G16330.1** in **TAIR\_Arabidopsis**, Symbols: | similar to unknown protein [Arabidopsis thaliana] (TAIR:AT1G52140.1); similar to hypothetical protein [Vitis vinifera] (GB:CAN64915.1) | chr3:5535269-5535886 FORWARD

Match to Query 2829: 1042.511668 from(522.263110,2+) index(4454)

Title: Elution from: 42.043 to 42.043 scan no 5630 cid35.00 polarity:+

Data file 0-3\_1.mgf

Click mouse within plot area to zoom in by factor of two about that point

Or,   to  Da

Label all possible matches  Label matches used for scoring

Show Y-axis

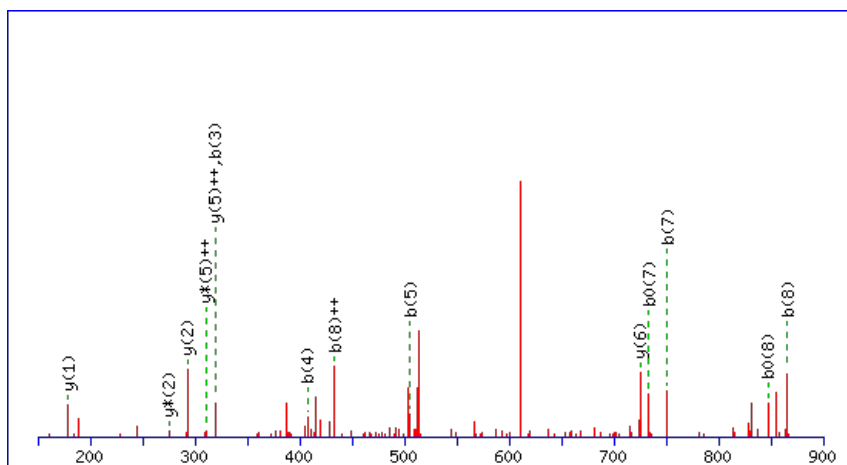

**Monoisotopic mass of neutral peptide Mr(calc):** 1042.5092

**Fixed modifications:** Carbamidomethyl (C) (apply to specified residues or termini only)

**Ions Score:** 24 **Expect:** 0.026

**Matches:** 14/68 fragment ions using 31 most intense peaks ([help](#))

| # | b               | b <sup>++</sup> | b <sup>0</sup>  | b <sup>0++</sup> | Seq. | y               | y <sup>++</sup> | y*              | y <sup>*++</sup> | y <sup>0</sup> | y <sup>0++</sup> | # |
|---|-----------------|-----------------|-----------------|------------------|------|-----------------|-----------------|-----------------|------------------|----------------|------------------|---|
| 1 | 101.0727        | 51.0400         |                 |                  | V    |                 |                 |                 |                  |                |                  | 9 |
| 2 | 203.1174        | 102.0624        | 185.1069        | 93.0571          | T    | 943.4510        | 472.2291        | 925.4274        | 463.2173         | 925.4404       | 463.2239         | 8 |
| 3 | <b>319.1414</b> | 160.0743        | 301.1309        | 151.0691         | D    | 841.4063        | 421.2068        | 823.3827        | 412.1950         | 823.3957       | 412.2015         | 7 |
| 4 | <b>407.1705</b> | 204.0889        | 389.1599        | 195.0836         | S    | <b>725.3823</b> | 363.1948        | 707.3587        | 354.1830         | 707.3717       | 354.1895         | 6 |
| 5 | <b>505.2203</b> | 253.1138        | 487.2097        | 244.1085         | P    | 637.3532        | <b>319.1803</b> | 619.3297        | <b>310.1685</b>  |                |                  | 5 |
| 6 | 653.2857        | 327.1465        | 635.2752        | 318.1412         | F    | 539.3034        | 270.1554        | 521.2799        | 261.1436         |                |                  | 4 |
| 7 | <b>751.3355</b> | 376.1714        | <b>733.3250</b> | 367.1661         | P    | 391.2380        | 196.1226        | 373.2144        | 187.1108         |                |                  | 3 |
| 8 | <b>865.4166</b> | <b>433.2120</b> | <b>847.4061</b> | 424.2067         | L    | <b>293.1882</b> | 147.0977        | <b>275.1646</b> | 138.0859         |                |                  | 2 |
| 9 |                 |                 |                 |                  | R    | <b>179.1071</b> | 90.0572         | 161.0835        | 81.0454          |                |                  | 1 |

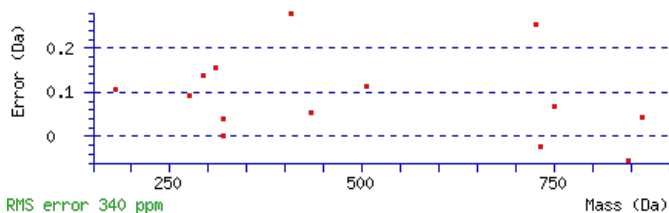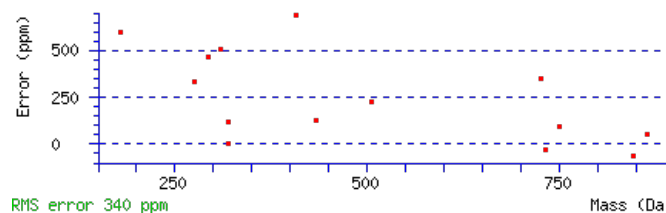

NCBI **BLAST** search of [VTDSPFPLR](#)

(Parameters: blastp, nr protein database, expect=20000, no filter, PAM30)

Other BLAST [web gateways](#)

**All matches to this query**

| Score | Mr(calc) | Delta | Sequence |
|-------|----------|-------|----------|
|       |          |       |          |

**AT3G16330.1**

|      |           |         |                           |
|------|-----------|---------|---------------------------|
| 23.9 | 1042.5092 | 0.0025  | <a href="#">VTDSPFPLR</a> |
| 12.2 | 1042.5125 | -0.0009 | <a href="#">VSISPMEIR</a> |
| 10.0 | 1042.5125 | -0.0009 | <a href="#">SLDLAKPCK</a> |
| 7.5  | 1042.5118 | -0.0002 | <a href="#">FTQHNLLR</a>  |
| 6.8  | 1042.5125 | -0.0009 | <a href="#">GPLESLMIR</a> |
| 6.7  | 1042.5125 | -0.0009 | <a href="#">ELGLALEMR</a> |
| 6.6  | 1042.5125 | -0.0009 | <a href="#">EMELQILR</a>  |
| 6.2  | 1042.5125 | -0.0009 | <a href="#">LEELQLMR</a>  |
| 5.2  | 1042.5092 | 0.0025  | <a href="#">EEWVISIR</a>  |
| 5.0  | 1042.5096 | 0.0021  | <a href="#">SINQNAKPR</a> |

**Mascot:** <http://www.matrixscience.com/>

**Peptide View**MS/MS Fragmentation of **QYNGFYSDTTTNEWK**Found in **AT3G16400.1** in **TAIR\_Arabidopsis**, Symbols: ATMLP-470 | ATMLP-470 (MYROSINASE-BINDING PROTEIN-LIKE PROTEIN-470) | chr3:5566522-5568336 FORWARD

Match to Query 9298: 1999.856156 from(1000.935354,2+) index(7989)

Title: Elution from: 71.602 to 71.602 scan no 10590 cid35.00 polarity:+

Data file 0-1\_2.mgf

Click mouse within plot area to zoom in by factor of two about that point

Or,   to  Da Label all possible matches  Label matches used for scoring Show Y-axis 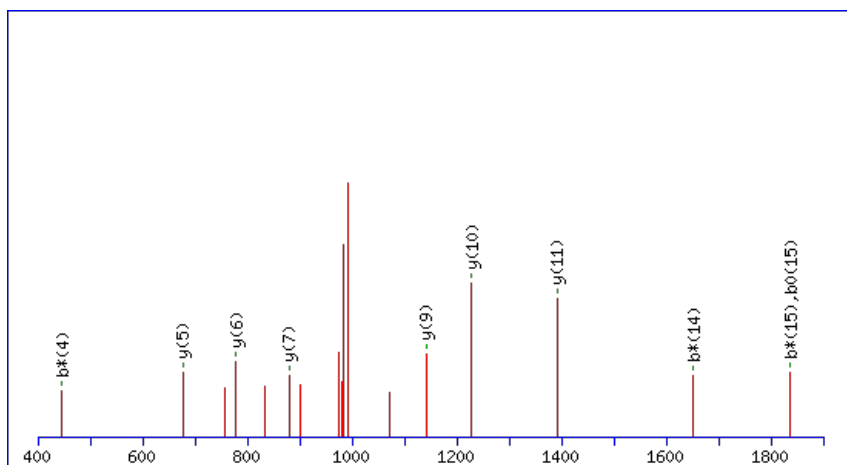

Monoisotopic mass of neutral peptide Mr(calc): 1999.8588

Fixed modifications: Carbamidomethyl (C) (apply to specified residues or termini only)

Ions Score: 40 Expect: 0.00011

Matches : 10/164 fragment ions using 10 most intense peaks ([help](#))

| #  | b         | b <sup>++</sup> | b*        | b <sup>*++</sup> | b <sup>0</sup> | b <sup>0++</sup> | Seq. | y         | y <sup>++</sup> | y*        | y <sup>*++</sup> | y <sup>0</sup> | y <sup>0++</sup> | #  |
|----|-----------|-----------------|-----------|------------------|----------------|------------------|------|-----------|-----------------|-----------|------------------|----------------|------------------|----|
| 1  | 129.0659  | 65.0366         | 112.0393  | 56.5233          |                |                  | Q    |           |                 |           |                  |                |                  | 16 |
| 2  | 292.1292  | 146.5682        | 275.1026  | 138.0550         |                |                  | Y    | 1872.8075 | 936.9074        | 1855.7810 | 928.3941         | 1854.7970      | 927.9021         | 15 |
| 3  | 406.1721  | 203.5897        | 389.1456  | 195.0764         |                |                  | N    | 1709.7442 | 855.3757        | 1692.7176 | 846.8625         | 1691.7336      | 846.3705         | 14 |
| 4  | 463.1936  | 232.1004        | 446.1670  | 223.5872         |                |                  | G    | 1595.7013 | 798.3543        | 1578.6747 | 789.8410         | 1577.6907      | 789.3490         | 13 |
| 5  | 610.2620  | 305.6346        | 593.2354  | 297.1214         |                |                  | F    | 1538.6798 | 769.8435        | 1521.6533 | 761.3303         | 1520.6692      | 760.8383         | 12 |
| 6  | 773.3253  | 387.1663        | 756.2988  | 378.6530         |                |                  | Y    | 1391.6114 | 696.3093        | 1374.5848 | 687.7961         | 1373.6008      | 687.3040         | 11 |
| 7  | 860.3573  | 430.6823        | 843.3308  | 422.1690         | 842.3468       | 421.6770         | S    | 1228.5481 | 614.7777        | 1211.5215 | 606.2644         | 1210.5375      | 605.7724         | 10 |
| 8  | 1007.4258 | 504.2165        | 990.3992  | 495.7032         | 989.4152       | 495.2112         | F    | 1141.5160 | 571.2617        | 1124.4895 | 562.7484         | 1123.5055      | 562.2564         | 9  |
| 9  | 1122.4527 | 561.7300        | 1105.4262 | 553.2167         | 1104.4421      | 552.7247         | D    | 994.4476  | 497.7274        | 977.4211  | 489.2142         | 976.4371       | 488.7222         | 8  |
| 10 | 1223.5004 | 612.2538        | 1206.4738 | 603.7406         | 1205.4898      | 603.2485         | T    | 879.4207  | 440.2140        | 862.3941  | 431.7007         | 861.4101       | 431.2087         | 7  |
| 11 | 1324.5481 | 662.7777        | 1307.5215 | 654.2644         | 1306.5375      | 653.7724         | T    | 778.3730  | 389.6901        | 761.3464  | 381.1769         | 760.3624       | 380.6849         | 6  |
| 12 | 1425.5957 | 713.3015        | 1408.5692 | 704.7882         | 1407.5852      | 704.2962         | T    | 677.3253  | 339.1663        | 660.2988  | 330.6530         | 659.3148       | 330.1610         | 5  |
| 13 | 1539.6387 | 770.3230        | 1522.6121 | 761.8097         | 1521.6281      | 761.3177         | N    | 576.2776  | 288.6425        | 559.2511  | 280.1292         | 558.2671       | 279.6372         | 4  |
| 14 | 1668.6813 | 834.8443        | 1651.6547 | 826.3310         | 1650.6707      | 825.8390         | E    | 462.2347  | 231.6210        | 445.2082  | 223.1077         | 444.2241       | 222.6157         | 3  |
| 15 | 1854.7606 | 927.8839        | 1837.7340 | 919.3706         | 1836.7500      | 918.8786         | W    | 333.1921  | 167.0997        | 316.1656  | 158.5864         |                |                  | 2  |
| 16 |           |                 |           |                  |                |                  | K    | 147.1128  | 74.0600         | 130.0863  | 65.5468          |                |                  | 1  |

# AT3G16400.1

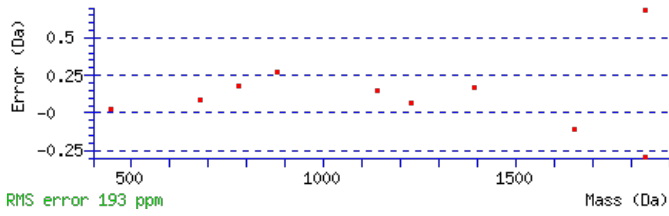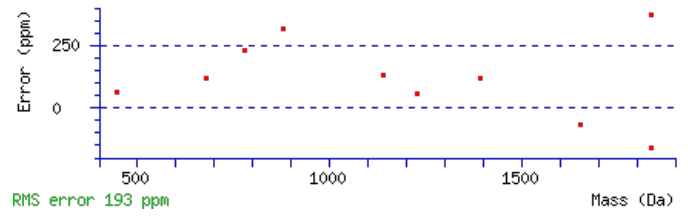

NCBI **BLAST** search of [QYNGFYSDTTNEWK](#)

(Parameters: blastp, nr protein database, expect=20000, no filter, PAM30)

Other BLAST [web gateways](#)

## All matches to this query

| Score | Mr(calc)  | Delta   | Sequence                       |
|-------|-----------|---------|--------------------------------|
| 40.1  | 1999.8588 | -0.0027 | <a href="#">QYNGFYSDTTNEWK</a> |

Mascot: <http://www.matrixscience.com/>

**Peptide View**MS/MS Fragmentation of **WTQVETFGVRPSE**RFound in **AT3G16410.1** in **TAIR\_Arabidopsis**, Symbols: | jacalin lectin family protein | chr3:5572151-5574365 FORWARD

Match to Query 8033: 1712.773668 from(571.931832,3+) index(4273)

Title: Elution from: 39.537 to 39.537 scan no 5369 cid35.00 polarity:+

Data file 0-1\_3.mgf

Click mouse within plot area to zoom in by factor of two about that point

Or,   to  Da Label all possible matches  Label matches used for scoring Show Y-axis 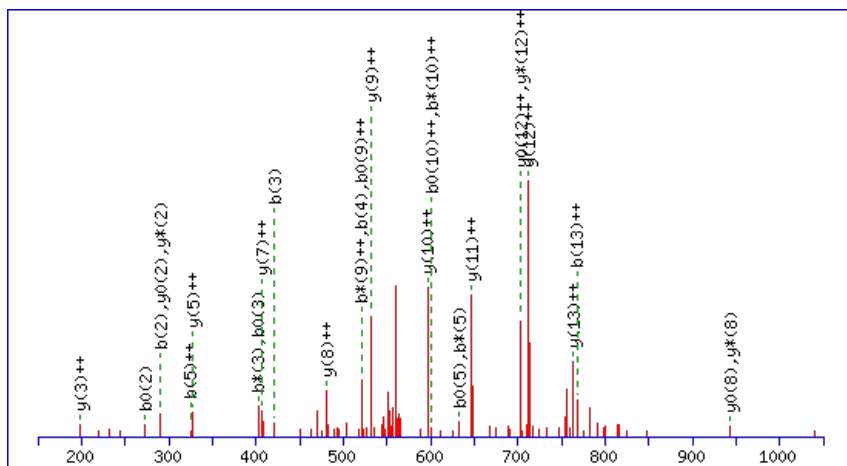**Monoisotopic mass of neutral peptide Mr(calc):** 1712.7775**Fixed modifications:** Carbamidomethyl (C) (apply to specified residues or termini only)**Ions Score:** 53 **Expect:** 4.6e-005**Matches:** 30/148 fragment ions using 43 most intense peaks ([help](#))

| #  | b               | b <sup>++</sup> | b <sup>*</sup>  | b <sup>*++</sup> | b <sup>0</sup>  | b <sup>0++</sup> | Seq. | y         | y <sup>++</sup> | y <sup>*</sup>  | y <sup>*++</sup> | y <sup>0</sup>  | y <sup>0++</sup> | #  |
|----|-----------------|-----------------|-----------------|------------------|-----------------|------------------|------|-----------|-----------------|-----------------|------------------|-----------------|------------------|----|
| 1  | 189.0807        | 95.0440         |                 |                  |                 |                  | W    |           |                 |                 |                  |                 |                  | 14 |
| 2  | <b>291.1254</b> | 146.0663        |                 |                  | 273.1148        | 137.0610         | T    | 1525.7114 | <b>763.3593</b> | 1507.6878       | 754.3475         | 1507.7008       | 754.3540         | 13 |
| 3  | <b>421.1780</b> | 211.0926        | <b>403.1544</b> | 202.0809         | <b>403.1675</b> | 202.0874         | Q    | 1423.6667 | <b>712.3370</b> | 1405.6431       | <b>703.3252</b>  | 1405.6561       | <b>703.3317</b>  | 12 |
| 4  | <b>521.2435</b> | 261.1254        | 503.2199        | 252.1136         | 503.2329        | 252.1201         | V    | 1293.6140 | <b>647.3106</b> | 1275.5904       | 638.2989         | 1275.6035       | 638.3054         | 11 |
| 5  | 651.2831        | <b>326.1452</b> | <b>633.2595</b> | 317.1334         | <b>633.2725</b> | 317.1399         | E    | 1193.5486 | <b>597.2779</b> | 1175.5250       | 588.2661         | 1175.5380       | 588.2726         | 10 |
| 6  | 753.3278        | 377.1675        | 735.3042        | 368.1558         | 735.3172        | 368.1623         | T    | 1063.5089 | <b>532.2581</b> | 1045.4854       | 523.2463         | 1045.4984       | 523.2528         | 9  |
| 7  | 901.3933        | 451.2003        | 883.3697        | 442.1885         | 883.3827        | 442.1950         | F    | 961.4642  | <b>481.2358</b> | <b>943.4406</b> | 472.2240         | <b>943.4537</b> | 472.2305         | 8  |
| 8  | 959.4118        | 480.2095        | 941.3882        | 471.1977         | 941.4012        | 471.2042         | G    | 813.3988  | <b>407.2030</b> | 795.3752        | 398.1912         | 795.3882        | 398.1977         | 7  |
| 9  | 1059.4772       | 530.2422        | 1041.4536       | <b>521.2304</b>  | 1041.4666       | <b>521.2370</b>  | V    | 755.3803  | 378.1938        | 737.3567        | 369.1820         | 737.3697        | 369.1885         | 6  |
| 10 | 1219.5665       | 610.2869        | 1201.5429       | <b>601.2751</b>  | 1201.5559       | <b>601.2816</b>  | R    | 655.3148  | <b>328.1611</b> | 637.2912        | 319.1493         | 637.3043        | 319.1558         | 5  |
| 11 | 1317.6163       | 659.3118        | 1299.5927       | 650.3000         | 1299.6057       | 650.3065         | P    | 495.2256  | 248.1164        | 477.2020        | 239.1046         | 477.2150        | 239.1111         | 4  |
| 12 | 1405.6453       | <b>703.3263</b> | 1387.6217       | 694.3145         | 1387.6348       | 694.3210         | S    | 397.1758  | <b>199.0915</b> | 379.1522        | 190.0797         | 379.1652        | 190.0862         | 3  |
| 13 | 1535.6849       | <b>768.3461</b> | 1517.6614       | 759.3343         | 1517.6744       | 759.3408         | E    | 309.1467  | 155.0770        | <b>291.1231</b> | 146.0652         | <b>291.1362</b> | 146.0717         | 2  |
| 14 |                 |                 |                 |                  |                 |                  | R    | 179.1071  | 90.0572         | 161.0835        | 81.0454          |                 |                  | 1  |

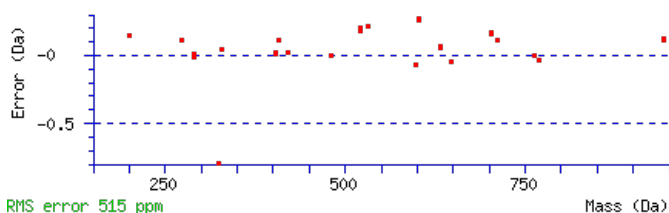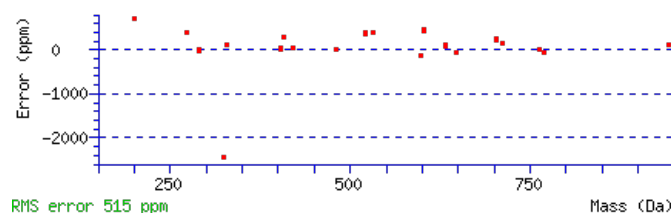NCBI BLAST search of **WTQVETFGVRPSE**R

(Parameters: blastp, nr protein database, expect=20000, no filter, PAM30)

AT3G16410.1

Other BLAST [web gateways](#)

**All matches to this query**

| Score | Mr(calc)  | Delta   | Sequence                         |
|-------|-----------|---------|----------------------------------|
| 53.3  | 1712.7775 | -0.0038 | <a href="#">WTQVETFGVRPSEK</a>   |
| 15.5  | 1712.7752 | -0.0016 | <a href="#">ANTKTAENGSDRLWK</a>  |
| 13.8  | 1712.7752 | -0.0016 | <a href="#">REEQPRDLYLSEK</a>    |
| 4.5   | 1712.7759 | -0.0023 | <a href="#">SVMEEGSEIGEKVRK</a>  |
| 3.9   | 1712.7703 | 0.0034  | <a href="#">DSVDLDTNVSGSRVTK</a> |

Mascot: <http://www.matrixscience.com/>

**Peptide View**MS/MS Fragmentation of **IFGSDGSVITMLR**Found in **AT3G16420.1** in **TAIR\_Arabidopsis**, Symbols: PBP1 | PBP1 (PYK10-BINDING PROTEIN 1) | chr3:5579566-5580680 FORWARD

Match to Query 5625: 1410.676246 from(706.345399,2+) index(8748)

Title: Elution from: 77.227 to 77.227 scan no 11596 cid35.00 polarity:+

Data file C7-2\_2.mgf

Click mouse within plot area to zoom in by factor of two about that point

Or,   to  Da Label all possible matches  Label matches used for scoring Show Y-axis 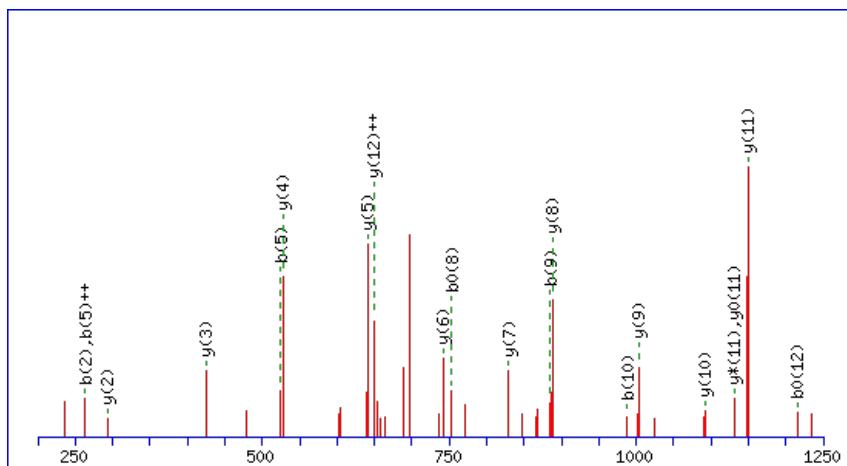Monoisotopic mass of neutral peptide  $M_r(\text{calc})$ : 1410.6753

Fixed modifications: Carbamidomethyl (C) (apply to specified residues or termini only)

Ions Score: 91 Expect: 6.5e-009

Matches : 20/108 fragment ions using 27 most intense peaks ([help](#))

| #  | b               | b <sup>++</sup> | b <sup>0</sup>   | b <sup>0++</sup> | Seq. | y                | y <sup>++</sup> | y*               | y <sup>*++</sup> | y <sup>0</sup>   | y <sup>0++</sup> | #  |
|----|-----------------|-----------------|------------------|------------------|------|------------------|-----------------|------------------|------------------|------------------|------------------|----|
| 1  | 115.0884        | 58.0478         |                  |                  | I    |                  |                 |                  |                  |                  |                  | 13 |
| 2  | <b>263.1538</b> | 132.0805        |                  |                  | F    | 1297.6015        | <b>649.3044</b> | 1279.5779        | 640.2926         | 1279.5910        | 640.2991         | 12 |
| 3  | 321.1723        | 161.0898        |                  |                  | G    | <b>1149.5361</b> | 575.2717        | <b>1131.5125</b> | 566.2599         | <b>1131.5255</b> | 566.2664         | 11 |
| 4  | 409.2014        | 205.1043        | 391.1908         | 196.0990         | S    | <b>1091.5176</b> | 546.2624        | 1073.4940        | 537.2506         | 1073.5070        | 537.2571         | 10 |
| 5  | <b>525.2254</b> | <b>263.1163</b> | 507.2148         | 254.1110         | D    | <b>1003.4885</b> | 502.2479        | 985.4649         | 493.2361         | 985.4779         | 493.2426         | 9  |
| 6  | 583.2439        | 292.1256        | 565.2333         | 283.1203         | G    | <b>887.4645</b>  | 444.2359        | 869.4409         | 435.2241         | 869.4540         | 435.2306         | 8  |
| 7  | 671.2729        | 336.1401        | 653.2624         | 327.1348         | S    | <b>829.4460</b>  | 415.2267        | 811.4225         | 406.2149         | 811.4355         | 406.2214         | 7  |
| 8  | 771.3384        | 386.1728        | <b>753.3278</b>  | 377.1675         | V    | <b>741.4170</b>  | 371.2121        | 723.3934         | 362.2003         | 723.4064         | 362.2068         | 6  |
| 9  | <b>885.4195</b> | 443.2134        | 867.4089         | 434.2081         | I    | <b>641.3515</b>  | 321.1794        | 623.3279         | 312.1676         | 623.3410         | 312.1741         | 5  |
| 10 | <b>987.4642</b> | 494.2357        | 969.4536         | 485.2304         | T    | <b>527.2704</b>  | 264.1389        | 509.2468         | 255.1271         | 509.2599         | 255.1336         | 4  |
| 11 | 1119.5017       | 560.2545        | 1101.4911        | 551.2492         | M    | <b>425.2257</b>  | 213.1165        | 407.2021         | 204.1047         |                  |                  | 3  |
| 12 | 1233.5828       | 617.2950        | <b>1215.5722</b> | 608.2898         | L    | <b>293.1882</b>  | 147.0977        | 275.1646         | 138.0859         |                  |                  | 2  |
| 13 |                 |                 |                  |                  | R    | 179.1071         | 90.0572         | 161.0835         | 81.0454          |                  |                  | 1  |

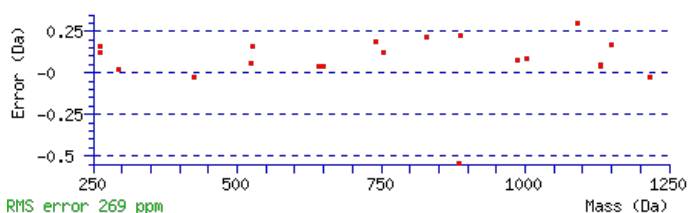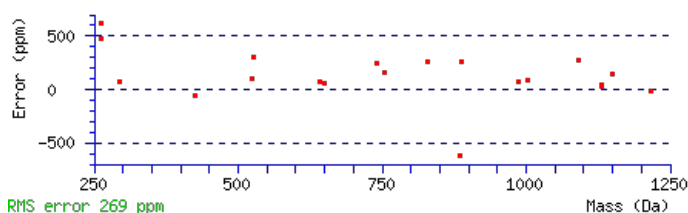NCBI BLAST search of [IFGSDGSVITMLR](#)

(Parameters: blastp, nr protein database, expect=20000, no filter, PAM30)

Other BLAST [web gateways](#)



# AT3G16420.1

All matches to this query

| Score | Mr(calc)  | Delta   | Sequence                      |
|-------|-----------|---------|-------------------------------|
| 91.2  | 1410.6753 | 0.0009  | <a href="#">IFGSDGSVITMLR</a> |
| 10.7  | 1410.6787 | -0.0025 | <a href="#">LMSVITGRDMIK</a>  |
| 9.4   | 1410.6740 | 0.0023  | <a href="#">MMIELLCKGKR</a>   |
| 9.4   | 1410.6740 | 0.0023  | <a href="#">MMIELLCKGKR</a>   |
| 8.7   | 1410.6780 | -0.0017 | <a href="#">VRFEDIGRCLK</a>   |
| 8.3   | 1410.6724 | 0.0039  | <a href="#">EFSGVGRQEVK</a>   |
| 7.0   | 1410.6724 | 0.0038  | <a href="#">KLEEYRGNLNR</a>   |
| 3.8   | 1410.6796 | -0.0033 | <a href="#">FLPSSRWRWR</a>    |
| 1.5   | 1410.6758 | 0.0005  | <a href="#">EAGIMTSSGRRVK</a> |
| 0.3   | 1410.6746 | 0.0016  | <a href="#">KEGYKITGFHGR</a>  |

Mascot: <http://www.matrixscience.com/>

**Peptide View**MS/MS Fragmentation of **VYVGQGQDGISAVK**Found in **AT3G16450.1** in **TAIR\_Arabidopsis**, Symbols: | jacalin lectin family protein | chr3:5588599-5589798 FORWARD

Match to Query 5620: 1436.686480 from(719.350516,2+) index(2821)

Title: Elution from: 31.760 to 31.760 scan no 3650 cid35.00 polarity:+

Data file D12h-2\_1.mgf

Click mouse within plot area to zoom in by factor of two about that point

Or,   to  Da Label all possible matches  Label matches used for scoring Show Y-axis 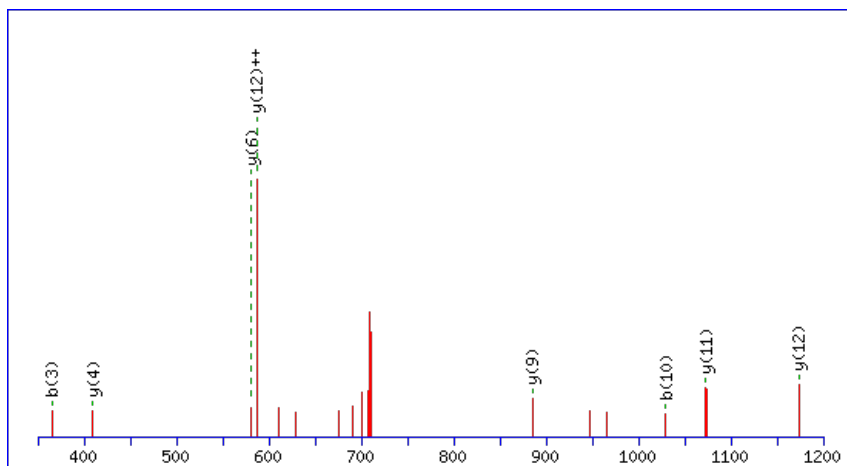Monoisotopic mass of neutral peptide  $M_r(\text{calc})$ : 1436.6853

Fixed modifications: Carbamidomethyl (C) (apply to specified residues or termini only)

Ions Score: 37 Expect: 0.0023

Matches : 8/128 fragment ions using 13 most intense peaks ([help](#))

| #  | b                | b <sup>++</sup> | b <sup>*</sup> | b <sup>*++</sup> | b <sup>0</sup> | b <sup>0++</sup> | Seq. | y                | y <sup>++</sup> | y <sup>*</sup> | y <sup>*++</sup> | y <sup>0</sup> | y <sup>0++</sup> | #  |
|----|------------------|-----------------|----------------|------------------|----------------|------------------|------|------------------|-----------------|----------------|------------------|----------------|------------------|----|
| 1  | 101.0727         | 51.0400         |                |                  |                |                  | V    |                  |                 |                |                  |                |                  | 14 |
| 2  | 265.1331         | 133.0702        |                |                  |                |                  | Y    | 1337.6272        | 669.3172        | 1319.6036      | 660.3055         | 1319.6167      | 660.3120         | 13 |
| 3  | <b>365.1985</b>  | 183.1029        |                |                  |                |                  | V    | <b>1173.5669</b> | <b>587.2871</b> | 1155.5433      | 578.2753         | 1155.5563      | 578.2818         | 12 |
| 4  | 423.2170         | 212.1122        |                |                  |                |                  | G    | <b>1073.5014</b> | 537.2543        | 1055.4778      | 528.2425         | 1055.4908      | 528.2491         | 11 |
| 5  | 553.2697         | 277.1385        | 535.2461       | 268.1267         |                |                  | Q    | 1015.4829        | 508.2451        | 997.4593       | 499.2333         | 997.4723       | 499.2398         | 10 |
| 6  | 611.2882         | 306.1477        | 593.2646       | 297.1359         |                |                  | G    | <b>885.4303</b>  | 443.2188        | 867.4067       | 434.2070         | 867.4197       | 434.2135         | 9  |
| 7  | 741.3408         | 371.1741        | 723.3172       | 362.1623         |                |                  | Q    | 827.4118         | 414.2095        | 809.3882       | 405.1977         | 809.4012       | 405.2042         | 8  |
| 8  | 857.3648         | 429.1860        | 839.3412       | 420.1743         | 839.3542       | 420.1808         | D    | 697.3591         | 349.1832        | 679.3355       | 340.1714         | 679.3485       | 340.1779         | 7  |
| 9  | 915.3833         | 458.1953        | 897.3597       | 449.1835         | 897.3727       | 449.1900         | G    | <b>581.3351</b>  | 291.1712        | 563.3115       | 282.1594         | 563.3246       | 282.1659         | 6  |
| 10 | <b>1029.4644</b> | 515.2358        | 1011.4408      | 506.2240         | 1011.4538      | 506.2306         | I    | 523.3166         | 262.1620        | 505.2930       | 253.1502         | 505.3061       | 253.1567         | 5  |
| 11 | 1117.4935        | 559.2504        | 1099.4699      | 550.2386         | 1099.4829      | 550.2451         | S    | <b>409.2355</b>  | 205.1214        | 391.2120       | 196.1096         | 391.2250       | 196.1161         | 4  |
| 12 | 1189.5276        | 595.2674        | 1171.5040      | 586.2557         | 1171.5171      | 586.2622         | A    | 321.2065         | 161.1069        | 303.1829       | 152.0951         |                |                  | 3  |
| 13 | 1289.5931        | 645.3002        | 1271.5695      | 636.2884         | 1271.5825      | 636.2949         | V    | 249.1723         | 125.0898        | 231.1487       | 116.0780         |                |                  | 2  |
| 14 |                  |                 |                |                  |                |                  | K    | 149.1069         | 75.0571         | 131.0833       | 66.0453          |                |                  | 1  |

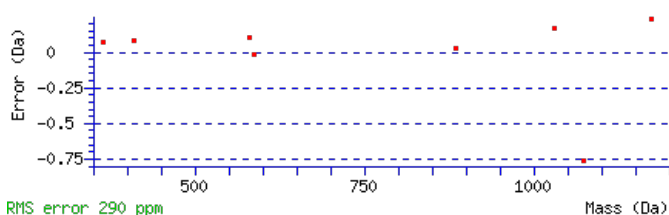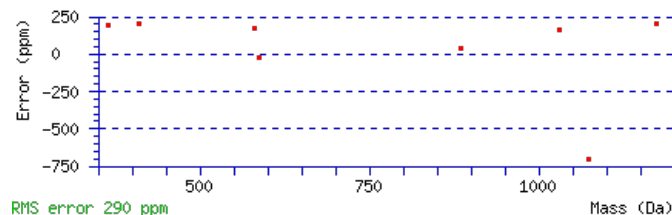NCBI BLAST search of [VYVGQGQDGISAVK](#)

(Parameters: blastp, nr protein database, expect=20000, no filter, PAM30)

# AT3G16450.1

Other BLAST [web gateways](#)

## All matches to this query

| Score | Mr(calc)  | Delta   | Sequence                       |
|-------|-----------|---------|--------------------------------|
| 36.6  | 1436.6853 | 0.0011  | <a href="#">VYVGQGQDGISAVK</a> |
| 7.7   | 1436.6858 | 0.0007  | <a href="#">RSASNTTPSAAVVR</a> |
| 6.5   | 1436.6840 | 0.0025  | <a href="#">GMLMNGTEIAVKR</a>  |
| 4.4   | 1436.6833 | 0.0032  | <a href="#">DFVGALRMAHKR</a>   |
| 3.7   | 1436.6903 | -0.0038 | <a href="#">NFLSHIQKEFR</a>    |
| 3.3   | 1436.6888 | -0.0023 | <a href="#">MIEKIARDVSDK</a>   |
| 3.0   | 1436.6858 | 0.0007  | <a href="#">RNSSGAVTTAIPSR</a> |
| 2.1   | 1436.6863 | 0.0002  | <a href="#">KYMALVIGCPPR</a>   |
| 1.8   | 1436.6876 | -0.0011 | <a href="#">LLSEYGQALWNK</a>   |
| 1.5   | 1436.6880 | -0.0016 | <a href="#">RVFNELQAGLDR</a>   |

Mascot: <http://www.matrixscience.com/>

**Peptide View**MS/MS Fragmentation of **VSVGQAQDGIGAVSFVYDK**Found in **AT3G16460.1** in **TAIR\_Arabidopsis**, Symbols: | jacalin lectin family protein | chr3:5593035-5595528 FORWARD

Match to Query 9023: 1938.968902 from(970.491727,2+) index(7471)

Title: Elution from: 66.567 to 66.567 scan no 9845 cid35.00 polarity:+

Data file 0-2\_2.mgf

Click mouse within plot area to zoom in by factor of two about that point

Or,   to  Da Label all possible matches  Label matches used for scoring Show Y-axis 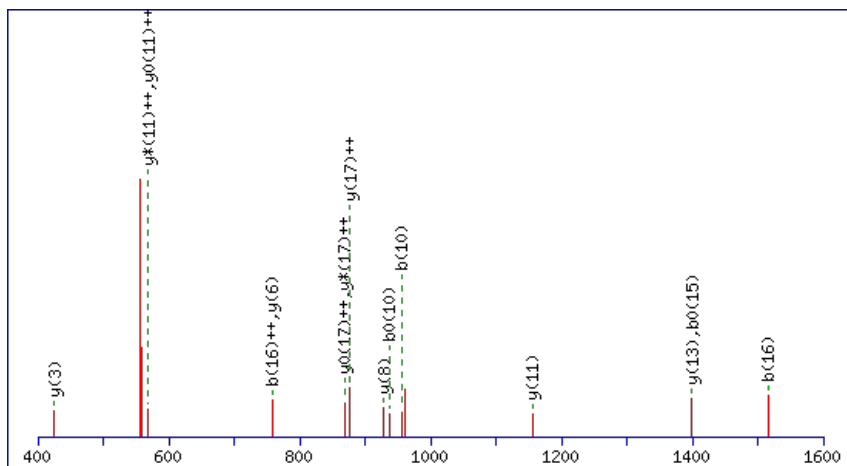**Monoisotopic mass of neutral peptide Mr(calc):** 1938.9687**Fixed modifications:** Carbamidomethyl (C) (apply to specified residues or termini only)**Ions Score:** 32 **Expect:** 0.002**Matches:** 15/204 fragment ions using 14 most intense peaks ([help](#))

| #  | b         | b <sup>++</sup> | b <sup>*</sup> | b <sup>*++</sup> | b <sup>0</sup> | b <sup>0++</sup> | Seq. | y         | y <sup>++</sup> | y <sup>*</sup> | y <sup>*++</sup> | y <sup>0</sup> | y <sup>0++</sup> | #  |
|----|-----------|-----------------|----------------|------------------|----------------|------------------|------|-----------|-----------------|----------------|------------------|----------------|------------------|----|
| 1  | 100.0757  | 50.5415         |                |                  |                |                  | V    |           |                 |                |                  |                |                  | 19 |
| 2  | 187.1077  | 94.0575         |                |                  | 169.0972       | 85.0522          | S    | 1840.9076 | 920.9574        | 1823.8810      | 912.4441         | 1822.8970      | 911.9521         | 18 |
| 3  | 286.1761  | 143.5917        |                |                  | 268.1656       | 134.5864         | V    | 1753.8755 | 877.4414        | 1736.8490      | 868.9281         | 1735.8650      | 868.4361         | 17 |
| 4  | 343.1976  | 172.1024        |                |                  | 325.1870       | 163.0972         | G    | 1654.8071 | 827.9072        | 1637.7806      | 819.3939         | 1636.7966      | 818.9019         | 16 |
| 5  | 471.2562  | 236.1317        | 454.2296       | 227.6185         | 453.2456       | 227.1264         | Q    | 1597.7857 | 799.3965        | 1580.7591      | 790.8832         | 1579.7751      | 790.3912         | 15 |
| 6  | 542.2933  | 271.6503        | 525.2667       | 263.1370         | 524.2827       | 262.6450         | A    | 1469.7271 | 735.3672        | 1452.7005      | 726.8539         | 1451.7165      | 726.3619         | 14 |
| 7  | 670.3519  | 335.6796        | 653.3253       | 327.1663         | 652.3413       | 326.6743         | Q    | 1398.6900 | 699.8486        | 1381.6634      | 691.3354         | 1380.6794      | 690.8433         | 13 |
| 8  | 785.3788  | 393.1930        | 768.3523       | 384.6798         | 767.3682       | 384.1878         | D    | 1270.6314 | 635.8193        | 1253.6048      | 627.3061         | 1252.6208      | 626.8141         | 12 |
| 9  | 842.4003  | 421.7038        | 825.3737       | 413.1905         | 824.3897       | 412.6985         | G    | 1155.6045 | 578.3059        | 1138.5779      | 569.7926         | 1137.5939      | 569.3006         | 11 |
| 10 | 955.4843  | 478.2458        | 938.4578       | 469.7325         | 937.4738       | 469.2405         | I    | 1098.5830 | 549.7951        | 1081.5564      | 541.2819         | 1080.5724      | 540.7898         | 10 |
| 11 | 1012.5058 | 506.7565        | 995.4793       | 498.2433         | 994.4952       | 497.7513         | G    | 985.4989  | 493.2531        | 968.4724       | 484.7398         | 967.4884       | 484.2478         | 9  |
| 12 | 1083.5429 | 542.2751        | 1066.5164      | 533.7618         | 1065.5324      | 533.2698         | A    | 928.4775  | 464.7424        | 911.4509       | 456.2291         | 910.4669       | 455.7371         | 8  |
| 13 | 1182.6113 | 591.8093        | 1165.5848      | 583.2960         | 1164.6008      | 582.8040         | V    | 857.4403  | 429.2238        | 840.4138       | 420.7105         | 839.4298       | 420.2185         | 7  |
| 14 | 1269.6434 | 635.3253        | 1252.6168      | 626.8120         | 1251.6328      | 626.3200         | S    | 758.3719  | 379.6896        | 741.3454       | 371.1763         | 740.3614       | 370.6843         | 6  |
| 15 | 1416.7118 | 708.8595        | 1399.6852      | 700.3462         | 1398.7012      | 699.8542         | F    | 671.3399  | 336.1736        | 654.3134       | 327.6603         | 653.3293       | 327.1683         | 5  |
| 16 | 1515.7802 | 758.3937        | 1498.7536      | 749.8805         | 1497.7696      | 749.3884         | V    | 524.2715  | 262.6394        | 507.2449       | 254.1261         | 506.2609       | 253.6341         | 4  |
| 17 | 1678.8435 | 839.9254        | 1661.8170      | 831.4121         | 1660.8329      | 830.9201         | Y    | 425.2031  | 213.1052        | 408.1765       | 204.5919         | 407.1925       | 204.0999         | 3  |
| 18 | 1793.8705 | 897.4389        | 1776.8439      | 888.9256         | 1775.8599      | 888.4336         | D    | 262.1397  | 131.5735        | 245.1132       | 123.0602         | 244.1292       | 122.5682         | 2  |
| 19 |           |                 |                |                  |                |                  | K    | 147.1128  | 74.0600         | 130.0863       | 65.5468          |                |                  | 1  |

AT3G16460.1

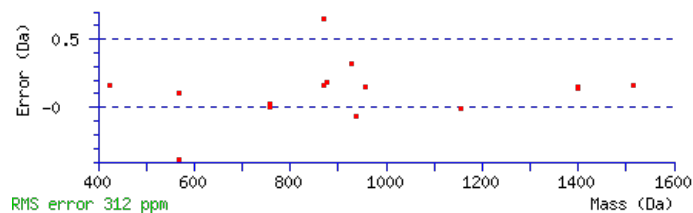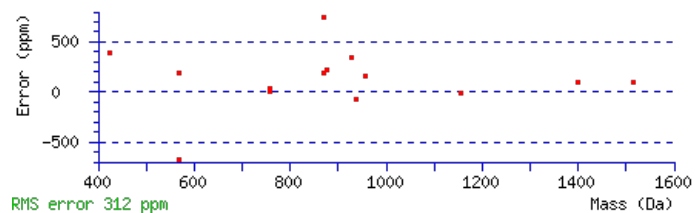

NCBI **BLAST** search of [VSVGQAQDGIGAVSFVYDK](#)

(Parameters: blastp, nr protein database, expect=20000, no filter, PAM30)

Other BLAST [web gateways](#)

**All matches to this query**

| Score | Mr(calc)  | Delta  | Sequence                             |
|-------|-----------|--------|--------------------------------------|
| 32.2  | 1938.9687 | 0.0002 | <a href="#">VSVGQAQDGIGAVSFVYDK</a>  |
| 1.7   | 1938.9647 | 0.0042 | <a href="#">ASGIVEGGGSLSDVYSSAKR</a> |

**Mascot:** <http://www.matrixscience.com/>

**Peptide View**MS/MS Fragmentation of **IYVGQGDSCVTYFK**Found in **AT3G16470.1** in **TAIR\_Arabidopsis**, Symbols: JR1 | JR1 (Jacalin lectin family protein) | chr3:5596102-5597715 REVERSE

Match to Query 7326: 1635.756804 from(818.885678,2+) index(5453)

Title: Elution from: 51.972 to 51.972 scan no 7048 cid35.00 polarity:+

Data file D1d-1\_1.mgf

Click mouse within plot area to zoom in by factor of two about that point

Or,  to  Da Label all possible matches  Label matches used for scoring Show Y-axis 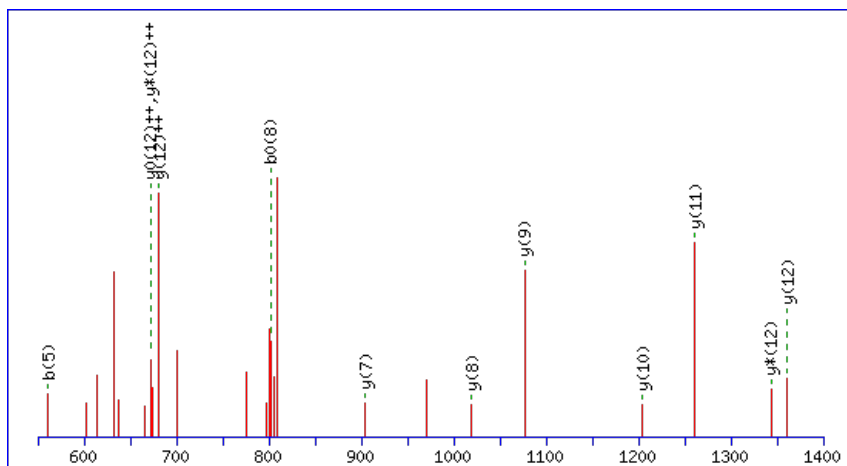Monoisotopic mass of neutral peptide  $M_r(\text{calc})$ : 1635.7603

Fixed modifications: Carbamidomethyl (C) (apply to specified residues or termini only)

Ions Score: 41 Expect: 0.00027

Matches : 14/130 fragment ions using 17 most intense peaks ([help](#))

| #  | b         | b <sup>++</sup> | b*        | b <sup>*++</sup> | b <sup>0</sup> | b <sup>0++</sup> | Seq. | y         | y <sup>++</sup> | y*        | y <sup>*++</sup> | y <sup>0</sup> | y <sup>0++</sup> | #  |
|----|-----------|-----------------|-----------|------------------|----------------|------------------|------|-----------|-----------------|-----------|------------------|----------------|------------------|----|
| 1  | 114.0913  | 57.5493         |           |                  |                |                  | I    |           |                 |           |                  |                |                  | 14 |
| 2  | 277.1547  | 139.0810        |           |                  |                |                  | Y    | 1523.6835 | 762.3454        | 1506.6570 | 753.8321         | 1505.6729      | 753.3401         | 13 |
| 3  | 376.2231  | 188.6152        |           |                  |                |                  | V    | 1360.6202 | 680.8137        | 1343.5936 | 672.3005         | 1342.6096      | 671.8084         | 12 |
| 4  | 433.2445  | 217.1259        |           |                  |                |                  | G    | 1261.5518 | 631.2795        | 1244.5252 | 622.7662         | 1243.5412      | 622.2742         | 11 |
| 5  | 561.3031  | 281.1552        | 544.2766  | 272.6419         |                |                  | Q    | 1204.5303 | 602.7688        | 1187.5038 | 594.2555         | 1186.5197      | 593.7635         | 10 |
| 6  | 618.3246  | 309.6659        | 601.2980  | 301.1527         |                |                  | G    | 1076.4717 | 538.7395        | 1059.4452 | 530.2262         | 1058.4612      | 529.7342         | 9  |
| 7  | 733.3515  | 367.1794        | 716.3250  | 358.6661         | 715.3410       | 358.1741         | D    | 1019.4503 | 510.2288        | 1002.4237 | 501.7155         | 1001.4397      | 501.2235         | 8  |
| 8  | 820.3836  | 410.6954        | 803.3570  | 402.1821         | 802.3730       | 401.6901         | S    | 904.4233  | 452.7153        | 887.3968  | 444.2020         | 886.4128       | 443.7100         | 7  |
| 9  | 980.4142  | 490.7107        | 963.3877  | 482.1975         | 962.4036       | 481.7055         | C    | 817.3913  | 409.1993        | 800.3647  | 400.6860         | 799.3807       | 400.1940         | 6  |
| 10 | 1079.4826 | 540.2449        | 1062.4561 | 531.7317         | 1061.4721      | 531.2397         | V    | 657.3606  | 329.1840        | 640.3341  | 320.6707         | 639.3501       | 320.1787         | 5  |
| 11 | 1180.5303 | 590.7688        | 1163.5038 | 582.2555         | 1162.5197      | 581.7635         | T    | 558.2922  | 279.6498        | 541.2657  | 271.1365         | 540.2817       | 270.6445         | 4  |
| 12 | 1343.5936 | 672.3005        | 1326.5671 | 663.7872         | 1325.5831      | 663.2952         | Y    | 457.2445  | 229.1259        | 440.2180  | 220.6126         |                |                  | 3  |
| 13 | 1490.6620 | 745.8347        | 1473.6355 | 737.3214         | 1472.6515      | 736.8294         | F    | 294.1812  | 147.5942        | 277.1547  | 139.0810         |                |                  | 2  |
| 14 |           |                 |           |                  |                |                  | K    | 147.1128  | 74.0600         | 130.0863  | 65.5468          |                |                  | 1  |

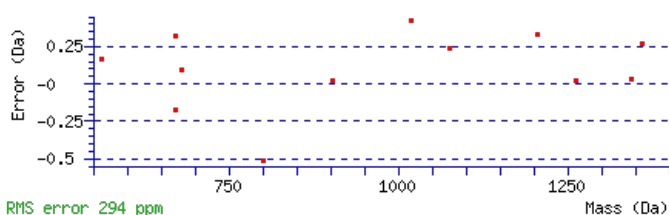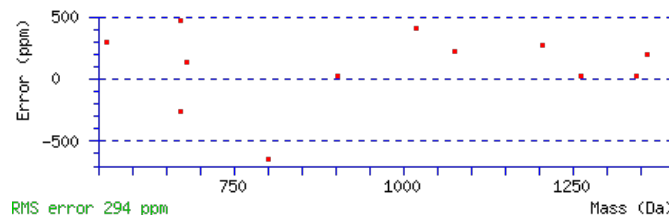NCBI BLAST search of **IYVGQGDSCVTYFK**

(Parameters: blastp, nr protein database, expect=20000, no filter, PAM30)

AT3G16470.1

Other BLAST [web gateways](#)

**All matches to this query**

| Score | Mr(calc)  | Delta   | Sequence                        |
|-------|-----------|---------|---------------------------------|
| 40.9  | 1635.7603 | -0.0035 | <a href="#">IYVGQGDSCVTYFK</a>  |
| 1.2   | 1635.7562 | 0.0006  | <a href="#">KNSSSGSASNMFYIK</a> |
| 1.1   | 1635.7542 | 0.0026  | <a href="#">FEWWAKGNNNTR</a>    |

Mascot: <http://www.matrixscience.com/>

**Peptide View**MS/MS Fragmentation of **LSEEDQAVFKK**

Found in **AT3G16640.1** in **TAIR\_Arabidopsis**, Symbols: TCTP | TCTP (TRANSLATIONALLY CONTROLLED TUMOR PROTEIN) | chr3:5669715-5670735 REVERSE

Match to Query 4760: 1292.658974 from(647.336763,2+) index(1838)

Title: Elution from: 22.394 to 22.394 scan no 2394 cid35.00 polarity:+

Data file D12h-1\_2.mgf

Click mouse within plot area to zoom in by factor of two about that point

Or,   to  Da

Label all possible matches  Label matches used for scoring

Show Y-axis

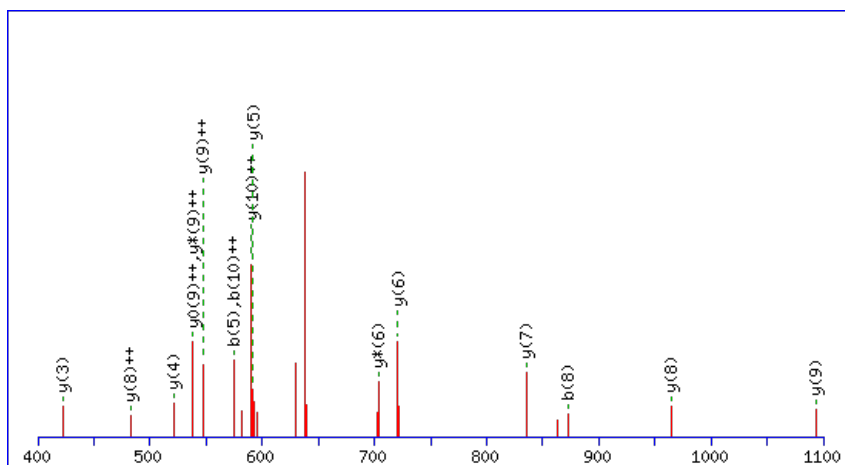

Monoisotopic mass of neutral peptide  $M_r(\text{calc})$ : 1292.6612

Fixed modifications: Carbamidomethyl (C) (apply to specified residues or termini only)

Ions Score: 70 Expect: 4.4e-007

Matches : 16/96 fragment ions using 18 most intense peaks ([help](#))

| #  | b         | b <sup>++</sup> | b*        | b <sup>*++</sup> | b <sup>0</sup> | b <sup>0++</sup> | Seq. | y         | y <sup>++</sup> | y*        | y <sup>*++</sup> | y <sup>0</sup> | y <sup>0++</sup> | #  |
|----|-----------|-----------------|-----------|------------------|----------------|------------------|------|-----------|-----------------|-----------|------------------|----------------|------------------|----|
| 1  | 114.0913  | 57.5493         |           |                  |                |                  | L    |           |                 |           |                  |                |                  | 11 |
| 2  | 201.1234  | 101.0653        |           |                  | 183.1128       | 92.0600          | S    | 1180.5844 | 590.7959        | 1163.5579 | 582.2826         | 1162.5739      | 581.7906         | 10 |
| 3  | 330.1660  | 165.5866        |           |                  | 312.1554       | 156.5813         | E    | 1093.5524 | 547.2798        | 1076.5259 | 538.7666         | 1075.5419      | 538.2746         | 9  |
| 4  | 459.2086  | 230.1079        |           |                  | 441.1980       | 221.1026         | E    | 964.5098  | 482.7585        | 947.4833  | 474.2453         | 946.4993       | 473.7533         | 8  |
| 5  | 574.2355  | 287.6214        |           |                  | 556.2249       | 278.6161         | D    | 835.4672  | 418.2373        | 818.4407  | 409.7240         | 817.4567       | 409.2320         | 7  |
| 6  | 702.2941  | 351.6507        | 685.2675  | 343.1374         | 684.2835       | 342.6454         | Q    | 720.4403  | 360.7238        | 703.4137  | 352.2105         |                |                  | 6  |
| 7  | 773.3312  | 387.1692        | 756.3046  | 378.6560         | 755.3206       | 378.1640         | A    | 592.3817  | 296.6945        | 575.3552  | 288.1812         |                |                  | 5  |
| 8  | 872.3996  | 436.7034        | 855.3731  | 428.1902         | 854.3890       | 427.6982         | V    | 521.3446  | 261.1759        | 504.3180  | 252.6627         |                |                  | 4  |
| 9  | 1019.4680 | 510.2376        | 1002.4415 | 501.7244         | 1001.4575      | 501.2324         | F    | 422.2762  | 211.6417        | 405.2496  | 203.1285         |                |                  | 3  |
| 10 | 1147.5630 | 574.2851        | 1130.5364 | 565.7719         | 1129.5524      | 565.2798         | K    | 275.2078  | 138.1075        | 258.1812  | 129.5942         |                |                  | 2  |
| 11 |           |                 |           |                  |                |                  | K    | 147.1128  | 74.0600         | 130.0863  | 65.5468          |                |                  | 1  |

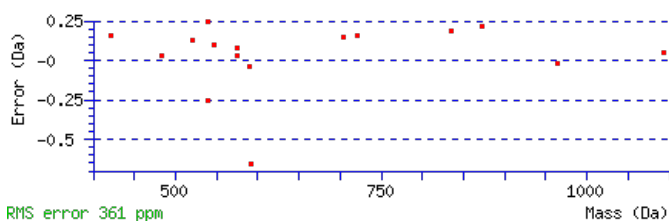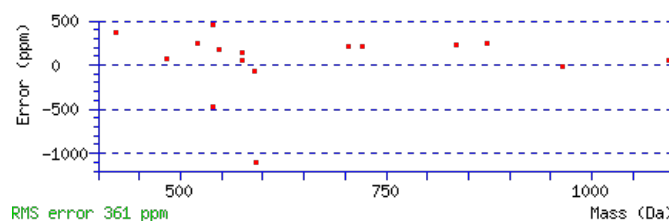

NCBI BLAST search of **LSEEDQAVFKK**

(Parameters: blastp, nr protein database, expect=20000, no filter, PAM30)

Other BLAST [web gateways](#)

All matches to this query



## AT3G16640.1

| Score | Mr(calc)  | Delta   | Sequence                      |
|-------|-----------|---------|-------------------------------|
| 70.0  | 1292.6612 | -0.0022 | <a href="#">LSEEDQAVFKK</a>   |
| 20.8  | 1292.6612 | -0.0022 | <a href="#">TVEEIFSALER</a>   |
| 11.4  | 1292.6580 | 0.0009  | <a href="#">ATKMAGAAMNLAK</a> |
| 3.2   | 1292.6580 | 0.0009  | <a href="#">ATKMAGAAMNLAK</a> |
| 3.1   | 1292.6612 | -0.0022 | <a href="#">SFLDEKAQDLK</a>   |
| 2.6   | 1292.6560 | 0.0029  | <a href="#">NHWHVVMARK</a>    |
| 0.8   | 1292.6612 | -0.0022 | <a href="#">AEP TPAPPKEEK</a> |

Mascot: <http://www.matrixscience.com/>

**Peptide View**MS/MS Fragmentation of **VPGVVYTYPEVASVGK**

Found in **AT3G17240.1** in **TAIR\_Arabidopsis**, Symbols: LPD2 | LPD2 (LIPOAMIDE DEHYDROGENASE 2); FAD binding / dihydrolipoyl dehydrogenase/ oxidoreductase | chr3:5890284-5892172 REVERSE

Match to Query 7763: 1663.880756 from(832.947654,2+) index(6328)

Title: Elution from: 58.134 to 58.134 scan no 8196 cid35.00 polarity:+

Data file D1d-2\_1.mgf

Click mouse within plot area to zoom in by factor of two about that point

Or,   to  Da

Label all possible matches  Label matches used for scoring

Show Y-axis

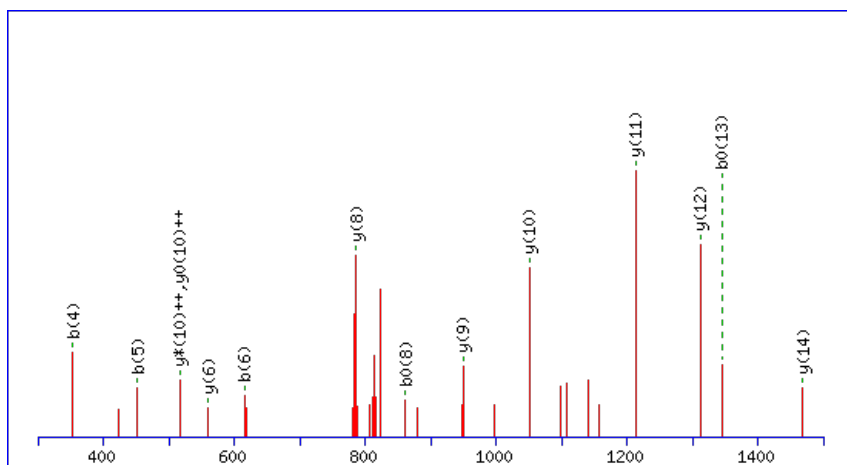

**Monoisotopic mass of neutral peptide Mr(calc):** 1663.8821

**Fixed modifications:** Carbamidomethyl (C) (apply to specified residues or termini only)

**Ions Score:** 53 **Expect:** 2.3e-005

**Matches:** 14/132 fragment ions using 18 most intense peaks ([help](#))

| #  | b               | b <sup>++</sup> | b <sup>0</sup>   | b <sup>0++</sup> | Seq. | y                | y <sup>++</sup> | y*        | y <sup>*++</sup> | y <sup>0</sup> | y <sup>0++</sup> | #  |
|----|-----------------|-----------------|------------------|------------------|------|------------------|-----------------|-----------|------------------|----------------|------------------|----|
| 1  | 100.0757        | 50.5415         |                  |                  | V    |                  |                 |           |                  |                |                  | 16 |
| 2  | 197.1285        | 99.0679         |                  |                  | P    | 1565.8210        | 783.4141        | 1548.7944 | 774.9009         | 1547.8104      | 774.4088         | 15 |
| 3  | 254.1499        | 127.5786        |                  |                  | G    | <b>1468.7682</b> | 734.8878        | 1451.7417 | 726.3745         | 1450.7577      | 725.8825         | 14 |
| 4  | <b>353.2183</b> | 177.1128        |                  |                  | V    | 1411.7468        | 706.3770        | 1394.7202 | 697.8637         | 1393.7362      | 697.3717         | 13 |
| 5  | <b>452.2867</b> | 226.6470        |                  |                  | V    | <b>1312.6783</b> | 656.8428        | 1295.6518 | 648.3295         | 1294.6678      | 647.8375         | 12 |
| 6  | <b>615.3501</b> | 308.1787        |                  |                  | Y    | <b>1213.6099</b> | 607.3086        | 1196.5834 | 598.7953         | 1195.5994      | 598.3033         | 11 |
| 7  | 716.3978        | 358.7025        | 698.3872         | 349.6972         | T    | <b>1050.5466</b> | 525.7769        | 1033.5201 | <b>517.2637</b>  | 1032.5360      | <b>516.7717</b>  | 10 |
| 8  | 879.4611        | 440.2342        | <b>861.4505</b>  | 431.2289         | Y    | <b>949.4989</b>  | 475.2531        | 932.4724  | 466.7398         | 931.4884       | 466.2478         | 9  |
| 9  | 976.5138        | 488.7606        | 958.5033         | 479.7553         | P    | <b>786.4356</b>  | 393.7214        | 769.4090  | 385.2082         | 768.4250       | 384.7162         | 8  |
| 10 | 1105.5564       | 553.2819        | 1087.5459        | 544.2766         | E    | 689.3828         | 345.1951        | 672.3563  | 336.6818         | 671.3723       | 336.1898         | 7  |
| 11 | 1204.6249       | 602.8161        | 1186.6143        | 593.8108         | V    | <b>560.3402</b>  | 280.6738        | 543.3137  | 272.1605         | 542.3297       | 271.6685         | 6  |
| 12 | 1275.6620       | 638.3346        | 1257.6514        | 629.3293         | A    | 461.2718         | 231.1396        | 444.2453  | 222.6263         | 443.2613       | 222.1343         | 5  |
| 13 | 1362.6940       | 681.8506        | <b>1344.6834</b> | 672.8454         | S    | 390.2347         | 195.6210        | 373.2082  | 187.1077         | 372.2241       | 186.6157         | 4  |
| 14 | 1461.7624       | 731.3848        | 1443.7518        | 722.3796         | V    | 303.2027         | 152.1050        | 286.1761  | 143.5917         |                |                  | 3  |
| 15 | 1518.7839       | 759.8956        | 1500.7733        | 750.8903         | G    | 204.1343         | 102.5708        | 187.1077  | 94.0575          |                |                  | 2  |
| 16 |                 |                 |                  |                  | K    | 147.1128         | 74.0600         | 130.0863  | 65.5468          |                |                  | 1  |

# AT3G17240.1

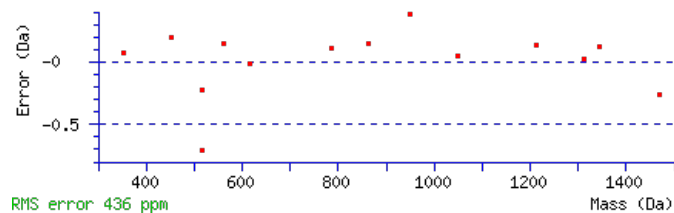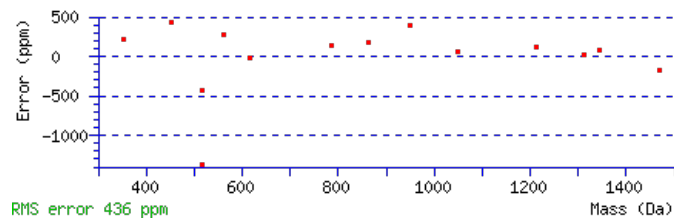

NCBI **BLAST** search of [VPGVVYTYPEVASVGK](#)

(Parameters: blastp, nr protein database, expect=20000, no filter, PAM30)

Other BLAST [web gateways](#)

## All matches to this query

| Score | Mr(calc)  | Delta   | Sequence                         |
|-------|-----------|---------|----------------------------------|
| 53.0  | 1663.8821 | -0.0014 | <a href="#">VPGVVYTYPEVASVGK</a> |

Mascot: <http://www.matrixscience.com/>

**Peptide View**MS/MS Fragmentation of **EIGFVSADVGLDADNCK**

Found in **AT3G17390.1** in **TAIR\_Arabidopsis**, Symbols: SAMS3, MAT4, MTO3 | MTO3 (S-adenosylmethionine synthase 3); methionine adenosyltransferase | chr3:5952490-5953671 REVERSE

Match to Query 8159: 1808.823268 from(905.418910,2+) index(6637)

Title: Elution from: 62.664 to 62.664 scan no 8772 cid35.00 polarity:+

Data file D1d-1-2.mgf

Click mouse within plot area to zoom in by factor of two about that point

Or,   to  Da

Label all possible matches  Label matches used for scoring

Show Y-axis

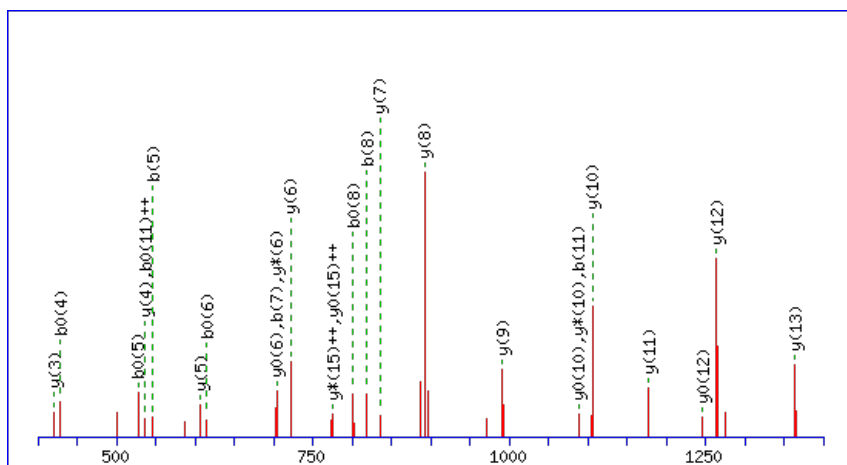

Monoisotopic mass of neutral peptide  $M_r(\text{calc})$ : 1808.8251

Fixed modifications: Carbamidomethyl (C) (apply to specified residues or termini only)

Ions Score: 79 Expect: 3e-008

Matches : 27/158 fragment ions using 40 most intense peaks ([help](#))

| #  | b         | b <sup>++</sup> | b*        | b <sup>*++</sup> | b <sup>0</sup> | b <sup>0++</sup> | Seq. | y         | y <sup>++</sup> | y*        | y <sup>*++</sup> | y <sup>0</sup> | y <sup>0++</sup> | #  |
|----|-----------|-----------------|-----------|------------------|----------------|------------------|------|-----------|-----------------|-----------|------------------|----------------|------------------|----|
| 1  | 130.0499  | 65.5286         |           |                  | 112.0393       | 56.5233          | E    |           |                 |           |                  |                |                  | 17 |
| 2  | 243.1339  | 122.0706        |           |                  | 225.1234       | 113.0653         | I    | 1680.7898 | 840.8985        | 1663.7632 | 832.3852         | 1662.7792      | 831.8932         | 16 |
| 3  | 300.1554  | 150.5813        |           |                  | 282.1448       | 141.5761         | G    | 1567.7057 | 784.3565        | 1550.6792 | 775.8432         | 1549.6951      | 775.3512         | 15 |
| 4  | 447.2238  | 224.1155        |           |                  | 429.2132       | 215.1103         | F    | 1510.6842 | 755.8458        | 1493.6577 | 747.3325         | 1492.6737      | 746.8405         | 14 |
| 5  | 546.2922  | 273.6498        |           |                  | 528.2817       | 264.6445         | V    | 1363.6158 | 682.3115        | 1346.5893 | 673.7983         | 1345.6053      | 673.3063         | 13 |
| 6  | 633.3243  | 317.1658        |           |                  | 615.3137       | 308.1605         | S    | 1264.5474 | 632.7773        | 1247.5209 | 624.2641         | 1246.5368      | 623.7721         | 12 |
| 7  | 704.3614  | 352.6843        |           |                  | 686.3508       | 343.6790         | A    | 1177.5154 | 589.2613        | 1160.4888 | 580.7481         | 1159.5048      | 580.2560         | 11 |
| 8  | 819.3883  | 410.1978        |           |                  | 801.3777       | 401.1925         | D    | 1106.4783 | 553.7428        | 1089.4517 | 545.2295         | 1088.4677      | 544.7375         | 10 |
| 9  | 918.4567  | 459.7320        |           |                  | 900.4462       | 450.7267         | V    | 991.4513  | 496.2293        | 974.4248  | 487.7160         | 973.4408       | 487.2240         | 9  |
| 10 | 975.4782  | 488.2427        |           |                  | 957.4676       | 479.2374         | G    | 892.3829  | 446.6951        | 875.3564  | 438.1818         | 874.3723       | 437.6898         | 8  |
| 11 | 1088.5623 | 544.7848        |           |                  | 1070.5517      | 535.7795         | L    | 835.3614  | 418.1844        | 818.3349  | 409.6711         | 817.3509       | 409.1791         | 7  |
| 12 | 1203.5892 | 602.2982        |           |                  | 1185.5786      | 593.2930         | D    | 722.2774  | 361.6423        | 705.2508  | 353.1291         | 704.2668       | 352.6370         | 6  |
| 13 | 1274.6263 | 637.8168        |           |                  | 1256.6157      | 628.8115         | A    | 607.2504  | 304.1289        | 590.2239  | 295.6156         | 589.2399       | 295.1236         | 5  |
| 14 | 1389.6533 | 695.3303        |           |                  | 1371.6427      | 686.3250         | D    | 536.2133  | 268.6103        | 519.1868  | 260.0970         | 518.2028       | 259.6050         | 4  |
| 15 | 1503.6962 | 752.3517        | 1486.6696 | 743.8385         | 1485.6856      | 743.3464         | N    | 421.1864  | 211.0968        | 404.1598  | 202.5836         |                |                  | 3  |
| 16 | 1663.7268 | 832.3671        | 1646.7003 | 823.8538         | 1645.7163      | 823.3618         | C    | 307.1435  | 154.0754        | 290.1169  | 145.5621         |                |                  | 2  |
| 17 |           |                 |           |                  |                |                  | K    | 147.1128  | 74.0600         | 130.0863  | 65.5468          |                |                  | 1  |

AT3G17390.1

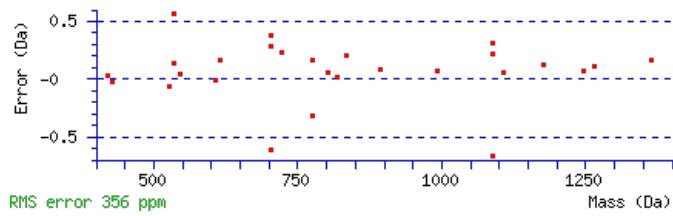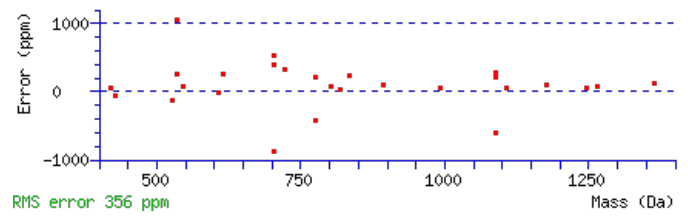

NCBI **BLAST** search of [EIGFVSADVGLDADNCK](#)

(Parameters: blastp, nr protein database, expect=20000, no filter, PAM30)

Other BLAST [web gateways](#)

All matches to this query

| Score | Mr(calc)  | Delta   | Sequence                          |
|-------|-----------|---------|-----------------------------------|
| 78.8  | 1808.8251 | -0.0018 | <a href="#">EIGFVSADVGLDADNCK</a> |

Mascot: <http://www.matrixscience.com/>

## Peptide View

MS/MS Fragmentation of **GSNQLVLDEAER**

Found in **AT3G18190.1** in **TAIR\_Arabidopsis**, Symbols: | chaperonin, putative | chr3:6232232-6233842 FORWARD

Match to Query 4891: 1346.601464 from(674.308008,2+) index(3082)

Title: Elution from: 32.903 to 32.903 scan no 3920 cid35.00 polarity:+

Data file D1d-2\_1.mgf

Click mouse within plot area to zoom in by factor of two about that point

Or,   to  Da

Label all possible matches  Label matches used for scoring

Show Y-axis

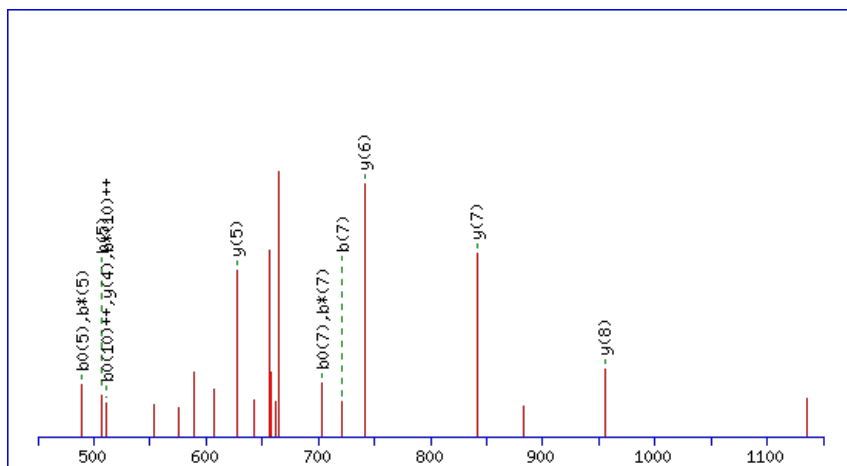

Monoisotopic mass of neutral peptide  $M_r(\text{calc})$ : 1346.6020

Fixed modifications: Carbamidomethyl (C) (apply to specified residues or termini only)

Ions Score: 40 Expect: 0.00052

Matches : 13/124 fragment ions using 13 most intense peaks ([help](#))

| #  | b               | b <sup>++</sup> | b*              | b <sup>*++</sup> | b <sup>0</sup>  | b <sup>0++</sup> | Seq.     | y               | y <sup>++</sup> | y*        | y <sup>*++</sup> | y <sup>0</sup> | y <sup>0++</sup> | #         |
|----|-----------------|-----------------|-----------------|------------------|-----------------|------------------|----------|-----------------|-----------------|-----------|------------------|----------------|------------------|-----------|
| 1  | 59.0258         | 30.0165         |                 |                  |                 |                  | <b>G</b> |                 |                 |           |                  |                |                  | <b>12</b> |
| 2  | 147.0548        | 74.0311         |                 |                  | 129.0443        | 65.0258          | <b>S</b> | 1289.5908       | 645.2991        | 1271.5672 | 636.2873         | 1271.5803      | 636.2938         | <b>11</b> |
| 3  | 263.0918        | 132.0496        | 245.0683        | 123.0378         | 245.0813        | 123.0443         | <b>N</b> | 1201.5618       | 601.2845        | 1183.5382 | 592.2727         | 1183.5512      | 592.2792         | <b>10</b> |
| 4  | 393.1445        | 197.0759        | 375.1209        | 188.0641         | 375.1339        | 188.0706         | <b>Q</b> | 1085.5248       | 543.2660        | 1067.5012 | 534.2542         | 1067.5142      | 534.2607         | <b>9</b>  |
| 5  | <b>507.2256</b> | 254.1164        | <b>489.2020</b> | 245.1046         | <b>489.2150</b> | 245.1111         | <b>L</b> | <b>955.4721</b> | 478.2397        | 937.4485  | 469.2279         | 937.4616       | 469.2344         | <b>8</b>  |
| 6  | 607.2910        | 304.1492        | 589.2674        | 295.1374         | 589.2805        | 295.1439         | <b>V</b> | <b>841.3910</b> | 421.1991        | 823.3674  | 412.1874         | 823.3805       | 412.1939         | <b>7</b>  |
| 7  | <b>721.3721</b> | 361.1897        | <b>703.3485</b> | 352.1779         | <b>703.3616</b> | 352.1844         | <b>L</b> | <b>741.3256</b> | 371.1664        | 723.3020  | 362.1546         | 723.3150       | 362.1611         | <b>6</b>  |
| 8  | 837.3961        | 419.2017        | 819.3725        | 410.1899         | 819.3855        | 410.1964         | <b>D</b> | <b>627.2445</b> | 314.1259        | 609.2209  | 305.1141         | 609.2339       | 305.1206         | <b>5</b>  |
| 9  | 967.4357        | 484.2215        | 949.4122        | 475.2097         | 949.4252        | 475.2162         | <b>E</b> | <b>511.2205</b> | 256.1139        | 493.1969  | 247.1021         | 493.2099       | 247.1086         | <b>4</b>  |
| 10 | 1039.4699       | 520.2386        | 1021.4463       | <b>511.2268</b>  | 1021.4593       | <b>511.2333</b>  | <b>A</b> | 381.1809        | 191.0941        | 363.1573  | 182.0823         | 363.1703       | 182.0888         | <b>3</b>  |
| 11 | 1169.5095       | 585.2584        | 1151.4859       | 576.2466         | 1151.4989       | 576.2531         | <b>E</b> | 309.1467        | 155.0770        | 291.1231  | 146.0652         | 291.1362       | 146.0717         | <b>2</b>  |
| 12 |                 |                 |                 |                  |                 |                  | <b>R</b> | 179.1071        | 90.0572         | 161.0835  | 81.0454          |                |                  | <b>1</b>  |

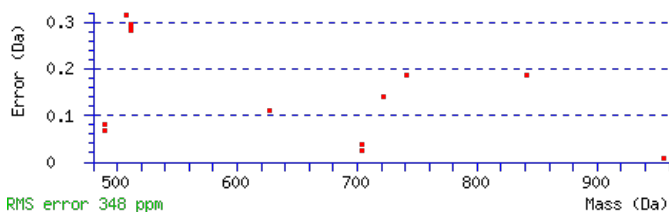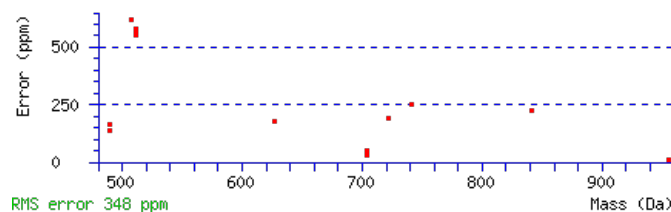

NCBI **BLAST** search of **GSNQLVLDEAER**

(Parameters: blastp, nr protein database, expect=20000, no filter, PAM30)

Other BLAST [web gateways](#)

All matches to this query

**AT3G18190.1**

| Score | Mr(calc)  | Delta   | Sequence                     |
|-------|-----------|---------|------------------------------|
| 40.5  | 1346.6020 | -0.0006 | <a href="#">GSNQLVLDEAER</a> |
| 12.4  | 1346.5995 | 0.0019  | <a href="#">QAGRYMAVYQK</a>  |
| 5.1   | 1346.5995 | 0.0019  | <a href="#">STCIASLWQHK</a>  |
| 1.8   | 1346.6043 | -0.0028 | <a href="#">IFQELNSEHSK</a>  |

**Mascot:** <http://www.matrixscience.com/>



# Mascot Search Results

## Peptide View

### MS/MS Fragmentation of ANKIAEDIR

Found in **AT3G18240.1** in **TAIR\_Arabidopsis**, Symbols: | similar to unknown protein [Arabidopsis thaliana] (TAIR:AT4G21460.1); similar to unnamed protein product [Vitis vinifera] (GB:CAO68106.1) | chr3:6255816-6257701 FORWARD

Match to Query 2523: 1042.518528 from(522.266540,2+) index(4376)

Title: Elution from: 42.673 to 42.673 scan no 5591 cid35.00 polarity:+

Data file D1d-2\_1.mgf

Click mouse within plot area to zoom in by factor of two about that point

Or,   to  Da

Label all possible matches  Label matches used for scoring

Show Y-axis

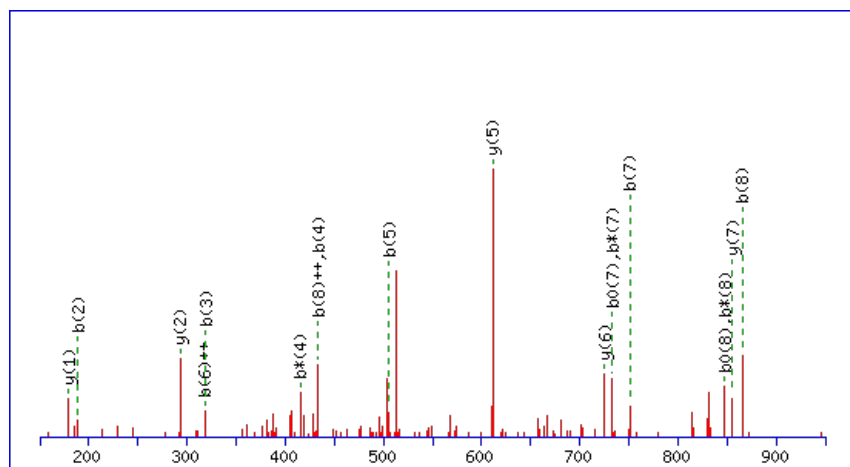

Monoisotopic mass of neutral peptide Mr(calc): 1042.5199

Fixed modifications: Carbamidomethyl (C) (apply to specified residues or termini only)

Ions Score: 46 Expect: 0.00024

Matches : 18/80 fragment ions using 24 most intense peaks [\(help\)](#)

| # | b               | b <sup>++</sup> | b*              | b <sup>*++</sup> | b <sup>0</sup>  | b <sup>0++</sup> | Seq. | y               | y <sup>++</sup> | y*       | y <sup>*++</sup> | y <sup>0</sup> | y <sup>0++</sup> | # |
|---|-----------------|-----------------|-----------------|------------------|-----------------|------------------|------|-----------------|-----------------|----------|------------------|----------------|------------------|---|
| 1 | 73.0414         | 37.0244         |                 |                  |                 |                  | A    |                 |                 |          |                  |                |                  | 9 |
| 2 | <b>189.0784</b> | 95.0428         | 171.0548        | 86.0311          |                 |                  | N    | 971.4931        | 486.2502        | 953.4695 | 477.2384         | 953.4825       | 477.2449         | 8 |
| 3 | <b>319.1675</b> | 160.0874        | 301.1439        | 151.0756         |                 |                  | K    | <b>855.4561</b> | 428.2317        | 837.4325 | 419.2199         | 837.4455       | 419.2264         | 7 |
| 4 | <b>433.2486</b> | 217.1279        | <b>415.2250</b> | 208.1161         |                 |                  | I    | <b>725.3670</b> | 363.1872        | 707.3435 | 354.1754         | 707.3565       | 354.1819         | 6 |
| 5 | <b>505.2827</b> | 253.1450        | 487.2591        | 244.1332         |                 |                  | A    | <b>611.2859</b> | 306.1466        | 593.2624 | 297.1348         | 593.2754       | 297.1413         | 5 |
| 6 | 635.3223        | <b>318.1648</b> | 617.2987        | 309.1530         | 617.3118        | 309.1595         | E    | 539.2518        | 270.1295        | 521.2282 | 261.1177         | 521.2412       | 261.1243         | 4 |
| 7 | <b>751.3463</b> | 376.1768        | <b>733.3227</b> | 367.1650         | <b>733.3357</b> | 367.1715         | D    | 409.2122        | 205.1097        | 391.1886 | 196.0979         | 391.2016       | 196.1044         | 3 |
| 8 | <b>865.4274</b> | <b>433.2173</b> | <b>847.4038</b> | 424.2056         | <b>847.4168</b> | 424.2121         | I    | <b>293.1882</b> | 147.0977        | 275.1646 | 138.0859         |                |                  | 2 |
| 9 |                 |                 |                 |                  |                 |                  | R    | <b>179.1071</b> | 90.0572         | 161.0835 | 81.0454          |                |                  | 1 |

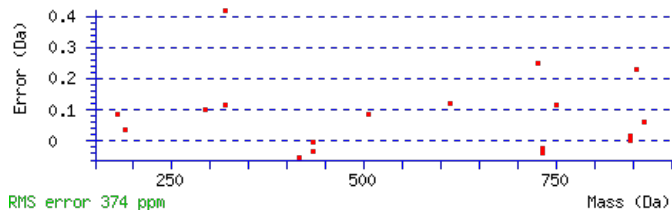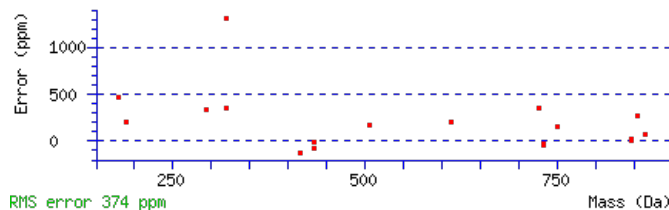

NCBI BLAST search of [ANKIAEDIR](#)

(Parameters: blastp, nr protein database, expect=20000, no filter, PAM30)

Other BLAST [web gateways](#)

### All matches to this query

| Score | Mr(calc) | Delta | Sequence |
|-------|----------|-------|----------|
|       |          |       |          |



**AT3G18240.1**

|      |           |         |                            |
|------|-----------|---------|----------------------------|
| 46.4 | 1042.5199 | -0.0014 | <a href="#">ANKIAEDIR</a>  |
| 21.7 | 1042.5199 | -0.0014 | <a href="#">NVVDADKLR</a>  |
| 19.7 | 1042.5199 | -0.0014 | <a href="#">LVTDNSKPR</a>  |
| 14.1 | 1042.5199 | -0.0014 | <a href="#">NEQEKLRL</a>   |
| 11.8 | 1042.5199 | -0.0014 | <a href="#">GGASIQVELR</a> |
| 11.2 | 1042.5199 | -0.0014 | <a href="#">GEGGIAEKLR</a> |
| 11.2 | 1042.5199 | -0.0014 | <a href="#">AGQIGILDSR</a> |
| 11.2 | 1042.5199 | -0.0014 | <a href="#">AKQVDDVVR</a>  |
| 11.2 | 1042.5199 | -0.0014 | <a href="#">VKEAGLQER</a>  |
| 10.3 | 1042.5199 | -0.0014 | <a href="#">RDDEILLR</a>   |

**Mascot:** <http://www.matrixscience.com/>

**Peptide View**MS/MS Fragmentation of **FDMKAMLTDKTFHSQWQDR**Found in **AT3G18310.1** in **TAIR\_Arabidopsis**, Symbols: | similar to hypothetical protein [Vitis vinifera] (GB:CAN64638.1) | chr3:6284529-6287150  
REVERSEMatch to Query 9823: 2400.101127 from(801.040985,3+) index(10178)  
Title: Elution from: 101.804 to 101.804 scan no 14962 cid35.00 polarity:+  
Data file D1d-1\_3.mgf

Click mouse within plot area to zoom in by factor of two about that point

Or, Plot from  to  Da Label all possible matches  Label matches used for scoring Show Y-axis 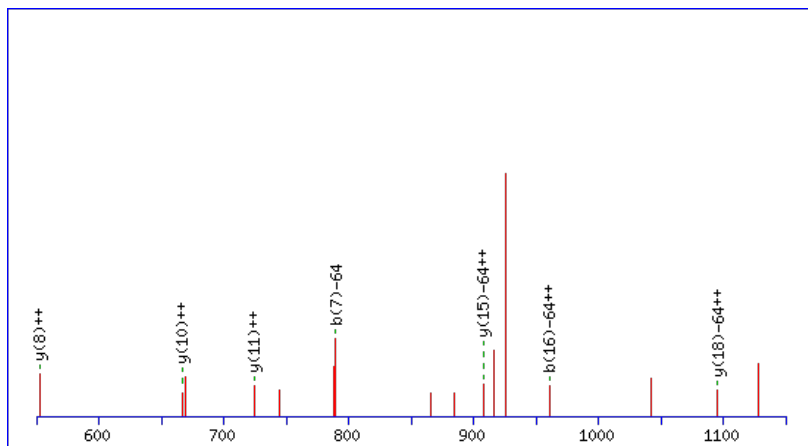Monoisotopic mass of neutral peptide  $M_r(\text{calc})$ : 2400.0991

Fixed modifications: Carbamidomethyl (C) (apply to specified residues or termini only)

Variable modifications:

M6 : Oxidation (M), with neutral losses 63.9983 (shown in table), 0.0000

Ions Score: 16 Expect: 0.049

Matches : 7/314 fragment ions using 15 most intense peaks ([help](#))

| #  | b         | b <sup>++</sup> | b <sup>*</sup> | b <sup>*++</sup> | b <sup>0</sup> | b <sup>0++</sup> | Seq | y         | y <sup>++</sup> | y <sup>*</sup> | y <sup>*++</sup> | y <sup>0</sup> | y <sup>0++</sup> | #  |
|----|-----------|-----------------|----------------|------------------|----------------|------------------|-----|-----------|-----------------|----------------|------------------|----------------|------------------|----|
| 1  | 148.0757  | 74.5415         |                |                  |                |                  | F   |           |                 |                |                  |                |                  | 19 |
| 2  | 263.1026  | 132.0550        |                |                  | 245.0921       | 123.0497         | D   | 2190.0397 | 1095.5235       | 2173.0131      | 1087.0102        | 2172.0291      | 1086.5182        | 18 |
| 3  | 394.1431  | 197.5752        |                |                  | 376.1326       | 188.5699         | M   | 2075.0127 | 1038.0100       | 2057.9862      | 1029.4967        | 2057.0022      | 1029.0047        | 17 |
| 4  | 522.2381  | 261.6227        | 505.2115       | 253.1094         | 504.2275       | 252.6174         | K   | 1943.9722 | 972.4898        | 1926.9457      | 963.9765         | 1925.9617      | 963.4845         | 16 |
| 5  | 593.2752  | 297.1412        | 576.2486       | 288.6280         | 575.2646       | 288.1360         | A   | 1815.8773 | 908.4423        | 1798.8507      | 899.9290         | 1797.8667      | 899.4370         | 15 |
| 6  | 676.3123  | 338.6598        | 659.2858       | 330.1465         | 658.3017       | 329.6545         | M   | 1744.8402 | 872.9237        | 1727.8136      | 864.4104         | 1726.8296      | 863.9184         | 14 |
| 7  | 789.3964  | 395.2018        | 772.3698       | 386.6886         | 771.3858       | 386.1965         | L   | 1661.8030 | 831.4052        | 1644.7765      | 822.8919         | 1643.7925      | 822.3999         | 13 |
| 8  | 890.4441  | 445.7257        | 873.4175       | 437.2124         | 872.4335       | 436.7204         | T   | 1548.7190 | 774.8631        | 1531.6924      | 766.3499         | 1530.7084      | 765.8578         | 12 |
| 9  | 1005.4710 | 503.2391        | 988.4444       | 494.7259         | 987.4604       | 494.2339         | D   | 1447.6713 | 724.3393        | 1430.6448      | 715.8260         | 1429.6607      | 715.3340         | 11 |
| 10 | 1133.5660 | 567.2866        | 1116.5394      | 558.7733         | 1115.5554      | 558.2813         | K   | 1332.6444 | 666.8258        | 1315.6178      | 658.3125         | 1314.6338      | 657.8205         | 10 |
| 11 | 1234.6136 | 617.8105        | 1217.5871      | 609.2972         | 1216.6031      | 608.8052         | T   | 1204.5494 | 602.7783        | 1187.5228      | 594.2651         | 1186.5388      | 593.7731         | 9  |
| 12 | 1381.6821 | 691.3447        | 1364.6555      | 682.8314         | 1363.6715      | 682.3394         | F   | 1103.5017 | 552.2545        | 1086.4752      | 543.7412         | 1085.4912      | 543.2492         | 8  |
| 13 | 1518.7410 | 759.8741        | 1501.7144      | 751.3608         | 1500.7304      | 750.8688         | H   | 956.4333  | 478.7203        | 939.4068       | 470.2070         | 938.4227       | 469.7150         | 7  |
| 14 | 1605.7730 | 803.3901        | 1588.7464      | 794.8769         | 1587.7624      | 794.3849         | S   | 819.3744  | 410.1908        | 802.3478       | 401.6776         | 801.3638       | 401.1856         | 6  |
| 15 | 1733.8316 | 867.4194        | 1716.8050      | 858.9061         | 1715.8210      | 858.4141         | Q   | 732.3424  | 366.6748        | 715.3158       | 358.1615         | 714.3318       | 357.6695         | 5  |
| 16 | 1919.9109 | 960.4591        | 1902.8843      | 951.9458         | 1901.9003      | 951.4538         | W   | 604.2838  | 302.6455        | 587.2572       | 294.1323         | 586.2732       | 293.6402         | 4  |
| 17 | 2047.9695 | 1024.4884       | 2030.9429      | 1015.9751        | 2029.9589      | 1015.4831        | Q   | 418.2045  | 209.6059        | 401.1779       | 201.0926         | 400.1939       | 200.6006         | 3  |
| 18 | 2162.9964 | 1082.0018       | 2145.9699      | 1073.4886        | 2144.9858      | 1072.9966        | D   | 290.1459  | 145.5766        | 273.1193       | 137.0633         | 272.1353       | 136.5713         | 2  |
| 19 |           |                 |                |                  |                |                  | R   | 175.1190  | 88.0631         | 158.0924       | 79.5498          |                |                  | 1  |

# AT3G18310.1

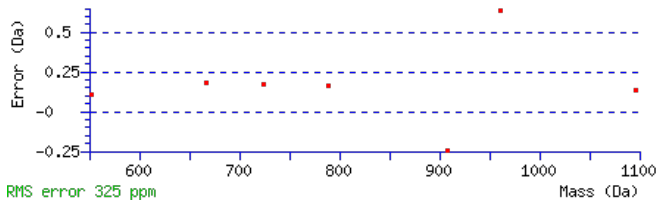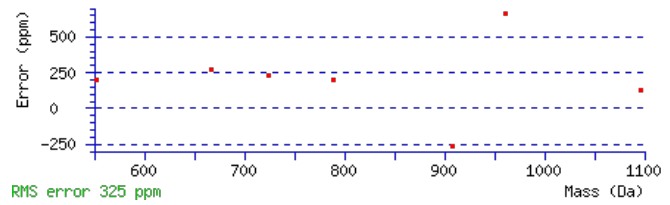

NCBI BLAST search of [FDMKAMLTDKTFHSQWQDR](#)  
 (Parameters: blastp, nr protein database, expect=20000, no filter, PAM30)  
 Other BLAST [web gateways](#)

## All matches to this query

| Score | Mr(calc)  | Delta   | Sequence                               | Site Analysis       |
|-------|-----------|---------|----------------------------------------|---------------------|
| 16.0  | 2400.0991 | 0.0020  | <a href="#">FDMKAMLTDKTFHSQWQDR</a>    | Oxidation M6 89.66% |
| 6.6   | 2400.0991 | 0.0020  | <a href="#">FDMKAMLTDKTFHSQWQDR</a>    | Oxidation M3 10.34% |
| 4.8   | 2400.0944 | 0.0067  | <a href="#">GLMSFPLDGNNSTDFIEDWVK</a>  |                     |
| 4.5   | 2400.1016 | -0.0005 | <a href="#">DSL DGENMEILVNSYHHQGVK</a> |                     |
| 4.0   | 2400.0946 | 0.0066  | <a href="#">MAVEGMMKKHGGFSNIVEMEK</a>  |                     |
| 4.0   | 2400.0946 | 0.0066  | <a href="#">MAVEGMMKKHGGFSNIVEMEK</a>  |                     |
| 3.5   | 2400.0946 | 0.0066  | <a href="#">MAVEGMMKKHGGFSNIVEMEK</a>  |                     |
| 2.8   | 2400.1049 | -0.0038 | <a href="#">EMESRLKGFLSGEGTPESMSGR</a> |                     |
| 1.6   | 2400.0964 | 0.0047  | <a href="#">RRPFVTHFTGCQPCSGDHNK</a>   |                     |
| 0.9   | 2400.1036 | -0.0025 | <a href="#">SSSTEATLLLVDTAGCDMEEKK</a> |                     |

Mascot: <http://www.matrixscience.com/>

**Peptide View**MS/MS Fragmentation of **NISCKKSYK**Found in **AT3G18330.1** in **TAIR\_Arabidopsis**, Symbols: | F-box family protein | chr3:6291133-6292263 REVERSE

Match to Query 4021: 1140.540520 from(571.277536,2+) index(1757)

Title: Elution from: 21.599 to 21.599 scan no 2317 cid35.00 polarity:+

Data file D1d-3\_1.mgf

Click mouse within plot area to zoom in by factor of two about that point

Or,   to  Da Label all possible matches  Label matches used for scoring Show Y-axis 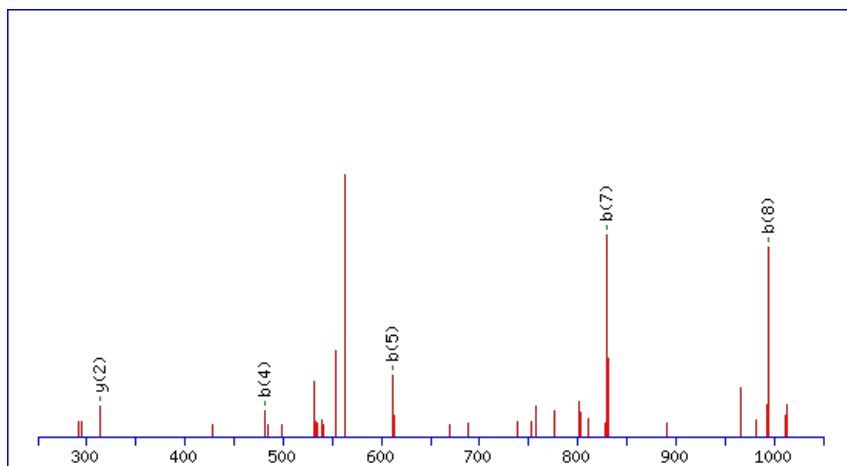Monoisotopic mass of neutral peptide **Mr(calc)**: 1140.5390**Fixed modifications**: Carbamidomethyl (C) (apply to specified residues or termini only)**Ions Score**: 22 **Expect**: 0.024**Matches**: 5/88 fragment ions using 8 most intense peaks ([help](#))

| # | b               | b <sup>++</sup> | b*       | b <sup>*++</sup> | b <sup>0</sup> | b <sup>0++</sup> | Seq. | y               | y <sup>++</sup> | y*        | y <sup>*++</sup> | y <sup>0</sup> | y <sup>0++</sup> | # |
|---|-----------------|-----------------|----------|------------------|----------------|------------------|------|-----------------|-----------------|-----------|------------------|----------------|------------------|---|
| 1 | 117.0443        | 59.0258         | 99.0207  | 50.0140          |                |                  | N    |                 |                 |           |                  |                |                  | 9 |
| 2 | 231.1254        | 116.0663        | 213.1018 | 107.0545         |                |                  | I    | 1025.5092       | 513.2583        | 1007.4857 | 504.2465         | 1007.4987      | 504.2530         | 8 |
| 3 | 319.1544        | 160.0809        | 301.1309 | 151.0691         | 301.1439       | 151.0756         | S    | 911.4281        | 456.2177        | 893.4046  | 447.2059         | 893.4176       | 447.2124         | 7 |
| 4 | <b>481.1792</b> | 241.0932        | 463.1556 | 232.0814         | 463.1686       | 232.0879         | C    | 823.3991        | 412.2032        | 805.3755  | 403.1914         | 805.3885       | 403.1979         | 6 |
| 5 | <b>611.2682</b> | 306.1377        | 593.2446 | 297.1259         | 593.2576       | 297.1324         | K    | 661.3744        | 331.1908        | 643.3508  | 322.1790         | 643.3638       | 322.1855         | 5 |
| 6 | 741.3572        | 371.1822        | 723.3336 | 362.1705         | 723.3467       | 362.1770         | K    | 531.2853        | 266.1463        | 513.2617  | 257.1345         | 513.2748       | 257.1410         | 4 |
| 7 | <b>829.3863</b> | 415.1968        | 811.3627 | 406.1850         | 811.3757       | 406.1915         | S    | 401.1963        | 201.1018        | 383.1727  | 192.0900         | 383.1857       | 192.0965         | 3 |
| 8 | <b>993.4466</b> | 497.2270        | 975.4231 | 488.2152         | 975.4361       | 488.2217         | Y    | <b>313.1672</b> | 157.0873        | 295.1437  | 148.0755         |                |                  | 2 |
| 9 |                 |                 |          |                  |                |                  | K    | 149.1069        | 75.0571         | 131.0833  | 66.0453          |                |                  | 1 |

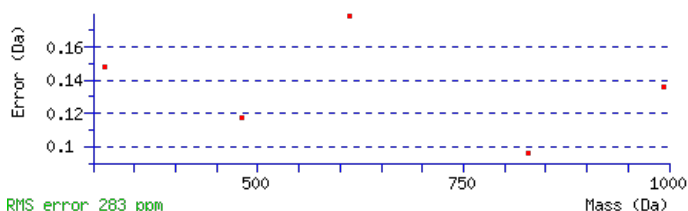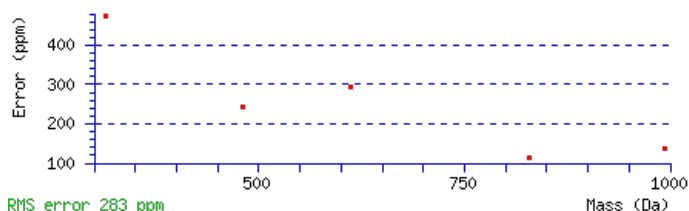NCBI **BLAST** search of [NISCKKSYK](#)

(Parameters: blastp, nr protein database, expect=20000, no filter, PAM30)

Other BLAST [web gateways](#)**All matches to this query**

| Score | Mr(calc)  | Delta  | Sequence                  |
|-------|-----------|--------|---------------------------|
| 22.4  | 1140.5390 | 0.0015 | <a href="#">NISCKKSYK</a> |

## AT3G18330.1

|     |           |         |                             |
|-----|-----------|---------|-----------------------------|
| 6.2 | 1140.5412 | -0.0007 | <a href="#">YFAILSMQR</a>   |
| 2.5 | 1140.5390 | 0.0015  | <a href="#">INSVMTRYK</a>   |
| 1.5 | 1140.5434 | -0.0029 | <a href="#">FTMYIWLR</a>    |
| 1.0 | 1140.5385 | 0.0020  | <a href="#">LLVFDYMSK</a>   |
| 0.3 | 1140.5437 | -0.0032 | <a href="#">GKPGPESLTDK</a> |

**Mascot:** <http://www.matrixscience.com/>

**Peptide View**MS/MS Fragmentation of **YNGNNVDLGTACGK**Found in **AT3G18740.1** in **TAIR\_Arabidopsis**, Symbols: | 60S ribosomal protein L30 (RPL30C) | chr3:6453443-6453876 FORWARD

Match to Query 6114: 1481.654458 from(741.834505,2+) index(1964)

Title: Elution from: 23.379 to 23.379 scan no 2547 cid35.00 polarity:+

Data file 0-2\_2.mgf

Click mouse within plot area to zoom in by factor of two about that point

Or,   to  Da Label all possible matches  Label matches used for scoring Show Y-axis 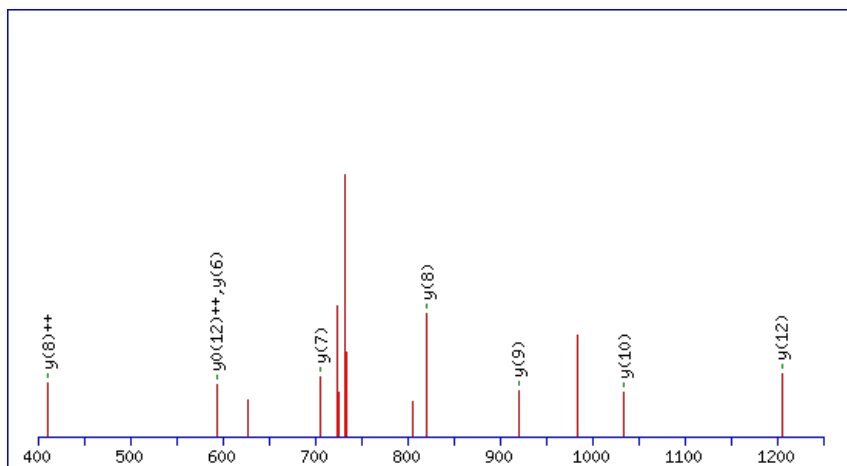Monoisotopic mass of neutral peptide  $M_r(\text{calc})$ : 1481.6569

Fixed modifications: Carbamidomethyl (C) (apply to specified residues or termini only)

Ions Score: 41 Expect: 8.3e-005

Matches : 8/134 fragment ions using 11 most intense peaks ([help](#))

| #  | b         | b <sup>++</sup> | b*        | b <sup>*++</sup> | b <sup>0</sup> | b <sup>0++</sup> | Seq. | y                | y <sup>++</sup> | y*        | y <sup>*++</sup> | y <sup>0</sup> | y <sup>0++</sup> | #  |
|----|-----------|-----------------|-----------|------------------|----------------|------------------|------|------------------|-----------------|-----------|------------------|----------------|------------------|----|
| 1  | 164.0706  | 82.5389         |           |                  |                |                  | Y    |                  |                 |           |                  |                |                  | 14 |
| 2  | 278.1135  | 139.5604        | 261.0870  | 131.0471         |                |                  | N    | 1319.6008        | 660.3041        | 1302.5743 | 651.7908         | 1301.5903      | 651.2988         | 13 |
| 3  | 335.1350  | 168.0711        | 318.1084  | 159.5579         |                |                  | G    | <b>1205.5579</b> | 603.2826        | 1188.5314 | 594.7693         | 1187.5473      | <b>594.2773</b>  | 12 |
| 4  | 449.1779  | 225.0926        | 432.1514  | 216.5793         |                |                  | N    | 1148.5364        | 574.7719        | 1131.5099 | 566.2586         | 1130.5259      | 565.7666         | 11 |
| 5  | 563.2209  | 282.1141        | 546.1943  | 273.6008         |                |                  | N    | <b>1034.4935</b> | 517.7504        | 1017.4670 | 509.2371         | 1016.4830      | 508.7451         | 10 |
| 6  | 662.2893  | 331.6483        | 645.2627  | 323.1350         |                |                  | V    | <b>920.4506</b>  | 460.7289        | 903.4240  | 452.2157         | 902.4400       | 451.7237         | 9  |
| 7  | 777.3162  | 389.1617        | 760.2897  | 380.6485         | 759.3056       | 380.1565         | D    | <b>821.3822</b>  | <b>411.1947</b> | 804.3556  | 402.6815         | 803.3716       | 402.1894         | 8  |
| 8  | 890.4003  | 445.7038        | 873.3737  | 437.1905         | 872.3897       | 436.6985         | L    | <b>706.3552</b>  | 353.6813        | 689.3287  | 345.1680         | 688.3447       | 344.6760         | 7  |
| 9  | 947.4217  | 474.2145        | 930.3952  | 465.7012         | 929.4112       | 465.2092         | G    | <b>593.2712</b>  | 297.1392        | 576.2446  | 288.6260         | 575.2606       | 288.1339         | 6  |
| 10 | 1048.4694 | 524.7383        | 1031.4429 | 516.2251         | 1030.4588      | 515.7331         | T    | 536.2497         | 268.6285        | 519.2232  | 260.1152         | 518.2391       | 259.6232         | 5  |
| 11 | 1119.5065 | 560.2569        | 1102.4800 | 551.7436         | 1101.4960      | 551.2516         | A    | 435.2020         | 218.1047        | 418.1755  | 209.5914         |                |                  | 4  |
| 12 | 1279.5372 | 640.2722        | 1262.5106 | 631.7590         | 1261.5266      | 631.2669         | C    | 364.1649         | 182.5861        | 347.1384  | 174.0728         |                |                  | 3  |
| 13 | 1336.5586 | 668.7830        | 1319.5321 | 660.2697         | 1318.5481      | 659.7777         | G    | 204.1343         | 102.5708        | 187.1077  | 94.0575          |                |                  | 2  |
| 14 |           |                 |           |                  |                |                  | K    | 147.1128         | 74.0600         | 130.0863  | 65.5468          |                |                  | 1  |

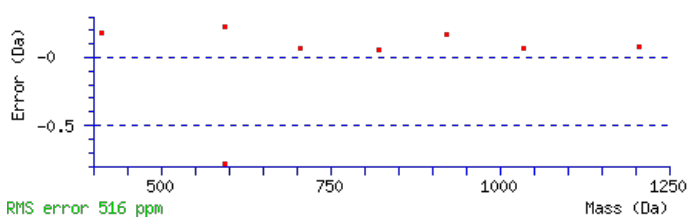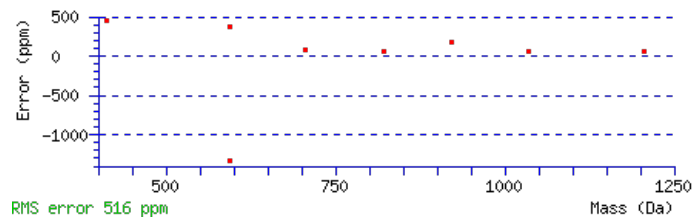NCBI BLAST search of **YNGNNVDLGTACGK**

(Parameters: blastp, nr protein database, expect=20000, no filter, PAM30)

AT3G18740.1

Other BLAST [web gateways](#)

All matches to this query

| Score | Mr(calc)  | Delta   | Sequence                       |
|-------|-----------|---------|--------------------------------|
| 41.4  | 1481.6569 | -0.0024 | <a href="#">YNGNNVDLGTACGK</a> |

Mascot: <http://www.matrixscience.com/>

**Peptide View**MS/MS Fragmentation of **SPVAKGMMIK**Found in **AT3G18940.1** in **TAIR\_Arabidopsis**, Symbols: | clast3-related | chr3:6527087-6529056 REVERSE

Match to Query 3489: 1088.536180 from(545.275366,2+) index(6578)

Title: Elution from: 57.363 to 57.363 scan no 8379 cid35.00 polarity:+

Data file D6h-1\_1.mgf

Click mouse within plot area to zoom in by factor of two about that point

Or,   to  Da Label all possible matches  Label matches used for scoring Show Y-axis 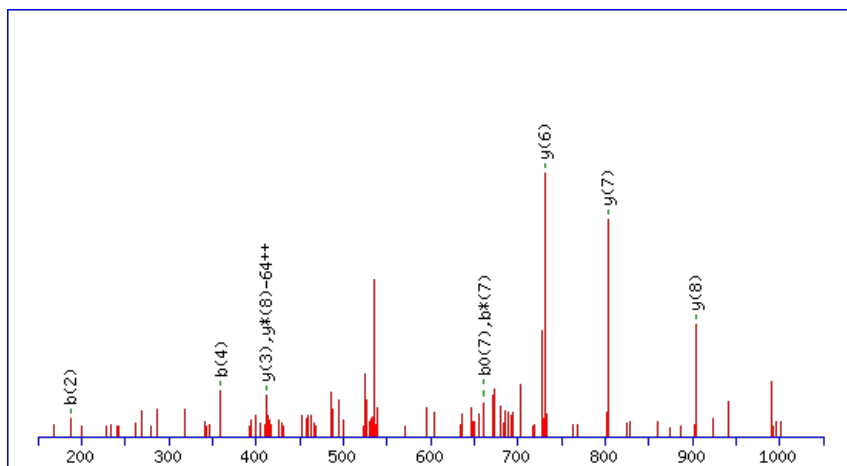**Monoisotopic mass of neutral peptide Mr(calc):** 1088.5367**Fixed modifications:** Carbamidomethyl (C) (apply to specified residues or termini only)**Variable modifications:****M8** : Oxidation (M), with neutral losses 0.0000 (shown in table), 63.9983**Ions Score:** 31 **Expect:** 0.007**Matches** : 9/122 fragment ions using 9 most intense peaks ([help](#))

| #  | b               | b <sup>++</sup> | b <sup>*</sup>  | b <sup>*++</sup> | b <sup>0</sup>  | b <sup>0++</sup> | Seq. | y               | y <sup>++</sup> | y <sup>*</sup> | y <sup>*++</sup> | #  |
|----|-----------------|-----------------|-----------------|------------------|-----------------|------------------|------|-----------------|-----------------|----------------|------------------|----|
| 1  | 89.0363         | 45.0218         |                 |                  | 71.0258         | 36.0165          | S    |                 |                 |                |                  | 10 |
| 2  | <b>187.0861</b> | 94.0467         |                 |                  | 169.0756        | 85.0414          | P    | 1001.5149       | 501.2611        | 983.4913       | 492.2493         | 9  |
| 3  | 287.1516        | 144.0794        |                 |                  | 269.1410        | 135.0741         | V    | <b>903.4651</b> | 452.2362        | 885.4415       | 443.2244         | 8  |
| 4  | <b>359.1857</b> | 180.0965        |                 |                  | 341.1752        | 171.0912         | A    | <b>803.3996</b> | 402.2034        | 785.3760       | 393.1917         | 7  |
| 5  | 489.2748        | 245.1410        | 471.2512        | 236.1292         | 471.2642        | 236.1357         | K    | <b>731.3655</b> | 366.1864        | 713.3419       | 357.1746         | 6  |
| 6  | 547.2933        | 274.1503        | 529.2697        | 265.1385         | 529.2827        | 265.1450         | G    | 601.2764        | 301.1419        | 583.2528       | 292.1301         | 5  |
| 7  | 679.3308        | 340.1690        | <b>661.3072</b> | 331.1572         | <b>661.3202</b> | 331.1637         | M    | 543.2579        | 272.1326        | 525.2343       | 263.1208         | 4  |
| 8  | 827.3632        | 414.1852        | 809.3396        | 405.1735         | 809.3527        | 405.1800         | M    | <b>411.2204</b> | 206.1138        | 393.1968       | 197.1020         | 3  |
| 9  | 941.4443        | 471.2258        | 923.4207        | 462.2140         | 923.4338        | 462.2205         | I    | 263.1880        | 132.0976        | 245.1644       | 123.0858         | 2  |
| 10 |                 |                 |                 |                  |                 |                  | K    | 149.1069        | 75.0571         | 131.0833       | 66.0453          | 1  |

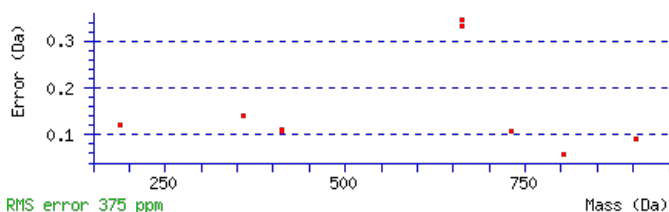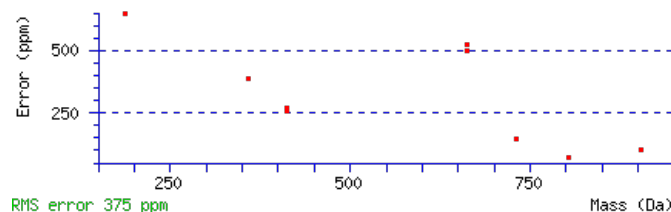NCBI **BLAST** search of **SPVAKGMMIK**

(Parameters: blastp, nr protein database, expect=20000, no filter, PAM30)

Other BLAST [web gateways](#)**All matches to this query**



## AT3G18940.1

| Score | Mr(calc)  | Delta   | Sequence                   | Site Analysis       |
|-------|-----------|---------|----------------------------|---------------------|
| 31.5  | 1088.5367 | -0.0005 | <a href="#">SPVAKGMMIK</a> | Oxidation M8 96.31% |
| 17.3  | 1088.5367 | -0.0005 | <a href="#">SPVAKGMMIK</a> | Oxidation M7 3.69%  |
| 8.5   | 1088.5380 | -0.0018 | <a href="#">IAVEGVDTFK</a> |                     |
| 5.2   | 1088.5359 | 0.0003  | <a href="#">VRVTMGFHK</a>  |                     |
| 0.1   | 1088.5385 | -0.0023 | <a href="#">KKPSSTSSPR</a> |                     |

Mascot: <http://www.matrixscience.com/>

## Peptide View

### MS/MS Fragmentation of **DFAQAIDVVR**

Found in **AT3G19170.1** in **TAIR\_Arabidopsis**, Symbols: ATPREP1, ATZNMP | ATPREP1/ATZNMP (PRESEQUENCE PROTEASE 1); metalloendopeptidase | chr3:6625584-6631880 REVERSE

Match to Query 3973: 1146.543566 from(574.279059,2+) index(7135)

Title: Elution from: 62.709 to 62.709 scan no 9170 cid35.00 polarity:+

Data file 0-2\_1.mgf

Click mouse within plot area to zoom in by factor of two about that point

Or,   to  Da

Label all possible matches  Label matches used for scoring

Show Y-axis

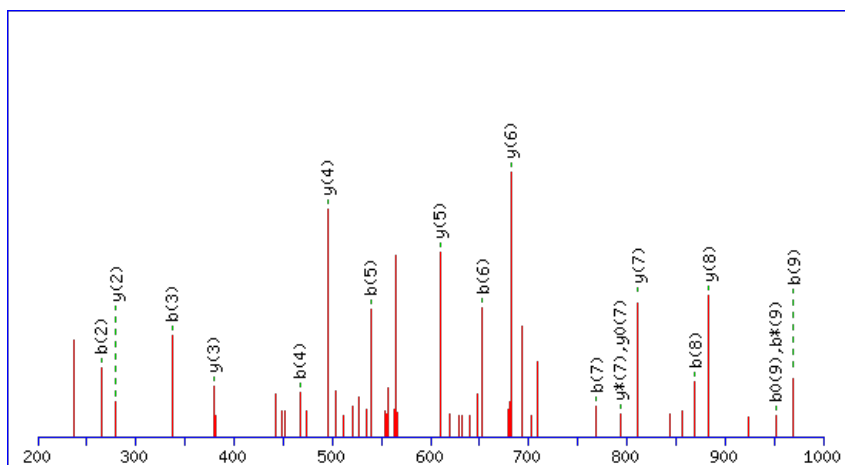

Monoisotopic mass of neutral peptide  $M_r(\text{calc})$ : 1146.5461

Fixed modifications: Carbamidomethyl (C) (apply to specified residues or termini only)

Ions Score: 71 Expect: 7e-007

Matches : 19/96 fragment ions using 23 most intense peaks ([help](#))

| #  | b               | b <sup>++</sup> | b*              | b <sup>*++</sup> | b <sup>0</sup>  | b <sup>0++</sup> | Seq. | y               | y <sup>++</sup> | y*              | y <sup>*++</sup> | y <sup>0</sup>  | y <sup>0++</sup> | #  |
|----|-----------------|-----------------|-----------------|------------------|-----------------|------------------|------|-----------------|-----------------|-----------------|------------------|-----------------|------------------|----|
| 1  | 117.0313        | 59.0193         |                 |                  | 99.0207         | 50.0140          | D    |                 |                 |                 |                  |                 |                  | 10 |
| 2  | <b>265.0967</b> | 133.0520        |                 |                  | 247.0861        | 124.0467         | F    | 1031.5295       | 516.2684        | 1013.5059       | 507.2566         | 1013.5189       | 507.2631         | 9  |
| 3  | <b>337.1309</b> | 169.0691        |                 |                  | 319.1203        | 160.0638         | A    | <b>883.4640</b> | 442.2356        | 865.4404        | 433.2239         | 865.4534        | 433.2304         | 8  |
| 4  | <b>467.1835</b> | 234.0954        | 449.1599        | 225.0836         | 449.1729        | 225.0901         | Q    | <b>811.4299</b> | 406.2186        | <b>793.4063</b> | 397.2068         | <b>793.4193</b> | 397.2133         | 7  |
| 5  | <b>539.2176</b> | 270.1125        | 521.1941        | 261.1007         | 521.2071        | 261.1072         | A    | <b>681.3772</b> | 341.1922        | 663.3536        | 332.1805         | 663.3667        | 332.1870         | 6  |
| 6  | <b>653.2987</b> | 327.1530        | 635.2752        | 318.1412         | 635.2882        | 318.1477         | I    | <b>609.3431</b> | 305.1752        | 591.3195        | 296.1634         | 591.3325        | 296.1699         | 5  |
| 7  | <b>769.3227</b> | 385.1650        | 751.2991        | 376.1532         | 751.3122        | 376.1597         | D    | <b>495.2620</b> | 248.1346        | 477.2384        | 239.1228         | 477.2514        | 239.1293         | 4  |
| 8  | <b>869.3882</b> | 435.1977        | 851.3646        | 426.1859         | 851.3776        | 426.1924         | V    | <b>379.2380</b> | 190.1226        | 361.2144        | 181.1108         |                 |                  | 3  |
| 9  | <b>969.4536</b> | 485.2304        | <b>951.4300</b> | 476.2187         | <b>951.4431</b> | 476.2252         | V    | <b>279.1725</b> | 140.0899        | 261.1490        | 131.0781         |                 |                  | 2  |
| 10 |                 |                 |                 |                  |                 |                  | R    | 179.1071        | 90.0572         | 161.0835        | 81.0454          |                 |                  | 1  |

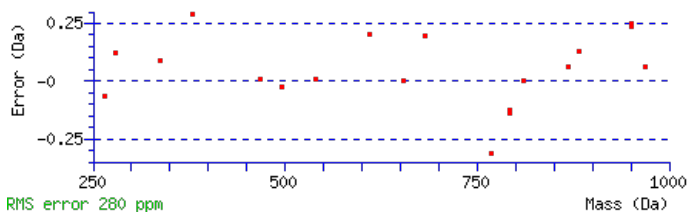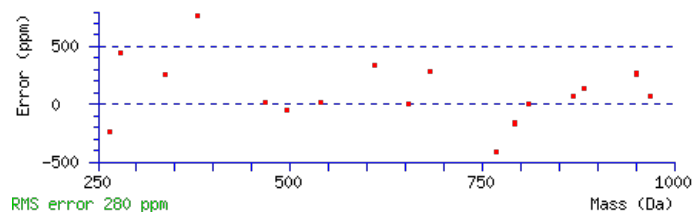

NCBI BLAST search of [DFAQAIDVVR](#)

(Parameters: blastp, nr protein database, expect=20000, no filter, PAM30)

Other BLAST [web gateways](#)

All matches to this query

**AT3G19170.1**

| <b>Score</b> | <b>Mr(calc)</b> | <b>Delta</b> | <b>Sequence</b>            |
|--------------|-----------------|--------------|----------------------------|
| 70.9         | 1146.5461       | -0.0026      | <a href="#">DFAQAIDVVR</a> |
| 25.0         | 1146.5462       | -0.0026      | <a href="#">GYLKNPEANK</a> |
| 12.8         | 1146.5462       | -0.0026      | <a href="#">YANLPASEIR</a> |
| 9.5          | 1146.5462       | -0.0026      | <a href="#">NIFLNEDLR</a>  |
| 6.6          | 1146.5461       | -0.0026      | <a href="#">FAEDNGILVR</a> |
| 4.9          | 1146.5414       | 0.0022       | <a href="#">VFPGCQIVGR</a> |
| 4.8          | 1146.5435       | 0.0001       | <a href="#">LYVEAGEVEK</a> |
| 3.4          | 1146.5461       | -0.0026      | <a href="#">DTSAVQLPER</a> |
| 0.6          | 1146.5414       | 0.0022       | <a href="#">AGFSVCVHKK</a> |
| 0.6          | 1146.5435       | 0.0001       | <a href="#">EIKFELDDK</a>  |

**Mascot:** <http://www.matrixscience.com/>

**Peptide View**MS/MS Fragmentation of **LYETLSDIQTGR**

Found in **AT3G19710.1** in **TAIR\_Arabidopsis**, Symbols: BCAT4 | BCAT4 (BRANCHED-CHAIN AMINOTRANSFERASE4); catalytic/methionine-oxo-acid transaminase | chr3:6847208-6849435 REVERSE

Match to Query 5148: 1394.703414 from(698.358983,2+) index(4954)

Title: Elution from: 44.111 to 44.111 scan no 6222 cid35.00 polarity:+

Data file 0-3\_3.mgf

Click mouse within plot area to zoom in by factor of two about that point

Or,   to  Da

Label all possible matches  Label matches used for scoring

Show Y-axis

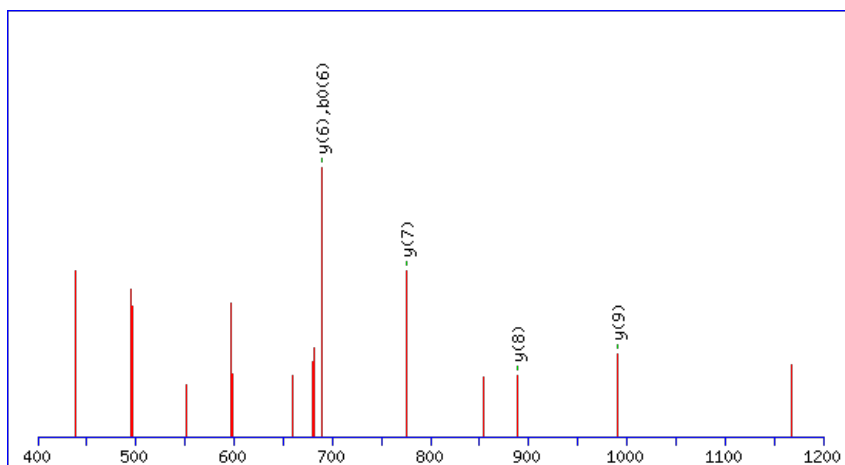

**Monoisotopic mass of neutral peptide Mr(calc):** 1394.7041

**Fixed modifications:** Carbamidomethyl (C) (apply to specified residues or termini only)

**Ions Score:** 22 **Expect:** 0.027

**Matches:** 5/108 fragment ions using 7 most intense peaks ([help](#))

| #  | b         | b <sup>++</sup> | b*        | b <sup>*++</sup> | b <sup>0</sup>  | b <sup>0++</sup> | Seq. | y               | y <sup>++</sup> | y*        | y <sup>*++</sup> | y <sup>0</sup> | y <sup>0++</sup> | #  |
|----|-----------|-----------------|-----------|------------------|-----------------|------------------|------|-----------------|-----------------|-----------|------------------|----------------|------------------|----|
| 1  | 114.0913  | 57.5493         |           |                  |                 |                  | L    |                 |                 |           |                  |                |                  | 12 |
| 2  | 277.1547  | 139.0810        |           |                  |                 |                  | Y    | 1282.6274       | 641.8173        | 1265.6008 | 633.3041         | 1264.6168      | 632.8120         | 11 |
| 3  | 406.1973  | 203.6023        |           |                  | 388.1867        | 194.5970         | E    | 1119.5640       | 560.2857        | 1102.5375 | 551.7724         | 1101.5535      | 551.2804         | 10 |
| 4  | 507.2449  | 254.1261        |           |                  | 489.2344        | 245.1208         | T    | <b>990.5215</b> | 495.7644        | 973.4949  | 487.2511         | 972.5109       | 486.7591         | 9  |
| 5  | 620.3290  | 310.6681        |           |                  | 602.3184        | 301.6629         | L    | <b>889.4738</b> | 445.2405        | 872.4472  | 436.7272         | 871.4632       | 436.2352         | 8  |
| 6  | 707.3610  | 354.1842        |           |                  | <b>689.3505</b> | 345.1789         | S    | <b>776.3897</b> | 388.6985        | 759.3632  | 380.1852         | 758.3791       | 379.6932         | 7  |
| 7  | 822.3880  | 411.6976        |           |                  | 804.3774        | 402.6923         | D    | <b>689.3577</b> | 345.1825        | 672.3311  | 336.6692         | 671.3471       | 336.1772         | 6  |
| 8  | 935.4720  | 468.2397        |           |                  | 917.4615        | 459.2344         | I    | 574.3307        | 287.6690        | 557.3042  | 279.1557         | 556.3202       | 278.6637         | 5  |
| 9  | 1063.5306 | 532.2689        | 1046.5041 | 523.7557         | 1045.5201       | 523.2637         | Q    | 461.2467        | 231.1270        | 444.2201  | 222.6137         | 443.2361       | 222.1217         | 4  |
| 10 | 1164.5783 | 582.7928        | 1147.5517 | 574.2795         | 1146.5677       | 573.7875         | T    | 333.1881        | 167.0977        | 316.1615  | 158.5844         | 315.1775       | 158.0924         | 3  |
| 11 | 1221.5998 | 611.3035        | 1204.5732 | 602.7902         | 1203.5892       | 602.2982         | G    | 232.1404        | 116.5738        | 215.1139  | 108.0606         |                |                  | 2  |
| 12 |           |                 |           |                  |                 |                  | R    | 175.1190        | 88.0631         | 158.0924  | 79.5498          |                |                  | 1  |

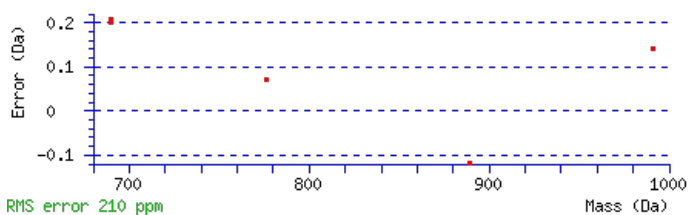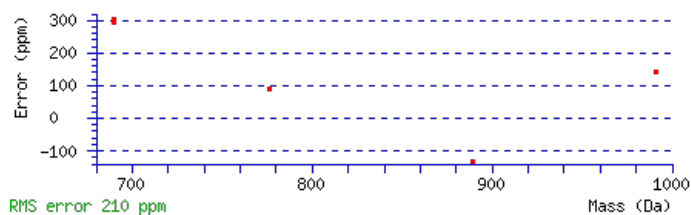

NCBI **BLAST** search of **LYETLSDIQTGR**

(Parameters: blastp, nr protein database, expect=20000, no filter, PAM30)

Other BLAST [web gateways](#)

# AT3G19710.1

All matches to this query

| Score | Mr(calc)  | Delta   | Sequence                      |
|-------|-----------|---------|-------------------------------|
| 21.5  | 1394.7041 | -0.0007 | <a href="#">LYETLSDIQTGR</a>  |
| 2.6   | 1394.7041 | -0.0007 | <a href="#">FEETKKISEER</a>   |
| 1.3   | 1394.7016 | 0.0018  | <a href="#">SGGYMPSSLFAPR</a> |
| 1.1   | 1394.7055 | -0.0021 | <a href="#">YRSDSPPVRYR</a>   |
| 0.7   | 1394.7041 | -0.0007 | <a href="#">LSKSSGQGEVEEK</a> |
| 0.2   | 1394.7010 | 0.0024  | <a href="#">DTMEALRRIMK</a>   |

Mascot: <http://www.matrixscience.com/>

**Peptide View**MS/MS Fragmentation of **GQIYPEPGFEYENR**

Found in **AT3G19820.1** in **TAIR\_Arabidopsis**, Symbols: DIM, EVE1, DW1, DIM1, CBB1, DWF1 | DWF1 (DIMINUTO 1); catalytic | chr3:6879841-6881622 REVERSE

Match to Query 8008: 1697.767090 from(849.890821,2+) index(5408)

Title: Elution from: 49.322 to 49.322 scan no 6804 cid35.00 polarity:+

Data file D6h-2\_2.mgf

Click mouse within plot area to zoom in by factor of two about that point

Or,   to  Da

Label all possible matches  Label matches used for scoring

Show Y-axis

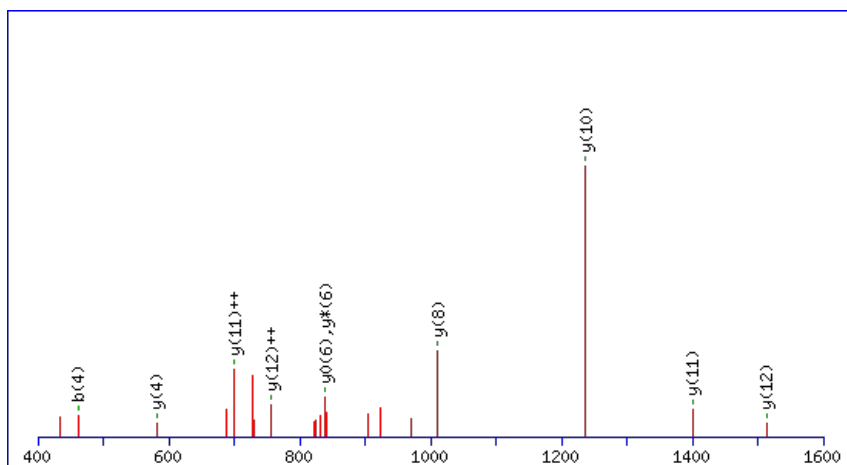

Monoisotopic mass of neutral peptide  $M_r(\text{calc})$ : 1697.7685

Fixed modifications: Carbamidomethyl (C) (apply to specified residues or termini only)

Ions Score: 40 Expect: 0.00022

Matches : 10/140 fragment ions using 9 most intense peaks ([help](#))

| #  | b         | b <sup>++</sup> | b*        | b <sup>*++</sup> | b <sup>0</sup> | b <sup>0++</sup> | Seq. | y         | y <sup>++</sup> | y*        | y <sup>*++</sup> | y <sup>0</sup> | y <sup>0++</sup> | #  |
|----|-----------|-----------------|-----------|------------------|----------------|------------------|------|-----------|-----------------|-----------|------------------|----------------|------------------|----|
| 1  | 58.0287   | 29.5180         |           |                  |                |                  | G    |           |                 |           |                  |                |                  | 14 |
| 2  | 186.0873  | 93.5473         | 169.0608  | 85.0340          |                |                  | Q    | 1641.7544 | 821.3808        | 1624.7278 | 812.8675         | 1623.7438      | 812.3755         | 13 |
| 3  | 299.1714  | 150.0893        | 282.1448  | 141.5761         |                |                  | I    | 1513.6958 | 757.3515        | 1496.6692 | 748.8383         | 1495.6852      | 748.3462         | 12 |
| 4  | 462.2347  | 231.6210        | 445.2082  | 223.1077         |                |                  | Y    | 1400.6117 | 700.8095        | 1383.5852 | 692.2962         | 1382.6012      | 691.8042         | 11 |
| 5  | 559.2875  | 280.1474        | 542.2609  | 271.6341         |                |                  | P    | 1237.5484 | 619.2778        | 1220.5218 | 610.7646         | 1219.5378      | 610.2726         | 10 |
| 6  | 688.3301  | 344.6687        | 671.3035  | 336.1554         | 670.3195       | 335.6634         | E    | 1140.4956 | 570.7515        | 1123.4691 | 562.2382         | 1122.4851      | 561.7462         | 9  |
| 7  | 785.3828  | 393.1951        | 768.3563  | 384.6818         | 767.3723       | 384.1898         | P    | 1011.4530 | 506.2302        | 994.4265  | 497.7169         | 993.4425       | 497.2249         | 8  |
| 8  | 842.4043  | 421.7058        | 825.3777  | 413.1925         | 824.3937       | 412.7005         | G    | 914.4003  | 457.7038        | 897.3737  | 449.1905         | 896.3897       | 448.6985         | 7  |
| 9  | 989.4727  | 495.2400        | 972.4462  | 486.7267         | 971.4621       | 486.2347         | F    | 857.3788  | 429.1930        | 840.3523  | 420.6798         | 839.3682       | 420.1878         | 6  |
| 10 | 1118.5153 | 559.7613        | 1101.4888 | 551.2480         | 1100.5047      | 550.7560         | E    | 710.3104  | 355.6588        | 693.2838  | 347.1456         | 692.2998       | 346.6536         | 5  |
| 11 | 1281.5786 | 641.2930        | 1264.5521 | 632.7797         | 1263.5681      | 632.2877         | Y    | 581.2678  | 291.1375        | 564.2413  | 282.6243         | 563.2572       | 282.1323         | 4  |
| 12 | 1410.6212 | 705.8143        | 1393.5947 | 697.3010         | 1392.6107      | 696.8090         | E    | 418.2045  | 209.6059        | 401.1779  | 201.0926         | 400.1939       | 200.6006         | 3  |
| 13 | 1524.6642 | 762.8357        | 1507.6376 | 754.3224         | 1506.6536      | 753.8304         | N    | 289.1619  | 145.0846        | 272.1353  | 136.5713         |                |                  | 2  |
| 14 |           |                 |           |                  |                |                  | R    | 175.1190  | 88.0631         | 158.0924  | 79.5498          |                |                  | 1  |

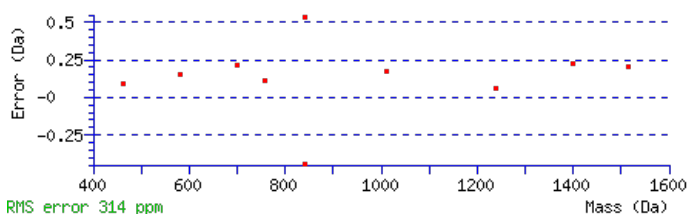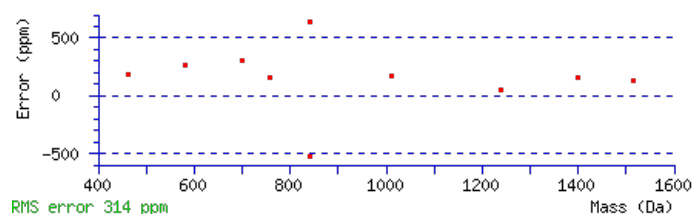

NCBI BLAST search of [GQIYPEPGFEYENR](#)

## AT3G19820.1

(Parameters: blastp, nr protein database, expect=20000, no filter, PAM30)

Other BLAST [web gateways](#)

### All matches to this query

| Score | Mr(calc)  | Delta   | Sequence                       |
|-------|-----------|---------|--------------------------------|
| 40.5  | 1697.7685 | -0.0014 | <a href="#">GQIYPEPGFEYENR</a> |
| 1.0   | 1697.7640 | 0.0031  | <a href="#">GLMSEAEKVWEEMK</a> |

Mascot: <http://www.matrixscience.com/>

**Peptide View**MS/MS Fragmentation of **ETKLILSK**Found in **AT3G19960.1** in **TAIR\_Arabidopsis**, Symbols: ATM1 | ATATM (myosin 1); motor | chr3:6949793-6956742 FORWARD

Match to Query 2134: 940.544812 from(471.279682,2+) index(733)

Title: Elution from: 12.052 to 12.052 scan no 1028 cid35.00 polarity:+

Data file D1d-3\_2.mgf

Click mouse within plot area to zoom in by factor of two about that point

Or,   to  Da Label all possible matches  Label matches used for scoring Show Y-axis 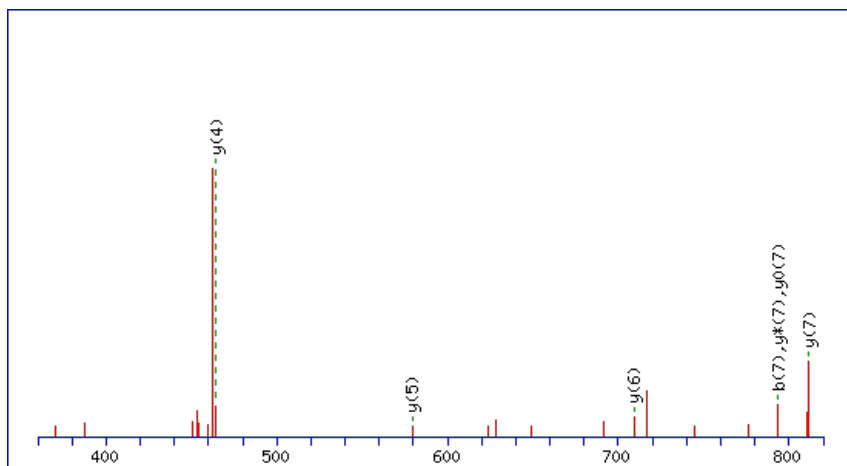Monoisotopic mass of neutral peptide **Mr(calc)**: 940.5453**Fixed modifications**: Carbamidomethyl (C) (apply to specified residues or termini only)**Ions Score**: 32 **Expect**: 0.001**Matches** : 7/78 fragment ions using 8 most intense peaks ([help](#))

| # | b        | b <sup>++</sup> | b*       | b <sup>*++</sup> | b <sup>0</sup> | b <sup>0++</sup> | Seq. | y        | y <sup>++</sup> | y*       | y <sup>*++</sup> | y <sup>0</sup> | y <sup>0++</sup> | # |
|---|----------|-----------------|----------|------------------|----------------|------------------|------|----------|-----------------|----------|------------------|----------------|------------------|---|
| 1 | 131.0469 | 66.0271         |          |                  | 113.0363       | 57.0218          | E    |          |                 |          |                  |                |                  | 8 |
| 2 | 233.0916 | 117.0494        |          |                  | 215.0811       | 108.0442         | T    | 811.5130 | 406.2601        | 793.4894 | 397.2483         | 793.5024       | 397.2548         | 7 |
| 3 | 363.1806 | 182.0940        | 345.1571 | 173.0822         | 345.1701       | 173.0887         | K    | 709.4683 | 355.2378        | 691.4447 | 346.2260         | 691.4577       | 346.2325         | 6 |
| 4 | 477.2617 | 239.1345        | 459.2382 | 230.1227         | 459.2512       | 230.1292         | L    | 579.3792 | 290.1933        | 561.3556 | 281.1815         | 561.3687       | 281.1880         | 5 |
| 5 | 591.3428 | 296.1751        | 573.3193 | 287.1633         | 573.3323       | 287.1698         | I    | 465.2981 | 233.1527        | 447.2746 | 224.1409         | 447.2876       | 224.1474         | 4 |
| 6 | 705.4239 | 353.2156        | 687.4004 | 344.2038         | 687.4134       | 344.2103         | L    | 351.2170 | 176.1122        | 333.1935 | 167.1004         | 333.2065       | 167.1069         | 3 |
| 7 | 793.4530 | 397.2301        | 775.4294 | 388.2184         | 775.4424       | 388.2249         | S    | 237.1359 | 119.0716        | 219.1124 | 110.0598         | 219.1254       | 110.0663         | 2 |
| 8 |          |                 |          |                  |                |                  | K    | 149.1069 | 75.0571         | 131.0833 | 66.0453          |                |                  | 1 |

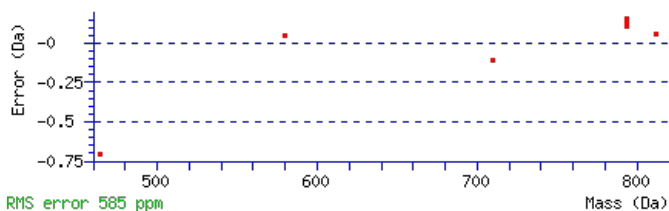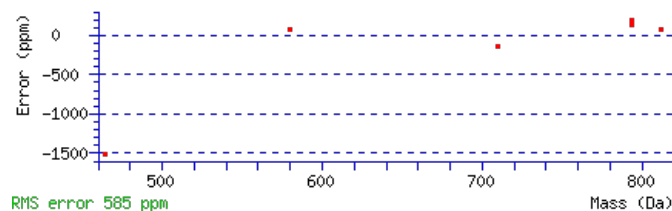NCBI **BLAST** search of [ETKLILSK](#)

(Parameters: blastp, nr protein database, expect=20000, no filter, PAM30)

Other BLAST [web gateways](#)**All matches to this query**

| Score | Mr(calc) | Delta   | Sequence                 |
|-------|----------|---------|--------------------------|
| 31.6  | 940.5453 | -0.0005 | <a href="#">ETKLILSK</a> |
| 26.4  | 940.5453 | -0.0005 | <a href="#">KTEVLLTK</a> |



# AT3G19960.1

|      |          |         |                          |
|------|----------|---------|--------------------------|
| 13.4 | 940.5476 | -0.0027 | <a href="#">AIFEVLK</a>  |
| 13.4 | 940.5476 | -0.0028 | <a href="#">YSLPIVIK</a> |
| 12.0 | 940.5453 | -0.0005 | <a href="#">KELSLITK</a> |
| 2.9  | 940.5453 | -0.0005 | <a href="#">SELKTLK</a>  |
| 2.3  | 940.5453 | -0.0005 | <a href="#">DITIKITK</a> |
| 2.3  | 940.5453 | -0.0005 | <a href="#">IIKELSTK</a> |
| 1.1  | 940.5476 | -0.0027 | <a href="#">LIIDFLAK</a> |

**Mascot:** <http://www.matrixscience.com/>

**Peptide View**MS/MS Fragmentation of **FKEAEREAEK**Found in **AT3G19990.1** in **TAIR\_Arabidopsis**, Symbols: | binding | chr3:6965677-6967108 FORWARD

Match to Query 4208: 1250.572090 from(626.293321,2+) index(2192)

Title: Elution from: 27.332 to 27.332 scan no 2894 cid35.00 polarity:+

Data file D12h-2\_1.mgf

Click mouse within plot area to zoom in by factor of two about that point

Or,   to  Da Label all possible matches  Label matches used for scoring Show Y-axis 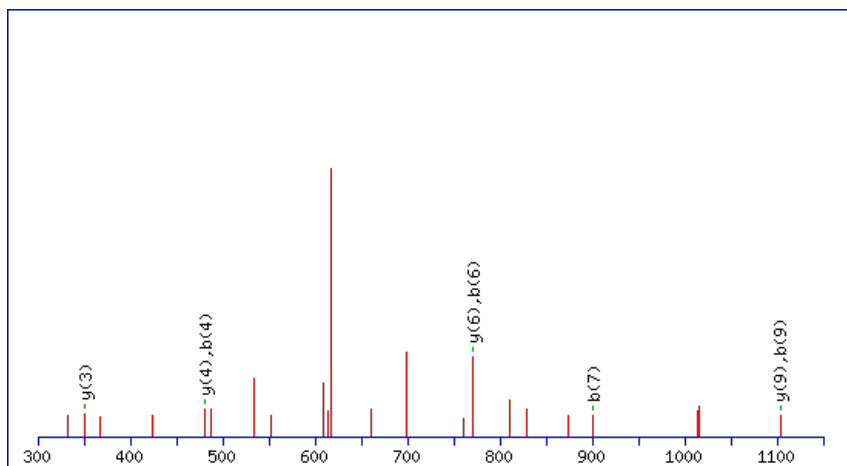Monoisotopic mass of neutral peptide **Mr(calc)**: 1250.5701

Fixed modifications: Carbamidomethyl (C) (apply to specified residues or termini only)

Ions Score: 28 **Expect**: 0.02Matches : 8/100 fragment ions using 8 most intense peaks ([help](#))

| #  | b                | b <sup>++</sup> | b <sup>*</sup> | b <sup>*++</sup> | b <sup>0</sup> | b <sup>0++</sup> | Seq. | y                | y <sup>++</sup> | y <sup>*</sup> | y <sup>*++</sup> | y <sup>0</sup> | y <sup>0++</sup> | #  |
|----|------------------|-----------------|----------------|------------------|----------------|------------------|------|------------------|-----------------|----------------|------------------|----------------|------------------|----|
| 1  | 149.0727         | 75.0400         |                |                  |                |                  | F    |                  |                 |                |                  |                |                  | 10 |
| 2  | 279.1618         | 140.0845        | 261.1382       | 131.0727         |                |                  | K    | <b>1103.5120</b> | 552.2596        | 1085.4884      | 543.2478         | 1085.5014      | 543.2543         | 9  |
| 3  | 409.2014         | 205.1043        | 391.1778       | 196.0925         | 391.1908       | 196.0990         | E    | 973.4229         | 487.2151        | 955.3994       | 478.2033         | 955.4124       | 478.2098         | 8  |
| 4  | <b>481.2355</b>  | 241.1214        | 463.2120       | 232.1096         | 463.2250       | 232.1161         | A    | 843.3833         | 422.1953        | 825.3597       | 413.1835         | 825.3727       | 413.1900         | 7  |
| 5  | 611.2752         | 306.1412        | 593.2516       | 297.1294         | 593.2646       | 297.1359         | E    | <b>771.3492</b>  | 386.1782        | 753.3256       | 377.1664         | 753.3386       | 377.1729         | 6  |
| 6  | <b>771.3644</b>  | 386.1858        | 753.3408       | 377.1741         | 753.3538       | 377.1806         | R    | 641.3095         | 321.1584        | 623.2859       | 312.1466         | 623.2990       | 312.1531         | 5  |
| 7  | <b>901.4040</b>  | 451.2057        | 883.3805       | 442.1939         | 883.3935       | 442.2004         | E    | <b>481.2203</b>  | 241.1138        | 463.1967       | 232.1020         | 463.2097       | 232.1085         | 4  |
| 8  | 973.4382         | 487.2227        | 955.4146       | 478.2109         | 955.4276       | 478.2175         | A    | <b>351.1807</b>  | 176.0940        | 333.1571       | 167.0822         | 333.1701       | 167.0887         | 3  |
| 9  | <b>1103.4778</b> | 552.2425        | 1085.4542      | 543.2308         | 1085.4673      | 543.2373         | E    | 279.1465         | 140.0769        | 261.1229       | 131.0651         | 261.1359       | 131.0716         | 2  |
| 10 |                  |                 |                |                  |                |                  | K    | 149.1069         | 75.0571         | 131.0833       | 66.0453          |                |                  | 1  |

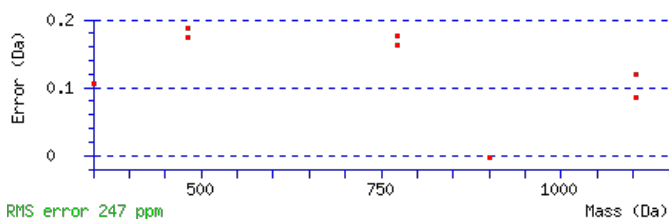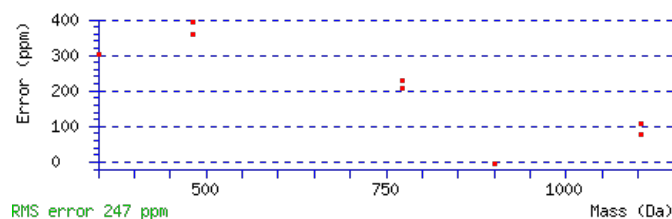NCBI **BLAST** search of **FKEAEREAEK**

(Parameters: blastp, nr protein database, expect=20000, no filter, PAM30)

Other BLAST [web gateways](#)**All matches to this query**

| Score | Mr(calc) | Delta | Sequence |
|-------|----------|-------|----------|
|       |          |       |          |

**AT3G19990.1**

|      |           |         |                              |
|------|-----------|---------|------------------------------|
| 27.7 | 1250.5701 | 0.0020  | <a href="#">FKEAEREAEK</a>   |
| 27.5 | 1250.5701 | 0.0020  | <a href="#">EEAFRKEEAK</a>   |
| 20.3 | 1250.5735 | -0.0014 | <a href="#">MRTDLEEAKK</a>   |
| 14.3 | 1250.5701 | 0.0020  | <a href="#">FEVTAIANTDR</a>  |
| 12.6 | 1250.5724 | -0.0003 | <a href="#">FSIPEFQDVR</a>   |
| 12.1 | 1250.5688 | 0.0033  | <a href="#">EIQTCMGRIK</a>   |
| 11.2 | 1250.5701 | 0.0020  | <a href="#">FTSEVAELQGR</a>  |
| 10.5 | 1250.5688 | 0.0033  | <a href="#">MRELQMTAQK</a>   |
| 10.5 | 1250.5758 | -0.0037 | <a href="#">SMIPQNLGSEK</a>  |
| 8.8  | 1250.5757 | -0.0036 | <a href="#">VAVICGYGDVGK</a> |

Mascot: <http://www.matrixscience.com/>

**Peptide View**MS/MS Fragmentation of **DYLSSYIGR**

Found in **AT3G20210.1** in **TAIR\_Arabidopsis**, Symbols: DELTAVPE, DELTA-VPE | DELTA-VPE (delta vacuolar processing enzyme); cysteine-type endopeptidase | chr3:7052488-7054531 FORWARD

Match to Query 3299: 1084.483287 from(362.501705,3+) index(4670)

Title: Elution from: 41.233 to 41.233 scan no 5838 cid35.00 polarity:+

Data file D1d-3\_3.mgf

Click mouse within plot area to zoom in by factor of two about that point

Or,   to  Da

Label all possible matches  Label matches used for scoring

Show Y-axis

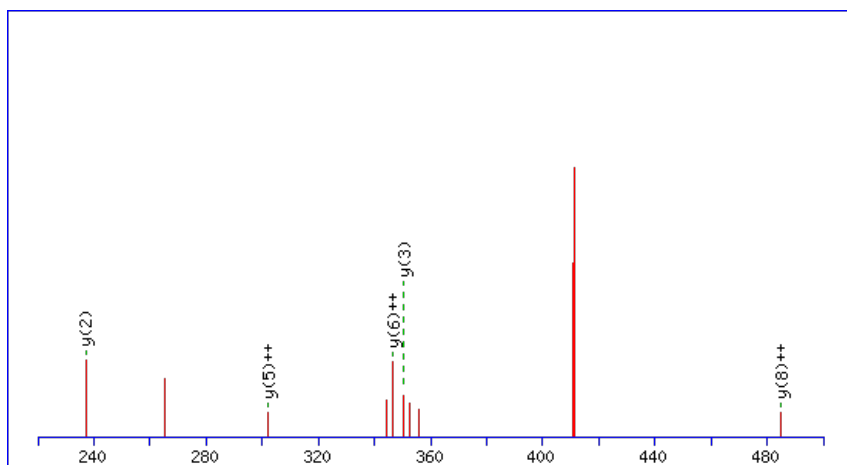

Monoisotopic mass of neutral peptide  $M_r(\text{calc})$ : 1084.4833

Fixed modifications: Carbamidomethyl (C) (apply to specified residues or termini only)

Ions Score: 19 Expect: 0.047

Matches : 5/72 fragment ions using 8 most intense peaks ([help](#))

| # | b        | b <sup>++</sup> | b <sup>0</sup> | b <sup>0++</sup> | Seq. | y        | y <sup>++</sup> | y*       | y <sup>*++</sup> | y <sup>0</sup> | y <sup>0++</sup> | # |
|---|----------|-----------------|----------------|------------------|------|----------|-----------------|----------|------------------|----------------|------------------|---|
| 1 | 117.0313 | 59.0193         | 99.0207        | 50.0140          | D    |          |                 |          |                  |                |                  | 9 |
| 2 | 281.0916 | 141.0494        | 263.0811       | 132.0442         | Y    | 969.4666 | 485.2370        | 951.4431 | 476.2252         | 951.4561       | 476.2317         | 8 |
| 3 | 395.1727 | 198.0900        | 377.1622       | 189.0847         | L    | 805.4063 | 403.2068        | 787.3827 | 394.1950         | 787.3957       | 394.2015         | 7 |
| 4 | 483.2018 | 242.1045        | 465.1912       | 233.0992         | S    | 691.3252 | 346.1662        | 673.3016 | 337.1544         | 673.3146       | 337.1609         | 6 |
| 5 | 571.2308 | 286.1191        | 553.2203       | 277.1138         | S    | 603.2961 | 302.1517        | 585.2725 | 293.1399         | 585.2856       | 293.1464         | 5 |
| 6 | 735.2912 | 368.1492        | 717.2806       | 359.1440         | Y    | 515.2671 | 258.1372        | 497.2435 | 249.1254         |                |                  | 4 |
| 7 | 849.3723 | 425.1898        | 831.3617       | 416.1845         | I    | 351.2067 | 176.1070        | 333.1831 | 167.0952         |                |                  | 3 |
| 8 | 907.3908 | 454.1990        | 889.3802       | 445.1938         | G    | 237.1256 | 119.0664        | 219.1020 | 110.0546         |                |                  | 2 |
| 9 |          |                 |                |                  | R    | 179.1071 | 90.0572         | 161.0835 | 81.0454          |                |                  | 1 |

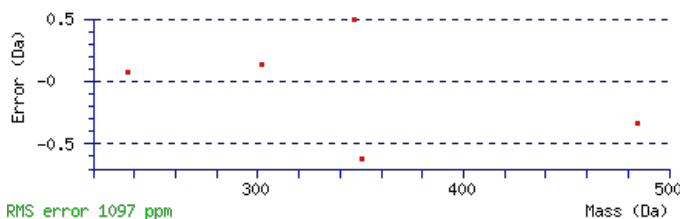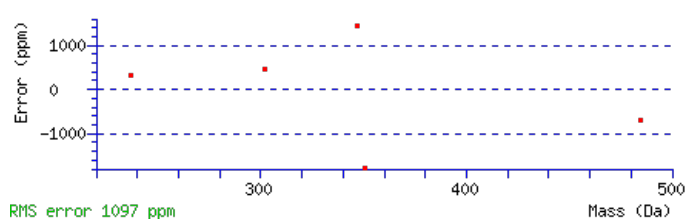

NCBI **BLAST** search of **DYLSSYIGR**

(Parameters: blastp, nr protein database, expect=20000, no filter, PAM30)

Other BLAST [web gateways](#)

All matches to this query

| Score | $M_r(\text{calc})$ | Delta | Sequence |
|-------|--------------------|-------|----------|
|       |                    |       |          |

# AT3G20210.1

|      |           |         |                             |
|------|-----------|---------|-----------------------------|
| 19.4 | 1084.4833 | -0.0001 | <a href="#">DYLSSYIGR</a>   |
| 11.1 | 1084.4833 | -0.0000 | <a href="#">DFIHDIGEK</a>   |
| 9.7  | 1084.4838 | -0.0005 | <a href="#">SYSGERKSR</a>   |
| 6.3  | 1084.4833 | -0.0000 | <a href="#">SFGFSGTKDK</a>  |
| 4.5  | 1084.4865 | -0.0032 | <a href="#">SSSFNRRGR</a>   |
| 3.9  | 1084.4838 | -0.0005 | <a href="#">SEKHGGVGGNK</a> |
| 3.9  | 1084.4833 | -0.0000 | <a href="#">VHEFLADDK</a>   |
| 3.9  | 1084.4833 | -0.0000 | <a href="#">TFVYTNSGGK</a>  |

Mascot: <http://www.matrixscience.com/>

**Peptide View**MS/MS Fragmentation of **SESMNLREEVDDER**

Found in **AT3G20350.1** in **TAIR\_Arabidopsis**, Symbols: | similar to unknown protein [Arabidopsis thaliana] (TAIR:AT1G50660.1); similar to unnamed protein product [Vitis vinifera] (GB:CAO38960.1) | chr3:7096608-7099378 FORWARD

Match to Query 7923: 1728.677536 from(865.346044,2+) index(7082)

Title: Elution from: 62.499 to 62.499 scan no 9284 cid35.00 polarity:+

Data file 0-3\_3.mgf

Click mouse within plot area to zoom in by factor of two about that point

Or,  to  Da

Label all possible matches  Label matches used for scoring

Show Y-axis

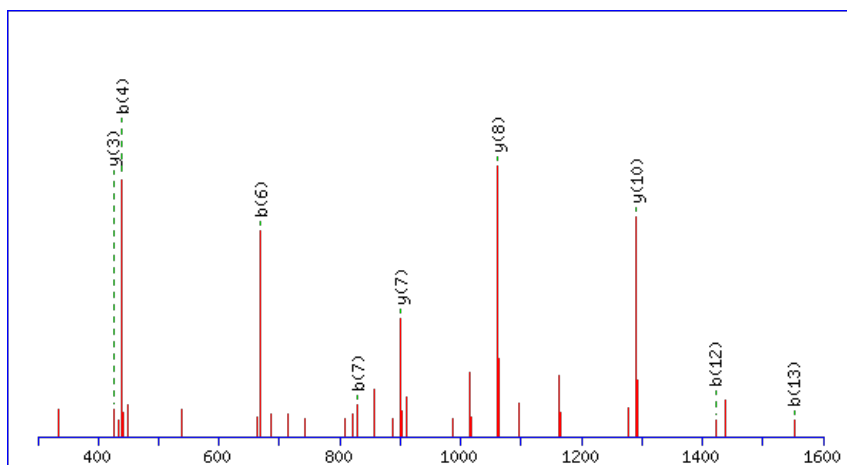

**Monoisotopic mass of neutral peptide Mr(calc):** 1728.6747

**Fixed modifications:** Carbamidomethyl (C) (apply to specified residues or termini only)

**Ions Score:** 34 **Expect:** 0.0007

**Matches:** 9/146 fragment ions using 13 most intense peaks ([help](#))

| #  | b                | b <sup>++</sup> | b*        | b <sup>*++</sup> | b <sup>0</sup> | b <sup>0++</sup> | Seq. | y                | y <sup>++</sup> | y*        | y <sup>*++</sup> | y <sup>0</sup> | y <sup>0++</sup> | #  |
|----|------------------|-----------------|-----------|------------------|----------------|------------------|------|------------------|-----------------|-----------|------------------|----------------|------------------|----|
| 1  | 89.0363          | 45.0218         |           |                  | 71.0258        | 36.0165          | S    |                  |                 |           |                  |                |                  | 14 |
| 2  | 219.0760         | 110.0416        |           |                  | 201.0654       | 101.0363         | E    | 1641.6529        | 821.3301        | 1623.6294 | 812.3183         | 1623.6424      | 812.3248         | 13 |
| 3  | 307.1050         | 154.0562        |           |                  | 289.0945       | 145.0509         | S    | 1511.6133        | 756.3103        | 1493.5897 | 747.2985         | 1493.6027      | 747.3050         | 12 |
| 4  | <b>439.1425</b>  | 220.0749        |           |                  | 421.1320       | 211.0696         | M    | 1423.5842        | 712.2958        | 1405.5607 | 703.2840         | 1405.5737      | 703.2905         | 11 |
| 5  | 555.1795         | 278.0934        | 537.1560  | 269.0816         | 537.1690       | 269.0881         | N    | <b>1291.5467</b> | 646.2770        | 1273.5231 | 637.2652         | 1273.5362      | 637.2717         | 10 |
| 6  | <b>669.2606</b>  | 335.1340        | 651.2371  | 326.1222         | 651.2501       | 326.1287         | L    | 1175.5097        | 588.2585        | 1157.4861 | 579.2467         | 1157.4992      | 579.2532         | 9  |
| 7  | <b>829.3499</b>  | 415.1786        | 811.3263  | 406.1668         | 811.3393       | 406.1733         | R    | <b>1061.4286</b> | 531.2180        | 1043.4050 | 522.2062         | 1043.4181      | 522.2127         | 8  |
| 8  | 959.3895         | 480.1984        | 941.3659  | 471.1866         | 941.3790       | 471.1931         | E    | <b>901.3394</b>  | 451.1733        | 883.3158  | 442.1615         | 883.3288       | 442.1680         | 7  |
| 9  | 1089.4292        | 545.2182        | 1071.4056 | 536.2064         | 1071.4186      | 536.2129         | E    | 771.2998         | 386.1535        | 753.2762  | 377.1417         | 753.2892       | 377.1482         | 6  |
| 10 | 1189.4946        | 595.2509        | 1171.4710 | 586.2391         | 1171.4840      | 586.2457         | V    | 641.2601         | 321.1337        | 623.2365  | 312.1219         | 623.2496       | 312.1284         | 5  |
| 11 | 1305.5186        | 653.2629        | 1287.4950 | 644.2511         | 1287.5080      | 644.2576         | D    | 541.1947         | 271.1010        | 523.1711  | 262.0892         | 523.1841       | 262.0957         | 4  |
| 12 | <b>1421.5426</b> | 711.2749        | 1403.5190 | 702.2631         | 1403.5320      | 702.2696         | D    | <b>425.1707</b>  | 213.0890        | 407.1471  | 204.0772         | 407.1601       | 204.0837         | 3  |
| 13 | <b>1551.5822</b> | 776.2947        | 1533.5586 | 767.2829         | 1533.5716      | 767.2894         | E    | 309.1467         | 155.0770        | 291.1231  | 146.0652         | 291.1362       | 146.0717         | 2  |
| 14 |                  |                 |           |                  |                |                  | R    | 179.1071         | 90.0572         | 161.0835  | 81.0454          |                |                  | 1  |

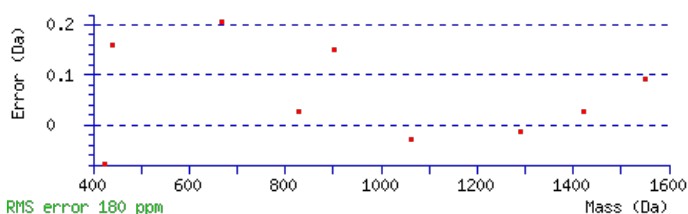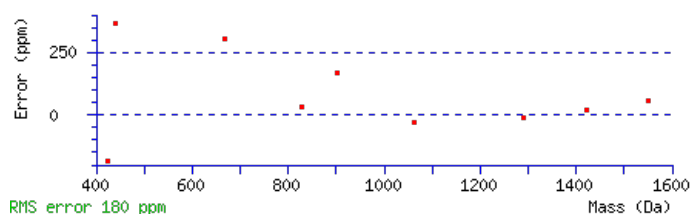

## AT3G20350.1

(Parameters: blastp, nr protein database, expect=20000, no filter, PAM30)

Other BLAST [web gateways](#)

### All matches to this query

| Score | Mr(calc)  | Delta   | Sequence                          |
|-------|-----------|---------|-----------------------------------|
| 34.1  | 1728.6747 | 0.0028  | <a href="#">SESMNLREEVDDER</a>    |
| 2.6   | 1728.6826 | -0.0050 | <a href="#">VFEPGCSNPTGMASEK</a>  |
| 2.1   | 1728.6747 | 0.0028  | <a href="#">MESSPKQQNTEEER</a>    |
| 2.1   | 1728.6821 | -0.0046 | <a href="#">RALADDGSSSSDGSPER</a> |
| 1.8   | 1728.6776 | -0.0001 | <a href="#">DMDDSALGTEGMVEVK</a>  |

Mascot: <http://www.matrixscience.com/>

**Peptide View**MS/MS Fragmentation of **STYQVAALPLNAK**Found in **AT3G20390.1** in **TAIR\_Arabidopsis**, Symbols: | endoribonuclease L-PSP family protein | chr3:7110233-7111701 REVERSE

Match to Query 5442: 1390.700630 from(696.357591,2+) index(5167)

Title: Elution from: 45.682 to 45.682 scan no 6482 cid35.00 polarity:+

Data file C7-3\_2.mgf

Click mouse within plot area to zoom in by factor of two about that point

Or,   to  Da Label all possible matches  Label matches used for scoring Show Y-axis 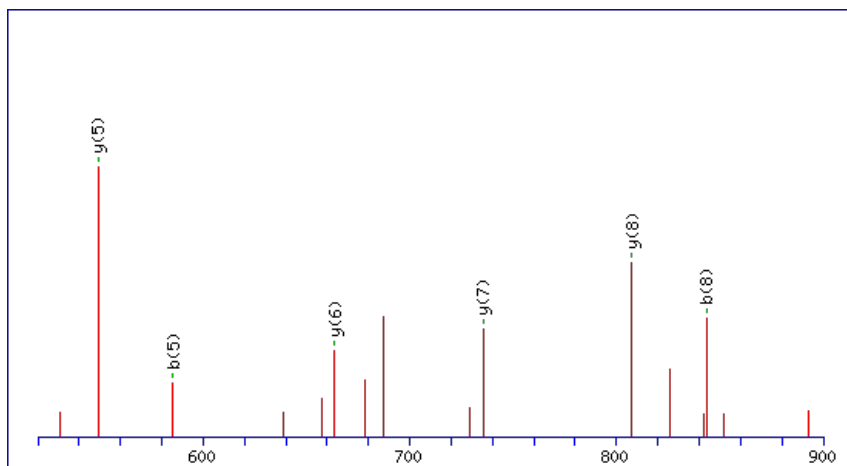Monoisotopic mass of neutral peptide  $M_r(\text{calc})$ : 1390.7033

Fixed modifications: Carbamidomethyl (C) (apply to specified residues or termini only)

Ions Score: 32 Expect: 0.0037

Matches : 6/116 fragment ions using 8 most intense peaks ([help](#))

| #  | b               | b <sup>++</sup> | b*        | b <sup>*++</sup> | b <sup>0</sup> | b <sup>0++</sup> | Seq. | y               | y <sup>++</sup> | y*        | y <sup>*++</sup> | y <sup>0</sup> | y <sup>0++</sup> | #  |
|----|-----------------|-----------------|-----------|------------------|----------------|------------------|------|-----------------|-----------------|-----------|------------------|----------------|------------------|----|
| 1  | 89.0363         | 45.0218         |           |                  | 71.0258        | 36.0165          | S    |                 |                 |           |                  |                |                  | 13 |
| 2  | 191.0811        | 96.0442         |           |                  | 173.0705       | 87.0389          | T    | 1303.6815       | 652.3444        | 1285.6579 | 643.3326         | 1285.6709      | 643.3391         | 12 |
| 3  | 355.1414        | 178.0743        |           |                  | 337.1309       | 169.0691         | Y    | 1201.6368       | 601.3220        | 1183.6132 | 592.3102         |                |                  | 11 |
| 4  | 485.1941        | 243.1007        | 467.1705  | 234.0889         | 467.1835       | 234.0954         | Q    | 1037.5764       | 519.2918        | 1019.5528 | 510.2801         |                |                  | 10 |
| 5  | <b>585.2595</b> | 293.1334        | 567.2359  | 284.1216         | 567.2489       | 284.1281         | V    | 907.5238        | 454.2655        | 889.5002  | 445.2537         |                |                  | 9  |
| 6  | 657.2937        | 329.1505        | 639.2701  | 320.1387         | 639.2831       | 320.1452         | A    | <b>807.4583</b> | 404.2328        | 789.4347  | 395.2210         |                |                  | 8  |
| 7  | 729.3278        | 365.1675        | 711.3042  | 356.1558         | 711.3172       | 356.1623         | A    | <b>735.4242</b> | 368.2157        | 717.4006  | 359.2039         |                |                  | 7  |
| 8  | <b>843.4089</b> | 422.2081        | 825.3853  | 413.1963         | 825.3983       | 413.2028         | L    | <b>663.3900</b> | 332.1986        | 645.3664  | 323.1869         |                |                  | 6  |
| 9  | 941.4587        | 471.2330        | 923.4351  | 462.2212         | 923.4481       | 462.2277         | P    | <b>549.3089</b> | 275.1581        | 531.2853  | 266.1463         |                |                  | 5  |
| 10 | 1055.5398       | 528.2735        | 1037.5162 | 519.2617         | 1037.5292      | 519.2683         | L    | 451.2591        | 226.1332        | 433.2355  | 217.1214         |                |                  | 4  |
| 11 | 1171.5768       | 586.2920        | 1153.5532 | 577.2802         | 1153.5662      | 577.2868         | N    | 337.1780        | 169.0926        | 319.1544  | 160.0809         |                |                  | 3  |
| 12 | 1243.6110       | 622.3091        | 1225.5874 | 613.2973         | 1225.6004      | 613.3038         | A    | 221.1410        | 111.0741        | 203.1174  | 102.0624         |                |                  | 2  |
| 13 |                 |                 |           |                  |                |                  | K    | 149.1069        | 75.0571         | 131.0833  | 66.0453          |                |                  | 1  |

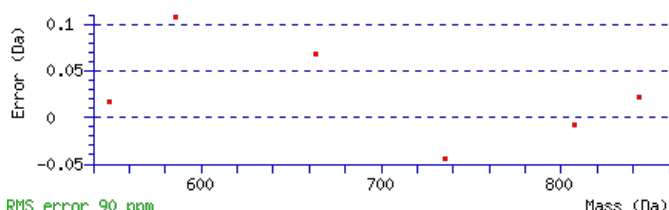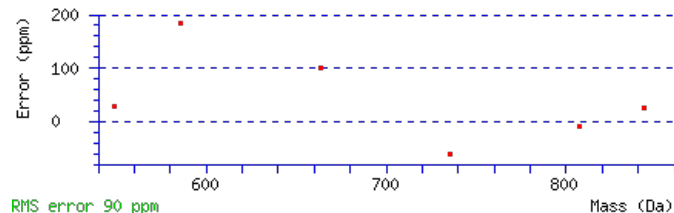NCBI **BLAST** search of **STYQVAALPLNAK**

(Parameters: blastp, nr protein database, expect=20000, no filter, PAM30)

Other BLAST [web gateways](#)



AT3G20390.1

All matches to this query

| Score | Mr(calc)  | Delta   | Sequence                        |
|-------|-----------|---------|---------------------------------|
| 32.5  | 1390.7033 | -0.0026 | <a href="#">STYQVAALPLNAK</a>   |
| 5.8   | 1390.7010 | -0.0004 | <a href="#">AGKTIALVGESGSGK</a> |

Mascot: <http://www.matrixscience.com/>

**Peptide View**MS/MS Fragmentation of **LAVLNVDNR**Found in **AT3G20820.1** in **TAIR\_Arabidopsis**, Symbols: | leucine-rich repeat family protein | chr3:7280936-7282033 FORWARD

Match to Query 3608: 1098.556790 from(550.285671,2+) index(4474)

Title: Elution from: 40.964 to 40.964 scan no 5520 cid35.00 polarity:+

Data file D12h-1\_1.mgf

Click mouse within plot area to zoom in by factor of two about that point

Or,   to  Da Label all possible matches  Label matches used for scoring Show Y-axis 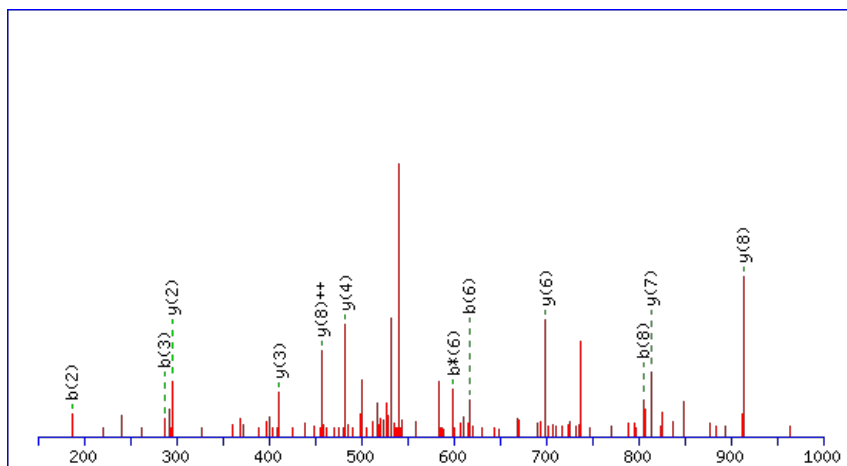Monoisotopic mass of neutral peptide **Mr(calc)**: 1098.5592**Fixed modifications**: Carbamidomethyl (C) (apply to specified residues or termini only)**Ions Score**: 40 **Expect**: 0.00067**Matches**: 12/82 fragment ions using 24 most intense peaks ([help](#))

| #  | b               | b <sup>++</sup> | b*              | b <sup>*++</sup> | b <sup>0</sup> | b <sup>0++</sup> | Seq. | y               | y <sup>++</sup> | y*       | y <sup>*++</sup> | y <sup>0</sup> | y <sup>0++</sup> | #  |
|----|-----------------|-----------------|-----------------|------------------|----------------|------------------|------|-----------------|-----------------|----------|------------------|----------------|------------------|----|
| 1  | 115.0884        | 58.0478         |                 |                  |                |                  | L    |                 |                 |          |                  |                |                  | 10 |
| 2  | <b>187.1225</b> | 94.0649         |                 |                  |                |                  | A    | 985.4854        | 493.2463        | 967.4618 | 484.2345         | 967.4748       | 484.2410         | 9  |
| 3  | <b>287.1880</b> | 144.0976        |                 |                  |                |                  | V    | <b>913.4512</b> | <b>457.2292</b> | 895.4276 | 448.2175         | 895.4406       | 448.2240         | 8  |
| 4  | 401.2691        | 201.1382        |                 |                  |                |                  | L    | <b>813.3858</b> | 407.1965        | 795.3622 | 398.1847         | 795.3752       | 398.1912         | 7  |
| 5  | 517.3061        | 259.1567        | 499.2825        | 250.1449         |                |                  | N    | <b>699.3047</b> | 350.1560        | 681.2811 | 341.1442         | 681.2941       | 341.1507         | 6  |
| 6  | <b>617.3715</b> | 309.1894        | <b>599.3479</b> | 300.1776         |                |                  | V    | 583.2677        | 292.1375        | 565.2441 | 283.1257         | 565.2571       | 283.1322         | 5  |
| 7  | 689.4057        | 345.2065        | 671.3821        | 336.1947         |                |                  | A    | <b>483.2022</b> | 242.1047        | 465.1786 | 233.0930         | 465.1917       | 233.0995         | 4  |
| 8  | <b>805.4296</b> | 403.2185        | 787.4061        | 394.2067         | 787.4191       | 394.2132         | D    | <b>411.1681</b> | 206.0877        | 393.1445 | 197.0759         | 393.1575       | 197.0824         | 3  |
| 9  | 921.4666        | 461.2370        | 903.4431        | 452.2252         | 903.4561       | 452.2317         | N    | <b>295.1441</b> | 148.0757        | 277.1205 | 139.0639         |                |                  | 2  |
| 10 |                 |                 |                 |                  |                |                  | R    | 179.1071        | 90.0572         | 161.0835 | 81.0454          |                |                  | 1  |

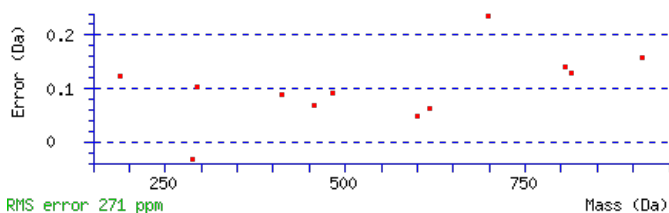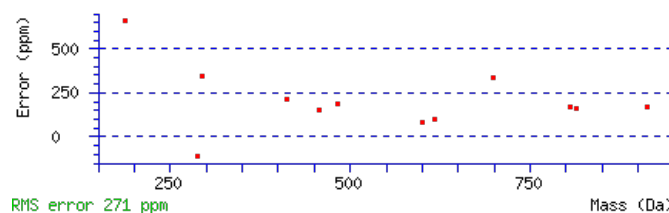NCBI **BLAST** search of **LAVLNVDNR**

(Parameters: blastp, nr protein database, expect=20000, no filter, PAM30)

Other BLAST [web gateways](#)**All matches to this query**

| Score | Mr(calc) | Delta | Sequence |
|-------|----------|-------|----------|
|       |          |       |          |

# AT3G20820.1

|      |           |         |                             |
|------|-----------|---------|-----------------------------|
| 40.2 | 1098.5592 | -0.0024 | <a href="#">LAVLNVADNR</a>  |
| 1.1  | 1098.5592 | -0.0024 | <a href="#">LAVEGPGKASR</a> |
| 0.6  | 1098.5592 | -0.0024 | <a href="#">SPIVNIQASR</a>  |

**Mascot:** <http://www.matrixscience.com/>



# Mascot Search Results

## Peptide View

MS/MS Fragmentation of **YAQVCVTMPTAK**

Found in **AT3G21055.1** in **TAIR\_Arabidopsis**, Symbols: PSBTN | PSBTN (photosystem II subunit T) | chr3:7376767-7377078 REVERSE

Match to Query 5387: 1383.650452 from(692.832502,2+) index(2105)

Title: Elution from: 25.786 to 25.786 scan no 2766 cid35.00 polarity:+

Data file D6h-2\_1.mgf

Click mouse within plot area to zoom in by factor of two about that point

Or,   to  Da

Label all possible matches  Label matches used for scoring

Show Y-axis

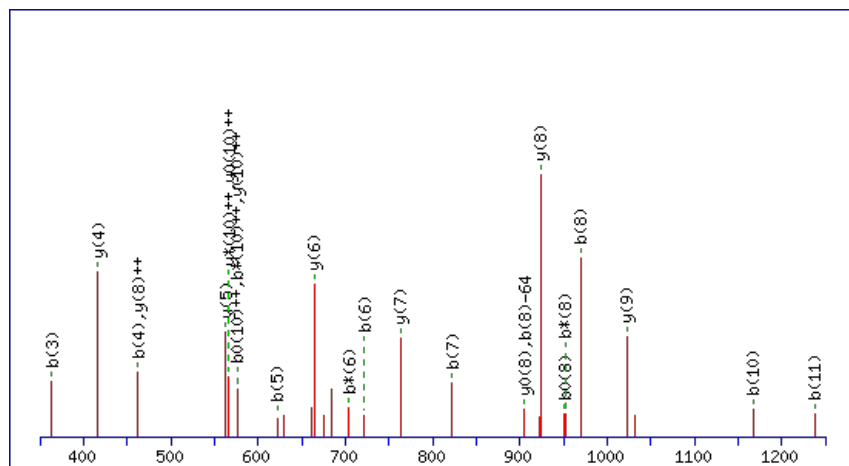

**Monoisotopic mass of neutral peptide Mr(calc):** 1383.6527

**Fixed modifications:** Carbamidomethyl (C) (apply to specified residues or termini only)

**Variable modifications:**

**M8** : Oxidation (M), with neutral losses 0.0000 (shown in table), 63.9983

**Ions Score:** 78 **Expect:** 2.9e-008

**Matches** : 25/178 fragment ions using 27 most intense peaks ([help](#))

| #  | b                | b <sup>++</sup> | b <sup>*</sup>  | b <sup>*++</sup> | b <sup>0</sup>  | b <sup>0++</sup> | Seq. | y                | y <sup>++</sup> | y <sup>*</sup> | y <sup>*++</sup> | y <sup>0</sup>  | y <sup>0++</sup> | #  |
|----|------------------|-----------------|-----------------|------------------|-----------------|------------------|------|------------------|-----------------|----------------|------------------|-----------------|------------------|----|
| 1  | 164.0706         | 82.5389         |                 |                  |                 |                  | Y    |                  |                 |                |                  |                 |                  | 12 |
| 2  | 235.1077         | 118.0575        |                 |                  |                 |                  | A    | 1221.5966        | 611.3019        | 1204.5701      | 602.7887         | 1203.5860       | 602.2967         | 11 |
| 3  | <b>363.1663</b>  | 182.0868        | 346.1397        | 173.5735         |                 |                  | Q    | 1150.5595        | <b>575.7834</b> | 1133.5329      | <b>567.2701</b>  | 1132.5489       | <b>566.7781</b>  | 10 |
| 4  | <b>462.2347</b>  | 231.6210        | 445.2082        | 223.1077         |                 |                  | V    | <b>1022.5009</b> | 511.7541        | 1005.4744      | 503.2408         | 1004.4904       | 502.7488         | 9  |
| 5  | <b>622.2654</b>  | 311.6363        | 605.2388        | 303.1230         |                 |                  | C    | <b>923.4325</b>  | <b>462.2199</b> | 906.4060       | 453.7066         | <b>905.4219</b> | 453.2146         | 8  |
| 6  | <b>721.3338</b>  | 361.1705        | <b>704.3072</b> | 352.6573         |                 |                  | V    | <b>763.4019</b>  | 382.2046        | 746.3753       | 373.6913         | 745.3913        | 373.1993         | 7  |
| 7  | <b>822.3815</b>  | 411.6944        | 805.3549        | 403.1811         | 804.3709        | 402.6891         | T    | <b>664.3334</b>  | 332.6704        | 647.3069       | 324.1571         | 646.3229        | 323.6651         | 6  |
| 8  | <b>969.4169</b>  | 485.2121        | <b>952.3903</b> | 476.6988         | <b>951.4063</b> | 476.2068         | M    | <b>563.2858</b>  | 282.1465        | 546.2592       | 273.6332         | 545.2752        | 273.1412         | 5  |
| 9  | 1066.4696        | 533.7384        | 1049.4431       | 525.2252         | 1048.4591       | 524.7332         | P    | <b>416.2504</b>  | 208.6288        | 399.2238       | 200.1155         | 398.2398        | 199.6235         | 4  |
| 10 | <b>1167.5173</b> | 584.2623        | 1150.4907       | <b>575.7490</b>  | 1149.5067       | <b>575.2570</b>  | T    | 319.1976         | 160.1024        | 302.1710       | 151.5892         | 301.1870        | 151.0972         | 3  |
| 11 | <b>1238.5544</b> | 619.7808        | 1221.5279       | 611.2676         | 1220.5438       | 610.7756         | A    | 218.1499         | 109.5786        | 201.1234       | 101.0653         |                 |                  | 2  |
| 12 |                  |                 |                 |                  |                 |                  | K    | 147.1128         | 74.0600         | 130.0863       | 65.5468          |                 |                  | 1  |

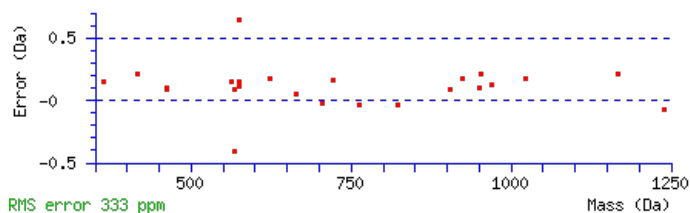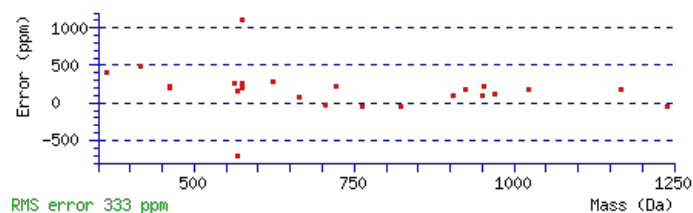

NCBI **BLAST** search of **YAQVCVTMPTAK**

(Parameters: blastp, nr protein database, expect=20000, no filter, PAM30)

Other BLAST [web gateways](#)

AT3G21055.1

All matches to this query

| Score | Mr(calc)  | Delta   | Sequence                     |
|-------|-----------|---------|------------------------------|
| 78.3  | 1383.6527 | -0.0022 | <a href="#">YAQVCVTMPTAK</a> |
| 0.8   | 1383.6500 | 0.0005  | <a href="#">GCRFCNVKTSR</a>  |

Mascot: <http://www.matrixscience.com/>

**Peptide View**MS/MS Fragmentation of **VEDVTGVSAGMIRAVESKLAR**Found in **AT3G21150.1** in **TAIR\_Arabidopsis**, Symbols: | zinc finger (B-box type) family protein | chr3:7412719-7413396 REVERSE

Match to Query 9535: 2187.169398 from(730.063742,3+) index(9667)

Title: Elution from: 89.310 to 89.310 scan no 13443 cid35.00 polarity:+

Data file D12h-3\_2.mgf

Click mouse within plot area to zoom in by factor of two about that point

Or, Plot from  to  Da Label all possible matches  Label matches used for scoring Show Y-axis 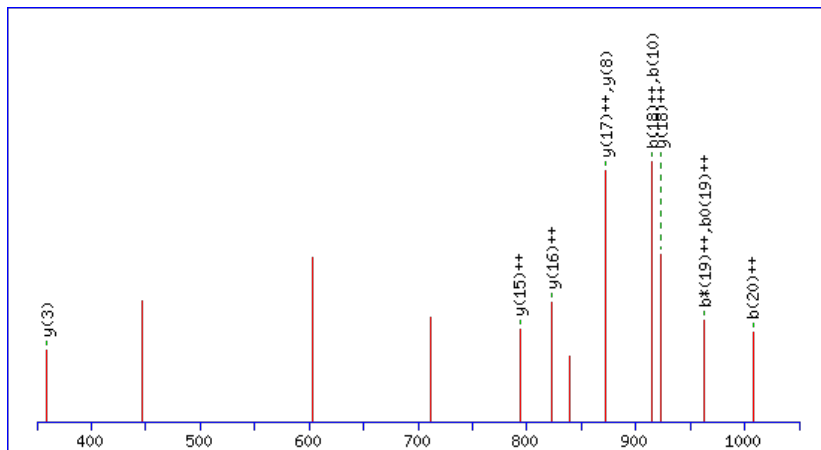

Monoisotopic mass of neutral peptide Mr(calc): 2187.1681

Fixed modifications: Carbamidomethyl (C) (apply to specified residues or termini only)

Ions Score: 18 Expect: 0.048

Matches: 11/206 fragment ions using 14 most intense peaks ([help](#))

| #  | b         | b <sup>++</sup> | b <sup>*</sup> | b <sup>*++</sup> | b <sup>0</sup> | b <sup>0++</sup> | Seq. | y         | y <sup>++</sup> | y <sup>*</sup> | y <sup>*++</sup> | y <sup>0</sup> | y <sup>0++</sup> | #  |
|----|-----------|-----------------|----------------|------------------|----------------|------------------|------|-----------|-----------------|----------------|------------------|----------------|------------------|----|
| 1  | 100.0757  | 50.5415         |                |                  |                |                  | V    |           |                 |                |                  |                |                  | 21 |
| 2  | 229.1183  | 115.0628        |                |                  | 211.1077       | 106.0575         | E    | 2089.1070 | 1045.0571       | 2072.0805      | 1036.5439        | 2071.0964      | 1036.0519        | 20 |
| 3  | 344.1452  | 172.5763        |                |                  | 326.1347       | 163.5710         | D    | 1960.0644 | 980.5358        | 1943.0379      | 972.0226         | 1942.0539      | 971.5306         | 19 |
| 4  | 443.2136  | 222.1105        |                |                  | 425.2031       | 213.1052         | V    | 1845.0375 | 923.0224        | 1828.0109      | 914.5091         | 1827.0269      | 914.0171         | 18 |
| 5  | 544.2613  | 272.6343        |                |                  | 526.2508       | 263.6290         | T    | 1745.9691 | 873.4882        | 1728.9425      | 864.9749         | 1727.9585      | 864.4829         | 17 |
| 6  | 601.2828  | 301.1450        |                |                  | 583.2722       | 292.1397         | G    | 1644.9214 | 822.9643        | 1627.8948      | 814.4511         | 1626.9108      | 813.9590         | 16 |
| 7  | 700.3512  | 350.6792        |                |                  | 682.3406       | 341.6740         | V    | 1587.8999 | 794.4536        | 1570.8734      | 785.9403         | 1569.8894      | 785.4483         | 15 |
| 8  | 787.3832  | 394.1953        |                |                  | 769.3727       | 385.1900         | S    | 1488.8315 | 744.9194        | 1471.8050      | 736.4061         | 1470.8209      | 735.9141         | 14 |
| 9  | 858.4203  | 429.7138        |                |                  | 840.4098       | 420.7085         | A    | 1401.7995 | 701.4034        | 1384.7729      | 692.8901         | 1383.7889      | 692.3981         | 13 |
| 10 | 915.4418  | 458.2245        |                |                  | 897.4312       | 449.2193         | G    | 1330.7624 | 665.8848        | 1313.7358      | 657.3715         | 1312.7518      | 656.8795         | 12 |
| 11 | 1046.4823 | 523.7448        |                |                  | 1028.4717      | 514.7395         | M    | 1273.7409 | 637.3741        | 1256.7144      | 628.8608         | 1255.7303      | 628.3688         | 11 |
| 12 | 1159.5664 | 580.2868        |                |                  | 1141.5558      | 571.2815         | I    | 1142.7004 | 571.8538        | 1125.6739      | 563.3406         | 1124.6899      | 562.8486         | 10 |
| 13 | 1315.6675 | 658.3374        | 1298.6409      | 649.8241         | 1297.6569      | 649.3321         | R    | 1029.6164 | 515.3118        | 1012.5898      | 506.7985         | 1011.6058      | 506.3065         | 9  |
| 14 | 1386.7046 | 693.8559        | 1369.6780      | 685.3427         | 1368.6940      | 684.8506         | A    | 873.5152  | 437.2613        | 856.4887       | 428.7480         | 855.5047       | 428.2560         | 8  |
| 15 | 1485.7730 | 743.3901        | 1468.7464      | 734.8769         | 1467.7624      | 734.3849         | V    | 802.4781  | 401.7427        | 785.4516       | 393.2294         | 784.4676       | 392.7374         | 7  |
| 16 | 1614.8156 | 807.9114        | 1597.7890      | 799.3982         | 1596.8050      | 798.9061         | E    | 703.4097  | 352.2085        | 686.3832       | 343.6952         | 685.3991       | 343.2032         | 6  |
| 17 | 1701.8476 | 851.4274        | 1684.8211      | 842.9142         | 1683.8370      | 842.4222         | S    | 574.3671  | 287.6872        | 557.3406       | 279.1739         | 556.3566       | 278.6819         | 5  |
| 18 | 1829.9426 | 915.4749        | 1812.9160      | 906.9617         | 1811.9320      | 906.4696         | K    | 487.3351  | 244.1712        | 470.3085       | 235.6579         |                |                  | 4  |
| 19 | 1943.0266 | 972.0170        | 1926.0001      | 963.5037         | 1925.0161      | 963.0117         | L    | 359.2401  | 180.1237        | 342.2136       | 171.6104         |                |                  | 3  |
| 20 | 2014.0638 | 1007.5355       | 1997.0372      | 999.0222         | 1996.0532      | 998.5302         | A    | 246.1561  | 123.5817        | 229.1295       | 115.0684         |                |                  | 2  |
| 21 |           |                 |                |                  |                |                  | R    | 175.1190  | 88.0631         | 158.0924       | 79.5498          |                |                  | 1  |

# AT3G21150.1

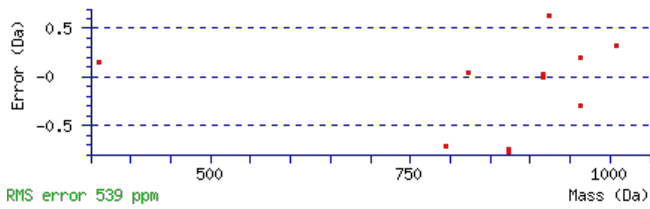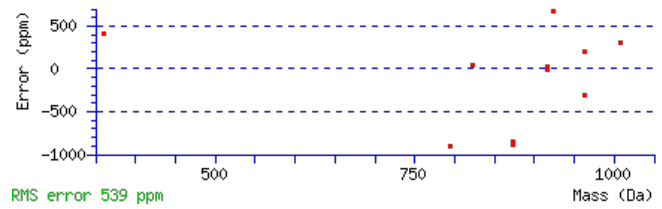

NCBI BLAST search of [VEDVTGVSAGMIRAVESKLAR](#)  
 (Parameters: blastp, nr protein database, expect=20000, no filter, PAM30)  
 Other BLAST [web gateways](#)

## All matches to this query

| Score | Mr(calc)  | Delta   | Sequence                              |
|-------|-----------|---------|---------------------------------------|
| 17.7  | 2187.1681 | 0.0013  | <a href="#">VEDVTGVSAGMIRAVESKLAR</a> |
| 2.9   | 2187.1648 | 0.0046  | <a href="#">TTAQHLSQVHGLQVELGELK</a>  |
| 1.5   | 2187.1730 | -0.0036 | <a href="#">SMISMLRKPPKHFEMLVK</a>    |
| 1.5   | 2187.1730 | -0.0036 | <a href="#">SMISMLRKPPKHFEMLVK</a>    |
| 0.2   | 2187.1647 | 0.0046  | <a href="#">QDLLLTQRESIYGSKPSPR</a>   |
| 0.2   | 2187.1688 | 0.0006  | <a href="#">HVYVDFSQLNVTLPKKGDK</a>   |
| 0.1   | 2187.1647 | 0.0046  | <a href="#">ATELKDPNGQVLRLLDYSR</a>   |

Mascot: <http://www.matrixscience.com/>

**Peptide View**MS/MS Fragmentation of **AAAVGANNQAAQSILK**Found in **AT3G22110.1** in **TAIR\_Arabidopsis**, Symbols: PAC1 | PAC1 (20S proteasome alpha subunit C1); peptidase | chr3:7792826-7793578  
REVERSE

Match to Query 6462: 1525.821410 from(763.917981,2+) index(3146)

Title: Elution from: 31.009 to 31.009 scan no 3915 cid35.00 polarity:+

Data file D6h-3\_2.mgf

Click mouse within plot area to zoom in by factor of two about that point

Or,   to  Da Label all possible matches  Label matches used for scoring Show Y-axis 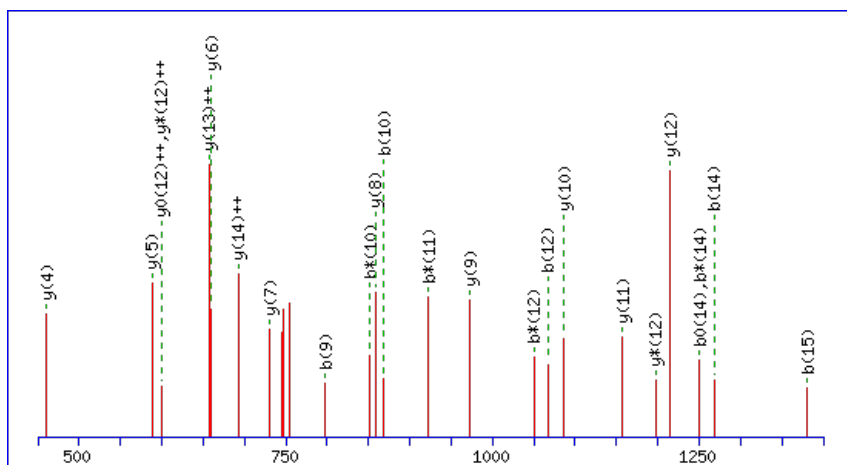Monoisotopic mass of neutral peptide  $M_r(\text{calc})$ : 1525.8212

Fixed modifications: Carbamidomethyl (C) (apply to specified residues or termini only)

Ions Score: 96 Expect: 8.4e-010

Matches : 24/138 fragment ions using 26 most intense peaks ([help](#))

| #  | b         | b <sup>++</sup> | b*        | b <sup>*++</sup> | b <sup>0</sup> | b <sup>0++</sup> | Seq. | y         | y <sup>++</sup> | y*        | y <sup>*++</sup> | y <sup>0</sup> | y <sup>0++</sup> | #  |
|----|-----------|-----------------|-----------|------------------|----------------|------------------|------|-----------|-----------------|-----------|------------------|----------------|------------------|----|
| 1  | 72.0444   | 36.5258         |           |                  |                |                  | A    |           |                 |           |                  |                |                  | 16 |
| 2  | 143.0815  | 72.0444         |           |                  |                |                  | A    | 1455.7914 | 728.3993        | 1438.7649 | 719.8861         | 1437.7809      | 719.3941         | 15 |
| 3  | 214.1186  | 107.5629        |           |                  |                |                  | A    | 1384.7543 | 692.8808        | 1367.7278 | 684.3675         | 1366.7437      | 683.8755         | 14 |
| 4  | 313.1870  | 157.0972        |           |                  |                |                  | V    | 1313.7172 | 657.3622        | 1296.6906 | 648.8490         | 1295.7066      | 648.3570         | 13 |
| 5  | 370.2085  | 185.6079        |           |                  |                |                  | G    | 1214.6488 | 607.8280        | 1197.6222 | 599.3148         | 1196.6382      | 598.8227         | 12 |
| 6  | 441.2456  | 221.1264        |           |                  |                |                  | A    | 1157.6273 | 579.3173        | 1140.6008 | 570.8040         | 1139.6167      | 570.3120         | 11 |
| 7  | 555.2885  | 278.1479        | 538.2620  | 269.6346         |                |                  | N    | 1086.5902 | 543.7987        | 1069.5636 | 535.2855         | 1068.5796      | 534.7935         | 10 |
| 8  | 669.3315  | 335.1694        | 652.3049  | 326.6561         |                |                  | N    | 972.5473  | 486.7773        | 955.5207  | 478.2640         | 954.5367       | 477.7720         | 9  |
| 9  | 797.3900  | 399.1987        | 780.3635  | 390.6854         |                |                  | Q    | 858.5043  | 429.7558        | 841.4778  | 421.2425         | 840.4938       | 420.7505         | 8  |
| 10 | 868.4272  | 434.7172        | 851.4006  | 426.2039         |                |                  | A    | 730.4458  | 365.7265        | 713.4192  | 357.2132         | 712.4352       | 356.7212         | 7  |
| 11 | 939.4643  | 470.2358        | 922.4377  | 461.7225         |                |                  | A    | 659.4087  | 330.2080        | 642.3821  | 321.6947         | 641.3981       | 321.2027         | 6  |
| 12 | 1067.5228 | 534.2651        | 1050.4963 | 525.7518         |                |                  | Q    | 588.3715  | 294.6894        | 571.3450  | 286.1761         | 570.3610       | 285.6841         | 5  |
| 13 | 1154.5549 | 577.7811        | 1137.5283 | 569.2678         | 1136.5443      | 568.7758         | S    | 460.3130  | 230.6601        | 443.2864  | 222.1468         | 442.3024       | 221.6548         | 4  |
| 14 | 1267.6389 | 634.3231        | 1250.6124 | 625.8098         | 1249.6284      | 625.3178         | I    | 373.2809  | 187.1441        | 356.2544  | 178.6308         |                |                  | 3  |
| 15 | 1380.7230 | 690.8651        | 1363.6965 | 682.3519         | 1362.7124      | 681.8599         | L    | 260.1969  | 130.6021        | 243.1703  | 122.0888         |                |                  | 2  |
| 16 |           |                 |           |                  |                |                  | K    | 147.1128  | 74.0600         | 130.0863  | 65.5468          |                |                  | 1  |



# AT3G22110.1

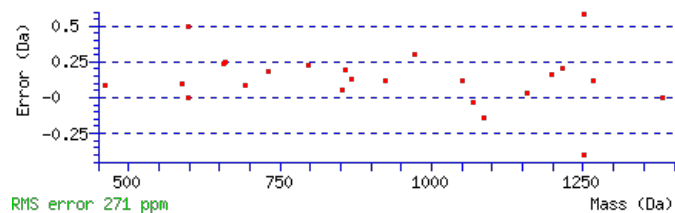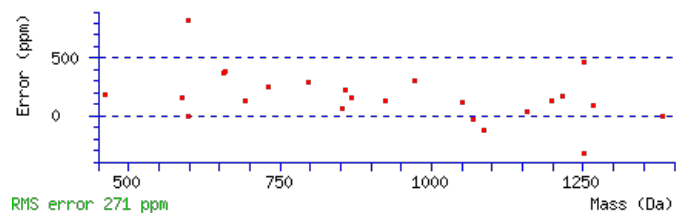

NCBI **BLAST** search of [AAAVGANNQAAQSILK](#)

(Parameters: blastp, nr protein database, expect=20000, no filter, PAM30)

Other BLAST [web gateways](#)

## All matches to this query

| Score | Mr(calc)  | Delta   | Sequence                         |
|-------|-----------|---------|----------------------------------|
| 96.0  | 1525.8212 | 0.0002  | <a href="#">AAAVGANNQAAQSILK</a> |
| 5.3   | 1525.8239 | -0.0025 | <a href="#">LPEGITGEELDIK</a>    |

Mascot: <http://www.matrixscience.com/>

**Peptide View**MS/MS Fragmentation of **MGASGRWIK**Found in **AT3G22190.1** in **TAIR\_Arabidopsis**, Symbols: IQD5 | IQD5 (IQ-domain 5); calmodulin binding | chr3:7831668-7833519 REVERSE

Match to Query 2950: 1034.476636 from(518,245594,2+) index(1679)

Title: Elution from: 21.947 to 21.947 scan no 2247 cid35.00 polarity:+

Data file C7-2\_1.mgf

Click mouse within plot area to zoom in by factor of two about that point

Or,   to  Da Label all possible matches  Label matches used for scoring Show Y-axis 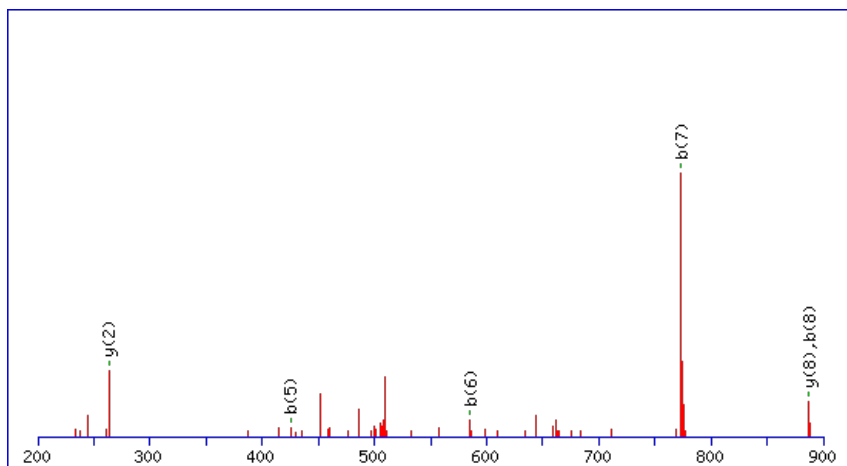Monoisotopic mass of neutral peptide **Mr(calc)**: 1034.4760**Fixed modifications:** Carbamidomethyl (C) (apply to specified residues or termini only)**Variable modifications:****M1** : Oxidation (M), with neutral losses 0.0000 (shown in table), 63.9983**Ions Score:** 33 **Expect:** 0.0048**Matches** : 6/102 fragment ions using 7 most intense peaks ([help](#))

| # | b               | b <sup>++</sup> | b*       | b <sup>*++</sup> | b <sup>0</sup> | b <sup>0++</sup> | Seq. | y               | y <sup>++</sup> | y*       | y <sup>*++</sup> | y <sup>0</sup> | y <sup>0++</sup> | # |
|---|-----------------|-----------------|----------|------------------|----------------|------------------|------|-----------------|-----------------|----------|------------------|----------------|------------------|---|
| 1 | 149.0397        | 75.0235         |          |                  |                |                  | M    |                 |                 |          |                  |                |                  | 9 |
| 2 | 207.0582        | 104.0327        |          |                  |                |                  | G    | <b>887.4508</b> | 444.2290        | 869.4272 | 435.2173         | 869.4403       | 435.2238         | 8 |
| 3 | 279.0924        | 140.0498        |          |                  |                |                  | A    | 829.4323        | 415.2198        | 811.4087 | 406.2080         | 811.4218       | 406.2145         | 7 |
| 4 | 367.1214        | 184.0643        |          |                  | 349.1109       | 175.0591         | S    | 757.3982        | 379.2027        | 739.3746 | 370.1909         | 739.3876       | 370.1974         | 6 |
| 5 | <b>425.1399</b> | 213.0736        |          |                  | 407.1294       | 204.0683         | G    | 669.3691        | 335.1882        | 651.3455 | 326.1764         |                |                  | 5 |
| 6 | <b>585.2292</b> | 293.1182        | 567.2056 | 284.1064         | 567.2186       | 284.1129         | R    | 611.3506        | 306.1789        | 593.3270 | 297.1671         |                |                  | 4 |
| 7 | <b>773.3026</b> | 387.1549        | 755.2790 | 378.1431         | 755.2920       | 378.1496         | W    | 451.2614        | 226.1343        | 433.2378 | 217.1225         |                |                  | 3 |
| 8 | <b>887.3837</b> | 444.1955        | 869.3601 | 435.1837         | 869.3731       | 435.1902         | I    | <b>263.1880</b> | 132.0976        | 245.1644 | 123.0858         |                |                  | 2 |
| 9 |                 |                 |          |                  |                |                  | K    | 149.1069        | 75.0571         | 131.0833 | 66.0453          |                |                  | 1 |

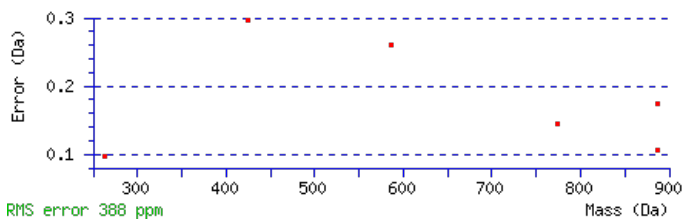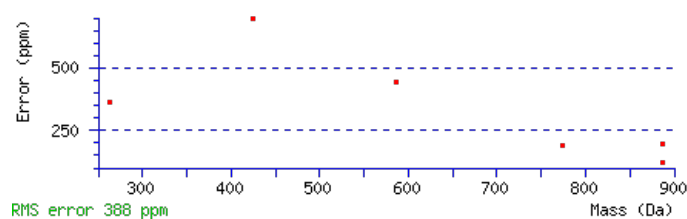NCBI **BLAST** search of **MGASGRWIK**

(Parameters: blastp, nr protein database, expect=20000, no filter, PAM30)

Other BLAST [web gateways](#)**All matches to this query**

| Score | Mr(calc) | Delta | Sequence |
|-------|----------|-------|----------|
|-------|----------|-------|----------|

**AT3G22190.1**

|      |           |         |                           |
|------|-----------|---------|---------------------------|
| 32.6 | 1034.4760 | 0.0007  | <a href="#">MGASGRWIK</a> |
| 14.2 | 1034.4789 | -0.0023 | <a href="#">EMKMVPYK</a>  |
| 14.2 | 1034.4793 | -0.0027 | <a href="#">MKQREMAK</a>  |
| 11.9 | 1034.4764 | 0.0002  | <a href="#">QMQNKRGR</a>  |
| 10.7 | 1034.4767 | -0.0000 | <a href="#">LKESMICK</a>  |
| 8.7  | 1034.4793 | -0.0027 | <a href="#">KMQQMSLR</a>  |
| 8.4  | 1034.4785 | -0.0018 | <a href="#">SRSSSELOK</a> |
| 8.3  | 1034.4737 | 0.0029  | <a href="#">SNGKVISCR</a> |
| 3.9  | 1034.4760 | 0.0007  | <a href="#">MLFSSHKR</a>  |
| 3.9  | 1034.4793 | -0.0027 | <a href="#">MLREMIGR</a>  |

**Mascot:** <http://www.matrixscience.com/>

**Peptide View**MS/MS Fragmentation of **AFASGSPHGETR**

Found in **AT3G22200.1** in **TAIR\_Arabidopsis**, Symbols: HER1, POP2, GABA-T | POP2 (POLLEN-PISTIL INCOMPATIBILITY 2); 4-aminobutyrate transaminase | chr3:7835293-7838870 FORWARD

Match to Query 5053: 1320.621274 from(661.317913,2+) index(4133)

Title: Elution from: 38.608 to 38.608 scan no 5137 cid35.00 polarity:+

Data file C7-3\_1.mgf

Click mouse within plot area to zoom in by factor of two about that point

Or,   to  Da

Label all possible matches  Label matches used for scoring

Show Y-axis

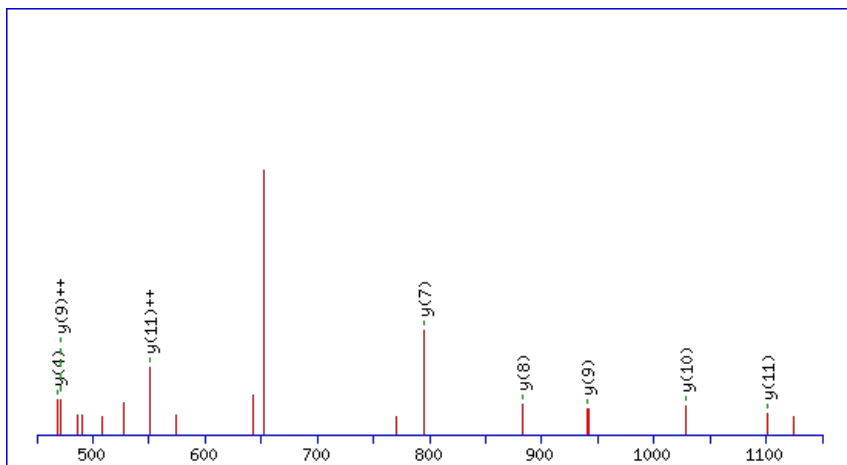

Monoisotopic mass of neutral peptide  $M_r(\text{calc})$ : 1320.6250

Fixed modifications: Carbamidomethyl (C) (apply to specified residues or termini only)

Ions Score: 45 Expect: 0.00032

Matches : 8/112 fragment ions using 14 most intense peaks ([help](#))

| #  | b         | b <sup>++</sup> | b <sup>0</sup> | b <sup>0++</sup> | Seq. | y                | y <sup>++</sup> | y*        | y <sup>*++</sup> | y <sup>0</sup> | y <sup>0++</sup> | #  |
|----|-----------|-----------------|----------------|------------------|------|------------------|-----------------|-----------|------------------|----------------|------------------|----|
| 1  | 73.0414   | 37.0244         |                |                  | A    |                  |                 |           |                  |                |                  | 13 |
| 2  | 221.1069  | 111.0571        |                |                  | F    | 1249.5982        | 625.3027        | 1231.5746 | 616.2909         | 1231.5876      | 616.2974         | 12 |
| 3  | 293.1410  | 147.0741        |                |                  | A    | <b>1101.5327</b> | <b>551.2700</b> | 1083.5091 | 542.2582         | 1083.5221      | 542.2647         | 11 |
| 4  | 381.1701  | 191.0887        | 363.1595       | 182.0834         | S    | <b>1029.4986</b> | 515.2529        | 1011.4750 | 506.2411         | 1011.4880      | 506.2476         | 10 |
| 5  | 439.1886  | 220.0979        | 421.1780       | 211.0926         | G    | <b>941.4695</b>  | <b>471.2384</b> | 923.4459  | 462.2266         | 923.4589       | 462.2331         | 9  |
| 6  | 527.2176  | 264.1125        | 509.2071       | 255.1072         | S    | <b>883.4510</b>  | 442.2291        | 865.4274  | 433.2173         | 865.4404       | 433.2239         | 8  |
| 7  | 625.2674  | 313.1374        | 607.2569       | 304.1321         | P    | <b>795.4219</b>  | 398.2146        | 777.3983  | 389.2028         | 777.4114       | 389.2093         | 7  |
| 8  | 739.3485  | 370.1779        | 721.3380       | 361.1726         | I    | 697.3721         | 349.1897        | 679.3485  | 340.1779         | 679.3616       | 340.1844         | 6  |
| 9  | 853.4296  | 427.2185        | 835.4191       | 418.2132         | I    | 583.2910         | 292.1492        | 565.2674  | 283.1374         | 565.2805       | 283.1439         | 5  |
| 10 | 911.4481  | 456.2277        | 893.4376       | 447.2224         | G    | <b>469.2099</b>  | 235.1086        | 451.1863  | 226.0968         | 451.1994       | 226.1033         | 4  |
| 11 | 1041.4878 | 521.2475        | 1023.4772      | 512.2422         | E    | 411.1914         | 206.0994        | 393.1678  | 197.0876         | 393.1809       | 197.0941         | 3  |
| 12 | 1143.5325 | 572.2699        | 1125.5219      | 563.2646         | T    | 281.1518         | 141.0795        | 263.1282  | 132.0677         | 263.1412       | 132.0743         | 2  |
| 13 |           |                 |                |                  | R    | 179.1071         | 90.0572         | 161.0835  | 81.0454          |                |                  | 1  |

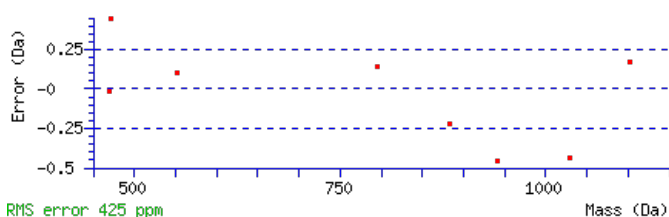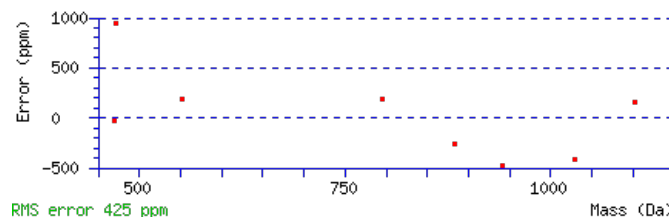

NCBI **BLAST** search of **AFASGSPHGETR**

(Parameters: blastp, nr protein database, expect=20000, no filter, PAM30)

# AT3G22200.1

Other BLAST [web gateways](#)

## All matches to this query

| Score | Mr(calc)  | Delta   | Sequence                      |
|-------|-----------|---------|-------------------------------|
| 45.3  | 1320.6250 | -0.0037 | <a href="#">AFASGSPPIGETR</a> |
| 4.8   | 1320.6228 | -0.0015 | <a href="#">IRSDSEPKSSAK</a>  |
| 2.6   | 1320.6180 | 0.0032  | <a href="#">RNQAAIGTDVMK</a>  |
| 2.4   | 1320.6207 | 0.0006  | <a href="#">EQRMSQIRPR</a>    |
| 2.4   | 1320.6250 | -0.0037 | <a href="#">VFGRGELVDDAK</a>  |
| 2.2   | 1320.6228 | -0.0015 | <a href="#">EVLDTESRSL</a>    |
| 1.9   | 1320.6232 | -0.0020 | <a href="#">VMFDKMPLPAK</a>   |
| 1.7   | 1320.6228 | -0.0015 | <a href="#">DDTSLETIVRR</a>   |
| 1.7   | 1320.6228 | -0.0015 | <a href="#">LQTDQSSLEKR</a>   |
| 1.7   | 1320.6180 | 0.0032  | <a href="#">AALES MRQEIR</a>  |

Mascot: <http://www.matrixscience.com/>

**Peptide View**MS/MS Fragmentation of **TPNGYMLQQFENPANPK**

Found in **AT3G22460.1** in **TAIR\_Arabidopsis**, Symbols: | cysteine synthase, putative / O-acetylserine (thiol)-lyase, putative / O-acetylserine sulfhydrylase, putative | chr3:7963862-7964776 FORWARD

Match to Query 8633: 1947.914126 from(974.964339,2+) index(6052)

Title: Elution from: 56.018 to 56.018 scan no 7895 cid35.00 polarity:+

Data file D1d-1\_3.mgf

Click mouse within plot area to zoom in by factor of two about that point

Or,   to  Da

Label all possible matches  Label matches used for scoring

Show Y-axis

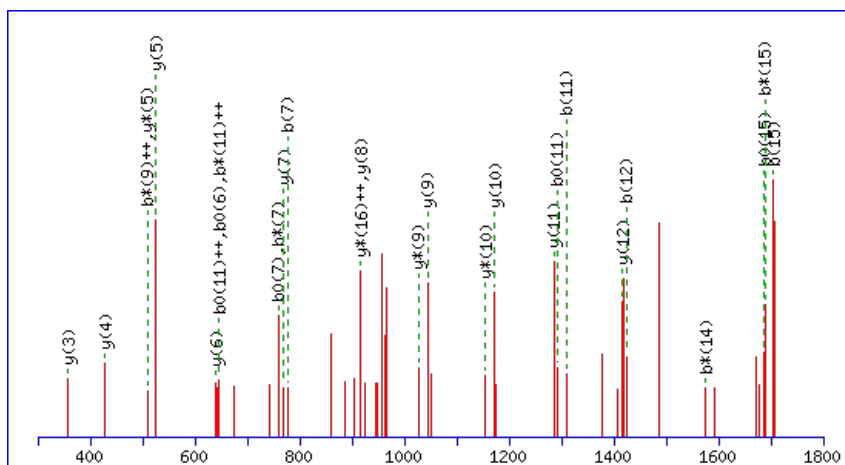

**Monoisotopic mass of neutral peptide Mr(calc):** 1947.9149

**Fixed modifications:** Carbamidomethyl (C) (apply to specified residues or termini only)

**Ions Score:** 66 **Expect:** 6.7e-007

**Matches:** 28/176 fragment ions using 38 most intense peaks ([help](#))

| #  | b         | b <sup>++</sup> | b <sup>*</sup> | b <sup>*++</sup> | b <sup>0</sup> | b <sup>0++</sup> | Seq. | y         | y <sup>++</sup> | y <sup>*</sup> | y <sup>*++</sup> | y <sup>0</sup> | y <sup>0++</sup> | #  |
|----|-----------|-----------------|----------------|------------------|----------------|------------------|------|-----------|-----------------|----------------|------------------|----------------|------------------|----|
| 1  | 102.0550  | 51.5311         |                |                  | 84.0444        | 42.5258          | T    |           |                 |                |                  |                |                  | 17 |
| 2  | 199.1077  | 100.0575        |                |                  | 181.0972       | 91.0522          | P    | 1847.8745 | 924.4409        | 1830.8479      | 915.9276         | 1829.8639      | 915.4356         | 16 |
| 3  | 313.1506  | 157.0790        | 296.1241       | 148.5657         | 295.1401       | 148.0737         | N    | 1750.8217 | 875.9145        | 1733.7952      | 867.4012         | 1732.8112      | 866.9092         | 15 |
| 4  | 370.1721  | 185.5897        | 353.1456       | 177.0764         | 352.1615       | 176.5844         | G    | 1636.7788 | 818.8930        | 1619.7523      | 810.3798         | 1618.7682      | 809.8878         | 14 |
| 5  | 533.2354  | 267.1214        | 516.2089       | 258.6081         | 515.2249       | 258.1161         | Y    | 1579.7573 | 790.3823        | 1562.7308      | 781.8690         | 1561.7468      | 781.3770         | 13 |
| 6  | 664.2759  | 332.6416        | 647.2494       | 324.1283         | 646.2654       | 323.6363         | M    | 1416.6940 | 708.8506        | 1399.6675      | 700.3374         | 1398.6834      | 699.8454         | 12 |
| 7  | 777.3600  | 389.1836        | 760.3334       | 380.6704         | 759.3494       | 380.1783         | L    | 1285.6535 | 643.3304        | 1268.6270      | 634.8171         | 1267.6430      | 634.3251         | 11 |
| 8  | 905.4186  | 453.2129        | 888.3920       | 444.6996         | 887.4080       | 444.2076         | Q    | 1172.5695 | 586.7884        | 1155.5429      | 578.2751         | 1154.5589      | 577.7831         | 10 |
| 9  | 1033.4771 | 517.2422        | 1016.4506      | 508.7289         | 1015.4666      | 508.2369         | Q    | 1044.5109 | 522.7591        | 1027.4843      | 514.2458         | 1026.5003      | 513.7538         | 9  |
| 10 | 1180.5456 | 590.7764        | 1163.5190      | 582.2631         | 1162.5350      | 581.7711         | F    | 916.4523  | 458.7298        | 899.4258       | 450.2165         | 898.4417       | 449.7245         | 8  |
| 11 | 1309.5882 | 655.2977        | 1292.5616      | 646.7844         | 1291.5776      | 646.2924         | E    | 769.3839  | 385.1956        | 752.3573       | 376.6823         | 751.3733       | 376.1903         | 7  |
| 12 | 1423.6311 | 712.3192        | 1406.6045      | 703.8059         | 1405.6205      | 703.3139         | N    | 640.3413  | 320.6743        | 623.3148       | 312.1610         |                |                  | 6  |
| 13 | 1520.6838 | 760.8456        | 1503.6573      | 752.3323         | 1502.6733      | 751.8403         | P    | 526.2984  | 263.6528        | 509.2718       | 255.1396         |                |                  | 5  |
| 14 | 1591.7210 | 796.3641        | 1574.6944      | 787.8508         | 1573.7104      | 787.3588         | A    | 429.2456  | 215.1264        | 412.2191       | 206.6132         |                |                  | 4  |
| 15 | 1705.7639 | 853.3856        | 1688.7373      | 844.8723         | 1687.7533      | 844.3803         | N    | 358.2085  | 179.6079        | 341.1819       | 171.0946         |                |                  | 3  |
| 16 | 1802.8166 | 901.9120        | 1785.7901      | 893.3987         | 1784.8061      | 892.9067         | P    | 244.1656  | 122.5864        | 227.1390       | 114.0731         |                |                  | 2  |
| 17 |           |                 |                |                  |                |                  | K    | 147.1128  | 74.0600         | 130.0863       | 65.5468          |                |                  | 1  |

AT3G22460.1

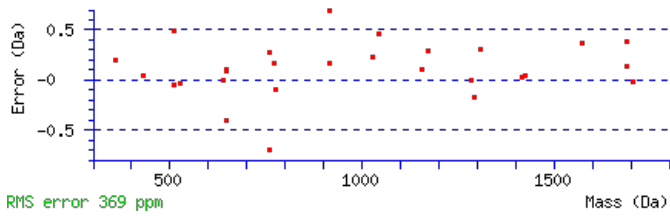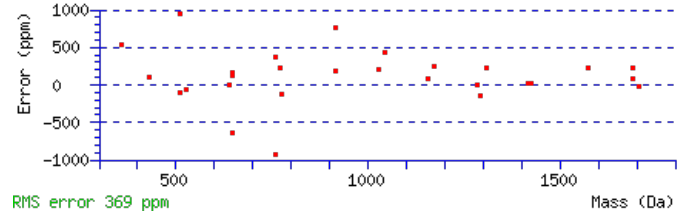

NCBI **BLAST** search of [TPNGYMLQQFENPANPK](#)  
(Parameters: blastp, nr protein database, expect=20000, no filter, PAM30)  
Other BLAST [web gateways](#)

**All matches to this query**

| Score | Mr(calc)  | Delta   | Sequence                            |
|-------|-----------|---------|-------------------------------------|
| 66.3  | 1947.9149 | -0.0007 | <a href="#">TPNGYMLQQFENPANPK</a>   |
| 0.3   | 1947.9104 | 0.0037  | <a href="#">MSDLAQSLGMPPGLSEGMK</a> |

Mascot: <http://www.matrixscience.com/>

**Peptide View**MS/MS Fragmentation of **TLVELGAEK**Found in **AT3G22790.1** in **TAIR\_Arabidopsis**, Symbols: | kinase interacting family protein | chr3:8052453-8057895 REVERSE

Match to Query 2396: 968.501400 from(485.257976,2+) index(4262)

Title: Elution from: 38.770 to 38.770 scan no 5273 cid35.00 polarity:+

Data file D1d-3\_1.mgf

Click mouse within plot area to zoom in by factor of two about that point

Or,   to  Da Label all possible matches  Label matches used for scoring Show Y-axis 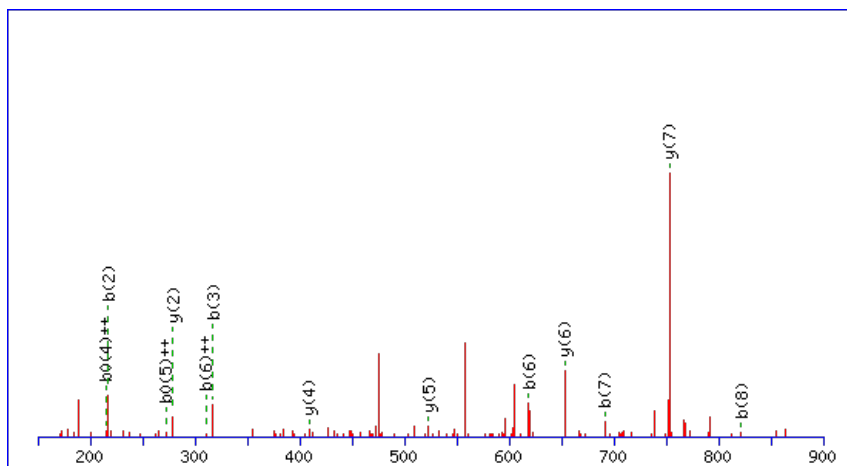Monoisotopic mass of neutral peptide **Mr(calc)**: 968.5038

Fixed modifications: Carbamidomethyl (C) (apply to specified residues or termini only)

Ions Score: 22 **Expect**: 0.036Matches : 13/78 fragment ions using 47 most intense peaks ([help](#))

| # | b               | b <sup>++</sup> | b <sup>0</sup> | b <sup>0++</sup> | Seq. | y               | y <sup>++</sup> | y*       | y <sup>*++</sup> | y <sup>0</sup> | y <sup>0++</sup> | # |
|---|-----------------|-----------------|----------------|------------------|------|-----------------|-----------------|----------|------------------|----------------|------------------|---|
| 1 | 103.0520        | 52.0296         | 85.0414        | 43.0244          | T    |                 |                 |          |                  |                |                  | 9 |
| 2 | <b>217.1331</b> | 109.0702        | 199.1225       | 100.0649         | L    | 867.4664        | 434.2369        | 849.4428 | 425.2251         | 849.4559       | 425.2316         | 8 |
| 3 | <b>317.1985</b> | 159.1029        | 299.1880       | 150.0976         | V    | <b>753.3853</b> | 377.1963        | 735.3617 | 368.1845         | 735.3748       | 368.1910         | 7 |
| 4 | 447.2382        | 224.1227        | 429.2276       | <b>215.1174</b>  | E    | <b>653.3199</b> | 327.1636        | 635.2963 | 318.1518         | 635.3093       | 318.1583         | 6 |
| 5 | 561.3193        | 281.1633        | 543.3087       | <b>272.1580</b>  | L    | <b>523.2802</b> | 262.1438        | 505.2567 | 253.1320         | 505.2697       | 253.1385         | 5 |
| 6 | <b>619.3378</b> | <b>310.1725</b> | 601.3272       | 301.1672         | G    | <b>409.1991</b> | 205.1032        | 391.1756 | 196.0914         | 391.1886       | 196.0979         | 4 |
| 7 | <b>691.3719</b> | 346.1896        | 673.3613       | 337.1843         | A    | 351.1807        | 176.0940        | 333.1571 | 167.0822         | 333.1701       | 167.0887         | 3 |
| 8 | <b>821.4115</b> | 411.2094        | 803.4010       | 402.2041         | E    | <b>279.1465</b> | 140.0769        | 261.1229 | 131.0651         | 261.1359       | 131.0716         | 2 |
| 9 |                 |                 |                |                  | K    | 149.1069        | 75.0571         | 131.0833 | 66.0453          |                |                  | 1 |

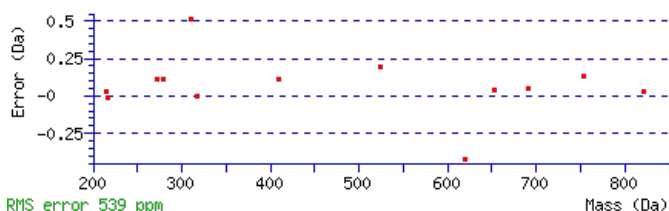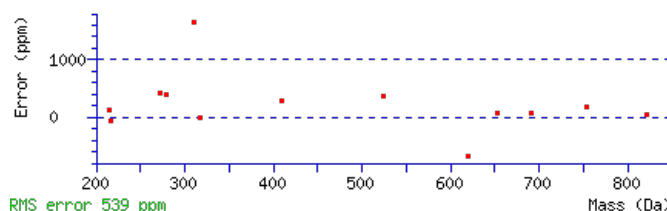NCBI **BLAST** search of [TLVELGAEK](#)

(Parameters: blastp, nr protein database, expect=20000, no filter, PAM30)

Other BLAST [web gateways](#)**All matches to this query**

| Score | Mr(calc) | Delta   | Sequence                  |
|-------|----------|---------|---------------------------|
| 22.0  | 968.5038 | -0.0024 | <a href="#">TLVELGAEK</a> |



## AT3G22790.1

|      |          |         |                            |
|------|----------|---------|----------------------------|
| 14.6 | 968.4991 | 0.0023  | <a href="#">LTMIP LDR</a>  |
| 10.0 | 968.5039 | -0.0025 | <a href="#">TLNILEEK</a>   |
| 5.8  | 968.5039 | -0.0025 | <a href="#">EAISL GLEK</a> |
| 5.1  | 968.5039 | -0.0025 | <a href="#">EALLEKEK</a>   |
| 4.1  | 968.5038 | -0.0024 | <a href="#">LAEVTGLEK</a>  |
| 4.0  | 968.5018 | -0.0004 | <a href="#">KAIMALHR</a>   |
| 3.9  | 968.5038 | -0.0024 | <a href="#">GLEAVETLK</a>  |
| 3.1  | 968.4991 | 0.0023  | <a href="#">VTLEMLPR</a>   |
| 2.2  | 968.5038 | -0.0024 | <a href="#">DTQEILK</a>    |

Mascot: <http://www.matrixscience.com/>

**Peptide View**MS/MS Fragmentation of **FSDLLAFSGPAPER**

Found in **AT3G22840.1** in **TAIR\_Arabidopsis**, Symbols: ELIP, ELIP1 | ELIP1 (EARLY LIGHT-INDUCIBLE PROTEIN); chlorophyll binding | chr3:8084635-8085452 REVERSE

Match to Query 6392: 1522.704458 from(762.359505,2+) index(7591)

Title: Elution from: 66.360 to 66.360 scan no 9969 cid35.00 polarity:+

Data file C7-2\_3.mgf

Click mouse within plot area to zoom in by factor of two about that point

Or,   to  Da

Label all possible matches  Label matches used for scoring

Show Y-axis

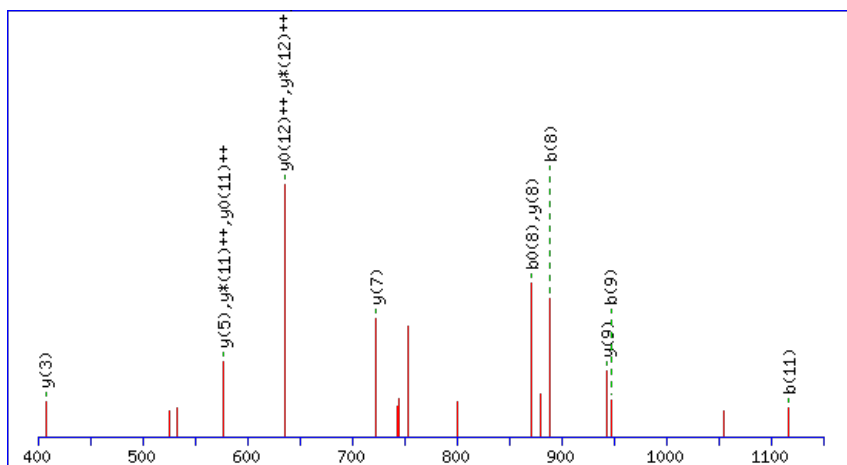

Monoisotopic mass of neutral peptide  $M_r(\text{calc})$ : 1522.7010

Fixed modifications: Carbamidomethyl (C) (apply to specified residues or termini only)

Ions Score: 51 Expect: 7.6e-005

Matches : 15/126 fragment ions using 12 most intense peaks ([help](#))

| #  | b         | b <sup>++</sup> | b <sup>0</sup> | b <sup>0++</sup> | Seq. | y         | y <sup>++</sup> | y*        | y <sup>*++</sup> | y <sup>0</sup> | y <sup>0++</sup> | #  |
|----|-----------|-----------------|----------------|------------------|------|-----------|-----------------|-----------|------------------|----------------|------------------|----|
| 1  | 149.0727  | 75.0400         |                |                  | F    |           |                 |           |                  |                |                  | 14 |
| 2  | 237.1018  | 119.0545        | 219.0912       | 110.0492         | S    | 1375.6429 | 688.3251        | 1357.6193 | 679.3133         | 1357.6323      | 679.3198         | 13 |
| 3  | 353.1258  | 177.0665        | 335.1152       | 168.0612         | D    | 1287.6138 | 644.3105        | 1269.5902 | 635.2987         | 1269.6032      | 635.3053         | 12 |
| 4  | 467.2069  | 234.1071        | 449.1963       | 225.1018         | L    | 1171.5898 | 586.2986        | 1153.5662 | 577.2868         | 1153.5793      | 577.2933         | 11 |
| 5  | 581.2880  | 291.1476        | 563.2774       | 282.1423         | L    | 1057.5087 | 529.2580        | 1039.4851 | 520.2462         | 1039.4982      | 520.2527         | 10 |
| 6  | 653.3221  | 327.1647        | 635.3115       | 318.1594         | A    | 943.4276  | 472.2175        | 925.4040  | 463.2057         | 925.4171       | 463.2122         | 9  |
| 7  | 801.3876  | 401.1974        | 783.3770       | 392.1921         | F    | 871.3935  | 436.2004        | 853.3699  | 427.1886         | 853.3829       | 427.1951         | 8  |
| 8  | 889.4166  | 445.2120        | 871.4061       | 436.2067         | S    | 723.3280  | 362.1677        | 705.3044  | 353.1559         | 705.3175       | 353.1624         | 7  |
| 9  | 947.4351  | 474.2212        | 929.4246       | 465.2159         | G    | 635.2990  | 318.1531        | 617.2754  | 309.1413         | 617.2884       | 309.1478         | 6  |
| 10 | 1045.4849 | 523.2461        | 1027.4744      | 514.2408         | P    | 577.2805  | 289.1439        | 559.2569  | 280.1321         | 559.2699       | 280.1386         | 5  |
| 11 | 1117.5191 | 559.2632        | 1099.5085      | 550.2579         | A    | 479.2307  | 240.1190        | 461.2071  | 231.1072         | 461.2201       | 231.1137         | 4  |
| 12 | 1215.5689 | 608.2881        | 1197.5583      | 599.2828         | P    | 407.1965  | 204.1019        | 389.1729  | 195.0901         | 389.1860       | 195.0966         | 3  |
| 13 | 1345.6085 | 673.3079        | 1327.5979      | 664.3026         | E    | 309.1467  | 155.0770        | 291.1231  | 146.0652         | 291.1362       | 146.0717         | 2  |
| 14 |           |                 |                |                  | R    | 179.1071  | 90.0572         | 161.0835  | 81.0454          |                |                  | 1  |

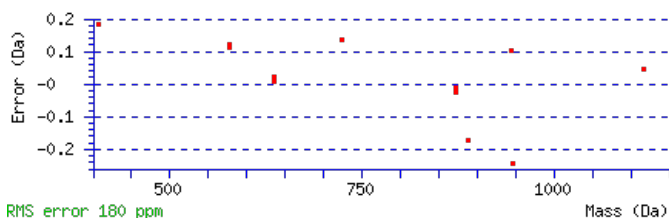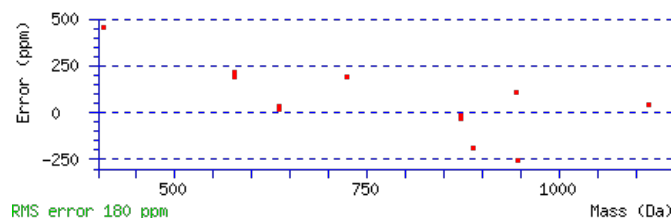

NCBI BLAST search of [FSDLLAFSGPAPER](#)

## AT3G22840.1

(Parameters: blastp, nr protein database, expect=20000, no filter, PAM30)

Other BLAST [web gateways](#)

### All matches to this query

| Score | Mr(calc)  | Delta  | Sequence                       |
|-------|-----------|--------|--------------------------------|
| 50.5  | 1522.7010 | 0.0034 | <a href="#">FSDLLAFSGPAPER</a> |
| 1.7   | 1522.7041 | 0.0003 | <a href="#">ATNNFSRHNIIGR</a>  |
| 0.1   | 1522.7010 | 0.0034 | <a href="#">EHSYQFIDINLK</a>   |

Mascot: <http://www.matrixscience.com/>

**Peptide View**MS/MS Fragmentation of **ESEFLQTLHFNSLR**Found in **AT3G22890.1** in **TAIR\_Arabidopsis**, Symbols: APS1 | APS1 (ATP sulfurylase 3) | chr3:8112844-8114741 FORWARD

Match to Query 7877: 1719.853062 from(574.291630,3+) index(7709)

Title: Elution from: 68.042 to 68.042 scan no 10189 cid35.00 polarity:+

Data file 0-3\_3.mgf

Click mouse within plot area to zoom in by factor of two about that point

Or,   to  Da Label all possible matches  Label matches used for scoring Show Y-axis 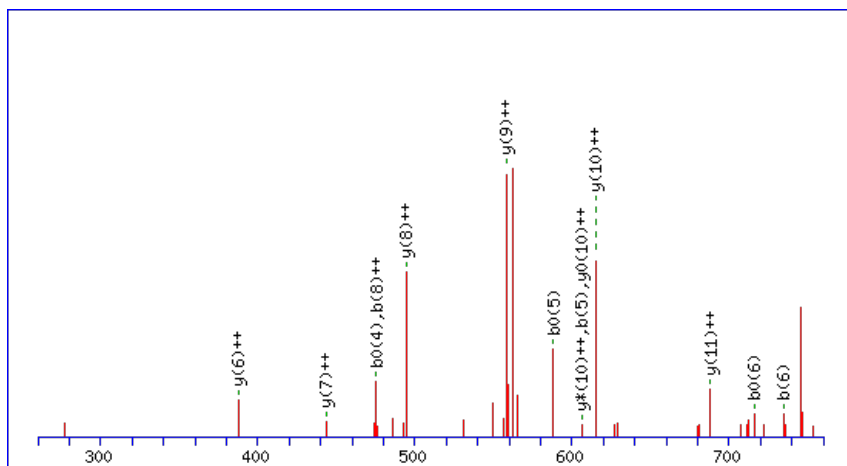Monoisotopic mass of neutral peptide **Mr(calc)**: 1719.8580

Fixed modifications: Carbamidomethyl (C) (apply to specified residues or termini only)

Ions Score: 34 Expect: 0.0016

Matches : 14/142 fragment ions using 21 most intense peaks ([help](#))

| #  | b         | b <sup>++</sup> | b <sup>*</sup> | b <sup>*++</sup> | b <sup>0</sup> | b <sup>0++</sup> | Seq. | y         | y <sup>++</sup> | y <sup>*</sup> | y <sup>*++</sup> | y <sup>0</sup> | y <sup>0++</sup> | #  |
|----|-----------|-----------------|----------------|------------------|----------------|------------------|------|-----------|-----------------|----------------|------------------|----------------|------------------|----|
| 1  | 130.0499  | 65.5286         |                |                  | 112.0393       | 56.5233          | E    |           |                 |                |                  |                |                  | 14 |
| 2  | 217.0819  | 109.0446        |                |                  | 199.0713       | 100.0393         | S    | 1591.8227 | 796.4150        | 1574.7962      | 787.9017         | 1573.8122      | 787.4097         | 13 |
| 3  | 346.1245  | 173.5659        |                |                  | 328.1139       | 164.5606         | E    | 1504.7907 | 752.8990        | 1487.7641      | 744.3857         | 1486.7801      | 743.8937         | 12 |
| 4  | 493.1929  | 247.1001        |                |                  | 475.1823       | 238.0948         | F    | 1375.7481 | 688.3777        | 1358.7215      | 679.8644         | 1357.7375      | 679.3724         | 11 |
| 5  | 606.2770  | 303.6421        |                |                  | 588.2664       | 294.6368         | L    | 1228.6797 | 614.8435        | 1211.6531      | 606.3302         | 1210.6691      | 605.8382         | 10 |
| 6  | 734.3355  | 367.6714        | 717.3090       | 359.1581         | 716.3250       | 358.6661         | Q    | 1115.5956 | 558.3014        | 1098.5691      | 549.7882         | 1097.5851      | 549.2962         | 9  |
| 7  | 835.3832  | 418.1953        | 818.3567       | 409.6820         | 817.3727       | 409.1900         | T    | 987.5370  | 494.2722        | 970.5105       | 485.7589         | 969.5265       | 485.2669         | 8  |
| 8  | 948.4673  | 474.7373        | 931.4407       | 466.2240         | 930.4567       | 465.7320         | L    | 886.4894  | 443.7483        | 869.4628       | 435.2350         | 868.4788       | 434.7430         | 7  |
| 9  | 1085.5262 | 543.2667        | 1068.4997      | 534.7535         | 1067.5156      | 534.2615         | H    | 773.4053  | 387.2063        | 756.3787       | 378.6930         | 755.3947       | 378.2010         | 6  |
| 10 | 1232.5946 | 616.8009        | 1215.5681      | 608.2877         | 1214.5841      | 607.7957         | F    | 636.3464  | 318.6768        | 619.3198       | 310.1636         | 618.3358       | 309.6715         | 5  |
| 11 | 1346.6375 | 673.8224        | 1329.6110      | 665.3091         | 1328.6270      | 664.8171         | N    | 489.2780  | 245.1426        | 472.2514       | 236.6293         | 471.2674       | 236.1373         | 4  |
| 12 | 1433.6696 | 717.3384        | 1416.6430      | 708.8251         | 1415.6590      | 708.3331         | S    | 375.2350  | 188.1212        | 358.2085       | 179.6079         | 357.2245       | 179.1159         | 3  |
| 13 | 1546.7536 | 773.8805        | 1529.7271      | 765.3672         | 1528.7431      | 764.8752         | L    | 288.2030  | 144.6051        | 271.1765       | 136.0919         |                |                  | 2  |
| 14 |           |                 |                |                  |                |                  | R    | 175.1190  | 88.0631         | 158.0924       | 79.5498          |                |                  | 1  |

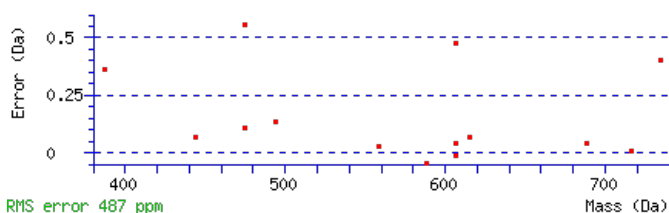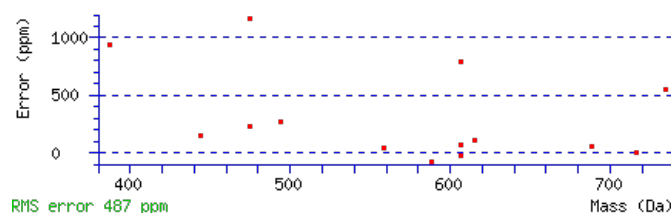NCBI BLAST search of **ESEFLQTLHFNSLR**

(Parameters: blastp, nr protein database, expect=20000, no filter, PAM30)

AT3G22890.1

Other BLAST [web gateways](#)

**All matches to this query**

| Score | Mr(calc)  | Delta   | Sequence                          |
|-------|-----------|---------|-----------------------------------|
| 34.3  | 1719.8580 | -0.0050 | <a href="#">ESEFLQTLHFNSLR</a>    |
| 5.5   | 1719.8540 | -0.0010 | <a href="#">GGSRVFEVNLVTDDGR</a>  |
| 2.1   | 1719.8500 | 0.0031  | <a href="#">TETAEARQTNSRAGTK</a>  |
| 1.0   | 1719.8502 | 0.0029  | <a href="#">SITSTAPLNGWMDSIK</a>  |
| 0.1   | 1719.8527 | 0.0004  | <a href="#">SSSTAVSVPISVNTDEK</a> |

Mascot: <http://www.matrixscience.com/>

## Peptide View

### MS/MS Fragmentation of **KAREFOK**

Found in **AT3G23020.1** in **TAIR\_Arabidopsis**, Symbols: | pentatricopeptide (PPR) repeat-containing protein | chr3:8177222-8179750 REVERSE

Match to Query 1865:918.468370 from(460.241461,2+) index(7597)

Title: Elution from: 65.989 to 65.989 scan no 9675 cid35.00 polarity:+

Data file 0-1\_1.mgf

Click mouse within plot area to zoom in by factor of two about that point

Or,   to  Da

Label all possible matches  Label matches used for scoring

Show Y-axis

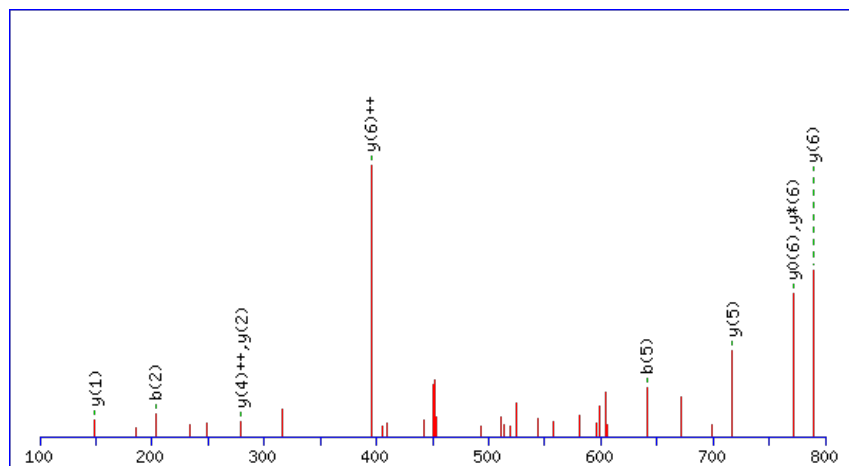

Monoisotopic mass of neutral peptide **Mr(calc)**: 918.4697

**Fixed modifications:** Carbamidomethyl (C) (apply to specified residues or termini only)

**Ions Score:** 30 **Expect:** 0.0084

**Matches** : 11/60 fragment ions using 14 most intense peaks ([help](#))

| # | b               | b <sup>++</sup> | b*       | b <sup>*++</sup> | b <sup>0</sup> | b <sup>0++</sup> | Seq. | y               | y <sup>++</sup> | y*              | y <sup>*++</sup> | y <sup>0</sup>  | y <sup>0++</sup> | # |
|---|-----------------|-----------------|----------|------------------|----------------|------------------|------|-----------------|-----------------|-----------------|------------------|-----------------|------------------|---|
| 1 | 131.0963        | 66.0518         | 113.0727 | 57.0400          |                |                  | K    |                 |                 |                 |                  |                 |                  | 7 |
| 2 | <b>203.1305</b> | 102.0689        | 185.1069 | 93.0571          |                |                  | A    | <b>789.3880</b> | <b>395.1976</b> | <b>771.3644</b> | 386.1858         | <b>771.3774</b> | 386.1924         | 6 |
| 3 | 363.2197        | 182.1135        | 345.1961 | 173.1017         |                |                  | R    | <b>717.3538</b> | 359.1806        | 699.3303        | 350.1688         | 699.3433        | 350.1753         | 5 |
| 4 | 493.2593        | 247.1333        | 475.2358 | 238.1215         | 475.2488       | 238.1280         | E    | 557.2646        | <b>279.1359</b> | 539.2410        | 270.1241         | 539.2540        | 270.1307         | 4 |
| 5 | <b>641.3248</b> | 321.1660        | 623.3012 | 312.1542         | 623.3142       | 312.1607         | F    | 427.2250        | 214.1161        | 409.2014        | 205.1043         |                 |                  | 3 |
| 6 | <b>771.3774</b> | 386.1924        | 753.3538 | 377.1806         | 753.3669       | 377.1871         | Q    | <b>279.1595</b> | 140.0834        | 261.1359        | 131.0716         |                 |                  | 2 |
| 7 |                 |                 |          |                  |                |                  | K    | <b>149.1069</b> | 75.0571         | 131.0833        | 66.0453          |                 |                  | 1 |

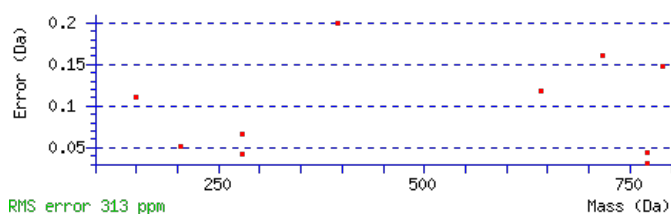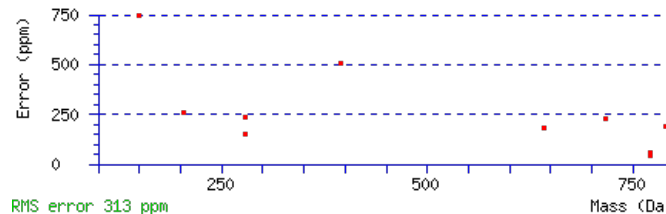

### NCBI BLAST search of **KAREFOK**

(Parameters: blastp, nr protein database, expect=20000, no filter, PAM30)

Other BLAST [web gateways](#)

### All matches to this query

| Score | Mr(calc) | Delta   | Sequence                 |
|-------|----------|---------|--------------------------|
| 30.5  | 918.4697 | -0.0014 | <a href="#">KAREFOK</a>  |
| 27.8  | 918.4693 | -0.0009 | <a href="#">GAFEFLVK</a> |
| 24.6  | 918.4671 | 0.0013  | <a href="#">KFEETKK</a>  |

# AT3G23020.1

|      |          |         |                          |
|------|----------|---------|--------------------------|
| 24.6 | 918.4671 | 0.0013  | <a href="#">KYLTEAGK</a> |
| 23.9 | 918.4697 | -0.0014 | <a href="#">QFAKREK</a>  |
| 21.2 | 918.4671 | 0.0013  | <a href="#">KTFEEKK</a>  |
| 19.6 | 918.4697 | -0.0014 | <a href="#">KAFGQTVR</a> |
| 18.7 | 918.4671 | 0.0013  | <a href="#">KTKEFEK</a>  |
| 16.8 | 918.4671 | 0.0013  | <a href="#">KFSEASLK</a> |
| 16.7 | 918.4671 | 0.0013  | <a href="#">ETQYLKK</a>  |

**Mascot:** <http://www.matrixscience.com/>

## Peptide View

### MS/MS Fragmentation of NFEQQNQIVKR

Found in **AT3G23160.1** in **TAIR\_Arabidopsis**, Symbols: | similar to unknown protein [Arabidopsis thaliana] (TAIR:AT5G04550.1); similar to unnamed protein product [Vitis vinifera] (GB:CAO71334.1); contains InterPro domain Protein of unknown function DUF668 (InterPro:IPR007700) | chr3:8260066-8

Match to Query 5608: 1422.670324 from(712.342438,2+) index(10886)

Title: Elution from: 108.718 to 108.718 scan no 15895 cid35.00 polarity:+

Data file C7-1\_2.mgf

Click mouse within plot area to zoom in by factor of two about that point

Or,   to  Da

Label all possible matches  Label matches used for scoring

Show Y-axis

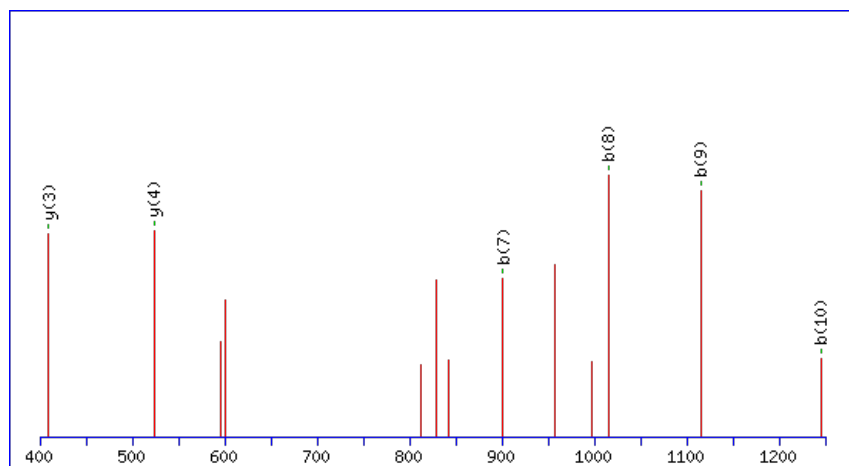

Monoisotopic mass of neutral peptide Mr(calc): 1422.6724

Fixed modifications: Carbamidomethyl (C) (apply to specified residues or termini only)

Ions Score: 31 Expect: 0.0062

Matches : 6/100 fragment ions using 7 most intense peaks ([help](#))

| #  | b                | b <sup>++</sup> | b <sup>*</sup> | b <sup>*++</sup> | b <sup>0</sup> | b <sup>0++</sup> | Seq. | y               | y <sup>++</sup> | y <sup>*</sup> | y <sup>*++</sup> | y <sup>0</sup> | y <sup>0++</sup> | #  |
|----|------------------|-----------------|----------------|------------------|----------------|------------------|------|-----------------|-----------------|----------------|------------------|----------------|------------------|----|
| 1  | 117.0443         | 59.0258         | 99.0207        | 50.0140          |                |                  | N    |                 |                 |                |                  |                |                  | 11 |
| 2  | 265.1097         | 133.0585        | 247.0861       | 124.0467         |                |                  | F    | 1307.6427       | 654.3250        | 1289.6191      | 645.3132         | 1289.6321      | 645.3197         | 10 |
| 3  | 395.1493         | 198.0783        | 377.1258       | 189.0665         | 377.1388       | 189.0730         | E    | 1159.5772       | 580.2923        | 1141.5537      | 571.2805         | 1141.5667      | 571.2870         | 9  |
| 4  | 525.2020         | 263.1046        | 507.1784       | 254.0928         | 507.1914       | 254.0994         | Q    | 1029.5376       | 515.2724        | 1011.5140      | 506.2607         |                |                  | 8  |
| 5  | 655.2546         | 328.1310        | 637.2311       | 319.1192         | 637.2441       | 319.1257         | Q    | 899.4850        | 450.2461        | 881.4614       | 441.2343         |                |                  | 7  |
| 6  | 771.2916         | 386.1495        | 753.2681       | 377.1377         | 753.2811       | 377.1442         | N    | 769.4323        | 385.2198        | 751.4087       | 376.2080         |                |                  | 6  |
| 7  | <b>901.3443</b>  | 451.1758        | 883.3207       | 442.1640         | 883.3337       | 442.1705         | Q    | 653.3953        | 327.2013        | 635.3717       | 318.1895         |                |                  | 5  |
| 8  | <b>1015.4254</b> | 508.2163        | 997.4018       | 499.2045         | 997.4148       | 499.2110         | I    | <b>523.3427</b> | 262.1750        | 505.3191       | 253.1632         |                |                  | 4  |
| 9  | <b>1115.4908</b> | 558.2491        | 1097.4673      | 549.2373         | 1097.4803      | 549.2438         | V    | <b>409.2616</b> | 205.1344        | 391.2380       | 196.1226         |                |                  | 3  |
| 10 | <b>1245.5799</b> | 623.2936        | 1227.5563      | 614.2818         | 1227.5693      | 614.2883         | K    | 309.1961        | 155.1017        | 291.1725       | 146.0899         |                |                  | 2  |
| 11 |                  |                 |                |                  |                |                  | R    | 179.1071        | 90.0572         | 161.0835       | 81.0454          |                |                  | 1  |

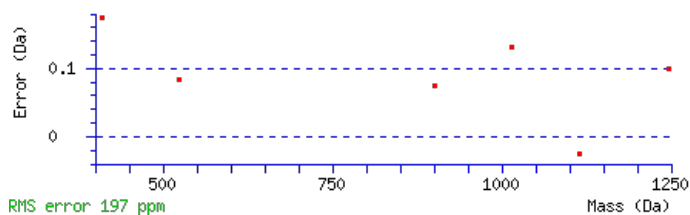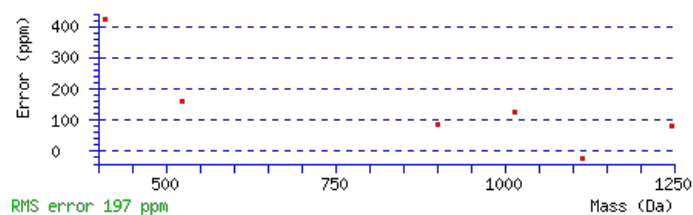

NCBI BLAST search of **NFEQQNQIVKR**

(Parameters: blastp, nr protein database, expect=20000, no filter, PAM30)

Other BLAST [web gateways](#)



**AT3G23160.1**

All matches to this query

| Score | Mr(calc)  | Delta   | Sequence                         |
|-------|-----------|---------|----------------------------------|
| 31.3  | 1422.6724 | -0.0021 | <a href="#">NFEQQNOIVKR</a>      |
| 20.7  | 1422.6697 | 0.0006  | <a href="#">GSDAVASVFAVLDLDR</a> |
| 19.4  | 1422.6720 | -0.0016 | <a href="#">FWKSVVVEEVER</a>     |
| 4.9   | 1422.6697 | 0.0006  | <a href="#">IFDQGTGTPSKQK</a>    |
| 4.2   | 1422.6683 | 0.0020  | <a href="#">DRMMLLDDIRK</a>      |
| 4.0   | 1422.6720 | -0.0016 | <a href="#">KDYKPPVFEER</a>      |
| 3.9   | 1422.6720 | -0.0016 | <a href="#">SIGFWTEGNGLVK</a>    |
| 3.4   | 1422.6677 | 0.0027  | <a href="#">LCYRHIEKQR</a>       |
| 3.3   | 1422.6675 | 0.0028  | <a href="#">QASLSTDKALSER</a>    |
| 3.3   | 1422.6697 | 0.0006  | <a href="#">DQYEKGALVEVR</a>     |

Mascot: <http://www.matrixscience.com/>

## Peptide View

MS/MS Fragmentation of **DTARAWLK**

Found in **AT3G23310.1** in **TAIR\_Arabidopsis**, Symbols: | protein kinase, putative | chr3:8339806-8343362 FORWARD

Match to Query 2317: 959.518778 from(480.766665,2+) index(1467)

Title: Elution from: 20.499 to 20.499 scan no 2023 cid35.00 polarity:+

Data file D12h-1\_1.mgf

Click mouse within plot area to zoom in by factor of two about that point

Or,  to  Da

Label all possible matches  Label matches used for scoring

Show Y-axis

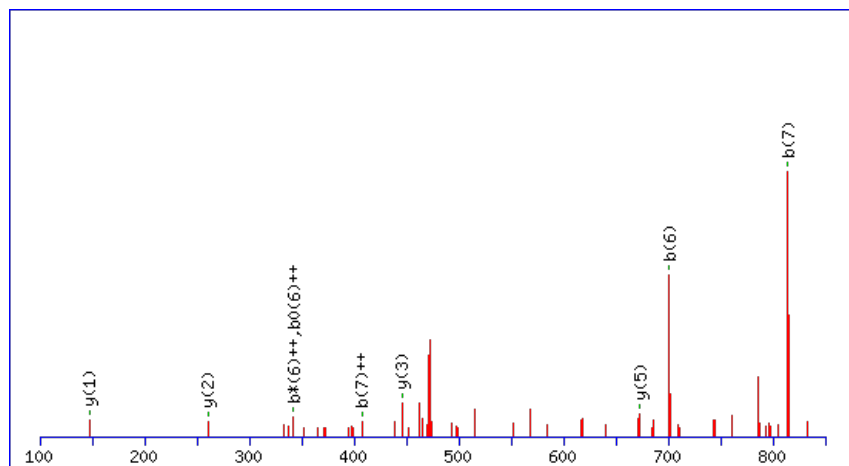

Monoisotopic mass of neutral peptide  $M_r(\text{calc})$ : 959.5188

Fixed modifications: Carbamidomethyl (C) (apply to specified residues or termini only)

Ions Score: 20 Expect: 0.035

Matches : 9/66 fragment ions using 19 most intense peaks ([help](#))

| # | b               | b <sup>++</sup> | b*       | b <sup>*++</sup> | b <sup>0</sup> | b <sup>0++</sup> | Seq. | y               | y <sup>++</sup> | y*       | y <sup>*++</sup> | y <sup>0</sup> | y <sup>0++</sup> | # |
|---|-----------------|-----------------|----------|------------------|----------------|------------------|------|-----------------|-----------------|----------|------------------|----------------|------------------|---|
| 1 | 116.0342        | 58.5207         |          |                  | 98.0237        | 49.5155          | D    |                 |                 |          |                  |                |                  | 8 |
| 2 | 217.0819        | 109.0446        |          |                  | 199.0713       | 100.0393         | T    | 845.4992        | 423.2532        | 828.4727 | 414.7400         | 827.4886       | 414.2480         | 7 |
| 3 | 288.1190        | 144.5631        |          |                  | 270.1084       | 135.5579         | A    | 744.4515        | 372.7294        | 727.4250 | 364.2161         |                |                  | 6 |
| 4 | 444.2201        | 222.6137        | 427.1936 | 214.1004         | 426.2096       | 213.6084         | R    | <b>673.4144</b> | 337.2108        | 656.3879 | 328.6976         |                |                  | 5 |
| 5 | 515.2572        | 258.1323        | 498.2307 | 249.6190         | 497.2467       | 249.1270         | A    | 517.3133        | 259.1603        | 500.2867 | 250.6470         |                |                  | 4 |
| 6 | <b>701.3365</b> | 351.1719        | 684.3100 | <b>342.6586</b>  | 683.3260       | <b>342.1666</b>  | W    | <b>446.2762</b> | 223.6417        | 429.2496 | 215.1285         |                |                  | 3 |
| 7 | <b>814.4206</b> | <b>407.7139</b> | 797.3941 | 399.2007         | 796.4100       | 398.7087         | L    | <b>260.1969</b> | 130.6021        | 243.1703 | 122.0888         |                |                  | 2 |
| 8 |                 |                 |          |                  |                |                  | K    | <b>147.1128</b> | 74.0600         | 130.0863 | 65.5468          |                |                  | 1 |

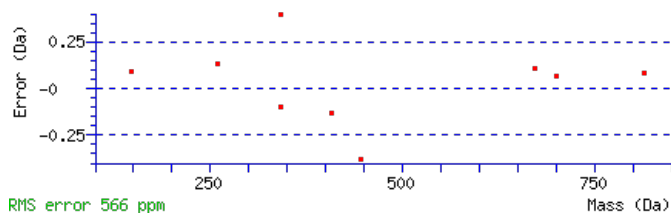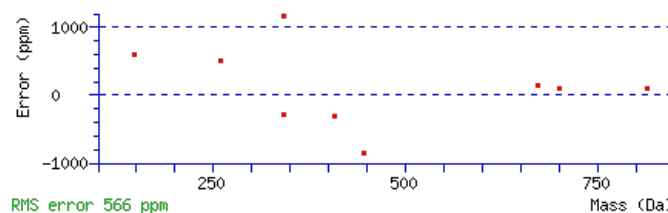

NCBI **BLAST** search of [DTARAWLK](#)

(Parameters: blastp, nr protein database, expect=20000, no filter, PAM30)

Other BLAST [web gateways](#)

### All matches to this query

| Score | $M_r(\text{calc})$ | Delta   | Sequence                 |
|-------|--------------------|---------|--------------------------|
| 20.3  | 959.5188           | -0.0001 | <a href="#">DTARAWLK</a> |
| 19.3  | 959.5175           | 0.0013  | <a href="#">LETEVEIK</a> |

# AT3G23310.1

|      |          |         |                          |
|------|----------|---------|--------------------------|
| 16.4 | 959.5188 | -0.0001 | <a href="#">RSSPSWLK</a> |
| 15.3 | 959.5175 | 0.0013  | <a href="#">LETDIEIK</a> |
| 7.5  | 959.5188 | -0.0001 | <a href="#">DWDRKIK</a>  |
| 7.5  | 959.5175 | 0.0013  | <a href="#">LELEESLK</a> |
| 7.5  | 959.5175 | 0.0013  | <a href="#">SEEEIELK</a> |
| 4.9  | 959.5175 | 0.0013  | <a href="#">LTELLDEK</a> |
| 3.3  | 959.5175 | 0.0013  | <a href="#">DLLEELTK</a> |
| 0.3  | 959.5188 | -0.0001 | <a href="#">WLREGTAK</a> |

Mascot: <http://www.matrixscience.com/>

## Peptide View

MS/MS Fragmentation of **LIPVTLGQVFQR**

Found in **AT3G23400.1** in **TAIR\_Arabidopsis**, Symbols: | plastid-lipid associated protein PAP / fibrillin family protein | chr3:8376643-8378232  
REVERSE

Match to Query 5051: 1369.805300 from(685.909926,2+) index(8358)

Title: Elution from: 74.881 to 74.881 scan no 11337 cid35.00 polarity:+

Data file D12h-3\_3.mgf

Click mouse within plot area to zoom in by factor of two about that point

Or,   to  Da

Label all possible matches  Label matches used for scoring

Show Y-axis

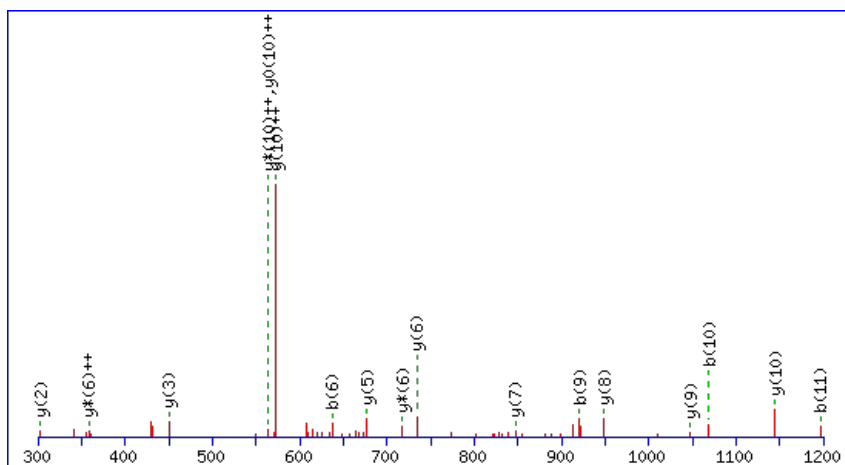

Monoisotopic mass of neutral peptide  $M_r(\text{calc})$ : 1369.8082

Fixed modifications: Carbamidomethyl (C) (apply to specified residues or termini only)

Ions Score: 56 Expect: 5.7e-006

Matches : 17/96 fragment ions using 26 most intense peaks ([help](#))

| #  | b                | b <sup>++</sup> | b*        | b <sup>*++</sup> | b <sup>0</sup> | b <sup>0++</sup> | Seq. | y                | y <sup>++</sup> | y*              | y <sup>*++</sup> | y <sup>0</sup> | y <sup>0++</sup> | #  |
|----|------------------|-----------------|-----------|------------------|----------------|------------------|------|------------------|-----------------|-----------------|------------------|----------------|------------------|----|
| 1  | 114.0913         | 57.5493         |           |                  |                |                  | L    |                  |                 |                 |                  |                |                  | 12 |
| 2  | 227.1754         | 114.0913        |           |                  |                |                  | I    | 1257.7314        | 629.3693        | 1240.7048       | 620.8561         | 1239.7208      | 620.3640         | 11 |
| 3  | 324.2282         | 162.6177        |           |                  |                |                  | P    | <b>1144.6473</b> | <b>572.8273</b> | 1127.6208       | <b>564.3140</b>  | 1126.6368      | <b>563.8220</b>  | 10 |
| 4  | 423.2966         | 212.1519        |           |                  |                |                  | V    | <b>1047.5946</b> | 524.3009        | 1030.5680       | 515.7876         | 1029.5840      | 515.2956         | 9  |
| 5  | 524.3443         | 262.6758        |           |                  | 506.3337       | 253.6705         | T    | <b>948.5261</b>  | 474.7667        | 931.4996        | 466.2534         | 930.5156       | 465.7614         | 8  |
| 6  | <b>637.4283</b>  | 319.2178        |           |                  | 619.4178       | 310.2125         | L    | <b>847.4785</b>  | 424.2429        | 830.4519        | 415.7296         |                |                  | 7  |
| 7  | 694.4498         | 347.7285        |           |                  | 676.4392       | 338.7233         | G    | <b>734.3944</b>  | 367.7008        | <b>717.3679</b> | <b>359.1876</b>  |                |                  | 6  |
| 8  | 822.5084         | 411.7578        | 805.4818  | 403.2445         | 804.4978       | 402.7525         | Q    | <b>677.3729</b>  | 339.1901        | 660.3464        | 330.6768         |                |                  | 5  |
| 9  | <b>921.5768</b>  | 461.2920        | 904.5502  | 452.7788         | 903.5662       | 452.2867         | V    | 549.3144         | 275.1608        | 532.2878        | 266.6475         |                |                  | 4  |
| 10 | <b>1068.6452</b> | 534.8262        | 1051.6186 | 526.3130         | 1050.6346      | 525.8210         | F    | <b>450.2459</b>  | 225.6266        | 433.2194        | 217.1133         |                |                  | 3  |
| 11 | <b>1196.7038</b> | 598.8555        | 1179.6772 | 590.3423         | 1178.6932      | 589.8502         | Q    | <b>303.1775</b>  | 152.0924        | 286.1510        | 143.5791         |                |                  | 2  |
| 12 |                  |                 |           |                  |                |                  | R    | 175.1190         | 88.0631         | 158.0924        | 79.5498          |                |                  | 1  |

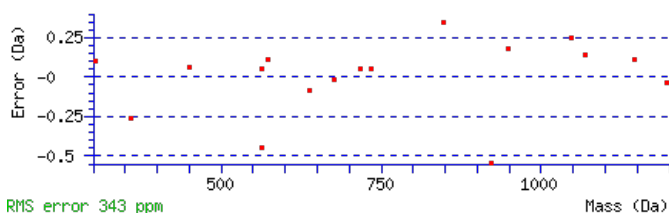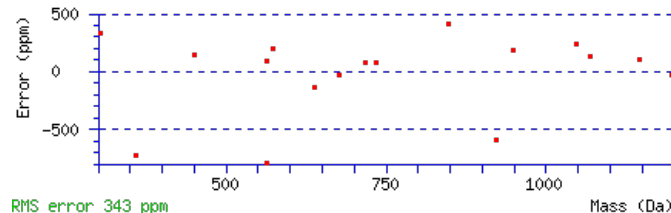

NCBI BLAST search of **LIPVTLGQVFQR**

(Parameters: blastp, nr protein database, expect=20000, no filter, PAM30)

Other BLAST [web gateways](#)

AT3G23400.1

All matches to this query

| Score | Mr(calc)  | Delta   | Sequence                     |
|-------|-----------|---------|------------------------------|
| 56.2  | 1369.8082 | -0.0029 | <a href="#">LIPVTLGQVFQR</a> |
| 1.7   | 1369.8041 | 0.0012  | <a href="#">LNIKKTEQQLR</a>  |
| 0.5   | 1369.8041 | 0.0012  | <a href="#">NIELVSRAVLTR</a> |

Mascot: <http://www.matrixscience.com/>

## Peptide View

MS/MS Fragmentation of **EELIQAAVLLHPSFVNVDLIK**

Found in **AT3G23600.1** in **TAIR\_Arabidopsis**, Symbols: | diene lactone hydrolase family protein | chr3:8473840-8475662 FORWARD

Match to Query 10012: 2375.175042 from(792.732290,3+) index(9860)

Title: Elution from 92.654 to 92.654 scan no 13887 cid35.00 polarity:+

Data file C7-1\_3.mgf

Click mouse within plot area to zoom in by factor of two about that point

Or, Plot from  to  Da

Label all possible matches  Label matches used for scoring

Show Y-axis

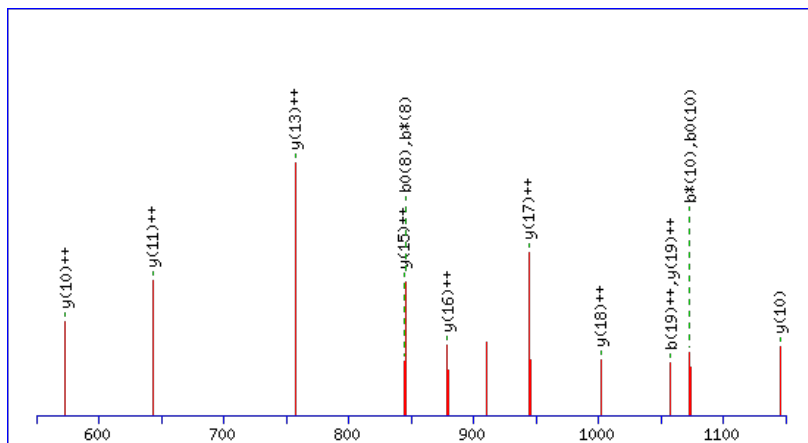

**Monoisotopic mass of neutral peptide Mr(calc):** 2375.1809

**Fixed modifications:** Carbamidomethyl (C) (apply to specified residues or termini only)

**Ions Score:** 54 **Expect:** 1.9e-005

**Matches:** 14/228 fragment ions using 15 most intense peaks ([help](#))

| #  | b         | b <sup>++</sup> | b <sup>*</sup> | b <sup>*++</sup> | b <sup>0</sup> | b <sup>0++</sup> | Seq. | y         | y <sup>++</sup> | y <sup>*</sup> | y <sup>*++</sup> | y <sup>0</sup> | y <sup>0++</sup> | #  |
|----|-----------|-----------------|----------------|------------------|----------------|------------------|------|-----------|-----------------|----------------|------------------|----------------|------------------|----|
| 1  | 131.0469  | 66.0271         |                |                  | 113.0363       | 57.0218          | E    |           |                 |                |                  |                |                  | 21 |
| 2  | 261.0865  | 131.0469        |                |                  | 243.0760       | 122.0416         | E    | 2246.1486 | 1123.5779       | 2228.1250      | 1114.5661        | 2228.1380      | 1114.5726        | 20 |
| 3  | 375.1676  | 188.0875        |                |                  | 357.1571       | 179.0822         | L    | 2116.1089 | 1058.5581       | 2098.0854      | 1049.5463        | 2098.0984      | 1049.5528        | 19 |
| 4  | 489.2487  | 245.1280        |                |                  | 471.2382       | 236.1227         | I    | 2002.0278 | 1001.5176       | 1984.0043      | 992.5058         | 1984.0173      | 992.5123         | 18 |
| 5  | 619.3014  | 310.1543        | 601.2778       | 301.1425         | 601.2908       | 301.1490         | Q    | 1887.9467 | 944.4770        | 1869.9232      | 935.4652         | 1869.9362      | 935.4717         | 17 |
| 6  | 691.3355  | 346.1714        | 673.3119       | 337.1596         | 673.3250       | 337.1661         | A    | 1757.8941 | 879.4507        | 1739.8705      | 870.4389         | 1739.8835      | 870.4454         | 16 |
| 7  | 763.3697  | 382.1885        | 745.3461       | 373.1767         | 745.3591       | 373.1832         | A    | 1685.8599 | 843.4336        | 1667.8364      | 834.4218         | 1667.8494      | 834.4283         | 15 |
| 8  | 863.4351  | 432.2212        | 845.4115       | 423.2094         | 845.4246       | 423.2159         | V    | 1613.8258 | 807.4165        | 1595.8022      | 798.4047         | 1595.8152      | 798.4113         | 14 |
| 9  | 977.5162  | 489.2617        | 959.4926       | 480.2500         | 959.5057       | 480.2565         | L    | 1513.7603 | 757.3838        | 1495.7368      | 748.3720         | 1495.7498      | 748.3785         | 13 |
| 10 | 1091.5973 | 546.3023        | 1073.5737      | 537.2905         | 1073.5868      | 537.2970         | L    | 1399.6793 | 700.3433        | 1381.6557      | 691.3315         | 1381.6687      | 691.3380         | 12 |
| 11 | 1231.6473 | 616.3273        | 1213.6238      | 607.3155         | 1213.6368      | 607.3220         | H    | 1285.5982 | 643.3027        | 1267.5746      | 634.2909         | 1267.5876      | 634.2974         | 11 |
| 12 | 1329.6971 | 665.3522        | 1311.6736      | 656.3404         | 1311.6866      | 656.3469         | P    | 1145.5481 | 573.2777        | 1127.5246      | 564.2659         | 1127.5376      | 564.2724         | 10 |
| 13 | 1417.7262 | 709.3667        | 1399.7026      | 700.3549         | 1399.7156      | 700.3615         | S    | 1047.4983 | 524.2528        | 1029.4748      | 515.2410         | 1029.4878      | 515.2475         | 9  |
| 14 | 1565.7916 | 783.3995        | 1547.7681      | 774.3877         | 1547.7811      | 774.3942         | F    | 959.4693  | 480.2383        | 941.4457       | 471.2265         | 941.4587       | 471.2330         | 8  |
| 15 | 1665.8571 | 833.4322        | 1647.8335      | 824.4204         | 1647.8465      | 824.4269         | V    | 811.4038  | 406.2056        | 793.3802       | 397.1938         | 793.3933       | 397.2003         | 7  |
| 16 | 1781.8941 | 891.4507        | 1763.8705      | 882.4389         | 1763.8835      | 882.4454         | N    | 711.3384  | 356.1728        | 693.3148       | 347.1610         | 693.3278       | 347.1675         | 6  |
| 17 | 1881.9595 | 941.4834        | 1863.9360      | 932.4716         | 1863.9490      | 932.4781         | V    | 595.3014  | 298.1543        | 577.2778       | 289.1425         | 577.2908       | 289.1490         | 5  |
| 18 | 1997.9835 | 999.4954        | 1979.9599      | 990.4836         | 1979.9730      | 990.4901         | D    | 495.2359  | 248.1216        | 477.2123       | 239.1098         | 477.2254       | 239.1163         | 4  |
| 19 | 2114.0075 | 1057.5074       | 2095.9839      | 1048.4956        | 2095.9969      | 1048.5021        | D    | 379.2120  | 190.1096        | 361.1884       | 181.0978         | 361.2014       | 181.1043         | 3  |
| 20 | 2228.0886 | 1114.5479       | 2210.0650      | 1105.5361        | 2210.0780      | 1105.5427        | I    | 263.1880  | 132.0976        | 245.1644       | 123.0858         |                |                  | 2  |
| 21 |           |                 |                |                  |                |                  | K    | 149.1069  | 75.0571         | 131.0833       | 66.0453          |                |                  | 1  |

# AT3G23600.1

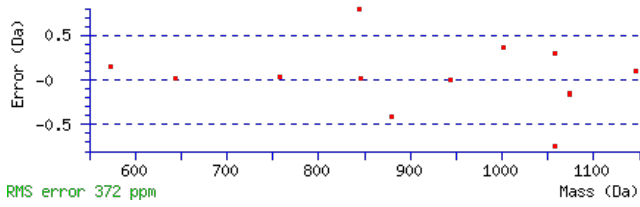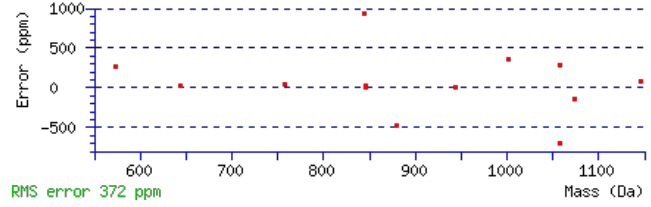

NCBI **BLAST** search of [EELIQAAVLLHPSFVNVDLIK](#)  
(Parameters: blastp, nr protein database, expect=20000, no filter, PAM30)  
Other BLAST [web gateways](#)

## All matches to this query

| Score | Mr(calc)  | Delta   | Sequence                                |
|-------|-----------|---------|-----------------------------------------|
| 54.2  | 2375.1809 | -0.0059 | <a href="#">EELIQAAVLLHPSFVNVDLIK</a>   |
| 2.3   | 2375.1710 | 0.0040  | <a href="#">GAVPHGNLKATNILLDGAELNAR</a> |

Mascot: <http://www.matrixscience.com/>

**Peptide View**MS/MS Fragmentation of **DGLQVDPK**

Found in **AT3G23810.1** in **TAIR\_Arabidopsis**, Symbols: SAHH2 | SAHH2 (S-ADENOSYL-L-HOMOCYSTEINE (SAH) HYDROLASE 2); adenosylhomocysteinase | chr3:8588020-8589678 REVERSE

Match to Query 1445: 870.443890 from(436.229221,2+) index(1299)

Title: Elution from: 17.826 to 17.826 scan no 1759 cid35.00 polarity:+

Data file C7-3\_2.mgf

Click mouse within plot area to zoom in by factor of two about that point

Or,   to  Da

Label all possible matches  Label matches used for scoring

Show Y-axis

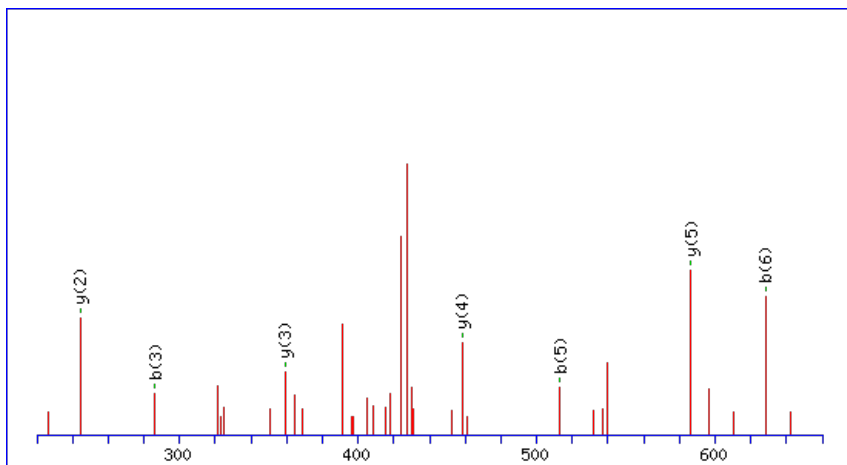

**Monoisotopic mass of neutral peptide Mr(calc):** 870.4447

**Fixed modifications:** Carbamidomethyl (C) (apply to specified residues or termini only)

**Ions Score:** 24 **Expect:** 0.008

**Matches:** 7/74 fragment ions using 14 most intense peaks ([help](#))

| # | b               | b <sup>++</sup> | b*       | b <sup>*++</sup> | b <sup>0</sup> | b <sup>0++</sup> | Seq.     | y               | y <sup>++</sup> | y*       | y <sup>*++</sup> | y <sup>0</sup> | y <sup>0++</sup> | #        |
|---|-----------------|-----------------|----------|------------------|----------------|------------------|----------|-----------------|-----------------|----------|------------------|----------------|------------------|----------|
| 1 | 116.0342        | 58.5207         |          |                  | 98.0237        | 49.5155          | <b>D</b> |                 |                 |          |                  |                |                  | <b>8</b> |
| 2 | 173.0557        | 87.0315         |          |                  | 155.0451       | 78.0262          | <b>G</b> | 756.4250        | 378.7162        | 739.3985 | 370.2029         | 738.4145       | 369.7109         | <b>7</b> |
| 3 | <b>286.1397</b> | 143.5735        |          |                  | 268.1292       | 134.5682         | <b>L</b> | 699.4036        | 350.2054        | 682.3770 | 341.6921         | 681.3930       | 341.2001         | <b>6</b> |
| 4 | 414.1983        | 207.6028        | 397.1718 | 199.0895         | 396.1878       | 198.5975         | <b>Q</b> | <b>586.3195</b> | 293.6634        | 569.2930 | 285.1501         | 568.3089       | 284.6581         | <b>5</b> |
| 5 | <b>513.2667</b> | 257.1370        | 496.2402 | 248.6237         | 495.2562       | 248.1317         | <b>V</b> | <b>458.2609</b> | 229.6341        | 441.2344 | 221.1208         | 440.2504       | 220.6288         | <b>4</b> |
| 6 | <b>628.2937</b> | 314.6505        | 611.2671 | 306.1372         | 610.2831       | 305.6452         | <b>D</b> | <b>359.1925</b> | 180.0999        | 342.1660 | 171.5866         | 341.1819       | 171.0946         | <b>3</b> |
| 7 | 725.3464        | 363.1769        | 708.3199 | 354.6636         | 707.3359       | 354.1716         | <b>P</b> | <b>244.1656</b> | 122.5864        | 227.1390 | 114.0731         |                |                  | <b>2</b> |
| 8 |                 |                 |          |                  |                |                  | <b>K</b> | 147.1128        | 74.0600         | 130.0863 | 65.5468          |                |                  | <b>1</b> |

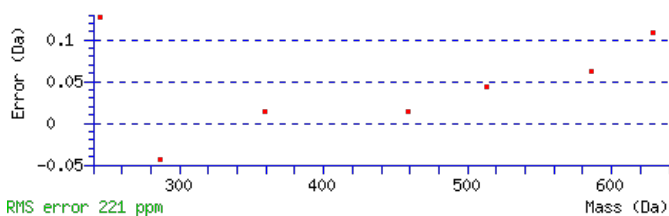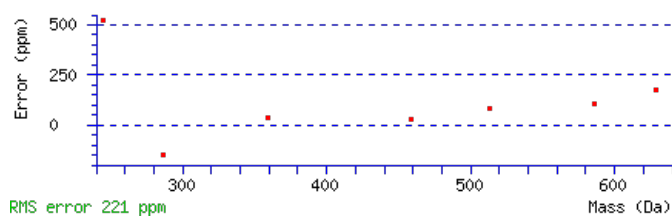

NCBI **BLAST** search of [DGLQVDPK](#)

(Parameters: blastp, nr protein database, expect=20000, no filter, PAM30)

Other BLAST [web gateways](#)

**All matches to this query**

| Score | Mr(calc) | Delta   | Sequence                 |
|-------|----------|---------|--------------------------|
| 24.0  | 870.4447 | -0.0008 | <a href="#">DGLQVDPK</a> |





**Peptide View**MS/MS Fragmentation of **YLLELLK**Found in **AT3G23940.1** in **TAIR\_Arabidopsis**, Symbols: | dehydratase family | chr3:8648787-8652330 FORWARD

Match to Query 1501: 898.523816 from(450.269184,2+) index(7809)

Title: Elution from: 69.539 to 69.539 scan no 10274 cid35.00 polarity:+

Data file C7-1\_3.mgf

Click mouse within plot area to zoom in by factor of two about that point

Or,  to  Da Label all possible matches  Label matches used for scoring Show Y-axis 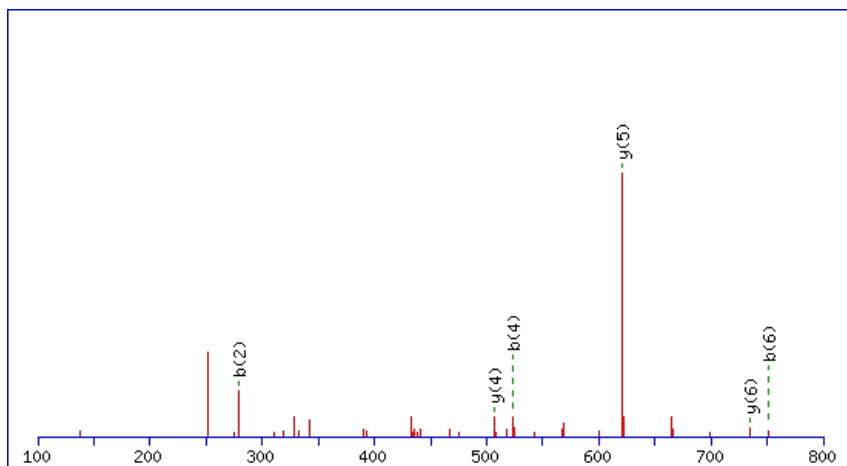Monoisotopic mass of neutral peptide **Mr(calc)**: 898.5240

Fixed modifications: Carbamidomethyl (C) (apply to specified residues or termini only)

Ions Score: 23 **Expect**: 0.02Matches : 6/48 fragment ions using 12 most intense peaks ([help](#))

| # | b               | b <sup>++</sup> | b <sup>0</sup> | b <sup>0++</sup> | Seq. | y               | y <sup>++</sup> | y*       | y <sup>*++</sup> | y <sup>0</sup> | y <sup>0++</sup> | # |
|---|-----------------|-----------------|----------------|------------------|------|-----------------|-----------------|----------|------------------|----------------|------------------|---|
| 1 | 165.0676        | 83.0375         |                |                  | Y    |                 |                 |          |                  |                |                  | 7 |
| 2 | <b>279.1487</b> | 140.0780        |                |                  | L    | <b>735.4709</b> | 368.2391        | 717.4473 | 359.2273         | 717.4603       | 359.2338         | 6 |
| 3 | 393.2298        | 197.1186        |                |                  | L    | <b>621.3898</b> | 311.1985        | 603.3662 | 302.1867         | 603.3792       | 302.1933         | 5 |
| 4 | <b>523.2695</b> | 262.1384        | 505.2589       | 253.1331         | E    | <b>507.3087</b> | 254.1580        | 489.2851 | 245.1462         | 489.2981       | 245.1527         | 4 |
| 5 | 637.3506        | 319.1789        | 619.3400       | 310.1736         | L    | 377.2691        | 189.1382        | 359.2455 | 180.1264         |                |                  | 3 |
| 6 | <b>751.4317</b> | 376.2195        | 733.4211       | 367.2142         | L    | 263.1880        | 132.0976        | 245.1644 | 123.0858         |                |                  | 2 |
| 7 |                 |                 |                |                  | K    | 149.1069        | 75.0571         | 131.0833 | 66.0453          |                |                  | 1 |

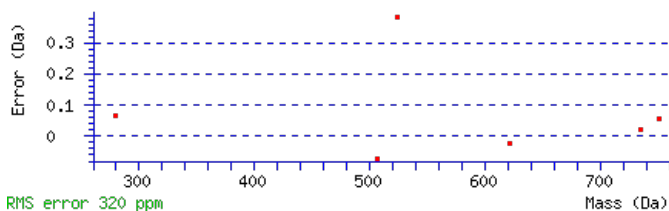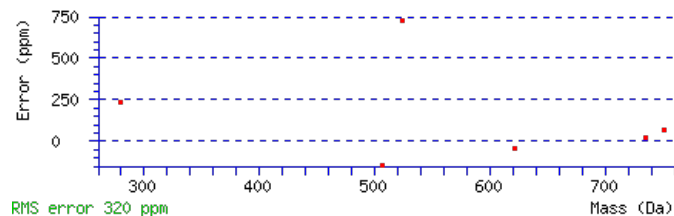NCBI **BLAST** search of **YLLELLK**

(Parameters: blastp, nr protein database, expect=20000, no filter, PAM30)

Other BLAST [web gateways](#)**All matches to this query**

| Score | Mr(calc) | Delta   | Sequence                 |
|-------|----------|---------|--------------------------|
| 23.3  | 898.5240 | -0.0002 | <a href="#">YLLELLK</a>  |
| 22.6  | 898.5244 | -0.0006 | <a href="#">SKIGNLKK</a> |
| 20.0  | 898.5240 | -0.0002 | <a href="#">IYLLIEK</a>  |

# AT3G23940.1

|      |          |         |                          |
|------|----------|---------|--------------------------|
| 19.5 | 898.5244 | -0.0006 | <a href="#">RKTIEK</a>   |
| 15.3 | 898.5240 | -0.0002 | <a href="#">IYLELLK</a>  |
| 14.0 | 898.5244 | -0.0006 | <a href="#">SIINKGKK</a> |
| 9.6  | 898.5244 | -0.0006 | <a href="#">KKPASTKK</a> |
| 8.7  | 898.5244 | -0.0006 | <a href="#">RTLLKEK</a>  |
| 5.5  | 898.5244 | -0.0006 | <a href="#">KPASTKKK</a> |
| 3.6  | 898.5244 | -0.0006 | <a href="#">LGLNKSCK</a> |

**Mascot:** <http://www.matrixscience.com/>

## Peptide View

### MS/MS Fragmentation of **DRVTDALNATK**

Found in **AT3G23990.1** in **TAIR\_Arabidopsis**, Symbols: HSP60 | HSP60 (Heat shock protein 60); ATP binding / protein binding / unfolded protein binding | chr3:8669020-8672285 FORWARD

Match to Query 3842: 1202.623232 from(602.318892,2+) index(2644)

Title: Elution from: 29.999 to 29.999 scan no 3428 cid35.00 polarity:+

Data file D1d-2\_1.mgf

Click mouse within plot area to zoom in by factor of two about that point

Or,  to  Da

Label all possible matches  Label matches used for scoring

Show Y-axis

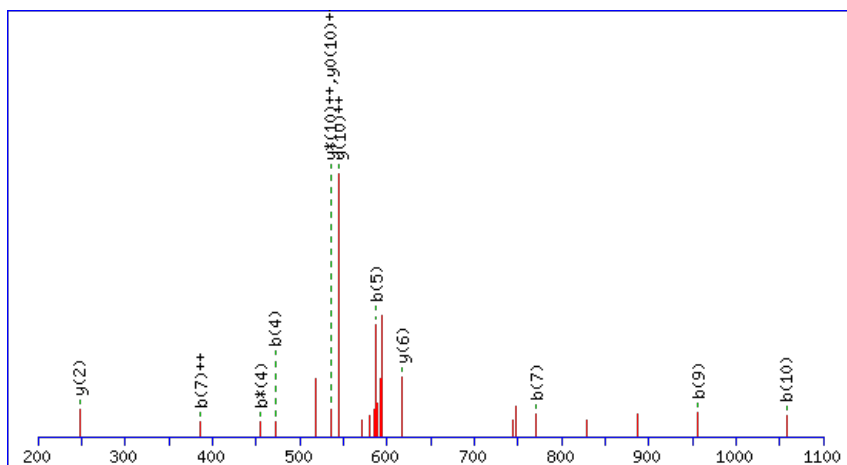

**Monoisotopic mass of neutral peptide Mr(calc):** 1202.6255

**Fixed modifications:** Carbamidomethyl (C) (apply to specified residues or termini only)

**Ions Score:** 29 **Expect:** 0.0059

**Matches:** 12/116 fragment ions using 21 most intense peaks ([help](#))

| #  | b         | b <sup>++</sup> | b*        | b <sup>*++</sup> | b <sup>0</sup> | b <sup>0++</sup> | Seq. | y         | y <sup>++</sup> | y*        | y <sup>*++</sup> | y <sup>0</sup> | y <sup>0++</sup> | #  |
|----|-----------|-----------------|-----------|------------------|----------------|------------------|------|-----------|-----------------|-----------|------------------|----------------|------------------|----|
| 1  | 116.0342  | 58.5207         |           |                  | 98.0237        | 49.5155          | D    |           |                 |           |                  |                |                  | 11 |
| 2  | 272.1353  | 136.5713        | 255.1088  | 128.0580         | 254.1248       | 127.5660         | R    | 1088.6058 | 544.8066        | 1071.5793 | 536.2933         | 1070.5953      | 535.8013         | 10 |
| 3  | 371.2037  | 186.1055        | 354.1772  | 177.5922         | 353.1932       | 177.1002         | V    | 932.5047  | 466.7560        | 915.4782  | 458.2427         | 914.4942       | 457.7507         | 9  |
| 4  | 472.2514  | 236.6293        | 455.2249  | 228.1161         | 454.2409       | 227.6241         | T    | 833.4363  | 417.2218        | 816.4098  | 408.7085         | 815.4258       | 408.2165         | 8  |
| 5  | 587.2784  | 294.1428        | 570.2518  | 285.6295         | 569.2678       | 285.1375         | D    | 732.3886  | 366.6980        | 715.3621  | 358.1847         | 714.3781       | 357.6927         | 7  |
| 6  | 658.3155  | 329.6614        | 641.2889  | 321.1481         | 640.3049       | 320.6561         | A    | 617.3617  | 309.1845        | 600.3352  | 300.6712         | 599.3511       | 300.1792         | 6  |
| 7  | 771.3995  | 386.2034        | 754.3730  | 377.6901         | 753.3890       | 377.1981         | L    | 546.3246  | 273.6659        | 529.2980  | 265.1527         | 528.3140       | 264.6606         | 5  |
| 8  | 885.4425  | 443.2249        | 868.4159  | 434.7116         | 867.4319       | 434.2196         | N    | 433.2405  | 217.1239        | 416.2140  | 208.6106         | 415.2300       | 208.1186         | 4  |
| 9  | 956.4796  | 478.7434        | 939.4530  | 470.2302         | 938.4690       | 469.7381         | A    | 319.1976  | 160.1024        | 302.1710  | 151.5892         | 301.1870       | 151.0972         | 3  |
| 10 | 1057.5273 | 529.2673        | 1040.5007 | 520.7540         | 1039.5167      | 520.2620         | T    | 248.1605  | 124.5839        | 231.1339  | 116.0706         | 230.1499       | 115.5786         | 2  |
| 11 |           |                 |           |                  |                |                  | K    | 147.1128  | 74.0600         | 130.0863  | 65.5468          |                |                  | 1  |

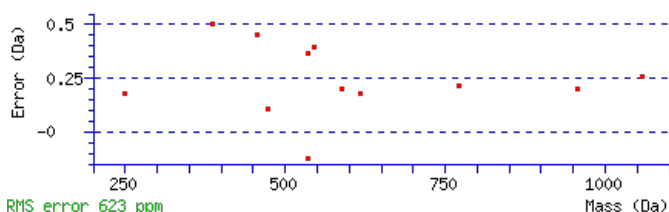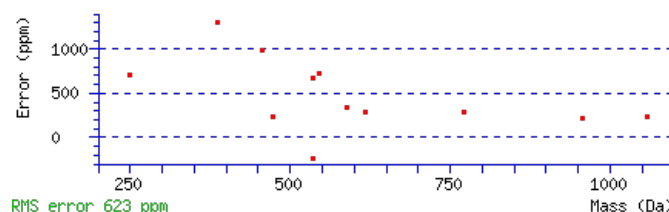

NCBI **BLAST** search of **DRVTDALNATK**

(Parameters: blastp, nr protein database, expect=20000, no filter, PAM30)

Other BLAST [web gateways](#)

All matches to this query

## AT3G23990.1

| Score | Mr(calc)  | Delta   | Sequence                    |
|-------|-----------|---------|-----------------------------|
| 29.4  | 1202.6255 | -0.0023 | <a href="#">DRVTDALNATK</a> |
| 5.4   | 1202.6255 | -0.0023 | <a href="#">EQDTLVROSK</a>  |
| 2.7   | 1202.6255 | -0.0022 | <a href="#">QESAERKVEK</a>  |
| 2.2   | 1202.6255 | -0.0022 | <a href="#">LEESKEOGKR</a>  |
| 1.5   | 1202.6196 | 0.0036  | <a href="#">LRWPDFVDR</a>   |
| 1.3   | 1202.6255 | -0.0022 | <a href="#">LAGESESNLRK</a> |
| 1.2   | 1202.6255 | -0.0023 | <a href="#">GLKEASTQNQK</a> |
| 0.7   | 1202.6255 | -0.0023 | <a href="#">NSSSDQVVVLR</a> |
| 0.5   | 1202.6255 | -0.0023 | <a href="#">IVQSSDQKNGK</a> |
| 0.4   | 1202.6264 | -0.0031 | <a href="#">GMNLRPQMK</a>   |

Mascot: <http://www.matrixscience.com/>

## Peptide View

### MS/MS Fragmentation of **VVGPNEVEVR**

Found in **AT3G24170.1** in **TAIR\_Arabidopsis**, Symbols: ATGR1 | ATGR1 (GLUTATHIONE-DISULFIDE REDUCTASE); glutathione-disulfide reductase | chr3:8729769-8734122 REVERSE

Match to Query 3475: 1096.586030 from(549.300291,2+) index(2285)

Title: Elution from: 25.793 to 25.793 scan no 2911 cid35.00 polarity:+

Data file 0-2\_1.mgf

Click mouse within plot area to zoom in by factor of two about that point

Or,   to  Da

Label all possible matches  Label matches used for scoring

Show Y-axis

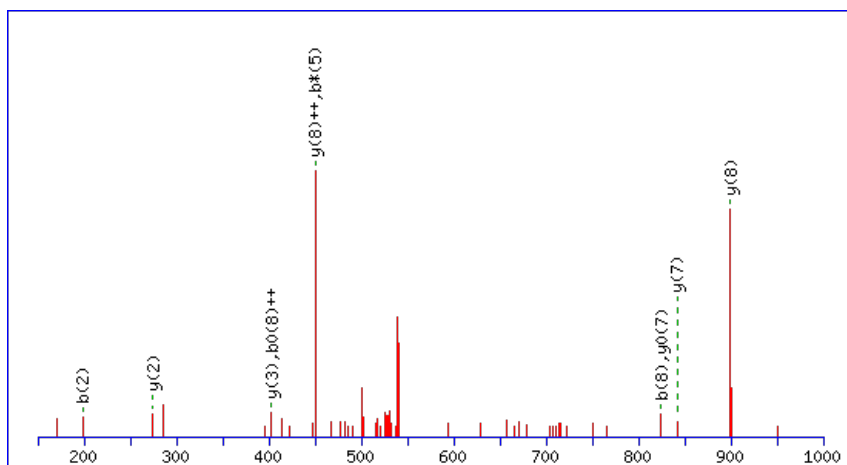

Monoisotopic mass of neutral peptide  $M_r(\text{calc})$ : 1096.5877

Fixed modifications: Carbamidomethyl (C) (apply to specified residues or termini only)

Ions Score: 22 Expect: 0.015

Matches : 10/86 fragment ions using 16 most intense peaks ([help](#))

| #  | b               | b <sup>++</sup> | b*              | b <sup>*++</sup> | b <sup>0</sup> | b <sup>0++</sup> | Seq. | y               | y <sup>++</sup> | y*       | y <sup>*++</sup> | y <sup>0</sup>  | y <sup>0++</sup> | #  |
|----|-----------------|-----------------|-----------------|------------------|----------------|------------------|------|-----------------|-----------------|----------|------------------|-----------------|------------------|----|
| 1  | 100.0757        | 50.5415         |                 |                  |                |                  | V    |                 |                 |          |                  |                 |                  | 10 |
| 2  | <b>199.1441</b> | 100.0757        |                 |                  |                |                  | V    | 998.5265        | 499.7669        | 981.5000 | 491.2536         | 980.5160        | 490.7616         | 9  |
| 3  | 256.1656        | 128.5864        |                 |                  |                |                  | G    | <b>899.4581</b> | <b>450.2327</b> | 882.4316 | 441.7194         | 881.4476        | 441.2274         | 8  |
| 4  | 353.2183        | 177.1128        |                 |                  |                |                  | P    | <b>842.4367</b> | 421.7220        | 825.4101 | 413.2087         | <b>824.4261</b> | 412.7167         | 7  |
| 5  | 467.2613        | 234.1343        | <b>450.2347</b> | 225.6210         |                |                  | N    | 745.3839        | 373.1956        | 728.3573 | 364.6823         | 727.3733        | 364.1903         | 6  |
| 6  | 596.3039        | 298.6556        | 579.2773        | 290.1423         | 578.2933       | 289.6503         | E    | 631.3410        | 316.1741        | 614.3144 | 307.6608         | 613.3304        | 307.1688         | 5  |
| 7  | 695.3723        | 348.1898        | 678.3457        | 339.6765         | 677.3617       | 339.1845         | V    | 502.2984        | 251.6528        | 485.2718 | 243.1395         | 484.2878        | 242.6475         | 4  |
| 8  | <b>824.4149</b> | 412.7111        | 807.3883        | 404.1978         | 806.4043       | <b>403.7058</b>  | E    | <b>403.2300</b> | 202.1186        | 386.2034 | 193.6053         | 385.2194        | 193.1133         | 3  |
| 9  | 923.4833        | 462.2453        | 906.4567        | 453.7320         | 905.4727       | 453.2400         | V    | <b>274.1874</b> | 137.5973        | 257.1608 | 129.0840         |                 |                  | 2  |
| 10 |                 |                 |                 |                  |                |                  | R    | 175.1190        | 88.0631         | 158.0924 | 79.5498          |                 |                  | 1  |

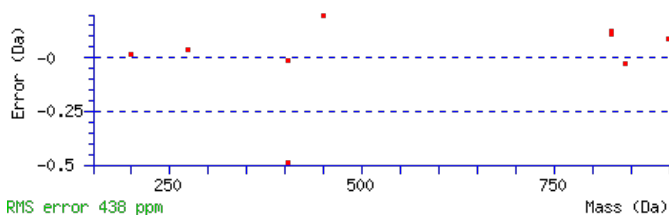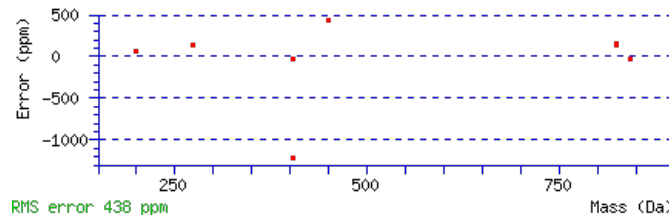

### NCBI BLAST search of **VVGPNEVEVR**

(Parameters: blastp, nr protein database, expect=20000, no filter, PAM30)

Other BLAST [web gateways](#)

All matches to this query

AT3G24170.1

| Score | Mr(calc)  | Delta   | Sequence                    |
|-------|-----------|---------|-----------------------------|
| 21.9  | 1096.5877 | -0.0016 | <a href="#">VYGPNEVEVR</a>  |
| 5.2   | 1096.5877 | -0.0016 | <a href="#">LGLGDHSTAVK</a> |

Mascot: <http://www.matrixscience.com/>

**Peptide View**MS/MS Fragmentation of **DLLLNPPAYDIALK**

Found in **AT3G24320.1** in **TAIR\_Arabidopsis**, Symbols: MSH1, CHM1, ATMSH1, CHM | ATMSH1/CHM/CHM1/MSH1 (MUTL PROTEIN HOMOLOG 1); ATP binding / damaged DNA binding | chr3:8823236-8829578 REVERSE

Match to Query 6927: 1570.822820 from(393.712981,4+) index(1949)

Title: Elution from: 23.288 to 23.288 scan no 2531 cid35.00 polarity:+

Data file 0-2\_2.mgf

Click mouse within plot area to zoom in by factor of two about that point

Or,   to  Da

Label all possible matches  Label matches used for scoring

Show Y-axis

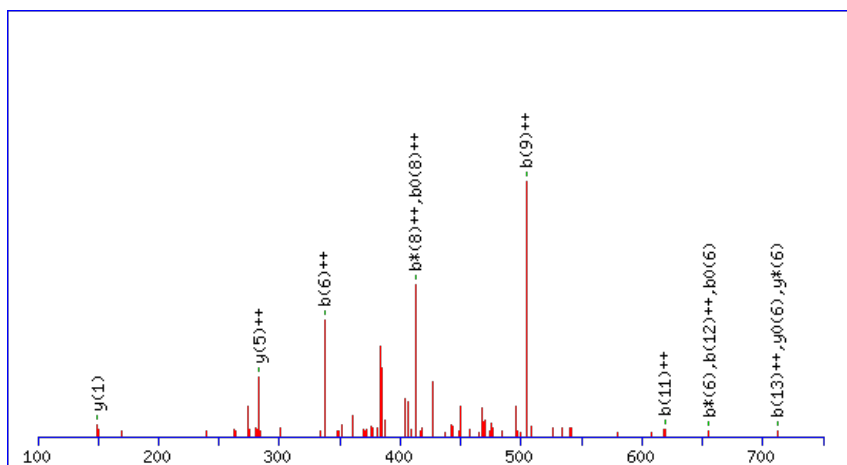

Monoisotopic mass of neutral peptide  $M_r(\text{calc})$ : 1570.8183

Fixed modifications: Carbamidomethyl (C) (apply to specified residues or termini only)

Ions Score: 25 Expect: 0.012

Matches : 13/140 fragment ions using 12 most intense peaks ([help](#))

| #  | b         | b <sup>++</sup> | b*              | b <sup>*++</sup> | b <sup>0</sup>  | b <sup>0++</sup> | Seq. | y               | y <sup>++</sup> | y*              | y <sup>*++</sup> | y <sup>0</sup>  | y <sup>0++</sup> | #  |
|----|-----------|-----------------|-----------------|------------------|-----------------|------------------|------|-----------------|-----------------|-----------------|------------------|-----------------|------------------|----|
| 1  | 117.0313  | 59.0193         |                 |                  | 99.0207         | 50.0140          | D    |                 |                 |                 |                  |                 |                  | 14 |
| 2  | 231.1124  | 116.0598        |                 |                  | 213.1018        | 107.0545         | L    | 1455.8016       | 728.4044        | 1437.7780       | 719.3926         | 1437.7910       | 719.3992         | 13 |
| 3  | 345.1935  | 173.1004        |                 |                  | 327.1829        | 164.0951         | L    | 1341.7205       | 671.3639        | 1323.6969       | 662.3521         | 1323.7099       | 662.3586         | 12 |
| 4  | 459.2746  | 230.1409        |                 |                  | 441.2640        | 221.1356         | L    | 1227.6394       | 614.3233        | 1209.6158       | 605.3115         | 1209.6288       | 605.3181         | 11 |
| 5  | 575.3115  | 288.1594        | 557.2880        | 279.1476         | 557.3010        | 279.1541         | N    | 1113.5583       | 557.2828        | 1095.5347       | 548.2710         | 1095.5477       | 548.2775         | 10 |
| 6  | 673.3613  | <b>337.1843</b> | <b>655.3378</b> | 328.1725         | <b>655.3508</b> | 328.1790         | P    | 997.5213        | 499.2643        | 979.4977        | 490.2525         | 979.5107        | 490.2590         | 9  |
| 7  | 771.4111  | 386.2092        | 753.3876        | 377.1974         | 753.4006        | 377.2039         | P    | 899.4715        | 450.2394        | 881.4479        | 441.2276         | 881.4609        | 441.2341         | 8  |
| 8  | 843.4453  | 422.2263        | 825.4217        | <b>413.2145</b>  | 825.4347        | <b>413.2210</b>  | A    | 801.4217        | 401.2145        | 783.3981        | 392.2027         | 783.4111        | 392.2092         | 7  |
| 9  | 1007.5057 | <b>504.2565</b> | 989.4821        | 495.2447         | 989.4951        | 495.2512         | Y    | 729.3876        | 365.1974        | <b>711.3640</b> | 356.1856         | <b>711.3770</b> | 356.1921         | 6  |
| 10 | 1123.5296 | 562.2685        | 1105.5061       | 553.2567         | 1105.5191       | 553.2632         | D    | 565.3272        | <b>283.1672</b> | 547.3036        | 274.1554         | 547.3166        | 274.1620         | 5  |
| 11 | 1237.6107 | <b>619.3090</b> | 1219.5872       | 610.2972         | 1219.6002       | 610.3037         | I    | 449.3032        | 225.1552        | 431.2796        | 216.1435         |                 |                  | 4  |
| 12 | 1309.6449 | <b>655.3261</b> | 1291.6213       | 646.3143         | 1291.6343       | 646.3208         | A    | 335.2221        | 168.1147        | 317.1985        | 159.1029         |                 |                  | 3  |
| 13 | 1423.7260 | <b>712.3666</b> | 1405.7024       | 703.3548         | 1405.7154       | 703.3613         | L    | 263.1880        | 132.0976        | 245.1644        | 123.0858         |                 |                  | 2  |
| 14 |           |                 |                 |                  |                 |                  | K    | <b>149.1069</b> | 75.0571         | 131.0833        | 66.0453          |                 |                  | 1  |

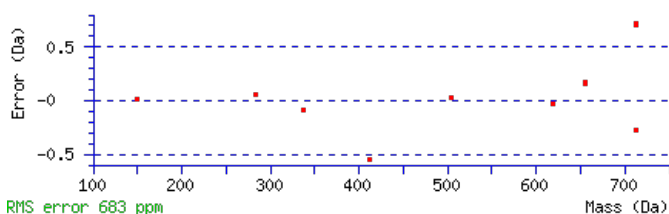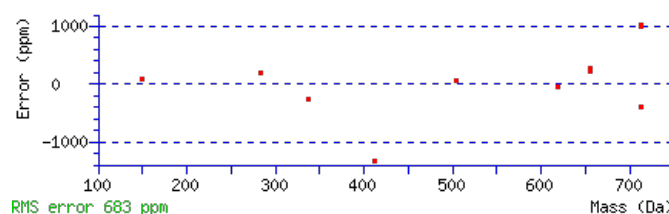

NCBI BLAST search of [DLLLNPPAYDIALK](#)



## AT3G24320.1

(Parameters: blastp, nr protein database, expect=20000, no filter, PAM30)

Other BLAST [web gateways](#)

### All matches to this query

| Score | Mr(calc)  | Delta   | Sequence                       |
|-------|-----------|---------|--------------------------------|
| 25.0  | 1570.8183 | 0.0045  | <a href="#">DLLNPPAYDIALK</a>  |
| 8.7   | 1570.8237 | -0.0008 | <a href="#">KLPIHHIPGPEGVR</a> |
| 3.0   | 1570.8187 | 0.0041  | <a href="#">VSRTHDPILSLVSK</a> |
| 2.1   | 1570.8188 | 0.0040  | <a href="#">HLKNLSLNPSSTLK</a> |
| 1.8   | 1570.8210 | 0.0018  | <a href="#">LKNNGPSPPPPPLK</a> |
| 1.1   | 1570.8187 | 0.0041  | <a href="#">LQLGSKLSDVIHMK</a> |
| 0.8   | 1570.8266 | -0.0038 | <a href="#">LYIKELVMRNFK</a>   |

Mascot: <http://www.matrixscience.com/>


**Mascot Search Results**
**Peptide View**MS/MS Fragmentation of **DLELQKKQIVDR**Found in **AT3G24490.1** in **TAIR\_Arabidopsis**, Symbols: | transcription factor | chr3:8911029-8912030 FORWARD

Match to Query 5838: 1502.776928 from(752.395740,2+) index(8492)

Title: Elution from: 79.859 to 79.859 scan no 11570 cid35.00 polarity:+

Data file D1d-1-2.mgf

Click mouse within plot area to zoom in by factor of two about that point

Or,   to  Da Label all possible matches  Label matches used for scoring Show Y-axis 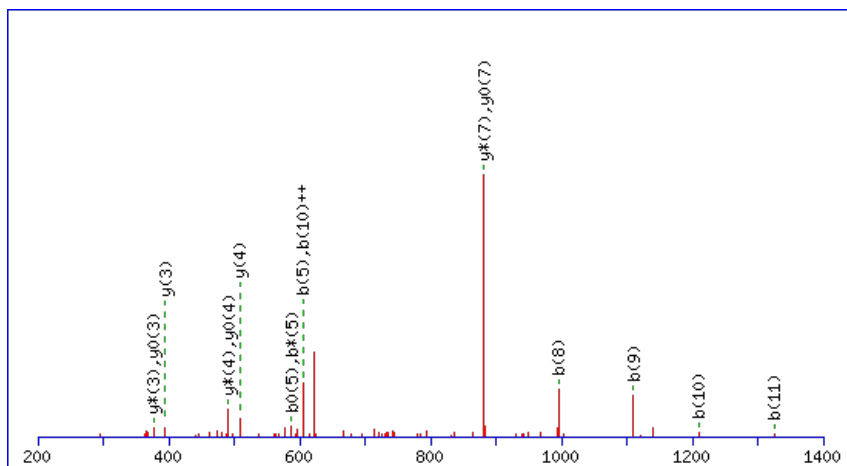Monoisotopic mass of neutral peptide  $M_r(\text{calc})$ : 1502.7795

Fixed modifications: Carbamidomethyl (C) (apply to specified residues or termini only)

Ions Score: 33 Expect: 0.0019

Matches : 16/122 fragment ions using 22 most intense peaks ([help](#))

| #  | b                | b <sup>++</sup> | b*              | b <sup>*++</sup> | b <sup>0</sup>  | b <sup>0++</sup> | Seq. | y               | y <sup>++</sup> | y*              | y <sup>*++</sup> | y <sup>0</sup>  | y <sup>0++</sup> | #  |
|----|------------------|-----------------|-----------------|------------------|-----------------|------------------|------|-----------------|-----------------|-----------------|------------------|-----------------|------------------|----|
| 1  | 117.0313         | 59.0193         |                 |                  | 99.0207         | 50.0140          | D    |                 |                 |                 |                  |                 |                  | 12 |
| 2  | 231.1124         | 116.0598        |                 |                  | 213.1018        | 107.0545         | L    | 1387.7628       | 694.3850        | 1369.7392       | 685.3732         | 1369.7522       | 685.3798         | 11 |
| 3  | 361.1520         | 181.0796        |                 |                  | 343.1414        | 172.0743         | E    | 1273.6817       | 637.3445        | 1255.6581       | 628.3327         | 1255.6711       | 628.3392         | 10 |
| 4  | 475.2331         | 238.1202        |                 |                  | 457.2225        | 229.1149         | L    | 1143.6421       | 572.3247        | 1125.6185       | 563.3129         | 1125.6315       | 563.3194         | 9  |
| 5  | <b>605.2857</b>  | 303.1465        | <b>587.2621</b> | 294.1347         | <b>587.2752</b> | 294.1412         | Q    | 1029.5610       | 515.2841        | 1011.5374       | 506.2723         | 1011.5504       | 506.2788         | 8  |
| 6  | 735.3748         | 368.1910        | 717.3512        | 359.1792         | 717.3642        | 359.1857         | K    | 899.5083        | 450.2578        | <b>881.4847</b> | 441.2460         | <b>881.4978</b> | 441.2525         | 7  |
| 7  | 865.4638         | 433.2355        | 847.4402        | 424.2237         | 847.4532        | 424.2303         | K    | 769.4193        | 385.2133        | 751.3957        | 376.2015         | 751.4087        | 376.2080         | 6  |
| 8  | <b>995.5164</b>  | 498.2619        | 977.4929        | 489.2501         | 977.5059        | 489.2566         | Q    | 639.3303        | 320.1688        | 621.3067        | 311.1570         | 621.3197        | 311.1635         | 5  |
| 9  | <b>1109.5975</b> | 555.3024        | 1091.5740       | 546.2906         | 1091.5870       | 546.2971         | I    | <b>509.2776</b> | 255.1424        | <b>491.2540</b> | 246.1307         | <b>491.2671</b> | 246.1372         | 4  |
| 10 | <b>1209.6630</b> | <b>605.3351</b> | 1191.6394       | 596.3233         | 1191.6524       | 596.3298         | V    | <b>395.1965</b> | 198.1019        | <b>377.1729</b> | 189.0901         | <b>377.1860</b> | 189.0966         | 3  |
| 11 | <b>1325.6870</b> | 663.3471        | 1307.6634       | 654.3353         | 1307.6764       | 654.3418         | D    | 295.1311        | 148.0692        | 277.1075        | 139.0574         | 277.1205        | 139.0639         | 2  |
| 12 |                  |                 |                 |                  |                 |                  | R    | 179.1071        | 90.0572         | 161.0835        | 81.0454          |                 |                  | 1  |

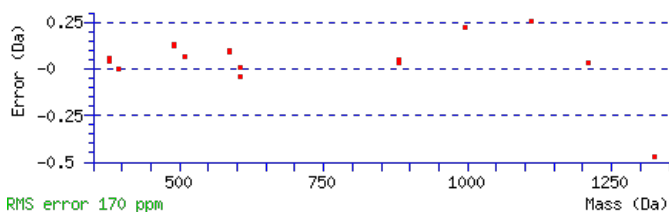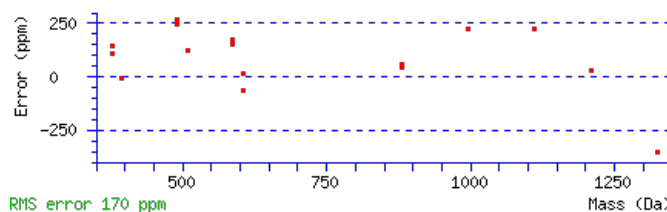NCBI BLAST search of **DLELQKKQIVDR**

(Parameters: blastp, nr protein database, expect=20000, no filter, PAM30)

Other BLAST [web gateways](#)**All matches to this query**

AT3G24490.1

| Score | Mr(calc)  | Delta   | Sequence                       |
|-------|-----------|---------|--------------------------------|
| 33.3  | 1502.7795 | -0.0026 | <a href="#">DLELQKKQIVDR</a>   |
| 5.9   | 1502.7795 | -0.0026 | <a href="#">VLGPKSNVTSLNQK</a> |

Mascot: <http://www.matrixscience.com/>

**Peptide View**MS/MS Fragmentation of **FADLIEENIEELAK**

Found in **AT3G24503.1** in **TAIR\_Arabidopsis**, Symbols: ALDH1A, REF1, ALDH2C4 | ALDH2C4 (REDUCED EPIDERMAL FLUORESCENCE1); 3-chloroallyl aldehyde dehydrogenase/ aldehyde dehydrogenase (NAD) | chr3:8919739-8923036 REVERSE

Match to Query 7321: 1648.780570 from(825.397561,2+) index(9800)

Title: Elution from: 92.662 to 92.662 scan no 13946 cid35.00 polarity:+

Data file D6h-2\_3.mgf

Click mouse within plot area to zoom in by factor of two about that point

Or,   to  Da

Label all possible matches  Label matches used for scoring

Show Y-axis

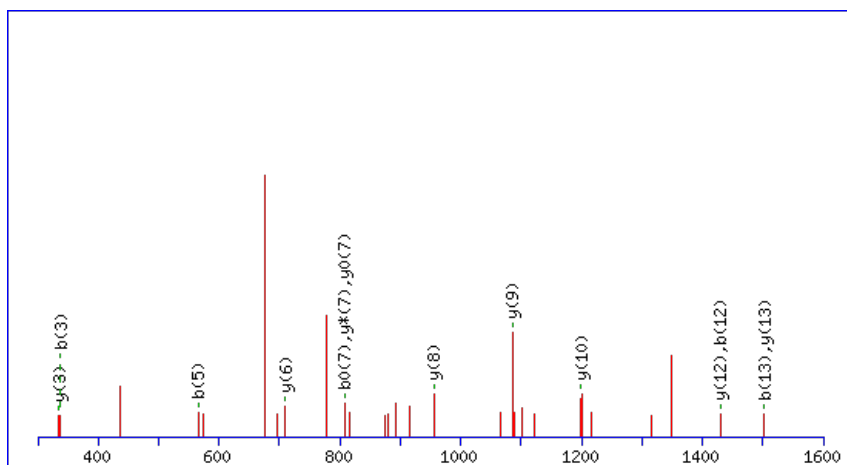

Monoisotopic mass of neutral peptide  $M_r(\text{calc})$ : 1648.7772

Fixed modifications: Carbamidomethyl (C) (apply to specified residues or termini only)

Ions Score: 35 Expect: 0.0028

Matches : 14/132 fragment ions using 21 most intense peaks ([help](#))

| #  | b                | b <sup>++</sup> | b*        | b <sup>*++</sup> | b <sup>0</sup>  | b <sup>0++</sup> | Seq. | y                | y <sup>++</sup> | y*              | y <sup>*++</sup> | y <sup>0</sup>  | y <sup>0++</sup> | #  |
|----|------------------|-----------------|-----------|------------------|-----------------|------------------|------|------------------|-----------------|-----------------|------------------|-----------------|------------------|----|
| 1  | 149.0727         | 75.0400         |           |                  |                 |                  | F    |                  |                 |                 |                  |                 |                  | 14 |
| 2  | 221.1069         | 111.0571        |           |                  |                 |                  | A    | <b>1501.7191</b> | 751.3632        | 1483.6955       | 742.3514         | 1483.7085       | 742.3579         | 13 |
| 3  | <b>337.1309</b>  | 169.0691        |           |                  | 319.1203        | 160.0638         | D    | <b>1429.6849</b> | 715.3461        | 1411.6613       | 706.3343         | 1411.6743       | 706.3408         | 12 |
| 4  | 451.2120         | 226.1096        |           |                  | 433.2014        | 217.1043         | L    | 1313.6609        | 657.3341        | 1295.6373       | 648.3223         | 1295.6504       | 648.3288         | 11 |
| 5  | <b>565.2930</b>  | 283.1502        |           |                  | 547.2825        | 274.1449         | I    | <b>1199.5798</b> | 600.2936        | 1181.5562       | 591.2818         | 1181.5693       | 591.2883         | 10 |
| 6  | 695.3327         | 348.1700        |           |                  | 677.3221        | 339.1647         | E    | <b>1085.4987</b> | 543.2530        | 1067.4751       | 534.2412         | 1067.4882       | 534.2477         | 9  |
| 7  | 825.3723         | 413.1898        |           |                  | <b>807.3617</b> | 404.1845         | E    | <b>955.4591</b>  | 478.2332        | 937.4355        | 469.2214         | 937.4485        | 469.2279         | 8  |
| 8  | 941.4093         | 471.2083        | 923.3857  | 462.1965         | 923.3987        | 462.2030         | N    | 825.4195         | 413.2134        | <b>807.3959</b> | 404.2016         | <b>807.4089</b> | 404.2081         | 7  |
| 9  | 1055.4904        | 528.2488        | 1037.4668 | 519.2370         | 1037.4798       | 519.2436         | I    | <b>709.3825</b>  | 355.1949        | 691.3589        | 346.1831         | 691.3719        | 346.1896         | 6  |
| 10 | 1185.5300        | 593.2687        | 1167.5064 | 584.2569         | 1167.5195       | 584.2634         | E    | 595.3014         | 298.1543        | 577.2778        | 289.1425         | 577.2908        | 289.1490         | 5  |
| 11 | 1315.5697        | 658.2885        | 1297.5461 | 649.2767         | 1297.5591       | 649.2832         | E    | 465.2618         | 233.1345        | 447.2382        | 224.1227         | 447.2512        | 224.1292         | 4  |
| 12 | <b>1429.6508</b> | 715.3290        | 1411.6272 | 706.3172         | 1411.6402       | 706.3237         | L    | <b>335.2221</b>  | 168.1147        | 317.1985        | 159.1029         |                 |                  | 3  |
| 13 | <b>1501.6849</b> | 751.3461        | 1483.6613 | 742.3343         | 1483.6743       | 742.3408         | A    | 221.1410         | 111.0741        | 203.1174        | 102.0624         |                 |                  | 2  |
| 14 |                  |                 |           |                  |                 |                  | K    | 149.1069         | 75.0571         | 131.0833        | 66.0453          |                 |                  | 1  |

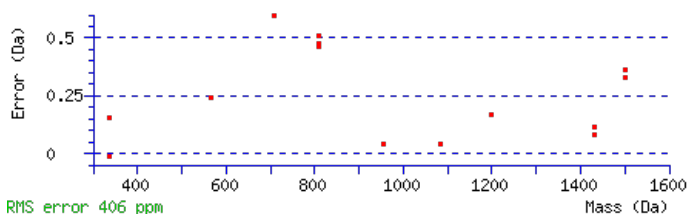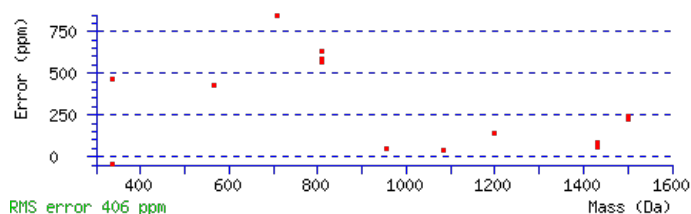

NCBI BLAST search of [FADLIEENIEELAK](#)

## AT3G24503.1

(Parameters: blastp, nr protein database, expect=20000, no filter, PAM30)

Other BLAST [web gateways](#)

### All matches to this query

| Score | Mr(calc)  | Delta  | Sequence                       |
|-------|-----------|--------|--------------------------------|
| 34.5  | 1648.7772 | 0.0033 | <a href="#">FADLIEENIEELAK</a> |
| 3.3   | 1648.7799 | 0.0007 | <a href="#">DLQDPVTDPIAYRK</a> |

Mascot: <http://www.matrixscience.com/>

**Peptide View**MS/MS Fragmentation of **CEEICLSGGLVR**Found in **AT3G24830.1** in **TAIR\_Arabidopsis**, Symbols: | 60S ribosomal protein L13A (RPL13aB) | chr3:9064620-9065878 FORWARD

Match to Query 5761: 1391.652010 from(696.833281,2+) index(6015)

Title: Elution from: 52.732 to 52.732 scan no 7522 cid35.00 polarity:+

Data file D12h-1\_1.mgf

Click mouse within plot area to zoom in by factor of two about that point

Or,   to  Da Label all possible matches  Label matches used for scoring Show Y-axis 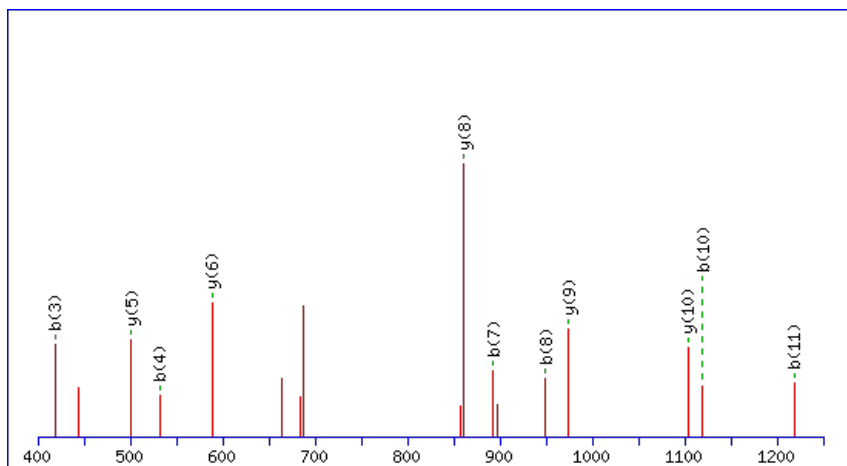Monoisotopic mass of neutral peptide  $M_r(\text{calc})$ : 1391.6537

Fixed modifications: Carbamidomethyl (C) (apply to specified residues or termini only)

Ions Score: 64 Expect: 9.5e-007

Matches : 11/98 fragment ions using 13 most intense peaks ([help](#))

| #  | b                | b <sup>++</sup> | b <sup>0</sup> | b <sup>0++</sup> | Seq. | y                | y <sup>++</sup> | y*        | y <sup>*++</sup> | y <sup>0</sup> | y <sup>0++</sup> | #  |
|----|------------------|-----------------|----------------|------------------|------|------------------|-----------------|-----------|------------------|----------------|------------------|----|
| 1  | 161.0379         | 81.0226         |                |                  | C    |                  |                 |           |                  |                |                  | 12 |
| 2  | 290.0805         | 145.5439        | 272.0700       | 136.5386         | E    | 1232.6303        | 616.8188        | 1215.6038 | 608.3055         | 1214.6198      | 607.8135         | 11 |
| 3  | <b>419.1231</b>  | 210.0652        | 401.1125       | 201.0599         | E    | <b>1103.5878</b> | 552.2975        | 1086.5612 | 543.7842         | 1085.5772      | 543.2922         | 10 |
| 4  | <b>532.2072</b>  | 266.6072        | 514.1966       | 257.6019         | I    | <b>974.5452</b>  | 487.7762        | 957.5186  | 479.2629         | 956.5346       | 478.7709         | 9  |
| 5  | 692.2378         | 346.6226        | 674.2273       | 337.6173         | C    | <b>861.4611</b>  | 431.2342        | 844.4346  | 422.7209         | 843.4505       | 422.2289         | 8  |
| 6  | 805.3219         | 403.1646        | 787.3113       | 394.1593         | L    | 701.4305         | 351.2189        | 684.4039  | 342.7056         | 683.4199       | 342.2136         | 7  |
| 7  | <b>892.3539</b>  | 446.6806        | 874.3434       | 437.6753         | S    | <b>588.3464</b>  | 294.6768        | 571.3198  | 286.1636         | 570.3358       | 285.6715         | 6  |
| 8  | <b>949.3754</b>  | 475.1913        | 931.3648       | 466.1860         | G    | <b>501.3144</b>  | 251.1608        | 484.2878  | 242.6475         |                |                  | 5  |
| 9  | 1006.3968        | 503.7021        | 988.3863       | 494.6968         | G    | 444.2929         | 222.6501        | 427.2663  | 214.1368         |                |                  | 4  |
| 10 | <b>1119.4809</b> | 560.2441        | 1101.4703      | 551.2388         | L    | 387.2714         | 194.1394        | 370.2449  | 185.6261         |                |                  | 3  |
| 11 | <b>1218.5493</b> | 609.7783        | 1200.5388      | 600.7730         | V    | 274.1874         | 137.5973        | 257.1608  | 129.0840         |                |                  | 2  |
| 12 |                  |                 |                |                  | R    | 175.1190         | 88.0631         | 158.0924  | 79.5498          |                |                  | 1  |

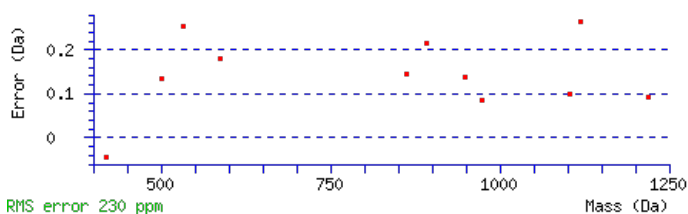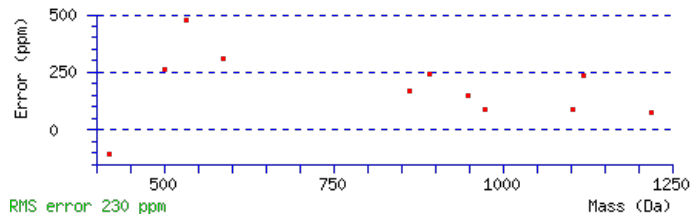NCBI BLAST search of [CEEICLSGGLVR](#)

(Parameters: blastp, nr protein database, expect=20000, no filter, PAM30)

Other BLAST [web gateways](#)**All matches to this query**

## AT3G24830.1

| Score | Mr(calc)  | Delta   | Sequence                      |
|-------|-----------|---------|-------------------------------|
| 64.5  | 1391.6537 | -0.0017 | <a href="#">CEEICLSGGLVR</a>  |
| 11.0  | 1391.6503 | 0.0017  | <a href="#">FSPSNSPSSVPMR</a> |
| 4.7   | 1391.6503 | 0.0017  | <a href="#">TDWEGEAVKAMR</a>  |
| 3.0   | 1391.6528 | -0.0008 | <a href="#">VKSESNEDESIR</a>  |
| 2.1   | 1391.6542 | -0.0022 | <a href="#">ISGSNERWSNSR</a>  |
| 0.4   | 1391.6503 | 0.0017  | <a href="#">AVAEAMEWGVASR</a> |
| 0.2   | 1391.6503 | 0.0017  | <a href="#">TLMVAADWADQR</a>  |

Mascot: <http://www.matrixscience.com/>

**Peptide View**MS/MS Fragmentation of **LTDGTVFDSSFER**

Found in **AT3G25220.1** in **TAIR Arabidopsis**, Symbols: FKBP15-1 | FKBP15-1 (FK506-binding protein 15 kD-1); FK506 binding / peptidyl-prolyl cis-trans isomerase | chr3:9183928-9185700 FORWARD

Match to Query 5998: 1472.678426 from(737.346489,2+) index(5911)

Title: Elution from: 52.477 to 52.477 scan no 7547 cid35.00 polarity:+

Data file 0-1\_3.mgf

Click mouse within plot area to zoom in by factor of two about that point

Or,  to  Da

Label all possible matches  Label matches used for scoring

Show Y-axis

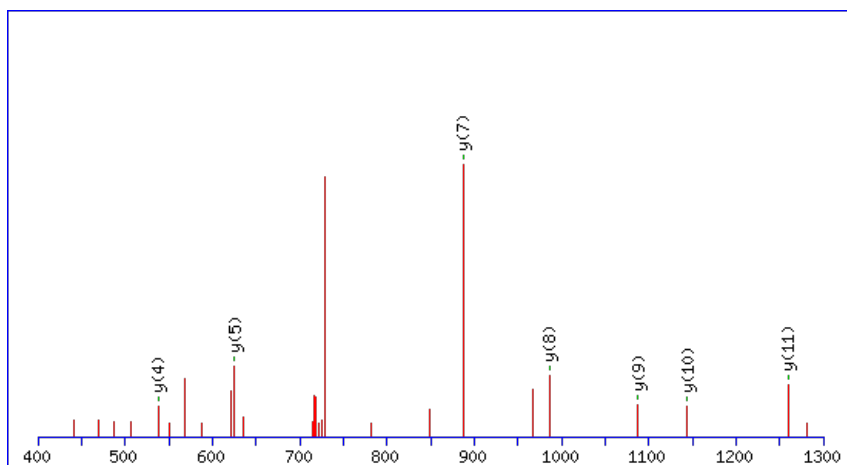

**Monoisotopic mass of neutral peptide Mr(calc):** 1472.6784

**Fixed modifications:** Carbamidomethyl (C) (apply to specified residues or termini only)

**Ions Score:** 65 **Expect:** 8.3e-007

**Matches:** 7/116 fragment ions using 9 most intense peaks ([help](#))

| #  | b         | b <sup>++</sup> | b <sup>0</sup> | b <sup>0++</sup> | Seq. | y                | y <sup>++</sup> | y*        | y <sup>*++</sup> | y <sup>0</sup> | y <sup>0++</sup> | #  |
|----|-----------|-----------------|----------------|------------------|------|------------------|-----------------|-----------|------------------|----------------|------------------|----|
| 1  | 114.0913  | 57.5493         |                |                  | L    |                  |                 |           |                  |                |                  | 13 |
| 2  | 215.1390  | 108.0731        | 197.1285       | 99.0679          | T    | 1360.6016        | 680.8044        | 1343.5750 | 672.2911         | 1342.5910      | 671.7991         | 12 |
| 3  | 330.1660  | 165.5866        | 312.1554       | 156.5813         | D    | <b>1259.5539</b> | 630.2806        | 1242.5273 | 621.7673         | 1241.5433      | 621.2753         | 11 |
| 4  | 387.1874  | 194.0974        | 369.1769       | 185.0921         | G    | <b>1144.5269</b> | 572.7671        | 1127.5004 | 564.2538         | 1126.5164      | 563.7618         | 10 |
| 5  | 488.2351  | 244.6212        | 470.2245       | 235.6159         | T    | <b>1087.5055</b> | 544.2564        | 1070.4789 | 535.7431         | 1069.4949      | 535.2511         | 9  |
| 6  | 587.3035  | 294.1554        | 569.2930       | 285.1501         | V    | <b>986.4578</b>  | 493.7325        | 969.4312  | 485.2193         | 968.4472       | 484.7272         | 8  |
| 7  | 734.3719  | 367.6896        | 716.3614       | 358.6843         | F    | <b>887.3894</b>  | 444.1983        | 870.3628  | 435.6850         | 869.3788       | 435.1930         | 7  |
| 8  | 849.3989  | 425.2031        | 831.3883       | 416.1978         | D    | 740.3210         | 370.6641        | 723.2944  | 362.1508         | 722.3104       | 361.6588         | 6  |
| 9  | 936.4309  | 468.7191        | 918.4203       | 459.7138         | S    | <b>625.2940</b>  | 313.1506        | 608.2675  | 304.6374         | 607.2835       | 304.1454         | 5  |
| 10 | 1023.4629 | 512.2351        | 1005.4524      | 503.2298         | S    | <b>538.2620</b>  | 269.6346        | 521.2354  | 261.1214         | 520.2514       | 260.6293         | 4  |
| 11 | 1170.5313 | 585.7693        | 1152.5208      | 576.7640         | F    | 451.2300         | 226.1186        | 434.2034  | 217.6053         | 433.2194       | 217.1133         | 3  |
| 12 | 1299.5739 | 650.2906        | 1281.5634      | 641.2853         | E    | 304.1615         | 152.5844        | 287.1350  | 144.0711         | 286.1510       | 143.5791         | 2  |
| 13 |           |                 |                |                  | R    | 175.1190         | 88.0631         | 158.0924  | 79.5498          |                |                  | 1  |

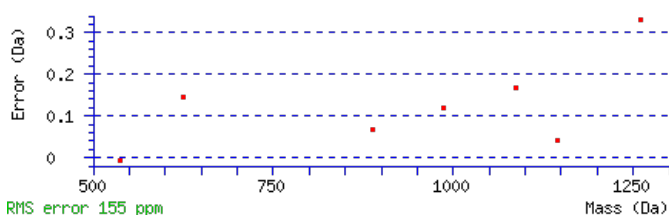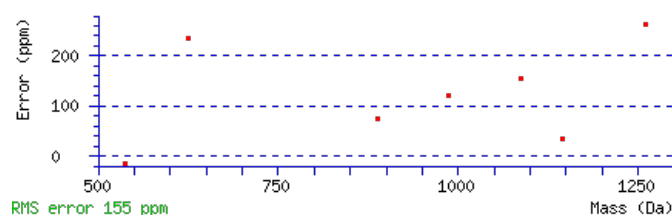

NCBI **BLAST** search of **LTDGTVFDSSFER**

(Parameters: blastp, nr protein database, expect=20000, no filter, PAM30)



AT3G25220.1

Other BLAST [web gateways](#)

**All matches to this query**

| Score | Mr(calc)  | Delta   | Sequence                      |
|-------|-----------|---------|-------------------------------|
| 65.0  | 1472.6784 | 0.0001  | <a href="#">LTDGTVFDSSFER</a> |
| 2.5   | 1472.6817 | -0.0033 | <a href="#">GMEELDIVDHAK</a>  |

**Mascot:** <http://www.matrixscience.com/>

**Peptide View**MS/MS Fragmentation of **ILAVGEK**

Found in **AT3G25230.1** in **TAIR\_Arabidopsis**, Symbols: ROF1 | ROF1 (ROTAMASE FKBP 1); FK506 binding / calmodulin binding / peptidyl-prolyl cis-trans isomerase | chr3:9189494-9192374 FORWARD

Match to Query 732: 736.419552 from(369.217052,2+) index(4047)

Title: Elution from: 37.900 to 37.900 scan no 5102 cid35.00 polarity:+

Data file C7-3\_3.mgf

Click mouse within plot area to zoom in by factor of two about that point

Or,   to  Da

Label all possible matches  Label matches used for scoring

Show Y-axis

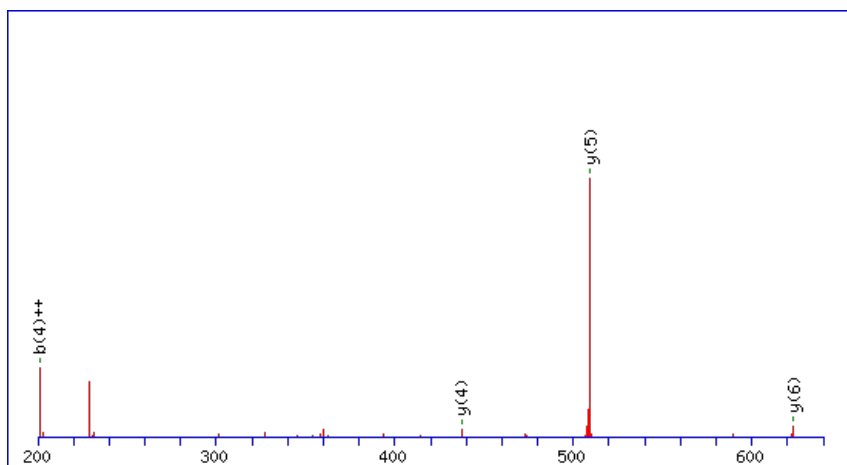

Monoisotopic mass of neutral peptide **Mr(calc)**: 736.4195

**Fixed modifications**: Carbamidomethyl (C) (apply to specified residues or termini only)

**Ions Score**: 26 **Expect**: 0.019

**Matches** : 4/48 fragment ions using 5 most intense peaks ([help](#))

| # | b        | b <sup>++</sup> | b <sup>0</sup> | b <sup>0++</sup> | Seq. | y        | y <sup>++</sup> | y*       | y <sup>*++</sup> | y <sup>0</sup> | y <sup>0++</sup> | # |
|---|----------|-----------------|----------------|------------------|------|----------|-----------------|----------|------------------|----------------|------------------|---|
| 1 | 115.0884 | 58.0478         |                |                  | I    |          |                 |          |                  |                |                  | 7 |
| 2 | 229.1695 | 115.0884        |                |                  | L    | 623.3457 | 312.1765        | 605.3221 | 303.1647         | 605.3351       | 303.1712         | 6 |
| 3 | 301.2036 | 151.1054        |                |                  | A    | 509.2646 | 255.1359        | 491.2410 | 246.1241         | 491.2540       | 246.1307         | 5 |
| 4 | 401.2691 | 201.1382        |                |                  | V    | 437.2304 | 219.1189        | 419.2069 | 210.1071         | 419.2199       | 210.1136         | 4 |
| 5 | 459.2876 | 230.1474        |                |                  | G    | 337.1650 | 169.0861        | 319.1414 | 160.0743         | 319.1544       | 160.0809         | 3 |
| 6 | 589.3272 | 295.1672        | 571.3166       | 286.1620         | E    | 279.1465 | 140.0769        | 261.1229 | 131.0651         | 261.1359       | 131.0716         | 2 |
| 7 |          |                 |                |                  | K    | 149.1069 | 75.0571         | 131.0833 | 66.0453          |                |                  | 1 |

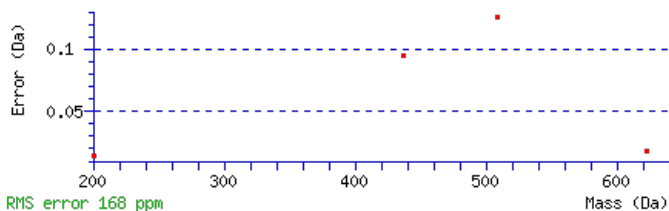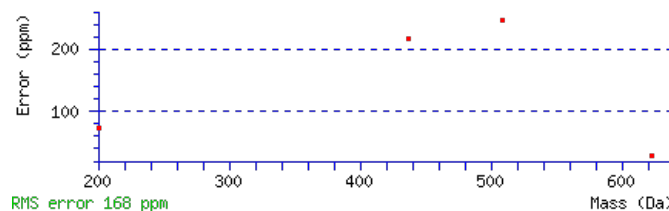

NCBI **BLAST** search of **ILAVGEK**

(Parameters: blastp, nr protein database, expect=20000, no filter, PAM30)

Other BLAST [web gateways](#)

**All matches to this query**

| Score | Mr(calc) | Delta  | Sequence                |
|-------|----------|--------|-------------------------|
| 25.7  | 736.4195 | 0.0000 | <a href="#">ILAVGEK</a> |
| 17.6  | 736.4195 | 0.0000 | <a href="#">LIPSTAK</a> |

# AT3G25230.1

|      |          |        |                         |
|------|----------|--------|-------------------------|
| 16.5 | 736.4195 | 0.0000 | <a href="#">ILNEIK</a>  |
| 16.5 | 736.4195 | 0.0000 | <a href="#">LINEIK</a>  |
| 16.5 | 736.4195 | 0.0000 | <a href="#">LLNLEK</a>  |
| 16.5 | 736.4195 | 0.0000 | <a href="#">LLPTASK</a> |
| 16.3 | 736.4195 | 0.0000 | <a href="#">LLLQDK</a>  |
| 15.3 | 736.4195 | 0.0000 | <a href="#">ILQEVK</a>  |
| 15.3 | 736.4195 | 0.0000 | <a href="#">LIEQVK</a>  |
| 14.6 | 736.4195 | 0.0000 | <a href="#">ILENLK</a>  |

**Mascot:** <http://www.matrixscience.com/>

**Peptide View**MS/MS Fragmentation of **LLGEDEPEK**

Found in **AT3G25520.1** in **TAIR\_Arabidopsis**, Symbols: ATL5, PGY3 | ATL5 (A. THALIANA RIBOSOMAL PROTEIN L5); structural constituent of ribosome | chr3:9270810-9272564 REVERSE

Match to Query 2834: 1028.500250 from(515.257401,2+) index(1512)

Title: Elution from: 20.045 to 20.045 scan no 2028 cid35.00 polarity:+

Data file C7-2\_2.mgf

Click mouse within plot area to zoom in by factor of two about that point

Or,   to  Da

Label all possible matches  Label matches used for scoring

Show Y-axis

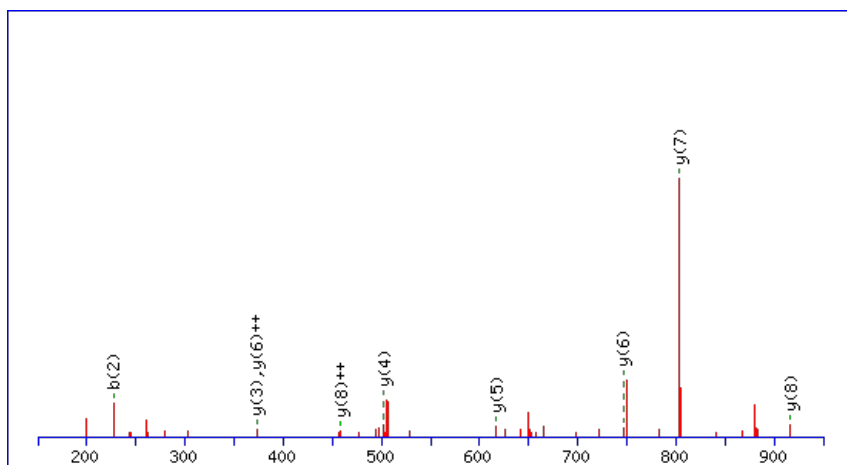

**Monoisotopic mass of neutral peptide Mr(calc):** 1028.5026

**Fixed modifications:** Carbamidomethyl (C) (apply to specified residues or termini only)

**Ions Score:** 33 **Expect:** 0.00072

**Matches:** 9/72 fragment ions using 21 most intense peaks ([help](#))

| # | b        | b <sup>++</sup> | b <sup>0</sup> | b <sup>0++</sup> | Seq. | y        | y <sup>++</sup> | y*       | y <sup>*++</sup> | y <sup>0</sup> | y <sup>0++</sup> | # |
|---|----------|-----------------|----------------|------------------|------|----------|-----------------|----------|------------------|----------------|------------------|---|
| 1 | 114.0913 | 57.5493         |                |                  | L    |          |                 |          |                  |                |                  | 9 |
| 2 | 227.1754 | 114.0913        |                |                  | L    | 916.4258 | 458.7165        | 899.3993 | 450.2033         | 898.4153       | 449.7113         | 8 |
| 3 | 284.1969 | 142.6021        |                |                  | G    | 803.3418 | 402.1745        | 786.3152 | 393.6612         | 785.3312       | 393.1692         | 7 |
| 4 | 413.2395 | 207.1234        | 395.2289       | 198.1181         | E    | 746.3203 | 373.6638        | 729.2937 | 365.1505         | 728.3097       | 364.6585         | 6 |
| 5 | 528.2664 | 264.6368        | 510.2558       | 255.6316         | D    | 617.2777 | 309.1425        | 600.2511 | 300.6292         | 599.2671       | 300.1372         | 5 |
| 6 | 657.3090 | 329.1581        | 639.2984       | 320.1529         | E    | 502.2508 | 251.6290        | 485.2242 | 243.1157         | 484.2402       | 242.6237         | 4 |
| 7 | 754.3618 | 377.6845        | 736.3512       | 368.6792         | P    | 373.2082 | 187.1077        | 356.1816 | 178.5944         | 355.1976       | 178.1024         | 3 |
| 8 | 883.4044 | 442.2058        | 865.3938       | 433.2005         | E    | 276.1554 | 138.5813        | 259.1288 | 130.0681         | 258.1448       | 129.5761         | 2 |
| 9 |          |                 |                |                  | K    | 147.1128 | 74.0600         | 130.0863 | 65.5468          |                |                  | 1 |

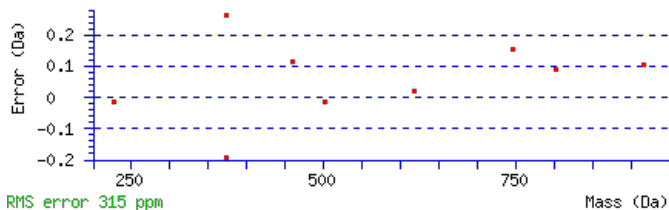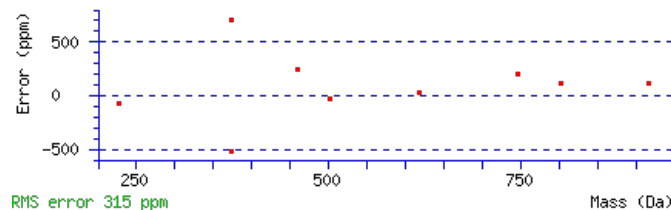

NCBI **BLAST** search of [LLGEDEPEK](#)

(Parameters: blastp, nr protein database, expect=20000, no filter, PAM30)

Other BLAST [web gateways](#)

**All matches to this query**

| Score | Mr(calc) | Delta | Sequence |
|-------|----------|-------|----------|
|       |          |       |          |

AT3G25520.1

|      |           |         |                           |
|------|-----------|---------|---------------------------|
| 32.9 | 1028.5026 | -0.0023 | <a href="#">LLGEDEPEK</a> |
|------|-----------|---------|---------------------------|

**Mascot:** <http://www.matrixscience.com/>

## Peptide View

### MS/MS Fragmentation of **ALFEESIPAFDVLGK**

Found in **AT3G25530.1** in **TAIR\_Arabidopsis**, Symbols: GHBDH, ATGHBDH | ATGHBDH/GHBDH; 3-hydroxybutyrate dehydrogenase/phosphogluconate dehydrogenase (decarboxylating) | chr3:9273186-9274751 REVERSE

Match to Query 7545: 1650.808308 from(826.411430,2+) index(10221)

Title: Elution from: 96.280 to 96.280 scan no 14472 cid35.00 polarity:+

Data file 0-3\_2.mgf

Click mouse within plot area to zoom in by factor of two about that point

Or,   to  Da

Label all possible matches  Label matches used for scoring

Show Y-axis

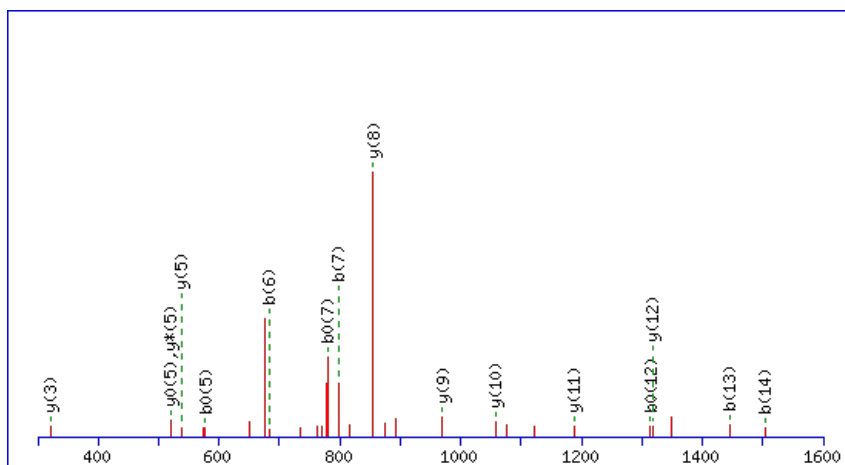

**Monoisotopic mass of neutral peptide Mr(calc):** 1650.8081

**Fixed modifications:** Carbamidomethyl (C) (apply to specified residues or termini only)

**Ions Score:** 44 **Expect:** 0.00037

**Matches:** 16/126 fragment ions using 24 most intense peaks ([help](#))

| #  | b                | b <sup>++</sup> | b <sup>0</sup>   | b <sup>0++</sup> | Seq. | y                | y <sup>++</sup> | y*              | y* <sup>++</sup> | y <sup>0</sup>  | y <sup>0++</sup> | #  |
|----|------------------|-----------------|------------------|------------------|------|------------------|-----------------|-----------------|------------------|-----------------|------------------|----|
| 1  | 73.0414          | 37.0244         |                  |                  | A    |                  |                 |                 |                  |                 |                  | 15 |
| 2  | 187.1225         | 94.0649         |                  |                  | L    | 1579.7813        | 790.3943        | 1561.7577       | 781.3825         | 1561.7707       | 781.3890         | 14 |
| 3  | 335.1880         | 168.0976        |                  |                  | F    | 1465.7002        | 733.3537        | 1447.6766       | 724.3419         | 1447.6896       | 724.3484         | 13 |
| 4  | 465.2276         | 233.1174        | 447.2170         | 224.1122         | E    | <b>1317.6347</b> | 659.3210        | 1299.6111       | 650.3092         | 1299.6241       | 650.3157         | 12 |
| 5  | 595.2672         | 298.1373        | <b>577.2567</b>  | 289.1320         | E    | <b>1187.5951</b> | 594.3012        | 1169.5715       | 585.2894         | 1169.5845       | 585.2959         | 11 |
| 6  | <b>683.2963</b>  | 342.1518        | 665.2857         | 333.1465         | S    | <b>1057.5555</b> | 529.2814        | 1039.5319       | 520.2696         | 1039.5449       | 520.2761         | 10 |
| 7  | <b>797.3774</b>  | 399.1923        | <b>779.3668</b>  | 390.1871         | I    | <b>969.5264</b>  | 485.2668        | 951.5028        | 476.2550         | 951.5158        | 476.2616         | 9  |
| 8  | 895.4272         | 448.2172        | 877.4166         | 439.2120         | P    | <b>855.4453</b>  | 428.2263        | 837.4217        | 419.2145         | 837.4347        | 419.2210         | 8  |
| 9  | 967.4613         | 484.2343        | 949.4508         | 475.2290         | A    | 757.3955         | 379.2014        | 739.3719        | 370.1896         | 739.3849        | 370.1961         | 7  |
| 10 | 1115.5268        | 558.2670        | 1097.5162        | 549.2617         | F    | 685.3613         | 343.1843        | 667.3378        | 334.1725         | 667.3508        | 334.1790         | 6  |
| 11 | 1231.5508        | 616.2790        | 1213.5402        | 607.2737         | D    | <b>537.2959</b>  | 269.1516        | <b>519.2723</b> | 260.1398         | <b>519.2853</b> | 260.1463         | 5  |
| 12 | 1331.6162        | 666.3117        | <b>1313.6056</b> | 657.3065         | V    | 421.2719         | 211.1396        | 403.2483        | 202.1278         |                 |                  | 4  |
| 13 | <b>1445.6973</b> | 723.3523        | 1427.6867        | 714.3470         | L    | <b>321.2065</b>  | 161.1069        | 303.1829        | 152.0951         |                 |                  | 3  |
| 14 | <b>1503.7158</b> | 752.3615        | 1485.7052        | 743.3563         | G    | 207.1254         | 104.0663        | 189.1018        | 95.0545          |                 |                  | 2  |
| 15 |                  |                 |                  |                  | K    | 149.1069         | 75.0571         | 131.0833        | 66.0453          |                 |                  | 1  |

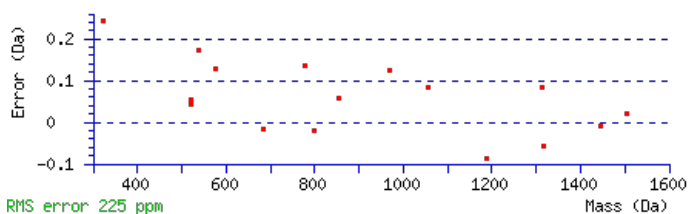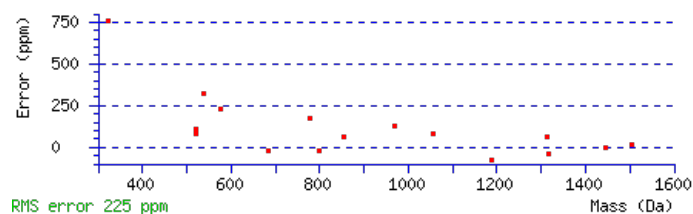

## AT3G25530.1

NCBI **BLAST** search of [ALFEESIPAFDVLGK](#)

(Parameters: blastp, nr protein database, expect=20000, no filter, PAM30)

Other BLAST [web gateways](#)

### All matches to this query

| Score | Mr(calc)  | Delta   | Sequence                         |
|-------|-----------|---------|----------------------------------|
| 43.9  | 1650.8081 | 0.0002  | <a href="#">ALFEESIPAFDVLGK</a>  |
| 11.6  | 1650.8063 | 0.0020  | <a href="#">ETSEQLRIQAEKAK</a>   |
| 8.5   | 1650.8063 | 0.0020  | <a href="#">GSDVTKAENKQNLVK</a>  |
| 5.0   | 1650.8046 | 0.0038  | <a href="#">IPVMVNMASSSLALGK</a> |
| 4.8   | 1650.8059 | 0.0024  | <a href="#">AAEAVEEFGGILTSIK</a> |
| 3.9   | 1650.8094 | -0.0011 | <a href="#">MAPLRNMFPNLVTK</a>   |
| 3.9   | 1650.8046 | 0.0038  | <a href="#">IPVMVNMASSSLALGK</a> |
| 2.7   | 1650.8036 | 0.0047  | <a href="#">TLSETQEILKDTQK</a>   |
| 2.4   | 1650.8119 | -0.0036 | <a href="#">MVATKRVVEVEQDK</a>   |
| 1.7   | 1650.8072 | 0.0011  | <a href="#">RMIGESGCIPLLR</a>    |

Mascot: <http://www.matrixscience.com/>

## Peptide View

### MS/MS Fragmentation of **LQEMLSDLQSK**

Found in **AT3G25680.1** in **TAIR Arabidopsis**, Symbols: | similar to unknown protein [Arabidopsis thaliana] (TAIR:AT5G23890.1); similar to unnamed protein product [Vitis vinifera] (GB:CAO42077.1); contains InterPro domain S-layer homology region (InterPro:IPR001119) | chr3:9350930-9353495 FORW

Match to Query 4804: 1320.601862 from(661.308207,2+) index(2835)

Title: Elution from: 29.073 to 29.073 scan no 3549 cid35.00 polarity:+

Data file D12h-3\_2.mgf

Click mouse within plot area to zoom in by factor of two about that point

Or,   to  Da

Label all possible matches  Label matches used for scoring

Show Y-axis

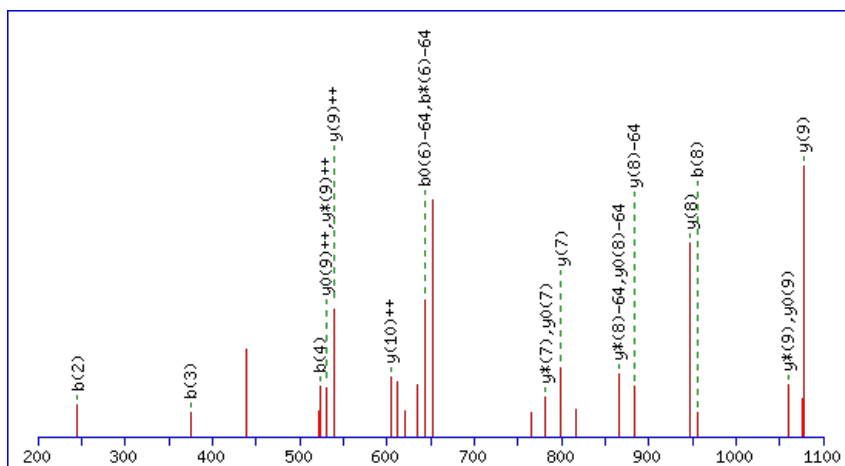

**Monoisotopic mass of neutral peptide Mr(calc):** 1320.6024

**Fixed modifications:** Carbamidomethyl (C) (apply to specified residues or termini only)

**Variable modifications:**

**M4** : Oxidation (M), with neutral losses 0.0000 (shown in table), 63.9983

**Ions Score:** 26 **Expect:** 0.03

**Matches :** 20/172 fragment ions using 22 most intense peaks ([help](#))

| #  | b               | b <sup>++</sup> | b <sup>*</sup> | b <sup>*++</sup> | b <sup>0</sup> | b <sup>0++</sup> | Seq. | y                | y <sup>++</sup> | y <sup>*</sup>   | y <sup>*++</sup> | y <sup>0</sup>   | y <sup>0++</sup> | #  |
|----|-----------------|-----------------|----------------|------------------|----------------|------------------|------|------------------|-----------------|------------------|------------------|------------------|------------------|----|
| 1  | 115.0884        | 58.0478         |                |                  |                |                  | L    |                  |                 |                  |                  |                  |                  | 11 |
| 2  | <b>245.1410</b> | 123.0741        | 227.1174       | 114.0624         |                |                  | Q    | 1207.5285        | <b>604.2679</b> | 1189.5049        | 595.2561         | 1189.5180        | 595.2626         | 10 |
| 3  | <b>375.1806</b> | 188.0940        | 357.1571       | 179.0822         | 357.1701       | 179.0887         | E    | <b>1077.4759</b> | <b>539.2416</b> | <b>1059.4523</b> | <b>530.2298</b>  | <b>1059.4653</b> | <b>530.2363</b>  | 9  |
| 4  | <b>523.2131</b> | 262.1102        | 505.1895       | 253.0984         | 505.2025       | 253.1049         | M    | <b>947.4363</b>  | 474.2218        | 929.4127         | 465.2100         | 929.4257         | 465.2165         | 8  |
| 5  | 637.2942        | 319.1507        | 619.2706       | 310.1389         | 619.2836       | 310.1454         | L    | <b>799.4038</b>  | 400.2055        | <b>781.3802</b>  | 391.1938         | <b>781.3933</b>  | 391.2003         | 7  |
| 6  | 725.3232        | 363.1653        | 707.2997       | 354.1535         | 707.3127       | 354.1600         | S    | 685.3227         | 343.1650        | 667.2991         | 334.1532         | 667.3122         | 334.1597         | 6  |
| 7  | 841.3472        | 421.1773        | 823.3236       | 412.1655         | 823.3367       | 412.1720         | D    | 597.2937         | 299.1505        | 579.2701         | 290.1387         | 579.2831         | 290.1452         | 5  |
| 8  | <b>955.4283</b> | 478.2178        | 937.4047       | 469.2060         | 937.4178       | 469.2125         | L    | 481.2697         | 241.1385        | 463.2461         | 232.1267         | 463.2591         | 232.1332         | 4  |
| 9  | 1085.4810       | 543.2441        | 1067.4574      | 534.2323         | 1067.4704      | 534.2388         | Q    | 367.1886         | 184.0979        | 349.1650         | 175.0861         | 349.1780         | 175.0926         | 3  |
| 10 | 1173.5100       | 587.2587        | 1155.4864      | 578.2469         | 1155.4995      | 578.2534         | S    | 237.1359         | 119.0716        | 219.1124         | 110.0598         | 219.1254         | 110.0663         | 2  |
| 11 |                 |                 |                |                  |                |                  | K    | 149.1069         | 75.0571         | 131.0833         | 66.0453          |                  |                  | 1  |

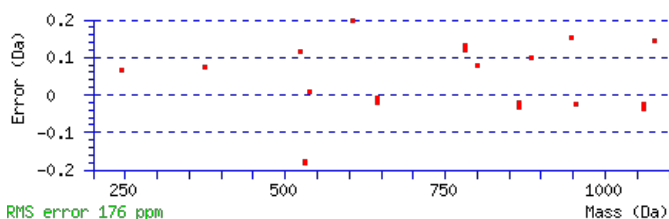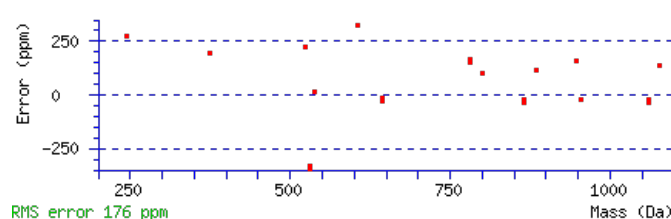

NCBI **BLAST** search of **LQEMLSDLQSK**

(Parameters: blastp, nr protein database, expect=20000, no filter, PAM30)



# AT3G25680.1

Other BLAST [web gateways](#)

## All matches to this query

| Score | Mr(calc)  | Delta   | Sequence                     |
|-------|-----------|---------|------------------------------|
| 25.8  | 1320.6024 | -0.0005 | <a href="#">LQEMLSDLQSK</a>  |
| 18.2  | 1320.6050 | -0.0032 | <a href="#">LEKACAEAREK</a>  |
| 12.7  | 1320.5994 | 0.0025  | <a href="#">QLSDDLSDVRR</a>  |
| 9.7   | 1320.6017 | 0.0002  | <a href="#">GQSPEYQNLLR</a>  |
| 6.0   | 1320.5994 | 0.0024  | <a href="#">NSANQKEKADAK</a> |
| 4.6   | 1320.5994 | 0.0025  | <a href="#">QIEESEERRK</a>   |
| 4.0   | 1320.6043 | -0.0024 | <a href="#">QLENHFTRTR</a>   |
| 3.3   | 1320.5994 | 0.0025  | <a href="#">KQIEESEERR</a>   |
| 3.2   | 1320.5990 | 0.0029  | <a href="#">ELFSEIGEVER</a>  |
| 2.7   | 1320.6017 | 0.0002  | <a href="#">RNFPDQLESAK</a>  |

Mascot: <http://www.matrixscience.com/>

## Peptide View

MS/MS Fragmentation of **ITASDVETAAGIAPSK**

Found in **AT3G25860.1** in **TAIR\_Arabidopsis**, Symbols: PLE2, LTA2 | LTA2 (PLASTID E2 SUBUNIT OF PYRUVATE DECARBOXYLASE); dihydrolipoyllysine-residue acetyltransferase | chr3:9461869-9463822 FORWARD

Match to Query 6498: 1529.794036 from(765.904294,2+) index(5877)

Title: Elution from: 54.427 to 54.427 scan no 7575 cid35.00 polarity:+

Data file D1d-2\_1.mgf

Click mouse within plot area to zoom in by factor of two about that point

Or,   to  Da

Label all possible matches  Label matches used for scoring

Show Y-axis

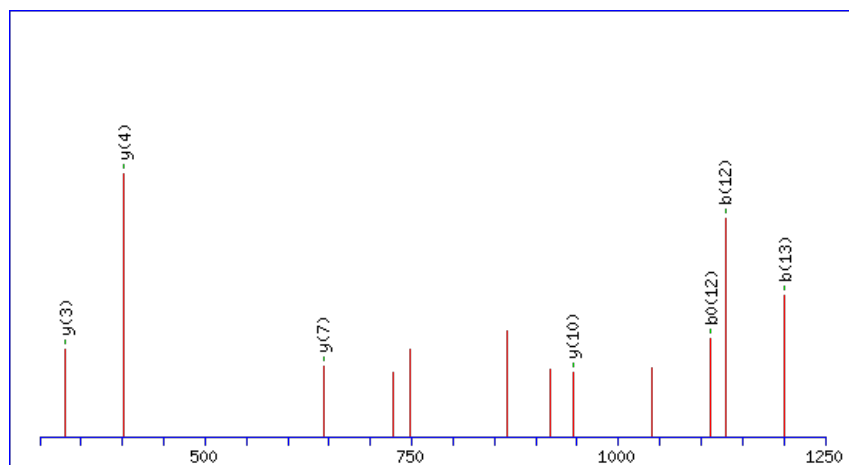

Monoisotopic mass of neutral peptide  $M_r(\text{calc})$ : 1529.7937

Fixed modifications: Carbamidomethyl (C) (apply to specified residues or termini only)

Ions Score: 26 Expect: 0.013

Matches : 7/146 fragment ions using 11 most intense peaks ([help](#))

| #  | b                | b <sup>++</sup> | b <sup>0</sup>   | b <sup>0++</sup> | Seq. | y               | y <sup>++</sup> | y*        | y <sup>*++</sup> | y <sup>0</sup> | y <sup>0++</sup> | #  |
|----|------------------|-----------------|------------------|------------------|------|-----------------|-----------------|-----------|------------------|----------------|------------------|----|
| 1  | 114.0913         | 57.5493         |                  |                  | I    |                 |                 |           |                  |                |                  | 16 |
| 2  | 215.1390         | 108.0731        | 197.1285         | 99.0679          | T    | 1417.7169       | 709.3621        | 1400.6904 | 700.8488         | 1399.7064      | 700.3568         | 15 |
| 3  | 286.1761         | 143.5917        | 268.1656         | 134.5864         | A    | 1316.6692       | 658.8383        | 1299.6427 | 650.3250         | 1298.6587      | 649.8330         | 14 |
| 4  | 373.2082         | 187.1077        | 355.1976         | 178.1024         | S    | 1245.6321       | 623.3197        | 1228.6056 | 614.8064         | 1227.6216      | 614.3144         | 13 |
| 5  | 488.2351         | 244.6212        | 470.2245         | 235.6159         | D    | 1158.6001       | 579.8037        | 1141.5735 | 571.2904         | 1140.5895      | 570.7984         | 12 |
| 6  | 587.3035         | 294.1554        | 569.2930         | 285.1501         | V    | 1043.5732       | 522.2902        | 1026.5466 | 513.7769         | 1025.5626      | 513.2849         | 11 |
| 7  | 716.3461         | 358.6767        | 698.3355         | 349.6714         | E    | <b>944.5047</b> | 472.7560        | 927.4782  | 464.2427         | 926.4942       | 463.7507         | 10 |
| 8  | 817.3938         | 409.2005        | 799.3832         | 400.1953         | T    | 815.4621        | 408.2347        | 798.4356  | 399.7214         | 797.4516       | 399.2294         | 9  |
| 9  | 888.4309         | 444.7191        | 870.4203         | 435.7138         | A    | 714.4145        | 357.7109        | 697.3879  | 349.1976         | 696.4039       | 348.7056         | 8  |
| 10 | 959.4680         | 480.2376        | 941.4575         | 471.2324         | A    | <b>643.3774</b> | 322.1923        | 626.3508  | 313.6790         | 625.3668       | 313.1870         | 7  |
| 11 | 1016.4895        | 508.7484        | 998.4789         | 499.7431         | G    | 572.3402        | 286.6738        | 555.3137  | 278.1605         | 554.3297       | 277.6685         | 6  |
| 12 | <b>1129.5735</b> | 565.2904        | <b>1111.5630</b> | 556.2851         | I    | 515.3188        | 258.1630        | 498.2922  | 249.6498         | 497.3082       | 249.1577         | 5  |
| 13 | <b>1200.6107</b> | 600.8090        | 1182.6001        | 591.8037         | A    | <b>402.2347</b> | 201.6210        | 385.2082  | 193.1077         | 384.2241       | 192.6157         | 4  |
| 14 | 1297.6634        | 649.3354        | 1279.6529        | 640.3301         | P    | <b>331.1976</b> | 166.1024        | 314.1710  | 157.5892         | 313.1870       | 157.0972         | 3  |
| 15 | 1384.6955        | 692.8514        | 1366.6849        | 683.8461         | S    | 234.1448        | 117.5761        | 217.1183  | 109.0628         | 216.1343       | 108.5708         | 2  |
| 16 |                  |                 |                  |                  | K    | 147.1128        | 74.0600         | 130.0863  | 65.5468          |                |                  | 1  |

AT3G25860.1

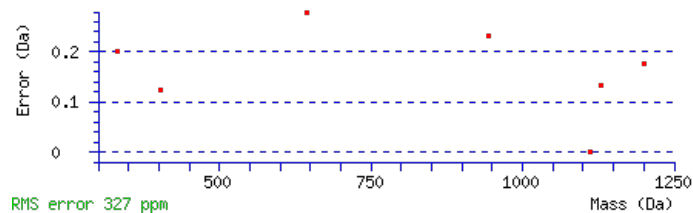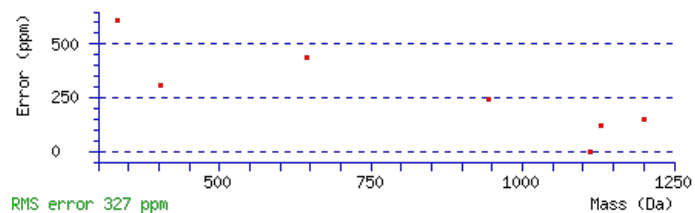

NCBI **BLAST** search of [ITASDVETAAGIAPSK](#)

(Parameters: blastp, nr protein database, expect=20000, no filter, PAM30)

Other BLAST [web gateways](#)

**All matches to this query**

| Score | Mr(calc)  | Delta   | Sequence                         |
|-------|-----------|---------|----------------------------------|
| 25.7  | 1529.7937 | 0.0004  | <a href="#">ITASDVETAAGIAPSK</a> |
| 4.2   | 1529.7950 | -0.0010 | <a href="#">HPSPSPSPSPVSRK</a>   |

Mascot: <http://www.matrixscience.com/>



# Mascot Search Results

## Peptide View

MS/MS Fragmentation of **GISAGQGASCGFGMR**

Found in **AT3G25920.1** in **TAIR\_Arabidopsis**, Symbols: RPL15 | RPL15 (ribosomal protein L15) | chr3:9492505-9493795 REVERSE

Match to Query 5324: 1454.637916 from(728.326234,2+) index(2953)

Title: Elution from: 31.511 to 31.511 scan no 3754 cid35.00 polarity:+

Data file D1d-1\_3.mgf

Click mouse within plot area to zoom in by factor of two about that point

Or,  to  Da

Label all possible matches  Label matches used for scoring

Show Y-axis

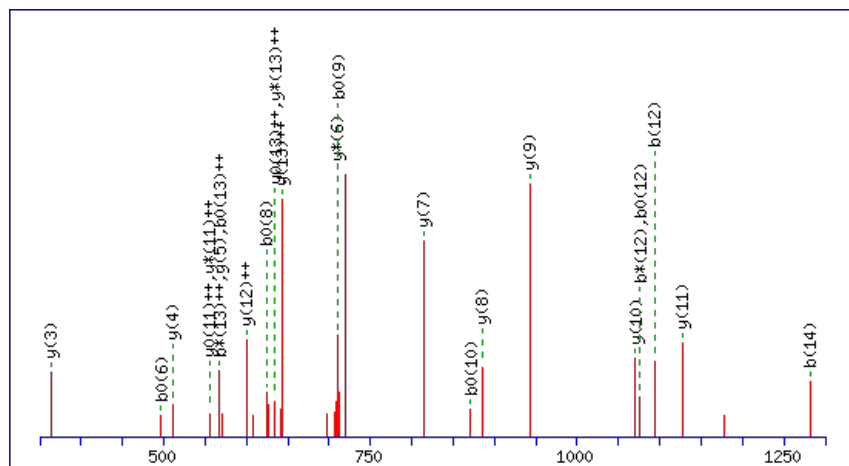

Monoisotopic mass of neutral peptide  $M_r(\text{calc})$ : 1454.6395

Fixed modifications: Carbamidomethyl (C) (apply to specified residues or termini only)

Ions Score: 79 Expect: 2e-008

Matches : 25/142 fragment ions using 24 most intense peaks [\(help\)](#)

| #  | b         | b <sup>++</sup> | b*        | b <sup>*++</sup> | b <sup>0</sup> | b <sup>0++</sup> | Seq. | y         | y <sup>++</sup> | y*        | y <sup>*++</sup> | y <sup>0</sup> | y <sup>0++</sup> | #  |
|----|-----------|-----------------|-----------|------------------|----------------|------------------|------|-----------|-----------------|-----------|------------------|----------------|------------------|----|
| 1  | 58.0287   | 29.5180         |           |                  |                |                  | G    |           |                 |           |                  |                |                  | 15 |
| 2  | 171.1128  | 86.0600         |           |                  |                |                  | I    | 1398.6253 | 699.8163        | 1381.5987 | 691.3030         | 1380.6147      | 690.8110         | 14 |
| 3  | 258.1448  | 129.5761        |           |                  | 240.1343       | 120.5708         | S    | 1285.5412 | 643.2742        | 1268.5147 | 634.7610         | 1267.5307      | 634.2690         | 13 |
| 4  | 329.1819  | 165.0946        |           |                  | 311.1714       | 156.0893         | A    | 1198.5092 | 599.7582        | 1181.4826 | 591.2450         | 1180.4986      | 590.7530         | 12 |
| 5  | 386.2034  | 193.6053        |           |                  | 368.1928       | 184.6001         | G    | 1127.4721 | 564.2397        | 1110.4455 | 555.7264         | 1109.4615      | 555.2344         | 11 |
| 6  | 514.2620  | 257.6346        | 497.2354  | 249.1214         | 496.2514       | 248.6293         | Q    | 1070.4506 | 535.7289        | 1053.4241 | 527.2157         | 1052.4400      | 526.7237         | 10 |
| 7  | 571.2835  | 286.1454        | 554.2569  | 277.6321         | 553.2729       | 277.1401         | G    | 942.3920  | 471.6997        | 925.3655  | 463.1864         | 924.3815       | 462.6944         | 9  |
| 8  | 642.3206  | 321.6639        | 625.2940  | 313.1506         | 624.3100       | 312.6586         | A    | 885.3706  | 443.1889        | 868.3440  | 434.6756         | 867.3600       | 434.1836         | 8  |
| 9  | 729.3526  | 365.1799        | 712.3260  | 356.6667         | 711.3420       | 356.1747         | S    | 814.3335  | 407.6704        | 797.3069  | 399.1571         | 796.3229       | 398.6651         | 7  |
| 10 | 889.3832  | 445.1953        | 872.3567  | 436.6820         | 871.3727       | 436.1900         | C    | 727.3014  | 364.1544        | 710.2749  | 355.6411         |                |                  | 6  |
| 11 | 946.4047  | 473.7060        | 929.3782  | 465.1927         | 928.3941       | 464.7007         | G    | 567.2708  | 284.1390        | 550.2442  | 275.6258         |                |                  | 5  |
| 12 | 1093.4731 | 547.2402        | 1076.4466 | 538.7269         | 1075.4626      | 538.2349         | F    | 510.2493  | 255.6283        | 493.2228  | 247.1150         |                |                  | 4  |
| 13 | 1150.4946 | 575.7509        | 1133.4680 | 567.2377         | 1132.4840      | 566.7456         | G    | 363.1809  | 182.0941        | 346.1544  | 173.5808         |                |                  | 3  |
| 14 | 1281.5351 | 641.2712        | 1264.5085 | 632.7579         | 1263.5245      | 632.2659         | M    | 306.1594  | 153.5834        | 289.1329  | 145.0701         |                |                  | 2  |
| 15 |           |                 |           |                  |                |                  | R    | 175.1190  | 88.0631         | 158.0924  | 79.5498          |                |                  | 1  |

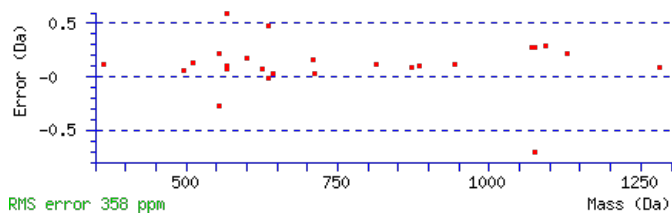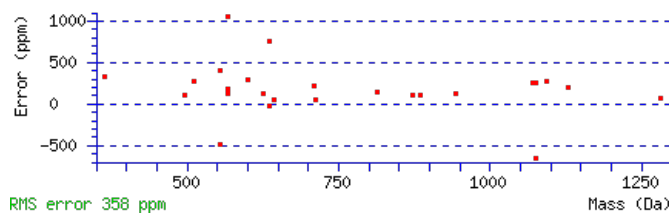

NCBI BLAST search of [GISAGQGASCGFGMR](#)

## AT3G25920.1

(Parameters: blastp, nr protein database, expect=20000, no filter, PAM30)

Other BLAST [web gateways](#)

### All matches to this query

| Score | Mr(calc)  | Delta   | Sequence                        |
|-------|-----------|---------|---------------------------------|
| 78.8  | 1454.6395 | -0.0016 | <a href="#">GISAGQGASCGFGMR</a> |
| 0.1   | 1454.6381 | -0.0002 | <a href="#">QEKETEMEIMR</a>     |

Mascot: <http://www.matrixscience.com/>

## Peptide View

MS/MS Fragmentation of **AGAEVIGISGDDSASHK**

Found in **AT3G26060.1** in **TAIR\_Arabidopsis**, Symbols: ATPRX Q | ATPRX Q; antioxidant/ peroxiredoxin | chr3:9526044-9527360 FORWARD

Match to Query 7791: 1612.773080 from(807.393816,2+) index(2341)

Title: Elution from: 26.397 to 26.397 scan no 2983 cid35.00 polarity:+

Data file 0-1\_1.mgf

Click mouse within plot area to zoom in by factor of two about that point

Or,   to  Da

Label all possible matches  Label matches used for scoring

Show Y-axis

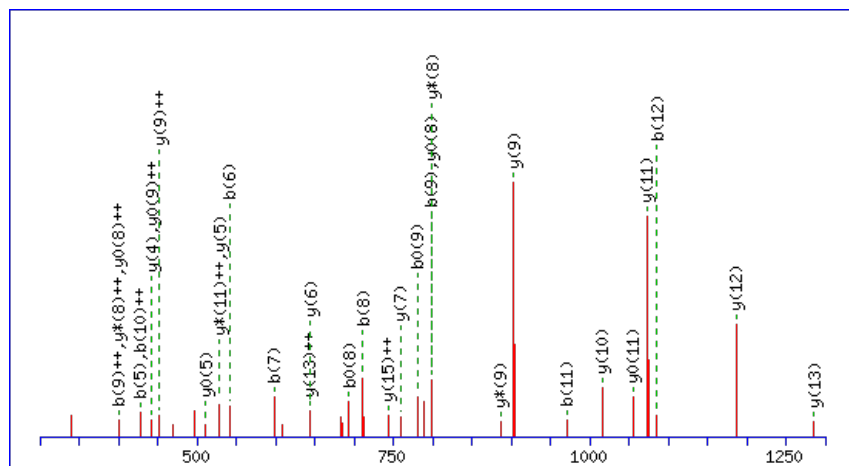

Monoisotopic mass of neutral peptide  $M_r(\text{calc})$ : 1612.7693

Fixed modifications: Carbamidomethyl (C) (apply to specified residues or termini only)

Ions Score: 61 Expect: 1.8e-006

Matches : 32/150 fragment ions using 41 most intense peaks ([help](#))

| #  | b                | b <sup>++</sup> | b <sup>0</sup>  | b <sup>0++</sup> | Seq. | y                | y <sup>++</sup> | y*              | y <sup>*++</sup> | y <sup>0</sup>   | y <sup>0++</sup> | #  |
|----|------------------|-----------------|-----------------|------------------|------|------------------|-----------------|-----------------|------------------|------------------|------------------|----|
| 1  | 72.0444          | 36.5258         |                 |                  | A    |                  |                 |                 |                  |                  |                  | 17 |
| 2  | 129.0659         | 65.0366         |                 |                  | G    | 1542.7394        | 771.8734        | 1525.7129       | 763.3601         | 1524.7289        | 762.8681         | 16 |
| 3  | 200.1030         | 100.5551        |                 |                  | A    | 1485.7180        | 743.3626        | 1468.6914       | 734.8494         | 1467.7074        | 734.3573         | 15 |
| 4  | 329.1456         | 165.0764        | 311.1350        | 156.0711         | E    | 1414.6809        | 707.8441        | 1397.6543       | 699.3308         | 1396.6703        | 698.8388         | 14 |
| 5  | <b>428.2140</b>  | 214.6106        | 410.2034        | 205.6053         | V    | <b>1285.6383</b> | <b>643.3228</b> | 1268.6117       | 634.8095         | 1267.6277        | 634.3175         | 13 |
| 6  | <b>541.2980</b>  | 271.1527        | 523.2875        | 262.1474         | I    | <b>1186.5699</b> | 593.7886        | 1169.5433       | 585.2753         | 1168.5593        | 584.7833         | 12 |
| 7  | <b>598.3195</b>  | 299.6634        | 580.3089        | 290.6581         | G    | <b>1073.4858</b> | 537.2465        | 1056.4592       | <b>528.7333</b>  | <b>1055.4752</b> | 528.2413         | 11 |
| 8  | <b>711.4036</b>  | 356.2054        | <b>693.3930</b> | 347.2001         | I    | <b>1016.4643</b> | 508.7358        | 999.4378        | 500.2225         | 998.4538         | 499.7305         | 10 |
| 9  | <b>798.4356</b>  | <b>399.7214</b> | <b>780.4250</b> | 390.7162         | S    | <b>903.3803</b>  | <b>452.1938</b> | <b>886.3537</b> | 443.6805         | 885.3697         | <b>443.1885</b>  | 9  |
| 10 | 855.4571         | <b>428.2322</b> | 837.4465        | 419.2269         | G    | 816.3482         | 408.6778        | <b>799.3217</b> | <b>400.1645</b>  | <b>798.3377</b>  | <b>399.6725</b>  | 8  |
| 11 | <b>970.4840</b>  | 485.7456        | 952.4734        | 476.7404         | D    | <b>759.3268</b>  | 380.1670        | 742.3002        | 371.6537         | 741.3162         | 371.1617         | 7  |
| 12 | <b>1085.5109</b> | 543.2591        | 1067.5004       | 534.2538         | D    | <b>644.2998</b>  | 322.6536        | 627.2733        | 314.1403         | 626.2893         | 313.6483         | 6  |
| 13 | 1172.5430        | 586.7751        | 1154.5324       | 577.7698         | S    | <b>529.2729</b>  | 265.1401        | 512.2463        | 256.6268         | <b>511.2623</b>  | 256.1348         | 5  |
| 14 | 1243.5801        | 622.2937        | 1225.5695       | 613.2884         | A    | <b>442.2409</b>  | 221.6241        | 425.2143        | 213.1108         | 424.2303         | 212.6188         | 4  |
| 15 | 1330.6121        | 665.8097        | 1312.6016       | 656.8044         | S    | 371.2037         | 186.1055        | 354.1772        | 177.5922         | 353.1932         | 177.1002         | 3  |
| 16 | 1467.6710        | 734.3392        | 1449.6605       | 725.3339         | H    | 284.1717         | 142.5895        | 267.1452        | 134.0762         |                  |                  | 2  |
| 17 |                  |                 |                 |                  | K    | 147.1128         | 74.0600         | 130.0863        | 65.5468          |                  |                  | 1  |

AT3G26060.1

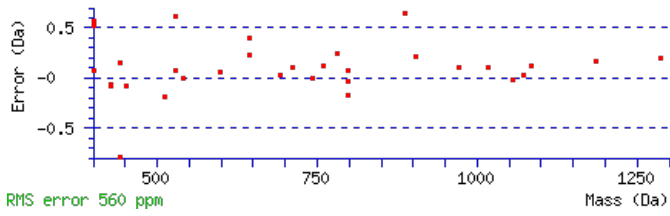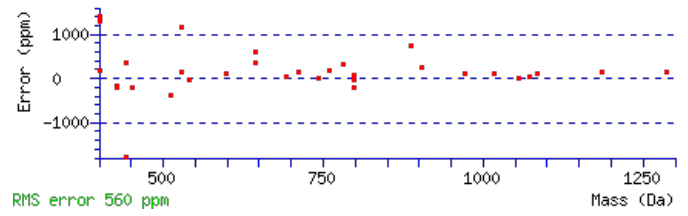

NCBI **BLAST** search of [AGAEVIGISGDDSASHK](#)  
(Parameters: blastp, nr protein database, expect=20000, no filter, PAM30)  
Other BLAST [web gateways](#)

**All matches to this query**

| Score | Mr(calc)  | Delta  | Sequence                          |
|-------|-----------|--------|-----------------------------------|
| 61.1  | 1612.7693 | 0.0038 | <a href="#">AGAEVIGISGDDSASHK</a> |

Mascot: <http://www.matrixscience.com/>

## Peptide View

MS/MS Fragmentation of **QELLEAIEPLER**

Found in **AT3G26070.1** in **TAIR\_Arabidopsis**, Symbols: | plastid-lipid associated protein PAP / fibrillin family protein | chr3:9528141-9529436  
FORWARD

Match to Query 5209: 1438.766738 from(720.390645,2+) index(7744)

Title: Elution from: 72.384 to 72.384 scan no 10366 cid35.00 polarity:+

Data file D1d-1-2.mgf

Click mouse within plot area to zoom in by factor of two about that point

Or,  to  Da Label all possible matches  Label matches used for scoring Show Y-axis 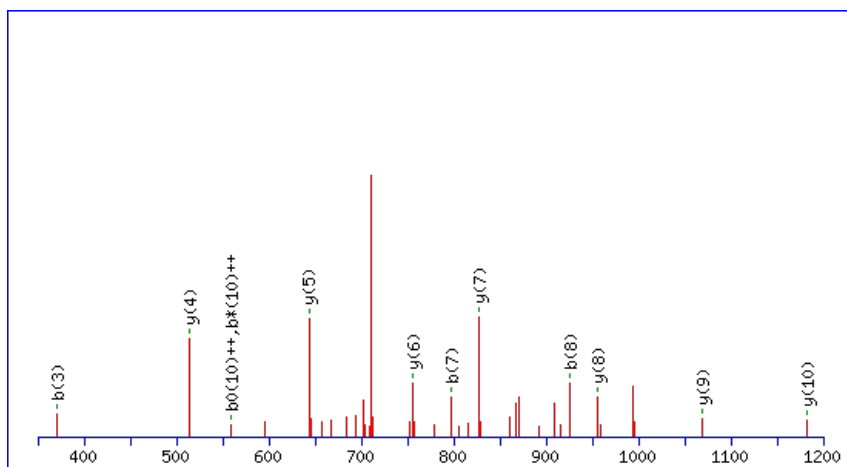Monoisotopic mass of neutral peptide  $M_r(\text{calc})$ : 1438.7667

Fixed modifications: Carbamidomethyl (C) (apply to specified residues or termini only)

Ions Score: 63 Expect: 1.6e-006

Matches : 12/128 fragment ions using 14 most intense peaks ([help](#))

| #  | b               | b <sup>++</sup> | b*        | b <sup>*++</sup> | b <sup>0</sup> | b <sup>0++</sup> | Seq. | y                | y <sup>++</sup> | y*        | y <sup>*++</sup> | y <sup>0</sup> | y <sup>0++</sup> | #  |
|----|-----------------|-----------------|-----------|------------------|----------------|------------------|------|------------------|-----------------|-----------|------------------|----------------|------------------|----|
| 1  | 129.0659        | 65.0366         | 112.0393  | 56.5233          |                |                  | Q    |                  |                 |           |                  |                |                  | 12 |
| 2  | 258.1084        | 129.5579        | 241.0819  | 121.0446         | 240.0979       | 120.5526         | E    | 1311.7155        | 656.3614        | 1294.6889 | 647.8481         | 1293.7049      | 647.3561         | 11 |
| 3  | <b>371.1925</b> | 186.0999        | 354.1660  | 177.5866         | 353.1819       | 177.0946         | L    | <b>1182.6729</b> | 591.8401        | 1165.6463 | 583.3268         | 1164.6623      | 582.8348         | 10 |
| 4  | 484.2766        | 242.6419        | 467.2500  | 234.1287         | 466.2660       | 233.6366         | L    | <b>1069.5888</b> | 535.2980        | 1052.5623 | 526.7848         | 1051.5782      | 526.2928         | 9  |
| 5  | 613.3192        | 307.1632        | 596.2926  | 298.6499         | 595.3086       | 298.1579         | E    | <b>956.5047</b>  | 478.7560        | 939.4782  | 470.2427         | 938.4942       | 469.7507         | 8  |
| 6  | 684.3563        | 342.6818        | 667.3297  | 334.1685         | 666.3457       | 333.6765         | A    | <b>827.4621</b>  | 414.2347        | 810.4356  | 405.7214         | 809.4516       | 405.2294         | 7  |
| 7  | <b>797.4403</b> | 399.2238        | 780.4138  | 390.7105         | 779.4298       | 390.2185         | I    | <b>756.4250</b>  | 378.7162        | 739.3985  | 370.2029         | 738.4145       | 369.7109         | 6  |
| 8  | <b>926.4829</b> | 463.7451        | 909.4564  | 455.2318         | 908.4724       | 454.7398         | E    | <b>643.3410</b>  | 322.1741        | 626.3144  | 313.6608         | 625.3304       | 313.1688         | 5  |
| 9  | 1023.5357       | 512.2715        | 1006.5092 | 503.7582         | 1005.5251      | 503.2662         | P    | <b>514.2984</b>  | 257.6528        | 497.2718  | 249.1395         | 496.2878       | 248.6475         | 4  |
| 10 | 1136.6198       | 568.8135        | 1119.5932 | <b>560.3002</b>  | 1118.6092      | <b>559.8082</b>  | L    | 417.2456         | 209.1264        | 400.2191  | 200.6132         | 399.2350       | 200.1212         | 3  |
| 11 | 1265.6624       | 633.3348        | 1248.6358 | 624.8215         | 1247.6518      | 624.3295         | E    | 304.1615         | 152.5844        | 287.1350  | 144.0711         | 286.1510       | 143.5791         | 2  |
| 12 |                 |                 |           |                  |                |                  | R    | 175.1190         | 88.0631         | 158.0924  | 79.5498          |                |                  | 1  |

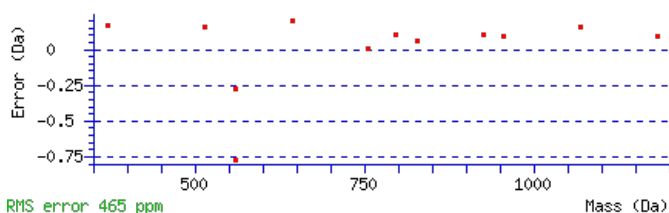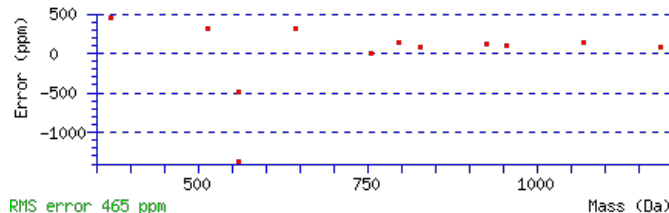NCBI BLAST search of **QELLEAIEPLER**

(Parameters: blastp, nr protein database, expect=20000, no filter, PAM30)

Other BLAST [web gateways](#)



AT3G26070.1

All matches to this query

| Score | Mr(calc)  | Delta   | Sequence                      |
|-------|-----------|---------|-------------------------------|
| 62.7  | 1438.7667 | 0.0000  | <a href="#">QELLEAIEPLER</a>  |
| 0.3   | 1438.7708 | -0.0040 | <a href="#">IEGFTALLDGYIK</a> |

Mascot: <http://www.matrixscience.com/>

**Peptide View**MS/MS Fragmentation of **IWNYTLGDGKEEVFK**Found in **AT3G26450.1** in **TAIR\_Arabidopsis**, Symbols: | major latex protein-related / MLP-related | chr3:9682830-9684536 REVERSE

Match to Query 8752: 1797.897858 from(600.306562,3+) index(7050)

Title: Elution from: 62.447 to 62.447 scan no 9078 cid35.00 polarity:+

Data file D12h-3\_1.mgf

Click mouse within plot area to zoom in by factor of two about that point

Or,   to  Da Label all possible matches  Label matches used for scoring Show Y-axis 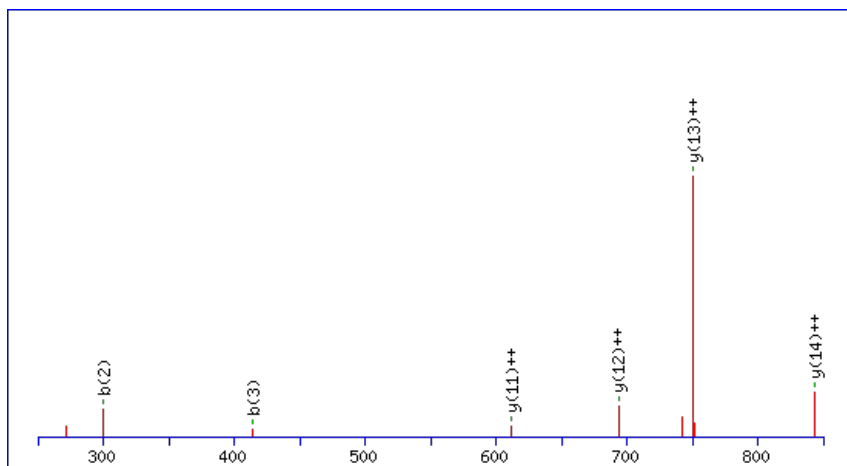Monoisotopic mass of neutral peptide **Mr(calc)**: 1797.8937

Fixed modifications: Carbamidomethyl (C) (apply to specified residues or termini only)

Ions Score: 31 Expect: 0.0029

Matches : 6/150 fragment ions using 8 most intense peaks ([help](#))

| #  | b               | b <sup>++</sup> | b*        | b <sup>*++</sup> | b <sup>0</sup> | b <sup>0++</sup> | Seq. | y         | y <sup>++</sup> | y*        | y <sup>*++</sup> | y <sup>0</sup> | y <sup>0++</sup> | #  |
|----|-----------------|-----------------|-----------|------------------|----------------|------------------|------|-----------|-----------------|-----------|------------------|----------------|------------------|----|
| 1  | 114.0913        | 57.5493         |           |                  |                |                  | I    |           |                 |           |                  |                |                  | 15 |
| 2  | <b>300.1707</b> | 150.5890        |           |                  |                |                  | W    | 1685.8170 | <b>843.4121</b> | 1668.7904 | 834.8988         | 1667.8064      | 834.4068         | 14 |
| 3  | <b>414.2136</b> | 207.6104        | 397.1870  | 199.0972         |                |                  | N    | 1499.7377 | <b>750.3725</b> | 1482.7111 | 741.8592         | 1481.7271      | 741.3672         | 13 |
| 4  | 577.2769        | 289.1421        | 560.2504  | 280.6288         |                |                  | Y    | 1385.6947 | <b>693.3510</b> | 1368.6682 | 684.8377         | 1367.6842      | 684.3457         | 12 |
| 5  | 678.3246        | 339.6659        | 661.2980  | 331.1527         | 660.3140       | 330.6606         | T    | 1222.6314 | <b>611.8193</b> | 1205.6048 | 603.3061         | 1204.6208      | 602.8141         | 11 |
| 6  | 791.4087        | 396.2080        | 774.3821  | 387.6947         | 773.3981       | 387.2027         | L    | 1121.5837 | 561.2955        | 1104.5572 | 552.7822         | 1103.5732      | 552.2902         | 10 |
| 7  | 848.4301        | 424.7187        | 831.4036  | 416.2054         | 830.4196       | 415.7134         | G    | 1008.4997 | 504.7535        | 991.4731  | 496.2402         | 990.4891       | 495.7482         | 9  |
| 8  | 963.4571        | 482.2322        | 946.4305  | 473.7189         | 945.4465       | 473.2269         | D    | 951.4782  | 476.2427        | 934.4516  | 467.7295         | 933.4676       | 467.2374         | 8  |
| 9  | 1020.4785       | 510.7429        | 1003.4520 | 502.2296         | 1002.4680      | 501.7376         | G    | 836.4512  | 418.7293        | 819.4247  | 410.2160         | 818.4407       | 409.7240         | 7  |
| 10 | 1148.5735       | 574.7904        | 1131.5469 | 566.2771         | 1130.5629      | 565.7851         | K    | 779.4298  | 390.2185        | 762.4032  | 381.7053         | 761.4192       | 381.2132         | 6  |
| 11 | 1277.6161       | 639.3117        | 1260.5895 | 630.7984         | 1259.6055      | 630.3064         | E    | 651.3348  | 326.1710        | 634.3083  | 317.6578         | 633.3243       | 317.1658         | 5  |
| 12 | 1406.6587       | 703.8330        | 1389.6321 | 695.3197         | 1388.6481      | 694.8277         | E    | 522.2922  | 261.6498        | 505.2657  | 253.1365         | 504.2817       | 252.6445         | 4  |
| 13 | 1505.7271       | 753.3672        | 1488.7005 | 744.8539         | 1487.7165      | 744.3619         | V    | 393.2496  | 197.1285        | 376.2231  | 188.6152         |                |                  | 3  |
| 14 | 1652.7955       | 826.9014        | 1635.7690 | 818.3881         | 1634.7849      | 817.8961         | F    | 294.1812  | 147.5942        | 277.1547  | 139.0810         |                |                  | 2  |
| 15 |                 |                 |           |                  |                |                  | K    | 147.1128  | 74.0600         | 130.0863  | 65.5468          |                |                  | 1  |

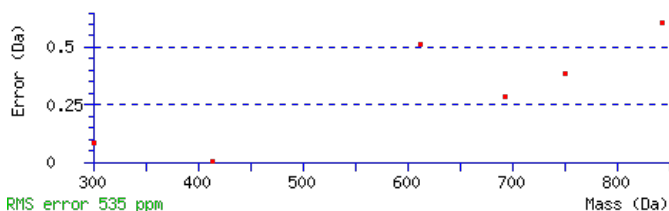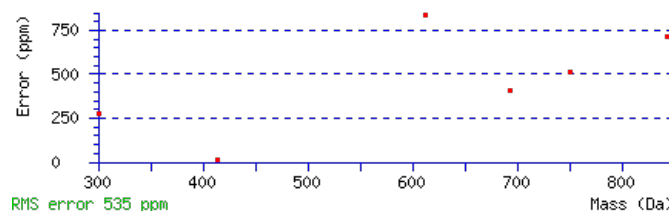NCBI **BLAST** search of [IWNYTLGDGKEEVFK](#)

## AT3G26450.1

(Parameters: blastp, nr protein database, expect=20000, no filter, PAM30)

Other BLAST [web gateways](#)

### All matches to this query

| Score | Mr(calc)  | Delta   | Sequence                           |
|-------|-----------|---------|------------------------------------|
| 31.2  | 1797.8937 | 0.0041  | <a href="#">IWNYTLGDGKEEVFK</a>    |
| 6.7   | 1797.8996 | -0.0017 | <a href="#">LALEAAAAAEDATPLDEK</a> |
| 6.6   | 1797.9023 | -0.0044 | <a href="#">GEIRRGGPSFEFRPGH</a>   |
| 4.6   | 1797.8978 | 0.0000  | <a href="#">MVCOSAGQTRFRTLK</a>    |

Mascot: <http://www.matrixscience.com/>

## Peptide View

### MS/MS Fragmentation of NIAIGGVQEEVYHPNALR

Found in **AT3G26520.1** in **TAIR Arabidopsis**, Symbols: SITIP, GAMMA-TIP2, TIP1;2, TIP2 | TIP2 (TONOPLAST INTRINSIC PROTEIN 2); water channel | chr3:9724007-9724940 REVERSE

Match to Query 9247: 1979.020872 from(990.517712,2+) index(5882)

Title: Elution from: 52.762 to 52.762 scan no 7515 cid35.00 polarity:+

Data file D6h-1\_2.mgf

Click mouse within plot area to zoom in by factor of two about that point

Or,   to  Da

Label all possible matches  Label matches used for scoring

Show Y-axis

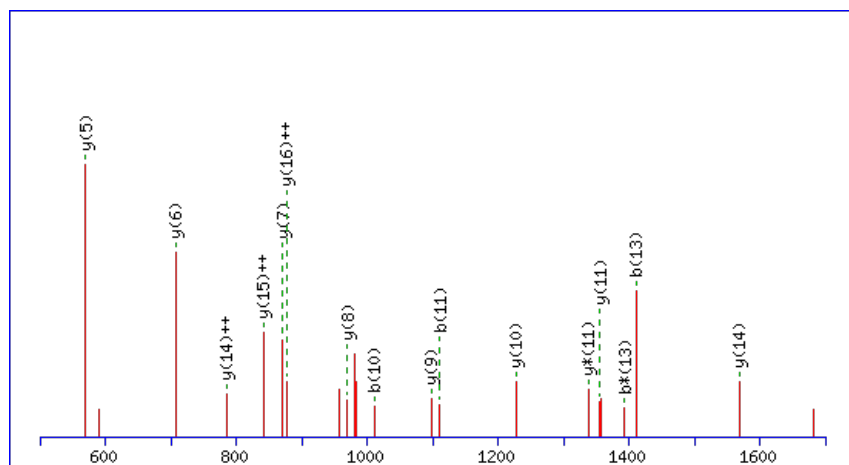

Monoisotopic mass of neutral peptide  $M_r(\text{calc})$ : 1979.0224

Fixed modifications: Carbamidomethyl (C) (apply to specified residues or termini only)

Ions Score: 54 Expect: 1.4e-005

Matches : 16/172 fragment ions using 26 most intense peaks ([help](#))

| #  | b         | b <sup>++</sup> | b*        | b <sup>*++</sup> | b <sup>0</sup> | b <sup>0++</sup> | Seq. | y         | y <sup>++</sup> | y*        | y <sup>*++</sup> | y <sup>0</sup> | y <sup>0++</sup> | #  |
|----|-----------|-----------------|-----------|------------------|----------------|------------------|------|-----------|-----------------|-----------|------------------|----------------|------------------|----|
| 1  | 115.0502  | 58.0287         | 98.0237   | 49.5155          |                |                  | N    |           |                 |           |                  |                |                  | 18 |
| 2  | 228.1343  | 114.5708        | 211.1077  | 106.0575         |                |                  | I    | 1865.9868 | 933.4971        | 1848.9603 | 924.9838         | 1847.9763      | 924.4918         | 17 |
| 3  | 299.1714  | 150.0893        | 282.1448  | 141.5761         |                |                  | A    | 1752.9028 | 876.9550        | 1735.8762 | 868.4417         | 1734.8922      | 867.9497         | 16 |
| 4  | 412.2554  | 206.6314        | 395.2289  | 198.1181         |                |                  | I    | 1681.8656 | 841.4365        | 1664.8391 | 832.9232         | 1663.8551      | 832.4312         | 15 |
| 5  | 469.2769  | 235.1421        | 452.2504  | 226.6288         |                |                  | G    | 1568.7816 | 784.8944        | 1551.7550 | 776.3812         | 1550.7710      | 775.8891         | 14 |
| 6  | 526.2984  | 263.6528        | 509.2718  | 255.1396         |                |                  | G    | 1511.7601 | 756.3837        | 1494.7336 | 747.8704         | 1493.7496      | 747.3784         | 13 |
| 7  | 625.3668  | 313.1870        | 608.3402  | 304.6738         |                |                  | V    | 1454.7387 | 727.8730        | 1437.7121 | 719.3597         | 1436.7281      | 718.8677         | 12 |
| 8  | 753.4254  | 377.2163        | 736.3988  | 368.7030         |                |                  | Q    | 1355.6702 | 678.3388        | 1338.6437 | 669.8255         | 1337.6597      | 669.3335         | 11 |
| 9  | 882.4680  | 441.7376        | 865.4414  | 433.2243         | 864.4574       | 432.7323         | E    | 1227.6117 | 614.3095        | 1210.5851 | 605.7962         | 1209.6011      | 605.3042         | 10 |
| 10 | 1011.5106 | 506.2589        | 994.4840  | 497.7456         | 993.5000       | 497.2536         | E    | 1098.5691 | 549.7882        | 1081.5425 | 541.2749         | 1080.5585      | 540.7829         | 9  |
| 11 | 1110.5790 | 555.7931        | 1093.5524 | 547.2798         | 1092.5684      | 546.7878         | V    | 969.5265  | 485.2669        | 952.4999  | 476.7536         |                |                  | 8  |
| 12 | 1273.6423 | 637.3248        | 1256.6157 | 628.8115         | 1255.6317      | 628.3195         | Y    | 870.4581  | 435.7327        | 853.4315  | 427.2194         |                |                  | 7  |
| 13 | 1410.7012 | 705.8542        | 1393.6747 | 697.3410         | 1392.6906      | 696.8490         | H    | 707.3947  | 354.2010        | 690.3682  | 345.6877         |                |                  | 6  |
| 14 | 1507.7540 | 754.3806        | 1490.7274 | 745.8673         | 1489.7434      | 745.3753         | P    | 570.3358  | 285.6715        | 553.3093  | 277.1583         |                |                  | 5  |
| 15 | 1621.7969 | 811.4021        | 1604.7703 | 802.8888         | 1603.7863      | 802.3968         | N    | 473.2831  | 237.1452        | 456.2565  | 228.6319         |                |                  | 4  |
| 16 | 1692.8340 | 846.9206        | 1675.8075 | 838.4074         | 1674.8234      | 837.9154         | A    | 359.2401  | 180.1237        | 342.2136  | 171.6104         |                |                  | 3  |
| 17 | 1805.9181 | 903.4627        | 1788.8915 | 894.9494         | 1787.9075      | 894.4574         | L    | 288.2030  | 144.6051        | 271.1765  | 136.0919         |                |                  | 2  |
| 18 |           |                 |           |                  |                |                  | R    | 175.1190  | 88.0631         | 158.0924  | 79.5498          |                |                  | 1  |

# AT3G26520.1

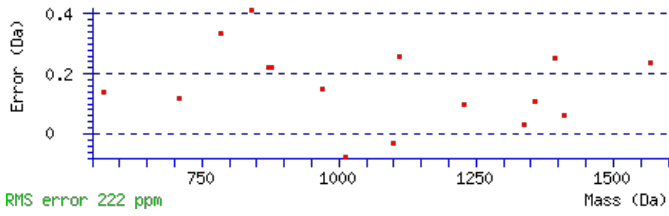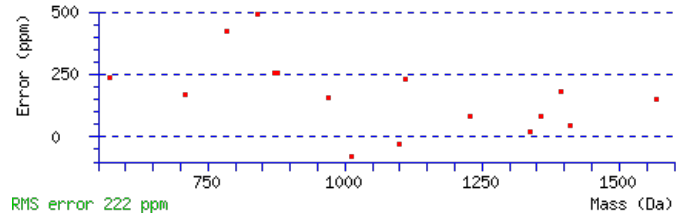

NCBI **BLAST** search of [NIAIGGVQEEVYHPNALR](#)  
(Parameters: blastp, nr protein database, expect=20000, no filter, PAM30)  
Other BLAST [web gateways](#)

## All matches to this query

| Score | Mr(calc)  | Delta   | Sequence                           |
|-------|-----------|---------|------------------------------------|
| 54.0  | 1979.0224 | -0.0016 | <a href="#">NIAIGGVQEEVYHPNALR</a> |

Mascot: <http://www.matrixscience.com/>

**Peptide View**MS/MS Fragmentation of **TELSQSELDPR**

Found in **AT3G26618.1** in **TAIR\_Arabidopsis**, Symbols: ERF1-3 | ERF1-3 (EUKARYOTIC RELEASE FACTOR 1-3); translation release factor | chr3:9790091-9791398 FORWARD

Match to Query 5459: 1420.681758 from(711.348155,2+) index(5679)

Title: Elution from: 52.751 to 52.751 scan no 7295 cid35.00 polarity:+

Data file D1d-2\_1.mgf

Click mouse within plot area to zoom in by factor of two about that point

Or,   to  Da

Label all possible matches  Label matches used for scoring

Show Y-axis

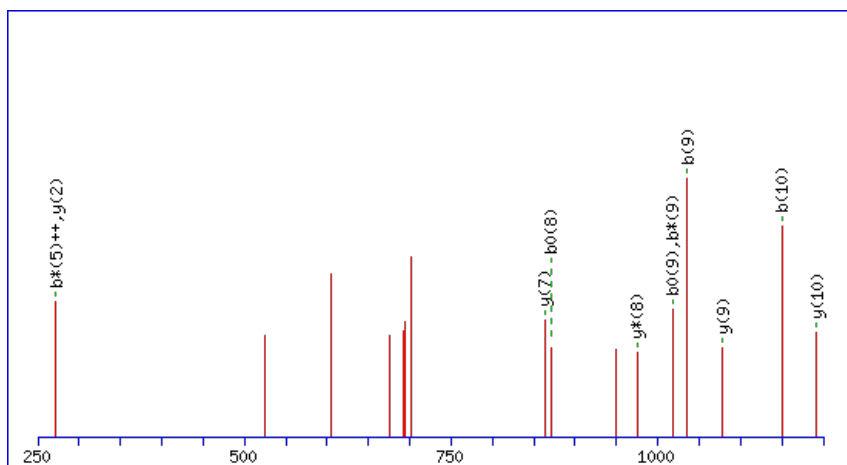

Monoisotopic mass of neutral peptide  $M_r(\text{calc})$ : 1420.6834

Fixed modifications: Carbamidomethyl (C) (apply to specified residues or termini only)

Ions Score: 28 Expect: 0.0046

Matches : 11/120 fragment ions using 15 most intense peaks ([help](#))

| #  | b                | b <sup>++</sup> | b*               | b <sup>*++</sup> | b <sup>0</sup>   | b <sup>0++</sup> | Seq. | y                | y <sup>++</sup> | y*              | y <sup>*++</sup> | y <sup>0</sup> | y <sup>0++</sup> | #  |
|----|------------------|-----------------|------------------|------------------|------------------|------------------|------|------------------|-----------------|-----------------|------------------|----------------|------------------|----|
| 1  | 102.0550         | 51.5311         |                  |                  | 84.0444          | 42.5258          | T    |                  |                 |                 |                  |                |                  | 12 |
| 2  | 231.0975         | 116.0524        |                  |                  | 213.0870         | 107.0471         | E    | 1320.6430        | 660.8251        | 1303.6165       | 652.3119         | 1302.6325      | 651.8199         | 11 |
| 3  | 344.1816         | 172.5944        |                  |                  | 326.1710         | 163.5892         | L    | <b>1191.6004</b> | 596.3039        | 1174.5739       | 587.7906         | 1173.5899      | 587.2986         | 10 |
| 4  | 431.2136         | 216.1105        |                  |                  | 413.2031         | 207.1052         | S    | <b>1078.5164</b> | 539.7618        | 1061.4898       | 531.2485         | 1060.5058      | 530.7565         | 9  |
| 5  | 559.2722         | 280.1397        | 542.2457         | <b>271.6265</b>  | 541.2617         | 271.1345         | Q    | 991.4843         | 496.2458        | <b>974.4578</b> | 487.7325         | 973.4738       | 487.2405         | 8  |
| 6  | 646.3042         | 323.6558        | 629.2777         | 315.1425         | 628.2937         | 314.6505         | S    | <b>863.4258</b>  | 432.2165        | 846.3992        | 423.7032         | 845.4152       | 423.2112         | 7  |
| 7  | 775.3468         | 388.1771        | 758.3203         | 379.6638         | 757.3363         | 379.1718         | E    | 776.3937         | 388.7005        | 759.3672        | 380.1872         | 758.3832       | 379.6952         | 6  |
| 8  | 888.4309         | 444.7191        | 871.4044         | 436.2058         | <b>870.4203</b>  | 435.7138         | L    | 647.3511         | 324.1792        | 630.3246        | 315.6659         | 629.3406       | 315.1739         | 5  |
| 9  | <b>1035.4993</b> | 518.2533        | <b>1018.4728</b> | 509.7400         | <b>1017.4888</b> | 509.2480         | F    | 534.2671         | 267.6372        | 517.2405        | 259.1239         | 516.2565       | 258.6319         | 4  |
| 10 | <b>1150.5263</b> | 575.7668        | 1133.4997        | 567.2535         | 1132.5157        | 566.7615         | D    | 387.1987         | 194.1030        | 370.1721        | 185.5897         | 369.1881       | 185.0977         | 3  |
| 11 | 1247.5790        | 624.2932        | 1230.5525        | 615.7799         | 1229.5685        | 615.2879         | P    | <b>272.1717</b>  | 136.5895        | 255.1452        | 128.0762         |                |                  | 2  |
| 12 |                  |                 |                  |                  |                  |                  | R    | 175.1190         | 88.0631         | 158.0924        | 79.5498          |                |                  | 1  |

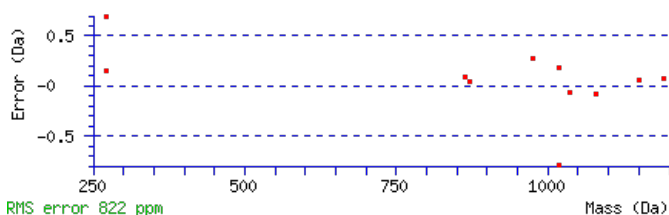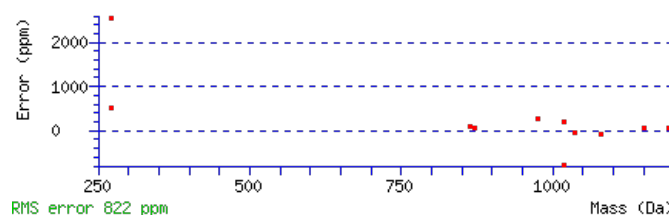NCBI BLAST search of **TELSQSELDPR**

(Parameters: blastp, nr protein database, expect=20000, no filter, PAM30)

Other BLAST [web gateways](#)

AT3G26618.1

All matches to this query

| Score | Mr(calc)  | Delta   | Sequence                      |
|-------|-----------|---------|-------------------------------|
| 28.0  | 1420.6834 | -0.0017 | <a href="#">TELSQSELDPR</a>   |
| 3.1   | 1420.6834 | -0.0016 | <a href="#">QYGKKPAPTESSE</a> |

Mascot: <http://www.matrixscience.com/>

### Peptide View

 MS/MS Fragmentation of **YDSTLGIFDADVKPSGETAISVDGK**

 Found in **AT3G26650.1** in **TAIR\_Arabidopsis**, Symbols: GAPA-1, GAPA | GAPA (GLYCERALDEHYDE 3-PHOSPHATE DEHYDROGENASE A SUBUNIT); glyceraldehyde-3-phosphate dehydrogenase | chr3:9796463-9798085 FORWARD

Match to Query 9867: 2611.181583 from(871.401137,3+) index(7807)

Title: Elution from: 69.773 to 69.773 scan no 10386 cid35.00 polarity:+

Data file C7-3\_3.mgf

Click mouse within plot area to zoom in by factor of two about that point

 Or,  450 to  Da 

 Label all possible matches  Label matches used for scoring 

 Show Y-axis 
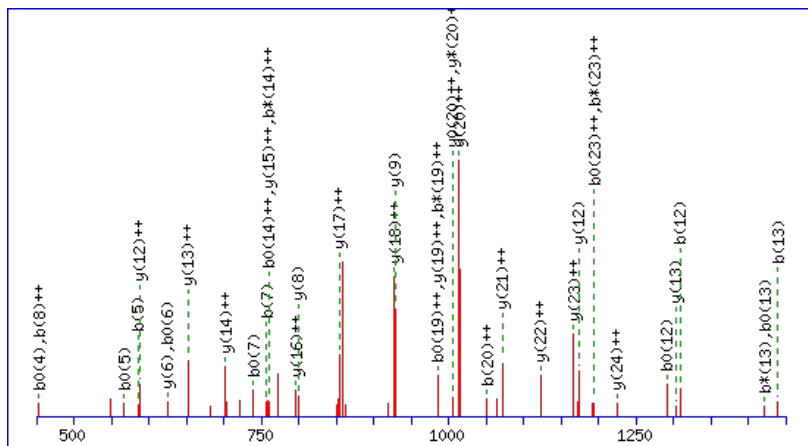
 Monoisotopic mass of neutral peptide  $M_r(\text{calc})$ : 2611.1743

Fixed modifications: Carbamidomethyl (C) (apply to specified residues or termini only)

Ions Score: 98 Expect: 1e-009

 Matches : 39/258 fragment ions using 46 most intense peaks ([help](#))

| #  | b         | b <sup>++</sup> | b*        | b* <sup>++</sup> | b <sup>0</sup> | b <sup>0</sup> ++ | Seq | y         | y <sup>++</sup> | y*        | y* <sup>++</sup> | y <sup>0</sup> | y <sup>0</sup> ++ | #  |
|----|-----------|-----------------|-----------|------------------|----------------|-------------------|-----|-----------|-----------------|-----------|------------------|----------------|-------------------|----|
| 1  | 165.0676  | 83.0375         |           |                  |                |                   | Y   |           |                 |           |                  |                |                   | 25 |
| 2  | 281.0916  | 141.0494        |           |                  | 263.0811       | 132.0442          | D   | 2448.1213 | 1224.5643       | 2430.0977 | 1215.5525        | 2430.1107      | 1215.5590         | 24 |
| 3  | 369.1207  | 185.0640        |           |                  | 351.1101       | 176.0587          | S   | 2332.0973 | 1166.5523       | 2314.0737 | 1157.5405        | 2314.0868      | 1157.5470         | 23 |
| 4  | 471.1654  | 236.0863        |           |                  | 453.1548       | 227.0811          | T   | 2244.0683 | 1122.5378       | 2226.0447 | 1113.5260        | 2226.0577      | 1113.5325         | 22 |
| 5  | 585.2465  | 293.1269        |           |                  | 567.2359       | 284.1216          | L   | 2142.0235 | 1071.5154       | 2124.0000 | 1062.5036        | 2124.0130      | 1062.5101         | 21 |
| 6  | 643.2650  | 322.1361        |           |                  | 625.2544       | 313.1309          | G   | 2027.9424 | 1014.4749       | 2009.9189 | 1005.4631        | 2009.9319      | 1005.4696         | 20 |
| 7  | 757.3461  | 379.1767        |           |                  | 739.3355       | 370.1714          | I   | 1969.9239 | 985.4656        | 1951.9004 | 976.4538         | 1951.9134      | 976.4603          | 19 |
| 8  | 905.4115  | 453.2094        |           |                  | 887.4010       | 444.2041          | F   | 1855.8428 | 928.4251        | 1837.8193 | 919.4133         | 1837.8323      | 919.4198          | 18 |
| 9  | 1021.4355 | 511.2214        |           |                  | 1003.4250      | 502.2161          | D   | 1707.7774 | 854.3923        | 1689.7538 | 845.3805         | 1689.7668      | 845.3871          | 17 |
| 10 | 1093.4697 | 547.2385        |           |                  | 1075.4591      | 538.2332          | A   | 1591.7534 | 796.3803        | 1573.7298 | 787.3686         | 1573.7429      | 787.3751          | 16 |
| 11 | 1209.4936 | 605.2505        |           |                  | 1191.4831      | 596.2452          | D   | 1519.7193 | 760.3633        | 1501.6957 | 751.3515         | 1501.7087      | 751.3580          | 15 |
| 12 | 1309.5591 | 655.2832        |           |                  | 1291.5485      | 646.2779          | V   | 1403.6953 | 702.3513        | 1385.6717 | 693.3395         | 1385.6847      | 693.3460          | 14 |
| 13 | 1439.6481 | 720.3277        | 1421.6245 | 711.3159         | 1421.6376      | 711.3224          | K   | 1303.6298 | 652.3186        | 1285.6063 | 643.3068         | 1285.6193      | 643.3133          | 13 |
| 14 | 1537.6979 | 769.3526        | 1519.6743 | 760.3408         | 1519.6874      | 760.3473          | P   | 1173.5408 | 587.2740        | 1155.5172 | 578.2623         | 1155.5302      | 578.2688          | 12 |
| 15 | 1625.7270 | 813.3671        | 1607.7034 | 804.3553         | 1607.7164      | 804.3618          | S   | 1075.4910 | 538.2491        | 1057.4674 | 529.2374         | 1057.4804      | 529.2439          | 11 |
| 16 | 1683.7455 | 842.3764        | 1665.7219 | 833.3646         | 1665.7349      | 833.3711          | G   | 987.4620  | 494.2346        | 969.4384  | 485.2228         | 969.4514       | 485.2293          | 10 |
| 17 | 1813.7851 | 907.3962        | 1795.7615 | 898.3844         | 1795.7746      | 898.3909          | E   | 929.4435  | 465.2254        | 911.4199  | 456.2136         | 911.4329       | 456.2201          | 9  |
| 18 | 1915.8298 | 958.4186        | 1897.8062 | 949.4068         | 1897.8193      | 949.4133          | T   | 799.4038  | 400.2056        | 781.3802  | 391.1938         | 781.3933       | 391.2003          | 8  |
| 19 | 1987.8640 | 994.4356        | 1969.8404 | 985.4238         | 1969.8534      | 985.4303          | A   | 697.3591  | 349.1832        | 679.3355  | 340.1714         | 679.3485       | 340.1779          | 7  |
| 20 | 2101.9451 | 1051.4762       | 2083.9215 | 1042.4644        | 2083.9345      | 1042.4709         | I   | 625.3250  | 313.1661        | 607.3014  | 304.1543         | 607.3144       | 304.1608          | 6  |
| 21 | 2189.9741 | 1095.4907       | 2171.9506 | 1086.4789        | 2171.9636      | 1086.4854         | S   | 511.2439  | 256.1256        | 493.2203  | 247.1138         | 493.2333       | 247.1203          | 5  |
| 22 | 2290.0396 | 1145.5234       | 2272.0160 | 1136.5116        | 2272.0290      | 1136.5181         | V   | 423.2148  | 212.1110        | 405.1912  | 203.0992         | 405.2042       | 203.1058          | 4  |
| 23 | 2406.0636 | 1203.5354       | 2388.0400 | 1194.5236        | 2388.0530      | 1194.5301         | D   | 323.1494  | 162.0783        | 305.1258  | 153.0665         | 305.1388       | 153.0730          | 3  |
| 24 | 2464.0821 | 1232.5447       | 2446.0585 | 1223.5329        | 2446.0715      | 1223.5394         | G   | 207.1254  | 104.0663        | 189.1018  | 95.0545          |                |                   | 2  |



|    |  |  |  |  |  |   |          |         |          |         |  |  |   |
|----|--|--|--|--|--|---|----------|---------|----------|---------|--|--|---|
| 25 |  |  |  |  |  | K | 149.1069 | 75.0571 | 131.0833 | 66.0453 |  |  | 1 |
|----|--|--|--|--|--|---|----------|---------|----------|---------|--|--|---|

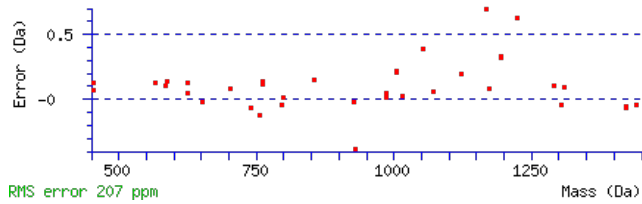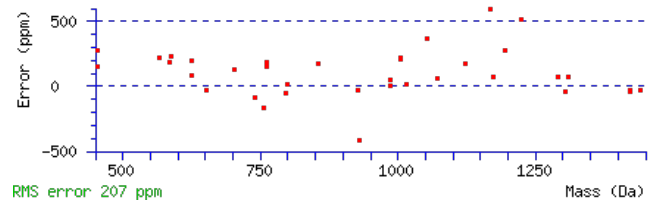

NCBI BLAST search of [YDSTLGIFDADV KPSGETAISVDGK](#)  
 (Parameters: blastp, nr protein database, expect=20000, no filter, PAM30)  
 Other BLAST [web gateways](#)

#### All matches to this query

| Score | Mr(calc)  | Delta   | Sequence                                   |
|-------|-----------|---------|--------------------------------------------|
| 98.1  | 2611.1743 | 0.0072  | <a href="#">YDSTLGIFDADV KPSGETAISVDGK</a> |
| 2.1   | 2611.1864 | -0.0048 | <a href="#">TTVPYGAWFHKSQVGGWAI EYGK</a>   |
| 0.7   | 2611.1783 | 0.0033  | <a href="#">QGLTREALGVENLMMDSGVRPDR</a>    |
| 0.0   | 2611.1887 | -0.0071 | <a href="#">TREDAVALALKAGLNMNCGDFLGK</a>   |

Mascot: <http://www.matrixscience.com/>

## Peptide View

### MS/MS Fragmentation of **MLEKTISSKA**

Found in **AT3G26670.1** in **TAIR Arabidopsis**, Symbols: | similar to permease-related [Arabidopsis thaliana] (TAIR:AT3G23870.1); similar to unnamed protein product [Vitis vinifera] (GB:CAO49131.1); contains InterPro domain Protein of unknown function DUF803 (InterPro:IPR008521) | chr3:9799473-

Match to Query 3605: 1134.557642 from(568.286097,2+) index(5331)

Title: Elution from: 47.696 to 47.696 scan no 6758 cid35.00 polarity:+

Data file D6h-3\_2.mgf

Click mouse within plot area to zoom in by factor of two about that point

Or,   to  Da

Label all possible matches  Label matches used for scoring

Show Y-axis

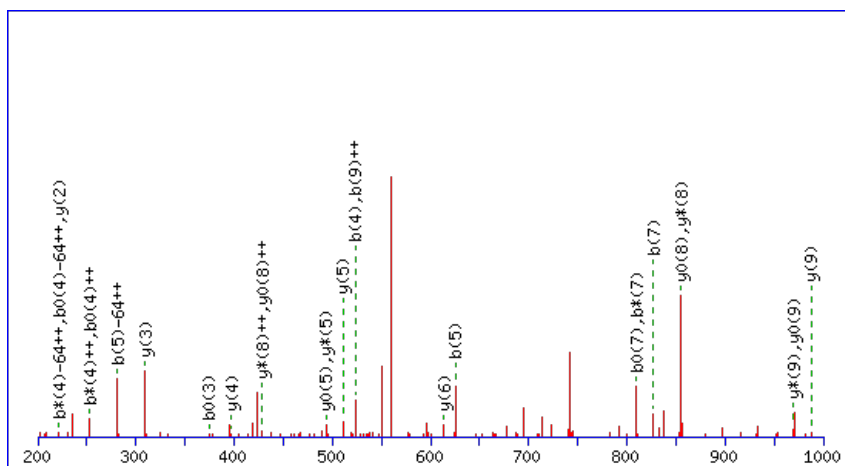

**Monoisotopic mass of neutral peptide Mr(calc):** 1134.5599

**Fixed modifications:** Carbamidomethyl (C) (apply to specified residues or termini only)

**Variable modifications:**

**M1** : Oxidation (M), with neutral losses 0.0000 (shown in table), 63.9983

**Ions Score:** 32 **Expect:** 0.0062

**Matches** : 26/136 fragment ions using 40 most intense peaks ([help](#))

| #  | b               | b <sup>++</sup> | b <sup>*</sup>  | b <sup>*++</sup> | b <sup>0</sup>  | b <sup>0++</sup> | Seq. | y               | y <sup>++</sup> | y <sup>*</sup>  | y <sup>*++</sup> | y <sup>0</sup>  | y <sup>0++</sup> | #  |
|----|-----------------|-----------------|-----------------|------------------|-----------------|------------------|------|-----------------|-----------------|-----------------|------------------|-----------------|------------------|----|
| 1  | 149.0397        | 75.0235         |                 |                  |                 |                  | M    |                 |                 |                 |                  |                 |                  | 10 |
| 2  | 263.1208        | 132.0640        |                 |                  |                 |                  | L    | <b>987.5347</b> | 494.2710        | <b>969.5111</b> | 485.2592         | <b>969.5242</b> | 485.2657         | 9  |
| 3  | 393.1604        | 197.0839        |                 |                  | <b>375.1499</b> | 188.0786         | E    | 873.4536        | 437.2304        | <b>855.4300</b> | <b>428.2187</b>  | <b>855.4431</b> | <b>428.2252</b>  | 8  |
| 4  | <b>523.2495</b> | 262.1284        | 505.2259        | <b>253.1166</b>  | 505.2389        | <b>253.1231</b>  | K    | 743.4140        | 372.2106        | 725.3904        | 363.1988         | 725.4034        | 363.2054         | 7  |
| 5  | <b>625.2942</b> | 313.1507        | 607.2706        | 304.1389         | 607.2836        | 304.1454         | T    | <b>613.3250</b> | 307.1661        | 595.3014        | 298.1543         | 595.3144        | 298.1608         | 6  |
| 6  | 739.3753        | 370.1913        | 721.3517        | 361.1795         | 721.3647        | 361.1860         | I    | <b>511.2802</b> | 256.1438        | <b>493.2567</b> | 247.1320         | <b>493.2697</b> | 247.1385         | 5  |
| 7  | <b>827.4043</b> | 414.2058        | <b>809.3808</b> | 405.1940         | <b>809.3938</b> | 405.2005         | S    | <b>397.1991</b> | 199.1032        | 379.1756        | 190.0914         | 379.1886        | 190.0979         | 4  |
| 8  | 915.4334        | 458.2203        | 897.4098        | 449.2086         | 897.4228        | 449.2151         | S    | <b>309.1701</b> | 155.0887        | 291.1465        | 146.0769         | 291.1595        | 146.0834         | 3  |
| 9  | 1045.5224       | <b>523.2649</b> | 1027.4989       | 514.2531         | 1027.5119       | 514.2596         | K    | <b>221.1410</b> | 111.0741        | 203.1174        | 102.0624         |                 |                  | 2  |
| 10 |                 |                 |                 |                  |                 |                  | A    | 91.0520         | 46.0296         |                 |                  |                 |                  | 1  |

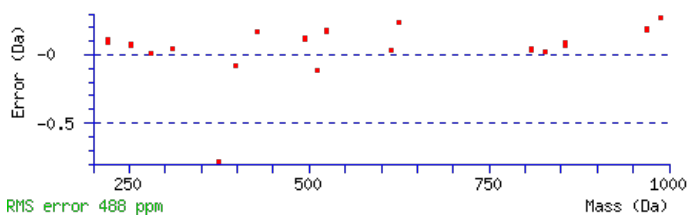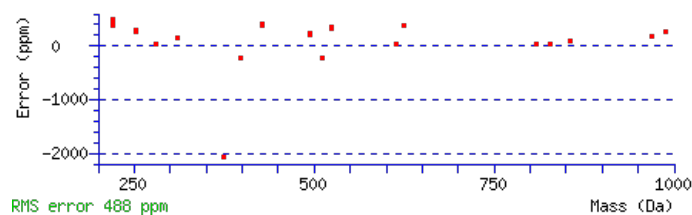

NCBI **BLAST** search of **MLEKTISSKA**

(Parameters: blastp, nr protein database, expect=20000, no filter, PAM30)

Other BLAST [web gateways](#)

# AT3G26670.1

All matches to this query

| Score | Mr(calc)  | Delta   | Sequence                   |
|-------|-----------|---------|----------------------------|
| 31.5  | 1134.5599 | -0.0022 | <a href="#">MLEKTISSKA</a> |
| 19.9  | 1134.5578 | -0.0002 | <a href="#">QRKAMNIMK</a>  |
| 12.7  | 1134.5592 | -0.0015 | <a href="#">VOYGSPVSRK</a> |
| 10.2  | 1134.5565 | 0.0012  | <a href="#">DITELYLTR</a>  |
| 7.6   | 1134.5587 | -0.0011 | <a href="#">DVYKLDFPK</a>  |
| 7.6   | 1134.5592 | -0.0015 | <a href="#">YIAAAEQRK</a>  |
| 7.5   | 1134.5565 | 0.0011  | <a href="#">LYELSNVSAK</a> |
| 6.0   | 1134.5592 | -0.0015 | <a href="#">KVFDQISQR</a>  |
| 3.1   | 1134.5544 | 0.0032  | <a href="#">RTMLWLAGR</a>  |
| 1.1   | 1134.5578 | -0.0002 | <a href="#">MATMLRLGAR</a> |

Mascot: <http://www.matrixscience.com/>

**Peptide View**MS/MS Fragmentation of **VQDEIRTTLGDKK**

Found in **AT3G26830.1** in **TAIR\_Arabidopsis**, Symbols: CYP71B15, PAD3 | PAD3 (PHYTOALEXIN DEFICIENT 3); oxygen binding | chr3:9889227-9890797 FORWARD

Match to Query 6291: 1520.752532 from(761.383542,2+) index(10590)

Title: Elution from: 107.779 to 107.779 scan no 15557 cid35.00 polarity:+

Data file D12h-1\_3.mgf

Click mouse within plot area to zoom in by factor of two about that point

Or,   to  Da

Label all possible matches  Label matches used for scoring

Show Y-axis

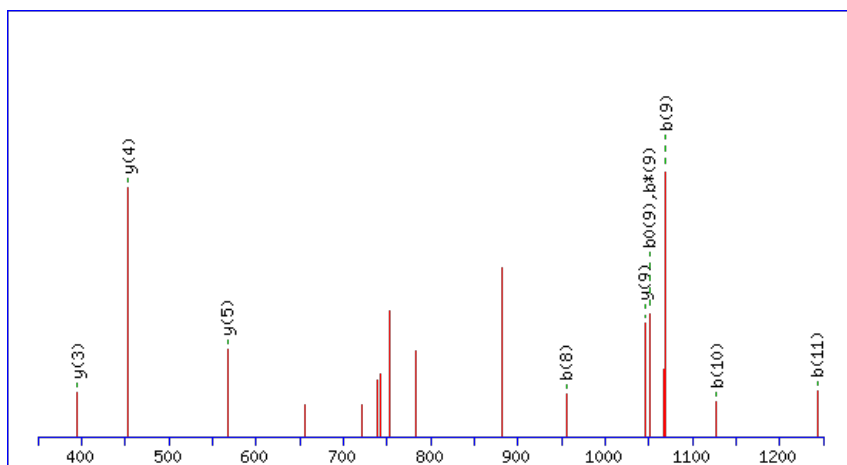

Monoisotopic mass of neutral peptide  $M_r(\text{calc})$ : 1520.7536

Fixed modifications: Carbamidomethyl (C) (apply to specified residues or termini only)

Ions Score: 33 Expect: 0.0057

Matches : 10/134 fragment ions using 15 most intense peaks [\(help\)](#)

| #  | b                | b <sup>++</sup> | b*               | b <sup>*++</sup> | b <sup>0</sup>   | b <sup>0++</sup> | Seq. | y                | y <sup>++</sup> | y*        | y <sup>*++</sup> | y <sup>0</sup> | y <sup>0++</sup> | #  |
|----|------------------|-----------------|------------------|------------------|------------------|------------------|------|------------------|-----------------|-----------|------------------|----------------|------------------|----|
| 1  | 101.0727         | 51.0400         |                  |                  |                  |                  | V    |                  |                 |           |                  |                |                  | 13 |
| 2  | 231.1254         | 116.0663        | 213.1018         | 107.0545         |                  |                  | Q    | 1421.6955        | 711.3514        | 1403.6719 | 702.3396         | 1403.6849      | 702.3461         | 12 |
| 3  | 347.1493         | 174.0783        | 329.1258         | 165.0665         | 329.1388         | 165.0730         | D    | 1291.6429        | 646.3251        | 1273.6193 | 637.3133         | 1273.6323      | 637.3198         | 11 |
| 4  | 477.1890         | 239.0981        | 459.1654         | 230.0863         | 459.1784         | 230.0928         | E    | 1175.6189        | 588.3131        | 1157.5953 | 579.3013         | 1157.6083      | 579.3078         | 10 |
| 5  | 591.2701         | 296.1387        | 573.2465         | 287.1269         | 573.2595         | 287.1334         | I    | <b>1045.5793</b> | 523.2933        | 1027.5557 | 514.2815         | 1027.5687      | 514.2880         | 9  |
| 6  | 751.3593         | 376.1833        | 733.3357         | 367.1715         | 733.3488         | 367.1780         | R    | 931.4982         | 466.2527        | 913.4746  | 457.2409         | 913.4876       | 457.2474         | 8  |
| 7  | 853.4040         | 427.2057        | 835.3805         | 418.1939         | 835.3935         | 418.2004         | T    | 771.4089         | 386.2081        | 753.3853  | 377.1963         | 753.3983       | 377.2028         | 7  |
| 8  | <b>955.4488</b>  | 478.2280        | 937.4252         | 469.2162         | 937.4382         | 469.2227         | T    | 669.3642         | 335.1857        | 651.3406  | 326.1739         | 651.3536       | 326.1805         | 6  |
| 9  | <b>1069.5299</b> | 535.2686        | <b>1051.5063</b> | 526.2568         | <b>1051.5193</b> | 526.2633         | L    | <b>567.3195</b>  | 284.1634        | 549.2959  | 275.1516         | 549.3089       | 275.1581         | 5  |
| 10 | <b>1127.5484</b> | 564.2778        | 1109.5248        | 555.2660         | 1109.5378        | 555.2725         | G    | <b>453.2384</b>  | 227.1228        | 435.2148  | 218.1110         | 435.2278       | 218.1175         | 4  |
| 11 | <b>1243.5723</b> | 622.2898        | 1225.5487        | 613.2780         | 1225.5618        | 613.2845         | D    | <b>395.2199</b>  | 198.1136        | 377.1963  | 189.1018         | 377.2093       | 189.1083         | 3  |
| 12 | 1373.6614        | 687.3343        | 1355.6378        | 678.3225         | 1355.6508        | 678.3290         | K    | 279.1959         | 140.1016        | 261.1723  | 131.0898         |                |                  | 2  |
| 13 |                  |                 |                  |                  |                  |                  | K    | 149.1069         | 75.0571         | 131.0833  | 66.0453          |                |                  | 1  |

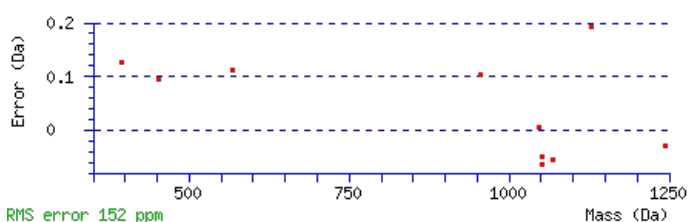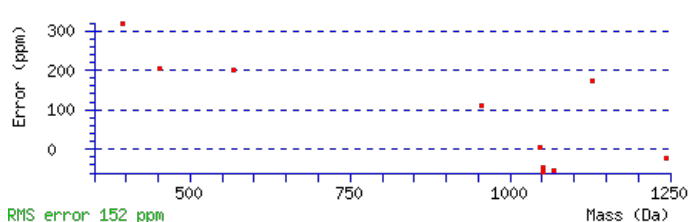

NCBI **BLAST** search of **VQDEIRTTLGDKK**

(Parameters: blastp, nr protein database, expect=20000, no filter, PAM30)

# AT3G26830.1

Other BLAST [web gateways](#)

## All matches to this query

| Score | Mr(calc)  | Delta   | Sequence                       |
|-------|-----------|---------|--------------------------------|
| 32.8  | 1520.7536 | -0.0011 | <a href="#">VQDEIRITLGDKK</a>  |
| 11.7  | 1520.7537 | -0.0011 | <a href="#">SGLDKIESDLAKAR</a> |
| 3.5   | 1520.7559 | -0.0034 | <a href="#">VVADQIARIFDEK</a>  |
| 0.6   | 1520.7519 | 0.0007  | <a href="#">IDLSLKDCGLLMK</a>  |
| 0.3   | 1520.7512 | 0.0014  | <a href="#">LRMDQLNLGWK</a>    |

Mascot: <http://www.matrixscience.com/>

**Peptide View**MS/MS Fragmentation of **KKDEEEDNWEMPGGDVPS**Found in **AT3G27160.1** in **TAIR\_Arabidopsis**, Symbols: GHS1 | GHS1 (GLUCOSE HYPERSENSITIVE 1); structural constituent of ribosome | chr3:10018768-10020091 FORWARD

Match to Query 9029: 2060.862903 from(687.961577,3+) index(4257)

Title: Elution from: 43.052 to 43.052 scan no 5490 cid35.00 polarity:+

Data file D1d-1-2.mgf

Click mouse within plot area to zoom in by factor of two about that point

Or,  to  Da Label all possible matches  Label matches used for scoring Show Y-axis 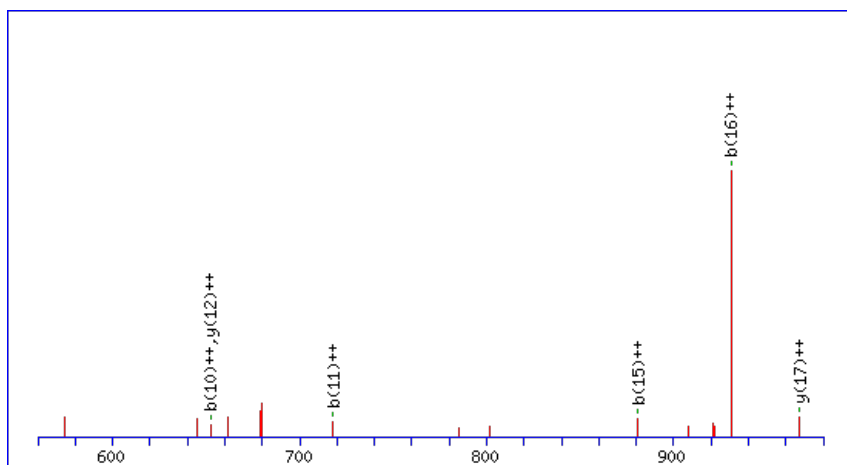

Monoisotopic mass of neutral peptide Mr(calc): 2060.8633

Fixed modifications: Carbamidomethyl (C) (apply to specified residues or termini only)

Ions Score: 15 Expect: 0.032

Matches : 6/180 fragment ions using 13 most intense peaks ([help](#))

| #  | b         | b <sup>++</sup> | b*        | b <sup>*++</sup> | b <sup>0</sup> | b <sup>0++</sup> | Seq.     | y         | y <sup>++</sup> | y*        | y <sup>*++</sup> | y <sup>0</sup> | y <sup>0++</sup> | #         |
|----|-----------|-----------------|-----------|------------------|----------------|------------------|----------|-----------|-----------------|-----------|------------------|----------------|------------------|-----------|
| 1  | 129.1022  | 65.0548         | 112.0757  | 56.5415          |                |                  | <b>K</b> |           |                 |           |                  |                |                  | <b>18</b> |
| 2  | 257.1972  | 129.1022        | 240.1707  | 120.5890         |                |                  | <b>K</b> | 1933.7756 | <b>967.3915</b> | 1916.7491 | 958.8782         | 1915.7651      | 958.3862         | <b>17</b> |
| 3  | 372.2241  | 186.6157        | 355.1976  | 178.1024         | 354.2136       | 177.6104         | <b>D</b> | 1805.6807 | 903.3440        | 1788.6541 | 894.8307         | 1787.6701      | 894.3387         | <b>16</b> |
| 4  | 501.2667  | 251.1370        | 484.2402  | 242.6237         | 483.2562       | 242.1317         | <b>E</b> | 1690.6537 | 845.8305        | 1673.6272 | 837.3172         | 1672.6432      | 836.8252         | <b>15</b> |
| 5  | 630.3093  | 315.6583        | 613.2828  | 307.1450         | 612.2988       | 306.6530         | <b>E</b> | 1561.6111 | 781.3092        | 1544.5846 | 772.7959         | 1543.6006      | 772.3039         | <b>14</b> |
| 6  | 759.3519  | 380.1796        | 742.3254  | 371.6663         | 741.3414       | 371.1743         | <b>E</b> | 1432.5685 | 716.7879        | 1415.5420 | 708.2746         | 1414.5580      | 707.7826         | <b>13</b> |
| 7  | 874.3789  | 437.6931        | 857.3523  | 429.1798         | 856.3683       | 428.6878         | <b>D</b> | 1303.5259 | <b>652.2666</b> | 1286.4994 | 643.7533         | 1285.5154      | 643.2613         | <b>12</b> |
| 8  | 988.4218  | 494.7145        | 971.3952  | 486.2013         | 970.4112       | 485.7093         | <b>N</b> | 1188.4990 | 594.7531        | 1171.4725 | 586.2399         | 1170.4884      | 585.7479         | <b>11</b> |
| 9  | 1174.5011 | 587.7542        | 1157.4746 | 579.2409         | 1156.4905      | 578.7489         | <b>W</b> | 1074.4561 | 537.7317        |           |                  | 1056.4455      | 528.7264         | <b>10</b> |
| 10 | 1303.5437 | <b>652.2755</b> | 1286.5172 | 643.7622         | 1285.5331      | 643.2702         | <b>E</b> | 888.3768  | 444.6920        |           |                  | 870.3662       | 435.6867         | <b>9</b>  |
| 11 | 1434.5842 | <b>717.7957</b> | 1417.5576 | 709.2825         | 1416.5736      | 708.7904         | <b>M</b> | 759.3342  | 380.1707        |           |                  | 741.3236       | 371.1654         | <b>8</b>  |
| 12 | 1531.6369 | 766.3221        | 1514.6104 | 757.8088         | 1513.6264      | 757.3168         | <b>P</b> | 628.2937  | 314.6505        |           |                  | 610.2831       | 305.6452         | <b>7</b>  |
| 13 | 1588.6584 | 794.8328        | 1571.6319 | 786.3196         | 1570.6478      | 785.8276         | <b>G</b> | 531.2409  | 266.1241        |           |                  | 513.2304       | 257.1188         | <b>6</b>  |
| 14 | 1645.6799 | 823.3436        | 1628.6533 | 814.8303         | 1627.6693      | 814.3383         | <b>G</b> | 474.2195  | 237.6134        |           |                  | 456.2089       | 228.6081         | <b>5</b>  |
| 15 | 1760.7068 | <b>880.8570</b> | 1743.6803 | 872.3438         | 1742.6963      | 871.8518         | <b>D</b> | 417.1980  | 209.1026        |           |                  | 399.1874       | 200.0974         | <b>4</b>  |
| 16 | 1859.7752 | <b>930.3913</b> | 1842.7487 | 921.8780         | 1841.7647      | 921.3860         | <b>V</b> | 302.1710  | 151.5892        |           |                  | 284.1605       | 142.5839         | <b>3</b>  |
| 17 | 1956.8280 | 978.9176        | 1939.8014 | 970.4044         | 1938.8174      | 969.9124         | <b>P</b> | 203.1026  | 102.0550        |           |                  | 185.0921       | 93.0497          | <b>2</b>  |
| 18 |           |                 |           |                  |                |                  | <b>S</b> | 106.0499  | 53.5286         |           |                  | 88.0393        | 44.5233          | <b>1</b>  |

# AT3G27160.1

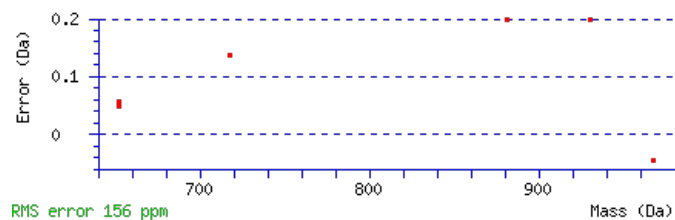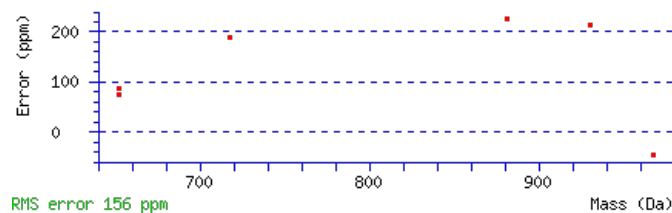

NCBI **BLAST** search of [KKDEEEDNWEMPGGDVPS](#)  
(Parameters: blastp, nr protein database, expect=20000, no filter, PAM30)  
Other BLAST [web gateways](#)

## All matches to this query

| Score | Mr(calc)  | Delta   | Sequence                           |
|-------|-----------|---------|------------------------------------|
| 15.0  | 2060.8633 | -0.0004 | <a href="#">KKDEEEDNWEMPGGDVPS</a> |

Mascot: <http://www.matrixscience.com/>

### Peptide View

 MS/MS Fragmentation of **LPYIFQTLGLEIDEK**

 Found in **AT3G27280.1** in **TAIR\_Arabidopsis**, Symbols: ATPHB4 | ATPHB4 (PROHIBITIN 4) | chr3:10078141-10079288 FORWARD

Match to Query 9125: 1844.878070 from(923.446311,2+) index(10793)

Title: Elution from: 101.936 to 101.936 scan no 15264 cid35.00 polarity:+

Data file C7-2\_1.mgf

Click mouse within plot area to zoom in by factor of two about that point

 Or,   to  Da 

 Label all possible matches  Label matches used for scoring 

 Show Y-axis 
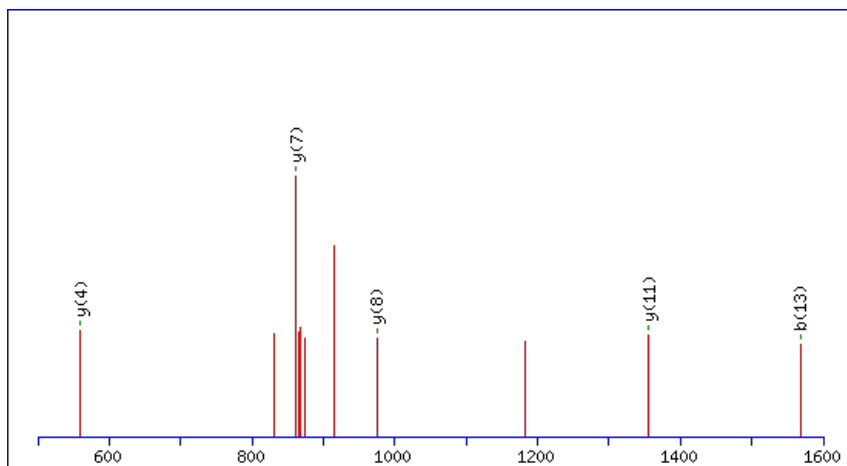
 Monoisotopic mass of neutral peptide  $M_r(\text{calc})$ : 1844.8790

Fixed modifications: Carbamidomethyl (C) (apply to specified residues or termini only)

Ions Score: 23 Expect: 0.034

 Matches : 5/144 fragment ions using 8 most intense peaks ([help](#))

| #  | b                | b <sup>++</sup> | b <sup>*</sup> | b <sup>*++</sup> | b <sup>0</sup> | b <sup>0++</sup> | Seq. | y                | y <sup>++</sup> | y <sup>*</sup> | y <sup>*++</sup> | y <sup>0</sup> | y <sup>0++</sup> | #  |
|----|------------------|-----------------|----------------|------------------|----------------|------------------|------|------------------|-----------------|----------------|------------------|----------------|------------------|----|
| 1  | 115.0884         | 58.0478         |                |                  |                |                  | L    |                  |                 |                |                  |                |                  | 15 |
| 2  | 213.1382         | 107.0727        |                |                  |                |                  | P    | 1731.8052        | 866.4063        | 1713.7817      | 857.3945         | 1713.7947      | 857.4010         | 14 |
| 3  | 377.1985         | 189.1029        |                |                  |                |                  | Y    | 1633.7554        | 817.3814        | 1615.7319      | 808.3696         | 1615.7449      | 808.3761         | 13 |
| 4  | 491.2796         | 246.1435        |                |                  |                |                  | I    | 1469.6951        | 735.3512        | 1451.6715      | 726.3394         | 1451.6845      | 726.3459         | 12 |
| 5  | 639.3451         | 320.1762        |                |                  |                |                  | F    | <b>1355.6140</b> | 678.3106        | 1337.5904      | 669.2988         | 1337.6034      | 669.3053         | 11 |
| 6  | 769.3977         | 385.2025        | 751.3741       | 376.1907         |                |                  | Q    | 1207.5485        | 604.2779        | 1189.5249      | 595.2661         | 1189.5380      | 595.2726         | 10 |
| 7  | 871.4424         | 436.2249        | 853.4189       | 427.2131         | 853.4319       | 427.2196         | T    | 1077.4959        | 539.2516        | 1059.4723      | 530.2398         | 1059.4853      | 530.2463         | 9  |
| 8  | 985.5235         | 493.2654        | 967.5000       | 484.2536         | 967.5130       | 484.2601         | L    | <b>975.4512</b>  | 488.2292        | 957.4276       | 479.2174         | 957.4406       | 479.2239         | 8  |
| 9  | 1043.5420        | 522.2747        | 1025.5185      | 513.2629         | 1025.5315      | 513.2694         | G    | <b>861.3701</b>  | 431.1887        | 843.3465       | 422.1769         | 843.3595       | 422.1834         | 7  |
| 10 | 1157.6231        | 579.3152        | 1139.5996      | 570.3034         | 1139.6126      | 570.3099         | L    | 803.3516         | 402.1794        | 785.3280       | 393.1676         | 785.3410       | 393.1741         | 6  |
| 11 | 1287.6628        | 644.3350        | 1269.6392      | 635.3232         | 1269.6522      | 635.3297         | E    | 689.2705         | 345.1389        | 671.2469       | 336.1271         | 671.2599       | 336.1336         | 5  |
| 12 | 1451.7231        | 726.3652        | 1433.6996      | 717.3534         | 1433.7126      | 717.3599         | Y    | <b>559.2308</b>  | 280.1191        | 541.2073       | 271.1073         | 541.2203       | 271.1138         | 4  |
| 13 | <b>1567.7471</b> | 784.3772        | 1549.7235      | 775.3654         | 1549.7365      | 775.3719         | D    | 395.1705         | 198.0889        | 377.1469       | 189.0771         | 377.1599       | 189.0836         | 3  |
| 14 | 1697.7867        | 849.3970        | 1679.7632      | 840.3852         | 1679.7762      | 840.3917         | E    | 279.1465         | 140.0769        | 261.1229       | 131.0651         | 261.1359       | 131.0716         | 2  |
| 15 |                  |                 |                |                  |                |                  | K    | 149.1069         | 75.0571         | 131.0833       | 66.0453          |                |                  | 1  |

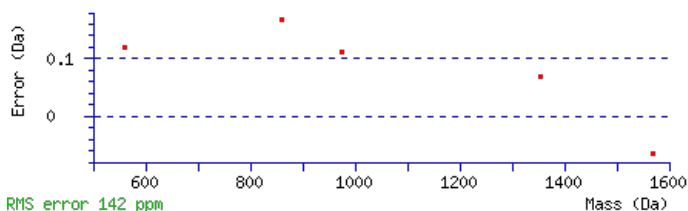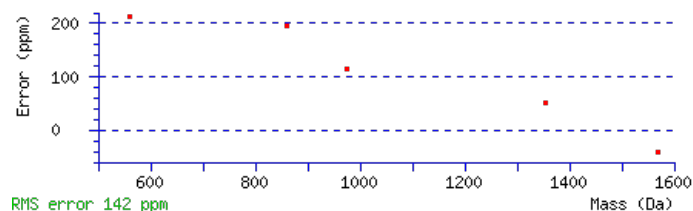
 NCBI BLAST search of [LPYIFQTLGLEIDEK](#)



## AT3G27280.1

(Parameters: blastp, nr protein database, expect=20000, no filter, PAM30)

Other BLAST [web gateways](#)

### All matches to this query

| Score | Mr(calc)  | Delta   | Sequence                          |
|-------|-----------|---------|-----------------------------------|
| 23.4  | 1844.8790 | -0.0010 | <a href="#">LPYIFQTLGLEIDEK</a>   |
| 12.7  | 1844.8806 | -0.0026 | <a href="#">KMDGQTIAISSLSTLSR</a> |
| 2.9   | 1844.8777 | 0.0004  | <a href="#">DIKTAFWLLGLMEMK</a>   |
| 2.9   | 1844.8759 | 0.0022  | <a href="#">MNTSVRAVLSSMKAPSK</a> |
| 1.5   | 1844.8786 | -0.0005 | <a href="#">LMIEQSCRLSRITGR</a>   |

Mascot: <http://www.matrixscience.com/>

### Peptide View

MS/MS Fragmentation of **VPNQHCQS~~Q~~SMANEMALLAYNRALK**

Found in **AT3G27610.1** in **TAIR\_Arabidopsis**, Symbols: | similar to nucleotidyltransferase [Arabidopsis thaliana] (TAIR:AT2G01220.2); similar to unnamed protein product [Vitis vinifera] (GB:CAO42196.1); contains domain SSF52374 (SSF52374) | chr3:10226966-10229389 REVERSE

Match to Query 10713: 2813.199024 from(704.307032,4+) index(6830)

Title: Elution from: 61.060 to 61.060 scan no 8867 cid35.00 polarity:+

Data file 0-1\_2.mgf

Click mouse within plot area to zoom in by factor of two about that point

Or,   to  Da

Label all possible matches  Label matches used for scoring

Show Y-axis

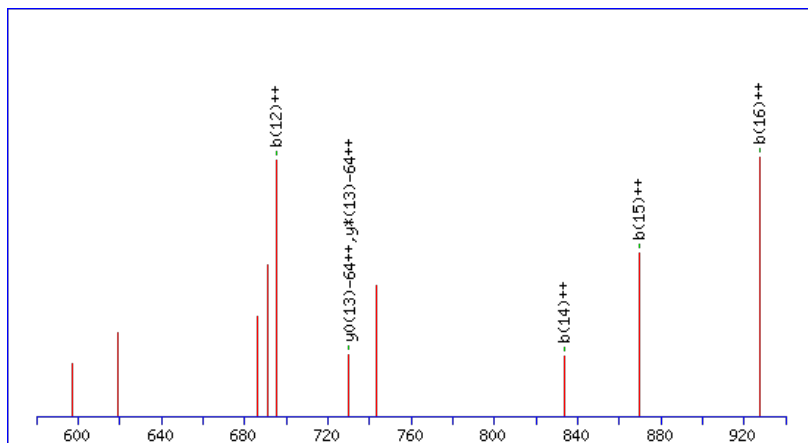

Monoisotopic mass of neutral peptide **Mr(calc)**: 2813.1980

**Fixed modifications**: Carbamidomethyl (C) (apply to specified residues or termini only)

**Variable modifications**:

**M10** : Oxidation (M), with neutral losses 0.0000(shown in table), 63.9983

**M14** : Oxidation (M), with neutral losses 0.0000(shown in table), 63.9983

**Ions Score**: 20 **Expect**: 0.037

**Matches** : 6/398 fragment ions using 7 most intense peaks ([help](#))

| #  | b         | b <sup>++</sup> | b <sup>*</sup> | b <sup>*++</sup> | b <sup>0</sup> | b <sup>0++</sup> | Seq | y         | y <sup>++</sup> | y <sup>*</sup> | y <sup>*++</sup> | y <sup>0</sup> | y <sup>0++</sup> | #  |
|----|-----------|-----------------|----------------|------------------|----------------|------------------|-----|-----------|-----------------|----------------|------------------|----------------|------------------|----|
| 1  | 101.0727  | 51.0400         |                |                  |                |                  | V   |           |                 |                |                  |                |                  | 24 |
| 2  | 199.1225  | 100.0649        |                |                  |                |                  | P   | 2714.1398 | 1357.5736       | 2696.1162      | 1348.5618        | 2696.1293      | 1348.5683        | 23 |
| 3  | 315.1595  | 158.0834        | 297.1359       | 149.0716         |                |                  | N   | 2616.0900 | 1308.5487       | 2598.0664      | 1299.5369        | 2598.0795      | 1299.5434        | 22 |
| 4  | 445.2122  | 223.1097        | 427.1886       | 214.0979         |                |                  | Q   | 2500.0530 | 1250.5302       | 2482.0294      | 1241.5184        | 2482.0425      | 1241.5249        | 21 |
| 5  | 585.2622  | 293.1347        | 567.2386       | 284.1229         |                |                  | H   | 2370.0004 | 1185.5038       | 2351.9768      | 1176.4920        | 2351.9898      | 1176.4985        | 20 |
| 6  | 747.2869  | 374.1471        | 729.2633       | 365.1353         |                |                  | C   | 2229.9504 | 1115.4788       | 2211.9268      | 1106.4670        | 2211.9398      | 1106.4735        | 19 |
| 7  | 835.3160  | 418.1616        | 817.2924       | 409.1498         | 817.3054       | 409.1563         | S   | 2067.9256 | 1034.4665       | 2049.9021      | 1025.4547        | 2049.9151      | 1025.4612        | 18 |
| 8  | 965.3686  | 483.1879        | 947.3450       | 474.1762         | 947.3580       | 474.1827         | Q   | 1979.8966 | 990.4519        | 1961.8730      | 981.4401         | 1961.8860      | 981.4466         | 17 |
| 9  | 1053.3977 | 527.2025        | 1035.3741      | 518.1907         | 1035.3871      | 518.1972         | S   | 1849.8439 | 925.4256        | 1831.8204      | 916.4138         | 1831.8334      | 916.4203         | 16 |
| 10 | 1201.4301 | 601.2187        | 1183.4065      | 592.2069         | 1183.4195      | 592.2134         | M   | 1761.8149 | 881.4111        | 1743.7913      | 872.3993         | 1743.8043      | 872.4058         | 15 |
| 11 | 1273.4643 | 637.2358        | 1255.4407      | 628.2240         | 1255.4537      | 628.2305         | A   | 1613.7824 | 807.3949        | 1595.7589      | 798.3831         | 1595.7719      | 798.3896         | 14 |
| 12 | 1389.5013 | <b>695.2543</b> | 1371.4777      | 686.2425         | 1371.4907      | 686.2490         | N   | 1541.7483 | 771.3778        | 1523.7247      | 762.3660         | 1523.7377      | 762.3725         | 13 |
| 13 | 1519.5409 | 760.2741        | 1501.5173      | 751.2623         | 1501.5303      | 751.2688         | E   | 1425.7113 | 713.3593        | 1407.6877      | 704.3475         | 1407.7007      | 704.3540         | 12 |
| 14 | 1667.5733 | <b>834.2903</b> | 1649.5497      | 825.2785         | 1649.5628      | 825.2850         | M   | 1295.6717 | 648.3395        | 1277.6481      | 639.3277         |                |                  | 11 |
| 15 | 1739.6075 | <b>870.3074</b> | 1721.5839      | 861.2956         | 1721.5969      | 861.3021         | A   | 1147.6392 | 574.3233        | 1129.6156      | 565.3115         |                |                  | 10 |
| 16 | 1853.6886 | <b>927.3479</b> | 1835.6650      | 918.3361         | 1835.6780      | 918.3426         | L   | 1075.6051 | 538.3062        | 1057.5815      | 529.2944         |                |                  | 9  |
| 17 | 1967.7697 | 984.3885        | 1949.7461      | 975.3767         | 1949.7591      | 975.3832         | L   | 961.5240  | 481.2656        | 943.5004       | 472.2538         |                |                  | 8  |
| 18 | 2039.8038 | 1020.4055       | 2021.7802      | 1011.3938        | 2021.7933      | 1011.4003        | A   | 847.4429  | 424.2251        | 829.4193       | 415.2133         |                |                  | 7  |
| 19 | 2203.8642 | 1102.4357       | 2185.8406      | 1093.4239        | 2185.8536      | 1093.4304        | Y   | 775.4087  | 388.2080        | 757.3852       | 379.1962         |                |                  | 6  |
| 20 | 2319.9012 | 1160.4542       | 2301.8776      | 1151.4424        | 2301.8906      | 1151.4489        | N   | 611.3484  | 306.1778        | 593.3248       | 297.1660         |                |                  | 5  |
| 21 | 2479.9904 | 1240.4989       | 2461.9668      | 1231.4871        | 2461.9799      | 1231.4936        | R   | 495.3114  | 248.1593        | 477.2878       | 239.1475         |                |                  | 4  |
| 22 | 2552.0246 | 1276.5159       | 2534.0010      | 1267.5041        | 2534.0140      | 1267.5106        | A   | 335.2221  | 168.1147        | 317.1985       | 159.1029         |                |                  | 3  |

# AT3G27610.1

|    |           |           |           |           |           |           |   |          |          |          |          |  |  |   |
|----|-----------|-----------|-----------|-----------|-----------|-----------|---|----------|----------|----------|----------|--|--|---|
| 23 | 2666.1057 | 1333.5565 | 2648.0821 | 1324.5447 | 2648.0951 | 1324.5512 | L | 263.1880 | 132.0976 | 245.1644 | 123.0858 |  |  | 2 |
| 24 |           |           |           |           |           |           | K | 149.1069 | 75.0571  | 131.0833 | 66.0453  |  |  | 1 |

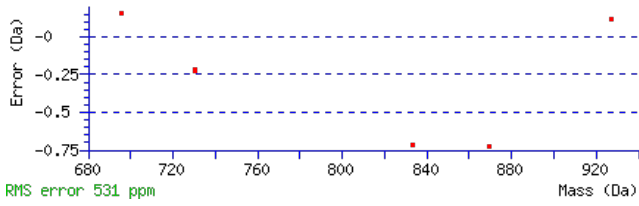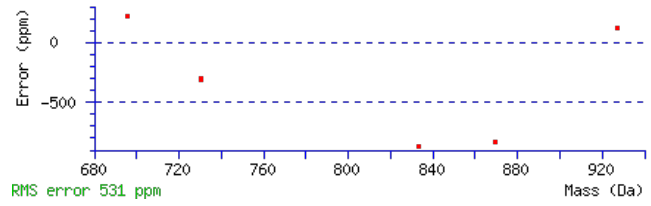

NCBI BLAST search of [VPNQHCSQSMANEMALLAYNRALK](#)  
 (Parameters: blastp, nr protein database, expect=20000, no filter, PAM30)  
 Other BLAST [web gateways](#)

## All matches to this query

| Score | Mr(calc)  | Delta   | Sequence                                  |
|-------|-----------|---------|-------------------------------------------|
| 20.3  | 2813.1980 | 0.0010  | <a href="#">VPNQHCSQSMANEMALLAYNRALK</a>  |
| 9.6   | 2813.1960 | 0.0031  | <a href="#">IGIAHSPAWEAHDLADSQDGASIDR</a> |
| 7.1   | 2813.2054 | -0.0064 | <a href="#">CIGVVKMYIPDGPWFCPECTINK</a>   |
| 4.2   | 2813.2005 | -0.0015 | <a href="#">LDNVSAQEEMLRNQSNNVICASASK</a> |
| 4.2   | 2813.1915 | 0.0075  | <a href="#">VTDTEMFLSSMYFSFPRGEGGPGK</a>  |
| 4.2   | 2813.1919 | 0.0071  | <a href="#">KCILGDNVYMKSGHTEHSSDEVK</a>   |
| 0.6   | 2813.2023 | -0.0033 | <a href="#">TLSKYCQDMLPDGSTSPASPNAIWK</a> |
| 0.0   | 2813.2050 | -0.0059 | <a href="#">MYPGCVVAQVTNLSPOATEKDVHR</a>  |

Mascot: <http://www.matrixscience.com/>

**Peptide View**MS/MS Fragmentation of **TLADYLTER**

Found in **AT3G27740.1** in **TAIR\_Arabidopsis**, Symbols: CARA | CARA (CARBAMOYL PHOSPHATE SYNTHETASE A); carbamoyl-phosphate synthase (glutamine-hydrolyzing) | chr3:10282707-10285029 REVERSE

Match to Query 2990: 1092.510048 from(547.262300,2+) index(5940)

Title: Elution from: 55.665 to 55.665 scan no 7697 cid35.00 polarity:+

Data file D12h-2\_1.mgf

Click mouse within plot area to zoom in by factor of two about that point

Or,   to  Da

Label all possible matches  Label matches used for scoring

Show Y-axis

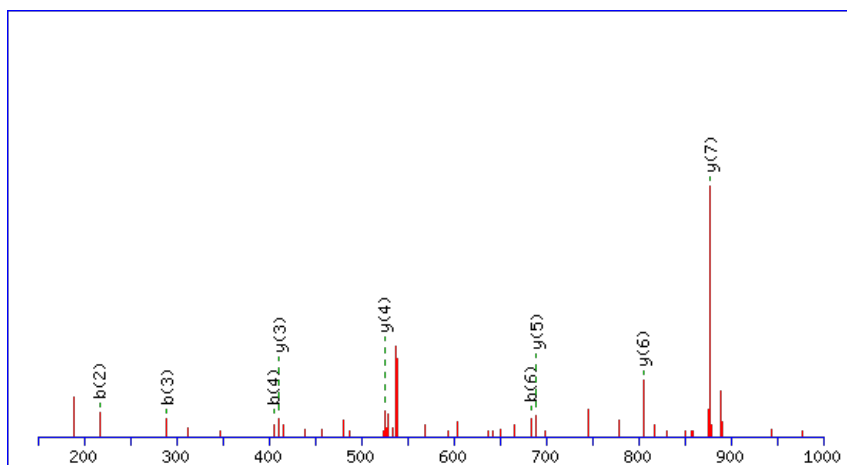

**Monoisotopic mass of neutral peptide Mr(calc):** 1092.5095

**Fixed modifications:** Carbamidomethyl (C) (apply to specified residues or termini only)

**Ions Score:** 27 **Expect:** 0.022

**Matches:** 9/78 fragment ions using 23 most intense peaks ([help](#))

| # | b               | b <sup>++</sup> | b <sup>0</sup> | b <sup>0++</sup> | Seq. | y               | y <sup>++</sup> | y*       | y <sup>*++</sup> | y <sup>0</sup> | y <sup>0++</sup> | # |
|---|-----------------|-----------------|----------------|------------------|------|-----------------|-----------------|----------|------------------|----------------|------------------|---|
| 1 | 103.0520        | 52.0296         | 85.0414        | 43.0244          | T    |                 |                 |          |                  |                |                  | 9 |
| 2 | <b>217.1331</b> | 109.0702        | 199.1225       | 100.0649         | L    | 991.4721        | 496.2397        | 973.4485 | 487.2279         | 973.4616       | 487.2344         | 8 |
| 3 | <b>289.1672</b> | 145.0873        | 271.1567       | 136.0820         | A    | <b>877.3910</b> | 439.1991        | 859.3674 | 430.1874         | 859.3805       | 430.1939         | 7 |
| 4 | <b>405.1912</b> | 203.0992        | 387.1807       | 194.0940         | D    | <b>805.3569</b> | 403.1821        | 787.3333 | 394.1703         | 787.3463       | 394.1768         | 6 |
| 5 | 569.2516        | 285.1294        | 551.2410       | 276.1241         | Y    | <b>689.3329</b> | 345.1701        | 671.3093 | 336.1583         | 671.3223       | 336.1648         | 5 |
| 6 | <b>683.3327</b> | 342.1700        | 665.3221       | 333.1647         | L    | <b>525.2725</b> | 263.1399        | 507.2489 | 254.1281         | 507.2620       | 254.1346         | 4 |
| 7 | 785.3774        | 393.1923        | 767.3668       | 384.1871         | T    | <b>411.1914</b> | 206.0994        | 393.1678 | 197.0876         | 393.1809       | 197.0941         | 3 |
| 8 | 915.4170        | 458.2121        | 897.4065       | 449.2069         | E    | 309.1467        | 155.0770        | 291.1231 | 146.0652         | 291.1362       | 146.0717         | 2 |
| 9 |                 |                 |                |                  | R    | 179.1071        | 90.0572         | 161.0835 | 81.0454          |                |                  | 1 |

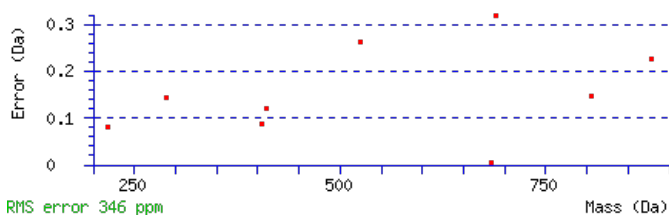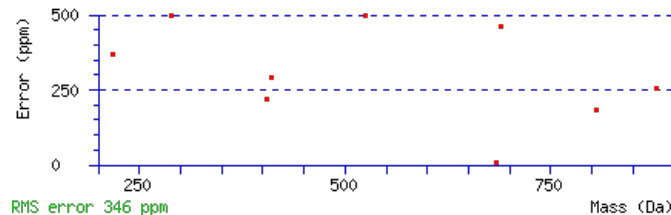

NCBI **BLAST** search of **TLADYLTER**

(Parameters: blastp, nr protein database, expect=20000, no filter, PAM30)

Other BLAST [web gateways](#)

**All matches to this query**

| Score | Mr(calc) | Delta | Sequence |
|-------|----------|-------|----------|
|       |          |       |          |

**AT3G27740.1**

|      |           |         |                             |
|------|-----------|---------|-----------------------------|
| 27.1 | 1092.5095 | 0.0005  | <a href="#">TLADYLTER</a>   |
| 8.7  | 1092.5096 | 0.0005  | <a href="#">TLPIDEEHK</a>   |
| 3.3  | 1092.5082 | 0.0019  | <a href="#">TLMKKDCGK</a>   |
| 3.2  | 1092.5096 | 0.0005  | <a href="#">GDFSQISSK</a>   |
| 1.4  | 1092.5122 | -0.0021 | <a href="#">IGGGFGGKETR</a> |
| 1.4  | 1092.5122 | -0.0021 | <a href="#">LGGGFGGKETR</a> |
| 0.5  | 1092.5122 | -0.0022 | <a href="#">VDVYNROGK</a>   |

**Mascot:** <http://www.matrixscience.com/>

## Peptide View

### MS/MS Fragmentation of **ILVDYLQDK**

Found in **AT3G27830.1** in **TAIR\_Arabidopsis**, Symbols: RPL12, RPL12-A | RPL12-A (RIBOSOMAL PROTEIN L12-A); structural constituent of ribosome | chr3:10319813-10320388 FORWARD

Match to Query 3591: 1105.599298 from(553.806925,2+) index(5868)

Title: Elution from: 51.821 to 51.821 scan no 7370 cid35.00 polarity:+

Data file C7-3\_1.mgf

Click mouse within plot area to zoom in by factor of two about that point

Or,   to  Da

Label all possible matches  Label matches used for scoring

Show Y-axis

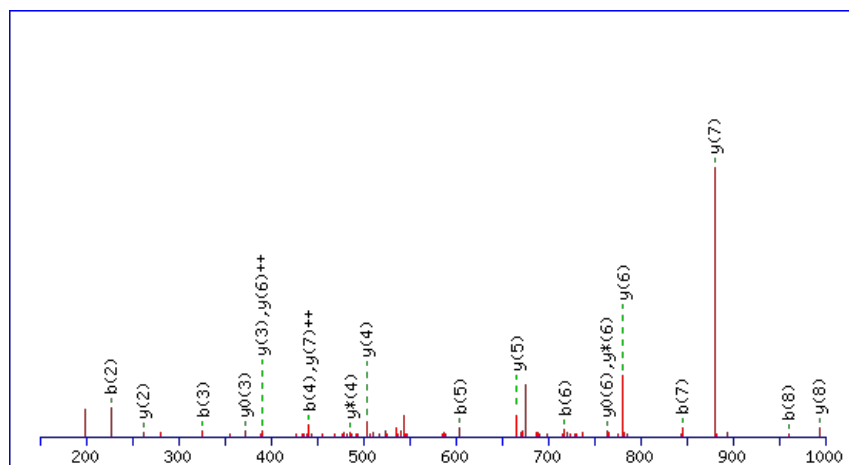

Monoisotopic mass of neutral peptide Mr(calc): 1105.6019

Fixed modifications: Carbamidomethyl (C) (apply to specified residues or termini only)

Ions Score: 69 Expect: 5e-007

Matches : 20/76 fragment ions using 23 most intense peaks ([help](#))

| # | b               | b <sup>++</sup> | b*       | b <sup>*++</sup> | b <sup>0</sup> | b <sup>0++</sup> | Seq. | y               | y <sup>++</sup> | y*              | y <sup>*++</sup> | y <sup>0</sup>  | y <sup>0++</sup> | # |
|---|-----------------|-----------------|----------|------------------|----------------|------------------|------|-----------------|-----------------|-----------------|------------------|-----------------|------------------|---|
| 1 | 114.0913        | 57.5493         |          |                  |                |                  | I    |                 |                 |                 |                  |                 |                  | 9 |
| 2 | <b>227.1754</b> | 114.0913        |          |                  |                |                  | L    | <b>993.5251</b> | 497.2662        | 976.4986        | 488.7529         | 975.5146        | 488.2609         | 8 |
| 3 | <b>326.2438</b> | 163.6255        |          |                  |                |                  | V    | <b>880.4411</b> | <b>440.7242</b> | 863.4145        | 432.2109         | 862.4305        | 431.7189         | 7 |
| 4 | <b>441.2708</b> | 221.1390        |          |                  | 423.2602       | 212.1337         | D    | <b>781.3727</b> | <b>391.1900</b> | <b>764.3461</b> | 382.6767         | <b>763.3621</b> | 382.1847         | 6 |
| 5 | <b>604.3341</b> | 302.6707        |          |                  | 586.3235       | 293.6654         | Y    | <b>666.3457</b> | 333.6765        | 649.3192        | 325.1632         | 648.3352        | 324.6712         | 5 |
| 6 | <b>717.4182</b> | 359.2127        |          |                  | 699.4076       | 350.2074         | L    | <b>503.2824</b> | 252.1448        | <b>486.2558</b> | 243.6316         | 485.2718        | 243.1396         | 4 |
| 7 | <b>845.4767</b> | 423.2420        | 828.4502 | 414.7287         | 827.4662       | 414.2367         | Q    | <b>390.1983</b> | 195.6028        | 373.1718        | 187.0895         | <b>372.1878</b> | 186.5975         | 3 |
| 8 | <b>960.5037</b> | 480.7555        | 943.4771 | 472.2422         | 942.4931       | 471.7502         | D    | <b>262.1397</b> | 131.5735        | 245.1132        | 123.0602         | 244.1292        | 122.5682         | 2 |
| 9 |                 |                 |          |                  |                |                  | K    | 147.1128        | 74.0600         | 130.0863        | 65.5468          |                 |                  | 1 |

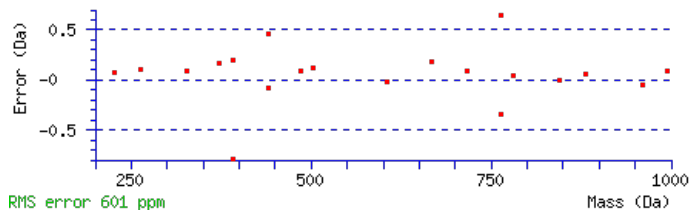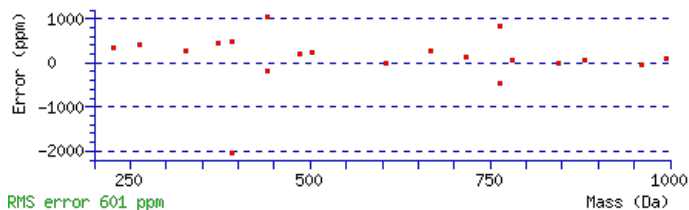

NCBI BLAST search of **ILVDYLQDK**

(Parameters: blastp, nr protein database, expect=20000, no filter, PAM30)

Other BLAST [web gateways](#)

All matches to this query

| Score | Mr(calc) | Delta | Sequence |
|-------|----------|-------|----------|
|       |          |       |          |

## AT3G27830.1

|      |           |         |                           |
|------|-----------|---------|---------------------------|
| 69.0 | 1105.6019 | -0.0026 | <a href="#">ILVDYLQDK</a> |
| 10.5 | 1105.5992 | 0.0001  | <a href="#">FNQLVRSSR</a> |
| 4.8  | 1105.6019 | -0.0026 | <a href="#">LFEIETQVK</a> |

**Mascot:** <http://www.matrixscience.com/>

## Peptide View

### MS/MS Fragmentation of **IGSEISLTLEEAR**

Found in **AT3G27850.1** in **TAIR\_Arabidopsis**, Symbols: RPL12-C | RPL12-C (RIBOSOMAL PROTEIN L12-C); structural constituent of ribosome | chr3:10326142-10326705 FORWARD

Match to Query 6064: 1520.727206 from(761.370879,2+) index(5577)

Title: Elution from: 52.879 to 52.879 scan no 7232 cid35.00 polarity:+

Data file D1d-2\_2.mgf

Click mouse within plot area to zoom in by factor of two about that point

Or,   to  Da

Label all possible matches  Label matches used for scoring

Show Y-axis

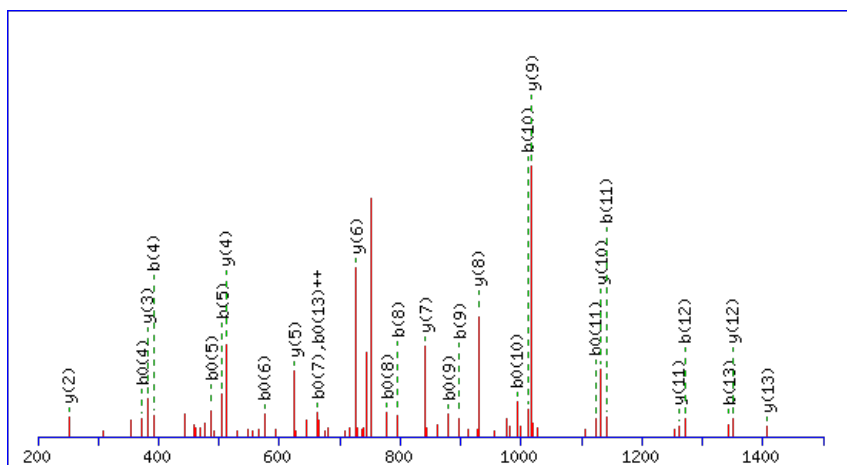

Monoisotopic mass of neutral peptide  $M_r(\text{calc})$ : 1520.7276

Fixed modifications: Carbamidomethyl (C) (apply to specified residues or termini only)

Ions Score: 119 Expect: 1.3e-011

Matches : 29/122 fragment ions using 39 most intense peaks ([help](#))

| #  | b                | b <sup>++</sup> | b <sup>0</sup>   | b <sup>0++</sup> | Seq. | y                | y <sup>++</sup> | y*        | y <sup>*++</sup> | y <sup>0</sup> | y <sup>0++</sup> | #  |
|----|------------------|-----------------|------------------|------------------|------|------------------|-----------------|-----------|------------------|----------------|------------------|----|
| 1  | 115.0884         | 58.0478         |                  |                  | I    |                  |                 |           |                  |                |                  | 14 |
| 2  | 173.1069         | 87.0571         |                  |                  | G    | <b>1407.6538</b> | 704.3305        | 1389.6302 | 695.3188         | 1389.6433      | 695.3253         | 13 |
| 3  | 261.1359         | 131.0716        | 243.1254         | 122.0663         | S    | <b>1349.6353</b> | 675.3213        | 1331.6117 | 666.3095         | 1331.6248      | 666.3160         | 12 |
| 4  | <b>391.1756</b>  | 196.0914        | <b>373.1650</b>  | 187.0861         | E    | <b>1261.6063</b> | 631.3068        | 1243.5827 | 622.2950         | 1243.5957      | 622.3015         | 11 |
| 5  | <b>505.2567</b>  | 253.1320        | <b>487.2461</b>  | 244.1267         | I    | <b>1131.5666</b> | 566.2870        | 1113.5430 | 557.2752         | 1113.5561      | 557.2817         | 10 |
| 6  | 593.2857         | 297.1465        | <b>575.2752</b>  | 288.1412         | S    | <b>1017.4855</b> | 509.2464        | 999.4619  | 500.2346         | 999.4750       | 500.2411         | 9  |
| 7  | 681.3148         | 341.1610        | <b>663.3042</b>  | 332.1558         | S    | <b>929.4565</b>  | 465.2319        | 911.4329  | 456.2201         | 911.4459       | 456.2266         | 8  |
| 8  | <b>795.3959</b>  | 398.2016        | <b>777.3853</b>  | 389.1963         | L    | <b>841.4274</b>  | 421.2173        | 823.4038  | 412.2056         | 823.4168       | 412.2121         | 7  |
| 9  | <b>897.4406</b>  | 449.2239        | <b>879.4300</b>  | 440.2187         | T    | <b>727.3463</b>  | 364.1768        | 709.3227  | 355.1650         | 709.3357       | 355.1715         | 6  |
| 10 | <b>1011.5217</b> | 506.2645        | <b>993.5111</b>  | 497.2592         | L    | <b>625.3016</b>  | 313.1544        | 607.2780  | 304.1426         | 607.2910       | 304.1492         | 5  |
| 11 | <b>1141.5613</b> | 571.2843        | <b>1123.5508</b> | 562.2790         | E    | <b>511.2205</b>  | 256.1139        | 493.1969  | 247.1021         | 493.2099       | 247.1086         | 4  |
| 12 | <b>1271.6010</b> | 636.3041        | 1253.5904        | 627.2988         | E    | <b>381.1809</b>  | 191.0941        | 363.1573  | 182.0823         | 363.1703       | 182.0888         | 3  |
| 13 | <b>1343.6351</b> | 672.3212        | 1325.6245        | <b>663.3159</b>  | A    | <b>251.1412</b>  | 126.0743        | 233.1177  | 117.0625         |                |                  | 2  |
| 14 |                  |                 |                  |                  | R    | 179.1071         | 90.0572         | 161.0835  | 81.0454          |                |                  | 1  |

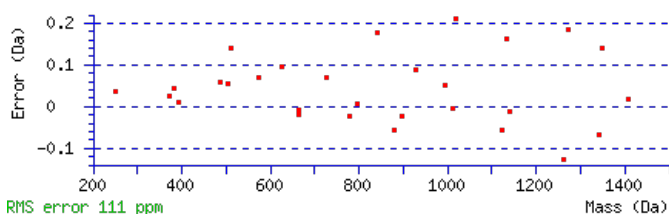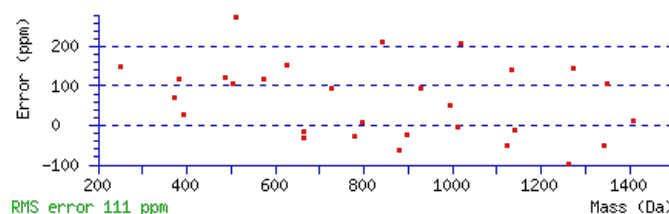

NCBI BLAST search of [IGSEISLTLEEAR](#)



## AT3G27850.1

(Parameters: blastp, nr protein database, expect=20000, no filter, PAM30)

Other BLAST [web gateways](#)

### All matches to this query

| Score | Mr(calc)  | Delta   | Sequence                        |
|-------|-----------|---------|---------------------------------|
| 118.7 | 1520.7276 | -0.0004 | <a href="#">IGSEISLTLLEEAR</a>  |
| 21.2  | 1520.7303 | -0.0031 | <a href="#">AVEAKETAAEKAQR</a>  |
| 18.2  | 1520.7252 | 0.0020  | <a href="#">EAWLSSINLAICK</a>   |
| 14.6  | 1520.7240 | 0.0032  | <a href="#">FTHLSPVWYDLK</a>    |
| 13.8  | 1520.7303 | -0.0031 | <a href="#">LAANDSLGKEKEAR</a>  |
| 7.1   | 1520.7249 | 0.0023  | <a href="#">RGFATHPRSAER</a>    |
| 4.3   | 1520.7303 | -0.0031 | <a href="#">GLSDLAGVGDNTVRK</a> |
| 3.4   | 1520.7303 | -0.0031 | <a href="#">SDAINRELVSLER</a>   |
| 3.2   | 1520.7303 | -0.0031 | <a href="#">ETVKENGLQKNGGK</a>  |
| 1.9   | 1520.7229 | 0.0043  | <a href="#">EKSLPDKLSMEAR</a>   |

Mascot: <http://www.matrixscience.com/>

**Peptide View**MS/MS Fragmentation of **QGDKEAVAK**

Found in **AT3G27870.1** in **TAIR\_Arabidopsis**, Symbols: | haloacid dehalogenase-like hydrolase family protein | chr3:10332187-10336525  
FORWARD

Match to Query 2136: 956.456790 from(479.235671,2+) index(3024)

Title: Elution from: 30.340 to 30.340 scan no 3762 cid35.00 polarity:+

Data file D12h-1\_2.mgf

Click mouse within plot area to zoom in by factor of two about that point

Or,   to  Da

Label all possible matches  Label matches used for scoring

Show Y-axis

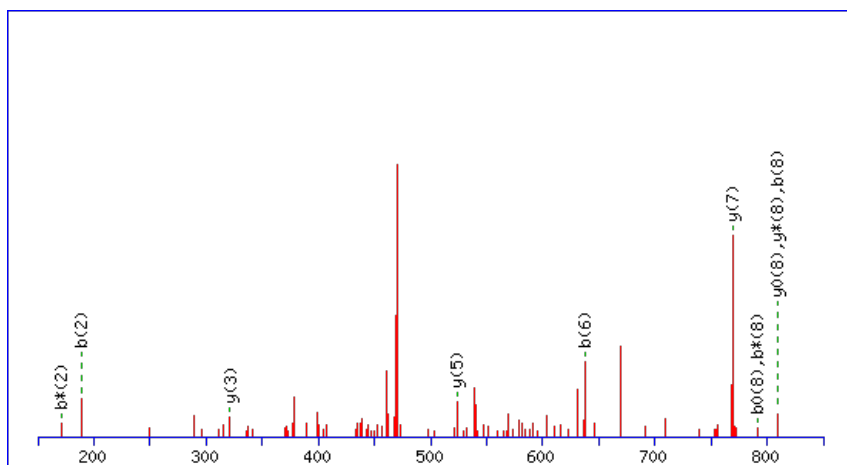

**Monoisotopic mass of neutral peptide Mr(calc):** 956.4571

**Fixed modifications:** Carbamidomethyl (C) (apply to specified residues or termini only)

**Ions Score:** 24 **Expect:** 0.048

**Matches:** 11/84 fragment ions using 14 most intense peaks ([help](#))

| # | b               | b <sup>++</sup> | b*              | b <sup>*++</sup> | b <sup>0</sup>  | b <sup>0++</sup> | Seq. | y               | y <sup>++</sup> | y*              | y <sup>*++</sup> | y <sup>0</sup>  | y <sup>0++</sup> | # |
|---|-----------------|-----------------|-----------------|------------------|-----------------|------------------|------|-----------------|-----------------|-----------------|------------------|-----------------|------------------|---|
| 1 | 131.0599        | 66.0336         | 113.0363        | 57.0218          |                 |                  | Q    |                 |                 |                 |                  |                 |                  | 9 |
| 2 | <b>189.0784</b> | 95.0428         | <b>171.0548</b> | 86.0311          |                 |                  | G    | 827.4118        | 414.2095        | <b>809.3882</b> | 405.1977         | <b>809.4012</b> | 405.2042         | 8 |
| 3 | 305.1024        | 153.0548        | 287.0788        | 144.0430         | 287.0918        | 144.0496         | D    | <b>769.3933</b> | 385.2003        | 751.3697        | 376.1885         | 751.3827        | 376.1950         | 7 |
| 4 | 435.1914        | 218.0994        | 417.1678        | 209.0876         | 417.1809        | 209.0941         | K    | 653.3693        | 327.1883        | 635.3457        | 318.1765         | 635.3587        | 318.1830         | 6 |
| 5 | 565.2311        | 283.1192        | 547.2075        | 274.1074         | 547.2205        | 274.1139         | E    | <b>523.2802</b> | 262.1438        | 505.2567        | 253.1320         | 505.2697        | 253.1385         | 5 |
| 6 | <b>637.2652</b> | 319.1362        | 619.2416        | 310.1245         | 619.2546        | 310.1310         | A    | 393.2406        | 197.1239        | 375.2170        | 188.1122         |                 |                  | 4 |
| 7 | 737.3307        | 369.1690        | 719.3071        | 360.1572         | 719.3201        | 360.1637         | V    | <b>321.2065</b> | 161.1069        | 303.1829        | 152.0951         |                 |                  | 3 |
| 8 | <b>809.3648</b> | 405.1860        | <b>791.3412</b> | 396.1742         | <b>791.3542</b> | 396.1808         | A    | 221.1410        | 111.0741        | 203.1174        | 102.0624         |                 |                  | 2 |
| 9 |                 |                 |                 |                  |                 |                  | K    | 149.1069        | 75.0571         | 131.0833        | 66.0453          |                 |                  | 1 |

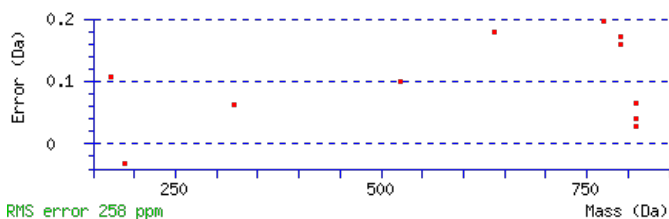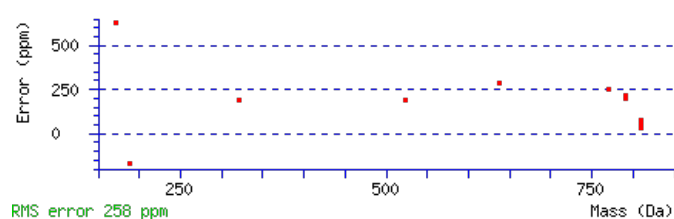

NCBI **BLAST** search of **QGDKEAVAK**

(Parameters: blastp, nr protein database, expect=20000, no filter, PAM30)

Other BLAST [web gateways](#)

All matches to this query

| Score | Mr(calc) | Delta | Sequence |
|-------|----------|-------|----------|
|       |          |       |          |

**AT3G27870.1**

|      |          |         |                           |
|------|----------|---------|---------------------------|
| 23.8 | 956.4571 | -0.0003 | <a href="#">QGDKEAVAK</a> |
| 13.3 | 956.4594 | -0.0026 | <a href="#">WLNEKEK</a>   |
| 10.7 | 956.4571 | -0.0003 | <a href="#">GENALKDAK</a> |
| 9.0  | 956.4593 | -0.0025 | <a href="#">VWDAATGVK</a> |
| 7.9  | 956.4594 | -0.0026 | <a href="#">FHSSLLDK</a>  |
| 7.5  | 956.4545 | 0.0023  | <a href="#">ESTLEELK</a>  |
| 3.5  | 956.4571 | -0.0003 | <a href="#">SLQGEGQVK</a> |
| 3.5  | 956.4593 | -0.0025 | <a href="#">TVHDFTVK</a>  |
| 2.4  | 956.4571 | -0.0003 | <a href="#">EVLKNNNDK</a> |
| 1.9  | 956.4571 | -0.0003 | <a href="#">ADEALKGNK</a> |

**Mascot:** <http://www.matrixscience.com/>

**Peptide View**MS/MS Fragmentation of **SLEEEKEK**Found in **AT3G28540.1** in **TAIR\_Arabidopsis**, Symbols: | AAA-type ATPase family protein | chr3:10695681-10697213 FORWARD

Match to Query 2383: 1000.456448 from(501.235500,2+) index(713)

Title: Elution from: 13.284 to 13.284 scan no 1054 cid35.00 polarity:+

Data file C7-1\_3.mgf

Click mouse within plot area to zoom in by factor of two about that point

Or,   to  Da Label all possible matches  Label matches used for scoring Show Y-axis 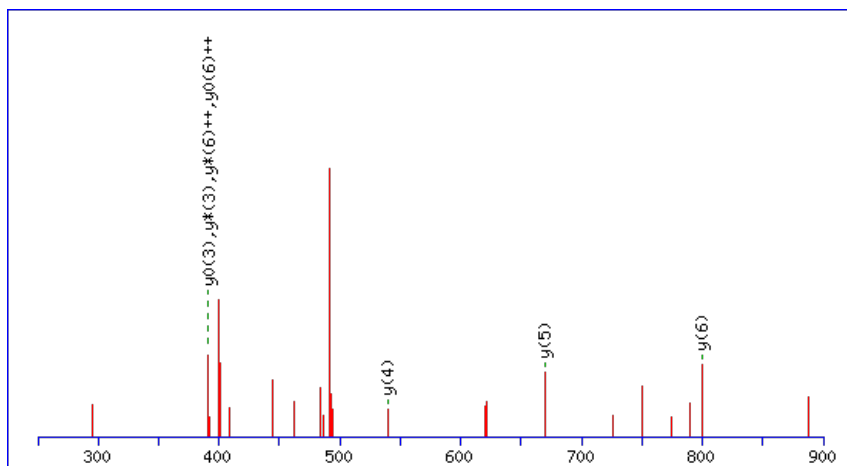Monoisotopic mass of neutral peptide **Mr(calc)**: 1000.4573**Fixed modifications**: Carbamidomethyl (C) (apply to specified residues or termini only)**Ions Score**: 21 **Expect**: 0.031**Matches** : 7/72 fragment ions using 6 most intense peaks ([help](#))

| # | b        | b <sup>++</sup> | b*       | b <sup>*++</sup> | b <sup>0</sup> | b <sup>0++</sup> | Seq. | y               | y <sup>++</sup> | y*              | y <sup>*++</sup> | y <sup>0</sup>  | y <sup>0++</sup> | # |
|---|----------|-----------------|----------|------------------|----------------|------------------|------|-----------------|-----------------|-----------------|------------------|-----------------|------------------|---|
| 1 | 89.0363  | 45.0218         |          |                  | 71.0258        | 36.0165          | S    |                 |                 |                 |                  |                 |                  | 8 |
| 2 | 203.1174 | 102.0624        |          |                  | 185.1069       | 93.0571          | L    | 913.4355        | 457.2214        | 895.4119        | 448.2096         | 895.4250        | 448.2161         | 7 |
| 3 | 333.1571 | 167.0822        |          |                  | 315.1465       | 158.0769         | E    | <b>799.3544</b> | 400.1808        | 781.3308        | <b>391.1691</b>  | 781.3439        | <b>391.1756</b>  | 6 |
| 4 | 463.1967 | 232.1020        |          |                  | 445.1861       | 223.0967         | E    | <b>669.3148</b> | 335.1610        | 651.2912        | 326.1492         | 651.3042        | 326.1558         | 5 |
| 5 | 593.2363 | 297.1218        |          |                  | 575.2258       | 288.1165         | E    | <b>539.2752</b> | 270.1412        | 521.2516        | 261.1294         | 521.2646        | 261.1359         | 4 |
| 6 | 723.3254 | 362.1663        | 705.3018 | 353.1545         | 705.3148       | 353.1610         | K    | 409.2355        | 205.1214        | <b>391.2120</b> | 196.1096         | <b>391.2250</b> | 196.1161         | 3 |
| 7 | 853.3650 | 427.1861        | 835.3414 | 418.1743         | 835.3544       | 418.1808         | E    | 279.1465        | 140.0769        | 261.1229        | 131.0651         | 261.1359        | 131.0716         | 2 |
| 8 |          |                 |          |                  |                |                  | K    | 149.1069        | 75.0571         | 131.0833        | 66.0453          |                 |                  | 1 |

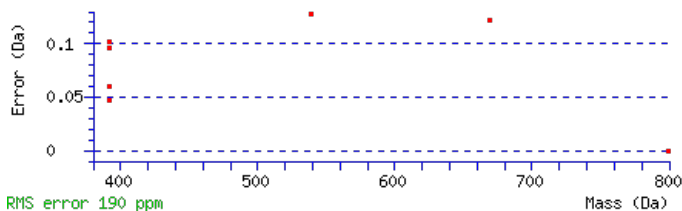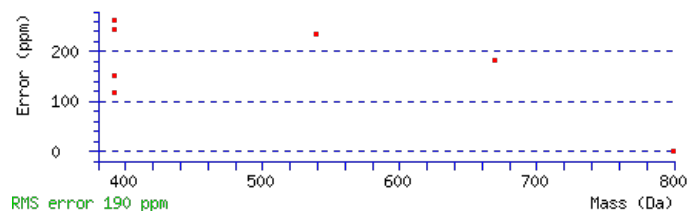NCBI **BLAST** search of [SLEEEKEK](#)

(Parameters: blastp, nr protein database, expect=20000, no filter, PAM30)

Other BLAST [web gateways](#)**All matches to this query**

| Score | Mr(calc)  | Delta   | Sequence                  |
|-------|-----------|---------|---------------------------|
| 21.1  | 1000.4573 | -0.0009 | <a href="#">SLEEEKEK</a>  |
| 3.9   | 1000.4552 | 0.0012  | <a href="#">LSLSSHMGR</a> |

## AT3G28540.1

|     |           |         |                           |
|-----|-----------|---------|---------------------------|
| 3.4 | 1000.4552 | 0.0012  | <a href="#">SICQNRPL</a>  |
| 0.4 | 1000.4552 | 0.0012  | <a href="#">LKDNNMMPR</a> |
| 0.3 | 1000.4573 | -0.0008 | <a href="#">LEEDTEKK</a>  |

**Mascot:** <http://www.matrixscience.com/>

**Peptide View**MS/MS Fragmentation of **IGKAWK**Found in **AT3G28570.1** in **TAIR\_Arabidopsis**, Symbols: | AAA-type ATPase family protein | chr3:10711771-10713126 FORWARD

Match to Query 673: 701.422430 from(351.718491,2+) index(4820)

Title: Elution from: 43.696 to 43.696 scan no 6005 cid35.00 polarity:+

Data file C7-3\_1.mgf

Click mouse within plot area to zoom in by factor of two about that point

Or,   to  Da Label all possible matches  Label matches used for scoring Show Y-axis 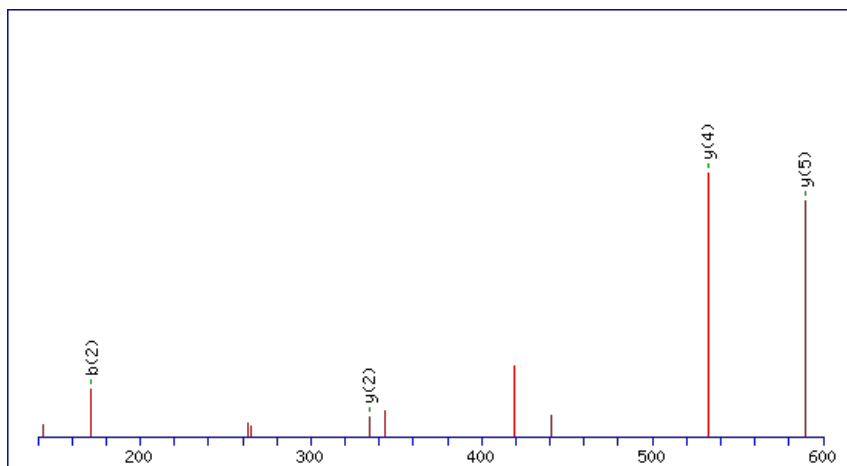Monoisotopic mass of neutral peptide **Mr(calc)**: 701.4224

Fixed modifications: Carbamidomethyl (C) (apply to specified residues or termini only)

Ions Score: 22 Expect: 0.013

Matches : 4/36 fragment ions using 5 most intense peaks ([help](#))

| # | b        | b <sup>++</sup> | b*       | b <sup>*++</sup> | Seq. | y        | y <sup>++</sup> | y*       | y <sup>*++</sup> | # |
|---|----------|-----------------|----------|------------------|------|----------|-----------------|----------|------------------|---|
| 1 | 114.0913 | 57.5493         |          |                  | I    |          |                 |          |                  | 6 |
| 2 | 171.1128 | 86.0600         |          |                  | G    | 589.3457 | 295.1765        | 572.3191 | 286.6632         | 5 |
| 3 | 299.2078 | 150.1075        | 282.1812 | 141.5942         | K    | 532.3242 | 266.6657        | 515.2976 | 258.1525         | 4 |
| 4 | 370.2449 | 185.6261        | 353.2183 | 177.1128         | A    | 404.2292 | 202.6183        | 387.2027 | 194.1050         | 3 |
| 5 | 556.3242 | 278.6657        | 539.2976 | 270.1525         | W    | 333.1921 | 167.0997        | 316.1656 | 158.5864         | 2 |
| 6 |          |                 |          |                  | K    | 147.1128 | 74.0600         | 130.0863 | 65.5468          | 1 |

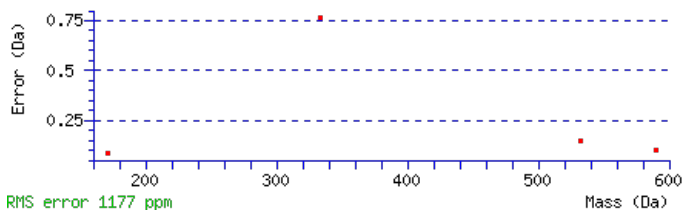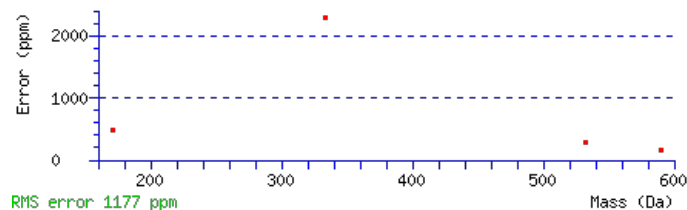NCBI **BLAST** search of **IGKAWK**

(Parameters: blastp, nr protein database, expect=20000, no filter, PAM30)

Other BLAST [web gateways](#)**All matches to this query**

| Score | Mr(calc) | Delta   | Sequence               |
|-------|----------|---------|------------------------|
| 22.5  | 701.4224 | 0.0000  | <a href="#">IGKAWK</a> |
| 11.3  | 701.4224 | -0.0000 | <a href="#">LLGFPR</a> |
| 7.5   | 701.4224 | 0.0000  | <a href="#">IKQWK</a>  |
| 7.5   | 701.4224 | 0.0000  | <a href="#">IQKWK</a>  |

AT3G28570.1

|     |          |        |                       |
|-----|----------|--------|-----------------------|
| 7.5 | 701.4224 | 0.0000 | <a href="#">LKQWK</a> |
| 7.5 | 701.4224 | 0.0000 | <a href="#">LQKWK</a> |

**Mascot:** <http://www.matrixscience.com/>

**Peptide View**MS/MS Fragmentation of **LGGATAEIMSDLLAFEADRR**Found in **AT3G28710.1** in **TAIR\_Arabidopsis**, Symbols: | H+-transporting two-sector ATPase, putative | chr3:10774381-10776831 REVERSE

Match to Query 10104: 2135.067897 from(712.696575,3+) index(10950)

Title: Elution from: 104.808 to 104.808 scan no 15597 cid35.00 polarity:+

Data file C7-2\_1.mgf

Click mouse within plot area to zoom in by factor of two about that point

Or,   to  Da Label all possible matches  Label matches used for scoring Show Y-axis 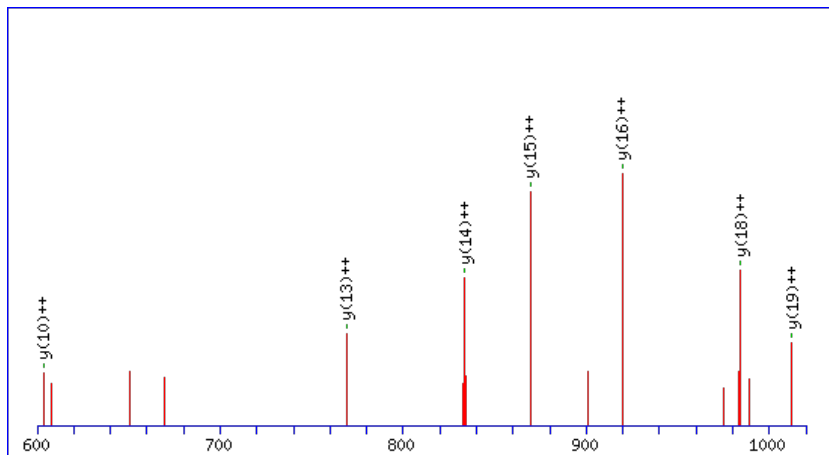**Monoisotopic mass of neutral peptide Mr(calc):** 2135.0681**Fixed modifications:** Carbamidomethyl (C) (apply to specified residues or termini only)**Ions Score:** 59 **Expect:** 4.3e-006**Matches:** 7/180 fragment ions using 8 most intense peaks ([help](#))

| #  | b         | b <sup>++</sup> | b*        | b <sup>*++</sup> | b <sup>0</sup> | b <sup>0++</sup> | Seq | y         | y <sup>++</sup> | y*        | y <sup>*++</sup> | y <sup>0</sup> | y <sup>0++</sup> | #  |
|----|-----------|-----------------|-----------|------------------|----------------|------------------|-----|-----------|-----------------|-----------|------------------|----------------|------------------|----|
| 1  | 114.0913  | 57.5493         |           |                  |                |                  | L   |           |                 |           |                  |                |                  | 20 |
| 2  | 171.1128  | 86.0600         |           |                  |                |                  | G   | 2022.9913 | 1011.9993       | 2005.9648 | 1003.4860        | 2004.9808      | 1002.9940        | 19 |
| 3  | 228.1343  | 114.5708        |           |                  |                |                  | G   | 1965.9699 | 983.4886        | 1948.9433 | 974.9753         | 1947.9593      | 974.4833         | 18 |
| 4  | 299.1714  | 150.0893        |           |                  |                |                  | A   | 1908.9484 | 954.9778        | 1891.9218 | 946.4646         | 1890.9378      | 945.9725         | 17 |
| 5  | 400.2191  | 200.6132        |           |                  | 382.2085       | 191.6079         | T   | 1837.9113 | 919.4593        | 1820.8847 | 910.9460         | 1819.9007      | 910.4540         | 16 |
| 6  | 471.2562  | 236.1317        |           |                  | 453.2456       | 227.1264         | A   | 1736.8636 | 868.9354        | 1719.8370 | 860.4222         | 1718.8530      | 859.9302         | 15 |
| 7  | 600.2988  | 300.6530        |           |                  | 582.2882       | 291.6477         | E   | 1665.8265 | 833.4169        | 1648.7999 | 824.9036         | 1647.8159      | 824.4116         | 14 |
| 8  | 713.3828  | 357.1951        |           |                  | 695.3723       | 348.1898         | I   | 1536.7839 | 768.8956        | 1519.7573 | 760.3823         | 1518.7733      | 759.8903         | 13 |
| 9  | 844.4233  | 422.7153        |           |                  | 826.4128       | 413.7100         | M   | 1423.6998 | 712.3536        | 1406.6733 | 703.8403         | 1405.6893      | 703.3483         | 12 |
| 10 | 931.4553  | 466.2313        |           |                  | 913.4448       | 457.2260         | S   | 1292.6593 | 646.8333        | 1275.6328 | 638.3200         | 1274.6488      | 637.8280         | 11 |
| 11 | 1046.4823 | 523.7448        |           |                  | 1028.4717      | 514.7395         | D   | 1205.6273 | 603.3173        | 1188.6008 | 594.8040         | 1187.6167      | 594.3120         | 10 |
| 12 | 1159.5664 | 580.2868        |           |                  | 1141.5558      | 571.2815         | L   | 1090.6004 | 545.8038        | 1073.5738 | 537.2905         | 1072.5898      | 536.7985         | 9  |
| 13 | 1272.6504 | 636.8288        |           |                  | 1254.6399      | 627.8236         | L   | 977.5163  | 489.2618        | 960.4898  | 480.7485         | 959.5057       | 480.2565         | 8  |
| 14 | 1343.6875 | 672.3474        |           |                  | 1325.6770      | 663.3421         | A   | 864.4322  | 432.7198        | 847.4057  | 424.2065         | 846.4217       | 423.7145         | 7  |
| 15 | 1490.7559 | 745.8816        |           |                  | 1472.7454      | 736.8763         | F   | 793.3951  | 397.2012        | 776.3686  | 388.6879         | 775.3846       | 388.1959         | 6  |
| 16 | 1619.7985 | 810.4029        |           |                  | 1601.7880      | 801.3976         | E   | 646.3267  | 323.6670        | 629.3002  | 315.1537         | 628.3161       | 314.6617         | 5  |
| 17 | 1690.8357 | 845.9215        |           |                  | 1672.8251      | 836.9162         | A   | 517.2841  | 259.1457        | 500.2576  | 250.6324         | 499.2736       | 250.1404         | 4  |
| 18 | 1805.8626 | 903.4349        |           |                  | 1787.8520      | 894.4297         | D   | 446.2470  | 223.6271        | 429.2205  | 215.1139         | 428.2364       | 214.6219         | 3  |
| 19 | 1961.9637 | 981.4855        | 1944.9372 | 972.9722         | 1943.9531      | 972.4802         | R   | 331.2201  | 166.1137        | 314.1935  | 157.6004         |                |                  | 2  |
| 20 |           |                 |           |                  |                |                  | R   | 175.1190  | 88.0631         | 158.0924  | 79.5498          |                |                  | 1  |



# AT3G28710.1

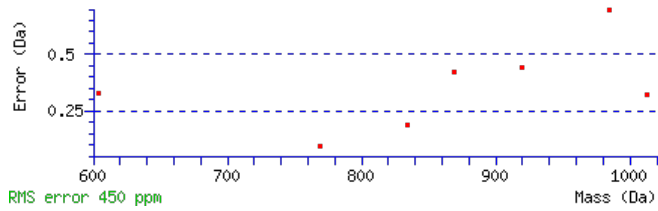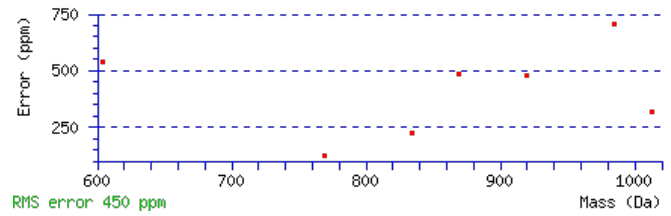

NCBI **BLAST** search of [LGGATAEIMSDLLAFEADRR](#)  
 (Parameters: blastp, nr protein database, expect=20000, no filter, PAM30)  
 Other BLAST [web gateways](#)

## All matches to this query

| Score | Mr(calc)  | Delta   | Sequence                             |
|-------|-----------|---------|--------------------------------------|
| 59.2  | 2135.0681 | -0.0002 | <a href="#">LGGATAEIMSDLLAFEADRR</a> |
| 3.9   | 2135.0656 | 0.0023  | <a href="#">ARATHICLDCGFIYTLPK</a>   |
| 1.9   | 2135.0694 | -0.0015 | <a href="#">IALGSARGLAYLHEDCHPR</a>  |
| 1.9   | 2135.0714 | -0.0035 | <a href="#">IKGEMSQVRNVMENIDK</a>    |
| 1.5   | 2135.0681 | -0.0002 | <a href="#">VTPKLPTEKNGMNSPSYR</a>   |

Mascot: <http://www.matrixscience.com/>

## Peptide View

### MS/MS Fragmentation of **ESVGLAAEMVKR**

Found in **AT3G29240.1** in **TAIR\_Arabidopsis**, Symbols: | similar to unknown protein [Arabidopsis thaliana] (TAIR:AT1G33780.1); similar to hypothetical protein OsI\_032014 [Oryza sativa (indica cultivar-group)] (GB:EAY78055.1); similar to Os10g0330400 [Oryza sativa (japonica cultivar-group)] (G)

Match to Query 4758: 1320.629910 from(661.322231,2+) index(5366)

Title: Elution from: 47.705 to 47.705 scan no 6740 cid35.00 polarity:+

Data file 0-3\_2.mgf

Click mouse within plot area to zoom in by factor of two about that point

Or,   to  Da

Label all possible matches  Label matches used for scoring

Show Y-axis

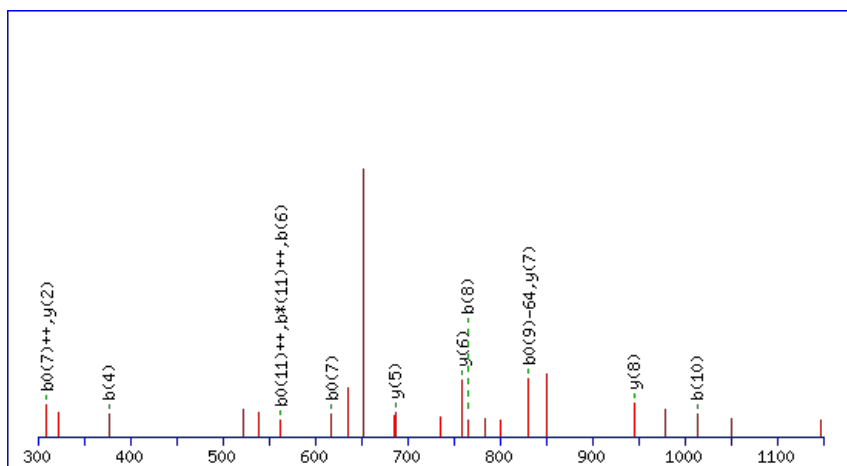

**Monoisotopic mass of neutral peptide Mr(calc):** 1320.6284

**Fixed modifications:** Carbamidomethyl (C) (apply to specified residues or termini only)

**Variable modifications:**

**M9** : Oxidation (M), with neutral losses 0.0000 (shown in table), 63.9983

**Ions Score:** 26 **Expect:** 0.033

**Matches :** 14/164 fragment ions using 24 most intense peaks ([help](#))

| #  | b                | b <sup>++</sup> | b*        | b <sup>*++</sup> | b <sup>0</sup>  | b <sup>0++</sup> | Seq. | y               | y <sup>++</sup> | y*        | y <sup>*++</sup> | y <sup>0</sup> | y <sup>0++</sup> | #  |
|----|------------------|-----------------|-----------|------------------|-----------------|------------------|------|-----------------|-----------------|-----------|------------------|----------------|------------------|----|
| 1  | 131.0469         | 66.0271         |           |                  | 113.0363        | 57.0218          | E    |                 |                 |           |                  |                |                  | 12 |
| 2  | 219.0760         | 110.0416        |           |                  | 201.0654        | 101.0363         | S    | 1191.5960       | 596.3017        | 1173.5725 | 587.2899         | 1173.5855      | 587.2964         | 11 |
| 3  | 319.1414         | 160.0743        |           |                  | 301.1309        | 151.0691         | V    | 1103.5670       | 552.2871        | 1085.5434 | 543.2753         | 1085.5564      | 543.2818         | 10 |
| 4  | <b>377.1599</b>  | 189.0836        |           |                  | 359.1494        | 180.0783         | G    | 1003.5015       | 502.2544        | 985.4779  | 493.2426         | 985.4910       | 493.2491         | 9  |
| 5  | 491.2410         | 246.1241        |           |                  | 473.2304        | 237.1189         | L    | <b>945.4830</b> | 473.2452        | 927.4594  | 464.2334         | 927.4725       | 464.2399         | 8  |
| 6  | <b>563.2752</b>  | 282.1412        |           |                  | 545.2646        | 273.1359         | A    | <b>831.4019</b> | 416.2046        | 813.3784  | 407.1928         | 813.3914       | 407.1993         | 7  |
| 7  | 635.3093         | 318.1583        |           |                  | <b>617.2987</b> | <b>309.1530</b>  | A    | <b>759.3678</b> | 380.1875        | 741.3442  | 371.1757         | 741.3572       | 371.1822         | 6  |
| 8  | <b>765.3489</b>  | 383.1781        |           |                  | 747.3384        | 374.1728         | E    | <b>687.3336</b> | 344.1705        | 669.3101  | 335.1587         | 669.3231       | 335.1652         | 5  |
| 9  | 913.3814         | 457.1943        |           |                  | 895.3708        | 448.1890         | M    | 557.2940        | 279.1506        | 539.2704  | 270.1389         |                |                  | 4  |
| 10 | <b>1013.4468</b> | 507.2270        |           |                  | 995.4363        | 498.2218         | V    | 409.2616        | 205.1344        | 391.2380  | 196.1226         |                |                  | 3  |
| 11 | 1143.5359        | 572.2716        | 1125.5123 | <b>563.2598</b>  | 1125.5253       | <b>563.2663</b>  | K    | <b>309.1961</b> | 155.1017        | 291.1725  | 146.0899         |                |                  | 2  |
| 12 |                  |                 |           |                  |                 |                  | R    | 179.1071        | 90.0572         | 161.0835  | 81.0454          |                |                  | 1  |

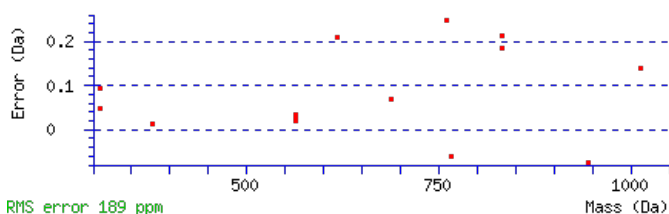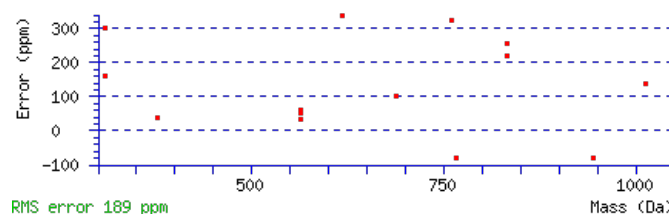

## AT3G29240.1

(Parameters: blastp, nr protein database, expect=20000, no filter, PAM30)

Other BLAST [web gateways](#)

### All matches to this query

| Score | Mr(calc)  | Delta  | Sequence                      |
|-------|-----------|--------|-------------------------------|
| 25.7  | 1320.6284 | 0.0015 | <a href="#">ESVGLAAEMVKR</a>  |
| 13.0  | 1320.6277 | 0.0022 | <a href="#">RFSSVDPNPKR</a>   |
| 7.4   | 1320.6284 | 0.0015 | <a href="#">MEIEATTVQKR</a>   |
| 7.4   | 1320.6284 | 0.0015 | <a href="#">LEMKADSVLAGR</a>  |
| 2.7   | 1320.6273 | 0.0027 | <a href="#">FPESPVVSEFAAR</a> |
| 2.2   | 1320.6277 | 0.0022 | <a href="#">DGLSRGDKWLR</a>   |
| 2.1   | 1320.6273 | 0.0027 | <a href="#">ANLAFEPLFER</a>   |
| 0.8   | 1320.6277 | 0.0022 | <a href="#">QKNSFAAIPNGR</a>  |
| 0.8   | 1320.6277 | 0.0022 | <a href="#">WEDVTNVRK</a>     |
| 0.6   | 1320.6272 | 0.0027 | <a href="#">EVWAEKFLER</a>    |

Mascot: <http://www.matrixscience.com/>

### Peptide View

 MS/MS Fragmentation of **FTIDVASTINHDP EIGDLLK**

 Found in **AT3G29320.1** in **TAIR\_Arabidopsis**, Symbols: | glucan phosphorylase, putative | chr3:11254108-11258824 FORWARD

Match to Query 10008: 2197.125927 from(733.382585,3+) index(9658)

Title: Elution from: 89.206 to 89.206 scan no 13246 cid35.00 polarity:+

Data file D1d-2\_1.mgf

Click mouse within plot area to zoom in by factor of two about that point

 Or, Plot from  to  Da 

 Label all possible matches  Label matches used for scoring 

 Show Y-axis 
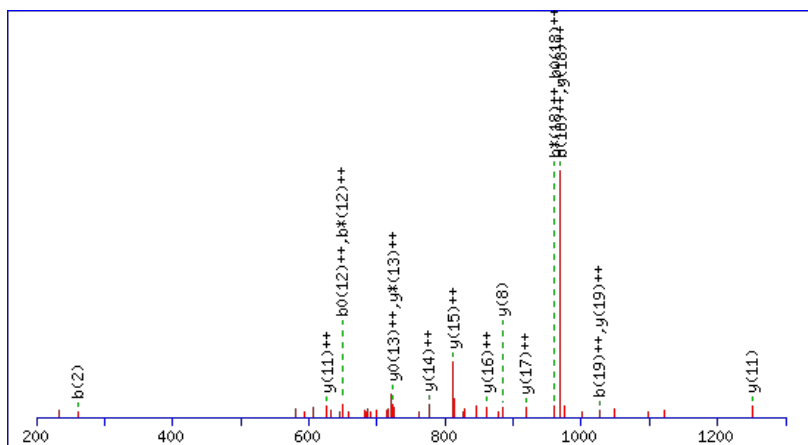

Monoisotopic mass of neutral peptide Mr(calc): 2197.1267

Fixed modifications: Carbamidomethyl (C) (apply to specified residues or termini only)

Ions Score: 33 Expect: 0.0015

 Matches : 20/200 fragment ions using 26 most intense peaks ([help](#))

| #  | b         | b <sup>++</sup> | b <sup>*</sup> | b <sup>*++</sup> | b <sup>0</sup> | b <sup>0++</sup> | Seq. | y         | y <sup>++</sup> | y <sup>*</sup> | y <sup>*++</sup> | y <sup>0</sup> | y <sup>0++</sup> | #  |
|----|-----------|-----------------|----------------|------------------|----------------|------------------|------|-----------|-----------------|----------------|------------------|----------------|------------------|----|
| 1  | 148.0757  | 74.5415         |                |                  |                |                  | F    |           |                 |                |                  |                |                  | 20 |
| 2  | 261.1598  | 131.0835        |                |                  |                |                  | I    | 2051.0655 | 1026.0364       | 2034.0390      | 1017.5231        | 2033.0550      | 1017.0311        | 19 |
| 3  | 362.2074  | 181.6074        |                |                  | 344.1969       | 172.6021         | T    | 1937.9815 | 969.4944        | 1920.9549      | 960.9811         | 1919.9709      | 960.4891         | 18 |
| 4  | 477.2344  | 239.1208        |                |                  | 459.2238       | 230.1155         | D    | 1836.9338 | 918.9705        | 1819.9072      | 910.4573         | 1818.9232      | 909.9652         | 17 |
| 5  | 576.3028  | 288.6550        |                |                  | 558.2922       | 279.6498         | V    | 1721.9068 | 861.4571        | 1704.8803      | 852.9438         | 1703.8963      | 852.4518         | 16 |
| 6  | 647.3399  | 324.1736        |                |                  | 629.3293       | 315.1683         | A    | 1622.8384 | 811.9229        | 1605.8119      | 803.4096         | 1604.8279      | 802.9176         | 15 |
| 7  | 734.3719  | 367.6896        |                |                  | 716.3614       | 358.6843         | S    | 1551.8013 | 776.4043        | 1534.7748      | 767.8910         | 1533.7907      | 767.3990         | 14 |
| 8  | 835.4196  | 418.2134        |                |                  | 817.4090       | 409.2082         | T    | 1464.7693 | 732.8883        | 1447.7427      | 724.3750         | 1446.7587      | 723.8830         | 13 |
| 9  | 948.5037  | 474.7555        |                |                  | 930.4931       | 465.7502         | I    | 1363.7216 | 682.3644        | 1346.6951      | 673.8512         | 1345.7110      | 673.3592         | 12 |
| 10 | 1062.5466 | 531.7769        | 1045.5201      | 523.2637         | 1044.5360      | 522.7717         | N    | 1250.6375 | 625.8224        | 1233.6110      | 617.3091         | 1232.6270      | 616.8171         | 11 |
| 11 | 1199.6055 | 600.3064        | 1182.5790      | 591.7931         | 1181.5949      | 591.3011         | H    | 1136.5946 | 568.8009        | 1119.5681      | 560.2877         | 1118.5840      | 559.7957         | 10 |
| 12 | 1314.6325 | 657.8199        | 1297.6059      | 649.3066         | 1296.6219      | 648.8146         | D    | 999.5357  | 500.2715        | 982.5092       | 491.7582         | 981.5251       | 491.2662         | 9  |
| 13 | 1411.6852 | 706.3462        | 1394.6587      | 697.8330         | 1393.6747      | 697.3410         | P    | 884.5088  | 442.7580        | 867.4822       | 434.2447         | 866.4982       | 433.7527         | 8  |
| 14 | 1540.7278 | 770.8675        | 1523.7013      | 762.3543         | 1522.7172      | 761.8623         | E    | 787.4560  | 394.2316        | 770.4294       | 385.7184         | 769.4454       | 385.2264         | 7  |
| 15 | 1653.8119 | 827.4096        | 1636.7853      | 818.8963         | 1635.8013      | 818.4043         | I    | 658.4134  | 329.7103        | 641.3869       | 321.1971         | 640.4028       | 320.7051         | 6  |
| 16 | 1710.8333 | 855.9203        | 1693.8068      | 847.4070         | 1692.8228      | 846.9150         | G    | 545.3293  | 273.1683        | 528.3028       | 264.6550         | 527.3188       | 264.1630         | 5  |
| 17 | 1825.8603 | 913.4338        | 1808.8337      | 904.9205         | 1807.8497      | 904.4285         | D    | 488.3079  | 244.6576        | 471.2813       | 236.1443         | 470.2973       | 235.6523         | 4  |
| 18 | 1938.9443 | 969.9758        | 1921.9178      | 961.4625         | 1920.9338      | 960.9705         | L    | 373.2809  | 187.1441        | 356.2544       | 178.6308         |                |                  | 3  |
| 19 | 2052.0284 | 1026.5178       | 2035.0019      | 1018.0046        | 2034.0178      | 1017.5126        | L    | 260.1969  | 130.6021        | 243.1703       | 122.0888         |                |                  | 2  |
| 20 |           |                 |                |                  |                |                  | K    | 147.1128  | 74.0600         | 130.0863       | 65.5468          |                |                  | 1  |

# AT3G29320.1

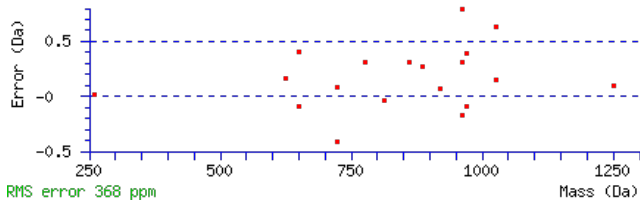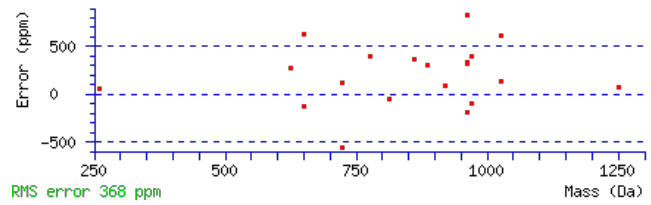

NCBI BLAST search of [FITDVASTINHDPEIGDLLK](#)  
 (Parameters: blastp, nr protein database, expect=20000, no filter, PAM30)  
 Other BLAST [web gateways](#)

## All matches to this query

| Score | Mr(calc)  | Delta   | Sequence                               |
|-------|-----------|---------|----------------------------------------|
| 33.5  | 2197.1267 | -0.0007 | <a href="#">FITDVASTINHDPEIGDLLK</a>   |
| 8.4   | 2197.1267 | -0.0007 | <a href="#">LLDFSSNQLSGSIPSGFSTLK</a>  |
| 8.3   | 2197.1202 | 0.0058  | <a href="#">GWSASTTGITDGKKGLVMFGGK</a> |
| 3.8   | 2197.1300 | -0.0041 | <a href="#">ILLCGELVEVEKHDSDTLK</a>    |
| 2.9   | 2197.1266 | -0.0007 | <a href="#">DHELEKGFEEKPIVEALK</a>     |
| 2.4   | 2197.1313 | -0.0054 | <a href="#">GSAASGGKPIWMKHAEDAKIK</a>  |
| 2.2   | 2197.1201 | 0.0058  | <a href="#">FLTSELINGGEEMIRAVR</a>     |
| 1.5   | 2197.1235 | 0.0025  | <a href="#">MVRISVLNDALKSMYNAEK</a>    |
| 1.3   | 2197.1207 | 0.0052  | <a href="#">FNIPFEYNIAIQKWESIK</a>     |

Mascot: <http://www.matrixscience.com/>

**Peptide View**MS/MS Fragmentation of **LSIYDPQVTEDQIQR**Found in **AT3G29360.1** in **TAIR\_Arabidopsis**, Symbols: | UDP-glucose 6-dehydrogenase, putative | chr3:11268612-11270054 REVERSE

Match to Query 8753: 1803.901672 from(902.958112,2+) index(6376)

Title: Elution from: 56.617 to 56.617 scan no 8197 cid35.00 polarity:+

Data file D6h-3\_1.mgf

Click mouse within plot area to zoom in by factor of two about that point

Or,  to  Da Label all possible matches  Label matches used for scoring Show Y-axis 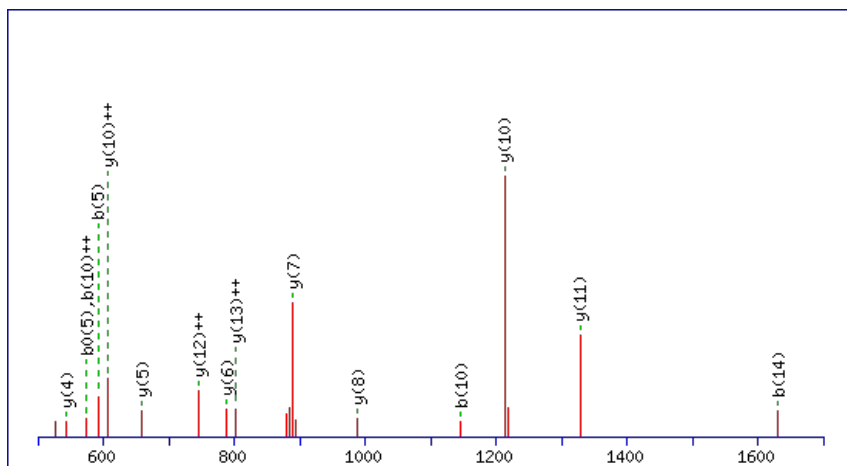Monoisotopic mass of neutral peptide  $M_r(\text{calc})$ : 1803.9003

Fixed modifications: Carbamidomethyl (C) (apply to specified residues or termini only)

Ions Score: 49 Expect: 5.7e-005

Matches : 15/146 fragment ions using 23 most intense peaks ([help](#))

| #  | b         | b <sup>++</sup> | b <sup>*</sup> | b <sup>*++</sup> | b <sup>0</sup> | b <sup>0++</sup> | Seq. | y         | y <sup>++</sup> | y <sup>*</sup> | y <sup>*++</sup> | y <sup>0</sup> | y <sup>0++</sup> | #  |
|----|-----------|-----------------|----------------|------------------|----------------|------------------|------|-----------|-----------------|----------------|------------------|----------------|------------------|----|
| 1  | 114.0913  | 57.5493         |                |                  |                |                  | L    |           |                 |                |                  |                |                  | 15 |
| 2  | 201.1234  | 101.0653        |                |                  | 183.1128       | 92.0600          | S    | 1691.8235 | 846.4154        | 1674.7970      | 837.9021         | 1673.8129      | 837.4101         | 14 |
| 3  | 314.2074  | 157.6074        |                |                  | 296.1969       | 148.6021         | I    | 1604.7915 | 802.8994        | 1587.7649      | 794.3861         | 1586.7809      | 793.8941         | 13 |
| 4  | 477.2708  | 239.1390        |                |                  | 459.2602       | 230.1337         | Y    | 1491.7074 | 746.3573        | 1474.6809      | 737.8441         | 1473.6969      | 737.3521         | 12 |
| 5  | 592.2977  | 296.6525        |                |                  | 574.2871       | 287.6472         | D    | 1328.6441 | 664.8257        | 1311.6175      | 656.3124         | 1310.6335      | 655.8204         | 11 |
| 6  | 689.3505  | 345.1789        |                |                  | 671.3399       | 336.1736         | P    | 1213.6171 | 607.3122        | 1196.5906      | 598.7989         | 1195.6066      | 598.3069         | 10 |
| 7  | 817.4090  | 409.2082        | 800.3825       | 400.6949         | 799.3985       | 400.2029         | Q    | 1116.5644 | 558.7858        | 1099.5378      | 550.2726         | 1098.5538      | 549.7805         | 9  |
| 8  | 916.4775  | 458.7424        | 899.4509       | 450.2291         | 898.4669       | 449.7371         | V    | 988.5058  | 494.7565        | 971.4793       | 486.2433         | 970.4952       | 485.7513         | 8  |
| 9  | 1017.5251 | 509.2662        | 1000.4986      | 500.7529         | 999.5146       | 500.2609         | T    | 889.4374  | 445.2223        | 872.4108       | 436.7091         | 871.4268       | 436.2170         | 7  |
| 10 | 1146.5677 | 573.7875        | 1129.5412      | 565.2742         | 1128.5572      | 564.7822         | E    | 788.3897  | 394.6985        | 771.3632       | 386.1852         | 770.3791       | 385.6932         | 6  |
| 11 | 1261.5947 | 631.3010        | 1244.5681      | 622.7877         | 1243.5841      | 622.2957         | D    | 659.3471  | 330.1772        | 642.3206       | 321.6639         | 641.3365       | 321.1719         | 5  |
| 12 | 1389.6533 | 695.3303        | 1372.6267      | 686.8170         | 1371.6427      | 686.3250         | Q    | 544.3202  | 272.6637        | 527.2936       | 264.1504         |                |                  | 4  |
| 13 | 1502.7373 | 751.8723        | 1485.7108      | 743.3590         | 1484.7268      | 742.8670         | I    | 416.2616  | 208.6344        | 399.2350       | 200.1212         |                |                  | 3  |
| 14 | 1630.7959 | 815.9016        | 1613.7693      | 807.3883         | 1612.7853      | 806.8963         | Q    | 303.1775  | 152.0924        | 286.1510       | 143.5791         |                |                  | 2  |
| 15 |           |                 |                |                  |                |                  | R    | 175.1190  | 88.0631         | 158.0924       | 79.5498          |                |                  | 1  |

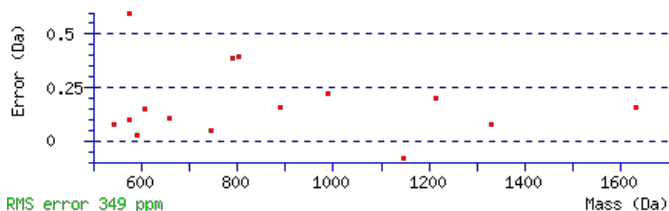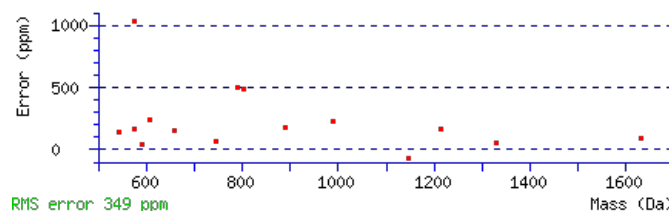NCBI BLAST search of [LSIYDPQVTEDQIQR](#)

## AT3G29360.1

(Parameters: blastp, nr protein database, expect=20000, no filter, PAM30)

Other BLAST [web gateways](#)

### All matches to this query

| Score | Mr(calc)  | Delta   | Sequence                           |
|-------|-----------|---------|------------------------------------|
| 48.7  | 1803.9003 | 0.0014  | <a href="#">LSIYDPQVTEIQIR</a>     |
| 6.0   | 1803.9043 | -0.0026 | <a href="#">LDFKSDPWPTISEAAK</a>   |
| 2.1   | 1803.9036 | -0.0020 | <a href="#">SAASAASLPCTSGIISPK</a> |

Mascot: <http://www.matrixscience.com/>

## Peptide View

MS/MS Fragmentation of **MGNITPLTGTQGQIR**

Found in **AT3G32980.1** in **TAIR\_Arabidopsis**, Symbols: | peroxidase 32 (PER32) (P32) (PRXR3) | chr3:13530117-13533662 REVERSE

Match to Query 7022: 1585.825070 from(793.919811,2+) index(4493)

Title: Elution from: 43.520 to 43.520 scan no 5735 cid35.00 polarity:+

Data file D1d-2\_1.mgf

Click mouse within plot area to zoom in by factor of two about that point

Or,   to  Da

Label all possible matches  Label matches used for scoring

Show Y-axis

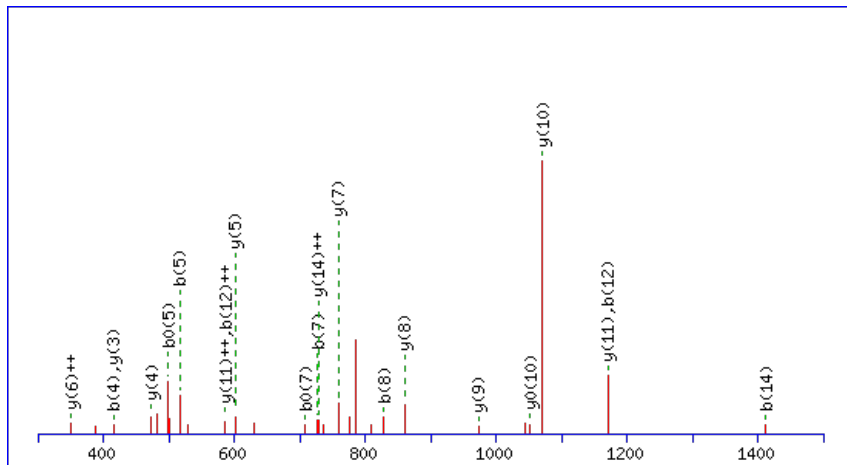

Monoisotopic mass of neutral peptide  $M_r(\text{calc})$ : 1585.8246

Fixed modifications: Carbamidomethyl (C) (apply to specified residues or termini only)

Ions Score: 58 Expect: 6.9e-006

Matches : 21/146 fragment ions using 28 most intense peaks ([help](#))

| #  | b         | b <sup>++</sup> | b <sup>*</sup> | b <sup>*++</sup> | b <sup>0</sup> | b <sup>0++</sup> | Seq. | y         | y <sup>++</sup> | y <sup>*</sup> | y <sup>*++</sup> | y <sup>0</sup> | y <sup>0++</sup> | #  |
|----|-----------|-----------------|----------------|------------------|----------------|------------------|------|-----------|-----------------|----------------|------------------|----------------|------------------|----|
| 1  | 132.0478  | 66.5275         |                |                  |                |                  | M    |           |                 |                |                  |                |                  | 15 |
| 2  | 189.0692  | 95.0383         |                |                  |                |                  | G    | 1455.7914 | 728.3993        | 1438.7649      | 719.8861         | 1437.7809      | 719.3941         | 14 |
| 3  | 303.1122  | 152.0597        | 286.0856       | 143.5464         |                |                  | N    | 1398.7700 | 699.8886        | 1381.7434      | 691.3753         | 1380.7594      | 690.8833         | 13 |
| 4  | 416.1962  | 208.6017        | 399.1697       | 200.0885         |                |                  | I    | 1284.7270 | 642.8672        | 1267.7005      | 634.3539         | 1266.7165      | 633.8619         | 12 |
| 5  | 517.2439  | 259.1256        | 500.2173       | 250.6123         | 499.2333       | 250.1203         | T    | 1171.6430 | 586.3251        | 1154.6164      | 577.8118         | 1153.6324      | 577.3198         | 11 |
| 6  | 614.2967  | 307.6520        | 597.2701       | 299.1387         | 596.2861       | 298.6467         | P    | 1070.5953 | 535.8013        | 1053.5687      | 527.2880         | 1052.5847      | 526.7960         | 10 |
| 7  | 727.3807  | 364.1940        | 710.3542       | 355.6807         | 709.3702       | 355.1887         | L    | 973.5425  | 487.2749        | 956.5160       | 478.7616         | 955.5320       | 478.2696         | 9  |
| 8  | 828.4284  | 414.7178        | 811.4019       | 406.2046         | 810.4178       | 405.7126         | T    | 860.4585  | 430.7329        | 843.4319       | 422.2196         | 842.4479       | 421.7276         | 8  |
| 9  | 885.4499  | 443.2286        | 868.4233       | 434.7153         | 867.4393       | 434.2233         | G    | 759.4108  | 380.2090        | 742.3842       | 371.6958         | 741.4002       | 371.2037         | 7  |
| 10 | 986.4975  | 493.7524        | 969.4710       | 485.2391         | 968.4870       | 484.7471         | T    | 702.3893  | 351.6983        | 685.3628       | 343.1850         | 684.3787       | 342.6930         | 6  |
| 11 | 1114.5561 | 557.7817        | 1097.5296      | 549.2684         | 1096.5456      | 548.7764         | Q    | 601.3416  | 301.1745        | 584.3151       | 292.6612         |                |                  | 5  |
| 12 | 1171.5776 | 586.2924        | 1154.5510      | 577.7792         | 1153.5670      | 577.2871         | G    | 473.2831  | 237.1452        | 456.2565       | 228.6319         |                |                  | 4  |
| 13 | 1299.6362 | 650.3217        | 1282.6096      | 641.8084         | 1281.6256      | 641.3164         | Q    | 416.2616  | 208.6344        | 399.2350       | 200.1212         |                |                  | 3  |
| 14 | 1412.7202 | 706.8638        | 1395.6937      | 698.3505         | 1394.7097      | 697.8585         | I    | 288.2030  | 144.6051        | 271.1765       | 136.0919         |                |                  | 2  |
| 15 |           |                 |                |                  |                |                  | R    | 175.1190  | 88.0631         | 158.0924       | 79.5498          |                |                  | 1  |

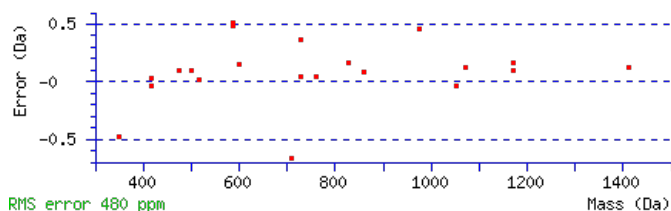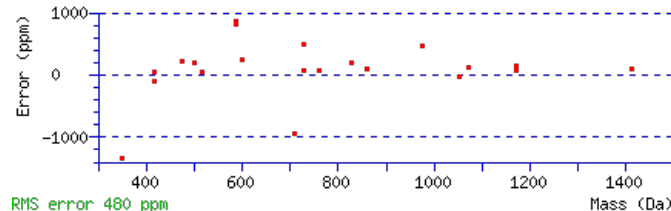

NCBI BLAST search of [MGNITPLTGTQGQIR](#)



## AT3G32980.1

(Parameters: blastp, nr protein database, expect=20000, no filter, PAM30)

Other BLAST [web gateways](#)

### All matches to this query

| Score | Mr(calc)  | Delta   | Sequence                        |
|-------|-----------|---------|---------------------------------|
| 57.9  | 1585.8246 | 0.0004  | <a href="#">MGNITPLIGTQGQIR</a> |
| 0.5   | 1585.8246 | 0.0005  | <a href="#">DGTLKQMVAKEPNR</a>  |
| 0.1   | 1585.8253 | -0.0002 | <a href="#">FKKLYDDLNAGFR</a>   |

Mascot: <http://www.matrixscience.com/>

**Peptide View**MS/MS Fragmentation of **KLSSFDKYK**Found in **AT3G42050.1** in **TAIR\_Arabidopsis**, Symbols: | vacuolar ATP synthase subunit H family protein | chr3:14239832-14243214 REVERSE

Match to Query 3796: 1126.569388 from(564.291970,2+) index(2520)

Title: Elution from: 27.439 to 27.439 scan no 3191 cid35.00 polarity:+

Data file C7-2\_1.mgf

Click mouse within plot area to zoom in by factor of two about that point

Or,   to  Da Label all possible matches  Label matches used for scoring Show Y-axis 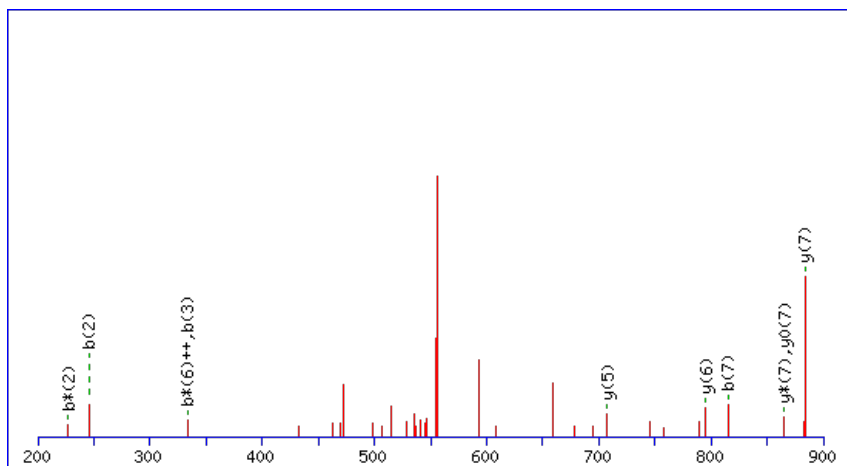Monoisotopic mass of neutral peptide **Mr(calc)**: 1126.5667**Fixed modifications**: Carbamidomethyl (C) (apply to specified residues or termini only)**Ions Score**: 23 **Expect**: 0.039**Matches** : 10/86 fragment ions using 13 most intense peaks ([help](#))

| # | b               | b <sup>++</sup> | b*              | b <sup>*++</sup> | b <sup>0</sup> | b <sup>0++</sup> | Seq.     | y               | y <sup>++</sup> | y*              | y <sup>*++</sup> | y <sup>0</sup>  | y <sup>0++</sup> | # |
|---|-----------------|-----------------|-----------------|------------------|----------------|------------------|----------|-----------------|-----------------|-----------------|------------------|-----------------|------------------|---|
| 1 | 131.0963        | 66.0518         | 113.0727        | 57.0400          |                |                  | <b>K</b> |                 |                 |                 |                  |                 |                  | 9 |
| 2 | <b>245.1774</b> | 123.0923        | <b>227.1538</b> | 114.0805         |                |                  | <b>L</b> | 997.4849        | 499.2461        | 979.4613        | 490.2343         | 979.4744        | 490.2408         | 8 |
| 3 | <b>333.2065</b> | 167.1069        | 315.1829        | 158.0951         | 315.1959       | 158.1016         | <b>S</b> | <b>883.4038</b> | 442.2056        | <b>865.3802</b> | 433.1938         | <b>865.3933</b> | 433.2003         | 7 |
| 4 | 421.2355        | 211.1214        | 403.2120        | 202.1096         | 403.2250       | 202.1161         | <b>S</b> | <b>795.3748</b> | 398.1910        | 777.3512        | 389.1792         | 777.3642        | 389.1857         | 6 |
| 5 | 569.3010        | 285.1541        | 551.2774        | 276.1423         | 551.2904       | 276.1488         | <b>F</b> | <b>707.3457</b> | 354.1765        | 689.3221        | 345.1647         | 689.3351        | 345.1712         | 5 |
| 6 | 685.3250        | 343.1661        | 667.3014        | <b>334.1543</b>  | 667.3144       | 334.1608         | <b>D</b> | 559.2802        | 280.1438        | 541.2567        | 271.1320         | 541.2697        | 271.1385         | 4 |
| 7 | <b>815.4140</b> | 408.2106        | 797.3904        | 399.1988         | 797.4034       | 399.2054         | <b>K</b> | 443.2563        | 222.1318        | 425.2327        | 213.1200         |                 |                  | 3 |
| 8 | 979.4744        | 490.2408        | 961.4508        | 481.2290         | 961.4638       | 481.2355         | <b>Y</b> | 313.1672        | 157.0873        | 295.1437        | 148.0755         |                 |                  | 2 |
| 9 |                 |                 |                 |                  |                |                  | <b>K</b> | 149.1069        | 75.0571         | 131.0833        | 66.0453          |                 |                  | 1 |

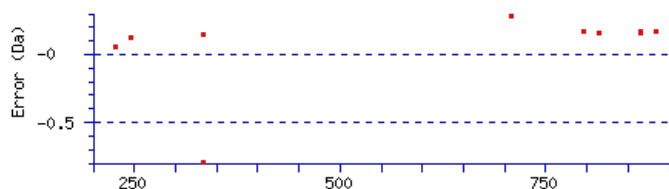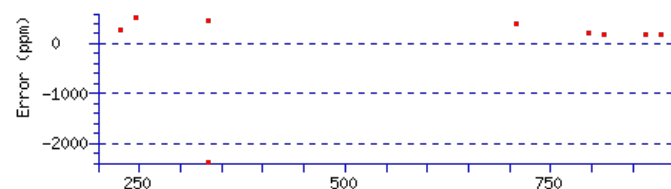NCBI **BLAST** search of [KLSSFDKYK](#)

(Parameters: blastp, nr protein database, expect=20000, no filter, PAM30)

Other BLAST [web gateways](#)**All matches to this query**

| Score | Mr(calc)  | Delta  | Sequence                  |
|-------|-----------|--------|---------------------------|
| 23.2  | 1126.5667 | 0.0027 | <a href="#">KLSSFDKYK</a> |

## AT3G42050.1

|     |           |         |                             |
|-----|-----------|---------|-----------------------------|
| 2.8 | 1126.5694 | 0.0000  | <a href="#">IKNPLDAWR</a>   |
| 1.6 | 1126.5667 | 0.0027  | <a href="#">AKYTAAAYLSK</a> |
| 1.3 | 1126.5701 | -0.0007 | <a href="#">MASPIPVGVTK</a> |
| 0.1 | 1126.5671 | 0.0023  | <a href="#">EGRAISIHTK</a>  |

**Mascot:** <http://www.matrixscience.com/>

**Peptide View**MS/MS Fragmentation of **SLATSRADR**Found in **AT3G42060.1** in **TAIR\_Arabidopsis**, Symbols: | myosin heavy chain-related | chr3:14262586-14265255 REVERSE

Match to Query 2359: 990.465388 from(496.239970,2+) index(4364)

Title: Elution from: 41.431 to 41.431 scan no 5527 cid35.00 polarity:+

Data file 0-3\_1.mgf

Click mouse within plot area to zoom in by factor of two about that point

Or,   to  Da Label all possible matches  Label matches used for scoring Show Y-axis 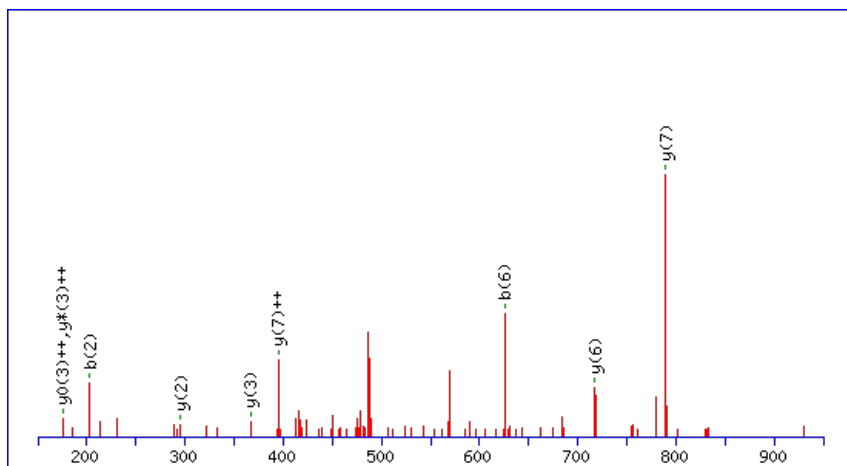Monoisotopic mass of neutral peptide **Mr(calc)**: 990.4653

Fixed modifications: Carbamidomethyl (C) (apply to specified residues or termini only)

Ions Score: 26 **Expect**: 0.035Matches : 9/84 fragment ions using 15 most intense peaks ([help](#))

| # | b               | b <sup>++</sup> | b*       | b <sup>*++</sup> | b <sup>0</sup> | b <sup>0++</sup> | Seq. | y               | y <sup>++</sup> | y*       | y <sup>*++</sup> | y <sup>0</sup> | y <sup>0++</sup> | # |
|---|-----------------|-----------------|----------|------------------|----------------|------------------|------|-----------------|-----------------|----------|------------------|----------------|------------------|---|
| 1 | 89.0363         | 45.0218         |          |                  | 71.0258        | 36.0165          | S    |                 |                 |          |                  |                |                  | 9 |
| 2 | <b>203.1174</b> | 102.0624        |          |                  | 185.1069       | 93.0571          | L    | 903.4435        | 452.2254        | 885.4199 | 443.2136         | 885.4329       | 443.2201         | 8 |
| 3 | 275.1516        | 138.0794        |          |                  | 257.1410       | 129.0741         | A    | <b>789.3624</b> | <b>395.1848</b> | 771.3388 | 386.1730         | 771.3518       | 386.1796         | 7 |
| 4 | 377.1963        | 189.1018        |          |                  | 359.1857       | 180.0965         | T    | <b>717.3282</b> | 359.1678        | 699.3047 | 350.1560         | 699.3177       | 350.1625         | 6 |
| 5 | 465.2254        | 233.1163        |          |                  | 447.2148       | 224.1110         | S    | 615.2835        | 308.1454        | 597.2599 | 299.1336         | 597.2730       | 299.1401         | 5 |
| 6 | <b>625.3146</b> | 313.1609        | 607.2910 | 304.1492         | 607.3040       | 304.1557         | R    | 527.2545        | 264.1309        | 509.2309 | 255.1191         | 509.2439       | 255.1256         | 4 |
| 7 | 697.3488        | 349.1780        | 679.3252 | 340.1662         | 679.3382       | 340.1727         | A    | <b>367.1652</b> | 184.0862        | 349.1416 | <b>175.0745</b>  | 349.1547       | <b>175.0810</b>  | 3 |
| 8 | 813.3727        | 407.1900        | 795.3492 | 398.1782         | 795.3622       | 398.1847         | D    | <b>295.1311</b> | 148.0692        | 277.1075 | 139.0574         | 277.1205       | 139.0639         | 2 |
| 9 |                 |                 |          |                  |                |                  | R    | 179.1071        | 90.0572         | 161.0835 | 81.0454          |                |                  | 1 |

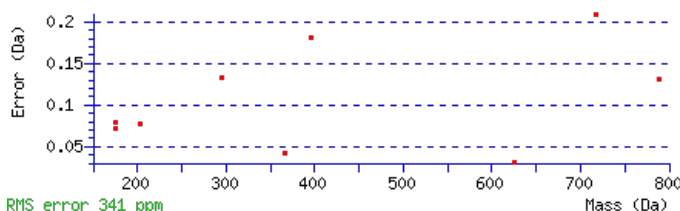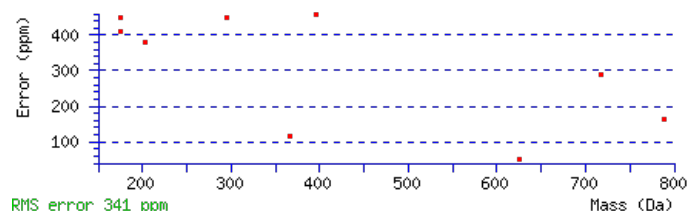NCBI **BLAST** search of [SLATSRADR](#)

(Parameters: blastp, nr protein database, expect=20000, no filter, PAM30)

Other BLAST [web gateways](#)**All matches to this query**

| Score | Mr(calc) | Delta  | Sequence                  |
|-------|----------|--------|---------------------------|
| 25.7  | 990.4653 | 0.0001 | <a href="#">SLATSRADR</a> |

## AT3G42060.1

|      |          |         |                          |
|------|----------|---------|--------------------------|
| 10.0 | 990.4671 | -0.0017 | <a href="#">AEYPVFQK</a> |
| 5.9  | 990.4635 | 0.0019  | <a href="#">LSVMIMNR</a> |
| 2.2  | 990.4635 | 0.0019  | <a href="#">LSVMIMNR</a> |

**Mascot:** <http://www.matrixscience.com/>

**Peptide View**MS/MS Fragmentation of **MGPPRTPLSKIDK**Found in **AT3G43210.1** in **TAIR\_Arabidopsis**, Symbols: TES | TES (TETRASPORE); microtubule motor | chr3:15202417-15207009 FORWARD

Match to Query 5810: 1456.743482 from(729.379017,2+) index(4674)

Title: Elution from: 45.657 to 45.657 scan no 6019 cid35.00 polarity:+

Data file D12h-2\_1.mgf

Click mouse within plot area to zoom in by factor of two about that point

Or,   to  Da Label all possible matches  Label matches used for scoring Show Y-axis 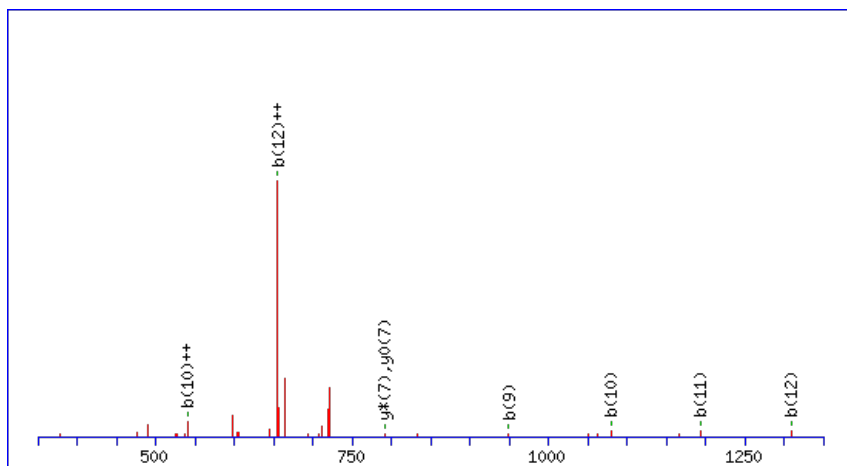Monoisotopic mass of neutral peptide  $M_r(\text{calc})$ : 1456.7433

Fixed modifications: Carbamidomethyl (C) (apply to specified residues or termini only)

Ions Score: 25 Expect: 0.011

Matches : 8/124 fragment ions using 10 most intense peaks ([help](#))

| #  | b         | b <sup>++</sup> | b*        | b <sup>*++</sup> | b <sup>0</sup> | b <sup>0++</sup> | Seq. | y         | y <sup>++</sup> | y*        | y <sup>*++</sup> | y <sup>0</sup> | y <sup>0++</sup> | #  |
|----|-----------|-----------------|-----------|------------------|----------------|------------------|------|-----------|-----------------|-----------|------------------|----------------|------------------|----|
| 1  | 133.0448  | 67.0260         |           |                  |                |                  | M    |           |                 |           |                  |                |                  | 13 |
| 2  | 191.0633  | 96.0353         |           |                  |                |                  | G    | 1325.7130 | 663.3601        | 1307.6894 | 654.3483         | 1307.7024      | 654.3549         | 12 |
| 3  | 289.1131  | 145.0602        |           |                  |                |                  | P    | 1267.6945 | 634.3509        | 1249.6709 | 625.3391         | 1249.6839      | 625.3456         | 11 |
| 4  | 387.1629  | 194.0851        |           |                  |                |                  | P    | 1169.6447 | 585.3260        | 1151.6211 | 576.3142         | 1151.6341      | 576.3207         | 10 |
| 5  | 547.2521  | 274.1297        | 529.2286  | 265.1179         |                |                  | R    | 1071.5949 | 536.3011        | 1053.5713 | 527.2893         | 1053.5843      | 527.2958         | 9  |
| 6  | 649.2969  | 325.1521        | 631.2733  | 316.1403         | 631.2863       | 316.1468         | T    | 911.5057  | 456.2565        | 893.4821  | 447.2447         | 893.4951       | 447.2512         | 8  |
| 7  | 747.3467  | 374.1770        | 729.3231  | 365.1652         | 729.3361       | 365.1717         | P    | 809.4609  | 405.2341        | 791.4374  | 396.2223         | 791.4504       | 396.2288         | 7  |
| 8  | 861.4278  | 431.2175        | 843.4042  | 422.2057         | 843.4172       | 422.2122         | L    | 711.4111  | 356.2092        | 693.3876  | 347.1974         | 693.4006       | 347.2039         | 6  |
| 9  | 949.4568  | 475.2320        | 931.4332  | 466.2203         | 931.4463       | 466.2268         | S    | 597.3300  | 299.1687        | 579.3065  | 290.1569         | 579.3195       | 290.1634         | 5  |
| 10 | 1079.5459 | 540.2766        | 1061.5223 | 531.2648         | 1061.5353      | 531.2713         | K    | 509.3010  | 255.1541        | 491.2774  | 246.1423         | 491.2904       | 246.1488         | 4  |
| 11 | 1193.6270 | 597.3171        | 1175.6034 | 588.3053         | 1175.6164      | 588.3118         | I    | 379.2120  | 190.1096        | 361.1884  | 181.0978         | 361.2014       | 181.1043         | 3  |
| 12 | 1309.6509 | 655.3291        | 1291.6273 | 646.3173         | 1291.6404      | 646.3238         | D    | 265.1309  | 133.0691        | 247.1073  | 124.0573         | 247.1203       | 124.0638         | 2  |
| 13 |           |                 |           |                  |                |                  | K    | 149.1069  | 75.0571         | 131.0833  | 66.0453          |                |                  | 1  |

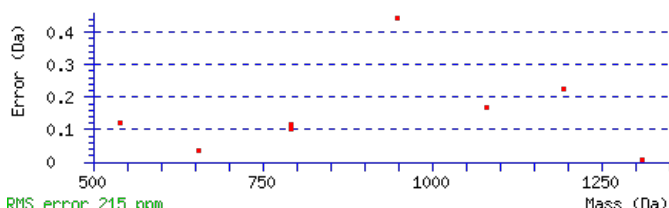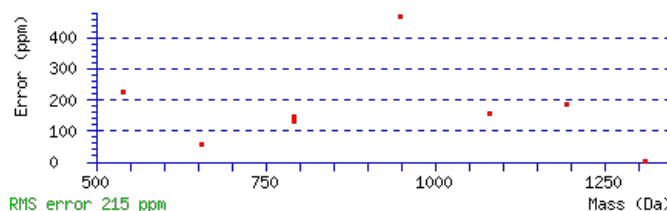NCBI **BLAST** search of **MGPPRTPLSKIDK**

(Parameters: blastp, nr protein database, expect=20000, no filter, PAM30)

Other BLAST [web gateways](#)

**AT3G43210.1**

All matches to this query

| Score | Mr(calc)  | Delta   | Sequence                      |
|-------|-----------|---------|-------------------------------|
| 25.5  | 1456.7433 | 0.0002  | <a href="#">MGPPRTPLSKIDK</a> |
| 15.2  | 1456.7432 | 0.0002  | <a href="#">ILHGEMQKDK</a>    |
| 15.1  | 1456.7455 | -0.0020 | <a href="#">EKIIHWMKVEK</a>   |
| 10.9  | 1456.7426 | 0.0009  | <a href="#">KLHLFSSSHRPK</a>  |
| 8.5   | 1456.7399 | 0.0036  | <a href="#">FLEKVESYRR</a>    |
| 4.5   | 1456.7403 | 0.0032  | <a href="#">KRHVALEINGGNK</a> |
| 4.1   | 1456.7399 | 0.0036  | <a href="#">YEPGKQVHGLALK</a> |
| 3.9   | 1456.7399 | 0.0036  | <a href="#">NNGSPPPPPLKK</a>  |
| 3.9   | 1456.7455 | -0.0020 | <a href="#">KFLDILNMYRK</a>   |
| 3.5   | 1456.7406 | 0.0029  | <a href="#">VDPLGEKAMIELK</a> |

Mascot: <http://www.matrixscience.com/>

**Peptide View**MS/MS Fragmentation of **IFGSTGEDISGGK**Found in **AT3G44100.1** in **TAIR\_Arabidopsis**, Symbols: | MD-2-related lipid recognition domain-containing protein / ML domain-containing protein | chr3:15877149-15878260 REVERSE

Match to Query 4890: 1266.607944 from(634.311248,2+) index(3346)

Title: Elution from: 32.378 to 32.378 scan no 4134 cid35.00 polarity:+

Data file D6h-1\_1.mgf

Click mouse within plot area to zoom in by factor of two about that point

Or,  to  Da Label all possible matches  Label matches used for scoring Show Y-axis 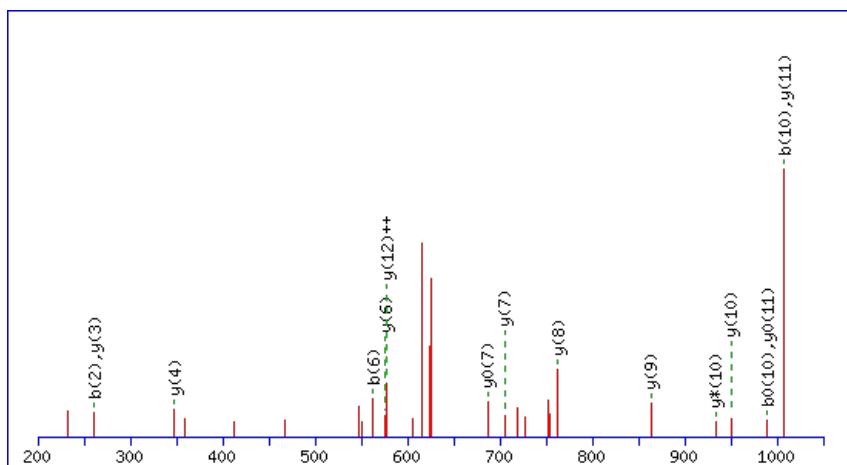Monoisotopic mass of neutral peptide  $M_r(\text{calc})$ : 1266.6092

Fixed modifications: Carbamidomethyl (C) (apply to specified residues or termini only)

Ions Score: 53 Expect: 1.7e-005

Matches : 16/108 fragment ions using 27 most intense peaks ([help](#))

| #  | b                | b <sup>++</sup> | b <sup>0</sup>  | b <sup>0++</sup> | Seq. | y                | y <sup>++</sup> | y*              | y <sup>*++</sup> | y <sup>0</sup>  | y <sup>0++</sup> | #  |
|----|------------------|-----------------|-----------------|------------------|------|------------------|-----------------|-----------------|------------------|-----------------|------------------|----|
| 1  | 114.0913         | 57.5493         |                 |                  | I    |                  |                 |                 |                  |                 |                  | 13 |
| 2  | <b>261.1598</b>  | 131.0835        |                 |                  | F    | 1154.5324        | <b>577.7698</b> | 1137.5059       | 569.2566         | 1136.5218       | 568.7646         | 12 |
| 3  | 318.1812         | 159.5942        |                 |                  | G    | <b>1007.4640</b> | 504.2356        | 990.4374        | 495.7224         | <b>989.4534</b> | 495.2304         | 11 |
| 4  | 405.2132         | 203.1103        | 387.2027        | 194.1050         | S    | <b>950.4425</b>  | 475.7249        | <b>933.4160</b> | 467.2116         | 932.4320        | 466.7196         | 10 |
| 5  | 506.2609         | 253.6341        | 488.2504        | 244.6288         | T    | <b>863.4105</b>  | 432.2089        | 846.3840        | 423.6956         | 845.3999        | 423.2036         | 9  |
| 6  | <b>563.2824</b>  | 282.1448        | 545.2718        | 273.1396         | G    | <b>762.3628</b>  | 381.6851        | 745.3363        | 373.1718         | 744.3523        | 372.6798         | 8  |
| 7  | 692.3250         | 346.6661        | 674.3144        | 337.6608         | E    | <b>705.3414</b>  | 353.1743        | 688.3148        | 344.6610         | <b>687.3308</b> | 344.1690         | 7  |
| 8  | 807.3519         | 404.1796        | 789.3414        | 395.1743         | D    | <b>576.2988</b>  | 288.6530        | 559.2722        | 280.1397         | 558.2882        | 279.6477         | 6  |
| 9  | 920.4360         | 460.7216        | 902.4254        | 451.7164         | I    | 461.2718         | 231.1395        | 444.2453        | 222.6263         | 443.2613        | 222.1343         | 5  |
| 10 | <b>1007.4680</b> | 504.2376        | <b>989.4575</b> | 495.2324         | S    | <b>348.1878</b>  | 174.5975        | 331.1612        | 166.0842         | 330.1772        | 165.5922         | 4  |
| 11 | 1064.4895        | 532.7484        | 1046.4789       | 523.7431         | G    | <b>261.1557</b>  | 131.0815        | 244.1292        | 122.5682         |                 |                  | 3  |
| 12 | 1121.5109        | 561.2591        | 1103.5004       | 552.2538         | G    | 204.1343         | 102.5708        | 187.1077        | 94.0575          |                 |                  | 2  |
| 13 |                  |                 |                 |                  | K    | 147.1128         | 74.0600         | 130.0863        | 65.5468          |                 |                  | 1  |

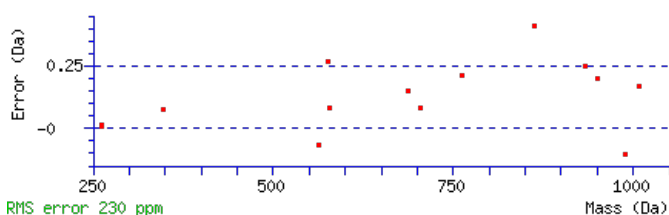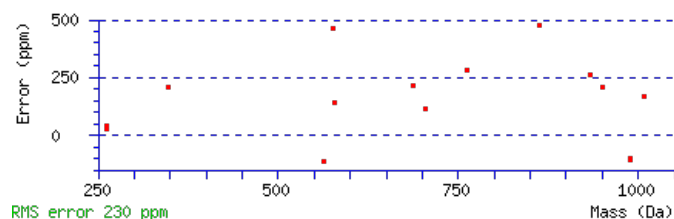NCBI **BLAST** search of **IFGSTGEDISGGK**

(Parameters: blastp, nr protein database, expect=20000, no filter, PAM30)



AT3G44100.1

Other BLAST [web gateways](#)

**All matches to this query**

| Score | Mr(calc)  | Delta   | Sequence                      |
|-------|-----------|---------|-------------------------------|
| 52.9  | 1266.6092 | -0.0013 | <a href="#">IFGSTGEDISGGK</a> |

Mascot: <http://www.matrixscience.com/>

**Peptide View**MS/MS Fragmentation of **NIMMVLK**

Found in **AT3G44200.1** in **TAIR\_Arabidopsis**, Symbols: ATNEK6, NEK6, IBO1 | ATNEK6/IBO1/NEK6 (NIMA (NEVER IN MITOSIS, GENE A)-RELATED 6); kinase | chr3:15917775-15922352 FORWARD

Match to Query 1431: 872.432698 from(437.223625,2+) index(4078)

Title: Elution from: 38.105 to 38.105 scan no 5137 cid35.00 polarity:+

Data file C7-3\_3.mgf

Click mouse within plot area to zoom in by factor of two about that point

Or,   to  Da

Label all possible matches  Label matches used for scoring

Show Y-axis

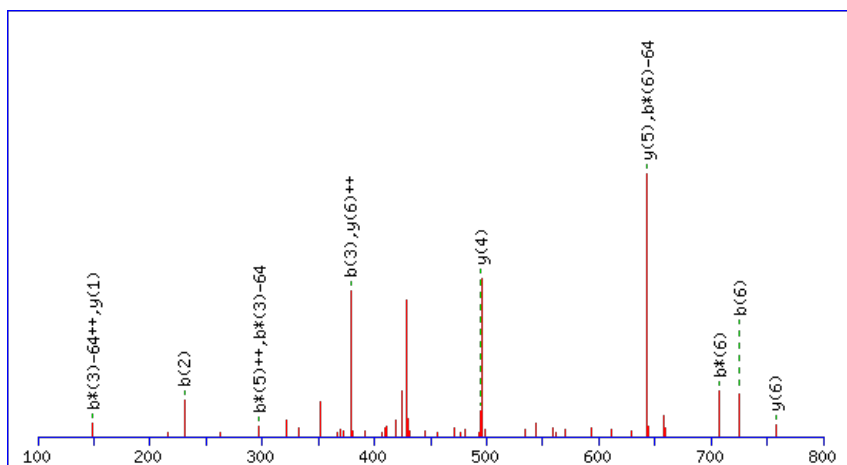

Monoisotopic mass of neutral peptide  $M_r(\text{calc})$ : 872.4342

Fixed modifications: Carbamidomethyl (C) (apply to specified residues or termini only)

Variable modifications:

M3 : Oxidation (M), with neutral losses 0.0000 (shown in table), 63.9983

Ions Score: 34 Expect: 0.0017

Matches : 13/72 fragment ions using 13 most intense peaks ([help](#))

| # | b               | b <sup>++</sup> | b*              | b <sup>*++</sup> | Seq. | y               | y <sup>++</sup> | y*       | y <sup>*++</sup> | # |
|---|-----------------|-----------------|-----------------|------------------|------|-----------------|-----------------|----------|------------------|---|
| 1 | 117.0443        | 59.0258         | 99.0207         | 50.0140          | N    |                 |                 |          |                  | 7 |
| 2 | <b>231.1254</b> | 116.0663        | 213.1018        | 107.0545         | I    | <b>757.4045</b> | <b>379.2059</b> | 739.3809 | 370.1941         | 6 |
| 3 | <b>379.1578</b> | 190.0825        | 361.1342        | 181.0707         | M    | <b>643.3234</b> | 322.1653        | 625.2998 | 313.1535         | 5 |
| 4 | 511.1953        | 256.1013        | 493.1717        | 247.0895         | M    | <b>495.2909</b> | 248.1491        | 477.2674 | 239.1373         | 4 |
| 5 | 611.2608        | 306.1340        | 593.2372        | <b>297.1222</b>  | V    | 363.2534        | 182.1303        | 345.2298 | 173.1186         | 3 |
| 6 | <b>725.3419</b> | 363.1746        | <b>707.3183</b> | 354.1628         | L    | 263.1880        | 132.0976        | 245.1644 | 123.0858         | 2 |
| 7 |                 |                 |                 |                  | K    | <b>149.1069</b> | 75.0571         | 131.0833 | 66.0453          | 1 |

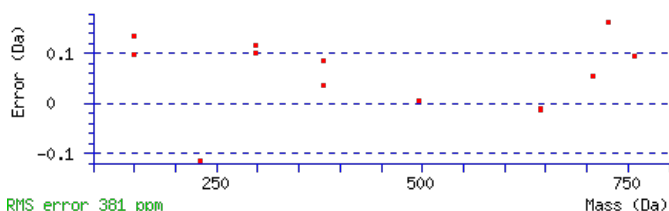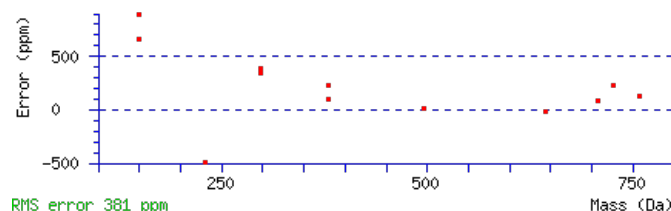

NCBI BLAST search of [NIMMVLK](#)

(Parameters: blastp, nr protein database, expect=20000, no filter, PAM30)

Other BLAST [web gateways](#)

**All matches to this query**

| Score | $M_r(\text{calc})$ | Delta   | Sequence                | Site Analysis       |
|-------|--------------------|---------|-------------------------|---------------------|
| 34.2  | 872.4342           | -0.0015 | <a href="#">NIMMVLK</a> | Oxidation M3 97.88% |

## AT3G44200.1

|      |          |         |                          |                    |
|------|----------|---------|--------------------------|--------------------|
| 27.8 | 872.4308 | 0.0019  | <a href="#">MQVVPEK</a>  |                    |
| 17.5 | 872.4342 | -0.0015 | <a href="#">NIMMVLK</a>  | Oxidation M4 2.12% |
| 15.4 | 872.4313 | 0.0014  | <a href="#">NLCLGRK</a>  |                    |
| 12.9 | 872.4333 | -0.0006 | <a href="#">ETSSLSLK</a> |                    |
| 9.8  | 872.4313 | 0.0014  | <a href="#">AMGRAINK</a> |                    |
| 8.5  | 872.4333 | -0.0006 | <a href="#">ESTISLTK</a> |                    |
| 5.7  | 872.4306 | 0.0021  | <a href="#">FHRRNK</a>   |                    |
| 5.1  | 872.4313 | 0.0014  | <a href="#">NMKPKSR</a>  |                    |
| 4.5  | 872.4308 | 0.0019  | <a href="#">MALIWSK</a>  |                    |

Mascot: <http://www.matrixscience.com/>

**Peptide View**MS/MS Fragmentation of **GIELYCAPTADGSK**Found in **AT3G44300.1** in **TAIR\_Arabidopsis**, Symbols: NIT2 | NIT2 (NITRILASE 2) | chr3:15994338-15996159 FORWARD

Match to Query 6014: 1480.685212 from(741.349882,2+) index(4228)

Title: Elution from: 38.260 to 38.260 scan no 5284 cid35.00 polarity:+

Data file C7-2\_3.mgf

Click mouse within plot area to zoom in by factor of two about that point

Or,   to  Da Label all possible matches  Label matches used for scoring Show Y-axis 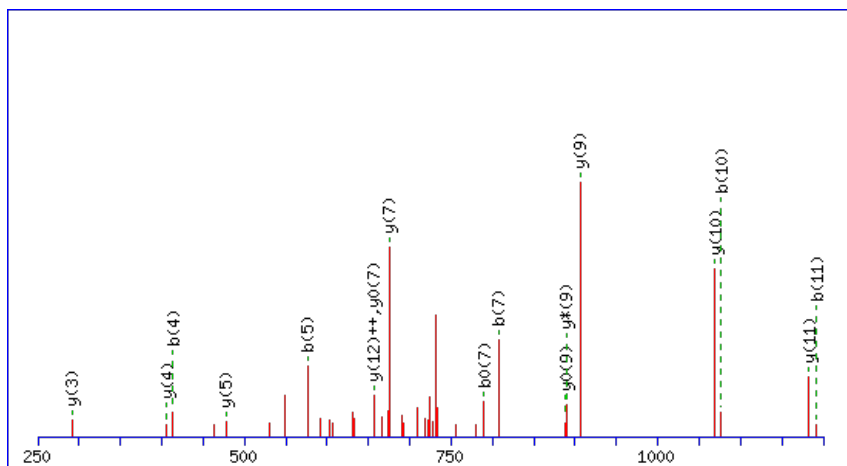Monoisotopic mass of neutral peptide  $M_r(\text{calc})$ : 1480.6868

Fixed modifications: Carbamidomethyl (C) (apply to specified residues or termini only)

Ions Score: 63 Expect: 1.4e-006

Matches : 17/124 fragment ions using 21 most intense peaks ([help](#))

| #  | b                | b <sup>++</sup> | b <sup>0</sup>  | b <sup>0++</sup> | Seq.     | y                | y <sup>++</sup> | y*              | y <sup>*++</sup> | y <sup>0</sup>  | y <sup>0++</sup> | #  |
|----|------------------|-----------------|-----------------|------------------|----------|------------------|-----------------|-----------------|------------------|-----------------|------------------|----|
| 1  | 58.0287          | 29.5180         |                 |                  | <b>G</b> |                  |                 |                 |                  |                 |                  | 14 |
| 2  | 171.1128         | 86.0600         |                 |                  | <b>I</b> | 1424.6726        | 712.8399        | 1407.6461       | 704.3267         | 1406.6620       | 703.8347         | 13 |
| 3  | 300.1554         | 150.5813        | 282.1448        | 141.5761         | <b>E</b> | 1311.5885        | 656.2979        | 1294.5620       | 647.7846         | 1293.5780       | 647.2926         | 12 |
| 4  | <b>413.2395</b>  | 207.1234        | 395.2289        | 198.1181         | <b>L</b> | <b>1182.5460</b> | 591.7766        | 1165.5194       | 583.2633         | 1164.5354       | 582.7713         | 11 |
| 5  | <b>576.3028</b>  | 288.6550        | 558.2922        | 279.6498         | <b>Y</b> | <b>1069.4619</b> | 535.2346        | 1052.4353       | 526.7213         | 1051.4513       | 526.2293         | 10 |
| 6  | 736.3334         | 368.6704        | 718.3229        | 359.6651         | <b>C</b> | <b>906.3986</b>  | 453.7029        | <b>889.3720</b> | 445.1896         | <b>888.3880</b> | 444.6976         | 9  |
| 7  | <b>807.3706</b>  | 404.1889        | <b>789.3600</b> | 395.1836         | <b>A</b> | 746.3679         | 373.6876        | 729.3414        | 365.1743         | 728.3573        | 364.6823         | 8  |
| 8  | 904.4233         | 452.7153        | 886.4128        | 443.7100         | <b>P</b> | <b>675.3308</b>  | 338.1690        | 658.3042        | 329.6558         | <b>657.3202</b> | 329.1638         | 7  |
| 9  | 1005.4710        | 503.2391        | 987.4604        | 494.2339         | <b>T</b> | 578.2780         | 289.6427        | 561.2515        | 281.1294         | 560.2675        | 280.6374         | 6  |
| 10 | <b>1076.5081</b> | 538.7577        | 1058.4975       | 529.7524         | <b>A</b> | <b>477.2304</b>  | 239.1188        | 460.2038        | 230.6055         | 459.2198        | 230.1135         | 5  |
| 11 | <b>1191.5351</b> | 596.2712        | 1173.5245       | 587.2659         | <b>D</b> | <b>406.1932</b>  | 203.6003        | 389.1667        | 195.0870         | 388.1827        | 194.5950         | 4  |
| 12 | 1248.5565        | 624.7819        | 1230.5460       | 615.7766         | <b>G</b> | <b>291.1663</b>  | 146.0868        | 274.1397        | 137.5735         | 273.1557        | 137.0815         | 3  |
| 13 | 1335.5885        | 668.2979        | 1317.5780       | 659.2926         | <b>S</b> | 234.1448         | 117.5761        | 217.1183        | 109.0628         | 216.1343        | 108.5708         | 2  |
| 14 |                  |                 |                 |                  | <b>K</b> | 147.1128         | 74.0600         | 130.0863        | 65.5468          |                 |                  | 1  |

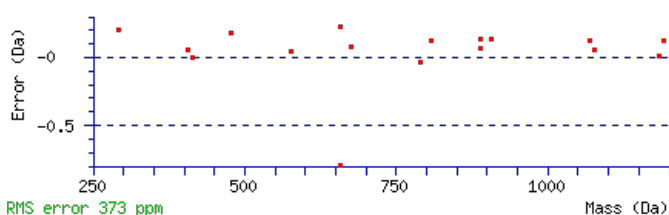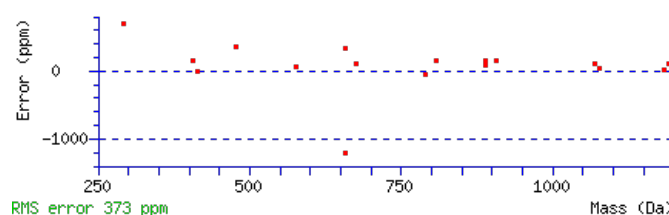NCBI **BLAST** search of **GIELYCAPTADGSK**

(Parameters: blastp, nr protein database, expect=20000, no filter, PAM30)

AT3G44300.1

Other BLAST [web gateways](#)

**All matches to this query**

| Score | Mr(calc)  | Delta   | Sequence                       |
|-------|-----------|---------|--------------------------------|
| 63.0  | 1480.6868 | -0.0016 | <a href="#">GIELYCAPTADGSK</a> |
| 8.8   | 1480.6834 | 0.0018  | <a href="#">EEFGDTNLVGWSK</a>  |
| 0.4   | 1480.6875 | -0.0022 | <a href="#">RNMVQNMLSSNR</a>   |

Mascot: <http://www.matrixscience.com/>

**Peptide View**MS/MS Fragmentation of **LGAaicWENR**

Found in **AT3G44310.1** in **TAIR\_Arabidopsis**, Symbols: NIT1, ATNIT1, NITI | ATNIT1/NIT1/NITI (NITRILASE 1); nitrilase | chr3:15997888-15999828 FORWARD

Match to Query 4103: 1188.568620 from(595.291586,2+) index(4617)

Title: Elution from: 43.671 to 43.671 scan no 5831 cid35.00 polarity:+

Data file D6h-2\_1.mgf

Click mouse within plot area to zoom in by factor of two about that point

Or,   to  Da

Label all possible matches  Label matches used for scoring

Show Y-axis

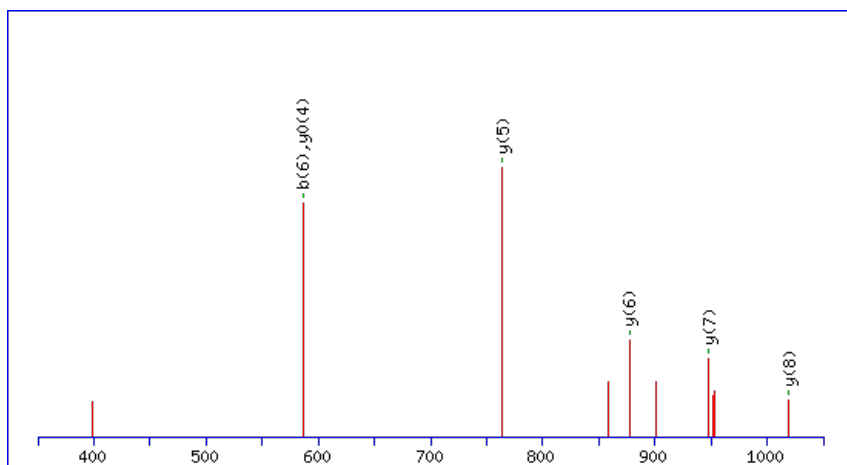

**Monoisotopic mass of neutral peptide Mr(calc):** 1188.5710

**Fixed modifications:** Carbamidomethyl (C) (apply to specified residues or termini only)

**Ions Score:** 34 **Expect:** 0.00088

**Matches:** 6/74 fragment ions using 6 most intense peaks ([help](#))

| #  | b               | b <sup>++</sup> | b*       | b <sup>*++</sup> | b <sup>0</sup> | b <sup>0++</sup> | Seq. | y                | y <sup>++</sup> | y*        | y <sup>*++</sup> | y <sup>0</sup>  | y <sup>0++</sup> | #  |
|----|-----------------|-----------------|----------|------------------|----------------|------------------|------|------------------|-----------------|-----------|------------------|-----------------|------------------|----|
| 1  | 114.0913        | 57.5493         |          |                  |                |                  | L    |                  |                 |           |                  |                 |                  | 10 |
| 2  | 171.1128        | 86.0600         |          |                  |                |                  | G    | 1076.4942        | 538.7507        | 1059.4676 | 530.2375         | 1058.4836       | 529.7455         | 9  |
| 3  | 242.1499        | 121.5786        |          |                  |                |                  | A    | <b>1019.4727</b> | 510.2400        | 1002.4462 | 501.7267         | 1001.4622       | 501.2347         | 8  |
| 4  | 313.1870        | 157.0972        |          |                  |                |                  | A    | <b>948.4356</b>  | 474.7214        | 931.4091  | 466.2082         | 930.4250        | 465.7162         | 7  |
| 5  | 426.2711        | 213.6392        |          |                  |                |                  | I    | <b>877.3985</b>  | 439.2029        | 860.3719  | 430.6896         | 859.3879        | 430.1976         | 6  |
| 6  | <b>586.3017</b> | 293.6545        |          |                  |                |                  | C    | <b>764.3144</b>  | 382.6609        | 747.2879  | 374.1476         | 746.3039        | 373.6556         | 5  |
| 7  | 772.3811        | 386.6942        |          |                  |                |                  | W    | 604.2838         | 302.6455        | 587.2572  | 294.1323         | <b>586.2732</b> | 293.6402         | 4  |
| 8  | 901.4237        | 451.2155        |          |                  | 883.4131       | 442.2102         | E    | 418.2045         | 209.6059        | 401.1779  | 201.0926         | 400.1939        | 200.6006         | 3  |
| 9  | 1015.4666       | 508.2369        | 998.4400 | 499.7237         | 997.4560       | 499.2316         | N    | 289.1619         | 145.0846        | 272.1353  | 136.5713         |                 |                  | 2  |
| 10 |                 |                 |          |                  |                |                  | R    | 175.1190         | 88.0631         | 158.0924  | 79.5498          |                 |                  | 1  |

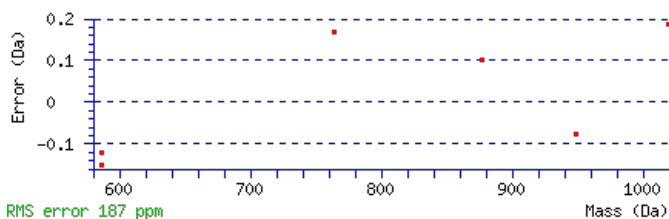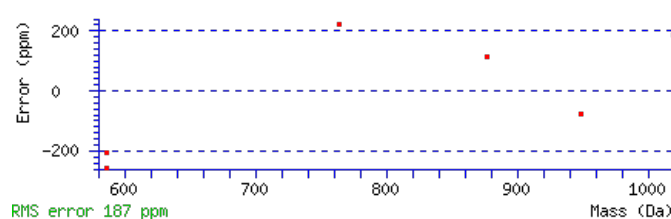

NCBI **BLAST** search of **LGAaicWENR**

(Parameters: blastp, nr protein database, expect=20000, no filter, PAM30)

Other BLAST [web gateways](#)

**All matches to this query**

AT3G44310.1

| Score | Mr(calc)  | Delta   | Sequence                   |
|-------|-----------|---------|----------------------------|
| 33.6  | 1188.5710 | -0.0023 | <a href="#">IGAAICWENR</a> |
| 33.6  | 1188.5710 | -0.0023 | <a href="#">LGAAICWENR</a> |

Mascot: <http://www.matrixscience.com/>

**Peptide View**MS/MS Fragmentation of **VTIVQSSTVYNDTPATLDK**Found in **AT3G44320.1** in **TAIR\_Arabidopsis**, Symbols: NIT3 | NIT3 (NITRILASE 3) | chr3:16004406-16006480 FORWARD

Match to Query 9497: 2051.045490 from(1026.530021,2+) index(5432)

Title: Elution from: 48.408 to 48.408 scan no 6855 cid35.00 polarity:+

Data file C7-1\_2.mgf

Click mouse within plot area to zoom in by factor of two about that point

Or,   to  Da Label all possible matches  Label matches used for scoring Show Y-axis 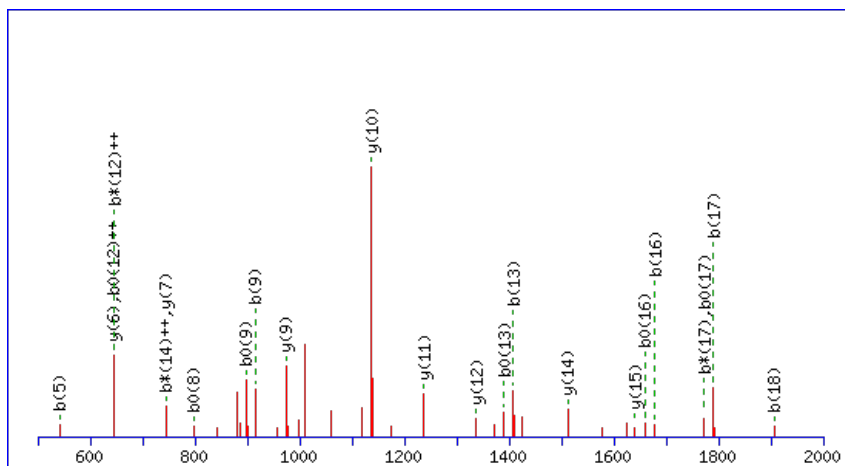Monoisotopic mass of neutral peptide  $M_r(\text{calc})$ : 2051.0423

Fixed modifications: Carbamidomethyl (C) (apply to specified residues or termini only)

Ions Score: 74 Expect: 1.4e-007

Matches : 23/204 fragment ions using 24 most intense peaks ([help](#))

| #  | b                | b <sup>++</sup> | b*               | b <sup>*++</sup> | b <sup>0</sup>   | b <sup>0++</sup> | Seq. | y                | y <sup>++</sup> | y*        | y <sup>*++</sup> | y <sup>0</sup> | y <sup>0++</sup> | #  |
|----|------------------|-----------------|------------------|------------------|------------------|------------------|------|------------------|-----------------|-----------|------------------|----------------|------------------|----|
| 1  | 100.0757         | 50.5415         |                  |                  |                  |                  | V    |                  |                 |           |                  |                |                  | 19 |
| 2  | 201.1234         | 101.0653        |                  |                  | 183.1128         | 92.0600          | T    | 1952.9811        | 976.9942        | 1935.9546 | 968.4809         | 1934.9706      | 967.9889         | 18 |
| 3  | 314.2074         | 157.6074        |                  |                  | 296.1969         | 148.6021         | I    | 1851.9335        | 926.4704        | 1834.9069 | 917.9571         | 1833.9229      | 917.4651         | 17 |
| 4  | 413.2758         | 207.1416        |                  |                  | 395.2653         | 198.1363         | V    | 1738.8494        | 869.9283        | 1721.8228 | 861.4151         | 1720.8388      | 860.9230         | 16 |
| 5  | <b>541.3344</b>  | 271.1709        | 524.3079         | 262.6576         | 523.3239         | 262.1656         | Q    | <b>1639.7810</b> | 820.3941        | 1622.7544 | 811.8809         | 1621.7704      | 811.3888         | 15 |
| 6  | 628.3665         | 314.6869        | 611.3399         | 306.1736         | 610.3559         | 305.6816         | S    | <b>1511.7224</b> | 756.3648        | 1494.6958 | 747.8516         | 1493.7118      | 747.3596         | 14 |
| 7  | 715.3985         | 358.2029        | 698.3719         | 349.6896         | 697.3879         | 349.1976         | S    | 1424.6904        | 712.8488        | 1407.6638 | 704.3355         | 1406.6798      | 703.8435         | 13 |
| 8  | 816.4462         | 408.7267        | 799.4196         | 400.2134         | <b>798.4356</b>  | 399.7214         | T    | <b>1337.6583</b> | 669.3328        | 1320.6318 | 660.8195         | 1319.6478      | 660.3275         | 12 |
| 9  | <b>915.5146</b>  | 458.2609        | 898.4880         | 449.7477         | <b>897.5040</b>  | 449.2556         | V    | <b>1236.6107</b> | 618.8090        | 1219.5841 | 610.2957         | 1218.6001      | 609.8037         | 11 |
| 10 | 1078.5779        | 539.7926        | 1061.5514        | 531.2793         | 1060.5673        | 530.7873         | Y    | <b>1137.5422</b> | 569.2748        | 1120.5157 | 560.7615         | 1119.5317      | 560.2695         | 10 |
| 11 | 1192.6208        | 596.8141        | 1175.5943        | 588.3008         | 1174.6103        | 587.8088         | N    | <b>974.4789</b>  | 487.7431        | 957.4524  | 479.2298         | 956.4684       | 478.7378         | 9  |
| 12 | 1307.6478        | 654.3275        | 1290.6212        | <b>645.8143</b>  | 1289.6372        | <b>645.3222</b>  | D    | 860.4360         | 430.7216        | 843.4094  | 422.2084         | 842.4254       | 421.7164         | 8  |
| 13 | <b>1408.6955</b> | 704.8514        | 1391.6689        | 696.3381         | <b>1390.6849</b> | 695.8461         | T    | <b>745.4090</b>  | 373.2082        | 728.3825  | 364.6949         | 727.3985       | 364.2029         | 7  |
| 14 | 1505.7482        | 753.3777        | 1488.7217        | <b>744.8645</b>  | 1487.7377        | 744.3725         | P    | <b>644.3614</b>  | 322.6843        | 627.3348  | 314.1710         | 626.3508       | 313.6790         | 6  |
| 15 | 1576.7853        | 788.8963        | 1559.7588        | 780.3830         | 1558.7748        | 779.8910         | A    | 547.3086         | 274.1579        | 530.2821  | 265.6447         | 529.2980       | 265.1527         | 5  |
| 16 | <b>1677.8330</b> | 839.4201        | 1660.8065        | 830.9069         | <b>1659.8224</b> | 830.4149         | T    | 476.2715         | 238.6394        | 459.2449  | 230.1261         | 458.2609       | 229.6341         | 4  |
| 17 | <b>1790.9171</b> | 895.9622        | <b>1773.8905</b> | 887.4489         | <b>1772.9065</b> | 886.9569         | L    | 375.2238         | 188.1155        | 358.1973  | 179.6023         | 357.2132       | 179.1103         | 3  |
| 18 | <b>1905.9440</b> | 953.4756        | 1888.9175        | 944.9624         | 1887.9335        | 944.4704         | D    | 262.1397         | 131.5735        | 245.1132  | 123.0602         | 244.1292       | 122.5682         | 2  |
| 19 |                  |                 |                  |                  |                  |                  | K    | 147.1128         | 74.0600         | 130.0863  | 65.5468          |                |                  | 1  |



AT3G44320.1

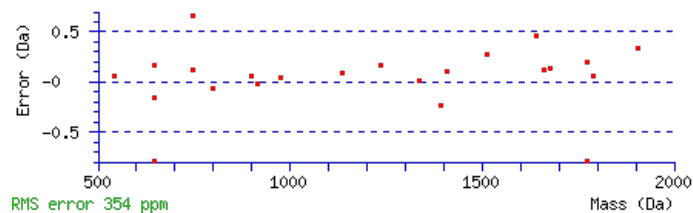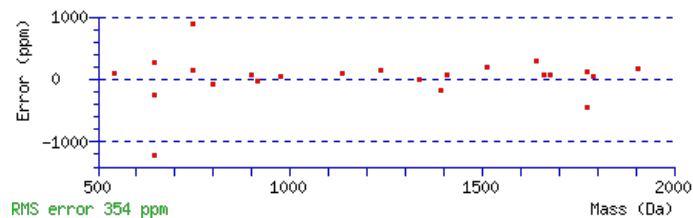

NCBI **BLAST** search of [VTIVQSSTVYNDTPATLDK](#)  
(Parameters: blastp, nr protein database, expect=20000, no filter, PAM30)  
Other BLAST [web gateways](#)

**All matches to this query**

| Score | Mr(calc)  | Delta   | Sequence                            |
|-------|-----------|---------|-------------------------------------|
| 74.5  | 2051.0423 | 0.0032  | <a href="#">VTIVQSSTVYNDTPATIDK</a> |
| 74.5  | 2051.0423 | 0.0032  | <a href="#">VTIVQSSTVYNDTPATLDK</a> |
| 2.8   | 2051.0470 | -0.0015 | <a href="#">SKIGDTGLLDHSLKHMDGK</a> |

Mascot: <http://www.matrixscience.com/>

**Peptide View**MS/MS Fragmentation of **QKLKELQK**

Found in **AT3G44540.1** in **TAIR\_Arabidopsis**, Symbols: | oxidoreductase, acting on the CH-CH group of donors | chr3:16135066-16138756  
FORWARD

Match to Query 2884: 1026.585778 from(514.300165,2+) index(1589)

Title: Elution from: 21.562 to 21.562 scan no 2153 cid35.00 polarity:+

Data file 0-1\_1.mgf

Click mouse within plot area to zoom in by factor of two about that point

Or,   to  Da

Label all possible matches  Label matches used for scoring

Show Y-axis

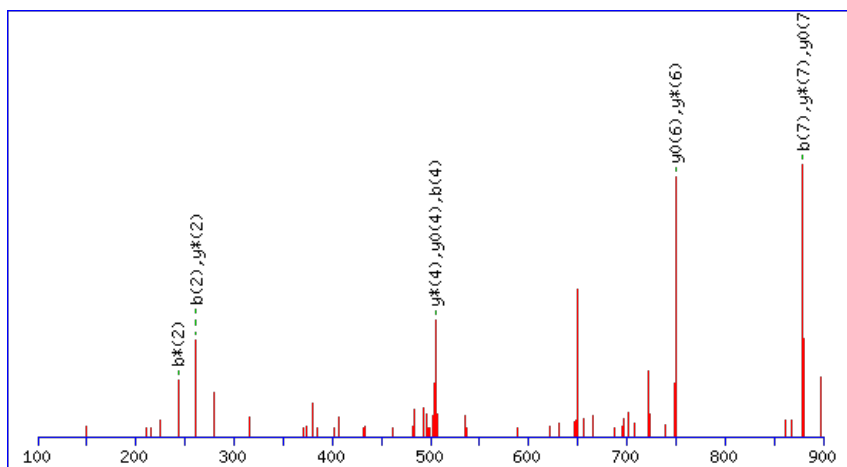

Monoisotopic mass of neutral peptide  $M_r(\text{calc})$ : 1026.5848

Fixed modifications: Carbamidomethyl (C) (apply to specified residues or termini only)

Ions Score: 25 Expect: 0.019

Matches : 12/70 fragment ions using 8 most intense peaks ([help](#))

| # | b               | b <sup>++</sup> | b*              | b <sup>*++</sup> | b <sup>0</sup> | b <sup>0++</sup> | Seq. | y        | y <sup>++</sup> | y*              | y <sup>*++</sup> | y <sup>0</sup>  | y <sup>0++</sup> | # |
|---|-----------------|-----------------|-----------------|------------------|----------------|------------------|------|----------|-----------------|-----------------|------------------|-----------------|------------------|---|
| 1 | 131.0599        | 66.0336         | 113.0363        | 57.0218          |                |                  | Q    |          |                 |                 |                  |                 |                  | 8 |
| 2 | <b>261.1490</b> | 131.0781        | <b>243.1254</b> | 122.0663         |                |                  | K    | 897.5394 | 449.2733        | <b>879.5158</b> | 440.2616         | <b>879.5288</b> | 440.2681         | 7 |
| 3 | 375.2301        | 188.1187        | 357.2065        | 179.1069         |                |                  | L    | 767.4504 | 384.2288        | <b>749.4268</b> | 375.2170         | <b>749.4398</b> | 375.2235         | 6 |
| 4 | <b>505.3191</b> | 253.1632        | 487.2955        | 244.1514         |                |                  | K    | 653.3693 | 327.1883        | 635.3457        | 318.1765         | 635.3587        | 318.1830         | 5 |
| 5 | 635.3587        | 318.1830        | 617.3351        | 309.1712         | 617.3482       | 309.1777         | E    | 523.2802 | 262.1438        | <b>505.2567</b> | 253.1320         | <b>505.2697</b> | 253.1385         | 4 |
| 6 | <b>749.4398</b> | 375.2235        | 731.4162        | 366.2118         | 731.4293       | 366.2183         | L    | 393.2406 | 197.1239        | 375.2170        | 188.1122         |                 |                  | 3 |
| 7 | <b>879.4925</b> | 440.2499        | 861.4689        | 431.2381         | 861.4819       | 431.2446         | Q    | 279.1595 | 140.0834        | <b>261.1359</b> | 131.0716         |                 |                  | 2 |
| 8 |                 |                 |                 |                  |                |                  | K    | 149.1069 | 75.0571         | 131.0833        | 66.0453          |                 |                  | 1 |

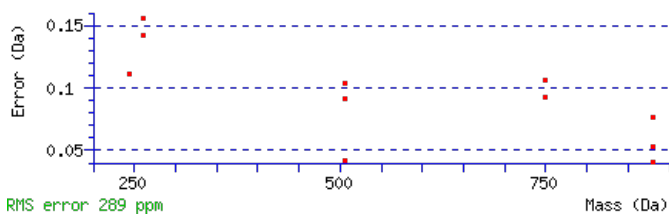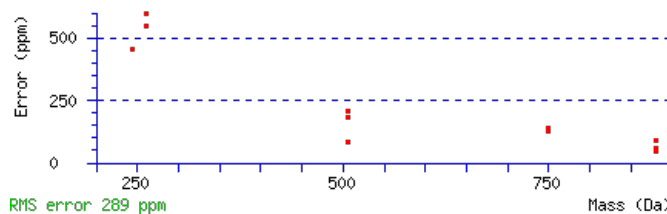NCBI BLAST search of **QKLKELQK**

(Parameters: blastp, nr protein database, expect=20000, no filter, PAM30)

Other BLAST [web gateways](#)

**All matches to this query**

| Score | $M_r(\text{calc})$ | Delta  | Sequence                 |
|-------|--------------------|--------|--------------------------|
| 25.1  | 1026.5848          | 0.0010 | <a href="#">QKLKELQK</a> |

**AT3G44540.1**

|      |           |         |                           |
|------|-----------|---------|---------------------------|
| 20.1 | 1026.5848 | 0.0010  | <a href="#">RAVVTLVEK</a> |
| 17.5 | 1026.5848 | 0.0010  | <a href="#">QTNGLLKK</a>  |
| 14.2 | 1026.5848 | 0.0010  | <a href="#">KPTTSKPKK</a> |
| 13.7 | 1026.5848 | 0.0010  | <a href="#">KEELVRLK</a>  |
| 13.7 | 1026.5848 | 0.0010  | <a href="#">QKIKQELK</a>  |
| 13.7 | 1026.5848 | 0.0010  | <a href="#">VASKKKPEK</a> |
| 12.3 | 1026.5848 | 0.0010  | <a href="#">QLLISSVVR</a> |
| 11.2 | 1026.5848 | 0.0010  | <a href="#">EVIRLKEK</a>  |
| 11.2 | 1026.5870 | -0.0012 | <a href="#">LAKWKLEK</a>  |

**Mascot:** <http://www.matrixscience.com/>

## Peptide View

### MS/MS Fragmentation of QELDVMLKK

Found in **AT3G44710.1** in **TAIR\_Arabidopsis**, Symbols: | similar to unknown protein [Arabidopsis thaliana] (TAIR:AT5G22540.1); similar to unnamed protein product [Vitis vinifera] (GB:CAO15956.1); contains InterPro domain Protein of unknown function DUF247, plant (InterPro:IPR004158) | chr3:16

Match to Query 3913: 1130.567796 from(566.291174,2+) index(6502)

Title: Elution from: 56.618 to 56.618 scan no 8174 cid35.00 polarity:+

Data file D12h-1\_1.mgf

Click mouse within plot area to zoom in by factor of two about that point

Or,   to  Da

Label all possible matches  Label matches used for scoring

Show Y-axis

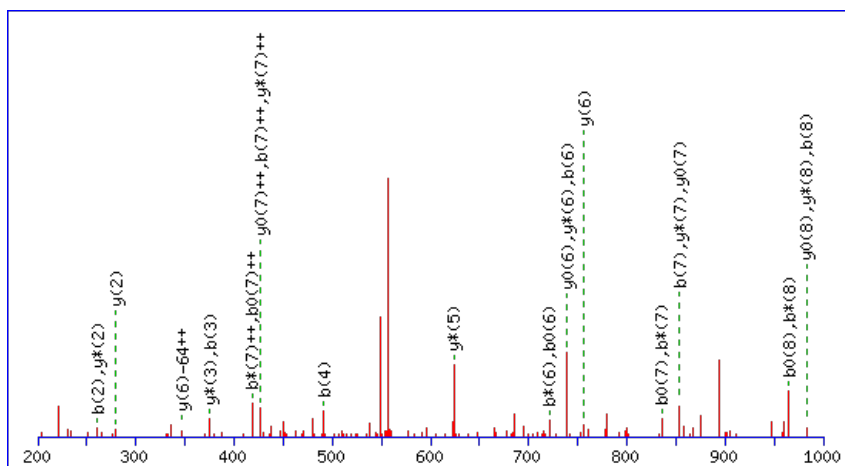

**Monoisotopic mass of neutral peptide Mr(calc):** 1130.5650

**Fixed modifications:** Carbamidomethyl (C) (apply to specified residues or termini only)

**Variable modifications:**

**M6** : Oxidation (M), with neutral losses 0.0000 (shown in table), 63.9983

**Ions Score:** 24 **Expect:** 0.026

**Matches** : 29/128 fragment ions using 32 most intense peaks ([help](#))

| # | b               | b <sup>++</sup> | b*              | b <sup>*++</sup> | b <sup>0</sup>  | b <sup>0++</sup> | Seq. | y               | y <sup>++</sup> | y*              | y <sup>*++</sup> | y <sup>0</sup>  | y <sup>0++</sup> | # |
|---|-----------------|-----------------|-----------------|------------------|-----------------|------------------|------|-----------------|-----------------|-----------------|------------------|-----------------|------------------|---|
| 1 | 131.0599        | 66.0336         | 113.0363        | 57.0218          |                 |                  | Q    |                 |                 |                 |                  |                 |                  | 9 |
| 2 | <b>261.0996</b> | 131.0534        | 243.0760        | 122.0416         | 243.0890        | 122.0481         | E    | 1001.5196       | 501.2634        | <b>983.4960</b> | 492.2516         | <b>983.5090</b> | 492.2582         | 8 |
| 3 | <b>375.1806</b> | 188.0940        | 357.1571        | 179.0822         | 357.1701        | 179.0887         | L    | 871.4800        | 436.2436        | <b>853.4564</b> | <b>427.2318</b>  | <b>853.4694</b> | <b>427.2383</b>  | 7 |
| 4 | <b>491.2046</b> | 246.1060        | 473.1810        | 237.0942         | 473.1941        | 237.1007         | D    | <b>757.3989</b> | 379.2031        | <b>739.3753</b> | 370.1913         | <b>739.3883</b> | 370.1978         | 6 |
| 5 | 591.2701        | 296.1387        | 573.2465        | 287.1269         | 573.2595        | 287.1334         | V    | 641.3749        | 321.1911        | <b>623.3513</b> | 312.1793         |                 |                  | 5 |
| 6 | <b>739.3025</b> | 370.1549        | <b>721.2789</b> | 361.1431         | <b>721.2919</b> | 361.1496         | M    | 541.3094        | 271.1584        | 523.2859        | 262.1466         |                 |                  | 4 |
| 7 | <b>853.3836</b> | <b>427.1954</b> | <b>835.3600</b> | <b>418.1837</b>  | <b>835.3730</b> | <b>418.1902</b>  | L    | 393.2770        | 197.1421        | <b>375.2534</b> | 188.1303         |                 |                  | 3 |
| 8 | <b>983.4726</b> | 492.2400        | <b>965.4491</b> | 483.2282         | <b>965.4621</b> | 483.2347         | K    | <b>279.1959</b> | 140.1016        | <b>261.1723</b> | 131.0898         |                 |                  | 2 |
| 9 |                 |                 |                 |                  |                 |                  | K    | 149.1069        | 75.0571         | 131.0833        | 66.0453          |                 |                  | 1 |

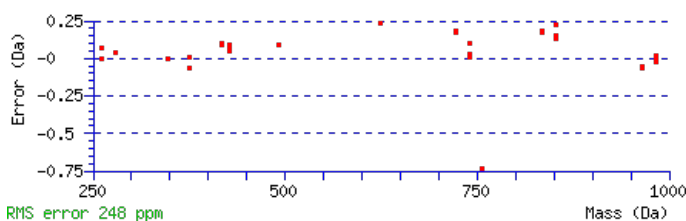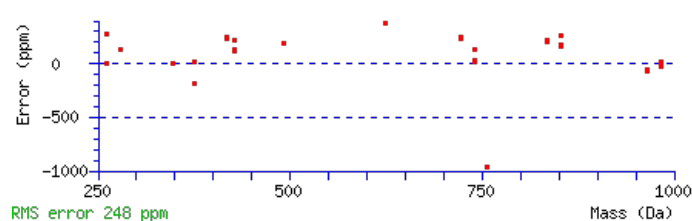

NCBI **BLAST** search of **QELDVMLKK**

(Parameters: blastp, nr protein database, expect=20000, no filter, PAM30)

Other BLAST [web gateways](#)

All matches to this query

## AT3G44710.1

| Score | Mr(calc)  | Delta   | Sequence                    |
|-------|-----------|---------|-----------------------------|
| 24.2  | 1130.5650 | 0.0028  | <a href="#">QELDVMLKK</a>   |
| 13.7  | 1130.5650 | 0.0028  | <a href="#">MVALTTNLEK</a>  |
| 13.2  | 1130.5650 | 0.0028  | <a href="#">LESLSLMAK</a>   |
| 8.5   | 1130.5672 | 0.0006  | <a href="#">KLFEVMPEK</a>   |
| 7.7   | 1130.5676 | 0.0002  | <a href="#">RLCLGEAVAK</a>  |
| 7.4   | 1130.5676 | 0.0002  | <a href="#">MGAOKKPAAAK</a> |
| 7.3   | 1130.5650 | 0.0028  | <a href="#">GSLDIDMKLK</a>  |
| 6.1   | 1130.5676 | 0.0002  | <a href="#">AVGEMGKGLVR</a> |
| 3.2   | 1130.5699 | -0.0021 | <a href="#">LHLGYMLVR</a>   |
| 2.9   | 1130.5665 | 0.0013  | <a href="#">GFAAHFVAVK</a>  |

Mascot: <http://www.matrixscience.com/>

## Peptide View

MS/MS Fragmentation of **NGAYVIQSK**

Found in **AT3G44850.1** in **TAIR\_Arabidopsis**, Symbols: | protein kinase-related | chr3:16385602-16387916 REVERSE

Match to Query 2343: 990.474938 from(496.244745,2+) index(1588)

Title: Elution from: 20.755 to 20.755 scan no 2117 cid35.00 polarity:+

Data file D12h-3\_2.mgf

Click mouse within plot area to zoom in by factor of two about that point

Or,   to  Da

Label all possible matches  Label matches used for scoring

Show Y-axis

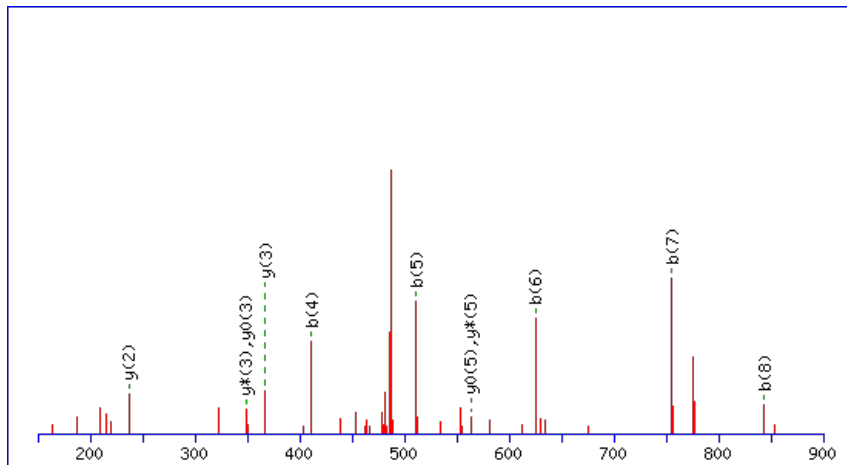

Monoisotopic mass of neutral peptide **Mr(calc)**: 990.4779

**Fixed modifications:** Carbamidomethyl (C) (apply to specified residues or termini only)

**Ions Score:** 31 **Expect:** 0.0065

**Matches** : 11/80 fragment ions using 21 most intense peaks ([help](#))

| # | b               | b <sup>++</sup> | b*       | b <sup>*++</sup> | b <sup>0</sup> | b <sup>0++</sup> | Seq. | y               | y <sup>++</sup> | y*              | y <sup>*++</sup> | y <sup>0</sup>  | y <sup>0++</sup> | # |
|---|-----------------|-----------------|----------|------------------|----------------|------------------|------|-----------------|-----------------|-----------------|------------------|-----------------|------------------|---|
| 1 | 117.0443        | 59.0258         | 99.0207  | 50.0140          |                |                  | N    |                 |                 |                 |                  |                 |                  | 9 |
| 2 | 175.0628        | 88.0350         | 157.0392 | 79.0232          |                |                  | G    | 875.4481        | 438.2277        | 857.4246        | 429.2159         | 857.4376        | 429.2224         | 8 |
| 3 | 247.0969        | 124.0521        | 229.0733 | 115.0403         |                |                  | A    | 817.4296        | 409.2185        | 799.4061        | 400.2067         | 799.4191        | 400.2132         | 7 |
| 4 | <b>411.1573</b> | 206.0823        | 393.1337 | 197.0705         |                |                  | Y    | 745.3955        | 373.2014        | 727.3719        | 364.1896         | 727.3849        | 364.1961         | 6 |
| 5 | <b>511.2227</b> | 256.1150        | 493.1992 | 247.1032         |                |                  | V    | 581.3351        | 291.1712        | <b>563.3115</b> | 282.1594         | <b>563.3246</b> | 282.1659         | 5 |
| 6 | <b>625.3038</b> | 313.1556        | 607.2802 | 304.1438         |                |                  | I    | 481.2697        | 241.1385        | 463.2461        | 232.1267         | 463.2591        | 232.1332         | 4 |
| 7 | <b>755.3565</b> | 378.1819        | 737.3329 | 369.1701         |                |                  | Q    | <b>367.1886</b> | 184.0979        | <b>349.1650</b> | 175.0861         | <b>349.1780</b> | 175.0926         | 3 |
| 8 | <b>843.3855</b> | 422.1964        | 825.3620 | 413.1846         | 825.3750       | 413.1911         | S    | <b>237.1359</b> | 119.0716        | 219.1124        | 110.0598         | 219.1254        | 110.0663         | 2 |
| 9 |                 |                 |          |                  |                |                  | K    | 149.1069        | 75.0571         | 131.0833        | 66.0453          |                 |                  | 1 |

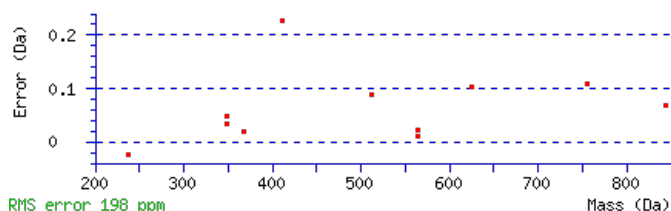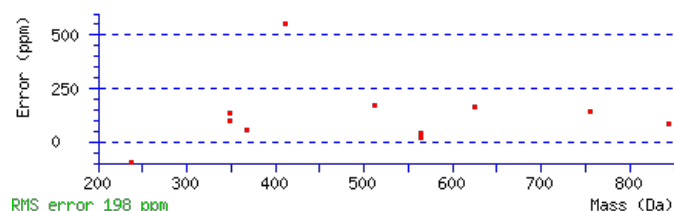

NCBI **BLAST** search of **NGAYVIQSK**

(Parameters: blastp, nr protein database, expect=20000, no filter, PAM30)

Other BLAST [web gateways](#)

All matches to this query

| Score | Mr(calc) | Delta   | Sequence                  |
|-------|----------|---------|---------------------------|
| 31.2  | 990.4779 | -0.0029 | <a href="#">NGAYVIQSK</a> |

## AT3G44850.1

|      |          |         |                            |
|------|----------|---------|----------------------------|
| 23.4 | 990.4779 | -0.0029 | <a href="#">FSELGASLR</a>  |
| 22.6 | 990.4779 | -0.0029 | <a href="#">GYAAPSAKSK</a> |
| 9.5  | 990.4779 | -0.0029 | <a href="#">YEAALERK</a>   |
| 9.3  | 990.4779 | -0.0029 | <a href="#">KVNFEQSK</a>   |
| 9.2  | 990.4752 | -0.0003 | <a href="#">ELYITESK</a>   |
| 5.9  | 990.4779 | -0.0029 | <a href="#">NTALFQASK</a>  |
| 3.4  | 990.4778 | -0.0029 | <a href="#">YAQELTVR</a>   |
| 2.3  | 990.4778 | -0.0029 | <a href="#">KYDDLGR</a>    |
| 2.1  | 990.4778 | -0.0029 | <a href="#">YVDELGRK</a>   |

Mascot: <http://www.matrixscience.com/>

**Peptide View**MS/MS Fragmentation of **AQLMTPLLLK**

Found in **AT3G44890.1** in **TAIR\_Arabidopsis**, Symbols: RP19, RPL9 | RPL9 (ribosomal protein L9); structural constituent of ribosome | chr3:16397490-16398948 FORWARD

Match to Query 4011: 1138.640988 from(570.327770,2+) index(7733)

Title: Elution from: 67.183 to 67.183 scan no 10014 cid35.00 polarity:+

Data file D1d-3\_1.mgf

Click mouse within plot area to zoom in by factor of two about that point

Or,   to  Da

Label all possible matches  Label matches used for scoring

Show Y-axis

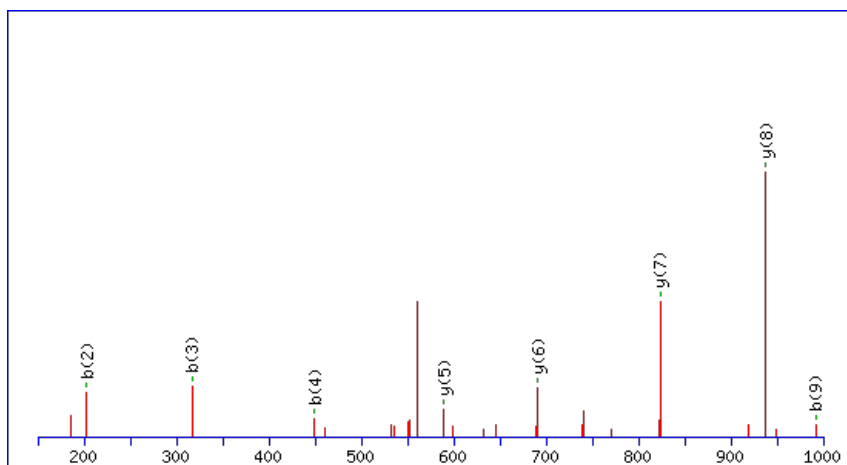

Monoisotopic mass of neutral peptide  $M_r(\text{calc})$ : 1138.6428

Fixed modifications: Carbamidomethyl (C) (apply to specified residues or termini only)

Ions Score: 46 Expect: 4e-005

Matches : 8/88 fragment ions using 9 most intense peaks ([help](#))

| #  | b               | b <sup>++</sup> | b*       | b <sup>*++</sup> | b <sup>0</sup> | b <sup>0++</sup> | Seq. | y               | y <sup>++</sup> | y*        | y <sup>*++</sup> | y <sup>0</sup> | y <sup>0++</sup> | #  |
|----|-----------------|-----------------|----------|------------------|----------------|------------------|------|-----------------|-----------------|-----------|------------------|----------------|------------------|----|
| 1  | 73.0414         | 37.0244         |          |                  |                |                  | A    |                 |                 |           |                  |                |                  | 10 |
| 2  | <b>203.0941</b> | 102.0507        | 185.0705 | 93.0389          |                |                  | Q    | 1067.6159       | 534.3116        | 1049.5924 | 525.2998         | 1049.6054      | 525.3063         | 9  |
| 3  | <b>317.1752</b> | 159.0912        | 299.1516 | 150.0794         |                |                  | L    | <b>937.5633</b> | 469.2853        | 919.5397  | 460.2735         | 919.5527       | 460.2800         | 8  |
| 4  | <b>449.2127</b> | 225.1100        | 431.1891 | 216.0982         |                |                  | M    | <b>823.4822</b> | 412.2447        | 805.4586  | 403.2329         | 805.4716       | 403.2395         | 7  |
| 5  | 551.2574        | 276.1323        | 533.2338 | 267.1205         | 533.2468       | 267.1271         | T    | <b>691.4447</b> | 346.2260        | 673.4211  | 337.2142         | 673.4341       | 337.2207         | 6  |
| 6  | 649.3072        | 325.1572        | 631.2836 | 316.1454         | 631.2966       | 316.1520         | P    | <b>589.4000</b> | 295.2036        | 571.3764  | 286.1918         |                |                  | 5  |
| 7  | 763.3883        | 382.1978        | 745.3647 | 373.1860         | 745.3777       | 373.1925         | L    | 491.3502        | 246.1787        | 473.3266  | 237.1669         |                |                  | 4  |
| 8  | 877.4694        | 439.2383        | 859.4458 | 430.2265         | 859.4588       | 430.2331         | L    | 377.2691        | 189.1382        | 359.2455  | 180.1264         |                |                  | 3  |
| 9  | <b>991.5505</b> | 496.2789        | 973.5269 | 487.2671         | 973.5399       | 487.2736         | L    | 263.1880        | 132.0976        | 245.1644  | 123.0858         |                |                  | 2  |
| 10 |                 |                 |          |                  |                |                  | K    | 149.1069        | 75.0571         | 131.0833  | 66.0453          |                |                  | 1  |

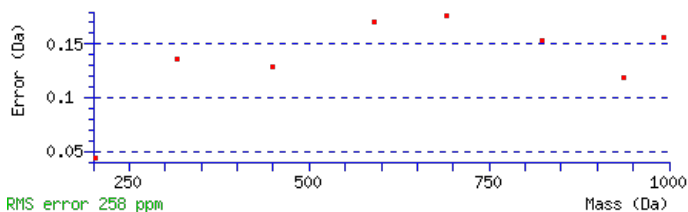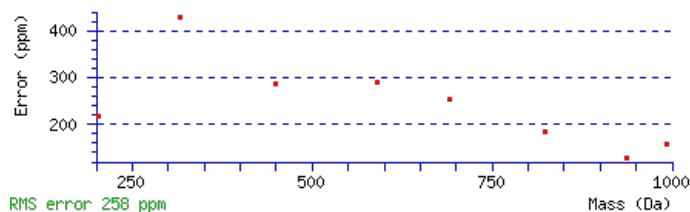NCBI BLAST search of **AQLMTPLLLK**

(Parameters: blastp, nr protein database, expect=20000, no filter, PAM30)

Other BLAST [web gateways](#)

All matches to this query



**AT3G44890.1**

| <b>Score</b> | <b>Mr(calc)</b> | <b>Delta</b> | <b>Sequence</b>            |
|--------------|-----------------|--------------|----------------------------|
| 45.9         | 1138.6428       | -0.0018      | <a href="#">AQLMTPLLLK</a> |
| 9.5          | 1138.6394       | 0.0015       | <a href="#">FTPLPKTPVK</a> |
| 2.5          | 1138.6399       | 0.0011       | <a href="#">SLVIRHGTIK</a> |
| 1.1          | 1138.6394       | 0.0015       | <a href="#">TIVALSWIPK</a> |

**Mascot:** <http://www.matrixscience.com/>

**Peptide View**MS/MS Fragmentation of **AGLEEPLEQIHK**Found in **AT3G45030.1** in **TAIR\_Arabidopsis**, Symbols: | 40S ribosomal protein S20 (RPS20A) | chr3:16482591-16483297 REVERSE

Match to Query 5701: 1378.667814 from(460.563214,3+) index(4320)

Title: Elution from: 39.575 to 39.575 scan no 5369 cid35.00 polarity:+

Data file D6h-1\_1.mgf

Click mouse within plot area to zoom in by factor of two about that point

Or,   to  Da Label all possible matches  Label matches used for scoring Show Y-axis 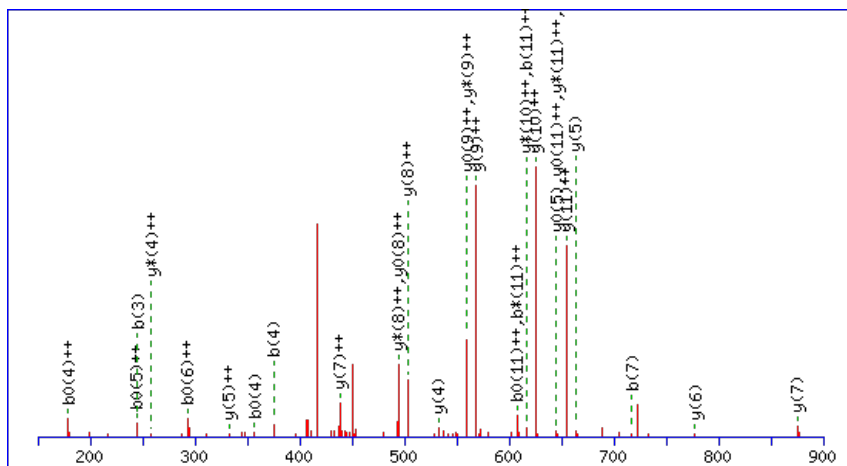Monoisotopic mass of neutral peptide  $M_r(\text{calc})$ : 1378.6669

Fixed modifications: Carbamidomethyl (C) (apply to specified residues or termini only)

Ions Score: 27 Expect: 0.019

Matches : 31/102 fragment ions using 52 most intense peaks ([help](#))

| #  | b               | b <sup>++</sup> | b <sup>*</sup> | b <sup>*++</sup> | b <sup>0</sup> | b <sup>0++</sup> | Seq. | y               | y <sup>++</sup> | y <sup>*</sup>  | y <sup>*++</sup> | y <sup>0</sup>  | y <sup>0++</sup> | #  |
|----|-----------------|-----------------|----------------|------------------|----------------|------------------|------|-----------------|-----------------|-----------------|------------------|-----------------|------------------|----|
| 1  | 73.0414         | 37.0244         |                |                  |                |                  | A    |                 |                 |                 |                  |                 |                  | 12 |
| 2  | 131.0599        | 66.0336         |                |                  |                |                  | G    | 1307.6400       | 654.3236        | 1289.6164       | 645.3119         | 1289.6295       | 645.3184         | 11 |
| 3  | <b>245.1410</b> | 123.0741        |                |                  |                |                  | L    | 1249.6215       | <b>625.3144</b> | 1231.5979       | <b>616.3026</b>  | 1231.6110       | <b>616.3091</b>  | 10 |
| 4  | <b>375.1807</b> | 188.0940        |                |                  | 357.1701       | 179.0887         | E    | 1135.5404       | <b>568.2738</b> | 1117.5168       | <b>559.2621</b>  | 1117.5299       | <b>559.2686</b>  | 9  |
| 5  | 505.2203        | 253.1138        |                |                  | 487.2097       | <b>244.1085</b>  | E    | 1005.5008       | <b>503.2540</b> | 987.4772        | <b>494.2422</b>  | 987.4902        | <b>494.2488</b>  | 8  |
| 6  | 603.2701        | 302.1387        |                |                  | 585.2595       | <b>293.1334</b>  | P    | <b>875.4612</b> | <b>438.2342</b> | 857.4376        | 429.2224         | 857.4506        | 429.2289         | 7  |
| 7  | <b>717.3512</b> | 359.1792        |                |                  | 699.3406       | 350.1739         | L    | <b>777.4114</b> | 389.2093        | 759.3878        | 380.1975         | 759.4008        | 380.2040         | 6  |
| 8  | 847.3908        | 424.1990        |                |                  | 829.3802       | 415.1938         | E    | <b>663.3303</b> | <b>332.1688</b> | <b>645.3067</b> | 323.1570         | <b>645.3197</b> | 323.1635         | 5  |
| 9  | 977.4435        | 489.2254        | 959.4199       | 480.2136         | 959.4329       | 480.2201         | Q    | <b>533.2906</b> | 267.1490        | 515.2671        | <b>258.1372</b>  |                 |                  | 4  |
| 10 | 1091.5246       | 546.2659        | 1073.5010      | 537.2541         | 1073.5140      | 537.2606         | I    | 403.2380        | 202.1226        | 385.2144        | 193.1108         |                 |                  | 3  |
| 11 | 1231.5746       | <b>616.2909</b> | 1213.5510      | <b>607.2791</b>  | 1213.5640      | <b>607.2856</b>  | H    | 289.1569        | 145.0821        | 271.1333        | 136.0703         |                 |                  | 2  |
| 12 |                 |                 |                |                  |                |                  | K    | 149.1069        | 75.0571         | 131.0833        | 66.0453          |                 |                  | 1  |

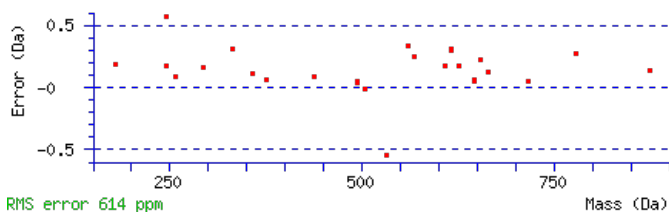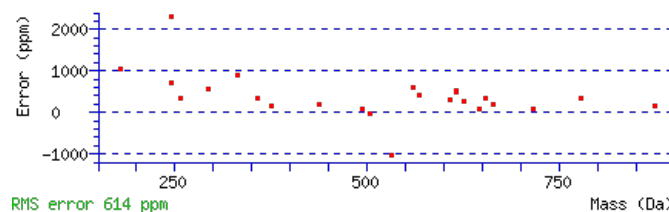NCBI BLAST search of **AGLEEPLEQIHK**

(Parameters: blastp, nr protein database, expect=20000, no filter, PAM30)

Other BLAST [web gateways](#)**All matches to this query**

## AT3G45030.1

| Score | Mr(calc)  | Delta   | Sequence                       |
|-------|-----------|---------|--------------------------------|
| 27.3  | 1378.6669 | 0.0009  | <a href="#">AGLEEPLEQIHK</a>   |
| 11.8  | 1378.6669 | 0.0009  | <a href="#">ELVQQIYSDIR</a>    |
| 11.4  | 1378.6647 | 0.0032  | <a href="#">ELISQSQNKSTK</a>   |
| 10.6  | 1378.6702 | -0.0024 | <a href="#">QKLQTMETLOK</a>    |
| 10.5  | 1378.6673 | 0.0005  | <a href="#">GTDRKSVGAEALR</a>  |
| 9.8   | 1378.6682 | -0.0004 | <a href="#">MHMKAISTRRLR</a>   |
| 9.8   | 1378.6682 | -0.0004 | <a href="#">MHMKAISTRRLR</a>   |
| 7.7   | 1378.6700 | -0.0022 | <a href="#">AIGRGQNSRELRL</a>  |
| 6.9   | 1378.6673 | 0.0005  | <a href="#">SGPLAATISAATRR</a> |
| 6.9   | 1378.6673 | 0.0005  | <a href="#">QQLDDKTRSLR</a>    |

Mascot: <http://www.matrixscience.com/>

### Peptide View

 MS/MS Fragmentation of **IYDYDVYNDVGDNDPELARPVIGGLTHPYPR**

 Found in **AT3G45140.1** in **TAIR\_Arabidopsis**, Symbols: ATLOX2, LOX2 | LOX2 (LIPOXYGENASE 2) | chr3:16536422-16540218 FORWARD

Match to Query 10915: 3744.767748 from(937.199213,4+) index(8846)

Title: Elution from: 78.558 to 78.558 scan no 11799 cid35.00 polarity:+

Data file D12h-1\_2.mgf

Click mouse within plot area to zoom in by factor of two about that point

 Or,   to  Da 

 Label all possible matches  Label matches used for scoring 

 Show Y-axis 
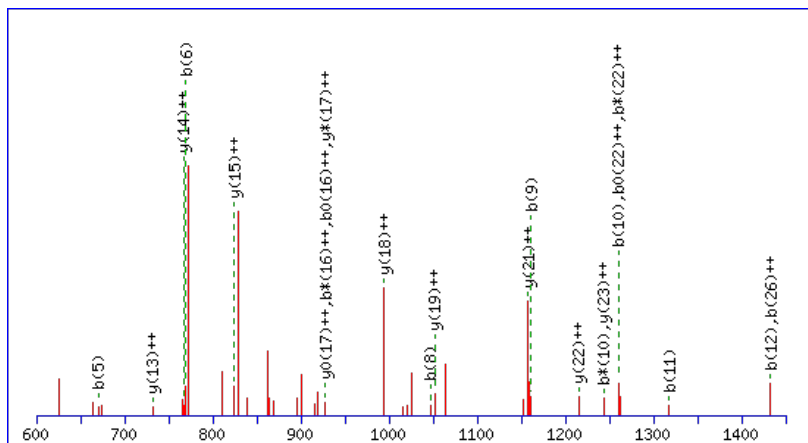
 Monoisotopic mass of neutral peptide  $M_r(\text{calc})$ : 3744.7696

Fixed modifications: Carbamidomethyl (C) (apply to specified residues or termini only)

Ions Score: 30 Expect: 0.0016

 Matches : 23/356 fragment ions using 41 most intense peaks ([help](#))

| #  | b                | b <sup>++</sup> | b <sup>*</sup>   | b <sup>*++</sup> | b <sup>0</sup> | b <sup>0++</sup> | Seq. | y         | y <sup>++</sup>  | y <sup>*</sup> | y <sup>*++</sup> | y <sup>0</sup> | y <sup>0++</sup> | #  |
|----|------------------|-----------------|------------------|------------------|----------------|------------------|------|-----------|------------------|----------------|------------------|----------------|------------------|----|
| 1  | 114.0913         | 57.5493         |                  |                  |                |                  | I    |           |                  |                |                  |                |                  | 33 |
| 2  | 277.1547         | 139.0810        |                  |                  |                |                  | Y    | 3632.6928 | 1816.8501        | 3615.6663      | 1808.3368        | 3614.6823      | 1807.8448        | 32 |
| 3  | 392.1816         | 196.5944        |                  |                  | 374.1710       | 187.5892         | D    | 3469.6295 | 1735.3184        | 3452.6030      | 1726.8051        | 3451.6189      | 1726.3131        | 31 |
| 4  | 555.2449         | 278.1261        |                  |                  | 537.2344       | 269.1208         | Y    | 3354.6026 | 1677.8049        | 3337.5760      | 1669.2916        | 3336.5920      | 1668.7996        | 30 |
| 5  | <b>670.2719</b>  | 335.6396        |                  |                  | 652.2613       | 326.6343         | D    | 3191.5392 | 1596.2733        | 3174.5127      | 1587.7600        | 3173.5287      | 1587.2680        | 29 |
| 6  | <b>769.3403</b>  | 385.1738        |                  |                  | 751.3297       | 376.1685         | V    | 3076.5123 | 1538.7598        | 3059.4857      | 1530.2465        | 3058.5017      | 1529.7545        | 28 |
| 7  | 932.4036         | 466.7055        |                  |                  | 914.3931       | 457.7002         | Y    | 2977.4439 | 1489.2256        | 2960.4173      | 1480.7123        | 2959.4333      | 1480.2203        | 27 |
| 8  | <b>1046.4466</b> | 523.7269        | 1029.4200        | 515.2136         | 1028.4360      | 514.7216         | N    | 2814.3805 | 1407.6939        | 2797.3540      | 1399.1806        | 2796.3700      | 1398.6886        | 26 |
| 9  | <b>1161.4735</b> | 581.2404        | 1144.4469        | 572.7271         | 1143.4629      | 572.2351         | D    | 2700.3376 | 1350.6724        | 2683.3111      | 1342.1592        | 2682.3271      | 1341.6672        | 25 |
| 10 | <b>1260.5419</b> | 630.7746        | <b>1243.5154</b> | 622.2613         | 1242.5313      | 621.7693         | V    | 2585.3107 | 1293.1590        | 2568.2841      | 1284.6457        | 2567.3001      | 1284.1537        | 24 |
| 11 | <b>1317.5634</b> | 659.2853        | 1300.5368        | 650.7721         | 1299.5528      | 650.2800         | G    | 2486.2423 | <b>1243.6248</b> | 2469.2157      | 1235.1115        | 2468.2317      | 1234.6195        | 23 |
| 12 | <b>1432.5903</b> | 716.7988        | 1415.5638        | 708.2855         | 1414.5798      | 707.7935         | D    | 2429.2208 | <b>1215.1140</b> | 2412.1943      | 1206.6008        | 2411.2102      | 1206.1088        | 22 |
| 13 | 1529.6431        | 765.3252        | 1512.6165        | 756.8119         | 1511.6325      | 756.3199         | P    | 2314.1939 | <b>1157.6006</b> | 2297.1673      | 1149.0873        | 2296.1833      | 1148.5953        | 21 |
| 14 | 1644.6700        | 822.8387        | 1627.6435        | 814.3254         | 1626.6595      | 813.8334         | D    | 2217.1411 | 1109.0742        | 2200.1145      | 1100.5609        | 2199.1305      | 1100.0689        | 20 |
| 15 | 1758.7130        | 879.8601        | 1741.6864        | 871.3468         | 1740.7024      | 870.8548         | N    | 2102.1141 | <b>1051.5607</b> | 2085.0876      | 1043.0474        | 2084.1036      | 1042.5554        | 19 |
| 16 | 1873.7399        | 937.3736        | 1856.7133        | <b>928.8603</b>  | 1855.7293      | <b>928.3683</b>  | D    | 1988.0712 | <b>994.5392</b>  | 1971.0447      | 986.0260         | 1970.0607      | 985.5340         | 18 |
| 17 | 1970.7927        | 985.9000        | 1953.7661        | 977.3867         | 1952.7821      | 976.8947         | P    | 1873.0443 | 937.0258         | 1856.0177      | <b>928.5125</b>  | 1855.0337      | <b>928.0205</b>  | 17 |
| 18 | 2099.8353        | 1050.4213       | 2082.8087        | 1041.9080        | 2081.8247      | 1041.4160        | E    | 1775.9915 | 888.4994         | 1758.9650      | 879.9861         | 1757.9810      | 879.4941         | 16 |
| 19 | 2212.9193        | 1106.9633       | 2195.8928        | 1098.4500        | 2194.9088      | 1097.9580        | L    | 1646.9489 | <b>823.9781</b>  | 1629.9224      | 815.4648         | 1628.9384      | 814.9728         | 15 |
| 20 | 2283.9564        | 1142.4819       | 2266.9299        | 1133.9686        | 2265.9459      | 1133.4766        | A    | 1533.8649 | <b>767.4361</b>  | 1516.8383      | 758.9228         | 1515.8543      | 758.4308         | 14 |
| 21 | 2440.0575        | 1220.5324       | 2423.0310        | 1212.0191        | 2422.0470      | 1211.5271        | R    | 1462.8277 | <b>731.9175</b>  | 1445.8012      | 723.4042         | 1444.8172      | 722.9122         | 13 |
| 22 | 2537.1103        | 1269.0588       | 2520.0838        | <b>1260.5455</b> | 2519.0997      | <b>1260.0535</b> | P    | 1306.7266 | 653.8670         | 1289.7001      | 645.3537         | 1288.7161      | 644.8617         | 12 |
| 23 | 2636.1787        | 1318.5930       | 2619.1522        | 1310.0797        | 2618.1682      | 1309.5877        | V    | 1209.6739 | 605.3406         | 1192.6473      | 596.8273         | 1191.6633      | 596.3353         | 11 |
| 24 | 2749.2628        | 1375.1350       | 2732.2362        | 1366.6218        | 2731.2522      | 1366.1297        | I    | 1110.6055 | 555.8064         | 1093.5789      | 547.2931         | 1092.5949      | 546.8011         | 10 |
| 25 | 2806.2842        | 1403.6458       | 2789.2577        | 1395.1325        | 2788.2737      | 1394.6405        | G    | 997.5214  | 499.2643         | 980.4948       | 490.7511         | 979.5108       | 490.2591         | 9  |

# AT3G45140.1

|    |           |           |           |           |           |           |   |          |          |          |          |          |          |   |
|----|-----------|-----------|-----------|-----------|-----------|-----------|---|----------|----------|----------|----------|----------|----------|---|
| 26 | 2863.3057 | 1432.1565 | 2846.2792 | 1423.6432 | 2845.2951 | 1423.1512 | G | 940.4999 | 470.7536 | 923.4734 | 462.2403 | 922.4894 | 461.7483 | 8 |
| 27 | 2976.3898 | 1488.6985 | 2959.3632 | 1480.1853 | 2958.3792 | 1479.6932 | L | 883.4785 | 442.2429 | 866.4519 | 433.7296 | 865.4679 | 433.2376 | 7 |
| 28 | 3077.4375 | 1539.2224 | 3060.4109 | 1530.7091 | 3059.4269 | 1530.2171 | T | 770.3944 | 385.7008 | 753.3679 | 377.1876 | 752.3838 | 376.6956 | 6 |
| 29 | 3214.4964 | 1607.7518 | 3197.4698 | 1599.2385 | 3196.4858 | 1598.7465 | H | 669.3467 | 335.1770 | 652.3202 | 326.6637 |          |          | 5 |
| 30 | 3311.5491 | 1656.2782 | 3294.5226 | 1647.7649 | 3293.5386 | 1647.2729 | P | 532.2878 | 266.6475 | 515.2613 | 258.1343 |          |          | 4 |
| 31 | 3474.6125 | 1737.8099 | 3457.5859 | 1729.2966 | 3456.6019 | 1728.8046 | Y | 435.2350 | 218.1212 | 418.2085 | 209.6079 |          |          | 3 |
| 32 | 3571.6652 | 1786.3362 | 3554.6387 | 1777.8230 | 3553.6547 | 1777.3310 | P | 272.1717 | 136.5895 | 255.1452 | 128.0762 |          |          | 2 |
| 33 |           |           |           |           |           |           | R | 175.1190 | 88.0631  | 158.0924 | 79.5498  |          |          | 1 |

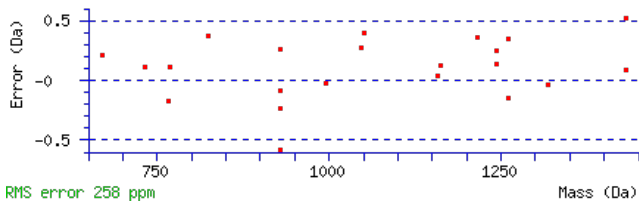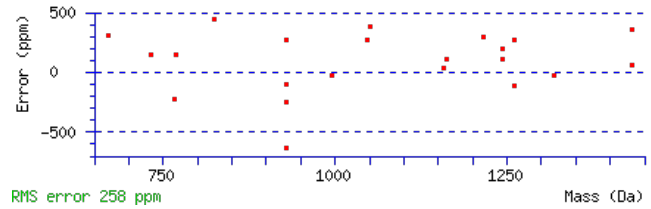

NCBI BLAST search of [IYDYDVYNDVGDNDPELARPVIGLTHPYPR](#)

(Parameters: blastp, nr protein database, expect=20000, no filter, PAM30)

Other BLAST [web gateways](#)

## All matches to this query

| Score | Mr(calc)  | Delta   | Sequence                                         |
|-------|-----------|---------|--------------------------------------------------|
| 30.3  | 3744.7696 | -0.0019 | <a href="#">IYDYDVYNDVGDNDPELARPVIGLTHPYPR</a>   |
| 3.6   | 3744.7741 | -0.0063 | <a href="#">MLPIFGCTIMLNCCLAQLSTYSVHQAATMNRK</a> |
| 2.5   | 3744.7684 | -0.0007 | <a href="#">YMTDGMLLREILIDENLSQYSVIMLDEAHER</a>  |

Mascot: <http://www.matrixscience.com/>

**Peptide View**MS/MS Fragmentation of **DWREDGIVSPVK**Found in **AT3G45310.1** in **TAIR\_Arabidopsis**, Symbols: | cysteine proteinase, putative | chr3:16639689-16641458 REVERSE

Match to Query 5546: 1399.709346 from(700.861949,2+) index(4946)

Title: Elution from: 43.635 to 43.635 scan no 6175 cid35.00 polarity:+

Data file D1d-3\_2.mgf

Click mouse within plot area to zoom in by factor of two about that point

Or,   to  Da Label all possible matches  Label matches used for scoring Show Y-axis 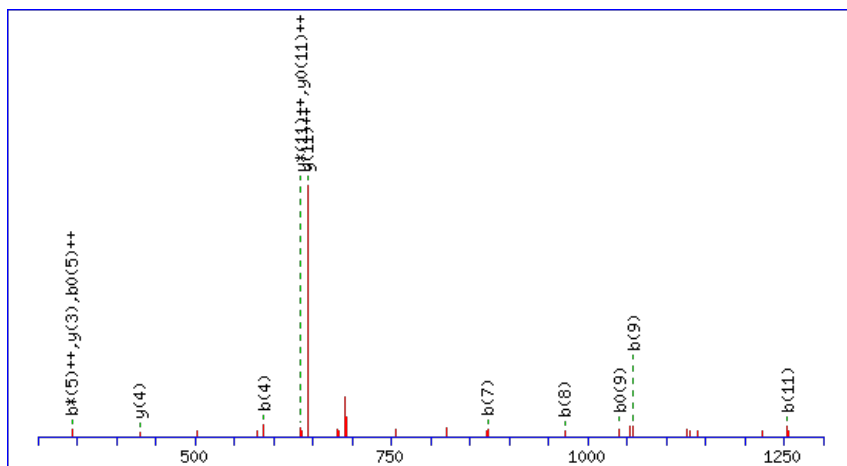Monoisotopic mass of neutral peptide  $M_r(\text{calc})$ : 1399.7096

Fixed modifications: Carbamidomethyl (C) (apply to specified residues or termini only)

Ions Score: 27 Expect: 0.011

Matches : 13/122 fragment ions using 18 most intense peaks ([help](#))

| #  | b         | b <sup>++</sup> | b <sup>*</sup> | b <sup>*++</sup> | b <sup>0</sup> | b <sup>0++</sup> | Seq. | y         | y <sup>++</sup> | y <sup>*</sup> | y <sup>*++</sup> | y <sup>0</sup> | y <sup>0++</sup> | #  |
|----|-----------|-----------------|----------------|------------------|----------------|------------------|------|-----------|-----------------|----------------|------------------|----------------|------------------|----|
| 1  | 116.0342  | 58.5207         |                |                  | 98.0237        | 49.5155          | D    |           |                 |                |                  |                |                  | 12 |
| 2  | 302.1135  | 151.5604        |                |                  | 284.1030       | 142.5551         | W    | 1285.6899 | 643.3486        | 1268.6634      | 634.8353         | 1267.6793      | 634.3433         | 11 |
| 3  | 458.2146  | 229.6110        | 441.1881       | 221.0977         | 440.2041       | 220.6057         | R    | 1099.6106 | 550.3089        | 1082.5841      | 541.7957         | 1081.6000      | 541.3037         | 10 |
| 4  | 587.2572  | 294.1323        | 570.2307       | 285.6190         | 569.2467       | 285.1270         | E    | 943.5095  | 472.2584        | 926.4829       | 463.7451         | 925.4989       | 463.2531         | 9  |
| 5  | 702.2842  | 351.6457        | 685.2576       | 343.1325         | 684.2736       | 342.6404         | D    | 814.4669  | 407.7371        | 797.4403       | 399.2238         | 796.4563       | 398.7318         | 8  |
| 6  | 759.3056  | 380.1565        | 742.2791       | 371.6432         | 741.2951       | 371.1512         | G    | 699.4400  | 350.2236        | 682.4134       | 341.7103         | 681.4294       | 341.2183         | 7  |
| 7  | 872.3897  | 436.6985        | 855.3632       | 428.1852         | 854.3791       | 427.6932         | I    | 642.4185  | 321.7129        | 625.3919       | 313.1996         | 624.4079       | 312.7076         | 6  |
| 8  | 971.4581  | 486.2327        | 954.4316       | 477.7194         | 953.4476       | 477.2274         | V    | 529.3344  | 265.1709        | 512.3079       | 256.6576         | 511.3239       | 256.1656         | 5  |
| 9  | 1058.4901 | 529.7487        | 1041.4636      | 521.2354         | 1040.4796      | 520.7434         | S    | 430.2660  | 215.6366        | 413.2395       | 207.1234         | 412.2554       | 206.6314         | 4  |
| 10 | 1155.5429 | 578.2751        | 1138.5164      | 569.7618         | 1137.5323      | 569.2698         | P    | 343.2340  | 172.1206        | 326.2074       | 163.6074         |                |                  | 3  |
| 11 | 1254.6113 | 627.8093        | 1237.5848      | 619.2960         | 1236.6008      | 618.8040         | V    | 246.1812  | 123.5942        | 229.1547       | 115.0810         |                |                  | 2  |
| 12 |           |                 |                |                  |                |                  | K    | 147.1128  | 74.0600         | 130.0863       | 65.5468          |                |                  | 1  |

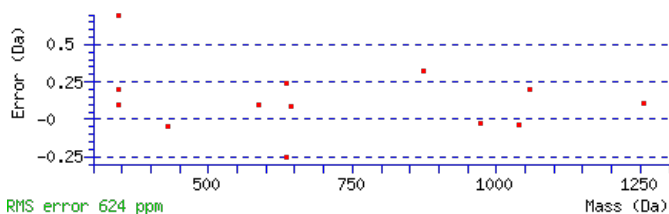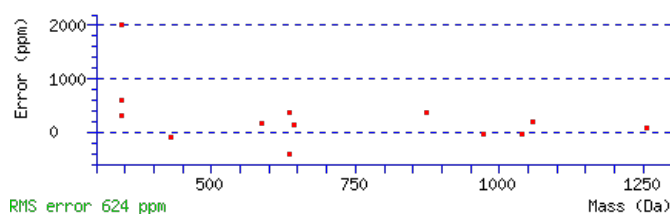NCBI BLAST search of **DWREDGIVSPVK**

(Parameters: blastp, nr protein database, expect=20000, no filter, PAM30)

Other BLAST [web gateways](#)**All matches to this query**

## AT3G45310.1

| Score | Mr(calc)  | Delta   | Sequence                        |
|-------|-----------|---------|---------------------------------|
| 27.4  | 1399.7096 | -0.0002 | <a href="#">DWREDGIVSPVK</a>    |
| 6.7   | 1399.7129 | -0.0036 | <a href="#">DRPAIAMIADA EK</a>  |
| 4.2   | 1399.7095 | -0.0002 | <a href="#">NPQASEKALWEK</a>    |
| 3.4   | 1399.7055 | 0.0038  | <a href="#">EGRVSPIQEETR</a>    |
| 3.0   | 1399.7056 | 0.0038  | <a href="#">NVSTTASAHSLQ GK</a> |
| 2.8   | 1399.7096 | -0.0002 | <a href="#">DLRDDIFEHLK</a>     |
| 2.7   | 1399.7055 | 0.0038  | <a href="#">NNGSDLGDQKKPK</a>   |
| 2.6   | 1399.7055 | 0.0038  | <a href="#">NDNSKHTEKSK</a>     |
| 1.0   | 1399.7095 | -0.0002 | <a href="#">DKTHWEEKLSK</a>     |

Mascot: <http://www.matrixscience.com/>

**Peptide View**MS/MS Fragmentation of **LLLIGDSGVGK**Found in **AT3G46060.1** in **TAIR\_Arabidopsis**, Symbols: Ara-3, AtRABE1c, AtRab8A, ARA3 | ARA3; GTP binding | chr3:16928893-16930725  
FORWARD

Match to Query 3154: 1082.597102 from(542.305827,2+) index(5794)

Title: Elution from: 51.687 to 51.687 scan no 7427 cid35.00 polarity:+

Data file D6h-3\_2.mgf

Click mouse within plot area to zoom in by factor of two about that point

Or,   to  Da Label all possible matches  Label matches used for scoring Show Y-axis 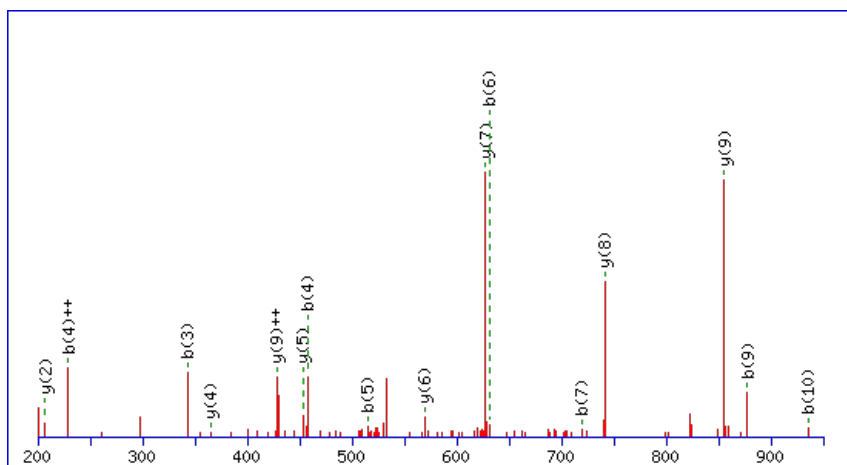Monoisotopic mass of neutral peptide  $M_r(\text{calc})$ : 1082.5980

Fixed modifications: Carbamidomethyl (C) (apply to specified residues or termini only)

Ions Score: 53 Expect: 1.7e-005

Matches : 17/82 fragment ions using 36 most intense peaks ([help](#))

| #  | b               | b <sup>++</sup> | b <sup>0</sup> | b <sup>0++</sup> | Seq. | y               | y <sup>++</sup> | y*       | y <sup>*++</sup> | y <sup>0</sup> | y <sup>0++</sup> | #  |
|----|-----------------|-----------------|----------------|------------------|------|-----------------|-----------------|----------|------------------|----------------|------------------|----|
| 1  | 115.0884        | 58.0478         |                |                  | L    |                 |                 |          |                  |                |                  | 11 |
| 2  | <b>229.1695</b> | 115.0884        |                |                  | L    | 969.5242        | 485.2657        | 951.5006 | 476.2539         | 951.5136       | 476.2604         | 10 |
| 3  | <b>343.2506</b> | 172.1289        |                |                  | L    | <b>855.4431</b> | <b>428.2252</b> | 837.4195 | 419.2134         | 837.4325       | 419.2199         | 9  |
| 4  | <b>457.3317</b> | <b>229.1695</b> |                |                  | I    | <b>741.3620</b> | 371.1846        | 723.3384 | 362.1728         | 723.3514       | 362.1793         | 8  |
| 5  | <b>515.3502</b> | 258.1787        |                |                  | G    | <b>627.2809</b> | 314.1441        | 609.2573 | 305.1323         | 609.2703       | 305.1388         | 7  |
| 6  | <b>631.3741</b> | 316.1907        | 613.3636       | 307.1854         | D    | <b>569.2624</b> | 285.1348        | 551.2388 | 276.1230         | 551.2518       | 276.1295         | 6  |
| 7  | <b>719.4032</b> | 360.2052        | 701.3926       | 351.2000         | S    | <b>453.2384</b> | 227.1228        | 435.2148 | 218.1110         | 435.2278       | 218.1175         | 5  |
| 8  | 777.4217        | 389.2145        | 759.4111       | 380.2092         | G    | <b>365.2093</b> | 183.1083        | 347.1857 | 174.0965         |                |                  | 4  |
| 9  | <b>877.4872</b> | 439.2472        | 859.4766       | 430.2419         | V    | 307.1908        | 154.0990        | 289.1672 | 145.0873         |                |                  | 3  |
| 10 | <b>935.5057</b> | 468.2565        | 917.4951       | 459.2512         | G    | <b>207.1254</b> | 104.0663        | 189.1018 | 95.0545          |                |                  | 2  |
| 11 |                 |                 |                |                  | K    | 149.1069        | 75.0571         | 131.0833 | 66.0453          |                |                  | 1  |

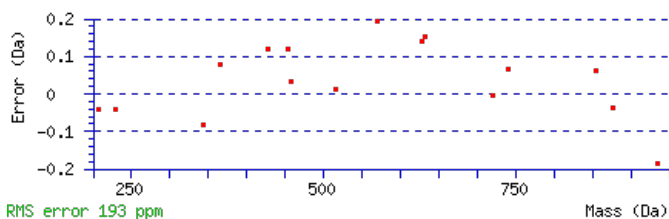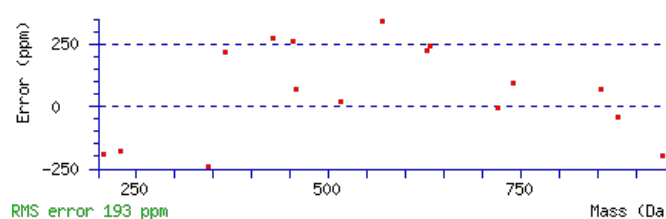NCBI BLAST search of **LLLIGDSGVGK**

(Parameters: blastp, nr protein database, expect=20000, no filter, PAM30)

Other BLAST [web gateways](#)**All matches to this query**



## AT3G46060.1

| Score | Mr(calc)  | Delta   | Sequence                    |
|-------|-----------|---------|-----------------------------|
| 53.4  | 1082.5980 | -0.0009 | <a href="#">IILGDSGVGK</a>  |
| 53.4  | 1082.5980 | -0.0009 | <a href="#">ILLIGDSGVGK</a> |
| 53.4  | 1082.5980 | -0.0009 | <a href="#">LLIGDSGVGK</a>  |
| 20.2  | 1082.5980 | -0.0009 | <a href="#">LILLDETVR</a>   |
| 2.4   | 1082.5980 | -0.0009 | <a href="#">LGSLDPIKTK</a>  |
| 1.9   | 1082.5980 | -0.0009 | <a href="#">ILKLVEDNK</a>   |
| 0.8   | 1082.5980 | -0.0009 | <a href="#">ILALTATPGSK</a> |
| 0.8   | 1082.6002 | -0.0031 | <a href="#">ILFTEPPKK</a>   |
| 0.8   | 1082.5980 | -0.0009 | <a href="#">LLAELGSIQK</a>  |
| 0.8   | 1082.5980 | -0.0009 | <a href="#">LLDQVVEKK</a>   |

Mascot: <http://www.matrixscience.com/>

**Peptide View**MS/MS Fragmentation of **KLSMDASTQTDDR**Found in **AT3G46110.1** in **TAIR\_Arabidopsis**, Symbols: | signal transducer | chr3:16943229-16944573 FORWARD

Match to Query 6120: 1466.666276 from(734.340414,2+) index(7547)

Title: Elution from: 65.485 to 65.485 scan no 9811 cid35.00 polarity:+

Data file D1d-3\_2.mgf

Click mouse within plot area to zoom in by factor of two about that point

Or,  to  Da Label all possible matches  Label matches used for scoring Show Y-axis 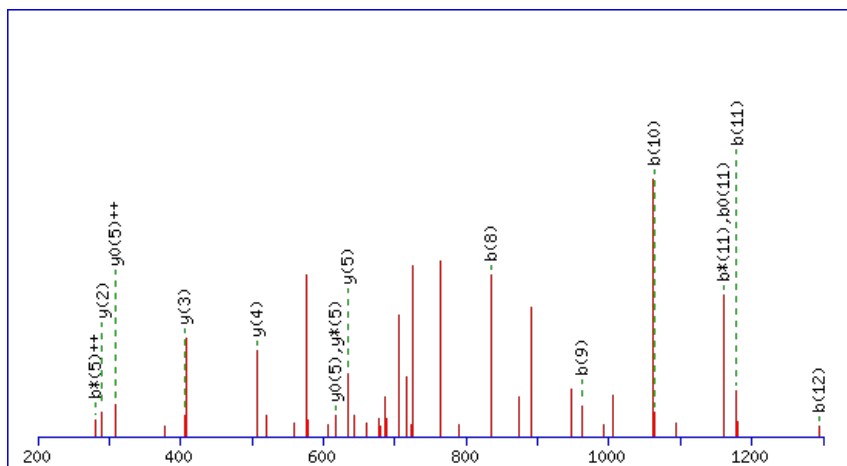Monoisotopic mass of neutral peptide  $M_r(\text{calc})$ : 1466.6671

Fixed modifications: Carbamidomethyl (C) (apply to specified residues or termini only)

Ions Score: 19 Expect: 0.02

Matches : 15/138 fragment ions using 28 most intense peaks ([help](#))

| #  | b                | b <sup>++</sup> | b*               | b <sup>*++</sup> | b <sup>0</sup>   | b <sup>0++</sup> | Seq.     | y               | y <sup>++</sup> | y*              | y <sup>*++</sup> | y <sup>0</sup>  | y <sup>0++</sup> | #         |
|----|------------------|-----------------|------------------|------------------|------------------|------------------|----------|-----------------|-----------------|-----------------|------------------|-----------------|------------------|-----------|
| 1  | 129.1022         | 65.0548         | 112.0757         | 56.5415          |                  |                  | <b>K</b> |                 |                 |                 |                  |                 |                  | <b>13</b> |
| 2  | 242.1863         | 121.5968        | 225.1598         | 113.0835         |                  |                  | <b>L</b> | 1339.5794       | 670.2934        | 1322.5529       | 661.7801         | 1321.5689       | 661.2881         | <b>12</b> |
| 3  | 329.2183         | 165.1128        | 312.1918         | 156.5995         | 311.2078         | 156.1075         | <b>S</b> | 1226.4954       | 613.7513        | 1209.4688       | 605.2380         | 1208.4848       | 604.7460         | <b>11</b> |
| 4  | 460.2588         | 230.6330        | 443.2323         | 222.1198         | 442.2483         | 221.6278         | <b>M</b> | 1139.4633       | 570.2353        | 1122.4368       | 561.7220         | 1121.4528       | 561.2300         | <b>10</b> |
| 5  | 575.2858         | 288.1465        | 558.2592         | <b>279.6332</b>  | 557.2752         | 279.1412         | <b>D</b> | 1008.4229       | 504.7151        | 991.3963        | 496.2018         | 990.4123        | 495.7098         | <b>9</b>  |
| 6  | 646.3229         | 323.6651        | 629.2963         | 315.1518         | 628.3123         | 314.6598         | <b>A</b> | 893.3959        | 447.2016        | 876.3694        | 438.6883         | 875.3854        | 438.1963         | <b>8</b>  |
| 7  | 733.3549         | 367.1811        | 716.3284         | 358.6678         | 715.3443         | 358.1758         | <b>S</b> | 822.3588        | 411.6830        | 805.3323        | 403.1698         | 804.3482        | 402.6778         | <b>7</b>  |
| 8  | <b>834.4026</b>  | 417.7049        | 817.3760         | 409.1917         | 816.3920         | 408.6996         | <b>T</b> | 735.3268        | 368.1670        | 718.3002        | 359.6538         | 717.3162        | 359.1617         | <b>6</b>  |
| 9  | <b>962.4612</b>  | 481.7342        | 945.4346         | 473.2209         | 944.4506         | 472.7289         | <b>Q</b> | <b>634.2791</b> | 317.6432        | <b>617.2525</b> | 309.1299         | <b>616.2685</b> | <b>308.6379</b>  | <b>5</b>  |
| 10 | <b>1063.5088</b> | 532.2581        | 1046.4823        | 523.7448         | 1045.4983        | 523.2528         | <b>T</b> | <b>506.2205</b> | 253.6139        | 489.1940        | 245.1006         | 488.2100        | 244.6086         | <b>4</b>  |
| 11 | <b>1178.5358</b> | 589.7715        | <b>1161.5092</b> | 581.2583         | <b>1160.5252</b> | 580.7662         | <b>D</b> | <b>405.1728</b> | 203.0901        | 388.1463        | 194.5768         | 387.1623        | 194.0848         | <b>3</b>  |
| 12 | <b>1293.5627</b> | 647.2850        | 1276.5362        | 638.7717         | 1275.5522        | 638.2797         | <b>D</b> | <b>290.1459</b> | 145.5766        | 273.1193        | 137.0633         | 272.1353        | 136.5713         | <b>2</b>  |
| 13 |                  |                 |                  |                  |                  |                  | <b>R</b> | 175.1190        | 88.0631         | 158.0924        | 79.5498          |                 |                  | <b>1</b>  |

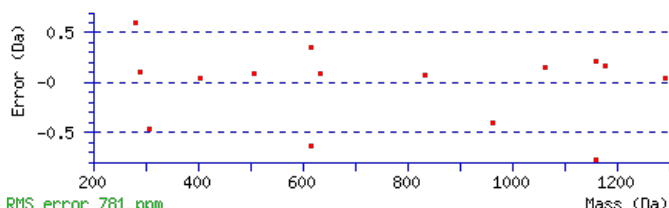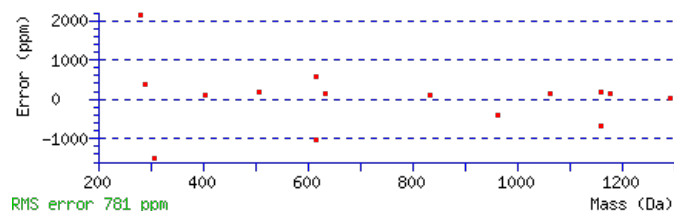NCBI **BLAST** search of **KLSMDASTQTDDR**

(Parameters: blastp, nr protein database, expect=20000, no filter, PAM30)

Other BLAST [web gateways](#)

AT3G46110.1

All matches to this query

| Score | Mr(calc)  | Delta   | Sequence                      |
|-------|-----------|---------|-------------------------------|
| 19.1  | 1466.6671 | -0.0008 | <a href="#">KLSMDASTQTDDR</a> |
| 9.6   | 1466.6646 | 0.0017  | <a href="#">LYNDCPKPSSMR</a>  |

Mascot: <http://www.matrixscience.com/>

## Peptide View

### MS/MS Fragmentation of **LTAGLTEEDAK**

Found in **AT3G46430.1** in **TAIR\_Arabidopsis**, Symbols: | similar to unknown protein [Arabidopsis thaliana] (TAIR:AT5G59613.1); similar to mitochondrial ATP synthase 6 KD subunit [Oryza sativa (japonica cultivar-group)] (GB:BAB21526.1) | chr3:17098672-17099482 FORWARD

Match to Query 3467: 1158.540830 from(580.277691,2+) index(1419)

Title: Elution from: 22.439 to 22.439 scan no 2020 cid35.00 polarity:+

Data file D1d-1\_1.mgf

Click mouse within plot area to zoom in by factor of two about that point

Or,   to  Da

Label all possible matches  Label matches used for scoring

Show Y-axis

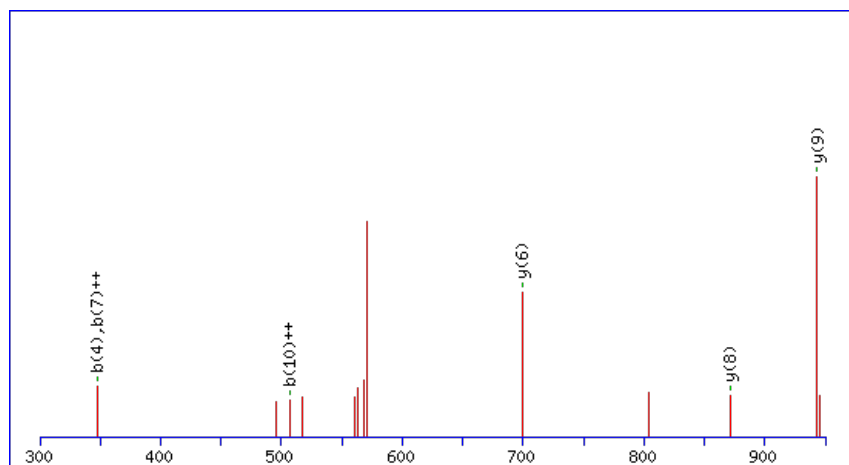

Monoisotopic mass of neutral peptide  $M_r(\text{calc})$ : 1158.5412

Fixed modifications: Carbamidomethyl (C) (apply to specified residues or termini only)

Ions Score: 26 Expect: 0.017

Matches : 6/94 fragment ions using 9 most intense peaks ([help](#))

| #  | b               | b <sup>++</sup> | b <sup>0</sup> | b <sup>0++</sup> | Seq. | y               | y <sup>++</sup> | y*        | y <sup>*++</sup> | y <sup>0</sup> | y <sup>0++</sup> | #  |
|----|-----------------|-----------------|----------------|------------------|------|-----------------|-----------------|-----------|------------------|----------------|------------------|----|
| 1  | 115.0884        | 58.0478         |                |                  | L    |                 |                 |           |                  |                |                  | 11 |
| 2  | 217.1331        | 109.0702        | 199.1225       | 100.0649         | T    | 1045.4674       | 523.2374        | 1027.4438 | 514.2256         | 1027.4569      | 514.2321         | 10 |
| 3  | 289.1672        | 145.0873        | 271.1567       | 136.0820         | A    | <b>943.4227</b> | 472.2150        | 925.3991  | 463.2032         | 925.4122       | 463.2097         | 9  |
| 4  | <b>347.1857</b> | 174.0965        | 329.1752       | 165.0912         | G    | <b>871.3886</b> | 436.1979        | 853.3650  | 427.1861         | 853.3780       | 427.1926         | 8  |
| 5  | 461.2668        | 231.1371        | 443.2563       | 222.1318         | L    | 813.3701        | 407.1887        | 795.3465  | 398.1769         | 795.3595       | 398.1834         | 7  |
| 6  | 563.3115        | 282.1594        | 545.3010       | 273.1541         | T    | <b>699.2890</b> | 350.1481        | 681.2654  | 341.1363         | 681.2784       | 341.1428         | 6  |
| 7  | 693.3512        | <b>347.1792</b> | 675.3406       | 338.1739         | E    | 597.2443        | 299.1258        | 579.2207  | 290.1140         | 579.2337       | 290.1205         | 5  |
| 8  | 823.3908        | 412.1990        | 805.3802       | 403.1938         | E    | 467.2046        | 234.1060        | 449.1810  | 225.0942         | 449.1941       | 225.1007         | 4  |
| 9  | 939.4148        | 470.2110        | 921.4042       | 461.2057         | D    | 337.1650        | 169.0861        | 319.1414  | 160.0743         | 319.1544       | 160.0809         | 3  |
| 10 | 1011.4489       | <b>506.2281</b> | 993.4384       | 497.2228         | A    | 221.1410        | 111.0741        | 203.1174  | 102.0624         |                |                  | 2  |
| 11 |                 |                 |                |                  | K    | 149.1069        | 75.0571         | 131.0833  | 66.0453          |                |                  | 1  |

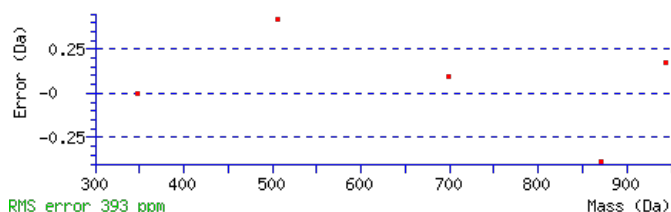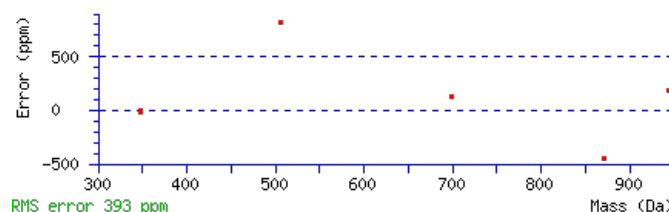

NCBI BLAST search of **LTAGLTEEDAK**

(Parameters: blastp, nr protein database, expect=20000, no filter, PAM30)

Other BLAST [web gateways](#)

All matches to this query

## AT3G46430.1

| Score | Mr(calc)  | Delta   | Sequence                    |
|-------|-----------|---------|-----------------------------|
| 25.8  | 1158.5412 | -0.0004 | <a href="#">LTAGLTEEDAK</a> |
| 2.3   | 1158.5439 | -0.0031 | <a href="#">LSVQEQGQOK</a>  |
| 2.3   | 1158.5421 | -0.0013 | <a href="#">QLTPMDLAMK</a>  |
| 2.3   | 1158.5412 | -0.0004 | <a href="#">SLDEELEGKK</a>  |
| 2.3   | 1158.5439 | -0.0031 | <a href="#">VGLEREAQDK</a>  |
| 1.4   | 1158.5388 | 0.0021  | <a href="#">MEWIQSLPK</a>   |
| 1.4   | 1158.5439 | -0.0031 | <a href="#">NLNREELEK</a>   |
| 0.8   | 1158.5380 | 0.0028  | <a href="#">VAGNFHFAPGK</a> |

Mascot: <http://www.matrixscience.com/>

## Peptide View

### MS/MS Fragmentation of **NIAEVGAEIR**

Found in **AT3G46740.1** in **TAIR\_Arabidopsis**, Symbols: TOC75-III | TOC75-III (translocon outer membrane complex 75-III); P-P-bond-hydrolysis-driven protein transmembrane transporter | chr3:17227089-17230281 REVERSE

Match to Query 3130: 1084.528002 from(543.271277,2+) index(3459)

Title: Elution from: 33.331 to 33.331 scan no 4292 cid35.00 polarity:+

Data file 0-3\_2.mgf

Click mouse within plot area to zoom in by factor of two about that point

Or,  to  Da

Label all possible matches  Label matches used for scoring

Show Y-axis

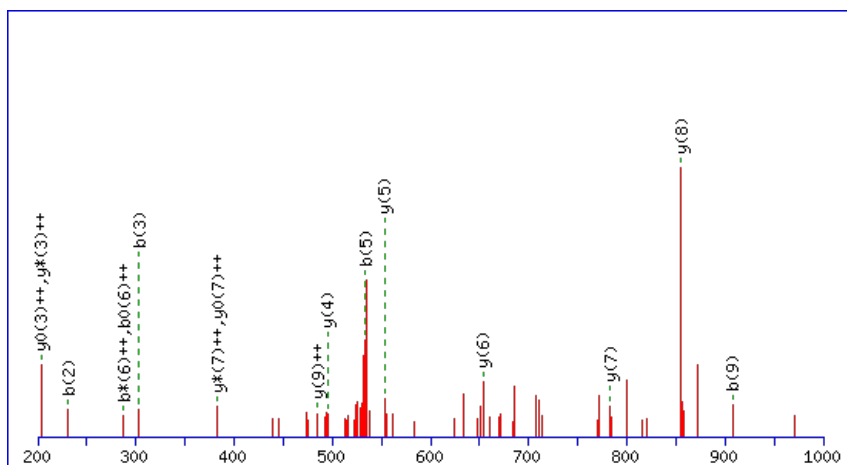

Monoisotopic mass of neutral peptide  $M_r(\text{calc})$ : 1084.5305

Fixed modifications: Carbamidomethyl (C) (apply to specified residues or termini only)

Ions Score: 22 Expect: 0.041

Matches : 16/98 fragment ions using 32 most intense peaks ([help](#))

| #  | b               | b <sup>++</sup> | b*       | b <sup>*++</sup> | b <sup>0</sup> | b <sup>0++</sup> | Seq. | y               | y <sup>++</sup> | y*       | y <sup>*++</sup> | y <sup>0</sup> | y <sup>0++</sup> | #  |
|----|-----------------|-----------------|----------|------------------|----------------|------------------|------|-----------------|-----------------|----------|------------------|----------------|------------------|----|
| 1  | 117.0443        | 59.0258         | 99.0207  | 50.0140          |                |                  | N    |                 |                 |          |                  |                |                  | 10 |
| 2  | <b>231.1254</b> | 116.0663        | 213.1018 | 107.0545         |                |                  | I    | 969.5008        | <b>485.2540</b> | 951.4772 | 476.2422         | 951.4902       | 476.2488         | 9  |
| 3  | <b>303.1595</b> | 152.0834        | 285.1359 | 143.0716         |                |                  | A    | <b>855.4197</b> | 428.2135        | 837.3961 | 419.2017         | 837.4091       | 419.2082         | 8  |
| 4  | 433.1991        | 217.1032        | 415.1756 | 208.0914         | 415.1886       | 208.0979         | E    | <b>783.3855</b> | 392.1964        | 765.3620 | <b>383.1846</b>  | 765.3750       | <b>383.1911</b>  | 7  |
| 5  | <b>533.2646</b> | 267.1359        | 515.2410 | 258.1241         | 515.2540       | 258.1307         | V    | <b>653.3459</b> | 327.1766        | 635.3223 | 318.1648         | 635.3354       | 318.1713         | 6  |
| 6  | 591.2831        | 296.1452        | 573.2595 | <b>287.1334</b>  | 573.2725       | <b>287.1399</b>  | G    | <b>553.2805</b> | 277.1439        | 535.2569 | 268.1321         | 535.2699       | 268.1386         | 5  |
| 7  | 663.3172        | 332.1623        | 645.2937 | 323.1505         | 645.3067       | 323.1570         | A    | <b>495.2620</b> | 248.1346        | 477.2384 | 239.1228         | 477.2514       | 239.1293         | 4  |
| 8  | 793.3569        | 397.1821        | 775.3333 | 388.1703         | 775.3463       | 388.1768         | E    | 423.2278        | 212.1175        | 405.2042 | <b>203.1058</b>  | 405.2173       | <b>203.1123</b>  | 3  |
| 9  | <b>907.4380</b> | 454.2226        | 889.4144 | 445.2108         | 889.4274       | 445.2173         | I    | 293.1882        | 147.0977        | 275.1646 | 138.0859         |                |                  | 2  |
| 10 |                 |                 |          |                  |                |                  | R    | 179.1071        | 90.0572         | 161.0835 | 81.0454          |                |                  | 1  |

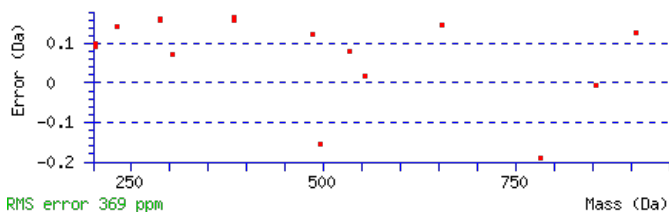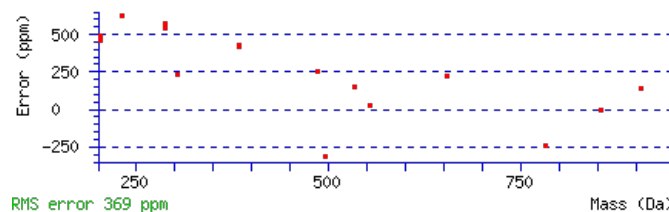

NCBI BLAST search of **NIAEVGAEIR**

(Parameters: blastp, nr protein database, expect=20000, no filter, PAM30)

Other BLAST [web gateways](#)

All matches to this query

## AT3G46740.1

| Score | Mr(calc)  | Delta   | Sequence                   |
|-------|-----------|---------|----------------------------|
| 21.6  | 1084.5305 | -0.0025 | <a href="#">NIAEVGAER</a>  |
| 10.8  | 1084.5305 | -0.0025 | <a href="#">LGIIEDAANR</a> |
| 8.6   | 1084.5305 | -0.0025 | <a href="#">IDGKISGPER</a> |
| 8.3   | 1084.5305 | -0.0025 | <a href="#">INSIKEDPR</a>  |
| 7.5   | 1084.5305 | -0.0025 | <a href="#">LVADGVVENR</a> |
| 6.7   | 1084.5257 | 0.0023  | <a href="#">VQMOGVPVGR</a> |
| 6.6   | 1084.5278 | 0.0002  | <a href="#">EVEAPTSLK</a>  |
| 4.1   | 1084.5305 | -0.0025 | <a href="#">LGGETKVDPR</a> |
| 3.7   | 1084.5305 | -0.0025 | <a href="#">LGEQLENLR</a>  |

Mascot: <http://www.matrixscience.com/>

**Peptide View**MS/MS Fragmentation of **IASLVADIFANTAVAENK**Found in **AT3G46780.1** in **TAIR\_Arabidopsis**, Symbols: PTAC16 | PTAC16 (PLASTID TRANSCRIPTIONALLY ACTIVE18); binding / catalytic | chr3:17239751-17242006 FORWARD

Match to Query 8383: 1845.979234 from(923.996893,2+) index(9797)

Title: Elution from: 95.100 to 95.100 scan no 14023 cid35.00 polarity:+

Data file D1d-2\_2.mgf

Click mouse within plot area to zoom in by factor of two about that point

Or,   to  Da Label all possible matches  Label matches used for scoring Show Y-axis 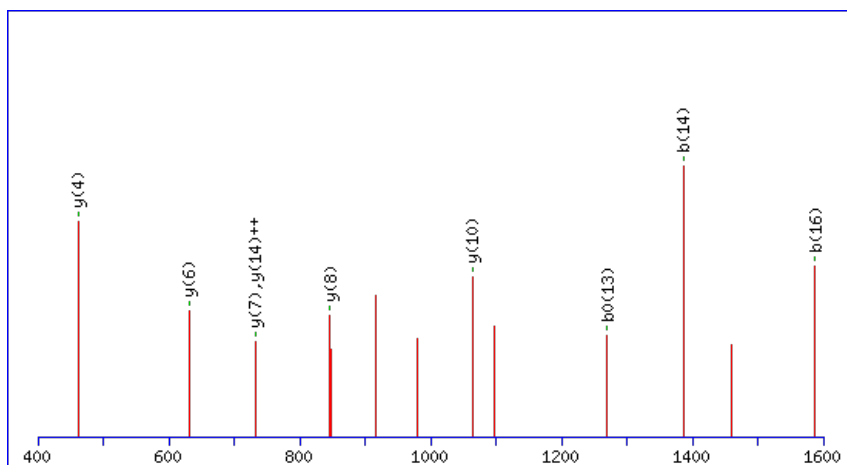Monoisotopic mass of neutral peptide  $M_r(\text{calc})$ : 1845.9836

Fixed modifications: Carbamidomethyl (C) (apply to specified residues or termini only)

Ions Score: 40 Expect: 0.00038

Matches : 9/176 fragment ions using 10 most intense peaks ([help](#))

| #  | b         | b <sup>++</sup> | b <sup>*</sup> | b <sup>*++</sup> | b <sup>0</sup> | b <sup>0++</sup> | Seq. | y         | y <sup>++</sup> | y <sup>*</sup> | y <sup>*++</sup> | y <sup>0</sup> | y <sup>0++</sup> | #  |
|----|-----------|-----------------|----------------|------------------|----------------|------------------|------|-----------|-----------------|----------------|------------------|----------------|------------------|----|
| 1  | 114.0913  | 57.5493         |                |                  |                |                  | I    |           |                 |                |                  |                |                  | 18 |
| 2  | 185.1285  | 93.0679         |                |                  |                |                  | A    | 1733.9068 | 867.4571        | 1716.8803      | 858.9438         | 1715.8963      | 858.4518         | 17 |
| 3  | 272.1605  | 136.5839        |                |                  | 254.1499       | 127.5786         | S    | 1662.8697 | 831.9385        | 1645.8432      | 823.4252         | 1644.8592      | 822.9332         | 16 |
| 4  | 385.2445  | 193.1259        |                |                  | 367.2340       | 184.1206         | L    | 1575.8377 | 788.4225        | 1558.8112      | 779.9092         | 1557.8271      | 779.4172         | 15 |
| 5  | 484.3130  | 242.6601        |                |                  | 466.3024       | 233.6548         | V    | 1462.7536 | 731.8805        | 1445.7271      | 723.3672         | 1444.7431      | 722.8752         | 14 |
| 6  | 555.3501  | 278.1787        |                |                  | 537.3395       | 269.1734         | A    | 1363.6852 | 682.3462        | 1346.6587      | 673.8330         | 1345.6747      | 673.3410         | 13 |
| 7  | 670.3770  | 335.6921        |                |                  | 652.3665       | 326.6869         | D    | 1292.6481 | 646.8277        | 1275.6216      | 638.3144         | 1274.6375      | 637.8224         | 12 |
| 8  | 783.4611  | 392.2342        |                |                  | 765.4505       | 383.2289         | I    | 1177.6212 | 589.3142        | 1160.5946      | 580.8009         | 1159.6106      | 580.3089         | 11 |
| 9  | 930.5295  | 465.7684        |                |                  | 912.5189       | 456.7631         | F    | 1064.5371 | 532.7722        | 1047.5106      | 524.2589         | 1046.5265      | 523.7669         | 10 |
| 10 | 1001.5666 | 501.2869        |                |                  | 983.5560       | 492.2817         | A    | 917.4687  | 459.2380        | 900.4421       | 450.7247         | 899.4581       | 450.2327         | 9  |
| 11 | 1115.6095 | 558.3084        | 1098.5830      | 549.7951         | 1097.5990      | 549.3031         | N    | 846.4316  | 423.7194        | 829.4050       | 415.2061         | 828.4210       | 414.7141         | 8  |
| 12 | 1216.6572 | 608.8322        | 1199.6307      | 600.3190         | 1198.6466      | 599.8270         | T    | 732.3886  | 366.6980        | 715.3621       | 358.1847         | 714.3781       | 357.6927         | 7  |
| 13 | 1287.6943 | 644.3508        | 1270.6678      | 635.8375         | 1269.6838      | 635.3455         | A    | 631.3410  | 316.1741        | 614.3144       | 307.6608         | 613.3304       | 307.1688         | 6  |
| 14 | 1386.7627 | 693.8850        | 1369.7362      | 685.3717         | 1368.7522      | 684.8797         | V    | 560.3039  | 280.6556        | 543.2773       | 272.1423         | 542.2933       | 271.6503         | 5  |
| 15 | 1457.7999 | 729.4036        | 1440.7733      | 720.8903         | 1439.7893      | 720.3983         | A    | 461.2354  | 231.1214        | 444.2089       | 222.6081         | 443.2249       | 222.1161         | 4  |
| 16 | 1586.8424 | 793.9249        | 1569.8159      | 785.4116         | 1568.8319      | 784.9196         | E    | 390.1983  | 195.6028        | 373.1718       | 187.0895         | 372.1878       | 186.5975         | 3  |
| 17 | 1700.8854 | 850.9463        | 1683.8588      | 842.4331         | 1682.8748      | 841.9410         | N    | 261.1557  | 131.0815        | 244.1292       | 122.5682         |                |                  | 2  |
| 18 |           |                 |                |                  |                |                  | K    | 147.1128  | 74.0600         | 130.0863       | 65.5468          |                |                  | 1  |



AT3G46780.1

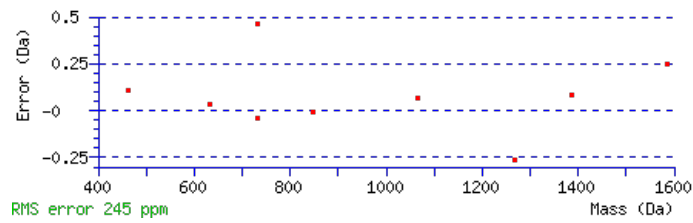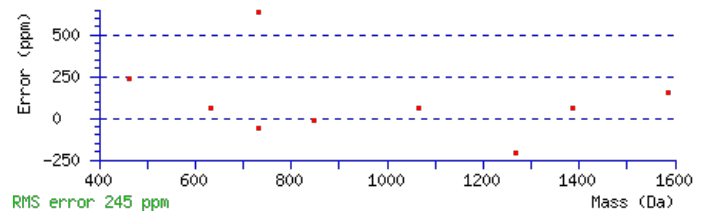

NCBI **BLAST** search of [IASLVADIFANTAVAENK](#)  
(Parameters: blastp, nr protein database, expect=20000, no filter, PAM30)  
Other BLAST [web gateways](#)

**All matches to this query**

| Score | Mr(calc)  | Delta   | Sequence                           |
|-------|-----------|---------|------------------------------------|
| 40.2  | 1845.9836 | -0.0044 | <a href="#">IASLVADIFANTAVAENK</a> |
| 2.4   | 1845.9804 | -0.0012 | <a href="#">MEAEIAGLLKRMEVTR</a>   |

Mascot: <http://www.matrixscience.com/>

**Peptide View**MS/MS Fragmentation of **NVRFDEFEQK**Found in **AT3G46920.1** in **TAIR\_Arabidopsis**, Symbols: | protein kinase family protein | chr3:17291415-17295842 REVERSE

Match to Query 4503: 1326.576888 from(664.295720,2+) index(8655)

Title: Elution from: 77.796 to 77.796 scan no 11599 cid35.00 polarity:+

Data file D12h-2\_3.mgf

Click mouse within plot area to zoom in by factor of two about that point

Or,   to  Da Label all possible matches  Label matches used for scoring Show Y-axis 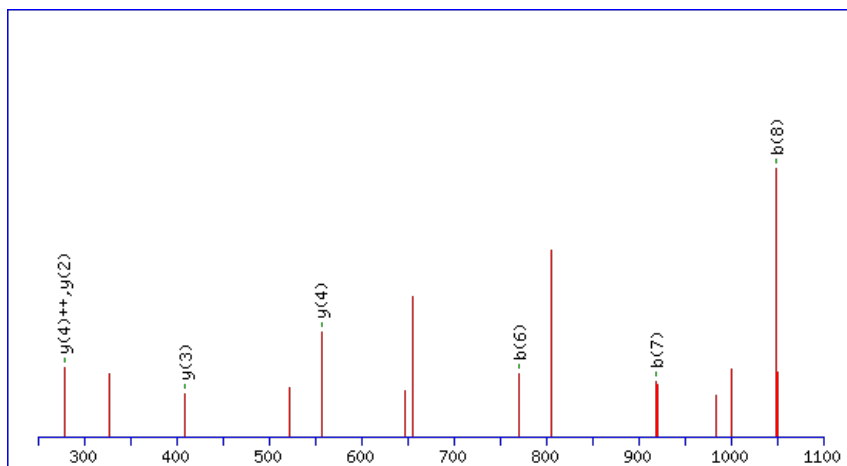**Monoisotopic mass of neutral peptide Mr(calc):** 1326.5780**Fixed modifications:** Carbamidomethyl (C) (apply to specified residues or termini only)**Ions Score:** 25 **Expect:** 0.02**Matches:** 7/96 fragment ions using 8 most intense peaks ([help](#))

| #  | b                | b <sup>++</sup> | b*        | b <sup>*++</sup> | b <sup>0</sup> | b <sup>0++</sup> | Seq. | y               | y <sup>++</sup> | y*        | y <sup>*++</sup> | y <sup>0</sup> | y <sup>0++</sup> | #  |
|----|------------------|-----------------|-----------|------------------|----------------|------------------|------|-----------------|-----------------|-----------|------------------|----------------|------------------|----|
| 1  | 117.0443         | 59.0258         | 99.0207   | 50.0140          |                |                  | N    |                 |                 |           |                  |                |                  | 10 |
| 2  | 217.1097         | 109.0585        | 199.0861  | 100.0467         |                |                  | V    | 1211.5484       | 606.2778        | 1193.5248 | 597.2660         | 1193.5378      | 597.2725         | 9  |
| 3  | 377.1990         | 189.1031        | 359.1754  | 180.0913         |                |                  | R    | 1111.4829       | 556.2451        | 1093.4593 | 547.2333         | 1093.4723      | 547.2398         | 8  |
| 4  | 525.2644         | 263.1358        | 507.2408  | 254.1241         |                |                  | F    | 951.3937        | 476.2005        | 933.3701  | 467.1887         | 933.3831       | 467.1952         | 7  |
| 5  | 641.2884         | 321.1478        | 623.2648  | 312.1360         | 623.2778       | 312.1426         | D    | 803.3282        | 402.1677        | 785.3046  | 393.1559         | 785.3176       | 393.1625         | 6  |
| 6  | <b>771.3280</b>  | 386.1677        | 753.3044  | 377.1559         | 753.3175       | 377.1624         | E    | 687.3042        | 344.1558        | 669.2806  | 335.1440         | 669.2937       | 335.1505         | 5  |
| 7  | <b>919.3935</b>  | 460.2004        | 901.3699  | 451.1886         | 901.3829       | 451.1951         | F    | <b>557.2646</b> | <b>279.1359</b> | 539.2410  | 270.1241         | 539.2540       | 270.1307         | 4  |
| 8  | <b>1049.4331</b> | 525.2202        | 1031.4095 | 516.2084         | 1031.4225      | 516.2149         | E    | <b>409.1991</b> | 205.1032        | 391.1756  | 196.0914         | 391.1886       | 196.0979         | 3  |
| 9  | 1179.4858        | 590.2465        | 1161.4622 | 581.2347         | 1161.4752      | 581.2412         | Q    | <b>279.1595</b> | 140.0834        | 261.1359  | 131.0716         |                |                  | 2  |
| 10 |                  |                 |           |                  |                |                  | K    | 149.1069        | 75.0571         | 131.0833  | 66.0453          |                |                  | 1  |

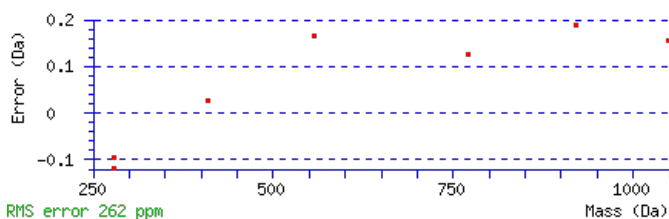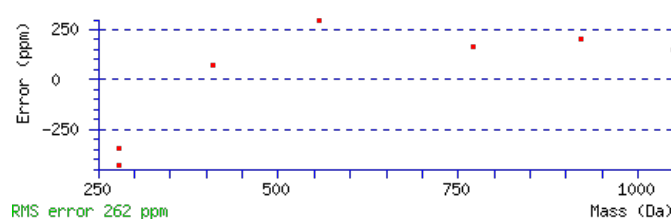NCBI **BLAST** search of **NVRFDEFEQK**

(Parameters: blastp, nr protein database, expect=20000, no filter, PAM30)

Other BLAST [web gateways](#)**All matches to this query**

| Score | Mr(calc) | Delta | Sequence |
|-------|----------|-------|----------|
|       |          |       |          |

**AT3G46920.1**

|      |           |         |                               |
|------|-----------|---------|-------------------------------|
| 24.6 | 1326.5780 | -0.0012 | <a href="#">NVRFDEFEQK</a>    |
| 21.8 | 1326.5808 | -0.0039 | <a href="#">EHNWPNKQQK</a>    |
| 11.8 | 1326.5780 | -0.0012 | <a href="#">GTFVEFENNVR</a>   |
| 11.8 | 1326.5754 | 0.0015  | <a href="#">YKGFGEVEEEK</a>   |
| 9.7  | 1326.5744 | 0.0025  | <a href="#">MGDTVMSGRVR</a>   |
| 5.0  | 1326.5740 | 0.0029  | <a href="#">MFPVVSSEVMR</a>   |
| 1.9  | 1326.5733 | 0.0036  | <a href="#">NCFSWNTIIR</a>    |
| 1.9  | 1326.5774 | -0.0005 | <a href="#">MSGMLGLSAVMGK</a> |
| 1.5  | 1326.5758 | 0.0011  | <a href="#">QSGSGDFSRLK</a>   |
| 0.9  | 1326.5763 | 0.0006  | <a href="#">SSSSRAPSRER</a>   |

**Mascot:** <http://www.matrixscience.com/>

## Peptide View

MS/MS Fragmentation of **LVNDVGDVVNSDPEVNEYLK**

Found in **AT3G46970.1** in **TAIR\_Arabidopsis**, Symbols: ATPHS2, PHS2 | ATPHS2/PHS2 (ALPHA-GLUCAN PHOSPHORYLASE 2); phosphorylase/transferase, transferring glycosyl groups | chr3:17312610-17317096 REVERSE

Match to Query 9521: 2217.078078 from(1109.546315,2+) index(7525)

Title: Elution from: 67.442 to 67.442 scan no 9927 cid35.00 polarity:+

Data file D1d-2\_3.mgf

Click mouse within plot area to zoom in by factor of two about that point

Or,   to  Da

Label all possible matches  Label matches used for scoring

Show Y-axis

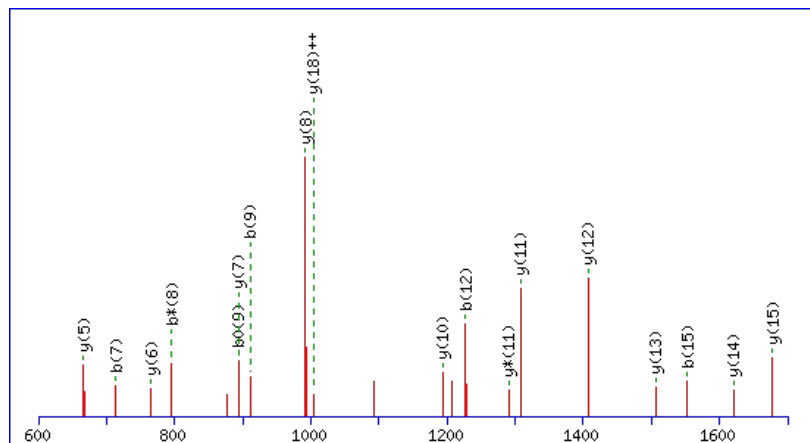

Monoisotopic mass of neutral peptide  $M_r(\text{calc})$ : 2217.0801

Fixed modifications: Carbamidomethyl (C) (apply to specified residues or termini only)

Ions Score: 80 Expect: 3.3e-008

Matches : 20/212 fragment ions using 23 most intense peaks ([help](#))

| #  | b         | b <sup>++</sup> | b*        | b* <sup>++</sup> | b <sup>0</sup> | b <sup>0++</sup> | Seq | y         | y <sup>++</sup> | y*        | y* <sup>++</sup> | y <sup>0</sup> | y <sup>0++</sup> | #  |
|----|-----------|-----------------|-----------|------------------|----------------|------------------|-----|-----------|-----------------|-----------|------------------|----------------|------------------|----|
| 1  | 114.0913  | 57.5493         |           |                  |                |                  | L   |           |                 |           |                  |                |                  | 20 |
| 2  | 213.1598  | 107.0835        |           |                  |                |                  | V   | 2105.0033 | 1053.0053       | 2087.9768 | 1044.4920        | 2086.9928      | 1044.0000        | 19 |
| 3  | 327.2027  | 164.1050        | 310.1761  | 155.5917         |                |                  | N   | 2005.9349 | 1003.4711       | 1988.9084 | 994.9578         | 1987.9243      | 994.4658         | 18 |
| 4  | 442.2296  | 221.6185        | 425.2031  | 213.1052         | 424.2191       | 212.6132         | D   | 1891.8920 | 946.4496        | 1874.8654 | 937.9364         | 1873.8814      | 937.4443         | 17 |
| 5  | 541.2980  | 271.1527        | 524.2715  | 262.6394         | 523.2875       | 262.1474         | V   | 1776.8650 | 888.9362        | 1759.8385 | 880.4229         | 1758.8545      | 879.9309         | 16 |
| 6  | 598.3195  | 299.6634        | 581.2930  | 291.1501         | 580.3089       | 290.6581         | G   | 1677.7966 | 839.4019        | 1660.7701 | 830.8887         | 1659.7861      | 830.3967         | 15 |
| 7  | 713.3464  | 357.1769        | 696.3199  | 348.6636         | 695.3359       | 348.1716         | D   | 1620.7752 | 810.8912        | 1603.7486 | 802.3779         | 1602.7646      | 801.8859         | 14 |
| 8  | 812.4149  | 406.7111        | 795.3883  | 398.1978         | 794.4043       | 397.7058         | V   | 1505.7482 | 753.3777        | 1488.7217 | 744.8645         | 1487.7376      | 744.3725         | 13 |
| 9  | 911.4833  | 456.2453        | 894.4567  | 447.7320         | 893.4727       | 447.2400         | V   | 1406.6798 | 703.8435        | 1389.6533 | 695.3303         | 1388.6692      | 694.8383         | 12 |
| 10 | 1025.5262 | 513.2667        | 1008.4997 | 504.7535         | 1007.5156      | 504.2615         | N   | 1307.6114 | 654.3093        | 1290.5848 | 645.7961         | 1289.6008      | 645.3040         | 11 |
| 11 | 1112.5582 | 556.7828        | 1095.5317 | 548.2695         | 1094.5477      | 547.7775         | S   | 1193.5685 | 597.2879        | 1176.5419 | 588.7746         | 1175.5579      | 588.2826         | 10 |
| 12 | 1227.5852 | 614.2962        | 1210.5586 | 605.7829         | 1209.5746      | 605.2909         | D   | 1106.5364 | 553.7719        | 1089.5099 | 545.2586         | 1088.5259      | 544.7666         | 9  |
| 13 | 1324.6379 | 662.8226        | 1307.6114 | 654.3093         | 1306.6274      | 653.8173         | P   | 991.5095  | 496.2584        | 974.4829  | 487.7451         | 973.4989       | 487.2531         | 8  |
| 14 | 1453.6805 | 727.3439        | 1436.6540 | 718.8306         | 1435.6700      | 718.3386         | E   | 894.4567  | 447.7320        | 877.4302  | 439.2187         | 876.4462       | 438.7267         | 7  |
| 15 | 1552.7489 | 776.8781        | 1535.7224 | 768.3648         | 1534.7384      | 767.8728         | V   | 765.4141  | 383.2107        | 748.3876  | 374.6974         | 747.4036       | 374.2054         | 6  |
| 16 | 1666.7919 | 833.8996        | 1649.7653 | 825.3863         | 1648.7813      | 824.8943         | N   | 666.3457  | 333.6765        | 649.3192  | 325.1632         | 648.3352       | 324.6712         | 5  |
| 17 | 1795.8345 | 898.4209        | 1778.8079 | 889.9076         | 1777.8239      | 889.4156         | E   | 552.3028  | 276.6550        | 535.2762  | 268.1418         | 534.2922       | 267.6498         | 4  |
| 18 | 1958.8978 | 979.9525        | 1941.8712 | 971.4393         | 1940.8872      | 970.9473         | Y   | 423.2602  | 212.1337        | 406.2336  | 203.6205         |                |                  | 3  |
| 19 | 2071.9819 | 1036.4946       | 2054.9553 | 1027.9813        | 2053.9713      | 1027.4893        | L   | 260.1969  | 130.6021        | 243.1703  | 122.0888         |                |                  | 2  |
| 20 |           |                 |           |                  |                |                  | K   | 147.1128  | 74.0600         | 130.0863  | 65.5468          |                |                  | 1  |

# AT3G46970.1

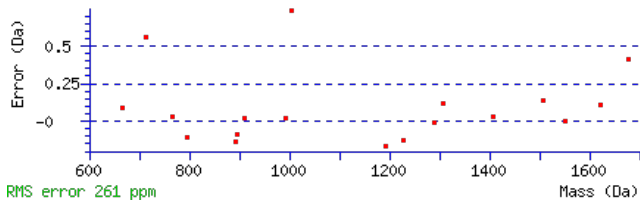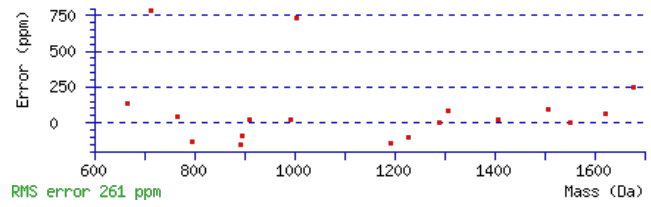

NCBI **BLAST** search of [LVNDVGDVVNSDPEVNEYLK](#)  
(Parameters: blastp, nr protein database, expect=20000, no filter, PAM30)  
Other BLAST [web gateways](#)

## All matches to this query

| Score | Mr(calc)  | Delta   | Sequence                             |
|-------|-----------|---------|--------------------------------------|
| 80.3  | 2217.0801 | -0.0020 | <a href="#">LVNDVGDVVNSDPEVNEYLK</a> |

Mascot: <http://www.matrixscience.com/>

**Peptide View**MS/MS Fragmentation of **QDQFYETNPLLK**Found in **AT3G47070.1** in **TAIR\_Arabidopsis**, Symbols: | similar to unknown [Populus trichocarpa] (GB:ABK95428.1) | chr3:17348190-17348492  
REVERSE

Match to Query 6489: 1510.686896 from(756.350724,2+) index(6494)

Title: Elution from: 57.611 to 57.611 scan no 8362 cid35.00 polarity:+

Data file D6h-3\_1.mgf

Click mouse within plot area to zoom in by factor of two about that point

Or,   to  Da Label all possible matches  Label matches used for scoring Show Y-axis 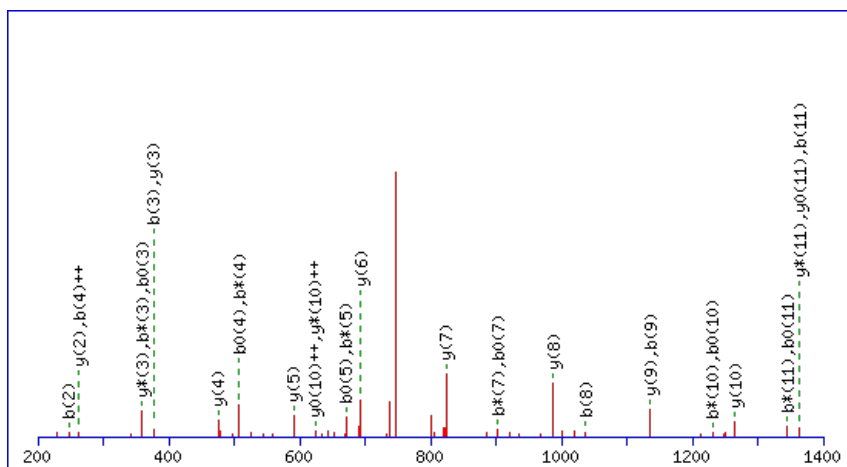Monoisotopic mass of neutral peptide  $M_r(\text{calc})$ : 1510.6880

Fixed modifications: Carbamidomethyl (C) (apply to specified residues or termini only)

Ions Score: 84 Expect: 3.8e-008

Matches : 32/120 fragment ions using 23 most intense peaks ([help](#))

| #  | b                | b <sup>++</sup> | b*               | b <sup>*++</sup> | b <sup>0</sup>   | b <sup>0++</sup> | Seq. | y                | y <sup>++</sup> | y*               | y <sup>*++</sup> | y <sup>0</sup>   | y <sup>0++</sup> | #  |
|----|------------------|-----------------|------------------|------------------|------------------|------------------|------|------------------|-----------------|------------------|------------------|------------------|------------------|----|
| 1  | 131.0599         | 66.0336         | 113.0363         | 57.0218          |                  |                  | Q    |                  |                 |                  |                  |                  |                  | 12 |
| 2  | <b>247.0839</b>  | 124.0456        | 229.0603         | 115.0338         | 229.0733         | 115.0403         | D    | 1381.6426        | 691.3250        | <b>1363.6191</b> | 682.3132         | <b>1363.6321</b> | 682.3197         | 11 |
| 3  | <b>377.1365</b>  | 189.0719        | <b>359.1130</b>  | 180.0601         | <b>359.1260</b>  | 180.0666         | Q    | <b>1265.6187</b> | 633.3130        | 1247.5951        | <b>624.3012</b>  | 1247.6081        | <b>624.3077</b>  | 10 |
| 4  | 525.2020         | <b>263.1046</b> | <b>507.1784</b>  | 254.0928         | <b>507.1914</b>  | 254.0994         | F    | <b>1135.5660</b> | 568.2866        | 1117.5424        | 559.2749         | 1117.5555        | 559.2814         | 9  |
| 5  | 689.2624         | 345.1348        | <b>671.2388</b>  | 336.1230         | <b>671.2518</b>  | 336.1295         | Y    | <b>987.5006</b>  | 494.2539        | 969.4770         | 485.2421         | 969.4900         | 485.2486         | 8  |
| 6  | 819.3020         | 410.1546        | 801.2784         | 401.1428         | 801.2914         | 401.1494         | E    | <b>823.4402</b>  | 412.2237        | 805.4166         | 403.2120         | 805.4296         | 403.2185         | 7  |
| 7  | 921.3467         | 461.1770        | <b>903.3231</b>  | 452.1652         | <b>903.3361</b>  | 452.1717         | T    | <b>693.4006</b>  | 347.2039        | 675.3770         | 338.1921         | 675.3900         | 338.1986         | 6  |
| 8  | <b>1037.3837</b> | 519.1955        | 1019.3601        | 510.1837         | 1019.3731        | 510.1902         | N    | <b>591.3559</b>  | 296.1816        | 573.3323         | 287.1698         |                  |                  | 5  |
| 9  | <b>1135.4335</b> | 568.2204        | 1117.4099        | 559.2086         | 1117.4229        | 559.2151         | P    | <b>475.3189</b>  | 238.1631        | 457.2953         | 229.1513         |                  |                  | 4  |
| 10 | 1249.5146        | 625.2609        | <b>1231.4910</b> | 616.2491         | <b>1231.5040</b> | 616.2557         | L    | <b>377.2691</b>  | 189.1382        | <b>359.2455</b>  | 180.1264         |                  |                  | 3  |
| 11 | <b>1363.5957</b> | 682.3015        | <b>1345.5721</b> | 673.2897         | <b>1345.5851</b> | 673.2962         | L    | <b>263.1880</b>  | 132.0976        | 245.1644         | 123.0858         |                  |                  | 2  |
| 12 |                  |                 |                  |                  |                  |                  | K    | 149.1069         | 75.0571         | 131.0833         | 66.0453          |                  |                  | 1  |

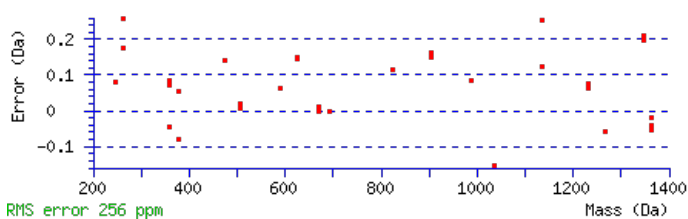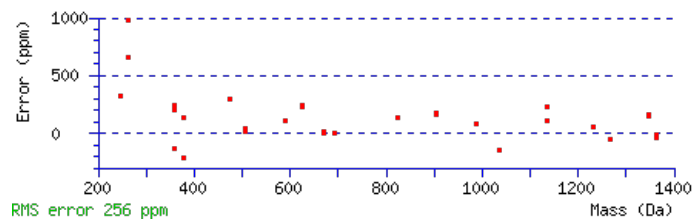NCBI BLAST search of **QDQFYETNPLLK**

(Parameters: blastp, nr protein database, expect=20000, no filter, PAM30)

Other BLAST [web gateways](#)

**AT3G47070.1**

All matches to this query

| Score | Mr(calc)  | Delta   | Sequence                       |
|-------|-----------|---------|--------------------------------|
| 84.4  | 1510.6880 | -0.0011 | <a href="#">QDQFYETNPLLK</a>   |
| 12.6  | 1510.6840 | 0.0029  | <a href="#">ALEGVIMMETFPK</a>  |
| 9.5   | 1510.6857 | 0.0012  | <a href="#">FDDERVTKEDLK</a>   |
| 9.2   | 1510.6914 | -0.0045 | <a href="#">MQDYTLQKVEPK</a>   |
| 4.8   | 1510.6914 | -0.0045 | <a href="#">KDFEMEQILSAK</a>   |
| 4.1   | 1510.6900 | -0.0031 | <a href="#">TCPGKQLAMTLMK</a>  |
| 2.1   | 1510.6893 | -0.0024 | <a href="#">HLCVLHLNMNPK</a>   |
| 2.0   | 1510.6893 | -0.0024 | <a href="#">MKLWGRNEVCAK</a>   |
| 1.8   | 1510.6831 | 0.0038  | <a href="#">YIKELTETDEEK</a>   |
| 1.6   | 1510.6914 | -0.0045 | <a href="#">FAAEQASMSVDVIK</a> |

Mascot: <http://www.matrixscience.com/>

**Peptide View**MS/MS Fragmentation of **QMIFFR**

Found in **AT3G47110.1** in **TAIR\_Arabidopsis**, Symbols: | leucine-rich repeat transmembrane protein kinase, putative | chr3:17358088-17361281  
REVERSE

Match to Query 1292: 856.42678 from(429.220715,2+) index(4239)

Title: Elution from: 40.331 to 40.331 scan no 5398 cid35.00 polarity:+

Data file 0-1\_2.mgf

Click mouse within plot area to zoom in by factor of two about that point

Or,   to  Da

Label all possible matches  Label matches used for scoring

Show Y-axis

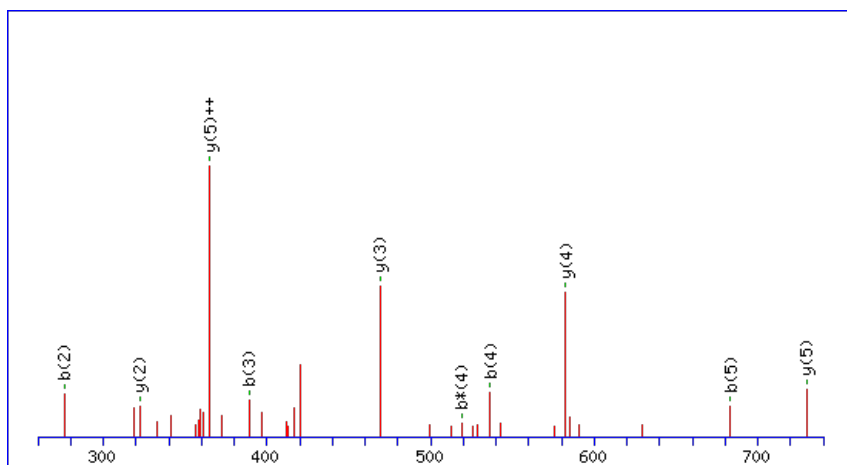

**Monoisotopic mass of neutral peptide Mr(calc):** 856.4265

**Fixed modifications:** Carbamidomethyl (C) (apply to specified residues or termini only)

**Variable modifications:**

**M2** : Oxidation (M), with neutral losses 0.0000 (shown in table), 63.9983

**Ions Score:** 35 **Expect:** 0.00075

**Matches** : 10/60 fragment ions using 14 most intense peaks ([help](#))

| # | b               | b <sup>++</sup> | b*              | b <sup>*++</sup> | Seq. | y               | y <sup>++</sup> | y*       | y <sup>*++</sup> | # |
|---|-----------------|-----------------|-----------------|------------------|------|-----------------|-----------------|----------|------------------|---|
| 1 | 129.0659        | 65.0366         | 112.0393        | 56.5233          | Q    |                 |                 |          |                  | 6 |
| 2 | <b>276.1013</b> | 138.5543        | 259.0747        | 130.0410         | M    | <b>729.3752</b> | <b>365.1913</b> | 712.3487 | 356.6780         | 5 |
| 3 | <b>389.1853</b> | 195.0963        | 372.1588        | 186.5830         | I    | <b>582.3398</b> | 291.6736        | 565.3133 | 283.1603         | 4 |
| 4 | <b>536.2537</b> | 268.6305        | <b>519.2272</b> | 260.1172         | F    | <b>469.2558</b> | 235.1315        | 452.2292 | 226.6183         | 3 |
| 5 | <b>683.3221</b> | 342.1647        | 666.2956        | 333.6514         | F    | <b>322.1874</b> | 161.5973        | 305.1608 | 153.0840         | 2 |
| 6 |                 |                 |                 |                  | R    | 175.1190        | 88.0631         | 158.0924 | 79.5498          | 1 |

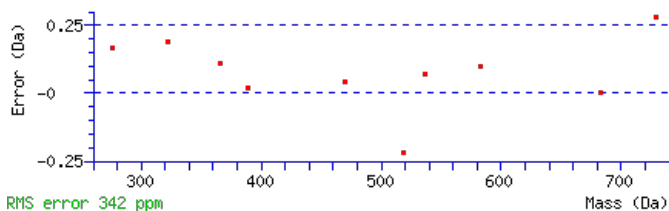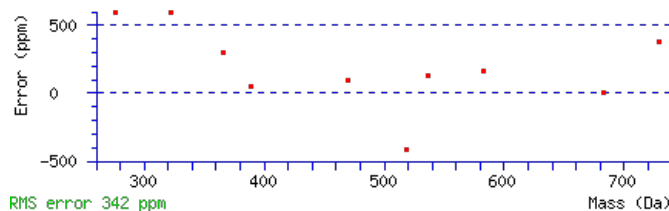

NCBI **BLAST** search of [QMIFFR](#)

(Parameters: blastp, nr protein database, expect=20000, no filter, PAM30)

Other BLAST [web gateways](#)

**All matches to this query**

| Score | Mr(calc) | Delta  | Sequence                |
|-------|----------|--------|-------------------------|
| 34.6  | 856.4265 | 0.0003 | <a href="#">QMIFFR</a>  |
| 32.2  | 856.4265 | 0.0003 | <a href="#">GAMIFFR</a> |



AT3G47110.1

|      |          |         |                         |
|------|----------|---------|-------------------------|
| 10.8 | 856.4265 | 0.0003  | <a href="#">QFFMIR</a>  |
| 2.6  | 856.4290 | -0.0022 | <a href="#">KQPEVQE</a> |

**Mascot:** <http://www.matrixscience.com/>

**Peptide View**MS/MS Fragmentation of **IKALHKYDCLR**Found in **AT3G47340.1** in **TAIR\_Arabidopsis**, Symbols: DIN6, AT-ASN1, ASN1 | ASN1 (DARK INDUCIBLE 6) | chr3:17449121-17452028 REVERSE

Match to Query 5812: 1415.771770 from(708.893161,2+) index(6509)

Title: Elution from: 57.423 to 57.423 scan no 8293 cid35.00 polarity:+

Data file 0-2\_1.mgf

Click mouse within plot area to zoom in by factor of two about that point

Or,  to  Da Label all possible matches  Label matches used for scoring Show Y-axis 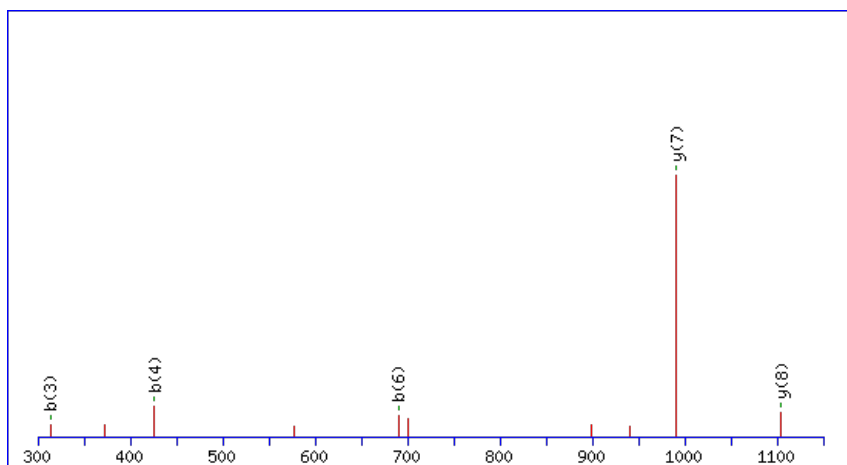Monoisotopic mass of neutral peptide  $M_r(\text{calc})$ : 1415.7707

Fixed modifications: Carbamidomethyl (C) (apply to specified residues or termini only)

Ions Score: 20 Expect: 0.033

Matches : 5/98 fragment ions using 7 most intense peaks ([help](#))

| #  | b               | b <sup>++</sup> | b <sup>*</sup> | b <sup>*++</sup> | b <sup>0</sup> | b <sup>0++</sup> | Seq. | y                | y <sup>++</sup> | y <sup>*</sup> | y <sup>*++</sup> | y <sup>0</sup> | y <sup>0++</sup> | #  |
|----|-----------------|-----------------|----------------|------------------|----------------|------------------|------|------------------|-----------------|----------------|------------------|----------------|------------------|----|
| 1  | 114.0913        | 57.5493         |                |                  |                |                  | I    |                  |                 |                |                  |                |                  | 11 |
| 2  | 242.1863        | 121.5968        | 225.1598       | 113.0835         |                |                  | K    | 1303.6940        | 652.3506        | 1286.6674      | 643.8373         | 1285.6834      | 643.3453         | 10 |
| 3  | <b>313.2234</b> | 157.1153        | 296.1969       | 148.6021         |                |                  | A    | 1175.5990        | 588.3031        | 1158.5724      | 579.7899         | 1157.5884      | 579.2979         | 9  |
| 4  | <b>426.3075</b> | 213.6574        | 409.2809       | 205.1441         |                |                  | L    | <b>1104.5619</b> | 552.7846        | 1087.5353      | 544.2713         | 1086.5513      | 543.7793         | 8  |
| 5  | 563.3664        | 282.1868        | 546.3398       | 273.6736         |                |                  | H    | <b>991.4778</b>  | 496.2425        | 974.4513       | 487.7293         | 973.4672       | 487.2373         | 7  |
| 6  | <b>691.4614</b> | 346.2343        | 674.4348       | 337.7210         |                |                  | K    | 854.4189         | 427.7131        | 837.3924       | 419.1998         | 836.4083       | 418.7078         | 6  |
| 7  | 854.5247        | 427.7660        | 837.4981       | 419.2527         |                |                  | Y    | 726.3239         | 363.6656        | 709.2974       | 355.1523         | 708.3134       | 354.6603         | 5  |
| 8  | 969.5516        | 485.2795        | 952.5251       | 476.7662         | 951.5411       | 476.2742         | D    | 563.2606         | 282.1339        | 546.2341       | 273.6207         | 545.2500       | 273.1287         | 4  |
| 9  | 1129.5823       | 565.2948        | 1112.5557      | 556.7815         | 1111.5717      | 556.2895         | C    | 448.2337         | 224.6205        | 431.2071       | 216.1072         |                |                  | 3  |
| 10 | 1242.6663       | 621.8368        | 1225.6398      | 613.3235         | 1224.6558      | 612.8315         | L    | 288.2030         | 144.6051        | 271.1765       | 136.0919         |                |                  | 2  |
| 11 |                 |                 |                |                  |                |                  | R    | 175.1190         | 88.0631         | 158.0924       | 79.5498          |                |                  | 1  |

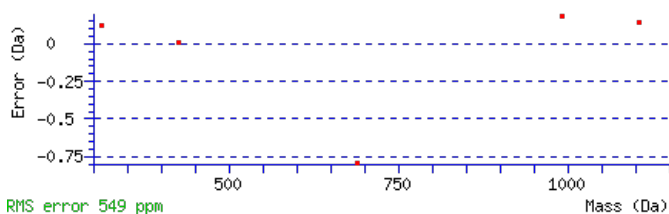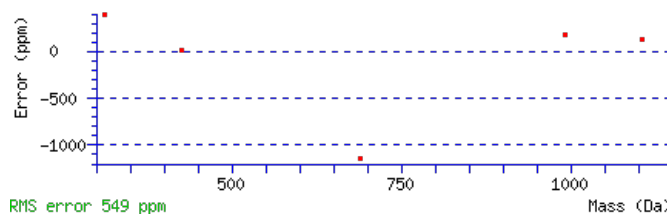NCBI BLAST search of **IKALHKYDCLR**

(Parameters: blastp, nr protein database, expect=20000, no filter, PAM30)

Other BLAST [web gateways](#)**All matches to this query**

AT3G47340.1

| Score | Mr(calc)  | Delta  | Sequence                    |
|-------|-----------|--------|-----------------------------|
| 20.1  | 1415.7707 | 0.0011 | <a href="#">IKALHKYDCLR</a> |

Mascot: <http://www.matrixscience.com/>

### Peptide View

 MS/MS Fragmentation of **APCGEGTNTWDRFELR**

 Found in **AT3G47370.1** in **TAIR\_Arabidopsis**, Symbols: | 40S ribosomal protein S20 (RPS20B) | chr3:17464656-17465422 REVERSE

Match to Query 8639: 1907.857566 from(636.959798,3+) index(5515)

Title: Elution from: 50.560 to 50.560 scan no 7114 cid35.00 polarity:+

Data file D12h-2\_3.mgf

Click mouse within plot area to zoom in by factor of two about that point

 Or,  250 to  Da 

 Label all possible matches  Label matches used for scoring 

 Show Y-axis 
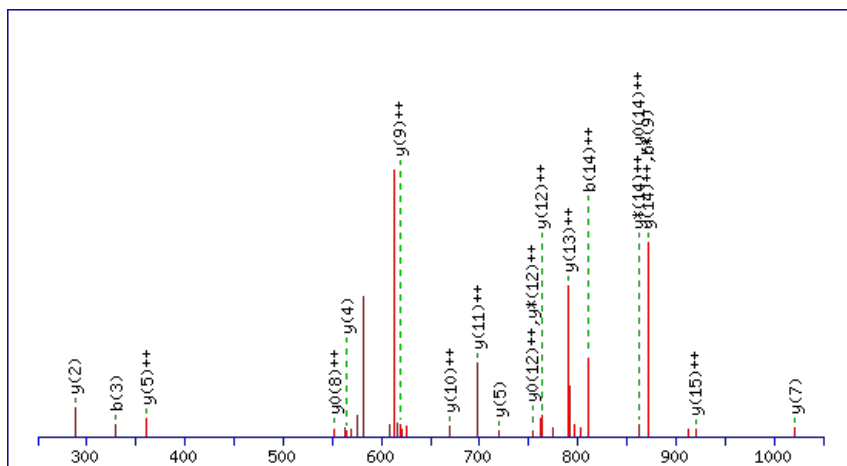
 Monoisotopic mass of neutral peptide **Mr(calc)**: 1907.8584

Fixed modifications: Carbamidomethyl (C) (apply to specified residues or termini only)

Ions Score: 44 Expect: 6.3e-005

 Matches : 20/154 fragment ions using 30 most intense peaks ([help](#))

| #  | b         | b <sup>++</sup> | b <sup>*</sup> | b <sup>*++</sup> | b <sup>0</sup> | b <sup>0++</sup> | Seq. | y         | y <sup>++</sup> | y <sup>*</sup> | y <sup>*++</sup> | y <sup>0</sup> | y <sup>0++</sup> | #  |
|----|-----------|-----------------|----------------|------------------|----------------|------------------|------|-----------|-----------------|----------------|------------------|----------------|------------------|----|
| 1  | 72.0444   | 36.5258         |                |                  |                |                  | A    |           |                 |                |                  |                |                  | 16 |
| 2  | 169.0972  | 85.0522         |                |                  |                |                  | P    | 1837.8286 | 919.4179        | 1820.8021      | 910.9047         | 1819.8180      | 910.4127         | 15 |
| 3  | 329.1278  | 165.0675        |                |                  |                |                  | C    | 1740.7758 | 870.8916        | 1723.7493      | 862.3783         | 1722.7653      | 861.8863         | 14 |
| 4  | 386.1493  | 193.5783        |                |                  |                |                  | G    | 1580.7452 | 790.8762        | 1563.7186      | 782.3630         | 1562.7346      | 781.8710         | 13 |
| 5  | 515.1919  | 258.0996        |                |                  | 497.1813       | 249.0943         | E    | 1523.7237 | 762.3655        | 1506.6972      | 753.8522         | 1505.7132      | 753.3602         | 12 |
| 6  | 572.2133  | 286.6103        |                |                  | 554.2028       | 277.6050         | G    | 1394.6811 | 697.8442        | 1377.6546      | 689.3309         | 1376.6706      | 688.8389         | 11 |
| 7  | 673.2610  | 337.1341        |                |                  | 655.2504       | 328.1289         | T    | 1337.6597 | 669.3335        | 1320.6331      | 660.8202         | 1319.6491      | 660.3282         | 10 |
| 8  | 787.3039  | 394.1556        | 770.2774       | 385.6423         | 769.2934       | 385.1503         | N    | 1236.6120 | 618.8096        | 1219.5854      | 610.2964         | 1218.6014      | 609.8044         | 9  |
| 9  | 888.3516  | 444.6794        | 871.3251       | 436.1662         | 870.3410       | 435.6742         | T    | 1122.5691 | 561.7882        | 1105.5425      | 553.2749         | 1104.5585      | 552.7829         | 8  |
| 10 | 1074.4309 | 537.7191        | 1057.4044      | 529.2058         | 1056.4204      | 528.7138         | W    | 1021.5214 | 511.2643        | 1004.4948      | 502.7511         | 1003.5108      | 502.2591         | 7  |
| 11 | 1189.4579 | 595.2326        | 1172.4313      | 586.7193         | 1171.4473      | 586.2273         | D    | 835.4421  | 418.2247        | 818.4155       | 409.7114         | 817.4315       | 409.2194         | 6  |
| 12 | 1345.5590 | 673.2831        | 1328.5324      | 664.7699         | 1327.5484      | 664.2778         | R    | 720.4151  | 360.7112        | 703.3886       | 352.1979         | 702.4046       | 351.7059         | 5  |
| 13 | 1492.6274 | 746.8173        | 1475.6008      | 738.3041         | 1474.6168      | 737.8121         | F    | 564.3140  | 282.6606        | 547.2875       | 274.1474         | 546.3035       | 273.6554         | 4  |
| 14 | 1621.6700 | 811.3386        | 1604.6434      | 802.8254         | 1603.6594      | 802.3333         | E    | 417.2456  | 209.1264        | 400.2191       | 200.6132         | 399.2350       | 200.1212         | 3  |
| 15 | 1734.7540 | 867.8807        | 1717.7275      | 859.3674         | 1716.7435      | 858.8754         | L    | 288.2030  | 144.6051        | 271.1765       | 136.0919         |                |                  | 2  |
| 16 |           |                 |                |                  |                |                  | R    | 175.1190  | 88.0631         | 158.0924       | 79.5498          |                |                  | 1  |

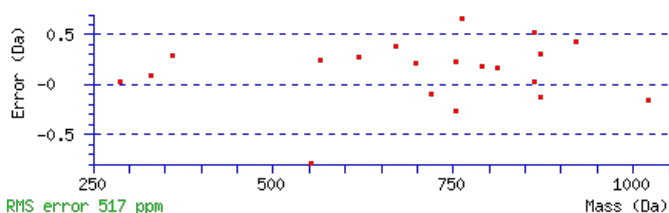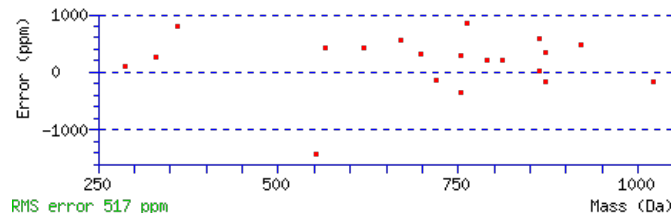

## AT3G47370.1

NCBI BLAST search of [APCGEGTNTWDRFELR](#)

(Parameters: blastp, nr protein database, expect=20000, no filter, PAM30)

Other BLAST [web gateways](#)

### All matches to this query

| Score | Mr(calc)  | Delta   | Sequence                         |
|-------|-----------|---------|----------------------------------|
| 43.9  | 1907.8584 | -0.0009 | <a href="#">APCGEGTNTWDRFELR</a> |

Mascot: <http://www.matrixscience.com/>

**Peptide View**MS/MS Fragmentation of **WFVQAELVNGR**

Found in **AT3G47470.1** in **TAIR\_Arabidopsis**, Symbols: CAB4, LHCA4 | LHCA4 (Photosystem I light harvesting complex gene 4); chlorophyll binding | chr3:17504607-17505758 REVERSE

Match to Query 5030: 1334.632842 from(668.323697,2+) index(7258)

Title: Elution from: 64.889 to 64.889 scan no 9426 cid35.00 polarity:+

Data file 0-3\_1.mgf

Click mouse within plot area to zoom in by factor of two about that point

Or,   to  Da

Label all possible matches  Label matches used for scoring

Show Y-axis

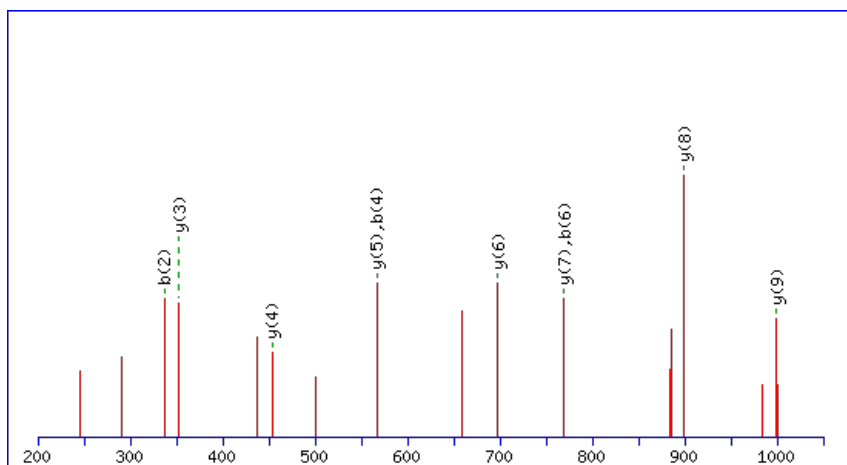

**Monoisotopic mass of neutral peptide Mr(calc)**: 1334.6325

**Fixed modifications**: Carbamidomethyl (C) (apply to specified residues or termini only)

**Ions Score**: 72 **Expect**: 6.6e-007

**Matches**: 10/94 fragment ions using 8 most intense peaks ([help](#))

| #  | b               | b <sup>++</sup> | b*        | b <sup>*++</sup> | b <sup>0</sup> | b <sup>0++</sup> | Seq. | y               | y <sup>++</sup> | y*        | y <sup>*++</sup> | y <sup>0</sup> | y <sup>0++</sup> | #  |
|----|-----------------|-----------------|-----------|------------------|----------------|------------------|------|-----------------|-----------------|-----------|------------------|----------------|------------------|----|
| 1  | 189.0807        | 95.0440         |           |                  |                |                  | W    |                 |                 |           |                  |                |                  | 11 |
| 2  | <b>337.1461</b> | 169.0767        |           |                  |                |                  | F    | 1147.5665       | 574.2869        | 1129.5429 | 565.2751         | 1129.5559      | 565.2816         | 10 |
| 3  | 437.2116        | 219.1094        |           |                  |                |                  | V    | <b>999.5010</b> | 500.2541        | 981.4774  | 491.2424         | 981.4904       | 491.2489         | 9  |
| 4  | <b>567.2642</b> | 284.1357        | 549.2406  | 275.1239         |                |                  | Q    | <b>899.4356</b> | 450.2214        | 881.4120  | 441.2096         | 881.4250       | 441.2161         | 8  |
| 5  | 639.2984        | 320.1528        | 621.2748  | 311.1410         |                |                  | A    | <b>769.3829</b> | 385.1951        | 751.3593  | 376.1833         | 751.3723       | 376.1898         | 7  |
| 6  | <b>769.3380</b> | 385.1726        | 751.3144  | 376.1608         | 751.3274       | 376.1673         | E    | <b>697.3488</b> | 349.1780        | 679.3252  | 340.1662         | 679.3382       | 340.1727         | 6  |
| 7  | 883.4191        | 442.2132        | 865.3955  | 433.2014         | 865.4085       | 433.2079         | L    | <b>567.3091</b> | 284.1582        | 549.2856  | 275.1464         |                |                  | 5  |
| 8  | 983.4845        | 492.2459        | 965.4609  | 483.2341         | 965.4740       | 483.2406         | V    | <b>453.2280</b> | 227.1177        | 435.2045  | 218.1059         |                |                  | 4  |
| 9  | 1099.5215       | 550.2644        | 1081.4979 | 541.2526         | 1081.5110      | 541.2591         | N    | <b>353.1626</b> | 177.0849        | 335.1390  | 168.0731         |                |                  | 3  |
| 10 | 1157.5400       | 579.2737        | 1139.5164 | 570.2619         | 1139.5295      | 570.2684         | G    | 237.1256        | 119.0664        | 219.1020  | 110.0546         |                |                  | 2  |
| 11 |                 |                 |           |                  |                |                  | R    | 179.1071        | 90.0572         | 161.0835  | 81.0454          |                |                  | 1  |

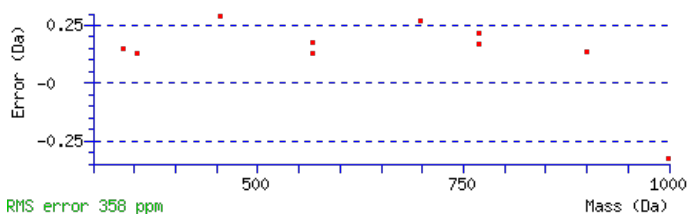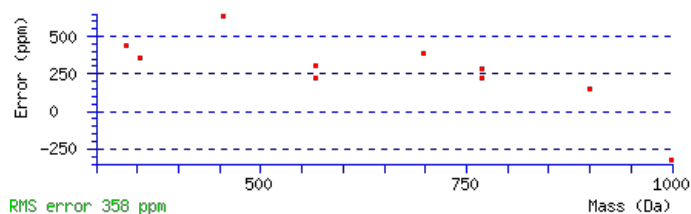

NCBI **BLAST** search of **WFVQAELVNGR**

(Parameters: blastp, nr protein database, expect=20000, no filter, PAM30)

Other BLAST [web gateways](#)

**All matches to this query**

## AT3G47470.1

| Score | Mr(calc)  | Delta   | Sequence                      |
|-------|-----------|---------|-------------------------------|
| 71.9  | 1334.6325 | 0.0003  | <a href="#">WFVQAELVNGR</a>   |
| 26.6  | 1334.6310 | 0.0018  | <a href="#">CALSVKTIDDAK</a>  |
| 11.5  | 1334.6310 | 0.0018  | <a href="#">MGKVSPKDLDSK</a>  |
| 2.7   | 1334.6310 | 0.0018  | <a href="#">VCDADISTKLAK</a>  |
| 2.6   | 1334.6337 | -0.0008 | <a href="#">MAARETGALQAAK</a> |
| 1.0   | 1334.6337 | -0.0009 | <a href="#">ARISSDPLMVGR</a>  |
| 0.7   | 1334.6337 | -0.0009 | <a href="#">RAIEENCLGKK</a>   |
| 0.5   | 1334.6337 | -0.0009 | <a href="#">RRDSLDPSTMIK</a>  |
| 0.2   | 1334.6337 | -0.0008 | <a href="#">CNGADLLTRVAK</a>  |

Mascot: <http://www.matrixscience.com/>

**Peptide View**MS/MS Fragmentation of **IQNAGTEVVDAK**Found in **AT3G47520.1** in **TAIR\_Arabidopsis**, Symbols: MDH | MDH (MALATE DEHYDROGENASE); malate dehydrogenase | chr3:17524642-17525853 FORWARD

Match to Query 4691: 1243.640252 from(622.827402,2+) index(1390)

Title: Elution from: 19.316 to 19.316 scan no 1898 cid35.00 polarity:+

Data file D6h-1\_1.mgf

Click mouse within plot area to zoom in by factor of two about that point

Or,   to  Da Label all possible matches  Label matches used for scoring Show Y-axis 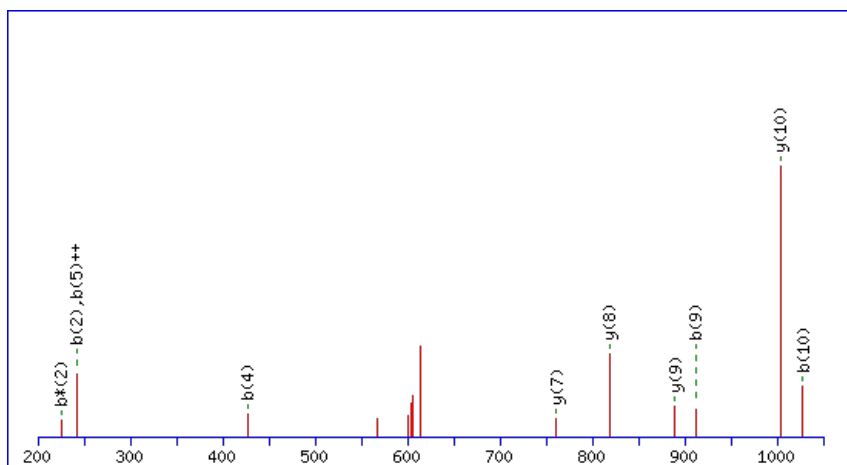Monoisotopic mass of neutral peptide  $M_r(\text{calc})$ : 1243.6408

Fixed modifications: Carbamidomethyl (C) (apply to specified residues or termini only)

Ions Score: 50 Expect: 4e-005

Matches : 10/116 fragment ions using 13 most intense peaks ([help](#))

| #  | b                | b <sup>++</sup> | b*              | b <sup>*++</sup> | b <sup>0</sup> | b <sup>0++</sup> | Seq. | y                | y <sup>++</sup> | y*        | y <sup>*++</sup> | y <sup>0</sup> | y <sup>0++</sup> | #  |
|----|------------------|-----------------|-----------------|------------------|----------------|------------------|------|------------------|-----------------|-----------|------------------|----------------|------------------|----|
| 1  | 114.0913         | 57.5493         |                 |                  |                |                  | I    |                  |                 |           |                  |                |                  | 12 |
| 2  | <b>242.1499</b>  | 121.5786        | <b>225.1234</b> | 113.0653         |                |                  | Q    | 1131.5640        | 566.2857        | 1114.5375 | 557.7724         | 1113.5535      | 557.2804         | 11 |
| 3  | 356.1928         | 178.6001        | 339.1663        | 170.0868         |                |                  | N    | <b>1003.5055</b> | 502.2564        | 986.4789  | 493.7431         | 985.4949       | 493.2511         | 10 |
| 4  | <b>427.2300</b>  | 214.1186        | 410.2034        | 205.6053         |                |                  | A    | <b>889.4625</b>  | 445.2349        | 872.4360  | 436.7216         | 871.4520       | 436.2296         | 9  |
| 5  | 484.2514         | <b>242.6293</b> | 467.2249        | 234.1161         |                |                  | G    | <b>818.4254</b>  | 409.7164        | 801.3989  | 401.2031         | 800.4149       | 400.7111         | 8  |
| 6  | 585.2991         | 293.1532        | 568.2726        | 284.6399         | 567.2885       | 284.1479         | T    | <b>761.4040</b>  | 381.2056        | 744.3774  | 372.6923         | 743.3934       | 372.2003         | 7  |
| 7  | 714.3417         | 357.6745        | 697.3151        | 349.1612         | 696.3311       | 348.6692         | E    | 660.3563         | 330.6818        | 643.3297  | 322.1685         | 642.3457       | 321.6765         | 6  |
| 8  | 813.4101         | 407.2087        | 796.3836        | 398.6954         | 795.3995       | 398.2034         | V    | 531.3137         | 266.1605        | 514.2871  | 257.6472         | 513.3031       | 257.1552         | 5  |
| 9  | <b>912.4785</b>  | 456.7429        | 895.4520        | 448.2296         | 894.4680       | 447.7376         | V    | 432.2453         | 216.6263        | 415.2187  | 208.1130         | 414.2347       | 207.6210         | 4  |
| 10 | <b>1027.5055</b> | 514.2564        | 1010.4789       | 505.7431         | 1009.4949      | 505.2511         | D    | 333.1769         | 167.0921        | 316.1503  | 158.5788         | 315.1663       | 158.0868         | 3  |
| 11 | 1098.5426        | 549.7749        | 1081.5160       | 541.2617         | 1080.5320      | 540.7696         | A    | 218.1499         | 109.5786        | 201.1234  | 101.0653         |                |                  | 2  |
| 12 |                  |                 |                 |                  |                |                  | K    | 147.1128         | 74.0600         | 130.0863  | 65.5468          |                |                  | 1  |

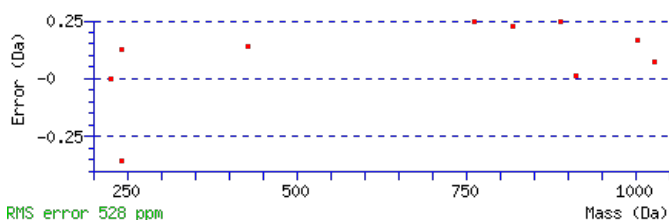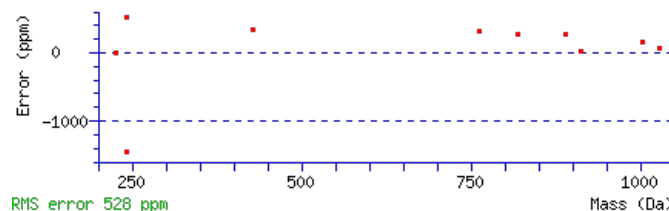NCBI BLAST search of **IQNAGTEVVDAK**

(Parameters: blastp, nr protein database, expect=20000, no filter, PAM30)

Other BLAST [web gateways](#)



AT3G47520.1

All matches to this query

| Score | Mr(calc)  | Delta   | Sequence                     |
|-------|-----------|---------|------------------------------|
| 50.3  | 1243.6408 | -0.0006 | <a href="#">IQNAGTEVVDK</a>  |
| 14.7  | 1243.6408 | -0.0006 | <a href="#">IQNGGTEVVEAK</a> |
| 13.1  | 1243.6383 | 0.0019  | <a href="#">KLNKCYGFSK</a>   |
| 11.6  | 1243.6408 | -0.0006 | <a href="#">IQELETQLDR</a>   |
| 4.2   | 1243.6383 | 0.0020  | <a href="#">QLKNWMAPEK</a>   |
| 0.7   | 1243.6408 | -0.0006 | <a href="#">QELITAPTESR</a>  |
| 0.7   | 1243.6422 | -0.0019 | <a href="#">VVHFNRTDIR</a>   |
| 0.1   | 1243.6383 | 0.0019  | <a href="#">FHPSMNLIAK</a>   |

Mascot: <http://www.matrixscience.com/>

## Peptide View

MS/MS Fragmentation of **GGGVNLIDHFNGQFK**

Found in **AT3G47650.1** in **TAIR\_Arabidopsis**, Symbols: | bundle-sheath defective protein 2 family / bsd2 family | chr3:17580561-17581247  
FORWARD

Match to Query 6772: 1622.732652 from(812.373602,2+) index(5850)

Title: Elution from: 54.405 to 54.405 scan no 7626 cid35.00 polarity:+

Data file D1d-1\_3.mgf

Click mouse within plot area to zoom in by factor of two about that point

Or,  to  Da

Label all possible matches  Label matches used for scoring

Show Y-axis

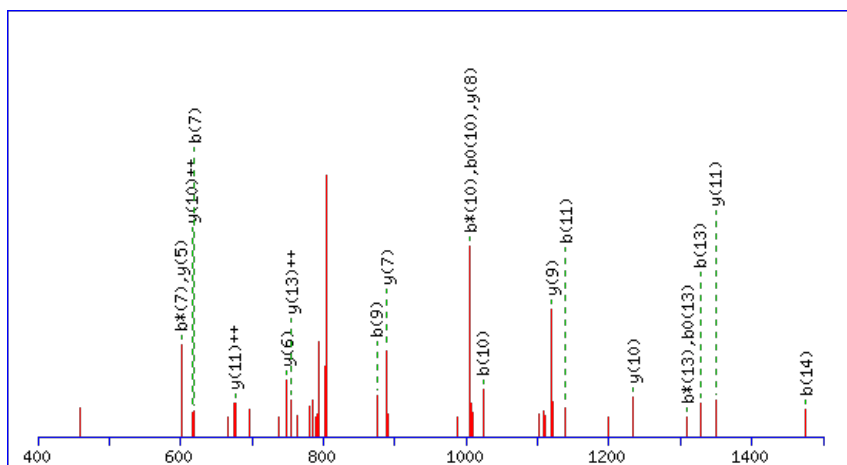

Monoisotopic mass of neutral peptide  $M_r(\text{calc})$ : 1622.7327

Fixed modifications: Carbamidomethyl (C) (apply to specified residues or termini only)

Ions Score: 65 Expect: 2.6e-006

Matches : 21/132 fragment ions using 25 most intense peaks ([help](#))

| #  | b         | b <sup>++</sup> | b*        | b <sup>*++</sup> | b <sup>0</sup> | b <sup>0++</sup> | Seq. | y         | y <sup>++</sup> | y*        | y <sup>*++</sup> | y <sup>0</sup> | y <sup>0++</sup> | #  |
|----|-----------|-----------------|-----------|------------------|----------------|------------------|------|-----------|-----------------|-----------|------------------|----------------|------------------|----|
| 1  | 59.0258   | 30.0165         |           |                  |                |                  | G    |           |                 |           |                  |                |                  | 15 |
| 2  | 117.0443  | 59.0258         |           |                  |                |                  | G    | 1565.7216 | 783.3644        | 1547.6980 | 774.3526         | 1547.7110      | 774.3591         | 14 |
| 3  | 175.0628  | 88.0350         |           |                  |                |                  | G    | 1507.7031 | 754.3552        | 1489.6795 | 745.3434         | 1489.6925      | 745.3499         | 13 |
| 4  | 275.1282  | 138.0677        |           |                  |                |                  | V    | 1449.6846 | 725.3459        | 1431.6610 | 716.3341         | 1431.6740      | 716.3406         | 12 |
| 5  | 391.1652  | 196.0862        | 373.1416  | 187.0745         |                |                  | N    | 1349.6191 | 675.3132        | 1331.5955 | 666.3014         | 1331.6085      | 666.3079         | 11 |
| 6  | 505.2463  | 253.1268        | 487.2227  | 244.1150         |                |                  | L    | 1233.5821 | 617.2947        | 1215.5585 | 608.2829         | 1215.5715      | 608.2894         | 10 |
| 7  | 619.3274  | 310.1673        | 601.3038  | 301.1556         |                |                  | I    | 1119.5010 | 560.2541        | 1101.4774 | 551.2424         | 1101.4904      | 551.2489         | 9  |
| 8  | 735.3514  | 368.1793        | 717.3278  | 359.1675         | 717.3408       | 359.1741         | D    | 1005.4199 | 503.2136        | 987.3963  | 494.2018         | 987.4093       | 494.2083         | 8  |
| 9  | 875.4014  | 438.2043        | 857.3778  | 429.1926         | 857.3908       | 429.1991         | H    | 889.3959  | 445.2016        | 871.3723  | 436.1898         |                |                  | 7  |
| 10 | 1023.4669 | 512.2371        | 1005.4433 | 503.2253         | 1005.4563      | 503.2318         | F    | 749.3459  | 375.1766        | 731.3223  | 366.1648         |                |                  | 6  |
| 11 | 1139.5039 | 570.2556        | 1121.4803 | 561.2438         | 1121.4933      | 561.2503         | N    | 601.2805  | 301.1439        | 583.2569  | 292.1321         |                |                  | 5  |
| 12 | 1197.5224 | 599.2648        | 1179.4988 | 590.2530         | 1179.5118      | 590.2595         | G    | 485.2435  | 243.1254        | 467.2199  | 234.1136         |                |                  | 4  |
| 13 | 1327.5750 | 664.2911        | 1309.5514 | 655.2793         | 1309.5644      | 655.2859         | Q    | 427.2250  | 214.1161        | 409.2014  | 205.1043         |                |                  | 3  |
| 14 | 1475.6405 | 738.3239        | 1457.6169 | 729.3121         | 1457.6299      | 729.3186         | F    | 297.1723  | 149.0898        | 279.1487  | 140.0780         |                |                  | 2  |
| 15 |           |                 |           |                  |                |                  | K    | 149.1069  | 75.0571         | 131.0833  | 66.0453          |                |                  | 1  |

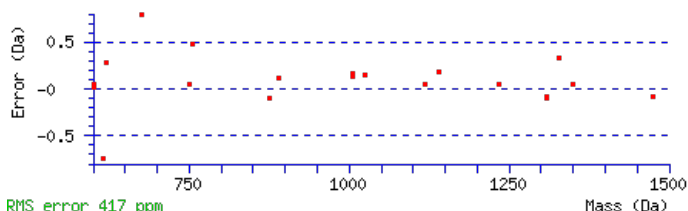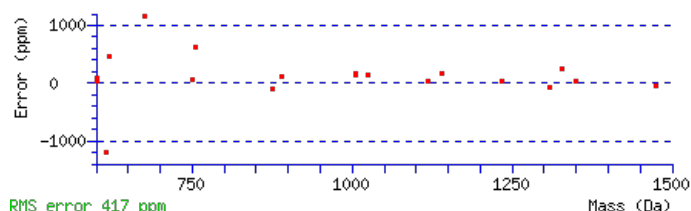

## AT3G47650.1

NCBI **BLAST** search of [GGGVNLIIDHFNGQFK](#)

(Parameters: blastp, nr protein database, expect=20000, no filter, PAM30)

Other BLAST [web gateways](#)

### All matches to this query

| Score | Mr(calc)  | Delta   | Sequence                         |
|-------|-----------|---------|----------------------------------|
| 65.0  | 1622.7327 | -0.0001 | <a href="#">GGGVNLIIDHFNGQFK</a> |
| 9.5   | 1622.7314 | 0.0013  | <a href="#">MNKFRGLFVGNMR</a>    |
| 9.3   | 1622.7278 | 0.0048  | <a href="#">ARATIPGALFDDDDK</a>  |
| 8.3   | 1622.7305 | 0.0021  | <a href="#">HSKVREDDLYSPR</a>    |
| 3.6   | 1622.7361 | -0.0035 | <a href="#">YKVGDMGVKHAEPK</a>   |
| 2.8   | 1622.7280 | 0.0046  | <a href="#">LCHSIYQWRNPK</a>     |
| 0.8   | 1622.7361 | -0.0035 | <a href="#">NEIPKEGFTRHMK</a>    |
| 0.6   | 1622.7339 | -0.0013 | <a href="#">LRSHVGSDKIDCSK</a>   |

Mascot: <http://www.matrixscience.com/>

**Peptide View**MS/MS Fragmentation of **TAVVTEQVTGR**Found in **AT3G47800.1** in **TAIR\_Arabidopsis**, Symbols: | aldose 1-epimerase family protein | chr3:17645956-17647983 FORWARD

Match to Query 3555: 1174.576486 from(588,295519,2+) index(1203)

Title: Elution from: 21.026 to 21.026 scan no 1782 cid35.00 polarity:+

Data file D1d-1\_1.mgf

Click mouse within plot area to zoom in by factor of two about that point

Or,   to  Da Label all possible matches  Label matches used for scoring Show Y-axis 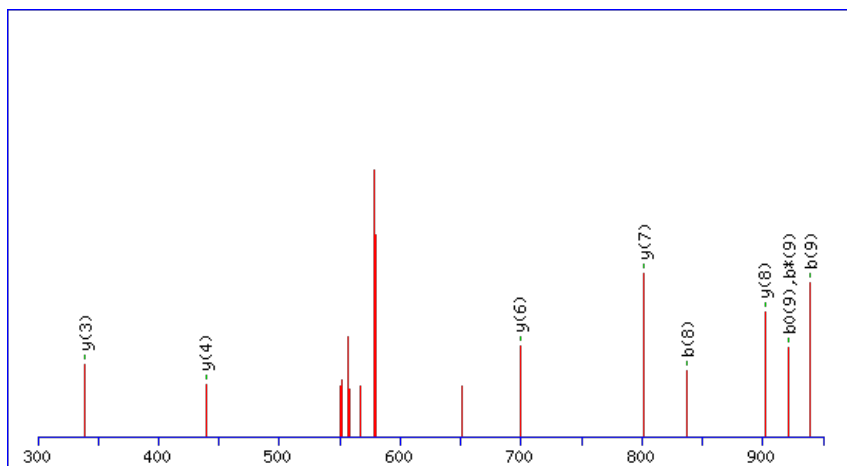Monoisotopic mass of neutral peptide **Mr(calc)**: 1174.5752**Fixed modifications**: Carbamidomethyl (C) (apply to specified residues or termini only)**Ions Score**: 46 **Expect**: 0.00032**Matches**: 9/104 fragment ions using 11 most intense peaks ([help](#))

| #  | b               | b <sup>++</sup> | b <sup>*</sup>  | b <sup>*++</sup> | b <sup>0</sup>  | b <sup>0++</sup> | Seq. | y               | y <sup>++</sup> | y <sup>*</sup> | y <sup>*++</sup> | y <sup>0</sup> | y <sup>0++</sup> | #  |
|----|-----------------|-----------------|-----------------|------------------|-----------------|------------------|------|-----------------|-----------------|----------------|------------------|----------------|------------------|----|
| 1  | 103.0520        | 52.0296         |                 |                  | 85.0414         | 43.0244          | T    |                 |                 |                |                  |                |                  | 11 |
| 2  | 175.0861        | 88.0467         |                 |                  | 157.0756        | 79.0414          | A    | 1073.5378       | 537.2725        | 1055.5142      | 528.2607         | 1055.5272      | 528.2672         | 10 |
| 3  | 275.1516        | 138.0794        |                 |                  | 257.1410        | 129.0741         | V    | 1001.5036       | 501.2555        | 983.4801       | 492.2437         | 983.4931       | 492.2502         | 9  |
| 4  | 375.2170        | 188.1122        |                 |                  | 357.2065        | 179.1069         | V    | <b>901.4382</b> | 451.2227        | 883.4146       | 442.2109         | 883.4276       | 442.2175         | 8  |
| 5  | 477.2617        | 239.1345        |                 |                  | 459.2512        | 230.1292         | T    | <b>801.3727</b> | 401.1900        | 783.3492       | 392.1782         | 783.3622       | 392.1847         | 7  |
| 6  | 607.3014        | 304.1543        |                 |                  | 589.2908        | 295.1490         | E    | <b>699.3280</b> | 350.1677        | 681.3044       | 341.1559         | 681.3175       | 341.1624         | 6  |
| 7  | 737.3540        | 369.1807        | 719.3304        | 360.1689         | 719.3435        | 360.1754         | Q    | 569.2884        | 285.1478        | 551.2648       | 276.1360         | 551.2778       | 276.1426         | 5  |
| 8  | <b>837.4195</b> | 419.2134        | 819.3959        | 410.2016         | 819.4089        | 410.2081         | V    | <b>439.2358</b> | 220.1215        | 421.2122       | 211.1097         | 421.2252       | 211.1162         | 4  |
| 9  | <b>939.4642</b> | 470.2357        | <b>921.4406</b> | 461.2239         | <b>921.4536</b> | 461.2304         | T    | <b>339.1703</b> | 170.0888        | 321.1467       | 161.0770         | 321.1597       | 161.0835         | 3  |
| 10 | 997.4827        | 499.2450        | 979.4591        | 490.2332         | 979.4721        | 490.2397         | G    | 237.1256        | 119.0664        | 219.1020       | 110.0546         |                |                  | 2  |
| 11 |                 |                 |                 |                  |                 |                  | R    | 179.1071        | 90.0572         | 161.0835       | 81.0454          |                |                  | 1  |

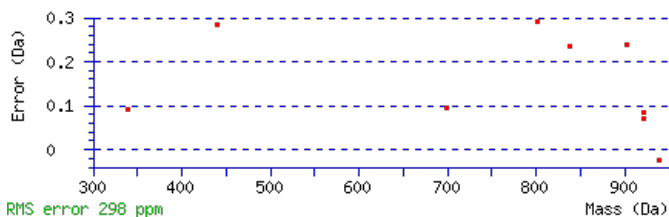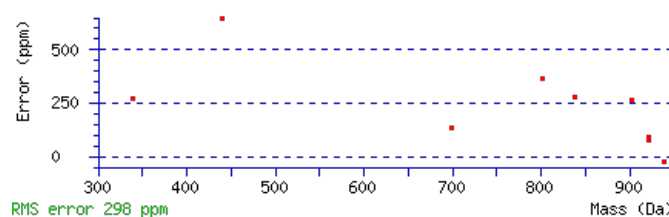NCBI **BLAST** search of **TAVVTEQVTGR**

(Parameters: blastp, nr protein database, expect=20000, no filter, PAM30)

Other BLAST [web gateways](#)**All matches to this query**

## AT3G47800.1

| Score | Mr(calc)  | Delta   | Sequence                     |
|-------|-----------|---------|------------------------------|
| 45.8  | 1174.5752 | 0.0013  | <a href="#">TAVVTEQVTGR</a>  |
| 14.7  | 1174.5752 | 0.0013  | <a href="#">VSLATEKQER</a>   |
| 12.2  | 1174.5752 | 0.0013  | <a href="#">GITDTGLASIGR</a> |
| 10.9  | 1174.5775 | -0.0010 | <a href="#">VYTAAHITASK</a>  |
| 2.8   | 1174.5775 | -0.0010 | <a href="#">GFAVPKEAQSK</a>  |
| 2.7   | 1174.5779 | -0.0014 | <a href="#">NSEIGNLVRR</a>   |
| 2.5   | 1174.5752 | 0.0013  | <a href="#">EIAGTERKEK</a>   |
| 2.3   | 1174.5782 | -0.0017 | <a href="#">LVTMEDLSK</a>    |
| 2.1   | 1174.5779 | -0.0014 | <a href="#">IEERAQGRAK</a>   |
| 2.1   | 1174.5752 | 0.0013  | <a href="#">KIKNGGETDAK</a>  |

Mascot: <http://www.matrixscience.com/>

**Peptide View**MS/MS Fragmentation of **YGLAAGVFTK**

Found in **AT3G48000.1** in **TAIR\_Arabidopsis**, Symbols: ALDH2, ALDH2B4 | ALDH2B4 (ALDEHYDE DEHYDROGENASE 2); 3-chloroallyl aldehyde dehydrogenase/ aldehyde dehydrogenase (NAD) | chr3:17728067-17730828 REVERSE

Match to Query 2718: 1036.522064 from(519.268308,2+) index(5104)

Title: Elution from: 45.935 to 45.935 scan no 6466 cid35.00 polarity:+

Data file D6h-3\_2.mgf

Click mouse within plot area to zoom in by factor of two about that point

Or,   to  Da

Label all possible matches  Label matches used for scoring

Show Y-axis

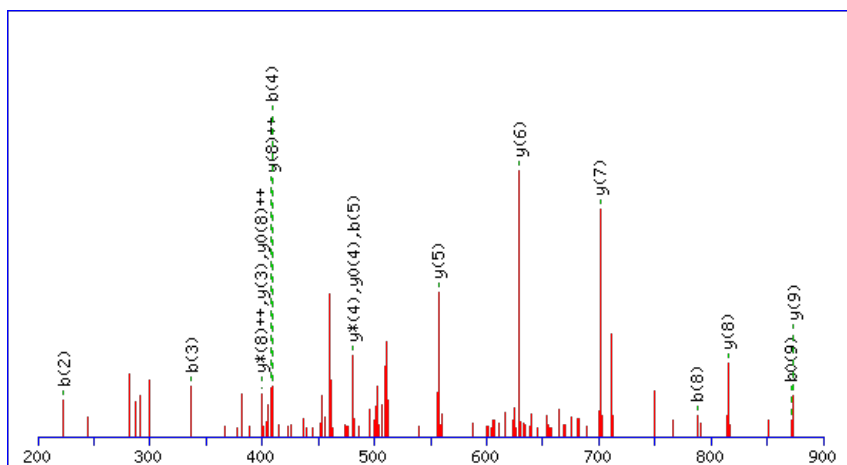

Monoisotopic mass of neutral peptide  $M_r(\text{calc})$ : 1036.5219

Fixed modifications: Carbamidomethyl (C) (apply to specified residues or termini only)

Ions Score: 40 Expect: 0.00058

Matches : 17/72 fragment ions using 28 most intense peaks ([help](#))

| #  | b               | b <sup>++</sup> | b <sup>0</sup>  | b <sup>0++</sup> | Seq. | y               | y <sup>++</sup> | y*              | y <sup>*++</sup> | y <sup>0</sup>  | y <sup>0++</sup> | #  |
|----|-----------------|-----------------|-----------------|------------------|------|-----------------|-----------------|-----------------|------------------|-----------------|------------------|----|
| 1  | 165.0676        | 83.0375         |                 |                  | Y    |                 |                 |                 |                  |                 |                  | 10 |
| 2  | <b>223.0861</b> | 112.0467        |                 |                  | G    | <b>873.4689</b> | 437.2381        | 855.4453        | 428.2263         | 855.4583        | 428.2328         | 9  |
| 3  | <b>337.1672</b> | 169.0873        |                 |                  | L    | <b>815.4504</b> | <b>408.2288</b> | 797.4268        | <b>399.2170</b>  | 797.4398        | <b>399.2235</b>  | 8  |
| 4  | <b>409.2014</b> | 205.1043        |                 |                  | A    | <b>701.3693</b> | 351.1883        | 683.3457        | 342.1765         | 683.3587        | 342.1830         | 7  |
| 5  | <b>481.2355</b> | 241.1214        |                 |                  | A    | <b>629.3351</b> | 315.1712        | 611.3115        | 306.1594         | 611.3246        | 306.1659         | 6  |
| 6  | 539.2540        | 270.1307        |                 |                  | G    | <b>557.3010</b> | 279.1541        | 539.2774        | 270.1423         | 539.2904        | 270.1488         | 5  |
| 7  | 639.3195        | 320.1634        |                 |                  | V    | 499.2825        | 250.1449        | <b>481.2589</b> | 241.1331         | <b>481.2719</b> | 241.1396         | 4  |
| 8  | <b>787.3849</b> | 394.1961        |                 |                  | F    | <b>399.2170</b> | 200.1122        | 381.1935        | 191.1004         | 381.2065        | 191.1069         | 3  |
| 9  | 889.4296        | 445.2185        | <b>871.4191</b> | 436.2132         | T    | 251.1516        | 126.0794        | 233.1280        | 117.0676         | 233.1410        | 117.0741         | 2  |
| 10 |                 |                 |                 |                  | K    | 149.1069        | 75.0571         | 131.0833        | 66.0453          |                 |                  | 1  |

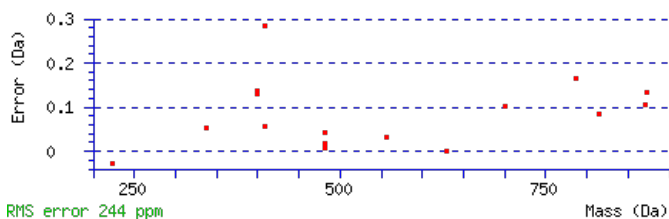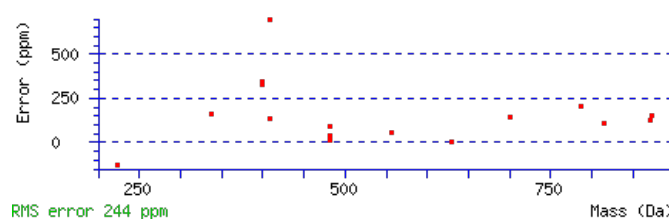NCBI BLAST search of **YGLAAGVFTK**

(Parameters: blastp, nr protein database, expect=20000, no filter, PAM30)

Other BLAST [web gateways](#)

All matches to this query

**AT3G48000.1**

| <b>Score</b> | <b>Mr(calc)</b> | <b>Delta</b> | <b>Sequence</b>            |
|--------------|-----------------|--------------|----------------------------|
| 40.1         | 1036.5219       | 0.0001       | <a href="#">YGLAAGVFTK</a> |
| 21.8         | 1036.5224       | -0.0003      | <a href="#">YLKARDTR</a>   |
| 1.7          | 1036.5242       | -0.0021      | <a href="#">WFAYLLSK</a>   |
| 1.5          | 1036.5231       | -0.0010      | <a href="#">TTVSSMKKK</a>  |

**Mascot:** <http://www.matrixscience.com/>

**Peptide View**MS/MS Fragmentation of **ILNDSDSGELK**

Found in **AT3G48050.1** in **TAIR\_Arabidopsis**, Symbols: | bromo-adjacent homology (BAH) domain-containing protein | chr3:17745255-17750397  
REVERSE

Match to Query 4286: 1202.547392 from(602.280972,2+) index(3086)

Title: Elution from: 29.661 to 29.661 scan no 3796 cid35.00 polarity:+

Data file D1d-3\_2.mgf

Click mouse within plot area to zoom in by factor of two about that point

Or,   to  Da

Label all possible matches  Label matches used for scoring

Show Y-axis

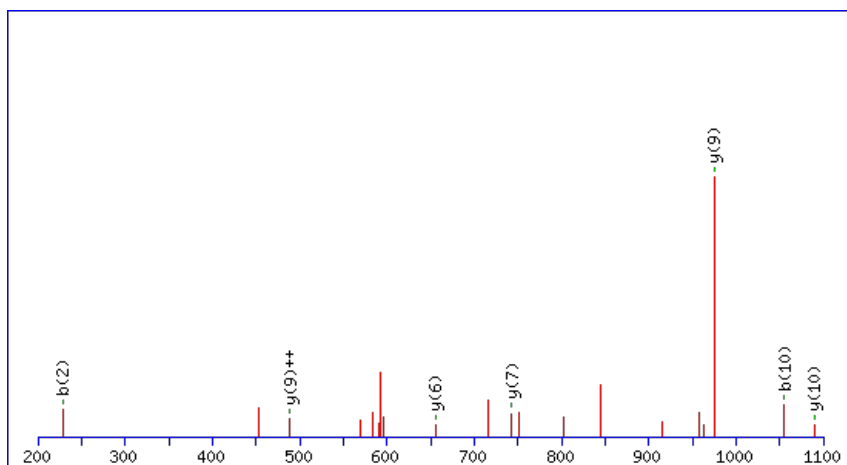

**Monoisotopic mass of neutral peptide Mr(calc):** 1202.5441

**Fixed modifications:** Carbamidomethyl (C) (apply to specified residues or termini only)

**Ions Score:** 23 **Expect:** 0.039

**Matches:** 7/106 fragment ions using 15 most intense peaks ([help](#))

| #  | b                | b <sup>++</sup> | b <sup>*</sup> | b <sup>*++</sup> | b <sup>0</sup> | b <sup>0++</sup> | Seq. | y                | y <sup>++</sup> | y <sup>*</sup> | y <sup>*++</sup> | y <sup>0</sup> | y <sup>0++</sup> | #  |
|----|------------------|-----------------|----------------|------------------|----------------|------------------|------|------------------|-----------------|----------------|------------------|----------------|------------------|----|
| 1  | 115.0884         | 58.0478         |                |                  |                |                  | I    |                  |                 |                |                  |                |                  | 11 |
| 2  | <b>229.1695</b>  | 115.0884        |                |                  |                |                  | L    | <b>1089.4703</b> | 545.2388        | 1071.4467      | 536.2270         | 1071.4597      | 536.2335         | 10 |
| 3  | 345.2065         | 173.1069        | 327.1829       | 164.0951         |                |                  | N    | <b>975.3892</b>  | <b>488.1982</b> | 957.3656       | 479.1864         | 957.3786       | 479.1929         | 9  |
| 4  | 461.2304         | 231.1189        | 443.2069       | 222.1071         | 443.2199       | 222.1136         | D    | 859.3522         | 430.1797        | 841.3286       | 421.1679         | 841.3416       | 421.1744         | 8  |
| 5  | 549.2595         | 275.1334        | 531.2359       | 266.1216         | 531.2489       | 266.1281         | S    | <b>743.3282</b>  | 372.1677        | 725.3046       | 363.1559         | 725.3176       | 363.1625         | 7  |
| 6  | 665.2835         | 333.1454        | 647.2599       | 324.1336         | 647.2729       | 324.1401         | D    | <b>655.2991</b>  | 328.1532        | 637.2756       | 319.1414         | 637.2886       | 319.1479         | 6  |
| 7  | 753.3126         | 377.1599        | 735.2890       | 368.1481         | 735.3020       | 368.1546         | S    | 539.2752         | 270.1412        | 521.2516       | 261.1294         | 521.2646       | 261.1359         | 5  |
| 8  | 811.3311         | 406.1692        | 793.3075       | 397.1574         | 793.3205       | 397.1639         | G    | 451.2461         | 226.1267        | 433.2225       | 217.1149         | 433.2355       | 217.1214         | 4  |
| 9  | 941.3707         | 471.1890        | 923.3471       | 462.1772         | 923.3601       | 462.1837         | E    | 393.2276         | 197.1174        | 375.2040       | 188.1056         | 375.2170       | 188.1122         | 3  |
| 10 | <b>1055.4518</b> | 528.2295        | 1037.4282      | 519.2177         | 1037.4412      | 519.2242         | L    | 263.1880         | 132.0976        | 245.1644       | 123.0858         |                |                  | 2  |
| 11 |                  |                 |                |                  |                |                  | K    | 149.1069         | 75.0571         | 131.0833       | 66.0453          |                |                  | 1  |

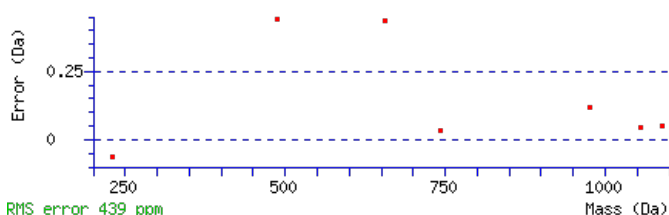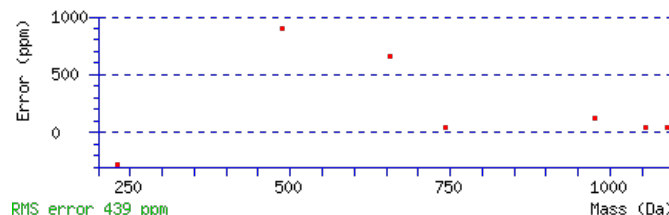

NCBI **BLAST** search of **ILNDSDSGELK**

(Parameters: blastp, nr protein database, expect=20000, no filter, PAM30)

Other BLAST [web gateways](#)

**All matches to this query**



## AT3G48050.1

| Score | Mr(calc)  | Delta   | Sequence                    |
|-------|-----------|---------|-----------------------------|
| 22.9  | 1202.5441 | 0.0033  | <a href="#">ILNDSDSGELK</a> |
| 8.7   | 1202.5463 | 0.0011  | <a href="#">EPDTTPFKEK</a>  |
| 3.9   | 1202.5468 | 0.0006  | <a href="#">DGLRSNPSDVK</a> |
| 2.6   | 1202.5441 | 0.0033  | <a href="#">AVSEVEEKDGK</a> |
| 2.6   | 1202.5494 | -0.0020 | <a href="#">GTRRHETAEK</a>  |
| 2.6   | 1202.5468 | 0.0006  | <a href="#">NRILNEDEGK</a>  |
| 2.5   | 1202.5463 | 0.0011  | <a href="#">FDGETLDPLGK</a> |
| 0.9   | 1202.5476 | -0.0002 | <a href="#">YSVMRKTMR</a>   |
| 0.7   | 1202.5468 | 0.0006  | <a href="#">LEEENERLR</a>   |

Mascot: <http://www.matrixscience.com/>

**Peptide View**MS/MS Fragmentation of **SPIVFDDVDIDK**

Found in **AT3G48170.1** in **TAIR\_Arabidopsis**, Symbols: ALDH10A9 | ALDH10A9 (Aldehyde dehydrogenase 10A9); 3-chloroallyl aldehyde dehydrogenase | chr3:17797275-17800903 REVERSE

Match to Query 6105: 1488.715858 from(745.365205,2+) index(9010)

Title: Elution from: 80.597 to 80.597 scan no 12127 cid35.00 polarity:+

Data file 0-3\_2.mgf

Click mouse within plot area to zoom in by factor of two about that point

Or,   to  Da

Label all possible matches  Label matches used for scoring

Show Y-axis

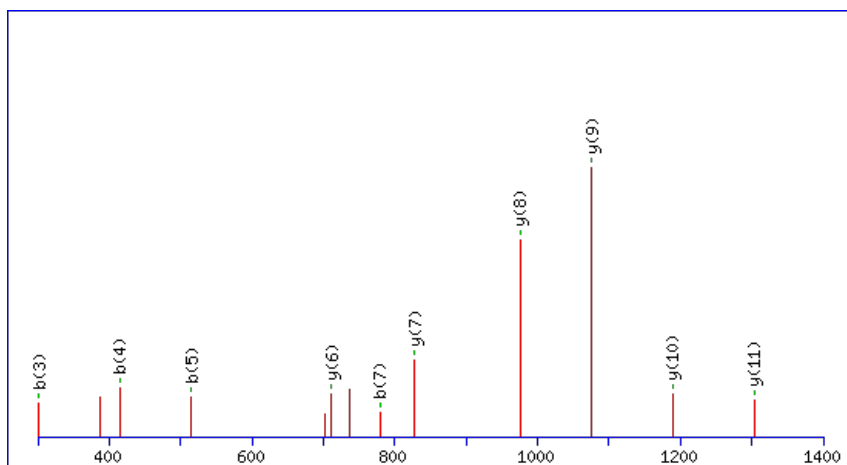

**Monoisotopic mass of neutral peptide Mr(calc):** 1488.7140

**Fixed modifications:** Carbamidomethyl (C) (apply to specified residues or termini only)

**Ions Score:** 51 **Expect:** 5.2e-005

**Matches:** 10/118 fragment ions using 14 most intense peaks ([help](#))

| #  | b               | b <sup>++</sup> | b <sup>0</sup> | b <sup>0++</sup> | Seq. | y                | y <sup>++</sup> | y*        | y <sup>*++</sup> | y <sup>0</sup> | y <sup>0++</sup> | #  |
|----|-----------------|-----------------|----------------|------------------|------|------------------|-----------------|-----------|------------------|----------------|------------------|----|
| 1  | 89.0363         | 45.0218         | 71.0258        | 36.0165          | S    |                  |                 |           |                  |                |                  | 13 |
| 2  | 187.0861        | 94.0467         | 169.0756       | 85.0414          | P    | 1401.6922        | 701.3498        | 1383.6686 | 692.3380         | 1383.6817      | 692.3445         | 12 |
| 3  | <b>301.1672</b> | 151.0873        | 283.1567       | 142.0820         | I    | <b>1303.6424</b> | 652.3249        | 1285.6188 | 643.3131         | 1285.6319      | 643.3196         | 11 |
| 4  | <b>415.2483</b> | 208.1278        | 397.2378       | 199.1225         | I    | <b>1189.5613</b> | 595.2843        | 1171.5377 | 586.2725         | 1171.5508      | 586.2790         | 10 |
| 5  | <b>515.3138</b> | 258.1605        | 497.3032       | 249.1552         | V    | <b>1075.4802</b> | 538.2438        | 1057.4566 | 529.2320         | 1057.4697      | 529.2385         | 9  |
| 6  | 663.3792        | 332.1933        | 645.3687       | 323.1880         | F    | <b>975.4148</b>  | 488.2110        | 957.3912  | 479.1992         | 957.4042       | 479.2057         | 8  |
| 7  | <b>779.4032</b> | 390.2052        | 761.3926       | 381.2000         | D    | <b>827.3493</b>  | 414.1783        | 809.3257  | 405.1665         | 809.3388       | 405.1730         | 7  |
| 8  | 895.4272        | 448.2172        | 877.4166       | 439.2120         | D    | <b>711.3254</b>  | 356.1663        | 693.3018  | 347.1545         | 693.3148       | 347.1610         | 6  |
| 9  | 995.4926        | 498.2500        | 977.4821       | 489.2447         | V    | 595.3014         | 298.1543        | 577.2778  | 289.1425         | 577.2908       | 289.1490         | 5  |
| 10 | 1111.5166       | 556.2619        | 1093.5061      | 547.2567         | D    | 495.2359         | 248.1216        | 477.2123  | 239.1098         | 477.2254       | 239.1163         | 4  |
| 11 | 1225.5977       | 613.3025        | 1207.5872      | 604.2972         | I    | 379.2120         | 190.1096        | 361.1884  | 181.0978         | 361.2014       | 181.1043         | 3  |
| 12 | 1341.6217       | 671.3145        | 1323.6111      | 662.3092         | D    | 265.1309         | 133.0691        | 247.1073  | 124.0573         | 247.1203       | 124.0638         | 2  |
| 13 |                 |                 |                |                  | K    | 149.1069         | 75.0571         | 131.0833  | 66.0453          |                |                  | 1  |

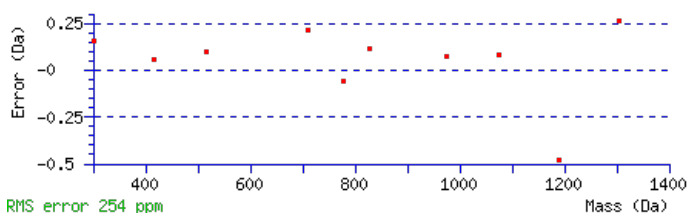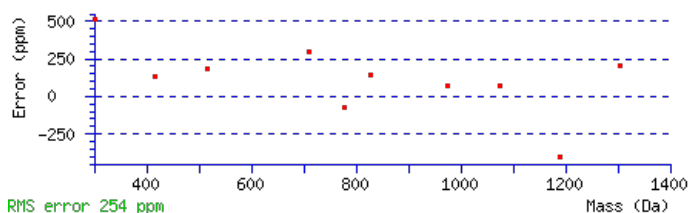

NCBI **BLAST** search of [SPIVFDDVDIDK](#)

(Parameters: blastp, nr protein database, expect=20000, no filter, PAM30)

AT3G48170.1

Other BLAST [web gateways](#)

**All matches to this query**

| Score | Mr(calc)  | Delta   | Sequence                      |
|-------|-----------|---------|-------------------------------|
| 51.3  | 1488.7140 | 0.0019  | <a href="#">SPIIVFDDVDIDK</a> |
| 51.3  | 1488.7140 | 0.0019  | <a href="#">SPLIVFDDVDLDK</a> |
| 12.9  | 1488.7201 | -0.0042 | <a href="#">VVEMGSHKELLSK</a> |
| 4.9   | 1488.7124 | 0.0035  | <a href="#">LSRGISSRAMSFR</a> |
| 4.6   | 1488.7167 | -0.0008 | <a href="#">APELATEVSNWKK</a> |

Mascot: <http://www.matrixscience.com/>

## Peptide View

MS/MS Fragmentation of **IVDMDLDLAEDTK**

Found in **AT3G48190.1** in **TAIR\_Arabidopsis**, Symbols: ATATM, ATM | ATM (ATAxia-TELANGIECTASIA MUTATED) | chr3:17808613-17834206 FORWARD

Match to Query 5799: 1490.656446 from(746.335499,2+) index(7132)

Title: Elution from: 64.325 to 64.325 scan no 9415 cid35.00 polarity:+

Data file D1d-2\_3.mgf

Click mouse within plot area to zoom in by factor of two about that point

Or,   to  Da

Label all possible matches  Label matches used for scoring

Show Y-axis

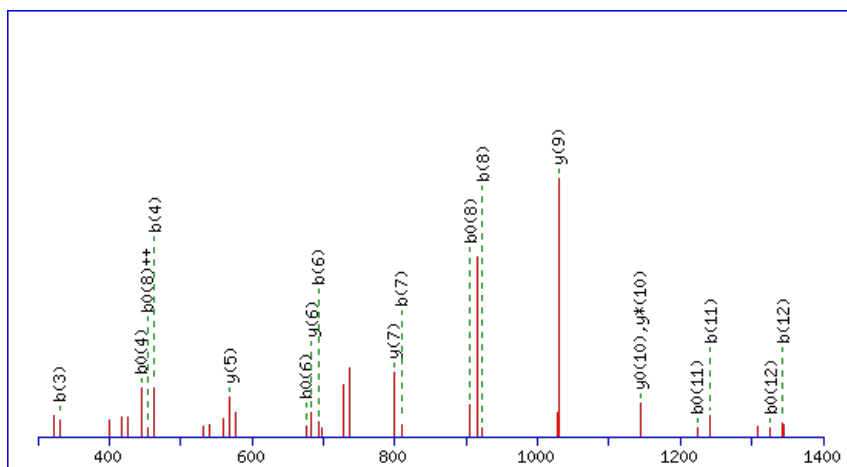

Monoisotopic mass of neutral peptide  $M_r(\text{calc})$ : 1490.6602

Fixed modifications: Carbamidomethyl (C) (apply to specified residues or termini only)

Ions Score: 37 Expect: 0.0013

Matches : 19/114 fragment ions using 38 most intense peaks ([help](#))

| #  | b                | b <sup>++</sup> | b <sup>0</sup>   | b <sup>0++</sup> | Seq. | y                | y <sup>++</sup> | y*               | y <sup>*++</sup> | y <sup>0</sup>   | y <sup>0++</sup> | #  |
|----|------------------|-----------------|------------------|------------------|------|------------------|-----------------|------------------|------------------|------------------|------------------|----|
| 1  | 115.0884         | 58.0478         |                  |                  | I    |                  |                 |                  |                  |                  |                  | 13 |
| 2  | 215.1538         | 108.0805        |                  |                  | V    | 1377.5864        | 689.2969        | 1359.5629        | 680.2851         | 1359.5759        | 680.2916         | 12 |
| 3  | <b>331.1778</b>  | 166.0925        | 313.1672         | 157.0873         | D    | 1277.5210        | 639.2641        | 1259.4974        | 630.2523         | 1259.5104        | 630.2589         | 11 |
| 4  | <b>463.2153</b>  | 232.1113        | <b>445.2048</b>  | 223.1060         | M    | 1161.4970        | 581.2521        | <b>1143.4734</b> | 572.2404         | <b>1143.4865</b> | 572.2469         | 10 |
| 5  | 579.2393         | 290.1233        | 561.2287         | 281.1180         | D    | <b>1029.4595</b> | 515.2334        | 1011.4359        | 506.2216         | 1011.4489        | 506.2281         | 9  |
| 6  | <b>693.3204</b>  | 347.1638        | <b>675.3098</b>  | 338.1586         | L    | 913.4355         | 457.2214        | 895.4119         | 448.2096         | 895.4250         | 448.2161         | 8  |
| 7  | <b>809.3444</b>  | 405.1758        | 791.3338         | 396.1705         | D    | <b>799.3544</b>  | 400.1808        | 781.3308         | 391.1691         | 781.3439         | 391.1756         | 7  |
| 8  | <b>923.4255</b>  | 462.2164        | <b>905.4149</b>  | 453.2111         | L    | <b>683.3304</b>  | 342.1689        | 665.3069         | 333.1571         | 665.3199         | 333.1636         | 6  |
| 9  | 995.4596         | 498.2335        | 977.4491         | 489.2282         | A    | <b>569.2493</b>  | 285.1283        | 551.2258         | 276.1165         | 551.2388         | 276.1230         | 5  |
| 10 | 1125.4993        | 563.2533        | 1107.4887        | 554.2480         | E    | 497.2152         | 249.1112        | 479.1916         | 240.0994         | 479.2046         | 240.1060         | 4  |
| 11 | <b>1241.5232</b> | 621.2653        | <b>1223.5127</b> | 612.2600         | D    | 367.1756         | 184.0914        | 349.1520         | 175.0796         | 349.1650         | 175.0861         | 3  |
| 12 | <b>1343.5679</b> | 672.2876        | <b>1325.5574</b> | 663.2823         | T    | 251.1516         | 126.0794        | 233.1280         | 117.0676         | 233.1410         | 117.0741         | 2  |
| 13 |                  |                 |                  |                  | K    | 149.1069         | 75.0571         | 131.0833         | 66.0453          |                  |                  | 1  |

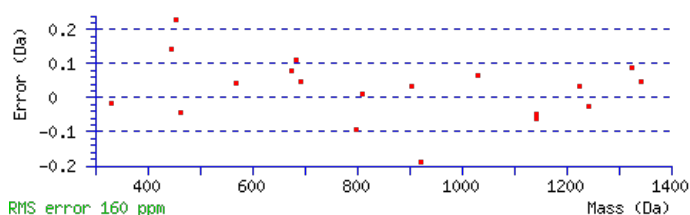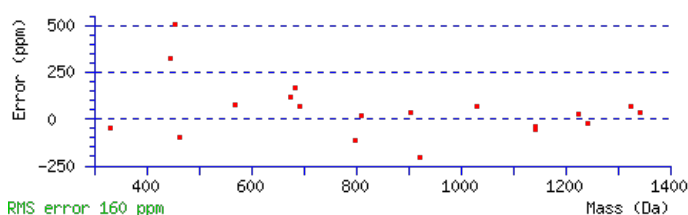

NCBI **BLAST** search of **IVDMDLDLAEDTK**

(Parameters: blastp, nr protein database, expect=20000, no filter, PAM30)

AT3G48190.1

Other BLAST [web gateways](#)

**All matches to this query**

| Score | Mr(calc)  | Delta   | Sequence                      |
|-------|-----------|---------|-------------------------------|
| 36.8  | 1490.6602 | -0.0038 | <a href="#">IVDMDLLAEDTK</a>  |
| 7.7   | 1490.6600 | -0.0035 | <a href="#">NDDLGVARKDDPR</a> |
| 0.2   | 1490.6582 | -0.0017 | <a href="#">MIFATVKAMGTQR</a> |

Mascot: <http://www.matrixscience.com/>

**Peptide View**MS/MS Fragmentation of **AVSAIVSCLLGP**ERFound in **AT3G48420.1** in **TAIR\_Arabidopsis**, Symbols: | haloacid dehalogenase-like hydrolase family protein | chr3:17940728-17942536  
FORWARD

Match to Query 6168: 1470.789252 from(491.270360,3+) index(8606)

Title: Elution from: 75.480 to 75.480 scan no 11433 cid35.00 polarity:+

Data file D1d-3\_2.mgf

Click mouse within plot area to zoom in by factor of two about that point

Or,   to  Da Label all possible matches  Label matches used for scoring Show Y-axis 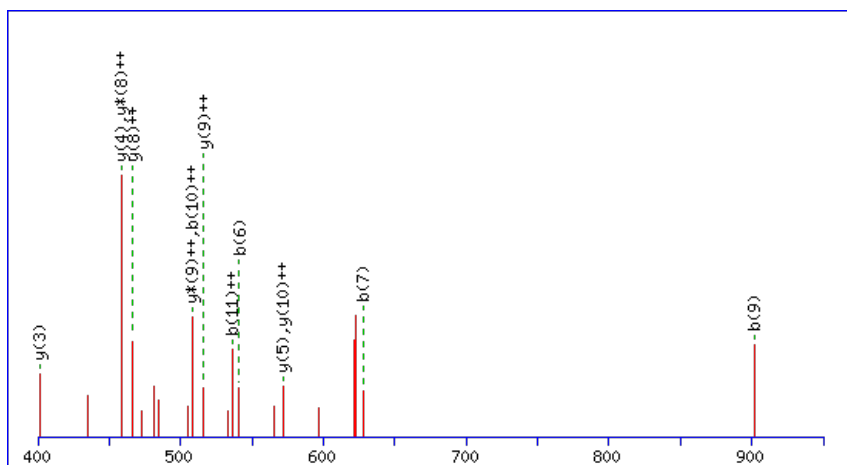Monoisotopic mass of neutral peptide  $M_r(\text{calc})$ : 1470.7864

Fixed modifications: Carbamidomethyl (C) (apply to specified residues or termini only)

Ions Score: 25 Expect: 0.01

Matches : 13/124 fragment ions using 14 most intense peaks ([help](#))

| #  | b         | b <sup>++</sup> | b <sup>0</sup> | b <sup>0++</sup> | Seq. | y         | y <sup>++</sup> | y*        | y <sup>*++</sup> | y <sup>0</sup> | y <sup>0++</sup> | #  |
|----|-----------|-----------------|----------------|------------------|------|-----------|-----------------|-----------|------------------|----------------|------------------|----|
| 1  | 72.0444   | 36.5258         |                |                  | A    |           |                 |           |                  |                |                  | 14 |
| 2  | 171.1128  | 86.0600         |                |                  | V    | 1400.7566 | 700.8819        | 1383.7301 | 692.3687         | 1382.7460      | 691.8767         | 13 |
| 3  | 258.1448  | 129.5761        | 240.1343       | 120.5708         | S    | 1301.6882 | 651.3477        | 1284.6616 | 642.8345         | 1283.6776      | 642.3425         | 12 |
| 4  | 329.1819  | 165.0946        | 311.1714       | 156.0893         | A    | 1214.6562 | 607.8317        | 1197.6296 | 599.3184         | 1196.6456      | 598.8264         | 11 |
| 5  | 442.2660  | 221.6366        | 424.2554       | 212.6314         | I    | 1143.6191 | 572.3132        | 1126.5925 | 563.7999         | 1125.6085      | 563.3079         | 10 |
| 6  | 541.3344  | 271.1709        | 523.3239       | 262.1656         | V    | 1030.5350 | 515.7711        | 1013.5084 | 507.2579         | 1012.5244      | 506.7659         | 9  |
| 7  | 628.3665  | 314.6869        | 610.3559       | 305.6816         | S    | 931.4666  | 466.2369        | 914.4400  | 457.7237         | 913.4560       | 457.2316         | 8  |
| 8  | 788.3971  | 394.7022        | 770.3865       | 385.6969         | C    | 844.4346  | 422.7209        | 827.4080  | 414.2076         | 826.4240       | 413.7156         | 7  |
| 9  | 901.4812  | 451.2442        | 883.4706       | 442.2389         | L    | 684.4039  | 342.7056        | 667.3774  | 334.1923         | 666.3933       | 333.7003         | 6  |
| 10 | 1014.5652 | 507.7863        | 996.5547       | 498.7810         | L    | 571.3198  | 286.1636        | 554.2933  | 277.6503         | 553.3093       | 277.1583         | 5  |
| 11 | 1071.5867 | 536.2970        | 1053.5761      | 527.2917         | G    | 458.2358  | 229.6215        | 441.2092  | 221.1083         | 440.2252       | 220.6162         | 4  |
| 12 | 1168.6395 | 584.8234        | 1150.6289      | 575.8181         | P    | 401.2143  | 201.1108        | 384.1878  | 192.5975         | 383.2037       | 192.1055         | 3  |
| 13 | 1297.6821 | 649.3447        | 1279.6715      | 640.3394         | E    | 304.1615  | 152.5844        | 287.1350  | 144.0711         | 286.1510       | 143.5791         | 2  |
| 14 |           |                 |                |                  | R    | 175.1190  | 88.0631         | 158.0924  | 79.5498          |                |                  | 1  |

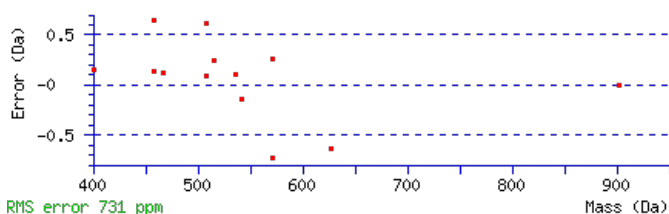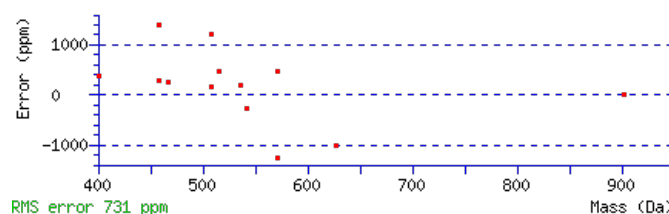NCBI BLAST search of [AVSAIVSCLLGP](#)ER

## AT3G48420.1

(Parameters: blastp, nr protein database, expect=20000, no filter, PAM30)

Other BLAST [web gateways](#)

### All matches to this query

| Score | Mr(calc)  | Delta   | Sequence                       |
|-------|-----------|---------|--------------------------------|
| 25.1  | 1470.7864 | 0.0028  | <a href="#">AVSAIVSCLLGP</a>   |
| 8.2   | 1470.7903 | -0.0010 | <a href="#">GGDIVKQLRNDTR</a>  |
| 4.7   | 1470.7903 | -0.0010 | <a href="#">NDDIQRLNSIK</a>    |
| 3.5   | 1470.7871 | 0.0021  | <a href="#">GGWLFKEPVDPVK</a>  |
| 1.5   | 1470.7865 | 0.0028  | <a href="#">VPSSSIPSLAVVCR</a> |
| 0.7   | 1470.7864 | 0.0028  | <a href="#">DLIRKMLDPDQK</a>   |
| 0.6   | 1470.7864 | 0.0028  | <a href="#">LGATPKEMQDLIR</a>  |
| 0.3   | 1470.7903 | -0.0010 | <a href="#">QAERLERSVVR</a>    |

Mascot: <http://www.matrixscience.com/>

**Peptide View**MS/MS Fragmentation of **KQELLVQNLR**

Found in **AT3G48670.1** in **TAIR\_Arabidopsis**, Symbols: | XH/XS domain-containing protein / XS zinc finger domain-containing protein |  
chr3:18042225-18044600 FORWARD

Match to Query 3864: 1239.728952 from(620.871752,2+) index(5715)

Title: Elution from: 52.163 to 52.163 scan no 7384 cid35.00 polarity:+

Data file D12h-2\_3.mgf

Click mouse within plot area to zoom in by factor of two about that point

Or,   to  Da

Label all possible matches  Label matches used for scoring

Show Y-axis

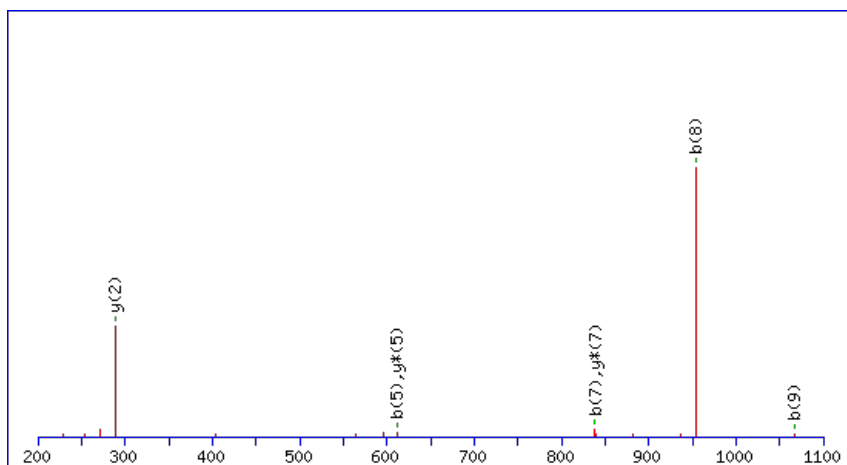

**Monoisotopic mass of neutral peptide Mr(calc):** 1239.7299

**Fixed modifications:** Carbamidomethyl (C) (apply to specified residues or termini only)

**Ions Score:** 29 **Expect:** 0.0026

**Matches:** 7/90 fragment ions using 6 most intense peaks ([help](#))

| #  | b                | b <sup>++</sup> | b*        | b <sup>*++</sup> | b <sup>0</sup> | b <sup>0++</sup> | Seq.     | y               | y <sup>++</sup> | y*              | y <sup>*++</sup> | y <sup>0</sup> | y <sup>0++</sup> | #         |
|----|------------------|-----------------|-----------|------------------|----------------|------------------|----------|-----------------|-----------------|-----------------|------------------|----------------|------------------|-----------|
| 1  | 129.1022         | 65.0548         | 112.0757  | 56.5415          |                |                  | <b>K</b> |                 |                 |                 |                  |                |                  | <b>10</b> |
| 2  | 257.1608         | 129.0840        | 240.1343  | 120.5708         |                |                  | <b>Q</b> | 1112.6422       | 556.8248        | 1095.6157       | 548.3115         | 1094.6317      | 547.8195         | <b>9</b>  |
| 3  | 386.2034         | 193.6053        | 369.1769  | 185.0921         | 368.1928       | 184.6001         | <b>E</b> | 984.5837        | 492.7955        | 967.5571        | 484.2822         | 966.5731       | 483.7902         | <b>8</b>  |
| 4  | 499.2875         | 250.1474        | 482.2609  | 241.6341         | 481.2769       | 241.1421         | <b>L</b> | 855.5411        | 428.2742        | <b>838.5145</b> | 419.7609         |                |                  | <b>7</b>  |
| 5  | <b>612.3715</b>  | 306.6894        | 595.3450  | 298.1761         | 594.3610       | 297.6841         | <b>L</b> | 742.4570        | 371.7321        | 725.4304        | 363.2189         |                |                  | <b>6</b>  |
| 6  | 711.4400         | 356.2236        | 694.4134  | 347.7103         | 693.4294       | 347.2183         | <b>V</b> | 629.3729        | 315.1901        | <b>612.3464</b> | 306.6768         |                |                  | <b>5</b>  |
| 7  | <b>839.4985</b>  | 420.2529        | 822.4720  | 411.7396         | 821.4880       | 411.2476         | <b>Q</b> | 530.3045        | 265.6559        | 513.2780        | 257.1426         |                |                  | <b>4</b>  |
| 8  | <b>953.5415</b>  | 477.2744        | 936.5149  | 468.7611         | 935.5309       | 468.2691         | <b>N</b> | 402.2459        | 201.6266        | 385.2194        | 193.1133         |                |                  | <b>3</b>  |
| 9  | <b>1066.6255</b> | 533.8164        | 1049.5990 | 525.3031         | 1048.6150      | 524.8111         | <b>L</b> | <b>288.2030</b> | 144.6051        | 271.1765        | 136.0919         |                |                  | <b>2</b>  |
| 10 |                  |                 |           |                  |                |                  | <b>R</b> | 175.1190        | 88.0631         | 158.0924        | 79.5498          |                |                  | <b>1</b>  |

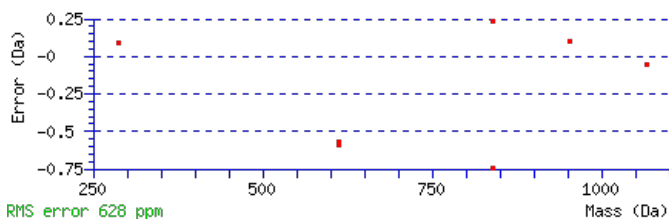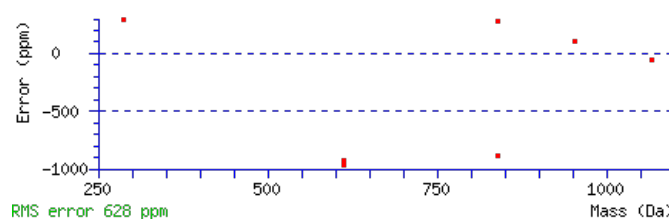

NCBI **BLAST** search of **KQELLVQNLR**

(Parameters: blastp, nr protein database, expect=20000, no filter, PAM30)

Other BLAST [web gateways](#)

**All matches to this query**



**AT3G48670.1**

| <b>Score</b> | <b>Mr(calc)</b> | <b>Delta</b> | <b>Sequence</b>            |
|--------------|-----------------|--------------|----------------------------|
| 28.6         | 1239.7299       | -0.0009      | <a href="#">KQELLVQNLK</a> |
| 26.3         | 1239.7299       | -0.0009      | <a href="#">ALAALRLEDL</a> |
| 6.2          | 1239.7299       | -0.0009      | <a href="#">NGVALQKELK</a> |
| 5.8          | 1239.7299       | -0.0010      | <a href="#">GNQQVILTVL</a> |
| 2.1          | 1239.7299       | -0.0010      | <a href="#">NLVLKVPSSK</a> |

**Mascot:** <http://www.matrixscience.com/>

**Peptide View**MS/MS Fragmentation of **NLMPPGGVNSPVR**

Found in **AT3G48730.1** in **TAIR\_Arabidopsis**, Symbols: GSA2 | GSA2 (GLUTAMATE-1-SEMIALDEHYDE 2,1-AMINOMUTASE 2); glutamate-1-semialdehyde 2,1-aminomutase | chr3:18060682-18062535 FORWARD

Match to Query 4628: 1239.635878 from(620.825215,2+) index(4236)

Title: Elution from: 39.477 to 39.477 scan no 5230 cid35.00 polarity:+

Data file 0-1\_1.mgf

Click mouse within plot area to zoom in by factor of two about that point

Or,   to  Da

Label all possible matches  Label matches used for scoring

Show Y-axis

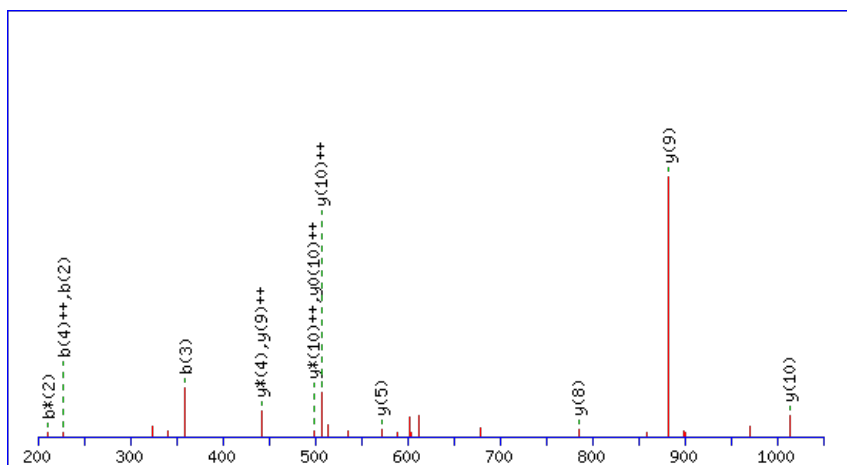

**Monoisotopic mass of neutral peptide Mr(calc):** 1239.6394

**Fixed modifications:** Carbamidomethyl (C) (apply to specified residues or termini only)

**Ions Score:** 23 **Expect:** 0.02

**Matches:** 13/110 fragment ions using 19 most intense peaks ([help](#))

| #  | b               | b <sup>++</sup> | b*              | b <sup>*++</sup> | b <sup>0</sup> | b <sup>0++</sup> | Seq. | y                | y <sup>++</sup> | y*              | y <sup>*++</sup> | y <sup>0</sup> | y <sup>0++</sup> | #  |
|----|-----------------|-----------------|-----------------|------------------|----------------|------------------|------|------------------|-----------------|-----------------|------------------|----------------|------------------|----|
| 1  | 115.0502        | 58.0287         | 98.0237         | 49.5155          |                |                  | N    |                  |                 |                 |                  |                |                  | 12 |
| 2  | <b>228.1343</b> | 114.5708        | <b>211.1077</b> | 106.0575         |                |                  | L    | 1126.6037        | 563.8055        | 1109.5772       | 555.2922         | 1108.5932      | 554.8002         | 11 |
| 3  | <b>359.1748</b> | 180.0910        | 342.1482        | 171.5777         |                |                  | M    | <b>1013.5197</b> | <b>507.2635</b> | 996.4931        | <b>498.7502</b>  | 995.5091       | <b>498.2582</b>  | 10 |
| 4  | 456.2275        | <b>228.6174</b> | 439.2010        | 220.1041         |                |                  | P    | <b>882.4792</b>  | <b>441.7432</b> | 865.4526        | 433.2300         | 864.4686       | 432.7380         | 9  |
| 5  | 513.2490        | 257.1281        | 496.2224        | 248.6149         |                |                  | G    | <b>785.4264</b>  | 393.2169        | 768.3999        | 384.7036         | 767.4159       | 384.2116         | 8  |
| 6  | 570.2704        | 285.6389        | 553.2439        | 277.1256         |                |                  | G    | 728.4050         | 364.7061        | 711.3784        | 356.1928         | 710.3944       | 355.7008         | 7  |
| 7  | 669.3389        | 335.1731        | 652.3123        | 326.6598         |                |                  | V    | 671.3835         | 336.1954        | 654.3569        | 327.6821         | 653.3729       | 327.1901         | 6  |
| 8  | 783.3818        | 392.1945        | 766.3552        | 383.6813         |                |                  | N    | <b>572.3151</b>  | 286.6612        | 555.2885        | 278.1479         | 554.3045       | 277.6559         | 5  |
| 9  | 870.4138        | 435.7105        | 853.3873        | 427.1973         | 852.4032       | 426.7053         | S    | 458.2722         | 229.6397        | <b>441.2456</b> | 221.1264         | 440.2616       | 220.6344         | 4  |
| 10 | 967.4666        | 484.2369        | 950.4400        | 475.7237         | 949.4560       | 475.2316         | P    | 371.2401         | 186.1237        | 354.2136        | 177.6104         |                |                  | 3  |
| 11 | 1066.5350       | 533.7711        | 1049.5084       | 525.2579         | 1048.5244      | 524.7659         | V    | 274.1874         | 137.5973        | 257.1608        | 129.0840         |                |                  | 2  |
| 12 |                 |                 |                 |                  |                |                  | R    | 175.1190         | 88.0631         | 158.0924        | 79.5498          |                |                  | 1  |

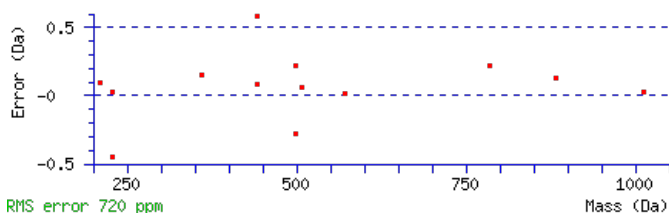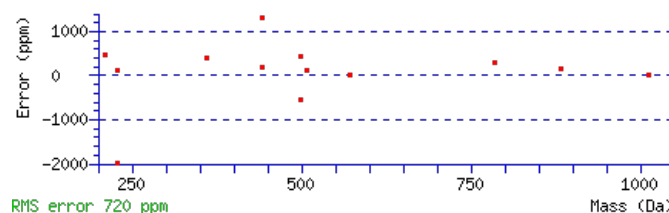

NCBI **BLAST** search of **NLMPPGGVNSPVR**

(Parameters: blastp, nr protein database, expect=20000, no filter, PAM30)

Other BLAST [web gateways](#)

AT3G48730.1

All matches to this query

| Score | Mr(calc)  | Delta   | Sequence                     |
|-------|-----------|---------|------------------------------|
| 22.9  | 1239.6394 | -0.0035 | <a href="#">NLMPGGVNSPVR</a> |
| 7.4   | 1239.6394 | -0.0035 | <a href="#">LIGKLC THNNA</a> |
| 7.2   | 1239.6360 | -0.0001 | <a href="#">RKDYDFGLAR</a>   |

Mascot: <http://www.matrixscience.com/>

**Peptide View**MS/MS Fragmentation of **ETKTKPVIHETMTESAK**Found in **AT3G48770.1** in **TAIR\_Arabidopsis**, Symbols: | ATP binding / DNA binding | chr3:18090246-18097802 REVERSE

Match to Query 9066: 1940.948732 from(971.481642,2+) index(8341)

Title: Elution from: 74.102 to 74.102 scan no 11082 cid35.00 polarity:+

Data file 0-3\_2.mgf

Click mouse within plot area to zoom in by factor of two about that point

Or,  to  Da Label all possible matches  Label matches used for scoring Show Y-axis 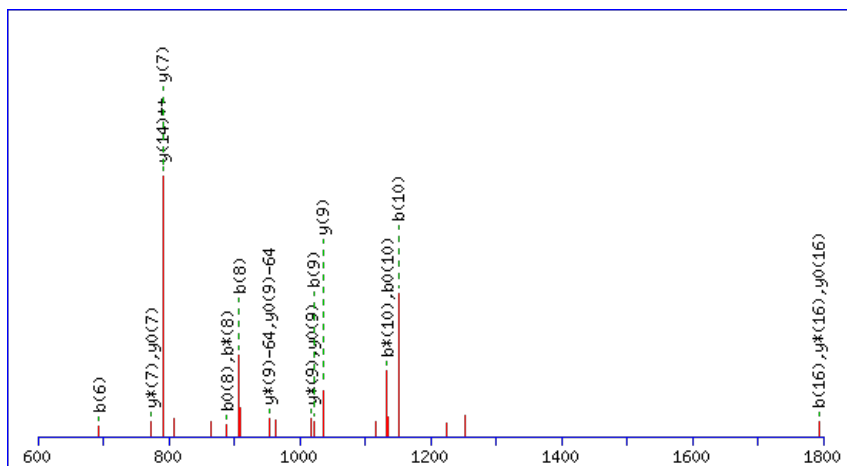**Monoisotopic mass of neutral peptide Mr(calc):** 1940.9485**Fixed modifications:** Carbamidomethyl (C) (apply to specified residues or termini only)**Variable modifications:****M12** : Oxidation (M), with neutral losses 0.0000 (shown in table), 63.9983**Ions Score:** 24 **Expect:** 0.039**Matches** : 20/280 fragment ions using 24 most intense peaks ([help](#))

| #  | b         | b <sup>++</sup> | b <sup>*</sup> | b <sup>*++</sup> | b <sup>0</sup> | b <sup>0++</sup> | Seq. | y         | y <sup>++</sup> | y <sup>*</sup> | y <sup>*++</sup> | y <sup>0</sup> | y <sup>0++</sup> | #  |
|----|-----------|-----------------|----------------|------------------|----------------|------------------|------|-----------|-----------------|----------------|------------------|----------------|------------------|----|
| 1  | 131.0469  | 66.0271         |                |                  | 113.0363       | 57.0218          | E    |           |                 |                |                  |                |                  | 17 |
| 2  | 233.0916  | 117.0494        |                |                  | 215.0811       | 108.0442         | T    | 1811.9161 | 906.4617        | 1793.8926      | 897.4499         | 1793.9056      | 897.4564         | 16 |
| 3  | 363.1806  | 182.0940        | 345.1571       | 173.0822         | 345.1701       | 173.0887         | K    | 1709.8714 | 855.4394        | 1691.8478      | 846.4276         | 1691.8609      | 846.4341         | 15 |
| 4  | 465.2254  | 233.1163        | 447.2018       | 224.1045         | 447.2148       | 224.1110         | T    | 1579.7824 | 790.3948        | 1561.7588      | 781.3830         | 1561.7718      | 781.3896         | 14 |
| 5  | 595.3144  | 298.1608        | 577.2908       | 289.1490         | 577.3038       | 289.1556         | K    | 1477.7377 | 739.3725        | 1459.7141      | 730.3607         | 1459.7271      | 730.3672         | 13 |
| 6  | 693.3642  | 347.1857        | 675.3406       | 338.1739         | 675.3536       | 338.1805         | P    | 1347.6486 | 674.3280        | 1329.6251      | 665.3162         | 1329.6381      | 665.3227         | 12 |
| 7  | 793.4296  | 397.2185        | 775.4061       | 388.2067         | 775.4191       | 388.2132         | V    | 1249.5989 | 625.3031        | 1231.5753      | 616.2913         | 1231.5883      | 616.2978         | 11 |
| 8  | 907.5107  | 454.2590        | 889.4872       | 445.2472         | 889.5002       | 445.2537         | I    | 1149.5334 | 575.2703        | 1131.5098      | 566.2585         | 1131.5228      | 566.2651         | 10 |
| 9  | 1021.5918 | 511.2996        | 1003.5683      | 502.2878         | 1003.5813      | 502.2943         | I    | 1035.4523 | 518.2298        | 1017.4287      | 509.2180         | 1017.4417      | 509.2245         | 9  |
| 10 | 1151.6315 | 576.3194        | 1133.6079      | 567.3076         | 1133.6209      | 567.3141         | E    | 921.3712  | 461.1892        | 903.3476       | 452.1774         | 903.3606       | 452.1840         | 8  |
| 11 | 1253.6762 | 627.3417        | 1235.6526      | 618.3299         | 1235.6656      | 618.3364         | T    | 791.3316  | 396.1694        | 773.3080       | 387.1576         | 773.3210       | 387.1641         | 7  |
| 12 | 1401.7086 | 701.3579        | 1383.6850      | 692.3462         | 1383.6981      | 692.3527         | M    | 689.2869  | 345.1471        | 671.2633       | 336.1353         | 671.2763       | 336.1418         | 6  |
| 13 | 1503.7533 | 752.3803        | 1485.7297      | 743.3685         | 1485.7428      | 743.3750         | T    | 541.2544  | 271.1309        | 523.2308       | 262.1191         | 523.2439       | 262.1256         | 5  |
| 14 | 1633.7930 | 817.4001        | 1615.7694      | 808.3883         | 1615.7824      | 808.3948         | E    | 439.2097  | 220.1085        | 421.1861       | 211.0967         | 421.1991       | 211.1032         | 4  |
| 15 | 1721.8220 | 861.4146        | 1703.7984      | 852.4029         | 1703.8115      | 852.4094         | S    | 309.1701  | 155.0887        | 291.1465       | 146.0769         | 291.1595       | 146.0834         | 3  |
| 16 | 1793.8562 | 897.4317        | 1775.8326      | 888.4199         | 1775.8456      | 888.4264         | A    | 221.1410  | 111.0741        | 203.1174       | 102.0624         |                |                  | 2  |
| 17 |           |                 |                |                  |                |                  | K    | 149.1069  | 75.0571         | 131.0833       | 66.0453          |                |                  | 1  |

# AT3G48770.1

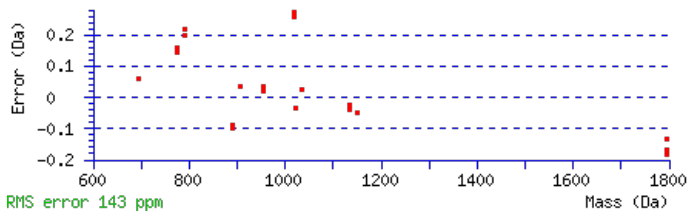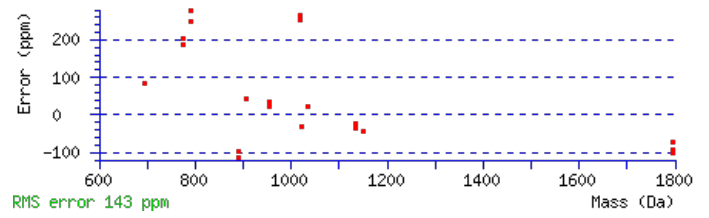

NCBI **BLAST** search of [ETKTKPVIIETMTESAK](#)

(Parameters: blastp, nr protein database, expect=20000, no filter, PAM30)

Other BLAST [web gateways](#)

## All matches to this query

| Score | Mr(calc)  | Delta   | Sequence                            |
|-------|-----------|---------|-------------------------------------|
| 23.7  | 1940.9485 | 0.0002  | <a href="#">ETKTKPVIIETMTESAK</a>   |
| 8.6   | 1940.9431 | 0.0057  | <a href="#">EILGICDNRLVLFNNK</a>    |
| 4.4   | 1940.9478 | 0.0009  | <a href="#">QKSEADFSSRAPELLK</a>    |
| 3.0   | 1940.9482 | 0.0005  | <a href="#">LIGRNKPVDRSESTNTK</a>   |
| 3.0   | 1940.9486 | 0.0001  | <a href="#">VGIMGLHGMGGVGKTTLFK</a> |
| 2.0   | 1940.9512 | -0.0024 | <a href="#">ALSGSNIGVTIGIONSMLK</a> |
| 2.0   | 1940.9430 | 0.0057  | <a href="#">DMKQRHIASFLTLEK</a>     |
| 2.0   | 1940.9487 | 0.0001  | <a href="#">RDPMGALGYAAMKPSLIK</a>  |
| 1.2   | 1940.9504 | -0.0017 | <a href="#">AIVVDEPGVTRDRLYGR</a>   |

Mascot: <http://www.matrixscience.com/>

**Peptide View**MS/MS Fragmentation of **MYLKEGCSTLLK**Found in **AT3G48810.1** in **TAIR\_Arabidopsis**, Symbols: | pentatricopeptide (PPR) repeat-containing protein | chr3:18108033-18110012  
FORWARD

Match to Query 5994: 1468.720062 from(735.367307,2+) index(10455)

Title: Elution from: 100.393 to 100.393 scan no 14978 cid35.00 polarity:+

Data file D6h-1\_2.mgf

Click mouse within plot area to zoom in by factor of two about that point

Or,  to  Da Label all possible matches  Label matches used for scoring Show Y-axis 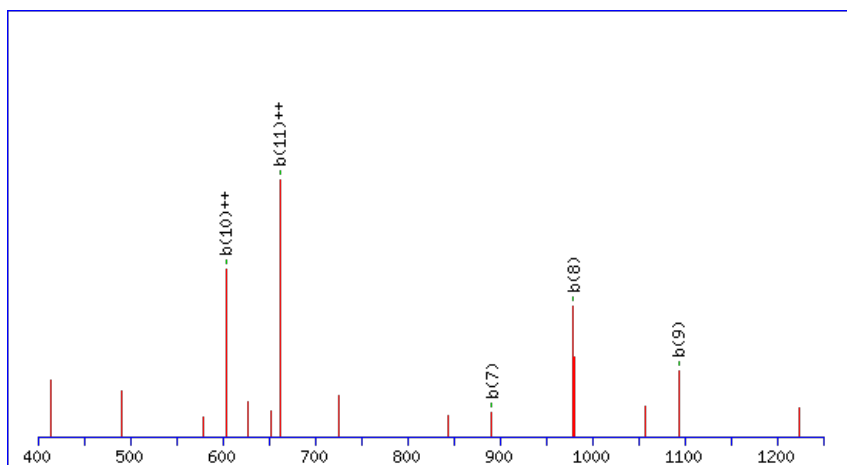Monoisotopic mass of neutral peptide  $M_r(\text{calc})$ : 1468.7228

Fixed modifications: Carbamidomethyl (C) (apply to specified residues or termini only)

Ions Score: 23 Expect: 0.034

Matches : 5/110 fragment ions using 8 most intense peaks ([help](#))

| #  | b                | b <sup>++</sup> | b*        | b <sup>*++</sup> | b <sup>0</sup> | b <sup>0++</sup> | Seq. | y         | y <sup>++</sup> | y*        | y <sup>*++</sup> | y <sup>0</sup> | y <sup>0++</sup> | #  |
|----|------------------|-----------------|-----------|------------------|----------------|------------------|------|-----------|-----------------|-----------|------------------|----------------|------------------|----|
| 1  | 133.0448         | 67.0260         |           |                  |                |                  | M    |           |                 |           |                  |                |                  | 12 |
| 2  | 297.1052         | 149.0562        |           |                  |                |                  | Y    | 1337.6926 | 669.3499        | 1319.6690 | 660.3381         | 1319.6820      | 660.3446         | 11 |
| 3  | 411.1863         | 206.0968        |           |                  |                |                  | L    | 1173.6322 | 587.3197        | 1155.6086 | 578.3080         | 1155.6216      | 578.3145         | 10 |
| 4  | 541.2753         | 271.1413        | 523.2517  | 262.1295         |                |                  | K    | 1059.5511 | 530.2792        | 1041.5275 | 521.2674         | 1041.5405      | 521.2739         | 9  |
| 5  | 671.3149         | 336.1611        | 653.2913  | 327.1493         | 653.3044       | 327.1558         | E    | 929.4621  | 465.2347        | 911.4385  | 456.2229         | 911.4515       | 456.2294         | 8  |
| 6  | 729.3334         | 365.1703        | 711.3098  | 356.1586         | 711.3229       | 356.1651         | G    | 799.4225  | 400.2149        | 781.3989  | 391.2031         | 781.4119       | 391.2096         | 7  |
| 7  | <b>891.3581</b>  | 446.1827        | 873.3346  | 437.1709         | 873.3476       | 437.1774         | C    | 741.4040  | 371.2056        | 723.3804  | 362.1938         | 723.3934       | 362.2003         | 6  |
| 8  | <b>979.3872</b>  | 490.1972        | 961.3636  | 481.1854         | 961.3766       | 481.1920         | S    | 579.3792  | 290.1933        | 561.3556  | 281.1815         | 561.3687       | 281.1880         | 5  |
| 9  | <b>1093.4683</b> | 547.2378        | 1075.4447 | 538.2260         | 1075.4577      | 538.2325         | L    | 491.3502  | 246.1787        | 473.3266  | 237.1669         |                |                  | 4  |
| 10 | 1207.5494        | <b>604.2783</b> | 1189.5258 | 595.2665         | 1189.5388      | 595.2731         | L    | 377.2691  | 189.1382        | 359.2455  | 180.1264         |                |                  | 3  |
| 11 | 1321.6305        | <b>661.3189</b> | 1303.6069 | 652.3071         | 1303.6199      | 652.3136         | L    | 263.1880  | 132.0976        | 245.1644  | 123.0858         |                |                  | 2  |
| 12 |                  |                 |           |                  |                |                  | K    | 149.1069  | 75.0571         | 131.0833  | 66.0453          |                |                  | 1  |

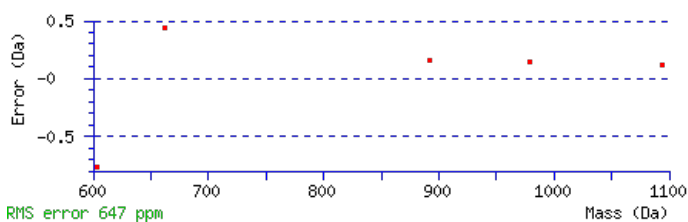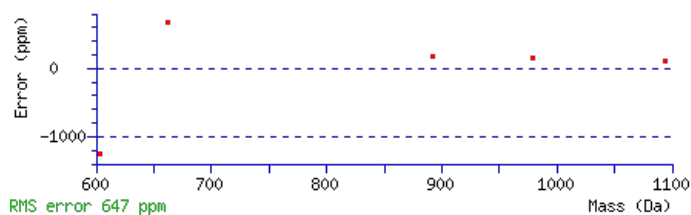NCBI BLAST search of **MYLKEGCSTLLK**

(Parameters: blastp, nr protein database, expect=20000, no filter, PAM30)

Other BLAST [web gateways](#)

# AT3G48810.1

All matches to this query

| Score | Mr(calc)  | Delta   | Sequence                      |
|-------|-----------|---------|-------------------------------|
| 23.0  | 1468.7228 | -0.0028 | <a href="#">MYLKEGCSLLK</a>   |
| 3.7   | 1468.7199 | 0.0002  | <a href="#">DYCQRKINLLK</a>   |
| 3.7   | 1468.7172 | 0.0029  | <a href="#">LAKFGTSNMDLIK</a> |
| 3.7   | 1468.7199 | 0.0002  | <a href="#">LTRFMVGANGQLK</a> |
| 3.4   | 1468.7194 | 0.0006  | <a href="#">MQILFVGYGVEAK</a> |
| 3.3   | 1468.7228 | -0.0027 | <a href="#">VEQKMSLTIFMK</a>  |
| 3.2   | 1468.7199 | 0.0002  | <a href="#">FILMVNKQGQTR</a>  |
| 3.1   | 1468.7194 | 0.0006  | <a href="#">EAFVFLCLTNK</a>   |
| 3.1   | 1468.7187 | 0.0013  | <a href="#">IFYRTYGHGPIK</a>  |
| 3.1   | 1468.7228 | -0.0028 | <a href="#">KSVLSFMLECIK</a>  |

Mascot: <http://www.matrixscience.com/>

**Peptide View**MS/MS Fragmentation of **VQTQPGFAR**Found in **AT3G48850.1** in **TAIR\_Arabidopsis**, Symbols: | mitochondrial phosphate transporter, putative | chr3:18125744-18127405 REVERSE

Match to Query 2663: 1016.482536 from(509.248544,2+) index(1024)

Title: Elution from: 13.961 to 13.961 scan no 1345 cid35.00 polarity:+

Data file D1d-3\_3.mgf

Click mouse within plot area to zoom in by factor of two about that point

Or,   to  Da Label all possible matches  Label matches used for scoring Show Y-axis 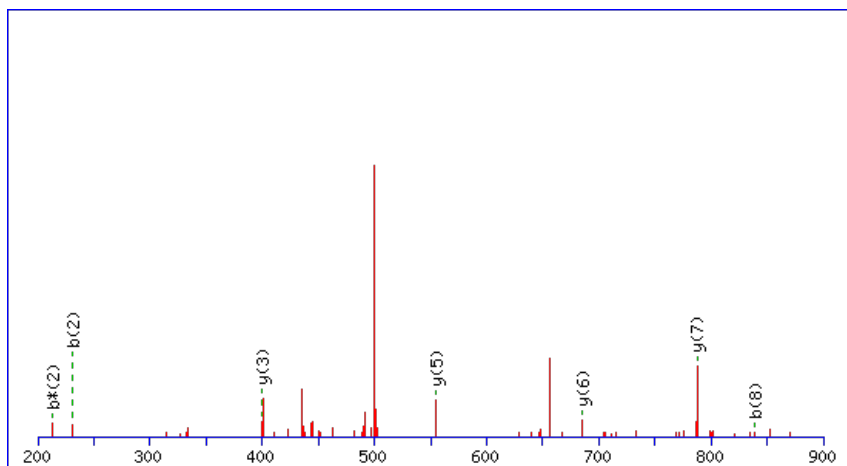Monoisotopic mass of neutral peptide **Mr(calc)**: 1016.4831**Fixed modifications**: Carbamidomethyl (C) (apply to specified residues or termini only)**Ions Score**: 27 **Expect**: 0.024**Matches**: 7/78 fragment ions using 14 most intense peaks ([help](#))

| # | b               | b <sup>++</sup> | b*              | b <sup>*++</sup> | b <sup>0</sup> | b <sup>0++</sup> | Seq. | y               | y <sup>++</sup> | y*       | y <sup>*++</sup> | y <sup>0</sup> | y <sup>0++</sup> | # |
|---|-----------------|-----------------|-----------------|------------------|----------------|------------------|------|-----------------|-----------------|----------|------------------|----------------|------------------|---|
| 1 | 101.0727        | 51.0400         |                 |                  |                |                  | V    |                 |                 |          |                  |                |                  | 9 |
| 2 | <b>231.1254</b> | 116.0663        | <b>213.1018</b> | 107.0545         |                |                  | Q    | 917.4250        | 459.2161        | 899.4014 | 450.2043         | 899.4144       | 450.2109         | 8 |
| 3 | 333.1701        | 167.0887        | 315.1465        | 158.0769         | 315.1595       | 158.0834         | T    | <b>787.3723</b> | 394.1898        | 769.3488 | 385.1780         | 769.3618       | 385.1845         | 7 |
| 4 | 463.2227        | 232.1150        | 445.1991        | 223.1032         | 445.2122       | 223.1097         | Q    | <b>685.3276</b> | 343.1675        | 667.3041 | 334.1557         |                |                  | 6 |
| 5 | 561.2725        | 281.1399        | 543.2489        | 272.1281         | 543.2620       | 272.1346         | P    | <b>555.2750</b> | 278.1411        | 537.2514 | 269.1293         |                |                  | 5 |
| 6 | 619.2910        | 310.1492        | 601.2674        | 301.1374         | 601.2805       | 301.1439         | G    | 457.2252        | 229.1162        | 439.2016 | 220.1044         |                |                  | 4 |
| 7 | 767.3565        | 384.1819        | 749.3329        | 375.1701         | 749.3459       | 375.1766         | F    | <b>399.2067</b> | 200.1070        | 381.1831 | 191.0952         |                |                  | 3 |
| 8 | <b>839.3906</b> | 420.1990        | 821.3670        | 411.1872         | 821.3801       | 411.1937         | A    | 251.1412        | 126.0743        | 233.1177 | 117.0625         |                |                  | 2 |
| 9 |                 |                 |                 |                  |                |                  | R    | 179.1071        | 90.0572         | 161.0835 | 81.0454          |                |                  | 1 |

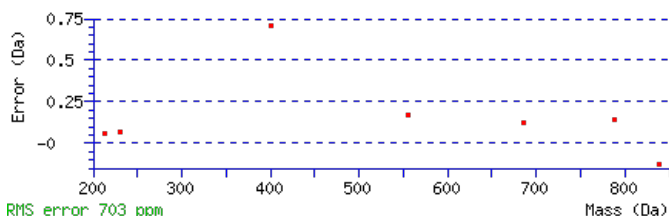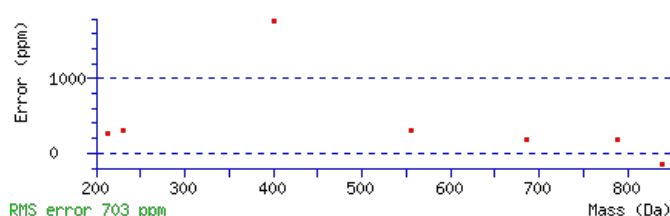NCBI **BLAST** search of [VQTQPGFAR](#)

(Parameters: blastp, nr protein database, expect=20000, no filter, PAM30)

Other BLAST [web gateways](#)**All matches to this query**

| Score | Mr(calc)  | Delta   | Sequence                  |
|-------|-----------|---------|---------------------------|
| 27.0  | 1016.4831 | -0.0006 | <a href="#">VQTQPGFAR</a> |



**AT3G48850.1**

|      |           |         |                           |
|------|-----------|---------|---------------------------|
| 10.6 | 1016.4805 | 0.0021  | <a href="#">LDDDLFIR</a>  |
| 9.3  | 1016.4839 | -0.0013 | <a href="#">SEIEIMLR</a>  |
| 7.4  | 1016.4832 | -0.0006 | <a href="#">KAKEEGWR</a>  |
| 7.3  | 1016.4836 | -0.0010 | <a href="#">VQGANQRAR</a> |
| 6.3  | 1016.4839 | -0.0013 | <a href="#">AKELAEMAK</a> |
| 5.6  | 1016.4809 | 0.0016  | <a href="#">ARVEEDKR</a>  |
| 2.7  | 1016.4836 | -0.0010 | <a href="#">VQANQRAGR</a> |
| 2.5  | 1016.4832 | -0.0006 | <a href="#">VENPFNKR</a>  |
| 2.3  | 1016.4805 | 0.0021  | <a href="#">LNGIDAFEK</a> |

**Mascot:** <http://www.matrixscience.com/>

**Peptide View**MS/MS Fragmentation of **CPFTGTVSIR**

Found in **AT3G48930.1** in **TAIR\_Arabidopsis**, Symbols: EMB1080 | EMB1080 (EMBRYO DEFECTIVE 1080); structural constituent of ribosome | chr3:18152002-18153174 REVERSE

Match to Query 3672: 1136.561986 from(569.288269,2+) index(3874)

Title: Elution from: 36.466 to 36.466 scan no 4841 cid35.00 polarity:+

Data file 0-1\_3.mgf

Click mouse within plot area to zoom in by factor of two about that point

Or,   to  Da

Label all possible matches  Label matches used for scoring

Show Y-axis

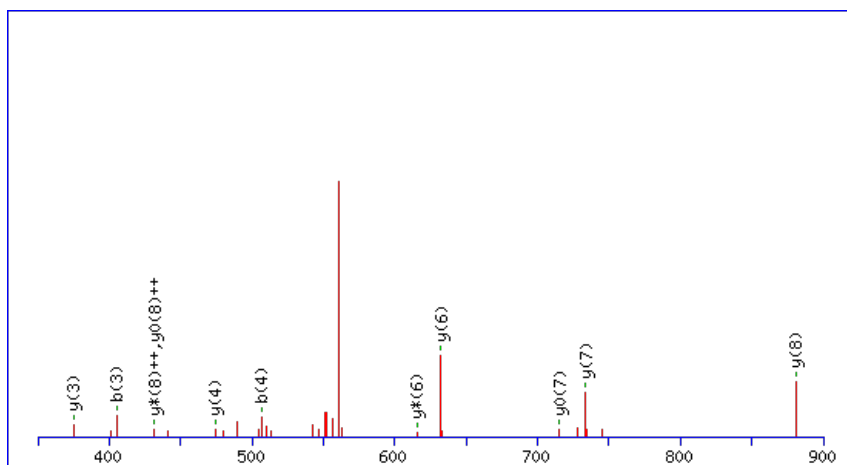

**Monoisotopic mass of neutral peptide Mr(calc):** 1136.5649

**Fixed modifications:** Carbamidomethyl (C) (apply to specified residues or termini only)

**Ions Score:** 38 **Expect:** 0.00077

**Matches:** 11/80 fragment ions using 17 most intense peaks ([help](#))

| #  | b               | b <sup>++</sup> | b <sup>0</sup> | b <sup>0++</sup> | Seq. | y               | y <sup>++</sup> | y*              | y <sup>*++</sup> | y <sup>0</sup>  | y <sup>0++</sup> | #  |
|----|-----------------|-----------------|----------------|------------------|------|-----------------|-----------------|-----------------|------------------|-----------------|------------------|----|
| 1  | 161.0379        | 81.0226         |                |                  | C    |                 |                 |                 |                  |                 |                  | 10 |
| 2  | 258.0907        | 129.5490        |                |                  | P    | 977.5415        | 489.2744        | 960.5149        | 480.7611         | 959.5309        | 480.2691         | 9  |
| 3  | <b>405.1591</b> | 203.0832        |                |                  | F    | <b>880.4887</b> | 440.7480        | 863.4621        | <b>432.2347</b>  | 862.4781        | <b>431.7427</b>  | 8  |
| 4  | <b>506.2068</b> | 253.6070        | 488.1962       | 244.6017         | T    | <b>733.4203</b> | 367.2138        | 716.3937        | 358.7005         | <b>715.4097</b> | 358.2085         | 7  |
| 5  | 563.2282        | 282.1178        | 545.2177       | 273.1125         | G    | <b>632.3726</b> | 316.6899        | <b>615.3461</b> | 308.1767         | 614.3620        | 307.6847         | 6  |
| 6  | 664.2759        | 332.6416        | 646.2654       | 323.6363         | T    | 575.3511        | 288.1792        | 558.3246        | 279.6659         | 557.3406        | 279.1739         | 5  |
| 7  | 763.3443        | 382.1758        | 745.3338       | 373.1705         | V    | <b>474.3035</b> | 237.6554        | 457.2769        | 229.1421         | 456.2929        | 228.6501         | 4  |
| 8  | 850.3764        | 425.6918        | 832.3658       | 416.6865         | S    | <b>375.2350</b> | 188.1212        | 358.2085        | 179.6079         | 357.2245        | 179.1159         | 3  |
| 9  | 963.4604        | 482.2339        | 945.4499       | 473.2286         | I    | 288.2030        | 144.6051        | 271.1765        | 136.0919         |                 |                  | 2  |
| 10 |                 |                 |                |                  | R    | 175.1190        | 88.0631         | 158.0924        | 79.5498          |                 |                  | 1  |

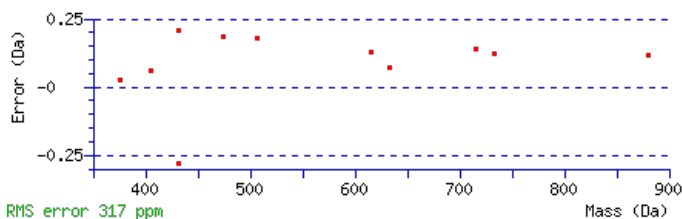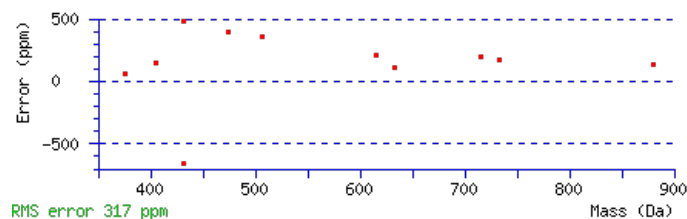

NCBI **BLAST** search of **CPFTGTVSIR**

(Parameters: blastp, nr protein database, expect=20000, no filter, PAM30)

Other BLAST [web gateways](#)

**All matches to this query**

## AT3G48930.1

| Score | Mr(calc)  | Delta   | Sequence                   |
|-------|-----------|---------|----------------------------|
| 38.0  | 1136.5649 | -0.0029 | <a href="#">CPFTGTVSIR</a> |
| 14.5  | 1136.5649 | -0.0029 | <a href="#">CFPTSIVTGR</a> |
| 0.6   | 1136.5648 | -0.0028 | <a href="#">LCDVVASFAR</a> |
| 0.6   | 1136.5614 | 0.0005  | <a href="#">FINNPVDYR</a>  |
| 0.6   | 1136.5648 | -0.0028 | <a href="#">VINDNCKFK</a>  |
| 0.1   | 1136.5649 | -0.0029 | <a href="#">VFCEGIGVTR</a> |

Mascot: <http://www.matrixscience.com/>

## Peptide View

### MS/MS Fragmentation of **TWFNQPAR**

Found in **AT3G49010.1** in **TAIR\_Arabidopsis**, Symbols: BBC1, RSU2 | ATBBC1 (breast basic conserved 1); structural constituent of ribosome | chr3:18177956-18179032 REVERSE

Match to Query 2816: 1018.497124 from(510.255838,2+) index(3503)

Title: Elution from: 32.632 to 32.632 scan no 4300 cid35.00 polarity:+

Data file D1d-3\_2.mgf

Click mouse within plot area to zoom in by factor of two about that point

Or,   to  Da

Label all possible matches  Label matches used for scoring

Show Y-axis

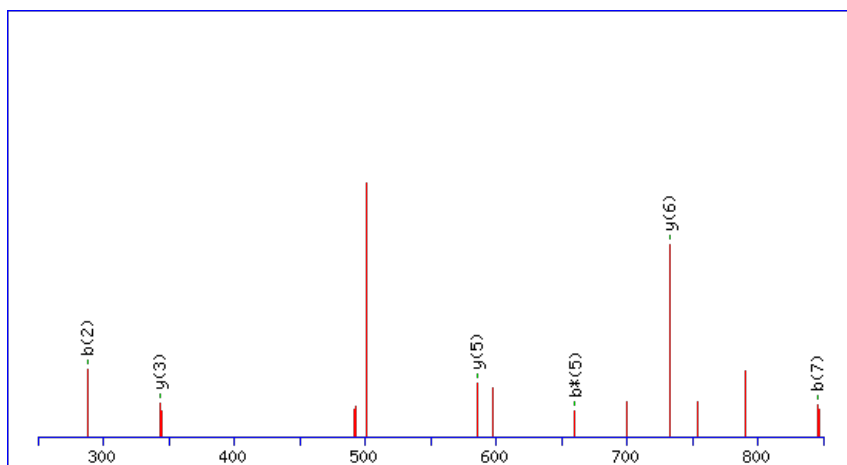

Monoisotopic mass of neutral peptide  $M_r(\text{calc})$ : 1018.4985

Fixed modifications: Carbamidomethyl (C) (apply to specified residues or termini only)

Ions Score: 17 Expect: 0.042

Matches : 6/64 fragment ions using 15 most intense peaks ([help](#))

| # | b               | b <sup>++</sup> | b*              | b <sup>*++</sup> | b <sup>0</sup> | b <sup>0++</sup> | Seq. | y               | y <sup>++</sup> | y*       | y <sup>*++</sup> | # |
|---|-----------------|-----------------|-----------------|------------------|----------------|------------------|------|-----------------|-----------------|----------|------------------|---|
| 1 | 102.0550        | 51.5311         |                 |                  | 84.0444        | 42.5258          | T    |                 |                 |          |                  | 8 |
| 2 | <b>288.1343</b> | 144.5708        |                 |                  | 270.1237       | 135.5655         | W    | 918.4581        | 459.7327        | 901.4315 | 451.2194         | 7 |
| 3 | 435.2027        | 218.1050        |                 |                  | 417.1921       | 209.0997         | F    | <b>732.3787</b> | 366.6930        | 715.3522 | 358.1797         | 6 |
| 4 | 549.2456        | 275.1264        | 532.2191        | 266.6132         | 531.2350       | 266.1212         | N    | <b>585.3103</b> | 293.1588        | 568.2838 | 284.6455         | 5 |
| 5 | 677.3042        | 339.1557        | <b>660.2776</b> | 330.6425         | 659.2936       | 330.1504         | Q    | 471.2674        | 236.1373        | 454.2409 | 227.6241         | 4 |
| 6 | 774.3570        | 387.6821        | 757.3304        | 379.1688         | 756.3464       | 378.6768         | P    | <b>343.2088</b> | 172.1081        | 326.1823 | 163.5948         | 3 |
| 7 | <b>845.3941</b> | 423.2007        | 828.3675        | 414.6874         | 827.3835       | 414.1954         | A    | 246.1561        | 123.5817        | 229.1295 | 115.0684         | 2 |
| 8 |                 |                 |                 |                  |                |                  | R    | 175.1190        | 88.0631         | 158.0924 | 79.5498          | 1 |

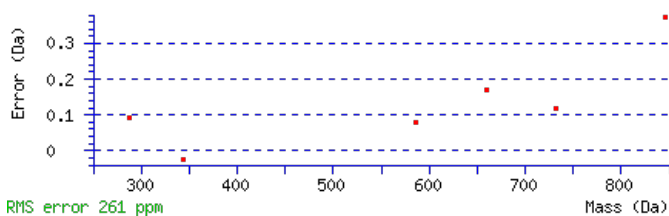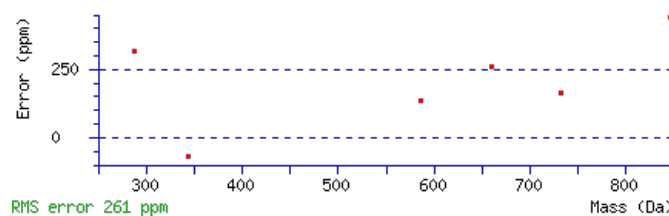

### NCBI BLAST search of **TWFNQPAR**

(Parameters: blastp, nr protein database, expect=20000, no filter, PAM30)

Other BLAST [web gateways](#)

### All matches to this query

| Score | $M_r(\text{calc})$ | Delta   | Sequence                 |
|-------|--------------------|---------|--------------------------|
| 17.0  | 1018.4985          | -0.0013 | <a href="#">TWFNQPAR</a> |

## AT3G49010.1

|      |           |         |                           |
|------|-----------|---------|---------------------------|
| 14.2 | 1018.4978 | -0.0007 | <a href="#">MNGGESRLR</a> |
| 3.9  | 1018.4978 | -0.0007 | <a href="#">MDNTNRLR</a>  |
| 2.2  | 1018.4978 | -0.0007 | <a href="#">SRPCDKTR</a>  |
| 1.2  | 1018.4978 | -0.0007 | <a href="#">TRAQQMER</a>  |
| 1.1  | 1018.4978 | -0.0007 | <a href="#">CRALAGSER</a> |
| 1.1  | 1018.4978 | -0.0007 | <a href="#">MPSATRQGR</a> |
| 1.1  | 1018.4944 | 0.0027  | <a href="#">YNGRAPGER</a> |
| 0.9  | 1018.4971 | 0.0000  | <a href="#">TEDVEIWK</a>  |

Mascot: <http://www.matrixscience.com/>

## Peptide View

### MS/MS Fragmentation of **ETIVNELR**

Found in **AT3G49120.1** in **TAIR\_Arabidopsis**, Symbols: ATPERX34, PERX34, PRXCB, ATPCB | ATPCB/ATPERX34/PERX34/PRXCB (PEROXIDASE 34); peroxidase | chr3:18218804-18221026 FORWARD

Match to Query 2262: 984.489442 from(493.251997,2+) index(3337)

Title: Elution from: 32.347 to 32.347 scan no 4143 cid35.00 polarity:+

Data file D6h-3\_2.mgf

Click mouse within plot area to zoom in by factor of two about that point

Or,   to  Da

Label all possible matches  Label matches used for scoring

Show Y-axis

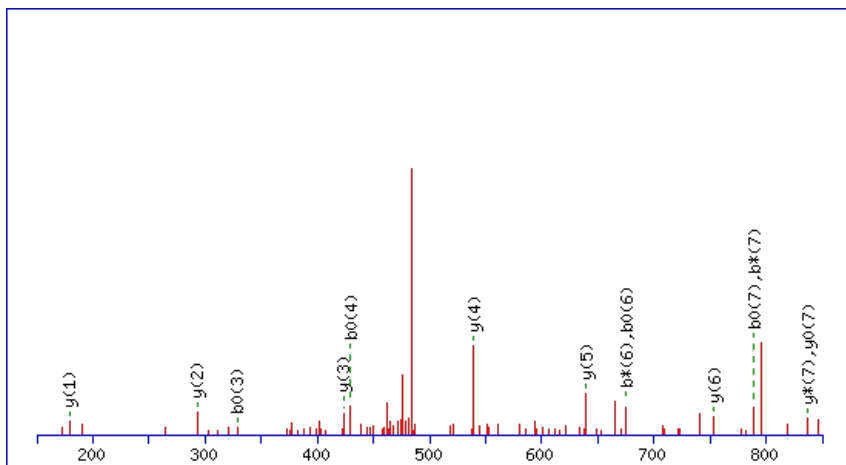

**Monoisotopic mass of neutral peptide Mr(calc):** 984.4884

**Fixed modifications:** Carbamidomethyl (C) (apply to specified residues or termini only)

**Ions Score:** 34 **Expect:** 0.0033

**Matches:** 14/72 fragment ions using 21 most intense peaks ([help](#))

| # | b        | b <sup>++</sup> | b*       | b <sup>*++</sup> | b <sup>0</sup> | b <sup>0++</sup> | Seq. | y        | y <sup>++</sup> | y*       | y <sup>*++</sup> | y <sup>0</sup> | y <sup>0++</sup> | # |
|---|----------|-----------------|----------|------------------|----------------|------------------|------|----------|-----------------|----------|------------------|----------------|------------------|---|
| 1 | 131.0469 | 66.0271         |          |                  | 113.0363       | 57.0218          | E    |          |                 |          |                  |                |                  | 8 |
| 2 | 233.0916 | 117.0494        |          |                  | 215.0811       | 108.0442         | T    | 855.4561 | 428.2317        | 837.4325 | 419.2199         | 837.4455       | 419.2264         | 7 |
| 3 | 347.1727 | 174.0900        |          |                  | 329.1622       | 165.0847         | I    | 753.4114 | 377.2093        | 735.3878 | 368.1975         | 735.4008       | 368.2040         | 6 |
| 4 | 447.2382 | 224.1227        |          |                  | 429.2276       | 215.1174         | V    | 639.3303 | 320.1688        | 621.3067 | 311.1570         | 621.3197       | 311.1635         | 5 |
| 5 | 563.2752 | 282.1412        | 545.2516 | 273.1294         | 545.2646       | 273.1359         | N    | 539.2648 | 270.1360        | 521.2412 | 261.1243         | 521.2543       | 261.1308         | 4 |
| 6 | 693.3148 | 347.1610        | 675.2912 | 338.1492         | 675.3042       | 338.1558         | E    | 423.2278 | 212.1175        | 405.2042 | 203.1058         | 405.2173       | 203.1123         | 3 |
| 7 | 807.3959 | 404.2016        | 789.3723 | 395.1898         | 789.3853       | 395.1963         | L    | 293.1882 | 147.0977        | 275.1646 | 138.0859         |                |                  | 2 |
| 8 |          |                 |          |                  |                |                  | R    | 179.1071 | 90.0572         | 161.0835 | 81.0454          |                |                  | 1 |

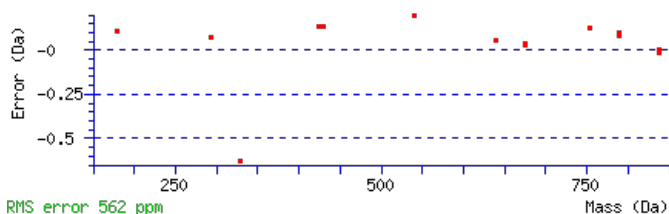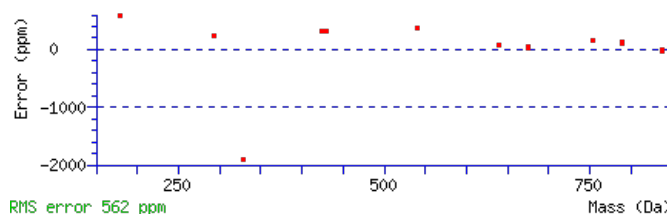

NCBI **BLAST** search of [ETIVNELR](#)

(Parameters: blastp, nr protein database, expect=20000, no filter, PAM30)

Other BLAST [web gateways](#)

### All matches to this query

| Score | Mr(calc) | Delta  | Sequence                 |
|-------|----------|--------|--------------------------|
| 34.2  | 984.4884 | 0.0010 | <a href="#">ETIVNELR</a> |

## AT3G49120.1

|      |          |         |                            |
|------|----------|---------|----------------------------|
| 23.0 | 984.4884 | 0.0010  | <a href="#">IKEADELR</a>   |
| 14.6 | 984.4884 | 0.0010  | <a href="#">DDIIGATLR</a>  |
| 13.9 | 984.4911 | -0.0017 | <a href="#">KHSSDKIR</a>   |
| 12.4 | 984.4884 | 0.0010  | <a href="#">SLEENELR</a>   |
| 12.3 | 984.4884 | 0.0010  | <a href="#">LELSDIAGR</a>  |
| 9.4  | 984.4911 | -0.0016 | <a href="#">SKTQTHLR</a>   |
| 9.2  | 984.4884 | 0.0010  | <a href="#">ELENLLR</a>    |
| 8.2  | 984.4884 | 0.0010  | <a href="#">SNDAGIVLGK</a> |
| 7.0  | 984.4884 | 0.0010  | <a href="#">GNQTVLVDK</a>  |

Mascot: <http://www.matrixscience.com/>

**Peptide View**MS/MS Fragmentation of **GLLTDPTLPLLTDSALK**Found in **AT3G49560.1** in **TAIR\_Arabidopsis**, Symbols: | mitochondrial import inner membrane translocase subunit Tim17/Tim22/Tim23 family protein | chr3:18381629-18382806 FORWARD

Match to Query 8640: 1784.949332 from(893.481942,2+) index(10528)

Title: Elution from: 99.363 to 99.363 scan no 14845 cid35.00 polarity:+

Data file 0-3\_1.mgf

Click mouse within plot area to zoom in by factor of two about that point

Or,   to  Da Label all possible matches  Label matches used for scoring Show Y-axis 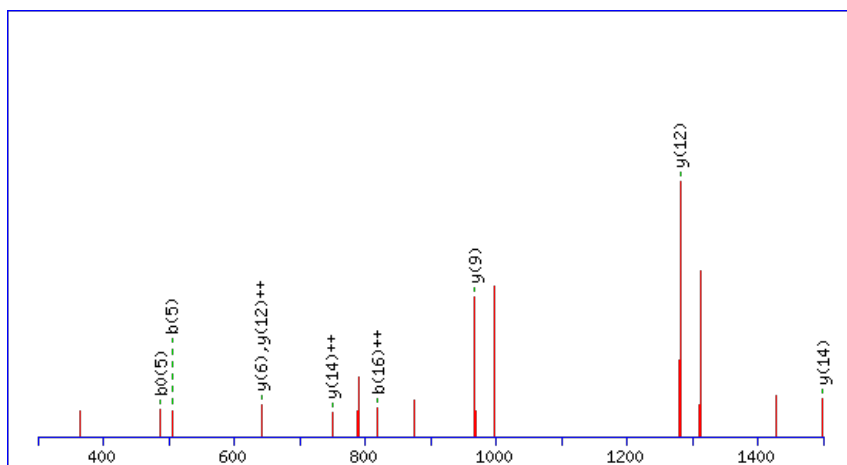Monoisotopic mass of neutral peptide  $M_r(\text{calc})$ : 1784.9496

Fixed modifications: Carbamidomethyl (C) (apply to specified residues or termini only)

Ions Score: 20 Expect: 0.017

Matches : 10/148 fragment ions using 14 most intense peaks ([help](#))

| #  | b               | b <sup>++</sup> | b <sup>0</sup>  | b <sup>0++</sup> | Seq.     | y                | y <sup>++</sup> | y <sup>*</sup> | y <sup>*++</sup> | y <sup>0</sup> | y <sup>0++</sup> | #  |
|----|-----------------|-----------------|-----------------|------------------|----------|------------------|-----------------|----------------|------------------|----------------|------------------|----|
| 1  | 59.0258         | 30.0165         |                 |                  | <b>G</b> |                  |                 |                |                  |                |                  | 17 |
| 2  | 173.1069        | 87.0571         |                 |                  | <b>L</b> | 1727.9384        | 864.4728        | 1709.9148      | 855.4610         | 1709.9278      | 855.4675         | 16 |
| 3  | 287.1880        | 144.0976        |                 |                  | <b>L</b> | 1613.8573        | 807.4323        | 1595.8337      | 798.4205         | 1595.8467      | 798.4270         | 15 |
| 4  | 389.2327        | 195.1200        | 371.2221        | 186.1147         | <b>T</b> | <b>1499.7762</b> | <b>750.3917</b> | 1481.7526      | 741.3799         | 1481.7656      | 741.3864         | 14 |
| 5  | <b>505.2567</b> | 253.1320        | <b>487.2461</b> | 244.1267         | <b>D</b> | 1397.7315        | 699.3694        | 1379.7079      | 690.3576         | 1379.7209      | 690.3641         | 13 |
| 6  | 603.3065        | 302.1569        | 585.2959        | 293.1516         | <b>P</b> | <b>1281.7075</b> | <b>641.3574</b> | 1263.6839      | 632.3456         | 1263.6969      | 632.3521         | 12 |
| 7  | 705.3512        | 353.1792        | 687.3406        | 344.1739         | <b>T</b> | 1183.6577        | 592.3325        | 1165.6341      | 583.3207         | 1165.6471      | 583.3272         | 11 |
| 8  | <b>819.4323</b> | 410.2198        | 801.4217        | 401.2145         | <b>L</b> | 1081.6130        | 541.3101        | 1063.5894      | 532.2983         | 1063.6024      | 532.3048         | 10 |
| 9  | 917.4821        | 459.2447        | 899.4715        | 450.2394         | <b>P</b> | <b>967.5319</b>  | 484.2696        | 949.5083       | 475.2578         | 949.5213       | 475.2643         | 9  |
| 10 | 1031.5632       | 516.2852        | 1013.5526       | 507.2799         | <b>L</b> | 869.4821         | 435.2447        | 851.4585       | 426.2329         | 851.4715       | 426.2394         | 8  |
| 11 | 1145.6443       | 573.3258        | 1127.6337       | 564.3205         | <b>L</b> | 755.4010         | 378.2041        | 737.3774       | 369.1923         | 737.3904       | 369.1988         | 7  |
| 12 | 1247.6890       | 624.3481        | 1229.6784       | 615.3428         | <b>T</b> | <b>641.3199</b>  | 321.1636        | 623.2963       | 312.1518         | 623.3093       | 312.1583         | 6  |
| 13 | 1363.7130       | 682.3601        | 1345.7024       | 673.3548         | <b>D</b> | 539.2752         | 270.1412        | 521.2516       | 261.1294         | 521.2646       | 261.1359         | 5  |
| 14 | 1451.7420       | 726.3747        | 1433.7315       | 717.3694         | <b>S</b> | 423.2512         | 212.1292        | 405.2276       | 203.1174         | 405.2406       | 203.1239         | 4  |
| 15 | 1523.7762       | 762.3917        | 1505.7656       | 753.3864         | <b>A</b> | 335.2221         | 168.1147        | 317.1985       | 159.1029         |                |                  | 3  |
| 16 | 1637.8573       | <b>819.4323</b> | 1619.8467       | 810.4270         | <b>L</b> | 263.1880         | 132.0976        | 245.1644       | 123.0858         |                |                  | 2  |
| 17 |                 |                 |                 |                  | <b>K</b> | 149.1069         | 75.0571         | 131.0833       | 66.0453          |                |                  | 1  |



AT3G49560.1

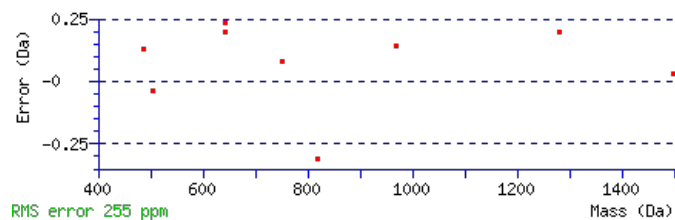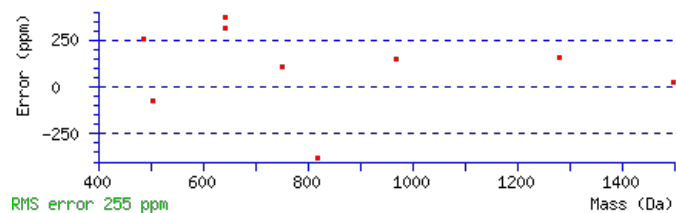

NCBI **BLAST** search of [GLLTDPTLPLLDSALK](#)

(Parameters: blastp, nr protein database, expect=20000, no filter, PAM30)

Other BLAST [web gateways](#)

**All matches to this query**

| Score | Mr(calc)  | Delta   | Sequence                         |
|-------|-----------|---------|----------------------------------|
| 20.1  | 1784.9496 | -0.0003 | <a href="#">GLLTDPTLPLLDSALK</a> |

Mascot: <http://www.matrixscience.com/>

**Peptide View**MS/MS Fragmentation of **IQNRTK**Found in **AT3G49650.1** in **TAIR\_Arabidopsis**, Symbols: | kinesin motor protein-related | chr3:18416245-18420387 REVERSE

Match to Query 852: 770.405872 from(386.210212,2+) index(4039)

Title: Elution from: 37.205 to 37.205 scan no 4983 cid35.00 polarity:+

Data file C7-1\_1.mgf

Click mouse within plot area to zoom in by factor of two about that point

Or,   to  Da Label all possible matches  Label matches used for scoring Show Y-axis 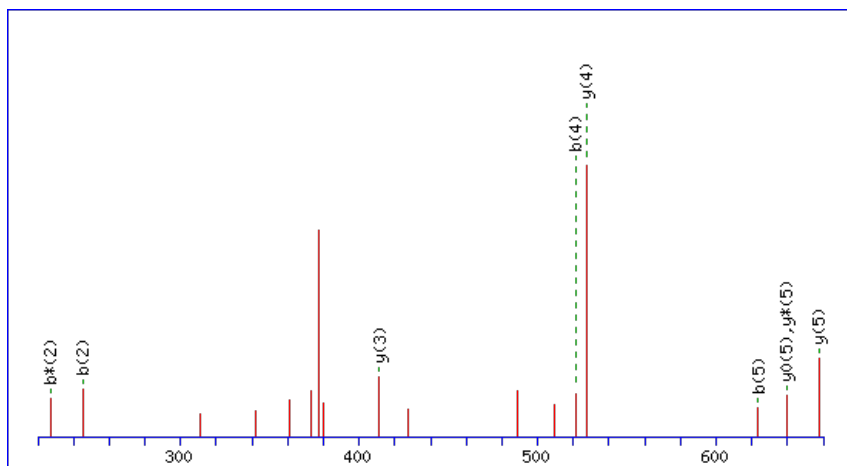Monoisotopic mass of neutral peptide **Mr(calc)**: 770.4043

Fixed modifications: Carbamidomethyl (C) (apply to specified residues or termini only)

Ions Score: 37 **Expect**: 0.0039Matches : 9/48 fragment ions using 10 most intense peaks ([help](#))

| # | b               | b <sup>++</sup> | b*              | b <sup>*++</sup> | b <sup>0</sup> | b <sup>0++</sup> | Seq. | y               | y <sup>++</sup> | y*              | y <sup>*++</sup> | y <sup>0</sup>  | y <sup>0++</sup> | # |
|---|-----------------|-----------------|-----------------|------------------|----------------|------------------|------|-----------------|-----------------|-----------------|------------------|-----------------|------------------|---|
| 1 | 115.0884        | 58.0478         |                 |                  |                |                  | I    |                 |                 |                 |                  |                 |                  | 6 |
| 2 | <b>245.1410</b> | 123.0741        | <b>227.1174</b> | 114.0624         |                |                  | Q    | <b>657.3305</b> | 329.1689        | <b>639.3069</b> | 320.1571         | <b>639.3199</b> | 320.1636         | 5 |
| 3 | 361.1780        | 181.0926        | 343.1544        | 172.0809         |                |                  | N    | <b>527.2778</b> | 264.1426        | 509.2543        | 255.1308         | 509.2673        | 255.1373         | 4 |
| 4 | <b>521.2673</b> | 261.1373        | 503.2437        | 252.1255         |                |                  | R    | <b>411.2408</b> | 206.1241        | 393.2173        | 197.1123         | 393.2303        | 197.1188         | 3 |
| 5 | <b>623.3120</b> | 312.1596        | 605.2884        | 303.1478         | 605.3014       | 303.1543         | T    | 251.1516        | 126.0794        | 233.1280        | 117.0676         | 233.1410        | 117.0741         | 2 |
| 6 |                 |                 |                 |                  |                |                  | K    | 149.1069        | 75.0571         | 131.0833        | 66.0453          |                 |                  | 1 |

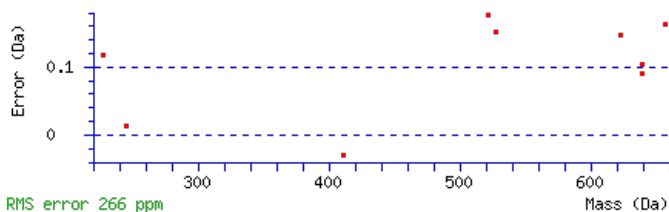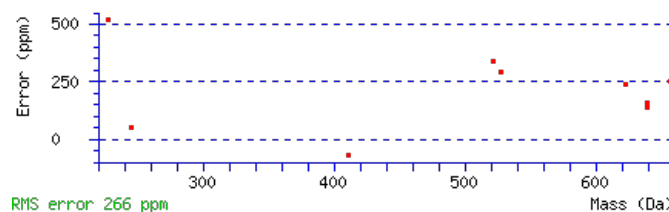NCBI **BLAST** search of **IQNRTK**

(Parameters: blastp, nr protein database, expect=20000, no filter, PAM30)

Other BLAST [web gateways](#)**All matches to this query**

| Score | Mr(calc) | Delta   | Sequence               |
|-------|----------|---------|------------------------|
| 37.0  | 770.4043 | 0.0016  | <a href="#">IQNRTK</a> |
| 31.1  | 770.4072 | -0.0014 | <a href="#">LKDMLK</a> |
| 25.3  | 770.4039 | 0.0020  | <a href="#">QIDFIK</a> |
| 25.3  | 770.4072 | -0.0014 | <a href="#">LKDMLK</a> |

## AT3G49650.1

|      |          |         |                        |
|------|----------|---------|------------------------|
| 25.3 | 770.4039 | 0.0020  | <a href="#">LQDLFK</a> |
| 19.5 | 770.4039 | 0.0020  | <a href="#">LEFVQK</a> |
| 19.5 | 770.4072 | -0.0014 | <a href="#">LEMVKK</a> |
| 16.2 | 770.4072 | -0.0014 | <a href="#">KLMDIK</a> |
| 16.0 | 770.4039 | 0.0020  | <a href="#">INEFLK</a> |
| 16.0 | 770.4072 | -0.0014 | <a href="#">LDKMLK</a> |

Mascot: <http://www.matrixscience.com/>

**Peptide View**MS/MS Fragmentation of **VIMSSPLSTDLR**Found in **AT3G49910.1** in **TAIR\_Arabidopsis**, Symbols: | 60S ribosomal protein L26 (RPL26A) | chr3:18515296-18515736 FORWARD

Match to Query 4329: 1317.698084 from(659.856318,2+) index(5496)

Title: Elution from: 52.848 to 52.848 scan no 7144 cid35.00 polarity:+

Data file D1d-1-2.mgf

Click mouse within plot area to zoom in by factor of two about that point

Or,   to  Da Label all possible matches  Label matches used for scoring Show Y-axis 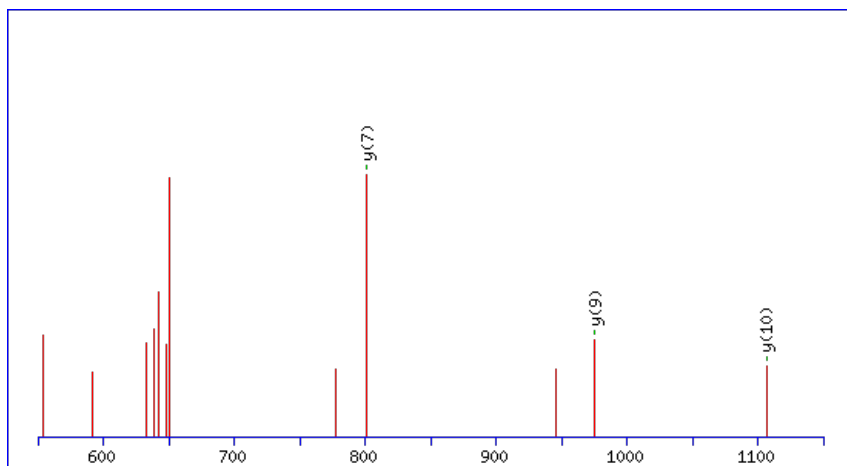Monoisotopic mass of neutral peptide **Mr(calc)**: 1317.6962**Fixed modifications**: Carbamidomethyl (C) (apply to specified residues or termini only)**Ions Score**: 21 **Expect**: 0.043**Matches**: 3/100 fragment ions using 5 most intense peaks ([help](#))

| #  | b         | b <sup>++</sup> | b <sup>0</sup> | b <sup>0++</sup> | Seq. | y                | y <sup>++</sup> | y*        | y <sup>*++</sup> | y <sup>0</sup> | y <sup>0++</sup> | #  |
|----|-----------|-----------------|----------------|------------------|------|------------------|-----------------|-----------|------------------|----------------|------------------|----|
| 1  | 100.0757  | 50.5415         |                |                  | V    |                  |                 |           |                  |                |                  | 12 |
| 2  | 213.1598  | 107.0835        |                |                  | I    | 1219.6351        | 610.3212        | 1202.6085 | 601.8079         | 1201.6245      | 601.3159         | 11 |
| 3  | 344.2002  | 172.6038        |                |                  | M    | <b>1106.5510</b> | 553.7792        | 1089.5245 | 545.2659         | 1088.5405      | 544.7739         | 10 |
| 4  | 431.2323  | 216.1198        | 413.2217       | 207.1145         | S    | <b>975.5105</b>  | 488.2589        | 958.4840  | 479.7456         | 957.5000       | 479.2536         | 9  |
| 5  | 518.2643  | 259.6358        | 500.2537       | 250.6305         | S    | 888.4785         | 444.7429        | 871.4520  | 436.2296         | 870.4680       | 435.7376         | 8  |
| 6  | 615.3171  | 308.1622        | 597.3065       | 299.1569         | P    | <b>801.4465</b>  | 401.2269        | 784.4199  | 392.7136         | 783.4359       | 392.2216         | 7  |
| 7  | 728.4011  | 364.7042        | 710.3906       | 355.6989         | L    | 704.3937         | 352.7005        | 687.3672  | 344.1872         | 686.3832       | 343.6952         | 6  |
| 8  | 815.4332  | 408.2202        | 797.4226       | 399.2149         | S    | 591.3097         | 296.1585        | 574.2831  | 287.6452         | 573.2991       | 287.1532         | 5  |
| 9  | 916.4808  | 458.7441        | 898.4703       | 449.7388         | T    | 504.2776         | 252.6425        | 487.2511  | 244.1292         | 486.2671       | 243.6372         | 4  |
| 10 | 1031.5078 | 516.2575        | 1013.4972      | 507.2522         | D    | 403.2300         | 202.1186        | 386.2034  | 193.6053         | 385.2194       | 193.1133         | 3  |
| 11 | 1144.5918 | 572.7996        | 1126.5813      | 563.7943         | L    | 288.2030         | 144.6051        | 271.1765  | 136.0919         |                |                  | 2  |
| 12 |           |                 |                |                  | R    | 175.1190         | 88.0631         | 158.0924  | 79.5498          |                |                  | 1  |

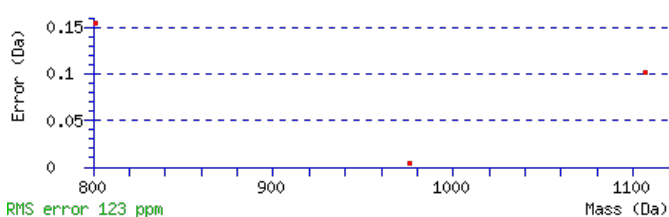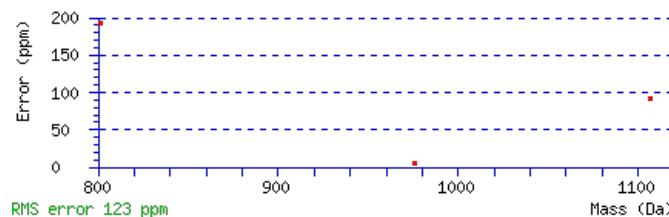NCBI **BLAST** search of **VIMSSPLSTDLR**

(Parameters: blastp, nr protein database, expect=20000, no filter, PAM30)

Other BLAST [web gateways](#)**All matches to this query**

AT3G49910.1

| Score | Mr(calc)  | Delta   | Sequence                     |
|-------|-----------|---------|------------------------------|
| 20.6  | 1317.6962 | 0.0019  | <a href="#">VIMSSPLSTDLR</a> |
| 3.9   | 1317.7002 | -0.0021 | <a href="#">IVMWLEELASK</a>  |
| 1.1   | 1317.6962 | 0.0019  | <a href="#">VIGENGTKEMLK</a> |

Mascot: <http://www.matrixscience.com/>

**Peptide View**MS/MS Fragmentation of **AVFGCETVETGDLYSQR**Found in **AT3G50050.1** in **TAIR\_Arabidopsis**, Symbols: | aspartyl protease family protein | chr3:18565121-18568098 REVERSE

Match to Query 8900: 1952.807337 from(651.943055,3+) index(6381)

Title: Elution from: 56.787 to 56.787 scan no 8188 cid35.00 polarity:+

Data file C7-1\_3.mgf

Click mouse within plot area to zoom in by factor of two about that point

Or,   to  Da Label all possible matches  Label matches used for scoring Show Y-axis 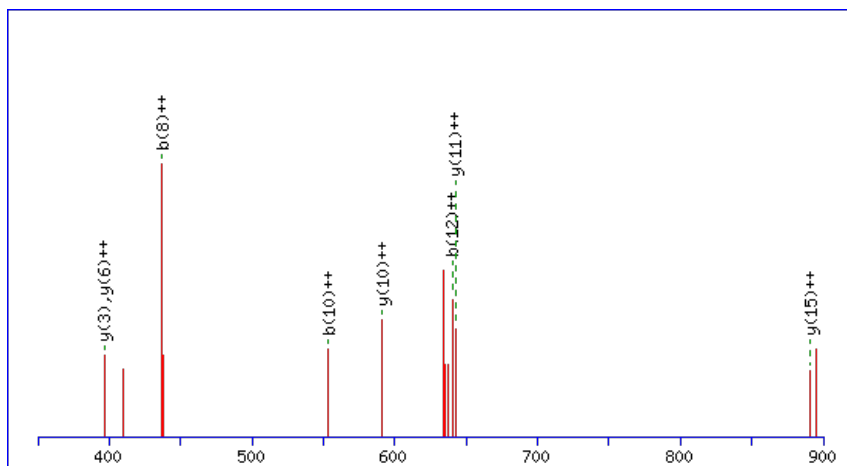Monoisotopic mass of neutral peptide **Mr(calc)**: 1952.8078

Fixed modifications: Carbamidomethyl (C) (apply to specified residues or termini only)

Ions Score: 31 Expect: 0.0025

Matches : 8/148 fragment ions using 10 most intense peaks ([help](#))

| #  | b         | b <sup>++</sup> | b*        | b <sup>*++</sup> | b <sup>0</sup> | b <sup>0++</sup> | Seq. | y         | y <sup>++</sup> | y*        | y <sup>*++</sup> | y <sup>0</sup> | y <sup>0++</sup> | #  |
|----|-----------|-----------------|-----------|------------------|----------------|------------------|------|-----------|-----------------|-----------|------------------|----------------|------------------|----|
| 1  | 73.0414   | 37.0244         |           |                  |                |                  | A    |           |                 |           |                  |                |                  | 17 |
| 2  | 173.1069  | 87.0571         |           |                  |                |                  | V    | 1881.7810 | 941.3941        | 1863.7574 | 932.3823         | 1863.7704      | 932.3888         | 16 |
| 3  | 321.1723  | 161.0898        |           |                  |                |                  | F    | 1781.7155 | 891.3614        | 1763.6920 | 882.3496         | 1763.7050      | 882.3561         | 15 |
| 4  | 379.1908  | 190.0990        |           |                  |                |                  | G    | 1633.6501 | 817.3287        | 1615.6265 | 808.3169         | 1615.6395      | 808.3234         | 14 |
| 5  | 541.2155  | 271.1114        |           |                  |                |                  | C    | 1575.6316 | 788.3194        | 1557.6080 | 779.3076         | 1557.6210      | 779.3142         | 13 |
| 6  | 671.2552  | 336.1312        |           |                  | 653.2446       | 327.1259         | E    | 1413.6069 | 707.3071        | 1395.5833 | 698.2953         | 1395.5963      | 698.3018         | 12 |
| 7  | 773.2999  | 387.1536        |           |                  | 755.2893       | 378.1483         | T    | 1283.5672 | 642.2873        | 1265.5437 | 633.2755         | 1265.5567      | 633.2820         | 11 |
| 8  | 873.3653  | 437.1863        |           |                  | 855.3548       | 428.1810         | V    | 1181.5225 | 591.2649        | 1163.4989 | 582.2531         | 1163.5120      | 582.2596         | 10 |
| 9  | 1003.4050 | 502.2061        |           |                  | 985.3944       | 493.2008         | E    | 1081.4571 | 541.2322        | 1063.4335 | 532.2204         | 1063.4465      | 532.2269         | 9  |
| 10 | 1105.4497 | 553.2285        |           |                  | 1087.4391      | 544.2232         | T    | 951.4175  | 476.2124        | 933.3939  | 467.2006         | 933.4069       | 467.2071         | 8  |
| 11 | 1163.4682 | 582.2377        |           |                  | 1145.4576      | 573.2324         | G    | 849.3727  | 425.1900        | 831.3492  | 416.1782         | 831.3622       | 416.1847         | 7  |
| 12 | 1279.4921 | 640.2497        |           |                  | 1261.4816      | 631.2444         | D    | 791.3542  | 396.1808        | 773.3307  | 387.1690         | 773.3437       | 387.1755         | 6  |
| 13 | 1393.5732 | 697.2903        |           |                  | 1375.5627      | 688.2850         | L    | 675.3303  | 338.1688        | 657.3067  | 329.1570         | 657.3197       | 329.1635         | 5  |
| 14 | 1557.6336 | 779.3204        |           |                  | 1539.6230      | 770.3152         | Y    | 561.2492  | 281.1282        | 543.2256  | 272.1164         | 543.2386       | 272.1229         | 4  |
| 15 | 1645.6627 | 823.3350        |           |                  | 1627.6521      | 814.3297         | S    | 397.1888  | 199.0980        | 379.1652  | 190.0862         | 379.1782       | 190.0928         | 3  |
| 16 | 1775.7153 | 888.3613        | 1757.6917 | 879.3495         | 1757.7048      | 879.3560         | Q    | 309.1597  | 155.0835        | 291.1362  | 146.0717         |                |                  | 2  |
| 17 |           |                 |           |                  |                |                  | R    | 179.1071  | 90.0572         | 161.0835  | 81.0454          |                |                  | 1  |

# AT3G50050.1

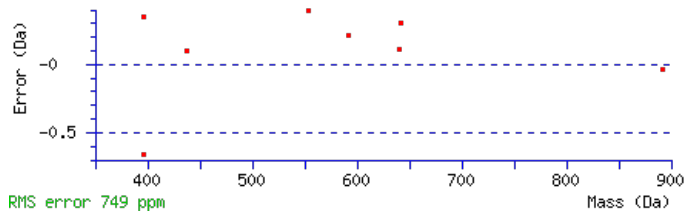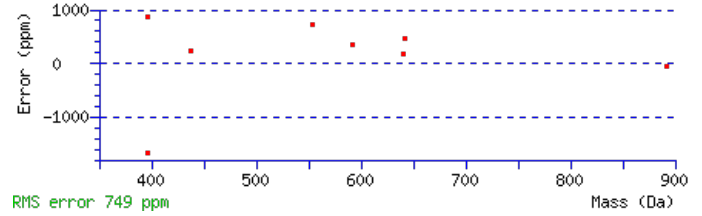

NCBI **BLAST** search of [AVFGCETVETGDLYSQ](#)

(Parameters: blastp, nr protein database, expect=20000, no filter, PAM30)

Other BLAST [web gateways](#)

## All matches to this query

| Score | Mr(calc)  | Delta   | Sequence                            |
|-------|-----------|---------|-------------------------------------|
| 31.1  | 1952.8078 | -0.0005 | <a href="#">AVFGCETVETGDLYSQ</a>    |
| 0.7   | 1952.8109 | -0.0035 | <a href="#">TSLSRSSSSSSNNNSPTK</a>  |
| 0.6   | 1952.8061 | 0.0013  | <a href="#">LQNVASSSGTGRSEMSSGR</a> |
| 0.0   | 1952.8065 | 0.0008  | <a href="#">CGSISDARLVFDNMMAK</a>   |
| 0.0   | 1952.8065 | 0.0008  | <a href="#">CGSISDARLVFDNMMAK</a>   |

Mascot: <http://www.matrixscience.com/>

**Peptide View**MS/MS Fragmentation of **HSGLNQEEK**Found in **AT3G50280.1** in **TAIR\_Arabidopsis**, Symbols: | transferase family protein | chr3:18648836-18650167 FORWARD

Match to Query 2837: 1040.490038 from(521.252295,2+) index(1286)

Title: Elution from: 20.367 to 20.367 scan no 1851 cid35.00 polarity:+

Data file D6h-2\_1.mgf

Click mouse within plot area to zoom in by factor of two about that point

Or,   to  Da Label all possible matches  Label matches used for scoring Show Y-axis 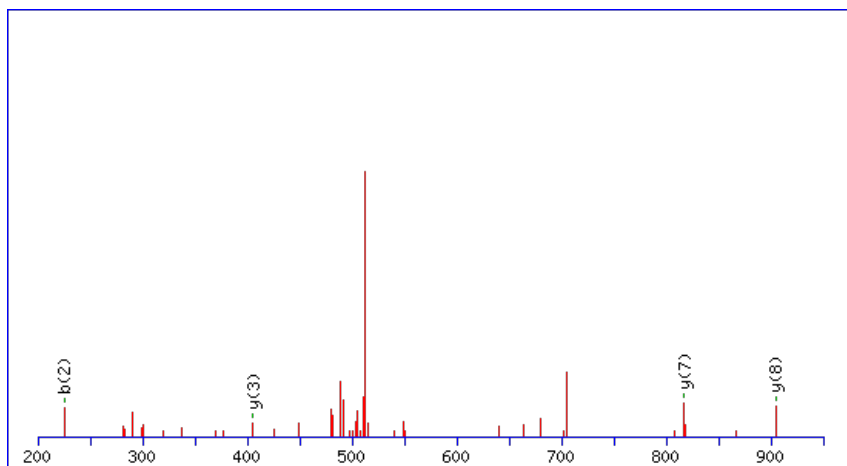Monoisotopic mass of neutral peptide **Mr(calc)**: 1040.4887**Fixed modifications**: Carbamidomethyl (C) (apply to specified residues or termini only)**Ions Score**: 16 **Expect**: 0.04**Matches**: 4/84 fragment ions using 7 most intense peaks ([help](#))

| # | b        | b <sup>++</sup> | b*       | b <sup>*++</sup> | b <sup>0</sup> | b <sup>0++</sup> | Seq. | y        | y <sup>++</sup> | y*       | y <sup>*++</sup> | y <sup>0</sup> | y <sup>0++</sup> | # |
|---|----------|-----------------|----------|------------------|----------------|------------------|------|----------|-----------------|----------|------------------|----------------|------------------|---|
| 1 | 138.0662 | 69.5367         |          |                  |                |                  | H    |          |                 |          |                  |                |                  | 9 |
| 2 | 225.0982 | 113.0527        |          |                  | 207.0877       | 104.0475         | S    | 904.4371 | 452.7222        | 887.4105 | 444.2089         | 886.4265       | 443.7169         | 8 |
| 3 | 282.1197 | 141.5635        |          |                  | 264.1091       | 132.5582         | G    | 817.4050 | 409.2061        | 800.3785 | 400.6929         | 799.3945       | 400.2009         | 7 |
| 4 | 395.2037 | 198.1055        |          |                  | 377.1932       | 189.1002         | L    | 760.3836 | 380.6954        | 743.3570 | 372.1821         | 742.3730       | 371.6901         | 6 |
| 5 | 509.2467 | 255.1270        | 492.2201 | 246.6137         | 491.2361       | 246.1217         | N    | 647.2995 | 324.1534        | 630.2729 | 315.6401         | 629.2889       | 315.1481         | 5 |
| 6 | 637.3052 | 319.1563        | 620.2787 | 310.6430         | 619.2947       | 310.1510         | Q    | 533.2566 | 267.1319        | 516.2300 | 258.6186         | 515.2460       | 258.1266         | 4 |
| 7 | 766.3478 | 383.6776        | 749.3213 | 375.1643         | 748.3373       | 374.6723         | E    | 405.1980 | 203.1026        | 388.1714 | 194.5894         | 387.1874       | 194.0974         | 3 |
| 8 | 895.3904 | 448.1989        | 878.3639 | 439.6856         | 877.3799       | 439.1936         | E    | 276.1554 | 138.5813        | 259.1288 | 130.0681         | 258.1448       | 129.5761         | 2 |
| 9 |          |                 |          |                  |                |                  | K    | 147.1128 | 74.0600         | 130.0863 | 65.5468          |                |                  | 1 |

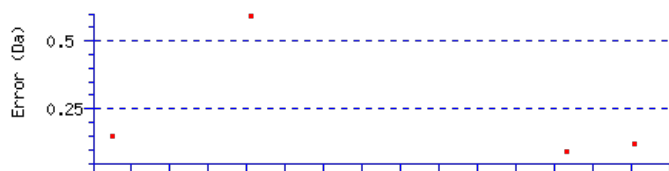

RMS error 805 ppm

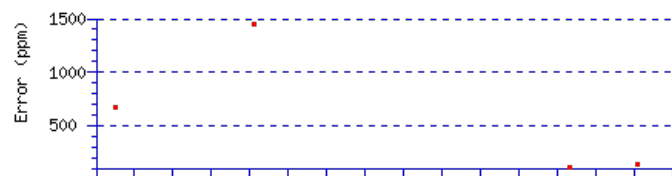

RMS error 805 ppm

NCBI **BLAST** search of [HSGLNQEEK](#)

(Parameters: blastp, nr protein database, expect=20000, no filter, PAM30)

Other BLAST [web gateways](#)**All matches to this query**

| Score | Mr(calc)  | Delta  | Sequence                  |
|-------|-----------|--------|---------------------------|
| 16.0  | 1040.4887 | 0.0014 | <a href="#">HSGLNQEEK</a> |



# AT3G50280.1

|     |           |        |                          |
|-----|-----------|--------|--------------------------|
| 1.0 | 1040.4887 | 0.0014 | <a href="#">SLHEGDEV</a> |
| 0.4 | 1040.4896 | 0.0005 | <a href="#">FMGCVKGR</a> |

**Mascot:** <http://www.matrixscience.com/>

**Peptide View**MS/MS Fragmentation of **RNMVSEK**

Found in **AT3G50370.1** in **TAIR\_Arabidopsis**, Symbols: | similar to unnamed protein product [Vitis vinifera] (GB:CAO71840.1); similar to hypothetical protein [Vitis vinifera] (GB:CAN81687.1) | chr3:18687418-18694926 REVERSE

Match to Query 1504: 890.392142 from(446.203347,2+) index(751)

Title: Elution from: 12.222 to 12.222 scan no 1054 cid35.00 polarity:+

Data file D12h-3\_3.mgf

Click mouse within plot area to zoom in by factor of two about that point

Or,  to  Da

Label all possible matches  Label matches used for scoring

Show Y-axis

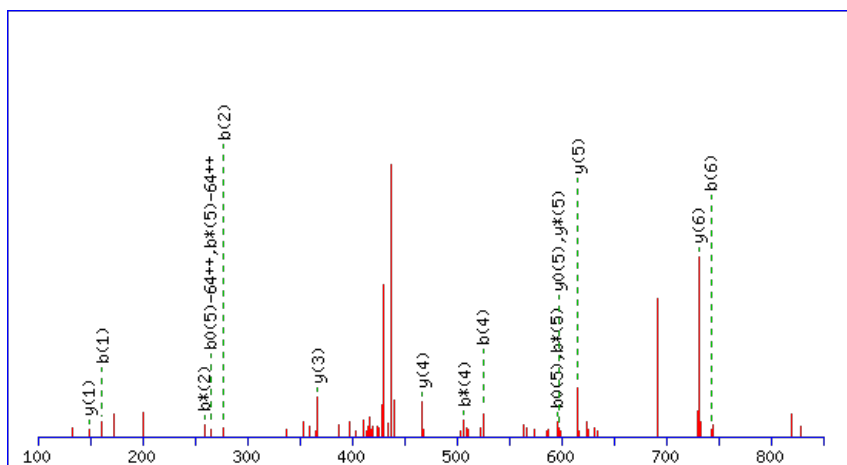

**Monoisotopic mass of neutral peptide Mr(calc):** 890.3924

**Fixed modifications:** Carbamidomethyl (C) (apply to specified residues or termini only)

**Variable modifications:**

**M3** : Oxidation (M), with neutral losses 0.0000 (shown in table), 63.9983

**Ions Score:** 24 **Expect:** 0.042

**Matches** : 17/94 fragment ions using 33 most intense peaks ([help](#))

| # | b        | b <sup>++</sup> | b*       | b <sup>+++</sup> | b <sup>0</sup> | b <sup>0++</sup> | Seq. | y        | y <sup>++</sup> | y*       | y <sup>+++</sup> | y <sup>0</sup> | y <sup>0++</sup> | # |
|---|----------|-----------------|----------|------------------|----------------|------------------|------|----------|-----------------|----------|------------------|----------------|------------------|---|
| 1 | 161.0965 | 81.0519         | 143.0729 | 72.0401          |                |                  | R    |          |                 |          |                  |                |                  | 7 |
| 2 | 277.1335 | 139.0704        | 259.1099 | 130.0586         |                |                  | N    | 731.3104 | 366.1589        | 713.2869 | 357.1471         | 713.2999       | 357.1536         | 6 |
| 3 | 425.1660 | 213.0866        | 407.1424 | 204.0748         |                |                  | M    | 615.2734 | 308.1404        | 597.2499 | 299.1286         | 597.2629       | 299.1351         | 5 |
| 4 | 525.2314 | 263.1193        | 507.2078 | 254.1076         |                |                  | V    | 467.2410 | 234.1241        | 449.2174 | 225.1124         | 449.2304       | 225.1189         | 4 |
| 5 | 613.2605 | 307.1339        | 595.2369 | 298.1221         | 595.2499       | 298.1286         | S    | 367.1756 | 184.0914        | 349.1520 | 175.0796         | 349.1650       | 175.0861         | 3 |
| 6 | 743.3001 | 372.1537        | 725.2765 | 363.1419         | 725.2895       | 363.1484         | E    | 279.1465 | 140.0769        | 261.1229 | 131.0651         | 261.1359       | 131.0716         | 2 |
| 7 |          |                 |          |                  |                |                  | K    | 149.1069 | 75.0571         | 131.0833 | 66.0453          |                |                  | 1 |

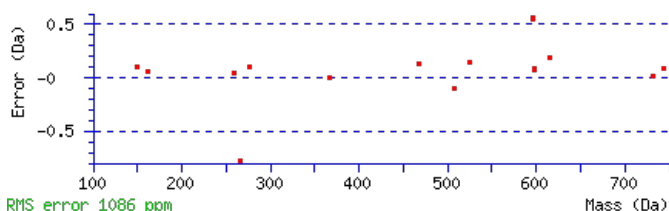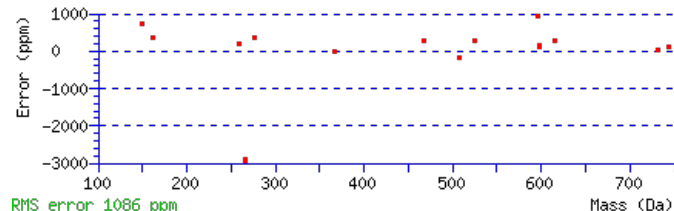

NCBI **BLAST** search of [RNMVSEK](#)

(Parameters: blastp, nr protein database, expect=20000, no filter, PAM30)

Other BLAST [web gateways](#)

**All matches to this query**

| Score | Mr(calc) | Delta   | Sequence                |
|-------|----------|---------|-------------------------|
| 23.8  | 890.3924 | -0.0003 | <a href="#">RNMVSEK</a> |

## AT3G50370.1

|      |          |         |                          |
|------|----------|---------|--------------------------|
| 12.2 | 890.3924 | -0.0003 | <a href="#">RNSEVMK</a>  |
| 8.3  | 890.3895 | 0.0027  | <a href="#">RDGRESR</a>  |
| 8.3  | 890.3924 | -0.0003 | <a href="#">MDSLKNR</a>  |
| 6.9  | 890.3947 | -0.0025 | <a href="#">KSMAWVK</a>  |
| 5.7  | 890.3924 | -0.0003 | <a href="#">RQMTDTK</a>  |
| 4.8  | 890.3924 | -0.0003 | <a href="#">RAMEASSK</a> |
| 4.3  | 890.3917 | 0.0004  | <a href="#">ASRHYSR</a>  |
| 4.1  | 890.3924 | -0.0003 | <a href="#">ATTMGVQR</a> |
| 3.7  | 890.3924 | -0.0003 | <a href="#">MKQNQSK</a>  |

Mascot: <http://www.matrixscience.com/>

**Peptide View**MS/MS Fragmentation of **KGHANVKGFK**

Found in **AT3G50610.1** in **TAIR\_Arabidopsis**, Symbols: | similar to unknown protein [Arabidopsis thaliana] (TAIR:AT5G66816.1); similar to unnamed protein product [Vitis vinifera] (GB:CAO71825.1) | chr3:18790704-18791393 REVERSE

Match to Query 3272: 1100.566646 from(551.290599,2+) index(7493)

Title: Elution from: 66.816 to 66.816 scan no 9908 cid35.00 polarity:+

Data file C7-3\_3.mgf

Click mouse within plot area to zoom in by factor of two about that point

Or,   to  Da

Label all possible matches  Label matches used for scoring

Show Y-axis

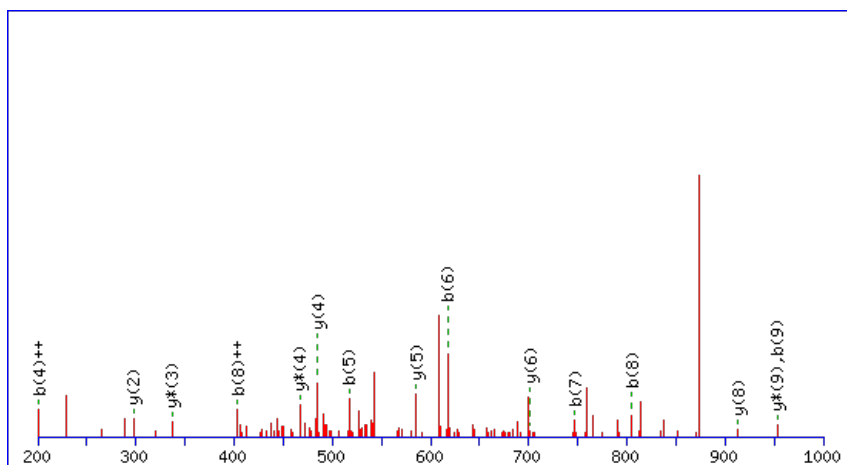

**Monoisotopic mass of neutral peptide Mr(calc):** 1100.5667

**Fixed modifications:** Carbamidomethyl (C) (apply to specified residues or termini only)

**Ions Score:** 23 **Expect:** 0.047

**Matches:** 15/72 fragment ions using 34 most intense peaks ([help](#))

| #  | b               | b <sup>++</sup> | b*       | b <sup>*++</sup> | Seq.     | y               | y <sup>++</sup> | y*              | y <sup>*++</sup> | #         |
|----|-----------------|-----------------|----------|------------------|----------|-----------------|-----------------|-----------------|------------------|-----------|
| 1  | 131.0963        | 66.0518         | 113.0727 | 57.0400          | <b>K</b> |                 |                 |                 |                  | <b>10</b> |
| 2  | 189.1148        | 95.0610         | 171.0912 | 86.0492          | <b>G</b> | 971.4850        | 486.2461        | <b>953.4614</b> | 477.2343         | <b>9</b>  |
| 3  | 329.1648        | 165.0861        | 311.1412 | 156.0743         | <b>H</b> | <b>913.4665</b> | 457.2369        | 895.4429        | 448.2251         | <b>8</b>  |
| 4  | 401.1990        | <b>201.1031</b> | 383.1754 | 192.0913         | <b>A</b> | 773.4164        | 387.2119        | 755.3929        | 378.2001         | <b>7</b>  |
| 5  | <b>517.2360</b> | 259.1216        | 499.2124 | 250.1098         | <b>N</b> | <b>701.3823</b> | 351.1948        | 683.3587        | 342.1830         | <b>6</b>  |
| 6  | <b>617.3014</b> | 309.1543        | 599.2778 | 300.1426         | <b>V</b> | <b>585.3453</b> | 293.1763        | 567.3217        | 284.1645         | <b>5</b>  |
| 7  | <b>747.3905</b> | 374.1989        | 729.3669 | 365.1871         | <b>K</b> | <b>485.2799</b> | 243.1436        | <b>467.2563</b> | 234.1318         | <b>4</b>  |
| 8  | <b>805.4090</b> | <b>403.2081</b> | 787.3854 | 394.1963         | <b>G</b> | 355.1908        | 178.0990        | <b>337.1672</b> | 169.0873         | <b>3</b>  |
| 9  | <b>953.4744</b> | 477.2408        | 935.4508 | 468.2290         | <b>F</b> | <b>297.1723</b> | 149.0898        | 279.1487        | 140.0780         | <b>2</b>  |
| 10 |                 |                 |          |                  | <b>K</b> | 149.1069        | 75.0571         | 131.0833        | 66.0453          | <b>1</b>  |

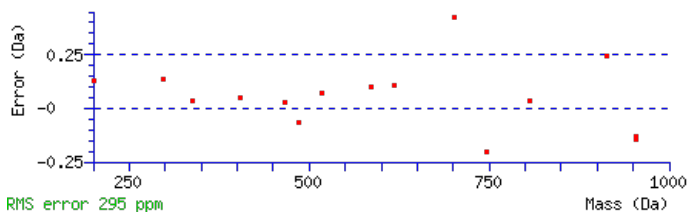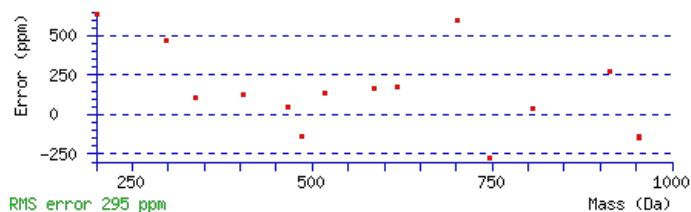

NCBI **BLAST** search of **KGHANVKGFK**

(Parameters: blastp, nr protein database, expect=20000, no filter, PAM30)

Other BLAST [web gateways](#)

**All matches to this query**

## AT3G50610.1

| Score | Mr(calc)  | Delta   | Sequence                    |
|-------|-----------|---------|-----------------------------|
| 22.6  | 1100.5667 | -0.0001 | <a href="#">KGHANVKGFK</a>  |
| 7.3   | 1100.5667 | -0.0001 | <a href="#">HGGLGGKFGKK</a> |
| 5.6   | 1100.5674 | -0.0008 | <a href="#">EVLVGMKAGGK</a> |
| 4.0   | 1100.5690 | -0.0023 | <a href="#">IAWRYLHK</a>    |
| 3.1   | 1100.5696 | -0.0030 | <a href="#">I WVIMKGDK</a>  |
| 1.1   | 1100.5640 | 0.0026  | <a href="#">ILAVGEPAYR</a>  |
| 0.2   | 1100.5648 | 0.0019  | <a href="#">LLSMLEELK</a>   |

Mascot: <http://www.matrixscience.com/>

**Peptide View**MS/MS Fragmentation of **FCFEPTSFTVK**

Found in **AT3G50820.1** in **TAIR\_Arabidopsis**, Symbols: PSBO2, PSBO-2 | PSBO-2/PSBO2 (PHOTOSYSTEM II SUBUNIT O-2); oxygen evolving/ poly(U) binding | chr3:18901989-18903292 REVERSE

Match to Query 5235: 1361.630310 from(681.822431,2+) index(7849)

Title: Elution from: 70.064 to 70.064 scan no 10277 cid35.00 polarity:+

Data file 0-3\_1.mgf

Click mouse within plot area to zoom in by factor of two about that point

Or,   to  Da

Label all possible matches  Label matches used for scoring

Show Y-axis

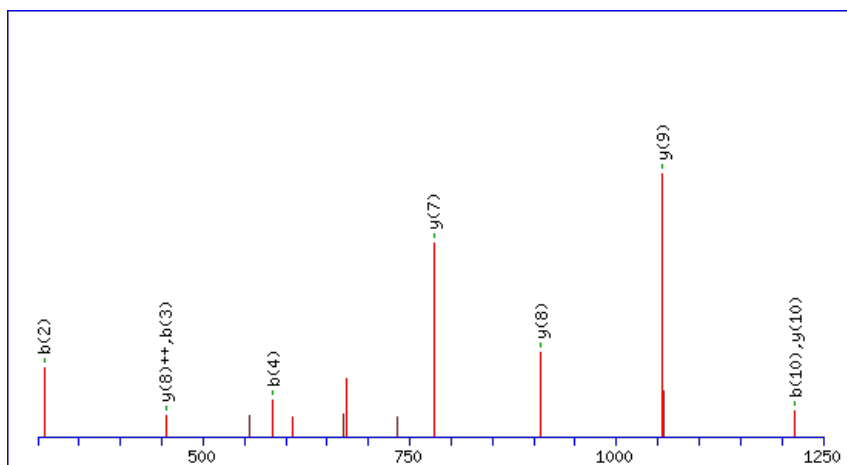

**Monoisotopic mass of neutral peptide Mr(calc):** 1361.6326

**Fixed modifications:** Carbamidomethyl (C) (apply to specified residues or termini only)

**Ions Score:** 42 **Expect:** 9.4e-005

**Matches:** 9/90 fragment ions using 8 most intense peaks ([help](#))

| #  | b                | b <sup>++</sup> | b <sup>0</sup> | b <sup>0++</sup> | Seq. | y                | y <sup>++</sup> | y*        | y <sup>*++</sup> | y <sup>0</sup> | y <sup>0++</sup> | #  |
|----|------------------|-----------------|----------------|------------------|------|------------------|-----------------|-----------|------------------|----------------|------------------|----|
| 1  | 148.0757         | 74.5415         |                |                  | F    |                  |                 |           |                  |                |                  | 11 |
| 2  | <b>308.1063</b>  | 154.5568        |                |                  | C    | <b>1215.5714</b> | 608.2894        | 1198.5449 | 599.7761         | 1197.5609      | 599.2841         | 10 |
| 3  | <b>455.1748</b>  | 228.0910        |                |                  | F    | <b>1055.5408</b> | 528.2740        | 1038.5142 | 519.7608         | 1037.5302      | 519.2687         | 9  |
| 4  | <b>584.2173</b>  | 292.6123        | 566.2068       | 283.6070         | E    | <b>908.4724</b>  | <b>454.7398</b> | 891.4458  | 446.2266         | 890.4618       | 445.7345         | 8  |
| 5  | 681.2701         | 341.1387        | 663.2595       | 332.1334         | P    | <b>779.4298</b>  | 390.2185        | 762.4032  | 381.7053         | 761.4192       | 381.2132         | 7  |
| 6  | 782.3178         | 391.6625        | 764.3072       | 382.6573         | T    | 682.3770         | 341.6921        | 665.3505  | 333.1789         | 664.3665       | 332.6869         | 6  |
| 7  | 869.3498         | 435.1785        | 851.3393       | 426.1733         | S    | 581.3293         | 291.1683        | 564.3028  | 282.6550         | 563.3188       | 282.1630         | 5  |
| 8  | 1016.4182        | 508.7128        | 998.4077       | 499.7075         | F    | 494.2973         | 247.6523        | 477.2708  | 239.1390         | 476.2867       | 238.6470         | 4  |
| 9  | 1117.4659        | 559.2366        | 1099.4553      | 550.2313         | T    | 347.2289         | 174.1181        | 330.2023  | 165.6048         | 329.2183       | 165.1128         | 3  |
| 10 | <b>1216.5343</b> | 608.7708        | 1198.5238      | 599.7655         | V    | 246.1812         | 123.5942        | 229.1547  | 115.0810         |                |                  | 2  |
| 11 |                  |                 |                |                  | K    | 147.1128         | 74.0600         | 130.0863  | 65.5468          |                |                  | 1  |

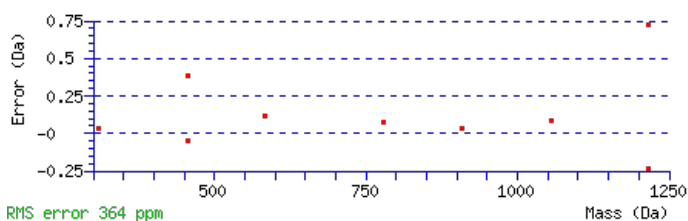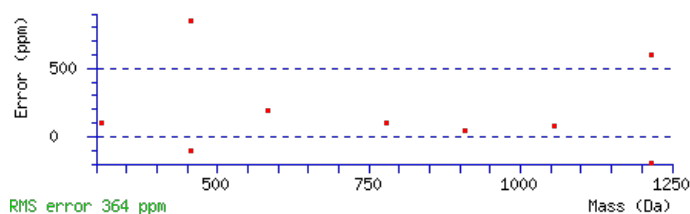

NCBI **BLAST** search of **FCFEPTSFTVK**

(Parameters: blastp, nr protein database, expect=20000, no filter, PAM30)

Other BLAST [web gateways](#)

**All matches to this query**

AT3G50820.1

| Score | Mr(calc)  | Delta   | Sequence                    |
|-------|-----------|---------|-----------------------------|
| 41.7  | 1361.6326 | -0.0023 | <a href="#">FCFEPTSFTVK</a> |

Mascot: <http://www.matrixscience.com/>

## Peptide View

### MS/MS Fragmentation of IGSNLEK

Found in **AT3G50840.1** in **TAIR\_Arabidopsis**, Symbols: | phototropic-responsive NPH3 family protein | chr3:18907334-18909355 REVERSE

Match to Query 735: 768.386880 from(385.200716,2+) index(339)

Title: Elution from: 10.757 to 10.757 scan no 639 cid35.00 polarity:+

Data file D12h-2\_1.mgf

Click mouse within plot area to zoom in by factor of two about that point

Or,   to  Da

Label all possible matches  Label matches used for scoring

Show Y-axis

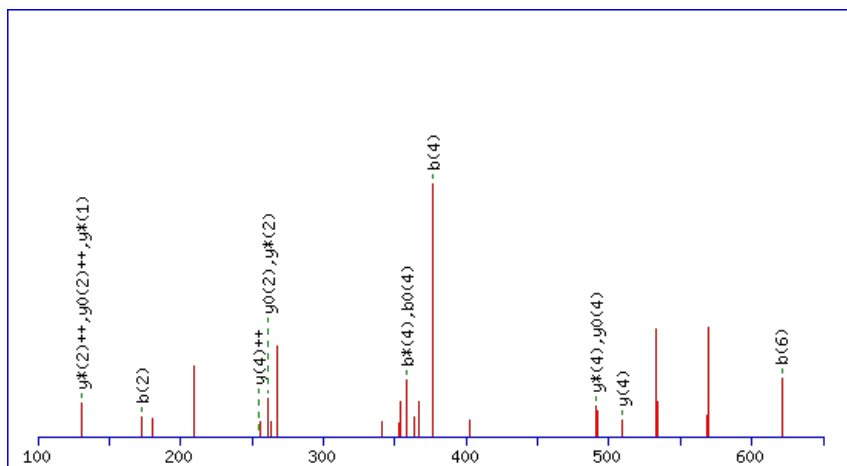

Monoisotopic mass of neutral peptide  $M_r(\text{calc})$ : 768.3860

Fixed modifications: Carbamidomethyl (C) (apply to specified residues or termini only)

Ions Score: 30 Expect: 0.017

Matches : 17/60 fragment ions using 15 most intense peaks ([help](#))

| # | b               | b <sup>++</sup> | b*              | b <sup>*++</sup> | b <sup>0</sup>  | b <sup>0++</sup> | Seq. | y               | y <sup>++</sup> | y*              | y <sup>*++</sup> | y <sup>0</sup>  | y <sup>0++</sup> | # |
|---|-----------------|-----------------|-----------------|------------------|-----------------|------------------|------|-----------------|-----------------|-----------------|------------------|-----------------|------------------|---|
| 1 | 115.0884        | 58.0478         |                 |                  |                 |                  | I    |                 |                 |                 |                  |                 |                  | 7 |
| 2 | <b>173.1069</b> | 87.0571         |                 |                  |                 |                  | G    | 655.3122        | 328.1597        | 637.2886        | 319.1479         | 637.3016        | 319.1544         | 6 |
| 3 | <b>261.1359</b> | <b>131.0716</b> |                 |                  | 243.1254        | 122.0663         | S    | 597.2937        | 299.1505        | 579.2701        | 290.1387         | 579.2831        | 290.1452         | 5 |
| 4 | <b>377.1729</b> | 189.0901        | <b>359.1493</b> | 180.0783         | <b>359.1624</b> | 180.0848         | N    | <b>509.2646</b> | <b>255.1359</b> | <b>491.2410</b> | 246.1241         | <b>491.2540</b> | 246.1307         | 4 |
| 5 | <b>491.2540</b> | 246.1307        | 473.2304        | 237.1189         | 473.2435        | 237.1254         | L    | 393.2276        | 197.1174        | 375.2040        | 188.1056         | 375.2170        | 188.1122         | 3 |
| 6 | <b>621.2937</b> | 311.1505        | 603.2701        | 302.1387         | 603.2831        | 302.1452         | E    | 279.1465        | 140.0769        | <b>261.1229</b> | <b>131.0651</b>  | <b>261.1359</b> | <b>131.0716</b>  | 2 |
| 7 |                 |                 |                 |                  |                 |                  | K    | 149.1069        | 75.0571         | <b>131.0833</b> | 66.0453          |                 |                  | 1 |

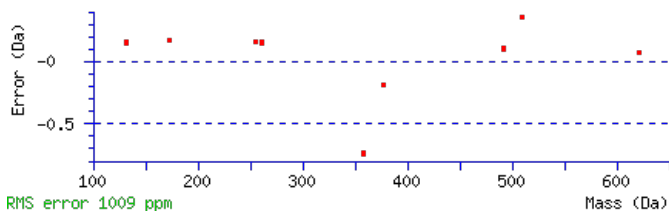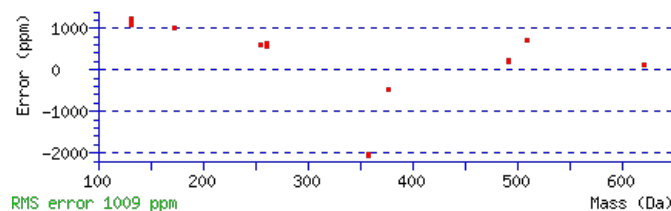

### NCBI BLAST search of IGSNLEK

(Parameters: blastp, nr protein database, expect=20000, no filter, PAM30)

Other BLAST [web gateways](#)

### All matches to this query

| Score | Mr(calc) | Delta  | Sequence                |
|-------|----------|--------|-------------------------|
| 29.6  | 768.3860 | 0.0009 | <a href="#">IGSNLEK</a> |
| 21.9  | 768.3860 | 0.0009 | <a href="#">EILNGSK</a> |
| 20.4  | 768.3860 | 0.0009 | <a href="#">EKTAPKS</a> |



# AT3G50840.1

|      |          |        |                        |
|------|----------|--------|------------------------|
| 17.6 | 768.3860 | 0.0009 | <a href="#">EDQLKK</a> |
| 17.6 | 768.3860 | 0.0009 | <a href="#">KDELQK</a> |
| 15.4 | 768.3860 | 0.0009 | <a href="#">EELNKK</a> |
| 15.4 | 768.3860 | 0.0009 | <a href="#">EKINEK</a> |
| 15.4 | 768.3860 | 0.0009 | <a href="#">EKLNEK</a> |
| 15.4 | 768.3860 | 0.0009 | <a href="#">EQVKEK</a> |
| 15.4 | 768.3860 | 0.0009 | <a href="#">KQEVEK</a> |

**Mascot:** <http://www.matrixscience.com/>

**Peptide View**MS/MS Fragmentation of **ALLEVVESGGK**Found in **AT3G51260.1** in **TAIR\_Arabidopsis**, Symbols: PAD1 | PAD1 (20S PROTEASOME ALPHA SUBUNIT PAD1); peptidase | chr3:19042065-19043725 FORWARD

Match to Query 3468: 1112.569376 from(557.291964,2+) index(5171)

Title: Elution from: 46.699 to 46.699 scan no 6525 cid35.00 polarity:+

Data file D6h-3\_1.mgf

Click mouse within plot area to zoom in by factor of two about that point

Or,   to  Da Label all possible matches  Label matches used for scoring Show Y-axis 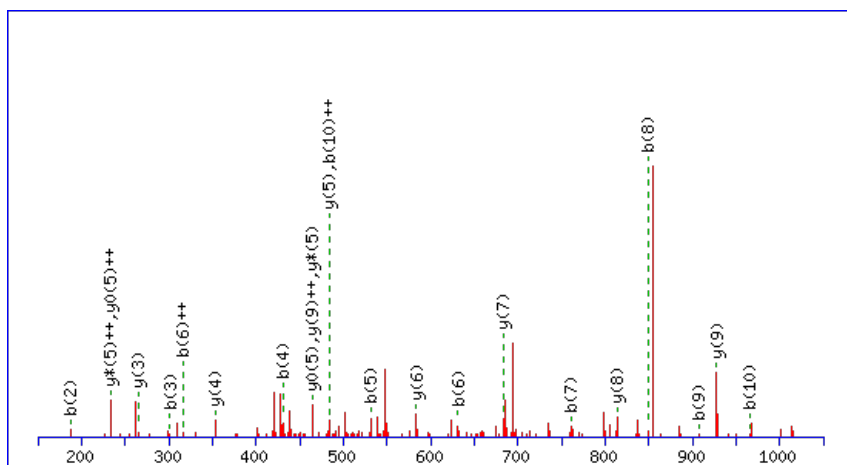Monoisotopic mass of neutral peptide  $M_r(\text{calc})$ : 1112.5721

Fixed modifications: Carbamidomethyl (C) (apply to specified residues or termini only)

Ions Score: 34 Expect: 0.0026

Matches : 23/88 fragment ions using 74 most intense peaks ([help](#))

| #  | b               | b <sup>++</sup> | b <sup>0</sup> | b <sup>0++</sup> | Seq. | y               | y <sup>++</sup> | y <sup>*</sup>  | y <sup>*++</sup> | y <sup>0</sup>  | y <sup>0++</sup> | #  |
|----|-----------------|-----------------|----------------|------------------|------|-----------------|-----------------|-----------------|------------------|-----------------|------------------|----|
| 1  | 73.0414         | 37.0244         |                |                  | A    |                 |                 |                 |                  |                 |                  | 11 |
| 2  | <b>187.1225</b> | 94.0649         |                |                  | L    | 1041.5453       | 521.2763        | 1023.5217       | 512.2645         | 1023.5347       | 512.2710         | 10 |
| 3  | <b>301.2036</b> | 151.1054        |                |                  | L    | <b>927.4642</b> | <b>464.2357</b> | 909.4406        | 455.2239         | 909.4536        | 455.2304         | 9  |
| 4  | <b>431.2433</b> | 216.1253        | 413.2327       | 207.1200         | E    | <b>813.3831</b> | 407.1952        | 795.3595        | 398.1834         | 795.3725        | 398.1899         | 8  |
| 5  | <b>531.3087</b> | 266.1580        | 513.2981       | 257.1527         | V    | <b>683.3435</b> | 342.1754        | 665.3199        | 333.1636         | 665.3329        | 333.1701         | 7  |
| 6  | <b>631.3741</b> | <b>316.1907</b> | 613.3636       | 307.1854         | V    | <b>583.2780</b> | 292.1426        | 565.2544        | 283.1309         | 565.2674        | 283.1374         | 6  |
| 7  | <b>761.4138</b> | 381.2105        | 743.4032       | 372.2052         | E    | <b>483.2126</b> | 242.1099        | <b>465.1890</b> | <b>233.0981</b>  | <b>465.2020</b> | <b>233.1046</b>  | 5  |
| 8  | <b>849.4428</b> | 425.2251        | 831.4323       | 416.2198         | S    | <b>353.1729</b> | 177.0901        | 335.1494        | 168.0783         | 335.1624        | 168.0848         | 4  |
| 9  | <b>907.4613</b> | 454.2343        | 889.4508       | 445.2290         | G    | <b>265.1439</b> | 133.0756        | 247.1203        | 124.0638         |                 |                  | 3  |
| 10 | <b>965.4798</b> | <b>483.2436</b> | 947.4693       | 474.2383         | G    | 207.1254        | 104.0663        | 189.1018        | 95.0545          |                 |                  | 2  |
| 11 |                 |                 |                |                  | K    | 149.1069        | 75.0571         | 131.0833        | 66.0453          |                 |                  | 1  |

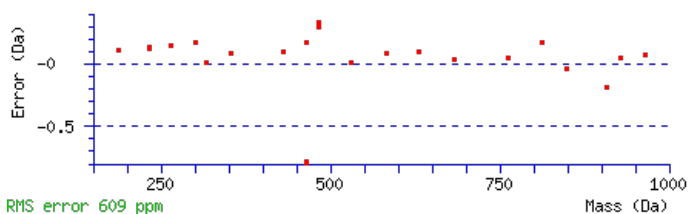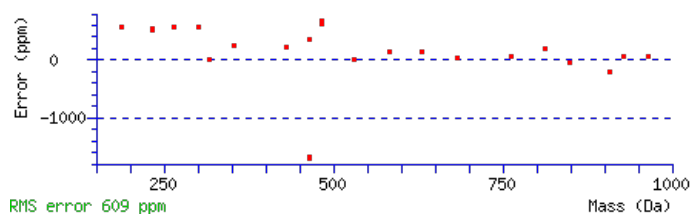NCBI **BLAST** search of [ALLEVVESGGK](#)

(Parameters: blastp, nr protein database, expect=20000, no filter, PAM30)

Other BLAST [web gateways](#)**All matches to this query**

AT3G51260.1

| Score | Mr(calc)  | Delta   | Sequence                    |
|-------|-----------|---------|-----------------------------|
| 33.7  | 1112.5721 | -0.0028 | <a href="#">ALLEVVESGGK</a> |

Mascot: <http://www.matrixscience.com/>

**Peptide View**MS/MS Fragmentation of **GIFLNMNEMK**Found in **AT3G51570.1** in **TAIR\_Arabidopsis**, Symbols: | disease resistance protein (TIR-NBS-LRR class), putative | chr3:19137337-19141435  
FORWARD

Match to Query 4055: 1224.532458 from(613.273505,2+) index(6290)

Title: Elution from: 56.039 to 56.039 scan no 8064 cid35.00 polarity:+

Data file C7-1\_3.mgf

Click mouse within plot area to zoom in by factor of two about that point

Or,   to  Da Label all possible matches  Label matches used for scoring Show Y-axis 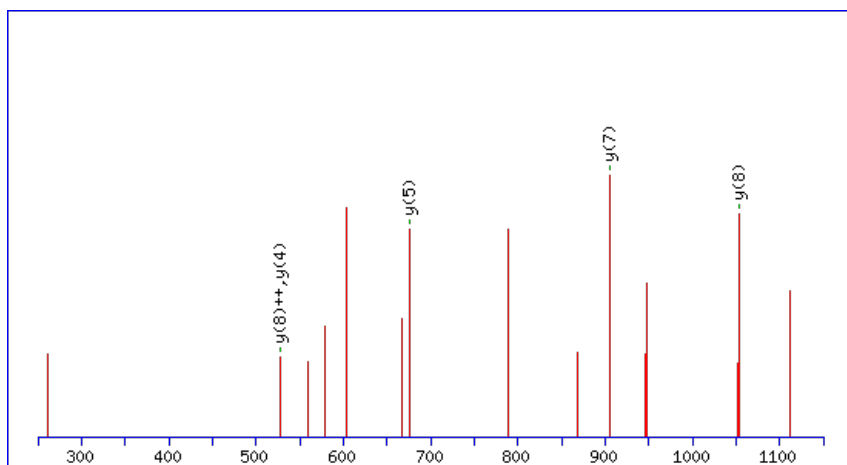Monoisotopic mass of neutral peptide  $M_r(\text{calc})$ : 1224.5293

Fixed modifications: Carbamidomethyl (C) (apply to specified residues or termini only)

Variable modifications:

M6 : Oxidation (M), with neutral losses 0.0000 (shown in table), 63.9983

Ions Score: 25 Expect: 0.02

Matches : 5/132 fragment ions using 8 most intense peaks ([help](#))

| #  | b         | b <sup>++</sup> | b <sup>*</sup> | b <sup>*++</sup> | b <sup>0</sup> | b <sup>0++</sup> | Seq. | y                | y <sup>++</sup> | y <sup>*</sup> | y <sup>*++</sup> | y <sup>0</sup> | y <sup>0++</sup> | #  |
|----|-----------|-----------------|----------------|------------------|----------------|------------------|------|------------------|-----------------|----------------|------------------|----------------|------------------|----|
| 1  | 59.0258   | 30.0165         |                |                  |                |                  | G    |                  |                 |                |                  |                |                  | 10 |
| 2  | 173.1069  | 87.0571         |                |                  |                |                  | I    | 1167.5181        | 584.2627        | 1149.4945      | 575.2509         | 1149.5075      | 575.2574         | 9  |
| 3  | 321.1723  | 161.0898        |                |                  |                |                  | F    | <b>1053.4370</b> | <b>527.2221</b> | 1035.4134      | 518.2103         | 1035.4264      | 518.2169         | 8  |
| 4  | 435.2534  | 218.1303        |                |                  |                |                  | L    | <b>905.3716</b>  | 453.1894        | 887.3480       | 444.1776         | 887.3610       | 444.1841         | 7  |
| 5  | 551.2904  | 276.1488        | 533.2668       | 267.1371         |                |                  | N    | 791.2905         | 396.1489        | 773.2669       | 387.1371         | 773.2799       | 387.1436         | 6  |
| 6  | 699.3229  | 350.1651        | 681.2993       | 341.1533         |                |                  | M    | <b>675.2535</b>  | 338.1304        | 657.2299       | 329.1186         | 657.2429       | 329.1251         | 5  |
| 7  | 815.3599  | 408.1836        | 797.3363       | 399.1718         |                |                  | N    | <b>527.2210</b>  | 264.1141        | 509.1974       | 255.1024         | 509.2105       | 255.1089         | 4  |
| 8  | 945.3995  | 473.2034        | 927.3759       | 464.1916         | 927.3889       | 464.1981         | E    | 411.1840         | 206.0956        | 393.1604       | 197.0839         | 393.1735       | 197.0904         | 3  |
| 9  | 1077.4370 | 539.2221        | 1059.4134      | 530.2103         | 1059.4264      | 530.2169         | M    | 281.1444         | 141.0758        | 263.1208       | 132.0640         |                |                  | 2  |
| 10 |           |                 |                |                  |                |                  | K    | 149.1069         | 75.0571         | 131.0833       | 66.0453          |                |                  | 1  |

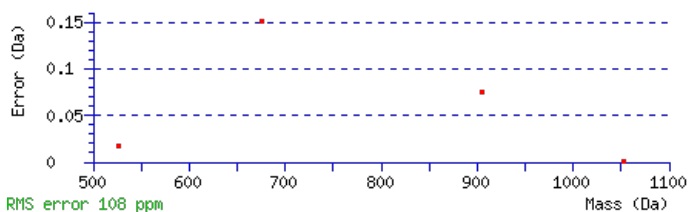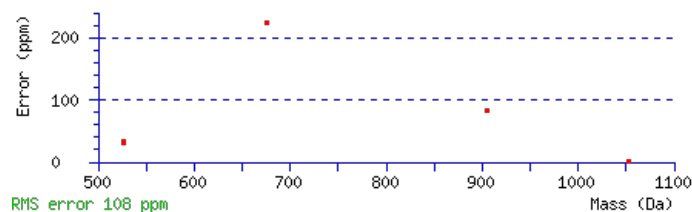NCBI BLAST search of **GIFLNMNEMK**

(Parameters: blastp, nr protein database, expect=20000, no filter, PAM30)

Other BLAST [web gateways](#)

All matches to this query

## AT3G51570.1

| Score | Mr(calc)  | Delta   | Sequence                      | Site Analysis       |
|-------|-----------|---------|-------------------------------|---------------------|
| 24.6  | 1224.5293 | 0.0031  | <a href="#">GIFLNMNEMK</a>    | Oxidation M6 92.24% |
| 16.1  | 1224.5341 | -0.0016 | <a href="#">IGFSMISDAEK</a>   |                     |
| 13.9  | 1224.5293 | 0.0031  | <a href="#">GIFLNMNEMK</a>    | Oxidation M9 7.76%  |
| 1.8   | 1224.5289 | 0.0036  | <a href="#">IGGSSNGSSSISR</a> |                     |
| 1.6   | 1224.5298 | 0.0027  | <a href="#">SRGQLCVMNK</a>    |                     |

Mascot: <http://www.matrixscience.com/>

## Peptide View

### MS/MS Fragmentation of **NTDVTEAIQK**

Found in **AT3G51800.1** in **TAIR\_Arabidopsis**, Symbols: ATG2 | ATG2 (G2p-related protein); metalloexopeptidase | chr3:1922238-1922454  
REVERSE

Match to Query 3493: 1130.521892 from(566.268222,2+) index(1457)

Title: Elution from: 19.471 to 19.471 scan no 1948 cid35.00 polarity:+

Data file D12h-1\_3.mgf

Click mouse within plot area to zoom in by factor of two about that point

Or,   to  Da

Label all possible matches  Label matches used for scoring

Show Y-axis

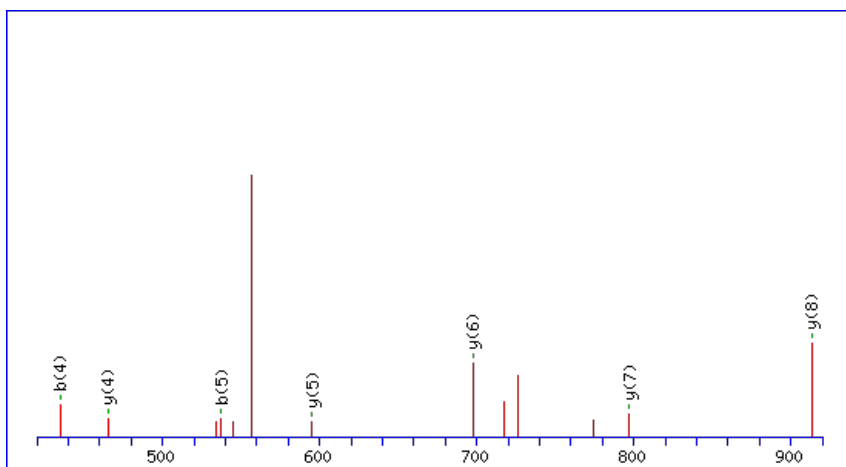

Monoisotopic mass of neutral peptide  $M_r(\text{calc})$ : 1130.5229

Fixed modifications: Carbamidomethyl (C) (apply to specified residues or termini only)

Ions Score: 36 Expect: 0.0015

Matches : 7/98 fragment ions using 12 most intense peaks ([help](#))

| #  | b               | b <sup>++</sup> | b*       | b <sup>*++</sup> | b <sup>0</sup> | b <sup>0++</sup> | Seq. | y               | y <sup>++</sup> | y*       | y <sup>*++</sup> | y <sup>0</sup> | y <sup>0++</sup> | #  |
|----|-----------------|-----------------|----------|------------------|----------------|------------------|------|-----------------|-----------------|----------|------------------|----------------|------------------|----|
| 1  | 117.0443        | 59.0258         | 99.0207  | 50.0140          |                |                  | N    |                 |                 |          |                  |                |                  | 10 |
| 2  | 219.0890        | 110.0481        | 201.0654 | 101.0363         | 201.0784       | 101.0428         | T    | 1015.4933       | 508.2503        | 997.4697 | 499.2385         | 997.4827       | 499.2450         | 9  |
| 3  | 335.1130        | 168.0601        | 317.0894 | 159.0483         | 317.1024       | 159.0548         | D    | <b>913.4485</b> | 457.2279        | 895.4250 | 448.2161         | 895.4380       | 448.2226         | 8  |
| 4  | <b>435.1784</b> | 218.0928        | 417.1548 | 209.0811         | 417.1678       | 209.0876         | V    | <b>797.4246</b> | 399.2159        | 779.4010 | 390.2041         | 779.4140       | 390.2106         | 7  |
| 5  | <b>537.2231</b> | 269.1152        | 519.1995 | 260.1034         | 519.2126       | 260.1099         | T    | <b>697.3591</b> | 349.1832        | 679.3355 | 340.1714         | 679.3485       | 340.1779         | 6  |
| 6  | 667.2628        | 334.1350        | 649.2392 | 325.1232         | 649.2522       | 325.1297         | E    | <b>595.3144</b> | 298.1608        | 577.2908 | 289.1490         | 577.3038       | 289.1556         | 5  |
| 7  | 739.2969        | 370.1521        | 721.2733 | 361.1403         | 721.2863       | 361.1468         | A    | <b>465.2748</b> | 233.1410        | 447.2512 | 224.1292         |                |                  | 4  |
| 8  | 853.3780        | 427.1926        | 835.3544 | 418.1808         | 835.3674       | 418.1874         | I    | 393.2406        | 197.1239        | 375.2170 | 188.1122         |                |                  | 3  |
| 9  | 983.4306        | 492.2190        | 965.4071 | 483.2072         | 965.4201       | 483.2137         | Q    | 279.1595        | 140.0834        | 261.1359 | 131.0716         |                |                  | 2  |
| 10 |                 |                 |          |                  |                |                  | K    | 149.1069        | 75.0571         | 131.0833 | 66.0453          |                |                  | 1  |

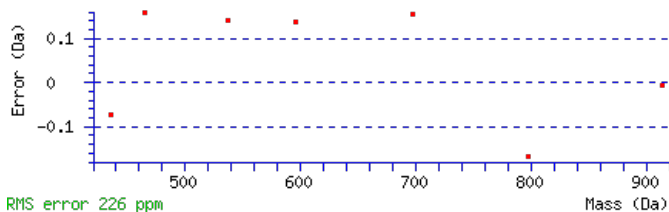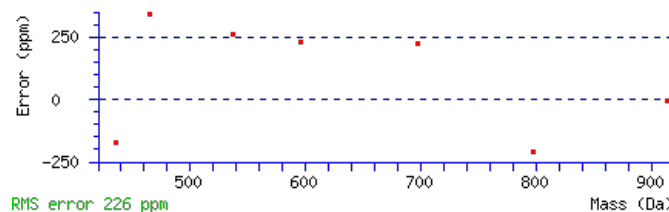

### NCBI BLAST search of **NTDVTEAIQK**

(Parameters: blastp, nr protein database, expect=20000, no filter, PAM30)

Other BLAST [web gateways](#)

All matches to this query

## AT3G51800.1

| Score | Mr(calc)  | Delta   | Sequence                    |
|-------|-----------|---------|-----------------------------|
| 36.5  | 1130.5229 | -0.0011 | <a href="#">NTDVTEAIQK</a>  |
| 10.7  | 1130.5229 | -0.0011 | <a href="#">TDDERELLK</a>   |
| 10.4  | 1130.5230 | -0.0011 | <a href="#">SEDLIEIKR</a>   |
| 2.8   | 1130.5230 | -0.0011 | <a href="#">DREEISEIK</a>   |
| 2.4   | 1130.5236 | -0.0017 | <a href="#">NRQKLHCR</a>    |
| 2.3   | 1130.5238 | -0.0020 | <a href="#">MAAANAPITMK</a> |

Mascot: <http://www.matrixscience.com/>

## Peptide View

MS/MS Fragmentation of **ELGGNGILADFLVAK**

Found in **AT3G51840.1** in **TAIR Arabidopsis**, Symbols: ATSCX, ATG6, ACX4 | ACX4 (ACYL-COA OXIDASE 4); oxidoreductase | chr3:19236630-19239985 REVERSE

Match to Query 6995: 1628.915026 from(815.464789,2+) index(10456)

Title: Elution from: 105.819 to 105.819 scan no 15434 cid35.00 polarity:+

Data file D1d-2\_2.mgf

Click mouse within plot area to zoom in by factor of two about that point

Or,  to  Da

Label all possible matches  Label matches used for scoring

Show Y-axis

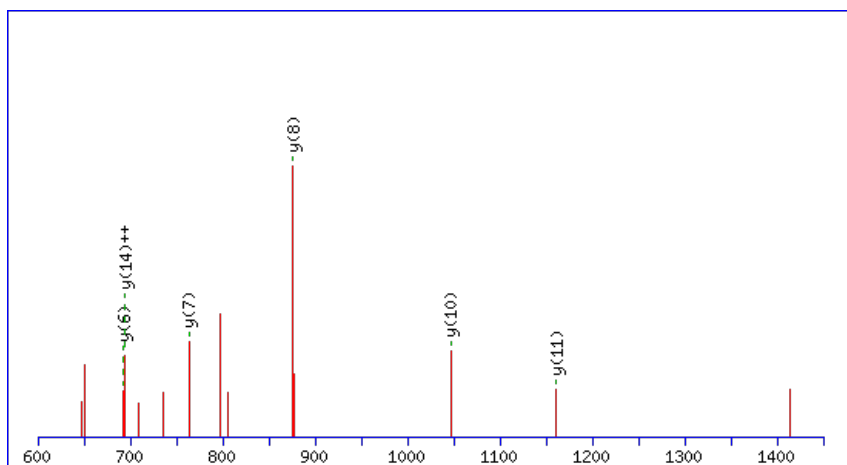

Monoisotopic mass of neutral peptide  $M_r(\text{calc})$ : 1628.9137

Fixed modifications: Carbamidomethyl (C) (apply to specified residues or termini only)

Ions Score: 28 Expect: 0.0037

Matches : 6/160 fragment ions using 11 most intense peaks ([help](#))

| #  | b         | b <sup>++</sup> | b*        | b <sup>*++</sup> | b <sup>0</sup> | b <sup>0++</sup> | Seq. | y         | y <sup>++</sup> | y*        | y <sup>*++</sup> | y <sup>0</sup> | y <sup>0++</sup> | #  |
|----|-----------|-----------------|-----------|------------------|----------------|------------------|------|-----------|-----------------|-----------|------------------|----------------|------------------|----|
| 1  | 130.0499  | 65.5286         |           |                  | 112.0393       | 56.5233          | E    |           |                 |           |                  |                |                  | 16 |
| 2  | 243.1339  | 122.0706        |           |                  | 225.1234       | 113.0653         | L    | 1500.8784 | 750.9429        | 1483.8519 | 742.4296         | 1482.8679      | 741.9376         | 15 |
| 3  | 356.2180  | 178.6126        |           |                  | 338.2074       | 169.6074         | L    | 1387.7944 | 694.4008        | 1370.7678 | 685.8876         | 1369.7838      | 685.3955         | 14 |
| 4  | 413.2395  | 207.1234        |           |                  | 395.2289       | 198.1181         | G    | 1274.7103 | 637.8588        | 1257.6838 | 629.3455         | 1256.6997      | 628.8535         | 13 |
| 5  | 470.2609  | 235.6341        |           |                  | 452.2504       | 226.6288         | G    | 1217.6889 | 609.3481        | 1200.6623 | 600.8348         | 1199.6783      | 600.3428         | 12 |
| 6  | 584.3039  | 292.6556        | 567.2773  | 284.1423         | 566.2933       | 283.6503         | N    | 1160.6674 | 580.8373        | 1143.6408 | 572.3241         | 1142.6568      | 571.8320         | 11 |
| 7  | 641.3253  | 321.1663        | 624.2988  | 312.6530         | 623.3148       | 312.1610         | G    | 1046.6245 | 523.8159        | 1029.5979 | 515.3026         | 1028.6139      | 514.8106         | 10 |
| 8  | 754.4094  | 377.7083        | 737.3828  | 369.1951         | 736.3988       | 368.7030         | I    | 989.6030  | 495.3051        | 972.5764  | 486.7919         | 971.5924       | 486.2999         | 9  |
| 9  | 867.4934  | 434.2504        | 850.4669  | 425.7371         | 849.4829       | 425.2451         | L    | 876.5189  | 438.7631        | 859.4924  | 430.2498         | 858.5084       | 429.7578         | 8  |
| 10 | 938.5306  | 469.7689        | 921.5040  | 461.2556         | 920.5200       | 460.7636         | A    | 763.4349  | 382.2211        | 746.4083  | 373.7078         | 745.4243       | 373.2158         | 7  |
| 11 | 1053.5575 | 527.2824        | 1036.5310 | 518.7691         | 1035.5469      | 518.2771         | D    | 692.3978  | 346.7025        | 675.3712  | 338.1892         | 674.3872       | 337.6972         | 6  |
| 12 | 1200.6259 | 600.8166        | 1183.5994 | 592.3033         | 1182.6154      | 591.8113         | F    | 577.3708  | 289.1890        | 560.3443  | 280.6758         |                |                  | 5  |
| 13 | 1313.7100 | 657.3586        | 1296.6834 | 648.8454         | 1295.6994      | 648.3533         | L    | 430.3024  | 215.6548        | 413.2758  | 207.1416         |                |                  | 4  |
| 14 | 1412.7784 | 706.8928        | 1395.7518 | 698.3796         | 1394.7678      | 697.8876         | V    | 317.2183  | 159.1128        | 300.1918  | 150.5995         |                |                  | 3  |
| 15 | 1483.8155 | 742.4114        | 1466.7890 | 733.8981         | 1465.8049      | 733.4061         | A    | 218.1499  | 109.5786        | 201.1234  | 101.0653         |                |                  | 2  |
| 16 |           |                 |           |                  |                |                  | K    | 147.1128  | 74.0600         | 130.0863  | 65.5468          |                |                  | 1  |



# AT3G51840.1

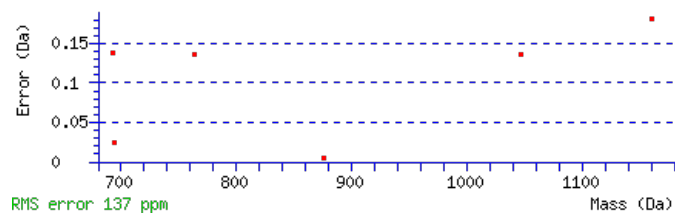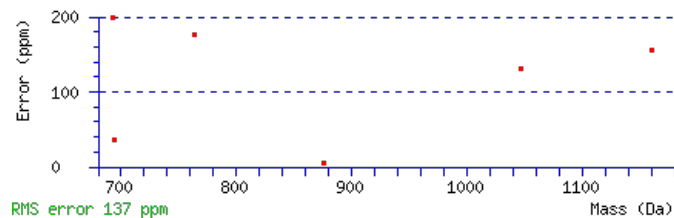

NCBI **BLAST** search of [ELGGNGILADFLVAK](#)

(Parameters: blastp, nr protein database, expect=20000, no filter, PAM30)

Other BLAST [web gateways](#)

## All matches to this query

| Score | Mr(calc)  | Delta  | Sequence                        |
|-------|-----------|--------|---------------------------------|
| 28.3  | 1628.9137 | 0.0013 | <a href="#">ELGGNGILADFLVAK</a> |

Mascot: <http://www.matrixscience.com/>

**Peptide View**MS/MS Fragmentation of **VYIGNIPR**

Found in **AT3G52150.1** in **TAIR\_Arabidopsis**, Symbols: | RNA recognition motif (RRM)-containing protein | chr3:19353052-19354068  
FORWARD

Match to Query 1836: 930.527690 from(466.271121,2+) index(3300)

Title: Elution from: 33.608 to 33.608 scan no 4128 cid35.00 polarity:+

Data file D6h-2\_2.mgf

Click mouse within plot area to zoom in by factor of two about that point

Or,   to  Da

Label all possible matches  Label matches used for scoring

Show Y-axis

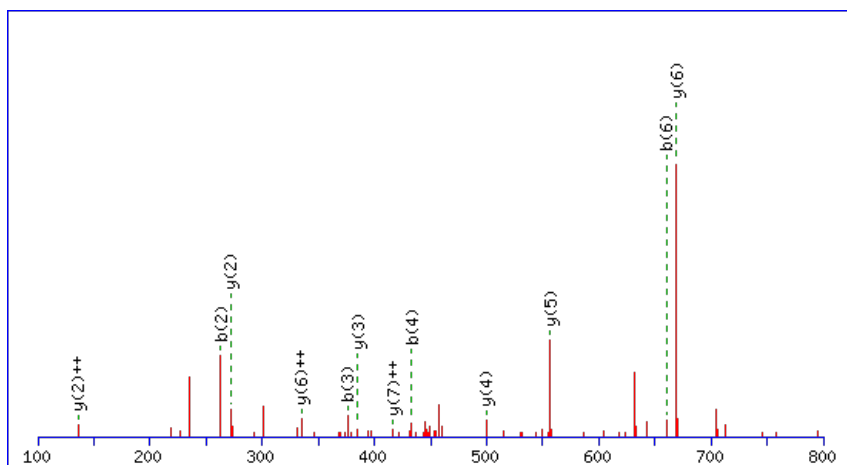

Monoisotopic mass of neutral peptide  $M_r(\text{calc})$ : 930.5287

Fixed modifications: Carbamidomethyl (C) (apply to specified residues or termini only)

Ions Score: 26 Expect: 0.0055

Matches : 12/48 fragment ions using 27 most intense peaks ([help](#))

| # | b               | b <sup>++</sup> | b*       | b <sup>*++</sup> | Seq. | y               | y <sup>++</sup> | y*       | y <sup>*++</sup> | # |
|---|-----------------|-----------------|----------|------------------|------|-----------------|-----------------|----------|------------------|---|
| 1 | 100.0757        | 50.5415         |          |                  | V    |                 |                 |          |                  | 8 |
| 2 | <b>263.1390</b> | 132.0731        |          |                  | Y    | 832.4676        | <b>416.7374</b> | 815.4410 | 408.2241         | 7 |
| 3 | <b>376.2231</b> | 188.6152        |          |                  | I    | <b>669.4042</b> | <b>335.2058</b> | 652.3777 | 326.6925         | 6 |
| 4 | <b>433.2445</b> | 217.1259        |          |                  | G    | <b>556.3202</b> | 278.6637        | 539.2936 | 270.1504         | 5 |
| 5 | 547.2875        | 274.1474        | 530.2609 | 265.6341         | N    | <b>499.2987</b> | 250.1530        | 482.2722 | 241.6397         | 4 |
| 6 | <b>660.3715</b> | 330.6894        | 643.3450 | 322.1761         | I    | <b>385.2558</b> | 193.1315        | 368.2292 | 184.6183         | 3 |
| 7 | 757.4243        | 379.2158        | 740.3978 | 370.7025         | P    | <b>272.1717</b> | <b>136.5895</b> | 255.1452 | 128.0762         | 2 |
| 8 |                 |                 |          |                  | R    | 175.1190        | 88.0631         | 158.0924 | 79.5498          | 1 |

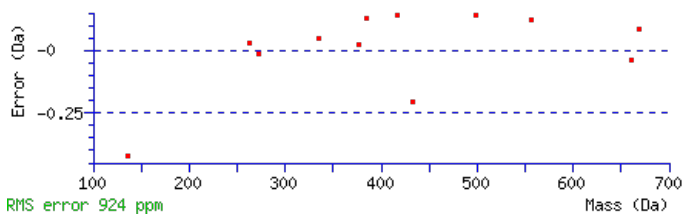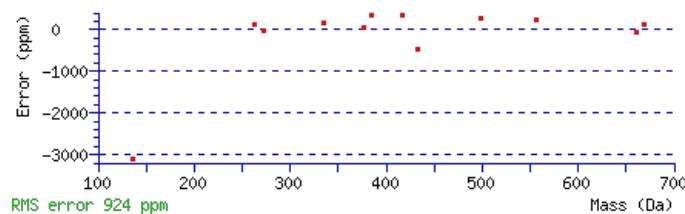

NCBI BLAST search of [VYIGNIPR](#)

(Parameters: blastp, nr protein database, expect=20000, no filter, PAM30)

Other BLAST [web gateways](#)

All matches to this query

| Score | $M_r(\text{calc})$ | Delta   | Sequence                 |
|-------|--------------------|---------|--------------------------|
| 25.7  | 930.5287           | -0.0010 | <a href="#">VYIGNIPR</a> |



**Peptide View**MS/MS Fragmentation of **LSEDPLELEEER**

Found in **AT3G52180.1** in **TAIR\_Arabidopsis**, Symbols: ATPTPKIS1, DSP4, SEX4 | ATPTPKIS1/DSP4/SEX4 (STARCH-EXCESS 4); polysaccharide binding / protein tyrosine/serine/threonine phosphatase | chr3:19360862-19364437 REVERSE

Match to Query 6479: 1544.720130 from(773.367341,2+) index(4177)

Title: Elution from: 42.145 to 42.145 scan no 5383 cid35.00 polarity:+

Data file D1d-1\_1.mgf

Click mouse within plot area to zoom in by factor of two about that point

Or,   to  Da

Label all possible matches  Label matches used for scoring

Show Y-axis

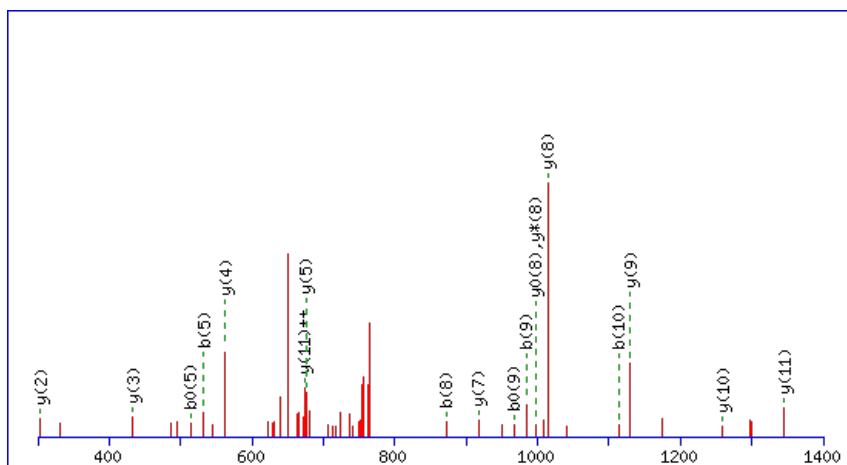

**Monoisotopic mass of neutral peptide Mr(calc):** 1544.7206

**Fixed modifications:** Carbamidomethyl (C) (apply to specified residues or termini only)

**Ions Score:** 59 **Expect:** 2.1e-006

**Matches:** 18/116 fragment ions using 33 most intense peaks ([help](#))

| #  | b                | b <sup>++</sup> | b <sup>0</sup>  | b <sup>0++</sup> | Seq. | y                | y <sup>++</sup> | y*              | y <sup>*++</sup> | y <sup>0</sup>  | y <sup>0++</sup> | #  |
|----|------------------|-----------------|-----------------|------------------|------|------------------|-----------------|-----------------|------------------|-----------------|------------------|----|
| 1  | 114.0913         | 57.5493         |                 |                  | L    |                  |                 |                 |                  |                 |                  | 13 |
| 2  | 201.1234         | 101.0653        | 183.1128        | 92.0600          | S    | 1432.6438        | 716.8255        | 1415.6173       | 708.3123         | 1414.6332       | 707.8203         | 12 |
| 3  | 288.1554         | 144.5813        | 270.1448        | 135.5761         | S    | <b>1345.6118</b> | <b>673.3095</b> | 1328.5852       | 664.7963         | 1327.6012       | 664.3042         | 11 |
| 4  | 417.1980         | 209.1026        | 399.1874        | 200.0973         | E    | <b>1258.5798</b> | 629.7935        | 1241.5532       | 621.2802         | 1240.5692       | 620.7882         | 10 |
| 5  | <b>532.2249</b>  | 266.6161        | <b>514.2144</b> | 257.6108         | D    | <b>1129.5372</b> | 565.2722        | 1112.5106       | 556.7589         | 1111.5266       | 556.2669         | 9  |
| 6  | 629.2777         | 315.1425        | 611.2671        | 306.1372         | P    | <b>1014.5102</b> | 507.7587        | <b>997.4837</b> | 499.2455         | <b>996.4997</b> | 498.7535         | 8  |
| 7  | 758.3203         | 379.6638        | 740.3097        | 370.6585         | E    | <b>917.4575</b>  | 459.2324        | 900.4309        | 450.7191         | 899.4469        | 450.2271         | 7  |
| 8  | <b>871.4044</b>  | 436.2058        | 853.3938        | 427.2005         | L    | 788.4149         | 394.7111        | 771.3883        | 386.1978         | 770.4043        | 385.7058         | 6  |
| 9  | <b>984.4884</b>  | 492.7478        | <b>966.4779</b> | 483.7426         | L    | <b>675.3308</b>  | 338.1690        | 658.3042        | 329.6558         | 657.3202        | 329.1638         | 5  |
| 10 | <b>1113.5310</b> | 557.2691        | 1095.5204       | 548.2639         | E    | <b>562.2467</b>  | 281.6270        | 545.2202        | 273.1137         | 544.2362        | 272.6217         | 4  |
| 11 | 1242.5736        | 621.7904        | 1224.5630       | 612.7852         | E    | <b>433.2041</b>  | 217.1057        | 416.1776        | 208.5924         | 415.1936        | 208.1004         | 3  |
| 12 | 1371.6162        | 686.3117        | 1353.6056       | 677.3065         | E    | <b>304.1615</b>  | 152.5844        | 287.1350        | 144.0711         | 286.1510        | 143.5791         | 2  |
| 13 |                  |                 |                 |                  | R    | 175.1190         | 88.0631         | 158.0924        | 79.5498          |                 |                  | 1  |

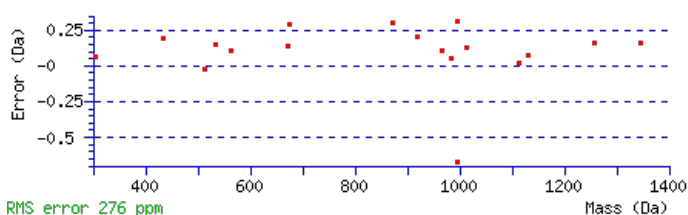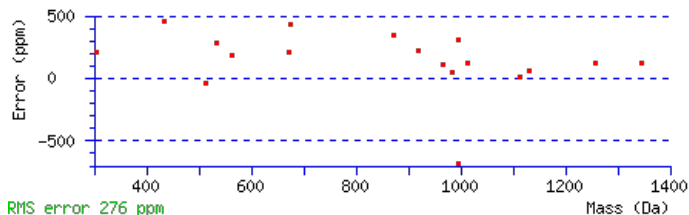

NCBI **BLAST** search of **LSEDPLELEEER**

(Parameters: blastp, nr protein database, expect=20000, no filter, PAM30)

AT3G52180.1

Other BLAST [web gateways](#)

All matches to this query

| Score | Mr(calc)  | Delta   | Sequence                    |
|-------|-----------|---------|-----------------------------|
| 59.0  | 1544.7206 | -0.0004 | <a href="#">LSSDPALLEER</a> |

Mascot: <http://www.matrixscience.com/>

**Peptide View**MS/MS Fragmentation of **SDCFGKIKK**Found in **AT3G52250.1** in **TAIR\_Arabidopsis**, Symbols: | DNA binding / transcription factor | chr3:19387607-19394078 FORWARD

Match to Query 2986: 1094.521640 from(548.268096,2+) index(3502)

Title: Elution from: 36.018 to 36.018 scan no 4455 cid35.00 polarity:+

Data file D1d-2\_1.mgf

Click mouse within plot area to zoom in by factor of two about that point

Or,  to  Da Label all possible matches  Label matches used for scoring Show Y-axis 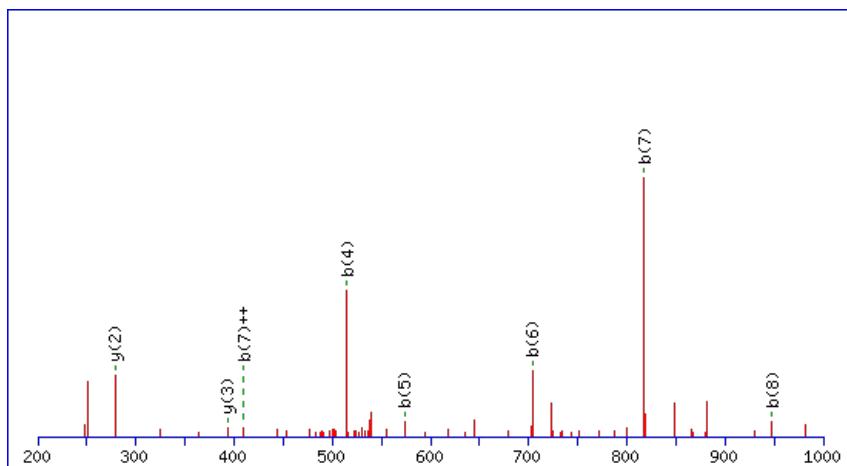Monoisotopic mass of neutral peptide **Mr(calc)**: 1094.5205**Fixed modifications**: Carbamidomethyl (C) (apply to specified residues or termini only)**Ions Score**: 31 **Expect**: 0.006**Matches** : 8/72 fragment ions using 16 most intense peaks ([help](#))

| # | b               | b <sup>++</sup> | b*       | b <sup>*++</sup> | b <sup>0</sup> | b <sup>0++</sup> | Seq. | y               | y <sup>++</sup> | y*       | y <sup>*++</sup> | y <sup>0</sup> | y <sup>0++</sup> | # |
|---|-----------------|-----------------|----------|------------------|----------------|------------------|------|-----------------|-----------------|----------|------------------|----------------|------------------|---|
| 1 | 89.0363         | 45.0218         |          |                  | 71.0258        | 36.0165          | S    |                 |                 |          |                  |                |                  | 9 |
| 2 | 205.0603        | 103.0338        |          |                  | 187.0498       | 94.0285          | D    | 1007.4987       | 504.2530        | 989.4751 | 495.2412         | 989.4881       | 495.2477         | 8 |
| 3 | 367.0850        | 184.0462        |          |                  | 349.0745       | 175.0409         | C    | 891.4747        | 446.2410        | 873.4511 | 437.2292         |                |                  | 7 |
| 4 | <b>515.1505</b> | 258.0789        |          |                  | 497.1399       | 249.0736         | F    | 729.4500        | 365.2286        | 711.4264 | 356.2168         |                |                  | 6 |
| 5 | <b>573.1690</b> | 287.0881        |          |                  | 555.1584       | 278.0828         | G    | 581.3845        | 291.1959        | 563.3610 | 282.1841         |                |                  | 5 |
| 6 | <b>703.2580</b> | 352.1326        | 685.2344 | 343.1209         | 685.2475       | 343.1274         | K    | 523.3660        | 262.1867        | 505.3425 | 253.1749         |                |                  | 4 |
| 7 | <b>817.3391</b> | <b>409.1732</b> | 799.3155 | 400.1614         | 799.3285       | 400.1679         | I    | <b>393.2770</b> | 197.1421        | 375.2534 | 188.1303         |                |                  | 3 |
| 8 | <b>947.4281</b> | 474.2177        | 929.4046 | 465.2059         | 929.4176       | 465.2124         | K    | <b>279.1959</b> | 140.1016        | 261.1723 | 131.0898         |                |                  | 2 |
| 9 |                 |                 |          |                  |                |                  | K    | 149.1069        | 75.0571         | 131.0833 | 66.0453          |                |                  | 1 |

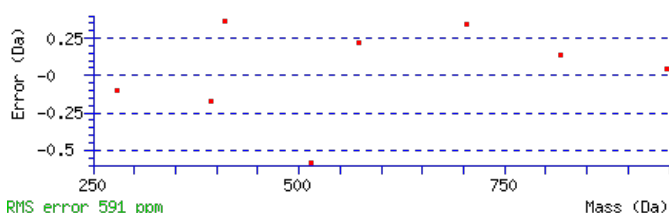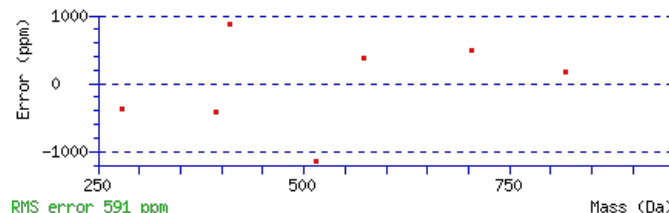NCBI **BLAST** search of [SDCFGKIKK](#)

(Parameters: blastp, nr protein database, expect=20000, no filter, PAM30)

Other BLAST [web gateways](#)**All matches to this query**

| Score | Mr(calc)  | Delta  | Sequence                  |
|-------|-----------|--------|---------------------------|
| 31.1  | 1094.5205 | 0.0012 | <a href="#">SDCFGKIKK</a> |

## AT3G52250.1

|      |           |         |                            |
|------|-----------|---------|----------------------------|
| 18.2 | 1094.5205 | 0.0012  | <a href="#">VIRMEYQK</a>   |
| 16.1 | 1094.5205 | 0.0012  | <a href="#">QFSAMNKLK</a>  |
| 15.1 | 1094.5205 | 0.0012  | <a href="#">MVASFEKVR</a>  |
| 13.3 | 1094.5204 | 0.0012  | <a href="#">FKVATGQGMK</a> |
| 12.4 | 1094.5205 | 0.0012  | <a href="#">SFDCLKGKK</a>  |
| 12.3 | 1094.5205 | 0.0012  | <a href="#">LMKDAVYAR</a>  |
| 11.1 | 1094.5205 | 0.0012  | <a href="#">AVMRYVAEK</a>  |
| 10.9 | 1094.5231 | -0.0015 | <a href="#">MKYNPRVR</a>   |
| 7.7  | 1094.5205 | 0.0012  | <a href="#">DMLRIYQK</a>   |

Mascot: <http://www.matrixscience.com/>

**Peptide View**MS/MS Fragmentation of **AFDEVNTQLQTK**

Found in **AT3G52300.1** in **TAIR\_Arabidopsis**, Symbols: ATPQ | ATPQ (ATP SYNTHASE D CHAIN, MITOCHONDRIAL); hydrogen ion transporting ATP synthase, rotational mechanism/ hydrogen ion transporting ATPase, rotational mechanism | chr3:19407667-19409097 FORWARD

Match to Query 5403: 1408.637140 from(705.325846,2+) index(3474)

Title: Elution from: 32.414 to 32.414 scan no 4283 cid35.00 polarity:+

Data file C7-2\_3.mgf

Click mouse within plot area to zoom in by factor of two about that point

Or,   to  Da

Label all possible matches  Label matches used for scoring

Show Y-axis

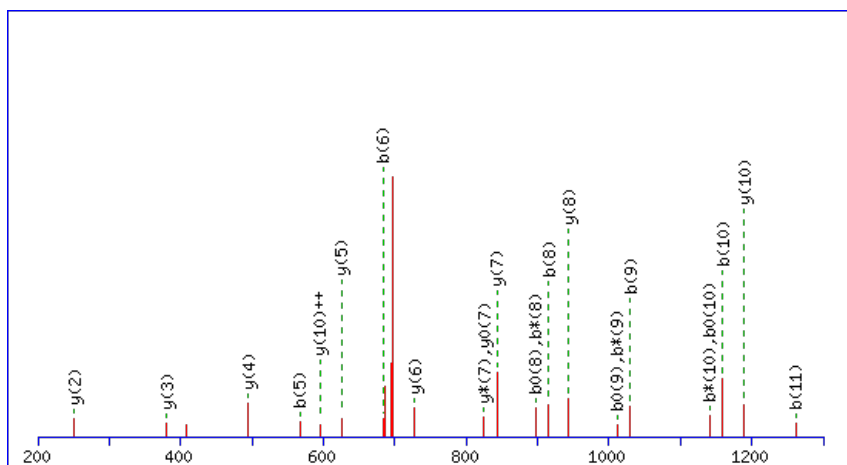

Monoisotopic mass of neutral peptide  $M_r(\text{calc})$ : 1408.6410

Fixed modifications: Carbamidomethyl (C) (apply to specified residues or termini only)

Ions Score: 78 Expect: 1.4e-007

Matches : 23/116 fragment ions using 23 most intense peaks ([help](#))

| #  | b                | b <sup>++</sup> | b*               | b <sup>*++</sup> | b <sup>0</sup>   | b <sup>0++</sup> | Seq. | y                | y <sup>++</sup> | y*              | y <sup>*++</sup> | y <sup>0</sup>  | y <sup>0++</sup> | #  |
|----|------------------|-----------------|------------------|------------------|------------------|------------------|------|------------------|-----------------|-----------------|------------------|-----------------|------------------|----|
| 1  | 73.0414          | 37.0244         |                  |                  |                  |                  | A    |                  |                 |                 |                  |                 |                  | 12 |
| 2  | 221.1069         | 111.0571        |                  |                  |                  |                  | F    | 1337.6142        | 669.3107        | 1319.5906       | 660.2989         | 1319.6036       | 660.3055         | 11 |
| 3  | 337.1309         | 169.0691        |                  |                  | 319.1203         | 160.0638         | D    | <b>1189.5487</b> | <b>595.2780</b> | 1171.5252       | 586.2662         | 1171.5382       | 586.2727         | 10 |
| 4  | 467.1705         | 234.0889        |                  |                  | 449.1599         | 225.0836         | E    | 1073.5248        | 537.2660        | 1055.5012       | 528.2542         | 1055.5142       | 528.2607         | 9  |
| 5  | <b>567.2359</b>  | 284.1216        |                  |                  | 549.2254         | 275.1163         | V    | <b>943.4851</b>  | 472.2462        | 925.4616        | 463.2344         | 925.4746        | 463.2409         | 8  |
| 6  | <b>683.2729</b>  | 342.1401        | 665.2493         | 333.1283         | 665.2624         | 333.1348         | N    | <b>843.4197</b>  | 422.2135        | <b>825.3961</b> | 413.2017         | <b>825.4091</b> | 413.2082         | 7  |
| 7  | 785.3176         | 393.1625        | 767.2941         | 384.1507         | 767.3071         | 384.1572         | T    | <b>727.3827</b>  | 364.1950        | 709.3591        | 355.1832         | 709.3721        | 355.1897         | 6  |
| 8  | <b>915.3703</b>  | 458.1888        | <b>897.3467</b>  | 449.1770         | <b>897.3597</b>  | 449.1835         | Q    | <b>625.3380</b>  | 313.1726        | 607.3144        | 304.1608         | 607.3274        | 304.1673         | 5  |
| 9  | <b>1029.4514</b> | 515.2293        | <b>1011.4278</b> | 506.2175         | <b>1011.4408</b> | 506.2240         | L    | <b>495.2853</b>  | 248.1463        | 477.2617        | 239.1345         | 477.2748        | 239.1410         | 4  |
| 10 | <b>1159.5040</b> | 580.2557        | <b>1141.4804</b> | 571.2439         | <b>1141.4935</b> | 571.2504         | Q    | <b>381.2042</b>  | 191.1058        | 363.1806        | 182.0940         | 363.1937        | 182.1005         | 3  |
| 11 | <b>1261.5487</b> | 631.2780        | 1243.5252        | 622.2662         | 1243.5382        | 622.2727         | T    | <b>251.1516</b>  | 126.0794        | 233.1280        | 117.0676         | 233.1410        | 117.0741         | 2  |
| 12 |                  |                 |                  |                  |                  |                  | K    | 149.1069         | 75.0571         | 131.0833        | 66.0453          |                 |                  | 1  |

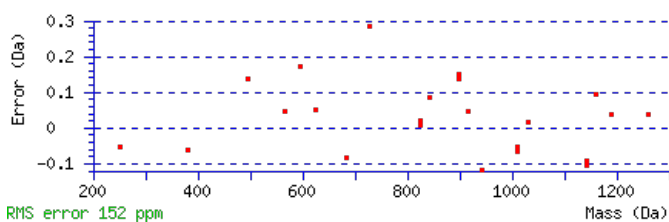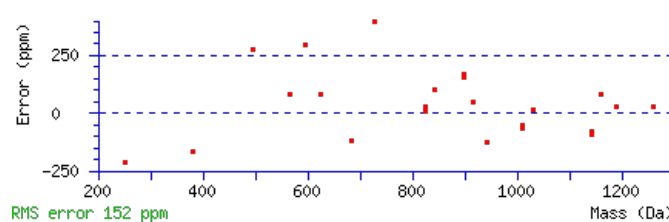

NCBI BLAST search of **AFDEVNTQLQTK**

(Parameters: blastp, nr protein database, expect=20000, no filter, PAM30)

Other BLAST [web gateways](#)



**AT3G52300.1**

All matches to this query

| Score | Mr(calc)  | Delta   | Sequence                       |
|-------|-----------|---------|--------------------------------|
| 78.1  | 1408.6410 | -0.0039 | <a href="#">AFDEVNTQLQTK</a>   |
| 16.6  | 1408.6341 | 0.0031  | <a href="#">MEEETRIKEAR</a>    |
| 15.4  | 1408.6341 | 0.0031  | <a href="#">MADKLEAKGGNGGK</a> |
| 14.5  | 1408.6411 | -0.0039 | <a href="#">YEDAADLLEKAR</a>   |
| 14.5  | 1408.6385 | -0.0014 | <a href="#">DDFFKKPHMTK</a>    |
| 10.4  | 1408.6412 | -0.0041 | <a href="#">RFPRGFPPECK</a>    |
| 9.4   | 1408.6329 | 0.0042  | <a href="#">FLDARNWDVEK</a>    |
| 8.8   | 1408.6390 | -0.0019 | <a href="#">KNCVNRGLWDK</a>    |
| 6.7   | 1408.6363 | 0.0008  | <a href="#">KMTNSFDHVIGK</a>   |
| 6.5   | 1408.6410 | -0.0039 | <a href="#">ETFADKLIDDAR</a>   |

Mascot: <http://www.matrixscience.com/>

**Peptide View**MS/MS Fragmentation of **VNFPEVPR**

Found in **AT3G52380.1** in **TAIR\_Arabidopsis**, Symbols: PDE322, CP33 | CP33 (PIGMENT DEFECTIVE 322); RNA binding | chr3:19432597-19433833 FORWARD

Match to Query 2173: 968.470414 from(485.242483,2+) index(4451)

Title: Elution from: 41.849 to 41.849 scan no 5656 cid35.00 polarity:+

Data file 0-1\_2.mgf

Click mouse within plot area to zoom in by factor of two about that point

Or,   to  Da

Label all possible matches  Label matches used for scoring

Show Y-axis

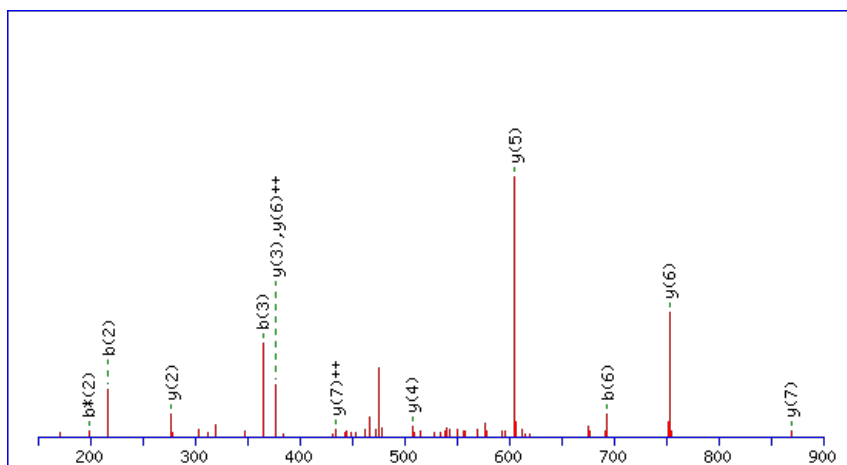

**Monoisotopic mass of neutral peptide Mr(calc):** 968.4724

**Fixed modifications:** Carbamidomethyl (C) (apply to specified residues or termini only)

**Ions Score:** 53 **Expect:** 2.9e-005

**Matches:** 12/68 fragment ions using 19 most intense peaks ([help](#))

| # | b               | b <sup>++</sup> | b*              | b <sup>*++</sup> | b <sup>0</sup> | b <sup>0++</sup> | Seq. | y               | y <sup>++</sup> | y*       | y <sup>*++</sup> | y <sup>0</sup> | y <sup>0++</sup> | # |
|---|-----------------|-----------------|-----------------|------------------|----------------|------------------|------|-----------------|-----------------|----------|------------------|----------------|------------------|---|
| 1 | 101.0727        | 51.0400         |                 |                  |                |                  | V    |                 |                 |          |                  |                |                  | 8 |
| 2 | <b>217.1097</b> | 109.0585        | <b>199.0861</b> | 100.0467         |                |                  | N    | <b>869.4142</b> | <b>435.2107</b> | 851.3906 | 426.1990         | 851.4036       | 426.2055         | 7 |
| 3 | <b>365.1752</b> | 183.0912        | 347.1516        | 174.0794         |                |                  | F    | <b>753.3772</b> | <b>377.1922</b> | 735.3536 | 368.1805         | 735.3667       | 368.1870         | 6 |
| 4 | 463.2250        | 232.1161        | 445.2014        | 223.1043         |                |                  | P    | <b>605.3118</b> | 303.1595        | 587.2882 | 294.1477         | 587.3012       | 294.1542         | 5 |
| 5 | 593.2646        | 297.1359        | 575.2410        | 288.1241         | 575.2540       | 288.1307         | E    | <b>507.2620</b> | 254.1346        | 489.2384 | 245.1228         | 489.2514       | 245.1293         | 4 |
| 6 | <b>693.3300</b> | 347.1687        | 675.3065        | 338.1569         | 675.3195       | 338.1634         | V    | <b>377.2223</b> | 189.1148        | 359.1988 | 180.1030         |                |                  | 3 |
| 7 | 791.3798        | 396.1936        | 773.3563        | 387.1818         | 773.3693       | 387.1883         | P    | <b>277.1569</b> | 139.0821        | 259.1333 | 130.0703         |                |                  | 2 |
| 8 |                 |                 |                 |                  |                |                  | R    | 179.1071        | 90.0572         | 161.0835 | 81.0454          |                |                  | 1 |

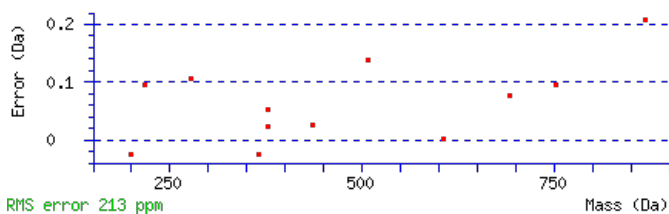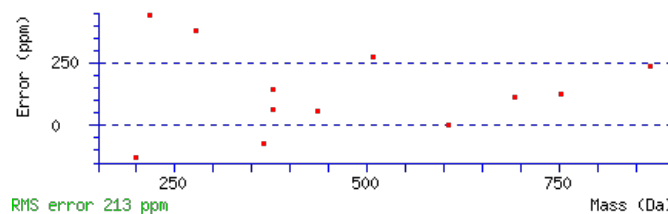

NCBI **BLAST** search of **VNFPEVPR**

(Parameters: blastp, nr protein database, expect=20000, no filter, PAM30)

Other BLAST [web gateways](#)

**All matches to this query**

| Score | Mr(calc) | Delta   | Sequence        |
|-------|----------|---------|-----------------|
| 52.6  | 968.4724 | -0.0020 | <b>VNFPEVPR</b> |

## AT3G52380.1

|     |          |         |                            |
|-----|----------|---------|----------------------------|
| 8.1 | 968.4701 | 0.0003  | <a href="#">QIDGIASPR</a>  |
| 4.4 | 968.4702 | 0.0003  | <a href="#">SGENIIPAR</a>  |
| 3.5 | 968.4701 | 0.0003  | <a href="#">GSEAVGLAPR</a> |
| 3.4 | 968.4728 | -0.0024 | <a href="#">NRLSNPPR</a>   |
| 1.8 | 968.4702 | 0.0003  | <a href="#">SDRPPEKK</a>   |

**Mascot:** <http://www.matrixscience.com/>

## Peptide View

MS/MS Fragmentation of **MKIMMMIK**

Found in **AT3G52720.1** in **TAIR\_Arabidopsis**, Symbols: | carbonic anhydrase family protein | chr3:19549782-19552094 REVERSE

Match to Query 2717: 1050.497844 from(526.256198,2+) index(2188)

Title: Elution from: 23.549 to 23.549 scan no 2736 cid35.00 polarity:+

Data file D6h-3\_3.mgf

Click mouse within plot area to zoom in by factor of two about that point

Or,   to  Da

Label all possible matches  Label matches used for scoring

Show Y-axis

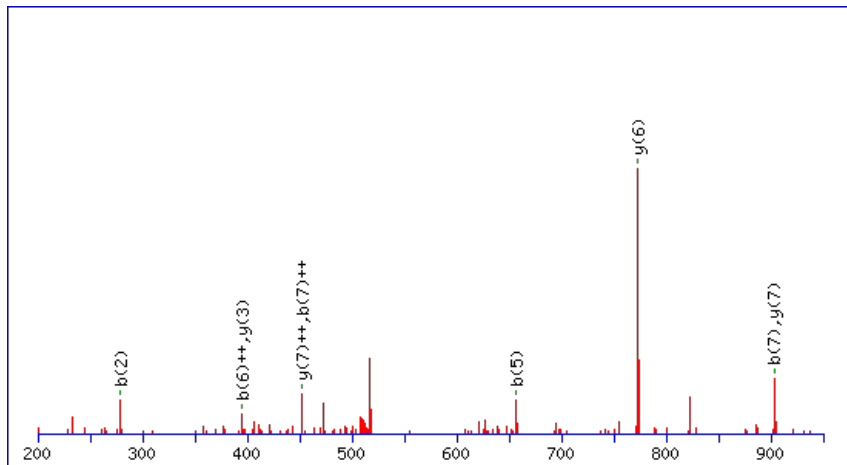

Monoisotopic mass of neutral peptide Mr(calc): 1050.4958

Fixed modifications: Carbamidomethyl (C) (apply to specified residues or termini only)

Variable modifications:

M1 : Oxidation (M), with neutral losses 0.0000 (shown in table), 63.9983

Ions Score: 25 Expect: 0.013

Matches : 9/80 fragment ions using 8 most intense peaks ([help](#))

| # | b               | b <sup>++</sup> | b*       | b <sup>*++</sup> | Seq. | y               | y <sup>++</sup> | y*       | y <sup>*++</sup> | # |
|---|-----------------|-----------------|----------|------------------|------|-----------------|-----------------|----------|------------------|---|
| 1 | 149.0397        | 75.0235         |          |                  | M    |                 |                 |          |                  | 8 |
| 2 | <b>279.1287</b> | 140.0680        | 261.1052 | 131.0562         | K    | <b>903.4707</b> | <b>452.2390</b> | 885.4471 | 443.2272         | 7 |
| 3 | 393.2098        | 197.1086        | 375.1863 | 188.0968         | I    | <b>773.3816</b> | 387.1945        | 755.3580 | 378.1827         | 6 |
| 4 | 525.2474        | 263.1273        | 507.2238 | 254.1155         | M    | 659.3005        | 330.1539        | 641.2769 | 321.1421         | 5 |
| 5 | <b>657.2849</b> | 329.1461        | 639.2613 | 320.1343         | M    | 527.2630        | 264.1351        | 509.2394 | 255.1234         | 4 |
| 6 | 789.3224        | <b>395.1648</b> | 771.2988 | 386.1530         | M    | <b>395.2255</b> | 198.1164        | 377.2019 | 189.1046         | 3 |
| 7 | <b>903.4035</b> | <b>452.2054</b> | 885.3799 | 443.1936         | I    | 263.1880        | 132.0976        | 245.1644 | 123.0858         | 2 |
| 8 |                 |                 |          |                  | K    | 149.1069        | 75.0571         | 131.0833 | 66.0453          | 1 |

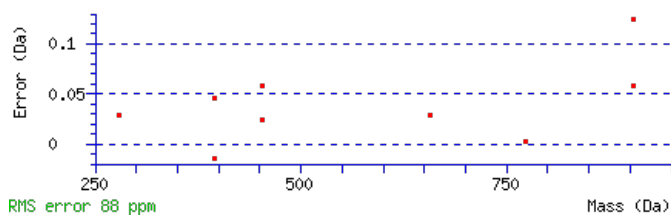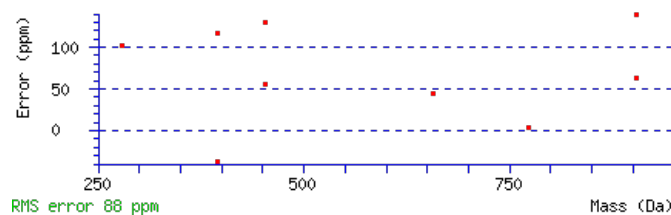

NCBI BLAST search of **MKIMMMIK**

(Parameters: blastp, nr protein database, expect=20000, no filter, PAM30)

Other BLAST [web gateways](#)

## All matches to this query

| Score | Mr(calc)  | Delta  | Sequence                 | Site Analysis       |
|-------|-----------|--------|--------------------------|---------------------|
| 25.0  | 1050.4958 | 0.0020 | <a href="#">MKIMMMIK</a> | Oxidation M1 76.27% |

## AT3G52720.1

|      |           |         |                            |                     |
|------|-----------|---------|----------------------------|---------------------|
| 18.3 | 1050.4958 | 0.0020  | <a href="#">MKIMMMIK</a>   | Oxidation M5 16.05% |
| 13.5 | 1050.4958 | 0.0020  | <a href="#">MKIMMMIK</a>   | Oxidation M4 5.37%  |
| 13.1 | 1050.4990 | -0.0011 | <a href="#">KFGSVSSEAK</a> |                     |
| 9.8  | 1050.4958 | 0.0020  | <a href="#">MKIMMMIK</a>   | Oxidation M6 2.31%  |
| 9.5  | 1050.4990 | -0.0011 | <a href="#">QYKDTKEK</a>   |                     |
| 5.2  | 1050.4990 | -0.0011 | <a href="#">KAGTYDEKK</a>  |                     |
| 5.1  | 1050.4976 | 0.0002  | <a href="#">ERLMMKK</a>    |                     |
| 4.6  | 1050.4990 | -0.0011 | <a href="#">DKSSTFVQK</a>  |                     |
| 4.0  | 1050.4990 | -0.0011 | <a href="#">TEHPVISEK</a>  |                     |

Mascot: <http://www.matrixscience.com/>

**Peptide View**MS/MS Fragmentation of **AAEGGAVEEYDYL**PFFYSRFound in **AT3G52880.1** in **TAIR\_Arabidopsis**, Symbols: ATMDAR1 | ATMDAR1 (MONODEHYDROASCORBATE REDUCTASE 1); monodehydroascorbate reductase (NADH) | chr3:19612455-19615344 REVERSE

Match to Query 9759: 2276.954846 from(1139.484699,2+) index(9911)

Title: Elution from: 95.995 to 95.995 scan no 14103 cid35.00 polarity:+

Data file D12h-2\_2.mgf

Click mouse within plot area to zoom in by factor of two about that point

Or,   to  Da Label all possible matches  Label matches used for scoring Show Y-axis 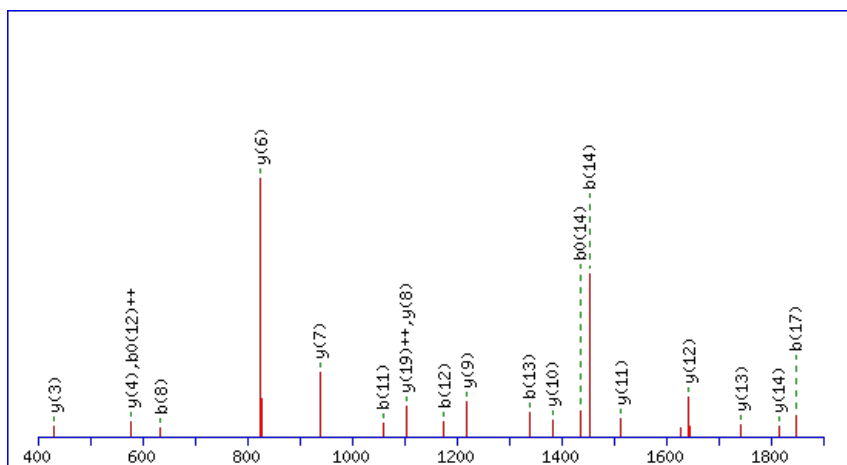Monoisotopic mass of neutral peptide **Mr(calc)**: 2276.9536**Fixed modifications**: Carbamidomethyl (C) (apply to specified residues or termini only)**Ions Score**: 91 **Expect**: 2.8e-009**Matches** : 20/184 fragment ions using 25 most intense peaks ([help](#))

| #  | b         | b <sup>++</sup> | b <sup>0</sup> | b <sup>0++</sup> | Seq. | y         | y <sup>++</sup> | y <sup>*</sup> | y <sup>++*</sup> | y <sup>0</sup> | y <sup>0++</sup> | #  |
|----|-----------|-----------------|----------------|------------------|------|-----------|-----------------|----------------|------------------|----------------|------------------|----|
| 1  | 73.0414   | 37.0244         |                |                  | A    |           |                 |                |                  |                |                  | 20 |
| 2  | 145.0756  | 73.0414         |                |                  | A    | 2205.9268 | 1103.4670       | 2187.9032      | 1094.4552        | 2187.9162      | 1094.4618        | 19 |
| 3  | 275.1152  | 138.0612        | 257.1046       | 129.0560         | E    | 2133.8926 | 1067.4500       | 2115.8691      | 1058.4382        | 2115.8821      | 1058.4447        | 18 |
| 4  | 333.1337  | 167.0705        | 315.1231       | 158.0652         | G    | 2003.8530 | 1002.4301       | 1985.8294      | 993.4184         | 1985.8425      | 993.4249         | 17 |
| 5  | 391.1522  | 196.0797        | 373.1416       | 187.0745         | G    | 1945.8345 | 973.4209        | 1927.8109      | 964.4091         | 1927.8240      | 964.4156         | 16 |
| 6  | 463.1863  | 232.0968        | 445.1758       | 223.0915         | A    | 1887.8160 | 944.4116        | 1869.7924      | 935.3999         | 1869.8055      | 935.4064         | 15 |
| 7  | 535.2205  | 268.1139        | 517.2099       | 259.1086         | A    | 1815.7819 | 908.3946        | 1797.7583      | 899.3828         | 1797.7713      | 899.3893         | 14 |
| 8  | 635.2859  | 318.1466        | 617.2754       | 309.1413         | V    | 1743.7477 | 872.3775        | 1725.7241      | 863.3657         | 1725.7372      | 863.3722         | 13 |
| 9  | 765.3256  | 383.1664        | 747.3150       | 374.1611         | E    | 1643.6823 | 822.3448        | 1625.6587      | 813.3330         | 1625.6717      | 813.3395         | 12 |
| 10 | 895.3652  | 448.1862        | 877.3546       | 439.1810         | E    | 1513.6426 | 757.3250        | 1495.6191      | 748.3132         | 1495.6321      | 748.3197         | 11 |
| 11 | 1059.4256 | 530.2164        | 1041.4150      | 521.2111         | Y    | 1383.6030 | 692.3051        | 1365.5794      | 683.2934         | 1365.5925      | 683.2999         | 10 |
| 12 | 1175.4495 | 588.2284        | 1157.4390      | 579.2231         | D    | 1219.5427 | 610.2750        | 1201.5191      | 601.2632         | 1201.5321      | 601.2697         | 9  |
| 13 | 1339.5099 | 670.2586        | 1321.4993      | 661.2533         | Y    | 1103.5187 | 552.2630        | 1085.4951      | 543.2512         | 1085.5081      | 543.2577         | 8  |
| 14 | 1453.5910 | 727.2991        | 1435.5804      | 718.2939         | L    | 939.4583  | 470.2328        | 921.4347       | 461.2210         | 921.4477       | 461.2275         | 7  |
| 15 | 1551.6408 | 776.3240        | 1533.6302      | 767.3188         | P    | 825.3772  | 413.1922        | 807.3536       | 404.1805         | 807.3667       | 404.1870         | 6  |
| 16 | 1699.7063 | 850.3568        | 1681.6957      | 841.3515         | F    | 727.3274  | 364.1673        | 709.3038       | 355.1556         | 709.3169       | 355.1621         | 5  |
| 17 | 1847.7717 | 924.3895        | 1829.7611      | 915.3842         | F    | 579.2620  | 290.1346        | 561.2384       | 281.1228         | 561.2514       | 281.1293         | 4  |
| 18 | 2011.8321 | 1006.4197       | 1993.8215      | 997.4144         | Y    | 431.1965  | 216.1019        | 413.1729       | 207.0901         | 413.1860       | 207.0966         | 3  |
| 19 | 2099.8611 | 1050.4342       | 2081.8506      | 1041.4289        | S    | 267.1362  | 134.0717        | 249.1126       | 125.0599         | 249.1256       | 125.0664         | 2  |
| 20 |           |                 |                |                  | R    | 179.1071  | 90.0572         | 161.0835       | 81.0454          |                |                  | 1  |

AT3G52880.1

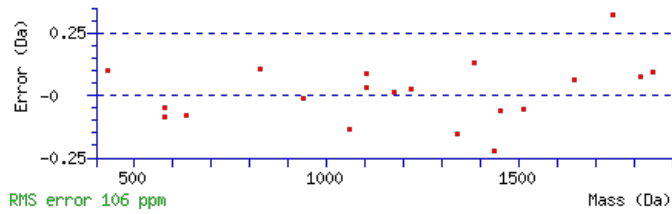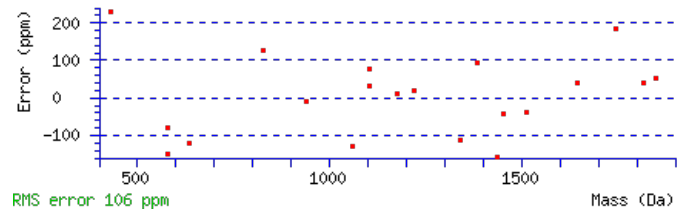

NCBI **BLAST** search of [AAEGGAAVEEYDYLPPFFYSR](#)  
(Parameters: blastp, nr protein database, expect=20000, no filter, PAM30)  
Other BLAST [web gateways](#)

**All matches to this query**

| Score | Mr(calc)  | Delta  | Sequence                              |
|-------|-----------|--------|---------------------------------------|
| 91.4  | 2276.9536 | 0.0012 | <a href="#">AAEGGAAVEEYDYLPPFFYSR</a> |
| 15.4  | 2276.9505 | 0.0044 | <a href="#">GLDRDRFVQNTLMDMYSR</a>    |
| 0.4   | 2276.9512 | 0.0036 | <a href="#">DCHLKKSCDDISDMSIALK</a>   |

Mascot: <http://www.matrixscience.com/>

## Peptide View

MS/MS Fragmentation of **IGENEPSEHSIHENAYGLAR**

Found in **AT3G52930.1** in **TAIR\_Arabidopsis**, Symbols: | fructose-bisphosphate aldolase, putative | chr3:19638361-19639852 REVERSE

Match to Query 10071: 2222.033994 from(741.685274,3+) index(2739)

Title: Elution from: 30.627 to 30.627 scan no 3536 cid35.00 polarity:+

Data file D1d-2\_1.mgf

Click mouse within plot area to zoom in by factor of two about that point

Or, Plot from  to  Da

Label all possible matches  Label matches used for scoring

Show Y-axis

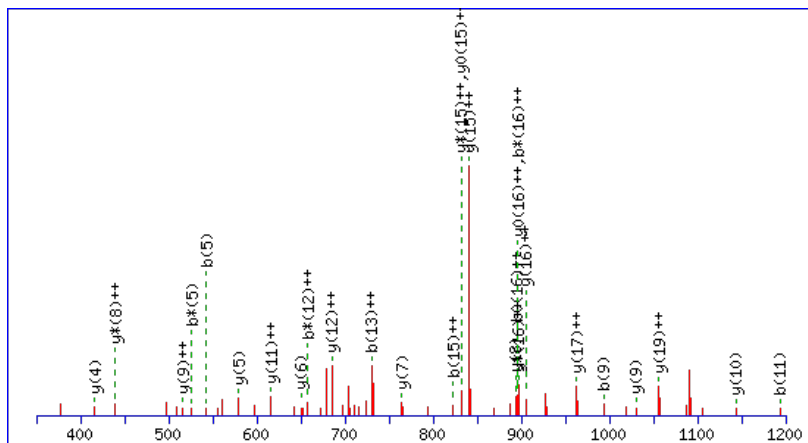

Monoisotopic mass of neutral peptide  $M_r(\text{calc})$ : 2222.0352

Fixed modifications: Carbamidomethyl (C) (apply to specified residues or termini only)

Ions Score: 44 Expect: 9.9e-005

Matches : 28/204 fragment ions using 50 most intense peaks ([help](#))

| #  | b                | b <sup>++</sup> | b <sup>*</sup>  | b <sup>*++</sup> | b <sup>0</sup> | b <sup>0++</sup> | Seq. | y                | y <sup>++</sup> | y <sup>*</sup> | y <sup>*++</sup> | y <sup>0</sup> | y <sup>0++</sup> | #  |
|----|------------------|-----------------|-----------------|------------------|----------------|------------------|------|------------------|-----------------|----------------|------------------|----------------|------------------|----|
| 1  | 114.0913         | 57.5493         |                 |                  |                |                  | I    |                  |                 |                |                  |                |                  | 20 |
| 2  | 171.1128         | 86.0600         |                 |                  |                |                  | G    | 2109.9584        | 1055.4829       | 2092.9319      | 1046.9696        | 2091.9479      | 1046.4776        | 19 |
| 3  | 300.1554         | 150.5813        |                 |                  | 282.1448       | 141.5761         | E    | 2052.9370        | 1026.9721       | 2035.9104      | 1018.4588        | 2034.9264      | 1017.9668        | 18 |
| 4  | 414.1983         | 207.6028        | 397.1718        | 199.0895         | 396.1878       | 198.5975         | N    | 1923.8944        | 962.4508        | 1906.8678      | 953.9376         | 1905.8838      | 953.4455         | 17 |
| 5  | <b>543.2409</b>  | 272.1241        | <b>526.2144</b> | 263.6108         | 525.2304       | 263.1188         | E    | 1809.8515        | <b>905.4294</b> | 1792.8249      | <b>896.9161</b>  | 1791.8409      | <b>896.4241</b>  | 16 |
| 6  | 640.2937         | 320.6505        | 623.2671        | 312.1372         | 622.2831       | 311.6452         | P    | 1680.8089        | <b>840.9081</b> | 1663.7823      | <b>832.3948</b>  | 1662.7983      | <b>831.9028</b>  | 15 |
| 7  | 727.3257         | 364.1665        | 710.2992        | 355.6532         | 709.3151       | 355.1612         | S    | 1583.7561        | 792.3817        | 1566.7295      | 783.8684         | 1565.7455      | 783.3764         | 14 |
| 8  | 856.3683         | 428.6878        | 839.3418        | 420.1745         | 838.3577       | 419.6825         | E    | 1496.7241        | 748.8657        | 1479.6975      | 740.3524         | 1478.7135      | 739.8604         | 13 |
| 9  | <b>993.4272</b>  | 497.2172        | 976.4007        | 488.7040         | 975.4166       | 488.2120         | H    | 1367.6815        | <b>684.3444</b> | 1350.6549      | 675.8311         | 1349.6709      | 675.3391         | 12 |
| 10 | 1080.4592        | 540.7333        | 1063.4327       | 532.2200         | 1062.4487      | 531.7280         | S    | 1230.6226        | <b>615.8149</b> | 1213.5960      | 607.3016         | 1212.6120      | 606.8096         | 11 |
| 11 | <b>1193.5433</b> | 597.2753        | 1176.5168       | 588.7620         | 1175.5327      | 588.2700         | I    | <b>1143.5905</b> | 572.2989        | 1126.5640      | 563.7856         | 1125.5800      | 563.2936         | 10 |
| 12 | 1330.6022        | 665.8047        | 1313.5757       | <b>657.2915</b>  | 1312.5917      | 656.7995         | H    | <b>1030.5065</b> | <b>515.7569</b> | 1013.4799      | 507.2436         | 1012.4959      | 506.7516         | 9  |
| 13 | 1459.6448        | <b>730.3260</b> | 1442.6183       | 721.8128         | 1441.6342      | 721.3208         | E    | <b>893.4476</b>  | 447.2274        | 876.4210       | <b>438.7141</b>  | 875.4370       | 438.2221         | 8  |
| 14 | 1573.6877        | 787.3475        | 1556.6612       | 778.8342         | 1555.6772      | 778.3422         | N    | <b>764.4050</b>  | 382.7061        | 747.3784       | 374.1928         |                |                  | 7  |
| 15 | 1644.7249        | <b>822.8661</b> | 1627.6983       | 814.3528         | 1626.7143      | 813.8608         | A    | <b>650.3620</b>  | 325.6847        | 633.3355       | 317.1714         |                |                  | 6  |
| 16 | 1807.7882        | 904.3977        | 1790.7616       | <b>895.8845</b>  | 1789.7776      | <b>895.3924</b>  | Y    | <b>579.3249</b>  | 290.1661        | 562.2984       | 281.6528         |                |                  | 5  |
| 17 | 1864.8096        | 932.9085        | 1847.7831       | 924.3952         | 1846.7991      | 923.9032         | G    | <b>416.2616</b>  | 208.6344        | 399.2350       | 200.1212         |                |                  | 4  |
| 18 | 1977.8937        | 989.4505        | 1960.8672       | 980.9372         | 1959.8831      | 980.4452         | L    | 359.2401         | 180.1237        | 342.2136       | 171.6104         |                |                  | 3  |
| 19 | 2048.9308        | 1024.9690       | 2031.9043       | 1016.4558        | 2030.9203      | 1015.9638        | A    | 246.1561         | 123.5817        | 229.1295       | 115.0684         |                |                  | 2  |
| 20 |                  |                 |                 |                  |                |                  | R    | 175.1190         | 88.0631         | 158.0924       | 79.5498          |                |                  | 1  |



# AT3G52930.1

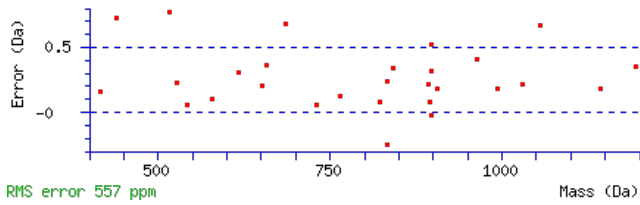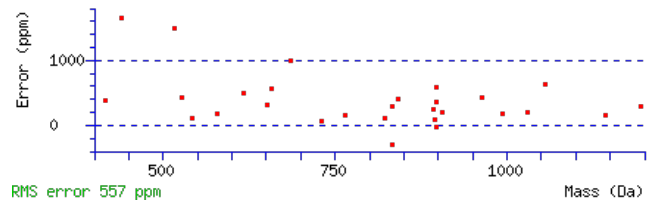

NCBI **BLAST** search of [IGENEPSEHSIHENAYGLAR](#)  
(Parameters: blastp, nr protein database, expect=20000, no filter, PAM30)  
Other BLAST [web gateways](#)

## All matches to this query

| Score | Mr(calc)  | Delta   | Sequence                             |
|-------|-----------|---------|--------------------------------------|
| 44.2  | 2222.0352 | -0.0012 | <a href="#">IGENEPSEHSIHENAYGLAR</a> |
| 4.4   | 2222.0395 | -0.0055 | <a href="#">LLMGQPPDYSDGKCRLCGR</a>  |
| 3.6   | 2222.0352 | -0.0012 | <a href="#">WDQINDHGTSHLSIIDSER</a>  |
| 1.8   | 2222.0280 | 0.0060  | <a href="#">NLNNGNINTSDMQNAKRMR</a>  |
| 0.7   | 2222.0280 | 0.0060  | <a href="#">ADVQKALQDYGYFEASFDR</a>  |

Mascot: <http://www.matrixscience.com/>

**Peptide View**MS/MS Fragmentation of **LGVELDLR**Found in **AT3G52960.1** in **TAIR\_Arabidopsis**, Symbols: | peroxiredoxin type 2, putative | chr3:19650677-19651381 FORWARD

Match to Query 1382: 913.522792 from(457.768672,2+) index(5380)

Title: Elution from: 51.858 to 51.858 scan no 6980 cid35.00 polarity:+

Data file D1d-1-2.mgf

Click mouse within plot area to zoom in by factor of two about that point

Or,   to  Da Label all possible matches  Label matches used for scoring Show Y-axis 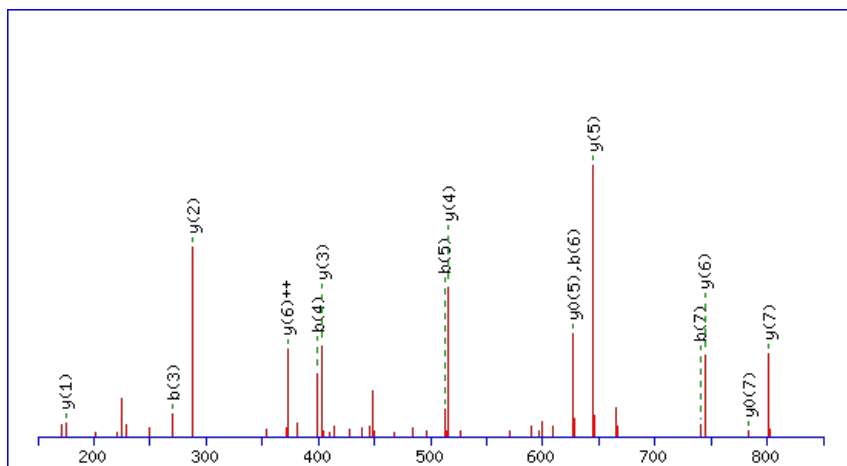Monoisotopic mass of neutral peptide **Mr(calc)**: 913.5233

Fixed modifications: Carbamidomethyl (C) (apply to specified residues or termini only)

Ions Score: 60 **Expect**: 6.1e-006Matches : 15/60 fragment ions using 19 most intense peaks ([help](#))

| # | b        | b <sup>++</sup> | b <sup>0</sup> | b <sup>0++</sup> | Seq. | y        | y <sup>++</sup> | y*       | y <sup>*++</sup> | y <sup>0</sup> | y <sup>0++</sup> | # |
|---|----------|-----------------|----------------|------------------|------|----------|-----------------|----------|------------------|----------------|------------------|---|
| 1 | 114.0913 | 57.5493         |                |                  | L    |          |                 |          |                  |                |                  | 8 |
| 2 | 171.1128 | 86.0600         |                |                  | G    | 801.4465 | 401.2269        | 784.4199 | 392.7136         | 783.4359       | 392.2216         | 7 |
| 3 | 270.1812 | 135.5942        |                |                  | V    | 744.4250 | 372.7162        | 727.3985 | 364.2029         | 726.4145       | 363.7109         | 6 |
| 4 | 399.2238 | 200.1155        | 381.2132       | 191.1103         | E    | 645.3566 | 323.1819        | 628.3301 | 314.6687         | 627.3461       | 314.1767         | 5 |
| 5 | 512.3079 | 256.6576        | 494.2973       | 247.6523         | L    | 516.3140 | 258.6606        | 499.2875 | 250.1474         | 498.3035       | 249.6554         | 4 |
| 6 | 627.3348 | 314.1710        | 609.3243       | 305.1658         | D    | 403.2300 | 202.1186        | 386.2034 | 193.6053         | 385.2194       | 193.1133         | 3 |
| 7 | 740.4189 | 370.7131        | 722.4083       | 361.7078         | L    | 288.2030 | 144.6051        | 271.1765 | 136.0919         |                |                  | 2 |
| 8 |          |                 |                |                  | R    | 175.1190 | 88.0631         | 158.0924 | 79.5498          |                |                  | 1 |

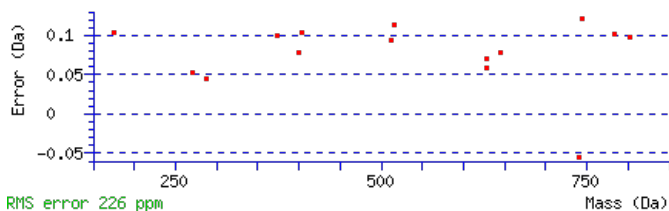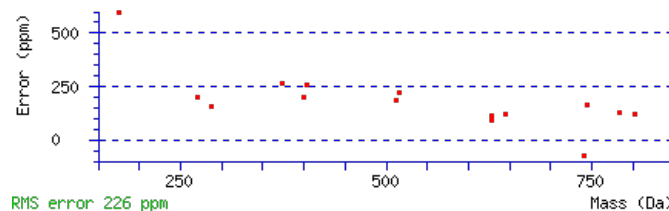NCBI **BLAST** search of [LGVELDLR](#)

(Parameters: blastp, nr protein database, expect=20000, no filter, PAM30)

Other BLAST [web gateways](#)**All matches to this query**

| Score | Mr(calc) | Delta   | Sequence                 |
|-------|----------|---------|--------------------------|
| 60.0  | 913.5233 | -0.0005 | <a href="#">LGVELDLR</a> |
| 15.6  | 913.5233 | -0.0005 | <a href="#">LLPTSDLR</a> |

## AT3G52960.1

|      |          |         |                          |
|------|----------|---------|--------------------------|
| 14.2 | 913.5233 | -0.0005 | <a href="#">VAEVIVER</a> |
| 6.0  | 913.5233 | -0.0005 | <a href="#">IPSIESLR</a> |
| 1.9  | 913.5233 | -0.0005 | <a href="#">LVAEEVVR</a> |
| 1.4  | 913.5206 | 0.0022  | <a href="#">RLAERNR</a>  |
| 0.7  | 913.5233 | -0.0005 | <a href="#">STVPLLR</a>  |

**Mascot:** <http://www.matrixscience.com/>

**Peptide View**MS/MS Fragmentation of **VFNQDLYFK**Found in **AT3G52990.1** in **TAIR\_Arabidopsis**, Symbols: | pyruvate kinase, putative | chr3:19660024-19663215 FORWARD

Match to Query 3668: 1172.586932 from(587.300742,2+) index(5660)

Title: Elution from: 52.609 to 52.609 scan no 7271 cid35.00 polarity:+

Data file D1d-2\_1.mgf

Click mouse within plot area to zoom in by factor of two about that point

Or,   to  Da Label all possible matches  Label matches used for scoring Show Y-axis 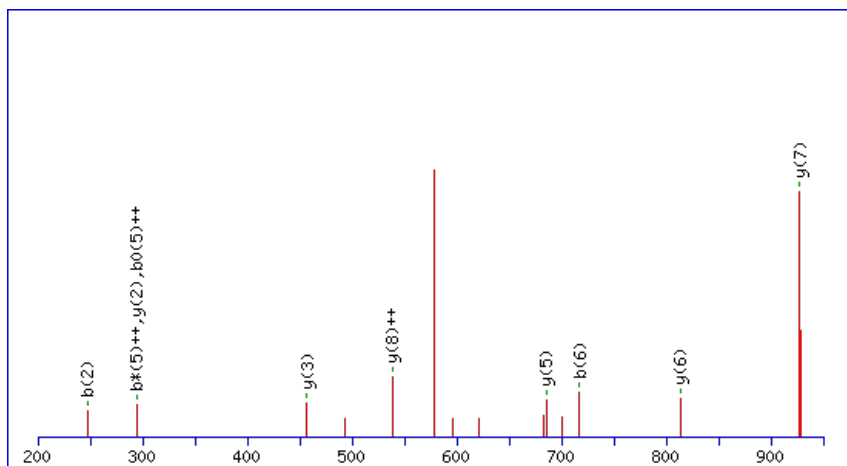**Monoisotopic mass of neutral peptide Mr(calc)**: 1172.5866**Fixed modifications**: Carbamidomethyl (C) (apply to specified residues or termini only)**Ions Score**: 39 **Expect**: 0.0004**Matches**: 10/76 fragment ions using 11 most intense peaks ([help](#))

| # | b               | b <sup>++</sup> | b*        | b <sup>*++</sup> | b <sup>0</sup> | b <sup>0++</sup> | Seq. | y               | y <sup>++</sup> | y*        | y <sup>*++</sup> | y <sup>0</sup> | y <sup>0++</sup> | # |
|---|-----------------|-----------------|-----------|------------------|----------------|------------------|------|-----------------|-----------------|-----------|------------------|----------------|------------------|---|
| 1 | 100.0757        | 50.5415         |           |                  |                |                  | V    |                 |                 |           |                  |                |                  | 9 |
| 2 | <b>247.1441</b> | 124.0757        |           |                  |                |                  | F    | 1074.5255       | <b>537.7664</b> | 1057.4989 | 529.2531         | 1056.5149      | 528.7611         | 8 |
| 3 | 361.1870        | 181.0972        | 344.1605  | 172.5839         |                |                  | N    | <b>927.4571</b> | 464.2322        | 910.4305  | 455.7189         | 909.4465       | 455.2269         | 7 |
| 4 | 489.2456        | 245.1264        | 472.2191  | 236.6132         |                |                  | Q    | <b>813.4141</b> | 407.2107        | 796.3876  | 398.6974         | 795.4036       | 398.2054         | 6 |
| 5 | 604.2726        | 302.6399        | 587.2460  | <b>294.1266</b>  | 586.2620       | <b>293.6346</b>  | D    | <b>685.3556</b> | 343.1814        | 668.3290  | 334.6681         | 667.3450       | 334.1761         | 5 |
| 6 | <b>717.3566</b> | 359.1819        | 700.3301  | 350.6687         | 699.3461       | 350.1767         | L    | 570.3286        | 285.6679        | 553.3021  | 277.1547         |                |                  | 4 |
| 7 | 880.4199        | 440.7136        | 863.3934  | 432.2003         | 862.4094       | 431.7083         | Y    | <b>457.2445</b> | 229.1259        | 440.2180  | 220.6126         |                |                  | 3 |
| 8 | 1027.4884       | 514.2478        | 1010.4618 | 505.7345         | 1009.4778      | 505.2425         | F    | <b>294.1812</b> | 147.5942        | 277.1547  | 139.0810         |                |                  | 2 |
| 9 |                 |                 |           |                  |                |                  | K    | 147.1128        | 74.0600         | 130.0863  | 65.5468          |                |                  | 1 |

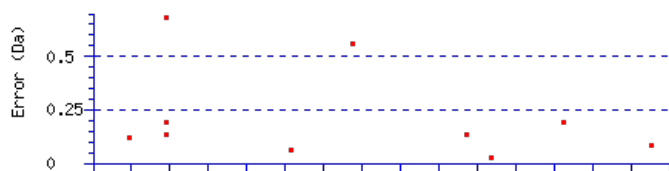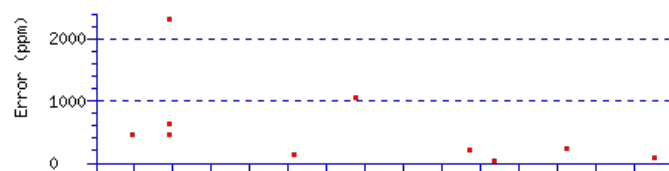NCBI **BLAST** search of [VFNQDLYFK](#)

(Parameters: blastp, nr protein database, expect=20000, no filter, PAM30)

Other BLAST [web gateways](#)**All matches to this query**

| Score | Mr(calc)  | Delta  | Sequence                  |
|-------|-----------|--------|---------------------------|
| 39.0  | 1172.5866 | 0.0003 | <a href="#">VFNQDLYFK</a> |

# AT3G52990.1

|     |           |         |                            |
|-----|-----------|---------|----------------------------|
| 1.3 | 1172.5900 | -0.0030 | <a href="#">SPTVMKGYFK</a> |
| 0.8 | 1172.5900 | -0.0030 | <a href="#">FLQSMGLSEK</a> |

**Mascot:** <http://www.matrixscience.com/>

**Peptide View**MS/MS Fragmentation of **LAWTAMYR**

Found in **AT3G53020.1** in **TAIR Arabidopsis**, Symbols: RPL24B, RPL24, STV1 | STV1 (SHORT VALVE1); structural constituent of ribosome | chr3:19671727-19672890 REVERSE

Match to Query 2636: 1022.463164 from(512.238858,2+) index(5481)

Title: Elution from: 49.348 to 49.348 scan no 6969 cid35.00 polarity:+

Data file D6h-1\_3.mgf

Click mouse within plot area to zoom in by factor of two about that point

Or,   to  Da

Label all possible matches  Label matches used for scoring

Show Y-axis

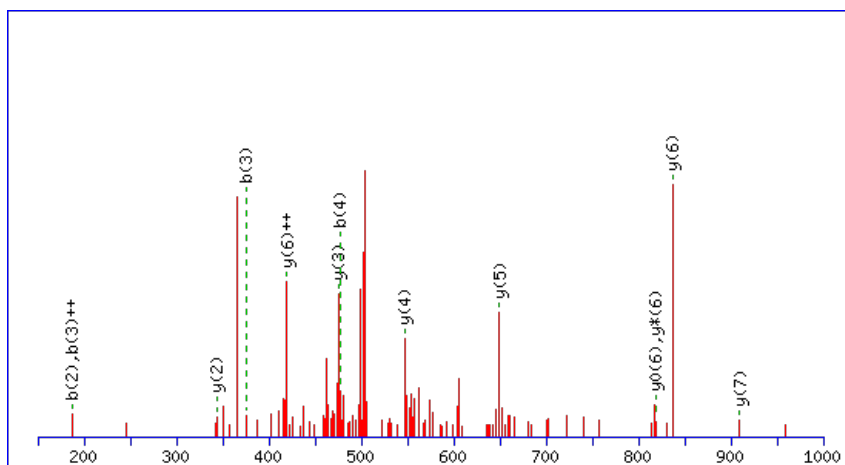

**Monoisotopic mass of neutral peptide Mr(calc):** 1022.4652

**Fixed modifications:** Carbamidomethyl (C) (apply to specified residues or termini only)

**Ions Score:** 26 **Expect:** 0.016

**Matches:** 13/56 fragment ions using 34 most intense peaks ([help](#))

| # | b               | b <sup>++</sup> | b <sup>0</sup> | b <sup>0++</sup> | Seq. | y               | y <sup>++</sup> | y*              | y <sup>*++</sup> | y <sup>0</sup>  | y <sup>0++</sup> | # |
|---|-----------------|-----------------|----------------|------------------|------|-----------------|-----------------|-----------------|------------------|-----------------|------------------|---|
| 1 | 115.0884        | 58.0478         |                |                  | L    |                 |                 |                 |                  |                 |                  | 8 |
| 2 | <b>187.1225</b> | 94.0649         |                |                  | A    | <b>909.3914</b> | 455.1993        | 891.3678        | 446.1875         | 891.3808        | 446.1940         | 7 |
| 3 | <b>375.1959</b> | <b>188.1016</b> |                |                  | W    | <b>837.3572</b> | <b>419.1822</b> | <b>819.3336</b> | 410.1705         | <b>819.3467</b> | 410.1770         | 6 |
| 4 | <b>477.2406</b> | 239.1239        | 459.2301       | 230.1187         | T    | <b>649.2838</b> | 325.1456        | 631.2603        | 316.1338         | 631.2733        | 316.1403         | 5 |
| 5 | 549.2748        | 275.1410        | 531.2642       | 266.1357         | A    | <b>547.2391</b> | 274.1232        | 529.2155        | 265.1114         |                 |                  | 4 |
| 6 | 681.3123        | 341.1598        | 663.3017       | 332.1545         | M    | <b>475.2050</b> | 238.1061        | 457.1814        | 229.0943         |                 |                  | 3 |
| 7 | 845.3727        | 423.1900        | 827.3621       | 414.1847         | Y    | <b>343.1675</b> | 172.0874        | 325.1439        | 163.0756         |                 |                  | 2 |
| 8 |                 |                 |                |                  | R    | 179.1071        | 90.0572         | 161.0835        | 81.0454          |                 |                  | 1 |

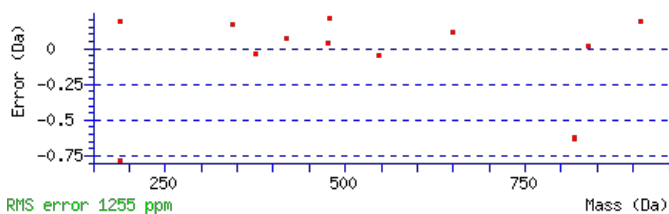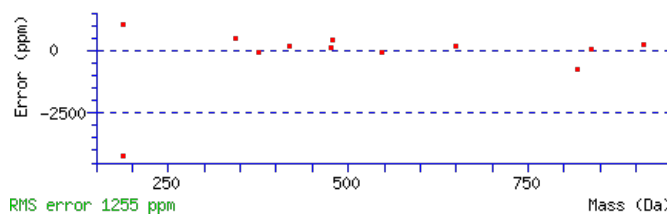

NCBI **BLAST** search of [LAWTAMYR](#)

(Parameters: blastp, nr protein database, expect=20000, no filter, PAM30)

Other BLAST [web gateways](#)

**All matches to this query**

| Score | Mr(calc)  | Delta   | Sequence                 |
|-------|-----------|---------|--------------------------|
| 26.2  | 1022.4652 | -0.0020 | <a href="#">LAWTAMYR</a> |



**Peptide View**MS/MS Fragmentation of **TSEAVDILK**

Found in **AT3G53260.1** in **TAIR\_Arabidopsis**, Symbols: PAL2 | PAL2 (phenylalanine ammonia-lyase 2); phenylalanine ammonia-lyase | chr3:19755234-19757597 REVERSE

Match to Query 2405: 984.496794 from(493.255673,2+) index(3354)

Title: Elution from: 31.891 to 31.891 scan no 4144 cid35.00 polarity:+

Data file C7-3\_2.mgf

Click mouse within plot area to zoom in by factor of two about that point

Or,   to  Da

Label all possible matches  Label matches used for scoring

Show Y-axis

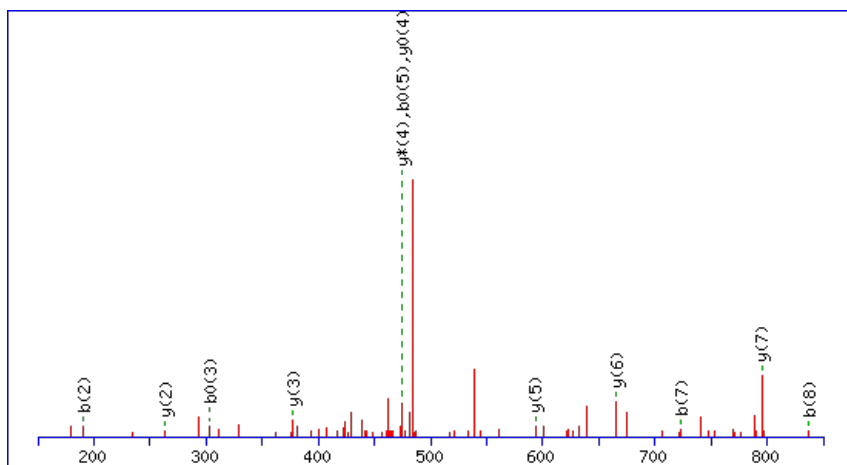

**Monoisotopic mass of neutral peptide Mr(calc):** 984.4988

**Fixed modifications:** Carbamidomethyl (C) (apply to specified residues or termini only)

**Ions Score:** 23 **Expect:** 0.03

**Matches:** 12/74 fragment ions using 28 most intense peaks ([help](#))

| # | b               | b <sup>++</sup> | b <sup>0</sup>  | b <sup>0++</sup> | Seq. | y               | y <sup>++</sup> | y*              | y <sup>*++</sup> | y <sup>0</sup>  | y <sup>0++</sup> | # |
|---|-----------------|-----------------|-----------------|------------------|------|-----------------|-----------------|-----------------|------------------|-----------------|------------------|---|
| 1 | 103.0520        | 52.0296         | 85.0414         | 43.0244          | T    |                 |                 |                 |                  |                 |                  | 9 |
| 2 | <b>191.0811</b> | 96.0442         | 173.0705        | 87.0389          | S    | 883.4613        | 442.2343        | 865.4378        | 433.2225         | 865.4508        | 433.2290         | 8 |
| 3 | 321.1207        | 161.0640        | <b>303.1101</b> | 152.0587         | E    | <b>795.4323</b> | 398.2198        | 777.4087        | 389.2080         | 777.4217        | 389.2145         | 7 |
| 4 | 393.1548        | 197.0811        | 375.1443        | 188.0758         | A    | <b>665.3926</b> | 333.2000        | 647.3691        | 324.1882         | 647.3821        | 324.1947         | 6 |
| 5 | 493.2203        | 247.1138        | <b>475.2097</b> | 238.1085         | V    | <b>593.3585</b> | 297.1829        | 575.3349        | 288.1711         | 575.3479        | 288.1776         | 5 |
| 6 | 609.2443        | 305.1258        | 591.2337        | 296.1205         | D    | 493.2930        | 247.1502        | <b>475.2695</b> | 238.1384         | <b>475.2825</b> | 238.1449         | 4 |
| 7 | <b>723.3254</b> | 362.1663        | 705.3148        | 353.1610         | I    | <b>377.2691</b> | 189.1382        | 359.2455        | 180.1264         |                 |                  | 3 |
| 8 | <b>837.4065</b> | 419.2069        | 819.3959        | 410.2016         | L    | <b>263.1880</b> | 132.0976        | 245.1644        | 123.0858         |                 |                  | 2 |
| 9 |                 |                 |                 |                  | K    | 149.1069        | 75.0571         | 131.0833        | 66.0453          |                 |                  | 1 |

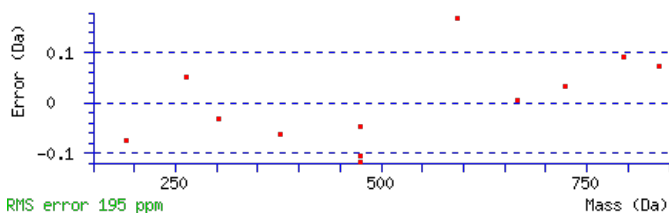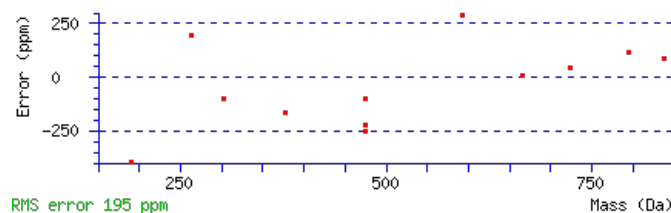

NCBI **BLAST** search of [TSEAVDILK](#)

(Parameters: blastp, nr protein database, expect=20000, no filter, PAM30)

Other BLAST [web gateways](#)

All matches to this query

| Score | Mr(calc) | Delta | Sequence |
|-------|----------|-------|----------|
|       |          |       |          |



## AT3G53260.1

|      |          |         |                           |
|------|----------|---------|---------------------------|
| 23.0 | 984.4988 | -0.0020 | <a href="#">TSEAVDILK</a> |
| 13.3 | 984.4996 | -0.0029 | <a href="#">QMIMPVIK</a>  |
| 12.0 | 984.4988 | -0.0020 | <a href="#">KLEEVTEK</a>  |
| 10.8 | 984.4940 | 0.0028  | <a href="#">NIVDCLK</a>   |
| 10.2 | 984.4988 | -0.0020 | <a href="#">KTIDEELK</a>  |
| 9.1  | 984.4940 | 0.0028  | <a href="#">DVMLDLR</a>   |
| 9.1  | 984.4987 | -0.0020 | <a href="#">DVTATDILK</a> |
| 8.3  | 984.4988 | -0.0020 | <a href="#">DEEITKLK</a>  |
| 7.0  | 984.4967 | 0.0001  | <a href="#">LANPKCLR</a>  |
| 5.3  | 984.4940 | 0.0028  | <a href="#">LENVQMLK</a>  |

Mascot: <http://www.matrixscience.com/>

**Peptide View**MS/MS Fragmentation of **SFGAAVIYNK**

Found in **AT3G53420.1** in **TAIR\_Arabidopsis**, Symbols: PIP2, PIP2;1, PIP2A | PIP2A (PLASMA MEMBRANE INTRINSIC PROTEIN 2A); water channel | chr3:19814884-19816432 REVERSE

Match to Query 3131: 1080.521858 from(541.268205,2+) index(3738)

Title: Elution from: 35.390 to 35.390 scan no 4671 cid35.00 polarity:+

Data file D6h-3\_2.mgf

Click mouse within plot area to zoom in by factor of two about that point

Or,   to  Da

Label all possible matches  Label matches used for scoring

Show Y-axis

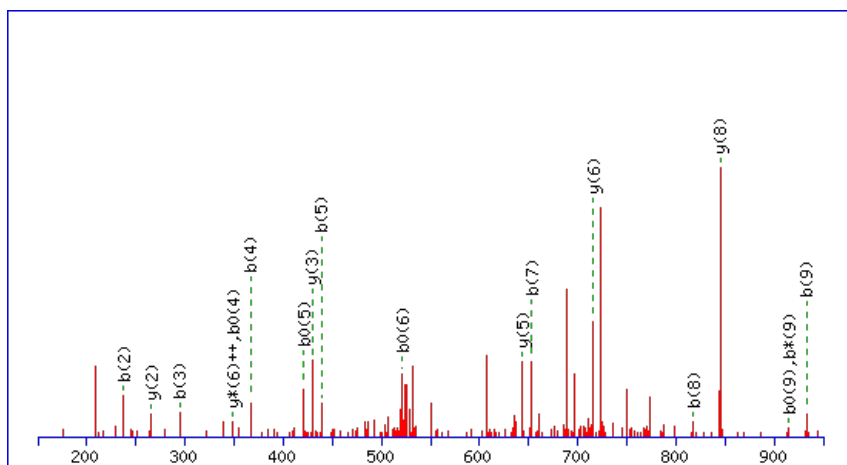

**Monoisotopic mass of neutral peptide Mr(calc):** 1080.5248

**Fixed modifications:** Carbamidomethyl (C) (apply to specified residues or termini only)

**Ions Score:** 59 **Expect:** 4.6e-006

**Matches:** 18/74 fragment ions using 24 most intense peaks ([help](#))

| #  | b               | b <sup>++</sup> | b*              | b <sup>*++</sup> | b <sup>0</sup>  | b <sup>0++</sup> | Seq. | y               | y <sup>++</sup> | y*       | y <sup>*++</sup> | #  |
|----|-----------------|-----------------|-----------------|------------------|-----------------|------------------|------|-----------------|-----------------|----------|------------------|----|
| 1  | 89.0363         | 45.0218         |                 |                  | 71.0258         | 36.0165          | S    |                 |                 |          |                  | 10 |
| 2  | <b>237.1018</b> | 119.0545        |                 |                  | 219.0912        | 110.0492         | F    | 993.5030        | 497.2552        | 975.4794 | 488.2434         | 9  |
| 3  | <b>295.1203</b> | 148.0638        |                 |                  | 277.1097        | 139.0585         | G    | <b>845.4376</b> | 423.2224        | 827.4140 | 414.2106         | 8  |
| 4  | <b>367.1544</b> | 184.0809        |                 |                  | <b>349.1439</b> | 175.0756         | A    | 787.4191        | 394.2132        | 769.3955 | 385.2014         | 7  |
| 5  | <b>439.1886</b> | 220.0979        |                 |                  | <b>421.1780</b> | 211.0926         | A    | <b>715.3849</b> | 358.1961        | 697.3613 | <b>349.1843</b>  | 6  |
| 6  | 539.2540        | 270.1307        |                 |                  | <b>521.2435</b> | 261.1254         | V    | <b>643.3508</b> | 322.1790        | 625.3272 | 313.1672         | 5  |
| 7  | <b>653.3351</b> | 327.1712        |                 |                  | 635.3246        | 318.1659         | I    | 543.2853        | 272.1463        | 525.2618 | 263.1345         | 4  |
| 8  | <b>817.3955</b> | 409.2014        |                 |                  | 799.3849        | 400.1961         | Y    | <b>429.2042</b> | 215.1058        | 411.1807 | 206.0940         | 3  |
| 9  | <b>933.4325</b> | 467.2199        | <b>915.4089</b> | 458.2081         | <b>915.4219</b> | 458.2146         | N    | <b>265.1439</b> | 133.0756        | 247.1203 | 124.0638         | 2  |
| 10 |                 |                 |                 |                  |                 |                  | K    | 149.1069        | 75.0571         | 131.0833 | 66.0453          | 1  |

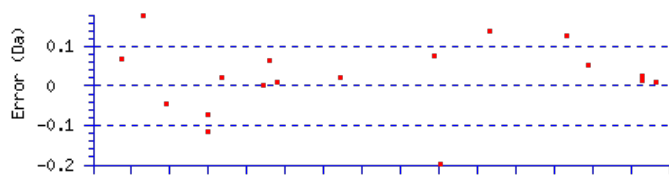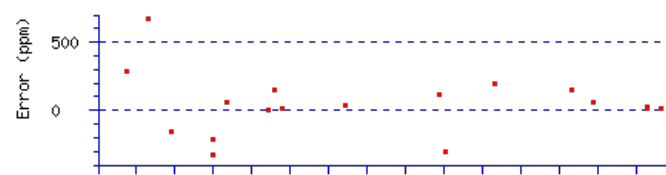

NCBI **BLAST** search of **SFGAAVIYNK**

(Parameters: blastp, nr protein database, expect=20000, no filter, PAM30)

Other BLAST [web gateways](#)

**All matches to this query**

AT3G53420.1

| Score | Mr(calc)  | Delta   | Sequence                   |
|-------|-----------|---------|----------------------------|
| 59.1  | 1080.5248 | -0.0030 | <a href="#">SFGAAVIYNK</a> |
| 8.0   | 1080.5199 | 0.0020  | <a href="#">PEEDLVELK</a>  |
| 1.8   | 1080.5248 | -0.0030 | <a href="#">FALGYEKNK</a>  |

Mascot: <http://www.matrixscience.com/>

**Peptide View**MS/MS Fragmentation of **KSGNSVLSSCSTK**Found in **AT3G53440.1** in **TAIR\_Arabidopsis**, Symbols: | DNA binding | chr3:19821914-19823452 FORWARD

Match to Query 4693: 1370.60468 from(686.309600,2+) index(3639)

Title: Elution from: 38.383 to 38.383 scan no 4694 cid35.00 polarity:+

Data file D1d-1-2.mgf

Click mouse within plot area to zoom in by factor of two about that point

Or,   to  Da Label all possible matches  Label matches used for scoring Show Y-axis 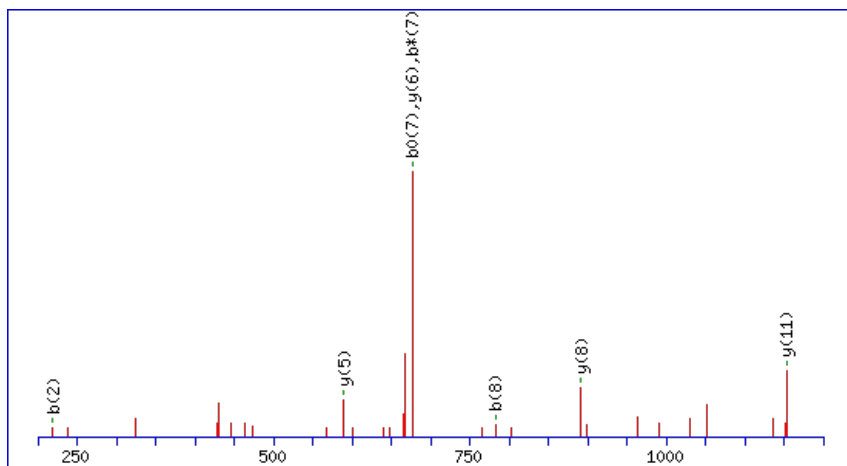Monoisotopic mass of neutral peptide **Mr(calc)**: 1370.6054

Fixed modifications: Carbamidomethyl (C) (apply to specified residues or termini only)

Ions Score: 23 **Expect**: 0.037Matches : 8/140 fragment ions using 10 most intense peaks ([help](#))

| #  | b               | b <sup>++</sup> | b*              | b <sup>*++</sup> | b <sup>0</sup>  | b <sup>0++</sup> | Seq.     | y                | y <sup>++</sup> | y*        | y <sup>*++</sup> | y <sup>0</sup> | y <sup>0++</sup> | #         |
|----|-----------------|-----------------|-----------------|------------------|-----------------|------------------|----------|------------------|-----------------|-----------|------------------|----------------|------------------|-----------|
| 1  | 131.0963        | 66.0518         | 113.0727        | 57.0400          |                 |                  | <b>K</b> |                  |                 |           |                  |                |                  | <b>13</b> |
| 2  | <b>219.1254</b> | 110.0663        | 201.1018        | 101.0545         | 201.1148        | 101.0610         | <b>S</b> | 1241.5237        | 621.2655        | 1223.5001 | 612.2537         | 1223.5131      | 612.2602         | <b>12</b> |
| 3  | 277.1439        | 139.0756        | 259.1203        | 130.0638         | 259.1333        | 130.0703         | <b>G</b> | <b>1153.4946</b> | 577.2509        | 1135.4710 | 568.2391         | 1135.4840      | 568.2457         | <b>11</b> |
| 4  | 393.1809        | 197.0941        | 375.1573        | 188.0823         | 375.1703        | 188.0888         | <b>N</b> | 1095.4761        | 548.2417        | 1077.4525 | 539.2299         | 1077.4655      | 539.2364         | <b>10</b> |
| 5  | 481.2099        | 241.1086        | 463.1863        | 232.0968         | 463.1994        | 232.1033         | <b>S</b> | 979.4391         | 490.2232        | 961.4155  | 481.2114         | 961.4285       | 481.2179         | <b>9</b>  |
| 6  | 581.2754        | 291.1413        | 563.2518        | 282.1295         | 563.2648        | 282.1360         | <b>V</b> | <b>891.4100</b>  | 446.2087        | 873.3865  | 437.1969         | 873.3995       | 437.2034         | <b>8</b>  |
| 7  | 695.3565        | 348.1819        | <b>677.3329</b> | 339.1701         | <b>677.3459</b> | 339.1766         | <b>L</b> | 791.3446         | 396.1759        | 773.3210  | 387.1641         | 773.3340       | 387.1707         | <b>7</b>  |
| 8  | <b>783.3855</b> | 392.1964        | 765.3620        | 383.1846         | 765.3750        | 383.1911         | <b>S</b> | <b>677.2635</b>  | 339.1354        | 659.2399  | 330.1236         | 659.2529       | 330.1301         | <b>6</b>  |
| 9  | 871.4146        | 436.2109        | 853.3910        | 427.1991         | 853.4040        | 427.2057         | <b>S</b> | <b>589.2344</b>  | 295.1209        | 571.2108  | 286.1091         | 571.2239       | 286.1156         | <b>5</b>  |
| 10 | 1033.4393       | 517.2233        | 1015.4157       | 508.2115         | 1015.4288       | 508.2180         | <b>C</b> | 501.2054         | 251.1063        | 483.1818  | 242.0945         | 483.1948       | 242.1010         | <b>4</b>  |
| 11 | 1121.4684       | 561.2378        | 1103.4448       | 552.2260         | 1103.4578       | 552.2325         | <b>S</b> | 339.1806         | 170.0940        | 321.1571  | 161.0822         | 321.1701       | 161.0887         | <b>3</b>  |
| 12 | 1223.5131       | 612.2602        | 1205.4895       | 603.2484         | 1205.5025       | 603.2549         | <b>T</b> | 251.1516         | 126.0794        | 233.1280  | 117.0676         | 233.1410       | 117.0741         | <b>2</b>  |
| 13 |                 |                 |                 |                  |                 |                  | <b>K</b> | 149.1069         | 75.0571         | 131.0833  | 66.0453          |                |                  | <b>1</b>  |

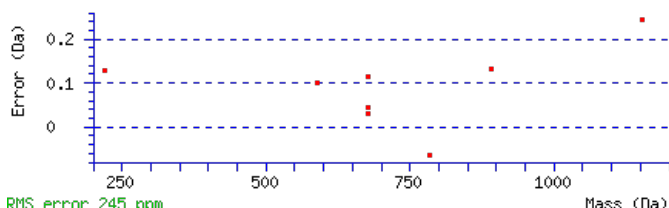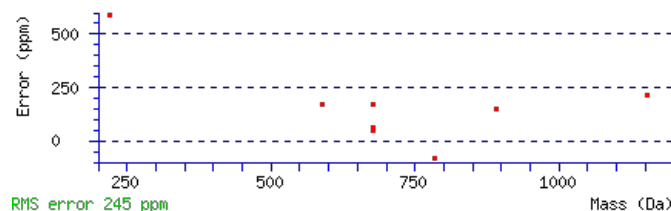NCBI **BLAST** search of **KSGNSVLSSCSTK**

(Parameters: blastp, nr protein database, expect=20000, no filter, PAM30)

Other BLAST [web gateways](#)

AT3G53440.1

All matches to this query

| Score | Mr(calc)  | Delta   | Sequence                       |
|-------|-----------|---------|--------------------------------|
| 22.8  | 1370.6054 | -0.0008 | <a href="#">KSGNSVLSSCSTK</a>  |
| 4.0   | 1370.6016 | 0.0030  | <a href="#">EKEEFISDFSK</a>    |
| 0.8   | 1370.6047 | -0.0001 | <a href="#">ASNSNSAAAFGRAK</a> |

Mascot: <http://www.matrixscience.com/>

## Peptide View

### MS/MS Fragmentation of AINSLNGADLDGR

Found in **AT3G53460.1** in **TAIR\_Arabidopsis**, Symbols: CP29 | CP29 (chloroplast 29 kDa ribonucleoprotein); RNA binding / poly(U) binding | chr3:19830716-19832401 REVERSE

Match to Query 5231: 1314.650302 from(658.332427,2+) index(3645)

Title: Elution from: 34.407 to 34.407 scan no 4480 cid35.00 polarity:+

Data file D6h-1\_1.mgf

Click mouse within plot area to zoom in by factor of two about that point

Or,   to  Da

Label all possible matches  Label matches used for scoring

Show Y-axis

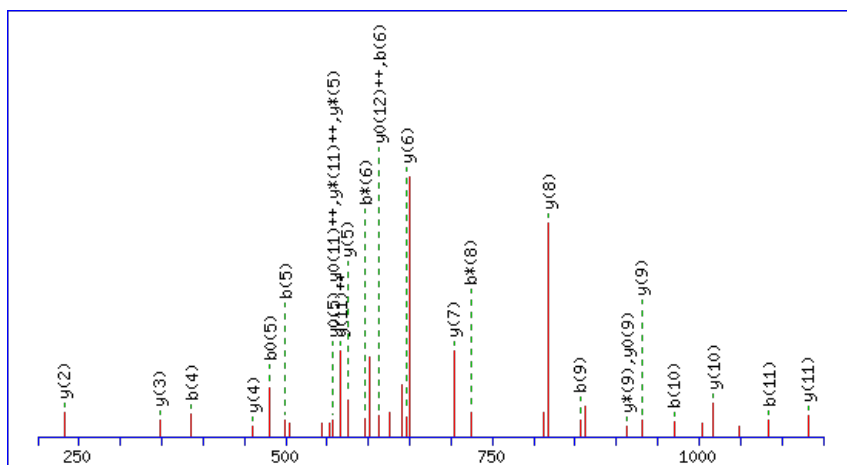

Monoisotopic mass of neutral peptide  $M_r(\text{calc})$ : 1314.6528

Fixed modifications: Carbamidomethyl (C) (apply to specified residues or termini only)

Ions Score: 87 Expect: 6e-009

Matches : 27/130 fragment ions using 31 most intense peaks ([help](#))

| #  | b         | b <sup>++</sup> | b*        | b <sup>*++</sup> | b <sup>0</sup> | b <sup>0++</sup> | Seq. | y         | y <sup>++</sup> | y*        | y <sup>*++</sup> | y <sup>0</sup> | y <sup>0++</sup> | #  |
|----|-----------|-----------------|-----------|------------------|----------------|------------------|------|-----------|-----------------|-----------|------------------|----------------|------------------|----|
| 1  | 72.0444   | 36.5258         |           |                  |                |                  | A    |           |                 |           |                  |                |                  | 13 |
| 2  | 185.1285  | 93.0679         |           |                  |                |                  | I    | 1244.6230 | 622.8151        | 1227.5964 | 614.3018         | 1226.6124      | 613.8098         | 12 |
| 3  | 299.1714  | 150.0893        | 282.1448  | 141.5761         |                |                  | N    | 1131.5389 | 566.2731        | 1114.5123 | 557.7598         | 1113.5283      | 557.2678         | 11 |
| 4  | 386.2034  | 193.6053        | 369.1769  | 185.0921         | 368.1928       | 184.6001         | S    | 1017.4960 | 509.2516        | 1000.4694 | 500.7383         | 999.4854       | 500.2463         | 10 |
| 5  | 499.2875  | 250.1474        | 482.2609  | 241.6341         | 481.2769       | 241.1421         | L    | 930.4639  | 465.7356        | 913.4374  | 457.2223         | 912.4534       | 456.7303         | 9  |
| 6  | 613.3304  | 307.1688        | 596.3039  | 298.6556         | 595.3198       | 298.1636         | N    | 817.3799  | 409.1936        | 800.3533  | 400.6803         | 799.3693       | 400.1883         | 8  |
| 7  | 670.3519  | 335.6796        | 653.3253  | 327.1663         | 652.3413       | 326.6743         | G    | 703.3369  | 352.1721        | 686.3104  | 343.6588         | 685.3264       | 343.1668         | 7  |
| 8  | 741.3890  | 371.1981        | 724.3624  | 362.6849         | 723.3784       | 362.1928         | A    | 646.3155  | 323.6614        | 629.2889  | 315.1481         | 628.3049       | 314.6561         | 6  |
| 9  | 856.4159  | 428.7116        | 839.3894  | 420.1983         | 838.4054       | 419.7063         | D    | 575.2784  | 288.1428        | 558.2518  | 279.6295         | 557.2678       | 279.1375         | 5  |
| 10 | 969.5000  | 485.2536        | 952.4734  | 476.7404         | 951.4894       | 476.2483         | L    | 460.2514  | 230.6293        | 443.2249  | 222.1161         | 442.2409       | 221.6241         | 4  |
| 11 | 1084.5269 | 542.7671        | 1067.5004 | 534.2538         | 1066.5164      | 533.7618         | D    | 347.1674  | 174.0873        | 330.1408  | 165.5740         | 329.1568       | 165.0820         | 3  |
| 12 | 1141.5484 | 571.2778        | 1124.5218 | 562.7646         | 1123.5378      | 562.2726         | G    | 232.1404  | 116.5738        | 215.1139  | 108.0606         |                |                  | 2  |
| 13 |           |                 |           |                  |                |                  | R    | 175.1190  | 88.0631         | 158.0924  | 79.5498          |                |                  | 1  |

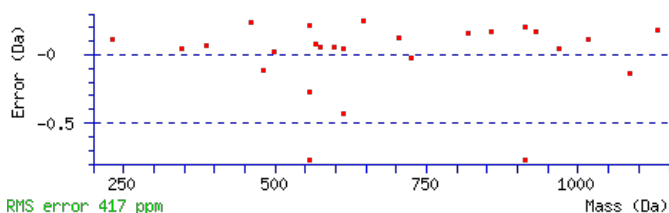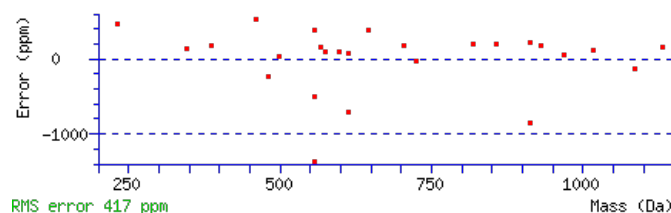

NCBI BLAST search of [AINSLNGADLDGR](#)

(Parameters: blastp, nr protein database, expect=20000, no filter, PAM30)

AT3G53460.1

Other BLAST [web gateways](#)

All matches to this query

| Score | Mr(calc)  | Delta   | Sequence                      |
|-------|-----------|---------|-------------------------------|
| 87.0  | 1314.6528 | -0.0025 | <a href="#">AINSLNGADLDGR</a> |
| 0.5   | 1314.6528 | -0.0025 | <a href="#">SPQNLSNSALER</a>  |

Mascot: <http://www.matrixscience.com/>

## Peptide View

### MS/MS Fragmentation of **MLQLLLK**

Found in **AT3G53540.1** in **TAIR\_Arabidopsis**, Symbols: | similar to unknown protein [Arabidopsis thaliana] (TAIR:AT4G28760.2); similar to unknown protein [Arabidopsis thaliana] (TAIR:AT4G28760.1); similar to unnamed protein product [Vitis vinifera] (GB:CAO18092.1); contains domain PHOSPHATIDY

Match to Query 1541: 882.488004 from(442.251278,2+) index(1954)

Title: Elution from: 22.339 to 22.339 scan no 2500 cid35.00 polarity:+

Data file C7-3\_2.mgf

Click mouse within plot area to zoom in by factor of two about that point

Or,   to  Da

Label all possible matches  Label matches used for scoring

Show Y-axis

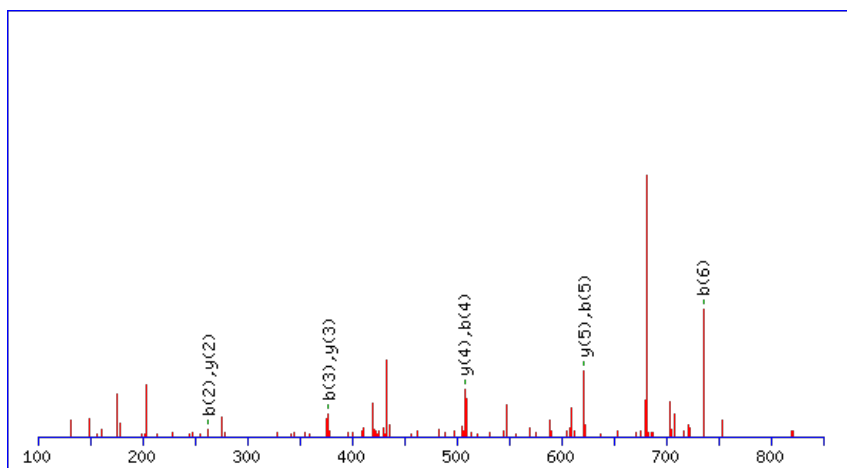

**Monoisotopic mass of neutral peptide Mr(calc):** 882.4857

**Fixed modifications:** Carbamidomethyl (C) (apply to specified residues or termini only)

**Ions Score:** 27 **Expect:** 0.0055

**Matches:** 9/46 fragment ions using 14 most intense peaks ([help](#))

| # | b               | b <sup>++</sup> | b*       | b <sup>+++</sup> | Seq. | y               | y <sup>++</sup> | y*       | y <sup>+++</sup> | # |
|---|-----------------|-----------------|----------|------------------|------|-----------------|-----------------|----------|------------------|---|
| 1 | 133.0448        | 67.0260         |          |                  | M    |                 |                 |          |                  | 7 |
| 2 | <b>263.0974</b> | 132.0524        | 245.0739 | 123.0406         | Q    | 751.4555        | 376.2314        | 733.4319 | 367.2196         | 6 |
| 3 | <b>377.1785</b> | 189.0929        | 359.1550 | 180.0811         | L    | <b>621.4028</b> | 311.2050        | 603.3792 | 302.1933         | 5 |
| 4 | <b>507.2312</b> | 254.1192        | 489.2076 | 245.1074         | Q    | <b>507.3217</b> | 254.1645        | 489.2981 | 245.1527         | 4 |
| 5 | <b>621.3123</b> | 311.1598        | 603.2887 | 302.1480         | L    | <b>377.2691</b> | 189.1382        | 359.2455 | 180.1264         | 3 |
| 6 | <b>735.3934</b> | 368.2003        | 717.3698 | 359.1885         | L    | <b>263.1880</b> | 132.0976        | 245.1644 | 123.0858         | 2 |
| 7 |                 |                 |          |                  | K    | 149.1069        | 75.0571         | 131.0833 | 66.0453          | 1 |

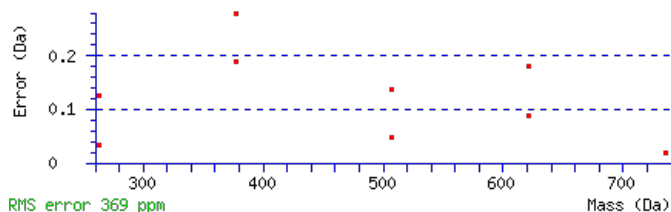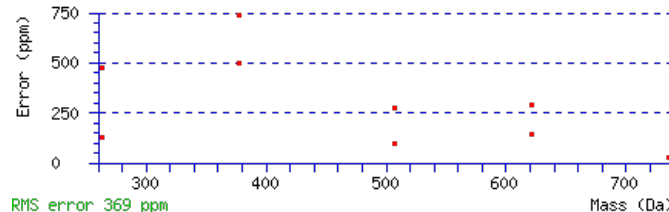

NCBI **BLAST** search of [MLQLLLK](#)

(Parameters: blastp, nr protein database, expect=20000, no filter, PAM30)

Other BLAST [web gateways](#)

### All matches to this query

| Score | Mr(calc) | Delta  | Sequence                |
|-------|----------|--------|-------------------------|
| 26.6  | 882.4857 | 0.0023 | <a href="#">MLQLLLK</a> |



**AT3G53540.1**

|      |          |         |                          |
|------|----------|---------|--------------------------|
| 21.2 | 882.4857 | 0.0023  | <a href="#">KMLPEKK</a>  |
| 17.5 | 882.4857 | 0.0023  | <a href="#">KALGLPMK</a> |
| 13.5 | 882.4857 | 0.0023  | <a href="#">QQLMIK</a>   |
| 12.2 | 882.4857 | 0.0023  | <a href="#">MAKLVAPK</a> |
| 8.8  | 882.4904 | -0.0024 | <a href="#">ELTTLGIK</a> |
| 6.6  | 882.4857 | 0.0023  | <a href="#">MEKPKLK</a>  |
| 6.3  | 882.4904 | -0.0024 | <a href="#">ETVSVVLK</a> |
| 6.3  | 882.4854 | 0.0026  | <a href="#">KRGPPR</a>   |
| 6.2  | 882.4879 | 0.0001  | <a href="#">MLWLALK</a>  |

**Mascot:** <http://www.matrixscience.com/>

**Peptide View**MS/MS Fragmentation of **EVAGQAPYEK**Found in **AT3G53740.1** in **TAIR\_Arabidopsis**, Symbols: | 60S ribosomal protein L36 (RPL36B) | chr3:19924899-19925791 REVERSE

Match to Query 3475: 1090.529992 from(546.272272,2+) index(557)

Title: Elution from: 11.210 to 11.210 scan no 860 cid35.00 polarity:+

Data file C7-2\_1.mgf

Click mouse within plot area to zoom in by factor of two about that point

Or,   to  Da Label all possible matches  Label matches used for scoring Show Y-axis 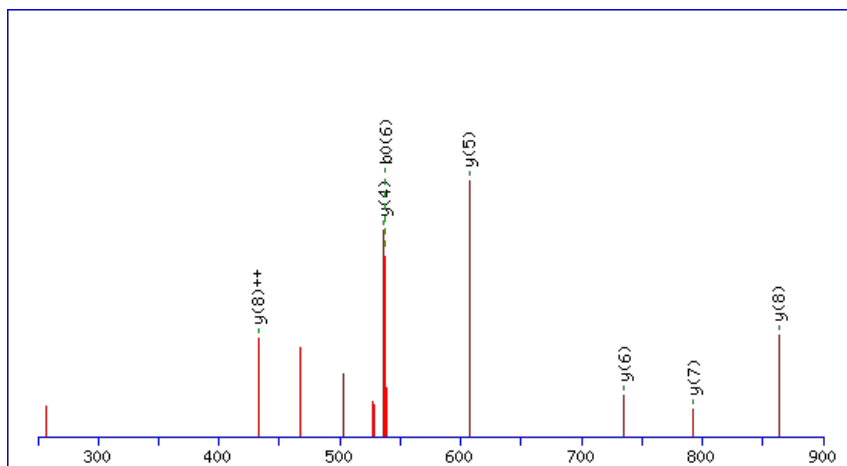Monoisotopic mass of neutral peptide **Mr(calc)**: 1090.5295**Fixed modifications**: Carbamidomethyl (C) (apply to specified residues or termini only)**Ions Score**: 42 **Expect**: 0.00033**Matches** : 7/98 fragment ions using 8 most intense peaks ([help](#))

| #  | b        | b <sup>++</sup> | b*       | b <sup>*++</sup> | b <sup>0</sup> | b <sup>0++</sup> | Seq. | y        | y <sup>++</sup> | y*       | y <sup>*++</sup> | y <sup>0</sup> | y <sup>0++</sup> | #  |
|----|----------|-----------------|----------|------------------|----------------|------------------|------|----------|-----------------|----------|------------------|----------------|------------------|----|
| 1  | 130.0499 | 65.5286         |          |                  | 112.0393       | 56.5233          | E    |          |                 |          |                  |                |                  | 10 |
| 2  | 229.1183 | 115.0628        |          |                  | 211.1077       | 106.0575         | V    | 962.4942 | 481.7507        | 945.4676 | 473.2375         | 944.4836       | 472.7454         | 9  |
| 3  | 300.1554 | 150.5813        |          |                  | 282.1448       | 141.5761         | A    | 863.4258 | 432.2165        | 846.3992 | 423.7032         | 845.4152       | 423.2112         | 8  |
| 4  | 357.1769 | 179.0921        |          |                  | 339.1663       | 170.0868         | G    | 792.3886 | 396.6980        | 775.3621 | 388.1847         | 774.3781       | 387.6927         | 7  |
| 5  | 485.2354 | 243.1214        | 468.2089 | 234.6081         | 467.2249       | 234.1161         | Q    | 735.3672 | 368.1872        | 718.3406 | 359.6740         | 717.3566       | 359.1819         | 6  |
| 6  | 556.2726 | 278.6399        | 539.2460 | 270.1266         | 538.2620       | 269.6346         | A    | 607.3086 | 304.1579        | 590.2821 | 295.6447         | 589.2980       | 295.1527         | 5  |
| 7  | 653.3253 | 327.1663        | 636.2988 | 318.6530         | 635.3148       | 318.1610         | P    | 536.2715 | 268.6394        | 519.2449 | 260.1261         | 518.2609       | 259.6341         | 4  |
| 8  | 816.3886 | 408.6980        | 799.3621 | 400.1847         | 798.3781       | 399.6927         | Y    | 439.2187 | 220.1130        | 422.1922 | 211.5997         | 421.2082       | 211.1077         | 3  |
| 9  | 945.4312 | 473.2193        | 928.4047 | 464.7060         | 927.4207       | 464.2140         | E    | 276.1554 | 138.5813        | 259.1288 | 130.0681         | 258.1448       | 129.5761         | 2  |
| 10 |          |                 |          |                  |                |                  | K    | 147.1128 | 74.0600         | 130.0863 | 65.5468          |                |                  | 1  |

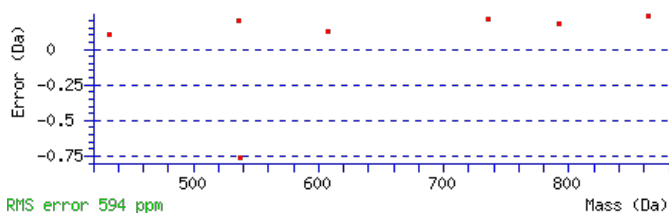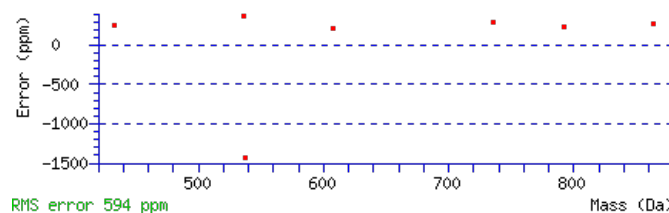NCBI **BLAST** search of **EVAGQAPYEK**

(Parameters: blastp, nr protein database, expect=20000, no filter, PAM30)

Other BLAST [web gateways](#)**All matches to this query**

| Score | Mr(calc) | Delta | Sequence |
|-------|----------|-------|----------|
|       |          |       |          |

## AT3G53740.1

|      |           |         |                            |
|------|-----------|---------|----------------------------|
| 42.2 | 1090.5295 | 0.0005  | <a href="#">EVAGQAPYEK</a> |
| 15.6 | 1090.5328 | -0.0028 | <a href="#">DQIQAMELK</a>  |
| 4.5  | 1090.5295 | 0.0005  | <a href="#">LDATANDFPK</a> |
| 3.7  | 1090.5329 | -0.0029 | <a href="#">LNTIIDCDK</a>  |
| 2.0  | 1090.5295 | 0.0005  | <a href="#">SAEPISSWK</a>  |

**Mascot:** <http://www.matrixscience.com/>

**Peptide View**MS/MS Fragmentation of **TPLPDVVIHSPK**Found in **AT3G53870.1** in **TAIR\_Arabidopsis**, Symbols: | 40S ribosomal protein S3 (RPS3B) | chr3:19962525-19963760 FORWARD

Match to Query 5579: 1430.770083 from(477.930637,3+) index(5688)

Title: Elution from: 51.661 to 51.661 scan no 7197 cid35.00 polarity:+

Data file D6h-2\_2.mgf

Click mouse within plot area to zoom in by factor of two about that point

Or,   to  Da Label all possible matches  Label matches used for scoring Show Y-axis 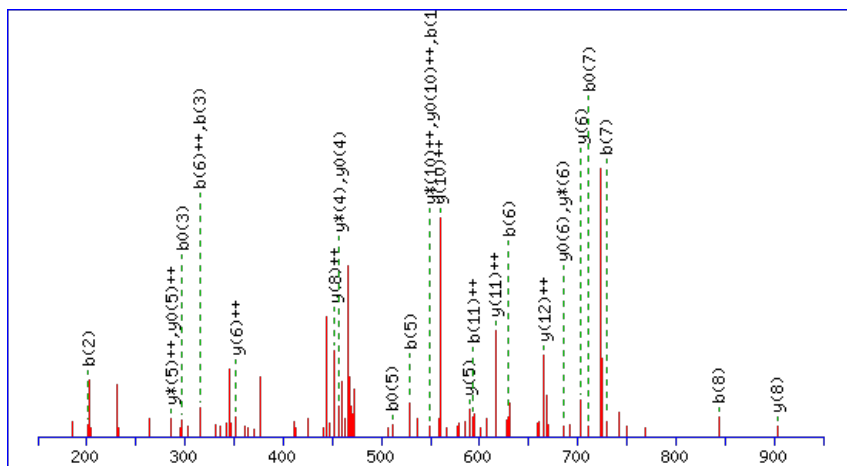Monoisotopic mass of neutral peptide  $M_r(\text{calc})$ : 1430.7710

Fixed modifications: Carbamidomethyl (C) (apply to specified residues or termini only)

Ions Score: 21 Expect: 0.032

Matches : 28/116 fragment ions using 54 most intense peaks ([help](#))

| #  | b               | b <sup>++</sup> | b <sup>0</sup>  | b <sup>0++</sup> | Seq. | y               | y <sup>++</sup> | y*              | y <sup>*++</sup> | y <sup>0</sup>  | y <sup>0++</sup> | #  |
|----|-----------------|-----------------|-----------------|------------------|------|-----------------|-----------------|-----------------|------------------|-----------------|------------------|----|
| 1  | 103.0520        | 52.0296         | 85.0414         | 43.0244          | T    |                 |                 |                 |                  |                 |                  | 13 |
| 2  | <b>201.1018</b> | 101.0545        | 183.0912        | 92.0492          | P    | 1329.7335       | <b>665.3704</b> | 1311.7099       | 656.3586         | 1311.7230       | 656.3651         | 12 |
| 3  | <b>315.1829</b> | 158.0951        | <b>297.1723</b> | 149.0898         | L    | 1231.6837       | <b>616.3455</b> | 1213.6601       | 607.3337         | 1213.6732       | 607.3402         | 11 |
| 4  | 413.2327        | 207.1200        | 395.2221        | 198.1147         | P    | 1117.6026       | <b>559.3050</b> | 1099.5790       | <b>550.2932</b>  | 1099.5921       | <b>550.2997</b>  | 10 |
| 5  | <b>529.2567</b> | 265.1320        | <b>511.2461</b> | 256.1267         | D    | 1019.5528       | 510.2801        | 1001.5292       | 501.2683         | 1001.5423       | 501.2748         | 9  |
| 6  | <b>629.3221</b> | <b>315.1647</b> | 611.3115        | 306.1594         | V    | <b>903.5288</b> | <b>452.2681</b> | 885.5053        | 443.2563         | 885.5183        | 443.2628         | 8  |
| 7  | <b>729.3876</b> | 365.1974        | <b>711.3770</b> | 356.1921         | V    | 803.4634        | 402.2353        | 785.4398        | 393.2235         | 785.4528        | 393.2301         | 7  |
| 8  | <b>843.4687</b> | 422.2380        | 825.4581        | 413.2327         | I    | <b>703.3980</b> | <b>352.2026</b> | <b>685.3744</b> | 343.1908         | <b>685.3874</b> | 343.1973         | 6  |
| 9  | 957.5498        | 479.2785        | 939.5392        | 470.2732         | I    | <b>589.3169</b> | 295.1621        | 571.2933        | <b>286.1503</b>  | 571.3063        | <b>286.1568</b>  | 5  |
| 10 | 1097.5998       | <b>549.3035</b> | 1079.5892       | 540.2982         | H    | 475.2358        | 238.1215        | <b>457.2122</b> | 229.1097         | <b>457.2252</b> | 229.1162         | 4  |
| 11 | 1185.6288       | <b>593.3181</b> | 1167.6183       | 584.3128         | S    | 335.1857        | 168.0965        | 317.1622        | 159.0847         | 317.1752        | 159.0912         | 3  |
| 12 | 1283.6786       | 642.3430        | 1265.6681       | 633.3377         | P    | 247.1567        | 124.0820        | 229.1331        | 115.0702         |                 |                  | 2  |
| 13 |                 |                 |                 |                  | K    | 149.1069        | 75.0571         | 131.0833        | 66.0453          |                 |                  | 1  |

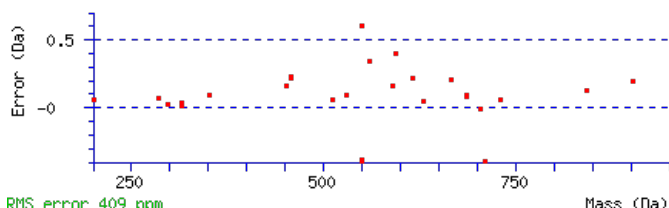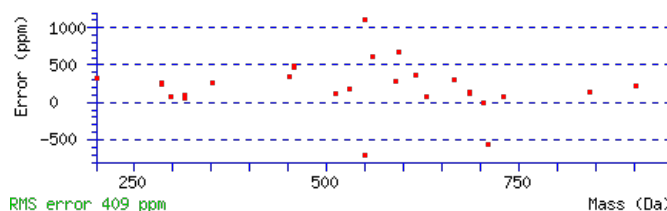NCBI **BLAST** search of **TPLPDVVIHSPK**

(Parameters: blastp, nr protein database, expect=20000, no filter, PAM30)

Other BLAST [web gateways](#)

AT3G53870.1

All matches to this query

| Score | Mr(calc)  | Delta   | Sequence                       |
|-------|-----------|---------|--------------------------------|
| 21.5  | 1430.7710 | -0.0009 | <a href="#">TPLPDVVIHSPK</a>   |
| 4.7   | 1430.7714 | -0.0013 | <a href="#">VKLGVI VNNVSNR</a> |
| 2.0   | 1430.7709 | -0.0009 | <a href="#">VVLSLTGVKEGWK</a>  |
| 0.7   | 1430.7736 | -0.0035 | <a href="#">VVKQILWVNGTR</a>   |

Mascot: <http://www.matrixscience.com/>

## Peptide View

MS/MS Fragmentation of **LLYECAPMSFIVEQAGGK**

Found in **AT3G54050.1** in **TAIR\_Arabidopsis**, Symbols: | fructose-1,6-bisphosphatase, putative / D-fructose-1,6-bisphosphate 1-phosphohydrolase, putative / FBPase, putative | chr3:20027929-20029505 FORWARD

Match to Query 8890: 2011.974722 from(1006.994637,2+) index(9241)

Title: Elution from: 88.674 to 88.674 scan no 12958 cid35.00 polarity:+

Data file D1d-1-2.mgf

Click mouse within plot area to zoom in by factor of two about that point

Or,   to  Da

Label all possible matches  Label matches used for scoring

Show Y-axis

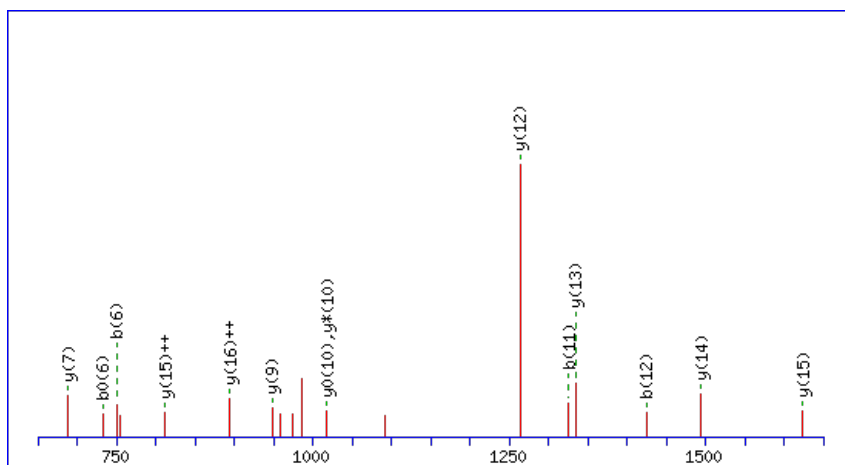

Monoisotopic mass of neutral peptide **Mr(calc)**: 2011.9747

**Fixed modifications**: Carbamidomethyl (C) (apply to specified residues or termini only)

**Ions Score**: 47 **Expect**: 5.9e-005

**Matches**: 14/162 fragment ions using 15 most intense peaks ([help](#))

| #  | b         | b <sup>++</sup> | b <sup>*</sup> | b <sup>*++</sup> | b <sup>0</sup> | b <sup>0++</sup> | Seq. | y         | y <sup>++</sup> | y <sup>*</sup> | y <sup>*++</sup> | y <sup>0</sup> | y <sup>0++</sup> | #  |
|----|-----------|-----------------|----------------|------------------|----------------|------------------|------|-----------|-----------------|----------------|------------------|----------------|------------------|----|
| 1  | 114.0913  | 57.5493         |                |                  |                |                  | L    |           |                 |                |                  |                |                  | 18 |
| 2  | 227.1754  | 114.0913        |                |                  |                |                  | L    | 1899.8979 | 950.4526        | 1882.8714      | 941.9393         | 1881.8874      | 941.4473         | 17 |
| 3  | 390.2387  | 195.6230        |                |                  |                |                  | Y    | 1786.8139 | 893.9106        | 1769.7873      | 885.3973         | 1768.8033      | 884.9053         | 16 |
| 4  | 519.2813  | 260.1443        |                |                  | 501.2708       | 251.1390         | E    | 1623.7505 | 812.3789        | 1606.7240      | 803.8656         | 1605.7400      | 803.3736         | 15 |
| 5  | 679.3120  | 340.1596        |                |                  | 661.3014       | 331.1543         | C    | 1494.7079 | 747.8576        | 1477.6814      | 739.3443         | 1476.6974      | 738.8523         | 14 |
| 6  | 750.3491  | 375.6782        |                |                  | 732.3385       | 366.6729         | A    | 1334.6773 | 667.8423        | 1317.6508      | 659.3290         | 1316.6667      | 658.8370         | 13 |
| 7  | 847.4019  | 424.2046        |                |                  | 829.3913       | 415.1993         | P    | 1263.6402 | 632.3237        | 1246.6136      | 623.8105         | 1245.6296      | 623.3184         | 12 |
| 8  | 978.4423  | 489.7248        |                |                  | 960.4318       | 480.7195         | M    | 1166.5874 | 583.7973        | 1149.5609      | 575.2841         | 1148.5769      | 574.7921         | 11 |
| 9  | 1065.4744 | 533.2408        |                |                  | 1047.4638      | 524.2355         | S    | 1035.5469 | 518.2771        | 1018.5204      | 509.7638         | 1017.5364      | 509.2718         | 10 |
| 10 | 1212.5428 | 606.7750        |                |                  | 1194.5322      | 597.7697         | F    | 948.5149  | 474.7611        | 931.4884       | 466.2478         | 930.5043       | 465.7558         | 9  |
| 11 | 1325.6268 | 663.3171        |                |                  | 1307.6163      | 654.3118         | I    | 801.4465  | 401.2269        | 784.4199       | 392.7136         | 783.4359       | 392.2216         | 8  |
| 12 | 1424.6953 | 712.8513        |                |                  | 1406.6847      | 703.8460         | V    | 688.3624  | 344.6849        | 671.3359       | 336.1716         | 670.3519       | 335.6796         | 7  |
| 13 | 1553.7379 | 777.3726        |                |                  | 1535.7273      | 768.3673         | E    | 589.2940  | 295.1506        | 572.2675       | 286.6374         | 571.2835       | 286.1454         | 6  |
| 14 | 1681.7964 | 841.4019        | 1664.7699      | 832.8886         | 1663.7859      | 832.3966         | Q    | 460.2514  | 230.6293        | 443.2249       | 222.1161         |                |                  | 5  |
| 15 | 1752.8335 | 876.9204        | 1735.8070      | 868.4071         | 1734.8230      | 867.9151         | A    | 332.1928  | 166.6001        | 315.1663       | 158.0868         |                |                  | 4  |
| 16 | 1809.8550 | 905.4311        | 1792.8285      | 896.9179         | 1791.8444      | 896.4259         | G    | 261.1557  | 131.0815        | 244.1292       | 122.5682         |                |                  | 3  |
| 17 | 1866.8765 | 933.9419        | 1849.8499      | 925.4286         | 1848.8659      | 924.9366         | G    | 204.1343  | 102.5708        | 187.1077       | 94.0575          |                |                  | 2  |
| 18 |           |                 |                |                  |                |                  | K    | 147.1128  | 74.0600         | 130.0863       | 65.5468          |                |                  | 1  |

AT3G54050.1

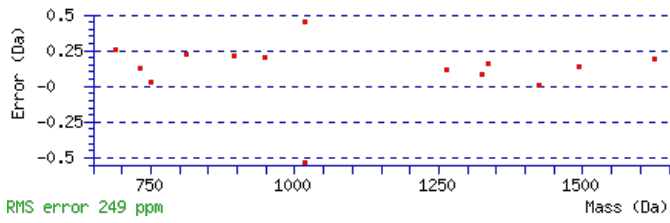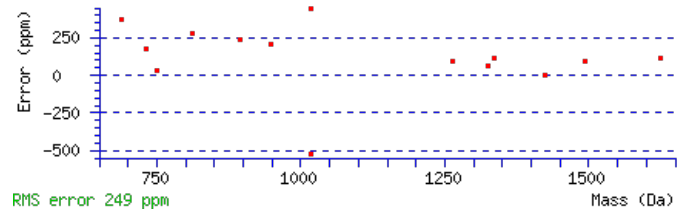

NCBI **BLAST** search of [LLYECAPMSFIVEQAGGK](#)  
(Parameters: blastp, nr protein database, expect=20000, no filter, PAM30)  
Other BLAST [web gateways](#)

**All matches to this query**

| Score | Mr(calc)  | Delta  | Sequence                           |
|-------|-----------|--------|------------------------------------|
| 46.9  | 2011.9747 | 0.0000 | <a href="#">LLYECAPMSFIVEQAGGK</a> |

Mascot: <http://www.matrixscience.com/>

### Peptide View

#### MS/MS Fragmentation of **ALWTGLGPNVAR**

Found in **AT3G54110.1** in **TAIR\_Arabidopsis**, Symbols: UCP, PUMP1, ATUCP1, UCP1, ATPUMP1 | ATPUMP1; binding / oxidative phosphorylation uncoupler | chr3:20049868-20051974 FORWARD

Match to Query 4797: 1270.636624 from(636.325588,2+) index(4424)

Title: Elution from: 41.034 to 41.034 scan no 5521 cid35.00 polarity:+

Data file C7-2\_1.mgf

Click mouse within plot area to zoom in by factor of two about that point

Or,   to  Da

Label all possible matches  Label matches used for scoring

Show Y-axis

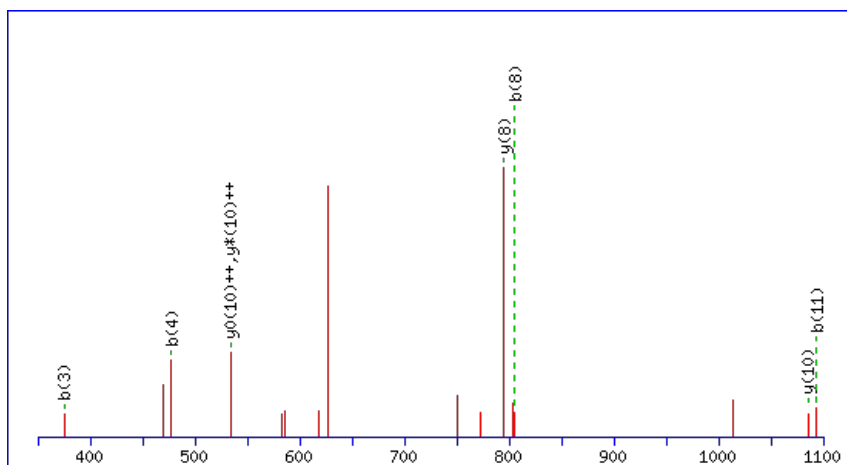

Monoisotopic mass of neutral peptide  $M_r(\text{calc})$ : 1270.6376

Fixed modifications: Carbamidomethyl (C) (apply to specified residues or termini only)

Ions Score: 22 Expect: 0.034

Matches : 8/94 fragment ions using 17 most intense peaks ([help](#))

| #  | b                | b <sup>++</sup> | b*        | b <sup>*++</sup> | b <sup>0</sup> | b <sup>0++</sup> | Seq. | y                | y <sup>++</sup> | y*        | y <sup>*++</sup> | y <sup>0</sup> | y <sup>0++</sup> | #  |
|----|------------------|-----------------|-----------|------------------|----------------|------------------|------|------------------|-----------------|-----------|------------------|----------------|------------------|----|
| 1  | 73.0414          | 37.0244         |           |                  |                |                  | A    |                  |                 |           |                  |                |                  | 12 |
| 2  | 187.1225         | 94.0649         |           |                  |                |                  | L    | 1199.6108        | 600.3090        | 1181.5872 | 591.2972         | 1181.6002      | 591.3037         | 11 |
| 3  | <b>375.1959</b>  | 188.1016        |           |                  |                |                  | W    | <b>1085.5297</b> | 543.2685        | 1067.5061 | <b>534.2567</b>  | 1067.5191      | <b>534.2632</b>  | 10 |
| 4  | <b>477.2406</b>  | 239.1239        |           |                  | 459.2301       | 230.1187         | T    | 897.4563         | 449.2318        | 879.4327  | 440.2200         | 879.4457       | 440.2265         | 9  |
| 5  | 535.2591         | 268.1332        |           |                  | 517.2486       | 259.1279         | G    | <b>795.4116</b>  | 398.2094        | 777.3880  | 389.1976         |                |                  | 8  |
| 6  | 649.3402         | 325.1737        |           |                  | 631.3297       | 316.1685         | L    | 737.3931         | 369.2002        | 719.3695  | 360.1884         |                |                  | 7  |
| 7  | 707.3587         | 354.1830        |           |                  | 689.3482       | 345.1777         | G    | 623.3120         | 312.1596        | 605.2884  | 303.1478         |                |                  | 6  |
| 8  | <b>805.4085</b>  | 403.2079        |           |                  | 787.3980       | 394.2026         | P    | 565.2935         | 283.1504        | 547.2699  | 274.1386         |                |                  | 5  |
| 9  | 921.4455         | 461.2264        | 903.4219  | 452.2146         | 903.4349       | 452.2211         | N    | 467.2437         | 234.1255        | 449.2201  | 225.1137         |                |                  | 4  |
| 10 | 1021.5110        | 511.2591        | 1003.4874 | 502.2473         | 1003.5004      | 502.2538         | V    | 351.2067         | 176.1070        | 333.1831  | 167.0952         |                |                  | 3  |
| 11 | <b>1093.5451</b> | 547.2762        | 1075.5215 | 538.2644         | 1075.5345      | 538.2709         | A    | 251.1412         | 126.0743        | 233.1177  | 117.0625         |                |                  | 2  |
| 12 |                  |                 |           |                  |                |                  | R    | 179.1071         | 90.0572         | 161.0835  | 81.0454          |                |                  | 1  |

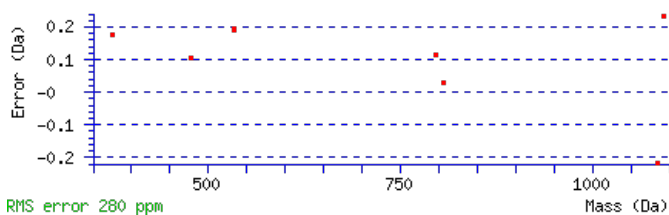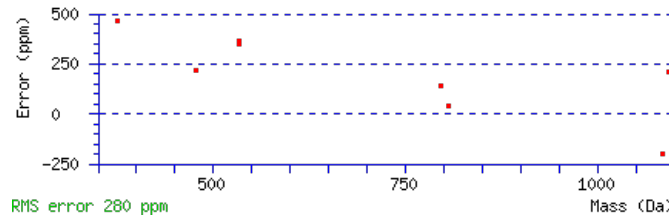

NCBI BLAST search of **ALWTGLGPNVAR**

(Parameters: blastp, nr protein database, expect=20000, no filter, PAM30)

Other BLAST [web gateways](#)



AT3G54110.1

All matches to this query

| Score | Mr(calc)  | Delta   | Sequence                     |
|-------|-----------|---------|------------------------------|
| 22.0  | 1270.6376 | -0.0010 | <a href="#">ALWTGLGPNVAR</a> |
| 8.2   | 1270.6384 | -0.0017 | <a href="#">IADIGPNIIMGK</a> |
| 1.7   | 1270.6384 | -0.0017 | <a href="#">HLVIESMALK</a>   |
| 1.6   | 1270.6354 | 0.0012  | <a href="#">AIKVHERGDTK</a>  |
| 0.2   | 1270.6354 | 0.0012  | <a href="#">TTSVPHISQKR</a>  |

Mascot: <http://www.matrixscience.com/>

**Peptide View**MS/MS Fragmentation of **MSEIVRVQEI VSK**Found in **AT3G54160.1** in **TAIR\_Arabidopsis**, Symbols: | syntaxin-related family protein | chr3:20064446-20066005 FORWARD

Match to Query 6727: 1534.774800 from(768.394676,2+) index(10217)

Title: Elution from: 94.622 to 94.622 scan no 14313 cid35.00 polarity:+

Data file D1d-3\_2.mgf

Click mouse within plot area to zoom in by factor of two about that point

Or,   to  Da Label all possible matches  Label matches used for scoring Show Y-axis 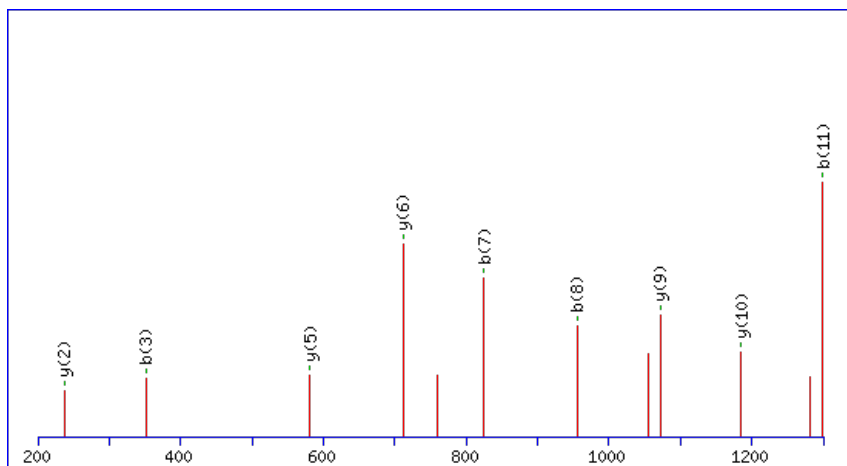Monoisotopic mass of neutral peptide  $M_r(\text{calc})$ : 1534.7749

Fixed modifications: Carbamidomethyl (C) (apply to specified residues or termini only)

Ions Score: 49 Expect: 0.00011

Matches : 9/130 fragment ions using 9 most intense peaks ([help](#))

| #  | b                | b <sup>++</sup> | b*        | b <sup>*++</sup> | b <sup>0</sup> | b <sup>0++</sup> | Seq. | y                | y <sup>++</sup> | y*        | y <sup>*++</sup> | y <sup>0</sup> | y <sup>0++</sup> | #  |
|----|------------------|-----------------|-----------|------------------|----------------|------------------|------|------------------|-----------------|-----------|------------------|----------------|------------------|----|
| 1  | 133.0448         | 67.0260         |           |                  |                |                  | M    |                  |                 |           |                  |                |                  | 13 |
| 2  | 221.0739         | 111.0406        |           |                  | 203.0633       | 102.0353         | S    | 1403.7447        | 702.3760        | 1385.7211 | 693.3642         | 1385.7341      | 693.3707         | 12 |
| 3  | <b>351.1135</b>  | 176.0604        |           |                  | 333.1029       | 167.0551         | E    | 1315.7156        | 658.3615        | 1297.6921 | 649.3497         | 1297.7051      | 649.3562         | 11 |
| 4  | 465.1946         | 233.1009        |           |                  | 447.1840       | 224.0956         | I    | <b>1185.6760</b> | 593.3416        | 1167.6524 | 584.3298         | 1167.6654      | 584.3364         | 10 |
| 5  | 565.2600         | 283.1337        |           |                  | 547.2495       | 274.1284         | V    | <b>1071.5949</b> | 536.3011        | 1053.5713 | 527.2893         | 1053.5843      | 527.2958         | 9  |
| 6  | 725.3493         | 363.1783        | 707.3257  | 354.1665         | 707.3387       | 354.1730         | R    | 971.5295         | 486.2684        | 953.5059  | 477.2566         | 953.5189       | 477.2631         | 8  |
| 7  | <b>825.4147</b>  | 413.2110        | 807.3912  | 404.1992         | 807.4042       | 404.2057         | V    | 811.4402         | 406.2237        | 793.4166  | 397.2120         | 793.4296       | 397.2185         | 7  |
| 8  | <b>955.4674</b>  | 478.2373        | 937.4438  | 469.2255         | 937.4568       | 469.2320         | Q    | <b>711.3748</b>  | 356.1910        | 693.3512  | 347.1792         | 693.3642       | 347.1857         | 6  |
| 9  | 1085.5070        | 543.2571        | 1067.4834 | 534.2454         | 1067.4964      | 534.2519         | E    | <b>581.3221</b>  | 291.1647        | 563.2985  | 282.1529         | 563.3115       | 282.1594         | 5  |
| 10 | 1199.5881        | 600.2977        | 1181.5645 | 591.2859         | 1181.5775      | 591.2924         | I    | 451.2825         | 226.1449        | 433.2589  | 217.1331         | 433.2719       | 217.1396         | 4  |
| 11 | <b>1299.6536</b> | 650.3304        | 1281.6300 | 641.3186         | 1281.6430      | 641.3251         | V    | 337.2014         | 169.1043        | 319.1778  | 160.0925         | 319.1908       | 160.0990         | 3  |
| 12 | 1387.6826        | 694.3449        | 1369.6590 | 685.3332         | 1369.6721      | 685.3397         | S    | <b>237.1359</b>  | 119.0716        | 219.1124  | 110.0598         | 219.1254       | 110.0663         | 2  |
| 13 |                  |                 |           |                  |                |                  | K    | 149.1069         | 75.0571         | 131.0833  | 66.0453          |                |                  | 1  |

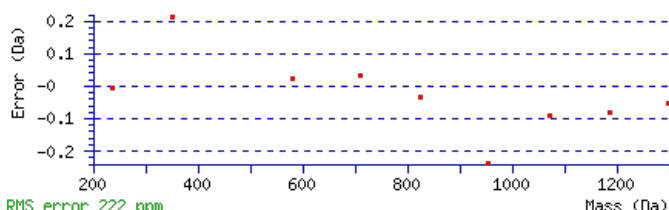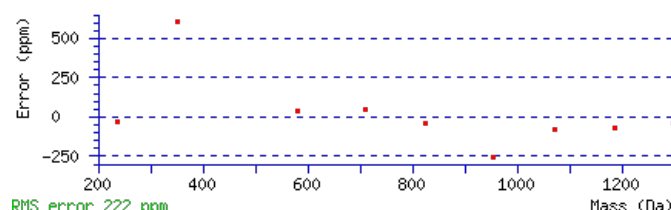NCBI BLAST search of [MSEIVRVQEI VSK](#)

(Parameters: blastp, nr protein database, expect=20000, no filter, PAM30)

Other BLAST [web gateways](#)

# AT3G54160.1

All matches to this query

| Score | Mr(calc)  | Delta   | Sequence                       |
|-------|-----------|---------|--------------------------------|
| 48.6  | 1534.7749 | -0.0001 | <a href="#">MSEIVRVQEIVSK</a>  |
| 12.0  | 1534.7720 | 0.0028  | <a href="#">QORSIRLGNLSLE</a>  |
| 11.9  | 1534.7776 | -0.0028 | <a href="#">VQLQCPTGRKISK</a>  |
| 7.5   | 1534.7749 | -0.0001 | <a href="#">LVKAADSVQVCLSK</a> |
| 5.7   | 1534.7749 | -0.0001 | <a href="#">LELNMVSLDRISK</a>  |
| 4.2   | 1534.7749 | -0.0001 | <a href="#">EKACVALQALSLSK</a> |
| 4.0   | 1534.7772 | -0.0024 | <a href="#">NTYPLLMLVNGGVK</a> |
| 0.6   | 1534.7716 | 0.0032  | <a href="#">LFSEEHVVKSSKK</a>  |

Mascot: <http://www.matrixscience.com/>

**Peptide View**MS/MS Fragmentation of **GLTTQLLK**Found in **AT3G54210.1** in **TAIR\_Arabidopsis**, Symbols: | ribosomal protein L17 family protein | chr3:20078650-20079363 REVERSE

Match to Query 1459: 882.501900 from(442.258226,2+) index(3680)

Title: Elution from: 34.926 to 34.926 scan no 4591 cid35.00 polarity:+

Data file D6h-3\_2.mgf

Click mouse within plot area to zoom in by factor of two about that point

Or,  to  Da Label all possible matches  Label matches used for scoring Show Y-axis 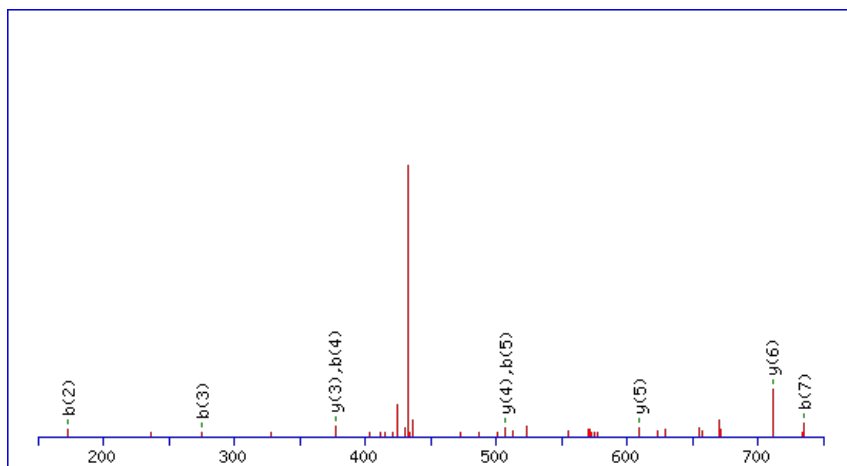Monoisotopic mass of neutral peptide **Mr(calc)**: 882.5034

Fixed modifications: Carbamidomethyl (C) (apply to specified residues or termini only)

Ions Score: 30 Expect: 0.0057

Matches : 9/64 fragment ions using 19 most intense peaks ([help](#))

| # | b               | b <sup>++</sup> | b*       | b <sup>*++</sup> | b <sup>0</sup> | b <sup>0++</sup> | Seq.     | y               | y <sup>++</sup> | y*       | y <sup>*++</sup> | y <sup>0</sup> | y <sup>0++</sup> | # |
|---|-----------------|-----------------|----------|------------------|----------------|------------------|----------|-----------------|-----------------|----------|------------------|----------------|------------------|---|
| 1 | 59.0258         | 30.0165         |          |                  |                |                  | <b>G</b> |                 |                 |          |                  |                |                  | 8 |
| 2 | <b>173.1069</b> | 87.0571         |          |                  |                |                  | <b>L</b> | 825.4922        | 413.2498        | 807.4687 | 404.2380         | 807.4817       | 404.2445         | 7 |
| 3 | <b>275.1516</b> | 138.0794        |          |                  | 257.1410       | 129.0741         | <b>T</b> | <b>711.4111</b> | 356.2092        | 693.3876 | 347.1974         | 693.4006       | 347.2039         | 6 |
| 4 | <b>377.1963</b> | 189.1018        |          |                  | 359.1857       | 180.0965         | <b>T</b> | <b>609.3664</b> | 305.1869        | 591.3428 | 296.1751         | 591.3559       | 296.1816         | 5 |
| 5 | <b>507.2489</b> | 254.1281        | 489.2254 | 245.1163         | 489.2384       | 245.1228         | <b>Q</b> | <b>507.3217</b> | 254.1645        | 489.2981 | 245.1527         |                |                  | 4 |
| 6 | 621.3300        | 311.1687        | 603.3065 | 302.1569         | 603.3195       | 302.1634         | <b>L</b> | <b>377.2691</b> | 189.1382        | 359.2455 | 180.1264         |                |                  | 3 |
| 7 | <b>735.4111</b> | 368.2092        | 717.3876 | 359.1974         | 717.4006       | 359.2039         | <b>L</b> | 263.1880        | 132.0976        | 245.1644 | 123.0858         |                |                  | 2 |
| 8 |                 |                 |          |                  |                |                  | <b>K</b> | 149.1069        | 75.0571         | 131.0833 | 66.0453          |                |                  | 1 |

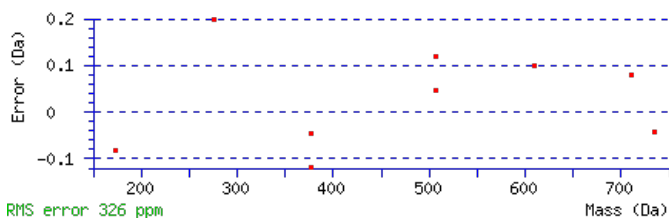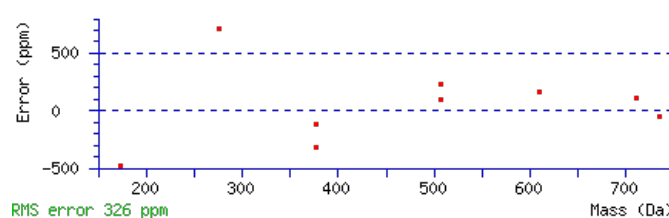NCBI **BLAST** search of **GLTTQLLK**

(Parameters: blastp, nr protein database, expect=20000, no filter, PAM30)

Other BLAST [web gateways](#)**All matches to this query**

| Score | Mr(calc) | Delta   | Sequence                 |
|-------|----------|---------|--------------------------|
| 30.4  | 882.5034 | -0.0015 | <a href="#">GLTTQLLK</a> |
| 17.8  | 882.5035 | -0.0016 | <a href="#">KAATEILK</a> |

## AT3G54210.1

|      |          |         |                          |
|------|----------|---------|--------------------------|
| 11.4 | 882.5035 | -0.0016 | <a href="#">LGVEKLSK</a> |
| 8.7  | 882.5034 | -0.0015 | <a href="#">GTVDKIHK</a> |
| 3.4  | 882.5035 | -0.0016 | <a href="#">GLDIKSLK</a> |
| 3.4  | 882.5034 | -0.0015 | <a href="#">GLVKEVTK</a> |
| 2.9  | 882.5035 | -0.0016 | <a href="#">LLGSVGSK</a> |
| 2.9  | 882.5035 | -0.0016 | <a href="#">AATSGLLK</a> |
| 2.8  | 882.5035 | -0.0016 | <a href="#">LDKASVIK</a> |
| 2.8  | 882.5035 | -0.0016 | <a href="#">ATIQSLK</a>  |

**Mascot:** <http://www.matrixscience.com/>

**Peptide View**MS/MS Fragmentation of **VLIDVPNSR**Found in **AT3G54400.1** in **TAIR\_Arabidopsis**, Symbols: | aspartyl protease family protein | chr3:20151269-20153577 REVERSE

Match to Query 2532: 1011.571278 from(506.792915,2+) index(3545)

Title: Elution from: 34.147 to 34.147 scan no 4416 cid35.00 polarity:+

Data file D12h-3\_2.mgf

Click mouse within plot area to zoom in by factor of two about that point

Or,   to  Da Label all possible matches  Label matches used for scoring Show Y-axis 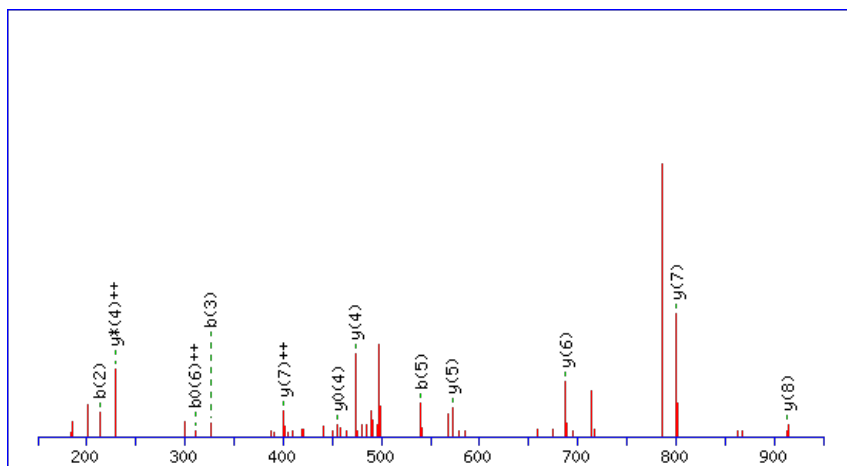Monoisotopic mass of neutral peptide **Mr(calc)**: 1011.5713**Fixed modifications**: Carbamidomethyl (C) (apply to specified residues or termini only)**Ions Score**: 23 **Expect**: 0.014**Matches**: 12/76 fragment ions using 28 most intense peaks ([help](#))

| # | b               | b <sup>++</sup> | b*       | b <sup>*++</sup> | b <sup>0</sup> | b <sup>0++</sup> | Seq. | y               | y <sup>++</sup> | y*       | y <sup>*++</sup> | y <sup>0</sup>  | y <sup>0++</sup> | # |
|---|-----------------|-----------------|----------|------------------|----------------|------------------|------|-----------------|-----------------|----------|------------------|-----------------|------------------|---|
| 1 | 100.0757        | 50.5415         |          |                  |                |                  | V    |                 |                 |          |                  |                 |                  | 9 |
| 2 | <b>213.1598</b> | 107.0835        |          |                  |                |                  | L    | <b>913.5102</b> | 457.2587        | 896.4836 | 448.7454         | 895.4996        | 448.2534         | 8 |
| 3 | <b>326.2438</b> | 163.6255        |          |                  |                |                  | I    | <b>800.4261</b> | <b>400.7167</b> | 783.3995 | 392.2034         | 782.4155        | 391.7114         | 7 |
| 4 | 441.2708        | 221.1390        |          |                  | 423.2602       | 212.1337         | D    | <b>687.3420</b> | 344.1747        | 670.3155 | 335.6614         | 669.3315        | 335.1694         | 6 |
| 5 | <b>540.3392</b> | 270.6732        |          |                  | 522.3286       | 261.6679         | V    | <b>572.3151</b> | 286.6612        | 555.2885 | 278.1479         | 554.3045        | 277.6559         | 5 |
| 6 | 637.3919        | 319.1996        |          |                  | 619.3814       | <b>310.1943</b>  | P    | <b>473.2467</b> | 237.1270        | 456.2201 | <b>228.6137</b>  | <b>455.2361</b> | 228.1217         | 4 |
| 7 | 751.4349        | 376.2211        | 734.4083 | 367.7078         | 733.4243       | 367.2158         | N    | 376.1939        | 188.6006        | 359.1674 | 180.0873         | 358.1833        | 179.5953         | 3 |
| 8 | 838.4669        | 419.7371        | 821.4403 | 411.2238         | 820.4563       | 410.7318         | S    | 262.1510        | 131.5791        | 245.1244 | 123.0659         | 244.1404        | 122.5738         | 2 |
| 9 |                 |                 |          |                  |                |                  | R    | 175.1190        | 88.0631         | 158.0924 | 79.5498          |                 |                  | 1 |

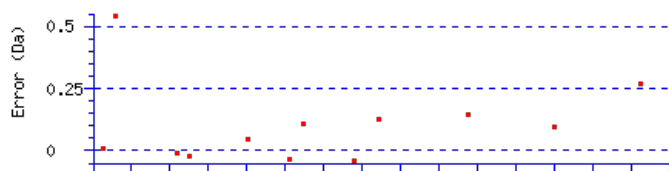

RMS error 700 ppm

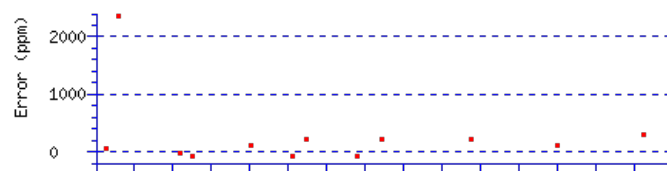

RMS error 700 ppm

NCBI **BLAST** search of [VLIDVPNSR](#)

(Parameters: blastp, nr protein database, expect=20000, no filter, PAM30)

Other BLAST [web gateways](#)**All matches to this query**

| Score | Mr(calc)  | Delta   | Sequence                  |
|-------|-----------|---------|---------------------------|
| 22.6  | 1011.5713 | -0.0000 | <a href="#">VLIDVPNSR</a> |



**Peptide View**MS/MS Fragmentation of **GGDALGQYNTPHSVITER**Found in **AT3G54470.1** in **TAIR\_Arabidopsis**, Symbols: | uridine 5'-monophosphate synthase / UMP synthase (PYRE-F) (UMPS) | chr3:20179263-20181223 REVERSE

Match to Query 9376: 2041.983501 from(681.668443,3+) index(3660)

Title: Elution from: 33.812 to 33.812 scan no 4502 cid35.00 polarity:+

Data file D1d-3\_2.mgf

Click mouse within plot area to zoom in by factor of two about that point

Or,   to  Da Label all possible matches  Label matches used for scoring Show Y-axis 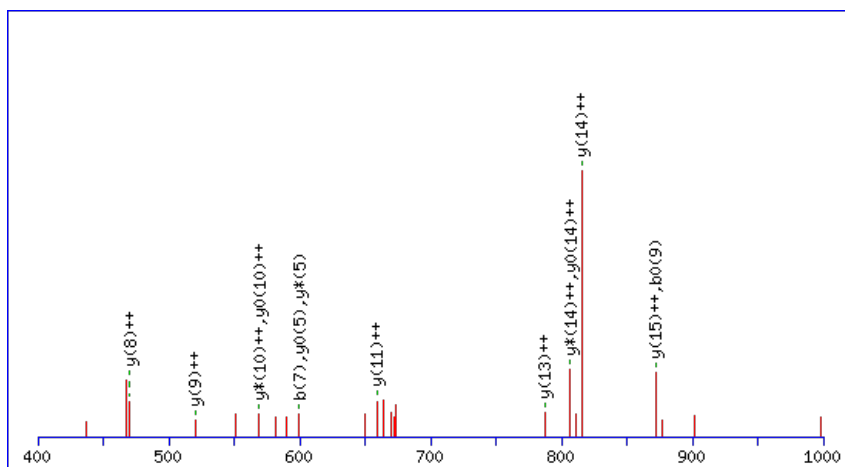Monoisotopic mass of neutral peptide  $M_r(\text{calc})$ : 2041.9817

Fixed modifications: Carbamidomethyl (C) (apply to specified residues or termini only)

Ions Score: 25 Expect: 0.011

Matches : 14/198 fragment ions using 16 most intense peaks ([help](#))

| #  | b         | b <sup>++</sup> | b <sup>*</sup> | b <sup>*++</sup> | b <sup>0</sup> | b <sup>0++</sup> | Seq. | y         | y <sup>++</sup> | y <sup>*</sup> | y <sup>*++</sup> | y <sup>0</sup> | y <sup>0++</sup> | #  |
|----|-----------|-----------------|----------------|------------------|----------------|------------------|------|-----------|-----------------|----------------|------------------|----------------|------------------|----|
| 1  | 58.0287   | 29.5180         |                |                  |                |                  | G    |           |                 |                |                  |                |                  | 19 |
| 2  | 115.0502  | 58.0287         |                |                  |                |                  | G    | 1985.9675 | 993.4874        | 1968.9410      | 984.9741         | 1967.9570      | 984.4821         | 18 |
| 3  | 230.0771  | 115.5422        |                |                  | 212.0666       | 106.5369         | D    | 1928.9461 | 964.9767        | 1911.9195      | 956.4634         | 1910.9355      | 955.9714         | 17 |
| 4  | 301.1143  | 151.0608        |                |                  | 283.1037       | 142.0555         | A    | 1813.9191 | 907.4632        | 1796.8926      | 898.9499         | 1795.9086      | 898.4579         | 16 |
| 5  | 414.1983  | 207.6028        |                |                  | 396.1878       | 198.5975         | L    | 1742.8820 | 871.9447        | 1725.8555      | 863.4314         | 1724.8715      | 862.9394         | 15 |
| 6  | 471.2198  | 236.1135        |                |                  | 453.2092       | 227.1083         | G    | 1629.7980 | 815.4026        | 1612.7714      | 806.8893         | 1611.7874      | 806.3973         | 14 |
| 7  | 599.2784  | 300.1428        | 582.2518       | 291.6295         | 581.2678       | 291.1375         | Q    | 1572.7765 | 786.8919        | 1555.7499      | 778.3786         | 1554.7659      | 777.8866         | 13 |
| 8  | 727.3369  | 364.1721        | 710.3104       | 355.6588         | 709.3264       | 355.1668         | Q    | 1444.7179 | 722.8626        | 1427.6914      | 714.3493         | 1426.7074      | 713.8573         | 12 |
| 9  | 890.4003  | 445.7038        | 873.3737       | 437.1905         | 872.3897       | 436.6985         | Y    | 1316.6593 | 658.8333        | 1299.6328      | 650.3200         | 1298.6488      | 649.8280         | 11 |
| 10 | 1004.4432 | 502.7252        | 987.4167       | 494.2120         | 986.4326       | 493.7200         | N    | 1153.5960 | 577.3016        | 1136.5695      | 568.7884         | 1135.5854      | 568.2964         | 10 |
| 11 | 1105.4909 | 553.2491        | 1088.4643      | 544.7358         | 1087.4803      | 544.2438         | T    | 1039.5531 | 520.2802        | 1022.5265      | 511.7669         | 1021.5425      | 511.2749         | 9  |
| 12 | 1202.5436 | 601.7755        | 1185.5171      | 593.2622         | 1184.5331      | 592.7702         | P    | 938.5054  | 469.7563        | 921.4789       | 461.2431         | 920.4948       | 460.7511         | 8  |
| 13 | 1339.6026 | 670.3049        | 1322.5760      | 661.7916         | 1321.5920      | 661.2996         | H    | 841.4526  | 421.2300        | 824.4261       | 412.7167         | 823.4421       | 412.2247         | 7  |
| 14 | 1426.6346 | 713.8209        | 1409.6080      | 705.3077         | 1408.6240      | 704.8156         | S    | 704.3937  | 352.7005        | 687.3672       | 344.1872         | 686.3832       | 343.6952         | 6  |
| 15 | 1525.7030 | 763.3551        | 1508.6764      | 754.8419         | 1507.6924      | 754.3499         | V    | 617.3617  | 309.1845        | 600.3352       | 300.6712         | 599.3511       | 300.1792         | 5  |
| 16 | 1638.7871 | 819.8972        | 1621.7605      | 811.3839         | 1620.7765      | 810.8919         | I    | 518.2933  | 259.6503        | 501.2667       | 251.1370         | 500.2827       | 250.6450         | 4  |
| 17 | 1739.8347 | 870.4210        | 1722.8082      | 861.9077         | 1721.8242      | 861.4157         | T    | 405.2092  | 203.1082        | 388.1827       | 194.5950         | 387.1987       | 194.1030         | 3  |
| 18 | 1868.8773 | 934.9423        | 1851.8508      | 926.4290         | 1850.8668      | 925.9370         | E    | 304.1615  | 152.5844        | 287.1350       | 144.0711         | 286.1510       | 143.5791         | 2  |
| 19 |           |                 |                |                  |                |                  | R    | 175.1190  | 88.0631         | 158.0924       | 79.5498          |                |                  | 1  |



AT3G54470.1

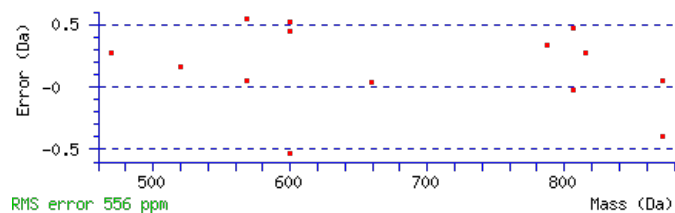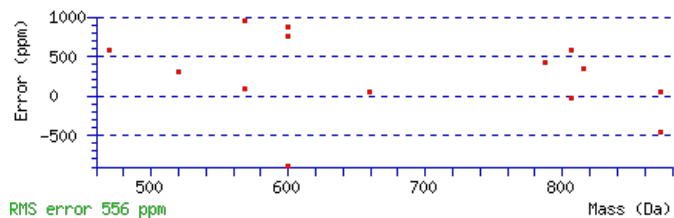

NCBI **BLAST** search of [GGDALGQOYNTPHSVITER](#)  
(Parameters: blastp, nr protein database, expect=20000, no filter, PAM30)  
Other BLAST [web gateways](#)

**All matches to this query**

| Score | Mr(calc)  | Delta   | Sequence                            |
|-------|-----------|---------|-------------------------------------|
| 25.0  | 2041.9817 | 0.0018  | <a href="#">GGDALGQOYNTPHSVITER</a> |
| 0.8   | 2041.9886 | -0.0051 | <a href="#">VDEAMKTMCLFEGALVTK</a>  |

**Mascot:** <http://www.matrixscience.com/>

**Peptide View**MS/MS Fragmentation of **GTNLDSEMLDK**

Found in **AT3G54640.1** in **TAIR\_Arabidopsis**, Symbols: TRP3, TSA1 | TSA1 (TRYPTOPHAN SYNTHASE ALPHA CHAIN); tryptophan synthase | chr3:20234309-20236281 REVERSE

Match to Query 6392: 1462.679608 from(732.347080,2+) index(11042)

Title: Elution from: 104.047 to 104.047 scan no 15653 cid35.00 polarity:+

Data file D6h-1\_1.mgf

Click mouse within plot area to zoom in by factor of two about that point

Or,   to  Da

Label all possible matches  Label matches used for scoring

Show Y-axis

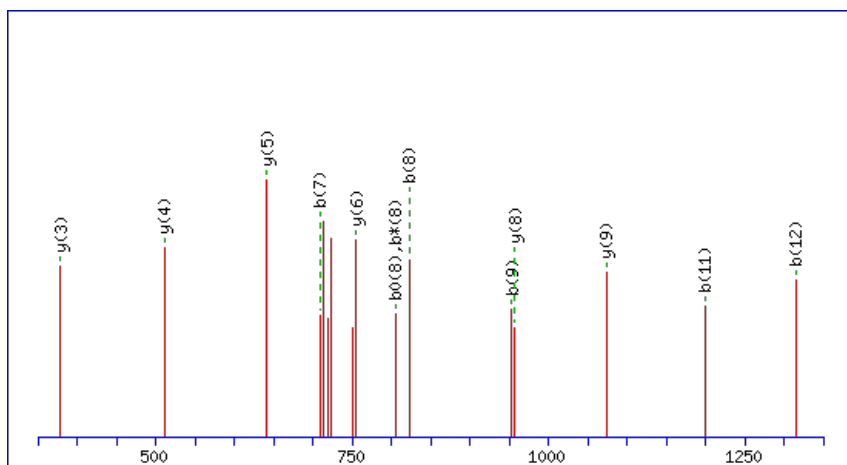

Monoisotopic mass of neutral peptide  $M_r(\text{calc})$ : 1462.6784

Fixed modifications: Carbamidomethyl (C) (apply to specified residues or termini only)

Ions Score: 70 Expect: 9.7e-007

Matches : 13/136 fragment ions using 15 most intense peaks ([help](#))

| #  | b                | b <sup>++</sup> | b*              | b <sup>*++</sup> | b <sup>0</sup>  | b <sup>0++</sup> | Seq.     | y                | y <sup>++</sup> | y*        | y <sup>*++</sup> | y <sup>0</sup> | y <sup>0++</sup> | #         |
|----|------------------|-----------------|-----------------|------------------|-----------------|------------------|----------|------------------|-----------------|-----------|------------------|----------------|------------------|-----------|
| 1  | 59.0258          | 30.0165         |                 |                  |                 |                  | <b>G</b> |                  |                 |           |                  |                |                  | <b>13</b> |
| 2  | 161.0705         | 81.0389         |                 |                  | 143.0599        | 72.0336          | <b>T</b> | 1405.6671        | 703.3372        | 1387.6436 | 694.3254         | 1387.6566      | 694.3319         | <b>12</b> |
| 3  | 277.1075         | 139.0574        | 259.0839        | 130.0456         | 259.0969        | 130.0521         | <b>N</b> | 1303.6224        | 652.3149        | 1285.5988 | 643.3031         | 1285.6119      | 643.3096         | <b>11</b> |
| 4  | 391.1886         | 196.0979        | 373.1650        | 187.0861         | 373.1780        | 187.0926         | <b>L</b> | 1187.5854        | 594.2964        | 1169.5619 | 585.2846         | 1169.5749      | 585.2911         | <b>10</b> |
| 5  | 507.2126         | 254.1099        | 489.1890        | 245.0981         | 489.2020        | 245.1046         | <b>D</b> | <b>1073.5043</b> | 537.2558        | 1055.4808 | 528.2440         | 1055.4938      | 528.2505         | <b>9</b>  |
| 6  | 595.2416         | 298.1245        | 577.2180        | 289.1127         | 577.2311        | 289.1192         | <b>S</b> | <b>957.4804</b>  | 479.2438        | 939.4568  | 470.2320         | 939.4698       | 470.2385         | <b>8</b>  |
| 7  | <b>709.3227</b>  | 355.1650        | 691.2991        | 346.1532         | 691.3122        | 346.1597         | <b>I</b> | 869.4513         | 435.2293        | 851.4277  | 426.2175         | 851.4407       | 426.2240         | <b>7</b>  |
| 8  | <b>823.4038</b>  | 412.2055        | <b>805.3802</b> | 403.1938         | <b>805.3933</b> | 403.2003         | <b>L</b> | <b>755.3702</b>  | 378.1887        | 737.3466  | 369.1769         | 737.3596       | 369.1835         | <b>6</b>  |
| 9  | <b>953.4435</b>  | 477.2254        | 935.4199        | 468.2136         | 935.4329        | 468.2201         | <b>E</b> | <b>641.2891</b>  | 321.1482        | 623.2655  | 312.1364         | 623.2785       | 312.1429         | <b>5</b>  |
| 10 | 1085.4810        | 543.2441        | 1067.4574       | 534.2323         | 1067.4704       | 534.2388         | <b>M</b> | <b>511.2495</b>  | 256.1284        | 493.2259  | 247.1166         | 493.2389       | 247.1231         | <b>4</b>  |
| 11 | <b>1199.5621</b> | 600.2847        | 1181.5385       | 591.2729         | 1181.5515       | 591.2794         | <b>L</b> | <b>379.2120</b>  | 190.1096        | 361.1884  | 181.0978         | 361.2014       | 181.1043         | <b>3</b>  |
| 12 | <b>1315.5860</b> | 658.2967        | 1297.5625       | 649.2849         | 1297.5755       | 649.2914         | <b>D</b> | 265.1309         | 133.0691        | 247.1073  | 124.0573         | 247.1203       | 124.0638         | <b>2</b>  |
| 13 |                  |                 |                 |                  |                 |                  | <b>K</b> | 149.1069         | 75.0571         | 131.0833  | 66.0453          |                |                  | <b>1</b>  |

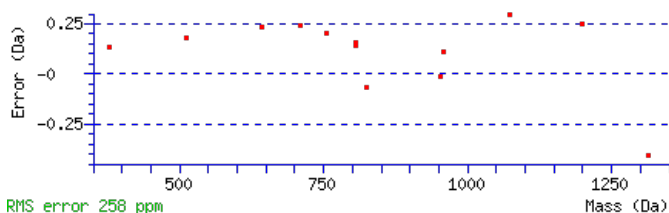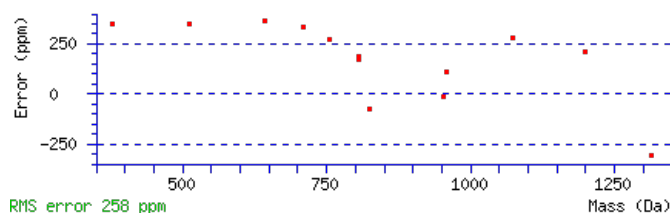

NCBI **BLAST** search of **GTNLDSEMLDK**

(Parameters: blastp, nr protein database, expect=20000, no filter, PAM30)

AT3G54640.1

Other BLAST [web gateways](#)

**All matches to this query**

| Score | Mr(calc)  | Delta   | Sequence                       |
|-------|-----------|---------|--------------------------------|
| 69.8  | 1462.6784 | 0.0012  | <a href="#">GTNLDSILEMLDK</a>  |
| 30.3  | 1462.6754 | 0.0042  | <a href="#">QREIAAAAKEDDK</a>  |
| 20.7  | 1462.6777 | 0.0019  | <a href="#">NNYLEAPKNSAPK</a>  |
| 15.7  | 1462.6833 | -0.0037 | <a href="#">EQWLSQVAMINK</a>   |
| 11.3  | 1462.6776 | 0.0020  | <a href="#">ALRDQLDSWVDK</a>   |
| 10.6  | 1462.6810 | -0.0014 | <a href="#">SPRTPOGSILMDK</a>  |
| 9.8   | 1462.6810 | -0.0014 | <a href="#">EKTQMPVAREEK</a>   |
| 8.9   | 1462.6810 | -0.0014 | <a href="#">TRDGIGLMDINPK</a>  |
| 6.4   | 1462.6810 | -0.0014 | <a href="#">MAQSSENVLPTLR</a>  |
| 5.8   | 1462.6781 | 0.0015  | <a href="#">SNGPVLRSQSPSGR</a> |

Mascot: <http://www.matrixscience.com/>

## Peptide View

### MS/MS Fragmentation of **SLGAIIYNK**

Found in **AT3G54820.1** in **TAIR\_Arabidopsis**, Symbols: PIP2D, PIP2;5 | PIP2;5/PIP2D (plasma membrane intrinsic protein 2;5); water channel | chr3:20313095-20314716 FORWARD

Match to Query 2902: 1048.589226 from(525.301889,2+) index(3910)

Title: Elution from: 37.975 to 37.975 scan no 4931 cid35.00 polarity:+

Data file 0-3\_1.mgf

Click mouse within plot area to zoom in by factor of two about that point

Or,   to  Da

Label all possible matches  Label matches used for scoring

Show Y-axis

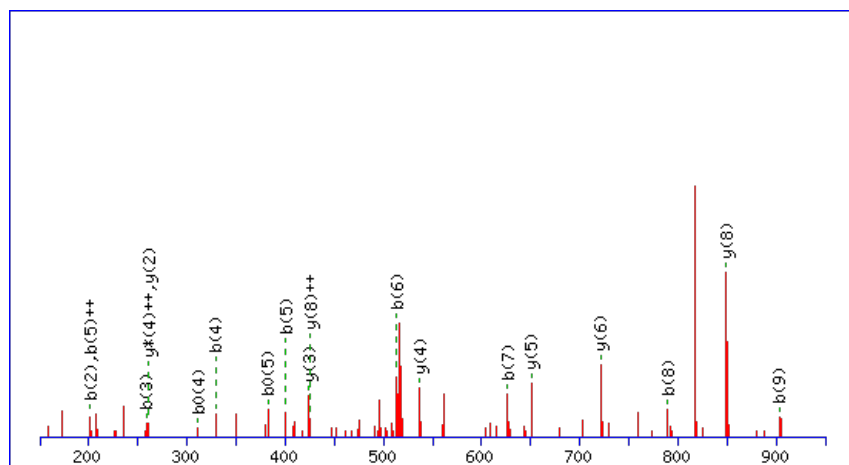

Monoisotopic mass of neutral peptide  $M_r(\text{calc})$ : 1048.5917

Fixed modifications: Carbamidomethyl (C) (apply to specified residues or termini only)

Ions Score: 48 Expect: 8.4e-005

Matches : 19/74 fragment ions using 38 most intense peaks ([help](#))

| #  | b               | b <sup>++</sup> | b*       | b <sup>*++</sup> | b <sup>0</sup>  | b <sup>0++</sup> | Seq. | y               | y <sup>++</sup> | y*       | y <sup>*++</sup> | #  |
|----|-----------------|-----------------|----------|------------------|-----------------|------------------|------|-----------------|-----------------|----------|------------------|----|
| 1  | 88.0393         | 44.5233         |          |                  | 70.0287         | 35.5180          | S    |                 |                 |          |                  | 10 |
| 2  | <b>201.1234</b> | 101.0653        |          |                  | 183.1128        | 92.0600          | L    | 962.5669        | 481.7871        | 945.5404 | 473.2738         | 9  |
| 3  | <b>258.1448</b> | 129.5761        |          |                  | 240.1343        | 120.5708         | G    | <b>849.4829</b> | <b>425.2451</b> | 832.4563 | 416.7318         | 8  |
| 4  | <b>329.1819</b> | 165.0946        |          |                  | <b>311.1714</b> | 156.0893         | A    | 792.4614        | 396.7343        | 775.4349 | 388.2211         | 7  |
| 5  | <b>400.2191</b> | <b>200.6132</b> |          |                  | <b>382.2085</b> | 191.6079         | A    | <b>721.4243</b> | 361.2158        | 704.3978 | 352.7025         | 6  |
| 6  | <b>513.3031</b> | 257.1552        |          |                  | 495.2926        | 248.1499         | I    | <b>650.3872</b> | 325.6972        | 633.3606 | 317.1840         | 5  |
| 7  | <b>626.3872</b> | 313.6972        |          |                  | 608.3766        | 304.6919         | I    | <b>537.3031</b> | 269.1552        | 520.2766 | <b>260.6419</b>  | 4  |
| 8  | <b>789.4505</b> | 395.2289        |          |                  | 771.4400        | 386.2236         | Y    | <b>424.2191</b> | 212.6132        | 407.1925 | 204.0999         | 3  |
| 9  | <b>903.4934</b> | 452.2504        | 886.4669 | 443.7371         | 885.4829        | 443.2451         | N    | <b>261.1557</b> | 131.0815        | 244.1292 | 122.5682         | 2  |
| 10 |                 |                 |          |                  |                 |                  | K    | 147.1128        | 74.0600         | 130.0863 | 65.5468          | 1  |

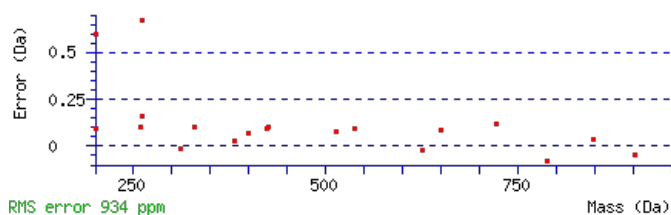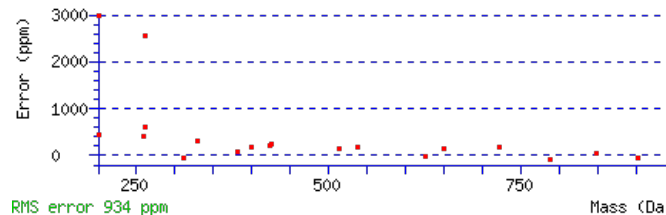

NCBI BLAST search of **SLGAIIYNK**

(Parameters: blastp, nr protein database, expect=20000, no filter, PAM30)

Other BLAST [web gateways](#)

All matches to this query

AT3G54820.1

| Score | Mr(calc)  | Delta   | Sequence                   |
|-------|-----------|---------|----------------------------|
| 48.3  | 1048.5917 | -0.0024 | <a href="#">SLGAAIYK</a>   |
| 0.6   | 1048.5917 | -0.0024 | <a href="#">AKISDFGLAK</a> |

Mascot: <http://www.matrixscience.com/>

**Peptide View**MS/MS Fragmentation of **KYPGGAFDPLGYSK**Found in **AT3G54890.1** in **TAIR\_Arabidopsis**, Symbols: LHCA1 | LHCA1; chlorophyll binding | chr3:20350684-20351900 REVERSE

Match to Query 6797: 1498.742180 from(750.378366,2+) index(5794)

Title: Elution from: 51.011 to 51.011 scan no 7182 cid35.00 polarity:+

Data file 0-1\_1.mgf

Click mouse within plot area to zoom in by factor of two about that point

Or,  to  Da Label all possible matches  Label matches used for scoring Show Y-axis 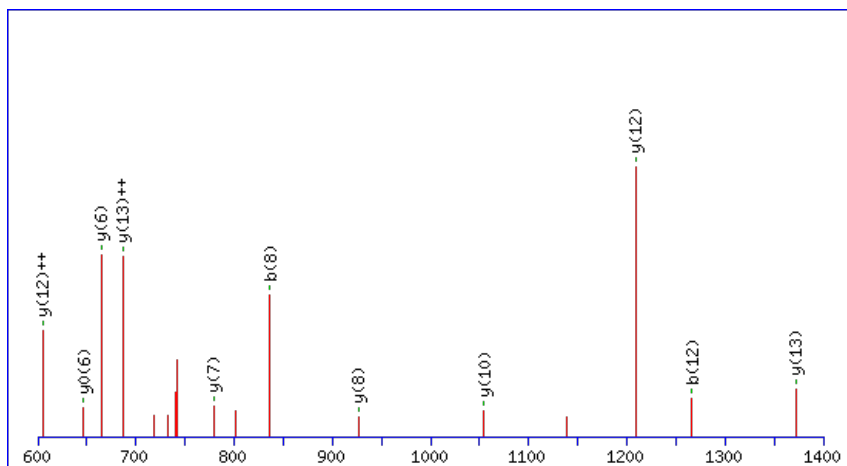**Monoisotopic mass of neutral peptide Mr(calc):** 1498.7456**Fixed modifications:** Carbamidomethyl (C) (apply to specified residues or termini only)**Ions Score:** 51 **Expect:** 2.7e-005**Matches:** 11/140 fragment ions using 16 most intense peaks ([help](#))

| #  | b                | b <sup>++</sup> | b*        | b <sup>*++</sup> | b <sup>0</sup> | b <sup>0++</sup> | Seq.     | y                | y <sup>++</sup> | y*        | y <sup>*++</sup> | y <sup>0</sup>  | y <sup>0++</sup> | #         |
|----|------------------|-----------------|-----------|------------------|----------------|------------------|----------|------------------|-----------------|-----------|------------------|-----------------|------------------|-----------|
| 1  | 129.1022         | 65.0548         | 112.0757  | 56.5415          |                |                  | <b>K</b> |                  |                 |           |                  |                 |                  | <b>14</b> |
| 2  | 292.1656         | 146.5864        | 275.1390  | 138.0731         |                |                  | <b>Y</b> | <b>1371.6579</b> | <b>686.3326</b> | 1354.6314 | 677.8193         | 1353.6474       | 677.3273         | <b>13</b> |
| 3  | 389.2183         | 195.1128        | 372.1918  | 186.5995         |                |                  | <b>P</b> | <b>1208.5946</b> | <b>604.8009</b> | 1191.5681 | 596.2877         | 1190.5841       | 595.7957         | <b>12</b> |
| 4  | 446.2398         | 223.6235        | 429.2132  | 215.1103         |                |                  | <b>G</b> | 1111.5419        | 556.2746        | 1094.5153 | 547.7613         | 1093.5313       | 547.2693         | <b>11</b> |
| 5  | 503.2613         | 252.1343        | 486.2347  | 243.6210         |                |                  | <b>G</b> | <b>1054.5204</b> | 527.7638        | 1037.4938 | 519.2506         | 1036.5098       | 518.7585         | <b>10</b> |
| 6  | 574.2984         | 287.6528        | 557.2718  | 279.1396         |                |                  | <b>A</b> | 997.4989         | 499.2531        | 980.4724  | 490.7398         | 979.4884        | 490.2478         | <b>9</b>  |
| 7  | 721.3668         | 361.1870        | 704.3402  | 352.6738         |                |                  | <b>F</b> | <b>926.4618</b>  | 463.7345        | 909.4353  | 455.2213         | 908.4512        | 454.7293         | <b>8</b>  |
| 8  | <b>836.3937</b>  | 418.7005        | 819.3672  | 410.1872         | 818.3832       | 409.6952         | <b>D</b> | <b>779.3934</b>  | 390.2003        | 762.3668  | 381.6871         | 761.3828        | 381.1951         | <b>7</b>  |
| 9  | 933.4465         | 467.2269        | 916.4199  | 458.7136         | 915.4359       | 458.2216         | <b>P</b> | <b>664.3665</b>  | 332.6869        | 647.3399  | 324.1736         | <b>646.3559</b> | 323.6816         | <b>6</b>  |
| 10 | 1046.5306        | 523.7689        | 1029.5040 | 515.2556         | 1028.5200      | 514.7636         | <b>L</b> | 567.3137         | 284.1605        | 550.2871  | 275.6472         | 549.3031        | 275.1552         | <b>5</b>  |
| 11 | 1103.5520        | 552.2796        | 1086.5255 | 543.7664         | 1085.5415      | 543.2744         | <b>G</b> | 454.2296         | 227.6185        | 437.2031  | 219.1052         | 436.2191        | 218.6132         | <b>4</b>  |
| 12 | <b>1266.6154</b> | 633.8113        | 1249.5888 | 625.2980         | 1248.6048      | 624.8060         | <b>Y</b> | 397.2082         | 199.1077        | 380.1816  | 190.5944         | 379.1976        | 190.1024         | <b>3</b>  |
| 13 | 1353.6474        | 677.3273        | 1336.6208 | 668.8141         | 1335.6368      | 668.3220         | <b>S</b> | 234.1448         | 117.5761        | 217.1183  | 109.0628         | 216.1343        | 108.5708         | <b>2</b>  |
| 14 |                  |                 |           |                  |                |                  | <b>K</b> | 147.1128         | 74.0600         | 130.0863  | 65.5468          |                 |                  | <b>1</b>  |

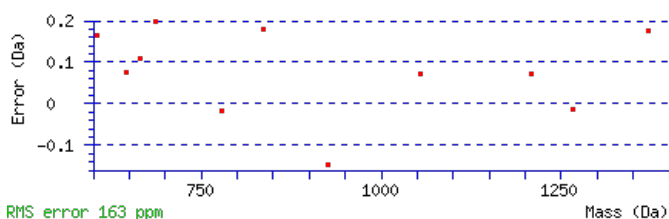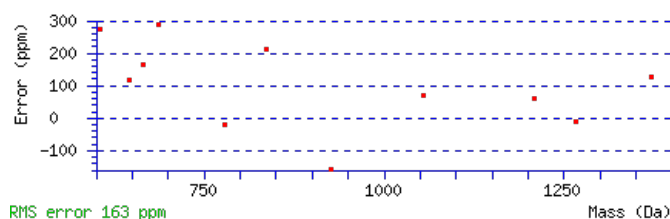NCBI **BLAST** search of **KYPGGAFDPLGYSK**

(Parameters: blastp, nr protein database, expect=20000, no filter, PAM30)

AT3G54890.1

Other BLAST [web gateways](#)

**All matches to this query**

| Score | Mr(calc)  | Delta   | Sequence                       |
|-------|-----------|---------|--------------------------------|
| 51.4  | 1498.7456 | -0.0034 | <a href="#">KYPGGAFDPLGYSK</a> |
| 1.7   | 1498.7416 | 0.0006  | <a href="#">GESVGYQSSFILGR</a> |

**Mascot:** <http://www.matrixscience.com/>

## Peptide View

### MS/MS Fragmentation of **TGELQEEVEK**

Found in **AT3G54900.1** in **TAIR\_Arabidopsis**, Symbols: CXIP1 | CXIP1 (CAX INTERACTING PROTEIN 1) | chr3:20352828-20353349 REVERSE

Match to Query 3865: 1172.518856 from(587.266704,2+) index(1421)

Title: Elution from: 18.449 to 18.449 scan no 1885 cid35.00 polarity:+

Data file 0-2\_3.mgf

Click mouse within plot area to zoom in by factor of two about that point

Or,   to  Da

Label all possible matches  Label matches used for scoring

Show Y-axis

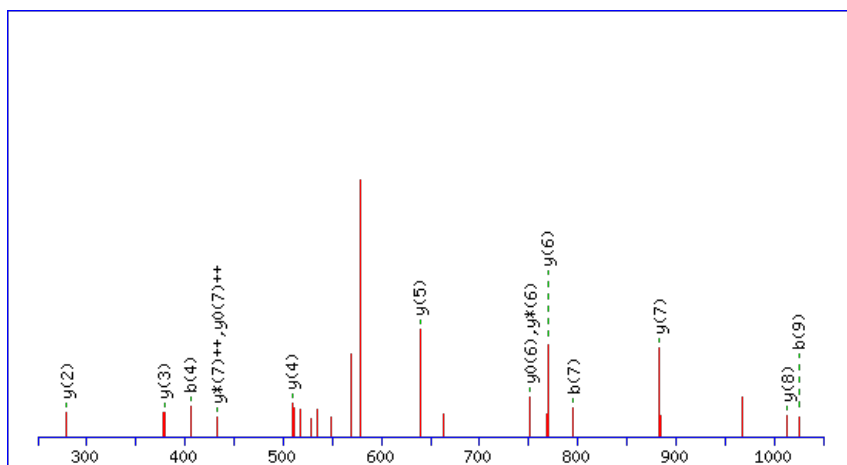

Monoisotopic mass of neutral peptide  $M_r(\text{calc})$ : 1172.5205

Fixed modifications: Carbamidomethyl (C) (apply to specified residues or termini only)

Ions Score: 61 Expect: 3.1e-006

Matches : 14/98 fragment ions using 19 most intense peaks ([help](#))

| #  | b         | b <sup>++</sup> | b*        | b <sup>*++</sup> | b <sup>0</sup> | b <sup>0++</sup> | Seq. | y         | y <sup>++</sup> | y*        | y <sup>*++</sup> | y <sup>0</sup> | y <sup>0++</sup> | #  |
|----|-----------|-----------------|-----------|------------------|----------------|------------------|------|-----------|-----------------|-----------|------------------|----------------|------------------|----|
| 1  | 103.0520  | 52.0296         |           |                  | 85.0414        | 43.0244          | T    |           |                 |           |                  |                |                  | 10 |
| 2  | 161.0705  | 81.0389         |           |                  | 143.0599       | 72.0336          | G    | 1071.4831 | 536.2452        | 1053.4595 | 527.2334         | 1053.4725      | 527.2399         | 9  |
| 3  | 291.1101  | 146.0587        |           |                  | 273.0996       | 137.0534         | E    | 1013.4646 | 507.2359        | 995.4410  | 498.2241         | 995.4540       | 498.2306         | 8  |
| 4  | 405.1912  | 203.0992        |           |                  | 387.1807       | 194.0940         | L    | 883.4250  | 442.2161        | 865.4014  | 433.2043         | 865.4144       | 433.2108         | 7  |
| 5  | 535.2439  | 268.1256        | 517.2203  | 259.1138         | 517.2333       | 259.1203         | Q    | 769.3439  | 385.1756        | 751.3203  | 376.1638         | 751.3333       | 376.1703         | 6  |
| 6  | 665.2835  | 333.1454        | 647.2599  | 324.1336         | 647.2729       | 324.1401         | E    | 639.2912  | 320.1492        | 621.2676  | 311.1374         | 621.2806       | 311.1440         | 5  |
| 7  | 795.3231  | 398.1652        | 777.2995  | 389.1534         | 777.3126       | 389.1599         | E    | 509.2516  | 255.1294        | 491.2280  | 246.1176         | 491.2410       | 246.1241         | 4  |
| 8  | 895.3886  | 448.1979        | 877.3650  | 439.1861         | 877.3780       | 439.1926         | V    | 379.2120  | 190.1096        | 361.1884  | 181.0978         | 361.2014       | 181.1043         | 3  |
| 9  | 1025.4282 | 513.2177        | 1007.4046 | 504.2059         | 1007.4176      | 504.2125         | E    | 279.1465  | 140.0769        | 261.1229  | 131.0651         | 261.1359       | 131.0716         | 2  |
| 10 |           |                 |           |                  |                |                  | K    | 149.1069  | 75.0571         | 131.0833  | 66.0453          |                |                  | 1  |

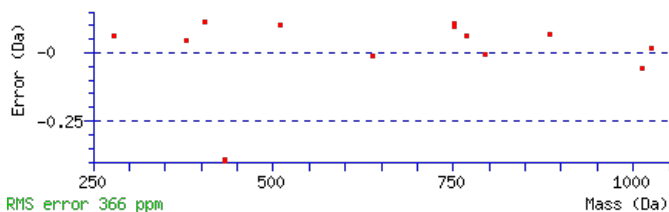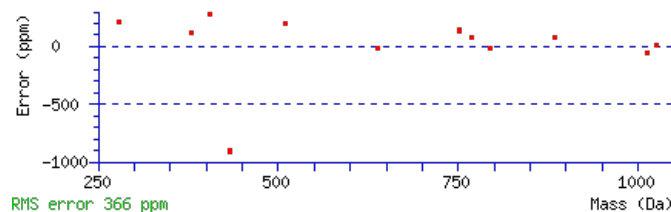

### NCBI BLAST search of **TGELQEEVEK**

(Parameters: blastp, nr protein database, expect=20000, no filter, PAM30)

Other BLAST [web gateways](#)

All matches to this query



## AT3G54900.1

| Score | Mr(calc)  | Delta   | Sequence                    |
|-------|-----------|---------|-----------------------------|
| 61.1  | 1172.5205 | -0.0016 | <a href="#">TGELQEEVEK</a>  |
| 8.0   | 1172.5184 | 0.0004  | <a href="#">MEHQILSQR</a>   |
| 4.1   | 1172.5158 | 0.0031  | <a href="#">CGTLQPEDLK</a>  |
| 3.8   | 1172.5180 | 0.0008  | <a href="#">SLSLFYEMR</a>   |
| 3.6   | 1172.5180 | 0.0009  | <a href="#">WMDVDPLTGK</a>  |
| 2.2   | 1172.5158 | 0.0031  | <a href="#">LCDDPDIK GK</a> |
| 1.9   | 1172.5155 | 0.0034  | <a href="#">RENGANHVTR</a>  |
| 1.5   | 1172.5184 | 0.0004  | <a href="#">MDISGHPKTR</a>  |
| 0.5   | 1172.5158 | 0.0031  | <a href="#">NQLSDDIPMK</a>  |
| 0.2   | 1172.5158 | 0.0031  | <a href="#">MQEIGVQPK</a>   |

Mascot: <http://www.matrixscience.com/>

**Peptide View**MS/MS Fragmentation of **GHSSDLLVR**

Found in **AT3G54910.1** in **TAIR\_Arabidopsis**, Symbols: | similar to F-box family protein [Arabidopsis thaliana] (TAIR:AT4G10400.2); similar to F-box family protein [Arabidopsis thaliana] (TAIR:AT4G10400.1); similar to hypothetical protein [Vitis vinifera] (GB:CAN74740.1); contains InterPro do

Match to Query 2413: 996.476040 from(499.245296,2+) index(3497)

Title: Elution from: 34.011 to 34.011 scan no 4369 cid35.00 polarity:+

Data file D6h-3\_1.mgf

Click mouse within plot area to zoom in by factor of two about that point

Or,   to  Da

Label all possible matches  Label matches used for scoring

Show Y-axis

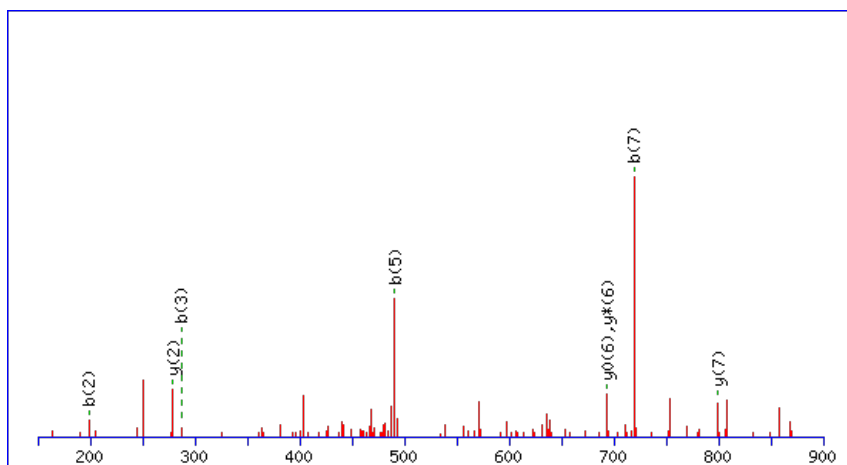

**Monoisotopic mass of neutral peptide Mr(calc):** 996.4781

**Fixed modifications:** Carbamidomethyl (C) (apply to specified residues or termini only)

**Ions Score:** 20 **Expect:** 0.048

**Matches:** 8/68 fragment ions using 16 most intense peaks ([help](#))

| # | b               | b <sup>++</sup> | b <sup>0</sup> | b <sup>0++</sup> | Seq.     | y               | y <sup>++</sup> | y*              | y <sup>*++</sup> | y <sup>0</sup>  | y <sup>0++</sup> | # |
|---|-----------------|-----------------|----------------|------------------|----------|-----------------|-----------------|-----------------|------------------|-----------------|------------------|---|
| 1 | 59.0258         | 30.0165         |                |                  | <b>G</b> |                 |                 |                 |                  |                 |                  | 9 |
| 2 | <b>199.0758</b> | 100.0415        |                |                  | <b>H</b> | 939.4669        | 470.2371        | 921.4433        | 461.2253         | 921.4563        | 461.2318         | 8 |
| 3 | <b>287.1049</b> | 144.0561        | 269.0943       | 135.0508         | <b>S</b> | <b>799.4168</b> | 400.2121        | 781.3933        | 391.2003         | 781.4063        | 391.2068         | 7 |
| 4 | 375.1339        | 188.0706        | 357.1234       | 179.0653         | <b>S</b> | 711.3878        | 356.1975        | <b>693.3642</b> | 347.1857         | <b>693.3772</b> | 347.1922         | 6 |
| 5 | <b>491.1579</b> | 246.0826        | 473.1473       | 237.0773         | <b>D</b> | 623.3587        | 312.1830        | 605.3351        | 303.1712         | 605.3482        | 303.1777         | 5 |
| 6 | 605.2390        | 303.1231        | 587.2284       | 294.1179         | <b>L</b> | 507.3347        | 254.1710        | 489.3112        | 245.1592         |                 |                  | 4 |
| 7 | <b>719.3201</b> | 360.1637        | 701.3095       | 351.1584         | <b>L</b> | 393.2536        | 197.1305        | 375.2301        | 188.1187         |                 |                  | 3 |
| 8 | 819.3855        | 410.1964        | 801.3750       | 401.1911         | <b>V</b> | <b>279.1725</b> | 140.0899        | 261.1490        | 131.0781         |                 |                  | 2 |
| 9 |                 |                 |                |                  | <b>R</b> | 179.1071        | 90.0572         | 161.0835        | 81.0454          |                 |                  | 1 |

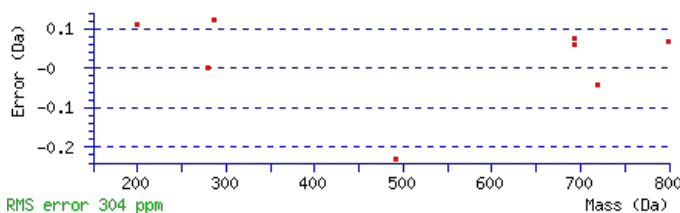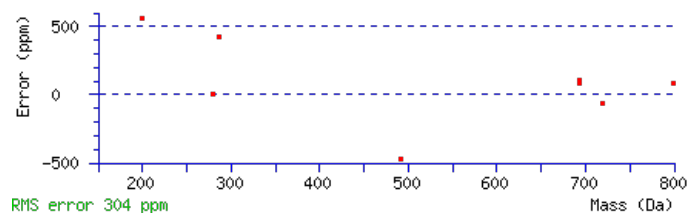

NCBI **BLAST** search of [GHSSDLLVR](#)

(Parameters: blastp, nr protein database, expect=20000, no filter, PAM30)

Other BLAST [web gateways](#)

All matches to this query

| Score | Mr(calc) | Delta | Sequence |
|-------|----------|-------|----------|
|       |          |       |          |

# AT3G54910.1

|      |          |         |                           |
|------|----------|---------|---------------------------|
| 20.0 | 996.4781 | -0.0020 | <a href="#">GHSSDLLVR</a> |
| 7.2  | 996.4776 | -0.0016 | <a href="#">DWSLIPEK</a>  |
| 5.2  | 996.4754 | 0.0006  | <a href="#">ALDPQVSEK</a> |
| 2.9  | 996.4781 | -0.0020 | <a href="#">TSNSYRKK</a>  |
| 2.7  | 996.4776 | -0.0016 | <a href="#">LYDYKGTK</a>  |
| 0.9  | 996.4754 | 0.0006  | <a href="#">DANTLVPEK</a> |
| 0.6  | 996.4781 | -0.0020 | <a href="#">SNVASHLQK</a> |
| 0.6  | 996.4734 | 0.0027  | <a href="#">CANHPKKK</a>  |

Mascot: <http://www.matrixscience.com/>

**Peptide View**MS/MS Fragmentation of **FNKIHK**

Found in **AT3G54930.1** in **TAIR\_Arabidopsis**, Symbols: | serine/threonine protein phosphatase 2A (PP2A) regulatory subunit B', putative | chr3:20362062-20363637 REVERSE

Match to Query 881: 770.452640 from(386.233596,2+) index(5253)

Title: Elution from: 45.663 to 45.663 scan no 6590 cid35.00 polarity:+

Data file D1d-3\_3.mgf

Click mouse within plot area to zoom in by factor of two about that point

Or,   to  Da

Label all possible matches  Label matches used for scoring

Show Y-axis

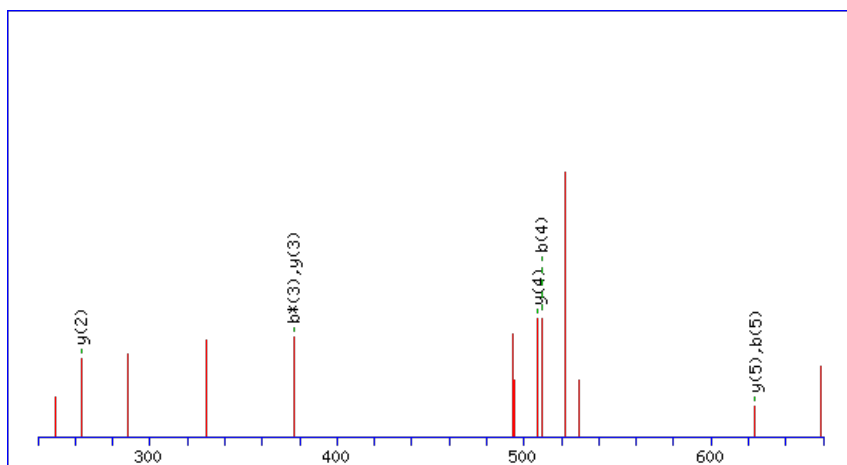

**Monoisotopic mass of neutral peptide Mr(calc):** 770.4533

**Fixed modifications:** Carbamidomethyl (C) (apply to specified residues or termini only)

**Ions Score:** 26 **Expect:** 0.021

**Matches:** 7/38 fragment ions using 9 most intense peaks ([help](#))

| # | b               | b <sup>++</sup> | b*              | b <sup>*++</sup> | Seq. | y               | y <sup>++</sup> | y*       | y <sup>*++</sup> | # |
|---|-----------------|-----------------|-----------------|------------------|------|-----------------|-----------------|----------|------------------|---|
| 1 | 149.0727        | 75.0400         |                 |                  | F    |                 |                 |          |                  | 6 |
| 2 | 265.1097        | 133.0585        | 247.0861        | 124.0467         | N    | <b>623.3951</b> | 312.2012        | 605.3715 | 303.1894         | 5 |
| 3 | 395.1988        | 198.1030        | <b>377.1752</b> | 189.0912         | K    | <b>507.3581</b> | 254.1827        | 489.3345 | 245.1709         | 4 |
| 4 | <b>509.2799</b> | 255.1436        | 491.2563        | 246.1318         | I    | <b>377.2691</b> | 189.1382        | 359.2455 | 180.1264         | 3 |
| 5 | <b>623.3610</b> | 312.1841        | 605.3374        | 303.1723         | I    | <b>263.1880</b> | 132.0976        | 245.1644 | 123.0858         | 2 |
| 6 |                 |                 |                 |                  | K    | 149.1069        | 75.0571         | 131.0833 | 66.0453          | 1 |

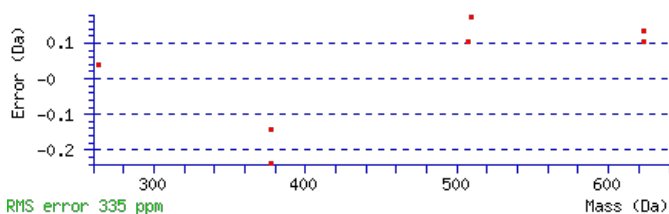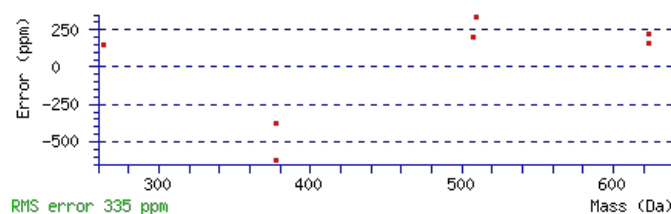NCBI **BLAST** search of **FNKIHK**

(Parameters: blastp, nr protein database, expect=20000, no filter, PAM30)

Other BLAST [web gateways](#)

**All matches to this query**

| Score | Mr(calc) | Delta   | Sequence                |
|-------|----------|---------|-------------------------|
| 26.0  | 770.4533 | -0.0006 | <a href="#">FNKIHK</a>  |
| 23.9  | 770.4533 | -0.0006 | <a href="#">LFLKNK</a>  |
| 14.0  | 770.4533 | -0.0006 | <a href="#">FIKGGIK</a> |

# AT3G54930.1

|      |          |         |                         |
|------|----------|---------|-------------------------|
| 13.8 | 770.4533 | -0.0006 | <a href="#">IFKNIK</a>  |
| 12.7 | 770.4533 | -0.0006 | <a href="#">LFKINK</a>  |
| 10.4 | 770.4533 | -0.0006 | <a href="#">IFQVKK</a>  |
| 10.4 | 770.4533 | -0.0006 | <a href="#">LFNLKK</a>  |
| 9.4  | 770.4511 | 0.0016  | <a href="#">LASKSKK</a> |
| 8.7  | 770.4533 | -0.0006 | <a href="#">NKFLIK</a>  |
| 8.3  | 770.4533 | -0.0006 | <a href="#">LIFGGKK</a> |

**Mascot:** <http://www.matrixscience.com/>

## Peptide View

### MS/MS Fragmentation of **FGETSKNELTTSATK**

Found in **AT3G55060.1** in **TAIR\_Arabidopsis**, Symbols: | similar to unknown protein [Arabidopsis thaliana] (TAIR:AT2G39300.1); similar to unnamed protein product [Vitis vinifera] (GB:CAO41551.1) | chr3:20414166-20417199 REVERSE

Match to Query 7002: 1630.743050 from(816.378801,2+) index(6290)

Title: Elution from: 59.010 to 59.010 scan no 8251 cid35.00 polarity:+

Data file D1d-2\_2.mgf

Click mouse within plot area to zoom in by factor of two about that point

Or,   to  Da

Label all possible matches  Label matches used for scoring

Show Y-axis

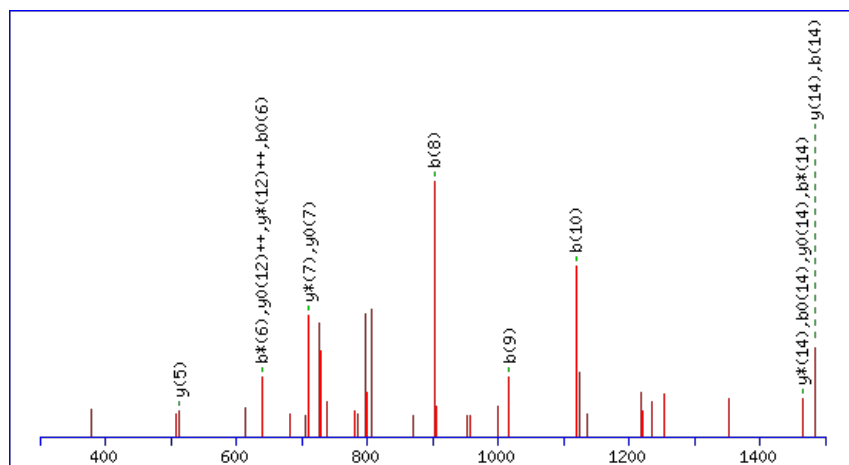

Monoisotopic mass of neutral peptide  $M_r(\text{calc})$ : 1630.7410

Fixed modifications: Carbamidomethyl (C) (apply to specified residues or termini only)

Ions Score: 24 Expect: 0.031

Matches : 16/152 fragment ions using 12 most intense peaks ([help](#))

| #  | b         | b <sup>++</sup> | b <sup>*</sup> | b <sup>*++</sup> | b <sup>0</sup> | b <sup>0++</sup> | Seq. | y         | y <sup>++</sup> | y <sup>*</sup> | y <sup>*++</sup> | y <sup>0</sup> | y <sup>0++</sup> | #  |
|----|-----------|-----------------|----------------|------------------|----------------|------------------|------|-----------|-----------------|----------------|------------------|----------------|------------------|----|
| 1  | 149.0727  | 75.0400         |                |                  |                |                  | F    |           |                 |                |                  |                |                  | 15 |
| 2  | 207.0912  | 104.0492        |                |                  |                |                  | G    | 1483.6829 | 742.3451        | 1465.6593      | 733.3333         | 1465.6723      | 733.3398         | 14 |
| 3  | 337.1309  | 169.0691        |                |                  | 319.1203       | 160.0638         | E    | 1425.6644 | 713.3358        | 1407.6408      | 704.3240         | 1407.6538      | 704.3305         | 13 |
| 4  | 439.1756  | 220.0914        |                |                  | 421.1650       | 211.0861         | T    | 1295.6248 | 648.3160        | 1277.6012      | 639.3042         | 1277.6142      | 639.3107         | 12 |
| 5  | 527.2046  | 264.1060        |                |                  | 509.1941       | 255.1007         | S    | 1193.5800 | 597.2937        | 1175.5565      | 588.2819         | 1175.5695      | 588.2884         | 11 |
| 6  | 657.2937  | 329.1505        | 639.2701       | 320.1387         | 639.2831       | 320.1452         | K    | 1105.5510 | 553.2791        | 1087.5274      | 544.2673         | 1087.5404      | 544.2738         | 10 |
| 7  | 773.3307  | 387.1690        | 755.3071       | 378.1572         | 755.3201       | 378.1637         | N    | 975.4619  | 488.2346        | 957.4384       | 479.2228         | 957.4514       | 479.2293         | 9  |
| 8  | 903.3703  | 452.1888        | 885.3467       | 443.1770         | 885.3597       | 443.1835         | E    | 859.4250  | 430.2161        | 841.4014       | 421.2043         | 841.4144       | 421.2108         | 8  |
| 9  | 1017.4514 | 509.2293        | 999.4278       | 500.2175         | 999.4408       | 500.2240         | L    | 729.3853  | 365.1963        | 711.3617       | 356.1845         | 711.3748       | 356.1910         | 7  |
| 10 | 1119.4961 | 560.2517        | 1101.4725      | 551.2399         | 1101.4855      | 551.2464         | T    | 615.3042  | 308.1558        | 597.2806       | 299.1440         | 597.2937       | 299.1505         | 6  |
| 11 | 1221.5408 | 611.2740        | 1203.5172      | 602.2623         | 1203.5302      | 602.2688         | T    | 513.2595  | 257.1334        | 495.2359       | 248.1216         | 495.2489       | 248.1281         | 5  |
| 12 | 1309.5699 | 655.2886        | 1291.5463      | 646.2768         | 1291.5593      | 646.2833         | S    | 411.2148  | 206.1110        | 393.1912       | 197.0992         | 393.2042       | 197.1058         | 4  |
| 13 | 1381.6040 | 691.3056        | 1363.5804      | 682.2939         | 1363.5935      | 682.3004         | A    | 323.1857  | 162.0965        | 305.1622       | 153.0847         | 305.1752       | 153.0912         | 3  |
| 14 | 1483.6487 | 742.3280        | 1465.6252      | 733.3162         | 1465.6382      | 733.3227         | T    | 251.1516  | 126.0794        | 233.1280       | 117.0676         | 233.1410       | 117.0741         | 2  |
| 15 |           |                 |                |                  |                |                  | K    | 149.1069  | 75.0571         | 131.0833       | 66.0453          |                |                  | 1  |

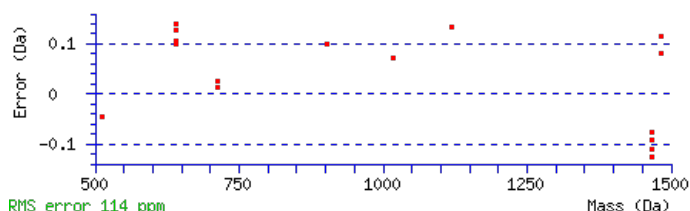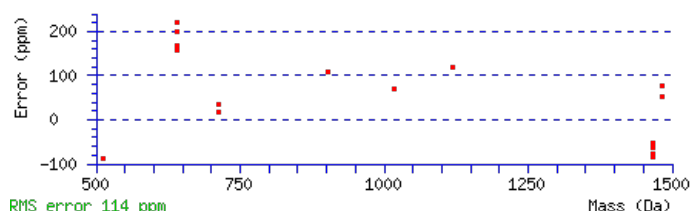

## AT3G55060.1

NCBI **BLAST** search of [FGETSKNELTTSATK](#)

(Parameters: blastp, nr protein database, expect=20000, no filter, PAM30)

Other BLAST [web gateways](#)

### All matches to this query

| Score | Mr(calc)  | Delta   | Sequence                        |
|-------|-----------|---------|---------------------------------|
| 24.2  | 1630.7410 | 0.0020  | <a href="#">FGETSKNELTTSATK</a> |
| 24.1  | 1630.7424 | 0.0007  | <a href="#">MLSCKQELSSRVR</a>   |
| 18.5  | 1630.7385 | 0.0045  | <a href="#">YVQGGCDGIQYIK</a>   |
| 8.5   | 1630.7437 | -0.0007 | <a href="#">GSSFETIDIATSARR</a> |
| 6.6   | 1630.7460 | -0.0029 | <a href="#">YATGNNTLFGNVNVK</a> |
| 3.9   | 1630.7446 | -0.0015 | <a href="#">CLCGKGYRNLEK</a>    |
| 3.9   | 1630.7430 | 0.0000  | <a href="#">FDEIMKWFLGWK</a>    |
| 3.1   | 1630.7390 | 0.0041  | <a href="#">EMQDSSAFAARKLR</a>  |
| 2.5   | 1630.7386 | 0.0045  | <a href="#">LKPYCSEFEDSLVR</a>  |
| 1.7   | 1630.7390 | 0.0041  | <a href="#">YVMDTDNNVVRKR</a>   |

Mascot: <http://www.matrixscience.com/>

## Peptide View

MS/MS Fragmentation of **IDHLDSDVDENITEWNTK**

Found in **AT3G55070.1** in **TAIR Arabidopsis**, Symbols: | similar to protein binding / zinc ion binding [Arabidopsis thaliana] (TAIR:AT4G37880.1); similar to unnamed protein product [Vitis vinifera] (GB:CAO41552.1); contains InterPro domain CT11-RanBPM (InterPro:IPR013144); contains InterPro d

Match to Query 9864: 2241.054669 from(748.025499,3+) index(10404)

Title: Elution from: 99.777 to 99.777 scan no 14667 cid35.00 polarity:+

Data file D6h-2\_2.mgf

Click mouse within plot area to zoom in by factor of two about that point

Or,   to  Da

Label all possible matches  Label matches used for scoring

Show Y-axis

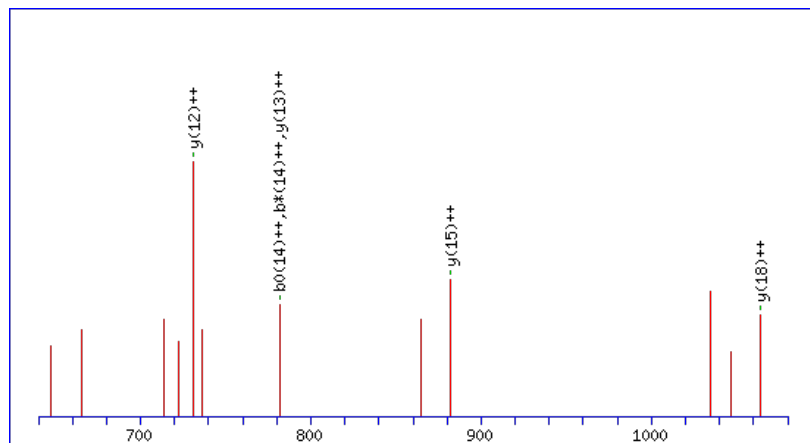

Monoisotopic mass of neutral peptide  $M_r(\text{calc})$ : 2241.0549

Fixed modifications: Carbamidomethyl (C) (apply to specified residues or termini only)

Ions Score: 26 Expect: 0.0079

Matches : 6/192 fragment ions using 5 most intense peaks ([help](#))

| #  | b         | b <sup>++</sup> | b <sup>*</sup> | b <sup>*++</sup> | b <sup>0</sup> | b <sup>0++</sup> | Seq. | y         | y <sup>++</sup> | y <sup>*</sup> | y <sup>*++</sup> | y <sup>0</sup> | y <sup>0++</sup> | #  |
|----|-----------|-----------------|----------------|------------------|----------------|------------------|------|-----------|-----------------|----------------|------------------|----------------|------------------|----|
| 1  | 114.0913  | 57.5493         |                |                  |                |                  | I    |           |                 |                |                  |                |                  | 19 |
| 2  | 229.1183  | 115.0628        |                |                  | 211.1077       | 106.0575         | D    | 2128.9782 | 1064.9927       | 2111.9516      | 1056.4794        | 2110.9676      | 1055.9874        | 18 |
| 3  | 366.1772  | 183.5922        |                |                  | 348.1666       | 174.5870         | H    | 2013.9512 | 1007.4792       | 1996.9247      | 998.9660         | 1995.9407      | 998.4740         | 17 |
| 4  | 479.2613  | 240.1343        |                |                  | 461.2507       | 231.1290         | L    | 1876.8923 | 938.9498        | 1859.8658      | 930.4365         | 1858.8817      | 929.9445         | 16 |
| 5  | 594.2882  | 297.6477        |                |                  | 576.2776       | 288.6425         | D    | 1763.8082 | 882.4078        | 1746.7817      | 873.8945         | 1745.7977      | 873.4025         | 15 |
| 6  | 681.3202  | 341.1638        |                |                  | 663.3097       | 332.1585         | S    | 1648.7813 | 824.8943        | 1631.7548      | 816.3810         | 1630.7707      | 815.8890         | 14 |
| 7  | 780.3886  | 390.6980        |                |                  | 762.3781       | 381.6927         | V    | 1561.7493 | 781.3783        | 1544.7227      | 772.8650         | 1543.7387      | 772.3730         | 13 |
| 8  | 895.4156  | 448.2114        |                |                  | 877.4050       | 439.2061         | D    | 1462.6809 | 731.8441        | 1445.6543      | 723.3308         | 1444.6703      | 722.8388         | 12 |
| 9  | 994.4840  | 497.7456        |                |                  | 976.4734       | 488.7404         | V    | 1347.6539 | 674.3306        | 1330.6274      | 665.8173         | 1329.6434      | 665.3253         | 11 |
| 10 | 1123.5266 | 562.2669        |                |                  | 1105.5160      | 553.2617         | E    | 1248.5855 | 624.7964        | 1231.5590      | 616.2831         | 1230.5749      | 615.7911         | 10 |
| 11 | 1237.5695 | 619.2884        | 1220.5430      | 610.7751         | 1219.5590      | 610.2831         | N    | 1119.5429 | 560.2751        | 1102.5164      | 551.7618         | 1101.5323      | 551.2698         | 9  |
| 12 | 1350.6536 | 675.8304        | 1333.6270      | 667.3172         | 1332.6430      | 666.8251         | I    | 1005.5000 | 503.2536        | 988.4734       | 494.7404         | 987.4894       | 494.2483         | 8  |
| 13 | 1451.7013 | 726.3543        | 1434.6747      | 717.8410         | 1433.6907      | 717.3490         | T    | 892.4159  | 446.7116        | 875.3894       | 438.1983         | 874.4054       | 437.7063         | 7  |
| 14 | 1580.7439 | 790.8756        | 1563.7173      | 782.3623         | 1562.7333      | 781.8703         | E    | 791.3682  | 396.1878        | 774.3417       | 387.6745         | 773.3577       | 387.1825         | 6  |
| 15 | 1766.8232 | 883.9152        | 1749.7966      | 875.4019         | 1748.8126      | 874.9099         | W    | 662.3257  | 331.6665        | 645.2991       | 323.1532         | 644.3151       | 322.6612         | 5  |
| 16 | 1880.8661 | 940.9367        | 1863.8395      | 932.4234         | 1862.8555      | 931.9314         | N    | 476.2463  | 238.6268        | 459.2198       | 230.1135         | 458.2358       | 229.6215         | 4  |
| 17 | 1994.9090 | 997.9581        | 1977.8825      | 989.4449         | 1976.8985      | 988.9529         | N    | 362.2034  | 181.6053        | 345.1769       | 173.0921         | 344.1928       | 172.6001         | 3  |
| 18 | 2095.9567 | 1048.4820       | 2078.9302      | 1039.9687        | 2077.9461      | 1039.4767        | T    | 248.1605  | 124.5839        | 231.1339       | 116.0706         | 230.1499       | 115.5786         | 2  |
| 19 |           |                 |                |                  |                |                  | K    | 147.1128  | 74.0600         | 130.0863       | 65.5468          |                |                  | 1  |



# AT3G55070.1

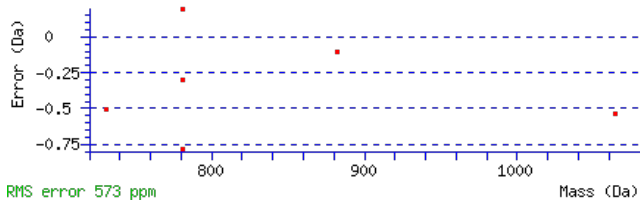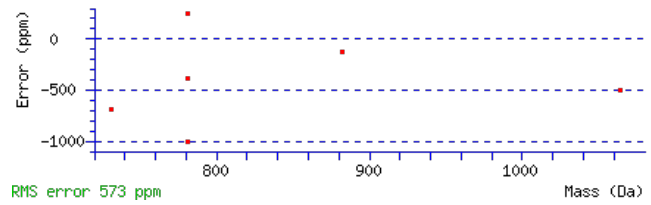

NCBI **BLAST** search of [IDHLDSVDVENTEWNNTK](#)  
(Parameters: blastp, nr protein database, expect=20000, no filter, PAM30)  
Other BLAST [web gateways](#)

## All matches to this query

| Score | Mr(calc)  | Delta   | Sequence                             |
|-------|-----------|---------|--------------------------------------|
| 26.3  | 2241.0549 | -0.0003 | <a href="#">IDHLDSVDVENTEWNNTK</a>   |
| 14.1  | 2241.0525 | 0.0022  | <a href="#">GFFEVTHTDISNLTCADFLR</a> |
| 2.8   | 2241.0524 | 0.0022  | <a href="#">AVHNFSIQTGEEFSLEFMR</a>  |
| 2.6   | 2241.0509 | 0.0037  | <a href="#">NLDDIKDISDNYDRSTTR</a>   |
| 0.8   | 2241.0484 | 0.0063  | <a href="#">ACLFTVNSQLNNEASFSPSR</a> |

Mascot: <http://www.matrixscience.com/>

## Peptide View

### MS/MS Fragmentation of SPASSNPLFLGGAGVR

Found in **AT3G55120.1** in **TAIR\_Arabidopsis**, Symbols: TT5, A11, CFI | A11/CFI/TT5 (TRANSPARENT TESTA 5); chalcone isomerase | chr3:20441225-20442392 REVERSE

Match to Query 6892: 1528.799176 from (765.406864,2+) index(6525)

Title: Elution from: 56.681 to 56.681 scan no 8289 cid35.00 polarity:+

Data file C7-1\_1.mgf

Click mouse within plot area to zoom in by factor of two about that point

Or,  to  Da

Label all possible matches  Label matches used for scoring

Show Y-axis

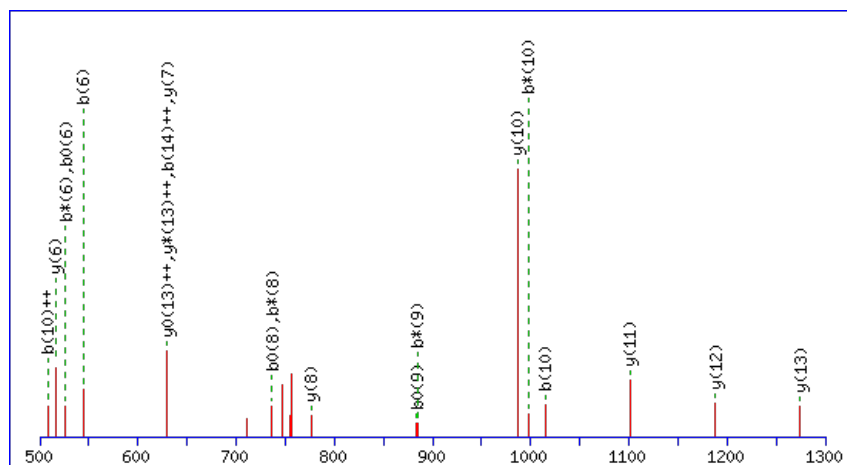

Monoisotopic mass of neutral peptide  $M_r(\text{calc})$ : 1528.7998

Fixed modifications: Carbamidomethyl (C) (apply to specified residues or termini only)

Ions Score: 71 Expect: 4.7e-007

Matches : 20/148 fragment ions using 18 most intense peaks ([help](#))

| #  | b                | b <sup>++</sup> | b*              | b <sup>*++</sup> | b <sup>0</sup>  | b <sup>0++</sup> | Seq. | y                | y <sup>++</sup> | y*        | y <sup>*++</sup> | y <sup>0</sup> | y <sup>0++</sup> | #  |
|----|------------------|-----------------|-----------------|------------------|-----------------|------------------|------|------------------|-----------------|-----------|------------------|----------------|------------------|----|
| 1  | 88.0393          | 44.5233         |                 |                  | 70.0287         | 35.5180          | S    |                  |                 |           |                  |                |                  | 16 |
| 2  | 185.0921         | 93.0497         |                 |                  | 167.0815        | 84.0444          | P    | 1442.7750        | 721.8912        | 1425.7485 | 713.3779         | 1424.7645      | 712.8859         | 15 |
| 3  | 256.1292         | 128.5682        |                 |                  | 238.1186        | 119.5629         | A    | 1345.7223        | 673.3648        | 1328.6957 | 664.8515         | 1327.7117      | 664.3595         | 14 |
| 4  | 343.1612         | 172.0842        |                 |                  | 325.1506        | 163.0790         | S    | <b>1274.6852</b> | 637.8462        | 1257.6586 | <b>629.3329</b>  | 1256.6746      | <b>628.8409</b>  | 13 |
| 5  | 430.1932         | 215.6003        |                 |                  | 412.1827        | 206.5950         | S    | <b>1187.6531</b> | 594.3302        | 1170.6266 | 585.8169         | 1169.6426      | 585.3249         | 12 |
| 6  | <b>544.2362</b>  | 272.6217        | <b>527.2096</b> | 264.1084         | <b>526.2256</b> | 263.6164         | N    | <b>1100.6211</b> | 550.8142        | 1083.5946 | 542.3009         |                |                  | 11 |
| 7  | 641.2889         | 321.1481        | 624.2624        | 312.6348         | 623.2784        | 312.1428         | P    | <b>986.5782</b>  | 493.7927        | 969.5516  | 485.2795         |                |                  | 10 |
| 8  | 754.3730         | 377.6901        | <b>737.3464</b> | 369.1769         | <b>736.3624</b> | 368.6849         | L    | 889.5254         | 445.2663        | 872.4989  | 436.7531         |                |                  | 9  |
| 9  | 901.4414         | 451.2243        | <b>884.4149</b> | 442.7111         | <b>883.4308</b> | 442.2191         | F    | <b>776.4413</b>  | 388.7243        | 759.4148  | 380.2110         |                |                  | 8  |
| 10 | <b>1014.5255</b> | <b>507.7664</b> | <b>997.4989</b> | 499.2531         | 996.5149        | 498.7611         | L    | <b>629.3729</b>  | 315.1901        | 612.3464  | 306.6768         |                |                  | 7  |
| 11 | 1071.5469        | 536.2771        | 1054.5204       | 527.7638         | 1053.5364       | 527.2718         | G    | <b>516.2889</b>  | 258.6481        | 499.2623  | 250.1348         |                |                  | 6  |
| 12 | 1128.5684        | 564.7878        | 1111.5419       | 556.2746         | 1110.5578       | 555.7826         | G    | 459.2674         | 230.1373        | 442.2409  | 221.6241         |                |                  | 5  |
| 13 | 1199.6055        | 600.3064        | 1182.5790       | 591.7931         | 1181.5949       | 591.3011         | A    | 402.2459         | 201.6266        | 385.2194  | 193.1133         |                |                  | 4  |
| 14 | 1256.6270        | <b>628.8171</b> | 1239.6004       | 620.3039         | 1238.6164       | 619.8118         | G    | 331.2088         | 166.1081        | 314.1823  | 157.5948         |                |                  | 3  |
| 15 | 1355.6954        | 678.3513        | 1338.6688       | 669.8381         | 1337.6848       | 669.3461         | V    | 274.1874         | 137.5973        | 257.1608  | 129.0840         |                |                  | 2  |
| 16 |                  |                 |                 |                  |                 |                  | R    | 175.1190         | 88.0631         | 158.0924  | 79.5498          |                |                  | 1  |

# AT3G55120.1

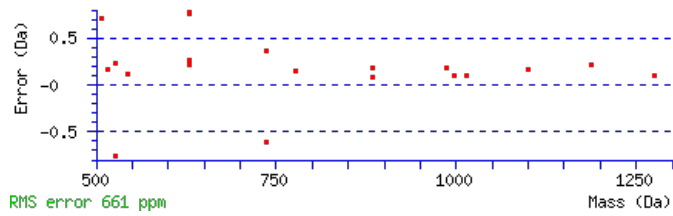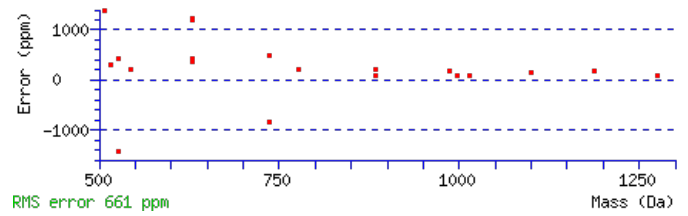

NCBI **BLAST** search of [SPASSNPLFLGGAGVR](#)

(Parameters: blastp, nr protein database, expect=20000, no filter, PAM30)

Other BLAST [web gateways](#)

## All matches to this query

| Score | Mr(calc)  | Delta   | Sequence                         |
|-------|-----------|---------|----------------------------------|
| 70.5  | 1528.7998 | -0.0006 | <a href="#">SPASSNPLFLGGAGVR</a> |
| 3.3   | 1528.7966 | 0.0025  | <a href="#">AVLMLSLRCTGHR</a>    |
| 1.9   | 1528.7985 | 0.0007  | <a href="#">DVIQSLVDDDLVAK</a>   |
| 0.6   | 1528.7997 | -0.0006 | <a href="#">SRNLHEFLEKEK</a>     |
| 0.5   | 1528.7984 | 0.0007  | <a href="#">IEEVIDSDLQGLAK</a>   |

Mascot: <http://www.matrixscience.com/>



# Mascot Search Results

## Peptide View

MS/MS Fragmentation of **NKLDHYQILK**

Found in **AT3G55280.1** in **TAIR\_Arabidopsis**, Symbols: | 60S ribosomal protein L23A (RPL23aB) | chr3:20511644-20512496 FORWARD

Match to Query 4524: 1286.657415 from(429.893081,3+) index(2112)

Title: Elution from: 22.987 to 22.987 scan no 2656 cid35.00 polarity:+

Data file 0-2\_3.mgf

Click mouse within plot area to zoom in by factor of two about that point

Or,  to  Da

Label all possible matches  Label matches used for scoring

Show Y-axis

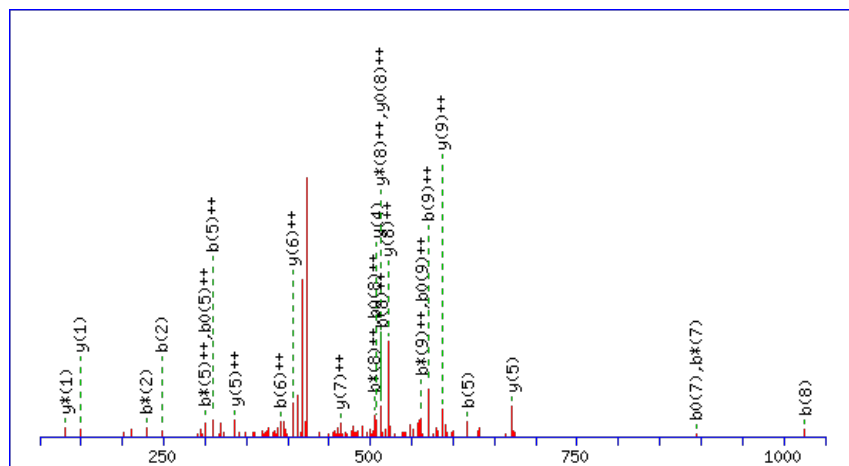

**Monoisotopic mass of neutral peptide Mr(calc):** 1286.6559

**Fixed modifications:** Carbamidomethyl (C) (apply to specified residues or termini only)

**Ions Score:** 31 **Expect:** 0.0066

**Matches:** 27/90 fragment ions using 37 most intense peaks ([help](#))

| #  | b                | b <sup>++</sup> | b*              | b <sup>*++</sup> | b <sup>0</sup>  | b <sup>0++</sup> | Seq. | y               | y <sup>++</sup> | y*              | y <sup>*++</sup> | y <sup>0</sup> | y <sup>0++</sup> | #  |
|----|------------------|-----------------|-----------------|------------------|-----------------|------------------|------|-----------------|-----------------|-----------------|------------------|----------------|------------------|----|
| 1  | 117.0443         | 59.0258         | 99.0207         | 50.0140          |                 |                  | N    |                 |                 |                 |                  |                |                  | 10 |
| 2  | <b>247.1333</b>  | 124.0703        | <b>229.1097</b> | 115.0585         |                 |                  | K    | 1171.6262       | <b>586.3167</b> | 1153.6026       | 577.3050         | 1153.6156      | 577.3115         | 9  |
| 3  | 361.2144         | 181.1108        | 343.1908        | 172.0990         |                 |                  | L    | 1041.5372       | <b>521.2722</b> | 1023.5136       | <b>512.2604</b>  | 1023.5266      | <b>512.2669</b>  | 8  |
| 4  | 477.2384         | 239.1228        | 459.2148        | 230.1110         | 459.2278        | 230.1175         | D    | 927.4561        | <b>464.2317</b> | 909.4325        | 455.2199         | 909.4455       | 455.2264         | 7  |
| 5  | <b>617.2884</b>  | <b>309.1478</b> | 599.2648        | <b>300.1360</b>  | 599.2778        | <b>300.1426</b>  | H    | 811.4321        | <b>406.2197</b> | 793.4085        | 397.2079         |                |                  | 6  |
| 6  | 781.3488         | <b>391.1780</b> | 763.3252        | 382.1662         | 763.3382        | 382.1727         | Y    | <b>671.3821</b> | <b>336.1947</b> | 653.3585        | 327.1829         |                |                  | 5  |
| 7  | 911.4014         | 456.2043        | <b>893.3778</b> | 447.1926         | <b>893.3908</b> | 447.1991         | Q    | <b>507.3217</b> | 254.1645        | 489.2981        | 245.1527         |                |                  | 4  |
| 8  | <b>1025.4825</b> | <b>513.2449</b> | 1007.4589       | <b>504.2331</b>  | 1007.4719       | <b>504.2396</b>  | I    | 377.2691        | 189.1382        | 359.2455        | 180.1264         |                |                  | 3  |
| 9  | 1139.5636        | <b>570.2854</b> | 1121.5400       | <b>561.2737</b>  | 1121.5530       | <b>561.2802</b>  | L    | 263.1880        | 132.0976        | 245.1644        | 123.0858         |                |                  | 2  |
| 10 |                  |                 |                 |                  |                 |                  | K    | <b>149.1069</b> | 75.0571         | <b>131.0833</b> | 66.0453          |                |                  | 1  |

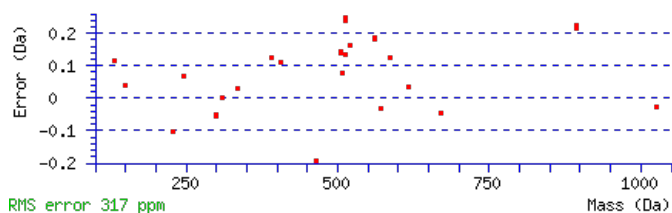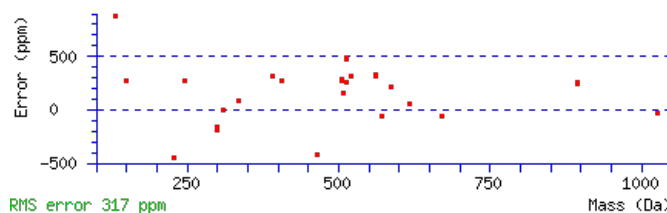

NCBI **BLAST** search of **NKLDHYQILK**

(Parameters: blastp, nr protein database, expect=20000, no filter, PAM30)

Other BLAST [web gateways](#)

### All matches to this query

| Score | Mr(calc) | Delta | Sequence |
|-------|----------|-------|----------|
|       |          |       |          |

**AT3G55280.1**

|      |           |         |                               |
|------|-----------|---------|-------------------------------|
| 30.8 | 1286.6559 | 0.0015  | <a href="#">NKLDHYQILK</a>    |
| 12.2 | 1286.6590 | -0.0016 | <a href="#">KPPQRGRGGGVR</a>  |
| 12.1 | 1286.6537 | 0.0037  | <a href="#">QRTIEALTNPK</a>   |
| 9.1  | 1286.6537 | 0.0037  | <a href="#">GLTGDSLNRIPK</a>  |
| 5.8  | 1286.6559 | 0.0015  | <a href="#">EHLELYARIK</a>    |
| 5.1  | 1286.6559 | 0.0015  | <a href="#">NFVSHLEKGLK</a>   |
| 4.9  | 1286.6559 | 0.0015  | <a href="#">GGKIWVVDVNGK</a>  |
| 3.7  | 1286.6537 | 0.0037  | <a href="#">AVATSGPSSRPLK</a> |
| 3.7  | 1286.6537 | 0.0037  | <a href="#">ETLPGGLSVNRK</a>  |
| 3.4  | 1286.6537 | 0.0037  | <a href="#">KQEPSGLVRK</a>    |

**Mascot:** <http://www.matrixscience.com/>

**Peptide View**MS/MS Fragmentation of **AADLGVESIVIGMSHR**

Found in **AT3G55410.1** in **TAIR\_Arabidopsis**, Symbols: | 2-oxoglutarate dehydrogenase E1 component, putative / oxoglutarate decarboxylase, putative / alpha-ketoglutaric dehydrogenase, putative | chr3:20552874-20556705 FORWARD

Match to Query 7512: 1653.847938 from(552.289922,3+) index(8149)

Title: Elution from: 72.626 to 72.626 scan no 10837 cid35.00 polarity:+

Data file D12h-3\_2.mgf

Click mouse within plot area to zoom in by factor of two about that point

Or,   to  Da

Label all possible matches  Label matches used for scoring

Show Y-axis

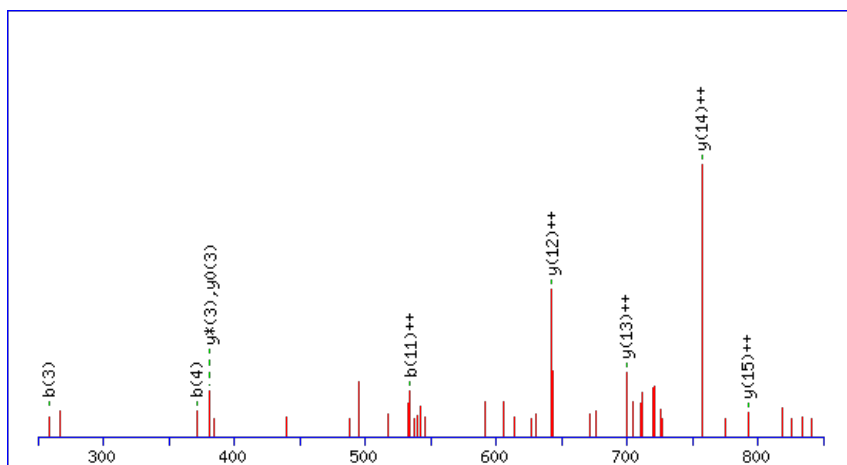

**Monoisotopic mass of neutral peptide Mr(calc):** 1653.8508

**Fixed modifications:** Carbamidomethyl (C) (apply to specified residues or termini only)

**Ions Score:** 19 **Expect:** 0.047

**Matches:** 9/142 fragment ions using 12 most intense peaks ([help](#))

| #  | b         | b <sup>++</sup> | b <sup>0</sup> | b <sup>0++</sup> | Seq. | y         | y <sup>++</sup> | y*        | y <sup>*++</sup> | y <sup>0</sup> | y <sup>0++</sup> | #  |
|----|-----------|-----------------|----------------|------------------|------|-----------|-----------------|-----------|------------------|----------------|------------------|----|
| 1  | 72.0444   | 36.5258         |                |                  | A    |           |                 |           |                  |                |                  | 16 |
| 2  | 143.0815  | 72.0444         |                |                  | A    | 1583.8210 | 792.4141        | 1566.7945 | 783.9009         | 1565.8104      | 783.4089         | 15 |
| 3  | 258.1084  | 129.5579        | 240.0979       | 120.5526         | D    | 1512.7839 | 756.8956        | 1495.7573 | 748.3823         | 1494.7733      | 747.8903         | 14 |
| 4  | 371.1925  | 186.0999        | 353.1819       | 177.0946         | L    | 1397.7569 | 699.3821        | 1380.7304 | 690.8688         | 1379.7464      | 690.3768         | 13 |
| 5  | 428.2140  | 214.6106        | 410.2034       | 205.6053         | G    | 1284.6729 | 642.8401        | 1267.6463 | 634.3268         | 1266.6623      | 633.8348         | 12 |
| 6  | 527.2824  | 264.1448        | 509.2718       | 255.1396         | V    | 1227.6514 | 614.3293        | 1210.6249 | 605.8161         | 1209.6409      | 605.3241         | 11 |
| 7  | 656.3250  | 328.6661        | 638.3144       | 319.6608         | E    | 1128.5830 | 564.7951        | 1111.5565 | 556.2819         | 1110.5724      | 555.7899         | 10 |
| 8  | 743.3570  | 372.1821        | 725.3464       | 363.1769         | S    | 999.5404  | 500.2738        | 982.5139  | 491.7606         | 981.5298       | 491.2686         | 9  |
| 9  | 856.4411  | 428.7242        | 838.4305       | 419.7189         | I    | 912.5084  | 456.7578        | 895.4818  | 448.2446         | 894.4978       | 447.7525         | 8  |
| 10 | 955.5095  | 478.2584        | 937.4989       | 469.2531         | V    | 799.4243  | 400.2158        | 782.3978  | 391.7025         | 781.4138       | 391.2105         | 7  |
| 11 | 1068.5936 | 534.8004        | 1050.5830      | 525.7951         | I    | 700.3559  | 350.6816        | 683.3294  | 342.1683         | 682.3453       | 341.6763         | 6  |
| 12 | 1125.6150 | 563.3111        | 1107.6045      | 554.3059         | G    | 587.2718  | 294.1396        | 570.2453  | 285.6263         | 569.2613       | 285.1343         | 5  |
| 13 | 1256.6555 | 628.8314        | 1238.6449      | 619.8261         | M    | 530.2504  | 265.6288        | 513.2238  | 257.1156         | 512.2398       | 256.6235         | 4  |
| 14 | 1343.6875 | 672.3474        | 1325.6770      | 663.3421         | S    | 399.2099  | 200.1086        | 382.1833  | 191.5953         | 381.1993       | 191.1033         | 3  |
| 15 | 1480.7464 | 740.8769        | 1462.7359      | 731.8716         | H    | 312.1779  | 156.5926        | 295.1513  | 148.0793         |                |                  | 2  |
| 16 |           |                 |                |                  | R    | 175.1190  | 88.0631         | 158.0924  | 79.5498          |                |                  | 1  |

AT3G55410.1

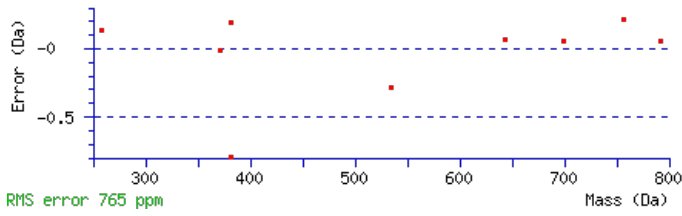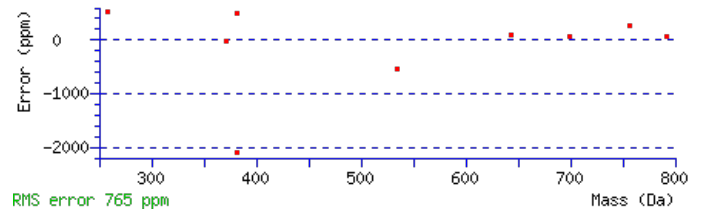

NCBI **BLAST** search of [AADLGVESIVIGMSHR](#)

(Parameters: blastp, nr protein database, expect=20000, no filter, PAM30)

Other BLAST [web gateways](#)

All matches to this query

| Score | Mr(calc)  | Delta   | Sequence                         |
|-------|-----------|---------|----------------------------------|
| 19.4  | 1653.8508 | -0.0029 | <a href="#">AADLGVESIVIGMSHR</a> |

Mascot: <http://www.matrixscience.com/>

**Peptide View**MS/MS Fragmentation of **FFVGGNWK**

Found in **AT3G55440.1** in **TAIR\_Arabidopsis**, Symbols: TPI, ATCTIMC | ATCTIMC (CYTOSOLIC TRIOSE PHOSPHATE ISOMERASE); triose-phosphate isomerase | chr3:20564771-20567055 FORWARD

Match to Query 2031: 953.476072 from(477.745312,2+) index(5561)

Title: Elution from: 50.382 to 50.382 scan no 7100 cid35.00 polarity:+

Data file 0-1\_2.mgf

Click mouse within plot area to zoom in by factor of two about that point

Or,   to  Da

Label all possible matches  Label matches used for scoring

Show Y-axis

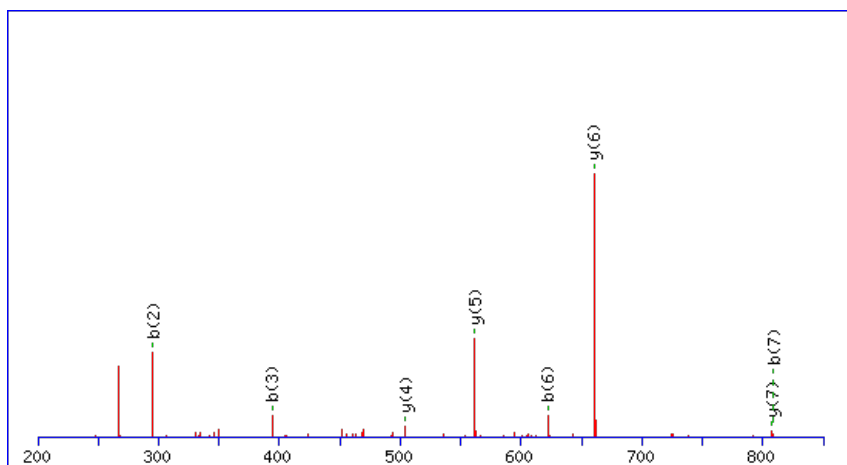

Monoisotopic mass of neutral peptide  $M_r(\text{calc})$ : 953.4760

Fixed modifications: Carbamidomethyl (C) (apply to specified residues or termini only)

Ions Score: 40 Expect: 0.00018

Matches : 8/46 fragment ions using 12 most intense peaks ([help](#))

| # | b               | b <sup>++</sup> | b*       | b <sup>*++</sup> | Seq. | y               | y <sup>++</sup> | y*       | y <sup>*++</sup> | # |
|---|-----------------|-----------------|----------|------------------|------|-----------------|-----------------|----------|------------------|---|
| 1 | 148.0757        | 74.5415         |          |                  | F    |                 |                 |          |                  | 8 |
| 2 | <b>295.1441</b> | 148.0757        |          |                  | F    | <b>807.4148</b> | 404.2110        | 790.3883 | 395.6978         | 7 |
| 3 | <b>394.2125</b> | 197.6099        |          |                  | V    | <b>660.3464</b> | 330.6768        | 643.3198 | 322.1636         | 6 |
| 4 | 451.2340        | 226.1206        |          |                  | G    | <b>561.2780</b> | 281.1426        | 544.2514 | 272.6293         | 5 |
| 5 | 508.2554        | 254.6314        |          |                  | G    | <b>504.2565</b> | 252.6319        | 487.2300 | 244.1186         | 4 |
| 6 | <b>622.2984</b> | 311.6528        | 605.2718 | 303.1395         | N    | 447.2350        | 224.1212        | 430.2085 | 215.6079         | 3 |
| 7 | <b>808.3777</b> | 404.6925        | 791.3511 | 396.1792         | W    | 333.1921        | 167.0997        | 316.1656 | 158.5864         | 2 |
| 8 |                 |                 |          |                  | K    | 147.1128        | 74.0600         | 130.0863 | 65.5468          | 1 |

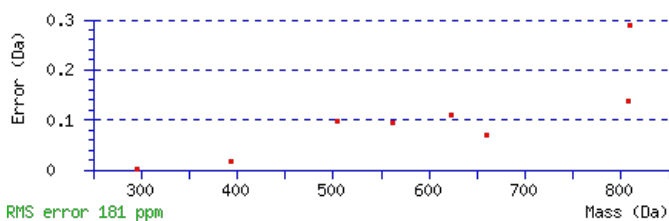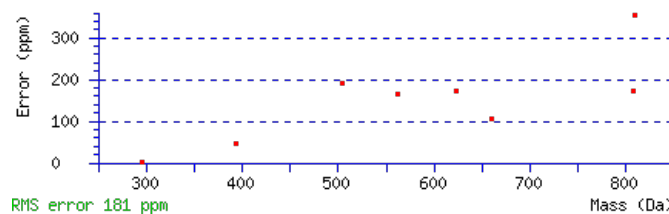

NCBI BLAST search of **FFVGGNWK**

(Parameters: blastp, nr protein database, expect=20000, no filter, PAM30)

Other BLAST [web gateways](#)

**All matches to this query**

| Score | $M_r(\text{calc})$ | Delta  | Sequence                 |
|-------|--------------------|--------|--------------------------|
| 40.3  | 953.4760           | 0.0001 | <a href="#">FFVGGNWK</a> |



# AT3G55440.1

|      |          |        |                         |
|------|----------|--------|-------------------------|
| 14.1 | 953.4753 | 0.0008 | <a href="#">MFAQRTK</a> |
| 2.8  | 953.4753 | 0.0008 | <a href="#">YMTEVRR</a> |

**Mascot:** <http://www.matrixscience.com/>

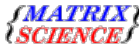

### Peptide View

#### MS/MS Fragmentation of SHFDLAMPVFLK

Found in **AT3G55500.1** in **TAIR\_Arabidopsis**, Symbols: EXP16, ATEXP16, ATHEXP ALPHA 1.7, ATEXPA16 | ATEXPA16 (ARABIDOPSIS THALIANA EXPANSIN A16) | chr3:20586052-20587081 REVERSE

Match to Query 5724: 1434.675910 from(718.345231,2+) index(5930)  
Title: Elution from: 52.477 to 52.477 scan no 7543 cid35.00 polarity:+  
Data file C7-1\_2.mgf

Click mouse within plot area to zoom in by factor of two about that point

Or,   to  Da

Label all possible matches  Label matches used for scoring   
Show Y-axis

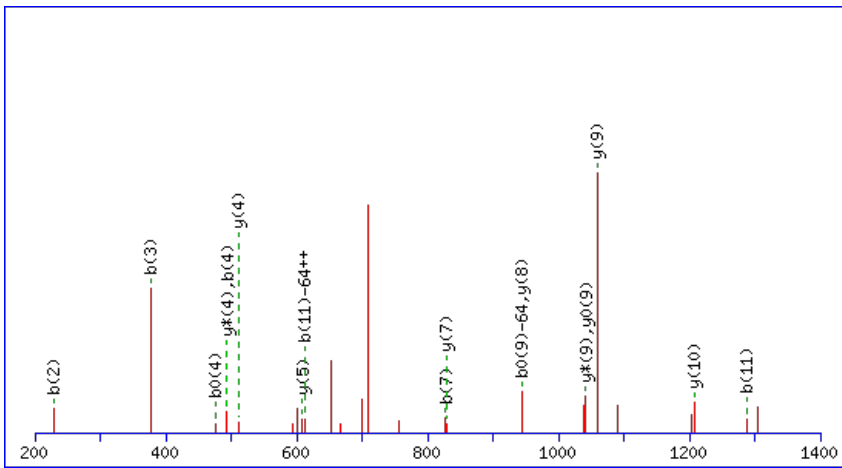

**Monoisotopic mass of neutral peptide Mr(calc):** 1434.6776  
**Fixed modifications:** Carbamidomethyl (C) (apply to specified residues or termini only)  
**Variable modifications:**  
**M7** : Oxidation (M), with neutral losses 0.0000 (shown in table), 63.9983  
**Ions Score:** 45 **Expect:** 0.00035  
**Matches :** 17/144 fragment ions using 23 most intense peaks ([help](#))

| #  | b         | b <sup>++</sup> | b <sup>0</sup> | b <sup>0++</sup> | Seq. | y         | y <sup>++</sup> | y <sup>*</sup> | y <sup>*++</sup> | y <sup>0</sup> | y <sup>0++</sup> | #  |
|----|-----------|-----------------|----------------|------------------|------|-----------|-----------------|----------------|------------------|----------------|------------------|----|
| 1  | 89.0363   | 45.0218         | 71.0258        | 36.0165          | S    |           |                 |                |                  |                |                  | 12 |
| 2  | 229.0864  | 115.0468        | 211.0758       | 106.0415         | H    | 1347.6558 | 674.3315        | 1329.6322      | 665.3197         | 1329.6452      | 665.3263         | 11 |
| 3  | 377.1518  | 189.0795        | 359.1412       | 180.0743         | F    | 1207.6058 | 604.3065        | 1189.5822      | 595.2947         | 1189.5952      | 595.3012         | 10 |
| 4  | 493.1758  | 247.0915        | 475.1652       | 238.0862         | D    | 1059.5403 | 530.2738        | 1041.5167      | 521.2620         | 1041.5298      | 521.2685         | 9  |
| 5  | 607.2569  | 304.1321        | 589.2463       | 295.1268         | L    | 943.5164  | 472.2618        | 925.4928       | 463.2500         |                |                  | 8  |
| 6  | 679.2910  | 340.1492        | 661.2805       | 331.1439         | A    | 829.4353  | 415.2213        | 811.4117       | 406.2095         |                |                  | 7  |
| 7  | 827.3235  | 414.1654        | 809.3129       | 405.1601         | M    | 757.4011  | 379.2042        | 739.3775       | 370.1924         |                |                  | 6  |
| 8  | 925.3733  | 463.1903        | 907.3627       | 454.1850         | P    | 609.3687  | 305.1880        | 591.3451       | 296.1762         |                |                  | 5  |
| 9  | 1025.4387 | 513.2230        | 1007.4281      | 504.2177         | V    | 511.3189  | 256.1631        | 493.2953       | 247.1513         |                |                  | 4  |
| 10 | 1173.5042 | 587.2557        | 1155.4936      | 578.2504         | F    | 411.2534  | 206.1303        | 393.2298       | 197.1186         |                |                  | 3  |
| 11 | 1287.5853 | 644.2963        | 1269.5747      | 635.2910         | L    | 263.1880  | 132.0976        | 245.1644       | 123.0858         |                |                  | 2  |
| 12 |           |                 |                |                  | K    | 149.1069  | 75.0571         | 131.0833       | 66.0453          |                |                  | 1  |

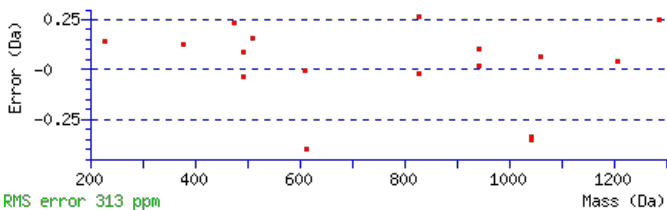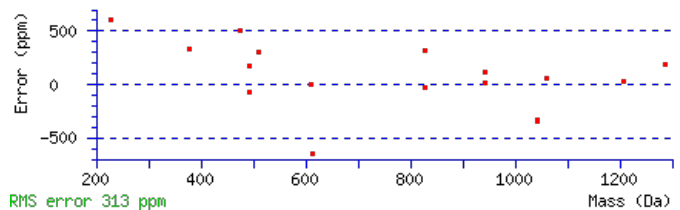

NCBI BLAST search of SHFDLAMPVFLK  
(Parameters: blastp, nr protein database, expect=20000, no filter, PAM30)

# AT3G55500.1

Other BLAST [web gateways](#)

## All matches to this query

| Score | Mr(calc)  | Delta   | Sequence                      |
|-------|-----------|---------|-------------------------------|
| 44.7  | 1434.6776 | -0.0017 | <a href="#">SHFDLAMPVFLK</a>  |
| 10.7  | 1434.6778 | -0.0019 | <a href="#">QDEIDKLSSEKK</a>  |
| 10.7  | 1434.6801 | -0.0042 | <a href="#">VDEFLQSLVNEK</a>  |
| 7.6   | 1434.6779 | -0.0019 | <a href="#">LIENKSEKSDEK</a>  |
| 5.9   | 1434.6753 | 0.0006  | <a href="#">MEDIGLVKQGWK</a>  |
| 5.5   | 1434.6731 | 0.0028  | <a href="#">RQVTDPLSLMDK</a>  |
| 4.7   | 1434.6731 | 0.0028  | <a href="#">ELMEGEKGKELR</a>  |
| 1.6   | 1434.6731 | 0.0028  | <a href="#">TGILTNHMTVVK</a>  |
| 1.5   | 1434.6731 | 0.0028  | <a href="#">VMAAAEASEITQR</a> |
| 1.3   | 1434.6778 | -0.0019 | <a href="#">NQKLEEIETTSK</a>  |

Mascot: <http://www.matrixscience.com/>

**Peptide View**MS/MS Fragmentation of **MEKKEIEK**Found in **AT3G55700.1** in **TAIR\_Arabidopsis**, Symbols: | UDP-glucuronosyl/UDP-glucosyl transferase family protein | chr3:20682181-20684257  
FORWARD

Match to Query 3004: 1060.508064 from(531.261308,2+) index(5126)

Title: Elution from: 46.869 to 46.869 scan no 6505 cid35.00 polarity:+

Data file 0-1\_2.mgf

Click mouse within plot area to zoom in by factor of two about that point

Or,  to  Da Label all possible matches  Label matches used for scoring Show Y-axis 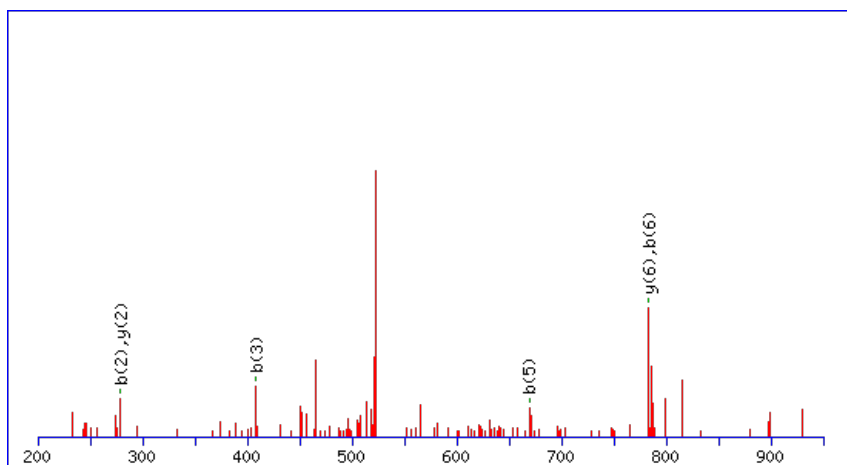Monoisotopic mass of neutral peptide  $M_r(\text{calc})$ : 1060.5101

Fixed modifications: Carbamidomethyl (C) (apply to specified residues or termini only)

Variable modifications:

M1 : Oxidation (M), with neutral losses 0.0000 (shown in table), 63.9983

Ions Score: 27 Expect: 0.022

Matches : 6/112 fragment ions using 7 most intense peaks ([help](#))

| # | b               | b <sup>++</sup> | b*       | b <sup>*++</sup> | b <sup>0</sup> | b <sup>0++</sup> | Seq. | y               | y <sup>++</sup> | y*       | y <sup>*++</sup> | y <sup>0</sup> | y <sup>0++</sup> | # |
|---|-----------------|-----------------|----------|------------------|----------------|------------------|------|-----------------|-----------------|----------|------------------|----------------|------------------|---|
| 1 | 149.0397        | 75.0235         |          |                  |                |                  | M    |                 |                 |          |                  |                |                  | 8 |
| 2 | <b>279.0793</b> | 140.0433        |          |                  | 261.0688       | 131.0380         | E    | 913.4849        | 457.2461        | 895.4613 | 448.2343         | 895.4744       | 448.2408         | 7 |
| 3 | <b>409.1684</b> | 205.0878        | 391.1448 | 196.0760         | 391.1578       | 196.0825         | K    | <b>783.4453</b> | 392.2263        | 765.4217 | 383.2145         | 765.4347       | 383.2210         | 6 |
| 4 | 539.2574        | 270.1323        | 521.2338 | 261.1205         | 521.2468       | 261.1271         | K    | 653.3563        | 327.1818        | 635.3327 | 318.1700         | 635.3457       | 318.1765         | 5 |
| 5 | <b>669.2970</b> | 335.1522        | 651.2734 | 326.1404         | 651.2865       | 326.1469         | E    | 523.2672        | 262.1373        | 505.2436 | 253.1255         | 505.2567       | 253.1320         | 4 |
| 6 | <b>783.3781</b> | 392.1927        | 765.3545 | 383.1809         | 765.3676       | 383.1874         | I    | 393.2276        | 197.1174        | 375.2040 | 188.1056         | 375.2170       | 188.1122         | 3 |
| 7 | 913.4178        | 457.2125        | 895.3942 | 448.2007         | 895.4072       | 448.2072         | E    | <b>279.1465</b> | 140.0769        | 261.1229 | 131.0651         | 261.1359       | 131.0716         | 2 |
| 8 |                 |                 |          |                  |                |                  | K    | 149.1069        | 75.0571         | 131.0833 | 66.0453          |                |                  | 1 |

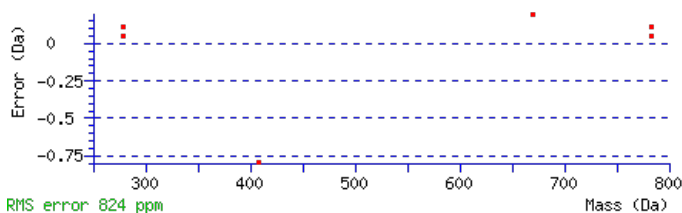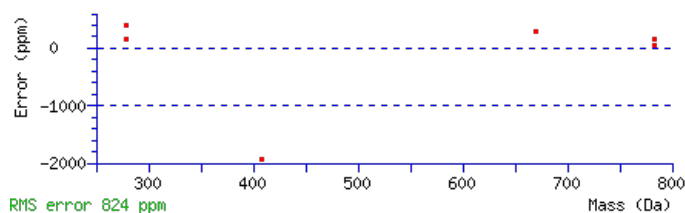NCBI **BLAST** search of **MEKKEIEK**

(Parameters: blastp, nr protein database, expect=20000, no filter, PAM30)

Other BLAST [web gateways](#)

All matches to this query

| Score | Mr(calc) | Delta | Sequence |
|-------|----------|-------|----------|
|       |          |       |          |

**AT3G55700.1**

|      |           |         |                            |
|------|-----------|---------|----------------------------|
| 27.3 | 1060.5101 | -0.0020 | <a href="#">MEKKEIEK</a>   |
| 7.7  | 1060.5101 | -0.0020 | <a href="#">KDMTVLEAK</a>  |
| 4.3  | 1060.5067 | 0.0014  | <a href="#">FEALEDKAK</a>  |
| 4.3  | 1060.5067 | 0.0014  | <a href="#">FQKEIEEK</a>   |
| 4.2  | 1060.5067 | 0.0014  | <a href="#">YVEALAEQK</a>  |
| 2.3  | 1060.5101 | -0.0020 | <a href="#">LKAMSDLEK</a>  |
| 2.1  | 1060.5067 | 0.0014  | <a href="#">EFLVETANK</a>  |
| 2.1  | 1060.5053 | 0.0027  | <a href="#">QMLELMIR</a>   |
| 2.0  | 1060.5071 | 0.0009  | <a href="#">LSNSGDAKVR</a> |
| 1.5  | 1060.5094 | -0.0013 | <a href="#">HPTVHSIEK</a>  |

**Mascot:** <http://www.matrixscience.com/>

## Peptide View

MS/MS Fragmentation of **LTGITGGDQVAAAMGIYGPR**

Found in **AT3G55800.1** in **TAIR\_Arabidopsis**, Symbols: SBPASE | SBPASE (SEDOHEPTULOSE-BISPHOSPHATASE); phosphoric ester hydrolase/ sedoheptulose-bisphosphatase | chr3:20720619-20722400 FORWARD

Match to Query 8996: 1970.920996 from(986.467774,2+) index(8356)

Title: Elution from: 74.719 to 74.719 scan no 11174 cid35.00 polarity:+

Data file D12h-3\_2.mgf

Click mouse within plot area to zoom in by factor of two about that point

Or,  to  Da

Label all possible matches  Label matches used for scoring

Show Y-axis

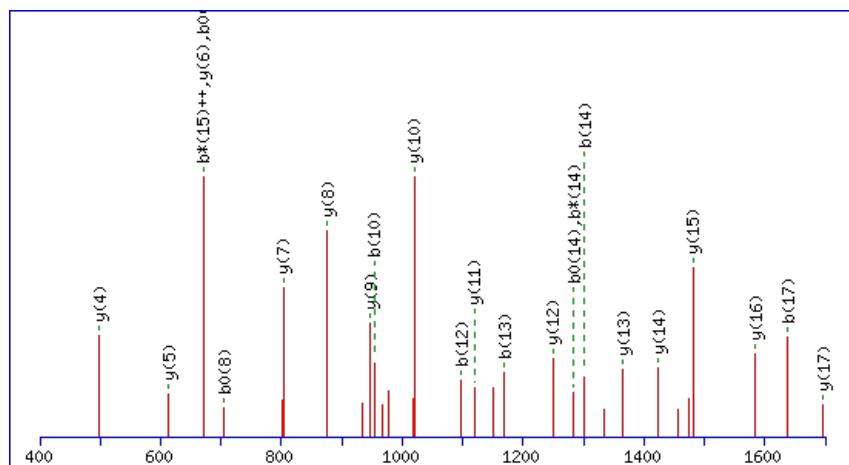

Monoisotopic mass of neutral peptide  $M_r(\text{calc})$ : 1970.9172

Fixed modifications: Carbamidomethyl (C) (apply to specified residues or termini only)

Ions Score: 157 Expect: 1.8e-015

Matches : 24/186 fragment ions using 22 most intense peaks ([help](#))

| #  | b                | b <sup>++</sup> | b*               | b <sup>*++</sup> | b <sup>0</sup>   | b <sup>0++</sup> | Seq. | y                | y <sup>++</sup> | y*        | y <sup>*++</sup> | y <sup>0</sup> | y <sup>0++</sup> | #  |
|----|------------------|-----------------|------------------|------------------|------------------|------------------|------|------------------|-----------------|-----------|------------------|----------------|------------------|----|
| 1  | 115.0884         | 58.0478         |                  |                  |                  |                  | L    |                  |                 |           |                  |                |                  | 20 |
| 2  | 217.1331         | 109.0702        |                  |                  | 199.1225         | 100.0649         | T    | 1857.8434        | 929.4253        | 1839.8198 | 920.4136         | 1839.8329      | 920.4201         | 19 |
| 3  | 275.1516         | 138.0794        |                  |                  | 257.1410         | 129.0741         | G    | 1755.7987        | 878.4030        | 1737.7751 | 869.3912         | 1737.7881      | 869.3977         | 18 |
| 4  | 389.2327         | 195.1200        |                  |                  | 371.2221         | 186.1147         | I    | <b>1697.7802</b> | 849.3937        | 1679.7566 | 840.3819         | 1679.7696      | 840.3885         | 17 |
| 5  | 491.2774         | 246.1423        |                  |                  | 473.2668         | 237.1371         | T    | <b>1583.6991</b> | 792.3532        | 1565.6755 | 783.3414         | 1565.6885      | 783.3479         | 16 |
| 6  | 549.2959         | 275.1516        |                  |                  | 531.2853         | 266.1463         | G    | <b>1481.6544</b> | 741.3308        | 1463.6308 | 732.3190         | 1463.6438      | 732.3256         | 15 |
| 7  | 607.3144         | 304.1608        |                  |                  | 589.3038         | 295.1556         | G    | <b>1423.6359</b> | 712.3216        | 1405.6123 | 703.3098         | 1405.6253      | 703.3163         | 14 |
| 8  | 723.3384         | 362.1728        |                  |                  | <b>705.3278</b>  | 353.1675         | D    | <b>1365.6174</b> | 683.3123        | 1347.5938 | 674.3005         | 1347.6068      | 674.3071         | 13 |
| 9  | 853.3910         | 427.1991        | 835.3674         | 418.1874         | 835.3805         | 418.1939         | Q    | <b>1249.5934</b> | 625.3003        | 1231.5698 | 616.2886         |                |                  | 12 |
| 10 | <b>953.4565</b>  | 477.2319        | 935.4329         | 468.2201         | 935.4459         | 468.2266         | V    | <b>1119.5408</b> | 560.2740        | 1101.5172 | 551.2622         |                |                  | 11 |
| 11 | 1025.4906        | 513.2489        | 1007.4670        | 504.2372         | 1007.4801        | 504.2437         | A    | <b>1019.4753</b> | 510.2413        | 1001.4517 | 501.2295         |                |                  | 10 |
| 12 | <b>1097.5248</b> | 549.2660        | 1079.5012        | 540.2542         | 1079.5142        | 540.2607         | A    | <b>947.4412</b>  | 474.2242        | 929.4176  | 465.2124         |                |                  | 9  |
| 13 | <b>1169.5589</b> | 585.2831        | 1151.5353        | 576.2713         | 1151.5484        | 576.2778         | A    | <b>875.4070</b>  | 438.2071        | 857.3834  | 429.1954         |                |                  | 8  |
| 14 | <b>1301.5964</b> | 651.3019        | <b>1283.5729</b> | 642.2901         | <b>1283.5859</b> | 642.2966         | M    | <b>803.3729</b>  | 402.1901        | 785.3493  | 393.1783         |                |                  | 7  |
| 15 | 1359.6149        | 680.3111        | 1341.5914        | <b>671.2993</b>  | 1341.6044        | <b>671.3058</b>  | G    | <b>671.3354</b>  | 336.1713        | 653.3118  | 327.1595         |                |                  | 6  |
| 16 | 1473.6960        | 737.3517        | 1455.6725        | 728.3399         | 1455.6855        | 728.3464         | I    | <b>613.3169</b>  | 307.1621        | 595.2933  | 298.1503         |                |                  | 5  |
| 17 | <b>1637.7564</b> | 819.3818        | 1619.7328        | 810.3700         | 1619.7458        | 810.3766         | Y    | <b>499.2358</b>  | 250.1215        | 481.2122  | 241.1097         |                |                  | 4  |
| 18 | 1695.7749        | 848.3911        | 1677.7513        | 839.3793         | 1677.7643        | 839.3858         | G    | 335.1754         | 168.0913        | 317.1518  | 159.0795         |                |                  | 3  |
| 19 | 1793.8247        | 897.4160        | 1775.8011        | 888.4042         | 1775.8141        | 888.4107         | P    | 277.1569         | 139.0821        | 259.1333  | 130.0703         |                |                  | 2  |
| 20 |                  |                 |                  |                  |                  |                  | R    | 179.1071         | 90.0572         | 161.0835  | 81.0454          |                |                  | 1  |

AT3G55800.1

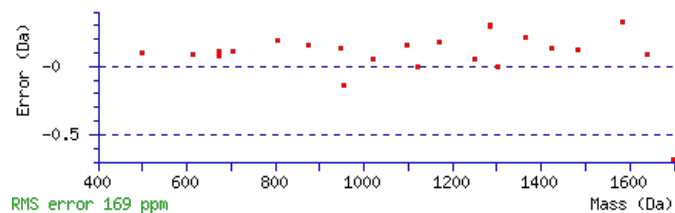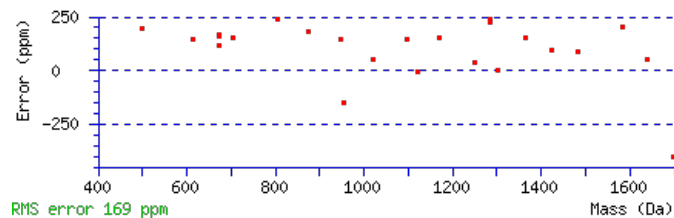

NCBI **BLAST** search of [LTGITGGDQVAAAMGIYGPR](#)

(Parameters: blastp, nr protein database, expect=20000, no filter, PAM30)

Other BLAST [web gateways](#)

**All matches to this query**

| Score | Mr(calc)  | Delta  | Sequence                             |
|-------|-----------|--------|--------------------------------------|
| 156.7 | 1970.9172 | 0.0038 | <a href="#">LTGITGGDQVAAAMGIYGPR</a> |

Mascot: <http://www.matrixscience.com/>

**Peptide View**MS/MS Fragmentation of **VFFDILIGK**

Found in **AT3G56070.1** in **TAIR\_Arabidopsis**, Symbols: ROC2 | ROC2 (rotamase CyP 2); peptidyl-prolyl cis-trans isomerase | chr3:20817966-20818496 REVERSE

Match to Query 2970: 1060.580802 from(531.297677,2+) index(9957)

Title: Elution from: 91.419 to 91.419 scan no 13847 cid35.00 polarity:+

Data file C7-1\_2.mgf

Click mouse within plot area to zoom in by factor of two about that point

Or,   to  Da

Label all possible matches  Label matches used for scoring

Show Y-axis

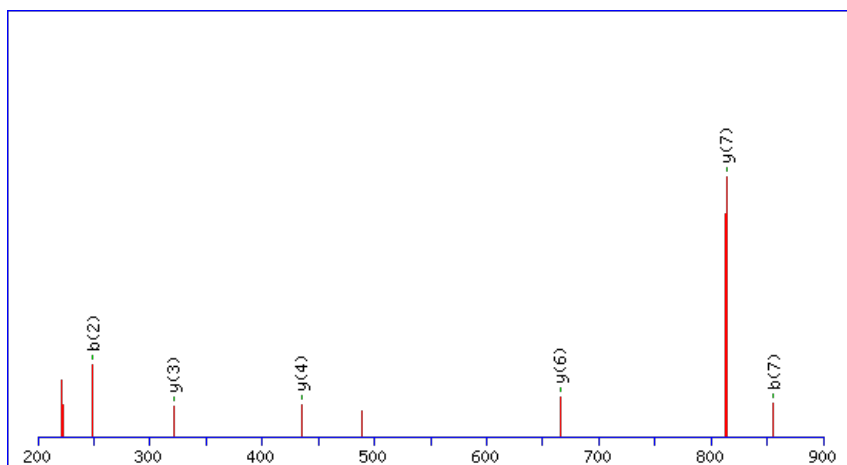

Monoisotopic mass of neutral peptide Mr(calc): 1060.5817

Fixed modifications: Carbamidomethyl (C) (apply to specified residues or termini only)

Ions Score: 38 Expect: 0.00079

Matches : 6/64 fragment ions using 6 most intense peaks ([help](#))

| # | b               | b <sup>++</sup> | b <sup>0</sup> | b <sup>0++</sup> | Seq. | y               | y <sup>++</sup> | y*       | y* <sup>++</sup> | y <sup>0</sup> | y <sup>0++</sup> | # |
|---|-----------------|-----------------|----------------|------------------|------|-----------------|-----------------|----------|------------------|----------------|------------------|---|
| 1 | 101.0727        | 51.0400         |                |                  | V    |                 |                 |          |                  |                |                  | 9 |
| 2 | <b>249.1382</b> | 125.0727        |                |                  | F    | 961.5235        | 481.2654        | 943.5000 | 472.2536         | 943.5130       | 472.2601         | 8 |
| 3 | 397.2036        | 199.1054        |                |                  | F    | <b>813.4581</b> | 407.2327        | 795.4345 | 398.2209         | 795.4475       | 398.2274         | 7 |
| 4 | 513.2276        | 257.1174        | 495.2170       | 248.1122         | D    | <b>665.3926</b> | 333.2000        | 647.3691 | 324.1882         | 647.3821       | 324.1947         | 6 |
| 5 | 627.3087        | 314.1580        | 609.2981       | 305.1527         | I    | 549.3687        | 275.1880        | 531.3451 | 266.1762         |                |                  | 5 |
| 6 | 741.3898        | 371.1985        | 723.3792       | 362.1933         | L    | <b>435.2876</b> | 218.1474        | 417.2640 | 209.1356         |                |                  | 4 |
| 7 | <b>855.4709</b> | 428.2391        | 837.4603       | 419.2338         | I    | <b>321.2065</b> | 161.1069        | 303.1829 | 152.0951         |                |                  | 3 |
| 8 | 913.4894        | 457.2483        | 895.4788       | 448.2431         | G    | 207.1254        | 104.0663        | 189.1018 | 95.0545          |                |                  | 2 |
| 9 |                 |                 |                |                  | K    | 149.1069        | 75.0571         | 131.0833 | 66.0453          |                |                  | 1 |

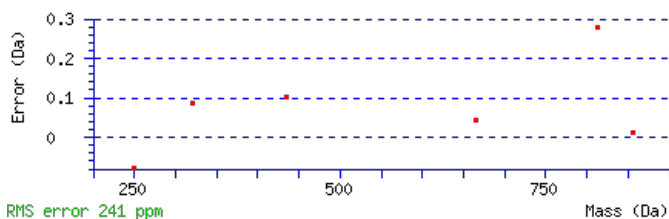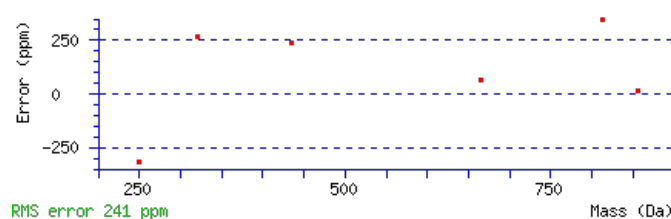

NCBI **BLAST** search of **VFFDILIGK**

(Parameters: blastp, nr protein database, expect=20000, no filter, PAM30)

Other BLAST [web gateways](#)

**All matches to this query**

| Score | Mr(calc) | Delta | Sequence |
|-------|----------|-------|----------|
|       |          |       |          |



AT3G56070.1

|      |           |         |                           |
|------|-----------|---------|---------------------------|
| 38.1 | 1060.5817 | -0.0009 | <a href="#">VFEDILIGK</a> |
|------|-----------|---------|---------------------------|

**Mascot:** <http://www.matrixscience.com/>



# Mascot Search Results

## Peptide View

MS/MS Fragmentation of **FELVDQLTHLTK**

Found in **AT3G56150.1** in **TAIR\_Arabidopsis**, Symbols: ATEIF3C-1, EIF3C-1, ATTIF3C1, TIF3C1, EIF3C | EIF3C (EUKARYOTIC TRANSLATION INITIATION FACTOR 3) | chr3:20844769-20847799 REVERSE

Match to Query 5354: 1442.777268 from(481.933032,3+) index(7994)

Title: Elution from: 71.520 to 71.520 scan no 10582 cid35.00 polarity:+

Data file D12h-2\_3.mgf

Click mouse within plot area to zoom in by factor of two about that point

Or,   to  Da

Label all possible matches  Label matches used for scoring

Show Y-axis

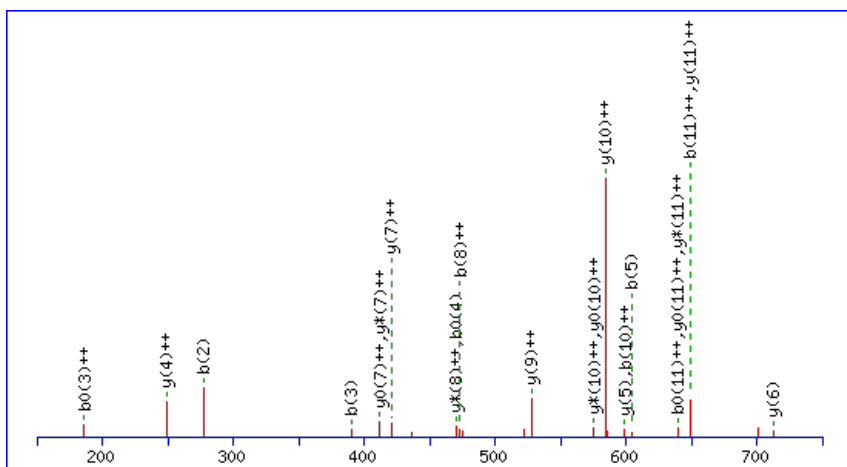

Monoisotopic mass of neutral peptide  $M_r(\text{calc})$ : 1442.7769

Fixed modifications: Carbamidomethyl (C) (apply to specified residues or termini only)

Ions Score: 45 Expect: 0.0001

Matches : 23/118 fragment ions using 20 most intense peaks [\(help\)](#)

| #  | b               | b <sup>++</sup> | b*        | b <sup>*++</sup> | b <sup>0</sup>  | b <sup>0++</sup> | Seq. | y               | y <sup>++</sup> | y*        | y <sup>*++</sup> | y <sup>0</sup> | y <sup>0++</sup> | #  |
|----|-----------------|-----------------|-----------|------------------|-----------------|------------------|------|-----------------|-----------------|-----------|------------------|----------------|------------------|----|
| 1  | 148.0757        | 74.5415         |           |                  |                 |                  | F    |                 |                 |           |                  |                |                  | 12 |
| 2  | <b>277.1183</b> | 139.0628        |           |                  | 259.1077        | 130.0575         | E    | 1296.7158       | <b>648.8615</b> | 1279.6892 | <b>640.3483</b>  | 1278.7052      | <b>639.8563</b>  | 11 |
| 3  | <b>390.2023</b> | 195.6048        |           |                  | 372.1918        | <b>186.5995</b>  | L    | 1167.6732       | <b>584.3402</b> | 1150.6467 | <b>575.8270</b>  | 1149.6626      | <b>575.3350</b>  | 10 |
| 4  | 489.2708        | 245.1390        |           |                  | <b>471.2602</b> | 236.1337         | V    | 1054.5891       | <b>527.7982</b> | 1037.5626 | 519.2849         | 1036.5786      | 518.7929         | 9  |
| 5  | <b>604.2977</b> | 302.6525        |           |                  | 586.2871        | 293.6472         | D    | 955.5207        | 478.2640        | 938.4942  | <b>469.7507</b>  | 937.5102       | 469.2587         | 8  |
| 6  | 732.3563        | 366.6818        | 715.3297  | 358.1685         | 714.3457        | 357.6765         | Q    | 840.4938        | <b>420.7505</b> | 823.4672  | <b>412.2373</b>  | 822.4832       | <b>411.7452</b>  | 7  |
| 7  | 845.4403        | 423.2238        | 828.4138  | 414.7105         | 827.4298        | 414.2185         | L    | <b>712.4352</b> | 356.7212        | 695.4087  | 348.2080         | 694.4246       | 347.7160         | 6  |
| 8  | 946.4880        | <b>473.7477</b> | 929.4615  | 465.2344         | 928.4775        | 464.7424         | T    | <b>599.3511</b> | 300.1792        | 582.3246  | 291.6659         | 581.3406       | 291.1739         | 5  |
| 9  | 1083.5469       | 542.2771        | 1066.5204 | 533.7638         | 1065.5364       | 533.2718         | H    | 498.3035        | <b>249.6554</b> | 481.2769  | 241.1421         | 480.2929       | 240.6501         | 4  |
| 10 | 1196.6310       | <b>598.8191</b> | 1179.6045 | 590.3059         | 1178.6204       | 589.8139         | L    | 361.2445        | 181.1259        | 344.2180  | 172.6126         | 343.2340       | 172.1206         | 3  |
| 11 | 1297.6787       | <b>649.3430</b> | 1280.6521 | 640.8297         | 1279.6681       | <b>640.3377</b>  | T    | 248.1605        | 124.5839        | 231.1339  | 116.0706         | 230.1499       | 115.5786         | 2  |
| 12 |                 |                 |           |                  |                 |                  | K    | 147.1128        | 74.0600         | 130.0863  | 65.5468          |                |                  | 1  |

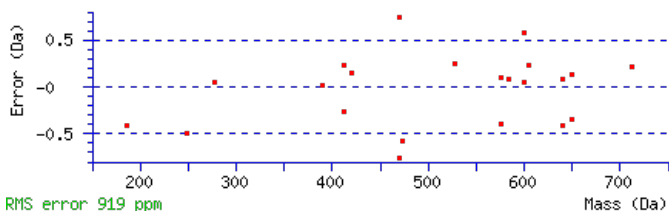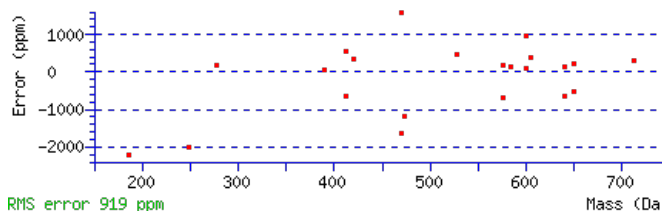

NCBI BLAST search of **FELVDQLTHLTK**

(Parameters: blastp, nr protein database, expect=20000, no filter, PAM30)

Other BLAST [web gateways](#)

AT3G56150.1

All matches to this query

| Score | Mr(calc)  | Delta   | Sequence                       |
|-------|-----------|---------|--------------------------------|
| 45.2  | 1442.7769 | 0.0003  | <a href="#">FELVDQLTHLTK</a>   |
| 17.8  | 1442.7803 | -0.0030 | <a href="#">GKAIP LPMKDTEK</a> |
| 17.4  | 1442.7737 | 0.0035  | <a href="#">QRIGPLLMQMEK</a>   |
| 0.8   | 1442.7769 | 0.0004  | <a href="#">TFLSHLIEALDGK</a>  |
| 0.2   | 1442.7809 | -0.0037 | <a href="#">KLFYEFLNVSAL</a>   |

Mascot: <http://www.matrixscience.com/>

## Peptide View

MS/MS Fragmentation of **YQDLDPFTFGTR**

Found in **AT3G56190.1** in **TAIR\_Arabidopsis**, Symbols: ASNAP, ALPHA-SNAP2 | ALPHA-SNAP2 (ALPHA-SOLUBLE NSF ATTACHMENT PROTEIN); soluble NSF attachment protein | chr3:20857098-20859335 REVERSE

Match to Query 5549: 1412.657738 from(707.336145,2+) index(4362)

Title: Elution from: 40.196 to 40.196 scan no 5454 cid35.00 polarity:+

Data file D12h-1\_2.mgf

Click mouse within plot area to zoom in by factor of two about that point

Or,   to  Da

Label all possible matches  Label matches used for scoring

Show Y-axis

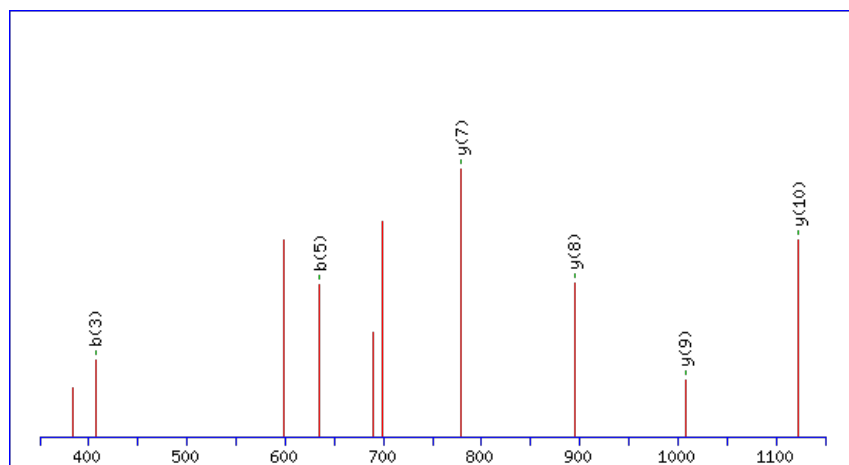

Monoisotopic mass of neutral peptide  $M_r(\text{calc})$ : 1412.6572

Fixed modifications: Carbamidomethyl (C) (apply to specified residues or termini only)

Ions Score: 30 Expect: 0.0037

Matches : 6/124 fragment ions using 10 most intense peaks ([help](#))

| #  | b               | b <sup>++</sup> | b*        | b <sup>*++</sup> | b <sup>0</sup> | b <sup>0++</sup> | Seq. | y                | y <sup>++</sup> | y*        | y <sup>*++</sup> | y <sup>0</sup> | y <sup>0++</sup> | #  |
|----|-----------------|-----------------|-----------|------------------|----------------|------------------|------|------------------|-----------------|-----------|------------------|----------------|------------------|----|
| 1  | 164.0706        | 82.5389         |           |                  |                |                  | Y    |                  |                 |           |                  |                |                  | 12 |
| 2  | 292.1292        | 146.5682        | 275.1026  | 138.0550         |                |                  | Q    | 1250.6012        | 625.8042        | 1233.5746 | 617.2909         | 1232.5906      | 616.7989         | 11 |
| 3  | <b>407.1561</b> | 204.0817        | 390.1296  | 195.5684         | 389.1456       | 195.0764         | D    | <b>1122.5426</b> | 561.7749        | 1105.5160 | 553.2617         | 1104.5320      | 552.7696         | 10 |
| 4  | 520.2402        | 260.6237        | 503.2136  | 252.1105         | 502.2296       | 251.6185         | L    | <b>1007.5156</b> | 504.2615        | 990.4891  | 495.7482         | 989.5051       | 495.2562         | 9  |
| 5  | <b>635.2671</b> | 318.1372        | 618.2406  | 309.6239         | 617.2566       | 309.1319         | D    | <b>894.4316</b>  | 447.7194        | 877.4050  | 439.2062         | 876.4210       | 438.7141         | 8  |
| 6  | 732.3199        | 366.6636        | 715.2933  | 358.1503         | 714.3093       | 357.6583         | P    | <b>779.4046</b>  | 390.2060        | 762.3781  | 381.6927         | 761.3941       | 381.2007         | 7  |
| 7  | 833.3676        | 417.1874        | 816.3410  | 408.6742         | 815.3570       | 408.1821         | T    | 682.3519         | 341.6796        | 665.3253  | 333.1663         | 664.3413       | 332.6743         | 6  |
| 8  | 980.4360        | 490.7216        | 963.4094  | 482.2084         | 962.4254       | 481.7164         | F    | 581.3042         | 291.1557        | 564.2776  | 282.6425         | 563.2936       | 282.1504         | 5  |
| 9  | 1081.4837       | 541.2455        | 1064.4571 | 532.7322         | 1063.4731      | 532.2402         | T    | 434.2358         | 217.6215        | 417.2092  | 209.1083         | 416.2252       | 208.6162         | 4  |
| 10 | 1138.5051       | 569.7562        | 1121.4786 | 561.2429         | 1120.4946      | 560.7509         | G    | 333.1881         | 167.0977        | 316.1615  | 158.5844         | 315.1775       | 158.0924         | 3  |
| 11 | 1239.5528       | 620.2800        | 1222.5263 | 611.7668         | 1221.5422      | 611.2748         | T    | 276.1666         | 138.5870        | 259.1401  | 130.0737         | 258.1561       | 129.5817         | 2  |
| 12 |                 |                 |           |                  |                |                  | R    | 175.1190         | 88.0631         | 158.0924  | 79.5498          |                |                  | 1  |

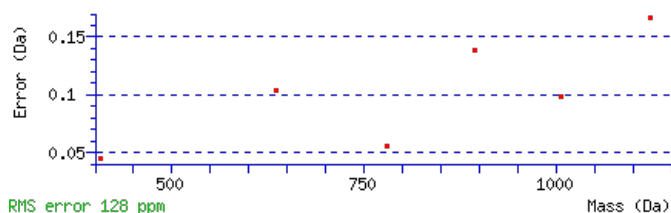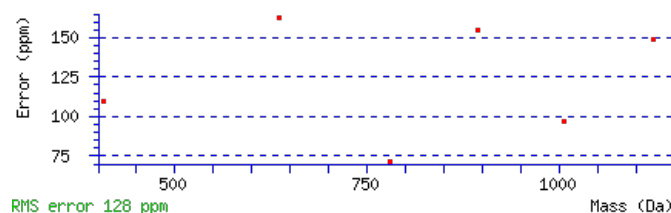

NCBI BLAST search of **YQDLDPFTFGTR**

(Parameters: blastp, nr protein database, expect=20000, no filter, PAM30)

Other BLAST [web gateways](#)

AT3G56190.1

All matches to this query

| Score | Mr(calc)  | Delta  | Sequence                     |
|-------|-----------|--------|------------------------------|
| 30.0  | 1412.6572 | 0.0005 | <a href="#">YQDLDPFTFGTR</a> |

Mascot: <http://www.matrixscience.com/>

**Peptide View**MS/MS Fragmentation of **GNVEPEAVFQTVSK**Found in **AT3G56240.1** in **TAIR\_Arabidopsis**, Symbols: CCH | CCH (COPPER CHAPERONE) | chr3:20874439-20875381 REVERSE

Match to Query 6812: 1520.704374 from(761.359463,2+) index(6289)

Title: Elution from: 54.675 to 54.675 scan no 7956 cid35.00 polarity:+

Data file C7-1\_1.mgf

Click mouse within plot area to zoom in by factor of two about that point

Or,   to  Da Label all possible matches  Label matches used for scoring Show Y-axis 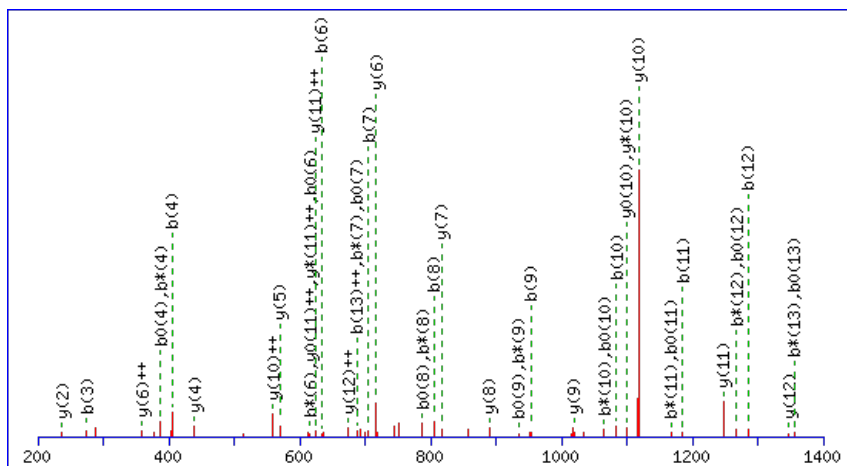Monoisotopic mass of neutral peptide  $M_r(\text{calc})$ : 1520.7065

Fixed modifications: Carbamidomethyl (C) (apply to specified residues or termini only)

Ions Score: 84 Expect: 3.3e-008

Matches : 46/146 fragment ions using 51 most intense peaks ([help](#))

| #  | b                | b <sup>++</sup> | b <sup>*</sup>   | b <sup>*++</sup> | b <sup>0</sup>   | b <sup>0++</sup> | Seq. | y                | y <sup>++</sup> | y <sup>*</sup>   | y <sup>*++</sup> | y <sup>0</sup>   | y <sup>0++</sup> | #  |
|----|------------------|-----------------|------------------|------------------|------------------|------------------|------|------------------|-----------------|------------------|------------------|------------------|------------------|----|
| 1  | 59.0258          | 30.0165         |                  |                  |                  |                  | G    |                  |                 |                  |                  |                  |                  | 14 |
| 2  | 175.0628         | 88.0350         | 157.0392         | 79.0232          |                  |                  | N    | 1463.6953        | 732.3513        | 1445.6717        | 723.3395         | 1445.6847        | 723.3460         | 13 |
| 3  | <b>275.1282</b>  | 138.0677        | 257.1046         | 129.0560         |                  |                  | V    | <b>1347.6583</b> | <b>674.3328</b> | 1329.6347        | 665.3210         | 1329.6477        | 665.3275         | 12 |
| 4  | <b>405.1678</b>  | 203.0876        | <b>387.1443</b>  | 194.0758         | <b>387.1573</b>  | 194.0823         | E    | <b>1247.5928</b> | <b>624.3001</b> | 1229.5693        | <b>615.2883</b>  | 1229.5823        | <b>615.2948</b>  | 11 |
| 5  | 503.2176         | 252.1125        | 485.1941         | 243.1007         | 485.2071         | 243.1072         | P    | <b>1117.5532</b> | <b>559.2802</b> | <b>1099.5296</b> | 550.2685         | <b>1099.5427</b> | 550.2750         | 10 |
| 6  | <b>633.2573</b>  | 317.1323        | <b>615.2337</b>  | 308.1205         | <b>615.2467</b>  | 308.1270         | E    | <b>1019.5034</b> | 510.2553        | 1001.4798        | 501.2436         | 1001.4929        | 501.2501         | 9  |
| 7  | <b>705.2914</b>  | 353.1494        | <b>687.2678</b>  | 344.1376         | <b>687.2809</b>  | 344.1441         | A    | <b>889.4638</b>  | 445.2355        | 871.4402         | 436.2237         | 871.4532         | 436.2303         | 8  |
| 8  | <b>805.3569</b>  | 403.1821        | <b>787.3333</b>  | 394.1703         | <b>787.3463</b>  | 394.1768         | V    | <b>817.4296</b>  | 409.2185        | 799.4061         | 400.2067         | 799.4191         | 400.2132         | 7  |
| 9  | <b>953.4223</b>  | 477.2148        | <b>935.3987</b>  | 468.2030         | <b>935.4118</b>  | 468.2095         | F    | <b>717.3642</b>  | <b>359.1857</b> | 699.3406         | 350.1739         | 699.3536         | 350.1805         | 6  |
| 10 | <b>1083.4750</b> | 542.2411        | <b>1065.4514</b> | 533.2293         | <b>1065.4644</b> | 533.2358         | Q    | <b>569.2987</b>  | 285.1530        | 551.2752         | 276.1412         | 551.2882         | 276.1477         | 5  |
| 11 | <b>1185.5197</b> | 593.2635        | <b>1167.4961</b> | 584.2517         | <b>1167.5091</b> | 584.2582         | T    | <b>439.2461</b>  | 220.1267        | 421.2225         | 211.1149         | 421.2355         | 211.1214         | 4  |
| 12 | <b>1285.5851</b> | 643.2962        | <b>1267.5615</b> | 634.2844         | <b>1267.5746</b> | 634.2909         | V    | 337.2014         | 169.1043        | 319.1778         | 160.0925         | 319.1908         | 160.0990         | 3  |
| 13 | 1373.6142        | <b>687.3107</b> | <b>1355.5906</b> | 678.2989         | <b>1355.6036</b> | 678.3055         | S    | <b>237.1359</b>  | 119.0716        | 219.1124         | 110.0598         | 219.1254         | 110.0663         | 2  |
| 14 |                  |                 |                  |                  |                  |                  | K    | 149.1069         | 75.0571         | 131.0833         | 66.0453          |                  |                  | 1  |

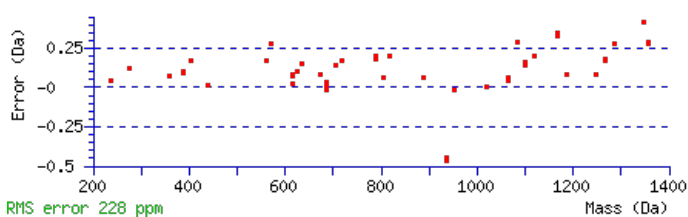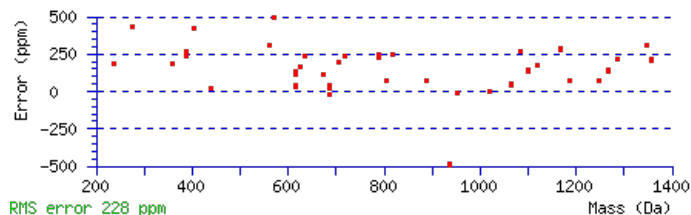NCBI BLAST search of [GNVEPEAVFQTVSK](#)

(Parameters: blastp, nr protein database, expect=20000, no filter, PAM30)

AT3G56240.1

Other BLAST [web gateways](#)

**All matches to this query**

| Score | Mr(calc)  | Delta   | Sequence                       |
|-------|-----------|---------|--------------------------------|
| 83.7  | 1520.7065 | -0.0021 | <a href="#">GNVEPEAVFQTVSK</a> |

Mascot: <http://www.matrixscience.com/>

**Peptide View**MS/MS Fragmentation of **MVIMKK**

Found in **AT3G56310.1** in **TAIR\_Arabidopsis**, Symbols: | alpha-galactosidase, putative / melibiase, putative / alpha-D-galactoside galactohydrolase, putative | chr3:20893865-20896724 FORWARD

Match to Query 935: 788.398104 from(395.206328,2+) index(1577)

Title: Elution from: 19.449 to 19.449 scan no 2050 cid35.00 polarity:+

Data file C7-2\_3.mgf

Click mouse within plot area to zoom in by factor of two about that point

Or,   to  Da

Label all possible matches  Label matches used for scoring

Show Y-axis

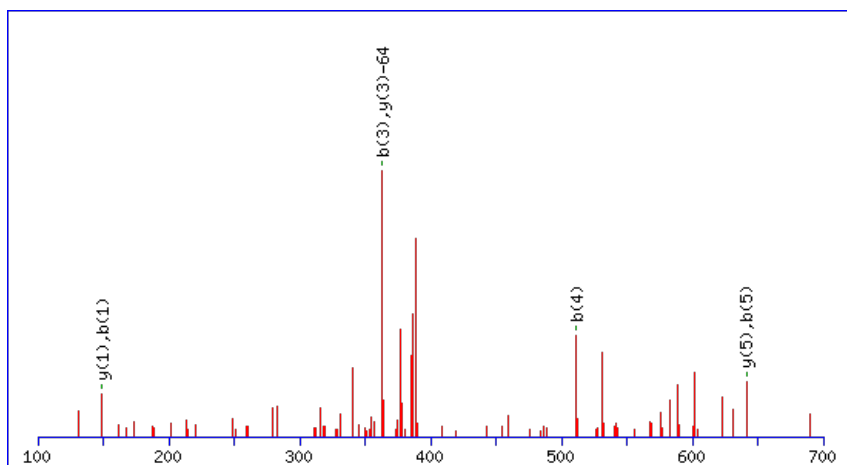

**Monoisotopic mass of neutral peptide Mr(calc):** 788.4001

**Fixed modifications:** Carbamidomethyl (C) (apply to specified residues or termini only)

**Variable modifications:**

**M1** : Oxidation (M), with neutral losses 0.0000 (shown in table), 63.9983

**M4** : Oxidation (M), with neutral losses 0.0000 (shown in table), 63.9983

**Ions Score:** 27 **Expect:** 0.013

**Matches:** 7/56 fragment ions using 6 most intense peaks ([help](#))

| # | b               | b <sup>++</sup> | b*       | b <sup>*++</sup> | Seq      | y               | y <sup>++</sup> | y*       | y <sup>*++</sup> | #        |
|---|-----------------|-----------------|----------|------------------|----------|-----------------|-----------------|----------|------------------|----------|
| 1 | <b>149.0397</b> | 75.0235         |          |                  | <b>M</b> |                 |                 |          |                  | <b>6</b> |
| 2 | 249.1052        | 125.0562        |          |                  | <b>V</b> | <b>641.3749</b> | 321.1911        | 623.3513 | 312.1793         | <b>5</b> |
| 3 | <b>363.1863</b> | 182.0968        |          |                  | <b>I</b> | 541.3094        | 271.1584        | 523.2859 | 262.1466         | <b>4</b> |
| 4 | <b>511.2187</b> | 256.1130        |          |                  | <b>M</b> | 427.2283        | 214.1178        | 409.2048 | 205.1060         | <b>3</b> |
| 5 | <b>641.3077</b> | 321.1575        | 623.2841 | 312.1457         | <b>K</b> | 279.1959        | 140.1016        | 261.1723 | 131.0898         | <b>2</b> |
| 6 |                 |                 |          |                  | <b>K</b> | <b>149.1069</b> | 75.0571         | 131.0833 | 66.0453          | <b>1</b> |

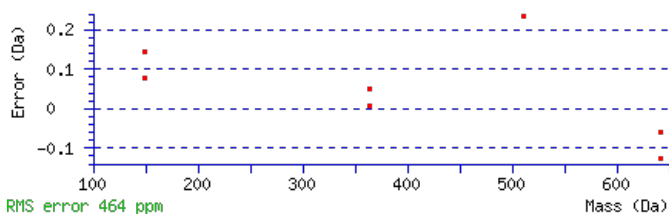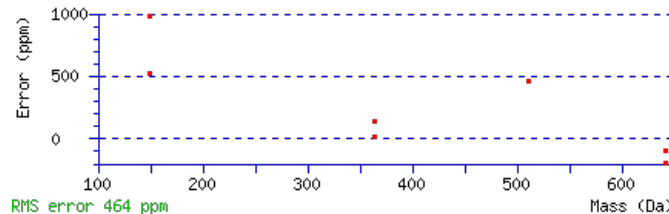

NCBI **BLAST** search of [MVIMKK](#)

(Parameters: blastp, nr protein database, expect=20000, no filter, PAM30)

Other BLAST [web gateways](#)

**All matches to this query**

| Score | Mr(calc) | Delta   | Sequence               |
|-------|----------|---------|------------------------|
| 27.4  | 788.4001 | -0.0020 | <a href="#">MVIMKK</a> |



## AT3G56310.1

|      |          |         |                         |
|------|----------|---------|-------------------------|
| 27.4 | 788.4001 | -0.0020 | <a href="#">MVIMKK</a>  |
| 17.0 | 788.3967 | 0.0014  | <a href="#">MQIFVK</a>  |
| 14.1 | 788.3971 | 0.0010  | <a href="#">ARQMKK</a>  |
| 13.0 | 788.4001 | -0.0020 | <a href="#">MMKVIK</a>  |
| 13.0 | 788.4001 | -0.0020 | <a href="#">MMKVLK</a>  |
| 10.2 | 788.4001 | -0.0020 | <a href="#">VMMLKK</a>  |
| 10.0 | 788.3971 | 0.0010  | <a href="#">MVRTVR</a>  |
| 9.0  | 788.3967 | 0.0014  | <a href="#">MVGFAVK</a> |
| 8.6  | 788.3967 | 0.0014  | <a href="#">MGIAFVK</a> |

Mascot: <http://www.matrixscience.com/>

## Peptide View

MS/MS Fragmentation of **TYLPDGDIDLTVLTK**

Found in **AT3G56320.1** in **TAIR\_Arabidopsis**, Symbols: | nucleotidyltransferase family protein | chr3:20897172-20899603 REVERSE

Match to Query 8068: 1678.827102 from(560.616310,3+) index(9553)

Title: Elution from: 87.646 to 87.646 scan no 13039 cid35.00 polarity:+

Data file D6h-2\_1.mgf

Click mouse within plot area to zoom in by factor of two about that point

Or,   to  Da

Label all possible matches  Label matches used for scoring

Show Y-axis

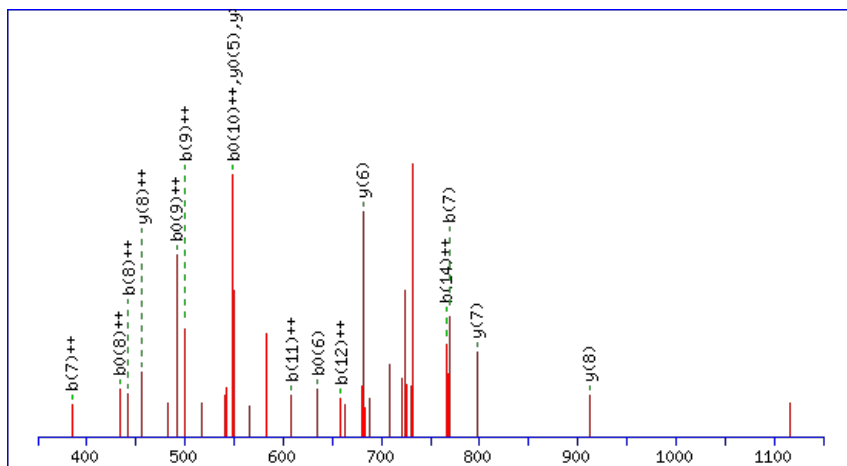

Monoisotopic mass of neutral peptide  $M_r(\text{calc})$ : 1678.8241

Fixed modifications: Carbamidomethyl (C) (apply to specified residues or termini only)

Ions Score: 31 Expect: 0.0079

Matches : 17/138 fragment ions using 24 most intense peaks [\(help\)](#)

| #  | b         | b <sup>++</sup> | b <sup>0</sup> | b <sup>0++</sup> | Seq. | y         | y <sup>++</sup> | y*        | y <sup>*++</sup> | y <sup>0</sup> | y <sup>0++</sup> | #  |
|----|-----------|-----------------|----------------|------------------|------|-----------|-----------------|-----------|------------------|----------------|------------------|----|
| 1  | 103.0520  | 52.0296         | 85.0414        | 43.0244          | T    |           |                 |           |                  |                |                  | 15 |
| 2  | 267.1124  | 134.0598        | 249.1018       | 125.0545         | Y    | 1577.7867 | 789.3970        | 1559.7632 | 780.3852         | 1559.7762      | 780.3917         | 14 |
| 3  | 381.1935  | 191.1004        | 363.1829       | 182.0951         | L    | 1413.7264 | 707.3668        | 1395.7028 | 698.3550         | 1395.7158      | 698.3615         | 13 |
| 4  | 479.2433  | 240.1253        | 461.2327       | 231.1200         | P    | 1299.6453 | 650.3263        | 1281.6217 | 641.3145         | 1281.6347      | 641.3210         | 12 |
| 5  | 595.2672  | 298.1373        | 577.2567       | 289.1320         | D    | 1201.5955 | 601.3014        | 1183.5719 | 592.2896         | 1183.5849      | 592.2961         | 11 |
| 6  | 653.2857  | 327.1465        | 635.2752       | 318.1412         | G    | 1085.5715 | 543.2894        | 1067.5479 | 534.2776         | 1067.5609      | 534.2841         | 10 |
| 7  | 769.3097  | 385.1585        | 751.2991       | 376.1532         | D    | 1027.5530 | 514.2801        | 1009.5294 | 505.2683         | 1009.5424      | 505.2749         | 9  |
| 8  | 883.3908  | 442.1990        | 865.3802       | 433.1938         | I    | 911.5290  | 456.2681        | 893.5054  | 447.2564         | 893.5185       | 447.2629         | 8  |
| 9  | 999.4148  | 500.2110        | 981.4042       | 491.2057         | D    | 797.4479  | 399.2276        | 779.4243  | 390.2158         | 779.4374       | 390.2223         | 7  |
| 10 | 1113.4959 | 557.2516        | 1095.4853      | 548.2463         | L    | 681.4239  | 341.2156        | 663.4004  | 332.2038         | 663.4134       | 332.2103         | 6  |
| 11 | 1215.5406 | 608.2739        | 1197.5300      | 599.2687         | T    | 567.3428  | 284.1751        | 549.3193  | 275.1633         | 549.3323       | 275.1698         | 5  |
| 12 | 1315.6060 | 658.3067        | 1297.5955      | 649.3014         | V    | 465.2981  | 233.1527        | 447.2746  | 224.1409         | 447.2876       | 224.1474         | 4  |
| 13 | 1429.6871 | 715.3472        | 1411.6766      | 706.3419         | L    | 365.2327  | 183.1200        | 347.2091  | 174.1082         | 347.2221       | 174.1147         | 3  |
| 14 | 1531.7319 | 766.3696        | 1513.7213      | 757.3643         | T    | 251.1516  | 126.0794        | 233.1280  | 117.0676         | 233.1410       | 117.0741         | 2  |
| 15 |           |                 |                |                  | K    | 149.1069  | 75.0571         | 131.0833  | 66.0453          |                |                  | 1  |

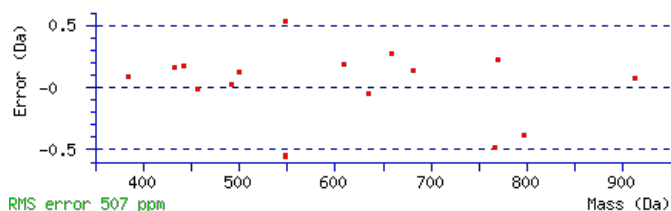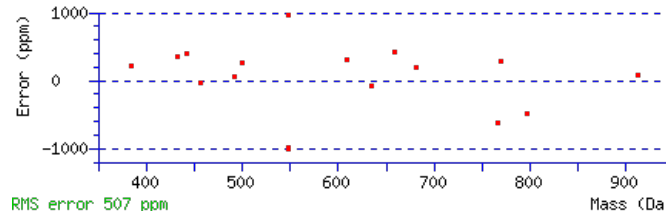

NCBI BLAST search of [TYLPDGDIDLTVLTK](#)

## AT3G56320.1

(Parameters: blastp, nr protein database, expect=20000, no filter, PAM30)

Other BLAST [web gateways](#)

### All matches to this query

| Score | Mr(calc)  | Delta   | Sequence                          |
|-------|-----------|---------|-----------------------------------|
| 31.2  | 1678.8241 | 0.0030  | <a href="#">TYLPDGDIDLTVLTK</a>   |
| 17.8  | 1678.8268 | 0.0003  | <a href="#">KLVYEELDPEAAKR</a>    |
| 10.8  | 1678.8302 | -0.0031 | <a href="#">SVEGMKGVSKVTVDPK</a>  |
| 10.5  | 1678.8268 | 0.0003  | <a href="#">NVSLAGPTLFSNVVDK</a>  |
| 7.2   | 1678.8248 | 0.0023  | <a href="#">DMVIGRNLGNWILR</a>    |
| 6.5   | 1678.8246 | 0.0025  | <a href="#">DSIDDKSKANVVQIK</a>   |
| 5.4   | 1678.8221 | 0.0050  | <a href="#">NTALARMVPYLDPAK</a>   |
| 2.8   | 1678.8295 | -0.0024 | <a href="#">TVDIGGWIDIAVSRR</a>   |
| 2.2   | 1678.8273 | -0.0002 | <a href="#">GGAVVRALQNESGASIK</a> |
| 1.8   | 1678.8273 | -0.0002 | <a href="#">SQRDKVAGLQQEVAK</a>   |

Mascot: <http://www.matrixscience.com/>

**Peptide View**MS/MS Fragmentation of **FLADLASAIDEEDIAK**

Found in **AT3G56450.1** in **TAIR\_Arabidopsis**, Symbols: ALPHA-SNAP1 | ALPHA-SNAP1 (alpha-soluble NSF attachment protein 1); soluble NSF attachment protein | chr3:20941536-20943848 FORWARD

Match to Query 7729: 1719.860606 from(860.937579,2+) index(8937)

Title: Elution from: 85.053 to 85.053 scan no 12388 cid35.00 polarity:+

Data file D1d-1-2.mgf

Click mouse within plot area to zoom in by factor of two about that point

Or,   to  Da

Label all possible matches  Label matches used for scoring

Show Y-axis

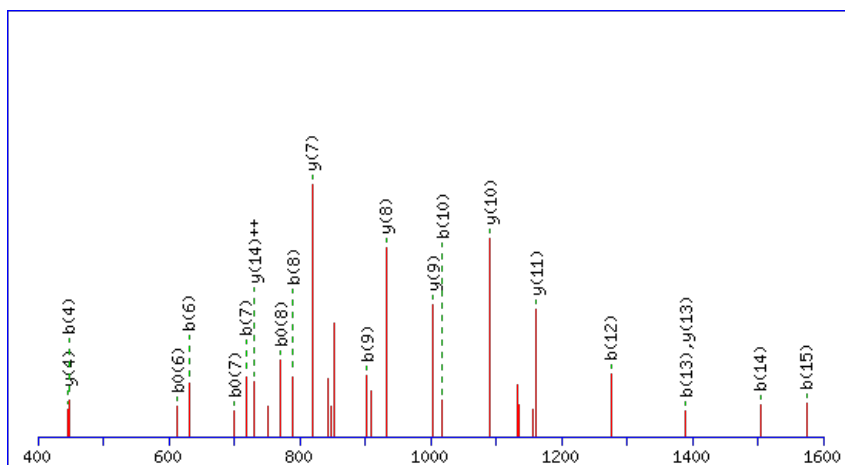

Monoisotopic mass of neutral peptide  $M_r(\text{calc})$ : 1719.8567

Fixed modifications: Carbamidomethyl (C) (apply to specified residues or termini only)

Ions Score: 90 Expect: 6.6e-009

Matches : 21/138 fragment ions using 24 most intense peaks ([help](#))

| #  | b         | b <sup>++</sup> | b <sup>0</sup> | b <sup>0++</sup> | Seq. | y         | y <sup>++</sup> | y*        | y <sup>*++</sup> | y <sup>0</sup> | y <sup>0++</sup> | #  |
|----|-----------|-----------------|----------------|------------------|------|-----------|-----------------|-----------|------------------|----------------|------------------|----|
| 1  | 148.0757  | 74.5415         |                |                  | F    |           |                 |           |                  |                |                  | 16 |
| 2  | 261.1598  | 131.0835        |                |                  | L    | 1573.7956 | 787.4014        | 1556.7690 | 778.8881         | 1555.7850      | 778.3961         | 15 |
| 3  | 332.1969  | 166.6021        |                |                  | A    | 1460.7115 | 730.8594        | 1443.6849 | 722.3461         | 1442.7009      | 721.8541         | 14 |
| 4  | 447.2238  | 224.1155        | 429.2132       | 215.1103         | D    | 1389.6744 | 695.3408        | 1372.6478 | 686.8276         | 1371.6638      | 686.3355         | 13 |
| 5  | 560.3079  | 280.6576        | 542.2973       | 271.6523         | L    | 1274.6474 | 637.8274        | 1257.6209 | 629.3141         | 1256.6369      | 628.8221         | 12 |
| 6  | 631.3450  | 316.1761        | 613.3344       | 307.1708         | A    | 1161.5634 | 581.2853        | 1144.5368 | 572.7721         | 1143.5528      | 572.2800         | 11 |
| 7  | 718.3770  | 359.6921        | 700.3665       | 350.6869         | S    | 1090.5263 | 545.7668        | 1073.4997 | 537.2535         | 1072.5157      | 536.7615         | 10 |
| 8  | 789.4141  | 395.2107        | 771.4036       | 386.2054         | A    | 1003.4942 | 502.2508        | 986.4677  | 493.7375         | 985.4837       | 493.2455         | 9  |
| 9  | 902.4982  | 451.7527        | 884.4876       | 442.7475         | I    | 932.4571  | 466.7322        | 915.4306  | 458.2189         | 914.4466       | 457.7269         | 8  |
| 10 | 1017.5251 | 509.2662        | 999.5146       | 500.2609         | D    | 819.3731  | 410.1902        | 802.3465  | 401.6769         | 801.3625       | 401.1849         | 7  |
| 11 | 1146.5677 | 573.7875        | 1128.5572      | 564.7822         | E    | 704.3461  | 352.6767        | 687.3196  | 344.1634         | 686.3355       | 343.6714         | 6  |
| 12 | 1275.6103 | 638.3088        | 1257.5998      | 629.3035         | E    | 575.3035  | 288.1554        | 558.2770  | 279.6421         | 557.2930       | 279.1501         | 5  |
| 13 | 1390.6373 | 695.8223        | 1372.6267      | 686.8170         | D    | 446.2609  | 223.6341        | 429.2344  | 215.1208         | 428.2504       | 214.6288         | 4  |
| 14 | 1503.7213 | 752.3643        | 1485.7108      | 743.3590         | I    | 331.2340  | 166.1206        | 314.2074  | 157.6074         |                |                  | 3  |
| 15 | 1574.7584 | 787.8829        | 1556.7479      | 778.8776         | A    | 218.1499  | 109.5786        | 201.1234  | 101.0653         |                |                  | 2  |
| 16 |           |                 |                |                  | K    | 147.1128  | 74.0600         | 130.0863  | 65.5468          |                |                  | 1  |

# AT3G56450.1

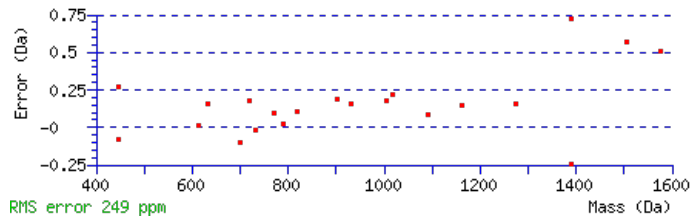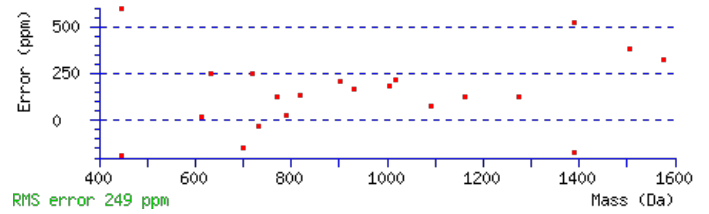

NCBI **BLAST** search of [FLADLASAIDEEDIAK](#)

(Parameters: blastp, nr protein database, expect=20000, no filter, PAM30)

Other BLAST [web gateways](#)

## All matches to this query

| Score | Mr(calc)  | Delta   | Sequence                         |
|-------|-----------|---------|----------------------------------|
| 90.2  | 1719.8567 | 0.0039  | <a href="#">FLADLASAIDEEDIAK</a> |
| 0.5   | 1719.8648 | -0.0042 | <a href="#">LKDLPASSGIMQTMGR</a> |

Mascot: <http://www.matrixscience.com/>

## Peptide View

MS/MS Fragmentation of **EAALAATPSDSPTIFDK**

Found in **AT3G56490.1** in **TAIR\_Arabidopsis**, Symbols: | zinc-binding protein, putative / protein kinase C inhibitor, putative | chr3:20952511-20954108 FORWARD

Match to Query 8392: 1750.800322 from(876.407437,2+) index(5807)

Title: Elution from: 54.558 to 54.558 scan no 7511 cid35.00 polarity:+

Data file D12h-2\_1.mgf

Click mouse within plot area to zoom in by factor of two about that point

Or,   to  Da

Label all possible matches  Label matches used for scoring

Show Y-axis

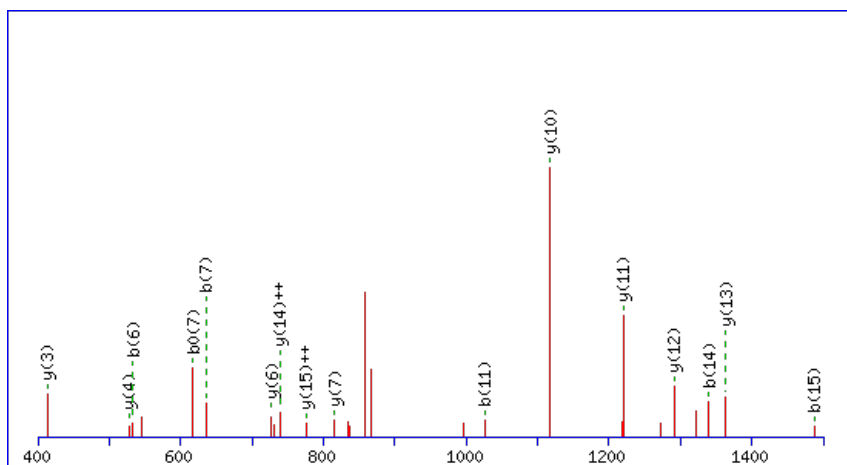

Monoisotopic mass of neutral peptide  $M_r(\text{calc})$ : 1750.7986

Fixed modifications: Carbamidomethyl (C) (apply to specified residues or termini only)

Ions Score: 72 Expect: 4.2e-007

Matches : 16/158 fragment ions using 22 most intense peaks ([help](#))

| #  | b         | b <sup>++</sup> | b <sup>0</sup> | b <sup>0++</sup> | Seq. | y         | y <sup>++</sup> | y*        | y <sup>*++</sup> | y <sup>0</sup> | y <sup>0++</sup> | #  |
|----|-----------|-----------------|----------------|------------------|------|-----------|-----------------|-----------|------------------|----------------|------------------|----|
| 1  | 131.0469  | 66.0271         | 113.0363       | 57.0218          | E    |           |                 |           |                  |                |                  | 17 |
| 2  | 203.0811  | 102.0442        | 185.0705       | 93.0389          | A    | 1621.7662 | 811.3867        | 1603.7426 | 802.3750         | 1603.7557      | 802.3815         | 16 |
| 3  | 275.1152  | 138.0612        | 257.1046       | 129.0560         | A    | 1549.7321 | 775.3697        | 1531.7085 | 766.3579         | 1531.7215      | 766.3644         | 15 |
| 4  | 389.1963  | 195.1018        | 371.1857       | 186.0965         | L    | 1477.6979 | 739.3526        | 1459.6743 | 730.3408         | 1459.6874      | 730.3473         | 14 |
| 5  | 461.2305  | 231.1189        | 443.2199       | 222.1136         | A    | 1363.6168 | 682.3121        | 1345.5932 | 673.3003         | 1345.6063      | 673.3068         | 13 |
| 6  | 533.2646  | 267.1359        | 515.2540       | 258.1307         | A    | 1291.5827 | 646.2950        | 1273.5591 | 637.2832         | 1273.5721      | 637.2897         | 12 |
| 7  | 635.3093  | 318.1583        | 617.2987       | 309.1530         | T    | 1219.5485 | 610.2779        | 1201.5249 | 601.2661         | 1201.5380      | 601.2726         | 11 |
| 8  | 733.3591  | 367.1832        | 715.3485       | 358.1779         | P    | 1117.5038 | 559.2555        | 1099.4802 | 550.2438         | 1099.4932      | 550.2503         | 10 |
| 9  | 821.3882  | 411.1977        | 803.3776       | 402.1924         | S    | 1019.4540 | 510.2306        | 1001.4304 | 501.2189         | 1001.4435      | 501.2254         | 9  |
| 10 | 937.4122  | 469.2097        | 919.4016       | 460.2044         | D    | 931.4250  | 466.2161        | 913.4014  | 457.2043         | 913.4144       | 457.2108         | 8  |
| 11 | 1025.4412 | 513.2242        | 1007.4307      | 504.2190         | S    | 815.4010  | 408.2041        | 797.3774  | 399.1923         | 797.3904       | 399.1988         | 7  |
| 12 | 1123.4910 | 562.2491        | 1105.4804      | 553.2439         | P    | 727.3719  | 364.1896        | 709.3483  | 355.1778         | 709.3613       | 355.1843         | 6  |
| 13 | 1225.5357 | 613.2715        | 1207.5252      | 604.2662         | T    | 629.3221  | 315.1647        | 611.2985  | 306.1529         | 611.3115       | 306.1594         | 5  |
| 14 | 1339.6168 | 670.3121        | 1321.6063      | 661.3068         | I    | 527.2774  | 264.1423        | 509.2538  | 255.1305         | 509.2668       | 255.1371         | 4  |
| 15 | 1487.6823 | 744.3448        | 1469.6717      | 735.3395         | F    | 413.1963  | 207.1018        | 395.1727  | 198.0900         | 395.1857       | 198.0965         | 3  |
| 16 | 1603.7063 | 802.3568        | 1585.6957      | 793.3515         | D    | 265.1309  | 133.0691        | 247.1073  | 124.0573         | 247.1203       | 124.0638         | 2  |
| 17 |           |                 |                |                  | K    | 149.1069  | 75.0571         | 131.0833  | 66.0453          |                |                  | 1  |

# AT3G56490.1

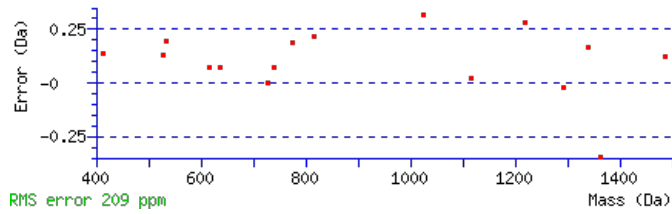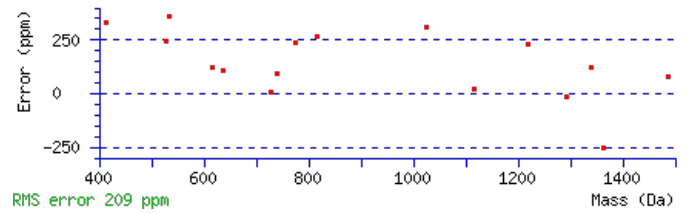

NCBI **BLAST** search of [EAALAATPSDSPTIFDK](#)

(Parameters: blastp, nr protein database, expect=20000, no filter, PAM30)

Other BLAST [web gateways](#)

## All matches to this query

| Score | Mr(calc)  | Delta  | Sequence                          |
|-------|-----------|--------|-----------------------------------|
| 71.8  | 1750.7986 | 0.0018 | <a href="#">EAALAATPSDSPTIFDK</a> |
| 3.0   | 1750.7986 | 0.0018 | <a href="#">LTNDSSTYIAASYVK</a>   |

Mascot: <http://www.matrixscience.com/>

## Peptide View

MS/MS Fragmentation of **NGYISMQNYKTALKSSTEATK**

Found in **AT3G56760.1** in **TAIR\_Arabidopsis**, Symbols: | calcium-dependent protein kinase, putative / CDPK, putative | chr3:21031640-21034735  
REVERSE

Match to Query 10464: 2463.228561 from(822.083463,3+) index(9646)

Title: Elution from: 87.058 to 87.058 scan no 13193 cid35.00 polarity:+

Data file D6h-3\_2.mgf

Click mouse within plot area to zoom in by factor of two about that point

Or,   to  Da

Label all possible matches  Label matches used for scoring

Show Y-axis

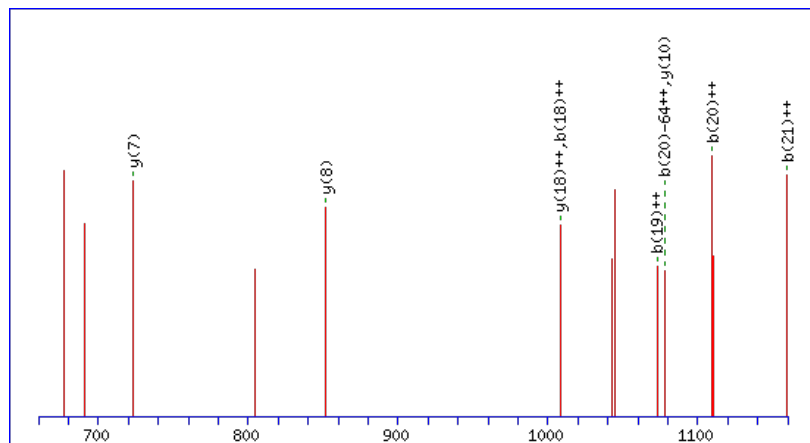

Monoisotopic mass of neutral peptide  $M_r(\text{calc})$ : 2463.2315

Fixed modifications: Carbamidomethyl (C) (apply to specified residues or termini only)

Variable modifications:

M6 : Oxidation (M), with neutral losses 0.0000 (shown in table), 63.9983

Ions Score: 22 Expect: 0.019

Matches : 9/368 fragment ions using 13 most intense peaks ([help](#))

| #  | b         | b <sup>++</sup> | b*        | b <sup>*++</sup> | b <sup>0</sup> | b <sup>0++</sup> | Seq | y         | y <sup>++</sup> | y*        | y <sup>*++</sup> | y <sup>0</sup> | y <sup>0++</sup> | #  |
|----|-----------|-----------------|-----------|------------------|----------------|------------------|-----|-----------|-----------------|-----------|------------------|----------------|------------------|----|
| 1  | 115.0502  | 58.0287         | 98.0237   | 49.5155          |                |                  | N   |           |                 |           |                  |                |                  | 22 |
| 2  | 172.0717  | 86.5395         | 155.0451  | 78.0262          |                |                  | G   | 2350.1959 | 1175.6016       | 2333.1693 | 1167.0883        | 2332.1853      | 1166.5963        | 21 |
| 3  | 335.1350  | 168.0711        | 318.1084  | 159.5579         |                |                  | Y   | 2293.1744 | 1147.0909       | 2276.1479 | 1138.5776        | 2275.1639      | 1138.0856        | 20 |
| 4  | 448.2191  | 224.6132        | 431.1925  | 216.0999         |                |                  | I   | 2130.1111 | 1065.5592       | 2113.0845 | 1057.0459        | 2112.1005      | 1056.5539        | 19 |
| 5  | 535.2511  | 268.1292        | 518.2245  | 259.6159         | 517.2405       | 259.1239         | S   | 2017.0270 | 1009.0172       | 2000.0005 | 1000.5039        | 1999.0165      | 1000.0119        | 18 |
| 6  | 682.2865  | 341.6469        | 665.2599  | 333.1336         | 664.2759       | 332.6416         | M   | 1929.9950 | 965.5011        | 1912.9685 | 956.9879         | 1911.9844      | 956.4959         | 17 |
| 7  | 810.3451  | 405.6762        | 793.3185  | 397.1629         | 792.3345       | 396.6709         | Q   | 1782.9596 | 891.9834        | 1765.9331 | 883.4702         | 1764.9490      | 882.9782         | 16 |
| 8  | 924.3880  | 462.6976        | 907.3614  | 454.1844         | 906.3774       | 453.6924         | N   | 1654.9010 | 827.9542        | 1637.8745 | 819.4409         | 1636.8905      | 818.9489         | 15 |
| 9  | 1087.4513 | 544.2293        | 1070.4248 | 535.7160         | 1069.4408      | 535.2240         | Y   | 1540.8581 | 770.9327        | 1523.8316 | 762.4194         | 1522.8475      | 761.9274         | 14 |
| 10 | 1215.5463 | 608.2768        | 1198.5197 | 599.7635         | 1197.5357      | 599.2715         | K   | 1377.7948 | 689.4010        | 1360.7682 | 680.8877         | 1359.7842      | 680.3957         | 13 |
| 11 | 1316.5940 | 658.8006        | 1299.5674 | 650.2873         | 1298.5834      | 649.7953         | T   | 1249.6998 | 625.3535        | 1232.6733 | 616.8403         | 1231.6892      | 616.3483         | 12 |
| 12 | 1387.6311 | 694.3192        | 1370.6045 | 685.8059         | 1369.6205      | 685.3139         | A   | 1148.6521 | 574.8297        | 1131.6256 | 566.3164         | 1130.6416      | 565.8244         | 11 |
| 13 | 1500.7151 | 750.8612        | 1483.6886 | 742.3479         | 1482.7046      | 741.8559         | I   | 1077.6150 | 539.3111        | 1060.5885 | 530.7979         | 1059.6045      | 530.3059         | 10 |
| 14 | 1613.7992 | 807.4032        | 1596.7727 | 798.8900         | 1595.7886      | 798.3980         | L   | 964.5310  | 482.7691        | 947.5044  | 474.2558         | 946.5204       | 473.7638         | 9  |
| 15 | 1741.8942 | 871.4507        | 1724.8676 | 862.9374         | 1723.8836      | 862.4454         | K   | 851.4469  | 426.2271        | 834.4203  | 417.7138         | 833.4363       | 417.2218         | 8  |
| 16 | 1828.9262 | 914.9667        | 1811.8996 | 906.4535         | 1810.9156      | 905.9615         | S   | 723.3519  | 362.1796        | 706.3254  | 353.6663         | 705.3414       | 353.1743         | 7  |
| 17 | 1915.9582 | 958.4828        | 1898.9317 | 949.9695         | 1897.9477      | 949.4775         | S   | 636.3199  | 318.6636        | 619.2933  | 310.1503         | 618.3093       | 309.6583         | 6  |
| 18 | 2017.0059 | 1009.0066       | 1999.9794 | 1000.4933        | 1998.9953      | 1000.0013        | T   | 549.2879  | 275.1476        | 532.2613  | 266.6343         | 531.2773       | 266.1423         | 5  |
| 19 | 2146.0485 | 1073.5279       | 2129.0219 | 1065.0146        | 2128.0379      | 1064.5226        | E   | 448.2402  | 224.6237        | 431.2136  | 216.1105         | 430.2296       | 215.6185         | 4  |
| 20 | 2217.0856 | 1109.0464       | 2200.0591 | 1100.5332        | 2199.0750      | 1100.0412        | A   | 319.1976  | 160.1024        | 302.1710  | 151.5892         | 301.1870       | 151.0972         | 3  |
| 21 | 2318.1333 | 1159.5703       | 2301.1067 | 1151.0570        | 2300.1227      | 1150.5650        | T   | 248.1605  | 124.5839        | 231.1339  | 116.0706         | 230.1499       | 115.5786         | 2  |
| 22 |           |                 |           |                  |                |                  | K   | 147.1128  | 74.0600         | 130.0863  | 65.5468          |                |                  | 1  |



# AT3G56760.1

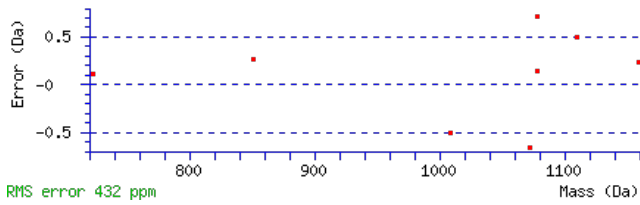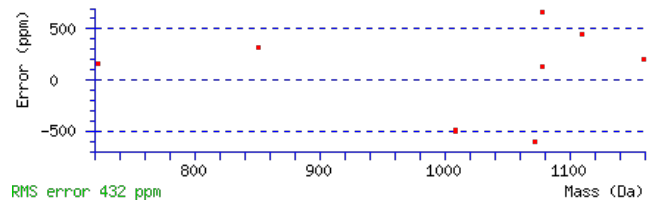

NCBI **BLAST** search of [NGYISMQNYKTAILKSSTEATK](#)  
(Parameters: blastp, nr protein database, expect=20000, no filter, PAM30)  
Other BLAST [web gateways](#)

## All matches to this query

| Score | Mr(calc)  | Delta   | Sequence                                |
|-------|-----------|---------|-----------------------------------------|
| 22.3  | 2463.2315 | -0.0029 | <a href="#">NGYISMQNYKTAILKSSTEATK</a>  |
| 5.6   | 2463.2250 | 0.0036  | <a href="#">NCGENVYQLIIDRGLLNDMVK</a>   |
| 5.2   | 2463.2275 | 0.0011  | <a href="#">SSADMNTELIKIQQEELSQR</a>    |
| 4.9   | 2463.2349 | -0.0063 | <a href="#">RMEVLKEGCEGNSTLLELEK</a>    |
| 1.0   | 2463.2315 | -0.0030 | <a href="#">SGTDGHMIEEAKFINLSLTSLGK</a> |
| 0.5   | 2463.2218 | 0.0068  | <a href="#">LMPMLASTYAYHFATVYLVEK</a>   |
| 0.5   | 2463.2218 | 0.0068  | <a href="#">LMPMLASTYAYHFATVYLVEK</a>   |

Mascot: <http://www.matrixscience.com/>

**Peptide View**MS/MS Fragmentation of **LLLELR**

Found in **AT3G56910.1** in **TAIR\_Arabidopsis**, Symbols: PSRP5 | PSRP5 (PLASTID-SPECIFIC 50S RIBOSOMAL PROTEIN 5) | chr3:21080537-21081236 REVERSE

Match to Query 757: 755.490904 from(378.752728,2+) index(5746)

Title: Elution from: 51.801 to 51.801 scan no 7267 cid35.00 polarity:+

Data file 0-3\_1.mgf

Click mouse within plot area to zoom in by factor of two about that point

Or,   to  Da

Label all possible matches  Label matches used for scoring

Show Y-axis

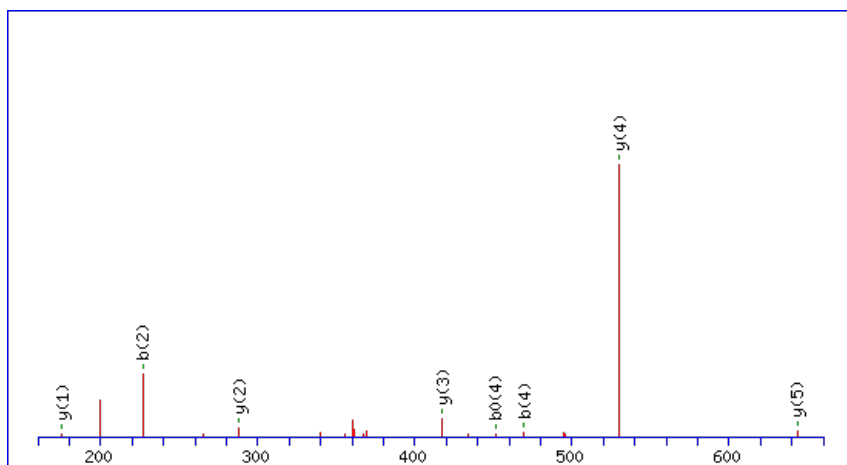

**Monoisotopic mass of neutral peptide Mr(calc):** 755.4905

**Fixed modifications:** Carbamidomethyl (C) (apply to specified residues or termini only)

**Ions Score:** 46 **Expect:** 8.5e-005

**Matches:** 8/40 fragment ions using 13 most intense peaks ([help](#))

| # | b               | b <sup>++</sup> | b <sup>0</sup>  | b <sup>0++</sup> | Seq. | y               | y <sup>++</sup> | y*       | y <sup>*++</sup> | y <sup>0</sup> | y <sup>0++</sup> | # |
|---|-----------------|-----------------|-----------------|------------------|------|-----------------|-----------------|----------|------------------|----------------|------------------|---|
| 1 | 114.0913        | 57.5493         |                 |                  | L    |                 |                 |          |                  |                |                  | 6 |
| 2 | <b>227.1754</b> | 114.0913        |                 |                  | L    | <b>643.4137</b> | 322.2105        | 626.3872 | 313.6972         | 625.4032       | 313.2052         | 5 |
| 3 | 340.2595        | 170.6334        |                 |                  | L    | <b>530.3297</b> | 265.6685        | 513.3031 | 257.1552         | 512.3191       | 256.6632         | 4 |
| 4 | <b>469.3021</b> | 235.1547        | <b>451.2915</b> | 226.1494         | E    | <b>417.2456</b> | 209.1264        | 400.2191 | 200.6132         | 399.2350       | 200.1212         | 3 |
| 5 | 582.3861        | 291.6967        | 564.3756        | 282.6914         | L    | <b>288.2030</b> | 144.6051        | 271.1765 | 136.0919         |                |                  | 2 |
| 6 |                 |                 |                 |                  | R    | <b>175.1190</b> | 88.0631         | 158.0924 | 79.5498          |                |                  | 1 |

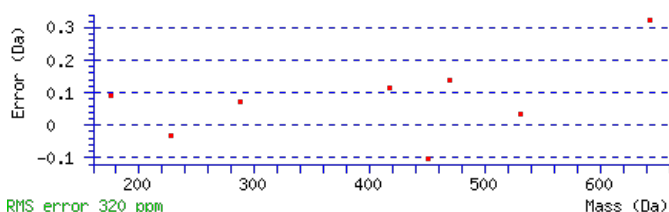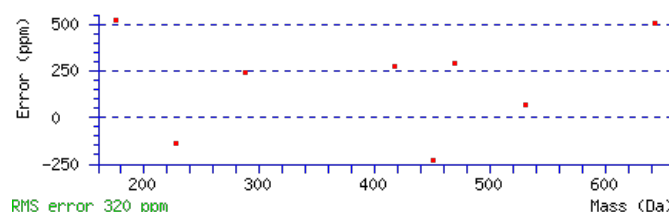

NCBI **BLAST** search of [LLLELR](#)

(Parameters: blastp, nr protein database, expect=20000, no filter, PAM30)

Other BLAST [web gateways](#)

**All matches to this query**

| Score | Mr(calc) | Delta  | Sequence               |
|-------|----------|--------|------------------------|
| 46.0  | 755.4905 | 0.0004 | <a href="#">LLLELR</a> |
| 46.0  | 755.4905 | 0.0004 | <a href="#">LLLELR</a> |
| 31.4  | 755.4905 | 0.0004 | <a href="#">HLELR</a>  |

# AT3G56910.1

|      |          |        |                       |
|------|----------|--------|-----------------------|
| 31.4 | 755.4905 | 0.0004 | <a href="#">LIELR</a> |
| 8.2  | 755.4905 | 0.0004 | <a href="#">LELIR</a> |
| 1.6  | 755.4905 | 0.0004 | <a href="#">EILIR</a> |
| 1.6  | 755.4905 | 0.0004 | <a href="#">EILIR</a> |
| 1.6  | 755.4905 | 0.0004 | <a href="#">ELLLR</a> |

**Mascot:** <http://www.matrixscience.com/>

## Peptide View

MS/MS Fragmentation of **DGSLEMDLPMIQLK**

Found in **AT3G57140.1** in **TAIR\_Arabidopsis**, Symbols: SDP1-LIKE | SDP1-LIKE (SDP1-LIKE); GTP binding | chr3:21161721-21164294 REVERSE

Match to Query 7292: 1636.726358 from(819.370455,2+) index(10509)

Title: Elution from: 104.393 to 104.393 scan no 15334 cid35.00 polarity:+

Data file D12h-1\_3.mgf

Click mouse within plot area to zoom in by factor of two about that point

Or,   to  Da

Label all possible matches  Label matches used for scoring

Show Y-axis

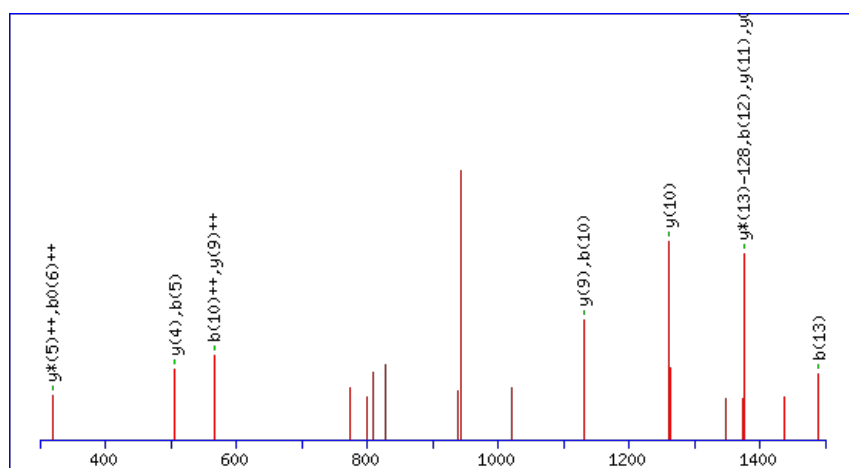

Monoisotopic mass of neutral peptide  $M_r(\text{calc})$ : 1636.7265

Fixed modifications: Carbamidomethyl (C) (apply to specified residues or termini only)

Variable modifications:

M6 : Oxidation (M), with neutral losses 0.0000 (shown in table), 63.9983

M10 : Oxidation (M), with neutral losses 0.0000 (shown in table), 63.9983

Ions Score: 27 Expect: 0.012

Matches : 14/204 fragment ions using 11 most intense peaks ([help](#))

| #  | b                | b <sup>++</sup> | b <sup>*</sup> | b <sup>*++</sup> | b <sup>0</sup> | b <sup>0++</sup> | Seq. | y                | y <sup>++</sup> | y <sup>*</sup> | y <sup>*++</sup> | y <sup>0</sup> | y <sup>0++</sup> | #  |
|----|------------------|-----------------|----------------|------------------|----------------|------------------|------|------------------|-----------------|----------------|------------------|----------------|------------------|----|
| 1  | 117.0313         | 59.0193         |                |                  | 99.0207        | 50.0140          | D    |                  |                 |                |                  |                |                  | 14 |
| 2  | 175.0498         | 88.0285         |                |                  | 157.0392       | 79.0232          | G    | 1521.7098        | 761.3585        | 1503.6862      | 752.3467         | 1503.6992      | 752.3532         | 13 |
| 3  | 263.0788         | 132.0430        |                |                  | 245.0683       | 123.0378         | S    | 1463.6913        | 732.3493        | 1445.6677      | 723.3375         | 1445.6807      | 723.3440         | 12 |
| 4  | 377.1599         | 189.0836        |                |                  | 359.1493       | 180.0783         | L    | <b>1375.6622</b> | 688.3347        | 1357.6386      | 679.3229         | 1357.6516      | 679.3295         | 11 |
| 5  | <b>507.1995</b>  | 254.1034        |                |                  | 489.1890       | 245.0981         | E    | <b>1261.5811</b> | 631.2942        | 1243.5575      | 622.2824         | 1243.5705      | 622.2889         | 10 |
| 6  | 655.2320         | 328.1196        |                |                  | 637.2214       | <b>319.1143</b>  | M    | <b>1131.5415</b> | <b>566.2744</b> | 1113.5179      | 557.2626         | 1113.5309      | 557.2691         | 9  |
| 7  | 771.2560         | 386.1316        |                |                  | 753.2454       | 377.1263         | D    | 983.5090         | 492.2582        | 965.4854       | 483.2464         | 965.4985       | 483.2529         | 8  |
| 8  | 885.3371         | 443.1722        |                |                  | 867.3265       | 434.1669         | L    | 867.4851         | 434.2462        | 849.4615       | 425.2344         |                |                  | 7  |
| 9  | 983.3869         | 492.1971        |                |                  | 965.3763       | 483.1918         | P    | 753.4040         | 377.2056        | 735.3804       | 368.1938         |                |                  | 6  |
| 10 | <b>1131.4193</b> | <b>566.2133</b> |                |                  | 1113.4087      | 557.2080         | M    | 655.3542         | 328.1807        | 637.3306       | <b>319.1689</b>  |                |                  | 5  |
| 11 | 1245.5004        | 623.2538        |                |                  | 1227.4898      | 614.2485         | I    | <b>507.3217</b>  | 254.1645        | 489.2981       | 245.1527         |                |                  | 4  |
| 12 | <b>1375.5530</b> | 688.2802        | 1357.5295      | 679.2684         | 1357.5425      | 679.2749         | Q    | 393.2406         | 197.1239        | 375.2170       | 188.1122         |                |                  | 3  |
| 13 | <b>1489.6341</b> | 745.3207        | 1471.6105      | 736.3089         | 1471.6236      | 736.3154         | L    | 263.1880         | 132.0976        | 245.1644       | 123.0858         |                |                  | 2  |
| 14 |                  |                 |                |                  |                |                  | K    | 149.1069         | 75.0571         | 131.0833       | 66.0453          |                |                  | 1  |

# AT3G57140.1

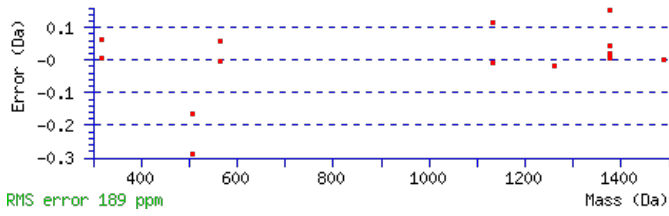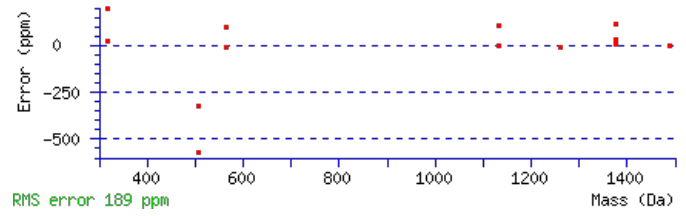

NCBI **BLAST** search of [DGSLEMDLPMIQLK](#)

(Parameters: blastp, nr protein database, expect=20000, no filter, PAM30)

Other BLAST [web gateways](#)

## All matches to this query

| Score | Mr(calc)  | Delta   | Sequence                         |
|-------|-----------|---------|----------------------------------|
| 27.2  | 1636.7265 | -0.0001 | <a href="#">DGSLEMDLPMIQLK</a>   |
| 4.9   | 1636.7273 | -0.0009 | <a href="#">LFSGGGSLWVDWHR</a>   |
| 4.2   | 1636.7292 | -0.0028 | <a href="#">SSLNDLNHMSMLLK</a>   |
| 4.2   | 1636.7292 | -0.0028 | <a href="#">SSLNDLNHMSMLLK</a>   |
| 2.6   | 1636.7217 | 0.0046  | <a href="#">MELVVMSMEAIHSK</a>   |
| 2.6   | 1636.7217 | 0.0046  | <a href="#">MELVVMSMEAIHSK</a>   |
| 1.6   | 1636.7309 | -0.0045 | <a href="#">VDRSDKPRGDDVEK</a>   |
| 1.3   | 1636.7235 | 0.0028  | <a href="#">EMSVNGKANLSPAGDK</a> |
| 1.2   | 1636.7231 | 0.0033  | <a href="#">MSGFDAPPTDLETLK</a>  |
| 0.5   | 1636.7237 | 0.0026  | <a href="#">NCPKAYHPACIKR</a>    |

Mascot: <http://www.matrixscience.com/>

**Peptide View**MS/MS Fragmentation of **LMIPGLLR**

Found in **AT3G57150.1** in **TAIR\_Arabidopsis**, Symbols: ATNAP57, CBF5, ATCBF5, NAP57 | NAP57 (ARABIDOPSIS THALIANA HOMOLOGUE OF NAP57) | chr3:21165234-21166931 REVERSE

Match to Query 1603: 911.562804 from(456.788678,2+) index(7579)

Title: Elution from: 67.377 to 67.377 scan no 9925 cid35.00 polarity:+

Data file C7-1\_3.mgf

Click mouse within plot area to zoom in by factor of two about that point

Or,   to  Da

Label all possible matches  Label matches used for scoring

Show Y-axis

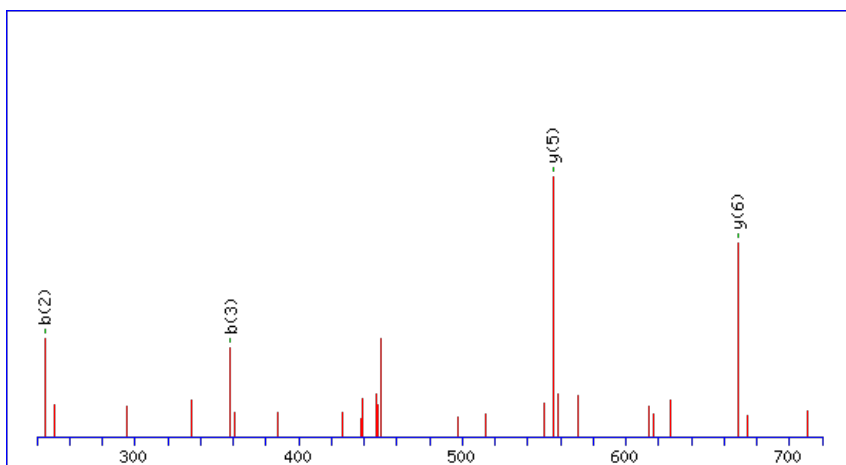

**Monoisotopic mass of neutral peptide Mr(calc):** 911.5626

**Fixed modifications:** Carbamidomethyl (C) (apply to specified residues or termini only)

**Ions Score:** 14 **Expect:** 0.037

**Matches:** 4/42 fragment ions using 5 most intense peaks ([help](#))

| # | b               | b <sup>++</sup> | Seq. | y               | y <sup>++</sup> | y*       | y <sup>*++</sup> | # |
|---|-----------------|-----------------|------|-----------------|-----------------|----------|------------------|---|
| 1 | 114.0913        | 57.5493         | L    |                 |                 |          |                  | 8 |
| 2 | <b>245.1318</b> | 123.0696        | M    | 799.4859        | 400.2466        | 782.4593 | 391.7333         | 7 |
| 3 | <b>358.2159</b> | 179.6116        | I    | <b>668.4454</b> | 334.7263        | 651.4188 | 326.2130         | 6 |
| 4 | 455.2687        | 228.1380        | P    | <b>555.3613</b> | 278.1843        | 538.3348 | 269.6710         | 5 |
| 5 | 512.2901        | 256.6487        | G    | 458.3085        | 229.6579        | 441.2820 | 221.1446         | 4 |
| 6 | 625.3742        | 313.1907        | L    | 401.2871        | 201.1472        | 384.2605 | 192.6339         | 3 |
| 7 | 738.4582        | 369.7328        | L    | 288.2030        | 144.6051        | 271.1765 | 136.0919         | 2 |
| 8 |                 |                 | R    | 175.1190        | 88.0631         | 158.0924 | 79.5498          | 1 |

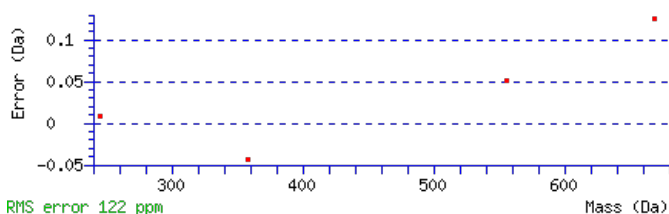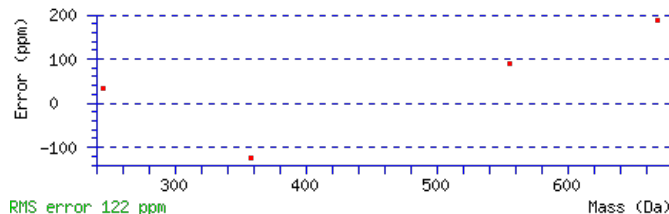

NCBI **BLAST** search of [LMIPGLLR](#)

(Parameters: blastp, nr protein database, expect=20000, no filter, PAM30)

Other BLAST [web gateways](#)

**All matches to this query**

| Score | Mr(calc) | Delta  | Sequence                 |
|-------|----------|--------|--------------------------|
| 14.3  | 911.5626 | 0.0002 | <a href="#">LMIPGLLR</a> |



## Peptide View

MS/MS Fragmentation of **VGSGPFPTENLGTGGDLLR**

Found in **AT3G57610.1** in **TAIR\_Arabidopsis**, Symbols: ATPURA | ATPURA; adenylosuccinate synthase | chr3:21345496-21347580 REVERSE

Match to Query 8674: 1908.883746 from(955.449149,2+) index(7540)

Title: Elution from: 69.431 to 69.431 scan no 9975 cid35.00 polarity:+

Data file D12h-2\_2.mgf

Click mouse within plot area to zoom in by factor of two about that point

Or,   to  Da

Label all possible matches  Label matches used for scoring

Show Y-axis

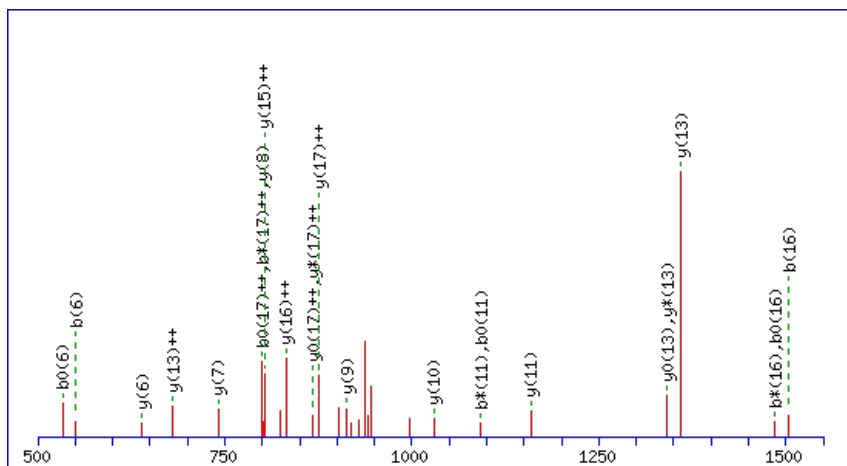

Monoisotopic mass of neutral peptide  $M_r(\text{calc})$ : 1908.8852

Fixed modifications: Carbamidomethyl (C) (apply to specified residues or termini only)

Ions Score: 60 Expect: 7.5e-006

Matches : 24/188 fragment ions using 23 most intense peaks ([help](#))

| #  | b         | b <sup>++</sup> | b*        | b <sup>*++</sup> | b <sup>0</sup> | b <sup>0++</sup> | Seq. | y         | y <sup>++</sup> | y*        | y <sup>*++</sup> | y <sup>0</sup> | y <sup>0++</sup> | #  |
|----|-----------|-----------------|-----------|------------------|----------------|------------------|------|-----------|-----------------|-----------|------------------|----------------|------------------|----|
| 1  | 101.0727  | 51.0400         |           |                  |                |                  | V    |           |                 |           |                  |                |                  | 19 |
| 2  | 159.0912  | 80.0492         |           |                  |                |                  | G    | 1809.8270 | 905.4171        | 1791.8034 | 896.4054         | 1791.8165      | 896.4119         | 18 |
| 3  | 247.1203  | 124.0638        |           |                  | 229.1097       | 115.0585         | S    | 1751.8085 | 876.4079        | 1733.7849 | 867.3961         | 1733.7980      | 867.4026         | 17 |
| 4  | 305.1388  | 153.0730        |           |                  | 287.1282       | 144.0677         | G    | 1663.7795 | 832.3934        | 1645.7559 | 823.3816         | 1645.7689      | 823.3881         | 16 |
| 5  | 403.1886  | 202.0979        |           |                  | 385.1780       | 193.0926         | P    | 1605.7610 | 803.3841        | 1587.7374 | 794.3723         | 1587.7504      | 794.3788         | 15 |
| 6  | 551.2540  | 276.1307        |           |                  | 533.2435       | 267.1254         | F    | 1507.7112 | 754.3592        | 1489.6876 | 745.3474         | 1489.7006      | 745.3539         | 14 |
| 7  | 649.3038  | 325.1556        |           |                  | 631.2933       | 316.1503         | P    | 1359.6457 | 680.3265        | 1341.6221 | 671.3147         | 1341.6351      | 671.3212         | 13 |
| 8  | 751.3485  | 376.1779        |           |                  | 733.3380       | 367.1726         | T    | 1261.5959 | 631.3016        | 1243.5723 | 622.2898         | 1243.5854      | 622.2963         | 12 |
| 9  | 881.3882  | 441.1977        |           |                  | 863.3776       | 432.1924         | E    | 1159.5512 | 580.2792        | 1141.5276 | 571.2674         | 1141.5406      | 571.2740         | 11 |
| 10 | 997.4252  | 499.2162        | 979.4016  | 490.2044         | 979.4146       | 490.2109         | N    | 1029.5116 | 515.2594        | 1011.4880 | 506.2476         | 1011.5010      | 506.2541         | 10 |
| 11 | 1111.5063 | 556.2568        | 1093.4827 | 547.2450         | 1093.4957      | 547.2515         | L    | 913.4746  | 457.2409        | 895.4510  | 448.2291         | 895.4640       | 448.2356         | 9  |
| 12 | 1169.5248 | 585.2660        | 1151.5012 | 576.2542         | 1151.5142      | 576.2607         | G    | 799.3935  | 400.2004        | 781.3699  | 391.1886         | 781.3829       | 391.1951         | 8  |
| 13 | 1271.5695 | 636.2884        | 1253.5459 | 627.2766         | 1253.5589      | 627.2831         | T    | 741.3750  | 371.1911        | 723.3514  | 362.1793         | 723.3644       | 362.1858         | 7  |
| 14 | 1329.5880 | 665.2976        | 1311.5644 | 656.2858         | 1311.5774      | 656.2923         | G    | 639.3303  | 320.1688        | 621.3067  | 311.1570         | 621.3197       | 311.1635         | 6  |
| 15 | 1387.6065 | 694.3069        | 1369.5829 | 685.2951         | 1369.5959      | 685.3016         | G    | 581.3118  | 291.1595        | 563.2882  | 282.1477         | 563.3012       | 282.1542         | 5  |
| 16 | 1503.6305 | 752.3189        | 1485.6069 | 743.3071         | 1485.6199      | 743.3136         | D    | 523.2933  | 262.1503        | 505.2697  | 253.1385         | 505.2827       | 253.1450         | 4  |
| 17 | 1617.7116 | 809.3594        | 1599.6880 | 800.3476         | 1599.7010      | 800.3541         | L    | 407.2693  | 204.1383        | 389.2457  | 195.1265         |                |                  | 3  |
| 18 | 1731.7927 | 866.4000        | 1713.7691 | 857.3882         | 1713.7821      | 857.3947         | L    | 293.1882  | 147.0977        | 275.1646  | 138.0859         |                |                  | 2  |
| 19 |           |                 |           |                  |                |                  | R    | 179.1071  | 90.0572         | 161.0835  | 81.0454          |                |                  | 1  |



AT3G57610.1

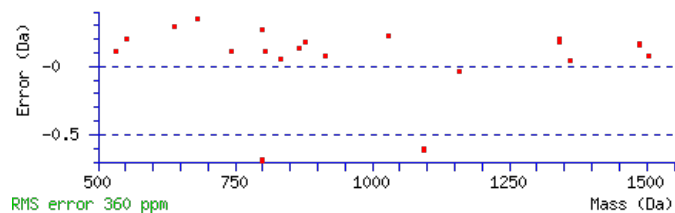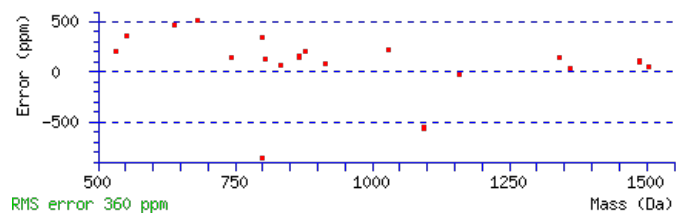

NCBI **BLAST** search of [VGSGPFPTENLGTGGDLLR](#)

(Parameters: blastp, nr protein database, expect=20000, no filter, PAM30)

Other BLAST [web gateways](#)

**All matches to this query**

| Score | Mr(calc)  | Delta   | Sequence                            |
|-------|-----------|---------|-------------------------------------|
| 59.8  | 1908.8852 | -0.0014 | <a href="#">VGSGPFPTENLGTGGDLLR</a> |
| 1.6   | 1908.8809 | 0.0029  | <a href="#">DMDAELAPREGLRPR</a>     |
| 0.7   | 1908.8802 | 0.0035  | <a href="#">TTETLEADKETNGGVPVK</a>  |
| 0.4   | 1908.8838 | -0.0001 | <a href="#">KAHMMEIQINGGTIAQK</a>   |
| 0.4   | 1908.8838 | -0.0001 | <a href="#">KAHMMEIQINGGTIAQK</a>   |

Mascot: <http://www.matrixscience.com/>

## Peptide View

MS/MS Fragmentation of **MMEVAKELK**

Found in **AT3G57740.1** in **TAIR\_Arabidopsis**, Symbols: | protein kinase family protein | chr3:21403648-21404721 FORWARD

Match to Query 2965: 1120.516812 from(561.265682,2+) index(6989)

Title: Elution from: 64.314 to 64.314 scan no 9268 cid35.00 polarity:+

Data file D1d-1\_3.mgf

Click mouse within plot area to zoom in by factor of two about that point

Or,   to  Da

Label all possible matches  Label matches used for scoring

Show Y-axis

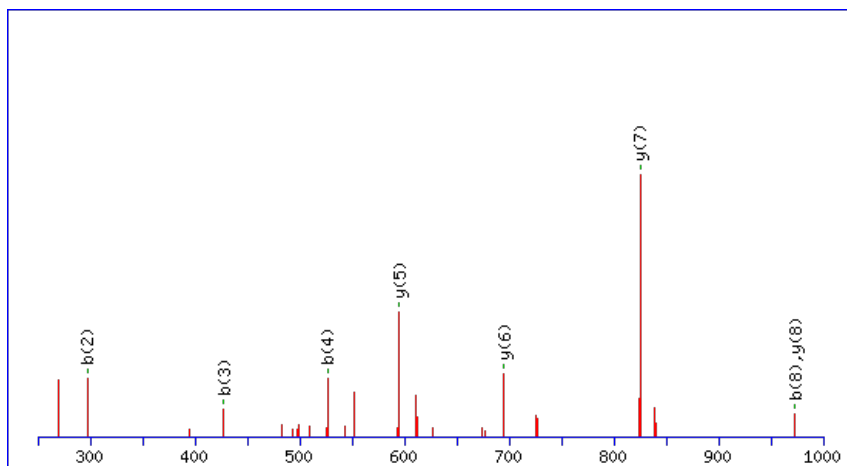

Monoisotopic mass of neutral peptide  $M_r(\text{calc})$ : 1120.5135

Fixed modifications: Carbamidomethyl (C) (apply to specified residues or termini only)

Variable modifications:

M1 : Oxidation (M), with neutral losses 0.0000 (shown in table), 63.9983

M2 : Oxidation (M), with neutral losses 0.0000 (shown in table), 63.9983

Ions Score: 41 Expect: 0.00071

Matches : 8/118 fragment ions using 7 most intense peaks ([help](#))

| # | b               | b <sup>++</sup> | b <sup>*</sup> | b <sup>*++</sup> | b <sup>0</sup> | b <sup>0++</sup> | Seq. | y               | y <sup>++</sup> | y <sup>*</sup> | y <sup>*++</sup> | y <sup>0</sup> | y <sup>0++</sup> | # |
|---|-----------------|-----------------|----------------|------------------|----------------|------------------|------|-----------------|-----------------|----------------|------------------|----------------|------------------|---|
| 1 | 149.0397        | 75.0235         |                |                  |                |                  | M    |                 |                 |                |                  |                |                  | 9 |
| 2 | <b>297.0721</b> | 149.0397        |                |                  |                |                  | M    | <b>973.4883</b> | 487.2478        | 955.4647       | 478.2360         | 955.4777       | 478.2425         | 8 |
| 3 | <b>427.1118</b> | 214.0595        |                |                  | 409.1012       | 205.0542         | E    | <b>825.4559</b> | 413.2316        | 807.4323       | 404.2198         | 807.4453       | 404.2263         | 7 |
| 4 | <b>527.1772</b> | 264.0922        |                |                  | 509.1667       | 255.0870         | V    | <b>695.4162</b> | 348.2118        | 677.3926       | 339.2000         | 677.4057       | 339.2065         | 6 |
| 5 | 599.2114        | 300.1093        |                |                  | 581.2008       | 291.1040         | A    | <b>595.3508</b> | 298.1790        | 577.3272       | 289.1672         | 577.3402       | 289.1737         | 5 |
| 6 | 729.3004        | 365.1538        | 711.2768       | 356.1420         | 711.2898       | 356.1486         | K    | 523.3166        | 262.1620        | 505.2930       | 253.1502         | 505.3061       | 253.1567         | 4 |
| 7 | 859.3400        | 430.1737        | 841.3164       | 421.1619         | 841.3295       | 421.1684         | E    | 393.2276        | 197.1174        | 375.2040       | 188.1056         | 375.2170       | 188.1122         | 3 |
| 8 | <b>973.4211</b> | 487.2142        | 955.3975       | 478.2024         | 955.4106       | 478.2089         | L    | 263.1880        | 132.0976        | 245.1644       | 123.0858         |                |                  | 2 |
| 9 |                 |                 |                |                  |                |                  | K    | 149.1069        | 75.0571         | 131.0833       | 66.0453          |                |                  | 1 |

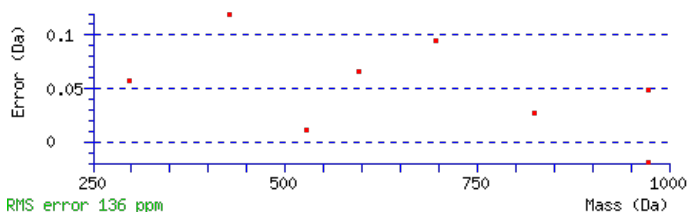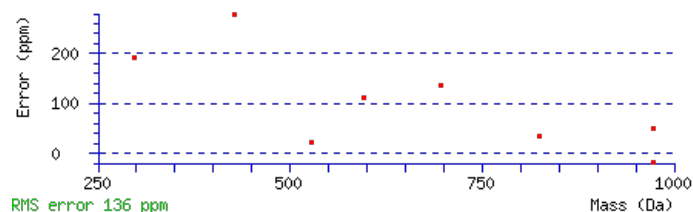

NCBI BLAST search of **MMEVAKELK**

(Parameters: blastp, nr protein database, expect=20000, no filter, PAM30)

Other BLAST [web gateways](#)

All matches to this query

## AT3G57740.1

| Score | Mr(calc)  | Delta   | Sequence                    |
|-------|-----------|---------|-----------------------------|
| 41.1  | 1120.5135 | 0.0034  | <a href="#">MMEVAKELK</a>   |
| 18.7  | 1120.5135 | 0.0033  | <a href="#">LMSLENLMK</a>   |
| 15.2  | 1120.5135 | 0.0034  | <a href="#">MEDMKSLIK</a>   |
| 12.9  | 1120.5197 | -0.0029 | <a href="#">VAADSQFPFK</a>  |
| 8.5   | 1120.5175 | -0.0007 | <a href="#">KNGEATDVK</a>   |
| 8.2   | 1120.5154 | 0.0014  | <a href="#">HGMFEGGKRSK</a> |
| 5.5   | 1120.5197 | -0.0029 | <a href="#">IYHDSALYK</a>   |
| 4.3   | 1120.5175 | -0.0007 | <a href="#">YTAGQNEVVK</a>  |
| 2.9   | 1120.5184 | -0.0015 | <a href="#">AGMWQLMKK</a>   |
| 2.3   | 1120.5175 | -0.0007 | <a href="#">FKTEEDAIR</a>   |

Mascot: <http://www.matrixscience.com/>

**Peptide View**MS/MS Fragmentation of **SLTDEEVNDLQSK**Found in **AT3G58140.1** in **TAIR\_Arabidopsis**, Symbols: | phenylalanyl-tRNA synthetase class IIc family protein | chr:21540965-21543363  
REVERSE

Match to Query 6320: 1476.696078 from(739.355315,2+) index(3562)

Title: Elution from: 34.889 to 34.889 scan no 4442 cid35.00 polarity:+

Data file D12h-3\_1.mgf

Click mouse within plot area to zoom in by factor of two about that point

Or,  to  Da Label all possible matches  Label matches used for scoring Show Y-axis 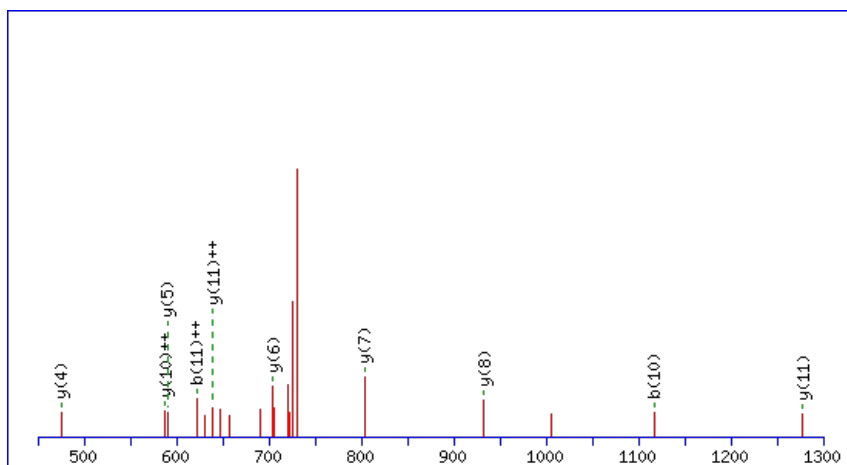Monoisotopic mass of neutral peptide  $M_r(\text{calc})$ : 1476.6944

Fixed modifications: Carbamidomethyl (C) (apply to specified residues or termini only)

Ions Score: 39 Expect: 0.0004

Matches : 10/128 fragment ions using 16 most intense peaks ([help](#))

| #  | b                | b <sup>++</sup> | b*        | b <sup>*++</sup> | b <sup>0</sup> | b <sup>0++</sup> | Seq. | y                | y <sup>++</sup> | y*        | y <sup>*++</sup> | y <sup>0</sup> | y <sup>0++</sup> | #  |
|----|------------------|-----------------|-----------|------------------|----------------|------------------|------|------------------|-----------------|-----------|------------------|----------------|------------------|----|
| 1  | 88.0393          | 44.5233         |           |                  | 70.0287        | 35.5180          | S    |                  |                 |           |                  |                |                  | 13 |
| 2  | 201.1234         | 101.0653        |           |                  | 183.1128       | 92.0600          | L    | 1390.6696        | 695.8385        | 1373.6431 | 687.3252         | 1372.6591      | 686.8332         | 12 |
| 3  | 302.1710         | 151.5892        |           |                  | 284.1605       | 142.5839         | T    | <b>1277.5856</b> | <b>639.2964</b> | 1260.5590 | 630.7831         | 1259.5750      | 630.2911         | 11 |
| 4  | 417.1980         | 209.1026        |           |                  | 399.1874       | 200.0974         | D    | 1176.5379        | <b>588.7726</b> | 1159.5113 | 580.2593         | 1158.5273      | 579.7673         | 10 |
| 5  | 546.2406         | 273.6239        |           |                  | 528.2300       | 264.6186         | E    | 1061.5109        | 531.2591        | 1044.4844 | 522.7458         | 1043.5004      | 522.2538         | 9  |
| 6  | 675.2832         | 338.1452        |           |                  | 657.2726       | 329.1399         | E    | <b>932.4684</b>  | 466.7378        | 915.4418  | 458.2245         | 914.4578       | 457.7325         | 8  |
| 7  | 774.3516         | 387.6794        |           |                  | 756.3410       | 378.6742         | V    | <b>803.4258</b>  | 402.2165        | 786.3992  | 393.7032         | 785.4152       | 393.2112         | 7  |
| 8  | 888.3945         | 444.7009        | 871.3680  | 436.1876         | 870.3840       | 435.6956         | N    | <b>704.3573</b>  | 352.6823        | 687.3308  | 344.1690         | 686.3468       | 343.6770         | 6  |
| 9  | 1003.4215        | 502.2144        | 986.3949  | 493.7011         | 985.4109       | 493.2091         | D    | <b>590.3144</b>  | 295.6608        | 573.2879  | 287.1476         | 572.3039       | 286.6556         | 5  |
| 10 | <b>1116.5055</b> | 558.7564        | 1099.4790 | 550.2431         | 1098.4950      | 549.7511         | L    | <b>475.2875</b>  | 238.1474        | 458.2609  | 229.6341         | 457.2769       | 229.1421         | 4  |
| 11 | 1244.5641        | <b>622.7857</b> | 1227.5376 | 614.2724         | 1226.5535      | 613.7804         | Q    | 362.2034         | 181.6053        | 345.1769  | 173.0921         | 344.1928       | 172.6001         | 3  |
| 12 | 1331.5961        | 666.3017        | 1314.5696 | 657.7884         | 1313.5856      | 657.2964         | S    | 234.1448         | 117.5761        | 217.1183  | 109.0628         | 216.1343       | 108.5708         | 2  |
| 13 |                  |                 |           |                  |                |                  | K    | 147.1128         | 74.0600         | 130.0863  | 65.5468          |                |                  | 1  |

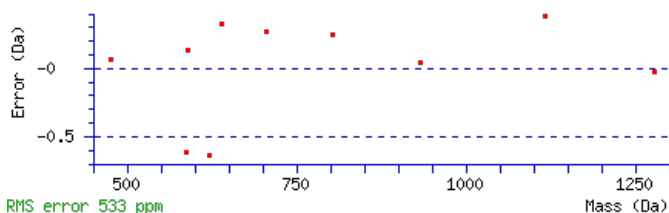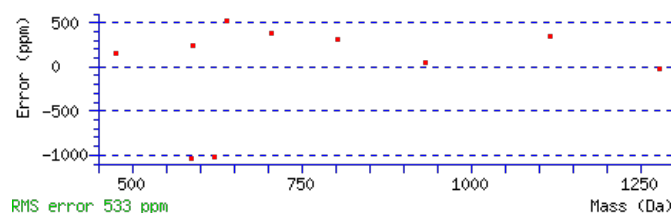NCBI **BLAST** search of **SLTDEEVNDLQSK**

(Parameters: blastp, nr protein database, expect=20000, no filter, PAM30)

# AT3G58140.1

Other BLAST [web gateways](#)

## All matches to this query

| Score | Mr(calc)  | Delta   | Sequence                       |
|-------|-----------|---------|--------------------------------|
| 38.9  | 1476.6944 | 0.0017  | <a href="#">SLTDEEVNDLQSK</a>  |
| 12.4  | 1476.6990 | -0.0030 | <a href="#">ANNVENKMEEKR</a>   |
| 2.1   | 1476.6917 | 0.0044  | <a href="#">HRSSTSTVSGSSER</a> |
| 0.8   | 1476.6957 | 0.0004  | <a href="#">ASHSDFSVTARDGK</a> |
| 0.7   | 1476.6918 | 0.0042  | <a href="#">ALQMTEWL DENK</a>  |
| 0.1   | 1476.6997 | -0.0036 | <a href="#">AISRAYDN YNYK</a>  |

Mascot: <http://www.matrixscience.com/>

**Peptide View**MS/MS Fragmentation of **MQEMKVFQK**Found in **AT3G58200.1** in **TAIR\_Arabidopsis**, Symbols: | meprin and TRAF homology domain-containing protein / MATH domain-containing protein | chr3:21571063-21572335 REVERSE

Match to Query 5201: 1326.620398 from(664.317475,2+) index(9342)

Title: Elution from: 82.660 to 82.660 scan no 12505 cid35.00 polarity:+

Data file D1d-3\_1.mgf

Click mouse within plot area to zoom in by factor of two about that point

Or,   to  Da Label all possible matches  Label matches used for scoring Show Y-axis 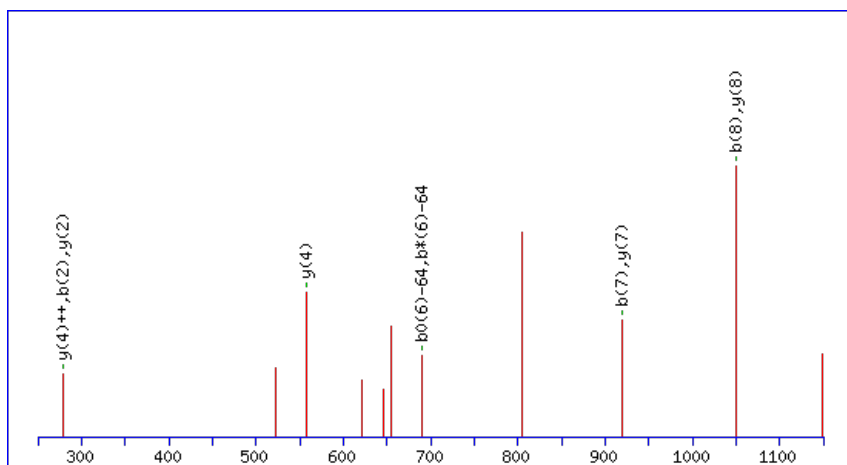**Monoisotopic mass of neutral peptide Mr(calc):** 1326.6234**Fixed modifications:** Carbamidomethyl (C) (apply to specified residues or termini only)**Variable modifications:****M1** : Oxidation (M), with neutral losses 0.0000 (shown in table), 63.9983**Ions Score:** 25 **Expect:** 0.021**Matches** : 10/136 fragment ions using 8 most intense peaks ([help](#))

| #  | b                | b <sup>++</sup> | b <sup>*</sup> | b <sup>*++</sup> | b <sup>0</sup> | b <sup>0++</sup> | Seq. | y                | y <sup>++</sup> | y <sup>*</sup> | y <sup>*++</sup> | y <sup>0</sup> | y <sup>0++</sup> | #  |
|----|------------------|-----------------|----------------|------------------|----------------|------------------|------|------------------|-----------------|----------------|------------------|----------------|------------------|----|
| 1  | 149.0397         | 75.0235         |                |                  |                |                  | M    |                  |                 |                |                  |                |                  | 10 |
| 2  | <b>279.0924</b>  | 140.0498        | 261.0688       | 131.0380         |                |                  | Q    | 1179.5983        | 590.3028        | 1161.5747      | 581.2910         | 1161.5877      | 581.2975         | 9  |
| 3  | 409.1320         | 205.0696        | 391.1084       | 196.0578         | 391.1214       | 196.0643         | E    | <b>1049.5456</b> | 525.2765        | 1031.5220      | 516.2647         | 1031.5351      | 516.2712         | 8  |
| 4  | 541.1695         | 271.0884        | 523.1459       | 262.0766         | 523.1589       | 262.0831         | M    | <b>919.5060</b>  | 460.2566        | 901.4824       | 451.2448         |                |                  | 7  |
| 5  | 671.2585         | 336.1329        | 653.2350       | 327.1211         | 653.2480       | 327.1276         | K    | 787.4685         | 394.2379        | 769.4449       | 385.2261         |                |                  | 6  |
| 6  | 771.3240         | 386.1656        | 753.3004       | 377.1538         | 753.3134       | 377.1603         | V    | 657.3795         | 329.1934        | 639.3559       | 320.1816         |                |                  | 5  |
| 7  | <b>919.3894</b>  | 460.1984        | 901.3659       | 451.1866         | 901.3789       | 451.1931         | F    | <b>557.3140</b>  | <b>279.1606</b> | 539.2904       | 270.1488         |                |                  | 4  |
| 8  | <b>1049.4785</b> | 525.2429        | 1031.4549      | 516.2311         | 1031.4679      | 516.2376         | K    | 409.2486         | 205.1279        | 391.2250       | 196.1161         |                |                  | 3  |
| 9  | 1179.5311        | 590.2692        | 1161.5075      | 581.2574         | 1161.5206      | 581.2639         | Q    | <b>279.1595</b>  | 140.0834        | 261.1359       | 131.0716         |                |                  | 2  |
| 10 |                  |                 |                |                  |                |                  | K    | 149.1069         | 75.0571         | 131.0833       | 66.0453          |                |                  | 1  |

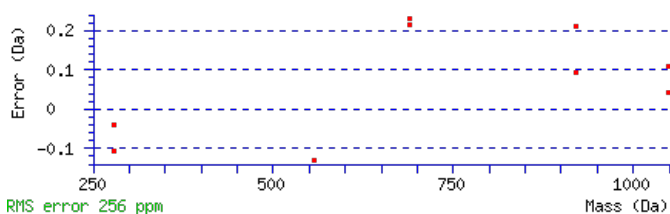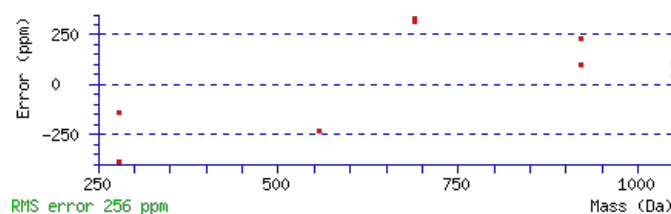NCBI **BLAST** search of **MQEMKVFQK**

(Parameters: blastp, nr protein database, expect=20000, no filter, PAM30)

Other BLAST [web gateways](#)**All matches to this query**

## AT3G58200.1

| Score | Mr(calc)  | Delta   | Sequence                     | Site Analysis       |
|-------|-----------|---------|------------------------------|---------------------|
| 25.1  | 1326.6234 | -0.0030 | <a href="#">MQEMKVFKQK</a>   | Oxidation M1 95.12% |
| 21.2  | 1326.6201 | 0.0003  | <a href="#">FOELAMIYAAR</a>  |                     |
| 16.7  | 1326.6200 | 0.0004  | <a href="#">YMQFLAGDLVR</a>  |                     |
| 14.9  | 1326.6171 | 0.0033  | <a href="#">TWARQSTGEVVR</a> |                     |
| 12.2  | 1326.6201 | 0.0003  | <a href="#">FLARCIFEEK</a>   |                     |
| 12.2  | 1326.6234 | -0.0030 | <a href="#">MQEMKVFKQK</a>   | Oxidation M4 4.88%  |
| 11.8  | 1326.6178 | 0.0026  | <a href="#">MKKSDSSFPLR</a>  |                     |
| 8.7   | 1326.6178 | 0.0026  | <a href="#">MOGDALITYRK</a>  |                     |
| 3.0   | 1326.6178 | 0.0026  | <a href="#">EMKAFTDVARK</a>  |                     |
| 2.2   | 1326.6178 | 0.0026  | <a href="#">LYDAMKISQSR</a>  |                     |

Mascot: <http://www.matrixscience.com/>

## Peptide View

MS/MS Fragmentation of **GILLGAVHGIVESLFR**

Found in **AT3G58610.1** in **TAIR\_Arabidopsis**, Symbols: | keto-acid reductoisomerase | chr3:21682538-21685616 FORWARD

Match to Query 7654: 1679.971869 from(560.997899,3+) index(10625)

Title: Elution from: 111.445 to 111.445 scan no 15724 cid35.00 polarity:+

Data file C7-1\_3.mgf

Click mouse within plot area to zoom in by factor of two about that point

Or,   to  Da

Label all possible matches  Label matches used for scoring

Show Y-axis

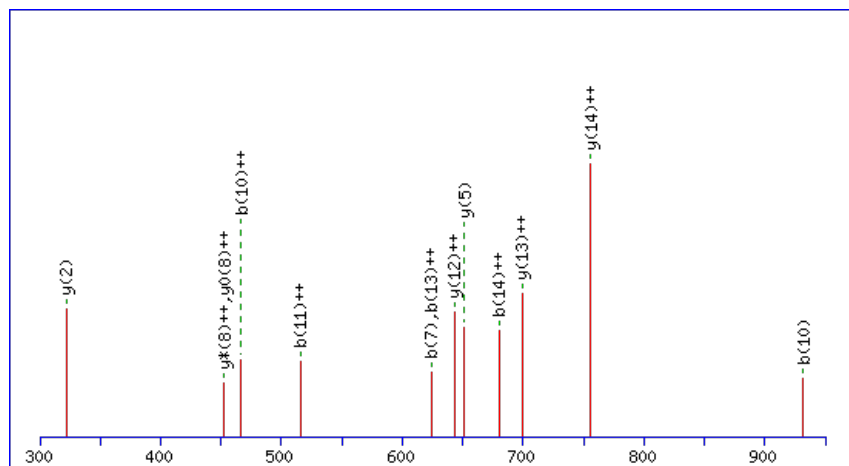

Monoisotopic mass of neutral peptide  $M_r(\text{calc})$ : 1679.9723

Fixed modifications: Carbamidomethyl (C) (apply to specified residues or termini only)

Ions Score: 47 Expect: 2.1e-005

Matches : 13/122 fragment ions using 12 most intense peaks ([help](#))

| #  | b               | b <sup>++</sup> | b <sup>0</sup> | b <sup>0++</sup> | Seq.     | y               | y <sup>++</sup> | y*        | y <sup>*++</sup> | y <sup>0</sup> | y <sup>0++</sup> | #  |
|----|-----------------|-----------------|----------------|------------------|----------|-----------------|-----------------|-----------|------------------|----------------|------------------|----|
| 1  | 58.0287         | 29.5180         |                |                  | <b>G</b> |                 |                 |           |                  |                |                  | 16 |
| 2  | 171.1128        | 86.0600         |                |                  | <b>I</b> | 1623.9581       | 812.4827        | 1606.9315 | 803.9694         | 1605.9475      | 803.4774         | 15 |
| 3  | 284.1969        | 142.6021        |                |                  | <b>L</b> | 1510.8740       | <b>755.9407</b> | 1493.8475 | 747.4274         | 1492.8635      | 746.9354         | 14 |
| 4  | 397.2809        | 199.1441        |                |                  | <b>L</b> | 1397.7900       | <b>699.3986</b> | 1380.7634 | 690.8853         | 1379.7794      | 690.3933         | 13 |
| 5  | 454.3024        | 227.6548        |                |                  | <b>G</b> | 1284.7059       | <b>642.8566</b> | 1267.6793 | 634.3433         | 1266.6953      | 633.8513         | 12 |
| 6  | 525.3395        | 263.1734        |                |                  | <b>A</b> | 1227.6844       | 614.3459        | 1210.6579 | 605.8326         | 1209.6739      | 605.3406         | 11 |
| 7  | <b>624.4079</b> | 312.7076        |                |                  | <b>V</b> | 1156.6473       | 578.8273        | 1139.6208 | 570.3140         | 1138.6368      | 569.8220         | 10 |
| 8  | 761.4668        | 381.2371        |                |                  | <b>H</b> | 1057.5789       | 529.2931        | 1040.5524 | 520.7798         | 1039.5683      | 520.2878         | 9  |
| 9  | 818.4883        | 409.7478        |                |                  | <b>G</b> | 920.5200        | 460.7636        | 903.4934  | <b>452.2504</b>  | 902.5094       | <b>451.7584</b>  | 8  |
| 10 | <b>931.5724</b> | <b>466.2898</b> |                |                  | <b>I</b> | 863.4985        | 432.2529        | 846.4720  | 423.7396         | 845.4880       | 423.2476         | 7  |
| 11 | 1030.6408       | <b>515.8240</b> |                |                  | <b>V</b> | 750.4145        | 375.7109        | 733.3879  | 367.1976         | 732.4039       | 366.7056         | 6  |
| 12 | 1159.6834       | 580.3453        | 1141.6728      | 571.3400         | <b>E</b> | <b>651.3461</b> | 326.1767        | 634.3195  | 317.6634         | 633.3355       | 317.1714         | 5  |
| 13 | 1246.7154       | <b>623.8613</b> | 1228.7048      | 614.8561         | <b>S</b> | 522.3035        | 261.6554        | 505.2769  | 253.1421         | 504.2929       | 252.6501         | 4  |
| 14 | 1359.7995       | <b>680.4034</b> | 1341.7889      | 671.3981         | <b>L</b> | 435.2714        | 218.1394        | 418.2449  | 209.6261         |                |                  | 3  |
| 15 | 1506.8679       | 753.9376        | 1488.8573      | 744.9323         | <b>F</b> | <b>322.1874</b> | 161.5973        | 305.1608  | 153.0840         |                |                  | 2  |
| 16 |                 |                 |                |                  | <b>R</b> | 175.1190        | 88.0631         | 158.0924  | 79.5498          |                |                  | 1  |

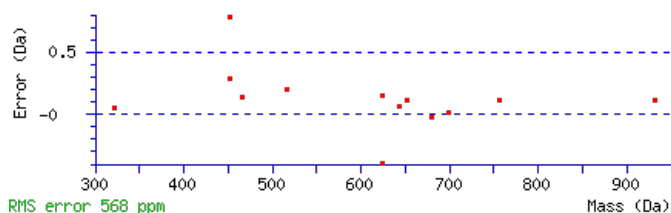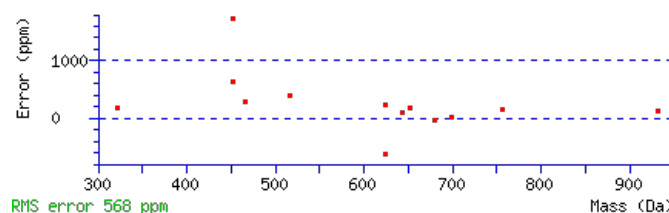



## AT3G58610.1

NCBI **BLAST** search of [GILGAVHGIVESLFR](#)

(Parameters: blastp, nr protein database, expect=20000, no filter, PAM30)

Other BLAST [web gateways](#)

### All matches to this query

| Score | Mr(calc)  | Delta   | Sequence                        |
|-------|-----------|---------|---------------------------------|
| 47.1  | 1679.9723 | -0.0004 | <a href="#">GILGAVHGIVESLFR</a> |
| 2.9   | 1679.9722 | -0.0004 | <a href="#">VLHNYANILELLR</a>   |

**Mascot:** <http://www.matrixscience.com/>

**Peptide View**MS/MS Fragmentation of **IKSENIPITK**Found in **AT3G58660.1** in **TAIR\_Arabidopsis**, Symbols: | 60S ribosomal protein-related | chr3:21712551-21713891 FORWARD

Match to Query 3849: 1154.628682 from(578.321617,2+) index(7401)

Title: Elution from: 65.618 to 65.618 scan no 9698 cid35.00 polarity:+

Data file D12h-3\_2.mgf

Click mouse within plot area to zoom in by factor of two about that point

Or,   to  Da Label all possible matches  Label matches used for scoring Show Y-axis 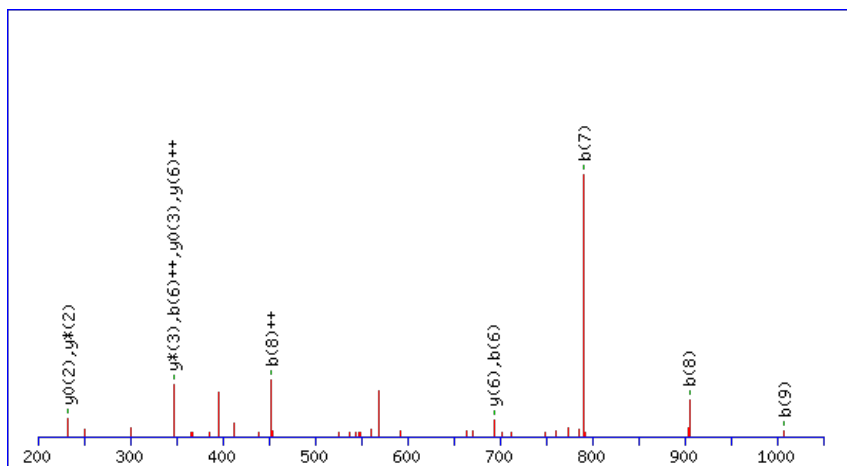**Monoisotopic mass of neutral peptide Mr(calc):** 1154.6321**Fixed modifications:** Carbamidomethyl (C) (apply to specified residues or termini only)**Ions Score:** 33 **Expect:** 0.0018**Matches:** 12/100 fragment ions using 8 most intense peaks ([help](#))

| #  | b         | b <sup>++</sup> | b*       | b <sup>*++</sup> | b <sup>0</sup> | b <sup>0++</sup> | Seq. | y         | y <sup>++</sup> | y*        | y <sup>*++</sup> | y <sup>0</sup> | y <sup>0++</sup> | #  |
|----|-----------|-----------------|----------|------------------|----------------|------------------|------|-----------|-----------------|-----------|------------------|----------------|------------------|----|
| 1  | 115.0884  | 58.0478         |          |                  |                |                  | I    |           |                 |           |                  |                |                  | 10 |
| 2  | 245.1774  | 123.0923        | 227.1538 | 114.0805         |                |                  | K    | 1041.5583 | 521.2828        | 1023.5347 | 512.2710         | 1023.5477      | 512.2775         | 9  |
| 3  | 333.2065  | 167.1069        | 315.1829 | 158.0951         | 315.1959       | 158.1016         | S    | 911.4693  | 456.2383        | 893.4457  | 447.2265         | 893.4587       | 447.2330         | 8  |
| 4  | 463.2461  | 232.1267        | 445.2225 | 223.1149         | 445.2355       | 223.1214         | E    | 823.4402  | 412.2237        | 805.4166  | 403.2120         | 805.4296       | 403.2185         | 7  |
| 5  | 579.2831  | 290.1452        | 561.2595 | 281.1334         | 561.2725       | 281.1399         | N    | 693.4006  | 347.2039        | 675.3770  | 338.1921         | 675.3900       | 338.1986         | 6  |
| 6  | 693.3642  | 347.1857        | 675.3406 | 338.1739         | 675.3536       | 338.1805         | I    | 577.3636  | 289.1854        | 559.3400  | 280.1736         | 559.3530       | 280.1801         | 5  |
| 7  | 791.4140  | 396.2106        | 773.3904 | 387.1988         | 773.4034       | 387.2054         | P    | 463.2825  | 232.1449        | 445.2589  | 223.1331         | 445.2719       | 223.1396         | 4  |
| 8  | 905.4951  | 453.2512        | 887.4715 | 444.2394         | 887.4845       | 444.2459         | I    | 365.2327  | 183.1200        | 347.2091  | 174.1082         | 347.2221       | 174.1147         | 3  |
| 9  | 1007.5398 | 504.2735        | 989.5162 | 495.2617         | 989.5292       | 495.2683         | T    | 251.1516  | 126.0794        | 233.1280  | 117.0676         | 233.1410       | 117.0741         | 2  |
| 10 |           |                 |          |                  |                |                  | K    | 149.1069  | 75.0571         | 131.0833  | 66.0453          |                |                  | 1  |

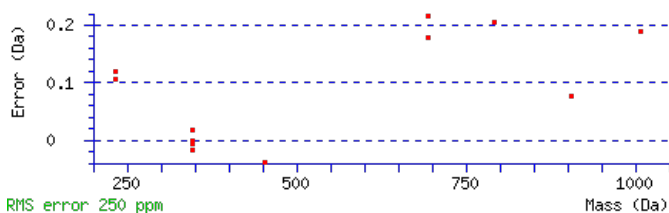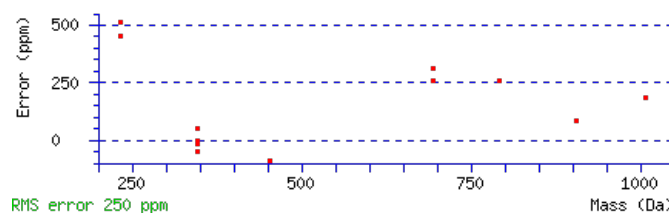NCBI **BLAST** search of **IKSENIPITK**

(Parameters: blastp, nr protein database, expect=20000, no filter, PAM30)

Other BLAST [web gateways](#)**All matches to this query**

| Score | Mr(calc) | Delta | Sequence |
|-------|----------|-------|----------|
|       |          |       |          |

## AT3G58660.1

|      |           |         |                             |
|------|-----------|---------|-----------------------------|
| 33.5 | 1154.6321 | -0.0035 | <a href="#">IKSENIPITK</a>  |
| 10.9 | 1154.6321 | -0.0034 | <a href="#">TLKELVPNTK</a>  |
| 2.6  | 1154.6321 | -0.0034 | <a href="#">VPEGSKSVLVK</a> |

**Mascot:** <http://www.matrixscience.com/>

**Peptide View**MS/MS Fragmentation of **MKFYISATGIK**

Found in **AT3G58790.1** in **TAIR\_Arabidopsis**, Symbols: GAUT15 | GAUT15 (Galacturonosyltransferase 15); polygalacturonate 4-alpha-galacturonosyltransferase/ transferase, transferring glycosyl groups / transferase, transferring hexosyl groups | chr3:21753432-21756949 REVERSE

Match to Query 4581: 1286.633872 from(644.324212,2+) index(7875)

Title: Elution from: 70.246 to 70.246 scan no 10414 cid35.00 polarity:+

Data file D6h-1\_3.mgf

Click mouse within plot area to zoom in by factor of two about that point

Or,   to  Da

Label all possible matches  Label matches used for scoring

Show Y-axis

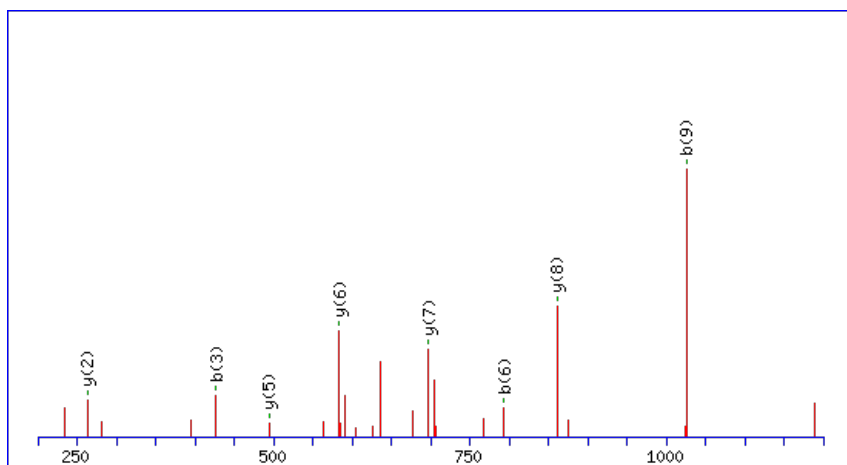

Monoisotopic mass of neutral peptide  $M_r(\text{calc})$ : 1286.6355

Fixed modifications: Carbamidomethyl (C) (apply to specified residues or termini only)

Variable modifications:

M1 : Oxidation (M), with neutral losses 0.0000 (shown in table), 63.9983

Ions Score: 43 Expect: 0.0003

Matches : 8/150 fragment ions using 9 most intense peaks ([help](#))

| #  | b                | b <sup>++</sup> | b*        | b <sup>*++</sup> | b <sup>0</sup> | b <sup>0++</sup> | Seq. | y               | y <sup>++</sup> | y*        | y <sup>*++</sup> | y <sup>0</sup> | y <sup>0++</sup> | #  |
|----|------------------|-----------------|-----------|------------------|----------------|------------------|------|-----------------|-----------------|-----------|------------------|----------------|------------------|----|
| 1  | 149.0397         | 75.0235         |           |                  |                |                  | M    |                 |                 |           |                  |                |                  | 11 |
| 2  | 279.1287         | 140.0680        | 261.1052  | 131.0562         |                |                  | K    | 1139.6103       | 570.3088        | 1121.5868 | 561.2970         | 1121.5998      | 561.3035         | 10 |
| 3  | <b>427.1942</b>  | 214.1007        | 409.1706  | 205.0889         |                |                  | F    | 1009.5213       | 505.2643        | 991.4977  | 496.2525         | 991.5107       | 496.2590         | 9  |
| 4  | 591.2546         | 296.1309        | 573.2310  | 287.1191         |                |                  | Y    | <b>861.4559</b> | 431.2316        | 843.4323  | 422.2198         | 843.4453       | 422.2263         | 8  |
| 5  | 705.3357         | 353.1715        | 687.3121  | 344.1597         |                |                  | I    | <b>697.3955</b> | 349.2014        | 679.3719  | 340.1896         | 679.3849       | 340.1961         | 7  |
| 6  | <b>793.3647</b>  | 397.1860        | 775.3411  | 388.1742         | 775.3542       | 388.1807         | S    | <b>583.3144</b> | 292.1608        | 565.2908  | 283.1490         | 565.3038       | 283.1556         | 6  |
| 7  | 865.3989         | 433.2031        | 847.3753  | 424.1913         | 847.3883       | 424.1978         | A    | <b>495.2853</b> | 248.1463        | 477.2617  | 239.1345         | 477.2748       | 239.1410         | 5  |
| 8  | 967.4436         | 484.2254        | 949.4200  | 475.2136         | 949.4330       | 475.2201         | T    | 423.2512        | 212.1292        | 405.2276  | 203.1174         | 405.2406       | 203.1239         | 4  |
| 9  | <b>1025.4621</b> | 513.2347        | 1007.4385 | 504.2229         | 1007.4515      | 504.2294         | G    | 321.2065        | 161.1069        | 303.1829  | 152.0951         |                |                  | 3  |
| 10 | 1139.5432        | 570.2752        | 1121.5196 | 561.2634         | 1121.5326      | 561.2699         | I    | <b>263.1880</b> | 132.0976        | 245.1644  | 123.0858         |                |                  | 2  |
| 11 |                  |                 |           |                  |                |                  | K    | 149.1069        | 75.0571         | 131.0833  | 66.0453          |                |                  | 1  |

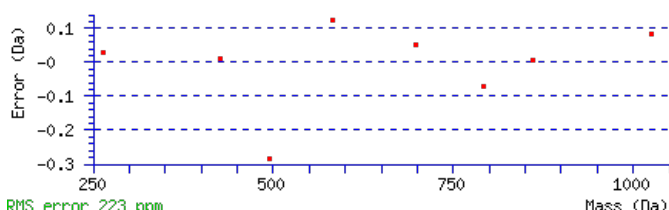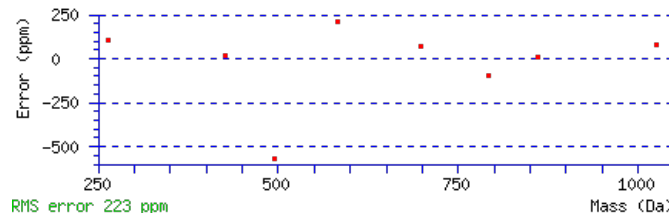

NCBI BLAST search of **MKFYISATGIK**

(Parameters: blastp, nr protein database, expect=20000, no filter, PAM30)

Other BLAST [web gateways](#)

# AT3G58790.1

All matches to this query

| Score | Mr(calc)  | Delta   | Sequence                     |
|-------|-----------|---------|------------------------------|
| 43.4  | 1286.6355 | -0.0016 | <a href="#">MKFYISATGIK</a>  |
| 3.8   | 1286.6359 | -0.0021 | <a href="#">MINDAHIKKGGK</a> |
| 3.6   | 1286.6303 | 0.0035  | <a href="#">IKRTSYSASR</a>   |
| 1.7   | 1286.6321 | 0.0017  | <a href="#">NVYSLGAYFIK</a>  |

Mascot: <http://www.matrixscience.com/>

**Peptide View**MS/MS Fragmentation of **TVKFHLK**Found in **AT3G59080.1** in **TAIR\_Arabidopsis**, Symbols: | aspartyl protease family protein | chr3:21847789-21849396 FORWARD

Match to Query 1377: 871.527594 from(436.771073,2+) index(1938)

Title: Elution from: 22.720 to 22.720 scan no 2491 cid35.00 polarity:+

Data file D6h-3\_2.mgf

Click mouse within plot area to zoom in by factor of two about that point

Or,  to  Da Label all possible matches  Label matches used for scoring Show Y-axis 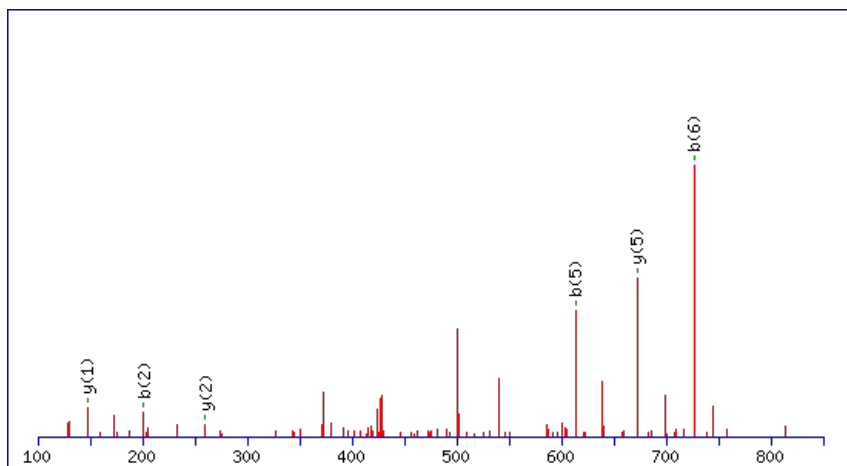Monoisotopic mass of neutral peptide  $M_r(\text{calc})$ : 871.5280

Fixed modifications: Carbamidomethyl (C) (apply to specified residues or termini only)

Ions Score: 14 Expect: 0.046

Matches : 6/56 fragment ions using 14 most intense peaks ([help](#))

| # | b               | b <sup>++</sup> | b*       | b <sup>+++</sup> | b <sup>0</sup> | b <sup>0++</sup> | Seq. | y               | y <sup>++</sup> | y*       | y <sup>+++</sup> | # |
|---|-----------------|-----------------|----------|------------------|----------------|------------------|------|-----------------|-----------------|----------|------------------|---|
| 1 | 102.0550        | 51.5311         |          |                  | 84.0444        | 42.5258          | T    |                 |                 |          |                  | 7 |
| 2 | <b>201.1234</b> | 101.0653        |          |                  | 183.1128       | 92.0600          | V    | 771.4876        | 386.2474        | 754.4610 | 377.7341         | 6 |
| 3 | 329.2183        | 165.1128        | 312.1918 | 156.5995         | 311.2078       | 156.1075         | K    | <b>672.4192</b> | 336.7132        | 655.3926 | 328.1999         | 5 |
| 4 | 476.2867        | 238.6470        | 459.2602 | 230.1337         | 458.2762       | 229.6417         | F    | 544.3242        | 272.6657        | 527.2976 | 264.1525         | 4 |
| 5 | <b>613.3457</b> | 307.1765        | 596.3191 | 298.6632         | 595.3351       | 298.1712         | H    | 397.2558        | 199.1315        | 380.2292 | 190.6183         | 3 |
| 6 | <b>726.4297</b> | 363.7185        | 709.4032 | 355.2052         | 708.4192       | 354.7132         | L    | <b>260.1969</b> | 130.6021        | 243.1703 | 122.0888         | 2 |
| 7 |                 |                 |          |                  |                |                  | K    | <b>147.1128</b> | 74.0600         | 130.0863 | 65.5468          | 1 |

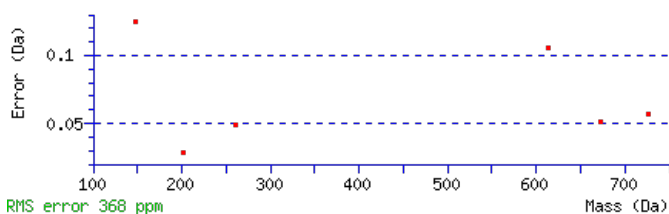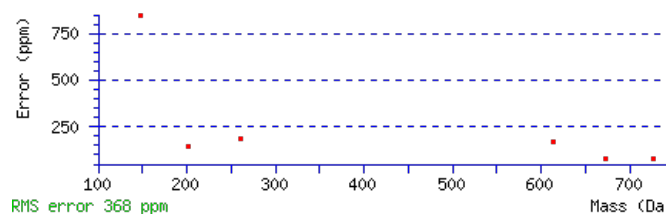NCBI BLAST search of **TVKFHLK**

(Parameters: blastp, nr protein database, expect=20000, no filter, PAM30)

Other BLAST [web gateways](#)**All matches to this query**

| Score | $M_r(\text{calc})$ | Delta   | Sequence                |
|-------|--------------------|---------|-------------------------|
| 14.2  | 871.5280           | -0.0004 | <a href="#">TVKFHLK</a> |
| 9.2   | 871.5279           | -0.0003 | <a href="#">YHKLALK</a> |
| 8.5   | 871.5280           | -0.0004 | <a href="#">IQGWKLK</a> |

# AT3G59080.1

|     |          |         |                         |
|-----|----------|---------|-------------------------|
| 8.5 | 871.5280 | -0.0004 | <a href="#">LFSKHLK</a> |
| 8.5 | 871.5280 | -0.0004 | <a href="#">LWGQKLK</a> |
| 8.5 | 871.5279 | -0.0003 | <a href="#">YLHKALK</a> |
| 5.6 | 871.5280 | -0.0004 | <a href="#">KWIQAVK</a> |

**Mascot:** <http://www.matrixscience.com/>

**Peptide View**MS/MS Fragmentation of **LLDTEVVQYNYR**Found in **AT3G59400.1** in **TAIR\_Arabidopsis**, Symbols: GUN4 | GUN4 (Genomes uncoupled 4) | chr3:21959858-21960655 REVERSE

Match to Query 6360: 1528.709824 from(765.362188,2+) index(5697)

Title: Elution from: 50.484 to 50.484 scan no 7241 cid35.00 polarity:+

Data file D12h-1\_3.mgf

Click mouse within plot area to zoom in by factor of two about that point

Or,   to  Da Label all possible matches  Label matches used for scoring Show Y-axis 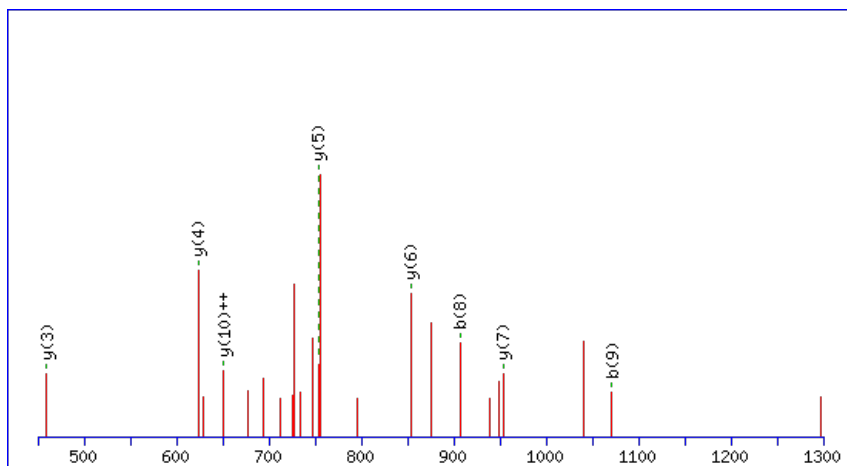Monoisotopic mass of neutral peptide  $M_r(\text{calc})$ : 1528.7116

Fixed modifications: Carbamidomethyl (C) (apply to specified residues or termini only)

Ions Score: 25 Expect: 0.024

Matches : 8/100 fragment ions using 19 most intense peaks ([help](#))

| #  | b         | b <sup>++</sup> | b*        | b <sup>+++</sup> | b <sup>0</sup> | b <sup>0++</sup> | Seq. | y         | y <sup>++</sup> | y*        | y <sup>+++</sup> | y <sup>0</sup> | y <sup>0++</sup> | #  |
|----|-----------|-----------------|-----------|------------------|----------------|------------------|------|-----------|-----------------|-----------|------------------|----------------|------------------|----|
| 1  | 115.0884  | 58.0478         |           |                  |                |                  | L    |           |                 |           |                  |                |                  | 12 |
| 2  | 229.1695  | 115.0884        |           |                  |                |                  | L    | 1415.6378 | 708.3225        | 1397.6142 | 699.3107         | 1397.6272      | 699.3172         | 11 |
| 3  | 345.1935  | 173.1004        |           |                  | 327.1829       | 164.0951         | D    | 1301.5567 | 651.2820        | 1283.5331 | 642.2702         | 1283.5461      | 642.2767         | 10 |
| 4  | 447.2382  | 224.1227        |           |                  | 429.2276       | 215.1174         | T    | 1185.5327 | 593.2700        | 1167.5091 | 584.2582         | 1167.5221      | 584.2647         | 9  |
| 5  | 577.2778  | 289.1425        |           |                  | 559.2672       | 280.1373         | E    | 1083.4880 | 542.2476        | 1065.4644 | 533.2358         | 1065.4774      | 533.2424         | 8  |
| 6  | 677.3432  | 339.1753        |           |                  | 659.3327       | 330.1700         | V    | 953.4484  | 477.2278        | 935.4248  | 468.2160         |                |                  | 7  |
| 7  | 777.4087  | 389.2080        |           |                  | 759.3981       | 380.2027         | V    | 853.3829  | 427.1951        | 835.3593  | 418.1833         |                |                  | 6  |
| 8  | 907.4613  | 454.2343        | 889.4378  | 445.2225         | 889.4508       | 445.2290         | Q    | 753.3175  | 377.1624        | 735.2939  | 368.1506         |                |                  | 5  |
| 9  | 1071.5217 | 536.2645        | 1053.4981 | 527.2527         | 1053.5111      | 527.2592         | Y    | 623.2648  | 312.1360        | 605.2412  | 303.1243         |                |                  | 4  |
| 10 | 1187.5587 | 594.2830        | 1169.5351 | 585.2712         | 1169.5481      | 585.2777         | N    | 459.2045  | 230.1059        | 441.1809  | 221.0941         |                |                  | 3  |
| 11 | 1351.6191 | 676.3132        | 1333.5955 | 667.3014         | 1333.6085      | 667.3079         | Y    | 343.1675  | 172.0874        | 325.1439  | 163.0756         |                |                  | 2  |
| 12 |           |                 |           |                  |                |                  | R    | 179.1071  | 90.0572         | 161.0835  | 81.0454          |                |                  | 1  |

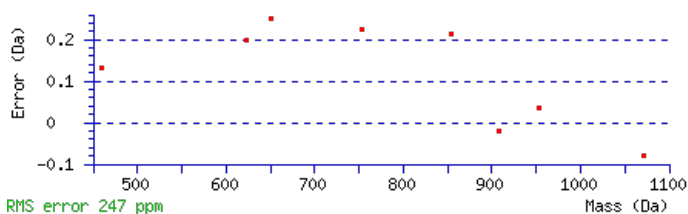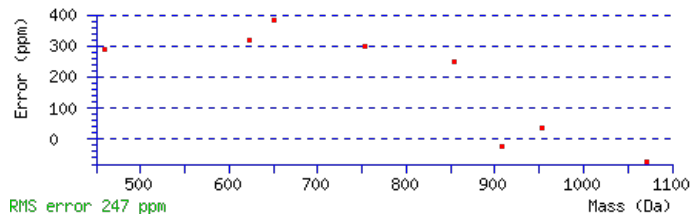NCBI BLAST search of **LLDTEVVQYNYR**

(Parameters: blastp, nr protein database, expect=20000, no filter, PAM30)

Other BLAST [web gateways](#)**All matches to this query**



AT3G59400.1

| Score | Mr(calc)  | Delta   | Sequence                      |
|-------|-----------|---------|-------------------------------|
| 25.1  | 1528.7116 | -0.0018 | <a href="#">LLDTEVVQYNYR</a>  |
| 0.5   | 1528.7068 | 0.0030  | <a href="#">NPVTGMREFLEGK</a> |

Mascot: <http://www.matrixscience.com/>

**Peptide View**MS/MS Fragmentation of **LIAVVFPSFGER**Found in **AT3G59760.1** in **TAIR\_Arabidopsis**, Symbols: ATCS-C, OASC | OASC (O-ACETYL SERINE (THIOL) LYASE ISOFORM C); cysteine synthase | chr3:22083096-22086322 REVERSE

Match to Query 5349: 1333.738646 from(667.876599,2+) index(9693)

Title: Elution from: 86.236 to 86.236 scan no 12997 cid35.00 polarity:+

Data file D12h-1\_1.mgf

Click mouse within plot area to zoom in by factor of two about that point

Or,   to  Da Label all possible matches  Label matches used for scoring Show Y-axis 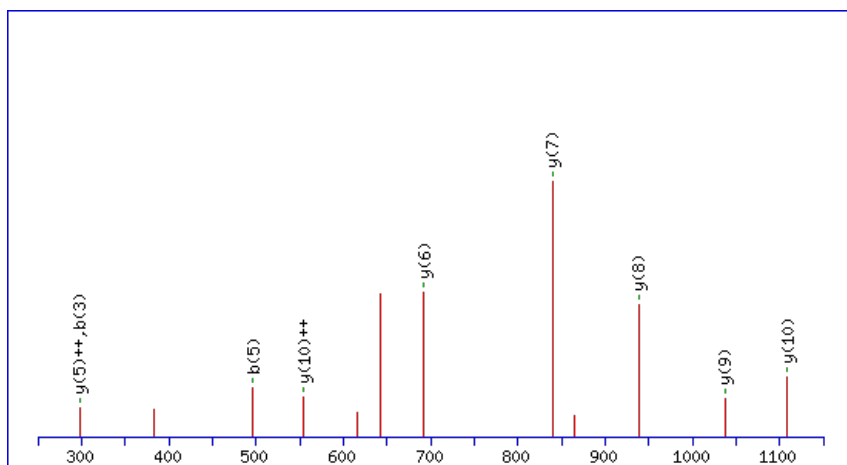Monoisotopic mass of neutral peptide  $M_r(\text{calc})$ : 1333.7394

Fixed modifications: Carbamidomethyl (C) (apply to specified residues or termini only)

Ions Score: 48 Expect: 6.2e-005

Matches : 9/94 fragment ions using 8 most intense peaks ([help](#))

| #  | b               | b <sup>++</sup> | b <sup>0</sup> | b <sup>0++</sup> | Seq. | y                | y <sup>++</sup> | y*        | y <sup>*++</sup> | y <sup>0</sup> | y <sup>0++</sup> | #  |
|----|-----------------|-----------------|----------------|------------------|------|------------------|-----------------|-----------|------------------|----------------|------------------|----|
| 1  | 114.0913        | 57.5493         |                |                  | L    |                  |                 |           |                  |                |                  | 12 |
| 2  | 227.1754        | 114.0913        |                |                  | I    | 1221.6626        | 611.3350        | 1204.6361 | 602.8217         | 1203.6521      | 602.3297         | 11 |
| 3  | <b>298.2125</b> | 149.6099        |                |                  | A    | <b>1108.5786</b> | <b>554.7929</b> | 1091.5520 | 546.2796         | 1090.5680      | 545.7876         | 10 |
| 4  | 397.2809        | 199.1441        |                |                  | V    | <b>1037.5415</b> | 519.2744        | 1020.5149 | 510.7611         | 1019.5309      | 510.2691         | 9  |
| 5  | <b>496.3493</b> | 248.6783        |                |                  | V    | <b>938.4730</b>  | 469.7402        | 921.4465  | 461.2269         | 920.4625       | 460.7349         | 8  |
| 6  | 643.4178        | 322.2125        |                |                  | F    | <b>839.4046</b>  | 420.2060        | 822.3781  | 411.6927         | 821.3941       | 411.2007         | 7  |
| 7  | 740.4705        | 370.7389        |                |                  | P    | <b>692.3362</b>  | 346.6717        | 675.3097  | 338.1585         | 674.3257       | 337.6665         | 6  |
| 8  | 827.5026        | 414.2549        | 809.4920       | 405.2496         | S    | 595.2835         | <b>298.1454</b> | 578.2569  | 289.6321         | 577.2729       | 289.1401         | 5  |
| 9  | 974.5710        | 487.7891        | 956.5604       | 478.7838         | F    | 508.2514         | 254.6293        | 491.2249  | 246.1161         | 490.2409       | 245.6241         | 4  |
| 10 | 1031.5924       | 516.2999        | 1013.5819      | 507.2946         | G    | 361.1830         | 181.0951        | 344.1565  | 172.5819         | 343.1724       | 172.0899         | 3  |
| 11 | 1160.6350       | 580.8211        | 1142.6245      | 571.8159         | E    | 304.1615         | 152.5844        | 287.1350  | 144.0711         | 286.1510       | 143.5791         | 2  |
| 12 |                 |                 |                |                  | R    | 175.1190         | 88.0631         | 158.0924  | 79.5498          |                |                  | 1  |

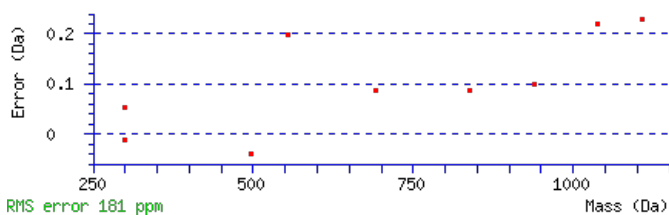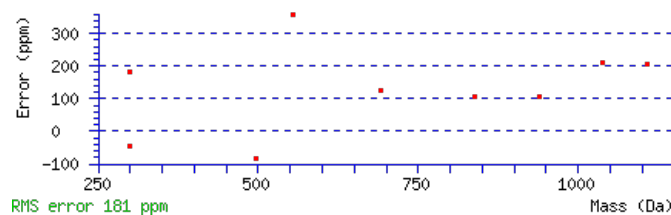NCBI BLAST search of [LIAVVFPSFGER](#)

(Parameters: blastp, nr protein database, expect=20000, no filter, PAM30)

Other BLAST [web gateways](#)

AT3G59760.1

All matches to this query

| Score | Mr(calc)  | Delta   | Sequence                     |
|-------|-----------|---------|------------------------------|
| 48.5  | 1333.7394 | -0.0008 | <a href="#">LIAVVFPFSGER</a> |
| 7.5   | 1333.7354 | 0.0032  | <a href="#">LNRGLSVVDSFK</a> |
| 3.3   | 1333.7363 | 0.0024  | <a href="#">MRIMIKGGVWK</a>  |
| 3.3   | 1333.7363 | 0.0024  | <a href="#">MRIMIKGGVWK</a>  |

Mascot: <http://www.matrixscience.com/>



# Mascot Search Results

## Peptide View

MS/MS Fragmentation of **SRLHPGTRYLAR**

Found in **AT3G59770.1** in **TAIR\_Arabidopsis**, Symbols: SAC9 | SAC9 (suppressor of actin 9) | chr3:22090258-22096651 REVERSE

Match to Query 5560: 1448.731424 from(725.372988,2+) index(8182)

Title: Elution from: 73.270 to 73.270 scan no 10880 cid35.00 polarity:+

Data file C7-1\_3.mgf

Click mouse within plot area to zoom in by factor of two about that point

Or,  to  Da

Label all possible matches  Label matches used for scoring

Show Y-axis

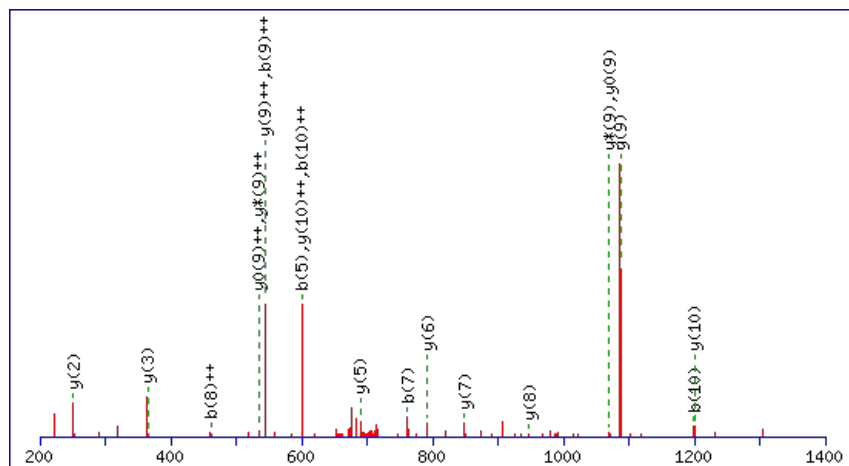

Monoisotopic mass of neutral peptide **Mr(calc)**: 1448.7271

**Fixed modifications:** Carbamidomethyl (C) (apply to specified residues or termini only)

**Ions Score:** 35 **Expect:** 0.0025

**Matches** : 20/120 fragment ions using 39 most intense peaks ([help](#))

| #  | b                | b <sup>++</sup> | b*        | b <sup>*++</sup> | b <sup>0</sup> | b <sup>0++</sup> | Seq. | y                | y <sup>++</sup> | y*               | y <sup>*++</sup> | y <sup>0</sup>   | y <sup>0++</sup> | #  |
|----|------------------|-----------------|-----------|------------------|----------------|------------------|------|------------------|-----------------|------------------|------------------|------------------|------------------|----|
| 1  | 89.0363          | 45.0218         |           |                  | 71.0258        | 36.0165          | S    |                  |                 |                  |                  |                  |                  | 12 |
| 2  | 249.1256         | 125.0664        | 231.1020  | 116.0546         | 231.1150       | 116.0612         | R    | 1361.7053        | 681.3563        | 1343.6817        | 672.3445         | 1343.6948        | 672.3510         | 11 |
| 3  | 363.2067         | 182.1070        | 345.1831  | 173.0952         | 345.1961       | 173.1017         | L    | <b>1201.6161</b> | <b>601.3117</b> | 1183.5925        | 592.2999         | 1183.6055        | 592.3064         | 10 |
| 4  | 503.2567         | 252.1320        | 485.2331  | 243.1202         | 485.2461       | 243.1267         | H    | <b>1087.5350</b> | <b>544.2711</b> | <b>1069.5114</b> | <b>535.2593</b>  | <b>1069.5244</b> | <b>535.2658</b>  | 9  |
| 5  | <b>601.3065</b>  | 301.1569        | 583.2829  | 292.1451         | 583.2959       | 292.1516         | P    | <b>947.4850</b>  | 474.2461        | 929.4614         | 465.2343         | 929.4744         | 465.2408         | 8  |
| 6  | 659.3250         | 330.1661        | 641.3014  | 321.1543         | 641.3144       | 321.1609         | G    | <b>849.4352</b>  | 425.2212        | 831.4116         | 416.2094         | 831.4246         | 416.2159         | 7  |
| 7  | <b>761.3697</b>  | 381.1885        | 743.3461  | 372.1767         | 743.3592       | 372.1832         | T    | <b>791.4167</b>  | 396.2120        | 773.3931         | 387.2002         | 773.4061         | 387.2067         | 6  |
| 8  | 921.4590         | <b>461.2331</b> | 903.4354  | 452.2213         | 903.4484       | 452.2278         | R    | <b>689.3720</b>  | 345.1896        | 671.3484         | 336.1778         |                  |                  | 5  |
| 9  | 1085.5193        | <b>543.2633</b> | 1067.4957 | 534.2515         | 1067.5088      | 534.2580         | Y    | 529.2827         | 265.1450        | 511.2591         | 256.1332         |                  |                  | 4  |
| 10 | <b>1199.6004</b> | <b>600.3039</b> | 1181.5768 | 591.2921         | 1181.5899      | 591.2986         | L    | <b>365.2223</b>  | 183.1148        | 347.1988         | 174.1030         |                  |                  | 3  |
| 11 | 1271.6346        | 636.3209        | 1253.6110 | 627.3091         | 1253.6240      | 627.3156         | A    | <b>251.1412</b>  | 126.0743        | 233.1177         | 117.0625         |                  |                  | 2  |
| 12 |                  |                 |           |                  |                |                  | R    | 179.1071         | 90.0572         | 161.0835         | 81.0454          |                  |                  | 1  |

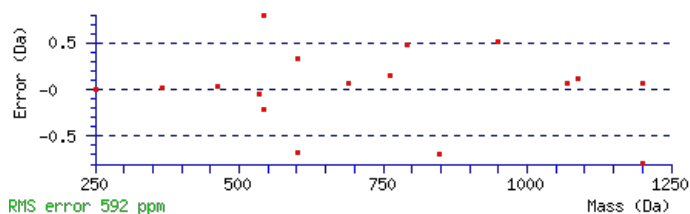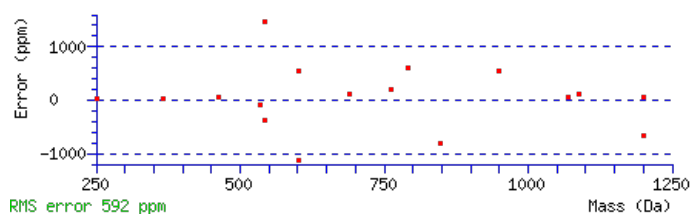

NCBI **BLAST** search of **SRLHPGTRYLAR**

(Parameters: blastp, nr protein database, expect=20000, no filter, PAM30)

Other BLAST [web gateways](#)

All matches to this query

**AT3G59770.1**

| <b>Score</b> | <b>Mr(calc)</b> | <b>Delta</b> | <b>Sequence</b>              |
|--------------|-----------------|--------------|------------------------------|
| 35.2         | 1448.7271       | 0.0043       | <a href="#">SRLHPGTRYLAR</a> |
| 2.7          | 1448.7355       | -0.0041      | <a href="#">EMVSKKEDLLVK</a> |
| 2.7          | 1448.7321       | -0.0007      | <a href="#">LYVTNQEDIIVK</a> |
| 1.1          | 1448.7348       | -0.0034      | <a href="#">DHNLPGLPQIVK</a> |

**Mascot:** <http://www.matrixscience.com/>

**Peptide View**MS/MS Fragmentation of **VIGVTSEGETAK**

Found in **AT3G59920.1** in **TAIR\_Arabidopsis**, Symbols: ATGD12 | ATGD12 (RAB GDP DISSOCIATION INHIBITOR 2); RAB GDP-dissociation inhibitor | chr3:22146134-22149198 FORWARD

Match to Query 4442: 1202.580920 from(602.297736,2+) index(1361)

Title: Elution from: 19.106 to 19.106 scan no 1865 cid35.00 polarity:+

Data file D6h-1\_1.mgf

Click mouse within plot area to zoom in by factor of two about that point

Or,   to  Da

Label all possible matches  Label matches used for scoring

Show Y-axis

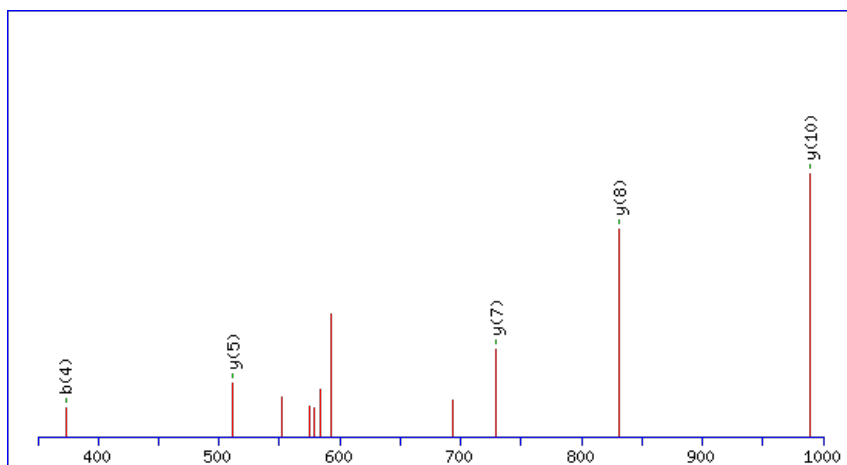

**Monoisotopic mass of neutral peptide Mr(calc):** 1202.5805

**Fixed modifications:** Carbamidomethyl (C) (apply to specified residues or termini only)

**Ions Score:** 33 **Expect:** 0.0046

**Matches:** 5/98 fragment ions using 6 most intense peaks ([help](#))

| #  | b               | b <sup>++</sup> | b <sup>0</sup> | b <sup>0++</sup> | Seq. | y               | y <sup>++</sup> | y*        | y <sup>*++</sup> | y <sup>0</sup> | y <sup>0++</sup> | #  |
|----|-----------------|-----------------|----------------|------------------|------|-----------------|-----------------|-----------|------------------|----------------|------------------|----|
| 1  | 101.0727        | 51.0400         |                |                  | V    |                 |                 |           |                  |                |                  | 12 |
| 2  | 215.1538        | 108.0805        |                |                  | I    | 1103.5223       | 552.2648        | 1085.4987 | 543.2530         | 1085.5117      | 543.2595         | 11 |
| 3  | 273.1723        | 137.0898        |                |                  | G    | <b>989.4412</b> | 495.2242        | 971.4176  | 486.2125         | 971.4307       | 486.2190         | 10 |
| 4  | <b>373.2378</b> | 187.1225        |                |                  | V    | 931.4227        | 466.2150        | 913.3991  | 457.2032         | 913.4122       | 457.2097         | 9  |
| 5  | 475.2825        | 238.1449        | 457.2719       | 229.1396         | T    | <b>831.3573</b> | 416.1823        | 813.3337  | 407.1705         | 813.3467       | 407.1770         | 8  |
| 6  | 563.3115        | 282.1594        | 545.3010       | 273.1541         | S    | <b>729.3126</b> | 365.1599        | 711.2890  | 356.1481         | 711.3020       | 356.1546         | 7  |
| 7  | 693.3512        | 347.1792        | 675.3406       | 338.1739         | E    | 641.2835        | 321.1454        | 623.2599  | 312.1336         | 623.2729       | 312.1401         | 6  |
| 8  | 751.3697        | 376.1885        | 733.3591       | 367.1832         | G    | <b>511.2439</b> | 256.1256        | 493.2203  | 247.1138         | 493.2333       | 247.1203         | 5  |
| 9  | 881.4093        | 441.2083        | 863.3987       | 432.2030         | E    | 453.2254        | 227.1163        | 435.2018  | 218.1045         | 435.2148       | 218.1110         | 4  |
| 10 | 983.4540        | 492.2306        | 965.4435       | 483.2254         | T    | 323.1857        | 162.0965        | 305.1622  | 153.0847         | 305.1752       | 153.0912         | 3  |
| 11 | 1055.4882       | 528.2477        | 1037.4776      | 519.2424         | A    | 221.1410        | 111.0741        | 203.1174  | 102.0624         |                |                  | 2  |
| 12 |                 |                 |                |                  | K    | 149.1069        | 75.0571         | 131.0833  | 66.0453          |                |                  | 1  |

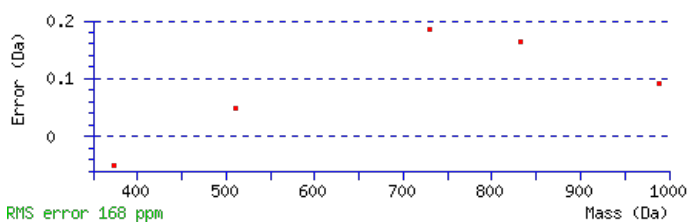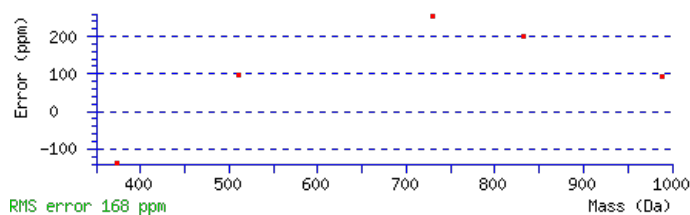

NCBI **BLAST** search of **VIGVTSEGETAK**

(Parameters: blastp, nr protein database, expect=20000, no filter, PAM30)

Other BLAST [web gateways](#)

AT3G59920.1

All matches to this query

| Score | Mr(calc)  | Delta   | Sequence                     |
|-------|-----------|---------|------------------------------|
| 32.8  | 1202.5805 | 0.0005  | <a href="#">VIGVTSEGETAK</a> |
| 4.9   | 1202.5827 | -0.0018 | <a href="#">DPKEFLSLDK</a>   |
| 0.5   | 1202.5832 | -0.0023 | <a href="#">NRSEGSSLLPK</a>  |

Mascot: <http://www.matrixscience.com/>

## Peptide View

### MS/MS Fragmentation of **SDSPAIGWGGPGGYVYQK**

Found in **AT3G59970.3** in **TAIR\_Arabidopsis**, Symbols: MTHFR1 | MTHFR1 (METHYLENETETRAHYDROFOLATE REDUCTASE 1); methylenetetrahydrofolate reductase (NADPH) | chr3:22162280-22165300 FORWARD

Match to Query 9178: 1837.861716 from(919.938134,2+) index(6962)

Title: Elution from: 60.567 to 60.567 scan no 8834 cid35.00 polarity:+

Data file D12h-1\_1.mgf

Click mouse within plot area to zoom in by factor of two about that point

Or,   to  Da

Label all possible matches  Label matches used for scoring

Show Y-axis

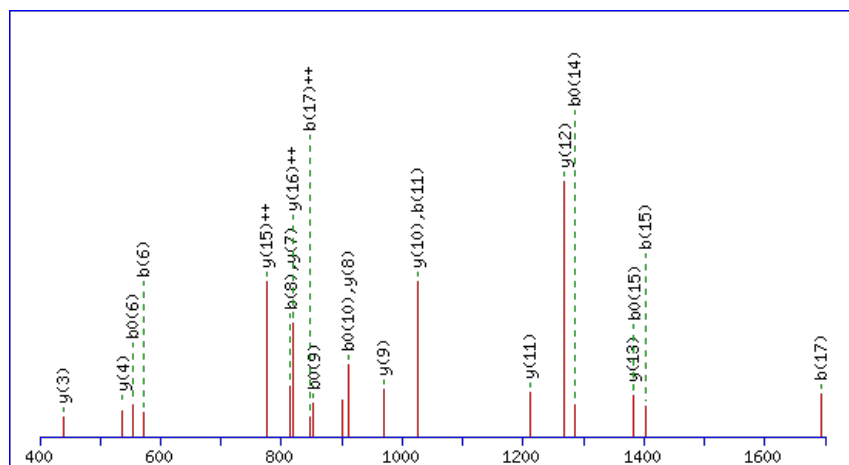

Monoisotopic mass of neutral peptide  $M_r(\text{calc})$ : 1837.8635

Fixed modifications: Carbamidomethyl (C) (apply to specified residues or termini only)

Ions Score: 87 Expect: 5.3e-009

Matches : 22/142 fragment ions using 22 most intense peaks ([help](#))

| #  | b         | b <sup>++</sup> | b <sup>*</sup> | b <sup>*++</sup> | b <sup>0</sup> | b <sup>0++</sup> | Seq. | y         | y <sup>++</sup> | y <sup>*</sup> | y <sup>*++</sup> | y <sup>0</sup> | y <sup>0++</sup> | #  |
|----|-----------|-----------------|----------------|------------------|----------------|------------------|------|-----------|-----------------|----------------|------------------|----------------|------------------|----|
| 1  | 88.0393   | 44.5233         |                |                  | 70.0287        | 35.5180          | S    |           |                 |                |                  |                |                  | 18 |
| 2  | 203.0662  | 102.0368        |                |                  | 185.0557       | 93.0315          | D    | 1751.8388 | 876.4230        | 1734.8122      | 867.9097         | 1733.8282      | 867.4177         | 17 |
| 3  | 290.0983  | 145.5528        |                |                  | 272.0877       | 136.5475         | S    | 1636.8118 | 818.9095        | 1619.7853      | 810.3963         | 1618.8013      | 809.9043         | 16 |
| 4  | 387.1510  | 194.0792        |                |                  | 369.1405       | 185.0739         | P    | 1549.7798 | 775.3935        | 1532.7532      | 766.8803         |                |                  | 15 |
| 5  | 458.1882  | 229.5977        |                |                  | 440.1776       | 220.5924         | A    | 1452.7270 | 726.8672        | 1435.7005      | 718.3539         |                |                  | 14 |
| 6  | 571.2722  | 286.1397        |                |                  | 553.2617       | 277.1345         | I    | 1381.6899 | 691.3486        | 1364.6634      | 682.8353         |                |                  | 13 |
| 7  | 628.2937  | 314.6505        |                |                  | 610.2831       | 305.6452         | G    | 1268.6059 | 634.8066        | 1251.5793      | 626.2933         |                |                  | 12 |
| 8  | 814.3730  | 407.6901        |                |                  | 796.3624       | 398.6849         | W    | 1211.5844 | 606.2958        | 1194.5578      | 597.7826         |                |                  | 11 |
| 9  | 871.3945  | 436.2009        |                |                  | 853.3839       | 427.1956         | G    | 1025.5051 | 513.2562        | 1008.4785      | 504.7429         |                |                  | 10 |
| 10 | 928.4159  | 464.7116        |                |                  | 910.4054       | 455.7063         | G    | 968.4836  | 484.7454        | 951.4571       | 476.2322         |                |                  | 9  |
| 11 | 1025.4687 | 513.2380        |                |                  | 1007.4581      | 504.2327         | P    | 911.4621  | 456.2347        | 894.4356       | 447.7214         |                |                  | 8  |
| 12 | 1082.4902 | 541.7487        |                |                  | 1064.4796      | 532.7434         | G    | 814.4094  | 407.7083        | 797.3828       | 399.1951         |                |                  | 7  |
| 13 | 1139.5116 | 570.2594        |                |                  | 1121.5010      | 561.2542         | G    | 757.3879  | 379.1976        | 740.3614       | 370.6843         |                |                  | 6  |
| 14 | 1302.5749 | 651.7911        |                |                  | 1284.5644      | 642.7858         | Y    | 700.3665  | 350.6869        | 683.3399       | 342.1736         |                |                  | 5  |
| 15 | 1401.6434 | 701.3253        |                |                  | 1383.6328      | 692.3200         | V    | 537.3031  | 269.1552        | 520.2766       | 260.6419         |                |                  | 4  |
| 16 | 1564.7067 | 782.8570        |                |                  | 1546.6961      | 773.8517         | Y    | 438.2347  | 219.6210        | 421.2082       | 211.1077         |                |                  | 3  |
| 17 | 1692.7653 | 846.8863        | 1675.7387      | 838.3730         | 1674.7547      | 837.8810         | Q    | 275.1714  | 138.0893        | 258.1448       | 129.5761         |                |                  | 2  |
| 18 |           |                 |                |                  |                |                  | K    | 147.1128  | 74.0600         | 130.0863       | 65.5468          |                |                  | 1  |



# AT3G59970.3

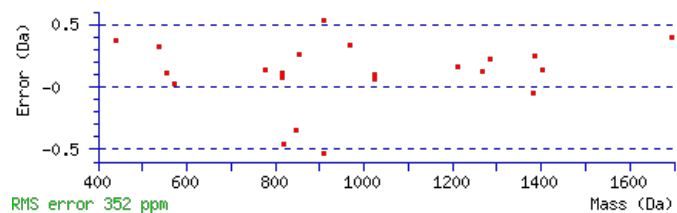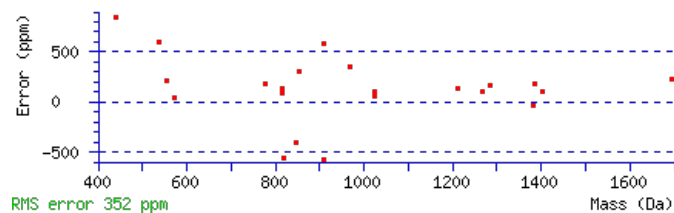

NCBI **BLAST** search of [SDSPAIGWGGPGGYVYQK](#)  
(Parameters: blastp, nr protein database, expect=20000, no filter, PAM30)  
Other BLAST [web gateways](#)

## All matches to this query

| Score | Mr(calc)  | Delta   | Sequence                           |
|-------|-----------|---------|------------------------------------|
| 87.4  | 1837.8635 | -0.0018 | <a href="#">SDSPAIGWGGPGGYVYQK</a> |
| 8.1   | 1837.8595 | 0.0022  | <a href="#">GNLGNCDITS DGYHKYK</a> |
| 5.0   | 1837.8588 | 0.0029  | <a href="#">NKNVDQSCSTSKQQSK</a>   |
| 4.8   | 1837.8653 | -0.0036 | <a href="#">ELKSEEDGLGSSSSRGK</a>  |
| 1.9   | 1837.8669 | -0.0052 | <a href="#">MASASFSAVSSLSYQFR</a>  |
| 0.3   | 1837.8628 | -0.0011 | <a href="#">VNGENNSNVYELMIRA</a>   |

Mascot: <http://www.matrixscience.com/>



# Mascot Search Results

## Peptide View

MS/MS Fragmentation of **MLSCKQELSSRVR**

Found in **AT3G60240.2** in **TAIR\_Arabidopsis**, Symbols: CUM2, EIF4G | EIF4G (EUKARYOTIC TRANSLATION INITIATION FACTOR 4G) | chr3:22272817-22279270 FORWARD

Match to Query 6966: 1630.744066 from(816.379309,2+) index(6250)

Title: Elution from: 59.154 to 59.154 scan no 8194 cid35.00 polarity:+

Data file D1d-1-2.mgf

Click mouse within plot area to zoom in by factor of two about that point

Or,  to  Da

Label all possible matches  Label matches used for scoring

Show Y-axis

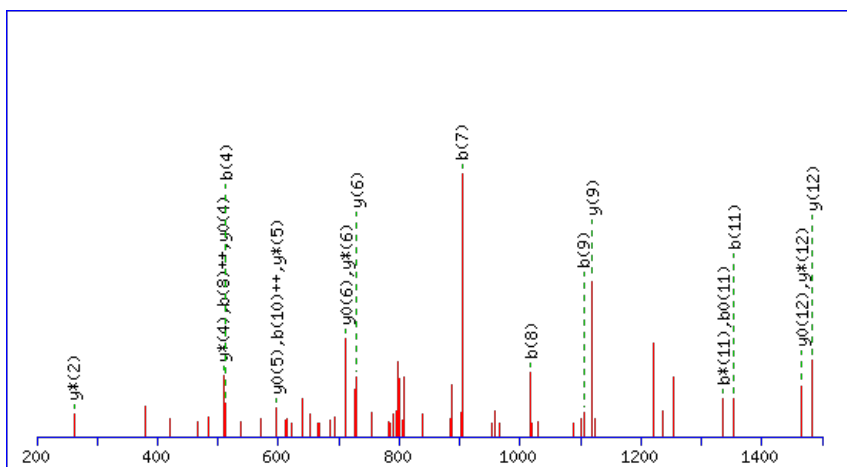

Monoisotopic mass of neutral peptide  $M_r(\text{calc})$ : 1630.7424

Fixed modifications: Carbamidomethyl (C) (apply to specified residues or termini only)

Variable modifications:

M1 : Oxidation (M), with neutral losses 0.0000 (shown in table), 63.9983

Ions Score: 28 Expect: 0.01

Matches : 21/186 fragment ions using 23 most intense peaks ([help](#))

| #  | b         | b <sup>++</sup> | b*        | b <sup>*++</sup> | b <sup>0</sup> | b <sup>0++</sup> | Seq. | y         | y <sup>++</sup> | y*        | y <sup>*++</sup> | y <sup>0</sup> | y <sup>0++</sup> | #  |
|----|-----------|-----------------|-----------|------------------|----------------|------------------|------|-----------|-----------------|-----------|------------------|----------------|------------------|----|
| 1  | 149.0397  | 75.0235         |           |                  |                |                  | M    |           |                 |           |                  |                |                  | 13 |
| 2  | 263.1208  | 132.0640        |           |                  |                |                  | L    | 1483.7172 | 742.3622        | 1465.6936 | 733.3504         | 1465.7066      | 733.3570         | 12 |
| 3  | 351.1499  | 176.0786        |           |                  | 333.1393       | 167.0733         | S    | 1369.6361 | 685.3217        | 1351.6125 | 676.3099         | 1351.6255      | 676.3164         | 11 |
| 4  | 513.1746  | 257.0909        |           |                  | 495.1640       | 248.0857         | C    | 1281.6070 | 641.3072        | 1263.5835 | 632.2954         | 1263.5965      | 632.3019         | 10 |
| 5  | 643.2636  | 322.1354        | 625.2400  | 313.1237         | 625.2531       | 313.1302         | K    | 1119.5823 | 560.2948        | 1101.5587 | 551.2830         | 1101.5718      | 551.2895         | 9  |
| 6  | 773.3163  | 387.1618        | 755.2927  | 378.1500         | 755.3057       | 378.1565         | Q    | 989.4933  | 495.2503        | 971.4697  | 486.2385         | 971.4827       | 486.2450         | 8  |
| 7  | 903.3559  | 452.1816        | 885.3323  | 443.1698         | 885.3453       | 443.1763         | E    | 859.4406  | 430.2240        | 841.4171  | 421.2122         | 841.4301       | 421.2187         | 7  |
| 8  | 1017.4370 | 509.2221        | 999.4134  | 500.2103         | 999.4264       | 500.2169         | L    | 729.4010  | 365.2041        | 711.3774  | 356.1924         | 711.3905       | 356.1989         | 6  |
| 9  | 1105.4661 | 553.2367        | 1087.4425 | 544.2249         | 1087.4555      | 544.2314         | S    | 615.3199  | 308.1636        | 597.2963  | 299.1518         | 597.3094       | 299.1583         | 5  |
| 10 | 1193.4951 | 597.2512        | 1175.4715 | 588.2394         | 1175.4846      | 588.2459         | S    | 527.2909  | 264.1491        | 509.2673  | 255.1373         | 509.2803       | 255.1438         | 4  |
| 11 | 1353.5844 | 677.2958        | 1335.5608 | 668.2840         | 1335.5738      | 668.2905         | R    | 439.2618  | 220.1345        | 421.2382  | 211.1227         |                |                  | 3  |
| 12 | 1453.6498 | 727.3285        | 1435.6262 | 718.3168         | 1435.6393      | 718.3233         | V    | 279.1725  | 140.0899        | 261.1490  | 131.0781         |                |                  | 2  |
| 13 |           |                 |           |                  |                |                  | R    | 179.1071  | 90.0572         | 161.0835  | 81.0454          |                |                  | 1  |

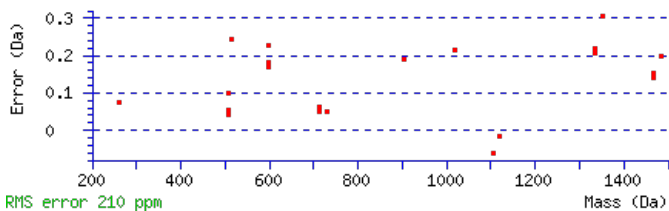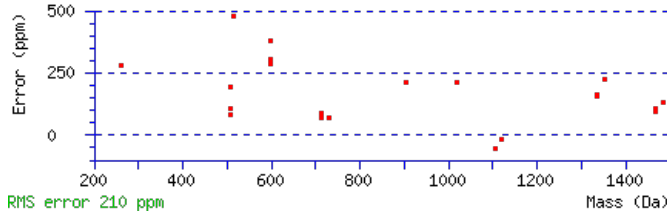

NCBI BLAST search of [MLSCKQELSSRVR](#)

## AT3G60240.2

(Parameters: blastp, nr protein database, expect=20000, no filter, PAM30)

Other BLAST [web gateways](#)

### All matches to this query

| Score | Mr(calc)  | Delta   | Sequence                        |
|-------|-----------|---------|---------------------------------|
| 28.0  | 1630.7424 | 0.0017  | <a href="#">MLSCKQELSSVR</a>    |
| 22.0  | 1630.7489 | -0.0048 | <a href="#">VYLEQDDFVKTMK</a>   |
| 21.0  | 1630.7410 | 0.0030  | <a href="#">FGETSKNELTTSATK</a> |
| 6.4   | 1630.7437 | 0.0004  | <a href="#">GSSFETIDIATSARR</a> |
| 3.7   | 1630.7435 | 0.0006  | <a href="#">FVHPNIDHMIFNK</a>   |
| 0.4   | 1630.7430 | 0.0011  | <a href="#">FDEIMKWFLGWK</a>    |

Mascot: <http://www.matrixscience.com/>

**Peptide View**MS/MS Fragmentation of **SDESVSARASVVGK**

Found in **AT3G60380.1** in **TAIR\_Arabidopsis**, Symbols: | similar to hydroxyproline-rich glycoprotein family protein [Arabidopsis thaliana] (TAIR:AT4G16790.1); similar to unnamed protein product [Vitis vinifera] (GB:CAO70557.1) | chr3:22327888-22330119 REVERSE

Match to Query 5077: 1408.649368 from(705.331960,2+) index(3175)

Title: Elution from: 32.155 to 32.155 scan no 4021 cid35.00 polarity:+

Data file D1d-2\_3.mgf

Click mouse within plot area to zoom in by factor of two about that point

Or,   to  Da

Label all possible matches  Label matches used for scoring

Show Y-axis

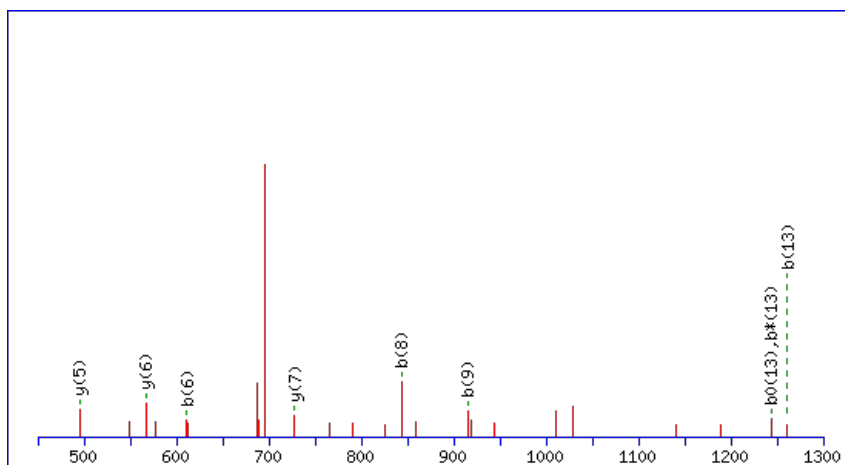

**Monoisotopic mass of neutral peptide Mr(calc):** 1408.6518

**Fixed modifications:** Carbamidomethyl (C) (apply to specified residues or termini only)

**Ions Score:** 23 **Expect:** 0.043

**Matches:** 9/134 fragment ions using 16 most intense peaks ([help](#))

| #  | b                | b <sup>++</sup> | b*               | b <sup>*++</sup> | b <sup>0</sup>   | b <sup>0++</sup> | Seq. | y               | y <sup>++</sup> | y*        | y <sup>*++</sup> | y <sup>0</sup> | y <sup>0++</sup> | #  |
|----|------------------|-----------------|------------------|------------------|------------------|------------------|------|-----------------|-----------------|-----------|------------------|----------------|------------------|----|
| 1  | 89.0363          | 45.0218         |                  |                  | 71.0258          | 36.0165          | S    |                 |                 |           |                  |                |                  | 14 |
| 2  | 205.0603         | 103.0338        |                  |                  | 187.0498         | 94.0285          | D    | 1321.6301       | 661.3187        | 1303.6065 | 652.3069         | 1303.6195      | 652.3134         | 13 |
| 3  | 335.0999         | 168.0536        |                  |                  | 317.0894         | 159.0483         | E    | 1205.6061       | 603.3067        | 1187.5825 | 594.2949         | 1187.5955      | 594.3014         | 12 |
| 4  | 423.1290         | 212.0681        |                  |                  | 405.1184         | 203.0629         | S    | 1075.5665       | 538.2869        | 1057.5429 | 529.2751         | 1057.5559      | 529.2816         | 11 |
| 5  | 523.1945         | 262.1009        |                  |                  | 505.1839         | 253.0956         | V    | 987.5374        | 494.2723        | 969.5138  | 485.2605         | 969.5268       | 485.2671         | 10 |
| 6  | <b>611.2235</b>  | 306.1154        |                  |                  | 593.2130         | 297.1101         | S    | 887.4719        | 444.2396        | 869.4484  | 435.2278         | 869.4614       | 435.2343         | 9  |
| 7  | 683.2577         | 342.1325        |                  |                  | 665.2471         | 333.1272         | A    | 799.4429        | 400.2251        | 781.4193  | 391.2133         | 781.4323       | 391.2198         | 8  |
| 8  | <b>843.3469</b>  | 422.1771        | 825.3233         | 413.1653         | 825.3364         | 413.1718         | R    | <b>727.4087</b> | 364.2080        | 709.3851  | 355.1962         | 709.3982       | 355.2027         | 7  |
| 9  | <b>915.3811</b>  | 458.1942        | 897.3575         | 449.1824         | 897.3705         | 449.1889         | A    | <b>567.3195</b> | 284.1634        | 549.2959  | 275.1516         | 549.3089       | 275.1581         | 6  |
| 10 | 1003.4101        | 502.2087        | 985.3865         | 493.1969         | 985.3996         | 493.2034         | S    | <b>495.2853</b> | 248.1463        | 477.2617  | 239.1345         | 477.2748       | 239.1410         | 5  |
| 11 | 1103.4756        | 552.2414        | 1085.4520        | 543.2296         | 1085.4650        | 543.2361         | V    | 407.2563        | 204.1318        | 389.2327  | 195.1200         |                |                  | 4  |
| 12 | 1203.5410        | 602.2742        | 1185.5174        | 593.2624         | 1185.5305        | 593.2689         | V    | 307.1908        | 154.0990        | 289.1672  | 145.0873         |                |                  | 3  |
| 13 | <b>1261.5595</b> | 631.2834        | <b>1243.5359</b> | 622.2716         | <b>1243.5490</b> | 622.2781         | G    | 207.1254        | 104.0663        | 189.1018  | 95.0545          |                |                  | 2  |
| 14 |                  |                 |                  |                  |                  |                  | K    | 149.1069        | 75.0571         | 131.0833  | 66.0453          |                |                  | 1  |

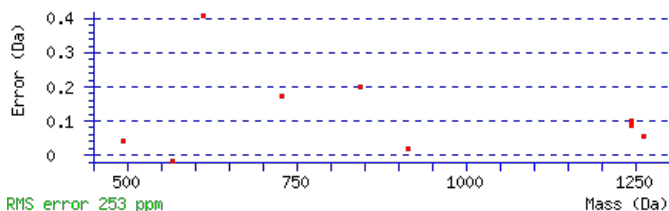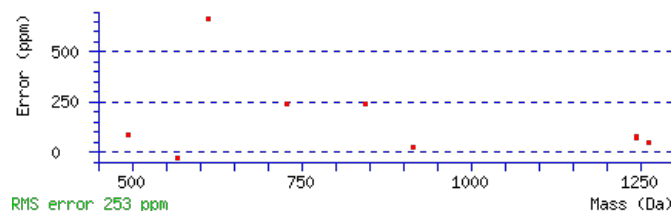

NCBI BLAST search of [SDESVSARASVVGK](#)

## AT3G60380.1

(Parameters: blastp, nr protein database, expect=20000, no filter, PAM30)

Other BLAST [web gateways](#)

### All matches to this query

| Score | Mr(calc)  | Delta   | Sequence                       |
|-------|-----------|---------|--------------------------------|
| 23.4  | 1408.6518 | -0.0025 | <a href="#">SDESVSARASVVGK</a> |
| 16.9  | 1408.6514 | -0.0020 | <a href="#">KSYILDAEVDDK</a>   |
| 13.3  | 1408.6467 | 0.0027  | <a href="#">SICEAAKVEYPK</a>   |
| 11.1  | 1408.6527 | -0.0033 | <a href="#">TMTHRMILTQK</a>    |
| 10.8  | 1408.6471 | 0.0023  | <a href="#">MASPRVVSEDRK</a>   |
| 10.0  | 1408.6516 | -0.0022 | <a href="#">FTEKHFCKAPK</a>    |
| 8.8   | 1408.6494 | 0.0000  | <a href="#">ETMNRALNLWK</a>    |
| 7.7   | 1408.6514 | -0.0021 | <a href="#">SSVESSVIPSFEK</a>  |
| 7.3   | 1408.6518 | -0.0025 | <a href="#">TREASQTETLQK</a>   |
| 7.3   | 1408.6516 | -0.0022 | <a href="#">MQITVAFNHFGK</a>   |

Mascot: <http://www.matrixscience.com/>

**Peptide View**MS/MS Fragmentation of **NLSQQCLNALAK**Found in **AT3G60750.1** in **TAIR\_Arabidopsis**, Symbols: | transketolase, putative | chr3:22464979-22467799 FORWARD

Match to Query 4979: 1358.698836 from(680.356694,2+) index(3811)

Title: Elution from: 35.110 to 35.110 scan no 4730 cid35.00 polarity:+

Data file D6h-3\_3.mgf

Click mouse within plot area to zoom in by factor of two about that point

Or,   to  Da Label all possible matches  Label matches used for scoring Show Y-axis 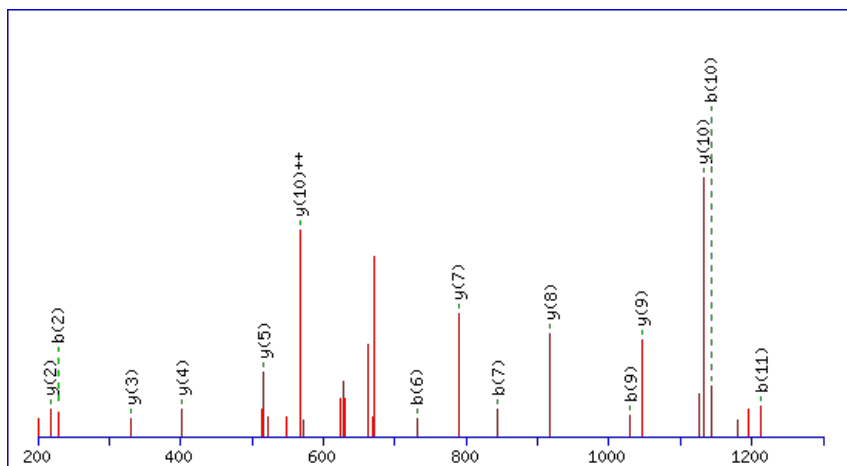Monoisotopic mass of neutral peptide  $M_r(\text{calc})$ : 1358.6976

Fixed modifications: Carbamidomethyl (C) (apply to specified residues or termini only)

Ions Score: 87 Expect: 6.6e-009

Matches : 15/110 fragment ions using 17 most intense peaks ([help](#))

| #  | b                | b <sup>++</sup> | b*        | b <sup>*++</sup> | b <sup>0</sup> | b <sup>0++</sup> | Seq. | y                | y <sup>++</sup> | y*        | y <sup>*++</sup> | y <sup>0</sup> | y <sup>0++</sup> | #  |
|----|------------------|-----------------|-----------|------------------|----------------|------------------|------|------------------|-----------------|-----------|------------------|----------------|------------------|----|
| 1  | 115.0502         | 58.0287         | 98.0237   | 49.5155          |                |                  | N    |                  |                 |           |                  |                |                  | 12 |
| 2  | <b>228.1343</b>  | 114.5708        | 211.1077  | 106.0575         |                |                  | L    | 1245.6620        | 623.3346        | 1228.6354 | 614.8214         | 1227.6514      | 614.3293         | 11 |
| 3  | 315.1663         | 158.0868        | 298.1397  | 149.5735         | 297.1557       | 149.0815         | S    | <b>1132.5779</b> | <b>566.7926</b> | 1115.5514 | 558.2793         | 1114.5674      | 557.7873         | 10 |
| 4  | 443.2249         | 222.1161        | 426.1983  | 213.6028         | 425.2143       | 213.1108         | Q    | <b>1045.5459</b> | 523.2766        | 1028.5193 | 514.7633         |                |                  | 9  |
| 5  | 571.2835         | 286.1454        | 554.2569  | 277.6321         | 553.2729       | 277.1401         | Q    | <b>917.4873</b>  | 459.2473        | 900.4608  | 450.7340         |                |                  | 8  |
| 6  | <b>731.3141</b>  | 366.1607        | 714.2876  | 357.6474         | 713.3035       | 357.1554         | C    | <b>789.4287</b>  | 395.2180        | 772.4022  | 386.7047         |                |                  | 7  |
| 7  | <b>844.3982</b>  | 422.7027        | 827.3716  | 414.1894         | 826.3876       | 413.6974         | L    | 629.3981         | 315.2027        | 612.3715  | 306.6894         |                |                  | 6  |
| 8  | 958.4411         | 479.7242        | 941.4145  | 471.2109         | 940.4305       | 470.7189         | N    | <b>516.3140</b>  | 258.6606        | 499.2875  | 250.1474         |                |                  | 5  |
| 9  | <b>1029.4782</b> | 515.2427        | 1012.4517 | 506.7295         | 1011.4676      | 506.2375         | A    | <b>402.2711</b>  | 201.6392        | 385.2445  | 193.1259         |                |                  | 4  |
| 10 | <b>1142.5623</b> | 571.7848        | 1125.5357 | 563.2715         | 1124.5517      | 562.7795         | L    | <b>331.2340</b>  | 166.1206        | 314.2074  | 157.6074         |                |                  | 3  |
| 11 | <b>1213.5994</b> | 607.3033        | 1196.5728 | 598.7901         | 1195.5888      | 598.2980         | A    | <b>218.1499</b>  | 109.5786        | 201.1234  | 101.0653         |                |                  | 2  |
| 12 |                  |                 |           |                  |                |                  | K    | 147.1128         | 74.0600         | 130.0863  | 65.5468          |                |                  | 1  |

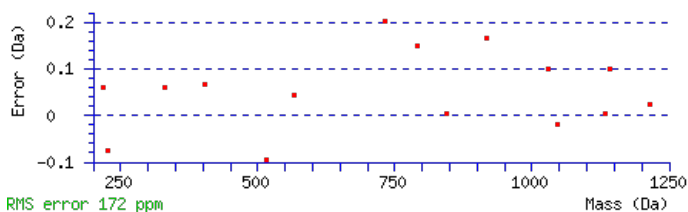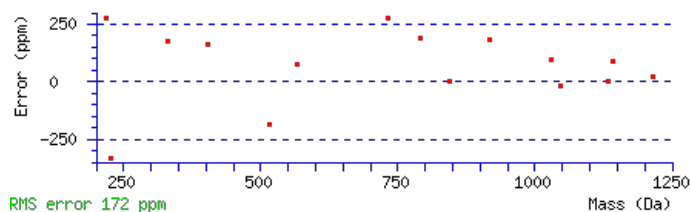NCBI BLAST search of **NLSQQCLNALAK**

(Parameters: blastp, nr protein database, expect=20000, no filter, PAM30)

Other BLAST [web gateways](#)**All matches to this query**

**AT3G60750.1**

| Score | Mr(calc)  | Delta   | Sequence                     |
|-------|-----------|---------|------------------------------|
| 87.0  | 1358.6976 | 0.0012  | <a href="#">NLSQQCLNALAK</a> |
| 1.8   | 1358.6976 | 0.0012  | <a href="#">QVAELQMERQK</a>  |
| 0.2   | 1358.7023 | -0.0035 | <a href="#">MMHSVSRLARR</a>  |
| 0.2   | 1358.7023 | -0.0035 | <a href="#">MMHSVSRLARR</a>  |

**Mascot:** <http://www.matrixscience.com/>

**Peptide View**MS/MS Fragmentation of **GISASALPYK**Found in **AT3G60770.1** in **TAIR\_Arabidopsis**, Symbols: | 40S ribosomal protein S13 (RPS13A) | chr3:22471500-22472631 REVERSE

Match to Query 2336: 1005.550358 from(503.782455,2+) index(3300)

Title: Elution from: 31.257 to 31.257 scan no 4065 cid35.00 polarity:+

Data file D6h-3\_3.mgf

Click mouse within plot area to zoom in by factor of two about that point

Or,   to  Da Label all possible matches  Label matches used for scoring Show Y-axis 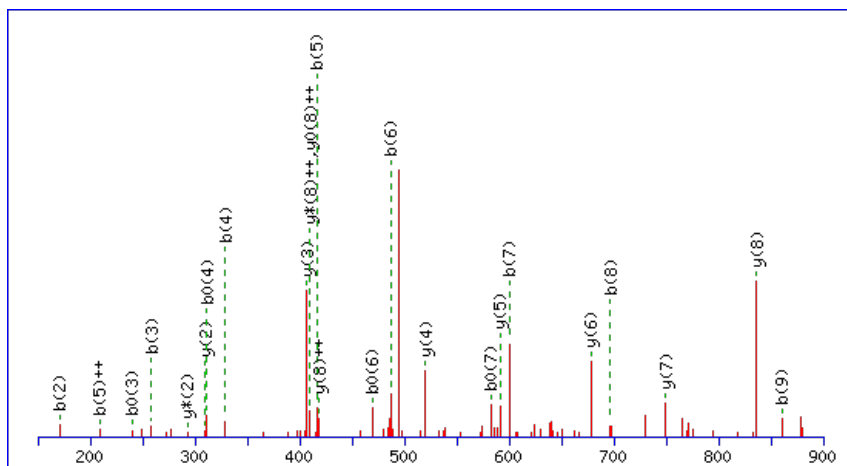Monoisotopic mass of neutral peptide  $M_r(\text{calc})$ : 1005.5495

Fixed modifications: Carbamidomethyl (C) (apply to specified residues or termini only)

Ions Score: 61 Expect: 4.2e-006

Matches : 24/76 fragment ions using 37 most intense peaks ([help](#))

| #  | b               | b <sup>++</sup> | b <sup>0</sup>  | b <sup>0++</sup> | Seq.     | y               | y <sup>++</sup> | y*              | y <sup>*++</sup> | y <sup>0</sup> | y <sup>0++</sup> | #  |
|----|-----------------|-----------------|-----------------|------------------|----------|-----------------|-----------------|-----------------|------------------|----------------|------------------|----|
| 1  | 58.0287         | 29.5180         |                 |                  | <b>G</b> |                 |                 |                 |                  |                |                  | 10 |
| 2  | <b>171.1128</b> | 86.0600         |                 |                  | <b>I</b> | 949.5353        | 475.2713        | 932.5088        | 466.7580         | 931.5247       | 466.2660         | 9  |
| 3  | <b>258.1448</b> | 129.5761        | <b>240.1343</b> | 120.5708         | <b>S</b> | <b>836.4512</b> | <b>418.7293</b> | 819.4247        | <b>410.2160</b>  | 818.4407       | <b>409.7240</b>  | 8  |
| 4  | <b>329.1819</b> | 165.0946        | <b>311.1714</b> | 156.0893         | <b>A</b> | <b>749.4192</b> | 375.2132        | 732.3927        | 366.7000         | 731.4087       | 366.2080         | 7  |
| 5  | <b>416.2140</b> | <b>208.6106</b> | 398.2034        | 199.6053         | <b>S</b> | <b>678.3821</b> | 339.6947        | 661.3556        | 331.1814         | 660.3715       | 330.6894         | 6  |
| 6  | <b>487.2511</b> | 244.1292        | <b>469.2405</b> | 235.1239         | <b>A</b> | <b>591.3501</b> | 296.1787        | 574.3235        | 287.6654         |                |                  | 5  |
| 7  | <b>600.3352</b> | 300.6712        | <b>582.3246</b> | 291.6659         | <b>L</b> | <b>520.3130</b> | 260.6601        | 503.2864        | 252.1468         |                |                  | 4  |
| 8  | <b>697.3879</b> | 349.1976        | 679.3774        | 340.1923         | <b>P</b> | <b>407.2289</b> | 204.1181        | 390.2023        | 195.6048         |                |                  | 3  |
| 9  | <b>860.4512</b> | 430.7293        | 842.4407        | 421.7240         | <b>Y</b> | <b>310.1761</b> | 155.5917        | <b>293.1496</b> | 147.0784         |                |                  | 2  |
| 10 |                 |                 |                 |                  | <b>K</b> | 147.1128        | 74.0600         | 130.0863        | 65.5468          |                |                  | 1  |

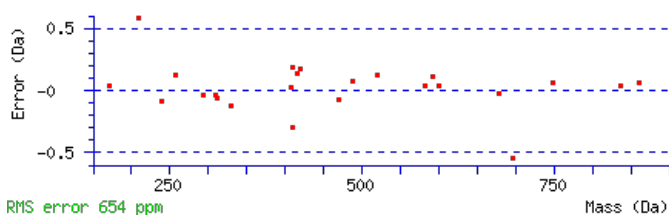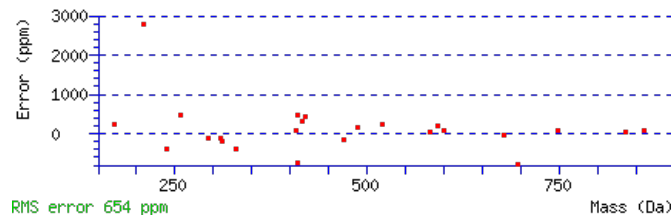NCBI **BLAST** search of **GISASALPYK**

(Parameters: blastp, nr protein database, expect=20000, no filter, PAM30)

Other BLAST [web gateways](#)**All matches to this query**

| Score | Mr(calc) | Delta | Sequence |
|-------|----------|-------|----------|
|       |          |       |          |



## AT3G60770.1

|      |           |         |                            |
|------|-----------|---------|----------------------------|
| 61.3 | 1005.5495 | 0.0009  | <a href="#">GISASALPYK</a> |
| 11.0 | 1005.5528 | -0.0025 | <a href="#">EKAMLALSK</a>  |
| 2.4  | 1005.5495 | 0.0009  | <a href="#">GLDYALLNK</a>  |
| 0.2  | 1005.5495 | 0.0009  | <a href="#">GEVKSVPYK</a>  |

**Mascot:** <http://www.matrixscience.com/>

**Peptide View**MS/MS Fragmentation of **LEIMILK**

Found in **AT3G60820.1** in **TAIR\_Arabidopsis**, Symbols: PBF1 | PBF1 (20S proteasome beta subunit F1); peptidase | chr3:22483013-22484784  
REVERSE

Match to Query 1636: 882.496730 from(442.255641,2+) index(1983)

Title: Elution from: 22.249 to 22.249 scan no 2514 cid35.00 polarity:+

Data file D1d-3\_2.mgf

Click mouse within plot area to zoom in by factor of two about that point

Or,  to  Da

Label all possible matches  Label matches used for scoring

Show Y-axis

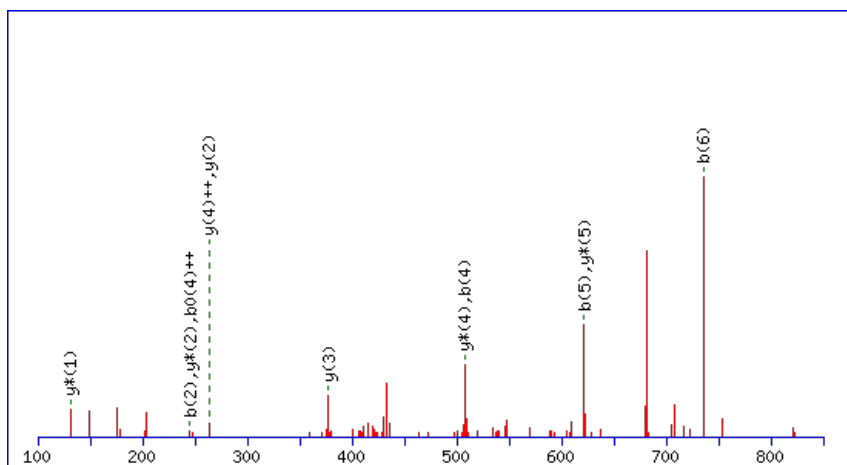

Monoisotopic mass of neutral peptide  $M_r(\text{calc})$ : 882.4961

Fixed modifications: Carbamidomethyl (C) (apply to specified residues or termini only)

Variable modifications:

M4 : Oxidation (M), with neutral losses 0.0000 (shown in table), 63.9983

Ions Score: 24 Expect: 0.011

Matches : 12/74 fragment ions using 14 most intense peaks ([help](#))

| # | b               | b <sup>++</sup> | b <sup>0</sup> | b <sup>0++</sup> | Seq. | y               | y <sup>++</sup> | y*              | y <sup>+++</sup> | y <sup>0</sup> | y <sup>0++</sup> | # |
|---|-----------------|-----------------|----------------|------------------|------|-----------------|-----------------|-----------------|------------------|----------------|------------------|---|
| 1 | 115.0884        | 58.0478         |                |                  | L    |                 |                 |                 |                  |                |                  | 7 |
| 2 | <b>245.1280</b> | 123.0676        | 227.1174       | 114.0624         | E    | 769.4222        | 385.2148        | 751.3986        | 376.2030         | 751.4117       | 376.2095         | 6 |
| 3 | 359.2091        | 180.1082        | 341.1985       | 171.1029         | I    | 639.3826        | 320.1949        | <b>621.3590</b> | 311.1831         |                |                  | 5 |
| 4 | <b>507.2415</b> | 254.1244        | 489.2310       | <b>245.1191</b>  | M    | 525.3015        | <b>263.1544</b> | <b>507.2779</b> | 254.1426         |                |                  | 4 |
| 5 | <b>621.3226</b> | 311.1650        | 603.3121       | 302.1597         | I    | <b>377.2691</b> | 189.1382        | 359.2455        | 180.1264         |                |                  | 3 |
| 6 | <b>735.4037</b> | 368.2055        | 717.3932       | 359.2002         | L    | <b>263.1880</b> | 132.0976        | <b>245.1644</b> | 123.0858         |                |                  | 2 |
| 7 |                 |                 |                |                  | K    | 149.1069        | 75.0571         | <b>131.0833</b> | 66.0453          |                |                  | 1 |

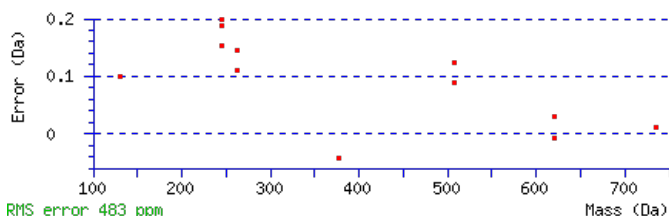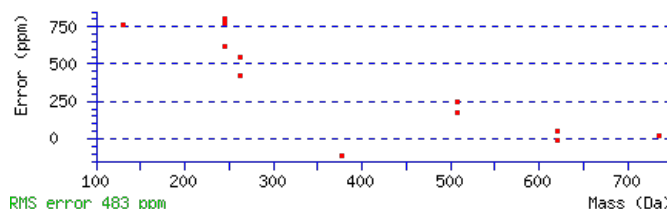

NCBI BLAST search of [LEIMILK](#)

(Parameters: blastp, nr protein database, expect=20000, no filter, PAM30)

Other BLAST [web gateways](#)

**All matches to this query**

| Score | $M_r(\text{calc})$ | Delta  | Sequence                |
|-------|--------------------|--------|-------------------------|
| 23.5  | 882.4961           | 0.0007 | <a href="#">LEIMILK</a> |

## AT3G60820.1

|      |          |         |                         |
|------|----------|---------|-------------------------|
| 19.3 | 882.4954 | 0.0014  | <a href="#">FLLLNPR</a> |
| 12.9 | 882.4954 | 0.0014  | <a href="#">LFSKHLK</a> |
| 12.9 | 882.4987 | -0.0020 | <a href="#">MKPKQIK</a> |
| 12.4 | 882.4953 | 0.0014  | <a href="#">TVKFHLK</a> |
| 9.2  | 882.4987 | -0.0020 | <a href="#">MVLPRIK</a> |
| 8.8  | 882.4953 | 0.0014  | <a href="#">IQGWKLK</a> |
| 8.4  | 882.4953 | 0.0014  | <a href="#">KWIQAVK</a> |
| 6.3  | 882.4953 | 0.0014  | <a href="#">LFLVQPR</a> |
| 1.6  | 882.4953 | 0.0014  | <a href="#">LWGQKLK</a> |

Mascot: <http://www.matrixscience.com/>

**Peptide View**MS/MS Fragmentation of **YLSSVLFDELRK**

Found in **AT3G61440.1** in **TAIR\_Arabidopsis**, Symbols: ARATH;BSAS3;1, ATCYSC1 | ATCYSC1 (BETA-SUBSTITUTED ALA SYNTHASE 3;1); L-3-cyanoalanine synthase/ cysteine synthase | chr3:22746860-22748767 FORWARD

Match to Query 5969: 1468.792986 from(490.604938,3+) index(7817)

Title: Elution from: 70.068 to 70.068 scan no 10227 cid35.00 polarity:+

Data file D6h-2\_2.mgf

Click mouse within plot area to zoom in by factor of two about that point

Or,   to  Da

Label all possible matches  Label matches used for scoring

Show Y-axis

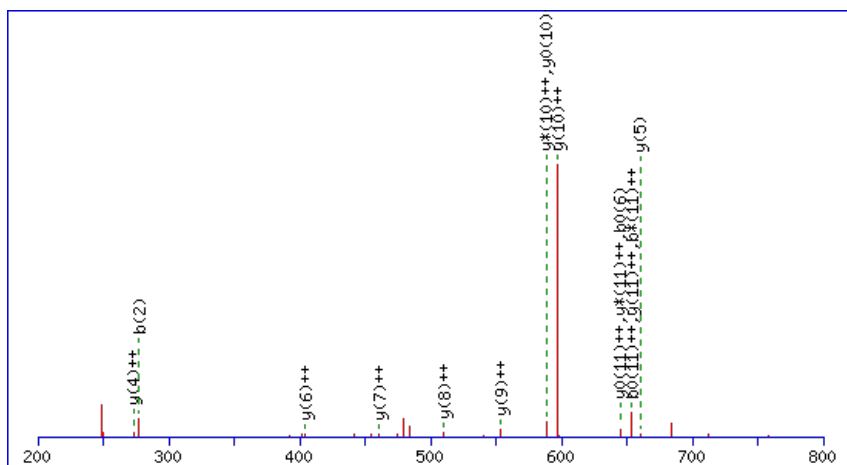

Monoisotopic mass of neutral peptide **Mr(calc)**: 1468.7926

**Fixed modifications**: Carbamidomethyl (C) (apply to specified residues or termini only)

**Ions Score**: 28 **Expect**: 0.0042

**Matches**: 16/102 fragment ions using 25 most intense peaks ([help](#))

| #  | b         | b <sup>++</sup> | b*        | b <sup>*++</sup> | b <sup>0</sup> | b <sup>0++</sup> | Seq. | y         | y <sup>++</sup> | y*        | y <sup>*++</sup> | y <sup>0</sup> | y <sup>0++</sup> | #  |
|----|-----------|-----------------|-----------|------------------|----------------|------------------|------|-----------|-----------------|-----------|------------------|----------------|------------------|----|
| 1  | 164.0706  | 82.5389         |           |                  |                |                  | Y    |           |                 |           |                  |                |                  | 12 |
| 2  | 277.1547  | 139.0810        |           |                  |                |                  | L    | 1306.7365 | 653.8719        | 1289.7100 | 645.3586         | 1288.7260      | 644.8666         | 11 |
| 3  | 364.1867  | 182.5970        |           |                  | 346.1761       | 173.5917         | S    | 1193.6252 | 597.3299        | 1176.6259 | 588.8166         | 1175.6419      | 588.3246         | 10 |
| 4  | 451.2187  | 226.1130        |           |                  | 433.2082       | 217.1077         | S    | 1106.6204 | 553.8139        | 1089.5939 | 545.3006         | 1088.6099      | 544.8086         | 9  |
| 5  | 550.2871  | 275.6472        |           |                  | 532.2766       | 266.6419         | V    | 1019.5884 | 510.2978        | 1002.5619 | 501.7846         | 1001.5778      | 501.2926         | 8  |
| 6  | 663.3712  | 332.1892        |           |                  | 645.3606       | 323.1840         | L    | 920.5200  | 460.7636        | 903.4934  | 452.2504         | 902.5094       | 451.7584         | 7  |
| 7  | 810.4396  | 405.7234        |           |                  | 792.4291       | 396.7182         | F    | 807.4359  | 404.2216        | 790.4094  | 395.7083         | 789.4254       | 395.2163         | 6  |
| 8  | 925.4666  | 463.2369        |           |                  | 907.4560       | 454.2316         | D    | 660.3675  | 330.6874        | 643.3410  | 322.1741         | 642.3569       | 321.6821         | 5  |
| 9  | 1054.5092 | 527.7582        |           |                  | 1036.4986      | 518.7529         | E    | 545.3406  | 273.1739        | 528.3140  | 264.6606         | 527.3300       | 264.1686         | 4  |
| 10 | 1167.5932 | 584.3002        |           |                  | 1149.5827      | 575.2950         | L    | 416.2980  | 208.6526        | 399.2714  | 200.1394         |                |                  | 3  |
| 11 | 1323.6943 | 662.3508        | 1306.6678 | 653.8375         | 1305.6838      | 653.3455         | R    | 303.2139  | 152.1106        | 286.1874  | 143.5973         |                |                  | 2  |
| 12 |           |                 |           |                  |                |                  | K    | 147.1128  | 74.0600         | 130.0863  | 65.5468          |                |                  | 1  |

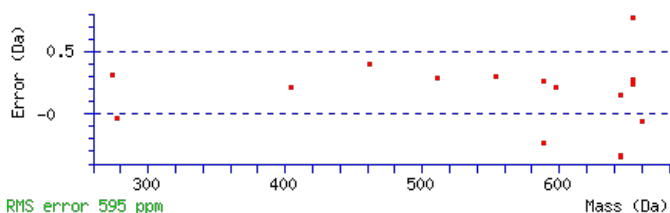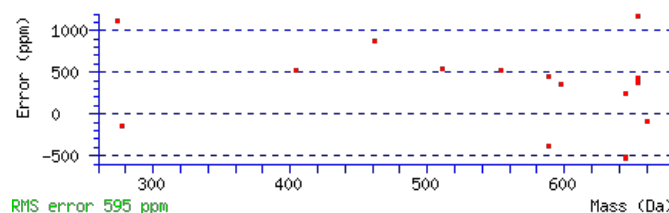

NCBI **BLAST** search of **YLSSVLFDELRK**

(Parameters: blastp, nr protein database, expect=20000, no filter, PAM30)

Other BLAST [web gateways](#)

AT3G61440.1

All matches to this query

| Score | Mr(calc)  | Delta   | Sequence                     |
|-------|-----------|---------|------------------------------|
| 28.4  | 1468.7926 | 0.0004  | <a href="#">YLSSVLFDELK</a>  |
| 15.9  | 1468.7973 | -0.0043 | <a href="#">YNPRMNPPIPVR</a> |
| 3.4   | 1468.7959 | -0.0029 | <a href="#">MPTQIIKVGPEK</a> |

Mascot: <http://www.matrixscience.com/>

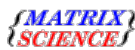

# Mascot Search Results

## Peptide View

MS/MS Fragmentation of **IGILNTPSWYTAGEQEYFTDK**

Found in **AT3G61470.1** in **TAIR\_Arabidopsis**, Symbols: LHCA2 | LHCA2 (Photosystem I light harvesting complex gene 2); chlorophyll binding | chr3:22756711-22758007 FORWARD

Match to Query 10123: 2432.146418 from(1217.080485,2+) index(9352)  
 Title: Elution from: 89.286 to 89.286 scan no 13138 cid35.00 polarity:+  
 Data file D1d-2\_2.mgf

Click mouse within plot area to zoom in by factor of two about that point

Or,   to  Da

Label all possible matches  Label matches used for scoring

Show Y-axis

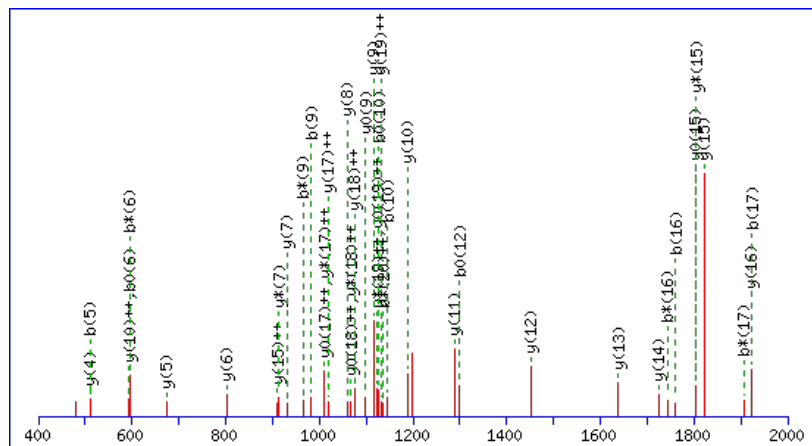

Monoisotopic mass of neutral peptide  $M_r(\text{calc})$ : 2432.1536

Fixed modifications: Carbamidomethyl (C) (apply to specified residues or termini only)

Ions Score: 108 Expect: 5.7e-011

Matches : 41/220 fragment ions using 46 most intense peaks ([help](#))

| #  | b                | b <sup>++</sup> | b <sup>*</sup>   | b <sup>*++</sup> | b <sup>0</sup>   | b <sup>0++</sup> | Seq | y                | y <sup>++</sup>  | y <sup>*</sup>   | y <sup>*++</sup> | y <sup>0</sup>   | y <sup>0++</sup> | #  |
|----|------------------|-----------------|------------------|------------------|------------------|------------------|-----|------------------|------------------|------------------|------------------|------------------|------------------|----|
| 1  | 114.0913         | 57.5493         |                  |                  |                  |                  | I   |                  |                  |                  |                  |                  |                  | 21 |
| 2  | 171.1128         | 86.0600         |                  |                  |                  |                  | G   | 2320.0768        | 1160.5420        | 2303.0503        | 1152.0288        | 2302.0663        | 1151.5368        | 20 |
| 3  | 284.1969         | 142.6021        |                  |                  |                  |                  | I   | 2263.0554        | <b>1132.0313</b> | 2246.0288        | <b>1123.5180</b> | 2245.0448        | <b>1123.0260</b> | 19 |
| 4  | 397.2809         | 199.1441        |                  |                  |                  |                  | L   | 2149.9713        | <b>1075.4893</b> | 2132.9447        | <b>1066.9760</b> | 2131.9607        | <b>1066.4840</b> | 18 |
| 5  | <b>511.3239</b>  | 256.1656        | 494.2973         | 247.6523         |                  |                  | N   | 2036.8872        | <b>1018.9473</b> | 2019.8607        | <b>1010.4340</b> | 2018.8767        | <b>1009.9420</b> | 17 |
| 6  | 612.3715         | 306.6894        | <b>595.3450</b>  | 298.1761         | <b>594.3610</b>  | 297.6841         | T   | <b>1922.8443</b> | 961.9258         | 1905.8178        | 953.4125         | 1904.8337        | 952.9205         | 16 |
| 7  | 709.4243         | 355.2158        | 692.3978         | 346.7025         | 691.4137         | 346.2105         | P   | <b>1821.7966</b> | <b>911.4019</b>  | <b>1804.7701</b> | 902.8887         | <b>1803.7861</b> | 902.3967         | 15 |
| 8  | 796.4563         | 398.7318        | 779.4298         | 390.2185         | 778.4458         | 389.7265         | S   | <b>1724.7439</b> | 862.8756         | 1707.7173        | 854.3623         | 1706.7333        | 853.8703         | 14 |
| 9  | <b>982.5356</b>  | 491.7715        | <b>965.5091</b>  | 483.2582         | 964.5251         | 482.7662         | W   | <b>1637.7118</b> | 819.3596         | 1620.6853        | 810.8463         | 1619.7013        | 810.3543         | 13 |
| 10 | <b>1145.5990</b> | 573.3031        | 1128.5724        | 564.7898         | <b>1127.5884</b> | 564.2978         | Y   | <b>1451.6325</b> | 726.3199         | 1434.6060        | 717.8066         | 1433.6220        | 717.3146         | 12 |
| 11 | 1246.6467        | 623.8270        | 1229.6201        | 615.3137         | 1228.6361        | 614.8217         | T   | <b>1288.5692</b> | 644.7882         | 1271.5426        | 636.2750         | 1270.5586        | 635.7830         | 11 |
| 12 | 1317.6838        | 659.3455        | 1300.6572        | 650.8322         | <b>1299.6732</b> | 650.3402         | A   | <b>1187.5215</b> | <b>594.2644</b>  | 1170.4950        | 585.7511         | 1169.5109        | 585.2591         | 10 |
| 13 | 1374.7052        | 687.8563        | 1357.6787        | 679.3430         | 1356.6947        | 678.8510         | G   | <b>1116.4844</b> | 558.7458         | 1099.4578        | 550.2326         | <b>1098.4738</b> | 549.7406         | 9  |
| 14 | 1503.7478        | 752.3775        | 1486.7213        | 743.8643         | 1485.7373        | 743.3723         | E   | <b>1059.4629</b> | 530.2351         | 1042.4364        | 521.7218         | 1041.4524        | 521.2298         | 8  |
| 15 | 1631.8064        | 816.4068        | 1614.7799        | 807.8936         | 1613.7958        | 807.4016         | Q   | <b>930.4203</b>  | 465.7138         | <b>913.3938</b>  | 457.2005         | 912.4098         | 456.7085         | 7  |
| 16 | <b>1760.8490</b> | 880.9281        | <b>1743.8224</b> | 872.4149         | 1742.8384        | 871.9229         | E   | <b>802.3618</b>  | 401.6845         | 785.3352         | 393.1712         | 784.3512         | 392.6792         | 6  |
| 17 | <b>1923.9123</b> | 962.4598        | <b>1906.8858</b> | 953.9465         | 1905.9018        | 953.4545         | Y   | <b>673.3192</b>  | 337.1632         | 656.2926         | 328.6499         | 655.3086         | 328.1579         | 5  |
| 18 | 2070.9807        | 1035.9940       | 2053.9542        | 1027.4807        | 2052.9702        | 1026.9887        | F   | <b>510.2558</b>  | 255.6316         | 493.2293         | 247.1183         | 492.2453         | 246.6263         | 4  |
| 19 | 2172.0284        | 1086.5178       | 2155.0019        | 1078.0046        | 2154.0178        | 1077.5126        | T   | 363.1874         | 182.0974         | 346.1609         | 173.5841         | 345.1769         | 173.0921         | 3  |
| 20 | 2287.0554        | 1144.0313       | 2270.0288        | <b>1135.5180</b> | 2269.0448        | 1135.0260        | D   | 262.1397         | 131.5735         | 245.1132         | 123.0602         | 244.1292         | 122.5682         | 2  |
| 21 |                  |                 |                  |                  |                  |                  | K   | 147.1128         | 74.0600          | 130.0863         | 65.5468          |                  |                  | 1  |

AT3G61470.1

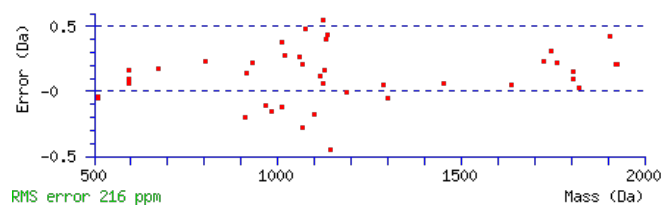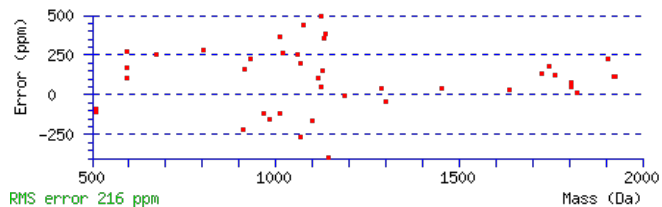

NCBI **BLAST** search of [IGILNTPSWYTAGEQEYFTDK](#)  
(Parameters: blastp, nr protein database, expect=20000, no filter, PAM30)  
Other BLAST [web gateways](#)

**All matches to this query**

| Score | Mr(calc)  | Delta   | Sequence                              |
|-------|-----------|---------|---------------------------------------|
| 107.6 | 2432.1536 | -0.0072 | <a href="#">IGILNTPSWYTAGEQEYFTDK</a> |

Mascot: <http://www.matrixscience.com/>

**Peptide View**MS/MS Fragmentation of **AAADLLAKK**Found in **AT3G61540.1** in **TAIR\_Arabidopsis**, Symbols: | peptidase family protein | chr3:22784374-22786674 FORWARD

Match to Query 1680: 910.509230 from(456.261891,2+) index(1463)

Title: Elution from: 21.145 to 21.145 scan no 2041 cid35.00 polarity:+

Data file 0-3\_1.mgf

Click mouse within plot area to zoom in by factor of two about that point

Or,  to  Da Label all possible matches  Label matches used for scoring Show Y-axis 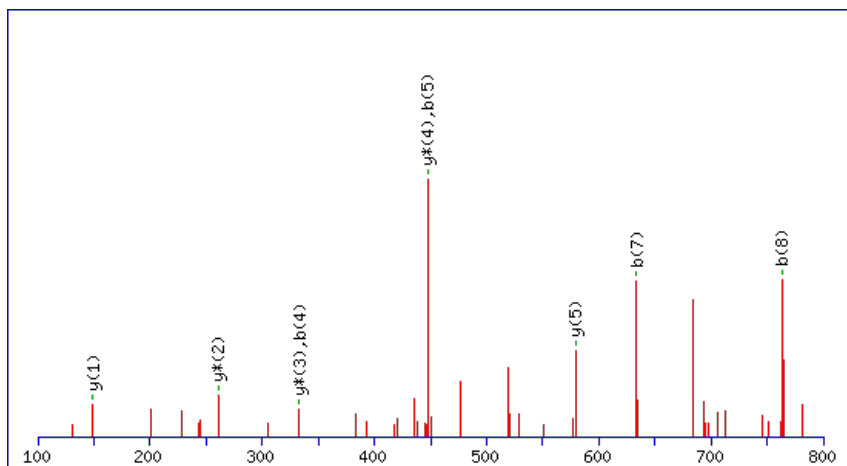Monoisotopic mass of neutral peptide **Mr(calc)**: 910.5114**Fixed modifications**: Carbamidomethyl (C) (apply to specified residues or termini only)**Ions Score**: 38 **Expect**: 0.0012**Matches** : 9/66 fragment ions using 7 most intense peaks ([help](#))

| # | b               | b <sup>++</sup> | b*       | b <sup>*++</sup> | b <sup>0</sup> | b <sup>0++</sup> | Seq. | y               | y <sup>++</sup> | y*              | y <sup>*++</sup> | y <sup>0</sup> | y <sup>0++</sup> | # |
|---|-----------------|-----------------|----------|------------------|----------------|------------------|------|-----------------|-----------------|-----------------|------------------|----------------|------------------|---|
| 1 | 73.0414         | 37.0244         |          |                  |                |                  | A    |                 |                 |                 |                  |                |                  | 9 |
| 2 | 145.0756        | 73.0414         |          |                  |                |                  | A    | 839.4845        | 420.2459        | 821.4609        | 411.2341         | 821.4740       | 411.2406         | 8 |
| 3 | 217.1097        | 109.0585        |          |                  |                |                  | A    | 767.4504        | 384.2288        | 749.4268        | 375.2170         | 749.4398       | 375.2235         | 7 |
| 4 | <b>333.1337</b> | 167.0705        |          |                  | 315.1231       | 158.0652         | D    | 695.4162        | 348.2118        | 677.3926        | 339.2000         | 677.4057       | 339.2065         | 6 |
| 5 | <b>447.2148</b> | 224.1110        |          |                  | 429.2042       | 215.1058         | L    | <b>579.3923</b> | 290.1998        | 561.3687        | 281.1880         |                |                  | 5 |
| 6 | 561.2959        | 281.1516        |          |                  | 543.2853       | 272.1463         | L    | 465.3112        | 233.1592        | <b>447.2876</b> | 224.1474         |                |                  | 4 |
| 7 | <b>633.3300</b> | 317.1687        |          |                  | 615.3195       | 308.1634         | A    | 351.2301        | 176.1187        | <b>333.2065</b> | 167.1069         |                |                  | 3 |
| 8 | <b>763.4191</b> | 382.2132        | 745.3955 | 373.2014         | 745.4085       | 373.2079         | K    | 279.1959        | 140.1016        | <b>261.1723</b> | 131.0898         |                |                  | 2 |
| 9 |                 |                 |          |                  |                |                  | K    | <b>149.1069</b> | 75.0571         | 131.0833        | 66.0453          |                |                  | 1 |

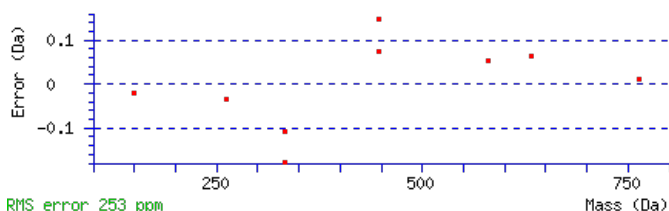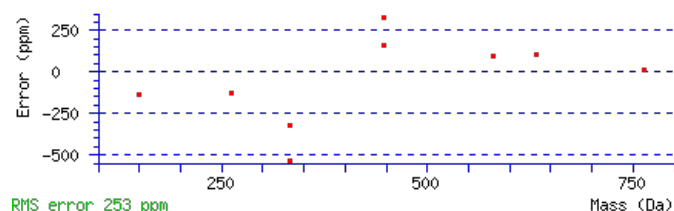NCBI **BLAST** search of [AAADLLAKK](#)

(Parameters: blastp, nr protein database, expect=20000, no filter, PAM30)

Other BLAST [web gateways](#)**All matches to this query**

| Score | Mr(calc) | Delta   | Sequence                  |
|-------|----------|---------|---------------------------|
| 37.9  | 910.5114 | -0.0022 | <a href="#">AAADLLAKK</a> |



## AT3G61540.1

|      |          |         |                           |
|------|----------|---------|---------------------------|
| 26.1 | 910.5114 | -0.0022 | <a href="#">AEKTVPKK</a>  |
| 26.1 | 910.5114 | -0.0022 | <a href="#">EKAKSIPK</a>  |
| 23.6 | 910.5114 | -0.0022 | <a href="#">QEVVGLKK</a>  |
| 18.7 | 910.5067 | 0.0026  | <a href="#">MKKHVLK</a>   |
| 18.6 | 910.5114 | -0.0022 | <a href="#">ELRLIEK</a>   |
| 18.1 | 910.5114 | -0.0022 | <a href="#">AQQLSILK</a>  |
| 16.5 | 910.5114 | -0.0022 | <a href="#">KLSSLQPK</a>  |
| 14.6 | 910.5114 | -0.0021 | <a href="#">QTVGVGVIK</a> |
| 13.3 | 910.5114 | -0.0022 | <a href="#">AIQELAKK</a>  |

Mascot: <http://www.matrixscience.com/>

**Peptide View**MS/MS Fragmentation of **QNLSTSAALK**

Found in **AT3G61570.1** in **TAIR\_Arabidopsis**, Symbols: GC3, GDAP1 | GC3/GDAP1 (GRIP-RELATED ARF-BINDING DOMAIN-CONTAINING ARABIDOPSIS PROTEIN 1); oxidoreductase/ transition metal ion binding | chr3:22790612-22794617 REVERSE

Match to Query 3247: 1146.566050 from(574.290301,2+) index(4520)

Title: Elution from: 45.068 to 45.068 scan no 5828 cid35.00 polarity:+

Data file D1d-1-2.mgf

Click mouse within plot area to zoom in by factor of two about that point

Or,   to  Da

Label all possible matches  Label matches used for scoring

Show Y-axis

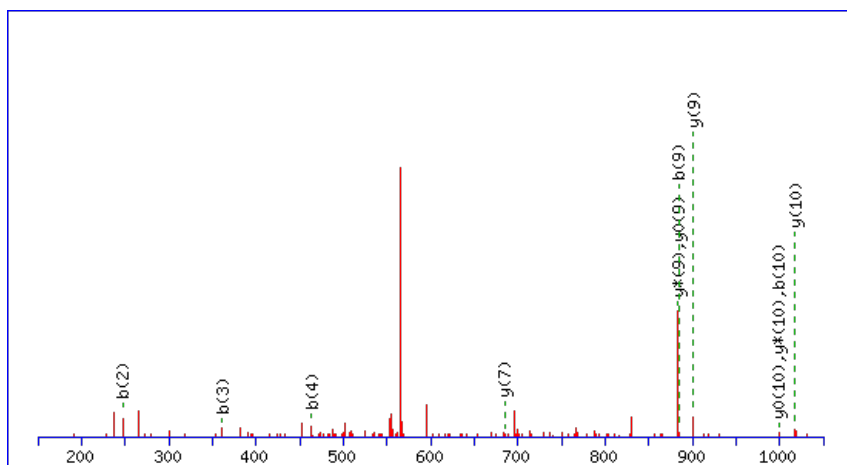

**Monoisotopic mass of neutral peptide Mr(calc):** 1146.5673

**Fixed modifications:** Carbamidomethyl (C) (apply to specified residues or termini only)

**Ions Score:** 19 **Expect:** 0.042

**Matches:** 12/106 fragment ions using 36 most intense peaks ([help](#))

| #  | b               | b <sup>++</sup> | b*       | b <sup>*++</sup> | b <sup>0</sup> | b <sup>0++</sup> | Seq. | y                | y <sup>++</sup> | y*              | y <sup>*++</sup> | y <sup>0</sup>  | y <sup>0++</sup> | #  |
|----|-----------------|-----------------|----------|------------------|----------------|------------------|------|------------------|-----------------|-----------------|------------------|-----------------|------------------|----|
| 1  | 131.0599        | 66.0336         | 113.0363 | 57.0218          |                |                  | Q    |                  |                 |                 |                  |                 |                  | 11 |
| 2  | <b>247.0969</b> | 124.0521        | 229.0733 | 115.0403         |                |                  | N    | <b>1017.5219</b> | 509.2646        | <b>999.4983</b> | 500.2528         | <b>999.5114</b> | 500.2593         | 10 |
| 3  | <b>361.1780</b> | 181.0926        | 343.1544 | 172.0809         |                |                  | L    | <b>901.4849</b>  | 451.2461        | <b>883.4613</b> | 442.2343         | <b>883.4744</b> | 442.2408         | 9  |
| 4  | <b>463.2227</b> | 232.1150        | 445.1991 | 223.1032         | 445.2122       | 223.1097         | T    | 787.4038         | 394.2055        | 769.3802        | 385.1938         | 769.3933        | 385.2003         | 8  |
| 5  | 551.2518        | 276.1295        | 533.2282 | 267.1177         | 533.2412       | 267.1243         | S    | <b>685.3591</b>  | 343.1832        | 667.3355        | 334.1714         | 667.3485        | 334.1779         | 7  |
| 6  | 653.2965        | 327.1519        | 635.2729 | 318.1401         | 635.2859       | 318.1466         | T    | 597.3300         | 299.1687        | 579.3065        | 290.1569         | 579.3195        | 290.1634         | 6  |
| 7  | 741.3256        | 371.1664        | 723.3020 | 362.1546         | 723.3150       | 362.1611         | S    | 495.2853         | 248.1463        | 477.2617        | 239.1345         | 477.2748        | 239.1410         | 5  |
| 8  | 813.3597        | 407.1835        | 795.3361 | 398.1717         | 795.3492       | 398.1782         | A    | 407.2563         | 204.1318        | 389.2327        | 195.1200         |                 |                  | 4  |
| 9  | <b>885.3939</b> | 443.2006        | 867.3703 | 434.1888         | 867.3833       | 434.1953         | A    | 335.2221         | 168.1147        | 317.1985        | 159.1029         |                 |                  | 3  |
| 10 | <b>999.4750</b> | 500.2411        | 981.4514 | 491.2293         | 981.4644       | 491.2358         | L    | 263.1880         | 132.0976        | 245.1644        | 123.0858         |                 |                  | 2  |
| 11 |                 |                 |          |                  |                |                  | K    | 149.1069         | 75.0571         | 131.0833        | 66.0453          |                 |                  | 1  |

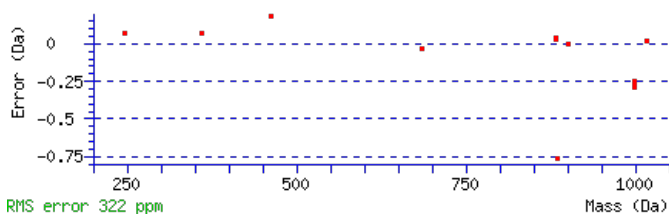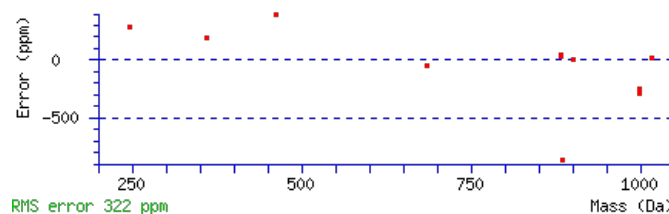

NCBI **BLAST** search of **QNLSTSAALK**

(Parameters: blastp, nr protein database, expect=20000, no filter, PAM30)

Other BLAST [web gateways](#)

**All matches to this query**

## AT3G61570.1

| Score | Mr(calc)  | Delta   | Sequence                     |
|-------|-----------|---------|------------------------------|
| 18.8  | 1146.5673 | -0.0012 | <a href="#">QNLTSTSAALK</a>  |
| 16.4  | 1146.5673 | -0.0012 | <a href="#">NKDTLSIGAK</a>   |
| 9.5   | 1146.5673 | -0.0012 | <a href="#">SKLQKAESDK</a>   |
| 8.4   | 1146.5673 | -0.0012 | <a href="#">KKGVEESTQK</a>   |
| 7.1   | 1146.5673 | -0.0012 | <a href="#">DKSALAAQTK</a>   |
| 6.3   | 1146.5673 | -0.0012 | <a href="#">SSGGSGGLAISK</a> |
| 2.3   | 1146.5655 | 0.0006  | <a href="#">MLLKMEEVK</a>    |
| 1.9   | 1146.5648 | 0.0013  | <a href="#">DFMKPLNLR</a>    |
| 1.6   | 1146.5682 | -0.0021 | <a href="#">MPKKMGLNSK</a>   |
| 1.6   | 1146.5682 | -0.0021 | <a href="#">NLEMLKMVR</a>    |

Mascot: <http://www.matrixscience.com/>

**Peptide View**MS/MS Fragmentation of **FPIHGR**

Found in **AT3G61670.1** in **TAIR\_Arabidopsis**, Symbols: | similar to unknown protein [Arabidopsis thaliana] (TAIR:AT2G46380.1); similar to unnamed protein product [Vitis vinifera] (GB:CAO65830.1) | chr3:22830027-22832845 FORWARD

Match to Query 725: 736.365090 from(369.189821,2+) index(416)

Title: Elution from: 9.607 to 9.607 scan no 654 cid35.00 polarity:+

Data file C7-2\_3.mgf

Click mouse within plot area to zoom in by factor of two about that point

Or,   to  Da

Label all possible matches  Label matches used for scoring

Show Y-axis

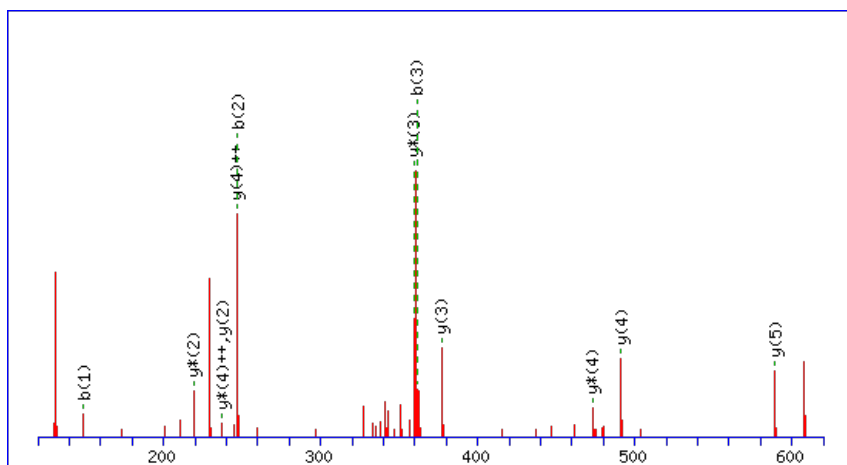

**Monoisotopic mass of neutral peptide Mr(calc):** 736.3647

**Fixed modifications:** Carbamidomethyl (C) (apply to specified residues or termini only)

**Ions Score:** 21 **Expect:** 0.0081

**Matches:** 12/30 fragment ions using 24 most intense peaks ([help](#))

| # | b        | b <sup>++</sup> | Seq. | y        | y <sup>++</sup> | y*       | y* <sup>++</sup> | # |
|---|----------|-----------------|------|----------|-----------------|----------|------------------|---|
| 1 | 149.0727 | 75.0400         | F    |          |                 |          |                  | 6 |
| 2 | 247.1225 | 124.0649        | P    | 589.3065 | 295.1569        | 571.2829 | 286.1451         | 5 |
| 3 | 361.2036 | 181.1054        | I    | 491.2567 | 246.1320        | 473.2331 | 237.1202         | 4 |
| 4 | 501.2536 | 251.1305        | H    | 377.1756 | 189.0914        | 359.1520 | 180.0796         | 3 |
| 5 | 559.2721 | 280.1397        | G    | 237.1256 | 119.0664        | 219.1020 | 110.0546         | 2 |
| 6 |          |                 | R    | 179.1071 | 90.0572         | 161.0835 | 81.0454          | 1 |

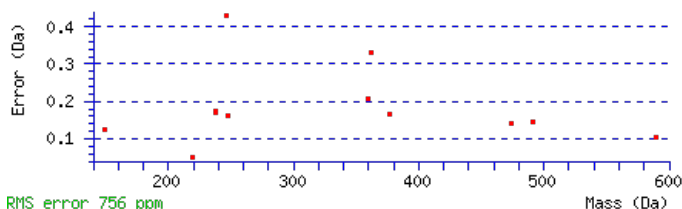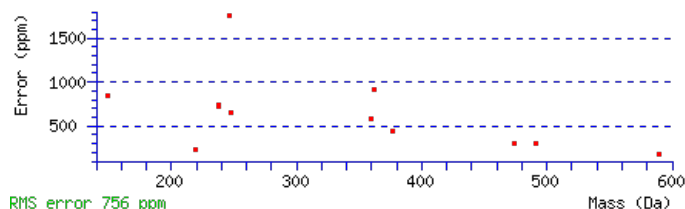NCBI **BLAST** search of **FPIHGR**

(Parameters: blastp, nr protein database, expect=20000, no filter, PAM30)

Other BLAST [web gateways](#)

**All matches to this query**

| Score | Mr(calc) | Delta  | Sequence               |
|-------|----------|--------|------------------------|
| 20.9  | 736.3647 | 0.0004 | <a href="#">FPIHGR</a> |
| 3.8   | 736.3647 | 0.0004 | <a href="#">IFPHGR</a> |
| 2.8   | 736.3647 | 0.0004 | <a href="#">QKHWK</a>  |

AT3G61670.1

|     |          |         |                        |
|-----|----------|---------|------------------------|
| 1.8 | 736.3654 | -0.0003 | <a href="#">MPEPKK</a> |
|-----|----------|---------|------------------------|

**Mascot:** <http://www.matrixscience.com/>

**Peptide View**MS/MS Fragmentation of **LQENEGILVK**

Found in **AT3G61730.1** in **TAIR\_Arabidopsis**, Symbols: | similar to unknown protein [Arabidopsis thaliana] (TAIR:AT5G36000.1); similar to unnamed protein product [Vitis vinifera] (GB:CAO39758.1); contains domain F-box domain (SSF81383) | chr3:22859402-22861450 REVERSE

Match to Query 3379: 1154.595530 from(578.305041,2+) index(3108)

Title: Elution from: 33.737 to 33.737 scan no 3990 cid35.00 polarity:+

Data file D1d-2\_2.mgf

Click mouse within plot area to zoom in by factor of two about that point

Or,   to  Da

Label all possible matches  Label matches used for scoring

Show Y-axis

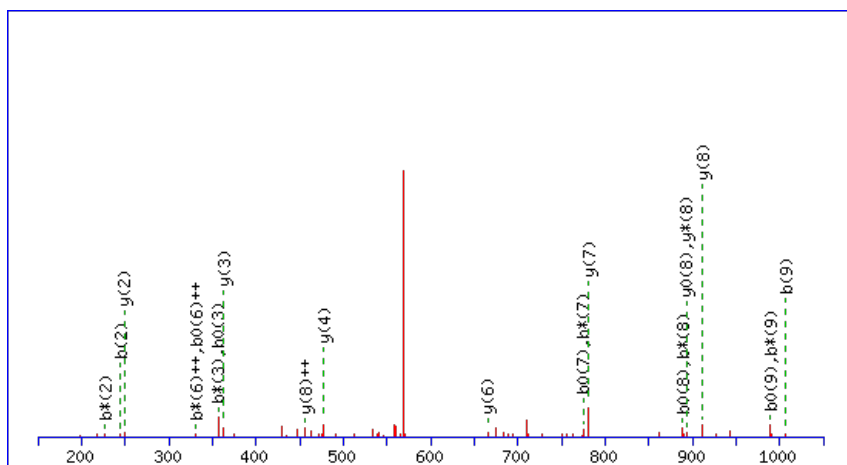

**Monoisotopic mass of neutral peptide Mr(calc):** 1154.5957

**Fixed modifications:** Carbamidomethyl (C) (apply to specified residues or termini only)

**Ions Score:** 42 **Expect:** 0.00024

**Matches:** 22/92 fragment ions using 25 most intense peaks ([help](#))

| #  | b                | b <sup>++</sup> | b*              | b <sup>*++</sup> | b <sup>0</sup>  | b <sup>0++</sup> | Seq. | y               | y <sup>++</sup> | y*              | y <sup>*++</sup> | y <sup>0</sup>  | y <sup>0++</sup> | #  |
|----|------------------|-----------------|-----------------|------------------|-----------------|------------------|------|-----------------|-----------------|-----------------|------------------|-----------------|------------------|----|
| 1  | 115.0884         | 58.0478         |                 |                  |                 |                  | L    |                 |                 |                 |                  |                 |                  | 10 |
| 2  | <b>245.1410</b>  | 123.0741        | <b>227.1174</b> | 114.0624         |                 |                  | Q    | 1041.5219       | 521.2646        | 1023.4983       | 512.2528         | 1023.5114       | 512.2593         | 9  |
| 3  | 375.1806         | 188.0940        | <b>357.1571</b> | 179.0822         | <b>357.1701</b> | 179.0887         | E    | <b>911.4693</b> | <b>456.2383</b> | <b>893.4457</b> | 447.2265         | <b>893.4587</b> | 447.2330         | 8  |
| 4  | 491.2176         | 246.1125        | 473.1941        | 237.1007         | 473.2071        | 237.1072         | N    | <b>781.4296</b> | 391.2185        | 763.4061        | 382.2067         | 763.4191        | 382.2132         | 7  |
| 5  | 621.2573         | 311.1323        | 603.2337        | 302.1205         | 603.2467        | 302.1270         | E    | <b>665.3926</b> | 333.2000        | 647.3691        | 324.1882         | 647.3821        | 324.1947         | 6  |
| 6  | 679.2758         | 340.1415        | 661.2522        | <b>331.1297</b>  | 661.2652        | <b>331.1362</b>  | G    | 535.3530        | 268.1801        | 517.3294        | 259.1684         |                 |                  | 5  |
| 7  | 793.3569         | 397.1821        | <b>775.3333</b> | 388.1703         | <b>775.3463</b> | 388.1768         | I    | <b>477.3345</b> | 239.1709        | 459.3109        | 230.1591         |                 |                  | 4  |
| 8  | 907.4380         | 454.2226        | <b>889.4144</b> | 445.2108         | <b>889.4274</b> | 445.2173         | L    | <b>363.2534</b> | 182.1303        | 345.2298        | 173.1186         |                 |                  | 3  |
| 9  | <b>1007.5034</b> | 504.2553        | <b>989.4798</b> | 495.2436         | <b>989.4929</b> | 495.2501         | V    | <b>249.1723</b> | 125.0898        | 231.1487        | 116.0780         |                 |                  | 2  |
| 10 |                  |                 |                 |                  |                 |                  | K    | 149.1069        | 75.0571         | 131.0833        | 66.0453          |                 |                  | 1  |

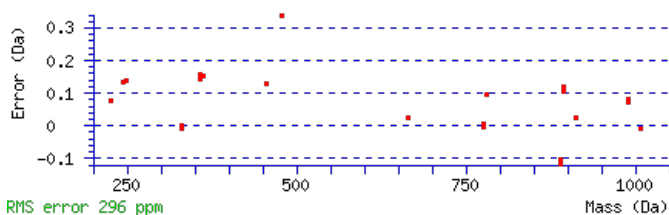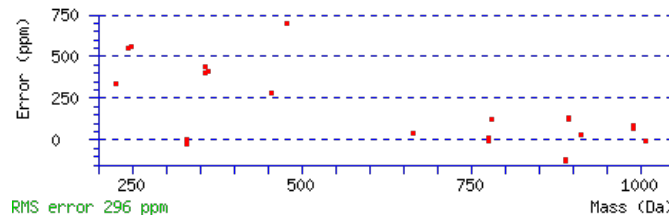NCBI BLAST search of **LQENEGILVK**

(Parameters: blastp, nr protein database, expect=20000, no filter, PAM30)

Other BLAST [web gateways](#)

All matches to this query

## AT3G61730.1

| Score | Mr(calc)  | Delta   | Sequence                    |
|-------|-----------|---------|-----------------------------|
| 41.8  | 1154.5957 | -0.0002 | <a href="#">LQENEGILVK</a>  |
| 37.4  | 1154.5957 | -0.0002 | <a href="#">QLQAEDVIVK</a>  |
| 13.4  | 1154.5958 | -0.0002 | <a href="#">APPSKSVSIEK</a> |
| 11.9  | 1154.5957 | -0.0002 | <a href="#">KLPEKGDEVK</a>  |
| 11.7  | 1154.5957 | -0.0002 | <a href="#">VSSPAINEVVK</a> |
| 10.6  | 1154.5957 | -0.0002 | <a href="#">VPEGTNSVLVK</a> |
| 9.5   | 1154.5966 | -0.0011 | <a href="#">QLLMMHLLK</a>   |
| 8.8   | 1154.5984 | -0.0029 | <a href="#">EQLPILRDR</a>   |
| 7.6   | 1154.5957 | -0.0002 | <a href="#">VKVPLASDAK</a>  |
| 6.3   | 1154.5957 | -0.0002 | <a href="#">LEAQIAELQK</a>  |

Mascot: <http://www.matrixscience.com/>

## Peptide View

MS/MS Fragmentation of **QGLAAESLK**

Found in **AT3G62000.1** in **TAIR\_Arabidopsis**, Symbols: | O-methyltransferase family 3 protein | chr3:22970416-22972155 REVERSE

Match to Query 1795: 926.472356 from(464.243454,2+) index(2975)

Title: Elution from: 29.776 to 29.776 scan no 3713 cid35.00 polarity:+

Data file C7-3\_3.mgf

Click mouse within plot area to zoom in by factor of two about that point

Or,   to  Da

Label all possible matches  Label matches used for scoring

Show Y-axis

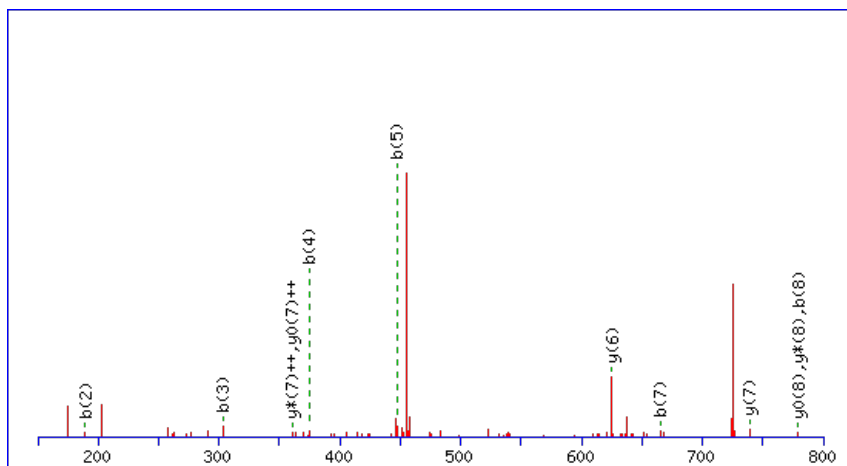

Monoisotopic mass of neutral peptide **Mr(calc)**: 926.4699

**Fixed modifications**: Carbamidomethyl (C) (apply to specified residues or termini only)

**Ions Score**: 33 **Expect**: 0.0069

**Matches** : 12/82 fragment ions using 25 most intense peaks ([help](#))

| # | b               | b <sup>++</sup> | b*       | b <sup>*++</sup> | b <sup>0</sup> | b <sup>0++</sup> | Seq. | y               | y <sup>++</sup> | y*              | y <sup>*++</sup> | y <sup>0</sup>  | y <sup>0++</sup> | # |
|---|-----------------|-----------------|----------|------------------|----------------|------------------|------|-----------------|-----------------|-----------------|------------------|-----------------|------------------|---|
| 1 | 131.0599        | 66.0336         | 113.0363 | 57.0218          |                |                  | Q    |                 |                 |                 |                  |                 |                  | 9 |
| 2 | <b>189.0784</b> | 95.0428         | 171.0548 | 86.0311          |                |                  | G    | 797.4246        | 399.2159        | <b>779.4010</b> | 390.2041         | <b>779.4140</b> | 390.2106         | 8 |
| 3 | <b>303.1595</b> | 152.0834        | 285.1359 | 143.0716         |                |                  | L    | <b>739.4061</b> | 370.2067        | 721.3825        | <b>361.1949</b>  | 721.3955        | <b>361.2014</b>  | 7 |
| 4 | <b>375.1937</b> | 188.1005        | 357.1701 | 179.0887         |                |                  | A    | <b>625.3250</b> | 313.1661        | 607.3014        | 304.1543         | 607.3144        | 304.1608         | 6 |
| 5 | <b>447.2278</b> | 224.1175        | 429.2042 | 215.1058         |                |                  | A    | 553.2908        | 277.1490        | 535.2672        | 268.1373         | 535.2802        | 268.1438         | 5 |
| 6 | 577.2674        | 289.1374        | 559.2439 | 280.1256         | 559.2569       | 280.1321         | E    | 481.2567        | 241.1320        | 463.2331        | 232.1202         | 463.2461        | 232.1267         | 4 |
| 7 | <b>665.2965</b> | 333.1519        | 647.2729 | 324.1401         | 647.2859       | 324.1466         | S    | 351.2170        | 176.1122        | 333.1935        | 167.1004         | 333.2065        | 167.1069         | 3 |
| 8 | <b>779.3776</b> | 390.1924        | 761.3540 | 381.1807         | 761.3670       | 381.1872         | L    | 263.1880        | 132.0976        | 245.1644        | 123.0858         |                 |                  | 2 |
| 9 |                 |                 |          |                  |                |                  | K    | 149.1069        | 75.0571         | 131.0833        | 66.0453          |                 |                  | 1 |

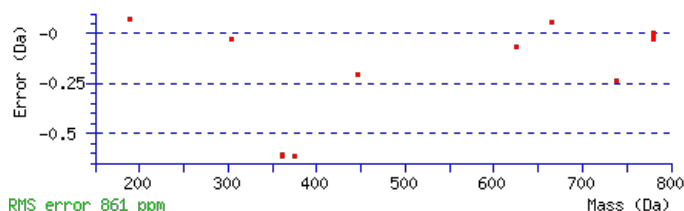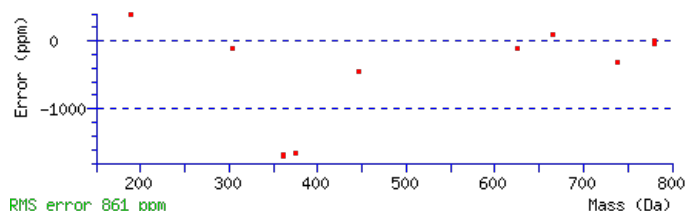

NCBI **BLAST** search of **QGLAAESLK**

(Parameters: blastp, nr protein database, expect=20000, no filter, PAM30)

Other BLAST [web gateways](#)

All matches to this query

| Score | Mr(calc) | Delta  | Sequence                  |
|-------|----------|--------|---------------------------|
| 33.2  | 926.4699 | 0.0024 | <a href="#">QGLAAESLK</a> |



# AT3G62000.1

|      |          |        |                            |
|------|----------|--------|----------------------------|
| 24.8 | 926.4699 | 0.0024 | <a href="#">NATIEQLK</a>   |
| 24.8 | 926.4699 | 0.0024 | <a href="#">NATLQEIK</a>   |
| 24.1 | 926.4699 | 0.0024 | <a href="#">AEVSAIQAK</a>  |
| 16.0 | 926.4699 | 0.0024 | <a href="#">GGALSDGVIK</a> |
| 15.6 | 926.4699 | 0.0024 | <a href="#">QAEAEKLLK</a>  |
| 15.1 | 926.4699 | 0.0024 | <a href="#">SVIASTPNK</a>  |
| 14.6 | 926.4699 | 0.0024 | <a href="#">NATQELLK</a>   |
| 13.6 | 926.4699 | 0.0024 | <a href="#">AEVEISR</a>    |
| 13.6 | 926.4699 | 0.0024 | <a href="#">ISVEEARL</a>   |

Mascot: <http://www.matrixscience.com/>


**Mascot Search Results**
**Peptide View**MS/MS Fragmentation of **IVMGLFGEVVPK**Found in **AT3G62030.1** in **TAIR\_Arabidopsis**, Symbols: ROC4 | ROC4 (ROTAMASE CYP 4); peptidyl-prolyl cis-trans isomerase | chr3:22984683-22986114 FORWARD

Match to Query 4281: 1300.683846 from(651.349199,2+) index(8485)

Title: Elution from: 79.285 to 79.285 scan no 11557 cid35.00 polarity:+

Data file D1d-2\_2.mgf

Click mouse within plot area to zoom in by factor of two about that point

Or,  to  Da Label all possible matches  Label matches used for scoring Show Y-axis 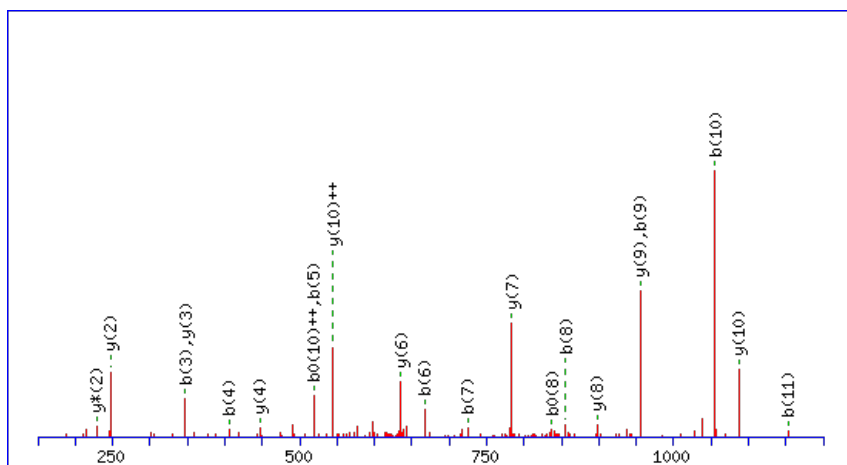

Monoisotopic mass of neutral peptide Mr(calc): 1300.6875

Fixed modifications: Carbamidomethyl (C) (apply to specified residues or termini only)

Ions Score: 101 Expect: 4e-010

Matches : 21/88 fragment ions using 20 most intense peaks ([help](#))

| #  | b                | b <sup>++</sup> | b <sup>0</sup>  | b <sup>0++</sup> | Seq. | y                | y <sup>++</sup> | y*              | y <sup>*++</sup> | y <sup>0</sup> | y <sup>0++</sup> | #  |
|----|------------------|-----------------|-----------------|------------------|------|------------------|-----------------|-----------------|------------------|----------------|------------------|----|
| 1  | 115.0884         | 58.0478         |                 |                  | I    |                  |                 |                 |                  |                |                  | 12 |
| 2  | 215.1538         | 108.0805        |                 |                  | V    | 1187.6137        | 594.3105        | 1169.5901       | 585.2987         | 1169.6031      | 585.3052         | 11 |
| 3  | <b>347.1913</b>  | 174.0993        |                 |                  | M    | <b>1087.5483</b> | <b>544.2778</b> | 1069.5247       | 535.2660         | 1069.5377      | 535.2725         | 10 |
| 4  | <b>405.2098</b>  | 203.1086        |                 |                  | G    | <b>955.5107</b>  | 478.2590        | 937.4872        | 469.2472         | 937.5002       | 469.2537         | 9  |
| 5  | <b>519.2909</b>  | 260.1491        |                 |                  | L    | <b>897.4922</b>  | 449.2498        | 879.4687        | 440.2380         | 879.4817       | 440.2445         | 8  |
| 6  | <b>667.3564</b>  | 334.1818        |                 |                  | F    | <b>783.4111</b>  | 392.2092        | 765.3876        | 383.1974         | 765.4006       | 383.2039         | 7  |
| 7  | <b>725.3749</b>  | 363.1911        |                 |                  | G    | <b>635.3457</b>  | 318.1765        | 617.3221        | 309.1647         | 617.3351       | 309.1712         | 6  |
| 8  | <b>855.4145</b>  | 428.2109        | <b>837.4040</b> | 419.2056         | E    | 577.3272         | 289.1672        | 559.3036        | 280.1554         | 559.3166       | 280.1620         | 5  |
| 9  | <b>955.4800</b>  | 478.2436        | 937.4694        | 469.2383         | V    | <b>447.2876</b>  | 224.1474        | 429.2640        | 215.1356         |                |                  | 4  |
| 10 | <b>1055.5454</b> | 528.2763        | 1037.5349       | <b>519.2711</b>  | V    | <b>347.2221</b>  | 174.1147        | 329.1985        | 165.1029         |                |                  | 3  |
| 11 | <b>1153.5952</b> | 577.3012        | 1135.5846       | 568.2960         | P    | <b>247.1567</b>  | 124.0820        | <b>229.1331</b> | 115.0702         |                |                  | 2  |
| 12 |                  |                 |                 |                  | K    | 149.1069         | 75.0571         | 131.0833        | 66.0453          |                |                  | 1  |

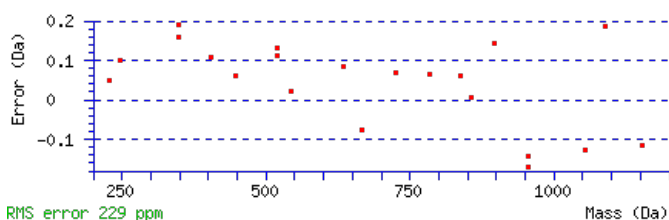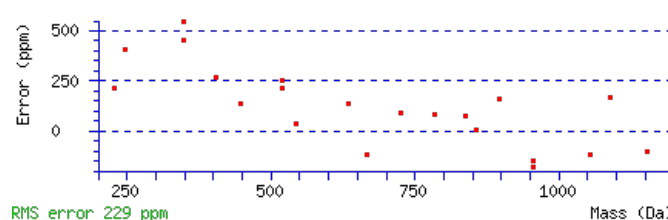NCBI BLAST search of **IVMGLFGEVVPK**

(Parameters: blastp, nr protein database, expect=20000, no filter, PAM30)

Other BLAST [web gateways](#)

AT3G62030.1

All matches to this query

| Score | Mr(calc)  | Delta   | Sequence                     |
|-------|-----------|---------|------------------------------|
| 101.5 | 1300.6875 | -0.0037 | <a href="#">IVMGLFGEVVPK</a> |
| 16.8  | 1300.6846 | -0.0007 | <a href="#">LTQLGVRSWPK</a>  |
| 11.5  | 1300.6853 | -0.0015 | <a href="#">QLLMLSSLASPK</a> |
| 1.2   | 1300.6823 | 0.0015  | <a href="#">DQILRILQER</a>   |

Mascot: <http://www.matrixscience.com/>


**Mascot Search Results**
**Peptide View**MS/MS Fragmentation of **TLADYNIQK**Found in **AT3G62250.1** in **TAIR\_Arabidopsis**, Symbols: UBG5 | UBG5 (UBIQUITIN 5); protein binding | chr3:23048113-23048586 FORWARD

Match to Query 2904: 1064.548908 from(533.281730,2+) index(2485)

Title: Elution from: 25.948 to 25.948 scan no 3109 cid35.00 polarity:+

Data file 0-3\_3.mgf

Click mouse within plot area to zoom in by factor of two about that point

Or,  to  Da Label all possible matches  Label matches used for scoring Show Y-axis 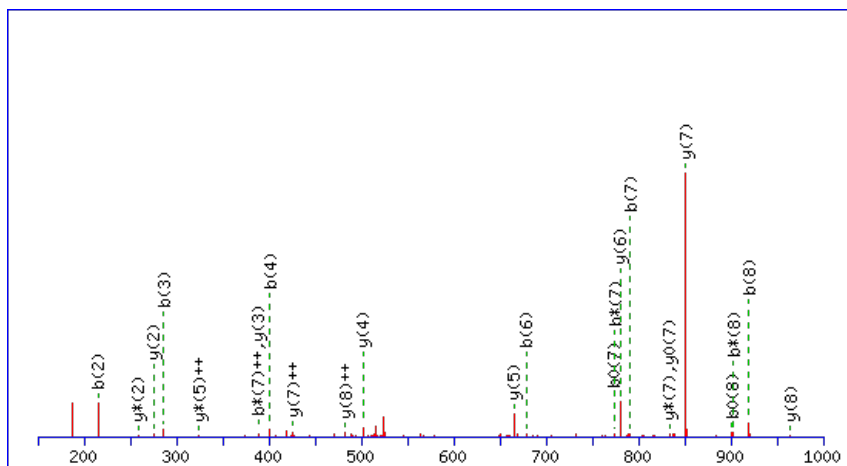Monoisotopic mass of neutral peptide  $M_r(\text{calc})$ : 1064.5502

Fixed modifications: Carbamidomethyl (C) (apply to specified residues or termini only)

Ions Score: 50 Expect: 0.00011

Matches : 24/76 fragment ions using 37 most intense peaks ([help](#))

| # | b               | b <sup>++</sup> | b*              | b <sup>*++</sup> | b <sup>0</sup>  | b <sup>0++</sup> | Seq. | y               | y <sup>++</sup> | y*              | y <sup>*++</sup> | y <sup>0</sup>  | y <sup>0++</sup> | # |
|---|-----------------|-----------------|-----------------|------------------|-----------------|------------------|------|-----------------|-----------------|-----------------|------------------|-----------------|------------------|---|
| 1 | 102.0550        | 51.5311         |                 |                  | 84.0444         | 42.5258          | T    |                 |                 |                 |                  |                 |                  | 9 |
| 2 | <b>215.1390</b> | 108.0731        |                 |                  | 197.1285        | 99.0679          | L    | <b>964.5098</b> | <b>482.7585</b> | 947.4833        | 474.2453         | 946.4993        | 473.7533         | 8 |
| 3 | <b>286.1761</b> | 143.5917        |                 |                  | 268.1656        | 134.5864         | A    | <b>851.4258</b> | <b>426.2165</b> | <b>834.3992</b> | 417.7032         | <b>833.4152</b> | 417.2112         | 7 |
| 4 | <b>401.2031</b> | 201.1052        |                 |                  | 383.1925        | 192.0999         | D    | <b>780.3886</b> | 390.6980        | 763.3621        | 382.1847         | 762.3781        | 381.6927         | 6 |
| 5 | 564.2664        | 282.6368        |                 |                  | 546.2558        | 273.6316         | Y    | <b>665.3617</b> | 333.1845        | 648.3352        | <b>324.6712</b>  |                 |                  | 5 |
| 6 | <b>678.3093</b> | 339.6583        | 661.2828        | 331.1450         | 660.2988        | 330.6530         | N    | <b>502.2984</b> | 251.6528        | 485.2718        | 243.1395         |                 |                  | 4 |
| 7 | <b>791.3934</b> | 396.2003        | <b>774.3668</b> | <b>387.6871</b>  | <b>773.3828</b> | 387.1951         | I    | <b>388.2554</b> | 194.6314        | 371.2289        | 186.1181         |                 |                  | 3 |
| 8 | <b>919.4520</b> | 460.2296        | <b>902.4254</b> | 451.7164         | <b>901.4414</b> | 451.2243         | Q    | <b>275.1714</b> | 138.0893        | <b>258.1448</b> | 129.5761         |                 |                  | 2 |
| 9 |                 |                 |                 |                  |                 |                  | K    | 147.1128        | 74.0600         | 130.0863        | 65.5468          |                 |                  | 1 |

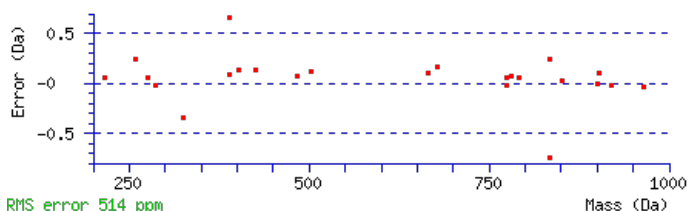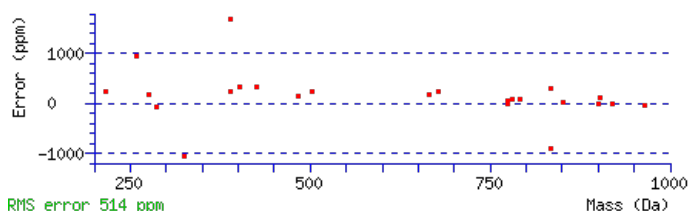NCBI BLAST search of **TLADYNIQK**

(Parameters: blastp, nr protein database, expect=20000, no filter, PAM30)

Other BLAST [web gateways](#)**All matches to this query**

| Score | $M_r(\text{calc})$ | Delta   | Sequence         |
|-------|--------------------|---------|------------------|
| 49.8  | 1064.5502          | -0.0013 | <b>TLADYNIQK</b> |

**AT3G62250.1**

|     |           |         |                             |
|-----|-----------|---------|-----------------------------|
| 5.7 | 1064.5462 | 0.0027  | <a href="#">SSQSVASSGKK</a> |
| 4.8 | 1064.5502 | -0.0013 | <a href="#">DVASELYLR</a>   |
| 4.7 | 1064.5502 | -0.0013 | <a href="#">FEKDEAAKK</a>   |
| 4.0 | 1064.5502 | -0.0013 | <a href="#">VDNFSKDLK</a>   |
| 2.7 | 1064.5502 | -0.0013 | <a href="#">NYDLGDLKK</a>   |
| 1.8 | 1064.5502 | -0.0013 | <a href="#">TNEVAGLYAK</a>  |
| 1.1 | 1064.5462 | 0.0027  | <a href="#">ETERSSTKK</a>   |

**Mascot:** <http://www.matrixscience.com/>

**Peptide View**MS/MS Fragmentation of **AAPEGGISDVVEK**Found in **AT3G62410.1** in **TAIR\_Arabidopsis**, Symbols: CP12, CP12-2 | CP12-2 | chr3:23101982-23102377 FORWARD

Match to Query 4597: 1284.598062 from(643.306307,2+) index(2779)

Title: Elution from: 29.277 to 29.277 scan no 3517 cid35.00 polarity:+

Data file D6h-1\_2.mgf

Click mouse within plot area to zoom in by factor of two about that point

Or,   to  Da Label all possible matches  Label matches used for scoring Show Y-axis 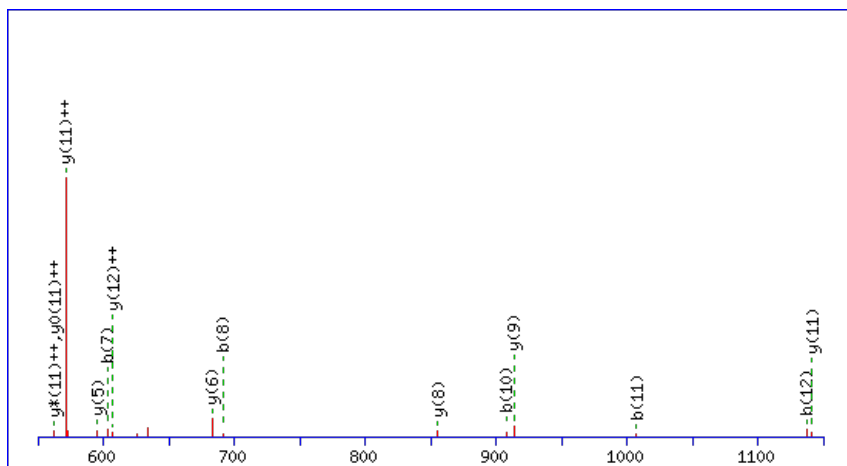Monoisotopic mass of neutral peptide **Mr(calc)**: 1284.5990

Fixed modifications: Carbamidomethyl (C) (apply to specified residues or termini only)

Ions Score: 61 **Expect**: 5.6e-006Matches : 14/112 fragment ions using 17 most intense peaks ([help](#))

| #  | b         | b <sup>++</sup> | b <sup>0</sup> | b <sup>0++</sup> | Seq. | y         | y <sup>++</sup> | y*        | y <sup>*++</sup> | y <sup>0</sup> | y <sup>0++</sup> | #  |
|----|-----------|-----------------|----------------|------------------|------|-----------|-----------------|-----------|------------------|----------------|------------------|----|
| 1  | 73.0414   | 37.0244         |                |                  | A    |           |                 |           |                  |                |                  | 13 |
| 2  | 145.0756  | 73.0414         |                |                  | A    | 1213.5721 | 607.2897        | 1195.5485 | 598.2779         | 1195.5615      | 598.2844         | 12 |
| 3  | 243.1254  | 122.0663        |                |                  | P    | 1141.5380 | 571.2726        | 1123.5144 | 562.2608         | 1123.5274      | 562.2673         | 11 |
| 4  | 373.1650  | 187.0861        | 355.1544       | 178.0809         | E    | 1043.4882 | 522.2477        | 1025.4646 | 513.2359         | 1025.4776      | 513.2424         | 10 |
| 5  | 431.1835  | 216.0954        | 413.1729       | 207.0901         | G    | 913.4485  | 457.2279        | 895.4250  | 448.2161         | 895.4380       | 448.2226         | 9  |
| 6  | 489.2020  | 245.1046        | 471.1914       | 236.0994         | G    | 855.4300  | 428.2187        | 837.4065  | 419.2069         | 837.4195       | 419.2134         | 8  |
| 7  | 603.2831  | 302.1452        | 585.2725       | 293.1399         | I    | 797.4115  | 399.2094        | 779.3880  | 390.1976         | 779.4010       | 390.2041         | 7  |
| 8  | 691.3122  | 346.1597        | 673.3016       | 337.1544         | S    | 683.3304  | 342.1689        | 665.3069  | 333.1571         | 665.3199       | 333.1636         | 6  |
| 9  | 807.3361  | 404.1717        | 789.3256       | 395.1664         | D    | 595.3014  | 298.1543        | 577.2778  | 289.1425         | 577.2908       | 289.1490         | 5  |
| 10 | 907.4016  | 454.2044        | 889.3910       | 445.1991         | V    | 479.2774  | 240.1423        | 461.2538  | 231.1305         | 461.2668       | 231.1371         | 4  |
| 11 | 1007.4670 | 504.2372        | 989.4565       | 495.2319         | V    | 379.2120  | 190.1096        | 361.1884  | 181.0978         | 361.2014       | 181.1043         | 3  |
| 12 | 1137.5067 | 569.2570        | 1119.4961      | 560.2517         | E    | 279.1465  | 140.0769        | 261.1229  | 131.0651         | 261.1359       | 131.0716         | 2  |
| 13 |           |                 |                |                  | K    | 149.1069  | 75.0571         | 131.0833  | 66.0453          |                |                  | 1  |

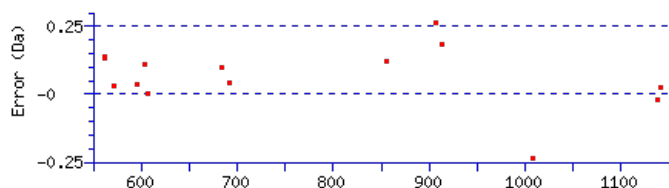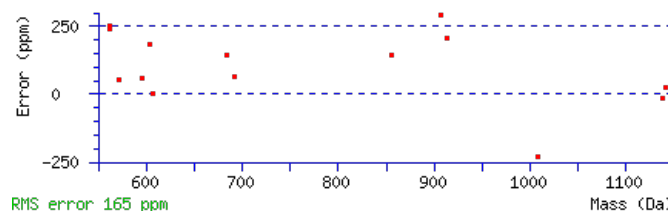NCBI **BLAST** search of **AAPEGGISDVVEK**

(Parameters: blastp, nr protein database, expect=20000, no filter, PAM30)

Other BLAST [web gateways](#)

AT3G62410.1

All matches to this query

| Score | Mr(calc)  | Delta   | Sequence                      |
|-------|-----------|---------|-------------------------------|
| 61.3  | 1284.5990 | -0.0009 | <a href="#">AAPEGGISDVVEK</a> |
| 7.1   | 1284.5969 | 0.0012  | <a href="#">MERYAQARVK</a>    |
| 6.1   | 1284.5991 | -0.0011 | <a href="#">TCRSGVKFWK</a>    |
| 0.3   | 1284.6016 | -0.0036 | <a href="#">QAHKEDDAKVK</a>   |

Mascot: <http://www.matrixscience.com/>

**Peptide View**MS/MS Fragmentation of **IEAAFVLGQLESK**Found in **AT3G62530.1** in **TAIR\_Arabidopsis**, Symbols: | PBS lyase HEAT-like repeat-containing protein | chr3:23143195-23144097 FORWARD

Match to Query 5863: 1418.721868 from(710.368210,2+) index(8815)

Title: Elution from: 76.716 to 76.716 scan no 11587 cid35.00 polarity:+

Data file C7-1\_1.mgf

Click mouse within plot area to zoom in by factor of two about that point

Or,   to  Da Label all possible matches  Label matches used for scoring Show Y-axis 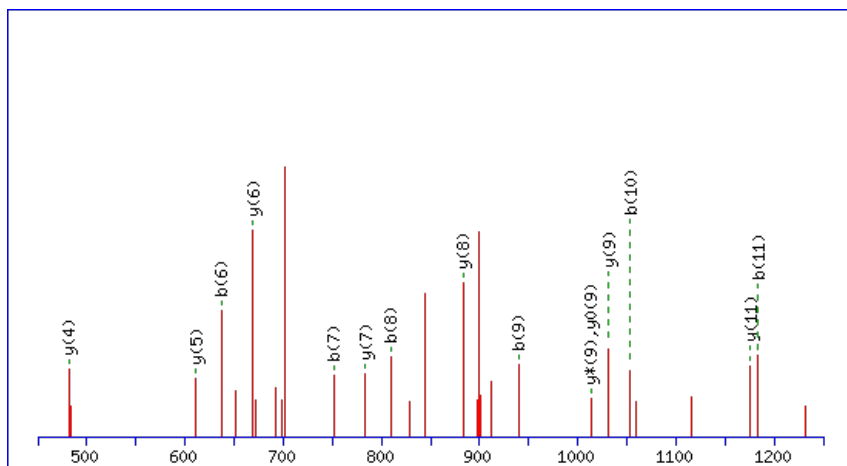Monoisotopic mass of neutral peptide  $M_r(\text{calc})$ : 1418.7215

Fixed modifications: Carbamidomethyl (C) (apply to specified residues or termini only)

Ions Score: 62 Expect: 5.6e-006

Matches : 15/124 fragment ions using 21 most intense peaks ([help](#))

| #  | b                | b <sup>++</sup> | b*        | b <sup>*++</sup> | b <sup>0</sup> | b <sup>0++</sup> | Seq. | y                | y <sup>++</sup> | y*               | y <sup>*++</sup> | y <sup>0</sup>   | y <sup>0++</sup> | #  |
|----|------------------|-----------------|-----------|------------------|----------------|------------------|------|------------------|-----------------|------------------|------------------|------------------|------------------|----|
| 1  | 115.0884         | 58.0478         |           |                  |                |                  | I    |                  |                 |                  |                  |                  |                  | 13 |
| 2  | 245.1280         | 123.0676        |           |                  | 227.1174       | 114.0624         | E    | 1305.6477        | 653.3275        | 1287.6241        | 644.3157         | 1287.6372        | 644.3222         | 12 |
| 3  | 317.1622         | 159.0847        |           |                  | 299.1516       | 150.0794         | A    | <b>1175.6081</b> | 588.3077        | 1157.5845        | 579.2959         | 1157.5975        | 579.3024         | 11 |
| 4  | 389.1963         | 195.1018        |           |                  | 371.1857       | 186.0965         | A    | 1103.5740        | 552.2906        | 1085.5504        | 543.2788         | 1085.5634        | 543.2853         | 10 |
| 5  | 537.2618         | 269.1345        |           |                  | 519.2512       | 260.1292         | F    | <b>1031.5398</b> | 516.2735        | <b>1013.5162</b> | 507.2617         | <b>1013.5292</b> | 507.2683         | 9  |
| 6  | <b>637.3272</b>  | 319.1672        |           |                  | 619.3166       | 310.1620         | V    | <b>883.4744</b>  | 442.2408        | 865.4508         | 433.2290         | 865.4638         | 433.2355         | 8  |
| 7  | <b>751.4083</b>  | 376.2078        |           |                  | 733.3977       | 367.2025         | L    | <b>783.4089</b>  | 392.2081        | 765.3853         | 383.1963         | 765.3983         | 383.2028         | 7  |
| 8  | <b>809.4268</b>  | 405.2170        |           |                  | 791.4162       | 396.2118         | G    | <b>669.3278</b>  | 335.1675        | 651.3042         | 326.1558         | 651.3172         | 326.1623         | 6  |
| 9  | <b>939.4794</b>  | 470.2434        | 921.4559  | 461.2316         | 921.4689       | 461.2381         | Q    | <b>611.3093</b>  | 306.1583        | 593.2857         | 297.1465         | 593.2987         | 297.1530         | 5  |
| 10 | <b>1053.5605</b> | 527.2839        | 1035.5370 | 518.2721         | 1035.5500      | 518.2786         | L    | <b>481.2567</b>  | 241.1320        | 463.2331         | 232.1202         | 463.2461         | 232.1267         | 4  |
| 11 | <b>1183.6002</b> | 592.3037        | 1165.5766 | 583.2919         | 1165.5896      | 583.2984         | E    | 367.1756         | 184.0914        | 349.1520         | 175.0796         | 349.1650         | 175.0861         | 3  |
| 12 | 1271.6292        | 636.3183        | 1253.6057 | 627.3065         | 1253.6187      | 627.3130         | S    | 237.1359         | 119.0716        | 219.1124         | 110.0598         | 219.1254         | 110.0663         | 2  |
| 13 |                  |                 |           |                  |                |                  | K    | 149.1069         | 75.0571         | 131.0833         | 66.0453          |                  |                  | 1  |

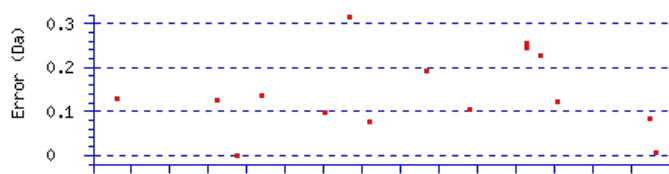

RMS error 197 ppm

Mass (Da)

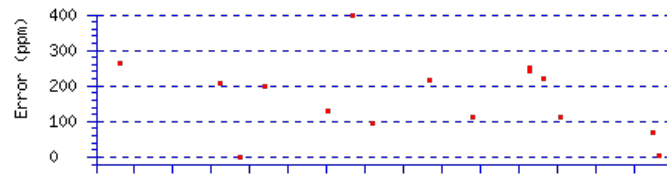

RMS error 197 ppm

Mass (Da)

NCBI BLAST search of [IEAAFVLGQLESK](#)

(Parameters: blastp, nr protein database, expect=20000, no filter, PAM30)

Other BLAST [web gateways](#)



# AT3G62530.1

All matches to this query

| Score | Mr(calc)  | Delta   | Sequence                      |
|-------|-----------|---------|-------------------------------|
| 62.0  | 1418.7215 | 0.0003  | <a href="#">IEAAFVLGOLESK</a> |
| 11.5  | 1418.7249 | -0.0030 | <a href="#">MLEEKLGTEKVK</a>  |
| 11.2  | 1418.7193 | 0.0026  | <a href="#">IASLQTEVSSLQK</a> |
| 7.2   | 1418.7193 | 0.0026  | <a href="#">TKSDEIVNAVVK</a>  |
| 1.5   | 1418.7242 | -0.0024 | <a href="#">LLDYRNPKPGTK</a>  |
| 1.2   | 1418.7242 | -0.0024 | <a href="#">DIIVNGNRIPK</a>   |
| 0.5   | 1418.7193 | 0.0025  | <a href="#">SDNLLISADKSIK</a> |
| 0.5   | 1418.7242 | -0.0023 | <a href="#">ALQOSTLKAWAGK</a> |
| 0.5   | 1418.7242 | -0.0024 | <a href="#">NPKGYTIPLDKR</a>  |

Mascot: <http://www.matrixscience.com/>

**Peptide View**MS/MS Fragmentation of **DDDAVLLER**Found in **AT3G62590.1** in **TAIR\_Arabidopsis**, Symbols: | lipase class 3 family protein | chr3:23158949-23161145 REVERSE

Match to Query 2942: 1056.476126 from(529.245339,2+) index(3363)

Title: Elution from: 32.773 to 32.773 scan no 4178 cid35.00 polarity:+

Data file D12h-3\_2.mgf

Click mouse within plot area to zoom in by factor of two about that point

Or,   to  Da Label all possible matches  Label matches used for scoring Show Y-axis 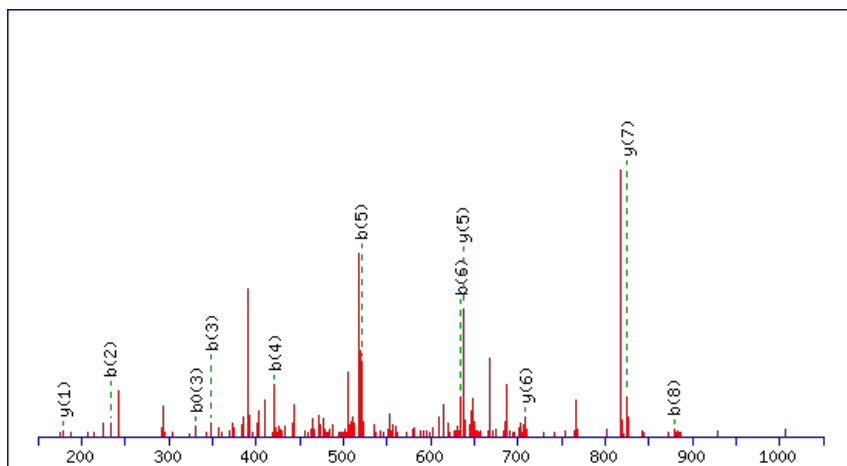Monoisotopic mass of neutral peptide **Mr(calc)**: 1056.4731

Fixed modifications: Carbamidomethyl (C) (apply to specified residues or termini only)

Ions Score: 22 **Expect**: 0.039Matches : 11/78 fragment ions using 33 most intense peaks ([help](#))

| # | b               | b <sup>++</sup> | b <sup>0</sup>  | b <sup>0++</sup> | Seq. | y               | y <sup>++</sup> | y*       | y <sup>*++</sup> | y <sup>0</sup> | y <sup>0++</sup> | # |
|---|-----------------|-----------------|-----------------|------------------|------|-----------------|-----------------|----------|------------------|----------------|------------------|---|
| 1 | 117.0313        | 59.0193         | 99.0207         | 50.0140          | D    |                 |                 |          |                  |                |                  | 9 |
| 2 | <b>233.0552</b> | 117.0313        | 215.0447        | 108.0260         | D    | 941.4565        | 471.2319        | 923.4329 | 462.2201         | 923.4459       | 462.2266         | 8 |
| 3 | <b>349.0792</b> | 175.0432        | <b>331.0686</b> | 166.0380         | D    | <b>825.4325</b> | 413.2199        | 807.4089 | 404.2081         | 807.4219       | 404.2146         | 7 |
| 4 | <b>421.1134</b> | 211.0603        | 403.1028        | 202.0550         | A    | <b>709.4085</b> | 355.2079        | 691.3849 | 346.1961         | 691.3980       | 346.2026         | 6 |
| 5 | <b>521.1788</b> | 261.0930        | 503.1682        | 252.0878         | V    | <b>637.3744</b> | 319.1908        | 619.3508 | 310.1790         | 619.3638       | 310.1855         | 5 |
| 6 | <b>635.2599</b> | 318.1336        | 617.2493        | 309.1283         | L    | 537.3089        | 269.1581        | 519.2853 | 260.1463         | 519.2984       | 260.1528         | 4 |
| 7 | 749.3410        | 375.1741        | 731.3304        | 366.1689         | L    | 423.2278        | 212.1175        | 405.2042 | 203.1058         | 405.2173       | 203.1123         | 3 |
| 8 | <b>879.3806</b> | 440.1940        | 861.3701        | 431.1887         | E    | 309.1467        | 155.0770        | 291.1231 | 146.0652         | 291.1362       | 146.0717         | 2 |
| 9 |                 |                 |                 |                  | R    | <b>179.1071</b> | 90.0572         | 161.0835 | 81.0454          |                |                  | 1 |

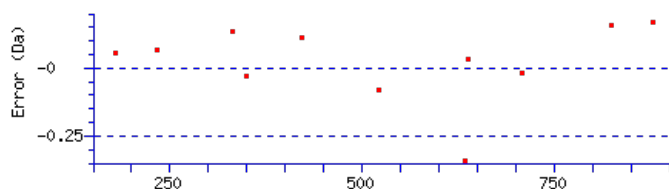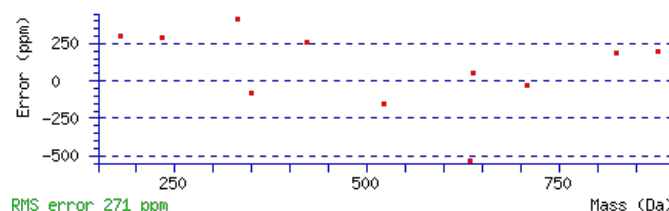NCBI **BLAST** search of [DDDAVLLER](#)

(Parameters: blastp, nr protein database, expect=20000, no filter, PAM30)

Other BLAST [web gateways](#)**All matches to this query**

| Score | Mr(calc)  | Delta  | Sequence                  |
|-------|-----------|--------|---------------------------|
| 22.1  | 1056.4731 | 0.0030 | <a href="#">DDDAVLLER</a> |

## AT3G62590.1

|      |           |        |                           |
|------|-----------|--------|---------------------------|
| 11.0 | 1056.4758 | 0.0003 | <a href="#">REQDPELR</a>  |
| 2.3  | 1056.4758 | 0.0003 | <a href="#">VETSSHVQR</a> |
| 1.7  | 1056.4758 | 0.0003 | <a href="#">QQANTDIPR</a> |
| 1.4  | 1056.4758 | 0.0003 | <a href="#">QERDPIER</a>  |

**Mascot:** <http://www.matrixscience.com/>

**Peptide View**MS/MS Fragmentation of **YGLNHVTYLIEQNK**Found in **AT3G62870.1** in **TAIR\_Arabidopsis**, Symbols: | 60S ribosomal protein L7A (RPL7aB) | chr3:23253837-23255248 REVERSE

Match to Query 8174: 1710.807620 from(856.411086,2+) index(5555)

Title: Elution from: 52.561 to 52.561 scan no 7177 cid35.00 polarity:+

Data file D12h-2\_1.mgf

Click mouse within plot area to zoom in by factor of two about that point

Or,  to  Da Label all possible matches  Label matches used for scoring Show Y-axis 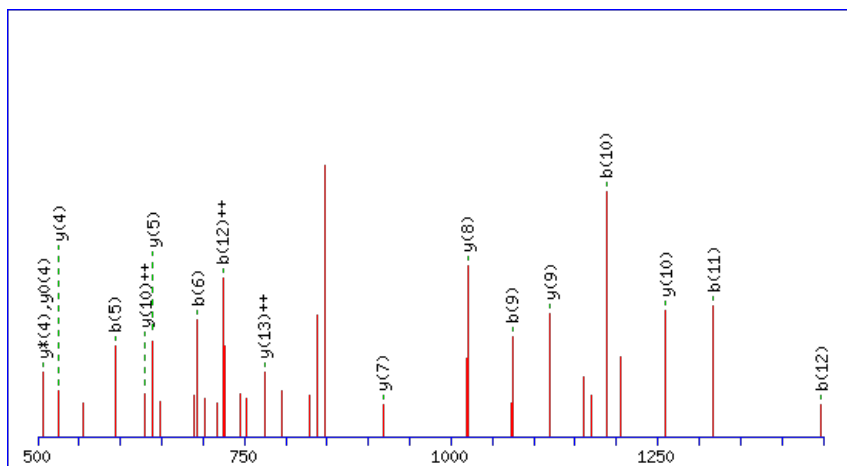Monoisotopic mass of neutral peptide  $M_r(\text{calc})$ : 1710.8086

Fixed modifications: Carbamidomethyl (C) (apply to specified residues or termini only)

Ions Score: 57 Expect: 1.9e-005

Matches : 17/132 fragment ions using 22 most intense peaks ([help](#))

| #  | b                | b <sup>++</sup> | b <sup>*</sup> | b <sup>*++</sup> | b <sup>0</sup> | b <sup>0++</sup> | Seq. | y                | y <sup>++</sup> | y <sup>*</sup>  | y <sup>*++</sup> | y <sup>0</sup>  | y <sup>0++</sup> | #  |
|----|------------------|-----------------|----------------|------------------|----------------|------------------|------|------------------|-----------------|-----------------|------------------|-----------------|------------------|----|
| 1  | 165.0676         | 83.0375         |                |                  |                |                  | Y    |                  |                 |                 |                  |                 |                  | 14 |
| 2  | 223.0861         | 112.0467        |                |                  |                |                  | G    | 1547.7555        | 774.3814        | 1529.7319       | 765.3696         | 1529.7449       | 765.3761         | 13 |
| 3  | 337.1672         | 169.0873        |                |                  |                |                  | L    | 1489.7370        | 745.3721        | 1471.7134       | 736.3603         | 1471.7264       | 736.3668         | 12 |
| 4  | 453.2042         | 227.1058        | 435.1807       | 218.0940         |                |                  | N    | 1375.6559        | 688.3316        | 1357.6323       | 679.3198         | 1357.6453       | 679.3263         | 11 |
| 5  | <b>593.2543</b>  | 297.1308        | 575.2307       | 288.1190         |                |                  | H    | <b>1259.6189</b> | <b>630.3131</b> | 1241.5953       | 621.3013         | 1241.6083       | 621.3078         | 10 |
| 6  | <b>693.3197</b>  | 347.1635        | 675.2961       | 338.1517         |                |                  | V    | <b>1119.5689</b> | 560.2881        | 1101.5453       | 551.2763         | 1101.5583       | 551.2828         | 9  |
| 7  | 795.3644         | 398.1858        | 777.3408       | 389.1741         | 777.3538       | 389.1806         | T    | <b>1019.5034</b> | 510.2553        | 1001.4798       | 501.2436         | 1001.4929       | 501.2501         | 8  |
| 8  | 959.4248         | 480.2160        | 941.4012       | 471.2042         | 941.4142       | 471.2107         | Y    | <b>917.4587</b>  | 459.2330        | 899.4351        | 450.2212         | 899.4481        | 450.2277         | 7  |
| 9  | <b>1073.5059</b> | 537.2566        | 1055.4823      | 528.2448         | 1055.4953      | 528.2513         | L    | 753.3983         | 377.2028        | 735.3748        | 368.1910         | 735.3878        | 368.1975         | 6  |
| 10 | <b>1187.5870</b> | 594.2971        | 1169.5634      | 585.2853         | 1169.5764      | 585.2918         | I    | <b>639.3172</b>  | 320.1623        | 621.2937        | 311.1505         | 621.3067        | 311.1570         | 5  |
| 11 | <b>1317.6266</b> | 659.3169        | 1299.6030      | 650.3051         | 1299.6160      | 650.3117         | E    | <b>525.2361</b>  | 263.1217        | <b>507.2126</b> | 254.1099         | <b>507.2256</b> | 254.1164         | 4  |
| 12 | <b>1447.6793</b> | <b>724.3433</b> | 1429.6557      | 715.3315         | 1429.6687      | 715.3380         | Q    | 395.1965         | 198.1019        | 377.1729        | 189.0901         |                 |                  | 3  |
| 13 | 1563.7162        | 782.3618        | 1545.6927      | 773.3500         | 1545.7057      | 773.3565         | N    | 265.1439         | 133.0756        | 247.1203        | 124.0638         |                 |                  | 2  |
| 14 |                  |                 |                |                  |                |                  | K    | 149.1069         | 75.0571         | 131.0833        | 66.0453          |                 |                  | 1  |

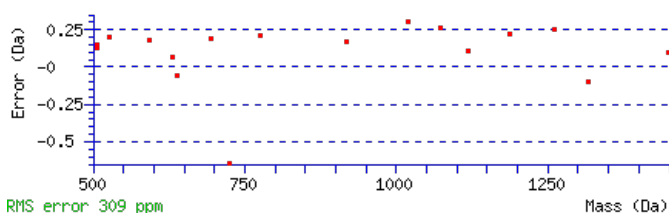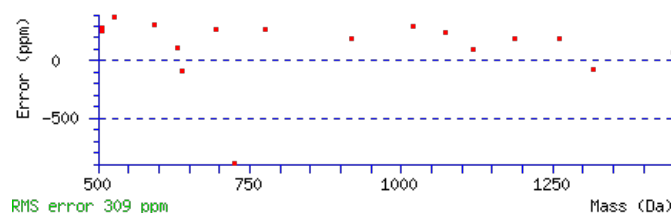NCBI BLAST search of [YGLNHVTYLIEQNK](#)

(Parameters: blastp, nr protein database, expect=20000, no filter, PAM30)

# AT3G62870.1

Other BLAST [web gateways](#)

## All matches to this query

| Score | Mr(calc)  | Delta   | Sequence                         |
|-------|-----------|---------|----------------------------------|
| 57.2  | 1710.8086 | -0.0009 | <a href="#">YGLNHVTYLIEQNK</a>   |
| 27.1  | 1710.8041 | 0.0035  | <a href="#">KEQLSGSQNSLQKDK</a>  |
| 2.5   | 1710.8079 | -0.0003 | <a href="#">VTMMKCLKVDLDCPK</a>  |
| 2.5   | 1710.8079 | -0.0003 | <a href="#">VTMMKCLKVDLDCPK</a>  |
| 2.4   | 1710.8108 | -0.0032 | <a href="#">GLKFGYGFHGAIPEEK</a> |
| 2.1   | 1710.8086 | -0.0009 | <a href="#">EIFIYLSDRDPAPR</a>   |
| 2.1   | 1710.8099 | -0.0022 | <a href="#">MIRVMWSVRAPDAR</a>   |
| 1.9   | 1710.8093 | -0.0016 | <a href="#">MEKVDVYDELVNLK</a>   |
| 1.7   | 1710.8119 | -0.0043 | <a href="#">YLQDIVPGCNKVTGK</a>  |
| 1.5   | 1710.8059 | 0.0017  | <a href="#">IAFIGDGPYKEDLEK</a>  |

Mascot: <http://www.matrixscience.com/>

**Peptide View**MS/MS Fragmentation of **AVPIPGSGLQLTNISHVR**Found in **AT3G63140.1** in **TAIR\_Arabidopsis**, Symbols: | mRNA-binding protein, putative | chr3:23337981-23339595 REVERSE

Match to Query 8757: 1882.973116 from(942.493834,2+) index(6612)

Title: Elution from: 58.913 to 58.913 scan no 8560 cid35.00 polarity:+

Data file D6h-1\_3.mgf

Click mouse within plot area to zoom in by factor of two about that point

Or,   to  Da Label all possible matches  Label matches used for scoring Show Y-axis 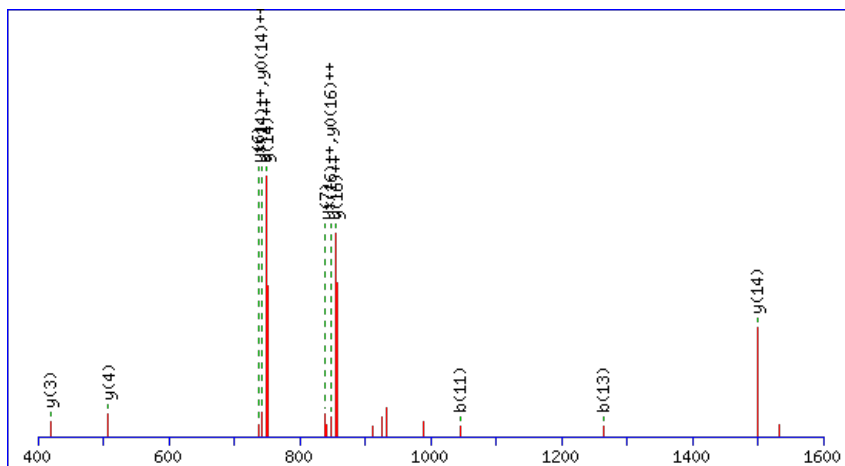Monoisotopic mass of neutral peptide  $M_r(\text{calc})$ : 1882.9684

Fixed modifications: Carbamidomethyl (C) (apply to specified residues or termini only)

Ions Score: 36 Expect: 0.0012

Matches : 13/168 fragment ions using 18 most intense peaks ([help](#))

| #  | b         | b <sup>++</sup> | b <sup>*</sup> | b <sup>*++</sup> | b <sup>0</sup> | b <sup>0++</sup> | Seq. | y         | y <sup>++</sup> | y <sup>*</sup> | y <sup>*++</sup> | y <sup>0</sup> | y <sup>0++</sup> | #  |
|----|-----------|-----------------|----------------|------------------|----------------|------------------|------|-----------|-----------------|----------------|------------------|----------------|------------------|----|
| 1  | 73.0414   | 37.0244         |                |                  |                |                  | A    |           |                 |                |                  |                |                  | 18 |
| 2  | 173.1069  | 87.0571         |                |                  |                |                  | V    | 1811.9415 | 906.4744        | 1793.9179      | 897.4626         | 1793.9309      | 897.4691         | 17 |
| 3  | 271.1567  | 136.0820        |                |                  |                |                  | P    | 1711.8760 | 856.4417        | 1693.8524      | 847.4299         | 1693.8655      | 847.4364         | 16 |
| 4  | 385.2378  | 193.1225        |                |                  |                |                  | I    | 1613.8262 | 807.4168        | 1595.8026      | 798.4050         | 1595.8157      | 798.4115         | 15 |
| 5  | 483.2876  | 242.1474        |                |                  |                |                  | P    | 1499.7451 | 750.3762        | 1481.7216      | 741.3644         | 1481.7346      | 741.3709         | 14 |
| 6  | 541.3061  | 271.1567        |                |                  |                |                  | G    | 1401.6953 | 701.3513        | 1383.6718      | 692.3395         | 1383.6848      | 692.3460         | 13 |
| 7  | 629.3351  | 315.1712        |                |                  | 611.3246       | 306.1659         | S    | 1343.6768 | 672.3421        | 1325.6533      | 663.3303         | 1325.6663      | 663.3368         | 12 |
| 8  | 687.3536  | 344.1805        |                |                  | 669.3431       | 335.1752         | G    | 1255.6478 | 628.3275        | 1237.6242      | 619.3157         | 1237.6372      | 619.3222         | 11 |
| 9  | 801.4347  | 401.2210        |                |                  | 783.4242       | 392.2157         | L    | 1197.6293 | 599.3183        | 1179.6057      | 590.3065         | 1179.6187      | 590.3130         | 10 |
| 10 | 931.4874  | 466.2473        | 913.4638       | 457.2355         | 913.4768       | 457.2420         | Q    | 1083.5482 | 542.2777        | 1065.5246      | 533.2659         | 1065.5376      | 533.2724         | 9  |
| 11 | 1045.5685 | 523.2879        | 1027.5449      | 514.2761         | 1027.5579      | 514.2826         | L    | 953.4955  | 477.2514        | 935.4719       | 468.2396         | 935.4850       | 468.2461         | 8  |
| 12 | 1147.6132 | 574.3102        | 1129.5896      | 565.2984         | 1129.6026      | 565.3050         | T    | 839.4144  | 420.2109        | 821.3908       | 411.1991         | 821.4039       | 411.2056         | 7  |
| 13 | 1263.6502 | 632.3287        | 1245.6266      | 623.3169         | 1245.6396      | 623.3234         | N    | 737.3697  | 369.1885        | 719.3461       | 360.1767         | 719.3592       | 360.1832         | 6  |
| 14 | 1377.7313 | 689.3693        | 1359.7077      | 680.3575         | 1359.7207      | 680.3640         | I    | 621.3327  | 311.1700        | 603.3091       | 302.1582         | 603.3222       | 302.1647         | 5  |
| 15 | 1465.7603 | 733.3838        | 1447.7368      | 724.3720         | 1447.7498      | 724.3785         | S    | 507.2516  | 254.1294        | 489.2280       | 245.1177         | 489.2411       | 245.1242         | 4  |
| 16 | 1605.8104 | 803.4088        | 1587.7868      | 794.3970         | 1587.7998      | 794.4035         | H    | 419.2226  | 210.1149        | 401.1990       | 201.1031         |                |                  | 3  |
| 17 | 1705.8758 | 853.4415        | 1687.8522      | 844.4298         | 1687.8652      | 844.4363         | V    | 279.1725  | 140.0899        | 261.1490       | 131.0781         |                |                  | 2  |
| 18 |           |                 |                |                  |                |                  | R    | 179.1071  | 90.0572         | 161.0835       | 81.0454          |                |                  | 1  |

AT3G63140.1

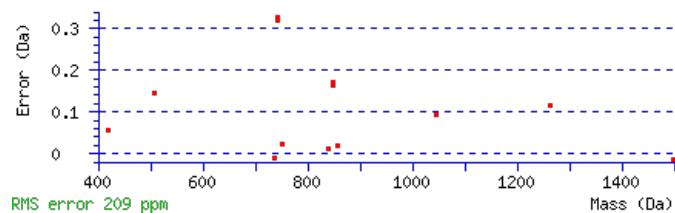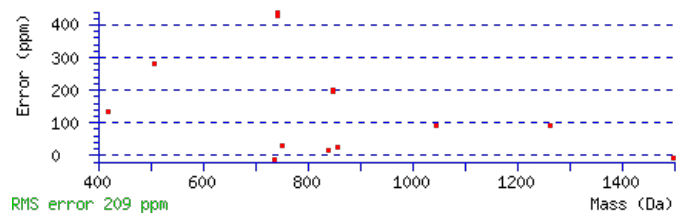

NCBI **BLAST** search of [AVPIPGSGLQLTNISHVR](#)  
(Parameters: blastp, nr protein database, expect=20000, no filter, PAM30)

Other BLAST [web gateways](#)

**All matches to this query**

| Score | Mr(calc)  | Delta   | Sequence                           |
|-------|-----------|---------|------------------------------------|
| 35.6  | 1882.9684 | 0.0048  | <a href="#">AVPIPGSGLQLTNISHVR</a> |
| 2.0   | 1882.9706 | 0.0025  | <a href="#">KIHRLPIEPIDFPER</a>    |
| 1.1   | 1882.9787 | -0.0056 | <a href="#">AVDISPSIAHELIQVLR</a>  |

Mascot: <http://www.matrixscience.com/>

**Peptide View**MS/MS Fragmentation of **SGGEVNFPK**Found in **AT3G63160.1** in **TAIR\_Arabidopsis**, Symbols: | unknown protein | chr3:23344748-23344957 REVERSE

Match to Query 1948: 933.457526 from(467.736039,2+) index(1864)

Title: Elution from: 22.568 to 22.568 scan no 2423 cid35.00 polarity:+

Data file D12h-1\_2.mgf

Click mouse within plot area to zoom in by factor of two about that point

Or,   to  Da Label all possible matches  Label matches used for scoring Show Y-axis 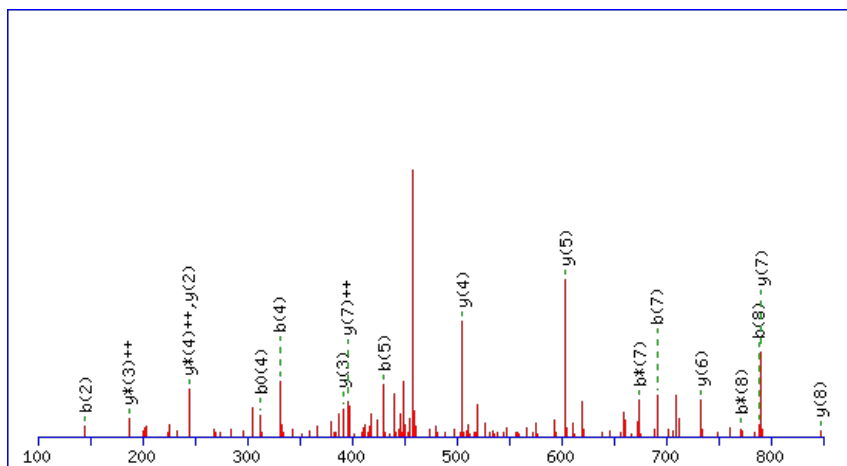Monoisotopic mass of neutral peptide  $M_r(\text{calc})$ : 933.4556

Fixed modifications: Carbamidomethyl (C) (apply to specified residues or termini only)

Ions Score: 45 Expect: 0.00021

Matches : 18/76 fragment ions using 36 most intense peaks ([help](#))

| # | b               | b <sup>++</sup> | b*              | b <sup>*++</sup> | b <sup>0</sup>  | b <sup>0++</sup> | Seq. | y               | y <sup>++</sup> | y*       | y <sup>*++</sup> | y <sup>0</sup> | y <sup>0++</sup> | # |
|---|-----------------|-----------------|-----------------|------------------|-----------------|------------------|------|-----------------|-----------------|----------|------------------|----------------|------------------|---|
| 1 | 88.0393         | 44.5233         |                 |                  | 70.0287         | 35.5180          | S    |                 |                 |          |                  |                |                  | 9 |
| 2 | <b>145.0608</b> | 73.0340         |                 |                  | 127.0502        | 64.0287          | G    | <b>847.4308</b> | 424.2191        | 830.4043 | 415.7058         | 829.4203       | 415.2138         | 8 |
| 3 | 202.0822        | 101.5448        |                 |                  | 184.0717        | 92.5395          | G    | <b>790.4094</b> | <b>395.7083</b> | 773.3828 | 387.1951         | 772.3988       | 386.7030         | 7 |
| 4 | <b>331.1248</b> | 166.0661        |                 |                  | <b>313.1143</b> | 157.0608         | E    | <b>733.3879</b> | 367.1976        | 716.3614 | 358.6843         | 715.3774       | 358.1923         | 6 |
| 5 | <b>430.1932</b> | 215.6003        |                 |                  | 412.1827        | 206.5950         | V    | <b>604.3453</b> | 302.6763        | 587.3188 | 294.1630         |                |                  | 5 |
| 6 | 544.2362        | 272.6217        | 527.2096        | 264.1084         | 526.2256        | 263.6164         | N    | <b>505.2769</b> | 253.1421        | 488.2504 | <b>244.6288</b>  |                |                  | 4 |
| 7 | <b>691.3046</b> | 346.1559        | <b>674.2780</b> | 337.6427         | 673.2940        | 337.1506         | F    | <b>391.2340</b> | 196.1206        | 374.2074 | <b>187.6074</b>  |                |                  | 3 |
| 8 | <b>788.3573</b> | 394.6823        | <b>771.3308</b> | 386.1690         | 770.3468        | 385.6770         | P    | <b>244.1656</b> | 122.5864        | 227.1390 | 114.0731         |                |                  | 2 |
| 9 |                 |                 |                 |                  |                 |                  | K    | 147.1128        | 74.0600         | 130.0863 | 65.5468          |                |                  | 1 |

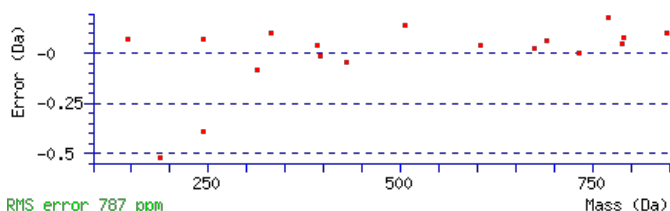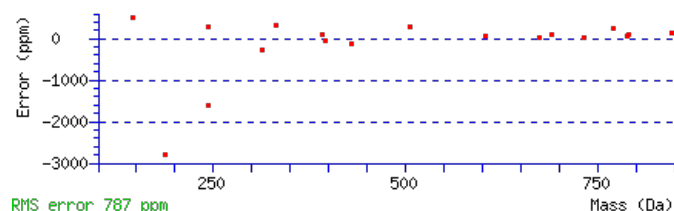NCBI BLAST search of [SGGEVNFPK](#)

(Parameters: blastp, nr protein database, expect=20000, no filter, PAM30)

Other BLAST [web gateways](#)**All matches to this query**

| Score | $M_r(\text{calc})$ | Delta  | Sequence                  |
|-------|--------------------|--------|---------------------------|
| 45.0  | 933.4556           | 0.0019 | <a href="#">SGGEVNFPK</a> |



## AT3G63160.1

|      |          |         |                           |
|------|----------|---------|---------------------------|
| 10.2 | 933.4596 | -0.0021 | <a href="#">FELDWPK</a>   |
| 9.2  | 933.4590 | -0.0014 | <a href="#">DSKCTVPK</a>  |
| 4.8  | 933.4589 | -0.0014 | <a href="#">SGIMEIER</a>  |
| 4.6  | 933.4590 | -0.0014 | <a href="#">MENGVIAGK</a> |
| 3.3  | 933.4589 | -0.0014 | <a href="#">MADLNLNK</a>  |
| 3.3  | 933.4589 | -0.0014 | <a href="#">MGELNLNK</a>  |
| 3.3  | 933.4590 | -0.0014 | <a href="#">NTMNLTPK</a>  |
| 3.0  | 933.4603 | -0.0028 | <a href="#">SRCGWLR</a>   |
| 1.8  | 933.4589 | -0.0014 | <a href="#">LGCKEAEK</a>  |

Mascot: <http://www.matrixscience.com/>

## Peptide View

### MS/MS Fragmentation of **SILDLYIGEEPFDK**

Found in **AT3G63170.1** in **TAIR\_Arabidopsis**, Symbols: | similar to unknown protein [Arabidopsis thaliana] (TAIR:AT2G26310.1); similar to unnamed protein product [Vitis vinifera] (GB:CAO22529.1); contains InterPro domain Chalcone isomerase-like (InterPro:IPR016087) | chr3:23345650-23346968 FO

Match to Query 6908: 1637.815398 from(819.914975,2+) index(9620)

Title: Elution from: 92.467 to 92.467 scan no 13732 cid35.00 polarity:+

Data file D1d-1\_3.mgf

Click mouse within plot area to zoom in by factor of two about that point

Or,   to  Da

Label all possible matches  Label matches used for scoring

Show Y-axis

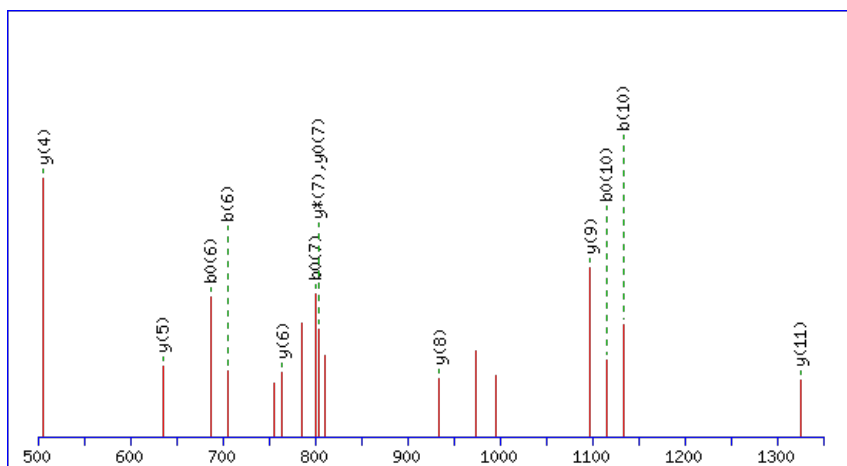

Monoisotopic mass of neutral peptide  $M_r(\text{calc})$ : 1637.8188

Fixed modifications: Carbamidomethyl (C) (apply to specified residues or termini only)

Ions Score: 47 Expect: 0.00011

Matches : 13/128 fragment ions using 18 most intense peaks ([help](#))

| #  | b                | b <sup>++</sup> | b <sup>0</sup>   | b <sup>0++</sup> | Seq. | y                | y <sup>++</sup> | y*              | y <sup>*++</sup> | y <sup>0</sup>  | y <sup>0++</sup> | #  |
|----|------------------|-----------------|------------------|------------------|------|------------------|-----------------|-----------------|------------------|-----------------|------------------|----|
| 1  | 88.0393          | 44.5233         | 70.0287          | 35.5180          | S    |                  |                 |                 |                  |                 |                  | 14 |
| 2  | 201.1234         | 101.0653        | 183.1128         | 92.0600          | I    | 1551.7941        | 776.4007        | 1534.7676       | 767.8874         | 1533.7835       | 767.3954         | 13 |
| 3  | 314.2074         | 157.6074        | 296.1969         | 148.6021         | L    | 1438.7100        | 719.8587        | 1421.6835       | 711.3454         | 1420.6995       | 710.8534         | 12 |
| 4  | 429.2344         | 215.1208        | 411.2238         | 206.1155         | D    | <b>1325.6260</b> | 663.3166        | 1308.5994       | 654.8034         | 1307.6154       | 654.3113         | 11 |
| 5  | 542.3184         | 271.6629        | 524.3079         | 262.6576         | L    | 1210.5990        | 605.8032        | 1193.5725       | 597.2899         | 1192.5885       | 596.7979         | 10 |
| 6  | <b>705.3818</b>  | 353.1945        | <b>687.3712</b>  | 344.1892         | Y    | <b>1097.5150</b> | 549.2611        | 1080.4884       | 540.7478         | 1079.5044       | 540.2558         | 9  |
| 7  | 818.4658         | 409.7366        | <b>800.4553</b>  | 400.7313         | I    | <b>934.4516</b>  | 467.7295        | 917.4251        | 459.2162         | 916.4411        | 458.7242         | 8  |
| 8  | 875.4873         | 438.2473        | 857.4767         | 429.2420         | G    | 821.3676         | 411.1874        | <b>804.3410</b> | 402.6742         | <b>803.3570</b> | 402.1821         | 7  |
| 9  | 1004.5299        | 502.7686        | 986.5193         | 493.7633         | E    | <b>764.3461</b>  | 382.6767        | 747.3196        | 374.1634         | 746.3355        | 373.6714         | 6  |
| 10 | <b>1133.5725</b> | 567.2899        | <b>1115.5619</b> | 558.2846         | E    | <b>635.3035</b>  | 318.1554        | 618.2770        | 309.6421         | 617.2930        | 309.1501         | 5  |
| 11 | 1230.6252        | 615.8163        | 1212.6147        | 606.8110         | P    | <b>506.2609</b>  | 253.6341        | 489.2344        | 245.1208         | 488.2504        | 244.6288         | 4  |
| 12 | 1377.6937        | 689.3505        | 1359.6831        | 680.3452         | F    | 409.2082         | 205.1077        | 392.1816        | 196.5944         | 391.1976        | 196.1024         | 3  |
| 13 | 1492.7206        | 746.8639        | 1474.7100        | 737.8587         | D    | 262.1397         | 131.5735        | 245.1132        | 123.0602         | 244.1292        | 122.5682         | 2  |
| 14 |                  |                 |                  |                  | K    | 147.1128         | 74.0600         | 130.0863        | 65.5468          |                 |                  | 1  |

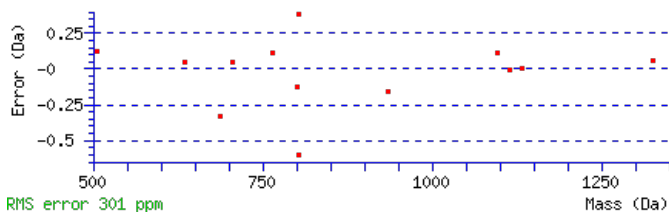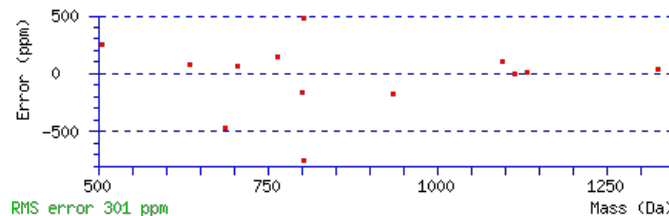

## AT3G63170.1

NCBI **BLAST** search of [SILDLYIGEEPFDK](#)

(Parameters: blastp, nr protein database, expect=20000, no filter, PAM30)

Other BLAST [web gateways](#)

### All matches to this query

| Score | Mr(calc)  | Delta   | Sequence                        |
|-------|-----------|---------|---------------------------------|
| 47.3  | 1637.8188 | -0.0034 | <a href="#">SILDLYIGEEPFDK</a>  |
| 3.1   | 1637.8161 | -0.0007 | <a href="#">QHAKVAEDAVAGWEK</a> |
| 0.3   | 1637.8195 | -0.0041 | <a href="#">TTKGGKVMNPTDAYR</a> |

Mascot: <http://www.matrixscience.com/>

**Peptide View**MS/MS Fragmentation of **LSLPPLTSDR**

Found in **AT3G63190.1** in **TAIR\_Arabidopsis**, Symbols: RRF | RRF (RIBOSOME RECYCLING FACTOR, CHLOROPLAST PRECURSOR) | chr3:23353836-23355615 REVERSE

Match to Query 3430: 1097.609312 from(549.811932,2+) index(5731)

Title: Elution from: 50.158 to 50.158 scan no 7237 cid35.00 polarity:+

Data file C7-3\_2.mgf

Click mouse within plot area to zoom in by factor of two about that point

Or,   to  Da

Label all possible matches  Label matches used for scoring

Show Y-axis

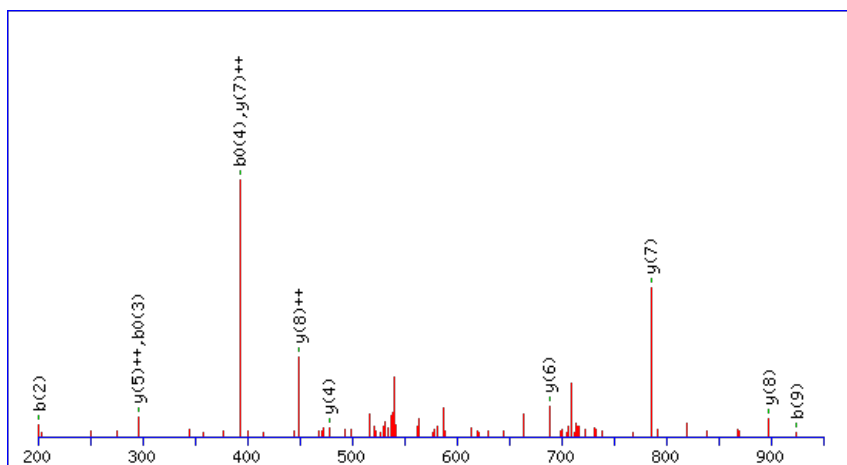

Monoisotopic mass of neutral peptide Mr(calc): 1097.6081

Fixed modifications: Carbamidomethyl (C) (apply to specified residues or termini only)

Ions Score: 29 Expect: 0.003

Matches : 11/86 fragment ions using 15 most intense peaks ([help](#))

| #  | b               | b <sup>++</sup> | b <sup>0</sup>  | b <sup>0++</sup> | Seq. | y               | y <sup>++</sup> | y*       | y <sup>*++</sup> | y <sup>0</sup> | y <sup>0++</sup> | #  |
|----|-----------------|-----------------|-----------------|------------------|------|-----------------|-----------------|----------|------------------|----------------|------------------|----|
| 1  | 114.0913        | 57.5493         |                 |                  | L    |                 |                 |          |                  |                |                  | 10 |
| 2  | <b>201.1234</b> | 101.0653        | 183.1128        | 92.0600          | S    | 985.5313        | 493.2693        | 968.5047 | 484.7560         | 967.5207       | 484.2640         | 9  |
| 3  | 314.2074        | 157.6074        | <b>296.1969</b> | 148.6021         | L    | <b>898.4993</b> | <b>449.7533</b> | 881.4727 | 441.2400         | 880.4887       | 440.7480         | 8  |
| 4  | 411.2602        | 206.1337        | <b>393.2496</b> | 197.1285         | P    | <b>785.4152</b> | <b>393.2112</b> | 768.3886 | 384.6980         | 767.4046       | 384.2060         | 7  |
| 5  | 508.3130        | 254.6601        | 490.3024        | 245.6548         | P    | <b>688.3624</b> | 344.6849        | 671.3359 | 336.1716         | 670.3519       | 335.6796         | 6  |
| 6  | 621.3970        | 311.2022        | 603.3865        | 302.1969         | L    | 591.3097        | <b>296.1585</b> | 574.2831 | 287.6452         | 573.2991       | 287.1532         | 5  |
| 7  | 722.4447        | 361.7260        | 704.4341        | 352.7207         | T    | <b>478.2256</b> | 239.6164        | 461.1991 | 231.1032         | 460.2150       | 230.6112         | 4  |
| 8  | 809.4767        | 405.2420        | 791.4662        | 396.2367         | S    | 377.1779        | 189.0926        | 360.1514 | 180.5793         | 359.1674       | 180.0873         | 3  |
| 9  | <b>924.5037</b> | 462.7555        | 906.4931        | 453.7502         | D    | 290.1459        | 145.5766        | 273.1193 | 137.0633         | 272.1353       | 136.5713         | 2  |
| 10 |                 |                 |                 |                  | R    | 175.1190        | 88.0631         | 158.0924 | 79.5498          |                |                  | 1  |

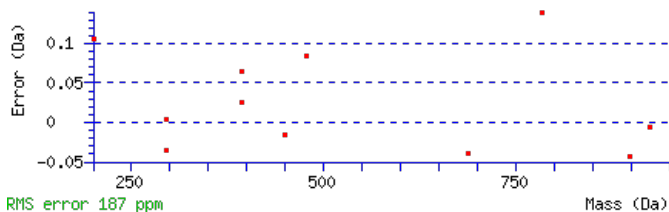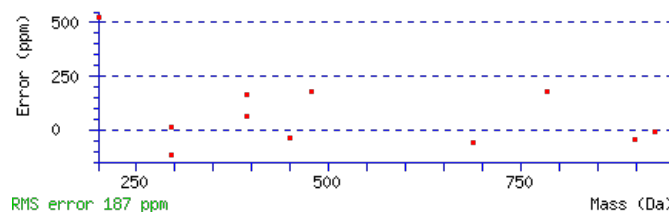

NCBI BLAST search of **LSLPPLTSDR**

(Parameters: blastp, nr protein database, expect=20000, no filter, PAM30)

Other BLAST [web gateways](#)

All matches to this query

AT3G63190.1

| Score | Mr(calc)  | Delta  | Sequence                    |
|-------|-----------|--------|-----------------------------|
| 28.5  | 1097.6081 | 0.0012 | <a href="#">LSLPPLTSDR</a>  |
| 3.8   | 1097.6081 | 0.0012 | <a href="#">KAVDPSVGIPK</a> |

Mascot: <http://www.matrixscience.com/>

### Peptide View

#### MS/MS Fragmentation of **YVSAGSIEYWDPQR**

Found in **AT3G63410.1** in **TAIR\_Arabidopsis**, Symbols: VTE3, APG1 | APG1 (ALBINO OR PALE GREEN MUTANT 1); methyltransferase | chr3:23426791-23427977 REVERSE

Match to Query 8377: 1786.764590 from(894.389571,2+) index(6776)

Title: Elution from: 59.693 to 59.693 scan no 8763 cid35.00 polarity:+

Data file D6h-3\_2.mgf

Click mouse within plot area to zoom in by factor of two about that point

Or,   to  Da

Label all possible matches  Label matches used for scoring

Show Y-axis

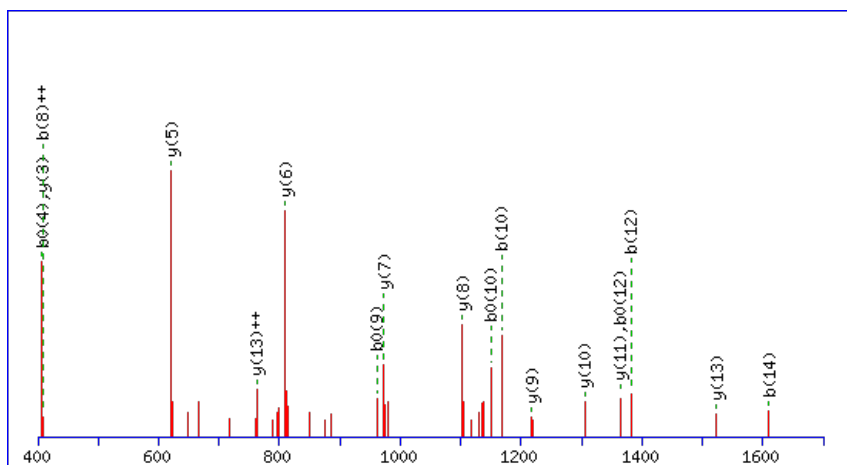

Monoisotopic mass of neutral peptide  $M_r(\text{calc})$ : 1786.7671

Fixed modifications: Carbamidomethyl (C) (apply to specified residues or termini only)

Ions Score: 66 Expect: 1.9e-006

Matches : 18/132 fragment ions using 21 most intense peaks ([help](#))

| #  | b                | b <sup>++</sup> | b*        | b <sup>*++</sup> | b <sup>0</sup>   | b <sup>0++</sup> | Seq. | y                | y <sup>++</sup> | y*        | y <sup>*++</sup> | y <sup>0</sup> | y <sup>0++</sup> | #  |
|----|------------------|-----------------|-----------|------------------|------------------|------------------|------|------------------|-----------------|-----------|------------------|----------------|------------------|----|
| 1  | 165.0676         | 83.0375         |           |                  |                  |                  | Y    |                  |                 |           |                  |                |                  | 15 |
| 2  | 265.1331         | 133.0702        |           |                  |                  |                  | V    | 1623.7140        | 812.3606        | 1605.6904 | 803.3489         | 1605.7034      | 803.3554         | 14 |
| 3  | 353.1622         | 177.0847        |           |                  | 335.1516         | 168.0794         | S    | <b>1523.6486</b> | <b>762.3279</b> | 1505.6250 | 753.3161         | 1505.6380      | 753.3226         | 13 |
| 4  | 425.1963         | 213.1018        |           |                  | <b>407.1857</b>  | 204.0965         | A    | 1435.6195        | 718.3134        | 1417.5959 | 709.3016         | 1417.6089      | 709.3081         | 12 |
| 5  | 483.2148         | 242.1110        |           |                  | 465.2042         | 233.1058         | G    | <b>1363.5854</b> | 682.2963        | 1345.5618 | 673.2845         | 1345.5748      | 673.2910         | 11 |
| 6  | 571.2439         | 286.1256        |           |                  | 553.2333         | 277.1203         | S    | <b>1305.5669</b> | 653.2871        | 1287.5433 | 644.2753         | 1287.5563      | 644.2818         | 10 |
| 7  | 685.3250         | 343.1661        |           |                  | 667.3144         | 334.1608         | I    | <b>1217.5378</b> | 609.2725        | 1199.5142 | 600.2607         | 1199.5272      | 600.2672         | 9  |
| 8  | 815.3646         | <b>408.1859</b> |           |                  | 797.3540         | 399.1807         | E    | <b>1103.4567</b> | 552.2320        | 1085.4331 | 543.2202         | 1085.4461      | 543.2267         | 8  |
| 9  | 979.4250         | 490.2161        |           |                  | <b>961.4144</b>  | 481.2108         | Y    | <b>973.4171</b>  | 487.2122        | 955.3935  | 478.2004         | 955.4065       | 478.2069         | 7  |
| 10 | <b>1167.4983</b> | 584.2528        |           |                  | <b>1149.4878</b> | 575.2475         | W    | <b>809.3567</b>  | 405.1820        | 791.3331  | 396.1702         | 791.3461       | 396.1767         | 6  |
| 11 | 1265.5481        | 633.2777        |           |                  | 1247.5376        | 624.2724         | P    | <b>621.2833</b>  | 311.1453        | 603.2597  | 302.1335         | 603.2727       | 302.1400         | 5  |
| 12 | <b>1381.5721</b> | 691.2897        |           |                  | <b>1363.5615</b> | 682.2844         | D    | 523.2335         | 262.1204        | 505.2099  | 253.1086         | 505.2230       | 253.1151         | 4  |
| 13 | 1479.6219        | 740.3146        |           |                  | 1461.6113        | 731.3093         | P    | <b>407.2095</b>  | 204.1084        | 389.1860  | 195.0966         |                |                  | 3  |
| 14 | <b>1609.6746</b> | 805.3409        | 1591.6510 | 796.3291         | 1591.6640        | 796.3356         | Q    | 309.1597         | 155.0835        | 291.1362  | 146.0717         |                |                  | 2  |
| 15 |                  |                 |           |                  |                  |                  | R    | 179.1071         | 90.0572         | 161.0835  | 81.0454          |                |                  | 1  |

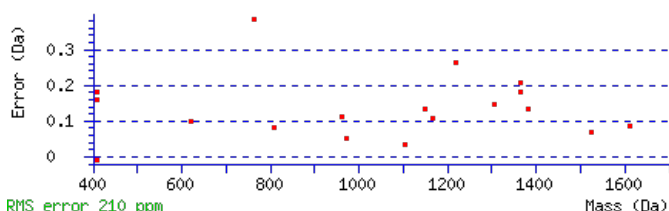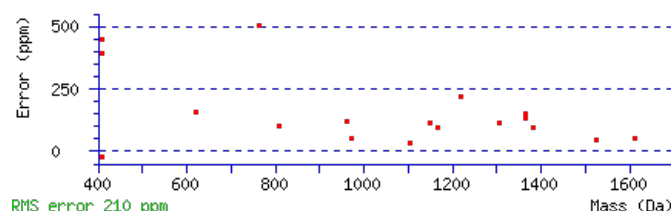

## AT3G63410.1

NCBI **BLAST** search of [YVSAGSIEYWDPQR](#)

(Parameters: blastp, nr protein database, expect=20000, no filter, PAM30)

Other BLAST [web gateways](#)

### All matches to this query

| Score | Mr(calc)  | Delta   | Sequence                         |
|-------|-----------|---------|----------------------------------|
| 65.6  | 1786.7671 | -0.0025 | <a href="#">YVSAGSIEYWDPQR</a>   |
| 5.9   | 1786.7608 | 0.0038  | <a href="#">GTLMQMIGADWISSDK</a> |

**Mascot:** <http://www.matrixscience.com/>

**Peptide View**MS/MS Fragmentation of **VLDSGGLSPELSILR**Found in **AT3G63460.1** in **TAIR\_Arabidopsis**, Symbols: | WD-40 repeat family protein | chr3:23441984-23448216 REVERSE

Match to Query 6826: 1572.803786 from(787.409169,2+) index(8369)

Title: Elution from: 73.760 to 73.760 scan no 11167 cid35.00 polarity:+

Data file C7-2\_3.mgf

Click mouse within plot area to zoom in by factor of two about that point

Or,  to  Da Label all possible matches  Label matches used for scoring Show Y-axis 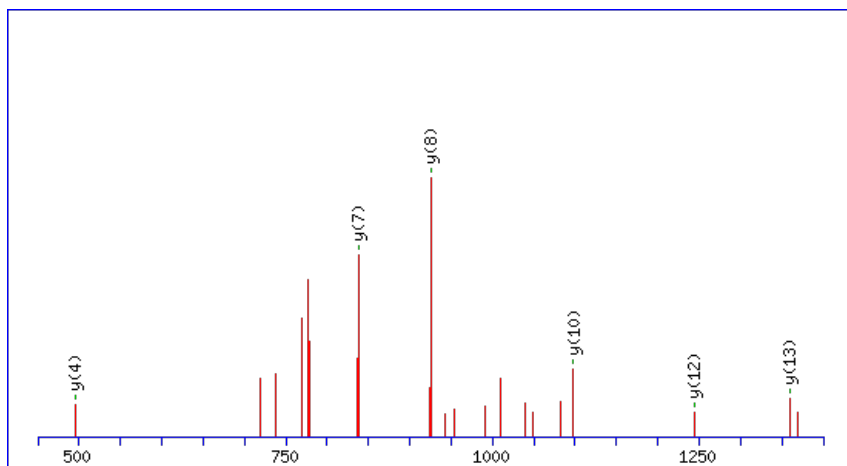Monoisotopic mass of neutral peptide  $M_r(\text{calc})$ : 1572.8084

Fixed modifications: Carbamidomethyl (C) (apply to specified residues or termini only)

Ions Score: 51 Expect: 3.1e-005

Matches : 6/130 fragment ions using 8 most intense peaks ([help](#))

| #  | b         | b <sup>++</sup> | b <sup>0</sup> | b <sup>0++</sup> | Seq. | y                | y <sup>++</sup> | y*        | y <sup>*++</sup> | y <sup>0</sup> | y <sup>0++</sup> | #  |
|----|-----------|-----------------|----------------|------------------|------|------------------|-----------------|-----------|------------------|----------------|------------------|----|
| 1  | 101.0727  | 51.0400         |                |                  | V    |                  |                 |           |                  |                |                  | 15 |
| 2  | 215.1538  | 108.0805        |                |                  | L    | 1473.7502        | 737.3787        | 1455.7266 | 728.3669         | 1455.7396      | 728.3734         | 14 |
| 3  | 331.1778  | 166.0925        | 313.1672       | 157.0873         | D    | <b>1359.6691</b> | 680.3382        | 1341.6455 | 671.3264         | 1341.6585      | 671.3329         | 13 |
| 4  | 419.2069  | 210.1071        | 401.1963       | 201.1018         | S    | <b>1243.6451</b> | 622.3262        | 1225.6215 | 613.3144         | 1225.6345      | 613.3209         | 12 |
| 5  | 477.2254  | 239.1163        | 459.2148       | 230.1110         | G    | 1155.6160        | 578.3117        | 1137.5925 | 569.2999         | 1137.6055      | 569.3064         | 11 |
| 6  | 535.2439  | 268.1256        | 517.2333       | 259.1203         | G    | <b>1097.5975</b> | 549.3024        | 1079.5740 | 540.2906         | 1079.5870      | 540.2971         | 10 |
| 7  | 649.3250  | 325.1661        | 631.3144       | 316.1608         | L    | 1039.5790        | 520.2932        | 1021.5555 | 511.2814         | 1021.5685      | 511.2879         | 9  |
| 8  | 737.3540  | 369.1807        | 719.3435       | 360.1754         | S    | <b>925.4979</b>  | 463.2526        | 907.4744  | 454.2408         | 907.4874       | 454.2473         | 8  |
| 9  | 835.4038  | 418.2056        | 817.3933       | 409.2003         | P    | <b>837.4689</b>  | 419.2381        | 819.4453  | 410.2263         | 819.4583       | 410.2328         | 7  |
| 10 | 965.4435  | 483.2254        | 947.4329       | 474.2201         | E    | 739.4191         | 370.2132        | 721.3955  | 361.2014         | 721.4085       | 361.2079         | 6  |
| 11 | 1079.5246 | 540.2659        | 1061.5140      | 531.2606         | L    | 609.3795         | 305.1934        | 591.3559  | 296.1816         | 591.3689       | 296.1881         | 5  |
| 12 | 1167.5536 | 584.2804        | 1149.5430      | 575.2752         | S    | <b>495.2984</b>  | 248.1528        | 477.2748  | 239.1410         | 477.2878       | 239.1475         | 4  |
| 13 | 1281.6347 | 641.3210        | 1263.6241      | 632.3157         | I    | 407.2693         | 204.1383        | 389.2457  | 195.1265         |                |                  | 3  |
| 14 | 1395.7158 | 698.3615        | 1377.7052      | 689.3563         | L    | 293.1882         | 147.0977        | 275.1646  | 138.0859         |                |                  | 2  |
| 15 |           |                 |                |                  | R    | 179.1071         | 90.0572         | 161.0835  | 81.0454          |                |                  | 1  |

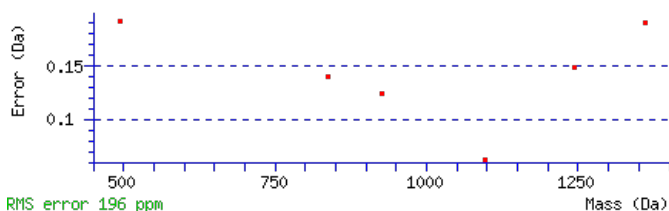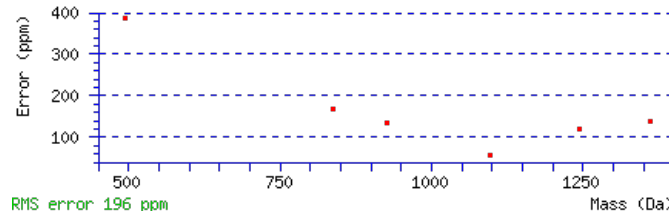NCBI **BLAST** search of [VLDSGGLSPELSILR](#)



## AT3G63460.1

(Parameters: blastp, nr protein database, expect=20000, no filter, PAM30)

Other BLAST [web gateways](#)

### All matches to this query

| Score | Mr(calc)  | Delta   | Sequence                        |
|-------|-----------|---------|---------------------------------|
| 51.0  | 1572.8084 | -0.0046 | <a href="#">VLDSGGLSPELSILR</a> |
| 2.9   | 1572.8007 | 0.0031  | <a href="#">RIPRGGSNPIQIDK</a>  |
| 1.4   | 1572.8002 | 0.0036  | <a href="#">IFTHNSTIPGQIVK</a>  |
| 0.9   | 1572.8025 | 0.0013  | <a href="#">AIGLNFIDVYFRK</a>   |

Mascot: <http://www.matrixscience.com/>

**Peptide View**MS/MS Fragmentation of **GGFMEDFK**Found in **AT3G63490.1** in **TAIR\_Arabidopsis**, Symbols: | ribosomal protein L1 family protein | chr3:23455244-23456995 FORWARD

Match to Query 1486: 929.396370 from(465.705461,2+) index(4360)

Title: Elution from: 42.423 to 42.423 scan no 5612 cid35.00 polarity:+

Data file D1d-1\_3.mgf

Click mouse within plot area to zoom in by factor of two about that point

Or,  to  Da Label all possible matches  Label matches used for scoring Show Y-axis 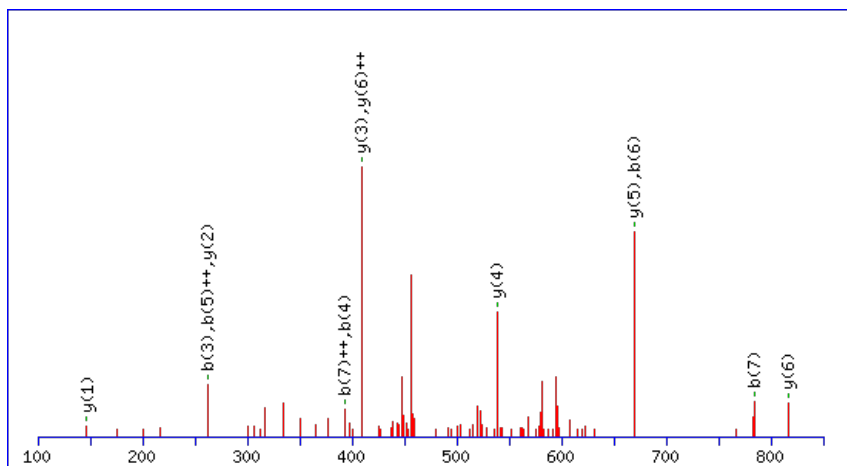Monoisotopic mass of neutral peptide  $M_r(\text{calc})$ : 929.3953

Fixed modifications: Carbamidomethyl (C) (apply to specified residues or termini only)

Ions Score: 47 Expect: 2.1e-005

Matches : 13/60 fragment ions using 14 most intense peaks ([help](#))

| # | b               | b <sup>++</sup> | b <sup>0</sup> | b <sup>0++</sup> | Seq.     | y               | y <sup>++</sup> | y*       | y <sup>*++</sup> | y <sup>0</sup> | y <sup>0++</sup> | # |
|---|-----------------|-----------------|----------------|------------------|----------|-----------------|-----------------|----------|------------------|----------------|------------------|---|
| 1 | 58.0287         | 29.5180         |                |                  | <b>G</b> |                 |                 |          |                  |                |                  | 8 |
| 2 | 115.0502        | 58.0287         |                |                  | <b>G</b> | 873.3811        | 437.1942        | 856.3546 | 428.6809         | 855.3706       | 428.1889         | 7 |
| 3 | <b>262.1186</b> | 131.5629        |                |                  | <b>F</b> | <b>816.3597</b> | <b>408.6835</b> | 799.3331 | 400.1702         | 798.3491       | 399.6782         | 6 |
| 4 | <b>393.1591</b> | 197.0832        |                |                  | <b>M</b> | <b>669.2912</b> | 335.1493        | 652.2647 | 326.6360         | 651.2807       | 326.1440         | 5 |
| 5 | 522.2017        | <b>261.6045</b> | 504.1911       | 252.5992         | <b>E</b> | <b>538.2508</b> | 269.6290        | 521.2242 | 261.1157         | 520.2402       | 260.6237         | 4 |
| 6 | <b>669.2701</b> | 335.1387        | 651.2595       | 326.1334         | <b>F</b> | <b>409.2082</b> | 205.1077        | 392.1816 | 196.5944         | 391.1976       | 196.1024         | 3 |
| 7 | <b>784.2971</b> | <b>392.6522</b> | 766.2865       | 383.6469         | <b>D</b> | <b>262.1397</b> | 131.5735        | 245.1132 | 123.0602         | 244.1292       | 122.5682         | 2 |
| 8 |                 |                 |                |                  | <b>K</b> | <b>147.1128</b> | 74.0600         | 130.0863 | 65.5468          |                |                  | 1 |

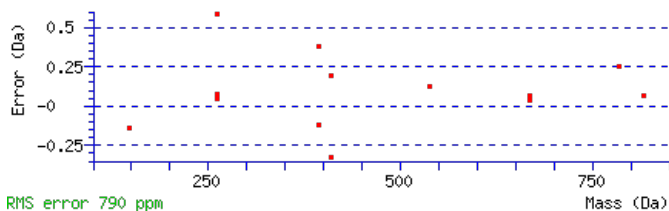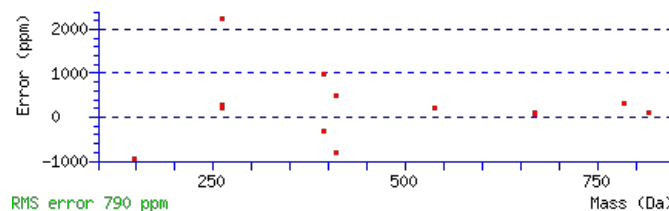NCBI **BLAST** search of [GGFMEDFK](#)

(Parameters: blastp, nr protein database, expect=20000, no filter, PAM30)

Other BLAST [web gateways](#)**All matches to this query**

| Score | $M_r(\text{calc})$ | Delta  | Sequence                   |
|-------|--------------------|--------|----------------------------|
| 46.8  | 929.3953           | 0.0011 | <a href="#">GGFMEDFK</a>   |
| 21.5  | 929.3938           | 0.0026 | <a href="#">SSSSSSSSSK</a> |

## AT3G63490.1

|     |          |         |                         |
|-----|----------|---------|-------------------------|
| 9.8 | 929.3953 | 0.0010  | <a href="#">FCDFVDK</a> |
| 9.6 | 929.3987 | -0.0023 | <a href="#">DMMFNLK</a> |
| 1.5 | 929.3955 | 0.0009  | <a href="#">MMMKAMR</a> |
| 1.5 | 929.3955 | 0.0009  | <a href="#">MMMKAMR</a> |

**Mascot:** <http://www.matrixscience.com/>

**Peptide View**MS/MS Fragmentation of **LNGFDMKKMHK**Found in **AT4G00200.1** in **TAIR\_Arabidopsis**, Symbols: | DNA binding | chr4:82653-84104 REVERSE

Match to Query 5101: 1380.624198 from(691.319375,2+) index(9978)

Title: Elution from: 93.616 to 93.616 scan no 14141 cid35.00 polarity:+

Data file D12h-1\_3.mgf

Click mouse within plot area to zoom in by factor of two about that point

Or,   to  Da Label all possible matches  Label matches used for scoring Show Y-axis 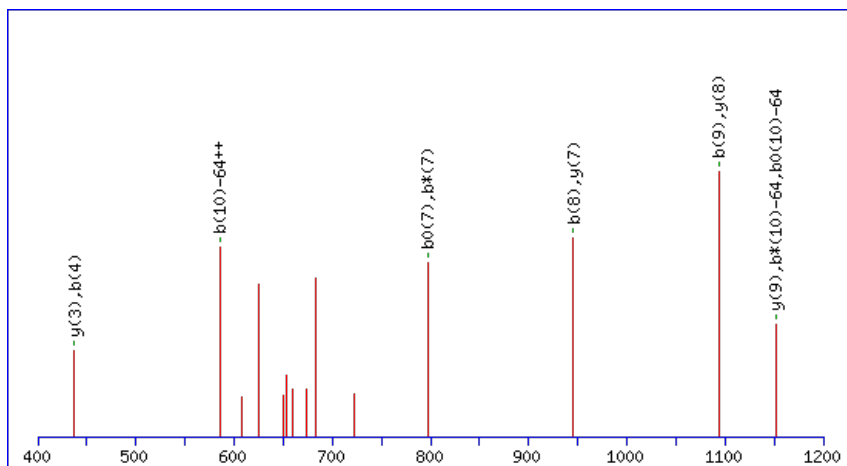Monoisotopic mass of neutral peptide **Mr(calc)**: 1380.6237**Fixed modifications:** Carbamidomethyl (C) (apply to specified residues or termini only)**Variable modifications:****M9** : Oxidation (M), with neutral losses 0.0000 (shown in table), 63.9983**Ions Score:** 37 **Expect:** 0.0017**Matches** : 12/150 fragment ions using 7 most intense peaks ([help](#))

| #  | b                | b <sup>++</sup> | b <sup>*</sup>  | b <sup>*++</sup> | b <sup>0</sup>  | b <sup>0++</sup> | Seq. | y                | y <sup>++</sup> | y <sup>*</sup> | y <sup>*++</sup> | y <sup>0</sup> | y <sup>0++</sup> | #  |
|----|------------------|-----------------|-----------------|------------------|-----------------|------------------|------|------------------|-----------------|----------------|------------------|----------------|------------------|----|
| 1  | 115.0884         | 58.0478         |                 |                  |                 |                  | L    |                  |                 |                |                  |                |                  | 11 |
| 2  | 231.1254         | 116.0663        | 213.1018        | 107.0545         |                 |                  | N    | 1267.5498        | 634.2786        | 1249.5263      | 625.2668         | 1249.5393      | 625.2733         | 10 |
| 3  | 289.1439         | 145.0756        | 271.1203        | 136.0638         |                 |                  | G    | <b>1151.5128</b> | 576.2601        | 1133.4893      | 567.2483         | 1133.5023      | 567.2548         | 9  |
| 4  | <b>437.2093</b>  | 219.1083        | 419.1857        | 210.0965         |                 |                  | F    | <b>1093.4943</b> | 547.2508        | 1075.4708      | 538.2390         | 1075.4838      | 538.2455         | 8  |
| 5  | 553.2333         | 277.1203        | 535.2097        | 268.1085         | 535.2227        | 268.1150         | D    | <b>945.4289</b>  | 473.2181        | 927.4053       | 464.2063         | 927.4183       | 464.2128         | 7  |
| 6  | 685.2708         | 343.1390        | 667.2472        | 334.1273         | 667.2603        | 334.1338         | M    | 829.4049         | 415.2061        | 811.3813       | 406.1943         |                |                  | 6  |
| 7  | 815.3599         | 408.1836        | <b>797.3363</b> | 399.1718         | <b>797.3493</b> | 399.1783         | K    | 697.3674         | 349.1873        | 679.3438       | 340.1755         |                |                  | 5  |
| 8  | <b>945.4489</b>  | 473.2281        | 927.4253        | 464.2163         | 927.4383        | 464.2228         | K    | 567.2784         | 284.1428        | 549.2548       | 275.1310         |                |                  | 4  |
| 9  | <b>1093.4813</b> | 547.2443        | 1075.4577       | 538.2325         | 1075.4708       | 538.2390         | M    | <b>437.1893</b>  | 219.0983        | 419.1657       | 210.0865         |                |                  | 3  |
| 10 | 1233.5313        | 617.2693        | 1215.5078       | 608.2575         | 1215.5208       | 608.2640         | H    | 289.1569         | 145.0821        | 271.1333       | 136.0703         |                |                  | 2  |
| 11 |                  |                 |                 |                  |                 |                  | K    | 149.1069         | 75.0571         | 131.0833       | 66.0453          |                |                  | 1  |

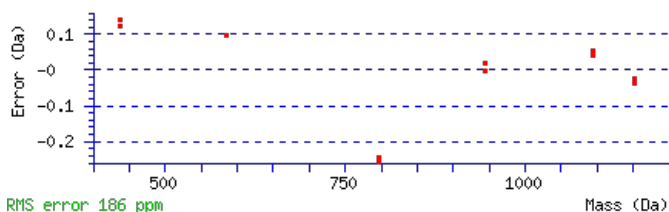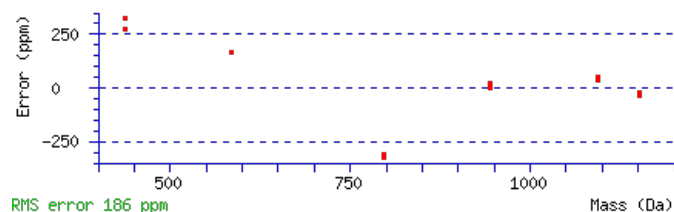NCBI **BLAST** search of **LNGFDMKKMHK**

(Parameters: blastp, nr protein database, expect=20000, no filter, PAM30)

Other BLAST [web gateways](#)

# AT4G00200.1

All matches to this query

| Score | Mr(calc)  | Delta   | Sequence                      | Site Analysis       |
|-------|-----------|---------|-------------------------------|---------------------|
| 36.9  | 1380.6237 | 0.0005  | <a href="#">LNGFDMKKMHK</a>   | Oxidation M9 97.11% |
| 21.6  | 1380.6237 | 0.0005  | <a href="#">LNGFDMKKMHK</a>   | Oxidation M6 2.89%  |
| 2.6   | 1380.6228 | 0.0014  | <a href="#">EVGSSWIDSRTK</a>  |                     |
| 2.0   | 1380.6228 | 0.0014  | <a href="#">ISFPEESSGKQR</a>  |                     |
| 1.8   | 1380.6210 | 0.0032  | <a href="#">MDLEMFLGVQ GK</a> |                     |
| 0.5   | 1380.6257 | -0.0015 | <a href="#">LDTGETVVEFMK</a>  |                     |

Mascot: <http://www.matrixscience.com/>

**Peptide View**MS/MS Fragmentation of **IQEQQLHSHPR**

Found in **AT4G00790.1** in **TAIR\_Arabidopsis**, Symbols: | DNA binding / binding / protein binding / zinc ion binding | chr4:337114-340602  
REVERSE

Match to Query 3977: 1262.587172 from(632.300862,2+) index(4566)

Title: Elution from: 45.399 to 45.399 scan no 5884 cid35.00 polarity:+

Data file D1d-1-2.mgf

Click mouse within plot area to zoom in by factor of two about that point

Or,   to  Da

Label all possible matches  Label matches used for scoring

Show Y-axis

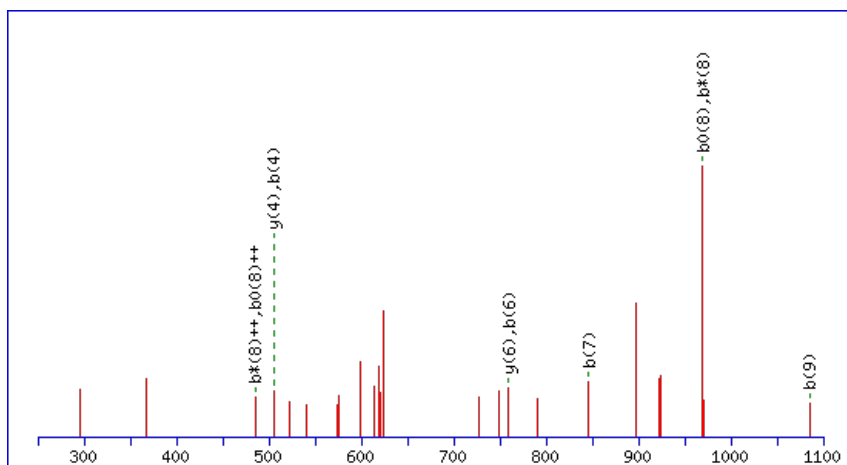

Monoisotopic mass of neutral peptide  $M_r(\text{calc})$ : 1262.5858

Fixed modifications: Carbamidomethyl (C) (apply to specified residues or termini only)

Ions Score: 31 Expect: 0.0074

Matches : 10/96 fragment ions using 8 most intense peaks ([help](#))

| #  | b                | b <sup>++</sup> | b*              | b <sup>*++</sup> | b <sup>0</sup>  | b <sup>0++</sup> | Seq. | y               | y <sup>++</sup> | y*        | y <sup>*++</sup> | y <sup>0</sup> | y <sup>0++</sup> | #  |
|----|------------------|-----------------|-----------------|------------------|-----------------|------------------|------|-----------------|-----------------|-----------|------------------|----------------|------------------|----|
| 1  | 115.0884         | 58.0478         |                 |                  |                 |                  | I    |                 |                 |           |                  |                |                  | 10 |
| 2  | 245.1410         | 123.0741        | 227.1174        | 114.0624         |                 |                  | Q    | 1149.5120       | 575.2596        | 1131.4884 | 566.2479         | 1131.5014      | 566.2544         | 9  |
| 3  | 375.1806         | 188.0940        | 357.1571        | 179.0822         | 357.1701        | 179.0887         | E    | 1019.4594       | 510.2333        | 1001.4358 | 501.2215         | 1001.4488      | 501.2280         | 8  |
| 4  | <b>505.2333</b>  | 253.1203        | 487.2097        | 244.1085         | 487.2227        | 244.1150         | Q    | 889.4197        | 445.2135        | 871.3961  | 436.2017         | 871.4092       | 436.2082         | 7  |
| 5  | 619.3144         | 310.1608        | 601.2908        | 301.1490         | 601.3038        | 301.1556         | L    | <b>759.3671</b> | 380.1872        | 741.3435  | 371.1754         | 741.3565       | 371.1819         | 6  |
| 6  | <b>759.3644</b>  | 380.1858        | 741.3408        | 371.1741         | 741.3538        | 371.1806         | H    | 645.2860        | 323.1466        | 627.2624  | 314.1348         | 627.2754       | 314.1413         | 5  |
| 7  | <b>847.3935</b>  | 424.2004        | 829.3699        | 415.1886         | 829.3829        | 415.1951         | S    | <b>505.2360</b> | 253.1216        | 487.2124  | 244.1098         | 487.2254       | 244.1163         | 4  |
| 8  | 987.4435         | 494.2254        | <b>969.4199</b> | <b>485.2136</b>  | <b>969.4329</b> | <b>485.2201</b>  | H    | 417.2069        | 209.1071        | 399.1833  | 200.0953         |                |                  | 3  |
| 9  | <b>1085.4933</b> | 543.2503        | 1067.4697       | 534.2385         | 1067.4827       | 534.2450         | P    | 277.1569        | 139.0821        | 259.1333  | 130.0703         |                |                  | 2  |
| 10 |                  |                 |                 |                  |                 |                  | R    | 179.1071        | 90.0572         | 161.0835  | 81.0454          |                |                  | 1  |

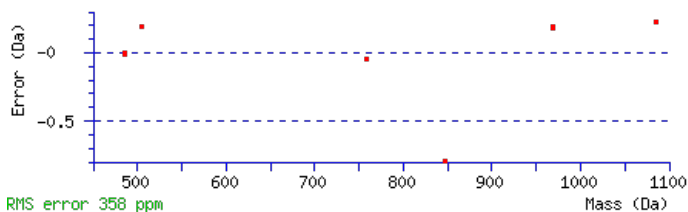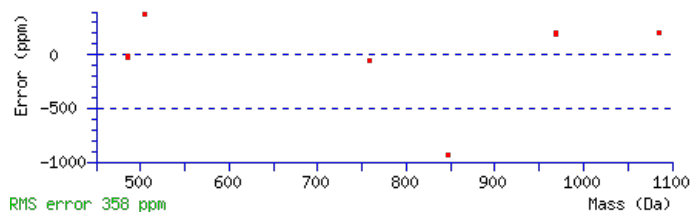NCBI BLAST search of **IQEQQLHSHPR**

(Parameters: blastp, nr protein database, expect=20000, no filter, PAM30)

Other BLAST [web gateways](#)

All matches to this query

## AT4G00790.1

| Score | Mr(calc)  | Delta   | Sequence                    |
|-------|-----------|---------|-----------------------------|
| 30.5  | 1262.5858 | 0.0013  | <a href="#">IQEQLHSHPR</a>  |
| 3.6   | 1262.5892 | -0.0020 | <a href="#">LNADQRPRMK</a>  |
| 2.6   | 1262.5865 | 0.0007  | <a href="#">NTVLVDAISCR</a> |
| 1.6   | 1262.5865 | 0.0006  | <a href="#">LDESQRPKMK</a>  |
| 1.2   | 1262.5888 | -0.0016 | <a href="#">CAIPLQYLDR</a>  |
| 1.2   | 1262.5865 | 0.0007  | <a href="#">MVDANGKLLDR</a> |
| 1.2   | 1262.5836 | 0.0036  | <a href="#">QIRDIONSNR</a>  |
| 0.8   | 1262.5892 | -0.0020 | <a href="#">MSETRPVPRR</a>  |
| 0.6   | 1262.5888 | -0.0016 | <a href="#">FMTLNPGTVPR</a> |
| 0.0   | 1262.5880 | -0.0009 | <a href="#">QRDGAPFLWR</a>  |

Mascot: <http://www.matrixscience.com/>

## Peptide View

### MS/MS Fragmentation of **LVASQFRR**

Found in **AT4G01010.1** in **TAIR\_Arabidopsis**, Symbols: CNGC13, ATCNGC13 | ATCNGC13 (cyclic nucleotide gated channel 13); calmodulin binding / cyclic nucleotide binding / ion channel | chr4:434569-437242 REVERSE

Match to Query 2358: 990.515562 from(496.265057,2+) index(6286)

Title: Elution from: 56.036 to 56.036 scan no 8112 cid35.00 polarity:+

Data file 0-2\_2.mgf

Click mouse within plot area to zoom in by factor of two about that point

Or,   to  Da

Label all possible matches  Label matches used for scoring

Show Y-axis

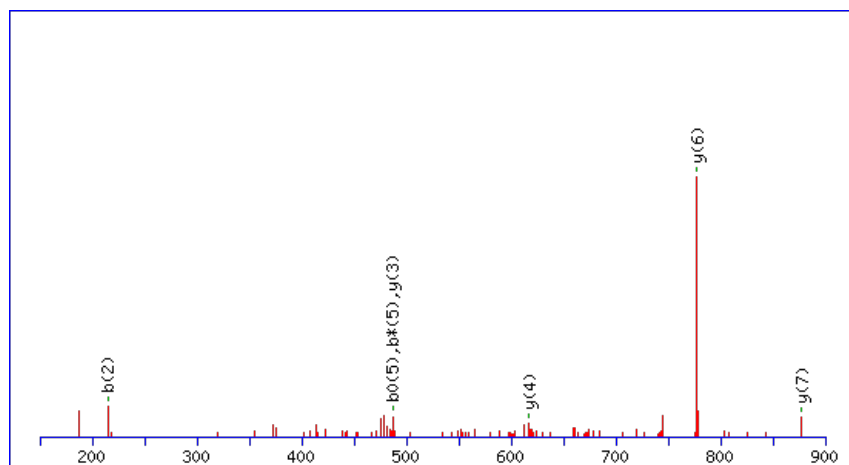

**Monoisotopic mass of neutral peptide Mr(calc):** 990.5169

**Fixed modifications:** Carbamidomethyl (C) (apply to specified residues or termini only)

**Ions Score:** 27 **Expect:** 0.016

**Matches:** 7/62 fragment ions using 7 most intense peaks ([help](#))

| # | b        | b <sup>++</sup> | b*       | b <sup>*++</sup> | b <sup>0</sup> | b <sup>0++</sup> | Seq. | y        | y <sup>++</sup> | y*       | y <sup>*++</sup> | y <sup>0</sup> | y <sup>0++</sup> | # |
|---|----------|-----------------|----------|------------------|----------------|------------------|------|----------|-----------------|----------|------------------|----------------|------------------|---|
| 1 | 115.0884 | 58.0478         |          |                  |                |                  | L    |          |                 |          |                  |                |                  | 8 |
| 2 | 215.1538 | 108.0805        |          |                  |                |                  | V    | 877.4431 | 439.2252        | 859.4195 | 430.2134         | 859.4325       | 430.2199         | 7 |
| 3 | 287.1880 | 144.0976        |          |                  |                |                  | A    | 777.3777 | 389.1925        | 759.3541 | 380.1807         | 759.3671       | 380.1872         | 6 |
| 4 | 375.2170 | 188.1122        |          |                  | 357.2065       | 179.1069         | S    | 705.3435 | 353.1754        | 687.3199 | 344.1636         | 687.3329       | 344.1701         | 5 |
| 5 | 505.2697 | 253.1385        | 487.2461 | 244.1267         | 487.2591       | 244.1332         | Q    | 617.3144 | 309.1609        | 599.2909 | 300.1491         |                |                  | 4 |
| 6 | 653.3351 | 327.1712        | 635.3115 | 318.1594         | 635.3246       | 318.1659         | F    | 487.2618 | 244.1345        | 469.2382 | 235.1227         |                |                  | 3 |
| 7 | 813.4244 | 407.2158        | 795.4008 | 398.2040         | 795.4138       | 398.2105         | R    | 339.1963 | 170.1018        | 321.1728 | 161.0900         |                |                  | 2 |
| 8 |          |                 |          |                  |                |                  | R    | 179.1071 | 90.0572         | 161.0835 | 81.0454          |                |                  | 1 |

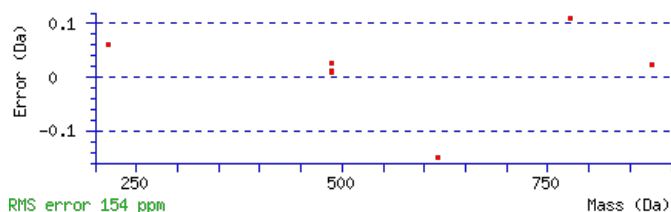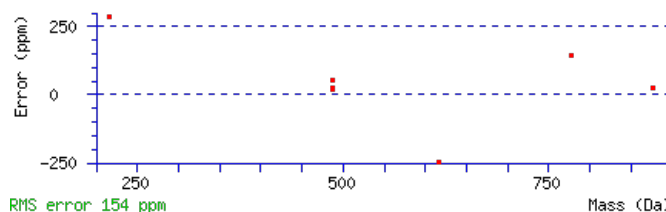

NCBI **BLAST** search of **LVASQFRR**

(Parameters: blastp, nr protein database, expect=20000, no filter, PAM30)

Other BLAST [web gateways](#)

All matches to this query

| Score | Mr(calc) | Delta   | Sequence                 |
|-------|----------|---------|--------------------------|
| 26.6  | 990.5169 | -0.0013 | <a href="#">LVASQFRR</a> |



## AT4G01010.1

|     |          |         |                           |
|-----|----------|---------|---------------------------|
| 4.2 | 990.5138 | 0.0018  | <a href="#">IVTLFYLD</a>  |
| 3.9 | 990.5142 | 0.0013  | <a href="#">IVINYTIR</a>  |
| 3.9 | 990.5165 | -0.0009 | <a href="#">IVPGYYLR</a>  |
| 3.9 | 990.5142 | 0.0013  | <a href="#">IVSKVYDR</a>  |
| 3.9 | 990.5165 | -0.0009 | <a href="#">LVFFPTTR</a>  |
| 3.3 | 990.5143 | 0.0013  | <a href="#">AINASTKFK</a> |

Mascot: <http://www.matrixscience.com/>

**Peptide View**MS/MS Fragmentation of **GWLNSSLPWIEPK**Found in **AT4G01050.1** in **TAIR\_Arabidopsis**, Symbols: | hydroxyproline-rich glycoprotein family protein | chr4:455874-458175 FORWARD

Match to Query 7119: 1542.747106 from(772.380829,2+) index(10311)

Title: Elution from: 93.402 to 93.402 scan no 14204 cid35.00 polarity:+

Data file D6h-1\_1.mgf

Click mouse within plot area to zoom in by factor of two about that point

Or,   to  Da Label all possible matches  Label matches used for scoring Show Y-axis 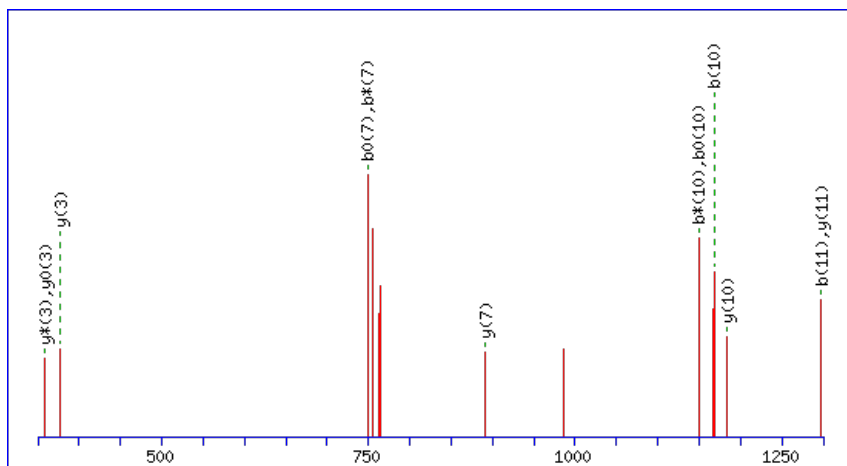Monoisotopic mass of neutral peptide  $M_r(\text{calc})$ : 1542.7425

Fixed modifications: Carbamidomethyl (C) (apply to specified residues or termini only)

Ions Score: 30 Expect: 0.0071

Matches : 12/126 fragment ions using 13 most intense peaks ([help](#))

| #  | b                | b <sup>++</sup> | b*               | b <sup>*++</sup> | b <sup>0</sup>   | b <sup>0++</sup> | Seq. | y                | y <sup>++</sup> | y*              | y <sup>*++</sup> | y <sup>0</sup>  | y <sup>0++</sup> | #  |
|----|------------------|-----------------|------------------|------------------|------------------|------------------|------|------------------|-----------------|-----------------|------------------|-----------------|------------------|----|
| 1  | 59.0258          | 30.0165         |                  |                  |                  |                  | G    |                  |                 |                 |                  |                 |                  | 13 |
| 2  | 247.0992         | 124.0532        |                  |                  |                  |                  | W    | 1485.7313        | 743.3693        | 1467.7077       | 734.3575         | 1467.7207       | 734.3640         | 12 |
| 3  | 361.1803         | 181.0938        |                  |                  |                  |                  | L    | <b>1297.6579</b> | 649.3326        | 1279.6343       | 640.3208         | 1279.6473       | 640.3273         | 11 |
| 4  | 477.2173         | 239.1123        | 459.1937         | 230.1005         |                  |                  | N    | <b>1183.5768</b> | 592.2920        | 1165.5532       | 583.2802         | 1165.5662       | 583.2868         | 10 |
| 5  | 565.2463         | 283.1268        | 547.2227         | 274.1150         | 547.2358         | 274.1215         | S    | 1067.5398        | 534.2735        | 1049.5162       | 525.2617         | 1049.5292       | 525.2683         | 9  |
| 6  | 653.2754         | 327.1413        | 635.2518         | 318.1295         | 635.2648         | 318.1360         | S    | 979.5107         | 490.2590        | 961.4872        | 481.2472         | 961.5002        | 481.2537         | 8  |
| 7  | 767.3565         | 384.1819        | <b>749.3329</b>  | 375.1701         | <b>749.3459</b>  | 375.1766         | L    | <b>891.4817</b>  | 446.2445        | 873.4581        | 437.2327         | 873.4711        | 437.2392         | 7  |
| 8  | 865.4063         | 433.2068        | 847.3827         | 424.1950         | 847.3957         | 424.2015         | P    | 777.4006         | 389.2039        | 759.3770        | 380.1921         | 759.3900        | 380.1986         | 6  |
| 9  | 1053.4797        | 527.2435        | 1035.4561        | 518.2317         | 1035.4691        | 518.2382         | W    | 679.3508         | 340.1790        | 661.3272        | 331.1672         | 661.3402        | 331.1737         | 5  |
| 10 | <b>1167.5608</b> | 584.2840        | <b>1149.5372</b> | 575.2722         | <b>1149.5502</b> | 575.2787         | I    | 491.2774         | 246.1423        | 473.2538        | 237.1305         | 473.2668        | 237.1371         | 4  |
| 11 | <b>1297.6004</b> | 649.3038        | 1279.5768        | 640.2920         | 1279.5898        | 640.2985         | E    | <b>377.1963</b>  | 189.1018        | <b>359.1727</b> | 180.0900         | <b>359.1857</b> | 180.0965         | 3  |
| 12 | 1395.6502        | 698.3287        | 1377.6266        | 689.3169         | 1377.6396        | 689.3234         | P    | 247.1567         | 124.0820        | 229.1331        | 115.0702         |                 |                  | 2  |
| 13 |                  |                 |                  |                  |                  |                  | K    | 149.1069         | 75.0571         | 131.0833        | 66.0453          |                 |                  | 1  |

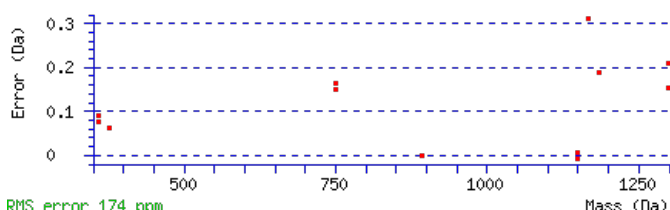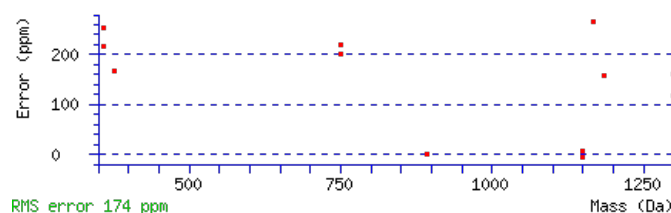NCBI **BLAST** search of **GWLNSSLPWIEPK**

(Parameters: blastp, nr protein database, expect=20000, no filter, PAM30)

Other BLAST [web gateways](#)

# AT4G01050.1

All matches to this query

| Score | Mr(calc)  | Delta   | Sequence                        |
|-------|-----------|---------|---------------------------------|
| 30.1  | 1542.7425 | 0.0046  | <a href="#">GWLNSSLPWIEPK</a>   |
| 3.2   | 1542.7511 | -0.0040 | <a href="#">FIRASSSTSQKPK</a>   |
| 1.9   | 1542.7429 | 0.0042  | <a href="#">NKLRSSFWDTLR</a>    |
| 1.1   | 1542.7436 | 0.0035  | <a href="#">GGEFNKVAMSTKLK</a>  |
| 0.9   | 1542.7484 | -0.0013 | <a href="#">KALEAGDDPTTALPK</a> |
| 0.7   | 1542.7437 | 0.0035  | <a href="#">LIEMAYEKSKASR</a>   |

Mascot: <http://www.matrixscience.com/>

**Peptide View**MS/MS Fragmentation of **ELAEDIESLK**

Found in **AT4G01150.1** in **TAIR\_Arabidopsis**, Symbols: | Identical to Uncharacterized protein At4g01150, chloroplast precursor [Arabidopsis thaliana] (GB:O04616;GB:Q38835); similar to unknown protein [Arabidopsis thaliana] (TAIR:AT4G38100.1); similar to unknown [Populus trichocarpa] (GB:ABK95)

Match to Query 3213: 1145.582494 from(573.798523,2+) index(5060)

Title: Elution from: 48.029 to 48.029 scan no 6560 cid35.00 polarity:+

Data file D1d-1\_3.mgf

Click mouse within plot area to zoom in by factor of two about that point

Or,   to  Da

Label all possible matches  Label matches used for scoring

Show Y-axis

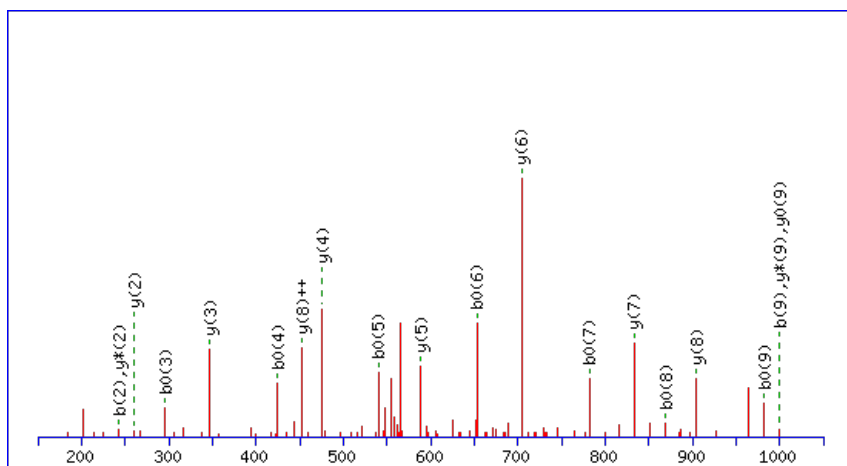

**Monoisotopic mass of neutral peptide Mr(calc):** 1145.5815

**Fixed modifications:** Carbamidomethyl (C) (apply to specified residues or termini only)

**Ions Score:** 57 **Expect:** 6.9e-006

**Matches:** 20/86 fragment ions using 25 most intense peaks ([help](#))

| #  | b                | b <sup>++</sup> | b <sup>0</sup>  | b <sup>0++</sup> | Seq. | y               | y <sup>++</sup> | y <sup>*</sup>   | y <sup>*++</sup> | y <sup>0</sup>  | y <sup>0++</sup> | #  |
|----|------------------|-----------------|-----------------|------------------|------|-----------------|-----------------|------------------|------------------|-----------------|------------------|----|
| 1  | 130.0499         | 65.5286         | 112.0393        | 56.5233          | E    |                 |                 |                  |                  |                 |                  | 10 |
| 2  | <b>243.1339</b>  | 122.0706        | 225.1234        | 113.0653         | L    | 1017.5463       | 509.2768        | <b>1000.5197</b> | 500.7635         | <b>999.5357</b> | 500.2715         | 9  |
| 3  | 314.1710         | 157.5892        | <b>296.1605</b> | 148.5839         | A    | <b>904.4622</b> | <b>452.7347</b> | 887.4357         | 444.2215         | 886.4516        | 443.7295         | 8  |
| 4  | 443.2136         | 222.1105        | <b>425.2031</b> | 213.1052         | E    | <b>833.4251</b> | 417.2162        | 816.3985         | 408.7029         | 815.4145        | 408.2109         | 7  |
| 5  | 558.2406         | 279.6239        | <b>540.2300</b> | 270.6186         | D    | <b>704.3825</b> | 352.6949        | 687.3559         | 344.1816         | 686.3719        | 343.6896         | 6  |
| 6  | 671.3246         | 336.1660        | <b>653.3141</b> | 327.1607         | I    | <b>589.3556</b> | 295.1814        | 572.3290         | 286.6681         | 571.3450        | 286.1761         | 5  |
| 7  | 800.3672         | 400.6873        | <b>782.3567</b> | 391.6820         | E    | <b>476.2715</b> | 238.6394        | 459.2449         | 230.1261         | 458.2609        | 229.6341         | 4  |
| 8  | 887.3993         | 444.2033        | <b>869.3887</b> | 435.1980         | S    | <b>347.2289</b> | 174.1181        | 330.2023         | 165.6048         | 329.2183        | 165.1128         | 3  |
| 9  | <b>1000.4833</b> | 500.7453        | <b>982.4728</b> | 491.7400         | L    | <b>260.1969</b> | 130.6021        | <b>243.1703</b>  | 122.0888         |                 |                  | 2  |
| 10 |                  |                 |                 |                  | K    | 147.1128        | 74.0600         | 130.0863         | 65.5468          |                 |                  | 1  |

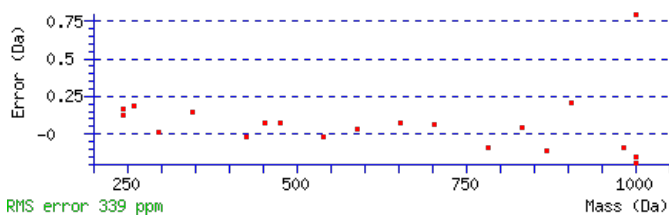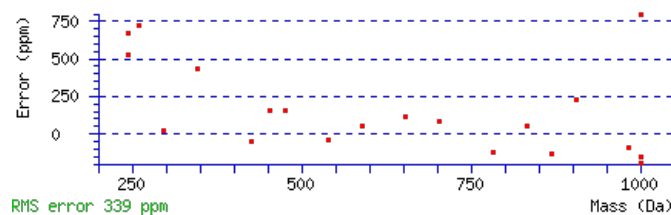

NCBI **BLAST** search of [ELAEDIESLK](#)

(Parameters: blastp, nr protein database, expect=20000, no filter, PAM30)

Other BLAST [web gateways](#)

**All matches to this query**

AT4G01150.1

| Score | Mr(calc)  | Delta  | Sequence                   |
|-------|-----------|--------|----------------------------|
| 57.1  | 1145.5815 | 0.0010 | <a href="#">ELAEDIESLK</a> |
| 12.4  | 1145.5816 | 0.0009 | <a href="#">EALIDEITDK</a> |
| 12.4  | 1145.5816 | 0.0009 | <a href="#">EALIDEVTEK</a> |

Mascot: <http://www.matrixscience.com/>

## Peptide View

### MS/MS Fragmentation of **DQGVFPEIR**

Found in **AT4G01310.1** in **TAIR\_Arabidopsis**, Symbols: | ribosomal protein L5 family protein | chr4:544166-545480 REVERSE

Match to Query 2914: 1059.537018 from(530.775785,2+) index(5364)

Title: Elution from: 47.683 to 47.683 scan no 6737 cid35.00 polarity:+

Data file 0-3\_2.mgf

Click mouse within plot area to zoom in by factor of two about that point

Or,   to  Da

Label all possible matches  Label matches used for scoring

Show Y-axis

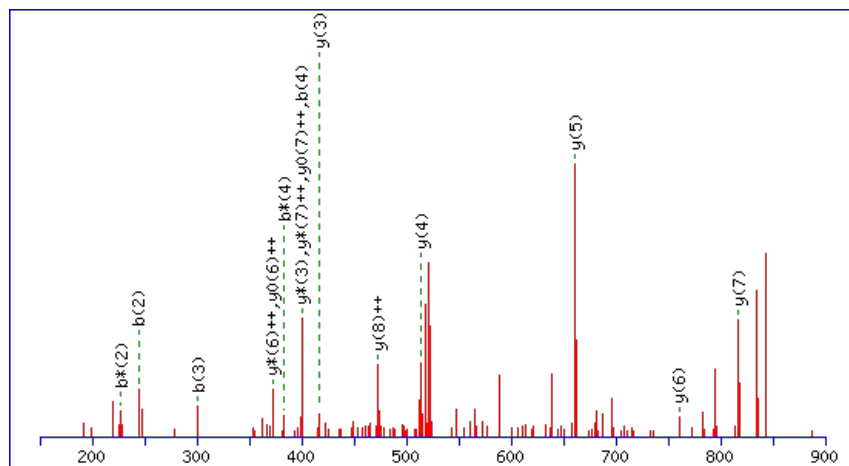

Monoisotopic mass of neutral peptide **Mr(calc)**: 1059.5349

**Fixed modifications**: Carbamidomethyl (C) (apply to specified residues or termini only)

**Ions Score**: 22 **Expect**: 0.027

**Matches**: 16/90 fragment ions using 28 most intense peaks ([help](#))

| # | b               | b <sup>++</sup> | b*              | b <sup>*++</sup> | b <sup>0</sup> | b <sup>0++</sup> | Seq.     | y               | y <sup>++</sup> | y*              | y <sup>*++</sup> | y <sup>0</sup> | y <sup>0++</sup> | #        |
|---|-----------------|-----------------|-----------------|------------------|----------------|------------------|----------|-----------------|-----------------|-----------------|------------------|----------------|------------------|----------|
| 1 | 116.0342        | 58.5207         |                 |                  | 98.0237        | 49.5155          | <b>D</b> |                 |                 |                 |                  |                |                  | <b>9</b> |
| 2 | <b>244.0928</b> | 122.5500        | <b>227.0662</b> | 114.0368         | 226.0822       | 113.5448         | <b>Q</b> | 945.5152        | <b>473.2613</b> | 928.4887        | 464.7480         | 927.5047       | 464.2560         | <b>8</b> |
| 3 | <b>301.1143</b> | 151.0608        | 284.0877        | 142.5475         | 283.1037       | 142.0555         | <b>G</b> | <b>817.4567</b> | 409.2320        | 800.4301        | <b>400.7187</b>  | 799.4461       | <b>400.2267</b>  | <b>7</b> |
| 4 | <b>400.1827</b> | 200.5950        | <b>383.1561</b> | 192.0817         | 382.1721       | 191.5897         | <b>V</b> | <b>760.4352</b> | 380.7212        | 743.4087        | <b>372.2080</b>  | 742.4246       | <b>371.7160</b>  | <b>6</b> |
| 5 | 547.2511        | 274.1292        | 530.2245        | 265.6159         | 529.2405       | 265.1239         | <b>F</b> | <b>661.3668</b> | 331.1870        | 644.3402        | 322.6738         | 643.3562       | 322.1817         | <b>5</b> |
| 6 | 644.3039        | 322.6556        | 627.2773        | 314.1423         | 626.2933       | 313.6503         | <b>P</b> | <b>514.2984</b> | 257.6528        | 497.2718        | 249.1396         | 496.2878       | 248.6475         | <b>4</b> |
| 7 | 773.3464        | 387.1769        | 756.3199        | 378.6636         | 755.3359       | 378.1716         | <b>E</b> | <b>417.2456</b> | 209.1264        | <b>400.2191</b> | 200.6132         | 399.2350       | 200.1212         | <b>3</b> |
| 8 | 886.4305        | 443.7189        | 869.4040        | 435.2056         | 868.4199       | 434.7136         | <b>I</b> | 288.2030        | 144.6051        | 271.1765        | 136.0919         |                |                  | <b>2</b> |
| 9 |                 |                 |                 |                  |                |                  | <b>R</b> | 175.1190        | 88.0631         | 158.0924        | 79.5498          |                |                  | <b>1</b> |

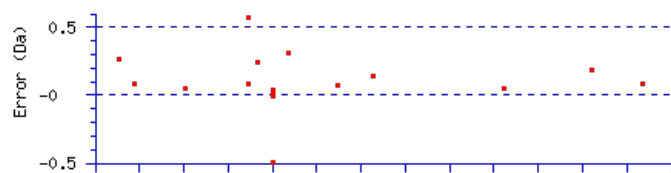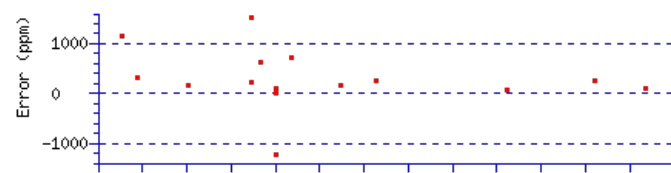

NCBI **BLAST** search of [DQGVFPEIR](#)

(Parameters: blastp, nr protein database, expect=20000, no filter, PAM30)

Other BLAST [web gateways](#)

### All matches to this query

| Score | Mr(calc)  | Delta  | Sequence                  |
|-------|-----------|--------|---------------------------|
| 22.2  | 1059.5349 | 0.0021 | <a href="#">DQGVFPEIR</a> |

AT4G01310.1

|     |           |         |                            |
|-----|-----------|---------|----------------------------|
| 2.1 | 1059.5383 | -0.0013 | <a href="#">GTQSVNVMPK</a> |
|-----|-----------|---------|----------------------------|

**Mascot:** <http://www.matrixscience.com/>

**Peptide View**MS/MS Fragmentation of **LEQNGGSIHGGTFK**

Found in **AT4G01690.1** in **TAIR\_Arabidopsis**, Symbols: HEMG1, PPOX | PPOX (PROTOPORPHYRINOGEN OXIDASE); protoporphyrinogen oxidase | chr4:729929-732309 FORWARD

Match to Query 5522: 1436.684916 from(719.349734,2+) index(4588)

Title: Elution from: 41.567 to 41.567 scan no 5735 cid35.00 polarity:+

Data file D12h-1\_3.mgf

Click mouse within plot area to zoom in by factor of two about that point

Or,   to  Da

Label all possible matches  Label matches used for scoring

Show Y-axis

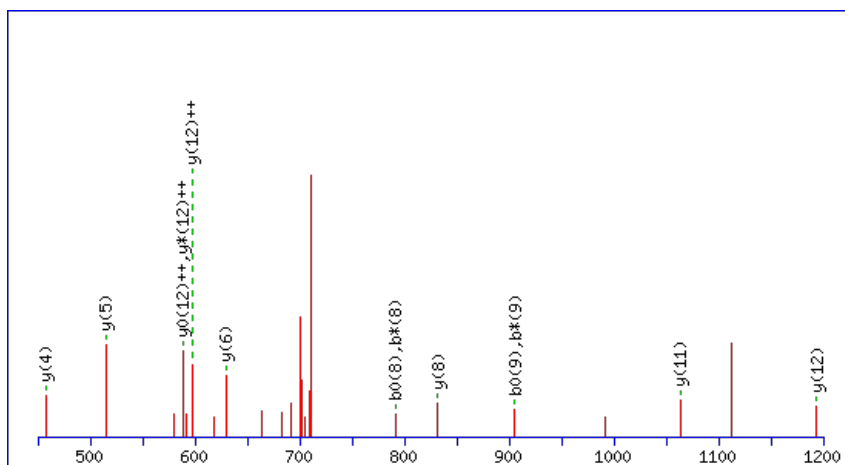

**Monoisotopic mass of neutral peptide Mr(calc):** 1436.6854

**Fixed modifications:** Carbamidomethyl (C) (apply to specified residues or termini only)

**Ions Score:** 35 **Expect:** 0.0032

**Matches:** 13/146 fragment ions using 15 most intense peaks ([help](#))

| #  | b         | b <sup>++</sup> | b*              | b <sup>*++</sup> | b <sup>0</sup>  | b <sup>0++</sup> | Seq. | y                | y <sup>++</sup> | y*        | y <sup>*++</sup> | y <sup>0</sup> | y <sup>0++</sup> | #  |
|----|-----------|-----------------|-----------------|------------------|-----------------|------------------|------|------------------|-----------------|-----------|------------------|----------------|------------------|----|
| 1  | 115.0884  | 58.0478         |                 |                  |                 |                  | L    |                  |                 |           |                  |                |                  | 14 |
| 2  | 245.1280  | 123.0676        |                 |                  | 227.1174        | 114.0624         | E    | 1323.6116        | 662.3094        | 1305.5880 | 653.2976         | 1305.6010      | 653.3041         | 13 |
| 3  | 375.1806  | 188.0940        | 357.1571        | 179.0822         | 357.1701        | 179.0887         | Q    | <b>1193.5719</b> | <b>597.2896</b> | 1175.5484 | <b>588.2778</b>  | 1175.5614      | <b>588.2843</b>  | 12 |
| 4  | 491.2176  | 246.1125        | 473.1941        | 237.1007         | 473.2071        | 237.1072         | N    | <b>1063.5193</b> | 532.2633        | 1045.4957 | 523.2515         | 1045.5087      | 523.2580         | 11 |
| 5  | 549.2361  | 275.1217        | 531.2126        | 266.1099         | 531.2256        | 266.1164         | G    | 947.4823         | 474.2448        | 929.4587  | 465.2330         | 929.4717       | 465.2395         | 10 |
| 6  | 607.2546  | 304.1310        | 589.2311        | 295.1192         | 589.2441        | 295.1257         | G    | 889.4638         | 445.2355        | 871.4402  | 436.2237         | 871.4532       | 436.2303         | 9  |
| 7  | 695.2837  | 348.1455        | 677.2601        | 339.1337         | 677.2731        | 339.1402         | S    | <b>831.4453</b>  | 416.2263        | 813.4217  | 407.2145         | 813.4347       | 407.2210         | 8  |
| 8  | 809.3648  | 405.1860        | <b>791.3412</b> | 396.1742         | <b>791.3542</b> | 396.1808         | I    | 743.4162         | 372.2118        | 725.3926  | 363.2000         | 725.4057       | 363.2065         | 7  |
| 9  | 923.4459  | 462.2266        | <b>905.4223</b> | 453.2148         | <b>905.4353</b> | 453.2213         | I    | <b>629.3351</b>  | 315.1712        | 611.3115  | 306.1594         | 611.3246       | 306.1659         | 6  |
| 10 | 981.4644  | 491.2358        | 963.4408        | 482.2240         | 963.4538        | 482.2306         | G    | <b>515.2540</b>  | 258.1307        | 497.2305  | 249.1189         | 497.2435       | 249.1254         | 5  |
| 11 | 1039.4829 | 520.2451        | 1021.4593       | 511.2333         | 1021.4723       | 511.2398         | G    | <b>457.2355</b>  | 229.1214        | 439.2120  | 220.1096         | 439.2250       | 220.1161         | 4  |
| 12 | 1141.5276 | 571.2674        | 1123.5040       | 562.2557         | 1123.5171       | 562.2622         | T    | 399.2170         | 200.1122        | 381.1935  | 191.1004         | 381.2065       | 191.1069         | 3  |
| 13 | 1289.5931 | 645.3002        | 1271.5695       | 636.2884         | 1271.5825       | 636.2949         | F    | 297.1723         | 149.0898        | 279.1487  | 140.0780         |                |                  | 2  |
| 14 |           |                 |                 |                  |                 |                  | K    | 149.1069         | 75.0571         | 131.0833  | 66.0453          |                |                  | 1  |

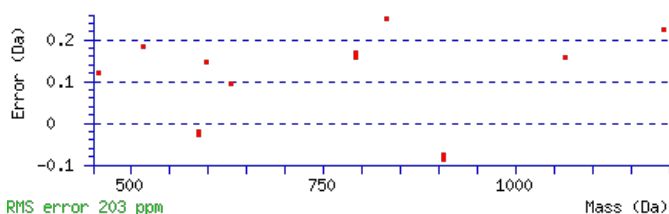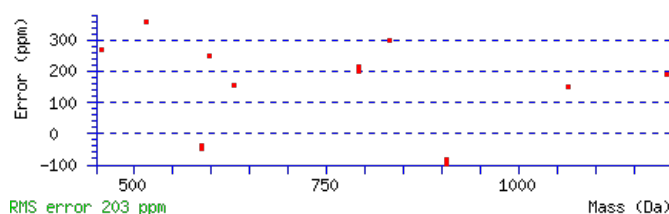

NCBI BLAST search of [LEQNGGSIHGGTFK](#)



## AT4G01690.1

(Parameters: blastp, nr protein database, expect=20000, no filter, PAM30)

Other BLAST [web gateways](#)

### All matches to this query

| Score | Mr(calc)  | Delta   | Sequence                       |
|-------|-----------|---------|--------------------------------|
| 35.4  | 1436.6854 | -0.0004 | <a href="#">LEQNGGSIIGGTFK</a> |
| 9.0   | 1436.6854 | -0.0004 | <a href="#">EIQAAFRTDEIK</a>   |
| 8.8   | 1436.6827 | 0.0022  | <a href="#">LKELGYEISDEK</a>   |
| 5.4   | 1436.6814 | 0.0036  | <a href="#">KLMMLEKEEQK</a>    |
| 5.4   | 1436.6814 | 0.0036  | <a href="#">KLMMLEKEEQK</a>    |
| 4.7   | 1436.6863 | -0.0013 | <a href="#">KYMALVIGCPPR</a>   |
| 4.7   | 1436.6840 | 0.0009  | <a href="#">AIGEMRKCVDLK</a>   |
| 2.5   | 1436.6887 | -0.0038 | <a href="#">ELGKTAGKDVMAGK</a> |
| 2.4   | 1436.6887 | -0.0038 | <a href="#">TKGVNGLTMDKEK</a>  |
| 1.8   | 1436.6854 | -0.0004 | <a href="#">FQKDGLESLLR</a>    |

Mascot: <http://www.matrixscience.com/>

**Peptide View**MS/MS Fragmentation of **DQVESVINTIEGAR**Found in **AT4G01900.1** in **TAIR\_Arabidopsis**, Symbols: P11, GLB1 | GLB1 (glutamine synthetase B1) | chr4:821736-823294 FORWARD

Match to Query 7423: 1642.848522 from(822.431537,2+) index(10743)

Title: Elution from: 106.922 to 106.922 scan no 15588 cid35.00 polarity:+

Data file D1d-1\_1.mgf

Click mouse within plot area to zoom in by factor of two about that point

Or,   to  Da Label all possible matches  Label matches used for scoring Show Y-axis 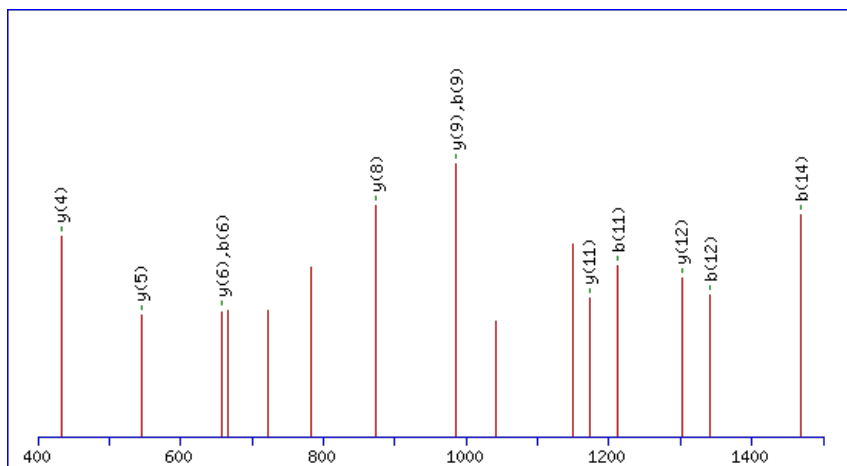Monoisotopic mass of neutral peptide  $M_r(\text{calc})$ : 1642.8526

Fixed modifications: Carbamidomethyl (C) (apply to specified residues or termini only)

Ions Score: 55 Expect: 1.2e-005

Matches : 12/160 fragment ions using 15 most intense peaks ([help](#))

| #  | b                | b <sup>++</sup> | b*        | b <sup>*++</sup> | b <sup>0</sup> | b <sup>0++</sup> | Seq. | y                | y <sup>++</sup> | y*        | y <sup>*++</sup> | y <sup>0</sup> | y <sup>0++</sup> | #  |
|----|------------------|-----------------|-----------|------------------|----------------|------------------|------|------------------|-----------------|-----------|------------------|----------------|------------------|----|
| 1  | 116.0342         | 58.5207         |           |                  | 98.0237        | 49.5155          | D    |                  |                 |           |                  |                |                  | 15 |
| 2  | 244.0928         | 122.5500        | 227.0662  | 114.0368         | 226.0822       | 113.5448         | Q    | 1528.8329        | 764.9201        | 1511.8064 | 756.4068         | 1510.8224      | 755.9148         | 14 |
| 3  | 343.1612         | 172.0842        | 326.1347  | 163.5710         | 325.1506       | 163.0790         | V    | 1400.7744        | 700.8908        | 1383.7478 | 692.3775         | 1382.7638      | 691.8855         | 13 |
| 4  | 472.2038         | 236.6055        | 455.1773  | 228.0923         | 454.1932       | 227.6003         | E    | <b>1301.7060</b> | 651.3566        | 1284.6794 | 642.8433         | 1283.6954      | 642.3513         | 12 |
| 5  | 559.2358         | 280.1216        | 542.2093  | 271.6083         | 541.2253       | 271.1163         | S    | <b>1172.6634</b> | 586.8353        | 1155.6368 | 578.3220         | 1154.6528      | 577.8300         | 11 |
| 6  | <b>658.3042</b>  | 329.6558        | 641.2777  | 321.1425         | 640.2937       | 320.6505         | V    | 1085.6313        | 543.3193        | 1068.6048 | 534.8060         | 1067.6208      | 534.3140         | 10 |
| 7  | 771.3883         | 386.1978        | 754.3618  | 377.6845         | 753.3777       | 377.1925         | I    | <b>986.5629</b>  | 493.7851        | 969.5364  | 485.2718         | 968.5524       | 484.7798         | 9  |
| 8  | 885.4312         | 443.2193        | 868.4047  | 434.7060         | 867.4207       | 434.2140         | N    | <b>873.4789</b>  | 437.2431        | 856.4523  | 428.7298         | 855.4683       | 428.2378         | 8  |
| 9  | <b>986.4789</b>  | 493.7431        | 969.4524  | 485.2298         | 968.4684       | 484.7378         | T    | 759.4359         | 380.2216        | 742.4094  | 371.7083         | 741.4254       | 371.2163         | 7  |
| 10 | 1099.5630        | 550.2851        | 1082.5364 | 541.7719         | 1081.5524      | 541.2798         | I    | <b>658.3883</b>  | 329.6978        | 641.3617  | 321.1845         | 640.3777       | 320.6925         | 6  |
| 11 | <b>1212.6470</b> | 606.8272        | 1195.6205 | 598.3139         | 1194.6365      | 597.8219         | I    | <b>545.3042</b>  | 273.1557        | 528.2776  | 264.6425         | 527.2936       | 264.1504         | 5  |
| 12 | <b>1341.6896</b> | 671.3485        | 1324.6631 | 662.8352         | 1323.6791      | 662.3432         | E    | <b>432.2201</b>  | 216.6137        | 415.1936  | 208.1004         | 414.2096       | 207.6084         | 4  |
| 13 | 1398.7111        | 699.8592        | 1381.6846 | 691.3459         | 1380.7005      | 690.8539         | G    | 303.1775         | 152.0924        | 286.1510  | 143.5791         |                |                  | 3  |
| 14 | <b>1469.7482</b> | 735.3777        | 1452.7217 | 726.8645         | 1451.7376      | 726.3725         | A    | 246.1561         | 123.5817        | 229.1295  | 115.0684         |                |                  | 2  |
| 15 |                  |                 |           |                  |                |                  | R    | 175.1190         | 88.0631         | 158.0924  | 79.5498          |                |                  | 1  |

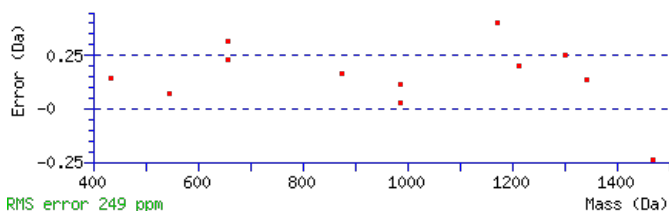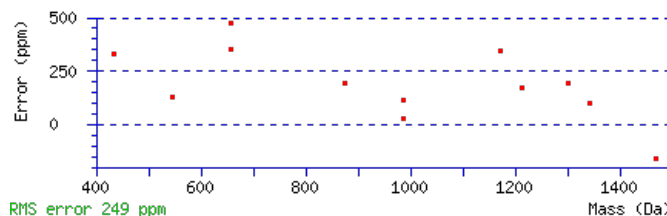NCBI BLAST search of [DQVESVINTIEGAR](#)

## AT4G01900.1

(Parameters: blastp, nr protein database, expect=20000, no filter, PAM30)

Other BLAST [web gateways](#)

### All matches to this query

| Score | Mr(calc)  | Delta   | Sequence                       |
|-------|-----------|---------|--------------------------------|
| 54.6  | 1642.8526 | -0.0041 | <a href="#">DQVESVINTIEGAR</a> |
| 2.4   | 1642.8514 | -0.0029 | <a href="#">MAHSLIIHYHLHR</a>  |

Mascot: <http://www.matrixscience.com/>

## Peptide View

MS/MS Fragmentation of **VGSGGDQSPVARK**

Found in **AT4G02110.1** in **TAIR\_Arabidopsis**, Symbols: | BRCT domain-containing protein | chr4:935191-940191 FORWARD

Match to Query 4161: 1274.594486 from(638.304519,2+) index(3511)

Title: Elution from: 34.964 to 34.964 scan no 4464 cid35.00 polarity:+

Data file D12h-2\_3.mgf

Click mouse within plot area to zoom in by factor of two about that point

Or,   to  Da

Label all possible matches  Label matches used for scoring

Show Y-axis

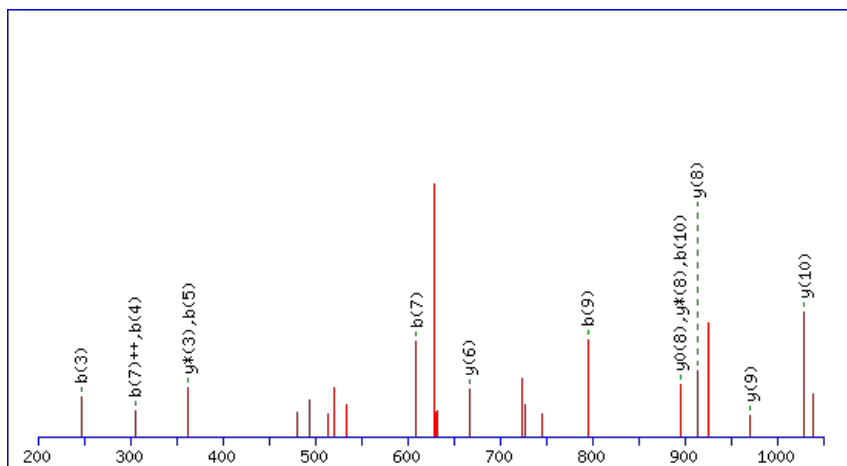

Monoisotopic mass of neutral peptide  $M_r(\text{calc})$ : 1274.5939

Fixed modifications: Carbamidomethyl (C) (apply to specified residues or termini only)

Ions Score: 37 Expect: 0.0018

Matches : 14/118 fragment ions using 19 most intense peaks ([help](#))

| #  | b               | b <sup>++</sup> | b*        | b <sup>*++</sup> | b <sup>0</sup> | b <sup>0++</sup> | Seq. | y                | y <sup>++</sup> | y*              | y <sup>*++</sup> | y <sup>0</sup>  | y <sup>0++</sup> | #  |
|----|-----------------|-----------------|-----------|------------------|----------------|------------------|------|------------------|-----------------|-----------------|------------------|-----------------|------------------|----|
| 1  | 101.0727        | 51.0400         |           |                  |                |                  | V    |                  |                 |                 |                  |                 |                  | 13 |
| 2  | 159.0912        | 80.0492         |           |                  |                |                  | G    | 1175.5358        | 588.2715        | 1157.5122       | 579.2597         | 1157.5252       | 579.2662         | 12 |
| 3  | <b>247.1203</b> | 124.0638        |           |                  | 229.1097       | 115.0585         | S    | 1117.5173        | 559.2623        | 1099.4937       | 550.2505         | 1099.5067       | 550.2570         | 11 |
| 4  | <b>305.1388</b> | 153.0730        |           |                  | 287.1282       | 144.0677         | G    | <b>1029.4882</b> | 515.2477        | 1011.4646       | 506.2360         | 1011.4776       | 506.2425         | 10 |
| 5  | <b>363.1573</b> | 182.0823        |           |                  | 345.1467       | 173.0770         | G    | <b>971.4697</b>  | 486.2385        | 953.4461        | 477.2267         | 953.4591        | 477.2332         | 9  |
| 6  | 479.1813        | 240.0943        |           |                  | 461.1707       | 231.0890         | D    | <b>913.4512</b>  | 457.2292        | <b>895.4276</b> | 448.2175         | <b>895.4406</b> | 448.2240         | 8  |
| 7  | <b>609.2339</b> | <b>305.1206</b> | 591.2103  | 296.1088         | 591.2233       | 296.1153         | Q    | 797.4272         | 399.2173        | 779.4036        | 390.2055         | 779.4167        | 390.2120         | 7  |
| 8  | 697.2630        | 349.1351        | 679.2394  | 340.1233         | 679.2524       | 340.1298         | S    | <b>667.3746</b>  | 334.1909        | 649.3510        | 325.1791         | 649.3640        | 325.1856         | 6  |
| 9  | <b>795.3128</b> | 398.1600        | 777.2892  | 389.1482         | 777.3022       | 389.1547         | P    | 579.3455         | 290.1764        | 561.3219        | 281.1646         |                 |                  | 5  |
| 10 | <b>895.3782</b> | 448.1927        | 877.3546  | 439.1810         | 877.3677       | 439.1875         | V    | 481.2957         | 241.1515        | 463.2721        | 232.1397         |                 |                  | 4  |
| 11 | 967.4124        | 484.2098        | 949.3888  | 475.1980         | 949.4018       | 475.2045         | A    | 381.2303         | 191.1188        | <b>363.2067</b> | 182.1070         |                 |                  | 3  |
| 12 | 1127.5016       | 564.2544        | 1109.4780 | 555.2427         | 1109.4911      | 555.2492         | R    | 309.1961         | 155.1017        | 291.1725        | 146.0899         |                 |                  | 2  |
| 13 |                 |                 |           |                  |                |                  | K    | 149.1069         | 75.0571         | 131.0833        | 66.0453          |                 |                  | 1  |

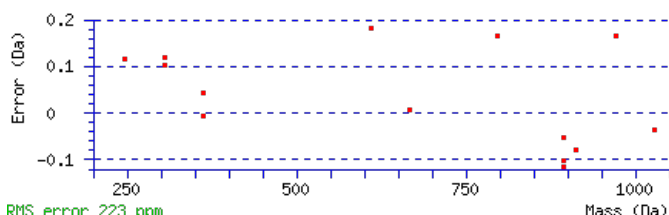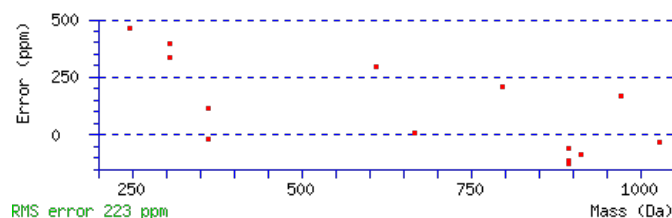

NCBI BLAST search of **VGSGGDQSPVARK**

(Parameters: blastp, nr protein database, expect=20000, no filter, PAM30)

Other BLAST [web gateways](#)

**AT4G02110.1**

All matches to this query

| Score | Mr(calc)  | Delta   | Sequence                      |
|-------|-----------|---------|-------------------------------|
| 36.8  | 1274.5939 | 0.0006  | <a href="#">VGSGGDQSPVARK</a> |
| 15.0  | 1274.5957 | -0.0012 | <a href="#">DKDFPVIWDK</a>    |
| 12.6  | 1274.5969 | -0.0024 | <a href="#">VAMDALDEAAKK</a>  |
| 10.0  | 1274.5912 | 0.0032  | <a href="#">ETQNQGELTLK</a>   |
| 9.9   | 1274.5939 | 0.0006  | <a href="#">KVGSGGDQSPVAR</a> |
| 9.9   | 1274.5912 | 0.0032  | <a href="#">KDDEIVQANTK</a>   |
| 9.7   | 1274.5913 | 0.0032  | <a href="#">EKKTNDPDSVK</a>   |
| 7.8   | 1274.5939 | 0.0005  | <a href="#">RINSEGPESLR</a>   |
| 7.0   | 1274.5912 | 0.0032  | <a href="#">DDEKLSVTTPR</a>   |
| 4.5   | 1274.5969 | -0.0024 | <a href="#">AETKNDVPMIK</a>   |

Mascot: <http://www.matrixscience.com/>

**Peptide View**MS/MS Fragmentation of **LLEIAK**

Found in **AT4G02405.1** in **TAIR\_Arabidopsis**, Symbols: | similar to unnamed protein product [Vitis vinifera] (GB:CAO40030.1); similar to hypothetical protein [Vitis vinifera] (GB:CAN68023.1); contains domain S-adenosyl-L-methionine-dependent methyltransferases (SSF53335) | chr4:1057999-105967

Match to Query 627: 685.437552 from(343.726052,2+) index(2073)

Title: Elution from: 24.493 to 24.493 scan no 2682 cid35.00 polarity:+

Data file C7-2\_1.mgf

Click mouse within plot area to zoom in by factor of two about that point

Or,   to  Da

Label all possible matches  Label matches used for scoring

Show Y-axis

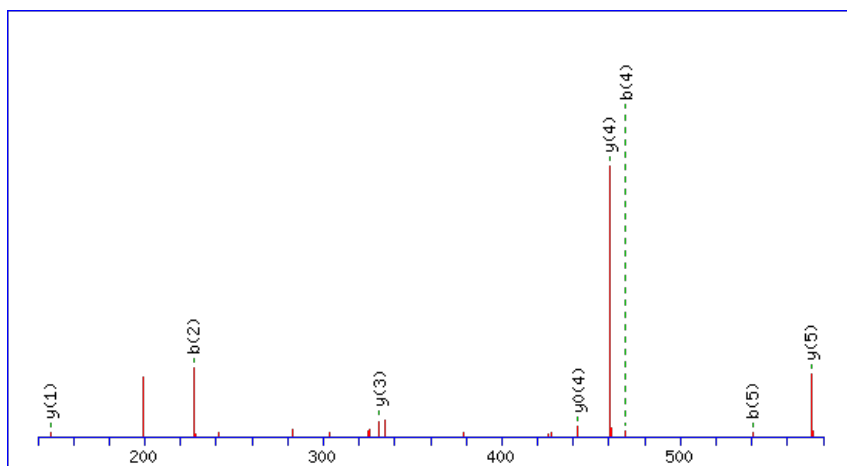

**Monoisotopic mass of neutral peptide Mr(calc):** 685.4374

**Fixed modifications:** Carbamidomethyl (C) (apply to specified residues or termini only)

**Ions Score:** 27 **Expect:** 0.0068

**Matches:** 8/40 fragment ions using 18 most intense peaks ([help](#))

| # | b               | b <sup>++</sup> | b <sup>0</sup> | b <sup>0++</sup> | Seq. | y               | y <sup>++</sup> | y*       | y <sup>*++</sup> | y <sup>0</sup>  | y <sup>0++</sup> | # |
|---|-----------------|-----------------|----------------|------------------|------|-----------------|-----------------|----------|------------------|-----------------|------------------|---|
| 1 | 114.0913        | 57.5493         |                |                  | L    |                 |                 |          |                  |                 |                  | 6 |
| 2 | <b>227.1754</b> | 114.0913        |                |                  | L    | <b>573.3606</b> | 287.1840        | 556.3341 | 278.6707         | 555.3501        | 278.1787         | 5 |
| 3 | 356.2180        | 178.6126        | 338.2074       | 169.6074         | E    | <b>460.2766</b> | 230.6419        | 443.2500 | 222.1287         | <b>442.2660</b> | 221.6366         | 4 |
| 4 | <b>469.3021</b> | 235.1547        | 451.2915       | 226.1494         | I    | <b>331.2340</b> | 166.1206        | 314.2074 | 157.6074         |                 |                  | 3 |
| 5 | <b>540.3392</b> | 270.6732        | 522.3286       | 261.6679         | A    | 218.1499        | 109.5786        | 201.1234 | 101.0653         |                 |                  | 2 |
| 6 |                 |                 |                |                  | K    | <b>147.1128</b> | 74.0600         | 130.0863 | 65.5468          |                 |                  | 1 |

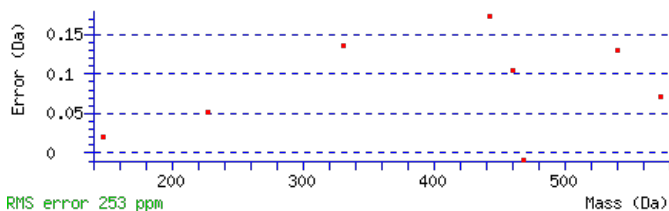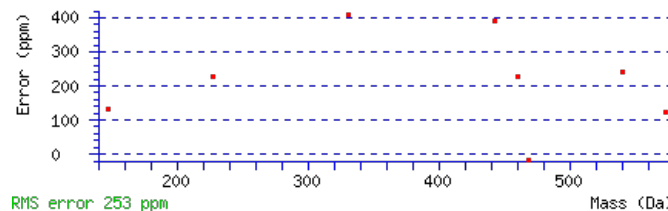

NCBI BLAST search of [LLEIAK](#)

(Parameters: blastp, nr protein database, expect=20000, no filter, PAM30)

Other BLAST [web gateways](#)

**All matches to this query**

| Score | Mr(calc) | Delta  | Sequence               |
|-------|----------|--------|------------------------|
| 26.9  | 685.4374 | 0.0002 | <a href="#">LLEIAK</a> |
| 26.9  | 685.4374 | 0.0002 | <a href="#">IIEALK</a> |

# AT4G02405.1

|      |          |        |                         |
|------|----------|--------|-------------------------|
| 26.9 | 685.4374 | 0.0002 | <a href="#">ILEAIK</a>  |
| 26.9 | 685.4374 | 0.0002 | <a href="#">ILEALK</a>  |
| 26.9 | 685.4374 | 0.0002 | <a href="#">LIEALK</a>  |
| 18.8 | 685.4374 | 0.0002 | <a href="#">ILAEIK</a>  |
| 18.8 | 685.4374 | 0.0002 | <a href="#">ILAEIK</a>  |
| 18.3 | 685.4374 | 0.0001 | <a href="#">LLVDVK</a>  |
| 15.3 | 685.4374 | 0.0001 | <a href="#">LLAVSAI</a> |
| 9.6  | 685.4374 | 0.0002 | <a href="#">IEILAK</a>  |

**Mascot:** <http://www.matrixscience.com/>

**Peptide View**MS/MS Fragmentation of **VNLDPEGVDFSAK**Found in **AT4G02450.1** in **TAIR\_Arabidopsis**, Symbols: | glycine-rich protein | chr4:1073987-1075765 REVERSE

Match to Query 6514: 1536.746866 from(769.380709,2+) index(8846)

Title: Elution from: 80.045 to 80.045 scan no 11998 cid35.00 polarity:+

Data file D6h-1\_3.mgf

Click mouse within plot area to zoom in by factor of two about that point

Or,   to  Da Label all possible matches  Label matches used for scoring Show Y-axis 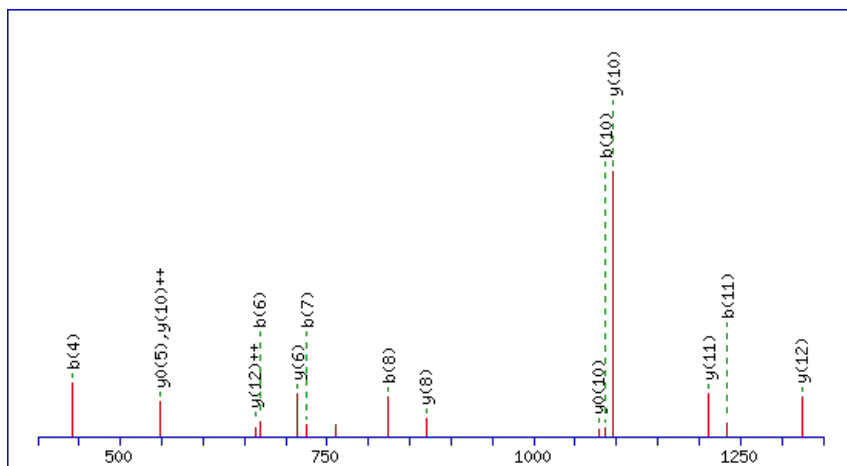**Monoisotopic mass of neutral peptide Mr(calc):** 1536.7460**Fixed modifications:** Carbamidomethyl (C) (apply to specified residues or termini only)**Ions Score:** 70 **Expect:** 3.3e-007**Matches:** 15/144 fragment ions using 15 most intense peaks ([help](#))

| #  | b                | b <sup>++</sup> | b*        | b <sup>*++</sup> | b <sup>0</sup> | b <sup>0++</sup> | Seq. | y                | y <sup>++</sup> | y*        | y <sup>*++</sup> | y <sup>0</sup>   | y <sup>0++</sup> | #  |
|----|------------------|-----------------|-----------|------------------|----------------|------------------|------|------------------|-----------------|-----------|------------------|------------------|------------------|----|
| 1  | 100.0757         | 50.5415         |           |                  |                |                  | V    |                  |                 |           |                  |                  |                  | 14 |
| 2  | 214.1186         | 107.5629        | 197.0921  | 99.0497          |                |                  | N    | 1438.6849        | 719.8461        | 1421.6583 | 711.3328         | 1420.6743        | 710.8408         | 13 |
| 3  | 327.2027         | 164.1050        | 310.1761  | 155.5917         |                |                  | L    | <b>1324.6420</b> | <b>662.8246</b> | 1307.6154 | 654.3113         | 1306.6314        | 653.8193         | 12 |
| 4  | <b>442.2296</b>  | 221.6185        | 425.2031  | 213.1052         | 424.2191       | 212.6132         | D    | <b>1211.5579</b> | 606.2826        | 1194.5313 | 597.7693         | 1193.5473        | 597.2773         | 11 |
| 5  | 539.2824         | 270.1448        | 522.2558  | 261.6316         | 521.2718       | 261.1395         | P    | <b>1096.5310</b> | <b>548.7691</b> | 1079.5044 | 540.2558         | <b>1078.5204</b> | 539.7638         | 10 |
| 6  | <b>668.3250</b>  | 334.6661        | 651.2984  | 326.1529         | 650.3144       | 325.6608         | E    | 999.4782         | 500.2427        | 982.4516  | 491.7295         | 981.4676         | 491.2374         | 9  |
| 7  | <b>725.3464</b>  | 363.1769        | 708.3199  | 354.6636         | 707.3359       | 354.1716         | G    | <b>870.4356</b>  | 435.7214        | 853.4090  | 427.2082         | 852.4250         | 426.7162         | 8  |
| 8  | <b>824.4149</b>  | 412.7111        | 807.3883  | 404.1978         | 806.4043       | 403.7058         | V    | 813.4141         | 407.2107        | 796.3876  | 398.6974         | 795.4036         | 398.2054         | 7  |
| 9  | 971.4833         | 486.2453        | 954.4567  | 477.7320         | 953.4727       | 477.2400         | F    | <b>714.3457</b>  | 357.6765        | 697.3192  | 349.1632         | 696.3352         | 348.6712         | 6  |
| 10 | <b>1086.5102</b> | 543.7587        | 1069.4837 | 535.2455         | 1068.4997      | 534.7535         | D    | 567.2773         | 284.1423        | 550.2508  | 275.6290         | <b>549.2667</b>  | 275.1370         | 5  |
| 11 | <b>1233.5786</b> | 617.2930        | 1216.5521 | 608.7797         | 1215.5681      | 608.2877         | F    | 452.2504         | 226.6288        | 435.2238  | 218.1155         | 434.2398         | 217.6235         | 4  |
| 12 | 1320.6107        | 660.8090        | 1303.5841 | 652.2957         | 1302.6001      | 651.8037         | S    | 305.1819         | 153.0946        | 288.1554  | 144.5813         | 287.1714         | 144.0893         | 3  |
| 13 | 1391.6478        | 696.3275        | 1374.6212 | 687.8142         | 1373.6372      | 687.3222         | A    | 218.1499         | 109.5786        | 201.1234  | 101.0653         |                  |                  | 2  |
| 14 |                  |                 |           |                  |                |                  | K    | 147.1128         | 74.0600         | 130.0863  | 65.5468          |                  |                  | 1  |

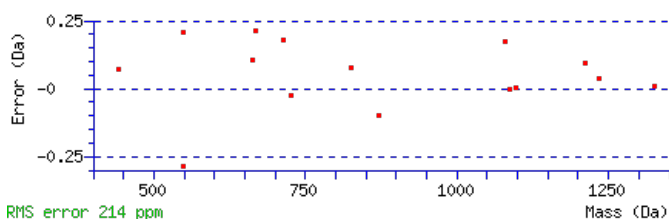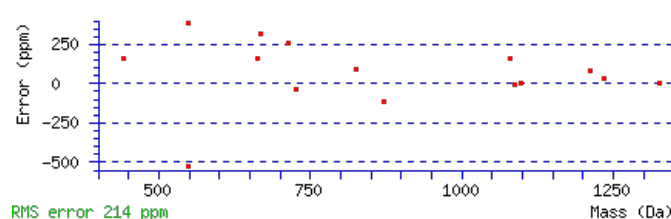NCBI BLAST search of **VNLDPEGVDFSAK**

(Parameters: blastp, nr protein database, expect=20000, no filter, PAM30)



AT4G02450.1

Other BLAST [web gateways](#)

**All matches to this query**

| Score | Mr(calc)  | Delta  | Sequence                      |
|-------|-----------|--------|-------------------------------|
| 70.2  | 1536.7460 | 0.0008 | <a href="#">VNLDPEGVDFSAK</a> |

Mascot: <http://www.matrixscience.com/>

## Peptide View

### MS/MS Fragmentation of **VNEWVAEITK**

Found in **AT4G02520.1** in **TAIR\_Arabidopsis**, Symbols: ATPM24.1, ATPM24, GST2, ATGSTF2 | ATGSTF2 (Arabidopsis thaliana Glutathione S-transferase (class phi) 2); glutathione transferase | chr4:1110673-1111531 REVERSE

Match to Query 3910: 1200.577118 from(601.295835,2+) index(5706)

Title: Elution from: 50.142 to 50.142 scan no 7281 cid35.00 polarity:+

Data file D6h-3\_3.mgf

Click mouse within plot area to zoom in by factor of two about that point

Or,   to  Da

Label all possible matches  Label matches used for scoring

Show Y-axis

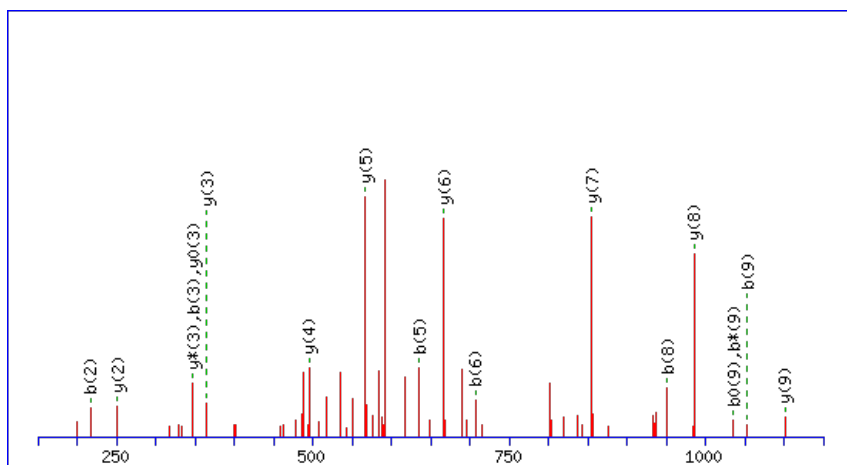

Monoisotopic mass of neutral peptide  $M_r(\text{calc})$ : 1200.5801

Fixed modifications: Carbamidomethyl (C) (apply to specified residues or termini only)

Ions Score: 76 Expect: 1.7e-007

Matches : 18/100 fragment ions using 19 most intense peaks ([help](#))

| #  | b                | b <sup>++</sup> | b*               | b <sup>*++</sup> | b <sup>0</sup>   | b <sup>0++</sup> | Seq. | y                | y <sup>++</sup> | y*              | y <sup>*++</sup> | y <sup>0</sup>  | y <sup>0++</sup> | #  |
|----|------------------|-----------------|------------------|------------------|------------------|------------------|------|------------------|-----------------|-----------------|------------------|-----------------|------------------|----|
| 1  | 101.0727         | 51.0400         |                  |                  |                  |                  | V    |                  |                 |                 |                  |                 |                  | 10 |
| 2  | <b>217.1097</b>  | 109.0585        | 199.0861         | 100.0467         |                  |                  | N    | <b>1101.5219</b> | 551.2646        | 1083.4983       | 542.2528         | 1083.5114       | 542.2593         | 9  |
| 3  | <b>347.1493</b>  | 174.0783        | 329.1258         | 165.0665         | 329.1388         | 165.0730         | E    | <b>985.4849</b>  | 493.2461        | 967.4613        | 484.2343         | 967.4744        | 484.2408         | 8  |
| 4  | 535.2227         | 268.1150        | 517.1991         | 259.1032         | 517.2122         | 259.1097         | W    | <b>855.4453</b>  | 428.2263        | 837.4217        | 419.2145         | 837.4347        | 419.2210         | 7  |
| 5  | <b>635.2882</b>  | 318.1477        | 617.2646         | 309.1359         | 617.2776         | 309.1424         | V    | <b>667.3719</b>  | 334.1896        | 649.3483        | 325.1778         | 649.3613        | 325.1843         | 6  |
| 6  | <b>707.3223</b>  | 354.1648        | 689.2987         | 345.1530         | 689.3118         | 345.1595         | A    | <b>567.3065</b>  | 284.1569        | 549.2829        | 275.1451         | 549.2959        | 275.1516         | 5  |
| 7  | 837.3620         | 419.1846        | 819.3384         | 410.1728         | 819.3514         | 410.1793         | E    | <b>495.2723</b>  | 248.1398        | 477.2487        | 239.1280         | 477.2617        | 239.1345         | 4  |
| 8  | <b>951.4431</b>  | 476.2252        | 933.4195         | 467.2134         | 933.4325         | 467.2199         | I    | <b>365.2327</b>  | 183.1200        | <b>347.2091</b> | 174.1082         | <b>347.2221</b> | 174.1147         | 3  |
| 9  | <b>1053.4878</b> | 527.2475        | <b>1035.4642</b> | 518.2357         | <b>1035.4772</b> | 518.2422         | T    | <b>251.1516</b>  | 126.0794        | 233.1280        | 117.0676         | 233.1410        | 117.0741         | 2  |
| 10 |                  |                 |                  |                  |                  |                  | K    | 149.1069         | 75.0571         | 131.0833        | 66.0453          |                 |                  | 1  |

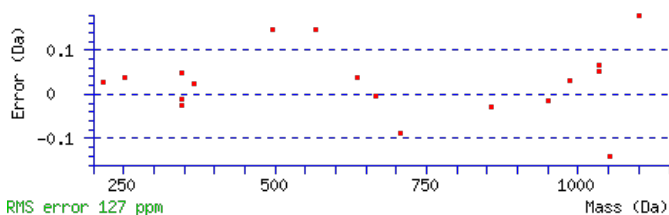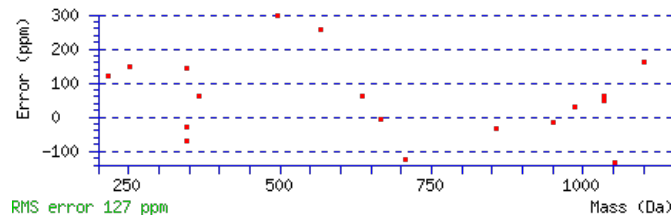

### NCBI BLAST search of **VNEWVAEITK**

(Parameters: blastp, nr protein database, expect=20000, no filter, PAM30)

Other BLAST [web gateways](#)

All matches to this query

## AT4G02520.1

| Score | Mr(calc)  | Delta   | Sequence                    |
|-------|-----------|---------|-----------------------------|
| 76.1  | 1200.5801 | -0.0030 | <a href="#">VNEWVAETK</a>   |
| 12.5  | 1200.5805 | -0.0034 | <a href="#">VQNQDISPKR</a>  |
| 11.8  | 1200.5805 | -0.0034 | <a href="#">VQNQQQVYVK</a>  |
| 10.3  | 1200.5778 | -0.0007 | <a href="#">VGGEDVDQLKK</a> |
| 9.2   | 1200.5778 | -0.0007 | <a href="#">DIDGKDVALNK</a> |
| 6.5   | 1200.5778 | -0.0007 | <a href="#">EDVLKNNDLK</a>  |
| 5.1   | 1200.5778 | -0.0007 | <a href="#">DKGLDGIVNEK</a> |
| 1.7   | 1200.5779 | -0.0007 | <a href="#">VDNSSLITNPK</a> |
| 1.3   | 1200.5778 | -0.0007 | <a href="#">EVKPNSGDLTK</a> |
| 0.0   | 1200.5778 | -0.0007 | <a href="#">DVLRVDSVPTS</a> |

Mascot: <http://www.matrixscience.com/>

**Peptide View**MS/MS Fragmentation of **VGQAIENNDLPAAGLVLGK**Found in **AT4G02530.1** in **TAIR\_Arabidopsis**, Symbols: | chloroplast thylakoid lumen protein | chr4:112335-1114005 REVERSE

Match to Query 9170: 1900.951028 from(951.482790,2+) index(7857)

Title: Elution from: 69.406 to 69.406 scan no 10302 cid35.00 polarity:+

Data file D6h-3\_1.mgf

Click mouse within plot area to zoom in by factor of two about that point

Or,  to  Da Label all possible matches  Label matches used for scoring Show Y-axis 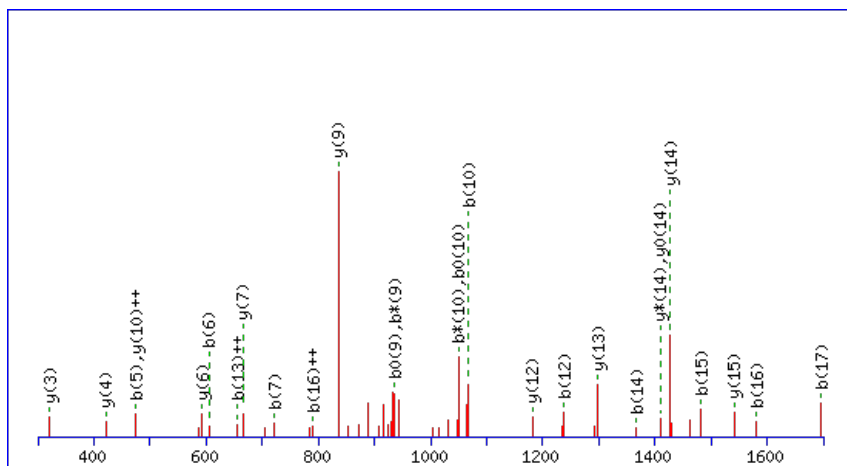Monoisotopic mass of neutral peptide  $M_r(\text{calc})$ : 1900.9529

Fixed modifications: Carbamidomethyl (C) (apply to specified residues or termini only)

Ions Score: 100 Expect: 4.5e-010

Matches : 27/182 fragment ions using 25 most intense peaks ([help](#))

| #  | b                | b <sup>++</sup> | b*               | b <sup>*++</sup> | b <sup>0</sup>   | b <sup>0++</sup> | Seq. | y                | y <sup>++</sup> | y*               | y <sup>*++</sup> | y <sup>0</sup>   | y <sup>0++</sup> | #  |
|----|------------------|-----------------|------------------|------------------|------------------|------------------|------|------------------|-----------------|------------------|------------------|------------------|------------------|----|
| 1  | 101.0727         | 51.0400         |                  |                  |                  |                  | V    |                  |                 |                  |                  |                  |                  | 19 |
| 2  | 159.0912         | 80.0492         |                  |                  |                  |                  | G    | 1801.8947        | 901.4510        | 1783.8711        | 892.4392         | 1783.8841        | 892.4457         | 18 |
| 3  | 289.1439         | 145.0756        | 271.1203         | 136.0638         |                  |                  | Q    | 1743.8762        | 872.4417        | 1725.8526        | 863.4300         | 1725.8656        | 863.4365         | 17 |
| 4  | 361.1780         | 181.0926        | 343.1544         | 172.0809         |                  |                  | A    | 1613.8236        | 807.4154        | 1595.8000        | 798.4036         | 1595.8130        | 798.4101         | 16 |
| 5  | <b>475.2591</b>  | 238.1332        | 457.2355         | 229.1214         |                  |                  | I    | <b>1541.7894</b> | 771.3983        | 1523.7658        | 762.3866         | 1523.7788        | 762.3931         | 15 |
| 6  | <b>605.2987</b>  | 303.1530        | 587.2752         | 294.1412         | 587.2882         | 294.1477         | E    | <b>1427.7083</b> | 714.3578        | <b>1409.6847</b> | 705.3460         | <b>1409.6978</b> | 705.3525         | 14 |
| 7  | <b>721.3357</b>  | 361.1715        | 703.3122         | 352.1597         | 703.3252         | 352.1662         | N    | <b>1297.6687</b> | 649.3380        | 1279.6451        | 640.3262         | 1279.6581        | 640.3327         | 13 |
| 8  | 837.3727         | 419.1900        | 819.3492         | 410.1782         | 819.3622         | 410.1847         | N    | <b>1181.6317</b> | 591.3195        | 1163.6081        | 582.3077         | 1163.6211        | 582.3142         | 12 |
| 9  | 953.3967         | 477.2020        | <b>935.3731</b>  | 468.1902         | <b>935.3862</b>  | 468.1967         | D    | 1065.5947        | 533.3010        | 1047.5711        | 524.2892         | 1047.5841        | 524.2957         | 11 |
| 10 | <b>1067.4778</b> | 534.2425        | <b>1049.4542</b> | 525.2308         | <b>1049.4673</b> | 525.2373         | L    | 949.5707         | <b>475.2890</b> | 931.5471         | 466.2772         |                  |                  | 10 |
| 11 | 1165.5276        | 583.2674        | 1147.5040        | 574.2557         | 1147.5171        | 574.2622         | P    | <b>835.4896</b>  | 418.2484        | 817.4660         | 409.2367         |                  |                  | 9  |
| 12 | <b>1237.5618</b> | 619.2845        | 1219.5382        | 610.2727         | 1219.5512        | 610.2792         | A    | 737.4398         | 369.2235        | 719.4162         | 360.2118         |                  |                  | 8  |
| 13 | 1309.5959        | <b>655.3016</b> | 1291.5723        | 646.2898         | 1291.5854        | 646.2963         | A    | <b>665.4057</b>  | 333.2065        | 647.3821         | 324.1947         |                  |                  | 7  |
| 14 | <b>1367.6144</b> | 684.3108        | 1349.5908        | 675.2991         | 1349.6038        | 675.3056         | G    | <b>593.3715</b>  | 297.1894        | 575.3479         | 288.1776         |                  |                  | 6  |
| 15 | <b>1481.6955</b> | 741.3514        | 1463.6719        | 732.3396         | 1463.6849        | 732.3461         | L    | 535.3530         | 268.1801        | 517.3294         | 259.1684         |                  |                  | 5  |
| 16 | <b>1581.7610</b> | <b>791.3841</b> | 1563.7374        | 782.3723         | 1563.7504        | 782.3788         | V    | <b>421.2719</b>  | 211.1396        | 403.2483         | 202.1278         |                  |                  | 4  |
| 17 | <b>1695.8421</b> | 848.4247        | 1677.8185        | 839.4129         | 1677.8315        | 839.4194         | L    | <b>321.2065</b>  | 161.1069        | 303.1829         | 152.0951         |                  |                  | 3  |
| 18 | 1753.8606        | 877.4339        | 1735.8370        | 868.4221         | 1735.8500        | 868.4286         | G    | 207.1254         | 104.0663        | 189.1018         | 95.0545          |                  |                  | 2  |
| 19 |                  |                 |                  |                  |                  |                  | K    | 149.1069         | 75.0571         | 131.0833         | 66.0453          |                  |                  | 1  |

AT4G02530.1

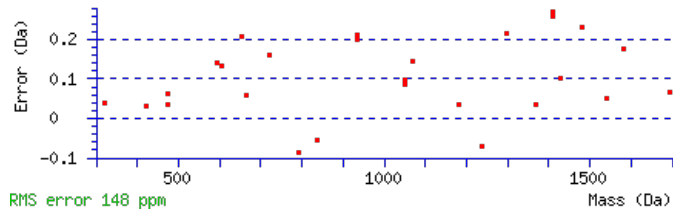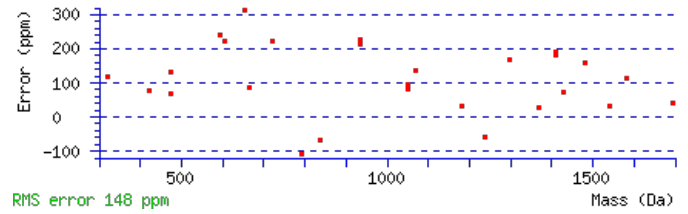

NCBI **BLAST** search of [VGQAIENNDLPAAGLVLGK](#)  
(Parameters: blastp, nr protein database, expect=20000, no filter, PAM30)  
Other BLAST [web gateways](#)

**All matches to this query**

| Score | Mr(calc)  | Delta   | Sequence                            |
|-------|-----------|---------|-------------------------------------|
| 99.7  | 1900.9529 | -0.0018 | <a href="#">VGQAIENNDLPAAGLVLGK</a> |
| 1.0   | 1900.9466 | 0.0045  | <a href="#">AVGEPFFLAASAFAIK</a>    |
| 0.9   | 1900.9556 | -0.0045 | <a href="#">SIQEKLESHVTLAHK</a>     |

Mascot: <http://www.matrixscience.com/>

**Peptide View**MS/MS Fragmentation of **NVSPIEVK**Found in **AT4G02770.1** in **TAIR\_Arabidopsis**, Symbols: PSAD-1 | PSAD-1 (photosystem I subunit D-1) | chr4:1229247-1229873 REVERSE

Match to Query 1545: 884.497416 from(443.255984,2+) index(1795)

Title: Elution from: 22.765 to 22.765 scan no 2362 cid35.00 polarity:+

Data file D12h-3\_1.mgf

Click mouse within plot area to zoom in by factor of two about that point

Or,  to  Da Label all possible matches  Label matches used for scoring Show Y-axis 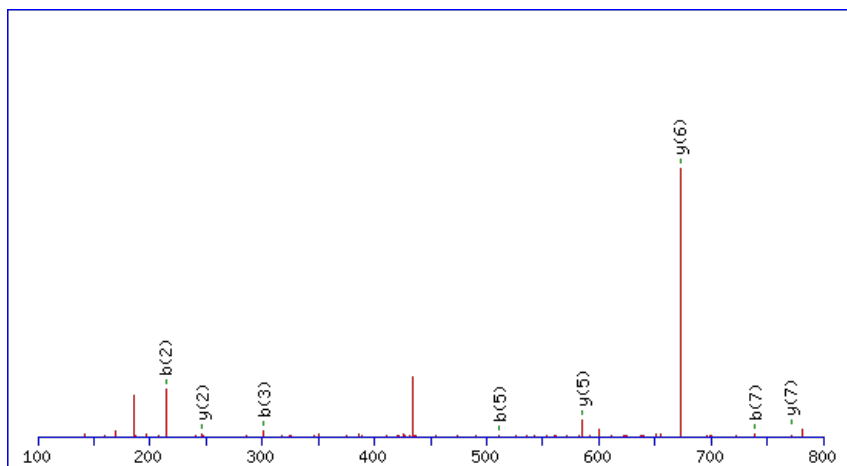Monoisotopic mass of neutral peptide **Mr(calc)**: 884.4967

Fixed modifications: Carbamidomethyl (C) (apply to specified residues or termini only)

Ions Score: 40 Expect: 0.00029

Matches : 8/76 fragment ions using 14 most intense peaks ([help](#))

| # | b               | b <sup>++</sup> | b*       | b <sup>*++</sup> | b <sup>0</sup> | b <sup>0++</sup> | Seq. | y               | y <sup>++</sup> | y*       | y <sup>*++</sup> | y <sup>0</sup> | y <sup>0++</sup> | # |
|---|-----------------|-----------------|----------|------------------|----------------|------------------|------|-----------------|-----------------|----------|------------------|----------------|------------------|---|
| 1 | 115.0502        | 58.0287         | 98.0237  | 49.5155          |                |                  | N    |                 |                 |          |                  |                |                  | 8 |
| 2 | <b>214.1186</b> | 107.5629        | 197.0921 | 99.0497          |                |                  | V    | <b>771.4611</b> | 386.2342        | 754.4345 | 377.7209         | 753.4505       | 377.2289         | 7 |
| 3 | <b>301.1506</b> | 151.0790        | 284.1241 | 142.5657         | 283.1401       | 142.0737         | S    | <b>672.3927</b> | 336.7000        | 655.3661 | 328.1867         | 654.3821       | 327.6947         | 6 |
| 4 | 398.2034        | 199.6053        | 381.1769 | 191.0921         | 380.1928       | 190.6001         | P    | <b>585.3606</b> | 293.1840        | 568.3341 | 284.6707         | 567.3501       | 284.1787         | 5 |
| 5 | <b>511.2875</b> | 256.1474        | 494.2609 | 247.6341         | 493.2769       | 247.1421         | I    | 488.3079        | 244.6576        | 471.2813 | 236.1443         | 470.2973       | 235.6523         | 4 |
| 6 | 640.3301        | 320.6687        | 623.3035 | 312.1554         | 622.3195       | 311.6634         | E    | 375.2238        | 188.1155        | 358.1973 | 179.6023         | 357.2132       | 179.1103         | 3 |
| 7 | <b>739.3985</b> | 370.2029        | 722.3719 | 361.6896         | 721.3879       | 361.1976         | V    | <b>246.1812</b> | 123.5942        | 229.1547 | 115.0810         |                |                  | 2 |
| 8 |                 |                 |          |                  |                |                  | K    | 147.1128        | 74.0600         | 130.0863 | 65.5468          |                |                  | 1 |

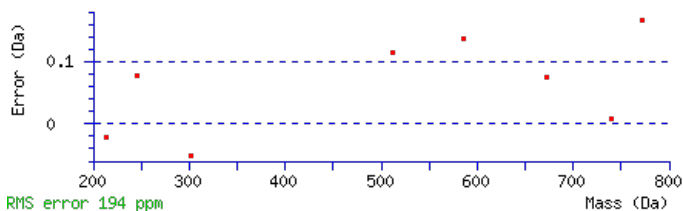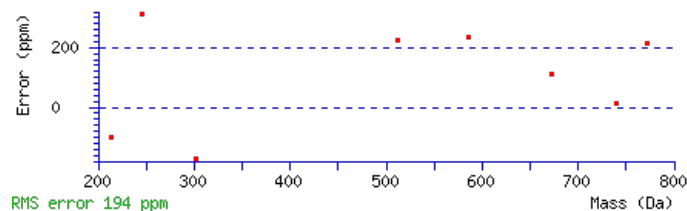NCBI **BLAST** search of **NVSPIEVK**

(Parameters: blastp, nr protein database, expect=20000, no filter, PAM30)

Other BLAST [web gateways](#)**All matches to this query**

| Score | Mr(calc) | Delta  | Sequence        |
|-------|----------|--------|-----------------|
| 39.7  | 884.4967 | 0.0007 | <b>NVSPIEVK</b> |



**Peptide View**MS/MS Fragmentation of **GSALSALQGTNDEIGR**Found in **AT4G02930.1** in **TAIR\_Arabidopsis**, Symbols: | elongation factor Tu, putative / EF-Tu, putative | chr4:1295751-1298354 REVERSE

Match to Query 7098: 1587.782396 from(794.898474,2+) index(5080)

Title: Elution from: 46.302 to 46.302 scan no 6424 cid35.00 polarity:+

Data file D6h-1\_2.mgf

Click mouse within plot area to zoom in by factor of two about that point

Or,   to  Da Label all possible matches  Label matches used for scoring Show Y-axis 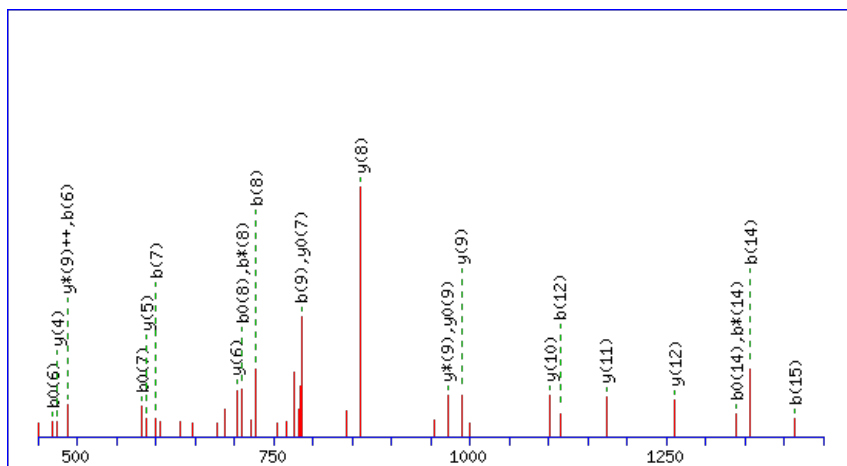Monoisotopic mass of neutral peptide  $M_r(\text{calc})$ : 1587.7852

Fixed modifications: Carbamidomethyl (C) (apply to specified residues or termini only)

Ions Score: 92 Expect: 3.1e-009

Matches : 25/158 fragment ions using 24 most intense peaks ([help](#))

| #  | b                | b <sup>++</sup> | b*               | b <sup>*++</sup> | b <sup>0</sup>   | b <sup>0++</sup> | Seq. | y                | y <sup>++</sup> | y*              | y <sup>*++</sup> | y <sup>0</sup>  | y <sup>0++</sup> | #  |
|----|------------------|-----------------|------------------|------------------|------------------|------------------|------|------------------|-----------------|-----------------|------------------|-----------------|------------------|----|
| 1  | 58.0287          | 29.5180         |                  |                  |                  |                  | G    |                  |                 |                 |                  |                 |                  | 16 |
| 2  | 145.0608         | 73.0340         |                  |                  | 127.0502         | 64.0287          | S    | 1531.7711        | 766.3892        | 1514.7445       | 757.8759         | 1513.7605       | 757.3839         | 15 |
| 3  | 216.0979         | 108.5526        |                  |                  | 198.0873         | 99.5473          | A    | 1444.7390        | 722.8732        | 1427.7125       | 714.3599         | 1426.7285       | 713.8679         | 14 |
| 4  | 329.1819         | 165.0946        |                  |                  | 311.1714         | 156.0893         | L    | 1373.7019        | 687.3546        | 1356.6754       | 678.8413         | 1355.6914       | 678.3493         | 13 |
| 5  | 416.2140         | 208.6106        |                  |                  | 398.2034         | 199.6053         | S    | <b>1260.6179</b> | 630.8126        | 1243.5913       | 622.2993         | 1242.6073       | 621.8073         | 12 |
| 6  | <b>487.2511</b>  | 244.1292        |                  |                  | <b>469.2405</b>  | 235.1239         | A    | <b>1173.5858</b> | 587.2966        | 1156.5593       | 578.7833         | 1155.5753       | 578.2913         | 11 |
| 7  | <b>600.3352</b>  | 300.6712        |                  |                  | <b>582.3246</b>  | 291.6659         | L    | <b>1102.5487</b> | 551.7780        | 1085.5222       | 543.2647         | 1084.5382       | 542.7727         | 10 |
| 8  | <b>728.3937</b>  | 364.7005        | <b>711.3672</b>  | 356.1872         | <b>710.3832</b>  | 355.6952         | Q    | <b>989.4647</b>  | 495.2360        | <b>972.4381</b> | <b>486.7227</b>  | <b>971.4541</b> | 486.2307         | 9  |
| 9  | <b>785.4152</b>  | 393.2112        | 768.3886         | 384.6980         | 767.4046         | 384.2060         | G    | <b>861.4061</b>  | 431.2067        | 844.3795        | 422.6934         | 843.3955        | 422.2014         | 8  |
| 10 | 886.4629         | 443.7351        | 869.4363         | 435.2218         | 868.4523         | 434.7298         | T    | 804.3846         | 402.6959        | 787.3581        | 394.1827         | <b>786.3741</b> | 393.6907         | 7  |
| 11 | 1000.5058        | 500.7565        | 983.4793         | 492.2433         | 982.4952         | 491.7513         | N    | <b>703.3369</b>  | 352.1721        | 686.3104        | 343.6588         | 685.3264        | 343.1668         | 6  |
| 12 | <b>1115.5327</b> | 558.2700        | 1098.5062        | 549.7567         | 1097.5222        | 549.2647         | D    | <b>589.2940</b>  | 295.1506        | 572.2675        | 286.6374         | 571.2835        | 286.1454         | 5  |
| 13 | 1244.5753        | 622.7913        | 1227.5488        | 614.2780         | 1226.5648        | 613.7860         | E    | <b>474.2671</b>  | 237.6372        | 457.2405        | 229.1239         | 456.2565        | 228.6319         | 4  |
| 14 | <b>1357.6594</b> | 679.3333        | <b>1340.6329</b> | 670.8201         | <b>1339.6488</b> | 670.3281         | I    | 345.2245         | 173.1159        | 328.1979        | 164.6026         |                 |                  | 3  |
| 15 | <b>1414.6809</b> | 707.8441        | 1397.6543        | 699.3308         | 1396.6703        | 698.8388         | G    | 232.1404         | 116.5738        | 215.1139        | 108.0606         |                 |                  | 2  |
| 16 |                  |                 |                  |                  |                  |                  | R    | 175.1190         | 88.0631         | 158.0924        | 79.5498          |                 |                  | 1  |

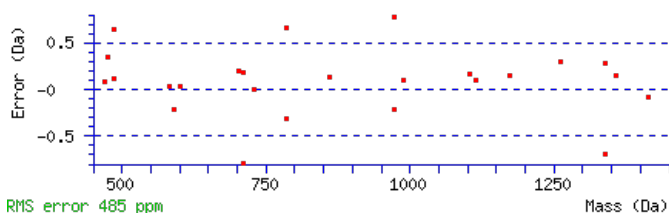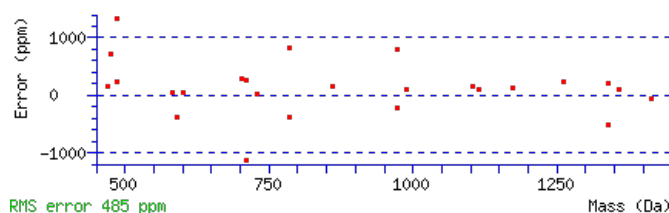



## AT4G02930.1

NCBI **BLAST** search of [GSALSALQGTNDEIGR](#)

(Parameters: blastp, nr protein database, expect=20000, no filter, PAM30)

Other BLAST [web gateways](#)

### All matches to this query

| Score | Mr(calc)  | Delta   | Sequence                         |
|-------|-----------|---------|----------------------------------|
| 91.9  | 1587.7852 | -0.0029 | <a href="#">GSALSALQGTNDEIGR</a> |
| 2.0   | 1587.7803 | 0.0021  | <a href="#">FPAFHAGPRMCLGK</a>   |
| 0.2   | 1587.7802 | 0.0022  | <a href="#">MYKSAFWARCLR</a>     |

Mascot: <http://www.matrixscience.com/>

**Peptide View**MS/MS Fragmentation of **ITTEVMK**Found in **AT4G03000.1** in **TAIR\_Arabidopsis**, Symbols: | protein binding / zinc ion binding | chr4:1324602-1327348 FORWARD

Match to Query 1252: 844.410066 from(423.212309,2+) index(3852)

Title: Elution from: 36.285 to 36.285 scan no 4799 cid35.00 polarity:+

Data file 0-3\_2.mgf

Click mouse within plot area to zoom in by factor of two about that point

Or,   to  Da Label all possible matches  Label matches used for scoring Show Y-axis 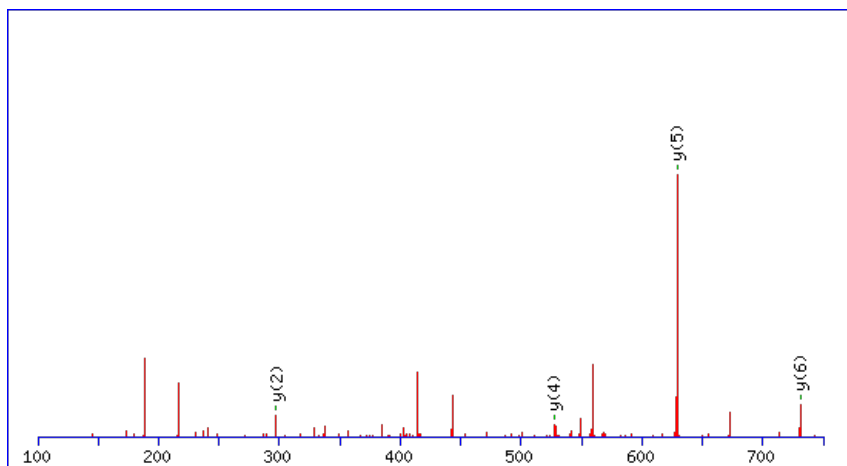**Monoisotopic mass of neutral peptide Mr(calc):** 844.4076**Fixed modifications:** Carbamidomethyl (C) (apply to specified residues or termini only)**Variable modifications:****M6** : Oxidation (M), with neutral losses 0.0000 (shown in table), 63.9983**Ions Score:** 34 **Expect:** 0.0037**Matches** : 4/82 fragment ions using 6 most intense peaks ([help](#))

| # | b        | b <sup>++</sup> | b <sup>0</sup> | b <sup>0++</sup> | Seq. | y               | y <sup>++</sup> | y*       | y <sup>*++</sup> | y <sup>0</sup> | y <sup>0++</sup> | # |
|---|----------|-----------------|----------------|------------------|------|-----------------|-----------------|----------|------------------|----------------|------------------|---|
| 1 | 115.0884 | 58.0478         |                |                  | I    |                 |                 |          |                  |                |                  | 7 |
| 2 | 217.1331 | 109.0702        | 199.1225       | 100.0649         | T    | <b>731.3338</b> | 366.1705        | 713.3102 | 357.1588         | 713.3232       | 357.1653         | 6 |
| 3 | 319.1778 | 160.0925        | 301.1672       | 151.0873         | T    | <b>629.2891</b> | 315.1482        | 611.2655 | 306.1364         | 611.2785       | 306.1429         | 5 |
| 4 | 449.2174 | 225.1124        | 431.2069       | 216.1071         | E    | <b>527.2444</b> | 264.1258        | 509.2208 | 255.1140         | 509.2338       | 255.1205         | 4 |
| 5 | 549.2829 | 275.1451        | 531.2723       | 266.1398         | V    | 397.2048        | 199.1060        | 379.1812 | 190.0942         |                |                  | 3 |
| 6 | 697.3153 | 349.1613        | 679.3047       | 340.1560         | M    | <b>297.1393</b> | 149.0733        | 279.1157 | 140.0615         |                |                  | 2 |
| 7 |          |                 |                |                  | K    | 149.1069        | 75.0571         | 131.0833 | 66.0453          |                |                  | 1 |

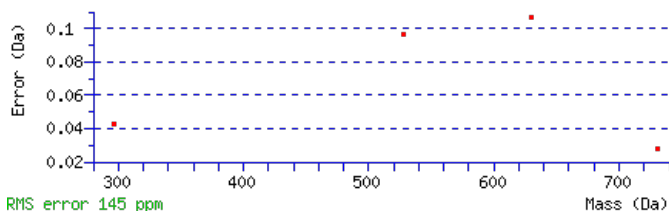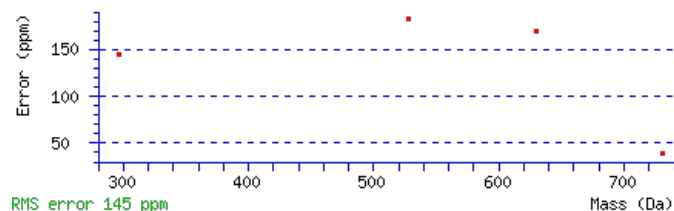NCBI **BLAST** search of [ITTEVMK](#)

(Parameters: blastp, nr protein database, expect=20000, no filter, PAM30)

Other BLAST [web gateways](#)**All matches to this query**

| Score | Mr(calc) | Delta  | Sequence                |
|-------|----------|--------|-------------------------|
| 34.1  | 844.4076 | 0.0024 | <a href="#">ITTEVMK</a> |
| 8.9   | 844.4076 | 0.0024 | <a href="#">TLLESMK</a> |

## AT4G03000.1

|     |          |         |                          |
|-----|----------|---------|--------------------------|
| 8.5 | 844.4076 | 0.0024  | <a href="#">TLSEIMK</a>  |
| 8.2 | 844.4103 | -0.0002 | <a href="#">ITNMVTR</a>  |
| 4.5 | 844.4103 | -0.0002 | <a href="#">IGTMSLGR</a> |
| 3.4 | 844.4092 | 0.0009  | <a href="#">LYGAHFK</a>  |
| 2.4 | 844.4103 | -0.0002 | <a href="#">LKEMTGR</a>  |
| 1.2 | 844.4103 | -0.0003 | <a href="#">LPRSMSK</a>  |

Mascot: <http://www.matrixscience.com/>



# Mascot Search Results

## Peptide View

MS/MS Fragmentation of **FLCPCHGSQYNAQGR**

Found in **AT4G03280.1** in **TAIR\_Arabidopsis**, Symbols: PGR1, PETC | PETC (PHOTOSYNTHETIC ELECTRON TRANSFER C) | chr4:1440314-1441717 FORWARD

Match to Query 9108: 1793.772108 from(598.931312,3+) index(1851)

Title: Elution from: 23.232 to 23.232 scan no 2440 cid35.00 polarity:+

Data file 0-1\_1.mgf

Click mouse within plot area to zoom in by factor of two about that point

Or,  to  Da

Label all possible matches  Label matches used for scoring

Show Y-axis

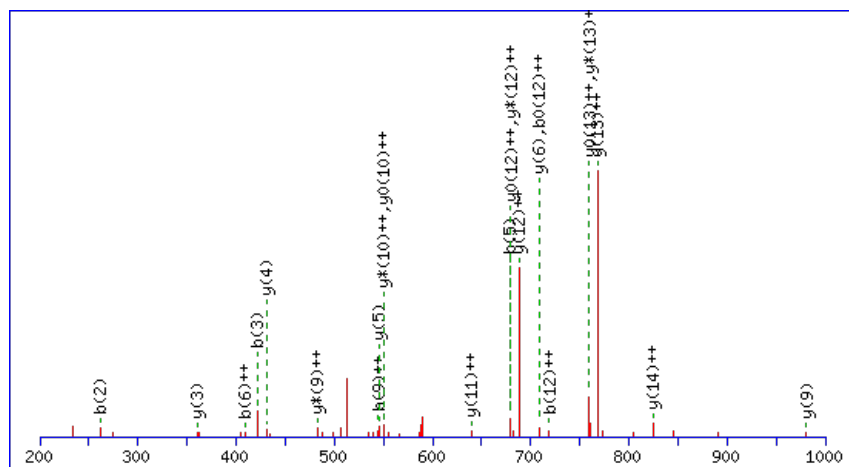

Monoisotopic mass of neutral peptide  $M_r(\text{calc})$ : 1793.7726

Fixed modifications: Carbamidomethyl (C) (apply to specified residues or termini only)

Ions Score: 30 Expect: 0.00091

Matches : 23/124 fragment ions using 36 most intense peaks [\(help\)](#)

| #  | b               | b <sup>++</sup> | b*        | b <sup>*++</sup> | b <sup>0</sup> | b <sup>0++</sup> | Seq. | y               | y <sup>++</sup> | y*        | y <sup>*++</sup> | y <sup>0</sup> | y <sup>0++</sup> | #  |
|----|-----------------|-----------------|-----------|------------------|----------------|------------------|------|-----------------|-----------------|-----------|------------------|----------------|------------------|----|
| 1  | 148.0757        | 74.5415         |           |                  |                |                  | F    |                 |                 |           |                  |                |                  | 15 |
| 2  | <b>261.1598</b> | 131.0835        |           |                  |                |                  | L    | 1647.7115       | <b>824.3594</b> | 1630.6849 | 815.8461         | 1629.7009      | 815.3541         | 14 |
| 3  | <b>421.1904</b> | 211.0988        |           |                  |                |                  | C    | 1534.6274       | <b>767.8173</b> | 1517.6009 | <b>759.3041</b>  | 1516.6168      | <b>758.8121</b>  | 13 |
| 4  | 518.2432        | 259.6252        |           |                  |                |                  | P    | 1374.5968       | <b>687.8020</b> | 1357.5702 | <b>679.2887</b>  | 1356.5862      | <b>678.7967</b>  | 12 |
| 5  | <b>678.2738</b> | 339.6405        |           |                  |                |                  | C    | 1277.5440       | <b>639.2756</b> | 1260.5174 | 630.7624         | 1259.5334      | 630.2704         | 11 |
| 6  | 815.3327        | <b>408.1700</b> |           |                  |                |                  | H    | 1117.5133       | 559.2603        | 1100.4868 | <b>550.7470</b>  | 1099.5028      | <b>550.2550</b>  | 10 |
| 7  | 872.3542        | 436.6807        |           |                  |                |                  | G    | <b>980.4544</b> | 490.7309        | 963.4279  | <b>482.2176</b>  | 962.4439       | 481.7256         | 9  |
| 8  | 959.3862        | 480.1967        |           |                  | 941.3757       | 471.1915         | S    | 923.4330        | 462.2201        | 906.4064  | 453.7068         | 905.4224       | 453.2148         | 8  |
| 9  | 1087.4448       | <b>544.2260</b> | 1070.4182 | 535.7128         | 1069.4342      | 535.2208         | Q    | 836.4009        | 418.7041        | 819.3744  | 410.1908         |                |                  | 7  |
| 10 | 1250.5081       | 625.7577        | 1233.4816 | 617.2444         | 1232.4976      | 616.7524         | Y    | <b>708.3424</b> | 354.6748        | 691.3158  | 346.1615         |                |                  | 6  |
| 11 | 1364.5511       | 682.7792        | 1347.5245 | 674.2659         | 1346.5405      | 673.7739         | N    | <b>545.2790</b> | 273.1432        | 528.2525  | 264.6299         |                |                  | 5  |
| 12 | 1435.5882       | <b>718.2977</b> | 1418.5616 | 709.7844         | 1417.5776      | <b>709.2924</b>  | A    | <b>431.2361</b> | 216.1217        | 414.2096  | 207.6084         |                |                  | 4  |
| 13 | 1563.6467       | 782.3270        | 1546.6202 | 773.8137         | 1545.6362      | 773.3217         | Q    | <b>360.1990</b> | 180.6031        | 343.1724  | 172.0899         |                |                  | 3  |
| 14 | 1620.6682       | 810.8377        | 1603.6417 | 802.3245         | 1602.6576      | 801.8325         | G    | 232.1404        | 116.5738        | 215.1139  | 108.0606         |                |                  | 2  |
| 15 |                 |                 |           |                  |                |                  | R    | 175.1190        | 88.0631         | 158.0924  | 79.5498          |                |                  | 1  |

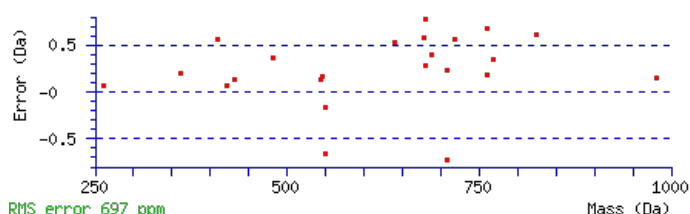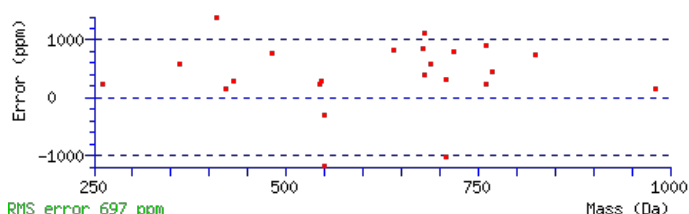

## AT4G03280.1

NCBI **BLAST** search of [FLCPCHGSQYNAQGR](#)

(Parameters: blastp, nr protein database, expect=20000, no filter, PAM30)

Other BLAST [web gateways](#)

### All matches to this query

| Score | Mr(calc)  | Delta   | Sequence                        |
|-------|-----------|---------|---------------------------------|
| 30.4  | 1793.7726 | -0.0005 | <a href="#">FLCPCHGSQYNAQGR</a> |

Mascot: <http://www.matrixscience.com/>

## Peptide View

MS/MS Fragmentation of **GDPTYLVVENDK**

Found in **AT4G03280.2** in **TAIR\_Arabidopsis**, Symbols: PGR1, PETC | PETC (PHOTOSYNTHETIC ELECTRON TRANSFER C) | chr4:1440462-1441717 FORWARD

Match to Query 5139: 1348.648024 from(675.331288,2+) index(3984)

Title: Elution from: 36.698 to 36.698 scan no 4968 cid35.00 polarity:+

Data file C7-3\_2.mgf

Click mouse within plot area to zoom in by factor of two about that point

Or,   to  Da

Label all possible matches  Label matches used for scoring

Show Y-axis

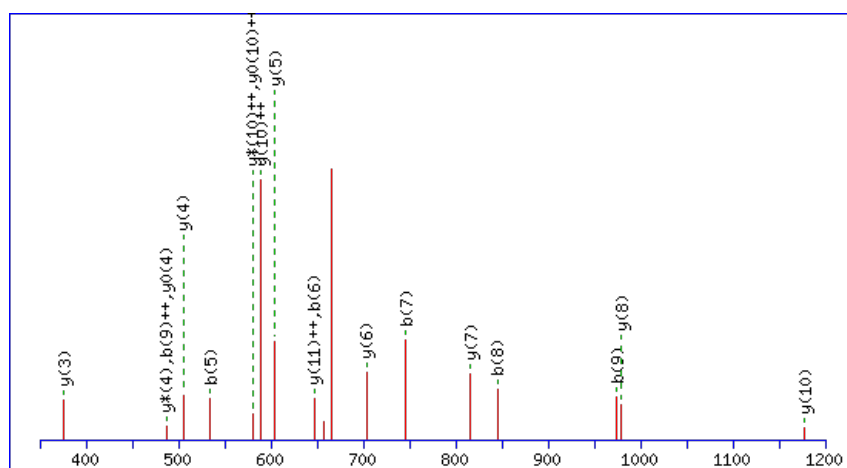

Monoisotopic mass of neutral peptide  $M_r(\text{calc})$ : 1348.6511

Fixed modifications: Carbamidomethyl (C) (apply to specified residues or termini only)

Ions Score: 74 Expect: 1e-007

Matches : 19/110 fragment ions using 17 most intense peaks ([help](#))

| #  | b         | b <sup>++</sup> | b*        | b <sup>*++</sup> | b <sup>0</sup> | b <sup>0++</sup> | Seq. | y         | y <sup>++</sup> | y*        | y <sup>*++</sup> | y <sup>0</sup> | y <sup>0++</sup> | #  |
|----|-----------|-----------------|-----------|------------------|----------------|------------------|------|-----------|-----------------|-----------|------------------|----------------|------------------|----|
| 1  | 58.0287   | 29.5180         |           |                  |                |                  | G    |           |                 |           |                  |                |                  | 12 |
| 2  | 173.0557  | 87.0315         |           |                  | 155.0451       | 78.0262          | D    | 1292.6369 | 646.8221        | 1275.6103 | 638.3088         | 1274.6263      | 637.8168         | 11 |
| 3  | 270.1084  | 135.5579        |           |                  | 252.0979       | 126.5526         | P    | 1177.6099 | 589.3086        | 1160.5834 | 580.7953         | 1159.5994      | 580.3033         | 10 |
| 4  | 371.1561  | 186.0817        |           |                  | 353.1456       | 177.0764         | T    | 1080.5572 | 540.7822        | 1063.5306 | 532.2689         | 1062.5466      | 531.7769         | 9  |
| 5  | 534.2195  | 267.6134        |           |                  | 516.2089       | 258.6081         | Y    | 979.5095  | 490.2584        | 962.4829  | 481.7451         | 961.4989       | 481.2531         | 8  |
| 6  | 647.3035  | 324.1554        |           |                  | 629.2930       | 315.1501         | L    | 816.4462  | 408.7267        | 799.4196  | 400.2134         | 798.4356       | 399.7214         | 7  |
| 7  | 746.3719  | 373.6896        |           |                  | 728.3614       | 364.6843         | V    | 703.3621  | 352.1847        | 686.3355  | 343.6714         | 685.3515       | 343.1794         | 6  |
| 8  | 845.4403  | 423.2238        |           |                  | 827.4298       | 414.2185         | V    | 604.2937  | 302.6505        | 587.2671  | 294.1372         | 586.2831       | 293.6452         | 5  |
| 9  | 974.4829  | 487.7451        |           |                  | 956.4724       | 478.7398         | E    | 505.2253  | 253.1163        | 488.1987  | 244.6030         | 487.2147       | 244.1110         | 4  |
| 10 | 1088.5259 | 544.7666        | 1071.4993 | 536.2533         | 1070.5153      | 535.7613         | N    | 376.1827  | 188.5950        | 359.1561  | 180.0817         | 358.1721       | 179.5897         | 3  |
| 11 | 1203.5528 | 602.2800        | 1186.5263 | 593.7668         | 1185.5422      | 593.2748         | D    | 262.1397  | 131.5735        | 245.1132  | 123.0602         | 244.1292       | 122.5682         | 2  |
| 12 |           |                 |           |                  |                |                  | K    | 147.1128  | 74.0600         | 130.0863  | 65.5468          |                |                  | 1  |

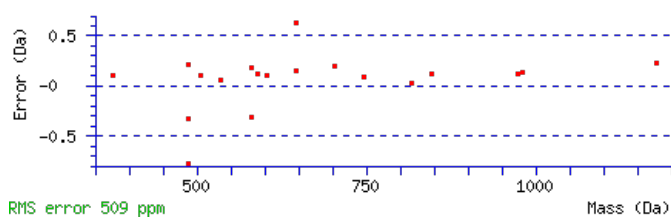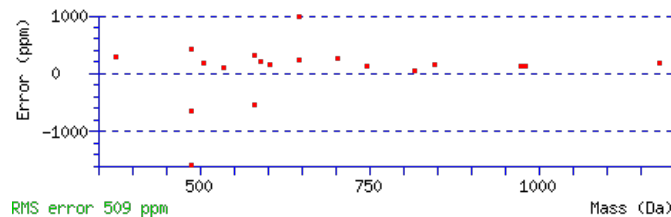

NCBI BLAST search of **GDPTYLVVENDK**

(Parameters: blastp, nr protein database, expect=20000, no filter, PAM30)

Other BLAST [web gateways](#)

AT4G03280.2

All matches to this query

| Score | Mr(calc)  | Delta   | Sequence                      |
|-------|-----------|---------|-------------------------------|
| 74.4  | 1348.6511 | -0.0030 | <a href="#">GDPTYLVVENDK</a>  |
| 3.5   | 1348.6486 | -0.0005 | <a href="#">VYLLDFTCYR</a>    |
| 1.6   | 1348.6517 | -0.0037 | <a href="#">DGKVCNSSAGKAR</a> |

Mascot: <http://www.matrixscience.com/>

## Peptide View

### MS/MS Fragmentation of **TTLTSSLDK**

Found in **AT4G03520.1** in **TAIR\_Arabidopsis**, Symbols: ATHM2 | ATHM2 (Arabidopsis thioredoxin M-type 2); thiol-disulfide exchange intermediate | chr4:1562583-1564053 REVERSE

Match to Query 2399: 974.476442 from(488.245497,2+) index(1651)

Title: Elution from: 21.768 to 21.768 scan no 2216 cid35.00 polarity:+

Data file C7-2\_1.mgf

Click mouse within plot area to zoom in by factor of two about that point

Or,   to  Da

Label all possible matches  Label matches used for scoring

Show Y-axis

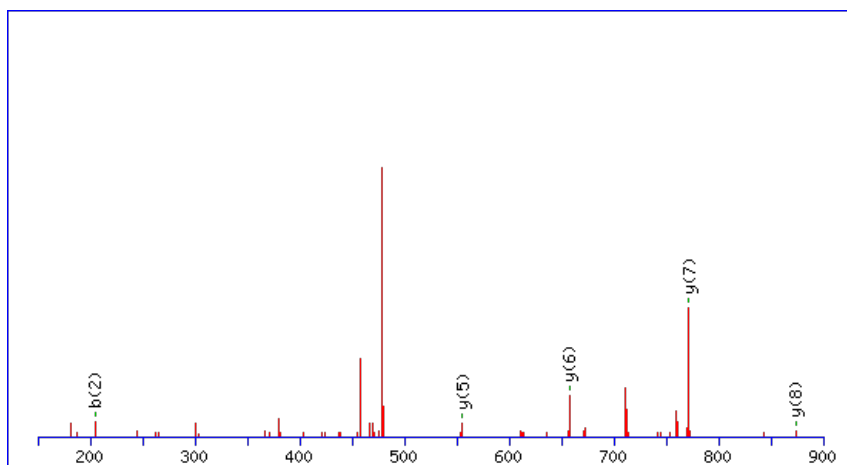

**Monoisotopic mass of neutral peptide Mr(calc):** 974.4780

**Fixed modifications:** Carbamidomethyl (C) (apply to specified residues or termini only)

**Ions Score:** 30 **Expect:** 0.0071

**Matches:** 5/78 fragment ions using 7 most intense peaks ([help](#))

| # | b               | b <sup>++</sup> | b <sup>0</sup> | b <sup>0++</sup> | Seq. | y               | y <sup>++</sup> | y*       | y <sup>*++</sup> | y <sup>0</sup> | y <sup>0++</sup> | # |
|---|-----------------|-----------------|----------------|------------------|------|-----------------|-----------------|----------|------------------|----------------|------------------|---|
| 1 | 103.0520        | 52.0296         | 85.0414        | 43.0244          | T    |                 |                 |          |                  |                |                  | 9 |
| 2 | <b>205.0967</b> | 103.0520        | 187.0861       | 94.0467          | T    | <b>873.4406</b> | 437.2239        | 855.4170 | 428.2121         | 855.4300       | 428.2187         | 8 |
| 3 | 319.1778        | 160.0925        | 301.1672       | 151.0873         | L    | <b>771.3959</b> | 386.2016        | 753.3723 | 377.1898         | 753.3853       | 377.1963         | 7 |
| 4 | 421.2225        | 211.1149        | 403.2119       | 202.1096         | T    | <b>657.3148</b> | 329.1610        | 639.2912 | 320.1492         | 639.3042       | 320.1558         | 6 |
| 5 | 509.2516        | 255.1294        | 491.2410       | 246.1241         | S    | <b>555.2701</b> | 278.1387        | 537.2465 | 269.1269         | 537.2595       | 269.1334         | 5 |
| 6 | 597.2806        | 299.1440        | 579.2701       | 290.1387         | S    | 467.2410        | 234.1241        | 449.2174 | 225.1124         | 449.2304       | 225.1189         | 4 |
| 7 | 711.3617        | 356.1845        | 693.3512       | 347.1792         | L    | 379.2120        | 190.1096        | 361.1884 | 181.0978         | 361.2014       | 181.1043         | 3 |
| 8 | 827.3857        | 414.1965        | 809.3752       | 405.1912         | D    | 265.1309        | 133.0691        | 247.1073 | 124.0573         | 247.1203       | 124.0638         | 2 |
| 9 |                 |                 |                |                  | K    | 149.1069        | 75.0571         | 131.0833 | 66.0453          |                |                  | 1 |

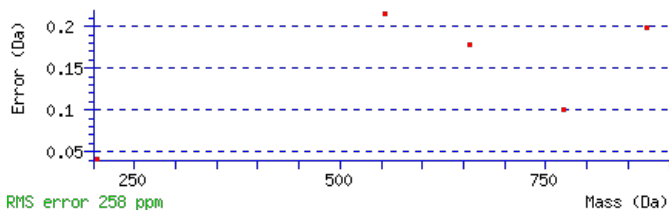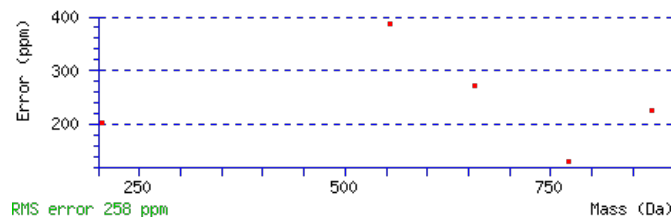

NCBI **BLAST** search of [TTLTSSLDK](#)

(Parameters: blastp, nr protein database, expect=20000, no filter, PAM30)

Other BLAST [web gateways](#)

### All matches to this query

| Score | Mr(calc) | Delta | Sequence |
|-------|----------|-------|----------|
|       |          |       |          |



## AT4G03520.1

|      |          |         |                           |
|------|----------|---------|---------------------------|
| 30.3 | 974.4780 | -0.0016 | <a href="#">TILTSSLDK</a> |
| 16.0 | 974.4760 | 0.0005  | <a href="#">TVNRNVMK</a>  |
| 13.4 | 974.4755 | 0.0009  | <a href="#">MALELFNK</a>  |
| 9.3  | 974.4760 | 0.0005  | <a href="#">SPMTTRLR</a>  |
| 5.4  | 974.4780 | -0.0016 | <a href="#">TLSSVETK</a>  |
| 5.2  | 974.4755 | 0.0009  | <a href="#">ITFPSCLK</a>  |
| 3.4  | 974.4789 | -0.0025 | <a href="#">TMITCVLK</a>  |
| 3.1  | 974.4753 | 0.0012  | <a href="#">QWRNKAR</a>   |
| 1.9  | 974.4755 | 0.0009  | <a href="#">FKTPPTMK</a>  |
| 1.8  | 974.4760 | 0.0005  | <a href="#">MARSLANAK</a> |

Mascot: <http://www.matrixscience.com/>

**Peptide View**MS/MS Fragmentation of **AIESVEETER**Found in **AT4G04020.1** in **TAIR\_Arabidopsis**, Symbols: FIB | FIB (FIBRILLIN); structural molecule | chr4:1932159-1933544 FORWARD

Match to Query 3786: 1174.512770 from(588.263661,2+) index(972)

Title: Elution from: 14.537 to 14.537 scan no 1340 cid35.00 polarity:+

Data file 0-3\_3.mgf

Click mouse within plot area to zoom in by factor of two about that point

Or,  to  Da Label all possible matches  Label matches used for scoring Show Y-axis 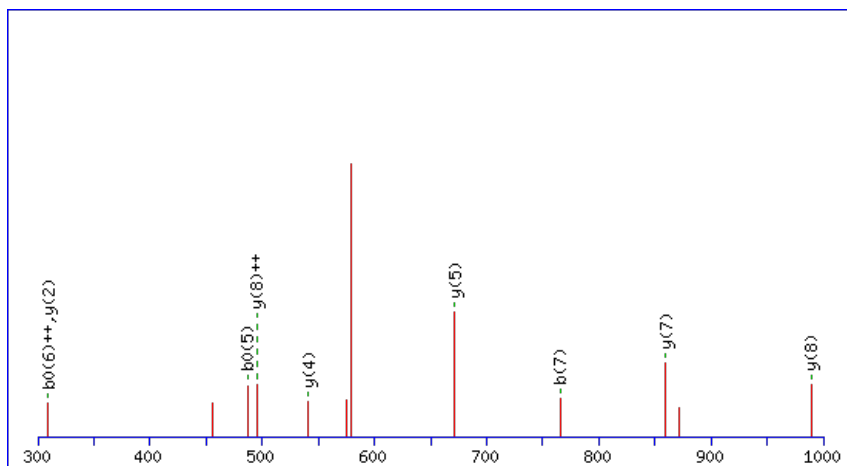Monoisotopic mass of neutral peptide **Mr(calc)**: 1174.5128**Fixed modifications**: Carbamidomethyl (C) (apply to specified residues or termini only)**Ions Score**: 31 **Expect**: 0.0044**Matches**: 9/84 fragment ions using 12 most intense peaks ([help](#))

| #  | b               | b <sup>++</sup> | b <sup>0</sup>  | b <sup>0++</sup> | Seq. | y               | y <sup>++</sup> | y <sup>*</sup> | y <sup>*++</sup> | y <sup>0</sup> | y <sup>0++</sup> | #  |
|----|-----------------|-----------------|-----------------|------------------|------|-----------------|-----------------|----------------|------------------|----------------|------------------|----|
| 1  | 73.0414         | 37.0244         |                 |                  | A    |                 |                 |                |                  |                |                  | 10 |
| 2  | 187.1225        | 94.0649         |                 |                  | I    | 1103.4859       | 552.2466        | 1085.4623      | 543.2348         | 1085.4754      | 543.2413         | 9  |
| 3  | 317.1622        | 159.0847        | 299.1516        | 150.0794         | E    | <b>989.4048</b> | <b>495.2061</b> | 971.3812       | 486.1943         | 971.3943       | 486.2008         | 8  |
| 4  | 405.1912        | 203.0992        | 387.1807        | 194.0940         | S    | <b>859.3652</b> | 430.1862        | 841.3416       | 421.1744         | 841.3546       | 421.1810         | 7  |
| 5  | 505.2567        | 253.1320        | <b>487.2461</b> | 244.1267         | V    | 771.3361        | 386.1717        | 753.3126       | 377.1599         | 753.3256       | 377.1664         | 6  |
| 6  | 635.2963        | 318.1518        | 617.2857        | <b>309.1465</b>  | E    | <b>671.2707</b> | 336.1390        | 653.2471       | 327.1272         | 653.2601       | 327.1337         | 5  |
| 7  | <b>765.3359</b> | 383.1716        | 747.3254        | 374.1663         | E    | <b>541.2311</b> | 271.1192        | 523.2075       | 262.1074         | 523.2205       | 262.1139         | 4  |
| 8  | 867.3806        | 434.1940        | 849.3701        | 425.1887         | T    | 411.1914        | 206.0994        | 393.1678       | 197.0876         | 393.1809       | 197.0941         | 3  |
| 9  | 997.4203        | 499.2138        | 979.4097        | 490.2085         | E    | <b>309.1467</b> | 155.0770        | 291.1231       | 146.0652         | 291.1362       | 146.0717         | 2  |
| 10 |                 |                 |                 |                  | R    | 179.1071        | 90.0572         | 161.0835       | 81.0454          |                |                  | 1  |

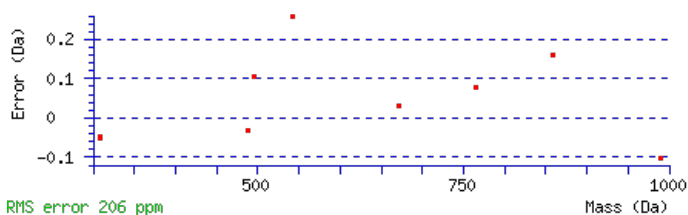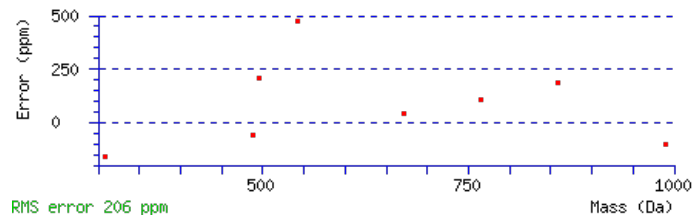NCBI **BLAST** search of **AIESVEETER**

(Parameters: blastp, nr protein database, expect=20000, no filter, PAM30)

Other BLAST [web gateways](#)**All matches to this query**

| Score | Mr(calc) | Delta | Sequence |
|-------|----------|-------|----------|
|       |          |       |          |

## AT4G04020.1

|      |           |         |                             |
|------|-----------|---------|-----------------------------|
| 31.3 | 1174.5128 | -0.0000 | <a href="#">AIESVEETER</a>  |
| 16.9 | 1174.5155 | -0.0027 | <a href="#">VNGQVSSSPER</a> |
| 4.8  | 1174.5128 | -0.0000 | <a href="#">IAEASKEGDDK</a> |
| 4.0  | 1174.5155 | -0.0027 | <a href="#">LEADGLSGNQR</a> |
| 3.0  | 1174.5155 | -0.0027 | <a href="#">NDAAVALSQOR</a> |
| 2.3  | 1174.5137 | -0.0009 | <a href="#">VTIHMSESK</a>   |
| 2.1  | 1174.5130 | -0.0002 | <a href="#">ALHQFDCLR</a>   |

**Mascot:** <http://www.matrixscience.com/>

**Peptide View**MS/MS Fragmentation of **ALQESLASELAAR**Found in **AT4G04640.1** in **TAIR\_Arabidopsis**, Symbols: ATPC1 | ATPC1 (ATP synthase gamma chain 1) | chr4:2350759-2351880 REVERSE

Match to Query 5446: 1374.668970 from(688.341761,2+) index(6016)

Title: Elution from: 53.031 to 53.031 scan no 7570 cid35.00 polarity:+

Data file C7-3\_1.mgf

Click mouse within plot area to zoom in by factor of two about that point

Or,   to  Da Label all possible matches  Label matches used for scoring Show Y-axis 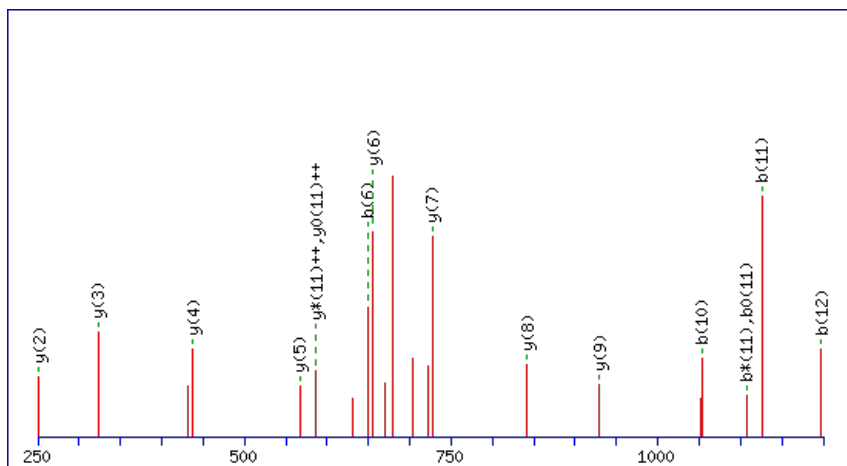

Monoisotopic mass of neutral peptide Mr(calc): 1374.6697

Fixed modifications: Carbamidomethyl (C) (apply to specified residues or termini only)

Ions Score: 81 Expect: 7.4e-008

Matches : 16/126 fragment ions using 16 most intense peaks ([help](#))

| #  | b         | b <sup>++</sup> | b*        | b <sup>*++</sup> | b <sup>0</sup> | b <sup>0++</sup> | Seq. | y         | y <sup>++</sup> | y*        | y <sup>*++</sup> | y <sup>0</sup> | y <sup>0++</sup> | #  |
|----|-----------|-----------------|-----------|------------------|----------------|------------------|------|-----------|-----------------|-----------|------------------|----------------|------------------|----|
| 1  | 73.0414   | 37.0244         |           |                  |                |                  | A    |           |                 |           |                  |                |                  | 13 |
| 2  | 187.1225  | 94.0649         |           |                  |                |                  | L    | 1303.6429 | 652.3251        | 1285.6193 | 643.3133         | 1285.6323      | 643.3198         | 12 |
| 3  | 317.1752  | 159.0912        | 299.1516  | 150.0794         |                |                  | Q    | 1189.5618 | 595.2845        | 1171.5382 | 586.2727         | 1171.5512      | 586.2792         | 11 |
| 4  | 447.2148  | 224.1110        | 429.1912  | 215.0992         | 429.2042       | 215.1058         | E    | 1059.5091 | 530.2582        | 1041.4855 | 521.2464         | 1041.4986      | 521.2529         | 10 |
| 5  | 535.2439  | 268.1256        | 517.2203  | 259.1138         | 517.2333       | 259.1203         | S    | 929.4695  | 465.2384        | 911.4459  | 456.2266         | 911.4589       | 456.2331         | 9  |
| 6  | 649.3250  | 325.1661        | 631.3014  | 316.1543         | 631.3144       | 316.1608         | L    | 841.4404  | 421.2239        | 823.4168  | 412.2121         | 823.4299       | 412.2186         | 8  |
| 7  | 721.3591  | 361.1832        | 703.3355  | 352.1714         | 703.3485       | 352.1779         | A    | 727.3593  | 364.1833        | 709.3357  | 355.1715         | 709.3488       | 355.1780         | 7  |
| 8  | 809.3882  | 405.1977        | 791.3646  | 396.1859         | 791.3776       | 396.1924         | S    | 655.3252  | 328.1662        | 637.3016  | 319.1544         | 637.3146       | 319.1609         | 6  |
| 9  | 939.4278  | 470.2175        | 921.4042  | 461.2057         | 921.4172       | 461.2123         | E    | 567.2961  | 284.1517        | 549.2725  | 275.1399         | 549.2856       | 275.1464         | 5  |
| 10 | 1053.5089 | 527.2581        | 1035.4853 | 518.2463         | 1035.4983      | 518.2528         | L    | 437.2565  | 219.1319        | 419.2329  | 210.1201         |                |                  | 4  |
| 11 | 1125.5430 | 563.2752        | 1107.5195 | 554.2634         | 1107.5325      | 554.2699         | A    | 323.1754  | 162.0913        | 305.1518  | 153.0795         |                |                  | 3  |
| 12 | 1197.5772 | 599.2922        | 1179.5536 | 590.2804         | 1179.5666      | 590.2870         | A    | 251.1412  | 126.0743        | 233.1177  | 117.0625         |                |                  | 2  |
| 13 |           |                 |           |                  |                |                  | R    | 179.1071  | 90.0572         | 161.0835  | 81.0454          |                |                  | 1  |

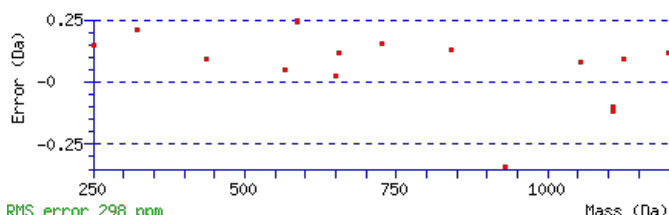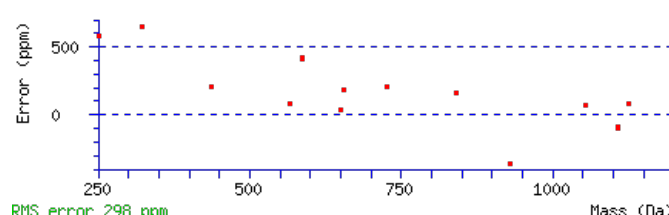NCBI **BLAST** search of [ALQESLASELAAR](#)

(Parameters: blastp, nr protein database, expect=20000, no filter, PAM30)

Other BLAST [web gateways](#)

## AT4G04640.1

All matches to this query

| Score | Mr(calc)  | Delta   | Sequence                       |
|-------|-----------|---------|--------------------------------|
| 81.2  | 1374.6697 | -0.0008 | <a href="#">ALQESLASELAAR</a>  |
| 23.5  | 1374.6697 | -0.0008 | <a href="#">EAEAKSLAIAAR</a>   |
| 14.6  | 1374.6697 | -0.0008 | <a href="#">EAKVTLDNEIAR</a>   |
| 10.3  | 1374.6724 | -0.0034 | <a href="#">AGVVREEAQVAAR</a>  |
| 9.0   | 1374.6672 | 0.0017  | <a href="#">LMLYAGADHVLRL</a>  |
| 2.9   | 1374.6720 | -0.0030 | <a href="#">VDKVLQPFDGNK</a>   |
| 2.7   | 1374.6697 | -0.0008 | <a href="#">EGAAESPAVKSGKK</a> |
| 2.7   | 1374.6697 | -0.0008 | <a href="#">ILSGLRAEGEEGK</a>  |
| 2.1   | 1374.6672 | 0.0017  | <a href="#">NVKMSYLYGKR</a>    |
| 0.8   | 1374.6699 | -0.0009 | <a href="#">MATSFRRRLAR</a>    |

Mascot: <http://www.matrixscience.com/>

**Peptide View**MS/MS Fragmentation of **AILSPEQFR**
 Found in **AT4G04800.1** in **TAIR\_Arabidopsis**, Symbols: | methionine sulfoxide reductase domain-containing protein / SeIR domain-containing protein | chr4:2439572-2440935 FORWARD

Match to Query 2613: 1059.571546 from(530.793049,2+) index(4396)

Title: Elution from: 41.586 to 41.586 scan no 5631 cid35.00 polarity:+

Data file D1d-2\_3.mgf

Click mouse within plot area to zoom in by factor of two about that point

Or,   to  Da Label all possible matches  Label matches used for scoring Show Y-axis 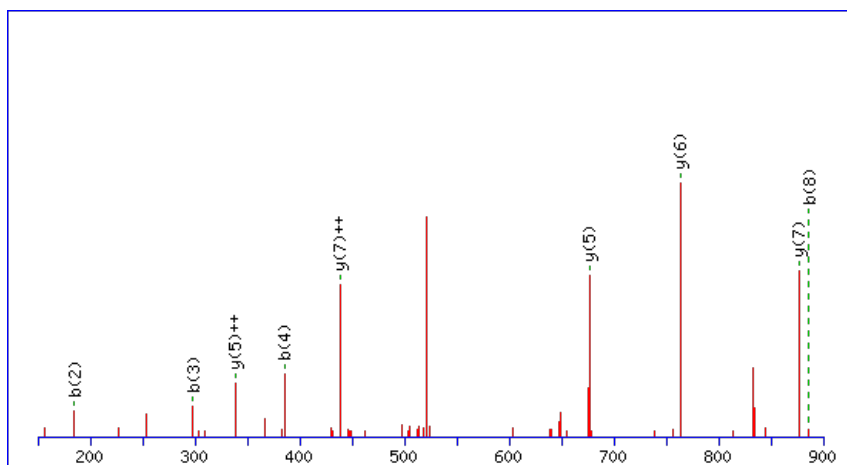Monoisotopic mass of neutral peptide  $M_r(\text{calc})$ : 1059.5713

Fixed modifications: Carbamidomethyl (C) (apply to specified residues or termini only)

Ions Score: 28 Expect: 0.0085

Matches : 9/72 fragment ions using 16 most intense peaks ([help](#))

| # | b               | b <sup>++</sup> | b*       | b <sup>*++</sup> | b <sup>0</sup> | b <sup>0++</sup> | Seq. | y               | y <sup>++</sup> | y*       | y <sup>*++</sup> | y <sup>0</sup> | y <sup>0++</sup> | # |
|---|-----------------|-----------------|----------|------------------|----------------|------------------|------|-----------------|-----------------|----------|------------------|----------------|------------------|---|
| 1 | 72.0444         | 36.5258         |          |                  |                |                  | A    |                 |                 |          |                  |                |                  | 9 |
| 2 | <b>185.1285</b> | 93.0679         |          |                  |                |                  | I    | 989.5415        | 495.2744        | 972.5149 | 486.7611         | 971.5309       | 486.2691         | 8 |
| 3 | <b>298.2125</b> | 149.6099        |          |                  |                |                  | L    | <b>876.4574</b> | <b>438.7323</b> | 859.4308 | 430.2191         | 858.4468       | 429.7271         | 7 |
| 4 | <b>385.2445</b> | 193.1259        |          |                  | 367.2340       | 184.1206         | S    | <b>763.3733</b> | 382.1903        | 746.3468 | 373.6770         | 745.3628       | 373.1850         | 6 |
| 5 | 482.2973        | 241.6523        |          |                  | 464.2867       | 232.6470         | P    | <b>676.3413</b> | <b>338.6743</b> | 659.3148 | 330.1610         | 658.3307       | 329.6690         | 5 |
| 6 | 611.3399        | 306.1736        |          |                  | 593.3293       | 297.1683         | E    | 579.2885        | 290.1479        | 562.2620 | 281.6346         | 561.2780       | 281.1426         | 4 |
| 7 | 739.3985        | 370.2029        | 722.3719 | 361.6896         | 721.3879       | 361.1976         | Q    | 450.2459        | 225.6266        | 433.2194 | 217.1133         |                |                  | 3 |
| 8 | <b>886.4669</b> | 443.7371        | 869.4403 | 435.2238         | 868.4563       | 434.7318         | F    | 322.1874        | 161.5973        | 305.1608 | 153.0840         |                |                  | 2 |
| 9 |                 |                 |          |                  |                |                  | R    | 175.1190        | 88.0631         | 158.0924 | 79.5498          |                |                  | 1 |

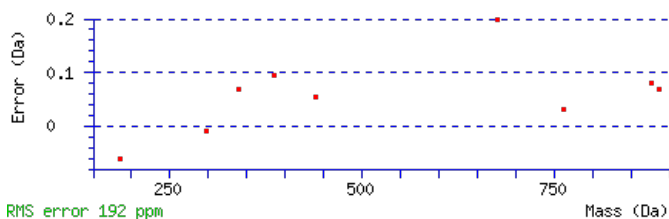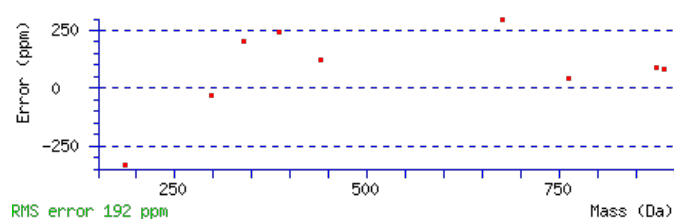NCBI BLAST search of [AILSPEQFR](#)

(Parameters: blastp, nr protein database, expect=20000, no filter, PAM30)

Other BLAST [web gateways](#)

All matches to this query

| Score | $M_r(\text{calc})$ | Delta | Sequence |
|-------|--------------------|-------|----------|
|       |                    |       |          |

## AT4G04800.1

|      |           |         |                            |
|------|-----------|---------|----------------------------|
| 28.2 | 1059.5713 | 0.0003  | <a href="#">AILSPEQFR</a>  |
| 18.8 | 1059.5746 | -0.0031 | <a href="#">SPAELKLMR</a>  |
| 15.1 | 1059.5746 | -0.0031 | <a href="#">AISLPSMAVR</a> |
| 0.3  | 1059.5713 | 0.0003  | <a href="#">SQYLALTHK</a>  |

**Mascot:** <http://www.matrixscience.com/>

**Peptide View**MS/MS Fragmentation of **LMSDGNFLK**

Found in **AT4G04955.1** in **TAIR\_Arabidopsis**, Symbols: ATALN | ATALN (ARABIDOPSIS ALLANTOINASE); allantoinase/ hydrolase | chr4:2522299-2525257 REVERSE

Match to Query 2890: 1034.476170 from(518.245361,2+) index(1655)

Title: Elution from: 20.958 to 20.958 scan no 2184 cid35.00 polarity:+

Data file C7-2\_2.mgf

Click mouse within plot area to zoom in by factor of two about that point

Or,   to  Da

Label all possible matches  Label matches used for scoring

Show Y-axis

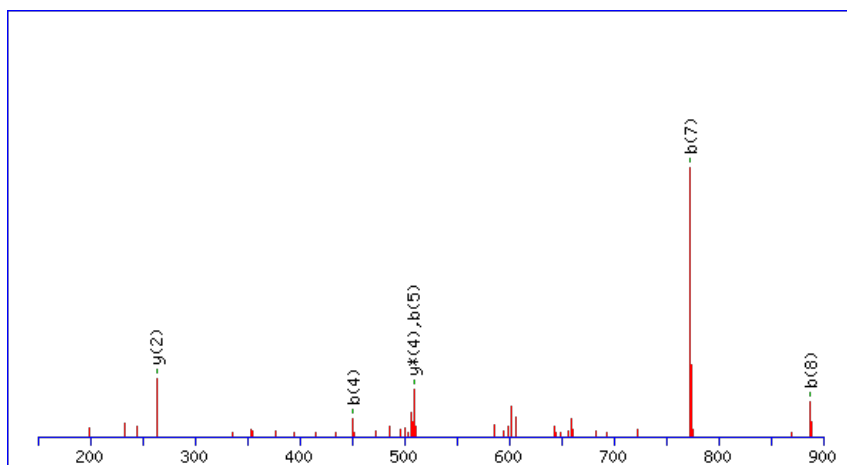

**Monoisotopic mass of neutral peptide Mr(calc):** 1034.4733

**Fixed modifications:** Carbamidomethyl (C) (apply to specified residues or termini only)

**Ions Score:** 26 **Expect:** 0.027

**Matches:** 6/72 fragment ions using 7 most intense peaks ([help](#))

| # | b               | b <sup>++</sup> | b*       | b <sup>*++</sup> | b <sup>0</sup> | b <sup>0++</sup> | Seq. | y               | y <sup>++</sup> | y*              | y <sup>*++</sup> | y <sup>0</sup> | y <sup>0++</sup> | # |
|---|-----------------|-----------------|----------|------------------|----------------|------------------|------|-----------------|-----------------|-----------------|------------------|----------------|------------------|---|
| 1 | 115.0884        | 58.0478         |          |                  |                |                  | L    |                 |                 |                 |                  |                |                  | 9 |
| 2 | 247.1259        | 124.0666        |          |                  |                |                  | M    | 921.3995        | 461.2034        | 903.3759        | 452.1916         | 903.3889       | 452.1981         | 8 |
| 3 | 335.1550        | 168.0811        |          |                  | 317.1444       | 159.0758         | S    | 789.3620        | 395.1846        | 771.3384        | 386.1728         | 771.3514       | 386.1793         | 7 |
| 4 | <b>451.1789</b> | 226.0931        |          |                  | 433.1684       | 217.0878         | D    | 701.3329        | 351.1701        | 683.3093        | 342.1583         | 683.3223       | 342.1648         | 6 |
| 5 | <b>509.1974</b> | 255.1024        |          |                  | 491.1869       | 246.0971         | G    | 585.3089        | 293.1581        | 567.2853        | 284.1463         |                |                  | 5 |
| 6 | 625.2344        | 313.1209        | 607.2108 | 304.1091         | 607.2239       | 304.1156         | N    | 527.2904        | 264.1488        | <b>509.2668</b> | 255.1371         |                |                  | 4 |
| 7 | <b>773.2999</b> | 387.1536        | 755.2763 | 378.1418         | 755.2893       | 378.1483         | F    | 411.2534        | 206.1303        | 393.2298        | 197.1186         |                |                  | 3 |
| 8 | <b>887.3810</b> | 444.1941        | 869.3574 | 435.1823         | 869.3704       | 435.1888         | L    | <b>263.1880</b> | 132.0976        | 245.1644        | 123.0858         |                |                  | 2 |
| 9 |                 |                 |          |                  |                |                  | K    | 149.1069        | 75.0571         | 131.0833        | 66.0453          |                |                  | 1 |

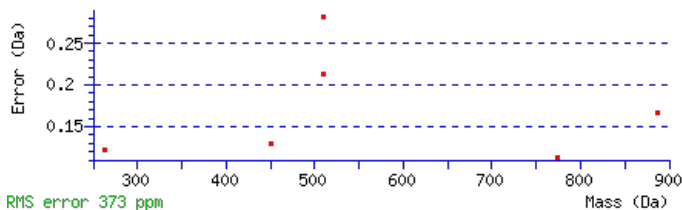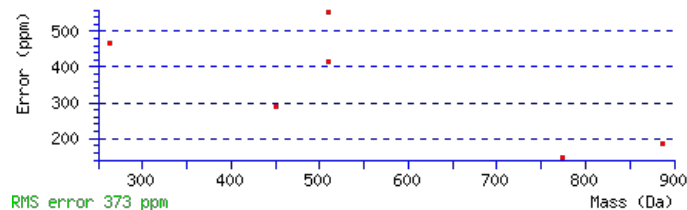

NCBI **BLAST** search of **LMSDGNFLK**

(Parameters: blastp, nr protein database, expect=20000, no filter, PAM30)

Other BLAST [web gateways](#)

**All matches to this query**

| Score | Mr(calc) | Delta | Sequence |
|-------|----------|-------|----------|
|       |          |       |          |



**AT4G04955.1**

|      |           |         |                             |
|------|-----------|---------|-----------------------------|
| 25.7 | 1034.4733 | 0.0029  | <a href="#">LMSDGNFLK</a>   |
| 19.3 | 1034.4760 | 0.0002  | <a href="#">MGASGRWIK</a>   |
| 15.6 | 1034.4733 | 0.0029  | <a href="#">MEKGVGF EK</a>  |
| 14.2 | 1034.4733 | 0.0029  | <a href="#">MAFAQESIK</a>   |
| 11.9 | 1034.4789 | -0.0028 | <a href="#">LPYNMMLK</a>    |
| 11.8 | 1034.4789 | -0.0028 | <a href="#">LPYNMMLK</a>    |
| 10.8 | 1034.4789 | -0.0027 | <a href="#">EMKMVPYK</a>    |
| 6.7  | 1034.4780 | -0.0019 | <a href="#">ETTSAEFLK</a>   |
| 6.7  | 1034.4785 | -0.0023 | <a href="#">ASTSGEVS RK</a> |
| 4.2  | 1034.4760 | 0.0002  | <a href="#">MLFSSHKR</a>    |

**Mascot:** <http://www.matrixscience.com/>

## Peptide View

MS/MS Fragmentation of **DRFYIQLSPTEAAAR**Found in **AT4G05180.1** in **TAIR\_Arabidopsis**, Symbols: PSBQ, PSBQ-2, PSII-Q | PSBQ/PSBQ-2/PSII-Q (PHOTOSYSTEM II SUBUNIT Q-2); calcium ion binding | chr4:2672091-2673168 REVERSE

Match to Query 8877: 1856.872587 from(619.964805,3+) index(6010)

Title: Elution from: 53.165 to 53.165 scan no 7659 cid35.00 polarity:+

Data file C7-1\_2.mgf

Click mouse within plot area to zoom in by factor of two about that point

Or,   to  Da Label all possible matches  Label matches used for scoring Show Y-axis 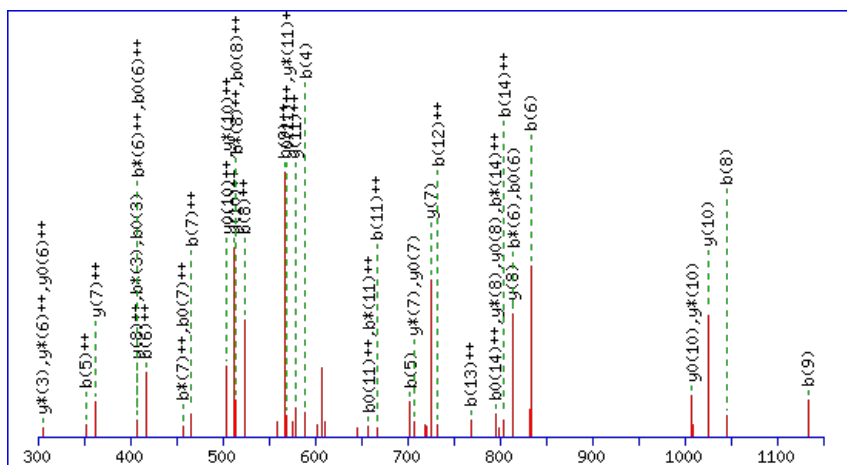Monoisotopic mass of neutral peptide  $M_r(\text{calc})$ : 1856.8691

Fixed modifications: Carbamidomethyl (C) (apply to specified residues or termini only)

Ions Score: 69 Expect: 1.3e-006

Matches : 48/170 fragment ions using 41 most intense peaks ([help](#))

| #  | b         | b <sup>++</sup> | b <sup>*</sup> | b <sup>*++</sup> | b <sup>0</sup> | b <sup>0++</sup> | Seq. | y         | y <sup>++</sup> | y <sup>*</sup> | y <sup>*++</sup> | y <sup>0</sup> | y <sup>0++</sup> | #  |
|----|-----------|-----------------|----------------|------------------|----------------|------------------|------|-----------|-----------------|----------------|------------------|----------------|------------------|----|
| 1  | 117.0313  | 59.0193         |                |                  | 99.0207        | 50.0140          | D    |           |                 |                |                  |                |                  | 16 |
| 2  | 277.1205  | 139.0639        | 259.0969       | 130.0521         | 259.1099       | 130.0586         | R    | 1741.8525 | 871.4299        | 1723.8289      | 862.4181         | 1723.8419      | 862.4246         | 15 |
| 3  | 425.1860  | 213.0966        | 407.1624       | 204.0848         | 407.1754       | 204.0913         | F    | 1581.7632 | 791.3852        | 1563.7396      | 782.3734         | 1563.7526      | 782.3800         | 14 |
| 4  | 589.2463  | 295.1268        | 571.2227       | 286.1150         | 571.2358       | 286.1215         | Y    | 1433.6978 | 717.3525        | 1415.6742      | 708.3407         | 1415.6872      | 708.3472         | 13 |
| 5  | 703.3274  | 352.1673        | 685.3038       | 343.1556         | 685.3169       | 343.1621         | I    | 1269.6374 | 635.3223        | 1251.6138      | 626.3105         | 1251.6268      | 626.3170         | 12 |
| 6  | 833.3801  | 417.1937        | 815.3565       | 408.1819         | 815.3695       | 408.1884         | Q    | 1155.5563 | 578.2818        | 1137.5327      | 569.2700         | 1137.5457      | 569.2765         | 11 |
| 7  | 931.4299  | 466.2186        | 913.4063       | 457.2068         | 913.4193       | 457.2133         | P    | 1025.5036 | 513.2555        | 1007.4801      | 504.2437         | 1007.4931      | 504.2502         | 10 |
| 8  | 1045.5110 | 523.2591        | 1027.4874      | 514.2473         | 1027.5004      | 514.2538         | L    | 927.4538  | 464.2306        | 909.4303       | 455.2188         | 909.4433       | 455.2253         | 9  |
| 9  | 1133.5400 | 567.2737        | 1115.5164      | 558.2619         | 1115.5295      | 558.2684         | S    | 813.3727  | 407.1900        | 795.3492       | 398.1782         | 795.3622       | 398.1847         | 8  |
| 10 | 1231.5898 | 616.2985        | 1213.5662      | 607.2868         | 1213.5793      | 607.2933         | P    | 725.3437  | 363.1755        | 707.3201       | 354.1637         | 707.3331       | 354.1702         | 7  |
| 11 | 1333.6345 | 667.3209        | 1315.6110      | 658.3091         | 1315.6240      | 658.3156         | T    | 627.2939  | 314.1506        | 609.2703       | 305.1388         | 609.2833       | 305.1453         | 6  |
| 12 | 1463.6742 | 732.3407        | 1445.6506      | 723.3289         | 1445.6636      | 723.3354         | E    | 525.2492  | 263.1282        | 507.2256       | 254.1164         | 507.2386       | 254.1229         | 5  |
| 13 | 1535.7083 | 768.3578        | 1517.6847      | 759.3460         | 1517.6977      | 759.3525         | A    | 395.2095  | 198.1084        | 377.1860       | 189.0966         |                |                  | 4  |
| 14 | 1607.7425 | 804.3749        | 1589.7189      | 795.3631         | 1589.7319      | 795.3696         | A    | 323.1754  | 162.0913        | 305.1518       | 153.0795         |                |                  | 3  |
| 15 | 1679.7766 | 840.3919        | 1661.7530      | 831.3802         | 1661.7660      | 831.3867         | A    | 251.1412  | 126.0743        | 233.1177       | 117.0625         |                |                  | 2  |
| 16 |           |                 |                |                  |                |                  | R    | 179.1071  | 90.0572         | 161.0835       | 81.0454          |                |                  | 1  |

# AT4G05180.1

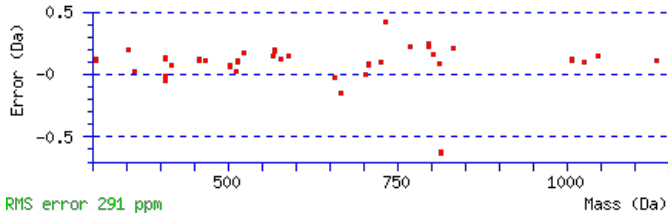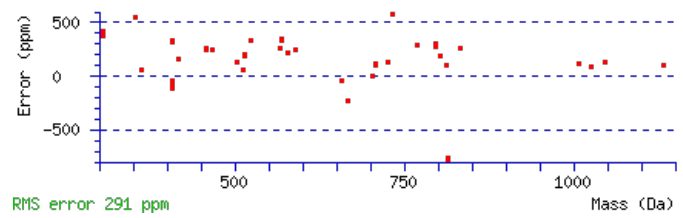

NCBI **BLAST** search of [DRFYIQPLSPTEAAAR](#)

(Parameters: blastp, nr protein database, expect=20000, no filter, PAM30)

Other BLAST [web gateways](#)

## All matches to this query

| Score | Mr(calc)  | Delta   | Sequence                            |
|-------|-----------|---------|-------------------------------------|
| 69.0  | 1856.8691 | 0.0034  | <a href="#">DRFYIQPLSPTEAAAR</a>    |
| 8.6   | 1856.8747 | -0.0022 | <a href="#">TSVAIVFSTFMRAYSR</a>    |
| 4.6   | 1856.8703 | 0.0023  | <a href="#">SGVRVSAGESVAMLAQGSK</a> |
| 3.0   | 1856.8725 | 0.0001  | <a href="#">ETSKQNPINMVTLFGR</a>    |
| 1.2   | 1856.8698 | 0.0027  | <a href="#">AMETFVAELNGVLNVSK</a>   |
| 1.2   | 1856.8698 | 0.0027  | <a href="#">MVEEINDYKLQLQSK</a>     |
| 0.3   | 1856.8772 | -0.0046 | <a href="#">TVRKEVSDGFEDLVGK</a>    |
| 0.1   | 1856.8725 | 0.0001  | <a href="#">GKLSEDMSGAQLLWKR</a>    |

Mascot: <http://www.matrixscience.com/>

**Peptide View**MS/MS Fragmentation of **GNFQTNEVIR**Found in **AT4G05200.1** in **TAIR\_Arabidopsis**, Symbols: | protein kinase family protein | chr4:2679791-2682307 REVERSE

Match to Query 3928: 1176.586874 from(589.300713,2+) index(1839)

Title: Elution from: 22.952 to 22.952 scan no 2424 cid35.00 polarity:+

Data file D6h-1\_2.mgf

Click mouse within plot area to zoom in by factor of two about that point

Or,   to  Da Label all possible matches  Label matches used for scoring Show Y-axis 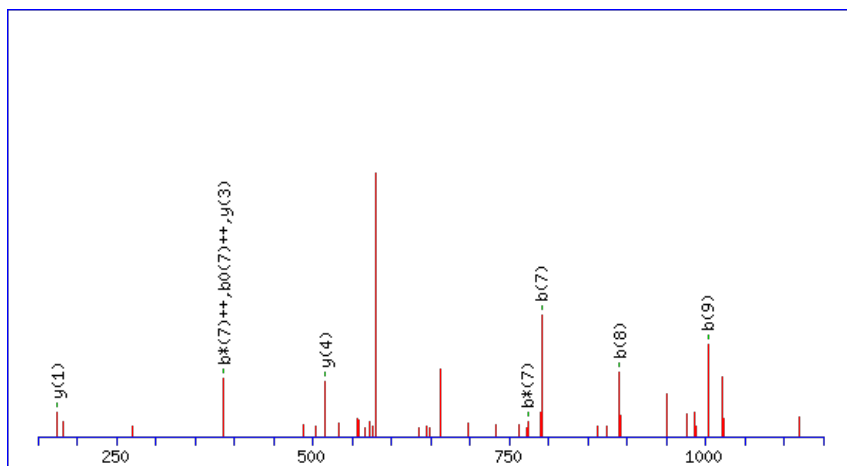Monoisotopic mass of neutral peptide **Mr(calc)**: 1176.5887**Fixed modifications**: Carbamidomethyl (C) (apply to specified residues or termini only)**Ions Score**: 27 **Expect**: 0.0066**Matches**: 9/92 fragment ions using 9 most intense peaks ([help](#))

| #  | b                | b <sup>++</sup> | b*              | b <sup>+++</sup> | b <sup>0</sup> | b <sup>0++</sup> | Seq.     | y               | y <sup>++</sup> | y*        | y <sup>+++</sup> | y <sup>0</sup> | y <sup>0++</sup> | #         |
|----|------------------|-----------------|-----------------|------------------|----------------|------------------|----------|-----------------|-----------------|-----------|------------------|----------------|------------------|-----------|
| 1  | 58.0287          | 29.5180         |                 |                  |                |                  | <b>G</b> |                 |                 |           |                  |                |                  | <b>10</b> |
| 2  | 172.0717         | 86.5395         | 155.0451        | 78.0262          |                |                  | <b>N</b> | 1120.5745       | 560.7909        | 1103.5480 | 552.2776         | 1102.5640      | 551.7856         | <b>9</b>  |
| 3  | 319.1401         | 160.0737        | 302.1135        | 151.5604         |                |                  | <b>F</b> | 1006.5316       | 503.7694        | 989.5051  | 495.2562         | 988.5211       | 494.7642         | <b>8</b>  |
| 4  | 447.1987         | 224.1030        | 430.1721        | 215.5897         |                |                  | <b>Q</b> | 859.4632        | 430.2352        | 842.4367  | 421.7220         | 841.4526       | 421.2300         | <b>7</b>  |
| 5  | 548.2463         | 274.6268        | 531.2198        | 266.1135         | 530.2358       | 265.6215         | <b>T</b> | 731.4046        | 366.2060        | 714.3781  | 357.6927         | 713.3941       | 357.2007         | <b>6</b>  |
| 6  | 662.2893         | 331.6483        | 645.2627        | 323.1350         | 644.2787       | 322.6430         | <b>N</b> | 630.3569        | 315.6821        | 613.3304  | 307.1688         | 612.3464       | 306.6768         | <b>5</b>  |
| 7  | <b>791.3319</b>  | 396.1696        | <b>774.3053</b> | <b>387.6563</b>  | 773.3213       | <b>387.1643</b>  | <b>E</b> | <b>516.3140</b> | 258.6606        | 499.2875  | 250.1474         | 498.3035       | 249.6554         | <b>4</b>  |
| 8  | <b>890.4003</b>  | 445.7038        | 873.3737        | 437.1905         | 872.3897       | 436.6985         | <b>V</b> | <b>387.2714</b> | 194.1394        | 370.2449  | 185.6261         |                |                  | <b>3</b>  |
| 9  | <b>1003.4843</b> | 502.2458        | 986.4578        | 493.7325         | 985.4738       | 493.2405         | <b>I</b> | 288.2030        | 144.6051        | 271.1765  | 136.0919         |                |                  | <b>2</b>  |
| 10 |                  |                 |                 |                  |                |                  | <b>R</b> | <b>175.1190</b> | 88.0631         | 158.0924  | 79.5498          |                |                  | <b>1</b>  |

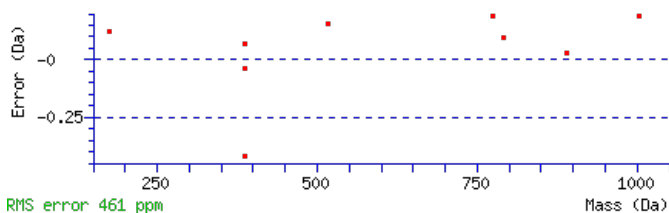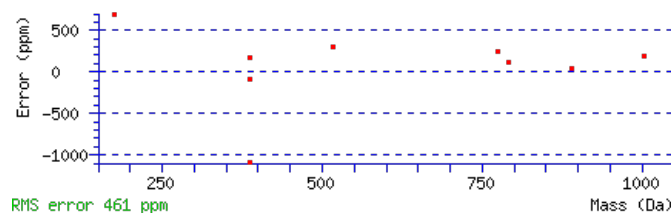NCBI **BLAST** search of **GNFQTNEVIR**

(Parameters: blastp, nr protein database, expect=20000, no filter, PAM30)

Other BLAST [web gateways](#)**All matches to this query**

| Score | Mr(calc) | Delta | Sequence |
|-------|----------|-------|----------|
|       |          |       |          |

**AT4G05200.1**

|      |           |         |                               |
|------|-----------|---------|-------------------------------|
| 27.4 | 1176.5887 | -0.0019 | <a href="#">GNFQTNEVIR</a>    |
| 19.2 | 1176.5860 | 0.0009  | <a href="#">RNNYNQGRR</a>     |
| 18.8 | 1176.5887 | -0.0019 | <a href="#">NNGTGDALFLR</a>   |
| 11.7 | 1176.5847 | 0.0022  | <a href="#">KSGNNSASKER</a>   |
| 7.2  | 1176.5887 | -0.0018 | <a href="#">NLSISTSNWR</a>    |
| 7.2  | 1176.5888 | -0.0019 | <a href="#">SGGTPVGGGGYIR</a> |
| 6.8  | 1176.5887 | -0.0018 | <a href="#">REPQYLTDK</a>     |
| 5.1  | 1176.5856 | 0.0013  | <a href="#">RDPLAMRMR</a>     |
| 5.0  | 1176.5887 | -0.0019 | <a href="#">QLFVANAGDSR</a>   |
| 2.7  | 1176.5847 | 0.0022  | <a href="#">SSQRSLSQSER</a>   |

**Mascot:** <http://www.matrixscience.com/>

## Peptide View

MS/MS Fragmentation of **LGAKESGMSWII**Found in **AT4G08210.1** in **TAIR\_Arabidopsis**, Symbols: | pentatricopeptide (PPR) repeat-containing protein | chr4:5183810-5185870 REVERSE

Match to Query 4862: 1320.619092 from(661.316822,2+) index(2925)

Title: Elution from: 29.746 to 29.746 scan no 3668 cid35.00 polarity:+

Data file C7-1\_2.mgf

Click mouse within plot area to zoom in by factor of two about that point

Or,   to  Da Label all possible matches  Label matches used for scoring Show Y-axis 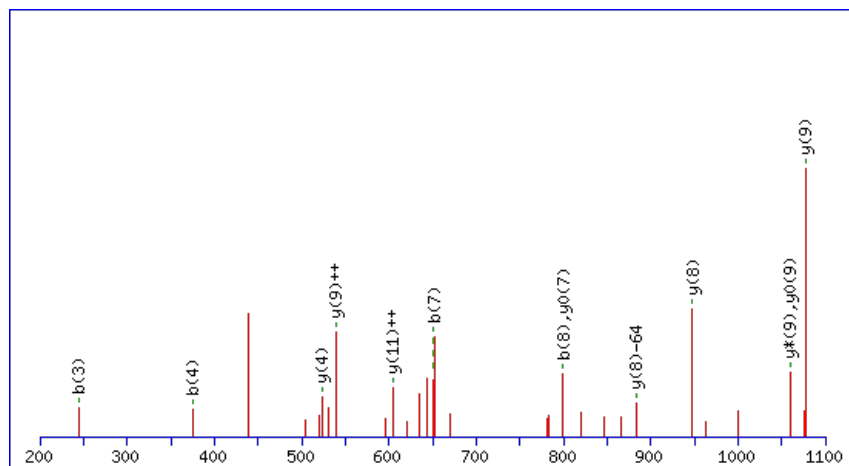Monoisotopic mass of neutral peptide **Mr(calc)**: 1320.6176

Fixed modifications: Carbamidomethyl (C) (apply to specified residues or termini only)

Variable modifications:

M8 : Oxidation (M), with neutral losses 0.0000 (shown in table), 63.9983

Ions Score: 26 Expect: 0.022

Matches : 13/154 fragment ions using 17 most intense peaks ([help](#))

| #  | b         | b <sup>++</sup> | b <sup>*</sup> | b <sup>*++</sup> | b <sup>0</sup> | b <sup>0++</sup> | Seq. | y         | y <sup>++</sup> | y <sup>*</sup> | y <sup>*++</sup> | y <sup>0</sup> | y <sup>0++</sup> | #  |
|----|-----------|-----------------|----------------|------------------|----------------|------------------|------|-----------|-----------------|----------------|------------------|----------------|------------------|----|
| 1  | 115.0884  | 58.0478         |                |                  |                |                  | L    |           |                 |                |                  |                |                  | 12 |
| 2  | 173.1069  | 87.0571         |                |                  |                |                  | G    | 1207.5438 | 604.2755        | 1189.5202      | 595.2637         | 1189.5332      | 595.2703         | 11 |
| 3  | 245.1410  | 123.0741        |                |                  |                |                  | A    | 1149.5253 | 575.2663        | 1131.5017      | 566.2545         | 1131.5147      | 566.2610         | 10 |
| 4  | 375.2301  | 188.1187        | 357.2065       | 179.1069         |                |                  | K    | 1077.4911 | 539.2492        | 1059.4676      | 530.2374         | 1059.4806      | 530.2439         | 9  |
| 5  | 505.2697  | 253.1385        | 487.2461       | 244.1267         | 487.2591       | 244.1332         | E    | 947.4021  | 474.2047        |                |                  | 929.3915       | 465.1994         | 8  |
| 6  | 593.2987  | 297.1530        | 575.2752       | 288.1412         | 575.2882       | 288.1477         | S    | 817.3625  | 409.1849        |                |                  | 799.3519       | 400.1796         | 7  |
| 7  | 651.3172  | 326.1623        | 633.2937       | 317.1505         | 633.3067       | 317.1570         | G    | 729.3334  | 365.1703        |                |                  | 711.3229       | 356.1651         | 6  |
| 8  | 799.3497  | 400.1785        | 781.3261       | 391.1667         | 781.3391       | 391.1732         | M    | 671.3149  | 336.1611        |                |                  | 653.3044       | 327.1558         | 5  |
| 9  | 887.3787  | 444.1930        | 869.3552       | 435.1812         | 869.3682       | 435.1877         | S    | 523.2825  | 262.1449        |                |                  | 505.2719       | 253.1396         | 4  |
| 10 | 1075.4521 | 538.2297        | 1057.4285      | 529.2179         | 1057.4416      | 529.2244         | W    | 435.2534  | 218.1303        |                |                  |                |                  | 3  |
| 11 | 1189.5332 | 595.2703        | 1171.5096      | 586.2585         | 1171.5227      | 586.2650         | I    | 247.1800  | 124.0937        |                |                  |                |                  | 2  |
| 12 |           |                 |                |                  |                |                  | I    | 133.0989  | 67.0531         |                |                  |                |                  | 1  |

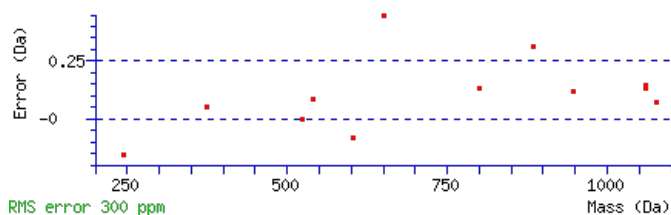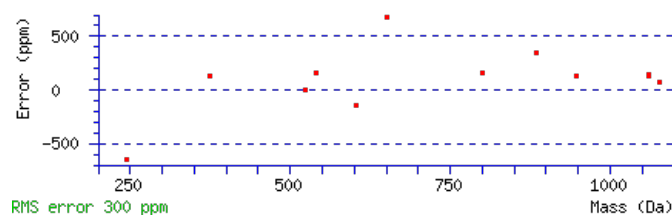NCBI **BLAST** search of **LGAKESGMSWII**

(Parameters: blastp, nr protein database, expect=20000, no filter, PAM30)

Other BLAST [web gateways](#)

**AT4G08210.1**

All matches to this query

| Score | Mr(calc)  | Delta   | Sequence                     |
|-------|-----------|---------|------------------------------|
| 26.4  | 1320.6176 | 0.0015  | <a href="#">LGAKESGMSWII</a> |
| 12.2  | 1320.6169 | 0.0022  | <a href="#">QIEVNFYVHR</a>   |
| 10.6  | 1320.6154 | 0.0037  | <a href="#">LEERKLEDMK</a>   |
| 10.6  | 1320.6154 | 0.0037  | <a href="#">ELNISGCSSLVK</a> |
| 10.3  | 1320.6228 | -0.0037 | <a href="#">LQTDQSSLEKR</a>  |
| 5.0   | 1320.6154 | 0.0037  | <a href="#">ELEAMLDKSVR</a>  |
| 5.0   | 1320.6154 | 0.0037  | <a href="#">ELKDMEKEIR</a>   |
| 4.4   | 1320.6223 | -0.0033 | <a href="#">EIEAKYDEIAK</a>  |
| 4.4   | 1320.6223 | -0.0033 | <a href="#">ELETLDLSFNK</a>  |
| 4.1   | 1320.6203 | -0.0012 | <a href="#">KMEGSKVPSWR</a>  |

Mascot: <http://www.matrixscience.com/>

**Peptide View**MS/MS Fragmentation of **EGPGAPGGQSWTPEWLK**Found in **AT4G08390.1** in **TAIR\_Arabidopsis**, Symbols: SAPX | SAPX; L-ascorbate peroxidase | chr4:5314996-5317068 FORWARD

Match to Query 8285: 1816.796062 from(909.405307,2+) index(7769)

Title: Elution from: 71.626 to 71.626 scan no 10327 cid35.00 polarity:+

Data file D12h-2\_2.mgf

Click mouse within plot area to zoom in by factor of two about that point

Or,   to  Da Label all possible matches  Label matches used for scoring Show Y-axis 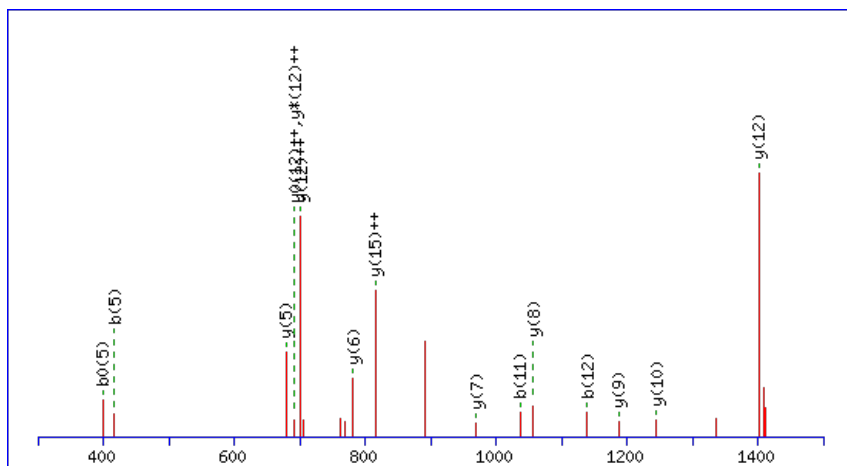Monoisotopic mass of neutral peptide  $M_r(\text{calc})$ : 1816.7907

Fixed modifications: Carbamidomethyl (C) (apply to specified residues or termini only)

Ions Score: 59 Expect: 8.9e-006

Matches : 15/170 fragment ions using 17 most intense peaks ([help](#))

| #  | b         | b <sup>++</sup> | b <sup>*</sup> | b <sup>*++</sup> | b <sup>0</sup> | b <sup>0++</sup> | Seq. | y         | y <sup>++</sup> | y <sup>*</sup> | y <sup>*++</sup> | y <sup>0</sup> | y <sup>0++</sup> | #  |
|----|-----------|-----------------|----------------|------------------|----------------|------------------|------|-----------|-----------------|----------------|------------------|----------------|------------------|----|
| 1  | 131.0469  | 66.0271         |                |                  | 113.0363       | 57.0218          | E    |           |                 |                |                  |                |                  | 17 |
| 2  | 189.0654  | 95.0363         |                |                  | 171.0548       | 86.0311          | G    | 1687.7583 | 844.3828        | 1669.7347      | 835.3710         | 1669.7478      | 835.3775         | 16 |
| 3  | 287.1152  | 144.0612        |                |                  | 269.1046       | 135.0560         | P    | 1629.7398 | 815.3736        | 1611.7162      | 806.3618         | 1611.7293      | 806.3683         | 15 |
| 4  | 345.1337  | 173.0705        |                |                  | 327.1231       | 164.0652         | G    | 1531.6900 | 766.3487        | 1513.6664      | 757.3369         | 1513.6795      | 757.3434         | 14 |
| 5  | 417.1678  | 209.0876        |                |                  | 399.1573       | 200.0823         | A    | 1473.6715 | 737.3394        | 1455.6480      | 728.3276         | 1455.6610      | 728.3341         | 13 |
| 6  | 515.2176  | 258.1125        |                |                  | 497.2071       | 249.1072         | P    | 1401.6374 | 701.3223        | 1383.6138      | 692.3105         | 1383.6268      | 692.3170         | 12 |
| 7  | 573.2361  | 287.1217        |                |                  | 555.2256       | 278.1164         | G    | 1303.5876 | 652.2974        | 1285.5640      | 643.2856         | 1285.5770      | 643.2921         | 11 |
| 8  | 631.2546  | 316.1310        |                |                  | 613.2441       | 307.1257         | G    | 1245.5691 | 623.2882        | 1227.5455      | 614.2764         | 1227.5585      | 614.2829         | 10 |
| 9  | 761.3073  | 381.1573        | 743.2837       | 372.1455         | 743.2967       | 372.1520         | Q    | 1187.5506 | 594.2789        | 1169.5270      | 585.2671         | 1169.5400      | 585.2736         | 9  |
| 10 | 849.3364  | 425.1718        | 831.3128       | 416.1600         | 831.3258       | 416.1665         | S    | 1057.4979 | 529.2526        | 1039.4744      | 520.2408         | 1039.4874      | 520.2473         | 8  |
| 11 | 1037.4097 | 519.2085        | 1019.3862      | 510.1967         | 1019.3992      | 510.2032         | W    | 969.4689  | 485.2381        | 951.4453       | 476.2263         | 951.4583       | 476.2328         | 7  |
| 12 | 1139.4545 | 570.2309        | 1121.4309      | 561.2191         | 1121.4439      | 561.2256         | T    | 781.3955  | 391.2014        | 763.3719       | 382.1896         | 763.3849       | 382.1961         | 6  |
| 13 | 1237.5043 | 619.2558        | 1219.4807      | 610.2440         | 1219.4937      | 610.2505         | P    | 679.3508  | 340.1790        | 661.3272       | 331.1672         | 661.3402       | 331.1737         | 5  |
| 14 | 1367.5439 | 684.2756        | 1349.5203      | 675.2638         | 1349.5333      | 675.2703         | E    | 581.3010  | 291.1541        | 563.2774       | 282.1423         | 563.2904       | 282.1488         | 4  |
| 15 | 1555.6173 | 778.3123        | 1537.5937      | 769.3005         | 1537.6067      | 769.3070         | W    | 451.2614  | 226.1343        | 433.2378       | 217.1225         |                |                  | 3  |
| 16 | 1669.6984 | 835.3528        | 1651.6748      | 826.3410         | 1651.6878      | 826.3475         | L    | 263.1880  | 132.0976        | 245.1644       | 123.0858         |                |                  | 2  |
| 17 |           |                 |                |                  |                |                  | K    | 149.1069  | 75.0571         | 131.0833       | 66.0453          |                |                  | 1  |



# AT4G08390.1

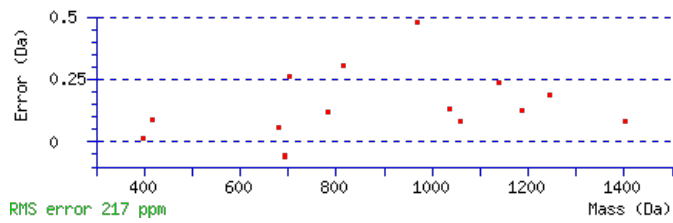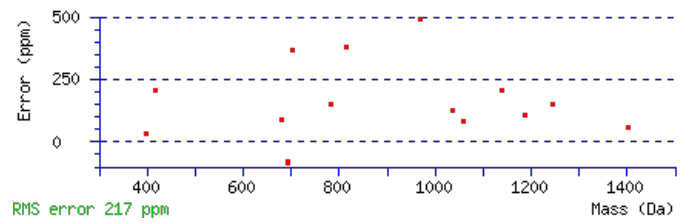

NCBI **BLAST** search of [EGPGAPGGQSWTPEWLK](#)  
(Parameters: blastp, nr protein database, expect=20000, no filter, PAM30)  
Other BLAST [web gateways](#)

## All matches to this query

| Score | Mr(calc)  | Delta  | Sequence                          |
|-------|-----------|--------|-----------------------------------|
| 59.2  | 1816.7907 | 0.0054 | <a href="#">EGPGAPGGQSWTPEWLK</a> |

Mascot: <http://www.matrixscience.com/>

**Peptide View**MS/MS Fragmentation of **MSVTAGVSESAIAVR**Found in **AT4G08580.1** in **TAIR\_Arabidopsis**, Symbols: | micro fibrillar-associated protein-related | chr4:5462187-5463715 FORWARD

Match to Query 6727: 1510.706152 from(756.360352,2+) index(7103)

Title: Elution from: 62.442 to 62.442 scan no 9126 cid35.00 polarity:+

Data file 0-2\_1.mgf

Click mouse within plot area to zoom in by factor of two about that point

Or,   to  Da Label all possible matches  Label matches used for scoring Show Y-axis 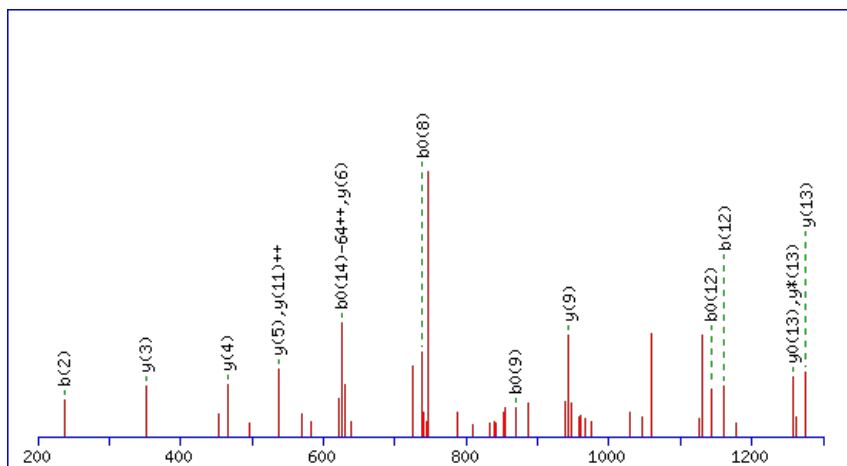Monoisotopic mass of neutral peptide  $M_r(\text{calc})$ : 1510.7022

Fixed modifications: Carbamidomethyl (C) (apply to specified residues or termini only)

Variable modifications:

M1 : Oxidation (M), with neutral losses 0.0000 (shown in table), 63.9983

Ions Score: 38 Expect: 0.0014

Matches : 15/182 fragment ions using 20 most intense peaks ([help](#))

| #  | b                | b <sup>++</sup> | b <sup>0</sup>   | b <sup>0++</sup> | Seq. | y                | y <sup>++</sup> | y <sup>*</sup>   | y <sup>*++</sup> | y <sup>0</sup>   | y <sup>0++</sup> | #  |
|----|------------------|-----------------|------------------|------------------|------|------------------|-----------------|------------------|------------------|------------------|------------------|----|
| 1  | 149.0397         | 75.0235         |                  |                  | M    |                  |                 |                  |                  |                  |                  | 15 |
| 2  | <b>237.0688</b>  | 119.0380        | 219.0582         | 110.0327         | S    | 1363.6770        | 682.3421        | 1345.6534        | 673.3304         | 1345.6664        | 673.3369         | 14 |
| 3  | 337.1342         | 169.0707        | 319.1237         | 160.0655         | V    | <b>1275.6480</b> | 638.3276        | <b>1257.6244</b> | 629.3158         | <b>1257.6374</b> | 629.3223         | 13 |
| 4  | 439.1789         | 220.0931        | 421.1684         | 211.0878         | T    | 1175.5825        | 588.2949        | 1157.5589        | 579.2831         | 1157.5719        | 579.2896         | 12 |
| 5  | 511.2131         | 256.1102        | 493.2025         | 247.1049         | A    | 1073.5378        | <b>537.2725</b> | 1055.5142        | 528.2607         | 1055.5272        | 528.2673         | 11 |
| 6  | 569.2316         | 285.1194        | 551.2210         | 276.1141         | G    | 1001.5036        | 501.2555        | 983.4801         | 492.2437         | 983.4931         | 492.2502         | 10 |
| 7  | 669.2970         | 335.1522        | 651.2865         | 326.1469         | V    | <b>943.4851</b>  | 472.2462        | 925.4616         | 463.2344         | 925.4746         | 463.2409         | 9  |
| 8  | 757.3261         | 379.1667        | <b>739.3155</b>  | 370.1614         | S    | 843.4197         | 422.2135        | 825.3961         | 413.2017         | 825.4091         | 413.2082         | 8  |
| 9  | 887.3657         | 444.1865        | <b>869.3552</b>  | 435.1812         | E    | 755.3906         | 378.1990        | 737.3670         | 369.1872         | 737.3801         | 369.1937         | 7  |
| 10 | 975.3948         | 488.2010        | 957.3842         | 479.1957         | S    | <b>625.3510</b>  | 313.1791        | 607.3274         | 304.1673         | 607.3404         | 304.1739         | 6  |
| 11 | 1047.4289        | 524.2181        | 1029.4184        | 515.2128         | A    | <b>537.3219</b>  | 269.1646        | 519.2984         | 260.1528         |                  |                  | 5  |
| 12 | <b>1161.5100</b> | 581.2587        | <b>1143.4995</b> | 572.2534         | I    | <b>465.2878</b>  | 233.1475        | 447.2642         | 224.1357         |                  |                  | 4  |
| 13 | 1233.5442        | 617.2757        | 1215.5336        | 608.2704         | A    | <b>351.2067</b>  | 176.1070        | 333.1831         | 167.0952         |                  |                  | 3  |
| 14 | 1333.6096        | 667.3085        | 1315.5991        | 658.3032         | V    | 279.1725         | 140.0899        | 261.1490         | 131.0781         |                  |                  | 2  |
| 15 |                  |                 |                  |                  | R    | 179.1071         | 90.0572         | 161.0835         | 81.0454          |                  |                  | 1  |

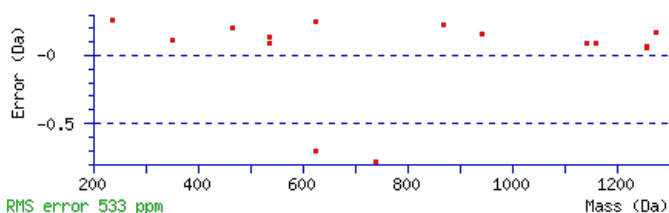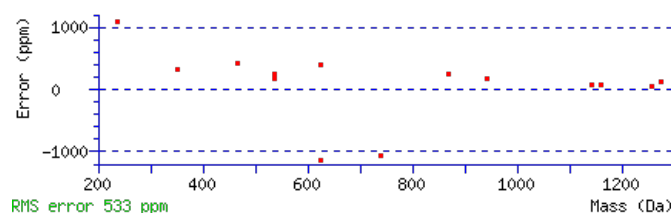

## AT4G08580.1

NCBI **BLAST** search of [MSVTAGVSESAIAVR](#)

(Parameters: blastp, nr protein database, expect=20000, no filter, PAM30)

Other BLAST [web gateways](#)

### All matches to this query

| Score | Mr(calc)  | Delta   | Sequence                        |
|-------|-----------|---------|---------------------------------|
| 38.3  | 1510.7022 | 0.0040  | <a href="#">MSVTAGVSESAIAVR</a> |
| 19.3  | 1510.7044 | 0.0017  | <a href="#">MLGFKEHTSTLSK</a>   |
| 10.9  | 1510.7092 | -0.0030 | <a href="#">VDFSNSLELIGSSK</a>  |
| 7.6   | 1510.7066 | -0.0005 | <a href="#">HYMVFEDEVLSK</a>    |
| 4.0   | 1510.7022 | 0.0040  | <a href="#">JKMELSTDQGLR</a>    |
| 2.0   | 1510.7071 | -0.0009 | <a href="#">HMRAKVSDFGLSK</a>   |
| 1.9   | 1510.7022 | 0.0040  | <a href="#">MAANTISLSNVAASK</a> |
| 1.3   | 1510.7022 | 0.0040  | <a href="#">LVMTATDLNSERK</a>   |
| 1.0   | 1510.7100 | -0.0039 | <a href="#">LREMSPLYEMVK</a>    |
| 0.1   | 1510.7022 | 0.0040  | <a href="#">MTKSSNVEVIVDR</a>   |

Mascot: <http://www.matrixscience.com/>

**Peptide View**MS/MS Fragmentation of **LLDTILVPAASGDSK**

Found in **AT4G09000.1** in **TAIR\_Arabidopsis**, Symbols: GF14 CHI | GRF1 (GENERAL REGULATORY FACTOR 1); protein phosphorylated amino acid binding | chr4:5775384-5777154 FORWARD

Match to Query 7192: 1586.807378 from(794.410965,2+) index(7486)

Title: Elution from: 65.405 to 65.405 scan no 9679 cid35.00 polarity:+

Data file C7-2\_2.mgf

Click mouse within plot area to zoom in by factor of two about that point

Or,   to  Da

Label all possible matches  Label matches used for scoring

Show Y-axis

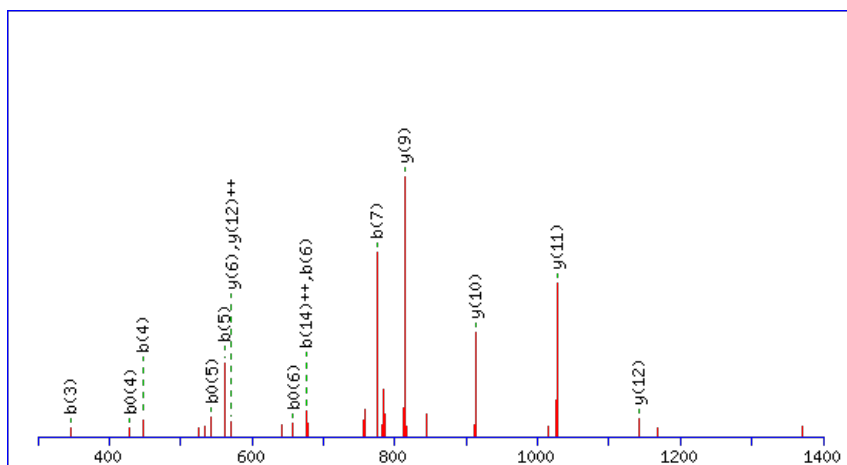

**Monoisotopic mass of neutral peptide Mr(calc):** 1586.8110

**Fixed modifications:** Carbamidomethyl (C) (apply to specified residues or termini only)

**Ions Score:** 39 **Expect:** 0.00042

**Matches:** 15/144 fragment ions using 17 most intense peaks ([help](#))

| #  | b               | b <sup>++</sup> | b <sup>0</sup>  | b <sup>0++</sup> | Seq. | y                | y <sup>++</sup> | y*        | y <sup>*++</sup> | y <sup>0</sup> | y <sup>0++</sup> | #  |
|----|-----------------|-----------------|-----------------|------------------|------|------------------|-----------------|-----------|------------------|----------------|------------------|----|
| 1  | 115.0884        | 58.0478         |                 |                  | L    |                  |                 |           |                  |                |                  | 16 |
| 2  | 229.1695        | 115.0884        |                 |                  | L    | 1473.7372        | 737.3722        | 1455.7136 | 728.3604         | 1455.7266      | 728.3669         | 15 |
| 3  | <b>345.1935</b> | 173.1004        | 327.1829        | 164.0951         | D    | 1359.6561        | 680.3317        | 1341.6325 | 671.3199         | 1341.6455      | 671.3264         | 14 |
| 4  | <b>447.2382</b> | 224.1227        | <b>429.2276</b> | 215.1174         | T    | 1243.6321        | 622.3197        | 1225.6085 | 613.3079         | 1225.6215      | 613.3144         | 13 |
| 5  | <b>561.3193</b> | 281.1633        | <b>543.3087</b> | 272.1580         | I    | <b>1141.5874</b> | <b>571.2973</b> | 1123.5638 | 562.2855         | 1123.5768      | 562.2920         | 12 |
| 6  | <b>675.4004</b> | 338.2038        | <b>657.3898</b> | 329.1985         | L    | <b>1027.5063</b> | 514.2568        | 1009.4827 | 505.2450         | 1009.4957      | 505.2515         | 11 |
| 7  | <b>775.4658</b> | 388.2365        | 757.4552        | 379.2313         | V    | <b>913.4252</b>  | 457.2162        | 895.4016  | 448.2044         | 895.4146       | 448.2109         | 10 |
| 8  | 873.5156        | 437.2614        | 855.5050        | 428.2562         | P    | <b>813.3597</b>  | 407.1835        | 795.3361  | 398.1717         | 795.3492       | 398.1782         | 9  |
| 9  | 945.5498        | 473.2785        | 927.5392        | 464.2732         | A    | 715.3099         | 358.1586        | 697.2863  | 349.1468         | 697.2994       | 349.1533         | 8  |
| 10 | 1017.5839       | 509.2956        | 999.5733        | 500.2903         | A    | 643.2758         | 322.1415        | 625.2522  | 313.1297         | 625.2652       | 313.1362         | 7  |
| 11 | 1089.6181       | 545.3127        | 1071.6075       | 536.3074         | A    | <b>571.2416</b>  | 286.1245        | 553.2180  | 277.1127         | 553.2311       | 277.1192         | 6  |
| 12 | 1177.6471       | 589.3272        | 1159.6366       | 580.3219         | S    | 499.2075         | 250.1074        | 481.1839  | 241.0956         | 481.1969       | 241.1021         | 5  |
| 13 | 1235.6656       | 618.3364        | 1217.6551       | 609.3312         | G    | 411.1784         | 206.0928        | 393.1548  | 197.0811         | 393.1678       | 197.0876         | 4  |
| 14 | 1351.6896       | <b>676.3484</b> | 1333.6790       | 667.3432         | D    | 353.1599         | 177.0836        | 335.1363  | 168.0718         | 335.1493       | 168.0783         | 3  |
| 15 | 1439.7187       | 720.3630        | 1421.7081       | 711.3577         | S    | 237.1359         | 119.0716        | 219.1124  | 110.0598         | 219.1254       | 110.0663         | 2  |
| 16 |                 |                 |                 |                  | K    | 149.1069         | 75.0571         | 131.0833  | 66.0453          |                |                  | 1  |

AT4G09000.1

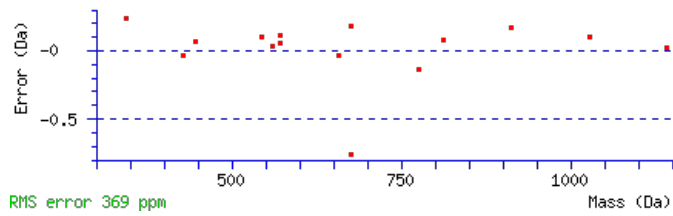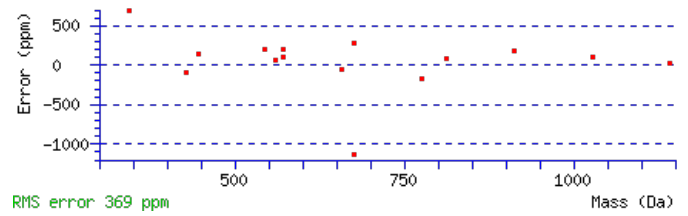

NCBI **BLAST** search of [LLDTILVPAAASGDSK](#)

(Parameters: blastp, nr protein database, expect=20000, no filter, PAM30)

Other BLAST [web gateways](#)

**All matches to this query**

| Score | Mr(calc)  | Delta   | Sequence                         |
|-------|-----------|---------|----------------------------------|
| 39.4  | 1586.8110 | -0.0036 | <a href="#">LLDTILVPAAASGDSK</a> |
| 5.4   | 1586.8033 | 0.0041  | <a href="#">QSEPLAGLRPTLQR</a>   |

Mascot: <http://www.matrixscience.com/>

**Peptide View**MS/MS Fragmentation of **GGPISYADIIQLAGQSAVK**Found in **AT4G09010.1** in **TAIR\_Arabidopsis**, Symbols: APX4 | APX4 (ASCORBATE PEROXIDASE 4); peroxidase | chr4:5777499-5779335  
REVERSE

Match to Query 8986: 1908.945966 from(955.480259,2+) index(9879)

Title: Elution from: 91.655 to 91.655 scan no 13752 cid35.00 polarity:+

Data file 0-1\_2.mgf

Click mouse within plot area to zoom in by factor of two about that point

Or,   to  Da Label all possible matches  Label matches used for scoring Show Y-axis 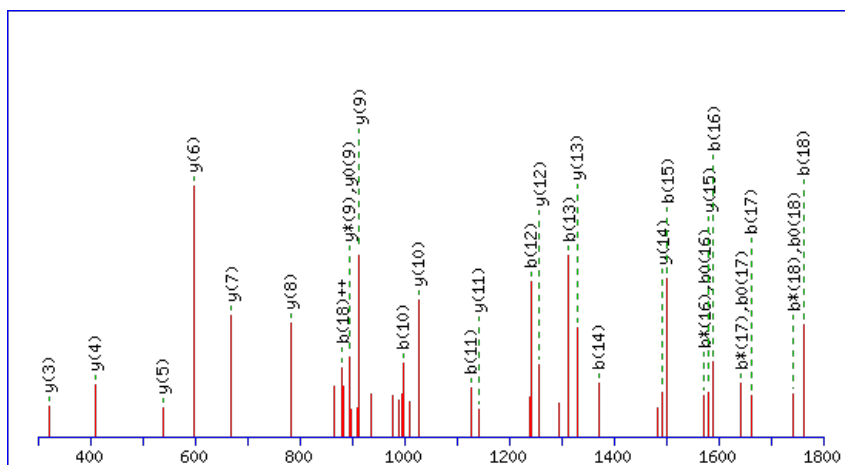Monoisotopic mass of neutral peptide  $M_r(\text{calc})$ : 1908.9449

Fixed modifications: Carbamidomethyl (C) (apply to specified residues or termini only)

Ions Score: 138 Expect: 9.1e-014

Matches : 31/182 fragment ions using 31 most intense peaks ([help](#))

| #  | b                | b <sup>++</sup> | b*               | b <sup>*++</sup> | b <sup>0</sup>   | b <sup>0++</sup> | Seq. | y                | y <sup>++</sup> | y*              | y <sup>*++</sup> | y <sup>0</sup>  | y <sup>0++</sup> | #  |
|----|------------------|-----------------|------------------|------------------|------------------|------------------|------|------------------|-----------------|-----------------|------------------|-----------------|------------------|----|
| 1  | 59.0258          | 30.0165         |                  |                  |                  |                  | G    |                  |                 |                 |                  |                 |                  | 19 |
| 2  | 117.0443         | 59.0258         |                  |                  |                  |                  | G    | 1851.9337        | 926.4705        | 1833.9101       | 917.4587         | 1833.9232       | 917.4652         | 18 |
| 3  | 215.0941         | 108.0507        |                  |                  |                  |                  | P    | 1793.9152        | 897.4613        | 1775.8916       | 888.4495         | 1775.9047       | 888.4560         | 17 |
| 4  | 329.1752         | 165.0912        |                  |                  |                  |                  | I    | 1695.8654        | 848.4364        | 1677.8418       | 839.4246         | 1677.8549       | 839.4311         | 16 |
| 5  | 417.2042         | 209.1058        |                  |                  | 399.1937         | 200.1005         | S    | <b>1581.7843</b> | 791.3958        | 1563.7607       | 782.3840         | 1563.7738       | 782.3905         | 15 |
| 6  | 581.2646         | 291.1359        |                  |                  | 563.2540         | 282.1307         | Y    | <b>1493.7553</b> | 747.3813        | 1475.7317       | 738.3695         | 1475.7447       | 738.3760         | 14 |
| 7  | 653.2987         | 327.1530        |                  |                  | 635.2882         | 318.1477         | A    | <b>1329.6949</b> | 665.3511        | 1311.6713       | 656.3393         | 1311.6843       | 656.3458         | 13 |
| 8  | 769.3227         | 385.1650        |                  |                  | 751.3122         | 376.1597         | D    | <b>1257.6608</b> | 629.3340        | 1239.6372       | 620.3222         | 1239.6502       | 620.3287         | 12 |
| 9  | 883.4038         | 442.2056        |                  |                  | 865.3933         | 433.2003         | I    | <b>1141.6368</b> | 571.3220        | 1123.6132       | 562.3102         | 1123.6262       | 562.3167         | 11 |
| 10 | <b>997.4849</b>  | 499.2461        |                  |                  | 979.4744         | 490.2408         | I    | <b>1027.5557</b> | 514.2815        | 1009.5321       | 505.2697         | 1009.5451       | 505.2762         | 10 |
| 11 | <b>1127.5376</b> | 564.2724        | 1109.5140        | 555.2606         | 1109.5270        | 555.2671         | Q    | <b>913.4746</b>  | 457.2409        | <b>895.4510</b> | 448.2291         | <b>895.4640</b> | 448.2356         | 9  |
| 12 | <b>1241.6187</b> | 621.3130        | 1223.5951        | 612.3012         | 1223.6081        | 612.3077         | L    | <b>783.4219</b>  | 392.2146        | 765.3983        | 383.2028         | 765.4114        | 383.2093         | 8  |
| 13 | <b>1313.6528</b> | 657.3300        | 1295.6292        | 648.3183         | 1295.6423        | 648.3248         | A    | <b>669.3408</b>  | 335.1741        | 651.3172        | 326.1623         | 651.3303        | 326.1688         | 7  |
| 14 | <b>1371.6713</b> | 686.3393        | 1353.6477        | 677.3275         | 1353.6608        | 677.3340         | G    | <b>597.3067</b>  | 299.1570        | 579.2831        | 290.1452         | 579.2961        | 290.1517         | 6  |
| 15 | <b>1501.7240</b> | 751.3656        | 1483.7004        | 742.3538         | 1483.7134        | 742.3603         | Q    | <b>539.2882</b>  | 270.1477        | 521.2646        | 261.1359         | 521.2776        | 261.1424         | 5  |
| 16 | <b>1589.7530</b> | 795.3802        | <b>1571.7294</b> | 786.3684         | <b>1571.7425</b> | 786.3749         | S    | <b>409.2355</b>  | 205.1214        | 391.2120        | 196.1096         | 391.2250        | 196.1161         | 4  |
| 17 | <b>1661.7872</b> | 831.3972        | <b>1643.7636</b> | 822.3854         | <b>1643.7766</b> | 822.3919         | A    | <b>321.2065</b>  | 161.1069        | 303.1829        | 152.0951         |                 |                  | 3  |
| 18 | <b>1761.8526</b> | <b>881.4300</b> | <b>1743.8290</b> | 872.4182         | <b>1743.8421</b> | 872.4247         | V    | 249.1723         | 125.0898        | 231.1487        | 116.0780         |                 |                  | 2  |
| 19 |                  |                 |                  |                  |                  |                  | K    | 149.1069         | 75.0571         | 131.0833        | 66.0453          |                 |                  | 1  |

AT4G09010.1

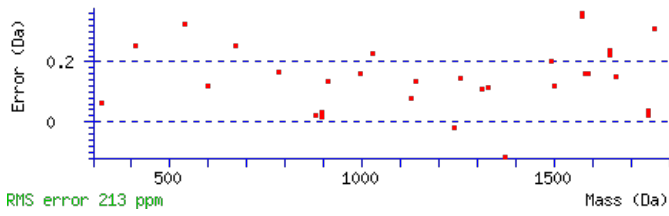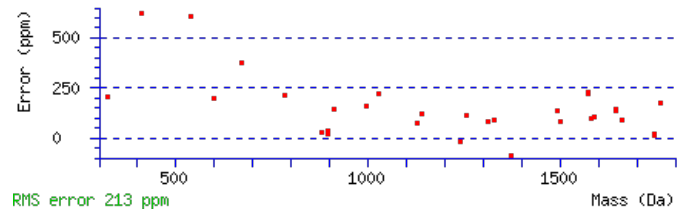

NCBI **BLAST** search of [GGPISYADIQLAGQSAVK](#)

(Parameters: blastp, nr protein database, expect=20000, no filter, PAM30)

Other BLAST [web gateways](#)

**All matches to this query**

| Score | Mr(calc)  | Delta   | Sequence                            |
|-------|-----------|---------|-------------------------------------|
| 138.3 | 1908.9449 | 0.0010  | <a href="#">GGPISYADIQLAGQSAVK</a>  |
| 11.7  | 1908.9450 | 0.0010  | <a href="#">NSPTSVSISKVPTWEKK</a>   |
| 10.6  | 1908.9454 | 0.0006  | <a href="#">GRPPKAKSDSSQIGAVSAK</a> |
| 8.6   | 1908.9417 | 0.0042  | <a href="#">FLPFARFGPIAHEINR</a>    |
| 0.5   | 1908.9483 | -0.0024 | <a href="#">IMKGSDSIGLAPGAVEKSK</a> |

Mascot: <http://www.matrixscience.com/>

**Peptide View**MS/MS Fragmentation of **GLVFIEMASPEEAATALK**Found in **AT4G09040.1** in **TAIR\_Arabidopsis**, Symbols: | RNA recognition motif (RRM)-containing protein | chr4:5795072-5797312 REVERSE

Match to Query 8859: 1894.906836 from(948.460694,2+) index(9647)

Title: Elution from: 88.691 to 88.691 scan no 13370 cid35.00 polarity:+

Data file 0-1\_3.mgf

Click mouse within plot area to zoom in by factor of two about that point

Or,   to  Da Label all possible matches  Label matches used for scoring Show Y-axis 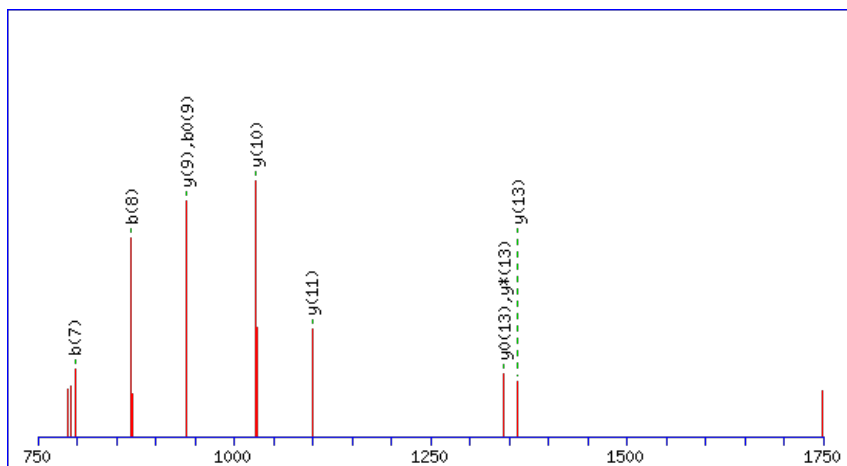**Monoisotopic mass of neutral peptide Mr(calc):** 1894.9089**Fixed modifications:** Carbamidomethyl (C) (apply to specified residues or termini only)**Ions Score:** 27 **Expect:** 0.017**Matches:** 9/154 fragment ions using 9 most intense peaks ([help](#))

| #  | b               | b <sup>++</sup> | b <sup>0</sup>  | b <sup>0++</sup> | Seq.     | y                | y <sup>++</sup> | y*               | y <sup>*++</sup> | y <sup>0</sup>   | y <sup>0++</sup> | #  |
|----|-----------------|-----------------|-----------------|------------------|----------|------------------|-----------------|------------------|------------------|------------------|------------------|----|
| 1  | 59.0258         | 30.0165         |                 |                  | <b>G</b> |                  |                 |                  |                  |                  |                  | 18 |
| 2  | 173.1069        | 87.0571         |                 |                  | <b>L</b> | 1837.8976        | 919.4525        | 1819.8741        | 910.4407         | 1819.8871        | 910.4472         | 17 |
| 3  | 273.1723        | 137.0898        |                 |                  | <b>V</b> | 1723.8165        | 862.4119        | 1705.7930        | 853.4001         | 1705.8060        | 853.4066         | 16 |
| 4  | 421.2378        | 211.1225        |                 |                  | <b>F</b> | 1623.7511        | 812.3792        | 1605.7275        | 803.3674         | 1605.7405        | 803.3739         | 15 |
| 5  | 535.3189        | 268.1631        |                 |                  | <b>I</b> | 1475.6856        | 738.3465        | 1457.6621        | 729.3347         | 1457.6751        | 729.3412         | 14 |
| 6  | 665.3585        | 333.1829        | 647.3479        | 324.1776         | <b>E</b> | <b>1361.6045</b> | 681.3059        | <b>1343.5810</b> | 672.2941         | <b>1343.5940</b> | 672.3006         | 13 |
| 7  | <b>797.3960</b> | 399.2016        | 779.3855        | 390.1964         | <b>M</b> | 1231.5649        | 616.2861        | 1213.5413        | 607.2743         | 1213.5544        | 607.2808         | 12 |
| 8  | <b>869.4302</b> | 435.2187        | 851.4196        | 426.2134         | <b>A</b> | <b>1099.5274</b> | 550.2673        | 1081.5038        | 541.2555         | 1081.5168        | 541.2621         | 11 |
| 9  | 957.4592        | 479.2333        | <b>939.4487</b> | 470.2280         | <b>S</b> | <b>1027.4933</b> | 514.2503        | 1009.4697        | 505.2385         | 1009.4827        | 505.2450         | 10 |
| 10 | 1055.5090       | 528.2582        | 1037.4985       | 519.2529         | <b>P</b> | <b>939.4642</b>  | 470.2357        | 921.4406         | 461.2239         | 921.4536         | 461.2304         | 9  |
| 11 | 1185.5487       | 593.2780        | 1167.5381       | 584.2727         | <b>E</b> | 841.4144         | 421.2108        | 823.3908         | 412.1990         | 823.4038         | 412.2056         | 8  |
| 12 | 1315.5883       | 658.2978        | 1297.5777       | 649.2925         | <b>E</b> | 711.3748         | 356.1910        | 693.3512         | 347.1792         | 693.3642         | 347.1857         | 7  |
| 13 | 1387.6224       | 694.3149        | 1369.6119       | 685.3096         | <b>A</b> | 581.3351         | 291.1712        | 563.3115         | 282.1594         | 563.3246         | 282.1659         | 6  |
| 14 | 1459.6566       | 730.3319        | 1441.6460       | 721.3266         | <b>A</b> | 509.3010         | 255.1541        | 491.2774         | 246.1423         | 491.2904         | 246.1488         | 5  |
| 15 | 1561.7013       | 781.3543        | 1543.6907       | 772.3490         | <b>T</b> | 437.2668         | 219.1371        | 419.2433         | 210.1253         | 419.2563         | 210.1318         | 4  |
| 16 | 1633.7354       | 817.3714        | 1615.7249       | 808.3661         | <b>A</b> | 335.2221         | 168.1147        | 317.1985         | 159.1029         |                  |                  | 3  |
| 17 | 1747.8165       | 874.4119        | 1729.8060       | 865.4066         | <b>L</b> | 263.1880         | 132.0976        | 245.1644         | 123.0858         |                  |                  | 2  |
| 18 |                 |                 |                 |                  | <b>K</b> | 149.1069         | 75.0571         | 131.0833         | 66.0453          |                  |                  | 1  |



AT4G09040.1

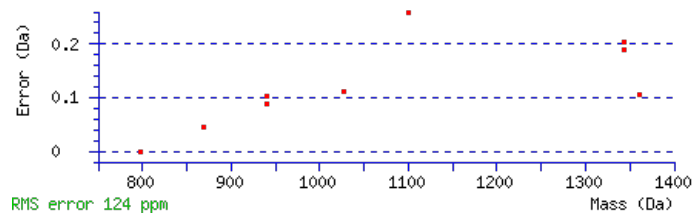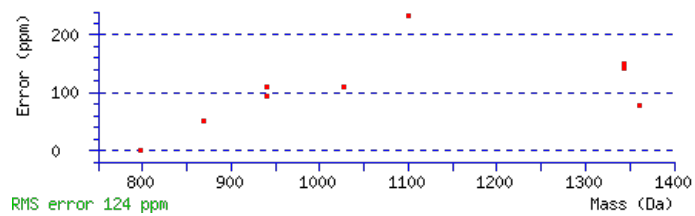

NCBI **BLAST** search of [GLVFIEMASPEEAATALK](#)  
(Parameters: blastp, nr protein database, expect=20000, no filter, PAM30)  
Other BLAST [web gateways](#)

**All matches to this query**

| Score | Mr(calc)  | Delta   | Sequence                            |
|-------|-----------|---------|-------------------------------------|
| 27.1  | 1894.9089 | -0.0020 | <a href="#">GLVFIEMASPEEAATALK</a>  |
| 14.1  | 1894.9081 | -0.0013 | <a href="#">WVFPDTNSGIIVLAAGR</a>   |
| 5.2   | 1894.9113 | -0.0044 | <a href="#">NPYQAIVAARDSLRHR</a>    |
| 4.8   | 1894.9019 | 0.0050  | <a href="#">ISHQMVMSLSGEVVVK</a>    |
| 4.8   | 1894.9033 | 0.0036  | <a href="#">SYGITEPLSIAGPSAADVK</a> |
| 4.3   | 1894.9012 | 0.0057  | <a href="#">SHEKVTIHGMAIKYGGK</a>   |

Mascot: <http://www.matrixscience.com/>

**Peptide View**MS/MS Fragmentation of **GLIGEVICR**

Found in **AT4G09320.1** in **TAIR\_Arabidopsis**, Symbols: NDPK1 | NDPK1 (nucleoside diphosphate kinase 1); ATP binding / nucleoside diphosphate kinase | chr4:5923421-5924363 FORWARD

Match to Query 2600: 1015.547578 from(508.781065,2+) index(5359)

Title: Elution from: 47.708 to 47.708 scan no 6745 cid35.00 polarity:+

Data file 0-1\_3.mgf

Click mouse within plot area to zoom in by factor of two about that point

Or,   to  Da

Label all possible matches  Label matches used for scoring

Show Y-axis

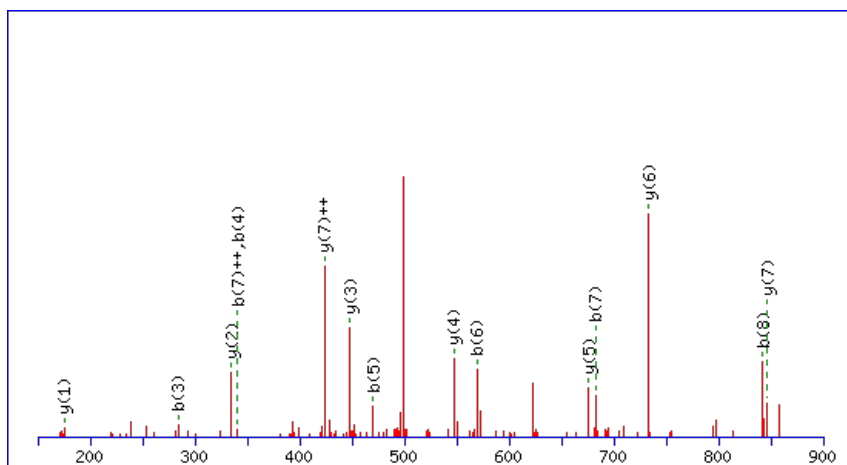

Monoisotopic mass of neutral peptide Mr(calc): 1015.5484

Fixed modifications: Carbamidomethyl (C) (apply to specified residues or termini only)

Ions Score: 55 Expect: 1.5e-005

Matches : 15/64 fragment ions using 21 most intense peaks ([help](#))

| # | b               | b <sup>++</sup> | b <sup>0</sup> | b <sup>0++</sup> | Seq.     | y               | y <sup>++</sup> | y*       | y <sup>*++</sup> | y <sup>0</sup> | y <sup>0++</sup> | # |
|---|-----------------|-----------------|----------------|------------------|----------|-----------------|-----------------|----------|------------------|----------------|------------------|---|
| 1 | 58.0287         | 29.5180         |                |                  | <b>G</b> |                 |                 |          |                  |                |                  | 9 |
| 2 | 171.1128        | 86.0600         |                |                  | <b>L</b> | 959.5343        | 480.2708        | 942.5077 | 471.7575         | 941.5237       | 471.2655         | 8 |
| 3 | <b>284.1969</b> | 142.6021        |                |                  | <b>I</b> | <b>846.4502</b> | <b>423.7287</b> | 829.4237 | 415.2155         | 828.4396       | 414.7235         | 7 |
| 4 | <b>341.2183</b> | 171.1128        |                |                  | <b>G</b> | <b>733.3661</b> | 367.1867        | 716.3396 | 358.6734         | 715.3556       | 358.1814         | 6 |
| 5 | <b>470.2609</b> | 235.6341        | 452.2504       | 226.6288         | <b>E</b> | <b>676.3447</b> | 338.6760        | 659.3181 | 330.1627         | 658.3341       | 329.6707         | 5 |
| 6 | <b>569.3293</b> | 285.1683        | 551.3188       | 276.1630         | <b>V</b> | <b>547.3021</b> | 274.1547        | 530.2755 | 265.6414         |                |                  | 4 |
| 7 | <b>682.4134</b> | <b>341.7103</b> | 664.4028       | 332.7051         | <b>I</b> | <b>448.2337</b> | 224.6205        | 431.2071 | 216.1072         |                |                  | 3 |
| 8 | <b>842.4441</b> | 421.7257        | 824.4335       | 412.7204         | <b>C</b> | <b>335.1496</b> | 168.0784        | 318.1231 | 159.5652         |                |                  | 2 |
| 9 |                 |                 |                |                  | <b>R</b> | <b>175.1190</b> | 88.0631         | 158.0924 | 79.5498          |                |                  | 1 |

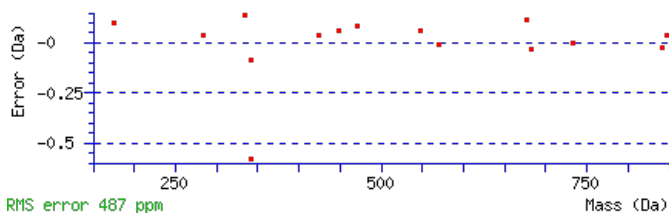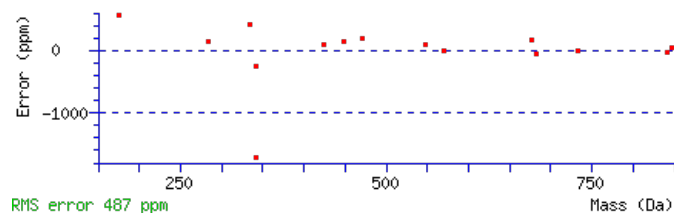

NCBI **BLAST** search of **GLIGEVICR**

(Parameters: blastp, nr protein database, expect=20000, no filter, PAM30)

Other BLAST [web gateways](#)

All matches to this query

| Score | Mr(calc) | Delta | Sequence |
|-------|----------|-------|----------|
|       |          |       |          |

AT4G09320.1

|      |           |         |                           |
|------|-----------|---------|---------------------------|
| 55.4 | 1015.5484 | -0.0009 | <a href="#">GLIGEVICR</a> |
|------|-----------|---------|---------------------------|

**Mascot:** <http://www.matrixscience.com/>

## Peptide View

### MS/MS Fragmentation of QVIDDIVK

Found in **AT4G09650.1** in **TAIR\_Arabidopsis**, Symbols: | ATP synthase delta chain, chloroplast, putative / H(+)-transporting two-sector ATPase, delta (OSCP) subunit, putative | chr4:6100796-6101500 FORWARD

Match to Query 1888: 938.491868 from(470.253210,2+) index(3551)

Title: Elution from: 34.033 to 34.033 scan no 4435 cid35.00 polarity:+

Data file D6h-3\_2.mgf

Click mouse within plot area to zoom in by factor of two about that point

Or,  to  Da

Label all possible matches  Label matches used for scoring

Show Y-axis

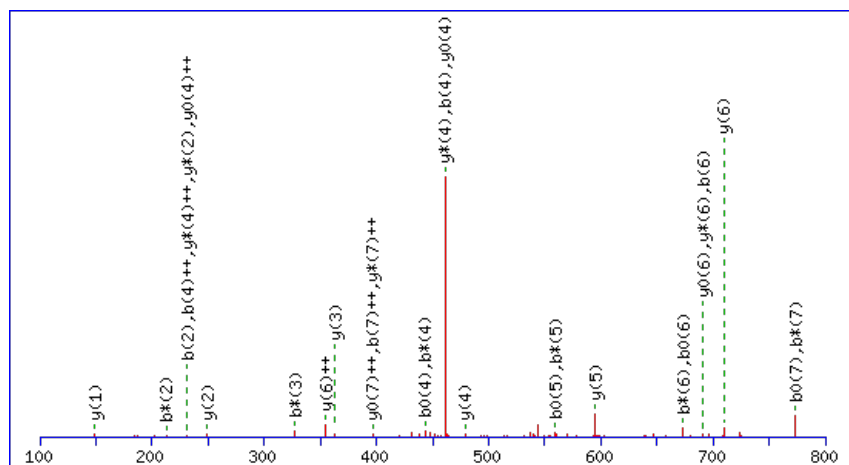

Monoisotopic mass of neutral peptide  $M_r(\text{calc})$ : 938.4933

Fixed modifications: Carbamidomethyl (C) (apply to specified residues or termini only)

Ions Score: 38 Expect: 0.00048

Matches : 31/72 fragment ions using 32 most intense peaks ([help](#))

| # | b               | b <sup>++</sup> | b*              | b* <sup>++</sup> | b <sup>0</sup>  | b <sup>0++</sup> | Seq. | y               | y <sup>++</sup> | y*              | y* <sup>++</sup> | y <sup>0</sup>  | y <sup>0++</sup> | # |
|---|-----------------|-----------------|-----------------|------------------|-----------------|------------------|------|-----------------|-----------------|-----------------|------------------|-----------------|------------------|---|
| 1 | 131.0599        | 66.0336         | 113.0363        | 57.0218          |                 |                  | Q    |                 |                 |                 |                  |                 |                  | 8 |
| 2 | <b>231.1254</b> | 116.0663        | <b>213.1018</b> | 107.0545         |                 |                  | V    | 809.4479        | 405.2276        | 791.4243        | <b>396.2158</b>  | 791.4374        | <b>396.2223</b>  | 7 |
| 3 | 345.2065        | 173.1069        | <b>327.1829</b> | 164.0951         |                 |                  | I    | <b>709.3825</b> | <b>355.1949</b> | <b>691.3589</b> | 346.1831         | <b>691.3719</b> | 346.1896         | 6 |
| 4 | <b>461.2304</b> | <b>231.1189</b> | <b>443.2069</b> | 222.1071         | <b>443.2199</b> | 222.1136         | D    | <b>595.3014</b> | 298.1543        | 577.2778        | 289.1425         | 577.2908        | 289.1490         | 5 |
| 5 | 577.2544        | 289.1309        | <b>559.2308</b> | 280.1191         | <b>559.2439</b> | 280.1256         | D    | <b>479.2774</b> | 240.1423        | <b>461.2538</b> | <b>231.1305</b>  | <b>461.2668</b> | <b>231.1371</b>  | 4 |
| 6 | <b>691.3355</b> | 346.1714        | <b>673.3119</b> | 337.1596         | <b>673.3250</b> | 337.1661         | I    | <b>363.2534</b> | 182.1303        | 345.2298        | 173.1186         |                 |                  | 3 |
| 7 | 791.4010        | <b>396.2041</b> | <b>773.3774</b> | 387.1923         | <b>773.3904</b> | 387.1988         | V    | <b>249.1723</b> | 125.0898        | <b>231.1487</b> | 116.0780         |                 |                  | 2 |
| 8 |                 |                 |                 |                  |                 |                  | K    | <b>149.1069</b> | 75.0571         | 131.0833        | 66.0453          |                 |                  | 1 |

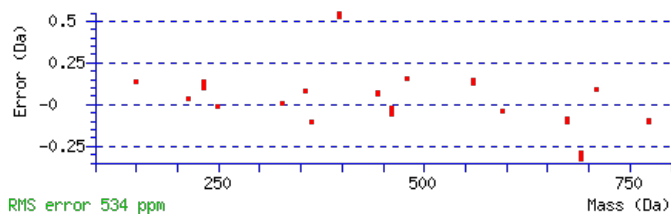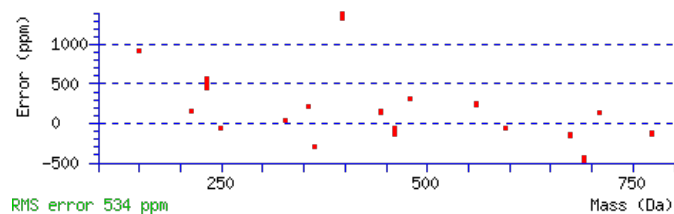

NCBI BLAST search of [QVIDDIVK](#)

(Parameters: blastp, nr protein database, expect=20000, no filter, PAM30)

Other BLAST [web gateways](#)

All matches to this query

| Score | $M_r(\text{calc})$ | Delta   | Sequence                |
|-------|--------------------|---------|-------------------------|
| 38.5  | 938.4933           | -0.0014 | <a href="#">EVLNVLK</a> |

**AT4G09650.1**

|      |          |         |                           |
|------|----------|---------|---------------------------|
| 38.5 | 938.4933 | -0.0014 | <a href="#">QVIDDIVK</a>  |
| 19.1 | 938.4933 | -0.0014 | <a href="#">LDLAEVAAK</a> |
| 19.0 | 938.4933 | -0.0014 | <a href="#">DLEQVVVK</a>  |
| 18.8 | 938.4933 | -0.0014 | <a href="#">EVIVVDQK</a>  |
| 18.8 | 938.4933 | -0.0014 | <a href="#">EVLQAIEK</a>  |
| 10.6 | 938.4933 | -0.0014 | <a href="#">EAGVEVVVK</a> |
| 5.5  | 938.4933 | -0.0014 | <a href="#">VLEVNVEK</a>  |
| 5.5  | 938.4933 | -0.0014 | <a href="#">EVAQEIIK</a>  |
| 5.5  | 938.4933 | -0.0014 | <a href="#">QVVDDLK</a>   |

**Mascot:** <http://www.matrixscience.com/>

## Peptide View

MS/MS Fragmentation of **AWFNDLVTAWVSPPEHTVK**

Found in **AT4G09670.1** in **TAIR\_Arabidopsis**, Symbols: | oxidoreductase family protein | chr4:6107379-6109046 REVERSE

Match to Query 9771: 2283.130092 from(762.050640,3+) index(10457)

Title: Elution from: 105.852 to 105.852 scan no 15437 cid35.00 polarity:+

Data file D1d-2\_2.mgf

Click mouse within plot area to zoom in by factor of two about that point

Or, Plot from  to  Da

Label all possible matches  Label matches used for scoring

Show Y-axis

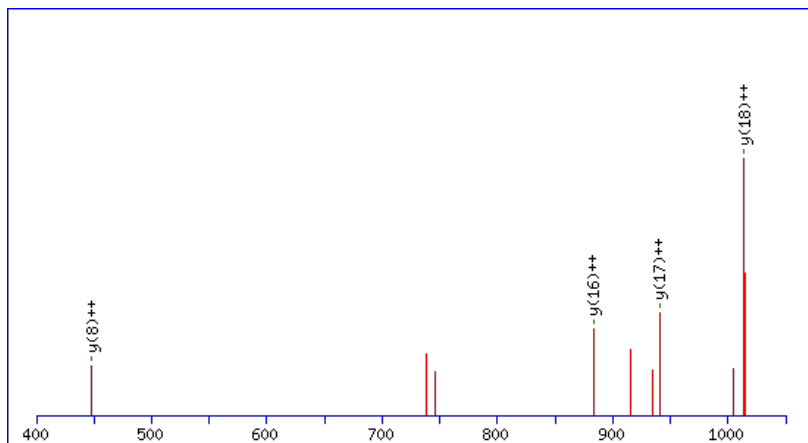

Monoisotopic mass of neutral peptide **Mr(calc)**: 2283.1324

**Fixed modifications**: Carbamidomethyl (C) (apply to specified residues or termini only)

**Ions Score**: 25 **Expect**: 0.014

**Matches**: 4/210 fragment ions using 7 most intense peaks ([help](#))

| #  | b         | b <sup>++</sup> | b <sup>*</sup> | b <sup>*++</sup> | b <sup>0</sup> | b <sup>0++</sup> | Seq. | y         | y <sup>++</sup> | y <sup>*</sup> | y <sup>*++</sup> | y <sup>0</sup> | y <sup>0++</sup> | #  |
|----|-----------|-----------------|----------------|------------------|----------------|------------------|------|-----------|-----------------|----------------|------------------|----------------|------------------|----|
| 1  | 72.0444   | 36.5258         |                |                  |                |                  | A    |           |                 |                |                  |                |                  | 20 |
| 2  | 258.1237  | 129.5655        |                |                  |                |                  | W    | 2213.1026 | 1107.0549       | 2196.0760      | 1098.5417        | 2195.0920      | 1098.0496        | 19 |
| 3  | 405.1921  | 203.0997        |                |                  |                |                  | F    | 2027.0233 | 1014.0153       | 2009.9967      | 1005.5020        | 2009.0127      | 1005.0100        | 18 |
| 4  | 519.2350  | 260.1212        | 502.2085       | 251.6079         |                |                  | N    | 1879.9549 | 940.4811        | 1862.9283      | 931.9678         | 1861.9443      | 931.4758         | 17 |
| 5  | 634.2620  | 317.6346        | 617.2354       | 309.1214         | 616.2514       | 308.6293         | D    | 1765.9119 | 883.4596        | 1748.8854      | 874.9463         | 1747.9014      | 874.4543         | 16 |
| 6  | 747.3461  | 374.1767        | 730.3195       | 365.6634         | 729.3355       | 365.1714         | L    | 1650.8850 | 825.9461        | 1633.8584      | 817.4329         | 1632.8744      | 816.9408         | 15 |
| 7  | 846.4145  | 423.7109        | 829.3879       | 415.1976         | 828.4039       | 414.7056         | V    | 1537.8009 | 769.4041        | 1520.7744      | 760.8908         | 1519.7904      | 760.3988         | 14 |
| 8  | 947.4621  | 474.2347        | 930.4356       | 465.7214         | 929.4516       | 465.2294         | T    | 1438.7325 | 719.8699        | 1421.7060      | 711.3566         | 1420.7219      | 710.8646         | 13 |
| 9  | 1018.4993 | 509.7533        | 1001.4727      | 501.2400         | 1000.4887      | 500.7480         | A    | 1337.6848 | 669.3461        | 1320.6583      | 660.8328         | 1319.6743      | 660.3408         | 12 |
| 10 | 1204.5786 | 602.7929        | 1187.5520      | 594.2796         | 1186.5680      | 593.7876         | W    | 1266.6477 | 633.8275        | 1249.6212      | 625.3142         | 1248.6371      | 624.8222         | 11 |
| 11 | 1303.6470 | 652.3271        | 1286.6204      | 643.8139         | 1285.6364      | 643.3218         | V    | 1080.5684 | 540.7878        | 1063.5419      | 532.2746         | 1062.5578      | 531.7826         | 10 |
| 12 | 1390.6790 | 695.8431        | 1373.6525      | 687.3299         | 1372.6684      | 686.8379         | S    | 981.5000  | 491.2536        | 964.4734       | 482.7404         | 963.4894       | 482.2483         | 9  |
| 13 | 1487.7318 | 744.3695        | 1470.7052      | 735.8563         | 1469.7212      | 735.3642         | P    | 894.4680  | 447.7376        | 877.4414       | 439.2243         | 876.4574       | 438.7323         | 8  |
| 14 | 1584.7845 | 792.8959        | 1567.7580      | 784.3826         | 1566.7740      | 783.8906         | P    | 797.4152  | 399.2112        | 780.3886       | 390.6980         | 779.4046       | 390.2060         | 7  |
| 15 | 1671.8166 | 836.4119        | 1654.7900      | 827.8986         | 1653.8060      | 827.4066         | S    | 700.3624  | 350.6849        | 683.3359       | 342.1716         | 682.3519       | 341.6796         | 6  |
| 16 | 1800.8592 | 900.9332        | 1783.8326      | 892.4199         | 1782.8486      | 891.9279         | E    | 613.3304  | 307.1688        | 596.3039       | 298.6556         | 595.3198       | 298.1636         | 5  |
| 17 | 1937.9181 | 969.4627        | 1920.8915      | 960.9494         | 1919.9075      | 960.4574         | H    | 484.2878  | 242.6475        | 467.2613       | 234.1343         | 466.2772       | 233.6423         | 4  |
| 18 | 2038.9658 | 1019.9865       | 2021.9392      | 1011.4732        | 2020.9552      | 1010.9812        | T    | 347.2289  | 174.1181        | 330.2023       | 165.6048         | 329.2183       | 165.1128         | 3  |
| 19 | 2138.0342 | 1069.5207       | 2121.0076      | 1061.0074        | 2120.0236      | 1060.5154        | V    | 246.1812  | 123.5942        | 229.1547       | 115.0810         |                |                  | 2  |
| 20 |           |                 |                |                  |                |                  | K    | 147.1128  | 74.0600         | 130.0863       | 65.5468          |                |                  | 1  |

# AT4G09670.1

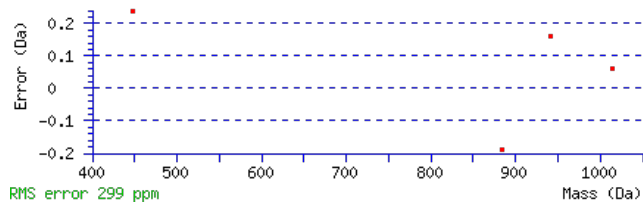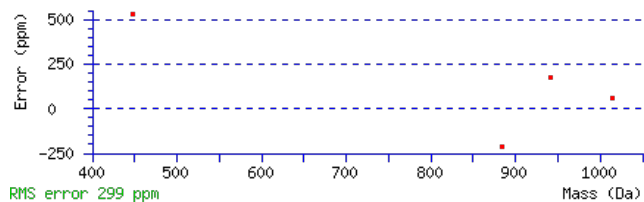

NCBI **BLAST** search of [AWFNDLVTAWVSPPEHTVK](#)  
(Parameters: blastp, nr protein database, expect=20000, no filter, PAM30)  
Other BLAST [web gateways](#)

## All matches to this query

| Score | Mr(calc)  | Delta   | Sequence                             |
|-------|-----------|---------|--------------------------------------|
| 25.0  | 2283.1324 | -0.0023 | <a href="#">AWFNDLVTAWVSPPEHTVK</a>  |
| 6.7   | 2283.1312 | -0.0011 | <a href="#">DSMALLIKGFMNGLEEKMEK</a> |
| 5.3   | 2283.1358 | -0.0057 | <a href="#">FQELSLVHHPIDYACVVK</a>   |
| 5.0   | 2283.1310 | -0.0010 | <a href="#">EEFEDPLTYLQKIFPEASK</a>  |

Mascot: <http://www.matrixscience.com/>

### Peptide View

 MS/MS Fragmentation of **SYMADLSHEIRENETAFQIK**

 Found in **AT4G09940.1** in **TAIR\_Arabidopsis**, Symbols: | avirulence-responsive family protein / avirulence induced gene (AIG1) family protein | chr4:6231783-6233394 FORWARD

Match to Query 10574: 2409.048705 from(804.023511,3+) index(11195)

Title: Elution from: 116.828 to 116.828 scan no 16468 cid35.00 polarity:+

Data file 0-3\_1.mgf

Click mouse within plot area to zoom in by factor of two about that point

 Or, Plot from  to  Da 

 Label all possible matches  Label matches used for scoring 

 Show Y-axis 
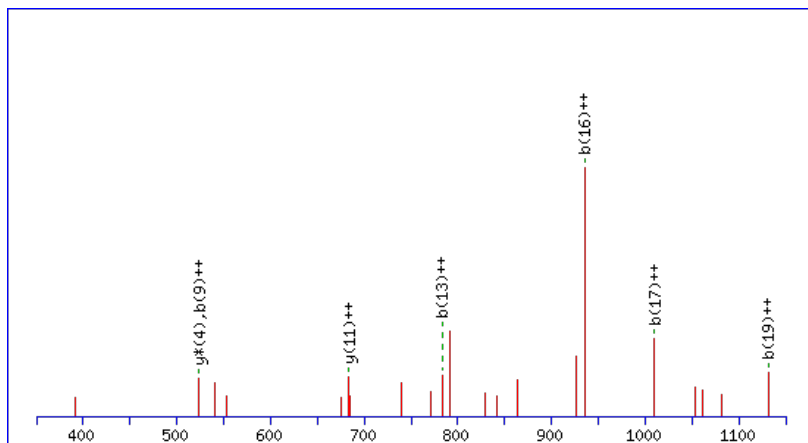
 Monoisotopic mass of neutral peptide  $M_r(\text{calc})$ : 2409.0491

Fixed modifications: Carbamidomethyl (C) (apply to specified residues or termini only)

Ions Score: 28 Expect: 0.0092

 Matches : 7/198 fragment ions using 8 most intense peaks ([help](#))

| #  | b         | b <sup>++</sup>  | b <sup>*</sup> | b <sup>*++</sup> | b <sup>0</sup> | b <sup>0++</sup> | Seq | y         | y <sup>++</sup> | y <sup>*</sup>  | y <sup>*++</sup> | y <sup>0</sup> | y <sup>0++</sup> | #  |
|----|-----------|------------------|----------------|------------------|----------------|------------------|-----|-----------|-----------------|-----------------|------------------|----------------|------------------|----|
| 1  | 89.0363   | 45.0218          |                |                  | 71.0258        | 36.0165          | S   |           |                 |                 |                  |                |                  | 20 |
| 2  | 253.0967  | 127.0520         |                |                  | 235.0861       | 118.0467         | Y   | 2322.0274 | 1161.5173       | 2304.0038       | 1152.5055        | 2304.0168      | 1152.5120        | 19 |
| 3  | 385.1342  | 193.0707         |                |                  | 367.1237       | 184.0655         | M   | 2157.9670 | 1079.4871       | 2139.9434       | 1070.4753        | 2139.9564      | 1070.4818        | 18 |
| 4  | 457.1684  | 229.0878         |                |                  | 439.1578       | 220.0825         | A   | 2025.9295 | 1013.4684       | 2007.9059       | 1004.4566        | 2007.9189      | 1004.4631        | 17 |
| 5  | 573.1924  | 287.0998         |                |                  | 555.1818       | 278.0945         | D   | 1953.8953 | 977.4513        | 1935.8717       | 968.4395         | 1935.8848      | 968.4460         | 16 |
| 6  | 687.2734  | 344.1404         |                |                  | 669.2629       | 335.1351         | L   | 1837.8713 | 919.4393        | 1819.8478       | 910.4275         | 1819.8608      | 910.4340         | 15 |
| 7  | 775.3025  | 388.1549         |                |                  | 757.2919       | 379.1496         | S   | 1723.7902 | 862.3988        | 1705.7667       | 853.3870         | 1705.7797      | 853.3935         | 14 |
| 8  | 915.3525  | 458.1799         |                |                  | 897.3420       | 449.1746         | H   | 1635.7612 | 818.3842        | 1617.7376       | 809.3724         | 1617.7506      | 809.3789         | 13 |
| 9  | 1045.3922 | <b>523.1997</b>  |                |                  | 1027.3816      | 514.1944         | E   | 1495.7112 | 748.3592        | 1477.6876       | 739.3474         | 1477.7006      | 739.3539         | 12 |
| 10 | 1159.4733 | 580.2403         |                |                  | 1141.4627      | 571.2350         | I   | 1365.6715 | <b>683.3394</b> | 1347.6480       | 674.3276         | 1347.6610      | 674.3341         | 11 |
| 11 | 1319.5625 | 660.2849         | 1301.5389      | 651.2731         | 1301.5519      | 651.2796         | R   | 1251.5904 | 626.2989        | 1233.5669       | 617.2871         | 1233.5799      | 617.2936         | 10 |
| 12 | 1449.6021 | 725.3047         | 1431.5786      | 716.2929         | 1431.5916      | 716.2994         | E   | 1091.5012 | 546.2542        | 1073.4776       | 537.2424         | 1073.4906      | 537.2489         | 9  |
| 13 | 1565.6391 | <b>783.3232</b>  | 1547.6155      | 774.3114         | 1547.6286      | 774.3179         | N   | 961.4616  | 481.2344        | 943.4380        | 472.2226         | 943.4510       | 472.2291         | 8  |
| 14 | 1695.6788 | 848.3430         | 1677.6552      | 839.3312         | 1677.6682      | 839.3377         | E   | 845.4246  | 423.2159        | 827.4010        | 414.2041         | 827.4140       | 414.2106         | 7  |
| 15 | 1797.7235 | 899.3654         | 1779.6999      | 890.3536         | 1779.7129      | 890.3601         | T   | 715.3849  | 358.1961        | 697.3613        | 349.1843         | 697.3744       | 349.1908         | 6  |
| 16 | 1869.7576 | <b>935.3824</b>  | 1851.7340      | 926.3707         | 1851.7471      | 926.3772         | A   | 613.3402  | 307.1737        | 595.3166        | 298.1620         |                |                  | 5  |
| 17 | 2017.8231 | <b>1009.4152</b> | 1999.7995      | 1000.4034        | 1999.8125      | 1000.4099        | F   | 541.3061  | 271.1567        | <b>523.2825</b> | 262.1449         |                |                  | 4  |
| 18 | 2147.8757 | 1074.4415        | 2129.8521      | 1065.4297        | 2129.8652      | 1065.4362        | Q   | 393.2406  | 197.1239        | 375.2170        | 188.1122         |                |                  | 3  |
| 19 | 2261.9568 | <b>1131.4820</b> | 2243.9332      | 1122.4703        | 2243.9463      | 1122.4768        | I   | 263.1880  | 132.0976        | 245.1644        | 123.0858         |                |                  | 2  |
| 20 |           |                  |                |                  |                |                  | K   | 149.1069  | 75.0571         | 131.0833        | 66.0453          |                |                  | 1  |



# AT4G09940.1

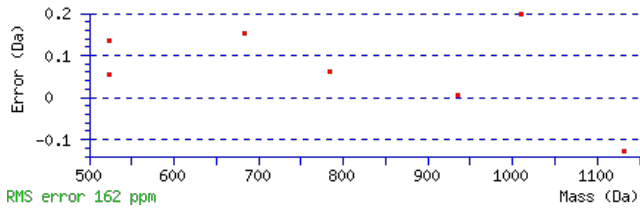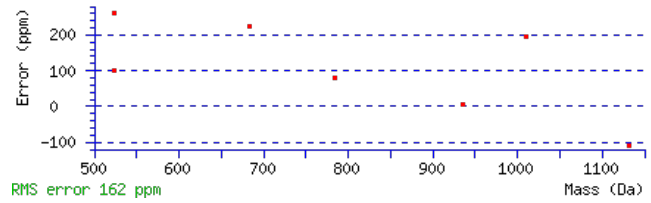

NCBI BLAST search of [SYMADLSHEIRENETAFQIK](#)  
 (Parameters: blastp, nr protein database, expect=20000, no filter, PAM30)  
 Other BLAST [web gateways](#)

## All matches to this query

| Score | Mr(calc)  | Delta   | Sequence                               |
|-------|-----------|---------|----------------------------------------|
| 28.4  | 2409.0491 | -0.0004 | <a href="#">SYMADLSHEIRENETAFQIK</a>   |
| 14.6  | 2409.0525 | -0.0038 | <a href="#">TLSETLENMHALNRMYGLEK</a>   |
| 11.3  | 2409.0446 | 0.0041  | <a href="#">GEEEDGETTSNSVMTKLLRGAR</a> |
| 6.9   | 2409.0422 | 0.0065  | <a href="#">IDCFPCIKVPSSRESVEGGR</a>   |
| 5.7   | 2409.0512 | -0.0025 | <a href="#">VIDLDDYAADDDQYEEKLKK</a>   |
| 2.5   | 2409.0444 | 0.0043  | <a href="#">CSICRQLFTGFSYESKELR</a>    |
| 1.7   | 2409.0547 | -0.0060 | <a href="#">QMDYSTRVQHYPYIEVLEMK</a>   |
| 1.7   | 2409.0536 | -0.0049 | <a href="#">NHVGDWGTQFGMLIEFLFEK</a>   |
| 1.7   | 2409.0536 | -0.0049 | <a href="#">NHVGDWGTQFGMLIEYLFEK</a>   |
| 1.2   | 2409.0480 | 0.0007  | <a href="#">SLYYVTWRHGDQFPDEIEK</a>    |

Mascot: <http://www.matrixscience.com/>

**Peptide View**MS/MS Fragmentation of **YTKEEAKK**Found in **AT4G10060.1** in **TAIR\_Arabidopsis**, Symbols: | catalytic | chr4:6289352-6295254 FORWARD

Match to Query 2462: 1006.499086 from(504.256819,2+) index(5432)

Title: Elution from: 48.480 to 48.480 scan no 6998 cid35.00 polarity:+

Data file D12h-3\_3.mgf

Click mouse within plot area to zoom in by factor of two about that point

Or,   to  Da Label all possible matches  Label matches used for scoring Show Y-axis 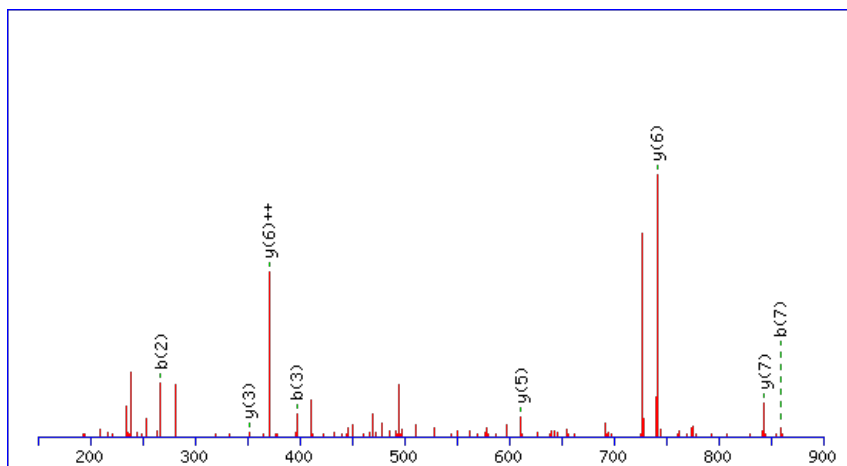Monoisotopic mass of neutral peptide **Mr(calc)**: 1006.4961**Fixed modifications**: Carbamidomethyl (C) (apply to specified residues or termini only)**Ions Score**: 25 **Expect**: 0.026**Matches** : 8/72 fragment ions using 14 most intense peaks ([help](#))

| # | b               | b <sup>++</sup> | b*       | b <sup>*++</sup> | b <sup>0</sup> | b <sup>0++</sup> | Seq. | y               | y <sup>++</sup> | y*       | y <sup>*++</sup> | y <sup>0</sup> | y <sup>0++</sup> | # |
|---|-----------------|-----------------|----------|------------------|----------------|------------------|------|-----------------|-----------------|----------|------------------|----------------|------------------|---|
| 1 | 165.0676        | 83.0375         |          |                  |                |                  | Y    |                 |                 |          |                  |                |                  | 8 |
| 2 | <b>267.1124</b> | 134.0598        |          |                  | 249.1018       | 125.0545         | T    | <b>843.4431</b> | 422.2252        | 825.4195 | 413.2134         | 825.4325       | 413.2199         | 7 |
| 3 | <b>397.2014</b> | 199.1043        | 379.1778 | 190.0925         | 379.1908       | 190.0990         | K    | <b>741.3983</b> | <b>371.2028</b> | 723.3748 | 362.1910         | 723.3878       | 362.1975         | 6 |
| 4 | 527.2410        | 264.1241        | 509.2174 | 255.1124         | 509.2304       | 255.1189         | E    | <b>611.3093</b> | 306.1583        | 593.2857 | 297.1465         | 593.2987       | 297.1530         | 5 |
| 5 | 657.2806        | 329.1440        | 639.2571 | 320.1322         | 639.2701       | 320.1387         | E    | 481.2697        | 241.1385        | 463.2461 | 232.1267         | 463.2591       | 232.1332         | 4 |
| 6 | 729.3148        | 365.1610        | 711.2912 | 356.1492         | 711.3042       | 356.1558         | A    | <b>351.2301</b> | 176.1187        | 333.2065 | 167.1069         |                |                  | 3 |
| 7 | <b>859.4038</b> | 430.2056        | 841.3802 | 421.1938         | 841.3933       | 421.2003         | K    | 279.1959        | 140.1016        | 261.1723 | 131.0898         |                |                  | 2 |
| 8 |                 |                 |          |                  |                |                  | K    | 149.1069        | 75.0571         | 131.0833 | 66.0453          |                |                  | 1 |

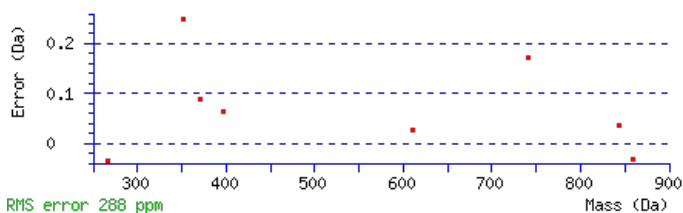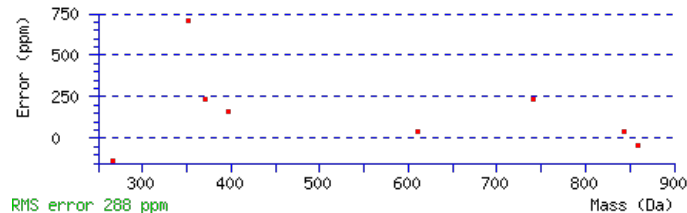NCBI **BLAST** search of **YTKEEAKK**

(Parameters: blastp, nr protein database, expect=20000, no filter, PAM30)

Other BLAST [web gateways](#)**All matches to this query**

| Score | Mr(calc)  | Delta  | Sequence                 |
|-------|-----------|--------|--------------------------|
| 25.3  | 1006.4961 | 0.0029 | <a href="#">YTKEEAKK</a> |
| 22.5  | 1006.4988 | 0.0003 | <a href="#">LFSRVESR</a> |

## AT4G10060.1

|      |           |         |                           |
|------|-----------|---------|---------------------------|
| 16.1 | 1006.5017 | -0.0027 | <a href="#">TYEVMVKK</a>  |
| 6.3  | 1006.4988 | 0.0003  | <a href="#">ASAYNRAIK</a> |
| 6.2  | 1006.4974 | 0.0016  | <a href="#">MKTMRGLR</a>  |
| 5.8  | 1006.5017 | -0.0027 | <a href="#">KFTDLMVK</a>  |
| 5.5  | 1006.4988 | 0.0003  | <a href="#">TNRATGFVK</a> |
| 4.3  | 1006.4984 | 0.0007  | <a href="#">FINTDIFK</a>  |
| 3.8  | 1006.4984 | 0.0007  | <a href="#">FVFESLQK</a>  |
| 3.7  | 1006.5018 | -0.0027 | <a href="#">YLQSVLMK</a>  |

Mascot: <http://www.matrixscience.com/>

## Peptide View

### MS/MS Fragmentation of **LGITIEK**

Found in **AT4G10300.1** in **TAIR\_Arabidopsis**, Symbols: | similar to unknown protein [Arabidopsis thaliana] (TAIR:AT3G04300.1); similar to unknown [Populus trichocarpa] (GB:ABK95374.1); contains InterPro domain RmlC-like jelly roll fold (InterPro:IPR014710); contains InterPro domain Protein of

Match to Query 921: 772.469356 from(387.241954,2+) index(3319)

Title: Elution from: 32.206 to 32.206 scan no 4104 cid35.00 polarity:+

Data file D6h-1\_1.mgf

Click mouse within plot area to zoom in by factor of two about that point

Or,   to  Da

Label all possible matches  Label matches used for scoring

Show Y-axis

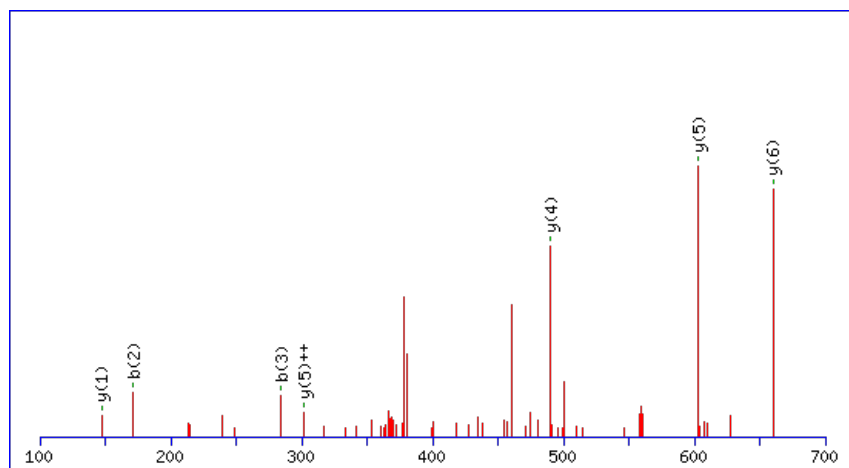

Monoisotopic mass of neutral peptide  $M_r(\text{calc})$ : 772.4694

Fixed modifications: Carbamidomethyl (C) (apply to specified residues or termini only)

Ions Score: 29 Expect: 0.0034

Matches : 7/52 fragment ions using 11 most intense peaks ([help](#))

| # | b               | b <sup>++</sup> | b <sup>0</sup> | b <sup>0++</sup> | Seq. | y               | y <sup>++</sup> | y*       | y <sup>*++</sup> | y <sup>0</sup> | y <sup>0++</sup> | # |
|---|-----------------|-----------------|----------------|------------------|------|-----------------|-----------------|----------|------------------|----------------|------------------|---|
| 1 | 114.0913        | 57.5493         |                |                  | L    |                 |                 |          |                  |                |                  | 7 |
| 2 | <b>171.1128</b> | 86.0600         |                |                  | G    | <b>660.3927</b> | 330.7000        | 643.3661 | 322.1867         | 642.3821       | 321.6947         | 6 |
| 3 | <b>284.1969</b> | 142.6021        |                |                  | I    | <b>603.3712</b> | <b>302.1892</b> | 586.3447 | 293.6760         | 585.3606       | 293.1840         | 5 |
| 4 | 385.2445        | 193.1259        | 367.2340       | 184.1206         | T    | <b>490.2871</b> | 245.6472        | 473.2606 | 237.1339         | 472.2766       | 236.6419         | 4 |
| 5 | 498.3286        | 249.6679        | 480.3180       | 240.6627         | I    | 389.2395        | 195.1234        | 372.2129 | 186.6101         | 371.2289       | 186.1181         | 3 |
| 6 | 627.3712        | 314.1892        | 609.3606       | 305.1840         | E    | 276.1554        | 138.5813        | 259.1288 | 130.0681         | 258.1448       | 129.5761         | 2 |
| 7 |                 |                 |                |                  | K    | <b>147.1128</b> | 74.0600         | 130.0863 | 65.5468          |                |                  | 1 |

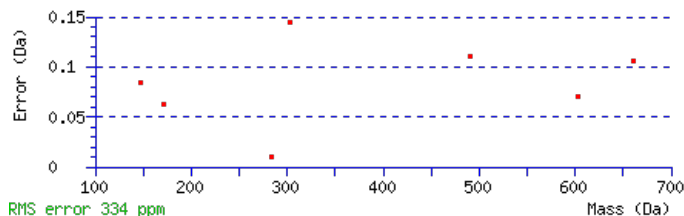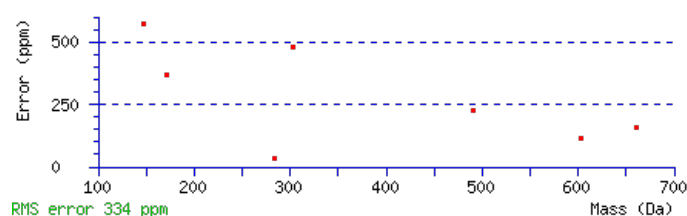

### NCBI BLAST search of **LGITIEK**

(Parameters: blastp, nr protein database, expect=20000, no filter, PAM30)

Other BLAST [web gateways](#)

### All matches to this query

| Score | $M_r(\text{calc})$ | Delta   | Sequence                |
|-------|--------------------|---------|-------------------------|
| 29.0  | 772.4694           | -0.0001 | <a href="#">LGITIEK</a> |

## AT4G10300.1

|      |          |         |                         |
|------|----------|---------|-------------------------|
| 21.8 | 772.4695 | -0.0001 | <a href="#">ITVVDVK</a> |
| 11.6 | 772.4694 | -0.0001 | <a href="#">IAVETLK</a> |
| 10.9 | 772.4694 | -0.0001 | <a href="#">IVTELAK</a> |
| 10.9 | 772.4694 | -0.0001 | <a href="#">LSLAEEK</a> |
| 10.7 | 772.4694 | -0.0001 | <a href="#">LTALLDK</a> |
| 9.9  | 772.4694 | -0.0001 | <a href="#">LTGELLK</a> |
| 3.2  | 772.4694 | -0.0001 | <a href="#">LLETAVK</a> |
| 0.3  | 772.4695 | -0.0001 | <a href="#">SDVVLLK</a> |

Mascot: <http://www.matrixscience.com/>

**Peptide View**MS/MS Fragmentation of **YQAFELIHAR**

Found in **AT4G10340.1** in **TAIR\_Arabidopsis**, Symbols: LHCB5 | LHCB5 (LIGHT HARVESTING COMPLEX OF PHOTOSYSTEM II 5); chlorophyll binding | chr4:6408196-6409492 FORWARD

Match to Query 4449: 1246.645212 from(624.329882,2+) index(5105)

Title: Elution from: 47.317 to 47.317 scan no 6448 cid35.00 polarity:+

Data file D6h-2\_1.mgf

Click mouse within plot area to zoom in by factor of two about that point

Or,   to  Da

Label all possible matches  Label matches used for scoring

Show Y-axis

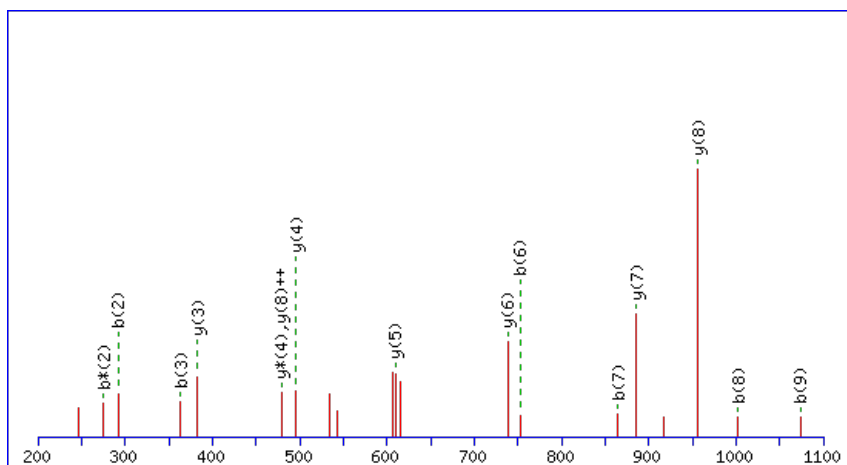

**Monoisotopic mass of neutral peptide Mr(calc):** 1246.6458

**Fixed modifications:** Carbamidomethyl (C) (apply to specified residues or termini only)

**Ions Score:** 76 **Expect:** 1.1e-007

**Matches:** 15/88 fragment ions using 15 most intense peaks ([help](#))

| #  | b                | b <sup>++</sup> | b*              | b <sup>*++</sup> | b <sup>0</sup> | b <sup>0++</sup> | Seq. | y               | y <sup>++</sup> | y*              | y <sup>*++</sup> | y <sup>0</sup> | y <sup>0++</sup> | #  |
|----|------------------|-----------------|-----------------|------------------|----------------|------------------|------|-----------------|-----------------|-----------------|------------------|----------------|------------------|----|
| 1  | 164.0706         | 82.5389         |                 |                  |                |                  | Y    |                 |                 |                 |                  |                |                  | 10 |
| 2  | <b>292.1292</b>  | 146.5682        | <b>275.1026</b> | 138.0550         |                |                  | Q    | 1084.5898       | 542.7985        | 1067.5633       | 534.2853         | 1066.5792      | 533.7933         | 9  |
| 3  | <b>363.1663</b>  | 182.0868        | 346.1397        | 173.5735         |                |                  | A    | <b>956.5312</b> | <b>478.7693</b> | 939.5047        | 470.2560         | 938.5207       | 469.7640         | 8  |
| 4  | 510.2347         | 255.6210        | 493.2082        | 247.1077         |                |                  | F    | <b>885.4941</b> | 443.2507        | 868.4676        | 434.7374         | 867.4835       | 434.2454         | 7  |
| 5  | 639.2773         | 320.1423        | 622.2508        | 311.6290         | 621.2667       | 311.1370         | E    | <b>738.4257</b> | 369.7165        | 721.3992        | 361.2032         | 720.4151       | 360.7112         | 6  |
| 6  | <b>752.3614</b>  | 376.6843        | 735.3348        | 368.1710         | 734.3508       | 367.6790         | L    | <b>609.3831</b> | 305.1952        | 592.3566        | 296.6819         |                |                  | 5  |
| 7  | <b>865.4454</b>  | 433.2264        | 848.4189        | 424.7131         | 847.4349       | 424.2211         | I    | <b>496.2990</b> | 248.6532        | <b>479.2725</b> | 240.1399         |                |                  | 4  |
| 8  | <b>1002.5043</b> | 501.7558        | 985.4778        | 493.2425         | 984.4938       | 492.7505         | H    | <b>383.2150</b> | 192.1111        | 366.1884        | 183.5979         |                |                  | 3  |
| 9  | <b>1073.5415</b> | 537.2744        | 1056.5149       | 528.7611         | 1055.5309      | 528.2691         | A    | 246.1561        | 123.5817        | 229.1295        | 115.0684         |                |                  | 2  |
| 10 |                  |                 |                 |                  |                |                  | R    | 175.1190        | 88.0631         | 158.0924        | 79.5498          |                |                  | 1  |

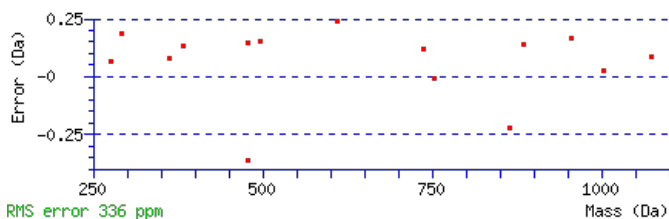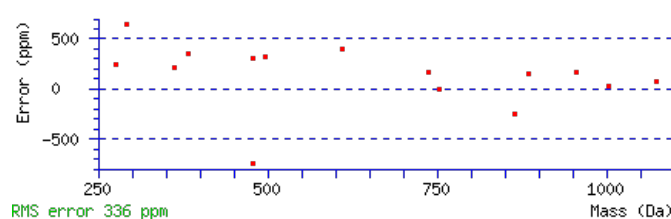

NCBI BLAST search of **YQAFELIHAR**

(Parameters: blastp, nr protein database, expect=20000, no filter, PAM30)

Other BLAST [web gateways](#)

All matches to this query

**AT4G10340.1**

| <b>Score</b> | <b>Mr(calc)</b> | <b>Delta</b> | <b>Sequence</b>             |
|--------------|-----------------|--------------|-----------------------------|
| 76.2         | 1246.6458       | -0.0006      | <a href="#">YQAFELIHAR</a>  |
| 2.0          | 1246.6458       | -0.0006      | <a href="#">WIPNKSFEAR</a>  |
| 1.3          | 1246.6452       | 0.0000       | <a href="#">LNAIQERTMR</a>  |
| 1.1          | 1246.6452       | 0.0000       | <a href="#">AKARETVEMGR</a> |

**Mascot:** <http://www.matrixscience.com/>

**Peptide View**MS/MS Fragmentation of **LELDILLR**Found in **AT4G10390.1** in **TAIR\_Arabidopsis**, Symbols: | protein kinase family protein | chr4:6441945-6443157 REVERSE

Match to Query 2560: 994.567022 from(498.290787,2+) index(9125)

Title: Elution from: 80.396 to 80.396 scan no 12152 cid35.00 polarity:+

Data file D6h-1\_1.mgf

Click mouse within plot area to zoom in by factor of two about that point

Or,   to  Da Label all possible matches  Label matches used for scoring Show Y-axis 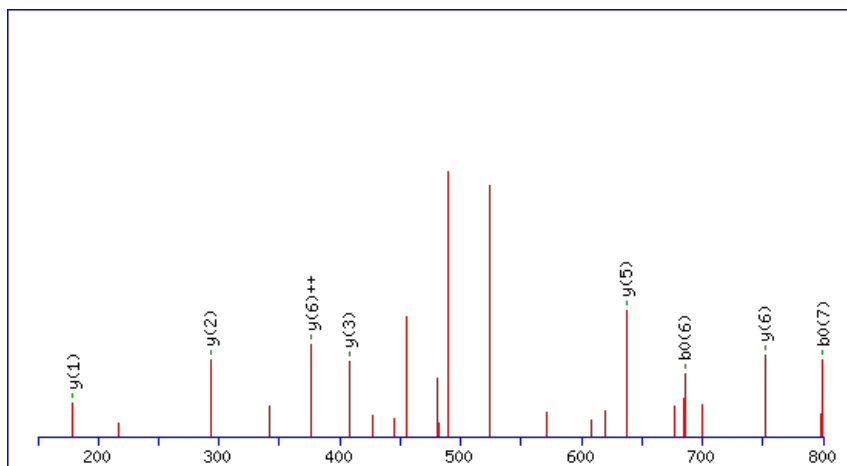

Monoisotopic mass of neutral peptide Mr(calc): 994.5689

Fixed modifications: Carbamidomethyl (C) (apply to specified residues or termini only)

Ions Score: 28 Expect: 0.0024

Matches : 8/60 fragment ions using 14 most intense peaks ([help](#))

| # | b        | b <sup>++</sup> | b <sup>0</sup> | b <sup>0++</sup> | Seq. | y        | y <sup>++</sup> | y*       | y <sup>*++</sup> | y <sup>0</sup> | y <sup>0++</sup> | # |
|---|----------|-----------------|----------------|------------------|------|----------|-----------------|----------|------------------|----------------|------------------|---|
| 1 | 115.0884 | 58.0478         |                |                  | L    |          |                 |          |                  |                |                  | 8 |
| 2 | 245.1280 | 123.0676        | 227.1174       | 114.0624         | E    | 881.4951 | 441.2512        | 863.4715 | 432.2394         | 863.4845       | 432.2459         | 7 |
| 3 | 359.2091 | 180.1082        | 341.1985       | 171.1029         | L    | 751.4555 | 376.2314        | 733.4319 | 367.2196         | 733.4449       | 367.2261         | 6 |
| 4 | 475.2331 | 238.1202        | 457.2225       | 229.1149         | D    | 637.3744 | 319.1908        | 619.3508 | 310.1790         | 619.3638       | 310.1855         | 5 |
| 5 | 589.3142 | 295.1607        | 571.3036       | 286.1554         | I    | 521.3504 | 261.1788        | 503.3268 | 252.1670         |                |                  | 4 |
| 6 | 703.3953 | 352.2013        | 685.3847       | 343.1960         | L    | 407.2693 | 204.1383        | 389.2457 | 195.1265         |                |                  | 3 |
| 7 | 817.4764 | 409.2418        | 799.4658       | 400.2365         | L    | 293.1882 | 147.0977        | 275.1646 | 138.0859         |                |                  | 2 |
| 8 |          |                 |                |                  | R    | 179.1071 | 90.0572         | 161.0835 | 81.0454          |                |                  | 1 |

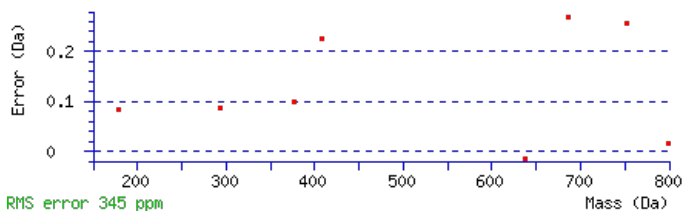

RMS error 345 ppm

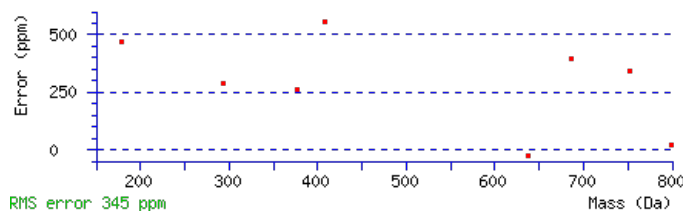

RMS error 345 ppm

NCBI BLAST search of [LELDILLR](#)

(Parameters: blastp, nr protein database, expect=20000, no filter, PAM30)

Other BLAST [web gateways](#)**All matches to this query**

| Score | Mr(calc) | Delta   | Sequence                 |
|-------|----------|---------|--------------------------|
| 27.7  | 994.5689 | -0.0019 | <a href="#">LELDILLR</a> |
| 16.8  | 994.5689 | -0.0019 | <a href="#">IILEDLIR</a> |





**Peptide View**MS/MS Fragmentation of **PGPVIEEVNEEALMDAIK**Found in **AT4G10480.1** in **TAIR\_Arabidopsis**, Symbols: | nascent polypeptide associated complex alpha chain protein, putative / alpha-NAC, putative | chr4:6478085-6479075 REVERSE

Match to Query 9264: 1972.918926 from(987.466739,2+) index(9468)

Title: Elution from: 88.797 to 88.797 scan no 13067 cid35.00 polarity:+

Data file D1d-1\_1.mgf

Click mouse within plot area to zoom in by factor of two about that point

Or,   to  Da Label all possible matches  Label matches used for scoring Show Y-axis 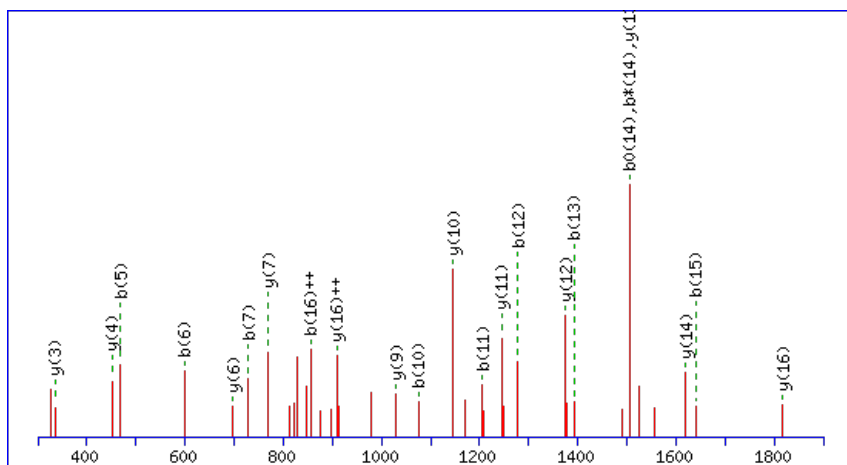Monoisotopic mass of neutral peptide  $M_r(\text{calc})$ : 1972.9172

Fixed modifications: Carbamidomethyl (C) (apply to specified residues or termini only)

Ions Score: 93 Expect: 4.1e-009

Matches : 23/172 fragment ions using 26 most intense peaks ([help](#))

| #  | b         | b <sup>++</sup> | b*        | b <sup>*++</sup> | b <sup>0</sup> | b <sup>0++</sup> | Seq. | y         | y <sup>++</sup> | y*        | y <sup>*++</sup> | y <sup>0</sup> | y <sup>0++</sup> | #  |
|----|-----------|-----------------|-----------|------------------|----------------|------------------|------|-----------|-----------------|-----------|------------------|----------------|------------------|----|
| 1  | 99.0571   | 50.0322         |           |                  |                |                  | P    |           |                 |           |                  |                |                  | 18 |
| 2  | 157.0756  | 79.0414         |           |                  |                |                  | G    | 1875.8747 | 938.4410        | 1857.8511 | 929.4292         | 1857.8641      | 929.4357         | 17 |
| 3  | 255.1254  | 128.0663        |           |                  |                |                  | P    | 1817.8562 | 909.4317        | 1799.8326 | 900.4199         | 1799.8456      | 900.4264         | 16 |
| 4  | 355.1908  | 178.0990        |           |                  |                |                  | V    | 1719.8064 | 860.4068        | 1701.7828 | 851.3950         | 1701.7958      | 851.4015         | 15 |
| 5  | 469.2719  | 235.1396        |           |                  |                |                  | I    | 1619.7409 | 810.3741        | 1601.7173 | 801.3623         | 1601.7304      | 801.3688         | 14 |
| 6  | 599.3115  | 300.1594        |           |                  | 581.3010       | 291.1541         | E    | 1505.6598 | 753.3336        | 1487.6362 | 744.3218         | 1487.6493      | 744.3283         | 13 |
| 7  | 729.3512  | 365.1792        |           |                  | 711.3406       | 356.1739         | E    | 1375.6202 | 688.3137        | 1357.5966 | 679.3019         | 1357.6096      | 679.3085         | 12 |
| 8  | 829.4166  | 415.2120        |           |                  | 811.4061       | 406.2067         | V    | 1245.5806 | 623.2939        | 1227.5570 | 614.2821         | 1227.5700      | 614.2886         | 11 |
| 9  | 945.4536  | 473.2304        | 927.4300  | 464.2187         | 927.4431       | 464.2252         | N    | 1145.5151 | 573.2612        | 1127.4915 | 564.2494         | 1127.5046      | 564.2559         | 10 |
| 10 | 1075.4933 | 538.2503        | 1057.4697 | 529.2385         | 1057.4827      | 529.2450         | E    | 1029.4781 | 515.2427        | 1011.4545 | 506.2309         | 1011.4676      | 506.2374         | 9  |
| 11 | 1205.5329 | 603.2701        | 1187.5093 | 594.2583         | 1187.5223      | 594.2648         | E    | 899.4385  | 450.2229        | 881.4149  | 441.2111         | 881.4279       | 441.2176         | 8  |
| 12 | 1277.5670 | 639.2872        | 1259.5434 | 630.2754         | 1259.5565      | 630.2819         | A    | 769.3989  | 385.2031        | 751.3753  | 376.1913         | 751.3883       | 376.1978         | 7  |
| 13 | 1391.6481 | 696.3277        | 1373.6245 | 687.3159         | 1373.6376      | 687.3224         | L    | 697.3647  | 349.1860        | 679.3411  | 340.1742         | 679.3542       | 340.1807         | 6  |
| 14 | 1523.6856 | 762.3465        | 1505.6621 | 753.3347         | 1505.6751      | 753.3412         | M    | 583.2836  | 292.1454        | 565.2600  | 283.1337         | 565.2731       | 283.1402         | 5  |
| 15 | 1639.7096 | 820.3585        | 1621.6860 | 811.3467         | 1621.6991      | 811.3532         | D    | 451.2461  | 226.1267        | 433.2225  | 217.1149         | 433.2355       | 217.1214         | 4  |
| 16 | 1711.7438 | 856.3755        | 1693.7202 | 847.3637         | 1693.7332      | 847.3702         | A    | 335.2221  | 168.1147        | 317.1985  | 159.1029         |                |                  | 3  |
| 17 | 1825.8249 | 913.4161        | 1807.8013 | 904.4043         | 1807.8143      | 904.4108         | I    | 263.1880  | 132.0976        | 245.1644  | 123.0858         |                |                  | 2  |
| 18 |           |                 |           |                  |                |                  | K    | 149.1069  | 75.0571         | 131.0833  | 66.0453          |                |                  | 1  |

# AT4G10480.1

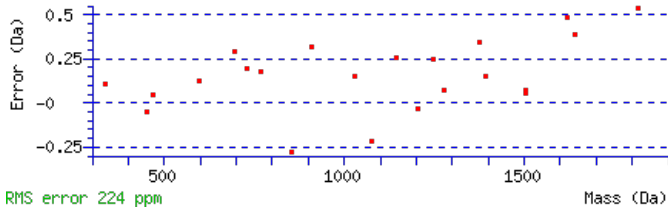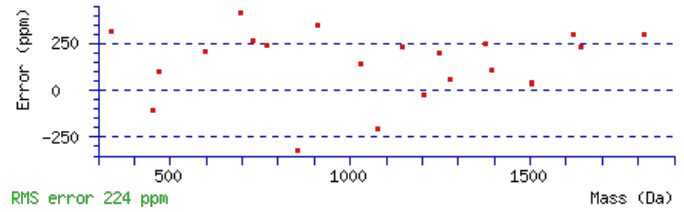

NCBI **BLAST** search of [PGPVIEEVNEEALMDAIK](#)  
 (Parameters: blastp, nr protein database, expect=20000, no filter, PAM30)  
 Other BLAST [web gateways](#)

## All matches to this query

| Score | Mr(calc)  | Delta   | Sequence                            |
|-------|-----------|---------|-------------------------------------|
| 93.2  | 1972.9172 | 0.0017  | <a href="#">PGPVIEEVNEEALMDAIK</a>  |
| 7.8   | 1972.9142 | 0.0047  | <a href="#">AFSNIKVDEDLQRTGK</a>    |
| 6.6   | 1972.9221 | -0.0032 | <a href="#">FPSALNMFDEIVNAK GK</a>  |
| 2.5   | 1972.9142 | 0.0047  | <a href="#">GSGQGDIEFKNEVSLLTR</a>  |
| 2.0   | 1972.9198 | -0.0009 | <a href="#">YAGDGGVTDMVVVGVVREK</a> |
| 1.3   | 1972.9138 | 0.0051  | <a href="#">ENSDFIILDDNFATIVK</a>   |

Mascot: <http://www.matrixscience.com/>

## Peptide View

### MS/MS Fragmentation of **LIGATDPQK**

Found in **AT4G11010.1** in **TAIR\_Arabidopsis**, Symbols: NDPK3 | NDPK3 (NUCLEOSIDE DIPHOSPHATE KINASE 3); ATP binding/nucleoside diphosphate kinase | chr4:6732776-6734294 REVERSE

Match to Query 1959: 941.519202 from(471.766877,2+) index(719)

Title: Elution from: 12.804 to 12.804 scan no 1051 cid35.00 polarity:+

Data file 0-2\_2.mgf

Click mouse within plot area to zoom in by factor of two about that point

Or,   to  Da

Label all possible matches  Label matches used for scoring

Show Y-axis

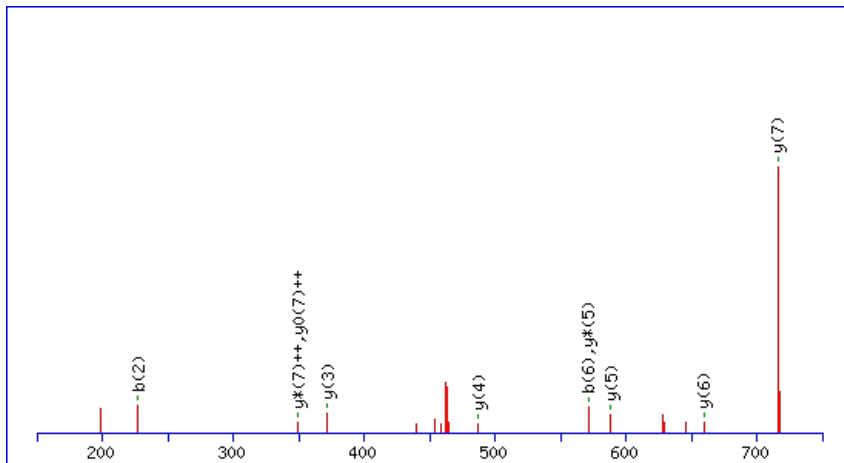

**Monoisotopic mass of neutral peptide Mr(calc):** 941.5182

**Fixed modifications:** Carbamidomethyl (C) (apply to specified residues or termini only)

**Ions Score:** 36 **Expect:** 0.00071

**Matches:** 10/68 fragment ions using 17 most intense peaks ([help](#))

| # | b               | b <sup>++</sup> | b*       | b <sup>*++</sup> | b <sup>0</sup> | b <sup>0++</sup> | Seq. | y               | y <sup>++</sup> | y*              | y <sup>*++</sup> | y <sup>0</sup> | y <sup>0++</sup> | # |
|---|-----------------|-----------------|----------|------------------|----------------|------------------|------|-----------------|-----------------|-----------------|------------------|----------------|------------------|---|
| 1 | 114.0913        | 57.5493         |          |                  |                |                  | L    |                 |                 |                 |                  |                |                  | 9 |
| 2 | <b>227.1754</b> | 114.0913        |          |                  |                |                  | I    | 829.4414        | 415.2243        | 812.4149        | 406.7111         | 811.4308       | 406.2191         | 8 |
| 3 | 284.1969        | 142.6021        |          |                  |                |                  | G    | <b>716.3573</b> | 358.6823        | 699.3308        | <b>350.1690</b>  | 698.3468       | <b>349.6770</b>  | 7 |
| 4 | 355.2340        | 178.1206        |          |                  |                |                  | A    | <b>659.3359</b> | 330.1716        | 642.3093        | 321.6583         | 641.3253       | 321.1663         | 6 |
| 5 | 456.2817        | 228.6445        |          |                  | 438.2711       | 219.6392         | T    | <b>588.2988</b> | 294.6530        | <b>571.2722</b> | 286.1397         | 570.2882       | 285.6477         | 5 |
| 6 | <b>571.3086</b> | 286.1579        |          |                  | 553.2980       | 277.1527         | D    | <b>487.2511</b> | 244.1292        | 470.2245        | 235.6159         | 469.2405       | 235.1239         | 4 |
| 7 | 668.3614        | 334.6843        |          |                  | 650.3508       | 325.6790         | P    | <b>372.2241</b> | 186.6157        | 355.1976        | 178.1024         |                |                  | 3 |
| 8 | 796.4199        | 398.7136        | 779.3934 | 390.2003         | 778.4094       | 389.7083         | Q    | 275.1714        | 138.0893        | 258.1448        | 129.5761         |                |                  | 2 |
| 9 |                 |                 |          |                  |                |                  | K    | 147.1128        | 74.0600         | 130.0863        | 65.5468          |                |                  | 1 |

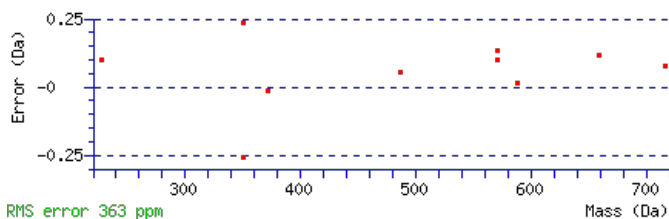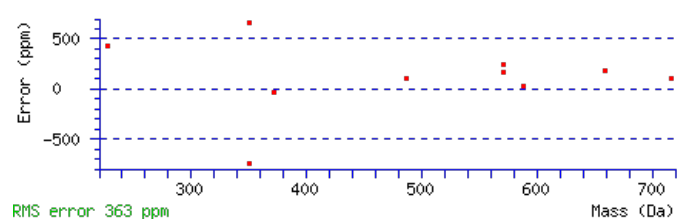

NCBI **BLAST** search of **LIGATDPQK**

(Parameters: blastp, nr protein database, expect=20000, no filter, PAM30)

Other BLAST [web gateways](#)

All matches to this query

| Score | Mr(calc) | Delta | Sequence |
|-------|----------|-------|----------|
|       |          |       |          |

AT4G11010.1

|      |          |        |                           |
|------|----------|--------|---------------------------|
| 36.0 | 941.5182 | 0.0010 | <a href="#">LIGATDPQK</a> |
|------|----------|--------|---------------------------|

|                                                                                          |
|------------------------------------------------------------------------------------------|
| <b>Mascot:</b> <a href="http://www.matrixscience.com/">http://www.matrixscience.com/</a> |
|------------------------------------------------------------------------------------------|

**Peptide View**MS/MS Fragmentation of **TCEGSSMAIVGRPSSR**Found in **AT4G11110.1** in **TAIR\_Arabidopsis**, Symbols: SPA2 | SPA2 (SPA1-RELATED 2); signal transducer | chr4:6772159-6776671  
FORWARD

Match to Query 8583: 1716.717402 from(859.365977,2+) index(5458)

Title: Elution from: 48.347 to 48.347 scan no 6777 cid35.00 polarity:+

Data file D12h-1\_1.mgf

Click mouse within plot area to zoom in by factor of two about that point

Or,  to  Da Label all possible matches  Label matches used for scoring Show Y-axis 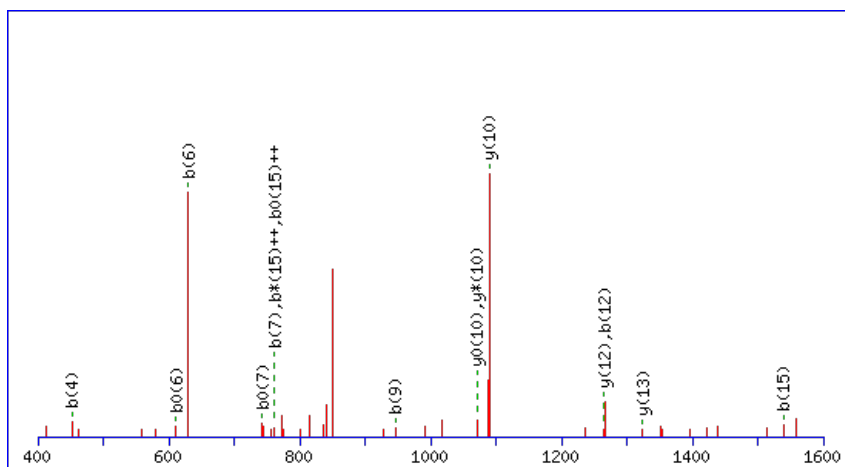Monoisotopic mass of neutral peptide  $M_r(\text{calc})$ : 1716.7194

Fixed modifications: Carbamidomethyl (C) (apply to specified residues or termini only)

Ions Score: 22 Expect: 0.029

Matches : 15/156 fragment ions using 38 most intense peaks ([help](#))

| #  | b                | b <sup>++</sup> | b*        | b <sup>*++</sup> | b <sup>0</sup>  | b <sup>0++</sup> | Seq. | y                | y <sup>++</sup> | y*               | y <sup>*++</sup> | y <sup>0</sup>   | y <sup>0++</sup> | #  |
|----|------------------|-----------------|-----------|------------------|-----------------|------------------|------|------------------|-----------------|------------------|------------------|------------------|------------------|----|
| 1  | 103.0520         | 52.0296         |           |                  | 85.0414         | 43.0244          | T    |                  |                 |                  |                  |                  |                  | 16 |
| 2  | 265.0767         | 133.0420        |           |                  | 247.0661        | 124.0367         | C    | 1615.6820        | 808.3446        | 1597.6584        | 799.3328         | 1597.6714        | 799.3393         | 15 |
| 3  | 395.1163         | 198.0618        |           |                  | 377.1058        | 189.0565         | E    | 1453.6572        | 727.3323        | 1435.6337        | 718.3205         | 1435.6467        | 718.3270         | 14 |
| 4  | <b>453.1348</b>  | 227.0711        |           |                  | 435.1243        | 218.0658         | G    | <b>1323.6176</b> | 662.3124        | 1305.5940        | 653.3007         | 1305.6070        | 653.3072         | 13 |
| 5  | 541.1639         | 271.0856        |           |                  | 523.1533        | 262.0803         | S    | <b>1265.5991</b> | 633.3032        | 1247.5755        | 624.2914         | 1247.5885        | 624.2979         | 12 |
| 6  | <b>629.1930</b>  | 315.1001        |           |                  | <b>611.1824</b> | 306.0948         | S    | 1177.5700        | 589.2887        | 1159.5465        | 580.2769         | 1159.5595        | 580.2834         | 11 |
| 7  | <b>761.2305</b>  | 381.1189        |           |                  | <b>743.2199</b> | 372.1136         | M    | <b>1089.5410</b> | 545.2741        | <b>1071.5174</b> | 536.2623         | <b>1071.5304</b> | 536.2688         | 10 |
| 8  | 833.2646         | 417.1360        |           |                  | 815.2541        | 408.1307         | A    | 957.5035         | 479.2554        | 939.4799         | 470.2436         | 939.4929         | 470.2501         | 9  |
| 9  | <b>947.3457</b>  | 474.1765        |           |                  | 929.3352        | 465.1712         | I    | 885.4693         | 443.2383        | 867.4457         | 434.2265         | 867.4587         | 434.2330         | 8  |
| 10 | 1047.4112        | 524.2092        |           |                  | 1029.4006       | 515.2039         | V    | 771.3882         | 386.1977        | 753.3646         | 377.1860         | 753.3777         | 377.1925         | 7  |
| 11 | 1105.4297        | 553.2185        |           |                  | 1087.4191       | 544.2132         | G    | 671.3228         | 336.1650        | 653.2992         | 327.1532         | 653.3122         | 327.1597         | 6  |
| 12 | <b>1265.5189</b> | 633.2631        | 1247.4953 | 624.2513         | 1247.5084       | 624.2578         | R    | 613.3043         | 307.1558        | 595.2807         | 298.1440         | 595.2937         | 298.1505         | 5  |
| 13 | 1363.5687        | 682.2880        | 1345.5451 | 673.2762         | 1345.5582       | 673.2827         | P    | 453.2150         | 227.1111        | 435.1914         | 218.0994         | 435.2045         | 218.1059         | 4  |
| 14 | 1451.5978        | 726.3025        | 1433.5742 | 717.2907         | 1433.5872       | 717.2972         | S    | 355.1652         | 178.0862        | 337.1416         | 169.0745         | 337.1547         | 169.0810         | 3  |
| 15 | <b>1539.6269</b> | 770.3171        | 1521.6033 | <b>761.3053</b>  | 1521.6163       | <b>761.3118</b>  | S    | 267.1362         | 134.0717        | 249.1126         | 125.0599         | 249.1256         | 125.0664         | 2  |
| 16 |                  |                 |           |                  |                 |                  | R    | 179.1071         | 90.0572         | 161.0835         | 81.0454          |                  |                  | 1  |

# AT4G11110.1

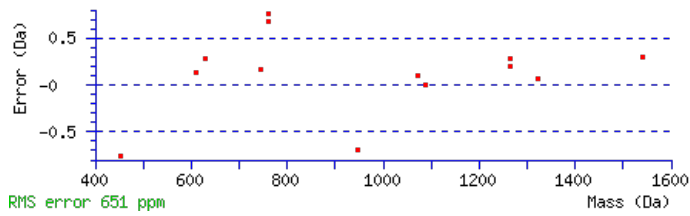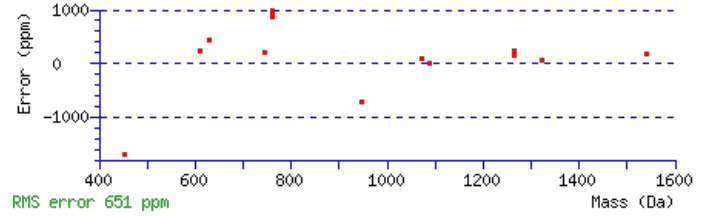

NCBI **BLAST** search of [TCEGSSMAIVGRPSSR](#)  
(Parameters: blastp, nr protein database, expect=20000, no filter, PAM30)  
Other BLAST [web gateways](#)

## All matches to this query

| Score | Mr(calc)  | Delta   | Sequence                         |
|-------|-----------|---------|----------------------------------|
| 22.1  | 1716.7194 | -0.0020 | <a href="#">TCEGSSMAIVGRPSSR</a> |
| 15.2  | 1716.7225 | -0.0051 | <a href="#">SDEEYFLVPSFPDR</a>   |
| 6.7   | 1716.7160 | 0.0014  | <a href="#">RQRDLFGSMDIENN</a>   |
| 2.7   | 1716.7169 | 0.0005  | <a href="#">ADRMFVMDKCLHR</a>    |
| 1.5   | 1716.7224 | -0.0050 | <a href="#">KNEMMMIPAAAASSK</a>  |
| 1.5   | 1716.7224 | -0.0050 | <a href="#">KNEMMMIPAAAASSK</a>  |
| 1.5   | 1716.7224 | -0.0050 | <a href="#">KNEMMMIPAAAASSK</a>  |

Mascot: <http://www.matrixscience.com/>

## Peptide View

### MS/MS Fragmentation of **VHAPEVAVDTK**

Found in **AT4G11150.1** in **TAIR\_Arabidopsis**, Symbols: EMB2448, TUFF, VHA-E1, TUF | TUF (VACUOLAR ATP SYNTHASE SUBUNIT E1) | chr4:6800087-6801692 FORWARD

Match to Query 4254: 1178.571588 from(393.864472,3+) index(1424)

Title: Elution from: 20.457 to 20.457 scan no 1969 cid35.00 polarity:+

Data file 0-1\_1.mgf

Click mouse within plot area to zoom in by factor of two about that point

Or,  to  Da

Label all possible matches  Label matches used for scoring

Show Y-axis

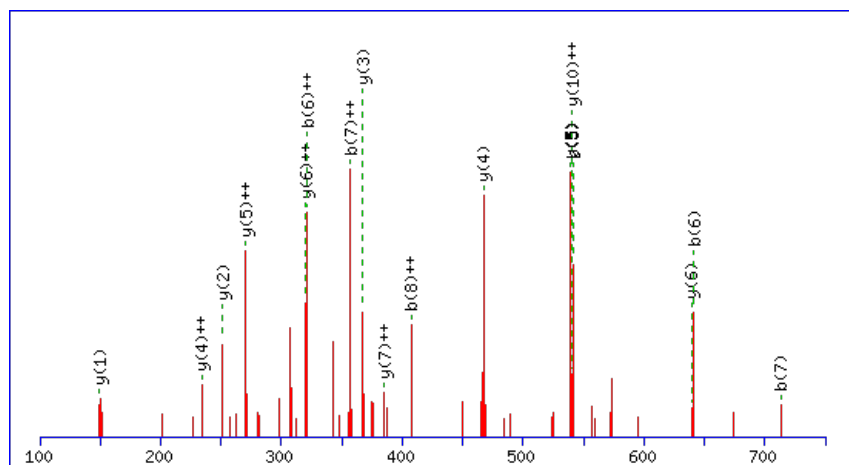

Monoisotopic mass of neutral peptide  $M_r(\text{calc})$ : 1178.5724

Fixed modifications: Carbamidomethyl (C) (apply to specified residues or termini only)

Ions Score: 44 Expect: 0.00036

Matches : 17/90 fragment ions using 32 most intense peaks ([help](#))

| #  | b         | b <sup>++</sup> | b <sup>0</sup> | b <sup>0++</sup> | Seq. | y         | y <sup>++</sup> | y*        | y <sup>*++</sup> | y <sup>0</sup> | y <sup>0++</sup> | #  |
|----|-----------|-----------------|----------------|------------------|------|-----------|-----------------|-----------|------------------|----------------|------------------|----|
| 1  | 101.0727  | 51.0400         |                |                  | V    |           |                 |           |                  |                |                  | 11 |
| 2  | 241.1227  | 121.0650        |                |                  | H    | 1079.5142 | 540.2607        | 1061.4906 | 531.2489         | 1061.5036      | 531.2555         | 10 |
| 3  | 313.1569  | 157.0821        |                |                  | A    | 939.4642  | 470.2357        | 921.4406  | 461.2239         | 921.4536       | 461.2304         | 9  |
| 4  | 411.2067  | 206.1070        |                |                  | P    | 867.4300  | 434.2187        | 849.4065  | 425.2069         | 849.4195       | 425.2134         | 8  |
| 5  | 541.2463  | 271.1268        | 523.2358       | 262.1215         | E    | 769.3802  | 385.1938        | 751.3567  | 376.1820         | 751.3697       | 376.1885         | 7  |
| 6  | 641.3118  | 321.1595        | 623.3012       | 312.1542         | V    | 639.3406  | 320.1739        | 621.3170  | 311.1622         | 621.3300       | 311.1687         | 6  |
| 7  | 713.3459  | 357.1766        | 695.3354       | 348.1713         | A    | 539.2752  | 270.1412        | 521.2516  | 261.1294         | 521.2646       | 261.1359         | 5  |
| 8  | 813.4114  | 407.2093        | 795.4008       | 398.2040         | V    | 467.2410  | 234.1241        | 449.2174  | 225.1124         | 449.2304       | 225.1189         | 4  |
| 9  | 929.4353  | 465.2213        | 911.4248       | 456.2160         | D    | 367.1756  | 184.0914        | 349.1520  | 175.0796         | 349.1650       | 175.0861         | 3  |
| 10 | 1031.4801 | 516.2437        | 1013.4695      | 507.2384         | T    | 251.1516  | 126.0794        | 233.1280  | 117.0676         | 233.1410       | 117.0741         | 2  |
| 11 |           |                 |                |                  | K    | 149.1069  | 75.0571         | 131.0833  | 66.0453          |                |                  | 1  |

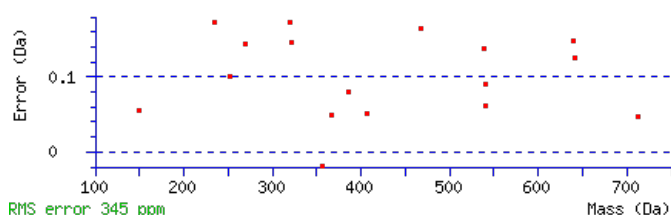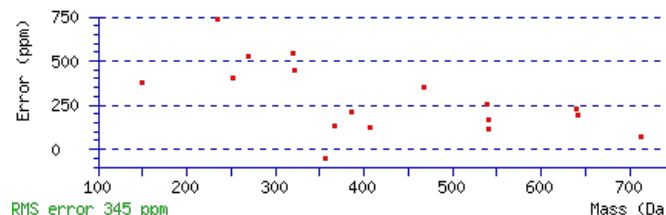

NCBI BLAST search of **VHAPEVAVDTK**

(Parameters: blastp, nr protein database, expect=20000, no filter, PAM30)

Other BLAST [web gateways](#)

All matches to this query



**AT4G11150.1**

| <b>Score</b> | <b>Mr(calc)</b> | <b>Delta</b> | <b>Sequence</b>             |
|--------------|-----------------|--------------|-----------------------------|
| 43.9         | 1178.5724       | -0.0008      | <a href="#">VHAPEVAVDTK</a> |
| 11.3         | 1178.5728       | -0.0012      | <a href="#">RASSKTNLER</a>  |
| 6.3          | 1178.5683       | 0.0032       | <a href="#">MIKMLGEVSK</a>  |
| 6.0          | 1178.5699       | 0.0017       | <a href="#">MFAPTKIWR</a>   |
| 5.4          | 1178.5724       | -0.0008      | <a href="#">SDRTLGFLEK</a>  |

**Mascot:** <http://www.matrixscience.com/>

## Peptide View

### MS/MS Fragmentation of **SLDLAKPCK**

Found in **AT4G11210.1** in **TAIR\_Arabidopsis**, Symbols: | disease resistance-responsive family protein / dirigent family protein | chr4:6832687-6833241 FORWARD

Match to Query 2762: 1042.514158 from(522.264355,2+) index(4199)

Title: Elution from: 38.987 to 38.987 scan no 5287 cid35.00 polarity:+

Data file C7-3\_3.mgf

Click mouse within plot area to zoom in by factor of two about that point

Or,   to  Da

Label all possible matches  Label matches used for scoring

Show Y-axis

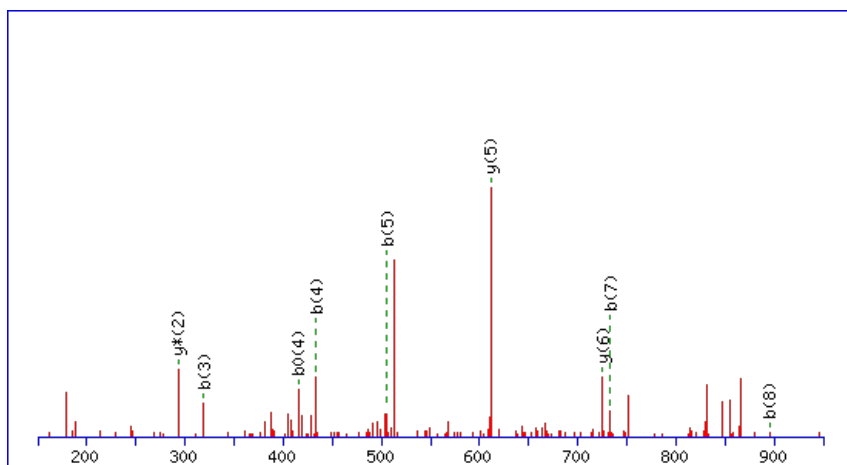

Monoisotopic mass of neutral peptide  $M_r(\text{calc})$ : 1042.5125

Fixed modifications: Carbamidomethyl (C) (apply to specified residues or termini only)

Ions Score: 24 Expect: 0.035

Matches : 9/74 fragment ions using 24 most intense peaks ([help](#))

| # | b               | b <sup>++</sup> | b*       | b <sup>*++</sup> | b <sup>0</sup>  | b <sup>0++</sup> | Seq. | y               | y <sup>++</sup> | y*              | y <sup>*++</sup> | y <sup>0</sup> | y <sup>0++</sup> | # |
|---|-----------------|-----------------|----------|------------------|-----------------|------------------|------|-----------------|-----------------|-----------------|------------------|----------------|------------------|---|
| 1 | 89.0363         | 45.0218         |          |                  | 71.0258         | 36.0165          | S    |                 |                 |                 |                  |                |                  | 9 |
| 2 | 203.1174        | 102.0624        |          |                  | 185.1069        | 93.0571          | L    | 955.4907        | 478.2490        | 937.4672        | 469.2372         | 937.4802       | 469.2437         | 8 |
| 3 | <b>319.1414</b> | 160.0743        |          |                  | 301.1309        | 151.0691         | D    | 841.4097        | 421.2085        | 823.3861        | 412.1967         | 823.3991       | 412.2032         | 7 |
| 4 | <b>433.2225</b> | 217.1149        |          |                  | <b>415.2120</b> | 208.1096         | L    | <b>725.3857</b> | 363.1965        | 707.3621        | 354.1847         |                |                  | 6 |
| 5 | <b>505.2567</b> | 253.1320        |          |                  | 487.2461        | 244.1267         | A    | <b>611.3046</b> | 306.1559        | 593.2810        | 297.1441         |                |                  | 5 |
| 6 | 635.3457        | 318.1765        | 617.3221 | 309.1647         | 617.3351        | 309.1712         | K    | 539.2704        | 270.1389        | 521.2468        | 261.1271         |                |                  | 4 |
| 7 | <b>733.3955</b> | 367.2014        | 715.3719 | 358.1896         | 715.3849        | 358.1961         | P    | 409.1814        | 205.0943        | 391.1578        | 196.0825         |                |                  | 3 |
| 8 | <b>895.4202</b> | 448.2137        | 877.3966 | 439.2020         | 877.4096        | 439.2085         | C    | 311.1316        | 156.0694        | <b>293.1080</b> | 147.0576         |                |                  | 2 |
| 9 |                 |                 |          |                  |                 |                  | K    | 149.1069        | 75.0571         | 131.0833        | 66.0453          |                |                  | 1 |

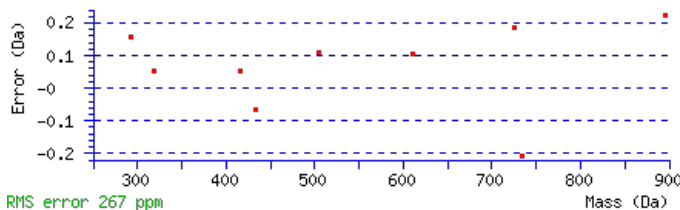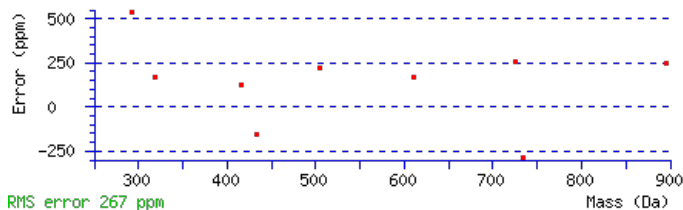

NCBI **BLAST** search of [SLDLAKPCK](#)

(Parameters: blastp, nr protein database, expect=20000, no filter, PAM30)

Other BLAST [web gateways](#)

All matches to this query

| Score | $M_r(\text{calc})$ | Delta | Sequence |
|-------|--------------------|-------|----------|
|       |                    |       |          |

## AT4G11210.1

|      |           |         |                           |
|------|-----------|---------|---------------------------|
| 23.9 | 1042.5125 | 0.0016  | <a href="#">SLDLAKPCK</a> |
| 11.5 | 1042.5125 | 0.0016  | <a href="#">VSISPMEIR</a> |
| 11.4 | 1042.5118 | 0.0023  | <a href="#">FTQHNLLR</a>  |
| 11.3 | 1042.5152 | -0.0011 | <a href="#">LPNGCAIKR</a> |
| 6.5  | 1042.5125 | 0.0016  | <a href="#">EMELQILR</a>  |
| 6.5  | 1042.5152 | -0.0010 | <a href="#">MKQLVTHR</a>  |
| 5.6  | 1042.5125 | 0.0016  | <a href="#">ELGLALEMR</a> |
| 5.5  | 1042.5118 | 0.0023  | <a href="#">FGTVVYNHR</a> |
| 5.2  | 1042.5125 | 0.0016  | <a href="#">GPLESLMIR</a> |
| 5.0  | 1042.5125 | 0.0016  | <a href="#">LEELQLMR</a>  |

Mascot: <http://www.matrixscience.com/>

**Peptide View**MS/MS Fragmentation of **SALLSELVSK**

Found in **AT4G11420.1** in **TAIR\_Arabidopsis**, Symbols: ATEIF3A-1, EIF3A-1, ATTIF3A1, TIF3A1, EIF3A | EIF3A (eukaryotic translation initiation factor 3A) | chr4:6947829-6952048 REVERSE

Match to Query 2458: 1045.600574 from(523.807563,2+) index(5894)

Title: Elution from: 55.595 to 55.595 scan no 7686 cid35.00 polarity:+

Data file D1d-2\_2.mgf

Click mouse within plot area to zoom in by factor of two about that point

Or,   to  Da

Label all possible matches  Label matches used for scoring

Show Y-axis

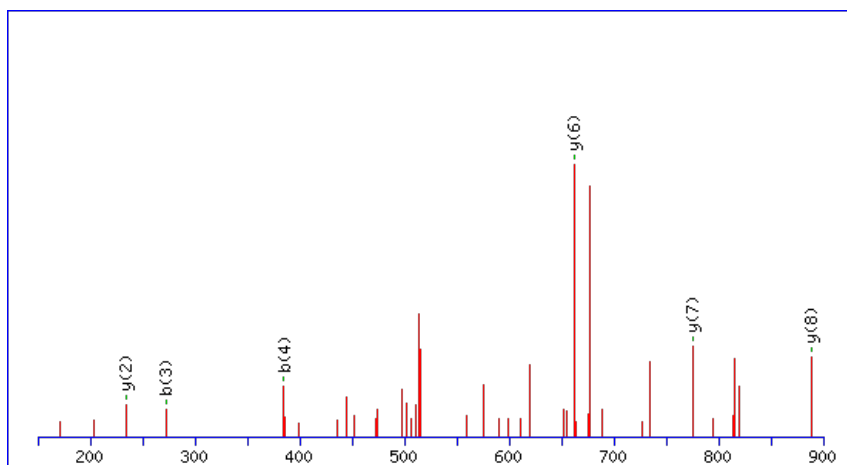

**Monoisotopic mass of neutral peptide Mr(calc):** 1045.6019

**Fixed modifications:** Carbamidomethyl (C) (apply to specified residues or termini only)

**Ions Score:** 31 **Expect:** 0.0024

**Matches:** 6/88 fragment ions using 8 most intense peaks ([help](#))

| #  | b               | b <sup>++</sup> | b <sup>0</sup> | b <sup>0++</sup> | Seq. | y               | y <sup>++</sup> | y*       | y <sup>*++</sup> | y <sup>0</sup> | y <sup>0++</sup> | #  |
|----|-----------------|-----------------|----------------|------------------|------|-----------------|-----------------|----------|------------------|----------------|------------------|----|
| 1  | 88.0393         | 44.5233         | 70.0287        | 35.5180          | S    |                 |                 |          |                  |                |                  | 10 |
| 2  | 159.0764        | 80.0418         | 141.0659       | 71.0366          | A    | 959.5772        | 480.2922        | 942.5506 | 471.7790         | 941.5666       | 471.2869         | 9  |
| 3  | <b>272.1605</b> | 136.5839        | 254.1499       | 127.5786         | L    | <b>888.5401</b> | 444.7737        | 871.5135 | 436.2604         | 870.5295       | 435.7684         | 8  |
| 4  | <b>385.2445</b> | 193.1259        | 367.2340       | 184.1206         | L    | <b>775.4560</b> | 388.2316        | 758.4294 | 379.7184         | 757.4454       | 379.2264         | 7  |
| 5  | 472.2766        | 236.6419        | 454.2660       | 227.6366         | S    | <b>662.3719</b> | 331.6896        | 645.3454 | 323.1763         | 644.3614       | 322.6843         | 6  |
| 6  | 601.3192        | 301.1632        | 583.3086       | 292.1579         | E    | 575.3399        | 288.1736        | 558.3134 | 279.6603         | 557.3293       | 279.1683         | 5  |
| 7  | 714.4032        | 357.7053        | 696.3927       | 348.7000         | L    | 446.2973        | 223.6523        | 429.2708 | 215.1390         | 428.2867       | 214.6470         | 4  |
| 8  | 813.4716        | 407.2395        | 795.4611       | 398.2342         | V    | 333.2132        | 167.1103        | 316.1867 | 158.5970         | 315.2027       | 158.1050         | 3  |
| 9  | 900.5037        | 450.7555        | 882.4931       | 441.7502         | S    | <b>234.1448</b> | 117.5761        | 217.1183 | 109.0628         | 216.1343       | 108.5708         | 2  |
| 10 |                 |                 |                |                  | K    | 147.1128        | 74.0600         | 130.0863 | 65.5468          |                |                  | 1  |

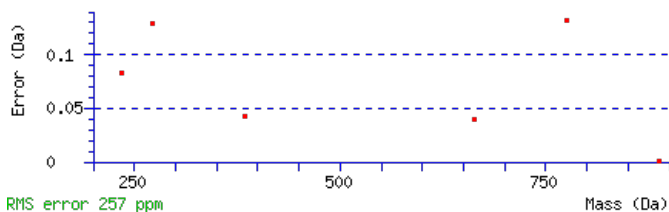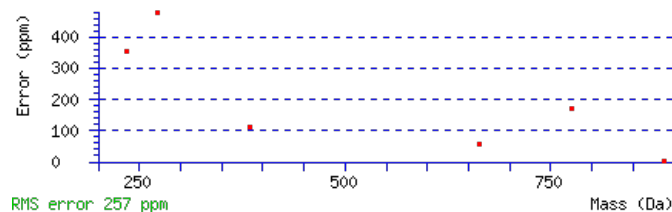

NCBI **BLAST** search of **SALLSELVSK**

(Parameters: blastp, nr protein database, expect=20000, no filter, PAM30)

Other BLAST [web gateways](#)

**All matches to this query**

AT4G11420.1

| Score | Mr(calc)  | Delta   | Sequence                   |
|-------|-----------|---------|----------------------------|
| 31.3  | 1045.6019 | -0.0013 | <a href="#">SALLSELYSK</a> |
| 6.4   | 1045.6019 | -0.0013 | <a href="#">ELKTIDLSK</a>  |

Mascot: <http://www.matrixscience.com/>

**Peptide View**MS/MS Fragmentation of **FAPTTSPLSIEK**

Found in **AT4G11600.1** in **TAIR\_Arabidopsis**, Symbols: PHGPX, LSC803, ATGPX6 | ATGPX6 (GLUTATHIONE PEROXIDASE 6); glutathione peroxidase | chr4:7010015-7011324 REVERSE

Match to Query 4928: 1289.685054 from(645.849803,2+) index(5256)

Title: Elution from: 46.399 to 46.399 scan no 6558 cid35.00 polarity:+

Data file C7-1\_1.mgf

Click mouse within plot area to zoom in by factor of two about that point

Or,   to  Da

Label all possible matches  Label matches used for scoring

Show Y-axis

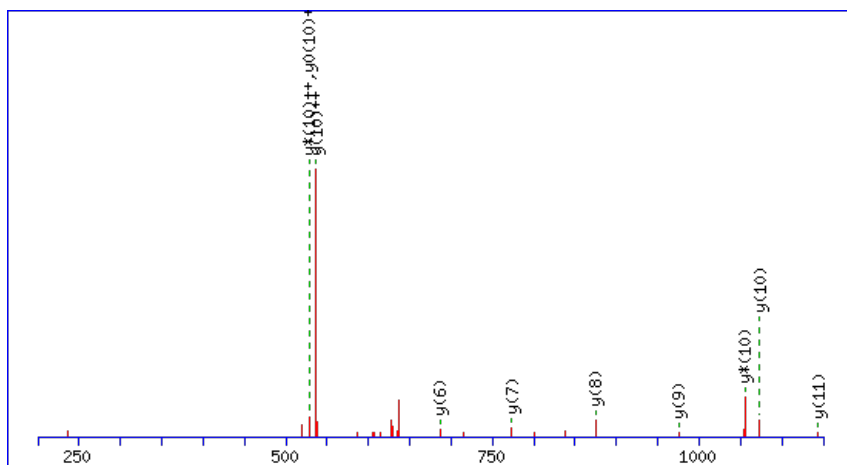

Monoisotopic mass of neutral peptide  $M_r(\text{calc})$ : 1289.6867

Fixed modifications: Carbamidomethyl (C) (apply to specified residues or termini only)

Ions Score: 44 Expect: 0.0002

Matches : 10/102 fragment ions using 15 most intense peaks ([help](#))

| #  | b         | b <sup>++</sup> | b <sup>0</sup> | b <sup>0++</sup> | Seq. | y                | y <sup>++</sup> | y*               | y <sup>*++</sup> | y <sup>0</sup> | y <sup>0++</sup> | #  |
|----|-----------|-----------------|----------------|------------------|------|------------------|-----------------|------------------|------------------|----------------|------------------|----|
| 1  | 148.0757  | 74.5415         |                |                  | F    |                  |                 |                  |                  |                |                  | 12 |
| 2  | 219.1128  | 110.0600        |                |                  | A    | <b>1143.6256</b> | 572.3164        | 1126.5990        | 563.8032         | 1125.6150      | 563.3111         | 11 |
| 3  | 316.1656  | 158.5864        |                |                  | P    | <b>1072.5885</b> | <b>536.7979</b> | <b>1055.5619</b> | <b>528.2846</b>  | 1054.5779      | <b>527.7926</b>  | 10 |
| 4  | 417.2132  | 209.1103        | 399.2027       | 200.1050         | T    | <b>975.5357</b>  | 488.2715        | 958.5092         | 479.7582         | 957.5251       | 479.2662         | 9  |
| 5  | 518.2609  | 259.6341        | 500.2504       | 250.6288         | T    | <b>874.4880</b>  | 437.7477        | 857.4615         | 429.2344         | 856.4775       | 428.7424         | 8  |
| 6  | 605.2930  | 303.1501        | 587.2824       | 294.1448         | S    | <b>773.4403</b>  | 387.2238        | 756.4138         | 378.7105         | 755.4298       | 378.2185         | 7  |
| 7  | 702.3457  | 351.6765        | 684.3352       | 342.6712         | P    | <b>686.4083</b>  | 343.7078        | 669.3818         | 335.1945         | 668.3978       | 334.7025         | 6  |
| 8  | 815.4298  | 408.2185        | 797.4192       | 399.2132         | L    | 589.3556         | 295.1814        | 572.3290         | 286.6681         | 571.3450       | 286.1761         | 5  |
| 9  | 902.4618  | 451.7345        | 884.4512       | 442.7293         | S    | 476.2715         | 238.6394        | 459.2449         | 230.1261         | 458.2609       | 229.6341         | 4  |
| 10 | 1015.5459 | 508.2766        | 997.5353       | 499.2713         | I    | 389.2395         | 195.1234        | 372.2129         | 186.6101         | 371.2289       | 186.1181         | 3  |
| 11 | 1144.5885 | 572.7979        | 1126.5779      | 563.7926         | E    | 276.1554         | 138.5813        | 259.1288         | 130.0681         | 258.1448       | 129.5761         | 2  |
| 12 |           |                 |                |                  | K    | 147.1128         | 74.0600         | 130.0863         | 65.5468          |                |                  | 1  |

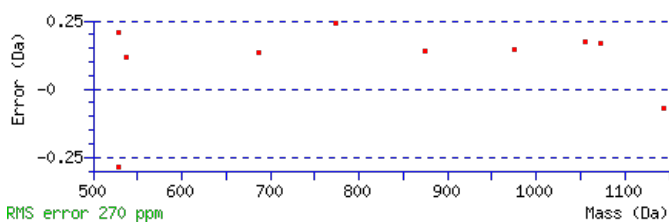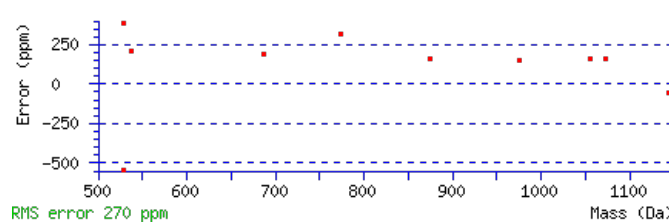NCBI BLAST search of **FAPTTSPLSIEK**

(Parameters: blastp, nr protein database, expect=20000, no filter, PAM30)

Other BLAST [web gateways](#)

**AT4G11600.1****All matches to this query**

| Score | Mr(calc)  | Delta   | Sequence                       |
|-------|-----------|---------|--------------------------------|
| 44.5  | 1289.6867 | -0.0017 | <a href="#">FAPTSPLSIEK</a>    |
| 4.6   | 1289.6874 | -0.0023 | <a href="#">MAGRKTLGSGGAK</a>  |
| 3.9   | 1289.6874 | -0.0023 | <a href="#">MADLVKTNARR</a>    |
| 3.8   | 1289.6874 | -0.0023 | <a href="#">MARVGAkSSGAGAK</a> |
| 2.5   | 1289.6840 | 0.0010  | <a href="#">SGGKVFSRAEPR</a>   |
| 2.3   | 1289.6827 | 0.0024  | <a href="#">KLDTEVSDQKK</a>    |

**Mascot:** <http://www.matrixscience.com/>

## Peptide View

MS/MS Fragmentation of **NLIAENKMLMEK**

Found in **AT4G11880.1** in **TAIR\_Arabidopsis**, Symbols: | AGL14 (AGAMOUS-LIKE 14); DNA binding / transcription factor | chr4:7143506-7147102 FORWARD

Match to Query 6375: 1464.692748 from(733.353650,2+) index(7137)

Title: Elution from: 61.963 to 61.963 scan no 9064 cid35.00 polarity:+

Data file D12h-1\_1.mgf

Click mouse within plot area to zoom in by factor of two about that point

Or,   to  Da

Label all possible matches  Label matches used for scoring

Show Y-axis

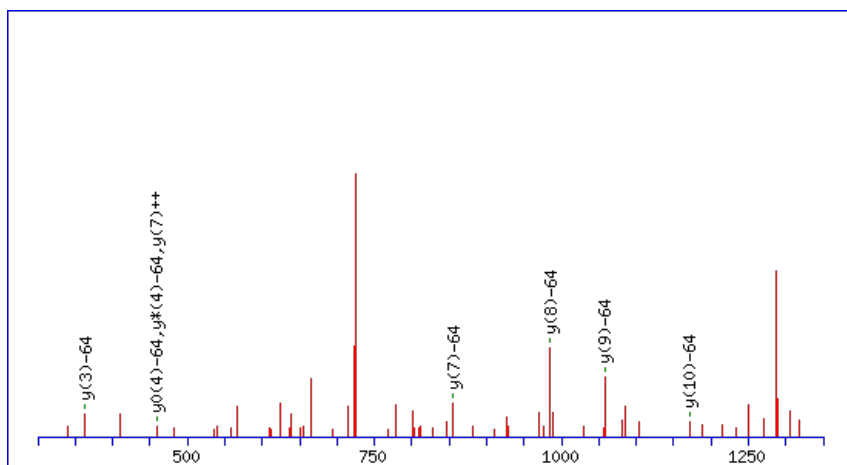

Monoisotopic mass of neutral peptide  $M_r(\text{calc})$ : 1464.6893

Fixed modifications: Carbamidomethyl (C) (apply to specified residues or termini only)

Variable modifications:

M10 : Oxidation (M), with neutral losses 63.9983 (shown in table), 0.0000

Ions Score: 25 Expect: 0.033

Matches : 8/188 fragment ions using 10 most intense peaks ([help](#))

| #  | b         | b <sup>++</sup> | b <sup>*</sup> | b <sup>*++</sup> | b <sup>0</sup> | b <sup>0++</sup> | Seq. | y                | y <sup>++</sup> | y <sup>*</sup>  | y <sup>*++</sup> | y <sup>0</sup>  | y <sup>0++</sup> | #  |
|----|-----------|-----------------|----------------|------------------|----------------|------------------|------|------------------|-----------------|-----------------|------------------|-----------------|------------------|----|
| 1  | 117.0443  | 59.0258         | 99.0207        | 50.0140          |                |                  | N    |                  |                 |                 |                  |                 |                  | 12 |
| 2  | 231.1254  | 116.0663        | 213.1018       | 107.0545         |                |                  | L    | 1285.6613        | 643.3343        | 1267.6377       | 634.3225         | 1267.6507       | 634.3290         | 11 |
| 3  | 345.2065  | 173.1069        | 327.1829       | 164.0951         |                |                  | I    | <b>1171.5802</b> | 586.2937        | 1153.5566       | 577.2819         | 1153.5696       | 577.2884         | 10 |
| 4  | 417.2406  | 209.1239        | 399.2170       | 200.1122         |                |                  | A    | <b>1057.4991</b> | 529.2532        | 1039.4755       | 520.2414         | 1039.4885       | 520.2479         | 9  |
| 5  | 547.2802  | 274.1438        | 529.2567       | 265.1320         | 529.2697       | 265.1385         | E    | <b>985.4649</b>  | 493.2361        | 967.4413        | 484.2243         | 967.4544        | 484.2308         | 8  |
| 6  | 663.3172  | 332.1623        | 645.2937       | 323.1505         | 645.3067       | 323.1570         | N    | <b>855.4253</b>  | 428.2163        | 837.4017        | 419.2045         | 837.4147        | 419.2110         | 7  |
| 7  | 793.4063  | 397.2068        | 775.3827       | 388.1950         | 775.3957       | 388.2015         | K    | 739.3883         | 370.1978        | 721.3647        | 361.1860         | 721.3777        | 361.1925         | 6  |
| 8  | 925.4438  | 463.2255        | 907.4202       | 454.2137         | 907.4332       | 454.2203         | M    | 609.2993         | 305.1533        | 591.2757        | 296.1415         | 591.2887        | 296.1480         | 5  |
| 9  | 1039.5249 | 520.2661        | 1021.5013      | 511.2543         | 1021.5143      | 511.2608         | L    | 477.2618         | 239.1345        | <b>459.2382</b> | 230.1227         | <b>459.2512</b> | 230.1292         | 4  |
| 10 | 1123.5590 | 562.2832        | 1105.5355      | 553.2714         | 1105.5485      | 553.2779         | M    | <b>363.1807</b>  | 182.0940        | 345.1571        | 173.0822         | 345.1701        | 173.0887         | 3  |
| 11 | 1253.5987 | 627.3030        | 1235.5751      | 618.2912         | 1235.5881      | 618.2977         | E    | 279.1465         | 140.0769        | 261.1229        | 131.0651         | 261.1359        | 131.0716         | 2  |
| 12 |           |                 |                |                  |                |                  | K    | 149.1069         | 75.0571         | 131.0833        | 66.0453          |                 |                  | 1  |

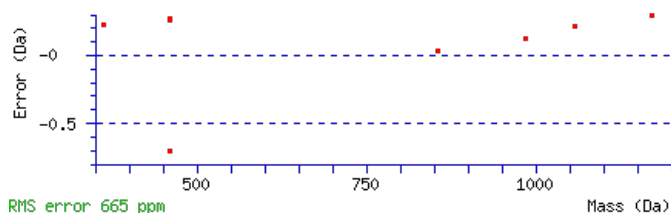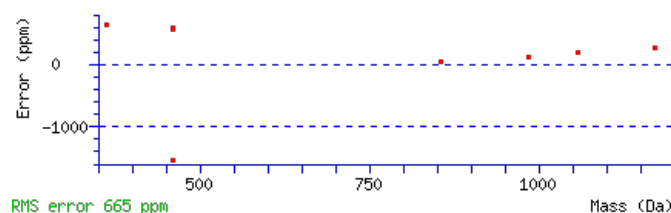

NCBI BLAST search of **NLIAENKMLMEK**

(Parameters: blastp, nr protein database, expect=20000, no filter, PAM30)



# AT4G11880.1

Other BLAST [web gateways](#)

## All matches to this query

| Score | Mr(calc)  | Delta   | Sequence                       | Site Analysis        |
|-------|-----------|---------|--------------------------------|----------------------|
| 25.4  | 1464.6893 | 0.0034  | <a href="#">NLIAENKMLMEK</a>   | Oxidation M10 96.21% |
| 15.7  | 1464.6933 | -0.0006 | <a href="#">RAFVEDILNENK</a>   |                      |
| 13.1  | 1464.6911 | 0.0017  | <a href="#">NSKDDLTVTANLR</a>  |                      |
| 12.0  | 1464.6933 | -0.0006 | <a href="#">RVFGAEAPKESEK</a>  |                      |
| 11.4  | 1464.6893 | 0.0034  | <a href="#">NLIAENKMLMEK</a>   | Oxidation M8 3.79%   |
| 10.2  | 1464.6911 | 0.0017  | <a href="#">QSSTDVSQVLNLR</a>  |                      |
| 9.7   | 1464.6933 | -0.0005 | <a href="#">DQDIRLGDFGLAK</a>  |                      |
| 9.2   | 1464.6906 | 0.0021  | <a href="#">TEEVLSGFSKPEK</a>  |                      |
| 8.8   | 1464.6967 | -0.0039 | <a href="#">RIMVTPEETISR</a>   |                      |
| 8.5   | 1464.6967 | -0.0039 | <a href="#">IGSPAMTTRGLSEK</a> |                      |

Mascot: <http://www.matrixscience.com/>

# MASCOT Search Results

## Peptide View

### MS/MS Fragmentation of **KWQAALK**

Found in **AT4G12020.1** in **TAIR\_Arabidopsis**, Symbols: ATWRKY19, MAPKKK11, WRKY19 | WRKY19 (WRKY DNA-binding protein 19); transcription factor | chr4:7201650-7208590 FORWARD

Match to Query 1239: 854.463592 from(428.239072,2+) index(2862)

Title: Elution from: 28.604 to 28.604 scan no 3569 cid35.00 polarity:+

Data file 0-3\_3.mgf

Click mouse within plot area to zoom in by factor of two about that point

Or,   to  Da

Label all possible matches  Label matches used for scoring

Show Y-axis

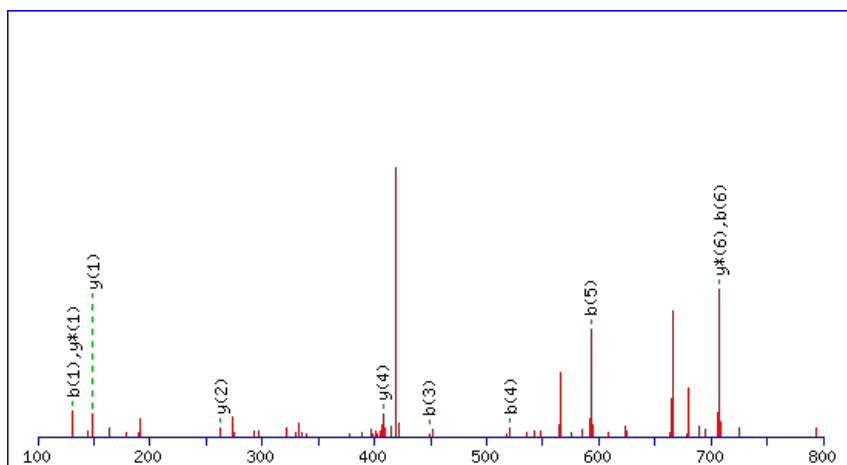

Monoisotopic mass of neutral peptide  $M_r(\text{calc})$ : 854.4641

Fixed modifications: Carbamidomethyl (C) (apply to specified residues or termini only)

Ions Score: 31 Expect: 0.009

Matches : 10/48 fragment ions using 19 most intense peaks ([help](#))

| # | b               | b <sup>++</sup> | b*       | b <sup>*++</sup> | Seq.     | y               | y <sup>++</sup> | y*              | y <sup>*++</sup> | #        |
|---|-----------------|-----------------|----------|------------------|----------|-----------------|-----------------|-----------------|------------------|----------|
| 1 | <b>131.0963</b> | 66.0518         | 113.0727 | 57.0400          | <b>K</b> |                 |                 |                 |                  | <b>7</b> |
| 2 | 319.1697        | 160.0885        | 301.1461 | 151.0767         | <b>W</b> | 725.3823        | 363.1948        | <b>707.3587</b> | 354.1830         | <b>6</b> |
| 3 | <b>449.2223</b> | 225.1148        | 431.1988 | 216.1030         | <b>Q</b> | 537.3089        | 269.1581        | 519.2853        | 260.1463         | <b>5</b> |
| 4 | <b>521.2565</b> | 261.1319        | 503.2329 | 252.1201         | <b>A</b> | <b>407.2563</b> | 204.1318        | 389.2327        | 195.1200         | <b>4</b> |
| 5 | <b>593.2906</b> | 297.1490        | 575.2671 | 288.1372         | <b>A</b> | 335.2221        | 168.1147        | 317.1985        | 159.1029         | <b>3</b> |
| 6 | <b>707.3717</b> | 354.1895        | 689.3482 | 345.1777         | <b>L</b> | <b>263.1880</b> | 132.0976        | 245.1644        | 123.0858         | <b>2</b> |
| 7 |                 |                 |          |                  | <b>K</b> | <b>149.1069</b> | 75.0571         | <b>131.0833</b> | 66.0453          | <b>1</b> |

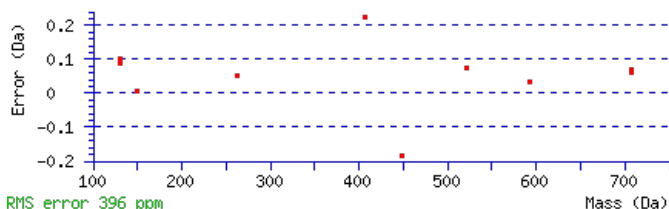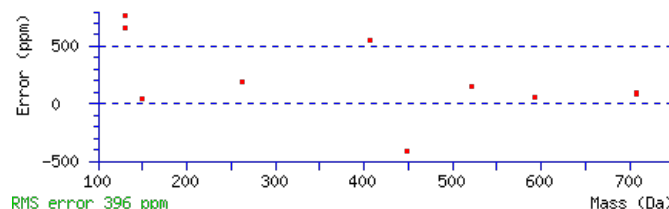

NCBI BLAST search of [KWQAALK](#)

(Parameters: blastp, nr protein database, expect=20000, no filter, PAM30)

Other BLAST [web gateways](#)

### All matches to this query

| Score | $M_r(\text{calc})$ | Delta   | Sequence                |
|-------|--------------------|---------|-------------------------|
| 31.4  | 854.4641           | -0.0005 | <a href="#">KWQAALK</a> |
| 28.3  | 854.4618           | 0.0018  | <a href="#">ORLELGK</a> |

# AT4G12020.1

|      |          |         |                          |
|------|----------|---------|--------------------------|
| 24.0 | 854.4618 | 0.0018  | <a href="#">REIQAVK</a>  |
| 16.6 | 854.4641 | -0.0005 | <a href="#">ELRWLK</a>   |
| 15.6 | 854.4618 | 0.0018  | <a href="#">ERGVVVGK</a> |
| 14.3 | 854.4618 | 0.0018  | <a href="#">DQIRALK</a>  |
| 14.3 | 854.4618 | 0.0018  | <a href="#">NLREAIK</a>  |
| 14.3 | 854.4618 | 0.0018  | <a href="#">RVAEGALK</a> |
| 14.3 | 854.4618 | 0.0018  | <a href="#">EANRLK</a>   |
| 14.3 | 854.4618 | 0.0018  | <a href="#">EARNILK</a>  |

Mascot: <http://www.matrixscience.com/>

**Peptide View**MS/MS Fragmentation of **VYLEQDDFVKTMK**Found in **AT4G12400.1** in **TAIR\_Arabidopsis**, Symbols: | stress-inducible protein, putative | chr4:7339021-7341236 REVERSE

Match to Query 7522: 1630.751258 from(816.382905,2+) index(6878)

Title: Elution from: 59.983 to 59.983 scan no 8795 cid35.00 polarity:+

Data file C7-2\_2.mgf

Click mouse within plot area to zoom in by factor of two about that point

Or,   to  Da Label all possible matches  Label matches used for scoring Show Y-axis 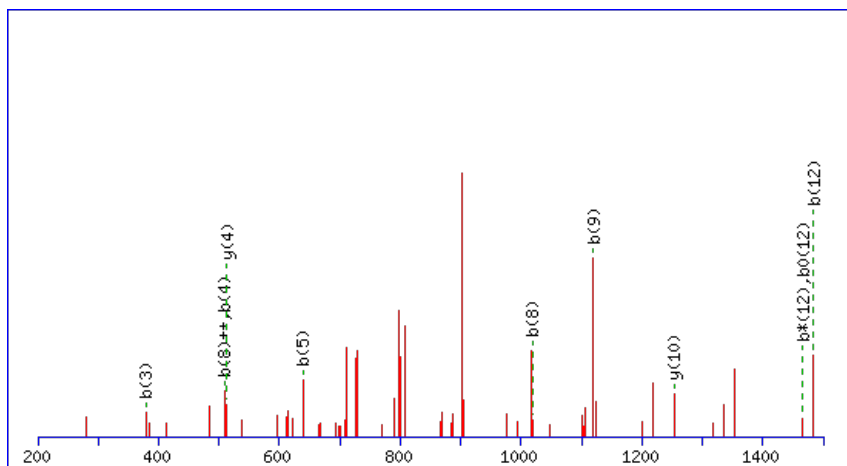Monoisotopic mass of neutral peptide  $M_r(\text{calc})$ : 1630.7489

Fixed modifications: Carbamidomethyl (C) (apply to specified residues or termini only)

Ions Score: 27 Expect: 0.013

Matches : 11/126 fragment ions using 24 most intense peaks ([help](#))

| #  | b                | b <sup>++</sup> | b*               | b <sup>*++</sup> | b <sup>0</sup>   | b <sup>0++</sup> | Seq. | y                | y <sup>++</sup> | y*        | y <sup>*++</sup> | y <sup>0</sup> | y <sup>0++</sup> | #  |
|----|------------------|-----------------|------------------|------------------|------------------|------------------|------|------------------|-----------------|-----------|------------------|----------------|------------------|----|
| 1  | 101.0727         | 51.0400         |                  |                  |                  |                  | V    |                  |                 |           |                  |                |                  | 13 |
| 2  | 265.1331         | 133.0702        |                  |                  |                  |                  | Y    | 1531.6907        | 766.3490        | 1513.6671 | 757.3372         | 1513.6802      | 757.3437         | 12 |
| 3  | <b>379.2142</b>  | 190.1107        |                  |                  |                  |                  | L    | 1367.6304        | 684.3188        | 1349.6068 | 675.3070         | 1349.6198      | 675.3135         | 11 |
| 4  | <b>509.2538</b>  | 255.1305        |                  |                  | 491.2433         | 246.1253         | E    | <b>1253.5493</b> | 627.2783        | 1235.5257 | 618.2665         | 1235.5387      | 618.2730         | 10 |
| 5  | <b>639.3065</b>  | 320.1569        | 621.2829         | 311.1451         | 621.2959         | 311.1516         | Q    | 1123.5096        | 562.2585        | 1105.4861 | 553.2467         | 1105.4991      | 553.2532         | 9  |
| 6  | 755.3304         | 378.1689        | 737.3069         | 369.1571         | 737.3199         | 369.1636         | D    | 993.4570         | 497.2321        | 975.4334  | 488.2203         | 975.4464       | 488.2269         | 8  |
| 7  | 871.3544         | 436.1808        | 853.3308         | 427.1691         | 853.3439         | 427.1756         | D    | 877.4330         | 439.2201        | 859.4094  | 430.2084         | 859.4225       | 430.2149         | 7  |
| 8  | <b>1019.4199</b> | <b>510.2136</b> | 1001.3963        | 501.2018         | 1001.4093        | 501.2083         | F    | 761.4090         | 381.2082        | 743.3855  | 372.1964         | 743.3985       | 372.2029         | 6  |
| 9  | <b>1119.4853</b> | 560.2463        | 1101.4617        | 551.2345         | 1101.4748        | 551.2410         | V    | 613.3436         | 307.1754        | 595.3200  | 298.1636         | 595.3330       | 298.1702         | 5  |
| 10 | 1249.5743        | 625.2908        | 1231.5508        | 616.2790         | 1231.5638        | 616.2855         | K    | <b>513.2781</b>  | 257.1427        | 495.2546  | 248.1309         | 495.2676       | 248.1374         | 4  |
| 11 | 1351.6191        | 676.3132        | 1333.5955        | 667.3014         | 1333.6085        | 667.3079         | T    | 383.1891         | 192.0982        | 365.1655  | 183.0864         | 365.1785       | 183.0929         | 3  |
| 12 | <b>1483.6566</b> | 742.3319        | <b>1465.6330</b> | 733.3201         | <b>1465.6460</b> | 733.3266         | M    | 281.1444         | 141.0758        | 263.1208  | 132.0640         |                |                  | 2  |
| 13 |                  |                 |                  |                  |                  |                  | K    | 149.1069         | 75.0571         | 131.0833  | 66.0453          |                |                  | 1  |

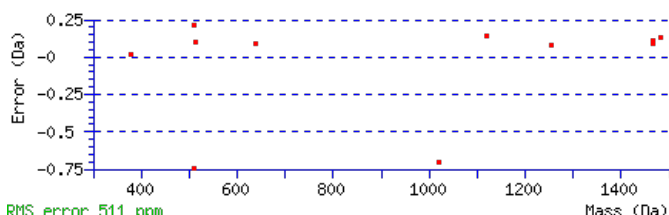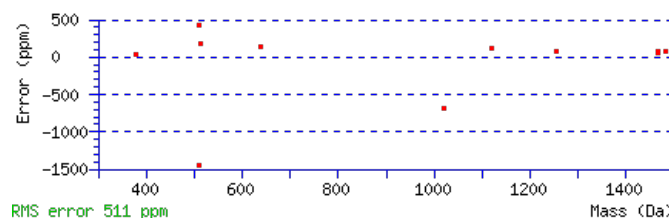NCBI BLAST search of **VYLEQDDFVKTMK**

(Parameters: blastp, nr protein database, expect=20000, no filter, PAM30)

Other BLAST [web gateways](#)

**AT4G12400.1**

All matches to this query

| Score | Mr(calc)  | Delta   | Sequence                        |
|-------|-----------|---------|---------------------------------|
| 26.9  | 1630.7489 | 0.0024  | <a href="#">VYLEQDDFVKTMK</a>   |
| 19.3  | 1630.7493 | 0.0019  | <a href="#">DMYNATRGESLVKK</a>  |
| 12.5  | 1630.7549 | -0.0037 | <a href="#">GGCYGGMKLSVKVEK</a> |
| 9.3   | 1630.7538 | -0.0025 | <a href="#">FEDVLKYFHLMR</a>    |
| 8.2   | 1630.7511 | 0.0001  | <a href="#">TFETLMWGYLEVK</a>   |
| 6.0   | 1630.7493 | 0.0019  | <a href="#">GQEIQAHEGAILAMK</a> |
| 4.5   | 1630.7516 | -0.0003 | <a href="#">DQRTVFAYQMPLK</a>   |
| 4.4   | 1630.7545 | -0.0032 | <a href="#">LCIVSYDIMFVEK</a>   |
| 0.4   | 1630.7523 | -0.0010 | <a href="#">MLKMGLTSFEDAİK</a>  |
| 0.3   | 1630.7538 | -0.0025 | <a href="#">EMKFRLWFDPTK</a>    |

Mascot: <http://www.matrixscience.com/>

**Peptide View**MS/MS Fragmentation of **MMMKEDGRGR**Found in **AT4G12640.1** in **TAIR\_Arabidopsis**, Symbols: | RNA recognition motif (RRM)-containing protein | chr4:7462694-7467627 FORWARD

Match to Query 3827: 1242.489058 from(622.251805,2+) index(1474)

Title: Elution from: 23.049 to 23.049 scan no 2078 cid35.00 polarity:+

Data file D1d-1-2.mgf

Click mouse within plot area to zoom in by factor of two about that point

Or,   to  Da Label all possible matches  Label matches used for scoring Show Y-axis 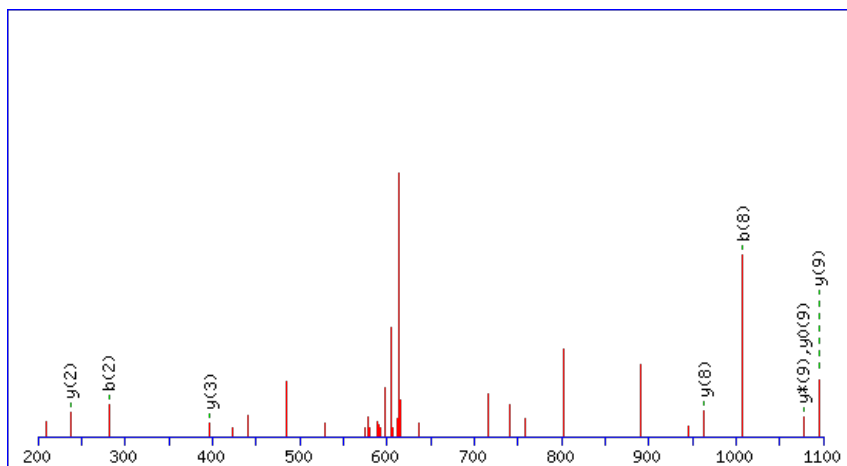Monoisotopic mass of neutral peptide  $M_r(\text{calc})$ : 1242.4862

Fixed modifications: Carbamidomethyl (C) (apply to specified residues or termini only)

Variable modifications:

M1 : Oxidation (M), with neutral losses 0.0000 (shown in table), 63.9983

Ions Score: 17 Expect: 0.045

Matches : 8/126 fragment ions using 22 most intense peaks ([help](#))

| #  | b                | b <sup>++</sup> | b <sup>*</sup> | b <sup>*++</sup> | b <sup>0</sup> | b <sup>0++</sup> | Seq. | y                | y <sup>++</sup> | y <sup>*</sup>   | y <sup>*++</sup> | y <sup>0</sup>   | y <sup>0++</sup> | #  |
|----|------------------|-----------------|----------------|------------------|----------------|------------------|------|------------------|-----------------|------------------|------------------|------------------|------------------|----|
| 1  | 149.0397         | 75.0235         |                |                  |                |                  | M    |                  |                 |                  |                  |                  |                  | 10 |
| 2  | <b>281.0772</b>  | 141.0423        |                |                  |                |                  | M    | <b>1095.4610</b> | 548.2341        | <b>1077.4374</b> | 539.2224         | <b>1077.4505</b> | 539.2289         | 9  |
| 3  | 413.1148         | 207.0610        |                |                  |                |                  | M    | <b>963.4235</b>  | 482.2154        | 945.3999         | 473.2036         | 945.4129         | 473.2101         | 8  |
| 4  | 543.2038         | 272.1055        | 525.1802       | 263.0937         |                |                  | K    | 831.3860         | 416.1966        | 813.3624         | 407.1848         | 813.3754         | 407.1913         | 7  |
| 5  | 673.2434         | 337.1253        | 655.2198       | 328.1136         | 655.2328       | 328.1201         | E    | 701.2969         | 351.1521        | 683.2734         | 342.1403         | 683.2864         | 342.1468         | 6  |
| 6  | 789.2674         | 395.1373        | 771.2438       | 386.1255         | 771.2568       | 386.1321         | D    | 571.2573         | 286.1323        | 553.2337         | 277.1205         | 553.2468         | 277.1270         | 5  |
| 7  | 847.2859         | 424.1466        | 829.2623       | 415.1348         | 829.2753       | 415.1413         | G    | 455.2333         | 228.1203        | 437.2098         | 219.1085         |                  |                  | 4  |
| 8  | <b>1007.3751</b> | 504.1912        | 989.3516       | 495.1794         | 989.3646       | 495.1859         | R    | <b>397.2148</b>  | 199.1111        | 379.1913         | 190.0993         |                  |                  | 3  |
| 9  | 1065.3936        | 533.2005        | 1047.3701      | 524.1887         | 1047.3831      | 524.1952         | G    | <b>237.1256</b>  | 119.0664        | 219.1020         | 110.0546         |                  |                  | 2  |
| 10 |                  |                 |                |                  |                |                  | R    | 179.1071         | 90.0572         | 161.0835         | 81.0454          |                  |                  | 1  |

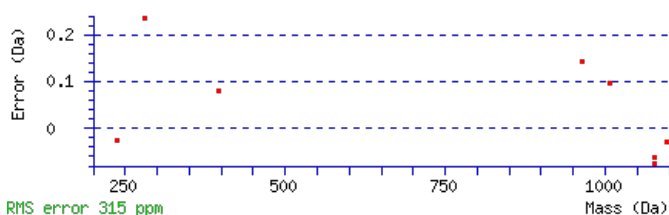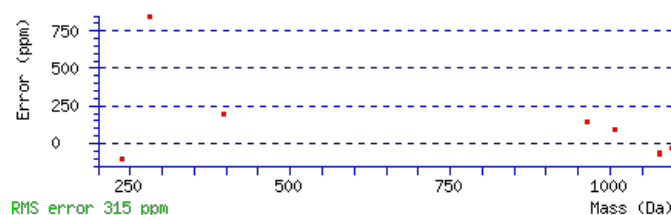NCBI **BLAST** search of **MMMKEDGRGR**

(Parameters: blastp, nr protein database, expect=20000, no filter, PAM30)

Other BLAST [web gateways](#)**All matches to this query**

## AT4G12640.1

| Score | Mr(calc)  | Delta   | Sequence                    | Site Analysis       |
|-------|-----------|---------|-----------------------------|---------------------|
| 16.9  | 1242.4862 | 0.0029  | <a href="#">MMMKEDGRGR</a>  | Oxidation M1 85.90% |
| 8.6   | 1242.4862 | 0.0029  | <a href="#">MMMKEDGRGR</a>  | Oxidation M2 12.42% |
| 6.3   | 1242.4896 | -0.0006 | <a href="#">ELESDPDSDPK</a> |                     |
| 2.8   | 1242.4905 | -0.0014 | <a href="#">MASMYADAVEK</a> |                     |
| 2.1   | 1242.4857 | 0.0033  | <a href="#">ASMFVQMCCK</a>  |                     |
| 2.1   | 1242.4875 | 0.0015  | <a href="#">AFTCLSDGNSR</a> |                     |
| 1.4   | 1242.4905 | -0.0014 | <a href="#">MTVVCSEFDK</a>  |                     |
| 1.3   | 1242.4905 | -0.0014 | <a href="#">EAFEMMDSKK</a>  |                     |
| 1.3   | 1242.4905 | -0.0014 | <a href="#">QSDMEMALFK</a>  |                     |
| 0.9   | 1242.4905 | -0.0014 | <a href="#">MASMYADAVEK</a> |                     |

Mascot: <http://www.matrixscience.com/>

**Peptide View**MS/MS Fragmentation of **VG<sup>+</sup>VQKFPGERNIPW<sup>+</sup>R**Found in **AT4G12670.1** in **TAIR\_Arabidopsis**, Symbols: | DNA binding | chr4:7472527-7474516 FORWARD

Match to Query 8629: 1806.890373 from(603.304067,3+) index(10741)

Title: Elution from: 107.314 to 107.314 scan no 15599 cid35.00 polarity:+

Data file D12h-1\_2.mgf

Click mouse within plot area to zoom in by factor of two about that point

Or,   to  Da Label all possible matches  Label matches used for scoring Show Y-axis 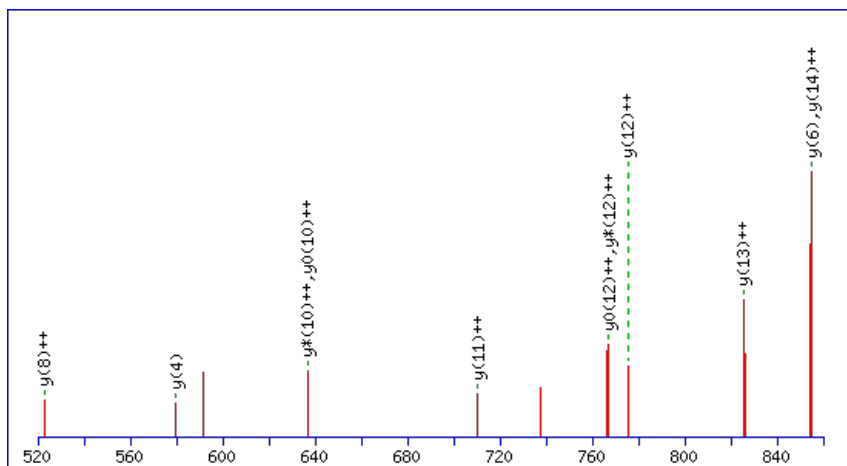**Monoisotopic mass of neutral peptide Mr(calc)** : 1806.8948**Fixed modifications**: Carbamidomethyl (C) (apply to specified residues or termini only)**Ions Score**: 41 **Expect**: 0.00064**Matches** : 11/134 fragment ions using 11 most intense peaks ([help](#))

| #  | b         | b <sup>++</sup> | b <sup>*</sup> | b <sup>*++</sup> | b <sup>0</sup> | b <sup>0++</sup> | Seq. | y         | y <sup>++</sup> | y <sup>*</sup> | y <sup>*++</sup> | y <sup>0</sup> | y <sup>0++</sup> | #  |
|----|-----------|-----------------|----------------|------------------|----------------|------------------|------|-----------|-----------------|----------------|------------------|----------------|------------------|----|
| 1  | 101.0727  | 51.0400         |                |                  |                |                  | V    |           |                 |                |                  |                |                  | 15 |
| 2  | 159.0912  | 80.0492         |                |                  |                |                  | G    | 1707.8366 | 854.4220        | 1689.8130      | 845.4102         | 1689.8261      | 845.4167         | 14 |
| 3  | 259.1567  | 130.0820        |                |                  |                |                  | V    | 1649.8181 | 825.4127        | 1631.7945      | 816.4009         | 1631.8076      | 816.4074         | 13 |
| 4  | 389.2093  | 195.1083        | 371.1857       | 186.0965         |                |                  | Q    | 1549.7527 | 775.3800        | 1531.7291      | 766.3682         | 1531.7421      | 766.3747         | 12 |
| 5  | 519.2984  | 260.1528        | 501.2748       | 251.1410         |                |                  | K    | 1419.7000 | 710.3537        | 1401.6764      | 701.3419         | 1401.6895      | 701.3484         | 11 |
| 6  | 667.3638  | 334.1855        | 649.3402       | 325.1737         |                |                  | F    | 1289.6110 | 645.3091        | 1271.5874      | 636.2973         | 1271.6004      | 636.3039         | 10 |
| 7  | 765.4136  | 383.2104        | 747.3900       | 374.1986         |                |                  | P    | 1141.5455 | 571.2764        | 1123.5220      | 562.2646         | 1123.5350      | 562.2711         | 9  |
| 8  | 823.4321  | 412.2197        | 805.4085       | 403.2079         |                |                  | G    | 1043.4957 | 522.2515        | 1025.4722      | 513.2397         | 1025.4852      | 513.2462         | 8  |
| 9  | 953.4717  | 477.2395        | 935.4481       | 468.2277         | 935.4612       | 468.2342         | E    | 985.4772  | 493.2423        | 967.4537       | 484.2305         | 967.4667       | 484.2370         | 7  |
| 10 | 1113.5610 | 557.2841        | 1095.5374      | 548.2723         | 1095.5504      | 548.2788         | R    | 855.4376  | 428.2224        | 837.4140       | 419.2107         |                |                  | 6  |
| 11 | 1229.5980 | 615.3026        | 1211.5744      | 606.2908         | 1211.5874      | 606.2973         | N    | 695.3484  | 348.1778        | 677.3248       | 339.1660         |                |                  | 5  |
| 12 | 1343.6791 | 672.3432        | 1325.6555      | 663.3314         | 1325.6685      | 663.3379         | I    | 579.3114  | 290.1593        | 561.2878       | 281.1475         |                |                  | 4  |
| 13 | 1441.7289 | 721.3681        | 1423.7053      | 712.3563         | 1423.7183      | 712.3628         | P    | 465.2303  | 233.1188        | 447.2067       | 224.1070         |                |                  | 3  |
| 14 | 1629.8023 | 815.4048        | 1611.7787      | 806.3930         | 1611.7917      | 806.3995         | W    | 367.1805  | 184.0939        | 349.1569       | 175.0821         |                |                  | 2  |
| 15 |           |                 |                |                  |                |                  | R    | 179.1071  | 90.0572         | 161.0835       | 81.0454          |                |                  | 1  |

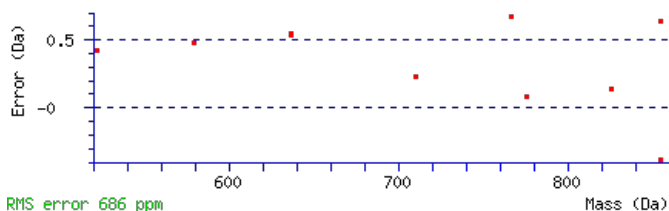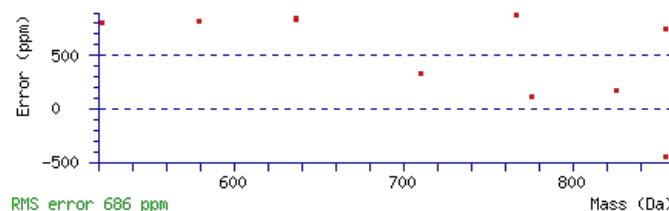NCBI **BLAST** search of [VG<sup>+</sup>VQKFPGERNIPW<sup>+</sup>R](#)



## AT4G12670.1

(Parameters: blastp, nr protein database, expect=20000, no filter, PAM30)

Other BLAST [web gateways](#)

### All matches to this query

| Score | Mr(calc)  | Delta   | Sequence                          |
|-------|-----------|---------|-----------------------------------|
| 41.2  | 1806.8948 | -0.0044 | <a href="#">VGVQKFPGERNIPWR</a>   |
| 27.9  | 1806.8894 | 0.0010  | <a href="#">VGVQFYHDLIDELLK</a>   |
| 6.4   | 1806.8898 | 0.0005  | <a href="#">VVGEGLVIDEWKERR</a>   |
| 6.0   | 1806.8928 | -0.0024 | <a href="#">SKTMKTQFLDLGYK</a>    |
| 3.1   | 1806.8955 | -0.0051 | <a href="#">LFGLSLERVCVDIHK</a>   |
| 2.6   | 1806.8899 | 0.0005  | <a href="#">VGREPSTGHLSFATVVK</a> |
| 1.1   | 1806.8858 | 0.0046  | <a href="#">GLCQIGEIDAVMLLVR</a>  |
| 0.3   | 1806.8955 | -0.0051 | <a href="#">SISRFEMYQVLKLR</a>    |

Mascot: <http://www.matrixscience.com/>

**Peptide View**MS/MS Fragmentation of **FLLEGAK**Found in **AT4G12740.1** in **TAIR\_Arabidopsis**, Symbols: | adenine-DNA glycosylase-related / MYH-related | chr4:7494575-7497593 REVERSE

Match to Query 878: 784.418280 from(393.216416,2+) index(2793)

Title: Elution from: 27.754 to 27.754 scan no 3480 cid35.00 polarity:+

Data file 0-2\_3.mgf

Click mouse within plot area to zoom in by factor of two about that point

Or,   to  Da Label all possible matches  Label matches used for scoring Show Y-axis 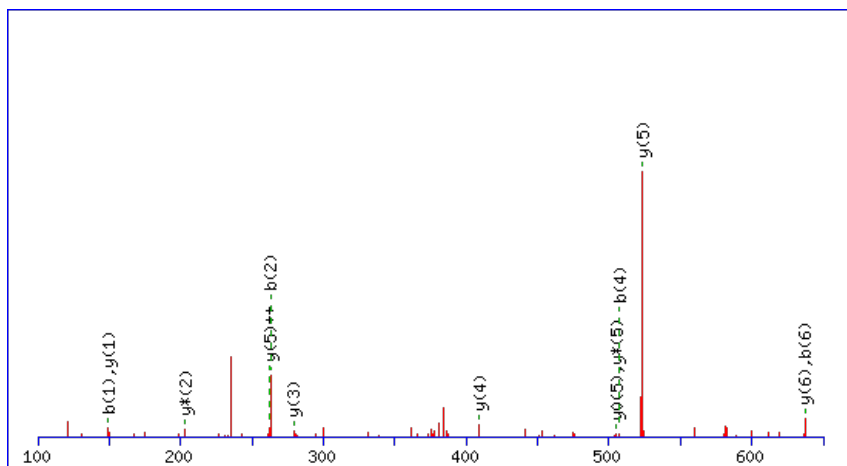Monoisotopic mass of neutral peptide **Mr(calc)**: 784.4195

Fixed modifications: Carbamidomethyl (C) (apply to specified residues or termini only)

Ions Score: 28 **Expect**: 0.037Matches : 13/48 fragment ions using 27 most intense peaks ([help](#))

| # | b               | b <sup>++</sup> | b <sup>0</sup> | b <sup>0++</sup> | Seq.     | y               | y <sup>++</sup> | y*              | y <sup>*++</sup> | y <sup>0</sup>  | y <sup>0++</sup> | #        |
|---|-----------------|-----------------|----------------|------------------|----------|-----------------|-----------------|-----------------|------------------|-----------------|------------------|----------|
| 1 | <b>149.0727</b> | 75.0400         |                |                  | <b>F</b> |                 |                 |                 |                  |                 |                  | <b>7</b> |
| 2 | <b>263.1538</b> | 132.0805        |                |                  | <b>L</b> | <b>637.3613</b> | 319.1843        | 619.3378        | 310.1725         | 619.3508        | 310.1790         | <b>6</b> |
| 3 | 377.2349        | 189.1211        |                |                  | <b>L</b> | <b>523.2802</b> | <b>262.1438</b> | <b>505.2567</b> | 253.1320         | <b>505.2697</b> | 253.1385         | <b>5</b> |
| 4 | <b>507.2746</b> | 254.1409        | 489.2640       | 245.1356         | <b>E</b> | <b>409.1991</b> | 205.1032        | 391.1756        | 196.0914         | 391.1886        | 196.0979         | <b>4</b> |
| 5 | 565.2930        | 283.1502        | 547.2825       | 274.1449         | <b>G</b> | <b>279.1595</b> | 140.0834        | 261.1359        | 131.0716         |                 |                  | <b>3</b> |
| 6 | <b>637.3272</b> | 319.1672        | 619.3166       | 310.1620         | <b>A</b> | 221.1410        | 111.0741        | <b>203.1174</b> | 102.0624         |                 |                  | <b>2</b> |
| 7 |                 |                 |                |                  | <b>K</b> | <b>149.1069</b> | 75.0571         | 131.0833        | 66.0453          |                 |                  | <b>1</b> |

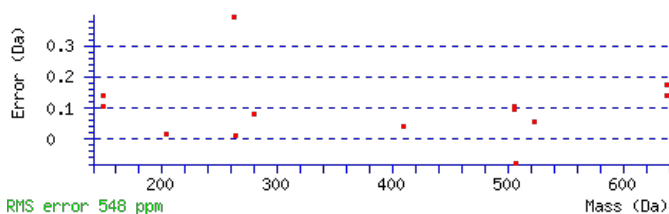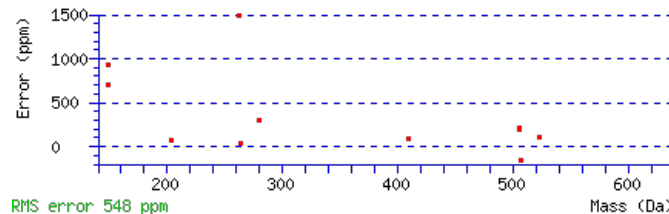NCBI **BLAST** search of **FLLEGAK**

(Parameters: blastp, nr protein database, expect=20000, no filter, PAM30)

Other BLAST [web gateways](#)**All matches to this query**

| Score | Mr(calc) | Delta   | Sequence                |
|-------|----------|---------|-------------------------|
| 27.7  | 784.4195 | -0.0012 | <a href="#">FLLEGAK</a> |
| 26.4  | 784.4195 | -0.0012 | <a href="#">FLLQEK</a>  |
| 17.3  | 784.4173 | 0.0010  | <a href="#">EISATKK</a> |

**AT4G12740.1**

|      |          |         |                         |
|------|----------|---------|-------------------------|
| 16.9 | 784.4195 | -0.0012 | <a href="#">FLEIQK</a>  |
| 16.9 | 784.4195 | -0.0012 | <a href="#">FLELQK</a>  |
| 16.4 | 784.4173 | 0.0010  | <a href="#">EISAKTK</a> |
| 16.3 | 784.4195 | -0.0012 | <a href="#">FLAGEKI</a> |
| 16.3 | 784.4195 | -0.0012 | <a href="#">YPEKIK</a>  |
| 16.0 | 784.4195 | -0.0012 | <a href="#">QFLELK</a>  |
| 15.9 | 784.4195 | -0.0012 | <a href="#">EAAVFLK</a> |

**Mascot:** <http://www.matrixscience.com/>

## Peptide View

MS/MS Fragmentation of **ELISLEDVMEDLK**Found in **AT4G12790.1** in **TAIR\_Arabidopsis**, Symbols: | ATP-binding family protein | chr4:7517277-7518889 REVERSE

Match to Query 6598: 1546.723900 from(774.369226,2+) index(5566)

Title: Elution from: 48.624 to 48.624 scan no 7035 cid35.00 polarity:+

Data file C7-2\_3.mgf

Click mouse within plot area to zoom in by factor of two about that point

Or,   to  Da Label all possible matches  Label matches used for scoring Show Y-axis 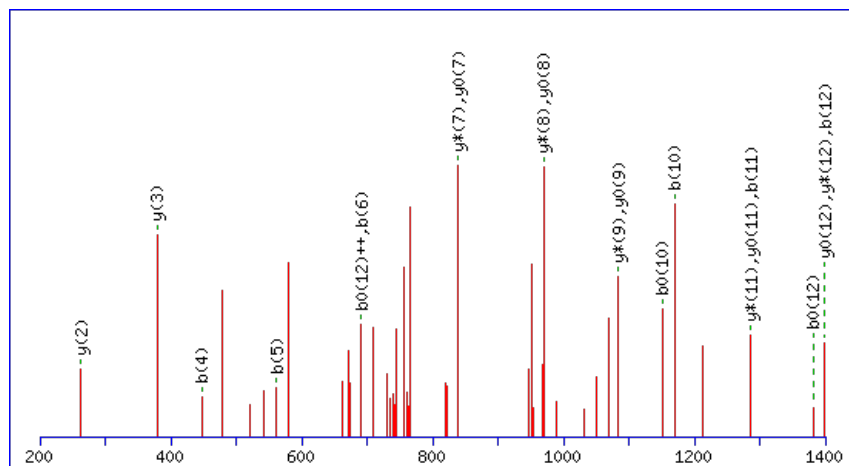Monoisotopic mass of neutral peptide  $M_r(\text{calc})$ : 1546.7229

Fixed modifications: Carbamidomethyl (C) (apply to specified residues or termini only)

Ions Score: 38 Expect: 0.0012

Matches : 21/116 fragment ions using 23 most intense peaks ([help](#))

| #  | b         | b <sup>++</sup> | b <sup>0</sup> | b <sup>0++</sup> | Seq. | y         | y <sup>++</sup> | y*        | y* <sup>++</sup> | y <sup>0</sup> | y <sup>0++</sup> | #  |
|----|-----------|-----------------|----------------|------------------|------|-----------|-----------------|-----------|------------------|----------------|------------------|----|
| 1  | 131.0469  | 66.0271         | 113.0363       | 57.0218          | E    |           |                 |           |                  |                |                  | 13 |
| 2  | 245.1280  | 123.0676        | 227.1174       | 114.0624         | L    | 1417.6905 | 709.3489        | 1399.6669 | 700.3371         | 1399.6799      | 700.3436         | 12 |
| 3  | 359.2091  | 180.1082        | 341.1985       | 171.1029         | I    | 1303.6094 | 652.3083        | 1285.5858 | 643.2966         | 1285.5988      | 643.3031         | 11 |
| 4  | 447.2382  | 224.1227        | 429.2276       | 215.1174         | S    | 1189.5283 | 595.2678        | 1171.5047 | 586.2560         | 1171.5178      | 586.2625         | 10 |
| 5  | 561.3193  | 281.1633        | 543.3087       | 272.1580         | L    | 1101.4993 | 551.2533        | 1083.4757 | 542.2415         | 1083.4887      | 542.2480         | 9  |
| 6  | 691.3589  | 346.1831        | 673.3483       | 337.1778         | E    | 987.4182  | 494.2127        | 969.3946  | 485.2009         | 969.4076       | 485.2074         | 8  |
| 7  | 807.3829  | 404.1951        | 789.3723       | 395.1898         | D    | 857.3785  | 429.1929        | 839.3549  | 420.1811         | 839.3680       | 420.1876         | 7  |
| 8  | 907.4483  | 454.2278        | 889.4378       | 445.2225         | V    | 741.3545  | 371.1809        | 723.3310  | 362.1691         | 723.3440       | 362.1756         | 6  |
| 9  | 1039.4858 | 520.2466        | 1021.4753      | 511.2413         | M    | 641.2891  | 321.1482        | 623.2655  | 312.1364         | 623.2785       | 312.1429         | 5  |
| 10 | 1169.5255 | 585.2664        | 1151.5149      | 576.2611         | E    | 509.2516  | 255.1294        | 491.2280  | 246.1176         | 491.2410       | 246.1241         | 4  |
| 11 | 1285.5494 | 643.2784        | 1267.5389      | 634.2731         | D    | 379.2120  | 190.1096        | 361.1884  | 181.0978         | 361.2014       | 181.1043         | 3  |
| 12 | 1399.6305 | 700.3189        | 1381.6200      | 691.3136         | L    | 263.1880  | 132.0976        | 245.1644  | 123.0858         |                |                  | 2  |
| 13 |           |                 |                |                  | K    | 149.1069  | 75.0571         | 131.0833  | 66.0453          |                |                  | 1  |

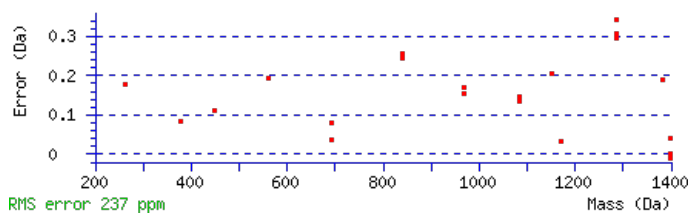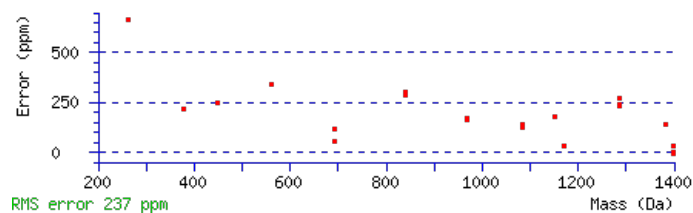NCBI BLAST search of **ELISLEDVMEDLK**

(Parameters: blastp, nr protein database, expect=20000, no filter, PAM30)

Other BLAST [web gateways](#)

**AT4G12790.1**

All matches to this query

| Score | Mr(calc)  | Delta   | Sequence                       |
|-------|-----------|---------|--------------------------------|
| 38.0  | 1546.7229 | 0.0010  | <a href="#">ELISLEDVMEDLK</a>  |
| 23.8  | 1546.7199 | 0.0040  | <a href="#">ELNDDDKAGLVNVK</a> |
| 11.4  | 1546.7282 | -0.0043 | <a href="#">MKEQHRLEEIAK</a>   |
| 7.8   | 1546.7282 | -0.0043 | <a href="#">AKASHLPSSMQNLK</a> |
| 7.3   | 1546.7278 | -0.0039 | <a href="#">MIATNYVGAFSLTK</a> |
| 6.0   | 1546.7278 | -0.0039 | <a href="#">WEIVSEISPACIK</a>  |
| 5.4   | 1546.7255 | -0.0016 | <a href="#">MELOQSNLETPLK</a>  |
| 2.9   | 1546.7226 | 0.0013  | <a href="#">NVSSPSPEISRTPR</a> |
| 0.7   | 1546.7255 | -0.0016 | <a href="#">ITVKNEMNPEEVK</a>  |

**Mascot:** <http://www.matrixscience.com/>

**Peptide View**MS/MS Fragmentation of **EGEPSIAPSLTLTGR**Found in **AT4G12800.1** in **TAIR\_Arabidopsis**, Symbols: PSAL | PSAL (photosystem I subunit L) | chr4:7521466-7522490 FORWARD

Match to Query 6593: 1544.739462 from(773.377007,2+) index(6127)

Title: Elution from: 54.295 to 54.295 scan no 7841 cid35.00 polarity:+

Data file 0-3\_2.mgf

Click mouse within plot area to zoom in by factor of two about that point

Or,   to  Da Label all possible matches  Label matches used for scoring Show Y-axis 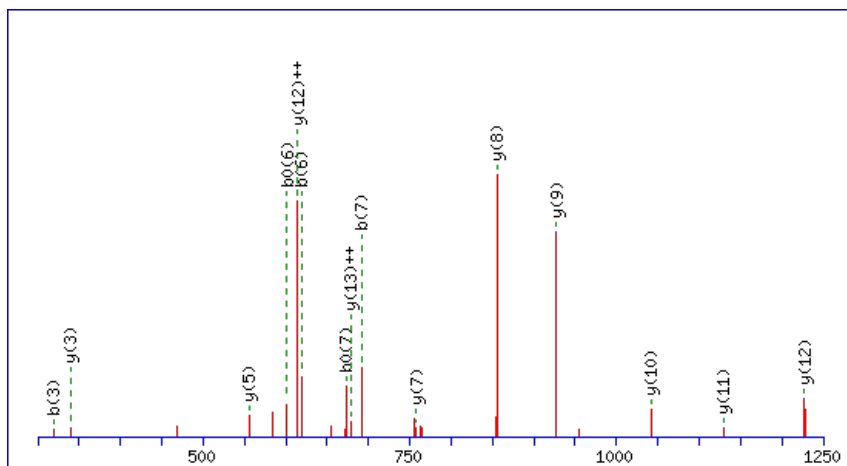Monoisotopic mass of neutral peptide  $M_r(\text{calc})$ : 1544.7407

Fixed modifications: Carbamidomethyl (C) (apply to specified residues or termini only)

Ions Score: 65 Expect: 1.7e-006

Matches : 15/136 fragment ions using 25 most intense peaks ([help](#))

| #  | b               | b <sup>++</sup> | b <sup>0</sup>  | b <sup>0++</sup> | Seq. | y                | y <sup>++</sup> | y*        | y <sup>*++</sup> | y <sup>0</sup> | y <sup>0++</sup> | #  |
|----|-----------------|-----------------|-----------------|------------------|------|------------------|-----------------|-----------|------------------|----------------|------------------|----|
| 1  | 131.0469        | 66.0271         | 113.0363        | 57.0218          | E    |                  |                 |           |                  |                |                  | 15 |
| 2  | 189.0654        | 95.0363         | 171.0548        | 86.0311          | G    | 1415.7083        | 708.3578        | 1397.6847 | 699.3460         | 1397.6977      | 699.3525         | 14 |
| 3  | <b>319.1050</b> | 160.0562        | 301.0945        | 151.0509         | E    | 1357.6898        | <b>679.3485</b> | 1339.6662 | 670.3368         | 1339.6793      | 670.3433         | 13 |
| 4  | 417.1548        | 209.0811        | 399.1443        | 200.0758         | P    | <b>1227.6502</b> | <b>614.3287</b> | 1209.6266 | 605.3169         | 1209.6396      | 605.3234         | 12 |
| 5  | 505.1839        | 253.0956        | 487.1733        | 244.0903         | S    | <b>1129.6004</b> | 565.3038        | 1111.5768 | 556.2920         | 1111.5898      | 556.2985         | 11 |
| 6  | <b>619.2650</b> | 310.1361        | <b>601.2544</b> | 301.1309         | I    | <b>1041.5713</b> | 521.2893        | 1023.5477 | 512.2775         | 1023.5608      | 512.2840         | 10 |
| 7  | <b>691.2991</b> | 346.1532        | <b>673.2886</b> | 337.1479         | A    | <b>927.4902</b>  | 464.2488        | 909.4666  | 455.2370         | 909.4797       | 455.2435         | 9  |
| 8  | 789.3489        | 395.1781        | 771.3384        | 386.1728         | P    | <b>855.4561</b>  | 428.2317        | 837.4325  | 419.2199         | 837.4455       | 419.2264         | 8  |
| 9  | 877.3780        | 439.1926        | 859.3674        | 430.1874         | S    | <b>757.4063</b>  | 379.2068        | 739.3827  | 370.1950         | 739.3957       | 370.2015         | 7  |
| 10 | 991.4591        | 496.2332        | 973.4485        | 487.2279         | L    | 669.3772         | 335.1922        | 651.3536  | 326.1805         | 651.3667       | 326.1870         | 6  |
| 11 | 1093.5038       | 547.2555        | 1075.4933       | 538.2503         | T    | <b>555.2961</b>  | 278.1517        | 537.2725  | 269.1399         | 537.2856       | 269.1464         | 5  |
| 12 | 1207.5849       | 604.2961        | 1189.5743       | 595.2908         | L    | 453.2514         | 227.1293        | 435.2278  | 218.1175         | 435.2408       | 218.1241         | 4  |
| 13 | 1309.6296       | 655.3185        | 1291.6191       | 646.3132         | T    | <b>339.1703</b>  | 170.0888        | 321.1467  | 161.0770         | 321.1597       | 161.0835         | 3  |
| 14 | 1367.6481       | 684.3277        | 1349.6376       | 675.3224         | G    | 237.1256         | 119.0664        | 219.1020  | 110.0546         |                |                  | 2  |
| 15 |                 |                 |                 |                  | R    | 179.1071         | 90.0572         | 161.0835  | 81.0454          |                |                  | 1  |

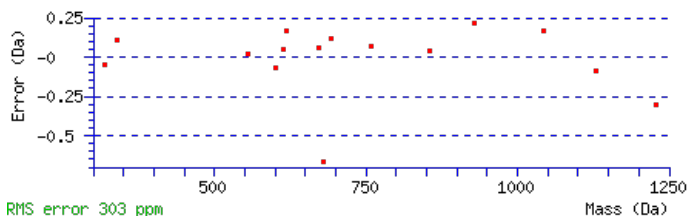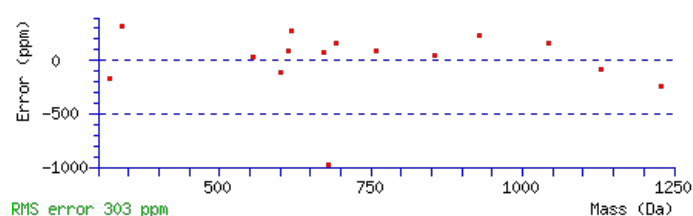NCBI BLAST search of [EGEPSIAPSLTLTGR](#)

## AT4G12800.1

(Parameters: blastp, nr protein database, expect=20000, no filter, PAM30)

Other BLAST [web gateways](#)

### All matches to this query

| Score | Mr(calc)  | Delta   | Sequence                        |
|-------|-----------|---------|---------------------------------|
| 65.5  | 1544.7407 | -0.0012 | <a href="#">EGEPSIAPSLTLTGR</a> |

Mascot: <http://www.matrixscience.com/>

**Peptide View**MS/MS Fragmentation of **LGSQLDVLAPVKY**Found in **AT4G13170.1** in **TAIR\_Arabidopsis**, Symbols: | 60S ribosomal protein L13A (RPL13aC) | chr4:7655129-7656538 REVERSE

Match to Query 5605: 1416.743212 from(709.378882,2+) index(7717)

Title: Elution from: 68.332 to 68.332 scan no 10127 cid35.00 polarity:+

Data file D6h-3\_1.mgf

Click mouse within plot area to zoom in by factor of two about that point

Or,   to  Da Label all possible matches  Label matches used for scoring Show Y-axis 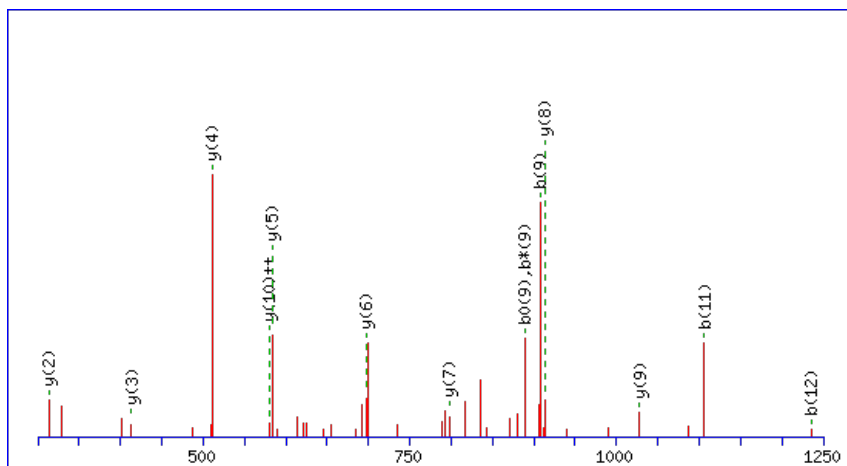Monoisotopic mass of neutral peptide  $M_r(\text{calc})$ : 1416.7423

Fixed modifications: Carbamidomethyl (C) (apply to specified residues or termini only)

Ions Score: 69 Expect: 9.8e-007

Matches : 14/118 fragment ions using 17 most intense peaks ([help](#))

| #  | b         | b <sup>++</sup> | b <sup>*</sup> | b <sup>*++</sup> | b <sup>0</sup> | b <sup>0++</sup> | Seq. | y         | y <sup>++</sup> | y <sup>*</sup> | y <sup>*++</sup> | y <sup>0</sup> | y <sup>0++</sup> | #  |
|----|-----------|-----------------|----------------|------------------|----------------|------------------|------|-----------|-----------------|----------------|------------------|----------------|------------------|----|
| 1  | 115.0884  | 58.0478         |                |                  |                |                  | L    |           |                 |                |                  |                |                  | 13 |
| 2  | 173.1069  | 87.0571         |                |                  |                |                  | G    | 1303.6685 | 652.3379        | 1285.6449      | 643.3261         | 1285.6579      | 643.3326         | 12 |
| 3  | 261.1359  | 131.0716        |                |                  | 243.1254       | 122.0663         | S    | 1245.6500 | 623.3286        | 1227.6264      | 614.3168         | 1227.6394      | 614.3233         | 11 |
| 4  | 391.1886  | 196.0979        | 373.1650       | 187.0861         | 373.1780       | 187.0926         | Q    | 1157.6209 | 579.3141        | 1139.5973      | 570.3023         | 1139.6103      | 570.3088         | 10 |
| 5  | 505.2697  | 253.1385        | 487.2461       | 244.1267         | 487.2591       | 244.1332         | L    | 1027.5683 | 514.2878        | 1009.5447      | 505.2760         | 1009.5577      | 505.2825         | 9  |
| 6  | 621.2937  | 311.1505        | 603.2701       | 302.1387         | 603.2831       | 302.1452         | D    | 913.4872  | 457.2472        | 895.4636       | 448.2354         | 895.4766       | 448.2419         | 8  |
| 7  | 721.3591  | 361.1832        | 703.3355       | 352.1714         | 703.3485       | 352.1779         | V    | 797.4632  | 399.2352        | 779.4396       | 390.2234         |                |                  | 7  |
| 8  | 835.4402  | 418.2237        | 817.4166       | 409.2120         | 817.4296       | 409.2185         | L    | 697.3977  | 349.2025        | 679.3741       | 340.1907         |                |                  | 6  |
| 9  | 907.4744  | 454.2408        | 889.4508       | 445.2290         | 889.4638       | 445.2355         | A    | 583.3166  | 292.1620        | 565.2931       | 283.1502         |                |                  | 5  |
| 10 | 1005.5242 | 503.2657        | 987.5006       | 494.2539         | 987.5136       | 494.2604         | P    | 511.2825  | 256.1449        | 493.2589       | 247.1331         |                |                  | 4  |
| 11 | 1105.5896 | 553.2984        | 1087.5660      | 544.2866         | 1087.5790      | 544.2932         | V    | 413.2327  | 207.1200        | 395.2091       | 198.1082         |                |                  | 3  |
| 12 | 1235.6786 | 618.3430        | 1217.6551      | 609.3312         | 1217.6681      | 609.3377         | K    | 313.1672  | 157.0873        | 295.1437       | 148.0755         |                |                  | 2  |
| 13 |           |                 |                |                  |                |                  | Y    | 183.0782  | 92.0427         |                |                  |                |                  | 1  |

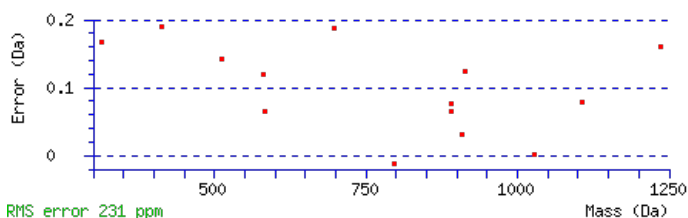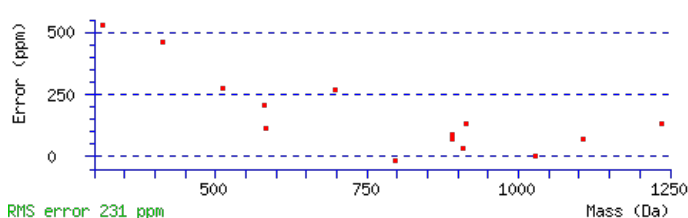NCBI BLAST search of **LGSQLDVLAPVKY**

(Parameters: blastp, nr protein database, expect=20000, no filter, PAM30)

Other BLAST [web gateways](#)



AT4G13170.1

All matches to this query

| Score | Mr(calc)  | Delta   | Sequence                      |
|-------|-----------|---------|-------------------------------|
| 68.7  | 1416.7423 | 0.0009  | <a href="#">LGSQLDVLAPVKY</a> |
| 10.2  | 1416.7450 | -0.0018 | <a href="#">ALSDFHLSKIR</a>   |

Mascot: <http://www.matrixscience.com/>

## Peptide View

MS/MS Fragmentation of **CVIVEGSTSR**Found in **AT4G13360.1** in **TAIR\_Arabidopsis**, Symbols: | catalytic | chr4:7775129-7777697 FORWARD

Match to Query 3525: 1120.498868 from(561.256710,2+) index(901)

Title: Elution from: 14.369 to 14.369 scan no 1270 cid35.00 polarity:+

Data file 0-2\_2.mgf

Click mouse within plot area to zoom in by factor of two about that point

Or,  to  Da Label all possible matches  Label matches used for scoring Show Y-axis 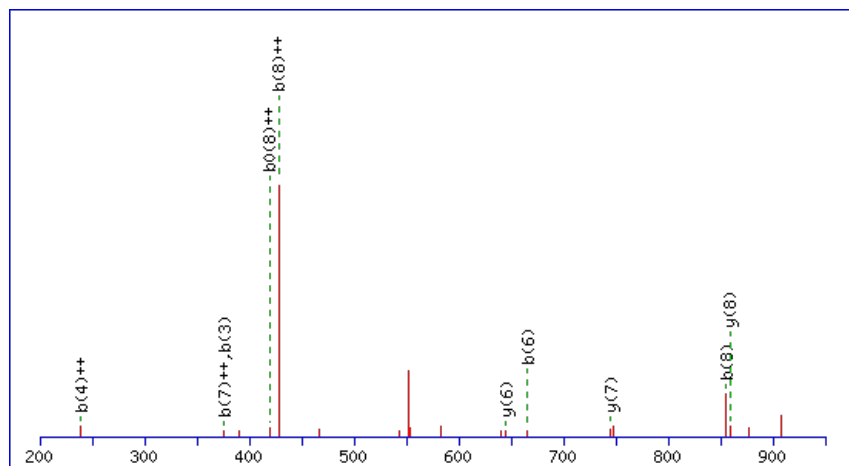Monoisotopic mass of neutral peptide **Mr(calc)**: 1120.4975**Fixed modifications**: Carbamidomethyl (C) (apply to specified residues or termini only)**Ions Score**: 25 **Expect**: 0.022**Matches**: 10/80 fragment ions using 19 most intense peaks ([help](#))

| #  | b               | b <sup>++</sup> | b <sup>0</sup> | b <sup>0++</sup> | Seq. | y               | y <sup>++</sup> | y <sup>*</sup> | y <sup>*++</sup> | y <sup>0</sup> | y <sup>0++</sup> | #  |
|----|-----------------|-----------------|----------------|------------------|------|-----------------|-----------------|----------------|------------------|----------------|------------------|----|
| 1  | 163.0320        | 82.0196         |                |                  | C    |                 |                 |                |                  |                |                  | 10 |
| 2  | 263.0974        | 132.0524        |                |                  | V    | 959.4801        | 480.2437        | 941.4565       | 471.2319         | 941.4695       | 471.2384         | 9  |
| 3  | <b>377.1785</b> | 189.0929        |                |                  | I    | <b>859.4146</b> | 430.2109        | 841.3910       | 421.1991         | 841.4040       | 421.2057         | 8  |
| 4  | 477.2440        | <b>239.1256</b> |                |                  | V    | <b>745.3335</b> | 373.1704        | 727.3099       | 364.1586         | 727.3229       | 364.1651         | 7  |
| 5  | 607.2836        | 304.1454        | 589.2731       | 295.1402         | E    | <b>645.2681</b> | 323.1377        | 627.2445       | 314.1259         | 627.2575       | 314.1324         | 6  |
| 6  | <b>665.3021</b> | 333.1547        | 647.2916       | 324.1494         | G    | 515.2284        | 258.1179        | 497.2048       | 249.1061         | 497.2179       | 249.1126         | 5  |
| 7  | 753.3312        | <b>377.1692</b> | 735.3206       | 368.1639         | S    | 457.2099        | 229.1086        | 439.1863       | 220.0968         | 439.1994       | 220.1033         | 4  |
| 8  | <b>855.3759</b> | <b>428.1916</b> | 837.3653       | <b>419.1863</b>  | T    | 369.1809        | 185.0941        | 351.1573       | 176.0823         | 351.1703       | 176.0888         | 3  |
| 9  | 943.4050        | 472.2061        | 925.3944       | 463.2008         | S    | 267.1362        | 134.0717        | 249.1126       | 125.0599         | 249.1256       | 125.0664         | 2  |
| 10 |                 |                 |                |                  | R    | 179.1071        | 90.0572         | 161.0835       | 81.0454          |                |                  | 1  |

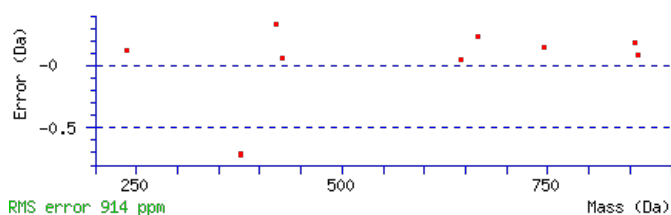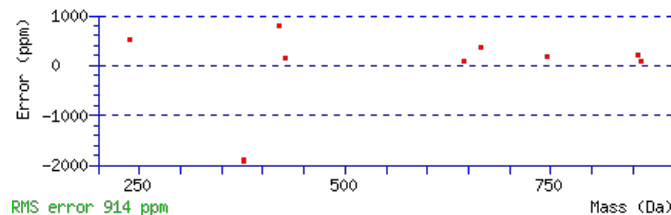NCBI **BLAST** search of **CVIVEGSTSR**

(Parameters: blastp, nr protein database, expect=20000, no filter, PAM30)

Other BLAST [web gateways](#)

All matches to this query

| Score | Mr(calc) | Delta | Sequence |
|-------|----------|-------|----------|
|       |          |       |          |

## AT4G13360.1

|      |           |        |                           |
|------|-----------|--------|---------------------------|
| 25.3 | 1120.4975 | 0.0014 | <a href="#">CVIVEGSTR</a> |
| 5.6  | 1120.4975 | 0.0014 | <a href="#">AKSMEELQR</a> |
| 2.1  | 1120.4975 | 0.0014 | <a href="#">AKEESIQMR</a> |

**Mascot:** <http://www.matrixscience.com/>

## Peptide View

MS/MS Fragmentation of **TSVPFEPVYSDGNASVADYR**

Found in **AT4G13430.1** in **TAIR\_Arabidopsis**, Symbols: | aconitase family protein / aconitate hydratase family protein | chr4:7804190-7807785 REVERSE

Match to Query 9999: 2320.063634 from(1161.039093,2+) index(8425)

Title: Elution from: 75.623 to 75.623 scan no 11311 cid35.00 polarity:+

Data file 0-2\_2.mgf

Click mouse within plot area to zoom in by factor of two about that point

Or,   to  Da

Label all possible matches  Label matches used for scoring

Show Y-axis

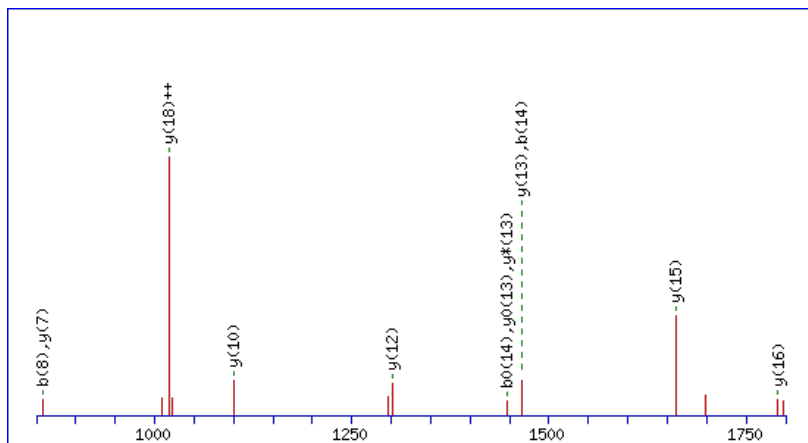

**Monoisotopic mass of neutral peptide Mr(calc):** 2320.0648

**Fixed modifications:** Carbamidomethyl (C) (apply to specified residues or termini only)

**Ions Score:** 49 **Expect:** 2.9e-005

**Matches:** 12/212 fragment ions using 8 most intense peaks ([help](#))

| #  | b         | b <sup>++</sup> | b <sup>*</sup> | b <sup>*++</sup> | b <sup>0</sup> | b <sup>0++</sup> | Seq. | y         | y <sup>++</sup> | y <sup>*</sup> | y <sup>*++</sup> | y <sup>0</sup> | y <sup>0++</sup> | #  |
|----|-----------|-----------------|----------------|------------------|----------------|------------------|------|-----------|-----------------|----------------|------------------|----------------|------------------|----|
| 1  | 102.0550  | 51.5311         |                |                  | 84.0444        | 42.5258          | T    |           |                 |                |                  |                |                  | 21 |
| 2  | 189.0870  | 95.0471         |                |                  | 171.0764       | 86.0418          | S    | 2220.0244 | 1110.5158       | 2202.9978      | 1102.0026        | 2202.0138      | 1101.5106        | 20 |
| 3  | 288.1554  | 144.5813        |                |                  | 270.1448       | 135.5761         | V    | 2132.9924 | 1066.9998       | 2115.9658      | 1058.4865        | 2114.9818      | 1057.9945        | 19 |
| 4  | 385.2082  | 193.1077        |                |                  | 367.1976       | 184.1024         | P    | 2033.9239 | 1017.4656       | 2016.8974      | 1008.9523        | 2015.9134      | 1008.4603        | 18 |
| 5  | 532.2766  | 266.6419        |                |                  | 514.2660       | 257.6366         | F    | 1936.8712 | 968.9392        | 1919.8446      | 960.4260         | 1918.8606      | 959.9339         | 17 |
| 6  | 661.3192  | 331.1632        |                |                  | 643.3086       | 322.1579         | E    | 1789.8028 | 895.4050        | 1772.7762      | 886.8917         | 1771.7922      | 886.3997         | 16 |
| 7  | 758.3719  | 379.6896        |                |                  | 740.3614       | 370.6843         | P    | 1660.7602 | 830.8837        | 1643.7336      | 822.3705         | 1642.7496      | 821.8784         | 15 |
| 8  | 857.4403  | 429.2238        |                |                  | 839.4298       | 420.2185         | V    | 1563.7074 | 782.3573        | 1546.6809      | 773.8441         | 1545.6968      | 773.3521         | 14 |
| 9  | 1020.5037 | 510.7555        |                |                  | 1002.4931      | 501.7502         | Y    | 1464.6390 | 732.8231        | 1447.6125      | 724.3099         | 1446.6284      | 723.8179         | 13 |
| 10 | 1107.5357 | 554.2715        |                |                  | 1089.5251      | 545.2662         | S    | 1301.5757 | 651.2915        | 1284.5491      | 642.7782         | 1283.5651      | 642.2862         | 12 |
| 11 | 1222.5626 | 611.7850        |                |                  | 1204.5521      | 602.7797         | D    | 1214.5436 | 607.7755        | 1197.5171      | 599.2622         | 1196.5331      | 598.7702         | 11 |
| 12 | 1279.5841 | 640.2957        |                |                  | 1261.5735      | 631.2904         | G    | 1099.5167 | 550.2620        | 1082.4902      | 541.7487         | 1081.5061      | 541.2567         | 10 |
| 13 | 1393.6270 | 697.3172        | 1376.6005      | 688.8039         | 1375.6165      | 688.3119         | N    | 1042.4952 | 521.7513        | 1025.4687      | 513.2380         | 1024.4847      | 512.7460         | 9  |
| 14 | 1464.6642 | 732.8357        | 1447.6376      | 724.3224         | 1446.6536      | 723.8304         | A    | 928.4523  | 464.7298        | 911.4258       | 456.2165         | 910.4417       | 455.7245         | 8  |
| 15 | 1551.6962 | 776.3517        | 1534.6696      | 767.8385         | 1533.6856      | 767.3464         | S    | 857.4152  | 429.2112        | 840.3886       | 420.6980         | 839.4046       | 420.2060         | 7  |
| 16 | 1698.7646 | 849.8859        | 1681.7380      | 841.3727         | 1680.7540      | 840.8807         | F    | 770.3832  | 385.6952        | 753.3566       | 377.1819         | 752.3726       | 376.6899         | 6  |
| 17 | 1797.8330 | 899.4201        | 1780.8065      | 890.9069         | 1779.8224      | 890.4149         | V    | 623.3148  | 312.1610        | 606.2882       | 303.6477         | 605.3042       | 303.1557         | 5  |
| 18 | 1868.8701 | 934.9387        | 1851.8436      | 926.4254         | 1850.8596      | 925.9334         | A    | 524.2463  | 262.6268        | 507.2198       | 254.1135         | 506.2358       | 253.6215         | 4  |
| 19 | 1983.8971 | 992.4522        | 1966.8705      | 983.9389         | 1965.8865      | 983.4469         | D    | 453.2092  | 227.1082        | 436.1827       | 218.5950         | 435.1987       | 218.1030         | 3  |
| 20 | 2146.9604 | 1073.9838       | 2129.9338      | 1065.4706        | 2128.9498      | 1064.9786        | Y    | 338.1823  | 169.5948        | 321.1557       | 161.0815         |                |                  | 2  |
| 21 |           |                 |                |                  |                |                  | R    | 175.1190  | 88.0631         | 158.0924       | 79.5498          |                |                  | 1  |

# AT4G13430.1

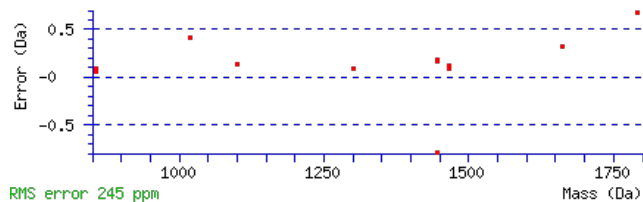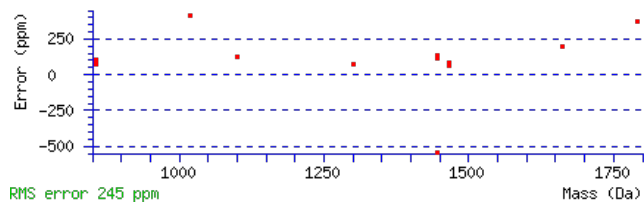

NCBI **BLAST** search of [TSVPFEPVYSDGNASFVADYR](#)  
(Parameters: blastp, nr protein database, expect=20000, no filter, PAM30)  
Other BLAST [web gateways](#)

## All matches to this query

| Score | Mr(calc)  | Delta   | Sequence                              |
|-------|-----------|---------|---------------------------------------|
| 48.6  | 2320.0648 | -0.0012 | <a href="#">TSVPFEPVYSDGNASFVADYR</a> |

Mascot: <http://www.matrixscience.com/>

**Peptide View**MS/MS Fragmentation of **LFIGGLSWGTDASLR**

Found in **AT4G13850.1** in **TAIR\_Arabidopsis**, Symbols: GR-RBP2, GRP2, ATGRP2 | ATGRP2 (GLYCINE-RICH RNA-BINDING PROTEIN 2); RNA binding / double-stranded DNA binding / single-stranded DNA binding | chr4:8021310-8022061 FORWARD

Match to Query 8422: 1726.804128 from(864.409340,2+) index(9862)

Title: Elution from: 89.735 to 89.735 scan no 13471 cid35.00 polarity:+

Data file C7-3\_1.mgf

Click mouse within plot area to zoom in by factor of two about that point

Or,   to  Da

Label all possible matches  Label matches used for scoring

Show Y-axis

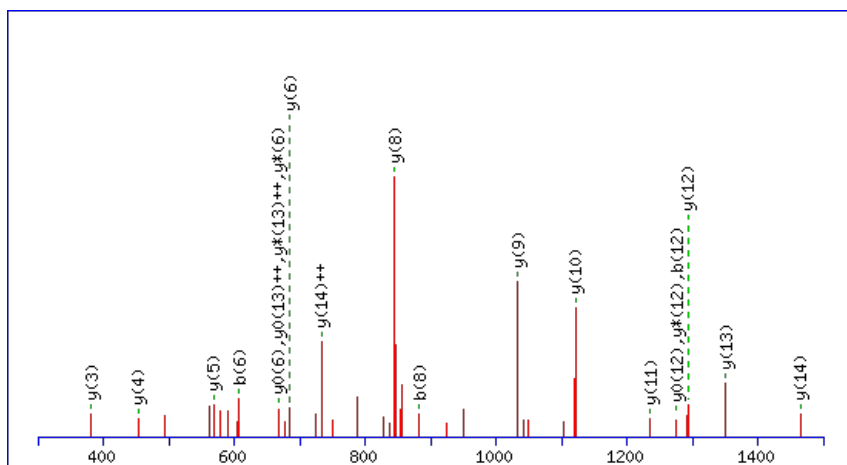

**Monoisotopic mass of neutral peptide Mr(calc):** 1726.8035

**Fixed modifications:** Carbamidomethyl (C) (apply to specified residues or termini only)

**Ions Score:** 106 **Expect:** 2.7e-010

**Matches:** 21/134 fragment ions using 21 most intense peaks ([help](#))

| #  | b         | b <sup>++</sup> | b <sup>0</sup> | b <sup>0++</sup> | Seq. | y         | y <sup>++</sup> | y <sup>*</sup> | y <sup>*++</sup> | y <sup>0</sup> | y <sup>0++</sup> | #  |
|----|-----------|-----------------|----------------|------------------|------|-----------|-----------------|----------------|------------------|----------------|------------------|----|
| 1  | 115.0884  | 58.0478         |                |                  | L    |           |                 |                |                  |                |                  | 16 |
| 2  | 263.1538  | 132.0805        |                |                  | F    | 1613.7297 | 807.3685        | 1595.7061      | 798.3567         | 1595.7191      | 798.3632         | 15 |
| 3  | 377.2349  | 189.1211        |                |                  | I    | 1465.6642 | 733.3357        | 1447.6406      | 724.3240         | 1447.6536      | 724.3305         | 14 |
| 4  | 435.2534  | 218.1303        |                |                  | G    | 1351.5831 | 676.2952        | 1333.5595      | 667.2834         | 1333.5725      | 667.2899         | 13 |
| 5  | 493.2719  | 247.1396        |                |                  | G    | 1293.5646 | 647.2859        | 1275.5410      | 638.2742         | 1275.5541      | 638.2807         | 12 |
| 6  | 607.3530  | 304.1801        |                |                  | L    | 1235.5461 | 618.2767        | 1217.5225      | 609.2649         | 1217.5356      | 609.2714         | 11 |
| 7  | 695.3821  | 348.1947        | 677.3715       | 339.1894         | S    | 1121.4650 | 561.2361        | 1103.4414      | 552.2244         | 1103.4545      | 552.2309         | 10 |
| 8  | 883.4555  | 442.2314        | 865.4449       | 433.2261         | W    | 1033.4360 | 517.2216        | 1015.4124      | 508.2098         | 1015.4254      | 508.2163         | 9  |
| 9  | 941.4740  | 471.2406        | 923.4634       | 462.2353         | G    | 845.3626  | 423.1849        | 827.3390       | 414.1731         | 827.3520       | 414.1796         | 8  |
| 10 | 1043.5187 | 522.2630        | 1025.5081      | 513.2577         | T    | 787.3441  | 394.1757        | 769.3205       | 385.1639         | 769.3335       | 385.1704         | 7  |
| 11 | 1159.5427 | 580.2750        | 1141.5321      | 571.2697         | D    | 685.2994  | 343.1533        | 667.2758       | 334.1415         | 667.2888       | 334.1480         | 6  |
| 12 | 1275.5666 | 638.2870        | 1257.5561      | 629.2817         | D    | 569.2754  | 285.1413        | 551.2518       | 276.1295         | 551.2648       | 276.1360         | 5  |
| 13 | 1347.6008 | 674.3040        | 1329.5902      | 665.2987         | A    | 453.2514  | 227.1293        | 435.2278       | 218.1175         | 435.2408       | 218.1241         | 4  |
| 14 | 1435.6298 | 718.3186        | 1417.6193      | 709.3133         | S    | 381.2173  | 191.1123        | 363.1937       | 182.1005         | 363.2067       | 182.1070         | 3  |
| 15 | 1549.7109 | 775.3591        | 1531.7004      | 766.3538         | L    | 293.1882  | 147.0977        | 275.1646       | 138.0859         |                |                  | 2  |
| 16 |           |                 |                |                  | R    | 179.1071  | 90.0572         | 161.0835       | 81.0454          |                |                  | 1  |

# AT4G13850.1

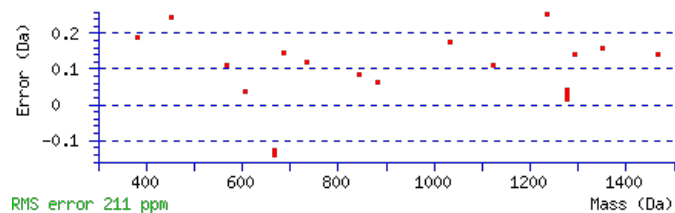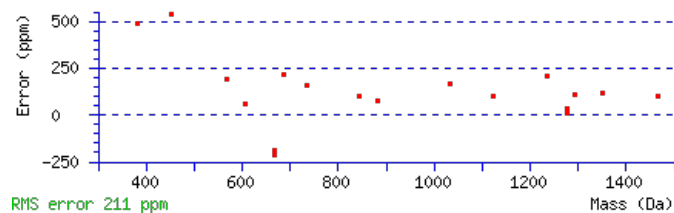

NCBI BLAST search of [LFIGGLSWGTDASLR](#)

(Parameters: blastp, nr protein database, expect=20000, no filter, PAM30)

Other BLAST [web gateways](#)

## All matches to this query

| Score | Mr(calc)  | Delta   | Sequence                        |
|-------|-----------|---------|---------------------------------|
| 105.7 | 1726.8035 | 0.0007  | <a href="#">LFIGGLSWGTDASLR</a> |
| 10.5  | 1726.8073 | -0.0032 | <a href="#">LTEEQNRLLMER</a>    |

Mascot: <http://www.matrixscience.com/>

**Peptide View**MS/MS Fragmentation of **AGMIFYR**

Found in **AT4G13930.1** in **TAIR\_Arabidopsis**, Symbols: SHM4 | SHM4 (SERINE HYDROXYMETHYLTRANSFERASE 4); glycine hydroxymethyltransferase | chr4:8048008-8050016 REVERSE

Match to Query 1345: 866.396444 from(434.205498,2+) index(3968)

Title: Elution from: 36.861 to 36.861 scan no 5032 cid35.00 polarity:+

Data file D12h-3\_3.mgf

Click mouse within plot area to zoom in by factor of two about that point

Or,   to  Da

Label all possible matches  Label matches used for scoring

Show Y-axis

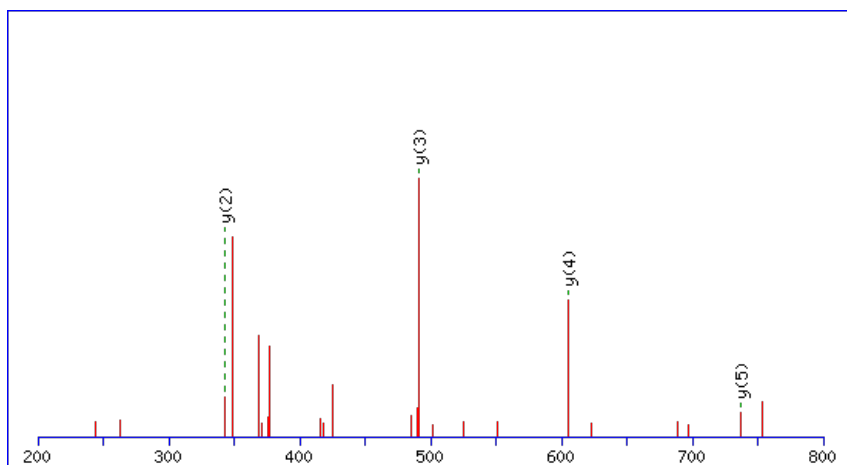

**Monoisotopic mass of neutral peptide Mr(calc):** 866.3969

**Fixed modifications:** Carbamidomethyl (C) (apply to specified residues or termini only)

**Ions Score:** 29 **Expect:** 0.0029

**Matches:** 4/36 fragment ions using 6 most intense peaks ([help](#))

| # | b        | b <sup>++</sup> | Seq. | y               | y <sup>++</sup> | y*       | y* <sup>++</sup> | # |
|---|----------|-----------------|------|-----------------|-----------------|----------|------------------|---|
| 1 | 73.0414  | 37.0244         | A    |                 |                 |          |                  | 7 |
| 2 | 131.0599 | 66.0336         | G    | 795.3700        | 398.1886        | 777.3464 | 389.1769         | 6 |
| 3 | 263.0974 | 132.0524        | M    | <b>737.3515</b> | 369.1794        | 719.3279 | 360.1676         | 5 |
| 4 | 377.1785 | 189.0929        | I    | <b>605.3140</b> | 303.1606        | 587.2904 | 294.1488         | 4 |
| 5 | 525.2440 | 263.1256        | F    | <b>491.2329</b> | 246.1201        | 473.2093 | 237.1083         | 3 |
| 6 | 689.3044 | 345.1558        | Y    | <b>343.1675</b> | 172.0874        | 325.1439 | 163.0756         | 2 |
| 7 |          |                 | R    | 179.1071        | 90.0572         | 161.0835 | 81.0454          | 1 |

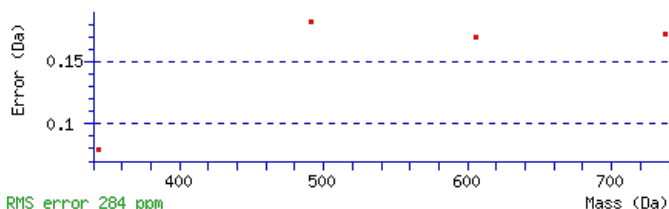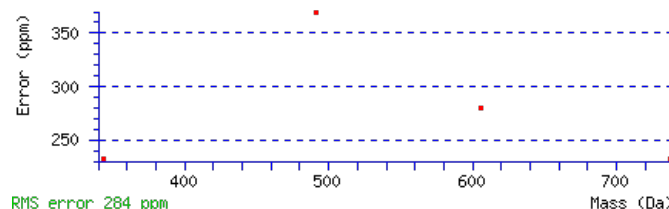

NCBI **BLAST** search of [AGMIFYR](#)

(Parameters: blastp, nr protein database, expect=20000, no filter, PAM30)

Other BLAST [web gateways](#)

**All matches to this query**

| Score | Mr(calc) | Delta   | Sequence                |
|-------|----------|---------|-------------------------|
| 29.3  | 866.3969 | -0.0004 | <a href="#">AGMIFYR</a> |
| 12.6  | 866.3969 | -0.0004 | <a href="#">IFMQYR</a>  |





**Peptide View**MS/MS Fragmentation of **DIIMVDHMR**

Found in **AT4G13940.1** in **TAIR\_Arabidopsis**, Symbols: EMB1395, MEE58, SAHH, SAHH1, HOG1 | HOG1 (HOMOLOGY-DEPENDENT GENE SILENCING 1); adenosylhomocysteinase | chr4:8054926-8056671 FORWARD

Match to Query 3326: 1128.539006 from(565.276779,2+) index(4154)

Title: Elution from: 41.805 to 41.805 scan no 5365 cid35.00 polarity:+

Data file D12h-2\_1.mgf

Click mouse within plot area to zoom in by factor of two about that point

Or,   to  Da

Label all possible matches  Label matches used for scoring

Show Y-axis

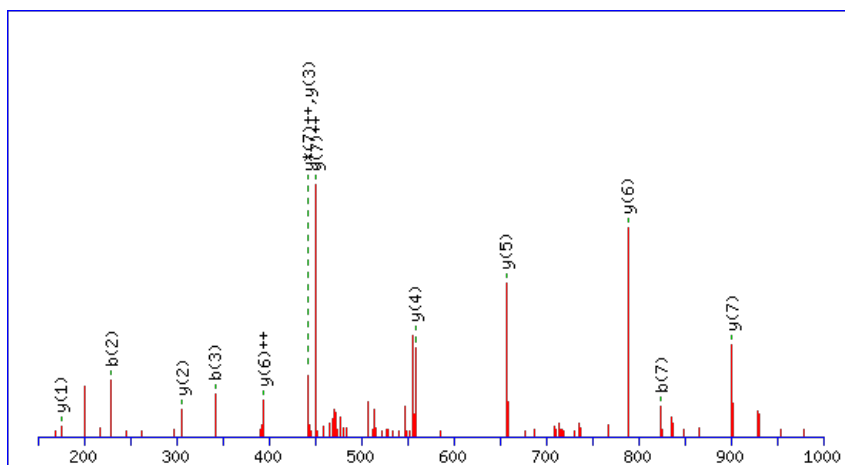

**Monoisotopic mass of neutral peptide Mr(calc):** 1128.5420

**Fixed modifications:** Carbamidomethyl (C) (apply to specified residues or termini only)

**Ions Score:** 46 **Expect:** 5.9e-005

**Matches:** 13/74 fragment ions using 25 most intense peaks ([help](#))

| # | b               | b <sup>++</sup> | b <sup>0</sup> | b <sup>0++</sup> | Seq. | y               | y <sup>++</sup> | y <sup>*</sup> | y <sup>*++</sup> | y <sup>0</sup> | y <sup>0++</sup> | # |
|---|-----------------|-----------------|----------------|------------------|------|-----------------|-----------------|----------------|------------------|----------------|------------------|---|
| 1 | 116.0342        | 58.5207         | 98.0237        | 49.5155          | D    |                 |                 |                |                  |                |                  | 9 |
| 2 | <b>229.1183</b> | 115.0628        | 211.1077       | 106.0575         | I    | 1014.5223       | 507.7648        | 997.4958       | 499.2515         | 996.5118       | 498.7595         | 8 |
| 3 | <b>342.2023</b> | 171.6048        | 324.1918       | 162.5995         | I    | <b>901.4383</b> | <b>451.2228</b> | 884.4117       | <b>442.7095</b>  | 883.4277       | 442.2175         | 7 |
| 4 | 473.2428        | 237.1251        | 455.2323       | 228.1198         | M    | <b>788.3542</b> | <b>394.6807</b> | 771.3276       | 386.1675         | 770.3436       | 385.6755         | 6 |
| 5 | 572.3112        | 286.6593        | 554.3007       | 277.6540         | V    | <b>657.3137</b> | 329.1605        | 640.2872       | 320.6472         | 639.3031       | 320.1552         | 5 |
| 6 | 687.3382        | 344.1727        | 669.3276       | 335.1674         | D    | <b>558.2453</b> | 279.6263        | 541.2187       | 271.1130         | 540.2347       | 270.6210         | 4 |
| 7 | <b>824.3971</b> | 412.7022        | 806.3865       | 403.6969         | H    | <b>443.2183</b> | 222.1128        | 426.1918       | 213.5995         |                |                  | 3 |
| 8 | 955.4376        | 478.2224        | 937.4270       | 469.2171         | M    | <b>306.1594</b> | 153.5834        | 289.1329       | 145.0701         |                |                  | 2 |
| 9 |                 |                 |                |                  | R    | <b>175.1190</b> | 88.0631         | 158.0924       | 79.5498          |                |                  | 1 |

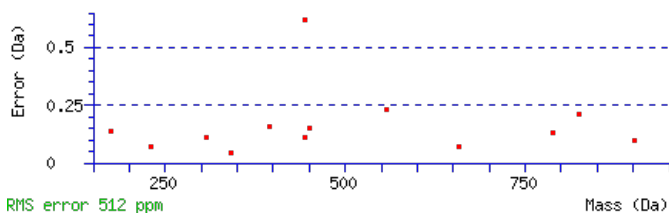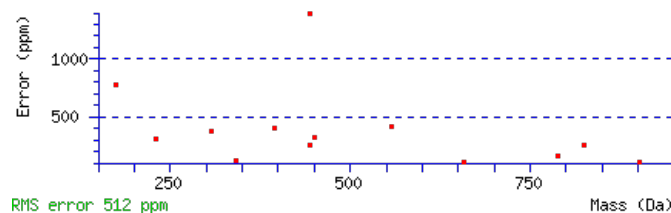

NCBI **BLAST** search of [DIIMVDHMR](#)

(Parameters: blastp, nr protein database, expect=20000, no filter, PAM30)

Other BLAST [web gateways](#)

**All matches to this query**

| Score | Mr(calc) | Delta | Sequence |
|-------|----------|-------|----------|
|       |          |       |          |

## AT4G13940.1

|      |           |         |                            |
|------|-----------|---------|----------------------------|
| 46.1 | 1128.5420 | -0.0030 | <a href="#">DIIMVDHMR</a>  |
| 3.1  | 1128.5411 | -0.0021 | <a href="#">AEPPEGSSLR</a> |
| 2.1  | 1128.5411 | -0.0021 | <a href="#">LSPPEEAQAR</a> |

**Mascot:** <http://www.matrixscience.com/>

**Peptide View**MS/MS Fragmentation of **SGPGYATPLAAMAGPR**

Found in **AT4G14040.1** in **TAIR\_Arabidopsis**, Symbols: EDA38, SBP2 | EDA38 (embryo sac development arrest 38); selenium binding | chr4:8100686-8102823 REVERSE

Match to Query 6549: 1515.748590 from(758.881571,2+) index(6177)

Title: Elution from: 55.389 to 55.389 scan no 7864 cid35.00 polarity:+

Data file 0-3\_1.mgf

Click mouse within plot area to zoom in by factor of two about that point

Or,   to  Da

Label all possible matches  Label matches used for scoring

Show Y-axis

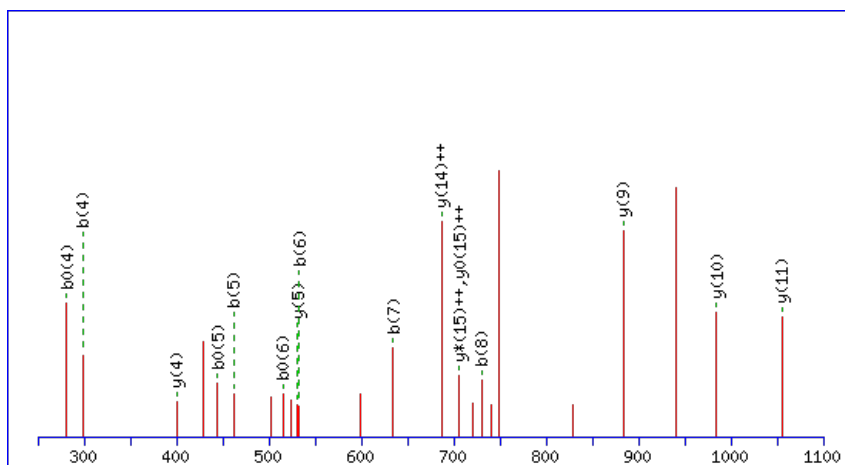

**Monoisotopic mass of neutral peptide Mr(calc):** 1515.7504

**Fixed modifications:** Carbamidomethyl (C) (apply to specified residues or termini only)

**Ions Score:** 33 **Expect:** 0.0015

**Matches:** 16/132 fragment ions using 24 most intense peaks ([help](#))

| #  | b         | b <sup>++</sup> | b <sup>0</sup> | b <sup>0++</sup> | Seq. | y         | y <sup>++</sup> | y*        | y <sup>*++</sup> | y <sup>0</sup> | y <sup>0++</sup> | #  |
|----|-----------|-----------------|----------------|------------------|------|-----------|-----------------|-----------|------------------|----------------|------------------|----|
| 1  | 88.0393   | 44.5233         | 70.0287        | 35.5180          | S    |           |                 |           |                  |                |                  | 16 |
| 2  | 145.0608  | 73.0340         | 127.0502       | 64.0287          | G    | 1429.7256 | 715.3665        | 1412.6991 | 706.8532         | 1411.7151      | 706.3612         | 15 |
| 3  | 242.1135  | 121.5604        | 224.1030       | 112.5551         | P    | 1372.7042 | 686.8557        | 1355.6776 | 678.3425         | 1354.6936      | 677.8504         | 14 |
| 4  | 299.1350  | 150.0711        | 281.1244       | 141.0659         | G    | 1275.6514 | 638.3293        | 1258.6249 | 629.8161         | 1257.6409      | 629.3241         | 13 |
| 5  | 462.1983  | 231.6028        | 444.1878       | 222.5975         | Y    | 1218.6300 | 609.8186        | 1201.6034 | 601.3053         | 1200.6194      | 600.8133         | 12 |
| 6  | 533.2354  | 267.1214        | 515.2249       | 258.1161         | A    | 1055.5666 | 528.2870        | 1038.5401 | 519.7737         | 1037.5561      | 519.2817         | 11 |
| 7  | 634.2831  | 317.6452        | 616.2726       | 308.6399         | T    | 984.5295  | 492.7684        | 967.5030  | 484.2551         | 966.5189       | 483.7631         | 10 |
| 8  | 731.3359  | 366.1716        | 713.3253       | 357.1663         | P    | 883.4818  | 442.2446        | 866.4553  | 433.7313         |                |                  | 9  |
| 9  | 844.4199  | 422.7136        | 826.4094       | 413.7083         | L    | 786.4291  | 393.7182        | 769.4025  | 385.2049         |                |                  | 8  |
| 10 | 915.4571  | 458.2322        | 897.4465       | 449.2269         | A    | 673.3450  | 337.1761        | 656.3185  | 328.6629         |                |                  | 7  |
| 11 | 986.4942  | 493.7507        | 968.4836       | 484.7454         | A    | 602.3079  | 301.6576        | 585.2813  | 293.1443         |                |                  | 6  |
| 12 | 1117.5347 | 559.2710        | 1099.5241      | 550.2657         | M    | 531.2708  | 266.1390        | 514.2442  | 257.6258         |                |                  | 5  |
| 13 | 1188.5718 | 594.7895        | 1170.5612      | 585.7842         | A    | 400.2303  | 200.6188        | 383.2037  | 192.1055         |                |                  | 4  |
| 14 | 1245.5932 | 623.3003        | 1227.5827      | 614.2950         | G    | 329.1932  | 165.1002        | 312.1666  | 156.5870         |                |                  | 3  |
| 15 | 1342.6460 | 671.8266        | 1324.6354      | 662.8214         | P    | 272.1717  | 136.5895        | 255.1452  | 128.0762         |                |                  | 2  |
| 16 |           |                 |                |                  | R    | 175.1190  | 88.0631         | 158.0924  | 79.5498          |                |                  | 1  |

# AT4G14040.1

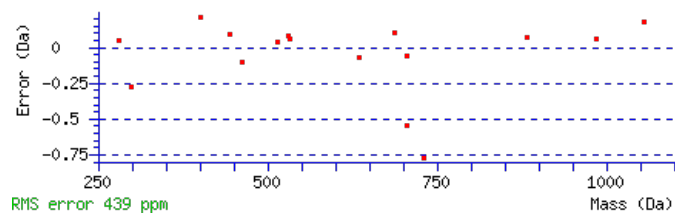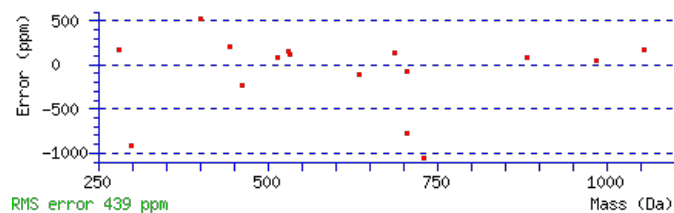

NCBI **BLAST** search of [SGPGYATPLAAMAGPR](#)

(Parameters: blastp, nr protein database, expect=20000, no filter, PAM30)

Other BLAST [web gateways](#)

## All matches to this query

| Score | Mr(calc)  | Delta   | Sequence                         |
|-------|-----------|---------|----------------------------------|
| 33.2  | 1515.7504 | -0.0018 | <a href="#">SGPGYATPLAAMAGPR</a> |
| 6.0   | 1515.7529 | -0.0043 | <a href="#">DITAAVANDLAASER</a>  |

Mascot: <http://www.matrixscience.com/>

**Peptide View**MS/MS Fragmentation of **IWREMSALVER**Found in **AT4G14360.1** in **TAIR\_Arabidopsis**, Symbols: | dehydration-responsive protein-related | chr4:8267865-8270187 REVERSE

Match to Query 5405: 1422.663310 from(712.338931,2+) index(10563)

Title: Elution from: 106.500 to 106.500 scan no 15474 cid35.00 polarity:+

Data file D12h-1\_3.mgf

Click mouse within plot area to zoom in by factor of two about that point

Or,   to  Da Label all possible matches  Label matches used for scoring Show Y-axis 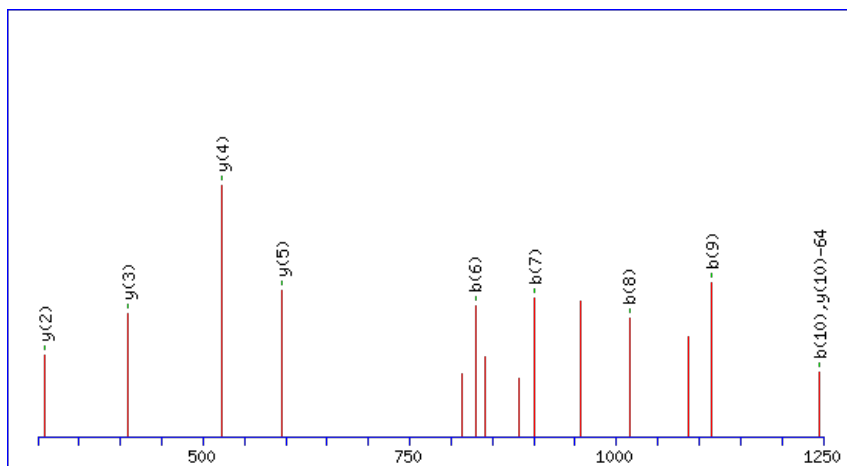Monoisotopic mass of neutral peptide  $M_r(\text{calc})$ : 1422.6650

Fixed modifications: Carbamidomethyl (C) (apply to specified residues or termini only)

Variable modifications:

M5 : Oxidation (M), with neutral losses 0.0000 (shown in table), 63.9983

Ions Score: 40 Expect: 0.00096

Matches : 10/168 fragment ions using 11 most intense peaks ([help](#))

| #  | b                | b <sup>++</sup> | b <sup>*</sup> | b <sup>*++</sup> | b <sup>0</sup> | b <sup>0++</sup> | Seq. | y               | y <sup>++</sup> | y <sup>*</sup> | y <sup>*++</sup> | y <sup>0</sup> | y <sup>0++</sup> | #  |
|----|------------------|-----------------|----------------|------------------|----------------|------------------|------|-----------------|-----------------|----------------|------------------|----------------|------------------|----|
| 1  | 115.0884         | 58.0478         |                |                  |                |                  | I    |                 |                 |                |                  |                |                  | 11 |
| 2  | 303.1618         | 152.0845        |                |                  |                |                  | W    | 1309.5912       | 655.2992        | 1291.5676      | 646.2874         | 1291.5806      | 646.2939         | 10 |
| 3  | 463.2510         | 232.1291        | 445.2274       | 223.1174         |                |                  | R    | 1121.5178       | 561.2625        | 1103.4942      | 552.2507         | 1103.5072      | 552.2573         | 9  |
| 4  | 593.2906         | 297.1490        | 575.2671       | 288.1372         | 575.2801       | 288.1437         | E    | 961.4285        | 481.2179        | 943.4050       | 472.2061         | 943.4180       | 472.2126         | 8  |
| 5  | 741.3231         | 371.1652        | 723.2995       | 362.1534         | 723.3125       | 362.1599         | M    | 831.3889        | 416.1981        | 813.3653       | 407.1863         | 813.3783       | 407.1928         | 7  |
| 6  | <b>829.3521</b>  | 415.1797        | 811.3286       | 406.1679         | 811.3416       | 406.1744         | S    | 683.3565        | 342.1819        | 665.3329       | 333.1701         | 665.3459       | 333.1766         | 6  |
| 7  | <b>901.3863</b>  | 451.1968        | 883.3627       | 442.1850         | 883.3757       | 442.1915         | A    | <b>595.3274</b> | 298.1673        | 577.3038       | 289.1556         | 577.3169       | 289.1621         | 5  |
| 8  | <b>1015.4674</b> | 508.2373        | 997.4438       | 499.2255         | 997.4568       | 499.2320         | L    | <b>523.2933</b> | 262.1503        | 505.2697       | 253.1385         | 505.2827       | 253.1450         | 4  |
| 9  | <b>1115.5328</b> | 558.2701        | 1097.5092      | 549.2583         | 1097.5223      | 549.2648         | V    | <b>409.2122</b> | 205.1097        | 391.1886       | 196.0979         | 391.2016       | 196.1044         | 3  |
| 10 | <b>1245.5725</b> | 623.2899        | 1227.5489      | 614.2781         | 1227.5619      | 614.2846         | E    | <b>309.1467</b> | 155.0770        | 291.1231       | 146.0652         | 291.1362       | 146.0717         | 2  |
| 11 |                  |                 |                |                  |                |                  | R    | 179.1071        | 90.0572         | 161.0835       | 81.0454          |                |                  | 1  |

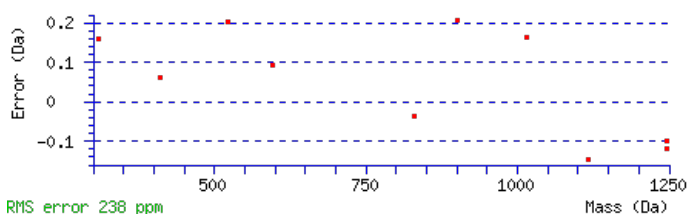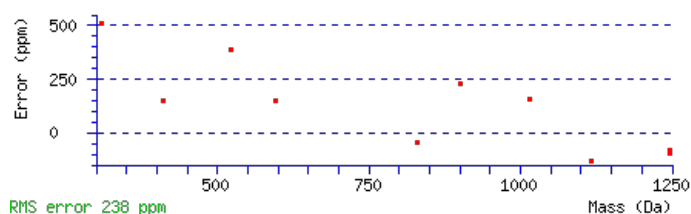NCBI **BLAST** search of **IWREMSALVER**

(Parameters: blastp, nr protein database, expect=20000, no filter, PAM30)

Other BLAST [web gateways](#)

**AT4G14360.1**

All matches to this query

| Score | Mr(calc)  | Delta   | Sequence                      |
|-------|-----------|---------|-------------------------------|
| 39.8  | 1422.6650 | -0.0017 | <a href="#">IWREMSALVER</a>   |
| 18.2  | 1422.6675 | -0.0042 | <a href="#">QASLSTDKALSER</a> |
| 17.1  | 1422.6616 | 0.0017  | <a href="#">GVWERDFLLDR</a>   |
| 11.8  | 1422.6620 | 0.0013  | <a href="#">THHHKETDIKR</a>   |
| 11.2  | 1422.6657 | -0.0024 | <a href="#">KMKIMDAELGEK</a>  |
| 5.5   | 1422.6616 | 0.0017  | <a href="#">GQNFELLPGAGR</a>  |
| 5.0   | 1422.6675 | -0.0042 | <a href="#">DLSSRASTAQLEK</a> |
| 4.3   | 1422.6628 | 0.0006  | <a href="#">SLDCQKLSAQVR</a>  |
| 2.5   | 1422.6657 | -0.0024 | <a href="#">MKIMDAELGEKK</a>  |
| 2.4   | 1422.6628 | 0.0005  | <a href="#">KGNKVNMEEAR</a>   |

Mascot: <http://www.matrixscience.com/>

## Peptide View

### MS/MS Fragmentation of **ELTTLEIR**

Found in **AT4G14605.1** in **TAIR\_Arabidopsis**, Symbols: | mitochondrial transcription termination factor-related / mTERF-related | chr4:8378810-8380412 FORWARD

Match to Query 2196: 984.510234 from(493.262393,2+) index(3251)

Title: Elution from: 31.256 to 31.256 scan no 4022 cid35.00 polarity:+

Data file 0-3\_3.mgf

Click mouse within plot area to zoom in by factor of two about that point

Or,   to  Da

Label all possible matches  Label matches used for scoring

Show Y-axis

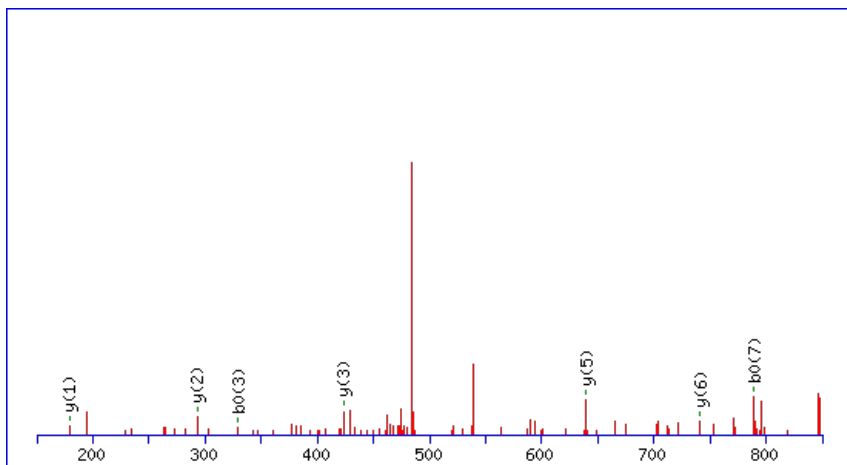

Monoisotopic mass of neutral peptide  $M_r(\text{calc})$ : 984.5118

Fixed modifications: Carbamidomethyl (C) (apply to specified residues or termini only)

Ions Score: 21 Expect: 0.044

Matches : 7/66 fragment ions using 21 most intense peaks ([help](#))

| # | b        | b <sup>++</sup> | b <sup>0</sup> | b <sup>0++</sup> | Seq. | y        | y <sup>++</sup> | y*       | y <sup>*++</sup> | y <sup>0</sup> | y <sup>0++</sup> | # |
|---|----------|-----------------|----------------|------------------|------|----------|-----------------|----------|------------------|----------------|------------------|---|
| 1 | 131.0469 | 66.0271         | 113.0363       | 57.0218          | E    |          |                 |          |                  |                |                  | 8 |
| 2 | 245.1280 | 123.0676        | 227.1174       | 114.0624         | L    | 855.4794 | 428.2434        | 837.4559 | 419.2316         | 837.4689       | 419.2381         | 7 |
| 3 | 347.1727 | 174.0900        | 329.1622       | 165.0847         | T    | 741.3983 | 371.2028        | 723.3748 | 362.1910         | 723.3878       | 362.1975         | 6 |
| 4 | 449.2174 | 225.1124        | 431.2069       | 216.1071         | T    | 639.3536 | 320.1805        | 621.3300 | 311.1687         | 621.3431       | 311.1752         | 5 |
| 5 | 563.2985 | 282.1529        | 545.2880       | 273.1476         | L    | 537.3089 | 269.1581        | 519.2853 | 260.1463         | 519.2984       | 260.1528         | 4 |
| 6 | 693.3382 | 347.1727        | 675.3276       | 338.1674         | E    | 423.2278 | 212.1175        | 405.2042 | 203.1058         | 405.2173       | 203.1123         | 3 |
| 7 | 807.4193 | 404.2133        | 789.4087       | 395.2080         | I    | 293.1882 | 147.0977        | 275.1646 | 138.0859         |                |                  | 2 |
| 8 |          |                 |                |                  | R    | 179.1071 | 90.0572         | 161.0835 | 81.0454          |                |                  | 1 |

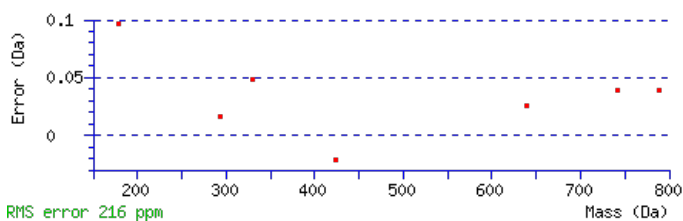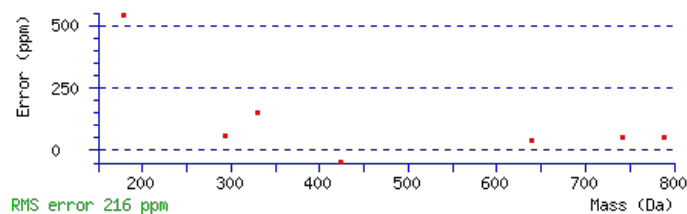

NCBI BLAST search of [ELTTLEIR](#)

(Parameters: blastp, nr protein database, expect=20000, no filter, PAM30)

Other BLAST [web gateways](#)

### All matches to this query

| Score | $M_r(\text{calc})$ | Delta   | Sequence                 |
|-------|--------------------|---------|--------------------------|
| 21.0  | 984.5118           | -0.0015 | <a href="#">ELTTLEIR</a> |



## AT4G14605.1

|     |          |         |                           |
|-----|----------|---------|---------------------------|
| 1.1 | 984.5097 | 0.0005  | <a href="#">KHMAKSIR</a>  |
| 0.3 | 984.5118 | -0.0015 | <a href="#">LDDKCLKDK</a> |
| 0.2 | 984.5118 | -0.0015 | <a href="#">TAVAVEKEK</a> |
| 0.0 | 984.5118 | -0.0016 | <a href="#">ELEAEKKK</a>  |
| 0.0 | 984.5118 | -0.0016 | <a href="#">LEAEKKK</a>   |

**Mascot:** <http://www.matrixscience.com/>

**Peptide View**MS/MS Fragmentation of **FGDLLAFSGPAPER**

Found in **AT4G14690.1** in **TAIR\_Arabidopsis**, Symbols: ELIP2 | ELIP2 (EARLY LIGHT-INDUCIBLE PROTEIN 2); chlorophyll binding | chr4:8418368-8419124 FORWARD

Match to Query 5812: 1492.691522 from(747.353037,2+) index(7679)

Title: Elution from: 68.861 to 68.861 scan no 10156 cid35.00 polarity:+

Data file D1d-2\_3.mgf

Click mouse within plot area to zoom in by factor of two about that point

Or,  to  Da

Label all possible matches  Label matches used for scoring

Show Y-axis

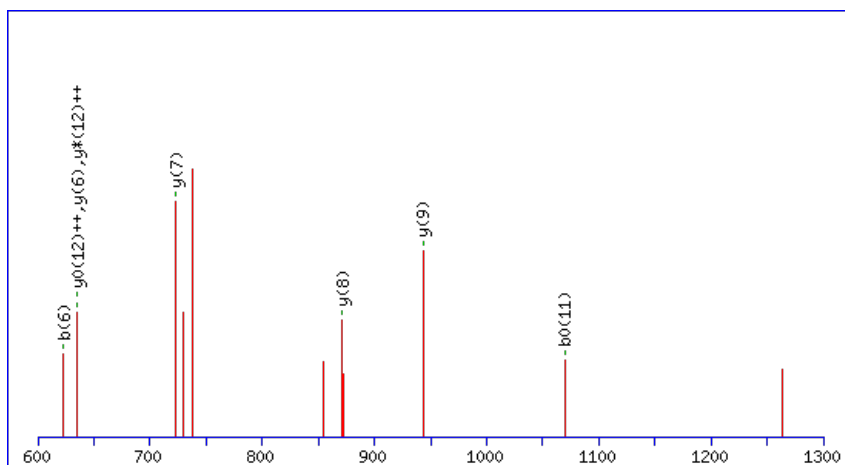

Monoisotopic mass of neutral peptide  $M_r(\text{calc})$ : 1492.6905

Fixed modifications: Carbamidomethyl (C) (apply to specified residues or termini only)

Ions Score: 23 Expect: 0.042

Matches : 8/124 fragment ions using 9 most intense peaks ([help](#))

| #  | b         | b <sup>++</sup> | b <sup>0</sup> | b <sup>0++</sup> | Seq. | y         | y <sup>++</sup> | y*        | y <sup>*++</sup> | y <sup>0</sup> | y <sup>0++</sup> | #  |
|----|-----------|-----------------|----------------|------------------|------|-----------|-----------------|-----------|------------------|----------------|------------------|----|
| 1  | 149.0727  | 75.0400         |                |                  | F    |           |                 |           |                  |                |                  | 14 |
| 2  | 207.0912  | 104.0492        |                |                  | G    | 1345.6323 | 673.3198        | 1327.6087 | 664.3080         | 1327.6217      | 664.3145         | 13 |
| 3  | 323.1152  | 162.0612        | 305.1046       | 153.0560         | D    | 1287.6138 | 644.3105        | 1269.5902 | 635.2987         | 1269.6032      | 635.3053         | 12 |
| 4  | 437.1963  | 219.1018        | 419.1857       | 210.0965         | L    | 1171.5898 | 586.2986        | 1153.5662 | 577.2868         | 1153.5793      | 577.2933         | 11 |
| 5  | 551.2774  | 276.1423        | 533.2668       | 267.1371         | L    | 1057.5087 | 529.2580        | 1039.4851 | 520.2462         | 1039.4982      | 520.2527         | 10 |
| 6  | 623.3115  | 312.1594        | 605.3010       | 303.1541         | A    | 943.4276  | 472.2175        | 925.4040  | 463.2057         | 925.4171       | 463.2122         | 9  |
| 7  | 771.3770  | 386.1921        | 753.3664       | 377.1869         | F    | 871.3935  | 436.2004        | 853.3699  | 427.1886         | 853.3829       | 427.1951         | 8  |
| 8  | 859.4061  | 430.2067        | 841.3955       | 421.2014         | S    | 723.3280  | 362.1677        | 705.3044  | 353.1559         | 705.3175       | 353.1624         | 7  |
| 9  | 917.4246  | 459.2159        | 899.4140       | 450.2106         | G    | 635.2990  | 318.1531        | 617.2754  | 309.1413         | 617.2884       | 309.1478         | 6  |
| 10 | 1015.4744 | 508.2408        | 997.4638       | 499.2355         | P    | 577.2805  | 289.1439        | 559.2569  | 280.1321         | 559.2699       | 280.1386         | 5  |
| 11 | 1087.5085 | 544.2579        | 1069.4979      | 535.2526         | A    | 479.2307  | 240.1190        | 461.2071  | 231.1072         | 461.2201       | 231.1137         | 4  |
| 12 | 1185.5583 | 593.2828        | 1167.5477      | 584.2775         | P    | 407.1965  | 204.1019        | 389.1729  | 195.0901         | 389.1860       | 195.0966         | 3  |
| 13 | 1315.5979 | 658.3026        | 1297.5874      | 649.2973         | E    | 309.1467  | 155.0770        | 291.1231  | 146.0652         | 291.1362       | 146.0717         | 2  |
| 14 |           |                 |                |                  | R    | 179.1071  | 90.0572         | 161.0835  | 81.0454          |                |                  | 1  |

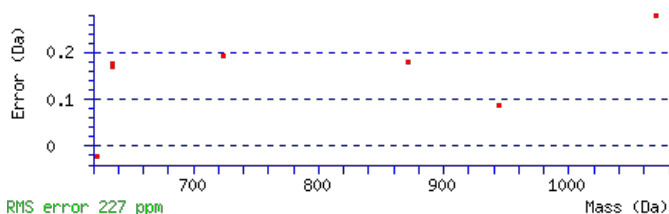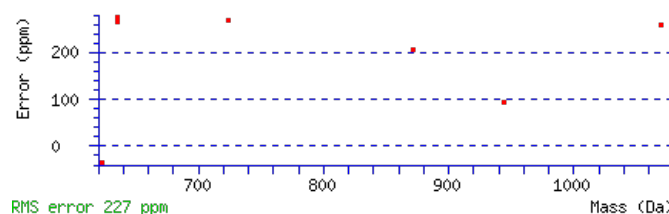

## AT4G14690.1

(Parameters: blastp, nr protein database, expect=20000, no filter, PAM30)

Other BLAST [web gateways](#)

### All matches to this query

| Score | Mr(calc)  | Delta  | Sequence                       |
|-------|-----------|--------|--------------------------------|
| 23.1  | 1492.6905 | 0.0011 | <a href="#">FGDLLAFSGPAPER</a> |
| 4.8   | 1492.6882 | 0.0033 | <a href="#">KGAWTAEEDSLR</a>   |
| 3.4   | 1492.6882 | 0.0033 | <a href="#">KVEQDYLHTSQK</a>   |
| 3.3   | 1492.6909 | 0.0006 | <a href="#">LDTPADHVN VHVR</a> |
| 3.2   | 1492.6878 | 0.0037 | <a href="#">IIDFEFLNPDEK</a>   |
| 2.8   | 1492.6889 | 0.0026 | <a href="#">QKLEESSELVEMK</a>  |

Mascot: <http://www.matrixscience.com/>

**Peptide View**MS/MS Fragmentation of **YLSTVLFDATRK**

Found in **AT4G14880.1** in **TAIR\_Arabidopsis**, Symbols: CYTACS1, ATCYS-3A, OASA1 | OASA1 (O-ACETYLSELINE (THIOL) LYASE (OAS-TL) ISOFORM A1) | chr4:8518204-8520045 REVERSE

Match to Query 5588: 1428.721950 from(715.368251,2+) index(5873)

Title: Elution from: 52.087 to 52.087 scan no 7481 cid35.00 polarity:+

Data file 0-1\_3.mgf

Click mouse within plot area to zoom in by factor of two about that point

Or,   to  Da

Label all possible matches  Label matches used for scoring

Show Y-axis

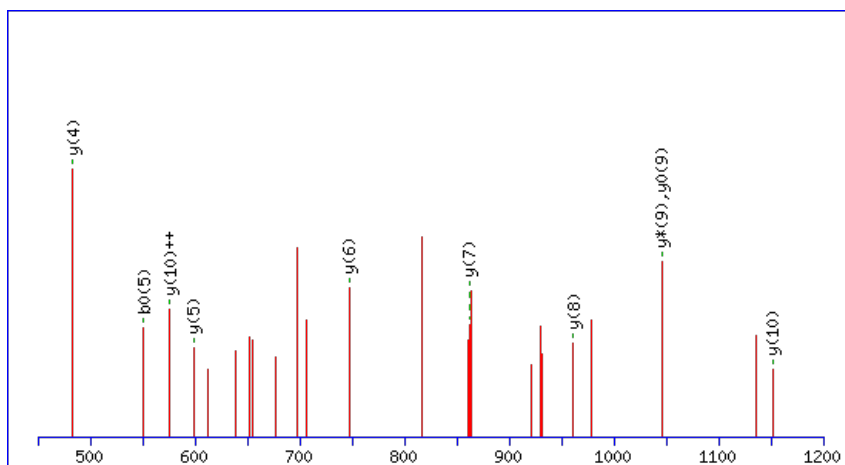

**Monoisotopic mass of neutral peptide Mr(calc):** 1428.7189

**Fixed modifications:** Carbamidomethyl (C) (apply to specified residues or termini only)

**Ions Score:** 28 **Expect:** 0.0068

**Matches:** 10/104 fragment ions using 19 most intense peaks ([help](#))

| #  | b         | b <sup>++</sup> | b <sup>*</sup> | b <sup>*++</sup> | b <sup>0</sup>  | b <sup>0++</sup> | Seq. | y                | y <sup>++</sup> | y <sup>*</sup>   | y <sup>*++</sup> | y <sup>0</sup>   | y <sup>0++</sup> | #  |
|----|-----------|-----------------|----------------|------------------|-----------------|------------------|------|------------------|-----------------|------------------|------------------|------------------|------------------|----|
| 1  | 165.0676  | 83.0375         |                |                  |                 |                  | Y    |                  |                 |                  |                  |                  |                  | 12 |
| 2  | 279.1487  | 140.0780        |                |                  |                 |                  | L    | 1265.6658        | 633.3366        | 1247.6423        | 624.3248         | 1247.6553        | 624.3313         | 11 |
| 3  | 367.1778  | 184.0925        |                |                  | 349.1672        | 175.0873         | S    | <b>1151.5847</b> | <b>576.2960</b> | 1133.5612        | 567.2842         | 1133.5742        | 567.2907         | 10 |
| 4  | 469.2225  | 235.1149        |                |                  | 451.2120        | 226.1096         | T    | 1063.5557        | 532.2815        | <b>1045.5321</b> | 523.2697         | <b>1045.5451</b> | 523.2762         | 9  |
| 5  | 569.2880  | 285.1476        |                |                  | <b>551.2774</b> | 276.1423         | V    | <b>961.5110</b>  | 481.2591        | 943.4874         | 472.2473         | 943.5004         | 472.2538         | 8  |
| 6  | 683.3691  | 342.1882        |                |                  | 665.3585        | 333.1829         | L    | <b>861.4455</b>  | 431.2264        | 843.4219         | 422.2146         | 843.4349         | 422.2211         | 7  |
| 7  | 831.4345  | 416.2209        |                |                  | 813.4239        | 407.2156         | F    | <b>747.3644</b>  | 374.1858        | 729.3408         | 365.1741         | 729.3538         | 365.1806         | 6  |
| 8  | 947.4585  | 474.2329        |                |                  | 929.4479        | 465.2276         | D    | <b>599.2990</b>  | 300.1531        | 581.2754         | 291.1413         | 581.2884         | 291.1478         | 5  |
| 9  | 1019.4926 | 510.2500        |                |                  | 1001.4821       | 501.2447         | A    | <b>483.2750</b>  | 242.1411        | 465.2514         | 233.1293         | 465.2644         | 233.1358         | 4  |
| 10 | 1121.5374 | 561.2723        |                |                  | 1103.5268       | 552.2670         | T    | 411.2408         | 206.1241        | 393.2173         | 197.1123         | 393.2303         | 197.1188         | 3  |
| 11 | 1281.6266 | 641.3169        | 1263.6030      | 632.3051         | 1263.6160       | 632.3117         | R    | 309.1961         | 155.1017        | 291.1725         | 146.0899         |                  |                  | 2  |
| 12 |           |                 |                |                  |                 |                  | K    | 149.1069         | 75.0571         | 131.0833         | 66.0453          |                  |                  | 1  |

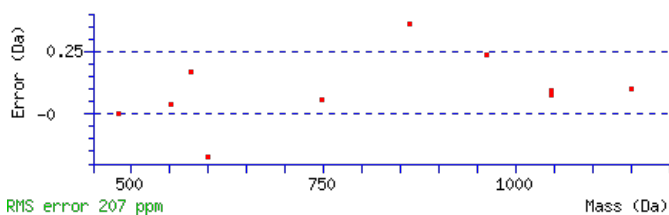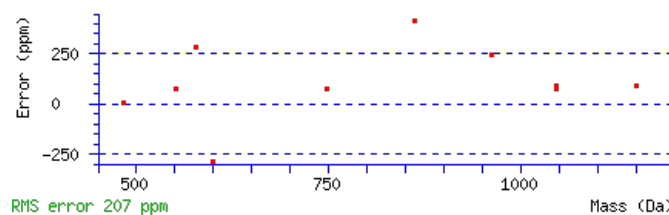

NCBI **BLAST** search of **YLSTVLFDATRK**

(Parameters: blastp, nr protein database, expect=20000, no filter, PAM30)

Other BLAST [web gateways](#)

AT4G14880.1

All matches to this query

| Score | Mr(calc)  | Delta   | Sequence                      |
|-------|-----------|---------|-------------------------------|
| 28.4  | 1428.7189 | 0.0030  | <a href="#">YLSTVLFDATRK</a>  |
| 0.6   | 1428.7223 | -0.0003 | <a href="#">DNVLPLSIVQGMK</a> |

Mascot: <http://www.matrixscience.com/>

**Peptide View**MS/MS Fragmentation of **SLNIERPTYNLNR**Found in **AT4G14960.2** in **TAIR\_Arabidopsis**, Symbols: TUA6 | TUA6 (tubulin alpha-6 chain) | chr4:8548765-8550315 REVERSE

Match to Query 8479: 1712.811669 from(571.944499,3+) index(4350)

Title: Elution from: 39.550 to 39.550 scan no 5387 cid35.00 polarity:+

Data file C7-1\_1.mgf

Click mouse within plot area to zoom in by factor of two about that point

Or,   to  Da Label all possible matches  Label matches used for scoring Show Y-axis 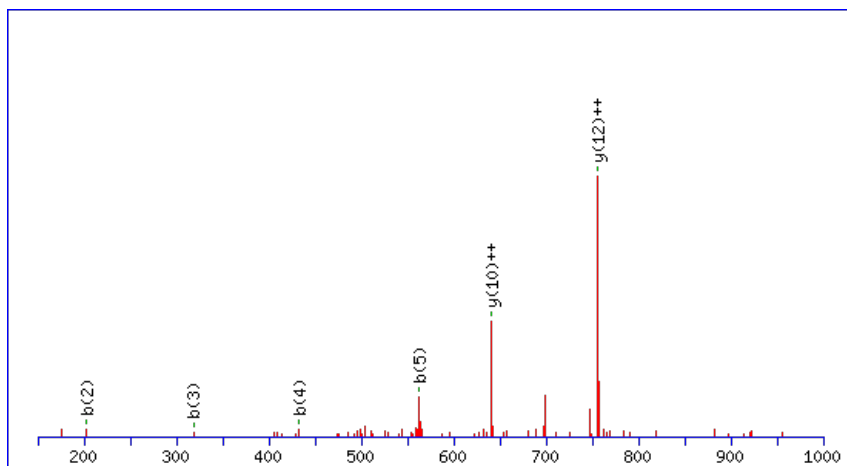Monoisotopic mass of neutral peptide **Mr(calc)**: 1712.8116**Fixed modifications**: Carbamidomethyl (C) (apply to specified residues or termini only)**Ions Score**: 26 **Expect**: 0.025**Matches**: 6/144 fragment ions using 8 most intense peaks ([help](#))

| #  | b               | b <sup>++</sup> | b*        | b <sup>*++</sup> | b <sup>0</sup> | b <sup>0++</sup> | Seq. | y         | y <sup>++</sup> | y*        | y <sup>*++</sup> | y <sup>0</sup> | y <sup>0++</sup> | #  |
|----|-----------------|-----------------|-----------|------------------|----------------|------------------|------|-----------|-----------------|-----------|------------------|----------------|------------------|----|
| 1  | 89.0363         | 45.0218         |           |                  | 71.0258        | 36.0165          | S    |           |                 |           |                  |                |                  | 14 |
| 2  | <b>203.1174</b> | 102.0624        |           |                  | 185.1069       | 93.0571          | L    | 1625.7898 | 813.3986        | 1607.7663 | 804.3868         | 1607.7793      | 804.3933         | 13 |
| 3  | <b>319.1544</b> | 160.0809        | 301.1309  | 151.0691         | 301.1439       | 151.0756         | N    | 1511.7087 | <b>756.3580</b> | 1493.6852 | 747.3462         | 1493.6982      | 747.3527         | 12 |
| 4  | <b>433.2355</b> | 217.1214        | 415.2120  | 208.1096         | 415.2250       | 208.1161         | I    | 1395.6718 | 698.3395        | 1377.6482 | 689.3277         | 1377.6612      | 689.3342         | 11 |
| 5  | <b>563.2752</b> | 282.1412        | 545.2516  | 273.1294         | 545.2646       | 273.1359         | E    | 1281.5907 | <b>641.2990</b> | 1263.5671 | 632.2872         | 1263.5801      | 632.2937         | 10 |
| 6  | 723.3644        | 362.1858        | 705.3408  | 353.1741         | 705.3538       | 353.1806         | R    | 1151.5510 | 576.2792        | 1133.5274 | 567.2674         | 1133.5405      | 567.2739         | 9  |
| 7  | 821.4142        | 411.2107        | 803.3906  | 402.1990         | 803.4036       | 402.2055         | P    | 991.4618  | 496.2345        | 973.4382  | 487.2227         | 973.4512       | 487.2292         | 8  |
| 8  | 923.4589        | 462.2331        | 905.4353  | 453.2213         | 905.4484       | 453.2278         | T    | 893.4120  | 447.2096        | 875.3884  | 438.1978         | 875.4014       | 438.2043         | 7  |
| 9  | 1087.5193       | 544.2633        | 1069.4957 | 535.2515         | 1069.5087      | 535.2580         | Y    | 791.3673  | 396.1873        | 773.3437  | 387.1755         | 773.3567       | 387.1820         | 6  |
| 10 | 1189.5640       | 595.2856        | 1171.5404 | 586.2738         | 1171.5534      | 586.2804         | T    | 627.3069  | 314.1571        | 609.2833  | 305.1453         | 609.2963       | 305.1518         | 5  |
| 11 | 1305.6010       | 653.3041        | 1287.5774 | 644.2923         | 1287.5904      | 644.2989         | N    | 525.2622  | 263.1347        | 507.2386  | 254.1229         |                |                  | 4  |
| 12 | 1419.6821       | 710.3447        | 1401.6585 | 701.3329         | 1401.6715      | 701.3394         | L    | 409.2252  | 205.1162        | 391.2016  | 196.1044         |                |                  | 3  |
| 13 | 1535.7191       | 768.3632        | 1517.6955 | 759.3514         | 1517.7085      | 759.3579         | N    | 295.1441  | 148.0757        | 277.1205  | 139.0639         |                |                  | 2  |
| 14 |                 |                 |           |                  |                |                  | R    | 179.1071  | 90.0572         | 161.0835  | 81.0454          |                |                  | 1  |

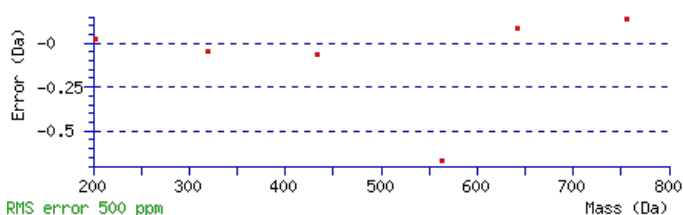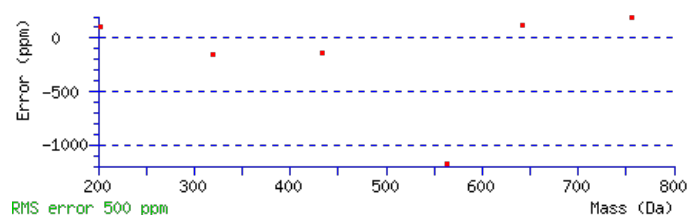NCBI **BLAST** search of **SLNIERPTYNLNR**

(Parameters: blastp, nr protein database, expect=20000, no filter, PAM30)

## AT4G14960.2

Other BLAST [web gateways](#)

### All matches to this query

| Score | Mr(calc)  | Delta   | Sequence                         |
|-------|-----------|---------|----------------------------------|
| 26.3  | 1712.8116 | 0.0000  | <a href="#">SLNIERPTYTNLNR</a>   |
| 4.4   | 1712.8089 | 0.0027  | <a href="#">DSLIEVAKSYVADQR</a>  |
| 3.1   | 1712.8145 | -0.0029 | <a href="#">QAQIGMLFDTLEK GK</a> |
| 1.2   | 1712.8123 | -0.0007 | <a href="#">SLGMTSGEELEKIRK</a>  |
| 0.1   | 1712.8129 | -0.0013 | <a href="#">ANQILMRGSCRPKR</a>   |

Mascot: <http://www.matrixscience.com/>

**Peptide View**MS/MS Fragmentation of **YTLDVDLK**Found in **AT4G15000.1** in **TAIR\_Arabidopsis**, Symbols: | 60S ribosomal protein L27 (RPL27C) | chr4:8571892-8572299 FORWARD

Match to Query 2193: 974.480344 from(488.247448,2+) index(5143)

Title: Elution from: 47.266 to 47.266 scan no 6455 cid35.00 polarity:+

Data file D6h-2\_2.mgf

Click mouse within plot area to zoom in by factor of two about that point

Or,   to  Da Label all possible matches  Label matches used for scoring Show Y-axis 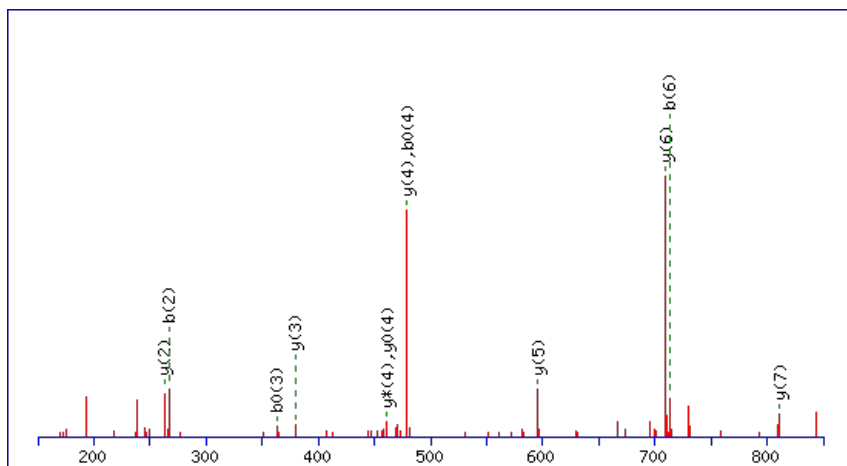Monoisotopic mass of neutral peptide  $M_r(\text{calc})$ : 974.4803

Fixed modifications: Carbamidomethyl (C) (apply to specified residues or termini only)

Ions Score: 54 Expect: 4.6e-005

Matches : 12/64 fragment ions using 14 most intense peaks ([help](#))

| # | b               | b <sup>++</sup> | b <sup>0</sup>  | b <sup>0++</sup> | Seq. | y               | y <sup>++</sup> | y*              | y <sup>*++</sup> | y <sup>0</sup>  | y <sup>0++</sup> | # |
|---|-----------------|-----------------|-----------------|------------------|------|-----------------|-----------------|-----------------|------------------|-----------------|------------------|---|
| 1 | 165.0676        | 83.0375         |                 |                  | Y    |                 |                 |                 |                  |                 |                  | 8 |
| 2 | <b>267.1124</b> | 134.0598        | 249.1018        | 125.0545         | T    | <b>811.4272</b> | 406.2172        | 793.4036        | 397.2054         | 793.4166        | 397.2120         | 7 |
| 3 | 381.1935        | 191.1004        | <b>363.1829</b> | 182.0951         | L    | <b>709.3825</b> | 355.1949        | 691.3589        | 346.1831         | 691.3719        | 346.1896         | 6 |
| 4 | 497.2174        | 249.1124        | <b>479.2069</b> | 240.1071         | D    | <b>595.3014</b> | 298.1543        | 577.2778        | 289.1425         | 577.2908        | 289.1490         | 5 |
| 5 | 597.2829        | 299.1451        | 579.2723        | 290.1398         | V    | <b>479.2774</b> | 240.1423        | <b>461.2538</b> | 231.1305         | <b>461.2668</b> | 231.1371         | 4 |
| 6 | <b>713.3069</b> | 357.1571        | 695.2963        | 348.1518         | D    | <b>379.2120</b> | 190.1096        | 361.1884        | 181.0978         | 361.2014        | 181.1043         | 3 |
| 7 | 827.3880        | 414.1976        | 809.3774        | 405.1923         | L    | <b>263.1880</b> | 132.0976        | 245.1644        | 123.0858         |                 |                  | 2 |
| 8 |                 |                 |                 |                  | K    | 149.1069        | 75.0571         | 131.0833        | 66.0453          |                 |                  | 1 |

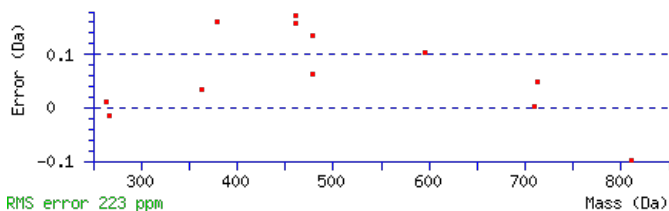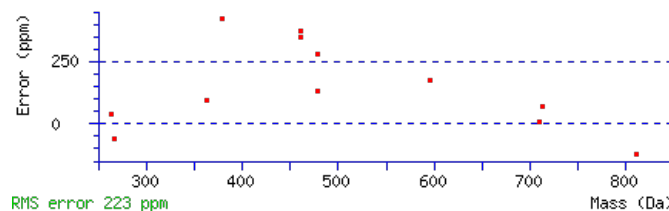NCBI **BLAST** search of **YTLDVDLK**

(Parameters: blastp, nr protein database, expect=20000, no filter, PAM30)

Other BLAST [web gateways](#)**All matches to this query**

| Score | $M_r(\text{calc})$ | Delta   | Sequence                 |
|-------|--------------------|---------|--------------------------|
| 53.5  | 974.4803           | 0.0001  | <a href="#">YTLDVDLK</a> |
| 23.7  | 974.4829           | -0.0026 | <a href="#">FLNVVESR</a> |



## AT4G15000.1

|      |          |         |                           |
|------|----------|---------|---------------------------|
| 17.8 | 974.4829 | -0.0026 | <a href="#">RFDAVDLK</a>  |
| 14.2 | 974.4830 | -0.0026 | <a href="#">YPNITSLR</a>  |
| 12.6 | 974.4829 | -0.0026 | <a href="#">NDFVLLSR</a>  |
| 12.0 | 974.4789 | 0.0014  | <a href="#">KMSEIMVK</a>  |
| 7.5  | 974.4789 | 0.0014  | <a href="#">EMVTMVKK</a>  |
| 7.5  | 974.4782 | 0.0021  | <a href="#">TICVWKR</a>   |
| 7.3  | 974.4807 | -0.0004 | <a href="#">DRTVESKK</a>  |
| 7.2  | 974.4807 | -0.0004 | <a href="#">TKGDVLSLR</a> |

Mascot: <http://www.matrixscience.com/>

**Peptide View**MS/MS Fragmentation of **YVMRHVFGDPK**Found in **AT4G15180.1** in **TAIR\_Arabidopsis**, Symbols: | SET domain-containing protein | chr4:8651999-8662178 FORWARD

Match to Query 5132: 1380.619764 from(691.317158,2+) index(6655)

Title: Elution from: 61.639 to 61.639 scan no 8692 cid35.00 polarity:+

Data file D12h-2\_1.mgf

Click mouse within plot area to zoom in by factor of two about that point

Or,   to  Da Label all possible matches  Label matches used for scoring Show Y-axis 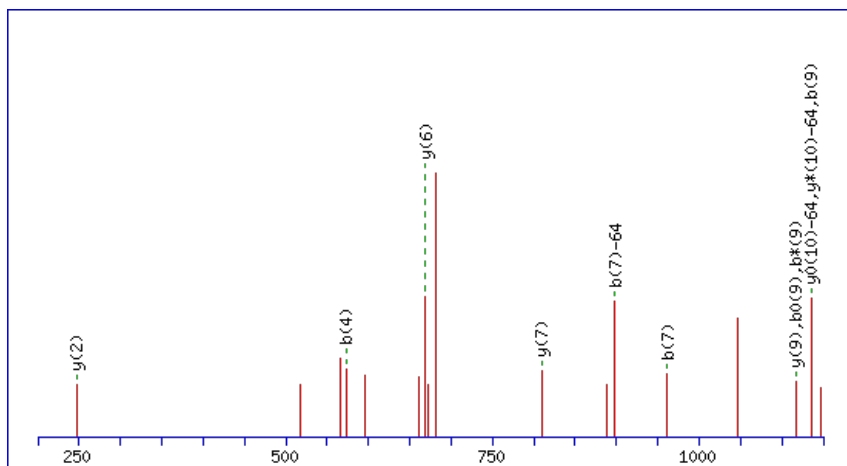Monoisotopic mass of neutral peptide  $M_r(\text{calc})$ : 1380.6203

Fixed modifications: Carbamidomethyl (C) (apply to specified residues or termini only)

Variable modifications:

M3 : Oxidation (M), with neutral losses 0.0000 (shown in table), 63.9983

Ions Score: 25 Expect: 0.03

Matches : 12/140 fragment ions using 14 most intense peaks ([help](#))

| #  | b                | b <sup>++</sup> | b <sup>*</sup>   | b <sup>*++</sup> | b <sup>0</sup>   | b <sup>0++</sup> | Seq. | y                | y <sup>++</sup> | y <sup>*</sup> | y <sup>*++</sup> | y <sup>0</sup> | y <sup>0++</sup> | #  |
|----|------------------|-----------------|------------------|------------------|------------------|------------------|------|------------------|-----------------|----------------|------------------|----------------|------------------|----|
| 1  | 165.0676         | 83.0375         |                  |                  |                  |                  | Y    |                  |                 |                |                  |                |                  | 11 |
| 2  | 265.1331         | 133.0702        |                  |                  |                  |                  | V    | 1217.5672        | 609.2872        | 1199.5436      | 600.2754         | 1199.5566      | 600.2820         | 10 |
| 3  | 413.1655         | 207.0864        |                  |                  |                  |                  | M    | <b>1117.5018</b> | 559.2545        | 1099.4782      | 550.2427         | 1099.4912      | 550.2492         | 9  |
| 4  | <b>573.2548</b>  | 287.1310        | 555.2312         | 278.1192         |                  |                  | R    | 969.4693         | 485.2383        | 951.4457       | 476.2265         | 951.4588       | 476.2330         | 8  |
| 5  | 713.3048         | 357.1560        | 695.2812         | 348.1442         |                  |                  | H    | <b>809.3801</b>  | 405.1937        | 791.3565       | 396.1819         | 791.3695       | 396.1884         | 7  |
| 6  | 813.3702         | 407.1888        | 795.3467         | 398.1770         |                  |                  | V    | <b>669.3300</b>  | 335.1687        | 651.3065       | 326.1569         | 651.3195       | 326.1634         | 6  |
| 7  | <b>961.4357</b>  | 481.2215        | 943.4121         | 472.2097         |                  |                  | F    | 569.2646         | 285.1359        | 551.2410       | 276.1241         | 551.2540       | 276.1307         | 5  |
| 8  | 1019.4542        | 510.2307        | 1001.4306        | 501.2189         |                  |                  | G    | 421.1991         | 211.1032        | 403.1756       | 202.0914         | 403.1886       | 202.0979         | 4  |
| 9  | <b>1135.4782</b> | 568.2427        | <b>1117.4546</b> | 559.2309         | <b>1117.4676</b> | 559.2374         | D    | 363.1807         | 182.0940        | 345.1571       | 173.0822         | 345.1701       | 173.0887         | 3  |
| 10 | 1233.5280        | 617.2676        | 1215.5044        | 608.2558         | 1215.5174        | 608.2623         | P    | <b>247.1567</b>  | 124.0820        | 229.1331       | 115.0702         |                |                  | 2  |
| 11 |                  |                 |                  |                  |                  |                  | K    | 149.1069         | 75.0571         | 131.0833       | 66.0453          |                |                  | 1  |

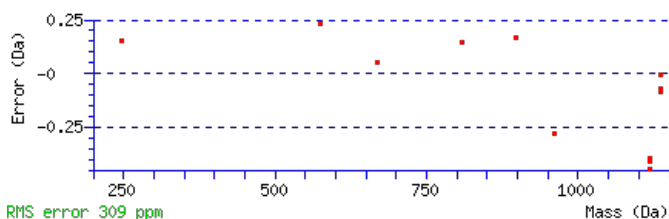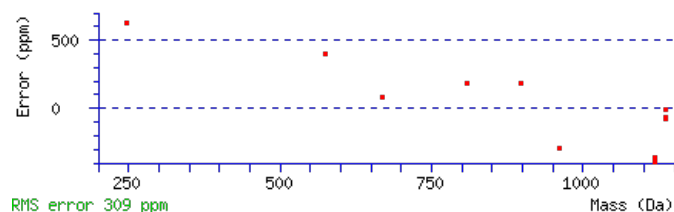NCBI **BLAST** search of **YVMRHVFGDPK**

(Parameters: blastp, nr protein database, expect=20000, no filter, PAM30)

Other BLAST [web gateways](#)

# AT4G15180.1

All matches to this query

| Score | Mr(calc)  | Delta   | Sequence                       |
|-------|-----------|---------|--------------------------------|
| 24.9  | 1380.6203 | -0.0005 | <a href="#">YVMRHVFGDPK</a>    |
| 2.0   | 1380.6180 | 0.0017  | <a href="#">FDINGPGSCLKR</a>   |
| 1.4   | 1380.6176 | 0.0021  | <a href="#">FPWEKVSSMEK</a>    |
| 1.3   | 1380.6188 | 0.0010  | <a href="#">NSNIMLDVMSVK</a>   |
| 0.9   | 1380.6232 | -0.0035 | <a href="#">ARAEENNVSskr</a>   |
| 0.8   | 1380.6206 | -0.0008 | <a href="#">SNLEIKDSSNTR</a>   |
| 0.4   | 1380.6180 | 0.0017  | <a href="#">MGGGPRTFPGGVSK</a> |
| 0.0   | 1380.6214 | -0.0017 | <a href="#">DMALLMKQQR</a>     |

Mascot: <http://www.matrixscience.com/>

## Peptide View

### MS/MS Fragmentation of **YGDNIITGK**

Found in **AT4G16155.1** in **TAIR\_Arabidopsis**, Symbols: | dihydrolipoamide dehydrogenase 2, plastidic / lipoamide dehydrogenase 2 (PTLPD2) | chr4:9153586-9157149 REVERSE

Match to Query 2221: 990.466652 from(496.240602,2+) index(2359)

Title: Elution from: 24.691 to 24.691 scan no 2935 cid35.00 polarity:+

Data file D6h-3\_3.mgf

Click mouse within plot area to zoom in by factor of two about that point

Or,   to  Da

Label all possible matches  Label matches used for scoring

Show Y-axis

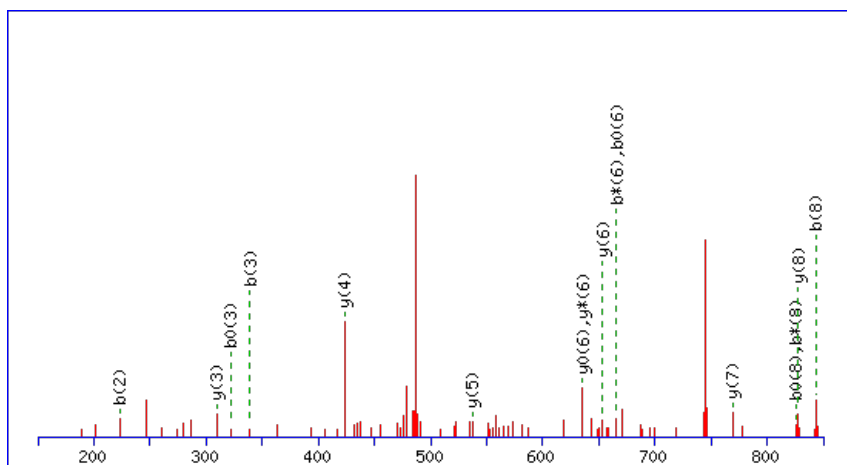

**Monoisotopic mass of neutral peptide Mr(calc):** 990.4648

**Fixed modifications:** Carbamidomethyl (C) (apply to specified residues or termini only)

**Ions Score:** 30 **Expect:** 0.011

**Matches:** 16/82 fragment ions using 34 most intense peaks ([help](#))

| # | b               | b <sup>++</sup> | b*              | b <sup>*++</sup> | b <sup>0</sup>  | b <sup>0++</sup> | Seq. | y               | y <sup>++</sup> | y*              | y <sup>*++</sup> | y <sup>0</sup>  | y <sup>0++</sup> | # |
|---|-----------------|-----------------|-----------------|------------------|-----------------|------------------|------|-----------------|-----------------|-----------------|------------------|-----------------|------------------|---|
| 1 | 165.0676        | 83.0375         |                 |                  |                 |                  | Y    |                 |                 |                 |                  |                 |                  | 9 |
| 2 | <b>223.0861</b> | 112.0467        |                 |                  |                 |                  | G    | <b>827.4118</b> | 414.2095        | 809.3882        | 405.1977         | 809.4012        | 405.2042         | 8 |
| 3 | <b>339.1101</b> | 170.0587        |                 |                  | <b>321.0996</b> | 161.0534         | D    | <b>769.3933</b> | 385.2003        | 751.3697        | 376.1885         | 751.3827        | 376.1950         | 7 |
| 4 | 455.1471        | 228.0772        | 437.1235        | 219.0654         | 437.1365        | 219.0719         | N    | <b>653.3693</b> | 327.1883        | <b>635.3457</b> | 318.1765         | <b>635.3587</b> | 318.1830         | 6 |
| 5 | 569.2282        | 285.1177        | 551.2046        | 276.1060         | 551.2176        | 276.1125         | I    | <b>537.3323</b> | 269.1698        | 519.3087        | 260.1580         | 519.3217        | 260.1645         | 5 |
| 6 | 683.3093        | 342.1583        | <b>665.2857</b> | 333.1465         | <b>665.2987</b> | 333.1530         | I    | <b>423.2512</b> | 212.1292        | 405.2276        | 203.1174         | 405.2406        | 203.1239         | 4 |
| 7 | 785.3540        | 393.1807        | 767.3304        | 384.1689         | 767.3435        | 384.1754         | T    | <b>309.1701</b> | 155.0887        | 291.1465        | 146.0769         | 291.1595        | 146.0834         | 3 |
| 8 | <b>843.3725</b> | 422.1899        | <b>825.3489</b> | 413.1781         | <b>825.3620</b> | 413.1846         | G    | 207.1254        | 104.0663        | 189.1018        | 95.0545          |                 |                  | 2 |
| 9 |                 |                 |                 |                  |                 |                  | K    | 149.1069        | 75.0571         | 131.0833        | 66.0453          |                 |                  | 1 |

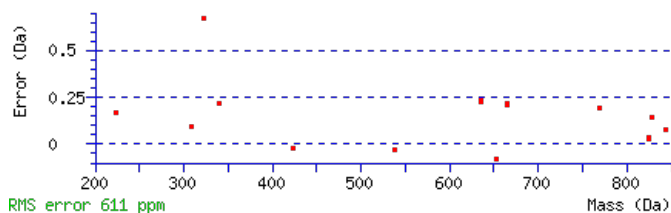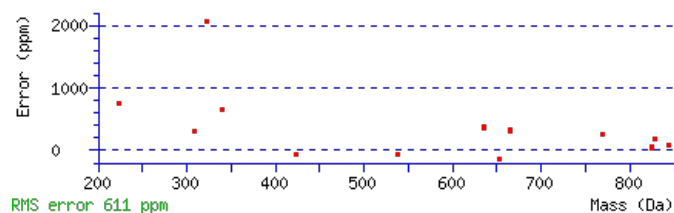

NCBI **BLAST** search of [YGDNIITGK](#)

(Parameters: blastp, nr protein database, expect=20000, no filter, PAM30)

Other BLAST [web gateways](#)

All matches to this query

| Score | Mr(calc) | Delta | Sequence |
|-------|----------|-------|----------|
|       |          |       |          |

## AT4G16155.1

|      |          |         |                           |
|------|----------|---------|---------------------------|
| 30.1 | 990.4648 | 0.0018  | <a href="#">YGDNIITGK</a> |
| 13.6 | 990.4648 | 0.0018  | <a href="#">DKDAIGFSK</a> |
| 13.6 | 990.4648 | 0.0018  | <a href="#">ENGEKYIK</a>  |
| 13.6 | 990.4648 | 0.0018  | <a href="#">NEKGYIEK</a>  |
| 13.6 | 990.4648 | 0.0018  | <a href="#">SGVGOYLEK</a> |
| 7.1  | 990.4671 | -0.0004 | <a href="#">GTFLETWK</a>  |
| 6.0  | 990.4675 | -0.0008 | <a href="#">FGIDGGKQR</a> |
| 5.9  | 990.4648 | 0.0018  | <a href="#">SKYKDDPK</a>  |
| 3.0  | 990.4648 | 0.0018  | <a href="#">EGSDKFVAK</a> |
| 2.4  | 990.4671 | -0.0004 | <a href="#">EDYKWLK</a>   |

Mascot: <http://www.matrixscience.com/>

**Peptide View**MS/MS Fragmentation of **MVEGGIAKADK**

Found in **AT4G16480.1** in **TAIR\_Arabidopsis**, Symbols: ATINT4 | ATINT4 (INOSITOL TRANSPORTER 4); carbohydrate transmembrane transporter/ myo-inositol:hydrogen symporter/ sugar:hydrogen ion symporter | chr4:9291268-9293105 FORWARD

Match to Query 3826: 1146.534076 from(574.274314,2+) index(6788)

Title: Elution from: 59.699 to 59.699 scan no 8725 cid35.00 polarity:+

Data file D12h-1\_2.mgf

Click mouse within plot area to zoom in by factor of two about that point

Or,   to  Da

Label all possible matches  Label matches used for scoring

Show Y-axis

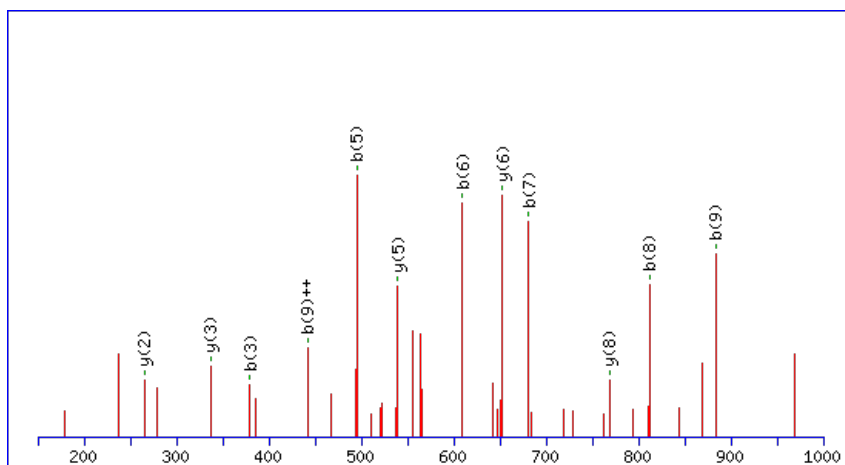

**Monoisotopic mass of neutral peptide Mr(calc):** 1146.5365

**Fixed modifications:** Carbamidomethyl (C) (apply to specified residues or termini only)

**Variable modifications:**

**M1** : Oxidation (M), with neutral losses 0.0000 (shown in table), 63.9983

**Ions Score:** 45 **Expect:** 0.0005

**Matches** : 12/142 fragment ions using 16 most intense peaks ([help](#))

| #  | b               | b <sup>++</sup> | b <sup>*</sup> | b <sup>*++</sup> | b <sup>0</sup> | b <sup>0++</sup> | Seq. | y               | y <sup>++</sup> | y <sup>*</sup> | y <sup>*++</sup> | y <sup>0</sup> | y <sup>0++</sup> | #  |
|----|-----------------|-----------------|----------------|------------------|----------------|------------------|------|-----------------|-----------------|----------------|------------------|----------------|------------------|----|
| 1  | 149.0397        | 75.0235         |                |                  |                |                  | M    |                 |                 |                |                  |                |                  | 11 |
| 2  | 249.1052        | 125.0562        |                |                  |                |                  | V    | 999.5114        | 500.2593        | 981.4878       | 491.2475         | 981.5008       | 491.2540         | 10 |
| 3  | <b>379.1448</b> | 190.0760        |                |                  | 361.1342       | 181.0707         | E    | 899.4459        | 450.2266        | 881.4223       | 441.2148         | 881.4353       | 441.2213         | 9  |
| 4  | 437.1633        | 219.0853        |                |                  | 419.1527       | 210.0800         | G    | <b>769.4063</b> | 385.2068        | 751.3827       | 376.1950         | 751.3957       | 376.2015         | 8  |
| 5  | <b>495.1818</b> | 248.0945        |                |                  | 477.1712       | 239.0892         | G    | 711.3878        | 356.1975        | 693.3642       | 347.1857         | 693.3772       | 347.1922         | 7  |
| 6  | <b>609.2629</b> | 305.1351        |                |                  | 591.2523       | 296.1298         | I    | <b>653.3693</b> | 327.1883        | 635.3457       | 318.1765         | 635.3587       | 318.1830         | 6  |
| 7  | <b>681.2970</b> | 341.1522        |                |                  | 663.2865       | 332.1469         | A    | <b>539.2882</b> | 270.1477        | 521.2646       | 261.1359         | 521.2776       | 261.1424         | 5  |
| 8  | <b>811.3861</b> | 406.1967        | 793.3625       | 397.1849         | 793.3755       | 397.1914         | K    | 467.2540        | 234.1307        | 449.2304       | 225.1189         | 449.2435       | 225.1254         | 4  |
| 9  | <b>883.4202</b> | <b>442.2137</b> | 865.3966       | 433.2020         | 865.4097       | 433.2085         | A    | <b>337.1650</b> | 169.0861        | 319.1414       | 160.0743         | 319.1544       | 160.0809         | 3  |
| 10 | 999.4442        | 500.2257        | 981.4206       | 491.2139         | 981.4336       | 491.2205         | D    | <b>265.1309</b> | 133.0691        | 247.1073       | 124.0573         | 247.1203       | 124.0638         | 2  |
| 11 |                 |                 |                |                  |                |                  | K    | 149.1069        | 75.0571         | 131.0833       | 66.0453          |                |                  | 1  |

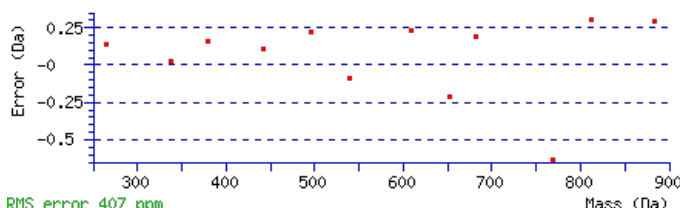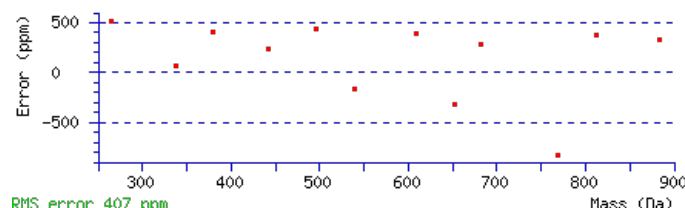

NCBI **BLAST** search of **MVEGGIAKADK**

(Parameters: blastp, nr protein database, expect=20000, no filter, PAM30)

Other BLAST [web gateways](#)

**AT4G16480.1**

All matches to this query

| Score | Mr(calc)  | Delta   | Sequence                    |
|-------|-----------|---------|-----------------------------|
| 44.6  | 1146.5365 | -0.0024 | <a href="#">MVEGGIAKADK</a> |
| 15.9  | 1146.5365 | -0.0024 | <a href="#">MEKEIAELR</a>   |
| 14.7  | 1146.5309 | 0.0032  | <a href="#">SSLGESLEGVR</a> |
| 12.8  | 1146.5309 | 0.0032  | <a href="#">KDASKDDVAGK</a> |
| 10.8  | 1146.5365 | -0.0025 | <a href="#">MKVPLNSSDK</a>  |
| 9.4   | 1146.5358 | -0.0017 | <a href="#">LGSKSEAFHR</a>  |
| 9.0   | 1146.5365 | -0.0024 | <a href="#">MRVLEDVEK</a>   |
| 8.1   | 1146.5358 | -0.0017 | <a href="#">RFVDGPSPTR</a>  |
| 7.5   | 1146.5365 | -0.0025 | <a href="#">LINEMVSANK</a>  |
| 7.4   | 1146.5358 | -0.0017 | <a href="#">QNFAQAVPTR</a>  |

Mascot: <http://www.matrixscience.com/>

**Peptide View**MS/MS Fragmentation of **ASAAQRAGRSGR**Found in **AT4G16680.1** in **TAIR\_Arabidopsis**, Symbols: | RNA helicase, putative | chr4:9388093-9390796 REVERSE

Match to Query 4078: 1186.628610 from(594.321581,2+) index(5113)

Title: Elution from: 45.789 to 45.789 scan no 6396 cid35.00 polarity:+

Data file D12h-1\_2.mgf

Click mouse within plot area to zoom in by factor of two about that point

Or,   to  Da Label all possible matches  Label matches used for scoring Show Y-axis 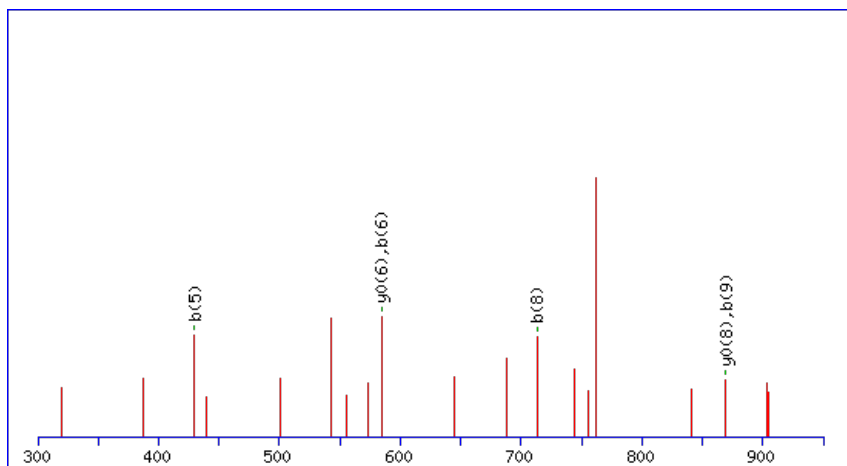**Monoisotopic mass of neutral peptide Mr(calc):** 1186.6279**Fixed modifications:** Carbamidomethyl (C) (apply to specified residues or termini only)**Ions Score:** 24 **Expect:** 0.021**Matches:** 6/118 fragment ions using 6 most intense peaks ([help](#))

| #  | b               | b <sup>++</sup> | b <sup>*</sup> | b <sup>*++</sup> | b <sup>0</sup> | b <sup>0++</sup> | Seq. | y         | y <sup>++</sup> | y <sup>*</sup> | y <sup>*++</sup> | y <sup>0</sup>  | y <sup>0++</sup> | #  |
|----|-----------------|-----------------|----------------|------------------|----------------|------------------|------|-----------|-----------------|----------------|------------------|-----------------|------------------|----|
| 1  | 72.0444         | 36.5258         |                |                  |                |                  | A    |           |                 |                |                  |                 |                  | 12 |
| 2  | 159.0764        | 80.0418         |                |                  | 141.0659       | 71.0366          | S    | 1116.5981 | 558.8027        | 1099.5715      | 550.2894         | 1098.5875       | 549.7974         | 11 |
| 3  | 230.1135        | 115.5604        |                |                  | 212.1030       | 106.5551         | A    | 1029.5661 | 515.2867        | 1012.5395      | 506.7734         | 1011.5555       | 506.2814         | 10 |
| 4  | 301.1506        | 151.0790        |                |                  | 283.1401       | 142.0737         | A    | 958.5289  | 479.7681        | 941.5024       | 471.2548         | 940.5184        | 470.7628         | 9  |
| 5  | <b>429.2092</b> | 215.1083        | 412.1827       | 206.5950         | 411.1987       | 206.1030         | Q    | 887.4918  | 444.2495        | 870.4653       | 435.7363         | <b>869.4813</b> | 435.2443         | 8  |
| 6  | <b>585.3103</b> | 293.1588        | 568.2838       | 284.6455         | 567.2998       | 284.1535         | R    | 759.4332  | 380.2203        | 742.4067       | 371.7070         | 741.4227        | 371.2150         | 7  |
| 7  | 656.3474        | 328.6774        | 639.3209       | 320.1641         | 638.3369       | 319.6721         | A    | 603.3321  | 302.1697        | 586.3056       | 293.6564         | <b>585.3216</b> | 293.1644         | 6  |
| 8  | <b>713.3689</b> | 357.1881        | 696.3424       | 348.6748         | 695.3583       | 348.1828         | G    | 532.2950  | 266.6511        | 515.2685       | 258.1379         | 514.2845        | 257.6459         | 5  |
| 9  | <b>869.4700</b> | 435.2387        | 852.4435       | 426.7254         | 851.4595       | 426.2334         | R    | 475.2736  | 238.1404        | 458.2470       | 229.6271         | 457.2630        | 229.1351         | 4  |
| 10 | 956.5021        | 478.7547        | 939.4755       | 470.2414         | 938.4915       | 469.7494         | S    | 319.1724  | 160.0899        | 302.1459       | 151.5766         | 301.1619        | 151.0846         | 3  |
| 11 | 1013.5235       | 507.2654        | 996.4970       | 498.7521         | 995.5130       | 498.2601         | G    | 232.1404  | 116.5738        | 215.1139       | 108.0606         |                 |                  | 2  |
| 12 |                 |                 |                |                  |                |                  | R    | 175.1190  | 88.0631         | 158.0924       | 79.5498          |                 |                  | 1  |

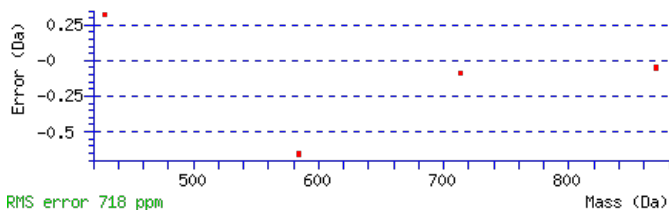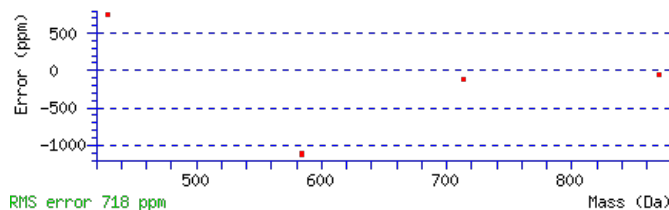NCBI **BLAST** search of [ASAAQRAGRSGR](#)

(Parameters: blastp, nr protein database, expect=20000, no filter, PAM30)

Other BLAST [web gateways](#)**All matches to this query**



**AT4G16680.1**

| <b>Score</b> | <b>Mr(calc)</b> | <b>Delta</b> | <b>Sequence</b>              |
|--------------|-----------------|--------------|------------------------------|
| 24.0         | 1186.6279       | 0.0007       | <a href="#">ASAAQRAGRSGR</a> |
| 1.4          | 1186.6306       | -0.0019      | <a href="#">EAVEQRKA EK</a>  |
| 0.5          | 1186.6306       | -0.0020      | <a href="#">GSLEREEIVR</a>   |
| 0.0          | 1186.6306       | -0.0020      | <a href="#">VQTSSGEKPVR</a>  |

**Mascot:** <http://www.matrixscience.com/>

**Peptide View**MS/MS Fragmentation of **YYEILVDPAHNAVR**Found in **AT4G16720.1** in **TAIR\_Arabidopsis**, Symbols: | 60S ribosomal protein L15 (RPL15A) | chr4:9400178-9401337 REVERSE

Match to Query 8769: 1771.926646 from(886.970599,2+) index(7436)

Title: Elution from: 65.319 to 65.319 scan no 9585 cid35.00 polarity:+

Data file C7-2\_1.mgf

Click mouse within plot area to zoom in by factor of two about that point

Or,   to  Da Label all possible matches  Label matches used for scoring Show Y-axis 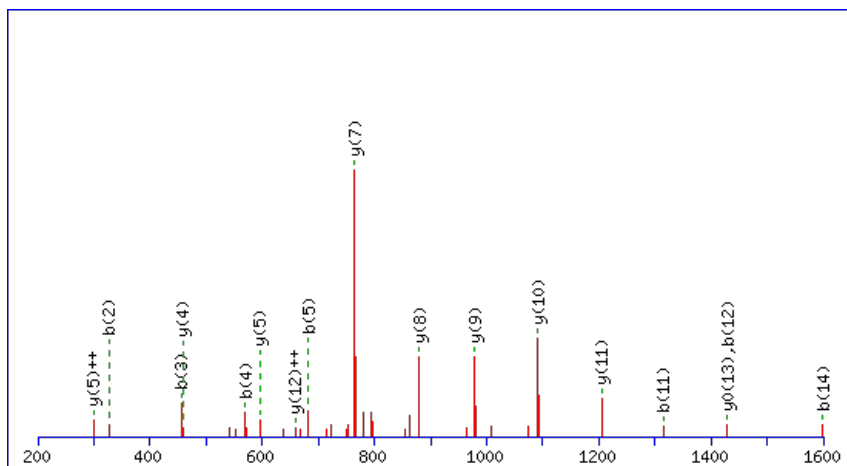Monoisotopic mass of neutral peptide **Mr(calc)**: 1771.9257

Fixed modifications: Carbamidomethyl (C) (apply to specified residues or termini only)

Ions Score: 74 **Expect**: 2.1e-007Matches : 17/128 fragment ions using 21 most intense peaks ([help](#))

| #  | b                | b <sup>++</sup> | b <sup>*</sup> | b <sup>*++</sup> | b <sup>0</sup> | b <sup>0++</sup> | Seq. | y                | y <sup>++</sup> | y <sup>*</sup> | y <sup>*++</sup> | y <sup>0</sup>   | y <sup>0++</sup> | #  |
|----|------------------|-----------------|----------------|------------------|----------------|------------------|------|------------------|-----------------|----------------|------------------|------------------|------------------|----|
| 1  | 164.0706         | 82.5389         |                |                  |                |                  | Y    |                  |                 |                |                  |                  |                  | 15 |
| 2  | <b>327.1339</b>  | 164.0706        |                |                  |                |                  | Y    | 1609.8697        | 805.4385        | 1592.8431      | 796.9252         | 1591.8591        | 796.4332         | 14 |
| 3  | <b>456.1765</b>  | 228.5919        |                |                  | 438.1660       | 219.5866         | E    | 1446.8063        | 723.9068        | 1429.7798      | 715.3935         | <b>1428.7958</b> | 714.9015         | 13 |
| 4  | <b>569.2606</b>  | 285.1339        |                |                  | 551.2500       | 276.1287         | I    | 1317.7637        | <b>659.3855</b> | 1300.7372      | 650.8722         | 1299.7532        | 650.3802         | 12 |
| 5  | <b>682.3447</b>  | 341.6760        |                |                  | 664.3341       | 332.6707         | I    | <b>1204.6797</b> | 602.8435        | 1187.6531      | 594.3302         | 1186.6691        | 593.8382         | 11 |
| 6  | 795.4287         | 398.2180        |                |                  | 777.4182       | 389.2127         | L    | <b>1091.5956</b> | 546.3014        | 1074.5691      | 537.7882         | 1073.5851        | 537.2962         | 10 |
| 7  | 894.4971         | 447.7522        |                |                  | 876.4866       | 438.7469         | V    | <b>978.5116</b>  | 489.7594        | 961.4850       | 481.2461         | 960.5010         | 480.7541         | 9  |
| 8  | 1009.5241        | 505.2657        |                |                  | 991.5135       | 496.2604         | D    | <b>879.4431</b>  | 440.2252        | 862.4166       | 431.7119         | 861.4326         | 431.2199         | 8  |
| 9  | 1106.5768        | 553.7921        |                |                  | 1088.5663      | 544.7868         | P    | <b>764.4162</b>  | 382.7117        | 747.3896       | 374.1985         |                  |                  | 7  |
| 10 | 1177.6140        | 589.3106        |                |                  | 1159.6034      | 580.3053         | A    | 667.3634         | 334.1854        | 650.3369       | 325.6721         |                  |                  | 6  |
| 11 | <b>1314.6729</b> | 657.8401        |                |                  | 1296.6623      | 648.8348         | H    | <b>596.3263</b>  | <b>298.6668</b> | 579.2998       | 290.1535         |                  |                  | 5  |
| 12 | <b>1428.7158</b> | 714.8615        | 1411.6892      | 706.3483         | 1410.7052      | 705.8563         | N    | <b>459.2674</b>  | 230.1373        | 442.2409       | 221.6241         |                  |                  | 4  |
| 13 | 1499.7529        | 750.3801        | 1482.7264      | 741.8668         | 1481.7423      | 741.3748         | A    | 345.2245         | 173.1159        | 328.1979       | 164.6026         |                  |                  | 3  |
| 14 | <b>1598.8213</b> | 799.9143        | 1581.7948      | 791.4010         | 1580.8108      | 790.9090         | V    | 274.1874         | 137.5973        | 257.1608       | 129.0840         |                  |                  | 2  |
| 15 |                  |                 |                |                  |                |                  | R    | 175.1190         | 88.0631         | 158.0924       | 79.5498          |                  |                  | 1  |

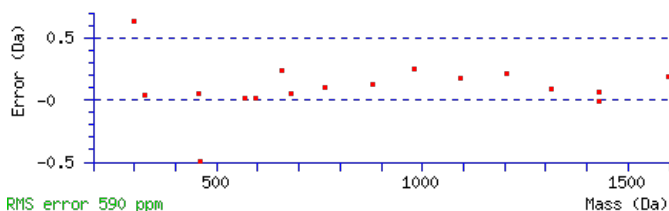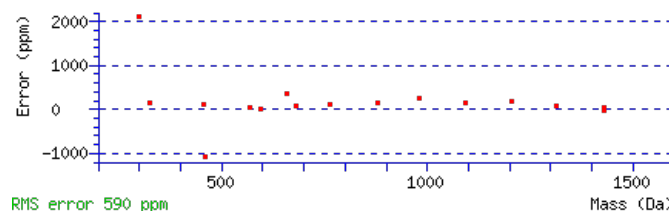NCBI **BLAST** search of [YYEILVDPAHNAVR](#)

## AT4G16720.1

(Parameters: blastp, nr protein database, expect=20000, no filter, PAM30)

Other BLAST [web gateways](#)

### All matches to this query

| Score | Mr(calc)  | Delta  | Sequence                         |
|-------|-----------|--------|----------------------------------|
| 74.0  | 1771.9257 | 0.0010 | <a href="#">YYEILVDPAHNAVR</a>   |
| 1.4   | 1771.9217 | 0.0050 | <a href="#">SRLQDPPTPTHPAIDK</a> |

Mascot: <http://www.matrixscience.com/>

## Peptide View

MS/MS Fragmentation of **FQGQATDVEIAR**Found in **AT4G17040.1** in **TAIR\_Arabidopsis**, Symbols: | ATP-dependent Clp protease proteolytic subunit, putative | chr4:9586759-9589316  
REVERSE

Match to Query 5029: 1350.614004 from(676.314278,2+) index(2743)

Title: Elution from: 28.700 to 28.700 scan no 3473 cid35.00 polarity:+

Data file 0-2\_2.mgf

Click mouse within plot area to zoom in by factor of two about that point

Or,   to  Da Label all possible matches  Label matches used for scoring Show Y-axis 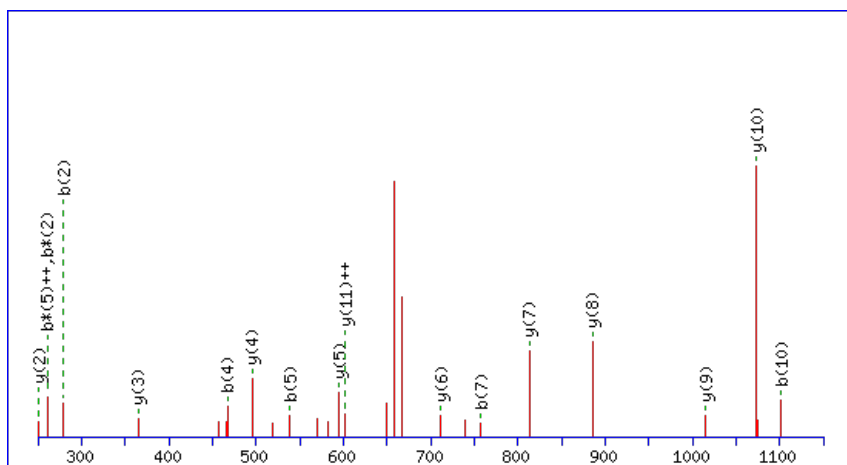Monoisotopic mass of neutral peptide  $M_r(\text{calc})$ : 1350.6122

Fixed modifications: Carbamidomethyl (C) (apply to specified residues or termini only)

Ions Score: 91 Expect: 9.5e-009

Matches : 17/114 fragment ions using 20 most intense peaks ([help](#))

| #  | b                | b <sup>++</sup> | b*              | b <sup>*++</sup> | b <sup>0</sup> | b <sup>0++</sup> | Seq. | y                | y <sup>++</sup> | y*        | y <sup>*++</sup> | y <sup>0</sup> | y <sup>0++</sup> | #  |
|----|------------------|-----------------|-----------------|------------------|----------------|------------------|------|------------------|-----------------|-----------|------------------|----------------|------------------|----|
| 1  | 149.0727         | 75.0400         |                 |                  |                |                  | F    |                  |                 |           |                  |                |                  | 12 |
| 2  | <b>279.1254</b>  | 140.0663        | <b>261.1018</b> | 131.0545         |                |                  | Q    | 1203.5541        | <b>602.2807</b> | 1185.5305 | 593.2689         | 1185.5435      | 593.2754         | 11 |
| 3  | 337.1439         | 169.0756        | 319.1203        | 160.0638         |                |                  | G    | <b>1073.5014</b> | 537.2543        | 1055.4778 | 528.2425         | 1055.4908      | 528.2491         | 10 |
| 4  | <b>467.1965</b>  | 234.1019        | 449.1729        | 225.0901         |                |                  | Q    | <b>1015.4829</b> | 508.2451        | 997.4593  | 499.2333         | 997.4723       | 499.2398         | 9  |
| 5  | <b>539.2307</b>  | 270.1190        | 521.2071        | <b>261.1072</b>  |                |                  | A    | <b>885.4303</b>  | 443.2188        | 867.4067  | 434.2070         | 867.4197       | 434.2135         | 8  |
| 6  | 641.2754         | 321.1413        | 623.2518        | 312.1295         | 623.2648       | 312.1360         | T    | <b>813.3961</b>  | 407.2017        | 795.3725  | 398.1899         | 795.3855       | 398.1964         | 7  |
| 7  | <b>757.2994</b>  | 379.1533        | 739.2758        | 370.1415         | 739.2888       | 370.1480         | D    | <b>711.3514</b>  | 356.1793        | 693.3278  | 347.1675         | 693.3408       | 347.1741         | 6  |
| 8  | 857.3648         | 429.1860        | 839.3412        | 420.1742         | 839.3542       | 420.1808         | V    | <b>595.3274</b>  | 298.1673        | 577.3038  | 289.1556         | 577.3169       | 289.1621         | 5  |
| 9  | 987.4044         | 494.2059        | 969.3809        | 485.1941         | 969.3939       | 485.2006         | E    | <b>495.2620</b>  | 248.1346        | 477.2384  | 239.1228         | 477.2514       | 239.1293         | 4  |
| 10 | <b>1101.4855</b> | 551.2464        | 1083.4619       | 542.2346         | 1083.4750      | 542.2411         | I    | <b>365.2223</b>  | 183.1148        | 347.1988  | 174.1030         |                |                  | 3  |
| 11 | 1173.5197        | 587.2635        | 1155.4961       | 578.2517         | 1155.5091      | 578.2582         | A    | <b>251.1412</b>  | 126.0743        | 233.1177  | 117.0625         |                |                  | 2  |
| 12 |                  |                 |                 |                  |                |                  | R    | 179.1071         | 90.0572         | 161.0835  | 81.0454          |                |                  | 1  |

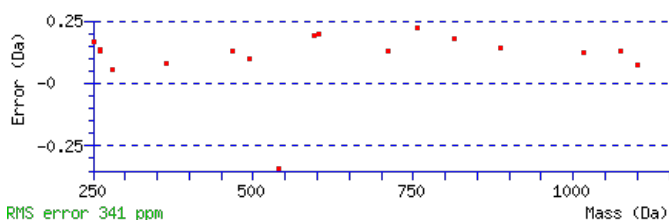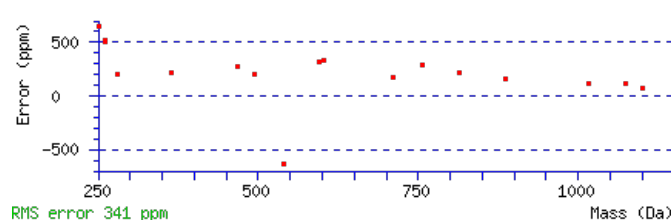NCBI BLAST search of **FQGQATDVEIAR**

(Parameters: blastp, nr protein database, expect=20000, no filter, PAM30)

Other BLAST [web gateways](#)

**AT4G17040.1**

All matches to this query

| Score | Mr(calc)  | Delta   | Sequence                      |
|-------|-----------|---------|-------------------------------|
| 90.8  | 1350.6122 | 0.0018  | <a href="#">FOGQATDVEIAR</a>  |
| 19.7  | 1350.6164 | -0.0024 | <a href="#">MCGIAIVVCGVR</a>  |
| 14.2  | 1350.6156 | -0.0016 | <a href="#">TRNLLEMEGQK</a>   |
| 14.2  | 1350.6156 | -0.0016 | <a href="#">MKSGKQSSQPEK</a>  |
| 12.3  | 1350.6156 | -0.0016 | <a href="#">EQECSQLKKGK</a>   |
| 11.6  | 1350.6178 | -0.0038 | <a href="#">SNFLAHLMTGTK</a>  |
| 10.5  | 1350.6122 | 0.0018  | <a href="#">YHDATSKLSQGK</a>  |
| 10.3  | 1350.6156 | -0.0016 | <a href="#">DMAGIKGDSVAVR</a> |
| 10.2  | 1350.6156 | -0.0016 | <a href="#">RKSVDNVMEEK</a>   |
| 9.2   | 1350.6167 | -0.0027 | <a href="#">FNPYLWPSGQK</a>   |

Mascot: <http://www.matrixscience.com/>

**Peptide View**MS/MS Fragmentation of **MPTKPPPPSQAVR**Found in **AT4G17520.1** in **TAIR\_Arabidopsis**, Symbols: | nuclear RNA-binding protein, putative | chr4:9771509-9773326 FORWARD

Match to Query 4924: 1404.754371 from(469.258733,3+) index(613)

Title: Elution from: 14.184 to 14.184 scan no 1000 cid35.00 polarity:+

Data file D1d-1-2.mgf

Click mouse within plot area to zoom in by factor of two about that point

Or,   to  Da Label all possible matches  Label matches used for scoring Show Y-axis 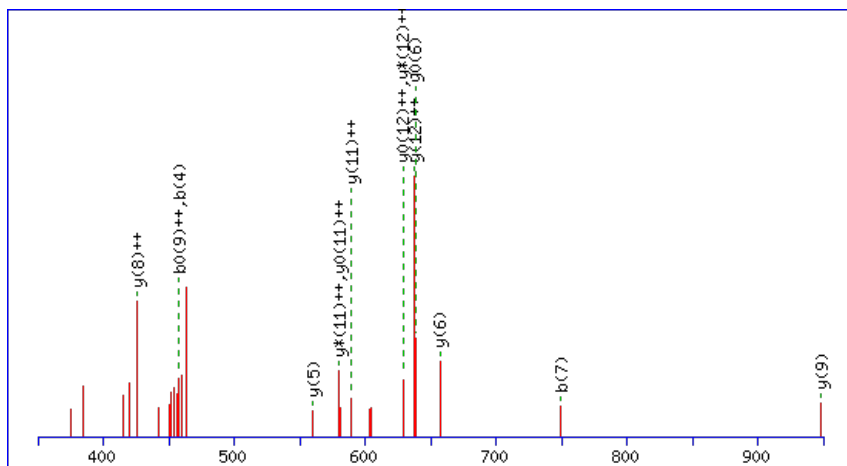Monoisotopic mass of neutral peptide  $M_r(\text{calc})$ : 1404.7547

Fixed modifications: Carbamidomethyl (C) (apply to specified residues or termini only)

Ions Score: 27 Expect: 0.0082

Matches : 14/126 fragment ions using 15 most intense peaks ([help](#))

| #  | b         | b <sup>++</sup> | b*        | b <sup>*++</sup> | b <sup>0</sup> | b <sup>0++</sup> | Seq. | y         | y <sup>++</sup> | y*        | y <sup>*++</sup> | y <sup>0</sup> | y <sup>0++</sup> | #  |
|----|-----------|-----------------|-----------|------------------|----------------|------------------|------|-----------|-----------------|-----------|------------------|----------------|------------------|----|
| 1  | 132.0478  | 66.5275         |           |                  |                |                  | M    |           |                 |           |                  |                |                  | 13 |
| 2  | 229.1005  | 115.0539        |           |                  |                |                  | P    | 1274.7215 | 637.8644        | 1257.6950 | 629.3511         | 1256.7110      | 628.8591         | 12 |
| 3  | 330.1482  | 165.5777        |           |                  | 312.1376       | 156.5725         | T    | 1177.6688 | 589.3380        | 1160.6422 | 580.8248         | 1159.6582      | 580.3327         | 11 |
| 4  | 458.2432  | 229.6252        | 441.2166  | 221.1119         | 440.2326       | 220.6199         | K    | 1076.6211 | 538.8142        | 1059.5946 | 530.3009         | 1058.6105      | 529.8089         | 10 |
| 5  | 555.2959  | 278.1516        | 538.2694  | 269.6383         | 537.2854       | 269.1463         | P    | 948.5261  | 474.7667        | 931.4996  | 466.2534         | 930.5156       | 465.7614         | 9  |
| 6  | 652.3487  | 326.6780        | 635.3221  | 318.1647         | 634.3381       | 317.6727         | P    | 851.4734  | 426.2403        | 834.4468  | 417.7271         | 833.4628       | 417.2350         | 8  |
| 7  | 749.4015  | 375.2044        | 732.3749  | 366.6911         | 731.3909       | 366.1991         | P    | 754.4206  | 377.7139        | 737.3941  | 369.2007         | 736.4100       | 368.7087         | 7  |
| 8  | 846.4542  | 423.7307        | 829.4277  | 415.2175         | 828.4437       | 414.7255         | P    | 657.3679  | 329.1876        | 640.3413  | 320.6743         | 639.3573       | 320.1823         | 6  |
| 9  | 933.4863  | 467.2468        | 916.4597  | 458.7335         | 915.4757       | 458.2415         | S    | 560.3151  | 280.6612        | 543.2885  | 272.1479         | 542.3045       | 271.6559         | 5  |
| 10 | 1061.5448 | 531.2761        | 1044.5183 | 522.7628         | 1043.5343      | 522.2708         | Q    | 473.2831  | 237.1452        | 456.2565  | 228.6319         |                |                  | 4  |
| 11 | 1132.5819 | 566.7946        | 1115.5554 | 558.2813         | 1114.5714      | 557.7893         | A    | 345.2245  | 173.1159        | 328.1979  | 164.6026         |                |                  | 3  |
| 12 | 1231.6504 | 616.3288        | 1214.6238 | 607.8155         | 1213.6398      | 607.3235         | V    | 274.1874  | 137.5973        | 257.1608  | 129.0840         |                |                  | 2  |
| 13 |           |                 |           |                  |                |                  | R    | 175.1190  | 88.0631         | 158.0924  | 79.5498          |                |                  | 1  |

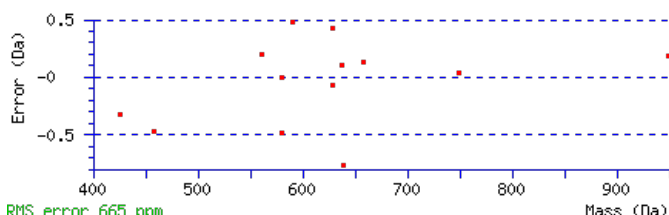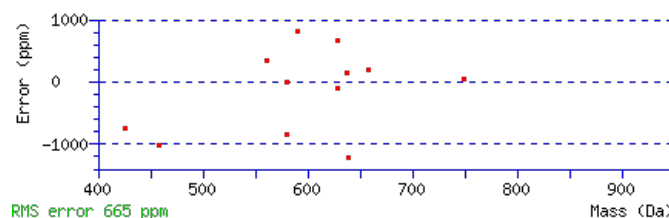NCBI BLAST search of [MPTKPPPPSQAVR](#)

(Parameters: blastp, nr protein database, expect=20000, no filter, PAM30)

Other BLAST [web gateways](#)

AT4G17520.1

All matches to this query

| Score | Mr(calc)  | Delta   | Sequence                      |
|-------|-----------|---------|-------------------------------|
| 26.8  | 1404.7547 | -0.0004 | <a href="#">MPTKPPPPSQAVR</a> |
| 2.8   | 1404.7572 | -0.0029 | <a href="#">LTSRSSDVSVNLK</a> |
| 2.0   | 1404.7581 | -0.0037 | <a href="#">MLKMAARDTGALK</a> |
| 1.9   | 1404.7547 | -0.0004 | <a href="#">MIFVDRIDALGR</a>  |

Mascot: <http://www.matrixscience.com/>

## Peptide View

### MS/MS Fragmentation of LQIWDTAGQER

Found in **AT4G17530.1** in **TAIR\_Arabidopsis**, Symbols: ATRAB1C, ATRABD2C, RAB1C | RAB1C; GTP binding | chr4:9773734-9775437  
REVERSE

Match to Query 4784: 1315.651738 from(658.833145,2+) index(4923)

Title: Elution from: 43.427 to 43.427 scan no 6160 cid35.00 polarity:+

Data file C7-2\_3.mgf

Click mouse within plot area to zoom in by factor of two about that point

Or,   to  Da

Label all possible matches  Label matches used for scoring

Show Y-axis

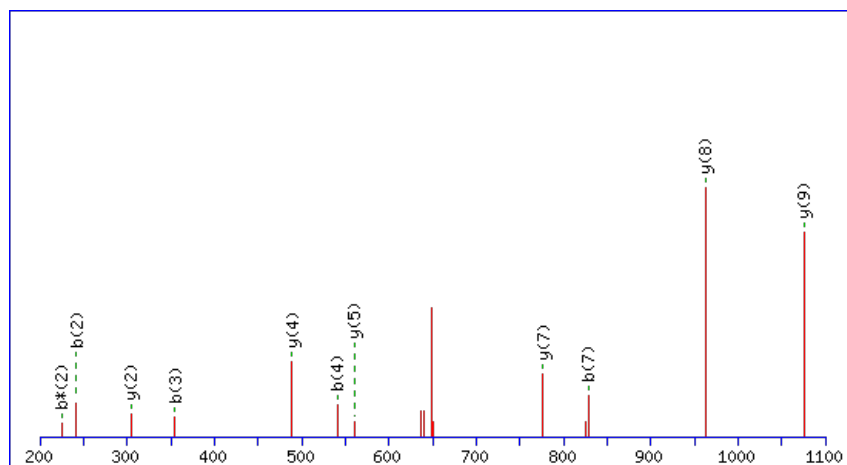

Monoisotopic mass of neutral peptide Mr(calc): 1315.6521

Fixed modifications: Carbamidomethyl (C) (apply to specified residues or termini only)

Ions Score: 54 Expect: 2.3e-005

Matches : 11/108 fragment ions using 16 most intense peaks ([help](#))

| #  | b         | b <sup>++</sup> | b*        | b <sup>*++</sup> | b <sup>0</sup> | b <sup>0++</sup> | Seq. | y         | y <sup>++</sup> | y*        | y <sup>*++</sup> | y <sup>0</sup> | y <sup>0++</sup> | #  |
|----|-----------|-----------------|-----------|------------------|----------------|------------------|------|-----------|-----------------|-----------|------------------|----------------|------------------|----|
| 1  | 114.0913  | 57.5493         |           |                  |                |                  | L    |           |                 |           |                  |                |                  | 11 |
| 2  | 242.1499  | 121.5786        | 225.1234  | 113.0653         |                |                  | Q    | 1203.5753 | 602.2913        | 1186.5487 | 593.7780         | 1185.5647      | 593.2860         | 10 |
| 3  | 355.2340  | 178.1206        | 338.2074  | 169.6074         |                |                  | I    | 1075.5167 | 538.2620        | 1058.4902 | 529.7487         | 1057.5061      | 529.2567         | 9  |
| 4  | 541.3133  | 271.1603        | 524.2867  | 262.6470         |                |                  | W    | 962.4326  | 481.7200        | 945.4061  | 473.2067         | 944.4221       | 472.7147         | 8  |
| 5  | 656.3402  | 328.6738        | 639.3137  | 320.1605         | 638.3297       | 319.6685         | D    | 776.3533  | 388.6803        | 759.3268  | 380.1670         | 758.3428       | 379.6750         | 7  |
| 6  | 757.3879  | 379.1976        | 740.3614  | 370.6843         | 739.3774       | 370.1923         | T    | 661.3264  | 331.1668        | 644.2998  | 322.6536         | 643.3158       | 322.1615         | 6  |
| 7  | 828.4250  | 414.7162        | 811.3985  | 406.2029         | 810.4145       | 405.7109         | A    | 560.2787  | 280.6430        | 543.2522  | 272.1297         | 542.2681       | 271.6377         | 5  |
| 8  | 885.4465  | 443.2269        | 868.4199  | 434.7136         | 867.4359       | 434.2216         | G    | 489.2416  | 245.1244        | 472.2150  | 236.6112         | 471.2310       | 236.1191         | 4  |
| 9  | 1013.5051 | 507.2562        | 996.4785  | 498.7429         | 995.4945       | 498.2509         | Q    | 432.2201  | 216.6137        | 415.1936  | 208.1004         | 414.2096       | 207.6084         | 3  |
| 10 | 1142.5477 | 571.7775        | 1125.5211 | 563.2642         | 1124.5371      | 562.7722         | E    | 304.1615  | 152.5844        | 287.1350  | 144.0711         | 286.1510       | 143.5791         | 2  |
| 11 |           |                 |           |                  |                |                  | R    | 175.1190  | 88.0631         | 158.0924  | 79.5498          |                |                  | 1  |

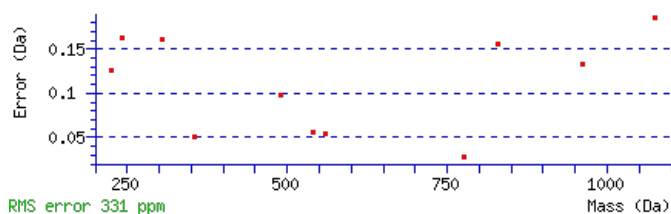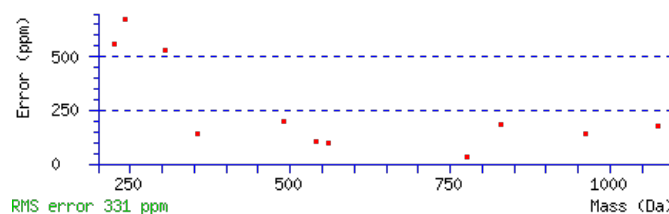

NCBI BLAST search of **LQIWDTAGQER**

(Parameters: blastp, nr protein database, expect=20000, no filter, PAM30)

Other BLAST [web gateways](#)

All matches to this query



AT4G17530.1

| Score | Mr(calc)  | Delta   | Sequence                    |
|-------|-----------|---------|-----------------------------|
| 54.1  | 1315.6521 | -0.0003 | <a href="#">LQIWDTAGQER</a> |
| 54.1  | 1315.6521 | -0.0003 | <a href="#">LQLWDTAGQER</a> |
| 8.0   | 1315.6482 | 0.0035  | <a href="#">QILYATMADFK</a> |

Mascot: <http://www.matrixscience.com/>

## Peptide View

MS/MS Fragmentation of **ALIESIGSLDK**

Found in **AT4G17830.1** in **TAIR\_Arabidopsis**, Symbols: | peptidase M20/M25/M40 family protein | chr4:9915929-9918062 FORWARD

Match to Query 3314: 1144.631510 from(573.323031,2+) index(8016)

Title: Elution from: 71.945 to 71.945 scan no 10658 cid35.00 polarity:+

Data file D1d-2\_3.mgf

Click mouse within plot area to zoom in by factor of two about that point

Or,   to  Da

Label all possible matches  Label matches used for scoring

Show Y-axis

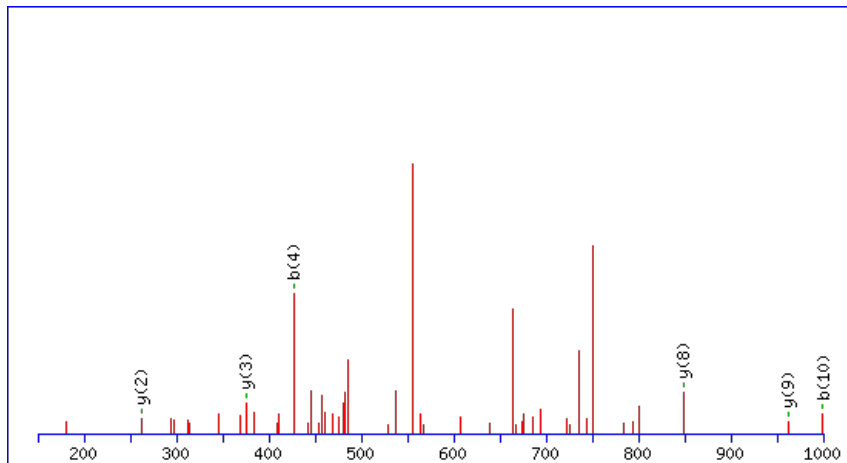

Monoisotopic mass of neutral peptide **Mr(calc)**: 1144.6339

**Fixed modifications:** Carbamidomethyl (C) (apply to specified residues or termini only)

**Ions Score:** 30 **Expect:** 0.0022

**Matches** : 6/92 fragment ions using 9 most intense peaks ([help](#))

| #  | b               | b <sup>++</sup> | b <sup>0</sup> | b <sup>0++</sup> | Seq. | y               | y <sup>++</sup> | y*        | y <sup>*++</sup> | y <sup>0</sup> | y <sup>0++</sup> | #  |
|----|-----------------|-----------------|----------------|------------------|------|-----------------|-----------------|-----------|------------------|----------------|------------------|----|
| 1  | 72.0444         | 36.5258         |                |                  | A    |                 |                 |           |                  |                |                  | 11 |
| 2  | 185.1285        | 93.0679         |                |                  | L    | 1074.6041       | 537.8057        | 1057.5776 | 529.2924         | 1056.5936      | 528.8004         | 10 |
| 3  | 298.2125        | 149.6099        |                |                  | I    | <b>961.5201</b> | 481.2637        | 944.4935  | 472.7504         | 943.5095       | 472.2584         | 9  |
| 4  | <b>427.2551</b> | 214.1312        | 409.2445       | 205.1259         | E    | <b>848.4360</b> | 424.7216        | 831.4094  | 416.2084         | 830.4254       | 415.7163         | 8  |
| 5  | 514.2871        | 257.6472        | 496.2766       | 248.6419         | S    | 719.3934        | 360.2003        | 702.3668  | 351.6871         | 701.3828       | 351.1951         | 7  |
| 6  | 627.3712        | 314.1892        | 609.3606       | 305.1840         | I    | 632.3614        | 316.6843        | 615.3348  | 308.1710         | 614.3508       | 307.6790         | 6  |
| 7  | 684.3927        | 342.7000        | 666.3821       | 333.6947         | G    | 519.2773        | 260.1423        | 502.2508  | 251.6290         | 501.2667       | 251.1370         | 5  |
| 8  | 771.4247        | 386.2160        | 753.4141       | 377.2107         | S    | 462.2558        | 231.6316        | 445.2293  | 223.1183         | 444.2453       | 222.6263         | 4  |
| 9  | 884.5088        | 442.7580        | 866.4982       | 433.7527         | L    | <b>375.2238</b> | 188.1155        | 358.1973  | 179.6023         | 357.2132       | 179.1103         | 3  |
| 10 | <b>999.5357</b> | 500.2715        | 981.5251       | 491.2662         | D    | <b>262.1397</b> | 131.5735        | 245.1132  | 123.0602         | 244.1292       | 122.5682         | 2  |
| 11 |                 |                 |                |                  | K    | 147.1128        | 74.0600         | 130.0863  | 65.5468          |                |                  | 1  |

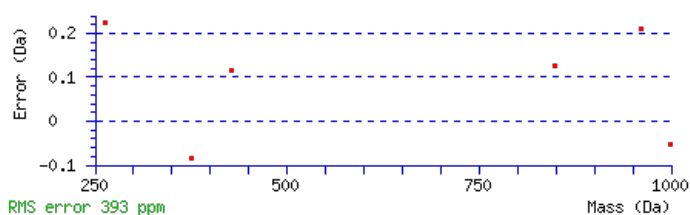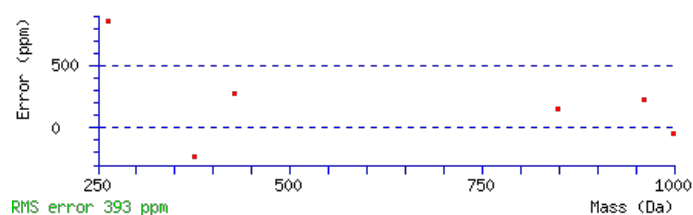

NCBI **BLAST** search of **ALIESIGSLDK**

(Parameters: blastp, nr protein database, expect=20000, no filter, PAM30)

Other BLAST [web gateways](#)

All matches to this query

AT4G17830.1

| Score | Mr(calc)  | Delta   | Sequence                    |
|-------|-----------|---------|-----------------------------|
| 29.6  | 1144.6339 | -0.0024 | <a href="#">ALIESIGSLDK</a> |
| 3.0   | 1144.6339 | -0.0024 | <a href="#">GAESTDVILLK</a> |

Mascot: <http://www.matrixscience.com/>

**Peptide View**MS/MS Fragmentation of **TYCAEIAHNVSTK**Found in **AT4G18100.1** in **TAIR\_Arabidopsis**, Symbols: | 60S ribosomal protein L32 (RPL32A) | chr4:10035727-10036487 REVERSE

Match to Query 6173: 1492.697256 from(747.355904,2+) index(1899)

Title: Elution from: 24.840 to 24.840 scan no 2543 cid35.00 polarity:+

Data file D1d-2\_1.mgf

Click mouse within plot area to zoom in by factor of two about that point

Or,   to  Da Label all possible matches  Label matches used for scoring Show Y-axis 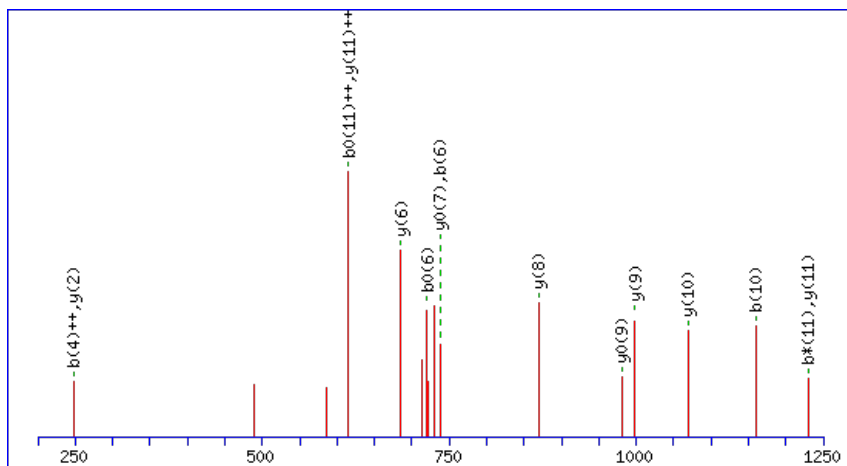Monoisotopic mass of neutral peptide  $M_r(\text{calc})$ : 1492.6980

Fixed modifications: Carbamidomethyl (C) (apply to specified residues or termini only)

Ions Score: 51 Expect: 2.7e-005

Matches : 16/126 fragment ions using 14 most intense peaks ([help](#))

| #  | b         | b <sup>++</sup> | b <sup>*</sup> | b <sup>*++</sup> | b <sup>0</sup> | b <sup>0++</sup> | Seq. | y         | y <sup>++</sup> | y <sup>*</sup> | y <sup>*++</sup> | y <sup>0</sup> | y <sup>0++</sup> | #  |
|----|-----------|-----------------|----------------|------------------|----------------|------------------|------|-----------|-----------------|----------------|------------------|----------------|------------------|----|
| 1  | 102.0550  | 51.5311         |                |                  | 84.0444        | 42.5258          | T    |           |                 |                |                  |                |                  | 13 |
| 2  | 265.1183  | 133.0628        |                |                  | 247.1077       | 124.0575         | Y    | 1392.6576 | 696.8325        | 1375.6311      | 688.3192         | 1374.6471      | 687.8272         | 12 |
| 3  | 425.1489  | 213.0781        |                |                  | 407.1384       | 204.0728         | C    | 1229.5943 | 615.3008        | 1212.5677      | 606.7875         | 1211.5837      | 606.2955         | 11 |
| 4  | 496.1860  | 248.5967        |                |                  | 478.1755       | 239.5914         | A    | 1069.5636 | 535.2855        | 1052.5371      | 526.7722         | 1051.5531      | 526.2802         | 10 |
| 5  | 625.2286  | 313.1180        |                |                  | 607.2181       | 304.1127         | E    | 998.5265  | 499.7669        | 981.5000       | 491.2536         | 980.5160       | 490.7616         | 9  |
| 6  | 738.3127  | 369.6600        |                |                  | 720.3021       | 360.6547         | I    | 869.4839  | 435.2456        | 852.4574       | 426.7323         | 851.4734       | 426.2403         | 8  |
| 7  | 809.3498  | 405.1785        |                |                  | 791.3393       | 396.1733         | A    | 756.3999  | 378.7036        | 739.3733       | 370.1903         | 738.3893       | 369.6983         | 7  |
| 8  | 946.4087  | 473.7080        |                |                  | 928.3982       | 464.7027         | H    | 685.3628  | 343.1850        | 668.3362       | 334.6717         | 667.3522       | 334.1797         | 6  |
| 9  | 1060.4517 | 530.7295        | 1043.4251      | 522.2162         | 1042.4411      | 521.7242         | N    | 548.3039  | 274.6556        | 531.2773       | 266.1423         | 530.2933       | 265.6503         | 5  |
| 10 | 1159.5201 | 580.2637        | 1142.4935      | 571.7504         | 1141.5095      | 571.2584         | V    | 434.2609  | 217.6341        | 417.2344       | 209.1208         | 416.2504       | 208.6288         | 4  |
| 11 | 1246.5521 | 623.7797        | 1229.5256      | 615.2664         | 1228.5415      | 614.7744         | S    | 335.1925  | 168.0999        | 318.1660       | 159.5866         | 317.1819       | 159.0946         | 3  |
| 12 | 1347.5998 | 674.3035        | 1330.5732      | 665.7903         | 1329.5892      | 665.2982         | T    | 248.1605  | 124.5839        | 231.1339       | 116.0706         | 230.1499       | 115.5786         | 2  |
| 13 |           |                 |                |                  |                |                  | K    | 147.1128  | 74.0600         | 130.0863       | 65.5468          |                |                  | 1  |

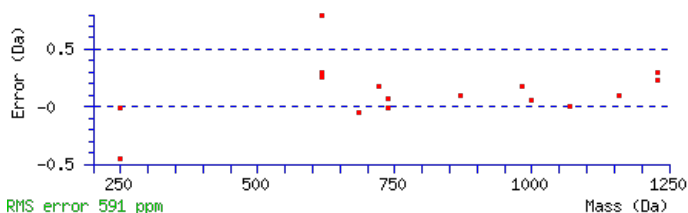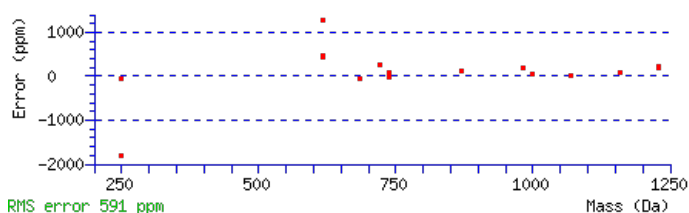NCBI BLAST search of **TYCAEIAHNVSTK**

(Parameters: blastp, nr protein database, expect=20000, no filter, PAM30)

Other BLAST [web gateways](#)

AT4G18100.1

All matches to this query

| Score | Mr(calc)  | Delta   | Sequence                      |
|-------|-----------|---------|-------------------------------|
| 50.6  | 1492.6980 | -0.0008 | <a href="#">TYCAELAHNVSTK</a> |

Mascot: <http://www.matrixscience.com/>

**Peptide View**MS/MS Fragmentation of **AIMTMVFK**Found in **AT4G18300.1** in **TAIR\_Arabidopsis**, Symbols: | eIF4-gamma/eIF5/eIF2-epsilon domain-containing protein | chr4:10118863-10120992  
FORWARD

Match to Query 2145:964.458770 from(483.236661,2+) index(5767)

Title: Elution from: 52.492 to 52.492 scan no 7325 cid35.00 polarity:+

Data file D6h-2\_1.mgf

Click mouse within plot area to zoom in by factor of two about that point

Or,   to  Da Label all possible matches  Label matches used for scoring Show Y-axis 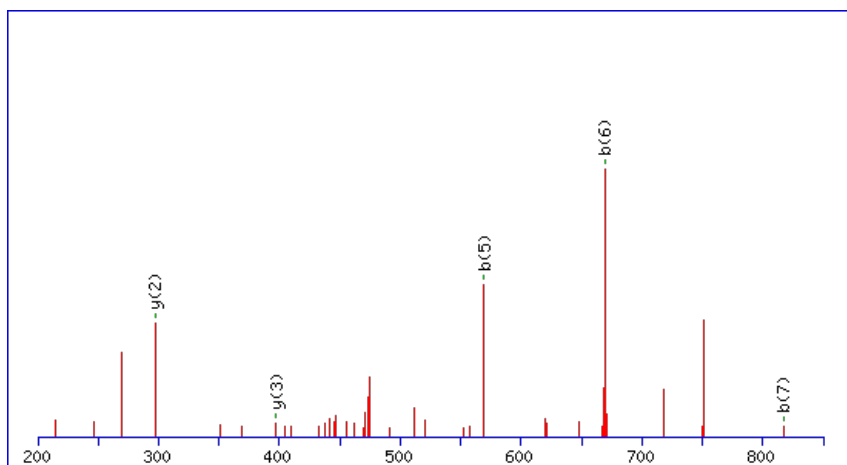Monoisotopic mass of neutral peptide **Mr(calc)**: 964.4604**Fixed modifications:** Carbamidomethyl (C) (apply to specified residues or termini only)**Variable modifications:**

M5 : Oxidation (M), with neutral losses 0.0000 (shown in table), 63.9983

**Ions Score:** 23 **Expect:** 0.027**Matches** : 5/90 fragment ions using 7 most intense peaks ([help](#))

| # | b               | b <sup>++</sup> | b <sup>0</sup> | b <sup>0++</sup> | Seq. | y               | y <sup>++</sup> | y*       | y <sup>*++</sup> | y <sup>0</sup> | y <sup>0++</sup> | # |
|---|-----------------|-----------------|----------------|------------------|------|-----------------|-----------------|----------|------------------|----------------|------------------|---|
| 1 | 73.0414         | 37.0244         |                |                  | A    |                 |                 |          |                  |                |                  | 8 |
| 2 | 187.1225        | 94.0649         |                |                  | I    | 893.4335        | 447.2204        | 875.4100 | 438.2086         | 875.4230       | 438.2151         | 7 |
| 3 | 319.1600        | 160.0837        |                |                  | M    | 779.3524        | 390.1799        | 761.3289 | 381.1681         | 761.3419       | 381.1746         | 6 |
| 4 | 421.2048        | 211.1060        | 403.1942       | 202.1007         | T    | 647.3149        | 324.1611        | 629.2913 | 315.1493         | 629.3044       | 315.1558         | 5 |
| 5 | <b>569.2372</b> | 285.1222        | 551.2266       | 276.1170         | M    | 545.2702        | 273.1387        | 527.2466 | 264.1269         |                |                  | 4 |
| 6 | <b>669.3026</b> | 335.1550        | 651.2921       | 326.1497         | V    | <b>397.2378</b> | 199.1225        | 379.2142 | 190.1107         |                |                  | 3 |
| 7 | <b>817.3681</b> | 409.1877        | 799.3575       | 400.1824         | F    | <b>297.1723</b> | 149.0898        | 279.1487 | 140.0780         |                |                  | 2 |
| 8 |                 |                 |                |                  | K    | 149.1069        | 75.0571         | 131.0833 | 66.0453          |                |                  | 1 |

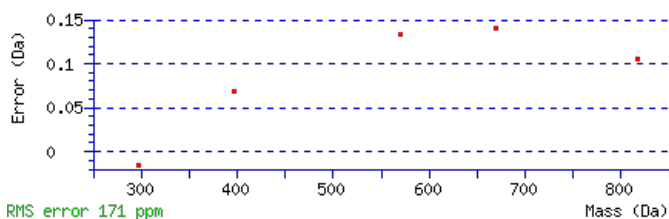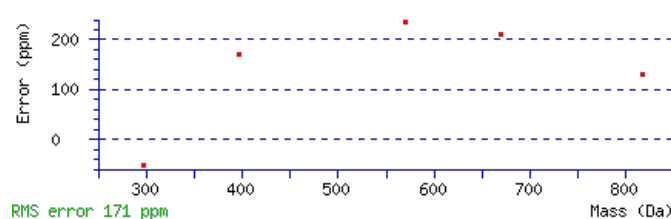NCBI **BLAST** search of **AIMTMVFK**

(Parameters: blastp, nr protein database, expect=20000, no filter, PAM30)

Other BLAST [web gateways](#)**All matches to this query**

| Score | Mr(calc) | Delta | Sequence | Site Analysis |
|-------|----------|-------|----------|---------------|
|       |          |       |          |               |

**AT4G18300.1**

|      |          |         |                          |                     |
|------|----------|---------|--------------------------|---------------------|
| 22.5 | 964.4604 | -0.0016 | <a href="#">AIMTMVFK</a> | Oxidation M5 50.00% |
| 22.5 | 964.4604 | -0.0016 | <a href="#">AIMTMVFK</a> | Oxidation M3 50.00% |
| 9.2  | 964.4575 | 0.0013  | <a href="#">NLRQMFK</a>  |                     |
| 9.2  | 964.4579 | 0.0009  | <a href="#">MSRRQVR</a>  |                     |
| 9.0  | 964.4575 | 0.0013  | <a href="#">MIGARNFK</a> |                     |
| 9.0  | 964.4597 | -0.0009 | <a href="#">MWGLRFK</a>  |                     |
| 6.8  | 964.4600 | -0.0012 | <a href="#">STSSLSRK</a> |                     |
| 5.6  | 964.4597 | -0.0009 | <a href="#">FKMWGLR</a>  |                     |
| 2.2  | 964.4575 | 0.0013  | <a href="#">MGSRLNFK</a> |                     |

**Mascot:** <http://www.matrixscience.com/>

**Peptide View**MS/MS Fragmentation of **MILASSELGCSHEIITAAVLSVQSVWIARGVQKEQDEAK**Found in **AT4G18465.1** in **TAIR\_Arabidopsis**, Symbols: | RNA helicase, putative | chr4:10197067-10201622 FORWARD

Match to Query 10782: 4548.175926 from(759.036597,6+) index(10285)

Title: Elution from: 98.784 to 98.784 scan no 14808 cid35.00 polarity:+

Data file D12h-1\_3.mgf

Click mouse within plot area to zoom in by factor of two about that point

Or, Plot from  to  Da Label all possible matches  Label matches used for scoring Show Y-axis 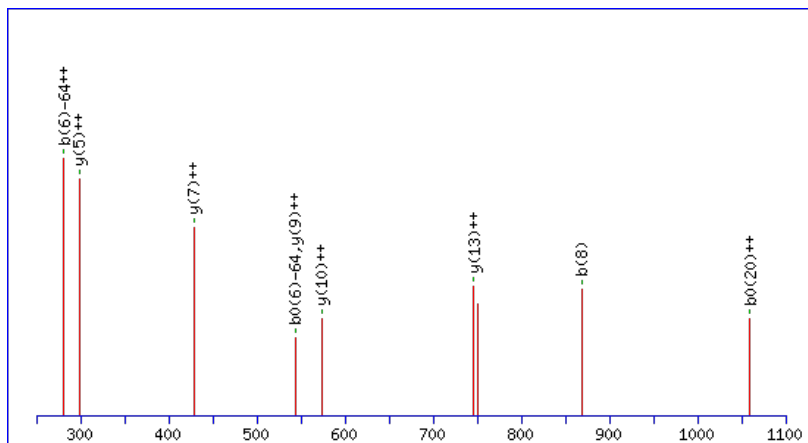Monoisotopic mass of neutral peptide  $M_r(\text{calc})$ : 4548.1883

Fixed modifications: Carbamidomethyl (C) (apply to specified residues or termini only)

Variable modifications:

M1 : Oxidation (M), with neutral losses 63.9983(shown in table), 0.0000

Ions Score: 19 Expect: 0.027

Matches : 9/608 fragment ions using 10 most intense peaks ([help](#))

| #  | b         | b <sup>++</sup> | b*        | b <sup>*++</sup> | b <sup>0</sup> | b <sup>0++</sup> | Seq | y         | y <sup>++</sup> | y*        | y <sup>*++</sup> | y <sup>0</sup> | y <sup>0++</sup> | #  |
|----|-----------|-----------------|-----------|------------------|----------------|------------------|-----|-----------|-----------------|-----------|------------------|----------------|------------------|----|
| 1  | 85.0414   | 43.0244         |           |                  |                |                  | M   |           |                 |           |                  |                |                  | 41 |
| 2  | 199.1225  | 100.0649        |           |                  |                |                  | I   | 4401.1632 | 2201.0852       | 4383.1396 | 2192.0734        | 4383.1526      | 2192.0799        | 40 |
| 3  | 313.2036  | 157.1054        |           |                  |                |                  | L   | 4287.0821 | 2144.0447       | 4269.0585 | 2135.0329        | 4269.0715      | 2135.0394        | 39 |
| 4  | 385.2378  | 193.1225        |           |                  |                |                  | A   | 4173.0010 | 2087.0041       | 4154.9774 | 2077.9923        | 4154.9904      | 2077.9988        | 38 |
| 5  | 473.2668  | 237.1371        |           |                  | 455.2563       | 228.1318         | S   | 4100.9668 | 2050.9870       | 4082.9432 | 2041.9753        | 4082.9563      | 2041.9818        | 37 |
| 6  | 561.2959  | 281.1516        |           |                  | 543.2853       | 272.1463         | S   | 4012.9378 | 2006.9725       | 3994.9142 | 1997.9607        | 3994.9272      | 1997.9672        | 36 |
| 7  | 691.3355  | 346.1714        |           |                  | 673.3250       | 337.1661         | E   | 3924.9087 | 1962.9580       | 3906.8851 | 1953.9462        | 3906.8981      | 1953.9527        | 35 |
| 8  | 805.4166  | 403.2120        |           |                  | 787.4061       | 394.2067         | L   | 3794.8691 | 1897.9382       | 3776.8455 | 1888.9264        | 3776.8585      | 1888.9329        | 34 |
| 9  | 863.4351  | 432.2212        |           |                  | 845.4246       | 423.2159         | G   | 3680.7880 | 1840.8976       | 3662.7644 | 1831.8858        | 3662.7774      | 1831.8923        | 33 |
| 10 | 1025.4598 | 513.2336        |           |                  | 1007.4493      | 504.2283         | C   | 3622.7695 | 1811.8884       | 3604.7459 | 1802.8766        | 3604.7589      | 1802.8831        | 32 |
| 11 | 1113.4889 | 557.2481        |           |                  | 1095.4783      | 548.2428         | S   | 3460.7447 | 1730.8760       | 3442.7212 | 1721.8642        | 3442.7342      | 1721.8707        | 31 |
| 12 | 1253.5389 | 627.2731        |           |                  | 1235.5284      | 618.2678         | H   | 3372.7157 | 1686.8615       | 3354.6921 | 1677.8497        | 3354.7051      | 1677.8562        | 30 |
| 13 | 1383.5786 | 692.2929        |           |                  | 1365.5680      | 683.2876         | E   | 3232.6657 | 1616.8365       | 3214.6421 | 1607.8247        | 3214.6551      | 1607.8312        | 29 |
| 14 | 1497.6597 | 749.3335        |           |                  | 1479.6491      | 740.3282         | I   | 3102.6260 | 1551.8167       | 3084.6025 | 1542.8049        | 3084.6155      | 1542.8114        | 28 |
| 15 | 1611.7407 | 806.3740        |           |                  | 1593.7302      | 797.3687         | I   | 2988.5449 | 1494.7761       | 2970.5214 | 1485.7643        | 2970.5344      | 1485.7708        | 27 |
| 16 | 1713.7855 | 857.3964        |           |                  | 1695.7749      | 848.3911         | T   | 2874.4638 | 1437.7356       | 2856.4403 | 1428.7238        | 2856.4533      | 1428.7303        | 26 |
| 17 | 1827.8666 | 914.4369        |           |                  | 1809.8560      | 905.4316         | I   | 2772.4191 | 1386.7132       | 2754.3955 | 1377.7014        | 2754.4086      | 1377.7079        | 25 |
| 18 | 1899.9007 | 950.4540        |           |                  | 1881.8901      | 941.4487         | A   | 2658.3380 | 1329.6727       | 2640.3144 | 1320.6609        | 2640.3275      | 1320.6674        | 24 |
| 19 | 1971.9349 | 986.4711        |           |                  | 1953.9243      | 977.4658         | A   | 2586.3039 | 1293.6556       | 2568.2803 | 1284.6438        | 2568.2933      | 1284.6503        | 23 |
| 20 | 2072.0003 | 1036.5038       |           |                  | 2053.9897      | 1027.4985        | V   | 2514.2697 | 1257.6385       | 2496.2461 | 1248.6267        | 2496.2592      | 1248.6332        | 22 |
| 21 | 2186.0814 | 1093.5443       |           |                  | 2168.0708      | 1084.5391        | L   | 2414.2043 | 1207.6058       | 2396.1807 | 1198.5940        | 2396.1937      | 1198.6005        | 21 |
| 22 | 2274.1105 | 1137.5589       |           |                  | 2256.0999      | 1128.5536        | S   | 2300.1232 | 1150.5652       | 2282.0996 | 1141.5534        | 2282.1126      | 1141.5599        | 20 |
| 23 | 2374.1759 | 1187.5916       |           |                  | 2356.1654      | 1178.5863        | V   | 2212.0941 | 1106.5507       | 2194.0705 | 1097.5389        | 2194.0836      | 1097.5454        | 19 |
| 24 | 2504.2286 | 1252.6179       | 2486.2050 | 1243.6061        | 2486.2180      | 1243.6126        | Q   | 2112.0287 | 1056.5180       | 2094.0051 | 1047.5062        | 2094.0181      | 1047.5127        | 18 |



# AT4G18465.1

|    |           |           |           |           |           |           |   |           |          |           |          |           |          |    |
|----|-----------|-----------|-----------|-----------|-----------|-----------|---|-----------|----------|-----------|----------|-----------|----------|----|
| 25 | 2592.2576 | 1296.6325 | 2574.2340 | 1287.6207 | 2574.2471 | 1287.6272 | S | 1981.9760 | 991.4917 | 1963.9524 | 982.4799 | 1963.9655 | 982.4864 | 17 |
| 26 | 2692.3231 | 1346.6652 | 2674.2995 | 1337.6534 | 2674.3125 | 1337.6599 | V | 1893.9470 | 947.4771 | 1875.9234 | 938.4653 | 1875.9364 | 938.4718 | 16 |
| 27 | 2880.3965 | 1440.7019 | 2862.3729 | 1431.6901 | 2862.3859 | 1431.6966 | W | 1793.8815 | 897.4444 | 1775.8579 | 888.4326 | 1775.8709 | 888.4391 | 15 |
| 28 | 2994.4776 | 1497.7424 | 2976.4540 | 1488.7306 | 2976.4670 | 1488.7371 | I | 1605.8081 | 803.4077 | 1587.7845 | 794.3959 | 1587.7976 | 794.4024 | 14 |
| 29 | 3108.5587 | 1554.7830 | 3090.5351 | 1545.7712 | 3090.5481 | 1545.7777 | I | 1491.7270 | 746.3672 | 1473.7034 | 737.3554 | 1473.7165 | 737.3619 | 13 |
| 30 | 3180.5928 | 1590.8000 | 3162.5692 | 1581.7882 | 3162.5822 | 1581.7948 | A | 1377.6459 | 689.3266 | 1359.6223 | 680.3148 | 1359.6354 | 680.3213 | 12 |
| 31 | 3340.6821 | 1670.8447 | 3322.6585 | 1661.8329 | 3322.6715 | 1661.8394 | R | 1305.6118 | 653.3095 | 1287.5882 | 644.2977 | 1287.6012 | 644.3042 | 11 |
| 32 | 3398.7006 | 1699.8539 | 3380.6770 | 1690.8421 | 3380.6900 | 1690.8486 | G | 1145.5225 | 573.2649 | 1127.4989 | 564.2531 | 1127.5120 | 564.2596 | 10 |
| 33 | 3498.7660 | 1749.8866 | 3480.7424 | 1740.8748 | 3480.7554 | 1740.8814 | V | 1087.5040 | 544.2557 | 1069.4804 | 535.2439 | 1069.4935 | 535.2504 | 9  |
| 34 | 3628.8187 | 1814.9130 | 3610.7951 | 1805.9012 | 3610.8081 | 1805.9077 | Q | 987.4386  | 494.2229 | 969.4150  | 485.2111 | 969.4280  | 485.2176 | 8  |
| 35 | 3758.9077 | 1879.9575 | 3740.8841 | 1870.9457 | 3740.8971 | 1870.9522 | K | 857.3859  | 429.1966 | 839.3624  | 420.1848 | 839.3754  | 420.1913 | 7  |
| 36 | 3888.9473 | 1944.9773 | 3870.9237 | 1935.9655 | 3870.9367 | 1935.9720 | E | 727.2969  | 364.1521 | 709.2733  | 355.1403 | 709.2863  | 355.1468 | 6  |
| 37 | 4019.0000 | 2010.0036 | 4000.9764 | 2000.9918 | 4000.9894 | 2000.9983 | Q | 597.2573  | 299.1323 | 579.2337  | 290.1205 | 579.2467  | 290.1270 | 5  |
| 38 | 4135.0239 | 2068.0156 | 4117.0004 | 2059.0038 | 4117.0134 | 2059.0103 | D | 467.2046  | 234.1060 | 449.1810  | 225.0942 | 449.1941  | 225.1007 | 4  |
| 39 | 4265.0636 | 2133.0354 | 4247.0400 | 2124.0236 | 4247.0530 | 2124.0301 | E | 351.1807  | 176.0940 | 333.1571  | 167.0822 | 333.1701  | 167.0887 | 3  |
| 40 | 4337.0977 | 2169.0525 | 4319.0741 | 2160.0407 | 4319.0872 | 2160.0472 | A | 221.1410  | 111.0741 | 203.1174  | 102.0624 |           |          | 2  |
| 41 |           |           |           |           |           |           | K | 149.1069  | 75.0571  | 131.0833  | 66.0453  |           |          | 1  |

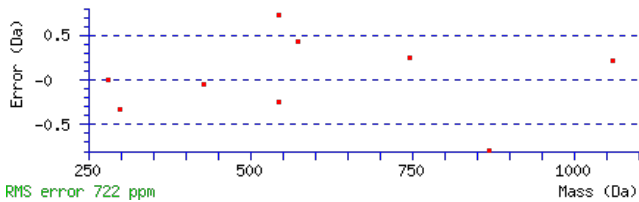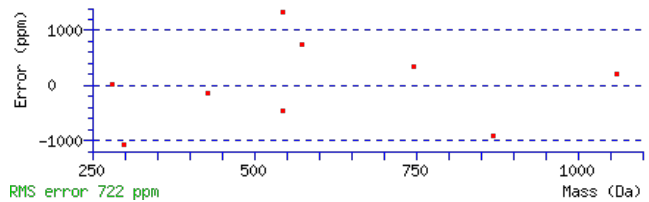

NCBI BLAST search of [MILASSELGCSHEITIAAVLSVQSVWIARGVQKEQDEAK](#)

(Parameters: blastp, nr protein database, expect=20000, no filter, PAM30)

Other BLAST [web gateways](#)

### All matches to this query

| Score | Mr(calc)  | Delta   | Sequence                                                |
|-------|-----------|---------|---------------------------------------------------------|
| 19.1  | 4548.1883 | -0.0124 | <a href="#">MILASSELGCSHEITIAAVLSVQSVWIARGVQKEQDEAK</a> |

Mascot: <http://www.matrixscience.com/>

## Peptide View

### MS/MS Fragmentation of **GEQVPVIATK**

Found in **AT4G18480.1** in **TAIR\_Arabidopsis**, Symbols: CH42, CH-42, CHL11, CHLI-1, CHLI1 | CHLI1 (CHLORINA 42); magnesium chelatase | chr4:10201908-10203372 REVERSE

Match to Query 2736: 1052.550066 from(527.282309,2+) index(2324)

Title: Elution from: 24.445 to 24.445 scan no 2893 cid35.00 polarity:+

Data file D6h-3\_3.mgf

Click mouse within plot area to zoom in by factor of two about that point

Or,   to  Da

Label all possible matches  Label matches used for scoring

Show Y-axis

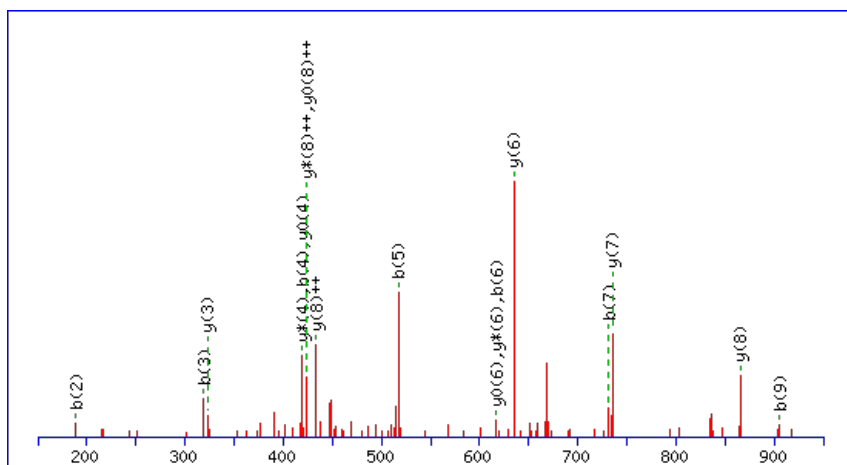

Monoisotopic mass of neutral peptide  $M_r(\text{calc})$ : 1052.5510

Fixed modifications: Carbamidomethyl (C) (apply to specified residues or termini only)

Ions Score: 47 Expect: 2.1e-005

Matches : 18/100 fragment ions using 24 most intense peaks ([help](#))

| #  | b               | b <sup>++</sup> | b*       | b <sup>*++</sup> | b <sup>0</sup> | b <sup>0++</sup> | Seq.     | y               | y <sup>++</sup> | y*              | y <sup>*++</sup> | y <sup>0</sup>  | y <sup>0++</sup> | #  |
|----|-----------------|-----------------|----------|------------------|----------------|------------------|----------|-----------------|-----------------|-----------------|------------------|-----------------|------------------|----|
| 1  | 59.0258         | 30.0165         |          |                  |                |                  | <b>G</b> |                 |                 |                 |                  |                 |                  | 10 |
| 2  | <b>189.0654</b> | 95.0363         |          |                  | 171.0548       | 86.0311          | <b>E</b> | 995.5398        | 498.2735        | 977.5162        | 489.2617         | 977.5292        | 489.2683         | 9  |
| 3  | <b>319.1180</b> | 160.0627        | 301.0945 | 151.0509         | 301.1075       | 151.0574         | <b>Q</b> | <b>865.5002</b> | <b>433.2537</b> | 847.4766        | <b>424.2419</b>  | 847.4896        | <b>424.2484</b>  | 8  |
| 4  | <b>419.1835</b> | 210.0954        | 401.1599 | 201.0836         | 401.1729       | 201.0901         | <b>V</b> | <b>735.4475</b> | 368.2274        | 717.4239        | 359.2156         | 717.4370        | 359.2221         | 7  |
| 5  | <b>517.2333</b> | 259.1203        | 499.2097 | 250.1085         | 499.2227       | 250.1150         | <b>P</b> | <b>635.3821</b> | 318.1947        | <b>617.3585</b> | 309.1829         | <b>617.3715</b> | 309.1894         | 6  |
| 6  | <b>617.2987</b> | 309.1530        | 599.2752 | 300.1412         | 599.2882       | 300.1477         | <b>V</b> | 537.3323        | 269.1698        | 519.3087        | 260.1580         | 519.3217        | 260.1645         | 5  |
| 7  | <b>731.3798</b> | 366.1936        | 713.3563 | 357.1818         | 713.3693       | 357.1883         | <b>I</b> | 437.2668        | 219.1371        | <b>419.2433</b> | 210.1253         | <b>419.2563</b> | 210.1318         | 4  |
| 8  | 803.4140        | 402.2106        | 785.3904 | 393.1988         | 785.4034       | 393.2054         | <b>A</b> | <b>323.1857</b> | 162.0965        | 305.1622        | 153.0847         | 305.1752        | 153.0912         | 3  |
| 9  | <b>905.4587</b> | 453.2330        | 887.4351 | 444.2212         | 887.4481       | 444.2277         | <b>T</b> | 251.1516        | 126.0794        | 233.1280        | 117.0676         | 233.1410        | 117.0741         | 2  |
| 10 |                 |                 |          |                  |                |                  | <b>K</b> | 149.1069        | 75.0571         | 131.0833        | 66.0453          |                 |                  | 1  |

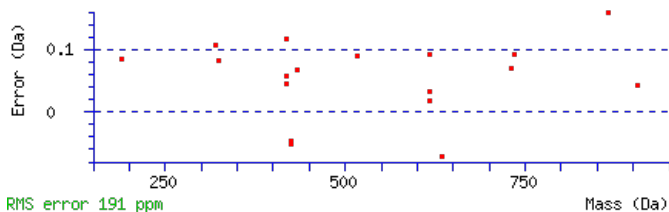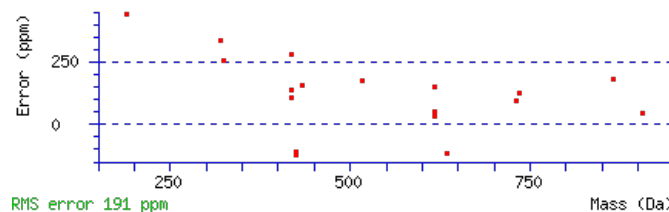

### NCBI BLAST search of **GEQVPVIATK**

(Parameters: blastp, nr protein database, expect=20000, no filter, PAM30)

Other BLAST [web gateways](#)

All matches to this query

AT4G18480.1

| Score | Mr(calc)  | Delta   | Sequence                    |
|-------|-----------|---------|-----------------------------|
| 47.3  | 1052.5510 | -0.0009 | <a href="#">GEQVPVIATK</a>  |
| 4.7   | 1052.5510 | -0.0010 | <a href="#">SPLVNVLGK</a>   |
| 1.1   | 1052.5510 | -0.0010 | <a href="#">IGEKLPAAADK</a> |

Mascot: <http://www.matrixscience.com/>

**Peptide View**MS/MS Fragmentation of **MKTKMMM**K

Found in **AT4G18670.1** in **TAIR\_Arabidopsis**, Symbols: | leucine-rich repeat family protein / extensin family protein | chr4:10275928-10278502  
REVERSE

Match to Query 3187: 1086.458906 from(544.236729,2+) index(2989)

Title: Elution from: 29.284 to 29.284 scan no 3723 cid35.00 polarity:+

Data file D12h-3\_3.mgf

Click mouse within plot area to zoom in by factor of two about that point

Or,   to  Da

Label all possible matches  Label matches used for scoring

Show Y-axis

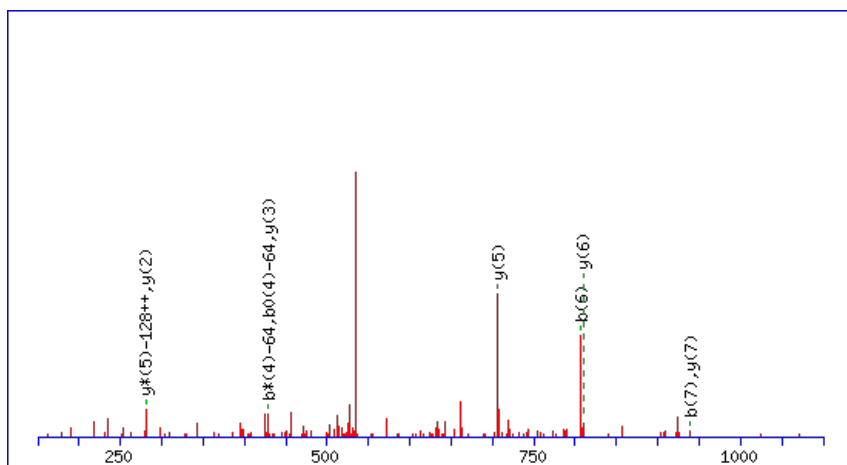

**Monoisotopic mass of neutral peptide Mr(calc):** 1086.4572

**Fixed modifications:** Carbamidomethyl (C) (apply to specified residues or termini only)

**Variable modifications:**

**M1** : Oxidation (M), with neutral losses 0.0000 (shown in table), 63.9983

**M5** : Oxidation (M), with neutral losses 0.0000 (shown in table), 63.9983

**M6** : Oxidation (M), with neutral losses 0.0000 (shown in table), 63.9983

**Ions Score:** 23 **Expect:** 0.02

**Matches** : 10/128 fragment ions using 26 most intense peaks ([help](#))

| # | b        | b <sup>++</sup> | b*       | b <sup>*++</sup> | b <sup>0</sup> | b <sup>0++</sup> | Seq. | y        | y <sup>++</sup> | y*       | y <sup>*++</sup> | y <sup>0</sup> | y <sup>0++</sup> | # |
|---|----------|-----------------|----------|------------------|----------------|------------------|------|----------|-----------------|----------|------------------|----------------|------------------|---|
| 1 | 149.0397 | 75.0235         |          |                  |                |                  | M    |          |                 |          |                  |                |                  | 8 |
| 2 | 279.1287 | 140.0680        | 261.1052 | 131.0562         |                |                  | K    | 939.4320 | 470.2197        | 921.4085 | 461.2079         | 921.4215       | 461.2144         | 7 |
| 3 | 381.1735 | 191.0904        | 363.1499 | 182.0786         | 363.1629       | 182.0851         | T    | 809.3430 | 405.1751        | 791.3194 | 396.1634         | 791.3324       | 396.1699         | 6 |
| 4 | 511.2625 | 256.1349        | 493.2389 | 247.1231         | 493.2519       | 247.1296         | K    | 707.2983 | 354.1528        | 689.2747 | 345.1410         |                |                  | 5 |
| 5 | 659.2949 | 330.1511        | 641.2713 | 321.1393         | 641.2844       | 321.1458         | M    | 577.2093 | 289.1083        | 559.1857 | 280.0965         |                |                  | 4 |
| 6 | 807.3274 | 404.1673        | 789.3038 | 395.1555         | 789.3168       | 395.1620         | M    | 429.1768 | 215.0921        | 411.1532 | 206.0803         |                |                  | 3 |
| 7 | 939.3649 | 470.1861        | 921.3413 | 461.1743         | 921.3543       | 461.1808         | M    | 281.1444 | 141.0758        | 263.1208 | 132.0640         |                |                  | 2 |
| 8 |          |                 |          |                  |                |                  | K    | 149.1069 | 75.0571         | 131.0833 | 66.0453          |                |                  | 1 |

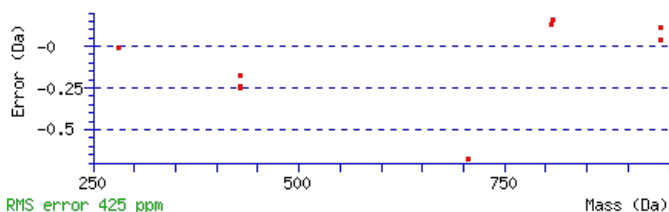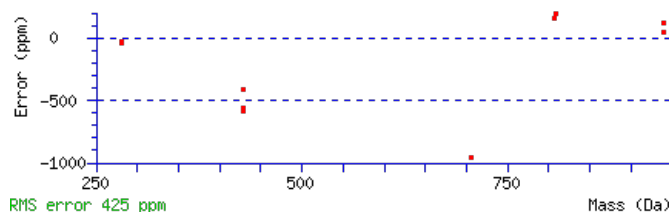

NCBI **BLAST** search of **MKTKMMM**K

(Parameters: blastp, nr protein database, expect=20000, no filter, PAM30)

Other BLAST [web gateways](#)

**All matches to this query**

## AT4G18670.1

| Score | Mr(calc)  | Delta   | Sequence                  | Site Analysis               |
|-------|-----------|---------|---------------------------|-----------------------------|
| 22.7  | 1086.4572 | 0.0017  | <a href="#">MKTkMMMk</a>  | Oxidation M1, M5, M6 72.00% |
| 17.3  | 1086.4572 | 0.0017  | <a href="#">MKTkMMMk</a>  | Oxidation M1, M5, M7 20.96% |
| 12.4  | 1086.4572 | 0.0017  | <a href="#">MKTkMMMk</a>  | Oxidation M1, M6, M7 6.72%  |
| 6.0   | 1086.4574 | 0.0015  | <a href="#">FVFEDYMK</a>  |                             |
| 1.6   | 1086.4579 | 0.0010  | <a href="#">FYNAKSCGK</a> |                             |
| 0.4   | 1086.4579 | 0.0011  | <a href="#">FFRDQMSK</a>  |                             |
| 0.1   | 1086.4612 | -0.0023 | <a href="#">MLHEEMIR</a>  |                             |

Mascot: <http://www.matrixscience.com/>

**Peptide View**MS/MS Fragmentation of **AQIWDTAGQER**

Found in **AT4G18800.1** in **TAIR\_Arabidopsis**, Symbols: AthSGBP, AtRab11B, AtRABA1d | AtRABA1d/AtRab11B/AthSGBP (Arabidopsis Rab GTPase homolog A1d); GTP binding | chr4:10320167-10321350 REVERSE

Match to Query 4799: 1290.552696 from(646.283624,2+) index(3376)

Title: Elution from: 32.491 to 32.491 scan no 4164 cid35.00 polarity:+

Data file C7-2\_2.mgf

Click mouse within plot area to zoom in by factor of two about that point

Or,   to  Da

Label all possible matches  Label matches used for scoring

Show Y-axis

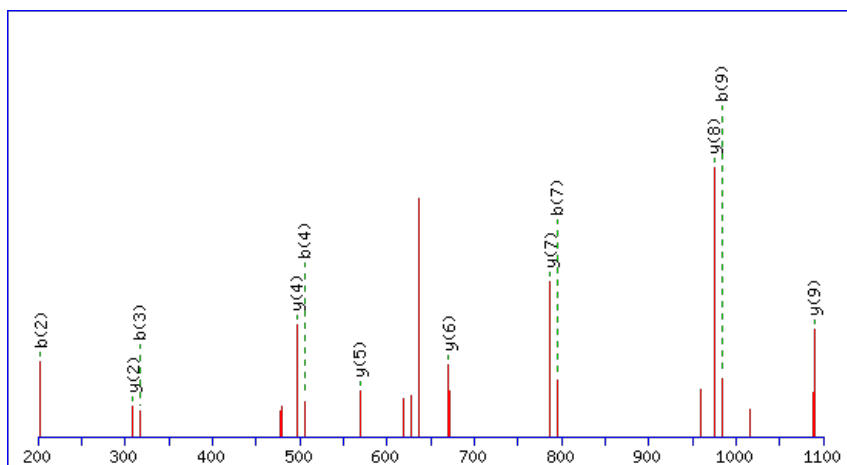

Monoisotopic mass of neutral peptide  $M_r(\text{calc})$ : 1290.5547

Fixed modifications: Carbamidomethyl (C) (apply to specified residues or termini only)

Ions Score: 70 Expect: 5.7e-007

Matches : 12/108 fragment ions using 15 most intense peaks ([help](#))

| #  | b               | b <sup>++</sup> | b*        | b <sup>*++</sup> | b <sup>0</sup> | b <sup>0++</sup> | Seq. | y                | y <sup>++</sup> | y*        | y <sup>*++</sup> | y <sup>0</sup> | y <sup>0++</sup> | #  |
|----|-----------------|-----------------|-----------|------------------|----------------|------------------|------|------------------|-----------------|-----------|------------------|----------------|------------------|----|
| 1  | 73.0414         | 37.0244         |           |                  |                |                  | A    |                  |                 |           |                  |                |                  | 11 |
| 2  | <b>203.0941</b> | 102.0507        | 185.0705  | 93.0389          |                |                  | Q    | 1219.5278        | 610.2676        | 1201.5043 | 601.2558         | 1201.5173      | 601.2623         | 10 |
| 3  | <b>317.1752</b> | 159.0912        | 299.1516  | 150.0794         |                |                  | I    | <b>1089.4752</b> | 545.2412        | 1071.4516 | 536.2294         | 1071.4646      | 536.2359         | 9  |
| 4  | <b>505.2486</b> | 253.1279        | 487.2250  | 244.1161         |                |                  | W    | <b>975.3941</b>  | 488.2007        | 957.3705  | 479.1889         | 957.3835       | 479.1954         | 8  |
| 5  | 621.2725        | 311.1399        | 603.2489  | 302.1281         | 603.2620       | 302.1346         | D    | <b>787.3207</b>  | 394.1640        | 769.2971  | 385.1522         | 769.3101       | 385.1587         | 7  |
| 6  | 723.3172        | 362.1623        | 705.2937  | 353.1505         | 705.3067       | 353.1570         | T    | <b>671.2967</b>  | 336.1520        | 653.2731  | 327.1402         | 653.2862       | 327.1467         | 6  |
| 7  | <b>795.3514</b> | 398.1793        | 777.3278  | 389.1675         | 777.3408       | 389.1741         | A    | <b>569.2520</b>  | 285.1296        | 551.2284  | 276.1179         | 551.2414       | 276.1244         | 5  |
| 8  | 853.3699        | 427.1886        | 835.3463  | 418.1768         | 835.3593       | 418.1833         | G    | <b>497.2179</b>  | 249.1126        | 479.1943  | 240.1008         | 479.2073       | 240.1073         | 4  |
| 9  | <b>983.4225</b> | 492.2149        | 965.3990  | 483.2031         | 965.4120       | 483.2096         | Q    | 439.1994         | 220.1033        | 421.1758  | 211.0915         | 421.1888       | 211.0980         | 3  |
| 10 | 1113.4622       | 557.2347        | 1095.4386 | 548.2229         | 1095.4516      | 548.2294         | E    | <b>309.1467</b>  | 155.0770        | 291.1231  | 146.0652         | 291.1362       | 146.0717         | 2  |
| 11 |                 |                 |           |                  |                |                  | R    | 179.1071         | 90.0572         | 161.0835  | 81.0454          |                |                  | 1  |

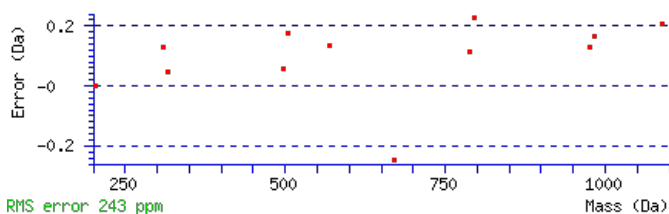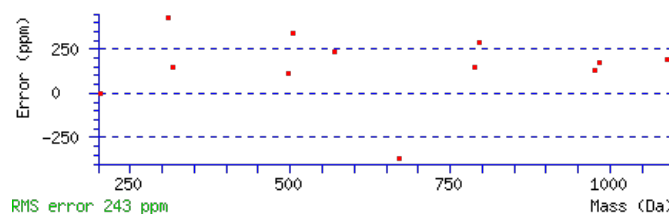

NCBI **BLAST** search of **AQIWDTAGQER**

(Parameters: blastp, nr protein database, expect=20000, no filter, PAM30)

Other BLAST [web gateways](#)

All matches to this query

**AT4G18800.1**

| <b>Score</b> | <b>Mr(calc)</b> | <b>Delta</b> | <b>Sequence</b>               |
|--------------|-----------------|--------------|-------------------------------|
| 69.8         | 1290.5547       | -0.0020      | <a href="#">AQIWDTAGQER</a>   |
| 69.8         | 1290.5547       | -0.0020      | <a href="#">AQLWDTAGQER</a>   |
| 3.1          | 1290.5554       | -0.0027      | <a href="#">LDADGMAEGLASK</a> |
| 2.5          | 1290.5524       | 0.0003       | <a href="#">LVTDENGQNQR</a>   |
| 1.5          | 1290.5500       | 0.0027       | <a href="#">TEMSAHQWRK</a>    |

**Mascot:** <http://www.matrixscience.com/>

**Peptide View**MS/MS Fragmentation of **IGTKENNK**

Found in **AT4G18830.1** in **TAIR\_Arabidopsis**, Symbols: ATOFP5, OFP5 | ATOFP5/OFP5 (ARABIDOPSIS THALIANA OVATE FAMILY PROTEIN 5) | chr4:10337460-10338509 FORWARD

Match to Query 1782: 914.444512 from(458.229532,2+) index(2481)

Title: Elution from: 26.340 to 26.340 scan no 3111 cid35.00 polarity:+

Data file C7-2\_2.mgf

Click mouse within plot area to zoom in by factor of two about that point

Or,   to  Da

Label all possible matches  Label matches used for scoring

Show Y-axis

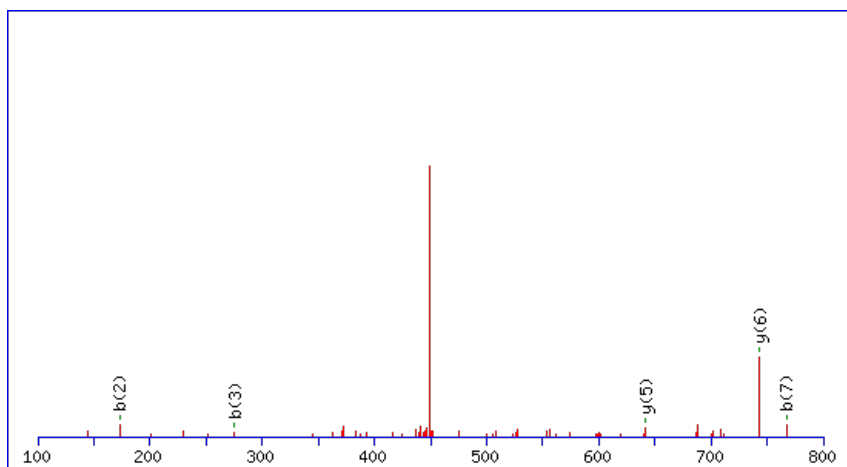

Monoisotopic mass of neutral peptide  $M_r(\text{calc})$ : 914.4466

Fixed modifications: Carbamidomethyl (C) (apply to specified residues or termini only)

Ions Score: 28 Expect: 0.018

Matches : 5/68 fragment ions using 7 most intense peaks ([help](#))

| # | b               | b <sup>++</sup> | b*       | b <sup>*++</sup> | b <sup>0</sup> | b <sup>0++</sup> | Seq. | y               | y <sup>++</sup> | y*       | y <sup>*++</sup> | y <sup>0</sup> | y <sup>0++</sup> | # |
|---|-----------------|-----------------|----------|------------------|----------------|------------------|------|-----------------|-----------------|----------|------------------|----------------|------------------|---|
| 1 | 115.0884        | 58.0478         |          |                  |                |                  | I    |                 |                 |          |                  |                |                  | 8 |
| 2 | <b>173.1069</b> | 87.0571         |          |                  |                |                  | G    | 801.3727        | 401.1900        | 783.3492 | 392.1782         | 783.3622       | 392.1847         | 7 |
| 3 | <b>275.1516</b> | 138.0794        |          |                  | 257.1410       | 129.0741         | T    | <b>743.3542</b> | 372.1808        | 725.3307 | 363.1690         | 725.3437       | 363.1755         | 6 |
| 4 | 405.2406        | 203.1239        | 387.2170 | 194.1122         | 387.2301       | 194.1187         | K    | <b>641.3095</b> | 321.1584        | 623.2859 | 312.1466         | 623.2990       | 312.1531         | 5 |
| 5 | 535.2802        | 268.1438        | 517.2567 | 259.1320         | 517.2697       | 259.1385         | E    | 511.2205        | 256.1139        | 493.1969 | 247.1021         | 493.2099       | 247.1086         | 4 |
| 6 | 651.3172        | 326.1623        | 633.2937 | 317.1505         | 633.3067       | 317.1570         | N    | 381.1809        | 191.0941        | 363.1573 | 182.0823         |                |                  | 3 |
| 7 | <b>767.3542</b> | 384.1808        | 749.3307 | 375.1690         | 749.3437       | 375.1755         | N    | 265.1439        | 133.0756        | 247.1203 | 124.0638         |                |                  | 2 |
| 8 |                 |                 |          |                  |                |                  | K    | 149.1069        | 75.0571         | 131.0833 | 66.0453          |                |                  | 1 |

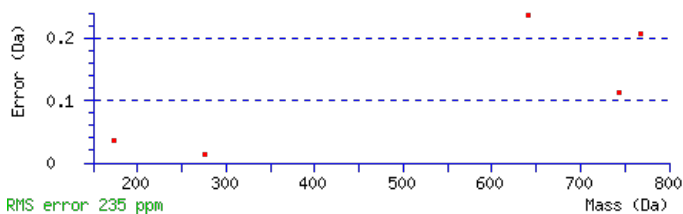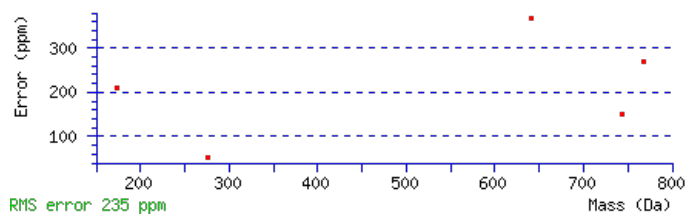

NCBI BLAST search of **IGTKENNK**

(Parameters: blastp, nr protein database, expect=20000, no filter, PAM30)

Other BLAST [web gateways](#)

**All matches to this query**

| Score | $M_r(\text{calc})$ | Delta   | Sequence                 |
|-------|--------------------|---------|--------------------------|
| 27.8  | 914.4466           | -0.0021 | <a href="#">IGTKENNK</a> |



**AT4G18830.1**

|      |          |         |                           |
|------|----------|---------|---------------------------|
| 10.7 | 914.4439 | 0.0006  | <a href="#">LLSESETK</a>  |
| 6.0  | 914.4461 | -0.0016 | <a href="#">LLEEFEK</a>   |
| 5.5  | 914.4465 | -0.0020 | <a href="#">AVAKQDGSK</a> |
| 4.5  | 914.4465 | -0.0020 | <a href="#">RLDDGSLK</a>  |
| 4.5  | 914.4465 | -0.0020 | <a href="#">RLDKEDK</a>   |
| 4.4  | 914.4465 | -0.0020 | <a href="#">TIDDVGRK</a>  |
| 4.4  | 914.4466 | -0.0021 | <a href="#">TLNNVSAGK</a> |
| 4.3  | 914.4466 | -0.0021 | <a href="#">EISNGKAGK</a> |
| 4.3  | 914.4465 | -0.0020 | <a href="#">LDGREVSK</a>  |

**Mascot:** <http://www.matrixscience.com/>

**Peptide View**MS/MS Fragmentation of **HGKHHGMFGGGGK**Found in **AT4G19200.1** in **TAIR\_Arabidopsis**, Symbols: | proline-rich family protein | chr4:10499288-10500401 FORWARD

Match to Query 4217: 1202.500824 from(602.257688,2+) index(2295)

Title: Elution from: 25.127 to 25.127 scan no 2900 cid35.00 polarity:+

Data file C7-2\_2.mgf

Click mouse within plot area to zoom in by factor of two about that point

Or,  to  Da Label all possible matches  Label matches used for scoring Show Y-axis 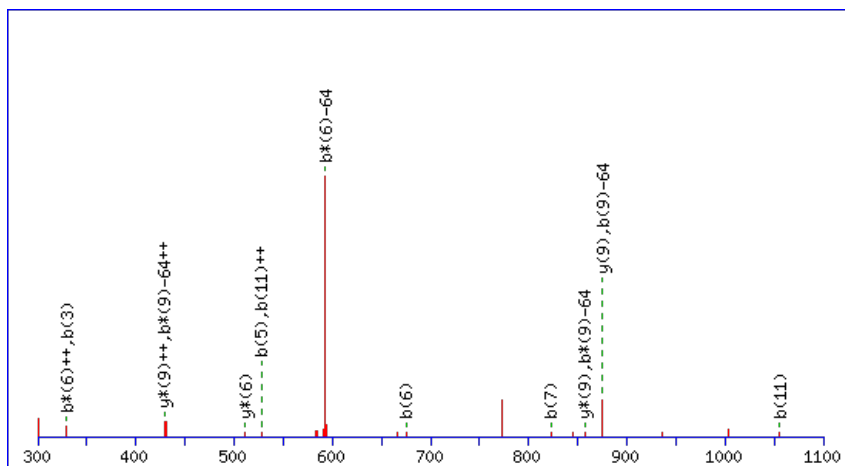Monoisotopic mass of neutral peptide  $M_r(\text{calc})$ : 1202.4975

Fixed modifications: Carbamidomethyl (C) (apply to specified residues or termini only)

Variable modifications:

M6 : Oxidation (M), with neutral losses 0.0000 (shown in table), 63.9983

Ions Score: 20 Expect: 0.029

Matches : 15/128 fragment ions using 21 most intense peaks ([help](#))

| #  | b                | b <sup>++</sup> | b <sup>*</sup> | b <sup>*++</sup> | Seq. | y               | y <sup>++</sup> | y <sup>*</sup>  | y <sup>*++</sup> | #  |
|----|------------------|-----------------|----------------|------------------|------|-----------------|-----------------|-----------------|------------------|----|
| 1  | 141.0573         | 71.0323         |                |                  | H    |                 |                 |                 |                  | 12 |
| 2  | 199.0758         | 100.0415        |                |                  | G    | 1063.4548       | 532.2310        | 1045.4312       | 523.2192         | 11 |
| 3  | <b>329.1648</b>  | 165.0861        | 311.1412       | 156.0743         | K    | 1005.4363       | 503.2218        | 987.4127        | 494.2100         | 10 |
| 4  | 469.2148         | 235.1111        | 451.1913       | 226.0993         | H    | <b>875.3473</b> | 438.1773        | <b>857.3237</b> | <b>429.1655</b>  | 9  |
| 5  | <b>527.2333</b>  | 264.1203        | 509.2098       | 255.1085         | G    | 735.2973        | 368.1523        | 717.2737        | 359.1405         | 8  |
| 6  | <b>675.2658</b>  | 338.1365        | 657.2422       | <b>329.1247</b>  | M    | 677.2788        | 339.1430        | 659.2552        | 330.1312         | 7  |
| 7  | <b>823.3312</b>  | 412.1693        | 805.3076       | 403.1575         | F    | 529.2463        | 265.1268        | <b>511.2227</b> | 256.1150         | 6  |
| 8  | 881.3497         | 441.1785        | 863.3261       | 432.1667         | G    | 381.1809        | 191.0941        | 363.1573        | 182.0823         | 5  |
| 9  | 939.3682         | 470.1877        | 921.3446       | 461.1760         | G    | 323.1624        | 162.0848        | 305.1388        | 153.0730         | 4  |
| 10 | 997.3867         | 499.1970        | 979.3631       | 490.1852         | G    | 265.1439        | 133.0756        | 247.1203        | 124.0638         | 3  |
| 11 | <b>1055.4052</b> | <b>528.2062</b> | 1037.3816      | 519.1945         | G    | 207.1254        | 104.0663        | 189.1018        | 95.0545          | 2  |
| 12 |                  |                 |                |                  | K    | 149.1069        | 75.0571         | 131.0833        | 66.0453          | 1  |

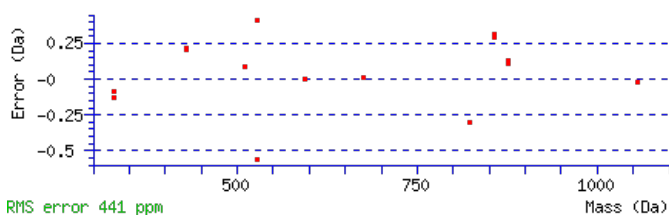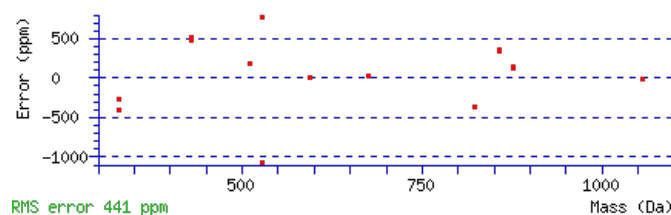NCBI **BLAST** search of **HGKHHGMFGGGGK**

(Parameters: blastp, nr protein database, expect=20000, no filter, PAM30)

Other BLAST [web gateways](#)

# AT4G19200.1

All matches to this query

| Score | Mr(calc)  | Delta   | Sequence                     |
|-------|-----------|---------|------------------------------|
| 20.3  | 1202.4975 | 0.0033  | <a href="#">HGKHGMFGGGGK</a> |
| 5.1   | 1202.5001 | 0.0008  | <a href="#">AEEPRNNNNK</a>   |
| 4.2   | 1202.5038 | -0.0030 | <a href="#">MMVLYCGRK</a>    |
| 3.2   | 1202.5030 | -0.0021 | <a href="#">GQMGLPGGEAEK</a> |
| 2.7   | 1202.5003 | 0.0005  | <a href="#">MEEEDSVIPK</a>   |
| 2.4   | 1202.5029 | -0.0021 | <a href="#">MGDIDGVVDPR</a>  |
| 2.4   | 1202.5018 | -0.0010 | <a href="#">VYYANFNDGK</a>   |
| 1.5   | 1202.4978 | 0.0030  | <a href="#">FMITYVDCK</a>    |

Mascot: <http://www.matrixscience.com/>

## Peptide View

MS/MS Fragmentation of **DFGFSGILGGK**

Found in **AT4G19410.1** in **TAIR\_Arabidopsis**, Symbols: | pectinacetylsterase, putative | chr4:10582199-10584777 REVERSE

Match to Query 3611: 1108.518146 from(555.266349,2+) index(9008)

Title: Elution from: 80.108 to 80.108 scan no 11977 cid35.00 polarity:+

Data file C7-3\_1.mgf

Click mouse within plot area to zoom in by factor of two about that point

Or,   to  Da

Label all possible matches  Label matches used for scoring

Show Y-axis

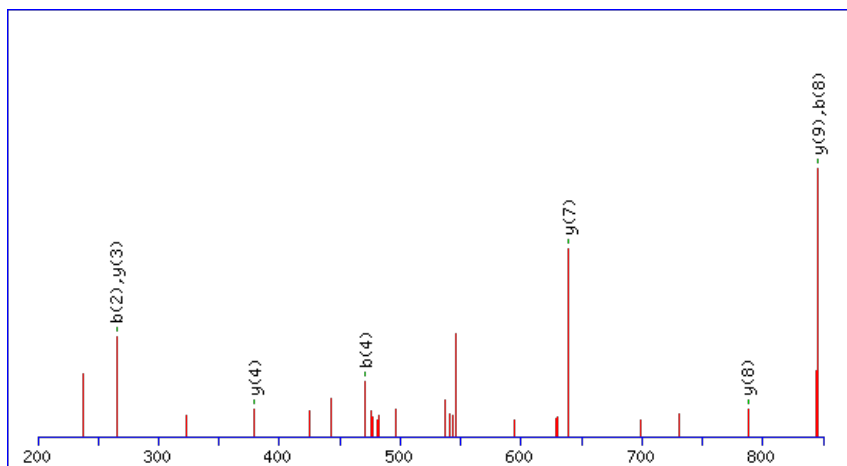

Monoisotopic mass of neutral peptide **Mr(calc)**: 1108.5197

**Fixed modifications**: Carbamidomethyl (C) (apply to specified residues or termini only)

**Ions Score**: 49 **Expect**: 9.8e-005

**Matches**: 8/88 fragment ions using 7 most intense peaks ([help](#))

| #  | b               | b <sup>++</sup> | b <sup>0</sup> | b <sup>0++</sup> | Seq. | y               | y <sup>++</sup> | y*       | y <sup>*++</sup> | y <sup>0</sup> | y <sup>0++</sup> | #  |
|----|-----------------|-----------------|----------------|------------------|------|-----------------|-----------------|----------|------------------|----------------|------------------|----|
| 1  | 117.0313        | 59.0193         | 99.0207        | 50.0140          | D    |                 |                 |          |                  |                |                  | 11 |
| 2  | <b>265.0967</b> | 133.0520        | 247.0861       | 124.0467         | F    | 993.5030        | 497.2552        | 975.4794 | 488.2434         | 975.4925       | 488.2499         | 10 |
| 3  | 323.1152        | 162.0612        | 305.1046       | 153.0560         | G    | <b>845.4376</b> | 423.2224        | 827.4140 | 414.2106         | 827.4270       | 414.2171         | 9  |
| 4  | <b>471.1807</b> | 236.0940        | 453.1701       | 227.0887         | F    | <b>787.4191</b> | 394.2132        | 769.3955 | 385.2014         | 769.4085       | 385.2079         | 8  |
| 5  | 559.2097        | 280.1085        | 541.1991       | 271.1032         | S    | <b>639.3536</b> | 320.1805        | 621.3300 | 311.1687         | 621.3431       | 311.1752         | 7  |
| 6  | 617.2282        | 309.1177        | 599.2176       | 300.1125         | G    | 551.3246        | 276.1659        | 533.3010 | 267.1541         |                |                  | 6  |
| 7  | 731.3093        | 366.1583        | 713.2987       | 357.1530         | I    | 493.3061        | 247.1567        | 475.2825 | 238.1449         |                |                  | 5  |
| 8  | <b>845.3904</b> | 423.1988        | 827.3798       | 414.1936         | L    | <b>379.2250</b> | 190.1161        | 361.2014 | 181.1043         |                |                  | 4  |
| 9  | 903.4089        | 452.2081        | 885.3983       | 443.2028         | G    | <b>265.1439</b> | 133.0756        | 247.1203 | 124.0638         |                |                  | 3  |
| 10 | 961.4274        | 481.2173        | 943.4168       | 472.2121         | G    | 207.1254        | 104.0663        | 189.1018 | 95.0545          |                |                  | 2  |
| 11 |                 |                 |                |                  | K    | 149.1069        | 75.0571         | 131.0833 | 66.0453          |                |                  | 1  |

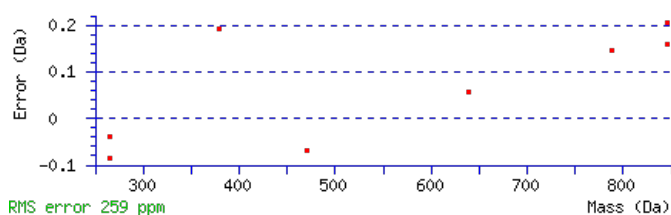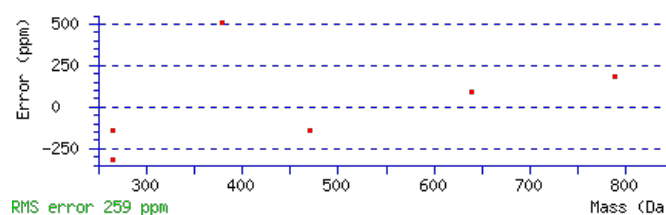

NCBI **BLAST** search of **DFGFSGILGGK**

(Parameters: blastp, nr protein database, expect=20000, no filter, PAM30)

Other BLAST [web gateways](#)

All matches to this query

**AT4G19410.1**

| <b>Score</b> | <b>Mr(calc)</b> | <b>Delta</b> | <b>Sequence</b>             |
|--------------|-----------------|--------------|-----------------------------|
| 49.3         | 1108.5197       | -0.0016      | <a href="#">DFGFSGILGGK</a> |
| 10.0         | 1108.5197       | -0.0016      | <a href="#">NFDAILYNK</a>   |
| 8.3          | 1108.5150       | 0.0032       | <a href="#">WMTLFRDK</a>    |
| 3.1          | 1108.5175       | 0.0007       | <a href="#">KYSSQEQVK</a>   |
| 0.4          | 1108.5197       | -0.0016      | <a href="#">FNFEVVSQK</a>   |

**Mascot:** <http://www.matrixscience.com/>

**Peptide View**MS/MS Fragmentation of **AVSDDVLDTGR**Found in **AT4G19610.1** in **TAIR\_Arabidopsis**, Symbols: | RNA binding | chr4:10677492-10681633 FORWARD

Match to Query 3355: 1160.509946 from(581.262249,2+) index(456)

Title: Elution from: 11.952 to 11.952 scan no 781 cid35.00 polarity:+

Data file D1d-1-2.mgf

Click mouse within plot area to zoom in by factor of two about that point

Or,   to  Da Label all possible matches  Label matches used for scoring Show Y-axis 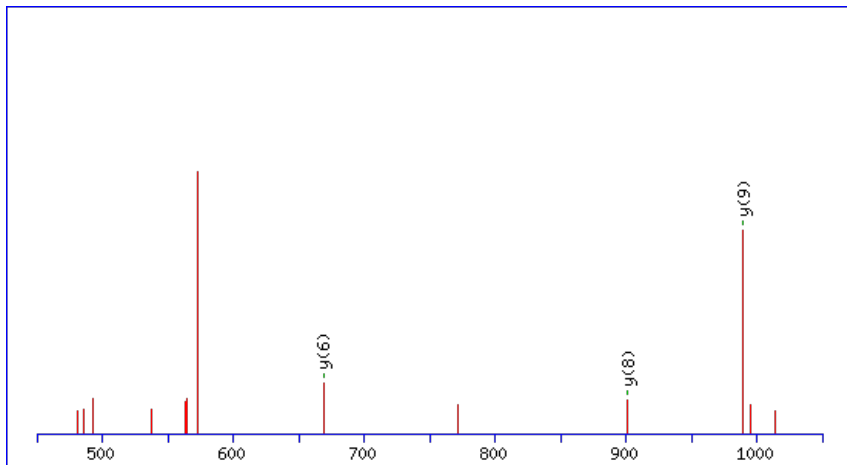Monoisotopic mass of neutral peptide **Mr(calc)**: 1160.5101**Fixed modifications**: Carbamidomethyl (C) (apply to specified residues or termini only)**Ions Score**: 23 **Expect**: 0.034**Matches** : 3/92 fragment ions using 5 most intense peaks ([help](#))

| #  | b        | b <sup>++</sup> | b <sup>0</sup> | b <sup>0++</sup> | Seq. | y               | y <sup>++</sup> | y*        | y <sup>*++</sup> | y <sup>0</sup> | y <sup>0++</sup> | #  |
|----|----------|-----------------|----------------|------------------|------|-----------------|-----------------|-----------|------------------|----------------|------------------|----|
| 1  | 73.0414  | 37.0244         |                |                  | A    |                 |                 |           |                  |                |                  | 11 |
| 2  | 173.1069 | 87.0571         |                |                  | V    | 1089.4833       | 545.2453        | 1071.4597 | 536.2335         | 1071.4727      | 536.2400         | 10 |
| 3  | 261.1359 | 131.0716        | 243.1254       | 122.0663         | S    | <b>989.4178</b> | 495.2126        | 971.3943  | 486.2008         | 971.4073       | 486.2073         | 9  |
| 4  | 377.1599 | 189.0836        | 359.1494       | 180.0783         | D    | <b>901.3888</b> | 451.1980        | 883.3652  | 442.1862         | 883.3782       | 442.1927         | 8  |
| 5  | 493.1839 | 247.0956        | 475.1733       | 238.0903         | D    | 785.3648        | 393.1860        | 767.3412  | 384.1742         | 767.3542       | 384.1808         | 7  |
| 6  | 593.2493 | 297.1283        | 575.2388       | 288.1230         | V    | <b>669.3408</b> | 335.1741        | 651.3172  | 326.1623         | 651.3303       | 326.1688         | 6  |
| 7  | 707.3304 | 354.1689        | 689.3199       | 345.1636         | L    | 569.2754        | 285.1413        | 551.2518  | 276.1295         | 551.2648       | 276.1360         | 5  |
| 8  | 823.3544 | 412.1808        | 805.3439       | 403.1756         | D    | 455.1943        | 228.1008        | 437.1707  | 219.0890         | 437.1837       | 219.0955         | 4  |
| 9  | 925.3991 | 463.2032        | 907.3886       | 454.1979         | T    | 339.1703        | 170.0888        | 321.1467  | 161.0770         | 321.1597       | 161.0835         | 3  |
| 10 | 983.4176 | 492.2125        | 965.4071       | 483.2072         | G    | 237.1256        | 119.0664        | 219.1020  | 110.0546         |                |                  | 2  |
| 11 |          |                 |                |                  | R    | 179.1071        | 90.0572         | 161.0835  | 81.0454          |                |                  | 1  |

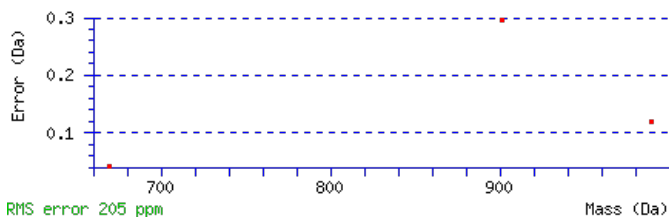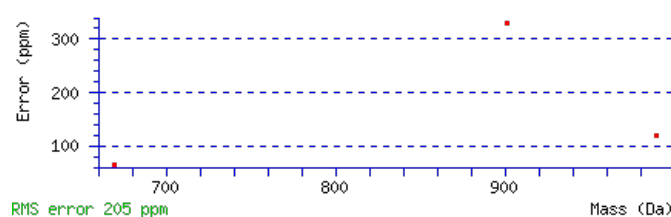NCBI **BLAST** search of **AVSDDVLDTGR**

(Parameters: blastp, nr protein database, expect=20000, no filter, PAM30)

Other BLAST [web gateways](#)**All matches to this query**

## AT4G19610.1

| Score | Mr(calc)  | Delta   | Sequence                    |
|-------|-----------|---------|-----------------------------|
| 22.6  | 1160.5101 | -0.0002 | <a href="#">AVSDDVLDTGR</a> |
| 17.9  | 1160.5077 | 0.0023  | <a href="#">MNPEKFTHK</a>   |
| 8.9   | 1160.5102 | -0.0002 | <a href="#">EEKNGSLNK</a>   |
| 8.9   | 1160.5102 | -0.0002 | <a href="#">EENISGNKK</a>   |
| 8.9   | 1160.5102 | -0.0002 | <a href="#">EKEAEEERK</a>   |
| 8.9   | 1160.5102 | -0.0002 | <a href="#">KEEEEEAKR</a>   |
| 3.6   | 1160.5102 | -0.0002 | <a href="#">NNEKEKEEK</a>   |
| 3.1   | 1160.5110 | -0.0011 | <a href="#">EPAMMIGDRK</a>  |
| 3.1   | 1160.5084 | 0.0016  | <a href="#">ISEMVDPTMK</a>  |
| 3.1   | 1160.5124 | -0.0024 | <a href="#">KDLSDWQEK</a>   |

Mascot: <http://www.matrixscience.com/>

**Peptide View**MS/MS Fragmentation of **LFIDNPEMLSDK**

Found in **AT4G19650.1** in **TAIR\_Arabidopsis**, Symbols: | similar to mitochondrial transcription termination factor-related / mTERF-related [Arabidopsis thaliana] (TAIR:AT5G45113.1); similar to unnamed protein product [Vitis vinifera] (GB:CAO44451.1); contains InterPro domain Mitochondrial tran

Match to Query 5601: 1434.647044 from(718.330798,2+) index(5644)

Title: Elution from: 50.686 to 50.686 scan no 7194 cid35.00 polarity:+

Data file D6h-1\_3.mgf

Click mouse within plot area to zoom in by factor of two about that point

Or,   to  Da

Label all possible matches  Label matches used for scoring

Show Y-axis

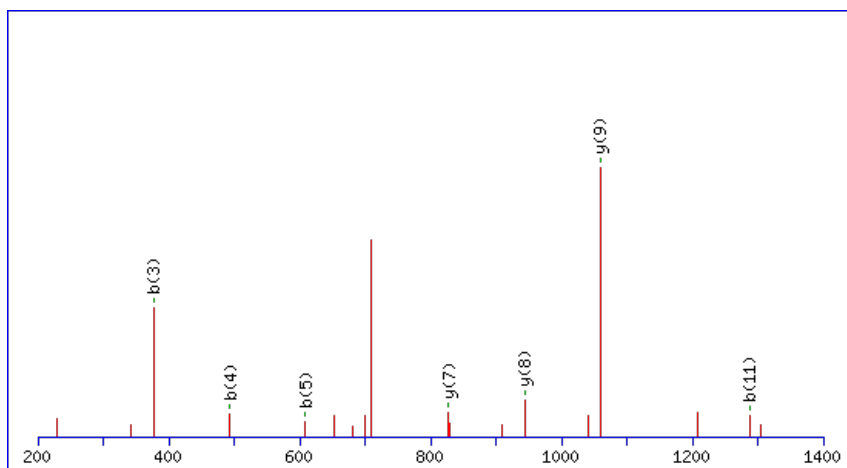

Monoisotopic mass of neutral peptide  $M_r(\text{calc})$ : 1434.6493

Fixed modifications: Carbamidomethyl (C) (apply to specified residues or termini only)

Ions Score: 27 Expect: 0.013

Matches : 7/116 fragment ions using 11 most intense peaks ([help](#))

| #  | b                | b <sup>++</sup> | b*        | b <sup>*++</sup> | b <sup>0</sup> | b <sup>0++</sup> | Seq. | y                | y <sup>++</sup> | y*        | y <sup>*++</sup> | y <sup>0</sup> | y <sup>0++</sup> | #  |
|----|------------------|-----------------|-----------|------------------|----------------|------------------|------|------------------|-----------------|-----------|------------------|----------------|------------------|----|
| 1  | 115.0884         | 58.0478         |           |                  |                |                  | L    |                  |                 |           |                  |                |                  | 12 |
| 2  | 263.1538         | 132.0805        |           |                  |                |                  | F    | 1321.5755        | 661.2914        | 1303.5519 | 652.2796         | 1303.5649      | 652.2861         | 11 |
| 3  | <b>377.2349</b>  | 189.1211        |           |                  |                |                  | I    | 1173.5100        | 587.2587        | 1155.4865 | 578.2469         | 1155.4995      | 578.2534         | 10 |
| 4  | <b>493.2589</b>  | 247.1331        |           |                  | 475.2483       | 238.1278         | D    | <b>1059.4289</b> | 530.2181        | 1041.4054 | 521.2063         | 1041.4184      | 521.2128         | 9  |
| 5  | <b>609.2959</b>  | 305.1516        | 591.2723  | 296.1398         | 591.2853       | 296.1463         | N    | <b>943.4050</b>  | 472.2061        | 925.3814  | 463.1943         | 925.3944       | 463.2008         | 8  |
| 6  | 707.3457         | 354.1765        | 689.3221  | 345.1647         | 689.3351       | 345.1712         | P    | <b>827.3680</b>  | 414.1876        | 809.3444  | 405.1758         | 809.3574       | 405.1823         | 7  |
| 7  | 837.3853         | 419.1963        | 819.3617  | 410.1845         | 819.3748       | 410.1910         | E    | 729.3182         | 365.1627        | 711.2946  | 356.1509         | 711.3076       | 356.1574         | 6  |
| 8  | 969.4228         | 485.2151        | 951.3993  | 476.2033         | 951.4123       | 476.2098         | M    | 599.2785         | 300.1429        | 581.2549  | 291.1311         | 581.2680       | 291.1376         | 5  |
| 9  | 1083.5039        | 542.2556        | 1065.4804 | 533.2438         | 1065.4934      | 533.2503         | L    | 467.2410         | 234.1241        | 449.2174  | 225.1124         | 449.2304       | 225.1189         | 4  |
| 10 | 1171.5330        | 586.2701        | 1153.5094 | 577.2583         | 1153.5224      | 577.2649         | S    | 353.1599         | 177.0836        | 335.1363  | 168.0718         | 335.1493       | 168.0783         | 3  |
| 11 | <b>1287.5570</b> | 644.2821        | 1269.5334 | 635.2703         | 1269.5464      | 635.2768         | D    | 265.1309         | 133.0691        | 247.1073  | 124.0573         | 247.1203       | 124.0638         | 2  |
| 12 |                  |                 |           |                  |                |                  | K    | 149.1069         | 75.0571         | 131.0833  | 66.0453          |                |                  | 1  |

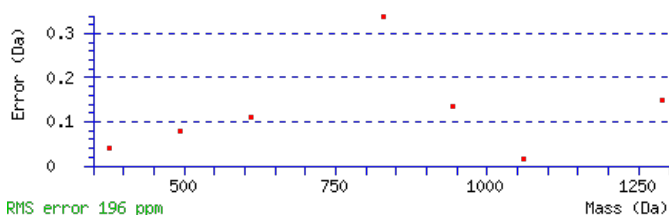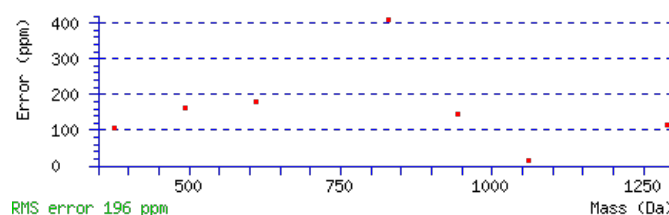

NCBI BLAST search of **LFIDNPEMLSDK**

(Parameters: blastp, nr protein database, expect=20000, no filter, PAM30)

Other BLAST [web gateways](#)



## AT4G19650.1

All matches to this query

| Score | Mr(calc)  | Delta   | Sequence                       |
|-------|-----------|---------|--------------------------------|
| 27.3  | 1434.6493 | -0.0023 | <a href="#">LFIDNPEMLSDK</a>   |
| 14.8  | 1434.6471 | -0.0000 | <a href="#">LECSEAQETLLK</a>   |
| 14.8  | 1434.6498 | -0.0027 | <a href="#">VRNETSNPLEMK</a>   |
| 14.7  | 1434.6497 | -0.0027 | <a href="#">RDLTNCALEPTK</a>   |
| 12.8  | 1434.6470 | -0.0000 | <a href="#">KDKFEEDMVGIEK</a>  |
| 12.6  | 1434.6497 | -0.0027 | <a href="#">EMISQGRVEPQK</a>   |
| 6.5   | 1434.6464 | 0.0007  | <a href="#">QQQYAAENPLOK</a>   |
| 6.0   | 1434.6471 | -0.0000 | <a href="#">MAPGILTELAGESK</a> |
| 2.5   | 1434.6486 | -0.0016 | <a href="#">FKDLNPQWNEK</a>    |
| 2.0   | 1434.6490 | -0.0020 | <a href="#">GISDRNSPLWNR</a>   |

Mascot: <http://www.matrixscience.com/>

### Peptide View

 MS/MS Fragmentation of **TVETGRRYFPSCYEVLDK**

 Found in **AT4G19660.1** in **TAIR\_Arabidopsis**, Symbols: NPR4 | NPR4 (NPR1-LIKE PROTEIN 4); protein binding | chr4:10696276-10698253  
 REVERSE

Match to Query 10121: 2244.997140 from(749.339656,3+) index(10534)

Title: Elution from: 99.510 to 99.510 scan no 14845 cid35.00 polarity:+

Data file D12h-3\_1.mgf

Click mouse within plot area to zoom in by factor of two about that point

 Or,   to  Da 

 Label all possible matches  Label matches used for scoring 

 Show Y-axis 
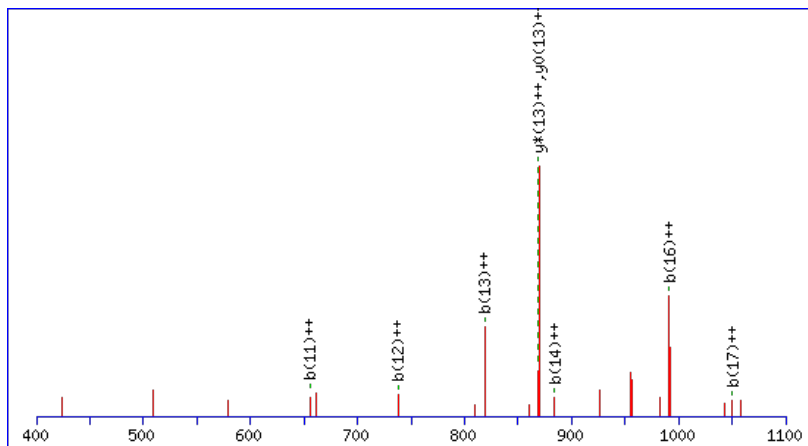
 Monoisotopic mass of neutral peptide  $M_r(\text{calc})$ : 2244.9910

Fixed modifications: Carbamidomethyl (C) (apply to specified residues or termini only)

Ions Score: 24 Expect: 0.031

 Matches : 8/192 fragment ions using 17 most intense peaks ([help](#))

| #  | b         | b <sup>++</sup> | b*        | b <sup>*++</sup> | b <sup>0</sup> | b <sup>0++</sup> | Seq | y         | y <sup>++</sup> | y*        | y <sup>*++</sup> | y <sup>0</sup> | y <sup>0++</sup> | #  |
|----|-----------|-----------------|-----------|------------------|----------------|------------------|-----|-----------|-----------------|-----------|------------------|----------------|------------------|----|
| 1  | 103.0520  | 52.0296         |           |                  | 85.0414        | 43.0244          | T   |           |                 |           |                  |                |                  | 18 |
| 2  | 203.1174  | 102.0624        |           |                  | 185.1069       | 93.0571          | V   | 2143.9536 | 1072.4804       | 2125.9300 | 1063.4686        | 2125.9430      | 1063.4751        | 17 |
| 3  | 333.1571  | 167.0822        |           |                  | 315.1465       | 158.0769         | E   | 2043.8881 | 1022.4477       | 2025.8645 | 1013.4359        | 2025.8776      | 1013.4424        | 16 |
| 4  | 435.2018  | 218.1045        |           |                  | 417.1912       | 209.0992         | T   | 1913.8485 | 957.4279        | 1895.8249 | 948.4161         | 1895.8379      | 948.4226         | 15 |
| 5  | 493.2203  | 247.1138        |           |                  | 475.2097       | 238.1085         | G   | 1811.8038 | 906.4055        | 1793.7802 | 897.3937         | 1793.7932      | 897.4002         | 14 |
| 6  | 653.3095  | 327.1584        | 635.2859  | 318.1466         | 635.2990       | 318.1531         | R   | 1753.7853 | 877.3963        | 1735.7617 | 868.3845         | 1735.7747      | 868.3910         | 13 |
| 7  | 813.3988  | 407.2030        | 795.3752  | 398.1912         | 795.3882       | 398.1977         | R   | 1593.6960 | 797.3517        | 1575.6725 | 788.3399         | 1575.6855      | 788.3464         | 12 |
| 8  | 977.4591  | 489.2332        | 959.4356  | 480.2214         | 959.4486       | 480.2279         | Y   | 1433.6068 | 717.3070        | 1415.5832 | 708.2952         | 1415.5962      | 708.3017         | 11 |
| 9  | 1125.5246 | 563.2659        | 1107.5010 | 554.2541         | 1107.5140      | 554.2607         | F   | 1269.5464 | 635.2768        | 1251.5228 | 626.2651         | 1251.5359      | 626.2716         | 10 |
| 10 | 1223.5744 | 612.2908        | 1205.5508 | 603.2790         | 1205.5638      | 603.2856         | P   | 1121.4810 | 561.2441        | 1103.4574 | 552.2323         | 1103.4704      | 552.2388         | 9  |
| 11 | 1311.6035 | 656.3054        | 1293.5799 | 647.2936         | 1293.5929      | 647.3001         | S   | 1023.4312 | 512.2192        | 1005.4076 | 503.2074         | 1005.4206      | 503.2139         | 8  |
| 12 | 1473.6282 | 737.3177        | 1455.6046 | 728.3059         | 1455.6176      | 728.3124         | C   | 935.4021  | 468.2047        | 917.3785  | 459.1929         | 917.3915       | 459.1994         | 7  |
| 13 | 1637.6885 | 819.3479        | 1619.6650 | 810.3361         | 1619.6780      | 810.3426         | Y   | 773.3774  | 387.1923        | 755.3538  | 378.1805         | 755.3668       | 378.1871         | 6  |
| 14 | 1767.7282 | 884.3677        | 1749.7046 | 875.3559         | 1749.7176      | 875.3624         | E   | 609.3170  | 305.1622        | 591.2934  | 296.1504         | 591.3065       | 296.1569         | 5  |
| 15 | 1867.7936 | 934.4004        | 1849.7700 | 925.3887         | 1849.7830      | 925.3952         | V   | 479.2774  | 240.1423        | 461.2538  | 231.1305         | 461.2668       | 231.1371         | 4  |
| 16 | 1981.8747 | 991.4410        | 1963.8511 | 982.4292         | 1963.8641      | 982.4357         | L   | 379.2120  | 190.1096        | 361.1884  | 181.0978         | 361.2014       | 181.1043         | 3  |
| 17 | 2097.8987 | 1049.4530       | 2079.8751 | 1040.4412        | 2079.8881      | 1040.4477        | D   | 265.1309  | 133.0691        | 247.1073  | 124.0573         | 247.1203       | 124.0638         | 2  |
| 18 |           |                 |           |                  |                |                  | K   | 149.1069  | 75.0571         | 131.0833  | 66.0453          |                |                  | 1  |

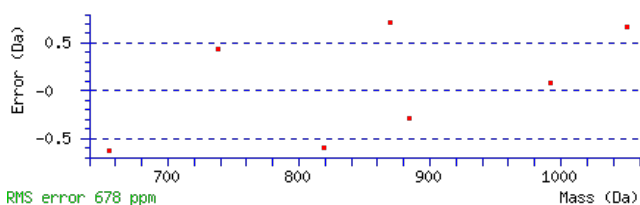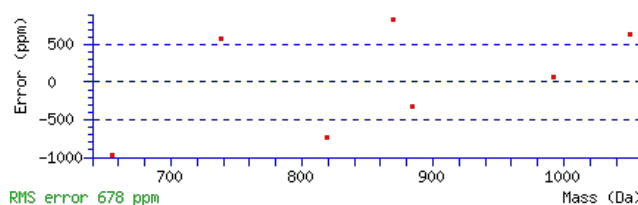

## AT4G19660.1

NCBI BLAST search of [TVETGRRYFPSCYEVLDK](#)

(Parameters: blastp, nr protein database, expect=20000, no filter, PAM30)

Other BLAST [web gateways](#)

### All matches to this query

| Score | Mr(calcd) | Delta   | Sequence                              |
|-------|-----------|---------|---------------------------------------|
| 23.7  | 2244.9910 | 0.0062  | <a href="#">TVETGRRYFPSCYEVLDK</a>    |
| 8.5   | 2244.9940 | 0.0032  | <a href="#">NLASTSSSKLGNESHGGQINK</a> |
| 7.9   | 2244.9971 | 0.0001  | <a href="#">VEPDVSLYNAAIHGMCLRR</a>   |
| 7.3   | 2245.0036 | -0.0065 | <a href="#">VFAPMENEINSPVSGFYPPK</a>  |
| 7.2   | 2244.9906 | 0.0066  | <a href="#">GMGEDNFPDLVPWLFETLK</a>   |
| 6.3   | 2244.9944 | 0.0028  | <a href="#">MAAGGFLTRAFDTMLKESGGK</a> |
| 4.9   | 2244.9971 | 0.0001  | <a href="#">HMRANGVSKEVGCSWIELK</a>   |
| 4.8   | 2244.9942 | 0.0029  | <a href="#">MEILESKSDPSVDNLSSEVK</a>  |
| 4.8   | 2245.0018 | -0.0046 | <a href="#">EARRVEDEVIVQMGSWADK</a>   |
| 4.2   | 2244.9995 | -0.0024 | <a href="#">SSSTASSLTVRTVRYGECQK</a>  |

Mascot: <http://www.matrixscience.com/>

## Peptide View

MS/MS Fragmentation of **MLLSDIGIDLSRWRELLNEK**

Found in **AT4G19710.1** in **TAIR Arabidopsis**, Symbols: AK-HSDH II, AK-HSDH | AK-HSDH/AK-HSDH II; aspartate kinase/ homoserine dehydrogenase | chr4:10725239-10729288 FORWARD

Match to Query 10508:2445.198702 from(816.073510,3+) index(8784)

Title: Elution from: 77.846 to 77.846 scan no 11614 cid35.00 polarity:+

Data file C7-3\_1.mgf

Click mouse within plot area to zoom in by factor of two about that point

Or, Plot from  to  Da

Label all possible matches  Label matches used for scoring

Show Y-axis

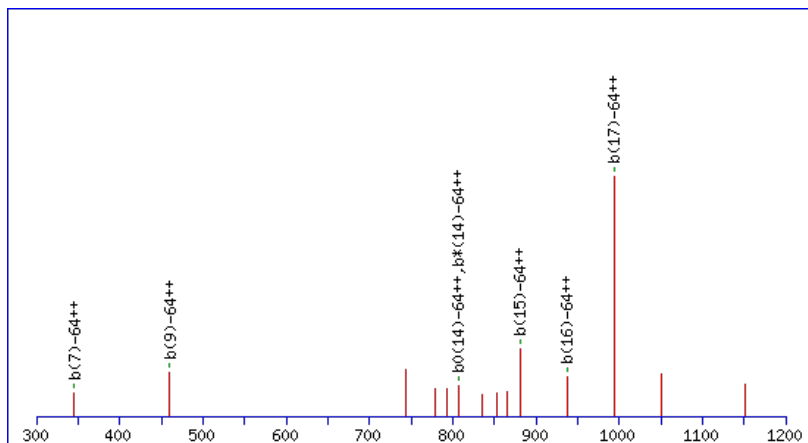

Monoisotopic mass of neutral peptide  $M_r(\text{calc})$ : 2445.1924

Fixed modifications: Carbamidomethyl (C) (apply to specified residues or termini only)

Variable modifications:

M1 : Oxidation (M), with neutral losses 63.9983 (shown in table), 0.0000

Ions Score: 25 Expect: 0.014

Matches : 7/284 fragment ions using 10 most intense peaks ([help](#))

| #  | b         | b <sup>++</sup> | b <sup>*</sup> | b <sup>*++</sup> | b <sup>0</sup> | b <sup>0++</sup> | Seq | y         | y <sup>++</sup> | y <sup>*</sup> | y <sup>*++</sup> | y <sup>0</sup> | y <sup>0++</sup> | #  |
|----|-----------|-----------------|----------------|------------------|----------------|------------------|-----|-----------|-----------------|----------------|------------------|----------------|------------------|----|
| 1  | 85.0414   | 43.0244         |                |                  |                |                  | M   |           |                 |                |                  |                |                  | 20 |
| 2  | 199.1225  | 100.0649        |                |                  |                |                  | L   | 2298.1673 | 1149.5873       | 2280.1437      | 1140.5755        | 2280.1567      | 1140.5820        | 19 |
| 3  | 313.2036  | 157.1054        |                |                  |                |                  | L   | 2184.0862 | 1092.5467       | 2166.0626      | 1083.5349        | 2166.0756      | 1083.5414        | 18 |
| 4  | 401.2327  | 201.1200        |                |                  | 383.2221       | 192.1147         | S   | 2070.0051 | 1035.5062       | 2051.9815      | 1026.4944        | 2051.9945      | 1026.5009        | 17 |
| 5  | 517.2567  | 259.1320        |                |                  | 499.2461       | 250.1267         | D   | 1981.9760 | 991.4917        | 1963.9524      | 982.4799         | 1963.9655      | 982.4864         | 16 |
| 6  | 631.3378  | 316.1725        |                |                  | 613.3272       | 307.1672         | I   | 1865.9520 | 933.4797        | 1847.9285      | 924.4679         | 1847.9415      | 924.4744         | 15 |
| 7  | 689.3563  | <b>345.1818</b> |                |                  | 671.3457       | 336.1765         | G   | 1751.8709 | 876.4391        | 1733.8474      | 867.4273         | 1733.8604      | 867.4338         | 14 |
| 8  | 803.4374  | 402.2223        |                |                  | 785.4268       | 393.2170         | I   | 1693.8524 | 847.4299        | 1675.8289      | 838.4181         | 1675.8419      | 838.4246         | 13 |
| 9  | 919.4613  | <b>460.2343</b> |                |                  | 901.4508       | 451.2290         | D   | 1579.7714 | 790.3893        | 1561.7478      | 781.3775         | 1561.7608      | 781.3840         | 12 |
| 10 | 1033.5424 | 517.2749        |                |                  | 1015.5319      | 508.2696         | L   | 1463.7474 | 732.3773        | 1445.7238      | 723.3655         | 1445.7368      | 723.3720         | 11 |
| 11 | 1121.5715 | 561.2894        |                |                  | 1103.5609      | 552.2841         | S   | 1349.6663 | 675.3368        | 1331.6427      | 666.3250         | 1331.6557      | 666.3315         | 10 |
| 12 | 1281.6608 | 641.3340        | 1263.6372      | 632.3222         | 1263.6502      | 632.3287         | R   | 1261.6372 | 631.3222        | 1243.6136      | 622.3105         | 1243.6266      | 622.3170         | 9  |
| 13 | 1469.7341 | 735.3707        | 1451.7106      | 726.3589         | 1451.7236      | 726.3654         | W   | 1101.5480 | 551.2776        | 1083.5244      | 542.2658         | 1083.5374      | 542.2723         | 8  |
| 14 | 1629.8234 | 815.4153        | 1611.7998      | <b>806.4035</b>  | 1611.8128      | <b>806.4100</b>  | R   | 913.4746  | 457.2409        | 895.4510       | 448.2291         | 895.4640       | 448.2356         | 7  |
| 15 | 1759.8630 | <b>880.4351</b> | 1741.8394      | 871.4234         | 1741.8524      | 871.4299         | E   | 753.3853  | 377.1963        | 735.3617       | 368.1845         | 735.3748       | 368.1910         | 6  |
| 16 | 1873.9441 | <b>937.4757</b> | 1855.9205      | 928.4639         | 1855.9335      | 928.4704         | L   | 623.3457  | 312.1765        | 605.3221       | 303.1647         | 605.3351       | 303.1712         | 5  |
| 17 | 1988.0252 | <b>994.5162</b> | 1970.0016      | 985.5045         | 1970.0146      | 985.5110         | L   | 509.2646  | 255.1359        | 491.2410       | 246.1241         | 491.2540       | 246.1307         | 4  |
| 18 | 2104.0622 | 1052.5347       | 2086.0386      | 1043.5230        | 2086.0516      | 1043.5295        | N   | 395.1835  | 198.0954        | 377.1599       | 189.0836         | 377.1729       | 189.0901         | 3  |
| 19 | 2234.1018 | 1117.5546       | 2216.0783      | 1108.5428        | 2216.0913      | 1108.5493        | E   | 279.1465  | 140.0769        | 261.1229       | 131.0651         | 261.1359       | 131.0716         | 2  |
| 20 |           |                 |                |                  |                |                  | K   | 149.1069  | 75.0571         | 131.0833       | 66.0453          |                |                  | 1  |

# AT4G19710.1

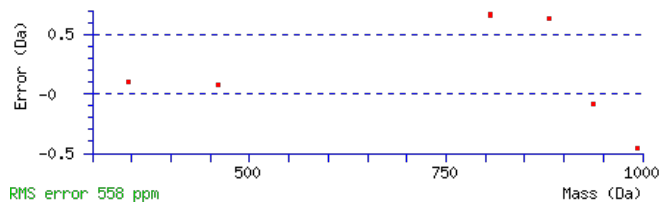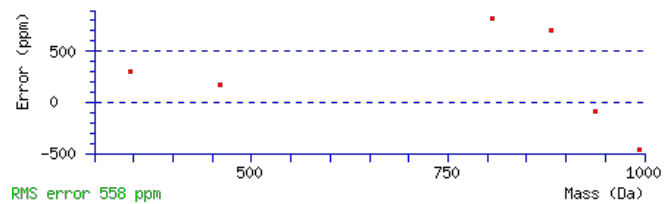

NCBI **BLAST** search of [MLLSDIGIDLSRWRELLNEK](#)  
(Parameters: blastp, nr protein database, expect=20000, no filter, PAM30)  
Other BLAST [web gateways](#)

## All matches to this query

| Score | Mr(calc)  | Delta   | Sequence                                |
|-------|-----------|---------|-----------------------------------------|
| 24.7  | 2445.1924 | 0.0063  | <a href="#">MLLSDIGIDLSRWRELLNEK</a>    |
| 4.3   | 2445.1938 | 0.0049  | <a href="#">AVKSMPVAAACALAASKMORPVR</a> |
| 2.8   | 2445.2033 | -0.0046 | <a href="#">ILNLSRNSMAGSIPEKISELSR</a>  |
| 0.9   | 2445.1973 | 0.0014  | <a href="#">RFTYSQVVIMTNNFQRILGK</a>    |

Mascot: <http://www.matrixscience.com/>

## Peptide View

### MS/MS Fragmentation of **LFVTLIR**

Found in **AT4G19880.1** in **TAIR\_Arabidopsis**, Symbols: | similar to unknown protein [Arabidopsis thaliana] (TAIR:AT5G45020.1); similar to Intracellular chloride channel [Medicago truncatula] (GB:ABC75353.2); contains InterPro domain Thioredoxin-like fold (InterPro:IPR012336); contains InterPr

Match to Query 1474: 860.547960 from(431.281256,2+) index(6791)

Title: Elution from: 58.877 to 58.877 scan no 8724 cid35.00 polarity:+

Data file D1d-3\_2.mgf

Click mouse within plot area to zoom in by factor of two about that point

Or,   to  Da

Label all possible matches  Label matches used for scoring

Show Y-axis

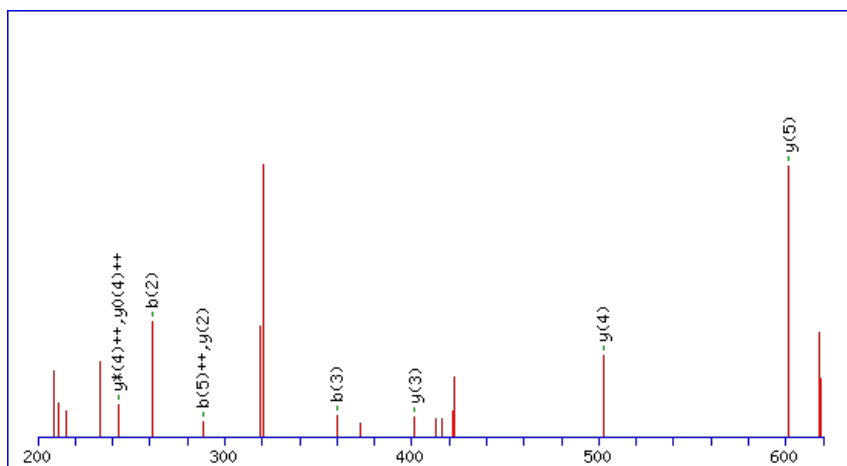

**Monoisotopic mass of neutral peptide Mr(calc):** 860.5484

**Fixed modifications:** Carbamidomethyl (C) (apply to specified residues or termini only)

**Ions Score:** 20 **Expect:** 0.017

**Matches:** 9/48 fragment ions using 20 most intense peaks ([help](#))

| # | b               | b <sup>++</sup> | b <sup>0</sup> | b <sup>0++</sup> | Seq. | y               | y <sup>++</sup> | y*       | y <sup>*++</sup> | y <sup>0</sup> | y <sup>0++</sup> | # |
|---|-----------------|-----------------|----------------|------------------|------|-----------------|-----------------|----------|------------------|----------------|------------------|---|
| 1 | 114.0913        | 57.5493         |                |                  | L    |                 |                 |          |                  |                |                  | 7 |
| 2 | <b>261.1598</b> | 131.0835        |                |                  | F    | 748.4716        | 374.7394        | 731.4450 | 366.2262         | 730.4610       | 365.7341         | 6 |
| 3 | <b>360.2282</b> | 180.6177        |                |                  | V    | <b>601.4032</b> | 301.2052        | 584.3766 | 292.6920         | 583.3926       | 292.1999         | 5 |
| 4 | 461.2758        | 231.1416        | 443.2653       | 222.1363         | T    | <b>502.3348</b> | 251.6710        | 485.3082 | <b>243.1577</b>  | 484.3242       | <b>242.6657</b>  | 4 |
| 5 | 574.3599        | <b>287.6836</b> | 556.3493       | 278.6783         | L    | <b>401.2871</b> | 201.1472        | 384.2605 | 192.6339         |                |                  | 3 |
| 6 | 687.4440        | 344.2256        | 669.4334       | 335.2203         | I    | <b>288.2030</b> | 144.6051        | 271.1765 | 136.0919         |                |                  | 2 |
| 7 |                 |                 |                |                  | R    | 175.1190        | 88.0631         | 158.0924 | 79.5498          |                |                  | 1 |

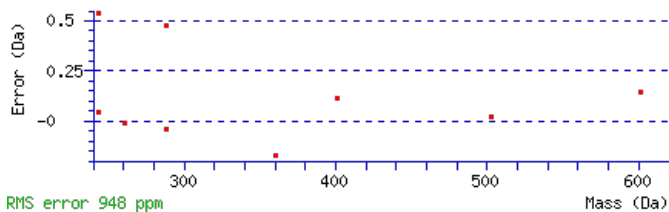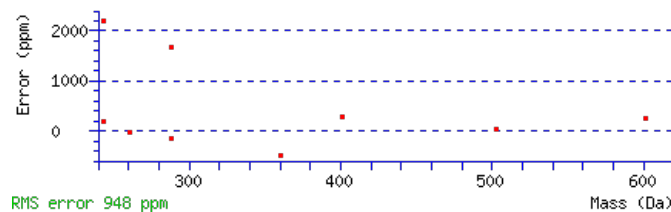

### NCBI BLAST search of **LFVTLIR**

(Parameters: blastp, nr protein database, expect=20000, no filter, PAM30)

Other BLAST [web gateways](#)

### All matches to this query

| Score | Mr(calc) | Delta   | Sequence                |
|-------|----------|---------|-------------------------|
| 19.8  | 860.5484 | -0.0004 | <a href="#">LFVTLIR</a> |

## AT4G19880.1

|      |          |         |                         |
|------|----------|---------|-------------------------|
| 11.9 | 860.5484 | -0.0004 | <a href="#">LFVLTLR</a> |
| 6.2  | 860.5484 | -0.0004 | <a href="#">FVIKLNK</a> |
| 6.2  | 860.5484 | -0.0004 | <a href="#">LVFKLNK</a> |
| 0.6  | 860.5484 | -0.0004 | <a href="#">LFKNIVK</a> |

**Mascot:** <http://www.matrixscience.com/>

## Peptide View

### MS/MS Fragmentation of **LDSTDAILK**

Found in **AT4G20050.1** in **TAIR\_Arabidopsis**, Symbols: QRT3 | QRT3 (QUARTET 3) | chr4:10849921-10852100 REVERSE

Match to Query 2451: 974.526000 from(488.270276,2+) index(4492)

Title: Elution from: 41.087 to 41.087 scan no 5541 cid35.00 polarity:+

Data file D12h-1\_1.mgf

Click mouse within plot area to zoom in by factor of two about that point

Or,   to  Da

Label all possible matches  Label matches used for scoring

Show Y-axis

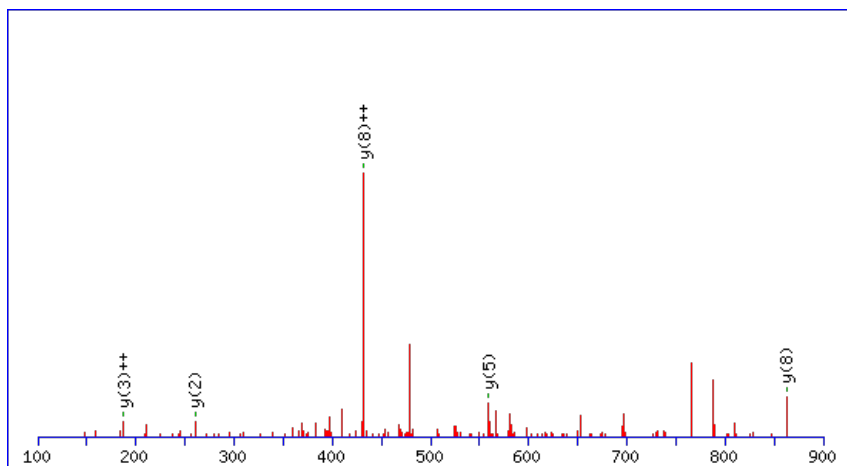

Monoisotopic mass of neutral peptide **Mr(calc)**: 974.5284

**Fixed modifications:** Carbamidomethyl (C) (apply to specified residues or termini only)

**Ions Score:** 21 **Expect:** 0.037

**Matches** : 5/70 fragment ions using 8 most intense peaks ([help](#))

| # | b        | b <sup>++</sup> | b <sup>0</sup> | b <sup>0++</sup> | Seq. | y        | y <sup>++</sup> | y*       | y <sup>*++</sup> | y <sup>0</sup> | y <sup>0++</sup> | # |
|---|----------|-----------------|----------------|------------------|------|----------|-----------------|----------|------------------|----------------|------------------|---|
| 1 | 114.0913 | 57.5493         |                |                  | L    |          |                 |          |                  |                |                  | 9 |
| 2 | 229.1183 | 115.0628        | 211.1077       | 106.0575         | D    | 862.4516 | 431.7295        | 845.4251 | 423.2162         | 844.4411       | 422.7242         | 8 |
| 3 | 316.1503 | 158.5788        | 298.1397       | 149.5735         | S    | 747.4247 | 374.2160        | 730.3981 | 365.7027         | 729.4141       | 365.2107         | 7 |
| 4 | 417.1980 | 209.1026        | 399.1874       | 200.0974         | T    | 660.3927 | 330.7000        | 643.3661 | 322.1867         | 642.3821       | 321.6947         | 6 |
| 5 | 532.2249 | 266.6161        | 514.2144       | 257.6108         | D    | 559.3450 | 280.1761        | 542.3184 | 271.6629         | 541.3344       | 271.1709         | 5 |
| 6 | 603.2620 | 302.1347        | 585.2515       | 293.1294         | A    | 444.3180 | 222.6627        | 427.2915 | 214.1494         |                |                  | 4 |
| 7 | 716.3461 | 358.6767        | 698.3355       | 349.6714         | I    | 373.2809 | 187.1441        | 356.2544 | 178.6308         |                |                  | 3 |
| 8 | 829.4302 | 415.2187        | 811.4196       | 406.2134         | L    | 260.1969 | 130.6021        | 243.1703 | 122.0888         |                |                  | 2 |
| 9 |          |                 |                |                  | K    | 147.1128 | 74.0600         | 130.0863 | 65.5468          |                |                  | 1 |

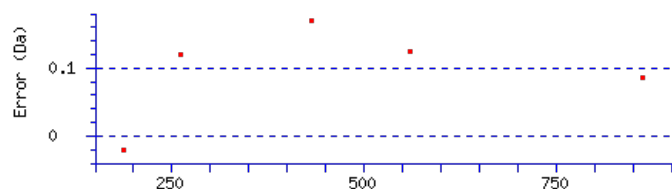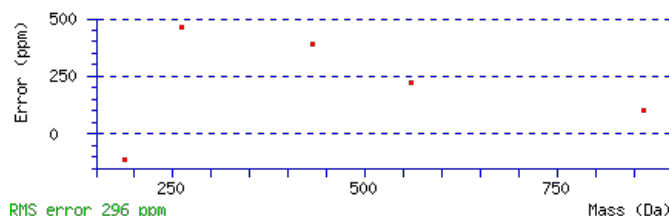

NCBI **BLAST** search of [LDSTDAILK](#)

(Parameters: blastp, nr protein database, expect=20000, no filter, PAM30)

Other BLAST [web gateways](#)

### All matches to this query

| Score | Mr(calc) | Delta   | Sequence                  |
|-------|----------|---------|---------------------------|
| 20.6  | 974.5284 | -0.0024 | <a href="#">LDSTDAILK</a> |



## AT4G20050.1

|     |          |         |                            |
|-----|----------|---------|----------------------------|
| 4.9 | 974.5284 | -0.0024 | <a href="#">IITIGGSVES</a> |
| 3.7 | 974.5257 | 0.0003  | <a href="#">LSRSNRDK</a>   |
| 2.1 | 974.5284 | -0.0024 | <a href="#">LSSLEADLK</a>  |
| 2.0 | 974.5284 | -0.0024 | <a href="#">LSETLPSTK</a>  |
| 1.7 | 974.5284 | -0.0024 | <a href="#">ELSDVTAIK</a>  |
| 1.6 | 974.5284 | -0.0024 | <a href="#">LSKEEIEK</a>   |
| 0.4 | 974.5284 | -0.0024 | <a href="#">ILSEVTADK</a>  |

**Mascot:** <http://www.matrixscience.com/>

**Peptide View**MS/MS Fragmentation of **VSVFLPEEVK**Found in **AT4G20260.1** in **TAIR\_Arabidopsis**, Symbols: | DREPP plasma membrane polypeptide family protein | chr4:10941603-10943237  
FORWARD

Match to Query 3273: 1145.633472 from(573.824012,2+) index(5671)

Title: Elution from: 51.846 to 51.846 scan no 7330 cid35.00 polarity:+

Data file D12h-2\_3.mgf

Click mouse within plot area to zoom in by factor of two about that point

Or,   to  Da Label all possible matches  Label matches used for scoring Show Y-axis 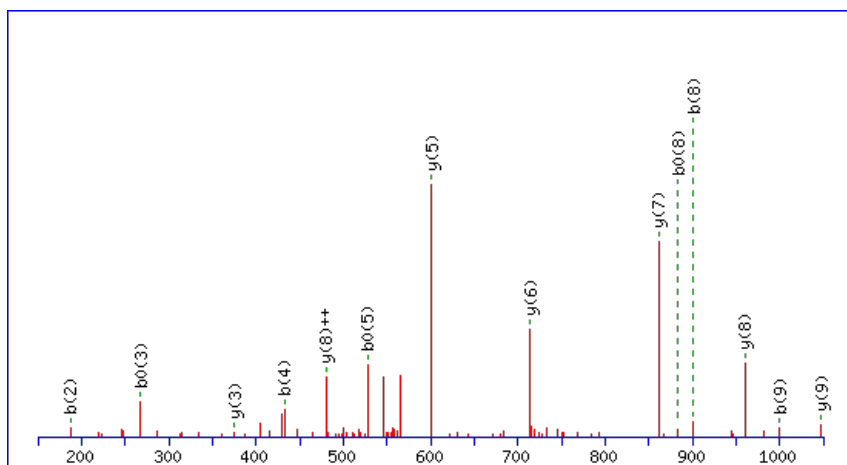Monoisotopic mass of neutral peptide  $M_r(\text{calc})$ : 1145.6332

Fixed modifications: Carbamidomethyl (C) (apply to specified residues or termini only)

Ions Score: 52 Expect: 2.3e-005

Matches : 14/84 fragment ions using 18 most intense peaks ([help](#))

| #  | b                | b <sup>++</sup> | b <sup>0</sup>  | b <sup>0++</sup> | Seq. | y                | y <sup>++</sup> | y*        | y <sup>*++</sup> | y <sup>0</sup> | y <sup>0++</sup> | #  |
|----|------------------|-----------------|-----------------|------------------|------|------------------|-----------------|-----------|------------------|----------------|------------------|----|
| 1  | 100.0757         | 50.5415         |                 |                  | V    |                  |                 |           |                  |                |                  | 10 |
| 2  | <b>187.1077</b>  | 94.0575         | 169.0972        | 85.0522          | S    | <b>1047.5721</b> | 524.2897        | 1030.5455 | 515.7764         | 1029.5615      | 515.2844         | 9  |
| 3  | 286.1761         | 143.5917        | <b>268.1656</b> | 134.5864         | V    | <b>960.5401</b>  | <b>480.7737</b> | 943.5135  | 472.2604         | 942.5295       | 471.7684         | 8  |
| 4  | <b>433.2445</b>  | 217.1259        | 415.2340        | 208.1206         | F    | <b>861.4716</b>  | 431.2395        | 844.4451  | 422.7262         | 843.4611       | 422.2342         | 7  |
| 5  | 546.3286         | 273.6679        | <b>528.3180</b> | 264.6627         | L    | <b>714.4032</b>  | 357.7053        | 697.3767  | 349.1920         | 696.3927       | 348.7000         | 6  |
| 6  | 643.3814         | 322.1943        | 625.3708        | 313.1890         | P    | <b>601.3192</b>  | 301.1632        | 584.2926  | 292.6499         | 583.3086       | 292.1579         | 5  |
| 7  | 772.4240         | 386.7156        | 754.4134        | 377.7103         | E    | 504.2664         | 252.6368        | 487.2399  | 244.1236         | 486.2558       | 243.6316         | 4  |
| 8  | <b>901.4666</b>  | 451.2369        | <b>883.4560</b> | 442.2316         | E    | <b>375.2238</b>  | 188.1155        | 358.1973  | 179.6023         | 357.2132       | 179.1103         | 3  |
| 9  | <b>1000.5350</b> | 500.7711        | 982.5244        | 491.7658         | V    | 246.1812         | 123.5942        | 229.1547  | 115.0810         |                |                  | 2  |
| 10 |                  |                 |                 |                  | K    | 147.1128         | 74.0600         | 130.0863  | 65.5468          |                |                  | 1  |

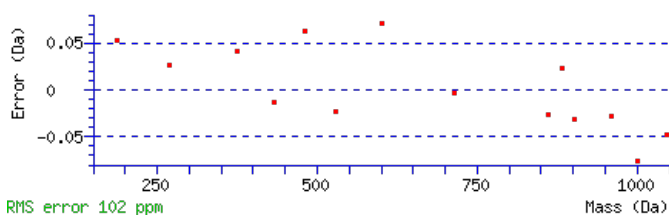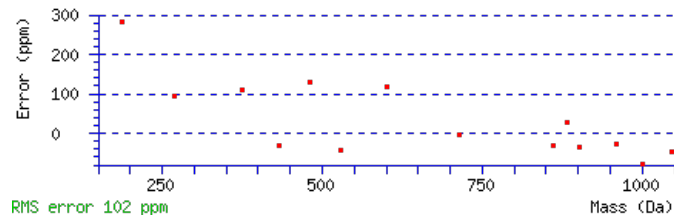NCBI BLAST search of **VSVFLPEEVK**

(Parameters: blastp, nr protein database, expect=20000, no filter, PAM30)

Other BLAST [web gateways](#)

All matches to this query

AT4G20260.1

| Score | Mr(calc)  | Delta  | Sequence                   |
|-------|-----------|--------|----------------------------|
| 52.5  | 1145.6332 | 0.0002 | <a href="#">VSVFLPEEVK</a> |
| 0.6   | 1145.6305 | 0.0029 | <a href="#">DAQRFIQLR</a>  |

Mascot: <http://www.matrixscience.com/>

**Peptide View**MS/MS Fragmentation of **GITINTATVEYETENR**

Found in **AT4G20360.1** in **TAIR\_Arabidopsis**, Symbols: AtRab8D, AtRABE1b | AtRABE1b/AtRab8D (Arabidopsis Rab GTPase homolog E1b); translation elongation factor | chr4:10990047-10991477 FORWARD

Match to Query 8701: 1809.872676 from(905.943614,2+) index(5655)

Title: Elution from: 53.360 to 53.360 scan no 7309 cid35.00 polarity:+

Data file D12h-2\_1.mgf

Click mouse within plot area to zoom in by factor of two about that point

Or,   to  Da

Label all possible matches  Label matches used for scoring

Show Y-axis

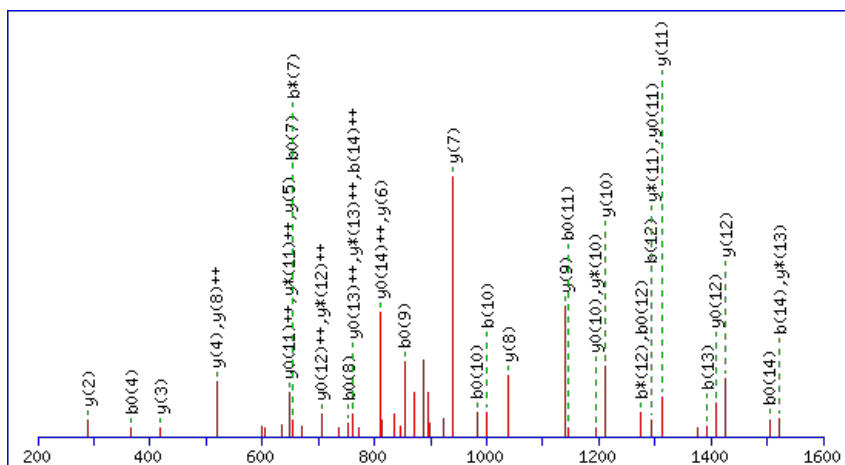

Monoisotopic mass of neutral peptide  $M_r(\text{calc})$ : 1809.8745

Fixed modifications: Carbamidomethyl (C) (apply to specified residues or termini only)

Ions Score: 121 Expect: 2.6e-012

Matches : 40/164 fragment ions using 31 most intense peaks ([help](#))

| #  | b                | b <sup>++</sup> | b <sup>*</sup>   | b <sup>*++</sup> | b <sup>0</sup>   | b <sup>0++</sup> | Seq.     | y                | y <sup>++</sup> | y <sup>*</sup>   | y <sup>*++</sup> | y <sup>0</sup>   | y <sup>0++</sup> | #         |
|----|------------------|-----------------|------------------|------------------|------------------|------------------|----------|------------------|-----------------|------------------|------------------|------------------|------------------|-----------|
| 1  | 58.0287          | 29.5180         |                  |                  |                  |                  | <b>G</b> |                  |                 |                  |                  |                  |                  | <b>16</b> |
| 2  | 171.1128         | 86.0600         |                  |                  |                  |                  | <b>I</b> | 1753.8603        | 877.4338        | 1736.8337        | 868.9205         | 1735.8497        | 868.4285         | <b>15</b> |
| 3  | 272.1605         | 136.5839        |                  |                  | 254.1499         | 127.5786         | <b>T</b> | 1640.7762        | 820.8917        | 1623.7497        | 812.3785         | 1622.7657        | <b>811.8865</b>  | <b>14</b> |
| 4  | 385.2445         | 193.1259        |                  |                  | <b>367.2340</b>  | 184.1206         | <b>I</b> | 1539.7285        | 770.3679        | <b>1522.7020</b> | <b>761.8546</b>  | 1521.7180        | <b>761.3626</b>  | <b>13</b> |
| 5  | 499.2875         | 250.1474        | 482.2609         | 241.6341         | 481.2769         | 241.1421         | <b>N</b> | <b>1426.6445</b> | 713.8259        | 1409.6179        | <b>705.3126</b>  | <b>1408.6339</b> | <b>704.8206</b>  | <b>12</b> |
| 6  | 600.3352         | 300.6712        | 583.3086         | 292.1579         | 582.3246         | 291.6659         | <b>T</b> | <b>1312.6016</b> | 656.8044        | <b>1295.5750</b> | <b>648.2911</b>  | <b>1294.5910</b> | <b>647.7991</b>  | <b>11</b> |
| 7  | 671.3723         | 336.1898        | <b>654.3457</b>  | 327.6765         | <b>653.3617</b>  | 327.1845         | <b>A</b> | <b>1211.5539</b> | 606.2806        | <b>1194.5273</b> | 597.7673         | <b>1193.5433</b> | 597.2753         | <b>10</b> |
| 8  | 772.4199         | 386.7136        | 755.3934         | 378.2003         | <b>754.4094</b>  | 377.7083         | <b>T</b> | <b>1140.5168</b> | 570.7620        | 1123.4902        | 562.2487         | 1122.5062        | 561.7567         | <b>9</b>  |
| 9  | 871.4884         | 436.2478        | 854.4618         | 427.7345         | <b>853.4778</b>  | 427.2425         | <b>V</b> | <b>1039.4691</b> | <b>520.2382</b> | 1022.4425        | 511.7249         | 1021.4585        | 511.2329         | <b>8</b>  |
| 10 | <b>1000.5310</b> | 500.7691        | 983.5044         | 492.2558         | <b>982.5204</b>  | 491.7638         | <b>E</b> | <b>940.4007</b>  | 470.7040        | 923.3741         | 462.1907         | 922.3901         | 461.6987         | <b>7</b>  |
| 11 | 1163.5943        | 582.3008        | 1146.5677        | 573.7875         | <b>1145.5837</b> | 573.2955         | <b>Y</b> | <b>811.3581</b>  | 406.1827        | 794.3315         | 397.6694         | 793.3475         | 397.1774         | <b>6</b>  |
| 12 | <b>1292.6369</b> | 646.8221        | <b>1275.6103</b> | 638.3088         | <b>1274.6263</b> | 637.8168         | <b>E</b> | <b>648.2947</b>  | 324.6510        | 631.2682         | 316.1377         | 630.2842         | 315.6457         | <b>5</b>  |
| 13 | <b>1393.6846</b> | 697.3459        | 1376.6580        | 688.8326         | 1375.6740        | 688.3406         | <b>T</b> | <b>519.2522</b>  | 260.1297        | 502.2256         | 251.6164         | 501.2416         | 251.1244         | <b>4</b>  |
| 14 | <b>1522.7271</b> | <b>761.8672</b> | 1505.7006        | 753.3539         | <b>1504.7166</b> | 752.8619         | <b>E</b> | <b>418.2045</b>  | 209.6059        | 401.1779         | 201.0926         | 400.1939         | 200.6006         | <b>3</b>  |
| 15 | 1636.7701        | 818.8887        | 1619.7435        | 810.3754         | 1618.7595        | 809.8834         | <b>N</b> | <b>289.1619</b>  | 145.0846        | 272.1353         | 136.5713         |                  |                  | <b>2</b>  |
| 16 |                  |                 |                  |                  |                  |                  | <b>R</b> | 175.1190         | 88.0631         | 158.0924         | 79.5498          |                  |                  | <b>1</b>  |

AT4G20360.1

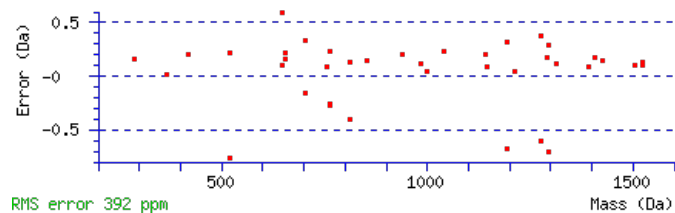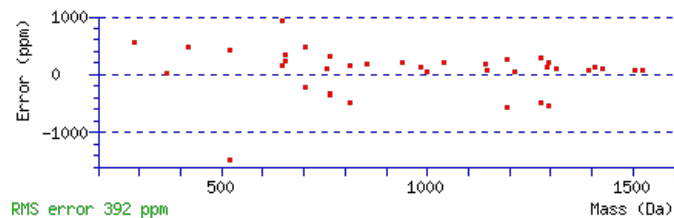

NCBI **BLAST** search of [GITINTATVEYETENR](#)

(Parameters: blastp, nr protein database, expect=20000, no filter, PAM30)

Other BLAST [web gateways](#)

All matches to this query

| Score | Mr(calc)  | Delta   | Sequence                         |
|-------|-----------|---------|----------------------------------|
| 120.7 | 1809.8745 | -0.0018 | <a href="#">GITINTATVEYETENR</a> |
| 5.0   | 1809.8753 | -0.0026 | <a href="#">CKIIFLETLCNDER</a>   |

Mascot: <http://www.matrixscience.com/>

**Peptide View**MS/MS Fragmentation of **INVYFNEASGGK**Found in **AT4G20890.1** in **TAIR\_Arabidopsis**, Symbols: TUB9 | TUB9 (tubulin beta-9 chain); structural molecule | chr4:11182229-11183851  
FORWARD

Match to Query 5005: 1312.583492 from(657.299022,2+) index(4587)

Title: Elution from: 42.023 to 42.023 scan no 5722 cid35.00 polarity:+

Data file C7-3\_1.mgf

Click mouse within plot area to zoom in by factor of two about that point

Or,   to  Da Label all possible matches  Label matches used for scoring Show Y-axis 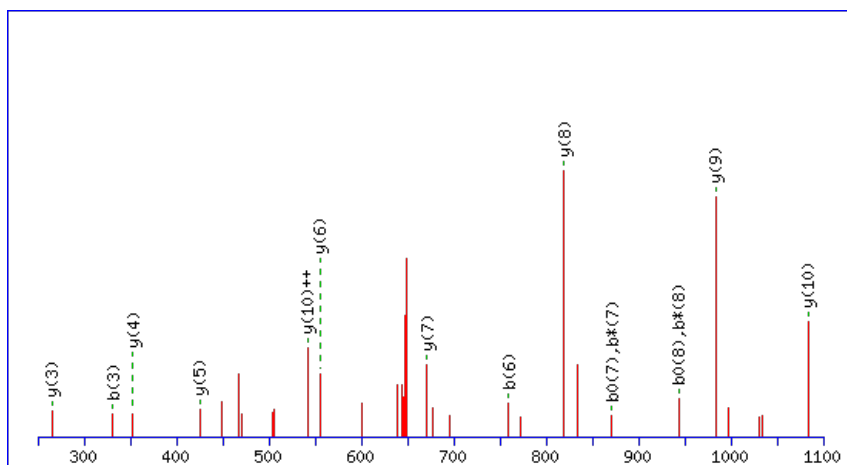Monoisotopic mass of neutral peptide  $M_r(\text{calc})$ : 1312.5858

Fixed modifications: Carbamidomethyl (C) (apply to specified residues or termini only)

Ions Score: 60 Expect: 7.4e-006

Matches : 15/112 fragment ions using 24 most intense peaks ([help](#))

| #  | b               | b <sup>++</sup> | b*              | b <sup>*++</sup> | b <sup>0</sup>  | b <sup>0++</sup> | Seq. | y                | y <sup>++</sup> | y*        | y <sup>*++</sup> | y <sup>0</sup> | y <sup>0++</sup> | #  |
|----|-----------------|-----------------|-----------------|------------------|-----------------|------------------|------|------------------|-----------------|-----------|------------------|----------------|------------------|----|
| 1  | 115.0884        | 58.0478         |                 |                  |                 |                  | I    |                  |                 |           |                  |                |                  | 12 |
| 2  | 231.1254        | 116.0663        | 213.1018        | 107.0545         |                 |                  | N    | 1199.5120        | 600.2596        | 1181.4884 | 591.2478         | 1181.5014      | 591.2543         | 11 |
| 3  | <b>331.1908</b> | 166.0990        | 313.1672        | 157.0873         |                 |                  | V    | <b>1083.4750</b> | <b>542.2411</b> | 1065.4514 | 533.2293         | 1065.4644      | 533.2358         | 10 |
| 4  | 495.2512        | 248.1292        | 477.2276        | 239.1174         |                 |                  | Y    | <b>983.4095</b>  | 492.2084        | 965.3859  | 483.1966         | 965.3990       | 483.2031         | 9  |
| 5  | 643.3166        | 322.1620        | 625.2930        | 313.1502         |                 |                  | F    | <b>819.3492</b>  | 410.1782        | 801.3256  | 401.1664         | 801.3386       | 401.1729         | 8  |
| 6  | <b>759.3536</b> | 380.1805        | 741.3300        | 371.1687         |                 |                  | N    | <b>671.2837</b>  | 336.1455        | 653.2601  | 327.1337         | 653.2731       | 327.1402         | 7  |
| 7  | 889.3933        | 445.2003        | <b>871.3697</b> | 436.1885         | <b>871.3827</b> | 436.1950         | E    | <b>555.2467</b>  | 278.1270        | 537.2231  | 269.1152         | 537.2361       | 269.1217         | 6  |
| 8  | 961.4274        | 481.2173        | <b>943.4038</b> | 472.2056         | <b>943.4168</b> | 472.2121         | A    | <b>425.2071</b>  | 213.1072        | 407.1835  | 204.0954         | 407.1965       | 204.1019         | 5  |
| 9  | 1049.4565       | 525.2319        | 1031.4329       | 516.2201         | 1031.4459       | 516.2266         | S    | <b>353.1729</b>  | 177.0901        | 335.1494  | 168.0783         | 335.1624       | 168.0848         | 4  |
| 10 | 1107.4750       | 554.2411        | 1089.4514       | 545.2293         | 1089.4644       | 545.2358         | G    | <b>265.1439</b>  | 133.0756        | 247.1203  | 124.0638         |                |                  | 3  |
| 11 | 1165.4935       | 583.2504        | 1147.4699       | 574.2386         | 1147.4829       | 574.2451         | G    | 207.1254         | 104.0663        | 189.1018  | 95.0545          |                |                  | 2  |
| 12 |                 |                 |                 |                  |                 |                  | K    | 149.1069         | 75.0571         | 131.0833  | 66.0453          |                |                  | 1  |

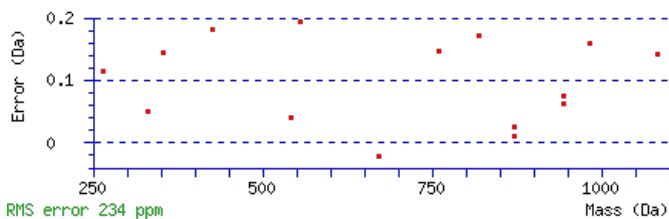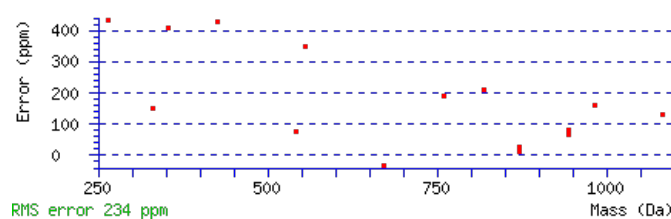NCBI BLAST search of **INVYFNEASGGK**

(Parameters: blastp, nr protein database, expect=20000, no filter, PAM30)

Other BLAST [web gateways](#)

AT4G20890.1

All matches to this query

| Score | Mr(calc)  | Delta   | Sequence                     |
|-------|-----------|---------|------------------------------|
| 59.5  | 1312.5858 | -0.0023 | <a href="#">INVYFNEASGGK</a> |
| 6.3   | 1312.5835 | -0.0000 | <a href="#">ADSVYTKDRDK</a>  |

Mascot: <http://www.matrixscience.com/>



# Mascot Search Results

## Peptide View

MS/MS Fragmentation of **SFLTLNALNEFDPK**

Found in **AT4G20980.1** in **TAIR\_Arabidopsis**, Symbols: | eukaryotic translation initiation factor 3 subunit 7, putative / eIF-3 zeta, putative / eIF3d, putative | chr4:11217008-11218783 FORWARD

Match to Query 7126: 1607.818276 from(804.916414,2+) index(9610)

Title: Elution from: 88.615 to 88.615 scan no 13340 cid35.00 polarity:+

Data file D12h-3\_2.mgf

Click mouse within plot area to zoom in by factor of two about that point

Or,  to  Da

Label all possible matches  Label matches used for scoring

Show Y-axis

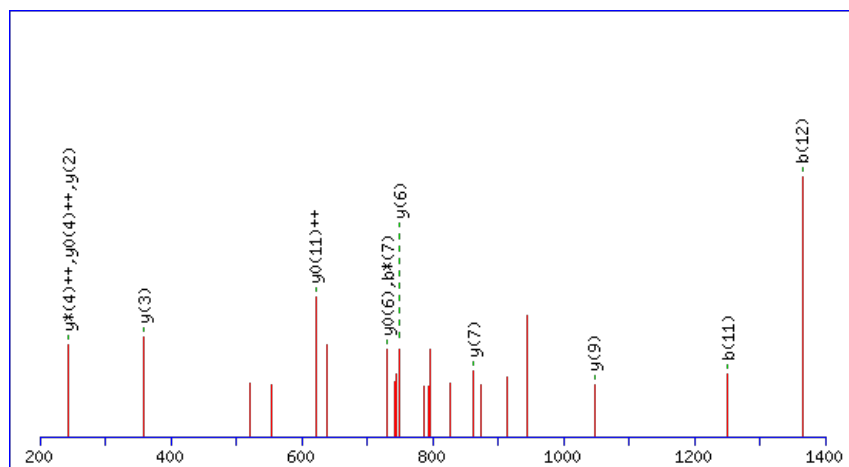

Monoisotopic mass of neutral peptide  $M_r(\text{calc})$ : 1607.8195

Fixed modifications: Carbamidomethyl (C) (apply to specified residues or termini only)

Ions Score: 37 Expect: 0.00066

Matches : 12/142 fragment ions using 11 most intense peaks [\(help\)](#)

| #  | b         | b <sup>++</sup> | b*        | b <sup>*++</sup> | b <sup>0</sup> | b <sup>0++</sup> | Seq. | y         | y <sup>++</sup> | y*        | y <sup>*++</sup> | y <sup>0</sup> | y <sup>0++</sup> | #  |
|----|-----------|-----------------|-----------|------------------|----------------|------------------|------|-----------|-----------------|-----------|------------------|----------------|------------------|----|
| 1  | 88.0393   | 44.5233         |           |                  | 70.0287        | 35.5180          | S    |           |                 |           |                  |                |                  | 14 |
| 2  | 235.1077  | 118.0575        |           |                  | 217.0972       | 109.0522         | F    | 1521.7948 | 761.4010        | 1504.7682 | 752.8877         | 1503.7842      | 752.3957         | 13 |
| 3  | 348.1918  | 174.5995        |           |                  | 330.1812       | 165.5942         | L    | 1374.7264 | 687.8668        | 1357.6998 | 679.3535         | 1356.7158      | 678.8615         | 12 |
| 4  | 449.2395  | 225.1234        |           |                  | 431.2289       | 216.1181         | T    | 1261.6423 | 631.3248        | 1244.6157 | 622.8115         | 1243.6317      | 622.3195         | 11 |
| 5  | 562.3235  | 281.6654        |           |                  | 544.3130       | 272.6601         | L    | 1160.5946 | 580.8009        | 1143.5681 | 572.2877         | 1142.5840      | 571.7957         | 10 |
| 6  | 676.3665  | 338.6869        | 659.3399  | 330.1736         | 658.3559       | 329.6816         | N    | 1047.5106 | 524.2589        | 1030.4840 | 515.7456         | 1029.5000      | 515.2536         | 9  |
| 7  | 747.4036  | 374.2054        | 730.3770  | 365.6921         | 729.3930       | 365.2001         | A    | 933.4676  | 467.2374        | 916.4411  | 458.7242         | 915.4571       | 458.2322         | 8  |
| 8  | 860.4876  | 430.7475        | 843.4611  | 422.2342         | 842.4771       | 421.7422         | L    | 862.4305  | 431.7189        | 845.4040  | 423.2056         | 844.4199       | 422.7136         | 7  |
| 9  | 974.5306  | 487.7689        | 957.5040  | 479.2556         | 956.5200       | 478.7636         | N    | 749.3464  | 375.1769        | 732.3199  | 366.6636         | 731.3359       | 366.1716         | 6  |
| 10 | 1103.5731 | 552.2902        | 1086.5466 | 543.7769         | 1085.5626      | 543.2849         | E    | 635.3035  | 318.1554        | 618.2770  | 309.6421         | 617.2930       | 309.1501         | 5  |
| 11 | 1250.6416 | 625.8244        | 1233.6150 | 617.3111         | 1232.6310      | 616.8191         | F    | 506.2609  | 253.6341        | 489.2344  | 245.1208         | 488.2504       | 244.6288         | 4  |
| 12 | 1365.6685 | 683.3379        | 1348.6420 | 674.8246         | 1347.6579      | 674.3326         | D    | 359.1925  | 180.0999        | 342.1660  | 171.5866         | 341.1819       | 171.0946         | 3  |
| 13 | 1462.7213 | 731.8643        | 1445.6947 | 723.3510         | 1444.7107      | 722.8590         | P    | 244.1656  | 122.5864        | 227.1390  | 114.0731         |                |                  | 2  |
| 14 |           |                 |           |                  |                |                  | K    | 147.1128  | 74.0600         | 130.0863  | 65.5468          |                |                  | 1  |

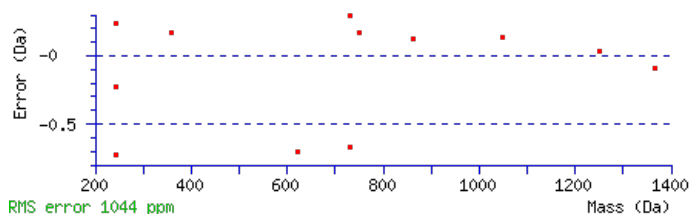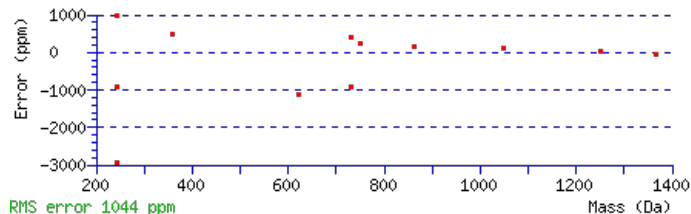



## AT4G20980.1

(Parameters: blastp, nr protein database, expect=20000, no filter, PAM30)

Other BLAST [web gateways](#)

### All matches to this query

| Score | Mr(calc)  | Delta   | Sequence                       |
|-------|-----------|---------|--------------------------------|
| 36.6  | 1607.8195 | -0.0012 | <a href="#">SFLTLNALNEFDPK</a> |

Mascot: <http://www.matrixscience.com/>

## Peptide View

MS/MS Fragmentation of **SLEEAYEALK**

Found in **AT4G21150.1** in **TAIR\_Arabidopsis**, Symbols: | ribophorin II (RPN2) family protein | chr4:11278656-11283609 FORWARD

Match to Query 4054: 1162.539880 from(582.277216,2+) index(5841)

Title: Elution from: 51.011 to 51.011 scan no 7336 cid35.00 polarity:+

Data file C7-1\_1.mgf

Click mouse within plot area to zoom in by factor of two about that point

Or,   to  Da

Label all possible matches  Label matches used for scoring

Show Y-axis

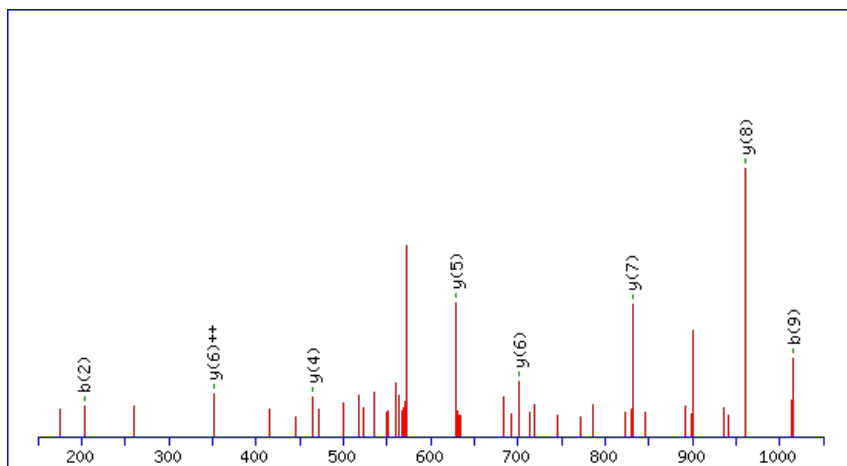

Monoisotopic mass of neutral peptide  $M_r(\text{calc})$ : 1162.5384

Fixed modifications: Carbamidomethyl (C) (apply to specified residues or termini only)

Ions Score: 43 Expect: 0.00045

Matches : 8/84 fragment ions using 9 most intense peaks ([help](#))

| #  | b                | b <sup>++</sup> | b <sup>0</sup> | b <sup>0++</sup> | Seq. | y               | y <sup>++</sup> | y <sup>*</sup> | y <sup>*++</sup> | y <sup>0</sup> | y <sup>0++</sup> | #  |
|----|------------------|-----------------|----------------|------------------|------|-----------------|-----------------|----------------|------------------|----------------|------------------|----|
| 1  | 89.0363          | 45.0218         | 71.0258        | 36.0165          | S    |                 |                 |                |                  |                |                  | 10 |
| 2  | <b>203.1174</b>  | 102.0624        | 185.1069       | 93.0571          | L    | 1075.5166       | 538.2619        | 1057.4930      | 529.2502         | 1057.5061      | 529.2567         | 9  |
| 3  | 333.1571         | 167.0822        | 315.1465       | 158.0769         | E    | <b>961.4355</b> | 481.2214        | 943.4119       | 472.2096         | 943.4250       | 472.2161         | 8  |
| 4  | 463.1967         | 232.1020        | 445.1861       | 223.0967         | E    | <b>831.3959</b> | 416.2016        | 813.3723       | 407.1898         | 813.3853       | 407.1963         | 7  |
| 5  | 535.2308         | 268.1191        | 517.2203       | 259.1138         | A    | <b>701.3563</b> | <b>351.1818</b> | 683.3327       | 342.1700         | 683.3457       | 342.1765         | 6  |
| 6  | 699.2912         | 350.1492        | 681.2806       | 341.1440         | Y    | <b>629.3221</b> | 315.1647        | 611.2985       | 306.1529         | 611.3115       | 306.1594         | 5  |
| 7  | 829.3308         | 415.1691        | 811.3203       | 406.1638         | E    | <b>465.2618</b> | 233.1345        | 447.2382       | 224.1227         | 447.2512       | 224.1292         | 4  |
| 8  | 901.3650         | 451.1861        | 883.3544       | 442.1808         | A    | 335.2221        | 168.1147        | 317.1985       | 159.1029         |                |                  | 3  |
| 9  | <b>1015.4461</b> | 508.2267        | 997.4355       | 499.2214         | L    | 263.1880        | 132.0976        | 245.1644       | 123.0858         |                |                  | 2  |
| 10 |                  |                 |                |                  | K    | 149.1069        | 75.0571         | 131.0833       | 66.0453          |                |                  | 1  |

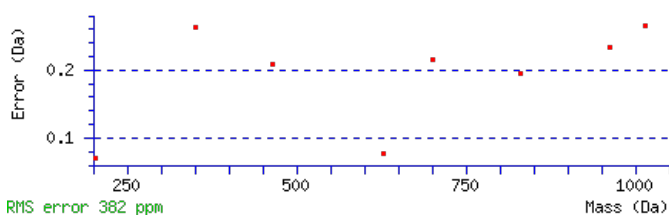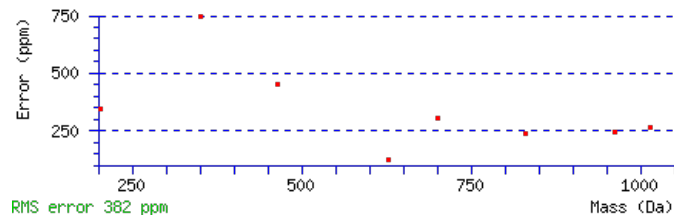

NCBI BLAST search of [SLEEAYEALK](#)

(Parameters: blastp, nr protein database, expect=20000, no filter, PAM30)

Other BLAST [web gateways](#)

All matches to this query

| Score | $M_r(\text{calc})$ | Delta | Sequence |
|-------|--------------------|-------|----------|
|       |                    |       |          |

**AT4G21150.1**

|      |           |         |                              |
|------|-----------|---------|------------------------------|
| 43.1 | 1162.5384 | 0.0015  | <a href="#">SLEEAYEALK</a>   |
| 8.8  | 1162.5433 | -0.0034 | <a href="#">AEFDYLHKK</a>    |
| 2.4  | 1162.5411 | -0.0012 | <a href="#">FIRQEAEEK</a>    |
| 1.1  | 1162.5370 | 0.0028  | <a href="#">SLGMLKDMEK</a>   |
| 0.9  | 1162.5415 | -0.0016 | <a href="#">SLRIGODNSR</a>   |
| 0.5  | 1162.5419 | -0.0021 | <a href="#">GYICKHMIK</a>    |
| 0.4  | 1162.5433 | -0.0034 | <a href="#">TLDVTPYWR</a>    |
| 0.2  | 1162.5388 | 0.0010  | <a href="#">DGKGSSTANALK</a> |
| 0.1  | 1162.5433 | -0.0034 | <a href="#">SLSFPQWASK</a>   |
| 0.1  | 1162.5411 | -0.0012 | <a href="#">SLSSEWKNAK</a>   |

**Mascot:** <http://www.matrixscience.com/>



# Mascot Search Results

## Peptide View

MS/MS Fragmentation of **DIINVKPLIDRK**

Found in **AT4G21280.1** in **TAIR\_Arabidopsis**, Symbols: PSBQ, PSBQA, PSBQ-1 | PSBQ/PSBQ-1/PSBQA; calcium ion binding | chr4:11334456-11335597 FORWARD

Match to Query 6004: 1422.853590 from(475.291806,3+) index(5702)

Title: Elution from: 50.205 to 50.205 scan no 7091 cid35.00 polarity:+

Data file D12h-1\_1.mgf

Click mouse within plot area to zoom in by factor of two about that point

Or,   to  Da

Label all possible matches  Label matches used for scoring

Show Y-axis

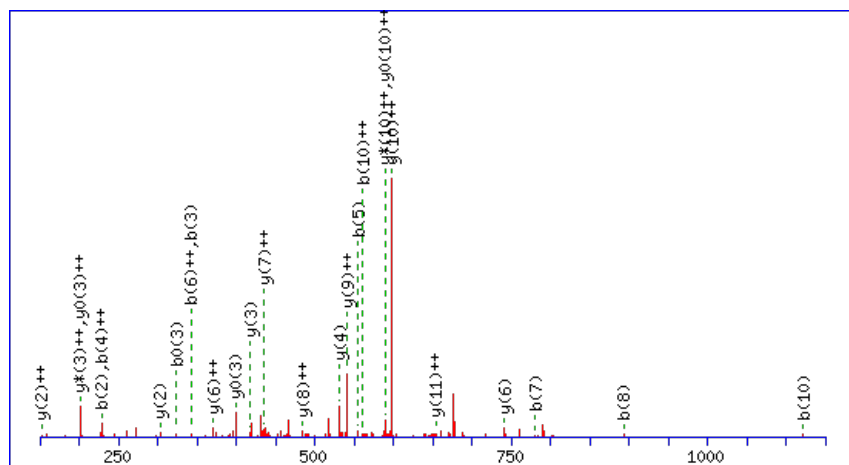

Monoisotopic mass of neutral peptide  $M_r(\text{calc})$ : 1422.8558

Fixed modifications: Carbamidomethyl (C) (apply to specified residues or termini only)

Ions Score: 29 Expect: 0.0014

Matches : 26/122 fragment ions using 62 most intense peaks [\(help\)](#)

| #  | b                | b <sup>++</sup> | b*        | b <sup>*++</sup> | b <sup>0</sup>  | b <sup>0++</sup> | Seq. | y               | y <sup>++</sup> | y*        | y <sup>*++</sup> | y <sup>0</sup>  | y <sup>0++</sup> | #  |
|----|------------------|-----------------|-----------|------------------|-----------------|------------------|------|-----------------|-----------------|-----------|------------------|-----------------|------------------|----|
| 1  | 116.0342         | 58.5207         |           |                  | 98.0237         | 49.5155          | D    |                 |                 |           |                  |                 |                  | 12 |
| 2  | <b>229.1183</b>  | 115.0628        |           |                  | 211.1077        | 106.0575         | I    | 1308.8362       | <b>654.9217</b> | 1291.8096 | 646.4085         | 1290.8256       | 645.9164         | 11 |
| 3  | <b>342.2023</b>  | 171.6048        |           |                  | <b>324.1918</b> | 162.5995         | I    | 1195.7521       | <b>598.3797</b> | 1178.7256 | <b>589.8664</b>  | 1177.7416       | <b>589.3744</b>  | 10 |
| 4  | 456.2453         | <b>228.6263</b> | 439.2187  | 220.1130         | 438.2347        | 219.6210         | N    | 1082.6681       | <b>541.8377</b> | 1065.6415 | 533.3244         | 1064.6575       | 532.8324         | 9  |
| 5  | <b>555.3137</b>  | 278.1605        | 538.2871  | 269.6472         | 537.3031        | 269.1552         | V    | 968.6251        | <b>484.8162</b> | 951.5986  | 476.3029         | 950.6146        | 475.8109         | 8  |
| 6  | 683.4087         | <b>342.2080</b> | 666.3821  | 333.6947         | 665.3981        | 333.2027         | K    | 869.5567        | <b>435.2820</b> | 852.5302  | 426.7687         | 851.5461        | 426.2767         | 7  |
| 7  | <b>780.4614</b>  | 390.7343        | 763.4349  | 382.2211         | 762.4509        | 381.7291         | P    | <b>741.4618</b> | <b>371.2345</b> | 724.4352  | 362.7212         | 723.4512        | 362.2292         | 6  |
| 8  | <b>893.5455</b>  | 447.2764        | 876.5189  | 438.7631         | 875.5349        | 438.2711         | L    | 644.4090        | 322.7081        | 627.3824  | 314.1949         | 626.3984        | 313.7028         | 5  |
| 9  | 1006.6295        | 503.8184        | 989.6030  | 495.3051         | 988.6190        | 494.8131         | I    | <b>531.3249</b> | 266.1661        | 514.2984  | 257.6528         | 513.3144        | 257.1608         | 4  |
| 10 | <b>1121.6565</b> | <b>561.3319</b> | 1104.6299 | 552.8186         | 1103.6459       | 552.3266         | D    | <b>418.2409</b> | 209.6241        | 401.2143  | <b>201.1108</b>  | <b>400.2303</b> | <b>200.6188</b>  | 3  |
| 11 | 1277.7576        | 639.3824        | 1260.7310 | 630.8692         | 1259.7470       | 630.3772         | R    | <b>303.2139</b> | <b>152.1106</b> | 286.1874  | 143.5973         |                 |                  | 2  |
| 12 |                  |                 |           |                  |                 |                  | K    | 147.1128        | 74.0600         | 130.0863  | 65.5468          |                 |                  | 1  |

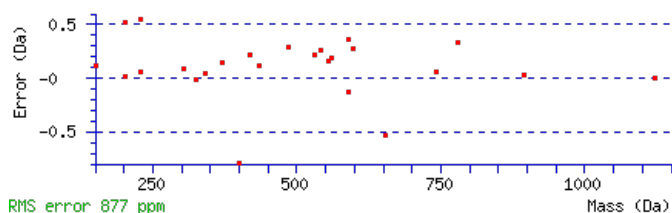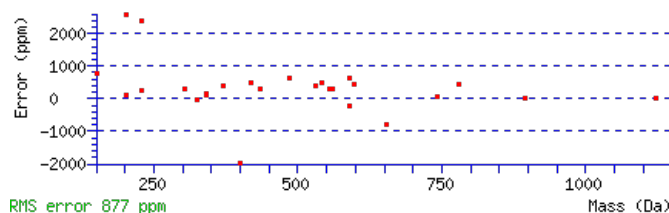

NCBI BLAST search of **DIINVKPLIDRK**

(Parameters: blastp, nr protein database, expect=20000, no filter, PAM30)

Other BLAST [web gateways](#)

AT4G21280.1

All matches to this query

| Score | Mr(calc)  | Delta   | Sequence                       |
|-------|-----------|---------|--------------------------------|
| 28.6  | 1422.8558 | -0.0022 | <a href="#">DIINVKPLIDRK</a>   |
| 12.2  | 1422.8558 | -0.0023 | <a href="#">QLASITVIGLVGPR</a> |
| 7.0   | 1422.8558 | -0.0022 | <a href="#">AGVLAVQISSPLR</a>  |

Mascot: <http://www.matrixscience.com/>

**Peptide View**MS/MS Fragmentation of **MQVVPFK**Found in **AT4G21430.1** in **TAIR\_Arabidopsis**, Symbols: B160 | B160; transcription factor | chr4:11407846-11412170 REVERSE

Match to Query 1421: 872.431396 from(437.222974,2+) index(4196)

Title: Elution from: 39.514 to 39.514 scan no 5326 cid35.00 polarity:+

Data file 0-2\_2.mgf

Click mouse within plot area to zoom in by factor of two about that point

Or,   to  Da Label all possible matches  Label matches used for scoring Show Y-axis 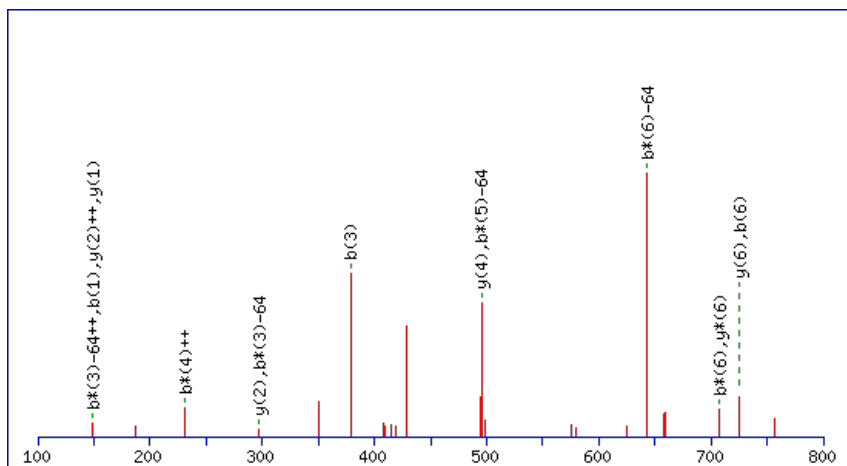**Monoisotopic mass of neutral peptide Mr(calc):** 872.4308**Fixed modifications:** Carbamidomethyl (C) (apply to specified residues or termini only)**Variable modifications:****M1** : Oxidation (M), with neutral losses 0.0000 (shown in table), 63.9983**Ions Score:** 30 **Expect:** 0.0039**Matches** : 15/68 fragment ions using 12 most intense peaks ([help](#))

| # | b        | b <sup>++</sup> | b*       | b <sup>*++</sup> | Seq. | y        | y <sup>++</sup> | y*       | y <sup>*++</sup> | # |
|---|----------|-----------------|----------|------------------|------|----------|-----------------|----------|------------------|---|
| 1 | 149.0397 | 75.0235         |          |                  | M    |          |                 |          |                  | 7 |
| 2 | 279.0924 | 140.0498        | 261.0688 | 131.0380         | Q    | 725.4057 | 363.2065        | 707.3821 | 354.1947         | 6 |
| 3 | 379.1578 | 190.0825        | 361.1342 | 181.0707         | V    | 595.3530 | 298.1801        | 577.3294 | 289.1684         | 5 |
| 4 | 479.2233 | 240.1153        | 461.1997 | 231.1035         | V    | 495.2876 | 248.1474        | 477.2640 | 239.1356         | 4 |
| 5 | 577.2731 | 289.1402        | 559.2495 | 280.1284         | P    | 395.2221 | 198.1147        | 377.1985 | 189.1029         | 3 |
| 6 | 725.3385 | 363.1729        | 707.3149 | 354.1611         | F    | 297.1723 | 149.0898        | 279.1487 | 140.0780         | 2 |
| 7 |          |                 |          |                  | K    | 149.1069 | 75.0571         | 131.0833 | 66.0453          | 1 |

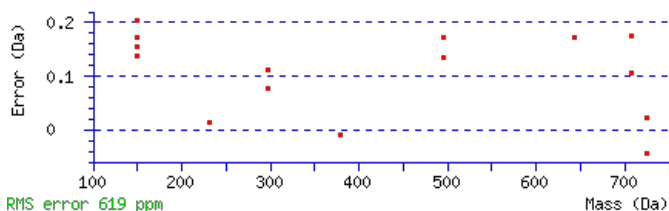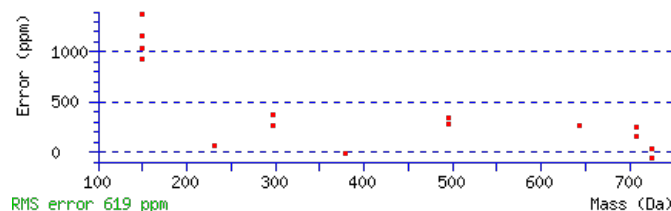NCBI **BLAST** search of [MQVVPFK](#)

(Parameters: blastp, nr protein database, expect=20000, no filter, PAM30)

Other BLAST [web gateways](#)**All matches to this query**

| Score | Mr(calc) | Delta  | Sequence                |
|-------|----------|--------|-------------------------|
| 29.9  | 872.4308 | 0.0006 | <a href="#">MQVVPFK</a> |
| 18.8  | 872.4313 | 0.0001 | <a href="#">NLCLGRK</a> |

## AT4G21430.1

|      |          |         |                          |
|------|----------|---------|--------------------------|
| 10.0 | 872.4313 | 0.0001  | <a href="#">AMGRAINK</a> |
| 7.8  | 872.4313 | 0.0001  | <a href="#">NMKPKSR</a>  |
| 5.1  | 872.4308 | 0.0006  | <a href="#">MSIWLAK</a>  |
| 3.1  | 872.4313 | 0.0001  | <a href="#">NLGKCR</a>   |
| 2.7  | 872.4308 | 0.0006  | <a href="#">MASLWLK</a>  |
| 2.7  | 872.4308 | 0.0006  | <a href="#">MSALWLK</a>  |
| 2.2  | 872.4333 | -0.0019 | <a href="#">ETSSLSLK</a> |
| 1.0  | 872.4312 | 0.0002  | <a href="#">DMIRAVR</a>  |

Mascot: <http://www.matrixscience.com/>

### Peptide View

 MS/MS Fragmentation of **MTADSTVALVHSVVSNGDVSNGNTSASSK**

 Found in **AT4G21660.1** in **TAIR\_Arabidopsis**, Symbols: | proline-rich splicesome-associated (PSP) family protein | chr4:11506271-11509784 REVERSE

Match to Query 10699: 2834.338326 from(945.786718,3+) index(7303)

Title: Elution from 63.856 to 63.856 scan no 9494 cid35.00 polarity:+

Data file C7-3\_2.mgf

Click mouse within plot area to zoom in by factor of two about that point

 Or, Plot from  to  Da 

 Label all possible matches  Label matches used for scoring 

 Show Y-axis 
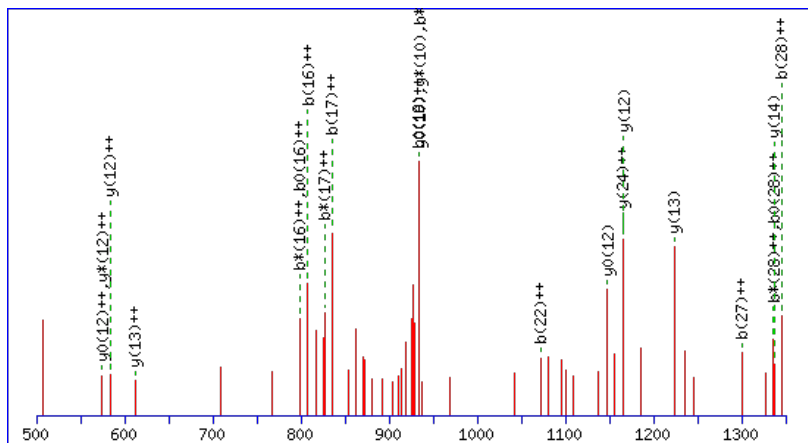

Monoisotopic mass of neutral peptide Mr(calc): 2834.3353

Fixed modifications: Carbamidomethyl (C) (apply to specified residues or termini only)

Ions Score: 20 Expect: 0.039

 Matches : 23/302 fragment ions using 25 most intense peaks ([help](#))

| #  | b         | b <sup>++</sup> | b <sup>*</sup> | b <sup>*++</sup> | b <sup>0</sup> | b <sup>0++</sup> | Seq. | y         | y <sup>++</sup> | y <sup>*</sup> | y <sup>*++</sup> | y <sup>0</sup> | y <sup>0++</sup> | #  |
|----|-----------|-----------------|----------------|------------------|----------------|------------------|------|-----------|-----------------|----------------|------------------|----------------|------------------|----|
| 1  | 132.0478  | 66.5275         |                |                  |                |                  | M    |           |                 |                |                  |                |                  | 29 |
| 2  | 233.0954  | 117.0514        |                |                  | 215.0849       | 108.0461         | T    | 2704.3020 | 1352.6546       | 2687.2755      | 1344.1414        | 2686.2915      | 1343.6494        | 28 |
| 3  | 304.1326  | 152.5699        |                |                  | 286.1220       | 143.5646         | A    | 2603.2543 | 1302.1308       | 2586.2278      | 1293.6175        | 2585.2438      | 1293.1255        | 27 |
| 4  | 419.1595  | 210.0834        |                |                  | 401.1489       | 201.0781         | D    | 2532.2172 | 1266.6123       | 2515.1907      | 1258.0990        | 2514.2067      | 1257.6070        | 26 |
| 5  | 506.1915  | 253.5994        |                |                  | 488.1810       | 244.5941         | S    | 2417.1903 | 1209.0988       | 2400.1637      | 1200.5855        | 2399.1797      | 1200.0935        | 25 |
| 6  | 607.2392  | 304.1232        |                |                  | 589.2286       | 295.1180         | T    | 2330.1583 | 1165.5828       | 2313.1317      | 1157.0695        | 2312.1477      | 1156.5775        | 24 |
| 7  | 706.3076  | 353.6574        |                |                  | 688.2971       | 344.6522         | V    | 2229.1106 | 1115.0589       | 2212.0840      | 1106.5457        | 2211.1000      | 1106.0536        | 23 |
| 8  | 777.3447  | 389.1760        |                |                  | 759.3342       | 380.1707         | A    | 2130.0422 | 1065.5247       | 2113.0156      | 1057.0114        | 2112.0316      | 1056.5194        | 22 |
| 9  | 890.4288  | 445.7180        |                |                  | 872.4182       | 436.7128         | L    | 2059.0050 | 1030.0062       | 2041.9785      | 1021.4929        | 2040.9945      | 1021.0009        | 21 |
| 10 | 989.4972  | 495.2522        |                |                  | 971.4866       | 486.2470         | V    | 1945.9210 | 973.4641        | 1928.8944      | 964.9509         | 1927.9104      | 964.4588         | 20 |
| 11 | 1126.5561 | 563.7817        |                |                  | 1108.5456      | 554.7764         | H    | 1846.8526 | 923.9299        | 1829.8260      | 915.4166         | 1828.8420      | 914.9246         | 19 |
| 12 | 1213.5882 | 607.2977        |                |                  | 1195.5776      | 598.2924         | S    | 1709.7937 | 855.4005        | 1692.7671      | 846.8872         | 1691.7831      | 846.3952         | 18 |
| 13 | 1312.6566 | 656.8319        |                |                  | 1294.6460      | 647.8266         | V    | 1622.7616 | 811.8845        | 1605.7351      | 803.3712         | 1604.7511      | 802.8792         | 17 |
| 14 | 1411.7250 | 706.3661        |                |                  | 1393.7144      | 697.3608         | V    | 1523.6932 | 762.3502        | 1506.6667      | 753.8370         | 1505.6827      | 753.3450         | 16 |
| 15 | 1498.7570 | 749.8821        |                |                  | 1480.7464      | 740.8769         | S    | 1424.6248 | 712.8160        | 1407.5983      | 704.3028         | 1406.6142      | 703.8108         | 15 |
| 16 | 1612.7999 | 806.9036        | 1595.7734      | 798.3903         | 1594.7894      | 797.8983         | N    | 1337.5928 | 669.3000        | 1320.5662      | 660.7868         | 1319.5822      | 660.2947         | 14 |
| 17 | 1669.8214 | 835.4143        | 1652.7948      | 826.9011         | 1651.8108      | 826.4091         | G    | 1223.5498 | 612.2786        | 1206.5233      | 603.7653         | 1205.5393      | 603.2733         | 13 |
| 18 | 1784.8483 | 892.9278        | 1767.8218      | 884.4145         | 1766.8378      | 883.9225         | D    | 1166.5284 | 583.7678        | 1149.5018      | 575.2546         | 1148.5178      | 574.7625         | 12 |
| 19 | 1883.9168 | 942.4620        | 1866.8902      | 933.9487         | 1865.9062      | 933.4567         | V    | 1051.5014 | 526.2544        | 1034.4749      | 517.7411         | 1033.4909      | 517.2491         | 11 |
| 20 | 1970.9488 | 985.9780        | 1953.9222      | 977.4648         | 1952.9382      | 976.9727         | S    | 952.4330  | 476.7202        | 935.4065       | 468.2069         | 934.4225       | 467.7149         | 10 |
| 21 | 2084.9917 | 1042.9995       | 2067.9652      | 1034.4862        | 2066.9811      | 1033.9942        | N    | 865.4010  | 433.2041        | 848.3745       | 424.6909         | 847.3904       | 424.1989         | 9  |
| 22 | 2142.0132 | 1071.5102       | 2124.9866      | 1062.9970        | 2124.0026      | 1062.5049        | G    | 751.3581  | 376.1827        | 734.3315       | 367.6694         | 733.3475       | 367.1774         | 8  |
| 23 | 2256.0561 | 1128.5317       | 2239.0296      | 1120.0184        | 2238.0455      | 1119.5264        | N    | 694.3366  | 347.6719        | 677.3101       | 339.1587         | 676.3260       | 338.6667         | 7  |
| 24 | 2357.1038 | 1179.0555       | 2340.0772      | 1170.5423        | 2339.0932      | 1170.0502        | T    | 580.2937  | 290.6505        | 563.2671       | 282.1372         | 562.2831       | 281.6452         | 6  |
| 25 | 2444.1358 | 1222.5715       | 2427.1093      | 1214.0583        | 2426.1252      | 1213.5663        | S    | 479.2460  | 240.1266        | 462.2195       | 231.6134         | 461.2354       | 231.1214         | 5  |



# AT4G21660.1

|    |           |                  |           |                  |           |                  |   |          |          |          |          |          |          |   |
|----|-----------|------------------|-----------|------------------|-----------|------------------|---|----------|----------|----------|----------|----------|----------|---|
| 26 | 2515.1729 | 1258.0901        | 2498.1464 | 1249.5768        | 2497.1624 | 1249.0848        | A | 392.2140 | 196.6106 | 375.1874 | 188.0974 | 374.2034 | 187.6053 | 4 |
| 27 | 2602.2049 | <b>1301.6061</b> | 2585.1784 | 1293.0928        | 2584.1944 | 1292.6008        | S | 321.1769 | 161.0921 | 304.1503 | 152.5788 | 303.1663 | 152.0868 | 3 |
| 28 | 2689.2370 | <b>1345.1221</b> | 2672.2104 | <b>1336.6089</b> | 2671.2264 | <b>1336.1168</b> | S | 234.1448 | 117.5761 | 217.1183 | 109.0628 | 216.1343 | 108.5708 | 2 |
| 29 |           |                  |           |                  |           |                  | K | 147.1128 | 74.0600  | 130.0863 | 65.5468  |          |          | 1 |

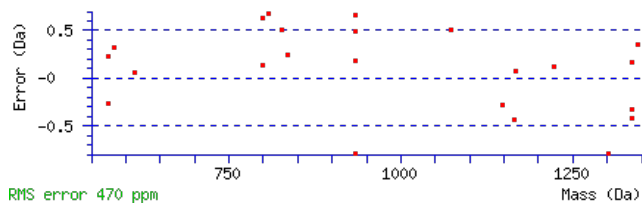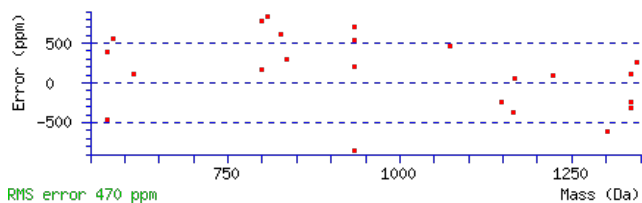

NCBI **BLAST** search of [MTADSTVALVHSVVSNQDVSNGNTSASSK](#)

(Parameters: blastp, nr protein database, expect=20000, no filter, PAM30)

Other BLAST [web gateways](#)

## All matches to this query

| Score | Mr(calc)  | Delta   | Sequence                                      |
|-------|-----------|---------|-----------------------------------------------|
| 19.5  | 2834.3353 | 0.0031  | <a href="#">MTADSTVALVHSVVSNQDVSNGNTSASSK</a> |
| 3.0   | 2834.3418 | -0.0035 | <a href="#">SYGTVSGSSATEVGKTSVSIQIGSSGDTK</a> |
| 1.5   | 2834.3309 | 0.0074  | <a href="#">STCKQWNFLFNDQIFTKMHFDK</a>        |
| 1.4   | 2834.3439 | -0.0056 | <a href="#">RMSERDAAFGSNTSVGLGAYLGIMGSR</a>   |
| 0.1   | 2834.3314 | 0.0070  | <a href="#">MDMTELNTLYDDLDSVSKLQKSR</a>       |

Mascot: <http://www.matrixscience.com/>

## Peptide View

MS/MS Fragmentation of **QMYHALVK**

Found in **AT4G21705.1** in **TAIR\_Arabidopsis**, Symbols: | pentatricopeptide (PPR) repeat-containing protein | chr4:11533269-11534829 REVERSE

Match to Query 2268: 988.519276 from(495.266914,2+) index(784)

Title: Elution from: 13.108 to 13.108 scan no 1109 cid35.00 polarity:+

Data file D12h-1\_3.mgf

Click mouse within plot area to zoom in by factor of two about that point

Or,   to  Da

Label all possible matches  Label matches used for scoring

Show Y-axis

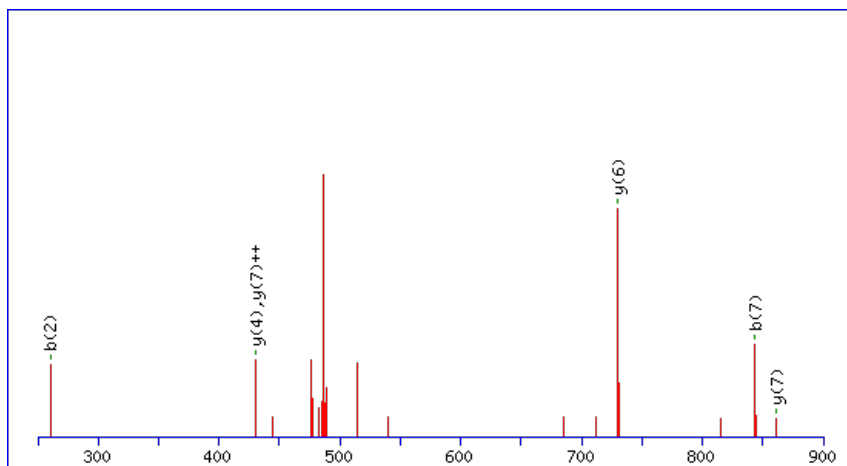

Monoisotopic mass of neutral peptide  $M_r(\text{calc})$ : 988.5164

Fixed modifications: Carbamidomethyl (C) (apply to specified residues or termini only)

Ions Score: 30 Expect: 0.0064

Matches : 6/56 fragment ions using 6 most intense peaks ([help](#))

| # | b               | b <sup>++</sup> | b*       | b <sup>*++</sup> | Seq. | y               | y <sup>++</sup> | y*       | y <sup>*++</sup> | # |
|---|-----------------|-----------------|----------|------------------|------|-----------------|-----------------|----------|------------------|---|
| 1 | 129.0659        | 65.0366         | 112.0393 | 56.5233          | Q    |                 |                 |          |                  | 8 |
| 2 | <b>260.1063</b> | 130.5568        | 243.0798 | 122.0435         | M    | <b>861.4651</b> | <b>431.2362</b> | 844.4386 | 422.7229         | 7 |
| 3 | 423.1697        | 212.0885        | 406.1431 | 203.5752         | Y    | <b>730.4246</b> | 365.7160        | 713.3981 | 357.2027         | 6 |
| 4 | 560.2286        | 280.6179        | 543.2020 | 272.1047         | H    | 567.3613        | 284.1843        | 550.3348 | 275.6710         | 5 |
| 5 | 631.2657        | 316.1365        | 614.2391 | 307.6232         | A    | <b>430.3024</b> | 215.6548        | 413.2758 | 207.1416         | 4 |
| 6 | 744.3498        | 372.6785        | 727.3232 | 364.1652         | L    | 359.2653        | 180.1363        | 342.2387 | 171.6230         | 3 |
| 7 | <b>843.4182</b> | 422.2127        | 826.3916 | 413.6994         | V    | 246.1812        | 123.5942        | 229.1547 | 115.0810         | 2 |
| 8 |                 |                 |          |                  | K    | 147.1128        | 74.0600         | 130.0863 | 65.5468          | 1 |

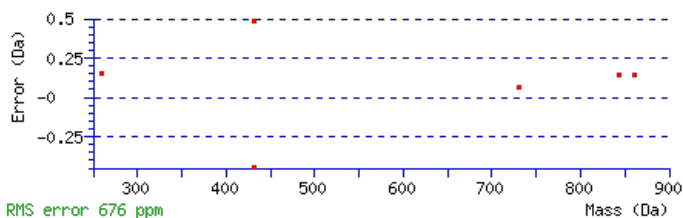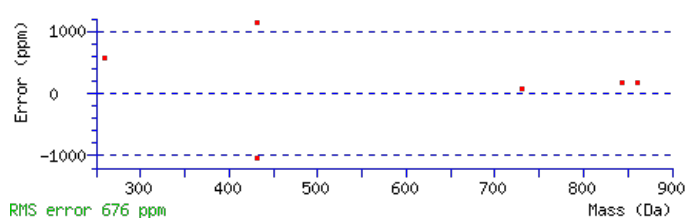

NCBI **BLAST** search of **QMYHALVK**

(Parameters: blastp, nr protein database, expect=20000, no filter, PAM30)

Other BLAST [web gateways](#)

### All matches to this query

| Score | $M_r(\text{calc})$ | Delta  | Sequence                 |
|-------|--------------------|--------|--------------------------|
| 29.6  | 988.5164           | 0.0029 | <a href="#">QMYHALVK</a> |
| 25.2  | 988.5189           | 0.0004 | <a href="#">KTEQENLK</a> |

## AT4G21705.1

|      |          |        |                            |
|------|----------|--------|----------------------------|
| 18.0 | 988.5189 | 0.0004 | <a href="#">KEAADQSLK</a>  |
| 15.8 | 988.5189 | 0.0004 | <a href="#">ERLDSELK</a>   |
| 10.7 | 988.5189 | 0.0004 | <a href="#">NTSENIALK</a>  |
| 10.3 | 988.5189 | 0.0004 | <a href="#">DSRELEIK</a>   |
| 9.5  | 988.5189 | 0.0004 | <a href="#">SLAETNNLK</a>  |
| 8.5  | 988.5189 | 0.0004 | <a href="#">SDIDGKIGGK</a> |
| 6.0  | 988.5189 | 0.0004 | <a href="#">NIEKEAGTK</a>  |
| 5.1  | 988.5189 | 0.0004 | <a href="#">ENGTKAELK</a>  |

Mascot: <http://www.matrixscience.com/>

**Peptide View**MS/MS Fragmentation of **DEEKKMGTLVK**

Found in **AT4G21710.1** in **TAIR\_Arabidopsis**, Symbols: EMB1989, RPB2, NRPB2 | NRPB2 (EMBRYO DEFECTIVE 1989); DNA binding | chr4:11535696-11542212 REVERSE

Match to Query 4391: 1276.673138 from(639.343845,2+) index(5734)

Title: Elution from: 51.081 to 51.081 scan no 7321 cid35.00 polarity:+

Data file C7-3\_3.mgf

Click mouse within plot area to zoom in by factor of two about that point

Or,   to  Da

Label all possible matches  Label matches used for scoring

Show Y-axis

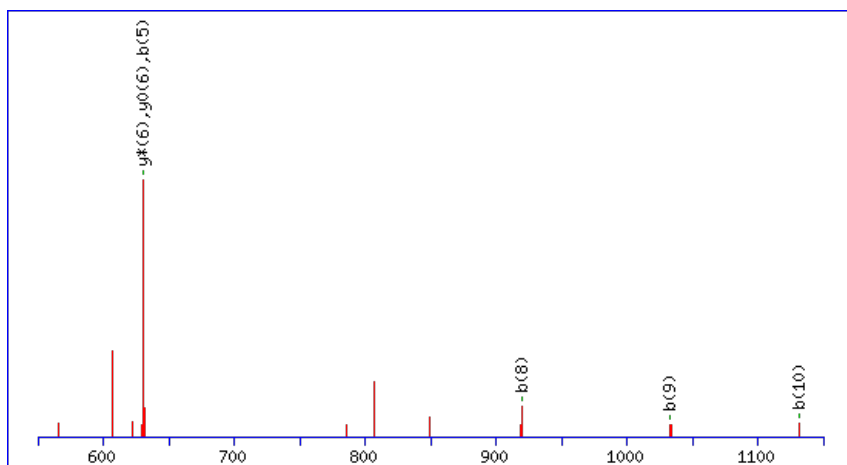

**Monoisotopic mass of neutral peptide Mr(calc):** 1276.6697

**Fixed modifications:** Carbamidomethyl (C) (apply to specified residues or termini only)

**Ions Score:** 31 **Expect:** 0.0027

**Matches:** 6/108 fragment ions using 5 most intense peaks ([help](#))

| #  | b                | b <sup>++</sup> | b <sup>*</sup> | b <sup>*++</sup> | b <sup>0</sup> | b <sup>0++</sup> | Seq.     | y         | y <sup>++</sup> | y <sup>*</sup>  | y <sup>*++</sup> | y <sup>0</sup>  | y <sup>0++</sup> | #  |
|----|------------------|-----------------|----------------|------------------|----------------|------------------|----------|-----------|-----------------|-----------------|------------------|-----------------|------------------|----|
| 1  | 116.0342         | 58.5207         |                |                  | 98.0237        | 49.5155          | <b>D</b> |           |                 |                 |                  |                 |                  | 11 |
| 2  | 245.0768         | 123.0420        |                |                  | 227.0662       | 114.0368         | <b>E</b> | 1162.6500 | 581.8286        | 1145.6235       | 573.3154         | 1144.6395       | 572.8234         | 10 |
| 3  | 374.1194         | 187.5633        |                |                  | 356.1088       | 178.5581         | <b>E</b> | 1033.6074 | 517.3074        | 1016.5809       | 508.7941         | 1015.5969       | 508.3021         | 9  |
| 4  | 502.2144         | 251.6108        | 485.1878       | 243.0975         | 484.2038       | 242.6055         | <b>K</b> | 904.5648  | 452.7861        | 887.5383        | 444.2728         | 886.5543        | 443.7808         | 8  |
| 5  | <b>630.3093</b>  | 315.6583        | 613.2828       | 307.1450         | 612.2988       | 306.6530         | <b>K</b> | 776.4699  | 388.7386        | 759.4433        | 380.2253         | 758.4593        | 379.7333         | 7  |
| 6  | 761.3498         | 381.1785        | 744.3233       | 372.6653         | 743.3393       | 372.1733         | <b>M</b> | 648.3749  | 324.6911        | <b>631.3484</b> | 316.1778         | <b>630.3643</b> | 315.6858         | 6  |
| 7  | 818.3713         | 409.6893        | 801.3447       | 401.1760         | 800.3607       | 400.6840         | <b>G</b> | 517.3344  | 259.1709        | 500.3079        | 250.6576         | 499.3239        | 250.1656         | 5  |
| 8  | <b>919.4190</b>  | 460.2131        | 902.3924       | 451.6998         | 901.4084       | 451.2078         | <b>T</b> | 460.3130  | 230.6601        | 443.2864        | 222.1468         | 442.3024        | 221.6548         | 4  |
| 9  | <b>1032.5030</b> | 516.7551        | 1015.4765      | 508.2419         | 1014.4925      | 507.7499         | <b>L</b> | 359.2653  | 180.1363        | 342.2387        | 171.6230         |                 |                  | 3  |
| 10 | <b>1131.5714</b> | 566.2894        | 1114.5449      | 557.7761         | 1113.5609      | 557.2841         | <b>V</b> | 246.1812  | 123.5942        | 229.1547        | 115.0810         |                 |                  | 2  |
| 11 |                  |                 |                |                  |                |                  | <b>K</b> | 147.1128  | 74.0600         | 130.0863        | 65.5468          |                 |                  | 1  |

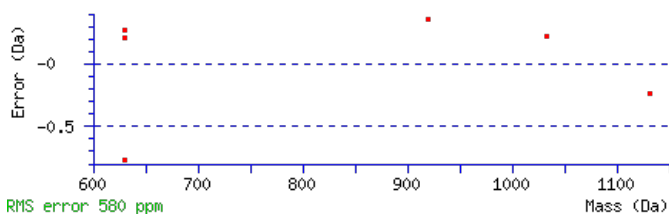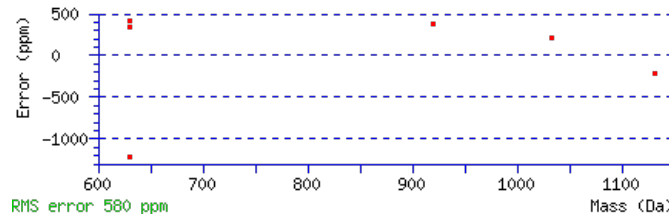

NCBI **BLAST** search of **DEEKKMGTLVK**

(Parameters: blastp, nr protein database, expect=20000, no filter, PAM30)

Other BLAST [web gateways](#)

**All matches to this query**

## AT4G21710.1

| Score | Mr(calc)  | Delta   | Sequence                     |
|-------|-----------|---------|------------------------------|
| 31.1  | 1276.6697 | 0.0035  | <a href="#">DEEKKMGTLYK</a>  |
| 5.3   | 1276.6703 | 0.0028  | <a href="#">ELYLWDVVIQ</a>   |
| 5.3   | 1276.6697 | 0.0035  | <a href="#">MNSLTVEQVLK</a>  |
| 5.1   | 1276.6697 | 0.0034  | <a href="#">TTICQILSDVK</a>  |
| 4.9   | 1276.6696 | 0.0035  | <a href="#">EMLIKDQEEK</a>   |
| 4.9   | 1276.6744 | -0.0012 | <a href="#">MVERVVNMRK</a>   |
| 4.7   | 1276.6697 | 0.0035  | <a href="#">MSGSLGLTPASK</a> |
| 4.5   | 1276.6703 | 0.0028  | <a href="#">LTYQTIFYTK</a>   |
| 3.6   | 1276.6710 | 0.0021  | <a href="#">MIISAHAVHGK</a>  |
| 2.8   | 1276.6744 | -0.0012 | <a href="#">RCVKQMVAALK</a>  |

Mascot: <http://www.matrixscience.com/>

## Peptide View

MS/MS Fragmentation of **GLLTSVQDTASSVAR**Found in **AT4G22240.1** in **TAIR\_Arabidopsis**, Symbols: | plastid-lipid associated protein PAP, putative | chr4:11766102-11767239 REVERSE

Match to Query 6829: 1522.732544 from(762.373548,2+) index(7098)

Title: Elution from: 62.415 to 62.415 scan no 9121 cid35.00 polarity:+

Data file 0-2\_1.mgf

Click mouse within plot area to zoom in by factor of two about that point

Or,   to  Da Label all possible matches  Label matches used for scoring Show Y-axis 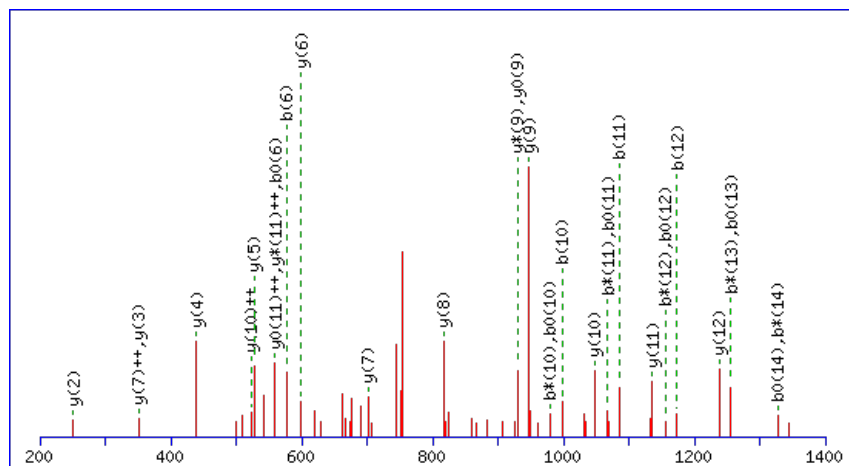Monoisotopic mass of neutral peptide  $M_r(\text{calc})$ : 1522.7329

Fixed modifications: Carbamidomethyl (C) (apply to specified residues or termini only)

Ions Score: 110 Expect: 9e-011

Matches : 32/144 fragment ions using 30 most intense peaks ([help](#))

| #  | b                | b <sup>++</sup> | b <sup>*</sup>   | b <sup>*++</sup> | b <sup>0</sup>   | b <sup>0++</sup> | Seq. | y                | y <sup>++</sup> | y <sup>*</sup>  | y <sup>*++</sup> | y <sup>0</sup>  | y <sup>0++</sup> | #  |
|----|------------------|-----------------|------------------|------------------|------------------|------------------|------|------------------|-----------------|-----------------|------------------|-----------------|------------------|----|
| 1  | 59.0258          | 30.0165         |                  |                  |                  |                  | G    |                  |                 |                 |                  |                 |                  | 15 |
| 2  | 173.1069         | 87.0571         |                  |                  |                  |                  | L    | 1465.7217        | 733.3645        | 1447.6981       | 724.3527         | 1447.7112       | 724.3592         | 14 |
| 3  | 287.1880         | 144.0976        |                  |                  |                  |                  | L    | 1351.6406        | 676.3240        | 1333.6170       | 667.3122         | 1333.6301       | 667.3187         | 13 |
| 4  | 389.2327         | 195.1200        |                  |                  | 371.2221         | 186.1147         | T    | <b>1237.5595</b> | 619.2834        | 1219.5359       | 610.2716         | 1219.5490       | 610.2781         | 12 |
| 5  | 477.2617         | 239.1345        |                  |                  | 459.2512         | 230.1292         | S    | <b>1135.5148</b> | 568.2610        | 1117.4912       | <b>559.2493</b>  | 1117.5043       | <b>559.2558</b>  | 11 |
| 6  | <b>577.3272</b>  | 289.1672        |                  |                  | <b>559.3166</b>  | 280.1620         | V    | <b>1047.4858</b> | <b>524.2465</b> | 1029.4622       | 515.2347         | 1029.4752       | 515.2412         | 10 |
| 7  | 707.3798         | 354.1936        | 689.3563         | 345.1818         | 689.3693         | 345.1883         | Q    | <b>947.4203</b>  | 474.2138        | <b>929.3967</b> | 465.2020         | <b>929.4097</b> | 465.2085         | 9  |
| 8  | 823.4038         | 412.2055        | 805.3802         | 403.1938         | 805.3933         | 403.2003         | D    | <b>817.3677</b>  | 409.1875        | 799.3441        | 400.1757         | 799.3571        | 400.1822         | 8  |
| 9  | 925.4485         | 463.2279        | 907.4250         | 454.2161         | 907.4380         | 454.2226         | T    | <b>701.3437</b>  | <b>351.1755</b> | 683.3201        | 342.1637         | 683.3331        | 342.1702         | 7  |
| 10 | <b>997.4827</b>  | 499.2450        | <b>979.4591</b>  | 490.2332         | <b>979.4721</b>  | 490.2397         | A    | <b>599.2990</b>  | 300.1531        | 581.2754        | 291.1413         | 581.2884        | 291.1478         | 6  |
| 11 | <b>1085.5117</b> | 543.2595        | <b>1067.4882</b> | 534.2477         | <b>1067.5012</b> | 534.2542         | S    | <b>527.2648</b>  | 264.1360        | 509.2412        | 255.1243         | 509.2543        | 255.1308         | 5  |
| 12 | <b>1173.5408</b> | 587.2740        | <b>1155.5172</b> | 578.2623         | <b>1155.5302</b> | 578.2688         | S    | <b>439.2358</b>  | 220.1215        | 421.2122        | 211.1097         | 421.2252        | 211.1162         | 4  |
| 13 | 1273.6063        | 637.3068        | <b>1255.5827</b> | 628.2950         | <b>1255.5957</b> | 628.3015         | V    | <b>351.2067</b>  | 176.1070        | 333.1831        | 167.0952         |                 |                  | 3  |
| 14 | 1345.6404        | 673.3238        | <b>1327.6168</b> | 664.3121         | <b>1327.6298</b> | 664.3186         | A    | <b>251.1412</b>  | 126.0743        | 233.1177        | 117.0625         |                 |                  | 2  |
| 15 |                  |                 |                  |                  |                  |                  | R    | 179.1071         | 90.0572         | 161.0835        | 81.0454          |                 |                  | 1  |

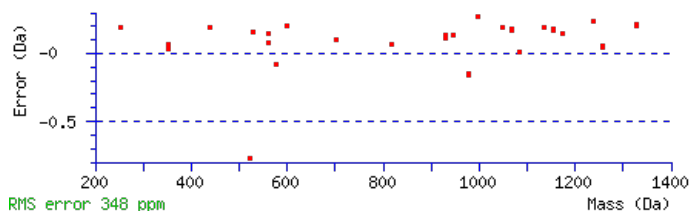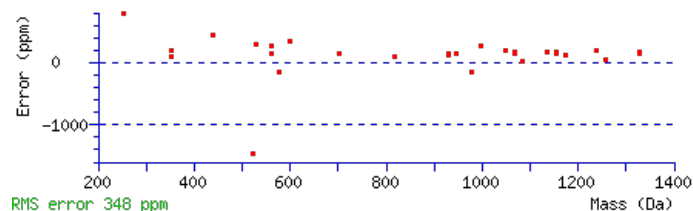NCBI BLAST search of [GLLTSVQDTASSVAR](#)

## AT4G22240.1

(Parameters: blastp, nr protein database, expect=20000, no filter, PAM30)

Other BLAST [web gateways](#)

### All matches to this query

| Score | Mr(calc)  | Delta   | Sequence                        |
|-------|-----------|---------|---------------------------------|
| 109.8 | 1522.7329 | -0.0004 | <a href="#">GLLTSVQDTASSVAR</a> |
| 0.8   | 1522.7282 | 0.0043  | <a href="#">MAVTKLDPDSVRR</a>   |

Mascot: <http://www.matrixscience.com/>

## Peptide View

MS/MS Fragmentation of **DESSLKAVK**

Found in **AT4G22300.1** in **TAIR\_Arabidopsis**, Symbols: SOBER1 | SOBER1 (SUPPRESSOR OF AVRBS-ELICITED RESISTANCE 1);  
carboxylesterase | chr4:11787572-11791067 REVERSE

Match to Query 3328: 1088.610434 from(545.312493,2+) index(7921)

Title: Elution from: 69.611 to 69.611 scan no 10352 cid35.00 polarity:+

Data file D12h-1\_2.mgf

Click mouse within plot area to zoom in by factor of two about that point

Or,   to  Da

Label all possible matches  Label matches used for scoring

Show Y-axis

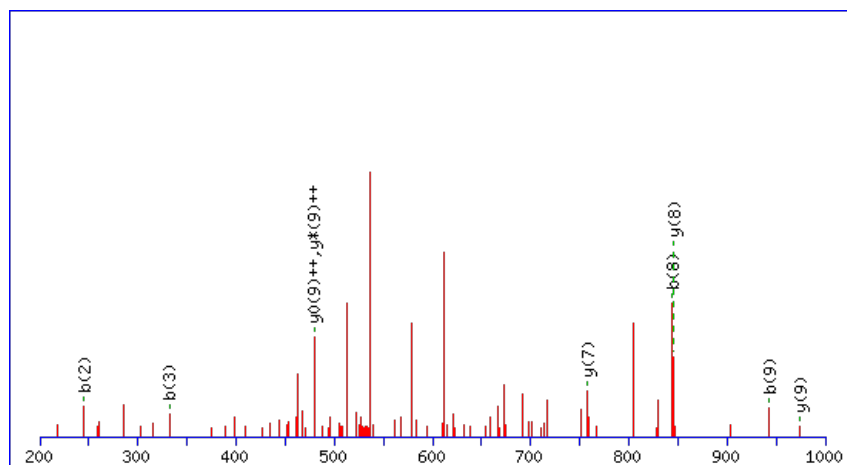

Monoisotopic mass of neutral peptide  $M_r(\text{calc})$ : 1088.6077

Fixed modifications: Carbamidomethyl (C) (apply to specified residues or termini only)

Ions Score: 21 Expect: 0.045

Matches : 9/84 fragment ions using 16 most intense peaks ([help](#))

| #  | b               | b <sup>++</sup> | b*       | b <sup>*++</sup> | b <sup>0</sup> | b <sup>0++</sup> | Seq. | y               | y <sup>++</sup> | y*       | y <sup>*++</sup> | y <sup>0</sup> | y <sup>0++</sup> | #  |
|----|-----------------|-----------------|----------|------------------|----------------|------------------|------|-----------------|-----------------|----------|------------------|----------------|------------------|----|
| 1  | 116.0342        | 58.5207         |          |                  | 98.0237        | 49.5155          | D    |                 |                 |          |                  |                |                  | 10 |
| 2  | <b>245.0768</b> | 123.0420        |          |                  | 227.0662       | 114.0368         | E    | <b>974.5881</b> | 487.7977        | 957.5615 | <b>479.2844</b>  | 956.5775       | <b>478.7924</b>  | 9  |
| 3  | <b>332.1088</b> | 166.5581        |          |                  | 314.0983       | 157.5528         | S    | <b>845.5455</b> | 423.2764        | 828.5189 | 414.7631         | 827.5349       | 414.2711         | 8  |
| 4  | 419.1409        | 210.0741        |          |                  | 401.1303       | 201.0688         | S    | <b>758.5135</b> | 379.7604        | 741.4869 | 371.2471         | 740.5029       | 370.7551         | 7  |
| 5  | 532.2249        | 266.6161        |          |                  | 514.2144       | 257.6108         | L    | 671.4814        | 336.2443        | 654.4549 | 327.7311         |                |                  | 6  |
| 6  | 645.3090        | 323.1581        |          |                  | 627.2984       | 314.1529         | L    | 558.3974        | 279.7023        | 541.3708 | 271.1890         |                |                  | 5  |
| 7  | 773.4040        | 387.2056        | 756.3774 | 378.6923         | 755.3934       | 378.2003         | K    | 445.3133        | 223.1603        | 428.2867 | 214.6470         |                |                  | 4  |
| 8  | <b>844.4411</b> | 422.7242        | 827.4145 | 414.2109         | 826.4305       | 413.7189         | A    | 317.2183        | 159.1128        | 300.1918 | 150.5995         |                |                  | 3  |
| 9  | <b>943.5095</b> | 472.2584        | 926.4829 | 463.7451         | 925.4989       | 463.2531         | V    | 246.1812        | 123.5942        | 229.1547 | 115.0810         |                |                  | 2  |
| 10 |                 |                 |          |                  |                |                  | K    | 147.1128        | 74.0600         | 130.0863 | 65.5468          |                |                  | 1  |

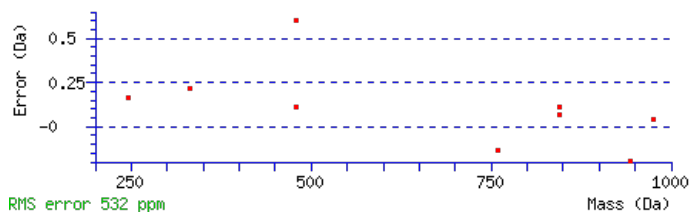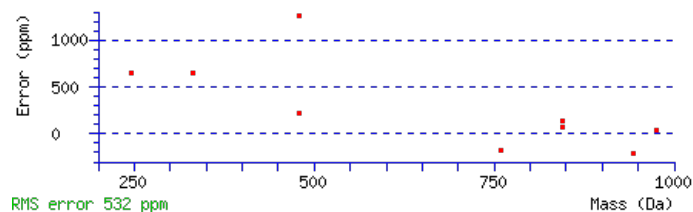

NCBI BLAST search of **DESSLKAVK**

(Parameters: blastp, nr protein database, expect=20000, no filter, PAM30)

Other BLAST [web gateways](#)

All matches to this query



**AT4G22300.1**

| <b>Score</b> | <b>Mr(calc)</b> | <b>Delta</b> | <b>Sequence</b>           |
|--------------|-----------------|--------------|---------------------------|
| 20.9         | 1088.6077       | 0.0027       | <a href="#">DESSLKAVK</a> |
| 7.5          | 1088.6124       | -0.0020      | <a href="#">REIKGSMR</a>  |
| 5.1          | 1088.6077       | 0.0027       | <a href="#">DEKSLKELK</a> |
| 4.2          | 1088.6124       | -0.0020      | <a href="#">MLAEKRIGR</a> |
| 1.2          | 1088.6124       | -0.0020      | <a href="#">LMLEQRRK</a>  |
| 0.6          | 1088.6091       | 0.0014       | <a href="#">FKRQTPQGK</a> |

**Mascot:** <http://www.matrixscience.com/>

## Peptide View

MS/MS Fragmentation of **AMEALSEGNFDEAIEHLTR**

Found in **AT4G22670.1** in **TAIR\_Arabidopsis**, Symbols: ATHIP1 | ATHIP1 (ARABIDOPSIS THALIANA HSP70-INTERACTING PROTEIN 1); binding | chr4:11918247-11920682 FORWARD

Match to Query 9643: 2131.986357 from(711.669395,3+) index(9181)

Title: Elution from: 81.145 to 81.145 scan no 12349 cid35.00 polarity:+

Data file D1d-3\_2.mgf

Click mouse within plot area to zoom in by factor of two about that point

Or, Plot from  to  Da

Label all possible matches  Label matches used for scoring

Show Y-axis

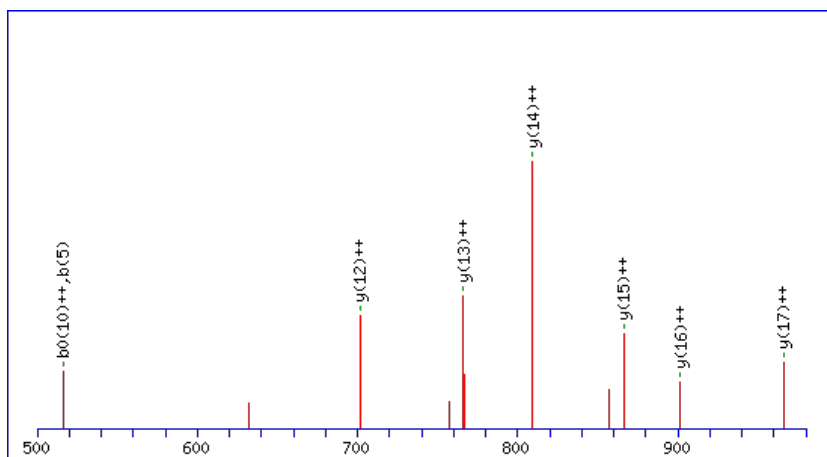

Monoisotopic mass of neutral peptide Mr(calc): 2131.9844

Fixed modifications: Carbamidomethyl (C) (apply to specified residues or termini only)

Ions Score: 45 Expect: 8.7e-005

Matches : 8/194 fragment ions using 9 most intense peaks ([help](#))

| #  | b         | b <sup>++</sup> | b*        | b <sup>*++</sup> | b <sup>0</sup> | b <sup>0++</sup> | Seq | y         | y <sup>++</sup> | y*        | y <sup>*++</sup> | y <sup>0</sup> | y <sup>0++</sup> | #  |
|----|-----------|-----------------|-----------|------------------|----------------|------------------|-----|-----------|-----------------|-----------|------------------|----------------|------------------|----|
| 1  | 72.0444   | 36.5258         |           |                  |                |                  | A   |           |                 |           |                  |                |                  | 19 |
| 2  | 203.0849  | 102.0461        |           |                  |                |                  | M   | 2061.9546 | 1031.4809       | 2044.9280 | 1022.9677        | 2043.9440      | 1022.4757        | 18 |
| 3  | 332.1275  | 166.5674        |           |                  | 314.1169       | 157.5621         | E   | 1930.9141 | 965.9607        | 1913.8876 | 957.4474         | 1912.9035      | 956.9554         | 17 |
| 4  | 403.1646  | 202.0859        |           |                  | 385.1540       | 193.0806         | A   | 1801.8715 | 901.4394        | 1784.8450 | 892.9261         | 1783.8610      | 892.4341         | 16 |
| 5  | 516.2486  | 258.6280        |           |                  | 498.2381       | 249.6227         | L   | 1730.8344 | 865.9208        | 1713.8079 | 857.4076         | 1712.8238      | 856.9156         | 15 |
| 6  | 603.2807  | 302.1440        |           |                  | 585.2701       | 293.1387         | S   | 1617.7503 | 809.3788        | 1600.7238 | 800.8655         | 1599.7398      | 800.3735         | 14 |
| 7  | 732.3233  | 366.6653        |           |                  | 714.3127       | 357.6600         | E   | 1530.7183 | 765.8628        | 1513.6918 | 757.3495         | 1512.7077      | 756.8575         | 13 |
| 8  | 789.3447  | 395.1760        |           |                  | 771.3342       | 386.1707         | G   | 1401.6757 | 701.3415        | 1384.6492 | 692.8282         | 1383.6652      | 692.3362         | 12 |
| 9  | 903.3877  | 452.1975        | 886.3611  | 443.6842         | 885.3771       | 443.1922         | N   | 1344.6543 | 672.8308        | 1327.6277 | 664.3175         | 1326.6437      | 663.8255         | 11 |
| 10 | 1050.4561 | 525.7317        | 1033.4295 | 517.2184         | 1032.4455      | 516.7264         | F   | 1230.6113 | 615.8093        | 1213.5848 | 607.2960         | 1212.6008      | 606.8040         | 10 |
| 11 | 1165.4830 | 583.2451        | 1148.4565 | 574.7319         | 1147.4725      | 574.2399         | D   | 1083.5429 | 542.2751        | 1066.5164 | 533.7618         | 1065.5323      | 533.2698         | 9  |
| 12 | 1294.5256 | 647.7664        | 1277.4991 | 639.2532         | 1276.5150      | 638.7612         | E   | 968.5160  | 484.7616        | 951.4894  | 476.2483         | 950.5054       | 475.7563         | 8  |
| 13 | 1365.5627 | 683.2850        | 1348.5362 | 674.7717         | 1347.5522      | 674.2797         | A   | 839.4734  | 420.2403        | 822.4468  | 411.7271         | 821.4628       | 411.2350         | 7  |
| 14 | 1478.6468 | 739.8270        | 1461.6202 | 731.3138         | 1460.6362      | 730.8217         | I   | 768.4363  | 384.7218        | 751.4097  | 376.2085         | 750.4257       | 375.7165         | 6  |
| 15 | 1607.6894 | 804.3483        | 1590.6628 | 795.8351         | 1589.6788      | 795.3430         | E   | 655.3522  | 328.1797        | 638.3257  | 319.6665         | 637.3416       | 319.1745         | 5  |
| 16 | 1744.7483 | 872.8778        | 1727.7217 | 864.3645         | 1726.7377      | 863.8725         | H   | 526.3096  | 263.6584        | 509.2831  | 255.1452         | 508.2990       | 254.6532         | 4  |
| 17 | 1857.8324 | 929.4198        | 1840.8058 | 920.9065         | 1839.8218      | 920.4145         | L   | 389.2507  | 195.1290        | 372.2241  | 186.6157         | 371.2401       | 186.1237         | 3  |
| 18 | 1958.8800 | 979.9437        | 1941.8535 | 971.4304         | 1940.8695      | 970.9384         | T   | 276.1666  | 138.5870        | 259.1401  | 130.0737         | 258.1561       | 129.5817         | 2  |
| 19 |           |                 |           |                  |                |                  | R   | 175.1190  | 88.0631         | 158.0924  | 79.5498          |                |                  | 1  |

# AT4G22670.1

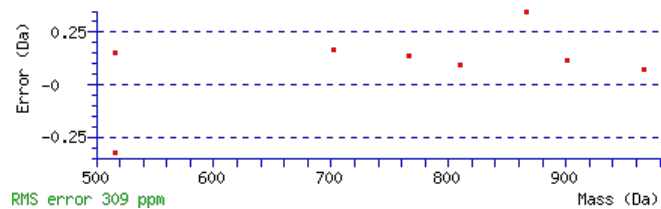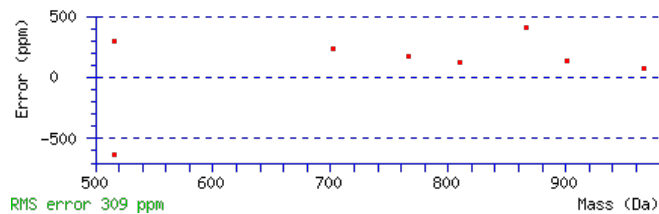

NCBI BLAST search of [AMEALSEGNFDEAIEHLTR](#)

(Parameters: blastp, nr protein database, expect=20000, no filter, PAM30)

Other BLAST [web gateways](#)

## All matches to this query

| Score | Mr(calc)  | Delta  | Sequence                            |
|-------|-----------|--------|-------------------------------------|
| 45.2  | 2131.9844 | 0.0020 | <a href="#">AMEALSEGNFDEAIEHLTR</a> |

Mascot: <http://www.matrixscience.com/>

## Peptide View

### MS/MS Fragmentation of **HVAEDVLK**

Found in **AT4G23100.1** in **TAIR\_Arabidopsis**, Symbols: GSH1, CAD2, PAD2, RML1 | RML1 (ROOT MERISTEMLESS 1); glutamate-cysteine ligase | chr4:12103469-12106762 REVERSE

Match to Query 1640: 909.492628 from(455.753590,2+) index(684)

Title: Elution from: 11.615 to 11.615 scan no 973 cid35.00 polarity:+

Data file D12h-3\_3.mgf

Click mouse within plot area to zoom in by factor of two about that point

Or,   to  Da

Label all possible matches  Label matches used for scoring

Show Y-axis

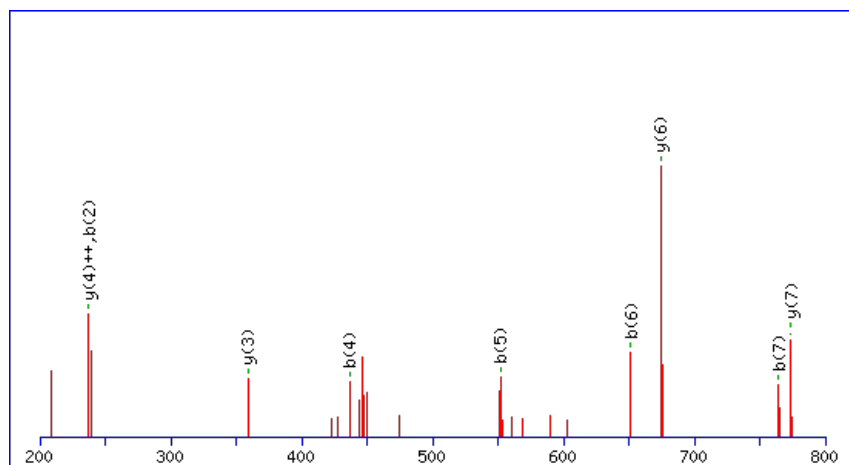

Monoisotopic mass of neutral peptide  $M_r(\text{calc})$ : 909.4920

Fixed modifications: Carbamidomethyl (C) (apply to specified residues or termini only)

Ions Score: 43 Expect: 0.0001

Matches : 9/58 fragment ions using 11 most intense peaks ([help](#))

| # | b               | b <sup>++</sup> | b <sup>0</sup> | b <sup>0++</sup> | Seq. | y               | y <sup>++</sup> | y*       | y <sup>*++</sup> | y <sup>0</sup> | y <sup>0++</sup> | # |
|---|-----------------|-----------------|----------------|------------------|------|-----------------|-----------------|----------|------------------|----------------|------------------|---|
| 1 | 138.0662        | 69.5367         |                |                  | H    |                 |                 |          |                  |                |                  | 8 |
| 2 | <b>237.1346</b> | 119.0709        |                |                  | V    | <b>773.4403</b> | 387.2238        | 756.4138 | 378.7105         | 755.4298       | 378.2185         | 7 |
| 3 | 308.1717        | 154.5895        |                |                  | A    | <b>674.3719</b> | 337.6896        | 657.3454 | 329.1763         | 656.3614       | 328.6843         | 6 |
| 4 | <b>437.2143</b> | 219.1108        | 419.2037       | 210.1055         | E    | 603.3348        | 302.1710        | 586.3083 | 293.6578         | 585.3243       | 293.1658         | 5 |
| 5 | <b>552.2413</b> | 276.6243        | 534.2307       | 267.6190         | D    | 474.2922        | <b>237.6498</b> | 457.2657 | 229.1365         | 456.2817       | 228.6445         | 4 |
| 6 | <b>651.3097</b> | 326.1585        | 633.2991       | 317.1532         | V    | <b>359.2653</b> | 180.1363        | 342.2387 | 171.6230         |                |                  | 3 |
| 7 | <b>764.3937</b> | 382.7005        | 746.3832       | 373.6952         | L    | 260.1969        | 130.6021        | 243.1703 | 122.0888         |                |                  | 2 |
| 8 |                 |                 |                |                  | K    | 147.1128        | 74.0600         | 130.0863 | 65.5468          |                |                  | 1 |

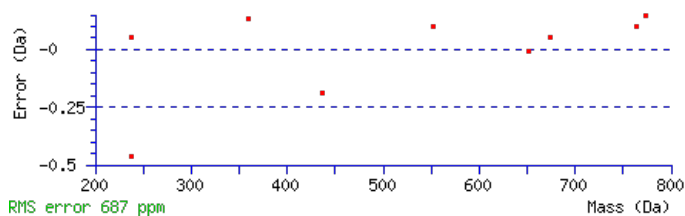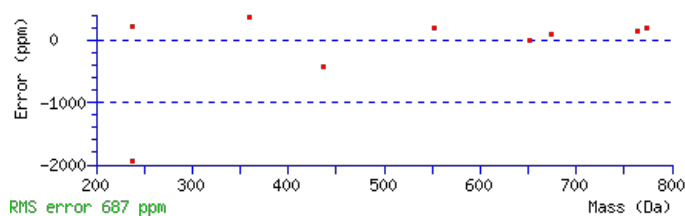

NCBI BLAST search of [HVAEDVLK](#)

(Parameters: blastp, nr protein database, expect=20000, no filter, PAM30)

Other BLAST [web gateways](#)

All matches to this query

| Score | $M_r(\text{calc})$ | Delta  | Sequence                 |
|-------|--------------------|--------|--------------------------|
| 43.5  | 909.4920           | 0.0007 | <a href="#">HVAEDVLK</a> |

## AT4G23100.1

|     |          |         |                         |
|-----|----------|---------|-------------------------|
| 4.3 | 909.4920 | 0.0007  | <a href="#">YRETTIK</a> |
| 0.2 | 909.4933 | -0.0007 | <a href="#">HGRIYHK</a> |

**Mascot:** <http://www.matrixscience.com/>



# Mascot Search Results

## Peptide View

MS/MS Fragmentation of **TGWLTLDGVER**

Found in **AT4G23600.1** in **TAIR\_Arabidopsis**, Symbols: JR2, COR13 | COR13 (CORONATINE INDUCED 1, JASMONIC ACID RESPONSIVE 2); transaminase | chr4:12310667-12312895 FORWARD

Match to Query 7738: 1648.770285 from(550.597371,3+) index(10029)

Title: Elution from: 92.097 to 92.097 scan no 13934 cid35.00 polarity:+

Data file D6h-3\_1.mgf

Click mouse within plot area to zoom in by factor of two about that point

Or,  to  Da

Label all possible matches  Label matches used for scoring

Show Y-axis

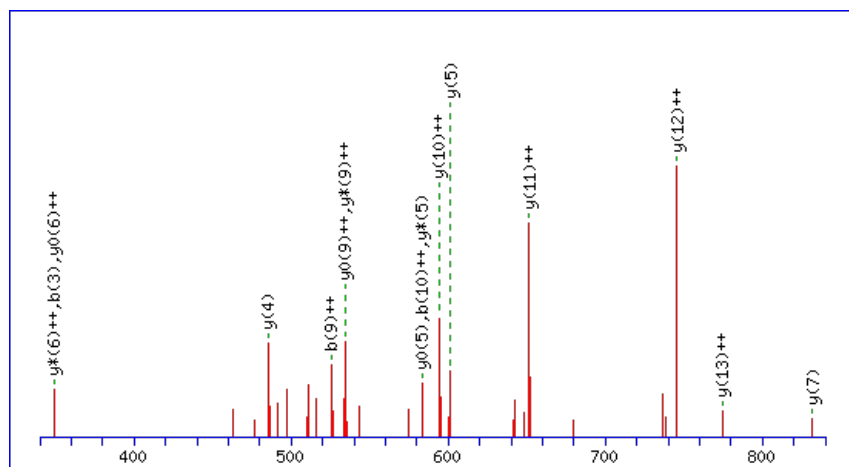

Monoisotopic mass of neutral peptide  $M_r(\text{calc})$ : 1648.7717

Fixed modifications: Carbamidomethyl (C) (apply to specified residues or termini only)

Ions Score: 46 Expect: 0.00021

Matches : 16/122 fragment ions using 12 most intense peaks [\(help\)](#)

| #  | b         | b <sup>++</sup> | b <sup>0</sup> | b <sup>0++</sup> | Seq. | y         | y <sup>++</sup> | y*        | y <sup>*++</sup> | y <sup>0</sup> | y <sup>0++</sup> | #  |
|----|-----------|-----------------|----------------|------------------|------|-----------|-----------------|-----------|------------------|----------------|------------------|----|
| 1  | 103.0520  | 52.0296         | 85.0414        | 43.0244          | T    |           |                 |           |                  |                |                  | 14 |
| 2  | 161.0705  | 81.0389         | 143.0599       | 72.0336          | G    | 1547.7344 | 774.3708        | 1529.7108 | 765.3590         | 1529.7238      | 765.3655         | 13 |
| 3  | 349.1439  | 175.0756        | 331.1333       | 166.0703         | W    | 1489.7159 | 745.3616        | 1471.6923 | 736.3498         | 1471.7053      | 736.3563         | 12 |
| 4  | 463.2250  | 232.1161        | 445.2144       | 223.1108         | L    | 1301.6425 | 651.3249        | 1283.6189 | 642.3131         | 1283.6319      | 642.3196         | 11 |
| 5  | 565.2697  | 283.1385        | 547.2591       | 274.1332         | T    | 1187.5614 | 594.2843        | 1169.5378 | 585.2725         | 1169.5508      | 585.2790         | 10 |
| 6  | 679.3508  | 340.1790        | 661.3402       | 331.1737         | L    | 1085.5167 | 543.2620        | 1067.4931 | 534.2502         | 1067.5061      | 534.2567         | 9  |
| 7  | 819.4008  | 410.2040        | 801.3902       | 401.1988         | H    | 971.4356  | 486.2214        | 953.4120  | 477.2096         | 953.4250       | 477.2161         | 8  |
| 8  | 935.4248  | 468.2160        | 917.4142       | 459.2107         | D    | 831.3855  | 416.1964        | 813.3620  | 407.1846         | 813.3750       | 407.1911         | 7  |
| 9  | 1049.5059 | 525.2566        | 1031.4953      | 516.2513         | L    | 715.3616  | 358.1844        | 697.3380  | 349.1726         | 697.3510       | 349.1791         | 6  |
| 10 | 1165.5299 | 583.2686        | 1147.5193      | 574.2633         | D    | 601.2805  | 301.1439        | 583.2569  | 292.1321         | 583.2699       | 292.1386         | 5  |
| 11 | 1223.5484 | 612.2778        | 1205.5378      | 603.2725         | G    | 485.2565  | 243.1319        | 467.2329  | 234.1201         |                |                  | 4  |
| 12 | 1323.6138 | 662.3105        | 1305.6032      | 653.3053         | V    | 427.2380  | 214.1226        | 409.2144  | 205.1108         |                |                  | 3  |
| 13 | 1471.6793 | 736.3433        | 1453.6687      | 727.3380         | F    | 327.1725  | 164.0899        | 309.1490  | 155.0781         |                |                  | 2  |
| 14 |           |                 |                |                  | R    | 179.1071  | 90.0572         | 161.0835  | 81.0454          |                |                  | 1  |

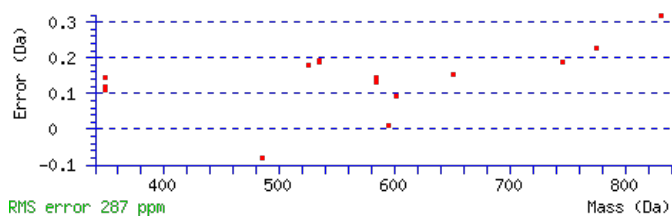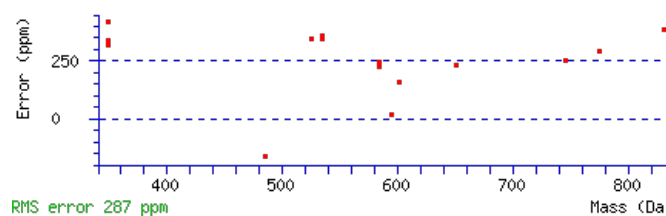

NCBI BLAST search of [TGWLTLDGVER](#)

## AT4G23600.1

(Parameters: blastp, nr protein database, expect=20000, no filter, PAM30)

Other BLAST [web gateways](#)

### All matches to this query

| Score | Mr(calc)  | Delta   | Sequence                         |
|-------|-----------|---------|----------------------------------|
| 46.2  | 1648.7717 | -0.0015 | <a href="#">TGWLTLDLDGVER</a>    |
| 4.3   | 1648.7695 | 0.0007  | <a href="#">WTGIPLSNLQOSER</a>   |
| 2.7   | 1648.7722 | -0.0019 | <a href="#">RLNRWVEPESPSR</a>    |
| 1.9   | 1648.7669 | 0.0034  | <a href="#">ASAEVLGKGSYGTTYK</a> |
| 1.9   | 1648.7704 | -0.0001 | <a href="#">MVFISCHLSAHAKK</a>   |
| 1.7   | 1648.7700 | 0.0003  | <a href="#">RRLGSETNGIHQEK</a>   |

Mascot: <http://www.matrixscience.com/>

**Peptide View**MS/MS Fragmentation of **MLKYDPK**

Found in **AT4G23650.1** in **TAIR\_Arabidopsis**, Symbols: CPK3, CDPK6 | CDPK6 (CALCIUM-DEPENDENT PROTEIN KINASE 6); calmodulin-dependent protein kinase/ kinase | chr4:12324977-12327425 REVERSE

Match to Query 1619: 893.468248 from(447.741400,2+) index(5953)

Title: Elution from: 52.767 to 52.767 scan no 7517 cid35.00 polarity:+

Data file 0-2\_1.mgf

Click mouse within plot area to zoom in by factor of two about that point

Or,   to  Da

Label all possible matches  Label matches used for scoring

Show Y-axis

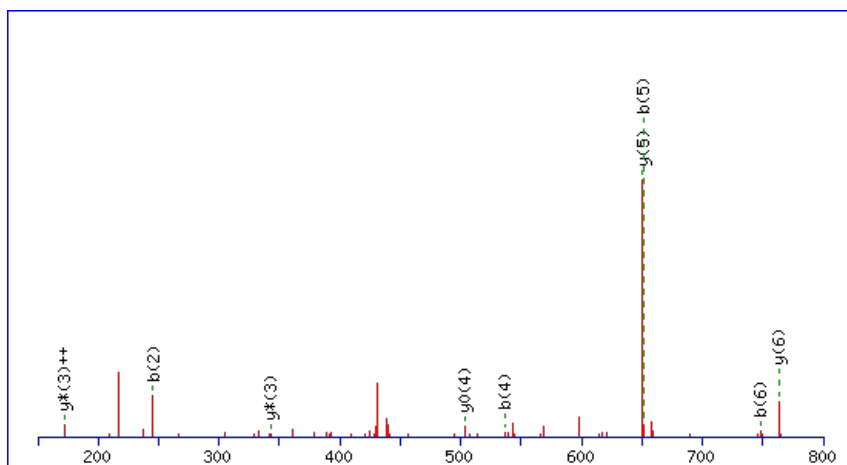

Monoisotopic mass of neutral peptide  $M_r(\text{calc})$ : 893.4680

Fixed modifications: Carbamidomethyl (C) (apply to specified residues or termini only)

Ions Score: 19 Expect: 0.029

Matches : 9/56 fragment ions using 24 most intense peaks ([help](#))

| # | b               | b <sup>++</sup> | b*       | b <sup>*++</sup> | b <sup>0</sup> | b <sup>0++</sup> | Seq. | y               | y <sup>++</sup> | y*              | y <sup>*++</sup> | y <sup>0</sup>  | y <sup>0++</sup> | # |
|---|-----------------|-----------------|----------|------------------|----------------|------------------|------|-----------------|-----------------|-----------------|------------------|-----------------|------------------|---|
| 1 | 132.0478        | 66.5275         |          |                  |                |                  | M    |                 |                 |                 |                  |                 |                  | 7 |
| 2 | <b>245.1318</b> | 123.0696        |          |                  |                |                  | L    | <b>763.4349</b> | 382.2211        | 746.4083        | 373.7078         | 745.4243        | 373.2158         | 6 |
| 3 | 373.2268        | 187.1170        | 356.2002 | 178.6038         |                |                  | K    | <b>650.3508</b> | 325.6790        | 633.3243        | 317.1658         | 632.3402        | 316.6738         | 5 |
| 4 | <b>536.2901</b> | 268.6487        | 519.2636 | 260.1354         |                |                  | Y    | 522.2558        | 261.6316        | 505.2293        | 253.1183         | <b>504.2453</b> | 252.6263         | 4 |
| 5 | <b>651.3171</b> | 326.1622        | 634.2905 | 317.6489         | 633.3065       | 317.1569         | D    | 359.1925        | 180.0999        | <b>342.1660</b> | <b>171.5866</b>  | 341.1819        | 171.0946         | 3 |
| 6 | <b>748.3698</b> | 374.6886        | 731.3433 | 366.1753         | 730.3593       | 365.6833         | P    | 244.1656        | 122.5864        | 227.1390        | 114.0731         |                 |                  | 2 |
| 7 |                 |                 |          |                  |                |                  | K    | 147.1128        | 74.0600         | 130.0863        | 65.5468          |                 |                  | 1 |

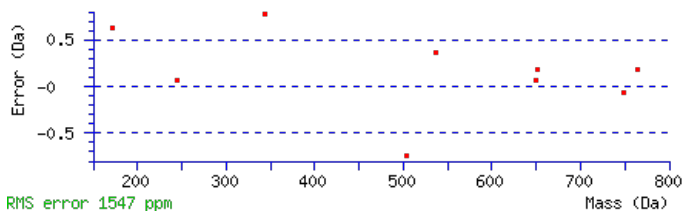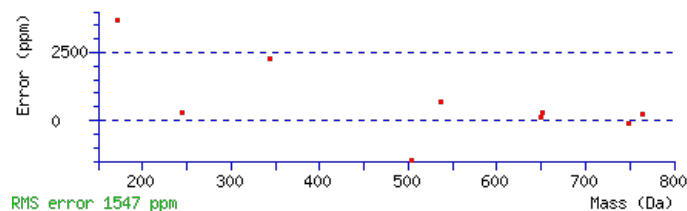

NCBI BLAST search of [MLKYDPK](#)

(Parameters: blastp, nr protein database, expect=20000, no filter, PAM30)

Other BLAST [web gateways](#)

**All matches to this query**

| Score | $M_r(\text{calc})$ | Delta  | Sequence                |
|-------|--------------------|--------|-------------------------|
| 18.9  | 893.4680           | 0.0002 | <a href="#">MLKYDPK</a> |
| 17.4  | 893.4681           | 0.0002 | <a href="#">MLFDIQK</a> |



# AT4G23650.1

|      |          |        |                         |
|------|----------|--------|-------------------------|
| 15.2 | 893.4681 | 0.0002 | <a href="#">MLDQFLK</a> |
| 9.0  | 893.4681 | 0.0002 | <a href="#">LMDQLFK</a> |

**Mascot:** <http://www.matrixscience.com/>

## Peptide View

MS/MS Fragmentation of **RNDDFPEPSGYMK**

Found in **AT4G23670.1** in **TAIR\_Arabidopsis**, Symbols: | major latex protein-related / MLP-related | chr4:12332856-12333666 REVERSE

Match to Query 6814: 1572.625098 from(787.319825,2+) index(3543)

Title: Elution from: 34.390 to 34.390 scan no 4434 cid35.00 polarity:+

Data file D6h-1\_3.mgf

Click mouse within plot area to zoom in by factor of two about that point

Or,   to  Da

Label all possible matches  Label matches used for scoring

Show Y-axis

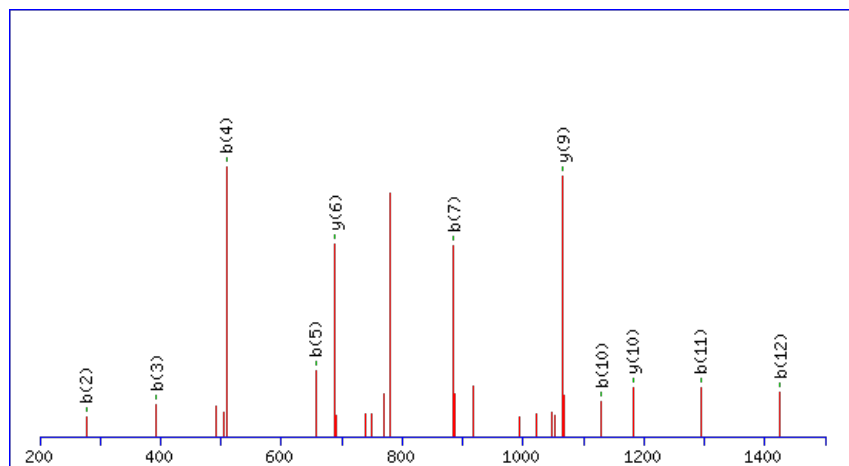

Monoisotopic mass of neutral peptide  $M_r(\text{calc})$ : 1572.6239

Fixed modifications: Carbamidomethyl (C) (apply to specified residues or termini only)

Ions Score: 83 Expect: 1.2e-008

Matches : 11/132 fragment ions using 12 most intense peaks ([help](#))

| #  | b                | b <sup>++</sup> | b*        | b <sup>*++</sup> | b <sup>0</sup> | b <sup>0++</sup> | Seq.     | y                | y <sup>++</sup> | y*        | y <sup>*++</sup> | y <sup>0</sup> | y <sup>0++</sup> | #         |
|----|------------------|-----------------|-----------|------------------|----------------|------------------|----------|------------------|-----------------|-----------|------------------|----------------|------------------|-----------|
| 1  | 161.0965         | 81.0519         | 143.0729  | 72.0401          |                |                  | <b>R</b> |                  |                 |           |                  |                |                  | <b>13</b> |
| 2  | <b>277.1335</b>  | 139.0704        | 259.1099  | 130.0586         |                |                  | <b>N</b> | 1413.5419        | 707.2746        | 1395.5184 | 698.2628         | 1395.5314      | 698.2693         | <b>12</b> |
| 3  | <b>393.1575</b>  | 197.0824        | 375.1339  | 188.0706         | 375.1469       | 188.0771         | <b>D</b> | 1297.5050        | 649.2561        | 1279.4814 | 640.2443         | 1279.4944      | 640.2508         | <b>11</b> |
| 4  | <b>509.1815</b>  | 255.0944        | 491.1579  | 246.0826         | 491.1709       | 246.0891         | <b>D</b> | <b>1181.4810</b> | 591.2441        | 1163.4574 | 582.2323         | 1163.4704      | 582.2388         | <b>10</b> |
| 5  | <b>657.2469</b>  | 329.1271        | 639.2233  | 320.1153         | 639.2364       | 320.1218         | <b>F</b> | <b>1065.4570</b> | 533.2321        | 1047.4334 | 524.2203         | 1047.4464      | 524.2269         | <b>9</b>  |
| 6  | 755.2967         | 378.1520        | 737.2731  | 369.1402         | 737.2862       | 369.1467         | <b>P</b> | 917.3915         | 459.1994        | 899.3680  | 450.1876         | 899.3810       | 450.1941         | <b>8</b>  |
| 7  | <b>885.3364</b>  | 443.1718        | 867.3128  | 434.1600         | 867.3258       | 434.1665         | <b>E</b> | 819.3417         | 410.1745        | 801.3182  | 401.1627         | 801.3312       | 401.1692         | <b>7</b>  |
| 8  | 983.3862         | 492.1967        | 965.3626  | 483.1849         | 965.3756       | 483.1914         | <b>P</b> | <b>689.3021</b>  | 345.1547        | 671.2785  | 336.1429         | 671.2916       | 336.1494         | <b>6</b>  |
| 9  | 1071.4152        | 536.2112        | 1053.3916 | 527.1995         | 1053.4047      | 527.2060         | <b>S</b> | 591.2523         | 296.1298        | 573.2287  | 287.1180         | 573.2418       | 287.1245         | <b>5</b>  |
| 10 | <b>1129.4337</b> | 565.2205        | 1111.4101 | 556.2087         | 1111.4232      | 556.2152         | <b>G</b> | 503.2233         | 252.1153        | 485.1997  | 243.1035         |                |                  | <b>4</b>  |
| 11 | <b>1293.4941</b> | 647.2507        | 1275.4705 | 638.2389         | 1275.4835      | 638.2454         | <b>Y</b> | 445.2048         | 223.1060        | 427.1812  | 214.0942         |                |                  | <b>3</b>  |
| 12 | <b>1425.5316</b> | 713.2694        | 1407.5080 | 704.2576         | 1407.5210      | 704.2642         | <b>M</b> | 281.1444         | 141.0758        | 263.1208  | 132.0640         |                |                  | <b>2</b>  |
| 13 |                  |                 |           |                  |                |                  | <b>K</b> | 149.1069         | 75.0571         | 131.0833  | 66.0453          |                |                  | <b>1</b>  |

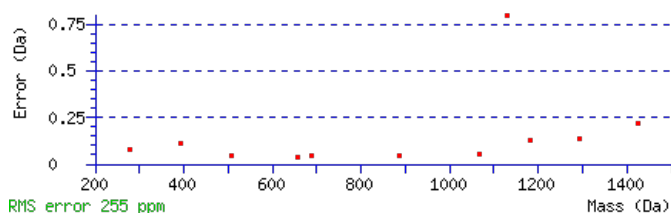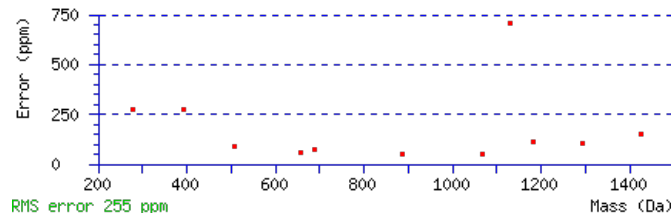

NCBI **BLAST** search of **RNDDFPEPSGYMK**

(Parameters: blastp, nr protein database, expect=20000, no filter, PAM30)

Other BLAST [web gateways](#)

AT4G23670.1

All matches to this query

| Score | Mr(calc)  | Delta   | Sequence                       |
|-------|-----------|---------|--------------------------------|
| 83.1  | 1572.6239 | 0.0012  | <a href="#">RNDDFPEPSGYMK</a>  |
| 7.0   | 1572.6221 | 0.0030  | <a href="#">ARRDGEMGSSPER</a>  |
| 3.3   | 1572.6298 | -0.0047 | <a href="#">GQOSTVETESMQSK</a> |

Mascot: <http://www.matrixscience.com/>

**Peptide View**MS/MS Fragmentation of **EFILGELVK**Found in **AT4G23850.1** in **TAIR\_Arabidopsis**, Symbols: | long-chain-fatty-acid--CoA ligase / long-chain acyl-CoA synthetase | chr4:12403730-12408273 REVERSE

Match to Query 3132: 1046.600934 from(524.307743,2+) index(8936)

Title: Elution from: 78.569 to 78.569 scan no 11851 cid35.00 polarity:+

Data file D1d-3\_1.mgf

Click mouse within plot area to zoom in by factor of two about that point

Or,   to  Da Label all possible matches  Label matches used for scoring Show Y-axis 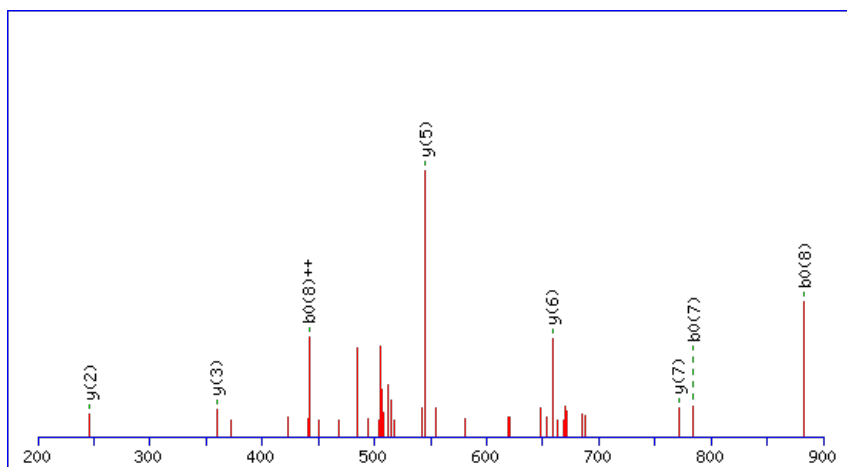

Monoisotopic mass of neutral peptide Mr(calc): 1046.6012

Fixed modifications: Carbamidomethyl (C) (apply to specified residues or termini only)

Ions Score: 25 Expect: 0.01

Matches : 8/74 fragment ions using 12 most intense peaks ([help](#))

| # | b        | b <sup>++</sup> | b <sup>0</sup>  | b <sup>0++</sup> | Seq. | y               | y <sup>++</sup> | y*       | y <sup>*++</sup> | y <sup>0</sup> | y <sup>0++</sup> | # |
|---|----------|-----------------|-----------------|------------------|------|-----------------|-----------------|----------|------------------|----------------|------------------|---|
| 1 | 130.0499 | 65.5286         | 112.0393        | 56.5233          | E    |                 |                 |          |                  |                |                  | 9 |
| 2 | 277.1183 | 139.0628        | 259.1077        | 130.0575         | F    | 918.5659        | 459.7866        | 901.5393 | 451.2733         | 900.5553       | 450.7813         | 8 |
| 3 | 390.2023 | 195.6048        | 372.1918        | 186.5995         | I    | <b>771.4975</b> | 386.2524        | 754.4709 | 377.7391         | 753.4869       | 377.2471         | 7 |
| 4 | 503.2864 | 252.1468        | 485.2758        | 243.1416         | L    | <b>658.4134</b> | 329.7103        | 641.3869 | 321.1971         | 640.4028       | 320.7051         | 6 |
| 5 | 560.3079 | 280.6576        | 542.2973        | 271.6523         | G    | <b>545.3293</b> | 273.1683        | 528.3028 | 264.6550         | 527.3188       | 264.1630         | 5 |
| 6 | 689.3505 | 345.1789        | 671.3399        | 336.1736         | E    | 488.3079        | 244.6576        | 471.2813 | 236.1443         | 470.2973       | 235.6523         | 4 |
| 7 | 802.4345 | 401.7209        | <b>784.4240</b> | 392.7156         | L    | <b>359.2653</b> | 180.1363        | 342.2387 | 171.6230         |                |                  | 3 |
| 8 | 901.5029 | 451.2551        | <b>883.4924</b> | <b>442.2498</b>  | V    | <b>246.1812</b> | 123.5942        | 229.1547 | 115.0810         |                |                  | 2 |
| 9 |          |                 |                 |                  | K    | 147.1128        | 74.0600         | 130.0863 | 65.5468          |                |                  | 1 |

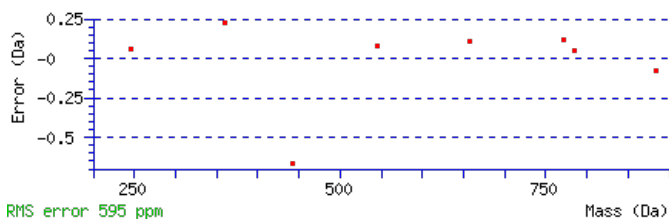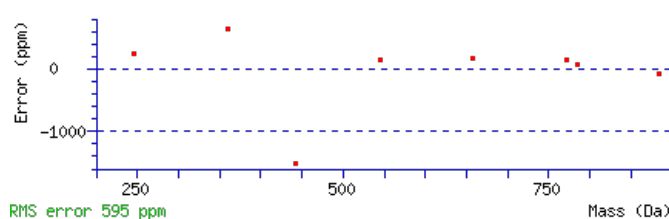NCBI **BLAST** search of **EFILGELVK**

(Parameters: blastp, nr protein database, expect=20000, no filter, PAM30)

Other BLAST [web gateways](#)

All matches to this query

| Score | Mr(calc) | Delta | Sequence |
|-------|----------|-------|----------|
|       |          |       |          |

AT4G23850.1

|      |           |         |                           |
|------|-----------|---------|---------------------------|
| 25.3 | 1046.6012 | -0.0002 | <a href="#">EFILGELVK</a> |
|------|-----------|---------|---------------------------|

**Mascot:** <http://www.matrixscience.com/>

## Peptide View

MS/MS Fragmentation of **APHDLYESYYNSNK**

Found in **AT4G24190.1** in **TAIR\_Arabidopsis**, Symbols: SHD | SHD (SHEPHERD); ATP binding | chr4:12551912-12555861 REVERSE

Match to Query 7952: 1718.692680 from(573.904836,3+) index(3309)

Title: Elution from: 30.694 to 30.694 scan no 4034 cid35.00 polarity:+

Data file D1d-3\_3.mgf

Click mouse within plot area to zoom in by factor of two about that point

Or,   to  Da

Label all possible matches  Label matches used for scoring

Show Y-axis

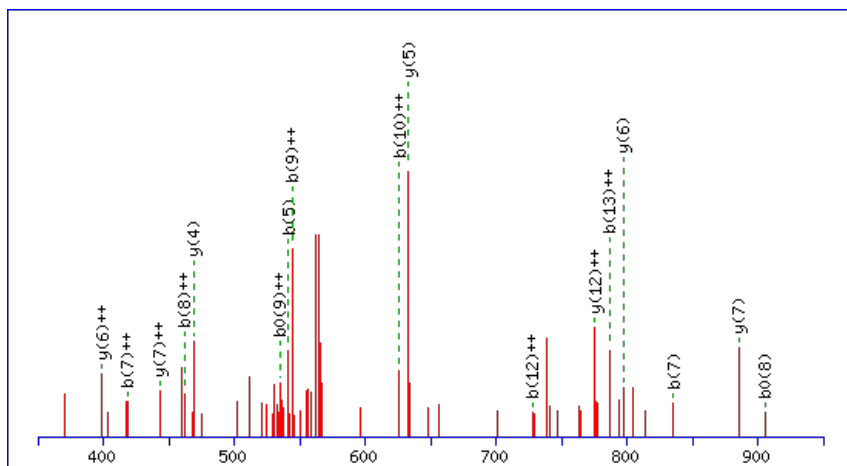

Monoisotopic mass of neutral peptide  $M_r(\text{calc})$ : 1718.6915

Fixed modifications: Carbamidomethyl (C) (apply to specified residues or termini only)

Ions Score: 18 Expect: 0.047

Matches : 17/126 fragment ions using 37 most intense peaks ([help](#))

| #  | b         | b <sup>++</sup> | b*        | b <sup>*++</sup> | b <sup>0</sup> | b <sup>0++</sup> | Seq. | y         | y <sup>++</sup> | y*        | y <sup>*++</sup> | y <sup>0</sup> | y <sup>0++</sup> | #  |
|----|-----------|-----------------|-----------|------------------|----------------|------------------|------|-----------|-----------------|-----------|------------------|----------------|------------------|----|
| 1  | 73.0414   | 37.0244         |           |                  |                |                  | A    |           |                 |           |                  |                |                  | 14 |
| 2  | 171.0912  | 86.0492         |           |                  |                |                  | P    | 1647.6646 | 824.3359        | 1629.6410 | 815.3241         | 1629.6540      | 815.3307         | 13 |
| 3  | 311.1412  | 156.0743        |           |                  |                |                  | H    | 1549.6148 | 775.3110        | 1531.5912 | 766.2992         | 1531.6042      | 766.3058         | 12 |
| 4  | 427.1652  | 214.0862        |           |                  | 409.1547       | 205.0810         | D    | 1409.5648 | 705.2860        | 1391.5412 | 696.2742         | 1391.5542      | 696.2808         | 11 |
| 5  | 541.2463  | 271.1268        |           |                  | 523.2358       | 262.1215         | L    | 1293.5408 | 647.2740        | 1275.5172 | 638.2623         | 1275.5302      | 638.2688         | 10 |
| 6  | 705.3067  | 353.1570        |           |                  | 687.2961       | 344.1517         | Y    | 1179.4597 | 590.2335        | 1161.4361 | 581.2217         | 1161.4491      | 581.2282         | 9  |
| 7  | 835.3463  | 418.1768        |           |                  | 817.3357       | 409.1715         | E    | 1015.3993 | 508.2033        | 997.3758  | 499.1915         | 997.3888       | 499.1980         | 8  |
| 8  | 923.3754  | 462.1913        |           |                  | 905.3648       | 453.1860         | S    | 885.3597  | 443.1835        | 867.3361  | 434.1717         | 867.3492       | 434.1782         | 7  |
| 9  | 1087.4357 | 544.2215        |           |                  | 1069.4252      | 535.2162         | Y    | 797.3307  | 399.1690        | 779.3071  | 390.1572         | 779.3201       | 390.1637         | 6  |
| 10 | 1251.4961 | 626.2517        |           |                  | 1233.4855      | 617.2464         | Y    | 633.2703  | 317.1388        | 615.2467  | 308.1270         | 615.2597       | 308.1335         | 5  |
| 11 | 1367.5331 | 684.2702        | 1349.5095 | 675.2584         | 1349.5225      | 675.2649         | N    | 469.2099  | 235.1086        | 451.1863  | 226.0968         | 451.1994       | 226.1033         | 4  |
| 12 | 1455.5622 | 728.2847        | 1437.5386 | 719.2729         | 1437.5516      | 719.2794         | S    | 353.1729  | 177.0901        | 335.1493  | 168.0783         | 335.1624       | 168.0848         | 3  |
| 13 | 1571.5992 | 786.3032        | 1553.5756 | 777.2914         | 1553.5886      | 777.2979         | N    | 265.1439  | 133.0756        | 247.1203  | 124.0638         |                |                  | 2  |
| 14 |           |                 |           |                  |                |                  | K    | 149.1069  | 75.0571         | 131.0833  | 66.0453          |                |                  | 1  |

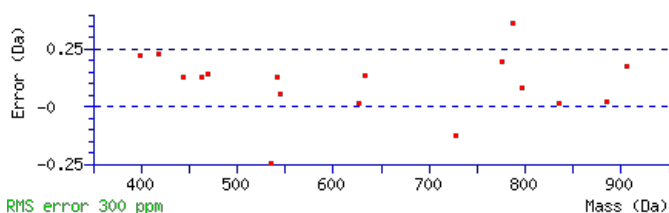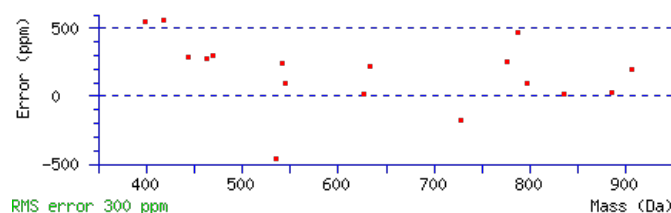

NCBI BLAST search of **APHDLYESYYNSNK**

(Parameters: blastp, nr protein database, expect=20000, no filter, PAM30)

AT4G24190.1

Other BLAST [web gateways](#)

All matches to this query

| Score | Mr(calc)  | Delta   | Sequence                        |
|-------|-----------|---------|---------------------------------|
| 17.7  | 1718.6915 | 0.0012  | <a href="#">APHDLYESYYNSNK</a>  |
| 0.1   | 1718.6948 | -0.0022 | <a href="#">GTHGYMDPTYISTNK</a> |

Mascot: <http://www.matrixscience.com/>

**Peptide View**MS/MS Fragmentation of **TTPSVVAYTK**

Found in **AT4G24280.1** in **TAIR\_Arabidopsis**, Symbols: CPHSC70-1 | CPHSC70-1 (chloroplast heat shock protein 70-1); ATP binding / unfolded protein binding | chr4:12590104-12593447 FORWARD

Match to Query 3266: 1065.570584 from(533.792568,2+) index(2195)

Title: Elution from: 25.463 to 25.463 scan no 2822 cid35.00 polarity:+

Data file 0-1\_1.mgf

Click mouse within plot area to zoom in by factor of two about that point

Or,   to  Da

Label all possible matches  Label matches used for scoring

Show Y-axis

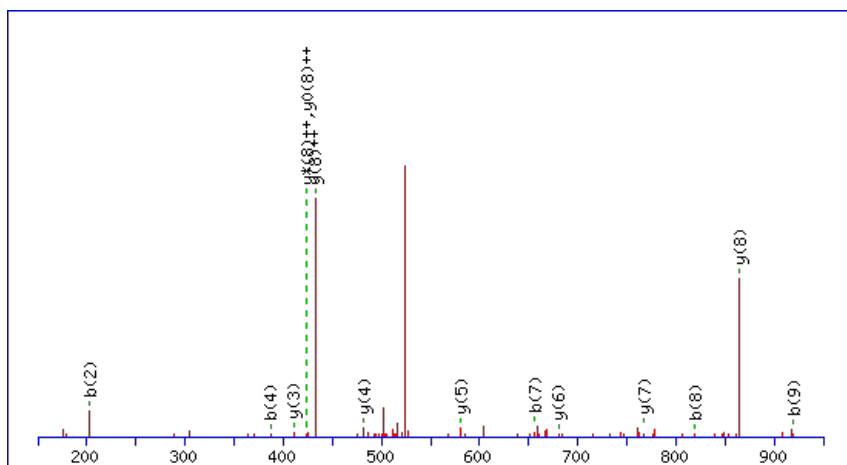

Monoisotopic mass of neutral peptide  $M_r(\text{calc})$ : 1065.5706

Fixed modifications: Carbamidomethyl (C) (apply to specified residues or termini only)

Ions Score: 29 Expect: 0.0063

Matches : 14/88 fragment ions using 44 most intense peaks ([help](#))

| #  | b               | b <sup>++</sup> | b <sup>0</sup> | b <sup>0++</sup> | Seq. | y               | y <sup>++</sup> | y*       | y <sup>*++</sup> | y <sup>0</sup> | y <sup>0++</sup> | #  |
|----|-----------------|-----------------|----------------|------------------|------|-----------------|-----------------|----------|------------------|----------------|------------------|----|
| 1  | 102.0550        | 51.5311         | 84.0444        | 42.5258          | T    |                 |                 |          |                  |                |                  | 10 |
| 2  | <b>203.1026</b> | 102.0550        | 185.0921       | 93.0497          | T    | 965.5302        | 483.2688        | 948.5037 | 474.7555         | 947.5197       | 474.2635         | 9  |
| 3  | 300.1554        | 150.5813        | 282.1448       | 141.5761         | P    | <b>864.4825</b> | <b>432.7449</b> | 847.4560 | <b>424.2316</b>  | 846.4720       | <b>423.7396</b>  | 8  |
| 4  | <b>387.1874</b> | 194.0974        | 369.1769       | 185.0921         | S    | <b>767.4298</b> | 384.2185        | 750.4032 | 375.7053         | 749.4192       | 375.2132         | 7  |
| 5  | 486.2558        | 243.6316        | 468.2453       | 234.6263         | V    | <b>680.3978</b> | 340.7025        | 663.3712 | 332.1892         | 662.3872       | 331.6972         | 6  |
| 6  | 585.3243        | 293.1658        | 567.3137       | 284.1605         | V    | <b>581.3293</b> | 291.1683        | 564.3028 | 282.6550         | 563.3188       | 282.1630         | 5  |
| 7  | <b>656.3614</b> | 328.6843        | 638.3508       | 319.6790         | A    | <b>482.2609</b> | 241.6341        | 465.2344 | 233.1208         | 464.2504       | 232.6288         | 4  |
| 8  | <b>819.4247</b> | 410.2160        | 801.4141       | 401.2107         | Y    | <b>411.2238</b> | 206.1155        | 394.1973 | 197.6023         | 393.2132       | 197.1103         | 3  |
| 9  | <b>920.4724</b> | 460.7398        | 902.4618       | 451.7345         | T    | 248.1605        | 124.5839        | 231.1339 | 116.0706         | 230.1499       | 115.5786         | 2  |
| 10 |                 |                 |                |                  | K    | 147.1128        | 74.0600         | 130.0863 | 65.5468          |                |                  | 1  |

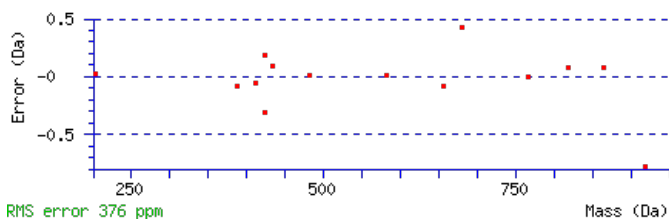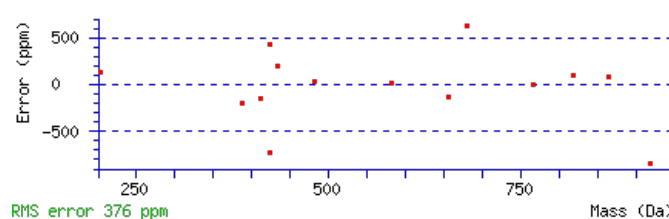

NCBI BLAST search of **TTPSVVAYTK**

(Parameters: blastp, nr protein database, expect=20000, no filter, PAM30)

Other BLAST [web gateways](#)

All matches to this query



AT4G24280.1

| Score | Mr(calc)  | Delta   | Sequence                   |
|-------|-----------|---------|----------------------------|
| 28.5  | 1065.5706 | -0.0000 | <a href="#">TTPSVVAYTK</a> |
| 0.3   | 1065.5706 | -0.0000 | <a href="#">SLLVDSFAK</a>  |

Mascot: <http://www.matrixscience.com/>


**Mascot Search Results**
**Peptide View**MS/MS Fragmentation of **AEFPEPSEEAK**

Found in **AT4G24770.1** in **TAIR\_Arabidopsis**, Symbols: ATRBP31, CP31, ATRBP33, RBP31 | RBP31 (31-KDA RNA BINDING PROTEIN); RNA binding / poly(U) binding | chr4:12766233-12767962 REVERSE

Match to Query 4661: 1244.519980 from(623.267266,2+) index(2432)

Title: Elution from: 27.003 to 27.003 scan no 3088 cid35.00 polarity:+

Data file 0-1\_1.mgf

Click mouse within plot area to zoom in by factor of two about that point

Or,   to  Da

Label all possible matches  Label matches used for scoring

Show Y-axis

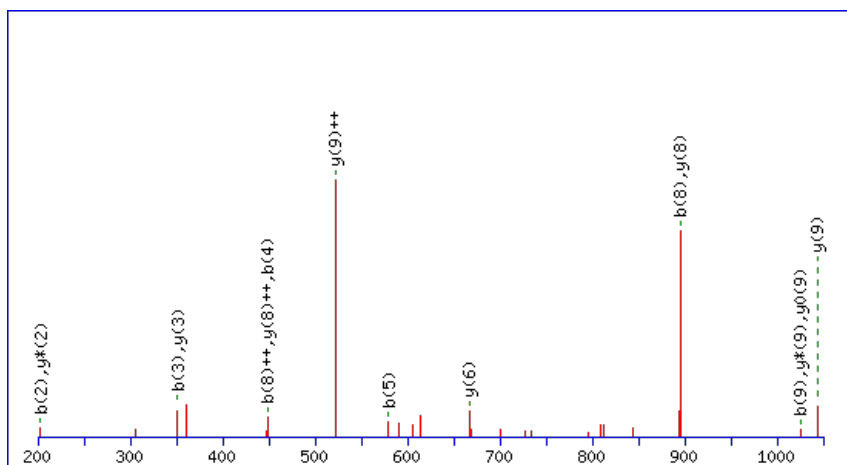

Monoisotopic mass of neutral peptide  $M_r(\text{calc})$ : 1244.5205

**Fixed modifications:** Carbamidomethyl (C) (apply to specified residues or termini only)

**Ions Score:** 50 **Expect:** 2.6e-005

**Matches:** 16/94 fragment ions using 15 most intense peaks ([help](#))

| #  | b                | b <sup>++</sup> | b <sup>0</sup> | b <sup>0++</sup> | Seq. | y                | y <sup>++</sup> | y*               | y <sup>*++</sup> | y <sup>0</sup>   | y <sup>0++</sup> | #  |
|----|------------------|-----------------|----------------|------------------|------|------------------|-----------------|------------------|------------------|------------------|------------------|----|
| 1  | 73.0414          | 37.0244         |                |                  | A    |                  |                 |                  |                  |                  |                  | 11 |
| 2  | <b>203.0811</b>  | 102.0442        | 185.0705       | 93.0389          | E    | 1173.4936        | 587.2505        | 1155.4701        | 578.2387         | 1155.4831        | 578.2452         | 10 |
| 3  | <b>351.1465</b>  | 176.0769        | 333.1359       | 167.0716         | F    | <b>1043.4540</b> | <b>522.2306</b> | <b>1025.4304</b> | 513.2189         | <b>1025.4435</b> | 513.2254         | 9  |
| 4  | <b>449.1963</b>  | 225.1018        | 431.1857       | 216.0965         | P    | <b>895.3886</b>  | <b>448.1979</b> | 877.3650         | 439.1861         | 877.3780         | 439.1926         | 8  |
| 5  | <b>579.2359</b>  | 290.1216        | 561.2254       | 281.1163         | E    | 797.3388         | 399.1730        | 779.3152         | 390.1612         | 779.3282         | 390.1677         | 7  |
| 6  | 677.2857         | 339.1465        | 659.2752       | 330.1412         | P    | <b>667.2991</b>  | 334.1532        | 649.2756         | 325.1414         | 649.2886         | 325.1479         | 6  |
| 7  | 765.3148         | 383.1610        | 747.3042       | 374.1558         | S    | 569.2493         | 285.1283        | 551.2258         | 276.1165         | 551.2388         | 276.1230         | 5  |
| 8  | <b>895.3544</b>  | <b>448.1808</b> | 877.3439       | 439.1756         | E    | 481.2203         | 241.1138        | 463.1967         | 232.1020         | 463.2097         | 232.1085         | 4  |
| 9  | <b>1025.3940</b> | 513.2007        | 1007.3835      | 504.1954         | E    | <b>351.1807</b>  | 176.0940        | 333.1571         | 167.0822         | 333.1701         | 167.0887         | 3  |
| 10 | 1097.4282        | 549.2177        | 1079.4176      | 540.2125         | A    | 221.1410         | 111.0741        | <b>203.1174</b>  | 102.0624         |                  |                  | 2  |
| 11 |                  |                 |                |                  | K    | 149.1069         | 75.0571         | 131.0833         | 66.0453          |                  |                  | 1  |

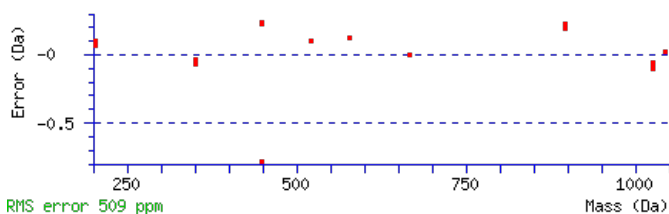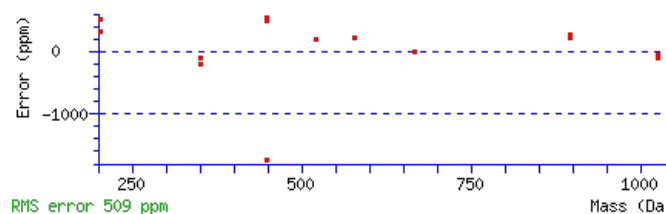

NCBI **BLAST** search of **AEFPEPSEEAK**

(Parameters: blastp, nr protein database, expect=20000, no filter, PAM30)

Other BLAST [web gateways](#)

All matches to this query

**AT4G24770.1**

| <b>Score</b> | <b>Mr(calc)</b> | <b>Delta</b> | <b>Sequence</b>             |
|--------------|-----------------|--------------|-----------------------------|
| 50.1         | 1244.5205       | -0.0005      | <a href="#">AEFPEPSEEAK</a> |
| 0.6          | 1244.5218       | -0.0018      | <a href="#">MSKMKDFGGGR</a> |
| 0.4          | 1244.5232       | -0.0032      | <a href="#">YSRNFEESEAK</a> |
| 0.3          | 1244.5184       | 0.0015       | <a href="#">QASSAQGFFMR</a> |

**Mascot:** <http://www.matrixscience.com/>

**Peptide View**MS/MS Fragmentation of **IADAEENLGESEVR**Found in **AT4G24820.1** in **TAIR\_Arabidopsis**, Symbols: | 26S proteasome regulatory subunit, putative (RPN7) | chr4:12790481-12792609  
REVERSE

Match to Query 6678: 1530.716466 from(766.365509,2+) index(3009)

Title: Elution from: 29.154 to 29.154 scan no 3709 cid35.00 polarity:+

Data file D1d-3\_2.mgf

Click mouse within plot area to zoom in by factor of two about that point

Or,   to  Da Label all possible matches  Label matches used for scoring Show Y-axis 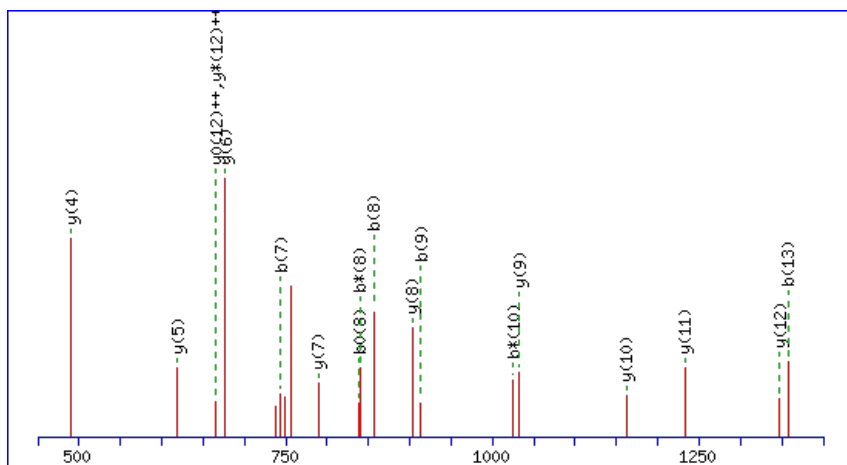Monoisotopic mass of neutral peptide  $M_r(\text{calc})$ : 1530.7161

Fixed modifications: Carbamidomethyl (C) (apply to specified residues or termini only)

Ions Score: 100 Expect: 3.2e-010

Matches : 18/136 fragment ions using 19 most intense peaks ([help](#))

| #  | b                | b <sup>++</sup> | b*               | b* <sup>++</sup> | b <sup>0</sup>  | b <sup>0++</sup> | Seq. | y                | y <sup>++</sup> | y*        | y* <sup>++</sup> | y <sup>0</sup> | y <sup>0++</sup> | #  |
|----|------------------|-----------------|------------------|------------------|-----------------|------------------|------|------------------|-----------------|-----------|------------------|----------------|------------------|----|
| 1  | 114.0913         | 57.5493         |                  |                  |                 |                  | I    |                  |                 |           |                  |                |                  | 14 |
| 2  | 185.1285         | 93.0679         |                  |                  |                 |                  | A    | 1418.6394        | 709.8233        | 1401.6128 | 701.3101         | 1400.6288      | 700.8181         | 13 |
| 3  | 300.1554         | 150.5813        |                  |                  | 282.1448        | 141.5761         | D    | <b>1347.6023</b> | 674.3048        | 1330.5757 | <b>665.7915</b>  | 1329.5917      | <b>665.2995</b>  | 12 |
| 4  | 371.1925         | 186.0999        |                  |                  | 353.1819        | 177.0946         | A    | <b>1232.5753</b> | 616.7913        | 1215.5488 | 608.2780         | 1214.5648      | 607.7860         | 11 |
| 5  | 500.2351         | 250.6212        |                  |                  | 482.2245        | 241.6159         | E    | <b>1161.5382</b> | 581.2727        | 1144.5117 | 572.7595         | 1143.5277      | 572.2675         | 10 |
| 6  | 629.2777         | 315.1425        |                  |                  | 611.2671        | 306.1372         | E    | <b>1032.4956</b> | 516.7515        | 1015.4691 | 508.2382         | 1014.4851      | 507.7462         | 9  |
| 7  | <b>743.3206</b>  | 372.1640        | 726.2941         | 363.6507         | 725.3101        | 363.1587         | N    | <b>903.4530</b>  | 452.2302        | 886.4265  | 443.7169         | 885.4425       | 443.2249         | 8  |
| 8  | <b>856.4047</b>  | 428.7060        | <b>839.3781</b>  | 420.1927         | <b>838.3941</b> | 419.7007         | L    | <b>789.4101</b>  | 395.2087        | 772.3836  | 386.6954         | 771.3995       | 386.2034         | 7  |
| 9  | <b>913.4262</b>  | 457.2167        | 896.3996         | 448.7034         | 895.4156        | 448.2114         | G    | <b>676.3260</b>  | 338.6667        | 659.2995  | 330.1534         | 658.3155       | 329.6614         | 6  |
| 10 | 1042.4687        | 521.7380        | <b>1025.4422</b> | 513.2247         | 1024.4582       | 512.7327         | E    | <b>619.3046</b>  | 310.1559        | 602.2780  | 301.6427         | 601.2940       | 301.1506         | 5  |
| 11 | 1129.5008        | 565.2540        | 1112.4742        | 556.7408         | 1111.4902       | 556.2487         | S    | <b>490.2620</b>  | 245.6346        | 473.2354  | 237.1214         | 472.2514       | 236.6293         | 4  |
| 12 | 1258.5434        | 629.7753        | 1241.5168        | 621.2620         | 1240.5328       | 620.7700         | E    | 403.2300         | 202.1186        | 386.2034  | 193.6053         | 385.2194       | 193.1133         | 3  |
| 13 | <b>1357.6118</b> | 679.3095        | 1340.5852        | 670.7963         | 1339.6012       | 670.3042         | V    | 274.1874         | 137.5973        | 257.1608  | 129.0840         |                |                  | 2  |
| 14 |                  |                 |                  |                  |                 |                  | R    | 175.1190         | 88.0631         | 158.0924  | 79.5498          |                |                  | 1  |

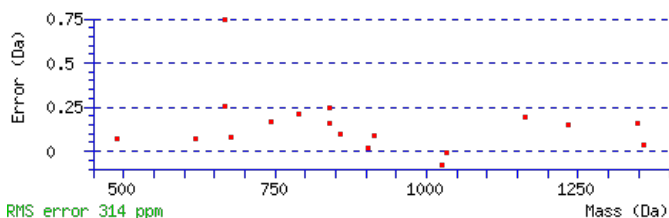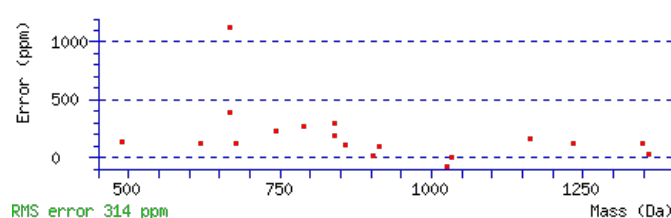NCBI BLAST search of [IADAEENLGESEVR](#)

## AT4G24820.1

(Parameters: blastp, nr protein database, expect=20000, no filter, PAM30)

Other BLAST [web gateways](#)

### All matches to this query

| Score | Mr(calc)  | Delta  | Sequence                       |
|-------|-----------|--------|--------------------------------|
| 99.5  | 1530.7161 | 0.0003 | <a href="#">IADAEENLGESEVR</a> |

Mascot: <http://www.matrixscience.com/>

**Peptide View**MS/MS Fragmentation of **FELTFFSLNPELK**Found in **AT4G24830.1** in **TAIR\_Arabidopsis**, Symbols: | arginosuccinate synthase family | chr4:12793095-12795867 REVERSE

Match to Query 7200: 1598.781410 from(800.397981,2+) index(10604)

Title: Elution from: 103.574 to 103.574 scan no 15308 cid35.00 polarity:+

Data file D6h-1\_2.mgf

Click mouse within plot area to zoom in by factor of two about that point

Or,  to  Da Label all possible matches  Label matches used for scoring Show Y-axis 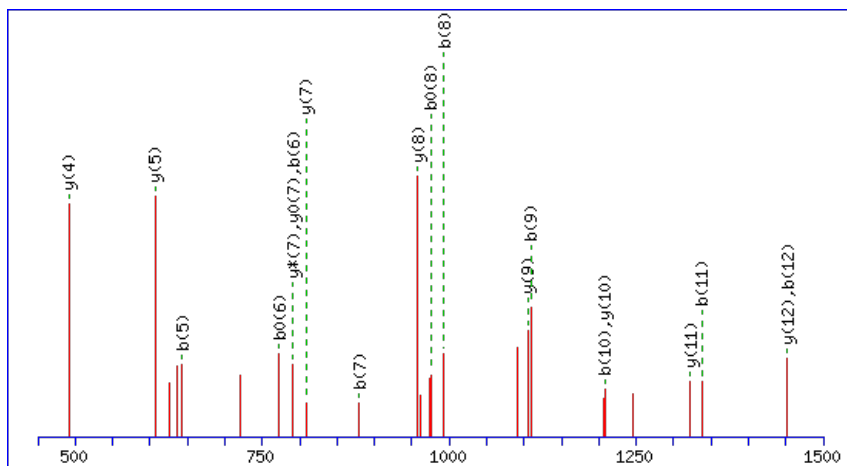Monoisotopic mass of neutral peptide  $M_r(\text{calc})$ : 1598.7791

Fixed modifications: Carbamidomethyl (C) (apply to specified residues or termini only)

Ions Score: 92 Expect: 6.1e-009

Matches : 20/122 fragment ions using 17 most intense peaks ([help](#))

| #  | b                | b <sup>++</sup> | b*        | b <sup>*++</sup> | b <sup>0</sup>  | b <sup>0++</sup> | Seq. | y                | y <sup>++</sup> | y*              | y <sup>*++</sup> | y <sup>0</sup>  | y <sup>0++</sup> | #  |
|----|------------------|-----------------|-----------|------------------|-----------------|------------------|------|------------------|-----------------|-----------------|------------------|-----------------|------------------|----|
| 1  | 149.0727         | 75.0400         |           |                  |                 |                  | F    |                  |                 |                 |                  |                 |                  | 13 |
| 2  | 279.1124         | 140.0598        |           |                  | 261.1018        | 131.0545         | E    | <b>1451.7209</b> | 726.3641        | 1433.6973       | 717.3523         | 1433.7103       | 717.3588         | 12 |
| 3  | 393.1935         | 197.1004        |           |                  | 375.1829        | 188.0951         | L    | <b>1321.6813</b> | 661.3443        | 1303.6577       | 652.3325         | 1303.6707       | 652.3390         | 11 |
| 4  | 495.2382         | 248.1227        |           |                  | 477.2276        | 239.1174         | T    | <b>1207.6002</b> | 604.3037        | 1189.5766       | 595.2919         | 1189.5896       | 595.2984         | 10 |
| 5  | <b>643.3036</b>  | 322.1554        |           |                  | 625.2930        | 313.1502         | F    | <b>1105.5555</b> | 553.2814        | 1087.5319       | 544.2696         | 1087.5449       | 544.2761         | 9  |
| 6  | <b>791.3691</b>  | 396.1882        |           |                  | <b>773.3585</b> | 387.1829         | F    | <b>957.4900</b>  | 479.2486        | 939.4664        | 470.2368         | 939.4794        | 470.2434         | 8  |
| 7  | <b>879.3981</b>  | 440.2027        |           |                  | 861.3876        | 431.1974         | S    | <b>809.4246</b>  | 405.2159        | <b>791.4010</b> | 396.2041         | <b>791.4140</b> | 396.2106         | 7  |
| 8  | <b>993.4792</b>  | 497.2433        |           |                  | <b>975.4687</b> | 488.2380         | L    | 721.3955         | 361.2014        | 703.3719        | 352.1896         | 703.3849        | 352.1961         | 6  |
| 9  | <b>1109.5162</b> | 555.2617        | 1091.4926 | 546.2500         | 1091.5057       | 546.2565         | N    | <b>607.3144</b>  | 304.1608        | 589.2908        | 295.1490         | 589.3038        | 295.1556         | 5  |
| 10 | <b>1207.5660</b> | 604.2866        | 1189.5424 | 595.2749         | 1189.5555       | 595.2814         | P    | <b>491.2774</b>  | 246.1423        | 473.2538        | 237.1305         | 473.2668        | 237.1371         | 4  |
| 11 | <b>1337.6056</b> | 669.3065        | 1319.5821 | 660.2947         | 1319.5951       | 660.3012         | E    | 393.2276         | 197.1174        | 375.2040        | 188.1056         | 375.2170        | 188.1122         | 3  |
| 12 | <b>1451.6867</b> | 726.3470        | 1433.6632 | 717.3352         | 1433.6762       | 717.3417         | L    | 263.1880         | 132.0976        | 245.1644        | 123.0858         |                 |                  | 2  |
| 13 |                  |                 |           |                  |                 |                  | K    | 149.1069         | 75.0571         | 131.0833        | 66.0453          |                 |                  | 1  |

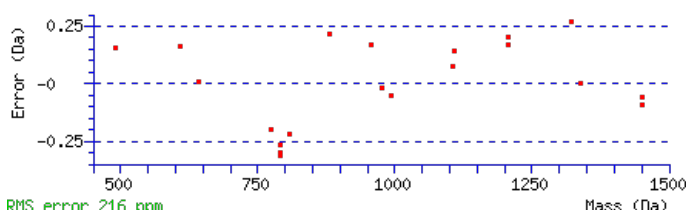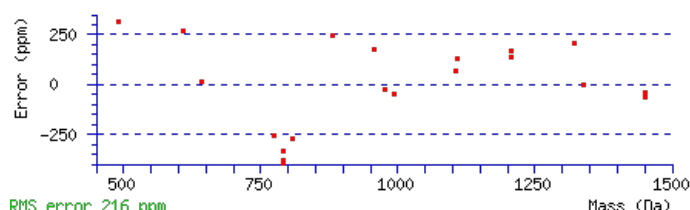NCBI BLAST search of [FELTFFSLNPELK](#)

(Parameters: blastp, nr protein database, expect=20000, no filter, PAM30)

Other BLAST [web gateways](#)

# AT4G24830.1

All matches to this query

| Score | Mr(calc)  | Delta   | Sequence                        |
|-------|-----------|---------|---------------------------------|
| 91.7  | 1598.7791 | 0.0023  | <a href="#">FELTFEFLNPELK</a>   |
| 9.1   | 1598.7815 | -0.0001 | <a href="#">MGNVIIGVMRKAMK</a>  |
| 8.3   | 1598.7791 | 0.0024  | <a href="#">LFKPFDELFDVSK</a>   |
| 4.5   | 1598.7773 | 0.0041  | <a href="#">RSYEVAEEAASKQLK</a> |
| 2.4   | 1598.7829 | -0.0015 | <a href="#">FTLNQTMESIRLK</a>   |
| 2.4   | 1598.7768 | 0.0046  | <a href="#">FVYDKDVQVTELK</a>   |
| 2.3   | 1598.7829 | -0.0015 | <a href="#">ISPLPKMVSPENPR</a>  |
| 2.2   | 1598.7802 | 0.0012  | <a href="#">SLLPVEPLVAECEK</a>  |
| 1.5   | 1598.7795 | 0.0019  | <a href="#">QQVOEDVKKFGEK</a>   |
| 0.9   | 1598.7768 | 0.0046  | <a href="#">EFALYVSAISNELK</a>  |

Mascot: <http://www.matrixscience.com/>

**Peptide View**MS/MS Fragmentation of **LLCSLQSPK**Found in **AT4G24930.1** in **TAIR\_Arabidopsis**, Symbols: | thylakoid lumenal 17.9 kDa protein, chloroplast | chr4:12821506-12822399 REVERSE

Match to Query 3037: 1044.565722 from(523.290137,2+) index(2408)

Title: Elution from: 26.541 to 26.541 scan no 3062 cid35.00 polarity:+

Data file C7-3\_1.mgf

Click mouse within plot area to zoom in by factor of two about that point

Or,   to  Da Label all possible matches  Label matches used for scoring Show Y-axis 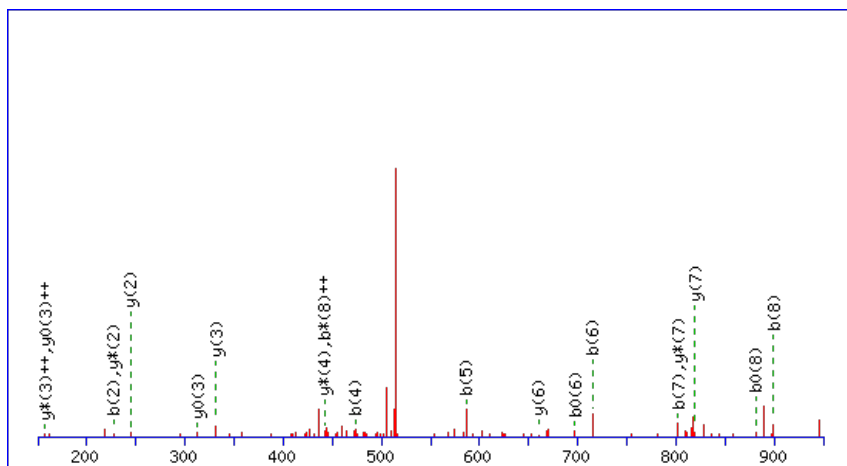

Monoisotopic mass of neutral peptide Mr(calc): 1044.5638

Fixed modifications: Carbamidomethyl (C) (apply to specified residues or termini only)

Ions Score: 22 Expect: 0.033

Matches : 19/76 fragment ions using 52 most intense peaks ([help](#))

| # | b               | b <sup>++</sup> | b*       | b <sup>*++</sup> | b <sup>0</sup>  | b <sup>0++</sup> | Seq. | y               | y <sup>++</sup> | y*              | y <sup>*++</sup> | y <sup>0</sup>  | y <sup>0++</sup> | # |
|---|-----------------|-----------------|----------|------------------|-----------------|------------------|------|-----------------|-----------------|-----------------|------------------|-----------------|------------------|---|
| 1 | 114.0913        | 57.5493         |          |                  |                 |                  | L    |                 |                 |                 |                  |                 |                  | 9 |
| 2 | <b>227.1754</b> | 114.0913        |          |                  |                 |                  | L    | 932.4870        | 466.7471        | 915.4604        | 458.2339         | 914.4764        | 457.7418         | 8 |
| 3 | 387.2061        | 194.1067        |          |                  |                 |                  | C    | <b>819.4029</b> | 410.2051        | <b>802.3764</b> | 401.6918         | 801.3924        | 401.1998         | 7 |
| 4 | <b>474.2381</b> | 237.6227        |          |                  | 456.2275        | 228.6174         | S    | <b>659.3723</b> | 330.1898        | 642.3457        | 321.6765         | 641.3617        | 321.1845         | 6 |
| 5 | <b>587.3221</b> | 294.1647        |          |                  | 569.3116        | 285.1594         | L    | 572.3402        | 286.6738        | 555.3137        | 278.1605         | 554.3297        | 277.6685         | 5 |
| 6 | <b>715.3807</b> | 358.1940        | 698.3542 | 349.6807         | <b>697.3702</b> | 349.1887         | Q    | 459.2562        | 230.1317        | <b>442.2296</b> | 221.6185         | 441.2456        | 221.1264         | 4 |
| 7 | <b>802.4128</b> | 401.7100        | 785.3862 | 393.1967         | 784.4022        | 392.7047         | S    | <b>331.1976</b> | 166.1024        | 314.1710        | <b>157.5892</b>  | <b>313.1870</b> | <b>157.0972</b>  | 3 |
| 8 | <b>899.4655</b> | 450.2364        | 882.4390 | <b>441.7231</b>  | <b>881.4550</b> | 441.2311         | P    | <b>244.1656</b> | 122.5864        | <b>227.1390</b> | 114.0731         |                 |                  | 2 |
| 9 |                 |                 |          |                  |                 |                  | K    | 147.1128        | 74.0600         | 130.0863        | 65.5468          |                 |                  | 1 |

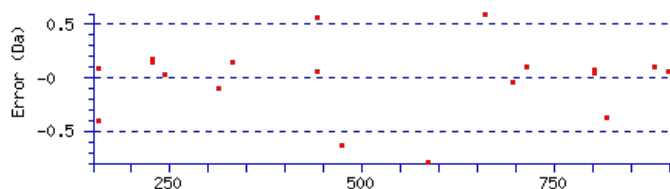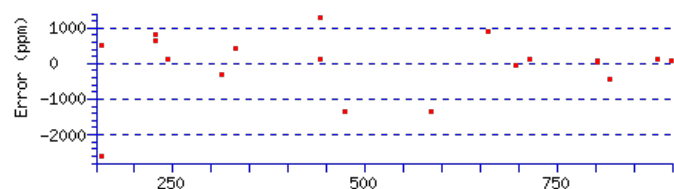NCBI BLAST search of **LLCSLQSPK**

(Parameters: blastp, nr protein database, expect=20000, no filter, PAM30)

Other BLAST [web gateways](#)**All matches to this query**

| Score | Mr(calc)  | Delta  | Sequence                  |
|-------|-----------|--------|---------------------------|
| 22.0  | 1044.5638 | 0.0020 | <a href="#">LLCSLQSPK</a> |



**AT4G24930.1**

|      |           |         |                           |
|------|-----------|---------|---------------------------|
| 18.3 | 1044.5676 | -0.0018 | <a href="#">ENLTEKRR</a>  |
| 14.8 | 1044.5676 | -0.0019 | <a href="#">SSVERRSPK</a> |
| 7.8  | 1044.5676 | -0.0018 | <a href="#">RLNEERTK</a>  |
| 7.7  | 1044.5676 | -0.0019 | <a href="#">REVETQRK</a>  |
| 5.5  | 1044.5676 | -0.0019 | <a href="#">RTQKEDIR</a>  |
| 4.6  | 1044.5676 | -0.0019 | <a href="#">QALDSRISR</a> |
| 3.4  | 1044.5684 | -0.0027 | <a href="#">RNMMKLPR</a>  |
| 3.2  | 1044.5651 | 0.0006  | <a href="#">MPPKRNER</a>  |
| 3.0  | 1044.5638 | 0.0020  | <a href="#">TIISDMLPR</a> |

**Mascot:** <http://www.matrixscience.com/>

**Peptide View**MS/MS Fragmentation of **EQLALAADVPLTAESK**Found in **AT4G25050.1** in **TAIR\_Arabidopsis**, Symbols: ACP4 | ACP4 (ACYL CARRIER PROTEIN 4) | chr4:12870188-12871034 FORWARD

Match to Query 7704: 1672.824512 from(837.419532,2+) index(6832)

Title: Elution from: 59.459 to 59.459 scan no 8837 cid35.00 polarity:+

Data file C7-2\_3.mgf

Click mouse within plot area to zoom in by factor of two about that point

Or,   to  Da Label all possible matches  Label matches used for scoring Show Y-axis 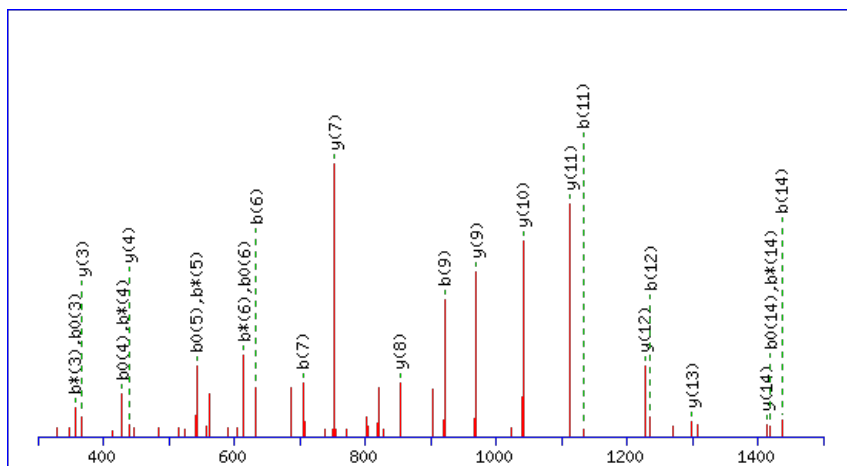**Monoisotopic mass of neutral peptide Mr(calc):** 1672.8244**Fixed modifications:** Carbamidomethyl (C) (apply to specified residues or termini only)**Ions Score:** 108 **Expect:** 6.8e-011**Matches:** 26/176 fragment ions using 24 most intense peaks ([help](#))

| #  | b         | b <sup>++</sup> | b*        | b <sup>*++</sup> | b <sup>0</sup> | b <sup>0++</sup> | Seq. | y         | y <sup>++</sup> | y*        | y <sup>*++</sup> | y <sup>0</sup> | y <sup>0++</sup> | #  |
|----|-----------|-----------------|-----------|------------------|----------------|------------------|------|-----------|-----------------|-----------|------------------|----------------|------------------|----|
| 1  | 131.0469  | 66.0271         |           |                  | 113.0363       | 57.0218          | E    |           |                 |           |                  |                |                  | 16 |
| 2  | 261.0996  | 131.0534        | 243.0760  | 122.0416         | 243.0890       | 122.0481         | Q    | 1543.7920 | 772.3997        | 1525.7685 | 763.3879         | 1525.7815      | 763.3944         | 15 |
| 3  | 375.1806  | 188.0940        | 357.1571  | 179.0822         | 357.1701       | 179.0887         | L    | 1413.7394 | 707.3733        | 1395.7158 | 698.3615         | 1395.7288      | 698.3681         | 14 |
| 4  | 447.2148  | 224.1110        | 429.1912  | 215.0992         | 429.2042       | 215.1058         | A    | 1299.6583 | 650.3328        | 1281.6347 | 641.3210         | 1281.6477      | 641.3275         | 13 |
| 5  | 561.2959  | 281.1516        | 543.2723  | 272.1398         | 543.2853       | 272.1463         | L    | 1227.6241 | 614.3157        | 1209.6006 | 605.3039         | 1209.6136      | 605.3104         | 12 |
| 6  | 633.3300  | 317.1687        | 615.3065  | 308.1569         | 615.3195       | 308.1634         | A    | 1113.5431 | 557.2752        | 1095.5195 | 548.2634         | 1095.5325      | 548.2699         | 11 |
| 7  | 705.3642  | 353.1857        | 687.3406  | 344.1739         | 687.3536       | 344.1805         | A    | 1041.5089 | 521.2581        | 1023.4853 | 512.2463         | 1023.4983      | 512.2528         | 10 |
| 8  | 821.3882  | 411.1977        | 803.3646  | 402.1859         | 803.3776       | 402.1924         | D    | 969.4748  | 485.2410        | 951.4512  | 476.2292         | 951.4642       | 476.2357         | 9  |
| 9  | 921.4536  | 461.2304        | 903.4300  | 452.2187         | 903.4431       | 452.2252         | V    | 853.4508  | 427.2290        | 835.4272  | 418.2172         | 835.4402       | 418.2237         | 8  |
| 10 | 1019.5034 | 510.2553        | 1001.4798 | 501.2436         | 1001.4929      | 501.2501         | P    | 753.3853  | 377.1963        | 735.3617  | 368.1845         | 735.3748       | 368.1910         | 7  |
| 11 | 1133.5845 | 567.2959        | 1115.5609 | 558.2841         | 1115.5740      | 558.2906         | L    | 655.3355  | 328.1714        | 637.3119  | 319.1596         | 637.3250       | 319.1661         | 6  |
| 12 | 1235.6292 | 618.3183        | 1217.6057 | 609.3065         | 1217.6187      | 609.3130         | T    | 541.2544  | 271.1309        | 523.2308  | 262.1191         | 523.2439       | 262.1256         | 5  |
| 13 | 1307.6634 | 654.3353        | 1289.6398 | 645.3235         | 1289.6528      | 645.3300         | A    | 439.2097  | 220.1085        | 421.1861  | 211.0967         | 421.1991       | 211.1032         | 4  |
| 14 | 1437.7030 | 719.3551        | 1419.6794 | 710.3434         | 1419.6924      | 710.3499         | E    | 367.1756  | 184.0914        | 349.1520  | 175.0796         | 349.1650       | 175.0861         | 3  |
| 15 | 1525.7321 | 763.3697        | 1507.7085 | 754.3579         | 1507.7215      | 754.3644         | S    | 237.1359  | 119.0716        | 219.1124  | 110.0598         | 219.1254       | 110.0663         | 2  |
| 16 |           |                 |           |                  |                |                  | K    | 149.1069  | 75.0571         | 131.0833  | 66.0453          |                |                  | 1  |

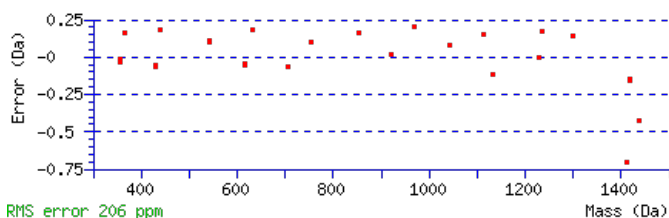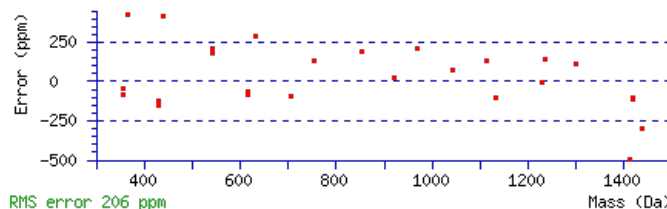

## AT4G25050.1

NCBI **BLAST** search of [EQLALAADVPLTAESK](#)

(Parameters: blastp, nr protein database, expect=20000, no filter, PAM30)

Other BLAST [web gateways](#)

### All matches to this query

| Score | Mr(calc)  | Delta  | Sequence                         |
|-------|-----------|--------|----------------------------------|
| 108.3 | 1672.8244 | 0.0001 | <a href="#">EQLALAADVPLTAESK</a> |

Mascot: <http://www.matrixscience.com/>

**Peptide View**MS/MS Fragmentation of **LLLQAETK**

Found in **AT4G25090.1** in **TAIR\_Arabidopsis**, Symbols: | respiratory burst oxidase, putative / NADPH oxidase, putative | chr4:12878940-12883609 REVERSE

Match to Query 1459: 924.512140 from(463.263346,2+) index(4244)

Title: Elution from: 42.973 to 42.973 scan no 5476 cid35.00 polarity:+

Data file D1d-1-2.mgf

Click mouse within plot area to zoom in by factor of two about that point

Or,   to  Da

Label all possible matches  Label matches used for scoring

Show Y-axis

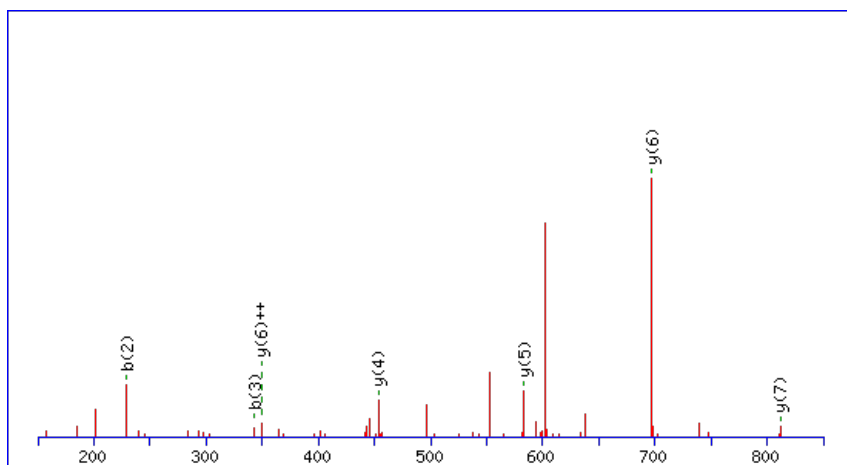

**Monoisotopic mass of neutral peptide Mr(calc):** 924.5140

**Fixed modifications:** Carbamidomethyl (C) (apply to specified residues or termini only)

**Ions Score:** 25 **Expect:** 0.015

**Matches:** 7/66 fragment ions using 14 most intense peaks ([help](#))

| # | b               | b <sup>++</sup> | b*       | b <sup>*++</sup> | b <sup>0</sup> | b <sup>0++</sup> | Seq. | y               | y <sup>++</sup> | y*       | y <sup>*++</sup> | y <sup>0</sup> | y <sup>0++</sup> | # |
|---|-----------------|-----------------|----------|------------------|----------------|------------------|------|-----------------|-----------------|----------|------------------|----------------|------------------|---|
| 1 | 115.0884        | 58.0478         |          |                  |                |                  | L    |                 |                 |          |                  |                |                  | 8 |
| 2 | <b>229.1695</b> | 115.0884        |          |                  |                |                  | L    | <b>811.4402</b> | 406.2237        | 793.4166 | 397.2120         | 793.4296       | 397.2185         | 7 |
| 3 | <b>343.2506</b> | 172.1289        |          |                  |                |                  | L    | <b>697.3591</b> | <b>349.1832</b> | 679.3355 | 340.1714         | 679.3485       | 340.1779         | 6 |
| 4 | 473.3032        | 237.1552        | 455.2796 | 228.1435         |                |                  | Q    | <b>583.2780</b> | 292.1426        | 565.2544 | 283.1309         | 565.2674       | 283.1374         | 5 |
| 5 | 545.3374        | 273.1723        | 527.3138 | 264.1605         |                |                  | A    | <b>453.2254</b> | 227.1163        | 435.2018 | 218.1045         | 435.2148       | 218.1110         | 4 |
| 6 | 675.3770        | 338.1921        | 657.3534 | 329.1803         | 657.3664       | 329.1869         | E    | 381.1912        | 191.0992        | 363.1676 | 182.0875         | 363.1806       | 182.0940         | 3 |
| 7 | 777.4217        | 389.2145        | 759.3981 | 380.2027         | 759.4111       | 380.2092         | T    | 251.1516        | 126.0794        | 233.1280 | 117.0676         | 233.1410       | 117.0741         | 2 |
| 8 |                 |                 |          |                  |                |                  | K    | 149.1069        | 75.0571         | 131.0833 | 66.0453          |                |                  | 1 |

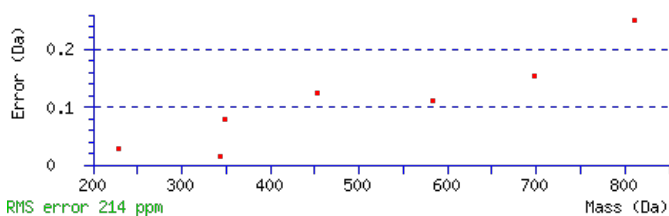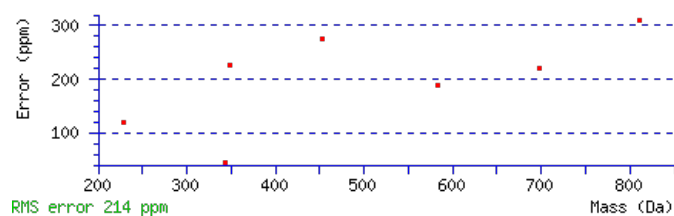

NCBI **BLAST** search of **LLLQAETK**

(Parameters: blastp, nr protein database, expect=20000, no filter, PAM30)

Other BLAST [web gateways](#)

**All matches to this query**

| Score | Mr(calc) | Delta   | Sequence                 |
|-------|----------|---------|--------------------------|
| 24.8  | 924.5140 | -0.0019 | <a href="#">LLLQAETK</a> |

## AT4G25090.1

|     |          |         |                          |
|-----|----------|---------|--------------------------|
| 4.7 | 924.5140 | -0.0019 | <a href="#">LPKSITEK</a> |
| 3.0 | 924.5140 | -0.0019 | <a href="#">IIVVTENK</a> |
| 3.0 | 924.5140 | -0.0019 | <a href="#">ILDGEKIK</a> |
| 3.0 | 924.5140 | -0.0019 | <a href="#">LIGEKVEK</a> |
| 3.0 | 924.5140 | -0.0019 | <a href="#">LLKEDVAK</a> |

**Mascot:** <http://www.matrixscience.com/>

## Peptide View

### MS/MS Fragmentation of **AYVDNLKK**

Found in **AT4G25100.1** in **TAIR\_Arabidopsis**, Symbols: FSD1 | FSD1 (FE SUPEROXIDE DISMUTASE 1); iron superoxide dismutase | chr4:12884659-12886511 REVERSE

Match to Query 2163: 949.524534 from(317.515454,3+) index(635)

Title: Elution from: 12.001 to 12.001 scan no 957 cid35.00 polarity:+

Data file C7-3\_1.mgf

Click mouse within plot area to zoom in by factor of two about that point

Or,   to  Da

Label all possible matches  Label matches used for scoring

Show Y-axis

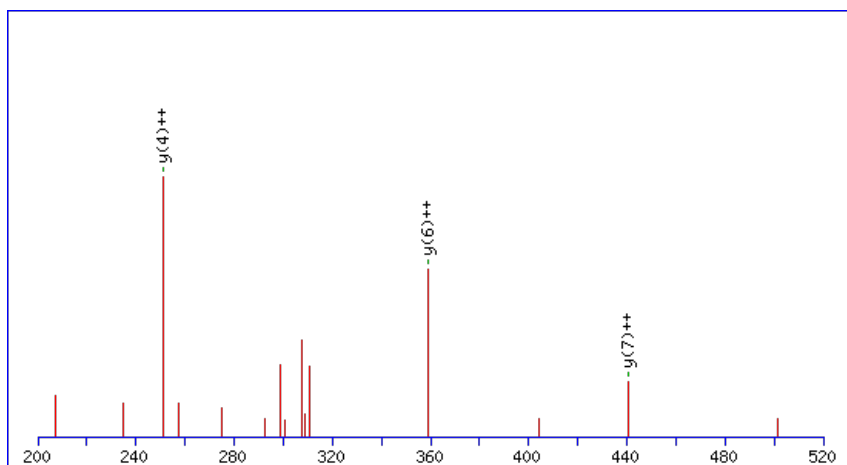

Monoisotopic mass of neutral peptide  $M_r(\text{calc})$ : 949.5233

Fixed modifications: Carbamidomethyl (C) (apply to specified residues or termini only)

Ions Score: 27 Expect: 0.016

Matches : 3/62 fragment ions using 3 most intense peaks ([help](#))

| # | b        | b <sup>++</sup> | b*       | b <sup>*++</sup> | b <sup>0</sup> | b <sup>0++</sup> | Seq. | y        | y <sup>++</sup> | y*       | y <sup>*++</sup> | y <sup>0</sup> | y <sup>0++</sup> | # |
|---|----------|-----------------|----------|------------------|----------------|------------------|------|----------|-----------------|----------|------------------|----------------|------------------|---|
| 1 | 72.0444  | 36.5258         |          |                  |                |                  | A    |          |                 |          |                  |                |                  | 8 |
| 2 | 235.1077 | 118.0575        |          |                  |                |                  | Y    | 879.4934 | 440.2504        | 862.4669 | 431.7371         | 861.4829       | 431.2451         | 7 |
| 3 | 334.1761 | 167.5917        |          |                  |                |                  | V    | 716.4301 | 358.7187        | 699.4036 | 350.2054         | 698.4196       | 349.7134         | 6 |
| 4 | 449.2031 | 225.1052        |          |                  | 431.1925       | 216.0999         | D    | 617.3617 | 309.1845        | 600.3352 | 300.6712         | 599.3511       | 300.1792         | 5 |
| 5 | 563.2460 | 282.1266        | 546.2195 | 273.6134         | 545.2354       | 273.1214         | N    | 502.3348 | 251.6710        | 485.3082 | 243.1577         |                |                  | 4 |
| 6 | 676.3301 | 338.6687        | 659.3035 | 330.1554         | 658.3195       | 329.6634         | L    | 388.2918 | 194.6496        | 371.2653 | 186.1363         |                |                  | 3 |
| 7 | 804.4250 | 402.7162        | 787.3985 | 394.2029         | 786.4145       | 393.7109         | K    | 275.2078 | 138.1075        | 258.1812 | 129.5942         |                |                  | 2 |
| 8 |          |                 |          |                  |                |                  | K    | 147.1128 | 74.0600         | 130.0863 | 65.5468          |                |                  | 1 |

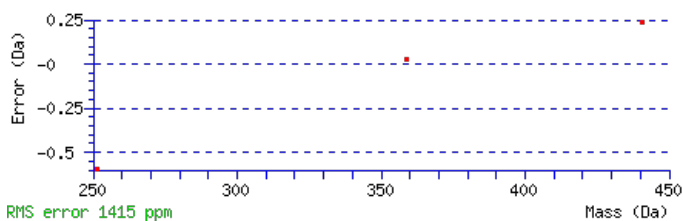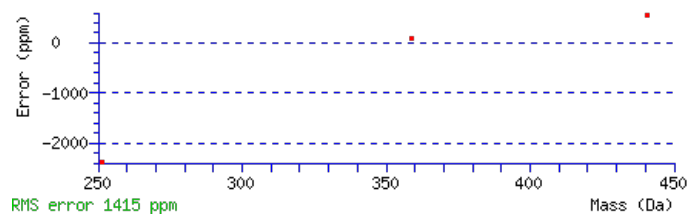

NCBI BLAST search of **AYVDNLKK**

(Parameters: blastp, nr protein database, expect=20000, no filter, PAM30)

Other BLAST [web gateways](#)

### All matches to this query

| Score | $M_r(\text{calc})$ | Delta  | Sequence                 |
|-------|--------------------|--------|--------------------------|
| 26.7  | 949.5233           | 0.0013 | <a href="#">AYVDNLKK</a> |

## AT4G25100.1

|      |          |         |                           |
|------|----------|---------|---------------------------|
| 11.7 | 949.5266 | -0.0021 | <a href="#">MKEIKSSK</a>  |
| 11.7 | 949.5266 | -0.0021 | <a href="#">SVAMLKSSK</a> |
| 3.2  | 949.5233 | 0.0013  | <a href="#">IEVTGIYR</a>  |
| 3.2  | 949.5233 | 0.0012  | <a href="#">YSGQVVAVK</a> |
| 2.1  | 949.5246 | -0.0001 | <a href="#">HLLHFQR</a>   |
| 1.6  | 949.5233 | 0.0013  | <a href="#">KYASVPASK</a> |

Mascot: <http://www.matrixscience.com/>

**Peptide View**MS/MS Fragmentation of **RIVTEILPATK**Found in **AT4G25130.1** in **TAIR\_Arabidopsis**, Symbols: | peptide methionine sulfoxide reductase, putative | chr4:12898812-12900008 REVERSE

Match to Query 4717: 1254.710926 from(628.362739,2+) index(3557)

Title: Elution from: 33.591 to 33.591 scan no 4381 cid35.00 polarity:+

Data file D1d-3\_1.mgf

Click mouse within plot area to zoom in by factor of two about that point

Or,   to  Da Label all possible matches  Label matches used for scoring Show Y-axis 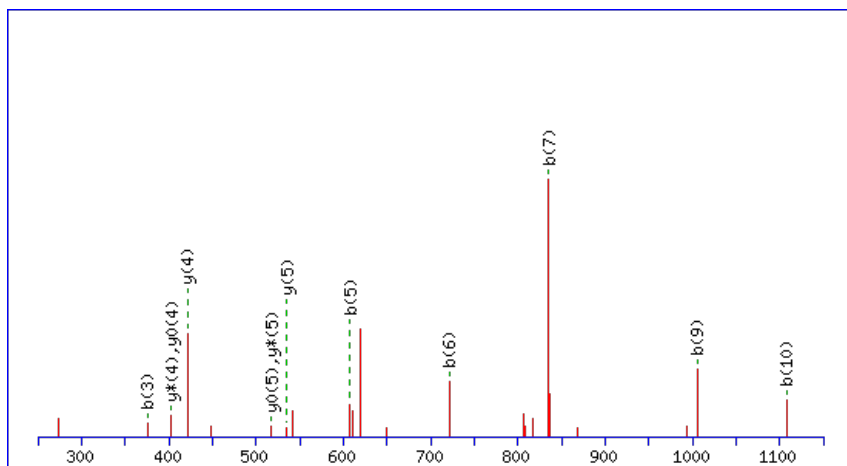Monoisotopic mass of neutral peptide **Mr(calc)**: 1254.7106**Fixed modifications**: Carbamidomethyl (C) (apply to specified residues or termini only)**Ions Score**: 41 **Expect**: 8.6e-005**Matches**: 12/112 fragment ions using 19 most intense peaks ([help](#))

| #  | b                | b <sup>++</sup> | b*        | b <sup>*++</sup> | b <sup>0</sup> | b <sup>0++</sup> | Seq.     | y               | y <sup>++</sup> | y*              | y <sup>*++</sup> | y <sup>0</sup>  | y <sup>0++</sup> | #  |
|----|------------------|-----------------|-----------|------------------|----------------|------------------|----------|-----------------|-----------------|-----------------|------------------|-----------------|------------------|----|
| 1  | 161.0965         | 81.0519         | 143.0729  | 72.0401          |                |                  | <b>R</b> |                 |                 |                 |                  |                 |                  | 11 |
| 2  | 275.1776         | 138.0925        | 257.1540  | 129.0807         |                |                  | <b>I</b> | 1095.6286       | 548.3179        | 1077.6050       | 539.3062         | 1077.6181       | 539.3127         | 10 |
| 3  | <b>375.2431</b>  | 188.1252        | 357.2195  | 179.1134         |                |                  | <b>V</b> | 981.5475        | 491.2774        | 963.5239        | 482.2656         | 963.5370        | 482.2721         | 9  |
| 4  | 477.2878         | 239.1475        | 459.2642  | 230.1357         | 459.2772       | 230.1422         | <b>T</b> | 881.4821        | 441.2447        | 863.4585        | 432.2329         | 863.4715        | 432.2394         | 8  |
| 5  | <b>607.3274</b>  | 304.1673        | 589.3038  | 295.1556         | 589.3169       | 295.1621         | <b>E</b> | 779.4374        | 390.2223        | 761.4138        | 381.2105         | 761.4268        | 381.2170         | 7  |
| 6  | <b>721.4085</b>  | 361.2079        | 703.3849  | 352.1961         | 703.3980       | 352.2026         | <b>I</b> | 649.3977        | 325.2025        | 631.3741        | 316.1907         | 631.3872        | 316.1972         | 6  |
| 7  | <b>835.4896</b>  | 418.2484        | 817.4660  | 409.2367         | 817.4790       | 409.2432         | <b>L</b> | <b>535.3166</b> | 268.1620        | <b>517.2930</b> | 259.1502         | <b>517.3061</b> | 259.1567         | 5  |
| 8  | 933.5394         | 467.2733        | 915.5158  | 458.2616         | 915.5288       | 458.2681         | <b>P</b> | <b>421.2355</b> | 211.1214        | <b>403.2120</b> | 202.1096         | <b>403.2250</b> | 202.1161         | 4  |
| 9  | <b>1005.5736</b> | 503.2904        | 987.5500  | 494.2786         | 987.5630       | 494.2851         | <b>A</b> | 323.1857        | 162.0965        | 305.1622        | 153.0847         | 305.1752        | 153.0912         | 3  |
| 10 | <b>1107.6183</b> | 554.3128        | 1089.5947 | 545.3010         | 1089.6077      | 545.3075         | <b>T</b> | 251.1516        | 126.0794        | 233.1280        | 117.0676         | 233.1410        | 117.0741         | 2  |
| 11 |                  |                 |           |                  |                |                  | <b>K</b> | 149.1069        | 75.0571         | 131.0833        | 66.0453          |                 |                  | 1  |

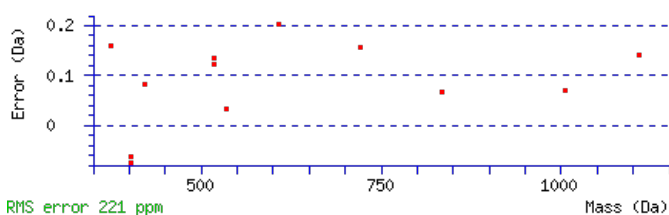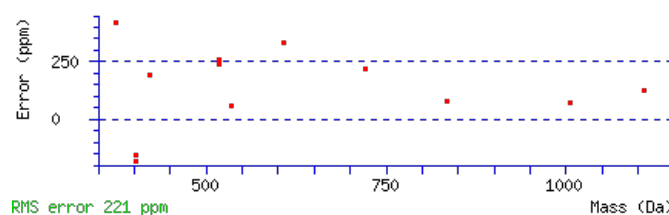NCBI **BLAST** search of **RIVTEILPATK**

(Parameters: blastp, nr protein database, expect=20000, no filter, PAM30)

Other BLAST [web gateways](#)**All matches to this query**



## AT4G25130.1

| Score | Mr(calc)  | Delta   | Sequence                     |
|-------|-----------|---------|------------------------------|
| 40.6  | 1254.7106 | 0.0003  | <a href="#">RIVTEILPATK</a>  |
| 21.0  | 1254.7106 | 0.0003  | <a href="#">TKSVLHITLTK</a>  |
| 7.5   | 1254.7106 | 0.0003  | <a href="#">ELQEIVRILK</a>   |
| 3.3   | 1254.7106 | 0.0004  | <a href="#">VEDILVRGLVK</a>  |
| 0.9   | 1254.7106 | 0.0003  | <a href="#">GILLNAVATQLK</a> |
| 0.5   | 1254.7133 | -0.0023 | <a href="#">TRPGTPVRIIK</a>  |

Mascot: <http://www.matrixscience.com/>

**Peptide View**MS/MS Fragmentation of **MISSSSRSLK**Found in **AT4G25280.1** in **TAIR\_Arabidopsis**, Symbols: | adenylate kinase family protein | chr4:12939078-12940733 REVERSE

Match to Query 3030: 1124.528406 from(563.271479,2+) index(8105)

Title: Elution from: 76.068 to 76.068 scan no 10964 cid35.00 polarity:+

Data file D1d-1-2.mgf

Click mouse within plot area to zoom in by factor of two about that point

Or,   to  Da Label all possible matches  Label matches used for scoring Show Y-axis 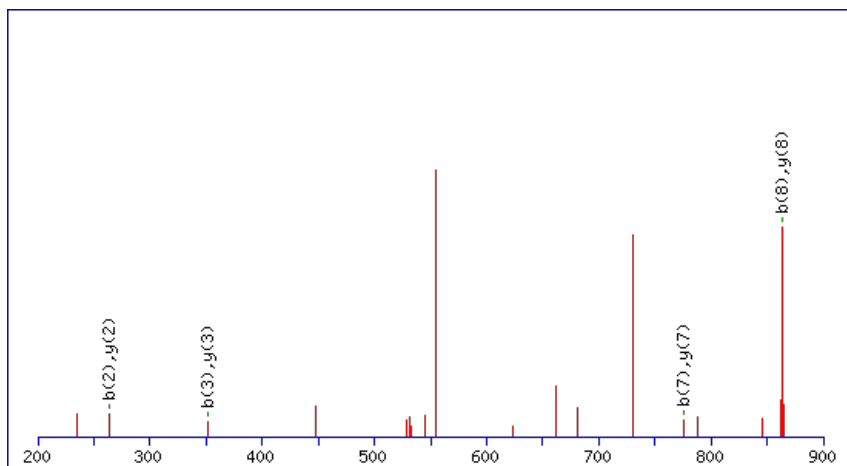**Monoisotopic mass of neutral peptide Mr(calc):** 1124.5288**Fixed modifications:** Carbamidomethyl (C) (apply to specified residues or termini only)**Variable modifications:****M1** : Oxidation (M), with neutral losses 0.0000 (shown in table), 63.9983**Ions Score:** 25 **Expect:** 0.025**Matches** : 8/126 fragment ions using 13 most intense peaks ([help](#))

| #  | b               | b <sup>++</sup> | b <sup>*</sup> | b <sup>*++</sup> | b <sup>0</sup> | b <sup>0++</sup> | Seq. | y               | y <sup>++</sup> | y <sup>*</sup> | y <sup>*++</sup> | y <sup>0</sup> | y <sup>0++</sup> | #  |
|----|-----------------|-----------------|----------------|------------------|----------------|------------------|------|-----------------|-----------------|----------------|------------------|----------------|------------------|----|
| 1  | 149.0397        | 75.0235         |                |                  |                |                  | M    |                 |                 |                |                  |                |                  | 10 |
| 2  | <b>263.1208</b> | 132.0640        |                |                  |                |                  | I    | 977.5036        | 489.2555        | 959.4801       | 480.2437         | 959.4931       | 480.2502         | 9  |
| 3  | <b>351.1499</b> | 176.0786        |                |                  | 333.1393       | 167.0733         | S    | <b>863.4225</b> | 432.2149        | 845.3990       | 423.2031         | 845.4120       | 423.2096         | 8  |
| 4  | 439.1789        | 220.0931        |                |                  | 421.1684       | 211.0878         | S    | <b>775.3935</b> | 388.2004        | 757.3699       | 379.1886         | 757.3829       | 379.1951         | 7  |
| 5  | 527.2080        | 264.1076        |                |                  | 509.1974       | 255.1024         | S    | 687.3644        | 344.1858        | 669.3408       | 335.1741         | 669.3538       | 335.1806         | 6  |
| 6  | 615.2371        | 308.1222        |                |                  | 597.2265       | 299.1169         | S    | 599.3354        | 300.1713        | 581.3118       | 291.1595         | 581.3248       | 291.1660         | 5  |
| 7  | <b>775.3263</b> | 388.1668        | 757.3027       | 379.1550         | 757.3157       | 379.1615         | R    | 511.3063        | 256.1568        | 493.2827       | 247.1450         | 493.2957       | 247.1515         | 4  |
| 8  | <b>863.3554</b> | 432.1813        | 845.3318       | 423.1695         | 845.3448       | 423.1760         | S    | <b>351.2170</b> | 176.1122        | 333.1935       | 167.1004         | 333.2065       | 167.1069         | 3  |
| 9  | 977.4365        | 489.2219        | 959.4129       | 480.2101         | 959.4259       | 480.2166         | L    | <b>263.1880</b> | 132.0976        | 245.1644       | 123.0858         |                |                  | 2  |
| 10 |                 |                 |                |                  |                |                  | K    | 149.1069        | 75.0571         | 131.0833       | 66.0453          |                |                  | 1  |

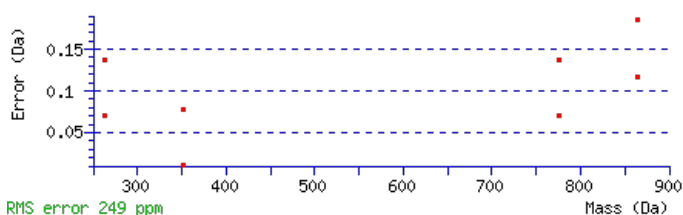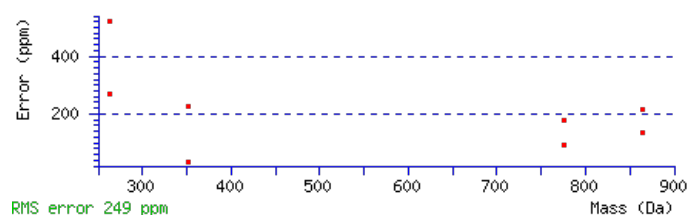NCBI **BLAST** search of **MISSSSRSLK**

(Parameters: blastp, nr protein database, expect=20000, no filter, PAM30)

Other BLAST [web gateways](#)**All matches to this query**

**AT4G25280.1**

| <b>Score</b> | <b>Mr(calc)</b> | <b>Delta</b> | <b>Sequence</b>            |
|--------------|-----------------|--------------|----------------------------|
| 25.1         | 1124.5288       | -0.0004      | <a href="#">MISSSSRSLK</a> |
| 23.3         | 1124.5299       | -0.0015      | <a href="#">LFSIEWYR</a>   |
| 2.1          | 1124.5254       | 0.0030       | <a href="#">RTFSADLSSK</a> |
| 2.0          | 1124.5254       | 0.0030       | <a href="#">QEHEITNIK</a>  |
| 1.2          | 1124.5281       | 0.0003       | <a href="#">NNLLHQVDR</a>  |

**Mascot:** <http://www.matrixscience.com/>

**Peptide View**MS/MS Fragmentation of **AIAWAIDEK**Found in **AT4G25370.1** in **TAIR\_Arabidopsis**, Symbols: | Clp amino terminal domain-containing protein | chr4:12972757-12974590 FORWARD

Match to Query 2707: 1015.533504 from(508.774028,2+) index(5084)

Title: Elution from: 45.243 to 45.243 scan no 6336 cid35.00 polarity:+

Data file C7-2\_2.mgf

Click mouse within plot area to zoom in by factor of two about that point

Or,   to  Da Label all possible matches  Label matches used for scoring Show Y-axis 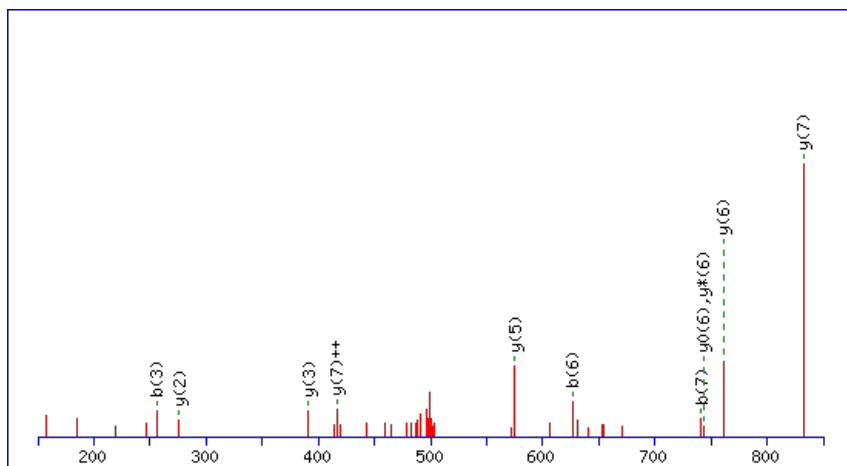

Monoisotopic mass of neutral peptide Mr(calc): 1015.5338

Fixed modifications: Carbamidomethyl (C) (apply to specified residues or termini only)

Ions Score: 40 Expect: 0.00021

Matches : 11/66 fragment ions using 13 most intense peaks ([help](#))

| # | b               | b <sup>++</sup> | b <sup>0</sup> | b <sup>0++</sup> | Seq. | y               | y <sup>++</sup> | y*              | y <sup>*++</sup> | y <sup>0</sup>  | y <sup>0++</sup> | # |
|---|-----------------|-----------------|----------------|------------------|------|-----------------|-----------------|-----------------|------------------|-----------------|------------------|---|
| 1 | 72.0444         | 36.5258         |                |                  | A    |                 |                 |                 |                  |                 |                  | 9 |
| 2 | 185.1285        | 93.0679         |                |                  | I    | 945.5040        | 473.2556        | 928.4775        | 464.7424         | 927.4934        | 464.2504         | 8 |
| 3 | <b>256.1656</b> | 128.5864        |                |                  | A    | <b>832.4199</b> | <b>416.7136</b> | 815.3934        | 408.2003         | 814.4094        | 407.7083         | 7 |
| 4 | 442.2449        | 221.6261        |                |                  | W    | <b>761.3828</b> | 381.1951        | <b>744.3563</b> | 372.6818         | <b>743.3723</b> | 372.1898         | 6 |
| 5 | 513.2820        | 257.1446        |                |                  | A    | <b>575.3035</b> | 288.1554        | 558.2770        | 279.6421         | 557.2930        | 279.1501         | 5 |
| 6 | <b>626.3661</b> | 313.6867        |                |                  | I    | 504.2664        | 252.6368        | 487.2399        | 244.1236         | 486.2558        | 243.6316         | 4 |
| 7 | <b>741.3930</b> | 371.2001        | 723.3824       | 362.1949         | D    | <b>391.1823</b> | 196.0948        | 374.1558        | 187.5815         | 373.1718        | 187.0895         | 3 |
| 8 | 870.4356        | 435.7214        | 852.4250       | 426.7162         | E    | <b>276.1554</b> | 138.5813        | 259.1288        | 130.0681         | 258.1448        | 129.5761         | 2 |
| 9 |                 |                 |                |                  | K    | 147.1128        | 74.0600         | 130.0863        | 65.5468          |                 |                  | 1 |

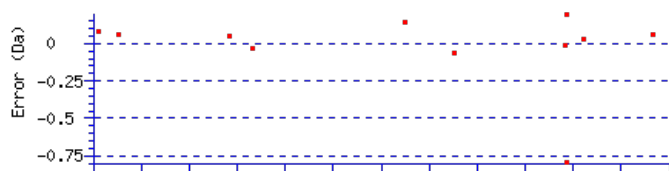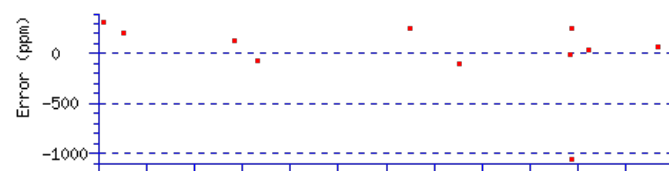NCBI BLAST search of [AIAWAIDEK](#)

(Parameters: blastp, nr protein database, expect=20000, no filter, PAM30)

Other BLAST [web gateways](#)**All matches to this query**

| Score | Mr(calc)  | Delta   | Sequence                  |
|-------|-----------|---------|---------------------------|
| 39.7  | 1015.5338 | -0.0003 | <a href="#">AIAWAIDEK</a> |



**Peptide View**MS/MS Fragmentation of **FGSGSITPAGQGSR**Found in **AT4G25620.1** in **TAIR\_Arabidopsis**, Symbols: | hydroxyproline-rich glycoprotein family protein | chr4:13067456-13069305 REVERSE

Match to Query 4929: 1338.592190 from(670.303371,2+) index(4520)

Title: Elution from: 41.860 to 41.860 scan no 5725 cid35.00 polarity:+

Data file 0-2\_2.mgf

Click mouse within plot area to zoom in by factor of two about that point

Or,   to  Da Label all possible matches  Label matches used for scoring Show Y-axis 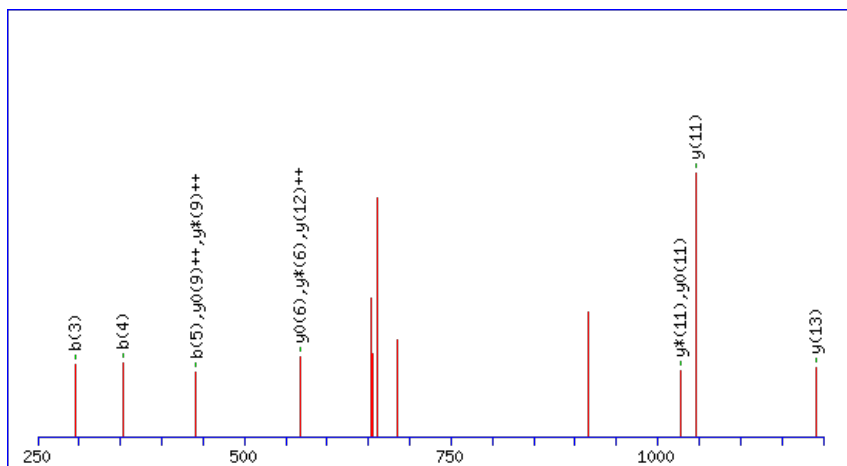Monoisotopic mass of neutral peptide  $M_r(\text{calc})$ : 1338.5888

Fixed modifications: Carbamidomethyl (C) (apply to specified residues or termini only)

Ions Score: 24 Expect: 0.028

Matches : 12/130 fragment ions using 10 most intense peaks ([help](#))

| #  | b               | b <sup>++</sup> | b <sup>*</sup> | b <sup>*++</sup> | b <sup>0</sup> | b <sup>0++</sup> | Seq. | y                | y <sup>++</sup> | y <sup>*</sup>   | y <sup>*++</sup> | y <sup>0</sup>   | y <sup>0++</sup> | #  |
|----|-----------------|-----------------|----------------|------------------|----------------|------------------|------|------------------|-----------------|------------------|------------------|------------------|------------------|----|
| 1  | 149.0727        | 75.0400         |                |                  |                |                  | F    |                  |                 |                  |                  |                  |                  | 14 |
| 2  | 207.0912        | 104.0492        |                |                  |                |                  | G    | <b>1191.5307</b> | 596.2690        | 1173.5071        | 587.2572         | 1173.5201        | 587.2637         | 13 |
| 3  | <b>295.1203</b> | 148.0638        |                |                  | 277.1097       | 139.0585         | S    | 1133.5122        | <b>567.2597</b> | 1115.4886        | 558.2479         | 1115.5016        | 558.2544         | 12 |
| 4  | <b>353.1388</b> | 177.0730        |                |                  | 335.1282       | 168.0677         | G    | <b>1045.4831</b> | 523.2452        | <b>1027.4595</b> | 514.2334         | <b>1027.4726</b> | 514.2399         | 11 |
| 5  | <b>441.1678</b> | 221.0876        |                |                  | 423.1573       | 212.0823         | S    | 987.4646         | 494.2359        | 969.4410         | 485.2242         | 969.4541         | 485.2307         | 10 |
| 6  | 555.2489        | 278.1281        |                |                  | 537.2384       | 269.1228         | I    | 899.4356         | 450.2214        | 881.4120         | <b>441.2096</b>  | 881.4250         | <b>441.2161</b>  | 9  |
| 7  | 657.2937        | 329.1505        |                |                  | 639.2831       | 320.1452         | T    | 785.3545         | 393.1809        | 767.3309         | 384.1691         | 767.3439         | 384.1756         | 8  |
| 8  | 755.3435        | 378.1754        |                |                  | 737.3329       | 369.1701         | P    | 683.3097         | 342.1585        | 665.2862         | 333.1467         | 665.2992         | 333.1532         | 7  |
| 9  | 827.3776        | 414.1924        |                |                  | 809.3670       | 405.1872         | A    | 585.2599         | 293.1336        | <b>567.2364</b>  | 284.1218         | <b>567.2494</b>  | 284.1283         | 6  |
| 10 | 885.3961        | 443.2017        |                |                  | 867.3855       | 434.1964         | G    | 513.2258         | 257.1165        | 495.2022         | 248.1047         | 495.2152         | 248.1113         | 5  |
| 11 | 1015.4488       | 508.2280        | 997.4252       | 499.2162         | 997.4382       | 499.2227         | Q    | 455.2073         | 228.1073        | 437.1837         | 219.0955         | 437.1967         | 219.1020         | 4  |
| 12 | 1073.4673       | 537.2373        | 1055.4437      | 528.2255         | 1055.4567      | 528.2320         | G    | 325.1547         | 163.0810        | 307.1311         | 154.0692         | 307.1441         | 154.0757         | 3  |
| 13 | 1161.4963       | 581.2518        | 1143.4727      | 572.2400         | 1143.4858      | 572.2465         | S    | 267.1362         | 134.0717        | 249.1126         | 125.0599         | 249.1256         | 125.0664         | 2  |
| 14 |                 |                 |                |                  |                |                  | R    | 179.1071         | 90.0572         | 161.0835         | 81.0454          |                  |                  | 1  |

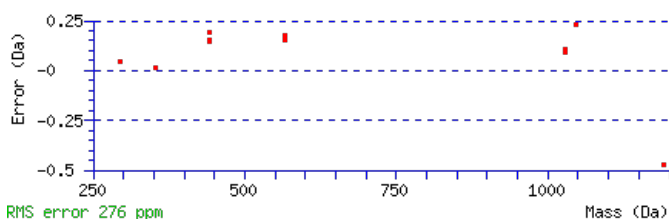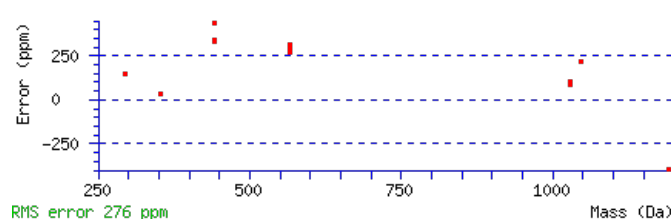NCBI BLAST search of **FGSGSITPAGQGSR**

(Parameters: blastp, nr protein database, expect=20000, no filter, PAM30)

# AT4G25620.1

Other BLAST [web gateways](#)

## All matches to this query

| Score | Mr(calc)  | Delta   | Sequence                       |
|-------|-----------|---------|--------------------------------|
| 24.2  | 1338.5888 | 0.0034  | <a href="#">FGSGSITPAGQGSR</a> |
| 19.0  | 1338.5911 | 0.0011  | <a href="#">QYSLWLDNQR</a>     |
| 14.5  | 1338.5922 | -0.0000 | <a href="#">GMENKVSTGKDR</a>   |
| 12.0  | 1338.5922 | -0.0000 | <a href="#">SKALCRADDASK</a>   |
| 8.7   | 1338.5945 | -0.0023 | <a href="#">RSSCAIWLSDK</a>    |
| 7.5   | 1338.5911 | 0.0011  | <a href="#">YSPFGPDLDR</a>     |
| 6.2   | 1338.5911 | 0.0011  | <a href="#">SDNPESFPRQK</a>    |
| 3.4   | 1338.5888 | 0.0034  | <a href="#">VSFGLNAQASDGR</a>  |
| 2.9   | 1338.5918 | 0.0004  | <a href="#">EDKQFEMALAK</a>    |
| 2.6   | 1338.5918 | 0.0004  | <a href="#">FISMIDAELDR</a>    |

Mascot: <http://www.matrixscience.com/>

**Peptide View**MS/MS Fragmentation of **VWNPFR**Found in **AT4G25630.1** in **TAIR\_Arabidopsis**, Symbols: ATFIB2, FIB2 | FIB2 (FIBRILLARIN 2) | chr4:13074248-13076214 FORWARD

Match to Query 1094: 817.423646 from(409.719099,2+) index(5655)

Title: Elution from: 50.627 to 50.627 scan no 7207 cid35.00 polarity:+

Data file 0-2\_2.mgf

Click mouse within plot area to zoom in by factor of two about that point

Or,   to  Da Label all possible matches  Label matches used for scoring Show Y-axis 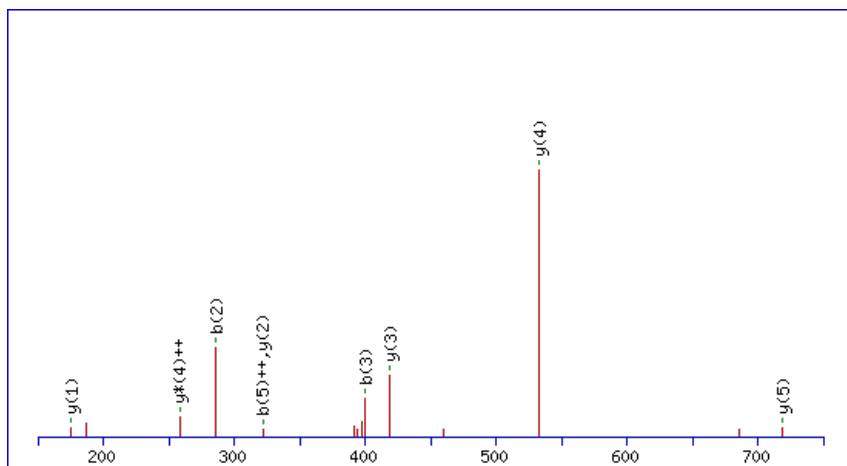Monoisotopic mass of neutral peptide **Mr(calc)**: 817.4235**Fixed modifications**: Carbamidomethyl (C) (apply to specified residues or termini only)**Ions Score**: 44 **Expect**: 0.00014**Matches**: 9/36 fragment ions using 11 most intense peaks ([help](#))

| # | b               | b <sup>++</sup> | b*       | b <sup>*++</sup> | Seq. | y               | y <sup>++</sup> | y*       | y <sup>*++</sup> | # |
|---|-----------------|-----------------|----------|------------------|------|-----------------|-----------------|----------|------------------|---|
| 1 | 100.0757        | 50.5415         |          |                  | V    |                 |                 |          |                  | 6 |
| 2 | <b>286.1550</b> | 143.5811        |          |                  | W    | <b>719.3624</b> | 360.1848        | 702.3358 | 351.6715         | 5 |
| 3 | <b>400.1979</b> | 200.6026        | 383.1714 | 192.0893         | N    | <b>533.2831</b> | 267.1452        | 516.2565 | <b>258.6319</b>  | 4 |
| 4 | 497.2507        | 249.1290        | 480.2241 | 240.6157         | P    | <b>419.2401</b> | 210.1237        | 402.2136 | 201.6104         | 3 |
| 5 | 644.3191        | <b>322.6632</b> | 627.2926 | 314.1499         | F    | <b>322.1874</b> | 161.5973        | 305.1608 | 153.0840         | 2 |
| 6 |                 |                 |          |                  | R    | <b>175.1190</b> | 88.0631         | 158.0924 | 79.5498          | 1 |

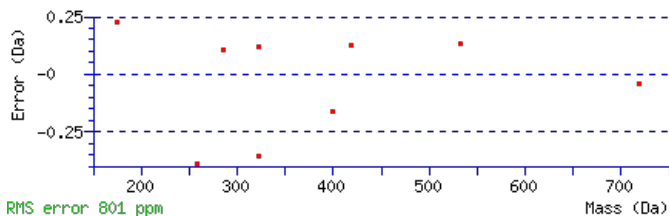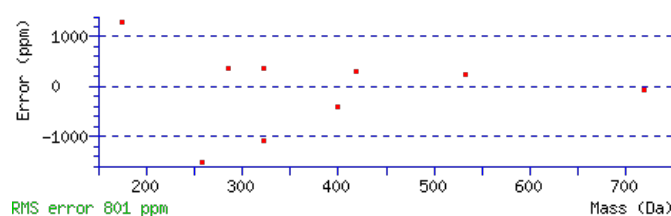NCBI **BLAST** search of **VWNPFR**

(Parameters: blastp, nr protein database, expect=20000, no filter, PAM30)

Other BLAST [web gateways](#)**All matches to this query**

| Score | Mr(calc) | Delta  | Sequence                |
|-------|----------|--------|-------------------------|
| 43.6  | 817.4235 | 0.0001 | <a href="#">VWNPFR</a>  |
| 21.8  | 817.4229 | 0.0008 | <a href="#">VGRSPMR</a> |
| 18.6  | 817.4228 | 0.0008 | <a href="#">ERNLMR</a>  |
| 4.9   | 817.4229 | 0.0008 | <a href="#">ERCVVR</a>  |





**Peptide View**MS/MS Fragmentation of **HPLIDVPNLQVIK**Found in **AT4G25740.1** in **TAIR\_Arabidopsis**, Symbols: | 40S ribosomal protein S10 (RPS10A) | chr4:13107497-13108760 REVERSE

Match to Query 6301: 1484.872449 from(495.964759,3+) index(7441)

Title: Elution from: 64.587 to 64.587 scan no 9661 cid35.00 polarity:+

Data file D1d-3\_2.mgf

Click mouse within plot area to zoom in by factor of two about that point

Or,   to  Da Label all possible matches  Label matches used for scoring Show Y-axis 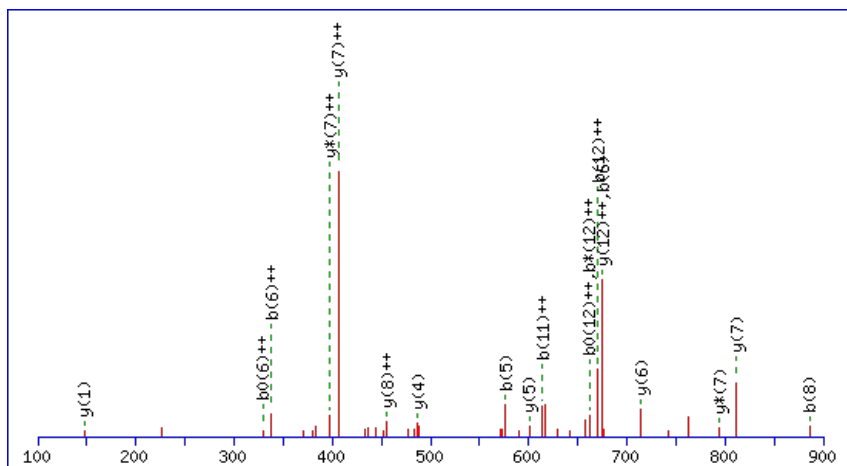Monoisotopic mass of neutral peptide  $M_r(\text{calc})$ : 1484.8715

Fixed modifications: Carbamidomethyl (C) (apply to specified residues or termini only)

Ions Score: 35 Expect: 0.00058

Matches : 19/106 fragment ions using 24 most intense peaks ([help](#))

| #  | b         | b <sup>++</sup> | b*        | b <sup>++</sup> * | b <sup>0</sup> | b <sup>0++</sup> | Seq. | y         | y <sup>++</sup> | y*        | y <sup>++</sup> * | y <sup>0</sup> | y <sup>0++</sup> | #  |
|----|-----------|-----------------|-----------|-------------------|----------------|------------------|------|-----------|-----------------|-----------|-------------------|----------------|------------------|----|
| 1  | 138.0662  | 69.5367         |           |                   |                |                  | H    |           |                 |           |                   |                |                  | 13 |
| 2  | 235.1190  | 118.0631        |           |                   |                |                  | P    | 1348.8199 | 674.9136        | 1331.7933 | 666.4003          | 1330.8093      | 665.9083         | 12 |
| 3  | 348.2030  | 174.6051        |           |                   |                |                  | L    | 1251.7671 | 626.3872        | 1234.7406 | 617.8739          | 1233.7565      | 617.3819         | 11 |
| 4  | 461.2871  | 231.1472        |           |                   |                |                  | I    | 1138.6830 | 569.8452        | 1121.6565 | 561.3319          | 1120.6725      | 560.8399         | 10 |
| 5  | 576.3140  | 288.6606        |           |                   | 558.3035       | 279.6554         | D    | 1025.5990 | 513.3031        | 1008.5724 | 504.7898          | 1007.5884      | 504.2978         | 9  |
| 6  | 675.3824  | 338.1949        |           |                   | 657.3719       | 329.1896         | V    | 910.5720  | 455.7897        | 893.5455  | 447.2764          |                |                  | 8  |
| 7  | 772.4352  | 386.7212        |           |                   | 754.4246       | 377.7160         | P    | 811.5036  | 406.2554        | 794.4771  | 397.7422          |                |                  | 7  |
| 8  | 886.4781  | 443.7427        | 869.4516  | 435.2294          | 868.4676       | 434.7374         | N    | 714.4509  | 357.7291        | 697.4243  | 349.2158          |                |                  | 6  |
| 9  | 999.5622  | 500.2847        | 982.5356  | 491.7715          | 981.5516       | 491.2795         | L    | 600.4079  | 300.7076        | 583.3814  | 292.1943          |                |                  | 5  |
| 10 | 1127.6208 | 564.3140        | 1110.5942 | 555.8007          | 1109.6102      | 555.3087         | Q    | 487.3239  | 244.1656        | 470.2973  | 235.6523          |                |                  | 4  |
| 11 | 1226.6892 | 613.8482        | 1209.6626 | 605.3350          | 1208.6786      | 604.8429         | V    | 359.2653  | 180.1363        | 342.2387  | 171.6230          |                |                  | 3  |
| 12 | 1339.7732 | 670.3903        | 1322.7467 | 661.8770          | 1321.7627      | 661.3850         | I    | 260.1969  | 130.6021        | 243.1703  | 122.0888          |                |                  | 2  |
| 13 |           |                 |           |                   |                |                  | K    | 147.1128  | 74.0600         | 130.0863  | 65.5468           |                |                  | 1  |

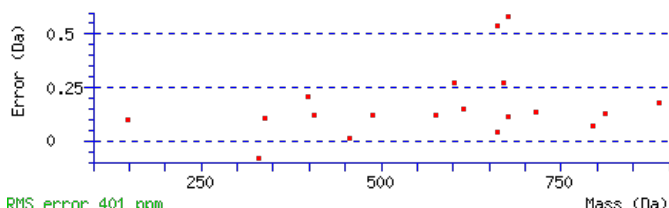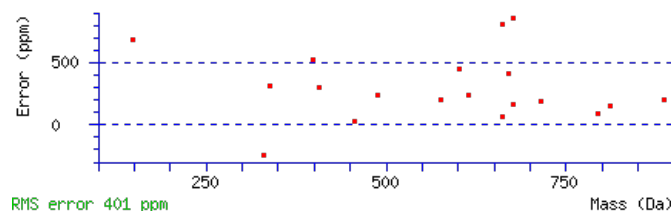NCBI **BLAST** search of **HPLIDVPNLQVIK**

(Parameters: blastp, nr protein database, expect=20000, no filter, PAM30)

Other BLAST [web gateways](#)

AT4G25740.1

All matches to this query

| Score | Mr(calc)  | Delta   | Sequence                      |
|-------|-----------|---------|-------------------------------|
| 34.8  | 1484.8715 | 0.0010  | <a href="#">HPLIDVPNLQVIK</a> |
| 3.7   | 1484.8748 | -0.0024 | <a href="#">MLVLTKSSPKPLR</a> |
| 0.0   | 1484.8715 | 0.0010  | <a href="#">ILGIYQVSSKHLK</a> |

Mascot: <http://www.matrixscience.com/>

**Peptide View**MS/MS Fragmentation of **LFDVSLK**

Found in **AT4G26300.1** in **TAIR\_Arabidopsis**, Symbols: EMB1027 | EMB1027 (EMBRYO DEFECTIVE 1027); ATP binding / arginine-tRNA ligase | chr4:13308409-13313118 REVERSE

Match to Query 1258: 828.445560 from(415.230056,2+) index(5955)

Title: Elution from: 52.663 to 52.663 scan no 7494 cid35.00 polarity:+

Data file C7-2\_1.mgf

Click mouse within plot area to zoom in by factor of two about that point

Or,   to  Da

Label all possible matches  Label matches used for scoring

Show Y-axis

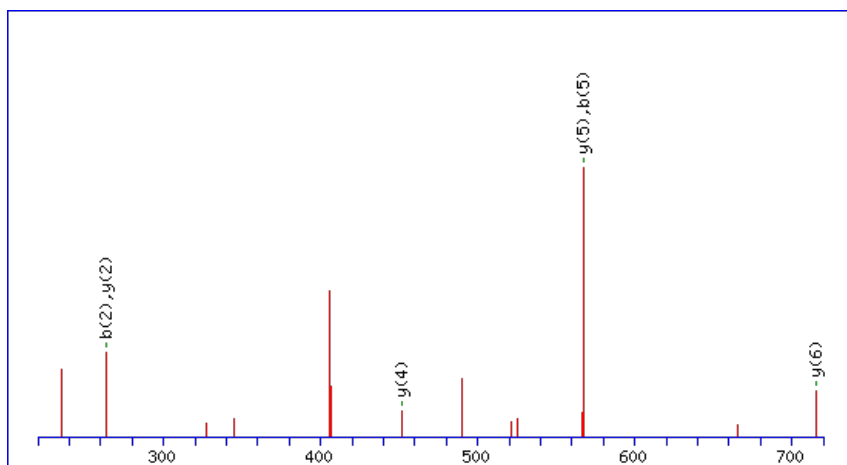

Monoisotopic mass of neutral peptide  $M_r(\text{calc})$ : 828.4457

Fixed modifications: Carbamidomethyl (C) (apply to specified residues or termini only)

Ions Score: 27 Expect: 0.017

Matches : 6/52 fragment ions using 10 most intense peaks ([help](#))

| # | b               | b <sup>++</sup> | b <sup>0</sup> | b <sup>0++</sup> | Seq. | y               | y <sup>++</sup> | y*       | y <sup>*++</sup> | y <sup>0</sup> | y <sup>0++</sup> | # |
|---|-----------------|-----------------|----------------|------------------|------|-----------------|-----------------|----------|------------------|----------------|------------------|---|
| 1 | 115.0884        | 58.0478         |                |                  | L    |                 |                 |          |                  |                |                  | 7 |
| 2 | <b>263.1538</b> | 132.0805        |                |                  | F    | <b>715.3719</b> | 358.1896        | 697.3483 | 349.1778         | 697.3613       | 349.1843         | 6 |
| 3 | 379.1778        | 190.0925        | 361.1672       | 181.0873         | D    | <b>567.3065</b> | 284.1569        | 549.2829 | 275.1451         | 549.2959       | 275.1516         | 5 |
| 4 | 479.2433        | 240.1253        | 461.2327       | 231.1200         | V    | <b>451.2825</b> | 226.1449        | 433.2589 | 217.1331         | 433.2719       | 217.1396         | 4 |
| 5 | <b>567.2723</b> | 284.1398        | 549.2617       | 275.1345         | S    | 351.2170        | 176.1122        | 333.1935 | 167.1004         | 333.2065       | 167.1069         | 3 |
| 6 | 681.3534        | 341.1803        | 663.3428       | 332.1751         | L    | <b>263.1880</b> | 132.0976        | 245.1644 | 123.0858         |                |                  | 2 |
| 7 |                 |                 |                |                  | K    | 149.1069        | 75.0571         | 131.0833 | 66.0453          |                |                  | 1 |

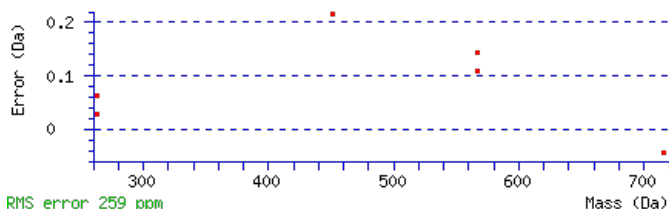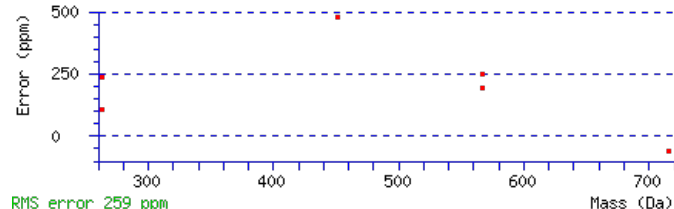

NCBI **BLAST** search of **LFDVSLK**

(Parameters: blastp, nr protein database, expect=20000, no filter, PAM30)

Other BLAST [web gateways](#)

**All matches to this query**

| Score | $M_r(\text{calc})$ | Delta   | Sequence                |
|-------|--------------------|---------|-------------------------|
| 27.4  | 828.4457           | -0.0002 | <a href="#">LFDVSLK</a> |
| 13.0  | 828.4457           | -0.0002 | <a href="#">IYAVDLK</a> |

# AT4G26300.1

|      |          |         |                          |
|------|----------|---------|--------------------------|
| 13.0 | 828.4457 | -0.0002 | <a href="#">LFVSLDK</a>  |
| 4.9  | 828.4457 | -0.0002 | <a href="#">IPYTSIK</a>  |
| 4.9  | 828.4457 | -0.0002 | <a href="#">ISFDVIK</a>  |
| 4.9  | 828.4457 | -0.0002 | <a href="#">LFELATK</a>  |
| 4.9  | 828.4457 | -0.0002 | <a href="#">LYGVELK</a>  |
| 3.1  | 828.4462 | -0.0006 | <a href="#">KTRGDIK</a>  |
| 3.1  | 828.4444 | 0.0012  | <a href="#">MIMGKLK</a>  |
| 3.1  | 828.4462 | -0.0006 | <a href="#">RSVTGGLK</a> |

**Mascot:** <http://www.matrixscience.com/>

**Peptide View**MS/MS Fragmentation of **RFASINVENIESNR**Found in **AT4G26530.1** in **TAIR\_Arabidopsis**, Symbols: | fructose-bisphosphate aldolase, putative | chr4:13391573-13392944 FORWARD

Match to Query 7841: 1670.765283 from(557.929037,3+) index(4501)

Title: Elution from: 43.579 to 43.579 scan no 5745 cid35.00 polarity:+

Data file D1d-2\_1.mgf

Click mouse within plot area to zoom in by factor of two about that point

Or,   to  Da Label all possible matches  Label matches used for scoring Show Y-axis 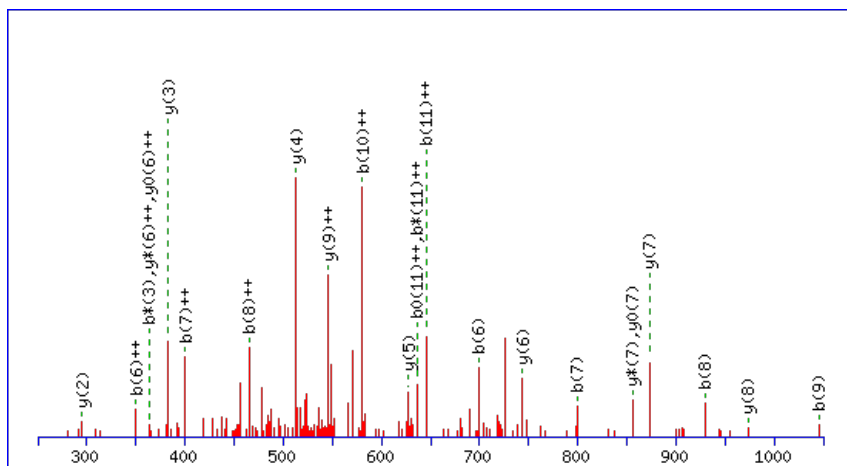Monoisotopic mass of neutral peptide  $M_r(\text{calc})$ : 1670.7647

Fixed modifications: Carbamidomethyl (C) (apply to specified residues or termini only)

Ions Score: 56 Expect: 2.3e-005

Matches : 24/146 fragment ions using 22 most intense peaks ([help](#))

| #  | b         | b <sup>++</sup> | b*        | b <sup>*++</sup> | b <sup>0</sup> | b <sup>0++</sup> | Seq. | y         | y <sup>++</sup> | y*        | y <sup>*++</sup> | y <sup>0</sup> | y <sup>0++</sup> | #  |
|----|-----------|-----------------|-----------|------------------|----------------|------------------|------|-----------|-----------------|-----------|------------------|----------------|------------------|----|
| 1  | 161.0965  | 81.0519         | 143.0729  | 72.0401          |                |                  | R    |           |                 |           |                  |                |                  | 14 |
| 2  | 309.1620  | 155.0846        | 291.1384  | 146.0728         |                |                  | F    | 1511.6827 | 756.3450        | 1493.6591 | 747.3332         | 1493.6721      | 747.3397         | 13 |
| 3  | 381.1961  | 191.1017        | 363.1725  | 182.0899         |                |                  | A    | 1363.6173 | 682.3123        | 1345.5937 | 673.3005         | 1345.6067      | 673.3070         | 12 |
| 4  | 469.2252  | 235.1162        | 451.2016  | 226.1044         | 451.2146       | 226.1109         | S    | 1291.5831 | 646.2952        | 1273.5595 | 637.2834         | 1273.5725      | 637.2899         | 11 |
| 5  | 583.3063  | 292.1568        | 565.2827  | 283.1450         | 565.2957       | 283.1515         | I    | 1203.5540 | 602.2807        | 1185.5305 | 593.2689         | 1185.5435      | 593.2754         | 10 |
| 6  | 699.3433  | 350.1753        | 681.3197  | 341.1635         | 681.3327       | 341.1700         | N    | 1089.4730 | 545.2401        | 1071.4494 | 536.2283         | 1071.4624      | 536.2348         | 9  |
| 7  | 799.4087  | 400.2080        | 781.3851  | 391.1962         | 781.3982       | 391.2027         | V    | 973.4360  | 487.2216        | 955.4124  | 478.2098         | 955.4254       | 478.2163         | 8  |
| 8  | 929.4484  | 465.2278        | 911.4248  | 456.2160         | 911.4378       | 456.2225         | E    | 873.3705  | 437.1889        | 855.3469  | 428.1771         | 855.3599       | 428.1836         | 7  |
| 9  | 1045.4854 | 523.2463        | 1027.4618 | 514.2345         | 1027.4748      | 514.2410         | N    | 743.3309  | 372.1691        | 725.3073  | 363.1573         | 725.3203       | 363.1638         | 6  |
| 10 | 1159.5665 | 580.2869        | 1141.5429 | 571.2751         | 1141.5559      | 571.2816         | I    | 627.2939  | 314.1506        | 609.2703  | 305.1388         | 609.2833       | 305.1453         | 5  |
| 11 | 1289.6061 | 645.3067        | 1271.5825 | 636.2949         | 1271.5955      | 636.3014         | E    | 513.2128  | 257.1100        | 495.1892  | 248.0982         | 495.2022       | 248.1047         | 4  |
| 12 | 1377.6351 | 689.3212        | 1359.6116 | 680.3094         | 1359.6246      | 680.3159         | S    | 383.1732  | 192.0902        | 365.1496  | 183.0784         | 365.1626       | 183.0849         | 3  |
| 13 | 1493.6721 | 747.3397        | 1475.6486 | 738.3279         | 1475.6616      | 738.3344         | N    | 295.1441  | 148.0757        | 277.1205  | 139.0639         |                |                  | 2  |
| 14 |           |                 |           |                  |                |                  | R    | 179.1071  | 90.0572         | 161.0835  | 81.0454          |                |                  | 1  |

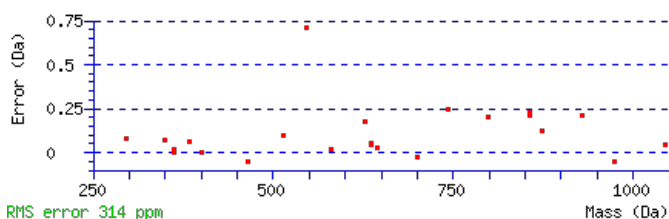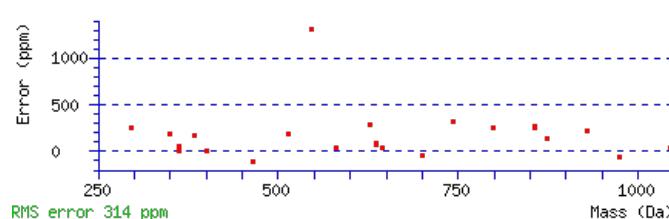NCBI BLAST search of **RFASINVENIESNR**

(Parameters: blastp, nr protein database, expect=20000, no filter, PAM30)

AT4G26530.1

Other BLAST [web gateways](#)

**All matches to this query**

| Score | Mr(calc)  | Delta   | Sequence                           |
|-------|-----------|---------|------------------------------------|
| 56.3  | 1670.7647 | 0.0006  | <a href="#">RFASINVENIESNR</a>     |
| 1.5   | 1670.7676 | -0.0023 | <a href="#">TYGGKVVP GAMDTAAAK</a> |
| 0.4   | 1670.7703 | -0.0050 | <a href="#">NGAAMISRPVFLSDR</a>    |

Mascot: <http://www.matrixscience.com/>

## Peptide View

MS/MS Fragmentation of **IDFSFQLYDLK**

Found in **AT4G26570.1** in **TAIR\_Arabidopsis**, Symbols: CBL3 | ATCBL3 (CALCINEURIN B-LIKE 3) | chr4:13408614-13410004 REVERSE

Match to Query 5191: 1400.663724 from(701.339138,2+) index(5595)

Title: Elution from: 49.848 to 49.848 scan no 7134 cid35.00 polarity:+

Data file D6h-2\_3.mgf

Click mouse within plot area to zoom in by factor of two about that point

Or,   to  Da

Label all possible matches  Label matches used for scoring

Show Y-axis

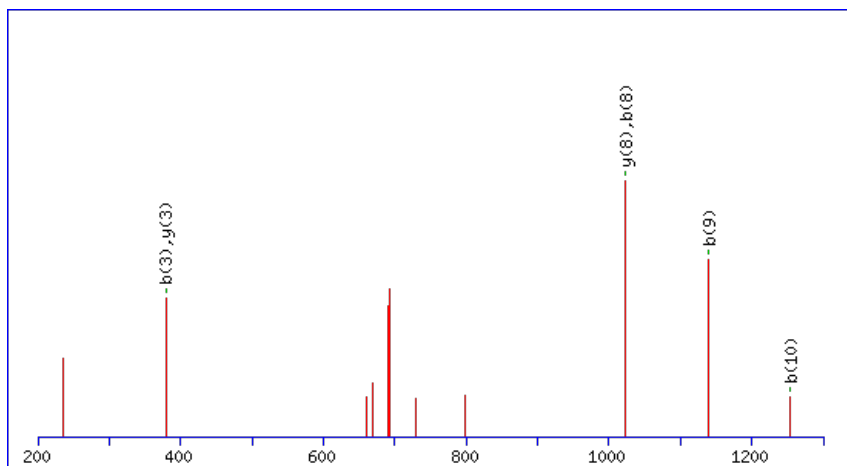

Monoisotopic mass of neutral peptide  $M_r(\text{calc})$ : 1400.6638

Fixed modifications: Carbamidomethyl (C) (apply to specified residues or termini only)

Ions Score: 28 Expect: 0.011

Matches : 6/104 fragment ions using 7 most intense peaks ([help](#))

| #  | b                | b <sup>++</sup> | b <sup>*</sup> | b <sup>*++</sup> | b <sup>0</sup> | b <sup>0++</sup> | Seq. | y                | y <sup>++</sup> | y <sup>*</sup> | y <sup>*++</sup> | y <sup>0</sup> | y <sup>0++</sup> | #  |
|----|------------------|-----------------|----------------|------------------|----------------|------------------|------|------------------|-----------------|----------------|------------------|----------------|------------------|----|
| 1  | 115.0884         | 58.0478         |                |                  |                |                  | I    |                  |                 |                |                  |                |                  | 11 |
| 2  | 231.1124         | 116.0598        |                |                  | 213.1018       | 107.0545         | D    | 1287.5900        | 644.2986        | 1269.5664      | 635.2868         | 1269.5794      | 635.2934         | 10 |
| 3  | <b>379.1778</b>  | 190.0925        |                |                  | 361.1672       | 181.0873         | F    | 1171.5660        | 586.2866        | 1153.5424      | 577.2749         | 1153.5555      | 577.2814         | 9  |
| 4  | 467.2069         | 234.1071        |                |                  | 449.1963       | 225.1018         | S    | <b>1023.5006</b> | 512.2539        | 1005.4770      | 503.2421         | 1005.4900      | 503.2486         | 8  |
| 5  | 615.2723         | 308.1398        |                |                  | 597.2617       | 299.1345         | F    | 935.4715         | 468.2394        | 917.4479       | 459.2276         | 917.4609       | 459.2341         | 7  |
| 6  | 745.3250         | 373.1661        | 727.3014       | 364.1543         | 727.3144       | 364.1608         | Q    | 787.4061         | 394.2067        | 769.3825       | 385.1949         | 769.3955       | 385.2014         | 6  |
| 7  | 859.4061         | 430.2067        | 841.3825       | 421.1949         | 841.3955       | 421.2014         | L    | 657.3534         | 329.1803        | 639.3298       | 320.1686         | 639.3428       | 320.1751         | 5  |
| 8  | <b>1023.4664</b> | 512.2369        | 1005.4428      | 503.2251         | 1005.4559      | 503.2316         | Y    | 543.2723         | 272.1398        | 525.2487       | 263.1280         | 525.2617       | 263.1345         | 4  |
| 9  | <b>1139.4904</b> | 570.2488        | 1121.4668      | 561.2370         | 1121.4798      | 561.2436         | D    | <b>379.2120</b>  | 190.1096        | 361.1884       | 181.0978         | 361.2014       | 181.1043         | 3  |
| 10 | <b>1253.5715</b> | 627.2894        | 1235.5479      | 618.2776         | 1235.5609      | 618.2841         | L    | 263.1880         | 132.0976        | 245.1644       | 123.0858         |                |                  | 2  |
| 11 |                  |                 |                |                  |                |                  | K    | 149.1069         | 75.0571         | 131.0833       | 66.0453          |                |                  | 1  |

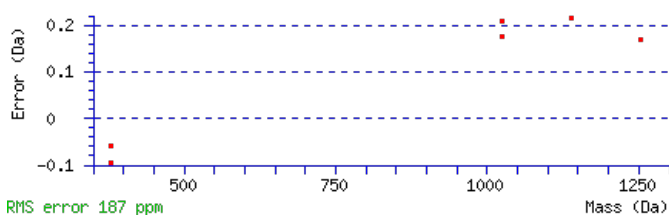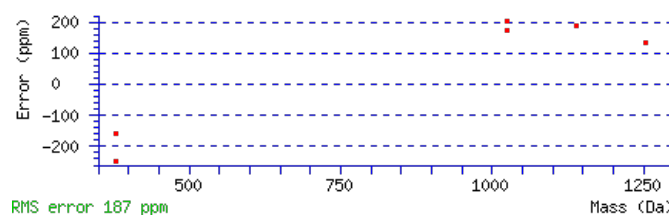

NCBI BLAST search of **IDFSFQLYDLK**

(Parameters: blastp, nr protein database, expect=20000, no filter, PAM30)

Other BLAST [web gateways](#)

All matches to this query



## AT4G26570.1

| Score | Mr(calc)  | Delta   | Sequence                      |
|-------|-----------|---------|-------------------------------|
| 28.0  | 1400.6638 | -0.0001 | <a href="#">IDFSFQLYDLK</a>   |
| 14.3  | 1400.6665 | -0.0027 | <a href="#">ALFNDRFFDLK</a>   |
| 4.3   | 1400.6669 | -0.0032 | <a href="#">HFARHSSEAVLK</a>  |
| 3.6   | 1400.6676 | -0.0039 | <a href="#">EKQMLHDEVKK</a>   |
| 3.6   | 1400.6676 | -0.0039 | <a href="#">KSRYLEVMNTK</a>   |
| 2.4   | 1400.6620 | 0.0017  | <a href="#">EITSAQAAHNTLK</a> |
| 1.7   | 1400.6647 | -0.0010 | <a href="#">HLSQQQPATSRK</a>  |
| 1.6   | 1400.6616 | 0.0021  | <a href="#">DSSSYAFKLELK</a>  |
| 1.6   | 1400.6665 | -0.0028 | <a href="#">FDAINWIHEIK</a>   |
| 0.2   | 1400.6642 | -0.0005 | <a href="#">FYRELNSQTVK</a>   |

Mascot: <http://www.matrixscience.com/>

**Peptide View**MS/MS Fragmentation of **GVISEDFNSYGSR**

Found in **AT4G26970.1** in **TAIR\_Arabidopsis**, Symbols: | aconitate hydratase, cytoplasmic, putative / citrate hydro-lyase/aconitase, putative | chr4:13543083-13548433 FORWARD

Match to Query 5596: 1446.598050 from(724.306301,2+) index(4568)

Title: Elution from: 41.427 to 41.427 scan no 5711 cid35.00 polarity:+

Data file D12h-1\_3.mgf

Click mouse within plot area to zoom in by factor of two about that point

Or,  to  Da

Label all possible matches  Label matches used for scoring

Show Y-axis

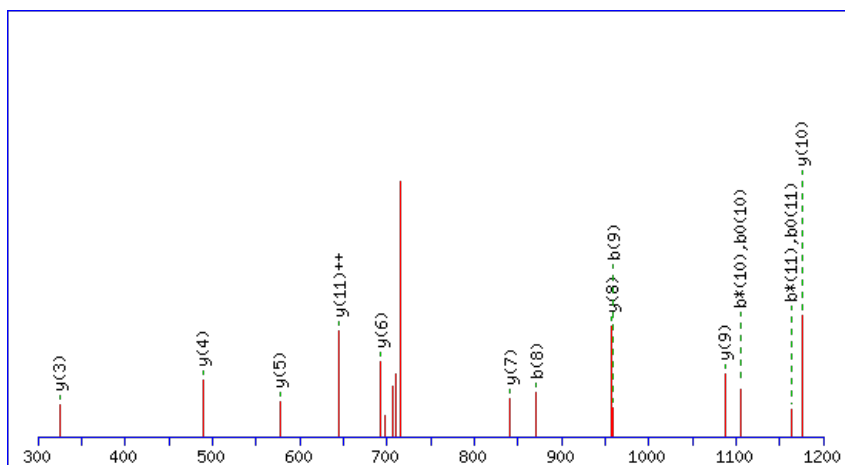

Monoisotopic mass of neutral peptide  $M_r(\text{calc})$ : 1446.5970

Fixed modifications: Carbamidomethyl (C) (apply to specified residues or termini only)

Ions Score: 80 Expect: 3.5e-008

Matches : 15/122 fragment ions using 15 most intense peaks ([help](#))

| #  | b               | b <sup>++</sup> | b*               | b <sup>*++</sup> | b <sup>0</sup>   | b <sup>0++</sup> | Seq.     | y                | y <sup>++</sup> | y*        | y <sup>*++</sup> | y <sup>0</sup> | y <sup>0++</sup> | #         |
|----|-----------------|-----------------|------------------|------------------|------------------|------------------|----------|------------------|-----------------|-----------|------------------|----------------|------------------|-----------|
| 1  | 59.0258         | 30.0165         |                  |                  |                  |                  | <b>G</b> |                  |                 |           |                  |                |                  | <b>13</b> |
| 2  | 159.0912        | 80.0492         |                  |                  |                  |                  | <b>V</b> | 1389.5857        | 695.2965        | 1371.5622 | 686.2847         | 1371.5752      | 686.2912         | <b>12</b> |
| 3  | 273.1723        | 137.0898        |                  |                  |                  |                  | <b>I</b> | 1289.5203        | <b>645.2638</b> | 1271.4967 | 636.2520         | 1271.5097      | 636.2585         | <b>11</b> |
| 4  | 361.2014        | 181.1043        |                  |                  | 343.1908         | 172.0990         | <b>S</b> | <b>1175.4392</b> | 588.2232        | 1157.4156 | 579.2114         | 1157.4286      | 579.2180         | <b>10</b> |
| 5  | 491.2410        | 246.1241        |                  |                  | 473.2304         | 237.1189         | <b>E</b> | <b>1087.4101</b> | 544.2087        | 1069.3865 | 535.1969         | 1069.3996      | 535.2034         | <b>9</b>  |
| 6  | 607.2650        | 304.1361        |                  |                  | 589.2544         | 295.1309         | <b>D</b> | <b>957.3705</b>  | 479.1889        | 939.3469  | 470.1771         | 939.3599       | 470.1836         | <b>8</b>  |
| 7  | 755.3304        | 378.1689        |                  |                  | 737.3199         | 369.1636         | <b>F</b> | <b>841.3465</b>  | 421.1769        | 823.3229  | 412.1651         | 823.3360       | 412.1716         | <b>7</b>  |
| 8  | <b>871.3674</b> | 436.1874        | 853.3439         | 427.1756         | 853.3569         | 427.1821         | <b>N</b> | <b>693.2811</b>  | 347.1442        | 675.2575  | 338.1324         | 675.2705       | 338.1389         | <b>6</b>  |
| 9  | <b>959.3965</b> | 480.2019        | 941.3729         | 471.1901         | 941.3859         | 471.1966         | <b>S</b> | <b>577.2441</b>  | 289.1257        | 559.2205  | 280.1139         | 559.2335       | 280.1204         | <b>5</b>  |
| 10 | 1123.4569       | 562.2321        | <b>1105.4333</b> | 553.2203         | <b>1105.4463</b> | 553.2268         | <b>Y</b> | <b>489.2150</b>  | 245.1111        | 471.1914  | 236.0994         | 471.2045       | 236.1059         | <b>4</b>  |
| 11 | 1181.4754       | 591.2413        | <b>1163.4518</b> | 582.2295         | <b>1163.4648</b> | 582.2360         | <b>G</b> | <b>325.1547</b>  | 163.0810        | 307.1311  | 154.0692         | 307.1441       | 154.0757         | <b>3</b>  |
| 12 | 1269.5044       | 635.2559        | 1251.4808        | 626.2441         | 1251.4939        | 626.2506         | <b>S</b> | 267.1362         | 134.0717        | 249.1126  | 125.0599         | 249.1256       | 125.0664         | <b>2</b>  |
| 13 |                 |                 |                  |                  |                  |                  | <b>R</b> | 179.1071         | 90.0572         | 161.0835  | 81.0454          |                |                  | <b>1</b>  |

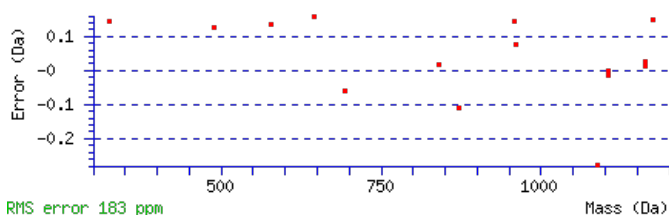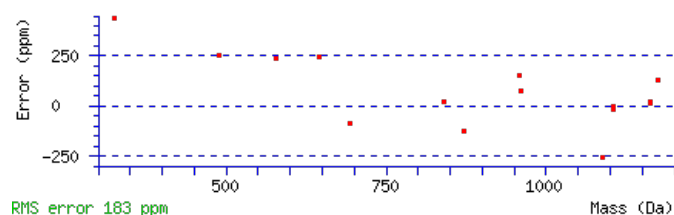

NCBI **BLAST** search of **GVISEDFNSYGSR**

(Parameters: blastp, nr protein database, expect=20000, no filter, PAM30)

AT4G26970.1

Other BLAST [web gateways](#)

**All matches to this query**

| Score | Mr(calc)  | Delta   | Sequence                       |
|-------|-----------|---------|--------------------------------|
| 79.7  | 1446.5970 | 0.0011  | <a href="#">GVISED FNSYGSR</a> |
| 0.6   | 1446.5994 | -0.0013 | <a href="#">FFFFCDPHRR</a>     |

**Mascot:** <http://www.matrixscience.com/>

**Peptide View**MS/MS Fragmentation of **RIMPQK**Found in **AT4G27080.1** in **TAIR\_Arabidopsis**, Symbols: ATPDIL5-4 | ATPDIL5-4 (PDI-LIKE 5-4) | chr4:13589162-13593341 FORWARD

Match to Query 951: 782.410232 from(392.212392,2+) index(1284)

Title: Elution from: 19.067 to 19.067 scan no 1792 cid35.00 polarity:+

Data file 0-2\_1.mgf

Click mouse within plot area to zoom in by factor of two about that point

Or,   to  Da Label all possible matches  Label matches used for scoring Show Y-axis 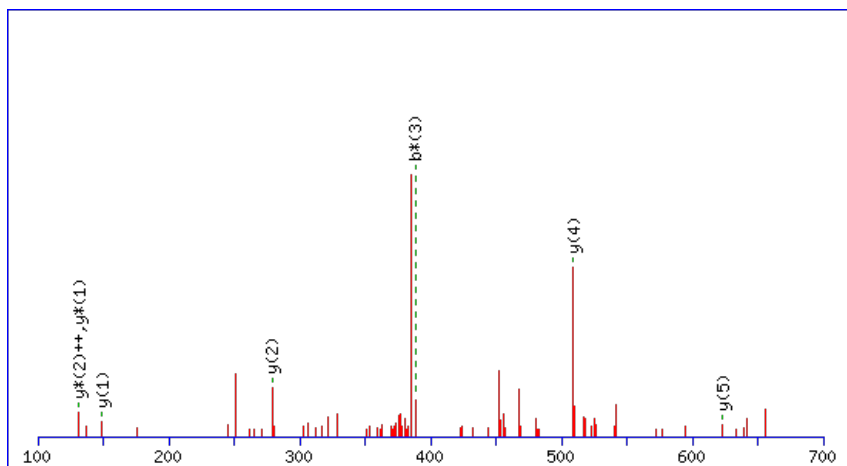Monoisotopic mass of neutral peptide **Mr(calc)**: 782.4099**Fixed modifications**: Carbamidomethyl (C) (apply to specified residues or termini only)**Ions Score**: 17 **Expect**: 0.021**Matches** : 7/40 fragment ions using 12 most intense peaks ([help](#))

| # | b        | b <sup>++</sup> | b*              | b <sup>*++</sup> | Seq. | y               | y <sup>++</sup> | y*              | y <sup>*++</sup> | # |
|---|----------|-----------------|-----------------|------------------|------|-----------------|-----------------|-----------------|------------------|---|
| 1 | 161.0965 | 81.0519         | 143.0729        | 72.0401          | R    |                 |                 |                 |                  | 6 |
| 2 | 275.1776 | 138.0925        | 257.1540        | 129.0807         | I    | <b>623.3279</b> | 312.1676        | 605.3044        | 303.1558         | 5 |
| 3 | 407.2151 | 204.1112        | <b>389.1916</b> | 195.0994         | M    | <b>509.2468</b> | 255.1271        | 491.2233        | 246.1153         | 4 |
| 4 | 505.2649 | 253.1361        | 487.2414        | 244.1243         | P    | 377.2093        | 189.1083        | 359.1857        | 180.0965         | 3 |
| 5 | 635.3176 | 318.1624        | 617.2940        | 309.1506         | Q    | <b>279.1595</b> | 140.0834        | 261.1359        | <b>131.0716</b>  | 2 |
| 6 |          |                 |                 |                  | K    | <b>149.1069</b> | 75.0571         | <b>131.0833</b> | 66.0453          | 1 |

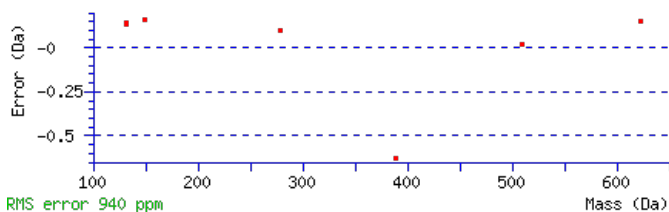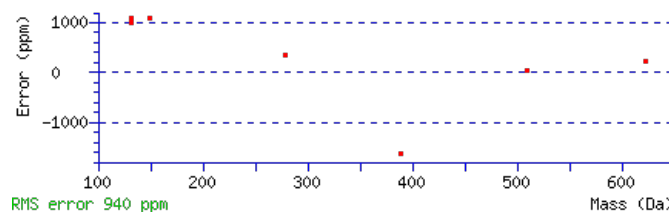NCBI **BLAST** search of **RIMPQK**

(Parameters: blastp, nr protein database, expect=20000, no filter, PAM30)

Other BLAST [web gateways](#)**All matches to this query**

| Score | Mr(calc) | Delta  | Sequence               |
|-------|----------|--------|------------------------|
| 17.2  | 782.4099 | 0.0003 | <a href="#">RIMPQK</a> |

## Peptide View

MS/MS Fragmentation of **ANLNDFDRFK**

Found in **AT4G27090.1** in **TAIR\_Arabidopsis**, Symbols: | 60S ribosomal protein L14 (RPL14B) | chr4:13594110-13595193 REVERSE

Match to Query 4489: 1238.603889 from(413.875239,3+) index(4394)

Title: Elution from: 39.533 to 39.533 scan no 5480 cid35.00 polarity:+

Data file D1d-3\_2.mgf

Click mouse within plot area to zoom in by factor of two about that point

Or,   to  Da

Label all possible matches  Label matches used for scoring

Show Y-axis

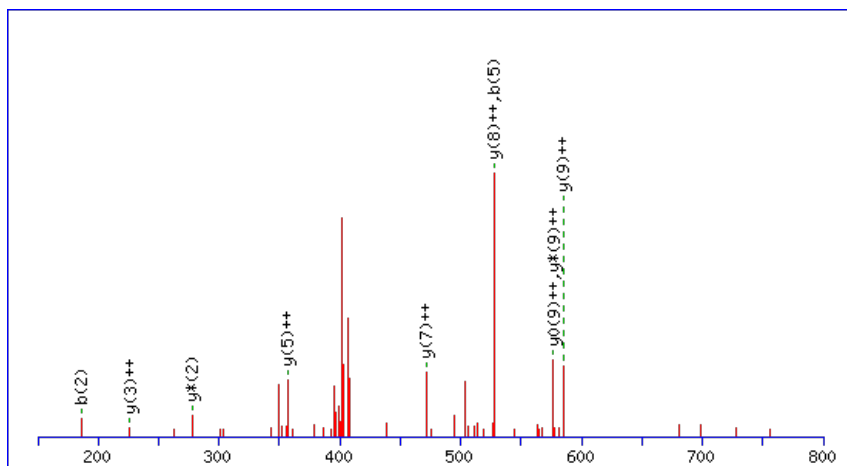

Monoisotopic mass of neutral peptide  $M_r(\text{calc})$ : 1238.6044

Fixed modifications: Carbamidomethyl (C) (apply to specified residues or termini only)

Ions Score: 18 Expect: 0.035

Matches : 10/92 fragment ions using 20 most intense peaks ([help](#))

| #  | b               | b <sup>++</sup> | b*        | b <sup>*++</sup> | b <sup>0</sup> | b <sup>0++</sup> | Seq. | y         | y <sup>++</sup> | y*              | y <sup>*++</sup> | y <sup>0</sup> | y <sup>0++</sup> | #  |
|----|-----------------|-----------------|-----------|------------------|----------------|------------------|------|-----------|-----------------|-----------------|------------------|----------------|------------------|----|
| 1  | 72.0444         | 36.5258         |           |                  |                |                  | A    |           |                 |                 |                  |                |                  | 10 |
| 2  | <b>186.0873</b> | 93.5473         | 169.0608  | 85.0340          |                |                  | N    | 1168.5745 | <b>584.7909</b> | 1151.5480       | <b>576.2776</b>  | 1150.5640      | <b>575.7856</b>  | 9  |
| 3  | 299.1714        | 150.0893        | 282.1448  | 141.5761         |                |                  | L    | 1054.5316 | <b>527.7694</b> | 1037.5051       | 519.2562         | 1036.5211      | 518.7642         | 8  |
| 4  | 413.2143        | 207.1108        | 396.1878  | 198.5975         |                |                  | N    | 941.4476  | <b>471.2274</b> | 924.4210        | 462.7141         | 923.4370       | 462.2221         | 7  |
| 5  | <b>528.2413</b> | 264.6243        | 511.2147  | 256.1110         | 510.2307       | 255.6190         | D    | 827.4046  | 414.2060        | 810.3781        | 405.6927         | 809.3941       | 405.2007         | 6  |
| 6  | 675.3097        | 338.1585        | 658.2831  | 329.6452         | 657.2991       | 329.1532         | F    | 712.3777  | <b>356.6925</b> | 695.3511        | 348.1792         | 694.3671       | 347.6872         | 5  |
| 7  | 790.3366        | 395.6719        | 773.3101  | 387.1587         | 772.3260       | 386.6667         | D    | 565.3093  | 283.1583        | 548.2827        | 274.6450         | 547.2987       | 274.1530         | 4  |
| 8  | 946.4377        | 473.7225        | 929.4112  | 465.2092         | 928.4272       | 464.7172         | R    | 450.2823  | <b>225.6448</b> | 433.2558        | 217.1315         |                |                  | 3  |
| 9  | 1093.5061       | 547.2567        | 1076.4796 | 538.7434         | 1075.4956      | 538.2514         | F    | 294.1812  | 147.5942        | <b>277.1547</b> | 139.0810         |                |                  | 2  |
| 10 |                 |                 |           |                  |                |                  | K    | 147.1128  | 74.0600         | 130.0863        | 65.5468          |                |                  | 1  |

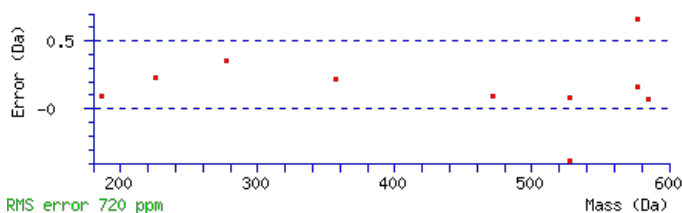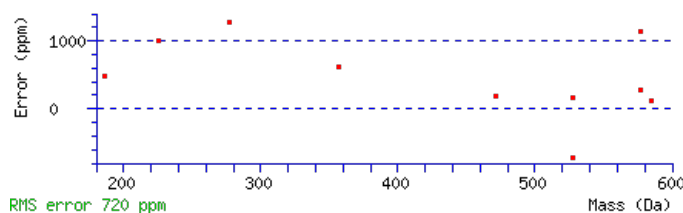

NCBI **BLAST** search of [ANLNDFDRFK](#)

(Parameters: blastp, nr protein database, expect=20000, no filter, PAM30)

Other BLAST [web gateways](#)

All matches to this query

| Score | Mr(calc) | Delta | Sequence |
|-------|----------|-------|----------|
|       |          |       |          |

# AT4G27090.1

|      |           |         |                            |
|------|-----------|---------|----------------------------|
| 18.1 | 1238.6044 | -0.0005 | <a href="#">ANLNDFDRFK</a> |
| 0.3  | 1238.6044 | -0.0005 | <a href="#">KGSQWFETR</a>  |

**Mascot:** <http://www.matrixscience.com/>

## Peptide View

MS/MS Fragmentation of **AFLDATGGLWR**

Found in **AT4G27270.1** in **TAIR\_Arabidopsis**, Symbols: | quinone reductase family protein | chr4:13661464-13663249 REVERSE

Match to Query 3621: 1205.621858 from(603.818205,2+) index(8025)

Title: Elution from: 75.357 to 75.357 scan no 10848 cid35.00 polarity:+

Data file D1d-1-2.mgf

Click mouse within plot area to zoom in by factor of two about that point

Or,   to  Da

Label all possible matches  Label matches used for scoring

Show Y-axis

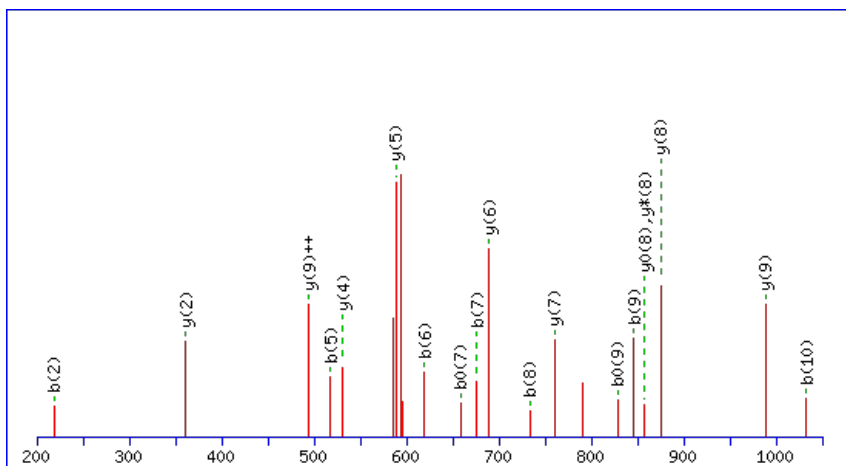

Monoisotopic mass of neutral peptide  $M_r(\text{calc})$ : 1205.6193

Fixed modifications: Carbamidomethyl (C) (apply to specified residues or termini only)

Ions Score: 77 Expect: 8.4e-008

Matches : 19/84 fragment ions using 23 most intense peaks ([help](#))

| #  | b                | b <sup>++</sup> | b <sup>0</sup>  | b <sup>0++</sup> | Seq. | y               | y <sup>++</sup> | y*              | y <sup>*++</sup> | y <sup>0</sup>  | y <sup>0++</sup> | #  |
|----|------------------|-----------------|-----------------|------------------|------|-----------------|-----------------|-----------------|------------------|-----------------|------------------|----|
| 1  | 72.0444          | 36.5258         |                 |                  | A    |                 |                 |                 |                  |                 |                  | 11 |
| 2  | <b>219.1128</b>  | 110.0600        |                 |                  | F    | 1135.5895       | 568.2984        | 1118.5629       | 559.7851         | 1117.5789       | 559.2931         | 10 |
| 3  | 332.1969         | 166.6021        |                 |                  | L    | <b>988.5211</b> | <b>494.7642</b> | 971.4945        | 486.2509         | 970.5105        | 485.7589         | 9  |
| 4  | 447.2238         | 224.1155        | 429.2132        | 215.1103         | D    | <b>875.4370</b> | 438.2221        | <b>858.4104</b> | 429.7089         | <b>857.4264</b> | 429.2169         | 8  |
| 5  | <b>518.2609</b>  | 259.6341        | 500.2504        | 250.6288         | A    | <b>760.4101</b> | 380.7087        | 743.3835        | 372.1954         | 742.3995        | 371.7034         | 7  |
| 6  | <b>619.3086</b>  | 310.1579        | 601.2980        | 301.1527         | T    | <b>689.3729</b> | 345.1901        | 672.3464        | 336.6768         | 671.3624        | 336.1848         | 6  |
| 7  | <b>676.3301</b>  | 338.6687        | <b>658.3195</b> | 329.6634         | G    | <b>588.3253</b> | 294.6663        | 571.2987        | 286.1530         |                 |                  | 5  |
| 8  | <b>733.3515</b>  | 367.1794        | 715.3410        | 358.1741         | G    | <b>531.3038</b> | 266.1555        | 514.2772        | 257.6423         |                 |                  | 4  |
| 9  | <b>846.4356</b>  | 423.7214        | <b>828.4250</b> | 414.7162         | L    | 474.2823        | 237.6448        | 457.2558        | 229.1315         |                 |                  | 3  |
| 10 | <b>1032.5149</b> | 516.7611        | 1014.5043       | 507.7558         | W    | <b>361.1983</b> | 181.1028        | 344.1717        | 172.5895         |                 |                  | 2  |
| 11 |                  |                 |                 |                  | R    | 175.1190        | 88.0631         | 158.0924        | 79.5498          |                 |                  | 1  |

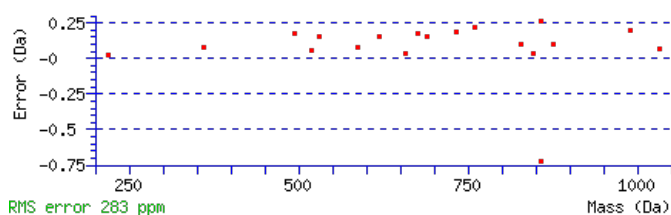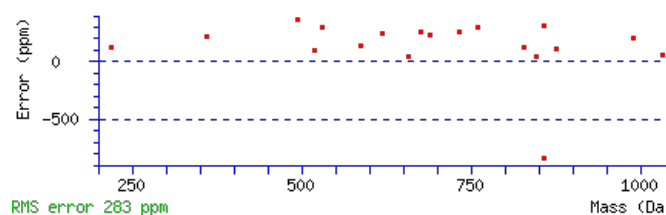

NCBI BLAST search of **AFLDATGGLWR**

(Parameters: blastp, nr protein database, expect=20000, no filter, PAM30)

Other BLAST [web gateways](#)

All matches to this query

**AT4G27270.1**

| <b>Score</b> | <b>Mr(calc)</b> | <b>Delta</b> | <b>Sequence</b>              |
|--------------|-----------------|--------------|------------------------------|
| 77.4         | 1205.6193       | 0.0026       | <a href="#">AFLDATGGLWR</a>  |
| 4.2          | 1205.6186       | 0.0032       | <a href="#">MPSKESLSRR</a>   |
| 0.9          | 1205.6252       | -0.0033      | <a href="#">TASIESSGVISR</a> |
| 0.7          | 1205.6186       | 0.0032       | <a href="#">RLDGTMSLAAR</a>  |
| 0.6          | 1205.6227       | -0.0008      | <a href="#">MLFSTVLSHR</a>   |

**Mascot:** <http://www.matrixscience.com/>



**Peptide View**MS/MS Fragmentation of **RLAQVSDPSLTK**Found in **AT4G27440.1** in **TAIR\_Arabidopsis**, Symbols: PORB | PORB (PROTOCHLOROPHYLLIDE OXIDOREDUCTASE B); oxidoreductase/ protochlorophyllide reductase | chr4:13725654-13727113 FORWARD

Match to Query 5647: 1412.795342 from(707.404947,2+) index(2680)

Title: Elution from: 26.814 to 26.814 scan no 3304 cid35.00 polarity:+

Data file D1d-3\_2.mgf

Click mouse within plot area to zoom in by factor of two about that point

Or,   to  Da Label all possible matches  Label matches used for scoring Show Y-axis 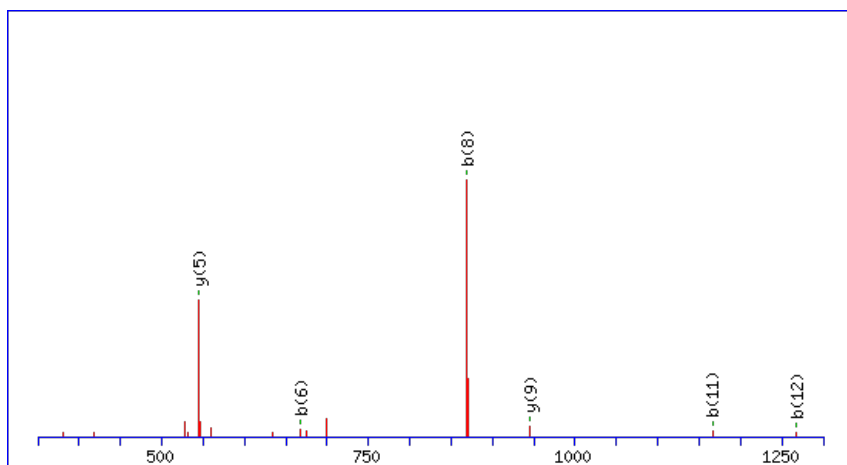Monoisotopic mass of neutral peptide  $M_r(\text{calc})$ : 1412.7987

Fixed modifications: Carbamidomethyl (C) (apply to specified residues or termini only)

Ions Score: 33 Expect: 0.0015

Matches : 6/130 fragment ions using 8 most intense peaks ([help](#))

| #  | b                | b <sup>++</sup> | b*        | b <sup>*++</sup> | b <sup>0</sup> | b <sup>0++</sup> | Seq. | y               | y <sup>++</sup> | y*        | y <sup>*++</sup> | y <sup>0</sup> | y <sup>0++</sup> | #  |
|----|------------------|-----------------|-----------|------------------|----------------|------------------|------|-----------------|-----------------|-----------|------------------|----------------|------------------|----|
| 1  | 157.1084         | 79.0578         | 140.0818  | 70.5446          |                |                  | R    |                 |                 |           |                  |                |                  | 13 |
| 2  | 270.1925         | 135.5999        | 253.1659  | 127.0866         |                |                  | L    | 1257.7049       | 629.3561        | 1240.6783 | 620.8428         | 1239.6943      | 620.3508         | 12 |
| 3  | 341.2296         | 171.1184        | 324.2030  | 162.6051         |                |                  | A    | 1144.6208       | 572.8141        | 1127.5943 | 564.3008         | 1126.6103      | 563.8088         | 11 |
| 4  | 469.2881         | 235.1477        | 452.2616  | 226.6344         |                |                  | Q    | 1073.5837       | 537.2955        | 1056.5572 | 528.7822         | 1055.5732      | 528.2902         | 10 |
| 5  | 568.3566         | 284.6819        | 551.3300  | 276.1686         |                |                  | V    | <b>945.5251</b> | 473.2662        | 928.4986  | 464.7529         | 927.5146       | 464.2609         | 9  |
| 6  | <b>667.4250</b>  | 334.2161        | 650.3984  | 325.7028         |                |                  | V    | 846.4567        | 423.7320        | 829.4302  | 415.2187         | 828.4462       | 414.7267         | 8  |
| 7  | 754.4570         | 377.7321        | 737.4304  | 369.2189         | 736.4464       | 368.7269         | S    | 747.3883        | 374.1978        | 730.3618  | 365.6845         | 729.3777       | 365.1925         | 7  |
| 8  | <b>869.4839</b>  | 435.2456        | 852.4574  | 426.7323         | 851.4734       | 426.2403         | D    | 660.3563        | 330.6818        | 643.3297  | 322.1685         | 642.3457       | 321.6765         | 6  |
| 9  | 966.5367         | 483.7720        | 949.5102  | 475.2587         | 948.5261       | 474.7667         | P    | <b>545.3293</b> | 273.1683        | 528.3028  | 264.6550         | 527.3188       | 264.1630         | 5  |
| 10 | 1053.5687        | 527.2880        | 1036.5422 | 518.7747         | 1035.5582      | 518.2827         | S    | 448.2766        | 224.6419        | 431.2500  | 216.1287         | 430.2660       | 215.6366         | 4  |
| 11 | <b>1166.6528</b> | 583.8300        | 1149.6262 | 575.3168         | 1148.6422      | 574.8248         | L    | 361.2445        | 181.1259        | 344.2180  | 172.6126         | 343.2340       | 172.1206         | 3  |
| 12 | <b>1267.7005</b> | 634.3539        | 1250.6739 | 625.8406         | 1249.6899      | 625.3486         | T    | 248.1605        | 124.5839        | 231.1339  | 116.0706         | 230.1499       | 115.5786         | 2  |
| 13 |                  |                 |           |                  |                |                  | K    | 147.1128        | 74.0600         | 130.0863  | 65.5468          |                |                  | 1  |

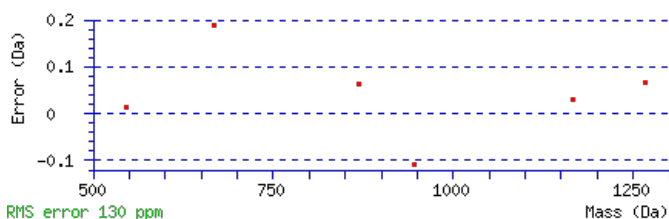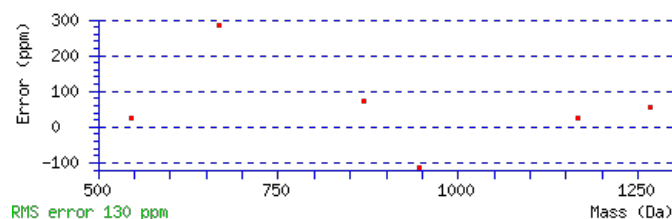NCBI **BLAST** search of [RLAQVSDPSLTK](#)

(Parameters: blastp, nr protein database, expect=20000, no filter, PAM30)

AT4G27440.1

Other BLAST [web gateways](#)

**All matches to this query**

| Score | Mr(calc)  | Delta   | Sequence                     |
|-------|-----------|---------|------------------------------|
| 32.6  | 1412.7987 | -0.0034 | <a href="#">RLAQVSDPSLTK</a> |
| 9.7   | 1412.7915 | 0.0038  | <a href="#">VIIEVLPEWSTK</a> |
| 3.7   | 1412.7922 | 0.0032  | <a href="#">MREKASLLPNVR</a> |

Mascot: <http://www.matrixscience.com/>

**Peptide View**MS/MS Fragmentation of **SELFDLLDPLK**

Found in **AT4G27500.1** in **TAIR\_Arabidopsis**, Symbols: PPI1 | PPI1 (PROTON PUMP INTERACTOR 1) | chr4:13743620-13745906  
FORWARD

Match to Query 4719: 1300.652344 from(651.333448,2+) index(10515)

Title: Elution from: 103.782 to 103.782 scan no 15281 cid35.00 polarity:+

Data file 0-1\_3.mgf

Click mouse within plot area to zoom in by factor of two about that point

Or,   to  Da

Label all possible matches  Label matches used for scoring

Show Y-axis

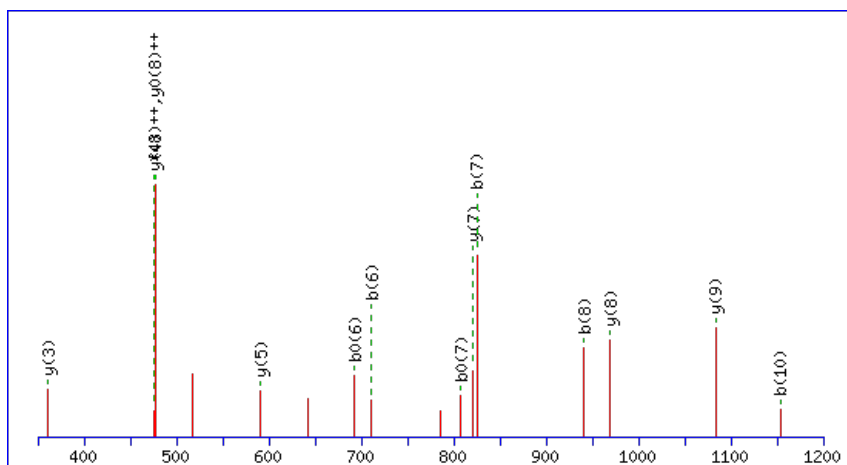

**Monoisotopic mass of neutral peptide Mr(calc):** 1300.6559

**Fixed modifications:** Carbamidomethyl (C) (apply to specified residues or termini only)

**Ions Score:** 58 **Expect:** 7e-006

**Matches:** 14/94 fragment ions using 15 most intense peaks ([help](#))

| #  | b                | b <sup>++</sup> | b <sup>0</sup>  | b <sup>0++</sup> | Seq. | y                | y <sup>++</sup> | y*        | y <sup>*++</sup> | y <sup>0</sup> | y <sup>0++</sup> | #  |
|----|------------------|-----------------|-----------------|------------------|------|------------------|-----------------|-----------|------------------|----------------|------------------|----|
| 1  | 89.0363          | 45.0218         | 71.0258         | 36.0165          | S    |                  |                 |           |                  |                |                  | 11 |
| 2  | 219.0760         | 110.0416        | 201.0654        | 101.0363         | E    | 1213.6341        | 607.3207        | 1195.6105 | 598.3089         | 1195.6235      | 598.3154         | 10 |
| 3  | 333.1571         | 167.0822        | 315.1465        | 158.0769         | L    | <b>1083.5945</b> | 542.3009        | 1065.5709 | 533.2891         | 1065.5839      | 533.2956         | 9  |
| 4  | 481.2225         | 241.1149        | 463.2120        | 232.1096         | F    | <b>969.5134</b>  | 485.2603        | 951.4898  | <b>476.2485</b>  | 951.5028       | <b>476.2550</b>  | 8  |
| 5  | 597.2465         | 299.1269        | 579.2359        | 290.1216         | D    | <b>821.4479</b>  | 411.2276        | 803.4243  | 402.2158         | 803.4374       | 402.2223         | 7  |
| 6  | <b>711.3276</b>  | 356.1674        | <b>693.3170</b> | 347.1622         | L    | 705.4239         | 353.2156        | 687.4004  | 344.2038         | 687.4134       | 344.2103         | 6  |
| 7  | <b>825.4087</b>  | 413.2080        | <b>807.3981</b> | 404.2027         | L    | <b>591.3428</b>  | 296.1751        | 573.3193  | 287.1633         | 573.3323       | 287.1698         | 5  |
| 8  | <b>941.4327</b>  | 471.2200        | 923.4221        | 462.2147         | D    | <b>477.2617</b>  | 239.1345        | 459.2382  | 230.1227         | 459.2512       | 230.1292         | 4  |
| 9  | 1039.4825        | 520.2449        | 1021.4719       | 511.2396         | P    | <b>361.2378</b>  | 181.1225        | 343.2142  | 172.1107         |                |                  | 3  |
| 10 | <b>1153.5636</b> | 577.2854        | 1135.5530       | 568.2801         | L    | 263.1880         | 132.0976        | 245.1644  | 123.0858         |                |                  | 2  |
| 11 |                  |                 |                 |                  | K    | 149.1069         | 75.0571         | 131.0833  | 66.0453          |                |                  | 1  |

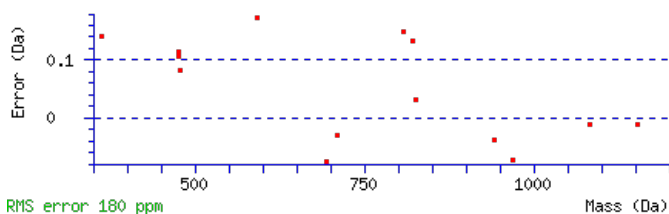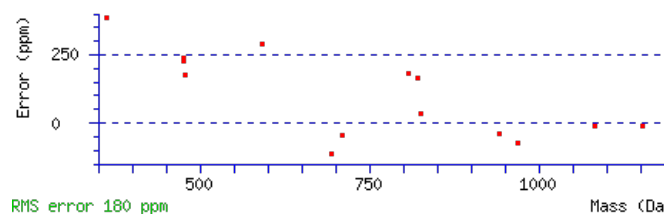

NCBI **BLAST** search of [SELFDLLDPLK](#)

(Parameters: blastp, nr protein database, expect=20000, no filter, PAM30)

Other BLAST [web gateways](#)

**All matches to this query**

## AT4G27500.1

| Score | Mr(calc)  | Delta   | Sequence                     |
|-------|-----------|---------|------------------------------|
| 57.6  | 1300.6559 | -0.0035 | <a href="#">SELDLLDPLK</a>   |
| 10.5  | 1300.6538 | -0.0015 | <a href="#">FPIPGNMPRIK</a>  |
| 5.1   | 1300.6516 | 0.0007  | <a href="#">NKL PQANVCLK</a> |
| 3.9   | 1300.6504 | 0.0019  | <a href="#">TPRSIFYFR</a>    |
| 0.4   | 1300.6516 | 0.0008  | <a href="#">KLGSLHCSVVK</a>  |
| 0.0   | 1300.6489 | 0.0034  | <a href="#">NLPKLVEDMK</a>   |

Mascot: <http://www.matrixscience.com/>

**Peptide View**MS/MS Fragmentation of **GADSVLEVNK**Found in **AT4G27520.1** in **TAIR\_Arabidopsis**, Symbols: | plastocyanin-like domain-containing protein | chr4:13750674-13751825 REVERSE

Match to Query 2860: 1030.526516 from(516.270534,2+) index(2231)

Title: Elution from: 24.721 to 24.721 scan no 2831 cid35.00 polarity:+

Data file C7-2\_2.mgf

Click mouse within plot area to zoom in by factor of two about that point

Or,   to  Da Label all possible matches  Label matches used for scoring Show Y-axis 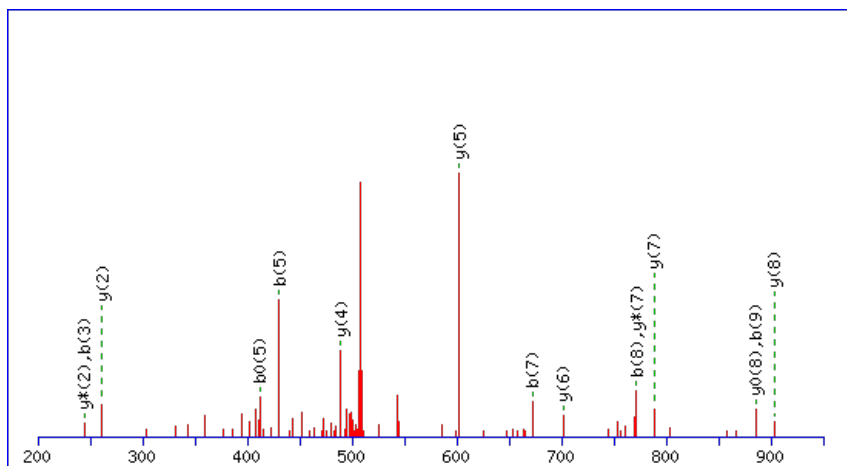

Monoisotopic mass of neutral peptide Mr(calc): 1030.5295

Fixed modifications: Carbamidomethyl (C) (apply to specified residues or termini only)

Ions Score: 68 Expect: 1.1e-006

Matches : 15/82 fragment ions using 14 most intense peaks ([help](#))

| #  | b               | b <sup>++</sup> | b*       | b <sup>*++</sup> | b <sup>0</sup>  | b <sup>0++</sup> | Seq.     | y               | y <sup>++</sup> | y*              | y <sup>*++</sup> | y <sup>0</sup>  | y <sup>0++</sup> | #         |
|----|-----------------|-----------------|----------|------------------|-----------------|------------------|----------|-----------------|-----------------|-----------------|------------------|-----------------|------------------|-----------|
| 1  | 58.0287         | 29.5180         |          |                  |                 |                  | <b>G</b> |                 |                 |                 |                  |                 |                  | <b>10</b> |
| 2  | 129.0659        | 65.0366         |          |                  |                 |                  | <b>A</b> | 974.5153        | 487.7613        | 957.4888        | 479.2480         | 956.5047        | 478.7560         | <b>9</b>  |
| 3  | <b>244.0928</b> | 122.5500        |          |                  | 226.0822        | 113.5448         | <b>D</b> | <b>903.4782</b> | 452.2427        | 886.4516        | 443.7295         | <b>885.4676</b> | 443.2374         | <b>8</b>  |
| 4  | 331.1248        | 166.0661        |          |                  | 313.1143        | 157.0608         | <b>S</b> | <b>788.4512</b> | 394.7293        | <b>771.4247</b> | 386.2160         | 770.4407        | 385.7240         | <b>7</b>  |
| 5  | <b>430.1932</b> | 215.6003        |          |                  | <b>412.1827</b> | 206.5950         | <b>V</b> | <b>701.4192</b> | 351.2132        | 684.3927        | 342.7000         | 683.4087        | 342.2080         | <b>6</b>  |
| 6  | 543.2773        | 272.1423        |          |                  | 525.2667        | 263.1370         | <b>L</b> | <b>602.3508</b> | 301.6790        | 585.3243        | 293.1658         | 584.3402        | 292.6738         | <b>5</b>  |
| 7  | <b>672.3199</b> | 336.6636        |          |                  | 654.3093        | 327.6583         | <b>E</b> | <b>489.2667</b> | 245.1370        | 472.2402        | 236.6237         | 471.2562        | 236.1317         | <b>4</b>  |
| 8  | <b>771.3883</b> | 386.1978        |          |                  | 753.3777        | 377.1925         | <b>V</b> | 360.2241        | 180.6157        | 343.1976        | 172.1024         |                 |                  | <b>3</b>  |
| 9  | <b>885.4312</b> | 443.2193        | 868.4047 | 434.7060         | 867.4207        | 434.2140         | <b>N</b> | <b>261.1557</b> | 131.0815        | <b>244.1292</b> | 122.5682         |                 |                  | <b>2</b>  |
| 10 |                 |                 |          |                  |                 |                  | <b>K</b> | 147.1128        | 74.0600         | 130.0863        | 65.5468          |                 |                  | <b>1</b>  |

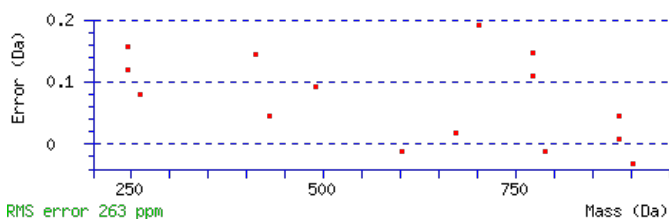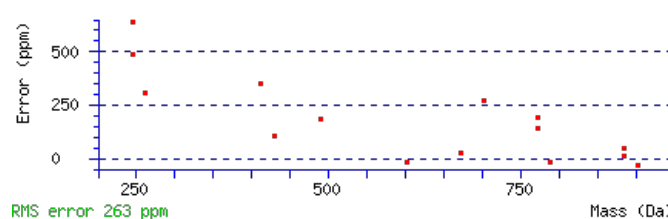NCBI **BLAST** search of [GADSVLEVNK](#)

(Parameters: blastp, nr protein database, expect=20000, no filter, PAM30)

Other BLAST [web gateways](#)**All matches to this query**

| Score | Mr(calc) | Delta | Sequence |
|-------|----------|-------|----------|
|       |          |       |          |

**AT4G27520.1**

|      |           |         |                            |
|------|-----------|---------|----------------------------|
| 67.8 | 1030.5295 | -0.0030 | <a href="#">GADSVLEVNK</a> |
| 14.0 | 1030.5295 | -0.0030 | <a href="#">AVDSGKTEPK</a> |
| 13.9 | 1030.5270 | -0.0005 | <a href="#">MVLQNPWK</a>   |
| 5.9  | 1030.5295 | -0.0029 | <a href="#">DLKEGENVK</a>  |
| 4.4  | 1030.5236 | 0.0029  | <a href="#">WVHAYIDK</a>   |
| 3.9  | 1030.5295 | -0.0029 | <a href="#">SRLEPTSEL</a>  |
| 1.2  | 1030.5295 | -0.0029 | <a href="#">NVSENIDKI</a>  |

**Mascot:** <http://www.matrixscience.com/>

**Peptide View**MS/MS Fragmentation of **NLKQSLLDK**Found in **AT4G27595.1** in **TAIR\_Arabidopsis**, Symbols: | protein transport protein-related | chr4:13772825-13776524 REVERSE

Match to Query 3040: 1070.571562 from(536.293057,2+) index(7578)

Title: Elution from: 67.617 to 67.617 scan no 9966 cid35.00 polarity:+

Data file D6h-1\_2.mgf

Click mouse within plot area to zoom in by factor of two about that point

Or,   to  Da Label all possible matches  Label matches used for scoring Show Y-axis 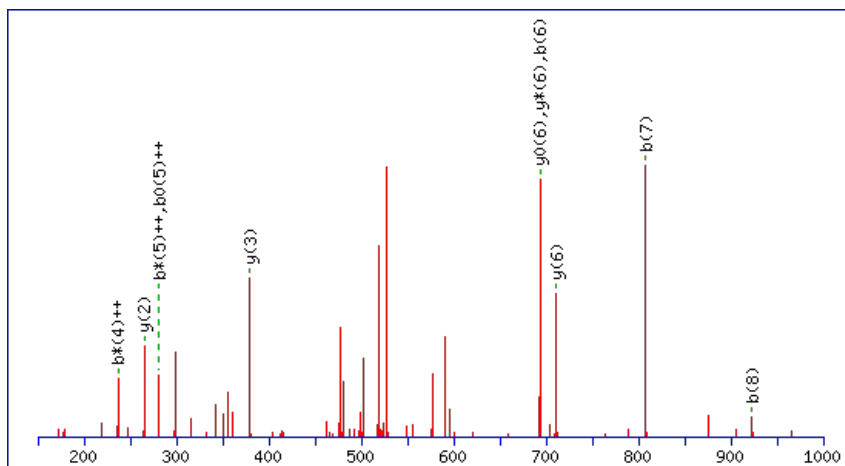Monoisotopic mass of neutral peptide **Mr(calc)**: 1070.5746**Fixed modifications**: Carbamidomethyl (C) (apply to specified residues or termini only)**Ions Score**: 22 **Expect**: 0.031**Matches** : 11/86 fragment ions using 16 most intense peaks ([help](#))

| # | b               | b <sup>++</sup> | b*       | b <sup>*++</sup> | b <sup>0</sup> | b <sup>0++</sup> | Seq. | y               | y <sup>++</sup> | y*              | y <sup>*++</sup> | y <sup>0</sup>  | y <sup>0++</sup> | # |
|---|-----------------|-----------------|----------|------------------|----------------|------------------|------|-----------------|-----------------|-----------------|------------------|-----------------|------------------|---|
| 1 | 117.0443        | 59.0258         | 99.0207  | 50.0140          |                |                  | N    |                 |                 |                 |                  |                 |                  | 9 |
| 2 | 231.1254        | 116.0663        | 213.1018 | 107.0545         |                |                  | L    | 955.5449        | 478.2761        | 937.5213        | 469.2643         | 937.5343        | 469.2708         | 8 |
| 3 | 361.2144        | 181.1108        | 343.1908 | 172.0990         |                |                  | K    | 841.4638        | 421.2355        | 823.4402        | 412.2237         | 823.4532        | 412.2303         | 7 |
| 4 | 491.2671        | 246.1372        | 473.2435 | <b>237.1254</b>  |                |                  | Q    | <b>711.3748</b> | 356.1910        | <b>693.3512</b> | 347.1792         | <b>693.3642</b> | 347.1857         | 6 |
| 5 | 579.2961        | 290.1517        | 561.2725 | <b>281.1399</b>  | 561.2855       | <b>281.1464</b>  | S    | 581.3221        | 291.1647        | 563.2985        | 282.1529         | 563.3115        | 282.1594         | 5 |
| 6 | <b>693.3772</b> | 347.1922        | 675.3536 | 338.1805         | 675.3666       | 338.1870         | L    | 493.2930        | 247.1502        | 475.2695        | 238.1384         | 475.2825        | 238.1449         | 4 |
| 7 | <b>807.4583</b> | 404.2328        | 789.4347 | 395.2210         | 789.4477       | 395.2275         | L    | <b>379.2120</b> | 190.1096        | 361.1884        | 181.0978         | 361.2014        | 181.1043         | 3 |
| 8 | <b>923.4823</b> | 462.2448        | 905.4587 | 453.2330         | 905.4717       | 453.2395         | D    | <b>265.1309</b> | 133.0691        | 247.1073        | 124.0573         | 247.1203        | 124.0638         | 2 |
| 9 |                 |                 |          |                  |                |                  | K    | 149.1069        | 75.0571         | 131.0833        | 66.0453          |                 |                  | 1 |

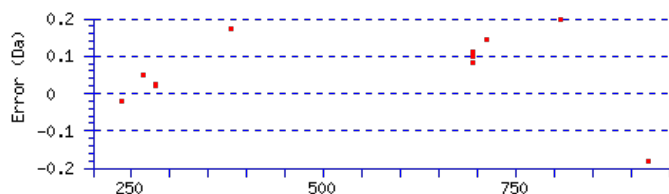

RMS error 205 ppm

Mass (Da)

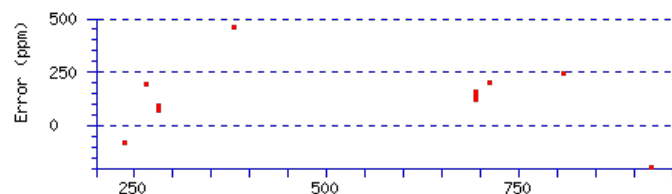

RMS error 205 ppm

Mass (Da)

NCBI **BLAST** search of **NLKQSLLDK**

(Parameters: blastp, nr protein database, expect=20000, no filter, PAM30)

Other BLAST [web gateways](#)**All matches to this query**

| Score | Mr(calc)  | Delta   | Sequence                  |
|-------|-----------|---------|---------------------------|
| 22.2  | 1070.5746 | -0.0031 | <a href="#">NLKQSLLDK</a> |

**AT4G27595.1**

|      |           |         |                              |
|------|-----------|---------|------------------------------|
| 17.4 | 1070.5746 | -0.0031 | <a href="#">INENKLLSK</a>    |
| 17.3 | 1070.5746 | -0.0030 | <a href="#">KITELPTR</a>     |
| 13.7 | 1070.5746 | -0.0031 | <a href="#">LLENSKLNK</a>    |
| 12.6 | 1070.5699 | 0.0017  | <a href="#">IMGRDKPIK</a>    |
| 10.9 | 1070.5746 | -0.0030 | <a href="#">TLGLGAATVAGK</a> |
| 4.6  | 1070.5746 | -0.0030 | <a href="#">EVTELRALK</a>    |
| 3.7  | 1070.5746 | -0.0031 | <a href="#">DSKGSLVPPK</a>   |
| 3.3  | 1070.5746 | -0.0030 | <a href="#">GDILQGTVKK</a>   |
| 3.3  | 1070.5746 | -0.0030 | <a href="#">NLVEKTVQK</a>    |

**Mascot:** <http://www.matrixscience.com/>



## Peptide View

### MS/MS Fragmentation of EWTAWDIAR

Found in **AT4G27700.1** in **TAIR\_Arabidopsis**, Symbols: | rhodanese-like domain-containing protein | chr4:13826547-13827679 REVERSE

Match to Query 3656: 1146.546704 from(574.280628,2+) index(7231)

Title: Elution from: 63.852 to 63.852 scan no 9459 cid35.00 polarity:+

Data file D12h-1\_3.mgf

Click mouse within plot area to zoom in by factor of two about that point

Or,   to  Da

Label all possible matches  Label matches used for scoring

Show Y-axis

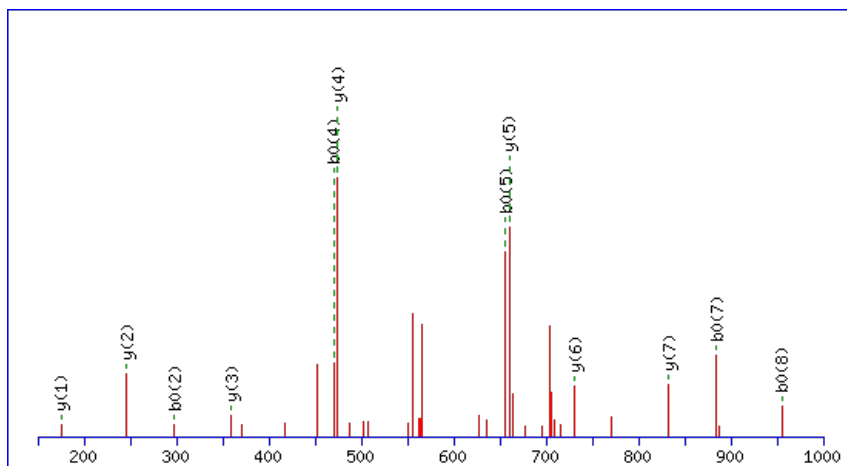

Monoisotopic mass of neutral peptide  $M_r(\text{calc})$ : 1146.5458

Fixed modifications: Carbamidomethyl (C) (apply to specified residues or termini only)

Ions Score: 48 Expect: 5.5e-005

Matches : 12/74 fragment ions using 15 most intense peaks ([help](#))

| # | b        | b <sup>++</sup> | b <sup>0</sup> | b <sup>0++</sup> | Seq. | y         | y <sup>++</sup> | y*        | y <sup>+++</sup> | y <sup>0</sup> | y <sup>0++</sup> | # |
|---|----------|-----------------|----------------|------------------|------|-----------|-----------------|-----------|------------------|----------------|------------------|---|
| 1 | 130.0499 | 65.5286         | 112.0393       | 56.5233          | E    |           |                 |           |                  |                |                  | 9 |
| 2 | 316.1292 | 158.5682        | 298.1186       | 149.5629         | W    | 1018.5105 | 509.7589        | 1001.4839 | 501.2456         | 1000.4999      | 500.7536         | 8 |
| 3 | 417.1769 | 209.0921        | 399.1663       | 200.0868         | T    | 832.4312  | 416.7192        | 815.4046  | 408.2060         | 814.4206       | 407.7139         | 7 |
| 4 | 488.2140 | 244.6106        | 470.2034       | 235.6053         | A    | 731.3835  | 366.1954        | 714.3570  | 357.6821         | 713.3729       | 357.1901         | 6 |
| 5 | 674.2933 | 337.6503        | 656.2827       | 328.6450         | W    | 660.3464  | 330.6768        | 643.3198  | 322.1636         | 642.3358       | 321.6715         | 5 |
| 6 | 789.3202 | 395.1638        | 771.3097       | 386.1585         | D    | 474.2671  | 237.6372        | 457.2405  | 229.1239         | 456.2565       | 228.6319         | 4 |
| 7 | 902.4043 | 451.7058        | 884.3937       | 442.7005         | I    | 359.2401  | 180.1237        | 342.2136  | 171.6104         |                |                  | 3 |
| 8 | 973.4414 | 487.2243        | 955.4308       | 478.2191         | A    | 246.1561  | 123.5817        | 229.1295  | 115.0684         |                |                  | 2 |
| 9 |          |                 |                |                  | R    | 175.1190  | 88.0631         | 158.0924  | 79.5498          |                |                  | 1 |

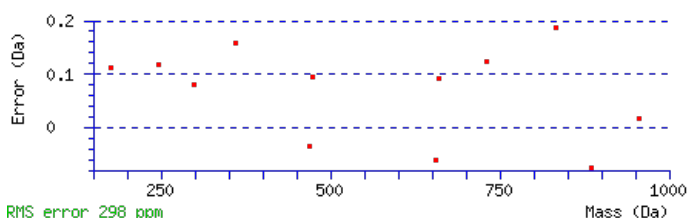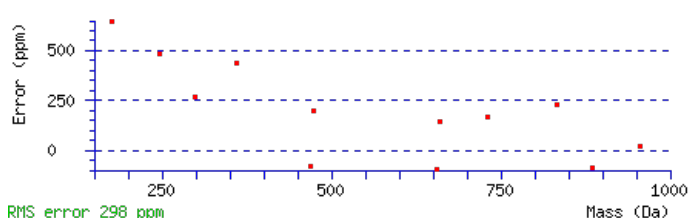

NCBI BLAST search of [EWTAWDIAR](#)

(Parameters: blastp, nr protein database, expect=20000, no filter, PAM30)

Other BLAST [web gateways](#)

All matches to this query

| Score | $M_r(\text{calc})$ | Delta  | Sequence                  |
|-------|--------------------|--------|---------------------------|
| 48.1  | 1146.5458          | 0.0009 | <a href="#">EWTAWDIAR</a> |

AT4G27700.1

|     |           |        |                            |
|-----|-----------|--------|----------------------------|
| 2.6 | 1146.5451 | 0.0016 | <a href="#">MDDSLSPRAR</a> |
|-----|-----------|--------|----------------------------|

**Mascot:** <http://www.matrixscience.com/>

**Peptide View**MS/MS Fragmentation of **MEKRQEYK**Found in **AT4G27860.1** in **TAIR\_Arabidopsis**, Symbols: | integral membrane family protein | chr4:13873814-13876246 FORWARD

Match to Query 3643: 1140.503230 from(571.258891,2+) index(2383)

Title: Elution from: 27.252 to 27.252 scan no 3047 cid35.00 polarity:+

Data file D6h-2\_2.mgf

Click mouse within plot area to zoom in by factor of two about that point

Or,   to  Da Label all possible matches  Label matches used for scoring Show Y-axis 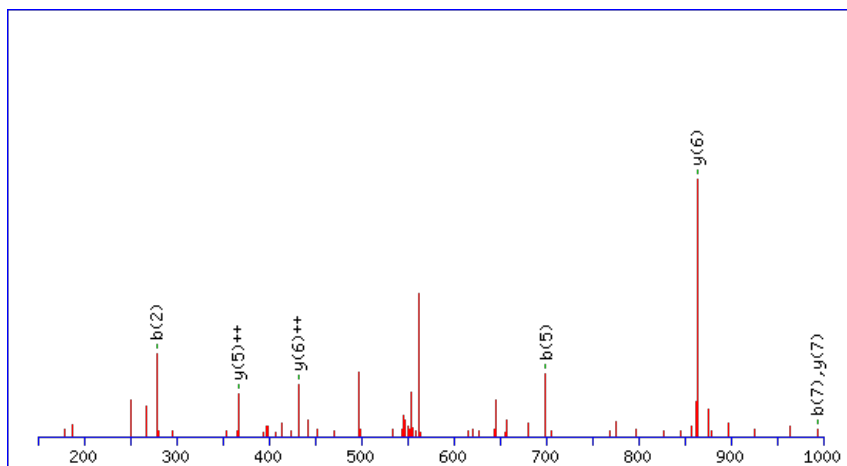

Monoisotopic mass of neutral peptide Mr(calc): 1140.5026

Fixed modifications: Carbamidomethyl (C) (apply to specified residues or termini only)

Variable modifications:

M1 : Oxidation (M), with neutral losses 0.0000 (shown in table), 63.9983

Ions Score: 21 Expect: 0.035

Matches : 7/110 fragment ions using 9 most intense peaks ([help](#))

| # | b               | b <sup>++</sup> | b*       | b <sup>*++</sup> | b <sup>0</sup> | b <sup>0++</sup> | Seq. | y               | y <sup>++</sup> | y*       | y <sup>*++</sup> | y <sup>0</sup> | y <sup>0++</sup> | # |
|---|-----------------|-----------------|----------|------------------|----------------|------------------|------|-----------------|-----------------|----------|------------------|----------------|------------------|---|
| 1 | 149.0397        | 75.0235         |          |                  |                |                  | M    |                 |                 |          |                  |                |                  | 8 |
| 2 | <b>279.0793</b> | 140.0433        |          |                  | 261.0688       | 131.0380         | E    | <b>993.4774</b> | 497.2424        | 975.4538 | 488.2306         | 975.4669       | 488.2371         | 7 |
| 3 | 409.1684        | 205.0878        | 391.1448 | 196.0760         | 391.1578       | 196.0825         | K    | <b>863.4378</b> | <b>432.2225</b> | 845.4142 | 423.2107         | 845.4272       | 423.2173         | 6 |
| 4 | 569.2576        | 285.1324        | 551.2340 | 276.1207         | 551.2471       | 276.1272         | R    | 733.3488        | <b>367.1780</b> | 715.3252 | 358.1662         | 715.3382       | 358.1727         | 5 |
| 5 | <b>699.3103</b> | 350.1588        | 681.2867 | 341.1470         | 681.2997       | 341.1535         | Q    | 573.2595        | 287.1334        | 555.2359 | 278.1216         | 555.2489       | 278.1281         | 4 |
| 6 | 829.3499        | 415.1786        | 811.3263 | 406.1668         | 811.3393       | 406.1733         | E    | 443.2069        | 222.1071        | 425.1833 | 213.0953         | 425.1963       | 213.1018         | 3 |
| 7 | <b>993.4103</b> | 497.2088        | 975.3867 | 488.1970         | 975.3997       | 488.2035         | Y    | 313.1672        | 157.0873        | 295.1437 | 148.0755         |                |                  | 2 |
| 8 |                 |                 |          |                  |                |                  | K    | 149.1069        | 75.0571         | 131.0833 | 66.0453          |                |                  | 1 |

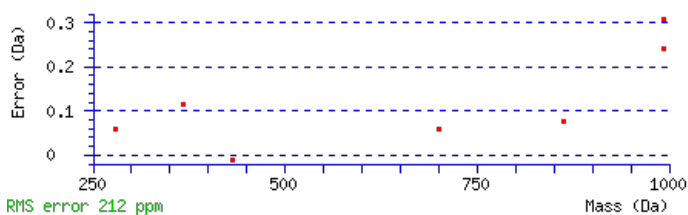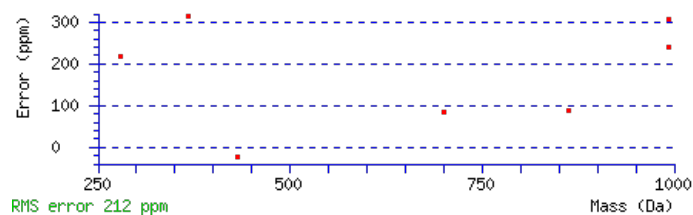NCBI BLAST search of **MEKRQEYK**

(Parameters: blastp, nr protein database, expect=20000, no filter, PAM30)

Other BLAST [web gateways](#)**All matches to this query**

| Score | Mr(calc)  | Delta  | Sequence                 |
|-------|-----------|--------|--------------------------|
| 20.5  | 1140.5026 | 0.0007 | <a href="#">MEKRQEYK</a> |

**AT4G27860.1**

|      |           |         |                             |
|------|-----------|---------|-----------------------------|
| 15.7 | 1140.5026 | 0.0007  | <a href="#">LYSAAMTGSAR</a> |
| 14.3 | 1140.5053 | -0.0020 | <a href="#">MHVHNTNKK</a>   |
| 10.5 | 1140.4999 | 0.0033  | <a href="#">EIYSEMKSK</a>   |
| 9.8  | 1140.5052 | -0.0020 | <a href="#">MRNQSFSVR</a>   |
| 8.4  | 1140.5026 | 0.0007  | <a href="#">CSNGTKFSVK</a>  |
| 8.0  | 1140.5012 | 0.0020  | <a href="#">MEMMLRKR</a>    |
| 7.1  | 1140.5030 | 0.0002  | <a href="#">MASROGSKSR</a>  |
| 6.4  | 1140.5045 | -0.0013 | <a href="#">WRGHHSVSR</a>   |
| 6.3  | 1140.5012 | 0.0020  | <a href="#">MEMMLRKR</a>    |

**Mascot:** <http://www.matrixscience.com/>

### Peptide View

 MS/MS Fragmentation of **DSPAAAAAPDGATATKPKPPPIGPK**

 Found in **AT4G28750.1** in **TAIR\_Arabidopsis**, Symbols: PSAE-1 | PSAE-1 (PSA E1 KNOCKOUT); catalytic | chr4:14202957-14203894 REVERSE

Match to Query 10332: 2325.231066 from(776.084298,3+) index(2501)

Title: Elution from: 27.377 to 27.377 scan no 3159 cid35.00 polarity:+

Data file D12h-3\_1.mgf

Click mouse within plot area to zoom in by factor of two about that point

 Or, Plot from  to  Da 

 Label all possible matches  Label matches used for scoring 

 Show Y-axis 
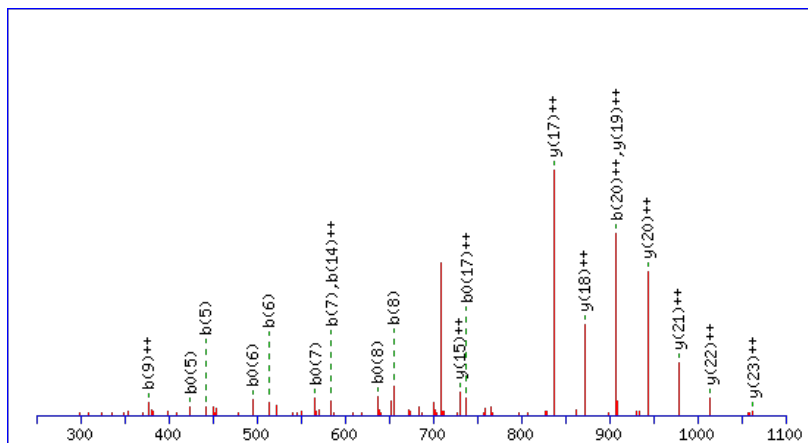
 Monoisotopic mass of neutral peptide  $M_r(\text{calc})$ : 2325.2328

Fixed modifications: Carbamidomethyl (C) (apply to specified residues or termini only)

Ions Score: 55 Expect: 1e-005

 Matches : 20/238 fragment ions using 24 most intense peaks ([help](#))

| #  | b         | b <sup>++</sup> | b <sup>*</sup> | b <sup>*++</sup> | b <sup>0</sup> | b <sup>0++</sup> | Seq. | y         | y <sup>++</sup> | y <sup>*</sup> | y <sup>*++</sup> | y <sup>0</sup> | y <sup>0++</sup> | #  |
|----|-----------|-----------------|----------------|------------------|----------------|------------------|------|-----------|-----------------|----------------|------------------|----------------|------------------|----|
| 1  | 116.0342  | 58.5207         |                |                  | 98.0237        | 49.5155          | D    |           |                 |                |                  |                |                  | 25 |
| 2  | 203.0662  | 102.0368        |                |                  | 185.0557       | 93.0315          | S    | 2211.2132 | 1106.1102       | 2194.1866      | 1097.5970        | 2193.2026      | 1097.1050        | 24 |
| 3  | 300.1190  | 150.5631        |                |                  | 282.1084       | 141.5579         | P    | 2124.1812 | 1062.5942       | 2107.1546      | 1054.0809        | 2106.1706      | 1053.5889        | 23 |
| 4  | 371.1561  | 186.0817        |                |                  | 353.1456       | 177.0764         | A    | 2027.1284 | 1014.0678       | 2010.1019      | 1005.5546        | 2009.1178      | 1005.0626        | 22 |
| 5  | 442.1932  | 221.6003        |                |                  | 424.1827       | 212.5950         | A    | 1956.0913 | 978.5493        | 1939.0647      | 970.0360         | 1938.0807      | 969.5440         | 21 |
| 6  | 513.2304  | 257.1188        |                |                  | 495.2198       | 248.1135         | A    | 1885.0542 | 943.0307        | 1868.0276      | 934.5175         | 1867.0436      | 934.0254         | 20 |
| 7  | 584.2675  | 292.6374        |                |                  | 566.2569       | 283.6321         | A    | 1814.0171 | 907.5122        | 1796.9905      | 898.9989         | 1796.0065      | 898.5069         | 19 |
| 8  | 655.3046  | 328.1559        |                |                  | 637.2940       | 319.1506         | A    | 1742.9799 | 871.9936        | 1725.9534      | 863.4803         | 1724.9694      | 862.9883         | 18 |
| 9  | 752.3573  | 376.6823        |                |                  | 734.3468       | 367.6770         | P    | 1671.9428 | 836.4751        | 1654.9163      | 827.9618         | 1653.9323      | 827.4698         | 17 |
| 10 | 867.3843  | 434.1958        |                |                  | 849.3737       | 425.1905         | D    | 1574.8901 | 787.9487        | 1557.8635      | 779.4354         | 1556.8795      | 778.9434         | 16 |
| 11 | 924.4058  | 462.7065        |                |                  | 906.3952       | 453.7012         | G    | 1459.8631 | 730.4352        | 1442.8366      | 721.9219         | 1441.8526      | 721.4299         | 15 |
| 12 | 995.4429  | 498.2251        |                |                  | 977.4323       | 489.2198         | A    | 1402.8417 | 701.9245        | 1385.8151      | 693.4112         | 1384.8311      | 692.9192         | 14 |
| 13 | 1096.4905 | 548.7489        |                |                  | 1078.4800      | 539.7436         | T    | 1331.8046 | 666.4059        | 1314.7780      | 657.8926         | 1313.7940      | 657.4006         | 13 |
| 14 | 1167.5277 | 584.2675        |                |                  | 1149.5171      | 575.2622         | A    | 1230.7569 | 615.8821        | 1213.7303      | 607.3688         | 1212.7463      | 606.8768         | 12 |
| 15 | 1268.5753 | 634.7913        |                |                  | 1250.5648      | 625.7860         | T    | 1159.7198 | 580.3635        | 1142.6932      | 571.8502         | 1141.7092      | 571.3582         | 11 |
| 16 | 1396.6703 | 698.8388        | 1379.6438      | 690.3255         | 1378.6597      | 689.8335         | K    | 1058.6721 | 529.8397        | 1041.6455      | 521.3264         |                |                  | 10 |
| 17 | 1493.7231 | 747.3652        | 1476.6965      | 738.8519         | 1475.7125      | 738.3599         | P    | 930.5771  | 465.7922        | 913.5506       | 457.2789         |                |                  | 9  |
| 18 | 1621.8180 | 811.4127        | 1604.7915      | 802.8994         | 1603.8075      | 802.4074         | K    | 833.5244  | 417.2658        | 816.4978       | 408.7525         |                |                  | 8  |
| 19 | 1718.8708 | 859.9390        | 1701.8442      | 851.4258         | 1700.8602      | 850.9338         | P    | 705.4294  | 353.2183        | 688.4028       | 344.7051         |                |                  | 7  |
| 20 | 1815.9236 | 908.4654        | 1798.8970      | 899.9521         | 1797.9130      | 899.4601         | P    | 608.3766  | 304.6920        | 591.3501       | 296.1787         |                |                  | 6  |
| 21 | 1912.9763 | 956.9918        | 1895.9498      | 948.4785         | 1894.9658      | 947.9865         | P    | 511.3239  | 256.1656        | 494.2973       | 247.6523         |                |                  | 5  |
| 22 | 2026.0604 | 1013.5338       | 2009.0338      | 1005.0206        | 2008.0498      | 1004.5285        | I    | 414.2711  | 207.6392        | 397.2445       | 199.1259         |                |                  | 4  |
| 23 | 2083.0818 | 1042.0446       | 2066.0553      | 1033.5313        | 2065.0713      | 1033.0393        | G    | 301.1870  | 151.0972        | 284.1605       | 142.5839         |                |                  | 3  |
| 24 | 2180.1346 | 1090.5709       | 2163.1081      | 1082.0577        | 2162.1240      | 1081.5657        | P    | 244.1656  | 122.5864        | 227.1390       | 114.0731         |                |                  | 2  |
| 25 |           |                 |                |                  |                |                  | K    | 147.1128  | 74.0600         | 130.0863       | 65.5468          |                |                  | 1  |

# AT4G28750.1

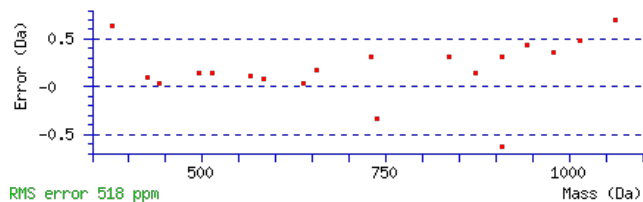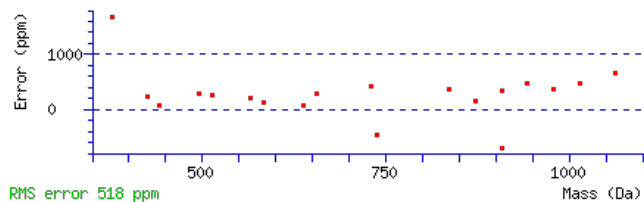

NCBI **BLAST** search of [DSPAAAAAPDGATATKPKPPPIGPK](#)  
(Parameters: blastp, nr protein database, expect=20000, no filter, PAM30)  
Other BLAST [web gateways](#)

## All matches to this query

| Score | Mr(calc)  | Delta   | Sequence                                  |
|-------|-----------|---------|-------------------------------------------|
| 54.6  | 2325.2328 | -0.0018 | <a href="#">DSPAAAAAPDGATATKPKPPPIGPK</a> |
| 1.4   | 2325.2250 | 0.0061  | <a href="#">LKIVEAVIETKDDMLPNER</a>       |

Mascot: <http://www.matrixscience.com/>



# Mascot Search Results

## Peptide View

MS/MS Fragmentation of **TPAPVVTEASSEESGNTATAESIK**

Found in **AT4G29060.1** in **TAIR\_Arabidopsis**, Symbols: EMB2726 | EMB2726 (EMBRYO DEFECTIVE 2726); translation elongation factor | chr4:14317750-14321321 FORWARD

Match to Query 10147: 2401.059081 from(801.360303,3+) index(3789)

Title: Elution from: 35.752 to 35.752 scan no 4721 cid35.00 polarity:+

Data file 0-1\_3.mgf

Click mouse within plot area to zoom in by factor of two about that point

Or,   to  Da

Label all possible matches  Label matches used for scoring

Show Y-axis

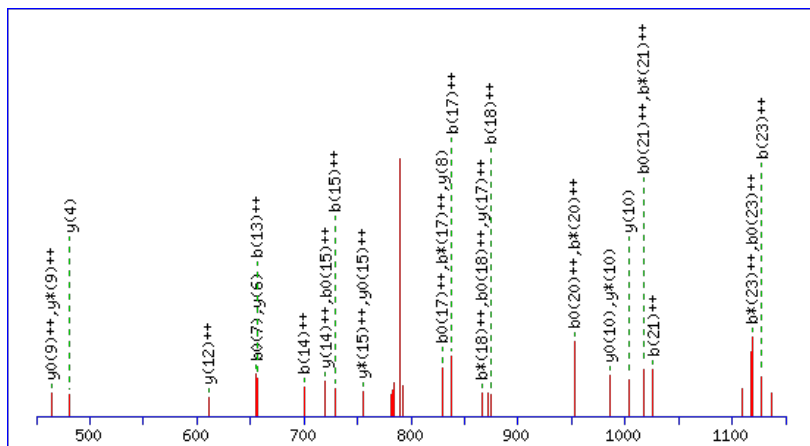

Monoisotopic mass of neutral peptide  $M_r(\text{calc})$ : 2401.0569

Fixed modifications: Carbamidomethyl (C) (apply to specified residues or termini only)

Ions Score: 39 Expect: 0.00073

Matches : 32/242 fragment ions using 25 most intense peaks ([help](#))

| #  | b         | b <sup>++</sup> | b*        | b <sup>*++</sup> | b <sup>0</sup> | b <sup>0++</sup> | Seq | y         | y <sup>++</sup> | y*        | y <sup>*++</sup> | y <sup>0</sup> | y <sup>0++</sup> | #  |
|----|-----------|-----------------|-----------|------------------|----------------|------------------|-----|-----------|-----------------|-----------|------------------|----------------|------------------|----|
| 1  | 103.0520  | 52.0296         |           |                  | 85.0414        | 43.0244          | T   |           |                 |           |                  |                |                  | 24 |
| 2  | 201.1018  | 101.0545        |           |                  | 183.0912       | 92.0492          | P   | 2300.0195 | 1150.5134       | 2281.9959 | 1141.5016        | 2282.0089      | 1141.5081        | 23 |
| 3  | 273.1359  | 137.0716        |           |                  | 255.1254       | 128.0663         | A   | 2201.9697 | 1101.4885       | 2183.9461 | 1092.4767        | 2183.9591      | 1092.4832        | 22 |
| 4  | 371.1857  | 186.0965        |           |                  | 353.1752       | 177.0912         | P   | 2129.9355 | 1065.4714       | 2111.9119 | 1056.4596        | 2111.9250      | 1056.4661        | 21 |
| 5  | 471.2512  | 236.1292        |           |                  | 453.2406       | 227.1239         | V   | 2031.8857 | 1016.4465       | 2013.8621 | 1007.4347        | 2013.8752      | 1007.4412        | 20 |
| 6  | 571.3166  | 286.1620        |           |                  | 553.3061       | 277.1567         | V   | 1931.8203 | 966.4138        | 1913.7967 | 957.4020         | 1913.8097      | 957.4085         | 19 |
| 7  | 673.3613  | 337.1843        |           |                  | 655.3508       | 328.1790         | T   | 1831.7548 | 916.3810        | 1813.7312 | 907.3693         | 1813.7443      | 907.3758         | 18 |
| 8  | 803.4010  | 402.2041        |           |                  | 785.3904       | 393.1988         | E   | 1729.7101 | 865.3587        | 1711.6865 | 856.3469         | 1711.6995      | 856.3534         | 17 |
| 9  | 875.4351  | 438.2212        |           |                  | 857.4246       | 429.2159         | A   | 1599.6705 | 800.3389        | 1581.6469 | 791.3271         | 1581.6599      | 791.3336         | 16 |
| 10 | 963.4642  | 482.2357        |           |                  | 945.4536       | 473.2304         | S   | 1527.6363 | 764.3218        | 1509.6127 | 755.3100         | 1509.6258      | 755.3165         | 15 |
| 11 | 1051.4933 | 526.2503        |           |                  | 1033.4827      | 517.2450         | S   | 1439.6073 | 720.3073        | 1421.5837 | 711.2955         | 1421.5967      | 711.3020         | 14 |
| 12 | 1181.5329 | 591.2701        |           |                  | 1163.5223      | 582.2648         | E   | 1351.5782 | 676.2927        | 1333.5546 | 667.2809         | 1333.5676      | 667.2875         | 13 |
| 13 | 1311.5725 | 656.2899        |           |                  | 1293.5619      | 647.2846         | E   | 1221.5386 | 611.2729        | 1203.5150 | 602.2611         | 1203.5280      | 602.2676         | 12 |
| 14 | 1399.6016 | 700.3044        |           |                  | 1381.5910      | 691.2991         | S   | 1091.4989 | 546.2531        | 1073.4754 | 537.2413         | 1073.4884      | 537.2478         | 11 |
| 15 | 1457.6201 | 729.3137        |           |                  | 1439.6095      | 720.3084         | G   | 1003.4699 | 502.2386        | 985.4463  | 493.2268         | 985.4593       | 493.2333         | 10 |
| 16 | 1573.6571 | 787.3322        | 1555.6335 | 778.3204         | 1555.6465      | 778.3269         | N   | 945.4514  | 473.2293        | 927.4278  | 464.2175         | 927.4408       | 464.2240         | 9  |
| 17 | 1675.7018 | 838.3545        | 1657.6782 | 829.3427         | 1657.6912      | 829.3492         | T   | 829.4144  | 415.2108        | 811.3908  | 406.1990         | 811.4038       | 406.2055         | 8  |
| 18 | 1747.7359 | 874.3716        | 1729.7123 | 865.3598         | 1729.7254      | 865.3663         | A   | 727.3697  | 364.1885        | 709.3461  | 355.1767         | 709.3591       | 355.1832         | 7  |
| 19 | 1849.7806 | 925.3940        | 1831.7571 | 916.3822         | 1831.7701      | 916.3887         | T   | 655.3355  | 328.1714        | 637.3119  | 319.1596         | 637.3250       | 319.1661         | 6  |
| 20 | 1921.8148 | 961.4110        | 1903.7912 | 952.3992         | 1903.8042      | 952.4058         | A   | 553.2908  | 277.1490        | 535.2672  | 268.1373         | 535.2802       | 268.1438         | 5  |
| 21 | 2051.8544 | 1026.4308       | 2033.8308 | 1017.4191        | 2033.8439      | 1017.4256        | E   | 481.2567  | 241.1320        | 463.2331  | 232.1202         | 463.2461       | 232.1267         | 4  |
| 22 | 2139.8835 | 1070.4454       | 2121.8599 | 1061.4336        | 2121.8729      | 1061.4401        | S   | 351.2170  | 176.1122        | 333.1935  | 167.1004         | 333.2065       | 167.1069         | 3  |
| 23 | 2253.9646 | 1127.4859       | 2235.9410 | 1118.4741        | 2235.9540      | 1118.4806        | I   | 263.1880  | 132.0976        | 245.1644  | 123.0858         |                |                  | 2  |
| 24 |           |                 |           |                  |                |                  | K   | 149.1069  | 75.0571         | 131.0833  | 66.0453          |                |                  | 1  |

# AT4G29060.1

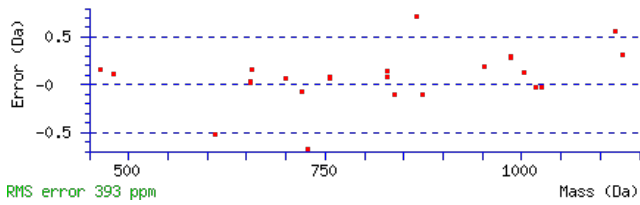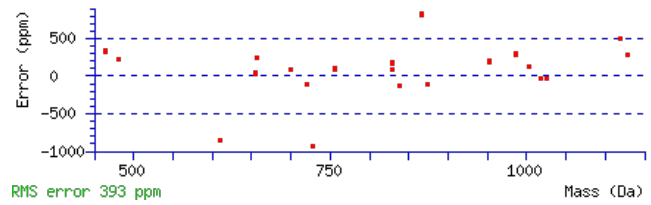

NCBI **BLAST** search of [TPAPVVTEASSEESGNTATAESIK](#)  
 (Parameters: blastp, nr protein database, expect=20000, no filter, PAM30)  
 Other BLAST [web gateways](#)

## All matches to this query

| Score | Mr(calc)  | Delta   | Sequence                                 |
|-------|-----------|---------|------------------------------------------|
| 39.4  | 2401.0569 | 0.0022  | <a href="#">TPAPVVTEASSEESGNTATAESIK</a> |
| 8.9   | 2401.0636 | -0.0045 | <a href="#">MAQMVAMPVAHSLSLICNWAK</a>    |
| 4.3   | 2401.0636 | -0.0045 | <a href="#">MAQMVAMPVAHSLSLICNWAK</a>    |
| 3.7   | 2401.0626 | -0.0036 | <a href="#">GCDQRTVRELFYEMTIVEK</a>      |
| 2.6   | 2401.0663 | -0.0072 | <a href="#">GYSSVYALLEAEGHDKFAYQK</a>    |
| 0.4   | 2401.0519 | 0.0072  | <a href="#">QGLVEAFYELFNVMEKNGCK</a>     |
| 0.1   | 2401.0660 | -0.0069 | <a href="#">GETTSTIMFGQRAMKVENMVK</a>    |

Mascot: <http://www.matrixscience.com/>



## Peptide View

### MS/MS Fragmentation of **SGGLLDVEHDMEALK**

Found in **AT4G29840.1** in **TAIR\_Arabidopsis**, Symbols: TS, MTO2 | MTO2 (METHIONINE OVER-ACCUMULATOR); threonine synthase | chr4:14599440-14601020 REVERSE

Match to Query 7109: 1612.777580 from(807.396066,2+) index(8507)

Title: Elution from: 78.384 to 78.384 scan no 11407 cid35.00 polarity:+

Data file D1d-1\_1.mgf

Click mouse within plot area to zoom in by factor of two about that point

Or,   to  Da

Label all possible matches  Label matches used for scoring

Show Y-axis

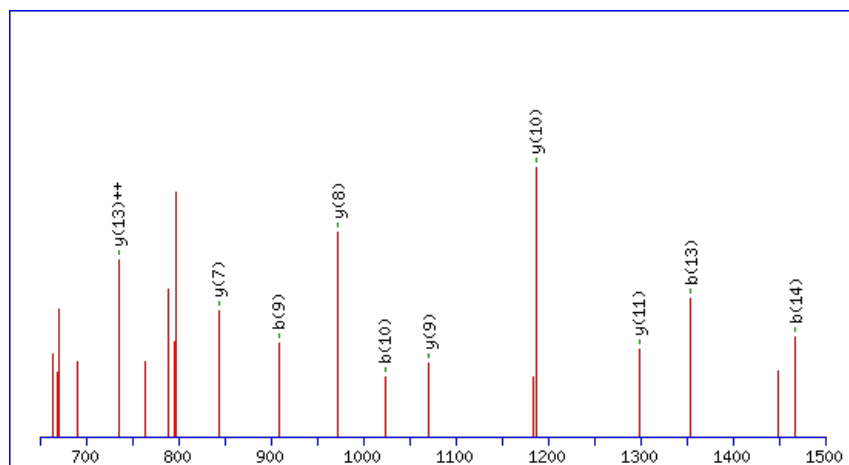

**Monoisotopic mass of neutral peptide Mr(calc):** 1612.7767

**Fixed modifications:** Carbamidomethyl (C) (apply to specified residues or termini only)

**Ions Score:** 45 **Expect:** 9e-005

**Matches:** 10/134 fragment ions using 17 most intense peaks ([help](#))

| #  | b         | b <sup>++</sup> | b <sup>0</sup> | b <sup>0++</sup> | Seq. | y         | y <sup>++</sup> | y <sup>*</sup> | y <sup>*++</sup> | y <sup>0</sup> | y <sup>0++</sup> | #  |
|----|-----------|-----------------|----------------|------------------|------|-----------|-----------------|----------------|------------------|----------------|------------------|----|
| 1  | 88.0393   | 44.5233         | 70.0287        | 35.5180          | S    |           |                 |                |                  |                |                  | 15 |
| 2  | 145.0608  | 73.0340         | 127.0502       | 64.0287          | G    | 1526.7519 | 763.8796        | 1509.7254      | 755.3663         | 1508.7414      | 754.8743         | 14 |
| 3  | 202.0822  | 101.5448        | 184.0717       | 92.5395          | G    | 1469.7305 | 735.3689        | 1452.7039      | 726.8556         | 1451.7199      | 726.3636         | 13 |
| 4  | 315.1663  | 158.0868        | 297.1557       | 149.0815         | L    | 1412.7090 | 706.8581        | 1395.6824      | 698.3449         | 1394.6984      | 697.8529         | 12 |
| 5  | 428.2504  | 214.6288        | 410.2398       | 205.6235         | L    | 1299.6249 | 650.3161        | 1282.5984      | 641.8028         | 1281.6144      | 641.3108         | 11 |
| 6  | 543.2773  | 272.1423        | 525.2667       | 263.1370         | D    | 1186.5409 | 593.7741        | 1169.5143      | 585.2608         | 1168.5303      | 584.7688         | 10 |
| 7  | 642.3457  | 321.6765        | 624.3352       | 312.6712         | V    | 1071.5139 | 536.2606        | 1054.4874      | 527.7473         | 1053.5034      | 527.2553         | 9  |
| 8  | 771.3883  | 386.1978        | 753.3777       | 377.1925         | E    | 972.4455  | 486.7264        | 955.4190       | 478.2131         | 954.4349       | 477.7211         | 8  |
| 9  | 908.4472  | 454.7272        | 890.4367       | 445.7220         | H    | 843.4029  | 422.2051        | 826.3764       | 413.6918         | 825.3923       | 413.1998         | 7  |
| 10 | 1023.4742 | 512.2407        | 1005.4636      | 503.2354         | D    | 706.3440  | 353.6756        | 689.3175       | 345.1624         | 688.3334       | 344.6704         | 6  |
| 11 | 1154.5146 | 577.7610        | 1136.5041      | 568.7557         | M    | 591.3171  | 296.1622        | 574.2905       | 287.6489         | 573.3065       | 287.1569         | 5  |
| 12 | 1283.5572 | 642.2823        | 1265.5467      | 633.2770         | E    | 460.2766  | 230.6419        | 443.2500       | 222.1287         | 442.2660       | 221.6366         | 4  |
| 13 | 1354.5944 | 677.8008        | 1336.5838      | 668.7955         | A    | 331.2340  | 166.1206        | 314.2074       | 157.6074         |                |                  | 3  |
| 14 | 1467.6784 | 734.3428        | 1449.6679      | 725.3376         | L    | 260.1969  | 130.6021        | 243.1703       | 122.0888         |                |                  | 2  |
| 15 |           |                 |                |                  | K    | 147.1128  | 74.0600         | 130.0863       | 65.5468          |                |                  | 1  |

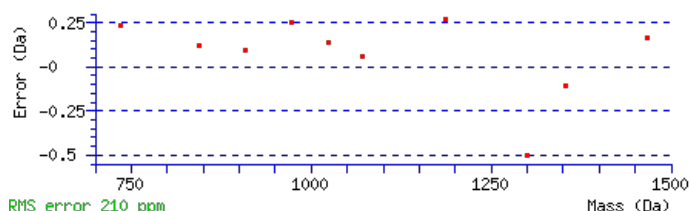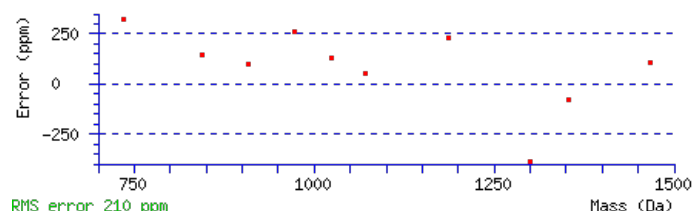

## AT4G29840.1

NCBI **BLAST** search of [SGGLLDVEHDMEALK](#)

(Parameters: blastp, nr protein database, expect=20000, no filter, PAM30)

Other BLAST [web gateways](#)

### All matches to this query

| Score | Mr(calc)  | Delta   | Sequence                        |
|-------|-----------|---------|---------------------------------|
| 45.3  | 1612.7767 | 0.0009  | <a href="#">SGGLLDVEHDMEALK</a> |
| 0.5   | 1612.7807 | -0.0031 | <a href="#">SGMIDDVFIGDFLGK</a> |

**Mascot:** <http://www.matrixscience.com/>

### Peptide View

 MS/MS Fragmentation of **YFTGHTKNEQGGPQFIGGKTK**

 Found in **AT4G29900.1** in **TAIR\_Arabidopsis**, Symbols: ATACA10, ACA10 | ACA10 (autoinhibited Ca<sup>2+</sup>-ATPase 10); calcium-transporting ATPase/calmodulin binding | chr4:14611231-14618781 REVERSE

Match to Query 10186: 2294.143854 from(765.721894,3+) index(6124)

Title: Elution from: 53.661 to 53.661 scan no 7746 cid35.00 polarity:+

Data file C7-2\_2.mgf

Click mouse within plot area to zoom in by factor of two about that point

 Or,   to  Da 

 Label all possible matches  Label matches used for scoring 

 Show Y-axis 
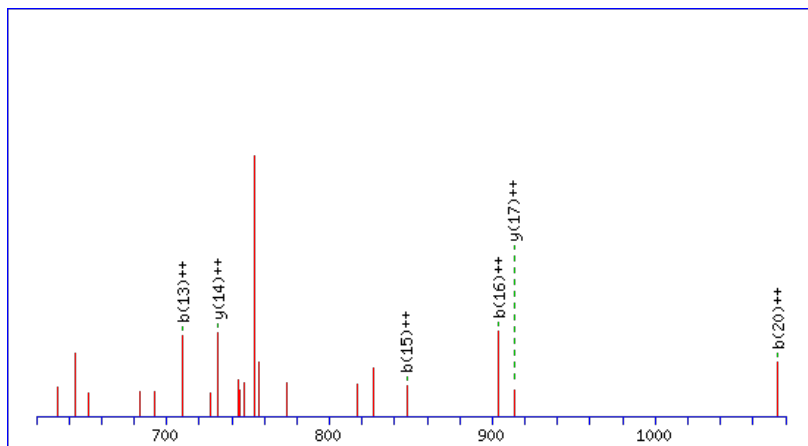
 Monoisotopic mass of neutral peptide **Mr(calc)**: 2294.1444

Fixed modifications: Carbamidomethyl (C) (apply to specified residues or termini only)

 Ions Score: 19 **Expect**: 0.047

 Matches : 6/222 fragment ions using 10 most intense peaks ([help](#))

| #  | b         | b <sup>++</sup>  | b <sup>*</sup> | b <sup>*++</sup> | b <sup>0</sup> | b <sup>0++</sup> | Seq      | y         | y <sup>++</sup> | y <sup>*</sup> | y <sup>*++</sup> | y <sup>0</sup> | y <sup>0++</sup> | #         |
|----|-----------|------------------|----------------|------------------|----------------|------------------|----------|-----------|-----------------|----------------|------------------|----------------|------------------|-----------|
| 1  | 164.0706  | 82.5389          |                |                  |                |                  | <b>Y</b> |           |                 |                |                  |                |                  | <b>21</b> |
| 2  | 311.1390  | 156.0731         |                |                  |                |                  | <b>F</b> | 2132.0883 | 1066.5478       | 2115.0618      | 1058.0345        | 2114.0778      | 1057.5425        | <b>20</b> |
| 3  | 412.1867  | 206.5970         |                |                  | 394.1761       | 197.5917         | <b>T</b> | 1985.0199 | 993.0136        | 1967.9934      | 984.5003         | 1967.0094      | 984.0083         | <b>19</b> |
| 4  | 469.2082  | 235.1077         |                |                  | 451.1976       | 226.1024         | <b>G</b> | 1883.9722 | 942.4898        | 1866.9457      | 933.9765         | 1865.9617      | 933.4845         | <b>18</b> |
| 5  | 606.2671  | 303.6372         |                |                  | 588.2565       | 294.6319         | <b>H</b> | 1826.9508 | <b>913.9790</b> | 1809.9242      | 905.4658         | 1808.9402      | 904.9737         | <b>17</b> |
| 6  | 707.3148  | 354.1610         |                |                  | 689.3042       | 345.1557         | <b>T</b> | 1689.8919 | 845.4496        | 1672.8653      | 836.9363         | 1671.8813      | 836.4443         | <b>16</b> |
| 7  | 835.4097  | 418.2085         | 818.3832       | 409.6952         | 817.3992       | 409.2032         | <b>K</b> | 1588.8442 | 794.9257        | 1571.8176      | 786.4125         | 1570.8336      | 785.9204         | <b>15</b> |
| 8  | 949.4526  | 475.2300         | 932.4261       | 466.7167         | 931.4421       | 466.2247         | <b>N</b> | 1460.7492 | <b>730.8782</b> | 1443.7227      | 722.3650         | 1442.7387      | 721.8730         | <b>14</b> |
| 9  | 1078.4952 | 539.7513         | 1061.4687      | 531.2380         | 1060.4847      | 530.7460         | <b>E</b> | 1346.7063 | 673.8568        | 1329.6797      | 665.3435         | 1328.6957      | 664.8515         | <b>13</b> |
| 10 | 1206.5538 | 603.7805         | 1189.5273      | 595.2673         | 1188.5432      | 594.7753         | <b>Q</b> | 1217.6637 | 609.3355        | 1200.6372      | 600.8222         | 1199.6531      | 600.3302         | <b>12</b> |
| 11 | 1263.5753 | 632.2913         | 1246.5487      | 623.7780         | 1245.5647      | 623.2860         | <b>G</b> | 1089.6051 | 545.3062        | 1072.5786      | 536.7929         | 1071.5946      | 536.3009         | <b>11</b> |
| 12 | 1320.5967 | 660.8020         | 1303.5702      | 652.2887         | 1302.5862      | 651.7967         | <b>G</b> | 1032.5837 | 516.7955        | 1015.5571      | 508.2822         | 1014.5731      | 507.7902         | <b>10</b> |
| 13 | 1417.6495 | <b>709.3284</b>  | 1400.6230      | 700.8151         | 1399.6389      | 700.3231         | <b>P</b> | 975.5622  | 488.2847        | 958.5356       | 479.7715         | 957.5516       | 479.2795         | <b>9</b>  |
| 14 | 1545.7081 | 773.3577         | 1528.6815      | 764.8444         | 1527.6975      | 764.3524         | <b>Q</b> | 878.5094  | 439.7584        | 861.4829       | 431.2451         | 860.4989       | 430.7531         | <b>8</b>  |
| 15 | 1692.7765 | <b>846.8919</b>  | 1675.7499      | 838.3786         | 1674.7659      | 837.8866         | <b>F</b> | 750.4509  | 375.7291        | 733.4243       | 367.2158         | 732.4403       | 366.7238         | <b>7</b>  |
| 16 | 1805.8606 | <b>903.4339</b>  | 1788.8340      | 894.9206         | 1787.8500      | 894.4286         | <b>I</b> | 603.3824  | 302.1949        | 586.3559       | 293.6816         | 585.3719       | 293.1896         | <b>6</b>  |
| 17 | 1862.8820 | 931.9447         | 1845.8555      | 923.4314         | 1844.8715      | 922.9394         | <b>G</b> | 490.2984  | 245.6528        | 473.2718       | 237.1396         | 472.2878       | 236.6475         | <b>5</b>  |
| 18 | 1919.9035 | 960.4554         | 1902.8769      | 951.9421         | 1901.8929      | 951.4501         | <b>G</b> | 433.2769  | 217.1421        | 416.2504       | 208.6288         | 415.2663       | 208.1368         | <b>4</b>  |
| 19 | 2047.9985 | 1024.5029        | 2030.9719      | 1015.9896        | 2029.9879      | 1015.4976        | <b>K</b> | 376.2554  | 188.6314        | 359.2289       | 180.1181         | 358.2449       | 179.6261         | <b>3</b>  |
| 20 | 2149.0461 | <b>1075.0267</b> | 2132.0196      | 1066.5134        | 2131.0356      | 1066.0214        | <b>T</b> | 248.1605  | 124.5839        | 231.1339       | 116.0706         | 230.1499       | 115.5786         | <b>2</b>  |
| 21 |           |                  |                |                  |                |                  | <b>K</b> | 147.1128  | 74.0600         | 130.0863       | 65.5468          |                |                  | <b>1</b>  |

# AT4G29900.1

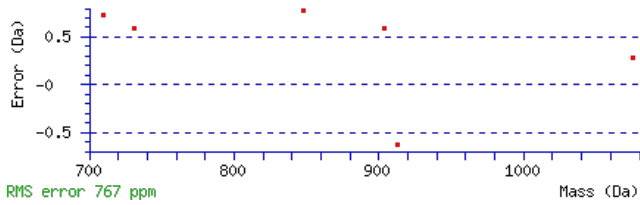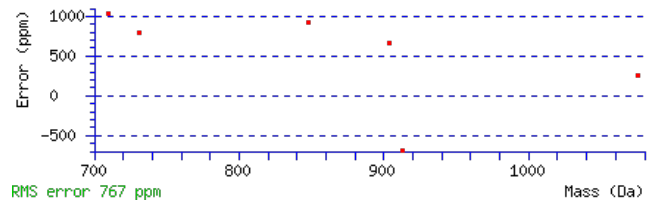

NCBI BLAST search of [YFTGHTKNEQGGPQFIGGKTK](#)  
(Parameters: blastp, nr protein database, expect=20000, no filter, PAM30)  
Other BLAST [web gateways](#)

## All matches to this query

| Score | Mr(calc)  | Delta   | Sequence                                 |
|-------|-----------|---------|------------------------------------------|
| 18.9  | 2294.1444 | -0.0005 | <a href="#">YFTGHTKNEQGGPQFIGGKTK</a>    |
| 15.0  | 2294.1503 | -0.0064 | <a href="#">GNADIIQISGHDGGTGASPISSIK</a> |
| 6.2   | 2294.1385 | 0.0053  | <a href="#">LNMVEDSATMLKEALILEDK</a>     |
| 4.3   | 2294.1399 | 0.0040  | <a href="#">SDDTASIVTKAWLEVKGGMGR</a>    |
| 2.4   | 2294.1424 | 0.0015  | <a href="#">TGSMVVGVTADEISTKERETGK</a>   |
| 1.0   | 2294.1444 | -0.0005 | <a href="#">ILQALGGHENVVGFHNAFEDK</a>    |
| 0.3   | 2294.1498 | -0.0059 | <a href="#">NLLTEMETVTNIMREVELK</a>      |

Mascot: <http://www.matrixscience.com/>



# Mascot Search Results

## Peptide View

MS/MS Fragmentation of **FRAGTSFNLEEAR**

Found in **AT4G30100.1** in **TAIR\_Arabidopsis**, Symbols: | tRNA-splicing endonuclease positive effector-related | chr4:14714197-14719341  
FORWARD

Match to Query 6207: 1516.679428 from(759.346990,2+) index(3266)

Title: Elution from: 35.207 to 35.207 scan no 4195 cid35.00 polarity:+

Data file D1d-1\_1.mgf

Click mouse within plot area to zoom in by factor of two about that point

Or,   to  Da

Label all possible matches  Label matches used for scoring

Show Y-axis

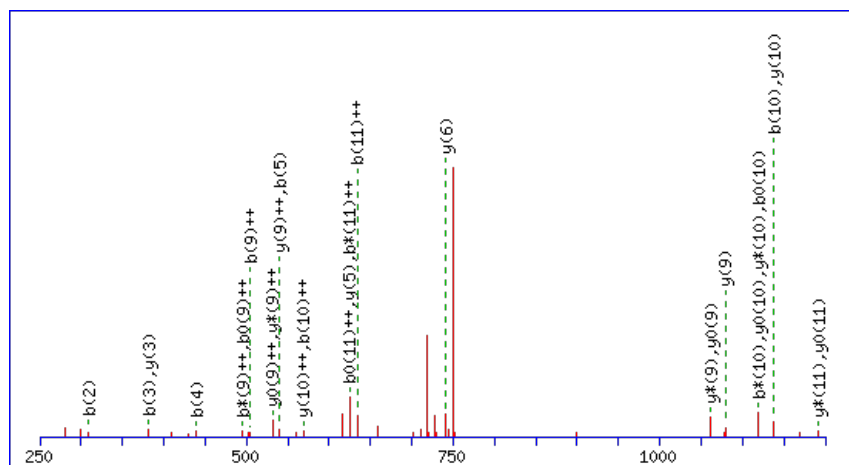

Monoisotopic mass of neutral peptide Mr(calc): 1516.6779

Fixed modifications: Carbamidomethyl (C) (apply to specified residues or termini only)

Ions Score: 33 Expect: 0.0033

Matches : 29/130 fragment ions using 31 most intense peaks [\(help\)](#)

| #  | b                | b <sup>++</sup> | b*               | b <sup>*++</sup> | b <sup>0</sup>   | b <sup>0++</sup> | Seq. | y                | y <sup>++</sup> | y*               | y <sup>*++</sup> | y <sup>0</sup>   | y <sup>0++</sup> | #  |
|----|------------------|-----------------|------------------|------------------|------------------|------------------|------|------------------|-----------------|------------------|------------------|------------------|------------------|----|
| 1  | 149.0727         | 75.0400         |                  |                  |                  |                  | F    |                  |                 |                  |                  |                  |                  | 13 |
| 2  | <b>309.1620</b>  | 155.0846        | 291.1384         | 146.0728         |                  |                  | R    | 1369.6197        | 685.3135        | 1351.5961        | 676.3017         | 1351.6092        | 676.3082         | 12 |
| 3  | <b>381.1961</b>  | 191.1017        | 363.1725         | 182.0899         |                  |                  | A    | 1209.5305        | 605.2689        | <b>1191.5069</b> | 596.2571         | <b>1191.5199</b> | 596.2636         | 11 |
| 4  | <b>439.2146</b>  | 220.1110        | 421.1910         | 211.0992         |                  |                  | G    | <b>1137.4963</b> | <b>569.2518</b> | <b>1119.4727</b> | 560.2400         | <b>1119.4858</b> | 560.2465         | 10 |
| 5  | <b>541.2593</b>  | 271.1333        | 523.2358         | 262.1215         | 523.2488         | 262.1280         | T    | <b>1079.4778</b> | <b>540.2425</b> | <b>1061.4542</b> | <b>531.2308</b>  | <b>1061.4673</b> | <b>531.2373</b>  | 9  |
| 6  | 629.2884         | 315.1478        | 611.2648         | 306.1360         | 611.2778         | 306.1426         | S    | 977.4331         | 489.2202        | 959.4095         | 480.2084         | 959.4225         | 480.2149         | 8  |
| 7  | 777.3538         | 389.1806        | 759.3303         | 380.1688         | 759.3433         | 380.1753         | F    | 889.4040         | 445.2057        | 871.3805         | 436.1939         | 871.3935         | 436.2004         | 7  |
| 8  | 893.3908         | 447.1991        | 875.3673         | 438.1873         | 875.3803         | 438.1938         | N    | <b>741.3386</b>  | 371.1729        | 723.3150         | 362.1611         | 723.3280         | 362.1677         | 6  |
| 9  | 1007.4719        | <b>504.2396</b> | 989.4484         | <b>495.2278</b>  | 989.4614         | <b>495.2343</b>  | L    | <b>625.3016</b>  | 313.1544        | 607.2780         | 304.1426         | 607.2910         | 304.1492         | 5  |
| 10 | <b>1137.5116</b> | <b>569.2594</b> | <b>1119.4880</b> | 560.2476         | <b>1119.5010</b> | 560.2541         | E    | 511.2205         | 256.1139        | 493.1969         | 247.1021         | 493.2099         | 247.1086         | 4  |
| 11 | 1267.5512        | <b>634.2792</b> | 1249.5276        | <b>625.2674</b>  | 1249.5406        | <b>625.2740</b>  | E    | <b>381.1809</b>  | 191.0941        | 363.1573         | 182.0823         | 363.1703         | 182.0888         | 3  |
| 12 | 1339.5854        | 670.2963        | 1321.5618        | 661.2845         | 1321.5748        | 661.2910         | A    | 251.1412         | 126.0743        | 233.1177         | 117.0625         |                  |                  | 2  |
| 13 |                  |                 |                  |                  |                  |                  | R    | 179.1071         | 90.0572         | 161.0835         | 81.0454          |                  |                  | 1  |

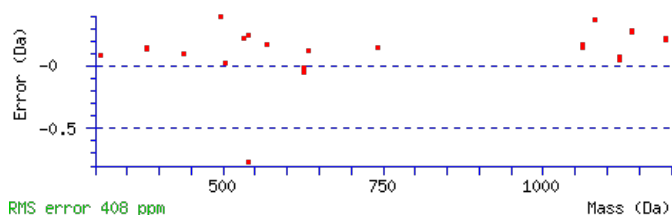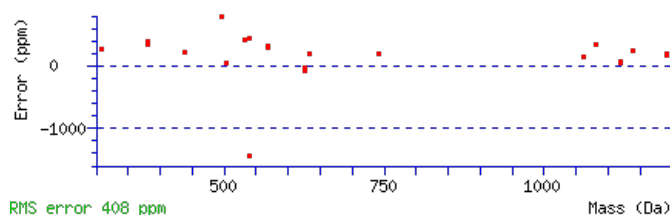

NCBI BLAST search of **FRAGTSFNLEEAR**

(Parameters: blastp, nr protein database, expect=20000, no filter, PAM30)

# AT4G30100.1

Other BLAST [web gateways](#)

## All matches to this query

| Score | Mr(calc)  | Delta   | Sequence                       |
|-------|-----------|---------|--------------------------------|
| 32.8  | 1516.6779 | 0.0016  | <a href="#">FRAGTSFNLEEAR</a>  |
| 6.8   | 1516.6761 | 0.0034  | <a href="#">FRAEAICVEFMK</a>   |
| 2.7   | 1516.6812 | -0.0018 | <a href="#">QSSDFMVKQQRK</a>   |
| 2.6   | 1516.6812 | -0.0018 | <a href="#">MGFTVVSRSGSPTR</a> |
| 2.5   | 1516.6774 | 0.0020  | <a href="#">SDTTESLFWIFR</a>   |
| 2.2   | 1516.6786 | 0.0009  | <a href="#">DGMSIKYVTDVTR</a>  |
| 2.1   | 1516.6758 | 0.0036  | <a href="#">QWQARAMRAGFR</a>   |
| 2.1   | 1516.6761 | 0.0034  | <a href="#">AIVEVFACCYLR</a>   |
| 2.0   | 1516.6835 | -0.0041 | <a href="#">SSLAFNCKTPAFR</a>  |
| 1.8   | 1516.6832 | -0.0038 | <a href="#">NGLIHDHHRQK</a>    |

Mascot: <http://www.matrixscience.com/>

## Peptide View

### MS/MS Fragmentation of **LFVCRGK**

Found in **AT4G30160.1** in **TAIR\_Arabidopsis**, Symbols: ATVLN4, VLN4 | VLN4 (ARABIDOPSIS THALIANA VILLIN 4); actin binding | chr4:14754534-14759517 FORWARD

Match to Query 1573: 890.442104 from(446.228328,2+) index(4643)

Title: Elution from: 42.921 to 42.921 scan no 5816 cid35.00 polarity:+

Data file D12h-3\_1.mgf

Click mouse within plot area to zoom in by factor of two about that point

Or,   to  Da

Label all possible matches  Label matches used for scoring

Show Y-axis

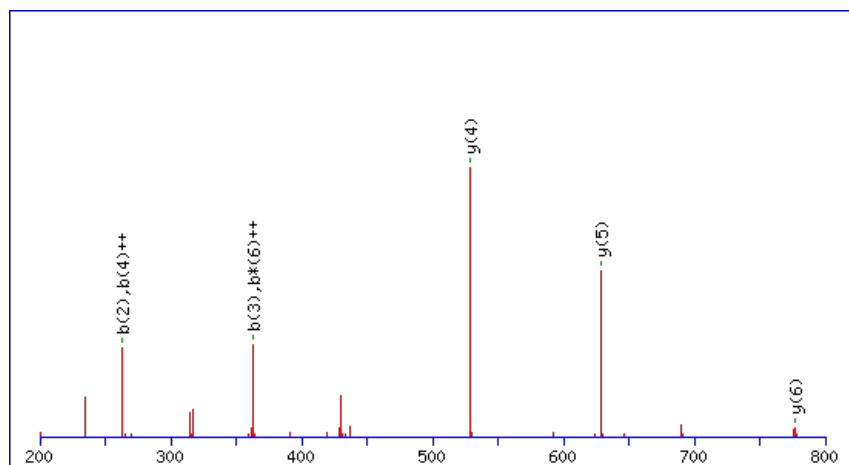

Monoisotopic mass of neutral peptide  $M_r(\text{calc})$ : 890.4440

Fixed modifications: Carbamidomethyl (C) (apply to specified residues or termini only)

Ions Score: 24 Expect: 0.03

Matches : 7/40 fragment ions using 6 most intense peaks ([help](#))

| # | b               | b <sup>++</sup> | b*       | b <sup>*++</sup> | Seq. | y               | y <sup>++</sup> | y*       | y <sup>*++</sup> | # |
|---|-----------------|-----------------|----------|------------------|------|-----------------|-----------------|----------|------------------|---|
| 1 | 115.0884        | 58.0478         |          |                  | L    |                 |                 |          |                  | 7 |
| 2 | <b>263.1538</b> | 132.0805        |          |                  | F    | <b>777.3702</b> | 389.1888        | 759.3467 | 380.1770         | 6 |
| 3 | <b>363.2193</b> | 182.1133        |          |                  | V    | <b>629.3048</b> | 315.1560        | 611.2812 | 306.1442         | 5 |
| 4 | 525.2440        | <b>263.1256</b> |          |                  | C    | <b>529.2393</b> | 265.1233        | 511.2158 | 256.1115         | 4 |
| 5 | 685.3332        | 343.1703        | 667.3097 | 334.1585         | R    | 367.2146        | 184.1109        | 349.1910 | 175.0992         | 3 |
| 6 | 743.3517        | 372.1795        | 725.3282 | <b>363.1677</b>  | G    | 207.1254        | 104.0663        | 189.1018 | 95.0545          | 2 |
| 7 |                 |                 |          |                  | K    | 149.1069        | 75.0571         | 131.0833 | 66.0453          | 1 |

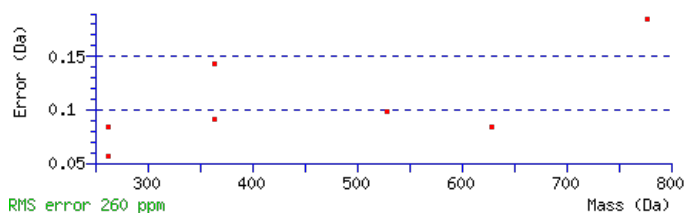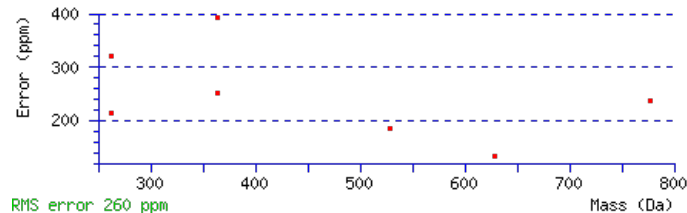

NCBI **BLAST** search of **LFVCRGK**

(Parameters: blastp, nr protein database, expect=20000, no filter, PAM30)

Other BLAST [web gateways](#)

### All matches to this query

| Score | $M_r(\text{calc})$ | Delta   | Sequence                |
|-------|--------------------|---------|-------------------------|
| 24.1  | 890.4440           | -0.0019 | <a href="#">LFVCRGK</a> |
| 18.5  | 890.4414           | 0.0007  | <a href="#">IFQSMLK</a> |

# AT4G30160.1

|      |          |         |                         |
|------|----------|---------|-------------------------|
| 13.6 | 890.4414 | 0.0007  | <a href="#">MVNYVLK</a> |
| 13.6 | 890.4414 | 0.0007  | <a href="#">YCSLVLK</a> |
| 9.3  | 890.4414 | 0.0007  | <a href="#">EMSKFLK</a> |
| 7.9  | 890.4448 | -0.0027 | <a href="#">IMSLKMK</a> |
| 7.9  | 890.4414 | 0.0007  | <a href="#">LFSLMQK</a> |
| 4.0  | 890.4445 | -0.0024 | <a href="#">IMRQRR</a>  |
| 2.1  | 890.4418 | 0.0003  | <a href="#">IMTVRSR</a> |
| 0.1  | 890.4448 | -0.0027 | <a href="#">SLKMMLK</a> |

**Mascot:** <http://www.matrixscience.com/>



## Peptide View

MS/MS Fragmentation of **VDQSALTGESLPVTK**

Found in **AT4G30190.1** in **TAIR\_Arabidopsis**, Symbols: PMA2, AHA2 | AHA2 (Arabidopsis H(+)-ATPase 2); ATPase | chr4:14770826-14775926 REVERSE

Match to Query 6632: 1560.755992 from(781.385272,2+) index(4471)

Title: Elution from: 40.715 to 40.715 scan no 5592 cid35.00 polarity:+

Data file D12h-1\_3.mgf

Click mouse within plot area to zoom in by factor of two about that point

Or,   to  Da

Label all possible matches  Label matches used for scoring

Show Y-axis

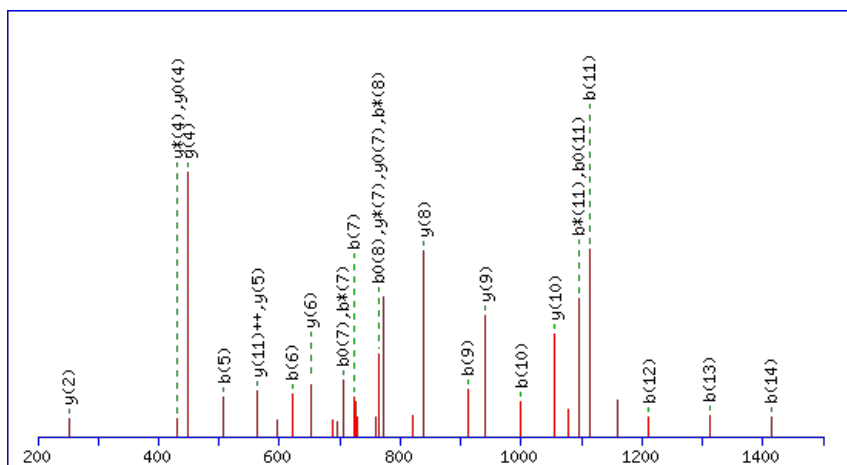

Monoisotopic mass of neutral peptide  $M_r(\text{calc})$ : 1560.7589

Fixed modifications: Carbamidomethyl (C) (apply to specified residues or termini only)

Ions Score: 80 Expect: 5.2e-008

Matches : 27/160 fragment ions using 25 most intense peaks ([help](#))

| #  | b                | b <sup>++</sup> | b*               | b <sup>*++</sup> | b <sup>0</sup>   | b <sup>0++</sup> | Seq. | y                | y <sup>++</sup> | y*              | y <sup>*++</sup> | y <sup>0</sup>  | y <sup>0++</sup> | #  |
|----|------------------|-----------------|------------------|------------------|------------------|------------------|------|------------------|-----------------|-----------------|------------------|-----------------|------------------|----|
| 1  | 101.0727         | 51.0400         |                  |                  |                  |                  | V    |                  |                 |                 |                  |                 |                  | 15 |
| 2  | 217.0967         | 109.0520        |                  |                  | 199.0861         | 100.0467         | D    | 1461.7008        | 731.3540        | 1443.6772       | 722.3422         | 1443.6902       | 722.3487         | 14 |
| 3  | 347.1493         | 174.0783        | 329.1258         | 165.0665         | 329.1388         | 165.0730         | Q    | 1345.6768        | 673.3420        | 1327.6532       | 664.3302         | 1327.6662       | 664.3368         | 13 |
| 4  | 435.1784         | 218.0928        | 417.1548         | 209.0811         | 417.1678         | 209.0876         | S    | 1215.6241        | 608.3157        | 1197.6006       | 599.3039         | 1197.6136       | 599.3104         | 12 |
| 5  | <b>507.2126</b>  | 254.1099        | 489.1890         | 245.0981         | 489.2020         | 245.1046         | A    | 1127.5951        | <b>564.3012</b> | 1109.5715       | 555.2894         | 1109.5845       | 555.2959         | 11 |
| 6  | <b>621.2937</b>  | 311.1505        | 603.2701         | 302.1387         | 603.2831         | 302.1452         | L    | <b>1055.5609</b> | 528.2841        | 1037.5374       | 519.2723         | 1037.5504       | 519.2788         | 10 |
| 7  | <b>723.3384</b>  | 362.1728        | <b>705.3148</b>  | 353.1610         | <b>705.3278</b>  | 353.1675         | T    | <b>941.4798</b>  | 471.2436        | 923.4563        | 462.2318         | 923.4693        | 462.2383         | 9  |
| 8  | 781.3569         | 391.1821        | <b>763.3333</b>  | 382.1703         | <b>763.3463</b>  | 382.1768         | G    | <b>839.4351</b>  | 420.2212        | 821.4115        | 411.2094         | 821.4246        | 411.2159         | 8  |
| 9  | <b>911.3965</b>  | 456.2019        | 893.3729         | 447.1901         | 893.3859         | 447.1966         | E    | 781.4166         | 391.2120        | <b>763.3930</b> | 382.2002         | <b>763.4061</b> | 382.2067         | 7  |
| 10 | <b>999.4256</b>  | 500.2164        | 981.4020         | 491.2046         | 981.4150         | 491.2111         | S    | <b>651.3770</b>  | 326.1921        | 633.3534        | 317.1803         | 633.3664        | 317.1869         | 6  |
| 11 | <b>1113.5067</b> | 557.2570        | <b>1095.4831</b> | 548.2452         | <b>1095.4961</b> | 548.2517         | L    | <b>563.3479</b>  | 282.1776        | 545.3243        | 273.1658         | 545.3374        | 273.1723         | 5  |
| 12 | <b>1211.5565</b> | 606.2819        | 1193.5329        | 597.2701         | 1193.5459        | 597.2766         | P    | <b>449.2668</b>  | 225.1371        | <b>431.2433</b> | 216.1253         | <b>431.2563</b> | 216.1318         | 4  |
| 13 | <b>1311.6219</b> | 656.3146        | 1293.5983        | 647.3028         | 1293.6113        | 647.3093         | V    | 351.2170         | 176.1122        | 333.1935        | 167.1004         | 333.2065        | 167.1069         | 3  |
| 14 | <b>1413.6666</b> | 707.3369        | 1395.6430        | 698.3252         | 1395.6561        | 698.3317         | T    | <b>251.1516</b>  | 126.0794        | 233.1280        | 117.0676         | 233.1410        | 117.0741         | 2  |
| 15 |                  |                 |                  |                  |                  |                  | K    | 149.1069         | 75.0571         | 131.0833        | 66.0453          |                 |                  | 1  |

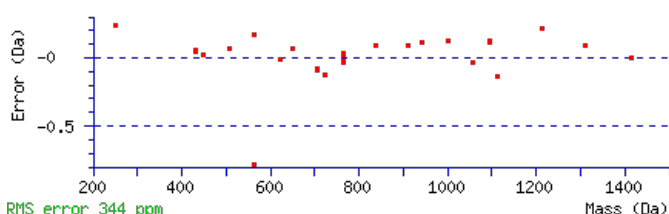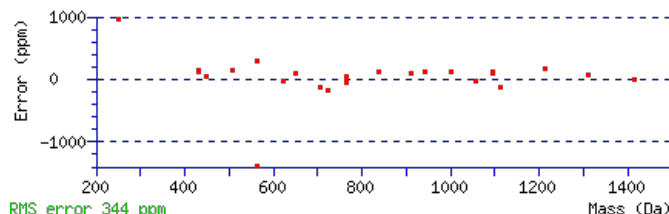

## AT4G30190.1

NCBI **BLAST** search of [VDQSALTGESLPVTK](#)

(Parameters: blastp, nr protein database, expect=20000, no filter, PAM30)

Other BLAST [web gateways](#)

### All matches to this query

| Score | Mr(calc)  | Delta   | Sequence                        |
|-------|-----------|---------|---------------------------------|
| 79.9  | 1560.7589 | -0.0029 | <a href="#">VDQSALTGESLPVTK</a> |
| 14.4  | 1560.7569 | -0.0009 | <a href="#">LTRAIMEEHTLAR</a>   |
| 7.3   | 1560.7540 | 0.0020  | <a href="#">NSEIGNLVRRNHK</a>   |
| 0.3   | 1560.7535 | 0.0025  | <a href="#">ENYLGHSIKAPVGR</a>  |

**Mascot:** <http://www.matrixscience.com/>

**Peptide View**MS/MS Fragmentation of **LLSLSLDK**Found in **AT4G30290.1** in **TAIR\_Arabidopsis**, Symbols: ATXTH19 | ATXTH19 (XYLOGLUCAN

ENDOTRANSGLUCOSYLASE/HYDROLASE 19); hydrolase, acting on glycosyl bonds | chr4:14828960-14829971 REVERSE

Match to Query 1617: 896.503764 from(449.259158,2+) index(1357)

Title: Elution from: 17.217 to 17.217 scan no 1764 cid35.00 polarity:+

Data file D1d-3\_3.mgf

Click mouse within plot area to zoom in by factor of two about that point

Or,   to  Da Label all possible matches  Label matches used for scoring Show Y-axis 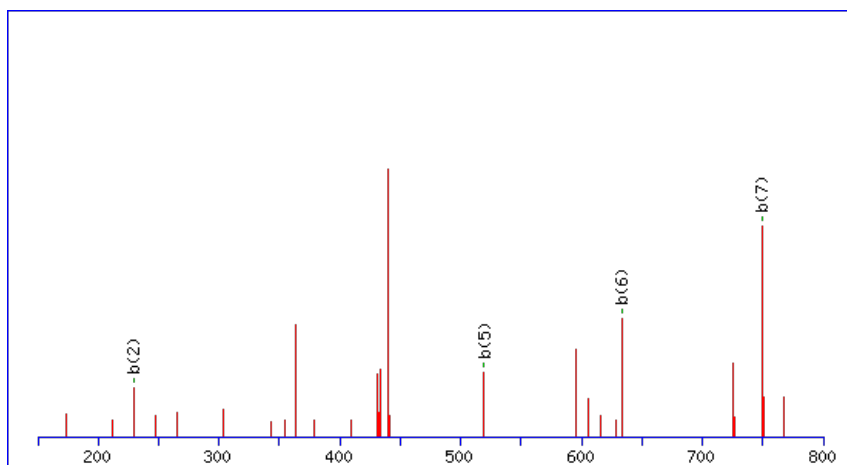Monoisotopic mass of neutral peptide  $M_r(\text{calc})$ : 896.5061

Fixed modifications: Carbamidomethyl (C) (apply to specified residues or termini only)

Ions Score: 29 Expect: 0.0016

Matches : 4/64 fragment ions using 6 most intense peaks ([help](#))

| # | b               | b <sup>++</sup> | b <sup>0</sup> | b <sup>0++</sup> | Seq. | y        | y <sup>++</sup> | y*       | y <sup>*++</sup> | y <sup>0</sup> | y <sup>0++</sup> | # |
|---|-----------------|-----------------|----------------|------------------|------|----------|-----------------|----------|------------------|----------------|------------------|---|
| 1 | 115.0884        | 58.0478         |                |                  | L    |          |                 |          |                  |                |                  | 8 |
| 2 | <b>229.1695</b> | 115.0884        |                |                  | L    | 783.4323 | 392.2198        | 765.4087 | 383.2080         | 765.4217       | 383.2145         | 7 |
| 3 | 317.1985        | 159.1029        | 299.1880       | 150.0976         | S    | 669.3512 | 335.1792        | 651.3276 | 326.1674         | 651.3406       | 326.1739         | 6 |
| 4 | 431.2796        | 216.1435        | 413.2691       | 207.1382         | L    | 581.3221 | 291.1647        | 563.2985 | 282.1529         | 563.3115       | 282.1594         | 5 |
| 5 | <b>519.3087</b> | 260.1580        | 501.2981       | 251.1527         | S    | 467.2410 | 234.1241        | 449.2174 | 225.1124         | 449.2304       | 225.1189         | 4 |
| 6 | <b>633.3898</b> | 317.1985        | 615.3792       | 308.1933         | L    | 379.2120 | 190.1096        | 361.1884 | 181.0978         | 361.2014       | 181.1043         | 3 |
| 7 | <b>749.4138</b> | 375.2105        | 731.4032       | 366.2052         | D    | 265.1309 | 133.0691        | 247.1073 | 124.0573         | 247.1203       | 124.0638         | 2 |
| 8 |                 |                 |                |                  | K    | 149.1069 | 75.0571         | 131.0833 | 66.0453          |                |                  | 1 |

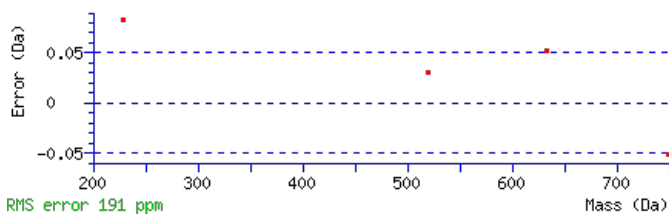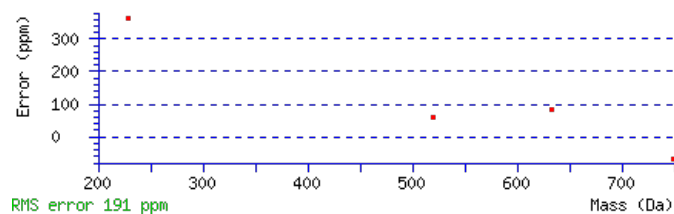NCBI BLAST search of **LLSLSLDK**

(Parameters: blastp, nr protein database, expect=20000, no filter, PAM30)

Other BLAST [web gateways](#)**All matches to this query**

| Score | $M_r(\text{calc})$ | Delta   | Sequence                 |
|-------|--------------------|---------|--------------------------|
| 29.3  | 896.5061           | -0.0023 | <a href="#">LLSLSLDK</a> |

## AT4G30290.1

|      |          |         |                          |
|------|----------|---------|--------------------------|
| 29.3 | 896.5061 | -0.0023 | <a href="#">LLSTVLDK</a> |
| 16.1 | 896.5061 | -0.0023 | <a href="#">VTLLSIDK</a> |
| 5.9  | 896.5014 | 0.0024  | <a href="#">ILIGCLAK</a> |
| 3.0  | 896.5061 | -0.0023 | <a href="#">SSIIIIVK</a> |
| 3.0  | 896.5061 | -0.0023 | <a href="#">TISLVLDK</a> |
| 3.0  | 896.5061 | -0.0023 | <a href="#">LLSLVDTK</a> |
| 1.6  | 896.5061 | -0.0023 | <a href="#">SVLIEISK</a> |
| 1.3  | 896.5061 | -0.0023 | <a href="#">LTTIEAK</a>  |
| 1.1  | 896.5061 | -0.0023 | <a href="#">VSISLLEK</a> |

Mascot: <http://www.matrixscience.com/>

**Peptide View**MS/MS Fragmentation of **EILFEIVDR**Found in **AT4G30530.1** in **TAIR\_Arabidopsis**, Symbols: | defense-related protein, putative | chr4:14920611-14922292 FORWARD

Match to Query 3813: 1144.579680 from(573.297116,2+) index(8476)

Title: Elution from: 75.900 to 75.900 scan no 11224 cid35.00 polarity:+

Data file 0-3\_1.mgf

Click mouse within plot area to zoom in by factor of two about that point

Or,   to  Da Label all possible matches  Label matches used for scoring Show Y-axis 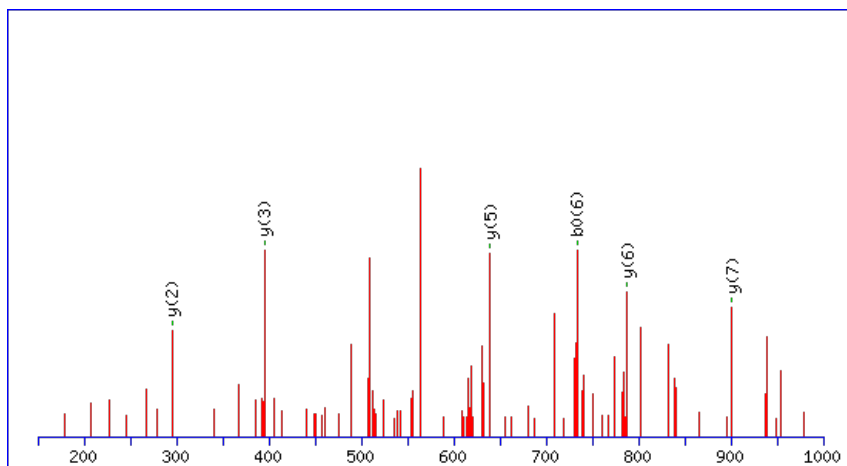Monoisotopic mass of neutral peptide **Mr(calc)**: 1144.5772

Fixed modifications: Carbamidomethyl (C) (apply to specified residues or termini only)

Ions Score: 34 **Expect**: 0.005Matches : 6/78 fragment ions using 9 most intense peaks ([help](#))

| # | b        | b <sup>++</sup> | b <sup>0</sup>  | b <sup>0++</sup> | Seq. | y               | y <sup>++</sup> | y*       | y <sup>*++</sup> | y <sup>0</sup> | y <sup>0++</sup> | # |
|---|----------|-----------------|-----------------|------------------|------|-----------------|-----------------|----------|------------------|----------------|------------------|---|
| 1 | 131.0469 | 66.0271         | 113.0363        | 57.0218          | E    |                 |                 |          |                  |                |                  | 9 |
| 2 | 245.1280 | 123.0676        | 227.1174        | 114.0624         | I    | 1015.5449       | 508.2761        | 997.5213 | 499.2643         | 997.5343       | 499.2708         | 8 |
| 3 | 359.2091 | 180.1082        | 341.1985        | 171.1029         | L    | <b>901.4638</b> | 451.2355        | 883.4402 | 442.2237         | 883.4532       | 442.2303         | 7 |
| 4 | 507.2746 | 254.1409        | 489.2640        | 245.1356         | F    | <b>787.3827</b> | 394.1950        | 769.3591 | 385.1832         | 769.3721       | 385.1897         | 6 |
| 5 | 637.3142 | 319.1607        | 619.3036        | 310.1554         | E    | <b>639.3172</b> | 320.1623        | 621.2937 | 311.1505         | 621.3067       | 311.1570         | 5 |
| 6 | 751.3953 | 376.2013        | <b>733.3847</b> | 367.1960         | I    | 509.2776        | 255.1424        | 491.2540 | 246.1307         | 491.2671       | 246.1372         | 4 |
| 7 | 851.4607 | 426.2340        | 833.4502        | 417.2287         | V    | <b>395.1965</b> | 198.1019        | 377.1729 | 189.0901         | 377.1860       | 189.0966         | 3 |
| 8 | 967.4847 | 484.2460        | 949.4741        | 475.2407         | D    | <b>295.1311</b> | 148.0692        | 277.1075 | 139.0574         | 277.1205       | 139.0639         | 2 |
| 9 |          |                 |                 |                  | R    | 179.1071        | 90.0572         | 161.0835 | 81.0454          |                |                  | 1 |

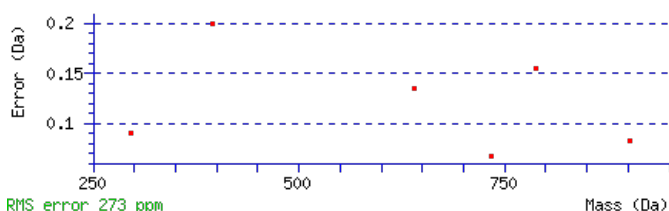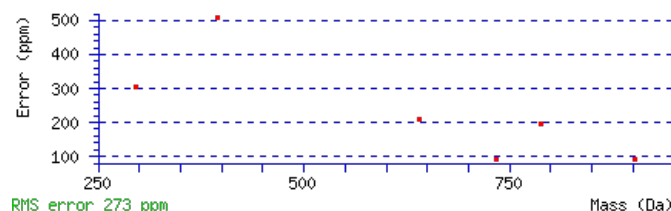NCBI **BLAST** search of [EILFEIVDR](#)

(Parameters: blastp, nr protein database, expect=20000, no filter, PAM30)

Other BLAST [web gateways](#)**All matches to this query**

| Score | Mr(calc)  | Delta  | Sequence                  |
|-------|-----------|--------|---------------------------|
| 33.6  | 1144.5772 | 0.0025 | <a href="#">EILFEIVDR</a> |

## AT4G30530.1

|     |           |         |                            |
|-----|-----------|---------|----------------------------|
| 7.9 | 1144.5777 | 0.0020  | <a href="#">EIIIRDITNR</a> |
| 4.2 | 1144.5777 | 0.0020  | <a href="#">RDDIIGATLR</a> |
| 3.6 | 1144.5799 | -0.0002 | <a href="#">DNWSKLLVR</a>  |

**Mascot:** <http://www.matrixscience.com/>

**Peptide View**MS/MS Fragmentation of **LIDGILLTK**

Found in **AT4G30600.1** in **TAIR\_Arabidopsis**, Symbols: | signal recognition particle receptor alpha subunit family protein | chr4:14938148-14940606  
REVERSE

Match to Query 2038: 994.589595 from(332.537141,3+) index(2448)

Title: Elution from: 27.176 to 27.176 scan no 3126 cid35.00 polarity:+

Data file D12h-2\_3.mgf

Click mouse within plot area to zoom in by factor of two about that point

Or,  to  Da

Label all possible matches  Label matches used for scoring

Show Y-axis

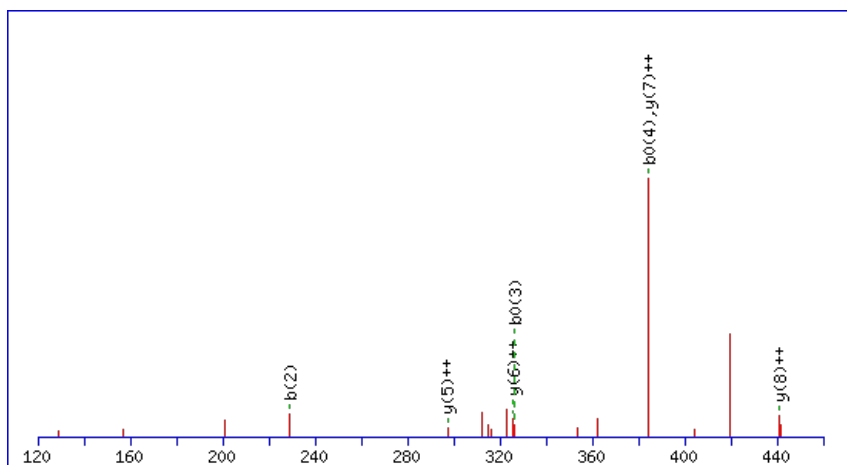

**Monoisotopic mass of neutral peptide Mr(calc):** 994.5923

**Fixed modifications:** Carbamidomethyl (C) (apply to specified residues or termini only)

**Ions Score:** 17 **Expect:** 0.02

**Matches:** 7/74 fragment ions using 17 most intense peaks ([help](#))

| # | b        | b <sup>++</sup> | b <sup>0</sup> | b <sup>0++</sup> | Seq. | y        | y <sup>++</sup> | y*       | y <sup>*++</sup> | y <sup>0</sup> | y <sup>0++</sup> | # |
|---|----------|-----------------|----------------|------------------|------|----------|-----------------|----------|------------------|----------------|------------------|---|
| 1 | 115.0884 | 58.0478         |                |                  | L    |          |                 |          |                  |                |                  | 9 |
| 2 | 229.1695 | 115.0884        |                |                  | I    | 881.5185 | 441.2629        | 863.4949 | 432.2511         | 863.5079       | 432.2576         | 8 |
| 3 | 345.1935 | 173.1004        | 327.1829       | 164.0951         | D    | 767.4374 | 384.2223        | 749.4138 | 375.2105         | 749.4268       | 375.2170         | 7 |
| 4 | 403.2120 | 202.1096        | 385.2014       | 193.1043         | G    | 651.4134 | 326.2103        | 633.3898 | 317.1985         | 633.4028       | 317.2050         | 6 |
| 5 | 517.2930 | 259.1502        | 499.2825       | 250.1449         | I    | 593.3949 | 297.2011        | 575.3713 | 288.1893         | 575.3843       | 288.1958         | 5 |
| 6 | 631.3741 | 316.1907        | 613.3636       | 307.1854         | L    | 479.3138 | 240.1605        | 461.2902 | 231.1487         | 461.3032       | 231.1552         | 4 |
| 7 | 745.4552 | 373.2313        | 727.4447       | 364.2260         | L    | 365.2327 | 183.1200        | 347.2091 | 174.1082         | 347.2221       | 174.1147         | 3 |
| 8 | 847.5000 | 424.2536        | 829.4894       | 415.2483         | T    | 251.1516 | 126.0794        | 233.1280 | 117.0676         | 233.1410       | 117.0741         | 2 |
| 9 |          |                 |                |                  | K    | 149.1069 | 75.0571         | 131.0833 | 66.0453          |                |                  | 1 |

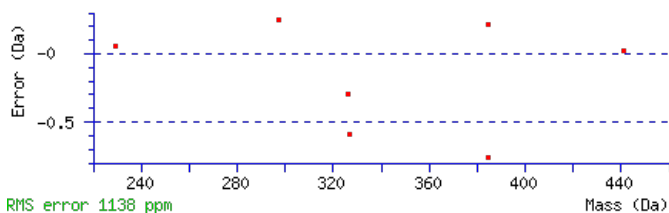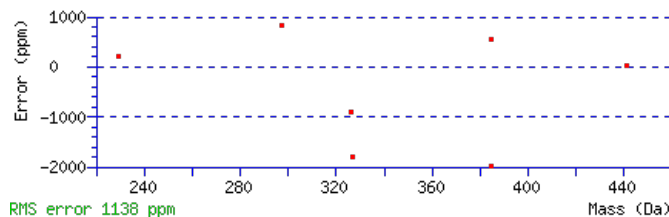

NCBI **BLAST** search of **LIDGILLTK**

(Parameters: blastp, nr protein database, expect=20000, no filter, PAM30)

Other BLAST [web gateways](#)

All matches to this query

| Score | Mr(calc) | Delta | Sequence |
|-------|----------|-------|----------|
|       |          |       |          |

## AT4G30600.1

|      |          |         |                           |
|------|----------|---------|---------------------------|
| 16.9 | 994.5923 | -0.0027 | <a href="#">LIDGILLTK</a> |
| 14.5 | 994.5876 | 0.0020  | <a href="#">IILPCLKK</a>  |
| 10.0 | 994.5923 | -0.0027 | <a href="#">LLLVTLGEK</a> |

**Mascot:** <http://www.matrixscience.com/>



## Peptide View

### MS/MS Fragmentation of **DFDVLNLK**

Found in **AT4G30720.1** in **TAIR\_Arabidopsis**, Symbols: | oxidoreductase | chr4:14972218-14975467 REVERSE

Match to Query 2384: 972.477470 from(487.246011,2+) index(1307)

Title: Elution from: 19.338 to 19.338 scan no 1828 cid35.00 polarity:+

Data file C7-2\_1.mgf

Click mouse within plot area to zoom in by factor of two about that point

Or,   to  Da

Label all possible matches  Label matches used for scoring

Show Y-axis

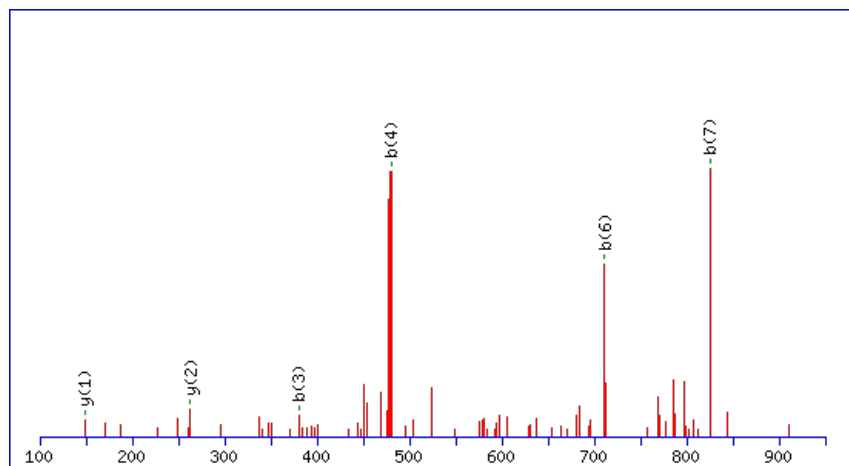

Monoisotopic mass of neutral peptide **Mr(calc)**: 972.4776

**Fixed modifications**: Carbamidomethyl (C) (apply to specified residues or termini only)

**Ions Score**: 29 **Expect**: 0.022

**Matches**: 6/64 fragment ions using 8 most intense peaks ([help](#))

| # | b               | b <sup>++</sup> | b*       | b <sup>*++</sup> | b <sup>0</sup> | b <sup>0++</sup> | Seq.     | y               | y <sup>++</sup> | y*       | y <sup>*++</sup> | y <sup>0</sup> | y <sup>0++</sup> | #        |
|---|-----------------|-----------------|----------|------------------|----------------|------------------|----------|-----------------|-----------------|----------|------------------|----------------|------------------|----------|
| 1 | 117.0313        | 59.0193         |          |                  | 99.0207        | 50.0140          | <b>D</b> |                 |                 |          |                  |                |                  | <b>8</b> |
| 2 | 265.0967        | 133.0520        |          |                  | 247.0861       | 124.0467         | <b>F</b> | 857.4609        | 429.2341        | 839.4374 | 420.2223         | 839.4504       | 420.2288         | <b>7</b> |
| 3 | <b>381.1207</b> | 191.0640        |          |                  | 363.1101       | 182.0587         | <b>D</b> | 709.3955        | 355.2014        | 691.3719 | 346.1896         | 691.3849       | 346.1961         | <b>6</b> |
| 4 | <b>481.1861</b> | 241.0967        |          |                  | 463.1756       | 232.0914         | <b>V</b> | 593.3715        | 297.1894        | 575.3479 | 288.1776         |                |                  | <b>5</b> |
| 5 | 595.2672        | 298.1373        |          |                  | 577.2567       | 289.1320         | <b>L</b> | 493.3061        | 247.1567        | 475.2825 | 238.1449         |                |                  | <b>4</b> |
| 6 | <b>711.3042</b> | 356.1558        | 693.2806 | 347.1440         | 693.2937       | 347.1505         | <b>N</b> | 379.2250        | 190.1161        | 361.2014 | 181.1043         |                |                  | <b>3</b> |
| 7 | <b>825.3853</b> | 413.1963        | 807.3617 | 404.1845         | 807.3748       | 404.1910         | <b>L</b> | <b>263.1880</b> | 132.0976        | 245.1644 | 123.0858         |                |                  | <b>2</b> |
| 8 |                 |                 |          |                  |                |                  | <b>K</b> | <b>149.1069</b> | 75.0571         | 131.0833 | 66.0453          |                |                  | <b>1</b> |

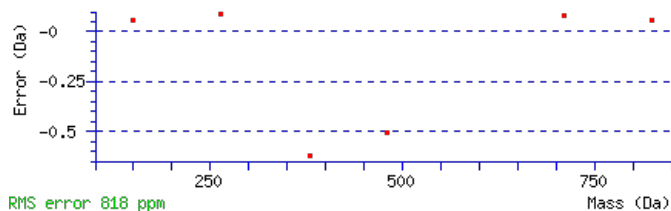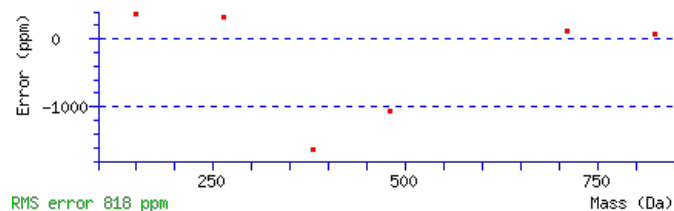

NCBI **BLAST** search of [DFDVLNLK](#)

(Parameters: blastp, nr protein database, expect=20000, no filter, PAM30)

Other BLAST [web gateways](#)

### All matches to this query

| Score | Mr(calc) | Delta   | Sequence                  |
|-------|----------|---------|---------------------------|
| 28.5  | 972.4776 | -0.0002 | <a href="#">DFDVLNLK</a>  |
| 25.1  | 972.4754 | 0.0021  | <a href="#">GSTSQEILK</a> |

# AT4G30720.1

|      |          |         |                           |
|------|----------|---------|---------------------------|
| 20.9 | 972.4776 | -0.0002 | <a href="#">FVSVPATDK</a> |
| 19.3 | 972.4776 | -0.0002 | <a href="#">VPYEQSLK</a>  |
| 18.0 | 972.4803 | -0.0029 | <a href="#">RSSPSWLK</a>  |
| 17.8 | 972.4799 | -0.0024 | <a href="#">LFEEWLK</a>   |
| 16.2 | 972.4776 | -0.0002 | <a href="#">IFTKPDDK</a>  |
| 15.7 | 972.4803 | -0.0028 | <a href="#">DTARAWLK</a>  |
| 14.0 | 972.4803 | -0.0028 | <a href="#">FIDNPKAR</a>  |
| 13.4 | 972.4776 | -0.0001 | <a href="#">FLGLDVGDK</a> |

Mascot: <http://www.matrixscience.com/>

**Peptide View**MS/MS Fragmentation of **RDYLHFVK**Found in **AT4G30800.1** in **TAIR\_Arabidopsis**, Symbols: | 40S ribosomal protein S11 (RPS11B) | chr4:15001222-15002398 FORWARD

Match to Query 3344: 1090.534266 from(364.518698,3+) index(3183)

Title: Elution from: 31.149 to 31.149 scan no 3947 cid35.00 polarity:+

Data file C7-1\_1.mgf

Click mouse within plot area to zoom in by factor of two about that point

Or,  to  Da Label all possible matches  Label matches used for scoring Show Y-axis 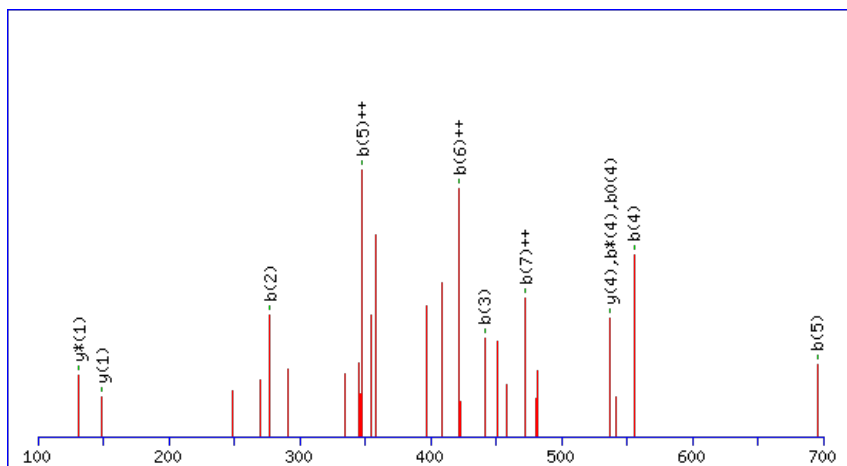Monoisotopic mass of neutral peptide **Mr(calc)**: 1090.5352

Fixed modifications: Carbamidomethyl (C) (apply to specified residues or termini only)

Ions Score: 40 **Expect**: 0.0011Matches : 12/70 fragment ions using 11 most intense peaks ([help](#))

| # | b               | b <sup>++</sup> | b*              | b <sup>*++</sup> | b <sup>0</sup>  | b <sup>0++</sup> | Seq.     | y               | y <sup>++</sup> | y*              | y <sup>*++</sup> | y <sup>0</sup> | y <sup>0++</sup> | # |
|---|-----------------|-----------------|-----------------|------------------|-----------------|------------------|----------|-----------------|-----------------|-----------------|------------------|----------------|------------------|---|
| 1 | 161.0965        | 81.0519         | 143.0729        | 72.0401          |                 |                  | <b>R</b> |                 |                 |                 |                  |                |                  | 8 |
| 2 | <b>277.1205</b> | 139.0639        | 259.0969        | 130.0521         | 259.1099        | 130.0586         | <b>D</b> | 931.4532        | 466.2303        | 913.4296        | 457.2185         | 913.4427       | 457.2250         | 7 |
| 3 | <b>441.1809</b> | 221.0941        | 423.1573        | 212.0823         | 423.1703        | 212.0888         | <b>Y</b> | 815.4293        | 408.2183        | 797.4057        | 399.2065         |                |                  | 6 |
| 4 | <b>555.2620</b> | 278.1346        | <b>537.2384</b> | 269.1228         | <b>537.2514</b> | 269.1293         | <b>L</b> | 651.3689        | 326.1881        | 633.3453        | 317.1763         |                |                  | 5 |
| 5 | <b>695.3120</b> | <b>348.1596</b> | 677.2884        | 339.1478         | 677.3014        | 339.1543         | <b>H</b> | <b>537.2878</b> | 269.1475        | 519.2642        | 260.1357         |                |                  | 4 |
| 6 | 843.3774        | <b>422.1924</b> | 825.3538        | 413.1806         | 825.3669        | 413.1871         | <b>F</b> | 397.2378        | 199.1225        | 379.2142        | 190.1107         |                |                  | 3 |
| 7 | 943.4429        | <b>472.2251</b> | 925.4193        | 463.2133         | 925.4323        | 463.2198         | <b>V</b> | 249.1723        | 125.0898        | 231.1487        | 116.0780         |                |                  | 2 |
| 8 |                 |                 |                 |                  |                 |                  | <b>K</b> | <b>149.1069</b> | 75.0571         | <b>131.0833</b> | 66.0453          |                |                  | 1 |

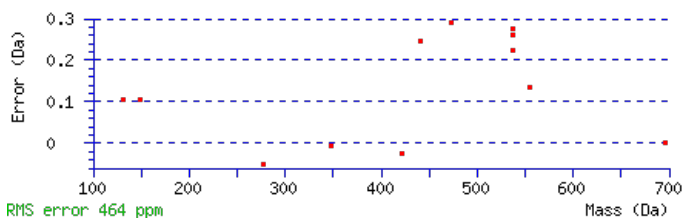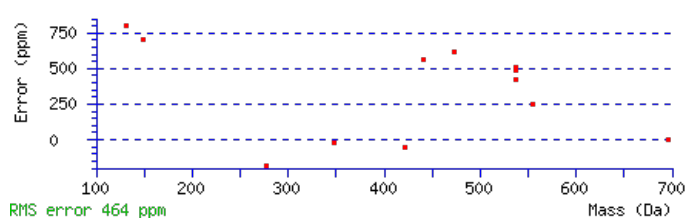NCBI **BLAST** search of [RDYLHFVK](#)

(Parameters: blastp, nr protein database, expect=20000, no filter, PAM30)

Other BLAST [web gateways](#)**All matches to this query**

| Score | Mr(calc)  | Delta   | Sequence                  |
|-------|-----------|---------|---------------------------|
| 40.2  | 1090.5352 | -0.0009 | <a href="#">RDYLHFVK</a>  |
| 12.6  | 1090.5359 | -0.0016 | <a href="#">YICIGDLVK</a> |

**AT4G30800.1**

|     |           |         |                            |
|-----|-----------|---------|----------------------------|
| 9.8 | 1090.5359 | -0.0016 | <a href="#">LYEAACLLK</a>  |
| 9.7 | 1090.5329 | 0.0013  | <a href="#">FVVQGNREK</a>  |
| 8.8 | 1090.5330 | 0.0013  | <a href="#">RSFSQNPIK</a>  |
| 8.5 | 1090.5363 | -0.0021 | <a href="#">VRSGIQMSAK</a> |
| 5.0 | 1090.5337 | 0.0006  | <a href="#">EKLQSIMSK</a>  |
| 4.8 | 1090.5337 | 0.0006  | <a href="#">MATKVSLEGK</a> |
| 3.8 | 1090.5363 | -0.0021 | <a href="#">MTTSPIRVR</a>  |
| 3.6 | 1090.5329 | 0.0013  | <a href="#">FRQLQOEK</a>   |

**Mascot:** <http://www.matrixscience.com/>

**Peptide View**MS/MS Fragmentation of **SVDIIGFGSGPELEK**Found in **AT4G30920.1** in **TAIR\_Arabidopsis**, Symbols: | cytosol aminopeptidase family protein | chr4:15046595-15049310 REVERSE

Match to Query 6598: 1546.787212 from(774.400882,2+) index(7583)

Title: Elution from: 67.249 to 67.249 scan no 9966 cid35.00 polarity:+

Data file D12h-3\_2.mgf

Click mouse within plot area to zoom in by factor of two about that point

Or,   to  Da Label all possible matches  Label matches used for scoring Show Y-axis 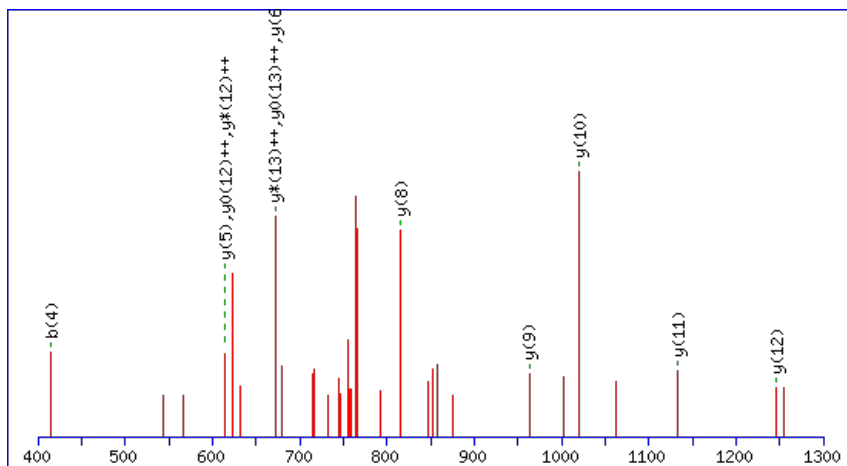Monoisotopic mass of neutral peptide  $M_r(\text{calc})$ : 1546.7879

Fixed modifications: Carbamidomethyl (C) (apply to specified residues or termini only)

Ions Score: 62 Expect: 2.2e-006

Matches : 12/138 fragment ions using 9 most intense peaks ([help](#))

| #  | b         | b <sup>++</sup> | b <sup>0</sup> | b <sup>0++</sup> | Seq. | y         | y <sup>++</sup> | y*        | y <sup>*++</sup> | y <sup>0</sup> | y <sup>0++</sup> | #  |
|----|-----------|-----------------|----------------|------------------|------|-----------|-----------------|-----------|------------------|----------------|------------------|----|
| 1  | 88.0393   | 44.5233         | 70.0287        | 35.5180          | S    |           |                 |           |                  |                |                  | 15 |
| 2  | 187.1077  | 94.0575         | 169.0972       | 85.0522          | V    | 1460.7631 | 730.8852        | 1443.7366 | 722.3719         | 1442.7526      | 721.8799         | 14 |
| 3  | 302.1347  | 151.5710        | 284.1241       | 142.5657         | D    | 1361.6947 | 681.3510        | 1344.6682 | 672.8377         | 1343.6842      | 672.3457         | 13 |
| 4  | 415.2187  | 208.1130        | 397.2082       | 199.1077         | I    | 1246.6678 | 623.8375        | 1229.6412 | 615.3243         | 1228.6572      | 614.8322         | 12 |
| 5  | 528.3028  | 264.6550        | 510.2922       | 255.6498         | I    | 1133.5837 | 567.2955        | 1116.5572 | 558.7822         | 1115.5732      | 558.2902         | 11 |
| 6  | 585.3243  | 293.1658        | 567.3137       | 284.1605         | G    | 1020.4997 | 510.7535        | 1003.4731 | 502.2402         | 1002.4891      | 501.7482         | 10 |
| 7  | 732.3927  | 366.7000        | 714.3821       | 357.6947         | F    | 963.4782  | 482.2427        | 946.4516  | 473.7295         | 945.4676       | 473.2374         | 9  |
| 8  | 789.4141  | 395.2107        | 771.4036       | 386.2054         | G    | 816.4098  | 408.7085        | 799.3832  | 400.1953         | 798.3992       | 399.7032         | 8  |
| 9  | 876.4462  | 438.7267        | 858.4356       | 429.7214         | S    | 759.3883  | 380.1978        | 742.3618  | 371.6845         | 741.3777       | 371.1925         | 7  |
| 10 | 933.4676  | 467.2374        | 915.4571       | 458.2322         | G    | 672.3563  | 336.6818        | 655.3297  | 328.1685         | 654.3457       | 327.6765         | 6  |
| 11 | 1030.5204 | 515.7638        | 1012.5098      | 506.7585         | P    | 615.3348  | 308.1710        | 598.3083  | 299.6578         | 597.3243       | 299.1658         | 5  |
| 12 | 1159.5630 | 580.2851        | 1141.5524      | 571.2798         | E    | 518.2821  | 259.6447        | 501.2555  | 251.1314         | 500.2715       | 250.6394         | 4  |
| 13 | 1272.6470 | 636.8272        | 1254.6365      | 627.8219         | L    | 389.2395  | 195.1234        | 372.2129  | 186.6101         | 371.2289       | 186.1181         | 3  |
| 14 | 1401.6896 | 701.3485        | 1383.6791      | 692.3432         | E    | 276.1554  | 138.5813        | 259.1288  | 130.0681         | 258.1448       | 129.5761         | 2  |
| 15 |           |                 |                |                  | K    | 147.1128  | 74.0600         | 130.0863  | 65.5468          |                |                  | 1  |

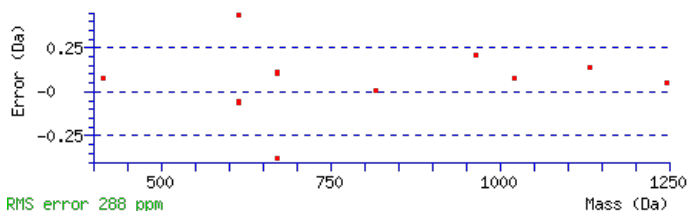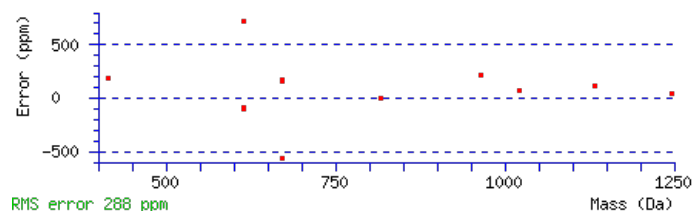NCBI **BLAST** search of [SVDIIGFGSGPELEK](#)

## AT4G30920.1

(Parameters: blastp, nr protein database, expect=20000, no filter, PAM30)

Other BLAST [web gateways](#)

### All matches to this query

| Score | Mr(calc)  | Delta   | Sequence                        |
|-------|-----------|---------|---------------------------------|
| 62.2  | 1546.7879 | -0.0007 | <a href="#">SVDIIGFGSGPELEK</a> |
| 0.7   | 1546.7912 | -0.0040 | <a href="#">IAELTGLSVEEAMGK</a> |

Mascot: <http://www.matrixscience.com/>

### Peptide View

 MS/MS Fragmentation of **SGSAADSQVVSDYVR**

 Found in **AT4G31300.1** in **TAIR\_Arabidopsis**, Symbols: PBA1 | PBA1 (20S proteasome beta subunit A 1); peptidase | chr4:15188933-15190941  
 FORWARD

Match to Query 6284: 1539.716606 from(770.865579,2+) index(3546)

Title: Elution from: 35.193 to 35.193 scan no 4504 cid35.00 polarity:+

Data file D12h-2\_3.mgf

Click mouse within plot area to zoom in by factor of two about that point

 Or,  to  Da 

 Label all possible matches  Label matches used for scoring 

 Show Y-axis 
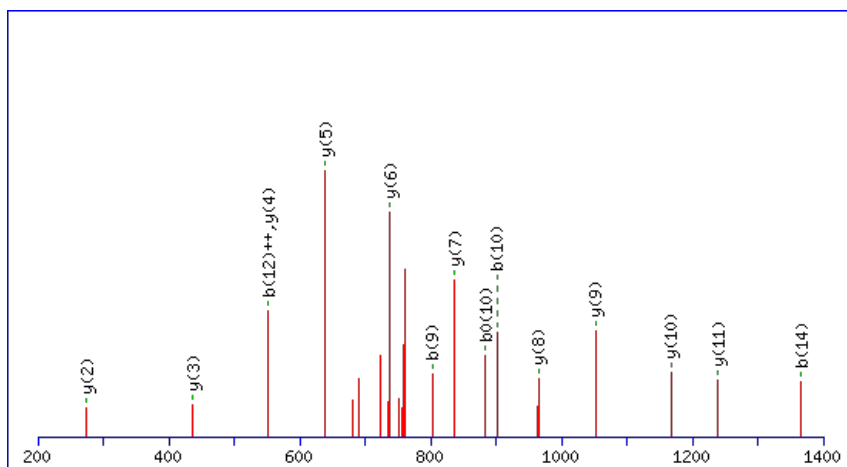
 Monoisotopic mass of neutral peptide  $M_r(\text{calc})$ : 1539.7165

Fixed modifications: Carbamidomethyl (C) (apply to specified residues or termini only)

Ions Score: 104 Expect: 1.1e-010

 Matches : 15/148 fragment ions using 17 most intense peaks ([help](#))

| #  | b                | b <sup>++</sup> | b*        | b <sup>*++</sup> | b <sup>0</sup>  | b <sup>0++</sup> | Seq. | y                | y <sup>++</sup> | y*        | y <sup>*++</sup> | y <sup>0</sup> | y <sup>0++</sup> | #  |
|----|------------------|-----------------|-----------|------------------|-----------------|------------------|------|------------------|-----------------|-----------|------------------|----------------|------------------|----|
| 1  | 88.0393          | 44.5233         |           |                  | 70.0287         | 35.5180          | S    |                  |                 |           |                  |                |                  | 15 |
| 2  | 145.0608         | 73.0340         |           |                  | 127.0502        | 64.0287          | G    | 1453.6918        | 727.3495        | 1436.6652 | 718.8362         | 1435.6812      | 718.3442         | 14 |
| 3  | 232.0928         | 116.5500        |           |                  | 214.0822        | 107.5448         | S    | 1396.6703        | 698.8388        | 1379.6438 | 690.3255         | 1378.6597      | 689.8335         | 13 |
| 4  | 303.1299         | 152.0686        |           |                  | 285.1193        | 143.0633         | A    | 1309.6383        | 655.3228        | 1292.6117 | 646.8095         | 1291.6277      | 646.3175         | 12 |
| 5  | 374.1670         | 187.5872        |           |                  | 356.1565        | 178.5819         | A    | <b>1238.6012</b> | 619.8042        | 1221.5746 | 611.2909         | 1220.5906      | 610.7989         | 11 |
| 6  | 489.1940         | 245.1006        |           |                  | 471.1834        | 236.0953         | D    | <b>1167.5640</b> | 584.2857        | 1150.5375 | 575.7724         | 1149.5535      | 575.2804         | 10 |
| 7  | 576.2260         | 288.6166        |           |                  | 558.2154        | 279.6114         | S    | <b>1052.5371</b> | 526.7722        | 1035.5106 | 518.2589         | 1034.5265      | 517.7669         | 9  |
| 8  | 704.2846         | 352.6459        | 687.2580  | 344.1327         | 686.2740        | 343.6406         | Q    | <b>965.5051</b>  | 483.2562        | 948.4785  | 474.7429         | 947.4945       | 474.2509         | 8  |
| 9  | <b>803.3530</b>  | 402.1801        | 786.3264  | 393.6669         | 785.3424        | 393.1748         | V    | <b>837.4465</b>  | 419.2269        | 820.4199  | 410.7136         | 819.4359       | 410.2216         | 7  |
| 10 | <b>902.4214</b>  | 451.7143        | 885.3949  | 443.2011         | <b>884.4108</b> | 442.7091         | V    | <b>738.3781</b>  | 369.6927        | 721.3515  | 361.1794         | 720.3675       | 360.6874         | 6  |
| 11 | 989.4534         | 495.2304        | 972.4269  | 486.7171         | 971.4429        | 486.2251         | S    | <b>639.3097</b>  | 320.1585        | 622.2831  | 311.6452         | 621.2991       | 311.1532         | 5  |
| 12 | 1104.4804        | <b>552.7438</b> | 1087.4538 | 544.2305         | 1086.4698       | 543.7385         | D    | <b>552.2776</b>  | 276.6425        | 535.2511  | 268.1292         | 534.2671       | 267.6372         | 4  |
| 13 | 1267.5437        | 634.2755        | 1250.5172 | 625.7622         | 1249.5331       | 625.2702         | Y    | <b>437.2507</b>  | 219.1290        | 420.2241  | 210.6157         |                |                  | 3  |
| 14 | <b>1366.6121</b> | 683.8097        | 1349.5856 | 675.2964         | 1348.6016       | 674.8044         | V    | <b>274.1874</b>  | 137.5973        | 257.1608  | 129.0840         |                |                  | 2  |
| 15 |                  |                 |           |                  |                 |                  | R    | 175.1190         | 88.0631         | 158.0924  | 79.5498          |                |                  | 1  |

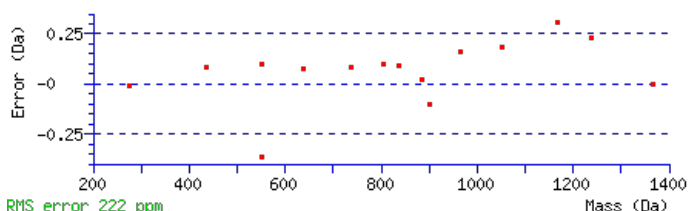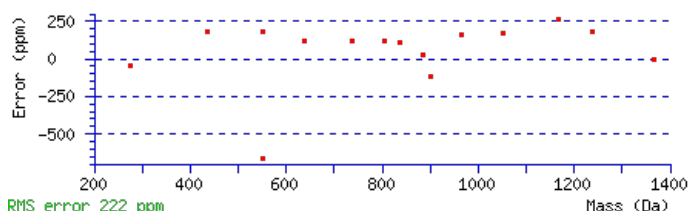

## AT4G31300.1

NCBI **BLAST** search of [SGSAADSQVSDYVR](#)

(Parameters: blastp, nr protein database, expect=20000, no filter, PAM30)

Other BLAST [web gateways](#)

### All matches to this query

| Score | Mr(calc)  | Delta  | Sequence                       |
|-------|-----------|--------|--------------------------------|
| 104.2 | 1539.7165 | 0.0001 | <a href="#">SGSAADSQVSDYVR</a> |
| 1.7   | 1539.7140 | 0.0026 | <a href="#">CTFEALAANTWR</a>   |

**Mascot:** <http://www.matrixscience.com/>



## Peptide View

MS/MS Fragmentation of **EEAEQLVVK**Found in **AT4G31300.2** in **TAIR\_Arabidopsis**, Symbols: PBA1 | PBA1 (20S proteasome beta subunit A 1); peptidase | chr4:15188933-15190941  
FORWARD

Match to Query 2810: 1043.551226 from(522.782889,2+) index(1983)

Title: Elution from: 23.434 to 23.434 scan no 2554 cid35.00 polarity:+

Data file D6h-1\_3.mgf

Click mouse within plot area to zoom in by factor of two about that point

Or,   to  Da Label all possible matches  Label matches used for scoring Show Y-axis 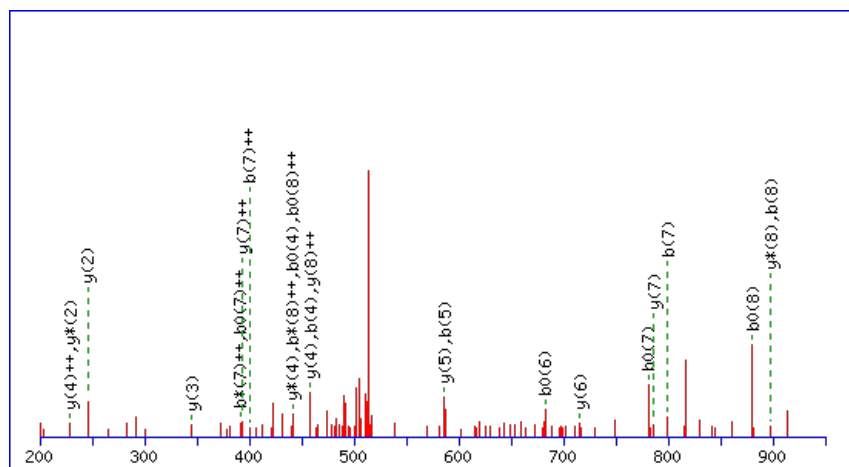

Monoisotopic mass of neutral peptide Mr(calc): 1043.5499

Fixed modifications: Carbamidomethyl (C) (apply to specified residues or termini only)

Ions Score: 27 Expect: 0.0069

Matches : 25/78 fragment ions using 43 most intense peaks ([help](#))

| # | b        | b <sup>++</sup> | b*       | b <sup>*++</sup> | b <sup>0</sup> | b <sup>0++</sup> | Seq. | y        | y <sup>++</sup> | y*       | y <sup>*++</sup> | y <sup>0</sup> | y <sup>0++</sup> | # |
|---|----------|-----------------|----------|------------------|----------------|------------------|------|----------|-----------------|----------|------------------|----------------|------------------|---|
| 1 | 130.0499 | 65.5286         |          |                  | 112.0393       | 56.5233          | E    |          |                 |          |                  |                |                  | 9 |
| 2 | 259.0925 | 130.0499        |          |                  | 241.0819       | 121.0446         | E    | 915.5146 | 458.2609        | 898.4880 | 449.7477         | 897.5040       | 449.2556         | 8 |
| 3 | 330.1296 | 165.5684        |          |                  | 312.1190       | 156.5631         | A    | 786.4720 | 393.7396        | 769.4454 | 385.2264         | 768.4614       | 384.7343         | 7 |
| 4 | 459.1722 | 230.0897        |          |                  | 441.1616       | 221.0844         | E    | 715.4349 | 358.2211        | 698.4083 | 349.7078         | 697.4243       | 349.2158         | 6 |
| 5 | 587.2307 | 294.1190        | 570.2042 | 285.6057         | 569.2202       | 285.1137         | Q    | 586.3923 | 293.6998        | 569.3657 | 285.1865         |                |                  | 5 |
| 6 | 700.3148 | 350.6610        | 683.2883 | 342.1478         | 682.3042       | 341.6558         | L    | 458.3337 | 229.6705        | 441.3071 | 221.1572         |                |                  | 4 |
| 7 | 799.3832 | 400.1953        | 782.3567 | 391.6820         | 781.3727       | 391.1900         | V    | 345.2496 | 173.1285        | 328.2231 | 164.6152         |                |                  | 3 |
| 8 | 898.4516 | 449.7295        | 881.4251 | 441.2162         | 880.4411       | 440.7242         | V    | 246.1812 | 123.5942        | 229.1547 | 115.0810         |                |                  | 2 |
| 9 |          |                 |          |                  |                |                  | K    | 147.1128 | 74.0600         | 130.0863 | 65.5468          |                |                  | 1 |

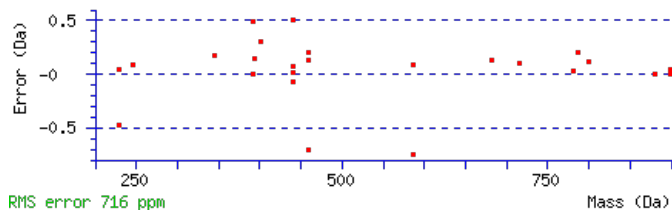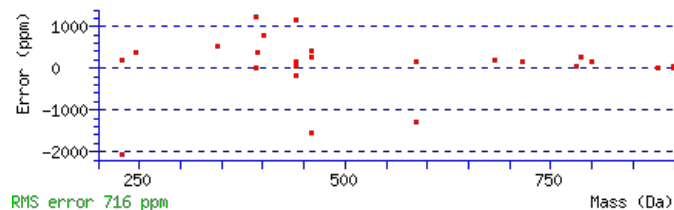NCBI BLAST search of [EEAEQLVVK](#)

(Parameters: blastp, nr protein database, expect=20000, no filter, PAM30)

Other BLAST [web gateways](#)

All matches to this query

| Score | Mr(calc) | Delta | Sequence |
|-------|----------|-------|----------|
|       |          |       |          |

## AT4G31300.2

|      |           |        |                           |
|------|-----------|--------|---------------------------|
| 26.8 | 1043.5499 | 0.0014 | <a href="#">EEAEQLVVK</a> |
| 14.9 | 1043.5499 | 0.0014 | <a href="#">SKEIPDEVK</a> |
| 12.3 | 1043.5499 | 0.0013 | <a href="#">EVDENVIVK</a> |
| 6.4  | 1043.5499 | 0.0013 | <a href="#">DVEENVLVK</a> |
| 1.1  | 1043.5499 | 0.0014 | <a href="#">EEENLALVK</a> |

**Mascot:** <http://www.matrixscience.com/>

**Peptide View**MS/MS Fragmentation of **TFRKK**Found in **AT4G31460.1** in **TAIR\_Arabidopsis**, Symbols: | ribosomal protein L28 family protein | chr4:15259779-15260853 REVERSE

Match to Query 601: 688.386914 from(345.200733,2+) index(3869)

Title: Elution from: 35.578 to 35.578 scan no 4811 cid35.00 polarity:+

Data file D6h-3\_3.mgf

Click mouse within plot area to zoom in by factor of two about that point

Or,   to  Da Label all possible matches  Label matches used for scoring Show Y-axis 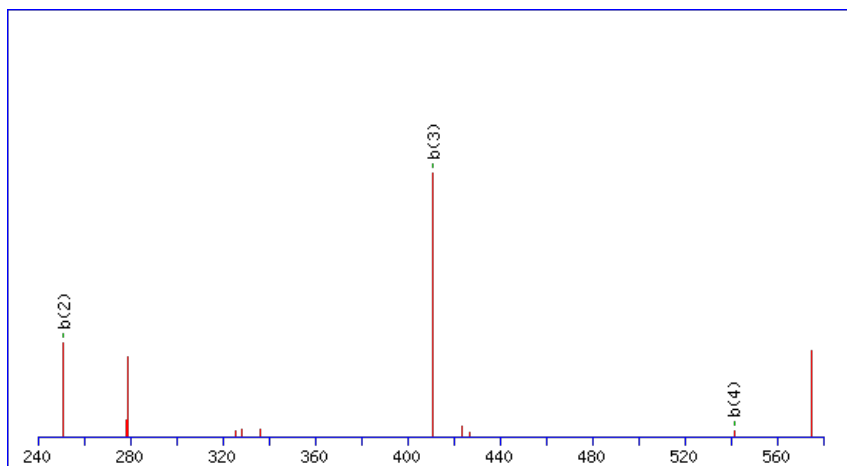Monoisotopic mass of neutral peptide **Mr(calc)**: 688.3880

Fixed modifications: Carbamidomethyl (C) (apply to specified residues or termini only)

Ions Score: 25 Expect: 0.012

Matches : 3/36 fragment ions using 4 most intense peaks ([help](#))

| # | b               | b <sup>++</sup> | b*       | b <sup>*++</sup> | b <sup>0</sup> | b <sup>0++</sup> | Seq. | y        | y <sup>++</sup> | y*       | y <sup>*++</sup> | # |
|---|-----------------|-----------------|----------|------------------|----------------|------------------|------|----------|-----------------|----------|------------------|---|
| 1 | 103.0520        | 52.0296         |          |                  | 85.0414        | 43.0244          | T    |          |                 |          |                  | 5 |
| 2 | <b>251.1174</b> | 126.0624        |          |                  | 233.1069       | 117.0571         | F    | 587.3506 | 294.1789        | 569.3270 | 285.1671         | 4 |
| 3 | <b>411.2067</b> | 206.1070        | 393.1831 | 197.0952         | 393.1961       | 197.1017         | R    | 439.2852 | 220.1462        | 421.2616 | 211.1344         | 3 |
| 4 | <b>541.2957</b> | 271.1515        | 523.2721 | 262.1397         | 523.2852       | 262.1462         | K    | 279.1959 | 140.1016        | 261.1723 | 131.0898         | 2 |
| 5 |                 |                 |          |                  |                |                  | K    | 149.1069 | 75.0571         | 131.0833 | 66.0453          | 1 |

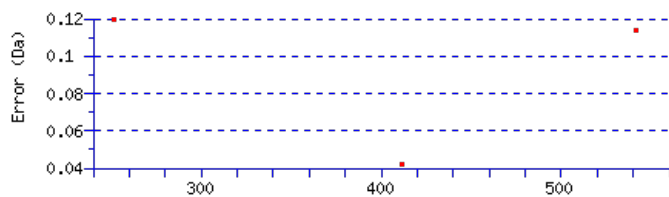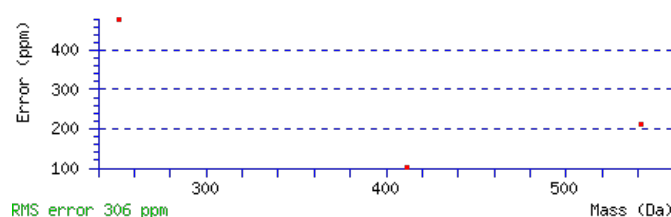NCBI **BLAST** search of **TFRKK**

(Parameters: blastp, nr protein database, expect=20000, no filter, PAM30)

Other BLAST [web gateways](#)**All matches to this query**

| Score | Mr(calc) | Delta   | Sequence              |
|-------|----------|---------|-----------------------|
| 24.6  | 688.3880 | -0.0011 | <a href="#">TFRKK</a> |
| 18.1  | 688.3876 | -0.0007 | <a href="#">YLFLK</a> |
| 17.4  | 688.3876 | -0.0007 | <a href="#">LYIFK</a> |
| 17.4  | 688.3876 | -0.0007 | <a href="#">LYLFK</a> |
| 15.2  | 688.3880 | -0.0011 | <a href="#">RTFKK</a> |

## AT4G31460.1

|      |          |         |                        |
|------|----------|---------|------------------------|
| 10.3 | 688.3880 | -0.0011 | <a href="#">FKKTR</a>  |
| 10.3 | 688.3880 | -0.0011 | <a href="#">FKTKR</a>  |
| 10.3 | 688.3880 | -0.0011 | <a href="#">VPAHKK</a> |
| 8.4  | 688.3880 | -0.0011 | <a href="#">KFTRK</a>  |
| 8.4  | 688.3876 | -0.0007 | <a href="#">YLLFK</a>  |

**Mascot:** <http://www.matrixscience.com/>

**Peptide View**MS/MS Fragmentation of **GYVFK**

Found in **AT4G31700.1** in **TAIR\_Arabidopsis**, Symbols: RPS6 | RPS6 (RIBOSOMAL PROTEIN S6); structural constituent of ribosome | chr4:15346312-15347720 REVERSE

Match to Query 480: 612.326904 from(307.170728,2+) index(1384)

Title: Elution from: 20.762 to 20.762 scan no 1933 cid35.00 polarity:+

Data file D6h-2\_2.mgf

Click mouse within plot area to zoom in by factor of two about that point

Or,   to  Da

Label all possible matches  Label matches used for scoring

Show Y-axis

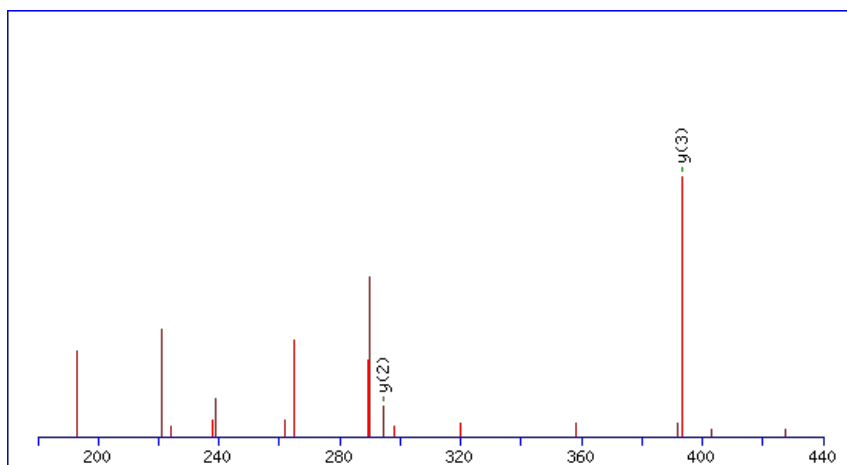

**Monoisotopic mass of neutral peptide Mr(calc):** 612.3271

**Fixed modifications:** Carbamidomethyl (C) (apply to specified residues or termini only)

**Ions Score:** 13 **Expect:** 0.048

**Matches:** 2/24 fragment ions using 3 most intense peaks ([help](#))

| # | b        | b <sup>++</sup> | Seq. | y               | y <sup>++</sup> | y*       | y <sup>*++</sup> | # |
|---|----------|-----------------|------|-----------------|-----------------|----------|------------------|---|
| 1 | 58.0287  | 29.5180         | G    |                 |                 |          |                  | 5 |
| 2 | 221.0921 | 111.0497        | Y    | 556.3130        | 278.6601        | 539.2864 | 270.1468         | 4 |
| 3 | 320.1605 | 160.5839        | V    | <b>393.2496</b> | 197.1285        | 376.2231 | 188.6152         | 3 |
| 4 | 467.2289 | 234.1181        | F    | <b>294.1812</b> | 147.5942        | 277.1547 | 139.0810         | 2 |
| 5 |          |                 | K    | 147.1128        | 74.0600         | 130.0863 | 65.5468          | 1 |

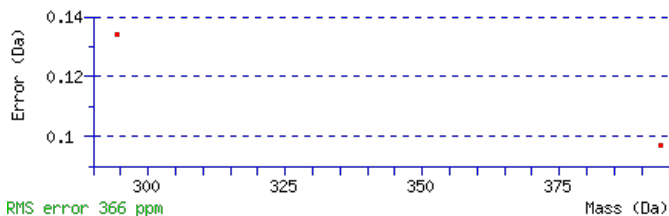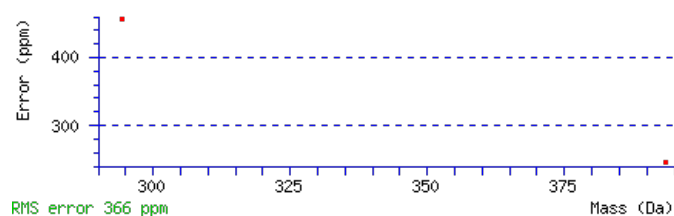NCBI **BLAST** search of **GYVFK**

(Parameters: blastp, nr protein database, expect=20000, no filter, PAM30)

Other BLAST [web gateways](#)

**All matches to this query**

| Score | Mr(calc) | Delta   | Sequence              |
|-------|----------|---------|-----------------------|
| 13.2  | 612.3271 | -0.0002 | <a href="#">GYVFK</a> |

## Peptide View

### MS/MS Fragmentation of **MGKTLASLSFNTK**

Found in **AT4G31780.1** in **TAIR\_Arabidopsis**, Symbols: MGDA, MGD1 | MGD1 (MONOGALACTOSYLDIACYLGLYCEROL SYNTHASE 1, MONOGALACTOSYLDIACYLGLYCEROL SYNTHASE A); 1,2-diacylglycerol 3-beta-galactosyltransferase/ transférase, transferring glycosyl groups | chr4:15374228-15376879 FORWARD

Match to Query 5443: 1428.688060 from(715.351306,2+) index(10473)

Title: Elution from: 103.134 to 103.134 scan no 15242 cid35.00 polarity:+

Data file D12h-1\_3.mgf

Click mouse within plot area to zoom in by factor of two about that point

Or,   to  Da

Label all possible matches  Label matches used for scoring

Show Y-axis

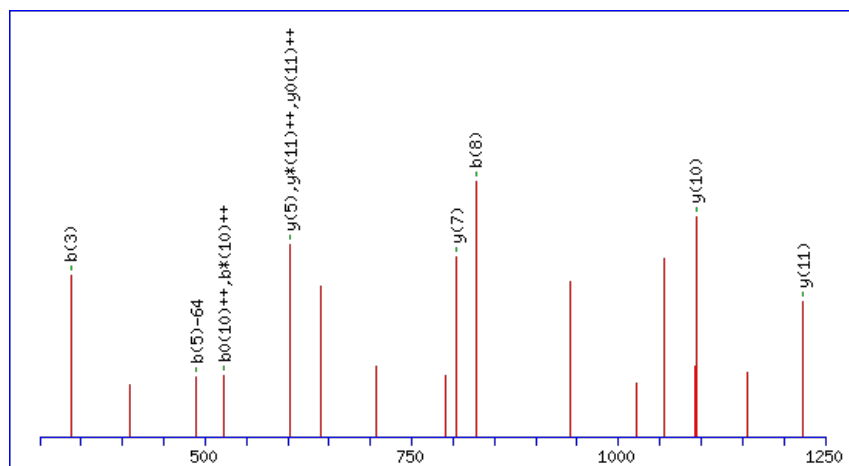

**Monoisotopic mass of neutral peptide Mr(calc):** 1428.6859

**Fixed modifications:** Carbamidomethyl (C) (apply to specified residues or termini only)

**Variable modifications:**

**M1** : Oxidation (M), with neutral losses 0.0000 (shown in table), 63.9983

**Ions Score:** 21 **Expect:** 0.035

**Matches** : 11/194 fragment ions using 15 most intense peaks ([help](#))

| #  | b               | b <sup>++</sup> | b <sup>*</sup> | b <sup>*++</sup> | b <sup>0</sup> | b <sup>0++</sup> | Seq. | y                | y <sup>++</sup> | y <sup>*</sup> | y <sup>*++</sup> | y <sup>0</sup> | y <sup>0++</sup> | #  |
|----|-----------------|-----------------|----------------|------------------|----------------|------------------|------|------------------|-----------------|----------------|------------------|----------------|------------------|----|
| 1  | 149.0397        | 75.0235         |                |                  |                |                  | M    |                  |                 |                |                  |                |                  | 13 |
| 2  | 207.0582        | 104.0327        |                |                  |                |                  | G    | 1281.6608        | 641.3340        | 1263.6372      | 632.3222         | 1263.6502      | 632.3287         | 12 |
| 3  | <b>337.1472</b> | 169.0773        | 319.1237       | 160.0655         |                |                  | K    | <b>1223.6423</b> | 612.3248        | 1205.6187      | <b>603.3130</b>  | 1205.6317      | <b>603.3195</b>  | 11 |
| 4  | 439.1920        | 220.0996        | 421.1684       | 211.0878         | 421.1814       | 211.0943         | T    | <b>1093.5532</b> | 547.2802        | 1075.5296      | 538.2685         | 1075.5427      | 538.2750         | 10 |
| 5  | 553.2731        | 277.1402        | 535.2495       | 268.1284         | 535.2625       | 268.1349         | L    | 991.5085         | 496.2579        | 973.4849       | 487.2461         | 973.4979       | 487.2526         | 9  |
| 6  | 625.3072        | 313.1572        | 607.2836       | 304.1454         | 607.2966       | 304.1520         | A    | 877.4274         | 439.2173        | 859.4038       | 430.2055         | 859.4168       | 430.2121         | 8  |
| 7  | 713.3363        | 357.1718        | 695.3127       | 348.1600         | 695.3257       | 348.1665         | S    | <b>805.3933</b>  | 403.2003        | 787.3697       | 394.1885         | 787.3827       | 394.1950         | 7  |
| 8  | <b>827.4174</b> | 414.2123        | 809.3938       | 405.2005         | 809.4068       | 405.2070         | L    | 717.3642         | 359.1857        | 699.3406       | 350.1739         | 699.3536       | 350.1805         | 6  |
| 9  | 915.4464        | 458.2269        | 897.4228       | 449.2151         | 897.4359       | 449.2216         | S    | <b>603.2831</b>  | 302.1452        | 585.2595       | 293.1334         | 585.2725       | 293.1399         | 5  |
| 10 | 1063.5119       | 532.2596        | 1045.4883      | <b>523.2478</b>  | 1045.5013      | <b>523.2543</b>  | F    | 515.2540         | 258.1307        | 497.2304       | 249.1189         | 497.2435       | 249.1254         | 4  |
| 11 | 1179.5489       | 590.2781        | 1161.5253      | 581.2663         | 1161.5383      | 581.2728         | N    | 367.1886         | 184.0979        | 349.1650       | 175.0861         | 349.1780       | 175.0926         | 3  |
| 12 | 1281.5936       | 641.3004        | 1263.5700      | 632.2886         | 1263.5830      | 632.2951         | T    | 251.1516         | 126.0794        | 233.1280       | 117.0676         | 233.1410       | 117.0741         | 2  |
| 13 |                 |                 |                |                  |                |                  | K    | 149.1069         | 75.0571         | 131.0833       | 66.0453          |                |                  | 1  |

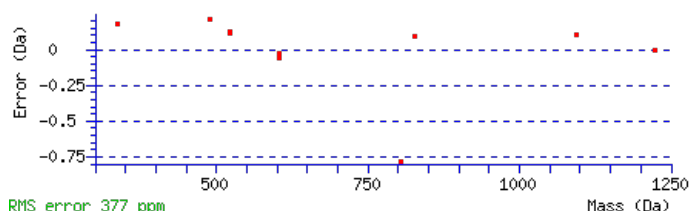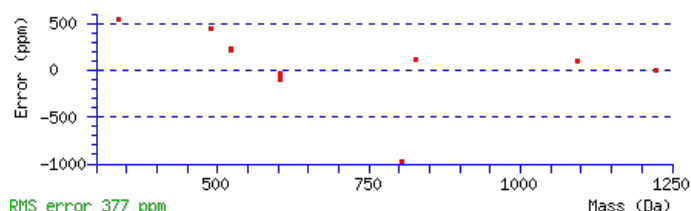

## AT4G31780.1

NCBI **BLAST** search of [MGKTLASLSFNTK](#)

(Parameters: blastp, nr protein database, expect=20000, no filter, PAM30)

Other BLAST [web gateways](#)

### All matches to this query

| Score | Mr(calc)  | Delta  | Sequence                      |
|-------|-----------|--------|-------------------------------|
| 21.5  | 1428.6859 | 0.0021 | <a href="#">MGKTLASLSFNTK</a> |

**Mascot:** <http://www.matrixscience.com/>

## Peptide View

### MS/MS Fragmentation of **VGDFIVFK**

Found in **AT4G31840.1** in **TAIR\_Arabidopsis**, Symbols: | plastocyanin-like domain-containing protein | chr4:15401804-15402432 FORWARD

Match to Query 1730: 923.511252 from(462.762902,2+) index(6499)

Title: Elution from: 57.606 to 57.606 scan no 8419 cid35.00 polarity:+

Data file D6h-2\_3.mgf

Click mouse within plot area to zoom in by factor of two about that point

Or,   to  Da

Label all possible matches  Label matches used for scoring

Show Y-axis

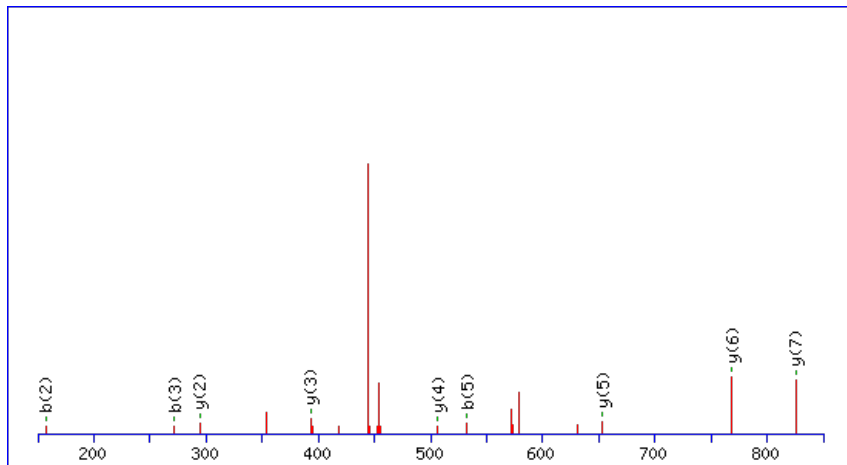

Monoisotopic mass of neutral peptide  $M_r(\text{calc})$ : 923.5117

Fixed modifications: Carbamidomethyl (C) (apply to specified residues or termini only)

Ions Score: 49 Expect: 1.4e-005

Matches : 9/56 fragment ions using 17 most intense peaks ([help](#))

| # | b               | b <sup>++</sup> | b <sup>0</sup> | b <sup>0++</sup> | Seq. | y               | y <sup>++</sup> | y*       | y <sup>*++</sup> | y <sup>0</sup> | y <sup>0++</sup> | # |
|---|-----------------|-----------------|----------------|------------------|------|-----------------|-----------------|----------|------------------|----------------|------------------|---|
| 1 | 100.0757        | 50.5415         |                |                  | V    |                 |                 |          |                  |                |                  | 8 |
| 2 | <b>157.0972</b> | 79.0522         |                |                  | G    | <b>825.4505</b> | 413.2289        | 808.4240 | 404.7156         | 807.4400       | 404.2236         | 7 |
| 3 | <b>272.1241</b> | 136.5657        | 254.1135       | 127.5604         | D    | <b>768.4291</b> | 384.7182        | 751.4025 | 376.2049         | 750.4185       | 375.7129         | 6 |
| 4 | 419.1925        | 210.0999        | 401.1819       | 201.0946         | F    | <b>653.4021</b> | 327.2047        | 636.3756 | 318.6914         |                |                  | 5 |
| 5 | <b>532.2766</b> | 266.6419        | 514.2660       | 257.6366         | I    | <b>506.3337</b> | 253.6705        | 489.3071 | 245.1572         |                |                  | 4 |
| 6 | 631.3450        | 316.1761        | 613.3344       | 307.1709         | V    | <b>393.2496</b> | 197.1285        | 376.2231 | 188.6152         |                |                  | 3 |
| 7 | 778.4134        | 389.7103        | 760.4028       | 380.7051         | F    | <b>294.1812</b> | 147.5942        | 277.1547 | 139.0810         |                |                  | 2 |
| 8 |                 |                 |                |                  | K    | 147.1128        | 74.0600         | 130.0863 | 65.5468          |                |                  | 1 |

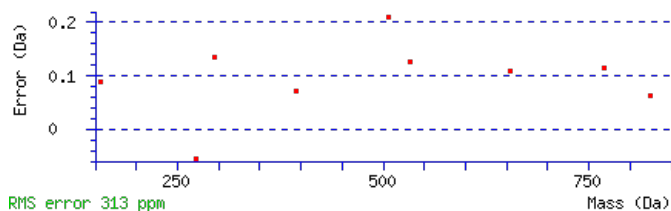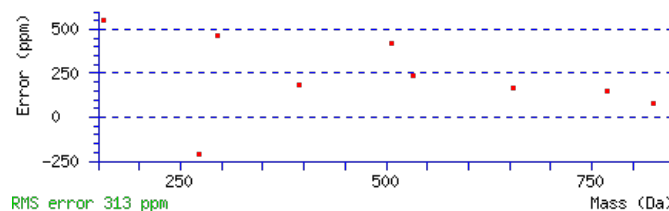

NCBI **BLAST** search of **VGDFIVFK**

(Parameters: blastp, nr protein database, expect=20000, no filter, PAM30)

Other BLAST [web gateways](#)

### All matches to this query

| Score | $M_r(\text{calc})$ | Delta   | Sequence                 |
|-------|--------------------|---------|--------------------------|
| 49.4  | 923.5117           | -0.0004 | <a href="#">VGDFIVFK</a> |
| 3.4   | 923.5117           | -0.0004 | <a href="#">EVVGFVFK</a> |





**Peptide View**MS/MS Fragmentation of **ISLAGLSLAK**Found in **AT4G31990.1** in **TAIR\_Arabidopsis**, Symbols: AAT3, ATAAT1 | ASP5 (ASPARTATE AMINOTRANSFERASE 5) | chr4:15471080-15473527 REVERSE

Match to Query 1796: 971.601974 from(486.808263,2+) index(6231)

Title: Elution from: 57.559 to 57.559 scan no 8150 cid35.00 polarity:+

Data file D1d-1\_3.mgf

Click mouse within plot area to zoom in by factor of two about that point

Or,   to  Da Label all possible matches  Label matches used for scoring Show Y-axis 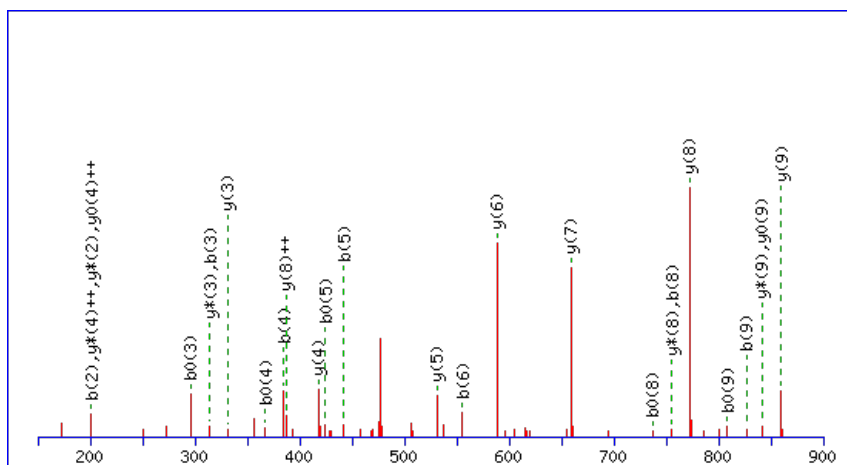Monoisotopic mass of neutral peptide  $M_r(\text{calc})$ : 971.6015

Fixed modifications: Carbamidomethyl (C) (apply to specified residues or termini only)

Ions Score: 59 Expect: 3.4e-006

Matches : 27/82 fragment ions using 33 most intense peaks ([help](#))

| #  | b               | b <sup>++</sup> | b <sup>0</sup>  | b <sup>0++</sup> | Seq. | y               | y <sup>++</sup> | y*              | y <sup>*++</sup> | y <sup>0</sup>  | y <sup>0++</sup> | #  |
|----|-----------------|-----------------|-----------------|------------------|------|-----------------|-----------------|-----------------|------------------|-----------------|------------------|----|
| 1  | 114.0913        | 57.5493         |                 |                  | I    |                 |                 |                 |                  |                 |                  | 10 |
| 2  | <b>201.1234</b> | 101.0653        | 183.1128        | 92.0600          | S    | <b>859.5247</b> | 430.2660        | <b>842.4982</b> | 421.7527         | <b>841.5142</b> | 421.2607         | 9  |
| 3  | <b>314.2074</b> | 157.6074        | <b>296.1969</b> | 148.6021         | L    | <b>772.4927</b> | <b>386.7500</b> | <b>755.4662</b> | 378.2367         | 754.4822        | 377.7447         | 8  |
| 4  | <b>385.2445</b> | 193.1259        | <b>367.2340</b> | 184.1206         | A    | <b>659.4087</b> | 330.2080        | 642.3821        | 321.6947         | 641.3981        | 321.2027         | 7  |
| 5  | <b>442.2660</b> | 221.6366        | <b>424.2554</b> | 212.6314         | G    | <b>588.3715</b> | 294.6894        | 571.3450        | 286.1761         | 570.3610        | 285.6841         | 6  |
| 6  | <b>555.3501</b> | 278.1787        | 537.3395        | 269.1734         | L    | <b>531.3501</b> | 266.1787        | 514.3235        | 257.6654         | 513.3395        | 257.1734         | 5  |
| 7  | 642.3821        | 321.6947        | 624.3715        | 312.6894         | S    | <b>418.2660</b> | 209.6366        | 401.2395        | <b>201.1234</b>  | 400.2554        | <b>200.6314</b>  | 4  |
| 8  | <b>755.4662</b> | 378.2367        | <b>737.4556</b> | 369.2314         | L    | <b>331.2340</b> | 166.1206        | <b>314.2074</b> | 157.6074         |                 |                  | 3  |
| 9  | <b>826.5033</b> | 413.7553        | <b>808.4927</b> | 404.7500         | A    | 218.1499        | 109.5786        | <b>201.1234</b> | 101.0653         |                 |                  | 2  |
| 10 |                 |                 |                 |                  | K    | 147.1128        | 74.0600         | 130.0863        | 65.5468          |                 |                  | 1  |

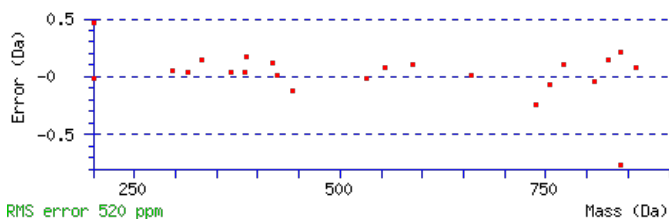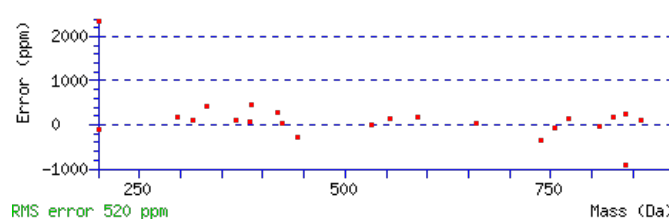NCBI BLAST search of **ISLAGLSLAK**

(Parameters: blastp, nr protein database, expect=20000, no filter, PAM30)

Other BLAST [web gateways](#)

All matches to this query

AT4G31990.1

| Score | Mr(calc) | Delta  | Sequence                   |
|-------|----------|--------|----------------------------|
| 59.0  | 971.6015 | 0.0005 | <a href="#">ISLAGLSLAK</a> |
| 7.3   | 971.6015 | 0.0005 | <a href="#">ELAİKASLK</a>  |

Mascot: <http://www.matrixscience.com/>



# Mascot Search Results

## Peptide View

MS/MS Fragmentation of **EALASLESQKEETIK**

Found in **AT4G32260.1** in **TAIR\_Arabidopsis**, Symbols: | ATP synthase family | chr4:15573865-15574592 REVERSE

Match to Query 8341: 1692.812170 from(847.413361,2+) index(3533)

Title: Elution from: 33.504 to 33.504 scan no 4347 cid35.00 polarity:+

Data file C7-1\_1.mgf

Click mouse within plot area to zoom in by factor of two about that point

Or,  to  Da

Label all possible matches  Label matches used for scoring

Show Y-axis

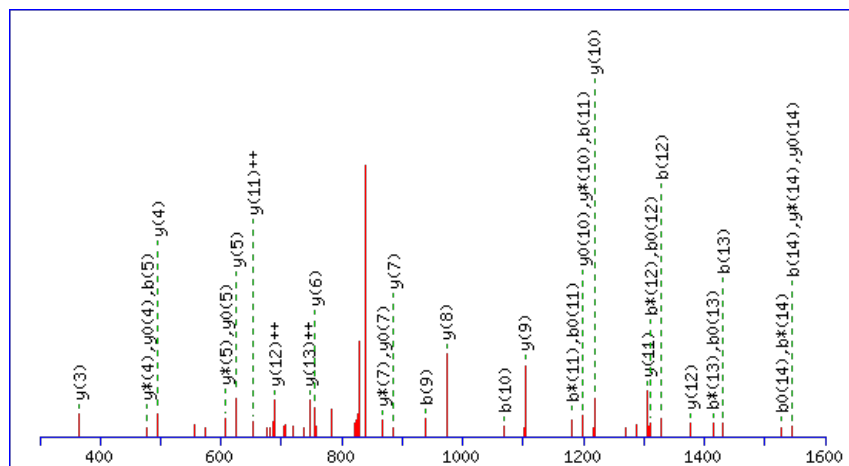

Monoisotopic mass of neutral peptide  $M_r(\text{calc})$ : 1692.8142

Fixed modifications: Carbamidomethyl (C) (apply to specified residues or termini only)

Ions Score: 100 Expect: 7.2e-010

Matches : 38/148 fragment ions using 33 most intense peaks [\(help\)](#)

| #  | b         | b <sup>++</sup> | b <sup>*</sup> | b <sup>*++</sup> | b <sup>0</sup> | b <sup>0++</sup> | Seq. | y         | y <sup>++</sup> | y <sup>*</sup> | y <sup>*++</sup> | y <sup>0</sup> | y <sup>0++</sup> | #  |
|----|-----------|-----------------|----------------|------------------|----------------|------------------|------|-----------|-----------------|----------------|------------------|----------------|------------------|----|
| 1  | 131.0469  | 66.0271         |                |                  | 113.0363       | 57.0218          | E    |           |                 |                |                  |                |                  | 15 |
| 2  | 203.0811  | 102.0442        |                |                  | 185.0705       | 93.0389          | A    | 1563.7819 | 782.3946        | 1545.7583      | 773.3828         | 1545.7713      | 773.3893         | 14 |
| 3  | 317.1622  | 159.0847        |                |                  | 299.1516       | 150.0794         | L    | 1491.7477 | 746.3775        | 1473.7241      | 737.3657         | 1473.7372      | 737.3722         | 13 |
| 4  | 389.1963  | 195.1018        |                |                  | 371.1857       | 186.0965         | A    | 1377.6666 | 689.3370        | 1359.6430      | 680.3252         | 1359.6561      | 680.3317         | 12 |
| 5  | 477.2254  | 239.1163        |                |                  | 459.2148       | 230.1110         | S    | 1305.6325 | 653.3199        | 1287.6089      | 644.3081         | 1287.6219      | 644.3146         | 11 |
| 6  | 591.3065  | 296.1569        |                |                  | 573.2959       | 287.1516         | L    | 1217.6034 | 609.3053        | 1199.5798      | 600.2936         | 1199.5928      | 600.3001         | 10 |
| 7  | 721.3461  | 361.1767        |                |                  | 703.3355       | 352.1714         | E    | 1103.5223 | 552.2648        | 1085.4987      | 543.2530         | 1085.5117      | 543.2595         | 9  |
| 8  | 809.3752  | 405.1912        |                |                  | 791.3646       | 396.1859         | S    | 973.4827  | 487.2450        | 955.4591       | 478.2332         | 955.4721       | 478.2397         | 8  |
| 9  | 939.4278  | 470.2175        | 921.4042       | 461.2057         | 921.4172       | 461.2123         | Q    | 885.4536  | 443.2304        | 867.4300       | 434.2187         | 867.4431       | 434.2252         | 7  |
| 10 | 1069.5168 | 535.2621        | 1051.4933      | 526.2503         | 1051.5063      | 526.2568         | K    | 755.4010  | 378.2041        | 737.3774       | 369.1923         | 737.3904       | 369.1988         | 6  |
| 11 | 1199.5565 | 600.2819        | 1181.5329      | 591.2701         | 1181.5459      | 591.2766         | E    | 625.3119  | 313.1596        | 607.2884       | 304.1478         | 607.3014       | 304.1543         | 5  |
| 12 | 1329.5961 | 665.3017        | 1311.5725      | 656.2899         | 1311.5855      | 656.2964         | E    | 495.2723  | 248.1398        | 477.2487       | 239.1280         | 477.2617       | 239.1345         | 4  |
| 13 | 1431.6408 | 716.3240        | 1413.6172      | 707.3122         | 1413.6302      | 707.3188         | T    | 365.2327  | 183.1200        | 347.2091       | 174.1082         | 347.2221       | 174.1147         | 3  |
| 14 | 1545.7219 | 773.3646        | 1527.6983      | 764.3528         | 1527.7113      | 764.3593         | I    | 263.1880  | 132.0976        | 245.1644       | 123.0858         |                |                  | 2  |
| 15 |           |                 |                |                  |                |                  | K    | 149.1069  | 75.0571         | 131.0833       | 66.0453          |                |                  | 1  |

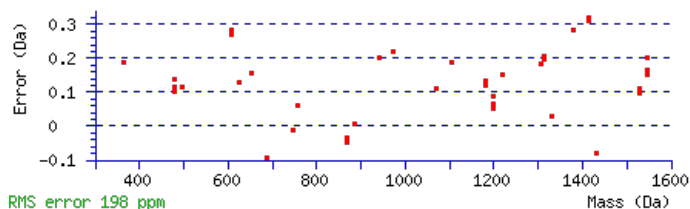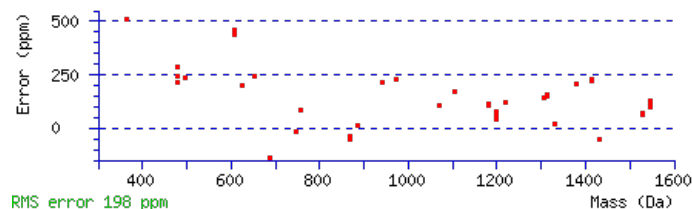

NCBI BLAST search of [EALASLESQKEETIK](#)

## AT4G32260.1

(Parameters: blastp, nr protein database, expect=20000, no filter, PAM30)

Other BLAST [web gateways](#)

### All matches to this query

| Score | Mr(calc)  | Delta   | Sequence                         |
|-------|-----------|---------|----------------------------------|
| 100.5 | 1692.8142 | -0.0021 | <a href="#">EALASLESQKEETIK</a>  |
| 21.9  | 1692.8142 | -0.0020 | <a href="#">EKTIQEEAEISATVK</a>  |
| 13.9  | 1692.8117 | 0.0004  | <a href="#">QVFPEIGEINISAMK</a>  |
| 11.1  | 1692.8144 | -0.0022 | <a href="#">MQVISPPSPAPRFAGK</a> |
| 6.6   | 1692.8088 | 0.0034  | <a href="#">ILDRYGKQHADDLK</a>   |
| 6.6   | 1692.8095 | 0.0027  | <a href="#">IEAKVEQMKAEEAEAK</a> |
| 2.7   | 1692.8110 | 0.0012  | <a href="#">NVKKEAGISWFEHK</a>   |
| 2.2   | 1692.8165 | -0.0043 | <a href="#">GSESEDLVVPLFSLGK</a> |
| 1.3   | 1692.8110 | 0.0012  | <a href="#">GSITLKVHYHEFNK</a>   |
| 0.9   | 1692.8119 | 0.0003  | <a href="#">IFVMSFMRNPRFK</a>    |

Mascot: <http://www.matrixscience.com/>

**Peptide View**MS/MS Fragmentation of **KAGAMNALIR**

Found in **AT4G32410.1** in **TAIR\_Arabidopsis**, Symbols: CESA1, RSW1 | CESA1 (CELLULOSE SYNTHASE 1); transférase, transferring glycosyl groups | chr4:15641015-15646394 REVERSE

Match to Query 2949: 1058.545654 from(530.280103,2+) index(5733)

Title: Elution from: 50.886 to 50.886 scan no 7403 cid35.00 polarity:+

Data file D12h-3\_3.mgf

Click mouse within plot area to zoom in by factor of two about that point

Or,   to  Da

Label all possible matches  Label matches used for scoring

Show Y-axis

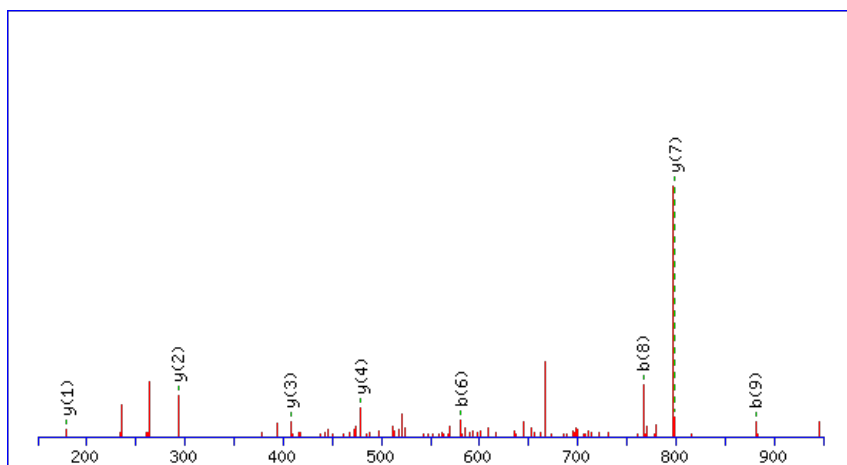

Monoisotopic mass of neutral peptide **Mr(calc)**: 1058.5465

**Fixed modifications**: Carbamidomethyl (C) (apply to specified residues or termini only)

**Ions Score**: 24 **Expect**: 0.038

**Matches**: 8/72 fragment ions using 23 most intense peaks ([help](#))

| #  | b               | b <sup>++</sup> | b*       | b <sup>*++</sup> | Seq.     | y               | y <sup>++</sup> | y*       | y <sup>*++</sup> | #         |
|----|-----------------|-----------------|----------|------------------|----------|-----------------|-----------------|----------|------------------|-----------|
| 1  | 131.0963        | 66.0518         | 113.0727 | 57.0400          | <b>K</b> |                 |                 |          |                  | <b>10</b> |
| 2  | 203.1305        | 102.0689        | 185.1069 | 93.0571          | <b>A</b> | 929.4648        | 465.2360        | 911.4412 | 456.2242         | <b>9</b>  |
| 3  | 261.1490        | 131.0781        | 243.1254 | 122.0663         | <b>G</b> | 857.4306        | 429.2189        | 839.4070 | 420.2071         | <b>8</b>  |
| 4  | 333.1831        | 167.0952        | 315.1595 | 158.0834         | <b>A</b> | <b>799.4121</b> | 400.2097        | 781.3885 | 391.1979         | <b>7</b>  |
| 5  | 465.2206        | 233.1140        | 447.1970 | 224.1022         | <b>M</b> | 727.3780        | 364.1926        | 709.3544 | 355.1808         | <b>6</b>  |
| 6  | <b>581.2576</b> | 291.1324        | 563.2340 | 282.1207         | <b>N</b> | 595.3404        | 298.1739        | 577.3169 | 289.1621         | <b>5</b>  |
| 7  | 653.2918        | 327.1495        | 635.2682 | 318.1377         | <b>A</b> | <b>479.3034</b> | 240.1554        | 461.2799 | 231.1436         | <b>4</b>  |
| 8  | <b>767.3729</b> | 384.1901        | 749.3493 | 375.1783         | <b>L</b> | <b>407.2693</b> | 204.1383        | 389.2457 | 195.1265         | <b>3</b>  |
| 9  | <b>881.4540</b> | 441.2306        | 863.4304 | 432.2188         | <b>I</b> | <b>293.1882</b> | 147.0977        | 275.1646 | 138.0859         | <b>2</b>  |
| 10 |                 |                 |          |                  | <b>R</b> | <b>179.1071</b> | 90.0572         | 161.0835 | 81.0454          | <b>1</b>  |

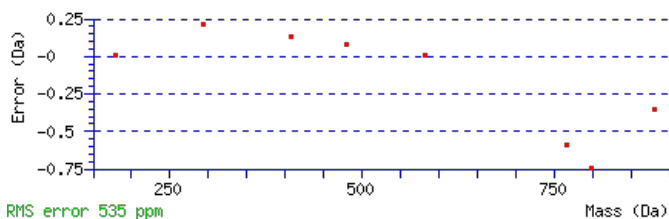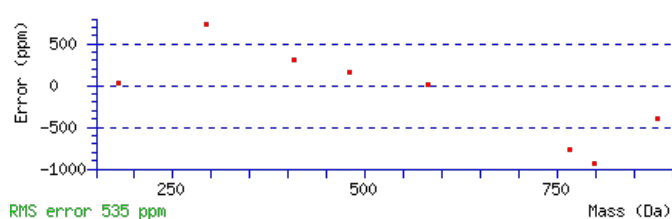NCBI **BLAST** search of **KAGAMNALIR**

(Parameters: blastp, nr protein database, expect=20000, no filter, PAM30)

Other BLAST [web gateways](#)

**All matches to this query**

## AT4G32410.1

| Score | Mr(calc)  | Delta   | Sequence                   |
|-------|-----------|---------|----------------------------|
| 23.6  | 1058.5465 | -0.0009 | <a href="#">KAGAMNALIR</a> |
| 17.2  | 1058.5438 | 0.0018  | <a href="#">LGTVMELLR</a>  |
| 16.5  | 1058.5465 | -0.0008 | <a href="#">EMRLVGALR</a>  |
| 16.5  | 1058.5438 | 0.0018  | <a href="#">KCLGLESIK</a>  |
| 16.3  | 1058.5438 | 0.0018  | <a href="#">MEQGTIKIK</a>  |
| 15.3  | 1058.5465 | -0.0008 | <a href="#">LRMALDVAR</a>  |
| 13.9  | 1058.5431 | 0.0025  | <a href="#">WASKGINIR</a>  |
| 13.8  | 1058.5465 | -0.0008 | <a href="#">MOKPKVGTR</a>  |
| 12.0  | 1058.5438 | 0.0018  | <a href="#">KEMEAAKIK</a>  |
| 10.7  | 1058.5438 | 0.0018  | <a href="#">LMAQNLLTK</a>  |

Mascot: <http://www.matrixscience.com/>

**Peptide View**MS/MS Fragmentation of **GYLQDMLALVER**

Found in **AT4G32470.1** in **TAIR\_Arabidopsis**, Symbols: | ubiquinol-cytochrome C reductase complex 14 kDa protein, putative | chr4:15669647-15671101 REVERSE

Match to Query 5466: 1422.676402 from(712.345477,2+) index(10686)

Title: Elution from: 108.159 to 108.159 scan no 15568 cid35.00 polarity:+

Data file 0-3\_2.mgf

Click mouse within plot area to zoom in by factor of two about that point

Or,   to  Da

Label all possible matches  Label matches used for scoring

Show Y-axis

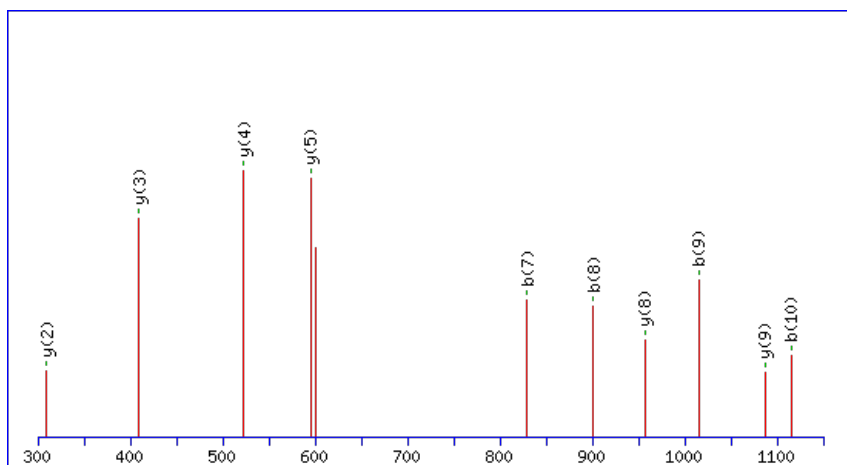

Monoisotopic mass of neutral peptide  $M_r(\text{calc})$ : 1422.6753

**Fixed modifications:** Carbamidomethyl (C) (apply to specified residues or termini only)

**Ions Score:** 61 **Expect:** 8.7e-006

**Matches:** 10/116 fragment ions using 10 most intense peaks ([help](#))

| #  | b                | b <sup>++</sup> | b*        | b <sup>*++</sup> | b <sup>0</sup> | b <sup>0++</sup> | Seq.     | y                | y <sup>++</sup> | y*        | y <sup>*++</sup> | y <sup>0</sup> | y <sup>0++</sup> | #  |
|----|------------------|-----------------|-----------|------------------|----------------|------------------|----------|------------------|-----------------|-----------|------------------|----------------|------------------|----|
| 1  | 59.0258          | 30.0165         |           |                  |                |                  | <b>G</b> |                  |                 |           |                  |                |                  | 12 |
| 2  | 223.0861         | 112.0467        |           |                  |                |                  | <b>Y</b> | 1365.6641        | 683.3357        | 1347.6405 | 674.3239         | 1347.6536      | 674.3304         | 11 |
| 3  | 337.1672         | 169.0873        |           |                  |                |                  | <b>L</b> | 1201.6038        | 601.3055        | 1183.5802 | 592.2937         | 1183.5932      | 592.3002         | 10 |
| 4  | 467.2199         | 234.1136        | 449.1963  | 225.1018         |                |                  | <b>Q</b> | <b>1087.5227</b> | 544.2650        | 1069.4991 | 535.2532         | 1069.5121      | 535.2597         | 9  |
| 5  | 583.2439         | 292.1256        | 565.2203  | 283.1138         | 565.2333       | 283.1203         | <b>D</b> | <b>957.4700</b>  | 479.2386        | 939.4464  | 470.2269         | 939.4594       | 470.2334         | 8  |
| 6  | 715.2814         | 358.1443        | 697.2578  | 349.1325         | 697.2708       | 349.1390         | <b>M</b> | 841.4460         | 421.2267        | 823.4225  | 412.2149         | 823.4355       | 412.2214         | 7  |
| 7  | <b>829.3625</b>  | 415.1849        | 811.3389  | 406.1731         | 811.3519       | 406.1796         | <b>L</b> | 709.4085         | 355.2079        | 691.3849  | 346.1961         | 691.3980       | 346.2026         | 6  |
| 8  | <b>901.3966</b>  | 451.2020        | 883.3730  | 442.1902         | 883.3861       | 442.1967         | <b>A</b> | <b>595.3274</b>  | 298.1673        | 577.3038  | 289.1556         | 577.3169       | 289.1621         | 5  |
| 9  | <b>1015.4777</b> | 508.2425        | 997.4541  | 499.2307         | 997.4672       | 499.2372         | <b>L</b> | <b>523.2933</b>  | 262.1503        | 505.2697  | 253.1385         | 505.2827       | 253.1450         | 4  |
| 10 | <b>1115.5432</b> | 558.2752        | 1097.5196 | 549.2634         | 1097.5326      | 549.2699         | <b>V</b> | <b>409.2122</b>  | 205.1097        | 391.1886  | 196.0979         | 391.2016       | 196.1044         | 3  |
| 11 | 1245.5828        | 623.2950        | 1227.5592 | 614.2832         | 1227.5722      | 614.2898         | <b>E</b> | <b>309.1467</b>  | 155.0770        | 291.1231  | 146.0652         | 291.1362       | 146.0717         | 2  |
| 12 |                  |                 |           |                  |                |                  | <b>R</b> | 179.1071         | 90.0572         | 161.0835  | 81.0454          |                |                  | 1  |

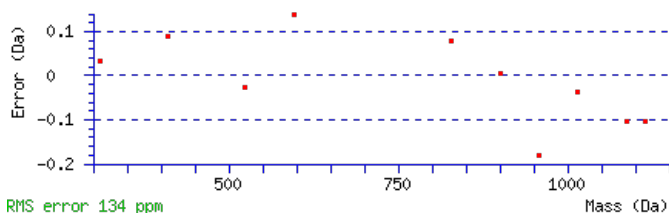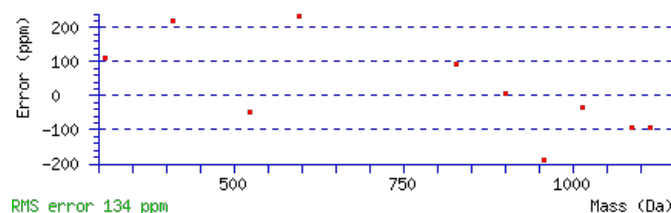

NCBI **BLAST** search of **GYLQDMLALVER**

(Parameters: blastp, nr protein database, expect=20000, no filter, PAM30)

Other BLAST [web gateways](#)



**AT4G32470.1**

All matches to this query

| Score | Mr(calc)  | Delta   | Sequence                      |
|-------|-----------|---------|-------------------------------|
| 61.1  | 1422.6753 | 0.0011  | <a href="#">GYLQDMLALVER</a>  |
| 17.7  | 1422.6724 | 0.0040  | <a href="#">NFEQQNQIVKR</a>   |
| 11.5  | 1422.6753 | 0.0011  | <a href="#">KPGSDYILMVER</a>  |
| 5.9   | 1422.6747 | 0.0018  | <a href="#">SYDKLHFNPRK</a>   |
| 5.9   | 1422.6805 | -0.0041 | <a href="#">DSELSLSRVKR</a>   |
| 5.9   | 1422.6758 | 0.0007  | <a href="#">ECREKVTVVAGR</a>  |
| 5.9   | 1422.6758 | 0.0007  | <a href="#">TAICDRVADVKR</a>  |
| 5.2   | 1422.6787 | -0.0023 | <a href="#">MATAVVMNGELKK</a> |
| 5.0   | 1422.6758 | 0.0006  | <a href="#">AGEMRDAAIVRAK</a> |
| 5.0   | 1422.6758 | 0.0006  | <a href="#">MQELSREKINR</a>   |

Mascot: <http://www.matrixscience.com/>

**Peptide View**MS/MS Fragmentation of **VCLSVKEK**Found in **AT4G32560.1** in **TAIR\_Arabidopsis**, Symbols: | paramyosin-related | chr4:15713872-15716041 FORWARD

Match to Query 2150: 972.494058 from(487.254305,2+) index(5657)

Title: Elution from: 50.174 to 50.174 scan no 7189 cid35.00 polarity:+

Data file D12h-1\_3.mgf

Click mouse within plot area to zoom in by factor of two about that point

Or,   to  Da Label all possible matches  Label matches used for scoring Show Y-axis 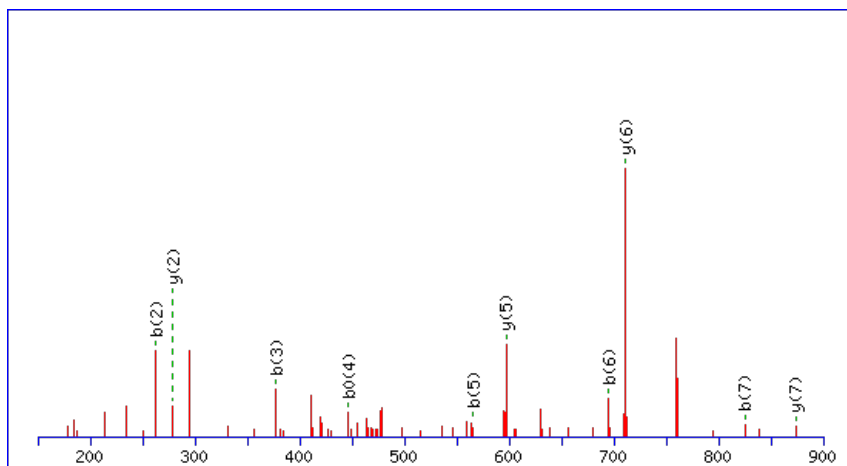Monoisotopic mass of neutral peptide **Mr(calc)**: 972.4940**Fixed modifications**: Carbamidomethyl (C) (apply to specified residues or termini only)**Ions Score**: 25 **Expect**: 0.027**Matches** : 10/66 fragment ions using 28 most intense peaks ([help](#))

| # | b               | b <sup>++</sup> | b*       | b <sup>*++</sup> | b <sup>0</sup> | b <sup>0++</sup> | Seq. | y               | y <sup>++</sup> | y*       | y <sup>*++</sup> | y <sup>0</sup> | y <sup>0++</sup> | # |
|---|-----------------|-----------------|----------|------------------|----------------|------------------|------|-----------------|-----------------|----------|------------------|----------------|------------------|---|
| 1 | 101.0727        | 51.0400         |          |                  |                |                  | V    |                 |                 |          |                  |                |                  | 8 |
| 2 | <b>263.0974</b> | 132.0524        |          |                  |                |                  | C    | <b>873.4359</b> | 437.2216        | 855.4123 | 428.2098         | 855.4253       | 428.2163         | 7 |
| 3 | <b>377.1785</b> | 189.0929        |          |                  |                |                  | L    | <b>711.4111</b> | 356.2092        | 693.3876 | 347.1974         | 693.4006       | 347.2039         | 6 |
| 4 | 465.2076        | 233.1074        |          |                  | 447.1970       | 224.1022         | S    | <b>597.3300</b> | 299.1687        | 579.3065 | 290.1569         | 579.3195       | 290.1634         | 5 |
| 5 | <b>565.2731</b> | 283.1402        |          |                  | 547.2625       | 274.1349         | V    | 509.3010        | 255.1541        | 491.2774 | 246.1423         | 491.2904       | 246.1488         | 4 |
| 6 | <b>695.3621</b> | 348.1847        | 677.3385 | 339.1729         | 677.3515       | 339.1794         | K    | 409.2355        | 205.1214        | 391.2120 | 196.1096         | 391.2250       | 196.1161         | 3 |
| 7 | <b>825.4017</b> | 413.2045        | 807.3781 | 404.1927         | 807.3911       | 404.1992         | E    | <b>279.1465</b> | 140.0769        | 261.1229 | 131.0651         | 261.1359       | 131.0716         | 2 |
| 8 |                 |                 |          |                  |                |                  | K    | 149.1069        | 75.0571         | 131.0833 | 66.0453          |                |                  | 1 |

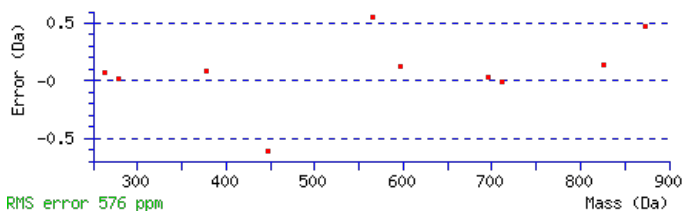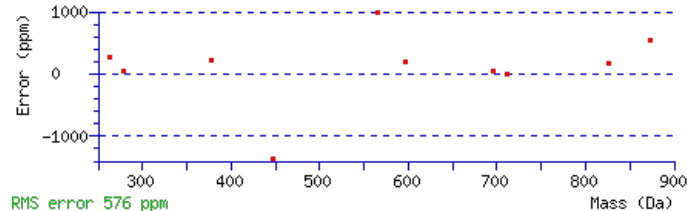NCBI **BLAST** search of [VCLSVKEK](#)

(Parameters: blastp, nr protein database, expect=20000, no filter, PAM30)

Other BLAST [web gateways](#)**All matches to this query**

| Score | Mr(calc) | Delta  | Sequence                 |
|-------|----------|--------|--------------------------|
| 25.0  | 972.4940 | 0.0000 | <a href="#">VCLSVKEK</a> |
| 20.2  | 972.4940 | 0.0000 | <a href="#">MKLNESIK</a> |

**AT4G32560.1**

|      |          |         |                           |
|------|----------|---------|---------------------------|
| 14.9 | 972.4940 | 0.0000  | <a href="#">MGSGEKILK</a> |
| 14.9 | 972.4940 | 0.0000  | <a href="#">QMAKDLIK</a>  |
| 13.8 | 972.4940 | 0.0000  | <a href="#">VLQTMVQK</a>  |
| 12.0 | 972.4940 | 0.0000  | <a href="#">KMTVQDLK</a>  |
| 10.4 | 972.4963 | -0.0022 | <a href="#">NMTIPFLK</a>  |
| 10.3 | 972.4940 | 0.0000  | <a href="#">MKVDTKPK</a>  |
| 9.6  | 972.4940 | 0.0000  | <a href="#">MTVLVEVR</a>  |
| 7.6  | 972.4940 | 0.0000  | <a href="#">QSASVVMIK</a> |

**Mascot:** <http://www.matrixscience.com/>

## Peptide View

### MS/MS Fragmentation of **EEIAQIEK**

Found in **AT4G33010.1** in **TAIR\_Arabidopsis**, Symbols: ATGLDP1 | ATGLDP1 (ARABIDOPSIS THALIANA GLYCINE DECARBOXYLASE P-PROTEIN 1); glycine dehydrogenase (decarboxylating) | chr4:15926855-15931153 REVERSE

Match to Query 2132: 968.467472 from(485.241012,2+) index(1478)

Title: Elution from: 19.862 to 19.862 scan no 1977 cid35.00 polarity:+

Data file 0-3\_2.mgf

Click mouse within plot area to zoom in by factor of two about that point

Or,  to  Da

Label all possible matches  Label matches used for scoring

Show Y-axis

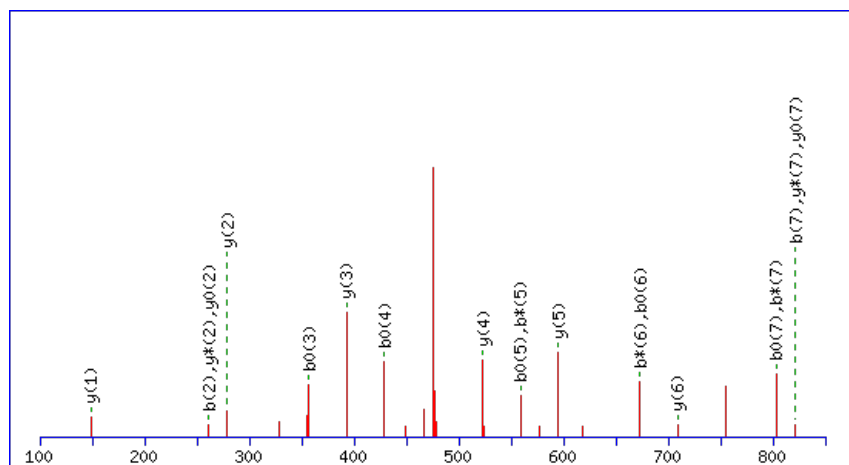

Monoisotopic mass of neutral peptide  $M_r(\text{calc})$ : 968.4675

Fixed modifications: Carbamidomethyl (C) (apply to specified residues or termini only)

Ions Score: 55 Expect: 2e-005

Matches : 20/74 fragment ions using 18 most intense peaks ([help](#))

| # | b               | b <sup>++</sup> | b*              | b <sup>*++</sup> | b <sup>0</sup>  | b <sup>0++</sup> | Seq. | y               | y <sup>++</sup> | y*              | y <sup>*++</sup> | y <sup>0</sup>  | y <sup>0++</sup> | # |
|---|-----------------|-----------------|-----------------|------------------|-----------------|------------------|------|-----------------|-----------------|-----------------|------------------|-----------------|------------------|---|
| 1 | 131.0469        | 66.0271         |                 |                  | 113.0363        | 57.0218          | E    |                 |                 |                 |                  |                 |                  | 8 |
| 2 | <b>261.0865</b> | 131.0469        |                 |                  | 243.0760        | 122.0416         | E    | 839.4351        | 420.2212        | <b>821.4115</b> | 411.2094         | <b>821.4246</b> | 411.2159         | 7 |
| 3 | 375.1676        | 188.0875        |                 |                  | <b>357.1571</b> | 179.0822         | I    | <b>709.3955</b> | 355.2014        | 691.3719        | 346.1896         | 691.3849        | 346.1961         | 6 |
| 4 | 447.2018        | 224.1045        |                 |                  | <b>429.1912</b> | 215.0992         | A    | <b>595.3144</b> | 298.1608        | 577.2908        | 289.1490         | 577.3038        | 289.1556         | 5 |
| 5 | 577.2544        | 289.1309        | <b>559.2308</b> | 280.1191         | <b>559.2439</b> | 280.1256         | Q    | <b>523.2802</b> | 262.1438        | 505.2567        | 253.1320         | 505.2697        | 253.1385         | 4 |
| 6 | 691.3355        | 346.1714        | <b>673.3119</b> | 337.1596         | <b>673.3250</b> | 337.1661         | I    | <b>393.2276</b> | 197.1174        | 375.2040        | 188.1056         | 375.2170        | 188.1122         | 3 |
| 7 | <b>821.3752</b> | 411.1912        | <b>803.3516</b> | 402.1794         | <b>803.3646</b> | 402.1859         | E    | <b>279.1465</b> | 140.0769        | <b>261.1229</b> | 131.0651         | <b>261.1359</b> | 131.0716         | 2 |
| 8 |                 |                 |                 |                  |                 |                  | K    | <b>149.1069</b> | 75.0571         | 131.0833        | 66.0453          |                 |                  | 1 |

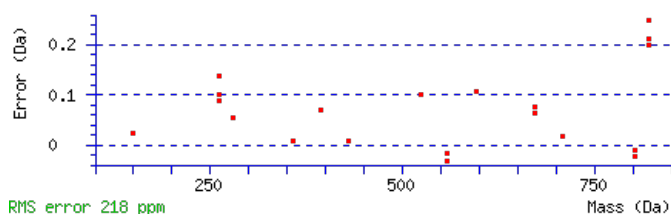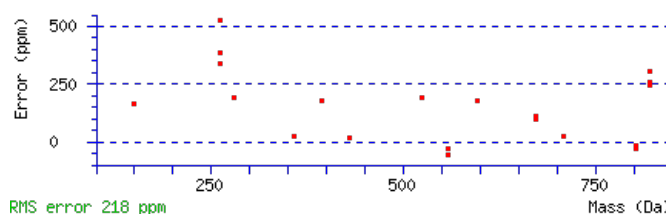

NCBI BLAST search of [EEIAQIEK](#)

(Parameters: blastp, nr protein database, expect=20000, no filter, PAM30)

Other BLAST [web gateways](#)

All matches to this query

| Score | $M_r(\text{calc})$ | Delta  | Sequence                 |
|-------|--------------------|--------|--------------------------|
| 55.4  | 968.4675           | 0.0000 | <a href="#">EEIAQIEK</a> |

**AT4G33010.1**

|      |          |         |                           |
|------|----------|---------|---------------------------|
| 34.7 | 968.4675 | 0.0000  | <a href="#">DLAAAEIEK</a> |
| 33.9 | 968.4672 | 0.0003  | <a href="#">FMFQLFK</a>   |
| 23.3 | 968.4675 | 0.0000  | <a href="#">DIDVQIEK</a>  |
| 17.2 | 968.4675 | -0.0000 | <a href="#">APSDSLELK</a> |
| 17.2 | 968.4650 | 0.0025  | <a href="#">FKKMDYK</a>   |
| 17.2 | 968.4675 | 0.0000  | <a href="#">EAQELLEK</a>  |
| 17.2 | 968.4701 | -0.0027 | <a href="#">SQQQPLOK</a>  |
| 17.2 | 968.4675 | 0.0000  | <a href="#">VEVQDLEK</a>  |
| 17.1 | 968.4650 | 0.0025  | <a href="#">MYIYNKK</a>   |

**Mascot:** <http://www.matrixscience.com/>

**Peptide View**MS/MS Fragmentation of **ELLEWGSR**Found in **AT4G33070.1** in **TAIR\_Arabidopsis**, Symbols: | pyruvate decarboxylase, putative | chr4:15952522-15954679 REVERSE

Match to Query 2318: 988.496314 from(495.255433,2+) index(5365)

Title: Elution from: 48.504 to 48.504 scan no 6798 cid35.00 polarity:+

Data file D6h-1\_2.mgf

Click mouse within plot area to zoom in by factor of two about that point

Or,   to  Da Label all possible matches  Label matches used for scoring Show Y-axis 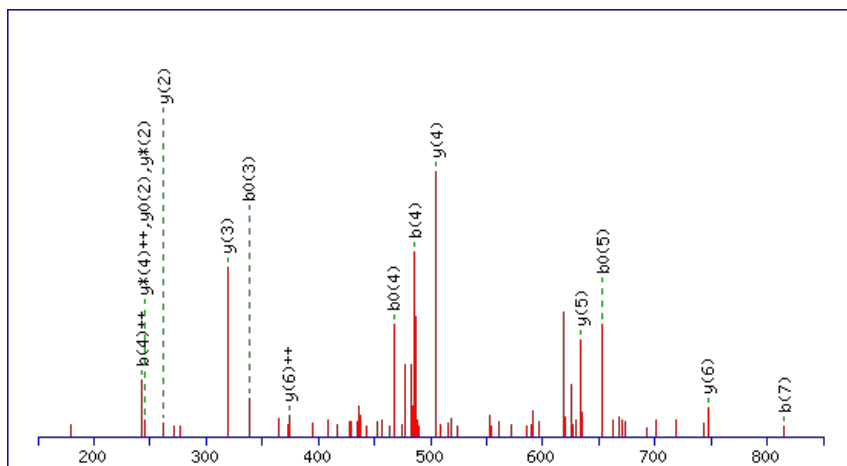Monoisotopic mass of neutral peptide **Mr(calc)**: 988.4978

Fixed modifications: Carbamidomethyl (C) (apply to specified residues or termini only)

Ions Score: 38 Expect: 0.001

Matches : 16/68 fragment ions using 19 most intense peaks ([help](#))

| # | b               | b <sup>++</sup> | b <sup>0</sup>  | b <sup>0++</sup> | Seq. | y               | y <sup>++</sup> | y*              | y <sup>*++</sup> | y <sup>0</sup>  | y <sup>0++</sup> | # |
|---|-----------------|-----------------|-----------------|------------------|------|-----------------|-----------------|-----------------|------------------|-----------------|------------------|---|
| 1 | 130.0499        | 65.5286         | 112.0393        | 56.5233          | E    |                 |                 |                 |                  |                 |                  | 8 |
| 2 | <b>243.1339</b> | 122.0706        | 225.1234        | 113.0653         | L    | 860.4625        | 430.7349        | 843.4359        | 422.2216         | 842.4519        | 421.7296         | 7 |
| 3 | 356.2180        | 178.6126        | <b>338.2074</b> | 169.6074         | L    | <b>747.3784</b> | <b>374.1928</b> | 730.3519        | 365.6796         | 729.3678        | 365.1876         | 6 |
| 4 | <b>485.2606</b> | <b>243.1339</b> | <b>467.2500</b> | 234.1287         | E    | <b>634.2944</b> | 317.6508        | 617.2678        | 309.1375         | 616.2838        | 308.6455         | 5 |
| 5 | 671.3399        | 336.1736        | <b>653.3293</b> | 327.1683         | W    | <b>505.2518</b> | 253.1295        | 488.2252        | <b>244.6162</b>  | 487.2412        | 244.1242         | 4 |
| 6 | 728.3614        | 364.6843        | 710.3508        | 355.6790         | G    | <b>319.1724</b> | 160.0899        | 302.1459        | 151.5766         | 301.1619        | 151.0846         | 3 |
| 7 | <b>815.3934</b> | 408.2003        | 797.3828        | 399.1951         | S    | <b>262.1510</b> | 131.5791        | <b>245.1244</b> | 123.0659         | <b>244.1404</b> | 122.5738         | 2 |
| 8 |                 |                 |                 |                  | R    | 175.1190        | 88.0631         | 158.0924        | 79.5498          |                 |                  | 1 |

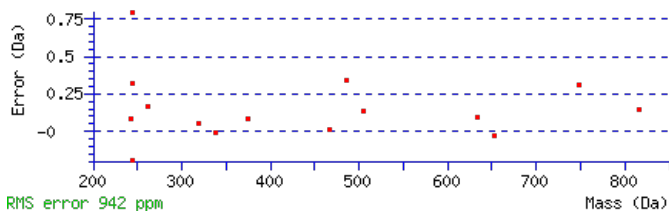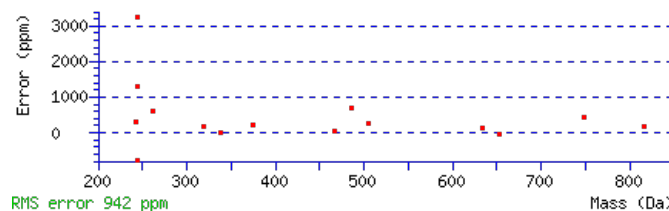NCBI **BLAST** search of [ELLEWGSR](#)

(Parameters: blastp, nr protein database, expect=20000, no filter, PAM30)

Other BLAST [web gateways](#)**All matches to this query**

| Score | Mr(calc) | Delta   | Sequence                  |
|-------|----------|---------|---------------------------|
| 37.6  | 988.4978 | -0.0015 | <a href="#">ELLEWGSR</a>  |
| 6.2   | 988.4978 | -0.0015 | <a href="#">EIGVPGFDR</a> |

# AT4G33070.1

|     |          |         |                             |
|-----|----------|---------|-----------------------------|
| 3.9 | 988.4978 | -0.0015 | <a href="#">AWEVDTLR</a>    |
| 0.3 | 988.4938 | 0.0025  | <a href="#">GKGNGSGVDAK</a> |

**Mascot:** <http://www.matrixscience.com/>

**Peptide View**MS/MS Fragmentation of **LGFNGLNDK**

Found in **AT4G33090.1** in **TAIR\_Arabidopsis**, Symbols: APM1, ATAPM1 | APM1 (AMINOPEPTIDASE M1) | chr4:15965918-15970421  
REVERSE

Match to Query 3334: 1075.565450 from(538.790001,2+) index(5560)

Title: Elution from: 49.240 to 49.240 scan no 6884 cid35.00 polarity:+

Data file 0-1\_1.mgf

Click mouse within plot area to zoom in by factor of two about that point

Or,   to  Da

Label all possible matches  Label matches used for scoring

Show Y-axis

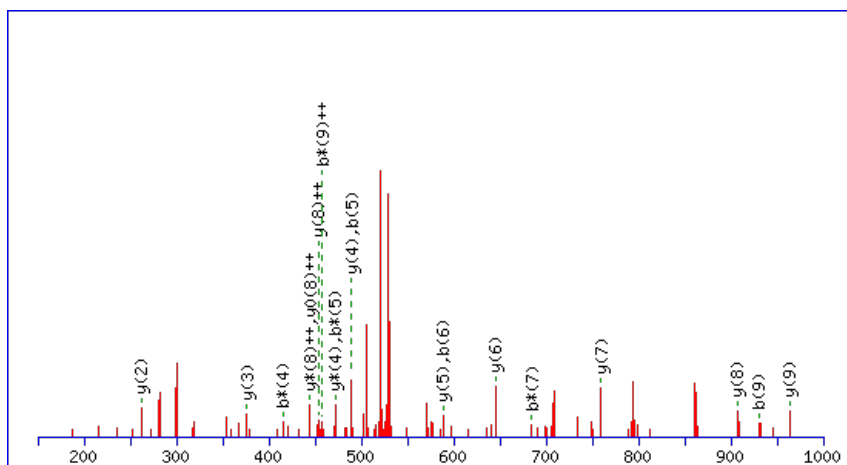

**Monoisotopic mass of neutral peptide Mr(calc):** 1075.5662

**Fixed modifications:** Carbamidomethyl (C) (apply to specified residues or termini only)

**Ions Score:** 45 **Expect:** 8.7e-005

**Matches:** 19/84 fragment ions using 40 most intense peaks ([help](#))

| #  | b        | b <sup>++</sup> | b*       | b <sup>*++</sup> | b <sup>0</sup> | b <sup>0++</sup> | Seq. | y        | y <sup>++</sup> | y*       | y <sup>*++</sup> | y <sup>0</sup> | y <sup>0++</sup> | #  |
|----|----------|-----------------|----------|------------------|----------------|------------------|------|----------|-----------------|----------|------------------|----------------|------------------|----|
| 1  | 114.0913 | 57.5493         |          |                  |                |                  | L    |          |                 |          |                  |                |                  | 10 |
| 2  | 171.1128 | 86.0600         |          |                  |                |                  | G    | 963.4894 | 482.2483        | 946.4629 | 473.7351         | 945.4789       | 473.2431         | 9  |
| 3  | 318.1812 | 159.5942        |          |                  |                |                  | F    | 906.4680 | 453.7376        | 889.4414 | 445.2243         | 888.4574       | 444.7323         | 8  |
| 4  | 432.2241 | 216.6157        | 415.1976 | 208.1024         |                |                  | N    | 759.3995 | 380.2034        | 742.3730 | 371.6901         | 741.3890       | 371.1981         | 7  |
| 5  | 489.2456 | 245.1264        | 472.2191 | 236.6132         |                |                  | G    | 645.3566 | 323.1819        | 628.3301 | 314.6687         | 627.3461       | 314.1767         | 6  |
| 6  | 588.3140 | 294.6606        | 571.2875 | 286.1474         |                |                  | V    | 588.3352 | 294.6712        | 571.3086 | 286.1579         | 570.3246       | 285.6659         | 5  |
| 7  | 701.3981 | 351.2027        | 684.3715 | 342.6894         |                |                  | L    | 489.2667 | 245.1370        | 472.2402 | 236.6237         | 471.2562       | 236.1317         | 4  |
| 8  | 815.4410 | 408.2241        | 798.4145 | 399.7109         |                |                  | N    | 376.1827 | 188.5950        | 359.1561 | 180.0817         | 358.1721       | 179.5897         | 3  |
| 9  | 930.4680 | 465.7376        | 913.4414 | 457.2243         | 912.4574       | 456.7323         | D    | 262.1397 | 131.5735        | 245.1132 | 123.0602         | 244.1292       | 122.5682         | 2  |
| 10 |          |                 |          |                  |                |                  | K    | 147.1128 | 74.0600         | 130.0863 | 65.5468          |                |                  | 1  |

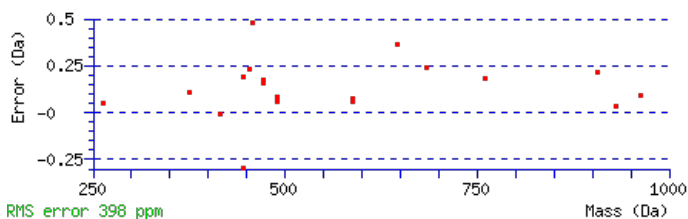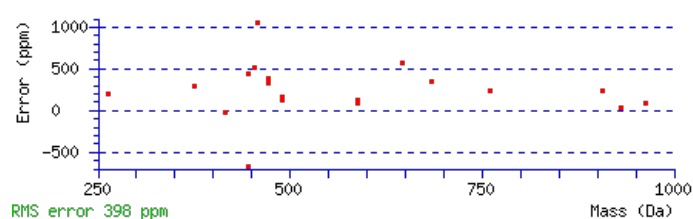NCBI BLAST search of **LGFNGLNDK**

(Parameters: blastp, nr protein database, expect=20000, no filter, PAM30)

Other BLAST [web gateways](#)

All matches to this query



**AT4G33090.1**

| <b>Score</b> | <b>Mr(calc)</b> | <b>Delta</b> | <b>Sequence</b>            |
|--------------|-----------------|--------------|----------------------------|
| 45.1         | 1075.5662       | -0.0008      | <a href="#">LGFNGVLNDK</a> |
| 5.4          | 1075.5662       | -0.0007      | <a href="#">LANAANFIDK</a> |
| 3.6          | 1075.5662       | -0.0007      | <a href="#">LESKFNGGPK</a> |
| 3.1          | 1075.5669       | -0.0014      | <a href="#">QRRMISNR</a>   |
| 3.1          | 1075.5669       | -0.0014      | <a href="#">QRRMLSNR</a>   |

**Mascot:** <http://www.matrixscience.com/>

**Peptide View**MS/MS Fragmentation of **LQQQLQEEINLR**

Found in **AT4G33130.1** in **TAIR\_Arabidopsis**, Symbols: | similar to unknown protein [Arabidopsis thaliana] (TAIR:AT3G13000.2); similar to transcription factor [Arabidopsis thaliana] (TAIR:AT3G13000.1); similar to unnamed protein product [Vitis vinifera] (GB:CAO65161.1) | chr4:15979440-1598065

Match to Query 6775: 1530.747114 from(766.380833,2+) index(7385)

Title: Elution from: 65.649 to 65.649 scan no 9605 cid35.00 polarity:+

Data file D12h-3\_1.mgf

Click mouse within plot area to zoom in by factor of two about that point

Or,   to  Da

Label all possible matches  Label matches used for scoring

Show Y-axis

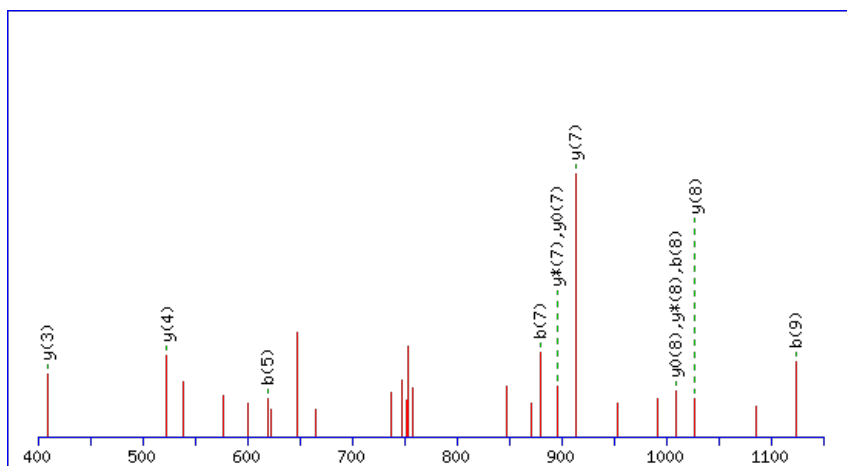

**Monoisotopic mass of neutral peptide Mr(calc)**: 1530.7510

**Fixed modifications**: Carbamidomethyl (C) (apply to specified residues or termini only)

**Ions Score**: 29 **Expect**: 0.0085

**Matches**: 12/110 fragment ions using 14 most intense peaks ([help](#))

| #  | b                | b <sup>++</sup> | b*        | b <sup>*++</sup> | b <sup>0</sup> | b <sup>0++</sup> | Seq. | y                | y <sup>++</sup> | y*               | y <sup>*++</sup> | y <sup>0</sup>   | y <sup>0++</sup> | #  |
|----|------------------|-----------------|-----------|------------------|----------------|------------------|------|------------------|-----------------|------------------|------------------|------------------|------------------|----|
| 1  | 115.0884         | 58.0478         |           |                  |                |                  | L    |                  |                 |                  |                  |                  |                  | 12 |
| 2  | 245.1410         | 123.0741        | 227.1174  | 114.0624         |                |                  | Q    | 1417.6772        | 709.3423        | 1399.6536        | 700.3305         | 1399.6667        | 700.3370         | 11 |
| 3  | 375.1937         | 188.1005        | 357.1701  | 179.0887         |                |                  | Q    | 1287.6246        | 644.3159        | 1269.6010        | 635.3041         | 1269.6140        | 635.3106         | 10 |
| 4  | 505.2463         | 253.1268        | 487.2227  | 244.1150         |                |                  | Q    | 1157.5719        | 579.2896        | 1139.5484        | 570.2778         | 1139.5614        | 570.2843         | 9  |
| 5  | <b>619.3274</b>  | 310.1673        | 601.3038  | 301.1556         |                |                  | L    | <b>1027.5193</b> | 514.2633        | <b>1009.4957</b> | 505.2515         | <b>1009.5087</b> | 505.2580         | 8  |
| 6  | 749.3801         | 375.1937        | 731.3565  | 366.1819         |                |                  | Q    | <b>913.4382</b>  | 457.2227        | <b>895.4146</b>  | 448.2109         | <b>895.4276</b>  | 448.2175         | 7  |
| 7  | <b>879.4197</b>  | 440.2135        | 861.3961  | 431.2017         | 861.4091       | 431.2082         | E    | 783.3855         | 392.1964        | 765.3620         | 383.1846         | 765.3750         | 383.1911         | 6  |
| 8  | <b>1009.4593</b> | 505.2333        | 991.4357  | 496.2215         | 991.4488       | 496.2280         | E    | 653.3459         | 327.1766        | 635.3223         | 318.1648         | 635.3353         | 318.1713         | 5  |
| 9  | <b>1123.5404</b> | 562.2738        | 1105.5168 | 553.2621         | 1105.5299      | 553.2686         | I    | <b>523.3063</b>  | 262.1568        | 505.2827         | 253.1450         |                  |                  | 4  |
| 10 | 1239.5774        | 620.2923        | 1221.5538 | 611.2806         | 1221.5668      | 611.2871         | N    | <b>409.2252</b>  | 205.1162        | 391.2016         | 196.1044         |                  |                  | 3  |
| 11 | 1353.6585        | 677.3329        | 1335.6349 | 668.3211         | 1335.6479      | 668.3276         | L    | 293.1882         | 147.0977        | 275.1646         | 138.0859         |                  |                  | 2  |
| 12 |                  |                 |           |                  |                |                  | R    | 179.1071         | 90.0572         | 161.0835         | 81.0454          |                  |                  | 1  |

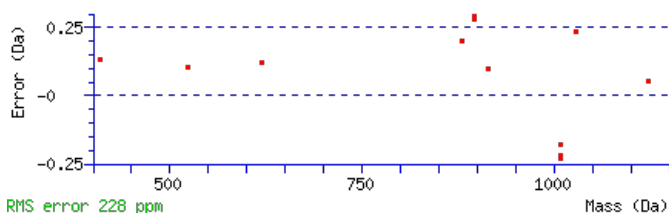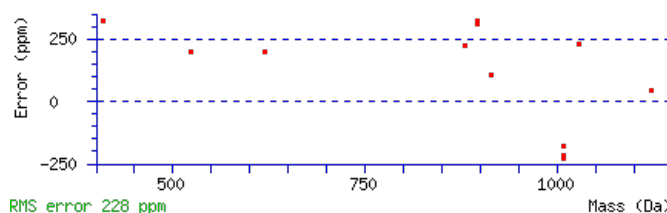NCBI BLAST search of **LQQQLQEEINLR**

(Parameters: blastp, nr protein database, expect=20000, no filter, PAM30)

Other BLAST [web gateways](#)

# AT4G33130.1

All matches to this query

| Score | Mr(calc)  | Delta   | Sequence                      |
|-------|-----------|---------|-------------------------------|
| 28.8  | 1530.7510 | -0.0039 | <a href="#">LQQQLQEEINLR</a>  |
| 7.2   | 1530.7459 | 0.0012  | <a href="#">AYSKYLCPVSKAK</a> |
| 5.6   | 1530.7436 | 0.0035  | <a href="#">GDILEIMDPNLRK</a> |
| 1.1   | 1530.7463 | 0.0008  | <a href="#">DGKTPLVATMRGK</a> |
| 0.2   | 1530.7510 | -0.0039 | <a href="#">VDTTTEHRLLOAK</a> |

Mascot: <http://www.matrixscience.com/>

**Peptide View**MS/MS Fragmentation of **SVLAEAVNMDGASLDK**Found in **AT4G33250.1** in **TAIR\_Arabidopsis**, Symbols: TIF3K1, ATTIF3K1, EIF3K | EIF3K (eukaryotic translation initiation factor 3K) | chr4:16039070-16040621 REVERSE

Match to Query 7342: 1618.785434 from(810.399993,2+) index(6709)

Title: Elution from: 59.841 to 59.841 scan no 8693 cid35.00 polarity:+

Data file D6h-1\_2.mgf

Click mouse within plot area to zoom in by factor of two about that point

Or,   to  Da Label all possible matches  Label matches used for scoring Show Y-axis 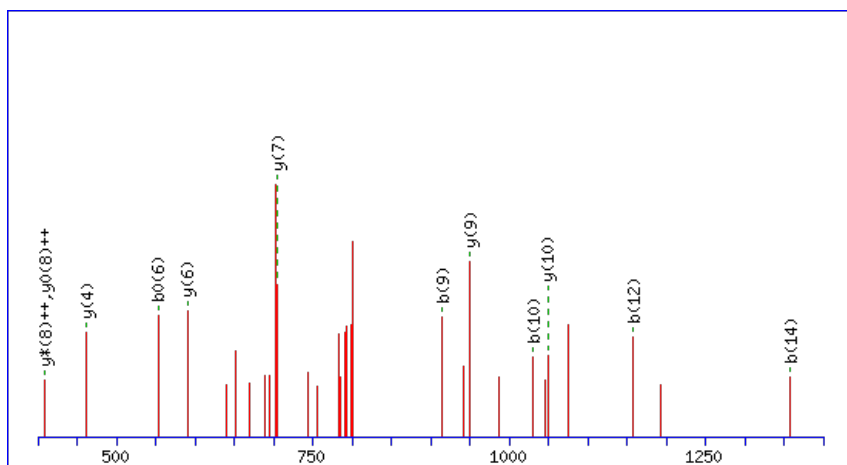Monoisotopic mass of neutral peptide  $M_r(\text{calc})$ : 1618.7872

Fixed modifications: Carbamidomethyl (C) (apply to specified residues or termini only)

Ions Score: 30 Expect: 0.0038

Matches : 12/164 fragment ions using 19 most intense peaks ([help](#))

| #  | b         | b <sup>++</sup> | b <sup>*</sup> | b <sup>*++</sup> | b <sup>0</sup> | b <sup>0++</sup> | Seq. | y         | y <sup>++</sup> | y <sup>*</sup> | y <sup>*++</sup> | y <sup>0</sup> | y <sup>0++</sup> | #  |
|----|-----------|-----------------|----------------|------------------|----------------|------------------|------|-----------|-----------------|----------------|------------------|----------------|------------------|----|
| 1  | 88.0393   | 44.5233         |                |                  | 70.0287        | 35.5180          | S    |           |                 |                |                  |                |                  | 16 |
| 2  | 187.1077  | 94.0575         |                |                  | 169.0972       | 85.0522          | V    | 1532.7625 | 766.8849        | 1515.7359      | 758.3716         | 1514.7519      | 757.8796         | 15 |
| 3  | 300.1918  | 150.5995        |                |                  | 282.1812       | 141.5942         | L    | 1433.6941 | 717.3507        | 1416.6675      | 708.8374         | 1415.6835      | 708.3454         | 14 |
| 4  | 371.2289  | 186.1181        |                |                  | 353.2183       | 177.1128         | A    | 1320.6100 | 660.8086        | 1303.5835      | 652.2954         | 1302.5994      | 651.8034         | 13 |
| 5  | 500.2715  | 250.6394        |                |                  | 482.2609       | 241.6341         | E    | 1249.5729 | 625.2901        | 1232.5463      | 616.7768         | 1231.5623      | 616.2848         | 12 |
| 6  | 571.3086  | 286.1579        |                |                  | 553.2980       | 277.1527         | A    | 1120.5303 | 560.7688        | 1103.5038      | 552.2555         | 1102.5197      | 551.7635         | 11 |
| 7  | 670.3770  | 335.6921        |                |                  | 652.3665       | 326.6869         | V    | 1049.4932 | 525.2502        | 1032.4666      | 516.7370         | 1031.4826      | 516.2449         | 10 |
| 8  | 784.4199  | 392.7136        | 767.3934       | 384.2003         | 766.4094       | 383.7083         | N    | 950.4248  | 475.7160        | 933.3982       | 467.2027         | 932.4142       | 466.7107         | 9  |
| 9  | 915.4604  | 458.2339        | 898.4339       | 449.7206         | 897.4499       | 449.2286         | M    | 836.3818  | 418.6946        | 819.3553       | 410.1813         | 818.3713       | 409.6893         | 8  |
| 10 | 1030.4874 | 515.7473        | 1013.4608      | 507.2340         | 1012.4768      | 506.7420         | D    | 705.3414  | 353.1743        | 688.3148       | 344.6610         | 687.3308       | 344.1690         | 7  |
| 11 | 1087.5088 | 544.2581        | 1070.4823      | 535.7448         | 1069.4983      | 535.2528         | G    | 590.3144  | 295.6608        | 573.2879       | 287.1476         | 572.3039       | 286.6556         | 6  |
| 12 | 1158.5459 | 579.7766        | 1141.5194      | 571.2633         | 1140.5354      | 570.7713         | A    | 533.2930  | 267.1501        | 516.2664       | 258.6368         | 515.2824       | 258.1448         | 5  |
| 13 | 1245.5780 | 623.2926        | 1228.5514      | 614.7794         | 1227.5674      | 614.2873         | S    | 462.2558  | 231.6316        | 445.2293       | 223.1183         | 444.2453       | 222.6263         | 4  |
| 14 | 1358.6620 | 679.8347        | 1341.6355      | 671.3214         | 1340.6515      | 670.8294         | L    | 375.2238  | 188.1155        | 358.1973       | 179.6023         | 357.2132       | 179.1103         | 3  |
| 15 | 1473.6890 | 737.3481        | 1456.6624      | 728.8349         | 1455.6784      | 728.3428         | D    | 262.1397  | 131.5735        | 245.1132       | 123.0602         | 244.1292       | 122.5682         | 2  |
| 16 |           |                 |                |                  |                |                  | K    | 147.1128  | 74.0600         | 130.0863       | 65.5468          |                |                  | 1  |

AT4G33250.1

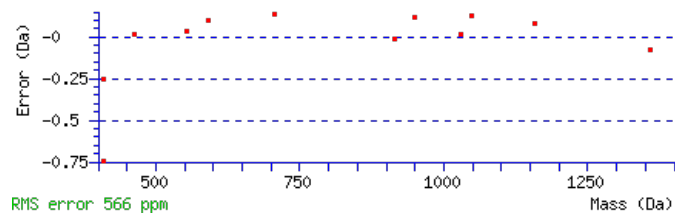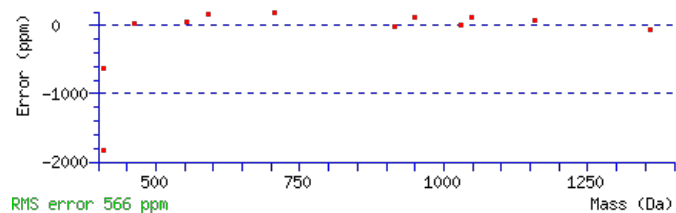

NCBI **BLAST** search of [SVLAEAVNMDGASLDK](#)

(Parameters: blastp, nr protein database, expect=20000, no filter, PAM30)

Other BLAST [web gateways](#)

**All matches to this query**

| Score | Mr(calc)  | Delta   | Sequence                         |
|-------|-----------|---------|----------------------------------|
| 30.0  | 1618.7872 | -0.0018 | <a href="#">SVLAEAVNMDGASLDK</a> |

Mascot: <http://www.matrixscience.com/>

**Peptide View**MS/MS Fragmentation of **FFMFLMKK**

Found in **AT4G33390.1** in **TAIR\_Arabidopsis**, Symbols: | similar to unknown protein [Arabidopsis thaliana] (TAIR:AT2G26570.1); similar to unnamed protein product [Vitis vinifera] (GB:CAO61337.1); contains InterPro domain Protein of unknown function DUF827, plant (InterPro:IPR008545) | chr4:16

Match to Query 3095: 1106.566624 from(554.290588,2+) index(7504)

Title: Elution from: 68.522 to 68.522 scan no 9903 cid35.00 polarity:+

Data file D1d-2\_1.mgf

Click mouse within plot area to zoom in by factor of two about that point

Or,   to  Da

Label all possible matches  Label matches used for scoring

Show Y-axis

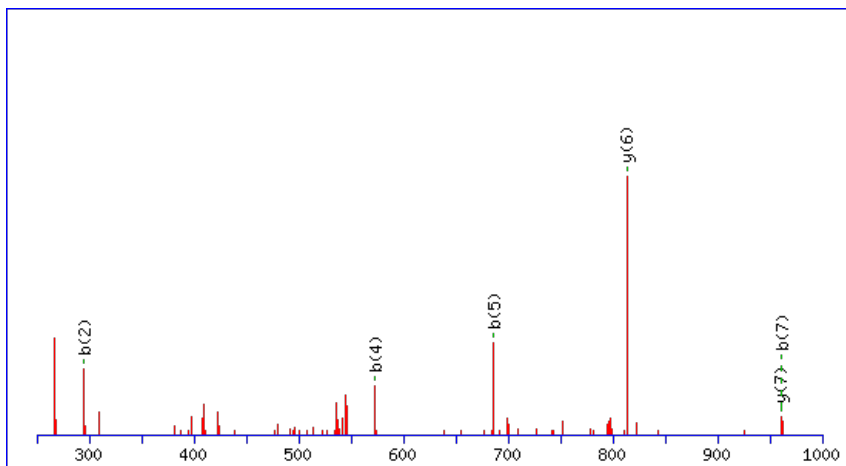

**Monoisotopic mass of neutral peptide Mr(calc):** 1106.5657

**Fixed modifications:** Carbamidomethyl (C) (apply to specified residues or termini only)

**Variable modifications:**

M6 : Oxidation (M), with neutral losses 0.0000 (shown in table), 63.9983

**Ions Score:** 21 **Expect:** 0.037

**Matches :** 6/70 fragment ions using 14 most intense peaks ([help](#))

| # | b               | b <sup>++</sup> | b*       | b <sup>*++</sup> | Seq. | y               | y <sup>++</sup> | y*       | y <sup>*++</sup> | # |
|---|-----------------|-----------------|----------|------------------|------|-----------------|-----------------|----------|------------------|---|
| 1 | 148.0757        | 74.5415         |          |                  | F    |                 |                 |          |                  | 8 |
| 2 | <b>295.1441</b> | 148.0757        |          |                  | F    | <b>960.5045</b> | 480.7559        | 943.4780 | 472.2426         | 7 |
| 3 | 426.1846        | 213.5959        |          |                  | M    | <b>813.4361</b> | 407.2217        | 796.4096 | 398.7084         | 6 |
| 4 | <b>573.2530</b> | 287.1301        |          |                  | F    | 682.3956        | 341.7015        | 665.3691 | 333.1882         | 5 |
| 5 | <b>686.3371</b> | 343.6722        |          |                  | L    | 535.3272        | 268.1673        | 518.3007 | 259.6540         | 4 |
| 6 | 833.3725        | 417.1899        |          |                  | M    | 422.2432        | 211.6252        | 405.2166 | 203.1119         | 3 |
| 7 | <b>961.4674</b> | 481.2374        | 944.4409 | 472.7241         | K    | 275.2078        | 138.1075        | 258.1812 | 129.5942         | 2 |
| 8 |                 |                 |          |                  | K    | 147.1128        | 74.0600         | 130.0863 | 65.5468          | 1 |

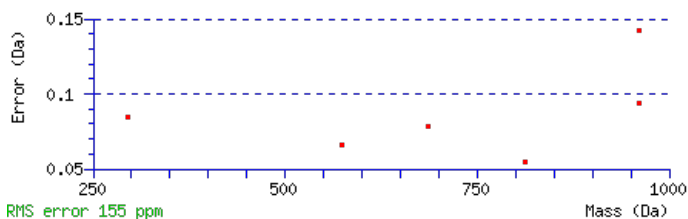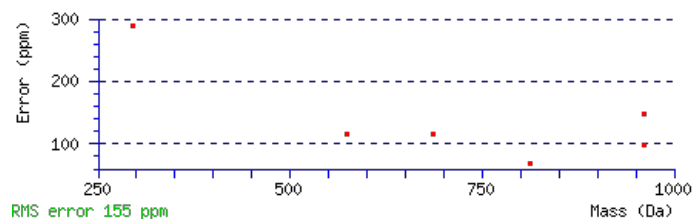

NCBI **BLAST** search of **FFMFLMKK**

(Parameters: blastp, nr protein database, expect=20000, no filter, PAM30)

Other BLAST [web gateways](#)

**All matches to this query**

## AT4G33390.1

| Score | Mr(calc)  | Delta  | Sequence                   | Site Analysis       |
|-------|-----------|--------|----------------------------|---------------------|
| 21.0  | 1106.5657 | 0.0010 | <a href="#">FFMFLMKK</a>   | Oxidation M6 96.77% |
| 6.3   | 1106.5657 | 0.0010 | <a href="#">FFMFLMKK</a>   | Oxidation M3 3.23%  |
| 4.6   | 1106.5641 | 0.0025 | <a href="#">VSQIEEKMK</a>  |                     |
| 4.3   | 1106.5641 | 0.0025 | <a href="#">SNLEEKLMK</a>  |                     |
| 1.3   | 1106.5641 | 0.0025 | <a href="#">ETKSLMPSAK</a> |                     |

Mascot: <http://www.matrixscience.com/>


**Mascot Search Results**
**Peptide View**MS/MS Fragmentation of **GIANPLGIK**

Found in **AT4G33510.1** in **TAIR\_Arabidopsis**, Symbols: DHS2 | DHS2 (3-DEOXY-D-ARABINO-HEPTULOSONATE 7-PHOSPHATE SYNTHASE); 3-deoxy-7-phosphoheptulonate synthase | chr4:16116499-16118552 FORWARD

Match to Query 1436: 881.534634 from(441.774593,2+) index(4529)

Title: Elution from: 40.640 to 40.640 scan no 5694 cid35.00 polarity:+

Data file 0-2\_3.mgf

Click mouse within plot area to zoom in by factor of two about that point

Or,   to  Da

Label all possible matches  Label matches used for scoring

Show Y-axis

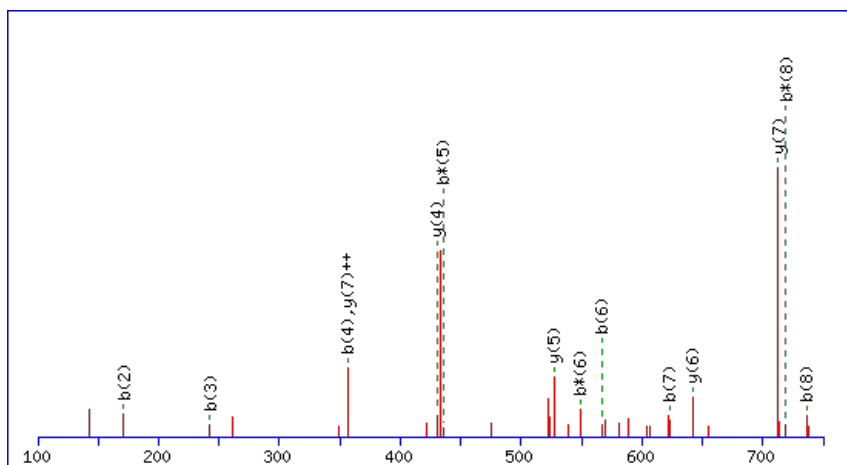

Monoisotopic mass of neutral peptide  $M_r(\text{calc})$ : 881.5334

Fixed modifications: Carbamidomethyl (C) (apply to specified residues or termini only)

Ions Score: 36 Expect: 0.00039

Matches : 14/58 fragment ions using 30 most intense peaks ([help](#))

| # | b               | b <sup>++</sup> | b*              | b <sup>*++</sup> | Seq.     | y               | y <sup>++</sup> | y*       | y <sup>*++</sup> | #        |
|---|-----------------|-----------------|-----------------|------------------|----------|-----------------|-----------------|----------|------------------|----------|
| 1 | 58.0287         | 29.5180         |                 |                  | <b>G</b> |                 |                 |          |                  | <b>9</b> |
| 2 | <b>171.1128</b> | 86.0600         |                 |                  | <b>I</b> | 825.5193        | 413.2633        | 808.4927 | 404.7500         | <b>8</b> |
| 3 | <b>242.1499</b> | 121.5786        |                 |                  | <b>A</b> | <b>712.4352</b> | <b>356.7212</b> | 695.4087 | 348.2080         | <b>7</b> |
| 4 | <b>356.1928</b> | 178.6001        | 339.1663        | 170.0868         | <b>N</b> | <b>641.3981</b> | 321.2027        | 624.3715 | 312.6894         | <b>6</b> |
| 5 | 453.2456        | 227.1264        | <b>436.2191</b> | 218.6132         | <b>P</b> | <b>527.3552</b> | 264.1812        | 510.3286 | 255.6679         | <b>5</b> |
| 6 | <b>566.3297</b> | 283.6685        | <b>549.3031</b> | 275.1552         | <b>L</b> | <b>430.3024</b> | 215.6548        | 413.2758 | 207.1416         | <b>4</b> |
| 7 | <b>623.3511</b> | 312.1792        | 606.3246        | 303.6659         | <b>G</b> | 317.2183        | 159.1128        | 300.1918 | 150.5995         | <b>3</b> |
| 8 | <b>736.4352</b> | 368.7212        | <b>719.4087</b> | 360.2080         | <b>I</b> | 260.1969        | 130.6021        | 243.1703 | 122.0888         | <b>2</b> |
| 9 |                 |                 |                 |                  | <b>K</b> | 147.1128        | 74.0600         | 130.0863 | 65.5468          | <b>1</b> |

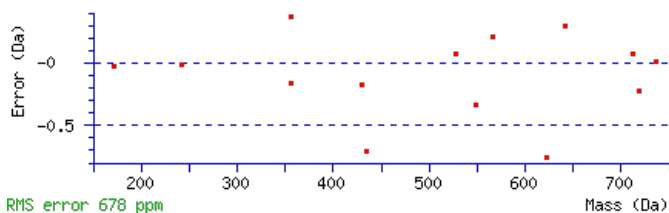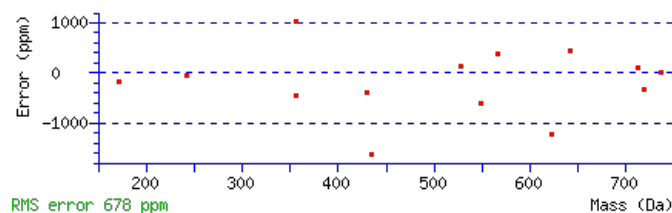

NCBI **BLAST** search of [GIANPLGIK](#)

(Parameters: blastp, nr protein database, expect=20000, no filter, PAM30)

Other BLAST [web gateways](#)

All matches to this query

| Score | $M_r(\text{calc})$ | Delta | Sequence |
|-------|--------------------|-------|----------|
|       |                    |       |          |



# AT4G33510.1

|      |          |        |                           |
|------|----------|--------|---------------------------|
| 35.9 | 881.5334 | 0.0012 | <a href="#">GIANPLGIK</a> |
| 9.0  | 881.5334 | 0.0012 | <a href="#">AGNLPLGLK</a> |

**Mascot:** <http://www.matrixscience.com/>

## Peptide View

MS/MS Fragmentation of **THVVTTPGSGFGPGGEGFVR**

Found in **AT4G33680.1** in **TAIR\_Arabidopsis**, Symbols: AGD2 | AGD2 (ABERRANT GROWTH AND DEATH 2); transaminase | chr4:16171850-16174633 REVERSE

Match to Query 8650: 1982.890611 from(661.970813,3+) index(4478)

Title: Elution from: 41.029 to 41.029 scan no 5633 cid35.00 polarity:+

Data file C7-3\_3.mgf

Click mouse within plot area to zoom in by factor of two about that point

Or,   to  Da

Label all possible matches  Label matches used for scoring

Show Y-axis

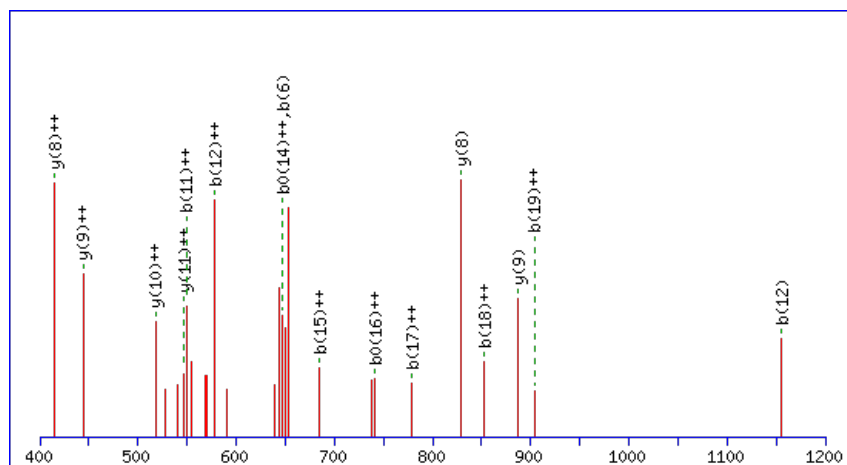

Monoisotopic mass of neutral peptide  $M_r(\text{calc})$ : 1982.8904

Fixed modifications: Carbamidomethyl (C) (apply to specified residues or termini only)

Ions Score: 41 Expect: 0.00067

Matches : 16/182 fragment ions using 21 most intense peaks ([help](#))

| #  | b                | b <sup>++</sup> | b <sup>0</sup> | b <sup>0++</sup> | Seq. | y               | y <sup>++</sup> | y*        | y <sup>*++</sup> | y <sup>0</sup> | y <sup>0++</sup> | #  |
|----|------------------|-----------------|----------------|------------------|------|-----------------|-----------------|-----------|------------------|----------------|------------------|----|
| 1  | 103.0520         | 52.0296         | 85.0414        | 43.0244          | T    |                 |                 |           |                  |                |                  | 20 |
| 2  | 243.1020         | 122.0546        | 225.0914       | 113.0494         | H    | 1881.8531       | 941.4302        | 1863.8295 | 932.4184         | 1863.8425      | 932.4249         | 19 |
| 3  | 343.1675         | 172.0874        | 325.1569       | 163.0821         | V    | 1741.8030       | 871.4052        | 1723.7795 | 862.3934         | 1723.7925      | 862.3999         | 18 |
| 4  | 443.2329         | 222.1201        | 425.2223       | 213.1148         | V    | 1641.7376       | 821.3724        | 1623.7140 | 812.3606         | 1623.7270      | 812.3672         | 17 |
| 5  | 545.2776         | 273.1424        | 527.2671       | 264.1372         | T    | 1541.6721       | 771.3397        | 1523.6486 | 762.3279         | 1523.6616      | 762.3344         | 16 |
| 6  | <b>647.3223</b>  | 324.1648        | 629.3118       | 315.1595         | T    | 1439.6274       | 720.3174        | 1421.6039 | 711.3056         | 1421.6169      | 711.3121         | 15 |
| 7  | 745.3721         | 373.1897        | 727.3616       | 364.1844         | P    | 1337.5827       | 669.2950        | 1319.5591 | 660.2832         | 1319.5722      | 660.2897         | 14 |
| 8  | 803.3906         | 402.1990        | 785.3801       | 393.1937         | G    | 1239.5329       | 620.2701        | 1221.5093 | 611.2583         | 1221.5224      | 611.2648         | 13 |
| 9  | 891.4197         | 446.2135        | 873.4091       | 437.2082         | S    | 1181.5144       | 591.2609        | 1163.4908 | 582.2491         | 1163.5039      | 582.2556         | 12 |
| 10 | 949.4382         | 475.2227        | 931.4276       | 466.2175         | G    | 1093.4854       | <b>547.2463</b> | 1075.4618 | 538.2345         | 1075.4748      | 538.2410         | 11 |
| 11 | 1097.5036        | <b>549.2555</b> | 1079.4931      | 540.2502         | F    | 1035.4669       | <b>518.2371</b> | 1017.4433 | 509.2253         | 1017.4563      | 509.2318         | 10 |
| 12 | <b>1155.5221</b> | <b>578.2647</b> | 1137.5116      | 569.2594         | G    | <b>887.4014</b> | <b>444.2043</b> | 869.3778  | 435.1926         | 869.3908       | 435.1991         | 9  |
| 13 | 1253.5719        | 627.2896        | 1235.5614      | 618.2843         | P    | <b>829.3829</b> | <b>415.1951</b> | 811.3593  | 406.1833         | 811.3723       | 406.1898         | 8  |
| 14 | 1311.5904        | 656.2989        | 1293.5799      | <b>647.2936</b>  | G    | 731.3331        | 366.1702        | 713.3095  | 357.1584         | 713.3226       | 357.1649         | 7  |
| 15 | 1369.6089        | <b>685.3081</b> | 1351.5984      | 676.3028         | G    | 673.3146        | 337.1609        | 655.2910  | 328.1492         | 655.3041       | 328.1557         | 6  |
| 16 | 1499.6486        | 750.3279        | 1481.6380      | <b>741.3226</b>  | E    | 615.2961        | 308.1517        | 597.2725  | 299.1399         | 597.2856       | 299.1464         | 5  |
| 17 | 1557.6671        | <b>779.3372</b> | 1539.6565      | 770.3319         | G    | 485.2565        | 243.1319        | 467.2329  | 234.1201         |                |                  | 4  |
| 18 | 1705.7325        | <b>853.3699</b> | 1687.7219      | 844.3646         | F    | 427.2380        | 214.1226        | 409.2144  | 205.1108         |                |                  | 3  |
| 19 | 1805.7980        | <b>903.4026</b> | 1787.7874      | 894.3973         | V    | 279.1725        | 140.0899        | 261.1490  | 131.0781         |                |                  | 2  |
| 20 |                  |                 |                |                  | R    | 179.1071        | 90.0572         | 161.0835  | 81.0454          |                |                  | 1  |

# AT4G33680.1

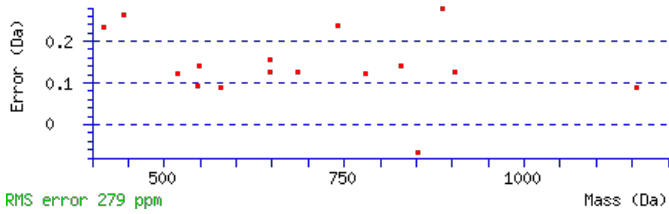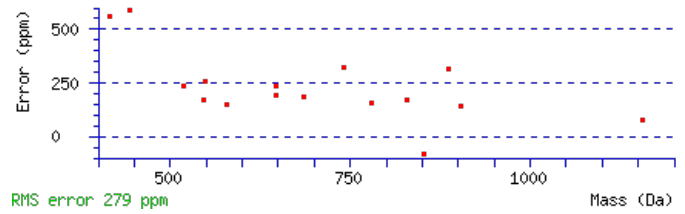

NCBI **BLAST** search of [THVVTTPGSGFGPGGEGFVR](#)

(Parameters: blastp, nr protein database, expect=20000, no filter, PAM30)

Other BLAST [web gateways](#)

## All matches to this query

| Score | Mr(calc)  | Delta   | Sequence                             |
|-------|-----------|---------|--------------------------------------|
| 41.2  | 1982.8904 | 0.0002  | <a href="#">THVVTTPGSGFGPGGEGFVR</a> |
| 13.1  | 1982.8905 | 0.0002  | <a href="#">TEEHQVFTLGAKQEW</a>      |
| 8.0   | 1982.8950 | -0.0044 | <a href="#">MKMLDEVFVYMGVMLK</a>     |
| 7.9   | 1982.8904 | 0.0002  | <a href="#">FSDGFRFGLGAEVGVSTGR</a>  |
| 3.9   | 1982.8959 | -0.0053 | <a href="#">EEVEGKASSEPIGDQIFK</a>   |
| 3.0   | 1982.8863 | 0.0043  | <a href="#">GLDELEDGINMIVSEVK</a>    |
| 3.0   | 1982.8889 | 0.0017  | <a href="#">LCSQLAELEVESLDQAR</a>    |
| 2.4   | 1982.8912 | -0.0006 | <a href="#">AKLGYDPLEVNPEDMVR</a>    |
| 1.5   | 1982.8961 | -0.0054 | <a href="#">LYCIERGGFTTWTVR</a>      |
| 0.7   | 1982.8909 | -0.0003 | <a href="#">KMDLDFLFHMFFLAR</a>      |

Mascot: <http://www.matrixscience.com/>

**Peptide View**MS/MS Fragmentation of **FDLELK**

Found in **AT4G33760.1** in **TAIR\_Arabidopsis**, Symbols: | tRNA synthetase class II (D, K and N) family protein | chr4:16189287-16193262  
REVERSE

Match to Query 813: 763.412130 from(382.713341,2+) index(4904)

Title: Elution from: 44.720 to 44.720 scan no 6209 cid35.00 polarity:+

Data file 0-2\_2.mgf

Click mouse within plot area to zoom in by factor of two about that point

Or,   to  Da

Label all possible matches  Label matches used for scoring

Show Y-axis

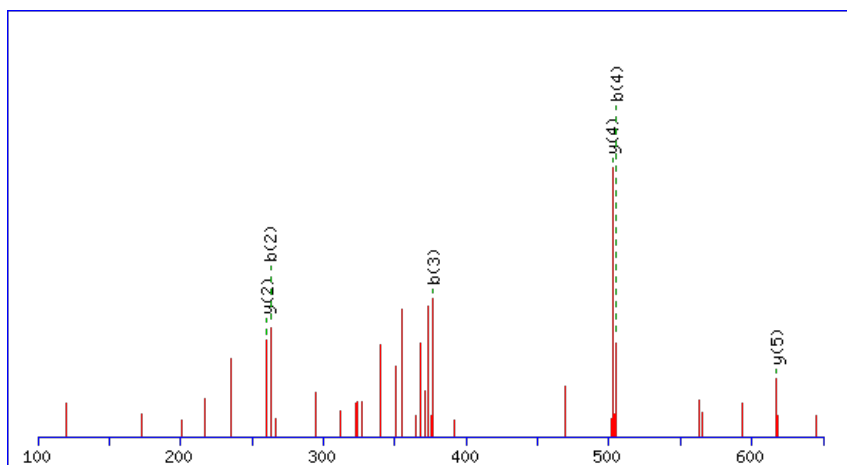

Monoisotopic mass of neutral peptide  $M_r(\text{calc})$ : 763.4116

**Fixed modifications:** Carbamidomethyl (C) (apply to specified residues or termini only)

**Ions Score:** 22 **Expect:** 0.021

**Matches:** 6/44 fragment ions using 11 most intense peaks ([help](#))

| # | b               | b <sup>++</sup> | b <sup>0</sup> | b <sup>0++</sup> | Seq. | y               | y <sup>++</sup> | y*       | y <sup>*++</sup> | y <sup>0</sup> | y <sup>0++</sup> | # |
|---|-----------------|-----------------|----------------|------------------|------|-----------------|-----------------|----------|------------------|----------------|------------------|---|
| 1 | 148.0757        | 74.5415         |                |                  | F    |                 |                 |          |                  |                |                  | 6 |
| 2 | <b>263.1026</b> | 132.0550        | 245.0921       | 123.0497         | D    | <b>617.3505</b> | 309.1789        | 600.3239 | 300.6656         | 599.3399       | 300.1736         | 5 |
| 3 | <b>376.1867</b> | 188.5970        | 358.1761       | 179.5917         | L    | <b>502.3235</b> | 251.6654        | 485.2970 | 243.1521         | 484.3130       | 242.6601         | 4 |
| 4 | <b>505.2293</b> | 253.1183        | 487.2187       | 244.1130         | E    | 389.2395        | 195.1234        | 372.2129 | 186.6101         | 371.2289       | 186.1181         | 3 |
| 5 | 618.3134        | 309.6603        | 600.3028       | 300.6550         | L    | <b>260.1969</b> | 130.6021        | 243.1703 | 122.0888         |                |                  | 2 |
| 6 |                 |                 |                |                  | K    | 147.1128        | 74.0600         | 130.0863 | 65.5468          |                |                  | 1 |

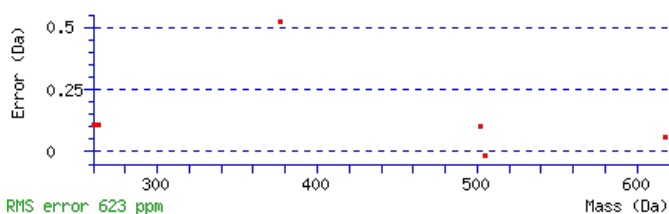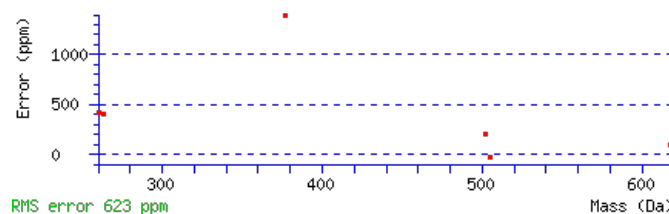NCBI **BLAST** search of **FDLELK**

(Parameters: blastp, nr protein database, expect=20000, no filter, PAM30)

Other BLAST [web gateways](#)

**All matches to this query**

| Score | $M_r(\text{calc})$ | Delta  | Sequence               |
|-------|--------------------|--------|------------------------|
| 22.4  | 763.4116           | 0.0005 | <a href="#">FDIELK</a> |
| 22.4  | 763.4116           | 0.0005 | <a href="#">FDLELK</a> |
| 7.7   | 763.4116           | 0.0005 | <a href="#">FVEELK</a> |

# AT4G33760.1

|     |          |         |                        |
|-----|----------|---------|------------------------|
| 6.9 | 763.4116 | 0.0005  | <a href="#">FEDILK</a> |
| 1.5 | 763.4123 | -0.0001 | <a href="#">RMKSAR</a> |

**Mascot:** <http://www.matrixscience.com/>

## Peptide View

MS/MS Fragmentation of **NHGTYDFIFVDADK**

Found in **AT4G34050.1** in **TAIR\_Arabidopsis**, Symbols: | caffeoyl-CoA 3-O-methyltransferase, putative | chr4:16310849-16311978 FORWARD

Match to Query 7632: 1658.693259 from(553.905029,3+) index(7001)

Title: Elution from: 61.901 to 61.901 scan no 9096 cid35.00 polarity:+

Data file 0-3\_2.mgf

Click mouse within plot area to zoom in by factor of two about that point

Or,   to  Da

Label all possible matches  Label matches used for scoring

Show Y-axis

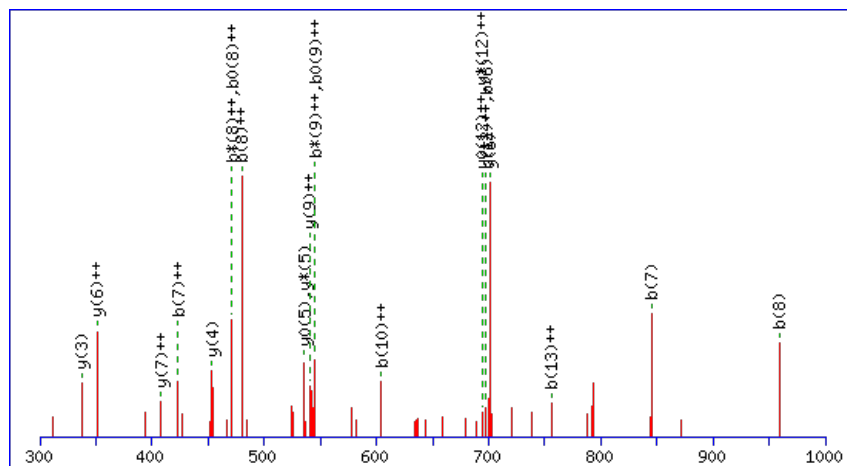

Monoisotopic mass of neutral peptide  $M_r(\text{calc})$ : 1658.6937

**Fixed modifications:** Carbamidomethyl (C) (apply to specified residues or termini only)

**Ions Score:** 29 **Expect:** 0.0058

**Matches:** 22/148 fragment ions using 24 most intense peaks ([help](#))

| #  | b         | b <sup>++</sup> | b <sup>*</sup> | b <sup>*++</sup> | b <sup>0</sup> | b <sup>0++</sup> | Seq. | y         | y <sup>++</sup> | y <sup>*</sup> | y <sup>*++</sup> | y <sup>0</sup> | y <sup>0++</sup> | #  |
|----|-----------|-----------------|----------------|------------------|----------------|------------------|------|-----------|-----------------|----------------|------------------|----------------|------------------|----|
| 1  | 117.0443  | 59.0258         | 99.0207        | 50.0140          |                |                  | N    |           |                 |                |                  |                |                  | 14 |
| 2  | 257.0943  | 129.0508        | 239.0707       | 120.0390         |                |                  | H    | 1543.6640 | 772.3356        | 1525.6404      | 763.3238         | 1525.6534      | 763.3304         | 13 |
| 3  | 315.1128  | 158.0600        | 297.0892       | 149.0482         |                |                  | G    | 1403.6140 | 702.3106        | 1385.5904      | 693.2988         | 1385.6034      | 693.3053         | 12 |
| 4  | 417.1575  | 209.0824        | 399.1339       | 200.0706         | 399.1469       | 200.0771         | T    | 1345.5955 | 673.3014        | 1327.5719      | 664.2896         | 1327.5849      | 664.2961         | 11 |
| 5  | 581.2179  | 291.1126        | 563.1943       | 282.1008         | 563.2073       | 282.1073         | Y    | 1243.5508 | 622.2790        | 1225.5272      | 613.2672         | 1225.5402      | 613.2737         | 10 |
| 6  | 697.2418  | 349.1246        | 679.2183       | 340.1128         | 679.2313       | 340.1193         | D    | 1079.4904 | 540.2488        | 1061.4668      | 531.2370         | 1061.4798      | 531.2436         | 9  |
| 7  | 845.3073  | 423.1573        | 827.2837       | 414.1455         | 827.2967       | 414.1520         | F    | 963.4664  | 482.2369        | 945.4428       | 473.2251         | 945.4559       | 473.2316         | 8  |
| 8  | 959.3884  | 480.1978        | 941.3648       | 471.1860         | 941.3778       | 471.1926         | I    | 815.4010  | 408.2041        | 797.3774       | 399.1923         | 797.3904       | 399.1988         | 7  |
| 9  | 1107.4538 | 554.2306        | 1089.4303      | 545.2188         | 1089.4433      | 545.2253         | F    | 701.3199  | 351.1636        | 683.2963       | 342.1518         | 683.3093       | 342.1583         | 6  |
| 10 | 1207.5193 | 604.2633        | 1189.4957      | 595.2515         | 1189.5087      | 595.2580         | V    | 553.2544  | 277.1309        | 535.2308       | 268.1191         | 535.2439       | 268.1256         | 5  |
| 11 | 1323.5433 | 662.2753        | 1305.5197      | 653.2635         | 1305.5327      | 653.2700         | D    | 453.1890  | 227.0981        | 435.1654       | 218.0863         | 435.1784       | 218.0928         | 4  |
| 12 | 1395.5774 | 698.2923        | 1377.5538      | 689.2806         | 1377.5669      | 689.2871         | A    | 337.1650  | 169.0861        | 319.1414       | 160.0743         | 319.1544       | 160.0809         | 3  |
| 13 | 1511.6014 | 756.3043        | 1493.5778      | 747.2925         | 1493.5908      | 747.2991         | D    | 265.1309  | 133.0691        | 247.1073       | 124.0573         | 247.1203       | 124.0638         | 2  |
| 14 |           |                 |                |                  |                |                  | K    | 149.1069  | 75.0571         | 131.0833       | 66.0453          |                |                  | 1  |

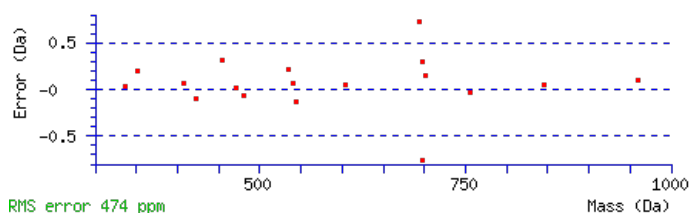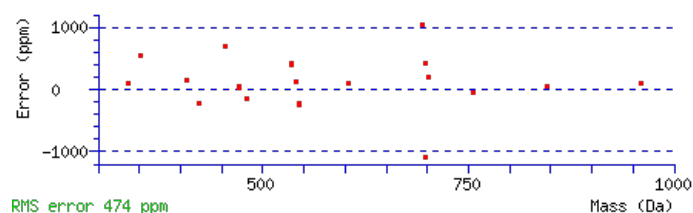

NCBI BLAST search of **NHGTYDFIFVDADK**

(Parameters: blastp, nr protein database, expect=20000, no filter, PAM30)

# AT4G34050.1

Other BLAST [web gateways](#)

## All matches to this query

| Score | Mr(calc)  | Delta   | Sequence                        |
|-------|-----------|---------|---------------------------------|
| 29.3  | 1658.6937 | -0.0004 | <a href="#">NHGTYDFIFVDADK</a>  |
| 10.8  | 1658.6915 | 0.0018  | <a href="#">GDSKTDDSAFAAAWK</a> |
| 4.8   | 1658.6948 | -0.0016 | <a href="#">MRGTTENTDLFDPK</a>  |
| 4.3   | 1658.6971 | -0.0038 | <a href="#">GFDMKVKWEDDAGK</a>  |
| 3.0   | 1658.6894 | 0.0039  | <a href="#">SHTWHEAPSMQVAR</a>  |
| 2.3   | 1658.6948 | -0.0016 | <a href="#">EIELYSTNQECVR</a>   |

Mascot: <http://www.matrixscience.com/>

**Peptide View**MS/MS Fragmentation of **LDIQAAR**Found in **AT4G34100.1** in **TAIR\_Arabidopsis**, Symbols: | protein binding / zinc ion binding | chr4:16330595-16334869 FORWARD

Match to Query 978: 796.404998 from(399.209775,2+) index(1222)

Title: Elution from: 17.948 to 17.948 scan no 1683 cid35.00 polarity:+

Data file 0-3\_2.mgf

Click mouse within plot area to zoom in by factor of two about that point

Or,   to  Da Label all possible matches  Label matches used for scoring Show Y-axis 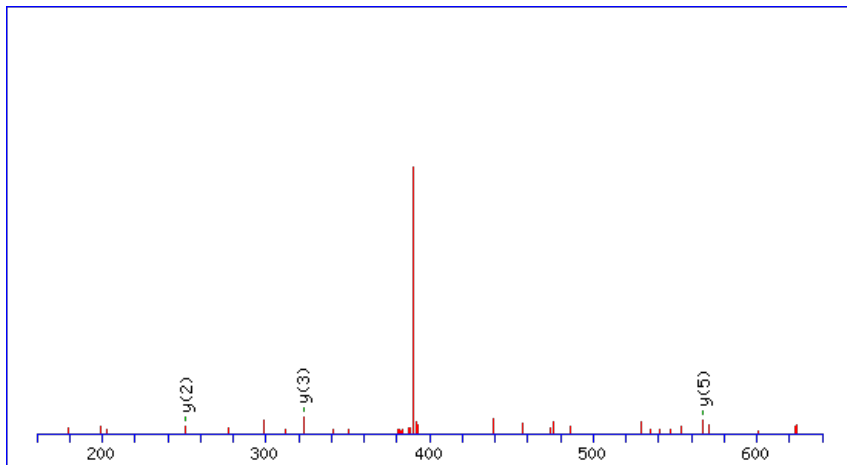Monoisotopic mass of neutral peptide **Mr(calc)**: 796.4069

Fixed modifications: Carbamidomethyl (C) (apply to specified residues or termini only)

Ions Score: 24 **Expect**: 0.038Matches : 3/54 fragment ions using 5 most intense peaks ([help](#))

| # | b        | b <sup>++</sup> | b*       | b <sup>*++</sup> | b <sup>0</sup> | b <sup>0++</sup> | Seq. | y               | y <sup>++</sup> | y*       | y <sup>*++</sup> | y <sup>0</sup> | y <sup>0++</sup> | # |
|---|----------|-----------------|----------|------------------|----------------|------------------|------|-----------------|-----------------|----------|------------------|----------------|------------------|---|
| 1 | 115.0884 | 58.0478         |          |                  |                |                  | L    |                 |                 |          |                  |                |                  | 7 |
| 2 | 231.1124 | 116.0598        |          |                  | 213.1018       | 107.0545         | D    | 683.3331        | 342.1702        | 665.3095 | 333.1584         | 665.3225       | 333.1649         | 6 |
| 3 | 345.1935 | 173.1004        |          |                  | 327.1829       | 164.0951         | I    | <b>567.3091</b> | 284.1582        | 549.2856 | 275.1464         |                |                  | 5 |
| 4 | 475.2461 | 238.1267        | 457.2225 | 229.1149         | 457.2355       | 229.1214         | Q    | 453.2280        | 227.1177        | 435.2045 | 218.1059         |                |                  | 4 |
| 5 | 547.2802 | 274.1438        | 529.2567 | 265.1320         | 529.2697       | 265.1385         | A    | <b>323.1754</b> | 162.0913        | 305.1518 | 153.0795         |                |                  | 3 |
| 6 | 619.3144 | 310.1608        | 601.2908 | 301.1490         | 601.3038       | 301.1556         | A    | <b>251.1412</b> | 126.0743        | 233.1177 | 117.0625         |                |                  | 2 |
| 7 |          |                 |          |                  |                |                  | R    | 179.1071        | 90.0572         | 161.0835 | 81.0454          |                |                  | 1 |

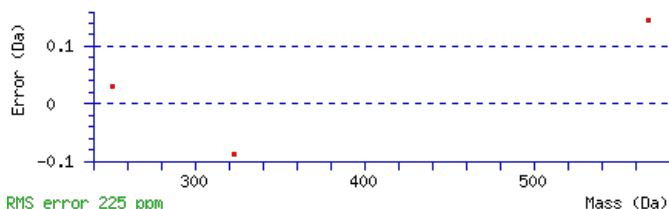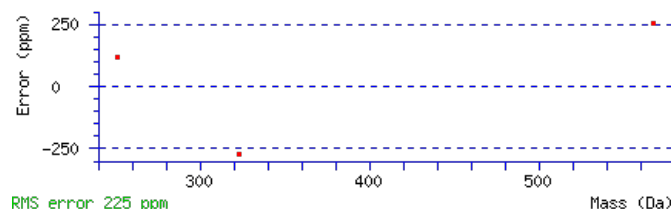NCBI **BLAST** search of **LDIQAAR**

(Parameters: blastp, nr protein database, expect=20000, no filter, PAM30)

Other BLAST [web gateways](#)**All matches to this query**

| Score | Mr(calc) | Delta   | Sequence                |
|-------|----------|---------|-------------------------|
| 24.1  | 796.4043 | 0.0007  | <a href="#">DILEATK</a> |
| 24.1  | 796.4069 | -0.0019 | <a href="#">LDIQAAR</a> |
| 24.1  | 796.4069 | -0.0019 | <a href="#">NLIEAAR</a> |



## AT4G34100.1

|      |          |         |                          |
|------|----------|---------|--------------------------|
| 20.5 | 796.4069 | -0.0019 | <a href="#">QILDAAR</a>  |
| 14.8 | 796.4069 | -0.0019 | <a href="#">ALVADAAR</a> |
| 11.5 | 796.4043 | 0.0007  | <a href="#">ILDEATK</a>  |
| 8.6  | 796.4069 | -0.0019 | <a href="#">DGVLGIGR</a> |
| 7.6  | 796.4069 | -0.0019 | <a href="#">SKLADPR</a>  |
| 7.6  | 796.4070 | -0.0020 | <a href="#">SLLSNPR</a>  |
| 7.6  | 796.4070 | -0.0020 | <a href="#">SLSLNPR</a>  |

**Mascot:** <http://www.matrixscience.com/>

**Peptide View**MS/MS Fragmentation of **VAEAMDVLR**

Found in **AT4G34110.1** in **TAIR\_Arabidopsis**, Symbols: PABP2, PAB2 | PAB2 (POLY(A) BINDING PROTEIN 2); RNA binding | chr4:16337714-16339896 FORWARD

Match to Query 2493: 1014.483196 from(508.248874,2+) index(3711)

Title: Elution from: 35.190 to 35.190 scan no 4638 cid35.00 polarity:+

Data file C7-3\_3.mgf

Click mouse within plot area to zoom in by factor of two about that point

Or,   to  Da

Label all possible matches  Label matches used for scoring

Show Y-axis

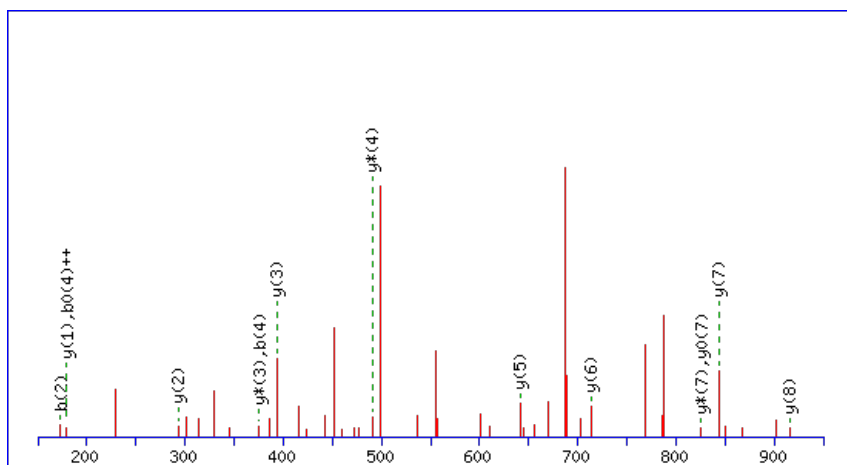

**Monoisotopic mass of neutral peptide Mr(calc):** 1014.4812

**Fixed modifications:** Carbamidomethyl (C) (apply to specified residues or termini only)

**Ions Score:** 23 **Expect:** 0.038

**Matches:** 14/70 fragment ions using 44 most intense peaks ([help](#))

| # | b        | b <sup>++</sup> | b <sup>0</sup> | b <sup>0++</sup> | Seq. | y        | y <sup>++</sup> | y*       | y <sup>*++</sup> | y <sup>0</sup> | y <sup>0++</sup> | # |
|---|----------|-----------------|----------------|------------------|------|----------|-----------------|----------|------------------|----------------|------------------|---|
| 1 | 101.0727 | 51.0400         |                |                  | V    |          |                 |          |                  |                |                  | 9 |
| 2 | 173.1069 | 87.0571         |                |                  | A    | 915.4231 | 458.2152        | 897.3995 | 449.2034         | 897.4125       | 449.2099         | 8 |
| 3 | 303.1465 | 152.0769        | 285.1359       | 143.0716         | E    | 843.3889 | 422.1981        | 825.3653 | 413.1863         | 825.3784       | 413.1928         | 7 |
| 4 | 375.1807 | 188.0940        | 357.1701       | 179.0887         | A    | 713.3493 | 357.1783        | 695.3257 | 348.1665         | 695.3387       | 348.1730         | 6 |
| 5 | 507.2182 | 254.1127        | 489.2076       | 245.1074         | M    | 641.3151 | 321.1612        | 623.2916 | 312.1494         | 623.3046       | 312.1559         | 5 |
| 6 | 623.2421 | 312.1247        | 605.2316       | 303.1194         | D    | 509.2776 | 255.1424        | 491.2540 | 246.1307         | 491.2671       | 246.1372         | 4 |
| 7 | 723.3076 | 362.1574        | 705.2970       | 353.1522         | V    | 393.2536 | 197.1305        | 375.2301 | 188.1187         |                |                  | 3 |
| 8 | 837.3887 | 419.1980        | 819.3781       | 410.1927         | L    | 293.1882 | 147.0977        | 275.1646 | 138.0859         |                |                  | 2 |
| 9 |          |                 |                |                  | R    | 179.1071 | 90.0572         | 161.0835 | 81.0454          |                |                  | 1 |

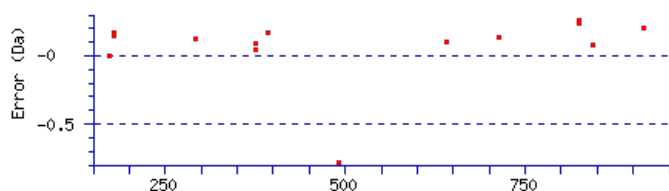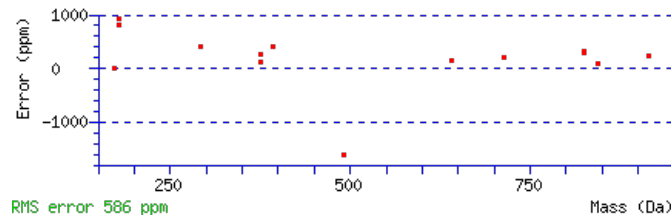

NCBI **BLAST** search of [VAEAMDVLR](#)

(Parameters: blastp, nr protein database, expect=20000, no filter, PAM30)

Other BLAST [web gateways](#)

**All matches to this query**

| Score | Mr(calc) | Delta | Sequence |
|-------|----------|-------|----------|
|       |          |       |          |

**AT4G34110.1**

|      |           |         |                           |
|------|-----------|---------|---------------------------|
| 23.5 | 1014.4812 | 0.0020  | <a href="#">VAEAMDVLR</a> |
| 9.6  | 1014.4813 | 0.0019  | <a href="#">MPISPSSLR</a> |
| 9.4  | 1014.4812 | 0.0020  | <a href="#">LNDILEMR</a>  |
| 6.1  | 1014.4805 | 0.0027  | <a href="#">IGKDGAFHR</a> |
| 4.1  | 1014.4835 | -0.0003 | <a href="#">EMLGWKPK</a>  |
| 3.5  | 1014.4839 | -0.0007 | <a href="#">HSKVCTLR</a>  |
| 2.9  | 1014.4812 | 0.0020  | <a href="#">ENLMELVR</a>  |
| 1.4  | 1014.4812 | 0.0020  | <a href="#">IACLEEIR</a>  |
| 0.5  | 1014.4812 | 0.0020  | <a href="#">IMEIVDQR</a>  |
| 0.5  | 1014.4839 | -0.0007 | <a href="#">LMGRSPSPR</a> |

**Mascot:** <http://www.matrixscience.com/>

## Peptide View

MS/MS Fragmentation of **VVGDLMTSPPLVVR**

Found in **AT4G34120.1** in **TAIR\_Arabidopsis**, Symbols: LEJ1 | LEJ1 (LOSS OF THE TIMING OF ET AND JA BIOSYNTHESIS 1) | chr4:16341198-16342897 FORWARD

Match to Query 6532: 1498.777570 from(750.396061,2+) index(7545)

Title: Elution from: 66.231 to 66.231 scan no 9737 cid35.00 polarity:+

Data file C7-3\_1.mgf

Click mouse within plot area to zoom in by factor of two about that point

Or,   to  Da

Label all possible matches  Label matches used for scoring

Show Y-axis

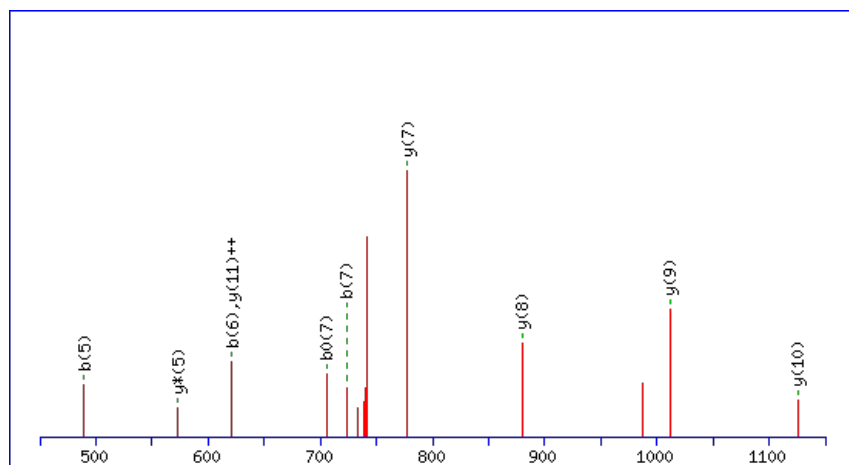

Monoisotopic mass of neutral peptide  $M_r(\text{calc})$ : 1498.7772

Fixed modifications: Carbamidomethyl (C) (apply to specified residues or termini only)

Ions Score: 33 Expect: 0.0022

Matches : 10/114 fragment ions using 12 most intense peaks ([help](#))

| #  | b         | b <sup>++</sup> | b <sup>0</sup> | b <sup>0++</sup> | Seq. | y         | y <sup>++</sup> | y*        | y* <sup>++</sup> | y <sup>0</sup> | y <sup>0++</sup> | #  |
|----|-----------|-----------------|----------------|------------------|------|-----------|-----------------|-----------|------------------|----------------|------------------|----|
| 1  | 101.0727  | 51.0400         |                |                  | V    |           |                 |           |                  |                |                  | 14 |
| 2  | 201.1382  | 101.0727        |                |                  | V    | 1399.7190 | 700.3631        | 1381.6954 | 691.3514         | 1381.7084      | 691.3579         | 13 |
| 3  | 259.1567  | 130.0820        |                |                  | G    | 1299.6536 | 650.3304        | 1281.6300 | 641.3186         | 1281.6430      | 641.3251         | 12 |
| 4  | 375.1807  | 188.0940        | 357.1701       | 179.0887         | D    | 1241.6351 | 621.3212        | 1223.6115 | 612.3094         | 1223.6245      | 612.3159         | 11 |
| 5  | 489.2618  | 245.1345        | 471.2512       | 236.1292         | L    | 1125.6111 | 563.3092        | 1107.5875 | 554.2974         | 1107.6005      | 554.3039         | 10 |
| 6  | 621.2993  | 311.1533        | 603.2887       | 302.1480         | M    | 1011.5300 | 506.2686        | 993.5064  | 497.2568         | 993.5194       | 497.2633         | 9  |
| 7  | 723.3440  | 362.1756        | 705.3334       | 353.1703         | T    | 879.4925  | 440.2499        | 861.4689  | 431.2381         | 861.4819       | 431.2446         | 8  |
| 8  | 821.3938  | 411.2005        | 803.3832       | 402.1952         | P    | 777.4477  | 389.2275        | 759.4242  | 380.2157         | 759.4372       | 380.2222         | 7  |
| 9  | 909.4228  | 455.2151        | 891.4123       | 446.2098         | S    | 679.3980  | 340.2026        | 661.3744  | 331.1908         | 661.3874       | 331.1973         | 6  |
| 10 | 1007.4726 | 504.2400        | 989.4621       | 495.2347         | P    | 591.3689  | 296.1881        | 573.3453  | 287.1763         |                |                  | 5  |
| 11 | 1121.5537 | 561.2805        | 1103.5432      | 552.2752         | L    | 493.3191  | 247.1632        | 475.2955  | 238.1514         |                |                  | 4  |
| 12 | 1221.6192 | 611.3132        | 1203.6086      | 602.3080         | V    | 379.2380  | 190.1226        | 361.2144  | 181.1108         |                |                  | 3  |
| 13 | 1321.6846 | 661.3460        | 1303.6741      | 652.3407         | V    | 279.1725  | 140.0899        | 261.1490  | 131.0781         |                |                  | 2  |
| 14 |           |                 |                |                  | R    | 179.1071  | 90.0572         | 161.0835  | 81.0454          |                |                  | 1  |

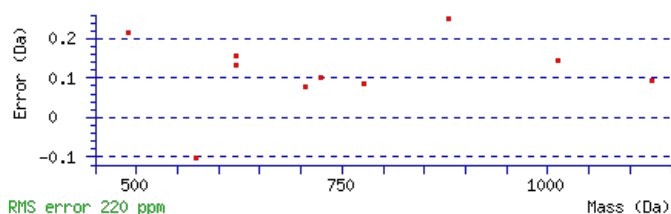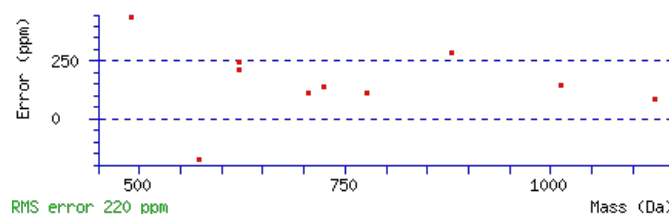

NCBI BLAST search of [VVGDLMTSPPLVVR](#)

## AT4G34120.1

(Parameters: blastp, nr protein database, expect=20000, no filter, PAM30)

Other BLAST [web gateways](#)

### All matches to this query

| Score | Mr(calc)  | Delta  | Sequence                       |
|-------|-----------|--------|--------------------------------|
| 33.0  | 1498.7772 | 0.0004 | <a href="#">VVGDLMTSPSLVVR</a> |
| 6.7   | 1498.7769 | 0.0007 | <a href="#">RVPKLNRPDQR</a>    |
| 1.9   | 1498.7769 | 0.0007 | <a href="#">GNTPLHIAVRKNR</a>  |
| 1.9   | 1498.7738 | 0.0038 | <a href="#">CLKIGEGGFGSVYK</a> |

Mascot: <http://www.matrixscience.com/>

**Peptide View**MS/MS Fragmentation of **FASSLSSESGEVK**

Found in **AT4G34200.1** in **TAIR\_Arabidopsis**, Symbols: EDA9 | EDA9 (embryo sac development arrest 9); NAD binding / amino acid binding / binding / catalytic / cofactor binding / oxidoreductase, acting on the CH-OH group of donors, NAD or NADP as acceptor / phosphoglycerate dehydrogenase | chr4:

Match to Query 3960: 1239.598300 from(620.806426,2+) index(1952)

Title: Elution from: 25.974 to 25.974 scan no 2621 cid35.00 polarity:+

Data file D1d-1\_1.mgf

Click mouse within plot area to zoom in by factor of two about that point

Or,   to  Da

Label all possible matches  Label matches used for scoring

Show Y-axis

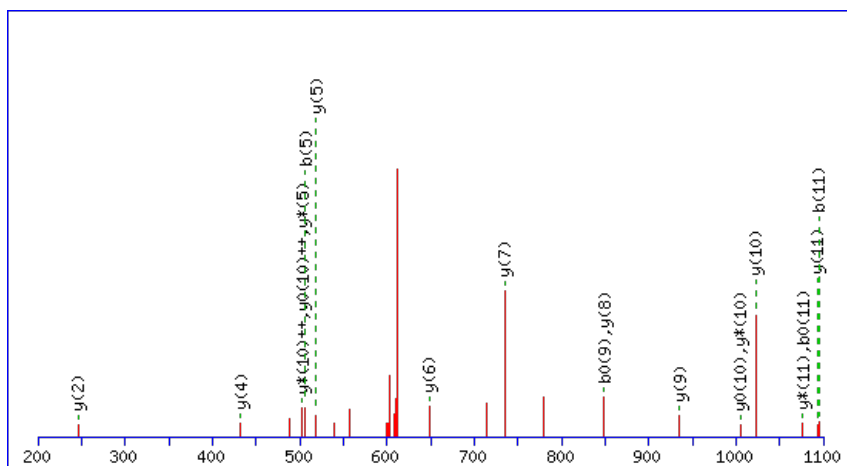

**Monoisotopic mass of neutral peptide Mr(calc):** 1239.5983

**Fixed modifications:** Carbamidomethyl (C) (apply to specified residues or termini only)

**Ions Score:** 89 **Expect:** 3.6e-009

**Matches:** 19/102 fragment ions using 20 most intense peaks ([help](#))

| #  | b         | b <sup>++</sup> | b <sup>0</sup> | b <sup>0++</sup> | Seq. | y         | y <sup>++</sup> | y*        | y <sup>*++</sup> | y <sup>0</sup> | y <sup>0++</sup> | #  |
|----|-----------|-----------------|----------------|------------------|------|-----------|-----------------|-----------|------------------|----------------|------------------|----|
| 1  | 148.0757  | 74.5415         |                |                  | F    |           |                 |           |                  |                |                  | 12 |
| 2  | 219.1128  | 110.0600        |                |                  | A    | 1093.5372 | 547.2722        | 1076.5106 | 538.7589         | 1075.5266      | 538.2669         | 11 |
| 3  | 306.1448  | 153.5761        | 288.1343       | 144.5708         | S    | 1022.5000 | 511.7537        | 1005.4735 | 503.2404         | 1004.4895      | 502.7484         | 10 |
| 4  | 393.1769  | 197.0921        | 375.1663       | 188.0868         | S    | 935.4680  | 468.2376        | 918.4415  | 459.7244         | 917.4575       | 459.2324         | 9  |
| 5  | 506.2609  | 253.6341        | 488.2504       | 244.6288         | L    | 848.4360  | 424.7216        | 831.4094  | 416.2084         | 830.4254       | 415.7163         | 8  |
| 6  | 593.2930  | 297.1501        | 575.2824       | 288.1448         | S    | 735.3519  | 368.1796        | 718.3254  | 359.6663         | 717.3414       | 359.1743         | 7  |
| 7  | 722.3355  | 361.6714        | 704.3250       | 352.6661         | E    | 648.3199  | 324.6636        | 631.2933  | 316.1503         | 630.3093       | 315.6583         | 6  |
| 8  | 809.3676  | 405.1874        | 791.3570       | 396.1821         | S    | 519.2773  | 260.1423        | 502.2508  | 251.6290         | 501.2667       | 251.1370         | 5  |
| 9  | 866.3890  | 433.6982        | 848.3785       | 424.6929         | G    | 432.2453  | 216.6263        | 415.2187  | 208.1130         | 414.2347       | 207.6210         | 4  |
| 10 | 995.4316  | 498.2195        | 977.4211       | 489.2142         | E    | 375.2238  | 188.1155        | 358.1973  | 179.6023         | 357.2132       | 179.1103         | 3  |
| 11 | 1094.5000 | 547.7537        | 1076.4895      | 538.7484         | V    | 246.1812  | 123.5942        | 229.1547  | 115.0810         |                |                  | 2  |
| 12 |           |                 |                |                  | K    | 147.1128  | 74.0600         | 130.0863  | 65.5468          |                |                  | 1  |

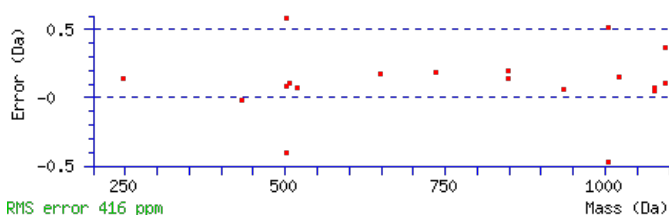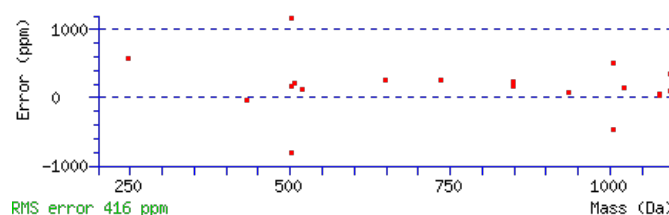

NCBI **BLAST** search of [FASSLSSESGEVK](#)

(Parameters: blastp, nr protein database, expect=20000, no filter, PAM30)

Other BLAST [web gateways](#)

# AT4G34200.1

All matches to this query

| Score | Mr(calc)  | Delta   | Sequence                     |
|-------|-----------|---------|------------------------------|
| 88.7  | 1239.5983 | 0.0000  | <a href="#">FASSLSESGEVK</a> |
| 5.6   | 1239.5956 | 0.0027  | <a href="#">KHDGNNNKEGK</a>  |
| 1.7   | 1239.5983 | 0.0000  | <a href="#">VYNDSSISSEVK</a> |
| 1.3   | 1239.5996 | -0.0013 | <a href="#">VYAATHGQEHK</a>  |
| 0.6   | 1239.5983 | 0.0000  | <a href="#">TKEDSSIFDAK</a>  |
| 0.5   | 1239.6005 | -0.0022 | <a href="#">KWFCGVCRK</a>    |

Mascot: <http://www.matrixscience.com/>

**Peptide View**MS/MS Fragmentation of **LIDGAIR**

Found in **AT4G34220.1** in **TAIR\_Arabidopsis**, Symbols: | leucine-rich repeat transmembrane protein kinase, putative | chr4:16381657-16384058  
REVERSE

Match to Query 838: 766.420590 from(384.217571,2+) index(2750)

Title: Elution from: 28.284 to 28.284 scan no 3458 cid35.00 polarity:+

Data file C7-3\_3.mgf

Click mouse within plot area to zoom in by factor of two about that point

Or,   to  Da

Label all possible matches  Label matches used for scoring

Show Y-axis

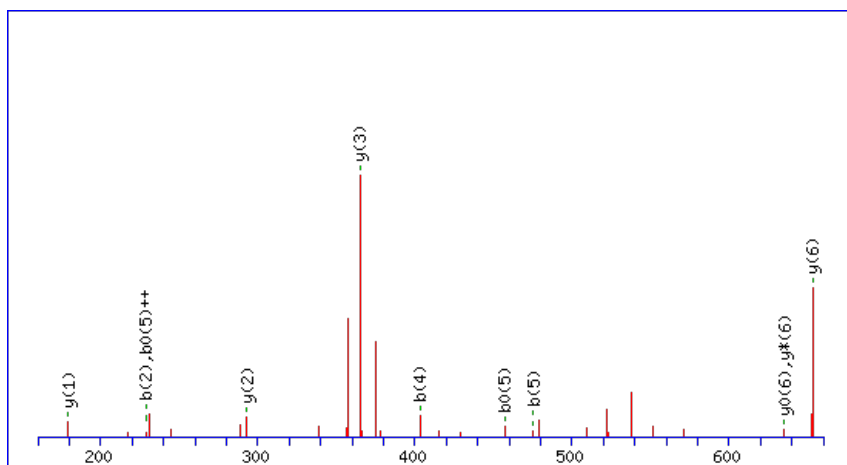

**Monoisotopic mass of neutral peptide Mr(calc):** 766.4197

**Fixed modifications:** Carbamidomethyl (C) (apply to specified residues or termini only)

**Ions Score:** 26 **Expect:** 0.022

**Matches:** 11/48 fragment ions using 19 most intense peaks ([help](#))

| # | b               | b <sup>++</sup> | b <sup>0</sup>  | b <sup>0++</sup> | Seq. | y               | y <sup>++</sup> | y*              | y <sup>*++</sup> | y <sup>0</sup>  | y <sup>0++</sup> | # |
|---|-----------------|-----------------|-----------------|------------------|------|-----------------|-----------------|-----------------|------------------|-----------------|------------------|---|
| 1 | 115.0884        | 58.0478         |                 |                  | L    |                 |                 |                 |                  |                 |                  | 7 |
| 2 | <b>229.1695</b> | 115.0884        |                 |                  | I    | <b>653.3459</b> | 327.1766        | <b>635.3223</b> | 318.1648         | <b>635.3354</b> | 318.1713         | 6 |
| 3 | 345.1935        | 173.1004        | 327.1829        | 164.0951         | D    | 539.2648        | 270.1360        | 521.2412        | 261.1243         | 521.2543        | 261.1308         | 5 |
| 4 | <b>403.2120</b> | 202.1096        | 385.2014        | 193.1043         | G    | 423.2408        | 212.1241        | 405.2173        | 203.1123         |                 |                  | 4 |
| 5 | <b>475.2461</b> | 238.1267        | <b>457.2355</b> | <b>229.1214</b>  | A    | <b>365.2223</b> | 183.1148        | 347.1988        | 174.1030         |                 |                  | 3 |
| 6 | 589.3272        | 295.1672        | 571.3166        | 286.1620         | I    | <b>293.1882</b> | 147.0977        | 275.1646        | 138.0859         |                 |                  | 2 |
| 7 |                 |                 |                 |                  | R    | <b>179.1071</b> | 90.0572         | 161.0835        | 81.0454          |                 |                  | 1 |

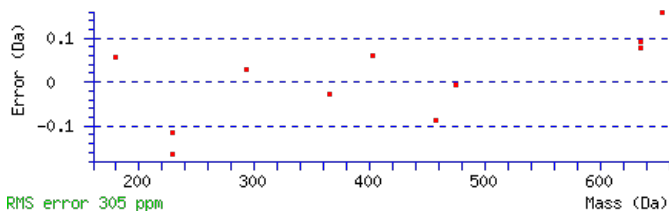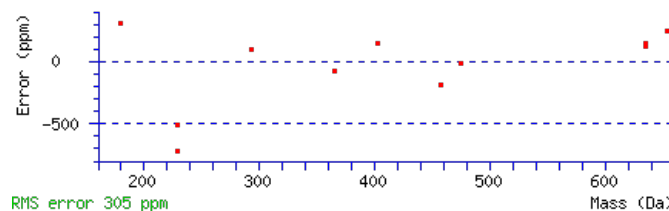

NCBI **BLAST** search of **LIDGAIR**

(Parameters: blastp, nr protein database, expect=20000, no filter, PAM30)

Other BLAST [web gateways](#)

**All matches to this query**

| Score | Mr(calc) | Delta  | Sequence                |
|-------|----------|--------|-------------------------|
| 26.3  | 766.4197 | 0.0009 | <a href="#">LIDGAIR</a> |
| 25.1  | 766.4197 | 0.0009 | <a href="#">LGVEALR</a> |



# AT4G34220.1

|      |          |        |                         |
|------|----------|--------|-------------------------|
| 23.2 | 766.4197 | 0.0009 | <a href="#">INELLR</a>  |
| 23.2 | 766.4197 | 0.0009 | <a href="#">LNLEIR</a>  |
| 22.5 | 766.4197 | 0.0009 | <a href="#">TPSIALR</a> |
| 14.1 | 766.4197 | 0.0009 | <a href="#">IAVDIAR</a> |
| 14.1 | 766.4197 | 0.0009 | <a href="#">IGEVLAR</a> |
| 13.4 | 766.4197 | 0.0009 | <a href="#">LEVQIR</a>  |
| 12.3 | 766.4197 | 0.0009 | <a href="#">LINEIR</a>  |
| 12.3 | 766.4197 | 0.0009 | <a href="#">LINELR</a>  |

**Mascot:** <http://www.matrixscience.com/>

**Peptide View**MS/MS Fragmentation of **VGFLLEIAK**

Found in **AT4G34290.1** in **TAIR\_Arabidopsis**, Symbols: | SWIB complex BAF60b domain-containing protein | chr4:16410887-16412126  
FORWARD

Match to Query 1217: 875.511782 from(438.763167,2+) index(5589)

Title: Elution from: 53.065 to 53.065 scan no 7233 cid35.00 polarity:+

Data file D1d-1\_1.mgf

Click mouse within plot area to zoom in by factor of two about that point

Or,   to  Da

Label all possible matches  Label matches used for scoring

Show Y-axis

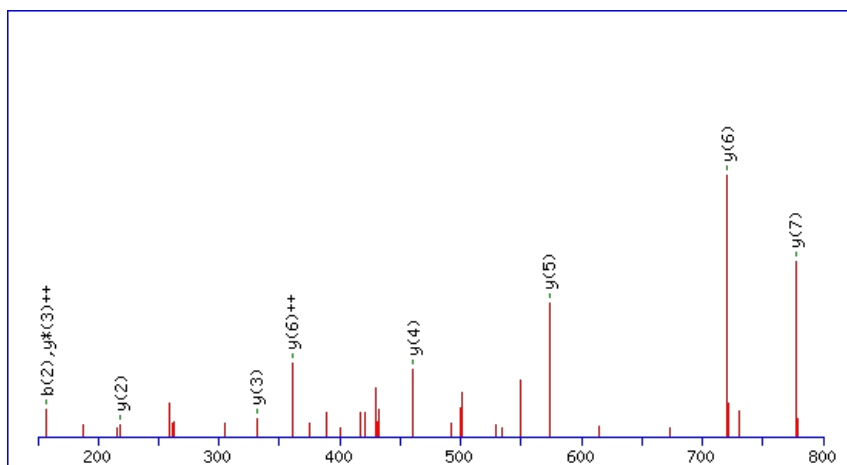

**Monoisotopic mass of neutral peptide Mr(calc):** 875.5116

**Fixed modifications:** Carbamidomethyl (C) (apply to specified residues or termini only)

**Ions Score:** 47 **Expect:** 4.3e-005

**Matches:** 9/56 fragment ions using 14 most intense peaks ([help](#))

| # | b        | b <sup>++</sup> | b <sup>0</sup> | b <sup>0++</sup> | Seq. | y        | y <sup>++</sup> | y*       | y <sup>*++</sup> | y <sup>0</sup> | y <sup>0++</sup> | # |
|---|----------|-----------------|----------------|------------------|------|----------|-----------------|----------|------------------|----------------|------------------|---|
| 1 | 100.0757 | 50.5415         |                |                  | V    |          |                 |          |                  |                |                  | 8 |
| 2 | 157.0972 | 79.0522         |                |                  | G    | 777.4505 | 389.2289        | 760.4240 | 380.7156         | 759.4400       | 380.2236         | 7 |
| 3 | 304.1656 | 152.5864        |                |                  | F    | 720.4291 | 360.7182        | 703.4025 | 352.2049         | 702.4185       | 351.7129         | 6 |
| 4 | 417.2496 | 209.1285        |                |                  | L    | 573.3606 | 287.1840        | 556.3341 | 278.6707         | 555.3501       | 278.1787         | 5 |
| 5 | 546.2922 | 273.6498        | 528.2817       | 264.6445         | E    | 460.2766 | 230.6419        | 443.2500 | 222.1287         | 442.2660       | 221.6366         | 4 |
| 6 | 659.3763 | 330.1918        | 641.3657       | 321.1865         | I    | 331.2340 | 166.1206        | 314.2074 | 157.6074         |                |                  | 3 |
| 7 | 730.4134 | 365.7103        | 712.4028       | 356.7051         | A    | 218.1499 | 109.5786        | 201.1234 | 101.0653         |                |                  | 2 |
| 8 |          |                 |                |                  | K    | 147.1128 | 74.0600         | 130.0863 | 65.5468          |                |                  | 1 |

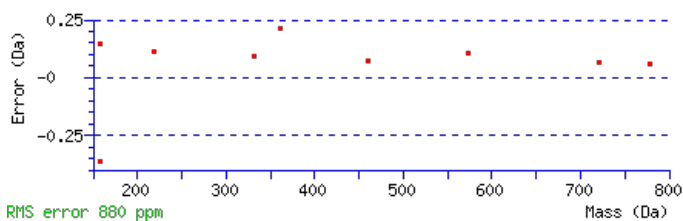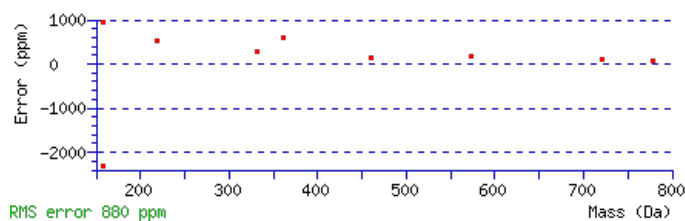

NCBI **BLAST** search of [VGFLLEIAK](#)

(Parameters: blastp, nr protein database, expect=20000, no filter, PAM30)

Other BLAST [web gateways](#)

All matches to this query

| Score | Mr(calc) | Delta  | Sequence                  |
|-------|----------|--------|---------------------------|
| 46.6  | 875.5116 | 0.0001 | <a href="#">VGFLLEIAK</a> |



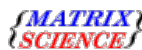

# Mascot Search Results

## Peptide View

MS/MS Fragmentation of **STSQHVSPITGEILN**

Found in **AT4G34620.1** in **TAIR\_Arabidopsis**, Symbols: SSR16 | SSR16 (ribosomal protein S16); structural constituent of ribosome | chr4:16535089-16536097 REVERSE

Match to Query 7158: 1600.742300 from(801.378426,2+) index(4591)

Title: Elution from: 44.214 to 44.214 scan no 5851 cid35.00 polarity:+

Data file D1d-2\_1.mgf

Click mouse within plot area to zoom in by factor of two about that point

Or,  to  Da

Label all possible matches  Label matches used for scoring

Show Y-axis

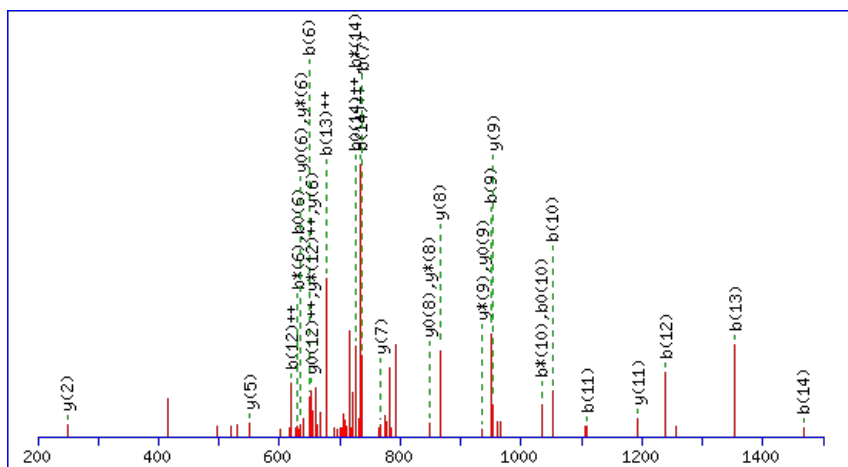

Monoisotopic mass of neutral peptide  $M_r(\text{calc})$ : 1600.7435

Fixed modifications: Carbamidomethyl (C) (apply to specified residues or termini only)

Ions Score: 56 Expect: 2.2e-005

Matches : 32/156 fragment ions using 42 most intense peaks [\(help\)](#)

| #  | b         | b <sup>++</sup> | b*        | b <sup>*++</sup> | b <sup>0</sup> | b <sup>0++</sup> | Seq. | y         | y <sup>++</sup> | y*        | y <sup>*++</sup> | y <sup>0</sup> | y <sup>0++</sup> | #  |
|----|-----------|-----------------|-----------|------------------|----------------|------------------|------|-----------|-----------------|-----------|------------------|----------------|------------------|----|
| 1  | 89.0363   | 45.0218         |           |                  | 71.0258        | 36.0165          | S    |           |                 |           |                  |                |                  | 15 |
| 2  | 191.0811  | 96.0442         |           |                  | 173.0705       | 87.0389          | T    | 1513.7217 | 757.3645        | 1495.6981 | 748.3527         | 1495.7112      | 748.3592         | 14 |
| 3  | 279.1101  | 140.0587        |           |                  | 261.0996       | 131.0534         | S    | 1411.6770 | 706.3421        | 1393.6534 | 697.3304         | 1393.6664      | 697.3369         | 13 |
| 4  | 409.1628  | 205.0850        | 391.1392  | 196.0732         | 391.1522       | 196.0797         | Q    | 1323.6479 | 662.3276        | 1305.6244 | 653.3158         | 1305.6374      | 653.3223         | 12 |
| 5  | 549.2128  | 275.1100        | 531.1892  | 266.0982         | 531.2022       | 266.1047         | H    | 1193.5953 | 597.3013        | 1175.5717 | 588.2895         | 1175.5847      | 588.2960         | 11 |
| 6  | 649.2782  | 325.1428        | 631.2546  | 316.1310         | 631.2677       | 316.1375         | V    | 1053.5453 | 527.2763        | 1035.5217 | 518.2645         | 1035.5347      | 518.2710         | 10 |
| 7  | 737.3073  | 369.1573        | 719.2837  | 360.1455         | 719.2967       | 360.1520         | S    | 953.4798  | 477.2436        | 935.4563  | 468.2318         | 935.4693       | 468.2383         | 9  |
| 8  | 835.3571  | 418.1822        | 817.3335  | 409.1704         | 817.3465       | 409.1769         | P    | 865.4508  | 433.2290        | 847.4272  | 424.2172         | 847.4402       | 424.2237         | 8  |
| 9  | 949.4382  | 475.2227        | 931.4146  | 466.2109         | 931.4276       | 466.2175         | I    | 767.4010  | 384.2041        | 749.3774  | 375.1923         | 749.3904       | 375.1988         | 7  |
| 10 | 1051.4829 | 526.2451        | 1033.4593 | 517.2333         | 1033.4723      | 517.2398         | T    | 653.3199  | 327.1636        | 635.2963  | 318.1518         | 635.3093       | 318.1583         | 6  |
| 11 | 1109.5014 | 555.2543        | 1091.4778 | 546.2425         | 1091.4908      | 546.2491         | G    | 551.2752  | 276.1412        | 533.2516  | 267.1294         | 533.2646       | 267.1359         | 5  |
| 12 | 1239.5410 | 620.2742        | 1221.5174 | 611.2624         | 1221.5305      | 611.2689         | E    | 493.2567  | 247.1320        | 475.2331  | 238.1202         | 475.2461       | 238.1267         | 4  |
| 13 | 1353.6221 | 677.3147        | 1335.5985 | 668.3029         | 1335.6116      | 668.3094         | I    | 363.2170  | 182.1122        | 345.1935  | 173.1004         |                |                  | 3  |
| 14 | 1467.7032 | 734.3553        | 1449.6796 | 725.3435         | 1449.6927      | 725.3500         | L    | 249.1359  | 125.0716        | 231.1124  | 116.0598         |                |                  | 2  |
| 15 |           |                 |           |                  |                |                  | N    | 135.0548  | 68.0311         | 117.0313  | 59.0193          |                |                  | 1  |

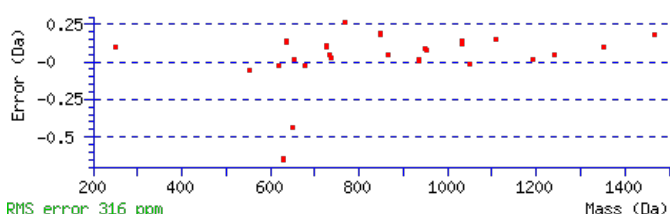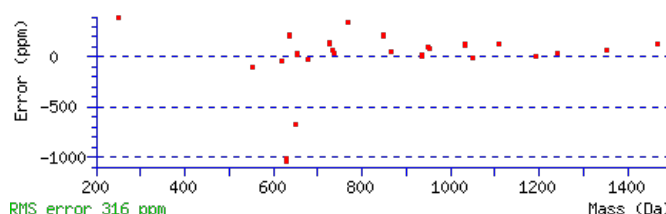

## AT4G34620.1

NCBI **BLAST** search of [STSQHVSPITGEILN](#)

(Parameters: blastp, nr protein database, expect=20000, no filter, PAM30)

Other BLAST [web gateways](#)

### All matches to this query

| Score | Mr(calc)  | Delta   | Sequence                        |
|-------|-----------|---------|---------------------------------|
| 55.8  | 1600.7435 | -0.0012 | <a href="#">STSQHVSPITGEILN</a> |
| 0.0   | 1600.7457 | -0.0034 | <a href="#">NNDGEIKFGYSLVK</a>  |

**Mascot:** <http://www.matrixscience.com/>

**Peptide View**MS/MS Fragmentation of **NVLTQFWGMDFTTDK**Found in **AT4G34670.1** in **TAIR\_Arabidopsis**, Symbols: | 40S ribosomal protein S3A (RPS3aB) | chr4:16548729-16550227 FORWARD

Match to Query 8601: 1817.829928 from(909.922240,2+) index(9886)

Title: Elution from: 92.605 to 92.605 scan no 13922 cid35.00 polarity:+

Data file 0-2\_2.mgf

Click mouse within plot area to zoom in by factor of two about that point

Or,   to  Da Label all possible matches  Label matches used for scoring Show Y-axis 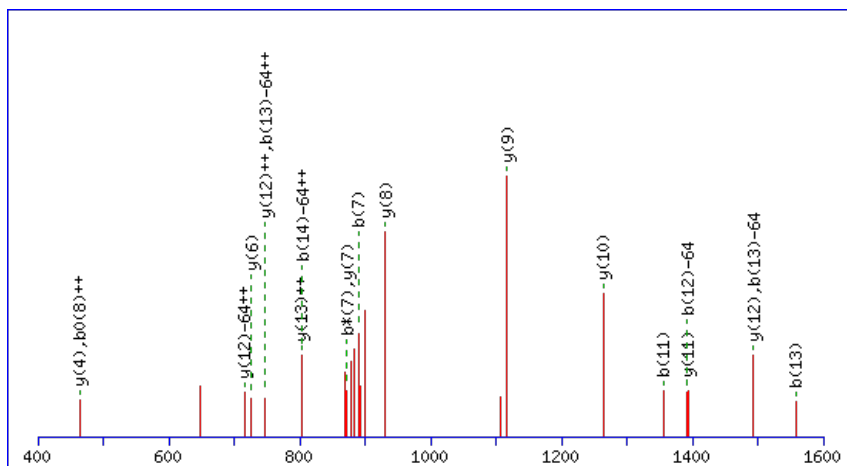Monoisotopic mass of neutral peptide  $M_r(\text{calc})$ : 1817.8295

Fixed modifications: Carbamidomethyl (C) (apply to specified residues or termini only)

Variable modifications:

M9 : Oxidation (M), with neutral losses 0.0000 (shown in table), 63.9983

Ions Score: 63 Expect: 9e-007

Matches : 20/244 fragment ions using 26 most intense peaks ([help](#))

| #  | b         | b <sup>++</sup> | b*        | b <sup>*++</sup> | b <sup>0</sup> | b <sup>0++</sup> | Seq. | y         | y <sup>++</sup> | y*        | y <sup>*++</sup> | y <sup>0</sup> | y <sup>0++</sup> | #  |
|----|-----------|-----------------|-----------|------------------|----------------|------------------|------|-----------|-----------------|-----------|------------------|----------------|------------------|----|
| 1  | 115.0502  | 58.0287         | 98.0237   | 49.5155          |                |                  | N    |           |                 |           |                  |                |                  | 15 |
| 2  | 214.1186  | 107.5629        | 197.0921  | 99.0497          |                |                  | V    | 1704.7938 | 852.9005        | 1687.7672 | 844.3873         | 1686.7832      | 843.8952         | 14 |
| 3  | 327.2027  | 164.1050        | 310.1761  | 155.5917         |                |                  | L    | 1605.7254 | 803.3663        | 1588.6988 | 794.8531         | 1587.7148      | 794.3610         | 13 |
| 4  | 428.2504  | 214.6288        | 411.2238  | 206.1155         | 410.2398       | 205.6235         | T    | 1492.6413 | 746.8243        | 1475.6148 | 738.3110         | 1474.6307      | 737.8190         | 12 |
| 5  | 556.3089  | 278.6581        | 539.2824  | 270.1448         | 538.2984       | 269.6528         | Q    | 1391.5936 | 696.3005        | 1374.5671 | 687.7872         | 1373.5831      | 687.2952         | 11 |
| 6  | 703.3774  | 352.1923        | 686.3508  | 343.6790         | 685.3668       | 343.1870         | F    | 1263.5351 | 632.2712        | 1246.5085 | 623.7579         | 1245.5245      | 623.2659         | 10 |
| 7  | 889.4567  | 445.2320        | 872.4301  | 436.7187         | 871.4461       | 436.2267         | W    | 1116.4666 | 558.7370        | 1099.4401 | 550.2237         | 1098.4561      | 549.7317         | 9  |
| 8  | 946.4781  | 473.7427        | 929.4516  | 465.2294         | 928.4676       | 464.7374         | G    | 930.3873  | 465.6973        | 913.3608  | 457.1840         | 912.3768       | 456.6920         | 8  |
| 9  | 1093.5135 | 547.2604        | 1076.4870 | 538.7471         | 1075.5030      | 538.2551         | M    | 873.3659  | 437.1866        | 856.3393  | 428.6733         | 855.3553       | 428.1813         | 7  |
| 10 | 1208.5405 | 604.7739        | 1191.5139 | 596.2606         | 1190.5299      | 595.7686         | D    | 726.3305  | 363.6689        | 709.3039  | 355.1556         | 708.3199       | 354.6636         | 6  |
| 11 | 1355.6089 | 678.3081        | 1338.5823 | 669.7948         | 1337.5983      | 669.3028         | F    | 611.3035  | 306.1554        | 594.2770  | 297.6421         | 593.2930       | 297.1501         | 5  |
| 12 | 1456.6566 | 728.8319        | 1439.6300 | 720.3186         | 1438.6460      | 719.8266         | T    | 464.2351  | 232.6212        | 447.2086  | 224.1079         | 446.2245       | 223.6159         | 4  |
| 13 | 1557.7042 | 779.3558        | 1540.6777 | 770.8425         | 1539.6937      | 770.3505         | T    | 363.1874  | 182.0974        | 346.1609  | 173.5841         | 345.1769       | 173.0921         | 3  |
| 14 | 1672.7312 | 836.8692        | 1655.7046 | 828.3560         | 1654.7206      | 827.8639         | D    | 262.1397  | 131.5735        | 245.1132  | 123.0602         | 244.1292       | 122.5682         | 2  |
| 15 |           |                 |           |                  |                |                  | K    | 147.1128  | 74.0600         | 130.0863  | 65.5468          |                |                  | 1  |

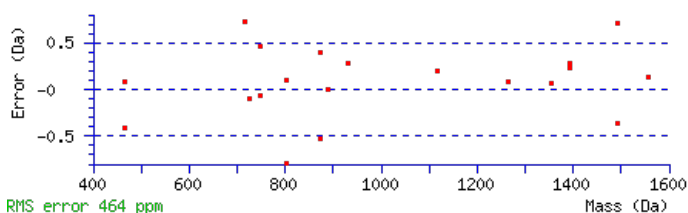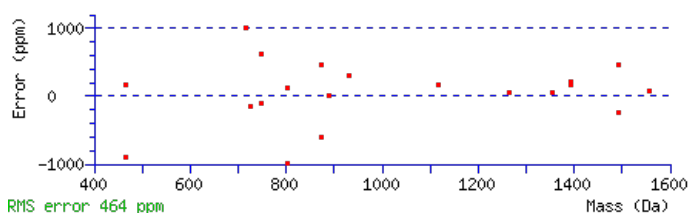

## AT4G34670.1

NCBI **BLAST** search of [NVLTQFWGMDFETDK](#)

(Parameters: blastp, nr protein database, expect=20000, no filter, PAM30)

Other BLAST [web gateways](#)

### All matches to this query

| Score | Mr(calc)  | Delta  | Sequence                        |
|-------|-----------|--------|---------------------------------|
| 62.6  | 1817.8295 | 0.0005 | <a href="#">NVLTQFWGMDFETDK</a> |

Mascot: <http://www.matrixscience.com/>

# MASCOT SCIENCE Mascot Search Results

## Peptide View

### MS/MS Fragmentation of **SLTELTGSPQLR**

Found in **AT4G34860.1** in **TAIR\_Arabidopsis**, Symbols: | beta-fructofuranosidase, putative / invertase, putative / saccharase, putative / beta-fructosidase, putative | chr4:16609960-16612024 REVERSE

Match to Query 5105: 1316.651452 from(659.333002,2+) index(9969)

Title: Elution from: 88.335 to 88.335 scan no 13443 cid35.00 polarity:+

Data file C7-1\_1.mgf

Click mouse within plot area to zoom in by factor of two about that point

Or,   to  Da

Label all possible matches  Label matches used for scoring

Show Y-axis

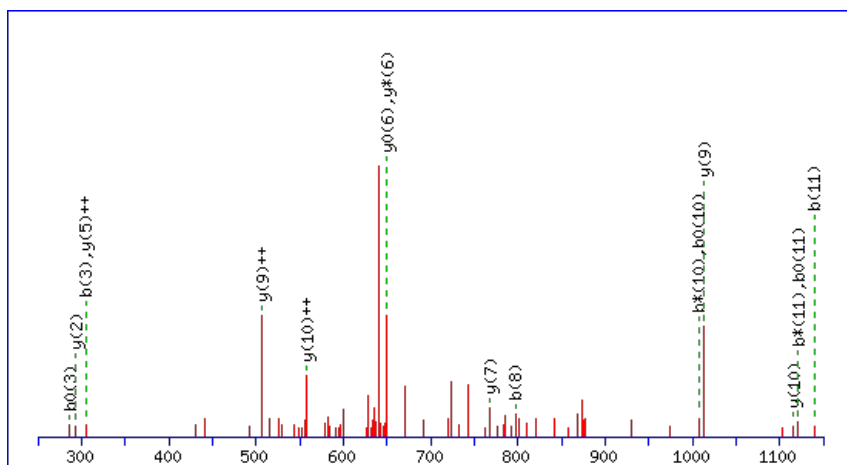

Monoisotopic mass of neutral peptide  $M_r(\text{calc})$ : 1316.6512

Fixed modifications: Carbamidomethyl (C) (apply to specified residues or termini only)

Ions Score: 23 Expect: 0.038

Matches : 17/106 fragment ions using 25 most intense peaks ([help](#))

| #  | b                | b <sup>++</sup> | b*               | b <sup>*++</sup> | b <sup>0</sup>   | b <sup>0++</sup> | Seq. | y                | y <sup>++</sup> | y*              | y <sup>*++</sup> | y <sup>0</sup>  | y <sup>0++</sup> | #  |
|----|------------------|-----------------|------------------|------------------|------------------|------------------|------|------------------|-----------------|-----------------|------------------|-----------------|------------------|----|
| 1  | 89.0363          | 45.0218         |                  |                  | 71.0258          | 36.0165          | S    |                  |                 |                 |                  |                 |                  | 12 |
| 2  | 203.1174         | 102.0624        |                  |                  | 185.1069         | 93.0571          | L    | 1229.6295        | 615.3184        | 1211.6059       | 606.3066         | 1211.6189       | 606.3131         | 11 |
| 3  | <b>305.1622</b>  | 153.0847        |                  |                  | <b>287.1516</b>  | 144.0794         | T    | <b>1115.5484</b> | <b>558.2778</b> | 1097.5248       | 549.2660         | 1097.5378       | 549.2725         | 10 |
| 4  | 435.2018         | 218.1045        |                  |                  | 417.1912         | 209.0992         | E    | <b>1013.5036</b> | <b>507.2555</b> | 995.4801        | 498.2437         | 995.4931        | 498.2502         | 9  |
| 5  | 549.2829         | 275.1451        |                  |                  | 531.2723         | 266.1398         | L    | 883.4640         | 442.2356        | 865.4404        | 433.2239         | 865.4534        | 433.2304         | 8  |
| 6  | 651.3276         | 326.1674        |                  |                  | 633.3170         | 317.1622         | T    | <b>769.3829</b>  | 385.1951        | 751.3593        | 376.1833         | 751.3723        | 376.1898         | 7  |
| 7  | 709.3461         | 355.1767        |                  |                  | 691.3355         | 346.1714         | G    | 667.3382         | 334.1727        | <b>649.3146</b> | 325.1609         | <b>649.3276</b> | 325.1675         | 6  |
| 8  | <b>797.3752</b>  | 399.1912        |                  |                  | 779.3646         | 390.1859         | S    | 609.3197         | <b>305.1635</b> | 591.2961        | 296.1517         | 591.3091        | 296.1582         | 5  |
| 9  | 895.4250         | 448.2161        |                  |                  | 877.4144         | 439.2108         | P    | 521.2906         | 261.1490        | 503.2671        | 252.1372         |                 |                  | 4  |
| 10 | 1025.4776        | 513.2424        | <b>1007.4540</b> | 504.2306         | <b>1007.4670</b> | 504.2372         | Q    | 423.2408         | 212.1241        | 405.2173        | 203.1123         |                 |                  | 3  |
| 11 | <b>1139.5587</b> | 570.2830        | <b>1121.5351</b> | 561.2712         | <b>1121.5481</b> | 561.2777         | L    | <b>293.1882</b>  | 147.0977        | 275.1646        | 138.0859         |                 |                  | 2  |
| 12 |                  |                 |                  |                  |                  |                  | R    | 179.1071         | 90.0572         | 161.0835        | 81.0454          |                 |                  | 1  |

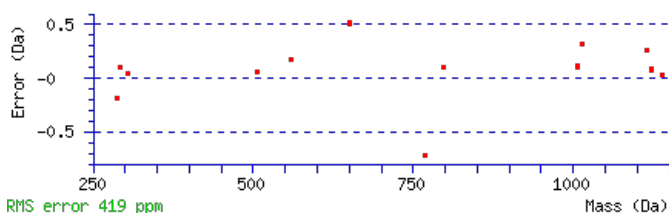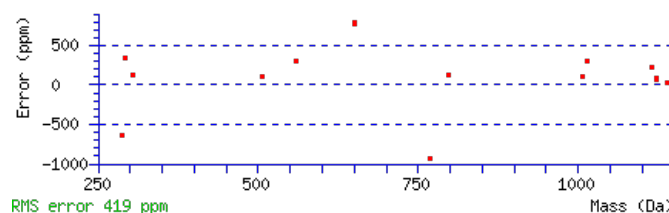

NCBI BLAST search of **SLTELTGSPQLR**

(Parameters: blastp, nr protein database, expect=20000, no filter, PAM30)

Other BLAST [web gateways](#)



AT4G34860.1

All matches to this query

| Score | Mr(calc)  | Delta   | Sequence                       |
|-------|-----------|---------|--------------------------------|
| 22.6  | 1316.6512 | 0.0002  | <a href="#">SLTELTGSPQLR</a>   |
| 10.1  | 1316.6512 | 0.0002  | <a href="#">SDVITAAQEIVR</a>   |
| 7.2   | 1316.6512 | 0.0002  | <a href="#">DSVIESSLPKR</a>    |
| 6.0   | 1316.6535 | -0.0020 | <a href="#">NDPVESLLLFR</a>    |
| 3.4   | 1316.6514 | 0.0001  | <a href="#">GHPRVMAYVLR</a>    |
| 1.0   | 1316.6512 | 0.0002  | <a href="#">KTAGDLAGPSASVK</a> |

Mascot: <http://www.matrixscience.com/>

**Peptide View**MS/MS Fragmentation of **IEMELFADTTPNTAENFR**

Found in **AT4G34870.1** in **TAIR\_Arabidopsis**, Symbols: ATCYP1, ROC5 | ROC5 (ROTAMASE CYP 5); peptidyl-prolyl cis-trans isomerase | chr4:16614456-16614974 FORWARD

Match to Query 9546: 2097.966694 from(1049.990623,2+) index(8655)

Title: Elution from: 75.965 to 75.965 scan no 11510 cid35.00 polarity:+

Data file D1d-3\_2.mgf

Click mouse within plot area to zoom in by factor of two about that point

Or,   to  Da

Label all possible matches  Label matches used for scoring

Show Y-axis

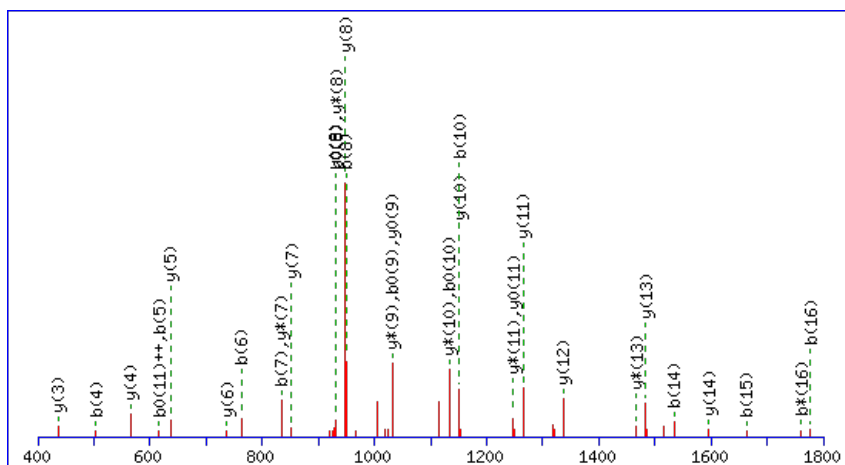

Monoisotopic mass of neutral peptide  $M_r(\text{calc})$ : 2097.9677

Fixed modifications: Carbamidomethyl (C) (apply to specified residues or termini only)

Ions Score: 95 Expect: 7.9e-010

Matches : 34/174 fragment ions using 32 most intense peaks ([help](#))

| #  | b                | b <sup>++</sup> | b*               | b <sup>*++</sup> | b <sup>0</sup>   | b <sup>0++</sup> | Seq. | y                | y <sup>++</sup> | y*               | y <sup>*++</sup> | y <sup>0</sup>   | y <sup>0++</sup> | #  |
|----|------------------|-----------------|------------------|------------------|------------------|------------------|------|------------------|-----------------|------------------|------------------|------------------|------------------|----|
| 1  | 114.0913         | 57.5493         |                  |                  |                  |                  | I    |                  |                 |                  |                  |                  |                  | 18 |
| 2  | 243.1339         | 122.0706        |                  |                  | 225.1234         | 113.0653         | E    | 1985.8909        | 993.4491        | 1968.8644        | 984.9358         | 1967.8804        | 984.4438         | 17 |
| 3  | 374.1744         | 187.5908        |                  |                  | 356.1639         | 178.5856         | M    | 1856.8483        | 928.9278        | 1839.8218        | 920.4145         | 1838.8378        | 919.9225         | 16 |
| 4  | <b>503.2170</b>  | 252.1121        |                  |                  | 485.2064         | 243.1069         | E    | 1725.8079        | 863.4076        | 1708.7813        | 854.8943         | 1707.7973        | 854.4023         | 15 |
| 5  | <b>616.3011</b>  | 308.6542        |                  |                  | 598.2905         | 299.6489         | L    | <b>1596.7653</b> | 798.8863        | 1579.7387        | 790.3730         | 1578.7547        | 789.8810         | 14 |
| 6  | <b>763.3695</b>  | 382.1884        |                  |                  | 745.3589         | 373.1831         | F    | <b>1483.6812</b> | 742.3442        | <b>1466.6547</b> | 733.8310         | 1465.6706        | 733.3390         | 13 |
| 7  | <b>834.4066</b>  | 417.7069        |                  |                  | 816.3960         | 408.7017         | A    | <b>1336.6128</b> | 668.8100        | 1319.5862        | 660.2968         | 1318.6022        | 659.8047         | 12 |
| 8  | <b>949.4335</b>  | 475.2204        |                  |                  | <b>931.4230</b>  | 466.2151         | D    | <b>1265.5757</b> | 633.2915        | <b>1248.5491</b> | 624.7782         | <b>1247.5651</b> | 624.2862         | 11 |
| 9  | 1050.4812        | 525.7443        |                  |                  | <b>1032.4707</b> | 516.7390         | T    | <b>1150.5487</b> | 575.7780        | <b>1133.5222</b> | 567.2647         | 1132.5382        | 566.7727         | 10 |
| 10 | <b>1151.5289</b> | 576.2681        |                  |                  | <b>1133.5183</b> | 567.2628         | T    | 1049.5010        | 525.2542        | <b>1032.4745</b> | 516.7409         | <b>1031.4905</b> | 516.2489         | 9  |
| 11 | 1248.5817        | 624.7945        |                  |                  | 1230.5711        | <b>615.7892</b>  | P    | <b>948.4534</b>  | 474.7303        | <b>931.4268</b>  | 466.2170         | <b>930.4428</b>  | 465.7250         | 8  |
| 12 | 1362.6246        | 681.8159        | 1345.5980        | 673.3027         | 1344.6140        | 672.8107         | N    | <b>851.4006</b>  | 426.2039        | <b>834.3741</b>  | 417.6907         | 833.3900         | 417.1987         | 7  |
| 13 | 1463.6723        | 732.3398        | 1446.6457        | 723.8265         | 1445.6617        | 723.3345         | T    | <b>737.3577</b>  | 369.1825        | 720.3311         | 360.6692         | 719.3471         | 360.1772         | 6  |
| 14 | <b>1534.7094</b> | 767.8583        | 1517.6828        | 759.3451         | 1516.6988        | 758.8530         | A    | <b>636.3100</b>  | 318.6586        | 619.2835         | 310.1454         | 618.2994         | 309.6534         | 5  |
| 15 | <b>1663.7520</b> | 832.3796        | 1646.7254        | 823.8664         | 1645.7414        | 823.3743         | E    | <b>565.2729</b>  | 283.1401        | 548.2463         | 274.6268         | 547.2623         | 274.1348         | 4  |
| 16 | <b>1777.7949</b> | 889.4011        | <b>1760.7684</b> | 880.8878         | 1759.7843        | 880.3958         | N    | <b>436.2303</b>  | 218.6188        | 419.2037         | 210.1055         |                  |                  | 3  |
| 17 | 1924.8633        | 962.9353        | 1907.8368        | 954.4220         | 1906.8528        | 953.9300         | F    | 322.1874         | 161.5973        | 305.1608         | 153.0840         |                  |                  | 2  |
| 18 |                  |                 |                  |                  |                  |                  | R    | 175.1190         | 88.0631         | 158.0924         | 79.5498          |                  |                  | 1  |

AT4G34870.1

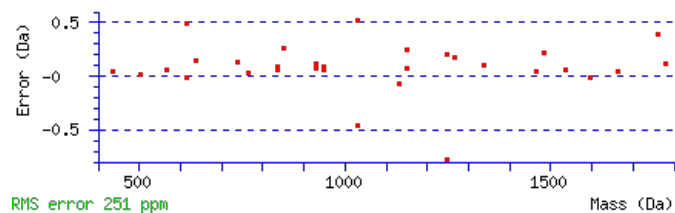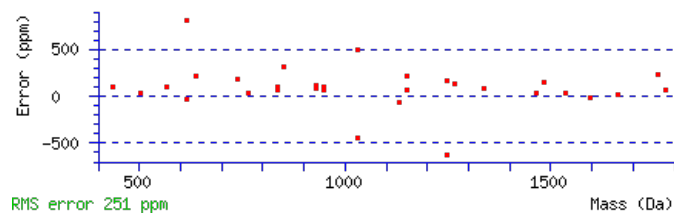

NCBI **BLAST** search of [IEMELFADTTPNTAENFR](#)

(Parameters: blastp, nr protein database, expect=20000, no filter, PAM30)

Other BLAST [web gateways](#)

**All matches to this query**

| Score | Mr(calc)  | Delta   | Sequence                           |
|-------|-----------|---------|------------------------------------|
| 95.4  | 2097.9677 | -0.0010 | <a href="#">IEMELFADTTPNTAENFR</a> |
| 4.6   | 2097.9711 | -0.0044 | <a href="#">SALSMLKHDSEGKEFMEK</a> |
| 1.5   | 2097.9679 | -0.0012 | <a href="#">KNEMMMIPAAAASSKEMR</a> |
| 1.5   | 2097.9679 | -0.0012 | <a href="#">KNEMMMIPAAAASSKEMR</a> |

Mascot: <http://www.matrixscience.com/>

**Peptide View**MS/MS Fragmentation of **TLLEDPEFR**

Found in **AT4G35000.1** in **TAIR\_Arabidopsis**, Symbols: APX3 | APX3 (ASCORBATE PEROXIDASE 3); L-ascorbate peroxidase | chr4:16665012-16667546 REVERSE

Match to Query 3024: 1118.563790 from(560.289171,2+) index(5073)

Title: Elution from: 46.919 to 46.919 scan no 6497 cid35.00 polarity:+

Data file D12h-2\_3.mgf

Click mouse within plot area to zoom in by factor of two about that point

Or,   to  Da

Label all possible matches  Label matches used for scoring

Show Y-axis

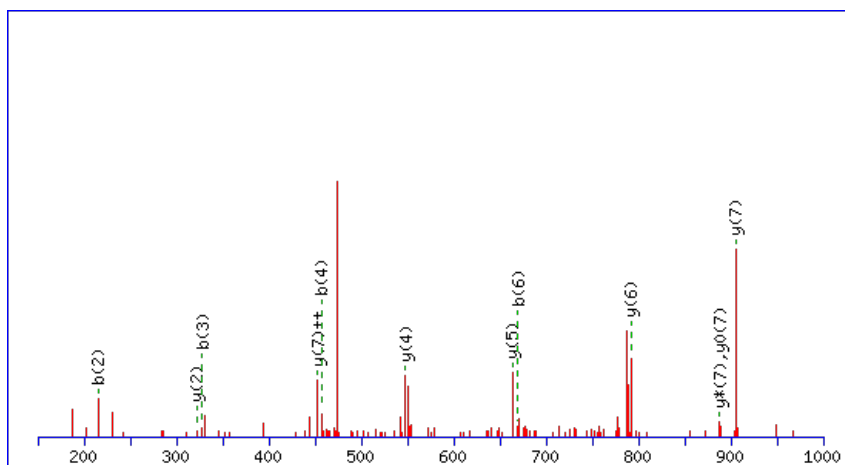

Monoisotopic mass of neutral peptide Mr(calc): 1118.5608

Fixed modifications: Carbamidomethyl (C) (apply to specified residues or termini only)

Ions Score: 25 Expect: 0.018

Matches : 12/76 fragment ions using 24 most intense peaks ([help](#))

| # | b               | b <sup>++</sup> | b <sup>0</sup> | b <sup>0++</sup> | Seq. | y               | y <sup>++</sup> | y*              | y <sup>*++</sup> | y <sup>0</sup>  | y <sup>0++</sup> | # |
|---|-----------------|-----------------|----------------|------------------|------|-----------------|-----------------|-----------------|------------------|-----------------|------------------|---|
| 1 | 102.0550        | 51.5311         | 84.0444        | 42.5258          | T    |                 |                 |                 |                  |                 |                  | 9 |
| 2 | <b>215.1390</b> | 108.0731        | 197.1285       | 99.0679          | L    | 1018.5204       | 509.7638        | 1001.4938       | 501.2506         | 1000.5098       | 500.7585         | 8 |
| 3 | <b>328.2231</b> | 164.6152        | 310.2125       | 155.6099         | L    | <b>905.4363</b> | <b>453.2218</b> | <b>888.4098</b> | 444.7085         | <b>887.4258</b> | 444.2165         | 7 |
| 4 | <b>457.2657</b> | 229.1365        | 439.2551       | 220.1312         | E    | <b>792.3523</b> | 396.6798        | 775.3257        | 388.1665         | 774.3417        | 387.6745         | 6 |
| 5 | 572.2926        | 286.6499        | 554.2821       | 277.6447         | D    | <b>663.3097</b> | 332.1585        | 646.2831        | 323.6452         | 645.2991        | 323.1532         | 5 |
| 6 | <b>669.3454</b> | 335.1763        | 651.3348       | 326.1710         | P    | <b>548.2827</b> | 274.6450        | 531.2562        | 266.1317         | 530.2722        | 265.6397         | 4 |
| 7 | 798.3880        | 399.6976        | 780.3774       | 390.6923         | E    | 451.2300        | 226.1186        | 434.2034        | 217.6053         | 433.2194        | 217.1133         | 3 |
| 8 | 945.4564        | 473.2318        | 927.4458       | 464.2266         | F    | <b>322.1874</b> | 161.5973        | 305.1608        | 153.0840         |                 |                  | 2 |
| 9 |                 |                 |                |                  | R    | 175.1190        | 88.0631         | 158.0924        | 79.5498          |                 |                  | 1 |

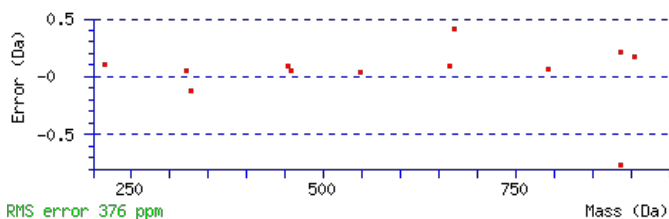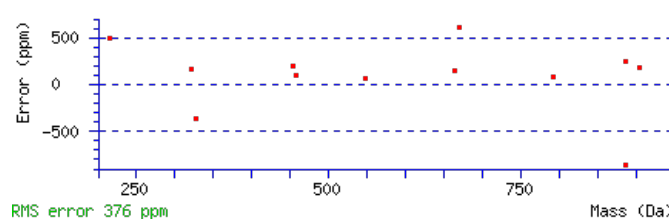

NCBI **BLAST** search of **TLLEDPEFR**

(Parameters: blastp, nr protein database, expect=20000, no filter, PAM30)

Other BLAST [web gateways](#)

All matches to this query

| Score | Mr(calc) | Delta | Sequence |
|-------|----------|-------|----------|
|       |          |       |          |

# AT4G35000.1

|      |           |         |                           |
|------|-----------|---------|---------------------------|
| 24.6 | 1118.5608 | 0.0030  | <a href="#">TLLEDPEFR</a> |
| 1.2  | 1118.5641 | -0.0003 | <a href="#">TLMQEQLEK</a> |

**Mascot:** <http://www.matrixscience.com/>

**Peptide View**MS/MS Fragmentation of **TWPEDILPLQPVGR**Found in **AT4G35090.1** in **TAIR\_Arabidopsis**, Symbols: CAT2 | CAT2 (CATALASE 2); catalase | chr4:16700942-16703220 REVERSE

Match to Query 7712: 1638.812260 from(820.413406,2+) index(10040)

Title: Elution from: 91.726 to 91.726 scan no 13776 cid35.00 polarity:+

Data file C7-3\_1.mgf

Click mouse within plot area to zoom in by factor of two about that point

Or,   to  Da Label all possible matches  Label matches used for scoring Show Y-axis 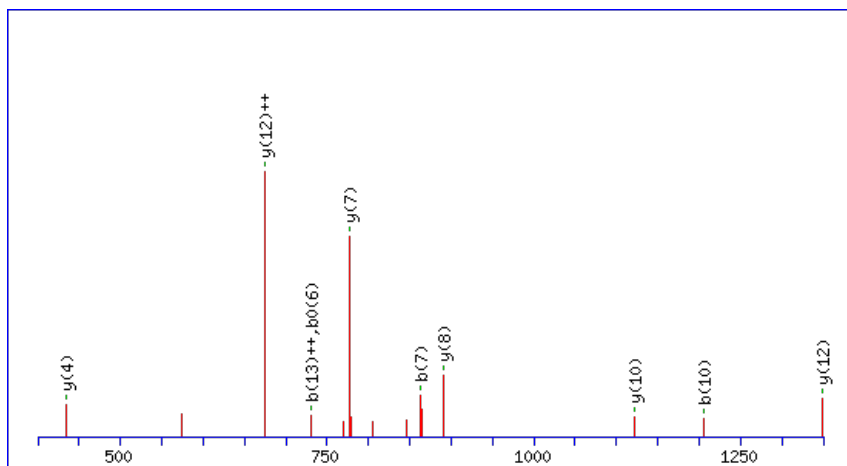Monoisotopic mass of neutral peptide  $M_r(\text{calc})$ : 1638.8108

Fixed modifications: Carbamidomethyl (C) (apply to specified residues or termini only)

Ions Score: 39 Expect: 0.0012

Matches : 10/120 fragment ions using 11 most intense peaks ([help](#))

| #  | b         | b <sup>++</sup> | b*        | b <sup>*++</sup> | b <sup>0</sup> | b <sup>0++</sup> | Seq. | y         | y <sup>++</sup> | y*        | y <sup>*++</sup> | y <sup>0</sup> | y <sup>0++</sup> | #  |
|----|-----------|-----------------|-----------|------------------|----------------|------------------|------|-----------|-----------------|-----------|------------------|----------------|------------------|----|
| 1  | 103.0520  | 52.0296         |           |                  | 85.0414        | 43.0244          | T    |           |                 |           |                  |                |                  | 14 |
| 2  | 291.1254  | 146.0663        |           |                  | 273.1148       | 137.0610         | W    | 1537.7734 | 769.3903        | 1519.7498 | 760.3785         | 1519.7628      | 760.3850         | 13 |
| 3  | 389.1752  | 195.0912        |           |                  | 371.1646       | 186.0859         | P    | 1349.7000 | 675.3536        | 1331.6764 | 666.3418         | 1331.6894      | 666.3483         | 12 |
| 4  | 519.2148  | 260.1110        |           |                  | 501.2042       | 251.1058         | E    | 1251.6502 | 626.3287        | 1233.6266 | 617.3169         | 1233.6396      | 617.3234         | 11 |
| 5  | 635.2388  | 318.1230        |           |                  | 617.2282       | 309.1177         | D    | 1121.6106 | 561.3089        | 1103.5870 | 552.2971         | 1103.6000      | 552.3036         | 10 |
| 6  | 749.3199  | 375.1636        |           |                  | 731.3093       | 366.1583         | I    | 1005.5866 | 503.2969        | 987.5630  | 494.2851         |                |                  | 9  |
| 7  | 863.4010  | 432.2041        |           |                  | 845.3904       | 423.1988         | L    | 891.5055  | 446.2564        | 873.4819  | 437.2446         |                |                  | 8  |
| 8  | 961.4508  | 481.2290        |           |                  | 943.4402       | 472.2237         | P    | 777.4244  | 389.2158        | 759.4008  | 380.2040         |                |                  | 7  |
| 9  | 1075.5319 | 538.2696        |           |                  | 1057.5213      | 529.2643         | L    | 679.3746  | 340.1909        | 661.3510  | 331.1791         |                |                  | 6  |
| 10 | 1205.5845 | 603.2959        | 1187.5609 | 594.2841         | 1187.5740      | 594.2906         | Q    | 565.2935  | 283.1504        | 547.2699  | 274.1386         |                |                  | 5  |
| 11 | 1303.6343 | 652.3208        | 1285.6107 | 643.3090         | 1285.6238      | 643.3155         | P    | 435.2408  | 218.1241        | 417.2173  | 209.1123         |                |                  | 4  |
| 12 | 1403.6998 | 702.3535        | 1385.6762 | 693.3417         | 1385.6892      | 693.3482         | V    | 337.1910  | 169.0992        | 319.1675  | 160.0874         |                |                  | 3  |
| 13 | 1461.7183 | 731.3628        | 1443.6947 | 722.3510         | 1443.7077      | 722.3575         | G    | 237.1256  | 119.0664        | 219.1020  | 110.0546         |                |                  | 2  |
| 14 |           |                 |           |                  |                |                  | R    | 179.1071  | 90.0572         | 161.0835  | 81.0454          |                |                  | 1  |

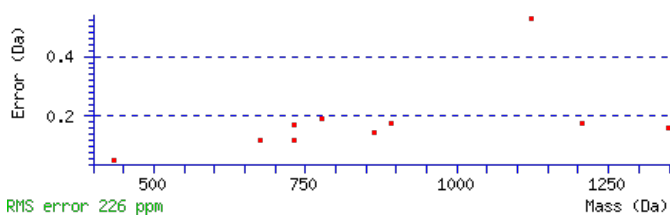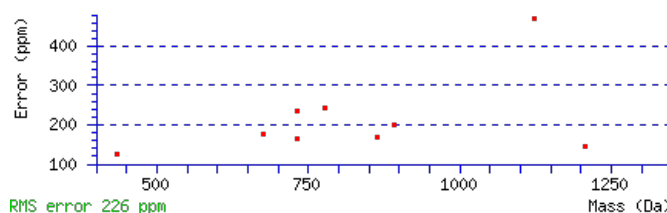NCBI BLAST search of **TWPEDILPLQPVGR**

(Parameters: blastp, nr protein database, expect=20000, no filter, PAM30)

AT4G35090.1

Other BLAST [web gateways](#)

**All matches to this query**

| Score | Mr(calc)  | Delta   | Sequence                         |
|-------|-----------|---------|----------------------------------|
| 39.0  | 1638.8108 | 0.0015  | <a href="#">TWPEDILPLQPVGR</a>   |
| 2.2   | 1638.8085 | 0.0037  | <a href="#">KRDSGLNVFEEVVK</a>   |
| 1.0   | 1638.8168 | -0.0046 | <a href="#">ERPIACGKTFGIR</a>    |
| 0.7   | 1638.8086 | 0.0037  | <a href="#">ILSPTASVSSAFIGNR</a> |
| 0.7   | 1638.8120 | 0.0003  | <a href="#">LKSMNEISSLVNLR</a>   |

Mascot: <http://www.matrixscience.com/>

**Peptide View**MS/MS Fragmentation of **SFGAAVIYNNEK**Found in **AT4G35100.1** in **TAIR\_Arabidopsis**, Symbols: PIP3A, PIP2;7, SIMIP, PIP3 | PIP3 (PLASMA MEMBRANE INTRINSIC PROTEIN 3); water channel | chr4:16708677-16709963 FORWARD

Match to Query 4703: 1326.597888 from(664.306220,2+) index(3879)

Title: Elution from: 36.374 to 36.374 scan no 4847 cid35.00 polarity:+

Data file D6h-2\_3.mgf

Click mouse within plot area to zoom in by factor of two about that point

Or,  to  Da Label all possible matches  Label matches used for scoring Show Y-axis 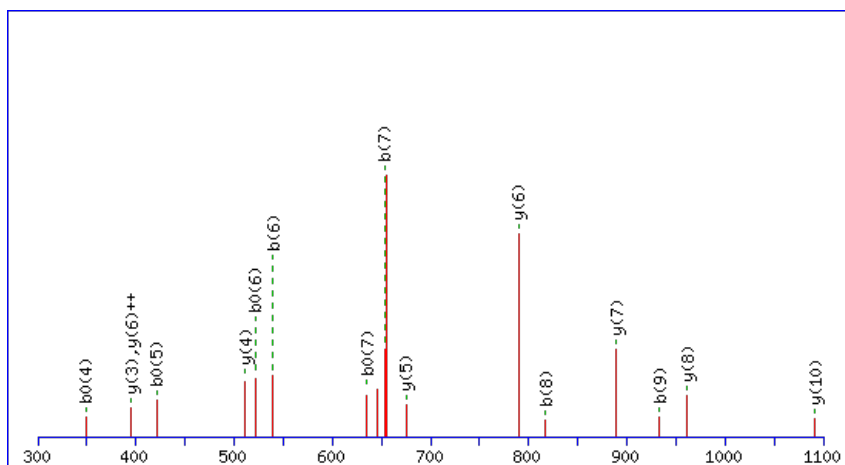Monoisotopic mass of neutral peptide  $M_r(\text{calc})$ : 1326.6014

Fixed modifications: Carbamidomethyl (C) (apply to specified residues or termini only)

Ions Score: 76 Expect: 2.3e-007

Matches : 16/114 fragment ions using 18 most intense peaks ([help](#))

| #  | b               | b <sup>++</sup> | b*        | b <sup>*++</sup> | b <sup>0</sup>  | b <sup>0++</sup> | Seq. | y                | y <sup>++</sup> | y*        | y <sup>*++</sup> | y <sup>0</sup> | y <sup>0++</sup> | #  |
|----|-----------------|-----------------|-----------|------------------|-----------------|------------------|------|------------------|-----------------|-----------|------------------|----------------|------------------|----|
| 1  | 89.0363         | 45.0218         |           |                  | 71.0258         | 36.0165          | S    |                  |                 |           |                  |                |                  | 12 |
| 2  | 237.1018        | 119.0545        |           |                  | 219.0912        | 110.0492         | F    | 1239.5797        | 620.2935        | 1221.5561 | 611.2817         | 1221.5691      | 611.2882         | 11 |
| 3  | 295.1203        | 148.0638        |           |                  | 277.1097        | 139.0585         | G    | <b>1091.5142</b> | 546.2607        | 1073.4906 | 537.2489         | 1073.5036      | 537.2555         | 10 |
| 4  | 367.1544        | 184.0809        |           |                  | <b>349.1439</b> | 175.0756         | A    | 1033.4957        | 517.2515        | 1015.4721 | 508.2397         | 1015.4851      | 508.2462         | 9  |
| 5  | 439.1886        | 220.0979        |           |                  | <b>421.1780</b> | 211.0926         | A    | <b>961.4616</b>  | 481.2344        | 943.4380  | 472.2226         | 943.4510       | 472.2291         | 8  |
| 6  | <b>539.2540</b> | 270.1307        |           |                  | <b>521.2435</b> | 261.1254         | V    | <b>889.4274</b>  | 445.2173        | 871.4038  | 436.2056         | 871.4168       | 436.2121         | 7  |
| 7  | <b>653.3351</b> | 327.1712        |           |                  | <b>635.3246</b> | 318.1659         | I    | <b>789.3620</b>  | <b>395.1846</b> | 771.3384  | 386.1728         | 771.3514       | 386.1793         | 6  |
| 8  | <b>817.3955</b> | 409.2014        |           |                  | 799.3849        | 400.1961         | Y    | <b>675.2809</b>  | 338.1441        | 657.2573  | 329.1323         | 657.2703       | 329.1388         | 5  |
| 9  | <b>933.4325</b> | 467.2199        | 915.4089  | 458.2081         | 915.4219        | 458.2146         | N    | <b>511.2205</b>  | 256.1139        | 493.1969  | 247.1021         | 493.2099       | 247.1086         | 4  |
| 10 | 1049.4695       | 525.2384        | 1031.4459 | 516.2266         | 1031.4589       | 516.2331         | N    | <b>395.1835</b>  | 198.0954        | 377.1599  | 189.0836         | 377.1729       | 189.0901         | 3  |
| 11 | 1179.5091       | 590.2582        | 1161.4855 | 581.2464         | 1161.4986       | 581.2529         | E    | 279.1465         | 140.0769        | 261.1229  | 131.0651         | 261.1359       | 131.0716         | 2  |
| 12 |                 |                 |           |                  |                 |                  | K    | 149.1069         | 75.0571         | 131.0833  | 66.0453          |                |                  | 1  |

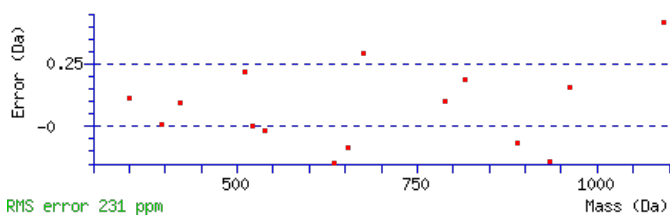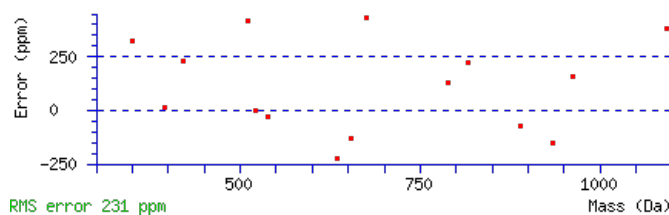NCBI BLAST search of **SFGAAVIYNNEK**

(Parameters: blastp, nr protein database, expect=20000, no filter, PAM30)

Other BLAST [web gateways](#)



# AT4G35100.1

All matches to this query

| Score | Mr(calc)  | Delta   | Sequence                      |
|-------|-----------|---------|-------------------------------|
| 76.0  | 1326.6014 | -0.0036 | <a href="#">SFGAAVIYNNEK</a>  |
| 14.6  | 1326.5957 | 0.0021  | <a href="#">LMRMQMRQGR</a>    |
| 14.2  | 1326.5970 | 0.0009  | <a href="#">KASTGSDKSSTNK</a> |
| 13.9  | 1326.6014 | -0.0035 | <a href="#">RAIYYDPETGK</a>   |
| 13.2  | 1326.5974 | 0.0005  | <a href="#">MMLDDYIAKSK</a>   |
| 12.4  | 1326.5967 | 0.0012  | <a href="#">LYWAGMSAERK</a>   |
| 6.9   | 1326.6001 | -0.0022 | <a href="#">LDRFSCILCK</a>    |
| 5.5   | 1326.6014 | -0.0036 | <a href="#">YNNYILEDLR</a>    |
| 5.0   | 1326.5996 | -0.0017 | <a href="#">TRRDTSETSVR</a>   |
| 4.5   | 1326.5978 | 0.0000  | <a href="#">AMAKDKMSIGSR</a>  |

Mascot: <http://www.matrixscience.com/>

## Peptide View

### MS/MS Fragmentation of GGELIR

Found in **AT4G35140.1** in **TAIR\_Arabidopsis**, Symbols: | transducin family protein / WD-40 repeat family protein | chr4:16723878-16726482  
REVERSE

Match to Query 532: 643.364878 from(322.689715,2+) index(450)

Title: Elution from: 10.200 to 10.200 scan no 713 cid35.00 polarity:+

Data file 0-2\_2.mgf

Click mouse within plot area to zoom in by factor of two about that point

Or,   to  Da

Label all possible matches  Label matches used for scoring

Show Y-axis

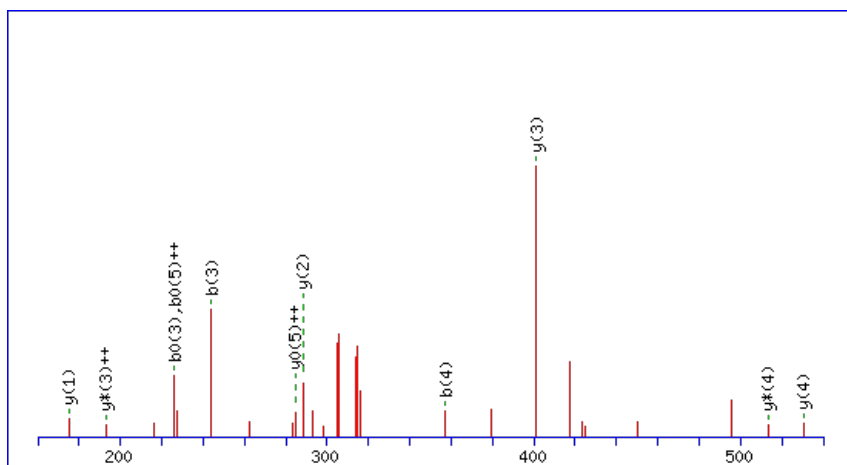

Monoisotopic mass of neutral peptide  $M_r(\text{calc})$ : 643.3653

Fixed modifications: Carbamidomethyl (C) (apply to specified residues or termini only)

Ions Score: 26 Expect: 0.039

Matches : 11/40 fragment ions using 25 most intense peaks ([help](#))

| # | b               | b <sup>++</sup> | b <sup>0</sup>  | b <sup>0++</sup> | Seq.     | y               | y <sup>++</sup> | y*              | y <sup>*++</sup> | y <sup>0</sup> | y <sup>0++</sup> | # |
|---|-----------------|-----------------|-----------------|------------------|----------|-----------------|-----------------|-----------------|------------------|----------------|------------------|---|
| 1 | 58.0287         | 29.5180         |                 |                  | <b>G</b> |                 |                 |                 |                  |                |                  | 6 |
| 2 | 115.0502        | 58.0287         |                 |                  | <b>G</b> | 587.3511        | 294.1792        | 570.3246        | 285.6659         | 569.3406       | 285.1739         | 5 |
| 3 | <b>244.0928</b> | 122.5500        | <b>226.0822</b> | 113.5448         | <b>E</b> | <b>530.3297</b> | 265.6685        | <b>513.3031</b> | 257.1552         | 512.3191       | 256.6632         | 4 |
| 4 | <b>357.1769</b> | 179.0921        | 339.1663        | 170.0868         | <b>L</b> | <b>401.2871</b> | 201.1472        | 384.2605        | <b>192.6339</b>  |                |                  | 3 |
| 5 | 470.2609        | 235.6341        | 452.2504        | <b>226.6288</b>  | <b>I</b> | <b>288.2030</b> | 144.6051        | 271.1765        | 136.0919         |                |                  | 2 |
| 6 |                 |                 |                 |                  | <b>R</b> | <b>175.1190</b> | 88.0631         | 158.0924        | 79.5498          |                |                  | 1 |

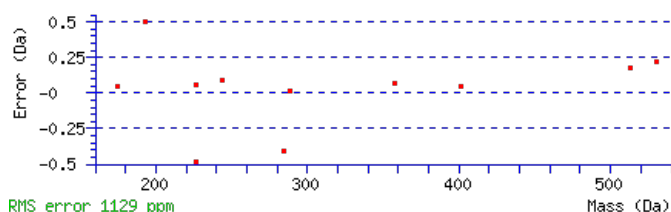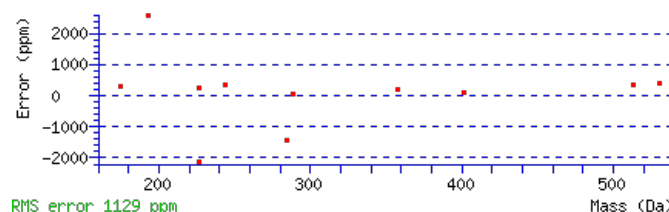

NCBI BLAST search of [GGELIR](#)

(Parameters: blastp, nr protein database, expect=20000, no filter, PAM30)

Other BLAST [web gateways](#)

### All matches to this query

| Score | $M_r(\text{calc})$ | Delta   | Sequence               |
|-------|--------------------|---------|------------------------|
| 26.5  | 643.3653           | -0.0004 | <a href="#">GGELIR</a> |
| 26.1  | 643.3653           | -0.0004 | <a href="#">NEIIR</a>  |
| 26.1  | 643.3653           | -0.0004 | <a href="#">NEILR</a>  |

# AT4G35140.1

|      |          |         |                        |
|------|----------|---------|------------------------|
| 26.1 | 643.3653 | -0.0004 | <a href="#">NELLR</a>  |
| 21.5 | 643.3653 | -0.0004 | <a href="#">GGLIER</a> |
| 21.5 | 643.3653 | -0.0004 | <a href="#">INIER</a>  |
| 21.5 | 643.3653 | -0.0004 | <a href="#">INLER</a>  |
| 21.5 | 643.3653 | -0.0004 | <a href="#">LNIER</a>  |
| 21.5 | 643.3653 | -0.0004 | <a href="#">LNLER</a>  |
| 21.5 | 643.3653 | -0.0004 | <a href="#">NILER</a>  |

**Mascot:** <http://www.matrixscience.com/>


**Mascot Search Results**
**Peptide View**MS/MS Fragmentation of **FFQWTNDVADR**Found in **AT4G35250.1** in **TAIR\_Arabidopsis**, Symbols: | vestitone reductase-related | chr4:16771406-16773274 REVERSE

Match to Query 5920: 1414.587158 from(708.300855,2+) index(7125)

Title: Elution from: 61.842 to 61.842 scan no 9044 cid35.00 polarity:+

Data file D12h-1\_1.mgf

Click mouse within plot area to zoom in by factor of two about that point

Or,   to  Da Label all possible matches  Label matches used for scoring Show Y-axis 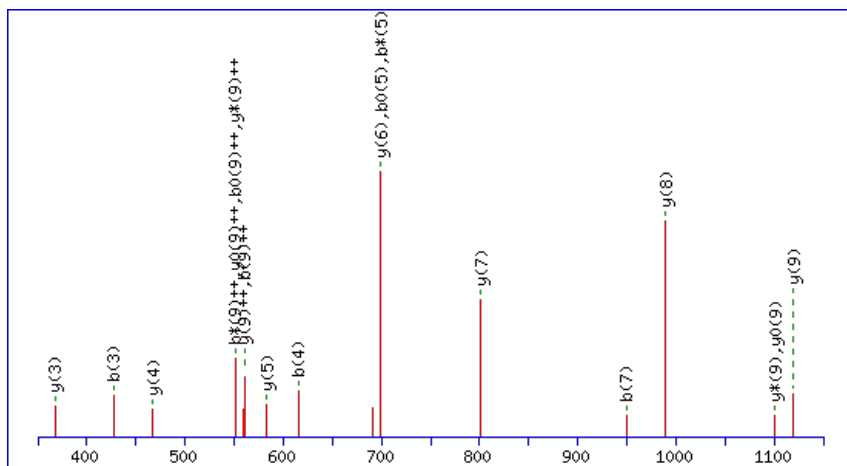Monoisotopic mass of neutral peptide **Mr(calc)**: 1414.5860**Fixed modifications**: Carbamidomethyl (C) (apply to specified residues or termini only)**Ions Score**: 65 **Expect**: 1.2e-006**Matches**: 20/106 fragment ions using 17 most intense peaks ([help](#))

| #  | b               | b <sup>++</sup> | b <sup>*</sup>  | b <sup>*++</sup> | b <sup>0</sup>  | b <sup>0++</sup> | Seq. | y                | y <sup>++</sup> | y <sup>*</sup>   | y <sup>*++</sup> | y <sup>0</sup>   | y <sup>0++</sup> | #  |
|----|-----------------|-----------------|-----------------|------------------|-----------------|------------------|------|------------------|-----------------|------------------|------------------|------------------|------------------|----|
| 1  | 149.0727        | 75.0400         |                 |                  |                 |                  | F    |                  |                 |                  |                  |                  |                  | 11 |
| 2  | 297.1382        | 149.0727        |                 |                  |                 |                  | F    | 1267.5278        | 634.2676        | 1249.5043        | 625.2558         | 1249.5173        | 625.2623         | 10 |
| 3  | <b>427.1908</b> | 214.0990        | 409.1672        | 205.0873         |                 |                  | Q    | <b>1119.4624</b> | <b>560.2348</b> | <b>1101.4388</b> | <b>551.2230</b>  | <b>1101.4518</b> | <b>551.2295</b>  | 9  |
| 4  | <b>615.2642</b> | 308.1357        | 597.2406        | 299.1239         |                 |                  | W    | <b>989.4097</b>  | 495.2085        | 971.3862         | 486.1967         | 971.3992         | 486.2032         | 8  |
| 5  | 717.3089        | 359.1581        | <b>699.2853</b> | 350.1463         | <b>699.2984</b> | 350.1528         | T    | <b>801.3364</b>  | 401.1718        | 783.3128         | 392.1600         | 783.3258         | 392.1665         | 7  |
| 6  | 833.3459        | 417.1766        | 815.3223        | 408.1648         | 815.3353        | 408.1713         | N    | <b>699.2916</b>  | 350.1495        | 681.2681         | 341.1377         | 681.2811         | 341.1442         | 6  |
| 7  | <b>949.3699</b> | 475.1886        | 931.3463        | 466.1768         | 931.3593        | 466.1833         | D    | <b>583.2546</b>  | 292.1310        | 565.2311         | 283.1192         | 565.2441         | 283.1257         | 5  |
| 8  | 1049.4353       | 525.2213        | 1031.4118       | 516.2095         | 1031.4248       | 516.2160         | V    | <b>467.2307</b>  | 234.1190        | 449.2071         | 225.1072         | 449.2201         | 225.1137         | 4  |
| 9  | 1121.4695       | <b>561.2384</b> | 1103.4459       | <b>552.2266</b>  | 1103.4589       | <b>552.2331</b>  | A    | <b>367.1652</b>  | 184.0862        | 349.1416         | 175.0745         | 349.1547         | 175.0810         | 3  |
| 10 | 1237.4935       | 619.2504        | 1219.4699       | 610.2386         | 1219.4829       | 610.2451         | D    | 295.1311         | 148.0692        | 277.1075         | 139.0574         | 277.1205         | 139.0639         | 2  |
| 11 |                 |                 |                 |                  |                 |                  | R    | 179.1071         | 90.0572         | 161.0835         | 81.0454          |                  |                  | 1  |

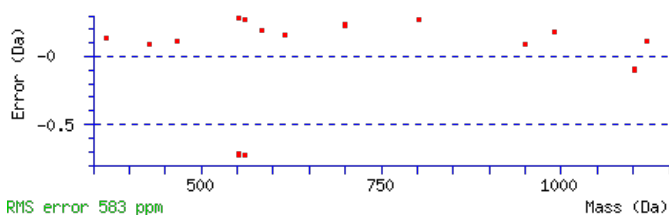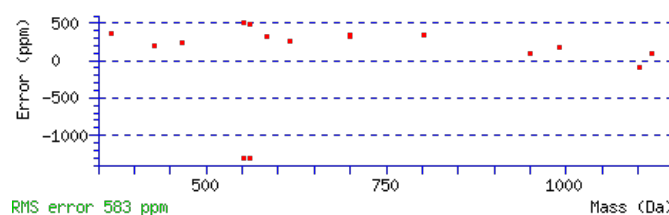NCBI **BLAST** search of **FFQWTNDVADR**

(Parameters: blastp, nr protein database, expect=20000, no filter, PAM30)

Other BLAST [web gateways](#)**All matches to this query**

## AT4G35250.1

| Score | Mr(calc)  | Delta   | Sequence                      |
|-------|-----------|---------|-------------------------------|
| 64.8  | 1414.5860 | 0.0012  | <a href="#">FFQWTNDVADR</a>   |
| 16.2  | 1414.5905 | -0.0033 | <a href="#">TGGAQMSRMVSEK</a> |
| 11.9  | 1414.5838 | 0.0034  | <a href="#">SVDGYSSGWVNAR</a> |
| 5.2   | 1414.5831 | 0.0041  | <a href="#">DMESMVKKMER</a>   |
| 4.3   | 1414.5851 | 0.0021  | <a href="#">AARCFMNSKHR</a>   |
| 4.3   | 1414.5831 | 0.0041  | <a href="#">QMGMSGLOSLMK</a>  |
| 4.3   | 1414.5831 | 0.0041  | <a href="#">QMGMSGLOSLMK</a>  |
| 0.6   | 1414.5871 | 0.0000  | <a href="#">GVMYTREEAEGR</a>  |
| 0.1   | 1414.5880 | -0.0009 | <a href="#">MWKDRNLMCK</a>    |
| 0.0   | 1414.5831 | 0.0041  | <a href="#">DMESMVKKMER</a>   |

Mascot: <http://www.matrixscience.com/>

**Peptide View**MS/MS Fragmentation of **DPAFNQLAEQLQR**

Found in **AT4G35450.1** in **TAIR\_Arabidopsis**, Symbols: AFT, AKR2A, AKR2 | AKR2 (ANKYRIN REPEAT-CONTAINING PROTEIN 2); protein binding | chr4:16839867-16841764 FORWARD

Match to Query 6146: 1528.767040 from(765.390796,2+) index(7294)

Title: Elution from: 67.235 to 67.235 scan no 9616 cid35.00 polarity:+

Data file D12h-2\_2.mgf

Click mouse within plot area to zoom in by factor of two about that point

Or,   to  Da

Label all possible matches  Label matches used for scoring

Show Y-axis

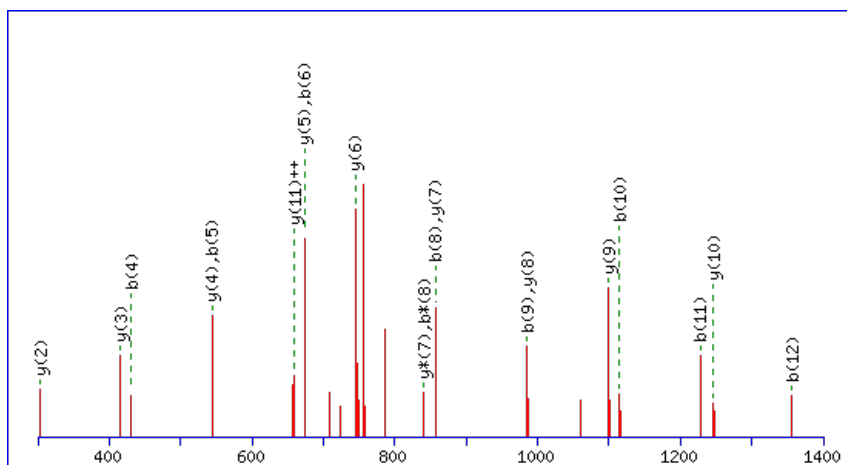

**Monoisotopic mass of neutral peptide Mr(calc):** 1528.7634

**Fixed modifications:** Carbamidomethyl (C) (apply to specified residues or termini only)

**Ions Score:** 87 **Expect:** 6.6e-009

**Matches:** 20/128 fragment ions using 20 most intense peaks ([help](#))

| #  | b                | b <sup>++</sup> | b*              | b <sup>*++</sup> | b <sup>0</sup> | b <sup>0++</sup> | Seq.     | y                | y <sup>++</sup> | y*              | y <sup>*++</sup> | y <sup>0</sup> | y <sup>0++</sup> | #         |
|----|------------------|-----------------|-----------------|------------------|----------------|------------------|----------|------------------|-----------------|-----------------|------------------|----------------|------------------|-----------|
| 1  | 116.0342         | 58.5207         |                 |                  | 98.0237        | 49.5155          | <b>D</b> |                  |                 |                 |                  |                |                  | <b>13</b> |
| 2  | 213.0870         | 107.0471        |                 |                  | 195.0764       | 98.0418          | <b>P</b> | 1414.7437        | 707.8755        | 1397.7172       | 699.3622         | 1396.7332      | 698.8702         | <b>12</b> |
| 3  | 284.1241         | 142.5657        |                 |                  | 266.1135       | 133.5604         | <b>A</b> | 1317.6910        | <b>659.3491</b> | 1300.6644       | 650.8359         | 1299.6804      | 650.3438         | <b>11</b> |
| 4  | <b>431.1925</b>  | 216.0999        |                 |                  | 413.1819       | 207.0946         | <b>F</b> | <b>1246.6539</b> | 623.8306        | 1229.6273       | 615.3173         | 1228.6433      | 614.8253         | <b>10</b> |
| 5  | <b>545.2354</b>  | 273.1214        | 528.2089        | 264.6081         | 527.2249       | 264.1161         | <b>N</b> | <b>1099.5854</b> | 550.2964        | 1082.5589       | 541.7831         | 1081.5749      | 541.2911         | <b>9</b>  |
| 6  | <b>673.2940</b>  | 337.1506        | 656.2675        | 328.6374         | 655.2835       | 328.1454         | <b>Q</b> | <b>985.5425</b>  | 493.2749        | 968.5160        | 484.7616         | 967.5320       | 484.2696         | <b>8</b>  |
| 7  | 786.3781         | 393.6927        | 769.3515        | 385.1794         | 768.3675       | 384.6874         | <b>L</b> | <b>857.4839</b>  | 429.2456        | <b>840.4574</b> | 420.7323         | 839.4734       | 420.2403         | <b>7</b>  |
| 8  | <b>857.4152</b>  | 429.2112        | <b>840.3886</b> | 420.6980         | 839.4046       | 420.2060         | <b>A</b> | <b>744.3999</b>  | 372.7036        | 727.3733        | 364.1903         | 726.3893       | 363.6983         | <b>6</b>  |
| 9  | <b>986.4578</b>  | 493.7325        | 969.4312        | 485.2193         | 968.4472       | 484.7272         | <b>E</b> | <b>673.3628</b>  | 337.1850        | 656.3362        | 328.6717         | 655.3522       | 328.1797         | <b>5</b>  |
| 10 | <b>1114.5164</b> | 557.7618        | 1097.4898       | 549.2485         | 1096.5058      | 548.7565         | <b>Q</b> | <b>544.3202</b>  | 272.6637        | 527.2936        | 264.1504         |                |                  | <b>4</b>  |
| 11 | <b>1227.6004</b> | 614.3039        | 1210.5739       | 605.7906         | 1209.5899      | 605.2986         | <b>L</b> | <b>416.2616</b>  | 208.6344        | 399.2350        | 200.1212         |                |                  | <b>3</b>  |
| 12 | <b>1355.6590</b> | 678.3331        | 1338.6325       | 669.8199         | 1337.6484      | 669.3279         | <b>Q</b> | <b>303.1775</b>  | 152.0924        | 286.1510        | 143.5791         |                |                  | <b>2</b>  |
| 13 |                  |                 |                 |                  |                |                  | <b>R</b> | 175.1190         | 88.0631         | 158.0924        | 79.5498          |                |                  | <b>1</b>  |

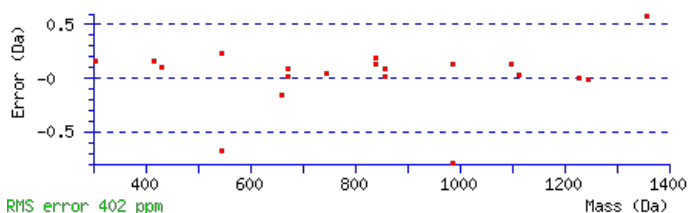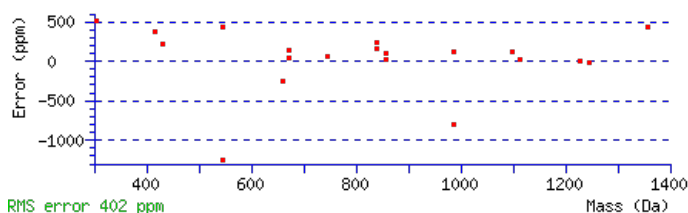

NCBI **BLAST** search of **DPAFNQLAEQLQR**

(Parameters: blastp, nr protein database, expect=20000, no filter, PAM30)

AT4G35450.1

Other BLAST [web gateways](#)

**All matches to this query**

| Score | Mr(calc)  | Delta  | Sequence                       |
|-------|-----------|--------|--------------------------------|
| 87.5  | 1528.7634 | 0.0037 | <a href="#">DPAFNQLAEQLQR</a>  |
| 10.3  | 1528.7634 | 0.0037 | <a href="#">QDKEWADLQAVAR</a>  |
| 1.7   | 1528.7668 | 0.0003 | <a href="#">LVMPSNGNGVKEER</a> |
| 0.6   | 1528.7668 | 0.0003 | <a href="#">QSSMKIVEVAEHR</a>  |

**Mascot:** <http://www.matrixscience.com/>

**Peptide View**MS/MS Fragmentation of **GISACAVCDGAAPFR**Found in **AT4G35460.1** in **TAIR\_Arabidopsis**, Symbols: TRB1, ATNTRB, NTRB, NTR1 | NTR1 (NADPH-dependent thioredoxin reductase 1) | chr4:16842223-16843745 FORWARD

Match to Query 7437: 1663.783882 from(832.899217,2+) index(6185)

Title: Elution from: 54.074 to 54.074 scan no 7938 cid35.00 polarity:+

Data file D6h-3\_3.mgf

Click mouse within plot area to zoom in by factor of two about that point

Or,  to  Da Label all possible matches  Label matches used for scoring Show Y-axis 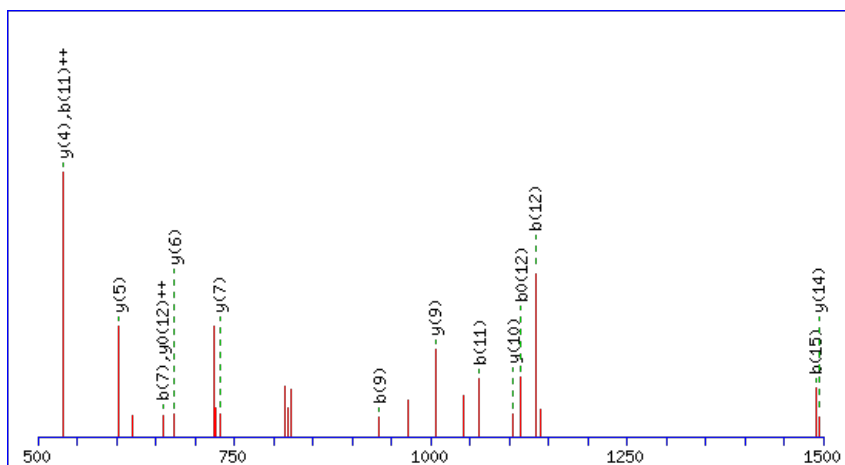**Monoisotopic mass of neutral peptide Mr(calc):** 1663.7811**Fixed modifications:** Carbamidomethyl (C) (apply to specified residues or termini only)**Ions Score:** 48 **Expect:** 4e-005**Matches:** 15/132 fragment ions using 23 most intense peaks ([help](#))

| #  | b                | b <sup>++</sup> | b <sup>0</sup>   | b <sup>0++</sup> | Seq. | y                | y <sup>++</sup> | y*        | y <sup>*++</sup> | y <sup>0</sup> | y <sup>0++</sup> | #  |
|----|------------------|-----------------|------------------|------------------|------|------------------|-----------------|-----------|------------------|----------------|------------------|----|
| 1  | 58.0287          | 29.5180         |                  |                  | G    |                  |                 |           |                  |                |                  | 16 |
| 2  | 171.1128         | 86.0600         |                  |                  | I    | 1607.7669        | 804.3871        | 1590.7403 | 795.8738         | 1589.7563      | 795.3818         | 15 |
| 3  | 258.1448         | 129.5761        | 240.1343         | 120.5708         | S    | <b>1494.6828</b> | 747.8450        | 1477.6562 | 739.3318         | 1476.6722      | 738.8398         | 14 |
| 4  | 329.1819         | 165.0946        | 311.1714         | 156.0893         | A    | 1407.6508        | 704.3290        | 1390.6242 | 695.8157         | 1389.6402      | 695.3237         | 13 |
| 5  | 489.2126         | 245.1099        | 471.2020         | 236.1047         | C    | 1336.6137        | 668.8105        | 1319.5871 | 660.2972         | 1318.6031      | <b>659.8052</b>  | 12 |
| 6  | 560.2497         | 280.6285        | 542.2391         | 271.6232         | A    | 1176.5830        | 588.7951        | 1159.5565 | 580.2819         | 1158.5724      | 579.7899         | 11 |
| 7  | <b>659.3181</b>  | 330.1627        | 641.3076         | 321.1574         | V    | <b>1105.5459</b> | 553.2766        | 1088.5193 | 544.7633         | 1087.5353      | 544.2713         | 10 |
| 8  | 819.3488         | 410.1780        | 801.3382         | 401.1727         | C    | <b>1006.4775</b> | 503.7424        | 989.4509  | 495.2291         | 988.4669       | 494.7371         | 9  |
| 9  | <b>934.3757</b>  | 467.6915        | 916.3651         | 458.6862         | D    | 846.4468         | 423.7271        | 829.4203  | 415.2138         | 828.4363       | 414.7218         | 8  |
| 10 | 991.3972         | 496.2022        | 973.3866         | 487.1969         | G    | <b>731.4199</b>  | 366.2136        | 714.3933  | 357.7003         |                |                  | 7  |
| 11 | <b>1062.4343</b> | <b>531.7208</b> | 1044.4237        | 522.7155         | A    | <b>674.3984</b>  | 337.7028        | 657.3719  | 329.1896         |                |                  | 6  |
| 12 | <b>1133.4714</b> | 567.2393        | <b>1115.4608</b> | 558.2341         | A    | <b>603.3613</b>  | 302.1843        | 586.3348  | 293.6710         |                |                  | 5  |
| 13 | 1230.5242        | 615.7657        | 1212.5136        | 606.7604         | P    | <b>532.3242</b>  | 266.6657        | 515.2976  | 258.1525         |                |                  | 4  |
| 14 | 1343.6082        | 672.3078        | 1325.5977        | 663.3025         | I    | 435.2714         | 218.1394        | 418.2449  | 209.6261         |                |                  | 3  |
| 15 | <b>1490.6766</b> | 745.8420        | 1472.6661        | 736.8367         | F    | 322.1874         | 161.5973        | 305.1608  | 153.0840         |                |                  | 2  |
| 16 |                  |                 |                  |                  | R    | 175.1190         | 88.0631         | 158.0924  | 79.5498          |                |                  | 1  |



AT4G35460.1

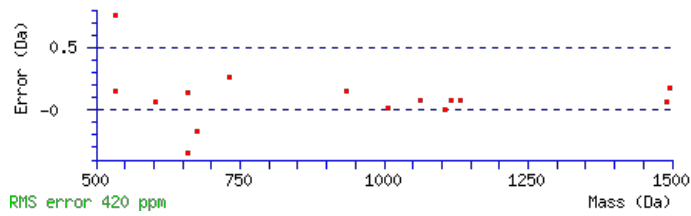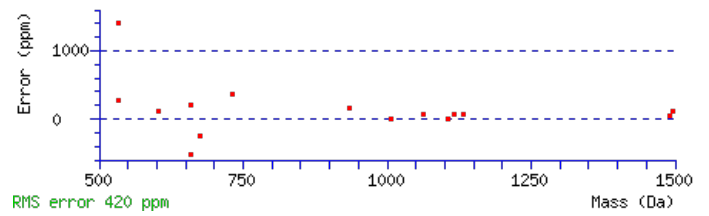

NCBI **BLAST** search of [GISACAVCDGAAPIER](#)

(Parameters: blastp, nr protein database, expect=20000, no filter, PAM30)

Other BLAST [web gateways](#)

**All matches to this query**

| Score | Mr(calc)  | Delta  | Sequence                         |
|-------|-----------|--------|----------------------------------|
| 47.6  | 1663.7811 | 0.0028 | <a href="#">GISACAVCDGAAPIER</a> |
| 4.6   | 1663.7835 | 0.0004 | <a href="#">EELDKMLEENSRR</a>    |
| 4.6   | 1663.7797 | 0.0042 | <a href="#">LMTEEMEVAVEVER</a>   |
| 3.5   | 1663.7835 | 0.0004 | <a href="#">DVETASLRMDNLER</a>   |

Mascot: <http://www.matrixscience.com/>

## Peptide View

### MS/MS Fragmentation of **VPSFEELEQTPDAK**

Found in **AT4G35630.1** in **TAIR\_Arabidopsis**, Symbols: PSAT | PSAT (phosphoserine aminotransferase); phosphoserine transaminase | chr4:16904210-16905502 FORWARD

Match to Query 7612: 1588.762876 from(795.388714,2+) index(6484)

Title: Elution from: 56.585 to 56.585 scan no 8122 cid35.00 polarity:+

Data file 0-1\_1.mgf

Click mouse within plot area to zoom in by factor of two about that point

Or,   to  Da

Label all possible matches  Label matches used for scoring

Show Y-axis

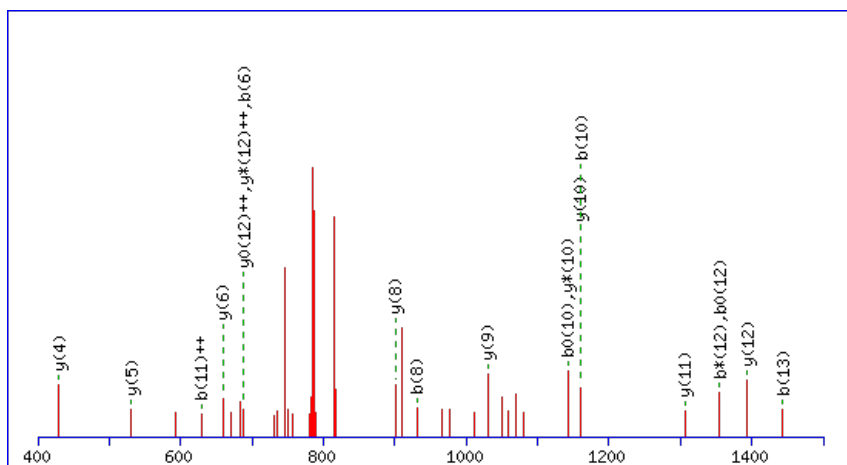

Monoisotopic mass of neutral peptide  $M_r(\text{calc})$ : 1588.7621

Fixed modifications: Carbamidomethyl (C) (apply to specified residues or termini only)

Ions Score: 52 Expect: 2.3e-005

Matches : 19/132 fragment ions using 27 most intense peaks ([help](#))

| #  | b                | b <sup>++</sup> | b*               | b <sup>*++</sup> | b <sup>0</sup>   | b <sup>0++</sup> | Seq. | y                | y <sup>++</sup> | y*               | y <sup>*++</sup> | y <sup>0</sup> | y <sup>0++</sup> | #  |
|----|------------------|-----------------|------------------|------------------|------------------|------------------|------|------------------|-----------------|------------------|------------------|----------------|------------------|----|
| 1  | 100.0757         | 50.5415         |                  |                  |                  |                  | V    |                  |                 |                  |                  |                |                  | 14 |
| 2  | 197.1285         | 99.0679         |                  |                  |                  |                  | P    | 1490.7009        | 745.8541        | 1473.6744        | 737.3408         | 1472.6904      | 736.8488         | 13 |
| 3  | 284.1605         | 142.5839        |                  |                  | 266.1499         | 133.5786         | S    | <b>1393.6482</b> | 697.3277        | 1376.6216        | <b>688.8144</b>  | 1375.6376      | <b>688.3224</b>  | 12 |
| 4  | 431.2289         | 216.1181        |                  |                  | 413.2183         | 207.1128         | F    | <b>1306.6161</b> | 653.8117        | 1289.5896        | 645.2984         | 1288.6056      | 644.8064         | 11 |
| 5  | 560.2715         | 280.6394        |                  |                  | 542.2609         | 271.6341         | E    | <b>1159.5477</b> | 580.2775        | <b>1142.5212</b> | 571.7642         | 1141.5372      | 571.2722         | 10 |
| 6  | <b>689.3141</b>  | 345.1607        |                  |                  | 671.3035         | 336.1554         | E    | <b>1030.5051</b> | 515.7562        | 1013.4786        | 507.2429         | 1012.4946      | 506.7509         | 9  |
| 7  | 802.3981         | 401.7027        |                  |                  | 784.3876         | 392.6974         | L    | <b>901.4625</b>  | 451.2349        | 884.4360         | 442.7216         | 883.4520       | 442.2296         | 8  |
| 8  | <b>931.4407</b>  | 466.2240        |                  |                  | 913.4302         | 457.2187         | E    | 788.3785         | 394.6929        | 771.3519         | 386.1796         | 770.3679       | 385.6876         | 7  |
| 9  | 1059.4993        | 530.2533        | 1042.4728        | 521.7400         | 1041.4888        | 521.2480         | Q    | <b>659.3359</b>  | 330.1716        | 642.3093         | 321.6583         | 641.3253       | 321.1663         | 6  |
| 10 | <b>1160.5470</b> | 580.7771        | 1143.5204        | 572.2639         | <b>1142.5364</b> | 571.7719         | T    | <b>531.2773</b>  | 266.1423        | 514.2508         | 257.6290         | 513.2667       | 257.1370         | 5  |
| 11 | 1257.5998        | <b>629.3035</b> | 1240.5732        | 620.7902         | 1239.5892        | 620.2982         | P    | <b>430.2296</b>  | 215.6185        | 413.2031         | 207.1052         | 412.2191       | 206.6132         | 4  |
| 12 | 1372.6267        | 686.8170        | <b>1355.6002</b> | 678.3037         | <b>1354.6161</b> | 677.8117         | D    | 333.1769         | 167.0921        | 316.1503         | 158.5788         | 315.1663       | 158.0868         | 3  |
| 13 | <b>1443.6638</b> | 722.3355        | 1426.6373        | 713.8223         | 1425.6533        | 713.3303         | A    | 218.1499         | 109.5786        | 201.1234         | 101.0653         |                |                  | 2  |
| 14 |                  |                 |                  |                  |                  |                  | K    | 147.1128         | 74.0600         | 130.0863         | 65.5468          |                |                  | 1  |

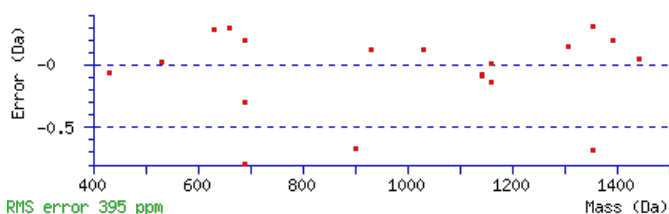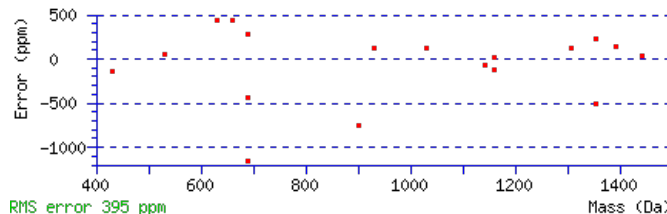

NCBI BLAST search of [VPSFEELEQTPDAK](#)

## AT4G35630.1

(Parameters: blastp, nr protein database, expect=20000, no filter, PAM30)

Other BLAST [web gateways](#)

### All matches to this query

| Score | Mr(calc)  | Delta  | Sequence                       |
|-------|-----------|--------|--------------------------------|
| 51.8  | 1588.7621 | 0.0008 | <a href="#">VPSFEELEQTPDAK</a> |

Mascot: <http://www.matrixscience.com/>

**Peptide View**MS/MS Fragmentation of **MSNMLVK**

Found in **AT4G35690.1** in **TAIR\_Arabidopsis**, Symbols: | similar to unknown protein [Arabidopsis thaliana] (TAIR:AT4G35710.1); similar to unnamed protein product [Vitis vinifera] (GB:CAO22786.1); contains InterPro domain Protein of unknown function DUF241, plant (InterPro:IPR004320) | chr4:16

Match to Query 1253: 846.382384 from(424.198468,2+) index(4662)

Title: Elution from: 42.523 to 42.523 scan no 5863 cid35.00 polarity:+

Data file C7-1\_2.mgf

Click mouse within plot area to zoom in by factor of two about that point

Or,   to  Da

Label all possible matches  Label matches used for scoring

Show Y-axis

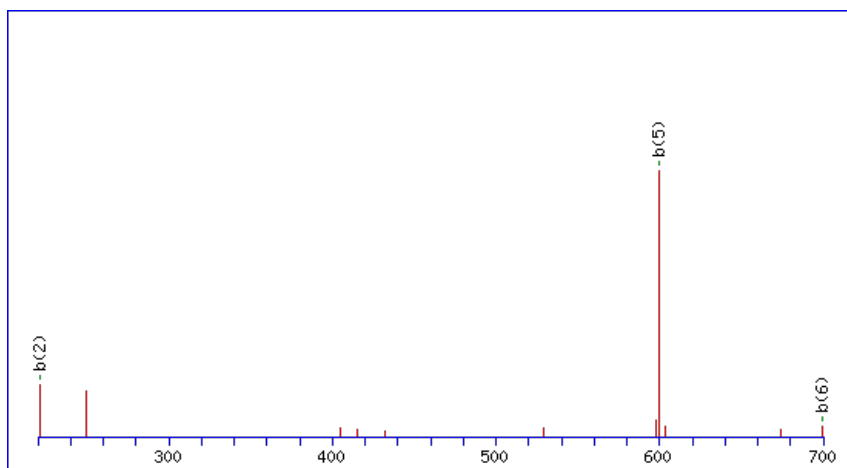

**Monoisotopic mass of neutral peptide Mr(calc):** 846.3822

**Fixed modifications:** Carbamidomethyl (C) (apply to specified residues or termini only)

**Variable modifications:**

**M4** : Oxidation (M), with neutral losses 0.0000 (shown in table), 63.9983

**Ions Score:** 21 **Expect:** 0.041

**Matches :** 3/88 fragment ions using 5 most intense peaks ([help](#))

| # | b               | b <sup>++</sup> | b*       | b <sup>*++</sup> | b <sup>0</sup> | b <sup>0++</sup> | Seq.     | y        | y <sup>++</sup> | y*       | y <sup>*++</sup> | y <sup>0</sup> | y <sup>0++</sup> | # |
|---|-----------------|-----------------|----------|------------------|----------------|------------------|----------|----------|-----------------|----------|------------------|----------------|------------------|---|
| 1 | 133.0448        | 67.0260         |          |                  |                |                  | <b>M</b> |          |                 |          |                  |                |                  | 7 |
| 2 | <b>221.0739</b> | 111.0406        |          |                  | 203.0633       | 102.0353         | <b>S</b> | 715.3519 | 358.1796        | 697.3283 | 349.1678         | 697.3414       | 349.1743         | 6 |
| 3 | 337.1109        | 169.0591        | 319.0873 | 160.0473         | 319.1003       | 160.0538         | <b>N</b> | 627.3229 | 314.1651        | 609.2993 | 305.1533         |                |                  | 5 |
| 4 | 485.1433        | 243.0753        | 467.1197 | 234.0635         | 467.1327       | 234.0700         | <b>M</b> | 511.2859 | 256.1466        | 493.2623 | 247.1348         |                |                  | 4 |
| 5 | <b>599.2244</b> | 300.1158        | 581.2008 | 291.1040         | 581.2138       | 291.1106         | <b>L</b> | 363.2534 | 182.1303        | 345.2298 | 173.1186         |                |                  | 3 |
| 6 | <b>699.2898</b> | 350.1486        | 681.2663 | 341.1368         | 681.2793       | 341.1433         | <b>V</b> | 249.1723 | 125.0898        | 231.1487 | 116.0780         |                |                  | 2 |
| 7 |                 |                 |          |                  |                |                  | <b>K</b> | 149.1069 | 75.0571         | 131.0833 | 66.0453          |                |                  | 1 |

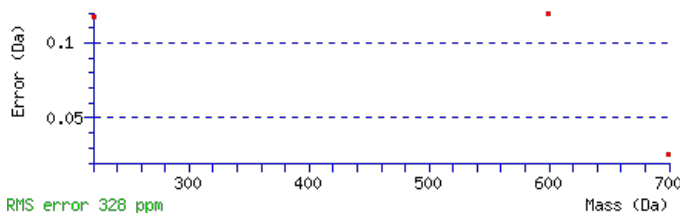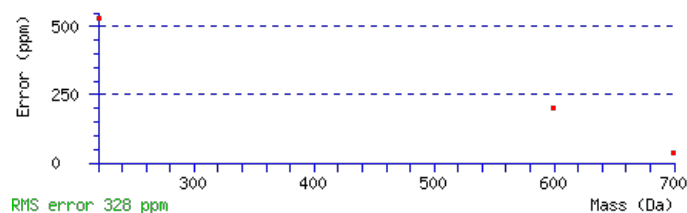

NCBI **BLAST** search of [MSNMLVK](#)

(Parameters: blastp, nr protein database, expect=20000, no filter, PAM30)

Other BLAST [web gateways](#)

All matches to this query

| Score | Mr(calc) | Delta | Sequence | Site Analysis |
|-------|----------|-------|----------|---------------|
|       |          |       |          |               |

## AT4G35690.1

|      |          |         |                          |                     |
|------|----------|---------|--------------------------|---------------------|
| 21.4 | 846.3822 | 0.0002  | <a href="#">MSNMLVK</a>  | Oxidation M4 92.78% |
| 16.5 | 846.3815 | 0.0009  | <a href="#">SRCWVK</a>   |                     |
| 11.8 | 846.3837 | -0.0013 | <a href="#">FVFMHR</a>   |                     |
| 10.3 | 846.3810 | 0.0014  | <a href="#">FVWMEK</a>   |                     |
| 10.3 | 846.3822 | 0.0002  | <a href="#">MSNMLVK</a>  | Oxidation M1 7.22%  |
| 10.3 | 846.3822 | 0.0002  | <a href="#">MVVMTNK</a>  |                     |
| 6.2  | 846.3822 | 0.0002  | <a href="#">NLMMAVK</a>  |                     |
| 4.7  | 846.3840 | -0.0016 | <a href="#">SRKSDDK</a>  |                     |
| 4.7  | 846.3840 | -0.0016 | <a href="#">SRSATADK</a> |                     |
| 4.7  | 846.3835 | -0.0011 | <a href="#">VFTEESK</a>  |                     |

Mascot: <http://www.matrixscience.com/>

**Peptide View**MS/MS Fragmentation of **EVAEVVQSSVLPDMFK**Found in **AT4G35830.1** in **TAIR\_Arabidopsis**, Symbols: | aconitate hydratase, cytoplasmic / citrate hydro-lyase / aconitase (ACO) | chr4:16973011-16977953 REVERSE

Match to Query 8496: 1794.838918 from(898.426735,2+) index(9158)

Title: Elution from: 82.218 to 82.218 scan no 12385 cid35.00 polarity:+

Data file 0-3\_2.mgf

Click mouse within plot area to zoom in by factor of two about that point

Or,  to  Da Label all possible matches  Label matches used for scoring Show Y-axis 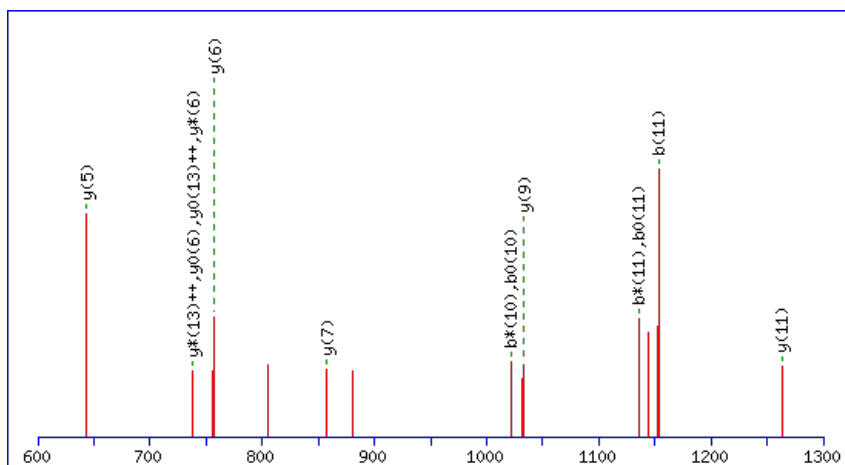Monoisotopic mass of neutral peptide  $M_r(\text{calc})$ : 1794.8434

Fixed modifications: Carbamidomethyl (C) (apply to specified residues or termini only)

Ions Score: 26 Expect: 0.02

Matches : 14/162 fragment ions using 12 most intense peaks ([help](#))

| #  | b         | b <sup>++</sup> | b*        | b <sup>++</sup> * | b <sup>0</sup> | b <sup>0++</sup> | Seq. | y         | y <sup>++</sup> | y*        | y <sup>++</sup> * | y <sup>0</sup> | y <sup>0++</sup> | #  |
|----|-----------|-----------------|-----------|-------------------|----------------|------------------|------|-----------|-----------------|-----------|-------------------|----------------|------------------|----|
| 1  | 131.0469  | 66.0271         |           |                   | 113.0363       | 57.0218          | E    |           |                 |           |                   |                |                  | 16 |
| 2  | 231.1124  | 116.0598        |           |                   | 213.1018       | 107.0545         | V    | 1665.8111 | 833.4092        | 1647.7875 | 824.3974          | 1647.8005      | 824.4039         | 15 |
| 3  | 303.1465  | 152.0769        |           |                   | 285.1359       | 143.0716         | A    | 1565.7456 | 783.3764        | 1547.7220 | 774.3647          | 1547.7351      | 774.3712         | 14 |
| 4  | 433.1861  | 217.0967        |           |                   | 415.1756       | 208.0914         | E    | 1493.7115 | 747.3594        | 1475.6879 | 738.3476          | 1475.7009      | 738.3541         | 13 |
| 5  | 533.2516  | 267.1294        |           |                   | 515.2410       | 258.1241         | V    | 1363.6718 | 682.3396        | 1345.6483 | 673.3278          | 1345.6613      | 673.3343         | 12 |
| 6  | 633.3170  | 317.1622        |           |                   | 615.3065       | 308.1569         | V    | 1263.6064 | 632.3068        | 1245.5828 | 623.2950          | 1245.5958      | 623.3016         | 11 |
| 7  | 763.3697  | 382.1885        | 745.3461  | 373.1767          | 745.3591       | 373.1832         | Q    | 1163.5409 | 582.2741        | 1145.5174 | 573.2623          | 1145.5304      | 573.2688         | 10 |
| 8  | 851.3987  | 426.2030        | 833.3752  | 417.1912          | 833.3882       | 417.1977         | S    | 1033.4883 | 517.2478        | 1015.4647 | 508.2360          | 1015.4777      | 508.2425         | 9  |
| 9  | 939.4278  | 470.2175        | 921.4042  | 461.2057          | 921.4172       | 461.2123         | S    | 945.4592  | 473.2333        | 927.4356  | 464.2215          | 927.4487       | 464.2280         | 8  |
| 10 | 1039.4932 | 520.2503        | 1021.4697 | 511.2385          | 1021.4827      | 511.2450         | V    | 857.4302  | 429.2187        | 839.4066  | 420.2069          | 839.4196       | 420.2134         | 7  |
| 11 | 1153.5743 | 577.2908        | 1135.5508 | 568.2790          | 1135.5638      | 568.2855         | L    | 757.3647  | 379.1860        | 739.3411  | 370.1742          | 739.3542       | 370.1807         | 6  |
| 12 | 1251.6241 | 626.3157        | 1233.6006 | 617.3039          | 1233.6136      | 617.3104         | P    | 643.2836  | 322.1454        | 625.2600  | 313.1337          | 625.2731       | 313.1402         | 5  |
| 13 | 1367.6481 | 684.3277        | 1349.6245 | 675.3159          | 1349.6376      | 675.3224         | D    | 545.2338  | 273.1205        | 527.2102  | 264.1088          | 527.2233       | 264.1153         | 4  |
| 14 | 1499.6856 | 750.3465        | 1481.6621 | 741.3347          | 1481.6751      | 741.3412         | M    | 429.2098  | 215.1086        | 411.1863  | 206.0968          |                |                  | 3  |
| 15 | 1647.7511 | 824.3792        | 1629.7275 | 815.3674          | 1629.7405      | 815.3739         | F    | 297.1723  | 149.0898        | 279.1487  | 140.0780          |                |                  | 2  |
| 16 |           |                 |           |                   |                |                  | K    | 149.1069  | 75.0571         | 131.0833  | 66.0453           |                |                  | 1  |

AT4G35830.1

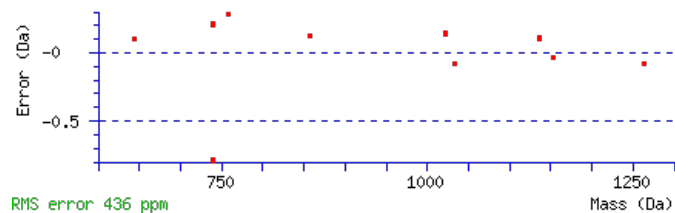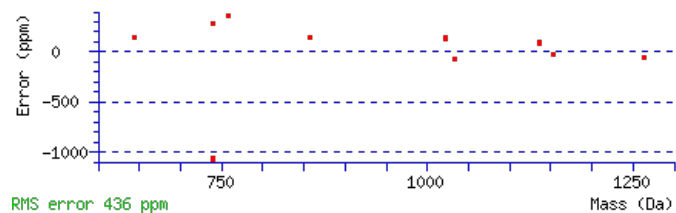

NCBI **BLAST** search of [EVAEVVQSSVLPDMFK](#)  
(Parameters: blastp, nr protein database, expect=20000, no filter, PAM30)

Other BLAST [web gateways](#)

**All matches to this query**

| Score | Mr(calc)  | Delta   | Sequence                          |
|-------|-----------|---------|-----------------------------------|
| 25.5  | 1794.8434 | -0.0045 | <a href="#">EVAEVVQSSVLPDMFK</a>  |
| 4.9   | 1794.8391 | -0.0002 | <a href="#">MDPVPVRCLLNSISR</a>   |
| 2.1   | 1794.8365 | 0.0025  | <a href="#">KGSMP LISKDIPCDAK</a> |
| 1.4   | 1794.8414 | -0.0024 | <a href="#">MCNETRILPVHYLK</a>    |

Mascot: <http://www.matrixscience.com/>

**Peptide View**MS/MS Fragmentation of **LLAVWK**

Found in **AT4G35870.1** in **TAIR\_Arabidopsis**, Symbols: | similar to early-responsive to dehydration protein-related / ERD protein-related [Arabidopsis thaliana] (TAIR:AT3G21620.1); similar to hypothetical protein OsI\_009692 [Oryza sativa (indica cultivar-group)] (GB:EAY88459.1); similar to un

Match to Query 732: 736.435132 from(369.224842,2+) index(4168)

Title: Elution from: 38.882 to 38.882 scan no 5232 cid35.00 polarity:+

Data file D12h-3\_2.mgf

Click mouse within plot area to zoom in by factor of two about that point

Or,   to  Da

Label all possible matches  Label matches used for scoring

Show Y-axis

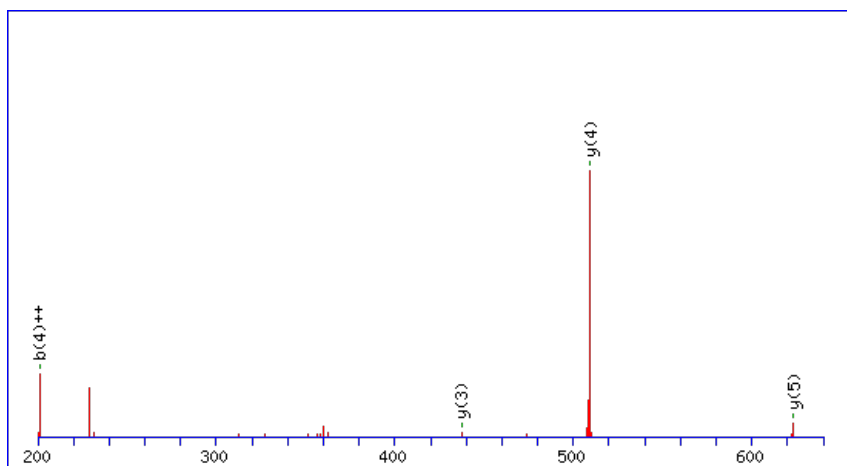

**Monoisotopic mass of neutral peptide Mr(calc):** 736.4348

**Fixed modifications:** Carbamidomethyl (C) (apply to specified residues or termini only)

**Ions Score:** 26 **Expect:** 0.003

**Matches:** 4/30 fragment ions using 5 most intense peaks ([help](#))

| # | b        | b <sup>++</sup> | Seq. | y               | y <sup>++</sup> | y*       | y <sup>*++</sup> | # |
|---|----------|-----------------|------|-----------------|-----------------|----------|------------------|---|
| 1 | 115.0884 | 58.0478         | L    |                 |                 |          |                  | 6 |
| 2 | 229.1695 | 115.0884        | L    | <b>623.3610</b> | 312.1841        | 605.3374 | 303.1723         | 5 |
| 3 | 301.2036 | 151.1054        | A    | <b>509.2799</b> | 255.1436        | 491.2563 | 246.1318         | 4 |
| 4 | 401.2691 | <b>201.1382</b> | V    | <b>437.2457</b> | 219.1265        | 419.2221 | 210.1147         | 3 |
| 5 | 589.3425 | 295.1749        | W    | 337.1803        | 169.0938        | 319.1567 | 160.0820         | 2 |
| 6 |          |                 | K    | 149.1069        | 75.0571         | 131.0833 | 66.0453          | 1 |

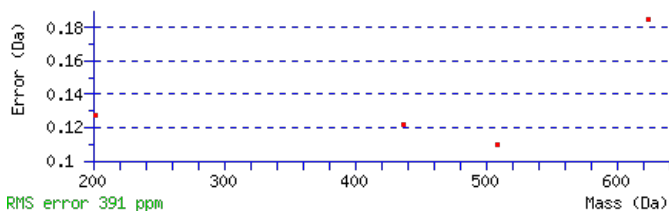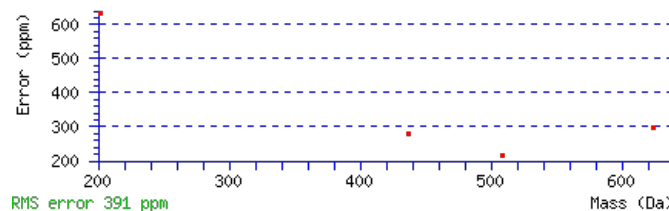

NCBI **BLAST** search of [LLAVWK](#)

(Parameters: blastp, nr protein database, expect=20000, no filter, PAM30)

Other BLAST [web gateways](#)

**All matches to this query**

| Score | Mr(calc) | Delta  | Sequence               |
|-------|----------|--------|------------------------|
| 25.6  | 736.4348 | 0.0004 | <a href="#">LLAVWK</a> |
| 24.8  | 736.4348 | 0.0004 | <a href="#">LIAWVK</a> |



## AT4G35870.1

|      |          |         |                        |
|------|----------|---------|------------------------|
| 12.7 | 736.4348 | 0.0004  | <a href="#">LILGWK</a> |
| 11.9 | 736.4348 | 0.0004  | <a href="#">ILWLGK</a> |
| 11.9 | 736.4352 | -0.0001 | <a href="#">LIRPAR</a> |
| 11.9 | 736.4348 | 0.0004  | <a href="#">LLLWVK</a> |
| 11.9 | 736.4348 | 0.0004  | <a href="#">LLWIGK</a> |

**Mascot:** <http://www.matrixscience.com/>

### Peptide View

 MS/MS Fragmentation of **KSPLMLSPMGIVMQNTLLRTPK**

 Found in **AT4G35930.1** in **TAIR\_Arabidopsis**, Symbols: | Identical to F-box protein At4g35930 [Arabidopsis Thaliana] (GB:Q5XF11;GB:O65630); similar to F-box family protein [Arabidopsis thaliana] (TAIR:AT1G61340.1); similar to hypothetical protein [Vitis vinifera] (GB:CAN71843.1); similar to u

Match to Query 10179: 2531.245407 from(844.755745,3+) index(8491)

Title: Elution from: 76.034 to 76.034 scan no 11383 cid35.00 polarity:+

Data file D12h-3\_2.mgf

Click mouse within plot area to zoom in by factor of two about that point

 Or,   to  Da 

 Label all possible matches  Label matches used for scoring 

 Show Y-axis 
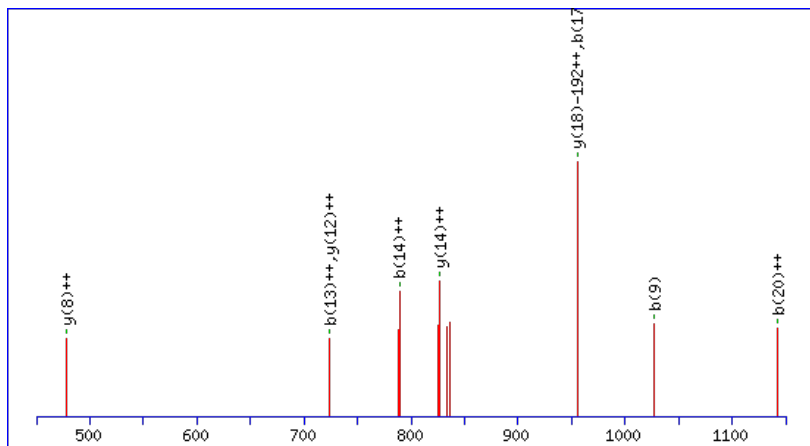
 Monoisotopic mass of neutral peptide  $M_r(\text{calc})$ : 2531.2513

Fixed modifications: Carbamidomethyl (C) (apply to specified residues or termini only)

Variable modifications:

M5 : Oxidation (M), with neutral losses 0.0000 (shown in table), 63.9983

M9 : Oxidation (M), with neutral losses 0.0000 (shown in table), 63.9983

M13 : Oxidation (M), with neutral losses 0.0000 (shown in table), 63.9983

Ions Score: 31 Expect: 0.0041

 Matches : 10/420 fragment ions using 7 most intense peaks ([help](#))

| #  | b                | b <sup>++</sup>  | b <sup>*</sup> | b <sup>*++</sup> | b <sup>0</sup> | b <sup>0++</sup> | Seq      | y               | y <sup>++</sup> | y <sup>*</sup> | y <sup>*++</sup> | y <sup>0</sup> | y <sup>0++</sup> | #  |
|----|------------------|------------------|----------------|------------------|----------------|------------------|----------|-----------------|-----------------|----------------|------------------|----------------|------------------|----|
| 1  | 131.0963         | 66.0518          | 113.0727       | 57.0400          |                |                  | <b>K</b> |                 |                 |                |                  |                |                  | 22 |
| 2  | 219.1254         | 110.0663         | 201.1018       | 101.0545         | 201.1148       | 101.0610         | <b>S</b> | 2402.1695       | 1201.5884       | 2384.1459      | 1192.5766        | 2384.1589      | 1192.5831        | 21 |
| 3  | 317.1752         | 159.0912         | 299.1516       | 150.0794         | 299.1646       | 150.0859         | <b>P</b> | 2314.1404       | 1157.5738       | 2296.1168      | 1148.5620        | 2296.1298      | 1148.5686        | 20 |
| 4  | 431.2563         | 216.1318         | 413.2327       | 207.1200         | 413.2457       | 207.1265         | <b>L</b> | 2216.0906       | 1108.5489       | 2198.0670      | 1099.5371        | 2198.0800      | 1099.5437        | 19 |
| 5  | 579.2887         | 290.1480         | 561.2651       | 281.1362         | 561.2781       | 281.1427         | <b>M</b> | 2102.0095       | 1051.5084       | 2083.9859      | 1042.4966        | 2083.9989      | 1042.5031        | 18 |
| 6  | 693.3698         | 347.1885         | 675.3462       | 338.1767         | 675.3592       | 338.1833         | <b>L</b> | 1953.9771       | 977.4922        | 1935.9535      | 968.4804         | 1935.9665      | 968.4869         | 17 |
| 7  | 781.3989         | 391.2031         | 763.3753       | 382.1913         | 763.3883       | 382.1978         | <b>S</b> | 1839.8960       | 920.4516        | 1821.8724      | 911.4398         | 1821.8854      | 911.4463         | 16 |
| 8  | 879.4487         | 440.2280         | 861.4251       | 431.2162         | 861.4381       | 431.2227         | <b>P</b> | 1751.8669       | 876.4371        | 1733.8433      | 867.4253         | 1733.8563      | 867.4318         | 15 |
| 9  | <b>1027.4811</b> | 514.2442         | 1009.4575      | 505.2324         | 1009.4705      | 505.2389         | <b>M</b> | 1653.8171       | <b>827.4122</b> | 1635.7935      | 818.4004         | 1635.8065      | 818.4069         | 14 |
| 10 | 1085.4996        | 543.2534         | 1067.4760      | 534.2416         | 1067.4890      | 534.2482         | <b>G</b> | 1505.7847       | 753.3960        | 1487.7611      | 744.3842         | 1487.7741      | 744.3907         | 13 |
| 11 | 1199.5807        | 600.2940         | 1181.5571      | 591.2822         | 1181.5701      | 591.2887         | <b>I</b> | 1447.7662       | <b>724.3867</b> | 1429.7426      | 715.3749         | 1429.7556      | 715.3814         | 12 |
| 12 | 1299.6461        | 650.3267         | 1281.6226      | 641.3149         | 1281.6356      | 641.3214         | <b>V</b> | 1333.6851       | 667.3462        | 1315.6615      | 658.3344         | 1315.6745      | 658.3409         | 11 |
| 13 | 1447.6786        | <b>724.3429</b>  | 1429.6550      | 715.3311         | 1429.6680      | 715.3376         | <b>M</b> | 1233.6196       | 617.3135        | 1215.5960      | 608.3017         | 1215.6091      | 608.3082         | 10 |
| 14 | 1577.7312        | <b>789.3693</b>  | 1559.7076      | 780.3575         | 1559.7207      | 780.3640         | <b>Q</b> | 1085.5872       | 543.2972        | 1067.5636      | 534.2854         | 1067.5766      | 534.2920         | 9  |
| 15 | 1693.7682        | 847.3878         | 1675.7446      | 838.3760         | 1675.7577      | 838.3825         | <b>N</b> | <b>955.5345</b> | <b>478.2709</b> | 937.5110       | 469.2591         | 937.5240       | 469.2656         | 8  |
| 16 | 1795.8129        | 898.4101         | 1777.7894      | 889.3983         | 1777.8024      | 889.4048         | <b>T</b> | 839.4975        | 420.2524        | 821.4740       | 411.2406         | 821.4870       | 411.2471         | 7  |
| 17 | 1909.8940        | <b>955.4507</b>  | 1891.8705      | 946.4389         | 1891.8835      | 946.4454         | <b>L</b> | 737.4528        | 369.2301        | 719.4293       | 360.2183         | 719.4423       | 360.2248         | 6  |
| 18 | 2023.9751        | 1012.4912        | 2005.9516      | 1003.4794        | 2005.9646      | 1003.4859        | <b>L</b> | 623.3717        | 312.1895        | 605.3482       | 303.1777         | 605.3612       | 303.1842         | 5  |
| 19 | 2184.0644        | 1092.5358        | 2166.0408      | 1083.5240        | 2166.0538      | 1083.5305        | <b>R</b> | 509.2906        | 255.1490        | 491.2671       | 246.1372         | 491.2801       | 246.1437         | 4  |
| 20 | 2286.1091        | <b>1143.5582</b> | 2268.0855      | 1134.5464        | 2268.0985      | 1134.5529        | <b>T</b> | 349.2014        | 175.1043        | 331.1778       | 166.0925         | 331.1908       | 166.0990         | 3  |
| 21 | 2384.1589        | 1192.5831        | 2366.1353      | 1183.5713        | 2366.1483      | 1183.5778        | <b>P</b> | 247.1567        | 124.0820        | 229.1331       | 115.0702         |                |                  | 2  |
| 22 |                  |                  |                |                  |                |                  | <b>K</b> | 149.1069        | 75.0571         | 131.0833       | 66.0453          |                |                  | 1  |

# AT4G35930.1

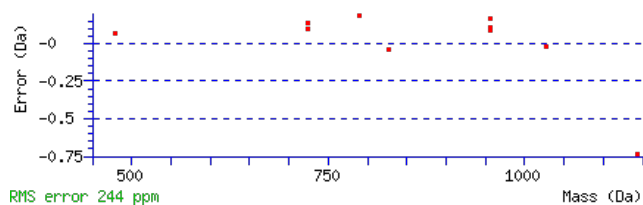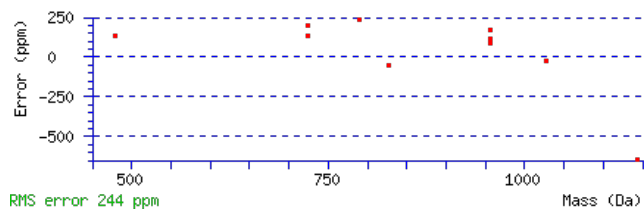

NCBI BLAST search of [KSPLMLSPMGIVMQNTLLRTPK](#)  
 (Parameters: blastp, nr protein database, expect=20000, no filter, PAM30)  
 Other BLAST [web gateways](#)

## All matches to this query

| Score | Mr(calc)  | Delta   | Sequence                                 |
|-------|-----------|---------|------------------------------------------|
| 31.1  | 2531.2513 | -0.0058 | <a href="#">KSPLMLSPMGIVMQNTLLRTPK</a>   |
| 8.1   | 2531.2451 | 0.0003  | <a href="#">VETGMIKPGMVVTFAPTGLTTEVK</a> |
| 8.0   | 2531.2526 | -0.0072 | <a href="#">LSFLPELMESVKRAALEGAAEVK</a>  |
| 4.0   | 2531.2438 | 0.0016  | <a href="#">LEHFSKTTGKLVWNLTVSHFR</a>    |
| 2.7   | 2531.2396 | 0.0058  | <a href="#">AEIDAANMKVALGKYEEAIDILK</a>  |
| 2.5   | 2531.2415 | 0.0039  | <a href="#">EWKPKSNQKPVGHNPGVIGTPTK</a>  |

Mascot: <http://www.matrixscience.com>

**Peptide View**MS/MS Fragmentation of **LILHLFR**Found in **AT4G36080.1** in **TAIR\_Arabidopsis**, Symbols: | FAT domain-containing protein / phosphatidylinositol 3- and 4-kinase family protein | chr4:17059999-17077631 REVERSE

Match to Query 1963:922.538046 from(308.519958,3+) index(667)

Title: Elution from: 11.542 to 11.542 scan no 953 cid35.00 polarity:+

Data file D1d-3\_2.mgf

Click mouse within plot area to zoom in by factor of two about that point

Or,   to  Da Label all possible matches  Label matches used for scoring Show Y-axis 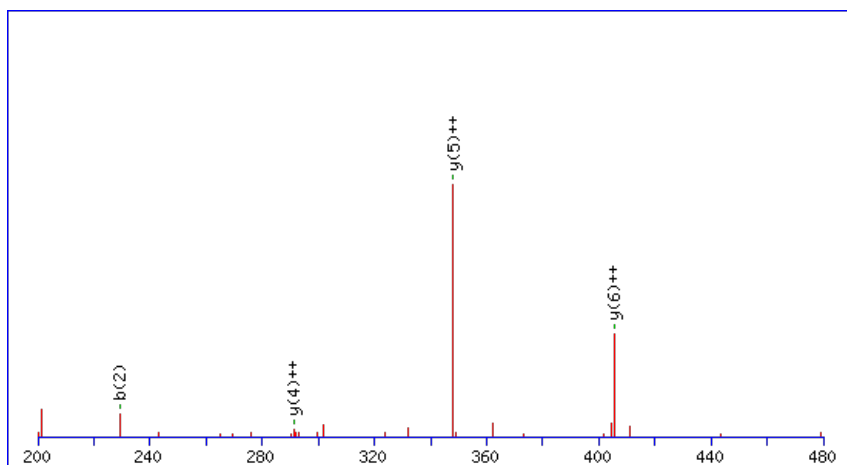Monoisotopic mass of neutral peptide **Mr(calc)**: 922.5397

Fixed modifications: Carbamidomethyl (C) (apply to specified residues or termini only)

Ions Score: 16 Expect: 0.039

Matches : 4/36 fragment ions using 9 most intense peaks ([help](#))

| # | b        | b <sup>++</sup> | Seq. | y        | y <sup>++</sup> | y*       | y <sup>*++</sup> | # |
|---|----------|-----------------|------|----------|-----------------|----------|------------------|---|
| 1 | 115.0884 | 58.0478         | L    |          |                 |          |                  | 7 |
| 2 | 229.1695 | 115.0884        | I    | 809.4659 | 405.2366        | 791.4423 | 396.2248         | 6 |
| 3 | 343.2506 | 172.1289        | L    | 695.3848 | 348.1960        | 677.3612 | 339.1842         | 5 |
| 4 | 483.3006 | 242.1539        | H    | 581.3037 | 291.1555        | 563.2801 | 282.1437         | 4 |
| 5 | 597.3817 | 299.1945        | L    | 441.2536 | 221.1305        | 423.2301 | 212.1187         | 3 |
| 6 | 745.4471 | 373.2272        | F    | 327.1725 | 164.0899        | 309.1490 | 155.0781         | 2 |
| 7 |          |                 | R    | 179.1071 | 90.0572         | 161.0835 | 81.0454          | 1 |

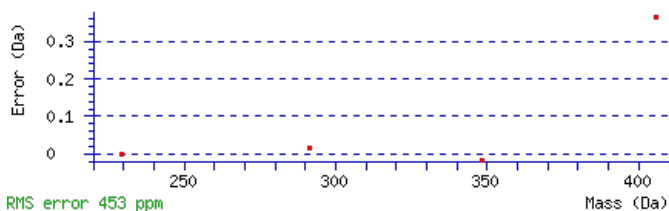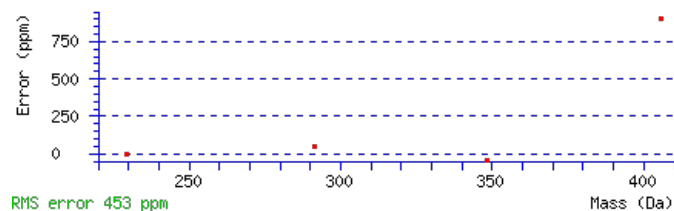NCBI **BLAST** search of [LILHLFR](#)

(Parameters: blastp, nr protein database, expect=20000, no filter, PAM30)

Other BLAST [web gateways](#)**All matches to this query**

| Score | Mr(calc) | Delta   | Sequence                 |
|-------|----------|---------|--------------------------|
| 16.0  | 922.5397 | -0.0016 | <a href="#">LILHLFR</a>  |
| 13.5  | 922.5374 | 0.0006  | <a href="#">ILPRGNLK</a> |

## AT4G36080.1

|      |          |        |                          |
|------|----------|--------|--------------------------|
| 13.5 | 922.5374 | 0.0006 | <a href="#">LLARPNVK</a> |
| 13.5 | 922.5374 | 0.0006 | <a href="#">LLGKPLNR</a> |
| 3.3  | 922.5374 | 0.0006 | <a href="#">KPLPTRAK</a> |
| 0.1  | 922.5374 | 0.0006 | <a href="#">RKLPTPAK</a> |

**Mascot:** <http://www.matrixscience.com/>

**Peptide View**MS/MS Fragmentation of **LEKACAEAREK**Found in **AT4G36520.1** in **TAIR\_Arabidopsis**, Symbols: | trichohyalin-related | chr4:17230592-17235438 REVERSE

Match to Query 4804: 1320.608944 from(661.311748,2+) index(2810)

Title: Elution from: 30.178 to 30.178 scan no 3551 cid35.00 polarity:+

Data file D6h-2\_2.mgf

Click mouse within plot area to zoom in by factor of two about that point

Or,   to  Da Label all possible matches  Label matches used for scoring Show Y-axis 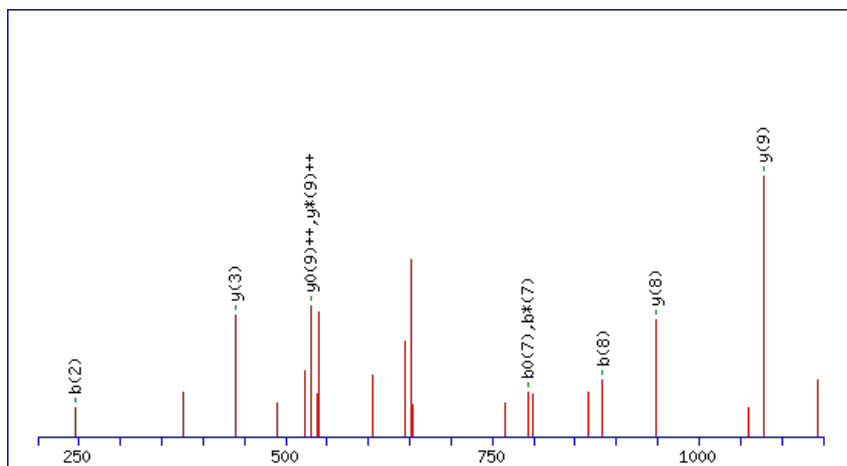Monoisotopic mass of neutral peptide **Mr(calc)**: 1320.6050**Fixed modifications**: Carbamidomethyl (C) (apply to specified residues or termini only)**Ions Score**: 26 **Expect**: 0.028**Matches**: 9/112 fragment ions using 9 most intense peaks ([help](#))

| #  | b               | b <sup>++</sup> | b <sup>*</sup>  | b <sup>*++</sup> | b <sup>0</sup>  | b <sup>0++</sup> | Seq. | y                | y <sup>++</sup> | y <sup>*</sup> | y <sup>*++</sup> | y <sup>0</sup> | y <sup>0++</sup> | #  |
|----|-----------------|-----------------|-----------------|------------------|-----------------|------------------|------|------------------|-----------------|----------------|------------------|----------------|------------------|----|
| 1  | 115.0884        | 58.0478         |                 |                  |                 |                  | L    |                  |                 |                |                  |                |                  | 11 |
| 2  | <b>245.1280</b> | 123.0676        |                 |                  | 227.1174        | 114.0624         | E    | 1207.5312        | 604.2692        | 1189.5076      | 595.2574         | 1189.5206      | 595.2640         | 10 |
| 3  | 375.2170        | 188.1122        | 357.1935        | 179.1004         | 357.2065        | 179.1069         | K    | <b>1077.4916</b> | 539.2494        | 1059.4680      | <b>530.2376</b>  | 1059.4810      | <b>530.2441</b>  | 9  |
| 4  | 447.2512        | 224.1292        | 429.2276        | 215.1174         | 429.2406        | 215.1239         | A    | <b>947.4025</b>  | 474.2049        | 929.3790       | 465.1931         | 929.3920       | 465.1996         | 8  |
| 5  | 609.2759        | 305.1416        | 591.2523        | 296.1298         | 591.2653        | 296.1363         | C    | 875.3684         | 438.1878        | 857.3448       | 429.1760         | 857.3578       | 429.1826         | 7  |
| 6  | 681.3101        | 341.1587        | 663.2865        | 332.1469         | 663.2995        | 332.1534         | A    | 713.3437         | 357.1755        | 695.3201       | 348.1637         | 695.3331       | 348.1702         | 6  |
| 7  | 811.3497        | 406.1785        | <b>793.3261</b> | 397.1667         | <b>793.3391</b> | 397.1732         | E    | 641.3095         | 321.1584        | 623.2859       | 312.1466         | 623.2990       | 312.1531         | 5  |
| 8  | <b>883.3838</b> | 442.1956        | 865.3602        | 433.1838         | 865.3733        | 433.1903         | A    | 511.2699         | 256.1386        | 493.2463       | 247.1268         | 493.2593       | 247.1333         | 4  |
| 9  | 1043.4731       | 522.2402        | 1025.4495       | 513.2284         | 1025.4625       | 513.2349         | R    | <b>439.2358</b>  | 220.1215        | 421.2122       | 211.1097         | 421.2252       | 211.1162         | 3  |
| 10 | 1173.5127       | 587.2600        | 1155.4891       | 578.2482         | 1155.5021       | 578.2547         | E    | 279.1465         | 140.0769        | 261.1229       | 131.0651         | 261.1359       | 131.0716         | 2  |
| 11 |                 |                 |                 |                  |                 |                  | K    | 149.1069         | 75.0571         | 131.0833       | 66.0453          |                |                  | 1  |

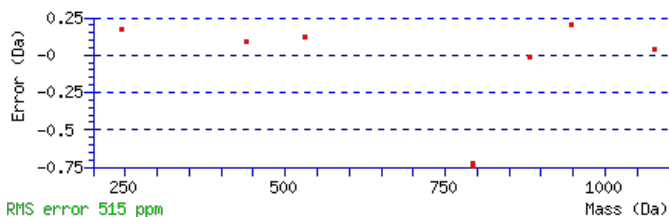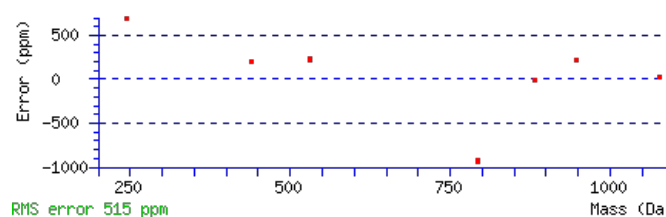NCBI **BLAST** search of **LEKACAEAREK**

(Parameters: blastp, nr protein database, expect=20000, no filter, PAM30)

Other BLAST [web gateways](#)**All matches to this query**

## AT4G36520.1

| Score | Mr(calc)  | Delta   | Sequence                    |
|-------|-----------|---------|-----------------------------|
| 25.5  | 1320.6050 | 0.0039  | <a href="#">LEKACAEAREK</a> |
| 8.5   | 1320.6050 | 0.0039  | <a href="#">LESLKQGMENR</a> |
| 6.1   | 1320.6120 | -0.0031 | <a href="#">KEEKEDPLYR</a>  |
| 5.8   | 1320.6124 | -0.0035 | <a href="#">IENDTKEAARR</a> |
| 4.7   | 1320.6099 | -0.0010 | <a href="#">LRRSEMGYTR</a>  |
| 3.8   | 1320.6120 | -0.0031 | <a href="#">LFENLREEEK</a>  |
| 3.5   | 1320.6106 | -0.0017 | <a href="#">CKQLMELVER</a>  |
| 2.6   | 1320.6061 | 0.0028  | <a href="#">LKPGHYWYDK</a>  |
| 1.8   | 1320.6099 | -0.0010 | <a href="#">SCNGLLHRAK</a>  |
| 1.6   | 1320.6120 | -0.0030 | <a href="#">ELTVVFAEENR</a> |

Mascot: <http://www.matrixscience.com/>

## Peptide View

MS/MS Fragmentation of **LLRMYAK**

Found in **AT4G37170.1** in **TAIR\_Arabidopsis**, Symbols: | pentatricopeptide (PPR) repeat-containing protein | chr4:17498574-17500649 REVERSE

Match to Query 1502: 920.477910 from(461.246231,2+) index(3260)

Title: Elution from: 34.872 to 34.872 scan no 4188 cid35.00 polarity:+

Data file D1d-2\_2.mgf

Click mouse within plot area to zoom in by factor of two about that point

Or,   to  Da

Label all possible matches  Label matches used for scoring

Show Y-axis

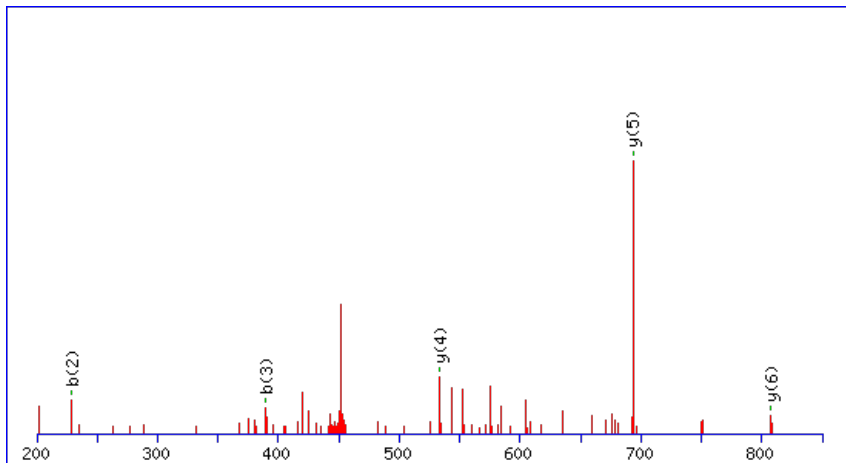

**Monoisotopic mass of neutral peptide Mr(calc):** 920.4780

**Fixed modifications:** Carbamidomethyl (C) (apply to specified residues or termini only)

**Variable modifications:**

**M4** : Oxidation (M), with neutral losses 0.0000 (shown in table), 63.9983

**Ions Score:** 22 **Expect:** 0.01

**Matches :** 5/68 fragment ions using 7 most intense peaks ([help](#))

| # | b               | b <sup>++</sup> | b*       | b <sup>*++</sup> | Seq. | y               | y <sup>++</sup> | y*       | y <sup>*++</sup> | # |
|---|-----------------|-----------------|----------|------------------|------|-----------------|-----------------|----------|------------------|---|
| 1 | 115.0884        | 58.0478         |          |                  | L    |                 |                 |          |                  | 7 |
| 2 | <b>229.1695</b> | 115.0884        |          |                  | L    | <b>807.4042</b> | 404.2057        | 789.3806 | 395.1939         | 6 |
| 3 | <b>389.2587</b> | 195.1330        | 371.2351 | 186.1212         | R    | <b>693.3231</b> | 347.1652        | 675.2995 | 338.1534         | 5 |
| 4 | 537.2912        | 269.1492        | 519.2676 | 260.1374         | M    | <b>533.2338</b> | 267.1205        | 515.2102 | 258.1088         | 4 |
| 5 | 701.3515        | 351.1794        | 683.3279 | 342.1676         | Y    | 385.2014        | 193.1043        | 367.1778 | 184.0925         | 3 |
| 6 | 773.3857        | 387.1965        | 755.3621 | 378.1847         | A    | 221.1410        | 111.0741        | 203.1174 | 102.0624         | 2 |
| 7 |                 |                 |          |                  | K    | 149.1069        | 75.0571         | 131.0833 | 66.0453          | 1 |

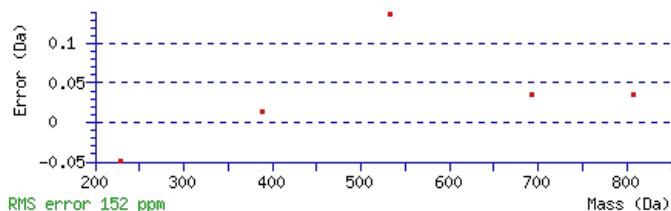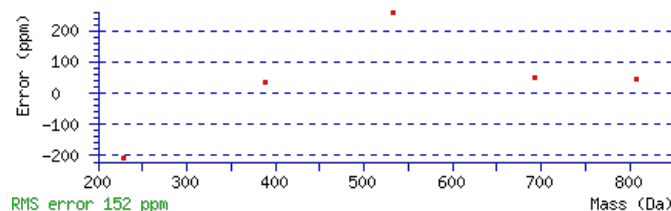

NCBI **BLAST** search of [LLRMYAK](#)

(Parameters: blastp, nr protein database, expect=20000, no filter, PAM30)

Other BLAST [web gateways](#)

All matches to this query

| Score | Mr(calc) | Delta   | Sequence                |
|-------|----------|---------|-------------------------|
| 22.1  | 920.4780 | -0.0001 | <a href="#">LLRMYAK</a> |





**Peptide View**MS/MS Fragmentation of **SDEISDPEQIQK**

Found in **AT4G37300.1** in **TAIR\_Arabidopsis**, Symbols: MEE59 | MEE59 (maternal effect embryo arrest 59) | chr4:17554799-17555492  
FORWARD

Match to Query 5400: 1402.600940 from(702.307746,2+) index(2503)

Title: Elution from: 27.590 to 27.590 scan no 3200 cid35.00 polarity:+

Data file 0-1\_2.mgf

Click mouse within plot area to zoom in by factor of two about that point

Or,   to  Da

Label all possible matches  Label matches used for scoring

Show Y-axis

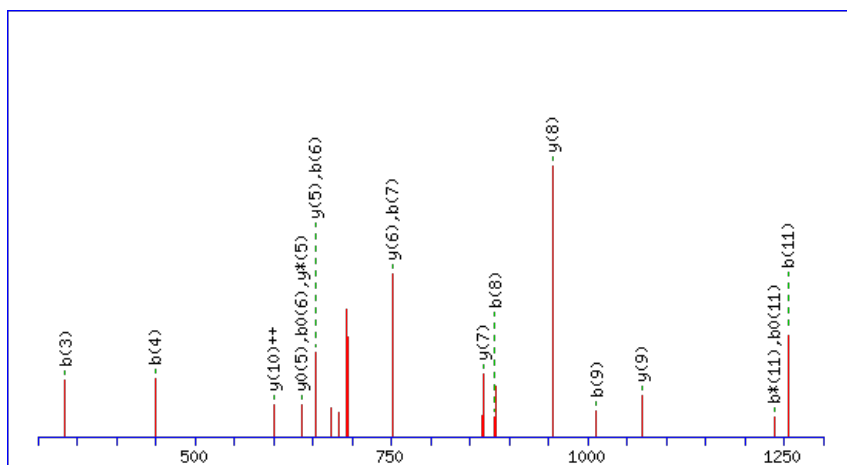

Monoisotopic mass of neutral peptide  $M_r(\text{calc})$ : 1402.6022

Fixed modifications: Carbamidomethyl (C) (apply to specified residues or termini only)

Ions Score: 58 Expect: 7.5e-006

Matches : 18/108 fragment ions using 17 most intense peaks ([help](#))

| #  | b                | b <sup>++</sup> | b*               | b <sup>*++</sup> | b <sup>0</sup>   | b <sup>0++</sup> | Seq. | y                | y <sup>++</sup> | y*              | y <sup>*++</sup> | y <sup>0</sup>  | y <sup>0++</sup> | #  |
|----|------------------|-----------------|------------------|------------------|------------------|------------------|------|------------------|-----------------|-----------------|------------------|-----------------|------------------|----|
| 1  | 89.0363          | 45.0218         |                  |                  | 71.0258          | 36.0165          | S    |                  |                 |                 |                  |                 |                  | 12 |
| 2  | 205.0603         | 103.0338        |                  |                  | 187.0498         | 94.0285          | D    | 1315.5804        | 658.2939        | 1297.5569       | 649.2821         | 1297.5699       | 649.2886         | 11 |
| 3  | <b>335.0999</b>  | 168.0536        |                  |                  | 317.0894         | 159.0483         | E    | 1199.5565        | <b>600.2819</b> | 1181.5329       | 591.2701         | 1181.5459       | 591.2766         | 10 |
| 4  | <b>449.1810</b>  | 225.0942        |                  |                  | 431.1705         | 216.0889         | I    | <b>1069.5168</b> | 535.2621        | 1051.4933       | 526.2503         | 1051.5063       | 526.2568         | 9  |
| 5  | 537.2101         | 269.1087        |                  |                  | 519.1995         | 260.1034         | S    | <b>955.4357</b>  | 478.2215        | 937.4122        | 469.2097         | 937.4252        | 469.2162         | 8  |
| 6  | <b>653.2341</b>  | 327.1207        |                  |                  | <b>635.2235</b>  | 318.1154         | D    | <b>867.4067</b>  | 434.2070        | 849.3831        | 425.1952         | 849.3961        | 425.2017         | 7  |
| 7  | <b>751.2839</b>  | 376.1456        |                  |                  | 733.2733         | 367.1403         | P    | <b>751.3827</b>  | 376.1950        | 733.3591        | 367.1832         | 733.3721        | 367.1897         | 6  |
| 8  | <b>881.3235</b>  | 441.1654        |                  |                  | 863.3129         | 432.1601         | E    | <b>653.3329</b>  | 327.1701        | <b>635.3093</b> | 318.1583         | <b>635.3223</b> | 318.1648         | 5  |
| 9  | <b>1011.3762</b> | 506.1917        | 993.3526         | 497.1799         | 993.3656         | 497.1864         | Q    | 523.2933         | 262.1503        | 505.2697        | 253.1385         |                 |                  | 4  |
| 10 | 1141.4288        | 571.2180        | 1123.4052        | 562.2062         | 1123.4182        | 562.2128         | Q    | 393.2406         | 197.1239        | 375.2170        | 188.1122         |                 |                  | 3  |
| 11 | <b>1255.5099</b> | 628.2586        | <b>1237.4863</b> | 619.2468         | <b>1237.4993</b> | 619.2533         | I    | 263.1880         | 132.0976        | 245.1644        | 123.0858         |                 |                  | 2  |
| 12 |                  |                 |                  |                  |                  |                  | K    | 149.1069         | 75.0571         | 131.0833        | 66.0453          |                 |                  | 1  |

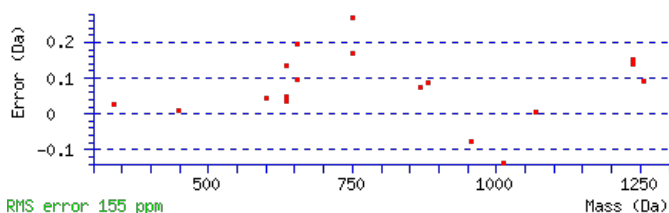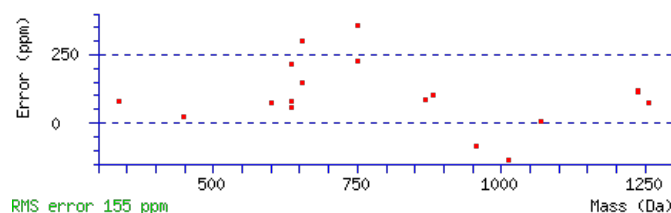

NCBI BLAST search of **SDEISDPEQIQK**

(Parameters: blastp, nr protein database, expect=20000, no filter, PAM30)

Other BLAST [web gateways](#)

# AT4G37300.1

All matches to this query

| Score | Mr(calc)  | Delta   | Sequence                     |
|-------|-----------|---------|------------------------------|
| 57.6  | 1402.6022 | -0.0013 | <a href="#">SDEISDPEQIQ</a>  |
| 10.5  | 1402.6045 | -0.0035 | <a href="#">EEQELAPFDPSK</a> |
| 8.0   | 1402.6022 | -0.0013 | <a href="#">ENEISKEDAEPK</a> |
| 3.5   | 1402.6002 | 0.0008  | <a href="#">SNCHLLEENIR</a>  |
| 0.5   | 1402.6024 | -0.0015 | <a href="#">LDYAKEHHMNK</a>  |
| 0.2   | 1402.6049 | -0.0039 | <a href="#">DSQHIDEKASQK</a> |

Mascot: <http://www.matrixscience.com/>

## Peptide View

MS/MS Fragmentation of **IINEPTAAALSYGMNNK**

Found in **AT4G37910.1** in **TAIR\_Arabidopsis**, Symbols: MTHSC70-1 | MTHSC70-1 (mitochondrial heat shock protein 70-1); ATP binding/unfolded protein binding | chr4:17825362-17828093 REVERSE

Match to Query 8727: 1826.832968 from(914.423760,2+) index(5998)

Title: Elution from: 52.866 to 52.866 scan no 7588 cid35.00 polarity:+

Data file D12h-1\_2.mgf

Click mouse within plot area to zoom in by factor of two about that point

Or,   to  Da

Label all possible matches  Label matches used for scoring

Show Y-axis

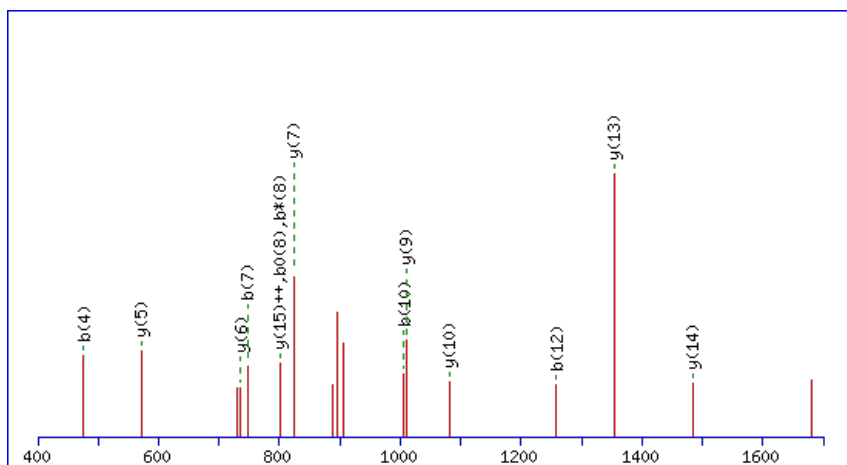

Monoisotopic mass of neutral peptide  $M_r(\text{calc})$ : 1826.8359

Fixed modifications: Carbamidomethyl (C) (apply to specified residues or termini only)

Ions Score: 59 Expect: 1.1e-005

Matches : 14/170 fragment ions using 16 most intense peaks ([help](#))

| #  | b         | b <sup>++</sup> | b*        | b <sup>*++</sup> | b <sup>0</sup> | b <sup>0++</sup> | Seq. | y         | y <sup>++</sup> | y*        | y <sup>*++</sup> | y <sup>0</sup> | y <sup>0++</sup> | #  |
|----|-----------|-----------------|-----------|------------------|----------------|------------------|------|-----------|-----------------|-----------|------------------|----------------|------------------|----|
| 1  | 115.0884  | 58.0478         |           |                  |                |                  | I    |           |                 |           |                  |                |                  | 17 |
| 2  | 229.1695  | 115.0884        |           |                  |                |                  | I    | 1713.7621 | 857.3847        | 1695.7385 | 848.3729         | 1695.7515      | 848.3794         | 16 |
| 3  | 345.2065  | 173.1069        | 327.1829  | 164.0951         |                |                  | N    | 1599.6810 | 800.3441        | 1581.6574 | 791.3323         | 1581.6704      | 791.3389         | 15 |
| 4  | 475.2461  | 238.1267        | 457.2225  | 229.1149         | 457.2355       | 229.1214         | E    | 1483.6440 | 742.3256        | 1465.6204 | 733.3138         | 1465.6334      | 733.3204         | 14 |
| 5  | 573.2959  | 287.1516        | 555.2723  | 278.1398         | 555.2853       | 278.1463         | P    | 1353.6044 | 677.3058        | 1335.5808 | 668.2940         | 1335.5938      | 668.3005         | 13 |
| 6  | 675.3406  | 338.1739        | 657.3170  | 329.1622         | 657.3300       | 329.1687         | T    | 1255.5546 | 628.2809        | 1237.5310 | 619.2691         | 1237.5440      | 619.2756         | 12 |
| 7  | 747.3748  | 374.1910        | 729.3512  | 365.1792         | 729.3642       | 365.1857         | A    | 1153.5099 | 577.2586        | 1135.4863 | 568.2468         | 1135.4993      | 568.2533         | 11 |
| 8  | 819.4089  | 410.2081        | 801.3853  | 401.1963         | 801.3983       | 401.2028         | A    | 1081.4757 | 541.2415        | 1063.4521 | 532.2297         | 1063.4651      | 532.2362         | 10 |
| 9  | 891.4431  | 446.2252        | 873.4195  | 437.2134         | 873.4325       | 437.2199         | A    | 1009.4416 | 505.2244        | 991.4180  | 496.2126         | 991.4310       | 496.2191         | 9  |
| 10 | 1005.5242 | 503.2657        | 987.5006  | 494.2539         | 987.5136       | 494.2604         | L    | 937.4074  | 469.2073        | 919.3838  | 460.1956         | 919.3968       | 460.2021         | 8  |
| 11 | 1093.5532 | 547.2802        | 1075.5296 | 538.2685         | 1075.5427      | 538.2750         | S    | 823.3263  | 412.1668        | 805.3027  | 403.1550         | 805.3157       | 403.1615         | 7  |
| 12 | 1257.6136 | 629.3104        | 1239.5900 | 620.2986         | 1239.6030      | 620.3051         | Y    | 735.2973  | 368.1523        | 717.2737  | 359.1405         |                |                  | 6  |
| 13 | 1315.6321 | 658.3197        | 1297.6085 | 649.3079         | 1297.6215      | 649.3144         | G    | 571.2369  | 286.1221        | 553.2133  | 277.1103         |                |                  | 5  |
| 14 | 1447.6696 | 724.3384        | 1429.6460 | 715.3266         | 1429.6590      | 715.3332         | M    | 513.2184  | 257.1128        | 495.1948  | 248.1010         |                |                  | 4  |
| 15 | 1563.7066 | 782.3569        | 1545.6830 | 773.3451         | 1545.6960      | 773.3517         | N    | 381.1809  | 191.0941        | 363.1573  | 182.0823         |                |                  | 3  |
| 16 | 1679.7436 | 840.3754        | 1661.7200 | 831.3636         | 1661.7330      | 831.3702         | N    | 265.1439  | 133.0756        | 247.1203  | 124.0638         |                |                  | 2  |
| 17 |           |                 |           |                  |                |                  | K    | 149.1069  | 75.0571         | 131.0833  | 66.0453          |                |                  | 1  |

# AT4G37910.1

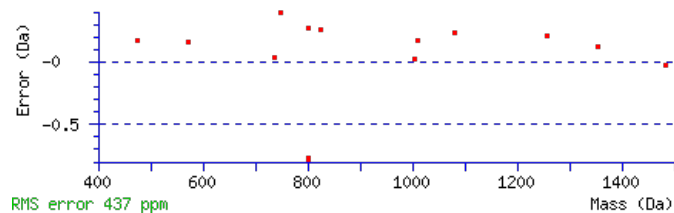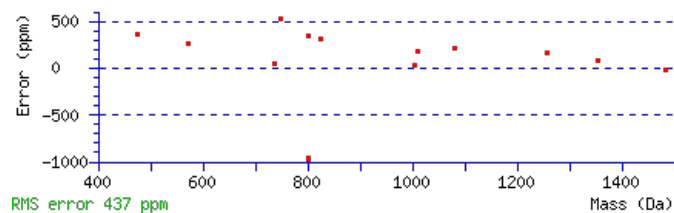

NCBI **BLAST** search of [IINEPTAAALSYGMNNK](#)  
(Parameters: blastp, nr protein database, expect=20000, no filter, PAM30)  
Other BLAST [web gateways](#)

## All matches to this query

| Score | Mr(calc)  | Delta   | Sequence                          |
|-------|-----------|---------|-----------------------------------|
| 59.3  | 1826.8359 | -0.0030 | <a href="#">IINEPTAAALSYGMNNK</a> |
| 3.3   | 1826.8381 | -0.0052 | <a href="#">IIVDGVM AHYEELFR</a>  |
| 2.1   | 1826.8299 | 0.0031  | <a href="#">FPETLDLAPYVSGGSEK</a> |

Mascot: <http://www.matrixscience.com/>

**Peptide View**MS/MS Fragmentation of **RALEAFR**

Found in **AT4G37930.1** in **TAIR\_Arabidopsis**, Symbols: STM, SHMT1, SHM1 | SHM1 (SERINE HYDROXYMETHYLTRANSFERASE 1); glycine hydroxymethyltransferase/ poly(U) binding | chr4:17831885-17834736 REVERSE

Match to Query 1330: 861.482366 from(431.748459,2+) index(1007)

Title: Elution from: 16.090 to 16.090 scan no 1430 cid35.00 polarity:+

Data file D6h-1\_3.mgf

Click mouse within plot area to zoom in by factor of two about that point

Or,   to  Da

Label all possible matches  Label matches used for scoring

Show Y-axis

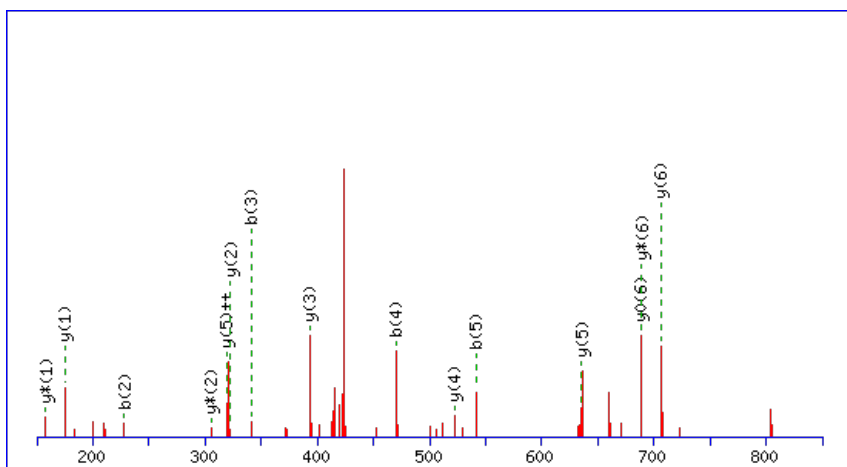

**Monoisotopic mass of neutral peptide Mr(calc):** 861.4821

**Fixed modifications:** Carbamidomethyl (C) (apply to specified residues or termini only)

**Ions Score:** 39 **Expect:** 0.00041

**Matches:** 16/60 fragment ions using 31 most intense peaks ([help](#))

| # | b               | b <sup>++</sup> | b*       | b <sup>*++</sup> | b <sup>0</sup> | b <sup>0++</sup> | Seq. | y               | y <sup>++</sup> | y*              | y <sup>*++</sup> | y <sup>0</sup>  | y <sup>0++</sup> | # |
|---|-----------------|-----------------|----------|------------------|----------------|------------------|------|-----------------|-----------------|-----------------|------------------|-----------------|------------------|---|
| 1 | 157.1084        | 79.0578         | 140.0818 | 70.5446          |                |                  | R    |                 |                 |                 |                  |                 |                  | 7 |
| 2 | <b>228.1455</b> | 114.5764        | 211.1190 | 106.0631         |                |                  | A    | <b>706.3883</b> | 353.6978        | <b>689.3617</b> | 345.1845         | <b>688.3777</b> | 344.6925         | 6 |
| 3 | <b>341.2296</b> | 171.1184        | 324.2030 | 162.6051         |                |                  | L    | <b>635.3511</b> | <b>318.1792</b> | 618.3246        | 309.6659         | 617.3406        | 309.1739         | 5 |
| 4 | <b>470.2722</b> | 235.6397        | 453.2456 | 227.1264         | 452.2616       | 226.6344         | E    | <b>522.2671</b> | 261.6372        | 505.2405        | 253.1239         | 504.2565        | 252.6319         | 4 |
| 5 | <b>541.3093</b> | 271.1583        | 524.2827 | 262.6450         | 523.2987       | 262.1530         | A    | <b>393.2245</b> | 197.1159        | 376.1979        | 188.6026         |                 |                  | 3 |
| 6 | <b>688.3777</b> | 344.6925        | 671.3511 | 336.1792         | 670.3671       | 335.6872         | F    | <b>322.1874</b> | 161.5973        | <b>305.1608</b> | 153.0840         |                 |                  | 2 |
| 7 |                 |                 |          |                  |                |                  | R    | <b>175.1190</b> | 88.0631         | <b>158.0924</b> | 79.5498          |                 |                  | 1 |

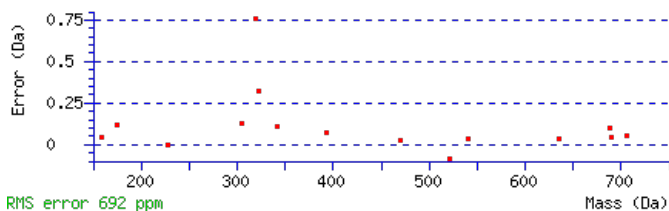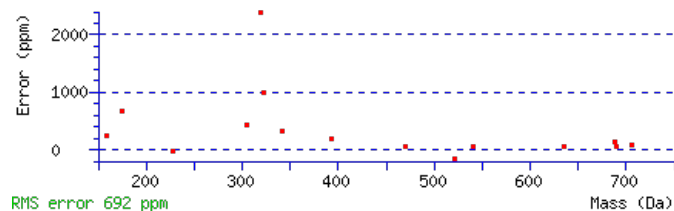

NCBI **BLAST** search of [RALEAFR](#)

(Parameters: blastp, nr protein database, expect=20000, no filter, PAM30)

Other BLAST [web gateways](#)

**All matches to this query**

| Score | Mr(calc) | Delta  | Sequence                |
|-------|----------|--------|-------------------------|
| 39.2  | 861.4821 | 0.0003 | <a href="#">RALEAFR</a> |
| 27.8  | 861.4821 | 0.0003 | <a href="#">ARIEAFR</a> |

# AT4G37930.1

|      |          |        |                          |
|------|----------|--------|--------------------------|
| 13.3 | 861.4821 | 0.0003 | <a href="#">KVNAGFAR</a> |
| 8.1  | 861.4821 | 0.0003 | <a href="#">GFNKALGR</a> |
| 6.6  | 861.4821 | 0.0003 | <a href="#">GLRDVFR</a>  |
| 4.7  | 861.4821 | 0.0003 | <a href="#">RFPSLSR</a>  |
| 0.5  | 861.4821 | 0.0003 | <a href="#">RGFEVVR</a>  |
| 0.5  | 861.4821 | 0.0003 | <a href="#">RLDGFVR</a>  |
| 0.5  | 861.4821 | 0.0003 | <a href="#">RVFDGLR</a>  |
| 0.4  | 861.4821 | 0.0003 | <a href="#">GFQGGIKR</a> |

Mascot: <http://www.matrixscience.com/>

## Peptide View

MS/MS Fragmentation of **DESGILSPFSSR**

Found in **AT4G37980.1** in **TAIR\_Arabidopsis**, Symbols: ELI3-1 | ELI3-1 (ELICITOR-ACTIVATED GENE 3); binding / catalytic/ oxidoreductase/ zinc ion binding | chr4:17852664-17854296 FORWARD

Match to Query 6005: 1456.640620 from(729.327586,2+) index(9376)

Title: Elution from: 83.794 to 83.794 scan no 12649 cid35.00 polarity:+

Data file C7-2\_2.mgf

Click mouse within plot area to zoom in by factor of two about that point

Or,   to  Da

Label all possible matches  Label matches used for scoring

Show Y-axis

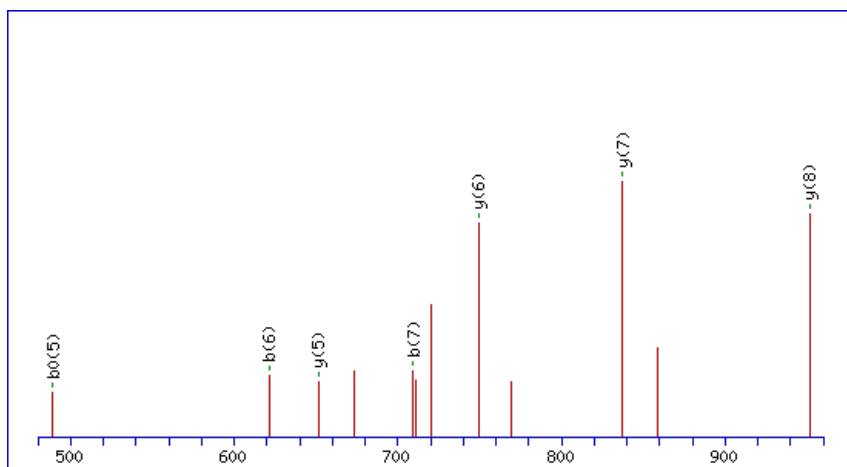

Monoisotopic mass of neutral peptide  $M_r(\text{calc})$ : 1456.6411

Fixed modifications: Carbamidomethyl (C) (apply to specified residues or termini only)

Ions Score: 30 Expect: 0.0087

Matches : 7/118 fragment ions using 11 most intense peaks ([help](#))

| #  | b         | b <sup>++</sup> | b <sup>0</sup> | b <sup>0++</sup> | Seq. | y         | y <sup>++</sup> | y*        | y <sup>*++</sup> | y <sup>0</sup> | y <sup>0++</sup> | #  |
|----|-----------|-----------------|----------------|------------------|------|-----------|-----------------|-----------|------------------|----------------|------------------|----|
| 1  | 117.0313  | 59.0193         | 99.0207        | 50.0140          | D    |           |                 |           |                  |                |                  | 13 |
| 2  | 247.0709  | 124.0391        | 229.0603       | 115.0338         | E    | 1341.6244 | 671.3158        | 1323.6008 | 662.3040         | 1323.6138      | 662.3105         | 12 |
| 3  | 335.0999  | 168.0536        | 317.0894       | 159.0483         | S    | 1211.5847 | 606.2960        | 1193.5612 | 597.2842         | 1193.5742      | 597.2907         | 11 |
| 4  | 393.1184  | 197.0629        | 375.1079       | 188.0576         | G    | 1123.5557 | 562.2815        | 1105.5321 | 553.2697         | 1105.5451      | 553.2762         | 10 |
| 5  | 507.1995  | 254.1034        | 489.1890       | 245.0981         | I    | 1065.5372 | 533.2722        | 1047.5136 | 524.2604         | 1047.5266      | 524.2669         | 9  |
| 6  | 621.2806  | 311.1440        | 603.2701       | 302.1387         | L    | 951.4561  | 476.2317        | 933.4325  | 467.2199         | 933.4455       | 467.2264         | 8  |
| 7  | 709.3097  | 355.1585        | 691.2991       | 346.1532         | S    | 837.3750  | 419.1911        | 819.3514  | 410.1793         | 819.3644       | 410.1858         | 7  |
| 8  | 807.3595  | 404.1834        | 789.3489       | 395.1781         | P    | 749.3459  | 375.1766        | 731.3223  | 366.1648         | 731.3353       | 366.1713         | 6  |
| 9  | 955.4250  | 478.2161        | 937.4144       | 469.2108         | F    | 651.2961  | 326.1517        | 633.2725  | 317.1399         | 633.2856       | 317.1464         | 5  |
| 10 | 1043.4540 | 522.2306        | 1025.4435      | 513.2254         | S    | 503.2307  | 252.1190        | 485.2071  | 243.1072         | 485.2201       | 243.1137         | 4  |
| 11 | 1191.5195 | 596.2634        | 1173.5089      | 587.2581         | F    | 415.2016  | 208.1044        | 397.1780  | 199.0926         | 397.1910       | 199.0992         | 3  |
| 12 | 1279.5485 | 640.2779        | 1261.5380      | 631.2726         | S    | 267.1362  | 134.0717        | 249.1126  | 125.0599         | 249.1256       | 125.0664         | 2  |
| 13 |           |                 |                |                  | R    | 179.1071  | 90.0572         | 161.0835  | 81.0454          |                |                  | 1  |

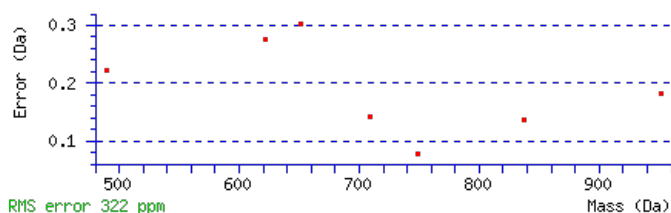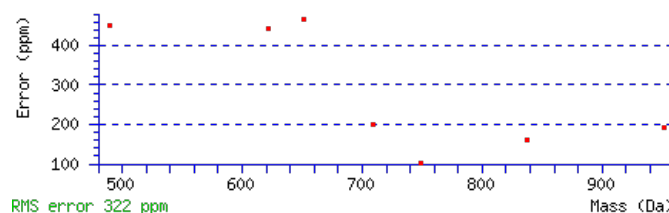

NCBI BLAST search of [DESGILSPFSSR](#)

(Parameters: blastp, nr protein database, expect=20000, no filter, PAM30)



AT4G37980.1

Other BLAST [web gateways](#)

**All matches to this query**

| Score | Mr(calc)  | Delta   | Sequence                      |
|-------|-----------|---------|-------------------------------|
| 29.6  | 1456.6411 | -0.0004 | <a href="#">DESGILSPFSFSR</a> |
| 6.8   | 1456.6363 | 0.0043  | <a href="#">VFFTMSPTHTR</a>   |
| 3.4   | 1456.6444 | -0.0038 | <a href="#">EDVAKNMAKYEK</a>  |
| 1.8   | 1456.6388 | 0.0018  | <a href="#">ELSGEEALVNDHK</a> |

**Mascot:** <http://www.matrixscience.com/>

## Peptide View

MS/MS Fragmentation of **GCGMFDFLKK**Found in **AT4G38410.1** in **TAIR\_Arabidopsis**, Symbols: | dehydrin, putative | chr4:17981019-17981598 FORWARD

Match to Query 4154: 1230.515108 from(616.264830,2+) index(3828)

Title: Elution from: 35.354 to 35.354 scan no 4789 cid35.00 polarity:+

Data file 0-2\_3.mgf

Click mouse within plot area to zoom in by factor of two about that point

Or,   to  Da Label all possible matches  Label matches used for scoring Show Y-axis 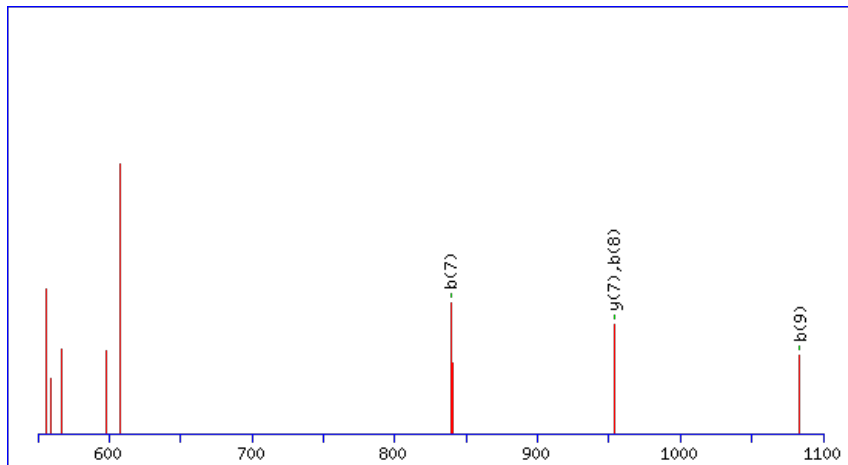Monoisotopic mass of neutral peptide **Mr(calc)**: 1230.5187**Fixed modifications:** Carbamidomethyl (C) (apply to specified residues or termini only)**Variable modifications:****M4** : Oxidation (M), with neutral losses 0.0000 (shown in table), 63.9983**Ions Score:** 21 **Expect:** 0.025**Matches** : 4/114 fragment ions using 4 most intense peaks ([help](#))

| #  | b                | b <sup>++</sup> | b <sup>*</sup> | b <sup>*++</sup> | b <sup>0</sup> | b <sup>0++</sup> | Seq. | y               | y <sup>++</sup> | y <sup>*</sup> | y <sup>*++</sup> | y <sup>0</sup> | y <sup>0++</sup> | #  |
|----|------------------|-----------------|----------------|------------------|----------------|------------------|------|-----------------|-----------------|----------------|------------------|----------------|------------------|----|
| 1  | 59.0258          | 30.0165         |                |                  |                |                  | G    |                 |                 |                |                  |                |                  | 10 |
| 2  | 221.0505         | 111.0289        |                |                  |                |                  | C    | 1173.5075       | 587.2574        | 1155.4839      | 578.2456         | 1155.4970      | 578.2521         | 9  |
| 3  | 279.0690         | 140.0381        |                |                  |                |                  | G    | 1011.4828       | 506.2450        | 993.4592       | 497.2333         | 993.4723       | 497.2398         | 8  |
| 4  | 427.1014         | 214.0544        |                |                  |                |                  | M    | <b>953.4643</b> | 477.2358        | 935.4407       | 468.2240         | 935.4538       | 468.2305         | 7  |
| 5  | 575.1669         | 288.0871        |                |                  |                |                  | F    | 805.4319        | 403.2196        | 787.4083       | 394.2078         | 787.4213       | 394.2143         | 6  |
| 6  | 691.1909         | 346.0991        |                |                  | 673.1803       | 337.0938         | D    | 657.3664        | 329.1869        | 639.3428       | 320.1751         | 639.3559       | 320.1816         | 5  |
| 7  | <b>839.2563</b>  | 420.1318        |                |                  | 821.2457       | 411.1265         | F    | 541.3425        | 271.1749        | 523.3189       | 262.1631         |                |                  | 4  |
| 8  | <b>953.3374</b>  | 477.1723        |                |                  | 935.3268       | 468.1671         | L    | 393.2770        | 197.1421        | 375.2534       | 188.1303         |                |                  | 3  |
| 9  | <b>1083.4264</b> | 542.2169        | 1065.4029      | 533.2051         | 1065.4159      | 533.2116         | K    | 279.1959        | 140.1016        | 261.1723       | 131.0898         |                |                  | 2  |
| 10 |                  |                 |                |                  |                |                  | K    | 149.1069        | 75.0571         | 131.0833       | 66.0453          |                |                  | 1  |

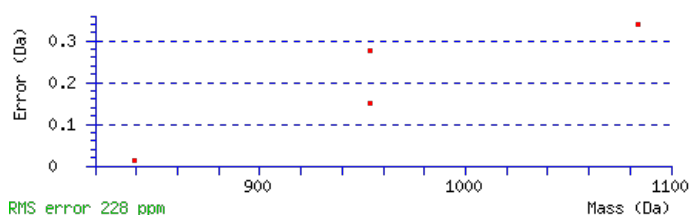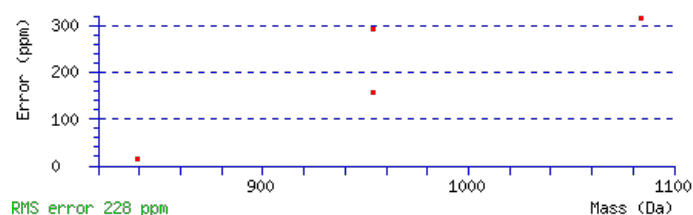NCBI **BLAST** search of **GCGMFDFLKK**

(Parameters: blastp, nr protein database, expect=20000, no filter, PAM30)

Other BLAST [web gateways](#)

All matches to this query

## AT4G38410.1

| Score | Mr(calc)  | Delta   | Sequence                   |
|-------|-----------|---------|----------------------------|
| 20.8  | 1230.5187 | -0.0036 | <a href="#">GCGMFDFLKK</a> |
| 19.7  | 1230.5136 | 0.0015  | <a href="#">MQHOGPSREK</a> |
| 5.5   | 1230.5165 | -0.0014 | <a href="#">FRESMKMEK</a>  |
| 5.5   | 1230.5136 | 0.0015  | <a href="#">MAQNHQTQOK</a> |
| 5.5   | 1230.5131 | 0.0020  | <a href="#">MSRAFYADEK</a> |
| 5.5   | 1230.5132 | 0.0020  | <a href="#">NPMYTYREK</a>  |
| 4.3   | 1230.5132 | 0.0020  | <a href="#">SHTSWMLDPK</a> |
| 3.7   | 1230.5132 | 0.0020  | <a href="#">NCYNFSLTAK</a> |
| 2.9   | 1230.5170 | -0.0018 | <a href="#">MSSCSRTRIK</a> |
| 2.3   | 1230.5154 | -0.0003 | <a href="#">GNAYWVYMSK</a> |

Mascot: <http://www.matrixscience.com/>

**Peptide View**MS/MS Fragmentation of **VHCGFMPRGGAEMSSLDK**

Found in **AT4G38500.1** in **TAIR\_Arabidopsis**, Symbols: | similar to unknown protein [Arabidopsis thaliana] (TAIR:AT1G28240.1); similar to Os06g0724300 [Oryza sativa (japonica cultivar-group)] (GB:NP\_001058611.1); similar to unnamed protein product [Vitis vinifera] (GB:CAO47423.1); similar to

Match to Query 9855: 2018.812545 from(673.944791,3+) index(6945)

Title: Elution from: 60.302 to 60.302 scan no 8872 cid35.00 polarity:+

Data file D6h-1\_1.mgf

Click mouse within plot area to zoom in by factor of two about that point

Or,   to  Da

Label all possible matches  Label matches used for scoring

Show Y-axis

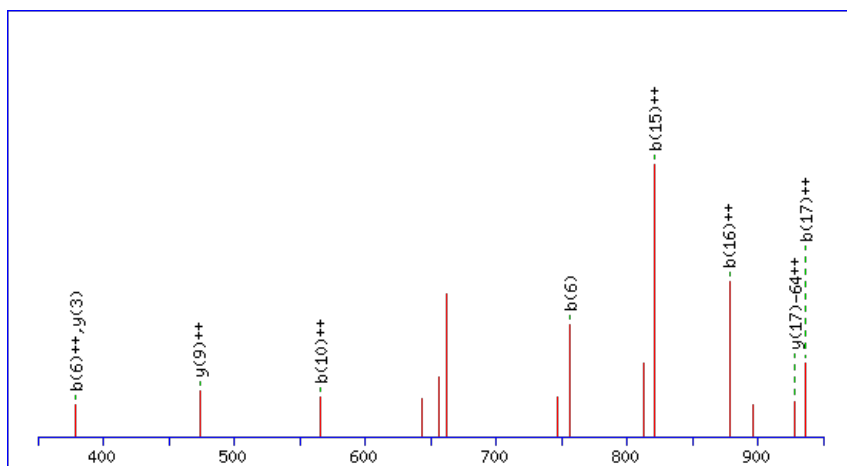

**Monoisotopic mass of neutral peptide Mr(calc):** 2018.8067

**Fixed modifications:** Carbamidomethyl (C) (apply to specified residues or termini only)

**Variable modifications:**

**M6** : Oxidation (M), with neutral losses 0.0000 (shown in table), 63.9983

**Ions Score:** 24 **Expect:** 0.011

**Matches** : 9/252 fragment ions using 11 most intense peaks ([help](#))

| #  | b         | b <sup>++</sup> | b*        | b <sup>*++</sup> | b <sup>0</sup> | b <sup>0++</sup> | Seq. | y         | y <sup>++</sup> | y*        | y <sup>*++</sup> | y <sup>0</sup> | y <sup>0++</sup> | #  |
|----|-----------|-----------------|-----------|------------------|----------------|------------------|------|-----------|-----------------|-----------|------------------|----------------|------------------|----|
| 1  | 101.0727  | 51.0400         |           |                  |                |                  | V    |           |                 |           |                  |                |                  | 18 |
| 2  | 241.1227  | 121.0650        |           |                  |                |                  | H    | 1919.7485 | 960.3779        | 1901.7250 | 951.3661         | 1901.7380      | 951.3726         | 17 |
| 3  | 403.1475  | 202.0774        |           |                  |                |                  | C    | 1779.6985 | 890.3529        | 1761.6749 | 881.3411         | 1761.6880      | 881.3476         | 16 |
| 4  | 461.1660  | 231.0866        |           |                  |                |                  | G    | 1617.6738 | 809.3405        | 1599.6502 | 800.3287         | 1599.6632      | 800.3353         | 15 |
| 5  | 609.2314  | 305.1193        |           |                  |                |                  | F    | 1559.6553 | 780.3313        | 1541.6317 | 771.3195         | 1541.6447      | 771.3260         | 14 |
| 6  | 757.2638  | 379.1356        |           |                  |                |                  | M    | 1411.5899 | 706.2986        | 1393.5663 | 697.2868         | 1393.5793      | 697.2933         | 13 |
| 7  | 855.3136  | 428.1605        |           |                  |                |                  | P    | 1263.5574 | 632.2823        | 1245.5338 | 623.2706         | 1245.5469      | 623.2771         | 12 |
| 8  | 1015.4029 | 508.2051        | 997.3793  | 499.1933         |                |                  | R    | 1165.5076 | 583.2574        | 1147.4840 | 574.2457         | 1147.4971      | 574.2522         | 11 |
| 9  | 1073.4214 | 537.2143        | 1055.3978 | 528.2025         |                |                  | G    | 1005.4184 | 503.2128        | 987.3948  | 494.2010         | 987.4078       | 494.2075         | 10 |
| 10 | 1131.4399 | 566.2236        | 1113.4163 | 557.2118         |                |                  | G    | 947.3999  | 474.2036        | 929.3763  | 465.1918         | 929.3893       | 465.1983         | 9  |
| 11 | 1203.4740 | 602.2407        | 1185.4505 | 593.2289         |                |                  | A    | 889.3814  | 445.1943        | 871.3578  | 436.1825         | 871.3708       | 436.1890         | 8  |
| 12 | 1333.5137 | 667.2605        | 1315.4901 | 658.2487         | 1315.5031      | 658.2552         | E    | 817.3472  | 409.1773        | 799.3236  | 400.1655         | 799.3367       | 400.1720         | 7  |
| 13 | 1465.5512 | 733.2792        | 1447.5276 | 724.2674         | 1447.5406      | 724.2739         | M    | 687.3076  | 344.1574        | 669.2840  | 335.1456         | 669.2970       | 335.1522         | 6  |
| 14 | 1553.5803 | 777.2938        | 1535.5567 | 768.2820         | 1535.5697      | 768.2885         | S    | 555.2701  | 278.1387        | 537.2465  | 269.1269         | 537.2595       | 269.1334         | 5  |
| 15 | 1641.6093 | 821.3083        | 1623.5857 | 812.2965         | 1623.5987      | 812.3030         | S    | 467.2410  | 234.1241        | 449.2174  | 225.1124         | 449.2304       | 225.1189         | 4  |
| 16 | 1755.6904 | 878.3488        | 1737.6668 | 869.3371         | 1737.6798      | 869.3436         | L    | 379.2120  | 190.1096        | 361.1884  | 181.0978         | 361.2014       | 181.1043         | 3  |
| 17 | 1871.7144 | 936.3608        | 1853.6908 | 927.3490         | 1853.7038      | 927.3556         | D    | 265.1309  | 133.0691        | 247.1073  | 124.0573         | 247.1203       | 124.0638         | 2  |
| 18 |           |                 |           |                  |                |                  | K    | 149.1069  | 75.0571         | 131.0833  | 66.0453          |                |                  | 1  |

# AT4G38500.1

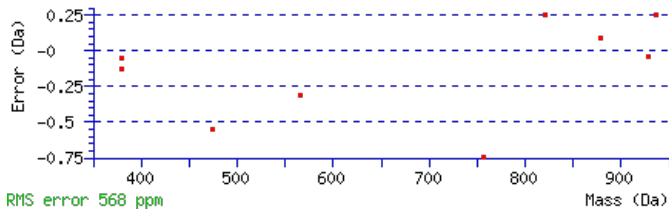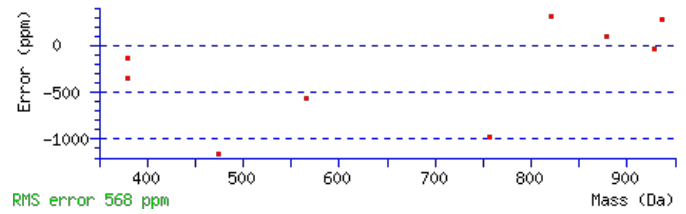

NCBI **BLAST** search of [VHCGFMPRGGAEMSSLDK](#)  
 (Parameters: blastp, nr protein database, expect=20000, no filter, PAM30)  
 Other BLAST [web gateways](#)

## All matches to this query

| Score | Mr(calc)  | Delta   | Sequence                           | Site Analysis       |
|-------|-----------|---------|------------------------------------|---------------------|
| 24.0  | 2018.8067 | 0.0058  | <a href="#">VHCGFMPRGGAEMSSLDK</a> | Oxidation M6 98.65% |
| 22.4  | 2018.8121 | 0.0004  | <a href="#">SMKDCGSPIADEMIGDIK</a> |                     |
| 15.2  | 2018.8101 | 0.0025  | <a href="#">ITNDDDDIDFAFEIGGK</a>  |                     |
| 11.8  | 2018.8170 | -0.0045 | <a href="#">QIGPGMFQOMTEQVCDK</a>  |                     |
| 11.1  | 2018.8114 | 0.0011  | <a href="#">SPLYSQMESGTCHQKDK</a>  |                     |
| 5.4   | 2018.8065 | 0.0060  | <a href="#">MNLCGDSEILKEDDNTK</a>  |                     |
| 5.4   | 2018.8067 | 0.0058  | <a href="#">VHCGFMPRGGAEMSSLDK</a> | Oxidation M13 1.35% |
| 3.8   | 2018.8105 | 0.0020  | <a href="#">GLDQTHKSEEAETGHDEL</a> |                     |
| 3.3   | 2018.8097 | 0.0029  | <a href="#">NMEMEK AIEFYMRMK</a>   |                     |
| 3.0   | 2018.8155 | -0.0029 | <a href="#">EKNEWSDGWNSNGGGTKK</a> |                     |

Mascot: <http://www.matrixscience.com/>

## Peptide View

### MS/MS Fragmentation of **AVVQVFEGTSGIDNK**

Found in **AT4G38510.1** in **TAIR\_Arabidopsis**, Symbols: | (VACUOLAR ATP SYNTHASE SUBUNIT B2); hydrogen ion transporting ATP synthase, rotational mechanism | chr4:18011149-18014783 REVERSE

Match to Query 6644: 1580.736526 from(791.375539,2+) index(5037)

Title: Elution from: 46.645 to 46.645 scan no 6450 cid35.00 polarity:+

Data file D12h-2\_3.mgf

Click mouse within plot area to zoom in by factor of two about that point

Or,   to  Da

Label all possible matches  Label matches used for scoring

Show Y-axis

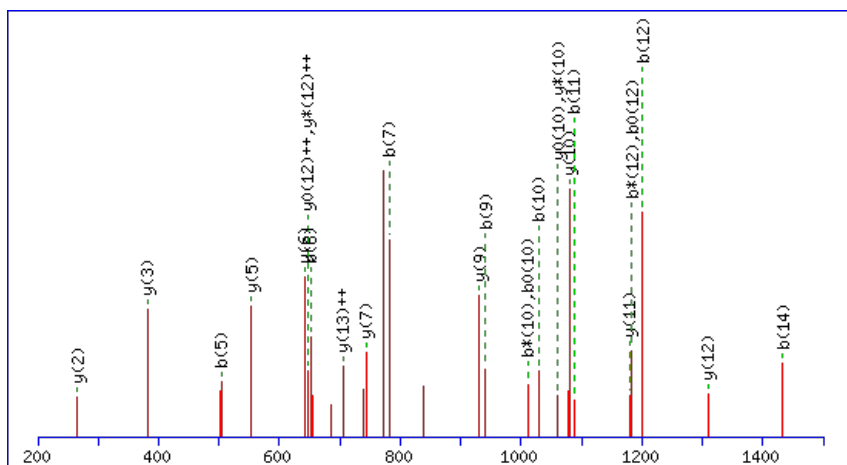

Monoisotopic mass of neutral peptide  $M_r(\text{calc})$ : 1580.7406

Fixed modifications: Carbamidomethyl (C) (apply to specified residues or termini only)

Ions Score: 103 Expect: 5e-010

Matches : 26/146 fragment ions using 27 most intense peaks ([help](#))

| #  | b         | b <sup>++</sup> | b*        | b <sup>*++</sup> | b <sup>0</sup> | b <sup>0++</sup> | Seq. | y         | y <sup>++</sup> | y*        | y <sup>*++</sup> | y <sup>0</sup> | y <sup>0++</sup> | #  |
|----|-----------|-----------------|-----------|------------------|----------------|------------------|------|-----------|-----------------|-----------|------------------|----------------|------------------|----|
| 1  | 73.0414   | 37.0244         |           |                  |                |                  | A    |           |                 |           |                  |                |                  | 15 |
| 2  | 173.1069  | 87.0571         |           |                  |                |                  | V    | 1509.7138 | 755.3605        | 1491.6902 | 746.3487         | 1491.7032      | 746.3553         | 14 |
| 3  | 273.1723  | 137.0898        |           |                  |                |                  | V    | 1409.6483 | 705.3278        | 1391.6248 | 696.3160         | 1391.6378      | 696.3225         | 13 |
| 4  | 403.2250  | 202.1161        | 385.2014  | 193.1043         |                |                  | Q    | 1309.5829 | 655.2951        | 1291.5593 | 646.2833         | 1291.5723      | 646.2898         | 12 |
| 5  | 503.2904  | 252.1488        | 485.2668  | 243.1371         |                |                  | V    | 1179.5302 | 590.2688        | 1161.5067 | 581.2570         | 1161.5197      | 581.2635         | 11 |
| 6  | 651.3559  | 326.1816        | 633.3323  | 317.1698         |                |                  | F    | 1079.4648 | 540.2360        | 1061.4412 | 531.2242         | 1061.4542      | 531.2308         | 10 |
| 7  | 781.3955  | 391.2014        | 763.3719  | 382.1896         | 763.3849       | 382.1961         | E    | 931.3993  | 466.2033        | 913.3758  | 457.1915         | 913.3888       | 457.1980         | 9  |
| 8  | 839.4140  | 420.2106        | 821.3904  | 411.1988         | 821.4034       | 411.2054         | G    | 801.3597  | 401.1835        | 783.3361  | 392.1717         | 783.3492       | 392.1782         | 8  |
| 9  | 941.4587  | 471.2330        | 923.4351  | 462.2212         | 923.4481       | 462.2277         | T    | 743.3412  | 372.1742        | 725.3176  | 363.1625         | 725.3307       | 363.1690         | 7  |
| 10 | 1029.4878 | 515.2475        | 1011.4642 | 506.2357         | 1011.4772      | 506.2422         | S    | 641.2965  | 321.1519        | 623.2729  | 312.1401         | 623.2859       | 312.1466         | 6  |
| 11 | 1087.5063 | 544.2568        | 1069.4827 | 535.2450         | 1069.4957      | 535.2515         | G    | 553.2674  | 277.1374        | 535.2439  | 268.1256         | 535.2569       | 268.1321         | 5  |
| 12 | 1201.5874 | 601.2973        | 1183.5638 | 592.2855         | 1183.5768      | 592.2920         | I    | 495.2489  | 248.1281        | 477.2254  | 239.1163         | 477.2384       | 239.1228         | 4  |
| 13 | 1317.6113 | 659.3093        | 1299.5878 | 650.2975         | 1299.6008      | 650.3040         | D    | 381.1678  | 191.0876        | 363.1443  | 182.0758         | 363.1573       | 182.0823         | 3  |
| 14 | 1433.6483 | 717.3278        | 1415.6248 | 708.3160         | 1415.6378      | 708.3225         | N    | 265.1439  | 133.0756        | 247.1203  | 124.0638         |                |                  | 2  |
| 15 |           |                 |           |                  |                |                  | K    | 149.1069  | 75.0571         | 131.0833  | 66.0453          |                |                  | 1  |

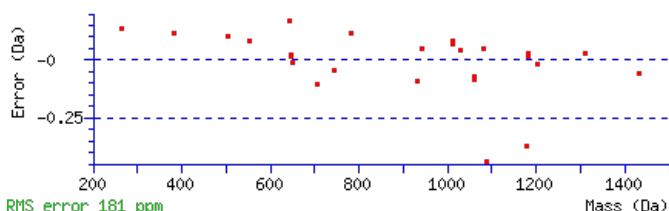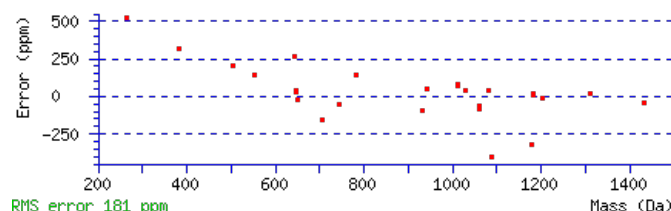

## AT4G38510.1

NCBI **BLAST** search of [AVVQVFEGTSGIDNK](#)

(Parameters: blastp, nr protein database, expect=20000, no filter, PAM30)

Other BLAST [web gateways](#)

### All matches to this query

| Score | Mr(calc)  | Delta   | Sequence                        |
|-------|-----------|---------|---------------------------------|
| 102.8 | 1580.7406 | -0.0041 | <a href="#">AVVQVFEGTSGIDNK</a> |
| 6.7   | 1580.7407 | -0.0042 | <a href="#">LLNSEQAYSLPNK</a>   |
| 5.2   | 1580.7337 | 0.0028  | <a href="#">CSEIVLKNERGEK</a>   |
| 5.2   | 1580.7384 | -0.0019 | <a href="#">AGRSSEDLLALTDK</a>  |
| 3.5   | 1580.7337 | 0.0028  | <a href="#">MTKNIASDNVPLSR</a>  |
| 3.1   | 1580.7333 | 0.0033  | <a href="#">MTKEFAEELNLPK</a>   |
| 2.9   | 1580.7393 | -0.0028 | <a href="#">EMRILMVGLDMSGK</a>  |
| 2.4   | 1580.7406 | -0.0041 | <a href="#">DTIFAVNEQLTNAK</a>  |
| 2.3   | 1580.7337 | 0.0029  | <a href="#">VDEGMQLLREISR</a>   |
| 1.3   | 1580.7380 | -0.0014 | <a href="#">EKTLEFAEELTEK</a>   |

Mascot: <http://www.matrixscience.com/>

## Peptide View

MS/MS Fragmentation of **GFGFITPDDGGDDLFDVHQSSIR**

Found in **AT4G38680.1** in **TAIR\_Arabidopsis**, Symbols: CSDP2, GRP2 | CSDP2/GRP2 (COLD SHOCK DOMAIN PROTEIN 2, GLYCINE RICH PROTEIN 2); nucleic acid binding | chr4:18072234-18072845 REVERSE

Match to Query 9870: 2379.115335 from(794.045721,3+) index(8806)

Title: Elution from: 79.570 to 79.570 scan no 12091 cid35.00 polarity:+

Data file D12h-3\_3.mgf

Click mouse within plot area to zoom in by factor of two about that point

Or, Plot from  to  Da

Label all possible matches  Label matches used for scoring

Show Y-axis

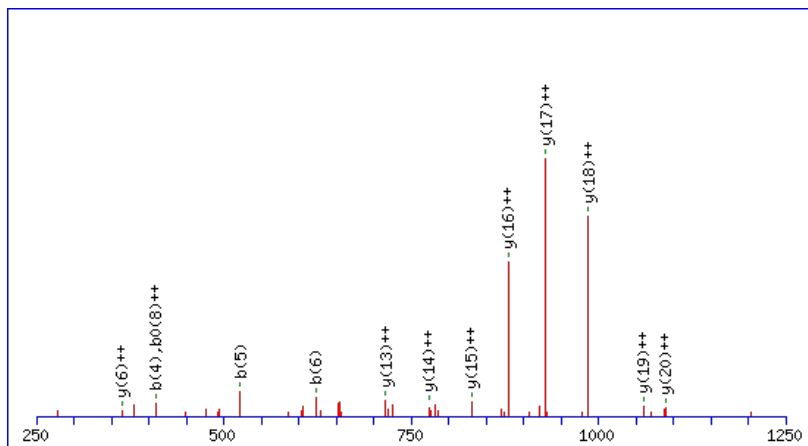

Monoisotopic mass of neutral peptide  $M_r(\text{calc})$ : 2379.1132

Fixed modifications: Carbamidomethyl (C) (apply to specified residues or termini only)

Ions Score: 51 Expect: 2.1e-005

Matches : 13/204 fragment ions using 26 most intense peaks ([help](#))

| #  | b         | b <sup>++</sup> | b*        | b <sup>*++</sup> | b <sup>0</sup> | b <sup>0++</sup> | Seq | y         | y <sup>++</sup> | y*        | y <sup>*++</sup> | y <sup>0</sup> | y <sup>0++</sup> | #  |
|----|-----------|-----------------|-----------|------------------|----------------|------------------|-----|-----------|-----------------|-----------|------------------|----------------|------------------|----|
| 1  | 58.0287   | 29.5180         |           |                  |                |                  | G   |           |                 |           |                  |                |                  | 22 |
| 2  | 205.0972  | 103.0522        |           |                  |                |                  | F   | 2323.0990 | 1162.0531       | 2306.0724 | 1153.5398        | 2305.0884      | 1153.0478        | 21 |
| 3  | 262.1186  | 131.5629        |           |                  |                |                  | G   | 2176.0305 | 1088.5189       | 2159.0040 | 1080.0056        | 2158.0200      | 1079.5136        | 20 |
| 4  | 409.1870  | 205.0972        |           |                  |                |                  | F   | 2119.0091 | 1060.0082       | 2101.9825 | 1051.4949        | 2100.9985      | 1051.0029        | 19 |
| 5  | 522.2711  | 261.6392        |           |                  |                |                  | I   | 1971.9407 | 986.4740        | 1954.9141 | 977.9607         | 1953.9301      | 977.4687         | 18 |
| 6  | 623.3188  | 312.1630        |           |                  | 605.3082       | 303.1577         | T   | 1858.8566 | 929.9319        | 1841.8300 | 921.4187         | 1840.8460      | 920.9267         | 17 |
| 7  | 720.3715  | 360.6894        |           |                  | 702.3610       | 351.6841         | P   | 1757.8089 | 879.4081        | 1740.7824 | 870.8948         | 1739.7984      | 870.4028         | 16 |
| 8  | 835.3985  | 418.2029        |           |                  | 817.3879       | 409.1976         | D   | 1660.7562 | 830.8817        | 1643.7296 | 822.3684         | 1642.7456      | 821.8764         | 15 |
| 9  | 950.4254  | 475.7164        |           |                  | 932.4149       | 466.7111         | D   | 1545.7292 | 773.3682        | 1528.7027 | 764.8550         | 1527.7186      | 764.3630         | 14 |
| 10 | 1007.4469 | 504.2271        |           |                  | 989.4363       | 495.2218         | G   | 1430.7023 | 715.8548        | 1413.6757 | 707.3415         | 1412.6917      | 706.8495         | 13 |
| 11 | 1064.4684 | 532.7378        |           |                  | 1046.4578      | 523.7325         | G   | 1373.6808 | 687.3440        | 1356.6543 | 678.8308         | 1355.6702      | 678.3388         | 12 |
| 12 | 1179.4953 | 590.2513        |           |                  | 1161.4847      | 581.2460         | D   | 1316.6593 | 658.8333        | 1299.6328 | 650.3200         | 1298.6488      | 649.8280         | 11 |
| 13 | 1294.5222 | 647.7648        |           |                  | 1276.5117      | 638.7595         | D   | 1201.6324 | 601.3198        | 1184.6058 | 592.8066         | 1183.6218      | 592.3146         | 10 |
| 14 | 1407.6063 | 704.3068        |           |                  | 1389.5957      | 695.3015         | L   | 1086.6055 | 543.8064        | 1069.5789 | 535.2931         | 1068.5949      | 534.8011         | 9  |
| 15 | 1554.6747 | 777.8410        |           |                  | 1536.6642      | 768.8357         | F   | 973.5214  | 487.2643        | 956.4948  | 478.7511         | 955.5108       | 478.2591         | 8  |
| 16 | 1653.7431 | 827.3752        |           |                  | 1635.7326      | 818.3699         | V   | 826.4530  | 413.7301        | 809.4264  | 405.2169         | 808.4424       | 404.7248         | 7  |
| 17 | 1790.8020 | 895.9047        |           |                  | 1772.7915      | 886.8994         | H   | 727.3846  | 364.1959        | 710.3580  | 355.6826         | 709.3740       | 355.1906         | 6  |
| 18 | 1918.8606 | 959.9339        | 1901.8341 | 951.4207         | 1900.8501      | 950.9287         | Q   | 590.3257  | 295.6665        | 573.2991  | 287.1532         | 572.3151       | 286.6612         | 5  |
| 19 | 2005.8926 | 1003.4500       | 1988.8661 | 994.9367         | 1987.8821      | 994.4447         | S   | 462.2671  | 231.6372        | 445.2405  | 223.1239         | 444.2565       | 222.6319         | 4  |
| 20 | 2092.9247 | 1046.9660       | 2075.8981 | 1038.4527        | 2074.9141      | 1037.9607        | S   | 375.2350  | 188.1212        | 358.2085  | 179.6079         | 357.2245       | 179.1159         | 3  |
| 21 | 2206.0087 | 1103.5080       | 2188.9822 | 1094.9947        | 2187.9982      | 1094.5027        | I   | 288.2030  | 144.6051        | 271.1765  | 136.0919         |                |                  | 2  |
| 22 |           |                 |           |                  |                |                  | R   | 175.1190  | 88.0631         | 158.0924  | 79.5498          |                |                  | 1  |



# AT4G38680.1

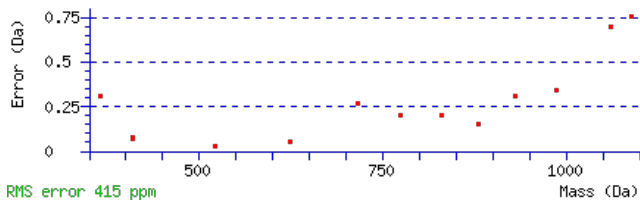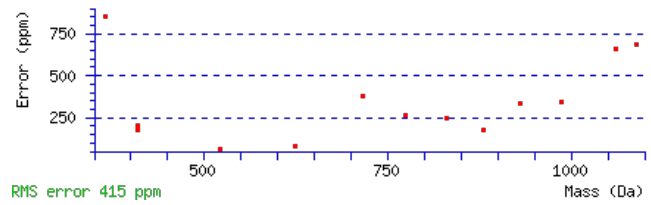

NCBI **BLAST** search of [GFGFITPDDGGDDLFFVHQSSIR](#)  
(Parameters: blastp, nr protein database, expect=20000, no filter, PAM30)  
Other BLAST [web gateways](#)

## All matches to this query

| Score | Mr(calc)  | Delta   | Sequence                                |
|-------|-----------|---------|-----------------------------------------|
| 50.6  | 2379.1132 | 0.0021  | <a href="#">GFGFITPDDGGDDLFFVHQSSIR</a> |
| 4.1   | 2379.1167 | -0.0014 | <a href="#">MPSYEPVLTEFFWDMVTKK</a>     |
| 1.4   | 2379.1214 | -0.0061 | <a href="#">GFGYPGPTTMMQMPAFSLPPR</a>   |
| 1.1   | 2379.1106 | 0.0047  | <a href="#">EWGFFYVTNHGVSRDMYKK</a>     |
| 0.3   | 2379.1129 | 0.0024  | <a href="#">AMMLETVAAVPGMVGGMLLHCK</a>  |

Mascot: <http://www.matrixscience.com/>

## Peptide View

MS/MS Fragmentation of **VGSSSGKPTKPVVVADCGQLS**

Found in **AT4G38740.1** in **TAIR\_Arabidopsis**, Symbols: ROC1 | ROC1 (rotamase CyP 1); peptidyl-prolyl cis-trans isomerase | chr4:18083614-18084132 REVERSE

Match to Query 9676: 2072.052624 from(691.691484,3+) index(2277)

Title: Elution from: 26.905 to 26.905 scan no 2958 cid35.00 polarity:+

Data file D6h-2\_1.mgf

Click mouse within plot area to zoom in by factor of two about that point

Or,   to  Da

Label all possible matches  Label matches used for scoring

Show Y-axis

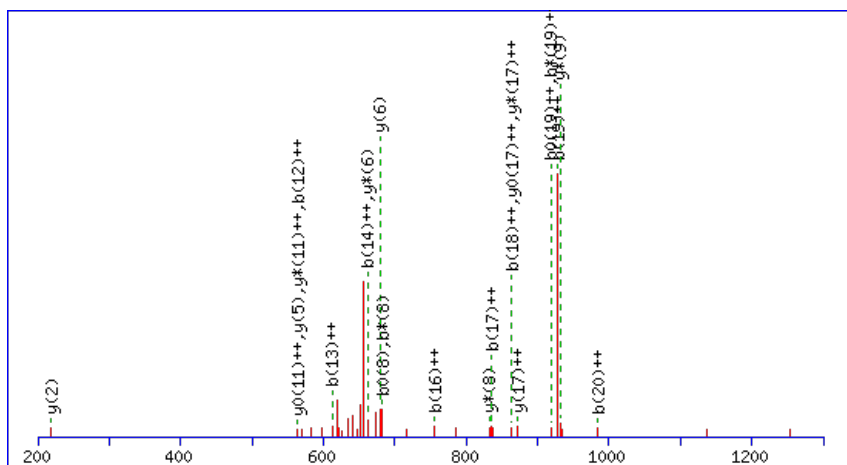

Monoisotopic mass of neutral peptide  $M_r(\text{calc})$ : 2072.0572

Fixed modifications: Carbamidomethyl (C) (apply to specified residues or termini only)

Ions Score: 32 Expect: 0.0022

Matches : 23/220 fragment ions using 30 most intense peaks ([help](#))

| #  | b         | b <sup>++</sup> | b*        | b <sup>*++</sup> | b <sup>0</sup> | b <sup>0++</sup> | Seq. | y         | y <sup>++</sup> | y*        | y <sup>*++</sup> | y <sup>0</sup> | y <sup>0++</sup> | #  |
|----|-----------|-----------------|-----------|------------------|----------------|------------------|------|-----------|-----------------|-----------|------------------|----------------|------------------|----|
| 1  | 100.0757  | 50.5415         |           |                  |                |                  | V    |           |                 |           |                  |                |                  | 21 |
| 2  | 157.0972  | 79.0522         |           |                  |                |                  | G    | 1973.9961 | 987.5017        | 1956.9695 | 978.9884         | 1955.9855      | 978.4964         | 20 |
| 3  | 244.1292  | 122.5682        |           |                  | 226.1186       | 113.5629         | S    | 1916.9746 | 958.9909        | 1899.9481 | 950.4777         | 1898.9640      | 949.9857         | 19 |
| 4  | 331.1612  | 166.0842        |           |                  | 313.1506       | 157.0790         | S    | 1829.9426 | 915.4749        | 1812.9160 | 906.9617         | 1811.9320      | 906.4696         | 18 |
| 5  | 418.1932  | 209.6003        |           |                  | 400.1827       | 200.5950         | S    | 1742.9105 | 871.9589        | 1725.8840 | 863.4456         | 1724.9000      | 862.9536         | 17 |
| 6  | 475.2147  | 238.1110        |           |                  | 457.2041       | 229.1057         | G    | 1655.8785 | 828.4429        | 1638.8520 | 819.9296         | 1637.8680      | 819.4376         | 16 |
| 7  | 603.3097  | 302.1585        | 586.2831  | 293.6452         | 585.2991       | 293.1532         | K    | 1598.8571 | 799.9322        | 1581.8305 | 791.4189         | 1580.8465      | 790.9269         | 15 |
| 8  | 700.3624  | 350.6849        | 683.3359  | 342.1716         | 682.3519       | 341.6796         | P    | 1470.7621 | 735.8847        | 1453.7355 | 727.3714         | 1452.7515      | 726.8794         | 14 |
| 9  | 801.4101  | 401.2087        | 784.3836  | 392.6954         | 783.3995       | 392.2034         | T    | 1373.7093 | 687.3583        | 1356.6828 | 678.8450         | 1355.6988      | 678.3530         | 13 |
| 10 | 929.5051  | 465.2562        | 912.4785  | 456.7429         | 911.4945       | 456.2509         | K    | 1272.6617 | 636.8345        | 1255.6351 | 628.3212         | 1254.6511      | 627.8292         | 12 |
| 11 | 1026.5578 | 513.7826        | 1009.5313 | 505.2693         | 1008.5473      | 504.7773         | P    | 1144.5667 | 572.7870        | 1127.5401 | 564.2737         | 1126.5561      | 563.7817         | 11 |
| 12 | 1125.6262 | 563.3168        | 1108.5997 | 554.8035         | 1107.6157      | 554.3115         | V    | 1047.5139 | 524.2606        | 1030.4874 | 515.7473         | 1029.5034      | 515.2553         | 10 |
| 13 | 1224.6947 | 612.8510        | 1207.6681 | 604.3377         | 1206.6841      | 603.8457         | V    | 948.4455  | 474.7264        | 931.4190  | 466.2131         | 930.4349       | 465.7211         | 9  |
| 14 | 1323.7631 | 662.3852        | 1306.7365 | 653.8719         | 1305.7525      | 653.3799         | V    | 849.3771  | 425.1922        | 832.3505  | 416.6789         | 831.3665       | 416.1869         | 8  |
| 15 | 1394.8002 | 697.9037        | 1377.7736 | 689.3905         | 1376.7896      | 688.8985         | A    | 750.3087  | 375.6580        | 733.2821  | 367.1447         | 732.2981       | 366.6527         | 7  |
| 16 | 1509.8271 | 755.4172        | 1492.8006 | 746.9039         | 1491.8166      | 746.4119         | D    | 679.2716  | 340.1394        | 662.2450  | 331.6261         | 661.2610       | 331.1341         | 6  |
| 17 | 1669.8578 | 835.4325        | 1652.8312 | 826.9193         | 1651.8472      | 826.4272         | C    | 564.2446  | 282.6259        | 547.2181  | 274.1127         | 546.2341       | 273.6207         | 5  |
| 18 | 1726.8792 | 863.9433        | 1709.8527 | 855.4300         | 1708.8687      | 854.9380         | G    | 404.2140  | 202.6106        | 387.1874  | 194.0974         | 386.2034       | 193.6053         | 4  |
| 19 | 1854.9378 | 927.9726        | 1837.9113 | 919.4593         | 1836.9273      | 918.9673         | Q    | 347.1925  | 174.0999        | 330.1660  | 165.5866         | 329.1819       | 165.0946         | 3  |
| 20 | 1968.0219 | 984.5146        | 1950.9953 | 976.0013         | 1950.0113      | 975.5093         | L    | 219.1339  | 110.0706        |           |                  | 201.1234       | 101.0653         | 2  |
| 21 |           |                 |           |                  |                |                  | S    | 106.0499  | 53.5286         |           |                  | 88.0393        | 44.5233          | 1  |

# AT4G38740.1

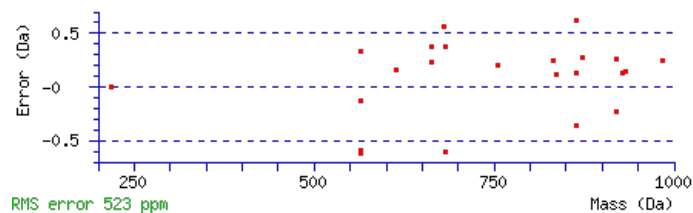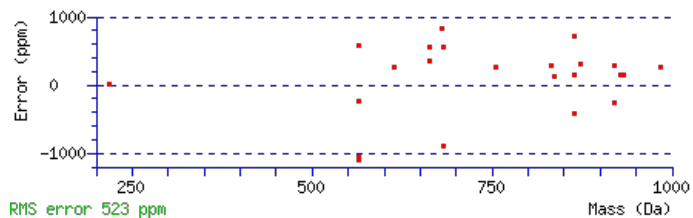

NCBI **BLAST** search of [VGSSSGKPTKPVVVADCGQLS](#)  
(Parameters: blastp, nr protein database, expect=20000, no filter, PAM30)

Other BLAST [web gateways](#)

## All matches to this query

| Score | Mr(calc)  | Delta   | Sequence                              |
|-------|-----------|---------|---------------------------------------|
| 32.3  | 2072.0572 | -0.0046 | <a href="#">VGSSSGKPTKPVVVADCGQLS</a> |
| 3.0   | 2072.0547 | -0.0020 | <a href="#">SMFSNLTFNNIIRMLAGK</a>    |

Mascot: <http://www.matrixscience.com/>


**Mascot Search Results**
**Peptide View**MS/MS Fragmentation of **RAEDIPLVAEWFK**Found in **AT4G38780.1** in **TAIR\_Arabidopsis**, Symbols: | splicing factor, putative | chr4:18101432-18111023 REVERSE

Match to Query 6830: 1572.829384 from (787.421968,2+) index(5121)

Title: Elution from: 46.347 to 46.347 scan no 6463 cid35.00 polarity:+

Data file D6h-1\_3.mgf

Click mouse within plot area to zoom in by factor of two about that point

Or,   to  Da Label all possible matches  Label matches used for scoring Show Y-axis 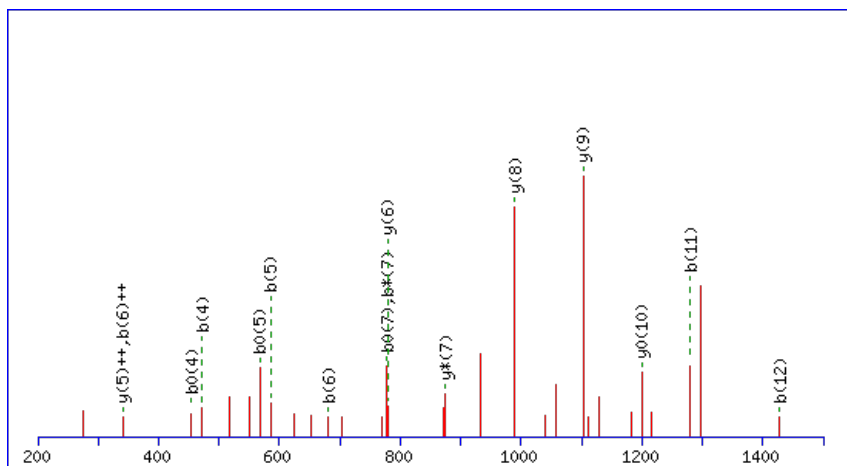Monoisotopic mass of neutral peptide  $M_r(\text{calc})$ : 1572.8300

Fixed modifications: Carbamidomethyl (C) (apply to specified residues or termini only)

Ions Score: 20 Expect: 0.044

Matches : 16/134 fragment ions using 29 most intense peaks ([help](#))

| #  | b                | b <sup>++</sup> | b*              | b <sup>*++</sup> | b <sup>0</sup>  | b <sup>0++</sup> | Seq.     | y                | y <sup>++</sup> | y*              | y <sup>*++</sup> | y <sup>0</sup>   | y <sup>0++</sup> | #         |
|----|------------------|-----------------|-----------------|------------------|-----------------|------------------|----------|------------------|-----------------|-----------------|------------------|------------------|------------------|-----------|
| 1  | 157.1084         | 79.0578         | 140.0818        | 70.5446          |                 |                  | <b>R</b> |                  |                 |                 |                  |                  |                  | <b>13</b> |
| 2  | 228.1455         | 114.5764        | 211.1190        | 106.0631         |                 |                  | <b>A</b> | 1417.7362        | 709.3717        | 1400.7096       | 700.8585         | 1399.7256        | 700.3665         | <b>12</b> |
| 3  | 357.1881         | 179.0977        | 340.1615        | 170.5844         | 339.1775        | 170.0924         | <b>E</b> | 1346.6991        | 673.8532        | 1329.6725       | 665.3399         | 1328.6885        | 664.8479         | <b>11</b> |
| 4  | <b>472.2150</b>  | 236.6112        | 455.1885        | 228.0979         | <b>454.2045</b> | 227.6059         | <b>D</b> | 1217.6565        | 609.3319        | 1200.6299       | 600.8186         | <b>1199.6459</b> | 600.3266         | <b>10</b> |
| 5  | <b>585.2991</b>  | 293.1532        | 568.2726        | 284.6399         | <b>567.2885</b> | 284.1479         | <b>I</b> | <b>1102.6295</b> | 551.8184        | 1085.6030       | 543.3051         | 1084.6190        | 542.8131         | <b>9</b>  |
| 6  | <b>682.3519</b>  | <b>341.6796</b> | 665.3253        | 333.1663         | 664.3413        | 332.6743         | <b>P</b> | <b>989.5455</b>  | 495.2764        | 972.5189        | 486.7631         | 971.5349         | 486.2711         | <b>8</b>  |
| 7  | 795.4359         | 398.2216        | <b>778.4094</b> | 389.7083         | <b>777.4254</b> | 389.2163         | <b>L</b> | 892.4927         | 446.7500        | <b>875.4662</b> | 438.2367         | 874.4822         | 437.7447         | <b>7</b>  |
| 8  | 894.5043         | 447.7558        | 877.4778        | 439.2425         | 876.4938        | 438.7505         | <b>V</b> | <b>779.4087</b>  | 390.2080        | 762.3821        | 381.6947         | 761.3981         | 381.2027         | <b>6</b>  |
| 9  | 965.5415         | 483.2744        | 948.5149        | 474.7611         | 947.5309        | 474.2691         | <b>A</b> | 680.3402         | <b>340.6738</b> | 663.3137        | 332.1605         | 662.3297         | 331.6685         | <b>5</b>  |
| 10 | 1094.5841        | 547.7957        | 1077.5575       | 539.2824         | 1076.5735       | 538.7904         | <b>E</b> | 609.3031         | 305.1552        | 592.2766        | 296.6419         | 591.2926         | 296.1499         | <b>4</b>  |
| 11 | <b>1280.6634</b> | 640.8353        | 1263.6368       | 632.3220         | 1262.6528       | 631.8300         | <b>W</b> | 480.2605         | 240.6339        | 463.2340        | 232.1206         |                  |                  | <b>3</b>  |
| 12 | <b>1427.7318</b> | 714.3695        | 1410.7052       | 705.8563         | 1409.7212       | 705.3642         | <b>F</b> | 294.1812         | 147.5942        | 277.1547        | 139.0810         |                  |                  | <b>2</b>  |
| 13 |                  |                 |                 |                  |                 |                  | <b>K</b> | 147.1128         | 74.0600         | 130.0863        | 65.5468          |                  |                  | <b>1</b>  |

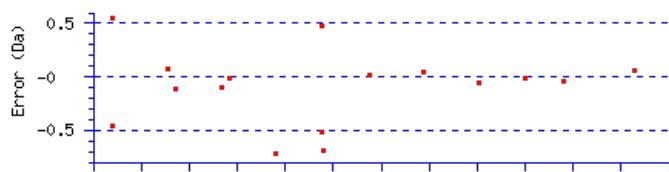

RMS error 670 ppm

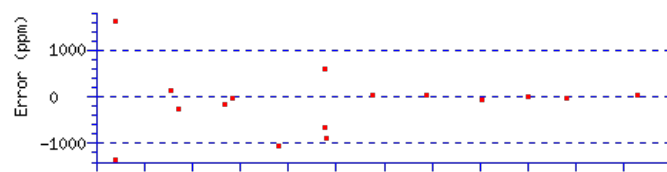

RMS error 670 ppm

NCBI **BLAST** search of [RAEDIPLVAEWFK](#)

(Parameters: blastp, nr protein database, expect=20000, no filter, PAM30)

Other BLAST [web gateways](#)

AT4G38780.1

All matches to this query

| Score | Mr(calc)  | Delta   | Sequence                      |
|-------|-----------|---------|-------------------------------|
| 20.1  | 1572.8300 | -0.0006 | <a href="#">RAEDIPLVAEWFK</a> |
| 4.1   | 1572.8293 | 0.0001  | <a href="#">AKQLRAEIEQMEK</a> |
| 1.0   | 1572.8269 | 0.0025  | <a href="#">KGHYVHLVSKMMK</a> |

Mascot: <http://www.matrixscience.com/>

## Peptide View

MS/MS Fragmentation of **MVDVLVEQNIVPGIK**

Found in **AT4G38970.1** in **TAIR\_Arabidopsis**, Symbols: | fructose-bisphosphate aldolase, putative | chr4:18163708-18165653 REVERSE

Match to Query 7982: 1652.918307 from(551.980045,3+) index(9159)

Title: Elution from: 81.554 to 81.554 scan no 12234 cid35.00 polarity:+

Data file 0-2\_1.mgf

Click mouse within plot area to zoom in by factor of two about that point

Or,   to  Da

Label all possible matches  Label matches used for scoring

Show Y-axis

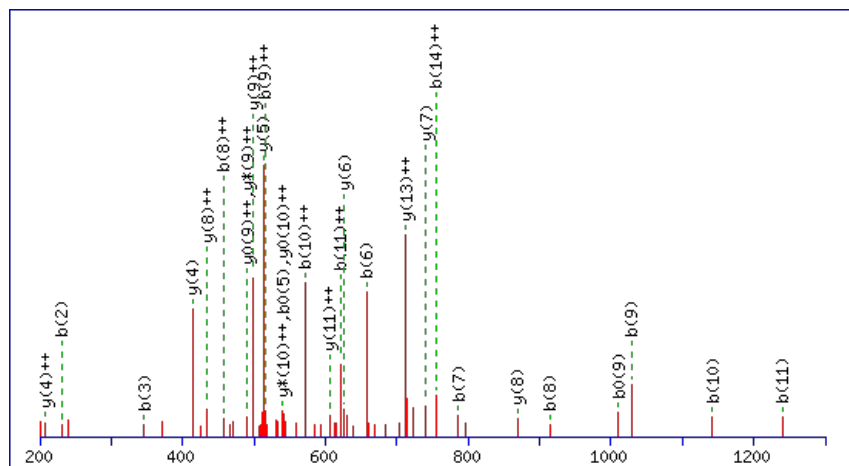

Monoisotopic mass of neutral peptide  $M_r(\text{calc})$ : 1652.9171

Fixed modifications: Carbamidomethyl (C) (apply to specified residues or termini only)

Ions Score: 58 Expect: 4.4e-006

Matches : 29/134 fragment ions using 36 most intense peaks ([help](#))

| #  | b                | b <sup>++</sup> | b*        | b <sup>*++</sup> | b <sup>0</sup>   | b <sup>0++</sup> | Seq. | y               | y <sup>++</sup> | y*        | y <sup>*++</sup> | y <sup>0</sup> | y <sup>0++</sup> | #  |
|----|------------------|-----------------|-----------|------------------|------------------|------------------|------|-----------------|-----------------|-----------|------------------|----------------|------------------|----|
| 1  | 132.0478         | 66.5275         |           |                  |                  |                  | M    |                 |                 |           |                  |                |                  | 15 |
| 2  | <b>231.1162</b>  | 116.0617        |           |                  |                  |                  | V    | 1522.8839       | 761.9456        | 1505.8574 | 753.4323         | 1504.8734      | 752.9403         | 14 |
| 3  | <b>346.1431</b>  | 173.5752        |           |                  | 328.1326         | 164.5699         | D    | 1423.8155       | <b>712.4114</b> | 1406.7890 | 703.8981         | 1405.8049      | 703.4061         | 13 |
| 4  | 445.2115         | 223.1094        |           |                  | 427.2010         | 214.1041         | V    | 1308.7886       | 654.8979        | 1291.7620 | 646.3846         | 1290.7780      | 645.8926         | 12 |
| 5  | 558.2956         | 279.6514        |           |                  | <b>540.2850</b>  | 270.6462         | L    | 1209.7201       | <b>605.3637</b> | 1192.6936 | 596.8504         | 1191.7096      | 596.3584         | 11 |
| 6  | <b>657.3640</b>  | 329.1856        |           |                  | 639.3534         | 320.1804         | V    | 1096.6361       | 548.8217        | 1079.6095 | <b>540.3084</b>  | 1078.6255      | <b>539.8164</b>  | 10 |
| 7  | <b>786.4066</b>  | 393.7069        |           |                  | 768.3960         | 384.7017         | E    | 997.5677        | <b>499.2875</b> | 980.5411  | <b>490.7742</b>  | 979.5571       | <b>490.2822</b>  | 9  |
| 8  | <b>914.4652</b>  | <b>457.7362</b> | 897.4386  | 449.2230         | 896.4546         | 448.7309         | Q    | <b>868.5251</b> | <b>434.7662</b> | 851.4985  | 426.2529         |                |                  | 8  |
| 9  | <b>1028.5081</b> | <b>514.7577</b> | 1011.4816 | 506.2444         | <b>1010.4975</b> | 505.7524         | N    | <b>740.4665</b> | 370.7369        | 723.4400  | 362.2236         |                |                  | 7  |
| 10 | <b>1141.5922</b> | <b>571.2997</b> | 1124.5656 | 562.7864         | 1123.5816        | 562.2944         | I    | <b>626.4236</b> | 313.7154        | 609.3970  | 305.2022         |                |                  | 6  |
| 11 | <b>1240.6606</b> | <b>620.8339</b> | 1223.6340 | 612.3207         | 1222.6500        | 611.8286         | V    | <b>513.3395</b> | 257.1734        | 496.3130  | 248.6601         |                |                  | 5  |
| 12 | 1337.7134        | 669.3603        | 1320.6868 | 660.8470         | 1319.7028        | 660.3550         | P    | <b>414.2711</b> | <b>207.6392</b> | 397.2445  | 199.1259         |                |                  | 4  |
| 13 | 1394.7348        | 697.8710        | 1377.7083 | 689.3578         | 1376.7242        | 688.8658         | G    | 317.2183        | 159.1128        | 300.1918  | 150.5995         |                |                  | 3  |
| 14 | 1507.8189        | <b>754.4131</b> | 1490.7923 | 745.8998         | 1489.8083        | 745.4078         | I    | 260.1969        | 130.6021        | 243.1703  | 122.0888         |                |                  | 2  |
| 15 |                  |                 |           |                  |                  |                  | K    | 147.1128        | 74.0600         | 130.0863  | 65.5468          |                |                  | 1  |

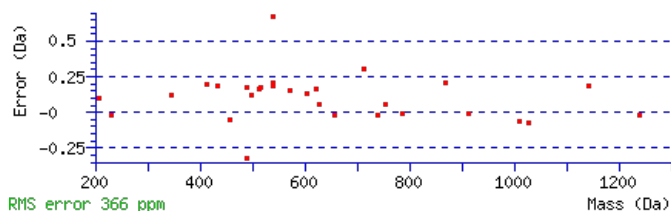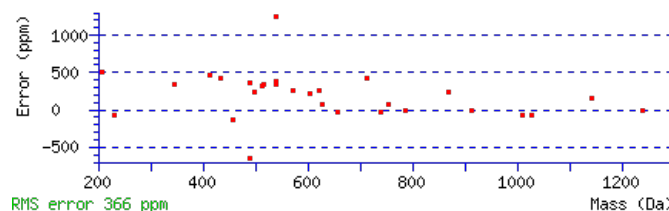

NCBI BLAST search of [MVDVLVEQNIVPGIK](#)

## AT4G38970.1

(Parameters: blastp, nr protein database, expect=20000, no filter, PAM30)

Other BLAST [web gateways](#)

### All matches to this query

| Score | Mr(calc)  | Delta   | Sequence                         |
|-------|-----------|---------|----------------------------------|
| 57.9  | 1652.9171 | 0.0012  | <a href="#">MVDVLVEQNIVPGIK</a>  |
| 4.0   | 1652.9144 | 0.0039  | <a href="#">SRGNMGPKPTPLKVR</a>  |
| 1.0   | 1652.9210 | -0.0027 | <a href="#">VTAIKVALSSGTQNHK</a> |

Mascot: <http://www.matrixscience.com/>

## Peptide View

### MS/MS Fragmentation of **QEELLAYIDR**

Found in **AT4G39170.1** in **TAIR\_Arabidopsis**, Symbols: | SEC14 cytosolic factor, putative / phosphoglyceride transfer protein, putative | chr4:18240881-18243615 FORWARD

Match to Query 4744: 1262.591544 from(632.303048,2+) index(5224)

Title: Elution from: 47.019 to 47.019 scan no 6537 cid35.00 polarity:+

Data file C7-2\_1.mgf

Click mouse within plot area to zoom in by factor of two about that point

Or,   to  Da

Label all possible matches  Label matches used for scoring

Show Y-axis

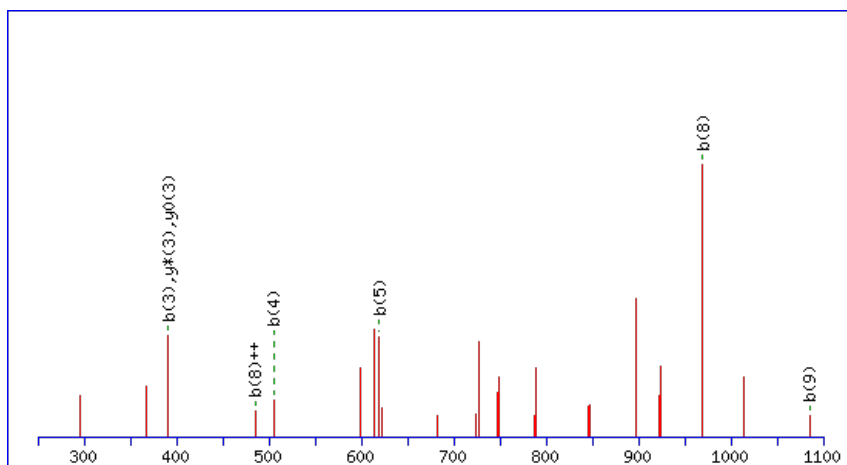

Monoisotopic mass of neutral peptide  $M_r(\text{calc})$ : 1262.5935

Fixed modifications: Carbamidomethyl (C) (apply to specified residues or termini only)

Ions Score: 24 Expect: 0.034

Matches : 8/104 fragment ions using 14 most intense peaks ([help](#))

| #  | b                | b <sup>++</sup> | b*        | b <sup>*++</sup> | b <sup>0</sup> | b <sup>0++</sup> | Seq. | y         | y <sup>++</sup> | y*              | y <sup>*++</sup> | y <sup>0</sup>  | y <sup>0++</sup> | #  |
|----|------------------|-----------------|-----------|------------------|----------------|------------------|------|-----------|-----------------|-----------------|------------------|-----------------|------------------|----|
| 1  | 131.0599         | 66.0336         | 113.0363  | 57.0218          |                |                  | Q    |           |                 |                 |                  |                 |                  | 10 |
| 2  | 261.0996         | 131.0534        | 243.0760  | 122.0416         | 243.0890       | 122.0481         | E    | 1133.5481 | 567.2777        | 1115.5246       | 558.2659         | 1115.5376       | 558.2724         | 9  |
| 3  | <b>391.1392</b>  | 196.0732        | 373.1156  | 187.0614         | 373.1286       | 187.0679         | E    | 1003.5085 | 502.2579        | 985.4849        | 493.2461         | 985.4979        | 493.2526         | 8  |
| 4  | <b>505.2203</b>  | 253.1138        | 487.1967  | 244.1020         | 487.2097       | 244.1085         | L    | 873.4689  | 437.2381        | 855.4453        | 428.2263         | 855.4583        | 428.2328         | 7  |
| 5  | <b>619.3014</b>  | 310.1543        | 601.2778  | 301.1425         | 601.2908       | 301.1490         | L    | 759.3878  | 380.1975        | 741.3642        | 371.1857         | 741.3772        | 371.1922         | 6  |
| 6  | 691.3355         | 346.1714        | 673.3119  | 337.1596         | 673.3250       | 337.1661         | A    | 645.3067  | 323.1570        | 627.2831        | 314.1452         | 627.2961        | 314.1517         | 5  |
| 7  | 855.3959         | 428.2016        | 837.3723  | 419.1898         | 837.3853       | 419.1963         | Y    | 573.2725  | 287.1399        | 555.2489        | 278.1281         | 555.2620        | 278.1346         | 4  |
| 8  | <b>969.4770</b>  | <b>485.2421</b> | 951.4534  | 476.2303         | 951.4664       | 476.2369         | I    | 409.2122  | 205.1097        | <b>391.1886</b> | 196.0979         | <b>391.2016</b> | 196.1044         | 3  |
| 9  | <b>1085.5010</b> | 543.2541        | 1067.4774 | 534.2423         | 1067.4904      | 534.2488         | D    | 295.1311  | 148.0692        | 277.1075        | 139.0574         | 277.1205        | 139.0639         | 2  |
| 10 |                  |                 |           |                  |                |                  | R    | 179.1071  | 90.0572         | 161.0835        | 81.0454          |                 |                  | 1  |

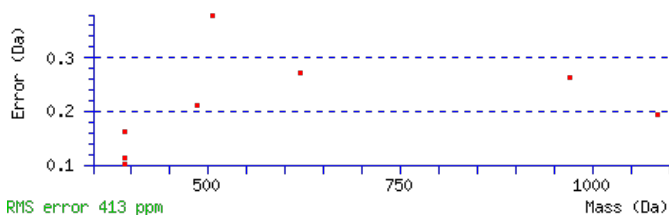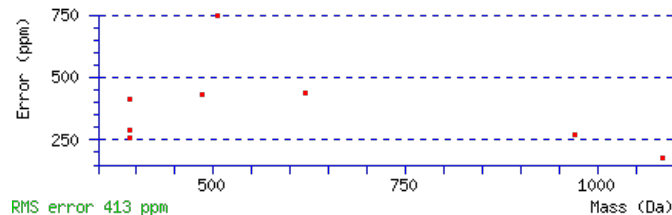

### NCBI BLAST search of **QEELLAYIDR**

(Parameters: blastp, nr protein database, expect=20000, no filter, PAM30)

Other BLAST [web gateways](#)

All matches to this query



## AT4G39170.1

| Score | Mr(calc)  | Delta   | Sequence                    |
|-------|-----------|---------|-----------------------------|
| 24.0  | 1262.5935 | -0.0019 | <a href="#">QEELAYIDR</a>   |
| 8.6   | 1262.5892 | 0.0023  | <a href="#">LNADQRPRMK</a>  |
| 5.4   | 1262.5880 | 0.0035  | <a href="#">QRDGAPFLWR</a>  |
| 4.6   | 1262.5939 | -0.0024 | <a href="#">EVKEERSVNR</a>  |
| 3.1   | 1262.5939 | -0.0024 | <a href="#">NRDTSVLIGDR</a> |
| 2.5   | 1262.5921 | -0.0006 | <a href="#">SMKVPCEIR</a>   |
| 2.2   | 1262.5892 | 0.0023  | <a href="#">MSEIRPVPRR</a>  |
| 0.3   | 1262.5888 | 0.0028  | <a href="#">FMTLNPGTVPR</a> |
| 0.3   | 1262.5921 | -0.0006 | <a href="#">LLCIMVGDGVR</a> |
| 0.3   | 1262.5892 | 0.0023  | <a href="#">MVRSNKQEPR</a>  |

Mascot: <http://www.matrixscience.com/>

**Peptide View**MS/MS Fragmentation of **VITVNEAQRS**

Found in **AT4G39260.1** in **TAIR\_Arabidopsis**, Symbols: GR-RBP8, ATGRP8, CCR1 | ATGRP8/GR-RBP8 (COLD, CIRCADIAN RHYTHM, AND RNA BINDING 1, GLYCINE-RICH PROTEIN 8); RNA binding | chr4:18274160-18274952 REVERSE

Match to Query 3711: 1115.591926 from(558.803239,2+) index(1058)

Title: Elution from: 17.243 to 17.243 scan no 1519 cid35.00 polarity:+

Data file 0-1\_1.mgf

Click mouse within plot area to zoom in by factor of two about that point

Or,   to  Da

Label all possible matches  Label matches used for scoring

Show Y-axis

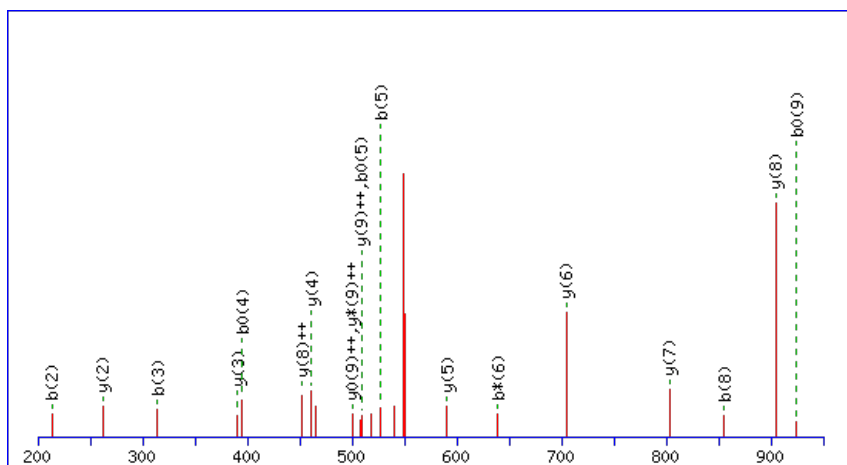

Monoisotopic mass of neutral peptide  $M_r(\text{calc})$ : 1115.5935

Fixed modifications: Carbamidomethyl (C) (apply to specified residues or termini only)

Ions Score: 65 Expect: 1.9e-006

Matches : 19/94 fragment ions using 23 most intense peaks ([help](#))

| #  | b               | b <sup>++</sup> | b*              | b <sup>*++</sup> | b <sup>0</sup>  | b <sup>0++</sup> | Seq. | y               | y <sup>++</sup> | y*        | y <sup>*++</sup> | y <sup>0</sup> | y <sup>0++</sup> | #  |
|----|-----------------|-----------------|-----------------|------------------|-----------------|------------------|------|-----------------|-----------------|-----------|------------------|----------------|------------------|----|
| 1  | 100.0757        | 50.5415         |                 |                  |                 |                  | V    |                 |                 |           |                  |                |                  | 10 |
| 2  | <b>213.1598</b> | 107.0835        |                 |                  |                 |                  | I    | 1017.5323       | <b>509.2698</b> | 1000.5058 | <b>500.7565</b>  | 999.5218       | <b>500.2645</b>  | 9  |
| 3  | <b>314.2074</b> | 157.6074        |                 |                  | 296.1969        | 148.6021         | T    | <b>904.4483</b> | <b>452.7278</b> | 887.4217  | 444.2145         | 886.4377       | 443.7225         | 8  |
| 4  | 413.2758        | 207.1416        |                 |                  | <b>395.2653</b> | 198.1363         | V    | <b>803.4006</b> | 402.2039        | 786.3741  | 393.6907         | 785.3900       | 393.1987         | 7  |
| 5  | <b>527.3188</b> | 264.1630        | 510.2922        | 255.6498         | <b>509.3082</b> | 255.1577         | N    | <b>704.3322</b> | 352.6697        | 687.3056  | 344.1565         | 686.3216       | 343.6645         | 6  |
| 6  | 656.3614        | 328.6843        | <b>639.3348</b> | 320.1710         | 638.3508        | 319.6790         | E    | <b>590.2893</b> | 295.6483        | 573.2627  | 287.1350         | 572.2787       | 286.6430         | 5  |
| 7  | 727.3985        | 364.2029        | 710.3719        | 355.6896         | 709.3879        | 355.1976         | A    | <b>461.2467</b> | 231.1270        | 444.2201  | 222.6137         | 443.2361       | 222.1217         | 4  |
| 8  | <b>855.4571</b> | 428.2322        | 838.4305        | 419.7189         | 837.4465        | 419.2269         | Q    | <b>390.2096</b> | 195.6084        | 373.1830  | 187.0951         | 372.1990       | 186.6031         | 3  |
| 9  | 942.4891        | 471.7482        | 925.4625        | 463.2349         | <b>924.4785</b> | 462.7429         | S    | <b>262.1510</b> | 131.5791        | 245.1244  | 123.0659         | 244.1404       | 122.5738         | 2  |
| 10 |                 |                 |                 |                  |                 |                  | R    | 175.1190        | 88.0631         | 158.0924  | 79.5498          |                |                  | 1  |

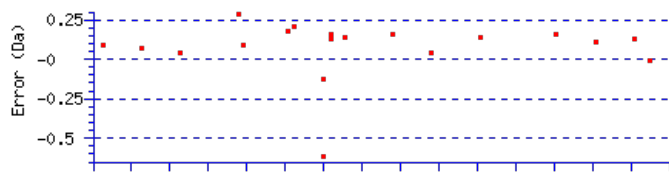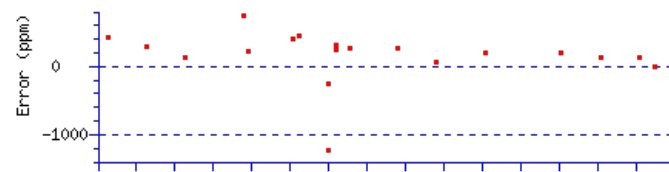NCBI BLAST search of **VITVNEAQRS**

(Parameters: blastp, nr protein database, expect=20000, no filter, PAM30)

Other BLAST [web gateways](#)

All matches to this query

**AT4G39260.1**

| Score | Mr(calc)  | Delta   | Sequence                    |
|-------|-----------|---------|-----------------------------|
| 65.1  | 1115.5935 | -0.0015 | <a href="#">VITVNEAQSR</a>  |
| 3.1   | 1115.5935 | -0.0015 | <a href="#">LVSNLSQAER</a>  |
| 1.0   | 1115.5935 | -0.0015 | <a href="#">LTVSIAADNGR</a> |
| 0.6   | 1115.5935 | -0.0015 | <a href="#">GSLINLEQSR</a>  |

**Mascot:** <http://www.matrixscience.com/>

### Peptide View

MS/MS Fragmentation of **NDWGYSYYPVPGHEIVGIATK**Found in **AT4G39330.1** in **TAIR\_Arabidopsis**, Symbols: | mamilol dehydrogenase, putative | chr4:18291262-18292766 FORWARD

Match to Query 10205: 2464.199775 from(822.407201,3+) index(8487)

Title: Elution from: 75.016 to 75.016 scan no 11358 cid35.00 polarity:+

Data file C7-2\_3.mgf

Click mouse within plot area to zoom in by factor of two about that point

Or,   to  Da Label all possible matches  Label matches used for scoring Show Y-axis 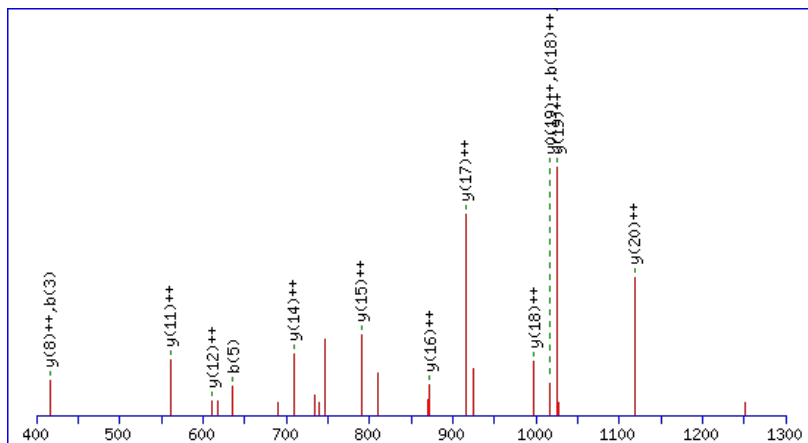Monoisotopic mass of neutral peptide **Mr(calc)**: 2464.2063

Fixed modifications: Carbamidomethyl (C) (apply to specified residues or termini only)

Ions Score: 78 Expect: 6.9e-008

Matches : 15/248 fragment ions using 15 most intense peaks ([help](#))

| #  | b               | b <sup>++</sup>  | b <sup>*</sup> | b <sup>*++</sup> | b <sup>0</sup> | b <sup>0++</sup> | Seq. | y         | y <sup>++</sup>  | y <sup>*</sup> | y <sup>*++</sup> | y <sup>0</sup> | y <sup>0++</sup> | #  |
|----|-----------------|------------------|----------------|------------------|----------------|------------------|------|-----------|------------------|----------------|------------------|----------------|------------------|----|
| 1  | 115.0502        | 58.0287          | 98.0237        | 49.5155          |                |                  | N    |           |                  |                |                  |                |                  | 22 |
| 2  | 230.0771        | 115.5422         | 213.0506       | 107.0289         | 212.0666       | 106.5369         | D    | 2351.1707 | 1176.0890        | 2334.1441      | 1167.5757        | 2333.1601      | 1167.0837        | 21 |
| 3  | <b>416.1565</b> | 208.5819         | 399.1299       | 200.0686         | 398.1459       | 199.5766         | W    | 2236.1437 | <b>1118.5755</b> | 2219.1172      | 1110.0622        | 2218.1332      | 1109.5702        | 20 |
| 4  | 473.1779        | 237.0926         | 456.1514       | 228.5793         | 455.1674       | 228.0873         | G    | 2050.0644 | <b>1025.5358</b> | 2033.0379      | <b>1017.0226</b> | 2032.0538      | <b>1016.5306</b> | 19 |
| 5  | <b>636.2413</b> | 318.6243         | 619.2147       | 310.1110         | 618.2307       | 309.6190         | Y    | 1993.0429 | <b>997.0251</b>  | 1976.0164      | 988.5118         | 1975.0324      | 988.0198         | 18 |
| 6  | 723.2733        | 362.1403         | 706.2467       | 353.6270         | 705.2627       | 353.1350         | S    | 1829.9796 | <b>915.4934</b>  | 1812.9531      | 906.9802         | 1811.9690      | 906.4882         | 17 |
| 7  | 886.3366        | 443.6719         | 869.3101       | 435.1587         | 868.3260       | 434.6667         | Y    | 1742.9476 | <b>871.9774</b>  | 1725.9210      | 863.4642         | 1724.9370      | 862.9721         | 16 |
| 8  | 1049.3999       | 525.2036         | 1032.3734      | 516.6903         | 1031.3894      | 516.1983         | Y    | 1579.8843 | <b>790.4458</b>  | 1562.8577      | 781.9325         | 1561.8737      | 781.4405         | 15 |
| 9  | 1146.4527       | 573.7300         | 1129.4262      | 565.2167         | 1128.4421      | 564.7247         | P    | 1416.8209 | <b>708.9141</b>  | 1399.7944      | 700.4008         | 1398.8104      | 699.9088         | 14 |
| 10 | 1245.5211       | 623.2642         | 1228.4946      | 614.7509         | 1227.5106      | 614.2589         | V    | 1319.7682 | 660.3877         | 1302.7416      | 651.8744         | 1301.7576      | 651.3824         | 13 |
| 11 | 1344.5895       | 672.7984         | 1327.5630      | 664.2851         | 1326.5790      | 663.7931         | V    | 1220.6998 | <b>610.8535</b>  | 1203.6732      | 602.3402         | 1202.6892      | 601.8482         | 12 |
| 12 | 1441.6423       | 721.3248         | 1424.6157      | 712.8115         | 1423.6317      | 712.3195         | P    | 1121.6313 | <b>561.3193</b>  | 1104.6048      | 552.8060         | 1103.6208      | 552.3140         | 11 |
| 13 | 1498.6638       | 749.8355         | 1481.6372      | 741.3222         | 1480.6532      | 740.8302         | G    | 1024.5786 | 512.7929         | 1007.5520      | 504.2796         | 1006.5680      | 503.7876         | 10 |
| 14 | 1635.7227       | 818.3650         | 1618.6961      | 809.8517         | 1617.7121      | 809.3597         | H    | 967.5571  | 484.2822         | 950.5306       | 475.7689         | 949.5465       | 475.2769         | 9  |
| 15 | 1764.7653       | 882.8863         | 1747.7387      | 874.3730         | 1746.7547      | 873.8810         | E    | 830.4982  | <b>415.7527</b>  | 813.4716       | 407.2395         | 812.4876       | 406.7475         | 8  |
| 16 | 1877.8493       | 939.4283         | 1860.8228      | 930.9150         | 1859.8388      | 930.4230         | I    | 701.4556  | 351.2314         | 684.4291       | 342.7182         | 683.4450       | 342.2262         | 7  |
| 17 | 1976.9177       | 988.9625         | 1959.8912      | 980.4492         | 1958.9072      | 979.9572         | V    | 588.3715  | 294.6894         | 571.3450       | 286.1761         | 570.3610       | 285.6841         | 6  |
| 18 | 2033.9392       | <b>1017.4732</b> | 2016.9127      | 1008.9600        | 2015.9286      | 1008.4680        | G    | 489.3031  | 245.1552         | 472.2766       | 236.6419         | 471.2926       | 236.1499         | 5  |
| 19 | 2147.0233       | 1074.0153        | 2129.9967      | 1065.5020        | 2129.0127      | 1065.0100        | I    | 432.2817  | 216.6445         | 415.2551       | 208.1312         | 414.2711       | 207.6392         | 4  |
| 20 | 2218.0604       | 1109.5338        | 2201.0338      | 1101.0206        | 2200.0498      | 1100.5285        | A    | 319.1976  | 160.1024         | 302.1710       | 151.5892         | 301.1870       | 151.0972         | 3  |
| 21 | 2319.1081       | 1160.0577        | 2302.0815      | 1151.5444        | 2301.0975      | 1151.0524        | T    | 248.1605  | 124.5839         | 231.1339       | 116.0706         | 230.1499       | 115.5786         | 2  |
| 22 |                 |                  |                |                  |                |                  | K    | 147.1128  | 74.0600          | 130.0863       | 65.5468          |                |                  | 1  |

# AT4G39330.1

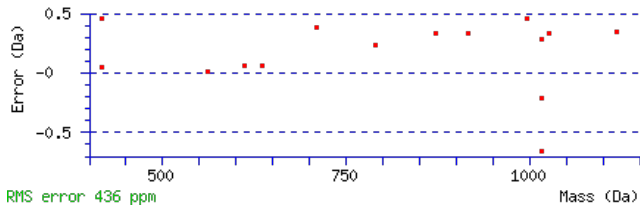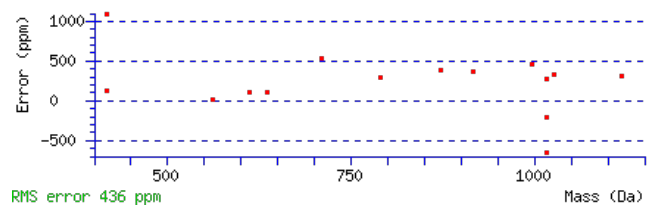

NCBI **BLAST** search of [NDWGYSYYPVVPGEIVGIATK](#)  
(Parameters: blastp, nr protein database, expect=20000, no filter, PAM30)  
Other BLAST [web gateways](#)

## All matches to this query

| Score | Mr(calc)  | Delta   | Sequence                              |
|-------|-----------|---------|---------------------------------------|
| 77.8  | 2464.2063 | -0.0065 | <a href="#">NDWGYSYYPVVPGEIVGIATK</a> |

Mascot: <http://www.matrixscience.com/>

**Peptide View**MS/MS Fragmentation of **GNLDIFSGR**Found in **AT4G39730.1** in **TAIR\_Arabidopsis**, Symbols: | lipid-associated family protein | chr4:18432944-18433575 FORWARD

Match to Query 2286: 977.492040 from(489.753296,2+) index(5332)

Title: Elution from: 46.597 to 46.597 scan no 6696 cid35.00 polarity:+

Data file C7-2\_3.mgf

Click mouse within plot area to zoom in by factor of two about that point

Or,   to  Da Label all possible matches  Label matches used for scoring Show Y-axis 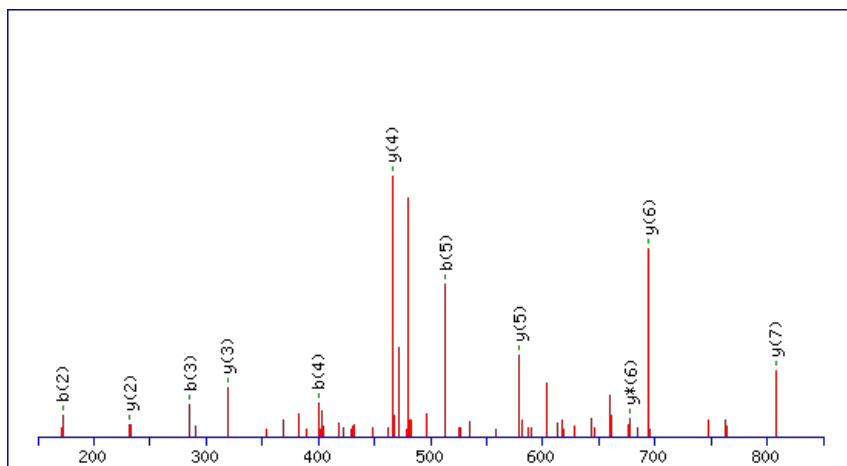Monoisotopic mass of neutral peptide **Mr(calc)**: 977.4930**Fixed modifications**: Carbamidomethyl (C) (apply to specified residues or termini only)**Ions Score**: 61 **Expect**: 3.1e-006**Matches**: 11/84 fragment ions using 13 most intense peaks ([help](#))

| # | b               | b <sup>++</sup> | b*       | b <sup>*++</sup> | b <sup>0</sup> | b <sup>0++</sup> | Seq.     | y               | y <sup>++</sup> | y*              | y <sup>*++</sup> | y <sup>0</sup> | y <sup>0++</sup> | # |
|---|-----------------|-----------------|----------|------------------|----------------|------------------|----------|-----------------|-----------------|-----------------|------------------|----------------|------------------|---|
| 1 | 58.0287         | 29.5180         |          |                  |                |                  | <b>G</b> |                 |                 |                 |                  |                |                  | 9 |
| 2 | <b>172.0717</b> | 86.5395         | 155.0451 | 78.0262          |                |                  | <b>N</b> | 921.4789        | 461.2431        | 904.4523        | 452.7298         | 903.4683       | 452.2378         | 8 |
| 3 | <b>285.1557</b> | 143.0815        | 268.1292 | 134.5682         |                |                  | <b>L</b> | <b>807.4359</b> | 404.2216        | 790.4094        | 395.7083         | 789.4254       | 395.2163         | 7 |
| 4 | <b>400.1827</b> | 200.5950        | 383.1561 | 192.0817         | 382.1721       | 191.5897         | <b>D</b> | <b>694.3519</b> | 347.6796        | <b>677.3253</b> | 339.1663         | 676.3413       | 338.6743         | 6 |
| 5 | <b>513.2667</b> | 257.1370        | 496.2402 | 248.6237         | 495.2562       | 248.1317         | <b>I</b> | <b>579.3249</b> | 290.1661        | 562.2984        | 281.6528         | 561.3144       | 281.1608         | 5 |
| 6 | 660.3352        | 330.6712        | 643.3086 | 322.1579         | 642.3246       | 321.6659         | <b>F</b> | <b>466.2409</b> | 233.6241        | 449.2143        | 225.1108         | 448.2303       | 224.6188         | 4 |
| 7 | 747.3672        | 374.1872        | 730.3406 | 365.6740         | 729.3566       | 365.1819         | <b>S</b> | <b>319.1724</b> | 160.0899        | 302.1459        | 151.5766         | 301.1619       | 151.0846         | 3 |
| 8 | 804.3886        | 402.6980        | 787.3621 | 394.1847         | 786.3781       | 393.6927         | <b>G</b> | <b>232.1404</b> | 116.5738        | 215.1139        | 108.0606         |                |                  | 2 |
| 9 |                 |                 |          |                  |                |                  | <b>R</b> | 175.1190        | 88.0631         | 158.0924        | 79.5498          |                |                  | 1 |

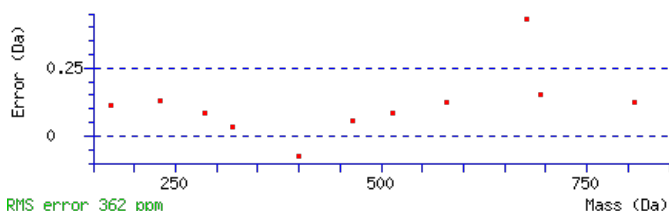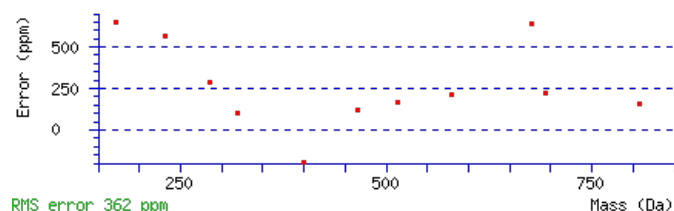NCBI **BLAST** search of [GNLDIFSGR](#)

(Parameters: blastp, nr protein database, expect=20000, no filter, PAM30)

Other BLAST [web gateways](#)**All matches to this query**

| Score | Mr(calc) | Delta   | Sequence                  |
|-------|----------|---------|---------------------------|
| 60.7  | 977.4930 | -0.0010 | <a href="#">GNLDIFSGR</a> |

AT4G39730.1

|     |          |         |                          |
|-----|----------|---------|--------------------------|
| 5.1 | 977.4930 | -0.0010 | <a href="#">DVQEKFGR</a> |
|-----|----------|---------|--------------------------|

**Mascot:** <http://www.matrixscience.com/>

## Peptide View

### MS/MS Fragmentation of **VGSFNAGEEYAPFK**

Found in **AT4G39800.1** in **TAIR\_Arabidopsis**, Symbols: MI-1-P SYNTHASE | MI-1-P SYNTHASE (Myo-inositol-1-phosphate synthase); inositol-3-phosphate synthase | chr4:18469653-18471887 REVERSE

Match to Query 6798: 1556.750816 from(779.382684,2+) index(7285)

Title: Elution from: 65.173 to 65.173 scan no 9565 cid35.00 polarity:+

Data file D6h-1\_2.mgf

Click mouse within plot area to zoom in by factor of two about that point

Or,   to  Da

Label all possible matches  Label matches used for scoring

Show Y-axis

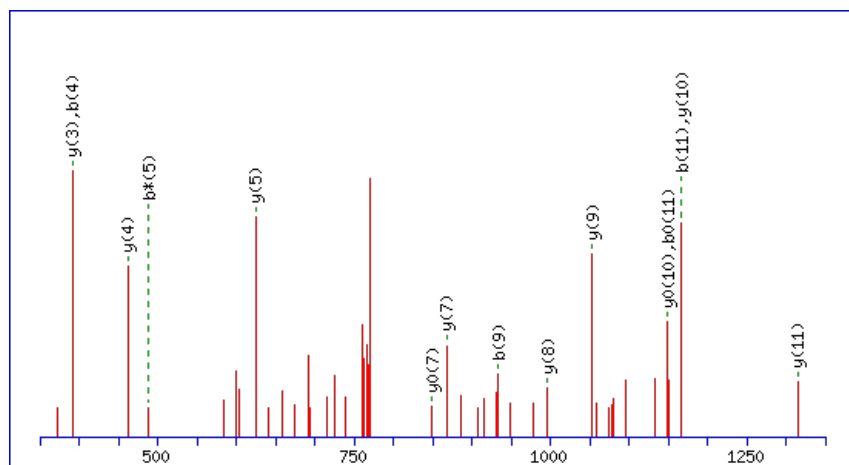

Monoisotopic mass of neutral peptide  $M_r(\text{calc})$ : 1556.7511

Fixed modifications: Carbamidomethyl (C) (apply to specified residues or termini only)

Ions Score: 72 Expect: 2.1e-007

Matches : 15/132 fragment ions using 16 most intense peaks [\(help\)](#)

| #  | b                | b <sup>++</sup> | b*              | b <sup>*++</sup> | b <sup>0</sup>   | b <sup>0++</sup> | Seq. | y                | y <sup>++</sup> | y*        | y <sup>*++</sup> | y <sup>0</sup>   | y <sup>0++</sup> | #  |
|----|------------------|-----------------|-----------------|------------------|------------------|------------------|------|------------------|-----------------|-----------|------------------|------------------|------------------|----|
| 1  | 100.0757         | 50.5415         |                 |                  |                  |                  | V    |                  |                 |           |                  |                  |                  | 14 |
| 2  | 157.0972         | 79.0522         |                 |                  |                  |                  | G    | 1458.6900        | 729.8486        | 1441.6634 | 721.3353         | 1440.6794        | 720.8433         | 13 |
| 3  | 244.1292         | 122.5682        |                 |                  | 226.1186         | 113.5629         | S    | 1401.6685        | 701.3379        | 1384.6420 | 692.8246         | 1383.6579        | 692.3326         | 12 |
| 4  | <b>391.1976</b>  | 196.1024        |                 |                  | 373.1870         | 187.0972         | F    | <b>1314.6365</b> | 657.8219        | 1297.6099 | 649.3086         | 1296.6259        | 648.8166         | 11 |
| 5  | 505.2405         | 253.1239        | <b>488.2140</b> | 244.6106         | 487.2300         | 244.1186         | N    | <b>1167.5681</b> | 584.2877        | 1150.5415 | 575.7744         | <b>1149.5575</b> | 575.2824         | 10 |
| 6  | 562.2620         | 281.6346        | 545.2354        | 273.1214         | 544.2514         | 272.6293         | G    | <b>1053.5251</b> | 527.2662        | 1036.4986 | 518.7529         | 1035.5146        | 518.2609         | 9  |
| 7  | 691.3046         | 346.1559        | 674.2780        | 337.6427         | 673.2940         | 337.1506         | E    | <b>996.5037</b>  | 498.7555        | 979.4771  | 490.2422         | 978.4931         | 489.7502         | 8  |
| 8  | 820.3472         | 410.6772        | 803.3206        | 402.1640         | 802.3366         | 401.6719         | E    | <b>867.4611</b>  | 434.2342        | 850.4345  | 425.7209         | <b>849.4505</b>  | 425.2289         | 7  |
| 9  | <b>933.4312</b>  | 467.2193        | 916.4047        | 458.7060         | 915.4207         | 458.2140         | I    | 738.4185         | 369.7129        | 721.3919  | 361.1996         |                  |                  | 6  |
| 10 | 1096.4946        | 548.7509        | 1079.4680       | 540.2376         | 1078.4840        | 539.7456         | Y    | <b>625.3344</b>  | 313.1709        | 608.3079  | 304.6576         |                  |                  | 5  |
| 11 | <b>1167.5317</b> | 584.2695        | 1150.5051       | 575.7562         | <b>1149.5211</b> | 575.2642         | A    | <b>462.2711</b>  | 231.6392        | 445.2445  | 223.1259         |                  |                  | 4  |
| 12 | 1264.5844        | 632.7959        | 1247.5579       | 624.2826         | 1246.5739        | 623.7906         | P    | <b>391.2340</b>  | 196.1206        | 374.2074  | 187.6074         |                  |                  | 3  |
| 13 | 1411.6529        | 706.3301        | 1394.6263       | 697.8168         | 1393.6423        | 697.3248         | F    | 294.1812         | 147.5942        | 277.1547  | 139.0810         |                  |                  | 2  |
| 14 |                  |                 |                 |                  |                  |                  | K    | 147.1128         | 74.0600         | 130.0863  | 65.5468          |                  |                  | 1  |

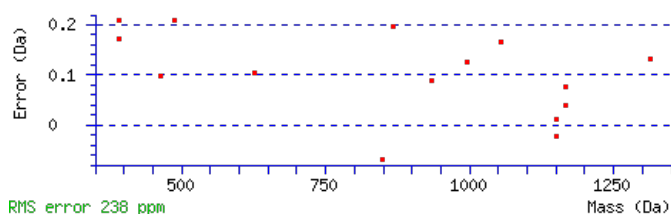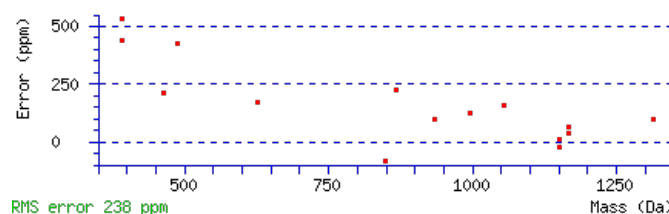

NCBI BLAST search of [VGSFNAGEEYAPFK](#)



## AT4G39800.1

(Parameters: blastp, nr protein database, expect=20000, no filter, PAM30)

Other BLAST [web gateways](#)

### All matches to this query

| Score | Mr(calc)  | Delta   | Sequence                       |
|-------|-----------|---------|--------------------------------|
| 71.8  | 1556.7511 | -0.0003 | <a href="#">VGSFNGEEIYAPFK</a> |

Mascot: <http://www.matrixscience.com/>

**Peptide View**MS/MS Fragmentation of **AFDSILAEVR**

Found in **AT4G39980.1** in **TAIR\_Arabidopsis**, Symbols: DHS1 | DHS1 (3-DEOXY-D-ARABINO-HEPTULOSONATE 7-PHOSPHATE SYNTHASE 1); 3-deoxy-7-phosphoheptulonate synthase | chr4:18539648-18541826 FORWARD

Match to Query 3635: 1132.552524 from(567.283538,2+) index(7448)

Title: Elution from: 66.034 to 66.034 scan no 9767 cid35.00 polarity:+

Data file D12h-3\_2.mgf

Click mouse within plot area to zoom in by factor of two about that point

Or,   to  Da

Label all possible matches  Label matches used for scoring

Show Y-axis

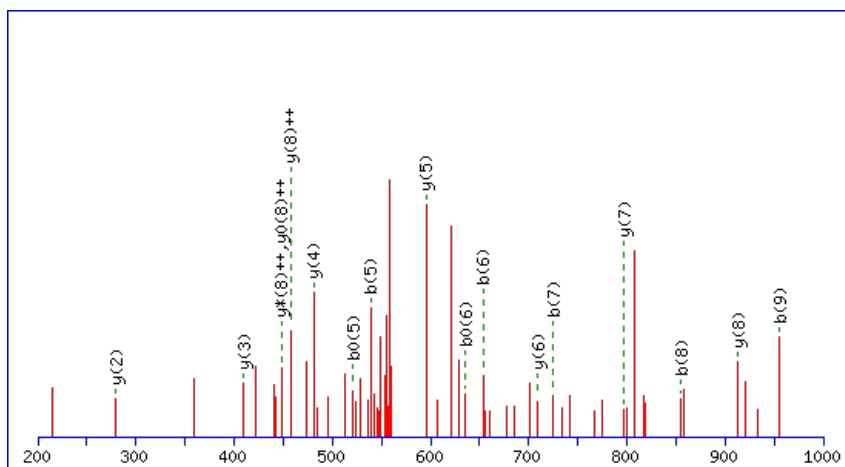

**Monoisotopic mass of neutral peptide Mr(calc):** 1132.5539

**Fixed modifications:** Carbamidomethyl (C) (apply to specified residues or termini only)

**Ions Score:** 28 **Expect:** 0.021

**Matches:** 17/82 fragment ions using 48 most intense peaks ([help](#))

| #  | b        | b <sup>++</sup> | b <sup>0</sup> | b <sup>0++</sup> | Seq. | y         | y <sup>++</sup> | y*        | y <sup>*++</sup> | y <sup>0</sup> | y <sup>0++</sup> | #  |
|----|----------|-----------------|----------------|------------------|------|-----------|-----------------|-----------|------------------|----------------|------------------|----|
| 1  | 73.0414  | 37.0244         |                |                  | A    |           |                 |           |                  |                |                  | 10 |
| 2  | 221.1069 | 111.0571        |                |                  | F    | 1061.5270 | 531.2671        | 1043.5034 | 522.2553         | 1043.5164      | 522.2619         | 9  |
| 3  | 337.1309 | 169.0691        | 319.1203       | 160.0638         | D    | 913.4616  | 457.2344        | 895.4380  | 448.2226         | 895.4510       | 448.2291         | 8  |
| 4  | 425.1599 | 213.0836        | 407.1494       | 204.0783         | S    | 797.4376  | 399.2224        | 779.4140  | 390.2106         | 779.4270       | 390.2171         | 7  |
| 5  | 539.2410 | 270.1241        | 521.2304       | 261.1189         | I    | 709.4085  | 355.2079        | 691.3849  | 346.1961         | 691.3980       | 346.2026         | 6  |
| 6  | 653.3221 | 327.1647        | 635.3115       | 318.1594         | L    | 595.3274  | 298.1673        | 577.3038  | 289.1556         | 577.3169       | 289.1621         | 5  |
| 7  | 725.3563 | 363.1818        | 707.3457       | 354.1765         | A    | 481.2463  | 241.1268        | 463.2227  | 232.1150         | 463.2358       | 232.1215         | 4  |
| 8  | 855.3959 | 428.2016        | 837.3853       | 419.1963         | E    | 409.2122  | 205.1097        | 391.1886  | 196.0979         | 391.2016       | 196.1044         | 3  |
| 9  | 955.4613 | 478.2343        | 937.4508       | 469.2290         | V    | 279.1725  | 140.0899        | 261.1490  | 131.0781         |                |                  | 2  |
| 10 |          |                 |                |                  | R    | 179.1071  | 90.0572         | 161.0835  | 81.0454          |                |                  | 1  |

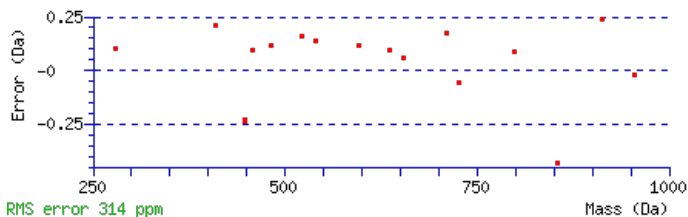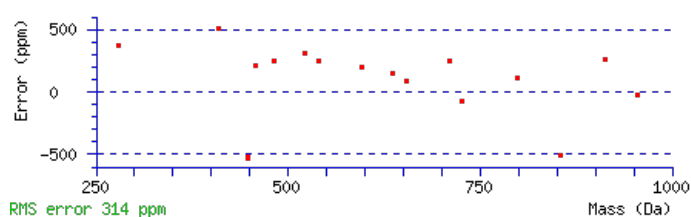

NCBI **BLAST** search of [AFDSILAEVR](#)

(Parameters: blastp, nr protein database, expect=20000, no filter, PAM30)

Other BLAST [web gateways](#)

All matches to this query

## AT4G39980.1

| Score | Mr(calc)  | Delta   | Sequence                    |
|-------|-----------|---------|-----------------------------|
| 27.6  | 1132.5539 | -0.0013 | <a href="#">AFDSILAEVR</a>  |
| 10.6  | 1132.5539 | -0.0013 | <a href="#">EFKAVIEER</a>   |
| 8.9   | 1132.5539 | -0.0013 | <a href="#">EEVKEAIFR</a>   |
| 8.5   | 1132.5539 | -0.0013 | <a href="#">LLADAESVFR</a>  |
| 5.2   | 1132.5539 | -0.0013 | <a href="#">EILSFLDQR</a>   |
| 4.8   | 1132.5516 | 0.0009  | <a href="#">ISKDAGGSEKK</a> |
| 4.5   | 1132.5539 | -0.0013 | <a href="#">IADAAEKFGAK</a> |
| 3.8   | 1132.5539 | -0.0013 | <a href="#">TGDFPKSLQK</a>  |
| 3.3   | 1132.5539 | -0.0013 | <a href="#">YIAGQNEVVK</a>  |
| 3.0   | 1132.5543 | -0.0018 | <a href="#">RNTVKNOEK</a>   |

Mascot: <http://www.matrixscience.com/>

**Peptide View**MS/MS Fragmentation of **LAAPYDLVMQTK**

Found in **AT5G01410.1** in **TAIR\_Arabidopsis**, Symbols: ATPDX1.3, RSR4, PDX1.3, PDX1 | PDX1 (PYRIDOXINE BIOSYNTHESIS 1.3); protein heterodimerization/ protein homodimerization | chr5:172575-173504 REVERSE

Match to Query 5426: 1362.665356 from(682.339954,2+) index(7390)

Title: Elution from: 65.120 to 65.120 scan no 9564 cid35.00 polarity:+

Data file 0-2\_1.mgf

Click mouse within plot area to zoom in by factor of two about that point

Or,  to  Da

Label all possible matches  Label matches used for scoring

Show Y-axis

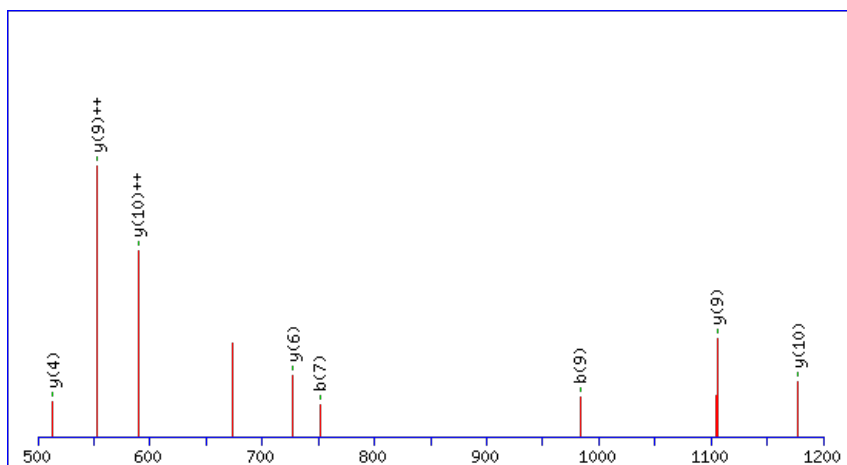

Monoisotopic mass of neutral peptide  $M_r(\text{calc})$ : 1362.6646

Fixed modifications: Carbamidomethyl (C) (apply to specified residues or termini only)

Ions Score: 36 Expect: 0.0029

Matches : 8/102 fragment ions using 11 most intense peaks ([help](#))

| #  | b               | b <sup>++</sup> | b*        | b <sup>*++</sup> | b <sup>0</sup> | b <sup>0++</sup> | Seq. | y                | y <sup>++</sup> | y*        | y <sup>*++</sup> | y <sup>0</sup> | y <sup>0++</sup> | #  |
|----|-----------------|-----------------|-----------|------------------|----------------|------------------|------|------------------|-----------------|-----------|------------------|----------------|------------------|----|
| 1  | 115.0884        | 58.0478         |           |                  |                |                  | L    |                  |                 |           |                  |                |                  | 12 |
| 2  | 187.1225        | 94.0649         |           |                  |                |                  | A    | 1249.5907        | 625.2990        | 1231.5672 | 616.2872         | 1231.5802      | 616.2937         | 11 |
| 3  | 259.1567        | 130.0820        |           |                  |                |                  | A    | <b>1177.5566</b> | <b>589.2819</b> | 1159.5330 | 580.2701         | 1159.5460      | 580.2767         | 10 |
| 4  | 357.2065        | 179.1069        |           |                  |                |                  | P    | <b>1105.5224</b> | <b>553.2649</b> | 1087.4989 | 544.2531         | 1087.5119      | 544.2596         | 9  |
| 5  | 521.2668        | 261.1371        |           |                  |                |                  | Y    | 1007.4726        | 504.2400        | 989.4491  | 495.2282         | 989.4621       | 495.2347         | 8  |
| 6  | 637.2908        | 319.1490        |           |                  | 619.2802       | 310.1438         | D    | 843.4123         | 422.2098        | 825.3887  | 413.1980         | 825.4017       | 413.2045         | 7  |
| 7  | <b>751.3719</b> | 376.1896        |           |                  | 733.3613       | 367.1843         | L    | <b>727.3883</b>  | 364.1978        | 709.3647  | 355.1860         | 709.3777       | 355.1925         | 6  |
| 8  | 851.4374        | 426.2223        |           |                  | 833.4268       | 417.2170         | V    | 613.3072         | 307.1572        | 595.2836  | 298.1454         | 595.2966       | 298.1520         | 5  |
| 9  | <b>983.4749</b> | 492.2411        |           |                  | 965.4643       | 483.2358         | M    | <b>513.2418</b>  | 257.1245        | 495.2182  | 248.1127         | 495.2312       | 248.1192         | 4  |
| 10 | 1113.5275       | 557.2674        | 1095.5039 | 548.2556         | 1095.5170      | 548.2621         | Q    | 381.2042         | 191.1058        | 363.1807  | 182.0940         | 363.1937       | 182.1005         | 3  |
| 11 | 1215.5722       | 608.2898        | 1197.5487 | 599.2780         | 1197.5617      | 599.2845         | T    | 251.1516         | 126.0794        | 233.1280  | 117.0676         | 233.1410       | 117.0741         | 2  |
| 12 |                 |                 |           |                  |                |                  | K    | 149.1069         | 75.0571         | 131.0833  | 66.0453          |                |                  | 1  |

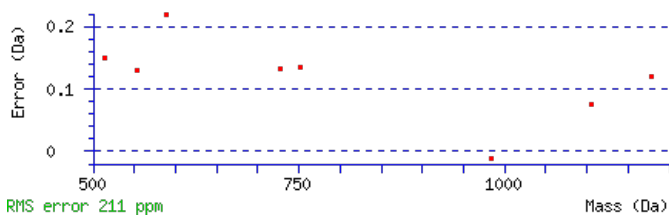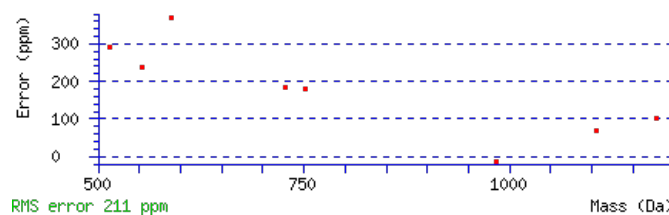

NCBI BLAST search of **LAAPYDLVMQTK**

(Parameters: blastp, nr protein database, expect=20000, no filter, PAM30)

Other BLAST [web gateways](#)

AT5G01410.1

All matches to this query

| Score | Mr(calc)  | Delta  | Sequence                     |
|-------|-----------|--------|------------------------------|
| 36.4  | 1362.6646 | 0.0008 | <a href="#">LAAPYDLVMQTK</a> |
| 6.2   | 1362.6623 | 0.0030 | <a href="#">AIETELMERLK</a>  |
| 4.7   | 1362.6650 | 0.0004 | <a href="#">LAMERLAQIER</a>  |
| 2.9   | 1362.6638 | 0.0015 | <a href="#">ALTTWGRWVEK</a>  |

Mascot: <http://www.matrixscience.com/>

**Peptide View**MS/MS Fragmentation of **TAQLQLAEIK**Found in **AT5G01530.1** in **TAIR\_Arabidopsis**, Symbols: | chlorophyll A-B binding protein CP29 (LHCB4) | chr5:209083-210242 FORWARD

Match to Query 2897: 1113.636256 from(557.825404,2+) index(3802)

Title: Elution from: 38.263 to 38.263 scan no 4910 cid35.00 polarity:+

Data file D1d-1\_3.mgf

Click mouse within plot area to zoom in by factor of two about that point

Or,   to  Da Label all possible matches  Label matches used for scoring Show Y-axis 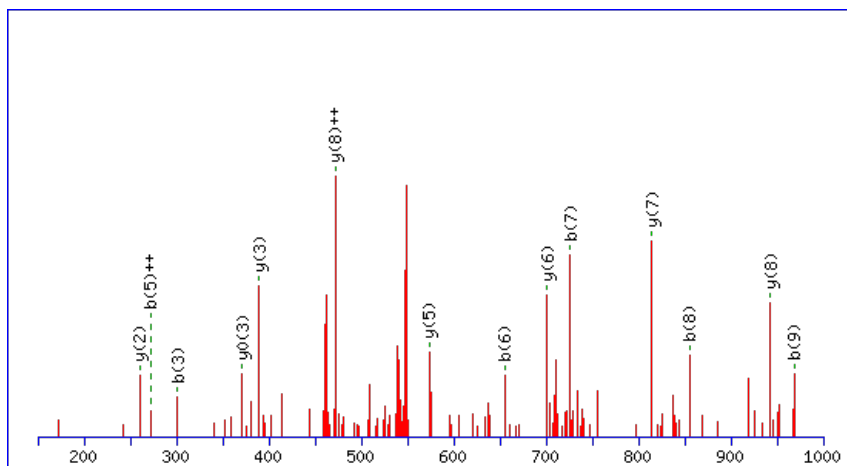**Monoisotopic mass of neutral peptide Mr(calc):** 1113.6393**Fixed modifications:** Carbamidomethyl (C) (apply to specified residues or termini only)**Ions Score:** 61 **Expect:** 4.1e-006**Matches:** 14/100 fragment ions using 16 most intense peaks ([help](#))

| #  | b               | b <sup>++</sup> | b*       | b <sup>*++</sup> | b <sup>0</sup> | b <sup>0++</sup> | Seq. | y               | y <sup>++</sup> | y*       | y <sup>*++</sup> | y <sup>0</sup>  | y <sup>0++</sup> | #  |
|----|-----------------|-----------------|----------|------------------|----------------|------------------|------|-----------------|-----------------|----------|------------------|-----------------|------------------|----|
| 1  | 102.0550        | 51.5311         |          |                  | 84.0444        | 42.5258          | T    |                 |                 |          |                  |                 |                  | 10 |
| 2  | 173.0921        | 87.0497         |          |                  | 155.0815       | 78.0444          | A    | 1013.5990       | 507.3031        | 996.5724 | 498.7899         | 995.5884        | 498.2978         | 9  |
| 3  | <b>301.1506</b> | 151.0790        | 284.1241 | 142.5657         | 283.1401       | 142.0737         | Q    | <b>942.5619</b> | <b>471.7846</b> | 925.5353 | 463.2713         | 924.5513        | 462.7793         | 8  |
| 4  | 414.2347        | 207.6210        | 397.2082 | 199.1077         | 396.2241       | 198.6157         | L    | <b>814.5033</b> | 407.7553        | 797.4767 | 399.2420         | 796.4927        | 398.7500         | 7  |
| 5  | 542.2933        | <b>271.6503</b> | 525.2667 | 263.1370         | 524.2827       | 262.6450         | Q    | <b>701.4192</b> | 351.2132        | 684.3927 | 342.7000         | 683.4087        | 342.2080         | 6  |
| 6  | <b>655.3774</b> | 328.1923        | 638.3508 | 319.6790         | 637.3668       | 319.1870         | L    | <b>573.3606</b> | 287.1840        | 556.3341 | 278.6707         | 555.3501        | 278.1787         | 5  |
| 7  | <b>726.4145</b> | 363.7109        | 709.3879 | 355.1976         | 708.4039       | 354.7056         | A    | 460.2766        | 230.6419        | 443.2500 | 222.1287         | 442.2660        | 221.6366         | 4  |
| 8  | <b>855.4571</b> | 428.2322        | 838.4305 | 419.7189         | 837.4465       | 419.2269         | E    | <b>389.2395</b> | 195.1234        | 372.2129 | 186.6101         | <b>371.2289</b> | 186.1181         | 3  |
| 9  | <b>968.5411</b> | 484.7742        | 951.5146 | 476.2609         | 950.5306       | 475.7689         | I    | <b>260.1969</b> | 130.6021        | 243.1703 | 122.0888         |                 |                  | 2  |
| 10 |                 |                 |          |                  |                |                  | K    | 147.1128        | 74.0600         | 130.0863 | 65.5468          |                 |                  | 1  |

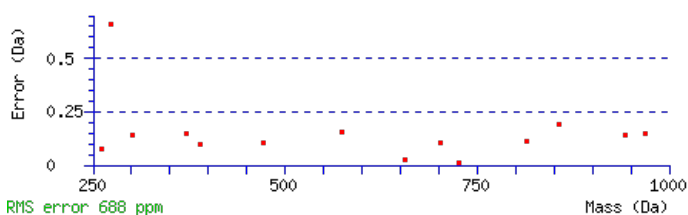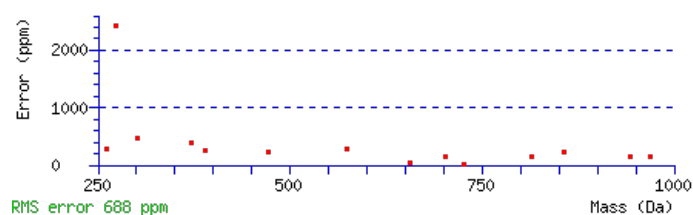NCBI **BLAST** search of **TAQLQLAEIK**

(Parameters: blastp, nr protein database, expect=20000, no filter, PAM30)

Other BLAST [web gateways](#)**All matches to this query**

| Score | Mr(calc) | Delta | Sequence |
|-------|----------|-------|----------|
|       |          |       |          |

**AT5G01530.1**

|      |           |         |                             |
|------|-----------|---------|-----------------------------|
| 60.9 | 1113.6393 | -0.0031 | <a href="#">TAQLQLAEIK</a>  |
| 11.2 | 1113.6368 | -0.0006 | <a href="#">MKFAPKAPPK</a>  |
| 10.2 | 1113.6393 | -0.0031 | <a href="#">LDANIQSILK</a>  |
| 6.8  | 1113.6393 | -0.0031 | <a href="#">NINALDLTK</a>   |
| 3.8  | 1113.6393 | -0.0031 | <a href="#">LQKELQDLK</a>   |
| 3.8  | 1113.6393 | -0.0031 | <a href="#">LKQDQLIEK</a>   |
| 1.2  | 1113.6394 | -0.0031 | <a href="#">LTLSGDKVPGK</a> |

**Mascot:** <http://www.matrixscience.com/>

## Peptide View

MS/MS Fragmentation of **RYSDPSSLK**

Found in **AT5G01730.1** in **TAIR\_Arabidopsis**, Symbols: ATSCAR4, WAVE3 | WAVE3 | chr5:273016-277558 REVERSE

Match to Query 3406: 1077.582572 from(539.798562,2+) index(2101)

Title: Elution from: 23.828 to 23.828 scan no 2702 cid35.00 polarity:+

Data file D1d-3\_1.mgf

Click mouse within plot area to zoom in by factor of two about that point

Or,   to  Da

Label all possible matches  Label matches used for scoring

Show Y-axis

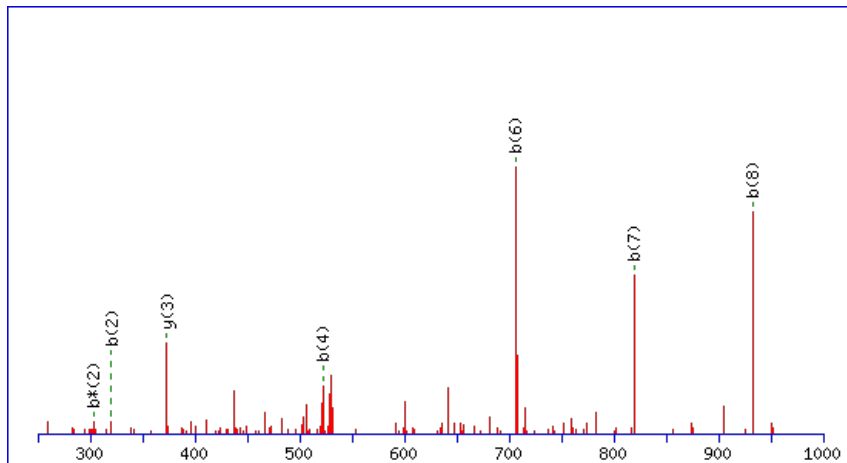

Monoisotopic mass of neutral peptide **Mr(calc)**: 1077.5818

**Fixed modifications**: Carbamidomethyl (C) (apply to specified residues or termini only)

**Ions Score**: 27 **Expect**: 0.013

**Matches** : 7/86 fragment ions using 14 most intense peaks ([help](#))

| # | b               | b <sup>++</sup> | b*              | b <sup>*++</sup> | b <sup>0</sup> | b <sup>0++</sup> | Seq. | y               | y <sup>++</sup> | y*       | y <sup>*++</sup> | y <sup>0</sup> | y <sup>0++</sup> | # |
|---|-----------------|-----------------|-----------------|------------------|----------------|------------------|------|-----------------|-----------------|----------|------------------|----------------|------------------|---|
| 1 | 157.1084        | 79.0578         | 140.0818        | 70.5446          |                |                  | R    |                 |                 |          |                  |                |                  | 9 |
| 2 | <b>320.1717</b> | 160.5895        | <b>303.1452</b> | 152.0762         |                |                  | Y    | 922.4880        | 461.7477        | 905.4615 | 453.2344         | 904.4775       | 452.7424         | 8 |
| 3 | 407.2037        | 204.1055        | 390.1772        | 195.5922         | 389.1932       | 195.1002         | S    | 759.4247        | 380.2160        | 742.3981 | 371.7027         | 741.4141       | 371.2107         | 7 |
| 4 | <b>522.2307</b> | 261.6190        | 505.2041        | 253.1057         | 504.2201       | 252.6137         | D    | 672.3927        | 336.7000        | 655.3661 | 328.1867         | 654.3821       | 327.6947         | 6 |
| 5 | 619.2835        | 310.1454        | 602.2569        | 301.6321         | 601.2729       | 301.1401         | P    | 557.3657        | 279.1865        | 540.3392 | 270.6732         | 539.3552       | 270.1812         | 5 |
| 6 | <b>706.3155</b> | 353.6614        | 689.2889        | 345.1481         | 688.3049       | 344.6561         | S    | 460.3130        | 230.6601        | 443.2864 | 222.1468         | 442.3024       | 221.6548         | 4 |
| 7 | <b>819.3995</b> | 410.2034        | 802.3730        | 401.6901         | 801.3890       | 401.1981         | L    | <b>373.2809</b> | 187.1441        | 356.2544 | 178.6308         |                |                  | 3 |
| 8 | <b>932.4836</b> | 466.7454        | 915.4571        | 458.2322         | 914.4730       | 457.7402         | L    | 260.1969        | 130.6021        | 243.1703 | 122.0888         |                |                  | 2 |
| 9 |                 |                 |                 |                  |                |                  | K    | 147.1128        | 74.0600         | 130.0863 | 65.5468          |                |                  | 1 |

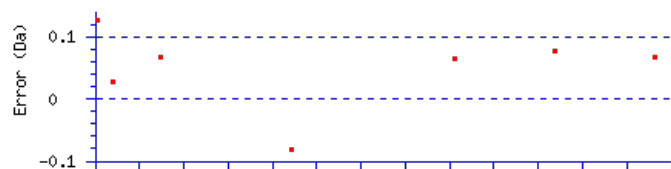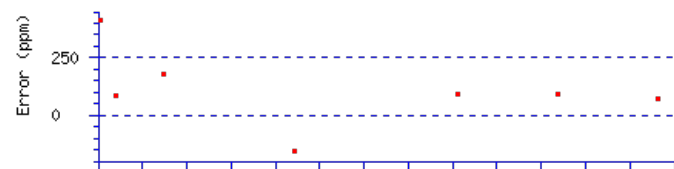

NCBI **BLAST** search of [RYSDPSSLK](#)

(Parameters: blastp, nr protein database, expect=20000, no filter, PAM30)

Other BLAST [web gateways](#)

All matches to this query

| Score | Mr(calc)  | Delta  | Sequence                  |
|-------|-----------|--------|---------------------------|
| 26.6  | 1077.5818 | 0.0007 | <a href="#">RYSDPSSLK</a> |



## AT5G01730.1

|      |           |         |                             |
|------|-----------|---------|-----------------------------|
| 25.3 | 1077.5818 | 0.0008  | <a href="#">YREAADLIK</a>   |
| 7.9  | 1077.5852 | -0.0026 | <a href="#">QSSKKMELK</a>   |
| 7.5  | 1077.5818 | 0.0007  | <a href="#">SVNAFDLKGK</a>  |
| 6.3  | 1077.5852 | -0.0026 | <a href="#">ACASSLKTLLK</a> |
| 4.5  | 1077.5852 | -0.0026 | <a href="#">SNMKVATSIK</a>  |
| 3.3  | 1077.5852 | -0.0026 | <a href="#">SSSGCLIVKK</a>  |
| 2.3  | 1077.5818 | 0.0007  | <a href="#">ENVLIHEPK</a>   |
| 2.2  | 1077.5852 | -0.0026 | <a href="#">RLMTETAJK</a>   |
| 2.1  | 1077.5818 | 0.0007  | <a href="#">LGFETDRLK</a>   |

Mascot: <http://www.matrixscience.com/>

## Peptide View

### MS/MS Fragmentation of **FLLAQMETK**

Found in **AT5G01940.1** in **TAIR\_Arabidopsis**, Symbols: | eukaryotic translation initiation factor 2B family protein / eIF-2B family protein | chr5:363591-364766 REVERSE

Match to Query 3482: 1090.536440 from(546.275496,2+) index(2067)

Title: Elution from: 24.636 to 24.636 scan no 2681 cid35.00 polarity:+

Data file 0-1\_1.mgf

Click mouse within plot area to zoom in by factor of two about that point

Or,   to  Da

Label all possible matches  Label matches used for scoring

Show Y-axis

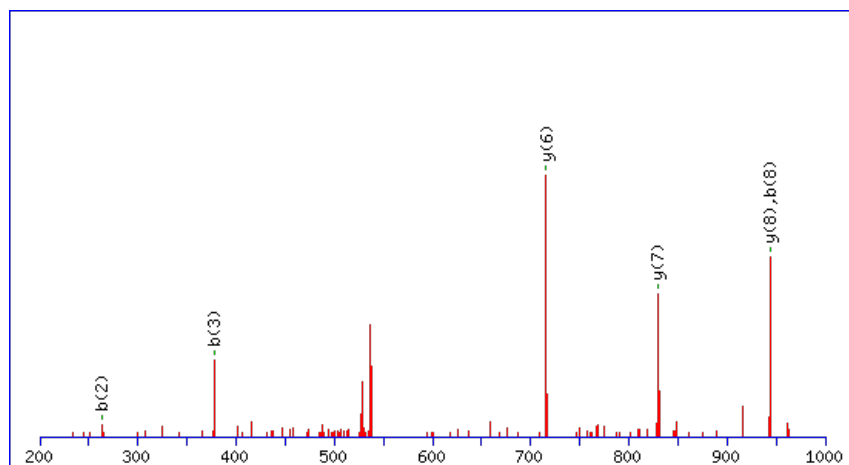

Monoisotopic mass of neutral peptide  $M_r(\text{calc})$ : 1090.5359

Fixed modifications: Carbamidomethyl (C) (apply to specified residues or termini only)

Ions Score: 25 Expect: 0.029

Matches : 6/74 fragment ions using 8 most intense peaks ([help](#))

| # | b               | b <sup>++</sup> | b*       | b <sup>*++</sup> | b <sup>0</sup> | b <sup>0++</sup> | Seq. | y               | y <sup>++</sup> | y*       | y <sup>*++</sup> | y <sup>0</sup> | y <sup>0++</sup> | # |
|---|-----------------|-----------------|----------|------------------|----------------|------------------|------|-----------------|-----------------|----------|------------------|----------------|------------------|---|
| 1 | 149.0727        | 75.0400         |          |                  |                |                  | F    |                 |                 |          |                  |                |                  | 9 |
| 2 | <b>263.1538</b> | 132.0805        |          |                  |                |                  | L    | <b>943.4777</b> | 472.2425        | 925.4541 | 463.2307         | 925.4672       | 463.2372         | 8 |
| 3 | <b>377.2349</b> | 189.1211        |          |                  |                |                  | L    | <b>829.3966</b> | 415.2020        | 811.3730 | 406.1902         | 811.3861       | 406.1967         | 7 |
| 4 | 449.2691        | 225.1382        |          |                  |                |                  | A    | <b>715.3155</b> | 358.1614        | 697.2919 | 349.1496         | 697.3050       | 349.1561         | 6 |
| 5 | 579.3217        | 290.1645        | 561.2981 | 281.1527         |                |                  | Q    | 643.2814        | 322.1443        | 625.2578 | 313.1325         | 625.2708       | 313.1390         | 5 |
| 6 | 711.3592        | 356.1833        | 693.3357 | 347.1715         |                |                  | M    | 513.2287        | 257.1180        | 495.2052 | 248.1062         | 495.2182       | 248.1127         | 4 |
| 7 | 841.3989        | 421.2031        | 823.3753 | 412.1913         | 823.3883       | 412.1978         | E    | 381.1912        | 191.0992        | 363.1676 | 182.0875         | 363.1807       | 182.0940         | 3 |
| 8 | <b>943.4436</b> | 472.2254        | 925.4200 | 463.2136         | 925.4330       | 463.2201         | T    | 251.1516        | 126.0794        | 233.1280 | 117.0676         | 233.1410       | 117.0741         | 2 |
| 9 |                 |                 |          |                  |                |                  | K    | 149.1069        | 75.0571         | 131.0833 | 66.0453          |                |                  | 1 |

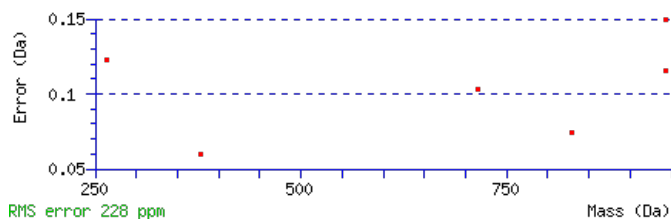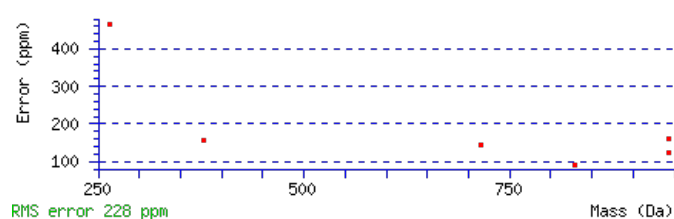

NCBI **BLAST** search of [FLLAQMETK](#)

(Parameters: blastp, nr protein database, expect=20000, no filter, PAM30)

Other BLAST [web gateways](#)

### All matches to this query

| Score | $M_r(\text{calc})$ | Delta | Sequence |
|-------|--------------------|-------|----------|
|       |                    |       |          |

## AT5G01940.1

|      |           |         |                            |
|------|-----------|---------|----------------------------|
| 25.0 | 1090.5359 | 0.0006  | <a href="#">FLLAQMETK</a>  |
| 23.7 | 1090.5386 | -0.0021 | <a href="#">YRCPQLLK</a>   |
| 22.5 | 1090.5337 | 0.0028  | <a href="#">EMLKEKSSK</a>  |
| 22.5 | 1090.5359 | 0.0006  | <a href="#">EYMQGVLIK</a>  |
| 22.5 | 1090.5359 | 0.0005  | <a href="#">LYEAACLLK</a>  |
| 18.2 | 1090.5386 | -0.0021 | <a href="#">TRGMLGWLK</a>  |
| 13.0 | 1090.5337 | 0.0027  | <a href="#">AMSLLSNSLK</a> |
| 11.3 | 1090.5393 | -0.0028 | <a href="#">KLVMMSIDK</a>  |
| 10.0 | 1090.5393 | -0.0028 | <a href="#">KLVMMSIDK</a>  |
| 7.7  | 1090.5359 | 0.0005  | <a href="#">NLMFLADIK</a>  |

Mascot: <http://www.matrixscience.com/>

**Peptide View**MS/MS Fragmentation of **FAALALR**Found in **AT5G01950.1** in **TAIR\_Arabidopsis**, Symbols: | ATP binding / kinase/ protein serine/threonine kinase | chr5:365037-369529 REVERSE

Match to Query 813: 770.430560 from(386.222556,2+) index(4562)

Title: Elution from: 41.559 to 41.559 scan no 5738 cid35.00 polarity:+

Data file D6h-2\_3.mgf

Click mouse within plot area to zoom in by factor of two about that point

Or,   to  Da Label all possible matches  Label matches used for scoring Show Y-axis 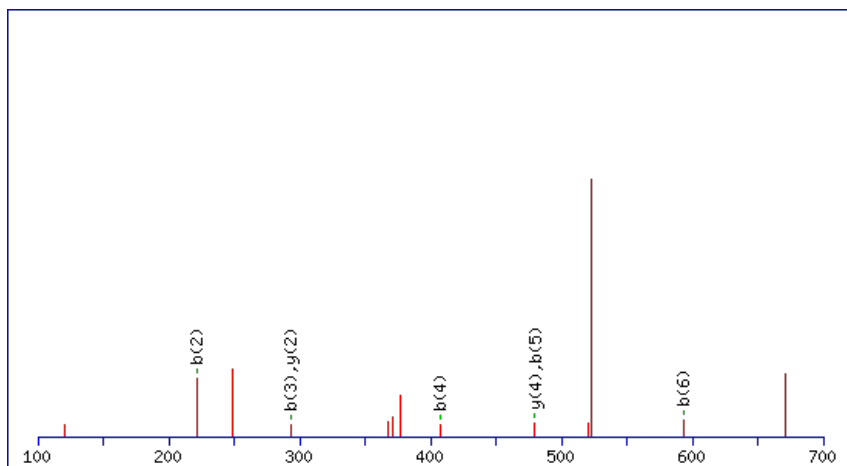Monoisotopic mass of neutral peptide **Mr(calc)**: 770.4299

Fixed modifications: Carbamidomethyl (C) (apply to specified residues or termini only)

Ions Score: 31 Expect: 0.0063

Matches : 7/36 fragment ions using 14 most intense peaks ([help](#))

| # | b               | b <sup>++</sup> | Seq. | y               | y <sup>++</sup> | y*       | y <sup>*++</sup> | # |
|---|-----------------|-----------------|------|-----------------|-----------------|----------|------------------|---|
| 1 | 149.0727        | 75.0400         | F    |                 |                 |          |                  | 7 |
| 2 | <b>221.1069</b> | 111.0571        | A    | 623.3717        | 312.1895        | 605.3482 | 303.1777         | 6 |
| 3 | <b>293.1410</b> | 147.0741        | A    | 551.3376        | 276.1724        | 533.3140 | 267.1606         | 5 |
| 4 | <b>407.2221</b> | 204.1147        | L    | <b>479.3034</b> | 240.1554        | 461.2799 | 231.1436         | 4 |
| 5 | <b>479.2563</b> | 240.1318        | A    | 365.2223        | 183.1148        | 347.1988 | 174.1030         | 3 |
| 6 | <b>593.3374</b> | 297.1723        | L    | <b>293.1882</b> | 147.0977        | 275.1646 | 138.0859         | 2 |
| 7 |                 |                 | R    | 179.1071        | 90.0572         | 161.0835 | 81.0454          | 1 |

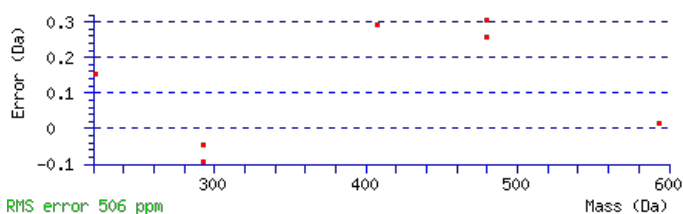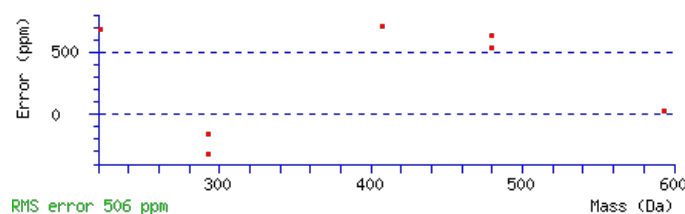NCBI **BLAST** search of **FAALALR**

(Parameters: blastp, nr protein database, expect=20000, no filter, PAM30)

Other BLAST [web gateways](#)**All matches to this query**

| Score | Mr(calc) | Delta  | Sequence                |
|-------|----------|--------|-------------------------|
| 31.1  | 770.4299 | 0.0007 | <a href="#">FAALALR</a> |
| 30.9  | 770.4299 | 0.0007 | <a href="#">VFNILR</a>  |
| 28.9  | 770.4299 | 0.0007 | <a href="#">AFALLAR</a> |

## AT5G01950.1

|      |          |        |                         |
|------|----------|--------|-------------------------|
| 18.2 | 770.4299 | 0.0007 | <a href="#">FVLNLR</a>  |
| 9.2  | 770.4299 | 0.0007 | <a href="#">ALAAFLR</a> |
| 9.1  | 770.4299 | 0.0007 | <a href="#">VLNFER</a>  |
| 6.8  | 770.4299 | 0.0007 | <a href="#">FKPTIR</a>  |

**Mascot:** <http://www.matrixscience.com/>

## Peptide View

MS/MS Fragmentation of **VSPGGLQENSRKQLQHK**

Found in **AT5G02010.1** in **TAIR\_Arabidopsis**, Symbols: ATROPGEF7, ROPGEF7 | ATROPGEF7/ROPGEF7 (KINASE PARTNER PROTEIN-LIKE); Rho guanyl-nucleotide exchange factor/ | chr5:383490-385695 FORWARD

Match to Query 9095: 1932.930744 from(645.317524,3+) index(5562)

Title: Elution from: 52.856 to 52.856 scan no 7198 cid35.00 polarity:+

Data file D1d-1\_1.mgf

Click mouse within plot area to zoom in by factor of two about that point

Or,  to  Da

Label all possible matches  Label matches used for scoring

Show Y-axis

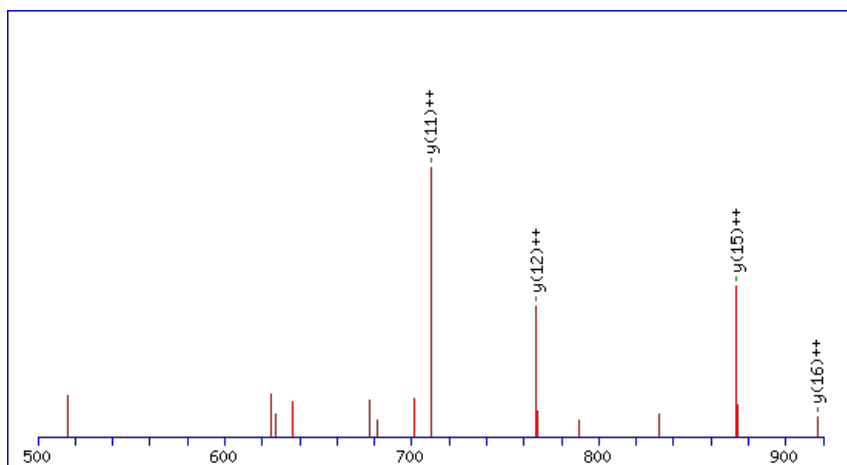

Monoisotopic mass of neutral peptide  $M_r(\text{calc})$ : 1932.9350

Fixed modifications: Carbamidomethyl (C) (apply to specified residues or termini only)

Ions Score: 29 Expect: 0.0082

Matches : 4/164 fragment ions using 5 most intense peaks ([help](#))

| #  | b         | b <sup>++</sup> | b*        | b <sup>*++</sup> | b <sup>0</sup> | b <sup>0++</sup> | Seq. | y         | y <sup>++</sup> | y*        | y <sup>*++</sup> | y <sup>0</sup> | y <sup>0++</sup> | #  |
|----|-----------|-----------------|-----------|------------------|----------------|------------------|------|-----------|-----------------|-----------|------------------|----------------|------------------|----|
| 1  | 101.0727  | 51.0400         |           |                  |                |                  | V    |           |                 |           |                  |                |                  | 17 |
| 2  | 189.1018  | 95.0545         |           |                  | 171.0912       | 86.0492          | S    | 1833.8769 | 917.4421        | 1815.8533 | 908.4303         | 1815.8663      | 908.4368         | 16 |
| 3  | 287.1516  | 144.0794        |           |                  | 269.1410       | 135.0741         | P    | 1745.8478 | 873.4275        | 1727.8242 | 864.4157         | 1727.8372      | 864.4223         | 15 |
| 4  | 345.1701  | 173.0887        |           |                  | 327.1595       | 164.0834         | G    | 1647.7980 | 824.4026        | 1629.7744 | 815.3908         | 1629.7874      | 815.3974         | 14 |
| 5  | 403.1886  | 202.0979        |           |                  | 385.1780       | 193.0926         | G    | 1589.7795 | 795.3934        | 1571.7559 | 786.3816         | 1571.7689      | 786.3881         | 13 |
| 6  | 517.2697  | 259.1385        |           |                  | 499.2591       | 250.1332         | L    | 1531.7610 | 766.3841        | 1513.7374 | 757.3723         | 1513.7504      | 757.3789         | 12 |
| 7  | 647.3223  | 324.1648        | 629.2987  | 315.1530         | 629.3118       | 315.1595         | Q    | 1417.6799 | 709.3436        | 1399.6563 | 700.3318         | 1399.6693      | 700.3383         | 11 |
| 8  | 777.3620  | 389.1846        | 759.3384  | 380.1728         | 759.3514       | 380.1793         | E    | 1287.6273 | 644.3173        | 1269.6037 | 635.3055         | 1269.6167      | 635.3120         | 10 |
| 9  | 893.3990  | 447.2031        | 875.3754  | 438.1913         | 875.3884       | 438.1978         | N    | 1157.5876 | 579.2975        | 1139.5640 | 570.2857         | 1139.5771      | 570.2922         | 9  |
| 10 | 981.4280  | 491.2176        | 963.4044  | 482.2059         | 963.4175       | 482.2124         | S    | 1041.5506 | 521.2790        | 1023.5270 | 512.2672         | 1023.5401      | 512.2737         | 8  |
| 11 | 1141.5173 | 571.2623        | 1123.4937 | 562.2505         | 1123.5067      | 562.2570         | R    | 953.5216  | 477.2644        | 935.4980  | 468.2526         |                |                  | 7  |
| 12 | 1271.6063 | 636.3068        | 1253.5827 | 627.2950         | 1253.5957      | 627.3015         | K    | 793.4323  | 397.2198        | 775.4087  | 388.2080         |                |                  | 6  |
| 13 | 1401.6590 | 701.3331        | 1383.6354 | 692.3213         | 1383.6484      | 692.3278         | Q    | 663.3433  | 332.1753        | 645.3197  | 323.1635         |                |                  | 5  |
| 14 | 1515.7400 | 758.3737        | 1497.7165 | 749.3619         | 1497.7295      | 749.3684         | L    | 533.2906  | 267.1490        | 515.2671  | 258.1372         |                |                  | 4  |
| 15 | 1645.7927 | 823.4000        | 1627.7691 | 814.3882         | 1627.7821      | 814.3947         | Q    | 419.2095  | 210.1084        | 401.1860  | 201.0966         |                |                  | 3  |
| 16 | 1785.8427 | 893.4250        | 1767.8191 | 884.4132         | 1767.8321      | 884.4197         | H    | 289.1569  | 145.0821        | 271.1333  | 136.0703         |                |                  | 2  |
| 17 |           |                 |           |                  |                |                  | K    | 149.1069  | 75.0571         | 131.0833  | 66.0453          |                |                  | 1  |

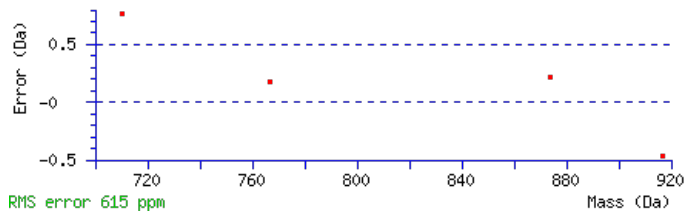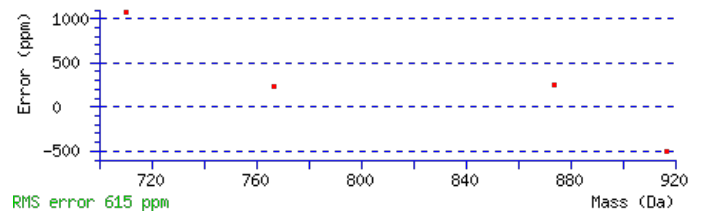

NCBI **BLAST** search of [VSPGGLQENSRKQLQHK](#)  
 (Parameters: blastp, nr protein database, expect=20000, no filter, PAM30)  
 Other BLAST [web gateways](#)

**All matches to this query**

| Score | Mr(calc)  | Delta   | Sequence                             |
|-------|-----------|---------|--------------------------------------|
| 28.7  | 1932.9350 | -0.0043 | <a href="#">VSPGGLQENSRKQLQHK</a>    |
| 4.9   | 1932.9272 | 0.0036  | <a href="#">NINTAFAKMGYPGTVSIK</a>   |
| 2.0   | 1932.9319 | -0.0012 | <a href="#">SPINSSGSLSDVLFSSKK</a>   |
| 1.1   | 1932.9353 | -0.0046 | <a href="#">DAPLGIVSQSPNIMDLVK</a>   |
| 0.9   | 1932.9324 | -0.0016 | <a href="#">VSADKHENSPGIKVGVS GK</a> |
| 0.9   | 1932.9299 | 0.0009  | <a href="#">VSFAERPSFKIGACIAR</a>    |
| 0.8   | 1932.9306 | 0.0002  | <a href="#">KGSFKMLNIDGNMISLK</a>    |
| 0.4   | 1932.9297 | 0.0011  | <a href="#">VKLGVEDVEVDNPNVSK</a>    |

Mascot: <http://www.matrixscience.com/>

**Peptide View**MS/MS Fragmentation of **QFAAEEISSMVLIK**Found in **AT5G02490.1** in **TAIR\_Arabidopsis**, Symbols: | heat shock cognate 70 kDa protein 2 (HSC70-2) (HSP70-2) | chr5:550294-552563  
REVERSE

Match to Query 6764: 1580.769408 from(791.391980,2+) index(9343)

Title: Elution from: 85.640 to 85.640 scan no 12991 cid35.00 polarity:+

Data file 0-3\_3.mgf

Click mouse within plot area to zoom in by factor of two about that point

Or,   to  Da Label all possible matches  Label matches used for scoring Show Y-axis 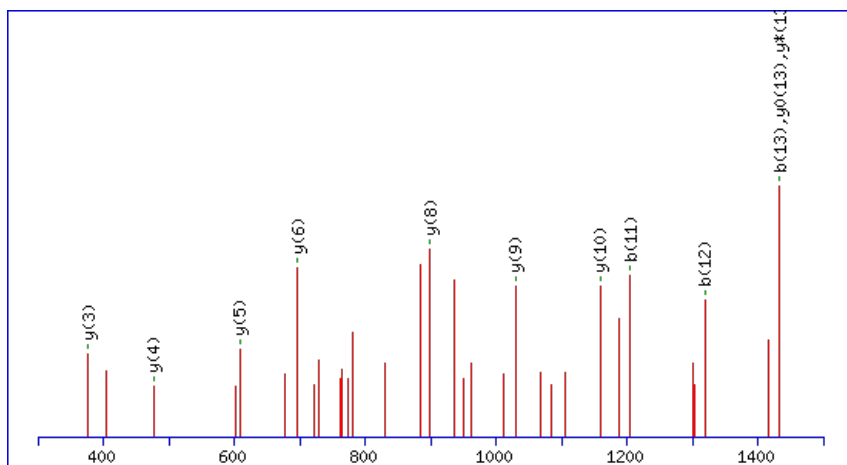Monoisotopic mass of neutral peptide  $M_r(\text{calc})$ : 1580.7696

Fixed modifications: Carbamidomethyl (C) (apply to specified residues or termini only)

Ions Score: 68 Expect: 1.3e-006

Matches : 12/138 fragment ions using 11 most intense peaks ([help](#))

| #  | b         | b <sup>++</sup> | b*        | b <sup>*++</sup> | b <sup>0</sup> | b <sup>0++</sup> | Seq. | y         | y <sup>++</sup> | y*        | y <sup>*++</sup> | y <sup>0</sup> | y <sup>0++</sup> | #  |
|----|-----------|-----------------|-----------|------------------|----------------|------------------|------|-----------|-----------------|-----------|------------------|----------------|------------------|----|
| 1  | 131.0599  | 66.0336         | 113.0363  | 57.0218          |                |                  | Q    |           |                 |           |                  |                |                  | 14 |
| 2  | 279.1254  | 140.0663        | 261.1018  | 131.0545         |                |                  | F    | 1451.7243 | 726.3658        | 1433.7007 | 717.3540         | 1433.7137      | 717.3605         | 13 |
| 3  | 351.1595  | 176.0834        | 333.1359  | 167.0716         |                |                  | A    | 1303.6588 | 652.3330        | 1285.6352 | 643.3213         | 1285.6483      | 643.3278         | 12 |
| 4  | 423.1937  | 212.1005        | 405.1701  | 203.0887         |                |                  | A    | 1231.6247 | 616.3160        | 1213.6011 | 607.3042         | 1213.6141      | 607.3107         | 11 |
| 5  | 553.2333  | 277.1203        | 535.2097  | 268.1085         | 535.2227       | 268.1150         | E    | 1159.5905 | 580.2989        | 1141.5669 | 571.2871         | 1141.5800      | 571.2936         | 10 |
| 6  | 683.2729  | 342.1401        | 665.2493  | 333.1283         | 665.2624       | 333.1348         | E    | 1029.5509 | 515.2791        | 1011.5273 | 506.2673         | 1011.5403      | 506.2738         | 9  |
| 7  | 797.3540  | 399.1807        | 779.3304  | 390.1689         | 779.3435       | 390.1754         | I    | 899.5113  | 450.2593        | 881.4877  | 441.2475         | 881.5007       | 441.2540         | 8  |
| 8  | 885.3831  | 443.1952        | 867.3595  | 434.1834         | 867.3725       | 434.1899         | S    | 785.4302  | 393.2187        | 767.4066  | 384.2069         | 767.4196       | 384.2134         | 7  |
| 9  | 973.4122  | 487.2097        | 955.3886  | 478.1979         | 955.4016       | 478.2044         | S    | 697.4011  | 349.2042        | 679.3775  | 340.1924         | 679.3905       | 340.1989         | 6  |
| 10 | 1105.4497 | 553.2285        | 1087.4261 | 544.2167         | 1087.4391      | 544.2232         | M    | 609.3720  | 305.1897        | 591.3485  | 296.1779         |                |                  | 5  |
| 11 | 1205.5151 | 603.2612        | 1187.4915 | 594.2494         | 1187.5046      | 594.2559         | V    | 477.3345  | 239.1709        | 459.3109  | 230.1591         |                |                  | 4  |
| 12 | 1319.5962 | 660.3017        | 1301.5726 | 651.2900         | 1301.5857      | 651.2965         | L    | 377.2691  | 189.1382        | 359.2455  | 180.1264         |                |                  | 3  |
| 13 | 1433.6773 | 717.3423        | 1415.6537 | 708.3305         | 1415.6668      | 708.3370         | I    | 263.1880  | 132.0976        | 245.1644  | 123.0858         |                |                  | 2  |
| 14 |           |                 |           |                  |                |                  | K    | 149.1069  | 75.0571         | 131.0833  | 66.0453          |                |                  | 1  |

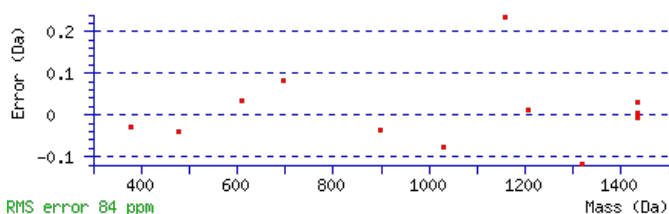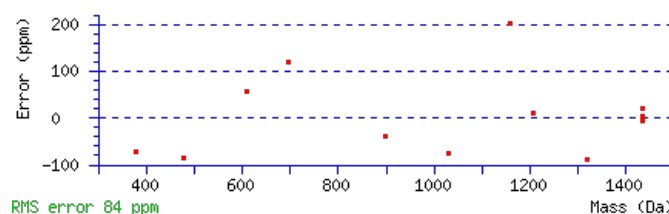NCBI BLAST search of [QFAAEEISSMVLIK](#)



## AT5G02490.1

(Parameters: blastp, nr protein database, expect=20000, no filter, PAM30)

Other BLAST [web gateways](#)

### All matches to this query

| Score | Mr(calc)  | Delta   | Sequence                       |
|-------|-----------|---------|--------------------------------|
| 68.5  | 1580.7696 | -0.0002 | <a href="#">QFAAEEISSMVLIK</a> |
| 15.1  | 1580.7730 | -0.0036 | <a href="#">DAKLMDEVMLLLK</a>  |
| 13.0  | 1580.7667 | 0.0027  | <a href="#">NRVSFQGLSTDPLK</a> |
| 12.9  | 1580.7667 | 0.0027  | <a href="#">NLQGTNIFEIRK</a>   |
| 9.8   | 1580.7723 | -0.0029 | <a href="#">TASFIMKNHGSLK</a>  |
| 8.5   | 1580.7710 | -0.0016 | <a href="#">LRMKLMGPLNNMK</a>  |
| 6.5   | 1580.7723 | -0.0029 | <a href="#">IMASGKYANTLHLK</a> |
| 4.9   | 1580.7663 | 0.0031  | <a href="#">DGSLEFLDPSKPYK</a> |
| 4.6   | 1580.7730 | -0.0036 | <a href="#">MLMVTDVQDIKK</a>   |
| 3.1   | 1580.7701 | -0.0007 | <a href="#">MLRSGKELEEVR</a>   |

Mascot: <http://www.matrixscience.com/>

### Peptide View

 MS/MS Fragmentation of **EQVFSTYSDNQPGVLIQVYEGER**

 Found in **AT5G02500.1** in **TAIR\_Arabidopsis**, Symbols: HSP70-1, AT-HSC70-1, HSC70, HSC70-1 | HSC70-1 (heat shock cognate 70 kDa protein 1); ATP binding | chr5:554053-556332 REVERSE

Match to Query 10893: 2687.173887 from(896.731905,3+) index(9303)

Title: Elution from: 84.341 to 84.341 scan no 12579 cid35.00 polarity:+

Data file 0-3\_1.mgf

Click mouse within plot area to zoom in by factor of two about that point

 Or, Plot from  to  Da 

 Label all possible matches  Label matches used for scoring 

 Show Y-axis 
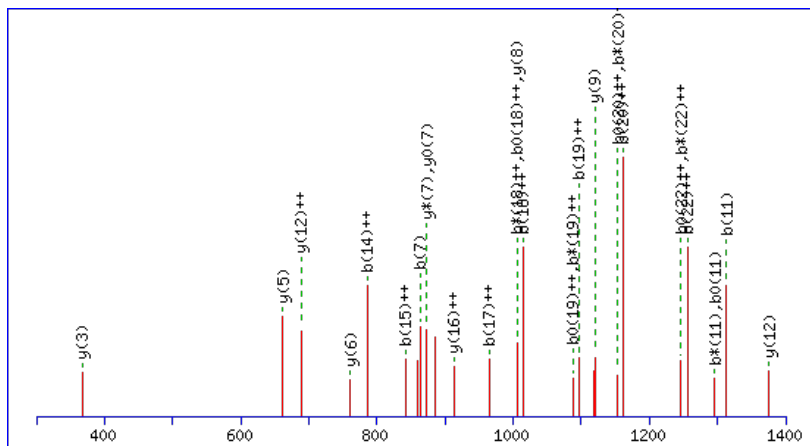
 Monoisotopic mass of neutral peptide  $M_r(\text{calc})$ : 2687.1719

Fixed modifications: Carbamidomethyl (C) (apply to specified residues or termini only)

Ions Score: 60 Expect: 5e-006

 Matches : 29/260 fragment ions using 25 most intense peaks ([help](#))

| #  | b                | b <sup>++</sup>  | b*               | b* <sup>++</sup> | b <sup>0</sup>   | b <sup>0</sup> ++ | Seq | y                | y <sup>++</sup> | y*              | y* <sup>++</sup> | y <sup>0</sup>  | y <sup>0</sup> ++ | #  |
|----|------------------|------------------|------------------|------------------|------------------|-------------------|-----|------------------|-----------------|-----------------|------------------|-----------------|-------------------|----|
| 1  | 131.0469         | 66.0271          |                  |                  | 113.0363         | 57.0218           | E   |                  |                 |                 |                  |                 |                   | 23 |
| 2  | 261.0996         | 131.0534         | 243.0760         | 122.0416         | 243.0890         | 122.0481          | Q   | 2558.1396        | 1279.5734       | 2540.1160       | 1270.5617        | 2540.1291       | 1270.5682         | 22 |
| 3  | 361.1650         | 181.0861         | 343.1414         | 172.0743         | 343.1544         | 172.0809          | V   | 2428.0870        | 1214.5471       | 2410.0634       | 1205.5353        | 2410.0764       | 1205.5418         | 21 |
| 4  | 509.2304         | 255.1189         | 491.2069         | 246.1071         | 491.2199         | 246.1136          | F   | 2328.0215        | 1164.5144       | 2309.9979       | 1155.5026        | 2310.0110       | 1155.5091         | 20 |
| 5  | 597.2595         | 299.1334         | 579.2359         | 290.1216         | 579.2489         | 290.1281          | S   | 2179.9561        | 1090.4817       | 2161.9325       | 1081.4699        | 2161.9455       | 1081.4764         | 19 |
| 6  | 699.3042         | 350.1558         | 681.2806         | 341.1440         | 681.2937         | 341.1505          | T   | 2091.9270        | 1046.4671       | 2073.9034       | 1037.4554        | 2073.9164       | 1037.4619         | 18 |
| 7  | <b>863.3646</b>  | 432.1859         | 845.3410         | 423.1741         | 845.3540         | 423.1807          | Y   | 1989.8823        | 995.4448        | 1971.8587       | 986.4330         | 1971.8717       | 986.4395          | 17 |
| 8  | 951.3937         | 476.2005         | 933.3701         | 467.1887         | 933.3831         | 467.1952          | S   | 1825.8219        | <b>913.4146</b> | 1807.7984       | 904.4028         | 1807.8114       | 904.4093          | 16 |
| 9  | 1067.4176        | 534.2125         | 1049.3940        | 525.2007         | 1049.4071        | 525.2072          | D   | 1737.7929        | 869.4001        | 1719.7693       | 860.3883         | 1719.7823       | 860.3948          | 15 |
| 10 | 1183.4546        | 592.2310         | 1165.4310        | 583.2192         | 1165.4441        | 583.2257          | N   | 1621.7689        | 811.3881        | 1603.7453       | 802.3763         | 1603.7583       | 802.3828          | 14 |
| 11 | <b>1313.5073</b> | 657.2573         | <b>1295.4837</b> | 648.2455         | <b>1295.4967</b> | 648.2520          | Q   | 1505.7319        | 753.3696        | 1487.7083       | 744.3578         | 1487.7213       | 744.3643          | 13 |
| 12 | 1411.5571        | 706.2822         | 1393.5335        | 697.2704         | 1393.5465        | 697.2769          | P   | <b>1375.6793</b> | <b>688.3433</b> | 1357.6557       | 679.3315         | 1357.6687       | 679.3380          | 12 |
| 13 | 1469.5756        | 735.2914         | 1451.5520        | 726.2796         | 1451.5650        | 726.2861          | G   | 1277.6295        | 639.3184        | 1259.6059       | 630.3066         | 1259.6189       | 630.3131          | 11 |
| 14 | 1569.6410        | <b>785.3241</b>  | 1551.6174        | 776.3124         | 1551.6305        | 776.3189          | V   | 1219.6110        | 610.3091        | 1201.5874       | 601.2973         | 1201.6004       | 601.3038          | 10 |
| 15 | 1683.7221        | <b>842.3647</b>  | 1665.6985        | 833.3529         | 1665.7116        | 833.3594          | L   | <b>1119.5455</b> | 560.2764        | 1101.5219       | 551.2646         | 1101.5349       | 551.2711          | 9  |
| 16 | 1797.8032        | 899.4052         | 1779.7796        | 890.3935         | 1779.7927        | 890.4000          | I   | <b>1005.4644</b> | 503.2358        | 987.4408        | 494.2240         | 987.4538        | 494.2306          | 8  |
| 17 | 1927.8559        | <b>964.4316</b>  | 1909.8323        | 955.4198         | 1909.8453        | 955.4263          | Q   | 891.3833         | 446.1953        | <b>873.3597</b> | 437.1835         | <b>873.3727</b> | 437.1900          | 7  |
| 18 | 2027.9213        | <b>1014.4643</b> | 2009.8977        | <b>1005.4525</b> | 2009.9107        | <b>1005.4590</b>  | V   | <b>761.3307</b>  | 381.1690        | 743.3071        | 372.1572         | 743.3201        | 372.1637          | 6  |
| 19 | 2191.9817        | <b>1096.4945</b> | 2173.9581        | <b>1087.4827</b> | 2173.9711        | <b>1087.4892</b>  | Y   | <b>661.2652</b>  | 331.1362        | 643.2416        | 322.1245         | 643.2546        | 322.1310          | 5  |
| 20 | 2322.0213        | <b>1161.5143</b> | 2303.9977        | <b>1152.5025</b> | 2304.0107        | <b>1152.5090</b>  | E   | 497.2048         | 249.1061        | 479.1813        | 240.0943         | 479.1943        | 240.1008          | 4  |
| 21 | 2380.0398        | 1190.5235        | 2362.0162        | 1181.5117        | 2362.0292        | 1181.5183         | G   | <b>367.1652</b>  | 184.0862        | 349.1416        | 175.0745         | 349.1547        | 175.0810          | 3  |
| 22 | 2510.0794        | <b>1255.5434</b> | 2492.0558        | <b>1246.5316</b> | 2492.0689        | <b>1246.5381</b>  | E   | 309.1467         | 155.0770        | 291.1231        | 146.0652         | 291.1362        | 146.0717          | 2  |
| 23 |                  |                  |                  |                  |                  |                   | R   | 179.1071         | 90.0572         | 161.0835        | 81.0454          |                 |                   | 1  |

# AT5G02500.1

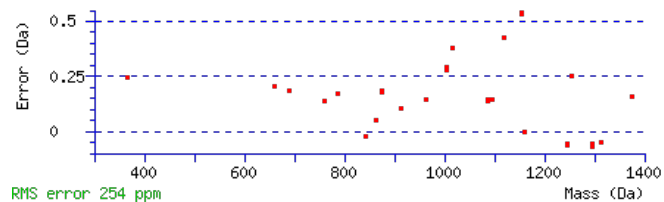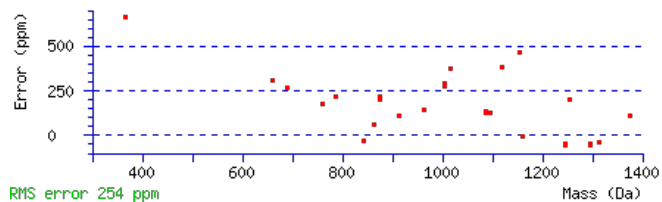

NCBI **BLAST** search of [EQVFSTYSDNQPGVLIQVYEGER](#)  
 (Parameters: blastp, nr protein database, expect=20000, no filter, PAM30)  
 Other BLAST [web gateways](#)

## All matches to this query

| Score | Mr(calc)  | Delta   | Sequence                                   |
|-------|-----------|---------|--------------------------------------------|
| 60.2  | 2687.1719 | 0.0020  | <a href="#">EQVFSTYSDNQPGVLIQVYEGER</a>    |
| 4.3   | 2687.1706 | 0.0033  | <a href="#">DCILEVRAGTGGEEASLFAMDIFR</a>   |
| 1.1   | 2687.1683 | 0.0056  | <a href="#">DISEKVALGMASTGGKGGGEVMYDQR</a> |
| 0.8   | 2687.1670 | 0.0069  | <a href="#">NIDEVNHDKPNWRSDARIEWR</a>      |
| 0.8   | 2687.1757 | -0.0018 | <a href="#">DSREVFGEQTSLKIDGIQTNTCR</a>    |
| 0.1   | 2687.1784 | -0.0045 | <a href="#">AYTKWVAEMAQGLSTGVPWIMCK</a>    |

Mascot: <http://www.matrixscience.com>

## Peptide View

MS/MS Fragmentation of **YLDNTFEGPSLYPEDHAK**

Found in **AT5G02790.1** in **TAIR\_Arabidopsis**, Symbols: | In2-1 protein, putative | chr5:632875-634856 FORWARD

Match to Query 9790: 2116.886823 from(706.636217,3+) index(6424)

Title: Elution from: 56.395 to 56.395 scan no 8129 cid35.00 polarity:+

Data file C7-3\_1.mgf

Click mouse within plot area to zoom in by factor of two about that point

Or,   to  Da

Label all possible matches  Label matches used for scoring

Show Y-axis

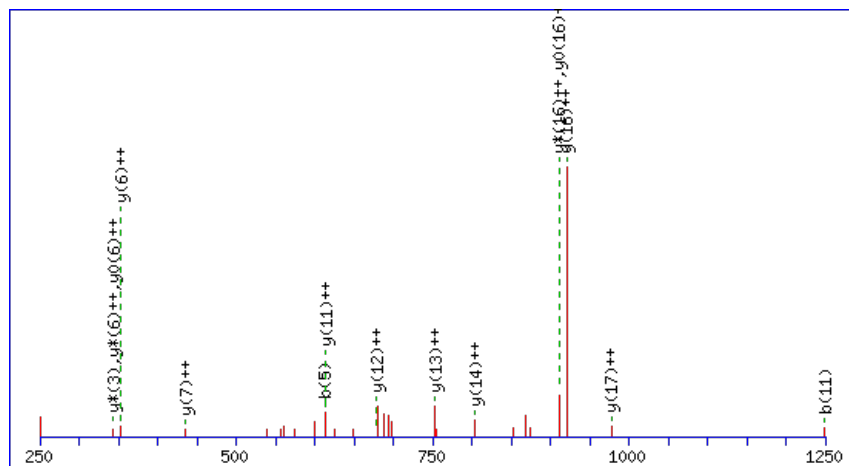

Monoisotopic mass of neutral peptide  $M_r(\text{calc})$ : 2116.8882

Fixed modifications: Carbamidomethyl (C) (apply to specified residues or termini only)

Ions Score: 48 Expect: 8.2e-005

Matches : 15/188 fragment ions using 19 most intense peaks ([help](#))

| #  | b                | b <sup>++</sup> | b*        | b <sup>*++</sup> | b <sup>0</sup> | b <sup>0++</sup> | Seq. | y         | y <sup>++</sup> | y*        | y <sup>*++</sup> | y <sup>0</sup> | y <sup>0++</sup> | #  |
|----|------------------|-----------------|-----------|------------------|----------------|------------------|------|-----------|-----------------|-----------|------------------|----------------|------------------|----|
| 1  | 165.0676         | 83.0375         |           |                  |                |                  | Y    |           |                 |           |                  |                |                  | 18 |
| 2  | 279.1487         | 140.0780        |           |                  |                |                  | L    | 1953.8351 | 977.4212        | 1935.8115 | 968.4094         | 1935.8246      | 968.4159         | 17 |
| 3  | 395.1727         | 198.0900        |           |                  | 377.1622       | 189.0847         | D    | 1839.7540 | 920.3807        | 1821.7304 | 911.3689         | 1821.7435      | 911.3754         | 16 |
| 4  | 511.2097         | 256.1085        | 493.1861  | 247.0967         | 493.1991       | 247.1032         | N    | 1723.7301 | 862.3687        | 1705.7065 | 853.3569         | 1705.7195      | 853.3634         | 15 |
| 5  | <b>613.2544</b>  | 307.1309        | 595.2308  | 298.1191         | 595.2439       | 298.1256         | T    | 1607.6931 | 804.3502        | 1589.6695 | 795.3384         | 1589.6825      | 795.3449         | 14 |
| 6  | 761.3199         | 381.1636        | 743.2963  | 372.1518         | 743.3093       | 372.1583         | F    | 1505.6483 | 753.3278        | 1487.6248 | 744.3160         | 1487.6378      | 744.3225         | 13 |
| 7  | 891.3595         | 446.1834        | 873.3359  | 437.1716         | 873.3489       | 437.1781         | E    | 1357.5829 | 679.2951        | 1339.5593 | 670.2833         | 1339.5723      | 670.2898         | 12 |
| 8  | 949.3780         | 475.1926        | 931.3544  | 466.1808         | 931.3674       | 466.1874         | G    | 1227.5433 | 614.2753        | 1209.5197 | 605.2635         | 1209.5327      | 605.2700         | 11 |
| 9  | 1047.4278        | 524.2175        | 1029.4042 | 515.2057         | 1029.4172      | 515.2123         | P    | 1169.5248 | 585.2660        | 1151.5012 | 576.2542         | 1151.5142      | 576.2607         | 10 |
| 10 | 1135.4569        | 568.2321        | 1117.4333 | 559.2203         | 1117.4463      | 559.2268         | S    | 1071.4750 | 536.2411        | 1053.4514 | 527.2293         | 1053.4644      | 527.2358         | 9  |
| 11 | <b>1249.5380</b> | 625.2726        | 1231.5144 | 616.2608         | 1231.5274      | 616.2673         | L    | 983.4459  | 492.2266        | 965.4223  | 483.2148         | 965.4353       | 483.2213         | 8  |
| 12 | 1413.5983        | 707.3028        | 1395.5747 | 698.2910         | 1395.5878      | 698.2975         | Y    | 869.3648  | 435.1860        | 851.3412  | 426.1743         | 851.3542       | 426.1808         | 7  |
| 13 | 1511.6481        | 756.3277        | 1493.6245 | 747.3159         | 1493.6376      | 747.3224         | P    | 705.3044  | 353.1559        | 687.2809  | 344.1441         | 687.2939       | 344.1506         | 6  |
| 14 | 1641.6878        | 821.3475        | 1623.6642 | 812.3357         | 1623.6772      | 812.3422         | E    | 607.2546  | 304.1310        | 589.2311  | 295.1192         | 589.2441       | 295.1257         | 5  |
| 15 | 1757.7117        | 879.3595        | 1739.6881 | 870.3477         | 1739.7012      | 870.3542         | D    | 477.2150  | 239.1111        | 459.1914  | 230.0994         | 459.2045       | 230.1059         | 4  |
| 16 | 1897.7617        | 949.3845        | 1879.7382 | 940.3727         | 1879.7512      | 940.3792         | H    | 361.1910  | 181.0992        | 343.1675  | 172.0874         |                |                  | 3  |
| 17 | 1969.7959        | 985.4016        | 1951.7723 | 976.3898         | 1951.7853      | 976.3963         | A    | 221.1410  | 111.0741        | 203.1174  | 102.0624         |                |                  | 2  |
| 18 |                  |                 |           |                  |                |                  | K    | 149.1069  | 75.0571         | 131.0833  | 66.0453          |                |                  | 1  |

# AT5G02790.1

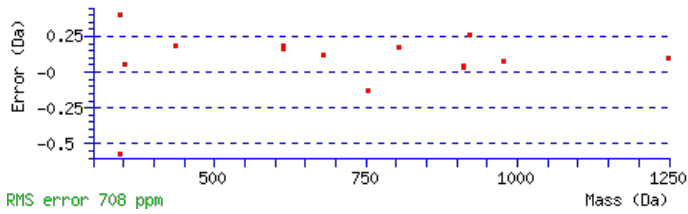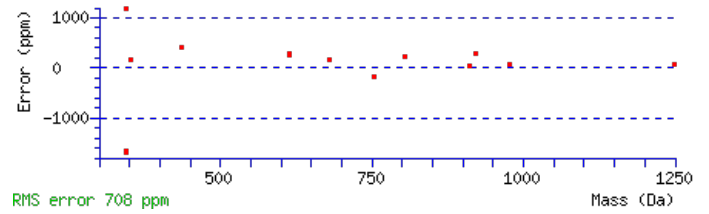

NCBI **BLAST** search of [YLDNTEFGPSLYPEDHAK](#)  
 (Parameters: blastp, nr protein database, expect=20000, no filter, PAM30)  
 Other BLAST [web gateways](#)

## All matches to this query

| Score | Mr(calc)  | Delta   | Sequence                            |
|-------|-----------|---------|-------------------------------------|
| 48.2  | 2116.8882 | -0.0014 | <a href="#">YLDNTEFGPSLYPEDHAK</a>  |
| 7.1   | 2116.8902 | -0.0034 | <a href="#">VSYSNKSMTPFCAATMCK</a>  |
| 5.0   | 2116.8873 | -0.0005 | <a href="#">CNTQMVIPHLTENYGASR</a>  |
| 3.8   | 2116.8827 | 0.0041  | <a href="#">QWNDVTNTVWQDFPR</a>     |
| 3.4   | 2116.8869 | -0.0000 | <a href="#">LHPPFPMMAPHSTEDVK</a>   |
| 3.2   | 2116.8873 | -0.0004 | <a href="#">DRLGCFNLSIDGHAECVK</a>  |
| 2.4   | 2116.8812 | 0.0056  | <a href="#">NFGVTSFHSICGDAPDIEK</a> |
| 2.3   | 2116.8907 | -0.0038 | <a href="#">MLSQRDMGKMISGSAFGR</a>  |
| 2.0   | 2116.8899 | -0.0031 | <a href="#">QQPPGPRMPDGTRGFSMGR</a> |
| 2.0   | 2116.8871 | -0.0003 | <a href="#">KATCETSLKHTETSDEEK</a>  |

Mascot: <http://www.matrixscience.com/>

**MASCOT SCIENCE** Mascot Search Results

**Peptide View**

MS/MS Fragmentation of **IINSDEVQSVVNPIK**

Found in **AT5G02870.1** in **TAIR\_Arabidopsis**, Symbols: | 60S ribosomal protein L4/L1 (RPL4D) | chr5:657828-659524 FORWARD

Match to Query 7095: 1653.892350 from(827.953451,2+) index(5662)

Title: Elution from: 52.814 to 52.814 scan no 7362 cid35.00 polarity:+

Data file D1d-1\_3.mgf

Click mouse within plot area to zoom in by factor of two about that point

Or,   to  Da

Label all possible matches  Label matches used for scoring

Show Y-axis

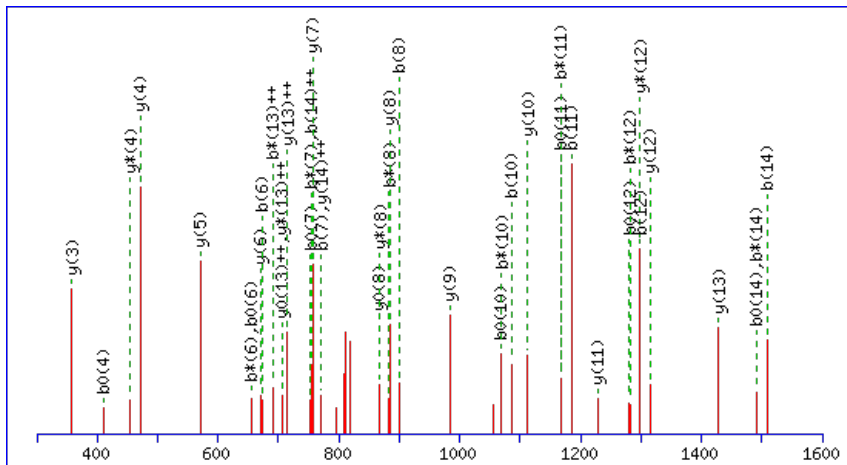

Monoisotopic mass of neutral peptide  $M_r(\text{calc})$ : 1653.8937

Fixed modifications: Carbamidomethyl (C) (apply to specified residues or termini only)

Ions Score: 108 Expect: 3.9e-011

Matches : 42/146 fragment ions using 43 most intense peaks [\(help\)](#)

| #  | b         | b <sup>++</sup> | b*        | b <sup>*++</sup> | b <sup>0</sup> | b <sup>0++</sup> | Seq. | y         | y <sup>++</sup> | y*        | y <sup>*++</sup> | y <sup>0</sup> | y <sup>0++</sup> | #  |
|----|-----------|-----------------|-----------|------------------|----------------|------------------|------|-----------|-----------------|-----------|------------------|----------------|------------------|----|
| 1  | 114.0913  | 57.5493         |           |                  |                |                  | I    |           |                 |           |                  |                |                  | 15 |
| 2  | 227.1754  | 114.0913        |           |                  |                |                  | I    | 1541.8170 | 771.4121        | 1524.7904 | 762.8988         | 1523.8064      | 762.4068         | 14 |
| 3  | 341.2183  | 171.1128        | 324.1918  | 162.5995         |                |                  | N    | 1428.7329 | 714.8701        | 1411.7063 | 706.3568         | 1410.7223      | 705.8648         | 13 |
| 4  | 428.2504  | 214.6288        | 411.2238  | 206.1155         | 410.2398       | 205.6235         | S    | 1314.6900 | 657.8486        | 1297.6634 | 649.3353         | 1296.6794      | 648.8433         | 12 |
| 5  | 543.2773  | 272.1423        | 526.2508  | 263.6290         | 525.2667       | 263.1370         | D    | 1227.6579 | 614.3326        | 1210.6314 | 605.8193         | 1209.6474      | 605.3273         | 11 |
| 6  | 672.3199  | 336.6636        | 655.2933  | 328.1503         | 654.3093       | 327.6583         | E    | 1112.6310 | 556.8191        | 1095.6045 | 548.3059         | 1094.6204      | 547.8139         | 10 |
| 7  | 771.3883  | 386.1978        | 754.3618  | 377.6845         | 753.3777       | 377.1925         | V    | 983.5884  | 492.2978        | 966.5619  | 483.7846         | 965.5778       | 483.2926         | 9  |
| 8  | 899.4469  | 450.2271        | 882.4203  | 441.7138         | 881.4363       | 441.2218         | Q    | 884.5200  | 442.7636        | 867.4934  | 434.2504         | 866.5094       | 433.7584         | 8  |
| 9  | 986.4789  | 493.7431        | 969.4524  | 485.2298         | 968.4683       | 484.7378         | S    | 756.4614  | 378.7343        | 739.4349  | 370.2211         | 738.4509       | 369.7291         | 7  |
| 10 | 1085.5473 | 543.2773        | 1068.5208 | 534.7640         | 1067.5368      | 534.2720         | V    | 669.4294  | 335.2183        | 652.4028  | 326.7051         |                |                  | 6  |
| 11 | 1184.6157 | 592.8115        | 1167.5892 | 584.2982         | 1166.6052      | 583.8062         | V    | 570.3610  | 285.6841        | 553.3344  | 277.1709         |                |                  | 5  |
| 12 | 1298.6587 | 649.8330        | 1281.6321 | 641.3197         | 1280.6481      | 640.8277         | N    | 471.2926  | 236.1499        | 454.2660  | 227.6366         |                |                  | 4  |
| 13 | 1395.7114 | 698.3594        | 1378.6849 | 689.8461         | 1377.7009      | 689.3541         | P    | 357.2496  | 179.1285        | 340.2231  | 170.6152         |                |                  | 3  |
| 14 | 1508.7955 | 754.9014        | 1491.7689 | 746.3881         | 1490.7849      | 745.8961         | I    | 260.1969  | 130.6021        | 243.1703  | 122.0888         |                |                  | 2  |
| 15 |           |                 |           |                  |                |                  | K    | 147.1128  | 74.0600         | 130.0863  | 65.5468          |                |                  | 1  |

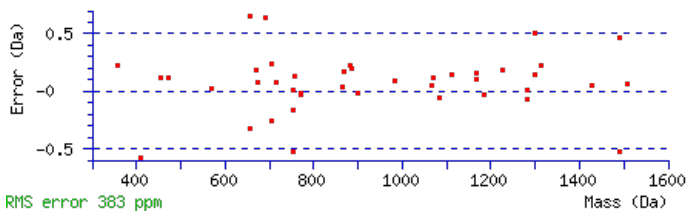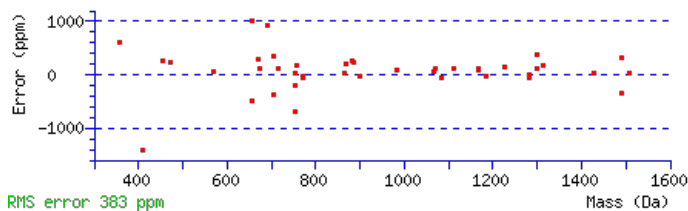

NCBI BLAST search of [IINSDEVQSVVNPIK](#)

## AT5G02870.1

(Parameters: blastp, nr protein database, expect=20000, no filter, PAM30)

Other BLAST [web gateways](#)

### All matches to this query

| Score | Mr(calc)  | Delta   | Sequence                        |
|-------|-----------|---------|---------------------------------|
| 108.4 | 1653.8937 | -0.0014 | <a href="#">IINSDEVQSVVNPIK</a> |
| 9.8   | 1653.8878 | 0.0045  | <a href="#">GWLNSSLPWIEPKK</a>  |

Mascot: <http://www.matrixscience.com/>

**Peptide View**MS/MS Fragmentation of **KSECCKPKDQATPAI**Found in **AT5G03250.1** in **TAIR\_Arabidopsis**, Symbols: | phototropic-responsive NPH3 family protein | chr5:774590-776854 FORWARD

Match to Query 7998: 1731.833265 from(578,285031,3+) index(4935)

Title: Elution from: 44.995 to 44.995 scan no 6212 cid35.00 polarity:+

Data file C7-1\_3.mgf

Click mouse within plot area to zoom in by factor of two about that point

Or,  to  Da Label all possible matches  Label matches used for scoring Show Y-axis 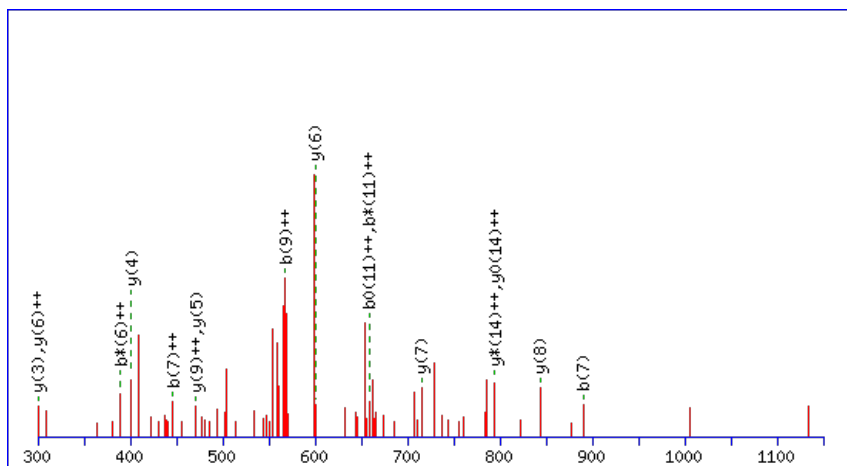Monoisotopic mass of neutral peptide  $M_r(\text{calc})$ : 1731.8284

Fixed modifications: Carbamidomethyl (C) (apply to specified residues or termini only)

Ions Score: 19 Expect: 0.045

Matches : 16/150 fragment ions using 26 most intense peaks ([help](#))

| #  | b               | b <sup>++</sup> | b*        | b <sup>*++</sup> | b <sup>0</sup> | b <sup>0++</sup> | Seq.     | y               | y <sup>++</sup> | y*        | y <sup>*++</sup> | y <sup>0</sup> | y <sup>0++</sup> | #         |
|----|-----------------|-----------------|-----------|------------------|----------------|------------------|----------|-----------------|-----------------|-----------|------------------|----------------|------------------|-----------|
| 1  | 129.1022        | 65.0548         | 112.0757  | 56.5415          |                |                  | <b>K</b> |                 |                 |           |                  |                |                  | <b>15</b> |
| 2  | 216.1343        | 108.5708        | 199.1077  | 100.0575         | 198.1237       | 99.5655          | <b>S</b> | 1604.7407       | 802.8740        | 1587.7142 | <b>794.3607</b>  | 1586.7301      | <b>793.8687</b>  | <b>14</b> |
| 3  | 345.1769        | 173.0921        | 328.1503  | 164.5788         | 327.1663       | 164.0868         | <b>E</b> | 1517.7087       | 759.3580        | 1500.6821 | 750.8447         | 1499.6981      | 750.3527         | <b>13</b> |
| 4  | 505.2075        | 253.1074        | 488.1810  | 244.5941         | 487.1969       | 244.1021         | <b>C</b> | 1388.6661       | 694.8367        | 1371.6395 | 686.3234         | 1370.6555      | 685.8314         | <b>12</b> |
| 5  | 665.2382        | 333.1227        | 648.2116  | 324.6094         | 647.2276       | 324.1174         | <b>C</b> | 1228.6354       | 614.8214        | 1211.6089 | 606.3081         | 1210.6249      | 605.8161         | <b>11</b> |
| 6  | 793.3331        | 397.1702        | 776.3066  | <b>388.6569</b>  | 775.3226       | 388.1649         | <b>K</b> | 1068.6048       | 534.8060        | 1051.5782 | 526.2928         | 1050.5942      | 525.8007         | <b>10</b> |
| 7  | <b>890.3859</b> | <b>445.6966</b> | 873.3593  | 437.1833         | 872.3753       | 436.6913         | <b>P</b> | 940.5098        | <b>470.7586</b> | 923.4833  | 462.2453         | 922.4993       | 461.7533         | <b>9</b>  |
| 8  | 1018.4808       | 509.7441        | 1001.4543 | 501.2308         | 1000.4703      | 500.7388         | <b>K</b> | <b>843.4571</b> | 422.2322        | 826.4305  | 413.7189         | 825.4465       | 413.2269         | <b>8</b>  |
| 9  | 1133.5078       | <b>567.2575</b> | 1116.4812 | 558.7443         | 1115.4972      | 558.2523         | <b>D</b> | <b>715.3621</b> | 358.1847        | 698.3355  | 349.6714         | 697.3515       | 349.1794         | <b>7</b>  |
| 10 | 1261.5664       | 631.2868        | 1244.5398 | 622.7735         | 1243.5558      | 622.2815         | <b>Q</b> | <b>600.3352</b> | <b>300.6712</b> | 583.3086  | 292.1579         | 582.3246       | 291.6659         | <b>6</b>  |
| 11 | 1332.6035       | 666.8054        | 1315.5769 | <b>658.2921</b>  | 1314.5929      | <b>657.8001</b>  | <b>A</b> | <b>472.2766</b> | 236.6419        |           |                  | 454.2660       | 227.6366         | <b>5</b>  |
| 12 | 1433.6512       | 717.3292        | 1416.6246 | 708.8159         | 1415.6406      | 708.3239         | <b>T</b> | <b>401.2395</b> | 201.1234        |           |                  | 383.2289       | 192.1181         | <b>4</b>  |
| 13 | 1530.7039       | 765.8556        | 1513.6774 | 757.3423         | 1512.6934      | 756.8503         | <b>P</b> | <b>300.1918</b> | 150.5995        |           |                  |                |                  | <b>3</b>  |
| 14 | 1601.7410       | 801.3742        | 1584.7145 | 792.8609         | 1583.7305      | 792.3689         | <b>A</b> | 203.1390        | 102.0731        |           |                  |                |                  | <b>2</b>  |
| 15 |                 |                 |           |                  |                |                  | <b>I</b> | 132.1019        | 66.5546         |           |                  |                |                  | <b>1</b>  |

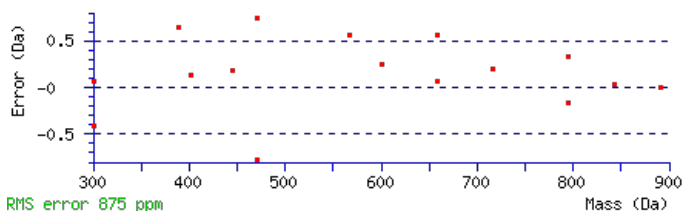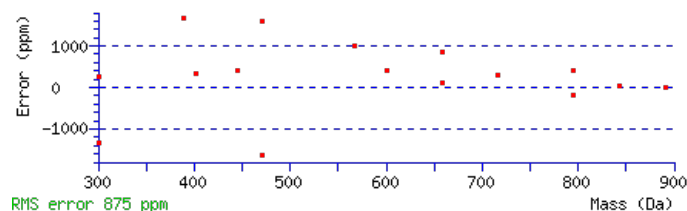NCBI **BLAST** search of [KSECCKPKDQATPAI](#)



## AT5G03250.1

(Parameters: blastp, nr protein database, expect=20000, no filter, PAM30)

Other BLAST [web gateways](#)

### All matches to this query

| Score | Mr(calc)  | Delta  | Sequence                        |
|-------|-----------|--------|---------------------------------|
| 19.0  | 1731.8284 | 0.0049 | <a href="#">KSECCKPKDQATPAI</a> |
| 8.0   | 1731.8322 | 0.0011 | <a href="#">MDEARQAAKNGLEQR</a> |

Mascot: <http://www.matrixscience.com/>

**Peptide View**MS/MS Fragmentation of **TQSFLTWESLESVR**Found in **AT5G03290.1** in **TAIR\_Arabidopsis**, Symbols: | isocitrate dehydrogenase, putative / NAD<sup>+</sup> isocitrate dehydrogenase, putative | chr5:794042-795938 FORWARD

Match to Query 8023: 1681.834000 from(841.924276,2+) index(9143)

Title: Elution from: 80.768 to 80.768 scan no 12290 cid35.00 polarity:+

Data file D1d-3\_2.mgf

Click mouse within plot area to zoom in by factor of two about that point

Or,   to  Da Label all possible matches  Label matches used for scoring Show Y-axis 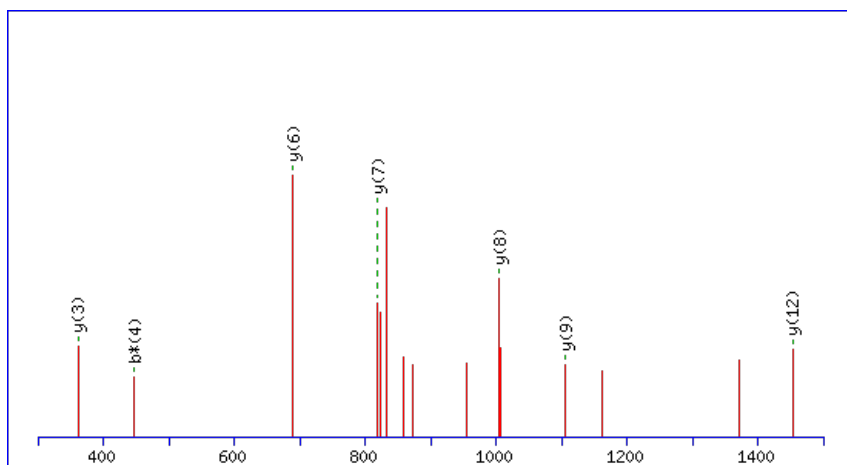Monoisotopic mass of neutral peptide  $M_r(\text{calc})$ : 1681.8311

Fixed modifications: Carbamidomethyl (C) (apply to specified residues or termini only)

Ions Score: 36 Expect: 0.00096

Matches : 7/150 fragment ions using 14 most intense peaks ([help](#))

| #  | b         | b <sup>++</sup> | b*              | b <sup>*++</sup> | b <sup>0</sup> | b <sup>0++</sup> | Seq. | y                | y <sup>++</sup> | y*        | y <sup>*++</sup> | y <sup>0</sup> | y <sup>0++</sup> | #  |
|----|-----------|-----------------|-----------------|------------------|----------------|------------------|------|------------------|-----------------|-----------|------------------|----------------|------------------|----|
| 1  | 102.0550  | 51.5311         |                 |                  | 84.0444        | 42.5258          | T    |                  |                 |           |                  |                |                  | 14 |
| 2  | 230.1135  | 115.5604        | 213.0870        | 107.0471         | 212.1030       | 106.5551         | Q    | 1581.7907        | 791.3990        | 1564.7642 | 782.8857         | 1563.7802      | 782.3937         | 13 |
| 3  | 317.1456  | 159.0764        | 300.1190        | 150.5631         | 299.1350       | 150.0711         | S    | <b>1453.7322</b> | 727.3697        | 1436.7056 | 718.8564         | 1435.7216      | 718.3644         | 12 |
| 4  | 464.2140  | 232.6106        | <b>447.1874</b> | 224.0974         | 446.2034       | 223.6053         | F    | 1366.7001        | 683.8537        | 1349.6736 | 675.3404         | 1348.6896      | 674.8484         | 11 |
| 5  | 577.2980  | 289.1527        | 560.2715        | 280.6394         | 559.2875       | 280.1474         | L    | 1219.6317        | 610.3195        | 1202.6052 | 601.8062         | 1201.6212      | 601.3142         | 10 |
| 6  | 678.3457  | 339.6765        | 661.3192        | 331.1632         | 660.3352       | 330.6712         | T    | <b>1106.5477</b> | 553.7775        | 1089.5211 | 545.2642         | 1088.5371      | 544.7722         | 9  |
| 7  | 864.4250  | 432.7162        | 847.3985        | 424.2029         | 846.4145       | 423.7109         | W    | <b>1005.5000</b> | 503.2536        | 988.4734  | 494.7404         | 987.4894       | 494.2483         | 8  |
| 8  | 993.4676  | 497.2375        | 976.4411        | 488.7242         | 975.4571       | 488.2322         | E    | <b>819.4207</b>  | 410.2140        | 802.3941  | 401.7007         | 801.4101       | 401.2087         | 7  |
| 9  | 1080.4997 | 540.7535        | 1063.4731       | 532.2402         | 1062.4891      | 531.7482         | S    | <b>690.3781</b>  | 345.6927        | 673.3515  | 337.1794         | 672.3675       | 336.6874         | 6  |
| 10 | 1193.5837 | 597.2955        | 1176.5572       | 588.7822         | 1175.5732      | 588.2902         | L    | 603.3461         | 302.1767        | 586.3195  | 293.6634         | 585.3355       | 293.1714         | 5  |
| 11 | 1322.6263 | 661.8168        | 1305.5998       | 653.3035         | 1304.6157      | 652.8115         | E    | 490.2620         | 245.6346        | 473.2354  | 237.1214         | 472.2514       | 236.6293         | 4  |
| 12 | 1409.6583 | 705.3328        | 1392.6318       | 696.8195         | 1391.6478      | 696.3275         | S    | <b>361.2194</b>  | 181.1133        | 344.1928  | 172.6001         | 343.2088       | 172.1081         | 3  |
| 13 | 1508.7268 | 754.8670        | 1491.7002       | 746.3537         | 1490.7162      | 745.8617         | V    | 274.1874         | 137.5973        | 257.1608  | 129.0840         |                |                  | 2  |
| 14 |           |                 |                 |                  |                |                  | R    | 175.1190         | 88.0631         | 158.0924  | 79.5498          |                |                  | 1  |

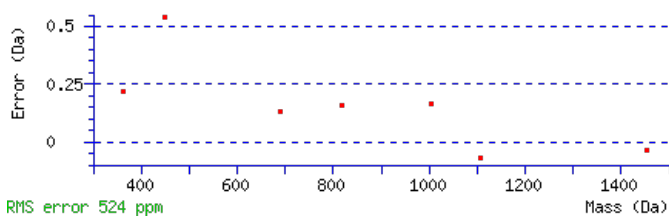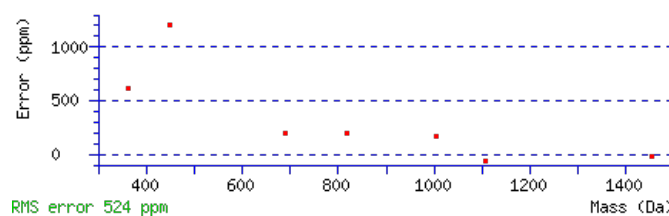NCBI BLAST search of [TQSFLTWESLESVR](#)

## AT5G03290.1

(Parameters: blastp, nr protein database, expect=20000, no filter, PAM30)

Other BLAST [web gateways](#)

### All matches to this query

| Score | Mr(calc)  | Delta   | Sequence                         |
|-------|-----------|---------|----------------------------------|
| 36.3  | 1681.8311 | 0.0029  | <a href="#">TQSFLTWESLESVR</a>   |
| 5.6   | 1681.8345 | -0.0005 | <a href="#">KTGEFSNSEAIAMGIK</a> |
| 0.0   | 1681.8383 | -0.0043 | <a href="#">RYTNVSTAGTIQESR</a>  |

Mascot: <http://www.matrixscience.com/>

**Peptide View**MS/MS Fragmentation of **LVDITNGAGDAFVGGFMSQLVK**Found in **AT5G03300.1** in **TAIR\_Arabidopsis**, Symbols: ADK2 | ADK2 (ADENOSINE KINASE 2); kinase | chr5:796572-798996 FORWARD

Match to Query 9682: 2125.050326 from(1063.532439,2+) index(10565)

Title: Elution from: 101.936 to 101.936 scan no 15156 cid35.00 polarity:+

Data file 0-1\_2.mgf

Click mouse within plot area to zoom in by factor of two about that point

Or,   to  Da Label all possible matches  Label matches used for scoring Show Y-axis 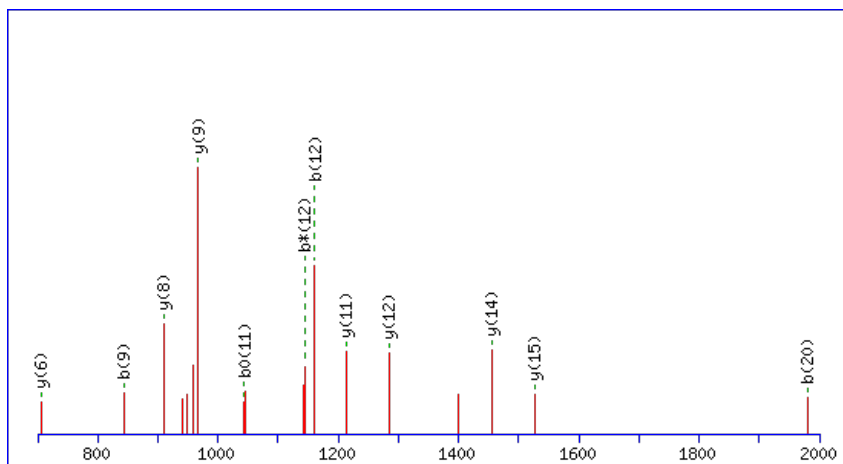**Monoisotopic mass of neutral peptide Mr(calc):** 2125.0514**Fixed modifications:** Carbamidomethyl (C) (apply to specified residues or termini only)**Ions Score:** 55 **Expect:** 1.8e-005**Matches:** 12/220 fragment ions using 15 most intense peaks ([help](#))

| #  | b                | b <sup>++</sup> | b*               | b <sup>*++</sup> | b <sup>0</sup>   | b <sup>0++</sup> | Seq. | y                | y <sup>++</sup> | y*        | y <sup>*++</sup> | y <sup>0</sup> | y <sup>0++</sup> | #  |
|----|------------------|-----------------|------------------|------------------|------------------|------------------|------|------------------|-----------------|-----------|------------------|----------------|------------------|----|
| 1  | 114.0913         | 57.5493         |                  |                  |                  |                  | L    |                  |                 |           |                  |                |                  | 21 |
| 2  | 213.1598         | 107.0835        |                  |                  |                  |                  | V    | 2012.9746        | 1006.9909       | 1995.9481 | 998.4777         | 1994.9640      | 997.9857         | 20 |
| 3  | 328.1867         | 164.5970        |                  |                  | 310.1761         | 155.5917         | D    | 1913.9062        | 957.4567        | 1896.8796 | 948.9435         | 1895.8956      | 948.4515         | 19 |
| 4  | 429.2344         | 215.1208        |                  |                  | 411.2238         | 206.1155         | T    | 1798.8792        | 899.9433        | 1781.8527 | 891.4300         | 1780.8687      | 890.9380         | 18 |
| 5  | 543.2773         | 272.1423        | 526.2508         | 263.6290         | 525.2667         | 263.1370         | N    | 1697.8316        | 849.4194        | 1680.8050 | 840.9061         | 1679.8210      | 840.4141         | 17 |
| 6  | 600.2988         | 300.6530        | 583.2722         | 292.1397         | 582.2882         | 291.6477         | G    | 1583.7886        | 792.3980        | 1566.7621 | 783.8847         | 1565.7781      | 783.3927         | 16 |
| 7  | 671.3359         | 336.1716        | 654.3093         | 327.6583         | 653.3253         | 327.1663         | A    | <b>1526.7672</b> | 763.8872        | 1509.7406 | 755.3740         | 1508.7566      | 754.8819         | 15 |
| 8  | 728.3573         | 364.6823        | 711.3308         | 356.1690         | 710.3468         | 355.6770         | G    | <b>1455.7301</b> | 728.3687        | 1438.7035 | 719.8554         | 1437.7195      | 719.3634         | 14 |
| 9  | <b>843.3843</b>  | 422.1958        | 826.3577         | 413.6825         | 825.3737         | 413.1905         | D    | 1398.7086        | 699.8579        | 1381.6821 | 691.3447         | 1380.6980      | 690.8527         | 13 |
| 10 | 914.4214         | 457.7143        | 897.3949         | 449.2011         | 896.4108         | 448.7091         | A    | <b>1283.6817</b> | 642.3445        | 1266.6551 | 633.8312         | 1265.6711      | 633.3392         | 12 |
| 11 | 1061.4898        | 531.2485        | 1044.4633        | 522.7353         | <b>1043.4793</b> | 522.2433         | F    | <b>1212.6445</b> | 606.8259        | 1195.6180 | 598.3126         | 1194.6340      | 597.8206         | 11 |
| 12 | <b>1160.5582</b> | 580.7828        | <b>1143.5317</b> | 572.2695         | 1142.5477        | 571.7775         | V    | 1065.5761        | 533.2917        | 1048.5496 | 524.7784         | 1047.5656      | 524.2864         | 10 |
| 13 | 1217.5797        | 609.2935        | 1200.5531        | 600.7802         | 1199.5691        | 600.2882         | G    | <b>966.5077</b>  | 483.7575        | 949.4812  | 475.2442         | 948.4972       | 474.7522         | 9  |
| 14 | 1274.6012        | 637.8042        | 1257.5746        | 629.2909         | 1256.5906        | 628.7989         | G    | <b>909.4863</b>  | 455.2468        | 892.4597  | 446.7335         | 891.4757       | 446.2415         | 8  |
| 15 | 1421.6696        | 711.3384        | 1404.6430        | 702.8251         | 1403.6590        | 702.3331         | F    | 852.4648         | 426.7360        | 835.4382  | 418.2228         | 834.4542       | 417.7307         | 7  |
| 16 | 1552.7101        | 776.8587        | 1535.6835        | 768.3454         | 1534.6995        | 767.8534         | M    | <b>705.3964</b>  | 353.2018        | 688.3698  | 344.6886         | 687.3858       | 344.1965         | 6  |
| 17 | 1639.7421        | 820.3747        | 1622.7155        | 811.8614         | 1621.7315        | 811.3694         | S    | 574.3559         | 287.6816        | 557.3293  | 279.1683         | 556.3453       | 278.6763         | 5  |
| 18 | 1767.8007        | 884.4040        | 1750.7741        | 875.8907         | 1749.7901        | 875.3987         | Q    | 487.3239         | 244.1656        | 470.2973  | 235.6523         |                |                  | 4  |
| 19 | 1880.8847        | 940.9460        | 1863.8582        | 932.4327         | 1862.8742        | 931.9407         | L    | 359.2653         | 180.1363        | 342.2387  | 171.6230         |                |                  | 3  |
| 20 | <b>1979.9531</b> | 990.4802        | 1962.9266        | 981.9669         | 1961.9426        | 981.4749         | V    | 246.1812         | 123.5942        | 229.1547  | 115.0810         |                |                  | 2  |
| 21 |                  |                 |                  |                  |                  |                  | K    | 147.1128         | 74.0600         | 130.0863  | 65.5468          |                |                  | 1  |

# AT5G03300.1

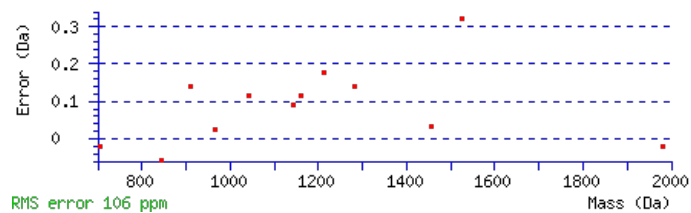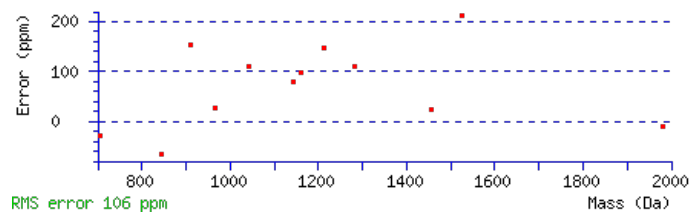

NCBI **BLAST** search of [LVDINGAGDAFVGGFMSQLVK](#)  
 (Parameters: blastp, nr protein database, expect=20000, no filter, PAM30)

Other BLAST [web gateways](#)

## All matches to this query

| Score | Mr(calc)  | Delta   | Sequence                              |
|-------|-----------|---------|---------------------------------------|
| 55.1  | 2125.0514 | -0.0011 | <a href="#">LVDINGAGDAFVGGFMSQLVK</a> |
| 3.2   | 2125.0448 | 0.0055  | <a href="#">MAYPERSLIVDPRSGFCK</a>    |
| 0.5   | 2125.0552 | -0.0049 | <a href="#">ALRLDTGNYSWGSEATRK</a>    |

Mascot: <http://www.matrixscience.com/>

**Peptide View**MS/MS Fragmentation of **GDLFLVR**Found in **AT5G03340.1** in **TAIR\_Arabidopsis**, Symbols: | (Cell division control protein 48 homolog E); ATPase | chr5:810090-813132 REVERSE

Match to Query 1192: 818.465446 from(410.239999,2+) index(6018)

Title: Elution from: 52.792 to 52.792 scan no 7487 cid35.00 polarity:+

Data file 0-1\_1.mgf

Click mouse within plot area to zoom in by factor of two about that point

Or,   to  Da Label all possible matches  Label matches used for scoring Show Y-axis 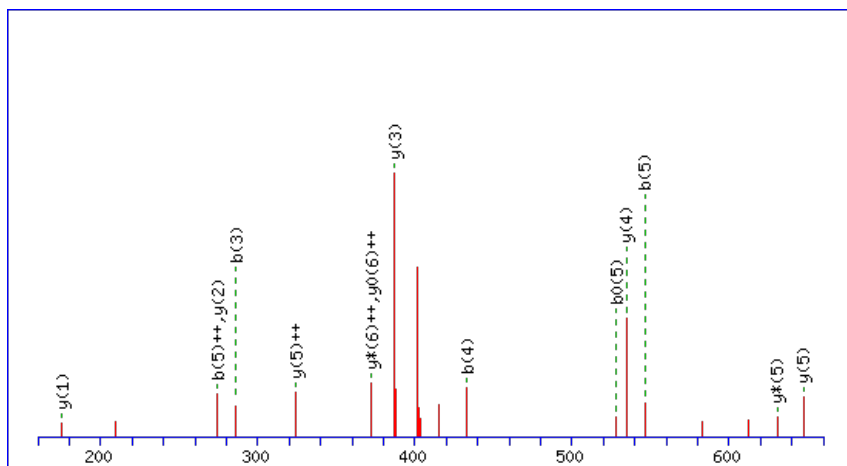Monoisotopic mass of neutral peptide  $M_r(\text{calc})$ : 818.4650

Fixed modifications: Carbamidomethyl (C) (apply to specified residues or termini only)

Ions Score: 44 Expect: 0.00012

Matches : 14/48 fragment ions using 15 most intense peaks ([help](#))

| # | b               | b <sup>++</sup> | b <sup>0</sup>  | b <sup>0++</sup> | Seq.     | y               | y <sup>++</sup> | y*              | y <sup>*++</sup> | y <sup>0</sup> | y <sup>0++</sup> | # |
|---|-----------------|-----------------|-----------------|------------------|----------|-----------------|-----------------|-----------------|------------------|----------------|------------------|---|
| 1 | 58.0287         | 29.5180         |                 |                  | <b>G</b> |                 |                 |                 |                  |                |                  | 7 |
| 2 | 173.0557        | 87.0315         | 155.0451        | 78.0262          | <b>D</b> | 762.4509        | 381.7291        | 745.4243        | <b>373.2158</b>  | 744.4403       | <b>372.7238</b>  | 6 |
| 3 | <b>286.1397</b> | 143.5735        | 268.1292        | 134.5682         | <b>L</b> | <b>647.4239</b> | <b>324.2156</b> | <b>630.3974</b> | 315.7023         |                |                  | 5 |
| 4 | <b>433.2082</b> | 217.1077        | 415.1976        | 208.1024         | <b>F</b> | <b>534.3398</b> | 267.6736        | 517.3133        | 259.1603         |                |                  | 4 |
| 5 | <b>546.2922</b> | <b>273.6498</b> | <b>528.2817</b> | 264.6445         | <b>L</b> | <b>387.2714</b> | 194.1394        | 370.2449        | 185.6261         |                |                  | 3 |
| 6 | 645.3606        | 323.1840        | 627.3501        | 314.1787         | <b>V</b> | <b>274.1874</b> | 137.5973        | 257.1608        | 129.0840         |                |                  | 2 |
| 7 |                 |                 |                 |                  | <b>R</b> | <b>175.1190</b> | 88.0631         | 158.0924        | 79.5498          |                |                  | 1 |

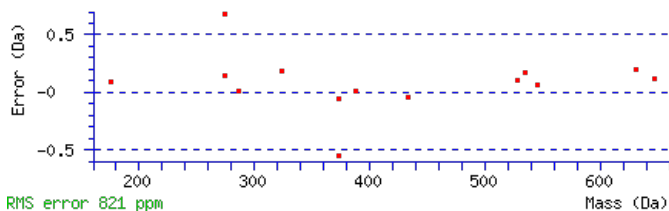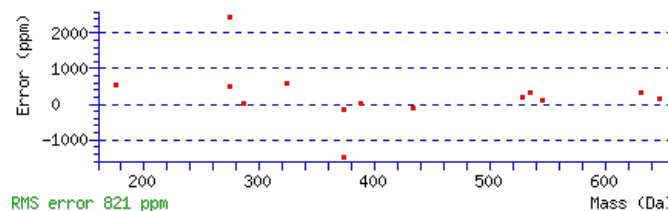NCBI **BLAST** search of **GDLFLVR**

(Parameters: blastp, nr protein database, expect=20000, no filter, PAM30)

Other BLAST [web gateways](#)**All matches to this query**

| Score | $M_r(\text{calc})$ | Delta  | Sequence                |
|-------|--------------------|--------|-------------------------|
| 44.3  | 818.4650           | 0.0004 | <a href="#">GDLFLVR</a> |
| 13.4  | 818.4650           | 0.0004 | <a href="#">FGDLLVR</a> |
| 0.4   | 818.4650           | 0.0004 | <a href="#">GLVEFVR</a> |



**Peptide View**MS/MS Fragmentation of **ILLIGDSGVGK**

Found in **AT5G03530.1** in **TAIR\_Arabidopsis**, Symbols: AtRab18B, AtRABC2a, ATRAB, ATRAB ALPHA | ATRAB ALPHA (Arabidopsis Rab GTPase homolog C2a); GTP binding | chr5:885740-887060 REVERSE

Match to Query 3209: 1082.597426 from(542.305989,2+) index(5747)

Title: Elution from: 51.404 to 51.404 scan no 7337 cid35.00 polarity:+

Data file 0-2\_2.mgf

Click mouse within plot area to zoom in by factor of two about that point

Or,   to  Da

Label all possible matches  Label matches used for scoring

Show Y-axis

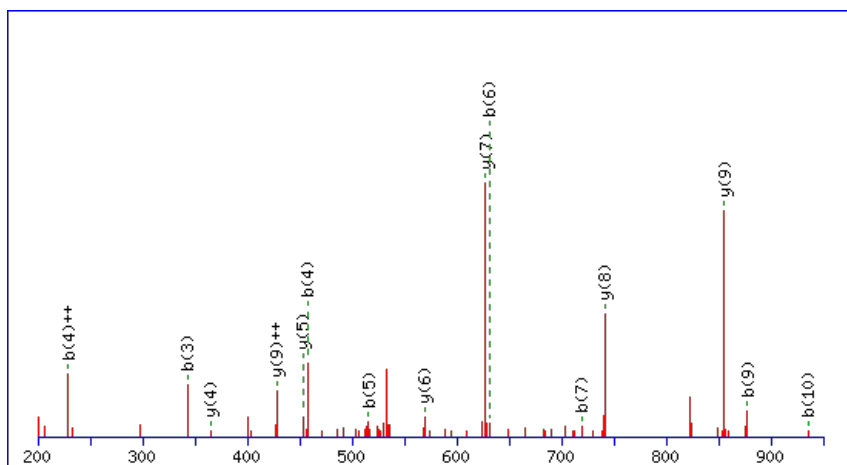

**Monoisotopic mass of neutral peptide Mr(calc):** 1082.5980

**Fixed modifications:** Carbamidomethyl (C) (apply to specified residues or termini only)

**Ions Score:** 61 **Expect:** 3.9e-006

**Matches:** 16/82 fragment ions using 28 most intense peaks ([help](#))

| #  | b               | b <sup>++</sup> | b <sup>0</sup> | b <sup>0++</sup> | Seq. | y               | y <sup>++</sup> | y <sup>*</sup> | y <sup>*++</sup> | y <sup>0</sup> | y <sup>0++</sup> | #  |
|----|-----------------|-----------------|----------------|------------------|------|-----------------|-----------------|----------------|------------------|----------------|------------------|----|
| 1  | 115.0884        | 58.0478         |                |                  | I    |                 |                 |                |                  |                |                  | 11 |
| 2  | <b>229.1695</b> | 115.0884        |                |                  | L    | 969.5242        | 485.2657        | 951.5006       | 476.2539         | 951.5136       | 476.2604         | 10 |
| 3  | <b>343.2506</b> | 172.1289        |                |                  | L    | <b>855.4431</b> | <b>428.2252</b> | 837.4195       | 419.2134         | 837.4325       | 419.2199         | 9  |
| 4  | <b>457.3317</b> | <b>229.1695</b> |                |                  | I    | <b>741.3620</b> | 371.1846        | 723.3384       | 362.1728         | 723.3514       | 362.1793         | 8  |
| 5  | <b>515.3502</b> | 258.1787        |                |                  | G    | <b>627.2809</b> | 314.1441        | 609.2573       | 305.1323         | 609.2703       | 305.1388         | 7  |
| 6  | <b>631.3741</b> | 316.1907        | 613.3636       | 307.1854         | D    | <b>569.2624</b> | 285.1348        | 551.2388       | 276.1230         | 551.2518       | 276.1295         | 6  |
| 7  | <b>719.4032</b> | 360.2052        | 701.3926       | 351.2000         | S    | <b>453.2384</b> | 227.1228        | 435.2148       | 218.1110         | 435.2278       | 218.1175         | 5  |
| 8  | 777.4217        | 389.2145        | 759.4111       | 380.2092         | G    | <b>365.2093</b> | 183.1083        | 347.1857       | 174.0965         |                |                  | 4  |
| 9  | <b>877.4872</b> | 439.2472        | 859.4766       | 430.2419         | V    | 307.1908        | 154.0990        | 289.1672       | 145.0873         |                |                  | 3  |
| 10 | <b>935.5057</b> | 468.2565        | 917.4951       | 459.2512         | G    | 207.1254        | 104.0663        | 189.1018       | 95.0545          |                |                  | 2  |
| 11 |                 |                 |                |                  | K    | 149.1069        | 75.0571         | 131.0833       | 66.0453          |                |                  | 1  |

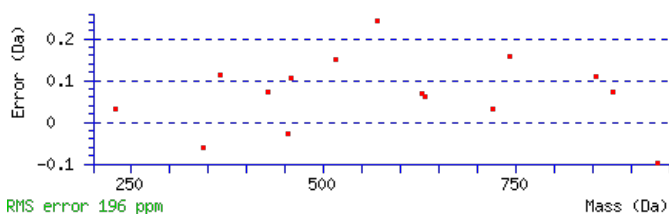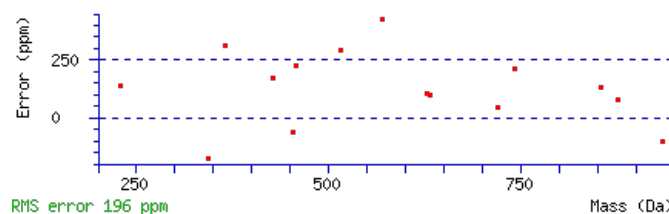

NCBI **BLAST** search of **ILLIGDSGVGK**

(Parameters: blastp, nr protein database, expect=20000, no filter, PAM30)

Other BLAST [web gateways](#)

**All matches to this query**



## AT5G03530.1

| Score | Mr(calc)  | Delta   | Sequence                    |
|-------|-----------|---------|-----------------------------|
| 61.0  | 1082.5980 | -0.0005 | <a href="#">IILGDSGVGK</a>  |
| 61.0  | 1082.5980 | -0.0005 | <a href="#">ILLIGDSGVGK</a> |
| 61.0  | 1082.5980 | -0.0005 | <a href="#">LLIGDSGVGK</a>  |
| 25.1  | 1082.5980 | -0.0005 | <a href="#">LILLDETVR</a>   |
| 2.6   | 1082.6006 | -0.0032 | <a href="#">VRANTLLPGK</a>  |
| 1.2   | 1082.5980 | -0.0005 | <a href="#">LLDQVVEKK</a>   |
| 1.0   | 1082.5980 | -0.0006 | <a href="#">ILKLVEDNK</a>   |

Mascot: <http://www.matrixscience.com/>

**Peptide View**MS/MS Fragmentation of **VVGAFLEGGSPENNIAIAK**Found in **AT5G03630.1** in **TAIR\_Arabidopsis**, Symbols: ATMDAR2 | ATMDAR2; monodehydroascorbate reductase (NADH) | chr5:922377-924615 REVERSE

Match to Query 8783: 1900.949396 from(951.481974,2+) index(5622)

Title: Elution from: 50.061 to 50.061 scan no 7128 cid35.00 polarity:+

Data file D12h-3\_2.mgf

Click mouse within plot area to zoom in by factor of two about that point

Or,  to  Da Label all possible matches  Label matches used for scoring Show Y-axis 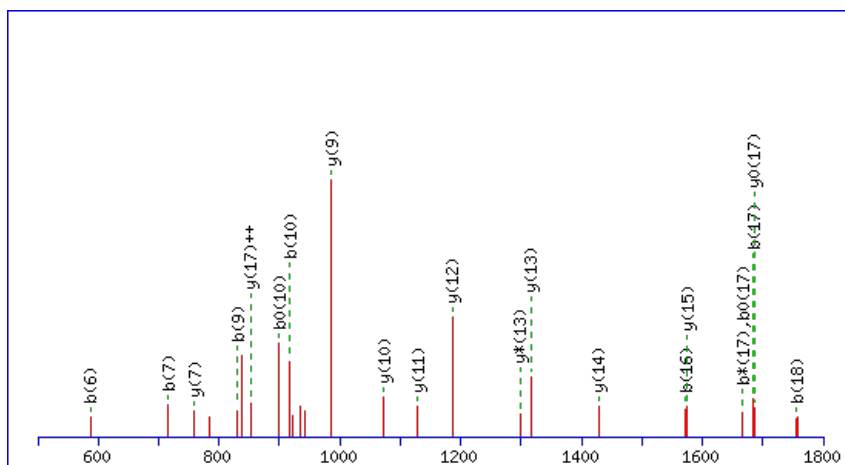Monoisotopic mass of neutral peptide  $M_r(\text{calc})$ : 1900.9530

Fixed modifications: Carbamidomethyl (C) (apply to specified residues or termini only)

Ions Score: 69 Expect: 5.9e-007

Matches : 21/166 fragment ions using 25 most intense peaks ([help](#))

| #  | b         | b <sup>++</sup> | b*        | b <sup>*++</sup> | b <sup>0</sup> | b <sup>0++</sup> | Seq. | y         | y <sup>++</sup> | y*        | y <sup>*++</sup> | y <sup>0</sup> | y <sup>0++</sup> | #  |
|----|-----------|-----------------|-----------|------------------|----------------|------------------|------|-----------|-----------------|-----------|------------------|----------------|------------------|----|
| 1  | 100.0757  | 50.5415         |           |                  |                |                  | V    |           |                 |           |                  |                |                  | 19 |
| 2  | 199.1441  | 100.0757        |           |                  |                |                  | V    | 1802.8919 | 901.9496        | 1785.8654 | 893.4363         | 1784.8814      | 892.9443         | 18 |
| 3  | 256.1656  | 128.5864        |           |                  |                |                  | G    | 1703.8235 | 852.4154        | 1686.7970 | 843.9021         | 1685.8129      | 843.4101         | 17 |
| 4  | 327.2027  | 164.1050        |           |                  |                |                  | A    | 1646.8020 | 823.9047        | 1629.7755 | 815.3914         | 1628.7915      | 814.8994         | 16 |
| 5  | 474.2711  | 237.6392        |           |                  |                |                  | F    | 1575.7649 | 788.3861        | 1558.7384 | 779.8728         | 1557.7544      | 779.3808         | 15 |
| 6  | 587.3552  | 294.1812        |           |                  |                |                  | L    | 1428.6965 | 714.8519        | 1411.6700 | 706.3386         | 1410.6859      | 705.8466         | 14 |
| 7  | 716.3978  | 358.7025        |           |                  | 698.3872       | 349.6972         | E    | 1315.6124 | 658.3099        | 1298.5859 | 649.7966         | 1297.6019      | 649.3046         | 13 |
| 8  | 773.4192  | 387.2132        |           |                  | 755.4087       | 378.2080         | G    | 1186.5699 | 593.7886        | 1169.5433 | 585.2753         | 1168.5593      | 584.7833         | 12 |
| 9  | 830.4407  | 415.7240        |           |                  | 812.4301       | 406.7187         | G    | 1129.5484 | 565.2778        | 1112.5218 | 556.7646         | 1111.5378      | 556.2726         | 11 |
| 10 | 917.4727  | 459.2400        |           |                  | 899.4621       | 450.2347         | S    | 1072.5269 | 536.7671        | 1055.5004 | 528.2538         | 1054.5164      | 527.7618         | 10 |
| 11 | 1014.5255 | 507.7664        |           |                  | 996.5149       | 498.7611         | P    | 985.4949  | 493.2511        | 968.4684  | 484.7378         | 967.4843       | 484.2458         | 9  |
| 12 | 1143.5681 | 572.2877        |           |                  | 1125.5575      | 563.2824         | E    | 888.4421  | 444.7247        | 871.4156  | 436.2114         | 870.4316       | 435.7194         | 8  |
| 13 | 1272.6107 | 636.8090        |           |                  | 1254.6001      | 627.8037         | E    | 759.3995  | 380.2034        | 742.3730  | 371.6901         | 741.3890       | 371.1981         | 7  |
| 14 | 1386.6536 | 693.8304        | 1369.6270 | 685.3172         | 1368.6430      | 684.8251         | N    | 630.3569  | 315.6821        | 613.3304  | 307.1688         |                |                  | 6  |
| 15 | 1500.6965 | 750.8519        | 1483.6700 | 742.3386         | 1482.6859      | 741.8466         | N    | 516.3140  | 258.6606        | 499.2875  | 250.1474         |                |                  | 5  |
| 16 | 1571.7336 | 786.3705        | 1554.7071 | 777.8572         | 1553.7231      | 777.3652         | A    | 402.2711  | 201.6392        | 385.2445  | 193.1259         |                |                  | 4  |
| 17 | 1684.8177 | 842.9125        | 1667.7911 | 834.3992         | 1666.8071      | 833.9072         | I    | 331.2340  | 166.1206        | 314.2074  | 157.6074         |                |                  | 3  |
| 18 | 1755.8548 | 878.4310        | 1738.8283 | 869.9178         | 1737.8442      | 869.4258         | A    | 218.1499  | 109.5786        | 201.1234  | 101.0653         |                |                  | 2  |
| 19 |           |                 |           |                  |                |                  | K    | 147.1128  | 74.0600         | 130.0863  | 65.5468          |                |                  | 1  |

AT5G03630.1

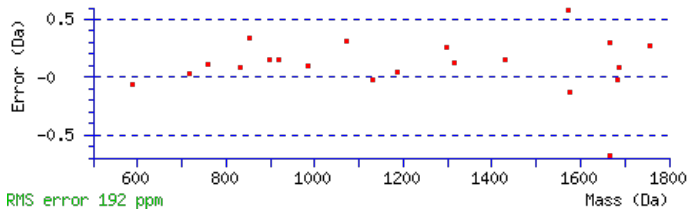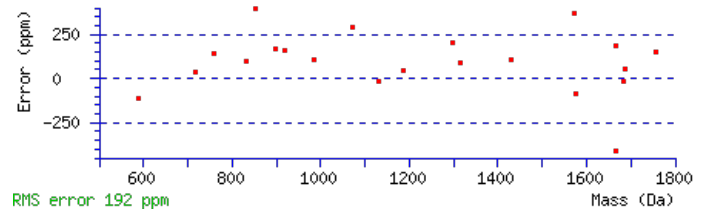

NCBI **BLAST** search of [VVGAFLEGGSPENNIAIAK](#)  
(Parameters: blastp, nr protein database, expect=20000, no filter, PAM30)  
Other BLAST [web gateways](#)

**All matches to this query**

| Score | Mr(calc)  | Delta   | Sequence                            |
|-------|-----------|---------|-------------------------------------|
| 68.8  | 1900.9530 | -0.0036 | <a href="#">VVGAFLEGGSPENNIAIAK</a> |

Mascot: <http://www.matrixscience.com/>

## Peptide View

MS/MS Fragmentation of **EAGVLPGIK**

Found in **AT5G03690.2** in **TAIR\_Arabidopsis**, Symbols: | fructose-bisphosphate aldolase, putative | chr5:963388-964981 REVERSE

Match to Query 1486: 892.485666 from(447.250109,2+) index(4681)

Title: Elution from: 43.193 to 43.193 scan no 5900 cid35.00 polarity:+

Data file D6h-1\_2.mgf

Click mouse within plot area to zoom in by factor of two about that point

Or,  to  Da

Label all possible matches  Label matches used for scoring

Show Y-axis

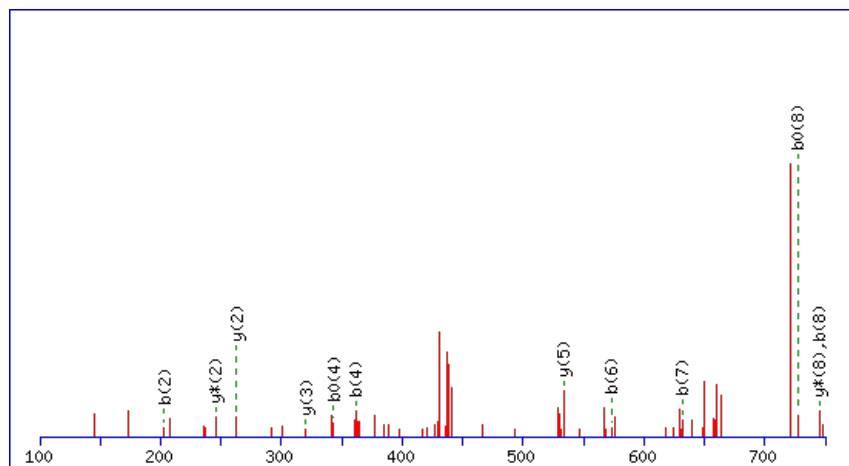

Monoisotopic mass of neutral peptide  $M_r(\text{calc})$ : 892.4878

Fixed modifications: Carbamidomethyl (C) (apply to specified residues or termini only)

Ions Score: 14 Expect: 0.048

Matches : 12/64 fragment ions using 45 most intense peaks ([help](#))

| # | b               | b <sup>++</sup> | b <sup>0</sup>  | b <sup>0++</sup> | Seq. | y               | y <sup>++</sup> | y*              | y <sup>*++</sup> | # |
|---|-----------------|-----------------|-----------------|------------------|------|-----------------|-----------------|-----------------|------------------|---|
| 1 | 131.0469        | 66.0271         | 113.0363        | 57.0218          | E    |                 |                 |                 |                  | 9 |
| 2 | <b>203.0811</b> | 102.0442        | 185.0705        | 93.0389          | A    | 763.4555        | 382.2314        | <b>745.4319</b> | 373.2196         | 8 |
| 3 | 261.0996        | 131.0534        | 243.0890        | 122.0481         | G    | 691.4213        | 346.2143        | 673.3977        | 337.2025         | 7 |
| 4 | <b>361.1650</b> | 181.0861        | <b>343.1544</b> | 172.0809         | V    | 633.4028        | 317.2050        | 615.3792        | 308.1933         | 6 |
| 5 | 475.2461        | 238.1267        | 457.2355        | 229.1214         | L    | <b>533.3374</b> | 267.1723        | 515.3138        | 258.1605         | 5 |
| 6 | <b>573.2959</b> | 287.1516        | 555.2853        | 278.1463         | P    | 419.2563        | 210.1318        | 401.2327        | 201.1200         | 4 |
| 7 | <b>631.3144</b> | 316.1608        | 613.3038        | 307.1556         | G    | <b>321.2065</b> | 161.1069        | 303.1829        | 152.0951         | 3 |
| 8 | <b>745.3955</b> | 373.2014        | <b>727.3849</b> | 364.1961         | I    | <b>263.1880</b> | 132.0976        | <b>245.1644</b> | 123.0858         | 2 |
| 9 |                 |                 |                 |                  | K    | 149.1069        | 75.0571         | 131.0833        | 66.0453          | 1 |

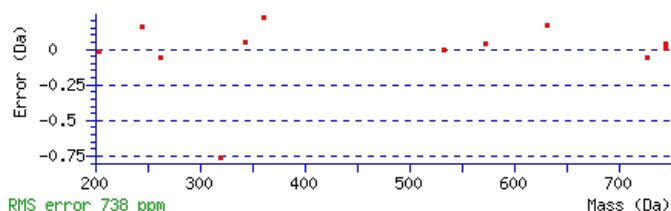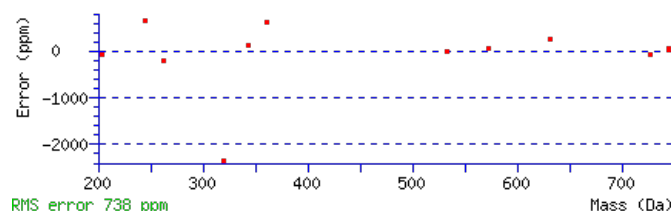

NCBI BLAST search of [EAGVLPGIK](#)

(Parameters: blastp, nr protein database, expect=20000, no filter, PAM30)

Other BLAST [web gateways](#)

All matches to this query

| Score | $M_r(\text{calc})$ | Delta   | Sequence                  |
|-------|--------------------|---------|---------------------------|
| 13.6  | 892.4878           | -0.0021 | <a href="#">EAGVLPGIK</a> |

## AT5G03690.2

|      |          |         |                          |
|------|----------|---------|--------------------------|
| 12.0 | 892.4878 | -0.0022 | <a href="#">LGNLEIPK</a> |
| 3.5  | 892.4878 | -0.0022 | <a href="#">NLPELGLK</a> |
| 2.1  | 892.4878 | -0.0022 | <a href="#">ELLINPGK</a> |

**Mascot:** <http://www.matrixscience.com/>

**Peptide View**MS/MS Fragmentation of **RFSIEEMGREIR**Found in **AT5G04050.1** in **TAIR\_Arabidopsis**, Symbols: | maturase-related | chr5:1096091-1097794 FORWARD

Match to Query 6748: 1558.701170 from(780.357861,2+) index(7919)

Title: Elution from: 70.265 to 70.265 scan no 10465 cid35.00 polarity:+

Data file 0-1\_3.mgf

Click mouse within plot area to zoom in by factor of two about that point

Or,   to  Da Label all possible matches  Label matches used for scoring Show Y-axis 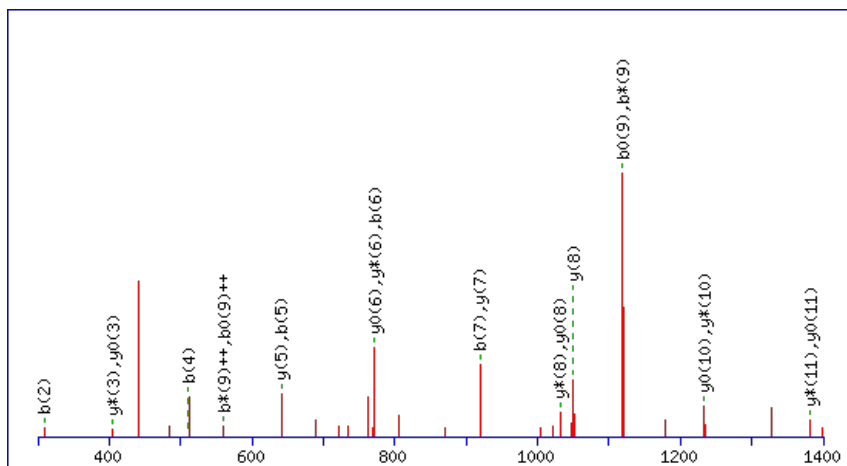**Monoisotopic mass of neutral peptide Mr(calc):** 1558.7048**Fixed modifications:** Carbamidomethyl (C) (apply to specified residues or termini only)**Variable modifications:****M7** : Oxidation (M), with neutral losses 0.0000 (shown in table), 63.9983**Ions Score:** 35 **Expect:** 0.0026**Matches** : 23/190 fragment ions using 21 most intense peaks ([help](#))

| #  | b                | b <sup>++</sup> | b <sup>*</sup>   | b <sup>*++</sup> | b <sup>0</sup>   | b <sup>0++</sup> | Seq. | y                | y <sup>++</sup> | y <sup>*</sup>   | y <sup>*++</sup> | y <sup>0</sup>   | y <sup>0++</sup> | #  |
|----|------------------|-----------------|------------------|------------------|------------------|------------------|------|------------------|-----------------|------------------|------------------|------------------|------------------|----|
| 1  | 161.0965         | 81.0519         | 143.0729         | 72.0401          |                  |                  | R    |                  |                 |                  |                  |                  |                  | 12 |
| 2  | <b>309.1620</b>  | 155.0846        | 291.1384         | 146.0728         |                  |                  | F    | 1399.6229        | 700.3151        | <b>1381.5993</b> | 691.3033         | <b>1381.6123</b> | 691.3098         | 11 |
| 3  | 397.1910         | 199.0992        | 379.1675         | 190.0874         | 379.1805         | 190.0939         | S    | 1251.5574        | 626.2823        | <b>1233.5338</b> | 617.2706         | <b>1233.5469</b> | 617.2771         | 10 |
| 4  | <b>511.2721</b>  | 256.1397        | 493.2486         | 247.1279         | 493.2616         | 247.1344         | I    | 1163.5284        | 582.2678        | 1145.5048        | 573.2560         | 1145.5178        | 573.2625         | 9  |
| 5  | <b>641.3118</b>  | 321.1595        | 623.2882         | 312.1477         | 623.3012         | 312.1542         | E    | <b>1049.4473</b> | 525.2273        | <b>1031.4237</b> | 516.2155         | <b>1031.4367</b> | 516.2220         | 8  |
| 6  | <b>771.3514</b>  | 386.1793        | 753.3278         | 377.1675         | 753.3408         | 377.1741         | E    | <b>919.4076</b>  | 460.2075        | 901.3840         | 451.1957         | 901.3971         | 451.2022         | 7  |
| 7  | <b>919.3838</b>  | 460.1956        | 901.3602         | 451.1838         | 901.3733         | 451.1903         | M    | 789.3680         | 395.1876        | <b>771.3444</b>  | 386.1758         | <b>771.3574</b>  | 386.1824         | 6  |
| 8  | 977.4023         | 489.2048        | 959.3787         | 480.1930         | 959.3918         | 480.1995         | G    | <b>641.3356</b>  | 321.1714        | 623.3120         | 312.1596         | 623.3250         | 312.1661         | 5  |
| 9  | 1137.4916        | 569.2494        | <b>1119.4680</b> | <b>560.2376</b>  | <b>1119.4810</b> | <b>560.2441</b>  | R    | 583.3171         | 292.1622        | 565.2935         | 283.1504         | 565.3065         | 283.1569         | 4  |
| 10 | 1267.5312        | 634.2692        | 1249.5076        | 625.2574         | 1249.5206        | 625.2640         | E    | 423.2278         | 212.1175        | <b>405.2042</b>  | 203.1058         | <b>405.2173</b>  | 203.1123         | 3  |
| 11 | <b>1381.6123</b> | 691.3098        | 1363.5887        | 682.2980         | 1363.6017        | 682.3045         | I    | 293.1882         | 147.0977        | 275.1646         | 138.0859         |                  |                  | 2  |
| 12 |                  |                 |                  |                  |                  |                  | R    | 179.1071         | 90.0572         | 161.0835         | 81.0454          |                  |                  | 1  |

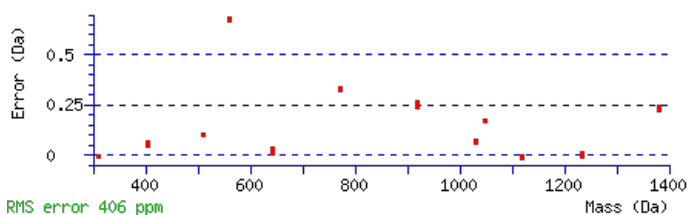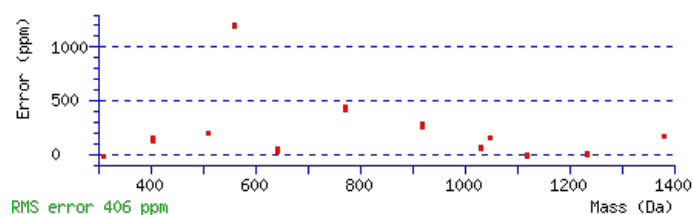NCBI **BLAST** search of **RFSIEEMGREIR**

(Parameters: blastp, nr protein database, expect=20000, no filter, PAM30)

Other BLAST [web gateways](#)

## AT5G04050.1

All matches to this query

| Score | Mr(calc)  | Delta   | Sequence                       |
|-------|-----------|---------|--------------------------------|
| 34.9  | 1558.7048 | -0.0037 | <a href="#">RFSIEEMGREIR</a>   |
| 17.4  | 1558.6974 | 0.0037  | <a href="#">CGSLSCAEKIFLR</a>  |
| 6.7   | 1558.7000 | 0.0012  | <a href="#">TEMKAKLSASSSER</a> |
| 6.3   | 1558.6992 | 0.0019  | <a href="#">DRSYAEANSIQKR</a>  |
| 6.1   | 1558.6974 | 0.0038  | <a href="#">ECGFGVTGMVSIKR</a> |
| 6.1   | 1558.7014 | -0.0003 | <a href="#">YAAREADFIAQAGR</a> |
| 5.2   | 1558.7019 | -0.0007 | <a href="#">RAKPNGEAHAEQAR</a> |
| 2.5   | 1558.6992 | 0.0019  | <a href="#">QSLLEHQTPANGSR</a> |
| 1.7   | 1558.7048 | -0.0037 | <a href="#">SPHLIRNEGKCDL</a>  |
| 0.6   | 1558.7010 | 0.0002  | <a href="#">WAYVGGFTEEKQK</a>  |

Mascot: <http://www.matrixscience.com/>

**Peptide View**MS/MS Fragmentation of **EGLQVLGWR**

Found in **AT5G04140.1** in **TAIR\_Arabidopsis**, Symbols: GLU1, GLS1, GLUS | GLS1/GLU1/GLUS (FERREDOXIN-DEPENDENT GLUTAMATE SYNTHASE 1); glutamate synthase (ferredoxin) | chr5:1130032-1138187 FORWARD

Match to Query 2923: 1056.571888 from(529.293220,2+) index(7098)

Title: Elution from: 63.398 to 63.398 scan no 9276 cid35.00 polarity:+

Data file D6h-1\_2.mgf

Click mouse within plot area to zoom in by factor of two about that point

Or,   to  Da

Label all possible matches  Label matches used for scoring

Show Y-axis

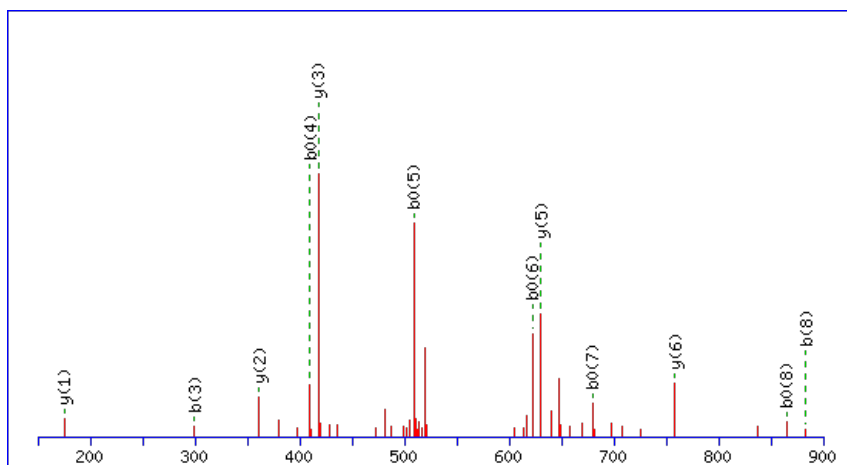

Monoisotopic mass of neutral peptide  $M_r(\text{calc})$ : 1056.5716

Fixed modifications: Carbamidomethyl (C) (apply to specified residues or termini only)

Ions Score: 47 Expect: 4.3e-005

Matches : 12/74 fragment ions using 14 most intense peaks ([help](#))

| # | b               | b <sup>++</sup> | b*       | b <sup>*++</sup> | b <sup>0</sup>  | b <sup>0++</sup> | Seq. | y               | y <sup>++</sup> | y*       | y <sup>*++</sup> | # |
|---|-----------------|-----------------|----------|------------------|-----------------|------------------|------|-----------------|-----------------|----------|------------------|---|
| 1 | 130.0499        | 65.5286         |          |                  | 112.0393        | 56.5233          | E    |                 |                 |          |                  | 9 |
| 2 | 187.0713        | 94.0393         |          |                  | 169.0608        | 85.0340          | G    | 928.5363        | 464.7718        | 911.5098 | 456.2585         | 8 |
| 3 | <b>300.1554</b> | 150.5813        |          |                  | 282.1448        | 141.5761         | L    | 871.5148        | 436.2611        | 854.4883 | 427.7478         | 7 |
| 4 | 428.2140        | 214.6106        | 411.1874 | 206.0974         | <b>410.2034</b> | 205.6053         | Q    | <b>758.4308</b> | 379.7190        | 741.4042 | 371.2058         | 6 |
| 5 | 527.2824        | 264.1448        | 510.2558 | 255.6316         | <b>509.2718</b> | 255.1396         | V    | <b>630.3722</b> | 315.6897        | 613.3457 | 307.1765         | 5 |
| 6 | 640.3665        | 320.6869        | 623.3399 | 312.1736         | <b>622.3559</b> | 311.6816         | L    | 531.3038        | 266.1555        | 514.2772 | 257.6423         | 4 |
| 7 | 697.3879        | 349.1976        | 680.3614 | 340.6843         | <b>679.3774</b> | 340.1923         | G    | <b>418.2197</b> | 209.6135        | 401.1932 | 201.1002         | 3 |
| 8 | <b>883.4672</b> | 442.2373        | 866.4407 | 433.7240         | <b>865.4567</b> | 433.2320         | W    | <b>361.1983</b> | 181.1028        | 344.1717 | 172.5895         | 2 |
| 9 |                 |                 |          |                  |                 |                  | R    | <b>175.1190</b> | 88.0631         | 158.0924 | 79.5498          | 1 |

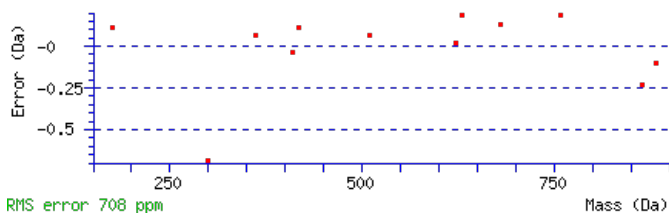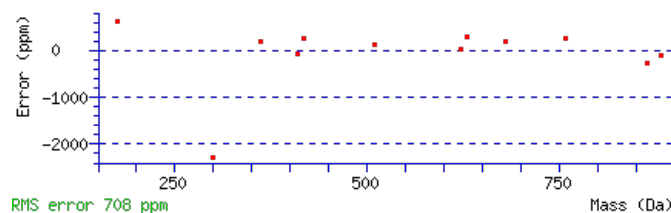

NCBI BLAST search of [EGLQVLGWR](#)

(Parameters: blastp, nr protein database, expect=20000, no filter, PAM30)

Other BLAST [web gateways](#)

**All matches to this query**

| Score | $M_r(\text{calc})$ | Delta | Sequence |
|-------|--------------------|-------|----------|
|       |                    |       |          |



# AT5G04140.1

|      |           |        |                           |
|------|-----------|--------|---------------------------|
| 46.7 | 1056.5716 | 0.0003 | <a href="#">EGLQVLGWR</a> |
| 0.0  | 1056.5716 | 0.0003 | <a href="#">LLWNIENR</a>  |

**Mascot:** <http://www.matrixscience.com/>

## Peptide View

### MS/MS Fragmentation of **DLDIRDLVK**

Found in **AT5G04360.1** in **TAIR\_Arabidopsis**, Symbols: ATPU1, ATLDA | ATLDA/ATPU1 (PULLULANASE 1); alpha-amylase/ limit dextrinase | chr5:1221567-1228400 FORWARD

Match to Query 2901: 1098.567608 from(550.291080,2+) index(2218)

Title: Elution from: 27.464 to 27.464 scan no 2919 cid35.00 polarity:+

Data file D1d-2\_2.mgf

Click mouse within plot area to zoom in by factor of two about that point

Or,   to  Da

Label all possible matches  Label matches used for scoring

Show Y-axis

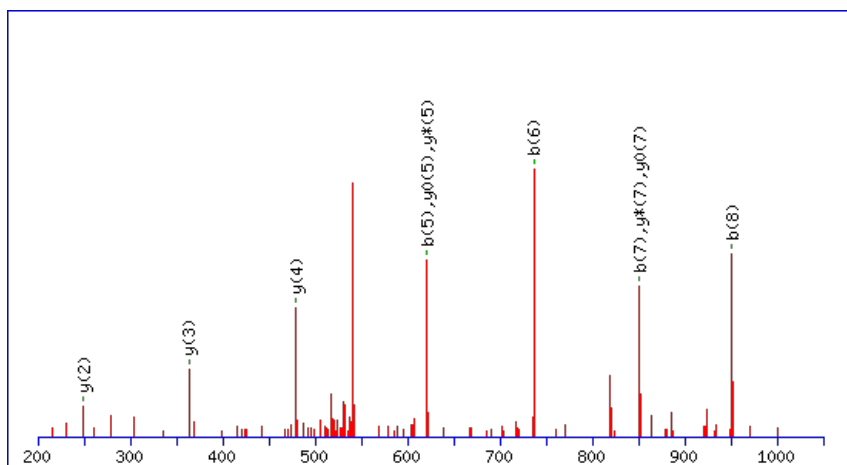

Monoisotopic mass of neutral peptide Mr(calc): 1098.5695

Fixed modifications: Carbamidomethyl (C) (apply to specified residues or termini only)

Ions Score: 37 Expect: 0.00077

Matches : 11/82 fragment ions using 8 most intense peaks ([help](#))

| # | b               | b <sup>++</sup> | b*       | b <sup>*++</sup> | b <sup>0</sup> | b <sup>0++</sup> | Seq.     | y               | y <sup>++</sup> | y*              | y <sup>*++</sup> | y <sup>0</sup>  | y <sup>0++</sup> | #        |
|---|-----------------|-----------------|----------|------------------|----------------|------------------|----------|-----------------|-----------------|-----------------|------------------|-----------------|------------------|----------|
| 1 | 117.0313        | 59.0193         |          |                  | 99.0207        | 50.0140          | <b>D</b> |                 |                 |                 |                  |                 |                  | <b>9</b> |
| 2 | 231.1124        | 116.0598        |          |                  | 213.1018       | 107.0545         | <b>L</b> | 983.5528        | 492.2801        | 965.5292        | 483.2683         | 965.5423        | 483.2748         | <b>8</b> |
| 3 | 347.1363        | 174.0718        |          |                  | 329.1258       | 165.0665         | <b>D</b> | 869.4717        | 435.2395        | <b>851.4481</b> | 426.2277         | <b>851.4612</b> | 426.2342         | <b>7</b> |
| 4 | 461.2174        | 231.1124        |          |                  | 443.2069       | 222.1071         | <b>I</b> | 753.4477        | 377.2275        | 735.4242        | 368.2157         | 735.4372        | 368.2222         | <b>6</b> |
| 5 | <b>621.3067</b> | 311.1570        | 603.2831 | 302.1452         | 603.2961       | 302.1517         | <b>R</b> | 639.3667        | 320.1870        | <b>621.3431</b> | 311.1752         | <b>621.3561</b> | 311.1817         | <b>5</b> |
| 6 | <b>737.3307</b> | 369.1690        | 719.3071 | 360.1572         | 719.3201       | 360.1637         | <b>D</b> | <b>479.2774</b> | 240.1423        | 461.2538        | 231.1305         | 461.2668        | 231.1371         | <b>4</b> |
| 7 | <b>851.4118</b> | 426.2095        | 833.3882 | 417.1977         | 833.4012       | 417.2042         | <b>L</b> | <b>363.2534</b> | 182.1303        | 345.2298        | 173.1186         |                 |                  | <b>3</b> |
| 8 | <b>951.4772</b> | 476.2422        | 933.4536 | 467.2304         | 933.4666       | 467.2370         | <b>V</b> | <b>249.1723</b> | 125.0898        | 231.1487        | 116.0780         |                 |                  | <b>2</b> |
| 9 |                 |                 |          |                  |                |                  | <b>K</b> | 149.1069        | 75.0571         | 131.0833        | 66.0453          |                 |                  | <b>1</b> |

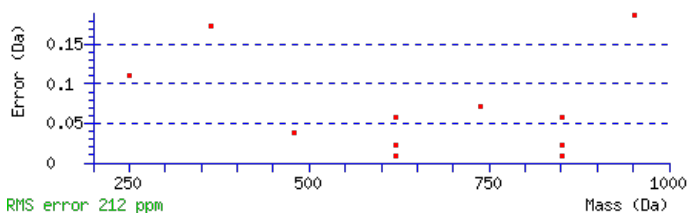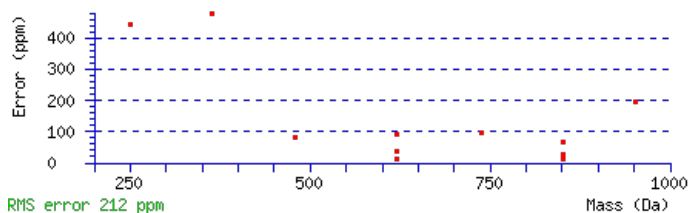

NCBI **BLAST** search of [DLDIRDLVK](#)

(Parameters: blastp, nr protein database, expect=20000, no filter, PAM30)

Other BLAST [web gateways](#)

### All matches to this query

| Score | Mr(calc) | Delta | Sequence |
|-------|----------|-------|----------|
|       |          |       |          |

**AT5G04360.1**

|      |           |         |                              |
|------|-----------|---------|------------------------------|
| 37.4 | 1098.5695 | -0.0019 | <a href="#">DLDIRDLVK</a>    |
| 21.5 | 1098.5695 | -0.0019 | <a href="#">IKEENNVLK</a>    |
| 18.9 | 1098.5648 | 0.0028  | <a href="#">RPNMLDVLK</a>    |
| 6.3  | 1098.5695 | -0.0019 | <a href="#">KASDAPEIKK</a>   |
| 4.3  | 1098.5695 | -0.0019 | <a href="#">ATDTVIKGPGK</a>  |
| 3.5  | 1098.5695 | -0.0019 | <a href="#">TIVKASEPNK</a>   |
| 2.0  | 1098.5670 | 0.0006  | <a href="#">VLFPAKMHK</a>    |
| 0.6  | 1098.5695 | -0.0019 | <a href="#">LQEINKDVK</a>    |
| 0.2  | 1098.5695 | -0.0019 | <a href="#">LILSDGQNVK</a>   |
| 0.2  | 1098.5695 | -0.0019 | <a href="#">SVLGTGSPAARK</a> |

**Mascot:** <http://www.matrixscience.com/>

**Peptide View**MS/MS Fragmentation of **ISPLDNTFYGLSDR**Found in **AT5G04430.1** in **TAIR\_Arabidopsis**, Symbols: | KH domain-containing protein NOVA, putative | chr5:1250603-1253524 REVERSE

Match to Query 7329: 1614.724568 from(808.369560,2+) index(8095)

Title: Elution from: 71.234 to 71.234 scan no 10612 cid35.00 polarity:+

Data file D12h-1\_2.mgf

Click mouse within plot area to zoom in by factor of two about that point

Or,  to  Da Label all possible matches  Label matches used for scoring Show Y-axis 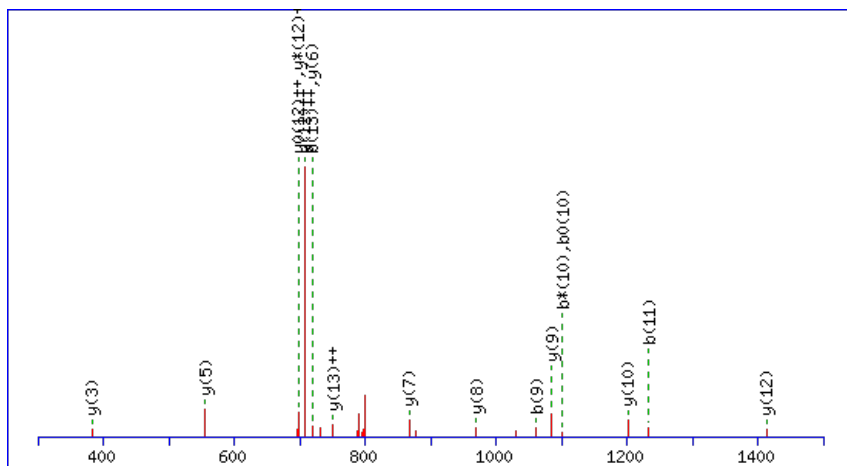Monoisotopic mass of neutral peptide  $M_r(\text{calc})$ : 1614.7250

Fixed modifications: Carbamidomethyl (C) (apply to specified residues or termini only)

Ions Score: 74 Expect: 2.9e-007

Matches : 17/142 fragment ions using 18 most intense peaks ([help](#))

| #  | b         | b <sup>++</sup> | b <sup>*</sup> | b <sup>*++</sup> | b <sup>0</sup> | b <sup>0++</sup> | Seq. | y         | y <sup>++</sup> | y <sup>*</sup> | y <sup>*++</sup> | y <sup>0</sup> | y <sup>0++</sup> | #  |
|----|-----------|-----------------|----------------|------------------|----------------|------------------|------|-----------|-----------------|----------------|------------------|----------------|------------------|----|
| 1  | 115.0884  | 58.0478         |                |                  |                |                  | I    |           |                 |                |                  |                |                  | 14 |
| 2  | 203.1174  | 102.0624        |                |                  | 185.1069       | 93.0571          | S    | 1501.6512 | 751.3292        | 1483.6276      | 742.3174         | 1483.6406      | 742.3240         | 13 |
| 3  | 301.1672  | 151.0873        |                |                  | 283.1567       | 142.0820         | P    | 1413.6221 | 707.3147        | 1395.5985      | 698.3029         | 1395.6116      | 698.3094         | 12 |
| 4  | 415.2483  | 208.1278        |                |                  | 397.2378       | 199.1225         | L    | 1315.5723 | 658.2898        | 1297.5487      | 649.2780         | 1297.5618      | 649.2845         | 11 |
| 5  | 531.2723  | 266.1398        |                |                  | 513.2617       | 257.1345         | D    | 1201.4912 | 601.2493        | 1183.4676      | 592.2375         | 1183.4807      | 592.2440         | 10 |
| 6  | 647.3093  | 324.1583        | 629.2857       | 315.1465         | 629.2987       | 315.1530         | N    | 1085.4673 | 543.2373        | 1067.4437      | 534.2255         | 1067.4567      | 534.2320         | 9  |
| 7  | 749.3540  | 375.1807        | 731.3304       | 366.1689         | 731.3435       | 366.1754         | T    | 969.4303  | 485.2188        | 951.4067       | 476.2070         | 951.4197       | 476.2135         | 8  |
| 8  | 897.4195  | 449.2134        | 879.3959       | 440.2016         | 879.4089       | 440.2081         | F    | 867.3855  | 434.1964        | 849.3620       | 425.1846         | 849.3750       | 425.1911         | 7  |
| 9  | 1061.4798 | 531.2436        | 1043.4563      | 522.2318         | 1043.4693      | 522.2383         | Y    | 719.3201  | 360.1637        | 701.2965       | 351.1519         | 701.3095       | 351.1584         | 6  |
| 10 | 1119.4983 | 560.2528        | 1101.4748      | 551.2410         | 1101.4878      | 551.2475         | G    | 555.2597  | 278.1335        | 537.2361       | 269.1217         | 537.2492       | 269.1282         | 5  |
| 11 | 1233.5794 | 617.2934        | 1215.5559      | 608.2816         | 1215.5689      | 608.2881         | L    | 497.2412  | 249.1243        | 479.2176       | 240.1125         | 479.2307       | 240.1190         | 4  |
| 12 | 1321.6085 | 661.3079        | 1303.5849      | 652.2961         | 1303.5979      | 652.3026         | S    | 383.1601  | 192.0837        | 365.1365       | 183.0719         | 365.1496       | 183.0784         | 3  |
| 13 | 1437.6325 | 719.3199        | 1419.6089      | 710.3081         | 1419.6219      | 710.3146         | D    | 295.1311  | 148.0692        | 277.1075       | 139.0574         | 277.1205       | 139.0639         | 2  |
| 14 |           |                 |                |                  |                |                  | R    | 179.1071  | 90.0572         | 161.0835       | 81.0454          |                |                  | 1  |

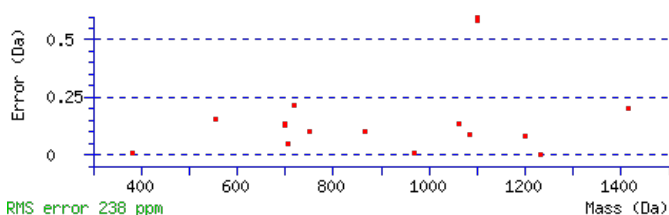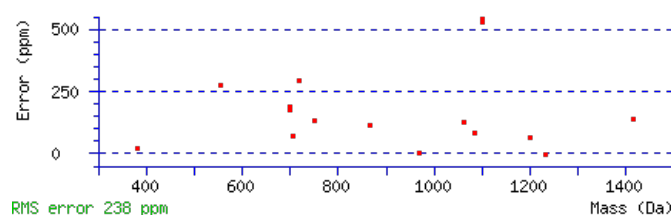NCBI BLAST search of **ISPLDNTFYGLSDR**

(Parameters: blastp, nr protein database, expect=20000, no filter, PAM30)

AT5G04430.1

Other BLAST [web gateways](#)

**All matches to this query**

| Score | Mr(calc)  | Delta   | Sequence                        |
|-------|-----------|---------|---------------------------------|
| 73.9  | 1614.7250 | -0.0004 | <a href="#">ISPLDNIFYGLSDR</a>  |
| 5.9   | 1614.7232 | 0.0014  | <a href="#">SIDGSVRTDRETR</a>   |
| 4.8   | 1614.7227 | 0.0018  | <a href="#">VTSFTSGGVVDGSLR</a> |
| 1.7   | 1614.7284 | -0.0038 | <a href="#">LSPDADPVVHMSVSK</a> |
| 1.7   | 1614.7277 | -0.0031 | <a href="#">INARREPGYEFDK</a>   |

Mascot: <http://www.matrixscience.com/>

## Peptide View

MS/MS Fragmentation of **VCEPLFYHWK**Found in **AT5G04590.1** in **TAIR\_Arabidopsis**, Symbols: SIR | SIR (sulfite reductase); sulfite reductase (ferredoxin) | chr5:1319405-1322299  
FORWARD

Match to Query 5691: 1377.651207 from(460.224345,3+) index(6448)

Title: Elution from: 56.209 to 56.209 scan no 8187 cid35.00 polarity:+

Data file D6h-1\_1.mgf

Click mouse within plot area to zoom in by factor of two about that point

Or,  to  Da Label all possible matches  Label matches used for scoring Show Y-axis 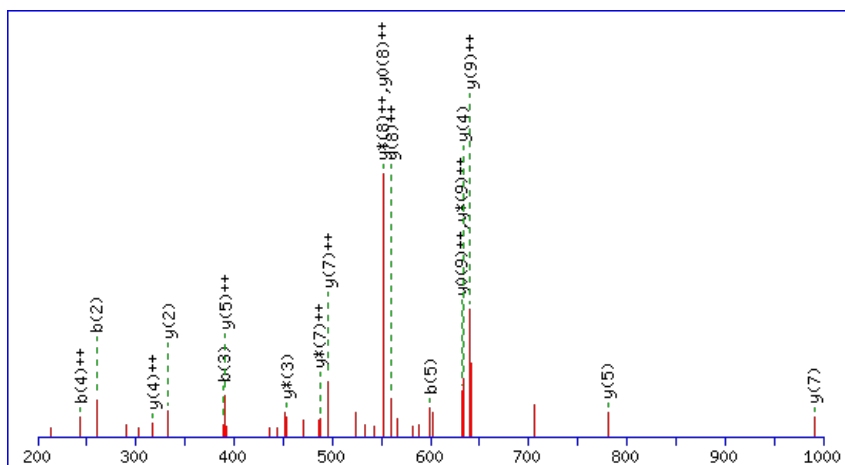Monoisotopic mass of neutral peptide  $M_r(\text{calc})$ : 1377.6540

Fixed modifications: Carbamidomethyl (C) (apply to specified residues or termini only)

Ions Score: 35 Expect: 0.00091

Matches : 19/72 fragment ions using 24 most intense peaks ([help](#))

| #  | b               | b <sup>++</sup> | b <sup>0</sup> | b <sup>0++</sup> | Seq. | y               | y <sup>++</sup> | y*              | y <sup>*++</sup> | y <sup>0</sup> | y <sup>0++</sup> | #  |
|----|-----------------|-----------------|----------------|------------------|------|-----------------|-----------------|-----------------|------------------|----------------|------------------|----|
| 1  | 100.0757        | 50.5415         |                |                  | V    |                 |                 |                 |                  |                |                  | 10 |
| 2  | <b>260.1063</b> | 130.5568        |                |                  | C    | 1279.5928       | <b>640.3001</b> | 1262.5663       | <b>631.7868</b>  | 1261.5823      | <b>631.2948</b>  | 9  |
| 3  | <b>389.1489</b> | 195.0781        | 371.1384       | 186.0728         | E    | 1119.5622       | <b>560.2847</b> | 1102.5356       | <b>551.7715</b>  | 1101.5516      | <b>551.2795</b>  | 8  |
| 4  | 486.2017        | <b>243.6045</b> | 468.1911       | 234.5992         | P    | <b>990.5196</b> | <b>495.7634</b> | 973.4931        | <b>487.2502</b>  |                |                  | 7  |
| 5  | <b>599.2858</b> | 300.1465        | 581.2752       | 291.1412         | L    | 893.4668        | 447.2371        | 876.4403        | 438.7238         |                |                  | 6  |
| 6  | 746.3542        | 373.6807        | 728.3436       | 364.6754         | F    | <b>780.3828</b> | <b>390.6950</b> | 763.3562        | 382.1817         |                |                  | 5  |
| 7  | 909.4175        | 455.2124        | 891.4069       | 446.2071         | Y    | <b>633.3144</b> | <b>317.1608</b> | 616.2878        | 308.6475         |                |                  | 4  |
| 8  | 1046.4764       | 523.7418        | 1028.4659      | 514.7366         | H    | 470.2510        | 235.6292        | <b>453.2245</b> | 227.1159         |                |                  | 3  |
| 9  | 1232.5557       | 616.7815        | 1214.5452      | 607.7762         | W    | <b>333.1921</b> | 167.0997        | 316.1656        | 158.5864         |                |                  | 2  |
| 10 |                 |                 |                |                  | K    | 147.1128        | 74.0600         | 130.0863        | 65.5468          |                |                  | 1  |

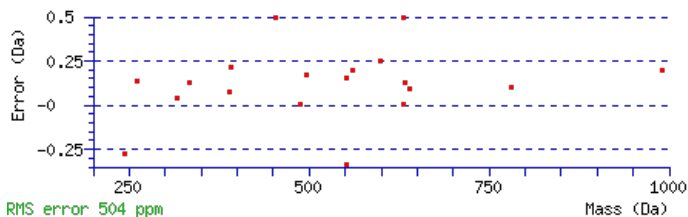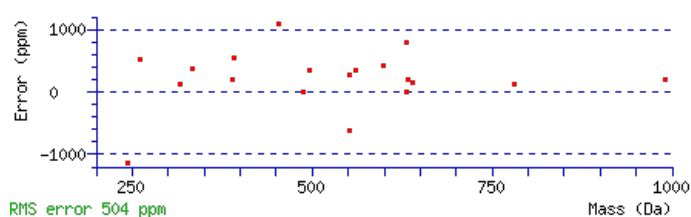NCBI BLAST search of **VCEPLFYHWK**

(Parameters: blastp, nr protein database, expect=20000, no filter, PAM30)

Other BLAST [web gateways](#)

All matches to this query

## AT5G04590.1

| Score | Mr(calc)  | Delta   | Sequence                      |
|-------|-----------|---------|-------------------------------|
| 34.8  | 1377.6540 | -0.0028 | <a href="#">VCEPLFYHWK</a>    |
| 1.4   | 1377.6525 | -0.0013 | <a href="#">VSDWSIVDSGSAR</a> |
| 1.1   | 1377.6493 | 0.0019  | <a href="#">VSMAMSPSQRPR</a>  |
| 1.0   | 1377.6519 | -0.0007 | <a href="#">EMDIIAALDEMK</a>  |

Mascot: <http://www.matrixscience.com/>

**Peptide View**MS/MS Fragmentation of **MLVRDPKK**

Found in **AT5G04870.1** in **TAIR\_Arabidopsis**, Symbols: AK1, ATPCK1, CPK1 | CPK1 (calcium-dependent protein kinase isoform AK1); calmodulin-dependent protein kinase/ kinase | chr5:1417016-1419878 REVERSE

Match to Query 2139: 1014.532552 from(508.273552,2+) index(5918)

Title: Elution from: 55.326 to 55.326 scan no 7658 cid35.00 polarity:+

Data file D12h-2\_2.mgf

Click mouse within plot area to zoom in by factor of two about that point

Or,   to  Da

Label all possible matches  Label matches used for scoring

Show Y-axis

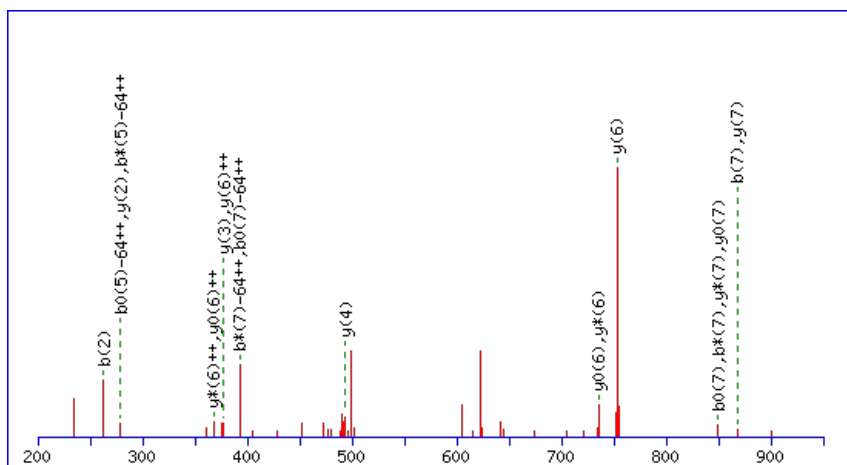

Monoisotopic mass of neutral peptide  $M_r(\text{calc})$ : 1014.5306

Fixed modifications: Carbamidomethyl (C) (apply to specified residues or termini only)

Variable modifications:

M1 : Oxidation (M), with neutral losses 0.0000 (shown in table), 63.9983

Ions Score: 24 Expect: 0.027

Matches : 20/92 fragment ions using 26 most intense peaks ([help](#))

| # | b               | b <sup>++</sup> | b*              | b <sup>*++</sup> | b <sup>0</sup>  | b <sup>0++</sup> | Seq. | y               | y <sup>++</sup> | y*              | y <sup>*++</sup> | y <sup>0</sup>  | y <sup>0++</sup> | # |
|---|-----------------|-----------------|-----------------|------------------|-----------------|------------------|------|-----------------|-----------------|-----------------|------------------|-----------------|------------------|---|
| 1 | 149.0397        | 75.0235         |                 |                  |                 |                  | M    |                 |                 |                 |                  |                 |                  | 8 |
| 2 | <b>263.1208</b> | 132.0640        |                 |                  |                 |                  | L    | <b>867.5055</b> | 434.2564        | <b>849.4819</b> | 425.2446         | <b>849.4949</b> | 425.2511         | 7 |
| 3 | 363.1863        | 182.0968        |                 |                  |                 |                  | V    | <b>753.4244</b> | <b>377.2158</b> | <b>735.4008</b> | <b>368.2040</b>  | <b>735.4138</b> | <b>368.2105</b>  | 6 |
| 4 | 523.2755        | 262.1414        | 505.2519        | 253.1296         |                 |                  | R    | 653.3589        | 327.1831        | 635.3354        | 318.1713         | 635.3484        | 318.1778         | 5 |
| 5 | 639.2995        | 320.1534        | 621.2759        | 311.1416         | 621.2889        | 311.1481         | D    | <b>493.2697</b> | 247.1385        | 475.2461        | 238.1267         | 475.2591        | 238.1332         | 4 |
| 6 | 737.3493        | 369.1783        | 719.3257        | 360.1665         | 719.3387        | 360.1730         | P    | <b>377.2457</b> | 189.1265        | 359.2221        | 180.1147         |                 |                  | 3 |
| 7 | <b>867.4383</b> | 434.2228        | <b>849.4147</b> | 425.2110         | <b>849.4278</b> | 425.2175         | K    | <b>279.1959</b> | 140.1016        | 261.1723        | 131.0898         |                 |                  | 2 |
| 8 |                 |                 |                 |                  |                 |                  | K    | 149.1069        | 75.0571         | 131.0833        | 66.0453          |                 |                  | 1 |

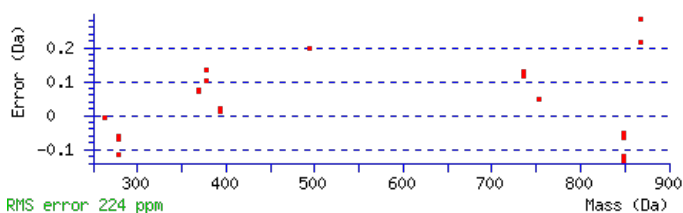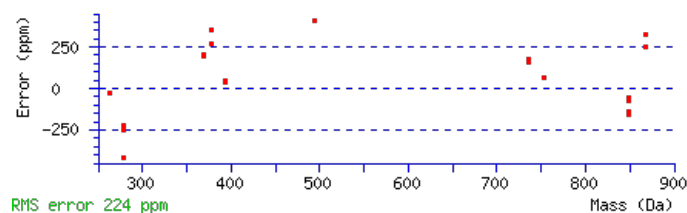

NCBI BLAST search of **MLVRDPKK**

(Parameters: blastp, nr protein database, expect=20000, no filter, PAM30)

Other BLAST [web gateways](#)

**All matches to this query**

| Score | $M_r(\text{calc})$ | Delta | Sequence |
|-------|--------------------|-------|----------|
|       |                    |       |          |



**AT5G04870.1**

|      |           |         |                            |
|------|-----------|---------|----------------------------|
| 23.8 | 1014.5306 | 0.0019  | <a href="#">MLVRDPKK</a>   |
| 21.7 | 1014.5354 | -0.0028 | <a href="#">ETNIASKLK</a>  |
| 21.7 | 1014.5354 | -0.0028 | <a href="#">LGSGSVDKIK</a> |
| 21.7 | 1014.5306 | 0.0019  | <a href="#">RDMVIQLK</a>   |
| 14.4 | 1014.5306 | 0.0019  | <a href="#">TMARPVSIK</a>  |
| 11.8 | 1014.5306 | 0.0019  | <a href="#">KMLVRDPK</a>   |
| 8.9  | 1014.5306 | 0.0019  | <a href="#">VQLQOKMK</a>   |
| 8.1  | 1014.5306 | 0.0019  | <a href="#">QQLVMIVR</a>   |
| 7.9  | 1014.5306 | 0.0019  | <a href="#">NVLRLLEK</a>   |
| 7.6  | 1014.5306 | 0.0019  | <a href="#">LGAKPCKTK</a>  |

**Mascot:** <http://www.matrixscience.com/>

**Peptide View**MS/MS Fragmentation of **DMRANLIK**Found in **AT5G04950.1** in **TAIR\_Arabidopsis**, Symbols: | nicotianamine synthase, putative | chr5:1457877-1458839 REVERSE

Match to Query 2220: 972.482304 from(487.248428,2+) index(5597)

Title: Elution from: 50.313 to 50.313 scan no 7133 cid35.00 polarity:+

Data file D6h-1\_3.mgf

Click mouse within plot area to zoom in by factor of two about that point

Or,   to  Da Label all possible matches  Label matches used for scoring Show Y-axis 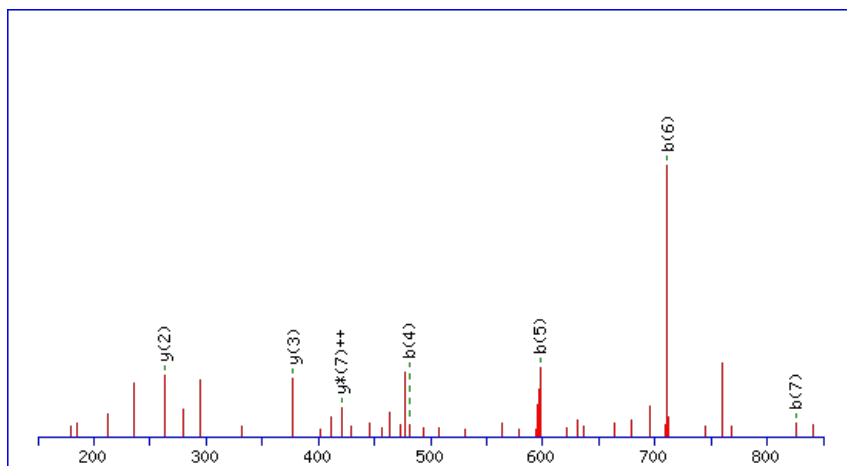Monoisotopic mass of neutral peptide **Mr(calc)**: 972.4837

Fixed modifications: Carbamidomethyl (C) (apply to specified residues or termini only)

Ions Score: 25 Expect: 0.037

Matches : 7/66 fragment ions using 14 most intense peaks ([help](#))

| # | b        | b <sup>++</sup> | b*       | b <sup>*++</sup> | b <sup>0</sup> | b <sup>0++</sup> | Seq. | y        | y <sup>++</sup> | y*       | y <sup>*++</sup> | # |
|---|----------|-----------------|----------|------------------|----------------|------------------|------|----------|-----------------|----------|------------------|---|
| 1 | 117.0313 | 59.0193         |          |                  | 99.0207        | 50.0140          | D    |          |                 |          |                  | 8 |
| 2 | 249.0688 | 125.0380        |          |                  | 231.0582       | 116.0327         | M    | 857.4670 | 429.2371        | 839.4434 | 420.2253         | 7 |
| 3 | 409.1580 | 205.0827        | 391.1344 | 196.0709         | 391.1475       | 196.0774         | R    | 725.4295 | 363.2184        | 707.4059 | 354.2066         | 6 |
| 4 | 481.1922 | 241.0997        | 463.1686 | 232.0879         | 463.1816       | 232.0944         | A    | 565.3402 | 283.1737        | 547.3166 | 274.1620         | 5 |
| 5 | 597.2292 | 299.1182        | 579.2056 | 290.1064         | 579.2186       | 290.1129         | N    | 493.3061 | 247.1567        | 475.2825 | 238.1449         | 4 |
| 6 | 711.3103 | 356.1588        | 693.2867 | 347.1470         | 693.2997       | 347.1535         | L    | 377.2691 | 189.1382        | 359.2455 | 180.1264         | 3 |
| 7 | 825.3914 | 413.1993        | 807.3678 | 404.1875         | 807.3808       | 404.1940         | I    | 263.1880 | 132.0976        | 245.1644 | 123.0858         | 2 |
| 8 |          |                 |          |                  |                |                  | K    | 149.1069 | 75.0571         | 131.0833 | 66.0453          | 1 |

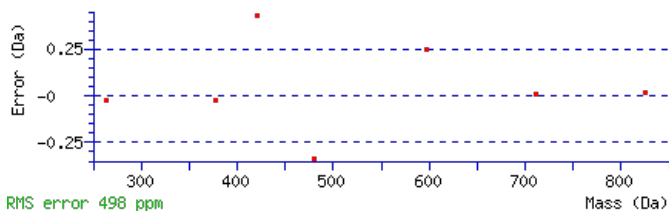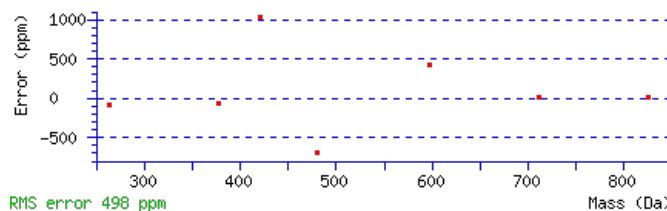NCBI **BLAST** search of [DMRANLIK](#)

(Parameters: blastp, nr protein database, expect=20000, no filter, PAM30)

Other BLAST [web gateways](#)**All matches to this query**

| Score | Mr(calc) | Delta   | Sequence                 |
|-------|----------|---------|--------------------------|
| 24.8  | 972.4837 | -0.0014 | <a href="#">DMRANLIK</a> |
| 24.3  | 972.4810 | 0.0013  | <a href="#">MAEDKILK</a> |

**AT5G04950.1**

|      |          |         |                           |
|------|----------|---------|---------------------------|
| 22.0 | 972.4810 | 0.0013  | <a href="#">EDMKSLIK</a>  |
| 22.0 | 972.4810 | 0.0013  | <a href="#">KMEDALIK</a>  |
| 22.0 | 972.4837 | -0.0014 | <a href="#">MELRIGNK</a>  |
| 18.1 | 972.4799 | 0.0024  | <a href="#">LFEEWLK</a>   |
| 17.3 | 972.4810 | 0.0013  | <a href="#">MLSEGAVLK</a> |
| 16.1 | 972.4810 | 0.0013  | <a href="#">MKESLLDK</a>  |
| 10.5 | 972.4832 | -0.0009 | <a href="#">MLVFDPVK</a>  |
| 10.5 | 972.4837 | -0.0014 | <a href="#">MSHKVSKK</a>  |

**Mascot:** <http://www.matrixscience.com/>

**Peptide View**MS/MS Fragmentation of **IDYLKDK**

Found in **AT5G05170.1** in **TAIR\_Arabidopsis**, Symbols: CESA3, IXR1, ATCESA3, ATH-B, CEV1 | CESA3 (CELLULOSE SYNTHASE 3); cellulose synthase/ transférase, transferring glycosyl groups | chr5:1530402-1535091 REVERSE

Match to Query 1547: 902.457256 from(452.235904,2+) index(5429)

Title: Elution from: 48.556 to 48.556 scan no 6916 cid35.00 polarity:+

Data file D6h-2\_3.mgf

Click mouse within plot area to zoom in by factor of two about that point

Or,   to  Da

Label all possible matches  Label matches used for scoring

Show Y-axis

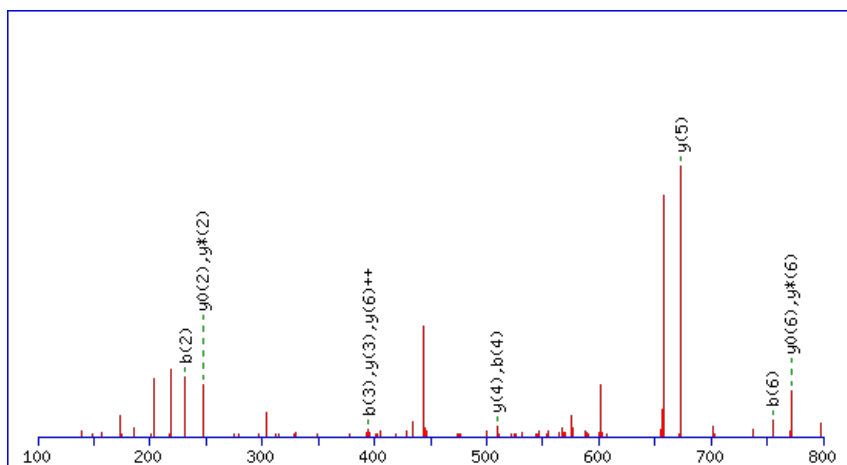

**Monoisotopic mass of neutral peptide Mr(calc):** 902.4591

**Fixed modifications:** Carbamidomethyl (C) (apply to specified residues or termini only)

**Ions Score:** 24 **Expect:** 0.034

**Matches:** 12/60 fragment ions using 14 most intense peaks ([help](#))

| # | b               | b <sup>++</sup> | b*       | b <sup>*++</sup> | b <sup>0</sup> | b <sup>0++</sup> | Seq. | y               | y <sup>++</sup> | y*              | y <sup>*++</sup> | y <sup>0</sup>  | y <sup>0++</sup> | # |
|---|-----------------|-----------------|----------|------------------|----------------|------------------|------|-----------------|-----------------|-----------------|------------------|-----------------|------------------|---|
| 1 | 115.0884        | 58.0478         |          |                  |                |                  | I    |                 |                 |                 |                  |                 |                  | 7 |
| 2 | <b>231.1124</b> | 116.0598        |          |                  | 213.1018       | 107.0545         | D    | 789.3853        | <b>395.1963</b> | <b>771.3617</b> | 386.1845         | <b>771.3748</b> | 386.1910         | 6 |
| 3 | <b>395.1727</b> | 198.0900        |          |                  | 377.1622       | 189.0847         | Y    | <b>673.3613</b> | 337.1843        | 655.3378        | 328.1725         | 655.3508        | 328.1790         | 5 |
| 4 | <b>509.2538</b> | 255.1305        |          |                  | 491.2433       | 246.1253         | L    | <b>509.3010</b> | 255.1541        | 491.2774        | 246.1423         | 491.2904        | 246.1488         | 4 |
| 5 | 639.3428        | 320.1751        | 621.3193 | 311.1633         | 621.3323       | 311.1698         | K    | <b>395.2199</b> | 198.1136        | 377.1963        | 189.1018         | 377.2093        | 189.1083         | 3 |
| 6 | <b>755.3668</b> | 378.1871        | 737.3432 | 369.1753         | 737.3563       | 369.1818         | D    | 265.1309        | 133.0691        | <b>247.1073</b> | 124.0573         | <b>247.1203</b> | 124.0638         | 2 |
| 7 |                 |                 |          |                  |                |                  | K    | 149.1069        | 75.0571         | 131.0833        | 66.0453          |                 |                  | 1 |

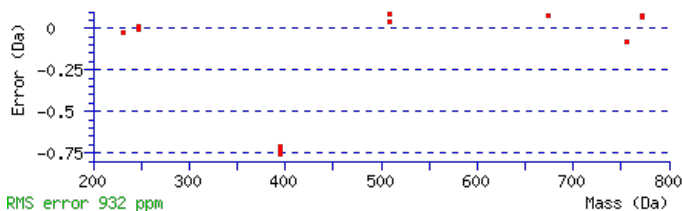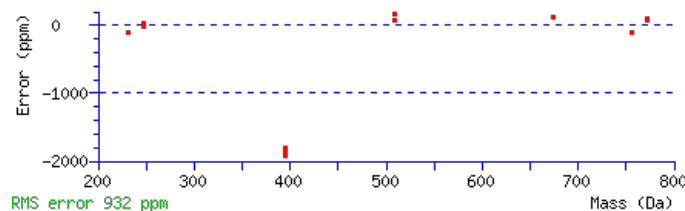

NCBI **BLAST** search of **IDYLKDK**

(Parameters: blastp, nr protein database, expect=20000, no filter, PAM30)

Other BLAST [web gateways](#)

**All matches to this query**

| Score | Mr(calc) | Delta   | Sequence                |
|-------|----------|---------|-------------------------|
| 24.5  | 902.4591 | -0.0019 | <a href="#">IDYLKDK</a> |
| 13.7  | 902.4591 | -0.0019 | <a href="#">VKYELDK</a> |

## AT5G05170.1

|      |          |         |                          |
|------|----------|---------|--------------------------|
| 12.4 | 902.4548 | 0.0024  | <a href="#">NLARCKK</a>  |
| 6.3  | 902.4548 | 0.0024  | <a href="#">RGREIMK</a>  |
| 5.2  | 902.4578 | -0.0005 | <a href="#">MEMKKVK</a>  |
| 4.9  | 902.4591 | -0.0019 | <a href="#">DKYELVK</a>  |
| 3.5  | 902.4591 | -0.0019 | <a href="#">DALTSFIK</a> |
| 3.5  | 902.4591 | -0.0019 | <a href="#">TVAYDVVK</a> |
| 2.5  | 902.4591 | -0.0019 | <a href="#">DLEVKYK</a>  |
| 1.3  | 902.4591 | -0.0019 | <a href="#">IEGVYSVK</a> |

**Mascot:** <http://www.matrixscience.com/>

**Peptide View**MS/MS Fragmentation of **LKEINIKSCP**KFound in **AT5G05400.1** in **TAIR\_Arabidopsis**, Symbols: | disease resistance protein (CC-NBS-LRR class), putative | chr5:1597746-1600370  
REVERSE

Match to Query 4565: 1344.701660 from(673.358106,2+) index(10119)

Title: Elution from: 99.990 to 99.990 scan no 14715 cid35.00 polarity:+

Data file D1d-2\_2.mgf

Click mouse within plot area to zoom in by factor of two about that point

Or,   to  Da Label all possible matches  Label matches used for scoring Show Y-axis 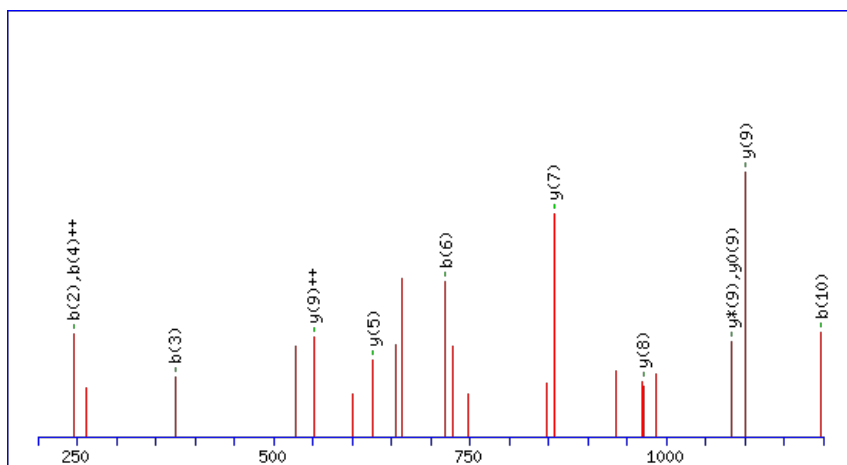Monoisotopic mass of neutral peptide  $M_r(\text{calc})$ : 1344.7012

Fixed modifications: Carbamidomethyl (C) (apply to specified residues or termini only)

Ions Score: 23 Expect: 0.026

Matches : 12/108 fragment ions using 20 most intense peaks ([help](#))

| #  | b                | b <sup>++</sup> | b*        | b <sup>*++</sup> | b <sup>0</sup> | b <sup>0++</sup> | Seq. | y                | y <sup>++</sup> | y*               | y <sup>*++</sup> | y <sup>0</sup>   | y <sup>0++</sup> | #  |
|----|------------------|-----------------|-----------|------------------|----------------|------------------|------|------------------|-----------------|------------------|------------------|------------------|------------------|----|
| 1  | 115.0884         | 58.0478         |           |                  |                |                  | L    |                  |                 |                  |                  |                  |                  | 11 |
| 2  | <b>245.1774</b>  | 123.0923        | 227.1538  | 114.0805         |                |                  | K    | 1231.6273        | 616.3173        | 1213.6038        | 607.3055         | 1213.6168        | 607.3120         | 10 |
| 3  | <b>375.2170</b>  | 188.1122        | 357.1935  | 179.1004         | 357.2065       | 179.1069         | E    | <b>1101.5383</b> | <b>551.2728</b> | <b>1083.5147</b> | 542.2610         | <b>1083.5277</b> | 542.2675         | 9  |
| 4  | 489.2981         | <b>245.1527</b> | 471.2746  | 236.1409         | 471.2876       | 236.1474         | I    | <b>971.4987</b>  | 486.2530        | 953.4751         | 477.2412         | 953.4881         | 477.2477         | 8  |
| 5  | 605.3351         | 303.1712        | 587.3115  | 294.1594         | 587.3246       | 294.1659         | N    | <b>857.4176</b>  | 429.2124        | 839.3940         | 420.2006         | 839.4070         | 420.2071         | 7  |
| 6  | <b>719.4162</b>  | 360.2118        | 701.3926  | 351.2000         | 701.4057       | 351.2065         | I    | 741.3806         | 371.1939        | 723.3570         | 362.1821         | 723.3700         | 362.1886         | 6  |
| 7  | 849.5053         | 425.2563        | 831.4817  | 416.2445         | 831.4947       | 416.2510         | K    | <b>627.2995</b>  | 314.1534        | 609.2759         | 305.1416         | 609.2889         | 305.1481         | 5  |
| 8  | 937.5343         | 469.2708        | 919.5107  | 460.2590         | 919.5238       | 460.2655         | S    | 497.2105         | 249.1089        | 479.1869         | 240.0971         | 479.1999         | 240.1036         | 4  |
| 9  | 1099.5590        | 550.2832        | 1081.5355 | 541.2714         | 1081.5485      | 541.2779         | C    | 409.1814         | 205.0943        | 391.1578         | 196.0825         |                  |                  | 3  |
| 10 | <b>1197.6088</b> | 599.3081        | 1179.5853 | 590.2963         | 1179.5983      | 590.3028         | P    | 247.1567         | 124.0820        | 229.1331         | 115.0702         |                  |                  | 2  |
| 11 |                  |                 |           |                  |                |                  | K    | 149.1069         | 75.0571         | 131.0833         | 66.0453          |                  |                  | 1  |

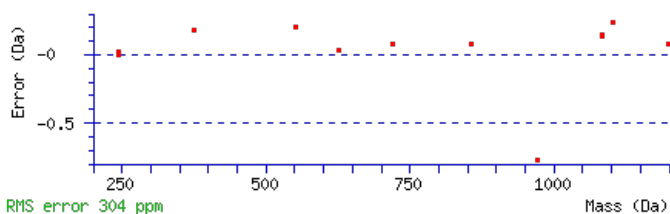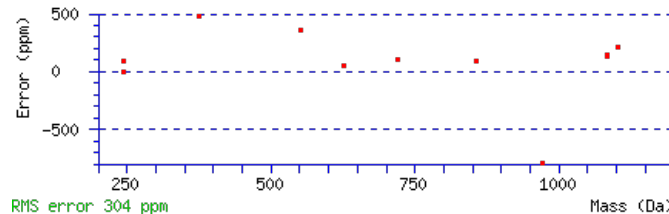NCBI **BLAST** search of **LKEINIKSCP**K

(Parameters: blastp, nr protein database, expect=20000, no filter, PAM30)

Other BLAST [web gateways](#)**All matches to this query**

## AT5G05400.1

| Score | Mr(calc)  | Delta   | Sequence                      |
|-------|-----------|---------|-------------------------------|
| 23.0  | 1344.7012 | 0.0005  | <a href="#">LKEINIKSCP</a>    |
| 7.8   | 1344.6978 | 0.0039  | <a href="#">LKPNTQYIPOK</a>   |
| 3.9   | 1344.7034 | -0.0017 | <a href="#">EYLGVMHKIK</a>    |
| 3.1   | 1344.6978 | 0.0039  | <a href="#">LEGLEGLPKFAR</a>  |
| 1.7   | 1344.7034 | -0.0017 | <a href="#">KIWCAVIAIEK</a>   |
| 1.7   | 1344.7034 | -0.0017 | <a href="#">KIWCAVIALEK</a>   |
| 1.0   | 1344.7012 | 0.0005  | <a href="#">QIVELPIMRSK</a>   |
| 1.0   | 1344.7012 | 0.0005  | <a href="#">SPGGLGLIKSLCK</a> |
| 0.7   | 1344.7012 | 0.0005  | <a href="#">EIEVTMKPKVR</a>   |

Mascot: <http://www.matrixscience.com/>

## Peptide View

MS/MS Fragmentation of **ATISVVDIQEK**

Found in **AT5G05540.1** in **TAIR\_Arabidopsis**, Symbols: | exonuclease family protein | chr5:1636420-1638760 FORWARD

Match to Query 4516: 1214.619026 from(608.316789,2+) index(1791)

Title: Elution from: 21.999 to 21.999 scan no 2345 cid35.00 polarity:+

Data file D6h-1\_1.mgf

Click mouse within plot area to zoom in by factor of two about that point

Or,   to  Da

Label all possible matches  Label matches used for scoring

Show Y-axis

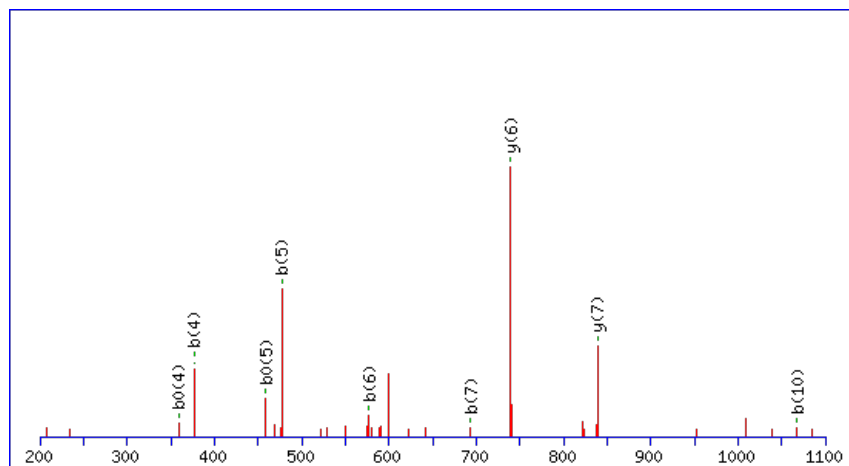

Monoisotopic mass of neutral peptide  $M_r(\text{calc})$ : 1214.6169

**Fixed modifications:** Carbamidomethyl (C) (apply to specified residues or termini only)

**Ions Score:** 31 **Expect:** 0.006

**Matches:** 9/100 fragment ions using 17 most intense peaks ([help](#))

| #  | b                | b <sup>++</sup> | b <sup>*</sup> | b <sup>*++</sup> | b <sup>0</sup>  | b <sup>0++</sup> | Seq. | y               | y <sup>++</sup> | y <sup>*</sup> | y <sup>*++</sup> | y <sup>0</sup> | y <sup>0++</sup> | #  |
|----|------------------|-----------------|----------------|------------------|-----------------|------------------|------|-----------------|-----------------|----------------|------------------|----------------|------------------|----|
| 1  | 73.0414          | 37.0244         |                |                  |                 |                  | A    |                 |                 |                |                  |                |                  | 11 |
| 2  | 175.0861         | 88.0467         |                |                  | 157.0756        | 79.0414          | T    | 1143.5900       | 572.2986        | 1125.5664      | 563.2868         | 1125.5794      | 563.2934         | 10 |
| 3  | 289.1672         | 145.0873        |                |                  | 271.1567        | 136.0820         | I    | 1041.5453       | 521.2763        | 1023.5217      | 512.2645         | 1023.5347      | 512.2710         | 9  |
| 4  | <b>377.1963</b>  | 189.1018        |                |                  | <b>359.1857</b> | 180.0965         | S    | 927.4642        | 464.2357        | 909.4406       | 455.2239         | 909.4536       | 455.2304         | 8  |
| 5  | <b>477.2617</b>  | 239.1345        |                |                  | <b>459.2512</b> | 230.1292         | V    | <b>839.4351</b> | 420.2212        | 821.4115       | 411.2094         | 821.4246       | 411.2159         | 7  |
| 6  | <b>577.3272</b>  | 289.1672        |                |                  | 559.3166        | 280.1620         | V    | <b>739.3697</b> | 370.1885        | 721.3461       | 361.1767         | 721.3591       | 361.1832         | 6  |
| 7  | <b>693.3512</b>  | 347.1792        |                |                  | 675.3406        | 338.1739         | D    | 639.3042        | 320.1558        | 621.2806       | 311.1440         | 621.2937       | 311.1505         | 5  |
| 8  | 807.4323         | 404.2198        |                |                  | 789.4217        | 395.2145         | I    | 523.2802        | 262.1438        | 505.2567       | 253.1320         | 505.2697       | 253.1385         | 4  |
| 9  | 937.4849         | 469.2461        | 919.4613       | 460.2343         | 919.4744        | 460.2408         | Q    | 409.1991        | 205.1032        | 391.1756       | 196.0914         | 391.1886       | 196.0979         | 3  |
| 10 | <b>1067.5246</b> | 534.2659        | 1049.5010      | 525.2541         | 1049.5140       | 525.2606         | E    | 279.1465        | 140.0769        | 261.1229       | 131.0651         | 261.1359       | 131.0716         | 2  |
| 11 |                  |                 |                |                  |                 |                  | K    | 149.1069        | 75.0571         | 131.0833       | 66.0453          |                |                  | 1  |

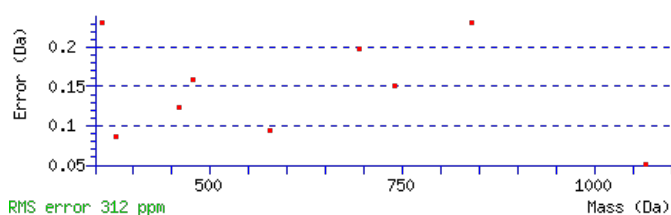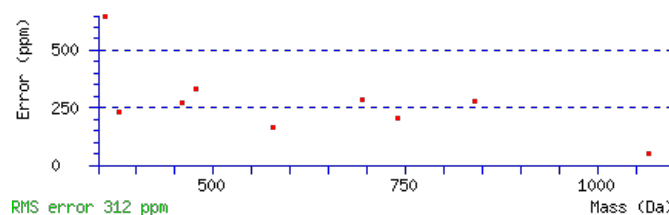

NCBI **BLAST** search of **ATISVVDIQEK**

(Parameters: blastp, nr protein database, expect=20000, no filter, PAM30)

Other BLAST [web gateways](#)

All matches to this query



## AT5G05540.1

| Score | Mr(calc)  | Delta   | Sequence                     |
|-------|-----------|---------|------------------------------|
| 31.1  | 1214.6169 | 0.0022  | <a href="#">ATISVVDIQEK</a>  |
| 30.8  | 1214.6195 | -0.0005 | <a href="#">RTGSIVDVPAGK</a> |
| 15.0  | 1214.6218 | -0.0027 | <a href="#">KTLEHLQFGK</a>   |
| 12.2  | 1214.6196 | -0.0005 | <a href="#">KNQASKAIDPK</a>  |
| 5.8   | 1214.6195 | -0.0005 | <a href="#">LRDALNEQLK</a>   |
| 2.8   | 1214.6195 | -0.0005 | <a href="#">VRVDLNELNK</a>   |
| 2.7   | 1214.6169 | 0.0021  | <a href="#">LSAISIAEAEAK</a> |
| 2.4   | 1214.6225 | -0.0035 | <a href="#">EIETMKPLVK</a>   |
| 1.8   | 1214.6169 | 0.0022  | <a href="#">DTKEEGVAIIK</a>  |
| 1.7   | 1214.6169 | 0.0022  | <a href="#">AVETASVSTIPK</a> |

Mascot: <http://www.matrixscience.com/>

## Peptide View

### MS/MS Fragmentation of **NPSFRESVK**

Found in **AT5G05920.1** in **TAIR\_Arabidopsis**, Symbols: EDA22, DHS | DHS (embryo sac development arrest 22) | chr5:1777782-1779700  
REVERSE

Match to Query 3054: 1076.501338 from(539.257945,2+) index(2768)

Title: Elution from: 28.326 to 28.326 scan no 3430 cid35.00 polarity:+

Data file 0-3\_2.mgf

Click mouse within plot area to zoom in by factor of two about that point

Or,   to  Da

Label all possible matches  Label matches used for scoring

Show Y-axis

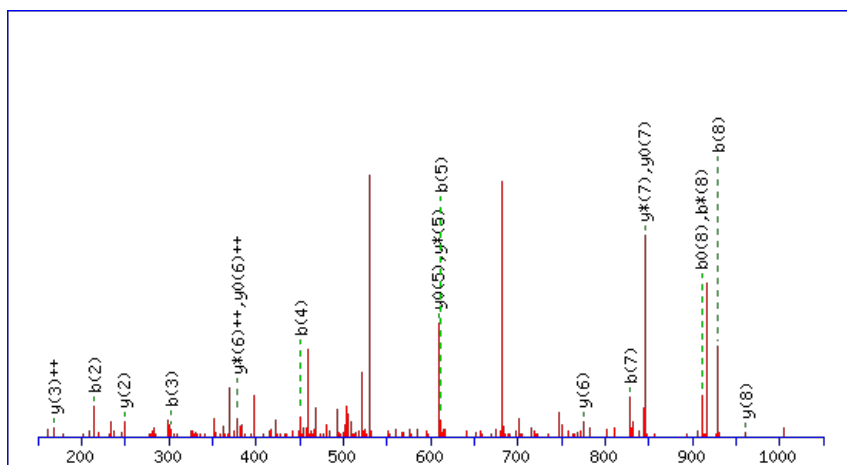

Monoisotopic mass of neutral peptide  $M_r(\text{calc})$ : 1076.5043

Fixed modifications: Carbamidomethyl (C) (apply to specified residues or termini only)

Ions Score: 27 Expect: 0.016

Matches : 18/88 fragment ions using 42 most intense peaks ([help](#))

| # | b               | b <sup>++</sup> | b*              | b <sup>*++</sup> | b <sup>0</sup>  | b <sup>0++</sup> | Seq. | y               | y <sup>++</sup> | y*              | y <sup>*++</sup> | y <sup>0</sup>  | y <sup>0++</sup> | # |
|---|-----------------|-----------------|-----------------|------------------|-----------------|------------------|------|-----------------|-----------------|-----------------|------------------|-----------------|------------------|---|
| 1 | 117.0443        | 59.0258         | 99.0207         | 50.0140          |                 |                  | N    |                 |                 |                 |                  |                 |                  | 9 |
| 2 | <b>215.0941</b> | 108.0507        | 197.0705        | 99.0389          |                 |                  | P    | <b>961.4746</b> | 481.2409        | 943.4510        | 472.2291         | 943.4640        | 472.2356         | 8 |
| 3 | <b>303.1231</b> | 152.0652        | 285.0996        | 143.0534         | 285.1126        | 143.0599         | S    | 863.4248        | 432.2160        | <b>845.4012</b> | 423.2042         | <b>845.4142</b> | 423.2107         | 7 |
| 4 | <b>451.1886</b> | 226.0979        | 433.1650        | 217.0861         | 433.1780        | 217.0926         | F    | <b>775.3957</b> | 388.2015        | 757.3721        | <b>379.1897</b>  | 757.3851        | <b>379.1962</b>  | 6 |
| 5 | <b>611.2778</b> | 306.1426        | 593.2543        | 297.1308         | 593.2673        | 297.1373         | R    | 627.3303        | 314.1688        | <b>609.3067</b> | 305.1570         | <b>609.3197</b> | 305.1635         | 5 |
| 6 | 741.3175        | 371.1624        | 723.2939        | 362.1506         | 723.3069        | 362.1571         | E    | 467.2410        | 234.1241        | 449.2174        | 225.1124         | 449.2304        | 225.1189         | 4 |
| 7 | <b>829.3465</b> | 415.1769        | 811.3229        | 406.1651         | 811.3360        | 406.1716         | S    | 337.2014        | <b>169.1043</b> | 319.1778        | 160.0925         | 319.1908        | 160.0990         | 3 |
| 8 | <b>929.4120</b> | 465.2096        | <b>911.3884</b> | 456.1978         | <b>911.4014</b> | 456.2043         | V    | <b>249.1723</b> | 125.0898        | 231.1487        | 116.0780         |                 |                  | 2 |
| 9 |                 |                 |                 |                  |                 |                  | K    | 149.1069        | 75.0571         | 131.0833        | 66.0453          |                 |                  | 1 |

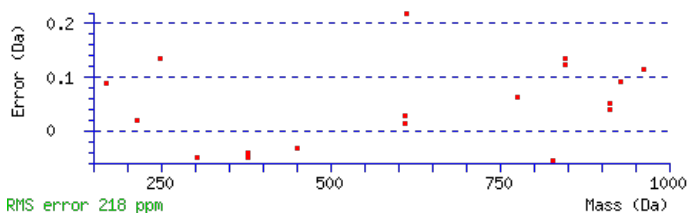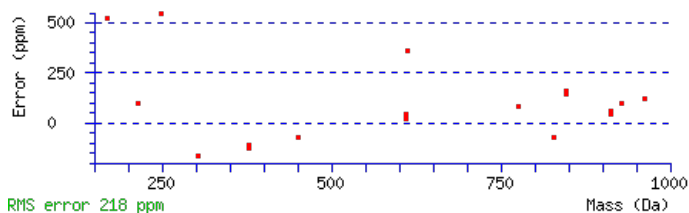

NCBI **BLAST** search of **NPSFRESVK**

(Parameters: blastp, nr protein database, expect=20000, no filter, PAM30)

Other BLAST [web gateways](#)

All matches to this query

| Score | $M_r(\text{calc})$ | Delta | Sequence |
|-------|--------------------|-------|----------|
|       |                    |       |          |

**AT5G05920.1**

|      |           |         |                            |
|------|-----------|---------|----------------------------|
| 27.2 | 1076.5043 | -0.0030 | <a href="#">NPSFRESVK</a>  |
| 11.5 | 1076.5016 | -0.0003 | <a href="#">SASEVVFAEK</a> |
| 9.3  | 1076.5038 | -0.0025 | <a href="#">DDPAFYVLK</a>  |
| 8.2  | 1076.5003 | 0.0011  | <a href="#">AMKVENMVK</a>  |
| 6.2  | 1076.4995 | 0.0018  | <a href="#">RAVWMVER</a>   |
| 5.7  | 1076.5003 | 0.0011  | <a href="#">AMKVENMVK</a>  |
| 5.7  | 1076.5003 | 0.0011  | <a href="#">IVSMAVMNGK</a> |
| 5.2  | 1076.5016 | -0.0003 | <a href="#">KDESDVVK</a>   |
| 4.4  | 1076.5002 | 0.0011  | <a href="#">MVKTEICGK</a>  |
| 4.3  | 1076.5002 | 0.0011  | <a href="#">GKLMGVEGMK</a> |

**Mascot:** <http://www.matrixscience.com/>

**Peptide View**MS/MS Fragmentation of **ENLVKSCAGIEK**Found in **AT5G05940.1** in **TAIR\_Arabidopsis**, Symbols: ATROPGEF5, ROPGEF5 | ATROPGEF5/ROPGEF5 (KINASE PARTNER PROTEIN-LIKE); Rho guanyl-nucleotide exchange factor/ | chr5:1786029-1788364 FORWARD

Match to Query 4971: 1346.687024 from(674.350788,2+) index(5521)

Title: Elution from: 50.385 to 50.385 scan no 6983 cid35.00 polarity:+

Data file D6h-2\_2.mgf

Click mouse within plot area to zoom in by factor of two about that point

Or,   to  Da Label all possible matches  Label matches used for scoring Show Y-axis 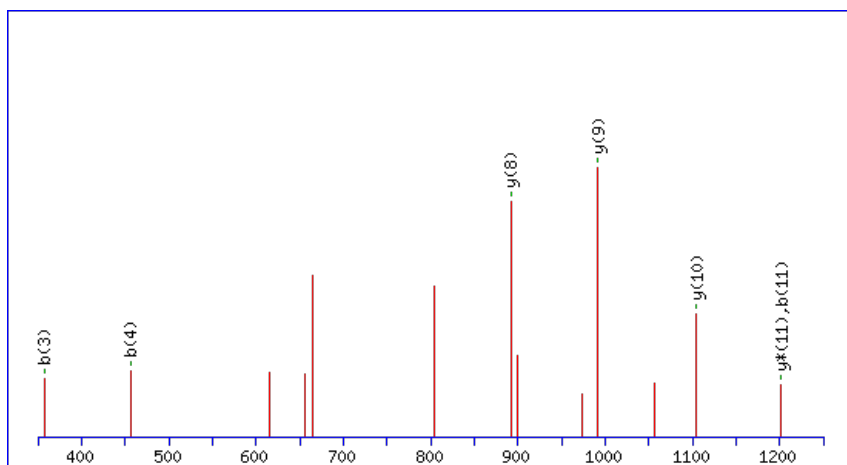Monoisotopic mass of neutral peptide  $M_r(\text{calc})$ : 1346.6864

Fixed modifications: Carbamidomethyl (C) (apply to specified residues or termini only)

Ions Score: 21 Expect: 0.041

Matches : 7/128 fragment ions using 12 most intense peaks ([help](#))

| #  | b         | b <sup>++</sup> | b*        | b <sup>*++</sup> | b <sup>0</sup> | b <sup>0++</sup> | Seq. | y         | y <sup>++</sup> | y*        | y <sup>*++</sup> | y <sup>0</sup> | y <sup>0++</sup> | #  |
|----|-----------|-----------------|-----------|------------------|----------------|------------------|------|-----------|-----------------|-----------|------------------|----------------|------------------|----|
| 1  | 130.0499  | 65.5286         |           |                  | 112.0393       | 56.5233          | E    |           |                 |           |                  |                |                  | 12 |
| 2  | 244.0928  | 122.5500        | 227.0662  | 114.0368         | 226.0822       | 113.5448         | N    | 1218.6511 | 609.8292        | 1201.6245 | 601.3159         | 1200.6405      | 600.8239         | 11 |
| 3  | 357.1769  | 179.0921        | 340.1503  | 170.5788         | 339.1663       | 170.0868         | L    | 1104.6082 | 552.8077        | 1087.5816 | 544.2944         | 1086.5976      | 543.8024         | 10 |
| 4  | 456.2453  | 228.6263        | 439.2187  | 220.1130         | 438.2347       | 219.6210         | V    | 991.5241  | 496.2657        | 974.4975  | 487.7524         | 973.5135       | 487.2604         | 9  |
| 5  | 584.3402  | 292.6738        | 567.3137  | 284.1605         | 566.3297       | 283.6685         | K    | 892.4557  | 446.7315        | 875.4291  | 438.2182         | 874.4451       | 437.7262         | 8  |
| 6  | 671.3723  | 336.1898        | 654.3457  | 327.6765         | 653.3617       | 327.1845         | S    | 764.3607  | 382.6840        | 747.3342  | 374.1707         | 746.3502       | 373.6787         | 7  |
| 7  | 831.4029  | 416.2051        | 814.3764  | 407.6918         | 813.3923       | 407.1998         | C    | 677.3287  | 339.1680        | 660.3021  | 330.6547         | 659.3181       | 330.1627         | 6  |
| 8  | 902.4400  | 451.7237        | 885.4135  | 443.2104         | 884.4295       | 442.7184         | A    | 517.2980  | 259.1527        | 500.2715  | 250.6394         | 499.2875       | 250.1474         | 5  |
| 9  | 959.4615  | 480.2344        | 942.4349  | 471.7211         | 941.4509       | 471.2291         | G    | 446.2609  | 223.6341        | 429.2344  | 215.1208         | 428.2504       | 214.6288         | 4  |
| 10 | 1072.5456 | 536.7764        | 1055.5190 | 528.2631         | 1054.5350      | 527.7711         | I    | 389.2395  | 195.1234        | 372.2129  | 186.6101         | 371.2289       | 186.1181         | 3  |
| 11 | 1201.5881 | 601.2977        | 1184.5616 | 592.7844         | 1183.5776      | 592.2924         | E    | 276.1554  | 138.5813        | 259.1288  | 130.0681         | 258.1448       | 129.5761         | 2  |
| 12 |           |                 |           |                  |                |                  | K    | 147.1128  | 74.0600         | 130.0863  | 65.5468          |                |                  | 1  |

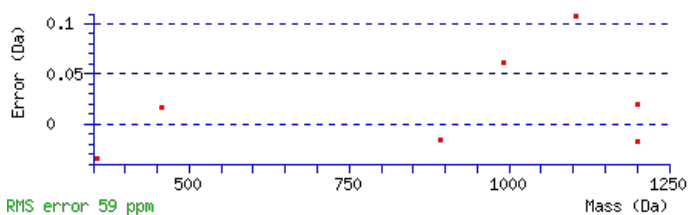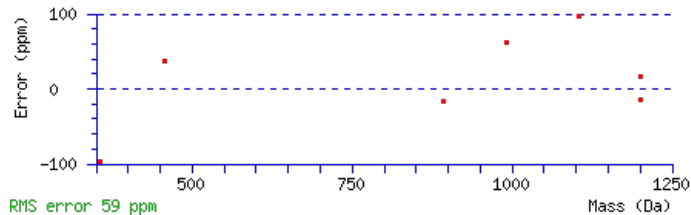NCBI BLAST search of **ENLVKSCAGIEK**

(Parameters: blastp, nr protein database, expect=20000, no filter, PAM30)

Other BLAST [web gateways](#)

**AT5G05940.1**

All matches to this query

| Score | Mr(calc)  | Delta   | Sequence                      |
|-------|-----------|---------|-------------------------------|
| 20.8  | 1346.6864 | 0.0007  | <a href="#">ENLVKSCAGIEK</a>  |
| 12.7  | 1346.6904 | -0.0034 | <a href="#">LNELWVSMVEK</a>   |
| 11.1  | 1346.6830 | 0.0040  | <a href="#">ERFVQESDIPK</a>   |
| 8.3   | 1346.6864 | 0.0006  | <a href="#">KDMGPTKTDLGGK</a> |
| 2.0   | 1346.6864 | 0.0007  | <a href="#">EVKLGCEEQKK</a>   |
| 1.8   | 1346.6904 | -0.0034 | <a href="#">NFPPKEVMEIK</a>   |
| 1.5   | 1346.6904 | -0.0034 | <a href="#">CGIAIEPSYPIK</a>  |

**Mascot:** <http://www.matrixscience.com/>

**Peptide View**MS/MS Fragmentation of **TSLVETLLEK**

Found in **AT5G06060.1** in **TAIR\_Arabidopsis**, Symbols: | tropinone reductase, putative / tropine dehydrogenase, putative | chr5:1824067-1825834  
REVERSE

Match to Query 3604: 1131.636938 from(566.825745,2+) index(8290)

Title: Elution from: 74.078 to 74.078 scan no 11020 cid35.00 polarity:+

Data file D6h-1\_2.mgf

Click mouse within plot area to zoom in by factor of two about that point

Or,   to  Da

Label all possible matches  Label matches used for scoring

Show Y-axis

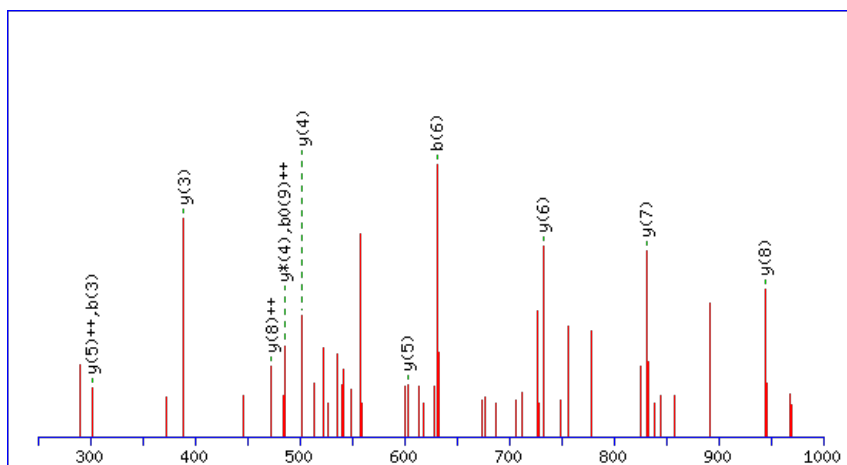

**Monoisotopic mass of neutral peptide Mr(calc):** 1131.6387

**Fixed modifications:** Carbamidomethyl (C) (apply to specified residues or termini only)

**Ions Score:** 34 **Expect:** 0.0013

**Matches:** 12/88 fragment ions using 21 most intense peaks ([help](#))

| #  | b               | b <sup>++</sup> | b <sup>0</sup> | b <sup>0++</sup> | Seq. | y               | y <sup>++</sup> | y*              | y <sup>*++</sup> | y <sup>0</sup> | y <sup>0++</sup> | #  |
|----|-----------------|-----------------|----------------|------------------|------|-----------------|-----------------|-----------------|------------------|----------------|------------------|----|
| 1  | 102.0550        | 51.5311         | 84.0444        | 42.5258          | T    |                 |                 |                 |                  |                |                  | 10 |
| 2  | 189.0870        | 95.0471         | 171.0764       | 86.0418          | S    | 1031.5983       | 516.3028        | 1014.5718       | 507.7895         | 1013.5877      | 507.2975         | 9  |
| 3  | <b>302.1710</b> | 151.5892        | 284.1605       | 142.5839         | L    | <b>944.5663</b> | <b>472.7868</b> | 927.5397        | 464.2735         | 926.5557       | 463.7815         | 8  |
| 4  | 401.2395        | 201.1234        | 383.2289       | 192.1181         | V    | <b>831.4822</b> | 416.2447        | 814.4557        | 407.7315         | 813.4716       | 407.2395         | 7  |
| 5  | 530.2821        | 265.6447        | 512.2715       | 256.6394         | E    | <b>732.4138</b> | 366.7105        | 715.3872        | 358.1973         | 714.4032       | 357.7053         | 6  |
| 6  | <b>631.3297</b> | 316.1685        | 613.3192       | 307.1632         | T    | <b>603.3712</b> | <b>302.1892</b> | 586.3447        | 293.6760         | 585.3606       | 293.1840         | 5  |
| 7  | 744.4138        | 372.7105        | 726.4032       | 363.7053         | L    | <b>502.3235</b> | 251.6654        | <b>485.2970</b> | 243.1521         | 484.3130       | 242.6601         | 4  |
| 8  | 857.4979        | 429.2526        | 839.4873       | 420.2473         | L    | <b>389.2395</b> | 195.1234        | 372.2129        | 186.6101         | 371.2289       | 186.1181         | 3  |
| 9  | 986.5405        | 493.7739        | 968.5299       | <b>484.7686</b>  | E    | 276.1554        | 138.5813        | 259.1288        | 130.0681         | 258.1448       | 129.5761         | 2  |
| 10 |                 |                 |                |                  | K    | 147.1128        | 74.0600         | 130.0863        | 65.5468          |                |                  | 1  |

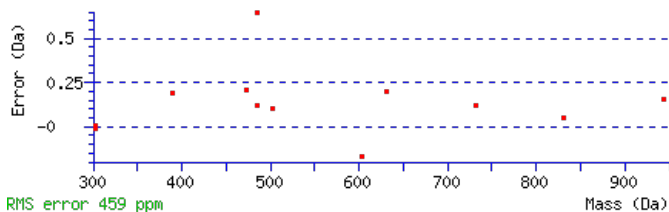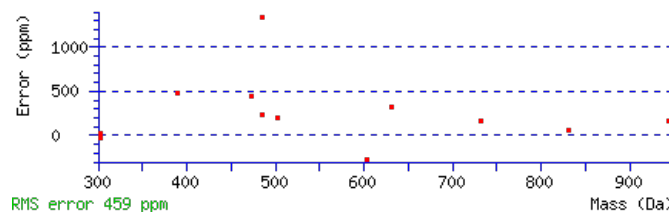

NCBI **BLAST** search of [TSLVETLLEK](#)

(Parameters: blastp, nr protein database, expect=20000, no filter, PAM30)

Other BLAST [web gateways](#)

**All matches to this query**

AT5G06060.1

| Score | Mr(calc)  | Delta   | Sequence                   |
|-------|-----------|---------|----------------------------|
| 34.3  | 1131.6387 | -0.0017 | <a href="#">TSLVETLLEK</a> |
| 4.8   | 1131.6387 | -0.0017 | <a href="#">SSLLEITEIK</a> |

Mascot: <http://www.matrixscience.com/>

### Peptide View

 MS/MS Fragmentation of **TLQALQYVQENPDEVCPAGWKPGEEK**

 Found in **AT5G06290.1** in **TAIR\_Arabidopsis**, Symbols: 2-CYS PRX B | 2-cys peroxiredoxin, chloroplast, putative | chr5:1919381-1921212 FORWARD

Match to Query 11206: 2856.370200 from(953.130676,3+) index(7810)

Title: Elution from 68.700 to 68.700 scan no 10137 cid35.00 polarity:+

Data file C7-2\_1.mgf

Click mouse within plot area to zoom in by factor of two about that point

 Or,   to  Da 

 Label all possible matches  Label matches used for scoring 

 Show Y-axis 
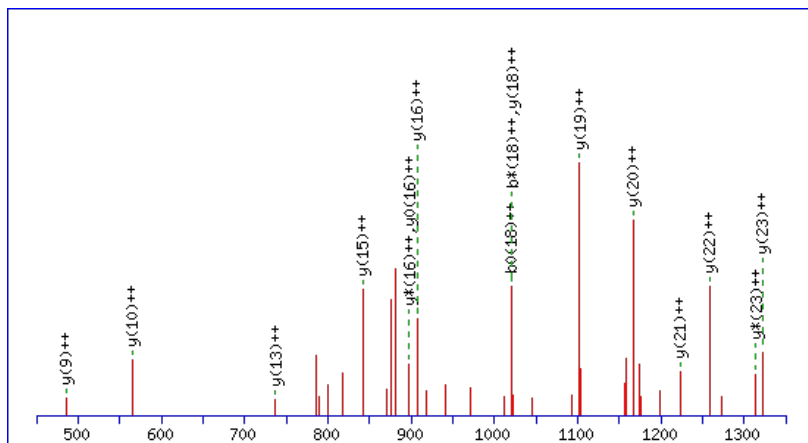
 Monoisotopic mass of neutral peptide **Mr(calc)**: 2856.3752

Fixed modifications: Carbamidomethyl (C) (apply to specified residues or termini only)

 Ions Score: 88 **Expect**: 5.3e-009

 Matches : 16/282 fragment ions using 15 most intense peaks ([help](#))

| #  | b         | b <sup>++</sup> | b <sup>*</sup> | b <sup>*++</sup> | b <sup>0</sup> | b <sup>0++</sup> | Seq. | y         | y <sup>++</sup> | y <sup>*</sup> | y <sup>*++</sup> | y <sup>0</sup> | y <sup>0++</sup> | #  |
|----|-----------|-----------------|----------------|------------------|----------------|------------------|------|-----------|-----------------|----------------|------------------|----------------|------------------|----|
| 1  | 102.0550  | 51.5311         |                |                  | 84.0444        | 42.5258          | T    |           |                 |                |                  |                |                  | 25 |
| 2  | 215.1390  | 108.0731        |                |                  | 197.1285       | 99.0679          | L    | 2756.3348 | 1378.6711       | 2739.3083      | 1370.1578        | 2738.3243      | 1369.6658        | 24 |
| 3  | 343.1976  | 172.1024        | 326.1710       | 163.5892         | 325.1870       | 163.0972         | Q    | 2643.2508 | 1322.1290       | 2626.2242      | 1313.6158        | 2625.2402      | 1313.1237        | 23 |
| 4  | 414.2347  | 207.6210        | 397.2082       | 199.1077         | 396.2241       | 198.6157         | A    | 2515.1922 | 1258.0997       | 2498.1657      | 1249.5865        | 2497.1816      | 1249.0945        | 22 |
| 5  | 527.3188  | 264.1630        | 510.2922       | 255.6498         | 509.3082       | 255.1577         | L    | 2444.1551 | 1222.5812       | 2427.1285      | 1214.0679        | 2426.1445      | 1213.5759        | 21 |
| 6  | 655.3774  | 328.1923        | 638.3508       | 319.6790         | 637.3668       | 319.1870         | Q    | 2331.0710 | 1166.0392       | 2314.0445      | 1157.5259        | 2313.0605      | 1157.0339        | 20 |
| 7  | 818.4407  | 409.7240        | 801.4141       | 401.2107         | 800.4301       | 400.7187         | Y    | 2203.0124 | 1102.0099       | 2185.9859      | 1093.4966        | 2185.0019      | 1093.0046        | 19 |
| 8  | 917.5091  | 459.2582        | 900.4825       | 450.7449         | 899.4985       | 450.2529         | V    | 2039.9491 | 1020.4782       | 2022.9226      | 1011.9649        | 2021.9386      | 1011.4729        | 18 |
| 9  | 1045.5677 | 523.2875        | 1028.5411      | 514.7742         | 1027.5571      | 514.2822         | Q    | 1940.8807 | 970.9440        | 1923.8542      | 962.4307         | 1922.8701      | 961.9387         | 17 |
| 10 | 1174.6103 | 587.8088        | 1157.5837      | 579.2955         | 1156.5997      | 578.8035         | E    | 1812.8221 | 906.9147        | 1795.7956      | 898.4014         | 1794.8116      | 897.9094         | 16 |
| 11 | 1288.6532 | 644.8302        | 1271.6266      | 636.3170         | 1270.6426      | 635.8250         | N    | 1683.7795 | 842.3934        | 1666.7530      | 833.8801         | 1665.7690      | 833.3881         | 15 |
| 12 | 1385.7060 | 693.3566        | 1368.6794      | 684.8433         | 1367.6954      | 684.3513         | P    | 1569.7366 | 785.3719        | 1552.7101      | 776.8587         | 1551.7260      | 776.3667         | 14 |
| 13 | 1500.7329 | 750.8701        | 1483.7064      | 742.3568         | 1482.7223      | 741.8648         | D    | 1472.6838 | 736.8456        | 1455.6573      | 728.3323         | 1454.6733      | 727.8403         | 13 |
| 14 | 1629.7755 | 815.3914        | 1612.7489      | 806.8781         | 1611.7649      | 806.3861         | E    | 1357.6569 | 679.3321        | 1340.6304      | 670.8188         | 1339.6463      | 670.3268         | 12 |
| 15 | 1728.8439 | 864.9256        | 1711.8174      | 856.4123         | 1710.8333      | 855.9203         | V    | 1228.6143 | 614.8108        | 1211.5878      | 606.2975         | 1210.6037      | 605.8055         | 11 |
| 16 | 1888.8746 | 944.9409        | 1871.8480      | 936.4276         | 1870.8640      | 935.9356         | C    | 1129.5459 | 565.2766        | 1112.5193      | 556.7633         | 1111.5353      | 556.2713         | 10 |
| 17 | 1985.9273 | 993.4673        | 1968.9008      | 984.9540         | 1967.9168      | 984.4620         | P    | 969.5152  | 485.2613        | 952.4887       | 476.7480         | 951.5047       | 476.2560         | 9  |
| 18 | 2056.9644 | 1028.9859       | 2039.9379      | 1020.4726        | 2038.9539      | 1019.9806        | A    | 872.4625  | 436.7349        | 855.4359       | 428.2216         | 854.4519       | 427.7296         | 8  |
| 19 | 2113.9859 | 1057.4966       | 2096.9594      | 1048.9833        | 2095.9753      | 1048.4913        | G    | 801.4254  | 401.2163        | 784.3988       | 392.7030         | 783.4148       | 392.2110         | 7  |
| 20 | 2300.0652 | 1150.5362       | 2283.0387      | 1142.0230        | 2282.0546      | 1141.5310        | W    | 744.4039  | 372.7056        | 727.3774       | 364.1923         | 726.3933       | 363.7003         | 6  |
| 21 | 2428.1602 | 1214.5837       | 2411.1336      | 1206.0705        | 2410.1496      | 1205.5784        | K    | 558.3246  | 279.6659        | 541.2980       | 271.1527         | 540.3140       | 270.6606         | 5  |
| 22 | 2525.2129 | 1263.1101       | 2508.1864      | 1254.5968        | 2507.2024      | 1254.1048        | P    | 430.2296  | 215.6185        | 413.2031       | 207.1052         | 412.2191       | 206.6132         | 4  |
| 23 | 2582.2344 | 1291.6208       | 2565.2079      | 1283.1076        | 2564.2238      | 1282.6156        | G    | 333.1769  | 167.0921        | 316.1503       | 158.5788         | 315.1663       | 158.0868         | 3  |
| 24 | 2711.2770 | 1356.1421       | 2694.2504      | 1347.6289        | 2693.2664      | 1347.1369        | E    | 276.1554  | 138.5813        | 259.1288       | 130.0681         | 258.1448       | 129.5761         | 2  |
| 25 |           |                 |                |                  |                |                  | K    | 147.1128  | 74.0600         | 130.0863       | 65.5468          |                |                  | 1  |



# AT5G06290.1

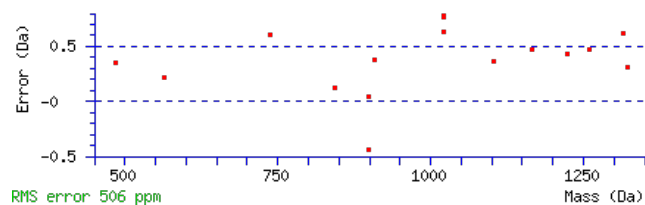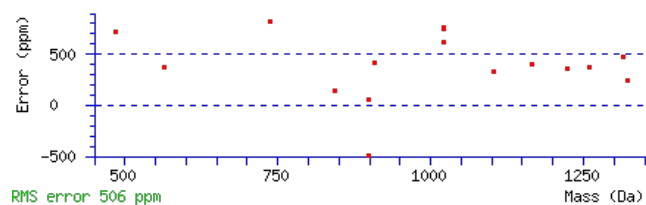

NCBI **BLAST** search of [TLQALQYVQENPDEVCPAGWKPGEK](#)  
 (Parameters: blastp, nr protein database, expect=20000, no filter, PAM30)  
 Other BLAST [web gateways](#)

## All matches to this query

| Score | Mr(calc)  | Delta   | Sequence                                     |
|-------|-----------|---------|----------------------------------------------|
| 88.1  | 2856.3752 | -0.0050 | <a href="#">TLQALQYVQENPDEVCPAGWKPGEK</a>    |
| 6.0   | 2856.3752 | -0.0050 | <a href="#">TNFYEGIGLNTKEFDMHVIIETNR</a>     |
| 0.8   | 2856.3679 | 0.0023  | <a href="#">FEYNDDLQSGGQSVGGTQVLNHFVAPPK</a> |

Mascot: <http://www.matrixscience.com/>

**Peptide View**MS/MS Fragmentation of **QFLFR**

Found in **AT5G06460.1** in **TAIR\_Arabidopsis**, Symbols: ATUBA2 | ATUBA2 (Arabidopsis thaliana ubiquitin activating enzyme 2); ubiquitin activating enzyme | chr5:1970240-1974383 FORWARD

Match to Query 759: 709.390156 from(355.702354,2+) index(4821)

Title: Elution from: 43.621 to 43.621 scan no 5980 cid35.00 polarity:+

Data file D12h-1\_1.mgf

Click mouse within plot area to zoom in by factor of two about that point

Or,   to  Da

Label all possible matches  Label matches used for scoring

Show Y-axis

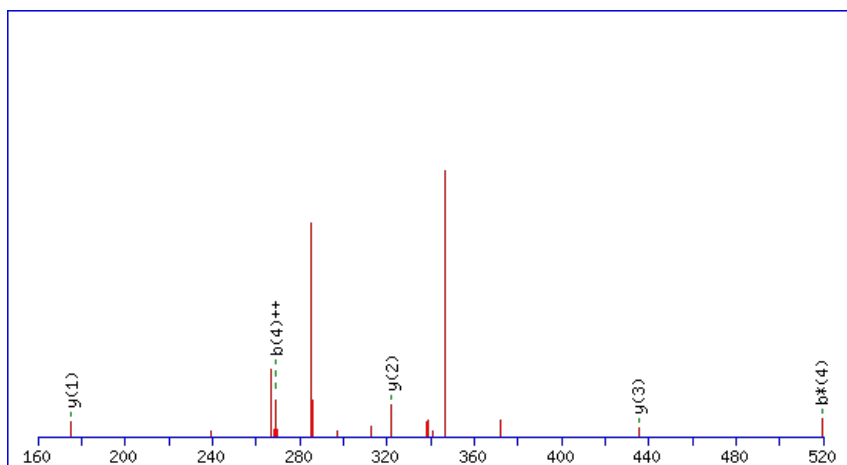

**Monoisotopic mass of neutral peptide Mr(calc):** 709.3911

**Fixed modifications:** Carbamidomethyl (C) (apply to specified residues or termini only)

**Ions Score:** 14 **Expect:** 0.042

**Matches:** 5/32 fragment ions using 10 most intense peaks ([help](#))

| # | b        | b <sup>++</sup> | b*              | b <sup>*++</sup> | Seq. | y               | y <sup>++</sup> | y*       | y <sup>*++</sup> | # |
|---|----------|-----------------|-----------------|------------------|------|-----------------|-----------------|----------|------------------|---|
| 1 | 129.0659 | 65.0366         | 112.0393        | 56.5233          | Q    |                 |                 |          |                  | 5 |
| 2 | 276.1343 | 138.5708        | 259.1077        | 130.0575         | F    | 582.3398        | 291.6736        | 565.3133 | 283.1603         | 4 |
| 3 | 389.2183 | 195.1128        | 372.1918        | 186.5995         | L    | <b>435.2714</b> | 218.1394        | 418.2449 | 209.6261         | 3 |
| 4 | 536.2867 | <b>268.6470</b> | <b>519.2602</b> | 260.1337         | F    | <b>322.1874</b> | 161.5973        | 305.1608 | 153.0840         | 2 |
| 5 |          |                 |                 |                  | R    | <b>175.1190</b> | 88.0631         | 158.0924 | 79.5498          | 1 |

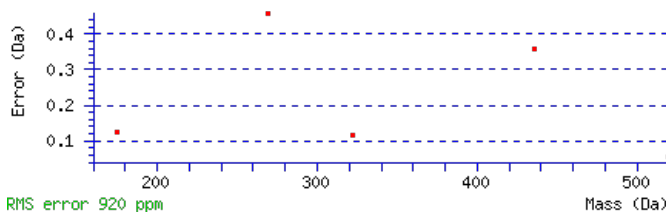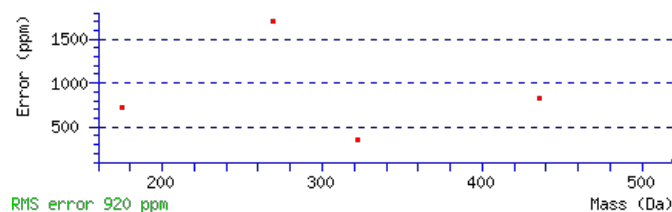NCBI **BLAST** search of **QFLFR**

(Parameters: blastp, nr protein database, expect=20000, no filter, PAM30)

Other BLAST [web gateways](#)

**All matches to this query**

| Score | Mr(calc) | Delta   | Sequence               |
|-------|----------|---------|------------------------|
| 13.8  | 709.3911 | -0.0010 | <a href="#">QFLFR</a>  |
| 6.6   | 709.3911 | -0.0010 | <a href="#">FOFLR</a>  |
| 6.6   | 709.3911 | -0.0010 | <a href="#">GFAFLR</a> |
| 6.6   | 709.3911 | -0.0010 | <a href="#">KFYPR</a>  |

# AT5G06460.1

|     |          |         |                        |
|-----|----------|---------|------------------------|
| 2.5 | 709.3911 | -0.0010 | <a href="#">LQFFR</a>  |
| 2.5 | 709.3911 | -0.0010 | <a href="#">QIFFR</a>  |
| 1.2 | 709.3911 | -0.0010 | <a href="#">FFALGR</a> |

**Mascot:** <http://www.matrixscience.com/>

## Peptide View

MS/MS Fragmentation of **AVDYSGPSLSYYINK**

Found in **AT5G07020.1** in **TAIR\_Arabidopsis**, Symbols: | proline-rich family protein | chr5:2180670-2182285 REVERSE

Match to Query 7621: 1675.807924 from(838.911238,2+) index(6781)

Title: Elution from: 59.524 to 59.524 scan no 8847 cid35.00 polarity:+

Data file 0-2\_3.mgf

Click mouse within plot area to zoom in by factor of two about that point

Or,   to  Da

Label all possible matches  Label matches used for scoring

Show Y-axis

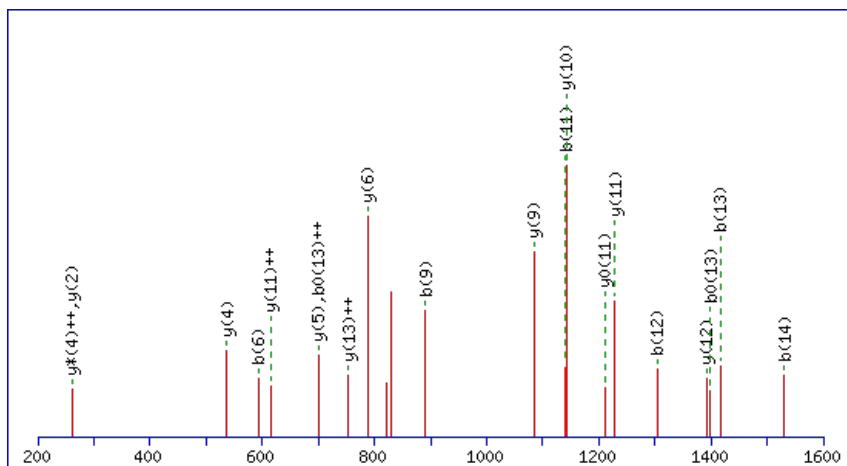

Monoisotopic mass of neutral peptide  $M_r(\text{calc})$ : 1675.8093

Fixed modifications: Carbamidomethyl (C) (apply to specified residues or termini only)

Ions Score: 90 Expect: 2.6e-009

Matches : 20/128 fragment ions using 20 most intense peaks ([help](#))

| #  | b         | b <sup>++</sup> | b*        | b <sup>*++</sup> | b <sup>0</sup> | b <sup>0++</sup> | Seq. | y         | y <sup>++</sup> | y*        | y <sup>*++</sup> | y <sup>0</sup> | y <sup>0++</sup> | #  |
|----|-----------|-----------------|-----------|------------------|----------------|------------------|------|-----------|-----------------|-----------|------------------|----------------|------------------|----|
| 1  | 72.0444   | 36.5258         |           |                  |                |                  | A    |           |                 |           |                  |                |                  | 15 |
| 2  | 171.1128  | 86.0600         |           |                  |                |                  | V    | 1605.7795 | 803.3934        | 1588.7530 | 794.8801         | 1587.7690      | 794.3881         | 14 |
| 3  | 286.1397  | 143.5735        |           |                  | 268.1292       | 134.5682         | D    | 1506.7111 | 753.8592        | 1489.6846 | 745.3459         | 1488.7005      | 744.8539         | 13 |
| 4  | 449.2031  | 225.1052        |           |                  | 431.1925       | 216.0999         | Y    | 1391.6842 | 696.3457        | 1374.6576 | 687.8324         | 1373.6736      | 687.3404         | 12 |
| 5  | 536.2351  | 268.6212        |           |                  | 518.2245       | 259.6159         | S    | 1228.6208 | 614.8141        | 1211.5943 | 606.3008         | 1210.6103      | 605.8088         | 11 |
| 6  | 593.2566  | 297.1319        |           |                  | 575.2460       | 288.1266         | G    | 1141.5888 | 571.2980        | 1124.5623 | 562.7848         | 1123.5782      | 562.2928         | 10 |
| 7  | 690.3093  | 345.6583        |           |                  | 672.2988       | 336.6530         | P    | 1084.5673 | 542.7873        | 1067.5408 | 534.2740         | 1066.5568      | 533.7820         | 9  |
| 8  | 777.3414  | 389.1743        |           |                  | 759.3308       | 380.1690         | S    | 987.5146  | 494.2609        | 970.4880  | 485.7477         | 969.5040       | 485.2556         | 8  |
| 9  | 890.4254  | 445.7164        |           |                  | 872.4149       | 436.7111         | L    | 900.4825  | 450.7449        | 883.4560  | 442.2316         | 882.4720       | 441.7396         | 7  |
| 10 | 977.4575  | 489.2324        |           |                  | 959.4469       | 480.2271         | S    | 787.3985  | 394.2029        | 770.3719  | 385.6896         | 769.3879       | 385.1976         | 6  |
| 11 | 1140.5208 | 570.7640        |           |                  | 1122.5102      | 561.7587         | Y    | 700.3665  | 350.6869        | 683.3399  | 342.1736         |                |                  | 5  |
| 12 | 1303.5841 | 652.2957        |           |                  | 1285.5735      | 643.2904         | Y    | 537.3031  | 269.1552        | 520.2766  | 260.6419         |                |                  | 4  |
| 13 | 1416.6682 | 708.8377        |           |                  | 1398.6576      | 699.8324         | I    | 374.2398  | 187.6235        | 357.2132  | 179.1103         |                |                  | 3  |
| 14 | 1530.7111 | 765.8592        | 1513.6846 | 757.3459         | 1512.7005      | 756.8539         | N    | 261.1557  | 131.0815        | 244.1292  | 122.5682         |                |                  | 2  |
| 15 |           |                 |           |                  |                |                  | K    | 147.1128  | 74.0600         | 130.0863  | 65.5468          |                |                  | 1  |

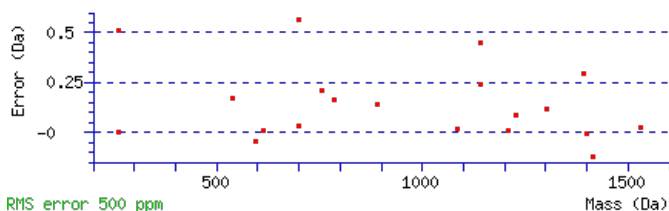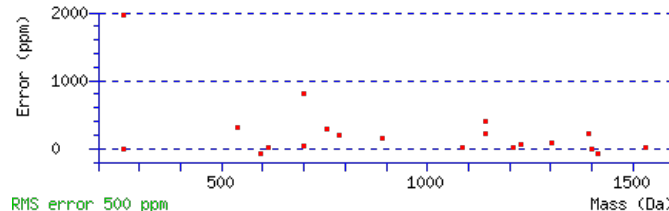

NCBI BLAST search of [AVDYSGPSLSYYINK](#)

## AT5G07020.1

(Parameters: blastp, nr protein database, expect=20000, no filter, PAM30)

Other BLAST [web gateways](#)

### All matches to this query

| Score | Mr(calc)  | Delta   | Sequence                        |
|-------|-----------|---------|---------------------------------|
| 90.2  | 1675.8093 | -0.0014 | <a href="#">AVDYSGPSLSYYINK</a> |
| 1.7   | 1675.8062 | 0.0017  | <a href="#">MATCSLLPPPSFSPR</a> |

Mascot: <http://www.matrixscience.com/>

**Peptide View**MS/MS Fragmentation of **SLTFSGSLR**Found in **AT5G07030.1** in **TAIR\_Arabidopsis**, Symbols: | pepsin A | chr5:2183601-2185718 REVERSE

Match to Query 2250: 978.477188 from(490.245870,2+) index(3931)

Title: Elution from: 36.999 to 36.999 scan no 4907 cid35.00 polarity:+

Data file D12h-3\_2.mgf

Click mouse within plot area to zoom in by factor of two about that point

Or,   to  Da Label all possible matches  Label matches used for scoring Show Y-axis 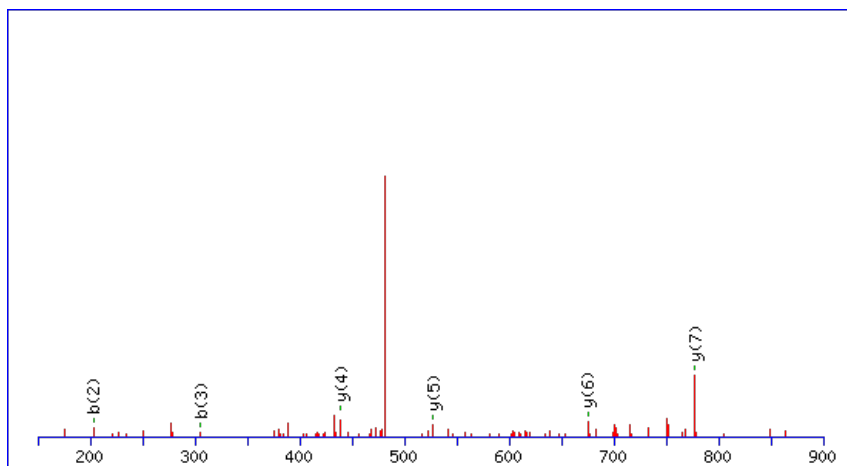Monoisotopic mass of neutral peptide **Mr(calc)**: 978.4779**Fixed modifications**: Carbamidomethyl (C) (apply to specified residues or termini only)**Ions Score**: 24 **Expect**: 0.024**Matches**: 6/76 fragment ions using 14 most intense peaks ([help](#))

| # | b               | b <sup>++</sup> | b <sup>0</sup> | b <sup>0++</sup> | Seq. | y               | y <sup>++</sup> | y*       | y <sup>*++</sup> | y <sup>0</sup> | y <sup>0++</sup> | # |
|---|-----------------|-----------------|----------------|------------------|------|-----------------|-----------------|----------|------------------|----------------|------------------|---|
| 1 | 89.0363         | 45.0218         | 71.0258        | 36.0165          | S    |                 |                 |          |                  |                |                  | 9 |
| 2 | <b>203.1174</b> | 102.0624        | 185.1069       | 93.0571          | L    | 891.4561        | 446.2317        | 873.4325 | 437.2199         | 873.4455       | 437.2264         | 8 |
| 3 | <b>305.1622</b> | 153.0847        | 287.1516       | 144.0794         | T    | <b>777.3750</b> | 389.1911        | 759.3514 | 380.1793         | 759.3644       | 380.1858         | 7 |
| 4 | 453.2276        | 227.1174        | 435.2170       | 218.1122         | F    | <b>675.3303</b> | 338.1688        | 657.3067 | 329.1570         | 657.3197       | 329.1635         | 6 |
| 5 | 541.2567        | 271.1320        | 523.2461       | 262.1267         | S    | <b>527.2648</b> | 264.1360        | 509.2412 | 255.1243         | 509.2543       | 255.1308         | 5 |
| 6 | 599.2752        | 300.1412        | 581.2646       | 291.1359         | G    | <b>439.2358</b> | 220.1215        | 421.2122 | 211.1097         | 421.2252       | 211.1162         | 4 |
| 7 | 687.3042        | 344.1558        | 669.2937       | 335.1505         | S    | 381.2173        | 191.1123        | 363.1937 | 182.1005         | 363.2067       | 182.1070         | 3 |
| 8 | 801.3853        | 401.1963        | 783.3748       | 392.1910         | L    | 293.1882        | 147.0977        | 275.1646 | 138.0859         |                |                  | 2 |
| 9 |                 |                 |                |                  | R    | 179.1071        | 90.0572         | 161.0835 | 81.0454          |                |                  | 1 |

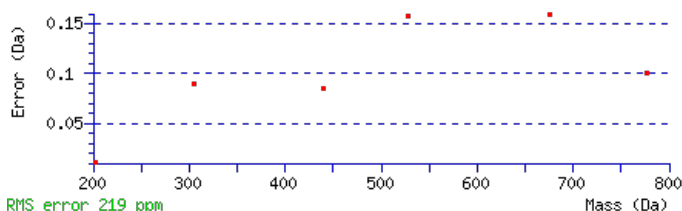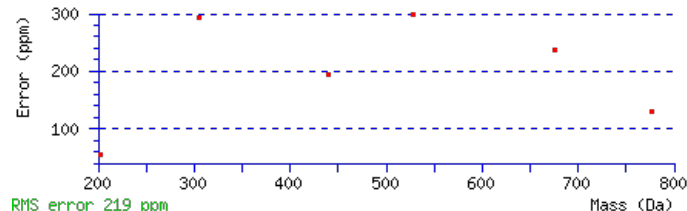NCBI **BLAST** search of [SLTFSGSLR](#)

(Parameters: blastp, nr protein database, expect=20000, no filter, PAM30)

Other BLAST [web gateways](#)**All matches to this query**

| Score | Mr(calc) | Delta   | Sequence                  |
|-------|----------|---------|---------------------------|
| 23.6  | 978.4779 | -0.0007 | <a href="#">SLTFSGSLR</a> |

## AT5G07030.1

|     |          |         |                           |
|-----|----------|---------|---------------------------|
| 6.7 | 978.4779 | -0.0007 | <a href="#">TVHIPSGEK</a> |
| 3.6 | 978.4801 | -0.0029 | <a href="#">SLFEGFIR</a>  |
| 3.2 | 978.4778 | -0.0007 | <a href="#">LIHQVDDK</a>  |
| 1.6 | 978.4779 | -0.0007 | <a href="#">LIQAHEEK</a>  |
| 1.2 | 978.4779 | -0.0007 | <a href="#">LYERTSAK</a>  |
| 1.1 | 978.4778 | -0.0007 | <a href="#">YLQSTTVR</a>  |

**Mascot:** <http://www.matrixscience.com/>

## Peptide View

MS/MS Fragmentation of **RPNMLDVLK**

Found in **AT5G07280.1** in **TAIR\_Arabidopsis**, Symbols: EXS, EMS1 | EMS1 (EXCESS MICROSPOROCTES1); kinase | chr5:2285089-2288667 FORWARD

Match to Query 3155: 1084.605686 from(543.310119,2+) index(2493)

Title: Elution from: 26.398 to 26.398 scan no 3135 cid35.00 polarity:+

Data file C7-3\_3.mgf

Click mouse within plot area to zoom in by factor of two about that point

Or,   to  Da

Label all possible matches  Label matches used for scoring

Show Y-axis

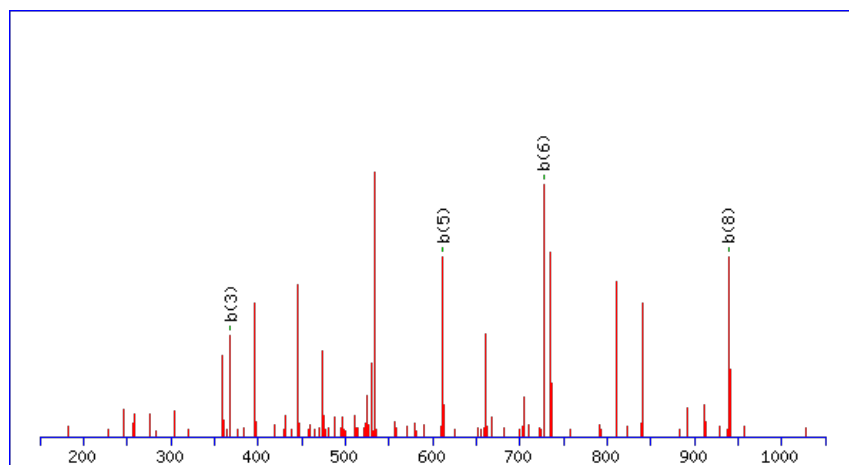

Monoisotopic mass of neutral peptide  $M_r(\text{calc})$ : 1084.6063

Fixed modifications: Carbamidomethyl (C) (apply to specified residues or termini only)

Ions Score: 19 Expect: 0.024

Matches : 4/80 fragment ions using 9 most intense peaks ([help](#))

| # | b               | b <sup>++</sup> | b*       | b <sup>*++</sup> | b <sup>0</sup> | b <sup>0++</sup> | Seq.     | y        | y <sup>++</sup> | y*       | y <sup>*++</sup> | y <sup>0</sup> | y <sup>0++</sup> | # |
|---|-----------------|-----------------|----------|------------------|----------------|------------------|----------|----------|-----------------|----------|------------------|----------------|------------------|---|
| 1 | 157.1084        | 79.0578         | 140.0818 | 70.5446          |                |                  | <b>R</b> |          |                 |          |                  |                |                  | 9 |
| 2 | 254.1612        | 127.5842        | 237.1346 | 119.0709         |                |                  | <b>P</b> | 929.5125 | 465.2599        | 912.4859 | 456.7466         | 911.5019       | 456.2546         | 8 |
| 3 | <b>368.2041</b> | 184.6057        | 351.1775 | 176.0924         |                |                  | <b>N</b> | 832.4597 | 416.7335        | 815.4332 | 408.2202         | 814.4491       | 407.7282         | 7 |
| 4 | 499.2446        | 250.1259        | 482.2180 | 241.6126         |                |                  | <b>M</b> | 718.4168 | 359.7120        | 701.3902 | 351.1988         | 700.4062       | 350.7067         | 6 |
| 5 | <b>612.3286</b> | 306.6680        | 595.3021 | 298.1547         |                |                  | <b>L</b> | 587.3763 | 294.1918        | 570.3497 | 285.6785         | 569.3657       | 285.1865         | 5 |
| 6 | <b>727.3556</b> | 364.1814        | 710.3290 | 355.6681         | 709.3450       | 355.1761         | <b>D</b> | 474.2922 | 237.6498        | 457.2657 | 229.1365         | 456.2817       | 228.6445         | 4 |
| 7 | 826.4240        | 413.7156        | 809.3974 | 405.2024         | 808.4134       | 404.7103         | <b>V</b> | 359.2653 | 180.1363        | 342.2387 | 171.6230         |                |                  | 3 |
| 8 | <b>939.5080</b> | 470.2577        | 922.4815 | 461.7444         | 921.4975       | 461.2524         | <b>L</b> | 260.1969 | 130.6021        | 243.1703 | 122.0888         |                |                  | 2 |
| 9 |                 |                 |          |                  |                |                  | <b>K</b> | 147.1128 | 74.0600         | 130.0863 | 65.5468          |                |                  | 1 |

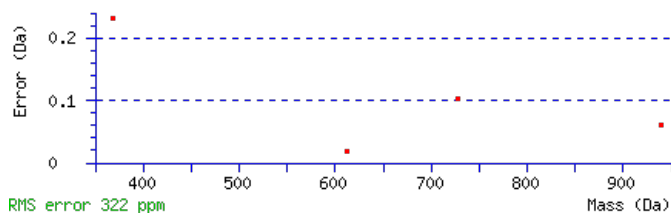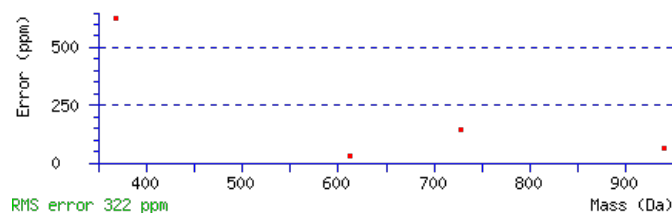

NCBI **BLAST** search of [RPNMLDVLK](#)

(Parameters: blastp, nr protein database, expect=20000, no filter, PAM30)

Other BLAST [web gateways](#)

All matches to this query

| Score | $M_r(\text{calc})$ | Delta | Sequence |
|-------|--------------------|-------|----------|
|       |                    |       |          |



AT5G07280.1

|      |           |         |                           |
|------|-----------|---------|---------------------------|
| 19.3 | 1084.6063 | -0.0006 | <a href="#">RPNMLDVLK</a> |
|------|-----------|---------|---------------------------|

**Mascot:** <http://www.matrixscience.com/>

**Peptide View**MS/MS Fragmentation of **VPGAAEASIR**

Found in **AT5G07350.1** in **TAIR\_Arabidopsis**, Symbols: | tudor domain-containing protein / nuclease family protein | chr5:2320345-2324893  
REVERSE

Match to Query 2193: 969.524508 from(485.769530,2+) index(1375)

Title: Elution from: 20.163 to 20.163 scan no 1922 cid35.00 polarity:+

Data file 0-1\_2.mgf

Click mouse within plot area to zoom in by factor of two about that point

Or,   to  Da

Label all possible matches  Label matches used for scoring

Show Y-axis

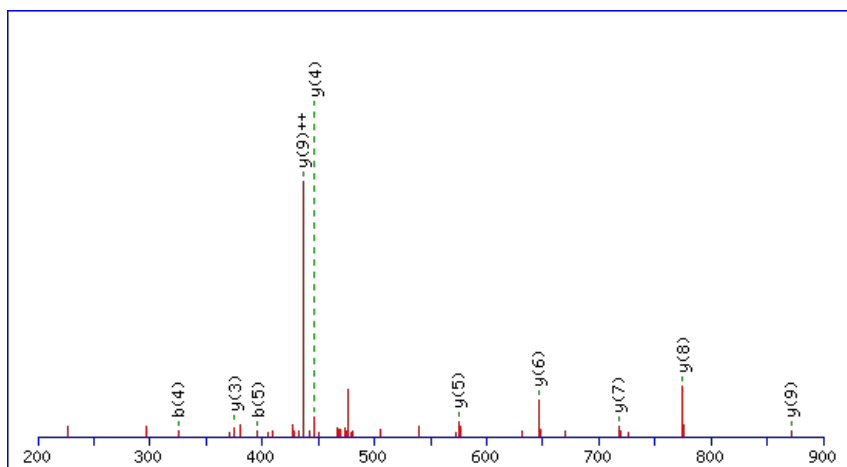

**Monoisotopic mass of neutral peptide Mr(calc):** 969.5243

**Fixed modifications:** Carbamidomethyl (C) (apply to specified residues or termini only)

**Ions Score:** 52 **Expect:** 1.9e-005

**Matches:** 10/76 fragment ions using 18 most intense peaks ([help](#))

| #  | b        | b <sup>++</sup> | b <sup>0</sup> | b <sup>0++</sup> | Seq. | y        | y <sup>++</sup> | y*       | y* <sup>++</sup> | y <sup>0</sup> | y <sup>0++</sup> | #  |
|----|----------|-----------------|----------------|------------------|------|----------|-----------------|----------|------------------|----------------|------------------|----|
| 1  | 100.0757 | 50.5415         |                |                  | V    |          |                 |          |                  |                |                  | 10 |
| 2  | 197.1285 | 99.0679         |                |                  | P    | 871.4632 | 436.2352        | 854.4367 | 427.7220         | 853.4526       | 427.2300         | 9  |
| 3  | 254.1499 | 127.5786        |                |                  | G    | 774.4104 | 387.7089        | 757.3839 | 379.1956         | 756.3999       | 378.7036         | 8  |
| 4  | 325.1870 | 163.0972        |                |                  | A    | 717.3890 | 359.1981        | 700.3624 | 350.6849         | 699.3784       | 350.1928         | 7  |
| 5  | 396.2241 | 198.6157        |                |                  | A    | 646.3519 | 323.6796        | 629.3253 | 315.1663         | 628.3413       | 314.6743         | 6  |
| 6  | 525.2667 | 263.1370        | 507.2562       | 254.1317         | E    | 575.3148 | 288.1610        | 558.2882 | 279.6477         | 557.3042       | 279.1557         | 5  |
| 7  | 596.3039 | 298.6556        | 578.2933       | 289.6503         | A    | 446.2722 | 223.6397        | 429.2456 | 215.1264         | 428.2616       | 214.6344         | 4  |
| 8  | 683.3359 | 342.1716        | 665.3253       | 333.1663         | S    | 375.2350 | 188.1212        | 358.2085 | 179.6079         | 357.2245       | 179.1159         | 3  |
| 9  | 796.4199 | 398.7136        | 778.4094       | 389.7083         | I    | 288.2030 | 144.6051        | 271.1765 | 136.0919         |                |                  | 2  |
| 10 |          |                 |                |                  | R    | 175.1190 | 88.0631         | 158.0924 | 79.5498          |                |                  | 1  |

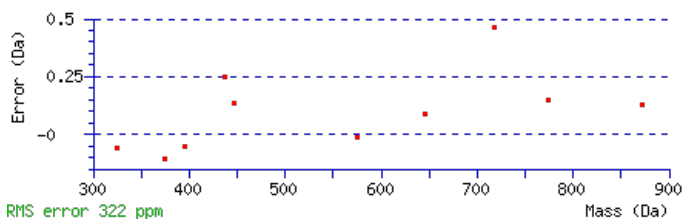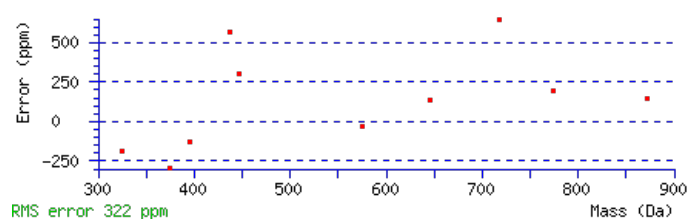

NCBI **BLAST** search of **VPGAAEASIR**

(Parameters: blastp, nr protein database, expect=20000, no filter, PAM30)

Other BLAST [web gateways](#)

**All matches to this query**

AT5G07350.1

| Score | Mr(calc) | Delta  | Sequence                   |
|-------|----------|--------|----------------------------|
| 51.7  | 969.5243 | 0.0002 | <a href="#">VPGAAEASIR</a> |

Mascot: <http://www.matrixscience.com/>

**Peptide View**MS/MS Fragmentation of **LGFEHVR**

Found in **AT5G07390.1** in **TAIR\_Arabidopsis**, Symbols: ATRBOHA | ATRBOHA (RESPIRATORY BURST OXIDASE HOMOLOG A); FAD binding / calcium ion binding / iron ion binding / oxidoreductase | chr5:2336064-2339729 REVERSE

Match to Query 1411: 856.457544 from(429.236048,2+) index(2668)

Title: Elution from: 28.331 to 28.331 scan no 3351 cid35.00 polarity:+

Data file 0-2\_1.mgf

Click mouse within plot area to zoom in by factor of two about that point

Or,   to  Da

Label all possible matches  Label matches used for scoring

Show Y-axis

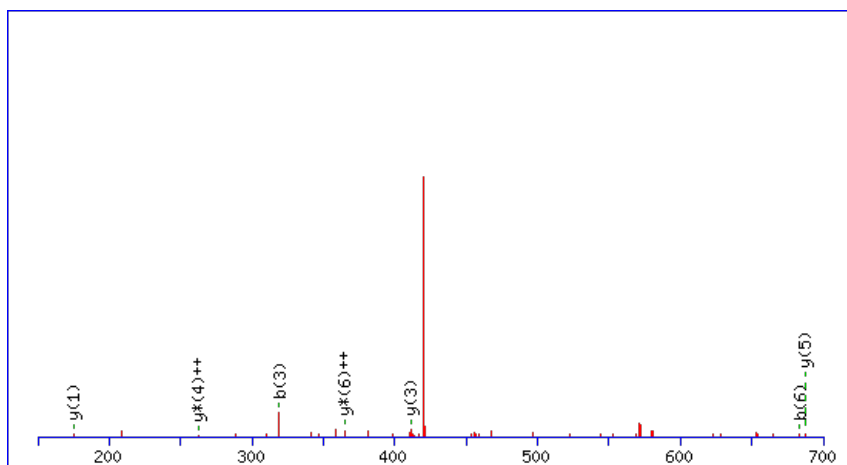

**Monoisotopic mass of neutral peptide Mr(calc):** 856.4555

**Fixed modifications:** Carbamidomethyl (C) (apply to specified residues or termini only)

**Ions Score:** 16 **Expect:** 0.049

**Matches :** 7/48 fragment ions using 17 most intense peaks ([help](#))

| # | b               | b <sup>++</sup> | b <sup>0</sup> | b <sup>0++</sup> | Seq. | y               | y <sup>++</sup> | y*       | y <sup>*++</sup> | y <sup>0</sup> | y <sup>0++</sup> | # |
|---|-----------------|-----------------|----------------|------------------|------|-----------------|-----------------|----------|------------------|----------------|------------------|---|
| 1 | 114.0913        | 57.5493         |                |                  | L    |                 |                 |          |                  |                |                  | 7 |
| 2 | 171.1128        | 86.0600         |                |                  | G    | 744.3787        | 372.6930        | 727.3522 | 364.1797         | 726.3682       | 363.6877         | 6 |
| 3 | <b>318.1812</b> | 159.5942        |                |                  | F    | <b>687.3573</b> | 344.1823        | 670.3307 | 335.6690         | 669.3467       | 335.1770         | 5 |
| 4 | 447.2238        | 224.1155        | 429.2132       | 215.1103         | E    | 540.2889        | 270.6481        | 523.2623 | <b>262.1348</b>  | 522.2783       | 261.6428         | 4 |
| 5 | 584.2827        | 292.6450        | 566.2722       | 283.6397         | H    | <b>411.2463</b> | 206.1268        | 394.2197 | 197.6135         |                |                  | 3 |
| 6 | <b>683.3511</b> | 342.1792        | 665.3406       | 333.1739         | V    | 274.1874        | 137.5973        | 257.1608 | 129.0840         |                |                  | 2 |
| 7 |                 |                 |                |                  | R    | <b>175.1190</b> | 88.0631         | 158.0924 | 79.5498          |                |                  | 1 |

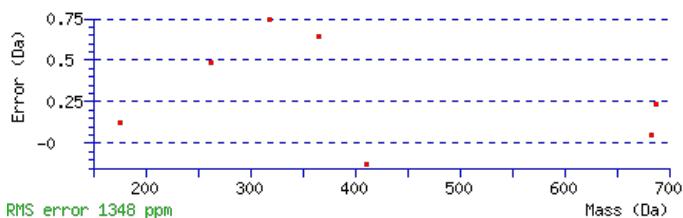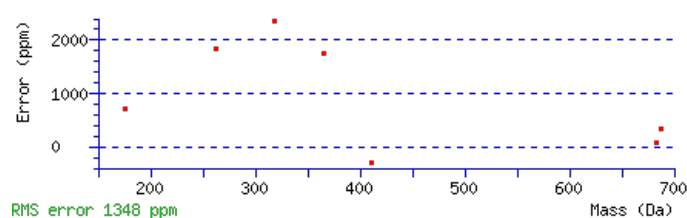NCBI **BLAST** search of **LGFEHVR**

(Parameters: blastp, nr protein database, expect=20000, no filter, PAM30)

Other BLAST [web gateways](#)

**All matches to this query**

| Score | Mr(calc) | Delta  | Sequence                |
|-------|----------|--------|-------------------------|
| 16.3  | 856.4555 | 0.0020 | <a href="#">LGFEHVR</a> |
| 14.3  | 856.4555 | 0.0020 | <a href="#">AVDLFHR</a> |

## AT5G07390.1

|      |          |         |                         |
|------|----------|---------|-------------------------|
| 11.1 | 856.4555 | 0.0020  | <a href="#">EGVFHLR</a> |
| 10.4 | 856.4555 | 0.0020  | <a href="#">EFLHVR</a>  |
| 10.4 | 856.4589 | -0.0013 | <a href="#">KLCPPSR</a> |
| 7.7  | 856.4555 | 0.0020  | <a href="#">LGPQWTR</a> |
| 3.7  | 856.4555 | 0.0020  | <a href="#">FHVDLAR</a> |
| 3.6  | 856.4555 | 0.0020  | <a href="#">GLWQPTR</a> |
| 3.4  | 856.4555 | 0.0020  | <a href="#">LFADVHR</a> |
| 3.3  | 856.4589 | -0.0013 | <a href="#">QVPINMR</a> |

Mascot: <http://www.matrixscience.com/>

**Peptide View**MS/MS Fragmentation of **GVVFATEALLAEY<sup>K</sup>**Found in **AT5G07440.1** in **TAIR\_Arabidopsis**, Symbols: GDH2 | GDH2 (GLUTAMATE DEHYDROGENASE 2); oxidoreductase | chr5:2356154-2358013 FORWARD

Match to Query 6570: 1582.780836 from(792.397694,2+) index(9200)

Title: Elution from: 88.160 to 88.160 scan no 12880 cid35.00 polarity:+

Data file D1d-1-2.mgf

Click mouse within plot area to zoom in by factor of two about that point

Or,  to  Da Label all possible matches  Label matches used for scoring Show Y-axis 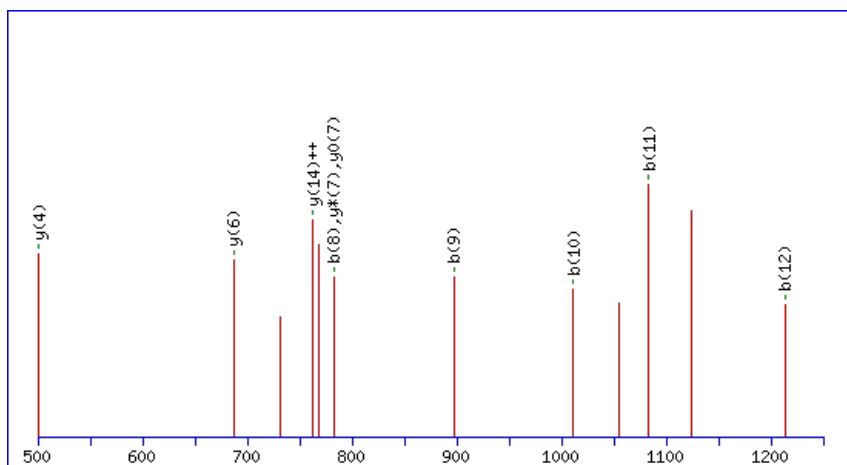Monoisotopic mass of neutral peptide  $M_r(\text{calc})$ : 1582.7819

Fixed modifications: Carbamidomethyl (C) (apply to specified residues or termini only)

Ions Score: 32 Expect: 0.0051

Matches : 10/124 fragment ions using 11 most intense peaks ([help](#))

| #  | b                | b <sup>++</sup> | b <sup>0</sup> | b <sup>0++</sup> | Seq.     | y               | y <sup>++</sup> | y*              | y <sup>*++</sup> | y <sup>0</sup>  | y <sup>0++</sup> | #         |
|----|------------------|-----------------|----------------|------------------|----------|-----------------|-----------------|-----------------|------------------|-----------------|------------------|-----------|
| 1  | 59.0258          | 30.0165         |                |                  | <b>G</b> |                 |                 |                 |                  |                 |                  | <b>15</b> |
| 2  | 159.0912         | 80.0492         |                |                  | <b>V</b> | 1525.7707       | <b>763.3890</b> | 1507.7471       | 754.3772         | 1507.7601       | 754.3837         | <b>14</b> |
| 3  | 259.1567         | 130.0820        |                |                  | <b>V</b> | 1425.7052       | 713.3563        | 1407.6817       | 704.3445         | 1407.6947       | 704.3510         | <b>13</b> |
| 4  | 407.2221         | 204.1147        |                |                  | <b>F</b> | 1325.6398       | 663.3235        | 1307.6162       | 654.3117         | 1307.6292       | 654.3183         | <b>12</b> |
| 5  | 479.2563         | 240.1318        |                |                  | <b>A</b> | 1177.5744       | 589.2908        | 1159.5508       | 580.2790         | 1159.5638       | 580.2855         | <b>11</b> |
| 6  | 581.3010         | 291.1541        | 563.2904       | 282.1488         | <b>T</b> | 1105.5402       | 553.2737        | 1087.5166       | 544.2619         | 1087.5296       | 544.2685         | <b>10</b> |
| 7  | 711.3406         | 356.1739        | 693.3300       | 347.1687         | <b>E</b> | 1003.4955       | 502.2514        | 985.4719        | 493.2396         | 985.4849        | 493.2461         | <b>9</b>  |
| 8  | <b>783.3748</b>  | 392.1910        | 765.3642       | 383.1857         | <b>A</b> | 873.4559        | 437.2316        | 855.4323        | 428.2198         | 855.4453        | 428.2263         | <b>8</b>  |
| 9  | <b>897.4559</b>  | 449.2316        | 879.4453       | 440.2263         | <b>L</b> | 801.4217        | 401.2145        | <b>783.3981</b> | 392.2027         | <b>783.4111</b> | 392.2092         | <b>7</b>  |
| 10 | <b>1011.5370</b> | 506.2721        | 993.5264       | 497.2668         | <b>L</b> | <b>687.3406</b> | 344.1739        | 669.3170        | 335.1622         | 669.3300        | 335.1687         | <b>6</b>  |
| 11 | <b>1083.5711</b> | 542.2892        | 1065.5605      | 533.2839         | <b>A</b> | 573.2595        | 287.1334        | 555.2359        | 278.1216         | 555.2489        | 278.1281         | <b>5</b>  |
| 12 | <b>1213.6107</b> | 607.3090        | 1195.6002      | 598.3037         | <b>E</b> | <b>501.2254</b> | 251.1163        | 483.2018        | 242.1045         | 483.2148        | 242.1110         | <b>4</b>  |
| 13 | 1377.6711        | 689.3392        | 1359.6605      | 680.3339         | <b>Y</b> | 371.1857        | 186.0965        | 353.1622        | 177.0847         |                 |                  | <b>3</b>  |
| 14 | 1435.6896        | 718.3484        | 1417.6790      | 709.3432         | <b>G</b> | 207.1254        | 104.0663        | 189.1018        | 95.0545          |                 |                  | <b>2</b>  |
| 15 |                  |                 |                |                  | <b>K</b> | 149.1069        | 75.0571         | 131.0833        | 66.0453          |                 |                  | <b>1</b>  |

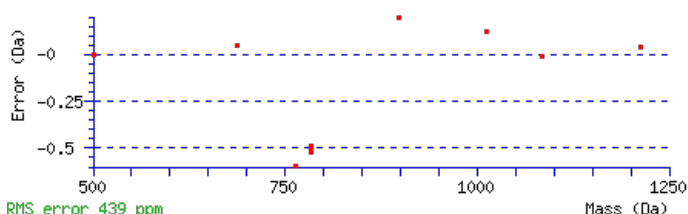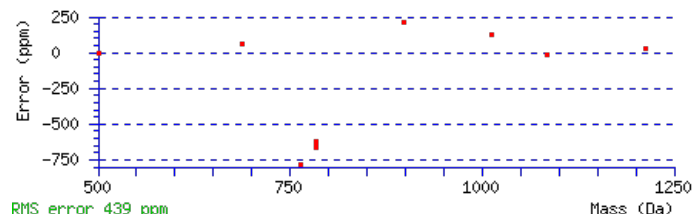

## AT5G07440.1

NCBI **BLAST** search of [GVVFATEALLAEYGK](#)

(Parameters: blastp, nr protein database, expect=20000, no filter, PAM30)

Other BLAST [web gateways](#)

### All matches to this query

| Score | Mr(calc)  | Delta   | Sequence                        |
|-------|-----------|---------|---------------------------------|
| 31.8  | 1582.7819 | -0.0011 | <a href="#">GVVFATEALLAEYGK</a> |
| 0.9   | 1582.7776 | 0.0032  | <a href="#">IHNQLIGVEKMHK</a>   |
| 0.4   | 1582.7823 | -0.0015 | <a href="#">KEAVTKLTEANGFR</a>  |
| 0.1   | 1582.7846 | -0.0037 | <a href="#">FRDFIPSILDVSR</a>   |

**Mascot:** <http://www.matrixscience.com/>

## Peptide View

### MS/MS Fragmentation of **MAAKLICSSLTVHSMANK**

Found in **AT5G08050.1** in **TAIR\_Arabidopsis**, Symbols: | similar to unnamed protein product [Vitis vinifera] (GB:CAO62462.1); similar to unknown [Populus trichocarpa] (GB:ABK95457.1); contains InterPro domain Protein of unknown function DUF1118 (InterPro:IPR009500); contains InterPro domain U

Match to Query 9118: 2000.908368 from(667.976732,3+) index(7312)

Title: Elution from: 65.233 to 65.233 scan no 9599 cid35.00 polarity:+

Data file D6h-1\_3.mgf

Click mouse within plot area to zoom in by factor of two about that point

Or,   to  Da

Label all possible matches  Label matches used for scoring

Show Y-axis

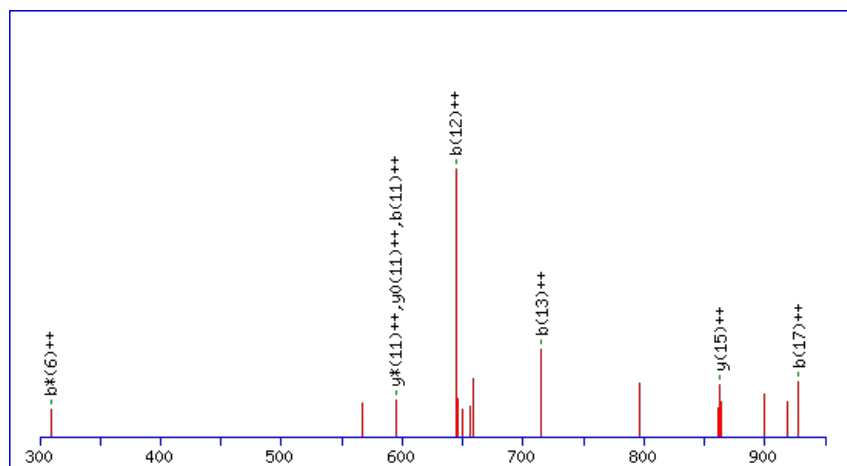

**Monoisotopic mass of neutral peptide Mr(calc):** 2000.9134

**Fixed modifications:** Carbamidomethyl (C) (apply to specified residues or termini only)

**Variable modifications:**

**M15** : Oxidation (M), with neutral losses 0.0000 (shown in table), 63.9983

**Ions Score:** 24 **Expect:** 0.031

**Matches** : 8/276 fragment ions using 6 most intense peaks ([help](#))

| #  | b         | b <sup>++</sup> | b*        | b <sup>*++</sup> | b <sup>0</sup> | b <sup>0++</sup> | Seq. | y         | y <sup>++</sup> | y*        | y <sup>*++</sup> | y <sup>0</sup> | y <sup>0++</sup> | #  |
|----|-----------|-----------------|-----------|------------------|----------------|------------------|------|-----------|-----------------|-----------|------------------|----------------|------------------|----|
| 1  | 133.0448  | 67.0260         |           |                  |                |                  | M    |           |                 |           |                  |                |                  | 18 |
| 2  | 205.0789  | 103.0431        |           |                  |                |                  | A    | 1869.8832 | 935.4452        | 1851.8596 | 926.4334         | 1851.8726      | 926.4399         | 17 |
| 3  | 277.1131  | 139.0602        |           |                  |                |                  | A    | 1797.8490 | 899.4281        | 1779.8254 | 890.4164         | 1779.8385      | 890.4229         | 16 |
| 4  | 407.2021  | 204.1047        | 389.1785  | 195.0929         |                |                  | K    | 1725.8149 | 863.4111        | 1707.7913 | 854.3993         | 1707.8043      | 854.4058         | 15 |
| 5  | 521.2832  | 261.1453        | 503.2596  | 252.1335         |                |                  | L    | 1595.7258 | 798.3666        | 1577.7023 | 789.3548         | 1577.7153      | 789.3613         | 14 |
| 6  | 635.3643  | 318.1858        | 617.3407  | 309.1740         |                |                  | I    | 1481.6447 | 741.3260        | 1463.6212 | 732.3142         | 1463.6342      | 732.3207         | 13 |
| 7  | 797.3890  | 399.1982        | 779.3655  | 390.1864         |                |                  | C    | 1367.5636 | 684.2855        | 1349.5401 | 675.2737         | 1349.5531      | 675.2802         | 12 |
| 8  | 885.4181  | 443.2127        | 867.3945  | 434.2009         | 867.4075       | 434.2074         | S    | 1205.5389 | 603.2731        | 1187.5153 | 594.2613         | 1187.5284      | 594.2678         | 11 |
| 9  | 973.4472  | 487.2272        | 955.4236  | 478.2154         | 955.4366       | 478.2219         | S    | 1117.5099 | 559.2586        | 1099.4863 | 550.2468         | 1099.4993      | 550.2533         | 10 |
| 10 | 1087.5283 | 544.2678        | 1069.5047 | 535.2560         | 1069.5177      | 535.2625         | L    | 1029.4808 | 515.2440        | 1011.4572 | 506.2322         | 1011.4702      | 506.2388         | 9  |
| 11 | 1189.5730 | 595.2901        | 1171.5494 | 586.2783         | 1171.5624      | 586.2848         | T    | 915.3997  | 458.2035        | 897.3761  | 449.1917         | 897.3891       | 449.1982         | 8  |
| 12 | 1289.6384 | 645.3229        | 1271.6148 | 636.3111         | 1271.6279      | 636.3176         | V    | 813.3550  | 407.1811        | 795.3314  | 398.1693         | 795.3444       | 398.1758         | 7  |
| 13 | 1429.6884 | 715.3479        | 1411.6649 | 706.3361         | 1411.6779      | 706.3426         | H    | 713.2895  | 357.1484        | 695.2660  | 348.1366         | 695.2790       | 348.1431         | 6  |
| 14 | 1517.7175 | 759.3624        | 1499.6939 | 750.3506         | 1499.7069      | 750.3571         | S    | 573.2395  | 287.1234        | 555.2159  | 278.1116         | 555.2290       | 278.1181         | 5  |
| 15 | 1665.7499 | 833.3786        | 1647.7264 | 824.3668         | 1647.7394      | 824.3733         | M    | 485.2105  | 243.1089        | 467.1869  | 234.0971         |                |                  | 4  |
| 16 | 1737.7841 | 869.3957        | 1719.7605 | 860.3839         | 1719.7735      | 860.3904         | A    | 337.1780  | 169.0926        | 319.1544  | 160.0809         |                |                  | 3  |
| 17 | 1853.8211 | 927.4142        | 1835.7975 | 918.4024         | 1835.8105      | 918.4089         | N    | 265.1439  | 133.0756        | 247.1203  | 124.0638         |                |                  | 2  |
| 18 |           |                 |           |                  |                |                  | K    | 149.1069  | 75.0571         | 131.0833  | 66.0453          |                |                  | 1  |



# AT5G08050.1

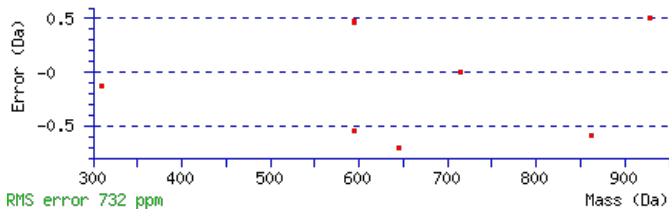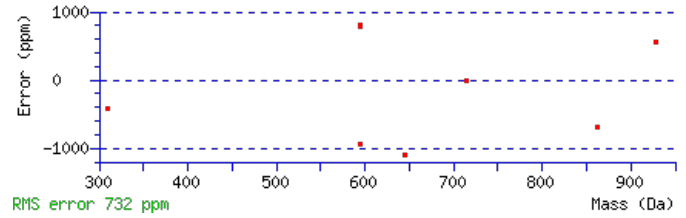

NCBI **BLAST** search of [MAAKLICSSLTVHSMANK](#)  
(Parameters: blastp, nr protein database, expect=20000, no filter, PAM30)  
Other BLAST [web gateways](#)

## All matches to this query

| Score | Mr(calc)  | Delta   | Sequence                              |
|-------|-----------|---------|---------------------------------------|
| 24.3  | 2000.9134 | -0.0051 | <a href="#">MAAKLICSSLTVHSMANK</a>    |
| 13.8  | 2000.9082 | 0.0001  | <a href="#">MMWLCVIVILQDMGQK</a>      |
| 13.8  | 2000.9082 | 0.0001  | <a href="#">MMWLCVIVILQDMGQK</a>      |
| 12.9  | 2000.9114 | -0.0030 | <a href="#">YYINERSSNFTEVTKK</a>      |
| 10.8  | 2000.9026 | 0.0057  | <a href="#">VLEHFDACDLVKMMKK</a>      |
| 10.8  | 2000.9026 | 0.0057  | <a href="#">VLEHFDACDLVKMMKK</a>      |
| 9.1   | 2000.9114 | -0.0030 | <a href="#">GSTATSSLVALSSSEFGFFGR</a> |
| 8.7   | 2000.9105 | -0.0021 | <a href="#">AMNEINAAARMRLAANEK</a>    |
| 8.4   | 2000.9044 | 0.0039  | <a href="#">VSPVPMKNGFGNESTREK</a>    |
| 7.4   | 2000.9140 | -0.0057 | <a href="#">YQARVGDALPDSVDWRK</a>     |

Mascot: <http://www.matrixscience.com/>

## Peptide View

### MS/MS Fragmentation of **GPYVYEDMVK**

Found in **AT5G08280.1** in **TAIR\_Arabidopsis**, Symbols: HEMC | HEMC (HYDROXYMETHYLBILANE SYNTHASE); hydroxymethylbilane synthase | chr5:2663764-2665597 REVERSE

Match to Query 4404: 1199.553576 from(600.784064,2+) index(4895)

Title: Elution from: 43.460 to 43.460 scan no 6071 cid35.00 polarity:+

Data file D1d-3\_1.mgf

Click mouse within plot area to zoom in by factor of two about that point

Or,   to  Da

Label all possible matches  Label matches used for scoring

Show Y-axis

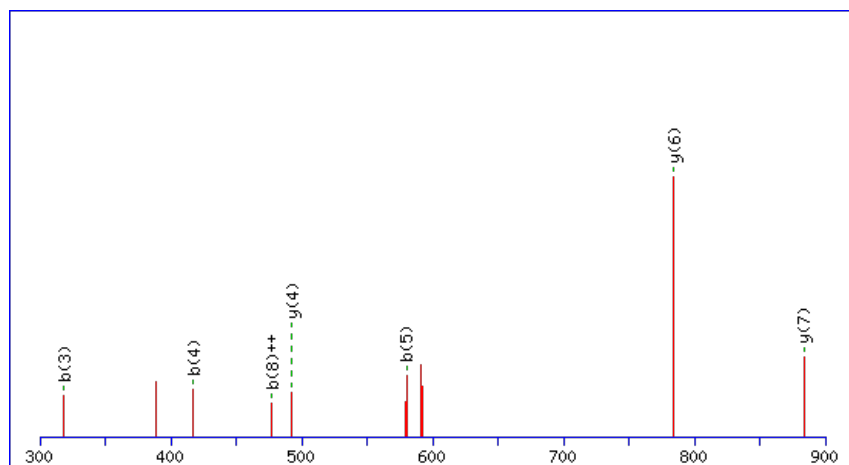

Monoisotopic mass of neutral peptide  $M_r(\text{calc})$ : 1199.5533

Fixed modifications: Carbamidomethyl (C) (apply to specified residues or termini only)

Ions Score: 27 Expect: 0.0026

Matches : 7/74 fragment ions using 10 most intense peaks ([help](#))

| #  | b               | b <sup>++</sup> | b <sup>0</sup> | b <sup>0++</sup> | Seq.     | y               | y <sup>++</sup> | y*        | y <sup>*++</sup> | y <sup>0</sup> | y <sup>0++</sup> | #  |
|----|-----------------|-----------------|----------------|------------------|----------|-----------------|-----------------|-----------|------------------|----------------|------------------|----|
| 1  | 58.0287         | 29.5180         |                |                  | <b>G</b> |                 |                 |           |                  |                |                  | 10 |
| 2  | 155.0815        | 78.0444         |                |                  | <b>P</b> | 1143.5391       | 572.2732        | 1126.5125 | 563.7599         | 1125.5285      | 563.2679         | 9  |
| 3  | <b>318.1448</b> | 159.5761        |                |                  | <b>Y</b> | 1046.4863       | 523.7468        | 1029.4598 | 515.2335         | 1028.4757      | 514.7415         | 8  |
| 4  | <b>417.2132</b> | 209.1103        |                |                  | <b>V</b> | <b>883.4230</b> | 442.2151        | 866.3964  | 433.7019         | 865.4124       | 433.2098         | 7  |
| 5  | <b>580.2766</b> | 290.6419        |                |                  | <b>Y</b> | <b>784.3546</b> | 392.6809        | 767.3280  | 384.1676         | 766.3440       | 383.6756         | 6  |
| 6  | 709.3192        | 355.1632        | 691.3086       | 346.1579         | <b>E</b> | 621.2912        | 311.1493        | 604.2647  | 302.6360         | 603.2807       | 302.1440         | 5  |
| 7  | 824.3461        | 412.6767        | 806.3355       | 403.6714         | <b>D</b> | <b>492.2486</b> | 246.6280        | 475.2221  | 238.1147         | 474.2381       | 237.6227         | 4  |
| 8  | 955.3866        | <b>478.1969</b> | 937.3760       | 469.1917         | <b>M</b> | 377.2217        | 189.1145        | 360.1952  | 180.6012         |                |                  | 3  |
| 9  | 1054.4550       | 527.7311        | 1036.4444      | 518.7259         | <b>V</b> | 246.1812        | 123.5942        | 229.1547  | 115.0810         |                |                  | 2  |
| 10 |                 |                 |                |                  | <b>K</b> | 147.1128        | 74.0600         | 130.0863  | 65.5468          |                |                  | 1  |

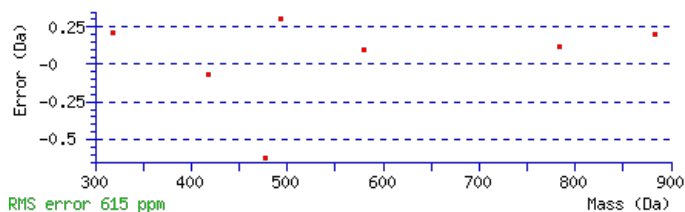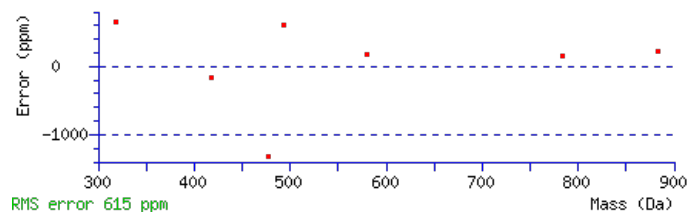

NCBI BLAST search of **GPYVYEDMVK**

(Parameters: blastp, nr protein database, expect=20000, no filter, PAM30)

Other BLAST [web gateways](#)

All matches to this query

AT5G08280.1

| Score | Mr(calc)  | Delta  | Sequence                  |
|-------|-----------|--------|---------------------------|
| 26.9  | 1199.5533 | 0.0003 | <a href="#">GPYYEDMYK</a> |

Mascot: <http://www.matrixscience.com/>

**Peptide View**MS/MS Fragmentation of **IGSAMYLEFQER**

Found in **AT5G08300.1** in **TAIR\_Arabidopsis**, Symbols: | succinyl-CoA ligase (GDP-forming) alpha-chain, mitochondrial, putative / succinyl-CoA synthetase, alpha chain, putative / SCS-alpha, putative | chr5:2667580-2669673 FORWARD

Match to Query 5537: 1442.685860 from(722.350206,2+) index(7723)

Title: Elution from: 67.167 to 67.167 scan no 10094 cid35.00 polarity:+

Data file D6h-3\_3.mgf

Click mouse within plot area to zoom in by factor of two about that point

Or,   to  Da

Label all possible matches  Label matches used for scoring

Show Y-axis

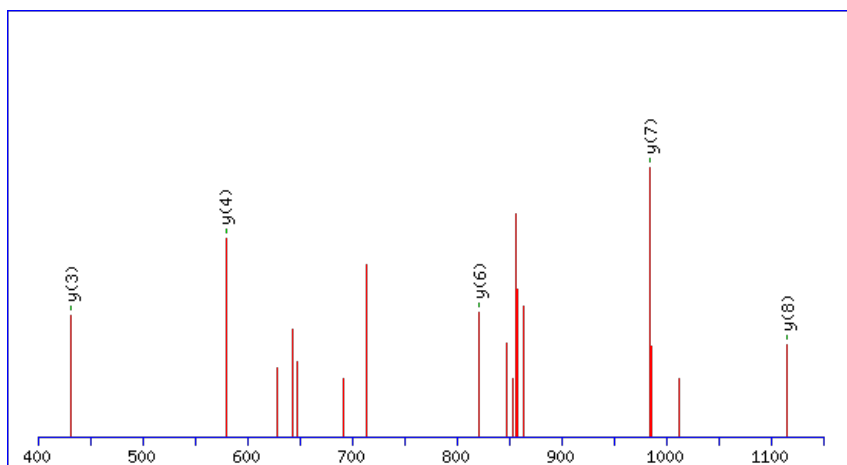

**Monoisotopic mass of neutral peptide Mr(calc):** 1442.6864

**Fixed modifications:** Carbamidomethyl (C) (apply to specified residues or termini only)

**Ions Score:** 41 **Expect:** 0.00029

**Matches:** 5/108 fragment ions using 7 most intense peaks ([help](#))

| #  | b         | b <sup>++</sup> | b <sup>*</sup> | b <sup>*++</sup> | b <sup>0</sup> | b <sup>0++</sup> | Seq. | y                | y <sup>++</sup> | y <sup>*</sup> | y <sup>*++</sup> | y <sup>0</sup> | y <sup>0++</sup> | #  |
|----|-----------|-----------------|----------------|------------------|----------------|------------------|------|------------------|-----------------|----------------|------------------|----------------|------------------|----|
| 1  | 114.0913  | 57.5493         |                |                  |                |                  | I    |                  |                 |                |                  |                |                  | 12 |
| 2  | 171.1128  | 86.0600         |                |                  |                |                  | G    | 1330.6096        | 665.8084        | 1313.5831      | 657.2952         | 1312.5990      | 656.8032         | 11 |
| 3  | 258.1448  | 129.5761        |                |                  | 240.1343       | 120.5708         | S    | 1273.5881        | 637.2977        | 1256.5616      | 628.7844         | 1255.5776      | 628.2924         | 10 |
| 4  | 329.1819  | 165.0946        |                |                  | 311.1714       | 156.0893         | A    | 1186.5561        | 593.7817        | 1169.5296      | 585.2684         | 1168.5456      | 584.7764         | 9  |
| 5  | 460.2224  | 230.6149        |                |                  | 442.2119       | 221.6096         | M    | <b>1115.5190</b> | 558.2631        | 1098.4925      | 549.7499         | 1097.5084      | 549.2579         | 8  |
| 6  | 623.2858  | 312.1465        |                |                  | 605.2752       | 303.1412         | Y    | <b>984.4785</b>  | 492.7429        | 967.4520       | 484.2296         | 966.4680       | 483.7376         | 7  |
| 7  | 752.3284  | 376.6678        |                |                  | 734.3178       | 367.6625         | E    | <b>821.4152</b>  | 411.2112        | 804.3886       | 402.6980         | 803.4046       | 402.2060         | 6  |
| 8  | 865.4124  | 433.2098        |                |                  | 847.4019       | 424.2046         | L    | 692.3726         | 346.6899        | 675.3461       | 338.1767         | 674.3620       | 337.6847         | 5  |
| 9  | 1012.4808 | 506.7441        |                |                  | 994.4703       | 497.7388         | F    | <b>579.2885</b>  | 290.1479        | 562.2620       | 281.6346         | 561.2780       | 281.1426         | 4  |
| 10 | 1140.5394 | 570.7733        | 1123.5129      | 562.2601         | 1122.5288      | 561.7681         | Q    | <b>432.2201</b>  | 216.6137        | 415.1936       | 208.1004         | 414.2096       | 207.6084         | 3  |
| 11 | 1269.5820 | 635.2946        | 1252.5555      | 626.7814         | 1251.5714      | 626.2894         | E    | 304.1615         | 152.5844        | 287.1350       | 144.0711         | 286.1510       | 143.5791         | 2  |
| 12 |           |                 |                |                  |                |                  | R    | 175.1190         | 88.0631         | 158.0924       | 79.5498          |                |                  | 1  |

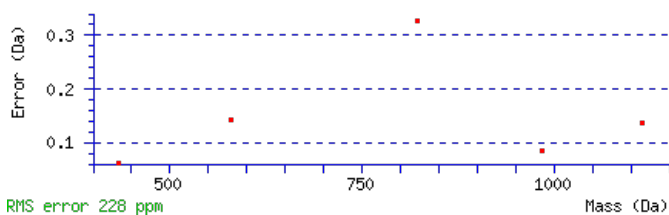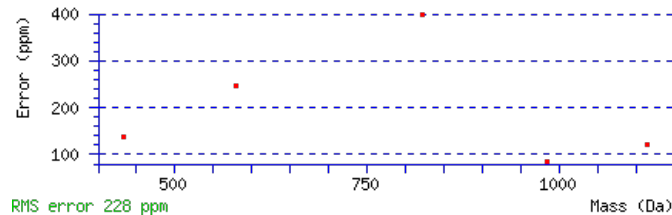

NCBI **BLAST** search of **IGSAMYLEFQER**

(Parameters: blastp, nr protein database, expect=20000, no filter, PAM30)

Other BLAST [web gateways](#)

AT5G08300.1

All matches to this query

| Score | Mr(calc)  | Delta   | Sequence                     |
|-------|-----------|---------|------------------------------|
| 40.9  | 1442.6864 | -0.0005 | <a href="#">IGSAMYLEFOER</a> |
| 13.4  | 1442.6898 | -0.0039 | <a href="#">VTQMYMIASLDR</a> |

Mascot: <http://www.matrixscience.com/>

**Peptide View**MS/MS Fragmentation of **MEKEGHAHLAWK**

Found in **AT5G08450.1** in **TAIR\_Arabidopsis**, Symbols: | similar to unnamed protein product [Vitis vinifera] (GB:CAO67090.1); contains InterPro domain Histone deacetylation protein Rxt3 (InterPro:IPR013951) | chr5:2727971-2732573 REVERSE

Match to Query 6243: 1470.637804 from(736.326178,2+) index(7077)

Title: Elution from: 62.677 to 62.677 scan no 9116 cid35.00 polarity:+

Data file D12h-3\_1.mgf

Click mouse within plot area to zoom in by factor of two about that point

Or,   to  Da

Label all possible matches  Label matches used for scoring

Show Y-axis

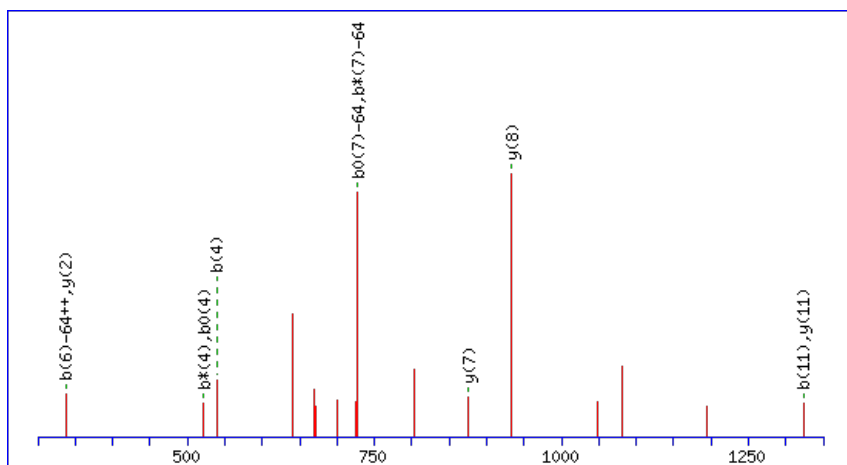

**Monoisotopic mass of neutral peptide Mr(calc):** 1470.6416

**Fixed modifications:** Carbamidomethyl (C) (apply to specified residues or termini only)

**Variable modifications:**

**M1** : Oxidation (M), with neutral losses 0.0000 (shown in table), 63.9983

**Ions Score:** 22 **Expect:** 0.039

**Matches** : 11/170 fragment ions using 12 most intense peaks ([help](#))

| #  | b                | b <sup>++</sup> | b <sup>*</sup>  | b <sup>*++</sup> | b <sup>0</sup>  | b <sup>0++</sup> | Seq. | y                | y <sup>++</sup> | y <sup>*</sup> | y <sup>*++</sup> | y <sup>0</sup> | y <sup>0++</sup> | #  |
|----|------------------|-----------------|-----------------|------------------|-----------------|------------------|------|------------------|-----------------|----------------|------------------|----------------|------------------|----|
| 1  | 149.0397         | 75.0235         |                 |                  |                 |                  | M    |                  |                 |                |                  |                |                  | 12 |
| 2  | 279.0793         | 140.0433        |                 |                  | 261.0688        | 131.0380         | E    | <b>1323.6165</b> | 662.3119        | 1305.5929      | 653.3001         | 1305.6059      | 653.3066         | 11 |
| 3  | 409.1684         | 205.0878        | 391.1448        | 196.0760         | 391.1578        | 196.0825         | K    | 1193.5768        | 597.2921        | 1175.5533      | 588.2803         | 1175.5663      | 588.2868         | 10 |
| 4  | <b>539.2080</b>  | 270.1076        | <b>521.1844</b> | 261.0958         | <b>521.1974</b> | 261.1024         | E    | 1063.4878        | 532.2475        | 1045.4642      | 523.2358         | 1045.4773      | 523.2423         | 9  |
| 5  | 597.2265         | 299.1169        | 579.2029        | 290.1051         | 579.2159        | 290.1116         | G    | <b>933.4482</b>  | 467.2277        | 915.4246       | 458.2159         |                |                  | 8  |
| 6  | 737.2765         | 369.1419        | 719.2529        | 360.1301         | 719.2660        | 360.1366         | H    | <b>875.4297</b>  | 438.2185        | 857.4061       | 429.2067         |                |                  | 7  |
| 7  | 809.3107         | 405.1590        | 791.2871        | 396.1472         | 791.3001        | 396.1537         | A    | 735.3797         | 368.1935        | 717.3561       | 359.1817         |                |                  | 6  |
| 8  | 949.3607         | 475.1840        | 931.3371        | 466.1722         | 931.3501        | 466.1787         | H    | 663.3455         | 332.1764        | 645.3219       | 323.1646         |                |                  | 5  |
| 9  | 1063.4418        | 532.2245        | 1045.4182       | 523.2127         | 1045.4312       | 523.2192         | L    | 523.2955         | 262.1514        | 505.2719       | 253.1396         |                |                  | 4  |
| 10 | 1135.4759        | 568.2416        | 1117.4523       | 559.2298         | 1117.4654       | 559.2363         | A    | 409.2144         | 205.1108        | 391.1908       | 196.0990         |                |                  | 3  |
| 11 | <b>1323.5493</b> | 662.2783        | 1305.5257       | 653.2665         | 1305.5387       | 653.2730         | W    | <b>337.1803</b>  | 169.0938        | 319.1567       | 160.0820         |                |                  | 2  |
| 12 |                  |                 |                 |                  |                 |                  | K    | 149.1069         | 75.0571         | 131.0833       | 66.0453          |                |                  | 1  |

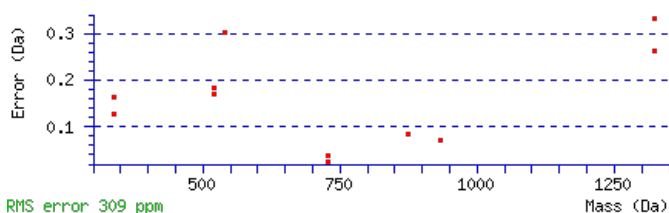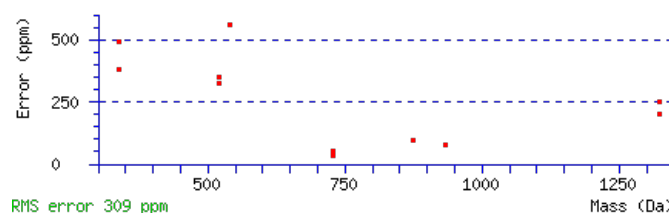

NCBI **BLAST** search of **MEKEGHAHLAWK**

(Parameters: blastp, nr protein database, expect=20000, no filter, PAM30)

# AT5G08450.1

Other BLAST [web gateways](#)

## All matches to this query

| Score | Mr(calc)  | Delta   | Sequence                        |
|-------|-----------|---------|---------------------------------|
| 21.6  | 1470.6416 | -0.0038 | <a href="#">MEKEGHAHLAWK</a>    |
| 9.1   | 1470.6401 | -0.0023 | <a href="#">STQAMGEAMKGVTK</a>  |
| 8.8   | 1470.6401 | -0.0023 | <a href="#">MTDVELRNMVSK</a>    |
| 5.2   | 1470.6401 | -0.0023 | <a href="#">STQAMGEAMKGVTK</a>  |
| 4.8   | 1470.6389 | -0.0011 | <a href="#">MAKDFDVNSVWK</a>    |
| 3.4   | 1470.6340 | 0.0038  | <a href="#">AGLISEMESTFEK</a>   |
| 3.0   | 1470.6421 | -0.0043 | <a href="#">SSRVREFHGMSR</a>    |
| 3.0   | 1470.6392 | -0.0014 | <a href="#">SESESAASGSVSKTK</a> |
| 1.0   | 1470.6389 | -0.0011 | <a href="#">SNMLGEGGFVPVYK</a>  |
| 1.0   | 1470.6401 | -0.0023 | <a href="#">AMDIAERKMTEK</a>    |

Mascot: <http://www.matrixscience.com/>

**Peptide View**MS/MS Fragmentation of **FLEFLK**

Found in **AT5G08560.1** in **TAIR\_Arabidopsis**, Symbols: | transducin family protein / WD-40 repeat family protein | chr5:2771105-2773828  
REVERSE

Match to Query 845: 795.45314 from(398.733933,2+) index(7057)

Title: Elution from: 65.196 to 65.196 scan no 9279 cid35.00 polarity:+

Data file D12h-2\_1.mgf

Click mouse within plot area to zoom in by factor of two about that point

Or,   to  Da

Label all possible matches  Label matches used for scoring

Show Y-axis

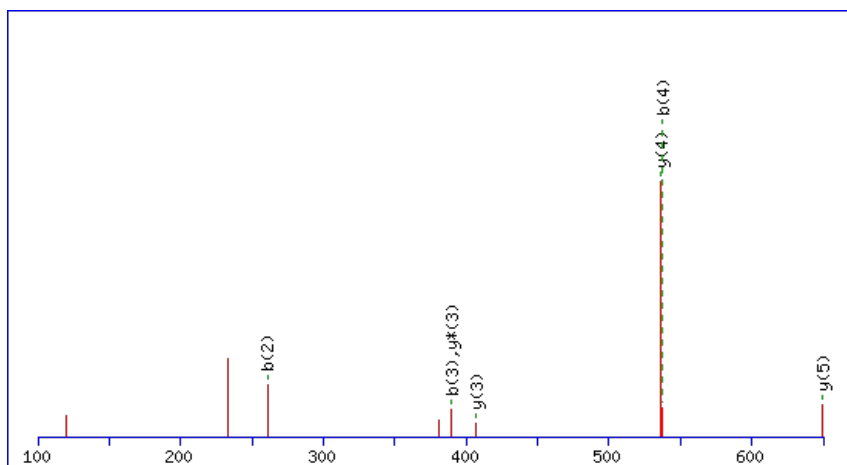

Monoisotopic mass of neutral peptide **Mr(calc)**: 795.4531

**Fixed modifications**: Carbamidomethyl (C) (apply to specified residues or termini only)

**Ions Score**: 29 **Expect**: 0.0014

**Matches** : 7/40 fragment ions using 10 most intense peaks ([help](#))

| # | b               | b <sup>++</sup> | b <sup>0</sup> | b <sup>0++</sup> | Seq. | y               | y <sup>++</sup> | y*              | y <sup>*++</sup> | y <sup>0</sup> | y <sup>0++</sup> | # |
|---|-----------------|-----------------|----------------|------------------|------|-----------------|-----------------|-----------------|------------------|----------------|------------------|---|
| 1 | 148.0757        | 74.5415         |                |                  | F    |                 |                 |                 |                  |                |                  | 6 |
| 2 | <b>261.1598</b> | 131.0835        |                |                  | L    | <b>649.3919</b> | 325.1996        | 632.3654        | 316.6863         | 631.3814       | 316.1943         | 5 |
| 3 | <b>390.2023</b> | 195.6048        | 372.1918       | 186.5995         | E    | <b>536.3079</b> | 268.6576        | 519.2813        | 260.1443         | 518.2973       | 259.6523         | 4 |
| 4 | <b>537.2708</b> | 269.1390        | 519.2602       | 260.1337         | F    | <b>407.2653</b> | 204.1363        | <b>390.2387</b> | 195.6230         |                |                  | 3 |
| 5 | 650.3548        | 325.6811        | 632.3443       | 316.6758         | L    | 260.1969        | 130.6021        | 243.1703        | 122.0888         |                |                  | 2 |
| 6 |                 |                 |                |                  | K    | 147.1128        | 74.0600         | 130.0863        | 65.5468          |                |                  | 1 |

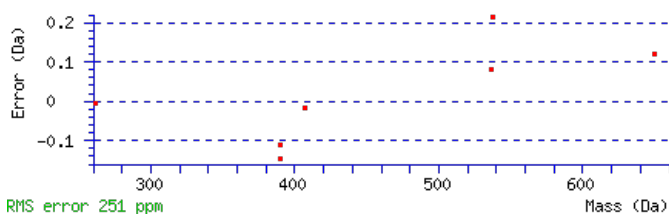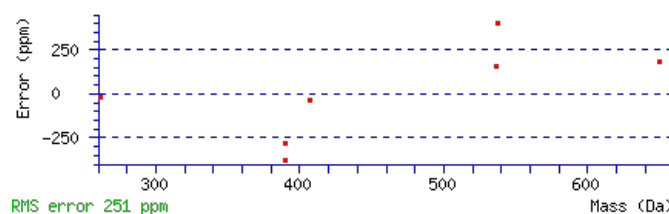NCBI **BLAST** search of **FLEFLK**

(Parameters: blastp, nr protein database, expect=20000, no filter, PAM30)

Other BLAST [web gateways](#)

**All matches to this query**

| Score | Mr(calc) | Delta  | Sequence               |
|-------|----------|--------|------------------------|
| 28.5  | 795.4531 | 0.0003 | <a href="#">FLEFIK</a> |
| 28.5  | 795.4531 | 0.0003 | <a href="#">FLEFLK</a> |
| 21.0  | 795.4531 | 0.0003 | <a href="#">FLEIFK</a> |



# AT5G08560.1

|      |          |        |                        |
|------|----------|--------|------------------------|
| 20.9 | 795.4531 | 0.0003 | <a href="#">IFEFLK</a> |
| 5.0  | 795.4531 | 0.0003 | <a href="#">LFFLEK</a> |

**Mascot:** <http://www.matrixscience.com/>

**Peptide View**MS/MS Fragmentation of **SDARGGPR**

Found in **AT5G08660.1** in **TAIR\_Arabidopsis**, Symbols: | similar to unknown protein [Arabidopsis thaliana] (TAIR:AT1G34320.1); similar to unknown protein [Oryza sativa (japonica cultivar-group)] (GB:BAD82727.1); contains InterPro domain Protein of unknown function DUF668 (InterPro:IPR007700)

Match to Query 1178: 814.404608 from(408.209580,2+) index(1163)

Title: Elution from: 16.022 to 16.022 scan no 1560 cid35.00 polarity:+

Data file D1d-3\_2.mgf

Click mouse within plot area to zoom in by factor of two about that point

Or,   to  Da

Label all possible matches  Label matches used for scoring

Show Y-axis

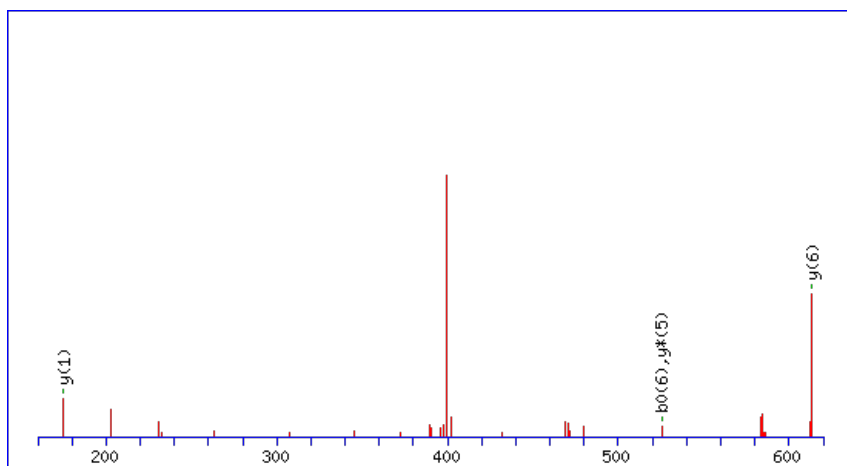

**Monoisotopic mass of neutral peptide Mr(calc):** 814.4046

**Fixed modifications:** Carbamidomethyl (C) (apply to specified residues or termini only)

**Ions Score:** 14 **Expect:** 0.042

**Matches:** 4/66 fragment ions using 5 most intense peaks ([help](#))

| # | b        | b <sup>++</sup> | b*       | b <sup>*++</sup> | b <sup>0</sup>  | b <sup>0++</sup> | Seq. | y               | y <sup>++</sup> | y*              | y <sup>*++</sup> | y <sup>0</sup> | y <sup>0++</sup> | # |
|---|----------|-----------------|----------|------------------|-----------------|------------------|------|-----------------|-----------------|-----------------|------------------|----------------|------------------|---|
| 1 | 88.0393  | 44.5233         |          |                  | 70.0287         | 35.5180          | S    |                 |                 |                 |                  |                |                  | 8 |
| 2 | 203.0662 | 102.0368        |          |                  | 185.0557        | 93.0315          | D    | 728.3798        | 364.6935        | 711.3533        | 356.1803         | 710.3692       | 355.6883         | 7 |
| 3 | 274.1034 | 137.5553        |          |                  | 256.0928        | 128.5500         | A    | <b>613.3529</b> | 307.1801        | 596.3263        | 298.6668         |                |                  | 6 |
| 4 | 430.2045 | 215.6059        | 413.1779 | 207.0926         | 412.1939        | 206.6006         | R    | 542.3158        | 271.6615        | <b>525.2892</b> | 263.1482         |                |                  | 5 |
| 5 | 487.2259 | 244.1166        | 470.1994 | 235.6033         | 469.2154        | 235.1113         | G    | 386.2146        | 193.6110        | 369.1881        | 185.0977         |                |                  | 4 |
| 6 | 544.2474 | 272.6273        | 527.2209 | 264.1141         | <b>526.2368</b> | 263.6221         | G    | 329.1932        | 165.1002        | 312.1666        | 156.5870         |                |                  | 3 |
| 7 | 641.3002 | 321.1537        | 624.2736 | 312.6404         | 623.2896        | 312.1484         | P    | 272.1717        | 136.5895        | 255.1452        | 128.0762         |                |                  | 2 |
| 8 |          |                 |          |                  |                 |                  | R    | <b>175.1190</b> | 88.0631         | 158.0924        | 79.5498          |                |                  | 1 |

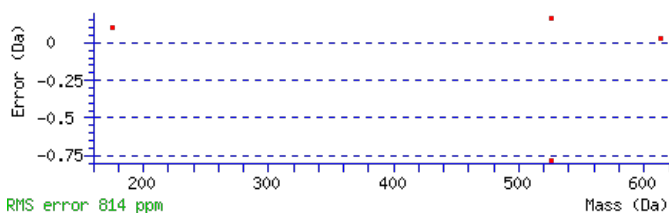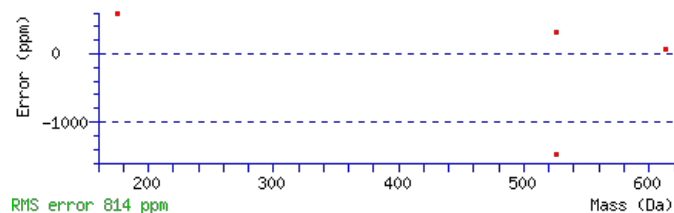

NCBI **BLAST** search of [SDARGGPR](#)

(Parameters: blastp, nr protein database, expect=20000, no filter, PAM30)

Other BLAST [web gateways](#)

**All matches to this query**

| Score | Mr(calc) | Delta | Sequence |
|-------|----------|-------|----------|
|       |          |       |          |

# AT5G08660.1

|      |          |        |                          |
|------|----------|--------|--------------------------|
| 14.2 | 814.4046 | 0.0001 | <a href="#">SDARGGPR</a> |
| 2.5  | 814.4046 | 0.0001 | <a href="#">QNGNQVR</a>  |

**Mascot:** <http://www.matrixscience.com/>

## Peptide View

MS/MS Fragmentation of **AHGGFSVFAGVGER**

Found in **AT5G08670.1** in **TAIR\_Arabidopsis**, Symbols: | ATP synthase beta chain 1, mitochondrial | chr5:2818396-2821150 REVERSE

Match to Query 5431: 1389.67905 from(464.233611,3+) index(5111)

Title: Elution from: 46.912 to 46.912 scan no 6446 cid35.00 polarity:+

Data file 0-3\_1.mgf

Click mouse within plot area to zoom in by factor of two about that point

Or,   to  Da

Label all possible matches  Label matches used for scoring

Show Y-axis

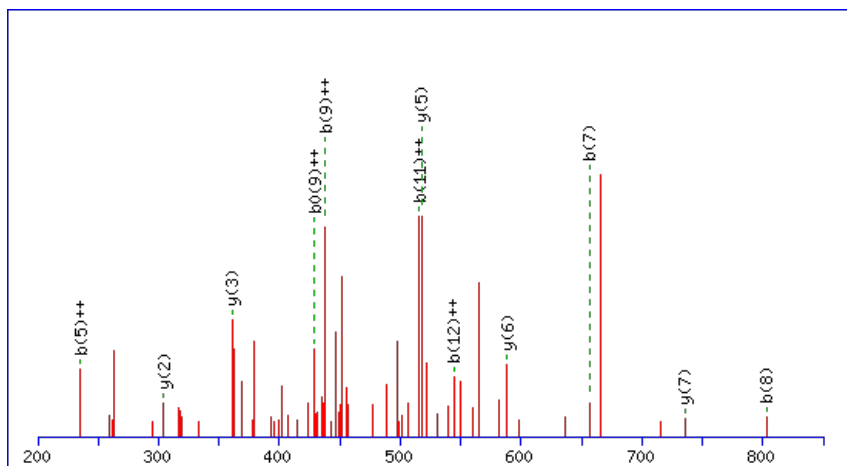

Monoisotopic mass of neutral peptide  $M_r(\text{calc})$ : 1389.6790

Fixed modifications: Carbamidomethyl (C) (apply to specified residues or termini only)

Ions Score: 32 Expect: 0.0022

Matches : 12/118 fragment ions using 17 most intense peaks ([help](#))

| #  | b               | b <sup>++</sup> | b <sup>0</sup> | b <sup>0++</sup> | Seq. | y               | y <sup>++</sup> | y*        | y <sup>*++</sup> | y <sup>0</sup> | y <sup>0++</sup> | #  |
|----|-----------------|-----------------|----------------|------------------|------|-----------------|-----------------|-----------|------------------|----------------|------------------|----|
| 1  | 72.0444         | 36.5258         |                |                  | A    |                 |                 |           |                  |                |                  | 14 |
| 2  | 209.1033        | 105.0553        |                |                  | H    | 1319.6491       | 660.3282        | 1302.6226 | 651.8149         | 1301.6385      | 651.3229         | 13 |
| 3  | 266.1248        | 133.5660        |                |                  | G    | 1182.5902       | 591.7987        | 1165.5636 | 583.2855         | 1164.5796      | 582.7935         | 12 |
| 4  | 323.1462        | 162.0768        |                |                  | G    | 1125.5687       | 563.2880        | 1108.5422 | 554.7747         | 1107.5582      | 554.2827         | 11 |
| 5  | 470.2146        | <b>235.6110</b> |                |                  | F    | 1068.5473       | 534.7773        | 1051.5207 | 526.2640         | 1050.5367      | 525.7720         | 10 |
| 6  | 557.2467        | 279.1270        | 539.2361       | 270.1217         | S    | 921.4789        | 461.2431        | 904.4523  | 452.7298         | 903.4683       | 452.2378         | 9  |
| 7  | <b>656.3151</b> | 328.6612        | 638.3045       | 319.6559         | V    | 834.4468        | 417.7271        | 817.4203  | 409.2138         | 816.4363       | 408.7218         | 8  |
| 8  | <b>803.3835</b> | 402.1954        | 785.3729       | 393.1901         | F    | <b>735.3784</b> | 368.1928        | 718.3519  | 359.6796         | 717.3678       | 359.1876         | 7  |
| 9  | 874.4206        | <b>437.7139</b> | 856.4100       | <b>428.7087</b>  | A    | <b>588.3100</b> | 294.6586        | 571.2835  | 286.1454         | 570.2994       | 285.6534         | 6  |
| 10 | 931.4421        | 466.2247        | 913.4315       | 457.2194         | G    | <b>517.2729</b> | 259.1401        | 500.2463  | 250.6268         | 499.2623       | 250.1348         | 5  |
| 11 | 1030.5105       | <b>515.7589</b> | 1012.4999      | 506.7536         | V    | 460.2514        | 230.6293        | 443.2249  | 222.1161         | 442.2409       | 221.6241         | 4  |
| 12 | 1087.5320       | <b>544.2696</b> | 1069.5214      | 535.2643         | G    | <b>361.1830</b> | 181.0951        | 344.1565  | 172.5819         | 343.1724       | 172.0899         | 3  |
| 13 | 1216.5745       | 608.7909        | 1198.5640      | 599.7856         | E    | <b>304.1615</b> | 152.5844        | 287.1350  | 144.0711         | 286.1510       | 143.5791         | 2  |
| 14 |                 |                 |                |                  | R    | 175.1190        | 88.0631         | 158.0924  | 79.5498          |                |                  | 1  |

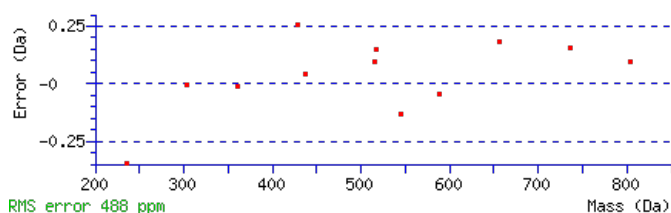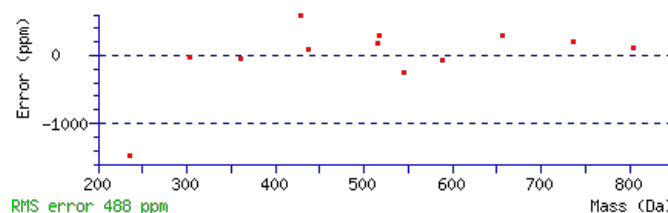

NCBI BLAST search of **AHGGFSVFAGVGER**

(Parameters: blastp, nr protein database, expect=20000, no filter, PAM30)

AT5G08670.1

Other BLAST [web gateways](#)

**All matches to this query**

| Score | Mr(calc)  | Delta  | Sequence                       |
|-------|-----------|--------|--------------------------------|
| 32.0  | 1389.6790 | 0.0000 | <a href="#">AHGGFSVFAGVGER</a> |
| 0.5   | 1389.6776 | 0.0014 | <a href="#">SSSSSEIGKSFFK</a>  |
| 0.1   | 1389.6783 | 0.0007 | <a href="#">DVAKRQSCSPSR</a>   |

Mascot: <http://www.matrixscience.com/>

## Peptide View

MS/MS Fragmentation of **DAPALVDLATGQEILATGIK**

Found in **AT5G08680.1** in **TAIR\_Arabidopsis**, Symbols: | ATP synthase beta chain, mitochondrial, putative | chr5:2821993-2824684 FORWARD

Match to Query 8884: 1995.089052 from(998.551802,2+) index(10146)

Title: Elution from: 98.355 to 98.355 scan no 14747 cid35.00 polarity:+

Data file D1d-2\_3.mgf

Click mouse within plot area to zoom in by factor of two about that point

Or,   to  Da

Label all possible matches  Label matches used for scoring

Show Y-axis

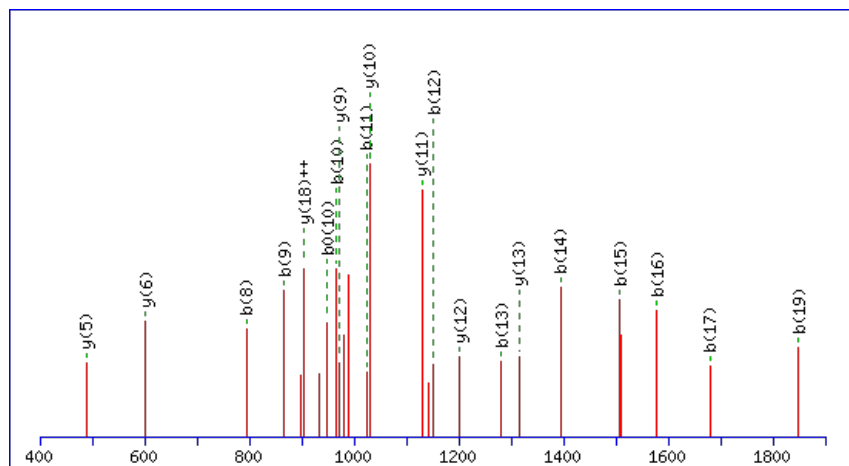

Monoisotopic mass of neutral peptide  $M_r(\text{calc})$ : 1995.0888

Fixed modifications: Carbamidomethyl (C) (apply to specified residues or termini only)

Ions Score: 90 Expect: 2.4e-009

Matches : 20/200 fragment ions using 28 most intense peaks ([help](#))

| #  | b         | b <sup>++</sup> | b*        | b <sup>*++</sup> | b <sup>0</sup> | b <sup>0++</sup> | Seq. | y         | y <sup>++</sup> | y*        | y <sup>*++</sup> | y <sup>0</sup> | y <sup>0++</sup> | #  |
|----|-----------|-----------------|-----------|------------------|----------------|------------------|------|-----------|-----------------|-----------|------------------|----------------|------------------|----|
| 1  | 116.0342  | 58.5207         |           |                  | 98.0237        | 49.5155          | D    |           |                 |           |                  |                |                  | 20 |
| 2  | 187.0713  | 94.0393         |           |                  | 169.0608       | 85.0340          | A    | 1881.0692 | 941.0382        | 1864.0426 | 932.5249         | 1863.0586      | 932.0329         | 19 |
| 3  | 284.1241  | 142.5657        |           |                  | 266.1135       | 133.5604         | P    | 1810.0320 | 905.5197        | 1793.0055 | 897.0064         | 1792.0215      | 896.5144         | 18 |
| 4  | 355.1612  | 178.0842        |           |                  | 337.1506       | 169.0790         | A    | 1712.9793 | 856.9933        | 1695.9527 | 848.4800         | 1694.9687      | 847.9880         | 17 |
| 5  | 468.2453  | 234.6263        |           |                  | 450.2347       | 225.6210         | L    | 1641.9422 | 821.4747        | 1624.9156 | 812.9614         | 1623.9316      | 812.4694         | 16 |
| 6  | 567.3137  | 284.1605        |           |                  | 549.3031       | 275.1552         | V    | 1528.8581 | 764.9327        | 1511.8316 | 756.4194         | 1510.8475      | 755.9274         | 15 |
| 7  | 682.3406  | 341.6740        |           |                  | 664.3301       | 332.6687         | D    | 1429.7897 | 715.3985        | 1412.7631 | 706.8852         | 1411.7791      | 706.3932         | 14 |
| 8  | 795.4247  | 398.2160        |           |                  | 777.4141       | 389.2107         | L    | 1314.7627 | 657.8850        | 1297.7362 | 649.3717         | 1296.7522      | 648.8797         | 13 |
| 9  | 866.4618  | 433.7345        |           |                  | 848.4512       | 424.7293         | A    | 1201.6787 | 601.3430        | 1184.6521 | 592.8297         | 1183.6681      | 592.3377         | 12 |
| 10 | 967.5095  | 484.2584        |           |                  | 949.4989       | 475.2531         | T    | 1130.6416 | 565.8244        | 1113.6150 | 557.3111         | 1112.6310      | 556.8191         | 11 |
| 11 | 1024.5310 | 512.7691        |           |                  | 1006.5204      | 503.7638         | G    | 1029.5939 | 515.3006        | 1012.5673 | 506.7873         | 1011.5833      | 506.2953         | 10 |
| 12 | 1152.5895 | 576.7984        | 1135.5630 | 568.2851         | 1134.5790      | 567.7931         | Q    | 972.5724  | 486.7898        | 955.5459  | 478.2766         | 954.5619       | 477.7846         | 9  |
| 13 | 1281.6321 | 641.3197        | 1264.6056 | 632.8064         | 1263.6216      | 632.3144         | E    | 844.5138  | 422.7606        | 827.4873  | 414.2473         | 826.5033       | 413.7553         | 8  |
| 14 | 1394.7162 | 697.8617        | 1377.6896 | 689.3485         | 1376.7056      | 688.8564         | I    | 715.4713  | 358.2393        | 698.4447  | 349.7260         | 697.4607       | 349.2340         | 7  |
| 15 | 1507.8003 | 754.4038        | 1490.7737 | 745.8905         | 1489.7897      | 745.3985         | L    | 602.3872  | 301.6972        | 585.3606  | 293.1840         | 584.3766       | 292.6919         | 6  |
| 16 | 1578.8374 | 789.9223        | 1561.8108 | 781.4090         | 1560.8268      | 780.9170         | A    | 489.3031  | 245.1552        | 472.2766  | 236.6419         | 471.2926       | 236.1499         | 5  |
| 17 | 1679.8850 | 840.4462        | 1662.8585 | 831.9329         | 1661.8745      | 831.4409         | T    | 418.2660  | 209.6366        | 401.2395  | 201.1234         | 400.2554       | 200.6314         | 4  |
| 18 | 1736.9065 | 868.9569        | 1719.8800 | 860.4436         | 1718.8959      | 859.9516         | G    | 317.2183  | 159.1128        | 300.1918  | 150.5995         |                |                  | 3  |
| 19 | 1849.9906 | 925.4989        | 1832.9640 | 916.9856         | 1831.9800      | 916.4936         | I    | 260.1969  | 130.6021        | 243.1703  | 122.0888         |                |                  | 2  |
| 20 |           |                 |           |                  |                |                  | K    | 147.1128  | 74.0600         | 130.0863  | 65.5468          |                |                  | 1  |

# AT5G08680.1

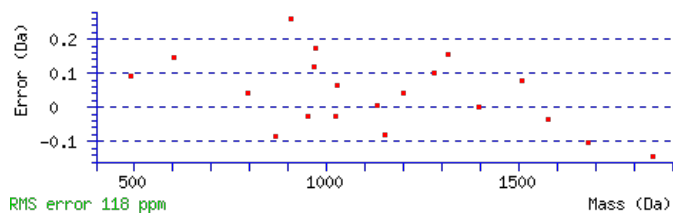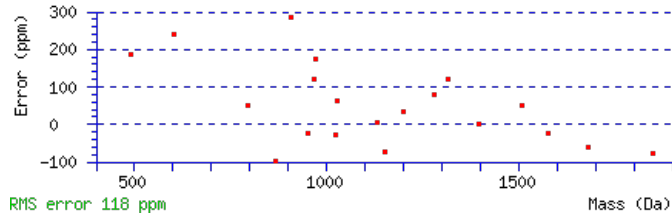

NCBI **BLAST** search of [DAPALVDLATGQEILATGIK](#)  
(Parameters: blastp, nr protein database, expect=20000, no filter, PAM30)  
Other BLAST [web gateways](#)

## All matches to this query

| Score | Mr(calc)  | Delta   | Sequence                             |
|-------|-----------|---------|--------------------------------------|
| 90.1  | 1995.0888 | 0.0002  | <a href="#">DAPALVDLATGQEILATGIK</a> |
| 0.8   | 1995.0902 | -0.0011 | <a href="#">LHSAVLDTRSSVQWVVAK</a>   |

Mascot: <http://www.matrixscience.com/>

**MASCOT SCIENCE** Mascot Search Results

**Peptide View**

MS/MS Fragmentation of **LVLEVSHHLGQNVVR**

Found in **AT5G08690.1** in **TAIR\_Arabidopsis**, Symbols: | ATP synthase beta chain 2, mitochondrial | chr5:2825740-2828353 FORWARD

Match to Query 8137: 1698.949464 from(567.323764,3+) index(4092)

Title: Elution from: 37.550 to 37.550 scan no 5112 cid35.00 polarity:+

Data file C7-3\_2.mgf

Click mouse within plot area to zoom in by factor of two about that point

Or,   to  Da

Label all possible matches  Label matches used for scoring

Show Y-axis

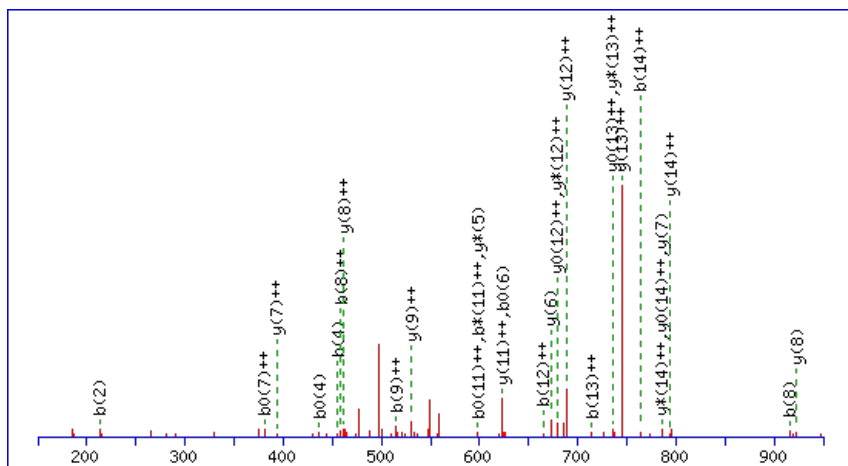

**Monoisotopic mass of neutral peptide Mr(calc):** 1698.9529

**Fixed modifications:** Carbamidomethyl (C) (apply to specified residues or termini only)

**Ions Score:** 35 **Expect:** 0.0011

**Matches:** 30/124 fragment ions using 57 most intense peaks [\(help\)](#)

| #  | b               | b <sup>++</sup> | b <sup>*</sup> | b <sup>*++</sup> | b <sup>0</sup>  | b <sup>0++</sup> | Seq. | y               | y <sup>++</sup> | y <sup>*</sup>  | y <sup>*++</sup> | y <sup>0</sup> | y <sup>0++</sup> | #  |
|----|-----------------|-----------------|----------------|------------------|-----------------|------------------|------|-----------------|-----------------|-----------------|------------------|----------------|------------------|----|
| 1  | 114.0913        | 57.5493         |                |                  |                 |                  | L    |                 |                 |                 |                  |                |                  | 15 |
| 2  | <b>213.1598</b> | 107.0835        |                |                  |                 |                  | V    | 1586.8762       | <b>793.9417</b> | 1569.8496       | <b>785.4284</b>  | 1568.8656      | <b>784.9364</b>  | 14 |
| 3  | 326.2438        | 163.6255        |                |                  |                 |                  | L    | 1487.8077       | <b>744.4075</b> | 1470.7812       | <b>735.8942</b>  | 1469.7972      | <b>735.4022</b>  | 13 |
| 4  | <b>455.2864</b> | 228.1468        |                |                  | <b>437.2758</b> | 219.1416         | E    | 1374.7237       | <b>687.8655</b> | 1357.6971       | <b>679.3522</b>  | 1356.7131      | <b>678.8602</b>  | 12 |
| 5  | 554.3548        | 277.6811        |                |                  | 536.3443        | 268.6758         | V    | 1245.6811       | <b>623.3442</b> | 1228.6545       | 614.8309         | 1227.6705      | 614.3389         | 11 |
| 6  | 641.3869        | 321.1971        |                |                  | <b>623.3763</b> | 312.1918         | S    | 1146.6127       | 573.8100        | 1129.5861       | 565.2967         | 1128.6021      | 564.8047         | 10 |
| 7  | 778.4458        | 389.7265        |                |                  | 760.4352        | <b>380.7212</b>  | H    | 1059.5806       | <b>530.2940</b> | 1042.5541       | 521.7807         |                |                  | 9  |
| 8  | <b>915.5047</b> | <b>458.2560</b> |                |                  | 897.4941        | 449.2507         | H    | <b>922.5217</b> | <b>461.7645</b> | 905.4952        | 453.2512         |                |                  | 8  |
| 9  | 1028.5887       | <b>514.7980</b> |                |                  | 1010.5782       | 505.7927         | L    | <b>785.4628</b> | <b>393.2350</b> | 768.4363        | 384.7218         |                |                  | 7  |
| 10 | 1085.6102       | 543.3087        |                |                  | 1067.5996       | 534.3035         | G    | <b>672.3787</b> | 336.6930        | 655.3522        | 328.1797         |                |                  | 6  |
| 11 | 1213.6688       | 607.3380        | 1196.6422      | <b>598.8248</b>  | 1195.6582       | <b>598.3327</b>  | Q    | 615.3573        | 308.1823        | <b>598.3307</b> | 299.6690         |                |                  | 5  |
| 12 | 1327.7117       | <b>664.3595</b> | 1310.6852      | 655.8462         | 1309.7011       | 655.3542         | N    | 487.2987        | 244.1530        | 470.2722        | 235.6397         |                |                  | 4  |
| 13 | 1426.7801       | <b>713.8937</b> | 1409.7536      | 705.3804         | 1408.7696       | 704.8884         | V    | 373.2558        | 187.1315        | 356.2292        | 178.6183         |                |                  | 3  |
| 14 | 1525.8485       | <b>763.4279</b> | 1508.8220      | 754.9146         | 1507.8380       | 754.4226         | V    | 274.1874        | 137.5973        | 257.1608        | 129.0840         |                |                  | 2  |
| 15 |                 |                 |                |                  |                 |                  | R    | 175.1190        | 88.0631         | 158.0924        | 79.5498          |                |                  | 1  |

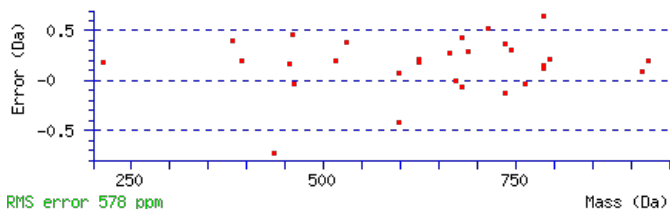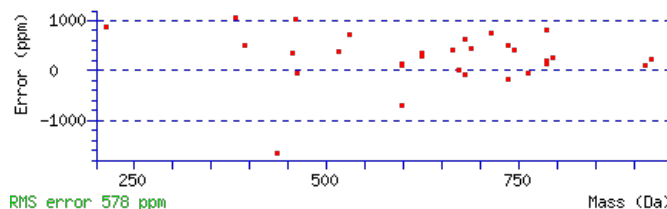



## AT5G08690.1

(Parameters: blastp, nr protein database, expect=20000, no filter, PAM30)

Other BLAST [web gateways](#)

### All matches to this query

| Score | Mr(calc)  | Delta   | Sequence                         |
|-------|-----------|---------|----------------------------------|
| 34.9  | 1698.9529 | -0.0035 | <a href="#">LVLEVSHHLGQNVVR</a>  |
| 1.9   | 1698.9491 | 0.0004  | <a href="#">VLKLMGELHELVYR</a>   |
| 1.6   | 1698.9451 | 0.0044  | <a href="#">NIVAIVDACSLAGLRK</a> |
| 1.6   | 1698.9491 | 0.0004  | <a href="#">LIPSFHEKLMNVK</a>    |
| 0.6   | 1698.9450 | 0.0044  | <a href="#">QKPPERMASLTKGLK</a>  |

Mascot: <http://www.matrixscience.com/>

**Peptide View**MS/MS Fragmentation of **FVIDICAK**Found in **AT5G09350.1** in **TAIR\_Arabidopsis**, Symbols: | phosphatidylinositol 4-kinase, putative | chr5:2899366-2905611 REVERSE

Match to Query 2376: 974.478214 from(488.246383,2+) index(1998)

Title: Elution from: 23.950 to 23.950 scan no 2593 cid35.00 polarity:+

Data file 0-2\_1.mgf

Click mouse within plot area to zoom in by factor of two about that point

Or,   to  Da Label all possible matches  Label matches used for scoring Show Y-axis 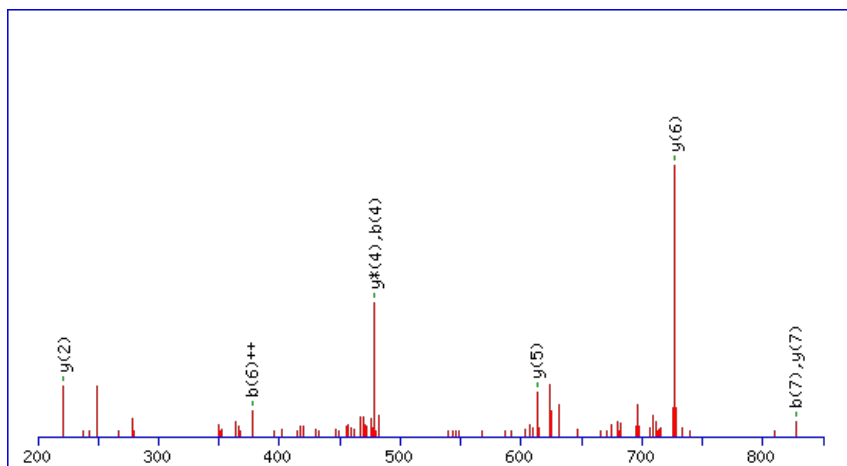Monoisotopic mass of neutral peptide **Mr(calc)**: 974.4755

Fixed modifications: Carbamidomethyl (C) (apply to specified residues or termini only)

Ions Score: 30 Expect: 0.013

Matches : 8/56 fragment ions using 7 most intense peaks ([help](#))

| # | b        | b <sup>++</sup> | b <sup>0</sup> | b <sup>0++</sup> | Seq. | y        | y <sup>++</sup> | y*       | y <sup>*++</sup> | y <sup>0</sup> | y <sup>0++</sup> | # |
|---|----------|-----------------|----------------|------------------|------|----------|-----------------|----------|------------------|----------------|------------------|---|
| 1 | 149.0727 | 75.0400         |                |                  | F    |          |                 |          |                  |                |                  | 8 |
| 2 | 249.1382 | 125.0727        |                |                  | V    | 827.4174 | 414.2123        | 809.3938 | 405.2005         | 809.4068       | 405.2070         | 7 |
| 3 | 363.2193 | 182.1133        |                |                  | I    | 727.3519 | 364.1796        | 709.3283 | 355.1678         | 709.3414       | 355.1743         | 6 |
| 4 | 479.2433 | 240.1253        | 461.2327       | 231.1200         | D    | 613.2708 | 307.1390        | 595.2472 | 298.1273         | 595.2603       | 298.1338         | 5 |
| 5 | 593.3244 | 297.1658        | 575.3138       | 288.1605         | I    | 497.2468 | 249.1271        | 479.2233 | 240.1153         |                |                  | 4 |
| 6 | 755.3491 | 378.1782        | 737.3385       | 369.1729         | C    | 383.1657 | 192.0865        | 365.1422 | 183.0747         |                |                  | 3 |
| 7 | 827.3832 | 414.1952        | 809.3727       | 405.1900         | A    | 221.1410 | 111.0741        | 203.1174 | 102.0624         |                |                  | 2 |
| 8 |          |                 |                |                  | K    | 149.1069 | 75.0571         | 131.0833 | 66.0453          |                |                  | 1 |

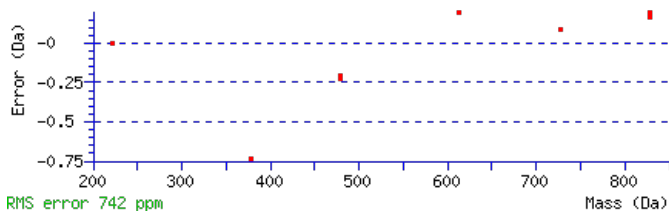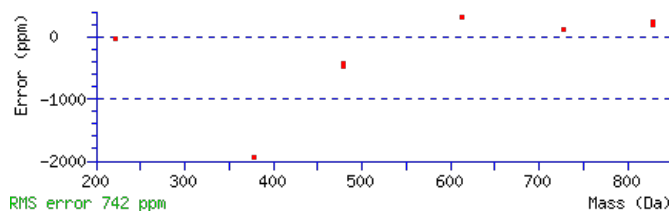NCBI **BLAST** search of [FVIDICAK](#)

(Parameters: blastp, nr protein database, expect=20000, no filter, PAM30)

Other BLAST [web gateways](#)**All matches to this query**

| Score | Mr(calc) | Delta   | Sequence                 |
|-------|----------|---------|--------------------------|
| 29.5  | 974.4755 | 0.0027  | <a href="#">FVIDICAK</a> |
| 20.9  | 974.4807 | -0.0025 | <a href="#">SRTDEKVK</a> |

## AT5G09350.1

|      |          |         |                           |
|------|----------|---------|---------------------------|
| 16.1 | 974.4782 | 0.0000  | <a href="#">MVIYHRK</a>   |
| 13.8 | 974.4760 | 0.0022  | <a href="#">GMREKNVK</a>  |
| 13.8 | 974.4789 | -0.0007 | <a href="#">KMSEIMVK</a>  |
| 12.4 | 974.4807 | -0.0025 | <a href="#">SRESSVAVK</a> |
| 10.4 | 974.4807 | -0.0025 | <a href="#">ASTLNKSNK</a> |
| 9.8  | 974.4807 | -0.0025 | <a href="#">RSEDSLKK</a>  |
| 9.3  | 974.4807 | -0.0025 | <a href="#">VVSSTGERK</a> |
| 8.2  | 974.4807 | -0.0025 | <a href="#">DRTVESKK</a>  |

Mascot: <http://www.matrixscience.com/>

**Peptide View**MS/MS Fragmentation of **KPMALIK**Found in **AT5G09500.1** in **TAIR\_Arabidopsis**, Symbols: | 40S ribosomal protein S15 (RPS15C) | chr5:2954045-2954851 REVERSE

Match to Query 1117: 808.472414 from(405.243483,2+) index(880)

Title: Elution from: 14.726 to 14.726 scan no 1266 cid35.00 polarity:+

Data file D6h-1\_1.mgf

Click mouse within plot area to zoom in by factor of two about that point

Or,  to  Da Label all possible matches  Label matches used for scoring Show Y-axis 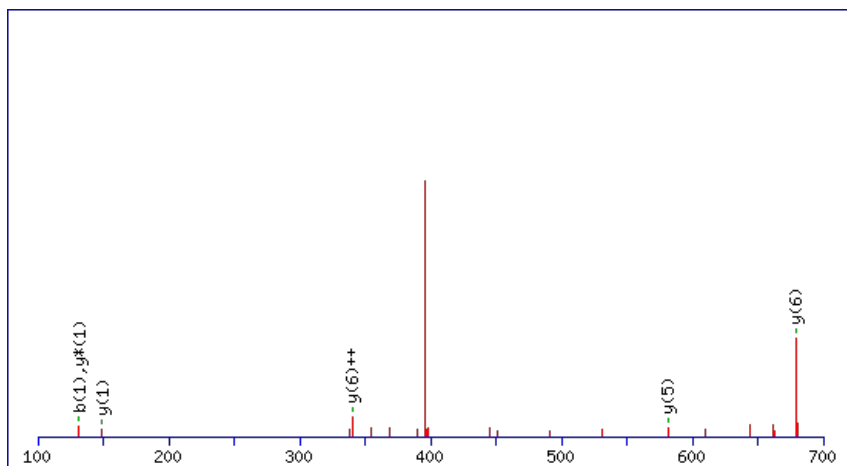Monoisotopic mass of neutral peptide **Mr(calc)**: 808.4723

Fixed modifications: Carbamidomethyl (C) (apply to specified residues or termini only)

Ions Score: 17 **Expect**: 0.019Matches : 6/48 fragment ions using 10 most intense peaks ([help](#))

| # | b        | b <sup>++</sup> | b*       | b <sup>*++</sup> | Seq. | y        | y <sup>++</sup> | y*       | y <sup>*++</sup> | # |
|---|----------|-----------------|----------|------------------|------|----------|-----------------|----------|------------------|---|
| 1 | 131.0963 | 66.0518         | 113.0727 | 57.0400          | K    |          |                 |          |                  | 7 |
| 2 | 229.1461 | 115.0767        | 211.1225 | 106.0649         | P    | 679.3905 | 340.1989        | 661.3670 | 331.1871         | 6 |
| 3 | 361.1836 | 181.0955        | 343.1600 | 172.0837         | M    | 581.3407 | 291.1740        | 563.3172 | 282.1622         | 5 |
| 4 | 433.2178 | 217.1125        | 415.1942 | 208.1007         | A    | 449.3032 | 225.1552        | 431.2796 | 216.1435         | 4 |
| 5 | 547.2989 | 274.1531        | 529.2753 | 265.1413         | L    | 377.2691 | 189.1382        | 359.2455 | 180.1264         | 3 |
| 6 | 661.3800 | 331.1936        | 643.3564 | 322.1818         | I    | 263.1880 | 132.0976        | 245.1644 | 123.0858         | 2 |
| 7 |          |                 |          |                  | K    | 149.1069 | 75.0571         | 131.0833 | 66.0453          | 1 |

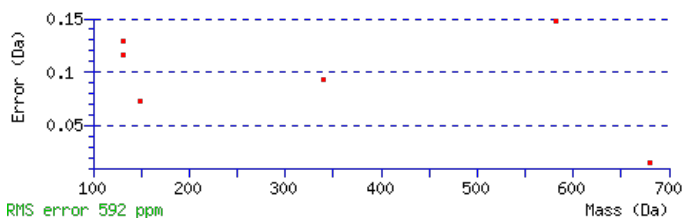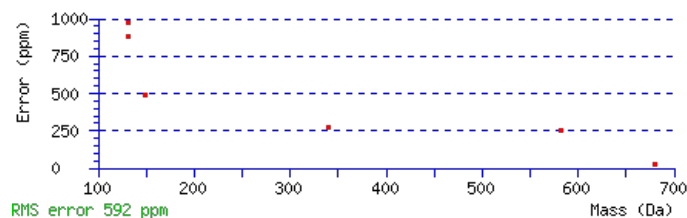NCBI **BLAST** search of [KPMALIK](#)

(Parameters: blastp, nr protein database, expect=20000, no filter, PAM30)

Other BLAST [web gateways](#)**All matches to this query**

| Score | Mr(calc) | Delta  | Sequence                |
|-------|----------|--------|-------------------------|
| 17.1  | 808.4723 | 0.0001 | <a href="#">KPMALIK</a> |
| 14.4  | 808.4723 | 0.0001 | <a href="#">KLMIPAK</a> |
| 14.4  | 808.4723 | 0.0001 | <a href="#">KMLLAPK</a> |

AT5G09500.1

|     |          |        |                         |
|-----|----------|--------|-------------------------|
| 5.7 | 808.4723 | 0.0001 | <a href="#">KIMPALK</a> |
|-----|----------|--------|-------------------------|

**Mascot:** <http://www.matrixscience.com/>

## Peptide View

MS/MS Fragmentation of **GVNPDEAVAMGAALQGGILR**

Found in **AT5G09590.1** in **TAIR\_Arabidopsis**, Symbols: HSC70-5, mtHSC70-2 | mtHSC70-2 (HEAT SHOCK PROTEIN 70); ATP binding / unfolded protein binding | chr5:2975722-2978509 FORWARD

Match to Query 9311: 1937.996912 from(970.005732,2+) index(9481)

Title: Elution from: 85.610 to 85.610 scan no 12918 cid35.00 polarity:+

Data file D6h-3\_1.mgf

Click mouse within plot area to zoom in by factor of two about that point

Or,  to  Da

Label all possible matches  Label matches used for scoring

Show Y-axis

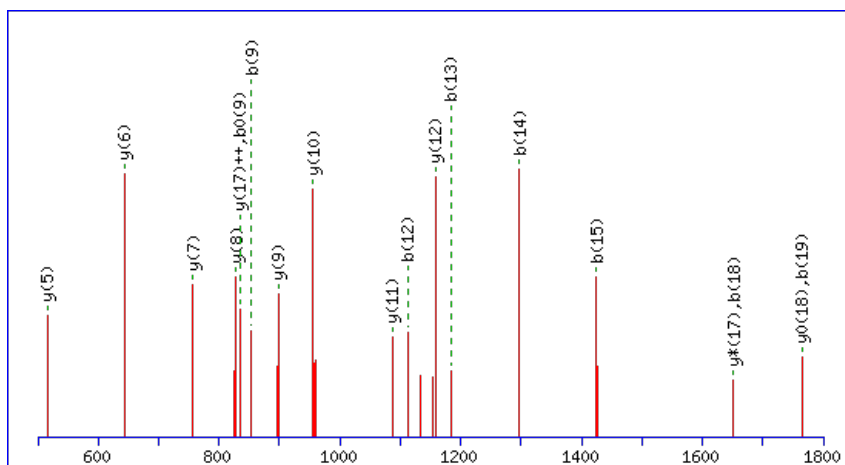

Monoisotopic mass of neutral peptide  $M_r(\text{calc})$ : 1937.9993

Fixed modifications: Carbamidomethyl (C) (apply to specified residues or termini only)

Ions Score: 66 Expect: 8e-007

Matches : 19/188 fragment ions using 22 most intense peaks ([help](#))

| #  | b         | b <sup>++</sup> | b*        | b <sup>*++</sup> | b <sup>0</sup> | b <sup>0++</sup> | Seq. | y         | y <sup>++</sup> | y*        | y <sup>*++</sup> | y <sup>0</sup> | y <sup>0++</sup> | #  |
|----|-----------|-----------------|-----------|------------------|----------------|------------------|------|-----------|-----------------|-----------|------------------|----------------|------------------|----|
| 1  | 58.0287   | 29.5180         |           |                  |                |                  | G    |           |                 |           |                  |                |                  | 20 |
| 2  | 157.0972  | 79.0522         |           |                  |                |                  | V    | 1881.9851 | 941.4962        | 1864.9586 | 932.9829         | 1863.9745      | 932.4909         | 19 |
| 3  | 271.1401  | 136.0737        | 254.1135  | 127.5604         |                |                  | N    | 1782.9167 | 891.9620        | 1765.8901 | 883.4487         | 1764.9061      | 882.9567         | 18 |
| 4  | 368.1928  | 184.6001        | 351.1663  | 176.0868         |                |                  | P    | 1668.8738 | 834.9405        | 1651.8472 | 826.4272         | 1650.8632      | 825.9352         | 17 |
| 5  | 483.2198  | 242.1135        | 466.1932  | 233.6003         | 465.2092       | 233.1082         | D    | 1571.8210 | 786.4141        | 1554.7945 | 777.9009         | 1553.8104      | 777.4089         | 16 |
| 6  | 612.2624  | 306.6348        | 595.2358  | 298.1216         | 594.2518       | 297.6295         | E    | 1456.7941 | 728.9007        | 1439.7675 | 720.3874         | 1438.7835      | 719.8954         | 15 |
| 7  | 683.2995  | 342.1534        | 666.2729  | 333.6401         | 665.2889       | 333.1481         | A    | 1327.7515 | 664.3794        | 1310.7249 | 655.8661         |                |                  | 14 |
| 8  | 782.3679  | 391.6876        | 765.3414  | 383.1743         | 764.3573       | 382.6823         | V    | 1256.7144 | 628.8608        | 1239.6878 | 620.3475         |                |                  | 13 |
| 9  | 853.4050  | 427.2061        | 836.3785  | 418.6929         | 835.3945       | 418.2009         | A    | 1157.6459 | 579.3266        | 1140.6194 | 570.8133         |                |                  | 12 |
| 10 | 984.4455  | 492.7264        | 967.4190  | 484.2131         | 966.4349       | 483.7211         | M    | 1086.6088 | 543.8081        | 1069.5823 | 535.2948         |                |                  | 11 |
| 11 | 1041.4670 | 521.2371        | 1024.4404 | 512.7238         | 1023.4564      | 512.2318         | G    | 955.5683  | 478.2878        | 938.5418  | 469.7745         |                |                  | 10 |
| 12 | 1112.5041 | 556.7557        | 1095.4775 | 548.2424         | 1094.4935      | 547.7504         | A    | 898.5469  | 449.7771        | 881.5203  | 441.2638         |                |                  | 9  |
| 13 | 1183.5412 | 592.2742        | 1166.5147 | 583.7610         | 1165.5306      | 583.2690         | A    | 827.5098  | 414.2585        | 810.4832  | 405.7452         |                |                  | 8  |
| 14 | 1296.6253 | 648.8163        | 1279.5987 | 640.3030         | 1278.6147      | 639.8110         | L    | 756.4726  | 378.7400        | 739.4461  | 370.2267         |                |                  | 7  |
| 15 | 1424.6838 | 712.8456        | 1407.6573 | 704.3323         | 1406.6733      | 703.8403         | Q    | 643.3886  | 322.1979        | 626.3620  | 313.6847         |                |                  | 6  |
| 16 | 1481.7053 | 741.3563        | 1464.6788 | 732.8430         | 1463.6947      | 732.3510         | G    | 515.3300  | 258.1686        | 498.3035  | 249.6554         |                |                  | 5  |
| 17 | 1538.7268 | 769.8670        | 1521.7002 | 761.3537         | 1520.7162      | 760.8617         | G    | 458.3085  | 229.6579        | 441.2820  | 221.1446         |                |                  | 4  |
| 18 | 1651.8108 | 826.4091        | 1634.7843 | 817.8958         | 1633.8003      | 817.4038         | I    | 401.2871  | 201.1472        | 384.2605  | 192.6339         |                |                  | 3  |
| 19 | 1764.8949 | 882.9511        | 1747.8683 | 874.4378         | 1746.8843      | 873.9458         | L    | 288.2030  | 144.6051        | 271.1765  | 136.0919         |                |                  | 2  |
| 20 |           |                 |           |                  |                |                  | R    | 175.1190  | 88.0631         | 158.0924  | 79.5498          |                |                  | 1  |

# AT5G09590.1

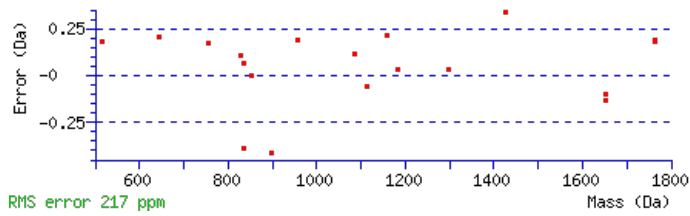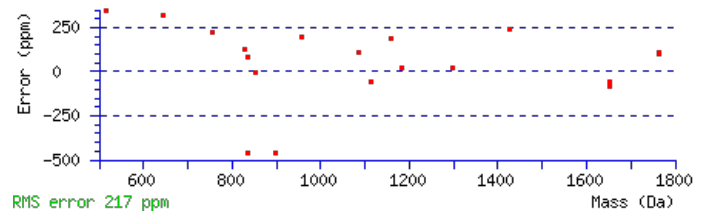

NCBI **BLAST** search of [GVNPDEAVAMGAALQGGILR](#)  
(Parameters: blastp, nr protein database, expect=20000, no filter, PAM30)  
Other BLAST [web gateways](#)

## All matches to this query

| Score | Mr(calc)  | Delta   | Sequence                             |
|-------|-----------|---------|--------------------------------------|
| 66.4  | 1937.9993 | -0.0024 | <a href="#">GVNPDEAVAMGAAIQGGILR</a> |
| 66.4  | 1937.9993 | -0.0024 | <a href="#">GVNPDEAVAMGAALQGGILR</a> |
| 2.4   | 1937.9973 | -0.0003 | <a href="#">KNTPHHPQDLQAFHLR</a>     |
| 1.3   | 1938.0006 | -0.0037 | <a href="#">HASPIHLMSPVHGGGGRTK</a>  |
| 0.2   | 1937.9993 | -0.0024 | <a href="#">EALAVAAAMEKGTTHPIGR</a>  |

Mascot: <http://www.matrixscience.com/>

**Peptide View**MS/MS Fragmentation of **IKPLAALAMIDEGELDWK**Found in **AT5G09650.1** in **TAIR\_Arabidopsis**, Symbols: ATPPA6 | ATPPA6 (ARABIDOPSIS THALIANA PYROPHOSPHORYLASE 6); inorganic diphosphatase/ pyrophosphatase | chr5:2991332-2993118 REVERSE

Match to Query 8810: 2012.063169 from(671.694999,3+) index(9657)

Title: Elution from: 92.965 to 92.965 scan no 13802 cid35.00 polarity:+

Data file D1d-1\_3.mgf

Click mouse within plot area to zoom in by factor of two about that point

Or,   to  Da Label all possible matches  Label matches used for scoring Show Y-axis 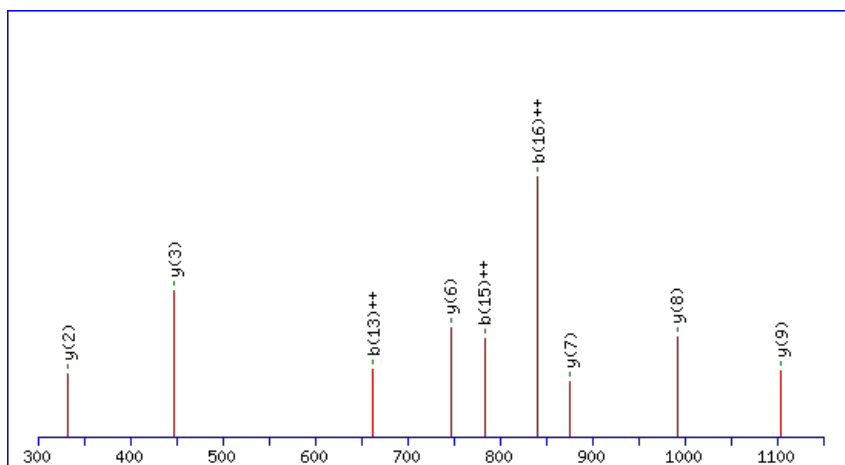Monoisotopic mass of neutral peptide  $M_r(\text{calc})$ : 2012.0652

Fixed modifications: Carbamidomethyl (C) (apply to specified residues or termini only)

Ions Score: 56 Expect: 8.4e-006

Matches : 9/178 fragment ions using 9 most intense peaks ([help](#))

| #  | b         | b <sup>++</sup> | b*        | b <sup>*++</sup> | b <sup>0</sup> | b <sup>0++</sup> | Seq. | y                | y <sup>++</sup> | y*        | y <sup>*++</sup> | y <sup>0</sup> | y <sup>0++</sup> | #  |
|----|-----------|-----------------|-----------|------------------|----------------|------------------|------|------------------|-----------------|-----------|------------------|----------------|------------------|----|
| 1  | 114.0913  | 57.5493         |           |                  |                |                  | I    |                  |                 |           |                  |                |                  | 18 |
| 2  | 242.1863  | 121.5968        | 225.1598  | 113.0835         |                |                  | K    | 1899.9885        | 950.4979        | 1882.9619 | 941.9846         | 1881.9779      | 941.4926         | 17 |
| 3  | 339.2391  | 170.1232        | 322.2125  | 161.6099         |                |                  | P    | 1771.8935        | 886.4504        | 1754.8670 | 877.9371         | 1753.8829      | 877.4451         | 16 |
| 4  | 452.3231  | 226.6652        | 435.2966  | 218.1519         |                |                  | L    | 1674.8407        | 837.9240        | 1657.8142 | 829.4107         | 1656.8302      | 828.9187         | 15 |
| 5  | 523.3602  | 262.1838        | 506.3337  | 253.6705         |                |                  | A    | 1561.7567        | 781.3820        | 1544.7301 | 772.8687         | 1543.7461      | 772.3767         | 14 |
| 6  | 594.3974  | 297.7023        | 577.3708  | 289.1890         |                |                  | A    | 1490.7196        | 745.8634        | 1473.6930 | 737.3501         | 1472.7090      | 736.8581         | 13 |
| 7  | 707.4814  | 354.2443        | 690.4549  | 345.7311         |                |                  | L    | 1419.6824        | 710.3449        | 1402.6559 | 701.8316         | 1401.6719      | 701.3396         | 12 |
| 8  | 778.5185  | 389.7629        | 761.4920  | 381.2496         |                |                  | A    | 1306.5984        | 653.8028        | 1289.5718 | 645.2896         | 1288.5878      | 644.7975         | 11 |
| 9  | 909.5590  | 455.2831        | 892.5325  | 446.7699         |                |                  | M    | 1235.5613        | 618.2843        | 1218.5347 | 609.7710         | 1217.5507      | 609.2790         | 10 |
| 10 | 1022.6431 | 511.8252        | 1005.6165 | 503.3119         |                |                  | I    | <b>1104.5208</b> | 552.7640        | 1087.4942 | 544.2508         | 1086.5102      | 543.7587         | 9  |
| 11 | 1137.6700 | 569.3387        | 1120.6435 | 560.8254         | 1119.6595      | 560.3334         | D    | <b>991.4367</b>  | 496.2220        | 974.4102  | 487.7087         | 973.4262       | 487.2167         | 8  |
| 12 | 1266.7126 | 633.8599        | 1249.6861 | 625.3467         | 1248.7021      | 624.8547         | E    | <b>876.4098</b>  | 438.7085        | 859.3832  | 430.1953         | 858.3992       | 429.7032         | 7  |
| 13 | 1323.7341 | <b>662.3707</b> | 1306.7075 | 653.8574         | 1305.7235      | 653.3654         | G    | <b>747.3672</b>  | 374.1872        | 730.3406  | 365.6740         | 729.3566       | 365.1819         | 6  |
| 14 | 1452.7767 | 726.8920        | 1435.7501 | 718.3787         | 1434.7661      | 717.8867         | E    | 690.3457         | 345.6765        | 673.3192  | 337.1632         | 672.3352       | 336.6712         | 5  |
| 15 | 1565.8607 | <b>783.4340</b> | 1548.8342 | 774.9207         | 1547.8502      | 774.4287         | L    | 561.3031         | 281.1552        | 544.2766  | 272.6419         | 543.2926       | 272.1499         | 4  |
| 16 | 1680.8877 | <b>840.9475</b> | 1663.8611 | 832.4342         | 1662.8771      | 831.9422         | D    | <b>448.2191</b>  | 224.6132        | 431.1925  | 216.0999         | 430.2085       | 215.6079         | 3  |
| 17 | 1866.9670 | 933.9871        | 1849.9405 | 925.4739         | 1848.9564      | 924.9819         | W    | <b>333.1921</b>  | 167.0997        | 316.1656  | 158.5864         |                |                  | 2  |
| 18 |           |                 |           |                  |                |                  | K    | 147.1128         | 74.0600         | 130.0863  | 65.5468          |                |                  | 1  |



AT5G09650.1

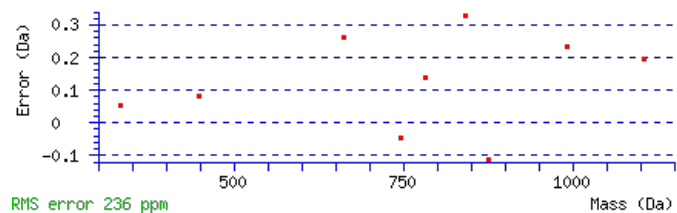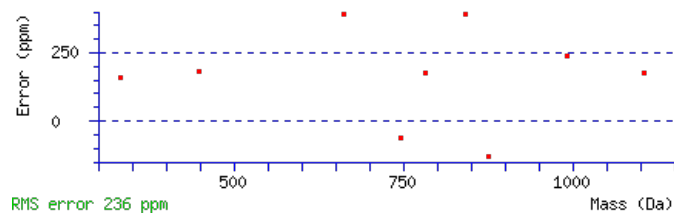

NCBI **BLAST** search of [IKPLAALAMIDEGELDWK](#)  
(Parameters: blastp, nr protein database, expect=20000, no filter, PAM30)  
Other BLAST [web gateways](#)

**All matches to this query**

| Score | Mr(calc)  | Delta   | Sequence                           |
|-------|-----------|---------|------------------------------------|
| 56.1  | 2012.0652 | -0.0020 | <a href="#">IKPLAALAMIDEGELDWK</a> |

Mascot: <http://www.matrixscience.com/>

**Peptide View**MS/MS Fragmentation of **AGAGSATLSMAYAAK**Found in **AT5G09660.1** in **TAIR\_Arabidopsis**, Symbols: PMDH2 | PMDH2 (PEROXISOMAL NAD-MALATE DEHYDROGENASE 2); malate dehydrogenase | chr5:2993646-2995552 REVERSE

Match to Query 6168: 1456.659872 from(729.337212,2+) index(4805)

Title: Elution from: 43.873 to 43.873 scan no 6005 cid35.00 polarity:+

Data file C7-2\_1.mgf

Click mouse within plot area to zoom in by factor of two about that point

Or,   to  Da Label all possible matches  Label matches used for scoring Show Y-axis 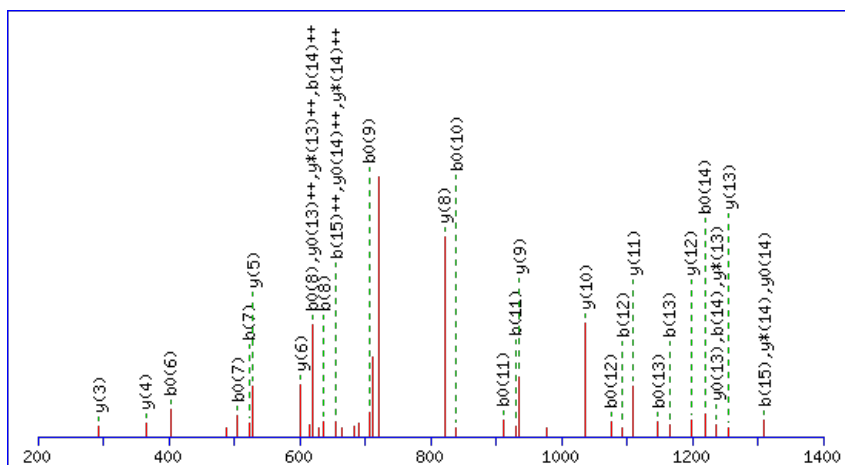Monoisotopic mass of neutral peptide  $M_r(\text{calc})$ : 1456.6575

Fixed modifications: Carbamidomethyl (C) (apply to specified residues or termini only)

Ions Score: 101 Expect: 6e-010

Matches : 36/128 fragment ions using 33 most intense peaks ([help](#))

| #  | b         | b <sup>++</sup> | b <sup>0</sup> | b <sup>0++</sup> | Seq. | y         | y <sup>++</sup> | y*        | y <sup>*++</sup> | y <sup>0</sup> | y <sup>0++</sup> | #  |
|----|-----------|-----------------|----------------|------------------|------|-----------|-----------------|-----------|------------------|----------------|------------------|----|
| 1  | 73.0414   | 37.0244         |                |                  | A    |           |                 |           |                  |                |                  | 16 |
| 2  | 131.0599  | 66.0336         |                |                  | G    | 1385.6306 | 693.3189        | 1367.6070 | 684.3071         | 1367.6200      | 684.3136         | 15 |
| 3  | 203.0941  | 102.0507        |                |                  | A    | 1327.6121 | 664.3097        | 1309.5885 | 655.2979         | 1309.6015      | 655.3044         | 14 |
| 4  | 261.1126  | 131.0599        |                |                  | G    | 1255.5779 | 628.2926        | 1237.5544 | 619.2808         | 1237.5674      | 619.2873         | 13 |
| 5  | 349.1416  | 175.0745        | 331.1311       | 166.0692         | S    | 1197.5594 | 599.2834        | 1179.5359 | 590.2716         | 1179.5489      | 590.2781         | 12 |
| 6  | 421.1758  | 211.0915        | 403.1652       | 202.0862         | A    | 1109.5304 | 555.2688        | 1091.5068 | 546.2570         | 1091.5198      | 546.2635         | 11 |
| 7  | 523.2205  | 262.1139        | 505.2099       | 253.1086         | T    | 1037.4962 | 519.2518        | 1019.4726 | 510.2400         | 1019.4857      | 510.2465         | 10 |
| 8  | 637.3016  | 319.1544        | 619.2910       | 310.1492         | L    | 935.4515  | 468.2294        | 917.4279  | 459.2176         | 917.4410       | 459.2241         | 9  |
| 9  | 725.3307  | 363.1690        | 707.3201       | 354.1637         | S    | 821.3704  | 411.1888        | 803.3468  | 402.1771         | 803.3599       | 402.1836         | 8  |
| 10 | 857.3682  | 429.1877        | 839.3576       | 420.1824         | M    | 733.3414  | 367.1743        | 715.3178  | 358.1625         |                |                  | 7  |
| 11 | 929.4023  | 465.2048        | 911.3918       | 456.1995         | A    | 601.3038  | 301.1556        | 583.2803  | 292.1438         |                |                  | 6  |
| 12 | 1093.4627 | 547.2350        | 1075.4521      | 538.2297         | Y    | 529.2697  | 265.1385        | 511.2461  | 256.1267         |                |                  | 5  |
| 13 | 1165.4968 | 583.2521        | 1147.4863      | 574.2468         | A    | 365.2093  | 183.1083        | 347.1857  | 174.0965         |                |                  | 4  |
| 14 | 1237.5310 | 619.2691        | 1219.5204      | 610.2639         | A    | 293.1752  | 147.0912        | 275.1516  | 138.0794         |                |                  | 3  |
| 15 | 1309.5651 | 655.2862        | 1291.5546      | 646.2809         | A    | 221.1410  | 111.0741        | 203.1174  | 102.0624         |                |                  | 2  |
| 16 |           |                 |                |                  | K    | 149.1069  | 75.0571         | 131.0833  | 66.0453          |                |                  | 1  |

AT5G09660.1

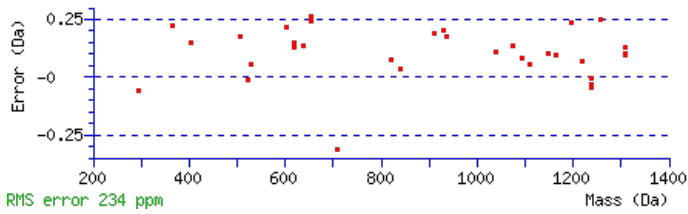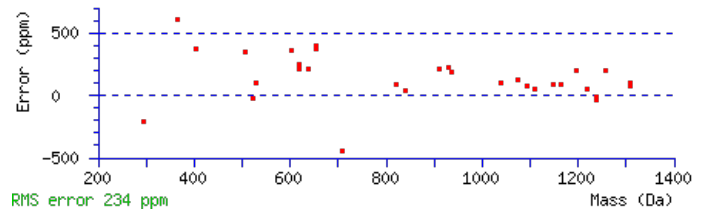

NCBI **BLAST** search of [AGAGSATLSMAYAAAK](#)  
(Parameters: blastp, nr protein database, expect=20000, no filter, PAM30)  
Other BLAST [web gateways](#)

**All matches to this query**

| Score | Mr(calc)  | Delta   | Sequence                         |
|-------|-----------|---------|----------------------------------|
| 101.3 | 1456.6575 | 0.0024  | <a href="#">AGAGSATLSMAYAAAK</a> |
| 3.3   | 1456.6635 | -0.0036 | <a href="#">MALCATTORTIR</a>     |
| 2.9   | 1456.6575 | 0.0024  | <a href="#">ASNILLDADMHPK</a>    |
| 2.7   | 1456.6574 | 0.0024  | <a href="#">VYVGKDKESQCK</a>     |
| 1.8   | 1456.6563 | 0.0036  | <a href="#">FGAGYVSDTFLHK</a>    |
| 1.4   | 1456.6575 | 0.0024  | <a href="#">LDCESYVSLRAK</a>     |
| 1.1   | 1456.6561 | 0.0038  | <a href="#">GGKQMKCLGVMAK</a>    |
| 1.0   | 1456.6631 | -0.0032 | <a href="#">CEASAYQKLLMK</a>     |
| 0.3   | 1456.6635 | -0.0036 | <a href="#">MRLSITNMDGRK</a>     |
| 0.1   | 1456.6624 | -0.0025 | <a href="#">IMWSQRDLAYR</a>      |

Mascot: <http://www.matrixscience.com/>

## Peptide View

MS/MS Fragmentation of **LAYVALDYEQELETAK**

Found in **AT5G09810.1** in **TAIR\_Arabidopsis**, Symbols: ACT2/7, ACT7 | ACT7 (actin 7) | chr5:3052810-3054221 FORWARD

Match to Query 8912: 1854.924392 from(928.469472,2+) index(8350)

Title: Elution from: 73.175 to 73.175 scan no 10947 cid35.00 polarity:+

Data file C7-2\_2.mgf

Click mouse within plot area to zoom in by factor of two about that point

Or,   to  Da

Label all possible matches  Label matches used for scoring

Show Y-axis

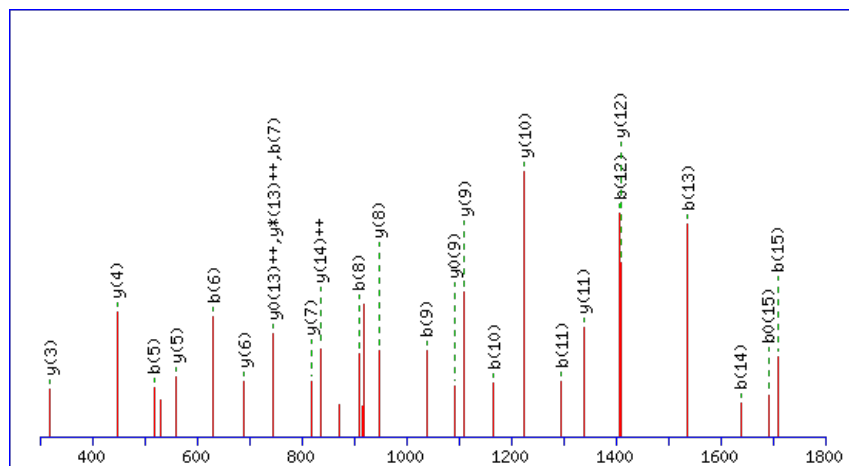

Monoisotopic mass of neutral peptide  $M_r(\text{calc})$ : 1854.9251

**Fixed modifications:** Carbamidomethyl (C) (apply to specified residues or termini only)

**Ions Score:** 115 **Expect:** 9.4e-012

**Matches:** 26/146 fragment ions using 28 most intense peaks ([help](#))

| #  | b         | b <sup>++</sup> | b*        | b <sup>*++</sup> | b <sup>0</sup> | b <sup>0++</sup> | Seq. | y         | y <sup>++</sup> | y*        | y <sup>*++</sup> | y <sup>0</sup> | y <sup>0++</sup> | #  |
|----|-----------|-----------------|-----------|------------------|----------------|------------------|------|-----------|-----------------|-----------|------------------|----------------|------------------|----|
| 1  | 114.0913  | 57.5493         |           |                  |                |                  | L    |           |                 |           |                  |                |                  | 16 |
| 2  | 185.1285  | 93.0679         |           |                  |                |                  | A    | 1742.8483 | 871.9278        | 1725.8218 | 863.4145         | 1724.8378      | 862.9225         | 15 |
| 3  | 348.1918  | 174.5995        |           |                  |                |                  | Y    | 1671.8112 | 836.4092        | 1654.7847 | 827.8960         | 1653.8006      | 827.4040         | 14 |
| 4  | 447.2602  | 224.1337        |           |                  |                |                  | V    | 1508.7479 | 754.8776        | 1491.7213 | 746.3643         | 1490.7373      | 745.8723         | 13 |
| 5  | 518.2973  | 259.6523        |           |                  |                |                  | A    | 1409.6795 | 705.3434        | 1392.6529 | 696.8301         | 1391.6689      | 696.3381         | 12 |
| 6  | 631.3814  | 316.1943        |           |                  |                |                  | L    | 1338.6424 | 669.8248        | 1321.6158 | 661.3115         | 1320.6318      | 660.8195         | 11 |
| 7  | 746.4083  | 373.7078        |           |                  | 728.3978       | 364.7025         | D    | 1225.5583 | 613.2828        | 1208.5317 | 604.7695         | 1207.5477      | 604.2775         | 10 |
| 8  | 909.4716  | 455.2395        |           |                  | 891.4611       | 446.2342         | Y    | 1110.5313 | 555.7693        | 1093.5048 | 547.2560         | 1092.5208      | 546.7640         | 9  |
| 9  | 1038.5142 | 519.7608        |           |                  | 1020.5037      | 510.7555         | E    | 947.4680  | 474.2376        | 930.4415  | 465.7244         | 929.4575       | 465.2324         | 8  |
| 10 | 1166.5728 | 583.7900        | 1149.5463 | 575.2768         | 1148.5623      | 574.7848         | Q    | 818.4254  | 409.7164        | 801.3989  | 401.2031         | 800.4149       | 400.7111         | 7  |
| 11 | 1295.6154 | 648.3113        | 1278.5889 | 639.7981         | 1277.6048      | 639.3061         | E    | 690.3668  | 345.6871        | 673.3403  | 337.1738         | 672.3563       | 336.6818         | 6  |
| 12 | 1408.6995 | 704.8534        | 1391.6729 | 696.3401         | 1390.6889      | 695.8481         | L    | 561.3243  | 281.1658        | 544.2977  | 272.6525         | 543.3137       | 272.1605         | 5  |
| 13 | 1537.7421 | 769.3747        | 1520.7155 | 760.8614         | 1519.7315      | 760.3694         | E    | 448.2402  | 224.6237        | 431.2136  | 216.1105         | 430.2296       | 215.6185         | 4  |
| 14 | 1638.7897 | 819.8985        | 1621.7632 | 811.3852         | 1620.7792      | 810.8932         | T    | 319.1976  | 160.1024        | 302.1710  | 151.5892         | 301.1870       | 151.0972         | 3  |
| 15 | 1709.8269 | 855.4171        | 1692.8003 | 846.9038         | 1691.8163      | 846.4118         | A    | 218.1499  | 109.5786        | 201.1234  | 101.0653         |                |                  | 2  |
| 16 |           |                 |           |                  |                |                  | K    | 147.1128  | 74.0600         | 130.0863  | 65.5468          |                |                  | 1  |

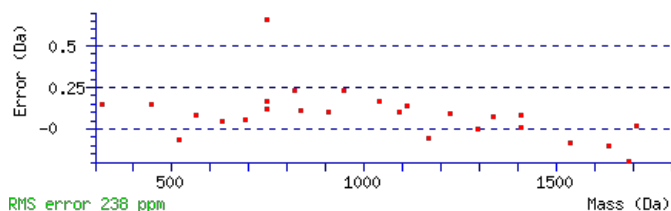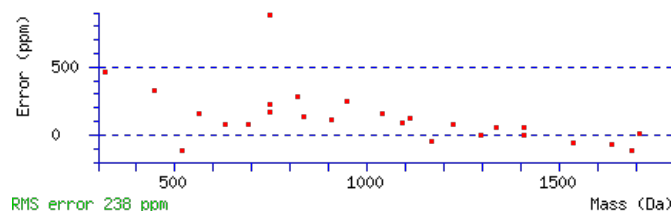

## AT5G09810.1

NCBI **BLAST** search of [LAYVALDYEQELETAK](#)

(Parameters: blastp, nr protein database, expect=20000, no filter, PAM30)

Other BLAST [web gateways](#)

### All matches to this query

| Score | Mr(calc)  | Delta   | Sequence                         |
|-------|-----------|---------|----------------------------------|
| 115.5 | 1854.9251 | -0.0007 | <a href="#">LAYVALDYEQELETAK</a> |

Mascot: <http://www.matrixscience.com/>

**Peptide View**MS/MS Fragmentation of **NGAFQWTVKPK**

Found in **AT5G10170.1** in **TAIR\_Arabidopsis**, Symbols: | inositol-3-phosphate synthase, putative / myo-inositol-1-phosphate synthase, putative / MI-1-P synthase, putative | chr5:3187539-3190162 REVERSE

Match to Query 4886: 1290.631976 from(646.323264,2+) index(6234)

Title: Elution from: 54.877 to 54.877 scan no 7877 cid35.00 polarity:+

Data file C7-3\_1.mgf

Click mouse within plot area to zoom in by factor of two about that point

Or,   to  Da

Label all possible matches  Label matches used for scoring

Show Y-axis

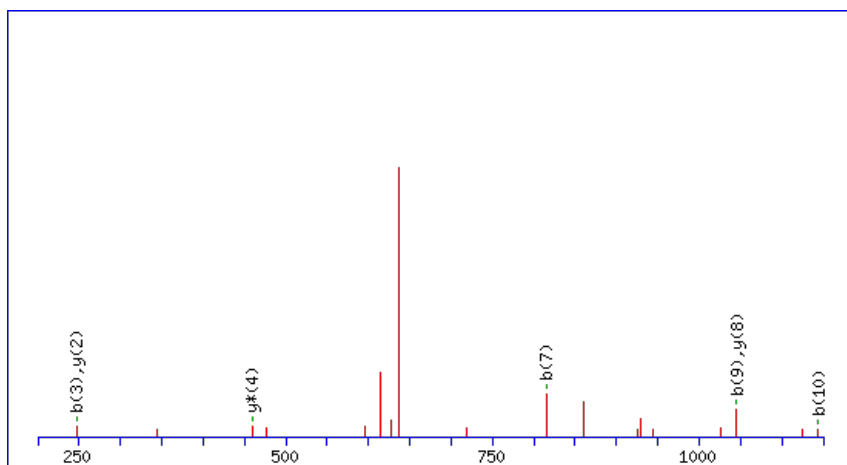

**Monoisotopic mass of neutral peptide Mr(calc):** 1290.6297

**Fixed modifications:** Carbamidomethyl (C) (apply to specified residues or termini only)

**Ions Score:** 29 **Expect:** 0.012

**Matches:** 7/100 fragment ions using 8 most intense peaks ([help](#))

| #  | b                | b <sup>++</sup> | b <sup>*</sup> | b <sup>*++</sup> | b <sup>0</sup> | b <sup>0++</sup> | Seq. | y                | y <sup>++</sup> | y <sup>*</sup>  | y <sup>*++</sup> | y <sup>0</sup> | y <sup>0++</sup> | #  |
|----|------------------|-----------------|----------------|------------------|----------------|------------------|------|------------------|-----------------|-----------------|------------------|----------------|------------------|----|
| 1  | 117.0443         | 59.0258         | 99.0207        | 50.0140          |                |                  | N    |                  |                 |                 |                  |                |                  | 11 |
| 2  | 175.0628         | 88.0350         | 157.0392       | 79.0232          |                |                  | G    | 1175.6000        | 588.3036        | 1157.5764       | 579.2918         | 1157.5894      | 579.2984         | 10 |
| 3  | <b>247.0969</b>  | 124.0521        | 229.0733       | 115.0403         |                |                  | A    | 1117.5815        | 559.2944        | 1099.5579       | 550.2826         | 1099.5709      | 550.2891         | 9  |
| 4  | 395.1624         | 198.0848        | 377.1388       | 189.0730         |                |                  | F    | <b>1045.5473</b> | 523.2773        | 1027.5238       | 514.2655         | 1027.5368      | 514.2720         | 8  |
| 5  | 525.2150         | 263.1111        | 507.1914       | 254.0994         |                |                  | Q    | 897.4819         | 449.2446        | 879.4583        | 440.2328         | 879.4713       | 440.2393         | 7  |
| 6  | 713.2884         | 357.1478        | 695.2648       | 348.1360         |                |                  | W    | 767.4293         | 384.2183        | 749.4057        | 375.2065         | 749.4187       | 375.2130         | 6  |
| 7  | <b>815.3331</b>  | 408.1702        | 797.3095       | 399.1584         | 797.3225       | 399.1649         | T    | 579.3559         | 290.1816        | 561.3323        | 281.1698         | 561.3453       | 281.1763         | 5  |
| 8  | 915.3986         | 458.2029        | 897.3750       | 449.1911         | 897.3880       | 449.1976         | V    | 477.3112         | 239.1592        | <b>459.2876</b> | 230.1474         |                |                  | 4  |
| 9  | <b>1045.4876</b> | 523.2474        | 1027.4640      | 514.2356         | 1027.4770      | 514.2422         | K    | 377.2457         | 189.1265        | 359.2221        | 180.1147         |                |                  | 3  |
| 10 | <b>1143.5374</b> | 572.2723        | 1125.5138      | 563.2605         | 1125.5268      | 563.2671         | P    | <b>247.1567</b>  | 124.0820        | 229.1331        | 115.0702         |                |                  | 2  |
| 11 |                  |                 |                |                  |                |                  | K    | 149.1069         | 75.0571         | 131.0833        | 66.0453          |                |                  | 1  |

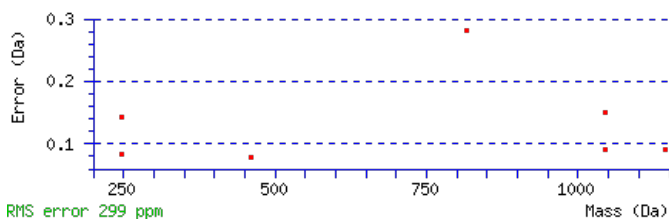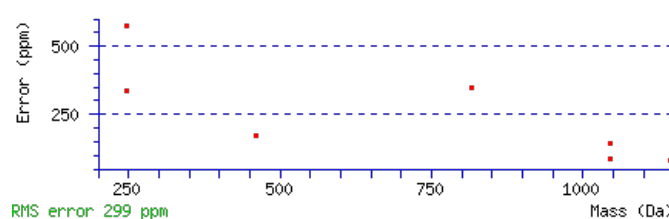

NCBI **BLAST** search of **NGAFQWTVKPK**

(Parameters: blastp, nr protein database, expect=20000, no filter, PAM30)

Other BLAST [web gateways](#)

**All matches to this query**

## AT5G10170.1

| Score | Mr(calc)  | Delta   | Sequence                    |
|-------|-----------|---------|-----------------------------|
| 29.1  | 1290.6297 | 0.0023  | <a href="#">NGAFQWTVKPK</a> |
| 18.1  | 1290.6282 | 0.0038  | <a href="#">DEEKKMGTLVK</a> |
| 16.1  | 1290.6331 | -0.0011 | <a href="#">MKLTWNKNPK</a>  |
| 9.2   | 1290.6335 | -0.0016 | <a href="#">CRTLINRNP</a>   |
| 9.2   | 1290.6338 | -0.0018 | <a href="#">DEKAIMTMVIK</a> |
| 8.2   | 1290.6308 | 0.0011  | <a href="#">IMNVQLGEKSR</a> |
| 6.4   | 1290.6331 | -0.0011 | <a href="#">FLPNMKEPRK</a>  |
| 5.3   | 1290.6283 | 0.0036  | <a href="#">WGRRPLLMVM</a>  |
| 5.2   | 1290.6297 | 0.0023  | <a href="#">WANYLRPDIK</a>  |
| 4.4   | 1290.6297 | 0.0023  | <a href="#">NELWWSKGKK</a>  |

Mascot: <http://www.matrixscience.com/>

## Peptide View

### MS/MS Fragmentation of LQLWDTAGQER

Found in **AT5G10260.1** in **TAIR\_Arabidopsis**, Symbols: AtRABH1e | AtRABH1e (Arabidopsis Rab GTPase homolog H1e); GTP binding | chr5:3219992-3221302 FORWARD

Match to Query 4705: 1315.652896 from(658.833724,2+) index(4787)

Title: Elution from: 43.105 to 43.105 scan no 6087 cid35.00 polarity:+

Data file D12h-3\_3.mgf

Click mouse within plot area to zoom in by factor of two about that point

Or,   to  Da

Label all possible matches  Label matches used for scoring

Show Y-axis

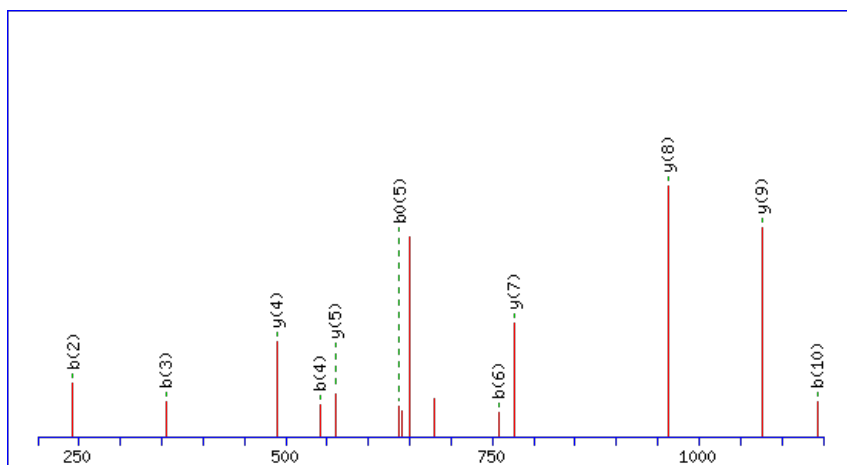

Monoisotopic mass of neutral peptide  $M_r(\text{calc})$ : 1315.6521

Fixed modifications: Carbamidomethyl (C) (apply to specified residues or termini only)

Ions Score: 53 Expect: 2.2e-005

Matches : 11/108 fragment ions using 15 most intense peaks ([help](#))

| #  | b                | b <sup>++</sup> | b*        | b <sup>*++</sup> | b <sup>0</sup>  | b <sup>0++</sup> | Seq. | y                | y <sup>++</sup> | y*        | y <sup>*++</sup> | y <sup>0</sup> | y <sup>0++</sup> | #  |
|----|------------------|-----------------|-----------|------------------|-----------------|------------------|------|------------------|-----------------|-----------|------------------|----------------|------------------|----|
| 1  | 114.0913         | 57.5493         |           |                  |                 |                  | L    |                  |                 |           |                  |                |                  | 11 |
| 2  | <b>242.1499</b>  | 121.5786        | 225.1234  | 113.0653         |                 |                  | Q    | 1203.5753        | 602.2913        | 1186.5487 | 593.7780         | 1185.5647      | 593.2860         | 10 |
| 3  | <b>355.2340</b>  | 178.1206        | 338.2074  | 169.6074         |                 |                  | L    | <b>1075.5167</b> | 538.2620        | 1058.4902 | 529.7487         | 1057.5061      | 529.2567         | 9  |
| 4  | <b>541.3133</b>  | 271.1603        | 524.2867  | 262.6470         |                 |                  | W    | <b>962.4326</b>  | 481.7200        | 945.4061  | 473.2067         | 944.4221       | 472.7147         | 8  |
| 5  | 656.3402         | 328.6738        | 639.3137  | 320.1605         | <b>638.3297</b> | 319.6685         | D    | <b>776.3533</b>  | 388.6803        | 759.3268  | 380.1670         | 758.3428       | 379.6750         | 7  |
| 6  | <b>757.3879</b>  | 379.1976        | 740.3614  | 370.6843         | 739.3774        | 370.1923         | T    | 661.3264         | 331.1668        | 644.2998  | 322.6536         | 643.3158       | 322.1615         | 6  |
| 7  | 828.4250         | 414.7162        | 811.3985  | 406.2029         | 810.4145        | 405.7109         | A    | <b>560.2787</b>  | 280.6430        | 543.2522  | 272.1297         | 542.2681       | 271.6377         | 5  |
| 8  | 885.4465         | 443.2269        | 868.4199  | 434.7136         | 867.4359        | 434.2216         | G    | <b>489.2416</b>  | 245.1244        | 472.2150  | 236.6112         | 471.2310       | 236.1191         | 4  |
| 9  | 1013.5051        | 507.2562        | 996.4785  | 498.7429         | 995.4945        | 498.2509         | Q    | 432.2201         | 216.6137        | 415.1936  | 208.1004         | 414.2096       | 207.6084         | 3  |
| 10 | <b>1142.5477</b> | 571.7775        | 1125.5211 | 563.2642         | 1124.5371       | 562.7722         | E    | 304.1615         | 152.5844        | 287.1350  | 144.0711         | 286.1510       | 143.5791         | 2  |
| 11 |                  |                 |           |                  |                 |                  | R    | 175.1190         | 88.0631         | 158.0924  | 79.5498          |                |                  | 1  |

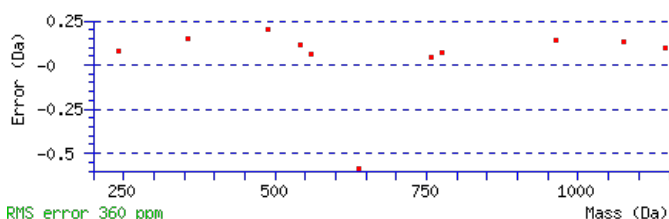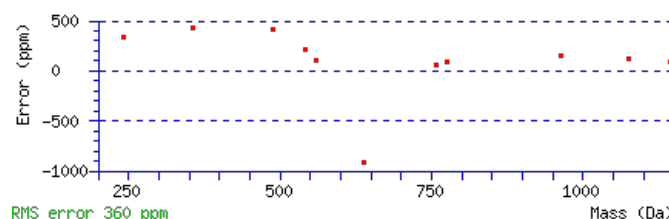

### NCBI BLAST search of LQLWDTAGQER

(Parameters: blastp, nr protein database, expect=20000, no filter, PAM30)

Other BLAST [web gateways](#)

All matches to this query



AT5G10260.1

| Score | Mr(calc)  | Delta   | Sequence                    |
|-------|-----------|---------|-----------------------------|
| 53.3  | 1315.6521 | 0.0008  | <a href="#">LQIWDTAGQER</a> |
| 53.3  | 1315.6521 | 0.0008  | <a href="#">LQLWDTAGQER</a> |
| 0.2   | 1315.6529 | -0.0000 | <a href="#">TCVKPLCPWR</a>  |

Mascot: <http://www.matrixscience.com/>

## Peptide View

MS/MS Fragmentation of **SLELDDEATTPLNTISAECQNSCVK**

Found in **AT5G10320.1** in **TAIR\_Arabidopsis**, Symbols: | similar to 80A08\_29 [Brassica rapa subsp. pekinensis] (GB:AAZ67614.1) | chr5:3244181-3246604 REVERSE

Match to Query 10282: 2794.258335 from(932.426721,3+) index(9707)

Title: Elution from: 91.321 to 91.321 scan no 13760 cid35.00 polarity:+

Data file D6h-2\_3.mgf

Click mouse within plot area to zoom in by factor of two about that point

Or, Plot from  to  Da

Label all possible matches  Label matches used for scoring

Show Y-axis

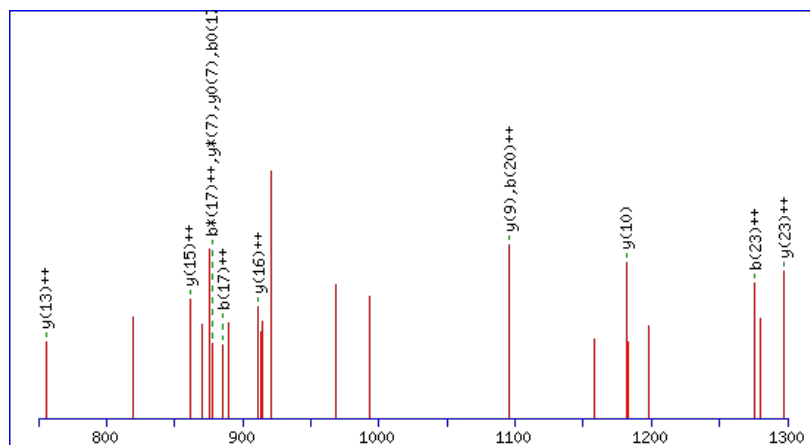

Monoisotopic mass of neutral peptide  $M_r(\text{calc})$ : 2794.2637

Fixed modifications: Carbamidomethyl (C) (apply to specified residues or termini only)

Ions Score: 14 Expect: 0.044

Matches : 13/258 fragment ions using 22 most intense peaks ([help](#))

| #  | b         | b <sup>++</sup>  | b <sup>*</sup> | b <sup>*++</sup> | b <sup>0</sup> | b <sup>0++</sup> | Seq | y                | y <sup>++</sup>  | y <sup>*</sup>  | y <sup>*++</sup> | y <sup>0</sup>  | y <sup>0++</sup> | #  |
|----|-----------|------------------|----------------|------------------|----------------|------------------|-----|------------------|------------------|-----------------|------------------|-----------------|------------------|----|
| 1  | 88.0393   | 44.5233          |                |                  | 70.0287        | 35.5180          | S   |                  |                  |                 |                  |                 |                  | 25 |
| 2  | 201.1234  | 101.0653         |                |                  | 183.1128       | 92.0600          | L   | 2708.2390        | 1354.6231        | 2691.2124       | 1346.1098        | 2690.2284       | 1345.6178        | 24 |
| 3  | 330.1660  | 165.5866         |                |                  | 312.1554       | 156.5813         | E   | 2595.1549        | <b>1298.0811</b> | 2578.1283       | 1289.5678        | 2577.1443       | 1289.0758        | 23 |
| 4  | 443.2500  | 222.1287         |                |                  | 425.2395       | 213.1234         | L   | 2466.1123        | 1233.5598        | 2449.0857       | 1225.0465        | 2448.1017       | 1224.5545        | 22 |
| 5  | 558.2770  | 279.6421         |                |                  | 540.2664       | 270.6368         | D   | 2353.0282        | 1177.0178        | 2336.0017       | 1168.5045        | 2335.0177       | 1168.0125        | 21 |
| 6  | 673.3039  | 337.1556         |                |                  | 655.2933       | 328.1503         | D   | 2238.0013        | 1119.5043        | 2220.9747       | 1110.9910        | 2219.9907       | 1110.4990        | 20 |
| 7  | 802.3465  | 401.6769         |                |                  | 784.3359       | 392.6716         | E   | 2122.9743        | 1061.9908        | 2105.9478       | 1053.4775        | 2104.9638       | 1052.9855        | 19 |
| 8  | 873.3836  | 437.1954         |                |                  | 855.3731       | 428.1902         | A   | 1993.9318        | 997.4695         | 1976.9052       | 988.9562         | 1975.9212       | 988.4642         | 18 |
| 9  | 974.4313  | 487.7193         |                |                  | 956.4207       | 478.7140         | T   | 1922.8946        | 961.9510         | 1905.8681       | 953.4377         | 1904.8841       | 952.9457         | 17 |
| 10 | 1075.4790 | 538.2431         |                |                  | 1057.4684      | 529.2378         | T   | 1821.8470        | <b>911.4271</b>  | 1804.8204       | 902.9138         | 1803.8364       | 902.4218         | 16 |
| 11 | 1172.5317 | 586.7695         |                |                  | 1154.5212      | 577.7642         | P   | 1720.7993        | <b>860.9033</b>  | 1703.7727       | 852.3900         | 1702.7887       | 851.8980         | 15 |
| 12 | 1285.6158 | 643.3115         |                |                  | 1267.6052      | 634.3063         | L   | 1623.7465        | 812.3769         | 1606.7200       | 803.8636         | 1605.7360       | 803.3716         | 14 |
| 13 | 1399.6587 | 700.3330         | 1382.6322      | 691.8197         | 1381.6482      | 691.3277         | N   | 1510.6625        | <b>755.8349</b>  | 1493.6359       | 747.3216         | 1492.6519       | 746.8296         | 13 |
| 14 | 1500.7064 | 750.8568         | 1483.6799      | 742.3436         | 1482.6958      | 741.8516         | T   | 1396.6195        | 698.8134         | 1379.5930       | 690.3001         | 1378.6090       | 689.8081         | 12 |
| 15 | 1613.7905 | 807.3989         | 1596.7639      | 798.8856         | 1595.7799      | 798.3936         | I   | 1295.5718        | 648.2896         | 1278.5453       | 639.7763         | 1277.5613       | 639.2843         | 11 |
| 16 | 1700.8225 | 850.9149         | 1683.7960      | 842.4016         | 1682.8119      | 841.9096         | S   | <b>1182.4878</b> | 591.7475         | 1165.4612       | 583.2343         | 1164.4772       | 582.7422         | 10 |
| 17 | 1771.8596 | <b>886.4334</b>  | 1754.8331      | <b>877.9202</b>  | 1753.8491      | <b>877.4282</b>  | A   | <b>1095.4558</b> | 548.2315         | 1078.4292       | 539.7182         | 1077.4452       | 539.2262         | 9  |
| 18 | 1900.9022 | 950.9547         | 1883.8757      | 942.4415         | 1882.8916      | 941.9495         | E   | 1024.4186        | 512.7130         | 1007.3921       | 504.1997         | 1006.4081       | 503.7077         | 8  |
| 19 | 2060.9329 | 1030.9701        | 2043.9063      | 1022.4568        | 2042.9223      | 1021.9648        | C   | 895.3760         | 448.1917         | <b>878.3495</b> | 439.6784         | <b>877.3655</b> | 439.1864         | 7  |
| 20 | 2188.9914 | <b>1094.9994</b> | 2171.9649      | 1086.4861        | 2170.9809      | 1085.9941        | Q   | 735.3454         | 368.1763         | 718.3189        | 359.6631         | 717.3348        | 359.1711         | 6  |
| 21 | 2303.0344 | 1152.0208        | 2286.0078      | 1143.5075        | 2285.0238      | 1143.0155        | N   | 607.2868         | 304.1470         | 590.2603        | 295.6338         | 589.2763        | 295.1418         | 5  |
| 22 | 2390.0664 | 1195.5368        | 2373.0398      | 1187.0236        | 2372.0558      | 1186.5316        | S   | 493.2439         | 247.1256         | 476.2173        | 238.6123         | 475.2333        | 238.1203         | 4  |
| 23 | 2550.0970 | <b>1275.5522</b> | 2533.0705      | 1267.0389        | 2532.0865      | 1266.5469        | C   | 406.2119         | 203.6096         | 389.1853        | 195.0963         |                 |                  | 3  |
| 24 | 2649.1655 | 1325.0864        | 2632.1389      | 1316.5731        | 2631.1549      | 1316.0811        | V   | 246.1812         | 123.5942         | 229.1547        | 115.0810         |                 |                  | 2  |

|    |  |  |  |  |  |  |  |   |          |         |          |         |  |  |  |   |
|----|--|--|--|--|--|--|--|---|----------|---------|----------|---------|--|--|--|---|
| 25 |  |  |  |  |  |  |  | K | 147.1128 | 74.0600 | 130.0863 | 65.5468 |  |  |  | 1 |
|----|--|--|--|--|--|--|--|---|----------|---------|----------|---------|--|--|--|---|

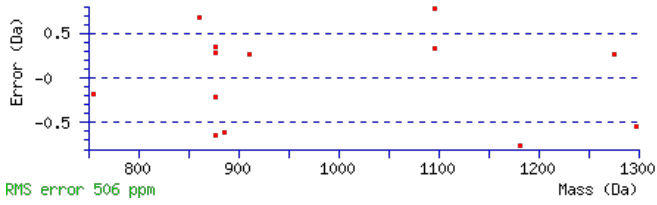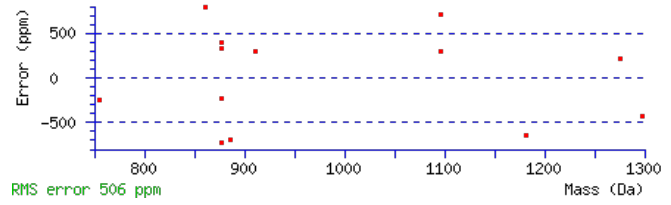

NCBI BLAST search of [SLELDDEATTPLNTISAECQNSCVK](#)  
 (Parameters: blastp, nr protein database, expect=20000, no filter, PAM30)  
 Other BLAST [web gateways](#)

**All matches to this query**

| Score | Mr(calc)  | Delta   | Sequence                                   |
|-------|-----------|---------|--------------------------------------------|
| 14.5  | 2794.2637 | -0.0054 | <a href="#">SLELDDEATTPLNTISAECQNSCVK</a>  |
| 4.3   | 2794.2637 | -0.0053 | <a href="#">MDEYALMIGTSSSESTSKNISLDGAR</a> |

**Mascot:** <http://www.matrixscience.com/>

## Peptide View

 MS/MS Fragmentation of **LSQEVSGDALGEEFK**

 Found in **AT5G10360.1** in **TAIR\_Arabidopsis**, Symbols: EMB3010 | EMB3010 (EMBRYO DEFECTIVE 3010); structural constituent of ribosome | chr5:3258735-3260143 REVERSE

Match to Query 7052: 1624.715148 from(813.364850,2+) index(5027)

Title: Elution from: 44.991 to 44.991 scan no 6408 cid35.00 polarity:+

Data file D12h-3\_3.mgf

Click mouse within plot area to zoom in by factor of two about that point

 Or,  to  Da 

 Label all possible matches  Label matches used for scoring 

 Show Y-axis 
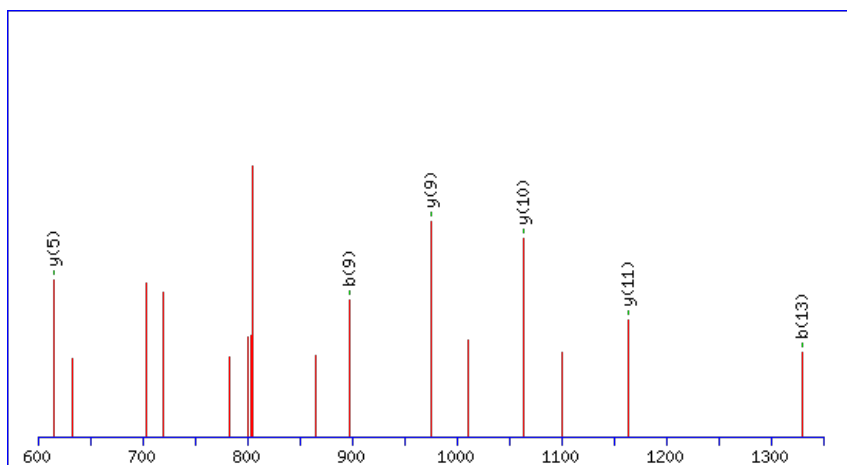
 Monoisotopic mass of neutral peptide  $M_r(\text{calc})$ : 1624.7175

Fixed modifications: Carbamidomethyl (C) (apply to specified residues or termini only)

Ions Score: 37 Expect: 0.0014

 Matches : 6/158 fragment ions using 7 most intense peaks ([help](#))

| #  | b                | b <sup>++</sup> | b*        | b <sup>*++</sup> | b <sup>0</sup> | b <sup>0++</sup> | Seq. | y                | y <sup>++</sup> | y*        | y <sup>*++</sup> | y <sup>0</sup> | y <sup>0++</sup> | #  |
|----|------------------|-----------------|-----------|------------------|----------------|------------------|------|------------------|-----------------|-----------|------------------|----------------|------------------|----|
| 1  | 115.0884         | 58.0478         |           |                  |                |                  | L    |                  |                 |           |                  |                |                  | 15 |
| 2  | 203.1174         | 102.0624        |           |                  | 185.1069       | 93.0571          | S    | 1511.6437        | 756.3255        | 1493.6201 | 747.3137         | 1493.6331      | 747.3202         | 14 |
| 3  | 333.1701         | 167.0887        | 315.1465  | 158.0769         | 315.1595       | 158.0834         | Q    | 1423.6146        | 712.3109        | 1405.5910 | 703.2991         | 1405.6040      | 703.3057         | 13 |
| 4  | 463.2097         | 232.1085        | 445.1861  | 223.0967         | 445.1991       | 223.1032         | E    | 1293.5619        | 647.2846        | 1275.5384 | 638.2728         | 1275.5514      | 638.2793         | 12 |
| 5  | 563.2752         | 282.1412        | 545.2516  | 273.1294         | 545.2646       | 273.1359         | V    | <b>1163.5223</b> | 582.2648        | 1145.4987 | 573.2530         | 1145.5117      | 573.2595         | 11 |
| 6  | 651.3042         | 326.1558        | 633.2806  | 317.1440         | 633.2937       | 317.1505         | S    | <b>1063.4569</b> | 532.2321        | 1045.4333 | 523.2203         | 1045.4463      | 523.2268         | 10 |
| 7  | 709.3227         | 355.1650        | 691.2991  | 346.1532         | 691.3122       | 346.1597         | G    | <b>975.4278</b>  | 488.2175        | 957.4042  | 479.2057         | 957.4172       | 479.2123         | 9  |
| 8  | 825.3467         | 413.1770        | 807.3231  | 404.1652         | 807.3361       | 404.1717         | D    | 917.4093         | 459.2083        | 899.3857  | 450.1965         | 899.3987       | 450.2030         | 8  |
| 9  | <b>897.3809</b>  | 449.1941        | 879.3573  | 440.1823         | 879.3703       | 440.1888         | A    | 801.3853         | 401.1963        | 783.3617  | 392.1845         | 783.3748       | 392.1910         | 7  |
| 10 | 1011.4620        | 506.2346        | 993.4384  | 497.2228         | 993.4514       | 497.2293         | L    | 729.3512         | 365.1792        | 711.3276  | 356.1674         | 711.3406       | 356.1739         | 6  |
| 11 | 1069.4804        | 535.2439        | 1051.4569 | 526.2321         | 1051.4699      | 526.2386         | G    | <b>615.2701</b>  | 308.1387        | 597.2465  | 299.1269         | 597.2595       | 299.1334         | 5  |
| 12 | 1199.5201        | 600.2637        | 1181.4965 | 591.2519         | 1181.5095      | 591.2584         | E    | 557.2516         | 279.1294        | 539.2280  | 270.1176         | 539.2410       | 270.1241         | 4  |
| 13 | <b>1329.5597</b> | 665.2835        | 1311.5361 | 656.2717         | 1311.5491      | 656.2782         | E    | 427.2120         | 214.1096        | 409.1884  | 205.0978         | 409.2014       | 205.1043         | 3  |
| 14 | 1477.6252        | 739.3162        | 1459.6016 | 730.3044         | 1459.6146      | 730.3109         | F    | 297.1723         | 149.0898        | 279.1487  | 140.0780         |                |                  | 2  |
| 15 |                  |                 |           |                  |                |                  | K    | 149.1069         | 75.0571         | 131.0833  | 66.0453          |                |                  | 1  |

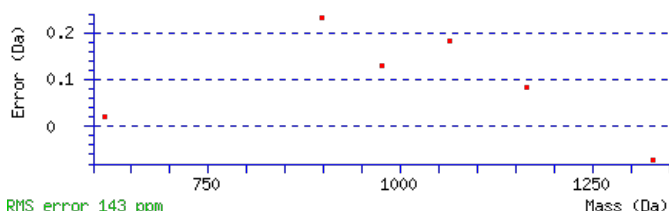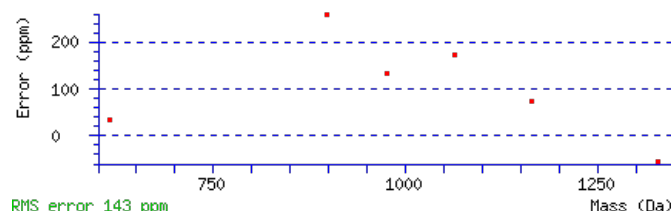

## AT5G10360.1

NCBI **BLAST** search of [LSQEVSGDALGEEFK](#)

(Parameters: blastp, nr protein database, expect=20000, no filter, PAM30)

Other BLAST [web gateways](#)

### All matches to this query

| Score | Mr(calc)  | Delta   | Sequence                        |
|-------|-----------|---------|---------------------------------|
| 37.2  | 1624.7175 | -0.0023 | <a href="#">LSQEVSGDALGEEFK</a> |
| 37.2  | 1624.7175 | -0.0023 | <a href="#">LSQEVSGDALGEEFK</a> |
| 2.0   | 1624.7154 | -0.0003 | <a href="#">GCSSRVSLTFHEPK</a>  |
| 0.5   | 1624.7161 | -0.0009 | <a href="#">EAVEKMEDLMKER</a>   |

**Mascot:** <http://www.matrixscience.com/>



# Mascot Search Results

## Peptide View

MS/MS Fragmentation of **KIGEMIER**

Found in **AT5G10440.1** in **TAIR\_Arabidopsis**, Symbols: CYCD4;2 | CYCD4;2 (CYCLIN D4;2); cyclin-dependent protein kinase | chr5:3280612-3282343 REVERSE

Match to Query 2633: 1002.483064 from(502.248808,2+) index(3145)

Title: Elution from: 31.472 to 31.472 scan no 3915 cid35.00 polarity:+

Data file C7-3\_1.mgf

Click mouse within plot area to zoom in by factor of two about that point

Or,   to  Da

Label all possible matches  Label matches used for scoring

Show Y-axis

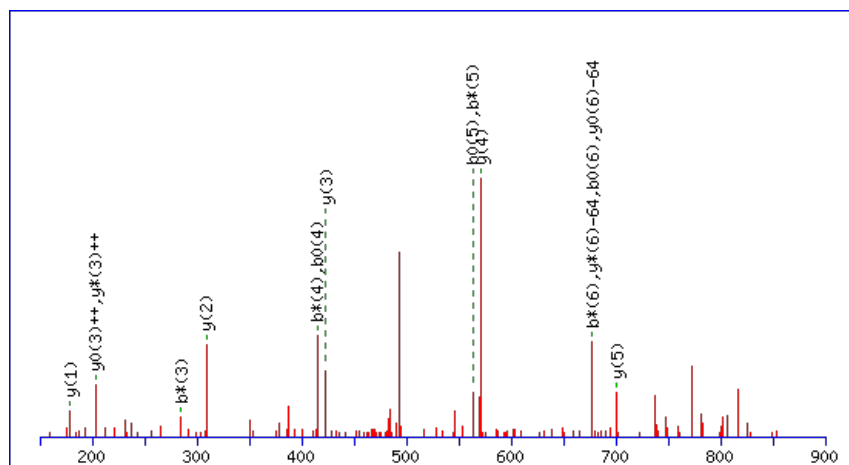

Monoisotopic mass of neutral peptide  $M_r(\text{calc})$ : 1002.4812

Fixed modifications: Carbamidomethyl (C) (apply to specified residues or termini only)

Variable modifications:

M5 : Oxidation (M), with neutral losses 0.0000 (shown in table), 63.9983

Ions Score: 32 Expect: 0.0068

Matches : 16/118 fragment ions using 14 most intense peaks ([help](#))

| # | b        | b <sup>++</sup> | b*              | b <sup>*++</sup> | b <sup>0</sup>  | b <sup>0++</sup> | Seq.     | y               | y <sup>++</sup> | y*       | y <sup>*++</sup> | y <sup>0</sup> | y <sup>0++</sup> | #        |
|---|----------|-----------------|-----------------|------------------|-----------------|------------------|----------|-----------------|-----------------|----------|------------------|----------------|------------------|----------|
| 1 | 131.0963 | 66.0518         | 113.0727        | 57.0400          |                 |                  | <b>K</b> |                 |                 |          |                  |                |                  | <b>8</b> |
| 2 | 245.1774 | 123.0923        | 227.1538        | 114.0805         |                 |                  | <b>I</b> | 873.3995        | 437.2034        | 855.3759 | 428.1916         | 855.3889       | 428.1981         | <b>7</b> |
| 3 | 303.1959 | 152.1016        | <b>285.1723</b> | 143.0898         |                 |                  | <b>G</b> | 759.3184        | 380.1628        | 741.2948 | 371.1510         | 741.3078       | 371.1575         | <b>6</b> |
| 4 | 433.2355 | 217.1214        | <b>415.2120</b> | 208.1096         | <b>415.2250</b> | 208.1161         | <b>E</b> | <b>701.2999</b> | 351.1536        | 683.2763 | 342.1418         | 683.2893       | 342.1483         | <b>5</b> |
| 5 | 581.2680 | 291.1376        | <b>563.2444</b> | 282.1258         | <b>563.2574</b> | 282.1323         | <b>M</b> | <b>571.2603</b> | 286.1338        | 553.2367 | 277.1220         | 553.2497       | 277.1285         | <b>4</b> |
| 6 | 695.3491 | 348.1782        | <b>677.3255</b> | 339.1664         | <b>677.3385</b> | 339.1729         | <b>I</b> | <b>423.2278</b> | 212.1175        | 405.2042 | <b>203.1058</b>  | 405.2173       | <b>203.1123</b>  | <b>3</b> |
| 7 | 825.3887 | 413.1980        | 807.3651        | 404.1862         | 807.3781        | 404.1927         | <b>E</b> | <b>309.1467</b> | 155.0770        | 291.1231 | 146.0652         | 291.1362       | 146.0717         | <b>2</b> |
| 8 |          |                 |                 |                  |                 |                  | <b>R</b> | <b>179.1071</b> | 90.0572         | 161.0835 | 81.0454          |                |                  | <b>1</b> |

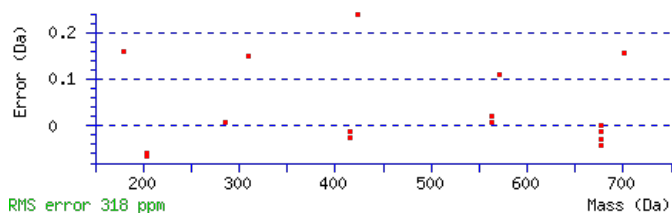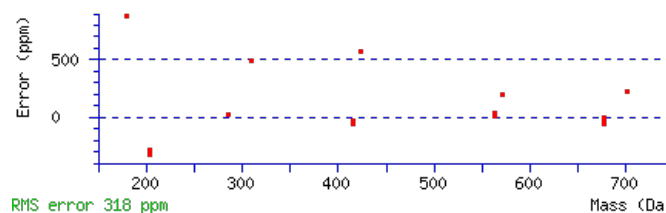

NCBI **BLAST** search of **KIGEMIER**

(Parameters: blastp, nr protein database, expect=20000, no filter, PAM30)

Other BLAST [web gateways](#)

All matches to this query

| Score | Mr(calc) | Delta | Sequence |
|-------|----------|-------|----------|
|       |          |       |          |

**AT5G10440.1**

|      |           |         |                           |
|------|-----------|---------|---------------------------|
| 32.1 | 1002.4812 | 0.0018  | <a href="#">KIGEMIER</a>  |
| 11.3 | 1002.4812 | 0.0018  | <a href="#">LSDMKLER</a>  |
| 10.9 | 1002.4812 | 0.0018  | <a href="#">SLEDLMKR</a>  |
| 8.9  | 1002.4812 | 0.0018  | <a href="#">MEDALIKR</a>  |
| 5.1  | 1002.4839 | -0.0008 | <a href="#">EAVMAGVRR</a> |
| 4.5  | 1002.4812 | 0.0018  | <a href="#">LKVMEAER</a>  |
| 4.3  | 1002.4812 | 0.0018  | <a href="#">MAEIKVER</a>  |
| 1.6  | 1002.4835 | -0.0004 | <a href="#">WLKEMAAK</a>  |
| 1.4  | 1002.4839 | -0.0008 | <a href="#">GAVEMAVRR</a> |
| 0.4  | 1002.4839 | -0.0008 | <a href="#">VDPSRMKR</a>  |

**Mascot:** <http://www.matrixscience.com/>

**Peptide View**MS/MS Fragmentation of **TAAEDTMLAYK**

Found in **AT5G10450.1** in **TAIR\_Arabidopsis**, Symbols: AFT1, GRF6 | GRF6 (G-BOX REGULATING FACTOR 6); protein phosphorylated amino acid binding | chr5:3284453-3286262 REVERSE

Match to Query 4056: 1224.536952 from(613.275752,2+) index(3306)

Title: Elution from: 32.725 to 32.725 scan no 4119 cid35.00 polarity:+

Data file C7-1\_3.mgf

Click mouse within plot area to zoom in by factor of two about that point

Or,   to  Da

Label all possible matches  Label matches used for scoring

Show Y-axis

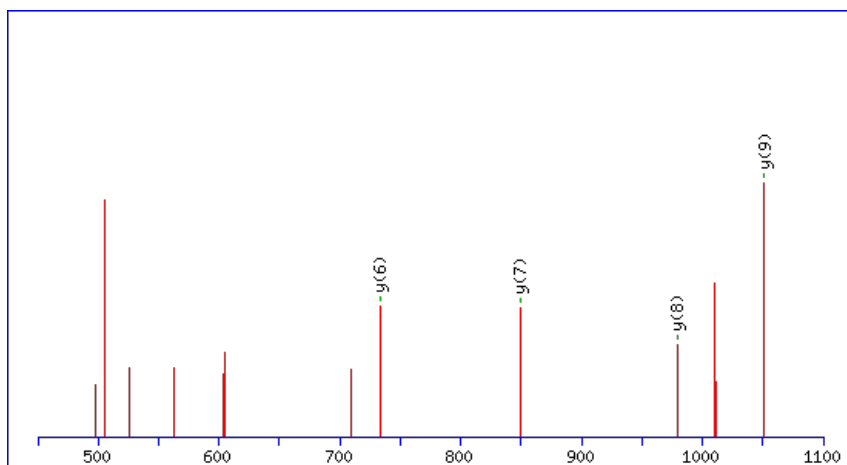

**Monoisotopic mass of neutral peptide Mr(calc):** 1224.5340

**Fixed modifications:** Carbamidomethyl (C) (apply to specified residues or termini only)

**Ions Score:** 31 **Expect:** 0.0062

**Matches:** 4/90 fragment ions using 6 most intense peaks ([help](#))

| #  | b         | b <sup>++</sup> | b <sup>0</sup> | b <sup>0++</sup> | Seq. | y                | y <sup>++</sup> | y*        | y <sup>*++</sup> | y <sup>0</sup> | y <sup>0++</sup> | #  |
|----|-----------|-----------------|----------------|------------------|------|------------------|-----------------|-----------|------------------|----------------|------------------|----|
| 1  | 103.0520  | 52.0296         | 85.0414        | 43.0244          | T    |                  |                 |           |                  |                |                  | 11 |
| 2  | 175.0861  | 88.0467         | 157.0756       | 79.0414          | A    | 1123.4966        | 562.2519        | 1105.4730 | 553.2402         | 1105.4861      | 553.2467         | 10 |
| 3  | 247.1203  | 124.0638        | 229.1097       | 115.0585         | A    | <b>1051.4625</b> | 526.2349        | 1033.4389 | 517.2231         | 1033.4519      | 517.2296         | 9  |
| 4  | 377.1599  | 189.0836        | 359.1494       | 180.0783         | E    | <b>979.4283</b>  | 490.2178        | 961.4047  | 481.2060         | 961.4178       | 481.2125         | 8  |
| 5  | 493.1839  | 247.0956        | 475.1733       | 238.0903         | D    | <b>849.3887</b>  | 425.1980        | 831.3651  | 416.1862         | 831.3781       | 416.1927         | 7  |
| 6  | 595.2286  | 298.1179        | 577.2180       | 289.1127         | T    | <b>733.3647</b>  | 367.1860        | 715.3411  | 358.1742         | 715.3542       | 358.1807         | 6  |
| 7  | 727.2661  | 364.1367        | 709.2556       | 355.1314         | M    | 631.3200         | 316.1636        | 613.2964  | 307.1518         |                |                  | 5  |
| 8  | 841.3472  | 421.1773        | 823.3367       | 412.1720         | L    | 499.2825         | 250.1449        | 481.2589  | 241.1331         |                |                  | 4  |
| 9  | 913.3814  | 457.1943        | 895.3708       | 448.1890         | A    | 385.2014         | 193.1043        | 367.1778  | 184.0925         |                |                  | 3  |
| 10 | 1077.4417 | 539.2245        | 1059.4312      | 530.2192         | Y    | 313.1672         | 157.0873        | 295.1437  | 148.0755         |                |                  | 2  |
| 11 |           |                 |                |                  | K    | 149.1069         | 75.0571         | 131.0833  | 66.0453          |                |                  | 1  |

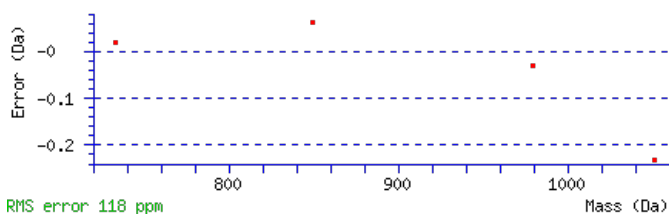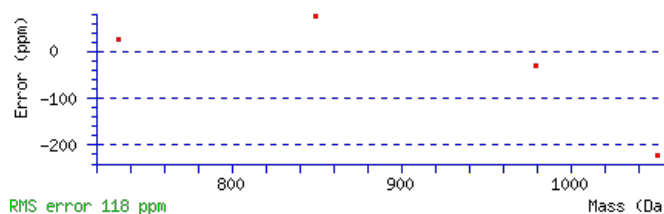

NCBI **BLAST** search of **TAAEDTMLAYK**

(Parameters: blastp, nr protein database, expect=20000, no filter, PAM30)

Other BLAST [web gateways](#)

**All matches to this query**



# AT5G10450.1

| Score | Mr(calc)  | Delta   | Sequence                    |
|-------|-----------|---------|-----------------------------|
| 30.7  | 1224.5340 | 0.0029  | <a href="#">TAAEDTMIAYK</a> |
| 30.7  | 1224.5340 | 0.0029  | <a href="#">TAAEDTMLAYK</a> |
| 1.3   | 1224.5394 | -0.0024 | <a href="#">AGNMPVQYRR</a>  |
| 0.5   | 1224.5390 | -0.0020 | <a href="#">GCAKSYGPFPK</a> |

Mascot: <http://www.matrixscience.com/>

## Peptide View

MS/MS Fragmentation of **QEVVGLKK**

Found in **AT5G10470.1** in **TAIR\_Arabidopsis**, Symbols: | kinesin motor protein-related | chr5:3290122-3297249 REVERSE

Match to Query 1369: 910.510504 from(456.262528,2+) index(1218)

Title: Elution from: 20.698 to 20.698 scan no 1785 cid35.00 polarity:+

Data file D12h-2\_2.mgf

Click mouse within plot area to zoom in by factor of two about that point

Or,  to  Da

Label all possible matches  Label matches used for scoring

Show Y-axis

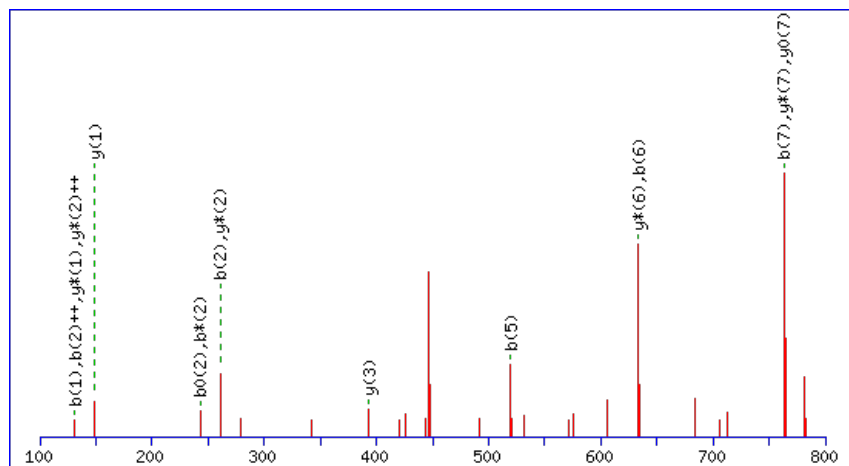

Monoisotopic mass of neutral peptide  $M_r(\text{calc})$ : 910.5114

Fixed modifications: Carbamidomethyl (C) (apply to specified residues or termini only)

Ions Score: 36 Expect: 0.0018

Matches : 16/70 fragment ions using 14 most intense peaks ([help](#))

| # | b               | b <sup>++</sup> | b*              | b <sup>*++</sup> | b <sup>0</sup>  | b <sup>0++</sup> | Seq.     | y               | y <sup>++</sup> | y*              | y <sup>*++</sup> | y <sup>0</sup>  | y <sup>0++</sup> | #        |
|---|-----------------|-----------------|-----------------|------------------|-----------------|------------------|----------|-----------------|-----------------|-----------------|------------------|-----------------|------------------|----------|
| 1 | <b>131.0599</b> | 66.0336         | 113.0363        | 57.0218          |                 |                  | <b>Q</b> |                 |                 |                 |                  |                 |                  | <b>8</b> |
| 2 | <b>261.0996</b> | <b>131.0534</b> | <b>243.0760</b> | 122.0416         | <b>243.0890</b> | 122.0481         | <b>E</b> | 781.4660        | 391.2367        | <b>763.4424</b> | 382.2249         | <b>763.4555</b> | 382.2314         | <b>7</b> |
| 3 | 361.1650        | 181.0861        | 343.1414        | 172.0743         | 343.1544        | 172.0809         | <b>V</b> | 651.4264        | 326.2168        | <b>633.4028</b> | 317.2050         |                 |                  | <b>6</b> |
| 4 | 461.2304        | 231.1189        | 443.2069        | 222.1071         | 443.2199        | 222.1136         | <b>V</b> | 551.3610        | 276.1841        | 533.3374        | 267.1723         |                 |                  | <b>5</b> |
| 5 | <b>519.2489</b> | 260.1281        | 501.2254        | 251.1163         | 501.2384        | 251.1228         | <b>G</b> | 451.2955        | 226.1514        | 433.2719        | 217.1396         |                 |                  | <b>4</b> |
| 6 | <b>633.3300</b> | 317.1687        | 615.3065        | 308.1569         | 615.3195        | 308.1634         | <b>L</b> | <b>393.2770</b> | 197.1421        | 375.2534        | 188.1303         |                 |                  | <b>3</b> |
| 7 | <b>763.4191</b> | 382.2132        | 745.3955        | 373.2014         | 745.4085        | 373.2079         | <b>K</b> | 279.1959        | 140.1016        | <b>261.1723</b> | <b>131.0898</b>  |                 |                  | <b>2</b> |
| 8 |                 |                 |                 |                  |                 |                  | <b>K</b> | <b>149.1069</b> | 75.0571         | <b>131.0833</b> | 66.0453          |                 |                  | <b>1</b> |

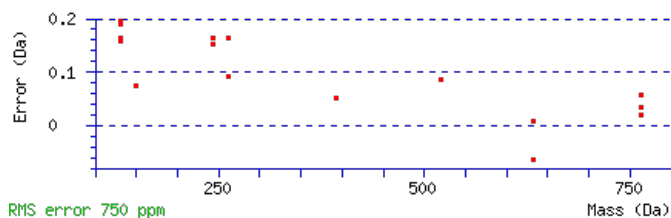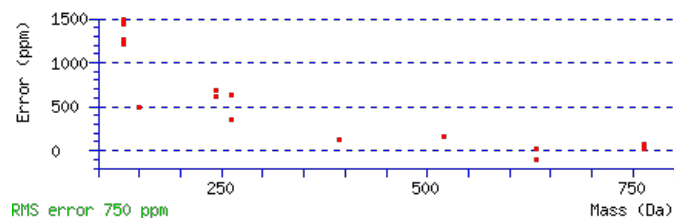

NCBI **BLAST** search of [QEVVGLKK](#)

(Parameters: blastp, nr protein database, expect=20000, no filter, PAM30)

Other BLAST [web gateways](#)

### All matches to this query

| Score | $M_r(\text{calc})$ | Delta   | Sequence                 |
|-------|--------------------|---------|--------------------------|
| 36.0  | 910.5114           | -0.0009 | <a href="#">QEVVGLKK</a> |
| 23.8  | 910.5114           | -0.0009 | <a href="#">ELRLIEK</a>  |

# AT5G10470.1

|      |          |         |                           |
|------|----------|---------|---------------------------|
| 17.5 | 910.5114 | -0.0009 | <a href="#">ILERLEK</a>   |
| 17.5 | 910.5114 | -0.0009 | <a href="#">IRELIEK</a>   |
| 17.5 | 910.5114 | -0.0009 | <a href="#">LLERIEK</a>   |
| 17.5 | 910.5114 | -0.0009 | <a href="#">RELLEK</a>    |
| 14.8 | 910.5114 | -0.0009 | <a href="#">AAADLLAKK</a> |
| 14.8 | 910.5114 | -0.0009 | <a href="#">AIQELAKK</a>  |
| 12.6 | 910.5114 | -0.0009 | <a href="#">EKAKSIPK</a>  |
| 12.4 | 910.5114 | -0.0009 | <a href="#">LILREEK</a>   |

Mascot: <http://www.matrixscience.com/>

**Peptide View**MS/MS Fragmentation of **YDINEEELRPYFSLPK**Found in **AT5G10540.1** in **TAIR\_Arabidopsis**, Symbols: | peptidase M3 family protein / thimet oligopeptidase family protein | chr5:3328120-3332463 FORWARD

Match to Query 9039: 2032.923141 from(678.648323,3+) index(8298)

Title: Elution from: 74.474 to 74.474 scan no 11058 cid35.00 polarity:+

Data file D12h-2\_3.mgf

Click mouse within plot area to zoom in by factor of two about that point

Or,   to  Da Label all possible matches  Label matches used for scoring Show Y-axis 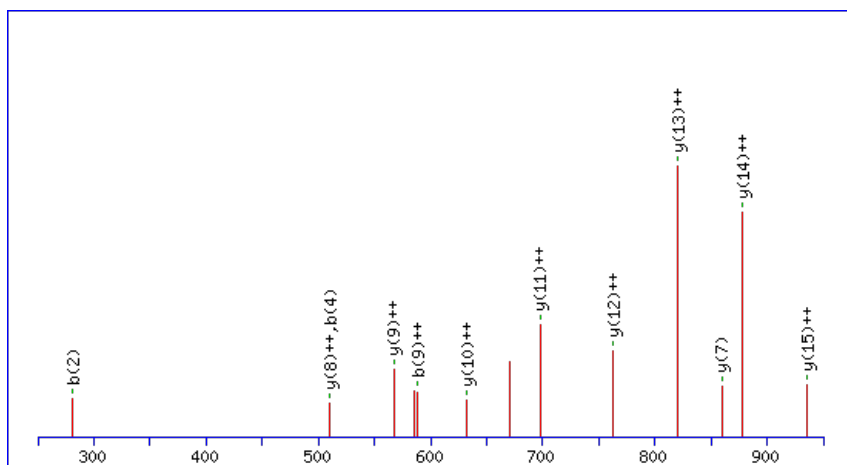Monoisotopic mass of neutral peptide **Mr(calc)**: 2032.9268**Fixed modifications**: Carbamidomethyl (C) (apply to specified residues or termini only)**Ions Score**: 61 **Expect**: 6.5e-006**Matches**: 12/166 fragment ions using 14 most intense peaks ([help](#))

| #  | b               | b <sup>++</sup> | b <sup>*</sup> | b <sup>*++</sup> | b <sup>0</sup> | b <sup>0++</sup> | Seq. | y               | y <sup>++</sup> | y <sup>*</sup> | y <sup>*++</sup> | y <sup>0</sup> | y <sup>0++</sup> | #  |
|----|-----------------|-----------------|----------------|------------------|----------------|------------------|------|-----------------|-----------------|----------------|------------------|----------------|------------------|----|
| 1  | 165.0676        | 83.0375         |                |                  |                |                  | Y    |                 |                 |                |                  |                |                  | 16 |
| 2  | <b>281.0916</b> | 141.0494        |                |                  | 263.0811       | 132.0442         | D    | 1869.8738       | <b>935.4405</b> | 1851.8502      | 926.4287         | 1851.8632      | 926.4352         | 15 |
| 3  | 395.1727        | 198.0900        |                |                  | 377.1622       | 189.0847         | I    | 1753.8498       | <b>877.4285</b> | 1735.8262      | 868.4167         | 1735.8392      | 868.4232         | 14 |
| 4  | <b>511.2097</b> | 256.1085        | 493.1861       | 247.0967         | 493.1991       | 247.1032         | N    | 1639.7687       | <b>820.3880</b> | 1621.7451      | 811.3762         | 1621.7581      | 811.3827         | 13 |
| 5  | 641.2493        | 321.1283        | 623.2258       | 312.1165         | 623.2388       | 312.1230         | E    | 1523.7317       | <b>762.3695</b> | 1505.7081      | 753.3577         | 1505.7211      | 753.3642         | 12 |
| 6  | 771.2890        | 386.1481        | 753.2654       | 377.1363         | 753.2784       | 377.1428         | E    | 1393.6921       | <b>697.3497</b> | 1375.6685      | 688.3379         | 1375.6815      | 688.3444         | 11 |
| 7  | 901.3286        | 451.1679        | 883.3050       | 442.1561         | 883.3180       | 442.1627         | E    | 1263.6524       | <b>632.3299</b> | 1245.6288      | 623.3181         | 1245.6419      | 623.3246         | 10 |
| 8  | 1015.4097       | 508.2085        | 997.3861       | 499.1967         | 997.3991       | 499.2032         | L    | 1133.6128       | <b>567.3100</b> | 1115.5892      | 558.2982         | 1115.6022      | 558.3048         | 9  |
| 9  | 1175.4989       | <b>588.2531</b> | 1157.4754      | 579.2413         | 1157.4884      | 579.2478         | R    | 1019.5317       | <b>510.2695</b> | 1001.5081      | 501.2577         | 1001.5211      | 501.2642         | 8  |
| 10 | 1273.5487       | 637.2780        | 1255.5252      | 628.2662         | 1255.5382      | 628.2727         | P    | <b>859.4424</b> | 430.2249        | 841.4189       | 421.2131         | 841.4319       | 421.2196         | 7  |
| 11 | 1437.6091       | 719.3082        | 1419.5855      | 710.2964         | 1419.5985      | 710.3029         | Y    | 761.3926        | 381.2000        | 743.3691       | 372.1882         | 743.3821       | 372.1947         | 6  |
| 12 | 1585.6746       | 793.3409        | 1567.6510      | 784.3291         | 1567.6640      | 784.3356         | F    | 597.3323        | 299.1698        | 579.3087       | 290.1580         | 579.3217       | 290.1645         | 5  |
| 13 | 1673.7036       | 837.3554        | 1655.6800      | 828.3437         | 1655.6931      | 828.3502         | S    | 449.2668        | 225.1371        | 431.2433       | 216.1253         | 431.2563       | 216.1318         | 4  |
| 14 | 1787.7847       | 894.3960        | 1769.7611      | 885.3842         | 1769.7742      | 885.3907         | L    | 361.2378        | 181.1225        | 343.2142       | 172.1107         |                |                  | 3  |
| 15 | 1885.8345       | 943.4209        | 1867.8109      | 934.4091         | 1867.8240      | 934.4156         | P    | 247.1567        | 124.0820        | 229.1331       | 115.0702         |                |                  | 2  |
| 16 |                 |                 |                |                  |                |                  | K    | 149.1069        | 75.0571         | 131.0833       | 66.0453          |                |                  | 1  |

# AT5G10540.1

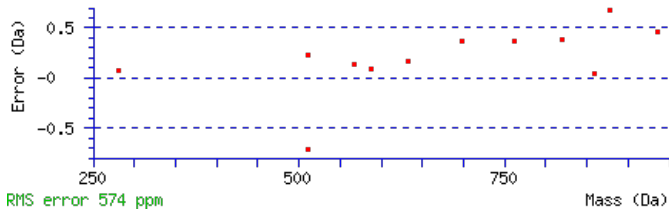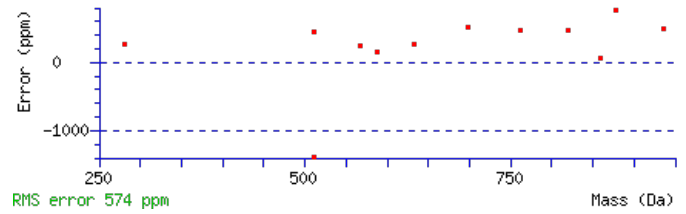

NCBI **BLAST** search of [YDINEEELRPYFSLPK](#)

(Parameters: blastp, nr protein database, expect=20000, no filter, PAM30)

Other BLAST [web gateways](#)

## All matches to this query

| Score | Mr(calc)  | Delta   | Sequence                             |
|-------|-----------|---------|--------------------------------------|
| 60.8  | 2032.9268 | -0.0037 | <a href="#">YDINEEELRPYFSLPK</a>     |
| 13.3  | 2032.9277 | -0.0046 | <a href="#">YLKPMVAWEPEVTFMR</a>     |
| 10.9  | 2032.9176 | 0.0055  | <a href="#">VTADQSDRFNDAVLSLMK</a>   |
| 7.7   | 2032.9176 | 0.0055  | <a href="#">AKTQVAASFASEGAGMNELK</a> |
| 6.4   | 2032.9198 | 0.0033  | <a href="#">MHKDTKYVLFDDDDVR</a>     |
| 6.4   | 2032.9203 | 0.0029  | <a href="#">LHDGGLAHGDLTTSNMLVR</a>  |
| 4.4   | 2032.9277 | -0.0046 | <a href="#">YLKPMVAWEPEVTFMR</a>     |
| 4.2   | 2032.9203 | 0.0028  | <a href="#">NCISQRVPEPPSVSTHAK</a>   |
| 3.4   | 2032.9198 | 0.0033  | <a href="#">VHDLPSVDMFVPTADPVR</a>   |
| 2.9   | 2032.9280 | -0.0048 | <a href="#">MKKGVEESINVDGSDFIK</a>   |

Mascot: <http://www.matrixscience.com/>

**Peptide View**MS/MS Fragmentation of **LNMSPYLSSSIHGK**Found in **AT5G10790.1** in **TAIR\_Arabidopsis**, Symbols: UBP22 | UBP22 (UBIQUITIN-SPECIFIC PROTEASE 22); ubiquitin-specific protease | chr5:3410639-3412560 FORWARD

Match to Query 6723: 1524.782106 from(763.398329,2+) index(7199)

Title: Elution from: 63.909 to 63.909 scan no 9320 cid35.00 polarity:+

Data file D12h-3\_1.mgf

Click mouse within plot area to zoom in by factor of two about that point

Or,  to  Da Label all possible matches  Label matches used for scoring Show Y-axis 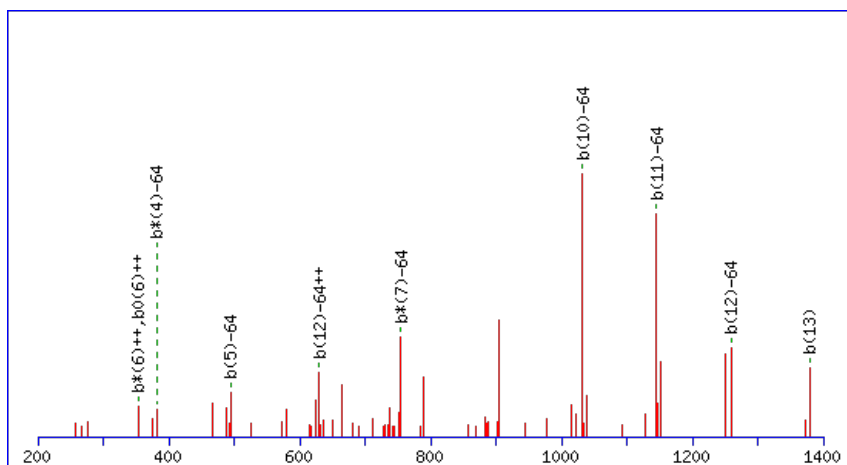Monoisotopic mass of neutral peptide  $M_r(\text{calc})$ : 1524.7858

Fixed modifications: Carbamidomethyl (C) (apply to specified residues or termini only)

Variable modifications:

M3 : Oxidation (M), with neutral losses 63.9983 (shown in table), 0.0000

Ions Score: 20 Expect: 0.044

Matches : 10/216 fragment ions using 12 most intense peaks ([help](#))

| #  | b         | b <sup>++</sup> | b*        | b <sup>++</sup> | b <sup>0</sup> | b <sup>0++</sup> | Seq. | y         | y <sup>++</sup> | y*        | y <sup>++</sup> | y <sup>0</sup> | y <sup>0++</sup> | #  |
|----|-----------|-----------------|-----------|-----------------|----------------|------------------|------|-----------|-----------------|-----------|-----------------|----------------|------------------|----|
| 1  | 114.0913  | 57.5493         |           |                 |                |                  | L    |           |                 |           |                 |                |                  | 14 |
| 2  | 228.1343  | 114.5708        | 211.1077  | 106.0575        |                |                  | N    | 1348.7107 | 674.8590        | 1331.6842 | 666.3457        | 1330.7001      | 665.8537         | 13 |
| 3  | 311.1714  | 156.0893        | 294.1448  | 147.5761        |                |                  | M    | 1234.6678 | 617.8375        | 1217.6412 | 609.3243        | 1216.6572      | 608.8322         | 12 |
| 4  | 398.2034  | 199.6053        | 381.1769  | 191.0921        | 380.1928       | 190.6001         | S    | 1151.6307 | 576.3190        | 1134.6041 | 567.8057        | 1133.6201      | 567.3137         | 11 |
| 5  | 495.2562  | 248.1317        | 478.2296  | 239.6185        | 477.2456       | 239.1264         | P    | 1064.5986 | 532.8030        | 1047.5721 | 524.2897        | 1046.5881      | 523.7977         | 10 |
| 6  | 658.3195  | 329.6634        | 641.2930  | 321.1501        | 640.3089       | 320.6581         | Y    | 967.5459  | 484.2766        | 950.5193  | 475.7633        | 949.5353       | 475.2713         | 9  |
| 7  | 771.4036  | 386.2054        | 754.3770  | 377.6921        | 753.3930       | 377.2001         | L    | 804.4825  | 402.7449        | 787.4560  | 394.2316        | 786.4720       | 393.7396         | 8  |
| 8  | 858.4356  | 429.7214        | 841.4090  | 421.2082        | 840.4250       | 420.7162         | S    | 691.3985  | 346.2029        | 674.3719  | 337.6896        | 673.3879       | 337.1976         | 7  |
| 9  | 945.4676  | 473.2374        | 928.4411  | 464.7242        | 927.4571       | 464.2322         | S    | 604.3665  | 302.6869        | 587.3399  | 294.1736        | 586.3559       | 293.6816         | 6  |
| 10 | 1032.4997 | 516.7535        | 1015.4731 | 508.2402        | 1014.4891      | 507.7482         | S    | 517.3344  | 259.1708        | 500.3079  | 250.6576        | 499.3239       | 250.1656         | 5  |
| 11 | 1145.5837 | 573.2955        | 1128.5572 | 564.7822        | 1127.5731      | 564.2902         | I    | 430.3024  | 215.6548        | 413.2758  | 207.1416        |                |                  | 4  |
| 12 | 1258.6678 | 629.8375        | 1241.6412 | 621.3243        | 1240.6572      | 620.8322         | I    | 317.2183  | 159.1128        | 300.1918  | 150.5995        |                |                  | 3  |
| 13 | 1315.6892 | 658.3483        | 1298.6627 | 649.8350        | 1297.6787      | 649.3430         | G    | 204.1343  | 102.5708        | 187.1077  | 94.0575         |                |                  | 2  |
| 14 |           |                 |           |                 |                |                  | K    | 147.1128  | 74.0600         | 130.0863  | 65.5468         |                |                  | 1  |

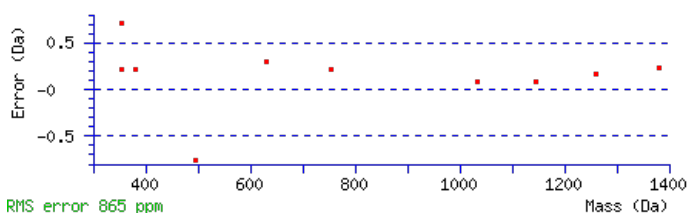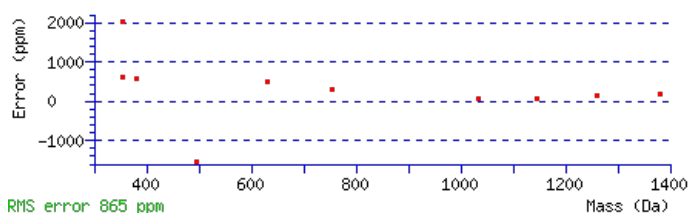

## AT5G10790.1

NCBI **BLAST** search of [LNMSPYLSSSIIGK](#)

(Parameters: blastp, nr protein database, expect=20000, no filter, PAM30)

Other BLAST [web gateways](#)

### All matches to this query

| Score | Mr(calc)  | Delta   | Sequence                       |
|-------|-----------|---------|--------------------------------|
| 19.6  | 1524.7858 | -0.0036 | <a href="#">LNMSPYLSSSIIGK</a> |
| 3.3   | 1524.7792 | 0.0029  | <a href="#">MEIFMDIAKRQK</a>   |
| 2.3   | 1524.7831 | -0.0010 | <a href="#">ENNMKNGGVKGHK</a>  |

Mascot: <http://www.matrixscience.com/>

## Peptide View

MS/MS Fragmentation of **MEESGFESTTISDVMK**

Found in **AT5G10860.1** in **TAIR\_Arabidopsis**, Symbols: | CBS domain-containing protein | chr5:3429174-3430143 REVERSE

Match to Query 8437: 1789.775348 from(895.894950,2+) index(6954)

Title: Elution from: 64.537 to 64.537 scan no 9144 cid35.00 polarity:+

Data file D1d-1\_1.mgf

Click mouse within plot area to zoom in by factor of two about that point

Or,   to  Da

Label all possible matches  Label matches used for scoring

Show Y-axis

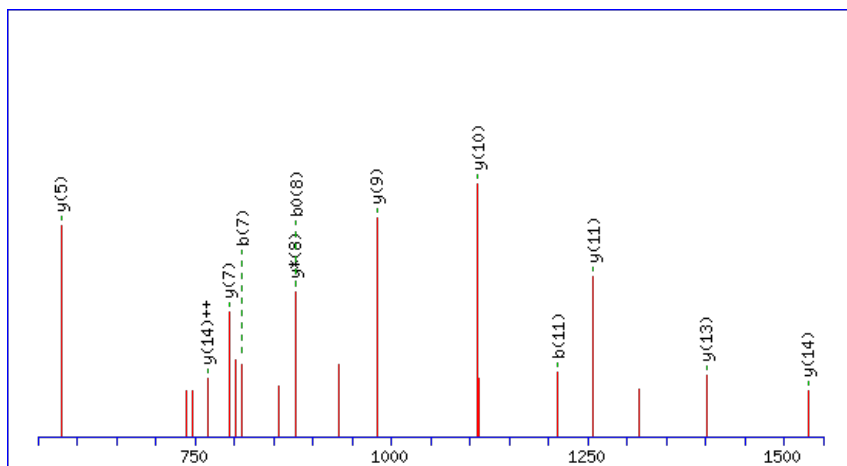

Monoisotopic mass of neutral peptide  $M_r(\text{calc})$ : 1789.7750

Fixed modifications: Carbamidomethyl (C) (apply to specified residues or termini only)

Ions Score: 43 Expect: 5.2e-005

Matches : 12/142 fragment ions using 19 most intense peaks ([help](#))

| #  | b                | b <sup>++</sup> | b <sup>0</sup>  | b <sup>0++</sup> | Seq. | y                | y <sup>++</sup> | y*              | y <sup>*++</sup> | y <sup>0</sup> | y <sup>0++</sup> | #  |
|----|------------------|-----------------|-----------------|------------------|------|------------------|-----------------|-----------------|------------------|----------------|------------------|----|
| 1  | 132.0478         | 66.5275         |                 |                  | M    |                  |                 |                 |                  |                |                  | 16 |
| 2  | 261.0904         | 131.0488        | 243.0798        | 122.0435         | E    | 1659.7418        | 830.3745        | 1642.7153       | 821.8613         | 1641.7312      | 821.3693         | 15 |
| 3  | 390.1329         | 195.5701        | 372.1224        | 186.5648         | E    | <b>1530.6992</b> | <b>765.8532</b> | 1513.6727       | 757.3400         | 1512.6887      | 756.8480         | 14 |
| 4  | 477.1650         | 239.0861        | 459.1544        | 230.0808         | S    | <b>1401.6566</b> | 701.3319        | 1384.6301       | 692.8187         | 1383.6461      | 692.3267         | 13 |
| 5  | 534.1864         | 267.5969        | 516.1759        | 258.5916         | G    | 1314.6246        | 657.8159        | 1297.5980       | 649.3027         | 1296.6140      | 648.8107         | 12 |
| 6  | 681.2549         | 341.1311        | 663.2443        | 332.1258         | F    | <b>1257.6031</b> | 629.3052        | 1240.5766       | 620.7919         | 1239.5926      | 620.2999         | 11 |
| 7  | <b>810.2974</b>  | 405.6524        | 792.2869        | 396.6471         | E    | <b>1110.5347</b> | 555.7710        | 1093.5082       | 547.2577         | 1092.5242      | 546.7657         | 10 |
| 8  | 897.3295         | 449.1684        | <b>879.3189</b> | 440.1631         | S    | <b>981.4921</b>  | 491.2497        | 964.4656        | 482.7364         | 963.4816       | 482.2444         | 9  |
| 9  | 998.3772         | 499.6922        | 980.3666        | 490.6869         | T    | 894.4601         | 447.7337        | <b>877.4335</b> | 439.2204         | 876.4495       | 438.7284         | 8  |
| 10 | 1099.4248        | 550.2161        | 1081.4143       | 541.2108         | T    | <b>793.4124</b>  | 397.2098        | 776.3859        | 388.6966         | 775.4019       | 388.2046         | 7  |
| 11 | <b>1212.5089</b> | 606.7581        | 1194.4983       | 597.7528         | I    | 692.3647         | 346.6860        | 675.3382        | 338.1727         | 674.3542       | 337.6807         | 6  |
| 12 | 1299.5409        | 650.2741        | 1281.5304       | 641.2688         | S    | <b>579.2807</b>  | 290.1440        | 562.2541        | 281.6307         | 561.2701       | 281.1387         | 5  |
| 13 | 1414.5679        | 707.7876        | 1396.5573       | 698.7823         | D    | 492.2486         | 246.6280        | 475.2221        | 238.1147         | 474.2381       | 237.6227         | 4  |
| 14 | 1513.6363        | 757.3218        | 1495.6257       | 748.3165         | V    | 377.2217         | 189.1145        | 360.1952        | 180.6012         |                |                  | 3  |
| 15 | 1644.6768        | 822.8420        | 1626.6662       | 813.8367         | M    | 278.1533         | 139.5803        | 261.1267        | 131.0670         |                |                  | 2  |
| 16 |                  |                 |                 |                  | K    | 147.1128         | 74.0600         | 130.0863        | 65.5468          |                |                  | 1  |

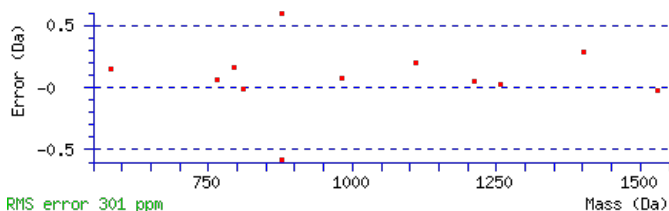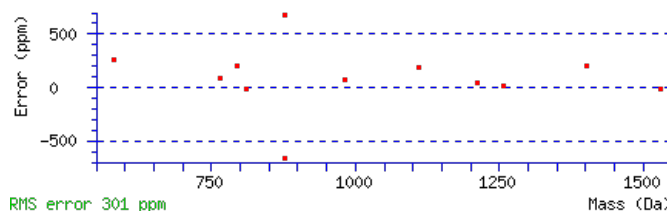



## AT5G10860.1

NCBI **BLAST** search of [MEESGFESTTISDVMK](#)

(Parameters: blastp, nr protein database, expect=20000, no filter, PAM30)

Other BLAST [web gateways](#)

### All matches to this query

| Score | Mr(calc)  | Delta  | Sequence                         |
|-------|-----------|--------|----------------------------------|
| 42.8  | 1789.7750 | 0.0003 | <a href="#">MEESGFESTTISDVMK</a> |

Mascot: <http://www.matrixscience.com/>

## Peptide View

MS/MS Fragmentation of **VNIVINYDMPDSADTYLHR**

Found in **AT5G11170.1** in **TAIR\_Arabidopsis**, Symbols: | DEAD/DEAH box helicase, putative (RH15) | chr5:3553335-3556647 FORWARD

Match to Query 10053: 2235.063426 from(746.028418,3+) index(8122)

Title: Elution from: 71.558 to 71.558 scan no 10608 cid35.00 polarity:+

Data file C7-3\_1.mgf

Click mouse within plot area to zoom in by factor of two about that point

Or, Plot from  to  Da

Label all possible matches  Label matches used for scoring

Show Y-axis

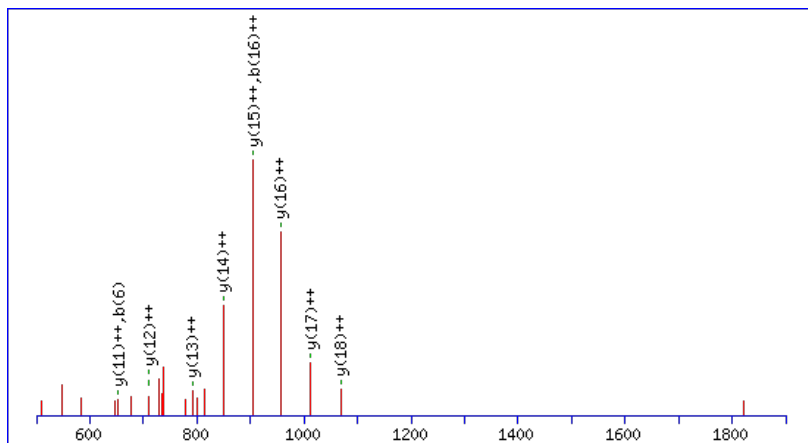

Monoisotopic mass of neutral peptide Mr(calc): 2235.0630

Fixed modifications: Carbamidomethyl (C) (apply to specified residues or termini only)

Ions Score: 43 Expect: 0.00014

Matches : 10/192 fragment ions using 19 most intense peaks ([help](#))

| #  | b         | b <sup>++</sup> | b <sup>*</sup> | b <sup>*++</sup> | b <sup>0</sup> | b <sup>0++</sup> | Seq. | y         | y <sup>++</sup> | y <sup>*</sup> | y <sup>*++</sup> | y <sup>0</sup> | y <sup>0++</sup> | #  |
|----|-----------|-----------------|----------------|------------------|----------------|------------------|------|-----------|-----------------|----------------|------------------|----------------|------------------|----|
| 1  | 100.0757  | 50.5415         |                |                  |                |                  | V    |           |                 |                |                  |                |                  | 19 |
| 2  | 214.1186  | 107.5629        | 197.0921       | 99.0497          |                |                  | N    | 2137.0019 | 1069.0046       | 2119.9753      | 1060.4913        | 2118.9913      | 1059.9993        | 18 |
| 3  | 327.2027  | 164.1050        | 310.1761       | 155.5917         |                |                  | I    | 2022.9590 | 1011.9831       | 2005.9324      | 1003.4698        | 2004.9484      | 1002.9778        | 17 |
| 4  | 426.2711  | 213.6392        | 409.2445       | 205.1259         |                |                  | V    | 1909.8749 | 955.4411        | 1892.8483      | 946.9278         | 1891.8643      | 946.4358         | 16 |
| 5  | 539.3552  | 270.1812        | 522.3286       | 261.6679         |                |                  | I    | 1810.8065 | 905.9069        | 1793.7799      | 897.3936         | 1792.7959      | 896.9016         | 15 |
| 6  | 653.3981  | 327.2027        | 636.3715       | 318.6894         |                |                  | N    | 1697.7224 | 849.3648        | 1680.6959      | 840.8516         | 1679.7118      | 840.3596         | 14 |
| 7  | 816.4614  | 408.7343        | 799.4349       | 400.2211         |                |                  | Y    | 1583.6795 | 792.3434        | 1566.6529      | 783.8301         | 1565.6689      | 783.3381         | 13 |
| 8  | 931.4884  | 466.2478        | 914.4618       | 457.7345         | 913.4778       | 457.2425         | D    | 1420.6162 | 710.8117        | 1403.5896      | 702.2984         | 1402.6056      | 701.8064         | 12 |
| 9  | 1062.5288 | 531.7681        | 1045.5023      | 523.2548         | 1044.5183      | 522.7628         | M    | 1305.5892 | 653.2982        | 1288.5627      | 644.7850         | 1287.5786      | 644.2930         | 11 |
| 10 | 1159.5816 | 580.2944        | 1142.5551      | 571.7812         | 1141.5710      | 571.2892         | P    | 1174.5487 | 587.7780        | 1157.5222      | 579.2647         | 1156.5382      | 578.7727         | 10 |
| 11 | 1274.6085 | 637.8079        | 1257.5820      | 629.2946         | 1256.5980      | 628.8026         | D    | 1077.4960 | 539.2516        | 1060.4694      | 530.7383         | 1059.4854      | 530.2463         | 9  |
| 12 | 1361.6406 | 681.3239        | 1344.6140      | 672.8107         | 1343.6300      | 672.3186         | S    | 962.4690  | 481.7381        | 945.4425       | 473.2249         | 944.4585       | 472.7329         | 8  |
| 13 | 1432.6777 | 716.8425        | 1415.6511      | 708.3292         | 1414.6671      | 707.8372         | A    | 875.4370  | 438.2221        | 858.4104       | 429.7089         | 857.4264       | 429.2169         | 7  |
| 14 | 1547.7046 | 774.3560        | 1530.6781      | 765.8427         | 1529.6941      | 765.3507         | D    | 804.3999  | 402.7036        | 787.3733       | 394.1903         | 786.3893       | 393.6983         | 6  |
| 15 | 1648.7523 | 824.8798        | 1631.7258      | 816.3665         | 1630.7417      | 815.8745         | T    | 689.3729  | 345.1901        | 672.3464       | 336.6768         | 671.3624       | 336.1848         | 5  |
| 16 | 1811.8156 | 906.4115        | 1794.7891      | 897.8982         | 1793.8051      | 897.4062         | Y    | 588.3253  | 294.6663        | 571.2987       | 286.1530         |                |                  | 4  |
| 17 | 1924.8997 | 962.9535        | 1907.8732      | 954.4402         | 1906.8891      | 953.9482         | L    | 425.2619  | 213.1346        | 408.2354       | 204.6213         |                |                  | 3  |
| 18 | 2061.9586 | 1031.4829       | 2044.9321      | 1022.9697        | 2043.9481      | 1022.4777        | H    | 312.1779  | 156.5926        | 295.1513       | 148.0793         |                |                  | 2  |
| 19 |           |                 |                |                  |                |                  | R    | 175.1190  | 88.0631         | 158.0924       | 79.5498          |                |                  | 1  |

# AT5G11170.1

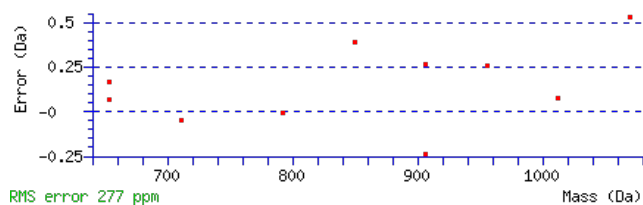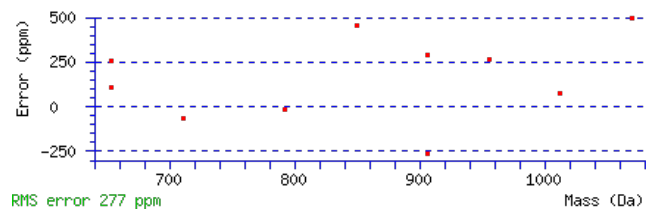

NCBI **BLAST** search of [VNIVINYDMPDSADTYLHR](#)  
(Parameters: blastp, nr protein database, expect=20000, no filter, PAM30)  
Other BLAST [web gateways](#)

## All matches to this query

| Score | Mr(calc)  | Delta   | Sequence                              |
|-------|-----------|---------|---------------------------------------|
| 42.9  | 2235.0630 | 0.0004  | <a href="#">VNIVINYDMPDSADTYLHR</a>   |
| 3.0   | 2235.0689 | -0.0055 | <a href="#">ESEKIEMTSPVVTKEGGGEGR</a> |
| 0.6   | 2235.0570 | 0.0065  | <a href="#">YGOVTPNPRFHGYQAGGSSGR</a> |

Mascot: <http://www.matrixscience.com/>

## Peptide View

### MS/MS Fragmentation of **YVDVEHFSVPQGR**

Found in **AT5G11420.1** in **TAIR\_Arabidopsis**, Symbols: | similar to unknown protein [Arabidopsis thaliana] (TAIR:AT5G25460.1); similar to unknown [Ricinus communis] (GB:CAB02653.1); contains InterPro domain Protein of unknown function DUF642 (InterPro:IPR006946); contains InterPro domain Gala

Match to Query 6018: 1531.743770 from(766.879161,2+) index(4328)

Title: Elution from: 42.183 to 42.183 scan no 5574 cid35.00 polarity:+

Data file D1d-1\_3.mgf

Click mouse within plot area to zoom in by factor of two about that point

Or,   to  Da

Label all possible matches  Label matches used for scoring

Show Y-axis

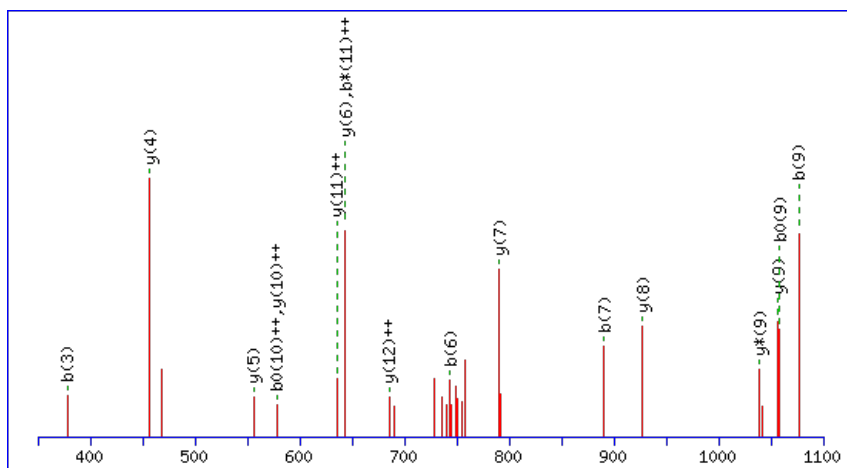

Monoisotopic mass of neutral peptide  $M_r(\text{calc})$ : 1531.7420

Fixed modifications: Carbamidomethyl (C) (apply to specified residues or termini only)

Ions Score: 51 Expect: 3.2e-005

Matches : 17/110 fragment ions using 21 most intense peaks ([help](#))

| #  | b         | b <sup>++</sup> | b*        | b <sup>*++</sup> | b <sup>0</sup> | b <sup>0++</sup> | Seq. | y         | y <sup>++</sup> | y*        | y <sup>*++</sup> | y <sup>0</sup> | y <sup>0++</sup> | #  |
|----|-----------|-----------------|-----------|------------------|----------------|------------------|------|-----------|-----------------|-----------|------------------|----------------|------------------|----|
| 1  | 164.0706  | 82.5389         |           |                  |                |                  | Y    |           |                 |           |                  |                |                  | 13 |
| 2  | 263.1390  | 132.0731        |           |                  |                |                  | V    | 1369.6859 | 685.3466        | 1352.6593 | 676.8333         | 1351.6753      | 676.3413         | 12 |
| 3  | 378.1660  | 189.5866        |           |                  | 360.1554       | 180.5813         | D    | 1270.6175 | 635.8124        | 1253.5909 | 627.2991         | 1252.6069      | 626.8071         | 11 |
| 4  | 477.2344  | 239.1208        |           |                  | 459.2238       | 230.1155         | V    | 1155.5905 | 578.2989        | 1138.5640 | 569.7856         | 1137.5800      | 569.2936         | 10 |
| 5  | 606.2770  | 303.6421        |           |                  | 588.2664       | 294.6368         | E    | 1056.5221 | 528.7647        | 1039.4956 | 520.2514         | 1038.5116      | 519.7594         | 9  |
| 6  | 743.3359  | 372.1716        |           |                  | 725.3253       | 363.1663         | H    | 927.4795  | 464.2434        | 910.4530  | 455.7301         | 909.4690       | 455.2381         | 8  |
| 7  | 890.4043  | 445.7058        |           |                  | 872.3937       | 436.7005         | F    | 790.4206  | 395.7139        | 773.3941  | 387.2007         | 772.4100       | 386.7087         | 7  |
| 8  | 977.4363  | 489.2218        |           |                  | 959.4258       | 480.2165         | S    | 643.3522  | 322.1797        | 626.3257  | 313.6665         | 625.3416       | 313.1745         | 6  |
| 9  | 1076.5047 | 538.7560        |           |                  | 1058.4942      | 529.7507         | V    | 556.3202  | 278.6637        | 539.2936  | 270.1504         |                |                  | 5  |
| 10 | 1173.5575 | 587.2824        |           |                  | 1155.5469      | 578.2771         | P    | 457.2518  | 229.1295        | 440.2252  | 220.6162         |                |                  | 4  |
| 11 | 1301.6161 | 651.3117        | 1284.5895 | 642.7984         | 1283.6055      | 642.3064         | Q    | 360.1990  | 180.6031        | 343.1724  | 172.0899         |                |                  | 3  |
| 12 | 1358.6375 | 679.8224        | 1341.6110 | 671.3091         | 1340.6270      | 670.8171         | G    | 232.1404  | 116.5738        | 215.1139  | 108.0606         |                |                  | 2  |
| 13 |           |                 |           |                  |                |                  | R    | 175.1190  | 88.0631         | 158.0924  | 79.5498          |                |                  | 1  |

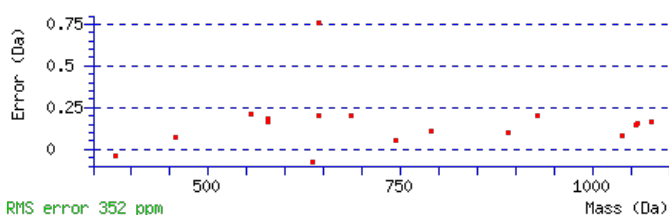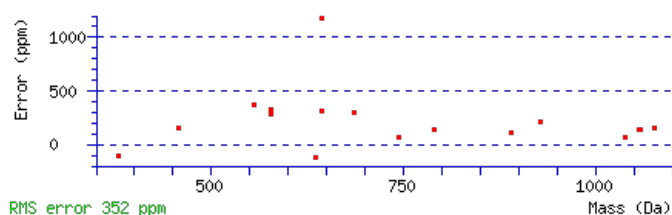

NCBI BLAST search of [YVDVEHFSVPQGR](#)

## AT5G11420.1

(Parameters: blastp, nr protein database, expect=20000, no filter, PAM30)

Other BLAST [web gateways](#)

### All matches to this query

| Score | Mr(calc)  | Delta  | Sequence                      |
|-------|-----------|--------|-------------------------------|
| 50.6  | 1531.7420 | 0.0018 | <a href="#">YVDVEHFSVPQGR</a> |
| 1.5   | 1531.7413 | 0.0025 | <a href="#">IVNDGRMKEDEAR</a> |

Mascot: <http://www.matrixscience.com/>

**Peptide View**MS/MS Fragmentation of **AIFGSGSPFDPVVYDGK**

Found in **AT5G11670.1** in **TAIR\_Arabidopsis**, Symbols: ATNADP-ME2 | ATNADP-ME2 (NADP-MALIC ENZYME 2); malate dehydrogenase (oxaloacetate-decarboxylating) (NADP+)/ malic enzyme/ oxidoreductase, acting on NADH or NADPH, NAD or NADP as acceptor | chr5:3754457-3758041 FORWARD

Match to Query 8054: 1772.798614 from(887.406583,2+) index(8674)

Title: Elution from: 80.495 to 80.495 scan no 11759 cid35.00 polarity:+

Data file D12h-2\_2.mgf

Click mouse within plot area to zoom in by factor of two about that point

Or,   to  Da

Label all possible matches  Label matches used for scoring

Show Y-axis

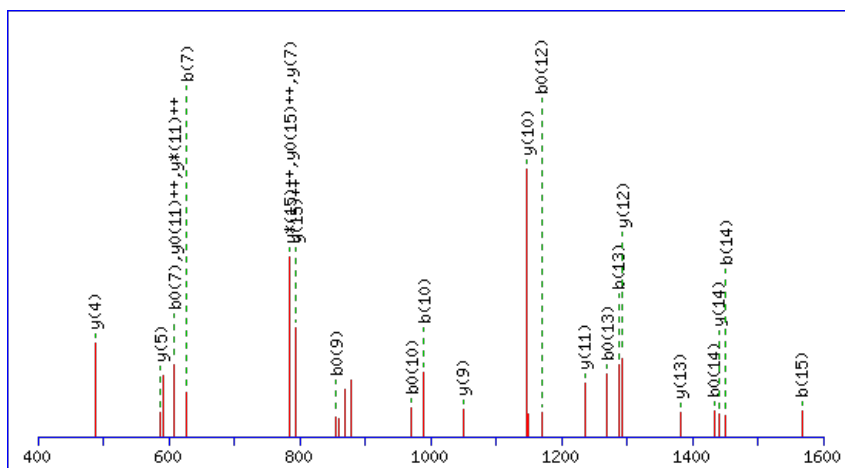

Monoisotopic mass of neutral peptide  $M_r(\text{calc})$ : 1772.7982

Fixed modifications: Carbamidomethyl (C) (apply to specified residues or termini only)

Ions Score: 75 Expect: 2.9e-007

Matches : 25/148 fragment ions using 31 most intense peaks ([help](#))

| #  | b         | b <sup>++</sup> | b <sup>0</sup> | b <sup>0++</sup> | Seq. | y         | y <sup>++</sup> | y*        | y <sup>*++</sup> | y <sup>0</sup> | y <sup>0++</sup> | #  |
|----|-----------|-----------------|----------------|------------------|------|-----------|-----------------|-----------|------------------|----------------|------------------|----|
| 1  | 73.0414   | 37.0244         |                |                  | A    |           |                 |           |                  |                |                  | 17 |
| 2  | 187.1225  | 94.0649         |                |                  | I    | 1701.7713 | 851.3893        | 1683.7477 | 842.3775         | 1683.7607      | 842.3840         | 16 |
| 3  | 335.1880  | 168.0976        |                |                  | F    | 1587.6902 | 794.3487        | 1569.6666 | 785.3370         | 1569.6796      | 785.3435         | 15 |
| 4  | 393.2065  | 197.1069        |                |                  | G    | 1439.6248 | 720.3160        | 1421.6012 | 711.3042         | 1421.6142      | 711.3107         | 14 |
| 5  | 481.2355  | 241.1214        | 463.2250       | 232.1161         | S    | 1381.6063 | 691.3068        | 1363.5827 | 682.2950         | 1363.5957      | 682.3015         | 13 |
| 6  | 539.2540  | 270.1307        | 521.2435       | 261.1254         | G    | 1293.5772 | 647.2922        | 1275.5536 | 638.2804         | 1275.5666      | 638.2870         | 12 |
| 7  | 627.2831  | 314.1452        | 609.2725       | 305.1399         | S    | 1235.5587 | 618.2830        | 1217.5351 | 609.2712         | 1217.5481      | 609.2777         | 11 |
| 8  | 725.3329  | 363.1701        | 707.3223       | 354.1648         | P    | 1147.5296 | 574.2685        | 1129.5061 | 565.2567         | 1129.5191      | 565.2632         | 10 |
| 9  | 873.3983  | 437.2028        | 855.3878       | 428.1975         | F    | 1049.4798 | 525.2436        | 1031.4563 | 516.2318         | 1031.4693      | 516.2383         | 9  |
| 10 | 989.4223  | 495.2148        | 971.4118       | 486.2095         | D    | 901.4144  | 451.2108        | 883.3908  | 442.1990         | 883.4038       | 442.2056         | 8  |
| 11 | 1087.4721 | 544.2397        | 1069.4616      | 535.2344         | P    | 785.3904  | 393.1988        | 767.3668  | 384.1871         | 767.3798       | 384.1936         | 7  |
| 12 | 1187.5376 | 594.2724        | 1169.5270      | 585.2671         | V    | 687.3406  | 344.1739        | 669.3170  | 335.1622         | 669.3300       | 335.1687         | 6  |
| 13 | 1287.6030 | 644.3051        | 1269.5925      | 635.2999         | V    | 587.2752  | 294.1412        | 569.2516  | 285.1294         | 569.2646       | 285.1359         | 5  |
| 14 | 1451.6634 | 726.3353        | 1433.6528      | 717.3300         | Y    | 487.2097  | 244.1085        | 469.1861  | 235.0967         | 469.1991       | 235.1032         | 4  |
| 15 | 1567.6874 | 784.3473        | 1549.6768      | 775.3420         | D    | 323.1494  | 162.0783        | 305.1258  | 153.0665         | 305.1388       | 153.0730         | 3  |
| 16 | 1625.7059 | 813.3566        | 1607.6953      | 804.3513         | G    | 207.1254  | 104.0663        | 189.1018  | 95.0545          |                |                  | 2  |
| 17 |           |                 |                |                  | K    | 149.1069  | 75.0571         | 131.0833  | 66.0453          |                |                  | 1  |

# AT5G11670.1

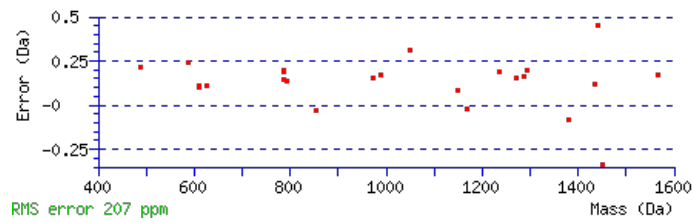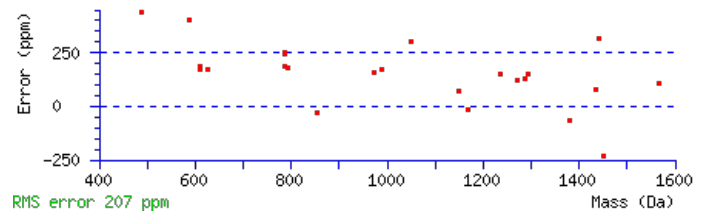

NCBI **BLAST** search of [AIFGSGSPFDPVVYDGK](#)

(Parameters: blastp, nr protein database, expect=20000, no filter, PAM30)

Other BLAST [web gateways](#)

## All matches to this query

| Score | Mr(calc)  | Delta  | Sequence                          |
|-------|-----------|--------|-----------------------------------|
| 75.0  | 1772.7982 | 0.0005 | <a href="#">AIFGSGSPFDPVVYDGK</a> |
| 4.7   | 1772.7971 | 0.0015 | <a href="#">SSKSTKVGDIMTEENK</a>  |

Mascot: <http://www.matrixscience.com/>

## Peptide View

MS/MS Fragmentation of **SSVLEVKPWDEETDMK**Found in **AT5G12110.1** in **TAIR\_Arabidopsis**, Symbols: | elongation factor 1B alpha-subunit 1 (eEF1Balpha1) | chr5:3914484-3915733  
FORWARDMatch to Query 9448: 1990.954470 from(664.658766,3+) index(8299)  
Title: Elution from: 75.785 to 75.785 scan no 11019 cid35.00 polarity:+  
Data file D12h-2\_1.mgf

Click mouse within plot area to zoom in by factor of two about that point

Or,  to  Da Label all possible matches  Label matches used for scoring Show Y-axis 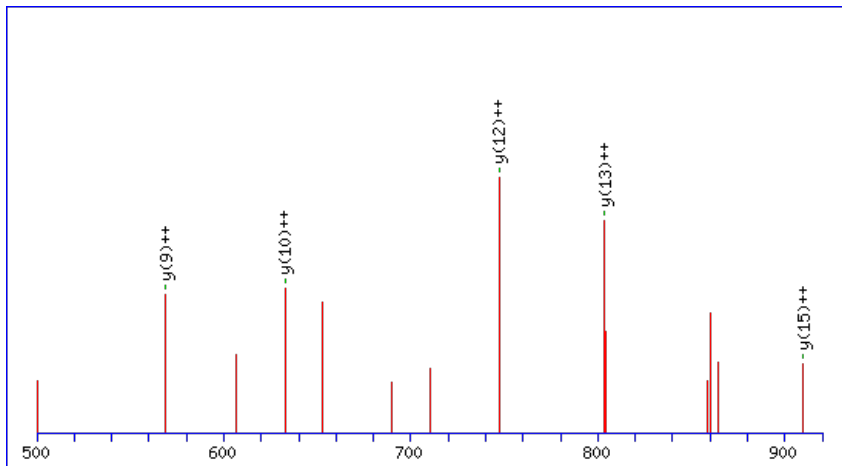Monoisotopic mass of neutral peptide  $M_r(\text{calc})$ : 1990.9558

Fixed modifications: Carbamidomethyl (C) (apply to specified residues or termini only)

Ions Score: 43 Expect: 0.00021

Matches : 5/174 fragment ions using 5 most intense peaks ([help](#))

| #  | b         | b <sup>++</sup> | b*        | b <sup>*++</sup> | b <sup>0</sup> | b <sup>0++</sup> | Seq. | y         | y <sup>++</sup> | y*        | y <sup>*++</sup> | y <sup>0</sup> | y <sup>0++</sup> | #  |
|----|-----------|-----------------|-----------|------------------|----------------|------------------|------|-----------|-----------------|-----------|------------------|----------------|------------------|----|
| 1  | 88.0393   | 44.5233         |           |                  | 70.0287        | 35.5180          | S    |           |                 |           |                  |                |                  | 17 |
| 2  | 175.0713  | 88.0393         |           |                  | 157.0608       | 79.0340          | S    | 1904.9310 | 952.9691        | 1887.9045 | 944.4559         | 1886.9204      | 943.9639         | 16 |
| 3  | 274.1397  | 137.5735        |           |                  | 256.1292       | 128.5682         | V    | 1817.8990 | 909.4531        | 1800.8724 | 900.9399         | 1799.8884      | 900.4478         | 15 |
| 4  | 387.2238  | 194.1155        |           |                  | 369.2132       | 185.1103         | L    | 1718.8306 | 859.9189        | 1701.8040 | 851.4056         | 1700.8200      | 850.9136         | 14 |
| 5  | 500.3079  | 250.6576        |           |                  | 482.2973       | 241.6523         | L    | 1605.7465 | 803.3769        | 1588.7200 | 794.8636         | 1587.7359      | 794.3716         | 13 |
| 6  | 629.3505  | 315.1789        |           |                  | 611.3399       | 306.1736         | E    | 1492.6624 | 746.8349        | 1475.6359 | 738.3216         | 1474.6519      | 737.8296         | 12 |
| 7  | 728.4189  | 364.7131        |           |                  | 710.4083       | 355.7078         | V    | 1363.6198 | 682.3136        | 1346.5933 | 673.8003         | 1345.6093      | 673.3083         | 11 |
| 8  | 856.5138  | 428.7606        | 839.4873  | 420.2473         | 838.5033       | 419.7553         | K    | 1264.5514 | 632.7794        | 1247.5249 | 624.2661         | 1246.5409      | 623.7741         | 10 |
| 9  | 953.5666  | 477.2869        | 936.5401  | 468.7737         | 935.5560       | 468.2817         | P    | 1136.4565 | 568.7319        | 1119.4299 | 560.2186         | 1118.4459      | 559.7266         | 9  |
| 10 | 1139.6459 | 570.3266        | 1122.6194 | 561.8133         | 1121.6354      | 561.3213         | W    | 1039.4037 | 520.2055        | 1022.3772 | 511.6922         | 1021.3931      | 511.2002         | 8  |
| 11 | 1254.6729 | 627.8401        | 1237.6463 | 619.3268         | 1236.6623      | 618.8348         | D    | 853.3244  | 427.1658        | 836.2978  | 418.6526         | 835.3138       | 418.1606         | 7  |
| 12 | 1369.6998 | 685.3535        | 1352.6733 | 676.8403         | 1351.6892      | 676.3483         | D    | 738.2974  | 369.6524        | 721.2709  | 361.1391         | 720.2869       | 360.6471         | 6  |
| 13 | 1498.7424 | 749.8748        | 1481.7159 | 741.3616         | 1480.7318      | 740.8696         | E    | 623.2705  | 312.1389        | 606.2440  | 303.6256         | 605.2599       | 303.1336         | 5  |
| 14 | 1599.7901 | 800.3987        | 1582.7635 | 791.8854         | 1581.7795      | 791.3934         | T    | 494.2279  | 247.6176        | 477.2014  | 239.1043         | 476.2173       | 238.6123         | 4  |
| 15 | 1714.8170 | 857.9121        | 1697.7905 | 849.3989         | 1696.8065      | 848.9069         | D    | 393.1802  | 197.0938        | 376.1537  | 188.5805         | 375.1697       | 188.0885         | 3  |
| 16 | 1845.8575 | 923.4324        | 1828.8310 | 914.9191         | 1827.8469      | 914.4271         | M    | 278.1533  | 139.5803        | 261.1267  | 131.0670         |                |                  | 2  |
| 17 |           |                 |           |                  |                |                  | K    | 147.1128  | 74.0600         | 130.0863  | 65.5468          |                |                  | 1  |



# AT5G12110.1

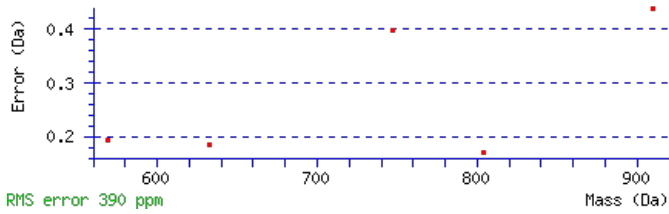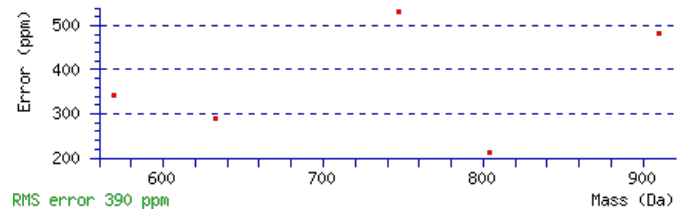

NCBI **BLAST** search of [SSVLEVKPWDEETDMK](#)  
 (Parameters: blastp, nr protein database, expect=20000, no filter, PAM30)  
 Other BLAST [web gateways](#)

## All matches to this query

| Score | Mr(calc)  | Delta   | Sequence                            |
|-------|-----------|---------|-------------------------------------|
| 43.3  | 1990.9558 | -0.0013 | <a href="#">SSVLIDIKPWDEETDMK</a>   |
| 43.3  | 1990.9558 | -0.0013 | <a href="#">SSVLEVKPWDEETDMK</a>    |
| 14.8  | 1990.9497 | 0.0048  | <a href="#">SWNSYIPDGENRVLGER</a>   |
| 11.2  | 1990.9571 | -0.0026 | <a href="#">VFEEHDKSQCSIFPR</a>     |
| 4.8   | 1990.9571 | -0.0026 | <a href="#">MAAISPWLSSPQSFNPR</a>   |
| 3.5   | 1990.9531 | 0.0014  | <a href="#">TAETLAMDYHRGAGVEVR</a>  |
| 2.1   | 1990.9596 | -0.0051 | <a href="#">AAEEDVNSDPSFLGGSKLR</a> |
| 1.4   | 1990.9571 | -0.0026 | <a href="#">ADELQKHEPLVAYYCR</a>    |
| 1.3   | 1990.9564 | -0.0020 | <a href="#">IQEQNTERGCVLEMLR</a>    |
| 0.8   | 1990.9517 | 0.0028  | <a href="#">INQIEEEEDKCKSIK</a>     |

Mascot: <http://www.matrixscience.com/>

## Peptide View

### MS/MS Fragmentation of **DIDANANDLQVESLAR**

Found in **AT5G12140.1** in **TAIR\_Arabidopsis**, Symbols: ATCYS1 | ATCYS1 (A. THALIANA CYSTATIN-1); cysteine protease inhibitor | chr5:3923296-3923937 REVERSE

Match to Query 7907: 1742.843506 from(872.429029,2+) index(6218)

Title: Elution from: 54.367 to 54.367 scan no 7987 cid35.00 polarity:+

Data file D6h-3\_3.mgf

Click mouse within plot area to zoom in by factor of two about that point

Or,   to  Da

Label all possible matches  Label matches used for scoring

Show Y-axis

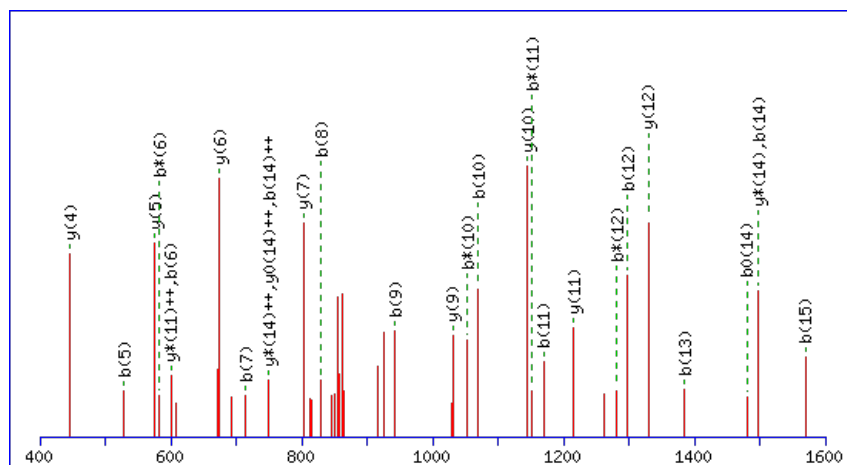

Monoisotopic mass of neutral peptide  $M_r(\text{calc})$ : 1742.8435

Fixed modifications: Carbamidomethyl (C) (apply to specified residues or termini only)

Ions Score: 117 Expect: 8.2e-012

Matches : 29/166 fragment ions using 29 most intense peaks ([help](#))

| #  | b         | b <sup>++</sup> | b*        | b <sup>*++</sup> | b <sup>0</sup> | b <sup>0++</sup> | Seq. | y         | y <sup>++</sup> | y*        | y <sup>*++</sup> | y <sup>0</sup> | y <sup>0++</sup> | #  |
|----|-----------|-----------------|-----------|------------------|----------------|------------------|------|-----------|-----------------|-----------|------------------|----------------|------------------|----|
| 1  | 116.0342  | 58.5207         |           |                  | 98.0237        | 49.5155          | D    |           |                 |           |                  |                |                  | 16 |
| 2  | 229.1183  | 115.0628        |           |                  | 211.1077       | 106.0575         | I    | 1628.8238 | 814.9156        | 1611.7973 | 806.4023         | 1610.8133      | 805.9103         | 15 |
| 3  | 344.1452  | 172.5763        |           |                  | 326.1347       | 163.5710         | D    | 1515.7398 | 758.3735        | 1498.7132 | 749.8603         | 1497.7292      | 749.3682         | 14 |
| 4  | 415.1823  | 208.0948        |           |                  | 397.1718       | 199.0895         | A    | 1400.7128 | 700.8601        | 1383.6863 | 692.3468         | 1382.7023      | 691.8548         | 13 |
| 5  | 529.2253  | 265.1163        | 512.1987  | 256.6030         | 511.2147       | 256.1110         | N    | 1329.6757 | 665.3415        | 1312.6492 | 656.8282         | 1311.6652      | 656.3362         | 12 |
| 6  | 600.2624  | 300.6348        | 583.2358  | 292.1216         | 582.2518       | 291.6295         | A    | 1215.6328 | 608.3200        | 1198.6062 | 599.8068         | 1197.6222      | 599.3148         | 11 |
| 7  | 714.3053  | 357.6563        | 697.2788  | 349.1430         | 696.2947       | 348.6510         | N    | 1144.5957 | 572.8015        | 1127.5691 | 564.2882         | 1126.5851      | 563.7962         | 10 |
| 8  | 829.3323  | 415.1698        | 812.3057  | 406.6565         | 811.3217       | 406.1645         | D    | 1030.5527 | 515.7800        | 1013.5262 | 507.2667         | 1012.5422      | 506.7747         | 9  |
| 9  | 942.4163  | 471.7118        | 925.3898  | 463.1985         | 924.4057       | 462.7065         | L    | 915.5258  | 458.2665        | 898.4993  | 449.7533         | 897.5152       | 449.2613         | 8  |
| 10 | 1070.4749 | 535.7411        | 1053.4483 | 527.2278         | 1052.4643      | 526.7358         | Q    | 802.4417  | 401.7245        | 785.4152  | 393.2112         | 784.4312       | 392.7192         | 7  |
| 11 | 1169.5433 | 585.2753        | 1152.5168 | 576.7620         | 1151.5327      | 576.2700         | V    | 674.3832  | 337.6952        | 657.3566  | 329.1819         | 656.3726       | 328.6899         | 6  |
| 12 | 1298.5859 | 649.7966        | 1281.5594 | 641.2833         | 1280.5753      | 640.7913         | E    | 575.3148  | 288.1610        | 558.2882  | 279.6477         | 557.3042       | 279.1557         | 5  |
| 13 | 1385.6179 | 693.3126        | 1368.5914 | 684.7993         | 1367.6074      | 684.3073         | S    | 446.2722  | 223.6397        | 429.2456  | 215.1264         | 428.2616       | 214.6344         | 4  |
| 14 | 1498.7020 | 749.8546        | 1481.6754 | 741.3414         | 1480.6914      | 740.8494         | L    | 359.2401  | 180.1237        | 342.2136  | 171.6104         |                |                  | 3  |
| 15 | 1569.7391 | 785.3732        | 1552.7126 | 776.8599         | 1551.7285      | 776.3679         | A    | 246.1561  | 123.5817        | 229.1295  | 115.0684         |                |                  | 2  |
| 16 |           |                 |           |                  |                |                  | R    | 175.1190  | 88.0631         | 158.0924  | 79.5498          |                |                  | 1  |

AT5G12140.1

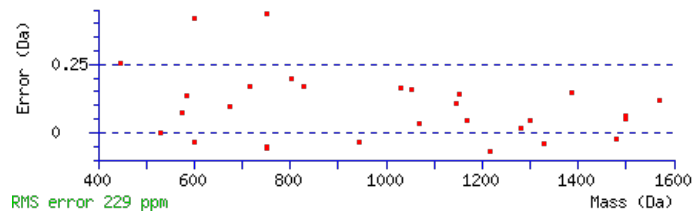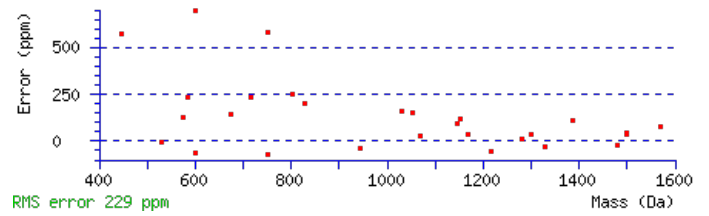

NCBI **BLAST** search of [DIDANANDLQVESLAR](#)

(Parameters: blastp, nr protein database, expect=20000, no filter, PAM30)

Other BLAST [web gateways](#)

**All matches to this query**

| Score | Mr(calc)  | Delta  | Sequence                         |
|-------|-----------|--------|----------------------------------|
| 116.6 | 1742.8435 | 0.0000 | <a href="#">DIDANANDLQVESLAR</a> |

Mascot: <http://www.matrixscience.com/>

**Peptide View**MS/MS Fragmentation of **EVDEQMINVQNK**Found in **AT5G12250.1** in **TAIR\_Arabidopsis**, Symbols: TUB6 | TUB6 (BETA-6 TUBULIN) | chr5:3961318-3962972 REVERSE

Match to Query 6410: 1462.630678 from(732.322615,2+) index(3658)

Title: Elution from: 35.250 to 35.250 scan no 4506 cid35.00 polarity:+

Data file 0-1\_1.mgf

Click mouse within plot area to zoom in by factor of two about that point

Or,  to  Da Label all possible matches  Label matches used for scoring Show Y-axis 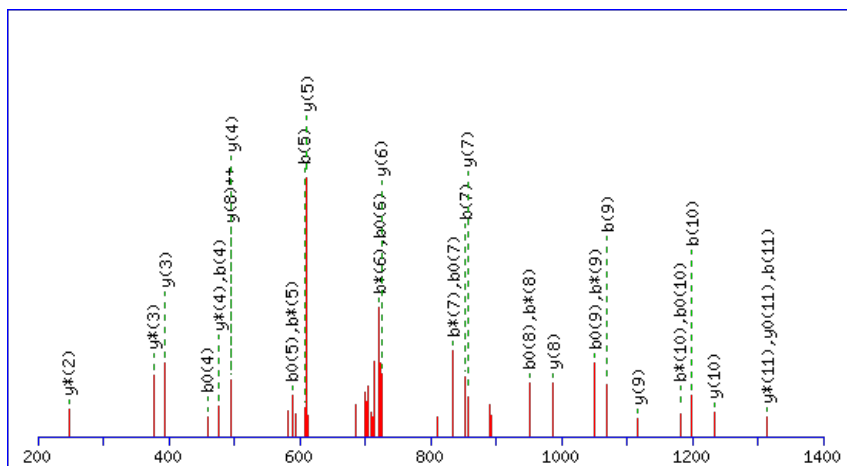Monoisotopic mass of neutral peptide  $M_r(\text{calc})$ : 1462.6316

Fixed modifications: Carbamidomethyl (C) (apply to specified residues or termini only)

Ions Score: 74 Expect: 1.9e-007

Matches : 33/108 fragment ions using 31 most intense peaks ([help](#))

| #  | b         | b <sup>++</sup> | b*        | b <sup>++</sup> * | b <sup>0</sup> | b <sup>0++</sup> | Seq. | y         | y <sup>++</sup> | y*        | y <sup>++</sup> * | y <sup>0</sup> | y <sup>0++</sup> | #  |
|----|-----------|-----------------|-----------|-------------------|----------------|------------------|------|-----------|-----------------|-----------|-------------------|----------------|------------------|----|
| 1  | 131.0469  | 66.0271         |           |                   | 113.0363       | 57.0218          | E    |           |                 |           |                   |                |                  | 12 |
| 2  | 231.1124  | 116.0598        |           |                   | 213.1018       | 107.0545         | V    | 1333.5993 | 667.3033        | 1315.5757 | 658.2915          | 1315.5887      | 658.2980         | 11 |
| 3  | 347.1363  | 174.0718        |           |                   | 329.1258       | 165.0665         | D    | 1233.5338 | 617.2706        | 1215.5103 | 608.2588          | 1215.5233      | 608.2653         | 10 |
| 4  | 477.1760  | 239.0916        |           |                   | 459.1654       | 230.0863         | E    | 1117.5099 | 559.2586        | 1099.4863 | 550.2468          | 1099.4993      | 550.2533         | 9  |
| 5  | 607.2286  | 304.1179        | 589.2050  | 295.1061          | 589.2180       | 295.1127         | Q    | 987.4702  | 494.2388        | 969.4466  | 485.2270          |                |                  | 8  |
| 6  | 739.2661  | 370.1367        | 721.2425  | 361.1249          | 721.2556       | 361.1314         | M    | 857.4176  | 429.2124        | 839.3940  | 420.2006          |                |                  | 7  |
| 7  | 853.3472  | 427.1773        | 835.3236  | 418.1655          | 835.3367       | 418.1720         | I    | 725.3801  | 363.1937        | 707.3565  | 354.1819          |                |                  | 6  |
| 8  | 969.3842  | 485.1957        | 951.3606  | 476.1840          | 951.3737       | 476.1905         | N    | 611.2990  | 306.1531        | 593.2754  | 297.1413          |                |                  | 5  |
| 9  | 1069.4497 | 535.2285        | 1051.4261 | 526.2167          | 1051.4391      | 526.2232         | V    | 495.2620  | 248.1346        | 477.2384  | 239.1228          |                |                  | 4  |
| 10 | 1199.5023 | 600.2548        | 1181.4787 | 591.2430          | 1181.4918      | 591.2495         | Q    | 395.1965  | 198.1019        | 377.1729  | 189.0901          |                |                  | 3  |
| 11 | 1315.5393 | 658.2733        | 1297.5157 | 649.2615          | 1297.5287      | 649.2680         | N    | 265.1439  | 133.0756        | 247.1203  | 124.0638          |                |                  | 2  |
| 12 |           |                 |           |                   |                |                  | K    | 149.1069  | 75.0571         | 131.0833  | 66.0453           |                |                  | 1  |

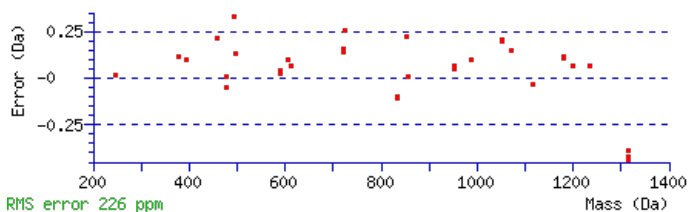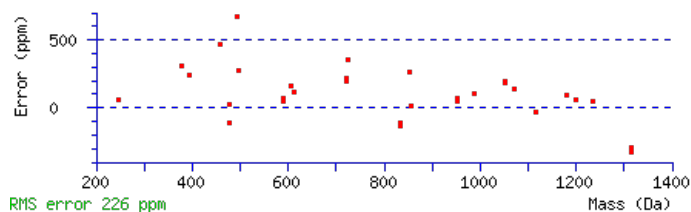NCBI BLAST search of **EVDEQMINVQNK**

(Parameters: blastp, nr protein database, expect=20000, no filter, PAM30)

Other BLAST [web gateways](#)**All matches to this query**

## AT5G12250.1

| Score | Mr(calc)  | Delta   | Sequence                       |
|-------|-----------|---------|--------------------------------|
| 74.1  | 1462.6316 | -0.0009 | <a href="#">EVDEQMINVQNK</a>   |
| 74.1  | 1462.6316 | -0.0009 | <a href="#">EVDEQMLNVQNK</a>   |
| 15.0  | 1462.6265 | 0.0042  | <a href="#">FLGMFSKTMEDK</a>   |
| 9.3   | 1462.6339 | -0.0032 | <a href="#">VYMDPNISVHEK</a>   |
| 5.8   | 1462.6316 | -0.0009 | <a href="#">QLQAVVADDMDNK</a>  |
| 5.3   | 1462.6289 | 0.0017  | <a href="#">DVLEEVCDLTK</a>    |
| 5.0   | 1462.6265 | 0.0042  | <a href="#">FLGMFSKTMEDK</a>   |
| 0.8   | 1462.6269 | 0.0038  | <a href="#">NLHSAAVMGVDGMK</a> |

Mascot: <http://www.matrixscience.com/>

## Peptide View

### MS/MS Fragmentation of TSEAEAVGFIR

Found in **AT5G12420.1** in **TAIR\_Arabidopsis**, Symbols: | similar to unknown protein [Arabidopsis thaliana] (TAIR:AT5G16350.1); similar to unnamed protein product [Vitis vinifera] (GB:CAO48523.1); contains InterPro domain Protein of unknown function UPF0089 (InterPro:IPR004255); contains Inter

Match to Query 3875: 1192.548620 from(597.281586,2+) index(1752)

Title: Elution from: 21.470 to 21.470 scan no 2280 cid35.00 polarity:+

Data file D6h-2\_3.mgf

Click mouse within plot area to zoom in by factor of two about that point

Or,   to  Da

Label all possible matches  Label matches used for scoring

Show Y-axis

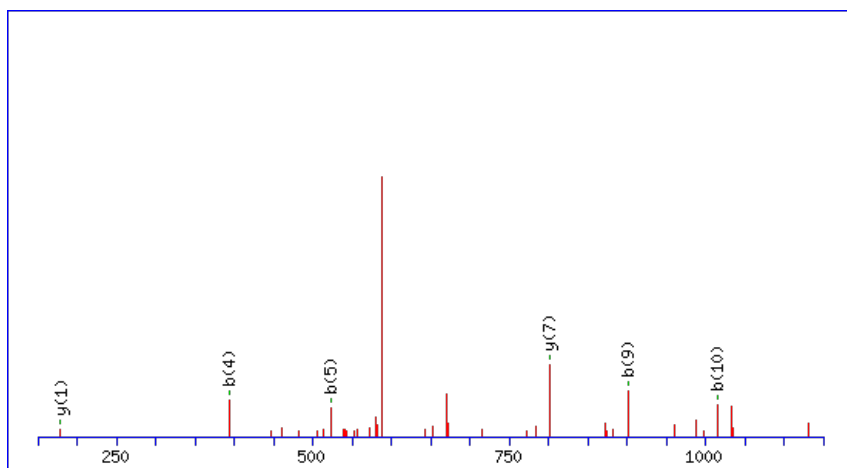

Monoisotopic mass of neutral peptide Mr(calc): 1192.5516

Fixed modifications: Carbamidomethyl (C) (apply to specified residues or termini only)

Ions Score: 30 Expect: 0.011

Matches : 6/88 fragment ions using 9 most intense peaks ([help](#))

| #  | b                | b <sup>++</sup> | b <sup>0</sup> | b <sup>0++</sup> | Seq. | y               | y <sup>++</sup> | y*        | y <sup>*++</sup> | y <sup>0</sup> | y <sup>0++</sup> | #  |
|----|------------------|-----------------|----------------|------------------|------|-----------------|-----------------|-----------|------------------|----------------|------------------|----|
| 1  | 103.0520         | 52.0296         | 85.0414        | 43.0244          | T    |                 |                 |           |                  |                |                  | 11 |
| 2  | 191.0811         | 96.0442         | 173.0705       | 87.0389          | S    | 1091.5142       | 546.2607        | 1073.4906 | 537.2489         | 1073.5036      | 537.2555         | 10 |
| 3  | 321.1207         | 161.0640        | 303.1101       | 152.0587         | E    | 1003.4851       | 502.2462        | 985.4616  | 493.2344         | 985.4746       | 493.2409         | 9  |
| 4  | <b>393.1548</b>  | 197.0811        | 375.1443       | 188.0758         | A    | 873.4455        | 437.2264        | 855.4219  | 428.2146         | 855.4349       | 428.2211         | 8  |
| 5  | <b>523.1945</b>  | 262.1009        | 505.1839       | 253.0956         | E    | <b>801.4114</b> | 401.2093        | 783.3878  | 392.1975         | 783.4008       | 392.2040         | 7  |
| 6  | 595.2286         | 298.1179        | 577.2180       | 289.1127         | A    | 671.3717        | 336.1895        | 653.3482  | 327.1777         |                |                  | 6  |
| 7  | 695.2941         | 348.1507        | 677.2835       | 339.1454         | V    | 599.3376        | 300.1724        | 581.3140  | 291.1606         |                |                  | 5  |
| 8  | 753.3126         | 377.1599        | 735.3020       | 368.1546         | G    | 499.2721        | 250.1397        | 481.2486  | 241.1279         |                |                  | 4  |
| 9  | <b>901.3780</b>  | 451.1926        | 883.3674       | 442.1874         | F    | 441.2536        | 221.1305        | 423.2301  | 212.1187         |                |                  | 3  |
| 10 | <b>1015.4591</b> | 508.2332        | 997.4485       | 499.2279         | I    | 293.1882        | 147.0977        | 275.1646  | 138.0859         |                |                  | 2  |
| 11 |                  |                 |                |                  | R    | <b>179.1071</b> | 90.0572         | 161.0835  | 81.0454          |                |                  | 1  |

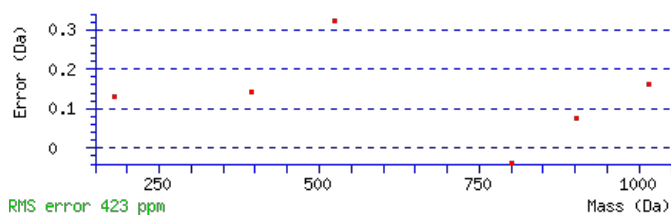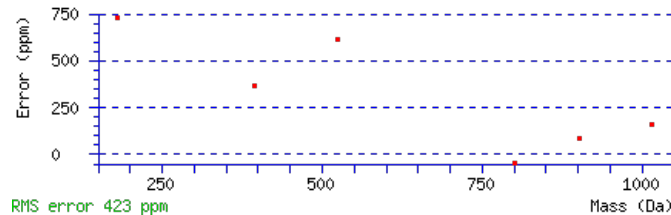

NCBI **BLAST** search of **TSEAEAVGFIR**

(Parameters: blastp, nr protein database, expect=20000, no filter, PAM30)

Other BLAST [web gateways](#)

**AT5G12420.1**

All matches to this query

| Score | Mr(calc)  | Delta   | Sequence                    |
|-------|-----------|---------|-----------------------------|
| 29.5  | 1192.5516 | -0.0030 | <a href="#">TSEAEAVGFIR</a> |
| 17.3  | 1192.5469 | 0.0017  | <a href="#">QAVCGFDLLR</a>  |
| 10.7  | 1192.5469 | 0.0017  | <a href="#">ELNCVQFLR</a>   |
| 6.8   | 1192.5521 | -0.0035 | <a href="#">ASLSPNSRISR</a> |
| 6.7   | 1192.5496 | -0.0010 | <a href="#">SWNRMPTKR</a>   |
| 4.6   | 1192.5469 | 0.0017  | <a href="#">NMAVSWGAKK</a>  |
| 3.8   | 1192.5521 | -0.0035 | <a href="#">KEQSSPTRSR</a>  |
| 3.8   | 1192.5516 | -0.0030 | <a href="#">SVSDKSWDKK</a>  |
| 3.1   | 1192.5516 | -0.0030 | <a href="#">GESYLDVIQR</a>  |
| 3.1   | 1192.5516 | -0.0030 | <a href="#">LSDFSNVLER</a>  |

Mascot: <http://www.matrixscience.com/>

## Peptide View

MS/MS Fragmentation of **IVIGLYGDDVPQTVENFR**

Found in **AT5G13120.1** in **TAIR\_Arabidopsis**, Symbols: | peptidyl-prolyl cis-trans isomerase cyclophilin-type family protein | chr5:4162717-4164723 REVERSE

Match to Query 9464: 2056.973082 from(1029.493817,2+) index(9152)

Title: Elution from: 81.887 to 81.887 scan no 12336 cid35.00 polarity:+

Data file D12h-1\_2.mgf

Click mouse within plot area to zoom in by factor of two about that point

Or,  to  Da

Label all possible matches  Label matches used for scoring

Show Y-axis

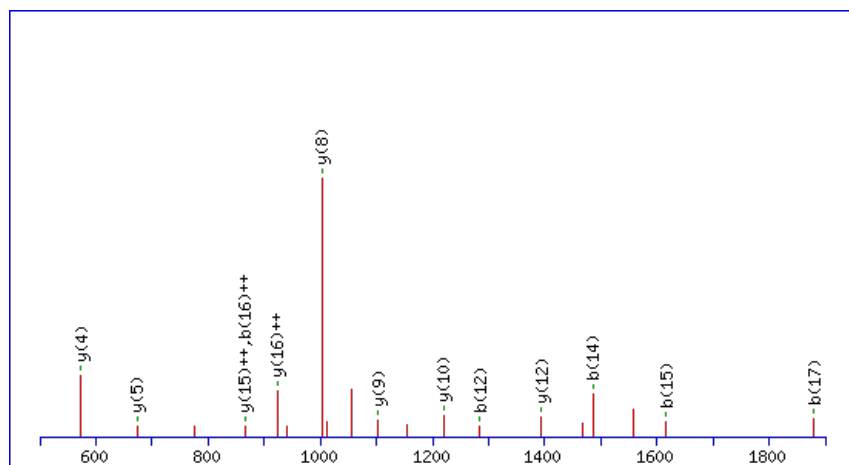

Monoisotopic mass of neutral peptide  $M_r(\text{calc})$ : 2056.9740

Fixed modifications: Carbamidomethyl (C) (apply to specified residues or termini only)

Ions Score: 64 Expect: 3.9e-006

Matches : 13/162 fragment ions using 12 most intense peaks ([help](#))

| #  | b         | b <sup>++</sup> | b*        | b <sup>*++</sup> | b <sup>0</sup> | b <sup>0++</sup> | Seq. | y         | y <sup>++</sup> | y*        | y <sup>*++</sup> | y <sup>0</sup> | y <sup>0++</sup> | #  |
|----|-----------|-----------------|-----------|------------------|----------------|------------------|------|-----------|-----------------|-----------|------------------|----------------|------------------|----|
| 1  | 115.0884  | 58.0478         |           |                  |                |                  | I    |           |                 |           |                  |                |                  | 18 |
| 2  | 215.1538  | 108.0805        |           |                  |                |                  | V    | 1943.9002 | 972.4537        | 1925.8766 | 963.4419         | 1925.8896      | 963.4484         | 17 |
| 3  | 329.2349  | 165.1211        |           |                  |                |                  | I    | 1843.8347 | 922.4210        | 1825.8112 | 913.4092         | 1825.8242      | 913.4157         | 16 |
| 4  | 387.2534  | 194.1303        |           |                  |                |                  | G    | 1729.7536 | 865.3805        | 1711.7301 | 856.3687         | 1711.7431      | 856.3752         | 15 |
| 5  | 501.3345  | 251.1709        |           |                  |                |                  | L    | 1671.7351 | 836.3712        | 1653.7116 | 827.3594         | 1653.7246      | 827.3659         | 14 |
| 6  | 665.3949  | 333.2011        |           |                  |                |                  | Y    | 1557.6540 | 779.3307        | 1539.6305 | 770.3189         | 1539.6435      | 770.3254         | 13 |
| 7  | 723.4134  | 362.2103        |           |                  |                |                  | G    | 1393.5937 | 697.3005        | 1375.5701 | 688.2887         | 1375.5831      | 688.2952         | 12 |
| 8  | 839.4374  | 420.2223        |           |                  | 821.4268       | 411.2170         | D    | 1335.5752 | 668.2912        | 1317.5516 | 659.2794         | 1317.5646      | 659.2859         | 11 |
| 9  | 955.4613  | 478.2343        |           |                  | 937.4508       | 469.2290         | D    | 1219.5512 | 610.2792        | 1201.5276 | 601.2674         | 1201.5406      | 601.2740         | 10 |
| 10 | 1055.5268 | 528.2670        |           |                  | 1037.5162      | 519.2618         | V    | 1103.5272 | 552.2672        | 1085.5036 | 543.2555         | 1085.5167      | 543.2620         | 9  |
| 11 | 1153.5766 | 577.2919        |           |                  | 1135.5660      | 568.2866         | P    | 1003.4618 | 502.2345        | 985.4382  | 493.2227         | 985.4512       | 493.2292         | 8  |
| 12 | 1283.6292 | 642.3183        | 1265.6057 | 633.3065         | 1265.6187      | 633.3130         | Q    | 905.4120  | 453.2096        | 887.3884  | 444.1978         | 887.4014       | 444.2043         | 7  |
| 13 | 1385.6739 | 693.3406        | 1367.6504 | 684.3288         | 1367.6634      | 684.3353         | T    | 775.3593  | 388.1833        | 757.3357  | 379.1715         | 757.3488       | 379.1780         | 6  |
| 14 | 1485.7394 | 743.3733        | 1467.7158 | 734.3615         | 1467.7288      | 734.3681         | V    | 673.3146  | 337.1609        | 655.2910  | 328.1492         | 655.3040       | 328.1557         | 5  |
| 15 | 1615.7790 | 808.3932        | 1597.7554 | 799.3814         | 1597.7685      | 799.3879         | E    | 573.2492  | 287.1282        | 555.2256  | 278.1164         | 555.2386       | 278.1229         | 4  |
| 16 | 1731.8160 | 866.4116        | 1713.7924 | 857.3999         | 1713.8055      | 857.4064         | N    | 443.2095  | 222.1084        | 425.1860  | 213.0966         |                |                  | 3  |
| 17 | 1879.8815 | 940.4444        | 1861.8579 | 931.4326         | 1861.8709      | 931.4391         | F    | 327.1725  | 164.0899        | 309.1490  | 155.0781         |                |                  | 2  |
| 18 |           |                 |           |                  |                |                  | R    | 179.1071  | 90.0572         | 161.0835  | 81.0454          |                |                  | 1  |



AT5G13120.1

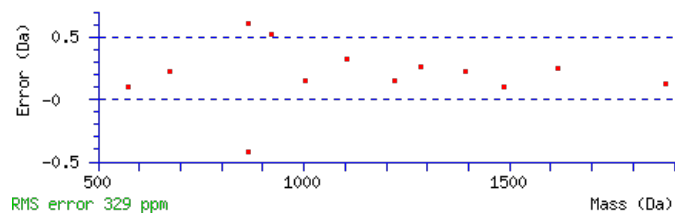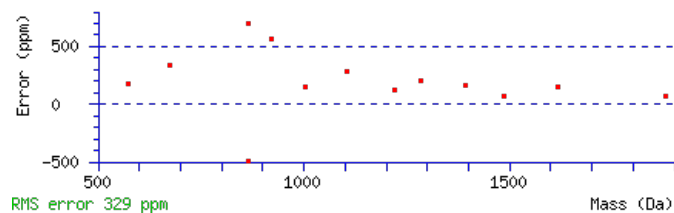

NCBI **BLAST** search of [IVIGLYGDDVPQTVENFR](#)

(Parameters: blastp, nr protein database, expect=20000, no filter, PAM30)

Other BLAST [web gateways](#)

**All matches to this query**

| Score | Mr(calc)  | Delta   | Sequence                             |
|-------|-----------|---------|--------------------------------------|
| 63.7  | 2056.9740 | -0.0009 | <a href="#">IVIGLYGDDVPQTVENFR</a>   |
| 3.0   | 2056.9760 | -0.0029 | <a href="#">AQMMEILNLMLODLKSR</a>    |
| 1.8   | 2056.9740 | -0.0009 | <a href="#">INNSFDQTAIDIAQIFPK</a>   |
| 1.6   | 2056.9767 | -0.0036 | <a href="#">IGAVHSVVFAGFSADSLAQR</a> |
| 1.4   | 2056.9767 | -0.0036 | <a href="#">KLAALADVYYNDAFGTAHR</a>  |
| 0.1   | 2056.9693 | 0.0038  | <a href="#">YASYVAIQGMRIKQDK</a>     |

Mascot: <http://www.matrixscience.com/>

## Peptide View

### MS/MS Fragmentation of **AIHCDILK**

Found in **AT5G13230.1** in **TAIR\_Arabidopsis**, Symbols: | pentatricopeptide (PPR) repeat-containing protein | chr5:4222517-4224985 FORWARD

Match to Query 2354: 980.476796 from(491.245674,2+) index(1984)

Title: Elution from: 24.001 to 24.001 scan no 2575 cid35.00 polarity:+

Data file D12h-3\_1.mgf

Click mouse within plot area to zoom in by factor of two about that point

Or,   to  Da

Label all possible matches  Label matches used for scoring

Show Y-axis

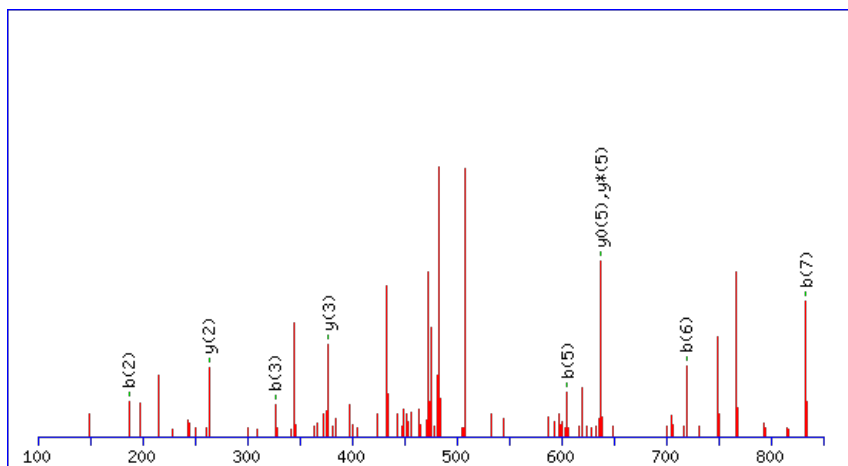

Monoisotopic mass of neutral peptide  $M_r(\text{calc})$ : 980.4758

**Fixed modifications:** Carbamidomethyl (C) (apply to specified residues or termini only)

**Ions Score:** 25 **Expect:** 0.011

**Matches:** 9/56 fragment ions using 21 most intense peaks ([help](#))

| # | b               | b <sup>++</sup> | b <sup>0</sup> | b <sup>0++</sup> | Seq. | y               | y <sup>++</sup> | y*              | y <sup>*++</sup> | y <sup>0</sup>  | y <sup>0++</sup> | # |
|---|-----------------|-----------------|----------------|------------------|------|-----------------|-----------------|-----------------|------------------|-----------------|------------------|---|
| 1 | 73.0414         | 37.0244         |                |                  | A    |                 |                 |                 |                  |                 |                  | 8 |
| 2 | <b>187.1225</b> | 94.0649         |                |                  | I    | 909.4489        | 455.2281        | 891.4253        | 446.2163         | 891.4383        | 446.2228         | 7 |
| 3 | <b>327.1725</b> | 164.0899        |                |                  | H    | 795.3678        | 398.1875        | 777.3442        | 389.1757         | 777.3572        | 389.1822         | 6 |
| 4 | 489.1973        | 245.1023        |                |                  | C    | 655.3178        | 328.1625        | <b>637.2942</b> | 319.1507         | <b>637.3072</b> | 319.1572         | 5 |
| 5 | <b>605.2212</b> | 303.1143        | 587.2107       | 294.1090         | D    | 493.2930        | 247.1502        | 475.2695        | 238.1384         | 475.2825        | 238.1449         | 4 |
| 6 | <b>719.3023</b> | 360.1548        | 701.2918       | 351.1495         | I    | <b>377.2691</b> | 189.1382        | 359.2455        | 180.1264         |                 |                  | 3 |
| 7 | <b>833.3834</b> | 417.1954        | 815.3729       | 408.1901         | L    | <b>263.1880</b> | 132.0976        | 245.1644        | 123.0858         |                 |                  | 2 |
| 8 |                 |                 |                |                  | K    | 149.1069        | 75.0571         | 131.0833        | 66.0453          |                 |                  | 1 |

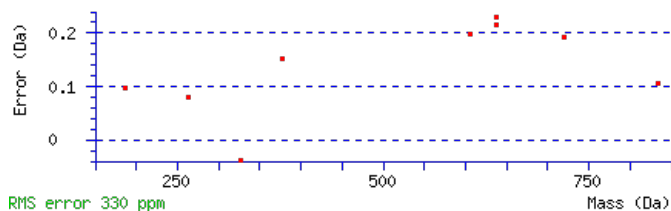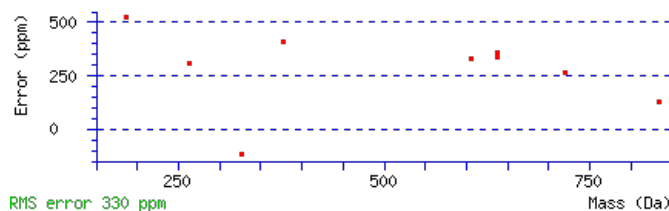

NCBI **BLAST** search of [AIHCDILK](#)

(Parameters: blastp, nr protein database, expect=20000, no filter, PAM30)

Other BLAST [web gateways](#)

### All matches to this query

| Score | $M_r(\text{calc})$ | Delta  | Sequence                 |
|-------|--------------------|--------|--------------------------|
| 25.3  | 980.4758           | 0.0010 | <a href="#">AIHCDILK</a> |
| 21.4  | 980.4758           | 0.0010 | <a href="#">MPPKQPK</a>  |

## AT5G13230.1

|     |          |        |                          |
|-----|----------|--------|--------------------------|
| 6.9 | 980.4758 | 0.0010 | <a href="#">MAIFSRTK</a> |
| 5.5 | 980.4758 | 0.0010 | <a href="#">IIDPVCPR</a> |
| 4.8 | 980.4758 | 0.0010 | <a href="#">MSTARFIK</a> |
| 4.5 | 980.4758 | 0.0010 | <a href="#">NHPTLMIK</a> |
| 0.3 | 980.4758 | 0.0010 | <a href="#">DMYKKLR</a>  |

**Mascot:** <http://www.matrixscience.com/>

**Peptide View**MS/MS Fragmentation of **AISTSNAINDQFR**Found in **AT5G13420.1** in **TAIR\_Arabidopsis**, Symbols: | transaldolase, putative | chr5:4302083-4304215 REVERSE

Match to Query 6586: 1504.627350 from(753.320951,2+) index(2942)

Title: Elution from: 30.110 to 30.110 scan no 3681 cid35.00 polarity:+

Data file C7-3\_1.mgf

Click mouse within plot area to zoom in by factor of two about that point

Or,   to  Da Label all possible matches  Label matches used for scoring Show Y-axis 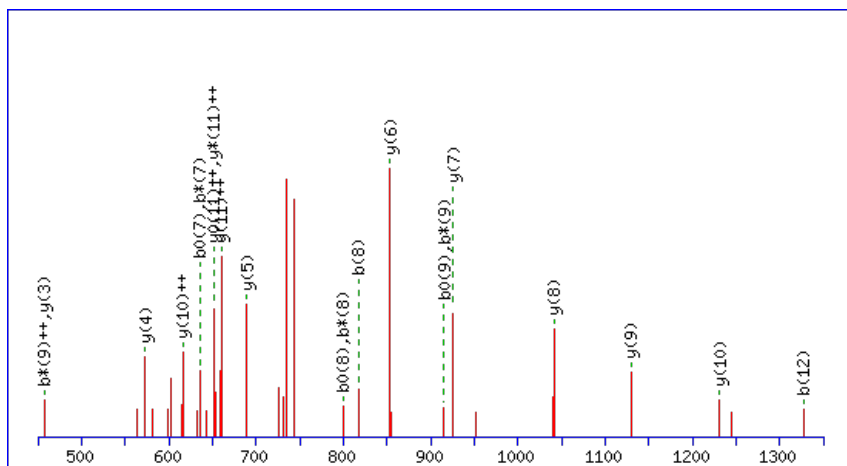Monoisotopic mass of neutral peptide  $M_r(\text{calc})$ : 1504.6285

Fixed modifications: Carbamidomethyl (C) (apply to specified residues or termini only)

Ions Score: 72 Expect: 2.6e-007

Matches : 21/124 fragment ions using 23 most intense peaks ([help](#))

| #  | b         | b <sup>++</sup> | b*        | b <sup>*++</sup> | b <sup>0</sup> | b <sup>0++</sup> | Seq. | y         | y <sup>++</sup> | y*        | y <sup>*++</sup> | y <sup>0</sup> | y <sup>0++</sup> | #  |
|----|-----------|-----------------|-----------|------------------|----------------|------------------|------|-----------|-----------------|-----------|------------------|----------------|------------------|----|
| 1  | 73.0414   | 37.0244         |           |                  |                |                  | A    |           |                 |           |                  |                |                  | 13 |
| 2  | 187.1225  | 94.0649         |           |                  |                |                  | I    | 1433.6016 | 717.3044        | 1415.5780 | 708.2927         | 1415.5910      | 708.2992         | 12 |
| 3  | 275.1516  | 138.0794        |           |                  | 257.1410       | 129.0741         | S    | 1319.5205 | 660.2639        | 1301.4969 | 651.2521         | 1301.5099      | 651.2586         | 11 |
| 4  | 377.1963  | 189.1018        |           |                  | 359.1857       | 180.0965         | T    | 1231.4914 | 616.2494        | 1213.4679 | 607.2376         | 1213.4809      | 607.2441         | 10 |
| 5  | 465.2254  | 233.1163        |           |                  | 447.2148       | 224.1110         | S    | 1129.4467 | 565.2270        | 1111.4232 | 556.2152         | 1111.4362      | 556.2217         | 9  |
| 6  | 581.2624  | 291.1348        | 563.2388  | 282.1230         | 563.2518       | 282.1295         | N    | 1041.4177 | 521.2125        | 1023.3941 | 512.2007         | 1023.4071      | 512.2072         | 8  |
| 7  | 653.2965  | 327.1519        | 635.2729  | 318.1401         | 635.2859       | 318.1466         | A    | 925.3807  | 463.1940        | 907.3571  | 454.1822         | 907.3701       | 454.1887         | 7  |
| 8  | 817.3569  | 409.1821        | 799.3333  | 400.1703         | 799.3463       | 400.1768         | Y    | 853.3465  | 427.1769        | 835.3229  | 418.1651         | 835.3360       | 418.1716         | 6  |
| 9  | 933.3939  | 467.2006        | 915.3703  | 458.1888         | 915.3833       | 458.1953         | N    | 689.2862  | 345.1467        | 671.2626  | 336.1349         | 671.2756       | 336.1414         | 5  |
| 10 | 1049.4178 | 525.2126        | 1031.3943 | 516.2008         | 1031.4073      | 516.2073         | D    | 573.2492  | 287.1282        | 555.2256  | 278.1164         | 555.2386       | 278.1229         | 4  |
| 11 | 1179.4705 | 590.2389        | 1161.4469 | 581.2271         | 1161.4599      | 581.2336         | Q    | 457.2252  | 229.1162        | 439.2016  | 220.1044         |                |                  | 3  |
| 12 | 1327.5359 | 664.2716        | 1309.5124 | 655.2598         | 1309.5254      | 655.2663         | F    | 327.1725  | 164.0899        | 309.1490  | 155.0781         |                |                  | 2  |
| 13 |           |                 |           |                  |                |                  | R    | 179.1071  | 90.0572         | 161.0835  | 81.0454          |                |                  | 1  |

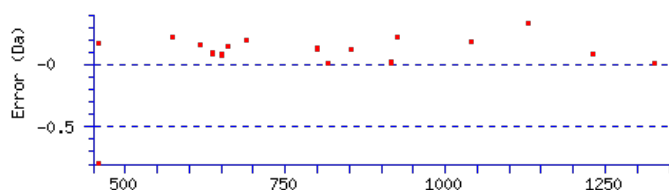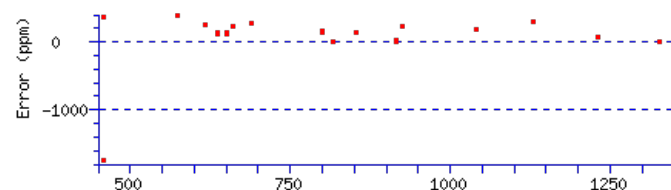NCBI **BLAST** search of **AISTSNAINDQFR**

(Parameters: blastp, nr protein database, expect=20000, no filter, PAM30)

Other BLAST [web gateways](#)

AT5G13420.1

All matches to this query

| Score | Mr(calc)  | Delta   | Sequence                      |
|-------|-----------|---------|-------------------------------|
| 72.0  | 1504.6285 | -0.0011 | <a href="#">AISTSNAYNDQER</a> |

Mascot: <http://www.matrixscience.com/>

### Peptide View

MS/MS Fragmentation of **GPAPYNLEVPTYSFLEENK**

Found in **AT5G13430.1** in **TAIR Arabidopsis**, Symbols: | ubiquinol-cytochrome C reductase iron-sulfur subunit, mitochondrial, putative / Rieske iron-sulfur protein, putative | chr5:4305417-4307402 REVERSE

Match to Query 9713: 2167.043838 from(1084.529195,2+) index(9274)

Title: Elution from: 83.567 to 83.567 scan no 12592 cid35.00 polarity:+

Data file 0-3\_2.mgf

Click mouse within plot area to zoom in by factor of two about that point

Or,   to  Da

Label all possible matches  Label matches used for scoring

Show Y-axis

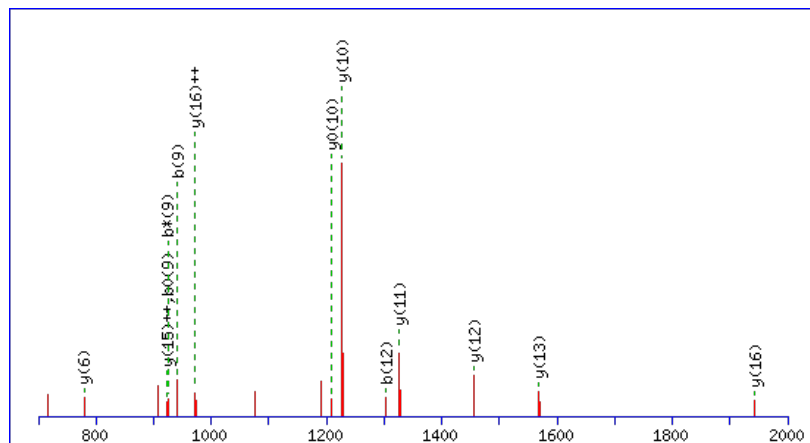

Monoisotopic mass of neutral peptide  $M_r(\text{calc})$ : 2167.0473

Fixed modifications: Carbamidomethyl (C) (apply to specified residues or termini only)

Ions Score: 33 Expect: 0.0018

Matches : 13/188 fragment ions using 22 most intense peaks ([help](#))

| #  | b                | b <sup>++</sup> | b <sup>*</sup>  | b <sup>*++</sup> | b <sup>0</sup>  | b <sup>0++</sup> | Seq | y                | y <sup>++</sup> | y <sup>*</sup> | y <sup>*++</sup> | y <sup>0</sup>   | y <sup>0++</sup> | #  |
|----|------------------|-----------------|-----------------|------------------|-----------------|------------------|-----|------------------|-----------------|----------------|------------------|------------------|------------------|----|
| 1  | 58.0287          | 29.5180         |                 |                  |                 |                  | G   |                  |                 |                |                  |                  |                  | 19 |
| 2  | 155.0815         | 78.0444         |                 |                  |                 |                  | P   | 2111.0332        | 1056.0202       | 2094.0066      | 1047.5069        | 2093.0226        | 1047.0149        | 18 |
| 3  | 226.1186         | 113.5629        |                 |                  |                 |                  | A   | 2013.9804        | 1007.4938       | 1996.9539      | 998.9806         | 1995.9698        | 998.4886         | 17 |
| 4  | 323.1714         | 162.0893        |                 |                  |                 |                  | P   | <b>1942.9433</b> | <b>971.9753</b> | 1925.9167      | 963.4620         | 1924.9327        | 962.9700         | 16 |
| 5  | 486.2347         | 243.6210        |                 |                  |                 |                  | Y   | 1845.8905        | <b>923.4489</b> | 1828.8640      | 914.9356         | 1827.8800        | 914.4436         | 15 |
| 6  | 600.2776         | 300.6425        | 583.2511        | 292.1292         |                 |                  | N   | 1682.8272        | 841.9172        | 1665.8006      | 833.4040         | 1664.8166        | 832.9120         | 14 |
| 7  | 713.3617         | 357.1845        | 696.3352        | 348.6712         |                 |                  | L   | <b>1568.7843</b> | 784.8958        | 1551.7577      | 776.3825         | 1550.7737        | 775.8905         | 13 |
| 8  | 842.4043         | 421.7058        | 825.3777        | 413.1925         | 824.3937        | 412.7005         | E   | <b>1455.7002</b> | 728.3537        | 1438.6737      | 719.8405         | 1437.6896        | 719.3485         | 12 |
| 9  | <b>941.4727</b>  | 471.2400        | <b>924.4462</b> | 462.7267         | <b>923.4621</b> | 462.2347         | V   | <b>1326.6576</b> | 663.8324        | 1309.6311      | 655.3192         | 1308.6470        | 654.8272         | 11 |
| 10 | 1038.5255        | 519.7664        | 1021.4989       | 511.2531         | 1020.5149       | 510.7611         | P   | <b>1227.5892</b> | 614.2982        | 1210.5626      | 605.7850         | <b>1209.5786</b> | 605.2930         | 10 |
| 11 | 1139.5732        | 570.2902        | 1122.5466       | 561.7769         | 1121.5626       | 561.2849         | T   | 1130.5364        | 565.7719        | 1113.5099      | 557.2586         | 1112.5259        | 556.7666         | 9  |
| 12 | <b>1302.6365</b> | 651.8219        | 1285.6099       | 643.3086         | 1284.6259       | 642.8166         | Y   | 1029.4888        | 515.2480        | 1012.4622      | 506.7347         | 1011.4782        | 506.2427         | 8  |
| 13 | 1389.6685        | 695.3379        | 1372.6420       | 686.8246         | 1371.6579       | 686.3326         | S   | 866.4254         | 433.7163        | 849.3989       | 425.2031         | 848.4149         | 424.7111         | 7  |
| 14 | 1536.7369        | 768.8721        | 1519.7104       | 760.3588         | 1518.7264       | 759.8668         | F   | <b>779.3934</b>  | 390.2003        | 762.3668       | 381.6871         | 761.3828         | 381.1951         | 6  |
| 15 | 1649.8210        | 825.4141        | 1632.7944       | 816.9009         | 1631.8104       | 816.4088         | L   | 632.3250         | 316.6661        | 615.2984       | 308.1529         | 614.3144         | 307.6608         | 5  |
| 16 | 1778.8636        | 889.9354        | 1761.8370       | 881.4222         | 1760.8530       | 880.9301         | E   | 519.2409         | 260.1241        | 502.2144       | 251.6108         | 501.2304         | 251.1188         | 4  |
| 17 | 1907.9062        | 954.4567        | 1890.8796       | 945.9435         | 1889.8956       | 945.4514         | E   | 390.1983         | 195.6028        | 373.1718       | 187.0895         | 372.1878         | 186.5975         | 3  |
| 18 | 2021.9491        | 1011.4782       | 2004.9226       | 1002.9649        | 2003.9385       | 1002.4729        | N   | 261.1557         | 131.0815        | 244.1292       | 122.5682         |                  |                  | 2  |
| 19 |                  |                 |                 |                  |                 |                  | K   | 147.1128         | 74.0600         | 130.0863       | 65.5468          |                  |                  | 1  |

# AT5G13430.1

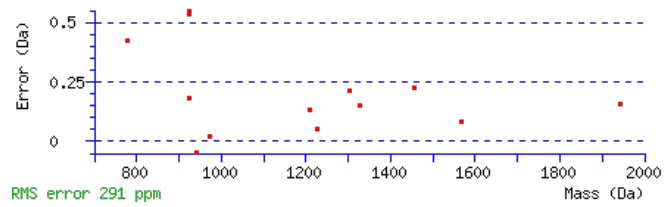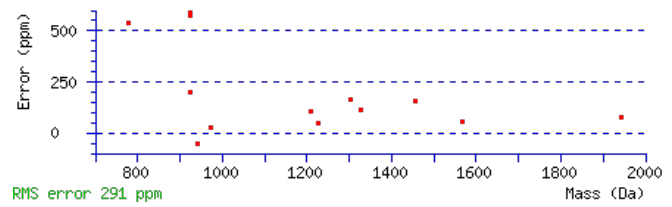

NCBI **BLAST** search of [GPAPYNLEVPTYSFLEENK](#)  
(Parameters: blastp, nr protein database, expect=20000, no filter, PAM30)  
Other BLAST [web gateways](#)

## All matches to this query

| Score | Mr(calc)  | Delta   | Sequence                            |
|-------|-----------|---------|-------------------------------------|
| 32.8  | 2167.0473 | -0.0035 | <a href="#">GPAPYNLEVPTYSFLEENK</a> |
| 6.9   | 2167.0480 | -0.0042 | <a href="#">SSIPTNLAWQEMFRSASSR</a> |

Mascot: <http://www.matrixscience.com/>

**Peptide View**MS/MS Fragmentation of **LANSVDVGLRDPQEDSVR**Found in **AT5G13440.1** in **TAIR\_Arabidopsis**, Symbols: | ubiquinol-cytochrome C reductase iron-sulfur subunit, mitochondrial, putative / Rieske iron-sulfur protein, putative | chr5:4308434-4310025 REVERSE

Match to Query 9046: 2056.015035 from(686.345621,3+) index(3898)

Title: Elution from: 37.882 to 37.882 scan no 5003 cid35.00 polarity:+

Data file D1d-2\_3.mgf

Click mouse within plot area to zoom in by factor of two about that point

Or,   to  Da Label all possible matches  Label matches used for scoring Show Y-axis 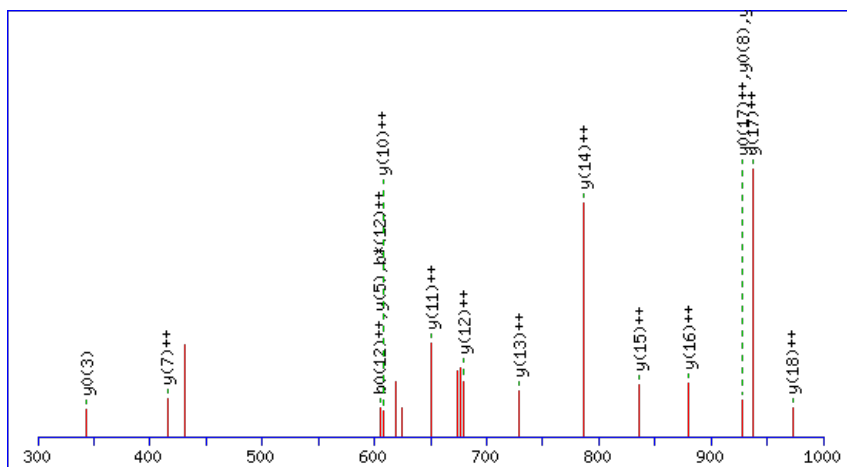Monoisotopic mass of neutral peptide  $M_r(\text{calc})$ : 2056.0185

Fixed modifications: Carbamidomethyl (C) (apply to specified residues or termini only)

Ions Score: 69 Expect: 5.2e-007

Matches : 18/202 fragment ions using 18 most intense peaks ([help](#))

| #  | b         | b <sup>++</sup> | b*        | b <sup>*++</sup> | b <sup>0</sup> | b <sup>0++</sup> | Seq. | y         | y <sup>++</sup> | y*        | y <sup>*++</sup> | y <sup>0</sup> | y <sup>0++</sup> | #  |
|----|-----------|-----------------|-----------|------------------|----------------|------------------|------|-----------|-----------------|-----------|------------------|----------------|------------------|----|
| 1  | 114.0913  | 57.5493         |           |                  |                |                  | L    |           |                 |           |                  |                |                  | 19 |
| 2  | 185.1285  | 93.0679         |           |                  |                |                  | A    | 1943.9417 | 972.4745        | 1926.9152 | 963.9612         | 1925.9312      | 963.4692         | 18 |
| 3  | 299.1714  | 150.0893        | 282.1448  | 141.5761         |                |                  | N    | 1872.9046 | 936.9559        | 1855.8781 | 928.4427         | 1854.8940      | 927.9507         | 17 |
| 4  | 386.2034  | 193.6053        | 369.1769  | 185.0921         | 368.1928       | 184.6001         | S    | 1758.8617 | 879.9345        | 1741.8351 | 871.4212         | 1740.8511      | 870.9292         | 16 |
| 5  | 485.2718  | 243.1395        | 468.2453  | 234.6263         | 467.2613       | 234.1343         | V    | 1671.8297 | 836.4185        | 1654.8031 | 827.9052         | 1653.8191      | 827.4132         | 15 |
| 6  | 600.2988  | 300.6530        | 583.2722  | 292.1397         | 582.2882       | 291.6477         | D    | 1572.7612 | 786.8843        | 1555.7347 | 778.3710         | 1554.7507      | 777.8790         | 14 |
| 7  | 699.3672  | 350.1872        | 682.3406  | 341.6740         | 681.3566       | 341.1819         | V    | 1457.7343 | 729.3708        | 1440.7077 | 720.8575         | 1439.7237      | 720.3655         | 13 |
| 8  | 756.3886  | 378.6980        | 739.3621  | 370.1847         | 738.3781       | 369.6927         | G    | 1358.6659 | 679.8366        | 1341.6393 | 671.3233         | 1340.6553      | 670.8313         | 12 |
| 9  | 843.4207  | 422.2140        | 826.3941  | 413.7007         | 825.4101       | 413.2087         | S    | 1301.6444 | 651.3258        | 1284.6179 | 642.8126         | 1283.6339      | 642.3206         | 11 |
| 10 | 956.5047  | 478.7560        | 939.4782  | 470.2427         | 938.4942       | 469.7507         | L    | 1214.6124 | 607.8098        | 1197.5858 | 599.2966         | 1196.6018      | 598.8046         | 10 |
| 11 | 1112.6058 | 556.8066        | 1095.5793 | 548.2933         | 1094.5953      | 547.8013         | R    | 1101.5283 | 551.2678        | 1084.5018 | 542.7545         | 1083.5178      | 542.2625         | 9  |
| 12 | 1227.6328 | 614.3200        | 1210.6062 | 605.8068         | 1209.6222      | 605.3148         | D    | 945.4272  | 473.2172        | 928.4007  | 464.7040         | 927.4167       | 464.2120         | 8  |
| 13 | 1324.6856 | 662.8464        | 1307.6590 | 654.3331         | 1306.6750      | 653.8411         | P    | 830.4003  | 415.7038        | 813.3737  | 407.1905         | 812.3897       | 406.6985         | 7  |
| 14 | 1452.7441 | 726.8757        | 1435.7176 | 718.3624         | 1434.7336      | 717.8704         | Q    | 733.3475  | 367.1774        | 716.3210  | 358.6641         | 715.3369       | 358.1721         | 6  |
| 15 | 1581.7867 | 791.3970        | 1564.7602 | 782.8837         | 1563.7762      | 782.3917         | E    | 605.2889  | 303.1481        | 588.2624  | 294.6348         | 587.2784       | 294.1428         | 5  |
| 16 | 1696.8137 | 848.9105        | 1679.7871 | 840.3972         | 1678.8031      | 839.9052         | D    | 476.2463  | 238.6268        | 459.2198  | 230.1135         | 458.2358       | 229.6215         | 4  |
| 17 | 1783.8457 | 892.4265        | 1766.8191 | 883.9132         | 1765.8351      | 883.4212         | S    | 361.2194  | 181.1133        | 344.1928  | 172.6001         | 343.2088       | 172.1081         | 3  |
| 18 | 1882.9141 | 941.9607        | 1865.8876 | 933.4474         | 1864.9035      | 932.9554         | V    | 274.1874  | 137.5973        | 257.1608  | 129.0840         |                |                  | 2  |
| 19 |           |                 |           |                  |                |                  | R    | 175.1190  | 88.0631         | 158.0924  | 79.5498          |                |                  | 1  |



AT5G13440.1

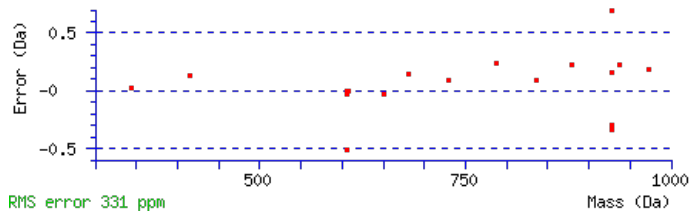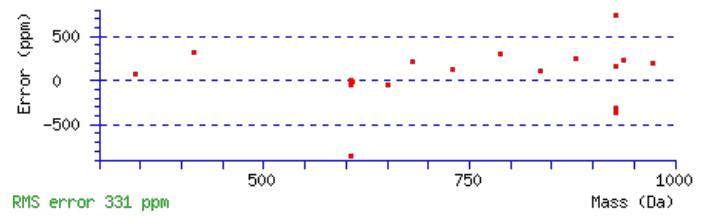

NCBI **BLAST** search of [LANSVDVGSLRDPQEDSVR](#)  
(Parameters: blastp, nr protein database, expect=20000, no filter, PAM30)  
Other BLAST [web gateways](#)

**All matches to this query**

| Score | Mr(calc)  | Delta   | Sequence                            |
|-------|-----------|---------|-------------------------------------|
| 69.0  | 2056.0185 | -0.0035 | <a href="#">LANSVDVGSLRDPQEDSVR</a> |
| 1.2   | 2056.0185 | -0.0035 | <a href="#">QTRVPSETEQKSTEPSPR</a>  |

Mascot: <http://www.matrixscience.com/>

**Peptide View**MS/MS Fragmentation of **VLDMSIR**

Found in **AT5G13450.1** in **TAIR\_Arabidopsis**, Symbols: | ATP synthase delta chain, mitochondrial, putative / H(+)-transporting two-sector ATPase, delta (OSCP) subunit, putative | chr5:4310561-4311944 REVERSE

Match to Query 1159: 832.446494 from(417.230523,2+) index(3587)

Title: Elution from: 35.339 to 35.339 scan no 4537 cid35.00 polarity:+

Data file 0-1\_2.mgf

Click mouse within plot area to zoom in by factor of two about that point

Or,   to  Da

Label all possible matches  Label matches used for scoring

Show Y-axis

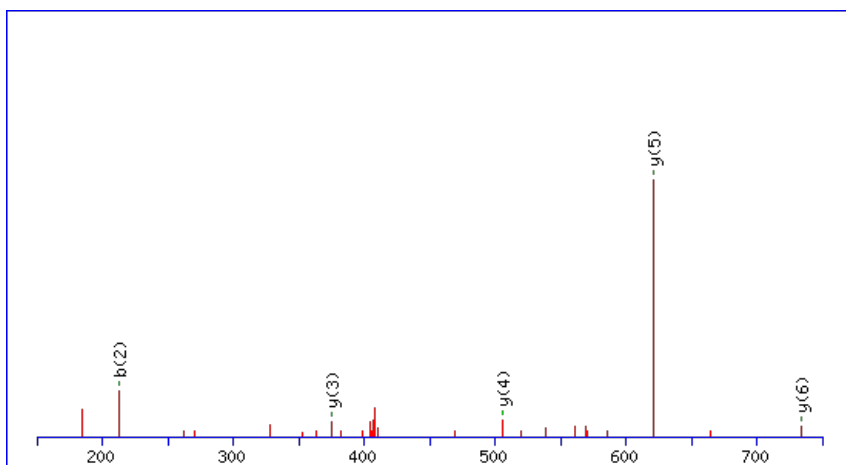

**Monoisotopic mass of neutral peptide Mr(calc):** 832.4477

**Fixed modifications:** Carbamidomethyl (C) (apply to specified residues or termini only)

**Ions Score:** 36 **Expect:** 0.0021

**Matches:** 5/52 fragment ions using 6 most intense peaks ([help](#))

| # | b        | b <sup>++</sup> | b <sup>0</sup> | b <sup>0++</sup> | Seq. | y        | y <sup>++</sup> | y*       | y <sup>*++</sup> | y <sup>0</sup> | y <sup>0++</sup> | # |
|---|----------|-----------------|----------------|------------------|------|----------|-----------------|----------|------------------|----------------|------------------|---|
| 1 | 100.0757 | 50.5415         |                |                  | V    |          |                 |          |                  |                |                  | 7 |
| 2 | 213.1598 | 107.0835        |                |                  | L    | 734.3865 | 367.6969        | 717.3600 | 359.1836         | 716.3760       | 358.6916         | 6 |
| 3 | 328.1867 | 164.5970        | 310.1761       | 155.5917         | D    | 621.3025 | 311.1549        | 604.2759 | 302.6416         | 603.2919       | 302.1496         | 5 |
| 4 | 459.2272 | 230.1172        | 441.2166       | 221.1119         | M    | 506.2755 | 253.6414        | 489.2490 | 245.1281         | 488.2650       | 244.6361         | 4 |
| 5 | 546.2592 | 273.6332        | 528.2486       | 264.6280         | S    | 375.2350 | 188.1212        | 358.2085 | 179.6079         | 357.2245       | 179.1159         | 3 |
| 6 | 659.3433 | 330.1753        | 641.3327       | 321.1700         | I    | 288.2030 | 144.6051        | 271.1765 | 136.0919         |                |                  | 2 |
| 7 |          |                 |                |                  | R    | 175.1190 | 88.0631         | 158.0924 | 79.5498          |                |                  | 1 |

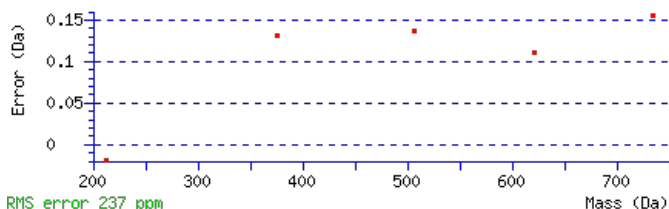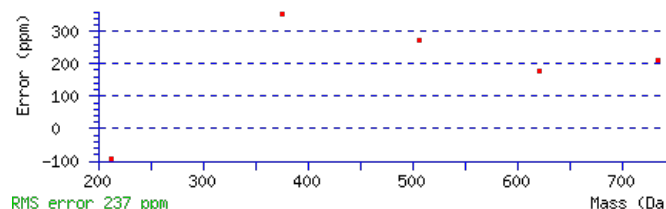

NCBI **BLAST** search of [VLDMSIR](#)

(Parameters: blastp, nr protein database, expect=20000, no filter, PAM30)

Other BLAST [web gateways](#)

**All matches to this query**

| Score | Mr(calc) | Delta   | Sequence                |
|-------|----------|---------|-------------------------|
| 36.1  | 832.4477 | -0.0012 | <a href="#">VLDMSIR</a> |
| 10.4  | 832.4443 | 0.0022  | <a href="#">IVDPAYR</a> |

## AT5G13450.1

|      |          |         |                          |
|------|----------|---------|--------------------------|
| 10.4 | 832.4477 | -0.0012 | <a href="#">IVDSLMR</a>  |
| 10.2 | 832.4477 | -0.0012 | <a href="#">VISDIMR</a>  |
| 10.2 | 832.4477 | -0.0012 | <a href="#">VLMEAVR</a>  |
| 6.9  | 832.4477 | -0.0012 | <a href="#">IVVNGGMK</a> |
| 2.3  | 832.4477 | -0.0012 | <a href="#">VVEMLAR</a>  |

**Mascot:** <http://www.matrixscience.com/>

### Peptide View

#### MS/MS Fragmentation of ELTETLQEIHGAGK

Found in **AT5G13450.2** in **TAIR\_Arabidopsis**, Symbols: | ATP synthase delta chain, mitochondrial, putative / H(+)-transporting two-sector ATPase, delta (OSCP) subunit, putative | chr5:4310561-4311944 REVERSE

Match to Query 6037: 1516.753260 from(759.383906,2+) index(9085)

Title: Elution from: 85.464 to 85.464 scan no 12524 cid35.00 polarity:+

Data file D12h-2\_2.mgf

Click mouse within plot area to zoom in by factor of two about that point

Or,   to  Da

Label all possible matches  Label matches used for scoring

Show Y-axis

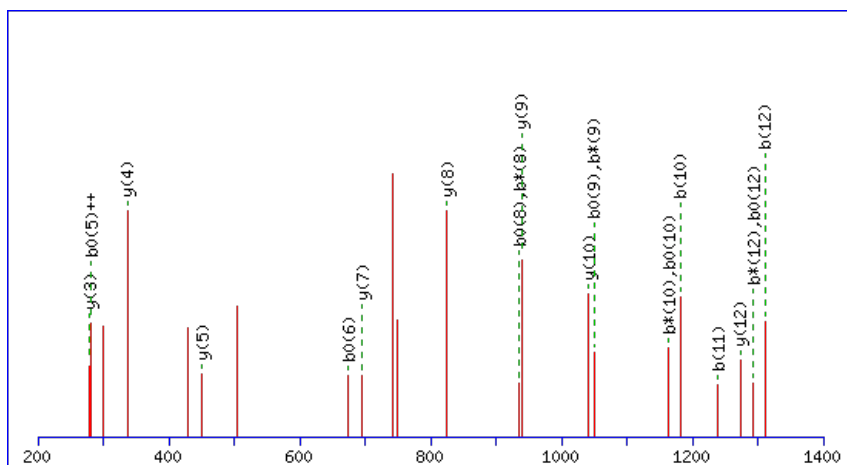

Monoisotopic mass of neutral peptide  $M_r(\text{calc})$ : 1516.7561

Fixed modifications: Carbamidomethyl (C) (apply to specified residues or termini only)

Ions Score: 69 Expect: 7e-007

Matches : 21/132 fragment ions using 23 most intense peaks ([help](#))

| #  | b                | b <sup>++</sup> | b*               | b <sup>*++</sup> | b <sup>0</sup>   | b <sup>0++</sup> | Seq. | y                | y <sup>++</sup> | y*        | y <sup>*++</sup> | y <sup>0</sup> | y <sup>0++</sup> | #  |
|----|------------------|-----------------|------------------|------------------|------------------|------------------|------|------------------|-----------------|-----------|------------------|----------------|------------------|----|
| 1  | 131.0469         | 66.0271         |                  |                  | 113.0363         | 57.0218          | E    |                  |                 |           |                  |                |                  | 14 |
| 2  | 245.1280         | 123.0676        |                  |                  | 227.1174         | 114.0624         | L    | 1387.7237        | 694.3655        | 1369.7002 | 685.3537         | 1369.7132      | 685.3602         | 13 |
| 3  | 347.1727         | 174.0900        |                  |                  | 329.1622         | 165.0847         | T    | <b>1273.6426</b> | 637.3250        | 1255.6191 | 628.3132         | 1255.6321      | 628.3197         | 12 |
| 4  | 477.2123         | 239.1098        |                  |                  | 459.2018         | 230.1045         | E    | 1171.5979        | 586.3026        | 1153.5744 | 577.2908         | 1153.5874      | 577.2973         | 11 |
| 5  | 579.2571         | 290.1322        |                  |                  | 561.2465         | <b>281.1269</b>  | T    | <b>1041.5583</b> | 521.2828        | 1023.5347 | 512.2710         | 1023.5477      | 512.2775         | 10 |
| 6  | 693.3382         | 347.1727        |                  |                  | <b>675.3276</b>  | 338.1674         | L    | <b>939.5136</b>  | 470.2604        | 921.4900  | 461.2486         | 921.5030       | 461.2552         | 9  |
| 7  | 823.3908         | 412.1990        | 805.3672         | 403.1872         | 805.3802         | 403.1938         | Q    | <b>825.4325</b>  | 413.2199        | 807.4089  | 404.2081         | 807.4219       | 404.2146         | 8  |
| 8  | 953.4304         | 477.2189        | <b>935.4068</b>  | 468.2071         | <b>935.4199</b>  | 468.2136         | E    | <b>695.3798</b>  | 348.1936        | 677.3563  | 339.1818         | 677.3693       | 339.1883         | 7  |
| 9  | 1067.5115        | 534.2594        | <b>1049.4879</b> | 525.2476         | <b>1049.5010</b> | 525.2541         | I    | 565.3402         | 283.1737        | 547.3166  | 274.1620         |                |                  | 6  |
| 10 | <b>1181.5926</b> | 591.3000        | <b>1163.5690</b> | 582.2882         | <b>1163.5821</b> | 582.2947         | I    | <b>451.2591</b>  | 226.1332        | 433.2355  | 217.1214         |                |                  | 5  |
| 11 | <b>1239.6111</b> | 620.3092        | 1221.5875        | 611.2974         | 1221.6006        | 611.3039         | G    | <b>337.1780</b>  | 169.0926        | 319.1544  | 160.0809         |                |                  | 4  |
| 12 | <b>1311.6453</b> | 656.3263        | <b>1293.6217</b> | 647.3145         | <b>1293.6347</b> | 647.3210         | A    | <b>279.1595</b>  | 140.0834        | 261.1359  | 131.0716         |                |                  | 3  |
| 13 | 1369.6638        | 685.3355        | 1351.6402        | 676.3237         | 1351.6532        | 676.3302         | G    | 207.1254         | 104.0663        | 189.1018  | 95.0545          |                |                  | 2  |
| 14 |                  |                 |                  |                  |                  |                  | K    | 149.1069         | 75.0571         | 131.0833  | 66.0453          |                |                  | 1  |

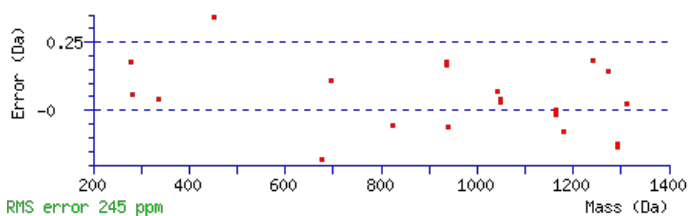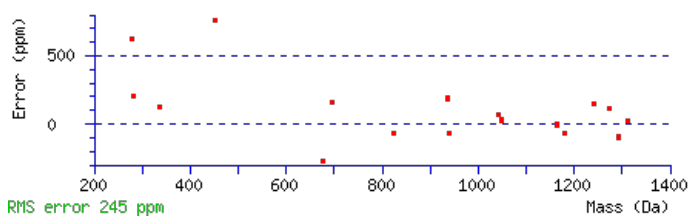

NCBI BLAST search of [ELTETLQEIHGAGK](#)

## AT5G13450.2

(Parameters: blastp, nr protein database, expect=20000, no filter, PAM30)

Other BLAST [web gateways](#)

### All matches to this query

| Score | Mr(calc)  | Delta   | Sequence                       |
|-------|-----------|---------|--------------------------------|
| 69.1  | 1516.7561 | -0.0028 | <a href="#">ELTETLQEIIGAGK</a> |
| 1.9   | 1516.7529 | 0.0004  | <a href="#">VLLYKLHHYQNA</a>   |
| 0.7   | 1516.7502 | 0.0030  | <a href="#">FTIALYEAENGKK</a>  |

Mascot: <http://www.matrixscience.com/>

## Peptide View

MS/MS Fragmentation of **KLENNDFAGAVFEGK**

Found in **AT5G13510.1** in **TAIR\_Arabidopsis**, Symbols: | ribosomal protein L10 family protein | chr5:4341297-4341959 FORWARD

Match to Query 7025: 1637.803197 from(546.941675,3+) index(4764)

Title: Elution from: 46.869 to 46.869 scan no 6132 cid35.00 polarity:+

Data file D1d-1-2.mgf

Click mouse within plot area to zoom in by factor of two about that point

Or,   to  Da

Label all possible matches  Label matches used for scoring

Show Y-axis

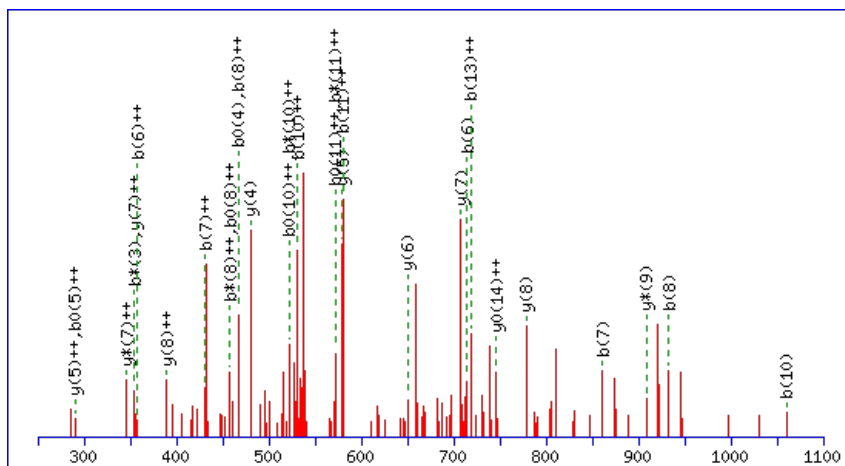

Monoisotopic mass of neutral peptide  $M_r(\text{calc})$ : 1637.8049

Fixed modifications: Carbamidomethyl (C) (apply to specified residues or termini only)

Ions Score: 33 Expect: 0.0017

Matches : 31/160 fragment ions using 45 most intense peaks ([help](#))

| #  | b                | b <sup>++</sup> | b <sup>*</sup>  | b <sup>*++</sup> | b <sup>0</sup>  | b <sup>0++</sup> | Seq.     | y               | y <sup>++</sup> | y <sup>*</sup>  | y <sup>*++</sup> | y <sup>0</sup> | y <sup>0++</sup> | #         |
|----|------------------|-----------------|-----------------|------------------|-----------------|------------------|----------|-----------------|-----------------|-----------------|------------------|----------------|------------------|-----------|
| 1  | 129.1022         | 65.0548         | 112.0757        | 56.5415          |                 |                  | <b>K</b> |                 |                 |                 |                  |                |                  | <b>15</b> |
| 2  | 242.1863         | 121.5968        | 225.1598        | 113.0835         |                 |                  | <b>L</b> | 1510.7172       | 755.8623        | 1493.6907       | 747.3490         | 1492.7067      | <b>746.8570</b>  | <b>14</b> |
| 3  | 371.2289         | 186.1181        | <b>354.2023</b> | 177.6048         | 353.2183        | 177.1128         | <b>E</b> | 1397.6332       | 699.3202        | 1380.6066       | 690.8070         | 1379.6226      | 690.3149         | <b>13</b> |
| 4  | 485.2718         | 243.1395        | 468.2453        | 234.6263         | <b>467.2613</b> | 234.1343         | <b>N</b> | 1268.5906       | 634.7989        | 1251.5640       | 626.2857         | 1250.5800      | 625.7937         | <b>12</b> |
| 5  | 599.3148         | 300.1610        | 582.2882        | 291.6477         | 581.3042        | <b>291.1557</b>  | <b>N</b> | 1154.5477       | 577.7775        | 1137.5211       | 569.2642         | 1136.5371      | 568.7722         | <b>11</b> |
| 6  | <b>714.3417</b>  | <b>357.6745</b> | 697.3151        | 349.1612         | 696.3311        | 348.6692         | <b>D</b> | 1040.5047       | 520.7560        | 1023.4782       | 512.2427         | 1022.4942      | 511.7507         | <b>10</b> |
| 7  | <b>861.4101</b>  | <b>431.2087</b> | 844.3836        | 422.6954         | 843.3995        | 422.2034         | <b>F</b> | 925.4778        | 463.2425        | <b>908.4512</b> | 454.7293         | 907.4672       | 454.2373         | <b>9</b>  |
| 8  | <b>932.4472</b>  | <b>466.7272</b> | 915.4207        | <b>458.2140</b>  | 914.4367        | <b>457.7220</b>  | <b>A</b> | <b>778.4094</b> | <b>389.7083</b> | 761.3828        | 381.1951         | 760.3988       | 380.7030         | <b>8</b>  |
| 9  | 989.4687         | 495.2380        | 972.4421        | 486.7247         | 971.4581        | 486.2327         | <b>G</b> | <b>707.3723</b> | <b>354.1898</b> | 690.3457        | <b>345.6765</b>  | 689.3617       | 345.1845         | <b>7</b>  |
| 10 | <b>1060.5058</b> | <b>530.7565</b> | 1043.4793       | <b>522.2433</b>  | 1042.4952       | <b>521.7513</b>  | <b>A</b> | <b>650.3508</b> | 325.6790        | 633.3243        | 317.1658         | 632.3402       | 316.6738         | <b>6</b>  |
| 11 | 1159.5742        | <b>580.2907</b> | 1142.5477       | <b>571.7775</b>  | 1141.5636       | <b>571.2855</b>  | <b>V</b> | <b>579.3137</b> | <b>290.1605</b> | 562.2871        | 281.6472         | 561.3031       | 281.1552         | <b>5</b>  |
| 12 | 1306.6426        | 653.8250        | 1289.6161       | 645.3117         | 1288.6321       | 644.8197         | <b>F</b> | <b>480.2453</b> | 240.6263        | 463.2187        | 232.1130         | 462.2347       | 231.6210         | <b>4</b>  |
| 13 | 1435.6852        | <b>718.3462</b> | 1418.6587       | 709.8330         | 1417.6747       | 709.3410         | <b>E</b> | 333.1769        | 167.0921        | 316.1503        | 158.5788         | 315.1663       | 158.0868         | <b>3</b>  |
| 14 | 1492.7067        | <b>746.8570</b> | 1475.6801       | 738.3437         | 1474.6961       | 737.8517         | <b>G</b> | 204.1343        | 102.5708        | 187.1077        | 94.0575          |                |                  | <b>2</b>  |
| 15 |                  |                 |                 |                  |                 |                  | <b>K</b> | 147.1128        | 74.0600         | 130.0863        | 65.5468          |                |                  | <b>1</b>  |

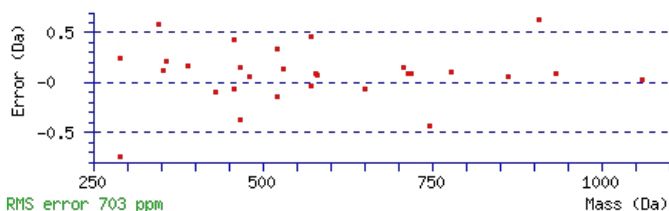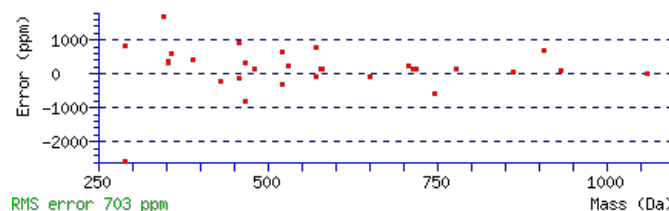

NCBI **BLAST** search of [KLENNDFAGAVFEGK](#)

## AT5G13510.1

(Parameters: blastp, nr protein database, expect=20000, no filter, PAM30)

Other BLAST [web gateways](#)

### All matches to this query

| Score | Mr(calc)  | Delta   | Sequence                        |
|-------|-----------|---------|---------------------------------|
| 33.3  | 1637.8049 | -0.0017 | <a href="#">KLENNDFAGAVFEGK</a> |
| 11.5  | 1637.8058 | -0.0026 | <a href="#">MGTMVLPWQGFISR</a>  |
| 7.7   | 1637.8058 | -0.0026 | <a href="#">MGTMVLPWQGFISR</a>  |

Mascot: <http://www.matrixscience.com/>

## Peptide View

### MS/MS Fragmentation of **GILSDVELLK**

Found in **AT5G13630.1** in **TAIR\_Arabidopsis**, Symbols: CCH, CHLH, CCH1, GUN5 | GUN5 (GENOMES UNCOUPLED 5) | chr5:4387570-4392085 REVERSE

Match to Query 3435: 1085.634384 from(543.824468,2+) index(8727)

Title: Elution from: 77.065 to 77.065 scan no 11495 cid35.00 polarity:+

Data file C7-2\_1.mgf

Click mouse within plot area to zoom in by factor of two about that point

Or,   to  Da

Label all possible matches  Label matches used for scoring

Show Y-axis

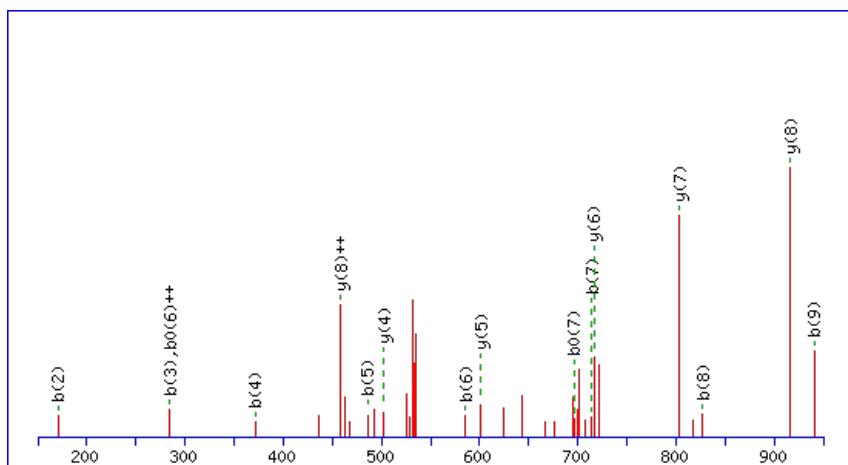

Monoisotopic mass of neutral peptide  $M_r(\text{calc})$ : 1085.6332

Fixed modifications: Carbamidomethyl (C) (apply to specified residues or termini only)

Ions Score: 57 Expect: 7.4e-006

Matches : 16/78 fragment ions using 31 most intense peaks ([help](#))

| #  | b               | b <sup>++</sup> | b <sup>0</sup>  | b <sup>0++</sup> | Seq.     | y               | y <sup>++</sup> | y*        | y <sup>*++</sup> | y <sup>0</sup> | y <sup>0++</sup> | #         |
|----|-----------------|-----------------|-----------------|------------------|----------|-----------------|-----------------|-----------|------------------|----------------|------------------|-----------|
| 1  | 58.0287         | 29.5180         |                 |                  | <b>G</b> |                 |                 |           |                  |                |                  | <b>10</b> |
| 2  | <b>171.1128</b> | 86.0600         |                 |                  | <b>I</b> | 1029.6190       | 515.3132        | 1012.5925 | 506.7999         | 1011.6085      | 506.3079         | <b>9</b>  |
| 3  | <b>284.1969</b> | 142.6021        |                 |                  | <b>L</b> | <b>916.5350</b> | <b>458.7711</b> | 899.5084  | 450.2579         | 898.5244       | 449.7658         | <b>8</b>  |
| 4  | <b>371.2289</b> | 186.1181        | 353.2183        | 177.1128         | <b>S</b> | <b>803.4509</b> | 402.2291        | 786.4244  | 393.7158         | 785.4403       | 393.2238         | <b>7</b>  |
| 5  | <b>486.2558</b> | 243.6316        | 468.2453        | 234.6263         | <b>D</b> | <b>716.4189</b> | 358.7131        | 699.3923  | 350.1998         | 698.4083       | 349.7078         | <b>6</b>  |
| 6  | <b>585.3243</b> | 293.1658        | 567.3137        | <b>284.1605</b>  | <b>V</b> | <b>601.3919</b> | 301.1996        | 584.3654  | 292.6863         | 583.3814       | 292.1943         | <b>5</b>  |
| 7  | <b>714.3668</b> | 357.6871        | <b>696.3563</b> | 348.6818         | <b>E</b> | <b>502.3235</b> | 251.6654        | 485.2970  | 243.1521         | 484.3130       | 242.6601         | <b>4</b>  |
| 8  | <b>827.4509</b> | 414.2291        | 809.4403        | 405.2238         | <b>L</b> | 373.2809        | 187.1441        | 356.2544  | 178.6308         |                |                  | <b>3</b>  |
| 9  | <b>940.5350</b> | 470.7711        | 922.5244        | 461.7658         | <b>L</b> | 260.1969        | 130.6021        | 243.1703  | 122.0888         |                |                  | <b>2</b>  |
| 10 |                 |                 |                 |                  | <b>K</b> | 147.1128        | 74.0600         | 130.0863  | 65.5468          |                |                  | <b>1</b>  |

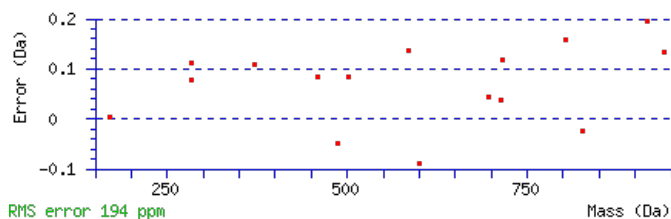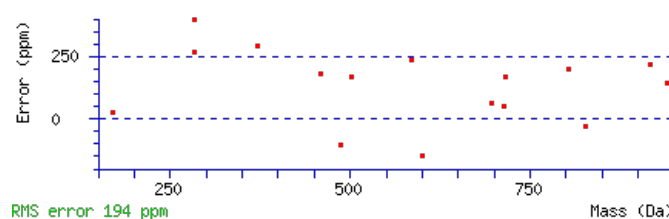

### NCBI BLAST search of **GILSDVELLK**

(Parameters: blastp, nr protein database, expect=20000, no filter, PAM30)

Other BLAST [web gateways](#)

All matches to this query



**AT5G13630.1**

| <b>Score</b> | <b>Mr(calc)</b> | <b>Delta</b> | <b>Sequence</b>            |
|--------------|-----------------|--------------|----------------------------|
| 56.7         | 1085.6332       | 0.0012       | <a href="#">GILSDVELLK</a> |
| 14.8         | 1085.6332       | 0.0012       | <a href="#">IGVTLDVEIK</a> |
| 10.5         | 1085.6332       | 0.0012       | <a href="#">IEKDVILLEK</a> |
| 10.0         | 1085.6346       | -0.0002      | <a href="#">GLLHKVTYR</a>  |
| 5.5          | 1085.6346       | -0.0002      | <a href="#">AVLPFERVR</a>  |
| 5.1          | 1085.6332       | 0.0012       | <a href="#">IDDVLSALLK</a> |
| 4.5          | 1085.6332       | 0.0012       | <a href="#">VLGESLDLIK</a> |

**Mascot:** <http://www.matrixscience.com/>

## Peptide View

MS/MS Fragmentation of **VNIIDTPGHSDFGGEVER**

Found in **AT5G13650.1** in **TAIR\_Arabidopsis**, Symbols: | elongation factor family protein | chr5:4397824-4402367 FORWARD

Match to Query 8774: 1940.922774 from(647.981534,3+) index(4857)

Title: Elution from: 43.348 to 43.348 scan no 6094 cid35.00 polarity:+

Data file 0-3\_3.mgf

Click mouse within plot area to zoom in by factor of two about that point

Or,   to  Da

Label all possible matches  Label matches used for scoring

Show Y-axis

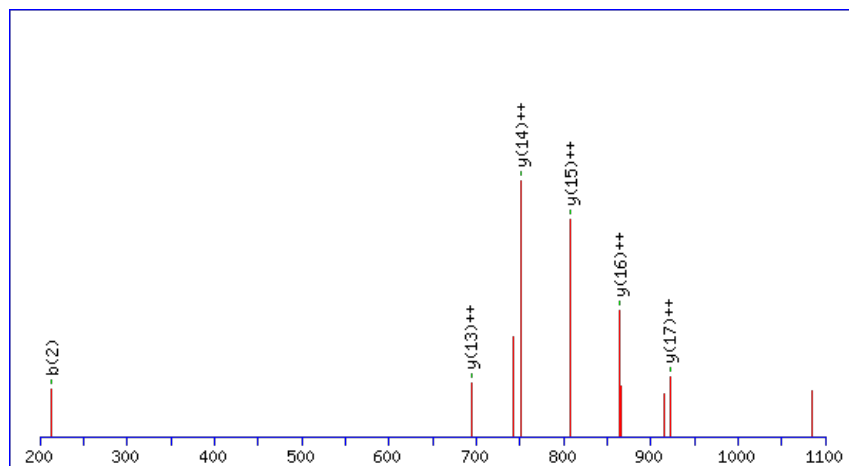

Monoisotopic mass of neutral peptide  $M_r(\text{calc})$ : 1940.9228

Fixed modifications: Carbamidomethyl (C) (apply to specified residues or termini only)

Ions Score: 33 Expect: 0.0013

Matches : 6/192 fragment ions using 9 most intense peaks ([help](#))

| #  | b         | b <sup>++</sup> | b <sup>*</sup> | b <sup>*++</sup> | b <sup>0</sup> | b <sup>0++</sup> | Seq. | y         | y <sup>++</sup> | y <sup>*</sup> | y <sup>*++</sup> | y <sup>0</sup> | y <sup>0++</sup> | #  |
|----|-----------|-----------------|----------------|------------------|----------------|------------------|------|-----------|-----------------|----------------|------------------|----------------|------------------|----|
| 1  | 100.0757  | 50.5415         |                |                  |                |                  | V    |           |                 |                |                  |                |                  | 18 |
| 2  | 214.1186  | 107.5629        | 197.0921       | 99.0497          |                |                  | N    | 1842.8617 | 921.9345        | 1825.8351      | 913.4212         | 1824.8511      | 912.9292         | 17 |
| 3  | 327.2027  | 164.1050        | 310.1761       | 155.5917         |                |                  | I    | 1728.8188 | 864.9130        | 1711.7922      | 856.3997         | 1710.8082      | 855.9077         | 16 |
| 4  | 440.2867  | 220.6470        | 423.2602       | 212.1337         |                |                  | I    | 1615.7347 | 808.3710        | 1598.7081      | 799.8577         | 1597.7241      | 799.3657         | 15 |
| 5  | 555.3137  | 278.1605        | 538.2871       | 269.6472         | 537.3031       | 269.1552         | D    | 1502.6506 | 751.8290        | 1485.6241      | 743.3157         | 1484.6401      | 742.8237         | 14 |
| 6  | 656.3614  | 328.6843        | 639.3348       | 320.1710         | 638.3508       | 319.6790         | T    | 1387.6237 | 694.3155        | 1370.5971      | 685.8022         | 1369.6131      | 685.3102         | 13 |
| 7  | 753.4141  | 377.2107        | 736.3876       | 368.6974         | 735.4036       | 368.2054         | P    | 1286.5760 | 643.7916        | 1269.5495      | 635.2784         | 1268.5654      | 634.7864         | 12 |
| 8  | 810.4356  | 405.7214        | 793.4090       | 397.2082         | 792.4250       | 396.7162         | G    | 1189.5232 | 595.2653        | 1172.4967      | 586.7520         | 1171.5127      | 586.2600         | 11 |
| 9  | 947.4945  | 474.2509        | 930.4680       | 465.7376         | 929.4839       | 465.2456         | H    | 1132.5018 | 566.7545        | 1115.4752      | 558.2413         | 1114.4912      | 557.7492         | 10 |
| 10 | 1034.5265 | 517.7669        | 1017.5000      | 509.2536         | 1016.5160      | 508.7616         | S    | 995.4429  | 498.2251        | 978.4163       | 489.7118         | 977.4323       | 489.2198         | 9  |
| 11 | 1149.5535 | 575.2804        | 1132.5269      | 566.7671         | 1131.5429      | 566.2751         | D    | 908.4108  | 454.7091        | 891.3843       | 446.1958         | 890.4003       | 445.7038         | 8  |
| 12 | 1296.6219 | 648.8146        | 1279.5953      | 640.3013         | 1278.6113      | 639.8093         | F    | 793.3839  | 397.1956        | 776.3573       | 388.6823         | 775.3733       | 388.1903         | 7  |
| 13 | 1353.6434 | 677.3253        | 1336.6168      | 668.8120         | 1335.6328      | 668.3200         | G    | 646.3155  | 323.6614        | 629.2889       | 315.1481         | 628.3049       | 314.6561         | 6  |
| 14 | 1410.6648 | 705.8360        | 1393.6383      | 697.3228         | 1392.6543      | 696.8308         | G    | 589.2940  | 295.1506        | 572.2675       | 286.6374         | 571.2835       | 286.1454         | 5  |
| 15 | 1539.7074 | 770.3573        | 1522.6809      | 761.8441         | 1521.6968      | 761.3521         | E    | 532.2726  | 266.6399        | 515.2460       | 258.1266         | 514.2620       | 257.6346         | 4  |
| 16 | 1638.7758 | 819.8916        | 1621.7493      | 811.3783         | 1620.7653      | 810.8863         | V    | 403.2300  | 202.1186        | 386.2034       | 193.6053         | 385.2194       | 193.1133         | 3  |
| 17 | 1767.8184 | 884.4128        | 1750.7919      | 875.8996         | 1749.8079      | 875.4076         | E    | 304.1615  | 152.5844        | 287.1350       | 144.0711         | 286.1510       | 143.5791         | 2  |
| 18 |           |                 |                |                  |                |                  | R    | 175.1190  | 88.0631         | 158.0924       | 79.5498          |                |                  | 1  |

# AT5G13650.1

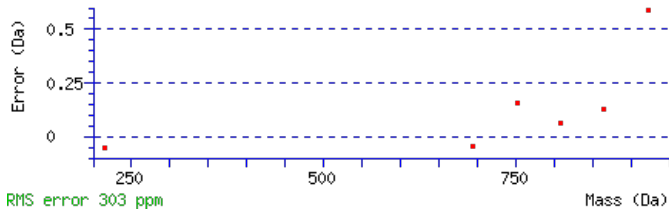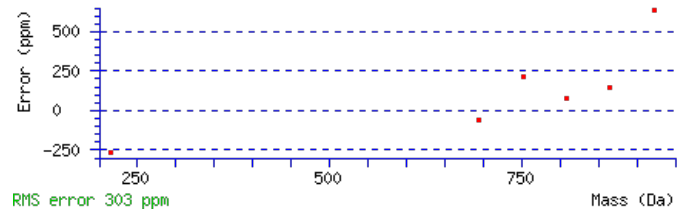

NCBI **BLAST** search of [VNIIDTPGHSDFGGEVER](#)

(Parameters: blastp, nr protein database, expect=20000, no filter, PAM30)

Other BLAST [web gateways](#)

## All matches to this query

| Score | Mr(calc)  | Delta   | Sequence                           |
|-------|-----------|---------|------------------------------------|
| 33.1  | 1940.9228 | -0.0001 | <a href="#">VNIIDTPGHSDFGGEVER</a> |
| 2.2   | 1940.9224 | 0.0004  | <a href="#">DMGLLNTCGVEVVYEVK</a>  |
| 0.1   | 1940.9257 | -0.0029 | <a href="#">MDGEEMVMVVKLKSSDK</a>  |
| 0.1   | 1940.9257 | -0.0029 | <a href="#">MDGEEMVMVVKLKSSDK</a>  |
| 0.1   | 1940.9257 | -0.0029 | <a href="#">MDGEEMVMVVKLKSSDK</a>  |

Mascot: <http://www.matrixscience.com/>

**Peptide View**MS/MS Fragmentation of **INLWFDPSK**

Found in **AT5G13870.1** in **TAIR\_Arabidopsis**, Symbols: EXGT-A4 | EXGT-A4 (ENDOXYLOGLUCAN TRANSFERASE A4); hydrolase, acting on glycosyl bonds | chr5:4475091-4476219 REVERSE

Match to Query 2956: 1118.574642 from(560.294597,2+) index(5204)

Title: Elution from: 49.150 to 49.150 scan no 6748 cid35.00 polarity:+

Data file D1d-1\_3.mgf

Click mouse within plot area to zoom in by factor of two about that point

Or,   to  Da

Label all possible matches  Label matches used for scoring

Show Y-axis

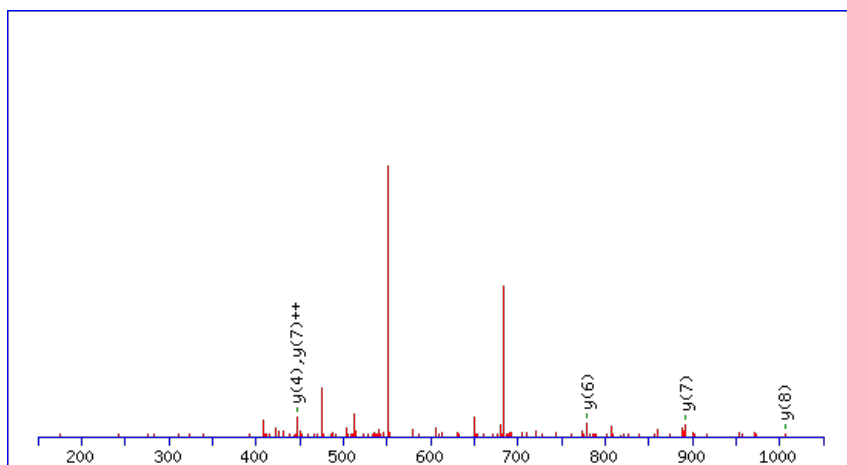

Monoisotopic mass of neutral peptide Mr(calc): 1118.5760

Fixed modifications: Carbamidomethyl (C) (apply to specified residues or termini only)

Ions Score: 22 Expect: 0.042

Matches : 5/82 fragment ions using 9 most intense peaks ([help](#))

| # | b        | b <sup>++</sup> | b*       | b <sup>*++</sup> | b <sup>0</sup> | b <sup>0++</sup> | Seq. | y         | y <sup>++</sup> | y*       | y <sup>*++</sup> | y <sup>0</sup> | y <sup>0++</sup> | # |
|---|----------|-----------------|----------|------------------|----------------|------------------|------|-----------|-----------------|----------|------------------|----------------|------------------|---|
| 1 | 114.0913 | 57.5493         |          |                  |                |                  | I    |           |                 |          |                  |                |                  | 9 |
| 2 | 228.1343 | 114.5708        | 211.1077 | 106.0575         |                |                  | N    | 1006.4993 | 503.7533        | 989.4727 | 495.2400         | 988.4887       | 494.7480         | 8 |
| 3 | 341.2183 | 171.1128        | 324.1918 | 162.5995         |                |                  | L    | 892.4563  | 446.7318        | 875.4298 | 438.2185         | 874.4458       | 437.7265         | 7 |
| 4 | 527.2976 | 264.1525        | 510.2711 | 255.6392         |                |                  | W    | 779.3723  | 390.1898        | 762.3457 | 381.6765         | 761.3617       | 381.1845         | 6 |
| 5 | 674.3661 | 337.6867        | 657.3395 | 329.1734         |                |                  | F    | 593.2930  | 297.1501        | 576.2664 | 288.6368         | 575.2824       | 288.1448         | 5 |
| 6 | 789.3930 | 395.2001        | 772.3665 | 386.6869         | 771.3824       | 386.1949         | D    | 446.2245  | 223.6159        | 429.1980 | 215.1026         | 428.2140       | 214.6106         | 4 |
| 7 | 886.4458 | 443.7265        | 869.4192 | 435.2132         | 868.4352       | 434.7212         | P    | 331.1976  | 166.1024        | 314.1710 | 157.5892         | 313.1870       | 157.0972         | 3 |
| 8 | 973.4778 | 487.2425        | 956.4512 | 478.7293         | 955.4672       | 478.2373         | S    | 234.1448  | 117.5761        | 217.1183 | 109.0628         | 216.1343       | 108.5708         | 2 |
| 9 |          |                 |          |                  |                |                  | K    | 147.1128  | 74.0600         | 130.0863 | 65.5468          |                |                  | 1 |

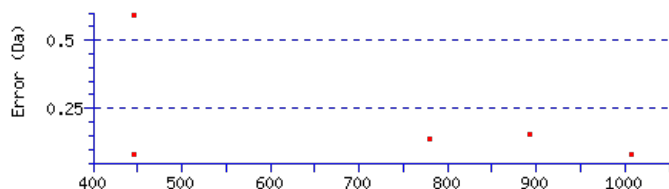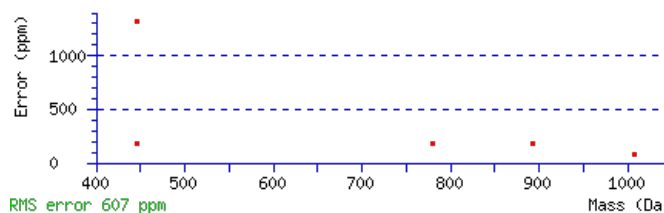

NCBI BLAST search of [INLWFDPSK](#)

(Parameters: blastp, nr protein database, expect=20000, no filter, PAM30)

Other BLAST [web gateways](#)

**All matches to this query**

| Score | Mr(calc) | Delta | Sequence |
|-------|----------|-------|----------|
|       |          |       |          |

**AT5G13870.1**

|      |           |         |                            |
|------|-----------|---------|----------------------------|
| 22.3 | 1118.5760 | -0.0014 | <a href="#">INLWFDPSK</a>  |
| 14.0 | 1118.5754 | -0.0007 | <a href="#">INLANSCSLK</a> |
| 12.0 | 1118.5754 | -0.0007 | <a href="#">ILCKAEETR</a>  |
| 6.4  | 1118.5720 | 0.0026  | <a href="#">LVETNTWTR</a>  |
| 5.4  | 1118.5754 | -0.0007 | <a href="#">LLLSEGMSNR</a> |
| 3.3  | 1118.5720 | 0.0026  | <a href="#">LGEPNSLFSR</a> |
| 2.9  | 1118.5754 | -0.0007 | <a href="#">LLENDKTMR</a>  |
| 2.8  | 1118.5754 | -0.0007 | <a href="#">LLNSMQELR</a>  |
| 2.5  | 1118.5760 | -0.0014 | <a href="#">YLLYQTR</a>    |
| 2.4  | 1118.5720 | 0.0026  | <a href="#">IWEQSSLTR</a>  |

**Mascot:** <http://www.matrixscience.com/>

**Peptide View**MS/MS Fragmentation of **QDIVVVEVPK**

Found in **AT5G13930.1** in **TAIR\_Arabidopsis**, Symbols: CHS, TT4, ATCHS | ATCHS/CHS/TT4 (CHALCONE SYNTHASE); naringenin-chalcone synthase | chr5:4488764-4490037 FORWARD

Match to Query 3884: 1136.606222 from(569.310387,2+) index(5136)

Title: Elution from: 46.095 to 46.095 scan no 6407 cid35.00 polarity:+

Data file C7-3\_1.mgf

Click mouse within plot area to zoom in by factor of two about that point

Or,   to  Da

Label all possible matches  Label matches used for scoring

Show Y-axis

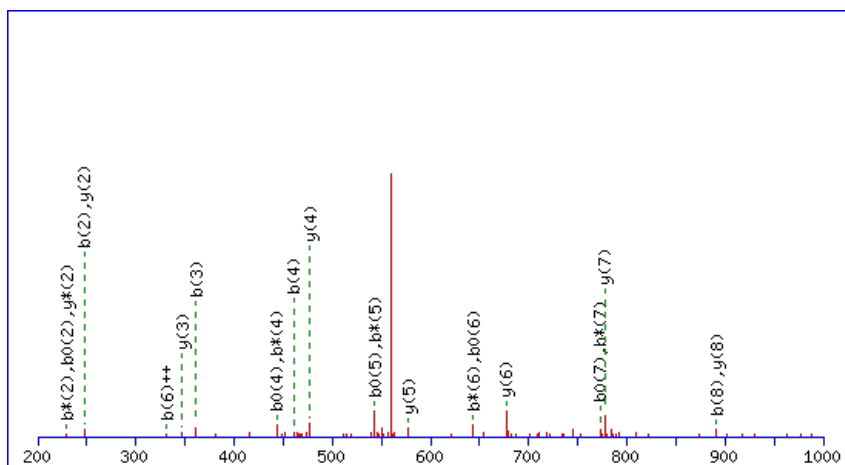

Monoisotopic mass of neutral peptide  $M_r(\text{calc})$ : 1136.6085

Fixed modifications: Carbamidomethyl (C) (apply to specified residues or termini only)

Ions Score: 45 Expect: 4e-005

Matches : 23/100 fragment ions using 30 most intense peaks ([help](#))

| #  | b               | b <sup>++</sup> | b*              | b <sup>*++</sup> | b <sup>0</sup>  | b <sup>0++</sup> | Seq. | y               | y <sup>++</sup> | y*              | y <sup>*++</sup> | y <sup>0</sup> | y <sup>0++</sup> | #  |
|----|-----------------|-----------------|-----------------|------------------|-----------------|------------------|------|-----------------|-----------------|-----------------|------------------|----------------|------------------|----|
| 1  | 131.0599        | 66.0336         | 113.0363        | 57.0218          |                 |                  | Q    |                 |                 |                 |                  |                |                  | 10 |
| 2  | <b>247.0839</b> | 124.0456        | <b>229.0603</b> | 115.0338         | <b>229.0733</b> | 115.0403         | D    | 1007.5632       | 504.2852        | 989.5396        | 495.2734         | 989.5526       | 495.2799         | 9  |
| 3  | <b>361.1650</b> | 181.0861        | 343.1414        | 172.0743         | 343.1544        | 172.0809         | I    | <b>891.5392</b> | 446.2732        | 873.5156        | 437.2614         | 873.5286       | 437.2680         | 8  |
| 4  | <b>461.2304</b> | 231.1189        | <b>443.2069</b> | 222.1071         | <b>443.2199</b> | 222.1136         | V    | <b>777.4581</b> | 389.2327        | 759.4345        | 380.2209         | 759.4475       | 380.2274         | 7  |
| 5  | 561.2959        | 281.1516        | <b>543.2723</b> | 272.1398         | <b>543.2853</b> | 272.1463         | V    | <b>677.3926</b> | 339.2000        | 659.3691        | 330.1882         | 659.3821       | 330.1947         | 6  |
| 6  | 661.3613        | <b>331.1843</b> | <b>643.3378</b> | 322.1725         | <b>643.3508</b> | 322.1790         | V    | <b>577.3272</b> | 289.1672        | 559.3036        | 280.1554         | 559.3166       | 280.1620         | 5  |
| 7  | 791.4010        | 396.2041        | <b>773.3774</b> | 387.1923         | <b>773.3904</b> | 387.1988         | E    | <b>477.2618</b> | 239.1345        | 459.2382        | 230.1227         | 459.2512       | 230.1292         | 4  |
| 8  | <b>891.4664</b> | 446.2369        | 873.4428        | 437.2251         | 873.4559        | 437.2316         | V    | <b>347.2221</b> | 174.1147        | 329.1985        | 165.1029         |                |                  | 3  |
| 9  | 989.5162        | 495.2617        | 971.4926        | 486.2500         | 971.5057        | 486.2565         | P    | <b>247.1567</b> | 124.0820        | <b>229.1331</b> | 115.0702         |                |                  | 2  |
| 10 |                 |                 |                 |                  |                 |                  | K    | 149.1069        | 75.0571         | 131.0833        | 66.0453          |                |                  | 1  |

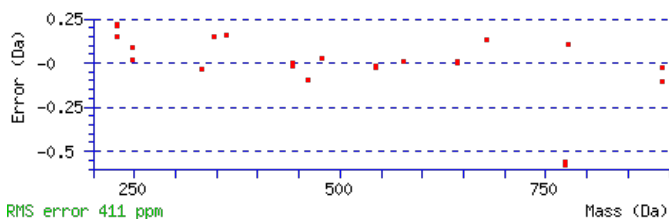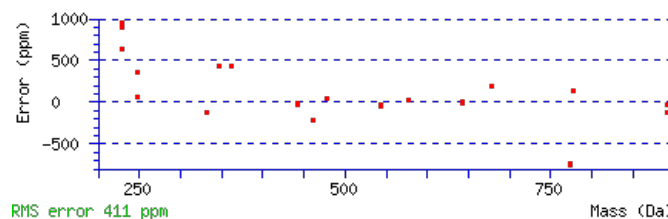NCBI BLAST search of **QDIVVVEVPK**

(Parameters: blastp, nr protein database, expect=20000, no filter, PAM30)

Other BLAST [web gateways](#)

All matches to this query

AT5G13930.1

| Score | Mr(calc)  | Delta   | Sequence                    |
|-------|-----------|---------|-----------------------------|
| 45.4  | 1136.6085 | -0.0023 | <a href="#">QDIVVVEVPK</a>  |
| 3.8   | 1136.6085 | -0.0023 | <a href="#">GELGLAEPVIK</a> |
| 1.2   | 1136.6038 | 0.0024  | <a href="#">MLTKFLSIR</a>   |

Mascot: <http://www.matrixscience.com/>



# Mascot Search Results

## Peptide View

MS/MS Fragmentation of **FASFETIVEMIIYK**

Found in **AT5G14040.1** in **TAIR\_Arabidopsis**, Symbols: | mitochondrial phosphate transporter | chr5:4531061-4532967 REVERSE

Match to Query 7289: 1606.736704 from(804.375628,2+) index(10652)

Title: Elution from: 101.783 to 101.783 scan no 15282 cid35.00 polarity:+

Data file C7-1\_2.mgf

Click mouse within plot area to zoom in by factor of two about that point

Or,   to  Da

Label all possible matches  Label matches used for scoring

Show Y-axis

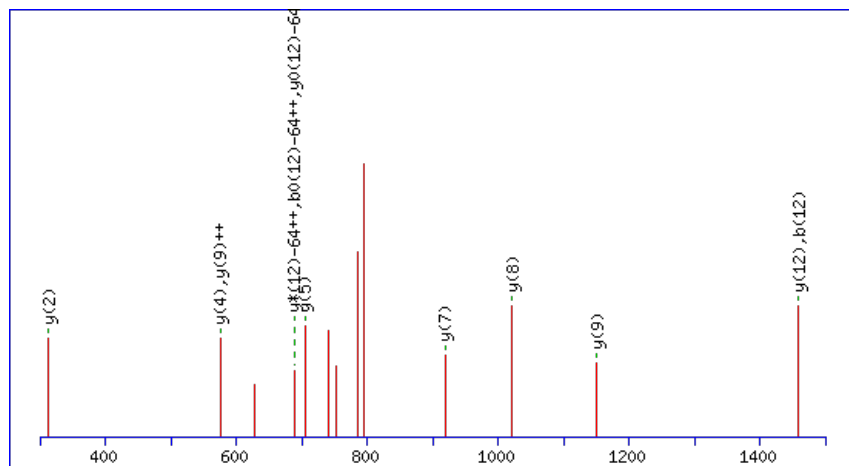

**Monoisotopic mass of neutral peptide Mr(calc):** 1606.7381

**Fixed modifications:** Carbamidomethyl (C) (apply to specified residues or termini only)

**Variable modifications:**

**M10** : Oxidation (M), with neutral losses 0.0000 (shown in table), 63.9983

**Ions Score:** 71 **Expect:** 6.5e-007

**Matches** : 13/172 fragment ions using 11 most intense peaks ([help](#))

| #  | b         | b <sup>++</sup> | b <sup>0</sup> | b <sup>0++</sup> | Seq. | y         | y <sup>++</sup> | y <sup>*</sup> | y <sup>*++</sup> | y <sup>0</sup> | y <sup>0++</sup> | #  |
|----|-----------|-----------------|----------------|------------------|------|-----------|-----------------|----------------|------------------|----------------|------------------|----|
| 1  | 149.0727  | 75.0400         |                |                  | F    |           |                 |                |                  |                |                  | 13 |
| 2  | 221.1069  | 111.0571        |                |                  | A    | 1459.6800 | 730.3436        | 1441.6564      | 721.3318         | 1441.6694      | 721.3383         | 12 |
| 3  | 309.1359  | 155.0716        | 291.1254       | 146.0663         | S    | 1387.6458 | 694.3265        | 1369.6222      | 685.3147         | 1369.6352      | 685.3213         | 11 |
| 4  | 457.2014  | 229.1043        | 439.1908       | 220.0990         | F    | 1299.6167 | 650.3120        | 1281.5932      | 641.3002         | 1281.6062      | 641.3067         | 10 |
| 5  | 587.2410  | 294.1241        | 569.2304       | 285.1189         | E    | 1151.5513 | 576.2793        | 1133.5277      | 567.2675         | 1133.5407      | 567.2740         | 9  |
| 6  | 689.2857  | 345.1465        | 671.2752       | 336.1412         | T    | 1021.5117 | 511.2595        | 1003.4881      | 502.2477         | 1003.5011      | 502.2542         | 8  |
| 7  | 803.3668  | 402.1871        | 785.3563       | 393.1818         | I    | 919.4669  | 460.2371        | 901.4434       | 451.2253         | 901.4564       | 451.2318         | 7  |
| 8  | 903.4323  | 452.2198        | 885.4217       | 443.2145         | V    | 805.3858  | 403.1966        | 787.3623       | 394.1848         | 787.3753       | 394.1913         | 6  |
| 9  | 1033.4719 | 517.2396        | 1015.4613      | 508.2343         | E    | 705.3204  | 353.1638        | 687.2968       | 344.1520         | 687.3098       | 344.1586         | 5  |
| 10 | 1181.5043 | 591.2558        | 1163.4938      | 582.2505         | M    | 575.2808  | 288.1440        | 557.2572       | 279.1322         |                |                  | 4  |
| 11 | 1295.5854 | 648.2964        | 1277.5749      | 639.2911         | I    | 427.2483  | 214.1278        | 409.2248       | 205.1160         |                |                  | 3  |
| 12 | 1459.6458 | 730.3265        | 1441.6352      | 721.3213         | Y    | 313.1672  | 157.0873        | 295.1437       | 148.0755         |                |                  | 2  |
| 13 |           |                 |                |                  | K    | 149.1069  | 75.0571         | 131.0833       | 66.0453          |                |                  | 1  |

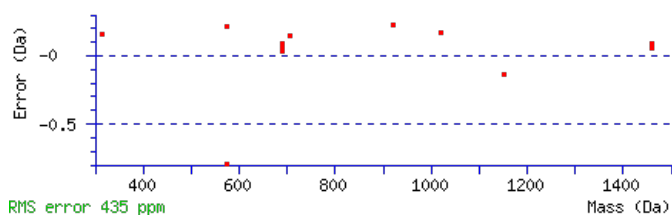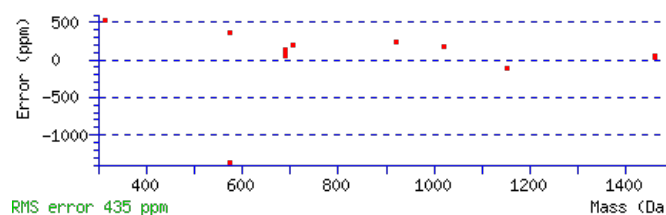

NCBI **BLAST** search of **FASFETIVEMIIYK**

(Parameters: blastp, nr protein database, expect=20000, no filter, PAM30)



# AT5G14040.1

Other BLAST [web gateways](#)

## All matches to this query

| Score | Mr(calc)  | Delta   | Sequence                        |
|-------|-----------|---------|---------------------------------|
| 70.8  | 1606.7381 | -0.0014 | <a href="#">FASFETIVEMIIYK</a>  |
| 11.7  | 1606.7390 | -0.0023 | <a href="#">HDSLNLNEMTRKK</a>   |
| 9.2   | 1606.7378 | -0.0011 | <a href="#">GYTQRDWIHSVPK</a>   |
| 8.9   | 1606.7390 | -0.0023 | <a href="#">MGSLHLNSNNNKLK</a>  |
| 4.4   | 1606.7359 | 0.0008  | <a href="#">LLAELDPMLFDDGK</a>  |
| 4.1   | 1606.7330 | 0.0037  | <a href="#">NLVPVNENEEYLR</a>   |
| 3.4   | 1606.7390 | -0.0023 | <a href="#">AKEALDAVPNCRNK</a>  |
| 3.2   | 1606.7412 | -0.0045 | <a href="#">AMAARVEFQYRTK</a>   |
| 2.7   | 1606.7363 | 0.0004  | <a href="#">VDLSDAPMKGTVNNK</a> |
| 2.0   | 1606.7352 | 0.0016  | <a href="#">KTQGFSLFNGFDTK</a>  |

Mascot: <http://www.matrixscience.com/>

**Peptide View**MS/MS Fragmentation of **ANVLDA SILWR**Found in **AT5G14200.1** in **TAIR\_Arabidopsis**, Symbols: | 3-isopropylmalate dehydrogenase, chloroplast, putative | chr5:4576222-4578113  
FORWARD

Match to Query 4544: 1272.637418 from(637.325985,2+) index(9027)

Title: Elution from: 80.183 to 80.183 scan no 12081 cid35.00 polarity:+

Data file C7-1\_2.mgf

Click mouse within plot area to zoom in by factor of two about that point

Or,   to  Da Label all possible matches  Label matches used for scoring Show Y-axis 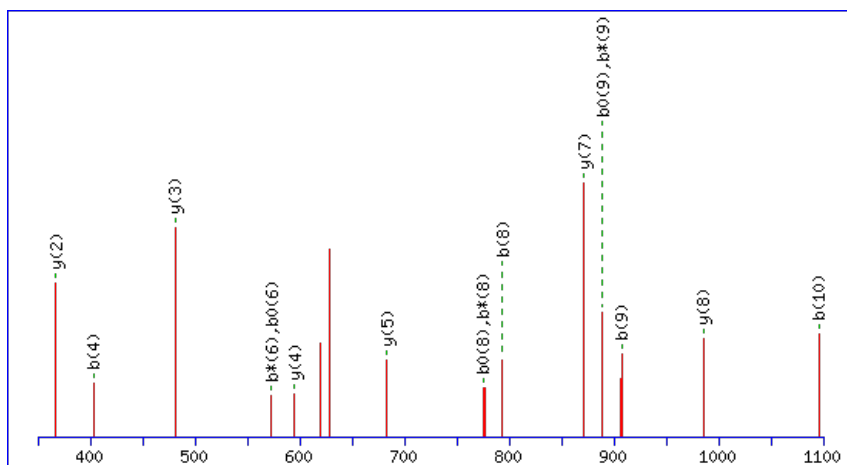Monoisotopic mass of neutral peptide  $M_r(\text{calc})$ : 1272.6403

Fixed modifications: Carbamidomethyl (C) (apply to specified residues or termini only)

Ions Score: 58 Expect: 1.5e-005

Matches : 16/102 fragment ions using 17 most intense peaks ([help](#))

| #  | b                | b <sup>++</sup> | b*              | b <sup>*++</sup> | b <sup>0</sup>  | b <sup>0++</sup> | Seq. | y               | y <sup>++</sup> | y*        | y <sup>*++</sup> | y <sup>0</sup> | y <sup>0++</sup> | #  |
|----|------------------|-----------------|-----------------|------------------|-----------------|------------------|------|-----------------|-----------------|-----------|------------------|----------------|------------------|----|
| 1  | 73.0414          | 37.0244         |                 |                  |                 |                  | A    |                 |                 |           |                  |                |                  | 11 |
| 2  | 189.0784         | 95.0428         | 171.0548        | 86.0311          |                 |                  | N    | 1201.6134       | 601.3103        | 1183.5898 | 592.2985         | 1183.6028      | 592.3051         | 10 |
| 3  | 289.1439         | 145.0756        | 271.1203        | 136.0638         |                 |                  | V    | 1085.5764       | 543.2918        | 1067.5528 | 534.2801         | 1067.5658      | 534.2866         | 9  |
| 4  | <b>403.2250</b>  | 202.1161        | 385.2014        | 193.1043         |                 |                  | L    | <b>985.5110</b> | 493.2591        | 967.4874  | 484.2473         | 967.5004       | 484.2538         | 8  |
| 5  | 519.2489         | 260.1281        | 501.2254        | 251.1163         | 501.2384        | 251.1228         | D    | <b>871.4299</b> | 436.2186        | 853.4063  | 427.2068         | 853.4193       | 427.2133         | 7  |
| 6  | 591.2831         | 296.1452        | <b>573.2595</b> | 287.1334         | <b>573.2725</b> | 287.1399         | A    | 755.4059        | 378.2066        | 737.3823  | 369.1948         | 737.3953       | 369.2013         | 6  |
| 7  | 679.3122         | 340.1597        | 661.2886        | 331.1479         | 661.3016        | 331.1544         | S    | <b>683.3717</b> | 342.1895        | 665.3482  | 333.1777         | 665.3612       | 333.1842         | 5  |
| 8  | <b>793.3933</b>  | 397.2003        | <b>775.3697</b> | 388.1885         | <b>775.3827</b> | 388.1950         | I    | <b>595.3427</b> | 298.1750        | 577.3191  | 289.1632         |                |                  | 4  |
| 9  | <b>907.4744</b>  | 454.2408        | <b>889.4508</b> | 445.2290         | <b>889.4638</b> | 445.2355         | L    | <b>481.2616</b> | 241.1344        | 463.2380  | 232.1226         |                |                  | 3  |
| 10 | <b>1095.5477</b> | 548.2775        | 1077.5242       | 539.2657         | 1077.5372       | 539.2722         | W    | <b>367.1805</b> | 184.0939        | 349.1569  | 175.0821         |                |                  | 2  |
| 11 |                  |                 |                 |                  |                 |                  | R    | 179.1071        | 90.0572         | 161.0835  | 81.0454          |                |                  | 1  |

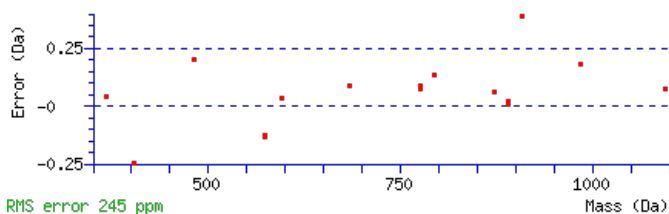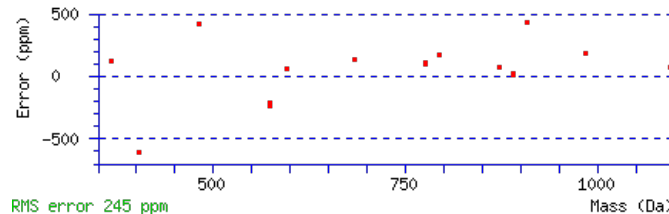NCBI **BLAST** search of **ANVLDA SILWR**

(Parameters: blastp, nr protein database, expect=20000, no filter, PAM30)

Other BLAST [web gateways](#)

All matches to this query

## AT5G14200.1

| Score | Mr(calc)  | Delta   | Sequence                     |
|-------|-----------|---------|------------------------------|
| 57.9  | 1272.6403 | -0.0029 | <a href="#">ANVLDASILWR</a>  |
| 14.2  | 1272.6380 | -0.0006 | <a href="#">SIKDQPNISVR</a>  |
| 12.7  | 1272.6410 | -0.0036 | <a href="#">LDAKMLPVETK</a>  |
| 10.9  | 1272.6381 | -0.0006 | <a href="#">ATISISPNALNR</a> |
| 10.5  | 1272.6403 | -0.0029 | <a href="#">FHLVKESELR</a>   |
| 7.0   | 1272.6380 | -0.0006 | <a href="#">ENSVGALLNLAR</a> |
| 5.3   | 1272.6354 | 0.0021  | <a href="#">EIADVQEISKK</a>  |
| 3.7   | 1272.6407 | -0.0033 | <a href="#">HVTRNVGKSQK</a>  |
| 1.9   | 1272.6354 | 0.0021  | <a href="#">IGDKLKEEEAK</a>  |
| 1.7   | 1272.6362 | 0.0012  | <a href="#">ITAICPMNVLK</a>  |

Mascot: <http://www.matrixscience.com/>

**Peptide View**MS/MS Fragmentation of **AVLDQLANYFMR**Found in **AT5G14260.1** in **TAIR\_Arabidopsis**, Symbols: | SET domain-containing protein | chr5:4601142-4603876 FORWARD

Match to Query 5337: 1456.670084 from(729,342318,2+) index(10150)

Title: Elution from: 101.317 to 101.317 scan no 14902 cid35.00 polarity:+

Data file D1d-1\_3.mgf

Click mouse within plot area to zoom in by factor of two about that point

Or,   to  Da Label all possible matches  Label matches used for scoring Show Y-axis 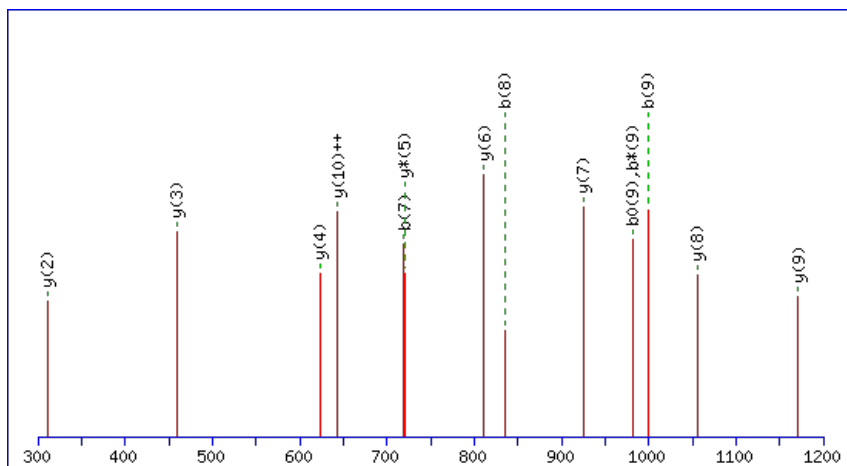**Monoisotopic mass of neutral peptide Mr(calc):** 1456.6727**Fixed modifications:** Carbamidomethyl (C) (apply to specified residues or termini only)**Ions Score:** 68 **Expect:** 1.1e-006**Matches:** 14/102 fragment ions using 14 most intense peaks ([help](#))

| #  | b         | b <sup>++</sup> | b*        | b <sup>*++</sup> | b <sup>0</sup> | b <sup>0++</sup> | Seq. | y         | y <sup>++</sup> | y*        | y <sup>*++</sup> | y <sup>0</sup> | y <sup>0++</sup> | #  |
|----|-----------|-----------------|-----------|------------------|----------------|------------------|------|-----------|-----------------|-----------|------------------|----------------|------------------|----|
| 1  | 73.0414   | 37.0244         |           |                  |                |                  | A    |           |                 |           |                  |                |                  | 12 |
| 2  | 173.1069  | 87.0571         |           |                  |                |                  | V    | 1385.6458 | 693.3266        | 1367.6223 | 684.3148         | 1367.6353      | 684.3213         | 11 |
| 3  | 287.1880  | 144.0976        |           |                  |                |                  | L    | 1285.5804 | 643.2938        | 1267.5568 | 634.2820         | 1267.5698      | 634.2886         | 10 |
| 4  | 403.2120  | 202.1096        |           |                  | 385.2014       | 193.1043         | D    | 1171.4993 | 586.2533        | 1153.4757 | 577.2415         | 1153.4887      | 577.2480         | 9  |
| 5  | 533.2646  | 267.1359        | 515.2410  | 258.1241         | 515.2540       | 258.1307         | Q    | 1055.4753 | 528.2413        | 1037.4517 | 519.2295         |                |                  | 8  |
| 6  | 647.3457  | 324.1765        | 629.3221  | 315.1647         | 629.3351       | 315.1712         | L    | 925.4227  | 463.2150        | 907.3991  | 454.2032         |                |                  | 7  |
| 7  | 719.3798  | 360.1936        | 701.3563  | 351.1818         | 701.3693       | 351.1883         | A    | 811.3416  | 406.1744        | 793.3180  | 397.1626         |                |                  | 6  |
| 8  | 835.4168  | 418.2121        | 817.3933  | 409.2003         | 817.4063       | 409.2068         | N    | 739.3074  | 370.1573        | 721.2838  | 361.1456         |                |                  | 5  |
| 9  | 999.4772  | 500.2422        | 981.4536  | 491.2304         | 981.4666       | 491.2370         | Y    | 623.2704  | 312.1389        | 605.2468  | 303.1271         |                |                  | 4  |
| 10 | 1147.5427 | 574.2750        | 1129.5191 | 565.2632         | 1129.5321      | 565.2697         | F    | 459.2101  | 230.1087        | 441.1865  | 221.0969         |                |                  | 3  |
| 11 | 1279.5802 | 640.2937        | 1261.5566 | 631.2819         | 1261.5696      | 631.2884         | M    | 311.1446  | 156.0759        | 293.1210  | 147.0642         |                |                  | 2  |
| 12 |           |                 |           |                  |                |                  | R    | 179.1071  | 90.0572         | 161.0835  | 81.0454          |                |                  | 1  |

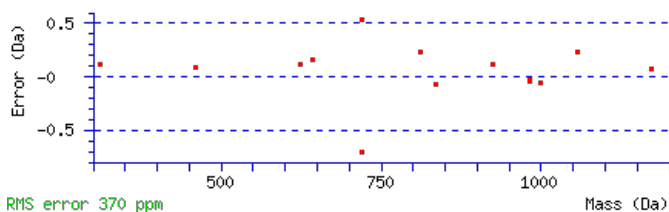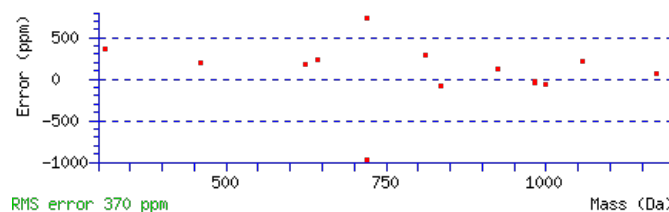NCBI **BLAST** search of **AVLDQLANYFMR**

(Parameters: blastp, nr protein database, expect=20000, no filter, PAM30)

Other BLAST [web gateways](#)**All matches to this query**

## AT5G14260.1

| Score | Mr(calc)  | Delta   | Sequence                      |
|-------|-----------|---------|-------------------------------|
| 67.5  | 1456.6727 | -0.0026 | <a href="#">AVLDQLANYFMR</a>  |
| 11.2  | 1456.6671 | 0.0030  | <a href="#">NPNSKIGIYYDR</a>  |
| 4.8   | 1456.6700 | 0.0001  | <a href="#">YGNVDFLVEMIK</a>  |
| 2.5   | 1456.6705 | -0.0004 | <a href="#">EDIDRTYKIMR</a>   |
| 1.2   | 1456.6725 | -0.0024 | <a href="#">DLDVTPEGDLELK</a> |
| 0.4   | 1456.6657 | 0.0043  | <a href="#">NALVNMYLKCGR</a>  |

Mascot: <http://www.matrixscience.com/>

## Peptide View

MS/MS Fragmentation of **VGGVEIPANK**Found in **AT5G14320.1** in **TAIR\_Arabidopsis**, Symbols: | 30S ribosomal protein S13, chloroplast (CS13) | chr5:4617842-4618775 REVERSE

Match to Query 2370: 994.509984 from(498.262268,2+) index(2003)

Title: Elution from: 24.020 to 24.020 scan no 2607 cid35.00 polarity:+

Data file D6h-1\_2.mgf

Click mouse within plot area to zoom in by factor of two about that point

Or,   to  Da Label all possible matches  Label matches used for scoring Show Y-axis 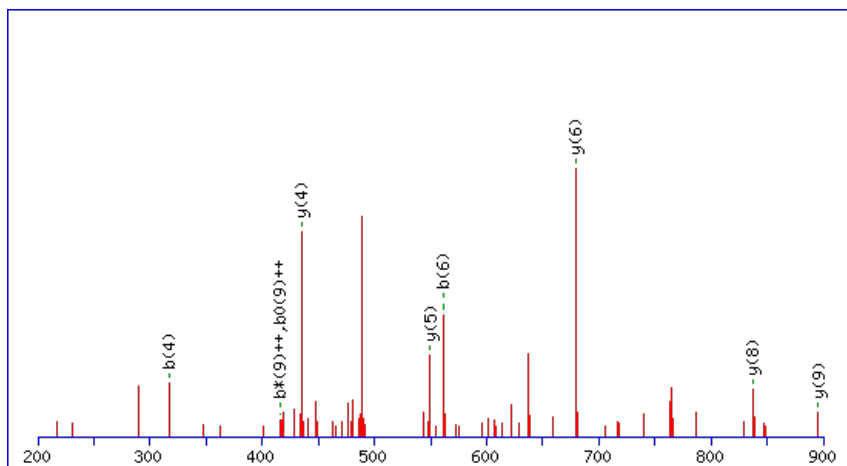Monoisotopic mass of neutral peptide **Mr(calc)**: 994.5092

Fixed modifications: Carbamidomethyl (C) (apply to specified residues or termini only)

Ions Score: 34 **Expect**: 0.0022Matches : 9/74 fragment ions using 14 most intense peaks ([help](#))

| #  | b               | b <sup>++</sup> | b*       | b <sup>*++</sup> | b <sup>0</sup> | b <sup>0++</sup> | Seq. | y               | y <sup>++</sup> | y*       | y <sup>*++</sup> | y <sup>0</sup> | y <sup>0++</sup> | #  |
|----|-----------------|-----------------|----------|------------------|----------------|------------------|------|-----------------|-----------------|----------|------------------|----------------|------------------|----|
| 1  | 101.0727        | 51.0400         |          |                  |                |                  | V    |                 |                 |          |                  |                |                  | 10 |
| 2  | 159.0912        | 80.0492         |          |                  |                |                  | G    | <b>895.4510</b> | 448.2291        | 877.4274 | 439.2173         | 877.4404       | 439.2239         | 9  |
| 3  | 217.1097        | 109.0585        |          |                  |                |                  | G    | <b>837.4325</b> | 419.2199        | 819.4089 | 410.2081         | 819.4219       | 410.2146         | 8  |
| 4  | <b>317.1752</b> | 159.0912        |          |                  |                |                  | V    | 779.4140        | 390.2106        | 761.3904 | 381.1988         | 761.4034       | 381.2054         | 7  |
| 5  | 447.2148        | 224.1110        |          |                  | 429.2042       | 215.1058         | E    | <b>679.3485</b> | 340.1779        | 661.3250 | 331.1661         | 661.3380       | 331.1726         | 6  |
| 6  | <b>561.2959</b> | 281.1516        |          |                  | 543.2853       | 272.1463         | I    | <b>549.3089</b> | 275.1581        | 531.2853 | 266.1463         |                |                  | 5  |
| 7  | 659.3457        | 330.1765        |          |                  | 641.3351       | 321.1712         | P    | <b>435.2278</b> | 218.1175        | 417.2042 | 209.1058         |                |                  | 4  |
| 8  | 731.3798        | 366.1936        |          |                  | 713.3693       | 357.1883         | A    | 337.1780        | 169.0926        | 319.1544 | 160.0809         |                |                  | 3  |
| 9  | 847.4168        | 424.2121        | 829.3933 | <b>415.2003</b>  | 829.4063       | <b>415.2068</b>  | N    | 265.1439        | 133.0756        | 247.1203 | 124.0638         |                |                  | 2  |
| 10 |                 |                 |          |                  |                |                  | K    | 149.1069        | 75.0571         | 131.0833 | 66.0453          |                |                  | 1  |

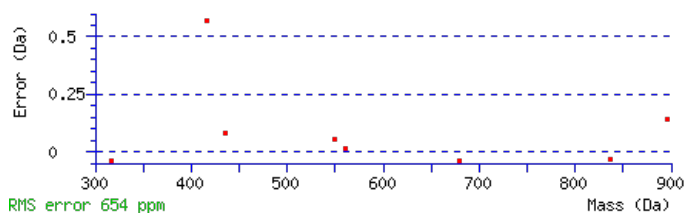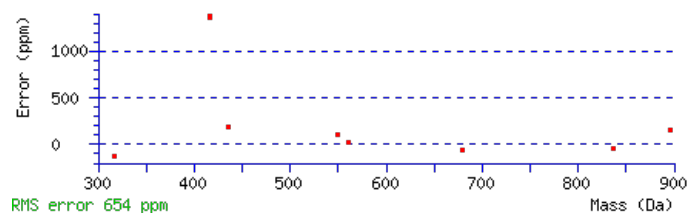NCBI **BLAST** search of **VGGVEIPANK**

(Parameters: blastp, nr protein database, expect=20000, no filter, PAM30)

Other BLAST [web gateways](#)

All matches to this query

| Score | Mr(calc) | Delta | Sequence |
|-------|----------|-------|----------|
|       |          |       |          |

## AT5G14320.1

|      |          |         |                            |
|------|----------|---------|----------------------------|
| 34.1 | 994.5092 | 0.0008  | <a href="#">VGGVEIPANK</a> |
| 11.8 | 994.5118 | -0.0018 | <a href="#">KALELGGHR</a>  |
| 1.4  | 994.5092 | 0.0008  | <a href="#">ELAPSTIPR</a>  |
| 0.2  | 994.5118 | -0.0018 | <a href="#">ADHARALVK</a>  |

**Mascot:** <http://www.matrixscience.com/>

**Peptide View**MS/MS Fragmentation of **AEEASVSTRK**LKFound in **AT5G14580.1** in **TAIR\_Arabidopsis**, Symbols: | polyribonucleotide nucleotidyltransferase, putative | chr5:4697615-4703016 REVERSE

Match to Query 5889: 1422.702556 from(712.358554,2+) index(5576)

Title: Elution from: 48.832 to 48.832 scan no 6970 cid35.00 polarity:+

Data file C7-1\_1.mgf

Click mouse within plot area to zoom in by factor of two about that point

Or,   to  Da Label all possible matches  Label matches used for scoring Show Y-axis 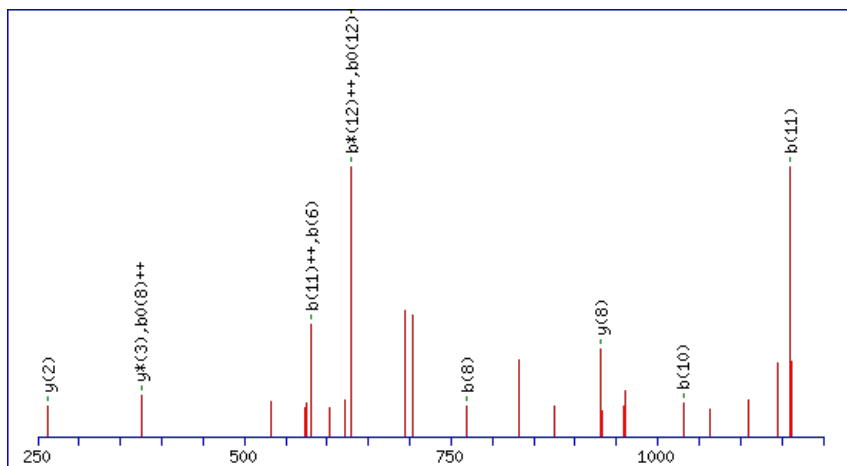Monoisotopic mass of neutral peptide **Mr(calc)**: 1422.7039**Fixed modifications**: Carbamidomethyl (C) (apply to specified residues or termini only)**Ions Score**: 24 **Expect**: 0.032**Matches**: 11/116 fragment ions using 14 most intense peaks ([help](#))

| #  | b                | b <sup>++</sup> | b*        | b <sup>++</sup> * | b <sup>0</sup> | b <sup>0++</sup> | Seq. | y               | y <sup>++</sup> | y*              | y <sup>++</sup> * | y <sup>0</sup> | y <sup>0++</sup> | #  |
|----|------------------|-----------------|-----------|-------------------|----------------|------------------|------|-----------------|-----------------|-----------------|-------------------|----------------|------------------|----|
| 1  | 73.0414          | 37.0244         |           |                   |                |                  | A    |                 |                 |                 |                   |                |                  | 13 |
| 2  | 203.0811         | 102.0442        |           |                   | 185.0705       | 93.0389          | E    | 1351.6770       | 676.3421        | 1333.6534       | 667.3304          | 1333.6664      | 667.3369         | 12 |
| 3  | 333.1207         | 167.0640        |           |                   | 315.1101       | 158.0587         | E    | 1221.6374       | 611.3223        | 1203.6138       | 602.3105          | 1203.6268      | 602.3170         | 11 |
| 4  | 421.1497         | 211.0785        |           |                   | 403.1392       | 202.0732         | S    | 1091.5978       | 546.3025        | 1073.5742       | 537.2907          | 1073.5872      | 537.2972         | 10 |
| 5  | 493.1839         | 247.0956        |           |                   | 475.1733       | 238.0903         | A    | 1003.5687       | 502.2880        | 985.5451        | 493.2762          | 985.5581       | 493.2827         | 9  |
| 6  | <b>581.2130</b>  | 291.1101        |           |                   | 563.2024       | 282.1048         | S    | <b>931.5345</b> | 466.2709        | 913.5110        | 457.2591          | 913.5240       | 457.2656         | 8  |
| 7  | 681.2784         | 341.1428        |           |                   | 663.2678       | 332.1376         | V    | 843.5055        | 422.2564        | 825.4819        | 413.2446          | 825.4949       | 413.2511         | 7  |
| 8  | <b>769.3075</b>  | 385.1574        |           |                   | 751.2969       | <b>376.1521</b>  | S    | 743.4400        | 372.2237        | 725.4164        | 363.2119          | 725.4295       | 363.2184         | 6  |
| 9  | 871.3522         | 436.1797        |           |                   | 853.3416       | 427.1744         | T    | 655.4110        | 328.2091        | 637.3874        | 319.1973          | 637.4004       | 319.2038         | 5  |
| 10 | <b>1031.4414</b> | 516.2244        | 1013.4178 | 507.2126          | 1013.4309      | 507.2191         | R    | 553.3663        | 277.1868        | 535.3427        | 268.1750          |                |                  | 4  |
| 11 | <b>1161.5305</b> | <b>581.2689</b> | 1143.5069 | 572.2571          | 1143.5199      | 572.2636         | K    | 393.2770        | 197.1421        | <b>375.2534</b> | 188.1303          |                |                  | 3  |
| 12 | 1275.6116        | 638.3094        | 1257.5880 | <b>629.2976</b>   | 1257.6010      | <b>629.3041</b>  | L    | <b>263.1880</b> | 132.0976        | 245.1644        | 123.0858          |                |                  | 2  |
| 13 |                  |                 |           |                   |                |                  | K    | 149.1069        | 75.0571         | 131.0833        | 66.0453           |                |                  | 1  |

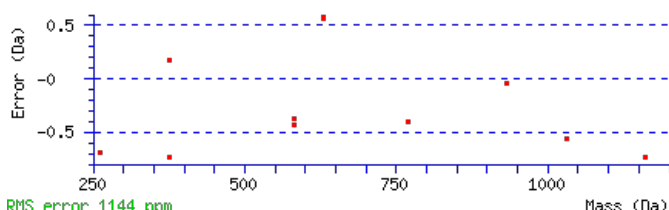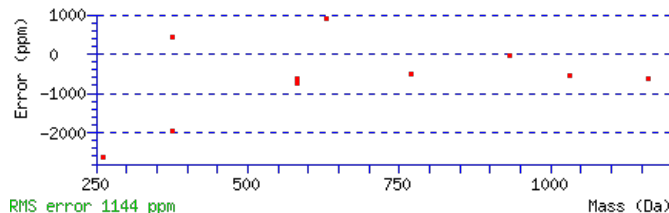NCBI **BLAST** search of **AEEASVSTRK**LK

(Parameters: blastp, nr protein database, expect=20000, no filter, PAM30)

Other BLAST [web gateways](#)



# AT5G14580.1

All matches to this query

| Score | Mr(calc)  | Delta   | Sequence                       |
|-------|-----------|---------|--------------------------------|
| 24.4  | 1422.7039 | -0.0013 | <a href="#">AEESASVSTRKLK</a>  |
| 14.6  | 1422.6987 | 0.0038  | <a href="#">MEKILEFLGSNK</a>   |
| 9.2   | 1422.7047 | -0.0022 | <a href="#">MLKMAARDTGALK</a>  |
| 8.1   | 1422.7021 | 0.0005  | <a href="#">SKMEVMLQSVIK</a>   |
| 3.5   | 1422.6987 | 0.0038  | <a href="#">AMSGKYVAEVPLK</a>  |
| 2.8   | 1422.7034 | -0.0009 | <a href="#">DSVDTILATSFLK</a>  |
| 2.5   | 1422.6991 | 0.0034  | <a href="#">RDISSMGRELK</a>    |
| 2.5   | 1422.6991 | 0.0034  | <a href="#">SLMERVRQELK</a>    |
| 1.7   | 1422.6987 | 0.0039  | <a href="#">QFVAEVVTMGSLK</a>  |
| 1.5   | 1422.7039 | -0.0013 | <a href="#">NKNGIGSTSSVTIK</a> |

Mascot: <http://www.matrixscience.com/>

**Peptide View**MS/MS Fragmentation of **EELEALEK**

Found in **AT5G14660.1** in **TAIR\_Arabidopsis**, Symbols: DEF2, PDF1B | PDF1B (PEPTIDE DEFORMYLASE 1B); peptide deformylase | chr5:4727132-4728674 REVERSE

Match to Query 1835: 968.455118 from(485.234835,2+) index(1147)

Title: Elution from: 18.265 to 18.265 scan no 1641 cid35.00 polarity:+

Data file D12h-2\_3.mgf

Click mouse within plot area to zoom in by factor of two about that point

Or,   to  Da

Label all possible matches  Label matches used for scoring

Show Y-axis

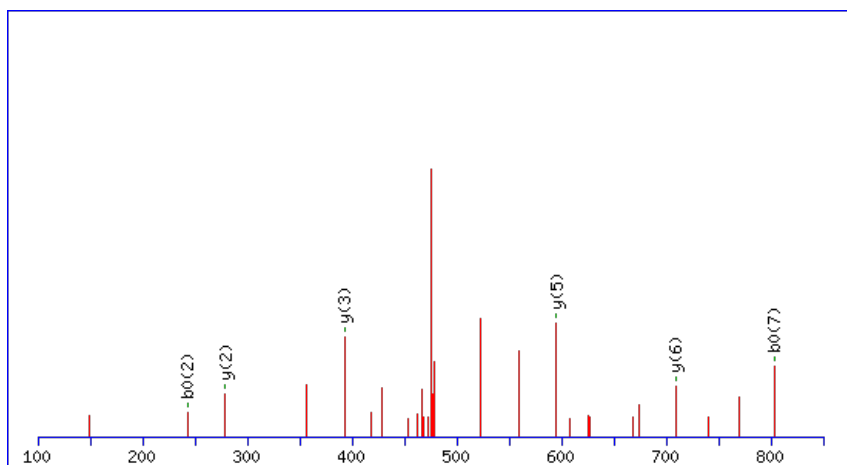

**Monoisotopic mass of neutral peptide Mr(calc):** 968.4545

**Fixed modifications:** Carbamidomethyl (C) (apply to specified residues or termini only)

**Ions Score:** 29 **Expect:** 0.0063

**Matches:** 6/68 fragment ions using 7 most intense peaks ([help](#))

| # | b        | b <sup>++</sup> | b <sup>0</sup> | b <sup>0++</sup> | Seq. | y        | y <sup>++</sup> | y*       | y <sup>*++</sup> | y <sup>0</sup> | y <sup>0++</sup> | # |
|---|----------|-----------------|----------------|------------------|------|----------|-----------------|----------|------------------|----------------|------------------|---|
| 1 | 131.0469 | 66.0271         | 113.0363       | 57.0218          | E    |          |                 |          |                  |                |                  | 8 |
| 2 | 261.0865 | 131.0469        | 243.0760       | 122.0416         | E    | 839.4221 | 420.2147        | 821.3985 | 411.2029         | 821.4115       | 411.2094         | 7 |
| 3 | 375.1676 | 188.0875        | 357.1571       | 179.0822         | L    | 709.3825 | 355.1949        | 691.3589 | 346.1831         | 691.3719       | 346.1896         | 6 |
| 4 | 505.2073 | 253.1073        | 487.1967       | 244.1020         | E    | 595.3014 | 298.1543        | 577.2778 | 289.1425         | 577.2908       | 289.1490         | 5 |
| 5 | 577.2414 | 289.1243        | 559.2308       | 280.1191         | A    | 465.2617 | 233.1345        | 447.2382 | 224.1227         | 447.2512       | 224.1292         | 4 |
| 6 | 691.3225 | 346.1649        | 673.3119       | 337.1596         | L    | 393.2276 | 197.1174        | 375.2040 | 188.1056         | 375.2170       | 188.1122         | 3 |
| 7 | 821.3621 | 411.1847        | 803.3516       | 402.1794         | E    | 279.1465 | 140.0769        | 261.1229 | 131.0651         | 261.1359       | 131.0716         | 2 |
| 8 |          |                 |                |                  | K    | 149.1069 | 75.0571         | 131.0833 | 66.0453          |                |                  | 1 |

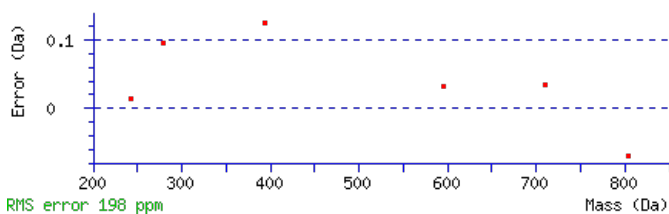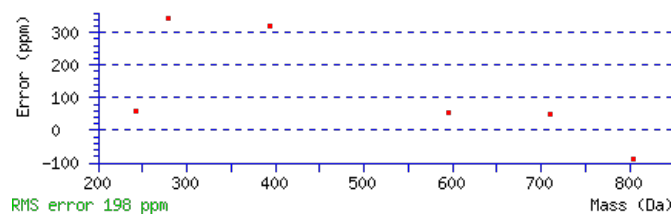

NCBI **BLAST** search of [EELEALEK](#)

(Parameters: blastp, nr protein database, expect=20000, no filter, PAM30)

Other BLAST [web gateways](#)

**All matches to this query**

| Score | Mr(calc) | Delta  | Sequence                 |
|-------|----------|--------|--------------------------|
| 29.1  | 968.4545 | 0.0007 | <a href="#">EELEALEK</a> |

## AT5G14660.1

|      |          |         |                            |
|------|----------|---------|----------------------------|
| 18.1 | 968.4571 | -0.0020 | <a href="#">SEGP AEIVR</a> |
| 17.4 | 968.4545 | 0.0007  | <a href="#">LEAE EIEK</a>  |
| 7.9  | 968.4545 | 0.0007  | <a href="#">EAIE LEEK</a>  |
| 7.2  | 968.4571 | -0.0020 | <a href="#">QKQP AE EK</a> |
| 4.0  | 968.4544 | 0.0007  | <a href="#">LIDDEVEK</a>   |
| 4.0  | 968.4544 | 0.0007  | <a href="#">LLDDEVEK</a>   |
| 0.2  | 968.4524 | 0.0027  | <a href="#">MNHLGQIK</a>   |
| 0.2  | 968.4571 | -0.0020 | <a href="#">QLLEDPR</a>    |

Mascot: <http://www.matrixscience.com/>

**Peptide View**MS/MS Fragmentation of **YAGVGAAIEYAVLHLK**Found in **AT5G14740.1** in **TAIR\_Arabidopsis**, Symbols: CA18, BETA CA2, CA2 | CA2 (BETA CARBONIC ANHYDRASE 2); carbonate dehydratase/ zinc ion binding | chr5:4758260-4762385 FORWARD

Match to Query 7900: 1673.914911 from(558.978913,3+) index(10298)

Title: Elution from: 97.836 to 97.836 scan no 14615 cid35.00 polarity:+

Data file 0-1\_2.mgf

Click mouse within plot area to zoom in by factor of two about that point

Or,   to  Da Label all possible matches  Label matches used for scoring Show Y-axis 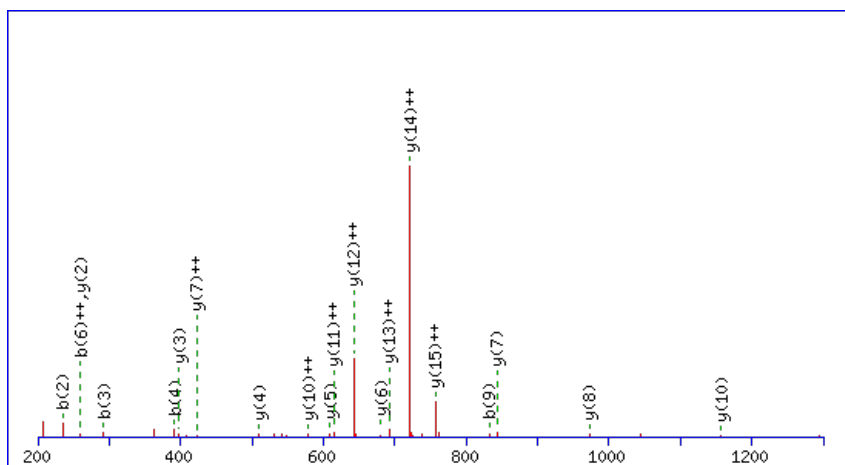Monoisotopic mass of neutral peptide **Mr(calc)**: 1673.9141**Fixed modifications**: Carbamidomethyl (C) (apply to specified residues or termini only)**Ions Score**: 62 **Expect**: 2.1e-006**Matches**: 20/120 fragment ions using 34 most intense peaks ([help](#))

| #  | b               | b <sup>++</sup> | b <sup>0</sup> | b <sup>0++</sup> | Seq. | y                | y <sup>++</sup> | y <sup>*</sup> | y <sup>*++</sup> | y <sup>0</sup> | y <sup>0++</sup> | #  |
|----|-----------------|-----------------|----------------|------------------|------|------------------|-----------------|----------------|------------------|----------------|------------------|----|
| 1  | 164.0706        | 82.5389         |                |                  | Y    |                  |                 |                |                  |                |                  | 16 |
| 2  | <b>235.1077</b> | 118.0575        |                |                  | A    | 1511.8580        | <b>756.4327</b> | 1494.8315      | 747.9194         | 1493.8475      | 747.4274         | 15 |
| 3  | <b>292.1292</b> | 146.5682        |                |                  | G    | 1440.8209        | <b>720.9141</b> | 1423.7944      | 712.4008         | 1422.8104      | 711.9088         | 14 |
| 4  | <b>391.1976</b> | 196.1024        |                |                  | V    | 1383.7995        | <b>692.4034</b> | 1366.7729      | 683.8901         | 1365.7889      | 683.3981         | 13 |
| 5  | 448.2191        | 224.6132        |                |                  | G    | 1284.7310        | <b>642.8692</b> | 1267.7045      | 634.3559         | 1266.7205      | 633.8639         | 12 |
| 6  | 519.2562        | <b>260.1317</b> |                |                  | A    | 1227.7096        | <b>614.3584</b> | 1210.6830      | 605.8452         | 1209.6990      | 605.3531         | 11 |
| 7  | 590.2933        | 295.6503        |                |                  | A    | <b>1156.6725</b> | <b>578.8399</b> | 1139.6459      | 570.3266         | 1138.6619      | 569.8346         | 10 |
| 8  | 703.3774        | 352.1923        |                |                  | I    | 1085.6354        | 543.3213        | 1068.6088      | 534.8080         | 1067.6248      | 534.3160         | 9  |
| 9  | <b>832.4199</b> | 416.7136        | 814.4094       | 407.7083         | E    | <b>972.5513</b>  | 486.7793        | 955.5247       | 478.2660         | 954.5407       | 477.7740         | 8  |
| 10 | 995.4833        | 498.2453        | 977.4727       | 489.2400         | Y    | <b>843.5087</b>  | <b>422.2580</b> | 826.4822       | 413.7447         |                |                  | 7  |
| 11 | 1066.5204       | 533.7638        | 1048.5098      | 524.7586         | A    | <b>680.4454</b>  | 340.7263        | 663.4188       | 332.2130         |                |                  | 6  |
| 12 | 1165.5888       | 583.2980        | 1147.5782      | 574.2928         | V    | <b>609.4083</b>  | 305.2078        | 592.3817       | 296.6945         |                |                  | 5  |
| 13 | 1278.6729       | 639.8401        | 1260.6623      | 630.8348         | L    | <b>510.3398</b>  | 255.6736        | 493.3133       | 247.1603         |                |                  | 4  |
| 14 | 1415.7318       | 708.3695        | 1397.7212      | 699.3642         | H    | <b>397.2558</b>  | 199.1315        | 380.2292       | 190.6183         |                |                  | 3  |
| 15 | 1528.8158       | 764.9116        | 1510.8053      | 755.9063         | L    | <b>260.1969</b>  | 130.6021        | 243.1703       | 122.0888         |                |                  | 2  |
| 16 |                 |                 |                |                  | K    | 147.1128         | 74.0600         | 130.0863       | 65.5468          |                |                  | 1  |

# AT5G14740.1

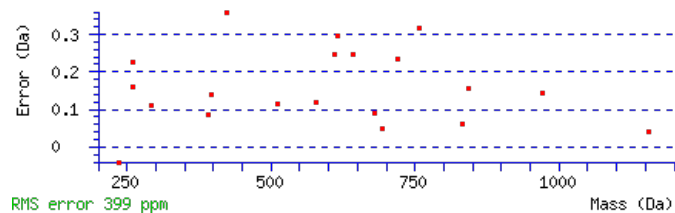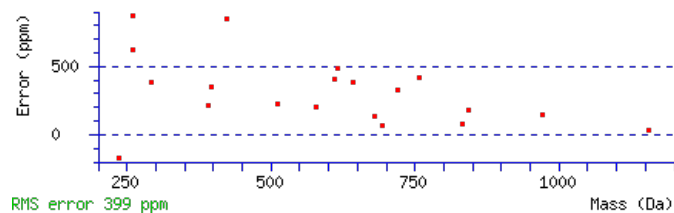

NCBI **BLAST** search of [YAGVGAAIEYAVLHLK](#)

(Parameters: blastp, nr protein database, expect=20000, no filter, PAM30)

Other BLAST [web gateways](#)

## All matches to this query

| Score | Mr(calc)  | Delta  | Sequence                         |
|-------|-----------|--------|----------------------------------|
| 62.5  | 1673.9141 | 0.0008 | <a href="#">YAGVGAAIEYAVLHLK</a> |
| 2.7   | 1673.9100 | 0.0049 | <a href="#">VPGGRNSLESFLIASK</a> |

Mascot: <http://www.matrixscience.com/>

## Peptide View

### MS/MS Fragmentation of **GNESYEDAIEALKK**

Found in **AT5G14740.2** in **TAIR\_Arabidopsis**, Symbols: CA18, BETA CA2, CA2 | CA2 (BETA CARBONIC ANHYDRASE 2); carbonate dehydratase/ zinc ion binding | chr5:4760539-4762385 FORWARD

Match to Query 7001: 1565.754322 from(783.884437,2+) index(5544)

Title: Elution from: 50.169 to 50.169 scan no 6992 cid35.00 polarity:+

Data file 0-3\_1.mgf

Click mouse within plot area to zoom in by factor of two about that point

Or,   to  Da

Label all possible matches  Label matches used for scoring

Show Y-axis

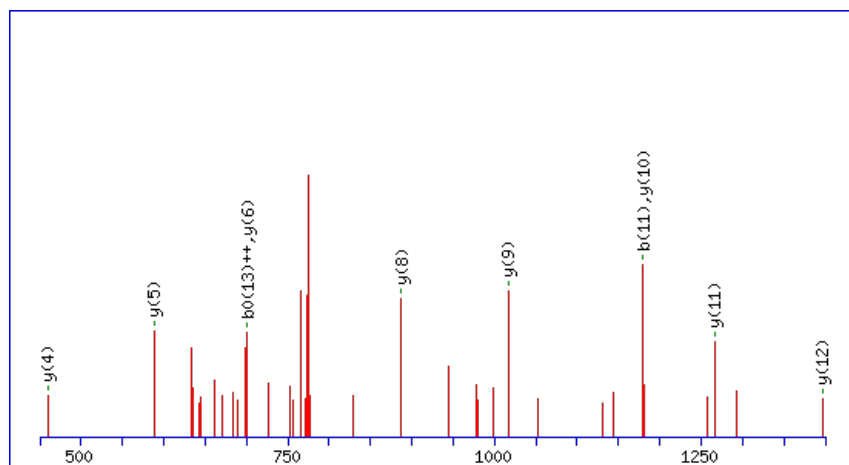

Monoisotopic mass of neutral peptide  $M_r(\text{calc})$ : 1565.7573

Fixed modifications: Carbamidomethyl (C) (apply to specified residues or termini only)

Ions Score: 74 Expect: 1.7e-007

Matches : 10/142 fragment ions using 10 most intense peaks ([help](#))

| #  | b                | b <sup>++</sup> | b*        | b <sup>*++</sup> | b <sup>0</sup> | b <sup>0++</sup> | Seq. | y                | y <sup>++</sup> | y*        | y <sup>*++</sup> | y <sup>0</sup> | y <sup>0++</sup> | #  |
|----|------------------|-----------------|-----------|------------------|----------------|------------------|------|------------------|-----------------|-----------|------------------|----------------|------------------|----|
| 1  | 58.0287          | 29.5180         |           |                  |                |                  | G    |                  |                 |           |                  |                |                  | 14 |
| 2  | 172.0717         | 86.5395         | 155.0451  | 78.0262          |                |                  | N    | 1509.7431        | 755.3752        | 1492.7166 | 746.8619         | 1491.7326      | 746.3699         | 13 |
| 3  | 301.1143         | 151.0608        | 284.0877  | 142.5475         | 283.1037       | 142.0555         | E    | <b>1395.7002</b> | 698.3537        | 1378.6737 | 689.8405         | 1377.6896      | 689.3485         | 12 |
| 4  | 388.1463         | 194.5768        | 371.1197  | 186.0635         | 370.1357       | 185.5715         | S    | <b>1266.6576</b> | 633.8324        | 1249.6311 | 625.3192         | 1248.6470      | 624.8272         | 11 |
| 5  | 551.2096         | 276.1084        | 534.1831  | 267.5952         | 533.1991       | 267.1032         | Y    | <b>1179.6256</b> | 590.3164        | 1162.5990 | 581.8032         | 1161.6150      | 581.3111         | 10 |
| 6  | 680.2522         | 340.6297        | 663.2257  | 332.1165         | 662.2416       | 331.6245         | E    | <b>1016.5623</b> | 508.7848        | 999.5357  | 500.2715         | 998.5517       | 499.7795         | 9  |
| 7  | 795.2792         | 398.1432        | 778.2526  | 389.6299         | 777.2686       | 389.1379         | D    | <b>887.5197</b>  | 444.2635        | 870.4931  | 435.7502         | 869.5091       | 435.2582         | 8  |
| 8  | 866.3163         | 433.6618        | 849.2897  | 425.1485         | 848.3057       | 424.6565         | A    | 772.4927         | 386.7500        | 755.4662  | 378.2367         | 754.4822       | 377.7447         | 7  |
| 9  | 979.4003         | 490.2038        | 962.3738  | 481.6905         | 961.3898       | 481.1985         | I    | <b>701.4556</b>  | 351.2314        | 684.4291  | 342.7182         | 683.4450       | 342.2262         | 6  |
| 10 | 1108.4429        | 554.7251        | 1091.4164 | 546.2118         | 1090.4324      | 545.7198         | E    | <b>588.3715</b>  | 294.6894        | 571.3450  | 286.1761         | 570.3610       | 285.6841         | 5  |
| 11 | <b>1179.4800</b> | 590.2437        | 1162.4535 | 581.7304         | 1161.4695      | 581.2384         | A    | <b>459.3289</b>  | 230.1681        | 442.3024  | 221.6548         |                |                  | 4  |
| 12 | 1292.5641        | 646.7857        | 1275.5376 | 638.2724         | 1274.5535      | 637.7804         | L    | 388.2918         | 194.6496        | 371.2653  | 186.1363         |                |                  | 3  |
| 13 | 1420.6591        | 710.8332        | 1403.6325 | 702.3199         | 1402.6485      | 701.8279         | K    | 275.2078         | 138.1075        | 258.1812  | 129.5942         |                |                  | 2  |
| 14 |                  |                 |           |                  |                |                  | K    | 147.1128         | 74.0600         | 130.0863  | 65.5468          |                |                  | 1  |

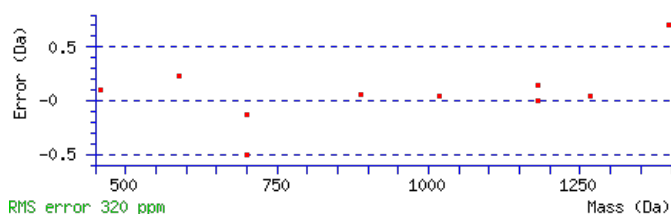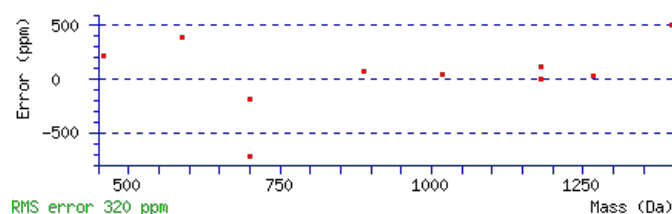

NCBI BLAST search of [GNESYEDAIEALKK](#)

## AT5G14740.2

(Parameters: blastp, nr protein database, expect=20000, no filter, PAM30)

Other BLAST [web gateways](#)

### All matches to this query

| Score | Mr(calc)  | Delta   | Sequence                       |
|-------|-----------|---------|--------------------------------|
| 74.1  | 1565.7573 | -0.0029 | <a href="#">GNESYEDAIEALKK</a> |
| 1.4   | 1565.7546 | -0.0003 | <a href="#">EILENHGGEERQR</a>  |
| 0.6   | 1565.7508 | 0.0036  | <a href="#">EVTEEYTKHMKR</a>   |
| 0.3   | 1565.7573 | -0.0030 | <a href="#">KEYDEIDLANIQK</a>  |

Mascot: <http://www.matrixscience.com/>

**Peptide View**MS/MS Fragmentation of **FVEDLNEMLPK**

Found in **AT5G14780.1** in **TAIR\_Arabidopsis**, Symbols: FDH | FDH (FORMATE DEHYDROGENASE); NAD binding / binding / catalytic / cofactor binding / oxidoreductase, acting on the CH-OH group of donors, NAD or NADP as acceptor | chr5:4777046-4779193 FORWARD

Match to Query 4729: 1333.657450 from(667.836001,2+) index(7533)

Title: Elution from: 66.400 to 66.400 scan no 9924 cid35.00 polarity:+

Data file 0-3\_3.mgf

Click mouse within plot area to zoom in by factor of two about that point

Or,   to  Da

Label all possible matches  Label matches used for scoring

Show Y-axis

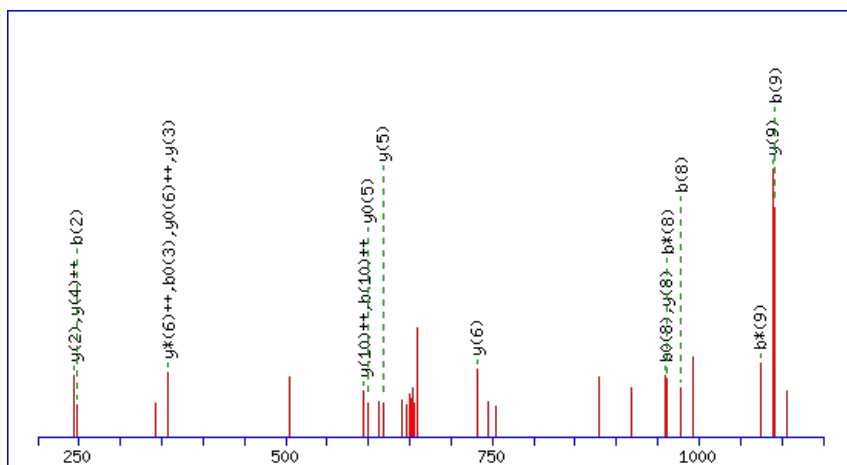

Monoisotopic mass of neutral peptide  $M_r(\text{calc})$ : 1333.6588

Fixed modifications: Carbamidomethyl (C) (apply to specified residues or termini only)

Ions Score: 36 Expect: 0.00099

Matches : 19/98 fragment ions using 26 most intense peaks ([help](#))

| #  | b                | b <sup>++</sup> | b*               | b <sup>*++</sup> | b <sup>0</sup>  | b <sup>0++</sup> | Seq. | y                | y <sup>++</sup> | y*        | y <sup>*++</sup> | y <sup>0</sup>  | y <sup>0++</sup> | #  |
|----|------------------|-----------------|------------------|------------------|-----------------|------------------|------|------------------|-----------------|-----------|------------------|-----------------|------------------|----|
| 1  | 148.0757         | 74.5415         |                  |                  |                 |                  | F    |                  |                 |           |                  |                 |                  | 11 |
| 2  | <b>247.1441</b>  | 124.0757        |                  |                  |                 |                  | V    | 1187.5977        | <b>594.3025</b> | 1170.5711 | 585.7892         | 1169.5871       | 585.2972         | 10 |
| 3  | 376.1867         | 188.5970        |                  |                  | <b>358.1761</b> | 179.5917         | E    | <b>1088.5292</b> | 544.7683        | 1071.5027 | 536.2550         | 1070.5187       | 535.7630         | 9  |
| 4  | 491.2136         | 246.1105        |                  |                  | 473.2031        | 237.1052         | D    | <b>959.4866</b>  | 480.2470        | 942.4601  | 471.7337         | 941.4761        | 471.2417         | 8  |
| 5  | 604.2977         | 302.6525        |                  |                  | 586.2871        | 293.6472         | L    | 844.4597         | 422.7335        | 827.4332  | 414.2202         | 826.4491        | 413.7282         | 7  |
| 6  | 718.3406         | 359.6740        | 701.3141         | 351.1607         | 700.3301        | 350.6687         | N    | <b>731.3756</b>  | 366.1915        | 714.3491  | <b>357.6782</b>  | 713.3651        | <b>357.1862</b>  | 6  |
| 7  | 847.3832         | 424.1953        | 830.3567         | 415.6820         | 829.3727        | 415.1900         | E    | <b>617.3327</b>  | 309.1700        | 600.3062  | 300.6567         | <b>599.3221</b> | 300.1647         | 5  |
| 8  | <b>978.4237</b>  | 489.7155        | <b>961.3972</b>  | 481.2022         | <b>960.4131</b> | 480.7102         | M    | 488.2901         | <b>244.6487</b> | 471.2636  | 236.1354         |                 |                  | 4  |
| 9  | <b>1091.5078</b> | 546.2575        | <b>1074.4812</b> | 537.7443         | 1073.4972       | 537.2522         | L    | <b>357.2496</b>  | 179.1285        | 340.2231  | 170.6152         |                 |                  | 3  |
| 10 | 1188.5605        | <b>594.7839</b> | 1171.5340        | 586.2706         | 1170.5500       | 585.7786         | P    | <b>244.1656</b>  | 122.5864        | 227.1390  | 114.0731         |                 |                  | 2  |
| 11 |                  |                 |                  |                  |                 |                  | K    | 147.1128         | 74.0600         | 130.0863  | 65.5468          |                 |                  | 1  |

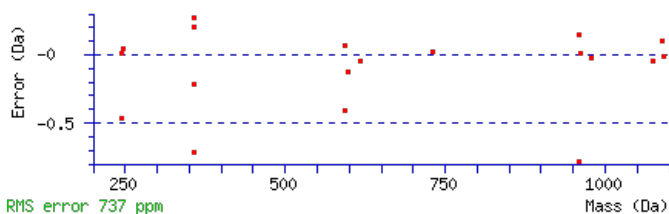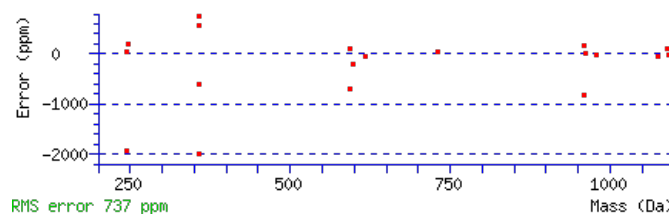

NCBI **BLAST** search of **FVEDLNEMLPK**

(Parameters: blastp, nr protein database, expect=20000, no filter, PAM30)

Other BLAST [web gateways](#)

All matches to this query



**AT5G14780.1**

| <b>Score</b> | <b>Mr(calc)</b> | <b>Delta</b> | <b>Sequence</b>              |
|--------------|-----------------|--------------|------------------------------|
| 35.7         | 1333.6588       | -0.0013      | <a href="#">FVEDLNEMLPK</a>  |
| 10.7         | 1333.6561       | 0.0014       | <a href="#">SRYCRGVPDPK</a>  |
| 9.3          | 1333.6568       | 0.0007       | <a href="#">RWNDFWSVPK</a>   |
| 6.3          | 1333.6586       | -0.0011      | <a href="#">RSISLGDSTENR</a> |

**Mascot:** <http://www.matrixscience.com/>

**Peptide View**MS/MS Fragmentation of **ALQDIDGVSNLK**Found in **AT5G14910.1** in **TAIR\_Arabidopsis**, Symbols: | heavy-metal-associated domain-containing protein | chr5:4823818-4825199 FORWARD

Match to Query 4563: 1286.626718 from(644.320635,2+) index(4609)

Title: Elution from: 42.019 to 42.019 scan no 5782 cid35.00 polarity:+

Data file 0-3\_2.mgf

Click mouse within plot area to zoom in by factor of two about that point

Or,   to  Da Label all possible matches  Label matches used for scoring Show Y-axis 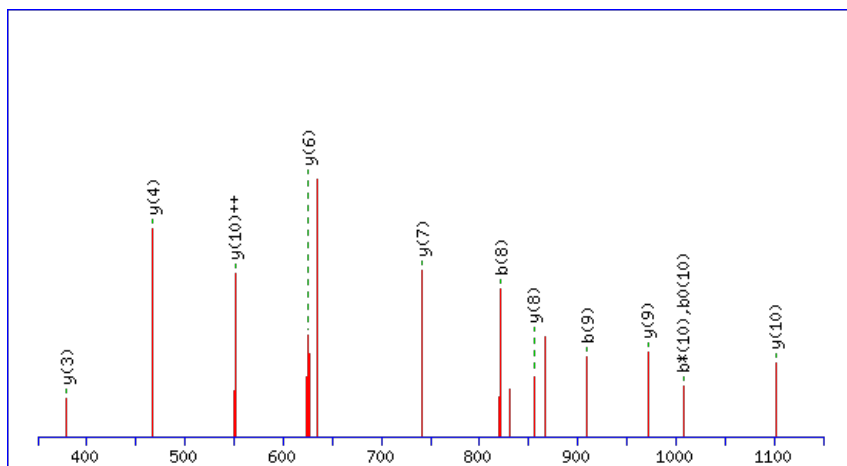Monoisotopic mass of neutral peptide  $M_r(\text{calc})$ : 1286.6276

Fixed modifications: Carbamidomethyl (C) (apply to specified residues or termini only)

Ions Score: 62 Expect: 4.6e-006

Matches : 12/116 fragment ions using 15 most intense peaks ([help](#))

| #  | b               | b <sup>++</sup> | b*               | b <sup>+++</sup> | b <sup>0</sup>   | b <sup>0++</sup> | Seq. | y                | y <sup>++</sup> | y*        | y <sup>+++</sup> | y <sup>0</sup> | y <sup>0++</sup> | #  |
|----|-----------------|-----------------|------------------|------------------|------------------|------------------|------|------------------|-----------------|-----------|------------------|----------------|------------------|----|
| 1  | 73.0414         | 37.0244         |                  |                  |                  |                  | A    |                  |                 |           |                  |                |                  | 12 |
| 2  | 187.1225        | 94.0649         |                  |                  |                  |                  | L    | 1215.6008        | 608.3040        | 1197.5772 | 599.2922         | 1197.5902      | 599.2987         | 11 |
| 3  | 317.1752        | 159.0912        | 299.1516         | 150.0794         |                  |                  | Q    | <b>1101.5197</b> | <b>551.2635</b> | 1083.4961 | 542.2517         | 1083.5091      | 542.2582         | 10 |
| 4  | 433.1991        | 217.1032        | 415.1756         | 208.0914         | 415.1886         | 208.0979         | D    | <b>971.4670</b>  | 486.2372        | 953.4435  | 477.2254         | 953.4565       | 477.2319         | 9  |
| 5  | 547.2802        | 274.1438        | 529.2567         | 265.1320         | 529.2697         | 265.1385         | I    | <b>855.4431</b>  | 428.2252        | 837.4195  | 419.2134         | 837.4325       | 419.2199         | 8  |
| 6  | 663.3042        | 332.1558        | 645.2806         | 323.1440         | 645.2937         | 323.1505         | D    | <b>741.3620</b>  | 371.1846        | 723.3384  | 362.1728         | 723.3514       | 362.1793         | 7  |
| 7  | 721.3227        | 361.1650        | 703.2991         | 352.1532         | 703.3122         | 352.1597         | G    | <b>625.3380</b>  | 313.1726        | 607.3144  | 304.1608         | 607.3274       | 304.1673         | 6  |
| 8  | <b>821.3882</b> | 411.1977        | 803.3646         | 402.1859         | 803.3776         | 402.1924         | V    | 567.3195         | 284.1634        | 549.2959  | 275.1516         | 549.3089       | 275.1581         | 5  |
| 9  | <b>909.4172</b> | 455.2123        | 891.3937         | 446.2005         | 891.4067         | 446.2070         | S    | <b>467.2540</b>  | 234.1307        | 449.2304  | 225.1189         | 449.2435       | 225.1254         | 4  |
| 10 | 1025.4542       | 513.2308        | <b>1007.4306</b> | 504.2190         | <b>1007.4437</b> | 504.2255         | N    | <b>379.2250</b>  | 190.1161        | 361.2014  | 181.1043         |                |                  | 3  |
| 11 | 1139.5353       | 570.2713        | 1121.5117        | 561.2595         | 1121.5248        | 561.2660         | L    | 263.1880         | 132.0976        | 245.1644  | 123.0858         |                |                  | 2  |
| 12 |                 |                 |                  |                  |                  |                  | K    | 149.1069         | 75.0571         | 131.0833  | 66.0453          |                |                  | 1  |

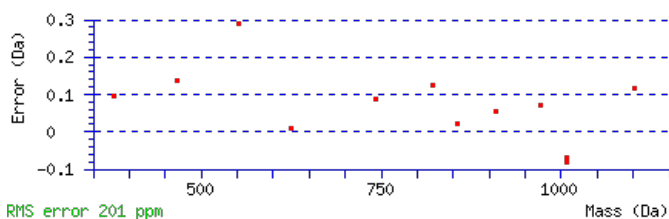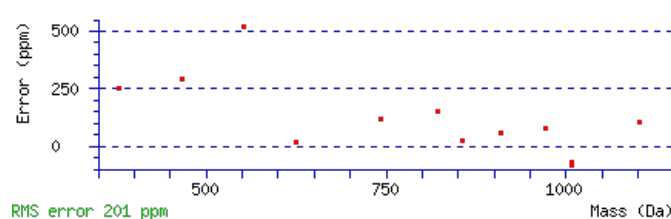NCBI **BLAST** search of **ALQDIDGVSNLK**

(Parameters: blastp, nr protein database, expect=20000, no filter, PAM30)

Other BLAST [web gateways](#)**All matches to this query**

## AT5G14910.1

| Score | Mr(calc)  | Delta   | Sequence                      |
|-------|-----------|---------|-------------------------------|
| 62.0  | 1286.6276 | -0.0009 | <a href="#">ALQDIDGVSNLK</a>  |
| 14.3  | 1286.6277 | -0.0010 | <a href="#">SPKGSPEKELSDK</a> |
| 13.1  | 1286.6276 | -0.0009 | <a href="#">KLANLDDGDIK</a>   |
| 5.6   | 1286.6276 | -0.0009 | <a href="#">RLPVDETSLDK</a>   |
| 4.8   | 1286.6303 | -0.0036 | <a href="#">IAPRESNQAGVK</a>  |
| 2.9   | 1286.6229 | 0.0038  | <a href="#">SLLINLHSCSK</a>   |
| 1.3   | 1286.6276 | -0.0009 | <a href="#">EIAEVANGVDKK</a>  |
| 1.2   | 1286.6229 | 0.0038  | <a href="#">LADCVGLTLGPR</a>  |
| 0.9   | 1286.6303 | -0.0036 | <a href="#">VDPARLGREEK</a>   |
| 0.6   | 1286.6276 | -0.0009 | <a href="#">QEVEKNGIKLD</a>   |

Mascot: <http://www.matrixscience.com/>

**Peptide View**MS/MS Fragmentation of **SFFTIVSGEVDSK**

Found in **AT5G15090.1** in **TAIR\_Arabidopsis**, Symbols: | porin, putative / voltage-dependent anion-selective channel protein, putative | chr5:4889644-4891392 REVERSE

Match to Query 4904: 1301.614348 from(651.814450,2+) index(5620)

Title: Elution from: 50.368 to 50.368 scan no 7067 cid35.00 polarity:+

Data file D12h-3\_1.mgf

Click mouse within plot area to zoom in by factor of two about that point

Or,   to  Da

Label all possible matches  Label matches used for scoring

Show Y-axis

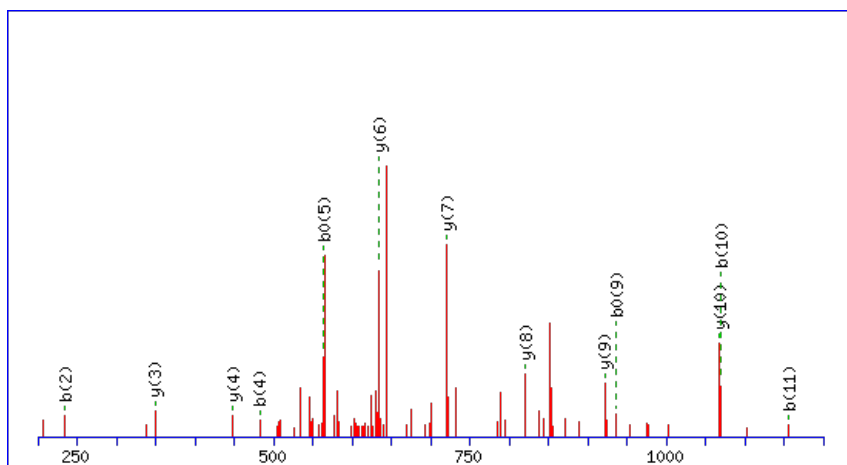

Monoisotopic mass of neutral peptide  $M_r(\text{calc})$ : 1301.6140

Fixed modifications: Carbamidomethyl (C) (apply to specified residues or termini only)

Ions Score: 55 Expect: 7.5e-006

Matches : 13/108 fragment ions using 19 most intense peaks ([help](#))

| #  | b                | b <sup>++</sup> | b <sup>0</sup>  | b <sup>0++</sup> | Seq. | y                | y <sup>++</sup> | y*        | y <sup>*++</sup> | y <sup>0</sup> | y <sup>0++</sup> | #  |
|----|------------------|-----------------|-----------------|------------------|------|------------------|-----------------|-----------|------------------|----------------|------------------|----|
| 1  | 88.0393          | 44.5233         | 70.0287         | 35.5180          | S    |                  |                 |           |                  |                |                  | 12 |
| 2  | <b>235.1077</b>  | 118.0575        | 217.0972        | 109.0522         | F    | 1215.5892        | 608.2982        | 1198.5626 | 599.7850         | 1197.5786      | 599.2930         | 11 |
| 3  | 382.1761         | 191.5917        | 364.1656        | 182.5864         | F    | <b>1068.5208</b> | 534.7640        | 1051.4942 | 526.2508         | 1050.5102      | 525.7587         | 10 |
| 4  | <b>483.2238</b>  | 242.1155        | 465.2132        | 233.1103         | T    | <b>921.4524</b>  | 461.2298        | 904.4258  | 452.7165         | 903.4418       | 452.2245         | 9  |
| 5  | 582.2922         | 291.6498        | <b>564.2817</b> | 282.6445         | V    | <b>820.4047</b>  | 410.7060        | 803.3781  | 402.1927         | 802.3941       | 401.7007         | 8  |
| 6  | 669.3243         | 335.1658        | 651.3137        | 326.1605         | S    | <b>721.3363</b>  | 361.1718        | 704.3097  | 352.6585         | 703.3257       | 352.1665         | 7  |
| 7  | 726.3457         | 363.6765        | 708.3352        | 354.6712         | G    | <b>634.3042</b>  | 317.6558        | 617.2777  | 309.1425         | 616.2937       | 308.6505         | 6  |
| 8  | 855.3883         | 428.1978        | 837.3777        | 419.1925         | E    | 577.2828         | 289.1450        | 560.2562  | 280.6318         | 559.2722       | 280.1397         | 5  |
| 9  | 954.4567         | 477.7320        | <b>936.4462</b> | 468.7267         | V    | <b>448.2402</b>  | 224.6237        | 431.2136  | 216.1105         | 430.2296       | 215.6185         | 4  |
| 10 | <b>1069.4837</b> | 535.2455        | 1051.4731       | 526.2402         | D    | <b>349.1718</b>  | 175.0895        | 332.1452  | 166.5763         | 331.1612       | 166.0842         | 3  |
| 11 | <b>1156.5157</b> | 578.7615        | 1138.5051       | 569.7562         | S    | 234.1448         | 117.5761        | 217.1183  | 109.0628         | 216.1343       | 108.5708         | 2  |
| 12 |                  |                 |                 |                  | K    | 147.1128         | 74.0600         | 130.0863  | 65.5468          |                |                  | 1  |

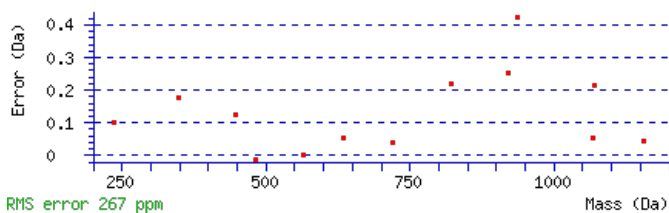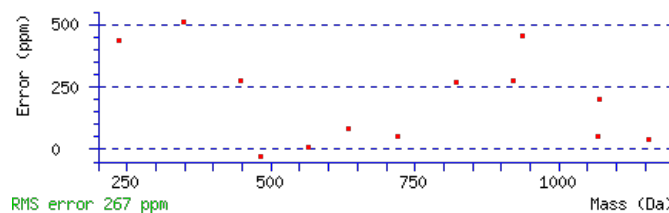

NCBI BLAST search of **SFFTIVSGEVDSK**

(Parameters: blastp, nr protein database, expect=20000, no filter, PAM30)

Other BLAST [web gateways](#)

# AT5G15090.1

All matches to this query

| Score | Mr(calc)  | Delta  | Sequence                     |
|-------|-----------|--------|------------------------------|
| 55.0  | 1301.6140 | 0.0004 | <a href="#">SFFTVSGEVDSK</a> |
| 4.8   | 1301.6139 | 0.0004 | <a href="#">KDYLVDGVDSK</a>  |
| 0.2   | 1301.6108 | 0.0036 | <a href="#">CVETRIYMSK</a>   |

Mascot: <http://www.matrixscience.com/>

**Peptide View**MS/MS Fragmentation of **RIFEGEALLR**Found in **AT5G15200.1** in **TAIR\_Arabidopsis**, Symbols: | 40S ribosomal protein S9 (RPS9B) | chr5:4935127-4936337 REVERSE

Match to Query 3938: 1218.628574 from(610.321563,2+) index(4609)

Title: Elution from: 44.339 to 44.339 scan no 5872 cid35.00 polarity:+

Data file D1d-2\_1.mgf

Click mouse within plot area to zoom in by factor of two about that point

Or,   to  Da Label all possible matches  Label matches used for scoring Show Y-axis 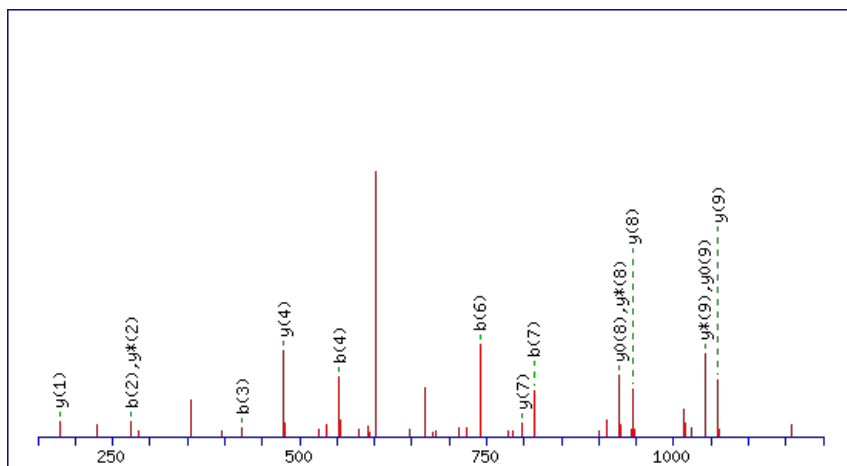Monoisotopic mass of neutral peptide **Mr(calc)**: 1218.6297**Fixed modifications**: Carbamidomethyl (C) (apply to specified residues or termini only)**Ions Score**: 58 **Expect**: 1.7e-005**Matches**: 17/94 fragment ions using 19 most intense peaks ([help](#))

| #  | b                | b <sup>++</sup> | b <sup>*</sup> | b <sup>*++</sup> | b <sup>0</sup> | b <sup>0++</sup> | Seq. | y                | y <sup>++</sup> | y <sup>*</sup>   | y <sup>*++</sup> | y <sup>0</sup>   | y <sup>0++</sup> | #  |
|----|------------------|-----------------|----------------|------------------|----------------|------------------|------|------------------|-----------------|------------------|------------------|------------------|------------------|----|
| 1  | 161.0965         | 81.0519         | 143.0729       | 72.0401          |                |                  | R    |                  |                 |                  |                  |                  |                  | 10 |
| 2  | <b>275.1776</b>  | 138.0925        | 257.1540       | 129.0807         |                |                  | I    | <b>1059.5477</b> | 530.2775        | <b>1041.5242</b> | 521.2657         | <b>1041.5372</b> | 521.2722         | 9  |
| 3  | <b>423.2431</b>  | 212.1252        | 405.2195       | 203.1134         |                |                  | F    | <b>945.4666</b>  | 473.2370        | <b>927.4431</b>  | 464.2252         | <b>927.4561</b>  | 464.2317         | 8  |
| 4  | <b>553.2827</b>  | 277.1450        | 535.2591       | 268.1332         | 535.2721       | 268.1397         | E    | <b>797.4012</b>  | 399.2042        | 779.3776         | 390.1924         | 779.3906         | 390.1990         | 7  |
| 5  | 611.3012         | 306.1542        | 593.2776       | 297.1424         | 593.2906       | 297.1490         | G    | 667.3616         | 334.1844        | 649.3380         | 325.1726         | 649.3510         | 325.1791         | 6  |
| 6  | <b>741.3408</b>  | 371.1741        | 723.3172       | 362.1623         | 723.3303       | 362.1688         | E    | 609.3431         | 305.1752        | 591.3195         | 296.1634         | 591.3325         | 296.1699         | 5  |
| 7  | <b>813.3750</b>  | 407.1911        | 795.3514       | 398.1793         | 795.3644       | 398.1858         | A    | <b>479.3034</b>  | 240.1554        | 461.2799         | 231.1436         |                  |                  | 4  |
| 8  | <b>927.4561</b>  | 464.2317        | 909.4325       | 455.2199         | 909.4455       | 455.2264         | L    | 407.2693         | 204.1383        | 389.2457         | 195.1265         |                  |                  | 3  |
| 9  | <b>1041.5372</b> | 521.2722        | 1023.5136      | 512.2604         | 1023.5266      | 512.2669         | L    | 293.1882         | 147.0977        | <b>275.1646</b>  | 138.0859         |                  |                  | 2  |
| 10 |                  |                 |                |                  |                |                  | R    | <b>179.1071</b>  | 90.0572         | 161.0835         | 81.0454          |                  |                  | 1  |

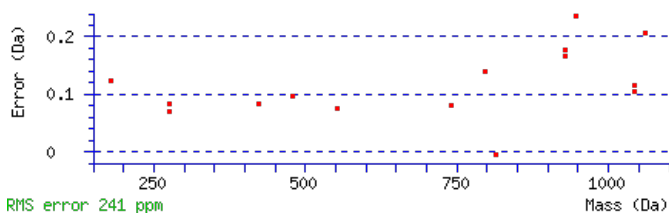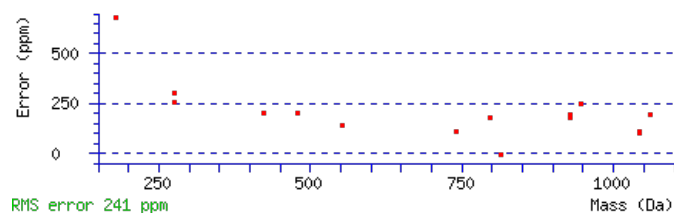NCBI **BLAST** search of **RIFEGEALLR**

(Parameters: blastp, nr protein database, expect=20000, no filter, PAM30)

Other BLAST [web gateways](#)**All matches to this query**

| Score | Mr(calc) | Delta | Sequence |
|-------|----------|-------|----------|
|       |          |       |          |

**AT5G15200.1**

|      |           |         |                              |
|------|-----------|---------|------------------------------|
| 57.6 | 1218.6297 | -0.0011 | <a href="#">RIFEGEALLR</a>   |
| 22.9 | 1218.6297 | -0.0011 | <a href="#">LRVDFTPSLR</a>   |
| 21.4 | 1218.6275 | 0.0011  | <a href="#">QTKDGS LGKLR</a> |
| 18.2 | 1218.6250 | 0.0036  | <a href="#">RLGLWGMLTR</a>   |
| 17.2 | 1218.6297 | -0.0011 | <a href="#">RFEIIEGIAR</a>   |
| 16.8 | 1218.6301 | -0.0016 | <a href="#">RNLVGRSELR</a>   |
| 16.2 | 1218.6270 | 0.0015  | <a href="#">ASLFGELAISK</a>  |
| 13.1 | 1218.6275 | 0.0011  | <a href="#">RLETQLSSLR</a>   |
| 9.7  | 1218.6301 | -0.0016 | <a href="#">IRVTVARNDR</a>   |
| 9.2  | 1218.6297 | -0.0011 | <a href="#">RLVDSTLPER</a>   |

**Mascot:** <http://www.matrixscience.com/>

**Peptide View**MS/MS Fragmentation of **LDYVLALTVENFLER**Found in **AT5G15200.2** in **TAIR\_Arabidopsis**, Symbols: | 40S ribosomal protein S9 (RPS9B) | chr5:4935605-4936337 REVERSE

Match to Query 8579: 1793.954782 from(897.984667,2+) index(11282)

Title: Elution from: 124.559 to 124.559 scan no 17107 cid35.00 polarity:+

Data file D1d-2\_1.mgf

Click mouse within plot area to zoom in by factor of two about that point

Or,   to  Da Label all possible matches  Label matches used for scoring Show Y-axis 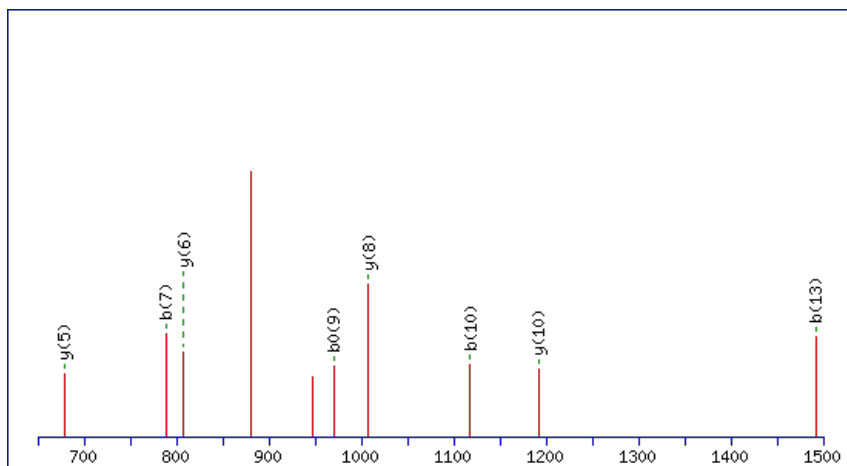Monoisotopic mass of neutral peptide  $M_r(\text{calc})$ : 1793.9563

Fixed modifications: Carbamidomethyl (C) (apply to specified residues or termini only)

Ions Score: 39 Expect: 0.00058

Matches : 8/144 fragment ions using 9 most intense peaks ([help](#))

| #  | b                | b <sup>++</sup> | b <sup>*</sup> | b <sup>*++</sup> | b <sup>0</sup>  | b <sup>0++</sup> | Seq. | y                | y <sup>++</sup> | y <sup>*</sup> | y <sup>*++</sup> | y <sup>0</sup> | y <sup>0++</sup> | #  |
|----|------------------|-----------------|----------------|------------------|-----------------|------------------|------|------------------|-----------------|----------------|------------------|----------------|------------------|----|
| 1  | 114.0913         | 57.5493         |                |                  |                 |                  | L    |                  |                 |                |                  |                |                  | 15 |
| 2  | 229.1183         | 115.0628        |                |                  | 211.1077        | 106.0575         | D    | 1681.8796        | 841.4434        | 1664.8530      | 832.9301         | 1663.8690      | 832.4381         | 14 |
| 3  | 392.1816         | 196.5944        |                |                  | 374.1710        | 187.5892         | Y    | 1566.8526        | 783.9299        | 1549.8261      | 775.4167         | 1548.8421      | 774.9247         | 13 |
| 4  | 491.2500         | 246.1287        |                |                  | 473.2395        | 237.1234         | V    | 1403.7893        | 702.3983        | 1386.7627      | 693.8850         | 1385.7787      | 693.3930         | 12 |
| 5  | 604.3341         | 302.6707        |                |                  | 586.3235        | 293.6654         | L    | 1304.7209        | 652.8641        | 1287.6943      | 644.3508         | 1286.7103      | 643.8588         | 11 |
| 6  | 675.3712         | 338.1892        |                |                  | 657.3606        | 329.1840         | A    | <b>1191.6368</b> | 596.3220        | 1174.6103      | 587.8088         | 1173.6262      | 587.3168         | 10 |
| 7  | <b>788.4553</b>  | 394.7313        |                |                  | 770.4447        | 385.7260         | L    | 1120.5997        | 560.8035        | 1103.5732      | 552.2902         | 1102.5891      | 551.7982         | 9  |
| 8  | 889.5029         | 445.2551        |                |                  | 871.4924        | 436.2498         | T    | <b>1007.5156</b> | 504.2615        | 990.4891       | 495.7482         | 989.5051       | 495.2562         | 8  |
| 9  | 988.5714         | 494.7893        |                |                  | <b>970.5608</b> | 485.7840         | V    | 906.4680         | 453.7376        | 889.4414       | 445.2243         | 888.4574       | 444.7323         | 7  |
| 10 | <b>1117.6140</b> | 559.3106        |                |                  | 1099.6034       | 550.3053         | E    | <b>807.3995</b>  | 404.2034        | 790.3730       | 395.6901         | 789.3890       | 395.1981         | 6  |
| 11 | 1231.6569        | 616.3321        | 1214.6303      | 607.8188         | 1213.6463       | 607.3268         | N    | <b>678.3570</b>  | 339.6821        | 661.3304       | 331.1688         | 660.3464       | 330.6768         | 5  |
| 12 | 1378.7253        | 689.8663        | 1361.6987      | 681.3530         | 1360.7147       | 680.8610         | F    | 564.3140         | 282.6606        | 547.2875       | 274.1474         | 546.3035       | 273.6554         | 4  |
| 13 | <b>1491.8094</b> | 746.4083        | 1474.7828      | 737.8950         | 1473.7988       | 737.4030         | L    | 417.2456         | 209.1264        | 400.2191       | 200.6132         | 399.2350       | 200.1212         | 3  |
| 14 | 1620.8520        | 810.9296        | 1603.8254      | 802.4163         | 1602.8414       | 801.9243         | E    | 304.1615         | 152.5844        | 287.1350       | 144.0711         | 286.1510       | 143.5791         | 2  |
| 15 |                  |                 |                |                  |                 |                  | R    | 175.1190         | 88.0631         | 158.0924       | 79.5498          |                |                  | 1  |

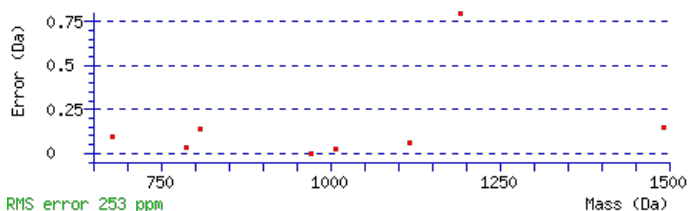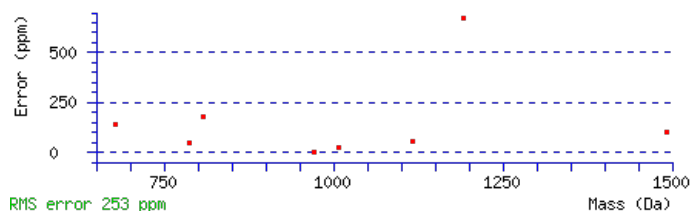NCBI BLAST search of [LDYVLALTVENFLER](#)



## AT5G15200.2

(Parameters: blastp, nr protein database, expect=20000, no filter, PAM30)

Other BLAST [web gateways](#)

### All matches to this query

| Score | Mr(calc)  | Delta   | Sequence                           |
|-------|-----------|---------|------------------------------------|
| 39.4  | 1793.9563 | -0.0015 | <a href="#">LDYVLALTVENFLER</a>    |
| 0.4   | 1793.9557 | -0.0009 | <a href="#">ESSGVMSLSSKKAGLVSK</a> |

Mascot: <http://www.matrixscience.com/>

**Peptide View**MS/MS Fragmentation of **AIDLVD EAAAK**

Found in **AT5G15450.1** in **TAIR\_Arabidopsis**, Symbols: APG6, CLPB3, CLPB-P | APG6/CLPB-P/CLPB3 (ALBINO AND PALE GREEN 6);  
ATP binding / ATPase | chr5:5014402-5018258 REVERSE

Match to Query 3082: 1126.552566 from(564.283559,2+) index(3794)

Title: Elution from: 38.627 to 38.627 scan no 4839 cid35.00 polarity:+

Data file D12h-2\_2.mgf

Click mouse within plot area to zoom in by factor of two about that point

Or,   to  Da

Label all possible matches  Label matches used for scoring

Show Y-axis

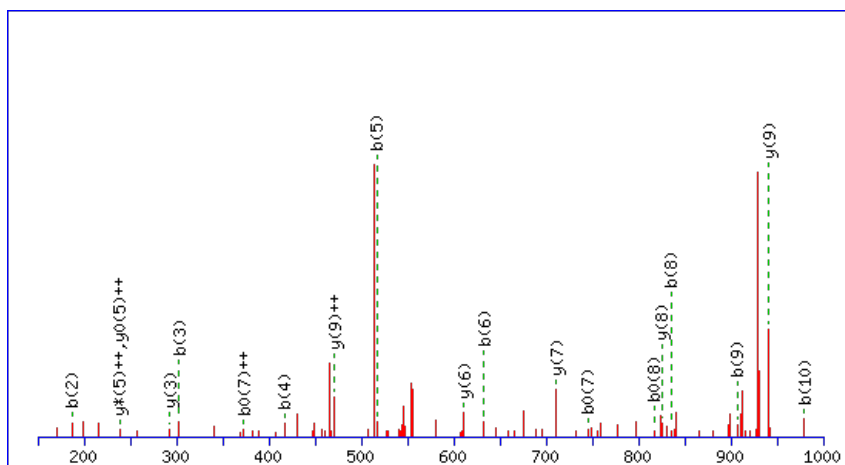

**Monoisotopic mass of neutral peptide Mr(calc):** 1126.5514

**Fixed modifications:** Carbamidomethyl (C) (apply to specified residues or termini only)

**Ions Score:** 29 **Expect:** 0.0056

**Matches:** 19/88 fragment ions using 65 most intense peaks ([help](#))

| #  | b               | b <sup>++</sup> | b <sup>0</sup>  | b <sup>0++</sup> | Seq. | y               | y <sup>++</sup> | y*        | y <sup>++</sup> * | y <sup>0</sup> | y <sup>0++</sup> | #  |
|----|-----------------|-----------------|-----------------|------------------|------|-----------------|-----------------|-----------|-------------------|----------------|------------------|----|
| 1  | 73.0414         | 37.0244         |                 |                  | A    |                 |                 |           |                   |                |                  | 11 |
| 2  | <b>187.1225</b> | 94.0649         |                 |                  | I    | 1055.5246       | 528.2659        | 1037.5010 | 519.2541          | 1037.5140      | 519.2606         | 10 |
| 3  | <b>303.1465</b> | 152.0769        | 285.1359        | 143.0716         | D    | <b>941.4435</b> | <b>471.2254</b> | 923.4199  | 462.2136          | 923.4329       | 462.2201         | 9  |
| 4  | <b>417.2276</b> | 209.1174        | 399.2170        | 200.1122         | L    | <b>825.4195</b> | 413.2134        | 807.3959  | 404.2016          | 807.4089       | 404.2081         | 8  |
| 5  | <b>517.2930</b> | 259.1502        | 499.2825        | 250.1449         | V    | <b>711.3384</b> | 356.1728        | 693.3148  | 347.1610          | 693.3278       | 347.1675         | 7  |
| 6  | <b>633.3170</b> | 317.1622        | 615.3065        | 308.1569         | D    | <b>611.2729</b> | 306.1401        | 593.2493  | 297.1283          | 593.2624       | 297.1348         | 6  |
| 7  | 763.3567        | 382.1820        | <b>745.3461</b> | <b>373.1767</b>  | E    | 495.2489        | 248.1281        | 477.2254  | <b>239.1163</b>   | 477.2384       | <b>239.1228</b>  | 5  |
| 8  | <b>835.3908</b> | 418.1990        | <b>817.3802</b> | 409.1938         | A    | 365.2093        | 183.1083        | 347.1857  | 174.0965          |                |                  | 4  |
| 9  | <b>907.4250</b> | 454.2161        | 889.4144        | 445.2108         | A    | <b>293.1752</b> | 147.0912        | 275.1516  | 138.0794          |                |                  | 3  |
| 10 | <b>979.4591</b> | 490.2332        | 961.4485        | 481.2279         | A    | 221.1410        | 111.0741        | 203.1174  | 102.0624          |                |                  | 2  |
| 11 |                 |                 |                 |                  | K    | 149.1069        | 75.0571         | 131.0833  | 66.0453           |                |                  | 1  |

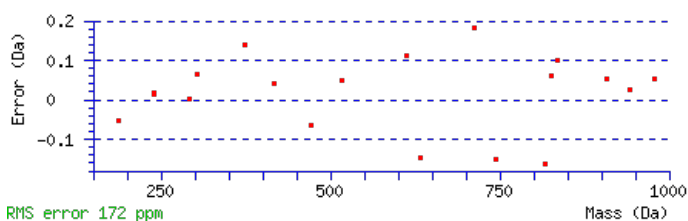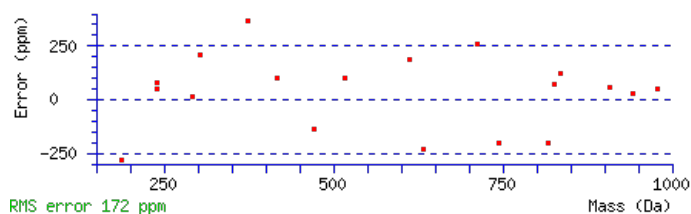

NCBI **BLAST** search of **AIDLVD EAAAK**

(Parameters: blastp, nr protein database, expect=20000, no filter, PAM30)

Other BLAST [web gateways](#)

**All matches to this query**

**AT5G15450.1**

| <b>Score</b> | <b>Mr(calc)</b> | <b>Delta</b> | <b>Sequence</b>              |
|--------------|-----------------|--------------|------------------------------|
| 29.2         | 1126.5514       | 0.0012       | <a href="#">AIDLVD EAAAK</a> |
| 7.8          | 1126.5514       | 0.0012       | <a href="#">VSPEVSVVDGK</a>  |
| 7.3          | 1126.5523       | 0.0003       | <a href="#">ICPGLPLAMK</a>   |
| 6.6          | 1126.5514       | 0.0012       | <a href="#">LEGLDALQK</a>    |

**Mascot:** <http://www.matrixscience.com/>

**Peptide View**MS/MS Fragmentation of **DIVELELK**

Found in **AT5G15530.1** in **TAIR\_Arabidopsis**, Symbols: BCCP2, CAC1-B | BCCP2 (biotin carboxyl carrier protein 2); biotin binding | chr5:5038958-5040440 FORWARD

Match to Query 2123: 966.512464 from(484.263508,2+) index(5811)

Title: Elution from: 51.519 to 51.519 scan no 7379 cid35.00 polarity:+

Data file 0-3\_2.mgf

Click mouse within plot area to zoom in by factor of two about that point

Or,   to  Da

Label all possible matches  Label matches used for scoring

Show Y-axis

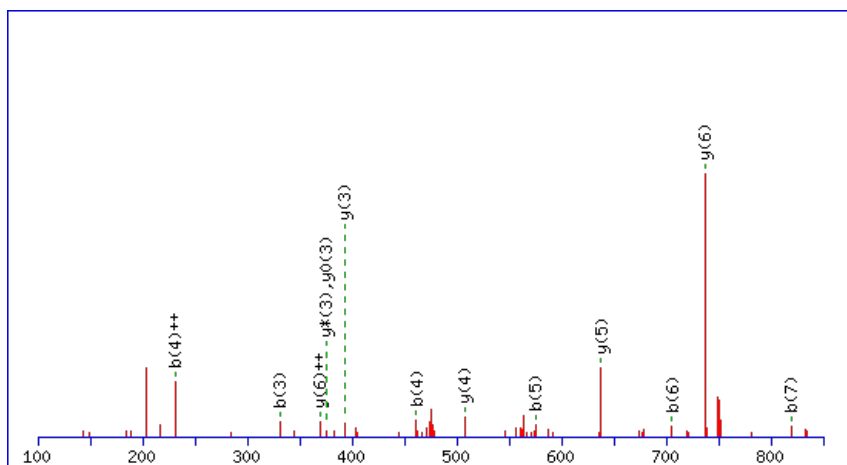

Monoisotopic mass of neutral peptide  $M_r(\text{calc})$ : 966.5116

Fixed modifications: Carbamidomethyl (C) (apply to specified residues or termini only)

Ions Score: 36 Expect: 0.00045

Matches : 14/66 fragment ions using 26 most intense peaks ([help](#))

| # | b               | b <sup>++</sup> | b <sup>0</sup> | b <sup>0++</sup> | Seq. | y               | y <sup>++</sup> | y*              | y <sup>*++</sup> | y <sup>0</sup>  | y <sup>0++</sup> | # |
|---|-----------------|-----------------|----------------|------------------|------|-----------------|-----------------|-----------------|------------------|-----------------|------------------|---|
| 1 | 117.0313        | 59.0193         | 99.0207        | 50.0140          | D    |                 |                 |                 |                  |                 |                  | 8 |
| 2 | <b>231.1124</b> | 116.0598        | 213.1018       | 107.0545         | I    | 851.4949        | 426.2511        | 833.4713        | 417.2393         | 833.4843        | 417.2458         | 7 |
| 3 | <b>331.1778</b> | 166.0925        | 313.1672       | 157.0873         | V    | <b>737.4138</b> | <b>369.2105</b> | 719.3902        | 360.1987         | 719.4032        | 360.2052         | 6 |
| 4 | <b>461.2174</b> | <b>231.1124</b> | 443.2069       | 222.1071         | E    | <b>637.3483</b> | 319.1778        | 619.3247        | 310.1660         | 619.3378        | 310.1725         | 5 |
| 5 | <b>575.2985</b> | 288.1529        | 557.2880       | 279.1476         | L    | <b>507.3087</b> | 254.1580        | 489.2851        | 245.1462         | 489.2981        | 245.1527         | 4 |
| 6 | <b>705.3382</b> | 353.1727        | 687.3276       | 344.1674         | E    | <b>393.2276</b> | 197.1174        | <b>375.2040</b> | 188.1056         | <b>375.2170</b> | 188.1122         | 3 |
| 7 | <b>819.4193</b> | 410.2133        | 801.4087       | 401.2080         | L    | 263.1880        | 132.0976        | 245.1644        | 123.0858         |                 |                  | 2 |
| 8 |                 |                 |                |                  | K    | 149.1069        | 75.0571         | 131.0833        | 66.0453          |                 |                  | 1 |

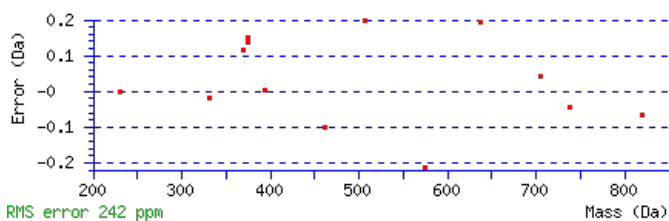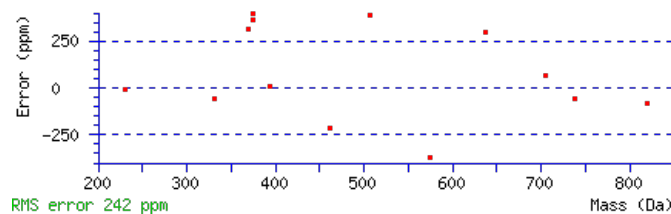

NCBI BLAST search of [DIVELELK](#)

(Parameters: blastp, nr protein database, expect=20000, no filter, PAM30)

Other BLAST [web gateways](#)

**All matches to this query**

| Score | $M_r(\text{calc})$ | Delta  | Sequence                 |
|-------|--------------------|--------|--------------------------|
| 36.1  | 966.5116           | 0.0009 | <a href="#">DIVELELK</a> |

## AT5G15530.1

|      |          |         |                          |
|------|----------|---------|--------------------------|
| 22.5 | 966.5116 | 0.0009  | <a href="#">DVLELIEK</a> |
| 7.0  | 966.5116 | 0.0009  | <a href="#">LEVEVEIK</a> |
| 2.8  | 966.5116 | 0.0009  | <a href="#">DDLLEK</a>   |
| 1.8  | 966.5143 | -0.0018 | <a href="#">ITLSKHEK</a> |
| 1.4  | 966.5116 | 0.0009  | <a href="#">ELEVLEK</a>  |

**Mascot:** <http://www.matrixscience.com/>

## Peptide View

### MS/MS Fragmentation of **LSSLDPYFDK**

Found in **AT5G15650.1** in **TAIR\_Arabidopsis**, Symbols: RGP2 | RGP2 (REVERSIBLY GLYCOSYLATED POLYPEPTIDE 2); alpha-1,4-glucan-protein synthase (UDP-forming) | chr5:5092206-5094096 FORWARD

Match to Query 3815: 1183.573978 from(592.794265,2+) index(5600)

Title: Elution from: 49.301 to 49.301 scan no 7140 cid35.00 polarity:+

Data file D6h-3\_3.mgf

Click mouse within plot area to zoom in by factor of two about that point

Or,   to  Da

Label all possible matches  Label matches used for scoring

Show Y-axis

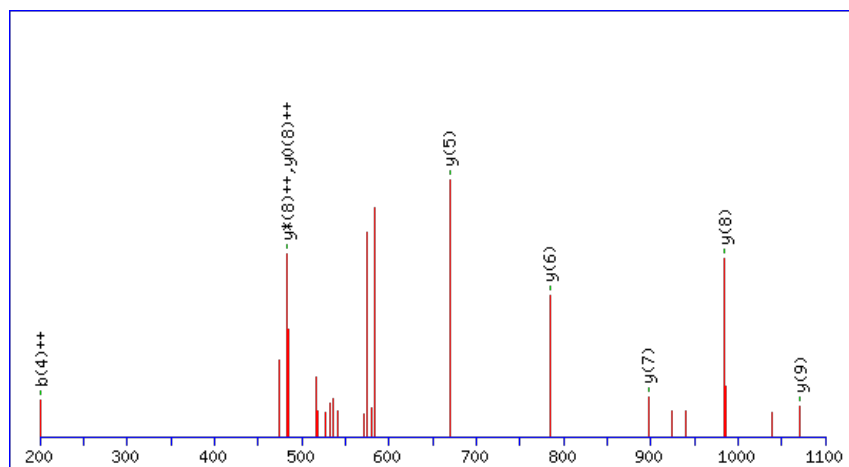

Monoisotopic mass of neutral peptide  $M_r(\text{calc})$ : 1183.5761

Fixed modifications: Carbamidomethyl (C) (apply to specified residues or termini only)

Ions Score: 44 Expect: 0.00012

Matches : 9/86 fragment ions using 8 most intense peaks ([help](#))

| #  | b         | b <sup>++</sup> | b <sup>0</sup> | b <sup>0++</sup> | Seq. | y         | y <sup>++</sup> | y*        | y <sup>*++</sup> | y <sup>0</sup> | y <sup>0++</sup> | #  |
|----|-----------|-----------------|----------------|------------------|------|-----------|-----------------|-----------|------------------|----------------|------------------|----|
| 1  | 114.0913  | 57.5493         |                |                  | L    |           |                 |           |                  |                |                  | 10 |
| 2  | 201.1234  | 101.0653        | 183.1128       | 92.0600          | S    | 1071.4993 | 536.2533        | 1054.4728 | 527.7400         | 1053.4888      | 527.2480         | 9  |
| 3  | 288.1554  | 144.5813        | 270.1448       | 135.5761         | S    | 984.4673  | 492.7373        | 967.4407  | 484.2240         | 966.4567       | 483.7320         | 8  |
| 4  | 401.2395  | 201.1234        | 383.2289       | 192.1181         | L    | 897.4353  | 449.2213        | 880.4087  | 440.7080         | 879.4247       | 440.2160         | 7  |
| 5  | 516.2664  | 258.6368        | 498.2558       | 249.6316         | D    | 784.3512  | 392.6792        | 767.3246  | 384.1660         | 766.3406       | 383.6740         | 6  |
| 6  | 613.3192  | 307.1632        | 595.3086       | 298.1579         | P    | 669.3243  | 335.1658        | 652.2977  | 326.6525         | 651.3137       | 326.1605         | 5  |
| 7  | 776.3825  | 388.6949        | 758.3719       | 379.6896         | Y    | 572.2715  | 286.6394        | 555.2449  | 278.1261         | 554.2609       | 277.6341         | 4  |
| 8  | 923.4509  | 462.2291        | 905.4403       | 453.2238         | F    | 409.2082  | 205.1077        | 392.1816  | 196.5944         | 391.1976       | 196.1024         | 3  |
| 9  | 1038.4779 | 519.7426        | 1020.4673      | 510.7373         | D    | 262.1397  | 131.5735        | 245.1132  | 123.0602         | 244.1292       | 122.5682         | 2  |
| 10 |           |                 |                |                  | K    | 147.1128  | 74.0600         | 130.0863  | 65.5468          |                |                  | 1  |

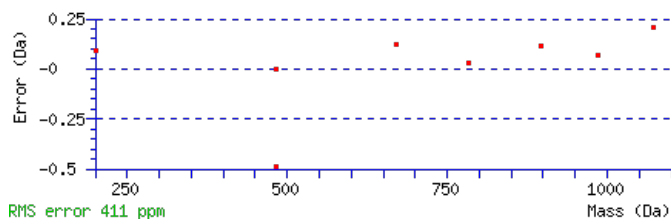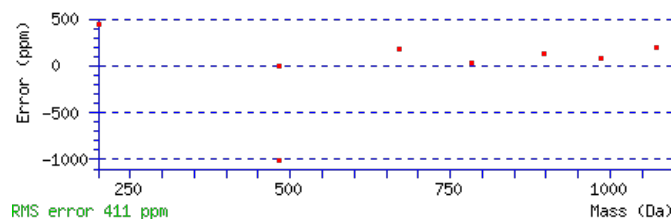

NCBI BLAST search of **LSSLDPYFDK**

(Parameters: blastp, nr protein database, expect=20000, no filter, PAM30)

Other BLAST [web gateways](#)

All matches to this query

**AT5G15650.1**

| <b>Score</b> | <b>Mr(calc)</b> | <b>Delta</b> | <b>Sequence</b>             |
|--------------|-----------------|--------------|-----------------------------|
| 43.7         | 1183.5761       | -0.0021      | <a href="#">LSSLDPYFDK</a>  |
| 2.4          | 1183.5768       | -0.0028      | <a href="#">VAELAGHCTAR</a> |
| 2.2          | 1183.5736       | 0.0004       | <a href="#">DWVMYFPVK</a>   |
| 0.3          | 1183.5729       | 0.0010       | <a href="#">CILEMIFSR</a>   |

**Mascot:** <http://www.matrixscience.com/>

## Peptide View

### MS/MS Fragmentation of **RNETIPEADLK**

Found in **AT5G15890.1** in **TAIR\_Arabidopsis**, Symbols: | similar to unknown protein [Arabidopsis thaliana] (TAIR:AT5G15900.1); similar to hypothetical protein [Cleome spinosa] (GB:ABD96865.1); contains InterPro domain Protein of unknown function DUF231, plant (InterPro:IPR004253) | chr5:51876

Match to Query 5134: 1300.621070 from(651.317811,2+) index(5396)

Title: Elution from: 47.697 to 47.697 scan no 6749 cid35.00 polarity:+

Data file D6h-1\_1.mgf

Click mouse within plot area to zoom in by factor of two about that point

Or,   to  Da

Label all possible matches  Label matches used for scoring

Show Y-axis

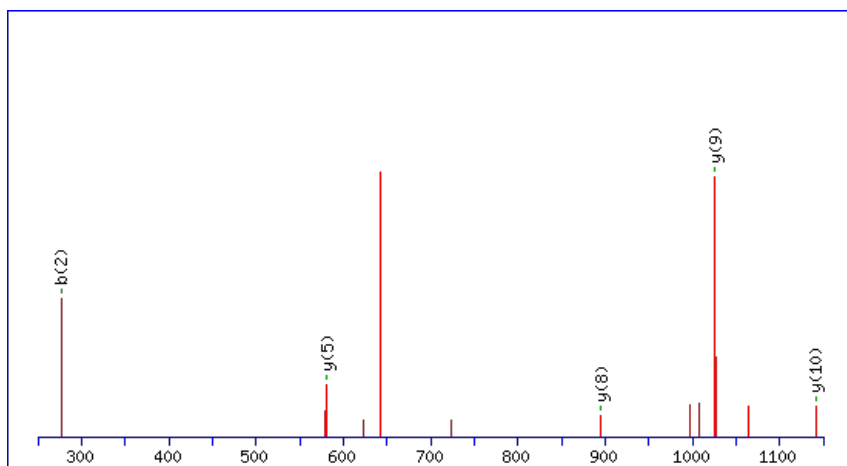

Monoisotopic mass of neutral peptide  $M_r(\text{calc})$ : 1300.6199

Fixed modifications: Carbamidomethyl (C) (apply to specified residues or termini only)

Ions Score: 27 Expect: 0.012

Matches : 5/112 fragment ions using 8 most intense peaks ([help](#))

| #  | b         | b <sup>++</sup> | b*        | b <sup>*++</sup> | b <sup>0</sup> | b <sup>0++</sup> | Seq. | y         | y <sup>++</sup> | y*        | y <sup>*++</sup> | y <sup>0</sup> | y <sup>0++</sup> | #  |
|----|-----------|-----------------|-----------|------------------|----------------|------------------|------|-----------|-----------------|-----------|------------------|----------------|------------------|----|
| 1  | 161.0965  | 81.0519         | 143.0729  | 72.0401          |                |                  | R    |           |                 |           |                  |                |                  | 11 |
| 2  | 277.1335  | 139.0704        | 259.1099  | 130.0586         |                |                  | N    | 1141.5380 | 571.2726        | 1123.5144 | 562.2608         | 1123.5274      | 562.2673         | 10 |
| 3  | 407.1732  | 204.0902        | 389.1496  | 195.0784         | 389.1626       | 195.0849         | E    | 1025.5010 | 513.2541        | 1007.4774 | 504.2423         | 1007.4904      | 504.2488         | 9  |
| 4  | 509.2179  | 255.1126        | 491.1943  | 246.1008         | 491.2073       | 246.1073         | T    | 895.4613  | 448.2343        | 877.4378  | 439.2225         | 877.4508       | 439.2290         | 8  |
| 5  | 623.2990  | 312.1531        | 605.2754  | 303.1413         | 605.2884       | 303.1478         | I    | 793.4166  | 397.2120        | 775.3930  | 388.2002         | 775.4061       | 388.2067         | 7  |
| 6  | 721.3488  | 361.1780        | 703.3252  | 352.1662         | 703.3382       | 352.1727         | P    | 679.3355  | 340.1714        | 661.3119  | 331.1596         | 661.3250       | 331.1661         | 6  |
| 7  | 851.3884  | 426.1978        | 833.3648  | 417.1860         | 833.3778       | 417.1926         | E    | 581.2857  | 291.1465        | 563.2621  | 282.1347         | 563.2752       | 282.1412         | 5  |
| 8  | 923.4225  | 462.2149        | 905.3990  | 453.2031         | 905.4120       | 453.2096         | A    | 451.2461  | 226.1267        | 433.2225  | 217.1149         | 433.2355       | 217.1214         | 4  |
| 9  | 1039.4465 | 520.2269        | 1021.4229 | 511.2151         | 1021.4360      | 511.2216         | D    | 379.2120  | 190.1096        | 361.1884  | 181.0978         | 361.2014       | 181.1043         | 3  |
| 10 | 1153.5276 | 577.2674        | 1135.5040 | 568.2557         | 1135.5171      | 568.2622         | L    | 263.1880  | 132.0976        | 245.1644  | 123.0858         |                |                  | 2  |
| 11 |           |                 |           |                  |                |                  | K    | 149.1069  | 75.0571         | 131.0833  | 66.0453          |                |                  | 1  |

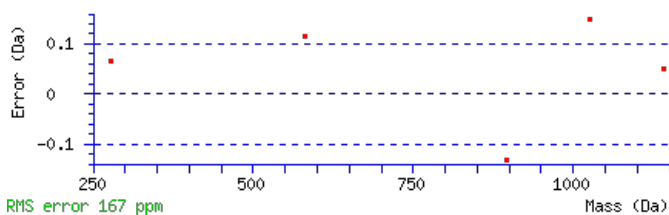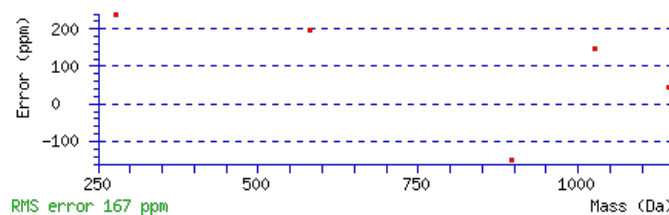

### NCBI BLAST search of **RNETIPEADLK**

(Parameters: blastp, nr protein database, expect=20000, no filter, PAM30)

Other BLAST [web gateways](#)



# AT5G15890.1

All matches to this query

| Score | Mr(calc)  | Delta   | Sequence                    |
|-------|-----------|---------|-----------------------------|
| 26.7  | 1300.6199 | 0.0011  | <a href="#">RNETIPEADLK</a> |
| 18.6  | 1300.6226 | -0.0015 | <a href="#">RDDTLLHSAVR</a> |
| 5.7   | 1300.6222 | -0.0011 | <a href="#">VSSYQTGYIIR</a> |
| 4.2   | 1300.6248 | -0.0038 | <a href="#">QYHVNSLAVPR</a> |
| 0.8   | 1300.6226 | -0.0015 | <a href="#">SNTRLPEVNR</a>  |

Mascot: <http://www.matrixscience.com/>

**Peptide View**MS/MS Fragmentation of **DIVEIIQK**Found in **AT5G15920.1** in **TAIR\_Arabidopsis**, Symbols: | structural maintenance of chromosomes (SMC) family protein (MSS2) | chr5:5196213-5199562 FORWARD

Match to Query 2326: 966.525172 from(484.269862,2+) index(6162)

Title: Elution from: 54.340 to 54.340 scan no 7771 cid35.00 polarity:+

Data file C7-2\_1.mgf

Click mouse within plot area to zoom in by factor of two about that point

Or,   to  Da Label all possible matches  Label matches used for scoring Show Y-axis 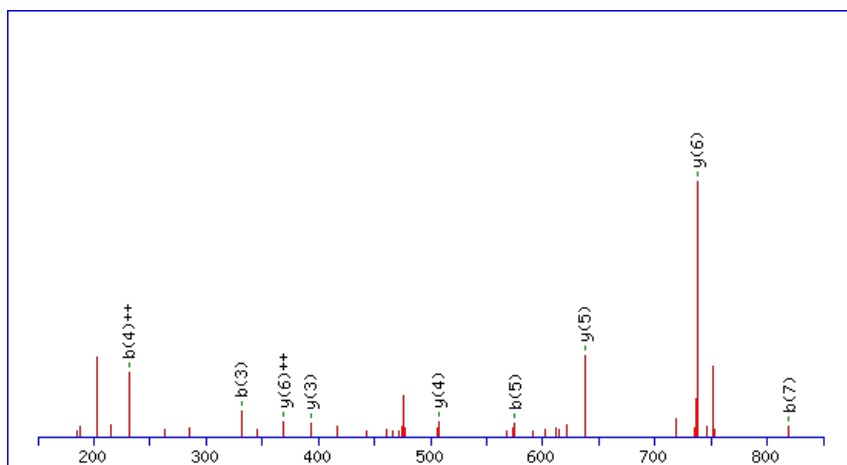Monoisotopic mass of neutral peptide  $M_r(\text{calc})$ : 966.5246

Fixed modifications: Carbamidomethyl (C) (apply to specified residues or termini only)

Ions Score: 32 Expect: 0.0022

Matches : 10/64 fragment ions using 14 most intense peaks ([help](#))

| # | b               | b <sup>++</sup> | b*       | b <sup>*++</sup> | b <sup>0</sup> | b <sup>0++</sup> | Seq. | y               | y <sup>++</sup> | y*       | y <sup>*++</sup> | y <sup>0</sup> | y <sup>0++</sup> | # |
|---|-----------------|-----------------|----------|------------------|----------------|------------------|------|-----------------|-----------------|----------|------------------|----------------|------------------|---|
| 1 | 117.0313        | 59.0193         |          |                  | 99.0207        | 50.0140          | D    |                 |                 |          |                  |                |                  | 8 |
| 2 | <b>231.1124</b> | 116.0598        |          |                  | 213.1018       | 107.0545         | I    | 851.5079        | 426.2576        | 833.4843 | 417.2458         | 833.4973       | 417.2523         | 7 |
| 3 | <b>331.1778</b> | 166.0925        |          |                  | 313.1672       | 157.0873         | V    | <b>737.4268</b> | <b>369.2170</b> | 719.4032 | 360.2052         | 719.4162       | 360.2118         | 6 |
| 4 | 461.2174        | <b>231.1124</b> |          |                  | 443.2069       | 222.1071         | E    | <b>637.3613</b> | 319.1843        | 619.3378 | 310.1725         | 619.3508       | 310.1790         | 5 |
| 5 | <b>575.2985</b> | 288.1529        |          |                  | 557.2880       | 279.1476         | I    | <b>507.3217</b> | 254.1645        | 489.2981 | 245.1527         |                |                  | 4 |
| 6 | 689.3796        | 345.1935        |          |                  | 671.3691       | 336.1882         | I    | <b>393.2406</b> | 197.1239        | 375.2170 | 188.1122         |                |                  | 3 |
| 7 | <b>819.4323</b> | 410.2198        | 801.4087 | 401.2080         | 801.4217       | 401.2145         | Q    | 279.1595        | 140.0834        | 261.1359 | 131.0716         |                |                  | 2 |
| 8 |                 |                 |          |                  |                |                  | K    | 149.1069        | 75.0571         | 131.0833 | 66.0453          |                |                  | 1 |

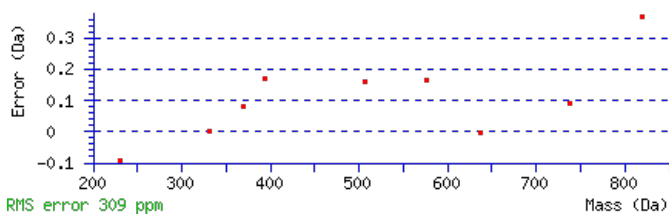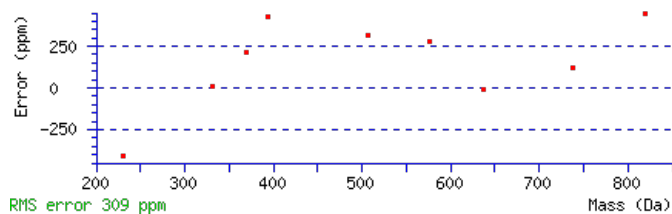NCBI BLAST search of **DIVEIIQK**

(Parameters: blastp, nr protein database, expect=20000, no filter, PAM30)

Other BLAST [web gateways](#)

All matches to this query

| Score | $M_r(\text{calc})$ | Delta  | Sequence                 |
|-------|--------------------|--------|--------------------------|
| 32.4  | 966.5246           | 0.0006 | <a href="#">DIVEIIQK</a> |

## AT5G15920.1

|      |          |         |                           |
|------|----------|---------|---------------------------|
| 32.4 | 966.5246 | 0.0006  | <a href="#">DIVEQLK</a>   |
| 25.3 | 966.5246 | 0.0006  | <a href="#">NLVLEELK</a>  |
| 21.3 | 966.5246 | 0.0006  | <a href="#">NLIDELIK</a>  |
| 14.4 | 966.5273 | -0.0021 | <a href="#">LNVLKDPR</a>  |
| 13.4 | 966.5246 | 0.0006  | <a href="#">EVIDQIK</a>   |
| 12.9 | 966.5273 | -0.0021 | <a href="#">NLLQGGPKK</a> |
| 11.2 | 966.5246 | 0.0006  | <a href="#">AEALAILEK</a> |
| 9.3  | 966.5246 | 0.0006  | <a href="#">INIELVEK</a>  |
| 6.2  | 966.5246 | 0.0006  | <a href="#">NLEDLIK</a>   |

Mascot: <http://www.matrixscience.com/>

## Peptide View

MS/MS Fragmentation of **SISDAAVGGVNFVK**

Found in **AT5G15970.1** in **TAIR\_Arabidopsis**, Symbols: COR6.6, KIN2 | KIN2 (COLD-RESPONSIVE 6.6) | chr5:5211969-5212444  
FORWARD

Match to Query 5207: 1378.667362 from(690.340957,2+) index(5676)

Title: Elution from: 51.586 to 51.586 scan no 7184 cid35.00 polarity:+

Data file D6h-2\_2.mgf

Click mouse within plot area to zoom in by factor of two about that point

Or,   to  Da

Label all possible matches  Label matches used for scoring

Show Y-axis

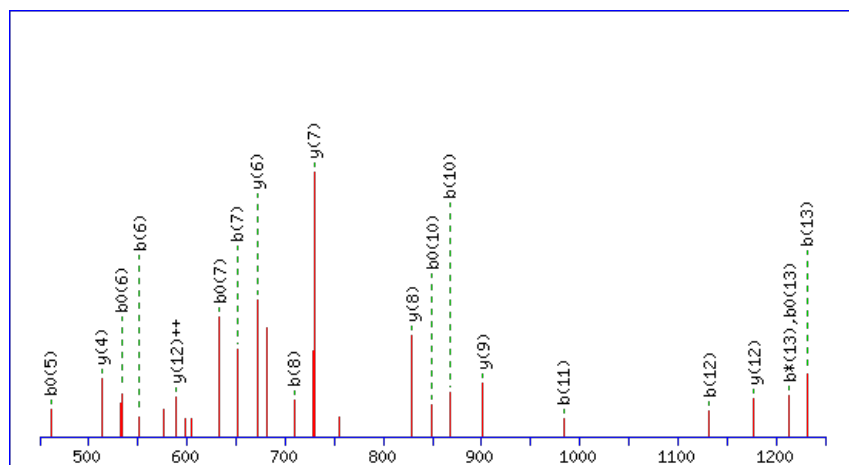

Monoisotopic mass of neutral peptide  $M_r(\text{calc})$ : 1378.6669

Fixed modifications: Carbamidomethyl (C) (apply to specified residues or termini only)

Ions Score: 69 Expect: 1.3e-006

Matches : 20/116 fragment ions using 25 most intense peaks ([help](#))

| #  | b                | b <sup>++</sup> | b*               | b* <sup>++</sup> | b <sup>0</sup>   | b <sup>0++</sup> | Seq. | y                | y <sup>++</sup> | y*        | y* <sup>++</sup> | y <sup>0</sup> | y <sup>0++</sup> | #  |
|----|------------------|-----------------|------------------|------------------|------------------|------------------|------|------------------|-----------------|-----------|------------------|----------------|------------------|----|
| 1  | 89.0363          | 45.0218         |                  |                  | 71.0258          | 36.0165          | S    |                  |                 |           |                  |                |                  | 14 |
| 2  | 203.1174         | 102.0624        |                  |                  | 185.1069         | 93.0571          | I    | 1291.6451        | 646.3262        | 1273.6215 | 637.3144         | 1273.6345      | 637.3209         | 13 |
| 3  | 291.1465         | 146.0769        |                  |                  | 273.1359         | 137.0716         | S    | <b>1177.5640</b> | <b>589.2856</b> | 1159.5404 | 580.2738         | 1159.5534      | 580.2804         | 12 |
| 4  | 407.1705         | 204.0889        |                  |                  | 389.1599         | 195.0836         | D    | 1089.5349        | 545.2711        | 1071.5114 | 536.2593         | 1071.5244      | 536.2658         | 11 |
| 5  | 479.2046         | 240.1060        |                  |                  | <b>461.1941</b>  | 231.1007         | A    | 973.5110         | 487.2591        | 955.4874  | 478.2473         |                |                  | 10 |
| 6  | <b>551.2388</b>  | 276.1230        |                  |                  | <b>533.2282</b>  | 267.1177         | A    | <b>901.4768</b>  | 451.2420        | 883.4532  | 442.2303         |                |                  | 9  |
| 7  | <b>651.3042</b>  | 326.1558        |                  |                  | <b>633.2937</b>  | 317.1505         | V    | <b>829.4427</b>  | 415.2250        | 811.4191  | 406.2132         |                |                  | 8  |
| 8  | <b>709.3227</b>  | 355.1650        |                  |                  | 691.3122         | 346.1597         | G    | <b>729.3772</b>  | 365.1922        | 711.3536  | 356.1805         |                |                  | 7  |
| 9  | 767.3412         | 384.1743        |                  |                  | 749.3307         | 375.1690         | G    | <b>671.3587</b>  | 336.1830        | 653.3351  | 327.1712         |                |                  | 6  |
| 10 | <b>867.4067</b>  | 434.2070        |                  |                  | <b>849.3961</b>  | 425.2017         | V    | 613.3402         | 307.1737        | 595.3166  | 298.1620         |                |                  | 5  |
| 11 | <b>983.4437</b>  | 492.2255        | 965.4201         | 483.2137         | 965.4331         | 483.2202         | N    | <b>513.2748</b>  | 257.1410        | 495.2512  | 248.1292         |                |                  | 4  |
| 12 | <b>1131.5091</b> | 566.2582        | 1113.4855        | 557.2464         | 1113.4986        | 557.2529         | F    | 397.2378         | 199.1225        | 379.2142  | 190.1107         |                |                  | 3  |
| 13 | <b>1231.5746</b> | 616.2909        | <b>1213.5510</b> | 607.2791         | <b>1213.5640</b> | 607.2856         | V    | 249.1723         | 125.0898        | 231.1487  | 116.0780         |                |                  | 2  |
| 14 |                  |                 |                  |                  |                  |                  | K    | 149.1069         | 75.0571         | 131.0833  | 66.0453          |                |                  | 1  |

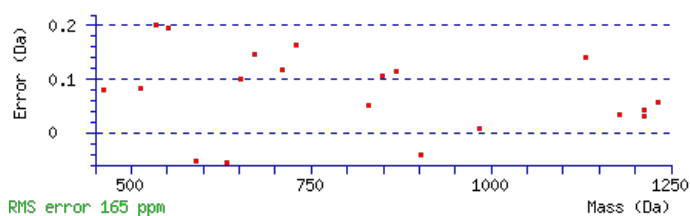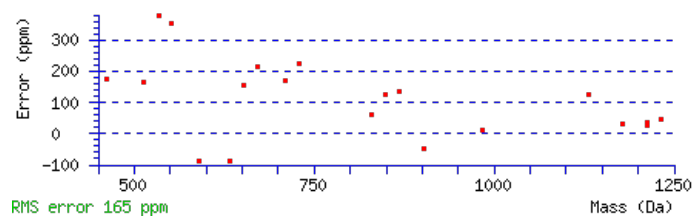

NCBI BLAST search of [SISDAAVGGVNFVK](#)

## AT5G15970.1

(Parameters: blastp, nr protein database, expect=20000, no filter, PAM30)

Other BLAST [web gateways](#)

### All matches to this query

| Score | Mr(calc)  | Delta   | Sequence                       |
|-------|-----------|---------|--------------------------------|
| 68.7  | 1378.6669 | 0.0005  | <a href="#">SISDAAVGGVNFVK</a> |
| 13.4  | 1378.6669 | 0.0005  | <a href="#">ATDLNQGVMYGVK</a>  |
| 4.3   | 1378.6647 | 0.0027  | <a href="#">AENGSKSKSIDVK</a>  |
| 3.0   | 1378.6678 | -0.0004 | <a href="#">LRICFVEAMPK</a>    |
| 2.6   | 1378.6669 | 0.0005  | <a href="#">QAADQVDKFLTK</a>   |
| 1.5   | 1378.6669 | 0.0005  | <a href="#">GLPPESSAEHIVK</a>  |
| 0.1   | 1378.6673 | 0.0000  | <a href="#">NIRGTSGNKDAVK</a>  |

Mascot: <http://www.matrixscience.com/>

## Peptide View

### MS/MS Fragmentation of **TVETEELTVEER**

Found in **AT5G16050.1** in **TAIR\_Arabidopsis**, Symbols: GF14 UPSILON, GRF5 | GRF5 (GENERAL REGULATORY FACTOR 5); protein phosphorylated amino acid binding | chr5:5244011-5245405 REVERSE

Match to Query 5758: 1448.641330 from(725.327941,2+) index(3131)

Title: Elution from: 30.907 to 30.907 scan no 3890 cid35.00 polarity:+

Data file 0-1\_3.mgf

Click mouse within plot area to zoom in by factor of two about that point

Or,   to  Da

Label all possible matches  Label matches used for scoring

Show Y-axis

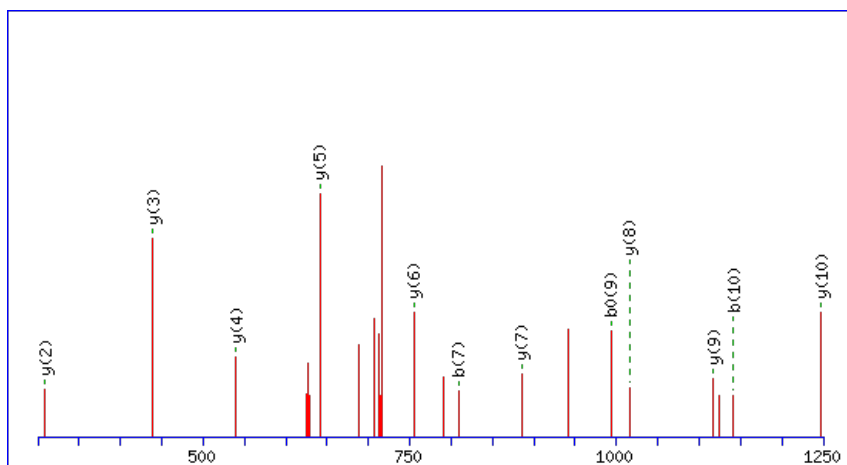

Monoisotopic mass of neutral peptide  $M_r(\text{calc})$ : 1448.6441

Fixed modifications: Carbamidomethyl (C) (apply to specified residues or termini only)

Ions Score: 92 Expect: 4.4e-009

Matches : 12/108 fragment ions using 15 most intense peaks ([help](#))

| #  | b                | b <sup>++</sup> | b <sup>0</sup>  | b <sup>0++</sup> | Seq. | y                | y <sup>++</sup> | y*        | y <sup>*++</sup> | y <sup>0</sup> | y <sup>0++</sup> | #  |
|----|------------------|-----------------|-----------------|------------------|------|------------------|-----------------|-----------|------------------|----------------|------------------|----|
| 1  | 103.0520         | 52.0296         | 85.0414         | 43.0244          | T    |                  |                 |           |                  |                |                  | 12 |
| 2  | 203.1174         | 102.0624        | 185.1069        | 93.0571          | V    | 1347.6067        | 674.3070        | 1329.5831 | 665.2952         | 1329.5961      | 665.3017         | 11 |
| 3  | 333.1571         | 167.0822        | 315.1465        | 158.0769         | E    | <b>1247.5412</b> | 624.2742        | 1229.5176 | 615.2624         | 1229.5306      | 615.2690         | 10 |
| 4  | 435.2018         | 218.1045        | 417.1912        | 209.0992         | T    | <b>1117.5016</b> | 559.2544        | 1099.4780 | 550.2426         | 1099.4910      | 550.2491         | 9  |
| 5  | 565.2414         | 283.1243        | 547.2308        | 274.1191         | E    | <b>1015.4569</b> | 508.2321        | 997.4333  | 499.2203         | 997.4463       | 499.2268         | 8  |
| 6  | 695.2810         | 348.1442        | 677.2705        | 339.1389         | E    | <b>885.4172</b>  | 443.2123        | 867.3937  | 434.2005         | 867.4067       | 434.2070         | 7  |
| 7  | <b>809.3621</b>  | 405.1847        | 791.3516        | 396.1794         | L    | <b>755.3776</b>  | 378.1924        | 737.3540  | 369.1807         | 737.3670       | 369.1872         | 6  |
| 8  | 911.4068         | 456.2071        | 893.3963        | 447.2018         | T    | <b>641.2965</b>  | 321.1519        | 623.2729  | 312.1401         | 623.2859       | 312.1466         | 5  |
| 9  | 1011.4723        | 506.2398        | <b>993.4617</b> | 497.2345         | V    | <b>539.2518</b>  | 270.1295        | 521.2282  | 261.1177         | 521.2412       | 261.1243         | 4  |
| 10 | <b>1141.5119</b> | 571.2596        | 1123.5014       | 562.2543         | E    | <b>439.1863</b>  | 220.0968        | 421.1628  | 211.0850         | 421.1758       | 211.0915         | 3  |
| 11 | 1271.5516        | 636.2794        | 1253.5410       | 627.2741         | E    | <b>309.1467</b>  | 155.0770        | 291.1231  | 146.0652         | 291.1362       | 146.0717         | 2  |
| 12 |                  |                 |                 |                  | R    | 179.1071         | 90.0572         | 161.0835  | 81.0454          |                |                  | 1  |

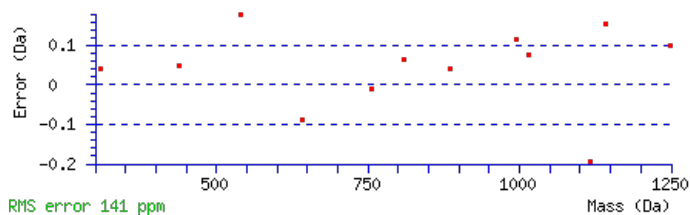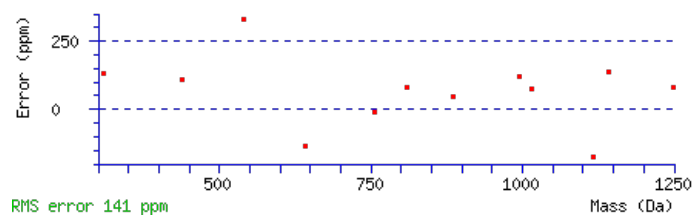

### NCBI BLAST search of **TVETEELTVEER**

(Parameters: blastp, nr protein database, expect=20000, no filter, PAM30)

Other BLAST [web gateways](#)

# AT5G16050.1

All matches to this query

| Score | Mr(calc)  | Delta   | Sequence                     |
|-------|-----------|---------|------------------------------|
| 91.8  | 1448.6441 | -0.0027 | <a href="#">TVETEELTVEER</a> |
| 8.2   | 1448.6447 | -0.0034 | <a href="#">THRCAQIKEER</a>  |
| 6.4   | 1448.6386 | 0.0027  | <a href="#">VLHSEREEFER</a>  |
| 3.7   | 1448.6416 | -0.0003 | <a href="#">ELVVYPADEPMR</a> |
| 0.6   | 1448.6386 | 0.0027  | <a href="#">STIQHFVNEAER</a> |
| 0.4   | 1448.6386 | 0.0027  | <a href="#">EADAIWDAIDRR</a> |

Mascot: <http://www.matrixscience.com/>

### Peptide View

MS/MS Fragmentation of **TLAENAGLDTQDVIIISLTSEHDK**Found in **AT5G16070.1** in **TAIR\_Arabidopsis**, Symbols: | chaperonin, putative | chr5:5247552-5251053 REVERSE

Match to Query 10344: 2469.222789 from(824.081539,3+) index(9321)

Title: Elution from: 84.104 to 84.104 scan no 12674 cid35.00 polarity:+

Data file 0-3\_2.mgf

Click mouse within plot area to zoom in by factor of two about that point

Or, Plot from  to  Da Label all possible matches  Label matches used for scoring Show Y-axis 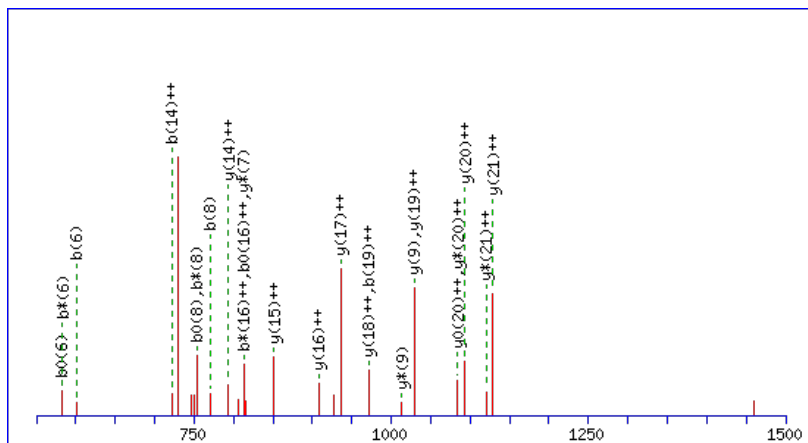Monoisotopic mass of neutral peptide  $M_r(\text{calc})$ : 2469.2235

Fixed modifications: Carbamidomethyl (C) (apply to specified residues or termini only)

Ions Score: 53 Expect: 1.8e-005

Matches : 24/254 fragment ions using 22 most intense peaks ([help](#))

| #  | b         | b <sup>++</sup> | b <sup>*</sup> | b <sup>*++</sup> | b <sup>0</sup> | b <sup>0++</sup> | Seq. | y         | y <sup>++</sup> | y <sup>*</sup> | y <sup>*++</sup> | y <sup>0</sup> | y <sup>0++</sup> | #  |
|----|-----------|-----------------|----------------|------------------|----------------|------------------|------|-----------|-----------------|----------------|------------------|----------------|------------------|----|
| 1  | 102.0550  | 51.5311         |                |                  | 84.0444        | 42.5258          | T    |           |                 |                |                  |                |                  | 23 |
| 2  | 215.1390  | 108.0731        |                |                  | 197.1285       | 99.0679          | L    | 2369.1831 | 1185.0952       | 2352.1565      | 1176.5819        | 2351.1725      | 1176.0899        | 22 |
| 3  | 286.1761  | 143.5917        |                |                  | 268.1656       | 134.5864         | A    | 2256.0990 | 1128.5531       | 2239.0725      | 1120.0399        | 2238.0884      | 1119.5479        | 21 |
| 4  | 415.2187  | 208.1130        |                |                  | 397.2082       | 199.1077         | E    | 2185.0619 | 1093.0346       | 2168.0353      | 1084.5213        | 2167.0513      | 1084.0293        | 20 |
| 5  | 529.2617  | 265.1345        | 512.2351       | 256.6212         | 511.2511       | 256.1292         | N    | 2056.0193 | 1028.5133       | 2038.9928      | 1020.0000        | 2038.0087      | 1019.5080        | 19 |
| 6  | 600.2988  | 300.6530        | 583.2722       | 292.1397         | 582.2882       | 291.6477         | A    | 1941.9764 | 971.4918        | 1924.9498      | 962.9786         | 1923.9658      | 962.4865         | 18 |
| 7  | 657.3202  | 329.1638        | 640.2937       | 320.6505         | 639.3097       | 320.1585         | G    | 1870.9393 | 935.9733        | 1853.9127      | 927.4600         | 1852.9287      | 926.9680         | 17 |
| 8  | 770.4043  | 385.7058        | 753.3777       | 377.1925         | 752.3937       | 376.7005         | L    | 1813.9178 | 907.4625        | 1796.8913      | 898.9493         | 1795.9072      | 898.4573         | 16 |
| 9  | 885.4312  | 443.2193        | 868.4047       | 434.7060         | 867.4207       | 434.2140         | D    | 1700.8337 | 850.9205        | 1683.8072      | 842.4072         | 1682.8232      | 841.9152         | 15 |
| 10 | 986.4789  | 493.7431        | 969.4524       | 485.2298         | 968.4684       | 484.7378         | T    | 1585.8068 | 793.4070        | 1568.7802      | 784.8938         | 1567.7962      | 784.4018         | 14 |
| 11 | 1114.5375 | 557.7724        | 1097.5109      | 549.2591         | 1096.5269      | 548.7671         | Q    | 1484.7591 | 742.8832        | 1467.7326      | 734.3699         | 1466.7485      | 733.8779         | 13 |
| 12 | 1229.5644 | 615.2859        | 1212.5379      | 606.7726         | 1211.5539      | 606.2806         | D    | 1356.7005 | 678.8539        | 1339.6740      | 670.3406         | 1338.6900      | 669.8486         | 12 |
| 13 | 1328.6329 | 664.8201        | 1311.6063      | 656.3068         | 1310.6223      | 655.8148         | V    | 1241.6736 | 621.3404        | 1224.6470      | 612.8272         | 1223.6630      | 612.3352         | 11 |
| 14 | 1441.7169 | 721.3621        | 1424.6904      | 712.8488         | 1423.7064      | 712.3568         | I    | 1142.6052 | 571.8062        | 1125.5786      | 563.2930         | 1124.5946      | 562.8009         | 10 |
| 15 | 1554.8010 | 777.9041        | 1537.7744      | 769.3909         | 1536.7904      | 768.8988         | I    | 1029.5211 | 515.2642        | 1012.4946      | 506.7509         | 1011.5105      | 506.2589         | 9  |
| 16 | 1641.8330 | 821.4201        | 1624.8065      | 812.9069         | 1623.8224      | 812.4149         | S    | 916.4371  | 458.7222        | 899.4105       | 450.2089         | 898.4265       | 449.7169         | 8  |
| 17 | 1754.9171 | 877.9622        | 1737.8905      | 869.4489         | 1736.9065      | 868.9569         | L    | 829.4050  | 415.2061        | 812.3785       | 406.6929         | 811.3945       | 406.2009         | 7  |
| 18 | 1855.9648 | 928.4860        | 1838.9382      | 919.9727         | 1837.9542      | 919.4807         | T    | 716.3210  | 358.6641        | 699.2944       | 350.1508         | 698.3104       | 349.6588         | 6  |
| 19 | 1942.9968 | 972.0020        | 1925.9702      | 963.4888         | 1924.9862      | 962.9967         | S    | 615.2733  | 308.1403        | 598.2467       | 299.6270         | 597.2627       | 299.1350         | 5  |
| 20 | 2072.0394 | 1036.5233       | 2055.0128      | 1028.0100        | 2054.0288      | 1027.5180        | E    | 528.2413  | 264.6243        | 511.2147       | 256.1110         | 510.2307       | 255.6190         | 4  |
| 21 | 2209.0983 | 1105.0528       | 2192.0717      | 1096.5395        | 2191.0877      | 1096.0475        | H    | 399.1987  | 200.1030        | 382.1721       | 191.5897         | 381.1881       | 191.0977         | 3  |
| 22 | 2324.1252 | 1162.5663       | 2307.0987      | 1154.0530        | 2306.1147      | 1153.5610        | D    | 262.1397  | 131.5735        | 245.1132       | 123.0602         | 244.1292       | 122.5682         | 2  |
| 23 |           |                 |                |                  |                |                  | K    | 147.1128  | 74.0600         | 130.0863       | 65.5468          |                |                  | 1  |



# AT5G16070.1

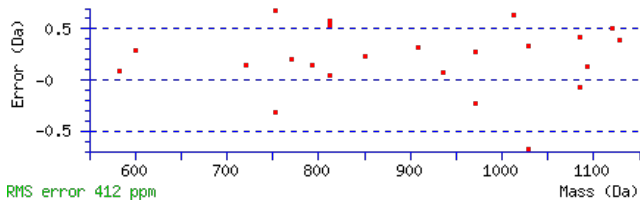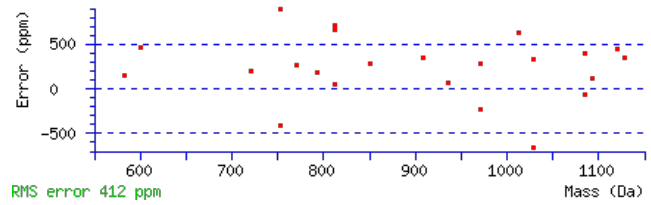

NCBI **BLAST** search of [TLAENAGLDTQDVIIISLTSEHDK](#)  
(Parameters: blastp, nr protein database, expect=20000, no filter, PAM30)  
Other BLAST [web gateways](#)

## All matches to this query

| Score | Mr(calc)  | Delta   | Sequence                                 |
|-------|-----------|---------|------------------------------------------|
| 52.8  | 2469.2235 | -0.0007 | <a href="#">TLAENAGLDTQDVIIISLTSEHDK</a> |
| 7.2   | 2469.2284 | -0.0056 | <a href="#">IVSLEDTKPKTHMDFGYTMK</a>     |
| 5.5   | 2469.2284 | -0.0056 | <a href="#">IVSLEDTKPKTHMDFGYTMK</a>     |
| 0.0   | 2469.2288 | -0.0060 | <a href="#">DQVYWIPPPDNAGSSKDAGIAIR</a>  |

Mascot: <http://www.matrixscience.com/>

## Peptide View

MS/MS Fragmentation of **AVVIYVPER**

Found in **AT5G16130.1** in **TAIR\_Arabidopsis**, Symbols: | 40S ribosomal protein S7 (RPS7C) | chr5:5268987-5269915 FORWARD

Match to Query 2942: 1062.623554 from(532.319053,2+) index(7269)

Title: Elution from: 64.786 to 64.786 scan no 9498 cid35.00 polarity:+

Data file C7-1\_3.mgf

Click mouse within plot area to zoom in by factor of two about that point

Or,   to  Da

Label all possible matches  Label matches used for scoring

Show Y-axis

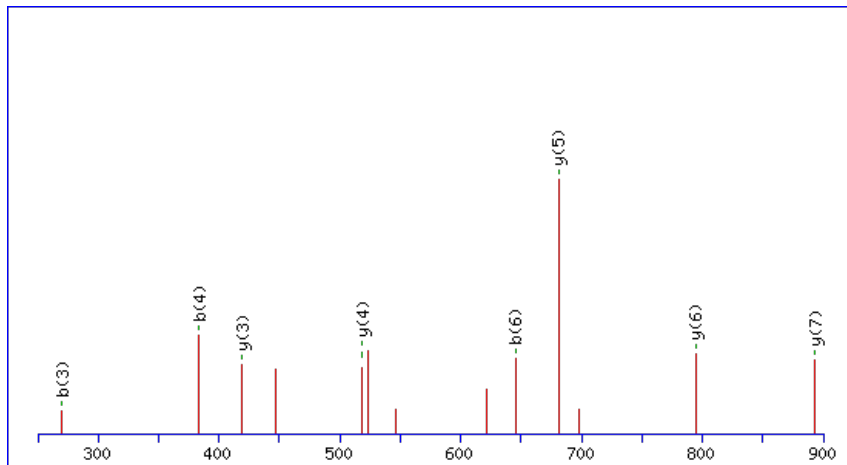

Monoisotopic mass of neutral peptide  $M_r(\text{calc})$ : 1062.6226

Fixed modifications: Carbamidomethyl (C) (apply to specified residues or termini only)

Ions Score: 44 Expect: 4.4e-005

Matches : 8/48 fragment ions using 11 most intense peaks ([help](#))

| # | b               | b <sup>++</sup> | Seq. | y               | y <sup>++</sup> | y*       | y <sup>*++</sup> | # |
|---|-----------------|-----------------|------|-----------------|-----------------|----------|------------------|---|
| 1 | 72.0444         | 36.5258         | A    |                 |                 |          |                  | 9 |
| 2 | 171.1128        | 86.0600         | V    | 992.5928        | 496.8000        | 975.5662 | 488.2867         | 8 |
| 3 | <b>270.1812</b> | 135.5942        | V    | <b>893.5244</b> | 447.2658        | 876.4978 | 438.7525         | 7 |
| 4 | <b>383.2653</b> | 192.1363        | I    | <b>794.4559</b> | 397.7316        | 777.4294 | 389.2183         | 6 |
| 5 | 546.3286        | 273.6679        | Y    | <b>681.3719</b> | 341.1896        | 664.3453 | 332.6763         | 5 |
| 6 | <b>645.3970</b> | 323.2022        | V    | <b>518.3085</b> | 259.6579        | 501.2820 | 251.1446         | 4 |
| 7 | 742.4498        | 371.7285        | P    | <b>419.2401</b> | 210.1237        | 402.2136 | 201.6104         | 3 |
| 8 | 889.5182        | 445.2627        | F    | 322.1874        | 161.5973        | 305.1608 | 153.0840         | 2 |
| 9 |                 |                 | R    | 175.1190        | 88.0631         | 158.0924 | 79.5498          | 1 |

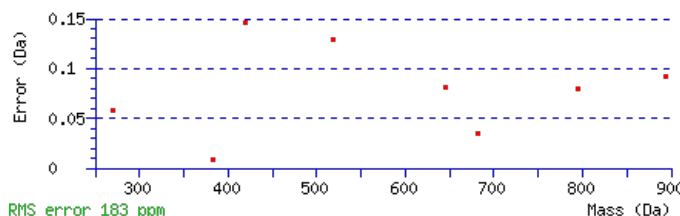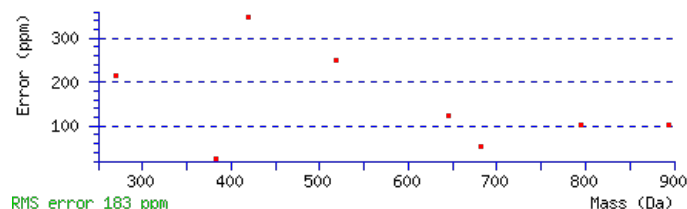

NCBI BLAST search of [AVVIYVPER](#)

(Parameters: blastp, nr protein database, expect=20000, no filter, PAM30)

Other BLAST [web gateways](#)

All matches to this query

| Score | $M_r(\text{calc})$ | Delta  | Sequence                  |
|-------|--------------------|--------|---------------------------|
| 43.6  | 1062.6226          | 0.0010 | <a href="#">AVVIYVPER</a> |

AT5G16130.1

|     |           |        |                           |
|-----|-----------|--------|---------------------------|
| 0.3 | 1062.6219 | 0.0016 | <a href="#">VISMVRKSK</a> |
|-----|-----------|--------|---------------------------|

**Mascot:** <http://www.matrixscience.com/>

**Peptide View**MS/MS Fragmentation of **YQDMVFLK**

Found in **AT5G16400.1** in **TAIR\_Arabidopsis**, Symbols: TRXF2, ATF2 | ATF2/TRXF2 (THIOREDOXIN F2); thio-disulfide exchange intermediate | chr5:5363908-5365252 REVERSE

Match to Query 3124: 1052.488208 from(527.251380,2+) index(6069)

Title: Elution from: 53.022 to 53.022 scan no 7655 cid35.00 polarity:+

Data file D6h-1\_1.mgf

Click mouse within plot area to zoom in by factor of two about that point

Or,   to  Da

Label all possible matches  Label matches used for scoring

Show Y-axis

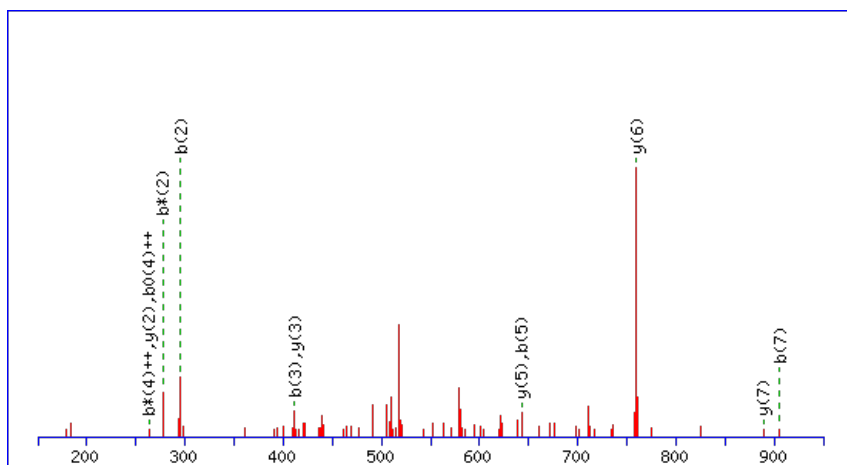

**Monoisotopic mass of neutral peptide Mr(calc):** 1052.4861

**Fixed modifications:** Carbamidomethyl (C) (apply to specified residues or termini only)

**Ions Score:** 27 **Expect:** 0.013

**Matches:** 12/68 fragment ions using 22 most intense peaks ([help](#))

| # | b               | b <sup>++</sup> | b*              | b <sup>*++</sup> | b <sup>0</sup> | b <sup>0++</sup> | Seq. | y               | y <sup>++</sup> | y*       | y <sup>*++</sup> | y <sup>0</sup> | y <sup>0++</sup> | # |
|---|-----------------|-----------------|-----------------|------------------|----------------|------------------|------|-----------------|-----------------|----------|------------------|----------------|------------------|---|
| 1 | 165.0676        | 83.0375         |                 |                  |                |                  | Y    |                 |                 |          |                  |                |                  | 8 |
| 2 | <b>295.1203</b> | 148.0638        | <b>277.0967</b> | 139.0520         |                |                  | Q    | <b>889.4330</b> | 445.2201        | 871.4094 | 436.2084         | 871.4225       | 436.2149         | 7 |
| 3 | <b>411.1443</b> | 206.0758        | 393.1207        | 197.0640         | 393.1337       | 197.0705         | D    | <b>759.3804</b> | 380.1938        | 741.3568 | 371.1820         | 741.3698       | 371.1885         | 6 |
| 4 | 543.1818        | 272.0945        | 525.1582        | <b>263.0827</b>  | 525.1712       | <b>263.0892</b>  | M    | <b>643.3564</b> | 322.1818        | 625.3328 | 313.1700         |                |                  | 5 |
| 5 | <b>643.2472</b> | 322.1273        | 625.2237        | 313.1155         | 625.2367       | 313.1220         | V    | 511.3189        | 256.1631        | 493.2953 | 247.1513         |                |                  | 4 |
| 6 | 791.3127        | 396.1600        | 773.2891        | 387.1482         | 773.3021       | 387.1547         | F    | <b>411.2534</b> | 206.1303        | 393.2298 | 197.1186         |                |                  | 3 |
| 7 | <b>905.3938</b> | 453.2005        | 887.3702        | 444.1887         | 887.3832       | 444.1952         | L    | <b>263.1880</b> | 132.0976        | 245.1644 | 123.0858         |                |                  | 2 |
| 8 |                 |                 |                 |                  |                |                  | K    | 149.1069        | 75.0571         | 131.0833 | 66.0453          |                |                  | 1 |

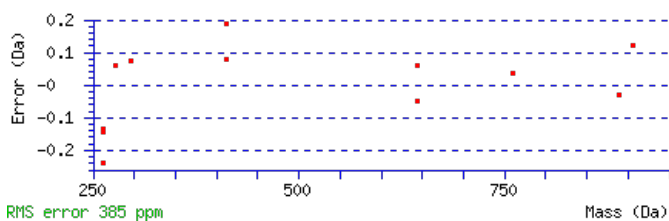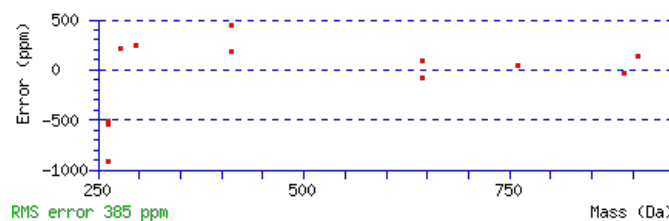

NCBI **BLAST** search of [YQDMVFLK](#)

(Parameters: blastp, nr protein database, expect=20000, no filter, PAM30)

Other BLAST [web gateways](#)

**All matches to this query**

| Score | Mr(calc)  | Delta  | Sequence                 |
|-------|-----------|--------|--------------------------|
| 27.3  | 1052.4861 | 0.0021 | <a href="#">YQDMVFLK</a> |

**AT5G16400.1**

|     |           |         |                           |
|-----|-----------|---------|---------------------------|
| 6.9 | 1052.4908 | -0.0026 | <a href="#">YEYTVLEK</a>  |
| 6.6 | 1052.4899 | -0.0017 | <a href="#">SKAMMARTK</a> |
| 5.0 | 1052.4861 | 0.0021  | <a href="#">IFMFNDLK</a>  |
| 4.2 | 1052.4899 | -0.0017 | <a href="#">SKAMMARTK</a> |
| 4.1 | 1052.4861 | 0.0021  | <a href="#">FMKDFDIK</a>  |
| 3.1 | 1052.4913 | -0.0030 | <a href="#">YTTKEKDR</a>  |
| 2.1 | 1052.4865 | 0.0017  | <a href="#">SFNKMQLR</a>  |
| 0.5 | 1052.4881 | 0.0001  | <a href="#">MVMMKKMK</a>  |
| 0.3 | 1052.4861 | 0.0021  | <a href="#">MLYPSFGTK</a> |

**Mascot:** <http://www.matrixscience.com/>

## Peptide View

### MS/MS Fragmentation of **TLPGPVTDPSQLPK**

Found in **AT5G16570.1** in **TAIR\_Arabidopsis**, Symbols: GLN1;4 | GLN1;4 (Glutamine synthetase 1;4); glutamate-ammonia ligase | chr5:5421901-5424526 REVERSE

Match to Query 6331: 1464.741400 from(733.377976,2+) index(5378)

Title: Elution from: 47.074 to 47.074 scan no 6680 cid35.00 polarity:+

Data file D1d-3\_1.mgf

Click mouse within plot area to zoom in by factor of two about that point

Or,  to  Da

Label all possible matches  Label matches used for scoring

Show Y-axis

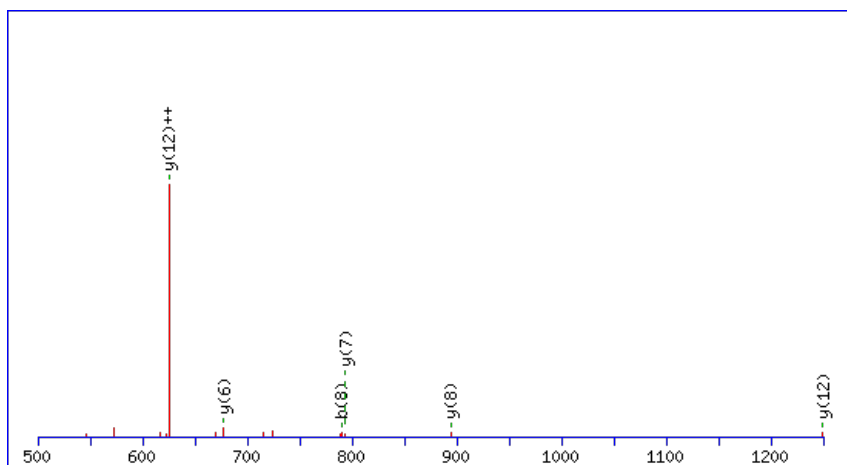

Monoisotopic mass of neutral peptide  $M_r(\text{calc})$ : 1464.7401

Fixed modifications: Carbamidomethyl (C) (apply to specified residues or termini only)

Ions Score: 26 Expect: 0.018

Matches : 6/128 fragment ions using 8 most intense peaks ([help](#))

| #  | b               | b <sup>++</sup> | b*        | b <sup>*++</sup> | b <sup>0</sup> | b <sup>0++</sup> | Seq. | y                | y <sup>++</sup> | y*        | y <sup>*++</sup> | y <sup>0</sup> | y <sup>0++</sup> | #  |
|----|-----------------|-----------------|-----------|------------------|----------------|------------------|------|------------------|-----------------|-----------|------------------|----------------|------------------|----|
| 1  | 103.0520        | 52.0296         |           |                  | 85.0414        | 43.0244          | T    |                  |                 |           |                  |                |                  | 14 |
| 2  | 217.1331        | 109.0702        |           |                  | 199.1225       | 100.0649         | L    | 1363.7026        | 682.3549        | 1345.6790 | 673.3432         | 1345.6921      | 673.3497         | 13 |
| 3  | 315.1829        | 158.0951        |           |                  | 297.1723       | 149.0898         | P    | <b>1249.6215</b> | <b>625.3144</b> | 1231.5979 | 616.3026         | 1231.6110      | 616.3091         | 12 |
| 4  | 373.2014        | 187.1043        |           |                  | 355.1908       | 178.0990         | G    | 1151.5717        | 576.2895        | 1133.5481 | 567.2777         | 1133.5612      | 567.2842         | 11 |
| 5  | 471.2512        | 236.1292        |           |                  | 453.2406       | 227.1239         | P    | 1093.5532        | 547.2802        | 1075.5296 | 538.2685         | 1075.5427      | 538.2750         | 10 |
| 6  | 571.3166        | 286.1620        |           |                  | 553.3061       | 277.1567         | V    | 995.5034         | 498.2553        | 977.4798  | 489.2436         | 977.4929       | 489.2501         | 9  |
| 7  | 673.3613        | 337.1843        |           |                  | 655.3508       | 328.1790         | T    | <b>895.4380</b>  | 448.2226        | 877.4144  | 439.2108         | 877.4274       | 439.2173         | 8  |
| 8  | <b>789.3853</b> | 395.1963        |           |                  | 771.3748       | 386.1910         | D    | <b>793.3933</b>  | 397.2003        | 775.3697  | 388.1885         | 775.3827       | 388.1950         | 7  |
| 9  | 887.4351        | 444.2212        |           |                  | 869.4246       | 435.2159         | P    | <b>677.3693</b>  | 339.1883        | 659.3457  | 330.1765         | 659.3587       | 330.1830         | 6  |
| 10 | 975.4642        | 488.2357        |           |                  | 957.4536       | 479.2304         | S    | 579.3195         | 290.1634        | 561.2959  | 281.1516         | 561.3089       | 281.1581         | 5  |
| 11 | 1105.5168       | 553.2621        | 1087.4933 | 544.2503         | 1087.5063      | 544.2568         | Q    | 491.2904         | 246.1488        | 473.2668  | 237.1371         |                |                  | 4  |
| 12 | 1219.5979       | 610.3026        | 1201.5743 | 601.2908         | 1201.5874      | 601.2973         | L    | 361.2378         | 181.1225        | 343.2142  | 172.1107         |                |                  | 3  |
| 13 | 1317.6477       | 659.3275        | 1299.6241 | 650.3157         | 1299.6372      | 650.3222         | P    | 247.1567         | 124.0820        | 229.1331  | 115.0702         |                |                  | 2  |
| 14 |                 |                 |           |                  |                |                  | K    | 149.1069         | 75.0571         | 131.0833  | 66.0453          |                |                  | 1  |

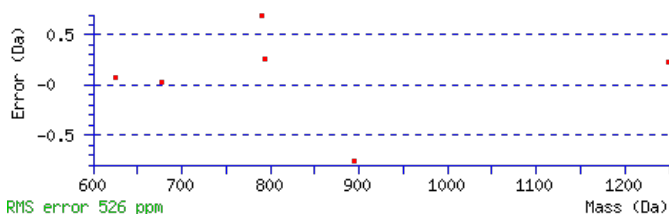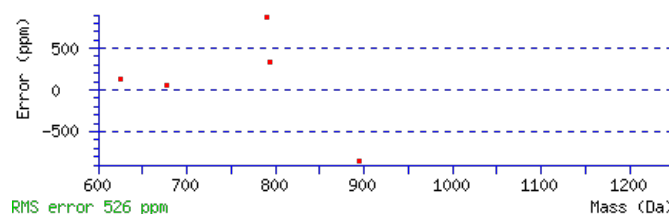

## AT5G16570.1

(Parameters: blastp, nr protein database, expect=20000, no filter, PAM30)

Other BLAST [web gateways](#)

### All matches to this query

| Score | Mr(calc)  | Delta   | Sequence                       |
|-------|-----------|---------|--------------------------------|
| 26.3  | 1464.7401 | 0.0013  | <a href="#">TLPGPVTDPSQLPK</a> |
| 4.3   | 1464.7431 | -0.0017 | <a href="#">VGGSVRPSKRNTGK</a> |

Mascot: <http://www.matrixscience.com/>

## Peptide View

MS/MS Fragmentation of **NYAFEDISPEETTK**

Found in **AT5G16620.1** in **TAIR\_Arabidopsis**, Symbols: TIC40, ATTIC40, PDE120 | PDE120 (PIGMENT DEFECTIVE EMBRYO) | chr5:5450811-5454259 FORWARD

Match to Query 7528: 1658.691246 from(830.352899,2+) index(5449)

Title: Elution from: 48.453 to 48.453 scan no 6899 cid35.00 polarity:+

Data file D12h-1\_3.mgf

Click mouse within plot area to zoom in by factor of two about that point

Or,   to  Da

Label all possible matches  Label matches used for scoring

Show Y-axis

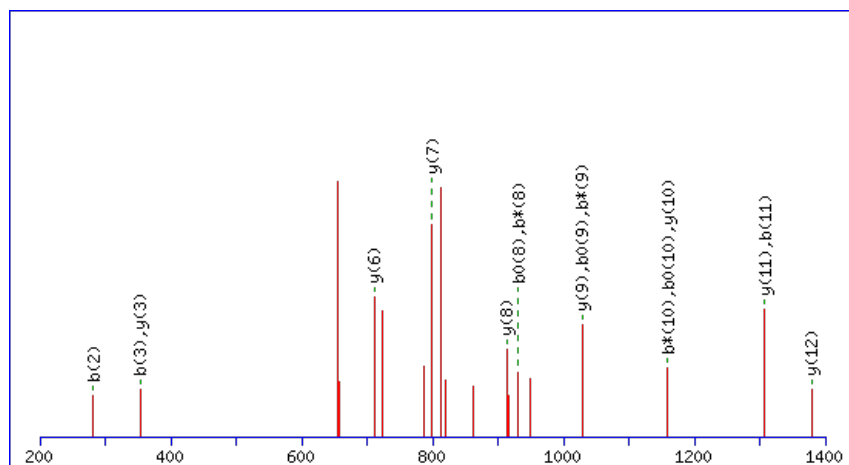

Monoisotopic mass of neutral peptide  $M_r(\text{calc})$ : 1658.6888

Fixed modifications: Carbamidomethyl (C) (apply to specified residues or termini only)

Ions Score: 67 Expect: 1e-006

Matches : 17/146 fragment ions using 14 most intense peaks ([help](#))

| #  | b                | b <sup>++</sup> | b*               | b <sup>*++</sup> | b <sup>0</sup>   | b <sup>0++</sup> | Seq. | y                | y <sup>++</sup> | y*        | y <sup>*++</sup> | y <sup>0</sup> | y <sup>0++</sup> | #  |
|----|------------------|-----------------|------------------|------------------|------------------|------------------|------|------------------|-----------------|-----------|------------------|----------------|------------------|----|
| 1  | 117.0443         | 59.0258         | 99.0207          | 50.0140          |                  |                  | N    |                  |                 |           |                  |                |                  | 14 |
| 2  | <b>281.1046</b>  | 141.0560        | 263.0811         | 132.0442         |                  |                  | Y    | 1543.6591        | 772.3332        | 1525.6355 | 763.3214         | 1525.6485      | 763.3279         | 13 |
| 3  | <b>353.1388</b>  | 177.0730        | 335.1152         | 168.0612         |                  |                  | A    | <b>1379.5987</b> | 690.3030        | 1361.5751 | 681.2912         | 1361.5882      | 681.2977         | 12 |
| 4  | 501.2042         | 251.1058        | 483.1807         | 242.0940         |                  |                  | F    | <b>1307.5646</b> | 654.2859        | 1289.5410 | 645.2741         | 1289.5540      | 645.2806         | 11 |
| 5  | 631.2439         | 316.1256        | 613.2203         | 307.1138         | 613.2333         | 307.1203         | E    | <b>1159.4991</b> | 580.2532        | 1141.4755 | 571.2414         | 1141.4886      | 571.2479         | 10 |
| 6  | 747.2678         | 374.1376        | 729.2443         | 365.1258         | 729.2573         | 365.1323         | D    | <b>1029.4595</b> | 515.2334        | 1011.4359 | 506.2216         | 1011.4489      | 506.2281         | 9  |
| 7  | 861.3489         | 431.1781        | 843.3254         | 422.1663         | 843.3384         | 422.1728         | I    | <b>913.4355</b>  | 457.2214        | 895.4119  | 448.2096         | 895.4250       | 448.2161         | 8  |
| 8  | 949.3780         | 475.1926        | <b>931.3544</b>  | 466.1808         | <b>931.3674</b>  | 466.1874         | S    | <b>799.3544</b>  | 400.1808        | 781.3308  | 391.1691         | 781.3439       | 391.1756         | 7  |
| 9  | 1047.4278        | 524.2175        | <b>1029.4042</b> | 515.2057         | <b>1029.4172</b> | 515.2123         | P    | <b>711.3254</b>  | 356.1663        | 693.3018  | 347.1545         | 693.3148       | 347.1610         | 6  |
| 10 | 1177.4674        | 589.2374        | <b>1159.4438</b> | 580.2256         | <b>1159.4569</b> | 580.2321         | E    | 613.2756         | 307.1414        | 595.2520  | 298.1296         | 595.2650       | 298.1361         | 5  |
| 11 | <b>1307.5071</b> | 654.2572        | 1289.4835        | 645.2454         | 1289.4965        | 645.2519         | E    | 483.2359         | 242.1216        | 465.2123  | 233.1098         | 465.2254       | 233.1163         | 4  |
| 12 | 1409.5518        | 705.2795        | 1391.5282        | 696.2677         | 1391.5412        | 696.2742         | T    | <b>353.1963</b>  | 177.1018        | 335.1727  | 168.0900         | 335.1857       | 168.0965         | 3  |
| 13 | 1511.5965        | 756.3019        | 1493.5729        | 747.2901         | 1493.5859        | 747.2966         | T    | 251.1516         | 126.0794        | 233.1280  | 117.0676         | 233.1410       | 117.0741         | 2  |
| 14 |                  |                 |                  |                  |                  |                  | K    | 149.1069         | 75.0571         | 131.0833  | 66.0453          |                |                  | 1  |

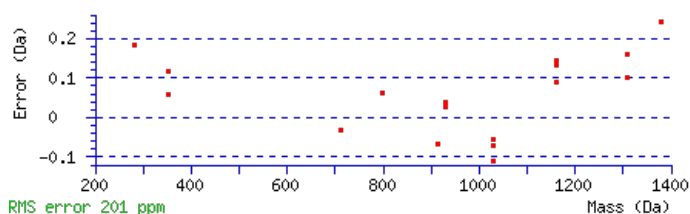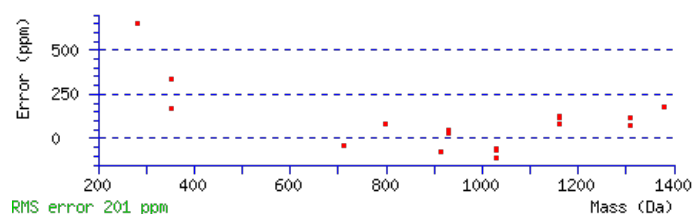

NCBI BLAST search of [NYAFEDISPEETTK](#)



## AT5G16620.1

(Parameters: blastp, nr protein database, expect=20000, no filter, PAM30)

Other BLAST [web gateways](#)

### All matches to this query

| Score | Mr(calc)  | Delta   | Sequence                        |
|-------|-----------|---------|---------------------------------|
| 67.3  | 1658.6888 | 0.0024  | <a href="#">NYAFEDISPEETTK</a>  |
| 13.3  | 1658.6888 | 0.0024  | <a href="#">FDFELSDSEKPSDK</a>  |
| 3.9   | 1658.6878 | 0.0034  | <a href="#">MEEDRATMTGAVATR</a> |
| 0.3   | 1658.6953 | -0.0040 | <a href="#">ITGSNNDEARGSCKK</a> |

Mascot: <http://www.matrixscience.com/>

**Peptide View**MS/MS Fragmentation of **IGQLNSAIDNVSSR**

Found in **AT5G16660.1** in **TAIR\_Arabidopsis**, Symbols: | similar to unknown protein [Arabidopsis thaliana] (TAIR:AT3G02900.1); similar to unnamed protein product [Vitis vinifera] (GB:CAO62132.1) | chr5:5465702-5467009 REVERSE

Match to Query 6480: 1492.699764 from(747.357158,2+) index(4180)

Title: Elution from: 38.991 to 38.991 scan no 5205 cid35.00 polarity:+

Data file C7-3\_1.mgf

Click mouse within plot area to zoom in by factor of two about that point

Or,   to  Da

Label all possible matches  Label matches used for scoring

Show Y-axis

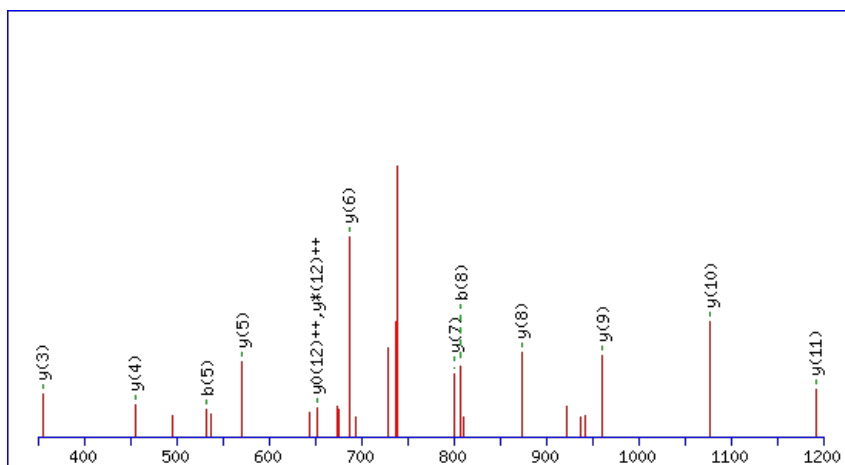

**Monoisotopic mass of neutral peptide Mr(calc):** 1492.6990

**Fixed modifications:** Carbamidomethyl (C) (apply to specified residues or termini only)

**Ions Score:** 92 **Expect:** 6.2e-009

**Matches:** 13/140 fragment ions using 15 most intense peaks ([help](#))

| #  | b         | b <sup>++</sup> | b <sup>*</sup> | b <sup>*++</sup> | b <sup>0</sup> | b <sup>0++</sup> | Seq. | y         | y <sup>++</sup> | y <sup>*</sup> | y <sup>*++</sup> | y <sup>0</sup> | y <sup>0++</sup> | #  |
|----|-----------|-----------------|----------------|------------------|----------------|------------------|------|-----------|-----------------|----------------|------------------|----------------|------------------|----|
| 1  | 115.0884  | 58.0478         |                |                  |                |                  | I    |           |                 |                |                  |                |                  | 14 |
| 2  | 173.1069  | 87.0571         |                |                  |                |                  | G    | 1379.6252 | 690.3162        | 1361.6016      | 681.3044         | 1361.6146      | 681.3110         | 13 |
| 3  | 303.1595  | 152.0834        | 285.1359       | 143.0716         |                |                  | Q    | 1321.6067 | 661.3070        | 1303.5831      | 652.2952         | 1303.5961      | 652.3017         | 12 |
| 4  | 417.2406  | 209.1239        | 399.2170       | 200.1122         |                |                  | L    | 1191.5540 | 596.2807        | 1173.5305      | 587.2689         | 1173.5435      | 587.2754         | 11 |
| 5  | 533.2776  | 267.1424        | 515.2540       | 258.1307         |                |                  | N    | 1077.4729 | 539.2401        | 1059.4494      | 530.2283         | 1059.4624      | 530.2348         | 10 |
| 6  | 621.3067  | 311.1570        | 603.2831       | 302.1452         | 603.2961       | 302.1517         | S    | 961.4360  | 481.2216        | 943.4124       | 472.2098         | 943.4254       | 472.2163         | 9  |
| 7  | 693.3408  | 347.1741        | 675.3172       | 338.1623         | 675.3303       | 338.1688         | A    | 873.4069  | 437.2071        | 855.3833       | 428.1953         | 855.3963       | 428.2018         | 8  |
| 8  | 807.4219  | 404.2146        | 789.3983       | 395.2028         | 789.4114       | 395.2093         | I    | 801.3727  | 401.1900        | 783.3492       | 392.1782         | 783.3622       | 392.1847         | 7  |
| 9  | 923.4459  | 462.2266        | 905.4223       | 453.2148         | 905.4353       | 453.2213         | D    | 687.2916  | 344.1495        | 669.2681       | 335.1377         | 669.2811       | 335.1442         | 6  |
| 10 | 1039.4829 | 520.2451        | 1021.4593      | 511.2333         | 1021.4723      | 511.2398         | N    | 571.2677  | 286.1375        | 553.2441       | 277.1257         | 553.2571       | 277.1322         | 5  |
| 11 | 1139.5484 | 570.2778        | 1121.5248      | 561.2660         | 1121.5378      | 561.2725         | V    | 455.2307  | 228.1190        | 437.2071       | 219.1072         | 437.2201       | 219.1137         | 4  |
| 12 | 1227.5774 | 614.2923        | 1209.5538      | 605.2806         | 1209.5668      | 605.2871         | S    | 355.1652  | 178.0862        | 337.1416       | 169.0745         | 337.1547       | 169.0810         | 3  |
| 13 | 1315.6065 | 658.3069        | 1297.5829      | 649.2951         | 1297.5959      | 649.3016         | S    | 267.1362  | 134.0717        | 249.1126       | 125.0599         | 249.1256       | 125.0664         | 2  |
| 14 |           |                 |                |                  |                |                  | R    | 179.1071  | 90.0572         | 161.0835       | 81.0454          |                |                  | 1  |

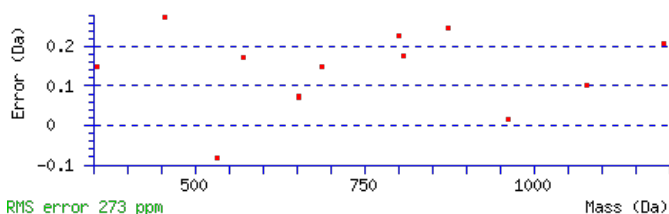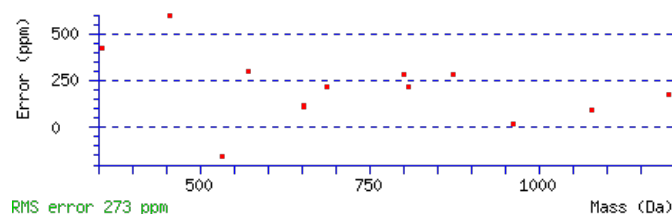

NCBI BLAST search of [IGQLNSAIDNVSSR](#)

## AT5G16660.1

(Parameters: blastp, nr protein database, expect=20000, no filter, PAM30)

Other BLAST [web gateways](#)

### All matches to this query

| Score | Mr(calc)  | Delta   | Sequence                       |
|-------|-----------|---------|--------------------------------|
| 92.0  | 1492.6990 | 0.0007  | <a href="#">IGQLNSAIDNVSSR</a> |
| 13.1  | 1492.6963 | 0.0034  | <a href="#">SLLKDELDNTNSK</a>  |
| 9.1   | 1492.7019 | -0.0022 | <a href="#">VAEIEGAEKEKMK</a>  |
| 3.7   | 1492.7016 | -0.0019 | <a href="#">GNRVLVVDGGGSQR</a> |
| 3.5   | 1492.6965 | 0.0033  | <a href="#">MGYVTYKRNSVR</a>   |
| 1.9   | 1492.7019 | -0.0022 | <a href="#">EQIMVLIGETGSGK</a> |
| 0.6   | 1492.6987 | 0.0010  | <a href="#">HCLWEVPLVGHK</a>   |
| 0.5   | 1492.7017 | -0.0019 | <a href="#">GSPNGTNPSTRRK</a>  |
| 0.1   | 1492.7012 | -0.0015 | <a href="#">DTVANIWDIRSGK</a>  |

Mascot: <http://www.matrixscience.com/>

## Peptide View

### MS/MS Fragmentation of **VLLTMEEK**

Found in **AT5G16710.1** in **TAIR\_Arabidopsis**, Symbols: DHAR3 | DHAR3 (DEHYDROASCORBATE REDUCTASE 1); glutathione dehydrogenase (ascorbate) | chr5:5483315-5484929 FORWARD

Match to Query 2202: 970.491236 from(486.252894,2+) index(3030)

Title: Elution from: 30.559 to 30.559 scan no 3783 cid35.00 polarity:+

Data file D6h-1\_3.mgf

Click mouse within plot area to zoom in by factor of two about that point

Or,   to  Da

Label all possible matches  Label matches used for scoring

Show Y-axis

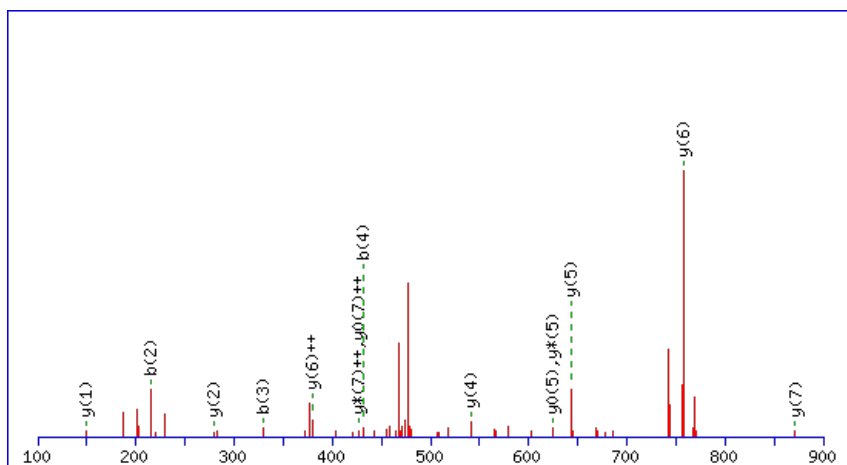

Monoisotopic mass of neutral peptide  $M_r(\text{calc})$ : 970.4887

Fixed modifications: Carbamidomethyl (C) (apply to specified residues or termini only)

Ions Score: 28 Expect: 0.0083

Matches : 14/62 fragment ions using 40 most intense peaks ([help](#))

| # | b               | b <sup>++</sup> | b <sup>0</sup> | b <sup>0++</sup> | Seq. | y               | y <sup>++</sup> | y*              | y <sup>*++</sup> | y <sup>0</sup>  | y <sup>0++</sup> | # |
|---|-----------------|-----------------|----------------|------------------|------|-----------------|-----------------|-----------------|------------------|-----------------|------------------|---|
| 1 | 101.0727        | 51.0400         |                |                  | V    |                 |                 |                 |                  |                 |                  | 8 |
| 2 | <b>215.1538</b> | 108.0805        |                |                  | L    | <b>871.4306</b> | 436.2189        | 853.4070        | <b>427.2071</b>  | 853.4200        | <b>427.2136</b>  | 7 |
| 3 | <b>329.2349</b> | 165.1211        |                |                  | L    | <b>757.3495</b> | <b>379.1784</b> | 739.3259        | 370.1666         | 739.3389        | 370.1731         | 6 |
| 4 | <b>431.2796</b> | 216.1435        | 413.2691       | 207.1382         | T    | <b>643.2684</b> | 322.1378        | <b>625.2448</b> | 313.1260         | <b>625.2578</b> | 313.1325         | 5 |
| 5 | 563.3172        | 282.1622        | 545.3066       | 273.1569         | M    | <b>541.2237</b> | 271.1155        | 523.2001        | 262.1037         | 523.2131        | 262.1102         | 4 |
| 6 | 693.3568        | 347.1820        | 675.3462       | 338.1767         | E    | 409.1861        | 205.0967        | 391.1625        | 196.0849         | 391.1756        | 196.0914         | 3 |
| 7 | 823.3964        | 412.2018        | 805.3858       | 403.1966         | E    | <b>279.1465</b> | 140.0769        | 261.1229        | 131.0651         | 261.1359        | 131.0716         | 2 |
| 8 |                 |                 |                |                  | K    | <b>149.1069</b> | 75.0571         | 131.0833        | 66.0453          |                 |                  | 1 |

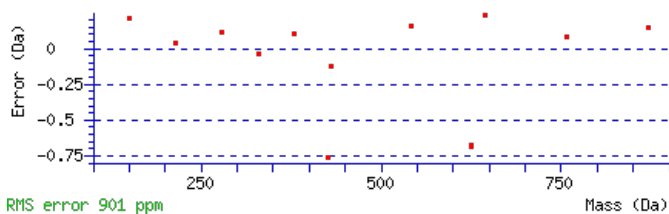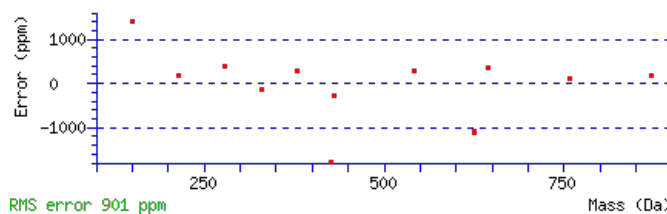

NCBI BLAST search of [VLLTMEEK](#)

(Parameters: blastp, nr protein database, expect=20000, no filter, PAM30)

Other BLAST [web gateways](#)

All matches to this query

| Score | $M_r(\text{calc})$ | Delta  | Sequence                 |
|-------|--------------------|--------|--------------------------|
| 28.3  | 970.4887           | 0.0025 | <a href="#">VLLTMEEK</a> |

AT5G16710.1

|     |          |         |                          |
|-----|----------|---------|--------------------------|
| 1.7 | 970.4914 | -0.0002 | <a href="#">VALQCLQK</a> |
|-----|----------|---------|--------------------------|

**Mascot:** <http://www.matrixscience.com/>

**Peptide View**MS/MS Fragmentation of **VWDLNAK**

Found in **AT5G16750.1** in **TAIR\_Arabidopsis**, Symbols: TOZ | TOZ (TORMOZEMBRYO DEFECTIVE); nucleotide binding | chr5:5504544-5509269 REVERSE

Match to Query 1323: 854.416964 from(428.215758,2+) index(7092)

Title: Elution from: 61.864 to 61.864 scan no 9231 cid35.00 polarity:+

Data file C7-2\_3.mgf

Click mouse within plot area to zoom in by factor of two about that point

Or,   to  Da

Label all possible matches  Label matches used for scoring

Show Y-axis

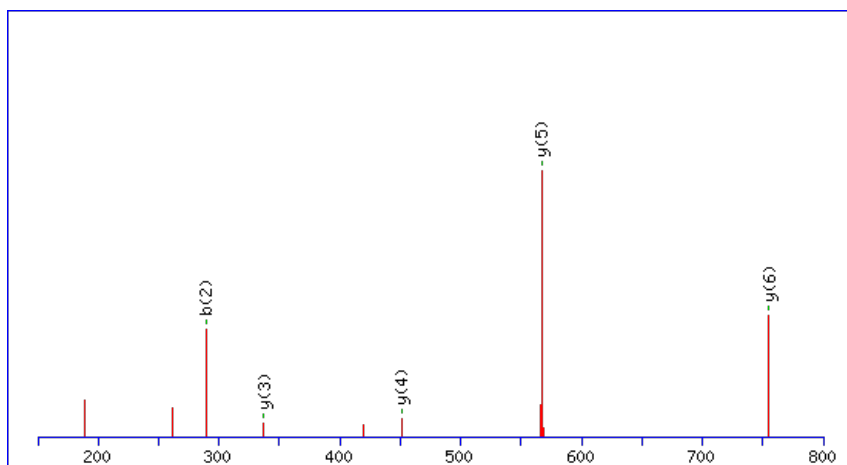

**Monoisotopic mass of neutral peptide Mr(calc):** 854.4146

**Fixed modifications:** Carbamidomethyl (C) (apply to specified residues or termini only)

**Ions Score:** 28 **Expect:** 0.0093

**Matches :** 5/52 fragment ions using 9 most intense peaks ([help](#))

| # | b        | b <sup>++</sup> | b*       | b <sup>*++</sup> | b <sup>0</sup> | b <sup>0++</sup> | Seq. | y        | y <sup>++</sup> | y*       | y <sup>*++</sup> | y <sup>0</sup> | y <sup>0++</sup> | # |
|---|----------|-----------------|----------|------------------|----------------|------------------|------|----------|-----------------|----------|------------------|----------------|------------------|---|
| 1 | 101.0727 | 51.0400         |          |                  |                |                  | V    |          |                 |          |                  |                |                  | 7 |
| 2 | 289.1461 | 145.0767        |          |                  |                |                  | W    | 755.3565 | 378.1819        | 737.3329 | 369.1701         | 737.3459       | 369.1766         | 6 |
| 3 | 405.1701 | 203.0887        |          |                  | 387.1595       | 194.0834         | D    | 567.2831 | 284.1452        | 549.2595 | 275.1334         | 549.2725       | 275.1399         | 5 |
| 4 | 519.2512 | 260.1292        |          |                  | 501.2406       | 251.1239         | L    | 451.2591 | 226.1332        | 433.2355 | 217.1214         |                |                  | 4 |
| 5 | 635.2882 | 318.1477        | 617.2646 | 309.1359         | 617.2776       | 309.1424         | N    | 337.1780 | 169.0926        | 319.1544 | 160.0809         |                |                  | 3 |
| 6 | 707.3223 | 354.1648        | 689.2987 | 345.1530         | 689.3118       | 345.1595         | A    | 221.1410 | 111.0741        | 203.1174 | 102.0624         |                |                  | 2 |
| 7 |          |                 |          |                  |                |                  | K    | 149.1069 | 75.0571         | 131.0833 | 66.0453          |                |                  | 1 |

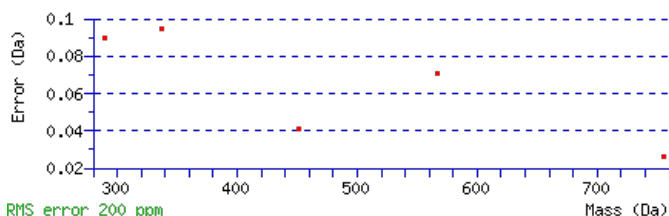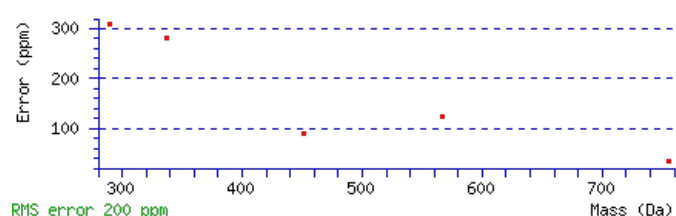NCBI **BLAST** search of **VWDLNAK**

(Parameters: blastp, nr protein database, expect=20000, no filter, PAM30)

Other BLAST [web gateways](#)

**All matches to this query**

| Score | Mr(calc) | Delta  | Sequence                |
|-------|----------|--------|-------------------------|
| 28.3  | 854.4146 | 0.0023 | <a href="#">VWDLNAK</a> |
| 28.3  | 854.4169 | 0.0001 | <a href="#">VWDLWK</a>  |

## AT5G16750.1

|      |          |         |                         |
|------|----------|---------|-------------------------|
| 13.3 | 854.4146 | 0.0023  | <a href="#">GEVINWK</a> |
| 6.0  | 854.4146 | 0.0023  | <a href="#">FHDSVLK</a> |
| 3.6  | 854.4151 | 0.0019  | <a href="#">RSEGKHK</a> |
| 1.6  | 854.4180 | -0.0011 | <a href="#">EMITPVR</a> |

**Mascot:** <http://www.matrixscience.com/>

## Peptide View

MS/MS Fragmentation of **SQGVWNPYEKEQMIK**

Found in **AT5G16810.1** in **TAIR\_Arabidopsis**, Symbols: | ATP binding / protein kinase | chr5:5526863-5529881 REVERSE

Match to Query 8849: 1872.824396 from(937.419474,2+) index(9730)

Title: Elution from: 91.811 to 91.811 scan no 13541 cid35.00 polarity:+

Data file D1d-1\_1.mgf

Click mouse within plot area to zoom in by factor of two about that point

Or,   to  Da

Label all possible matches  Label matches used for scoring

Show Y-axis

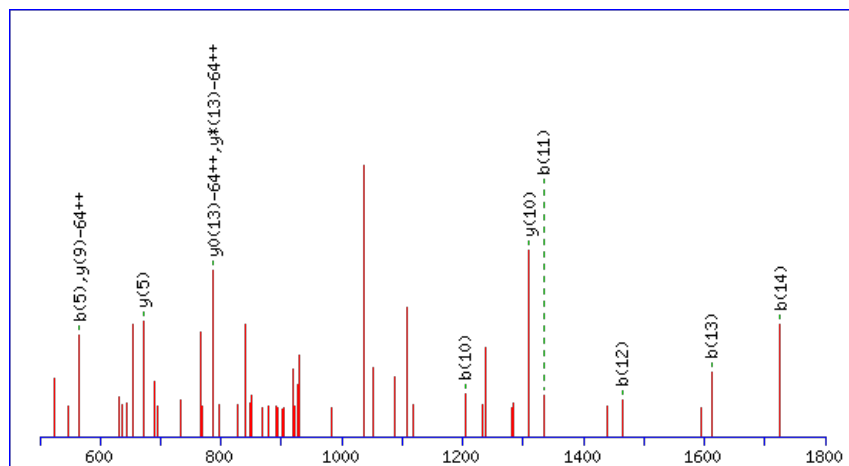

Monoisotopic mass of neutral peptide  $M_r(\text{calc})$ : 1872.8203

Fixed modifications: Carbamidomethyl (C) (apply to specified residues or termini only)

Variable modifications:

M13 : Oxidation (M), with neutral losses 0.0000 (shown in table), 63.9983

Ions Score: 39 Expect: 0.00092

Matches : 11/238 fragment ions using 12 most intense peaks ([help](#))

| #  | b                | b <sup>++</sup> | b <sup>*</sup> | b <sup>*++</sup> | b <sup>0</sup> | b <sup>0++</sup> | Seq. | y                | y <sup>++</sup> | y <sup>*</sup> | y <sup>*++</sup> | y <sup>0</sup> | y <sup>0++</sup> | #  |
|----|------------------|-----------------|----------------|------------------|----------------|------------------|------|------------------|-----------------|----------------|------------------|----------------|------------------|----|
| 1  | 89.0363          | 45.0218         |                |                  | 71.0258        | 36.0165          | S    |                  |                 |                |                  |                |                  | 15 |
| 2  | 219.0890         | 110.0481        | 201.0654       | 101.0363         | 201.0784       | 101.0428         | Q    | 1785.7985        | 893.4029        | 1767.7749      | 884.3911         | 1767.7879      | 884.3976         | 14 |
| 3  | 277.1075         | 139.0574        | 259.0839       | 130.0456         | 259.0969       | 130.0521         | G    | 1655.7458        | 828.3766        | 1637.7223      | 819.3648         | 1637.7353      | 819.3713         | 13 |
| 4  | 377.1729         | 189.0901        | 359.1494       | 180.0783         | 359.1624       | 180.0848         | V    | 1597.7273        | 799.3673        | 1579.7038      | 790.3555         | 1579.7168      | 790.3620         | 12 |
| 5  | <b>565.2463</b>  | 283.1268        | 547.2227       | 274.1150         | 547.2358       | 274.1215         | W    | 1497.6619        | 749.3346        | 1479.6383      | 740.3228         | 1479.6513      | 740.3293         | 11 |
| 6  | 681.2833         | 341.1453        | 663.2597       | 332.1335         | 663.2727       | 332.1400         | N    | <b>1309.5885</b> | 655.2979        | 1291.5649      | 646.2861         | 1291.5779      | 646.2926         | 10 |
| 7  | 779.3331         | 390.1702        | 761.3095       | 381.1584         | 761.3225       | 381.1649         | P    | 1193.5515        | 597.2794        | 1175.5279      | 588.2676         | 1175.5409      | 588.2741         | 9  |
| 8  | 943.3935         | 472.2004        | 925.3699       | 463.1886         | 925.3829       | 463.1951         | Y    | 1095.5017        | 548.2545        | 1077.4781      | 539.2427         | 1077.4911      | 539.2492         | 8  |
| 9  | 1073.4331        | 537.2202        | 1055.4095      | 528.2084         | 1055.4225      | 528.2149         | E    | 931.4413         | 466.2243        | 913.4178       | 457.2125         | 913.4308       | 457.2190         | 7  |
| 10 | <b>1203.5221</b> | 602.2647        | 1185.4986      | 593.2529         | 1185.5116      | 593.2594         | K    | 801.4017         | 401.2045        | 783.3781       | 392.1927         | 783.3912       | 392.1992         | 6  |
| 11 | <b>1333.5618</b> | 667.2845        | 1315.5382      | 658.2727         | 1315.5512      | 658.2792         | E    | <b>671.3127</b>  | 336.1600        | 653.2891       | 327.1482         | 653.3021       | 327.1547         | 5  |
| 12 | <b>1463.6144</b> | 732.3108        | 1445.5908      | 723.2991         | 1445.6038      | 723.3056         | Q    | 541.2731         | 271.1402        | 523.2495       | 262.1284         |                |                  | 4  |
| 13 | <b>1611.6468</b> | 806.3271        | 1593.6233      | 797.3153         | 1593.6363      | 797.3218         | M    | 411.2204         | 206.1138        | 393.1968       | 197.1020         |                |                  | 3  |
| 14 | <b>1725.7279</b> | 863.3676        | 1707.7044      | 854.3558         | 1707.7174      | 854.3623         | I    | 263.1880         | 132.0976        | 245.1644       | 123.0858         |                |                  | 2  |
| 15 |                  |                 |                |                  |                |                  | K    | 149.1069         | 75.0571         | 131.0833       | 66.0453          |                |                  | 1  |

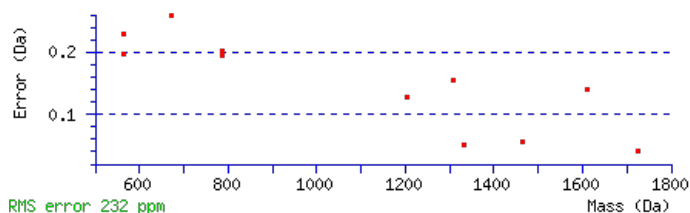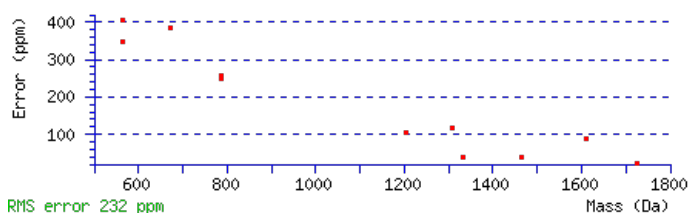



## AT5G16810.1

NCBI **BLAST** search of [SQGVWNPYEKEQMIK](#)

(Parameters: blastp, nr protein database, expect=20000, no filter, PAM30)

Other BLAST [web gateways](#)

### All matches to this query

| Score | Mr(calc)  | Delta   | Sequence                           |
|-------|-----------|---------|------------------------------------|
| 39.4  | 1872.8203 | 0.0041  | <a href="#">SQGVWNPYEKEQMIK</a>    |
| 17.7  | 1872.8228 | 0.0016  | <a href="#">TKREDDSNIEEFIK</a>     |
| 10.0  | 1872.8189 | 0.0055  | <a href="#">NVLLSQVCCNSMWIK</a>    |
| 5.6   | 1872.8210 | 0.0034  | <a href="#">NMVGIVEMTEEFLEK</a>    |
| 1.8   | 1872.8270 | -0.0026 | <a href="#">MLCEDGKLSLAMQVNK</a>   |
| 0.2   | 1872.8270 | -0.0026 | <a href="#">MMEEAEAKMSAEVIRK</a>   |
| 0.1   | 1872.8281 | -0.0037 | <a href="#">SSENAVSRVSEFGADHKR</a> |

Mascot: <http://www.matrixscience.com/>

## Peptide View

MS/MS Fragmentation of **TLIYPFLEEASKDVSSKECSR**

Found in **AT5G16850.1** in **TAIR\_Arabidopsis**, Symbols: ATTERT | ATTERT (TELOMERASE REVERSE TRANSCRIPTASE); telomeric template RNA reverse transcriptase | chr5:5538326-5543447 REVERSE

Match to Query 10398: 2485.121574 from(829.381134,3+) index(10778)

Title: Elution from: 108.614 to 108.614 scan no 15693 cid35.00 polarity:+

Data file D12h-1\_2.mgf

Click mouse within plot area to zoom in by factor of two about that point

Or, Plot from  to  Da

Label all possible matches  Label matches used for scoring

Show Y-axis

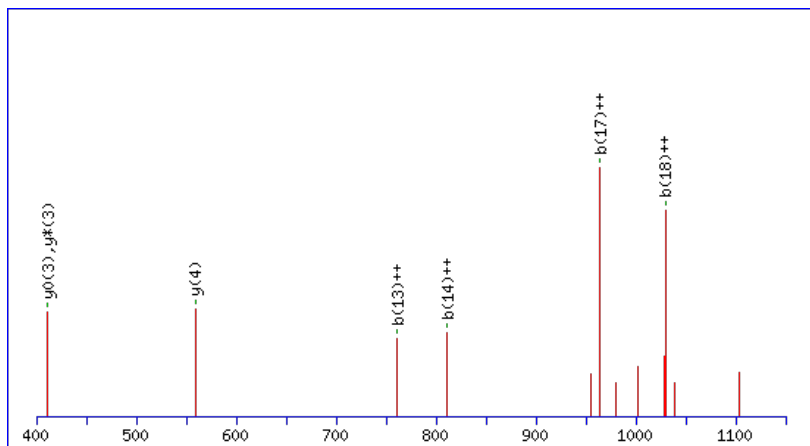

Monoisotopic mass of neutral peptide  $M_r(\text{calc})$ : 2485.1249

Fixed modifications: Carbamidomethyl (C) (apply to specified residues or termini only)

Ions Score: 24 Expect: 0.032

Matches : 7/216 fragment ions using 6 most intense peaks ([help](#))

| #  | b         | b <sup>++</sup>  | b <sup>*</sup> | b <sup>*++</sup> | b <sup>0</sup> | b <sup>0++</sup> | Seq | y               | y <sup>++</sup> | y <sup>*</sup>  | y <sup>*++</sup> | y <sup>0</sup>  | y <sup>0++</sup> | #  |
|----|-----------|------------------|----------------|------------------|----------------|------------------|-----|-----------------|-----------------|-----------------|------------------|-----------------|------------------|----|
| 1  | 103.0520  | 52.0296          |                |                  | 85.0414        | 43.0244          | T   |                 |                 |                 |                  |                 |                  | 21 |
| 2  | 217.1331  | 109.0702         |                |                  | 199.1225       | 100.0649         | L   | 2384.0875       | 1192.5474       | 2366.0639       | 1183.5356        | 2366.0769       | 1183.5421        | 20 |
| 3  | 331.2142  | 166.1107         |                |                  | 313.2036       | 157.1054         | I   | 2270.0064       | 1135.5068       | 2251.9828       | 1126.4950        | 2251.9958       | 1126.5016        | 19 |
| 4  | 495.2746  | 248.1409         |                |                  | 477.2640       | 239.1356         | Y   | 2155.9253       | 1078.4663       | 2137.9017       | 1069.4545        | 2137.9147       | 1069.4610        | 18 |
| 5  | 593.3243  | 297.1658         |                |                  | 575.3138       | 288.1605         | P   | 1991.8649       | 996.4361        | 1973.8414       | 987.4243         | 1973.8544       | 987.4308         | 17 |
| 6  | 741.3898  | 371.1985         |                |                  | 723.3792       | 362.1933         | F   | 1893.8151       | 947.4112        | 1875.7916       | 938.3994         | 1875.8046       | 938.4059         | 16 |
| 7  | 855.4709  | 428.2391         |                |                  | 837.4603       | 419.2338         | L   | 1745.7497       | 873.3785        | 1727.7261       | 864.3667         | 1727.7391       | 864.3732         | 15 |
| 8  | 985.5105  | 493.2589         |                |                  | 967.5000       | 484.2536         | E   | 1631.6686       | 816.3379        | 1613.6450       | 807.3261         | 1613.6580       | 807.3326         | 14 |
| 9  | 1115.5502 | 558.2787         |                |                  | 1097.5396      | 549.2734         | E   | 1501.6290       | 751.3181        | 1483.6054       | 742.3063         | 1483.6184       | 742.3128         | 13 |
| 10 | 1187.5843 | 594.2958         |                |                  | 1169.5737      | 585.2905         | A   | 1371.5893       | 686.2983        | 1353.5657       | 677.2865         | 1353.5788       | 677.2930         | 12 |
| 11 | 1275.6134 | 638.3103         |                |                  | 1257.6028      | 629.3050         | S   | 1299.5552       | 650.2812        | 1281.5316       | 641.2694         | 1281.5446       | 641.2759         | 11 |
| 12 | 1405.7024 | 703.3548         | 1387.6788      | 694.3430         | 1387.6918      | 694.3496         | K   | 1211.5261       | 606.2667        | 1193.5025       | 597.2549         | 1193.5156       | 597.2614         | 10 |
| 13 | 1521.7264 | <b>761.3668</b>  | 1503.7028      | 752.3550         | 1503.7158      | 752.3615         | D   | 1081.4371       | 541.2222        | 1063.4135       | 532.2104         | 1063.4265       | 532.2169         | 9  |
| 14 | 1621.7918 | <b>811.3996</b>  | 1603.7682      | 802.3878         | 1603.7813      | 802.3943         | V   | 965.4131        | 483.2102        | 947.3895        | 474.1984         | 947.4025        | 474.2049         | 8  |
| 15 | 1709.8209 | 855.4141         | 1691.7973      | 846.4023         | 1691.8103      | 846.4088         | S   | 865.3477        | 433.1775        | 847.3241        | 424.1657         | 847.3371        | 424.1722         | 7  |
| 16 | 1797.8500 | 899.4286         | 1779.8264      | 890.4168         | 1779.8394      | 890.4233         | S   | 777.3186        | 389.1629        | 759.2950        | 380.1511         | 759.3080        | 380.1577         | 6  |
| 17 | 1927.9390 | <b>964.4731</b>  | 1909.9154      | 955.4613         | 1909.9284      | 955.4678         | K   | 689.2895        | 345.1484        | 671.2660        | 336.1366         | 671.2790        | 336.1431         | 5  |
| 18 | 2057.9786 | <b>1029.4929</b> | 2039.9550      | 1020.4812        | 2039.9680      | 1020.4877        | E   | <b>559.2005</b> | 280.1039        | 541.1769        | 271.0921         | 541.1899        | 271.0986         | 4  |
| 19 | 2220.0033 | 1110.5053        | 2201.9797      | 1101.4935        | 2201.9928      | 1101.5000        | C   | 429.1609        | 215.0841        | <b>411.1373</b> | 206.0723         | <b>411.1503</b> | 206.0788         | 3  |
| 20 | 2308.0324 | 1154.5198        | 2290.0088      | 1145.5080        | 2290.0218      | 1145.5146        | S   | 267.1362        | 134.0717        | 249.1126        | 125.0599         | 249.1256        | 125.0664         | 2  |
| 21 |           |                  |                |                  |                |                  | R   | 179.1071        | 90.0572         | 161.0835        | 81.0454          |                 |                  | 1  |

# AT5G16850.1

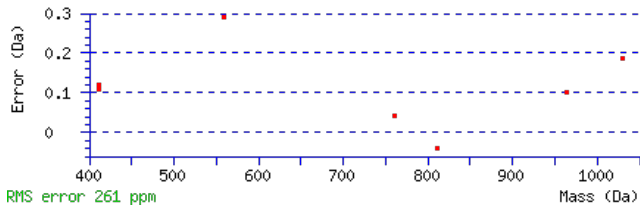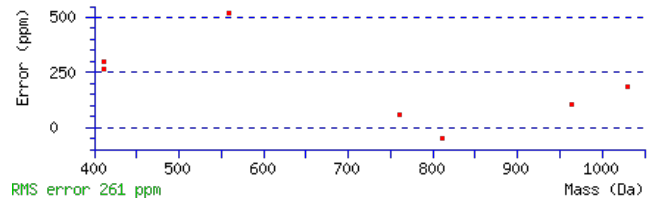

NCBI BLAST search of [TLIYPFLEEASKDVSSKECSR](#)  
 (Parameters: blastp, nr protein database, expect=20000, no filter, PAM30)  
 Other BLAST [web gateways](#)

## All matches to this query

| Score | Mr(calc)  | Delta   | Sequence                                  |
|-------|-----------|---------|-------------------------------------------|
| 24.0  | 2485.1249 | -0.0034 | <a href="#">TLIYPFLEEASKDVSSKECSR</a>     |
| 21.9  | 2485.1245 | -0.0029 | <a href="#">MLVYQDILTGDELLSDSFPYK</a>     |
| 21.9  | 2485.1245 | -0.0029 | <a href="#">MLVYQDLLTGDELLSDSFPYK</a>     |
| 10.2  | 2485.1278 | -0.0062 | <a href="#">IHGNQLAEMPFIGTRYMYRR</a>      |
| 8.4   | 2485.1229 | -0.0013 | <a href="#">DRSNRSVMLPYSFLPNMAAAK</a>     |
| 8.4   | 2485.1229 | -0.0013 | <a href="#">DRSNRSVMLPYSFLPNMAAAK</a>     |
| 3.9   | 2485.1262 | -0.0047 | <a href="#">RGELHLAVRFTCTSVSSMLMK</a>     |
| 3.0   | 2485.1190 | 0.0026  | <a href="#">IDLPDFLICFDFTERFGPR</a>       |
| 2.3   | 2485.1224 | -0.0008 | <a href="#">RTVSDVGAARSDVVGDPGPELGHTR</a> |
| 1.4   | 2485.1258 | -0.0042 | <a href="#">MLPGEVFGVFCKVKCQDSLTK</a>     |

Mascot: <http://www.matrixscience.com/>

**Peptide View**MS/MS Fragmentation of **ITYVEDVADGLEK**Found in **AT5G16970.1** in **TAIR\_Arabidopsis**, Symbols: AT-AER | AT-AER (ALKENAL REDUCTASE); 2-alkenal reductase | chr5:5576294-5578004 REVERSE

Match to Query 6166: 1464.681134 from(733.347843,2+) index(6929)

Title: Elution from: 61.389 to 61.389 scan no 8906 cid35.00 polarity:+

Data file D12h-3\_1.mgf

Click mouse within plot area to zoom in by factor of two about that point

Or,   to  Da Label all possible matches  Label matches used for scoring Show Y-axis 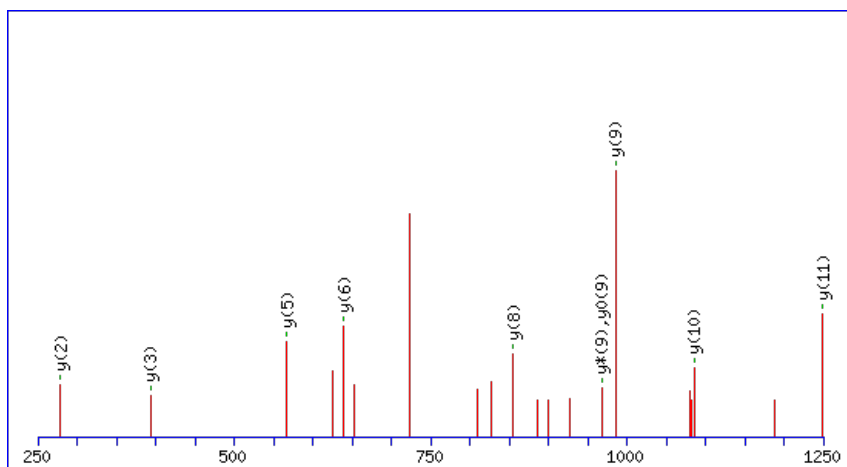Monoisotopic mass of neutral peptide  $M_r(\text{calc})$ : 1464.6776

Fixed modifications: Carbamidomethyl (C) (apply to specified residues or termini only)

Ions Score: 84 Expect: 3.1e-008

Matches : 10/116 fragment ions using 10 most intense peaks ([help](#))

| #  | b         | b <sup>++</sup> | b <sup>0</sup> | b <sup>0++</sup> | Seq. | y                | y <sup>++</sup> | y*              | y <sup>*++</sup> | y <sup>0</sup>  | y <sup>0++</sup> | #  |
|----|-----------|-----------------|----------------|------------------|------|------------------|-----------------|-----------------|------------------|-----------------|------------------|----|
| 1  | 115.0884  | 58.0478         |                |                  | I    |                  |                 |                 |                  |                 |                  | 13 |
| 2  | 217.1331  | 109.0702        | 199.1225       | 100.0649         | T    | 1351.6038        | 676.3055        | 1333.5802       | 667.2938         | 1333.5932       | 667.3003         | 12 |
| 3  | 381.1935  | 191.1004        | 363.1829       | 182.0951         | Y    | <b>1249.5591</b> | 625.2832        | 1231.5355       | 616.2714         | 1231.5485       | 616.2779         | 11 |
| 4  | 481.2589  | 241.1331        | 463.2483       | 232.1278         | V    | <b>1085.4987</b> | 543.2530        | 1067.4751       | 534.2412         | 1067.4882       | 534.2477         | 10 |
| 5  | 611.2985  | 306.1529        | 593.2880       | 297.1476         | E    | <b>985.4333</b>  | 493.2203        | <b>967.4097</b> | 484.2085         | <b>967.4227</b> | 484.2150         | 9  |
| 6  | 727.3225  | 364.1649        | 709.3119       | 355.1596         | D    | <b>855.3937</b>  | 428.2005        | 837.3701        | 419.1887         | 837.3831        | 419.1952         | 8  |
| 7  | 827.3880  | 414.1976        | 809.3774       | 405.1923         | V    | 739.3697         | 370.1885        | 721.3461        | 361.1767         | 721.3591        | 361.1832         | 7  |
| 8  | 899.4221  | 450.2147        | 881.4115       | 441.2094         | A    | <b>639.3042</b>  | 320.1558        | 621.2806        | 311.1440         | 621.2937        | 311.1505         | 6  |
| 9  | 1015.4461 | 508.2267        | 997.4355       | 499.2214         | D    | <b>567.2701</b>  | 284.1387        | 549.2465        | 275.1269         | 549.2595        | 275.1334         | 5  |
| 10 | 1073.4646 | 537.2359        | 1055.4540      | 528.2306         | G    | 451.2461         | 226.1267        | 433.2225        | 217.1149         | 433.2355        | 217.1214         | 4  |
| 11 | 1187.5457 | 594.2765        | 1169.5351      | 585.2712         | L    | <b>393.2276</b>  | 197.1174        | 375.2040        | 188.1056         | 375.2170        | 188.1122         | 3  |
| 12 | 1317.5853 | 659.2963        | 1299.5747      | 650.2910         | E    | <b>279.1465</b>  | 140.0769        | 261.1229        | 131.0651         | 261.1359        | 131.0716         | 2  |
| 13 |           |                 |                |                  | K    | 149.1069         | 75.0571         | 131.0833        | 66.0453          |                 |                  | 1  |

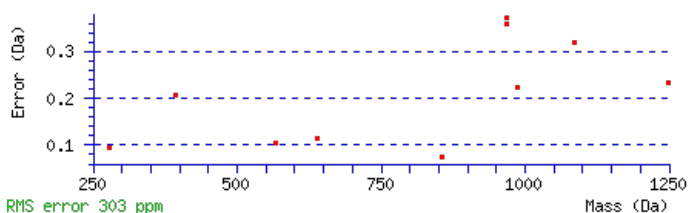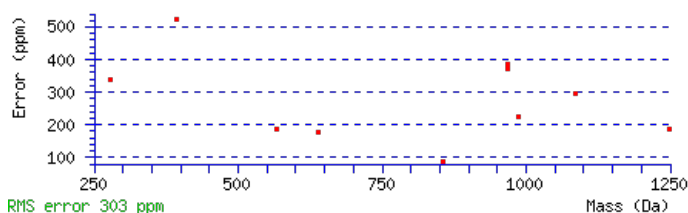NCBI **BLAST** search of **ITYVEDVADGLEK**

(Parameters: blastp, nr protein database, expect=20000, no filter, PAM30)

# AT5G16970.1

Other BLAST [web gateways](#)

## All matches to this query

| Score | Mr(calc)  | Delta   | Sequence                        |
|-------|-----------|---------|---------------------------------|
| 84.4  | 1464.6776 | 0.0035  | <a href="#">ITYVEDVADGLEK</a>   |
| 20.9  | 1464.6832 | -0.0021 | <a href="#">EFLSEEVEMVLK</a>    |
| 11.1  | 1464.6829 | -0.0018 | <a href="#">QSGDGGGGFVIPAKR</a> |
| 10.0  | 1464.6837 | -0.0025 | <a href="#">CDLLVTANGKTEK</a>   |
| 8.1   | 1464.6789 | 0.0022  | <a href="#">ENMMVLRQGLEK</a>    |
| 8.0   | 1464.6803 | 0.0009  | <a href="#">FQGVVEEQITELR</a>   |
| 5.7   | 1464.6837 | -0.0025 | <a href="#">EAEMISLQKQQK</a>    |
| 3.8   | 1464.6830 | -0.0018 | <a href="#">GTPFAAQTAAGNAIR</a> |
| 3.5   | 1464.6803 | 0.0009  | <a href="#">VGLELNEYGAQQK</a>   |
| 3.4   | 1464.6778 | 0.0034  | <a href="#">WGMEGLKNTVWK</a>    |

Mascot: <http://www.matrixscience.com/>

**Peptide View**MS/MS Fragmentation of **VPFVWSLK**

Found in **AT5G17050.1** in **TAIR\_Arabidopsis**, Symbols: | UDP-glucuronosyl/UDP-glucosyl transferase family protein | chr5:5607831-5609395  
REVERSE

Match to Query 2244: 974.559868 from(488.287210,2+) index(7593)

Title: Elution from: 67.698 to 67.698 scan no 10003 cid35.00 polarity:+

Data file D6h-1\_3.mgf

Click mouse within plot area to zoom in by factor of two about that point

Or,   to  Da

Label all possible matches  Label matches used for scoring

Show Y-axis

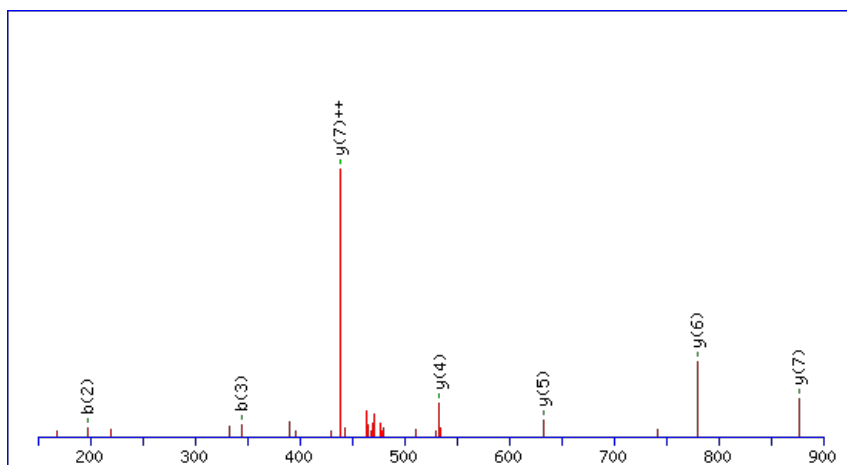

**Monoisotopic mass of neutral peptide Mr(calc):** 974.5589

**Fixed modifications:** Carbamidomethyl (C) (apply to specified residues or termini only)

**Ions Score:** 31 **Expect:** 0.003

**Matches:** 7/56 fragment ions using 8 most intense peaks ([help](#))

| # | b               | b <sup>++</sup> | b <sup>0</sup> | b <sup>0++</sup> | Seq. | y               | y <sup>++</sup> | y*       | y <sup>*++</sup> | y <sup>0</sup> | y <sup>0++</sup> | # |
|---|-----------------|-----------------|----------------|------------------|------|-----------------|-----------------|----------|------------------|----------------|------------------|---|
| 1 | 100.0757        | 50.5415         |                |                  | V    |                 |                 |          |                  |                |                  | 8 |
| 2 | <b>197.1285</b> | 99.0679         |                |                  | P    | <b>876.4978</b> | <b>438.7525</b> | 859.4713 | 430.2393         | 858.4872       | 429.7473         | 7 |
| 3 | <b>344.1969</b> | 172.6021        |                |                  | F    | <b>779.4450</b> | 390.2262        | 762.4185 | 381.7129         | 761.4345       | 381.2209         | 6 |
| 4 | 443.2653        | 222.1363        |                |                  | V    | <b>632.3766</b> | 316.6919        | 615.3501 | 308.1787         | 614.3661       | 307.6867         | 5 |
| 5 | 629.3446        | 315.1759        |                |                  | W    | <b>533.3082</b> | 267.1577        | 516.2817 | 258.6445         | 515.2976       | 258.1525         | 4 |
| 6 | 716.3766        | 358.6919        | 698.3661       | 349.6867         | S    | 347.2289        | 174.1181        | 330.2023 | 165.6048         | 329.2183       | 165.1128         | 3 |
| 7 | 829.4607        | 415.2340        | 811.4501       | 406.2287         | L    | 260.1969        | 130.6021        | 243.1703 | 122.0888         |                |                  | 2 |
| 8 |                 |                 |                |                  | K    | 147.1128        | 74.0600         | 130.0863 | 65.5468          |                |                  | 1 |

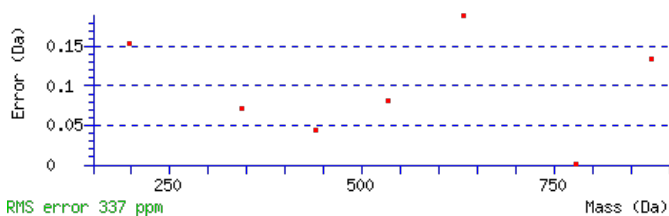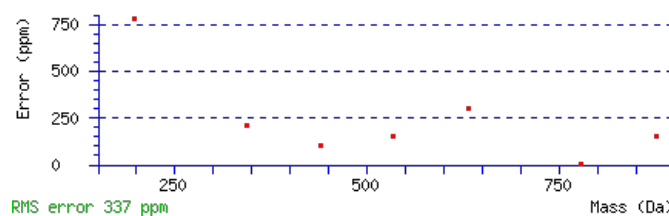

NCBI **BLAST** search of [VPFVWSLK](#)

(Parameters: blastp, nr protein database, expect=20000, no filter, PAM30)

Other BLAST [web gateways](#)

**All matches to this query**

| Score | Mr(calc) | Delta  | Sequence                 |
|-------|----------|--------|--------------------------|
| 31.2  | 974.5589 | 0.0009 | <a href="#">VPFVWSLK</a> |



**Peptide View**MS/MS Fragmentation of **MNLLGTQDRLR**Found in **AT5G17240.1** in **TAIR\_Arabidopsis**, Symbols: SDG40 | SDG40 (SET DOMAIN GROUP 40) | chr5:5666856-5668851 FORWARD

Match to Query 5641: 1450.687506 from(726.351029,2+) index(6900)

Title: Elution from: 60.625 to 60.625 scan no 9027 cid35.00 polarity:+

Data file 0-2\_3.mgf

Click mouse within plot area to zoom in by factor of two about that point

Or,  to  Da Label all possible matches  Label matches used for scoring Show Y-axis 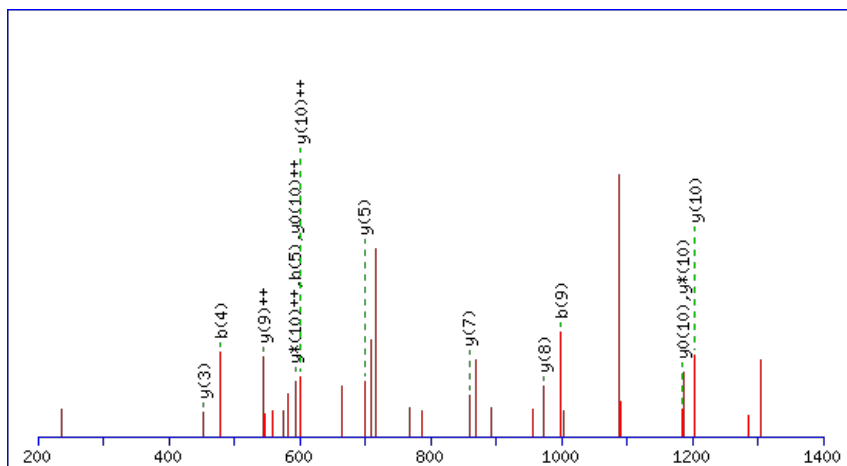Monoisotopic mass of neutral peptide  $M_r(\text{calc})$ : 1450.6837

Fixed modifications: Carbamidomethyl (C) (apply to specified residues or termini only)

Ions Score: 26 Expect: 0.028

Matches : 14/112 fragment ions using 24 most intense peaks ([help](#))

| #  | b               | b <sup>++</sup> | b*        | b <sup>*++</sup> | b <sup>0</sup> | b <sup>0++</sup> | Seq. | y                | y <sup>++</sup> | y*               | y <sup>*++</sup> | y <sup>0</sup>   | y <sup>0++</sup> | #  |
|----|-----------------|-----------------|-----------|------------------|----------------|------------------|------|------------------|-----------------|------------------|------------------|------------------|------------------|----|
| 1  | 133.0448        | 67.0260         |           |                  |                |                  | M    |                  |                 |                  |                  |                  |                  | 12 |
| 2  | 249.0818        | 125.0445        | 231.0582  | 116.0327         |                |                  | N    | 1319.6535        | 660.3304        | 1301.6299        | 651.3186         | 1301.6429        | 651.3251         | 11 |
| 3  | 365.1188        | 183.0630        | 347.0952  | 174.0512         |                |                  | N    | <b>1203.6165</b> | <b>602.3119</b> | <b>1185.5929</b> | <b>593.3001</b>  | <b>1185.6059</b> | <b>593.3066</b>  | 10 |
| 4  | <b>479.1999</b> | 240.1036        | 461.1763  | 231.0918         |                |                  | L    | 1087.5795        | <b>544.2934</b> | 1069.5559        | 535.2816         | 1069.5689        | 535.2881         | 9  |
| 5  | <b>593.2810</b> | 297.1441        | 575.2574  | 288.1323         |                |                  | L    | <b>973.4984</b>  | 487.2528        | 955.4748         | 478.2410         | 955.4878         | 478.2475         | 8  |
| 6  | 651.2995        | 326.1534        | 633.2759  | 317.1416         |                |                  | G    | <b>859.4173</b>  | 430.2123        | 841.3937         | 421.2005         | 841.4067         | 421.2070         | 7  |
| 7  | 753.3442        | 377.1757        | 735.3206  | 368.1639         | 735.3336       | 368.1705         | T    | 801.3988         | 401.2030        | 783.3752         | 392.1912         | 783.3882         | 392.1977         | 6  |
| 8  | 883.3968        | 442.2021        | 865.3733  | 433.1903         | 865.3863       | 433.1968         | Q    | <b>699.3541</b>  | 350.1807        | 681.3305         | 341.1689         | 681.3435         | 341.1754         | 5  |
| 9  | <b>999.4208</b> | 500.2141        | 981.3972  | 491.2023         | 981.4103       | 491.2088         | D    | 569.3014         | 285.1543        | 551.2778         | 276.1426         | 551.2909         | 276.1491         | 4  |
| 10 | 1159.5101       | 580.2587        | 1141.4865 | 571.2469         | 1141.4995      | 571.2534         | R    | <b>453.2774</b>  | 227.1424        | 435.2539         | 218.1306         |                  |                  | 3  |
| 11 | 1273.5912       | 637.2992        | 1255.5676 | 628.2874         | 1255.5806      | 628.2939         | L    | 293.1882         | 147.0977        | 275.1646         | 138.0859         |                  |                  | 2  |
| 12 |                 |                 |           |                  |                |                  | R    | 179.1071         | 90.0572         | 161.0835         | 81.0454          |                  |                  | 1  |

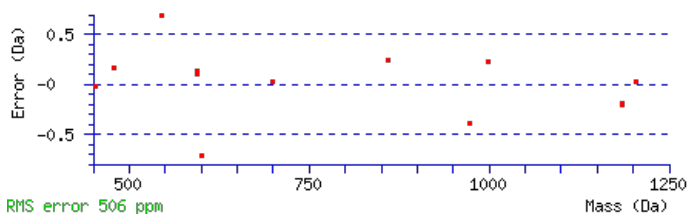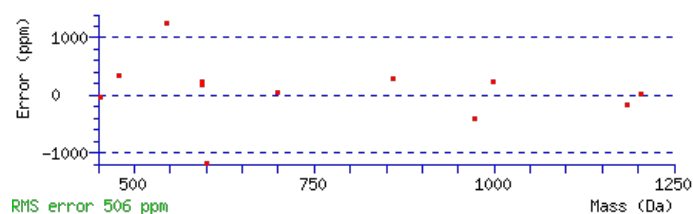NCBI BLAST search of [MNLLGTQDRLR](#)

(Parameters: blastp, nr protein database, expect=20000, no filter, PAM30)

Other BLAST [web gateways](#)

All matches to this query



## AT5G17240.1

| Score | Mr(calc)  | Delta   | Sequence                       |
|-------|-----------|---------|--------------------------------|
| 26.1  | 1450.6837 | 0.0038  | <a href="#">MNNLLGTQDRLR</a>   |
| 15.9  | 1450.6902 | -0.0027 | <a href="#">ATKTDDFAPFPVK</a>  |
| 11.5  | 1450.6833 | 0.0042  | <a href="#">LKCAIDLDFPSR</a>   |
| 11.4  | 1450.6911 | -0.0036 | <a href="#">GSNNVLGGVGDRRK</a> |
| 9.8   | 1450.6884 | -0.0009 | <a href="#">RSSDSTGSVLLPGR</a> |
| 8.4   | 1450.6907 | -0.0032 | <a href="#">LSYSRHTDLNVK</a>   |
| 7.8   | 1450.6907 | -0.0032 | <a href="#">YGNLNQALLNQGK</a>  |
| 7.0   | 1450.6907 | -0.0032 | <a href="#">DAWNSKRDTLVK</a>   |
| 5.5   | 1450.6855 | 0.0020  | <a href="#">FGTWPVAMLAQSK</a>  |
| 3.4   | 1450.6880 | -0.0005 | <a href="#">ISKFEAALENGEK</a>  |

Mascot: <http://www.matrixscience.com/>

## Peptide View

### MS/MS Fragmentation of **IQTPTDEIVVPYDK**

Found in **AT5G17310.2** in **TAIR\_Arabidopsis**, Symbols: | UTP--glucose-1-phosphate uridylyltransferase, putative / UDP-glucose pyrophosphorylase, putative / UGPase, putative | chr5:5696957-5700847 REVERSE

Match to Query 7405: 1632.785752 from(817.400152,2+) index(5958)

Title: Elution from: 53.942 to 53.942 scan no 7581 cid35.00 polarity:+

Data file D6h-2\_2.mgf

Click mouse within plot area to zoom in by factor of two about that point

Or,  to  Da

Label all possible matches  Label matches used for scoring

Show Y-axis

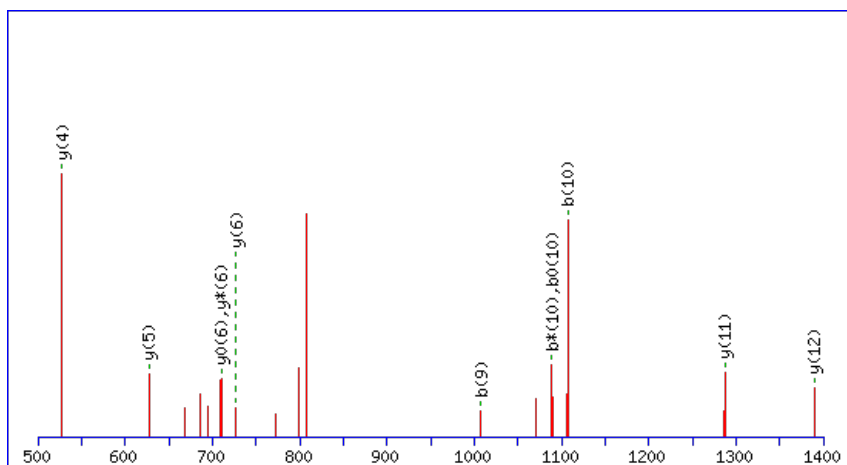

Monoisotopic mass of neutral peptide  $M_r(\text{calc})$ : 1632.7823

Fixed modifications: Carbamidomethyl (C) (apply to specified residues or termini only)

Ions Score: 43 Expect: 0.00038

Matches : 11/148 fragment ions using 15 most intense peaks [\(help\)](#)

| #  | b                | b <sup>++</sup> | b*               | b <sup>*++</sup> | b <sup>0</sup>   | b <sup>0++</sup> | Seq. | y                | y <sup>++</sup> | y*              | y <sup>*++</sup> | y <sup>0</sup>  | y <sup>0++</sup> | #  |
|----|------------------|-----------------|------------------|------------------|------------------|------------------|------|------------------|-----------------|-----------------|------------------|-----------------|------------------|----|
| 1  | 115.0884         | 58.0478         |                  |                  |                  |                  | I    |                  |                 |                 |                  |                 |                  | 14 |
| 2  | 245.1410         | 123.0741        | 227.1174         | 114.0624         |                  |                  | Q    | 1519.7085        | 760.3579        | 1501.6849       | 751.3461         | 1501.6979       | 751.3526         | 13 |
| 3  | 347.1857         | 174.0965        | 329.1622         | 165.0847         | 329.1752         | 165.0912         | T    | <b>1389.6558</b> | 695.3316        | 1371.6323       | 686.3198         | 1371.6453       | 686.3263         | 12 |
| 4  | 445.2355         | 223.1214        | 427.2120         | 214.1096         | 427.2250         | 214.1161         | P    | <b>1287.6111</b> | 644.3092        | 1269.5875       | 635.2974         | 1269.6006       | 635.3039         | 11 |
| 5  | 547.2802         | 274.1438        | 529.2567         | 265.1320         | 529.2697         | 265.1385         | T    | 1189.5613        | 595.2843        | 1171.5377       | 586.2725         | 1171.5508       | 586.2790         | 10 |
| 6  | 663.3042         | 332.1558        | 645.2806         | 323.1440         | 645.2937         | 323.1505         | D    | 1087.5166        | 544.2619        | 1069.4930       | 535.2502         | 1069.5061       | 535.2567         | 9  |
| 7  | 793.3439         | 397.1756        | 775.3203         | 388.1638         | 775.3333         | 388.1703         | E    | 971.4926         | 486.2500        | 953.4691        | 477.2382         | 953.4821        | 477.2447         | 8  |
| 8  | 907.4250         | 454.2161        | 889.4014         | 445.2043         | 889.4144         | 445.2108         | I    | 841.4530         | 421.2301        | 823.4294        | 412.2184         | 823.4424        | 412.2249         | 7  |
| 9  | <b>1007.4904</b> | 504.2488        | 989.4668         | 495.2370         | 989.4798         | 495.2436         | V    | <b>727.3719</b>  | 364.1896        | <b>709.3483</b> | 355.1778         | <b>709.3613</b> | 355.1843         | 6  |
| 10 | <b>1107.5559</b> | 554.2816        | <b>1089.5323</b> | 545.2698         | <b>1089.5453</b> | 545.2763         | V    | <b>627.3065</b>  | 314.1569        | 609.2829        | 305.1451         | 609.2959        | 305.1516         | 5  |
| 11 | 1205.6056        | 603.3065        | 1187.5821        | 594.2947         | 1187.5951        | 594.3012         | P    | <b>527.2410</b>  | 264.1241        | 509.2174        | 255.1124         | 509.2304        | 255.1189         | 4  |
| 12 | 1369.6660        | 685.3366        | 1351.6424        | 676.3249         | 1351.6554        | 676.3314         | Y    | 429.1912         | 215.0992        | 411.1676        | 206.0875         | 411.1807        | 206.0940         | 3  |
| 13 | 1485.6900        | 743.3486        | 1467.6664        | 734.3368         | 1467.6794        | 734.3434         | D    | 265.1309         | 133.0691        | 247.1073        | 124.0573         | 247.1203        | 124.0638         | 2  |
| 14 |                  |                 |                  |                  |                  |                  | K    | 149.1069         | 75.0571         | 131.0833        | 66.0453          |                 |                  | 1  |

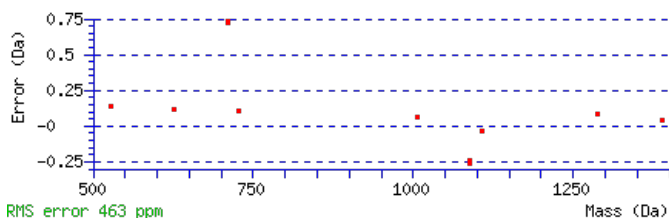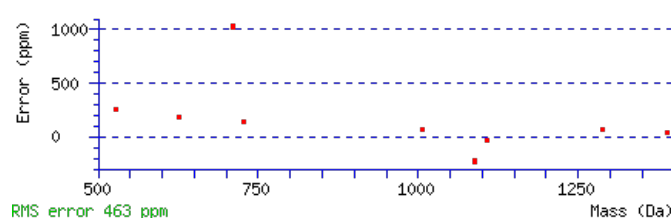

NCBI BLAST search of [IQTPTDEIVVPYDK](#)

## AT5G17310.2

(Parameters: blastp, nr protein database, expect=20000, no filter, PAM30)

Other BLAST [web gateways](#)

### All matches to this query

| Score | Mr(calc)  | Delta   | Sequence                       |
|-------|-----------|---------|--------------------------------|
| 42.8  | 1632.7823 | 0.0035  | <a href="#">IQTPIDEIVVPYDK</a> |
| 2.5   | 1632.7883 | -0.0026 | <a href="#">QLAEMEDPIGRVLK</a> |

Mascot: <http://www.matrixscience.com/>



# Mascot Search Results

## Peptide View

MS/MS Fragmentation of **VASLSNELSVER**

Found in **AT5G17710.1** in **TAIR\_Arabidopsis**, Symbols: EMB1241 | EMB1241 (EMBRYO DEFECTIVE 1241); adenylnucleotide exchange factor/ chaperone binding / protein binding / protein homodimerization | chr5:5839562-5841641 REVERSE

Match to Query 5100: 1302.676194 from(652.345373,2+) index(4465)

Title: Elution from: 41.343 to 41.343 scan no 5551 cid35.00 polarity:+

Data file 0-1\_1.mgf

Click mouse within plot area to zoom in by factor of two about that point

Or,   to  Da

Label all possible matches  Label matches used for scoring

Show Y-axis

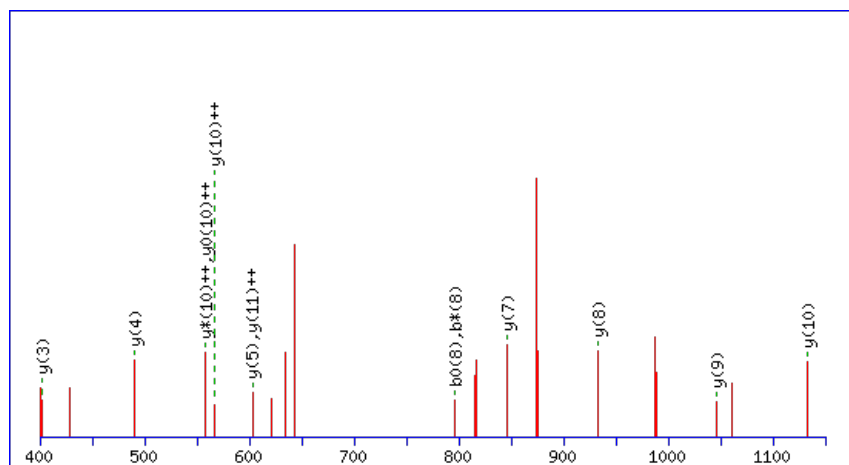

Monoisotopic mass of neutral peptide  $M_r(\text{calc})$ : 1302.6779

Fixed modifications: Carbamidomethyl (C) (apply to specified residues or termini only)

Ions Score: 40 Expect: 0.00052

Matches : 13/116 fragment ions using 21 most intense peaks [\(help\)](#)

| #  | b         | b <sup>++</sup> | b*        | b <sup>*++</sup> | b <sup>0</sup> | b <sup>0++</sup> | Seq. | y         | y <sup>++</sup> | y*        | y <sup>*++</sup> | y <sup>0</sup> | y <sup>0++</sup> | #  |
|----|-----------|-----------------|-----------|------------------|----------------|------------------|------|-----------|-----------------|-----------|------------------|----------------|------------------|----|
| 1  | 100.0757  | 50.5415         |           |                  |                |                  | V    |           |                 |           |                  |                |                  | 12 |
| 2  | 171.1128  | 86.0600         |           |                  |                |                  | A    | 1204.6168 | 602.8120        | 1187.5903 | 594.2988         | 1186.6062      | 593.8068         | 11 |
| 3  | 258.1448  | 129.5761        |           |                  | 240.1343       | 120.5708         | S    | 1133.5797 | 567.2935        | 1116.5531 | 558.7802         | 1115.5691      | 558.2882         | 10 |
| 4  | 371.2289  | 186.1181        |           |                  | 353.2183       | 177.1128         | L    | 1046.5477 | 523.7775        | 1029.5211 | 515.2642         | 1028.5371      | 514.7722         | 9  |
| 5  | 458.2609  | 229.6341        |           |                  | 440.2504       | 220.6288         | S    | 933.4636  | 467.2354        | 916.4370  | 458.7222         | 915.4530       | 458.2302         | 8  |
| 6  | 572.3039  | 286.6556        | 555.2773  | 278.1423         | 554.2933       | 277.6503         | N    | 846.4316  | 423.7194        | 829.4050  | 415.2061         | 828.4210       | 414.7141         | 7  |
| 7  | 701.3464  | 351.1769        | 684.3199  | 342.6636         | 683.3359       | 342.1716         | E    | 732.3886  | 366.6980        | 715.3621  | 358.1847         | 714.3781       | 357.6927         | 6  |
| 8  | 814.4305  | 407.7189        | 797.4040  | 399.2056         | 796.4199       | 398.7136         | L    | 603.3461  | 302.1767        | 586.3195  | 293.6634         | 585.3355       | 293.1714         | 5  |
| 9  | 901.4625  | 451.2349        | 884.4360  | 442.7216         | 883.4520       | 442.2296         | S    | 490.2620  | 245.6346        | 473.2354  | 237.1214         | 472.2514       | 236.6293         | 4  |
| 10 | 1000.5310 | 500.7691        | 983.5044  | 492.2558         | 982.5204       | 491.7638         | V    | 403.2300  | 202.1186        | 386.2034  | 193.6053         | 385.2194       | 193.1133         | 3  |
| 11 | 1129.5735 | 565.2904        | 1112.5470 | 556.7771         | 1111.5630      | 556.2851         | E    | 304.1615  | 152.5844        | 287.1350  | 144.0711         | 286.1510       | 143.5791         | 2  |
| 12 |           |                 |           |                  |                |                  | R    | 175.1190  | 88.0631         | 158.0924  | 79.5498          |                |                  | 1  |

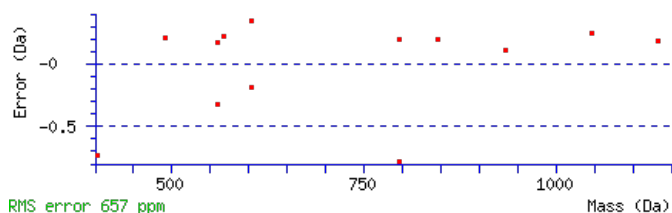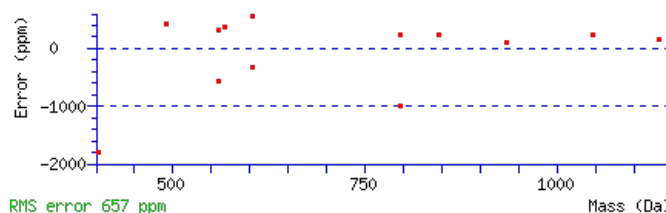

NCBI BLAST search of **VASLSNELSVER**

(Parameters: blastp, nr protein database, expect=20000, no filter, PAM30)

Other BLAST [web gateways](#)

AT5G17710.1

All matches to this query

| Score | Mr(calc)  | Delta   | Sequence                     |
|-------|-----------|---------|------------------------------|
| 40.0  | 1302.6779 | -0.0017 | <a href="#">VASLSNELSVER</a> |
| 0.7   | 1302.6754 | 0.0008  | <a href="#">LLEGWMRASPK</a>  |

Mascot: <http://www.matrixscience.com/>

**Peptide View**MS/MS Fragmentation of **VVEVNALAK**

Found in **AT5G17920.1** in **TAIR\_Arabidopsis**, Symbols: ATMETS, ATMS1, ATCIMS | ATCIMS (COBALAMIN-INDEPENDENT METHIONINE SYNTHASE); 5-methyltetrahydropteroyltriglutamate-homocysteine S-methyltransferase/ methionine synthase | chr5:5935773-5939197 FORWARD

Match to Query 2069: 952.522566 from(477.268559,2+) index(2213)

Title: Elution from: 24.613 to 24.613 scan no 2804 cid35.00 polarity:+

Data file 0-1\_3.mgf

Click mouse within plot area to zoom in by factor of two about that point

Or,   to  Da

Label all possible matches  Label matches used for scoring

Show Y-axis

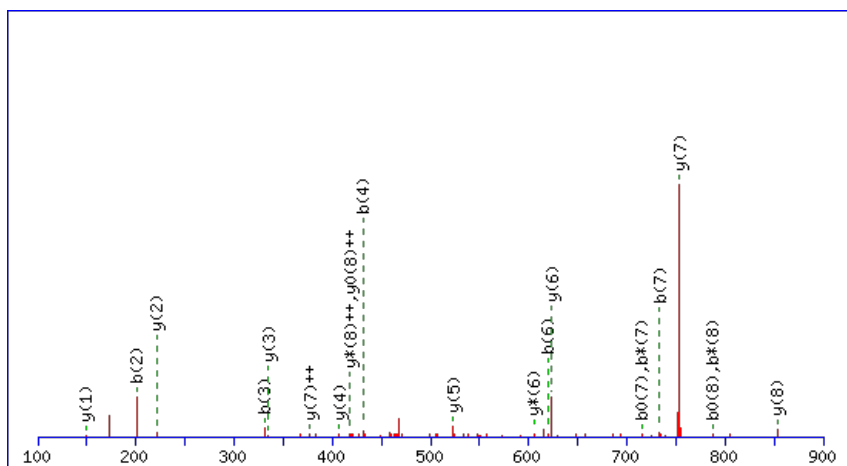

**Monoisotopic mass of neutral peptide Mr(calc):** 952.5220

**Fixed modifications:** Carbamidomethyl (C) (apply to specified residues or termini only)

**Ions Score:** 71 **Expect:** 4.7e-007

**Matches:** 21/72 fragment ions using 27 most intense peaks ([help](#))

| # | b               | b <sup>++</sup> | b*              | b <sup>*++</sup> | b <sup>0</sup>  | b <sup>0++</sup> | Seq. | y               | y <sup>++</sup> | y*              | y <sup>*++</sup> | y <sup>0</sup> | y <sup>0++</sup> | # |
|---|-----------------|-----------------|-----------------|------------------|-----------------|------------------|------|-----------------|-----------------|-----------------|------------------|----------------|------------------|---|
| 1 | 101.0727        | 51.0400         |                 |                  |                 |                  | V    |                 |                 |                 |                  |                |                  | 9 |
| 2 | <b>201.1382</b> | 101.0727        |                 |                  |                 |                  | V    | <b>853.4638</b> | 427.2355        | 835.4402        | <b>418.2237</b>  | 835.4532       | <b>418.2303</b>  | 8 |
| 3 | <b>331.1778</b> | 166.0925        |                 |                  | 313.1672        | 157.0873         | E    | <b>753.3983</b> | <b>377.2028</b> | 735.3748        | 368.1910         | 735.3878       | 368.1975         | 7 |
| 4 | <b>431.2433</b> | 216.1253        |                 |                  | 413.2327        | 207.1200         | V    | <b>623.3587</b> | 312.1830        | <b>605.3351</b> | 303.1712         |                |                  | 6 |
| 5 | 547.2802        | 274.1438        | 529.2567        | 265.1320         | 529.2697        | 265.1385         | N    | <b>523.2933</b> | 262.1503        | 505.2697        | 253.1385         |                |                  | 5 |
| 6 | <b>619.3144</b> | 310.1608        | 601.2908        | 301.1490         | 601.3038        | 301.1556         | A    | <b>407.2563</b> | 204.1318        | 389.2327        | 195.1200         |                |                  | 4 |
| 7 | <b>733.3955</b> | 367.2014        | <b>715.3719</b> | 358.1896         | <b>715.3849</b> | 358.1961         | L    | <b>335.2221</b> | 168.1147        | 317.1985        | 159.1029         |                |                  | 3 |
| 8 | 805.4296        | 403.2185        | <b>787.4061</b> | 394.2067         | <b>787.4191</b> | 394.2132         | A    | <b>221.1410</b> | 111.0741        | 203.1174        | 102.0624         |                |                  | 2 |
| 9 |                 |                 |                 |                  |                 |                  | K    | <b>149.1069</b> | 75.0571         | 131.0833        | 66.0453          |                |                  | 1 |

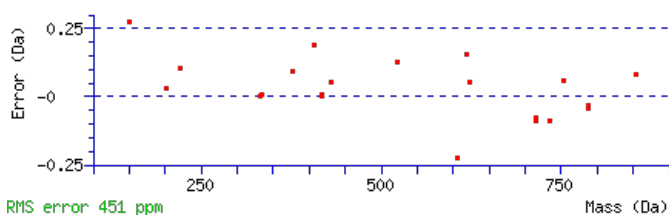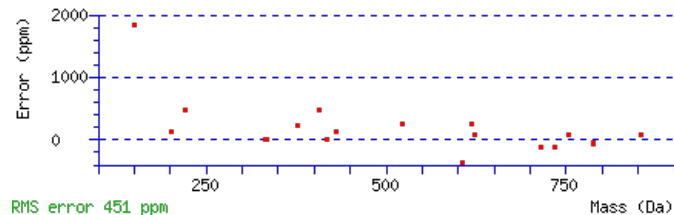

NCBI **BLAST** search of [VVEVNALAK](#)

(Parameters: blastp, nr protein database, expect=20000, no filter, PAM30)

Other BLAST [web gateways](#)

**All matches to this query**

## AT5G17920.1

| Score | Mr(calc) | Delta   | Sequence                   |
|-------|----------|---------|----------------------------|
| 71.3  | 952.5220 | 0.0006  | <a href="#">VVEVNALAK</a>  |
| 15.5  | 952.5220 | 0.0006  | <a href="#">VLNLEGVAK</a>  |
| 9.0   | 952.5220 | 0.0006  | <a href="#">VLLQSAPSK</a>  |
| 8.7   | 952.5220 | 0.0006  | <a href="#">LVNTLGTPK</a>  |
| 6.4   | 952.5220 | 0.0006  | <a href="#">SKTPLPTAK</a>  |
| 4.5   | 952.5242 | -0.0016 | <a href="#">VVLEGIWK</a>   |
| 4.2   | 952.5220 | 0.0006  | <a href="#">TILGNLSPK</a>  |
| 3.2   | 952.5220 | 0.0006  | <a href="#">VTSGGIIAPK</a> |
| 2.0   | 952.5220 | 0.0006  | <a href="#">LQEQLLAK</a>   |
| 0.8   | 952.5246 | -0.0021 | <a href="#">QGRAPLVAK</a>  |

Mascot: <http://www.matrixscience.com/>

## Peptide View

### MS/MS Fragmentation of **DEIQIASILK**

Found in **AT5G18070.1** in **TAIR\_Arabidopsis**, Symbols: | DRT101 (DNA-DAMAGE-REPAIR/TOLERATION 101); intramolecular transferase, phosphotransferases | chr5:5981119-5982789 FORWARD

Match to Query 3962: 1140.601586 from(571.308069,2+) index(9388)

Title: Elution from: 83.665 to 83.665 scan no 12553 cid35.00 polarity:+

Data file C7-2\_1.mgf

Click mouse within plot area to zoom in by factor of two about that point

Or,   to  Da

Label all possible matches  Label matches used for scoring

Show Y-axis

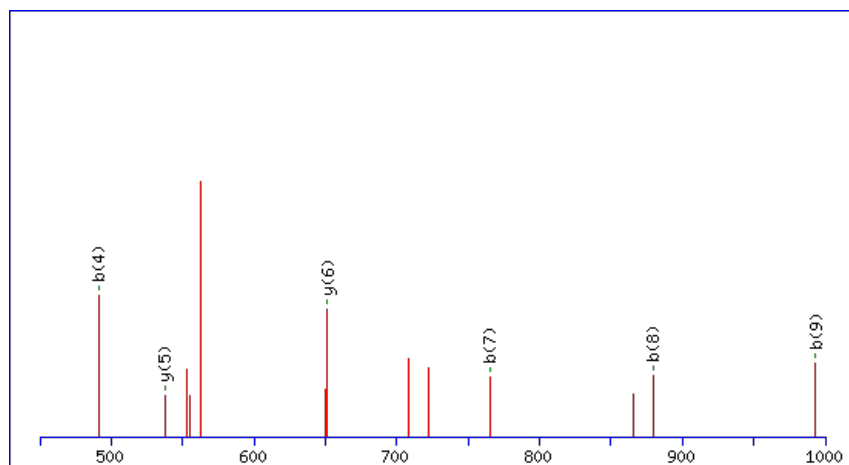

**Monoisotopic mass of neutral peptide Mr(calc):** 1140.6035

**Fixed modifications:** Carbamidomethyl (C) (apply to specified residues or termini only)

**Ions Score:** 25 **Expect:** 0.012

**Matches:** 6/96 fragment ions using 13 most intense peaks ([help](#))

| #  | b               | b <sup>++</sup> | b*       | b <sup>*++</sup> | b <sup>0</sup> | b <sup>0++</sup> | Seq.     | y               | y <sup>++</sup> | y*        | y <sup>*++</sup> | y <sup>0</sup> | y <sup>0++</sup> | #         |
|----|-----------------|-----------------|----------|------------------|----------------|------------------|----------|-----------------|-----------------|-----------|------------------|----------------|------------------|-----------|
| 1  | 117.0313        | 59.0193         |          |                  | 99.0207        | 50.0140          | <b>D</b> |                 |                 |           |                  |                |                  | <b>10</b> |
| 2  | 247.0709        | 124.0391        |          |                  | 229.0603       | 115.0338         | <b>E</b> | 1025.5868       | 513.2970        | 1007.5632 | 504.2852         | 1007.5762      | 504.2917         | <b>9</b>  |
| 3  | 361.1520        | 181.0796        |          |                  | 343.1414       | 172.0743         | <b>I</b> | 895.5471        | 448.2772        | 877.5235  | 439.2654         | 877.5366       | 439.2719         | <b>8</b>  |
| 4  | <b>491.2046</b> | 246.1060        | 473.1810 | 237.0942         | 473.1941       | 237.1007         | <b>Q</b> | 781.4660        | 391.2367        | 763.4424  | 382.2249         | 763.4555       | 382.2314         | <b>7</b>  |
| 5  | 605.2857        | 303.1465        | 587.2621 | 294.1347         | 587.2752       | 294.1412         | <b>I</b> | <b>651.4134</b> | 326.2103        | 633.3898  | 317.1985         | 633.4028       | 317.2050         | <b>6</b>  |
| 6  | 677.3199        | 339.1636        | 659.2963 | 330.1518         | 659.3093       | 330.1583         | <b>A</b> | <b>537.3323</b> | 269.1698        | 519.3087  | 260.1580         | 519.3217       | 260.1645         | <b>5</b>  |
| 7  | <b>765.3489</b> | 383.1781        | 747.3254 | 374.1663         | 747.3384       | 374.1728         | <b>S</b> | 465.2981        | 233.1527        | 447.2746  | 224.1409         | 447.2876       | 224.1474         | <b>4</b>  |
| 8  | <b>879.4300</b> | 440.2187        | 861.4065 | 431.2069         | 861.4195       | 431.2134         | <b>I</b> | 377.2691        | 189.1382        | 359.2455  | 180.1264         |                |                  | <b>3</b>  |
| 9  | <b>993.5111</b> | 497.2592        | 975.4876 | 488.2474         | 975.5006       | 488.2539         | <b>L</b> | 263.1880        | 132.0976        | 245.1644  | 123.0858         |                |                  | <b>2</b>  |
| 10 |                 |                 |          |                  |                |                  | <b>K</b> | 149.1069        | 75.0571         | 131.0833  | 66.0453          |                |                  | <b>1</b>  |

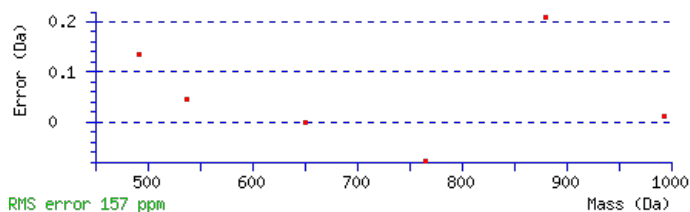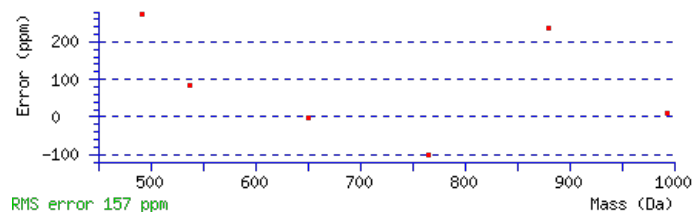

### NCBI BLAST search of **DEIQIASILK**

(Parameters: blastp, nr protein database, expect=20000, no filter, PAM30)

Other BLAST [web gateways](#)

All matches to this query



## AT5G18070.1

| Score | Mr(calc)  | Delta   | Sequence                     |
|-------|-----------|---------|------------------------------|
| 24.7  | 1140.6035 | -0.0019 | <a href="#">DEIQIASILK</a>   |
| 24.0  | 1140.6034 | -0.0018 | <a href="#">TVGAGVIGTILE</a> |
| 11.8  | 1140.5987 | 0.0029  | <a href="#">AVCVITGLPAK</a>  |
| 10.6  | 1140.6035 | -0.0019 | <a href="#">LDSEAIQILK</a>   |
| 10.6  | 1140.6035 | -0.0019 | <a href="#">SLPDSEKIIK</a>   |
| 9.6   | 1140.6035 | -0.0019 | <a href="#">VVSAEPISLSK</a>  |
| 8.3   | 1140.5998 | 0.0018  | <a href="#">FLFWKVYK</a>     |
| 3.7   | 1140.5987 | 0.0029  | <a href="#">AQLVSLPCLK</a>   |
| 3.7   | 1140.6035 | -0.0019 | <a href="#">AVIGAELESK</a>   |
| 3.7   | 1140.6035 | -0.0019 | <a href="#">DLAEAKLEIK</a>   |

Mascot: <http://www.matrixscience.com/>

**Peptide View**MS/MS Fragmentation of **ALVAYYQK**Found in **AT5G18380.1** in **TAIR\_Arabidopsis**, Symbols: | 40S ribosomal protein S16 (RPS16C) | chr5:6090255-6090695 REVERSE

Match to Query 2128: 964.486062 from(483.250307,2+) index(2470)

Title: Elution from: 26.570 to 26.570 scan no 3120 cid35.00 polarity:+

Data file C7-1\_2.mgf

Click mouse within plot area to zoom in by factor of two about that point

Or,   to  Da Label all possible matches  Label matches used for scoring Show Y-axis 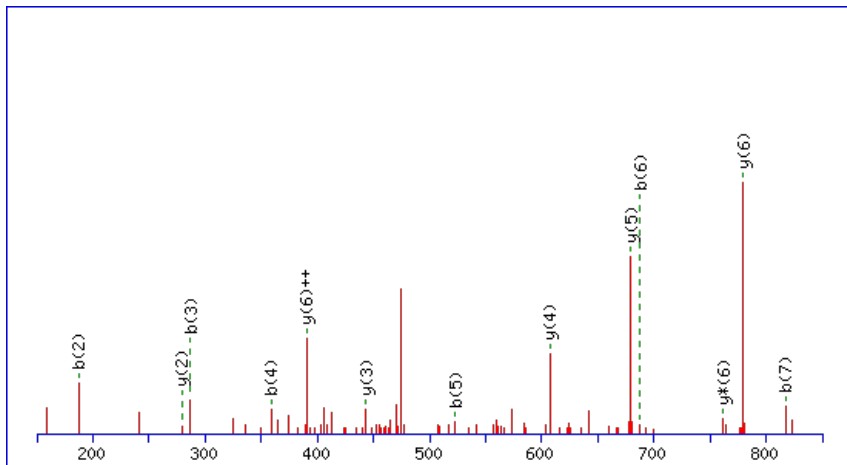Monoisotopic mass of neutral peptide **Mr(calc)**: 964.4878

Fixed modifications: Carbamidomethyl (C) (apply to specified residues or termini only)

Ions Score: 35 **Expect**: 0.0021Matches : 13/44 fragment ions using 33 most intense peaks ([help](#))

| # | b               | b <sup>++</sup> | b*       | b <sup>+++</sup> | Seq. | y               | y <sup>++</sup> | y*              | y <sup>+++</sup> | # |
|---|-----------------|-----------------|----------|------------------|------|-----------------|-----------------|-----------------|------------------|---|
| 1 | 73.0414         | 37.0244         |          |                  | A    |                 |                 |                 |                  | 8 |
| 2 | <b>187.1225</b> | 94.0649         |          |                  | L    | 893.4609        | 447.2341        | 875.4374        | 438.2223         | 7 |
| 3 | <b>287.1880</b> | 144.0976        |          |                  | V    | <b>779.3798</b> | <b>390.1936</b> | <b>761.3563</b> | 381.1818         | 6 |
| 4 | <b>359.2221</b> | 180.1147        |          |                  | A    | <b>679.3144</b> | 340.1608        | 661.2908        | 331.1490         | 5 |
| 5 | <b>523.2825</b> | 262.1449        |          |                  | Y    | <b>607.2802</b> | 304.1438        | 589.2567        | 295.1320         | 4 |
| 6 | <b>687.3429</b> | 344.1751        |          |                  | Y    | <b>443.2199</b> | 222.1136        | 425.1963        | 213.1018         | 3 |
| 7 | <b>817.3955</b> | 409.2014        | 799.3719 | 400.1896         | Q    | <b>279.1595</b> | 140.0834        | 261.1359        | 131.0716         | 2 |
| 8 |                 |                 |          |                  | K    | 149.1069        | 75.0571         | 131.0833        | 66.0453          | 1 |

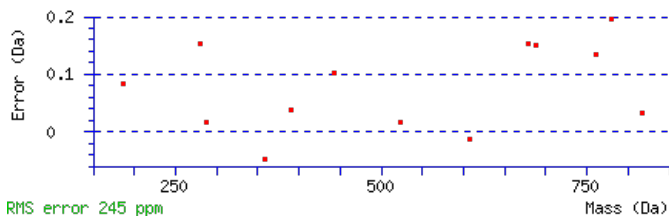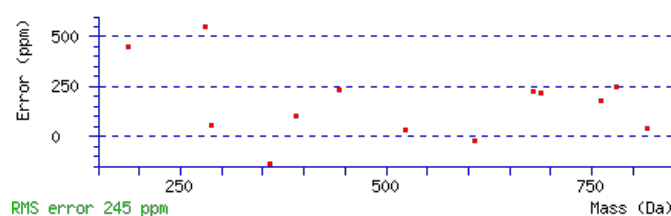NCBI **BLAST** search of **ALVAYYQK**

(Parameters: blastp, nr protein database, expect=20000, no filter, PAM30)

Other BLAST [web gateways](#)**All matches to this query**

| Score | Mr(calc) | Delta   | Sequence                  |
|-------|----------|---------|---------------------------|
| 35.4  | 964.4878 | -0.0017 | <a href="#">ALVAYYQK</a>  |
| 13.0  | 964.4882 | -0.0022 | <a href="#">LAAVDVAHR</a> |

## AT5G18380.1

|     |          |         |                           |
|-----|----------|---------|---------------------------|
| 7.4 | 964.4856 | 0.0005  | <a href="#">SSTLPPPQK</a> |
| 6.3 | 964.4878 | -0.0017 | <a href="#">FQYEKLLK</a>  |

**Mascot:** <http://www.matrixscience.com/>

**Peptide View**MS/MS Fragmentation of **SKQETDKK**Found in **AT5G18590.1** in **TAIR\_Arabidopsis**, Symbols: | kelch repeat-containing protein | chr5:6178518-6182188 REVERSE

Match to Query 2280: 974.467942 from(488.241247,2+) index(2631)

Title: Elution from: 27.330 to 27.330 scan no 3287 cid35.00 polarity:+

Data file C7-1\_1.mgf

Click mouse within plot area to zoom in by factor of two about that point

Or,   to  Da Label all possible matches  Label matches used for scoring Show Y-axis 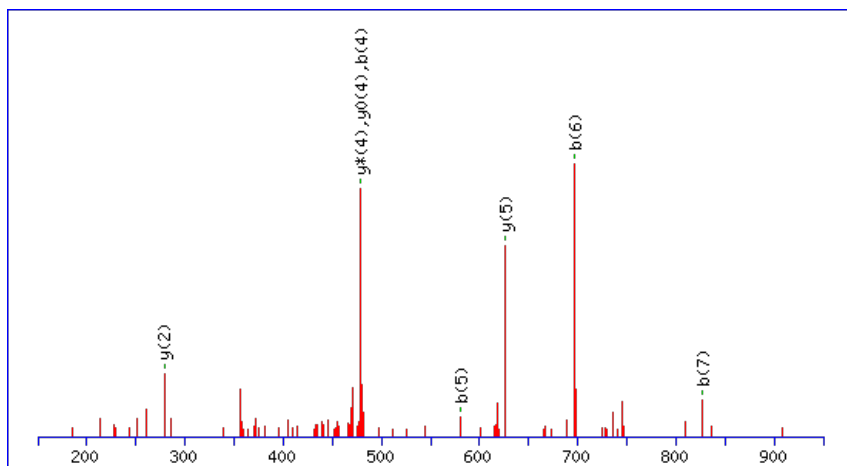Monoisotopic mass of neutral peptide **Mr(calc)**: 974.4677

Fixed modifications: Carbamidomethyl (C) (apply to specified residues or termini only)

Ions Score: 30 Expect: 0.011

Matches : 8/78 fragment ions using 8 most intense peaks ([help](#))

| # | b               | b <sup>++</sup> | b*       | b <sup>*++</sup> | b <sup>0</sup> | b <sup>0++</sup> | Seq. | y               | y <sup>++</sup> | y*              | y <sup>*++</sup> | y <sup>0</sup>  | y <sup>0++</sup> | # |
|---|-----------------|-----------------|----------|------------------|----------------|------------------|------|-----------------|-----------------|-----------------|------------------|-----------------|------------------|---|
| 1 | 89.0363         | 45.0218         |          |                  | 71.0258        | 36.0165          | S    |                 |                 |                 |                  |                 |                  | 8 |
| 2 | 219.1254        | 110.0663        | 201.1018 | 101.0545         | 201.1148       | 101.0610         | K    | 887.4459        | 444.2266        | 869.4223        | 435.2148         | 869.4353        | 435.2213         | 7 |
| 3 | 349.1780        | 175.0926        | 331.1544 | 166.0809         | 331.1675       | 166.0874         | Q    | 757.3569        | 379.1821        | 739.3333        | 370.1703         | 739.3463        | 370.1768         | 6 |
| 4 | <b>479.2176</b> | 240.1125        | 461.1941 | 231.1007         | 461.2071       | 231.1072         | E    | <b>627.3042</b> | 314.1558        | 609.2806        | 305.1440         | 609.2937        | 305.1505         | 5 |
| 5 | <b>581.2624</b> | 291.1348        | 563.2388 | 282.1230         | 563.2518       | 282.1295         | T    | 497.2646        | 249.1359        | <b>479.2410</b> | 240.1241         | <b>479.2540</b> | 240.1307         | 4 |
| 6 | <b>697.2863</b> | 349.1468        | 679.2628 | 340.1350         | 679.2758       | 340.1415         | D    | 395.2199        | 198.1136        | 377.1963        | 189.1018         | 377.2093        | 189.1083         | 3 |
| 7 | <b>827.3754</b> | 414.1913        | 809.3518 | 405.1795         | 809.3648       | 405.1860         | K    | <b>279.1959</b> | 140.1016        | 261.1723        | 131.0898         |                 |                  | 2 |
| 8 |                 |                 |          |                  |                |                  | K    | 149.1069        | 75.0571         | 131.0833        | 66.0453          |                 |                  | 1 |

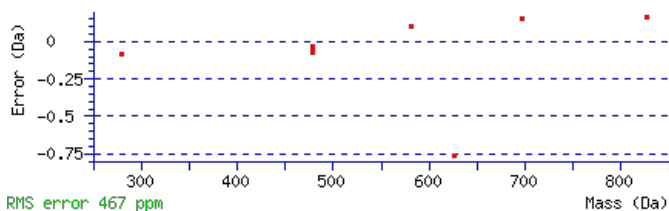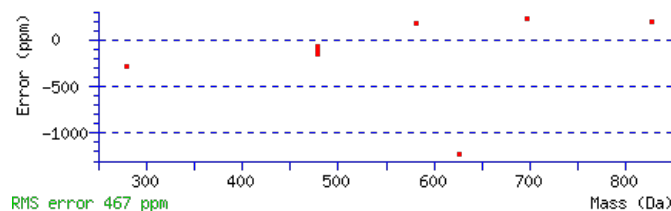NCBI **BLAST** search of **SKQETDKK**

(Parameters: blastp, nr protein database, expect=20000, no filter, PAM30)

Other BLAST [web gateways](#)**All matches to this query**

| Score | Mr(calc) | Delta   | Sequence                 |
|-------|----------|---------|--------------------------|
| 30.4  | 974.4677 | 0.0003  | <a href="#">SKQETDKK</a> |
| 12.1  | 974.4699 | -0.0020 | <a href="#">GIFEENKK</a> |

## AT5G18590.1

|      |          |         |                           |
|------|----------|---------|---------------------------|
| 12.0 | 974.4704 | -0.0024 | <a href="#">NKGGNKSQK</a> |
| 8.1  | 974.4656 | 0.0023  | <a href="#">MQRQPRK</a>   |
| 7.9  | 974.4699 | -0.0020 | <a href="#">EQTFPSKK</a>  |
| 6.2  | 974.4699 | -0.0020 | <a href="#">NLAEDFKK</a>  |
| 2.7  | 974.4699 | -0.0020 | <a href="#">YVEAEVVR</a>  |
| 2.0  | 974.4699 | -0.0020 | <a href="#">EAFDNLKK</a>  |
| 2.0  | 974.4699 | -0.0020 | <a href="#">EFVQSQVK</a>  |
| 2.0  | 974.4699 | -0.0020 | <a href="#">GKVQEFEK</a>  |

Mascot: <http://www.matrixscience.com/>



# Mascot Search Results

## Peptide View

MS/MS Fragmentation of **IAAGEAIAMLVLESK**

Found in **AT5G18980.1** in **TAIR\_Arabidopsis**, Symbols: | binding | chr5:6334946-6337945 REVERSE

Match to Query 6454: 1530.791208 from(511.271012,3+) index(9182)

Title: Elution from: 82.586 to 82.586 scan no 12545 cid35.00 polarity:+

Data file C7-2\_3.mgf

Click mouse within plot area to zoom in by factor of two about that point

Or,  to  Da

Label all possible matches  Label matches used for scoring

Show Y-axis

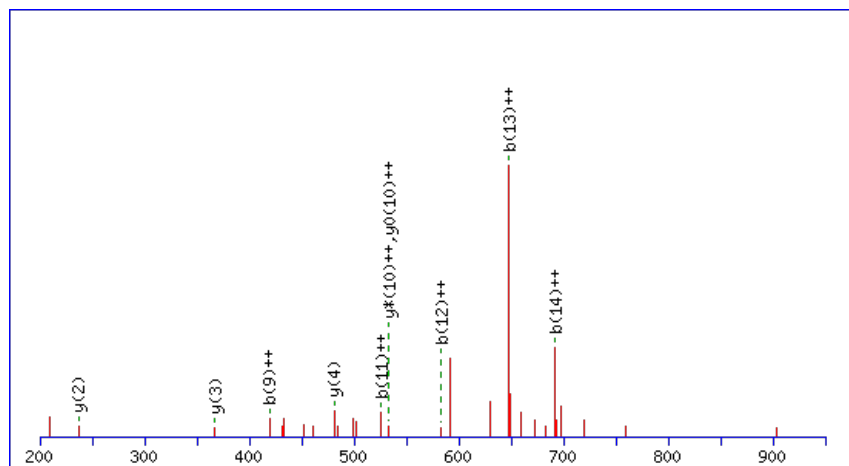

Monoisotopic mass of neutral peptide **Mr(calc)**: 1530.7904

**Fixed modifications**: Carbamidomethyl (C) (apply to specified residues or termini only)

**Ions Score**: 22 **Expect**: 0.03

**Matches** : 10/130 fragment ions using 21 most intense peaks ([help](#))

| #  | b         | b <sup>++</sup> | b <sup>0</sup> | b <sup>0++</sup> | Seq. | y         | y <sup>++</sup> | y*        | y <sup>*++</sup> | y <sup>0</sup> | y <sup>0++</sup> | #  |
|----|-----------|-----------------|----------------|------------------|------|-----------|-----------------|-----------|------------------|----------------|------------------|----|
| 1  | 115.0884  | 58.0478         |                |                  | I    |           |                 |           |                  |                |                  | 15 |
| 2  | 187.1225  | 94.0649         |                |                  | A    | 1417.7166 | 709.3619        | 1399.6930 | 700.3501         | 1399.7060      | 700.3566         | 14 |
| 3  | 259.1567  | 130.0820        |                |                  | A    | 1345.6824 | 673.3448        | 1327.6588 | 664.3330         | 1327.6718      | 664.3396         | 13 |
| 4  | 317.1752  | 159.0912        |                |                  | G    | 1273.6483 | 637.3278        | 1255.6247 | 628.3160         | 1255.6377      | 628.3225         | 12 |
| 5  | 447.2148  | 224.1110        | 429.2042       | 215.1058         | E    | 1215.6298 | 608.3185        | 1197.6062 | 599.3067         | 1197.6192      | 599.3132         | 11 |
| 6  | 519.2489  | 260.1281        | 501.2384       | 251.1228         | A    | 1085.5901 | 543.2987        | 1067.5665 | 534.2869         | 1067.5796      | 534.2934         | 10 |
| 7  | 633.3300  | 317.1687        | 615.3195       | 308.1634         | I    | 1013.5560 | 507.2816        | 995.5324  | 498.2698         | 995.5454       | 498.2763         | 9  |
| 8  | 705.3642  | 353.1857        | 687.3536       | 344.1805         | A    | 899.4749  | 450.2411        | 881.4513  | 441.2293         | 881.4643       | 441.2358         | 8  |
| 9  | 837.4017  | 419.2045        | 819.3912       | 410.1992         | M    | 827.4407  | 414.2240        | 809.4171  | 405.2122         | 809.4302       | 405.2187         | 7  |
| 10 | 951.4828  | 476.2450        | 933.4723       | 467.2398         | L    | 695.4032  | 348.2052        | 677.3796  | 339.1935         | 677.3926       | 339.2000         | 6  |
| 11 | 1051.5483 | 526.2778        | 1033.5377      | 517.2725         | V    | 581.3221  | 291.1647        | 563.2985  | 282.1529         | 563.3115       | 282.1594         | 5  |
| 12 | 1165.6294 | 583.3183        | 1147.6188      | 574.3130         | L    | 481.2567  | 241.1320        | 463.2331  | 232.1202         | 463.2461       | 232.1267         | 4  |
| 13 | 1295.6690 | 648.3381        | 1277.6584      | 639.3329         | E    | 367.1756  | 184.0914        | 349.1520  | 175.0796         | 349.1650       | 175.0861         | 3  |
| 14 | 1383.6981 | 692.3527        | 1365.6875      | 683.3474         | S    | 237.1359  | 119.0716        | 219.1124  | 110.0598         | 219.1254       | 110.0663         | 2  |
| 15 |           |                 |                |                  | K    | 149.1069  | 75.0571         | 131.0833  | 66.0453          |                |                  | 1  |

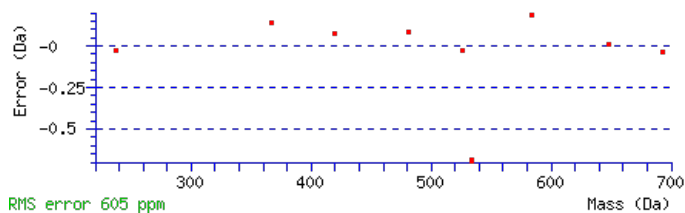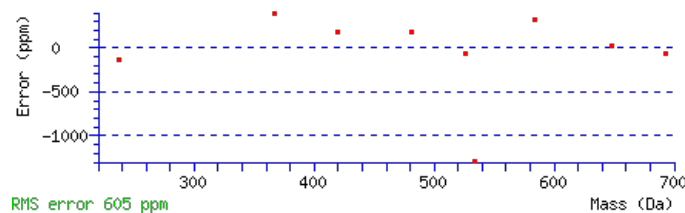

NCBI **BLAST** search of [IAAGEAIAMLVLESK](#)

## AT5G18980.1

(Parameters: blastp, nr protein database, expect=20000, no filter, PAM30)

Other BLAST [web gateways](#)

### All matches to this query

| Score | Mr(calc)  | Delta  | Sequence                        |
|-------|-----------|--------|---------------------------------|
| 21.8  | 1530.7904 | 0.0008 | <a href="#">IAAGEAIAMLVLESK</a> |
| 2.9   | 1530.7897 | 0.0015 | <a href="#">LGALGVEWRPSSIK</a>  |

Mascot: <http://www.matrixscience.com/>

**Peptide View**MS/MS Fragmentation of **EILLNLLR**

Found in **AT5G19220.1** in **TAIR\_Arabidopsis**, Symbols: APL1, ADG2 | ADG2 (ADPG PYROPHOSPHORYLASE 2); glucose-1-phosphate adenylyltransferase | chr5:6463933-6466777 REVERSE

Match to Query 2619: 994.583076 from(498.298814,2+) index(9155)

Title: Elution from: 80.799 to 80.799 scan no 12125 cid35.00 polarity:+

Data file D12h-1\_1.mgf

Click mouse within plot area to zoom in by factor of two about that point

Or,   to  Da

Label all possible matches  Label matches used for scoring

Show Y-axis

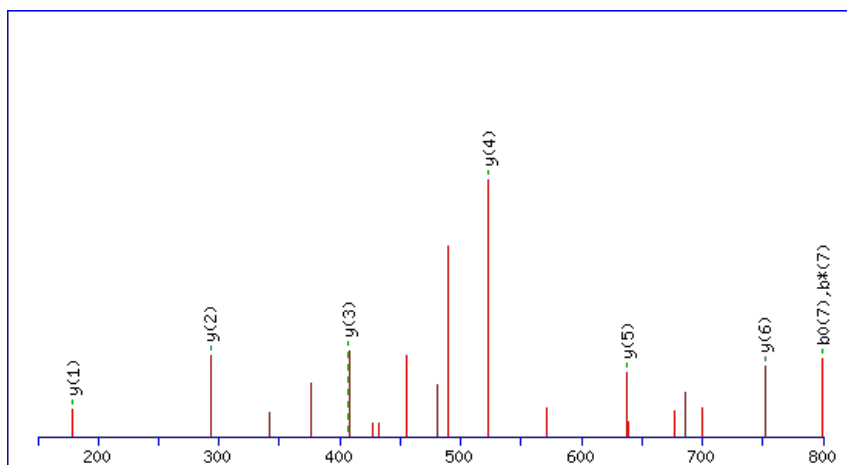

**Monoisotopic mass of neutral peptide Mr(calc):** 994.5819

**Fixed modifications:** Carbamidomethyl (C) (apply to specified residues or termini only)

**Ions Score:** 58 **Expect:** 1.8e-006

**Matches:** 8/62 fragment ions using 7 most intense peaks ([help](#))

| # | b        | b <sup>++</sup> | b*              | b <sup>*++</sup> | b <sup>0</sup>  | b <sup>0++</sup> | Seq. | y               | y <sup>++</sup> | y*       | y <sup>*++</sup> | # |
|---|----------|-----------------|-----------------|------------------|-----------------|------------------|------|-----------------|-----------------|----------|------------------|---|
| 1 | 131.0469 | 66.0271         |                 |                  | 113.0363        | 57.0218          | E    |                 |                 |          |                  | 8 |
| 2 | 245.1280 | 123.0676        |                 |                  | 227.1174        | 114.0624         | I    | 865.5496        | 433.2784        | 847.5260 | 424.2666         | 7 |
| 3 | 359.2091 | 180.1082        |                 |                  | 341.1985        | 171.1029         | L    | <b>751.4685</b> | 376.2379        | 733.4449 | 367.2261         | 6 |
| 4 | 473.2902 | 237.1487        |                 |                  | 455.2796        | 228.1435         | L    | <b>637.3874</b> | 319.1973        | 619.3638 | 310.1855         | 5 |
| 5 | 589.3272 | 295.1672        | 571.3036        | 286.1554         | 571.3166        | 286.1620         | N    | <b>523.3063</b> | 262.1568        | 505.2827 | 253.1450         | 4 |
| 6 | 703.4083 | 352.2078        | 685.3847        | 343.1960         | 685.3977        | 343.2025         | L    | <b>407.2693</b> | 204.1383        | 389.2457 | 195.1265         | 3 |
| 7 | 817.4894 | 409.2483        | <b>799.4658</b> | 400.2365         | <b>799.4788</b> | 400.2431         | L    | <b>293.1882</b> | 147.0977        | 275.1646 | 138.0859         | 2 |
| 8 |          |                 |                 |                  |                 |                  | R    | <b>179.1071</b> | 90.0572         | 161.0835 | 81.0454          | 1 |

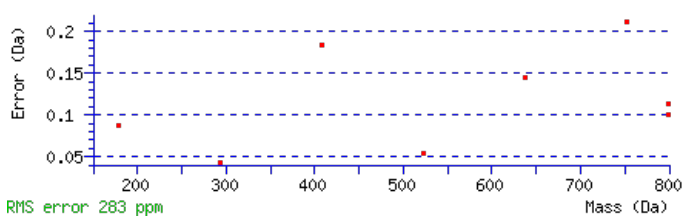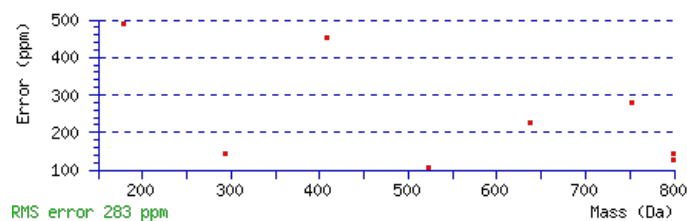

NCBI **BLAST** search of [EILLNLLR](#)

(Parameters: blastp, nr protein database, expect=20000, no filter, PAM30)

Other BLAST [web gateways](#)

**All matches to this query**

| Score | Mr(calc) | Delta  | Sequence                 |
|-------|----------|--------|--------------------------|
| 58.5  | 994.5819 | 0.0011 | <a href="#">EILLNLLR</a> |



## AT5G19220.1

|      |          |         |                           |
|------|----------|---------|---------------------------|
| 25.0 | 994.5819 | 0.0011  | <a href="#">EILLLNR</a>   |
| 25.0 | 994.5819 | 0.0012  | <a href="#">ELLLVQR</a>   |
| 23.0 | 994.5819 | 0.0012  | <a href="#">ELVQILLR</a>  |
| 22.9 | 994.5846 | -0.0015 | <a href="#">VPRQVLLR</a>  |
| 9.8  | 994.5819 | 0.0012  | <a href="#">IPVTALIR</a>  |
| 9.8  | 994.5846 | -0.0015 | <a href="#">LNVRLLR</a>   |
| 1.1  | 994.5846 | -0.0015 | <a href="#">PLVRLQVR</a>  |
| 0.3  | 994.5819 | 0.0011  | <a href="#">IKDPLKAAK</a> |

Mascot: <http://www.matrixscience.com/>

**Peptide View**MS/MS Fragmentation of **DGGILGWVK**

Found in **AT5G19370.1** in **TAIR\_Arabidopsis**, Symbols: | rhodanese-like domain-containing protein / PPIC-type PPIASE domain-containing protein | chr5:6524249-6526631 REVERSE

Match to Query 1904: 943.512816 from(472.763684,2+) index(7741)

Title: Elution from: 68.928 to 68.928 scan no 10265 cid35.00 polarity:+

Data file D6h-2\_3.mgf

Click mouse within plot area to zoom in by factor of two about that point

Or,   to  Da

Label all possible matches  Label matches used for scoring

Show Y-axis

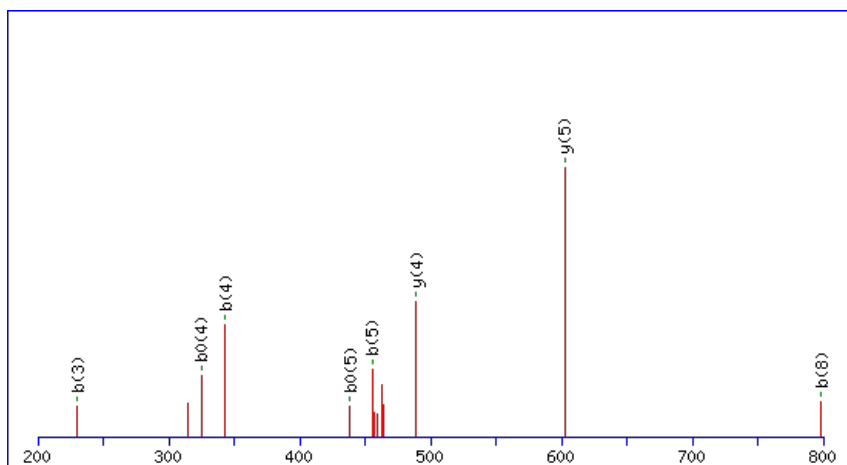

Monoisotopic mass of neutral peptide  $M_r(\text{calc})$ : 943.5127

Fixed modifications: Carbamidomethyl (C) (apply to specified residues or termini only)

Ions Score: 37 Expect: 0.0003

Matches : 8/64 fragment ions using 12 most intense peaks ([help](#))

| # | b               | b <sup>++</sup> | b <sup>0</sup>  | b <sup>0++</sup> | Seq. | y               | y <sup>++</sup> | y*       | y <sup>*++</sup> | # |
|---|-----------------|-----------------|-----------------|------------------|------|-----------------|-----------------|----------|------------------|---|
| 1 | 116.0342        | 58.5207         | 98.0237         | 49.5155          | D    |                 |                 |          |                  | 9 |
| 2 | 173.0557        | 87.0315         | 155.0451        | 78.0262          | G    | 829.4931        | 415.2502        | 812.4665 | 406.7369         | 8 |
| 3 | <b>230.0771</b> | 115.5422        | 212.0666        | 106.5369         | G    | 772.4716        | 386.7394        | 755.4450 | 378.2262         | 7 |
| 4 | <b>343.1612</b> | 172.0842        | <b>325.1506</b> | 163.0790         | I    | 715.4501        | 358.2287        | 698.4236 | 349.7154         | 6 |
| 5 | <b>456.2453</b> | 228.6263        | <b>438.2347</b> | 219.6210         | L    | <b>602.3661</b> | 301.6867        | 585.3395 | 293.1734         | 5 |
| 6 | 513.2667        | 257.1370        | 495.2562        | 248.1317         | G    | <b>489.2820</b> | 245.1446        | 472.2554 | 236.6314         | 4 |
| 7 | 699.3461        | 350.1767        | 681.3355        | 341.1714         | W    | 432.2605        | 216.6339        | 415.2340 | 208.1206         | 3 |
| 8 | <b>798.4145</b> | 399.7109        | 780.4039        | 390.7056         | V    | 246.1812        | 123.5942        | 229.1547 | 115.0810         | 2 |
| 9 |                 |                 |                 |                  | K    | 147.1128        | 74.0600         | 130.0863 | 65.5468          | 1 |

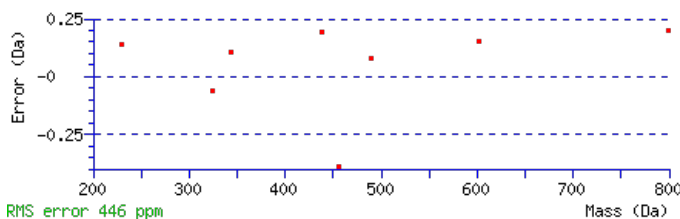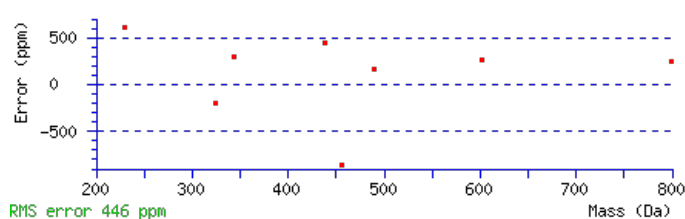

NCBI **BLAST** search of [DGGILGWVK](#)

(Parameters: blastp, nr protein database, expect=20000, no filter, PAM30)

Other BLAST [web gateways](#)

**All matches to this query**

| Score | $M_r(\text{calc})$ | Delta | Sequence |
|-------|--------------------|-------|----------|
|       |                    |       |          |

# AT5G19370.1

|      |          |        |                           |
|------|----------|--------|---------------------------|
| 37.0 | 943.5127 | 0.0001 | <a href="#">DGGILGWVK</a> |
| 3.5  | 943.5100 | 0.0028 | <a href="#">WRNGKQR</a>   |

**Mascot:** <http://www.matrixscience.com/>

**Peptide View**MS/MS Fragmentation of **SLGIDYIPLK**Found in **AT5G19440.1** in **TAIR\_Arabidopsis**, Symbols: | cinnamyl-alcohol dehydrogenase, putative (CAD) | chr5:6556495-6558125 FORWARD

Match to Query 3733: 1128.606846 from(565.310699,2+) index(7559)

Title: Elution from: 66.047 to 66.047 scan no 9783 cid35.00 polarity:+

Data file C7-2\_2.mgf

Click mouse within plot area to zoom in by factor of two about that point

Or,   to  Da Label all possible matches  Label matches used for scoring Show Y-axis 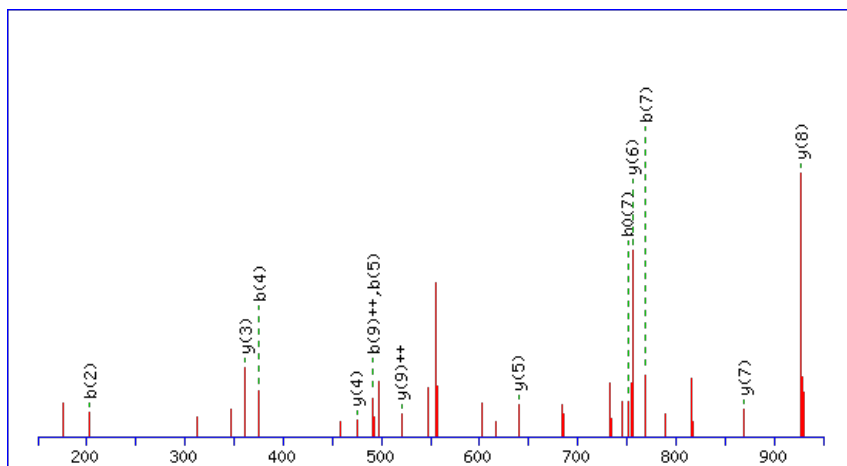Monoisotopic mass of neutral peptide **Mr(calc)**: 1128.6057**Fixed modifications**: Carbamidomethyl (C) (apply to specified residues or termini only)**Ions Score**: 28 **Expect**: 0.013**Matches**: 13/80 fragment ions using 35 most intense peaks ([help](#))

| #  | b               | b <sup>++</sup> | b <sup>0</sup>  | b <sup>0++</sup> | Seq. | y               | y <sup>++</sup> | y*        | y <sup>*++</sup> | y <sup>0</sup> | y <sup>0++</sup> | #  |
|----|-----------------|-----------------|-----------------|------------------|------|-----------------|-----------------|-----------|------------------|----------------|------------------|----|
| 1  | 89.0363         | 45.0218         | 71.0258         | 36.0165          | S    |                 |                 |           |                  |                |                  | 10 |
| 2  | <b>203.1174</b> | 102.0624        | 185.1069        | 93.0571          | L    | 1041.5839       | <b>521.2956</b> | 1023.5603 | 512.2838         | 1023.5733      | 512.2903         | 9  |
| 3  | 261.1359        | 131.0716        | 243.1254        | 122.0663         | G    | <b>927.5028</b> | 464.2550        | 909.4792  | 455.2433         | 909.4922       | 455.2498         | 8  |
| 4  | <b>375.2170</b> | 188.1122        | 357.2065        | 179.1069         | I    | <b>869.4843</b> | 435.2458        | 851.4607  | 426.2340         | 851.4737       | 426.2405         | 7  |
| 5  | <b>491.2410</b> | 246.1241        | 473.2304        | 237.1189         | D    | <b>755.4032</b> | 378.2052        | 737.3796  | 369.1935         | 737.3926       | 369.2000         | 6  |
| 6  | 655.3014        | 328.1543        | 637.2908        | 319.1490         | Y    | <b>639.3792</b> | 320.1933        | 621.3557  | 311.1815         |                |                  | 5  |
| 7  | <b>769.3825</b> | 385.1949        | <b>751.3719</b> | 376.1896         | I    | <b>475.3189</b> | 238.1631        | 457.2953  | 229.1513         |                |                  | 4  |
| 8  | 867.4323        | 434.2198        | 849.4217        | 425.2145         | P    | <b>361.2378</b> | 181.1225        | 343.2142  | 172.1107         |                |                  | 3  |
| 9  | 981.5134        | <b>491.2603</b> | 963.5028        | 482.2550         | L    | 263.1880        | 132.0976        | 245.1644  | 123.0858         |                |                  | 2  |
| 10 |                 |                 |                 |                  | K    | 149.1069        | 75.0571         | 131.0833  | 66.0453          |                |                  | 1  |

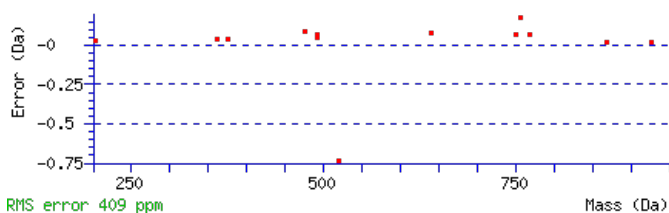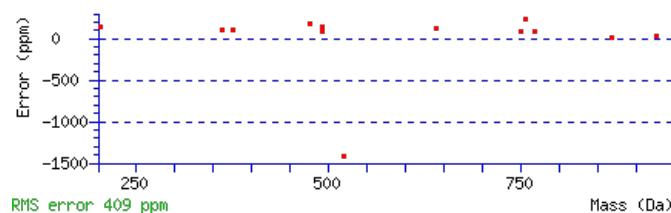NCBI **BLAST** search of **SLGIDYIPLK**

(Parameters: blastp, nr protein database, expect=20000, no filter, PAM30)

Other BLAST [web gateways](#)**All matches to this query**

| Score | Mr(calc) | Delta | Sequence |
|-------|----------|-------|----------|
|       |          |       |          |

AT5G19440.1

|      |           |        |                            |
|------|-----------|--------|----------------------------|
| 27.5 | 1128.6057 | 0.0011 | <a href="#">SLGIDYIPLK</a> |
|------|-----------|--------|----------------------------|

**Mascot:** <http://www.matrixscience.com/>

## Peptide View

MS/MS Fragmentation of **GVEMPGLFWGASK**

Found in **AT5G19510.1** in **TAIR\_Arabidopsis**, Symbols: | elongation factor 1B alpha-subunit 2 (eEF1Balpha2) | chr5:6581856-6583139 REVERSE

Match to Query 5803: 1408.625384 from(705.319968,2+) index(7065)

Title: Elution from: 61.084 to 61.084 scan no 9020 cid35.00 polarity:+

Data file D1d-3\_1.mgf

Click mouse within plot area to zoom in by factor of two about that point

Or,   to  Da

Label all possible matches  Label matches used for scoring

Show Y-axis

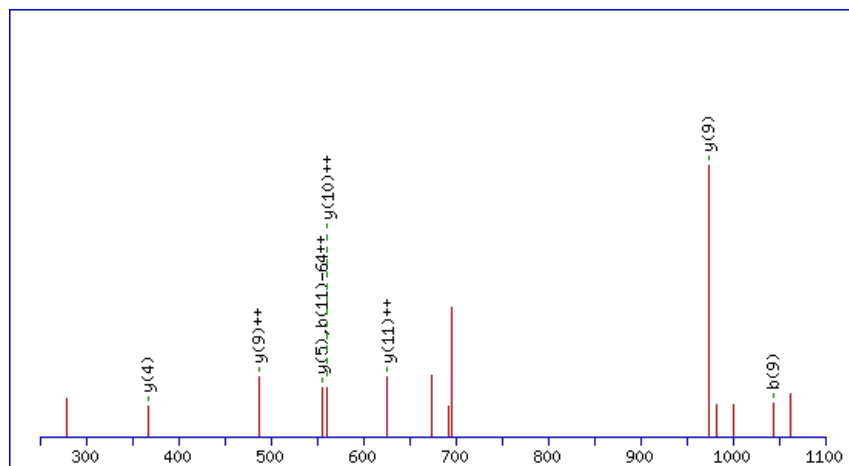

**Monoisotopic mass of neutral peptide Mr(calc):** 1408.6255

**Fixed modifications:** Carbamidomethyl (C) (apply to specified residues or termini only)

**Variable modifications:**

**M4** : Oxidation (M), with neutral losses 0.0000 (shown in table), 63.9983

**Ions Score:** 22 **Expect:** 0.042

**Matches** : 8/168 fragment ions using 13 most intense peaks ([help](#))

| #  | b         | b <sup>++</sup> | b <sup>0</sup> | b <sup>0++</sup> | Seq. | y         | y <sup>++</sup> | y <sup>*</sup> | y <sup>*++</sup> | y <sup>0</sup> | y <sup>0++</sup> | #  |
|----|-----------|-----------------|----------------|------------------|------|-----------|-----------------|----------------|------------------|----------------|------------------|----|
| 1  | 59.0258   | 30.0165         |                |                  | G    |           |                 |                |                  |                |                  | 13 |
| 2  | 159.0912  | 80.0492         |                |                  | V    | 1351.6143 | 676.3108        | 1333.5907      | 667.2990         | 1333.6038      | 667.3055         | 12 |
| 3  | 289.1309  | 145.0691        | 271.1203       | 136.0638         | E    | 1251.5489 | 626.2781        | 1233.5253      | 617.2663         | 1233.5383      | 617.2728         | 11 |
| 4  | 437.1633  | 219.0853        | 419.1527       | 210.0800         | M    | 1121.5092 | 561.2583        | 1103.4857      | 552.2465         | 1103.4987      | 552.2530         | 10 |
| 5  | 535.2131  | 268.1102        | 517.2025       | 259.1049         | P    | 973.4768  | 487.2420        | 955.4532       | 478.2303         | 955.4662       | 478.2368         | 9  |
| 6  | 593.2316  | 297.1194        | 575.2210       | 288.1141         | G    | 875.4270  | 438.2171        | 857.4034       | 429.2054         | 857.4164       | 429.2119         | 8  |
| 7  | 707.3127  | 354.1600        | 689.3021       | 345.1547         | L    | 817.4085  | 409.2079        | 799.3849       | 400.1961         | 799.3980       | 400.2026         | 7  |
| 8  | 855.3781  | 428.1927        | 837.3676       | 419.1874         | F    | 703.3274  | 352.1673        | 685.3038       | 343.1556         | 685.3169       | 343.1621         | 6  |
| 9  | 1043.4515 | 522.2294        | 1025.4410      | 513.2241         | W    | 555.2620  | 278.1346        | 537.2384       | 269.1228         | 537.2514       | 269.1293         | 5  |
| 10 | 1101.4700 | 551.2386        | 1083.4594      | 542.2334         | G    | 367.1886  | 184.0979        | 349.1650       | 175.0861         | 349.1780       | 175.0926         | 4  |
| 11 | 1173.5042 | 587.2557        | 1155.4936      | 578.2504         | A    | 309.1701  | 155.0887        | 291.1465       | 146.0769         | 291.1595       | 146.0834         | 3  |
| 12 | 1261.5332 | 631.2703        | 1243.5227      | 622.2650         | S    | 237.1359  | 119.0716        | 219.1124       | 110.0598         | 219.1254       | 110.0663         | 2  |
| 13 |           |                 |                |                  | K    | 149.1069  | 75.0571         | 131.0833       | 66.0453          |                |                  | 1  |

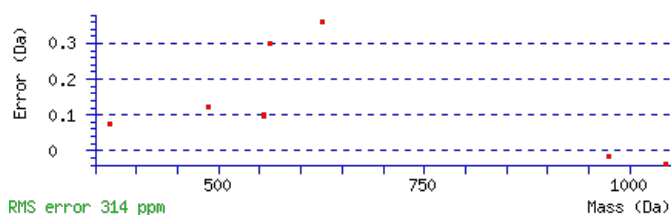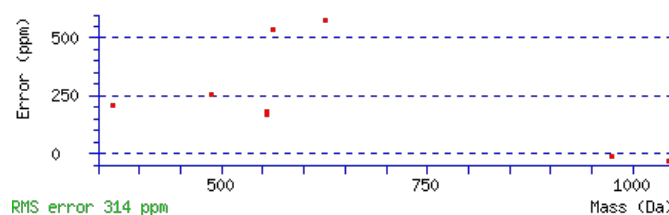

NCBI **BLAST** search of **GVEMPGLFWGASK**

(Parameters: blastp, nr protein database, expect=20000, no filter, PAM30)

# AT5G19510.1

Other BLAST [web gateways](#)

## All matches to this query

| Score | Mr(calc)  | Delta   | Sequence                      |
|-------|-----------|---------|-------------------------------|
| 22.4  | 1408.6255 | -0.0001 | <a href="#">GVEMPGLFWGASK</a> |
| 12.9  | 1408.6233 | 0.0021  | <a href="#">DDLYNMLPASVR</a>  |
| 6.2   | 1408.6280 | -0.0027 | <a href="#">ELQLATDNFSEK</a>  |
| 3.9   | 1408.6294 | -0.0040 | <a href="#">RSPEDRPMMKK</a>   |
| 3.9   | 1408.6294 | -0.0040 | <a href="#">RSPEDRPMMKK</a>   |
| 0.1   | 1408.6260 | -0.0006 | <a href="#">NGVAYPKNQPMR</a>  |

Mascot: <http://www.matrixscience.com/>

**Peptide View**MS/MS Fragmentation of **ELYVSKNEVNK**Found in **AT5G19680.1** in **TAIR\_Arabidopsis**, Symbols: | leucine-rich repeat family protein | chr5:6649665-6651566 FORWARD

Match to Query 4595: 1336.643868 from(669.329210,2+) index(7987)

Title: Elution from: 71.719 to 71.719 scan no 10622 cid35.00 polarity:+

Data file D1d-2\_3.mgf

Click mouse within plot area to zoom in by factor of two about that point

Or,   to  Da Label all possible matches  Label matches used for scoring Show Y-axis 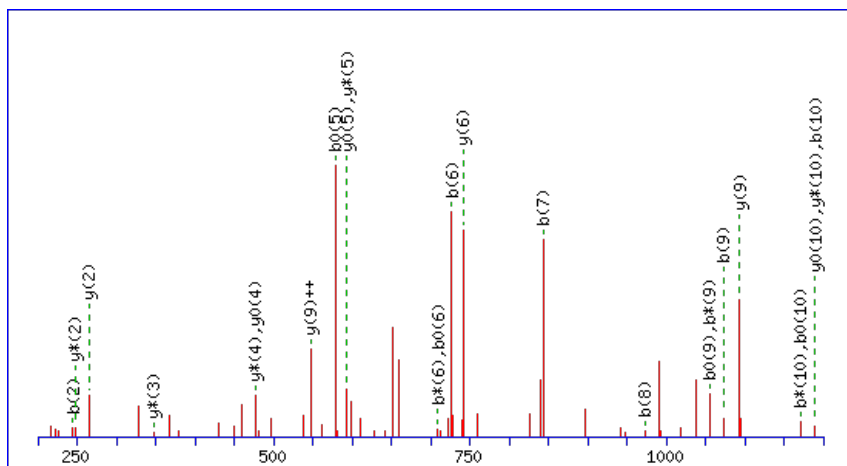Monoisotopic mass of neutral peptide  $M_r(\text{calc})$ : 1336.6433

Fixed modifications: Carbamidomethyl (C) (apply to specified residues or termini only)

Ions Score: 28 Expect: 0.014

Matches : 25/104 fragment ions using 38 most intense peaks ([help](#))

| #  | b                | b <sup>++</sup> | b <sup>*</sup>   | b <sup>*++</sup> | b <sup>0</sup>   | b <sup>0++</sup> | Seq. | y                | y <sup>++</sup> | y <sup>*</sup>   | y <sup>*++</sup> | y <sup>0</sup>   | y <sup>0++</sup> | #  |
|----|------------------|-----------------|------------------|------------------|------------------|------------------|------|------------------|-----------------|------------------|------------------|------------------|------------------|----|
| 1  | 131.0469         | 66.0271         |                  |                  | 113.0363         | 57.0218          | E    |                  |                 |                  |                  |                  |                  | 11 |
| 2  | <b>245.1280</b>  | 123.0676        |                  |                  | 227.1174         | 114.0624         | L    | 1207.6110        | 604.3091        | <b>1189.5874</b> | 595.2973         | <b>1189.6004</b> | 595.3038         | 10 |
| 3  | 409.1884         | 205.0978        |                  |                  | 391.1778         | 196.0925         | Y    | <b>1093.5299</b> | <b>547.2686</b> | 1075.5063        | 538.2568         | 1075.5193        | 538.2633         | 9  |
| 4  | 509.2538         | 255.1305        |                  |                  | 491.2433         | 246.1253         | V    | 929.4695         | 465.2384        | 911.4459         | 456.2266         | 911.4589         | 456.2331         | 8  |
| 5  | 597.2829         | 299.1451        |                  |                  | <b>579.2723</b>  | 290.1398         | S    | 829.4040         | 415.2057        | 811.3805         | 406.1939         | 811.3935         | 406.2004         | 7  |
| 6  | <b>727.3719</b>  | 364.1896        | <b>709.3483</b>  | 355.1778         | <b>709.3613</b>  | 355.1843         | K    | <b>741.3750</b>  | 371.1911        | 723.3514         | 362.1793         | 723.3644         | 362.1858         | 6  |
| 7  | <b>843.4089</b>  | 422.2081        | 825.3853         | 413.1963         | 825.3983         | 413.2028         | N    | 611.2859         | 306.1466        | <b>593.2624</b>  | 297.1348         | <b>593.2754</b>  | 297.1413         | 5  |
| 8  | <b>973.4485</b>  | 487.2279        | 955.4250         | 478.2161         | 955.4380         | 478.2226         | E    | 495.2489         | 248.1281        | <b>477.2254</b>  | 239.1163         | <b>477.2384</b>  | 239.1228         | 4  |
| 9  | <b>1073.5140</b> | 537.2606        | <b>1055.4904</b> | 528.2488         | <b>1055.5034</b> | 528.2553         | V    | 365.2093         | 183.1083        | <b>347.1857</b>  | 174.0965         |                  |                  | 3  |
| 10 | <b>1189.5510</b> | 595.2791        | <b>1171.5274</b> | 586.2673         | <b>1171.5404</b> | 586.2738         | N    | <b>265.1439</b>  | 133.0756        | <b>247.1203</b>  | 124.0638         |                  |                  | 2  |
| 11 |                  |                 |                  |                  |                  |                  | K    | 149.1069         | 75.0571         | 131.0833         | 66.0453          |                  |                  | 1  |

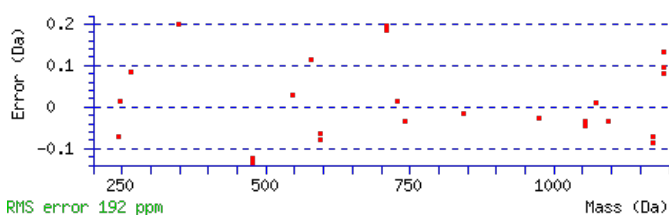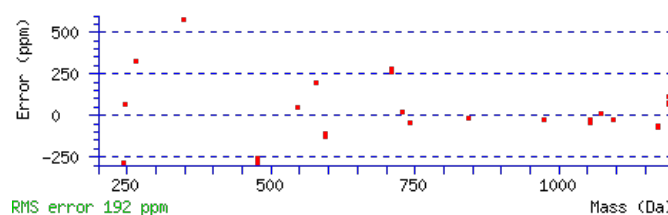NCBI BLAST search of **ELYVSKNEVNK**

(Parameters: blastp, nr protein database, expect=20000, no filter, PAM30)

Other BLAST [web gateways](#)

All matches to this query



**AT5G19680.1**

| Score | Mr(calc)  | Delta   | Sequence                     |
|-------|-----------|---------|------------------------------|
| 27.8  | 1336.6433 | 0.0006  | <a href="#">ELYVSKNEVNK</a>  |
| 8.6   | 1336.6408 | 0.0031  | <a href="#">RFVGEPMFVPK</a>  |
| 5.1   | 1336.6467 | -0.0028 | <a href="#">MLDVTGSKNLTK</a> |
| 2.8   | 1336.6460 | -0.0021 | <a href="#">VNKYNGNVVANK</a> |

**Mascot:** <http://www.matrixscience.com/>

**Peptide View**MS/MS Fragmentation of **MQADNTLPLAQR**Found in **AT5G19760.1** in **TAIR\_Arabidopsis**, Symbols: | dicarboxylate/tricarboxylate carrier (DTC) | chr5:6679593-6681847 REVERSE

Match to Query 5116: 1356.678010 from(679,346281,2+) index(3465)

Title: Elution from: 33.505 to 33.505 scan no 4313 cid35.00 polarity:+

Data file C7-1\_2.mgf

Click mouse within plot area to zoom in by factor of two about that point

Or,   to  Da Label all possible matches  Label matches used for scoring Show Y-axis 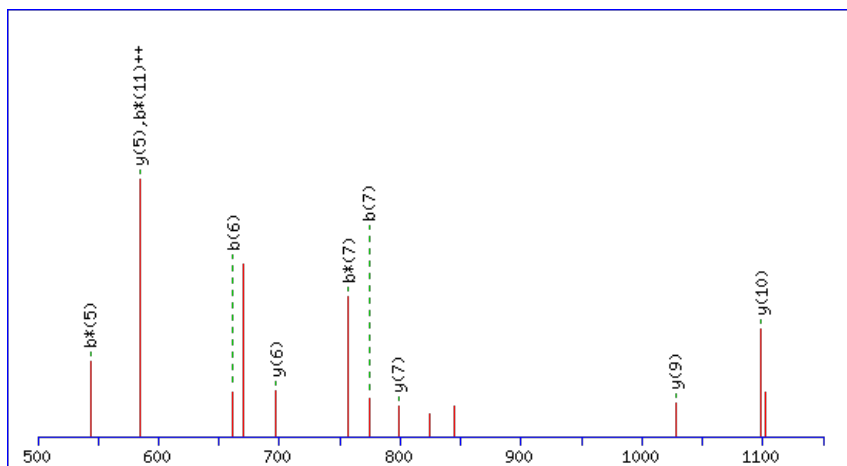**Monoisotopic mass of neutral peptide Mr(calc):** 1356.6820**Fixed modifications:** Carbamidomethyl (C) (apply to specified residues or termini only)**Ions Score:** 41 **Expect:** 0.00029**Matches:** 10/112 fragment ions using 12 most intense peaks ([help](#))

| #  | b               | b <sup>++</sup> | b*              | b <sup>*++</sup> | b <sup>0</sup> | b <sup>0++</sup> | Seq. | y                | y <sup>++</sup> | y*        | y <sup>*++</sup> | y <sup>0</sup> | y <sup>0++</sup> | #  |
|----|-----------------|-----------------|-----------------|------------------|----------------|------------------|------|------------------|-----------------|-----------|------------------|----------------|------------------|----|
| 1  | 132.0478        | 66.5275         |                 |                  |                |                  | M    |                  |                 |           |                  |                |                  | 12 |
| 2  | 260.1063        | 130.5568        | 243.0798        | 122.0435         |                |                  | Q    | 1226.6488        | 613.8280        | 1209.6222 | 605.3148         | 1208.6382      | 604.8227         | 11 |
| 3  | 331.1435        | 166.0754        | 314.1169        | 157.5621         |                |                  | A    | <b>1098.5902</b> | 549.7987        | 1081.5637 | 541.2855         | 1080.5796      | 540.7935         | 10 |
| 4  | 446.1704        | 223.5888        | 429.1438        | 215.0756         | 428.1598       | 214.5836         | D    | <b>1027.5531</b> | 514.2802        | 1010.5265 | 505.7669         | 1009.5425      | 505.2749         | 9  |
| 5  | 560.2133        | 280.6103        | <b>543.1868</b> | 272.0970         | 542.2028       | 271.6050         | N    | 912.5261         | 456.7667        | 895.4996  | 448.2534         | 894.5156       | 447.7614         | 8  |
| 6  | <b>661.2610</b> | 331.1341        | 644.2345        | 322.6209         | 643.2504       | 322.1289         | T    | <b>798.4832</b>  | 399.7452        | 781.4567  | 391.2320         | 780.4727       | 390.7400         | 7  |
| 7  | <b>774.3451</b> | 387.6762        | <b>757.3185</b> | 379.1629         | 756.3345       | 378.6709         | L    | <b>697.4355</b>  | 349.2214        | 680.4090  | 340.7081         |                |                  | 6  |
| 8  | 871.3978        | 436.2026        | 854.3713        | 427.6893         | 853.3873       | 427.1973         | P    | <b>584.3515</b>  | 292.6794        | 567.3249  | 284.1661         |                |                  | 5  |
| 9  | 984.4819        | 492.7446        | 967.4553        | 484.2313         | 966.4713       | 483.7393         | L    | 487.2987         | 244.1530        | 470.2722  | 235.6397         |                |                  | 4  |
| 10 | 1055.5190       | 528.2631        | 1038.4925       | 519.7499         | 1037.5084      | 519.2579         | A    | 374.2146         | 187.6110        | 357.1881  | 179.0977         |                |                  | 3  |
| 11 | 1183.5776       | 592.2924        | 1166.5510       | <b>583.7792</b>  | 1165.5670      | 583.2871         | Q    | 303.1775         | 152.0924        | 286.1510  | 143.5791         |                |                  | 2  |
| 12 |                 |                 |                 |                  |                |                  | R    | 175.1190         | 88.0631         | 158.0924  | 79.5498          |                |                  | 1  |

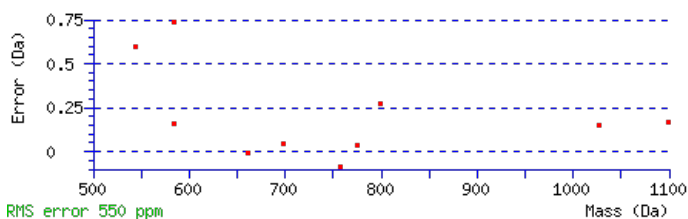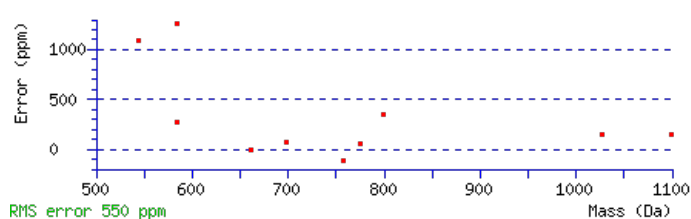NCBI **BLAST** search of **MQADNTLPLAQR**

(Parameters: blastp, nr protein database, expect=20000, no filter, PAM30)

Other BLAST [web gateways](#)**All matches to this query**

AT5G19760.1

| Score | Mr(calc)  | Delta   | Sequence                     |
|-------|-----------|---------|------------------------------|
| 41.0  | 1356.6820 | -0.0040 | <a href="#">MQADNTLPLAQR</a> |

Mascot: <http://www.matrixscience.com/>

**Peptide View**MS/MS Fragmentation of **EDLAALEK**Found in **AT5G19770.1** in **TAIR\_Arabidopsis**, Symbols: TUA3 | TUA3 (tubulin alpha-3) | chr5:6682763-6684476 REVERSE

Match to Query 1535: 896.431178 from(449.222865,2+) index(2619)

Title: Elution from: 27.341 to 27.341 scan no 3261 cid35.00 polarity:+

Data file 0-3\_2.mgf

Click mouse within plot area to zoom in by factor of two about that point

Or,   to  Da Label all possible matches  Label matches used for scoring Show Y-axis 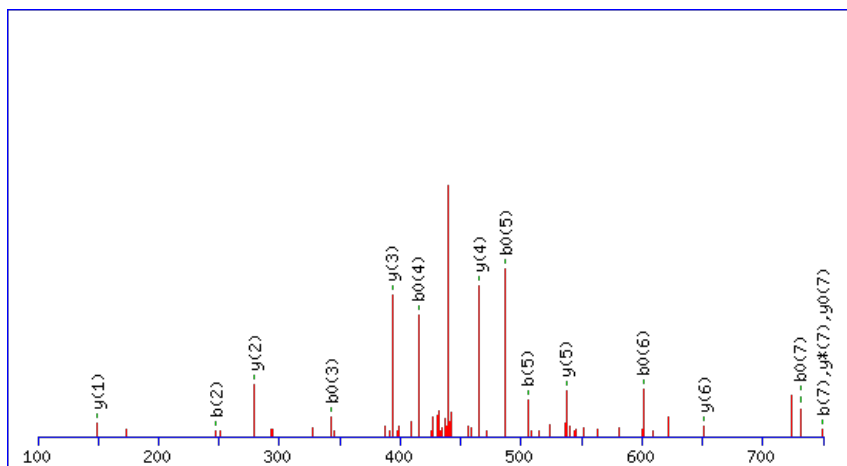Monoisotopic mass of neutral peptide **Mr(calc)**: 896.4333

Fixed modifications: Carbamidomethyl (C) (apply to specified residues or termini only)

Ions Score: 45 **Expect**: 0.00017Matches : 16/68 fragment ions using 24 most intense peaks ([help](#))

| # | b               | b <sup>++</sup> | b <sup>0</sup>  | b <sup>0++</sup> | Seq. | y               | y <sup>++</sup> | y*              | y <sup>*++</sup> | y <sup>0</sup>  | y <sup>0++</sup> | # |
|---|-----------------|-----------------|-----------------|------------------|------|-----------------|-----------------|-----------------|------------------|-----------------|------------------|---|
| 1 | 131.0469        | 66.0271         | 113.0363        | 57.0218          | E    |                 |                 |                 |                  |                 |                  | 8 |
| 2 | <b>247.0709</b> | 124.0391        | 229.0603        | 115.0338         | D    | 767.4010        | 384.2041        | <b>749.3774</b> | 375.1923         | <b>749.3904</b> | 375.1988         | 7 |
| 3 | 361.1520        | 181.0796        | <b>343.1414</b> | 172.0743         | L    | <b>651.3770</b> | 326.1921        | 633.3534        | 317.1803         | 633.3664        | 317.1869         | 6 |
| 4 | 433.1861        | 217.0967        | <b>415.1756</b> | 208.0914         | A    | <b>537.2959</b> | 269.1516        | 519.2723        | 260.1398         | 519.2853        | 260.1463         | 5 |
| 5 | <b>505.2203</b> | 253.1138        | <b>487.2097</b> | 244.1085         | A    | <b>465.2618</b> | 233.1345        | 447.2382        | 224.1227         | 447.2512        | 224.1292         | 4 |
| 6 | 619.3014        | 310.1543        | <b>601.2908</b> | 301.1490         | L    | <b>393.2276</b> | 197.1174        | 375.2040        | 188.1056         | 375.2170        | 188.1122         | 3 |
| 7 | <b>749.3410</b> | 375.1741        | <b>731.3304</b> | 366.1689         | E    | <b>279.1465</b> | 140.0769        | 261.1229        | 131.0651         | 261.1359        | 131.0716         | 2 |
| 8 |                 |                 |                 |                  | K    | <b>149.1069</b> | 75.0571         | 131.0833        | 66.0453          |                 |                  | 1 |

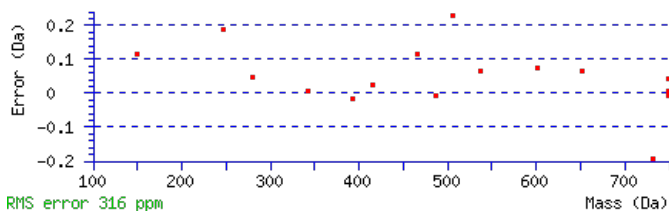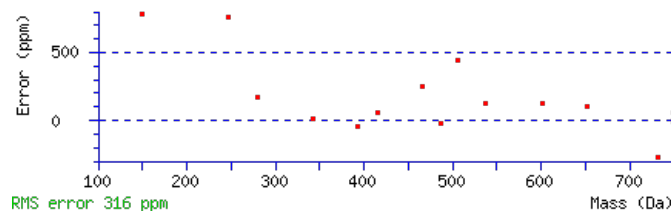NCBI **BLAST** search of [EDLAALEK](#)

(Parameters: blastp, nr protein database, expect=20000, no filter, PAM30)

Other BLAST [web gateways](#)**All matches to this query**

| Score | Mr(calc) | Delta   | Sequence                 |
|-------|----------|---------|--------------------------|
| 45.0  | 896.4333 | -0.0021 | <a href="#">EDLAALEK</a> |
| 19.6  | 896.4333 | -0.0021 | <a href="#">GEIEALEK</a> |

# AT5G19770.1

|      |          |         |                          |
|------|----------|---------|--------------------------|
| 19.6 | 896.4313 | -0.0001 | <a href="#">RHMALEK</a>  |
| 13.0 | 896.4330 | -0.0019 | <a href="#">MFFGLFK</a>  |
| 11.2 | 896.4333 | -0.0021 | <a href="#">EELELQK</a>  |
| 11.2 | 896.4333 | -0.0021 | <a href="#">EIEELQK</a>  |
| 9.8  | 896.4333 | -0.0022 | <a href="#">EDPSSLIK</a> |
| 9.8  | 896.4333 | -0.0021 | <a href="#">IEEELQK</a>  |
| 9.8  | 896.4333 | -0.0021 | <a href="#">IEEQLEK</a>  |
| 9.8  | 896.4333 | -0.0021 | <a href="#">IEQELEK</a>  |

Mascot: <http://www.matrixscience.com/>

**Peptide View**MS/MS Fragmentation of **EVAQVAGELQK**Found in **AT5G19940.1** in **TAIR\_Arabidopsis**, Symbols: | plastid-lipid associated protein PAP-related / fibrillin-related | chr5:6739695-6740663  
FORWARD

Match to Query 4204: 1184.581414 from(593.297983,2+) index(2431)

Title: Elution from: 26.744 to 26.744 scan no 3075 cid35.00 polarity:+

Data file 0-2\_1.mgf

Click mouse within plot area to zoom in by factor of two about that point

Or,  to  Da Label all possible matches  Label matches used for scoring Show Y-axis 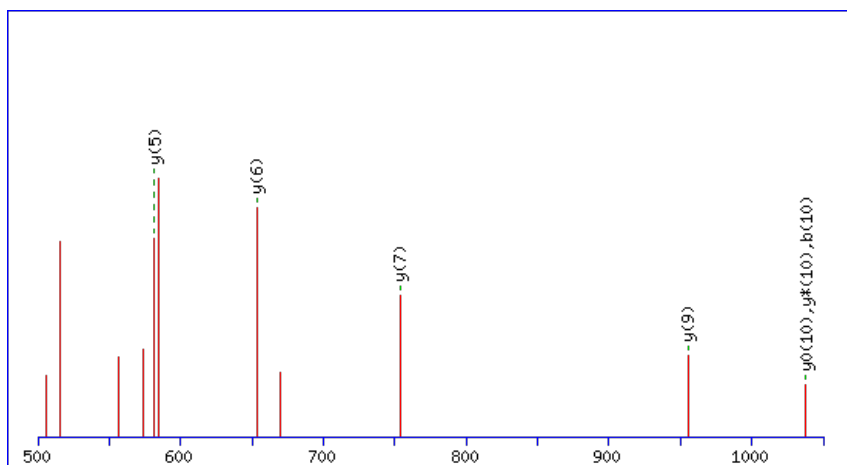Monoisotopic mass of neutral peptide  $M_r(\text{calc})$ : 1184.5829

Fixed modifications: Carbamidomethyl (C) (apply to specified residues or termini only)

Ions Score: 33 Expect: 0.0019

Matches : 7/108 fragment ions using 7 most intense peaks ([help](#))

| #  | b         | b <sup>++</sup> | b <sup>*</sup> | b <sup>*++</sup> | b <sup>0</sup> | b <sup>0++</sup> | Seq. | y         | y <sup>++</sup> | y <sup>*</sup> | y <sup>*++</sup> | y <sup>0</sup> | y <sup>0++</sup> | #  |
|----|-----------|-----------------|----------------|------------------|----------------|------------------|------|-----------|-----------------|----------------|------------------|----------------|------------------|----|
| 1  | 131.0469  | 66.0271         |                |                  | 113.0363       | 57.0218          | E    |           |                 |                |                  |                |                  | 11 |
| 2  | 231.1124  | 116.0598        |                |                  | 213.1018       | 107.0545         | V    | 1055.5506 | 528.2789        | 1037.5270      | 519.2671         | 1037.5400      | 519.2737         | 10 |
| 3  | 303.1465  | 152.0769        |                |                  | 285.1359       | 143.0716         | A    | 955.4851  | 478.2462        | 937.4616       | 469.2344         | 937.4746       | 469.2409         | 9  |
| 4  | 433.1991  | 217.1032        | 415.1756       | 208.0914         | 415.1886       | 208.0979         | Q    | 883.4510  | 442.2291        | 865.4274       | 433.2173         | 865.4404       | 433.2239         | 8  |
| 5  | 533.2646  | 267.1359        | 515.2410       | 258.1241         | 515.2540       | 258.1307         | V    | 753.3983  | 377.2028        | 735.3748       | 368.1910         | 735.3878       | 368.1975         | 7  |
| 6  | 605.2987  | 303.1530        | 587.2752       | 294.1412         | 587.2882       | 294.1477         | A    | 653.3329  | 327.1701        | 635.3093       | 318.1583         | 635.3223       | 318.1648         | 6  |
| 7  | 663.3172  | 332.1623        | 645.2937       | 323.1505         | 645.3067       | 323.1570         | G    | 581.2987  | 291.1530        | 563.2752       | 282.1412         | 563.2882       | 282.1477         | 5  |
| 8  | 793.3569  | 397.1821        | 775.3333       | 388.1703         | 775.3463       | 388.1768         | E    | 523.2802  | 262.1438        | 505.2567       | 253.1320         | 505.2697       | 253.1385         | 4  |
| 9  | 907.4380  | 454.2226        | 889.4144       | 445.2108         | 889.4274       | 445.2173         | L    | 393.2406  | 197.1239        | 375.2170       | 188.1122         |                |                  | 3  |
| 10 | 1037.4906 | 519.2489        | 1019.4670      | 510.2372         | 1019.4801      | 510.2437         | Q    | 279.1595  | 140.0834        | 261.1359       | 131.0716         |                |                  | 2  |
| 11 |           |                 |                |                  |                |                  | K    | 149.1069  | 75.0571         | 131.0833       | 66.0453          |                |                  | 1  |

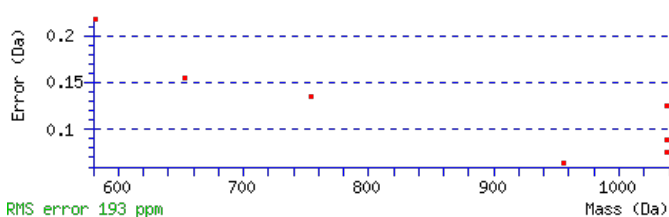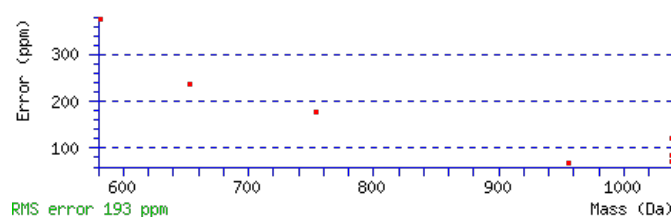NCBI BLAST search of **EVAQVAGELQK**

(Parameters: blastp, nr protein database, expect=20000, no filter, PAM30)

Other BLAST [web gateways](#)

All matches to this query

**AT5G19940.1**

| <b>Score</b> | <b>Mr(calc)</b> | <b>Delta</b> | <b>Sequence</b>             |
|--------------|-----------------|--------------|-----------------------------|
| 33.2         | 1184.5829       | -0.0015      | <a href="#">EVAQVAGELQK</a> |
| 11.4         | 1184.5829       | -0.0015      | <a href="#">EVDALLQEVK</a>  |
| 1.7          | 1184.5782       | 0.0032       | <a href="#">HKKIIDECK</a>   |
| 0.9          | 1184.5782       | 0.0032       | <a href="#">MEQKQHILK</a>   |

**Mascot:** <http://www.matrixscience.com/>


**Mascot Search Results**
**Peptide View**MS/MS Fragmentation of **IDILDQALLRPGR**Found in **AT5G19990.1** in **TAIR\_Arabidopsis**, Symbols: ATSUG1, RPT6A | RPT6A; ATPase | chr5:6752146-6754920 FORWARD

Match to Query 6207: 1478.858340 from(493.960056,3+) index(7929)

Title: Elution from: 69.279 to 69.279 scan no 10378 cid35.00 polarity:+

Data file C7-3\_2.mgf

Click mouse within plot area to zoom in by factor of two about that point

Or,   to  Da Label all possible matches  Label matches used for scoring Show Y-axis 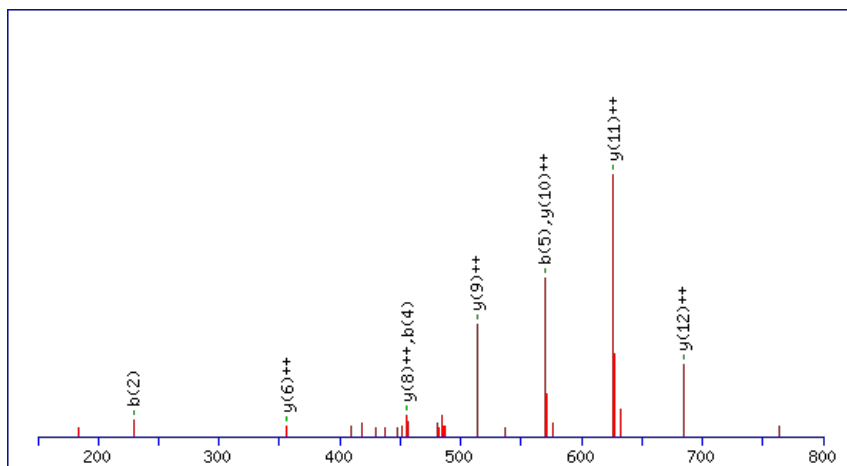Monoisotopic mass of neutral peptide  $M_r(\text{calc})$ : 1478.8569

Fixed modifications: Carbamidomethyl (C) (apply to specified residues or termini only)

Ions Score: 46 Expect: 3.1e-005

Matches : 9/116 fragment ions using 11 most intense peaks ([help](#))

| #  | b               | b <sup>++</sup> | b*        | b <sup>*++</sup> | b <sup>0</sup> | b <sup>0++</sup> | Seq. | y         | y <sup>++</sup> | y*        | y <sup>*++</sup> | y <sup>0</sup> | y <sup>0++</sup> | #  |
|----|-----------------|-----------------|-----------|------------------|----------------|------------------|------|-----------|-----------------|-----------|------------------|----------------|------------------|----|
| 1  | 114.0913        | 57.5493         |           |                  |                |                  | I    |           |                 |           |                  |                |                  | 13 |
| 2  | <b>229.1183</b> | 115.0628        |           |                  | 211.1077       | 106.0575         | D    | 1366.7801 | <b>683.8937</b> | 1349.7536 | 675.3804         | 1348.7696      | 674.8884         | 12 |
| 3  | 342.2023        | 171.6048        |           |                  | 324.1918       | 162.5995         | I    | 1251.7532 | <b>626.3802</b> | 1234.7266 | 617.8670         | 1233.7426      | 617.3749         | 11 |
| 4  | <b>455.2864</b> | 228.1468        |           |                  | 437.2758       | 219.1416         | L    | 1138.6691 | <b>569.8382</b> | 1121.6426 | 561.3249         | 1120.6586      | 560.8329         | 10 |
| 5  | <b>570.3134</b> | 285.6603        |           |                  | 552.3028       | 276.6550         | D    | 1025.5851 | <b>513.2962</b> | 1008.5585 | 504.7829         | 1007.5745      | 504.2909         | 9  |
| 6  | 698.3719        | 349.6896        | 681.3454  | 341.1763         | 680.3614       | 340.6843         | Q    | 910.5581  | <b>455.7827</b> | 893.5316  | 447.2694         |                |                  | 8  |
| 7  | 769.4090        | 385.2082        | 752.3825  | 376.6949         | 751.3985       | 376.2029         | A    | 782.4995  | 391.7534        | 765.4730  | 383.2401         |                |                  | 7  |
| 8  | 882.4931        | 441.7502        | 865.4666  | 433.2369         | 864.4825       | 432.7449         | L    | 711.4624  | <b>356.2348</b> | 694.4359  | 347.7216         |                |                  | 6  |
| 9  | 995.5772        | 498.2922        | 978.5506  | 489.7790         | 977.5666       | 489.2869         | L    | 598.3784  | 299.6928        | 581.3518  | 291.1795         |                |                  | 5  |
| 10 | 1151.6783       | 576.3428        | 1134.6517 | 567.8295         | 1133.6677      | 567.3375         | R    | 485.2943  | 243.1508        | 468.2677  | 234.6375         |                |                  | 4  |
| 11 | 1248.7310       | 624.8692        | 1231.7045 | 616.3559         | 1230.7205      | 615.8639         | P    | 329.1932  | 165.1002        | 312.1666  | 156.5870         |                |                  | 3  |
| 12 | 1305.7525       | 653.3799        | 1288.7260 | 644.8666         | 1287.7419      | 644.3746         | G    | 232.1404  | 116.5738        | 215.1139  | 108.0606         |                |                  | 2  |
| 13 |                 |                 |           |                  |                |                  | R    | 175.1190  | 88.0631         | 158.0924  | 79.5498          |                |                  | 1  |

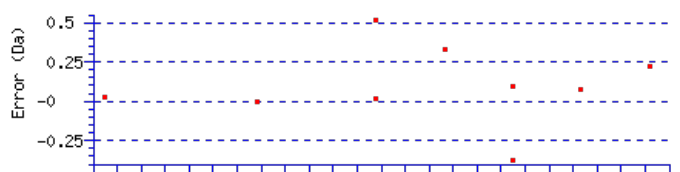

RMS error 503 ppm

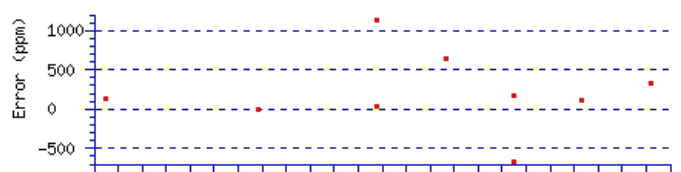

RMS error 503 ppm

NCBI BLAST search of [IDILDQALLRPGR](#)

(Parameters: blastp, nr protein database, expect=20000, no filter, PAM30)

Other BLAST [web gateways](#)



# AT5G19990.1

All matches to this query

| Score | Mr(calc)  | Delta   | Sequence                      |
|-------|-----------|---------|-------------------------------|
| 46.3  | 1478.8569 | 0.0015  | <a href="#">IDILDQALLRPGR</a> |
| 5.6   | 1478.8569 | 0.0015  | <a href="#">LQKEKASQLLHGK</a> |
| 2.8   | 1478.8569 | 0.0015  | <a href="#">LNVLRPQLEELR</a>  |
| 0.6   | 1478.8609 | -0.0026 | <a href="#">DVKLWQVHTLLK</a>  |
| 0.4   | 1478.8569 | 0.0014  | <a href="#">QDLVIHLGLKSTR</a> |

Mascot: <http://www.matrixscience.com/>

**Peptide View**MS/MS Fragmentation of **EVIELPIK**Found in **AT5G20000.1** in **TAIR\_Arabidopsis**, Symbols: | (REGULATORY PARTICLE TRIPLE-A 6A); ATPase | chr5:6756917-6759552  
FORWARD

Match to Query 1594: 939.564480 from(470.789516,2+) index(6788)

Title: Elution from: 62.764 to 62.764 scan no 8880 cid35.00 polarity:+

Data file D12h-2\_2.mgf

Click mouse within plot area to zoom in by factor of two about that point

Or,   to  Da Label all possible matches  Label matches used for scoring Show Y-axis 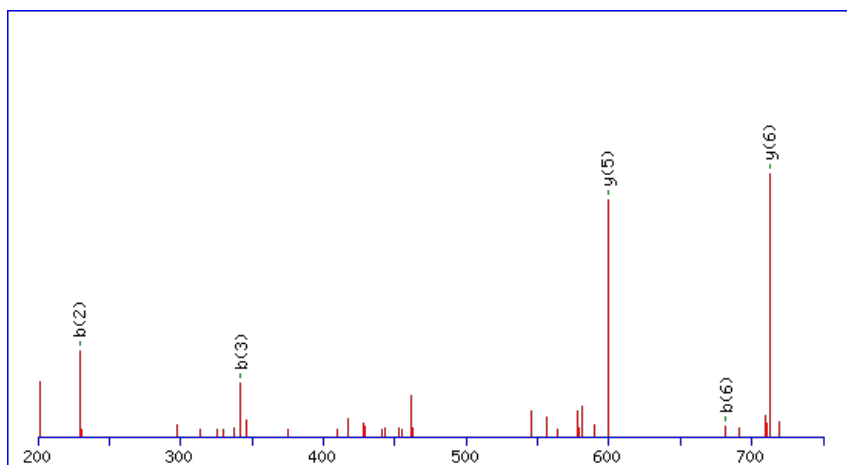Monoisotopic mass of neutral peptide **Mr(calc)**: 939.5641

Fixed modifications: Carbamidomethyl (C) (apply to specified residues or termini only)

Ions Score: 28 Expect: 0.0017

Matches : 5/62 fragment ions using 6 most intense peaks ([help](#))

| # | b               | b <sup>++</sup> | b <sup>0</sup> | b <sup>0++</sup> | Seq. | y               | y <sup>++</sup> | y*       | y <sup>*++</sup> | y <sup>0</sup> | y <sup>0++</sup> | # |
|---|-----------------|-----------------|----------------|------------------|------|-----------------|-----------------|----------|------------------|----------------|------------------|---|
| 1 | 130.0499        | 65.5286         | 112.0393       | 56.5233          | E    |                 |                 |          |                  |                |                  | 8 |
| 2 | <b>229.1183</b> | 115.0628        | 211.1077       | 106.0575         | V    | 811.5288        | 406.2680        | 794.5022 | 397.7547         | 793.5182       | 397.2627         | 7 |
| 3 | <b>342.2023</b> | 171.6048        | 324.1918       | 162.5995         | I    | <b>712.4604</b> | 356.7338        | 695.4338 | 348.2205         | 694.4498       | 347.7285         | 6 |
| 4 | 471.2449        | 236.1261        | 453.2344       | 227.1208         | E    | <b>599.3763</b> | 300.1918        | 582.3497 | 291.6785         | 581.3657       | 291.1865         | 5 |
| 5 | 584.3290        | 292.6681        | 566.3184       | 283.6629         | L    | 470.3337        | 235.6705        | 453.3071 | 227.1572         |                |                  | 4 |
| 6 | <b>681.3818</b> | 341.1945        | 663.3712       | 332.1892         | P    | 357.2496        | 179.1285        | 340.2231 | 170.6152         |                |                  | 3 |
| 7 | 794.4658        | 397.7366        | 776.4553       | 388.7313         | I    | 260.1969        | 130.6021        | 243.1703 | 122.0888         |                |                  | 2 |
| 8 |                 |                 |                |                  | K    | 147.1128        | 74.0600         | 130.0863 | 65.5468          |                |                  | 1 |

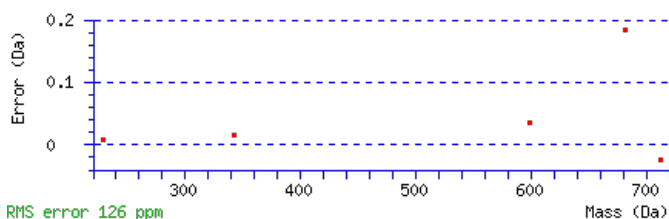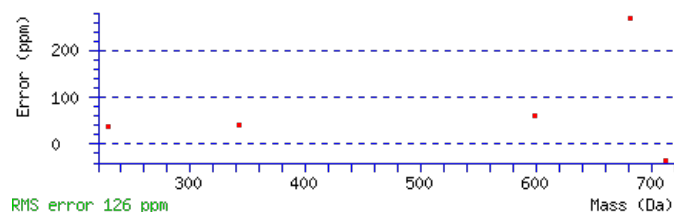NCBI BLAST search of **EVIELPIK**

(Parameters: blastp, nr protein database, expect=20000, no filter, PAM30)

Other BLAST [web gateways](#)**All matches to this query**

| Score | Mr(calc) | Delta  | Sequence                 |
|-------|----------|--------|--------------------------|
| 27.6  | 939.5641 | 0.0004 | <a href="#">EVIELPIK</a> |

AT5G20000.1

|      |          |        |                         |
|------|----------|--------|-------------------------|
| 15.6 | 939.5641 | 0.0004 | <a href="#">DIIPLEK</a> |
|------|----------|--------|-------------------------|

**Mascot:** <http://www.matrixscience.com/>

### Peptide View

 MS/MS Fragmentation of **KYEPTIGVEVHPLDFFTNCGK**

 Found in **AT5G20010.1** in **TAIR\_Arabidopsis**, Symbols: RAN1, ATRAN1, RAN-1 | RAN-1 (RAS RELATED NUCLEAR PROTEIN); GTP binding | chr5:6760366-6761749 FORWARD

Match to Query 10180: 2450.195874 from(817.739234,3+) index(8543)

Title: Elution from: 76.320 to 76.320 scan no 11487 cid35.00 polarity:+

Data file D12h-1\_3.mgf

Click mouse within plot area to zoom in by factor of two about that point

 Or, Plot from  to  Da 

 Label all possible matches  Label matches used for scoring 

 Show Y-axis 
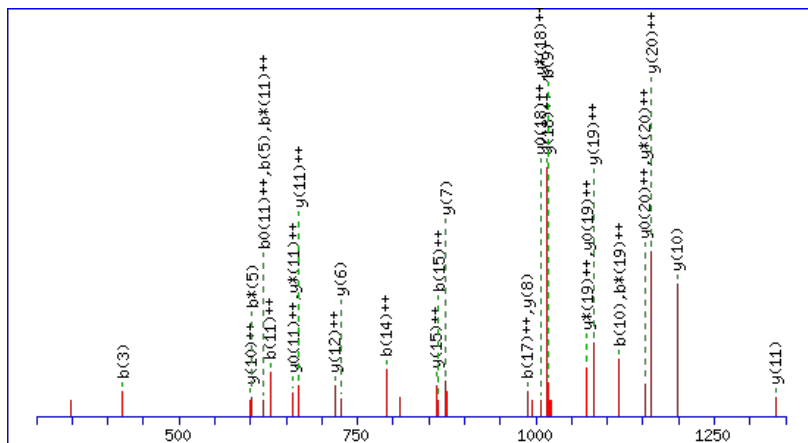
 Monoisotopic mass of neutral peptide  $M_r(\text{calc})$ : 2450.1940

Fixed modifications: Carbamidomethyl (C) (apply to specified residues or termini only)

Ions Score: 61 Expect: 3.1e-006

 Matches : 33/228 fragment ions using 29 most intense peaks ([help](#))

| #  | b                | b <sup>++</sup>  | b <sup>*</sup>  | b <sup>*++</sup> | b <sup>0</sup> | b <sup>0++</sup> | Seq | y                | y <sup>++</sup> | y <sup>*</sup> | y <sup>*++</sup> | y <sup>0</sup> | y <sup>0++</sup> | #  |
|----|------------------|------------------|-----------------|------------------|----------------|------------------|-----|------------------|-----------------|----------------|------------------|----------------|------------------|----|
| 1  | 129.1022         | 65.0548          | 112.0757        | 56.5415          |                |                  | K   |                  |                 |                |                  |                |                  | 21 |
| 2  | 292.1656         | 146.5864         | 275.1390        | 138.0731         |                |                  | Y   | 2323.1063        | 1162.0568       | 2306.0798      | 1153.5435        | 2305.0958      | 1153.0515        | 20 |
| 3  | <b>421.2082</b>  | 211.1077         | 404.1816        | 202.5944         | 403.1976       | 202.1024         | E   | 2160.0430        | 1080.5251       | 2143.0165      | 1072.0119        | 2142.0325      | 1071.5199        | 19 |
| 4  | 518.2609         | 259.6341         | 501.2344        | 251.1208         | 500.2504       | 250.6288         | P   | 2031.0004        | 1016.0039       | 2013.9739      | 1007.4906        | 2012.9899      | 1006.9986        | 18 |
| 5  | <b>619.3086</b>  | 310.1579         | <b>602.2821</b> | 301.6447         | 601.2980       | 301.1527         | T   | 1933.9477        | 967.4775        | 1916.9211      | 958.9642         | 1915.9371      | 958.4722         | 17 |
| 6  | 732.3927         | 366.7000         | 715.3661        | 358.1867         | 714.3821       | 357.6947         | I   | 1832.9000        | 916.9536        | 1815.8734      | 908.4404         | 1814.8894      | 907.9483         | 16 |
| 7  | 789.4141         | 395.2107         | 772.3876        | 386.6974         | 771.4036       | 386.2054         | G   | 1719.8159        | <b>860.4116</b> | 1702.7894      | 851.8983         | 1701.8054      | 851.4063         | 15 |
| 8  | 888.4825         | 444.7449         | 871.4560        | 436.2316         | 870.4720       | 435.7396         | V   | 1662.7945        | 831.9009        | 1645.7679      | 823.3876         | 1644.7839      | 822.8956         | 14 |
| 9  | <b>1017.5251</b> | 509.2662         | 1000.4986       | 500.7529         | 999.5146       | 500.2609         | E   | 1563.7260        | 782.3667        | 1546.6995      | 773.8534         | 1545.7155      | 773.3614         | 13 |
| 10 | <b>1116.5936</b> | 558.8004         | 1099.5670       | 550.2871         | 1098.5830      | 549.7951         | V   | 1434.6834        | <b>717.8454</b> | 1417.6569      | 709.3321         | 1416.6729      | 708.8401         | 12 |
| 11 | 1253.6525        | <b>627.3299</b>  | 1236.6259       | <b>618.8166</b>  | 1235.6419      | <b>618.3246</b>  | H   | <b>1335.6150</b> | <b>668.3112</b> | 1318.5885      | <b>659.7979</b>  | 1317.6045      | <b>659.3059</b>  | 11 |
| 12 | 1350.7052        | 675.8563         | 1333.6787       | 667.3430         | 1332.6947      | 666.8510         | P   | <b>1198.5561</b> | <b>599.7817</b> | 1181.5296      | 591.2684         | 1180.5456      | 590.7764         | 10 |
| 13 | 1463.7893        | 732.3983         | 1446.7627       | 723.8850         | 1445.7787      | 723.3930         | L   | 1101.5034        | 551.2553        | 1084.4768      | 542.7420         | 1083.4928      | 542.2500         | 9  |
| 14 | 1578.8162        | <b>789.9118</b>  | 1561.7897       | 781.3985         | 1560.8057      | 780.9065         | D   | <b>988.4193</b>  | 494.7133        | 971.3927       | 486.2000         | 970.4087       | 485.7080         | 8  |
| 15 | 1725.8847        | <b>863.4460</b>  | 1708.8581       | 854.9327         | 1707.8741      | 854.4407         | F   | <b>873.3924</b>  | 437.1998        | 856.3658       | 428.6865         | 855.3818       | 428.1945         | 7  |
| 16 | 1872.9531        | 936.9802         | 1855.9265       | 928.4669         | 1854.9425      | 927.9749         | F   | <b>726.3239</b>  | 363.6656        | 709.2974       | 355.1523         | 708.3134       | 354.6603         | 6  |
| 17 | 1974.0007        | <b>987.5040</b>  | 1956.9742       | 978.9907         | 1955.9902      | 978.4987         | T   | 579.2555         | 290.1314        | 562.2290       | 281.6181         | 561.2450       | 281.1261         | 5  |
| 18 | 2088.0437        | 1044.5255        | 2071.0171       | 1036.0122        | 2070.0331      | 1035.5202        | N   | 478.2078         | 239.6076        | 461.1813       | 231.0943         |                |                  | 4  |
| 19 | 2248.0743        | 1124.5408        | 2231.0478       | <b>1116.0275</b> | 2230.0638      | 1115.5355        | C   | 364.1649         | 182.5861        | 347.1384       | 174.0728         |                |                  | 3  |
| 20 | 2305.0958        | <b>1153.0515</b> | 2288.0692       | 1144.5383        | 2287.0852      | 1144.0462        | G   | 204.1343         | 102.5708        | 187.1077       | 94.0575          |                |                  | 2  |
| 21 |                  |                  |                 |                  |                |                  | K   | 147.1128         | 74.0600         | 130.0863       | 65.5468          |                |                  | 1  |

# AT5G20010.1

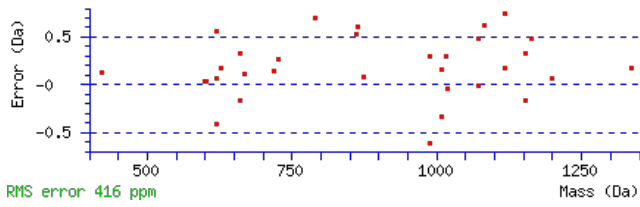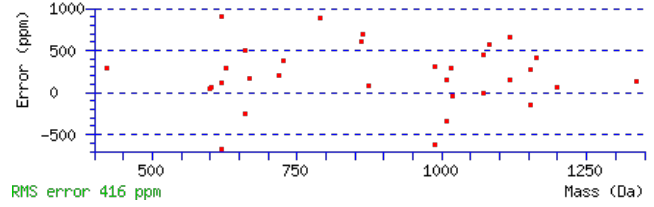

NCBI **BLAST** search of [KYEPTIGVEVHPLDFFTNCGK](#)  
(Parameters: blastp, nr protein database, expect=20000, no filter, PAM30)  
Other BLAST [web gateways](#)

## All matches to this query

| Score | Mr(calc)  | Delta  | Sequence                              |
|-------|-----------|--------|---------------------------------------|
| 61.4  | 2450.1940 | 0.0018 | <a href="#">KYEPTIGVEVHPLDFFTNCGK</a> |

Mascot: <http://www.matrixscience.com/>



# Mascot Search Results

## Peptide View

MS/MS Fragmentation of **KDGEEGEEAAVAPEEVKK**

Found in **AT5G20290.1** in **TAIR\_Arabidopsis**, Symbols: | 40S ribosomal protein S8 (RPS8A) | chr5:6851697-6853014 REVERSE

Match to Query 8965: 2006.892510 from(669.971446,3+) index(1174)

Title: Elution from: 18.553 to 18.553 scan no 1676 cid35.00 polarity:+

Data file D12h-2\_3.mgf

Click mouse within plot area to zoom in by factor of two about that point

Or,   to  Da

Label all possible matches  Label matches used for scoring

Show Y-axis

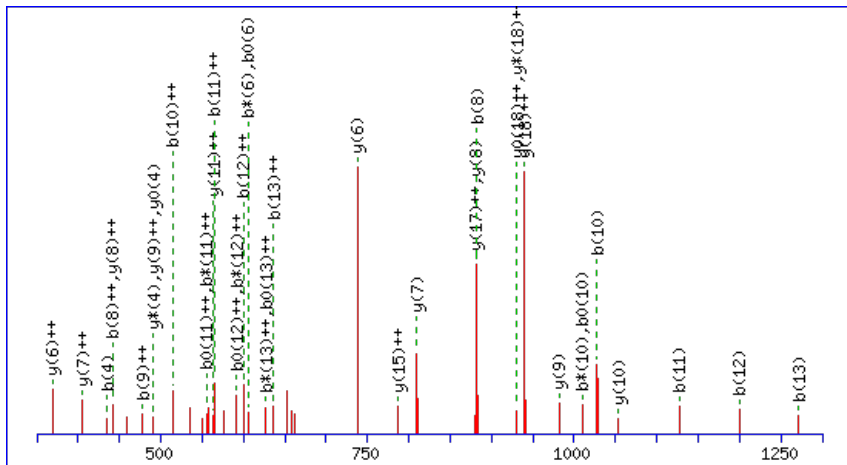

Monoisotopic mass of neutral peptide **Mr(calc)**: 2006.8937

**Fixed modifications**: Carbamidomethyl (C) (apply to specified residues or termini only)

**Ions Score**: 55 **Expect**: 2.2e-005

**Matches** : 40/208 fragment ions using 45 most intense peaks [\(help\)](#)

| #  | b                | b <sup>++</sup> | b <sup>*</sup>   | b <sup>*++</sup> | b <sup>0</sup>   | b <sup>0++</sup> | Seq.     | y                | y <sup>++</sup> | y <sup>*</sup>  | y <sup>*++</sup> | y <sup>0</sup>  | y <sup>0++</sup> | #  |
|----|------------------|-----------------|------------------|------------------|------------------|------------------|----------|------------------|-----------------|-----------------|------------------|-----------------|------------------|----|
| 1  | 131.0963         | 66.0518         | 113.0727         | 57.0400          |                  |                  | <b>K</b> |                  |                 |                 |                  |                 |                  | 19 |
| 2  | 247.1203         | 124.0638        | 229.0967         | 115.0520         | 229.1097         | 115.0585         | <b>D</b> | 1877.8119        | 939.4096        | 1859.7884       | 930.3978         | 1859.8014       | 930.4043         | 18 |
| 3  | 305.1388         | 153.0730        | 287.1152         | 144.0612         | 287.1282         | 144.0677         | <b>G</b> | 1761.7880        | 881.3976        | 1743.7644       | 872.3858         | 1743.7774       | 872.3923         | 17 |
| 4  | <b>435.1784</b>  | 218.0928        | 417.1548         | 209.0811         | 417.1678         | 209.0876         | <b>E</b> | 1703.7695        | 852.3884        | 1685.7459       | 843.3766         | 1685.7589       | 843.3831         | 16 |
| 5  | 565.2180         | 283.1127        | 547.1945         | 274.1009         | 547.2075         | 274.1074         | <b>E</b> | 1573.7298        | 787.3686        | 1555.7063       | 778.3568         | 1555.7193       | 778.3633         | 15 |
| 6  | 623.2365         | 312.1219        | <b>605.2130</b>  | 303.1101         | <b>605.2260</b>  | 303.1166         | <b>G</b> | 1443.6902        | 722.3487        | 1425.6666       | 713.3370         | 1425.6796       | 713.3435         | 14 |
| 7  | 753.2762         | 377.1417        | 735.2526         | 368.1299         | 735.2656         | 368.1364         | <b>E</b> | 1385.6717        | 693.3395        | 1367.6481       | 684.3277         | 1367.6611       | 684.3342         | 13 |
| 8  | <b>883.3158</b>  | <b>442.1615</b> | 865.2922         | 433.1497         | 865.3052         | 433.1563         | <b>E</b> | 1255.6321        | 628.3197        | 1237.6085       | 619.3079         | 1237.6215       | 619.3144         | 12 |
| 9  | 955.3499         | <b>478.1786</b> | 937.3264         | 469.1668         | 937.3394         | 469.1733         | <b>A</b> | 1125.5925        | <b>563.2999</b> | 1107.5689       | 554.2881         | 1107.5819       | 554.2946         | 11 |
| 10 | <b>1027.3841</b> | <b>514.1957</b> | <b>1009.3605</b> | 505.1839         | <b>1009.3735</b> | 505.1904         | <b>A</b> | <b>1053.5583</b> | 527.2828        | 1035.5347       | 518.2710         | 1035.5477       | 518.2775         | 10 |
| 11 | <b>1127.4495</b> | <b>564.2284</b> | 1109.4260        | <b>555.2166</b>  | 1109.4390        | <b>555.2231</b>  | <b>V</b> | <b>981.5242</b>  | <b>491.2657</b> | 963.5006        | 482.2539         | 963.5136        | 482.2604         | 9  |
| 12 | <b>1199.4837</b> | <b>600.2455</b> | 1181.4601        | <b>591.2337</b>  | 1181.4731        | <b>591.2402</b>  | <b>A</b> | <b>881.4587</b>  | <b>441.2330</b> | 863.4351        | 432.2212         | 863.4481        | 432.2277         | 8  |
| 13 | <b>1271.5178</b> | <b>636.2626</b> | 1253.4943        | <b>627.2508</b>  | 1253.5073        | <b>627.2573</b>  | <b>A</b> | <b>809.4246</b>  | <b>405.2159</b> | 791.4010        | 396.2041         | 791.4140        | 396.2106         | 7  |
| 14 | 1369.5676        | 685.2875        | 1351.5441        | 676.2757         | 1351.5571        | 676.2822         | <b>P</b> | <b>737.3904</b>  | <b>369.1988</b> | 719.3668        | 360.1871         | 719.3798        | 360.1936         | 6  |
| 15 | 1499.6073        | 750.3073        | 1481.5837        | 741.2955         | 1481.5967        | 741.3020         | <b>E</b> | 639.3406         | 320.1739        | 621.3170        | 311.1622         | 621.3300        | 311.1687         | 5  |
| 16 | 1629.6469        | 815.3271        | 1611.6233        | 806.3153         | 1611.6363        | 806.3218         | <b>E</b> | 509.3010         | 255.1541        | <b>491.2774</b> | 246.1423         | <b>491.2904</b> | 246.1488         | 4  |
| 17 | 1729.7123        | 865.3598        | 1711.6888        | 856.3480         | 1711.7018        | 856.3545         | <b>V</b> | 379.2614         | 190.1343        | 361.2378        | 181.1225         |                 |                  | 3  |
| 18 | 1859.8014        | <b>930.4043</b> | 1841.7778        | 921.3925         | 1841.7908        | 921.3990         | <b>K</b> | 279.1959         | 140.1016        | 261.1723        | 131.0898         |                 |                  | 2  |
| 19 |                  |                 |                  |                  |                  |                  | <b>K</b> | 149.1069         | 75.0571         | 131.0833        | 66.0453          |                 |                  | 1  |

# AT5G20290.1

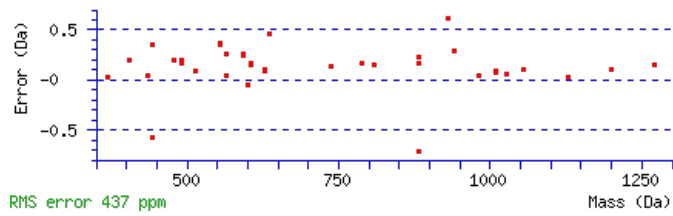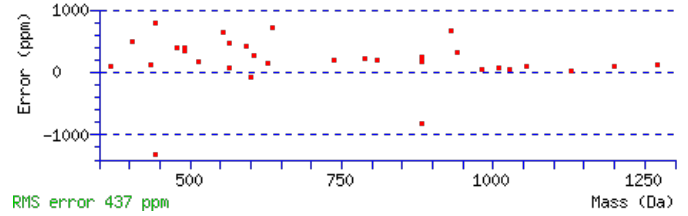

NCBI **BLAST** search of [KDGEEGEEAAVAPEEVKK](#)  
(Parameters: blastp, nr protein database, expect=20000, no filter, PAM30)  
Other BLAST [web gateways](#)

## All matches to this query

| Score | Mr(calc)  | Delta   | Sequence                           |
|-------|-----------|---------|------------------------------------|
| 55.2  | 2006.8937 | -0.0012 | <a href="#">KDGEEGEEAAVAPEEVKK</a> |
| 0.1   | 2006.8937 | -0.0012 | <a href="#">EKQPDNEIKTSEEDKPV</a>  |

Mascot: <http://www.matrixscience.com/>

## Peptide View

### MS/MS Fragmentation of **KIVANGSSSK**

Found in **AT5G20600.1** in **TAIR\_Arabidopsis**, Symbols: | similar to unnamed protein product [Vitis vinifera] (GB:CAO43199.1); contains InterPro domain Nucleolar, Nop52; (InterPro:IPR010301) | chr5:6966347-6967945 REVERSE

Match to Query 2470: 1002.513326 from(502.263939,2+) index(496)

Title: Elution from: 10.516 to 10.516 scan no 763 cid35.00 polarity:+

Data file D6h-3\_1.mgf

Click mouse within plot area to zoom in by factor of two about that point

Or,   to  Da

Label all possible matches  Label matches used for scoring

Show Y-axis

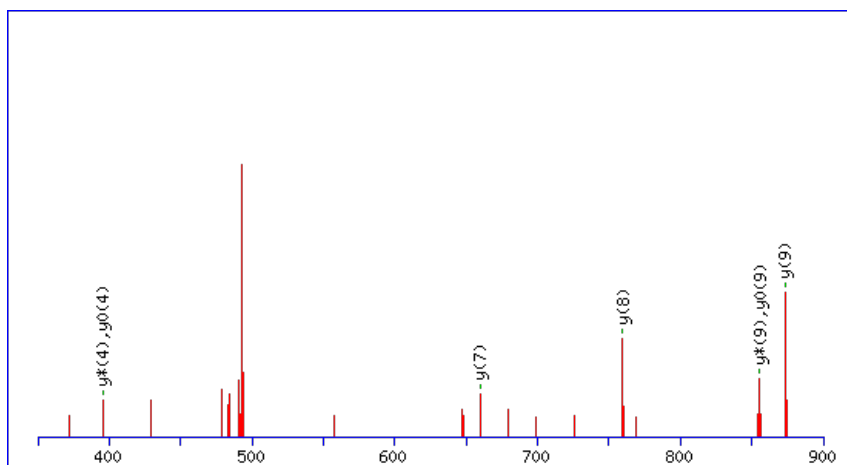

**Monoisotopic mass of neutral peptide Mr(calc):** 1002.5120

**Fixed modifications:** Carbamidomethyl (C) (apply to specified residues or termini only)

**Ions Score:** 26 **Expect:** 0.022

**Matches:** 8/94 fragment ions using 6 most intense peaks ([help](#))

| #  | b               | b <sup>++</sup> | b*       | b <sup>*++</sup> | b <sup>0</sup> | b <sup>0++</sup> | Seq.     | y               | y <sup>++</sup> | y*              | y <sup>*++</sup> | y <sup>0</sup>  | y <sup>0++</sup> | #         |
|----|-----------------|-----------------|----------|------------------|----------------|------------------|----------|-----------------|-----------------|-----------------|------------------|-----------------|------------------|-----------|
| 1  | 131.0963        | 66.0518         | 113.0727 | 57.0400          |                |                  | <b>K</b> |                 |                 |                 |                  |                 |                  | <b>10</b> |
| 2  | 245.1774        | 123.0923        | 227.1538 | 114.0805         |                |                  | <b>I</b> | <b>873.4303</b> | 437.2188        | <b>855.4067</b> | 428.2070         | <b>855.4197</b> | 428.2135         | <b>9</b>  |
| 3  | 345.2429        | 173.1251        | 327.2193 | 164.1133         |                |                  | <b>V</b> | <b>759.3492</b> | 380.1782        | 741.3256        | 371.1664         | 741.3386        | 371.1729         | <b>8</b>  |
| 4  | 417.2770        | 209.1421        | 399.2534 | 200.1303         |                |                  | <b>A</b> | <b>659.2837</b> | 330.1455        | 641.2601        | 321.1337         | 641.2731        | 321.1402         | <b>7</b>  |
| 5  | 533.3140        | 267.1606        | 515.2904 | 258.1488         |                |                  | <b>N</b> | 587.2496        | 294.1284        | 569.2260        | 285.1166         | 569.2390        | 285.1231         | <b>6</b>  |
| 6  | 591.3325        | 296.1699        | 573.3089 | 287.1581         |                |                  | <b>G</b> | 471.2126        | 236.1099        | 453.1890        | 227.0981         | 453.2020        | 227.1046         | <b>5</b>  |
| 7  | 679.3616        | 340.1844        | 661.3380 | 331.1726         | 661.3510       | 331.1791         | <b>S</b> | 413.1941        | 207.1007        | <b>395.1705</b> | 198.0889         | <b>395.1835</b> | 198.0954         | <b>4</b>  |
| 8  | 767.3906        | 384.1990        | 749.3670 | 375.1872         | 749.3801       | 375.1937         | <b>S</b> | 325.1650        | 163.0861        | 307.1414        | 154.0743         | 307.1544        | 154.0809         | <b>3</b>  |
| 9  | <b>855.4197</b> | 428.2135        | 837.3961 | 419.2017         | 837.4091       | 419.2082         | <b>S</b> | 237.1359        | 119.0716        | 219.1124        | 110.0598         | 219.1254        | 110.0663         | <b>2</b>  |
| 10 |                 |                 |          |                  |                |                  | <b>K</b> | 149.1069        | 75.0571         | 131.0833        | 66.0453          |                 |                  | <b>1</b>  |

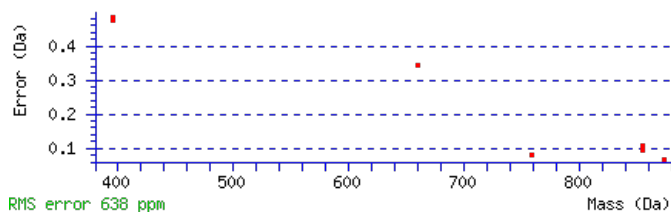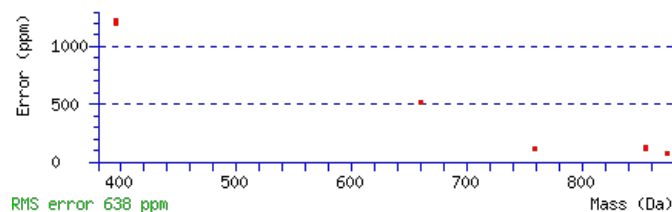

### NCBI BLAST search of **KIVANGSSSK**

(Parameters: blastp, nr protein database, expect=20000, no filter, PAM30)

Other BLAST [web gateways](#)

All matches to this query



## AT5G20600.1

| Score | Mr(calc)  | Delta   | Sequence                   |
|-------|-----------|---------|----------------------------|
| 26.1  | 1002.5120 | 0.0013  | <a href="#">KIVANGSSSK</a> |
| 22.0  | 1002.5142 | -0.0009 | <a href="#">EIVKEAFR</a>   |
| 22.0  | 1002.5142 | -0.0009 | <a href="#">ELVLSFAGR</a>  |
| 11.6  | 1002.5142 | -0.0009 | <a href="#">KLAEQFQK</a>   |
| 10.0  | 1002.5116 | 0.0018  | <a href="#">EIVVTELK</a>   |
| 10.0  | 1002.5142 | -0.0009 | <a href="#">ELQAYLVR</a>   |
| 10.0  | 1002.5147 | -0.0014 | <a href="#">KLAQRSER</a>   |
| 10.0  | 1002.5142 | -0.0009 | <a href="#">KLLFAEDR</a>   |
| 9.6   | 1002.5120 | 0.0013  | <a href="#">KSNSALDKK</a>  |
| 9.6   | 1002.5143 | -0.0009 | <a href="#">KYTPLAGNK</a>  |

Mascot: <http://www.matrixscience.com/>

**Peptide View**MS/MS Fragmentation of **EMEEMVGNKK**

Found in **AT5G20640.1** in **TAIR\_Arabidopsis**, Symbols: | similar to unknown protein [Arabidopsis thaliana] (TAIR:AT2G05910.1); similar to hypothetical protein [Vitis vinifera] (GB:CAN71378.1); contains InterPro domain Protein of unknown function DUF567 (InterPro:IPR007612) | chr5:6984381-6985

Match to Query 4077: 1209.534256 from(605.774404,2+) index(1100)

Title: Elution from: 18.642 to 18.642 scan no 1606 cid35.00 polarity:+

Data file D6h-2\_2.mgf

Click mouse within plot area to zoom in by factor of two about that point

Or,   to  Da

Label all possible matches  Label matches used for scoring

Show Y-axis

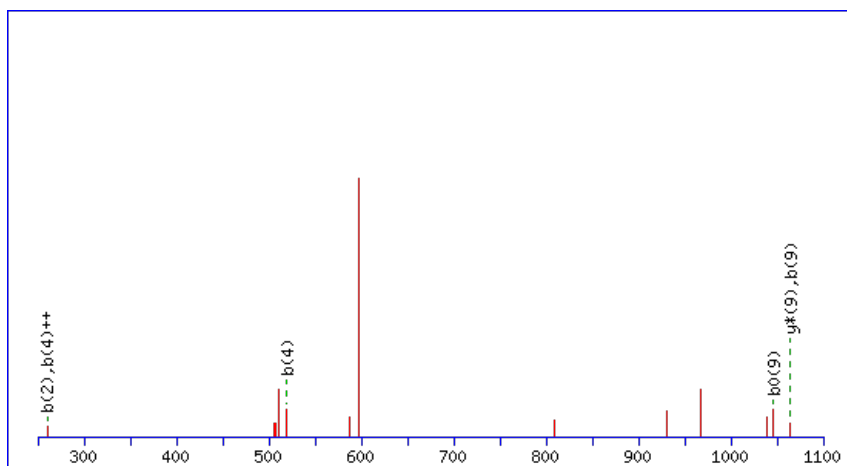

**Monoisotopic mass of neutral peptide Mr(calc):** 1209.5369

**Fixed modifications:** Carbamidomethyl (C) (apply to specified residues or termini only)

**Variable modifications:**

**M5** : Oxidation (M), with neutral losses 0.0000 (shown in table), 63.9983

**Ions Score:** 15 **Expect:** 0.045

**Matches** : 6/128 fragment ions using 10 most intense peaks ([help](#))

| #  | b                | b <sup>++</sup> | b <sup>*</sup> | b <sup>*++</sup> | b <sup>0</sup>   | b <sup>0++</sup> | Seq. | y         | y <sup>++</sup> | y <sup>*</sup>   | y <sup>*++</sup> | y <sup>0</sup> | y <sup>0++</sup> | #  |
|----|------------------|-----------------|----------------|------------------|------------------|------------------|------|-----------|-----------------|------------------|------------------|----------------|------------------|----|
| 1  | 130.0499         | 65.5286         |                |                  | 112.0393         | 56.5233          | E    |           |                 |                  |                  |                |                  | 10 |
| 2  | <b>261.0904</b>  | 131.0488        |                |                  | 243.0798         | 122.0435         | M    | 1081.5016 | 541.2545        | <b>1064.4751</b> | 532.7412         | 1063.4911      | 532.2492         | 9  |
| 3  | 390.1329         | 195.5701        |                |                  | 372.1224         | 186.5648         | E    | 950.4612  | 475.7342        | 933.4346         | 467.2209         | 932.4506       | 466.7289         | 8  |
| 4  | <b>519.1755</b>  | <b>260.0914</b> |                |                  | 501.1650         | 251.0861         | E    | 821.4186  | 411.2129        | 804.3920         | 402.6996         | 803.4080       | 402.2076         | 7  |
| 5  | 666.2109         | 333.6091        |                |                  | 648.2004         | 324.6038         | M    | 692.3760  | 346.6916        | 675.3494         | 338.1783         |                |                  | 6  |
| 6  | 765.2794         | 383.1433        |                |                  | 747.2688         | 374.1380         | V    | 545.3406  | 273.1739        | 528.3140         | 264.6606         |                |                  | 5  |
| 7  | 822.3008         | 411.6540        |                |                  | 804.2903         | 402.6488         | G    | 446.2722  | 223.6397        | 429.2456         | 215.1264         |                |                  | 4  |
| 8  | 936.3437         | 468.6755        | 919.3172       | 460.1622         | 918.3332         | 459.6702         | N    | 389.2507  | 195.1290        | 372.2241         | 186.6157         |                |                  | 3  |
| 9  | <b>1064.4387</b> | 532.7230        | 1047.4122      | 524.2097         | <b>1046.4281</b> | 523.7177         | K    | 275.2078  | 138.1075        | 258.1812         | 129.5942         |                |                  | 2  |
| 10 |                  |                 |                |                  |                  |                  | K    | 147.1128  | 74.0600         | 130.0863         | 65.5468          |                |                  | 1  |

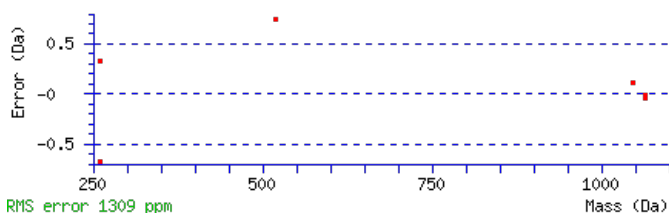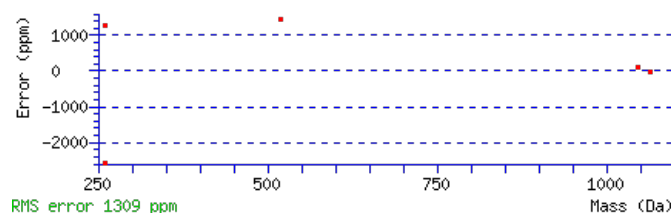

NCBI **BLAST** search of **EMEEMVGNKK**

(Parameters: blastp, nr protein database, expect=20000, no filter, PAM30)

Other BLAST [web gateways](#)

AT5G20640.1

All matches to this query

| Score | Mr(calc)  | Delta   | Sequence                    |
|-------|-----------|---------|-----------------------------|
| 14.7  | 1209.5369 | -0.0027 | <a href="#">EMEEMVGNKK</a>  |
| 10.9  | 1209.5369 | -0.0027 | <a href="#">EMDMVGSSNLK</a> |

Mascot: <http://www.matrixscience.com/>

## Peptide View

MS/MS Fragmentation of **ITPLPVSTGSTVLYSK**

Found in **AT5G20720.1** in **TAIR\_Arabidopsis**, Symbols: CPN10, CHCPN10, ATCPN21, CPN21, CPN20 | CPN20 (CHAPERONIN 20); calmodulin binding | chr5:7015017-7016356 FORWARD

Match to Query 7588: 1661.919058 from(831.966805,2+) index(6289)

Title: Elution from: 55.760 to 55.760 scan no 8072 cid35.00 polarity:+

Data file D12h-3\_2.mgf

Click mouse within plot area to zoom in by factor of two about that point

Or,   to  Da

Label all possible matches  Label matches used for scoring

Show Y-axis

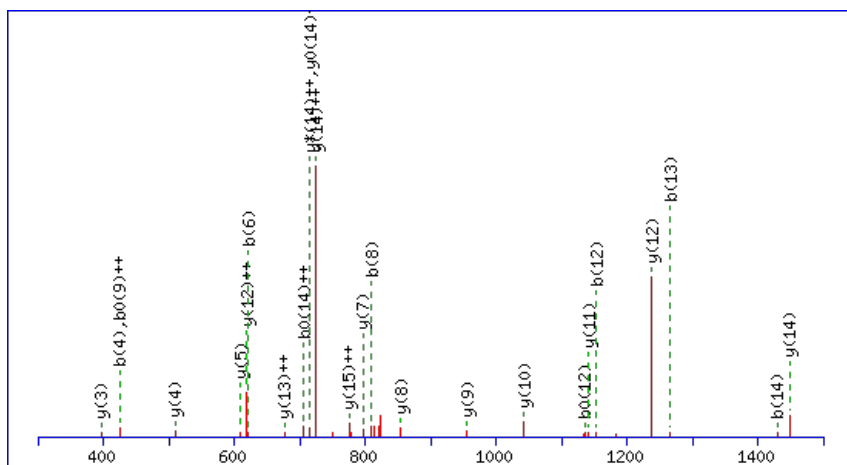

**Monoisotopic mass of neutral peptide Mr(calc):** 1661.9240

**Fixed modifications:** Carbamidomethyl (C) (apply to specified residues or termini only)

**Ions Score:** 92 **Expect:** 1.5e-009

**Matches:** 26/146 fragment ions using 30 most intense peaks ([help](#))

| #  | b         | b <sup>++</sup> | b <sup>0</sup> | b <sup>0++</sup> | Seq. | y         | y <sup>++</sup> | y*        | y <sup>*++</sup> | y <sup>0</sup> | y <sup>0++</sup> | #  |
|----|-----------|-----------------|----------------|------------------|------|-----------|-----------------|-----------|------------------|----------------|------------------|----|
| 1  | 114.0913  | 57.5493         |                |                  | I    |           |                 |           |                  |                |                  | 16 |
| 2  | 215.1390  | 108.0731        | 197.1285       | 99.0679          | T    | 1549.8472 | 775.4272        | 1532.8207 | 766.9140         | 1531.8366      | 766.4220         | 15 |
| 3  | 312.1918  | 156.5995        | 294.1812       | 147.5942         | P    | 1448.7995 | 724.9034        | 1431.7730 | 716.3901         | 1430.7890      | 715.8981         | 14 |
| 4  | 425.2758  | 213.1416        | 407.2653       | 204.1363         | L    | 1351.7468 | 676.3770        | 1334.7202 | 667.8637         | 1333.7362      | 667.3717         | 13 |
| 5  | 522.3286  | 261.6679        | 504.3180       | 252.6627         | P    | 1238.6627 | 619.8350        | 1221.6361 | 611.3217         | 1220.6521      | 610.8297         | 12 |
| 6  | 621.3970  | 311.2022        | 603.3865       | 302.1969         | V    | 1141.6099 | 571.3086        | 1124.5834 | 562.7953         | 1123.5994      | 562.3033         | 11 |
| 7  | 708.4291  | 354.7182        | 690.4185       | 345.7129         | S    | 1042.5415 | 521.7744        | 1025.5150 | 513.2611         | 1024.5310      | 512.7691         | 10 |
| 8  | 809.4767  | 405.2420        | 791.4662       | 396.2367         | T    | 955.5095  | 478.2584        | 938.4829  | 469.7451         | 937.4989       | 469.2531         | 9  |
| 9  | 866.4982  | 433.7527        | 848.4876       | 424.7475         | G    | 854.4618  | 427.7345        | 837.4353  | 419.2213         | 836.4512       | 418.7293         | 8  |
| 10 | 953.5302  | 477.2688        | 935.5197       | 468.2635         | S    | 797.4403  | 399.2238        | 780.4138  | 390.7105         | 779.4298       | 390.2185         | 7  |
| 11 | 1054.5779 | 527.7926        | 1036.5673      | 518.7873         | T    | 710.4083  | 355.7078        | 693.3818  | 347.1945         | 692.3978       | 346.7025         | 6  |
| 12 | 1153.6463 | 577.3268        | 1135.6358      | 568.3215         | V    | 609.3606  | 305.1840        | 592.3341  | 296.6707         | 591.3501       | 296.1787         | 5  |
| 13 | 1266.7304 | 633.8688        | 1248.7198      | 624.8635         | L    | 510.2922  | 255.6498        | 493.2657  | 247.1365         | 492.2817       | 246.6445         | 4  |
| 14 | 1429.7937 | 715.4005        | 1411.7831      | 706.3952         | Y    | 397.2082  | 199.1077        | 380.1816  | 190.5944         | 379.1976       | 190.1024         | 3  |
| 15 | 1516.8257 | 758.9165        | 1498.8152      | 749.9112         | S    | 234.1448  | 117.5761        | 217.1183  | 109.0628         | 216.1343       | 108.5708         | 2  |
| 16 |           |                 |                |                  | K    | 147.1128  | 74.0600         | 130.0863  | 65.5468          |                |                  | 1  |

# AT5G20720.1

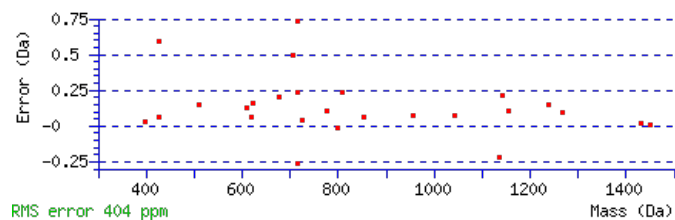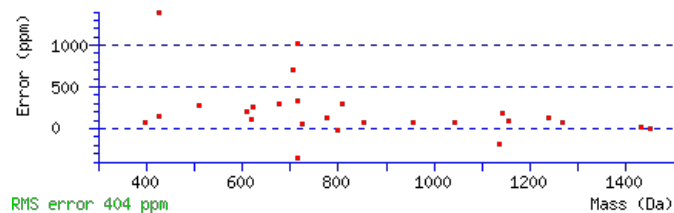

NCBI **BLAST** search of [ITPLPVSTGSTVLYSK](#)

(Parameters: blastp, nr protein database, expect=20000, no filter, PAM30)

Other BLAST [web gateways](#)

## All matches to this query

| Score | Mr(calc)  | Delta   | Sequence                         |
|-------|-----------|---------|----------------------------------|
| 91.9  | 1661.9240 | -0.0049 | <a href="#">ITPLPVSTGSTVLYSK</a> |
| 7.7   | 1661.9141 | 0.0050  | <a href="#">IPTLKSISFFSTHGK</a>  |
| 0.6   | 1661.9174 | 0.0016  | <a href="#">NTYPLLMLVNGGVKK</a>  |

Mascot: <http://www.matrixscience.com/>



# Mascot Search Results

## Peptide View

MS/MS Fragmentation of **KLEGGPFDDLK**

Found in **AT5G20830.1** in **TAIR Arabidopsis**, Symbols: SUS1, ASUS1, ATSUS1 | SUS1 (SUCROSE SYNTHASE 1); UDP-glycosyltransferase/sucrose synthase | chr5:7050601-7054034 REVERSE

Match to Query 4961: 1362.756225 from(455.259351,3+) index(8314)

Title: Elution from: 74.830 to 74.830 scan no 11218 cid35.00 polarity:+

Data file D6h-2\_3.mgf

Click mouse within plot area to zoom in by factor of two about that point

Or,   to  Da

Label all possible matches  Label matches used for scoring

Show Y-axis

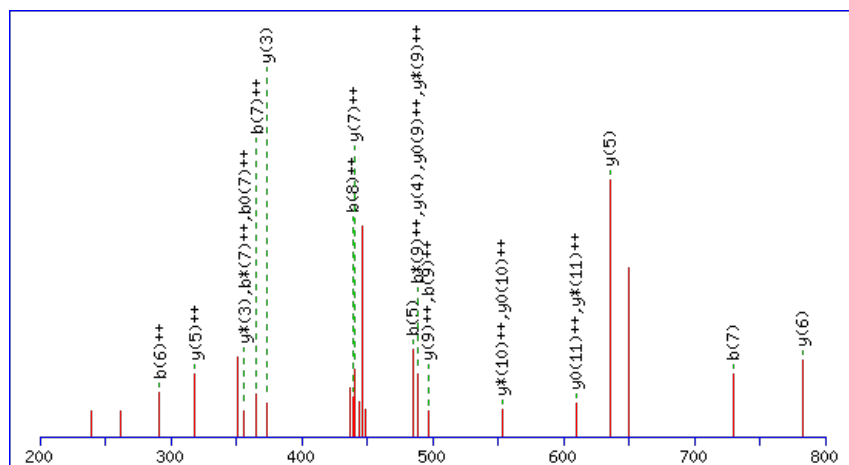

Monoisotopic mass of neutral peptide  $M_r(\text{calc})$ : 1362.7547

Fixed modifications: Carbamidomethyl (C) (apply to specified residues or termini only)

Ions Score: 36 Expect: 0.00041

Matches : 25/122 fragment ions using 24 most intense peaks [\(help\)](#)

| #  | b         | b <sup>++</sup> | b*        | b <sup>*++</sup> | b <sup>0</sup> | b <sup>0++</sup> | Seq.     | y         | y <sup>++</sup> | y*        | y <sup>*++</sup> | y <sup>0</sup> | y <sup>0++</sup> | #  |
|----|-----------|-----------------|-----------|------------------|----------------|------------------|----------|-----------|-----------------|-----------|------------------|----------------|------------------|----|
| 1  | 129.1022  | 65.0548         | 112.0757  | 56.5415          |                |                  | <b>K</b> |           |                 |           |                  |                |                  | 12 |
| 2  | 242.1863  | 121.5968        | 225.1598  | 113.0835         |                |                  | <b>L</b> | 1235.6671 | 618.3372        | 1218.6405 | 609.8239         | 1217.6565      | 609.3319         | 11 |
| 3  | 371.2289  | 186.1181        | 354.2023  | 177.6048         | 353.2183       | 177.1128         | <b>E</b> | 1122.5830 | 561.7951        | 1105.5564 | 553.2819         | 1104.5724      | 552.7898         | 10 |
| 4  | 428.2504  | 214.6288        | 411.2238  | 206.1155         | 410.2398       | 205.6235         | <b>G</b> | 993.5404  | 497.2738        | 976.5138  | 488.7606         | 975.5298       | 488.2686         | 9  |
| 5  | 485.2718  | 243.1395        | 468.2453  | 234.6263         | 467.2613       | 234.1343         | <b>G</b> | 936.5189  | 468.7631        | 919.4924  | 460.2498         | 918.5084       | 459.7578         | 8  |
| 6  | 582.3246  | 291.6659        | 565.2980  | 283.1527         | 564.3140       | 282.6606         | <b>P</b> | 879.4975  | 440.2524        | 862.4709  | 431.7391         | 861.4869       | 431.2471         | 7  |
| 7  | 729.3930  | 365.2001        | 712.3665  | 356.6869         | 711.3824       | 356.1949         | <b>F</b> | 782.4447  | 391.7260        | 765.4182  | 383.2127         | 764.4341       | 382.7207         | 6  |
| 8  | 876.4614  | 438.7343        | 859.4349  | 430.2211         | 858.4509       | 429.7291         | <b>F</b> | 635.3763  | 318.1918        | 618.3497  | 309.6785         | 617.3657       | 309.1865         | 5  |
| 9  | 991.4884  | 496.2478        | 974.4618  | 487.7345         | 973.4778       | 487.2425         | <b>D</b> | 488.3079  | 244.6576        | 471.2813  | 236.1443         | 470.2973       | 235.6523         | 4  |
| 10 | 1104.5724 | 552.7898        | 1087.5459 | 544.2766         | 1086.5619      | 543.7846         | <b>L</b> | 373.2809  | 187.1441        | 356.2544  | 178.6308         |                |                  | 3  |
| 11 | 1217.6565 | 609.3319        | 1200.6299 | 600.8186         | 1199.6459      | 600.3266         | <b>L</b> | 260.1969  | 130.6021        | 243.1703  | 122.0888         |                |                  | 2  |
| 12 |           |                 |           |                  |                |                  | <b>K</b> | 147.1128  | 74.0600         | 130.0863  | 65.5468          |                |                  | 1  |

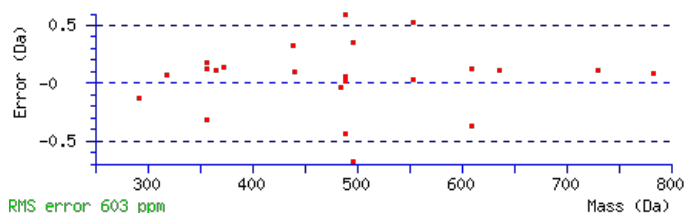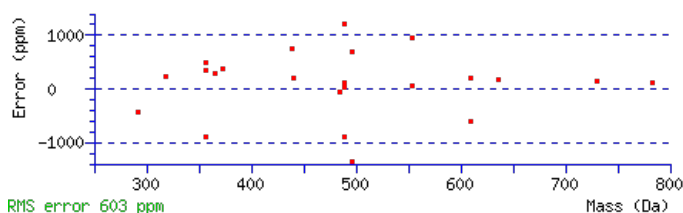

NCBI BLAST search of **KLEGGPFDDLK**

(Parameters: blastp, nr protein database, expect=20000, no filter, PAM30)

Other BLAST [web gateways](#)

AT5G20830.1

All matches to this query

| Score | Mr(calc)  | Delta  | Sequence                      |
|-------|-----------|--------|-------------------------------|
| 36.3  | 1362.7547 | 0.0015 | <a href="#">KLEGGPFFDLLK</a>  |
| 3.0   | 1362.7540 | 0.0022 | <a href="#">VKSSAETLAKAMK</a> |

Mascot: <http://www.matrixscience.com/>

**Peptide View**MS/MS Fragmentation of **GHAVTVTNDGATILK**Found in **AT5G20890.1** in **TAIR\_Arabidopsis**, Symbols: | chaperonin, putative | chr5:7087022-7089908 REVERSE

Match to Query 6764: 1514.744862 from(505.922230,3+) index(2899)

Title: Elution from: 29.120 to 29.120 scan no 3595 cid35.00 polarity:+

Data file C7-1\_1.mgf

Click mouse within plot area to zoom in by factor of two about that point

Or,   to  Da Label all possible matches  Label matches used for scoring Show Y-axis 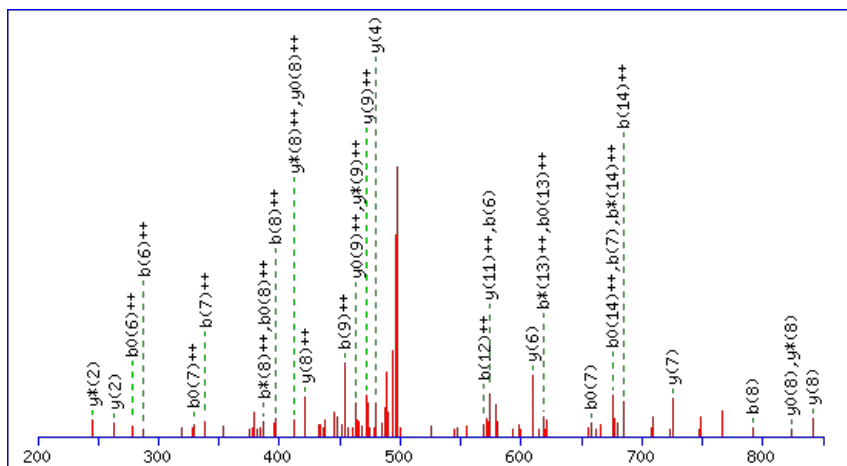Monoisotopic mass of neutral peptide  $M_r(\text{calc})$ : 1514.7431

Fixed modifications: Carbamidomethyl (C) (apply to specified residues or termini only)

Ions Score: 27 Expect: 0.013

Matches : 33/140 fragment ions using 50 most intense peaks ([help](#))

| #  | b               | b <sup>++</sup> | b <sup>*</sup> | b <sup>*++</sup> | b <sup>0</sup>  | b <sup>0++</sup> | Seq.     | y               | y <sup>++</sup> | y <sup>*</sup>  | y <sup>*++</sup> | y <sup>0</sup>  | y <sup>0++</sup> | #         |
|----|-----------------|-----------------|----------------|------------------|-----------------|------------------|----------|-----------------|-----------------|-----------------|------------------|-----------------|------------------|-----------|
| 1  | 59.0258         | 30.0165         |                |                  |                 |                  | <b>G</b> |                 |                 |                 |                  |                 |                  | <b>15</b> |
| 2  | 199.0758        | 100.0415        |                |                  |                 |                  | <b>H</b> | 1457.7319       | 729.3696        | 1439.7083       | 720.3578         | 1439.7213       | 720.3643         | <b>14</b> |
| 3  | 271.1099        | 136.0586        |                |                  |                 |                  | <b>A</b> | 1317.6819       | 659.3446        | 1299.6583       | 650.3328         | 1299.6713       | 650.3393         | <b>13</b> |
| 4  | 371.1754        | 186.0913        |                |                  |                 |                  | <b>V</b> | 1245.6477       | 623.3275        | 1227.6241       | 614.3157         | 1227.6372       | 614.3222         | <b>12</b> |
| 5  | 473.2201        | 237.1137        |                |                  | 455.2095        | 228.1084         | <b>T</b> | 1145.5823       | <b>573.2948</b> | 1127.5587       | 564.2830         | 1127.5717       | 564.2895         | <b>11</b> |
| 6  | <b>573.2856</b> | <b>287.1464</b> |                |                  | 555.2750        | <b>278.1411</b>  | <b>V</b> | 1043.5376       | 522.2724        | 1025.5140       | 513.2606         | 1025.5270       | 513.2671         | <b>10</b> |
| 7  | <b>675.3303</b> | <b>338.1688</b> |                |                  | <b>657.3197</b> | <b>329.1635</b>  | <b>T</b> | 943.4721        | <b>472.2397</b> | 925.4485        | <b>463.2279</b>  | 925.4616        | <b>463.2344</b>  | <b>9</b>  |
| 8  | <b>791.3673</b> | <b>396.1873</b> | 773.3437       | <b>387.1755</b>  | 773.3567        | <b>387.1820</b>  | <b>N</b> | <b>841.4274</b> | <b>421.2173</b> | <b>823.4038</b> | <b>412.2056</b>  | <b>823.4168</b> | <b>412.2121</b>  | <b>8</b>  |
| 9  | 907.3912        | <b>454.1993</b> | 889.3677       | 445.1875         | 889.3807        | 445.1940         | <b>D</b> | <b>725.3904</b> | 363.1988        | 707.3668        | 354.1871         | 707.3798        | 354.1936         | <b>7</b>  |
| 10 | 965.4097        | 483.2085        | 947.3862       | 474.1967         | 947.3992        | 474.2032         | <b>G</b> | <b>609.3664</b> | 305.1869        | 591.3428        | 296.1751         | 591.3559        | 296.1816         | <b>6</b>  |
| 11 | 1037.4439       | 519.2256        | 1019.4203      | 510.2138         | 1019.4333       | 510.2203         | <b>A</b> | 551.3479        | 276.1776        | 533.3244        | 267.1658         | 533.3374        | 267.1723         | <b>5</b>  |
| 12 | 1139.4886       | <b>570.2479</b> | 1121.4650      | 561.2361         | 1121.4780       | 561.2427         | <b>T</b> | <b>479.3138</b> | 240.1605        | 461.2902        | 231.1487         | 461.3032        | 231.1552         | <b>4</b>  |
| 13 | 1253.5697       | 627.2885        | 1235.5461      | <b>618.2767</b>  | 1235.5591       | <b>618.2832</b>  | <b>I</b> | 377.2691        | 189.1382        | 359.2455        | 180.1264         |                 |                  | <b>3</b>  |
| 14 | 1367.6508       | <b>684.3290</b> | 1349.6272      | <b>675.3172</b>  | 1349.6402       | <b>675.3238</b>  | <b>L</b> | <b>263.1880</b> | 132.0976        | <b>245.1644</b> | 123.0858         |                 |                  | <b>2</b>  |
| 15 |                 |                 |                |                  |                 |                  | <b>K</b> | 149.1069        | 75.0571         | 131.0833        | 66.0453          |                 |                  | <b>1</b>  |

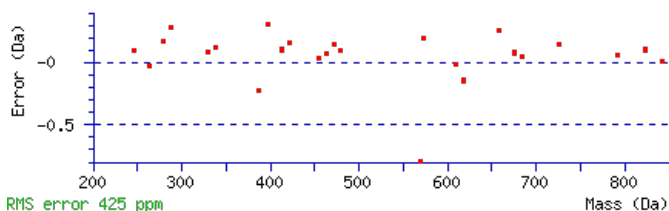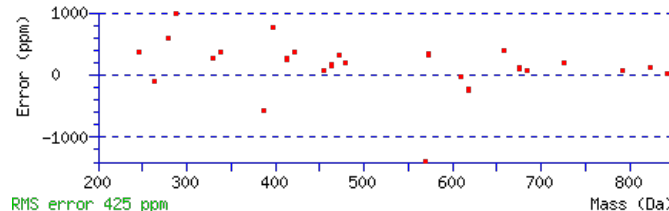NCBI **BLAST** search of [GHAVTVTNDGATILK](#)



## AT5G20890.1

(Parameters: blastp, nr protein database, expect=20000, no filter, PAM30)

Other BLAST [web gateways](#)

### All matches to this query

| Score | Mr(calc)  | Delta   | Sequence                         |
|-------|-----------|---------|----------------------------------|
| 26.5  | 1514.7431 | 0.0018  | <a href="#">GHAIVTVTNDGATILK</a> |
| 6.4   | 1514.7487 | -0.0039 | <a href="#">HVIMEGGEKKEIK</a>    |
| 4.1   | 1514.7427 | 0.0022  | <a href="#">ASLVYSPFTLSTK</a>    |
| 1.9   | 1514.7453 | -0.0005 | <a href="#">SSFQAFLEVVKSR</a>    |
| 1.3   | 1514.7406 | 0.0042  | <a href="#">YIPQAKMNFTRK</a>     |
| 0.1   | 1514.7453 | -0.0005 | <a href="#">QWLADGPKNLVEK</a>    |

Mascot: <http://www.matrixscience.com/>

**Peptide View**MS/MS Fragmentation of **QPLGARIR**Found in **AT5G20950.1** in **TAIR\_Arabidopsis**, Symbols: | glycosyl hydrolase family 3 protein | chr5:7107611-7110777 REVERSE

Match to Query 1778: 924.507922 from(463.261237,2+) index(4393)

Title: Elution from: 40.393 to 40.393 scan no 5525 cid35.00 polarity:+

Data file C7-3\_3.mgf

Click mouse within plot area to zoom in by factor of two about that point

Or,   to  Da Label all possible matches  Label matches used for scoring Show Y-axis 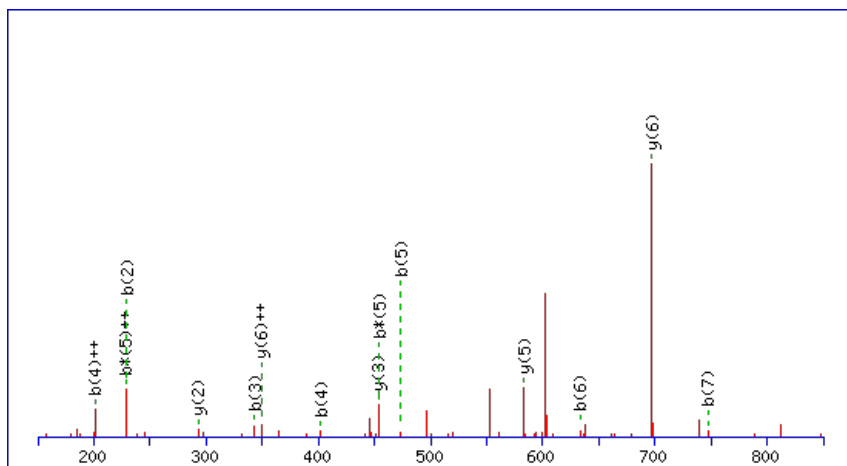Monoisotopic mass of neutral peptide **Mr(calc)**: 924.5063

Fixed modifications: Carbamidomethyl (C) (apply to specified residues or termini only)

Ions Score: 29 Expect: 0.0026

Matches : 14/56 fragment ions using 33 most intense peaks ([help](#))

| # | b               | b <sup>++</sup> | b*              | b <sup>*++</sup> | Seq. | y               | y <sup>++</sup> | y*       | y <sup>*++</sup> | # |
|---|-----------------|-----------------|-----------------|------------------|------|-----------------|-----------------|----------|------------------|---|
| 1 | 131.0599        | 66.0336         | 113.0363        | 57.0218          | Q    |                 |                 |          |                  | 8 |
| 2 | <b>229.1097</b> | 115.0585        | 211.0861        | 106.0467         | P    | 795.4610        | 398.2341        | 777.4374 | 389.2223         | 7 |
| 3 | <b>343.1908</b> | 172.0990        | 325.1672        | 163.0873         | L    | <b>697.4112</b> | <b>349.2092</b> | 679.3876 | 340.1974         | 6 |
| 4 | <b>401.2093</b> | <b>201.1083</b> | 383.1857        | 192.0965         | G    | <b>583.3301</b> | 292.1687        | 565.3065 | 283.1569         | 5 |
| 5 | <b>473.2435</b> | 237.1254        | <b>455.2199</b> | <b>228.1136</b>  | A    | 525.3116        | 263.1594        | 507.2880 | 254.1476         | 4 |
| 6 | <b>633.3327</b> | 317.1700        | 615.3091        | 308.1582         | R    | <b>453.2774</b> | 227.1424        | 435.2539 | 218.1306         | 3 |
| 7 | <b>747.4138</b> | 374.2105        | 729.3902        | 365.1988         | I    | <b>293.1882</b> | 147.0977        | 275.1646 | 138.0859         | 2 |
| 8 |                 |                 |                 |                  | R    | 179.1071        | 90.0572         | 161.0835 | 81.0454          | 1 |

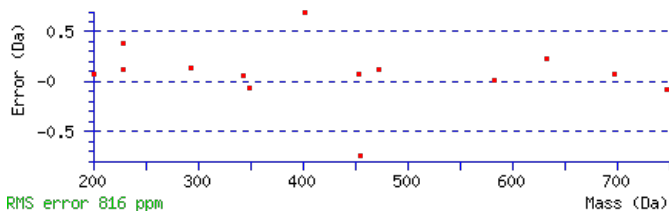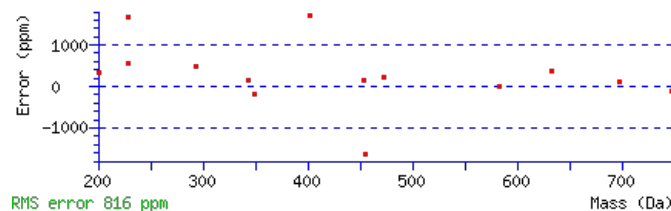NCBI **BLAST** search of [QPLGARIR](#)

(Parameters: blastp, nr protein database, expect=20000, no filter, PAM30)

Other BLAST [web gateways](#)**All matches to this query**

| Score | Mr(calc) | Delta   | Sequence                 |
|-------|----------|---------|--------------------------|
| 29.1  | 924.5063 | 0.0016  | <a href="#">QPLGARIR</a> |
| 3.0   | 924.5093 | -0.0014 | <a href="#">LLGQKMPK</a> |

AT5G20950.1

|     |          |        |                        |
|-----|----------|--------|------------------------|
| 2.4 | 924.5059 | 0.0020 | <a href="#">IIHFKK</a> |
|-----|----------|--------|------------------------|

**Mascot:** <http://www.matrixscience.com/>

**Peptide View**MS/MS Fragmentation of **NTGTIGGNIMMAQR**Found in **AT5G20960.1** in **TAIR\_Arabidopsis**, Symbols: AO1, ATAO, ATAO1, AAO1 | AAO1 (ALDEHYDE OXIDASE 1) | chr5:7116785-7122340 FORWARD

Match to Query 6037: 1462.699402 from(732.356977,2+) index(3872)

Title: Elution from: 35.721 to 35.721 scan no 4801 cid35.00 polarity:+

Data file C7-3\_2.mgf

Click mouse within plot area to zoom in by factor of two about that point

Or,  350  1300 Da Label all possible matches  Label matches used for scoring Show Y-axis 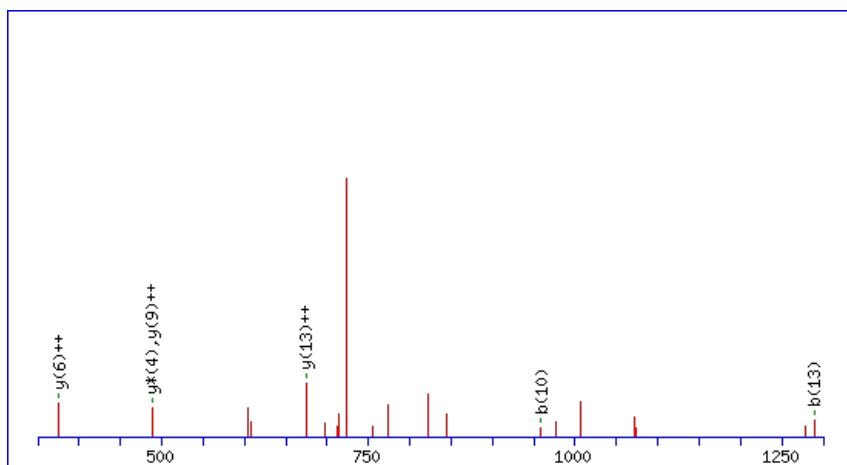Monoisotopic mass of neutral peptide  $M_r(\text{calc})$ : 1462.7021

Fixed modifications: Carbamidomethyl (C) (apply to specified residues or termini only)

Ions Score: 20 Expect: 0.04

Matches : 6/134 fragment ions using 8 most intense peaks ([help](#))

| #  | b         | b <sup>++</sup> | b*        | b <sup>*++</sup> | b <sup>0</sup> | b <sup>0++</sup> | Seq. | y         | y <sup>++</sup> | y*        | y <sup>*++</sup> | y <sup>0</sup> | y <sup>0++</sup> | #  |
|----|-----------|-----------------|-----------|------------------|----------------|------------------|------|-----------|-----------------|-----------|------------------|----------------|------------------|----|
| 1  | 115.0502  | 58.0287         | 98.0237   | 49.5155          |                |                  | N    |           |                 |           |                  |                |                  | 14 |
| 2  | 216.0979  | 108.5526        | 199.0713  | 100.0393         | 198.0873       | 99.5473          | T    | 1349.6664 | 675.3368        | 1332.6399 | 666.8236         | 1331.6559      | 666.3316         | 13 |
| 3  | 273.1193  | 137.0633        | 256.0928  | 128.5500         | 255.1088       | 128.0580         | G    | 1248.6187 | 624.8130        | 1231.5922 | 616.2997         | 1230.6082      | 615.8077         | 12 |
| 4  | 374.1670  | 187.5872        | 357.1405  | 179.0739         | 356.1565       | 178.5819         | T    | 1191.5973 | 596.3023        | 1174.5707 | 587.7890         | 1173.5867      | 587.2970         | 11 |
| 5  | 487.2511  | 244.1292        | 470.2245  | 235.6159         | 469.2405       | 235.1239         | I    | 1090.5496 | 545.7784        | 1073.5230 | 537.2652         |                |                  | 10 |
| 6  | 544.2726  | 272.6399        | 527.2460  | 264.1266         | 526.2620       | 263.6346         | G    | 977.4655  | 489.2364        | 960.4390  | 480.7231         |                |                  | 9  |
| 7  | 601.2940  | 301.1506        | 584.2675  | 292.6374         | 583.2835       | 292.1454         | G    | 920.4441  | 460.7257        | 903.4175  | 452.2124         |                |                  | 8  |
| 8  | 715.3369  | 358.1721        | 698.3104  | 349.6588         | 697.3264       | 349.1668         | N    | 863.4226  | 432.2149        | 846.3961  | 423.7017         |                |                  | 7  |
| 9  | 828.4210  | 414.7141        | 811.3945  | 406.2009         | 810.4104       | 405.7089         | I    | 749.3797  | 375.1935        | 732.3531  | 366.6802         |                |                  | 6  |
| 10 | 959.4615  | 480.2344        | 942.4349  | 471.7211         | 941.4509       | 471.2291         | M    | 636.2956  | 318.6514        | 619.2691  | 310.1382         |                |                  | 5  |
| 11 | 1090.5020 | 545.7546        | 1073.4754 | 537.2414         | 1072.4914      | 536.7493         | M    | 505.2551  | 253.1312        | 488.2286  | 244.6179         |                |                  | 4  |
| 12 | 1161.5391 | 581.2732        | 1144.5125 | 572.7599         | 1143.5285      | 572.2679         | A    | 374.2146  | 187.6110        | 357.1881  | 179.0977         |                |                  | 3  |
| 13 | 1289.5977 | 645.3025        | 1272.5711 | 636.7892         | 1271.5871      | 636.2972         | Q    | 303.1775  | 152.0924        | 286.1510  | 143.5791         |                |                  | 2  |
| 14 |           |                 |           |                  |                |                  | R    | 175.1190  | 88.0631         | 158.0924  | 79.5498          |                |                  | 1  |

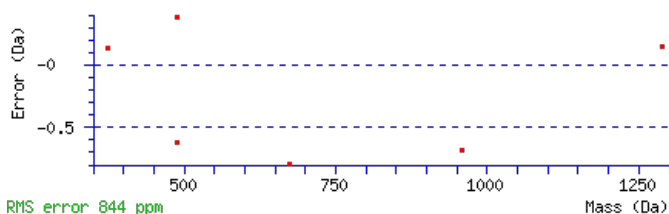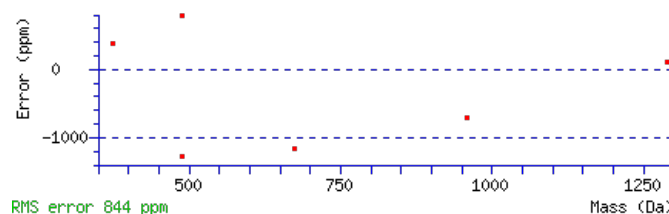NCBI BLAST search of [NTGTIGGNIMMAQR](#)

## AT5G20960.1

(Parameters: blastp, nr protein database, expect=20000, no filter, PAM30)

Other BLAST [web gateways](#)

### All matches to this query

| Score | Mr(calc)  | Delta   | Sequence                      |
|-------|-----------|---------|-------------------------------|
| 19.6  | 1462.7021 | -0.0027 | <a href="#">NTGTGGNIMMAQR</a> |
| 2.8   | 1462.6973 | 0.0021  | <a href="#">SEEAEKIIIEEMR</a> |
| 2.8   | 1462.6973 | 0.0021  | <a href="#">TVEMTPEEVKER</a>  |
| 2.2   | 1462.6987 | 0.0007  | <a href="#">WAAAVCAQTTQTR</a> |
| 1.2   | 1462.6973 | 0.0021  | <a href="#">KMEEEVDLVESR</a>  |

Mascot: <http://www.matrixscience.com/>

## Peptide View

### MS/MS Fragmentation of **WKEMVSK**

Found in **AT5G21930.1** in **TAIR\_Arabidopsis**, Symbols: PAA2, HMA8 | HMA8/PAA2 (P-TYPE ATPASE OF ARABIDOPSIS 2); ATPase, coupled to transmembrane movement of ions, phosphorylative mechanism / copper ion transmembrane transporter | chr5:7243132-7248724  
FORWARD

Match to Query 1419: 916.434194 from(459.224373,2+) index(2620)

Title: Elution from: 30.122 to 30.122 scan no 3388 cid35.00 polarity:+

Data file D12h-2\_2.mgf

Click mouse within plot area to zoom in by factor of two about that point

Or,   to  Da

Label all possible matches  Label matches used for scoring

Show Y-axis

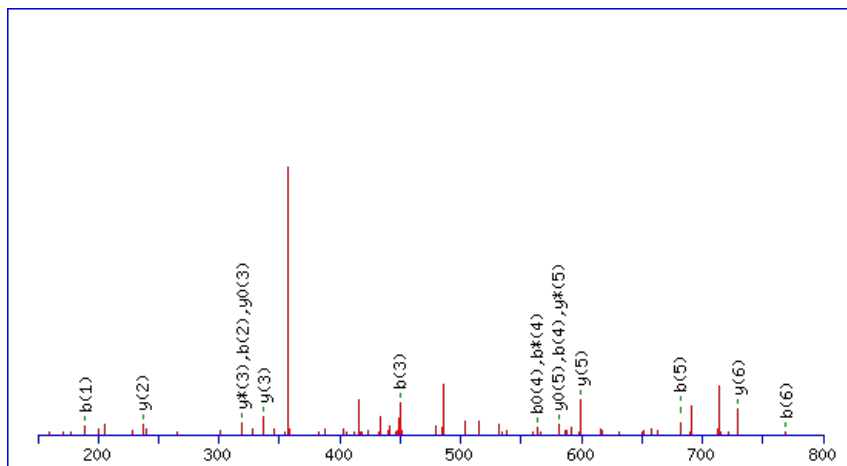

**Monoisotopic mass of neutral peptide Mr(calc):** 916.4337

**Fixed modifications:** Carbamidomethyl (C) (apply to specified residues or termini only)

**Ions Score:** 31 **Expect:** 0.0054

**Matches:** 16/64 fragment ions using 25 most intense peaks ([help](#))

| # | b               | b <sup>++</sup> | b*              | b <sup>*++</sup> | b <sup>0</sup>  | b <sup>0++</sup> | Seq. | y               | y <sup>++</sup> | y*              | y <sup>*++</sup> | y <sup>0</sup>  | y <sup>0++</sup> | # |
|---|-----------------|-----------------|-----------------|------------------|-----------------|------------------|------|-----------------|-----------------|-----------------|------------------|-----------------|------------------|---|
| 1 | <b>189.0807</b> | 95.0440         |                 |                  |                 |                  | W    |                 |                 |                 |                  |                 |                  | 7 |
| 2 | <b>319.1697</b> | 160.0885        | 301.1461        | 151.0767         |                 |                  | K    | <b>729.3676</b> | 365.1874        | 711.3440        | 356.1756         | 711.3570        | 356.1821         | 6 |
| 3 | <b>449.2093</b> | 225.1083        | 431.1857        | 216.0965         | 431.1988        | 216.1030         | E    | <b>599.2785</b> | 300.1429        | <b>581.2549</b> | 291.1311         | <b>581.2680</b> | 291.1376         | 5 |
| 4 | <b>581.2468</b> | 291.1271        | <b>563.2233</b> | 282.1153         | <b>563.2363</b> | 282.1218         | M    | 469.2389        | 235.1231        | 451.2153        | 226.1113         | 451.2283        | 226.1178         | 4 |
| 5 | <b>681.3123</b> | 341.1598        | 663.2887        | 332.1480         | 663.3017        | 332.1545         | V    | <b>337.2014</b> | 169.1043        | <b>319.1778</b> | 160.0925         | <b>319.1908</b> | 160.0990         | 3 |
| 6 | <b>769.3414</b> | 385.1743        | 751.3178        | 376.1625         | 751.3308        | 376.1690         | S    | <b>237.1359</b> | 119.0716        | 219.1124        | 110.0598         | 219.1254        | 110.0663         | 2 |
| 7 |                 |                 |                 |                  |                 |                  | K    | 149.1069        | 75.0571         | 131.0833        | 66.0453          |                 |                  | 1 |

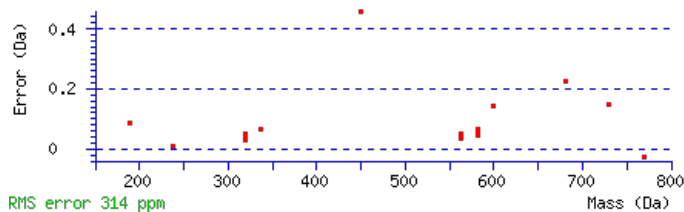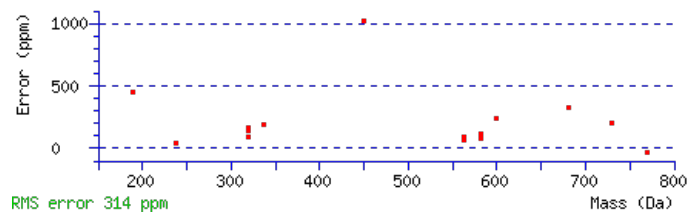

### NCBI BLAST search of **WKEMVSK**

(Parameters: blastp, nr protein database, expect=20000, no filter, PAM30)

Other BLAST [web gateways](#)

### All matches to this query

| Score | Mr(calc) | Delta  | Sequence                |
|-------|----------|--------|-------------------------|
| 31.4  | 916.4337 | 0.0005 | <a href="#">WKEMVSK</a> |

## AT5G21930.1

|      |          |         |                           |
|------|----------|---------|---------------------------|
| 14.9 | 916.4337 | 0.0005  | <a href="#">MPSLAGFGK</a> |
| 11.8 | 916.4359 | -0.0017 | <a href="#">AIMPFWK</a>   |
| 7.9  | 916.4337 | 0.0005  | <a href="#">WLEGMKK</a>   |
| 6.6  | 916.4362 | -0.0020 | <a href="#">EGLSSLSSK</a> |
| 5.8  | 916.4330 | 0.0012  | <a href="#">WKNPFGR</a>   |
| 5.7  | 916.4362 | -0.0020 | <a href="#">ISLDSSASK</a> |
| 3.6  | 916.4337 | 0.0005  | <a href="#">MLAFNPSK</a>  |
| 2.7  | 916.4314 | 0.0028  | <a href="#">MSLQNVSK</a>  |
| 2.3  | 916.4362 | -0.0020 | <a href="#">TLTSSSPSK</a> |

Mascot: <http://www.matrixscience.com/>

## Peptide View

### MS/MS Fragmentation of **EVSAGIATVSR**

Found in **AT5G22000.1** in **TAIR\_Arabidopsis**, Symbols: RHF2A, CIC7E11 | CIC7E11; protein binding / zinc ion binding | chr5:7277439-7279556  
FORWARD

Match to Query 3363: 1088.584354 from(545.299453,2+) index(5371)

Title: Elution from: 48.395 to 48.395 scan no 6736 cid35.00 polarity:+

Data file D12h-3\_1.mgf

Click mouse within plot area to zoom in by factor of two about that point

Or,   to  Da

Label all possible matches  Label matches used for scoring

Show Y-axis

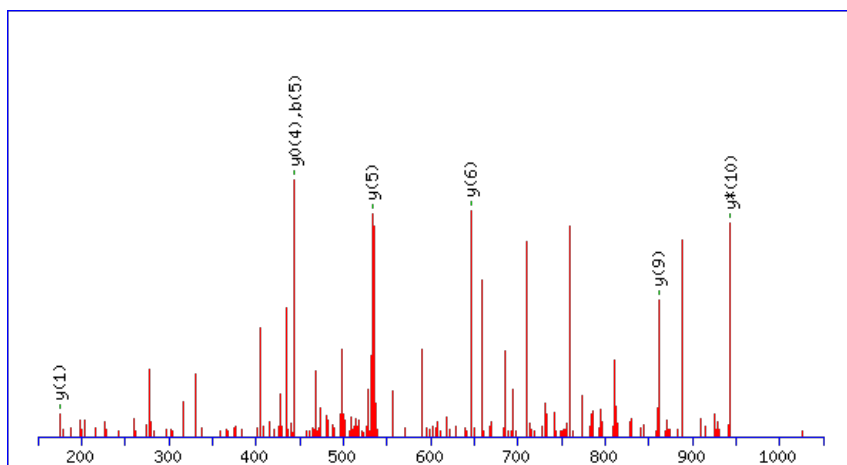

Monoisotopic mass of neutral peptide **Mr(calc)**: 1088.5826

**Fixed modifications:** Carbamidomethyl (C) (apply to specified residues or termini only)

**Ions Score:** 23 **Expect:** 0.029

**Matches** : 7/98 fragment ions using 9 most intense peaks ([help](#))

| #  | b        | b <sup>++</sup> | b <sup>0</sup> | b <sup>0++</sup> | Seq. | y        | y <sup>++</sup> | y*       | y <sup>*++</sup> | y <sup>0</sup> | y <sup>0++</sup> | #  |
|----|----------|-----------------|----------------|------------------|------|----------|-----------------|----------|------------------|----------------|------------------|----|
| 1  | 130.0499 | 65.5286         | 112.0393       | 56.5233          | E    |          |                 |          |                  |                |                  | 11 |
| 2  | 229.1183 | 115.0628        | 211.1077       | 106.0575         | V    | 960.5473 | 480.7773        | 943.5207 | 472.2640         | 942.5367       | 471.7720         | 10 |
| 3  | 316.1503 | 158.5788        | 298.1397       | 149.5735         | S    | 861.4789 | 431.2431        | 844.4523 | 422.7298         | 843.4683       | 422.2378         | 9  |
| 4  | 387.1874 | 194.0974        | 369.1769       | 185.0921         | A    | 774.4468 | 387.7271        | 757.4203 | 379.2138         | 756.4363       | 378.7218         | 8  |
| 5  | 444.2089 | 222.6081        | 426.1983       | 213.6028         | G    | 703.4097 | 352.2085        | 686.3832 | 343.6952         | 685.3991       | 343.2032         | 7  |
| 6  | 557.2930 | 279.1501        | 539.2824       | 270.1448         | I    | 646.3883 | 323.6978        | 629.3617 | 315.1845         | 628.3777       | 314.6925         | 6  |
| 7  | 628.3301 | 314.6687        | 610.3195       | 305.6634         | A    | 533.3042 | 267.1557        | 516.2776 | 258.6425         | 515.2936       | 258.1504         | 5  |
| 8  | 729.3777 | 365.1925        | 711.3672       | 356.1872         | T    | 462.2671 | 231.6372        | 445.2405 | 223.1239         | 444.2565       | 222.6319         | 4  |
| 9  | 828.4462 | 414.7267        | 810.4356       | 405.7214         | V    | 361.2194 | 181.1133        | 344.1928 | 172.6001         | 343.2088       | 172.1081         | 3  |
| 10 | 915.4782 | 458.2427        | 897.4676       | 449.2374         | S    | 262.1510 | 131.5791        | 245.1244 | 123.0659         | 244.1404       | 122.5738         | 2  |
| 11 |          |                 |                |                  | R    | 175.1190 | 88.0631         | 158.0924 | 79.5498          |                |                  | 1  |

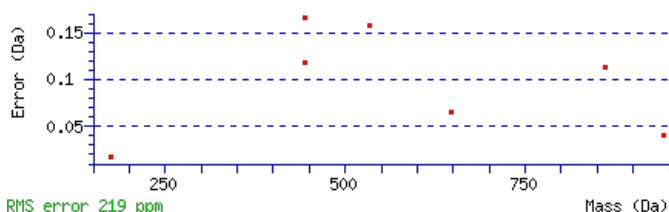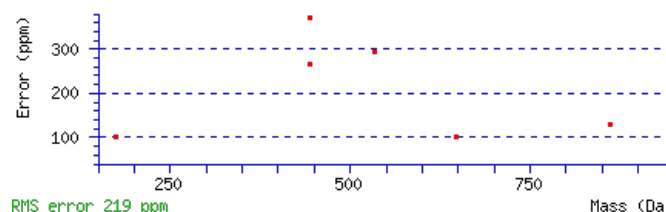

NCBI **BLAST** search of [EVSAGIATVSR](#)

(Parameters: blastp, nr protein database, expect=20000, no filter, PAM30)

Other BLAST [web gateways](#)

All matches to this query



## AT5G22000.1

| Score | Mr(calc)  | Delta   | Sequence                     |
|-------|-----------|---------|------------------------------|
| 23.2  | 1088.5826 | 0.0018  | <a href="#">EVSAGIATVSR</a>  |
| 15.8  | 1088.5873 | -0.0029 | <a href="#">IDMRNLRR</a>     |
| 13.3  | 1088.5873 | -0.0029 | <a href="#">SERCIIRR</a>     |
| 7.8   | 1088.5873 | -0.0029 | <a href="#">ECLRSLRR</a>     |
| 6.9   | 1088.5826 | 0.0018  | <a href="#">SSIREQELK</a>    |
| 6.7   | 1088.5826 | 0.0018  | <a href="#">DIDSVVGKTR</a>   |
| 5.7   | 1088.5866 | -0.0022 | <a href="#">LYPAANEAIK</a>   |
| 3.0   | 1088.5826 | 0.0018  | <a href="#">GGSAAEKASALK</a> |
| 1.6   | 1088.5826 | 0.0018  | <a href="#">DKSVDELK</a>     |
| 1.1   | 1088.5826 | 0.0018  | <a href="#">EVIASSLQR</a>    |

Mascot: <http://www.matrixscience.com/>

**Peptide View**MS/MS Fragmentation of **LLGPGLNK**Found in **AT5G22440.1** in **TAIR\_Arabidopsis**, Symbols: | 60S ribosomal protein L10A (RPL10aC) | chr5:7435331-7436489 REVERSE

Match to Query 1088: 820.465720 from(411.240136,2+) index(2123)

Title: Elution from: 24.368 to 24.368 scan no 2713 cid35.00 polarity:+

Data file D6h-1\_3.mgf

Click mouse within plot area to zoom in by factor of two about that point

Or,  to  Da Label all possible matches  Label matches used for scoring Show Y-axis 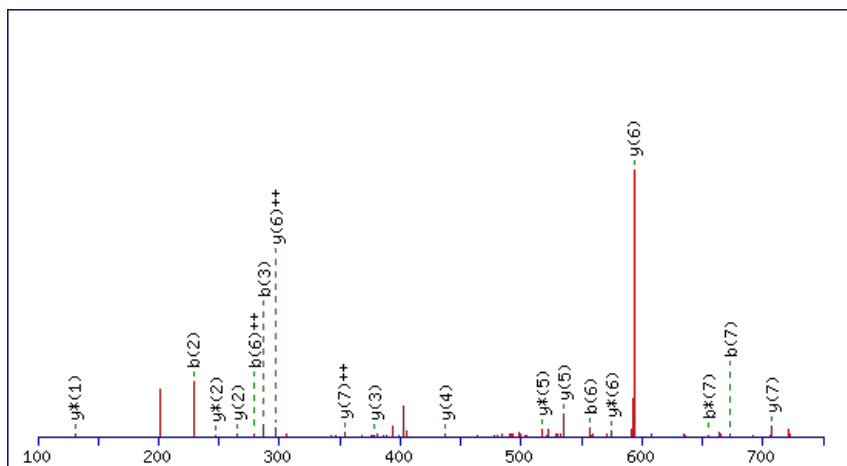Monoisotopic mass of neutral peptide **Mr(calc)**: 820.4667**Fixed modifications**: Carbamidomethyl (C) (apply to specified residues or termini only)**Ions Score**: 32 **Expect**: 0.00079**Matches** : 18/44 fragment ions using 46 most intense peaks ([help](#))

| # | b               | b <sup>++</sup> | b*              | b <sup>+++</sup> | Seq. | y               | y <sup>++</sup> | y*              | y <sup>+++</sup> | # |
|---|-----------------|-----------------|-----------------|------------------|------|-----------------|-----------------|-----------------|------------------|---|
| 1 | 115.0884        | 58.0478         |                 |                  | L    |                 |                 |                 |                  | 8 |
| 2 | <b>229.1695</b> | 115.0884        |                 |                  | L    | <b>707.3929</b> | <b>354.2001</b> | 689.3693        | 345.1883         | 7 |
| 3 | <b>287.1880</b> | 144.0976        |                 |                  | G    | <b>593.3118</b> | <b>297.1595</b> | <b>575.2882</b> | 288.1477         | 6 |
| 4 | 385.2378        | 193.1225        |                 |                  | P    | <b>535.2933</b> | 268.1503        | <b>517.2697</b> | 259.1385         | 5 |
| 5 | 443.2563        | 222.1318        |                 |                  | G    | <b>437.2435</b> | 219.1254        | 419.2199        | 210.1136         | 4 |
| 6 | <b>557.3374</b> | <b>279.1723</b> |                 |                  | L    | <b>379.2250</b> | 190.1161        | 361.2014        | 181.1043         | 3 |
| 7 | <b>673.3744</b> | 337.1908        | <b>655.3508</b> | 328.1790         | N    | <b>265.1439</b> | 133.0756        | <b>247.1203</b> | 124.0638         | 2 |
| 8 |                 |                 |                 |                  | K    | 149.1069        | 75.0571         | <b>131.0833</b> | 66.0453          | 1 |

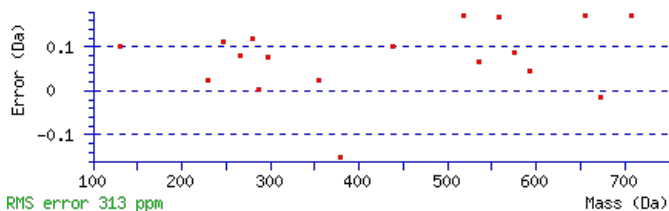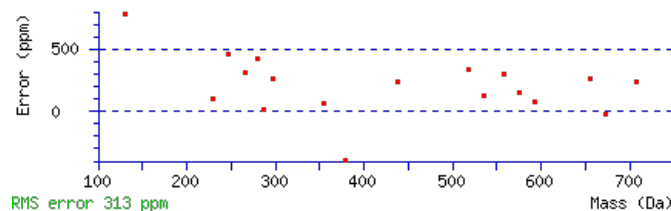NCBI **BLAST** search of [LLGPGLNK](#)

(Parameters: blastp, nr protein database, expect=20000, no filter, PAM30)

Other BLAST [web gateways](#)**All matches to this query**

| Score | Mr(calc) | Delta   | Sequence                 |
|-------|----------|---------|--------------------------|
| 31.8  | 820.4667 | -0.0010 | <a href="#">LLGPGLNK</a> |
| 9.9   | 820.4667 | -0.0010 | <a href="#">LLPIAER</a>  |



**Peptide View**MS/MS Fragmentation of **FPQISFDLVFDK**Found in **AT5G22650.1** in **TAIR\_Arabidopsis**, Symbols: HDT02, HDT2, ATHD2B, HDA4, HD2, HD2B | HD2B (HISTONE DEACETYLASE 2B) | chr5:7534123-7536057 FORWARD

Match to Query 6111: 1468.701112 from(735.357832,2+) index(10670)

Title: Elution from: 102.882 to 102.882 scan no 15238 cid35.00 polarity:+

Data file D6h-2\_1.mgf

Click mouse within plot area to zoom in by factor of two about that point

Or,   to  Da Label all possible matches  Label matches used for scoring Show Y-axis 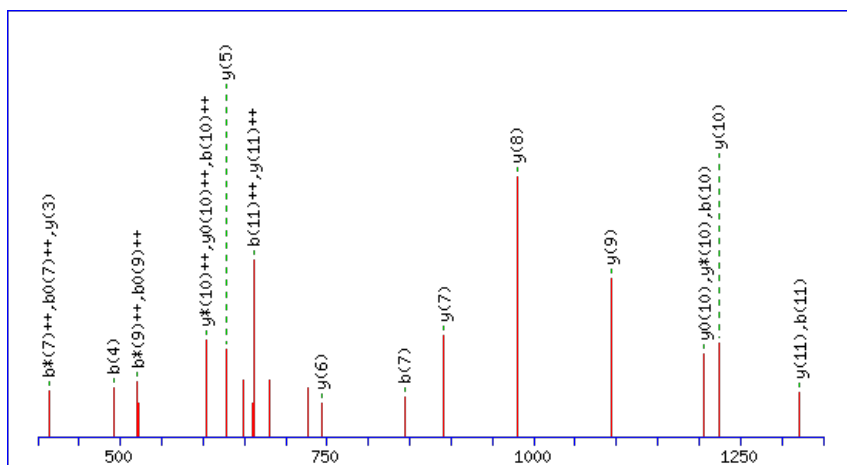Monoisotopic mass of neutral peptide  $M_r(\text{calc})$ : 1468.7030

Fixed modifications: Carbamidomethyl (C) (apply to specified residues or termini only)

Ions Score: 85 Expect: 2.4e-008

Matches : 23/118 fragment ions using 15 most intense peaks ([help](#))

| #  | b         | b <sup>++</sup> | b*        | b <sup>*++</sup> | b <sup>0</sup> | b <sup>0++</sup> | Seq. | y         | y <sup>++</sup> | y*        | y <sup>*++</sup> | y <sup>0</sup> | y <sup>0++</sup> | #  |
|----|-----------|-----------------|-----------|------------------|----------------|------------------|------|-----------|-----------------|-----------|------------------|----------------|------------------|----|
| 1  | 149.0727  | 75.0400         |           |                  |                |                  | F    |           |                 |           |                  |                |                  | 12 |
| 2  | 247.1225  | 124.0649        |           |                  |                |                  | P    | 1321.6449 | 661.3261        | 1303.6213 | 652.3143         | 1303.6343      | 652.3208         | 11 |
| 3  | 377.1752  | 189.0912        | 359.1516  | 180.0794         |                |                  | Q    | 1223.5951 | 612.3012        | 1205.5715 | 603.2894         | 1205.5845      | 603.2959         | 10 |
| 4  | 491.2563  | 246.1318        | 473.2327  | 237.1200         |                |                  | I    | 1093.5424 | 547.2749        | 1075.5189 | 538.2631         | 1075.5319      | 538.2696         | 9  |
| 5  | 579.2853  | 290.1463        | 561.2617  | 281.1345         | 561.2748       | 281.1410         | S    | 979.4613  | 490.2343        | 961.4378  | 481.2225         | 961.4508       | 481.2290         | 8  |
| 6  | 727.3508  | 364.1790        | 709.3272  | 355.1672         | 709.3402       | 355.1737         | F    | 891.4323  | 446.2198        | 873.4087  | 437.2080         | 873.4217       | 437.2145         | 7  |
| 7  | 843.3748  | 422.1910        | 825.3512  | 413.1792         | 825.3642       | 413.1857         | D    | 743.3668  | 372.1871        | 725.3432  | 363.1753         | 725.3563       | 363.1818         | 6  |
| 8  | 957.4559  | 479.2316        | 939.4323  | 470.2198         | 939.4453       | 470.2263         | L    | 627.3428  | 314.1751        | 609.3193  | 305.1633         | 609.3323       | 305.1698         | 5  |
| 9  | 1057.5213 | 529.2643        | 1039.4977 | 520.2525         | 1039.5107      | 520.2590         | V    | 513.2617  | 257.1345        | 495.2382  | 248.1227         | 495.2512       | 248.1292         | 4  |
| 10 | 1205.5868 | 603.2970        | 1187.5632 | 594.2852         | 1187.5762      | 594.2917         | F    | 413.1963  | 207.1018        | 395.1727  | 198.0900         | 395.1857       | 198.0965         | 3  |
| 11 | 1321.6107 | 661.3090        | 1303.5872 | 652.2972         | 1303.6002      | 652.3037         | D    | 265.1309  | 133.0691        | 247.1073  | 124.0573         | 247.1203       | 124.0638         | 2  |
| 12 |           |                 |           |                  |                |                  | K    | 149.1069  | 75.0571         | 131.0833  | 66.0453          |                |                  | 1  |

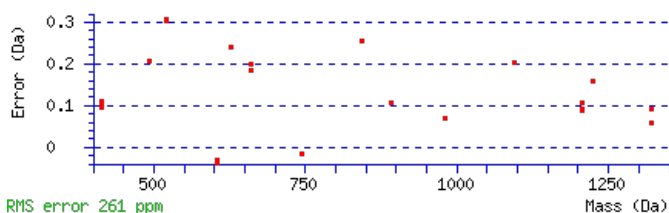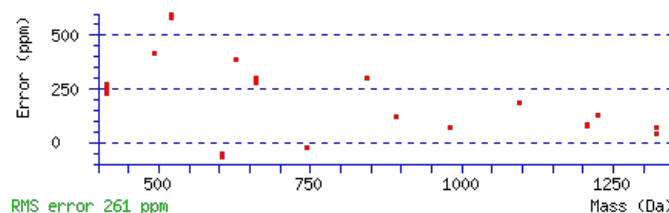NCBI BLAST search of **FPQISFDLVFDK**

(Parameters: blastp, nr protein database, expect=20000, no filter, PAM30)

Other BLAST [web gateways](#)

## AT5G22650.1

All matches to this query

| Score | Mr(calc)  | Delta   | Sequence                       |
|-------|-----------|---------|--------------------------------|
| 85.5  | 1468.7030 | -0.0019 | <a href="#">FPQISFDLVFDK</a>   |
| 11.1  | 1468.6995 | 0.0016  | <a href="#">MPIMLVSAAYREK</a>  |
| 10.3  | 1468.7035 | -0.0024 | <a href="#">FSYKATHNIKDK</a>   |
| 9.6   | 1468.6990 | 0.0021  | <a href="#">AVSTSSSIKGRDNK</a> |
| 4.4   | 1468.7012 | -0.0001 | <a href="#">EDDLTRRLASEK</a>   |
| 3.8   | 1468.7042 | -0.0031 | <a href="#">MSAALSSSLYISPK</a> |
| 3.7   | 1468.7013 | -0.0002 | <a href="#">IEFERNVSKSNK</a>   |
| 3.7   | 1468.7042 | -0.0031 | <a href="#">TFGVATKLDIMDK</a>  |
| 3.7   | 1468.7008 | 0.0003  | <a href="#">VLDLSYVQFEGGK</a>  |
| 3.7   | 1468.7008 | 0.0003  | <a href="#">YGIKFLVDEENK</a>   |

Mascot: <http://www.matrixscience.com/>

## Peptide View

### MS/MS Fragmentation of **GSNIILDSYTDSA**K

Found in **AT5G23060.1** in **TAIR\_Arabidopsis**, Symbols: CAS | similar to unknown protein [Arabidopsis thaliana] (TAIR:AT3G59780.1); similar to extracellular Ca<sup>2+</sup> sensing receptor [Glycine max] (GB:ABY57763.1); contains InterPro domain Rhodanese-like (InterPro:IPR001763) | chr:5:7736763-7738415 R

Match to Query 6986: 1595.801990 from(798.908271,2+) index(6647)

Title: Elution from: 57.528 to 57.528 scan no 8568 cid35.00 polarity:+

Data file D1d-3\_3.mgf

Click mouse within plot area to zoom in by factor of two about that point

Or,   to  Da

Label all possible matches  Label matches used for scoring

Show Y-axis

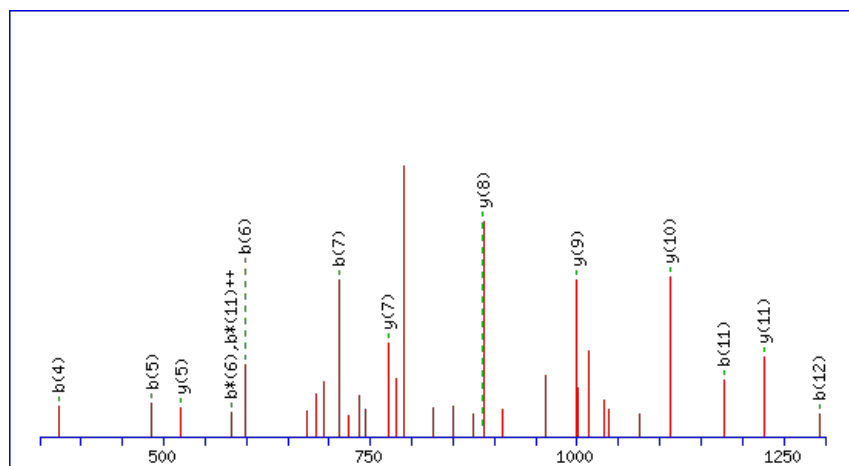

Monoisotopic mass of neutral peptide  $M_r(\text{calc})$ : 1595.8042

Fixed modifications: Carbamidomethyl (C) (apply to specified residues or termini only)

Ions Score: 57 Expect: 8.7e-006

Matches : 14/158 fragment ions using 18 most intense peaks ([help](#))

| #  | b                | b <sup>++</sup> | b <sup>*</sup>  | b <sup>*++</sup> | b <sup>0</sup> | b <sup>0++</sup> | Seq.     | y                | y <sup>++</sup> | y <sup>*</sup> | y <sup>*++</sup> | y <sup>0</sup> | y <sup>0++</sup> | #         |
|----|------------------|-----------------|-----------------|------------------|----------------|------------------|----------|------------------|-----------------|----------------|------------------|----------------|------------------|-----------|
| 1  | 58.0287          | 29.5180         |                 |                  |                |                  | <b>G</b> |                  |                 |                |                  |                |                  | <b>15</b> |
| 2  | 145.0608         | 73.0340         |                 |                  | 127.0502       | 64.0287          | <b>S</b> | 1539.7901        | 770.3987        | 1522.7635      | 761.8854         | 1521.7795      | 761.3934         | <b>14</b> |
| 3  | 259.1037         | 130.0555        | 242.0771        | 121.5422         | 241.0931       | 121.0502         | <b>N</b> | 1452.7581        | 726.8827        | 1435.7315      | 718.3694         | 1434.7475      | 717.8774         | <b>13</b> |
| 4  | <b>372.1878</b>  | 186.5975        | 355.1612        | 178.0842         | 354.1772       | 177.5922         | <b>I</b> | 1338.7151        | 669.8612        | 1321.6886      | 661.3479         | 1320.7046      | 660.8559         | <b>12</b> |
| 5  | <b>485.2718</b>  | 243.1395        | 468.2453        | 234.6263         | 467.2613       | 234.1343         | <b>I</b> | <b>1225.6311</b> | 613.3192        | 1208.6045      | 604.8059         | 1207.6205      | 604.3139         | <b>11</b> |
| 6  | <b>598.3559</b>  | 299.6816        | <b>581.3293</b> | 291.1683         | 580.3453       | 290.6763         | <b>I</b> | <b>1112.5470</b> | 556.7771        | 1095.5204      | 548.2639         | 1094.5364      | 547.7719         | <b>10</b> |
| 7  | <b>711.4400</b>  | 356.2236        | 694.4134        | 347.7103         | 693.4294       | 347.2183         | <b>L</b> | <b>999.4629</b>  | 500.2351        | 982.4364       | 491.7218         | 981.4524       | 491.2298         | <b>9</b>  |
| 8  | 826.4669         | 413.7371        | 809.4403        | 405.2238         | 808.4563       | 404.7318         | <b>D</b> | <b>886.3789</b>  | 443.6931        | 869.3523       | 435.1798         | 868.3683       | 434.6878         | <b>8</b>  |
| 9  | 913.4989         | 457.2531        | 896.4724        | 448.7398         | 895.4884       | 448.2478         | <b>S</b> | <b>771.3519</b>  | 386.1796        | 754.3254       | 377.6663         | 753.3414       | 377.1743         | <b>7</b>  |
| 10 | 1076.5623        | 538.7848        | 1059.5357       | 530.2715         | 1058.5517      | 529.7795         | <b>Y</b> | 684.3199         | 342.6636        | 667.2933       | 334.1503         | 666.3093       | 333.6583         | <b>6</b>  |
| 11 | <b>1177.6099</b> | 589.3086        | 1160.5834       | <b>580.7953</b>  | 1159.5994      | 580.3033         | <b>T</b> | <b>521.2566</b>  | 261.1319        | 504.2300       | 252.6186         | 503.2460       | 252.1266         | <b>5</b>  |
| 12 | <b>1292.6369</b> | 646.8221        | 1275.6103       | 638.3088         | 1274.6263      | 637.8168         | <b>D</b> | 420.2089         | 210.6081        | 403.1823       | 202.0948         | 402.1983       | 201.6028         | <b>4</b>  |
| 13 | 1379.6689        | 690.3381        | 1362.6424       | 681.8248         | 1361.6583      | 681.3328         | <b>S</b> | 305.1819         | 153.0946        | 288.1554       | 144.5813         | 287.1714       | 144.0893         | <b>3</b>  |
| 14 | 1450.7060        | 725.8566        | 1433.6795       | 717.3434         | 1432.6955      | 716.8514         | <b>A</b> | 218.1499         | 109.5786        | 201.1234       | 101.0653         |                |                  | <b>2</b>  |
| 15 |                  |                 |                 |                  |                |                  | <b>K</b> | 147.1128         | 74.0600         | 130.0863       | 65.5468          |                |                  | <b>1</b>  |

# AT5G23060.1

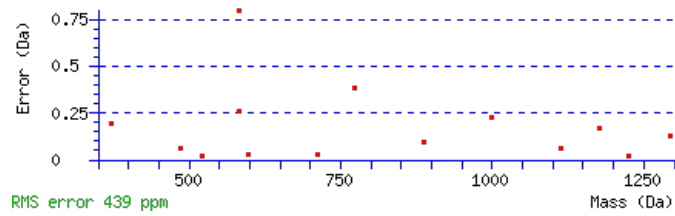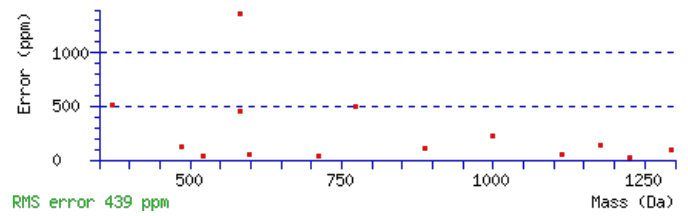

NCBI **BLAST** search of [GSNIILDSYTDSA K](#)

(Parameters: blastp, nr protein database, expect=20000, no filter, PAM30)

Other BLAST [web gateways](#)

## All matches to this query

| Score | Mr(calc)  | Delta   | Sequence                        |
|-------|-----------|---------|---------------------------------|
| 56.9  | 1595.8042 | -0.0023 | <a href="#">GSNIILDSYTDSA K</a> |
| 7.7   | 1595.8056 | -0.0036 | <a href="#">ROYDFSGNLDLIR</a>   |
| 5.0   | 1595.8042 | -0.0022 | <a href="#">KVSSILNEEYEASK</a>  |

Mascot: <http://www.matrixscience.com/>

**Peptide View**MS/MS Fragmentation of **SEEEAWAAGGSGILLR**Found in **AT5G23120.1** in **TAIR\_Arabidopsis**, Symbols: HCF136 | HCF136 (High chlorophyll fluorescence 136) | chr5:7778157-7780466  
FORWARD

Match to Query 7432: 1644.811736 from(823.413144,2+) index(7175)

Title: Elution from: 64.089 to 64.089 scan no 9410 cid35.00 polarity:+

Data file D6h-1\_3.mgf

Click mouse within plot area to zoom in by factor of two about that point

Or,  450  1500  Label all possible matches  Label matches used for scoring Show Y-axis 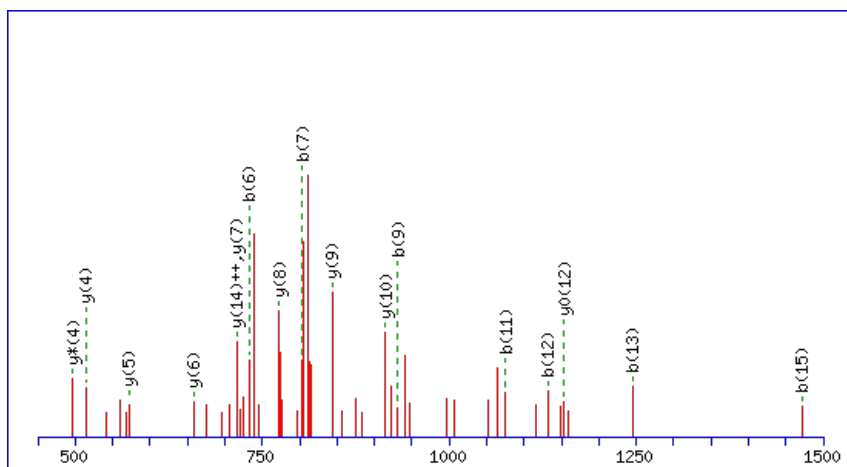Monoisotopic mass of neutral peptide  $M_r(\text{calc})$ : 1644.8107

Fixed modifications: Carbamidomethyl (C) (apply to specified residues or termini only)

Ions Score: 40 Expect: 0.00032

Matches : 17/140 fragment ions using 35 most intense peaks ([help](#))

| #  | b         | b <sup>++</sup> | b <sup>0</sup> | b <sup>0++</sup> | Seq. | y         | y <sup>++</sup> | y*        | y <sup>*++</sup> | y <sup>0</sup> | y <sup>0++</sup> | #  |
|----|-----------|-----------------|----------------|------------------|------|-----------|-----------------|-----------|------------------|----------------|------------------|----|
| 1  | 88.0393   | 44.5233         | 70.0287        | 35.5180          | S    |           |                 |           |                  |                |                  | 16 |
| 2  | 217.0819  | 109.0446        | 199.0713       | 100.0393         | E    | 1558.7860 | 779.8966        | 1541.7594 | 771.3834         | 1540.7754      | 770.8914         | 15 |
| 3  | 346.1245  | 173.5659        | 328.1139       | 164.5606         | E    | 1429.7434 | 715.3753        | 1412.7169 | 706.8621         | 1411.7328      | 706.3701         | 14 |
| 4  | 475.1671  | 238.0872        | 457.1565       | 229.0819         | E    | 1300.7008 | 650.8540        | 1283.6743 | 642.3408         | 1282.6902      | 641.8488         | 13 |
| 5  | 546.2042  | 273.6057        | 528.1936       | 264.6005         | A    | 1171.6582 | 586.3327        | 1154.6317 | 577.8195         | 1153.6477      | 577.3275         | 12 |
| 6  | 732.2835  | 366.6454        | 714.2729       | 357.6401         | W    | 1100.6211 | 550.8142        | 1083.5946 | 542.3009         | 1082.6105      | 541.8089         | 11 |
| 7  | 803.3206  | 402.1640        | 785.3101       | 393.1587         | A    | 914.5418  | 457.7745        | 897.5152  | 449.2613         | 896.5312       | 448.7693         | 10 |
| 8  | 874.3577  | 437.6825        | 856.3472       | 428.6772         | A    | 843.5047  | 422.2560        | 826.4781  | 413.7427         | 825.4941       | 413.2507         | 9  |
| 9  | 931.3792  | 466.1932        | 913.3686       | 457.1880         | G    | 772.4676  | 386.7374        | 755.4410  | 378.2241         | 754.4570       | 377.7321         | 8  |
| 10 | 988.4007  | 494.7040        | 970.3901       | 485.6987         | G    | 715.4461  | 358.2267        | 698.4196  | 349.7134         | 697.4355       | 349.2214         | 7  |
| 11 | 1075.4327 | 538.2200        | 1057.4221      | 529.2147         | S    | 658.4246  | 329.7160        | 641.3981  | 321.2027         | 640.4141       | 320.7107         | 6  |
| 12 | 1132.4542 | 566.7307        | 1114.4436      | 557.7254         | G    | 571.3926  | 286.1999        | 554.3661  | 277.6867         |                |                  | 5  |
| 13 | 1245.5382 | 623.2727        | 1227.5277      | 614.2675         | I    | 514.3711  | 257.6892        | 497.3446  | 249.1759         |                |                  | 4  |
| 14 | 1358.6223 | 679.8148        | 1340.6117      | 670.8095         | L    | 401.2871  | 201.1472        | 384.2605  | 192.6339         |                |                  | 3  |
| 15 | 1471.7063 | 736.3568        | 1453.6958      | 727.3515         | L    | 288.2030  | 144.6051        | 271.1765  | 136.0919         |                |                  | 2  |
| 16 |           |                 |                |                  | R    | 175.1190  | 88.0631         | 158.0924  | 79.5498          |                |                  | 1  |



# AT5G23120.1

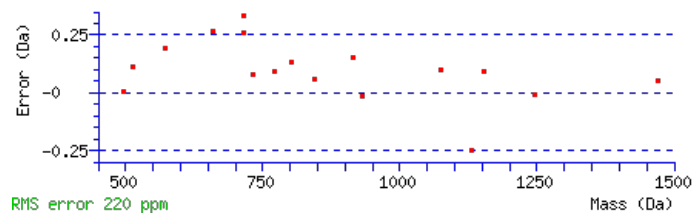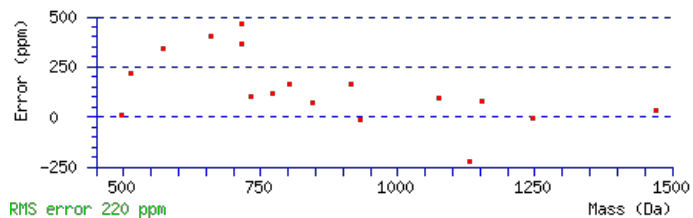

NCBI **BLAST** search of [SEEEAWAAGGSGILLR](#)

(Parameters: blastp, nr protein database, expect=20000, no filter, PAM30)

Other BLAST [web gateways](#)

## All matches to this query

| Score | Mr(calc)  | Delta   | Sequence                         |
|-------|-----------|---------|----------------------------------|
| 39.6  | 1644.8107 | 0.0010  | <a href="#">SEEEAWAAGGSGILLR</a> |
| 3.3   | 1644.8107 | 0.0011  | <a href="#">EWAEAKKELQEER</a>    |
| 2.6   | 1644.8154 | -0.0037 | <a href="#">DRSLVWGGSEPRMR</a>   |

Mascot: <http://www.matrixscience.com/>

## Peptide View

MS/MS Fragmentation of **AFGIIDEVIDERPLELVK**

Found in **AT5G23140.1** in **TAIR\_Arabidopsis**, Symbols: NCLPP2, CLPP2 | CLPP2 (Clp protease proteolytic subunit 2); endopeptidase Clp | chr5:7783814-7784829 FORWARD

Match to Query 9853: 2055.123960 from(686.048596,3+) index(10869)

Title: Elution from: 103.166 to 103.166 scan no 15424 cid35.00 polarity:+

Data file C7-2\_1.mgf

Click mouse within plot area to zoom in by factor of two about that point

Or,   to  Da

Label all possible matches  Label matches used for scoring

Show Y-axis

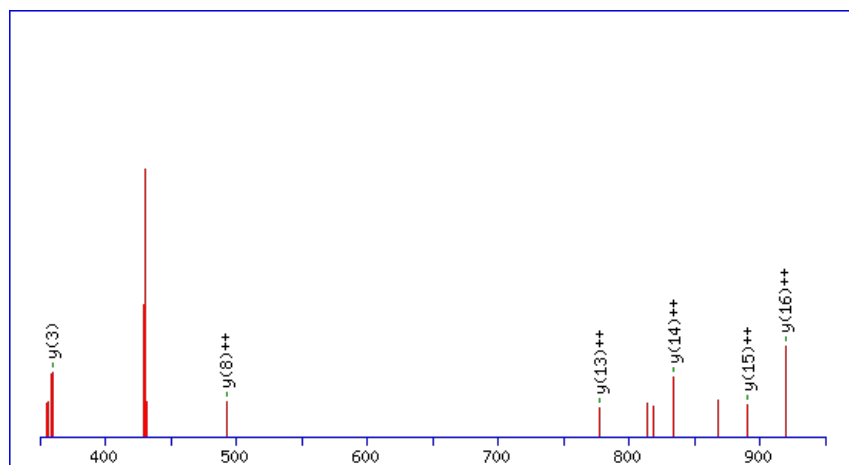

Monoisotopic mass of neutral peptide  $M_r(\text{calc})$ : 2055.1252

Fixed modifications: Carbamidomethyl (C) (apply to specified residues or termini only)

Ions Score: 21 Expect: 0.022

Matches : 6/166 fragment ions using 12 most intense peaks ([help](#))

| #  | b         | b <sup>++</sup> | b*        | b <sup>*++</sup> | b <sup>0</sup> | b <sup>0++</sup> | Seq. | y         | y <sup>++</sup> | y*        | y <sup>*++</sup> | y <sup>0</sup> | y <sup>0++</sup> | #  |
|----|-----------|-----------------|-----------|------------------|----------------|------------------|------|-----------|-----------------|-----------|------------------|----------------|------------------|----|
| 1  | 72.0444   | 36.5258         |           |                  |                |                  | A    |           |                 |           |                  |                |                  | 18 |
| 2  | 219.1128  | 110.0600        |           |                  |                |                  | F    | 1985.0954 | 993.0513        | 1968.0688 | 984.5380         | 1967.0848      | 984.0460         | 17 |
| 3  | 276.1343  | 138.5708        |           |                  |                |                  | G    | 1838.0270 | 919.5171        | 1821.0004 | 911.0038         | 1820.0164      | 910.5118         | 16 |
| 4  | 389.2183  | 195.1128        |           |                  |                |                  | I    | 1781.0055 | 891.0064        | 1763.9789 | 882.4931         | 1762.9949      | 882.0011         | 15 |
| 5  | 502.3024  | 251.6548        |           |                  |                |                  | I    | 1667.9214 | 834.4644        | 1650.8949 | 825.9511         | 1649.9109      | 825.4591         | 14 |
| 6  | 617.3293  | 309.1683        |           |                  | 599.3188       | 300.1630         | D    | 1554.8374 | 777.9223        | 1537.8108 | 769.4090         | 1536.8268      | 768.9170         | 13 |
| 7  | 746.3719  | 373.6896        |           |                  | 728.3614       | 364.6843         | E    | 1439.8104 | 720.4088        | 1422.7839 | 711.8956         | 1421.7999      | 711.4036         | 12 |
| 8  | 845.4403  | 423.2238        |           |                  | 827.4298       | 414.2185         | V    | 1310.7678 | 655.8876        | 1293.7413 | 647.3743         | 1292.7573      | 646.8823         | 11 |
| 9  | 958.5244  | 479.7658        |           |                  | 940.5138       | 470.7606         | I    | 1211.6994 | 606.3533        | 1194.6729 | 597.8401         | 1193.6888      | 597.3481         | 10 |
| 10 | 1073.5514 | 537.2793        |           |                  | 1055.5408      | 528.2740         | D    | 1098.6154 | 549.8113        | 1081.5888 | 541.2980         | 1080.6048      | 540.8060         | 9  |
| 11 | 1202.5939 | 601.8006        |           |                  | 1184.5834      | 592.7953         | E    | 983.5884  | 492.2978        | 966.5619  | 483.7846         | 965.5778       | 483.2926         | 8  |
| 12 | 1358.6951 | 679.8512        | 1341.6685 | 671.3379         | 1340.6845      | 670.8459         | R    | 854.5458  | 427.7765        | 837.5193  | 419.2633         | 836.5352       | 418.7713         | 7  |
| 13 | 1455.7478 | 728.3775        | 1438.7213 | 719.8643         | 1437.7373      | 719.3723         | P    | 698.4447  | 349.7260        | 681.4182  | 341.2127         | 680.4341       | 340.7207         | 6  |
| 14 | 1568.8319 | 784.9196        | 1551.8053 | 776.4063         | 1550.8213      | 775.9143         | L    | 601.3919  | 301.1996        | 584.3654  | 292.6863         | 583.3814       | 292.1943         | 5  |
| 15 | 1697.8745 | 849.4409        | 1680.8479 | 840.9276         | 1679.8639      | 840.4356         | E    | 488.3079  | 244.6576        | 471.2813  | 236.1443         | 470.2973       | 235.6523         | 4  |
| 16 | 1810.9585 | 905.9829        | 1793.9320 | 897.4696         | 1792.9480      | 896.9776         | L    | 359.2653  | 180.1363        | 342.2387  | 171.6230         |                |                  | 3  |
| 17 | 1910.0270 | 955.5171        | 1893.0004 | 947.0038         | 1892.0164      | 946.5118         | V    | 246.1812  | 123.5942        | 229.1547  | 115.0810         |                |                  | 2  |
| 18 |           |                 |           |                  |                |                  | K    | 147.1128  | 74.0600         | 130.0863  | 65.5468          |                |                  | 1  |

# AT5G23140.1

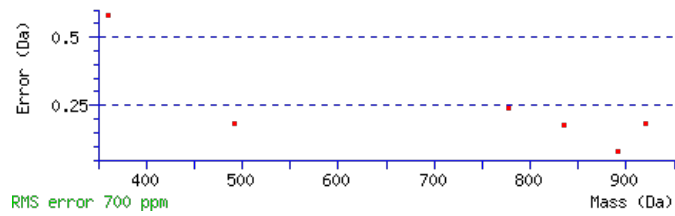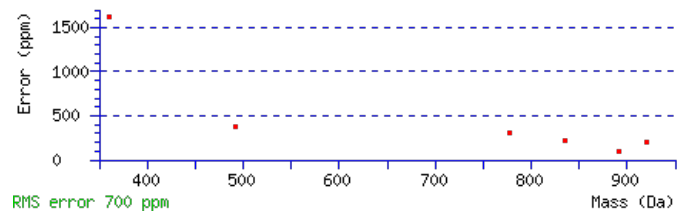

NCBI **BLAST** search of [AFGIIDEVIDERPLELVK](#)

(Parameters: blastp, nr protein database, expect=20000, no filter, PAM30)

Other BLAST [web gateways](#)

## All matches to this query

| Score | Mr(calc)  | Delta   | Sequence                           |
|-------|-----------|---------|------------------------------------|
| 20.6  | 2055.1252 | -0.0012 | <a href="#">AFGIIDEVIDERPLELVK</a> |
| 3.4   | 2055.1299 | -0.0059 | <a href="#">SLLQTLMRAGHSPPKYK</a>  |
| 2.0   | 2055.1285 | -0.0046 | <a href="#">IPDIEKCLEVVATLEAKK</a> |

Mascot: <http://www.matrixscience.com/>

## Peptide View

### MS/MS Fragmentation of **TLEEEDPIIK**

Found in **AT5G23820.1** in **TAIR\_Arabidopsis**, Symbols: | MD-2-related lipid recognition domain-containing protein / ML domain-containing protein | chr5:8031389-8032812 FORWARD

Match to Query 3913: 1185.613020 from(593.813786,2+) index(3789)

Title: Elution from: 35.849 to 35.849 scan no 4726 cid35.00 polarity:+

Data file 0-3\_2.mgf

Click mouse within plot area to zoom in by factor of two about that point

Or,  to  Da

Label all possible matches  Label matches used for scoring

Show Y-axis

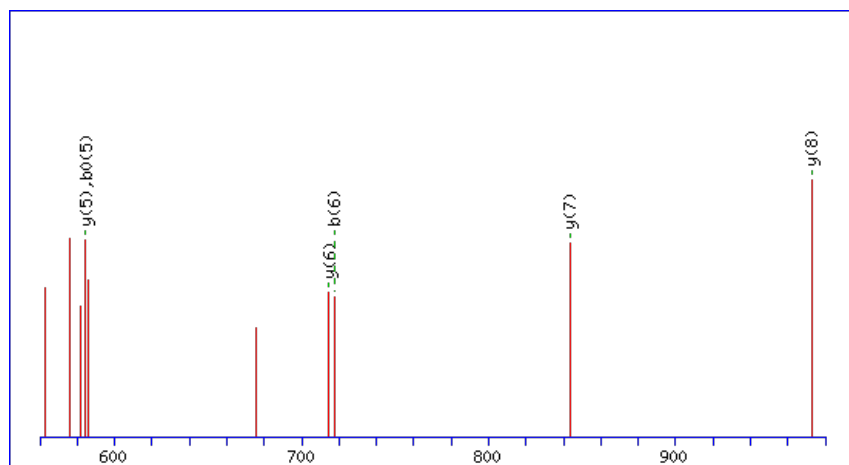

Monoisotopic mass of neutral peptide  $M_r(\text{calc})$ : 1185.6129

Fixed modifications: Carbamidomethyl (C) (apply to specified residues or termini only)

Ions Score: 28 Expect: 0.0051

Matches : 6/82 fragment ions using 6 most intense peaks ([help](#))

| #  | b               | b <sup>++</sup> | b <sup>0</sup>  | b <sup>0++</sup> | Seq. | y               | y <sup>++</sup> | y*        | y <sup>*++</sup> | y <sup>0</sup> | y <sup>0++</sup> | #  |
|----|-----------------|-----------------|-----------------|------------------|------|-----------------|-----------------|-----------|------------------|----------------|------------------|----|
| 1  | 102.0550        | 51.5311         | 84.0444         | 42.5258          | T    |                 |                 |           |                  |                |                  | 10 |
| 2  | 215.1390        | 108.0731        | 197.1285        | 99.0679          | L    | 1085.5725       | 543.2899        | 1068.5459 | 534.7766         | 1067.5619      | 534.2846         | 9  |
| 3  | 344.1816        | 172.5944        | 326.1710        | 163.5892         | E    | <b>972.4884</b> | 486.7478        | 955.4619  | 478.2346         | 954.4779       | 477.7426         | 8  |
| 4  | 473.2242        | 237.1157        | 455.2136        | 228.1105         | E    | <b>843.4458</b> | 422.2266        | 826.4193  | 413.7133         | 825.4353       | 413.2213         | 7  |
| 5  | 602.2668        | 301.6370        | <b>584.2562</b> | 292.6318         | E    | <b>714.4032</b> | 357.7053        | 697.3767  | 349.1920         | 696.3927       | 348.7000         | 6  |
| 6  | <b>717.2937</b> | 359.1505        | 699.2832        | 350.1452         | D    | <b>585.3606</b> | 293.1840        | 568.3341  | 284.6707         | 567.3501       | 284.1787         | 5  |
| 7  | 814.3465        | 407.6769        | 796.3359        | 398.6716         | P    | 470.3337        | 235.6705        | 453.3071  | 227.1572         |                |                  | 4  |
| 8  | 927.4306        | 464.2189        | 909.4200        | 455.2136         | I    | 373.2809        | 187.1441        | 356.2544  | 178.6308         |                |                  | 3  |
| 9  | 1040.5146       | 520.7610        | 1022.5041       | 511.7557         | I    | 260.1969        | 130.6021        | 243.1703  | 122.0888         |                |                  | 2  |
| 10 |                 |                 |                 |                  | K    | 147.1128        | 74.0600         | 130.0863  | 65.5468          |                |                  | 1  |

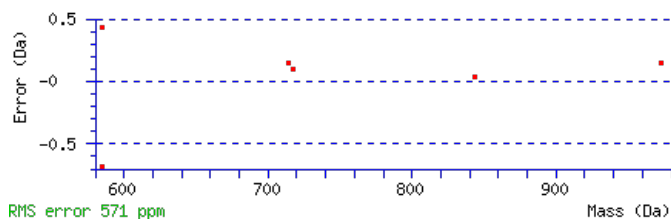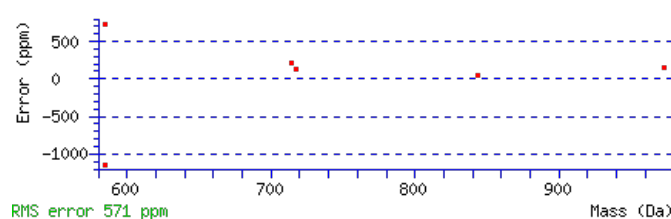

NCBI BLAST search of **TLEEEDPIIK**

(Parameters: blastp, nr protein database, expect=20000, no filter, PAM30)

Other BLAST [web gateways](#)

All matches to this query

AT5G23820.1

| Score | Mr(calc)  | Delta  | Sequence                  |
|-------|-----------|--------|---------------------------|
| 28.3  | 1185.6129 | 0.0002 | <a href="#">TLEEDPIIK</a> |

Mascot: <http://www.matrixscience.com/>


**Mascot Search Results**
**Peptide View**MS/MS Fragmentation of **VNVYYNEASCGR**Found in **AT5G23860.1** in **TAIR\_Arabidopsis**, Symbols: TUB8 | TUB8 (tubulin beta-8) | chr5:8042965-8044531 FORWARD

Match to Query 5536: 1430.624646 from(716.319599,2+) index(2123)

Title: Elution from: 26.298 to 26.298 scan no 2795 cid35.00 polarity:+

Data file D1d-2\_1.mgf

Click mouse within plot area to zoom in by factor of two about that point

Or,  to  Da Label all possible matches  Label matches used for scoring Show Y-axis 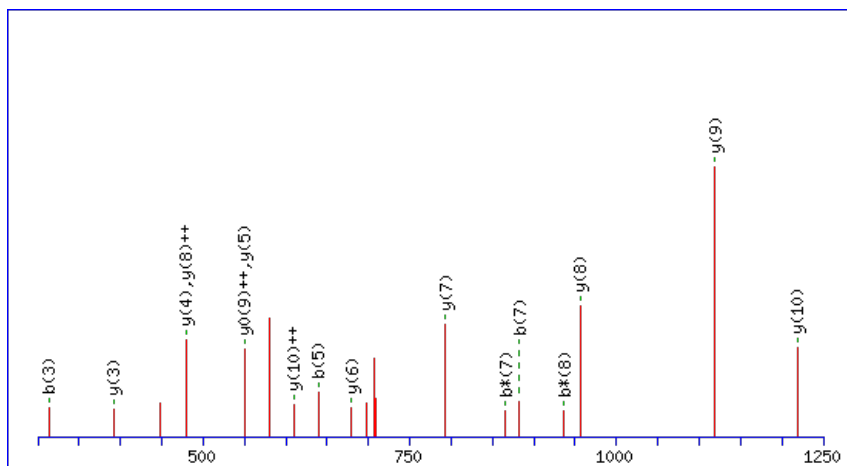**Monoisotopic mass of neutral peptide Mr(calc)** : 1430.6248**Fixed modifications**: Carbamidomethyl (C) (apply to specified residues or termini only)**Ions Score**: 77 **Expect**: 1.8e-008**Matches** : 16/112 fragment ions using 20 most intense peaks ([help](#))

| #  | b               | b <sup>++</sup> | b*              | b <sup>*++</sup> | b <sup>0</sup> | b <sup>0++</sup> | Seq. | y                | y <sup>++</sup> | y*        | y <sup>*++</sup> | y <sup>0</sup> | y <sup>0++</sup> | #  |
|----|-----------------|-----------------|-----------------|------------------|----------------|------------------|------|------------------|-----------------|-----------|------------------|----------------|------------------|----|
| 1  | 100.0757        | 50.5415         |                 |                  |                |                  | V    |                  |                 |           |                  |                |                  | 12 |
| 2  | 214.1186        | 107.5629        | 197.0921        | 99.0497          |                |                  | N    | 1332.5637        | 666.7855        | 1315.5372 | 658.2722         | 1314.5532      | 657.7802         | 11 |
| 3  | <b>313.1870</b> | 157.0972        | 296.1605        | 148.5839         |                |                  | V    | <b>1218.5208</b> | <b>609.7640</b> | 1201.4943 | 601.2508         | 1200.5102      | 600.7588         | 10 |
| 4  | 476.2504        | 238.6288        | 459.2238        | 230.1155         |                |                  | Y    | <b>1119.4524</b> | 560.2298        | 1102.4258 | 551.7166         | 1101.4418      | <b>551.2245</b>  | 9  |
| 5  | <b>639.3137</b> | 320.1605        | 622.2871        | 311.6472         |                |                  | Y    | <b>956.3891</b>  | <b>478.6982</b> | 939.3625  | 470.1849         | 938.3785       | 469.6929         | 8  |
| 6  | 753.3566        | 377.1819        | 736.3301        | 368.6687         |                |                  | N    | <b>793.3257</b>  | 397.1665        | 776.2992  | 388.6532         | 775.3152       | 388.1612         | 7  |
| 7  | <b>882.3992</b> | 441.7032        | <b>865.3727</b> | 433.1900         | 864.3886       | 432.6980         | E    | <b>679.2828</b>  | 340.1450        | 662.2563  | 331.6318         | 661.2722       | 331.1398         | 6  |
| 8  | 953.4363        | 477.2218        | <b>936.4098</b> | 468.7085         | 935.4258       | 468.2165         | A    | <b>550.2402</b>  | 275.6237        | 533.2137  | 267.1105         | 532.2296       | 266.6185         | 5  |
| 9  | 1040.4684       | 520.7378        | 1023.4418       | 512.2245         | 1022.4578      | 511.7325         | S    | <b>479.2031</b>  | 240.1052        | 462.1765  | 231.5919         | 461.1925       | 231.0999         | 4  |
| 10 | 1200.4990       | 600.7531        | 1183.4725       | 592.2399         | 1182.4884      | 591.7479         | C    | <b>392.1711</b>  | 196.5892        | 375.1445  | 188.0759         |                |                  | 3  |
| 11 | 1257.5205       | 629.2639        | 1240.4939       | 620.7506         | 1239.5099      | 620.2586         | G    | 232.1404         | 116.5738        | 215.1139  | 108.0606         |                |                  | 2  |
| 12 |                 |                 |                 |                  |                |                  | R    | 175.1190         | 88.0631         | 158.0924  | 79.5498          |                |                  | 1  |

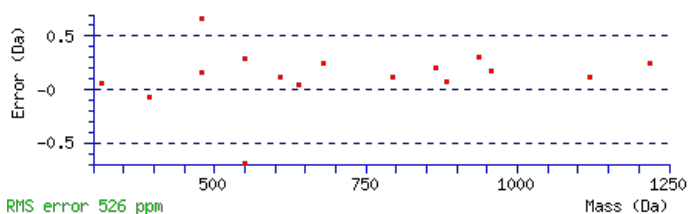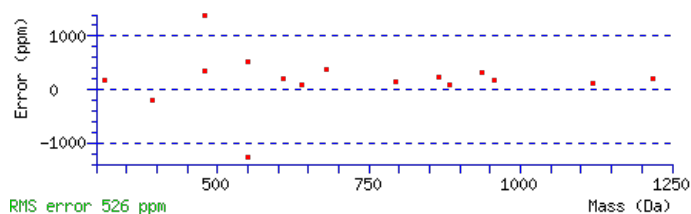NCBI **BLAST** search of **VNVYYNEASCGR**

(Parameters: blastp, nr protein database, expect=20000, no filter, PAM30)

Other BLAST [web gateways](#)**All matches to this query**

AT5G23860.1

| Score | Mr(calc)  | Delta   | Sequence                     |
|-------|-----------|---------|------------------------------|
| 77.4  | 1430.6248 | -0.0002 | <a href="#">VNVYYNEASCGR</a> |

Mascot: <http://www.matrixscience.com/>

**Peptide View**MS/MS Fragmentation of **SLEGLQSNVQR**Found in **AT5G23900.1** in **TAIR\_Arabidopsis**, Symbols: | 60S ribosomal protein L13 (RPL13D) | chr5:8064179-8065084 REVERSE

Match to Query 4483: 1246.586708 from(624.300630,2+) index(2443)

Title: Elution from: 26.082 to 26.082 scan no 3067 cid35.00 polarity:+

Data file C7-2\_2.mgf

Click mouse within plot area to zoom in by factor of two about that point

Or,   to  Da Label all possible matches  Label matches used for scoring Show Y-axis 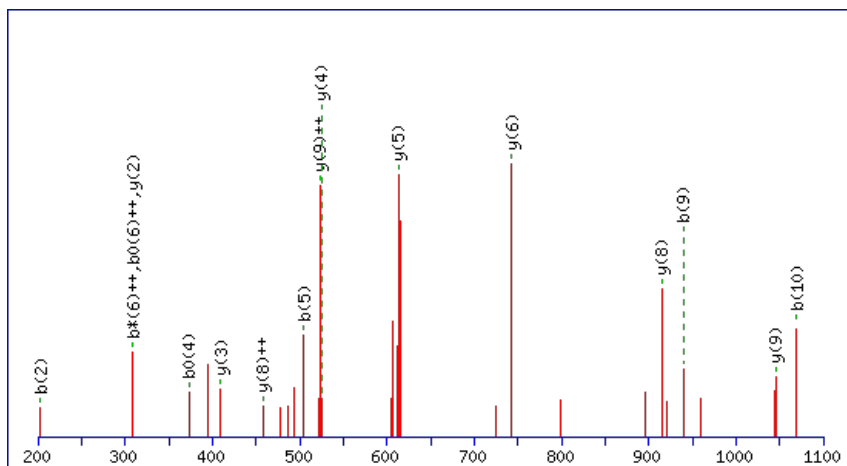Monoisotopic mass of neutral peptide  $M_r(\text{calc})$ : 1246.5860

Fixed modifications: Carbamidomethyl (C) (apply to specified residues or termini only)

Ions Score: 57 Expect: 2.3e-005

Matches : 16/102 fragment ions using 23 most intense peaks ([help](#))

| #  | b                | b <sup>++</sup> | b*        | b <sup>*++</sup> | b <sup>0</sup>  | b <sup>0++</sup> | Seq. | y                | y <sup>++</sup> | y*        | y <sup>*++</sup> | y <sup>0</sup> | y <sup>0++</sup> | #  |
|----|------------------|-----------------|-----------|------------------|-----------------|------------------|------|------------------|-----------------|-----------|------------------|----------------|------------------|----|
| 1  | 89.0363          | 45.0218         |           |                  | 71.0258         | 36.0165          | S    |                  |                 |           |                  |                |                  | 11 |
| 2  | <b>203.1174</b>  | 102.0624        |           |                  | 185.1069        | 93.0571          | L    | 1159.5642        | 580.2857        | 1141.5406 | 571.2740         | 1141.5537      | 571.2805         | 10 |
| 3  | 333.1571         | 167.0822        |           |                  | 315.1465        | 158.0769         | E    | <b>1045.4831</b> | <b>523.2452</b> | 1027.4595 | 514.2334         | 1027.4726      | 514.2399         | 9  |
| 4  | 391.1756         | 196.0914        |           |                  | <b>373.1650</b> | 187.0861         | G    | <b>915.4435</b>  | <b>458.2254</b> | 897.4199  | 449.2136         | 897.4329       | 449.2201         | 8  |
| 5  | <b>505.2567</b>  | 253.1320        |           |                  | 487.2461        | 244.1267         | L    | 857.4250         | 429.2161        | 839.4014  | 420.2043         | 839.4144       | 420.2109         | 7  |
| 6  | 635.3093         | 318.1583        | 617.2857  | <b>309.1465</b>  | 617.2987        | <b>309.1530</b>  | Q    | <b>743.3439</b>  | 372.1756        | 725.3203  | 363.1638         | 725.3333       | 363.1703         | 6  |
| 7  | 723.3384         | 362.1728        | 705.3148  | 353.1610         | 705.3278        | 353.1675         | S    | <b>613.2912</b>  | 307.1493        | 595.2677  | 298.1375         | 595.2807       | 298.1440         | 5  |
| 8  | 839.3754         | 420.1913        | 821.3518  | 411.1795         | 821.3648        | 411.1860         | N    | <b>525.2622</b>  | 263.1347        | 507.2386  | 254.1229         |                |                  | 4  |
| 9  | <b>939.4408</b>  | 470.2240        | 921.4172  | 461.2123         | 921.4303        | 461.2188         | V    | <b>409.2252</b>  | 205.1162        | 391.2016  | 196.1044         |                |                  | 3  |
| 10 | <b>1069.4935</b> | 535.2504        | 1051.4699 | 526.2386         | 1051.4829       | 526.2451         | Q    | <b>309.1597</b>  | 155.0835        | 291.1362  | 146.0717         |                |                  | 2  |
| 11 |                  |                 |           |                  |                 |                  | R    | 179.1071         | 90.0572         | 161.0835  | 81.0454          |                |                  | 1  |

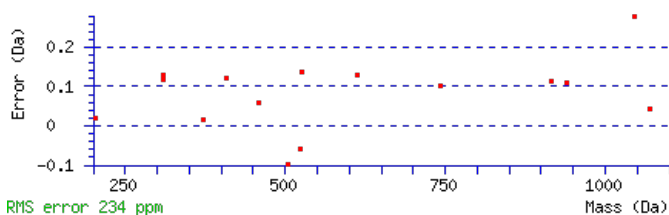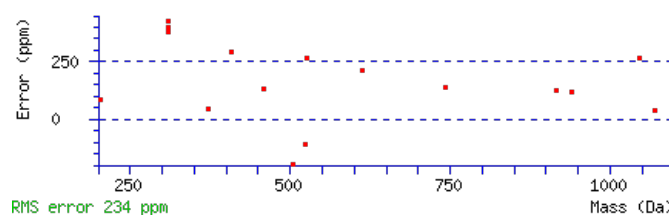NCBI BLAST search of **SLEGLQSNVQR**

(Parameters: blastp, nr protein database, expect=20000, no filter, PAM30)

Other BLAST [web gateways](#)

All matches to this query



**AT5G23900.1**

| <b>Score</b> | <b>Mr(calc)</b> | <b>Delta</b> | <b>Sequence</b>             |
|--------------|-----------------|--------------|-----------------------------|
| 57.0         | 1246.5860       | 0.0007       | <a href="#">SLEGLQSNVQR</a> |
| 11.4         | 1246.5882       | -0.0015      | <a href="#">LSFDAPQAVQR</a> |
| 5.6          | 1246.5833       | 0.0034       | <a href="#">KAESISDLENK</a> |
| 3.0          | 1246.5860       | 0.0007       | <a href="#">QISQLNDEKR</a>  |
| 2.9          | 1246.5860       | 0.0007       | <a href="#">NVNGSVKDIER</a> |
| 1.2          | 1246.5860       | 0.0007       | <a href="#">GEEVEKRVER</a>  |

**Mascot:** <http://www.matrixscience.com/>

**Peptide View**MS/MS Fragmentation of **FLLYK**

Found in **AT5G23940.1** in **TAIR\_Arabidopsis**, Symbols: EMB3009 | EMB3009 (EMBRYO DEFECTIVE 3009); transférase | chr5:8076619-8079680 REVERSE

Match to Query 613: 688.387594 from(345.201073,2+) index(3204)

Title: Elution from: 32.275 to 32.275 scan no 3994 cid35.00 polarity:+

Data file D12h-3\_1.mgf

Click mouse within plot area to zoom in by factor of two about that point

Or,   to  Da

Label all possible matches  Label matches used for scoring

Show Y-axis

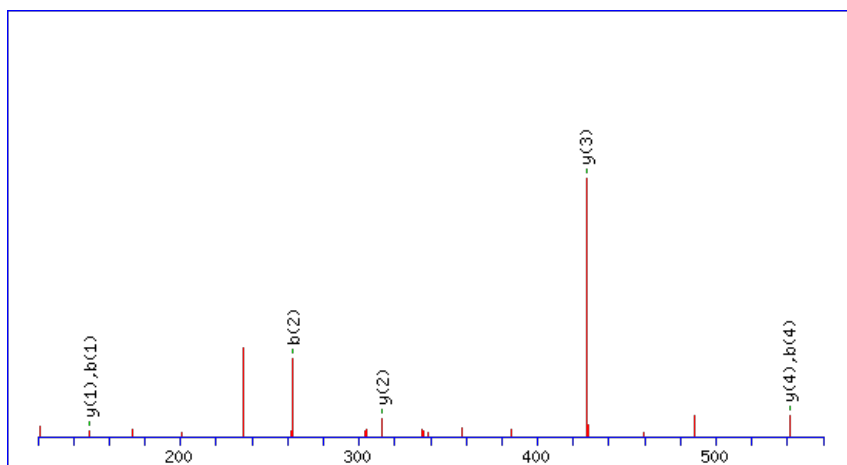

**Monoisotopic mass of neutral peptide Mr(calc):** 688.3876

**Fixed modifications:** Carbamidomethyl (C) (apply to specified residues or termini only)

**Ions Score:** 24 **Expect:** 0.012

**Matches:** 7/24 fragment ions using 13 most intense peaks ([help](#))

| # | b        | b <sup>++</sup> | Seq. | y        | y <sup>++</sup> | y*       | y <sup>*++</sup> | # |
|---|----------|-----------------|------|----------|-----------------|----------|------------------|---|
| 1 | 149.0727 | 75.0400         | F    |          |                 |          |                  | 5 |
| 2 | 263.1538 | 132.0805        | L    | 541.3294 | 271.1684        | 523.3059 | 262.1566         | 4 |
| 3 | 377.2349 | 189.1211        | L    | 427.2483 | 214.1278        | 409.2248 | 205.1160         | 3 |
| 4 | 541.2953 | 271.1513        | Y    | 313.1672 | 157.0873        | 295.1437 | 148.0755         | 2 |
| 5 |          |                 | K    | 149.1069 | 75.0571         | 131.0833 | 66.0453          | 1 |

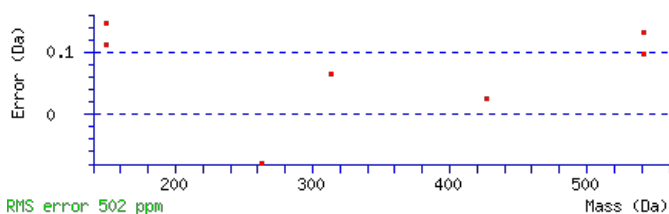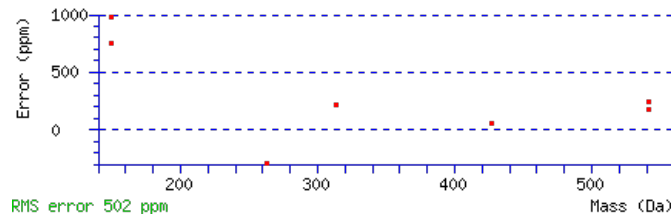NCBI **BLAST** search of **FLLYK**

(Parameters: blastp, nr protein database, expect=20000, no filter, PAM30)

Other BLAST [web gateways](#)

**All matches to this query**

| Score | Mr(calc) | Delta   | Sequence              |
|-------|----------|---------|-----------------------|
| 24.2  | 688.3876 | -0.0000 | <a href="#">FIIYK</a> |
| 24.2  | 688.3876 | -0.0000 | <a href="#">FLIYK</a> |
| 24.2  | 688.3876 | -0.0000 | <a href="#">FLLYK</a> |
| 24.2  | 688.3876 | -0.0000 | <a href="#">FYIIK</a> |

## AT5G23940.1

|      |          |         |                       |
|------|----------|---------|-----------------------|
| 22.6 | 688.3876 | -0.0000 | <a href="#">FLYLK</a> |
| 15.5 | 688.3876 | -0.0000 | <a href="#">IFLYK</a> |
| 15.5 | 688.3876 | -0.0000 | <a href="#">YFIK</a>  |
| 8.8  | 688.3876 | -0.0000 | <a href="#">YFLK</a>  |
| 7.8  | 688.3880 | -0.0004 | <a href="#">RTFKK</a> |
| 7.8  | 688.3880 | -0.0004 | <a href="#">TRFKK</a> |

Mascot: <http://www.matrixscience.com/>

**Peptide View**MS/MS Fragmentation of **DVIDDVGFVGFPMK**Found in **AT5G23950.1** in **TAIR\_Arabidopsis**, Symbols: | C2 domain-containing protein | chr5:8082792-8083451 FORWARD

Match to Query 6351: 1552.703172 from(777.358862,2+) index(8685)

Title: Elution from: 81.386 to 81.386 scan no 11895 cid35.00 polarity:+

Data file D1d-2\_2.mgf

Click mouse within plot area to zoom in by factor of two about that point

Or,   to  Da Label all possible matches  Label matches used for scoring Show Y-axis 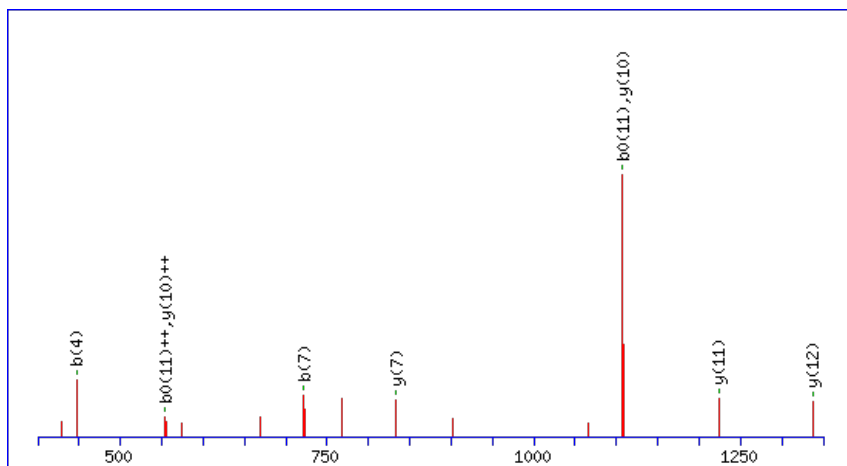Monoisotopic mass of neutral peptide  $M_r(\text{calc})$ : 1552.7041

Fixed modifications: Carbamidomethyl (C) (apply to specified residues or termini only)

Ions Score: 36 Expect: 0.0022

Matches : 9/112 fragment ions using 8 most intense peaks ([help](#))

| #  | b               | b <sup>++</sup> | b <sup>0</sup>   | b <sup>0++</sup> | Seq. | y                | y <sup>++</sup> | y*        | y* <sup>++</sup> | y <sup>0</sup> | y <sup>0++</sup> | #  |
|----|-----------------|-----------------|------------------|------------------|------|------------------|-----------------|-----------|------------------|----------------|------------------|----|
| 1  | 117.0313        | 59.0193         | 99.0207          | 50.0140          | D    |                  |                 |           |                  |                |                  | 14 |
| 2  | 217.0967        | 109.0520        | 199.0861         | 100.0467         | V    | 1437.6875        | 719.3474        | 1419.6639 | 710.3356         | 1419.6769      | 710.3421         | 13 |
| 3  | 331.1778        | 166.0925        | 313.1672         | 157.0873         | I    | <b>1337.6220</b> | 669.3147        | 1319.5985 | 660.3029         | 1319.6115      | 660.3094         | 12 |
| 4  | <b>447.2018</b> | 224.1045        | 429.1912         | 215.0992         | D    | <b>1223.5409</b> | 612.2741        | 1205.5174 | 603.2623         | 1205.5304      | 603.2688         | 11 |
| 5  | 563.2258        | 282.1165        | 545.2152         | 273.1112         | D    | <b>1107.5170</b> | <b>554.2621</b> | 1089.4934 | 545.2503         | 1089.5064      | 545.2568         | 10 |
| 6  | 663.2912        | 332.1492        | 645.2806         | 323.1440         | V    | 991.4930         | 496.2501        | 973.4694  | 487.2383         |                |                  | 9  |
| 7  | <b>721.3097</b> | 361.1585        | 703.2991         | 352.1532         | G    | 891.4275         | 446.2174        | 873.4040  | 437.2056         |                |                  | 8  |
| 8  | 869.3752        | 435.1912        | 851.3646         | 426.1859         | F    | <b>833.4090</b>  | 417.2082        | 815.3855  | 408.1964         |                |                  | 7  |
| 9  | 927.3937        | 464.2005        | 909.3831         | 455.1952         | G    | 685.3436         | 343.1754        | 667.3200  | 334.1636         |                |                  | 6  |
| 10 | 1027.4591       | 514.2332        | 1009.4485        | 505.2279         | V    | 627.3251         | 314.1662        | 609.3015  | 305.1544         |                |                  | 5  |
| 11 | 1125.5089       | 563.2581        | <b>1107.4983</b> | <b>554.2528</b>  | P    | 527.2596         | 264.1335        | 509.2361  | 255.1217         |                |                  | 4  |
| 12 | 1273.5744       | 637.2908        | 1255.5638        | 628.2855         | F    | 429.2098         | 215.1086        | 411.1863  | 206.0968         |                |                  | 3  |
| 13 | 1405.6119       | 703.3096        | 1387.6013        | 694.3043         | M    | 281.1444         | 141.0758        | 263.1208  | 132.0640         |                |                  | 2  |
| 14 |                 |                 |                  |                  | K    | 149.1069         | 75.0571         | 131.0833  | 66.0453          |                |                  | 1  |

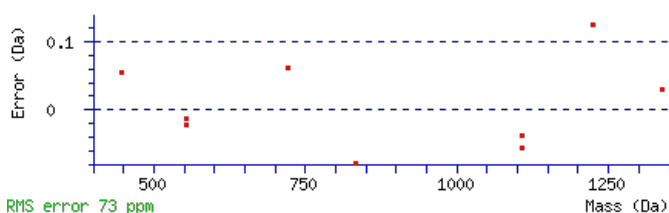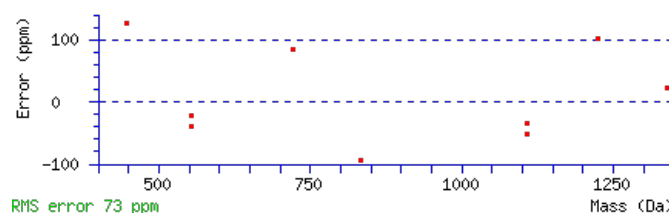NCBI BLAST search of [DVIDDVGFVGFPMK](#)

(Parameters: blastp, nr protein database, expect=20000, no filter, PAM30)

AT5G23950.1

Other BLAST [web gateways](#)

All matches to this query

| Score | Mr(calc)  | Delta   | Sequence                       |
|-------|-----------|---------|--------------------------------|
| 35.7  | 1552.7041 | -0.0010 | <a href="#">DVIDDVGFVPMK</a>   |
| 32.6  | 1552.6986 | 0.0046  | <a href="#">VNLDPEGVFDFSAK</a> |

Mascot: <http://www.matrixscience.com/>

**Peptide View**MS/MS Fragmentation of **NVTASSDVPAAPK**

Found in **AT5G24165.1** in **TAIR\_Arabidopsis**, Symbols: | similar to unknown protein [Arabidopsis thaliana] (TAIR:AT4G23885.1); similar to unknown [Populus trichocarpa] (GB:ABK96174.1) | chr5:8188625-8189090 FORWARD

Match to Query 4767: 1270.594708 from(636.304630,2+) index(1662)

Title: Elution from: 21.023 to 21.023 scan no 2203 cid35.00 polarity:+

Data file C7-1\_1.mgf

Click mouse within plot area to zoom in by factor of two about that point

Or,   to  Da

Label all possible matches  Label matches used for scoring

Show Y-axis

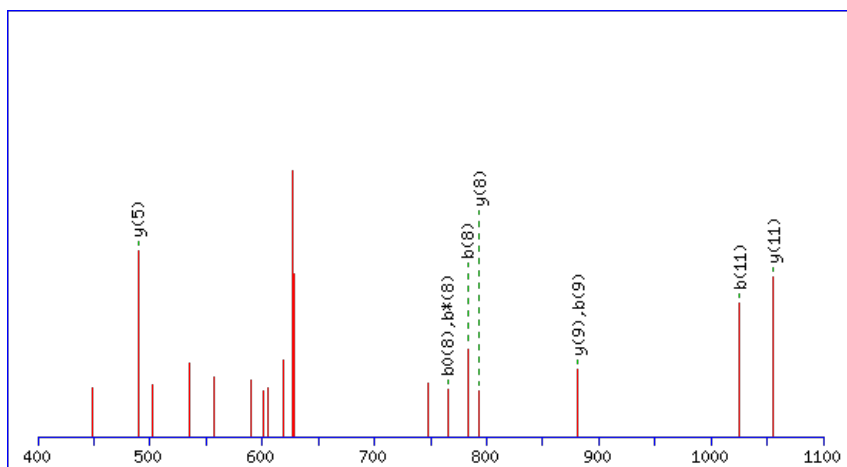

Monoisotopic mass of neutral peptide  $M_r(\text{calc})$ : 1270.5964

Fixed modifications: Carbamidomethyl (C) (apply to specified residues or termini only)

Ions Score: 31 Expect: 0.0045

Matches : 9/128 fragment ions using 15 most intense peaks ([help](#))

| #  | b                | b <sup>++</sup> | b*              | b <sup>*++</sup> | b <sup>0</sup>  | b <sup>0++</sup> | Seq. | y                | y <sup>++</sup> | y*        | y <sup>*++</sup> | y <sup>0</sup> | y <sup>0++</sup> | #  |
|----|------------------|-----------------|-----------------|------------------|-----------------|------------------|------|------------------|-----------------|-----------|------------------|----------------|------------------|----|
| 1  | 117.0443         | 59.0258         | 99.0207         | 50.0140          |                 |                  | N    |                  |                 |           |                  |                |                  | 13 |
| 2  | 217.1097         | 109.0585        | 199.0861        | 100.0467         |                 |                  | V    | 1155.5666        | 578.2870        | 1137.5431 | 569.2752         | 1137.5561      | 569.2817         | 12 |
| 3  | 319.1544         | 160.0809        | 301.1309        | 151.0691         | 301.1439        | 151.0756         | T    | <b>1055.5012</b> | 528.2542        | 1037.4776 | 519.2424         | 1037.4906      | 519.2489         | 11 |
| 4  | 391.1886         | 196.0979        | 373.1650        | 187.0861         | 373.1780        | 187.0926         | A    | 953.4565         | 477.2319        | 935.4329  | 468.2201         | 935.4459       | 468.2266         | 10 |
| 5  | 479.2176         | 240.1125        | 461.1941        | 231.1007         | 461.2071        | 231.1072         | S    | <b>881.4223</b>  | 441.2148        | 863.3987  | 432.2030         | 863.4118       | 432.2095         | 9  |
| 6  | 567.2467         | 284.1270        | 549.2231        | 275.1152         | 549.2361        | 275.1217         | S    | <b>793.3933</b>  | 397.2003        | 775.3697  | 388.1885         | 775.3827       | 388.1950         | 8  |
| 7  | 683.2707         | 342.1390        | 665.2471        | 333.1272         | 665.2601        | 333.1337         | D    | 705.3642         | 353.1857        | 687.3406  | 344.1739         | 687.3536       | 344.1805         | 7  |
| 8  | <b>783.3361</b>  | 392.1717        | <b>765.3126</b> | 383.1599         | <b>765.3256</b> | 383.1664         | V    | 589.3402         | 295.1737        | 571.3166  | 286.1620         |                |                  | 6  |
| 9  | <b>881.3859</b>  | 441.1966        | 863.3624        | 432.1848         | 863.3754        | 432.1913         | P    | <b>489.2748</b>  | 245.1410        | 471.2512  | 236.1292         |                |                  | 5  |
| 10 | 953.4201         | 477.2137        | 935.3965        | 468.2019         | 935.4095        | 468.2084         | A    | 391.2250         | 196.1161        | 373.2014  | 187.1043         |                |                  | 4  |
| 11 | <b>1025.4542</b> | 513.2308        | 1007.4307       | 504.2190         | 1007.4437       | 504.2255         | A    | 319.1908         | 160.0990        | 301.1672  | 151.0873         |                |                  | 3  |
| 12 | 1123.5040        | 562.2557        | 1105.4804       | 553.2439         | 1105.4935       | 553.2504         | P    | 247.1567         | 124.0820        | 229.1331  | 115.0702         |                |                  | 2  |
| 13 |                  |                 |                 |                  |                 |                  | K    | 149.1069         | 75.0571         | 131.0833  | 66.0453          |                |                  | 1  |

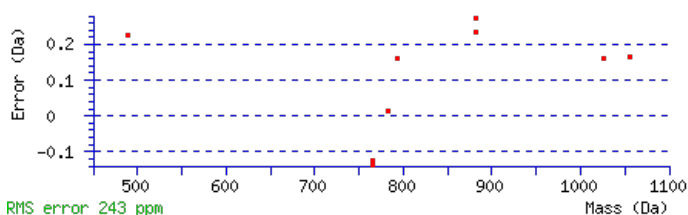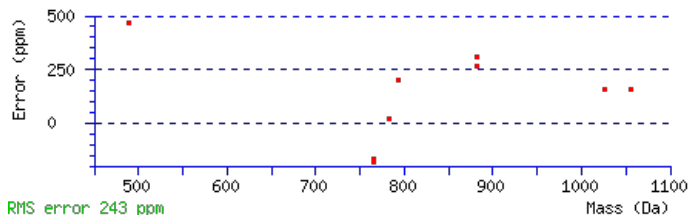

NCBI **BLAST** search of **NVTASSDVPAAPK**

(Parameters: blastp, nr protein database, expect=20000, no filter, PAM30)

AT5G24165.1

Other BLAST [web gateways](#)

**All matches to this query**

| Score | Mr(calc)  | Delta   | Sequence                      |
|-------|-----------|---------|-------------------------------|
| 30.6  | 1270.5964 | -0.0017 | <a href="#">NVTASSDVPAAPK</a> |
| 8.6   | 1270.5916 | 0.0031  | <a href="#">QQQPQAPMSLK</a>   |
| 2.6   | 1270.5963 | -0.0016 | <a href="#">VNGGVAEGELPSK</a> |
| 1.0   | 1270.5937 | 0.0010  | <a href="#">EELIEEIEQK</a>    |
| 0.6   | 1270.5972 | -0.0025 | <a href="#">IPLCTMIGHSK</a>   |

Mascot: <http://www.matrixscience.com/>

**Peptide View**MS/MS Fragmentation of **EGGYGLIIPK**Found in **AT5G24490.1** in **TAIR\_Arabidopsis**, Symbols: | 30S ribosomal protein, putative | chr5:8365693-8367181 FORWARD

Match to Query 2892: 1056.547850 from(529.281201,2+) index(5367)

Title: Elution from: 48.968 to 48.968 scan no 6743 cid35.00 polarity:+

Data file D6h-2\_2.mgf

Click mouse within plot area to zoom in by factor of two about that point

Or,   to  Da Label all possible matches  Label matches used for scoring Show Y-axis 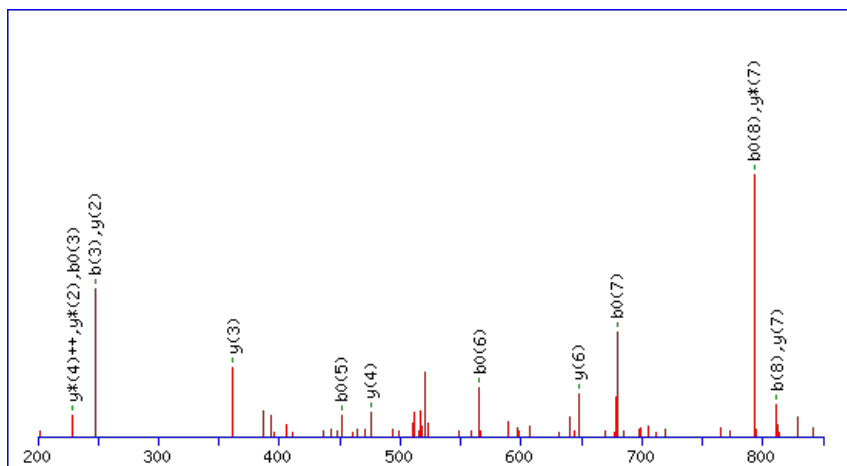Monoisotopic mass of neutral peptide **Mr(calc)**: 1056.5482**Fixed modifications:** Carbamidomethyl (C) (apply to specified residues or termini only)**Ions Score:** 40 **Expect:** 0.001**Matches** : 15/72 fragment ions using 14 most intense peaks ([help](#))

| #  | b               | b <sup>++</sup> | b <sup>0</sup>  | b <sup>0++</sup> | Seq. | y               | y <sup>++</sup> | y <sup>*</sup>  | y <sup>*++</sup> | #  |
|----|-----------------|-----------------|-----------------|------------------|------|-----------------|-----------------|-----------------|------------------|----|
| 1  | 131.0469        | 66.0271         | 113.0363        | 57.0218          | E    |                 |                 |                 |                  | 10 |
| 2  | 189.0654        | 95.0363         | 171.0548        | 86.0311          | G    | 927.5158        | 464.2616        | 909.4922        | 455.2498         | 9  |
| 3  | <b>247.0839</b> | 124.0456        | <b>229.0733</b> | 115.0403         | G    | 869.4973        | 435.2523        | 851.4737        | 426.2405         | 8  |
| 4  | 411.1443        | 206.0758        | 393.1337        | 197.0705         | Y    | <b>811.4788</b> | 406.2431        | <b>793.4552</b> | 397.2313         | 7  |
| 5  | 469.1628        | 235.0850        | <b>451.1522</b> | 226.0797         | G    | <b>647.4185</b> | 324.2129        | 629.3949        | 315.2011         | 6  |
| 6  | 583.2439        | 292.1256        | <b>565.2333</b> | 283.1203         | L    | 589.4000        | 295.2036        | 571.3764        | 286.1918         | 5  |
| 7  | 697.3250        | 349.1661        | <b>679.3144</b> | 340.1608         | I    | <b>475.3189</b> | 238.1631        | 457.2953        | <b>229.1513</b>  | 4  |
| 8  | <b>811.4061</b> | 406.2067        | <b>793.3955</b> | 397.2014         | I    | <b>361.2378</b> | 181.1225        | 343.2142        | 172.1107         | 3  |
| 9  | 909.4559        | 455.2316        | 891.4453        | 446.2263         | P    | <b>247.1567</b> | 124.0820        | <b>229.1331</b> | 115.0702         | 2  |
| 10 |                 |                 |                 |                  | K    | 149.1069        | 75.0571         | 131.0833        | 66.0453          | 1  |

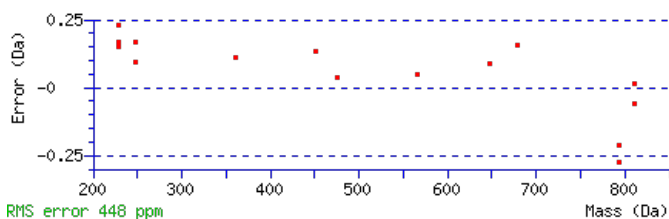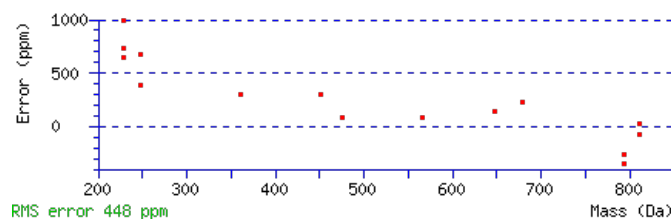NCBI **BLAST** search of **EGGYGLIIPK**

(Parameters: blastp, nr protein database, expect=20000, no filter, PAM30)

Other BLAST [web gateways](#)**All matches to this query**

| Score | Mr(calc) | Delta | Sequence |
|-------|----------|-------|----------|
|       |          |       |          |



**AT5G24490.1**

|      |           |         |                            |
|------|-----------|---------|----------------------------|
| 40.2 | 1056.5482 | -0.0003 | <a href="#">EGGYGLIIPK</a> |
| 14.1 | 1056.5460 | 0.0019  | <a href="#">SSTSNVIIPK</a> |
| 2.2  | 1056.5482 | -0.0003 | <a href="#">LPSEVFLNK</a>  |
| 1.4  | 1056.5482 | -0.0003 | <a href="#">VFITDNLPK</a>  |
| 1.1  | 1056.5486 | -0.0007 | <a href="#">GLRTQKDPK</a>  |
| 1.1  | 1056.5482 | -0.0003 | <a href="#">LFALDDKPK</a>  |

**Mascot:** <http://www.matrixscience.com/>

## Peptide View

MS/MS Fragmentation of **QAYEMGLVSSAQMVK**

Found in **AT5G24690.1** in **TAIR\_Arabidopsis**, Symbols: | similar to RER1 (RETICULATA-RELATED 1) [Arabidopsis thaliana] (TAIR:AT5G22790.1); similar to unnamed protein product [Vitis vinifera] (GB:CAO24736.1) | chr5:8455786-8458516 REVERSE

Match to Query 7533: 1672.783762 from(837.399157,2+) index(7360)

Title: Elution from: 65.386 to 65.386 scan no 9693 cid35.00 polarity:+

Data file D6h-2\_3.mgf

Click mouse within plot area to zoom in by factor of two about that point

Or,   to  Da

Label all possible matches  Label matches used for scoring

Show Y-axis

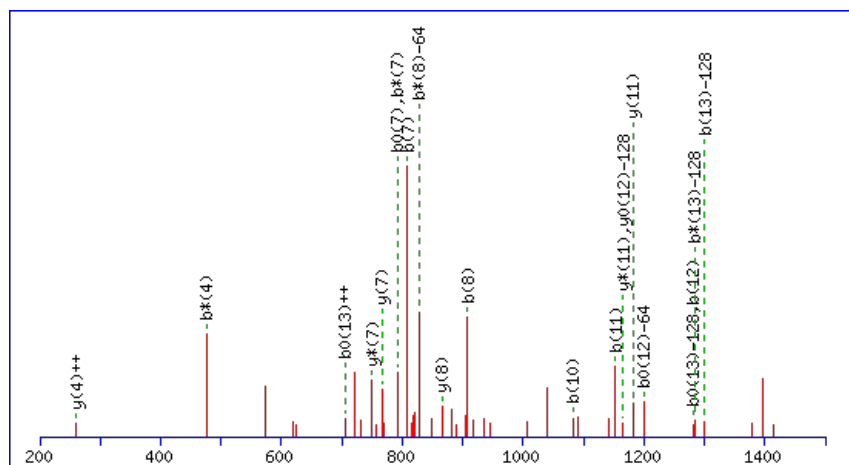

Monoisotopic mass of neutral peptide  $M_r(\text{calc})$ : 1672.7800

Fixed modifications: Carbamidomethyl (C) (apply to specified residues or termini only)

Variable modifications:

M5 : Oxidation (M), with neutral losses 0.0000 (shown in table), 63.9983

M13 : Oxidation (M), with neutral losses 0.0000 (shown in table), 63.9983

Ions Score: 18 Expect: 0.042

Matches : 21/278 fragment ions using 32 most intense peaks ([help](#))

| #  | b         | b <sup>++</sup> | b <sup>*</sup> | b <sup>*++</sup> | b <sup>0</sup> | b <sup>0++</sup> | Seq. | y         | y <sup>++</sup> | y <sup>*</sup> | y <sup>*++</sup> | y <sup>0</sup> | y <sup>0++</sup> | #  |
|----|-----------|-----------------|----------------|------------------|----------------|------------------|------|-----------|-----------------|----------------|------------------|----------------|------------------|----|
| 1  | 129.0659  | 65.0366         | 112.0393       | 56.5233          |                |                  | Q    |           |                 |                |                  |                |                  | 15 |
| 2  | 200.1030  | 100.5551        | 183.0764       | 92.0418          |                |                  | A    | 1545.7287 | 773.3680        | 1528.7022      | 764.8547         | 1527.7182      | 764.3627         | 14 |
| 3  | 363.1663  | 182.0868        | 346.1397       | 173.5735         |                |                  | Y    | 1474.6916 | 737.8495        | 1457.6651      | 729.3362         | 1456.6811      | 728.8442         | 13 |
| 4  | 492.2089  | 246.6081        | 475.1823       | 238.0948         | 474.1983       | 237.6028         | E    | 1311.6283 | 656.3178        | 1294.6018      | 647.8045         | 1293.6177      | 647.3125         | 12 |
| 5  | 639.2443  | 320.1258        | 622.2177       | 311.6125         | 621.2337       | 311.1205         | M    | 1182.5857 | 591.7965        | 1165.5592      | 583.2832         | 1164.5751      | 582.7912         | 11 |
| 6  | 696.2658  | 348.6365        | 679.2392       | 340.1232         | 678.2552       | 339.6312         | G    | 1035.5503 | 518.2788        | 1018.5238      | 509.7655         | 1017.5397      | 509.2735         | 10 |
| 7  | 809.3498  | 405.1785        | 792.3233       | 396.6653         | 791.3393       | 396.1733         | L    | 978.5288  | 489.7681        | 961.5023       | 481.2548         | 960.5183       | 480.7628         | 9  |
| 8  | 908.4182  | 454.7128        | 891.3917       | 446.1995         | 890.4077       | 445.7075         | V    | 865.4448  | 433.2260        | 848.4182       | 424.7128         | 847.4342       | 424.2207         | 8  |
| 9  | 995.4503  | 498.2288        | 978.4237       | 489.7155         | 977.4397       | 489.2235         | S    | 766.3764  | 383.6918        | 749.3498       | 375.1785         | 748.3658       | 374.6865         | 7  |
| 10 | 1082.4823 | 541.7448        | 1065.4557      | 533.2315         | 1064.4717      | 532.7395         | S    | 679.3443  | 340.1758        | 662.3178       | 331.6625         | 661.3338       | 331.1705         | 6  |
| 11 | 1153.5194 | 577.2633        | 1136.4929      | 568.7501         | 1135.5088      | 568.2581         | A    | 592.3123  | 296.6598        | 575.2858       | 288.1465         |                |                  | 5  |
| 12 | 1281.5780 | 641.2926        | 1264.5514      | 632.7794         | 1263.5674      | 632.2873         | Q    | 521.2752  | 261.1412        | 504.2486       | 252.6280         |                |                  | 4  |
| 13 | 1428.6134 | 714.8103        | 1411.5868      | 706.2971         | 1410.6028      | 705.8050         | M    | 393.2166  | 197.1119        | 376.1901       | 188.5987         |                |                  | 3  |
| 14 | 1527.6818 | 764.3445        | 1510.6552      | 755.8313         | 1509.6712      | 755.3393         | V    | 246.1812  | 123.5942        | 229.1547       | 115.0810         |                |                  | 2  |
| 15 |           |                 |                |                  |                |                  | K    | 147.1128  | 74.0600         | 130.0863       | 65.5468          |                |                  | 1  |

AT5G24690.1

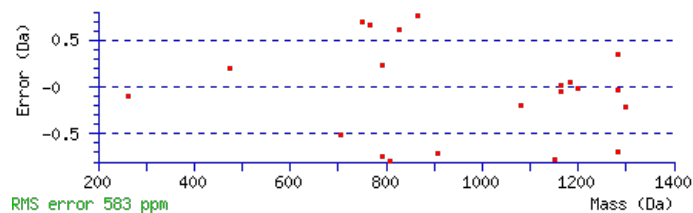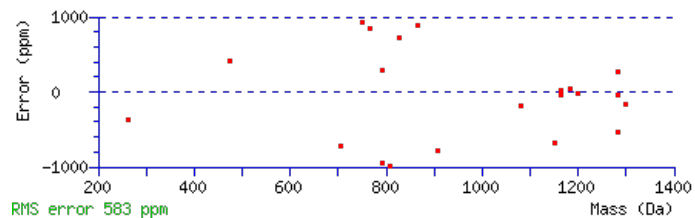

NCBI **BLAST** search of [QAYEMGLVSSAQMVK](#)

(Parameters: blastp, nr protein database, expect=20000, no filter, PAM30)

Other BLAST [web gateways](#)

**All matches to this query**

| Score | Mr(calc)  | Delta  | Sequence                        |
|-------|-----------|--------|---------------------------------|
| 18.2  | 1672.7800 | 0.0037 | <a href="#">QAYEMGLVSSAQMVK</a> |

Mascot: <http://www.matrixscience.com/>

### Peptide View

 MS/MS Fragmentation of **LKEAQRVAEHGELALITVEGSQAAK**

 Found in **AT5G24710.1** in **TAIR\_Arabidopsis**, Symbols: | similar to hypothetical protein OsI\_003062 [Oryza sativa (indica cultivar-group)] (GB:EAY75215.1); similar to hypothetical protein OsJ\_002759 [Oryza sativa (japonica cultivar-group)] (GB:EAZ12934.1); similar to unnamed protein product [

Match to Query 10445: 2825.393304 from(942.805044,3+) index(10438)

Title: Elution from: 105.843 to 105.843 scan no 15249 cid35.00 polarity:+

Data file D12h-2\_2.mgf

Click mouse within plot area to zoom in by factor of two about that point

 Or,   to  Da 

 Label all possible matches  Label matches used for scoring 

 Show Y-axis 
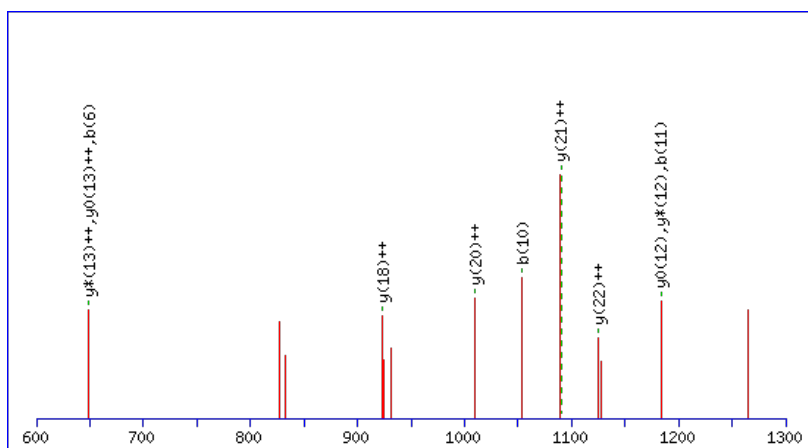
 Monoisotopic mass of neutral peptide  $M_r(\text{calc})$ : 2825.3968

Fixed modifications: Carbamidomethyl (C) (apply to specified residues or termini only)

Ions Score: 20 Expect: 0.04

 Matches : 11/298 fragment ions using 13 most intense peaks ([help](#))

| #  | b                | b <sup>++</sup> | b <sup>*</sup> | b <sup>*++</sup> | b <sup>0</sup> | b <sup>0++</sup> | Seq | y         | y <sup>++</sup>  | y <sup>*</sup>   | y <sup>*++</sup> | y <sup>0</sup>   | y <sup>0++</sup> | #  |
|----|------------------|-----------------|----------------|------------------|----------------|------------------|-----|-----------|------------------|------------------|------------------|------------------|------------------|----|
| 1  | 115.0884         | 58.0478         |                |                  |                |                  | L   |           |                  |                  |                  |                  |                  | 27 |
| 2  | 245.1774         | 123.0923        | 227.1538       | 114.0805         |                |                  | K   | 2712.3230 | 1356.6651        | 2694.2994        | 1347.6533        | 2694.3124        | 1347.6599        | 26 |
| 3  | 375.2170         | 188.1122        | 357.1935       | 179.1004         | 357.2065       | 179.1069         | E   | 2582.2340 | 1291.6206        | 2564.2104        | 1282.6088        | 2564.2234        | 1282.6153        | 25 |
| 4  | 447.2512         | 224.1292        | 429.2276       | 215.1174         | 429.2406       | 215.1239         | A   | 2452.1943 | 1226.6008        | 2434.1707        | 1217.5890        | 2434.1838        | 1217.5955        | 24 |
| 5  | 577.3038         | 289.1556        | 559.2802       | 280.1438         | 559.2933       | 280.1503         | Q   | 2380.1602 | 1190.5837        | 2362.1366        | 1181.5719        | 2362.1496        | 1181.5784        | 23 |
| 6  | <b>649.3380</b>  | 325.1726        | 631.3144       | 316.1608         | 631.3274       | 316.1673         | A   | 2250.1075 | <b>1125.5574</b> | 2232.0840        | 1116.5456        | 2232.0970        | 1116.5521        | 22 |
| 7  | 809.4272         | 405.2173        | 791.4036       | 396.2055         | 791.4167       | 396.2120         | R   | 2178.0734 | <b>1089.5403</b> | 2160.0498        | 1080.5285        | 2160.0628        | 1080.5350        | 21 |
| 8  | 881.4614         | 441.2343        | 863.4378       | 432.2225         | 863.4508       | 432.2290         | A   | 2017.9841 | <b>1009.4957</b> | 1999.9606        | 1000.4839        | 1999.9736        | 1000.4904        | 20 |
| 9  | 981.5268         | 491.2671        | 963.5032       | 482.2553         | 963.5163       | 482.2618         | V   | 1945.9500 | 973.4786         | 1927.9264        | 964.4668         | 1927.9394        | 964.4733         | 19 |
| 10 | <b>1053.5610</b> | 527.2841        | 1035.5374      | 518.2723         | 1035.5504      | 518.2788         | A   | 1845.8845 | <b>923.4459</b>  | 1827.8610        | 914.4341         | 1827.8740        | 914.4406         | 18 |
| 11 | <b>1183.6006</b> | 592.3039        | 1165.5770      | 583.2921         | 1165.5900      | 583.2987         | E   | 1773.8504 | 887.4288         | 1755.8268        | 878.4170         | 1755.8398        | 878.4236         | 17 |
| 12 | 1323.6506        | 662.3290        | 1305.6270      | 653.3172         | 1305.6401      | 653.3237         | H   | 1643.8108 | 822.4090         | 1625.7872        | 813.3972         | 1625.8002        | 813.4037         | 16 |
| 13 | 1381.6691        | 691.3382        | 1363.6455      | 682.3264         | 1363.6586      | 682.3329         | G   | 1503.7607 | 752.3840         | 1485.7372        | 743.3722         | 1485.7502        | 743.3787         | 15 |
| 14 | 1511.7088        | 756.3580        | 1493.6852      | 747.3462         | 1493.6982      | 747.3527         | E   | 1445.7422 | 723.3748         | 1427.7187        | 714.3630         | 1427.7317        | 714.3695         | 14 |
| 15 | 1625.7899        | 813.3986        | 1607.7663      | 804.3868         | 1607.7793      | 804.3933         | L   | 1315.7026 | 658.3549         | 1297.6790        | <b>649.3432</b>  | 1297.6921        | <b>649.3497</b>  | 13 |
| 16 | 1697.8240        | 849.4156        | 1679.8004      | 840.4038         | 1679.8134      | 840.4104         | A   | 1201.6215 | 601.3144         | <b>1183.5979</b> | 592.3026         | <b>1183.6110</b> | 592.3091         | 12 |
| 17 | 1811.9051        | 906.4562        | 1793.8815      | 897.4444         | 1793.8945      | 897.4509         | L   | 1129.5874 | 565.2973         | 1111.5638        | 556.2855         | 1111.5768        | 556.2920         | 11 |
| 18 | 1925.9862        | 963.4967        | 1907.9626      | 954.4849         | 1907.9756      | 954.4915         | I   | 1015.5063 | 508.2568         | 997.4827         | 499.2450         | 997.4957         | 499.2515         | 10 |
| 19 | 2028.0309        | 1014.5191       | 2010.0073      | 1005.5073        | 2010.0203      | 1005.5138        | T   | 901.4252  | 451.2162         | 883.4016         | 442.2044         | 883.4146         | 442.2109         | 9  |
| 20 | 2128.0964        | 1064.5518       | 2110.0728      | 1055.5400        | 2110.0858      | 1055.5465        | V   | 799.3805  | 400.1939         | 781.3569         | 391.1821         | 781.3699         | 391.1886         | 8  |
| 21 | 2258.1360        | 1129.5716       | 2240.1124      | 1120.5598        | 2240.1254      | 1120.5663        | E   | 699.3150  | 350.1611         | 681.2914         | 341.1494         | 681.3044         | 341.1559         | 7  |
| 22 | 2316.1545        | 1158.5809       | 2298.1309      | 1149.5691        | 2298.1439      | 1149.5756        | G   | 569.2754  | 285.1413         | 551.2518         | 276.1295         | 551.2648         | 276.1360         | 6  |
| 23 | 2404.1835        | 1202.5954       | 2386.1600      | 1193.5836        | 2386.1730      | 1193.5901        | S   | 511.2569  | 256.1321         | 493.2333         | 247.1203         | 493.2463         | 247.1268         | 5  |

# AT5G24710.1

|    |           |           |           |           |           |           |   |          |          |          |          |  |  |   |
|----|-----------|-----------|-----------|-----------|-----------|-----------|---|----------|----------|----------|----------|--|--|---|
| 24 | 2534.2362 | 1267.6217 | 2516.2126 | 1258.6099 | 2516.2256 | 1258.6165 | Q | 423.2278 | 212.1175 | 405.2042 | 203.1058 |  |  | 4 |
| 25 | 2606.2703 | 1303.6388 | 2588.2468 | 1294.6270 | 2588.2598 | 1294.6335 | A | 293.1752 | 147.0912 | 275.1516 | 138.0794 |  |  | 3 |
| 26 | 2678.3045 | 1339.6559 | 2660.2809 | 1330.6441 | 2660.2939 | 1330.6506 | A | 221.1410 | 111.0741 | 203.1174 | 102.0624 |  |  | 2 |
| 27 |           |           |           |           |           |           | K | 149.1069 | 75.0571  | 131.0833 | 66.0453  |  |  | 1 |

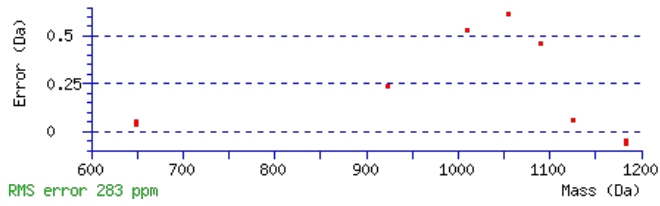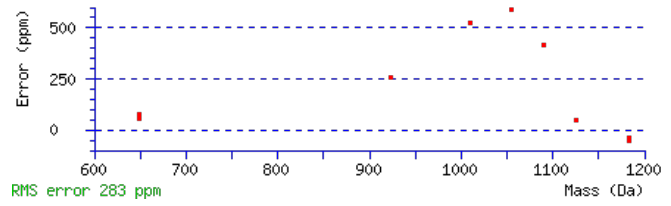

NCBI **BLAST** search of [LKEAQARAVAEHGELALITVEGSQAAK](#)  
 (Parameters: blastp, nr protein database, expect=20000, no filter, PAM30)  
 Other BLAST [web gateways](#)

## All matches to this query

| Score | Mr(calc)  | Delta   | Sequence                                    |
|-------|-----------|---------|---------------------------------------------|
| 19.9  | 2825.3968 | -0.0035 | <a href="#">LKEAQARAVAEHGELALITVEGSQAAK</a> |
| 2.9   | 2825.4013 | -0.0080 | <a href="#">FLLDLDAAPKITIPTEFRPDNHR</a>     |
| 0.7   | 2825.3858 | 0.0075  | <a href="#">HVWSKTPHLSFEWLMVSPKLINK</a>     |

Mascot: <http://www.matrixscience.com>

**Peptide View**MS/MS Fragmentation of **LQTDNIIR**

Found in **AT5G24740.1** in **TAIR\_Arabidopsis**, Symbols: | similar to unknown protein [Arabidopsis thaliana] (TAIR:AT4G17140.1); similar to hypothetical protein OsI\_026627 [Oryza sativa (indica cultivar-group)] (GB:EAZ05395.1); similar to C-5 cytosine-specific DNA methylase; Vacuolar protein so

Match to Query 2329: 984.502472 from(493.258512,2+) index(3303)

Title: Elution from: 33.463 to 33.463 scan no 4155 cid35.00 polarity:+

Data file 0-3\_1.mgf

Click mouse within plot area to zoom in by factor of two about that point

Or,   to  Da

Label all possible matches  Label matches used for scoring

Show Y-axis

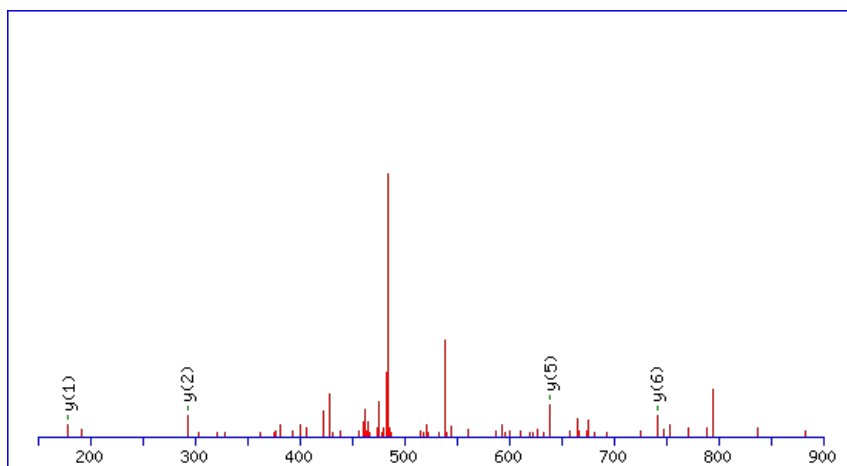

Monoisotopic mass of neutral peptide  $M_r(\text{calc})$ : 984.5014

Fixed modifications: Carbamidomethyl (C) (apply to specified residues or termini only)

Ions Score: 26 Expect: 0.029

Matches : 4/70 fragment ions using 8 most intense peaks ([help](#))

| # | b        | b <sup>++</sup> | b*       | b <sup>+++</sup> | b <sup>0</sup> | b <sup>0++</sup> | Seq. | y               | y <sup>++</sup> | y*       | y <sup>+++</sup> | y <sup>0</sup> | y <sup>0++</sup> | # |
|---|----------|-----------------|----------|------------------|----------------|------------------|------|-----------------|-----------------|----------|------------------|----------------|------------------|---|
| 1 | 115.0884 | 58.0478         |          |                  |                |                  | L    |                 |                 |          |                  |                |                  | 8 |
| 2 | 245.1410 | 123.0741        | 227.1174 | 114.0624         |                |                  | Q    | 871.4276        | 436.2175        | 853.4040 | 427.2057         | 853.4171       | 427.2122         | 7 |
| 3 | 347.1857 | 174.0965        | 329.1622 | 165.0847         | 329.1752       | 165.0912         | T    | <b>741.3750</b> | 371.1911        | 723.3514 | 362.1793         | 723.3644       | 362.1858         | 6 |
| 4 | 463.2097 | 232.1085        | 445.1861 | 223.0967         | 445.1991       | 223.1032         | D    | <b>639.3303</b> | 320.1688        | 621.3067 | 311.1570         | 621.3197       | 311.1635         | 5 |
| 5 | 579.2467 | 290.1270        | 561.2231 | 281.1152         | 561.2361       | 281.1217         | N    | 523.3063        | 262.1568        | 505.2827 | 253.1450         |                |                  | 4 |
| 6 | 693.3278 | 347.1675        | 675.3042 | 338.1558         | 675.3172       | 338.1623         | I    | 407.2693        | 204.1383        | 389.2457 | 195.1265         |                |                  | 3 |
| 7 | 807.4089 | 404.2081        | 789.3853 | 395.1963         | 789.3983       | 395.2028         | I    | <b>293.1882</b> | 147.0977        | 275.1646 | 138.0859         |                |                  | 2 |
| 8 |          |                 |          |                  |                |                  | R    | <b>179.1071</b> | 90.0572         | 161.0835 | 81.0454          |                |                  | 1 |

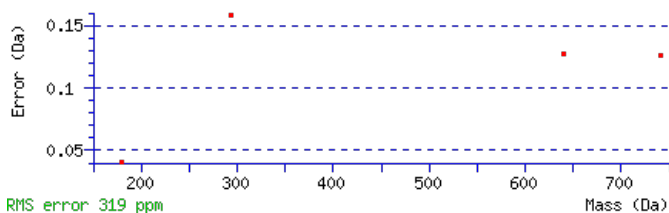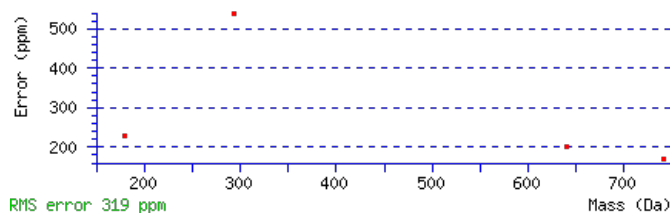NCBI BLAST search of **LQTDNIIR**

(Parameters: blastp, nr protein database, expect=20000, no filter, PAM30)

Other BLAST [web gateways](#)

**All matches to this query**

| Score | $M_r(\text{calc})$ | Delta | Sequence |
|-------|--------------------|-------|----------|
|       |                    |       |          |

**AT5G24740.1**

|      |          |         |                           |
|------|----------|---------|---------------------------|
| 25.8 | 984.5014 | 0.0010  | <a href="#">LQTDNIIR</a>  |
| 15.5 | 984.5014 | 0.0010  | <a href="#">LKQAEDLR</a>  |
| 14.6 | 984.5014 | 0.0010  | <a href="#">TSVGEKPVR</a> |
| 13.7 | 984.5014 | 0.0010  | <a href="#">QITAALAER</a> |
| 13.6 | 984.5014 | 0.0010  | <a href="#">ELENAKLR</a>  |
| 13.6 | 984.5014 | 0.0010  | <a href="#">IQINTDLR</a>  |
| 13.6 | 984.5014 | 0.0010  | <a href="#">LQLENSLR</a>  |
| 13.6 | 984.5014 | 0.0010  | <a href="#">QLQDLSIR</a>  |
| 9.8  | 984.5037 | -0.0012 | <a href="#">FELVNVPR</a>  |
| 8.9  | 984.5014 | 0.0010  | <a href="#">EIAELNKR</a>  |

**Mascot:** <http://www.matrixscience.com/>

## Peptide View

MS/MS Fragmentation of **ADGLVREMR**

Found in **AT5G24830.1** in **TAIR\_Arabidopsis**, Symbols: | pentatricopeptide (PPR) repeat-containing protein | chr5:8531229-8533269 FORWARD

Match to Query 2833: 1045.532260 from(523.773406,2+) index(5213)

Title: Elution from: 47.063 to 47.063 scan no 6582 cid35.00 polarity:+

Data file D6h-1\_3.mgf

Click mouse within plot area to zoom in by factor of two about that point

Or,   to  Da

Label all possible matches  Label matches used for scoring

Show Y-axis

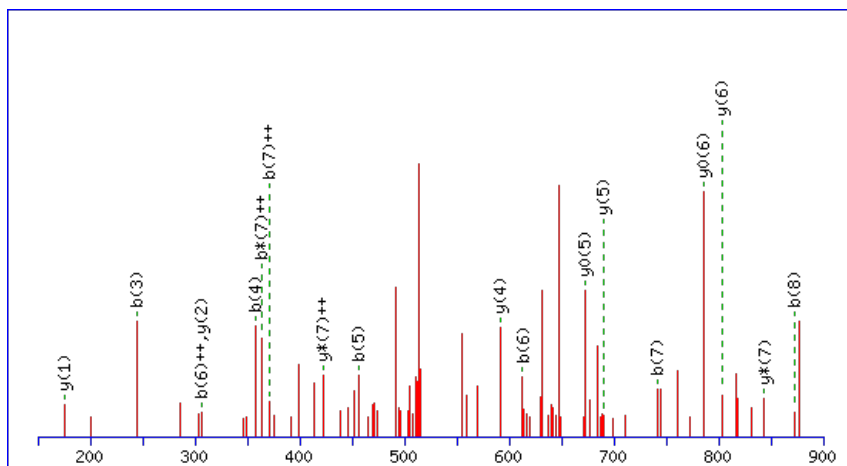

Monoisotopic mass of neutral peptide  $M_r(\text{calc})$ : 1045.5338

Fixed modifications: Carbamidomethyl (C) (apply to specified residues or termini only)

Ions Score: 24 Expect: 0.02

Matches : 18/80 fragment ions using 46 most intense peaks ([help](#))

| # | b               | b <sup>++</sup> | b*       | b <sup>*++</sup> | b <sup>0</sup> | b <sup>0++</sup> | Seq. | y               | y <sup>++</sup> | y*              | y <sup>*++</sup> | y <sup>0</sup>  | y <sup>0++</sup> | # |
|---|-----------------|-----------------|----------|------------------|----------------|------------------|------|-----------------|-----------------|-----------------|------------------|-----------------|------------------|---|
| 1 | 72.0444         | 36.5258         |          |                  |                |                  | A    |                 |                 |                 |                  |                 |                  | 9 |
| 2 | 187.0713        | 94.0393         |          |                  | 169.0608       | 85.0340          | D    | 975.5040        | 488.2557        | 958.4775        | 479.7424         | 957.4935        | 479.2504         | 8 |
| 3 | <b>244.0928</b> | 122.5500        |          |                  | 226.0822       | 113.5448         | G    | 860.4771        | 430.7422        | <b>843.4505</b> | <b>422.2289</b>  | 842.4665        | 421.7369         | 7 |
| 4 | <b>357.1769</b> | 179.0921        |          |                  | 339.1663       | 170.0868         | L    | <b>803.4556</b> | 402.2314        | 786.4291        | 393.7182         | <b>785.4451</b> | 393.2262         | 6 |
| 5 | <b>456.2453</b> | 228.6263        |          |                  | 438.2347       | 219.6210         | V    | <b>690.3716</b> | 345.6894        | 673.3450        | 337.1761         | <b>672.3610</b> | 336.6841         | 5 |
| 6 | <b>612.3464</b> | <b>306.6768</b> | 595.3198 | 298.1636         | 594.3358       | 297.6715         | R    | <b>591.3031</b> | 296.1552        | 574.2766        | 287.6419         | 573.2926        | 287.1499         | 4 |
| 7 | <b>741.3890</b> | <b>371.1981</b> | 724.3624 | <b>362.6849</b>  | 723.3784       | 362.1928         | E    | 435.2020        | 218.1047        | 418.1755        | 209.5914         | 417.1915        | 209.0994         | 3 |
| 8 | <b>872.4295</b> | 436.7184        | 855.4029 | 428.2051         | 854.4189       | 427.7131         | M    | <b>306.1594</b> | 153.5834        | 289.1329        | 145.0701         |                 |                  | 2 |
| 9 |                 |                 |          |                  |                |                  | R    | <b>175.1190</b> | 88.0631         | 158.0924        | 79.5498          |                 |                  | 1 |

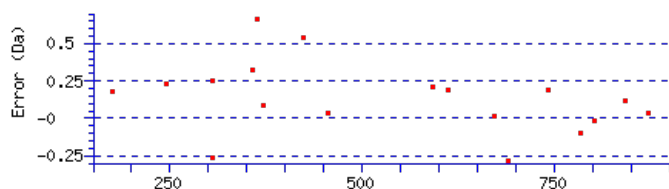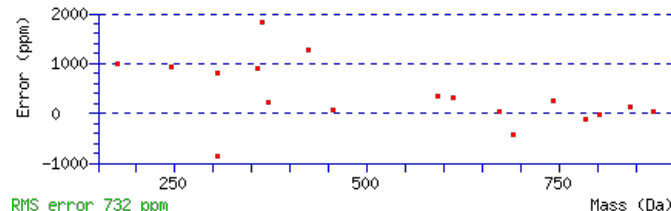

NCBI BLAST search of [ADGLVREMR](#)

(Parameters: blastp, nr protein database, expect=20000, no filter, PAM30)

Other BLAST [web gateways](#)

All matches to this query

| Score | $M_r(\text{calc})$ | Delta   | Sequence                  |
|-------|--------------------|---------|---------------------------|
| 24.4  | 1045.5338          | -0.0016 | <a href="#">ADGLVREMR</a> |



## AT5G24830.1

|      |           |         |                            |
|------|-----------|---------|----------------------------|
| 10.1 | 1045.5305 | 0.0018  | <a href="#">GWNALSKDR</a>  |
| 7.1  | 1045.5338 | -0.0016 | <a href="#">DLGNNVMKR</a>  |
| 4.4  | 1045.5339 | -0.0016 | <a href="#">TTKMOVSSHR</a> |
| 4.0  | 1045.5339 | -0.0016 | <a href="#">VALACVGNSR</a> |
| 1.8  | 1045.5338 | -0.0016 | <a href="#">LNDRMER</a>    |
| 0.2  | 1045.5339 | -0.0016 | <a href="#">TCIVLGNNR</a>  |

Mascot: <http://www.matrixscience.com/>

**Peptide View**MS/MS Fragmentation of **ESAIQVVR**

Found in **AT5G25460.1** in **TAIR\_Arabidopsis**, Symbols: | similar to unknown protein [Arabidopsis thaliana] (TAIR:AT5G11420.1); similar to unknown [Ricinus communis] (GB:CAB02653.1); contains InterPro domain Protein of unknown function DUF642 (InterPro:IPR006946) | chr5:8863433-8865397 FORWARD

Match to Query 2180: 971.541240 from(486.777896,2+) index(2464)

Title: Elution from: 25.321 to 25.321 scan no 3062 cid35.00 polarity:+

Data file 0-2\_3.mgf

Click mouse within plot area to zoom in by factor of two about that point

Or,   to  Da

Label all possible matches  Label matches used for scoring

Show Y-axis

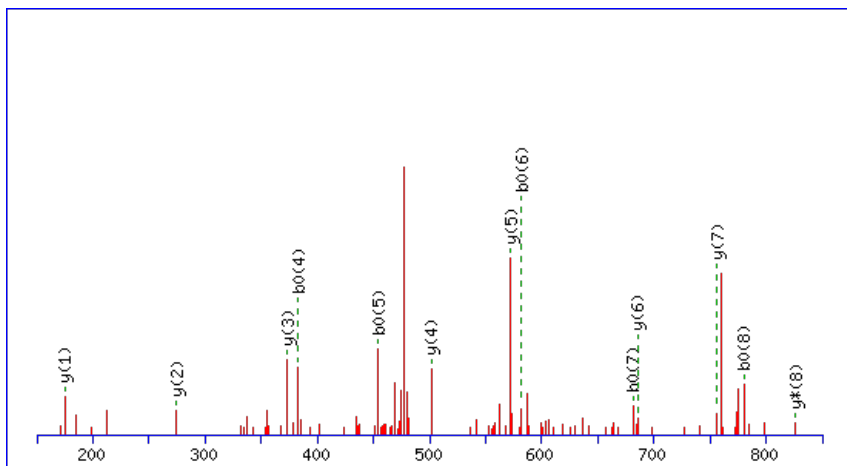

**Monoisotopic mass of neutral peptide Mr(calc):** 971.5400

**Fixed modifications:** Carbamidomethyl (C) (apply to specified residues or termini only)

**Ions Score:** 37 **Expect:** 0.0016

**Matches:** 13/72 fragment ions using 28 most intense peaks ([help](#))

| # | b        | b <sup>++</sup> | b*       | b <sup>+++</sup> | b <sup>0</sup> | b <sup>0++</sup> | Seq. | y        | y <sup>++</sup> | y*       | y <sup>+++</sup> | y <sup>0</sup> | y <sup>0++</sup> | # |
|---|----------|-----------------|----------|------------------|----------------|------------------|------|----------|-----------------|----------|------------------|----------------|------------------|---|
| 1 | 130.0499 | 65.5286         |          |                  | 112.0393       | 56.5233          | E    |          |                 |          |                  |                |                  | 9 |
| 2 | 217.0819 | 109.0446        |          |                  | 199.0713       | 100.0393         | S    | 843.5047 | 422.2560        | 826.4781 | 413.7427         | 825.4941       | 413.2507         | 8 |
| 3 | 288.1190 | 144.5631        |          |                  | 270.1084       | 135.5579         | A    | 756.4727 | 378.7400        | 739.4461 | 370.2267         |                |                  | 7 |
| 4 | 401.2031 | 201.1052        |          |                  | 383.1925       | 192.0999         | I    | 685.4355 | 343.2214        | 668.4090 | 334.7081         |                |                  | 6 |
| 5 | 472.2402 | 236.6237        |          |                  | 454.2296       | 227.6185         | A    | 572.3515 | 286.6794        | 555.3249 | 278.1661         |                |                  | 5 |
| 6 | 600.2988 | 300.6530        | 583.2722 | 292.1397         | 582.2882       | 291.6477         | Q    | 501.3144 | 251.1608        | 484.2878 | 242.6475         |                |                  | 4 |
| 7 | 699.3672 | 350.1872        | 682.3406 | 341.6740         | 681.3566       | 341.1819         | V    | 373.2558 | 187.1315        | 356.2292 | 178.6183         |                |                  | 3 |
| 8 | 798.4356 | 399.7214        | 781.4090 | 391.2082         | 780.4250       | 390.7162         | V    | 274.1874 | 137.5973        | 257.1608 | 129.0840         |                |                  | 2 |
| 9 |          |                 |          |                  |                |                  | R    | 175.1190 | 88.0631         | 158.0924 | 79.5498          |                |                  | 1 |

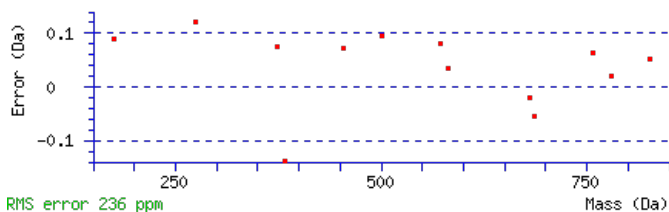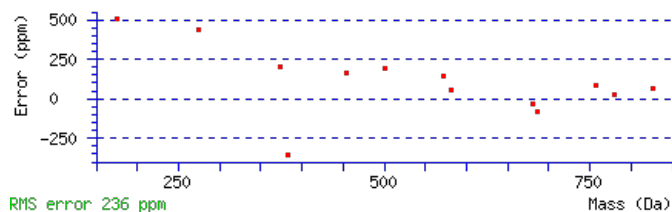

NCBI **BLAST** search of **ESAIQVVR**

(Parameters: blastp, nr protein database, expect=20000, no filter, PAM30)

Other BLAST [web gateways](#)

All matches to this query

## AT5G25460.1

| Score | Mr(calc) | Delta   | Sequence                   |
|-------|----------|---------|----------------------------|
| 37.0  | 971.5400 | 0.0013  | <a href="#">ESAIQVVR</a>   |
| 16.1  | 971.5400 | 0.0012  | <a href="#">SSPVQTVVR</a>  |
| 7.9   | 971.5400 | 0.0012  | <a href="#">GKPSTEVR</a>   |
| 6.3   | 971.5400 | 0.0012  | <a href="#">SSVPALGSVR</a> |
| 6.1   | 971.5400 | 0.0013  | <a href="#">DKVENIVR</a>   |
| 5.5   | 971.5400 | 0.0012  | <a href="#">TSVGEKPVR</a>  |
| 5.2   | 971.5400 | 0.0013  | <a href="#">ATTISNLPR</a>  |
| 4.8   | 971.5440 | -0.0028 | <a href="#">LAYELHVK</a>   |
| 4.7   | 971.5400 | 0.0013  | <a href="#">IQINTDLR</a>   |
| 4.6   | 971.5400 | 0.0012  | <a href="#">KQLVDDVR</a>   |

Mascot: <http://www.matrixscience.com/>

## Peptide View

### MS/MS Fragmentation of **ILLYIFK**

Found in **AT5G25754.1** in **TAIR\_Arabidopsis**, Symbols: | similar to unknown protein [Arabidopsis thaliana] (TAIR:AT5G25757.1); similar to predicted protein [Physcomitrella patens subsp. patens] (GB:EDQ51676.1); similar to unknown protein [Oryza sativa (japonica cultivar-group)] (GB:AAT77307.1)

Match to Query 1411: 908.573648 from(455.294100,2+) index(8135)

Title: Elution from: 75.928 to 75.928 scan no 11015 cid35.00 polarity:+

Data file D1d-2\_2.mgf

Click mouse within plot area to zoom in by factor of two about that point

Or,   to  Da

Label all possible matches  Label matches used for scoring

Show Y-axis

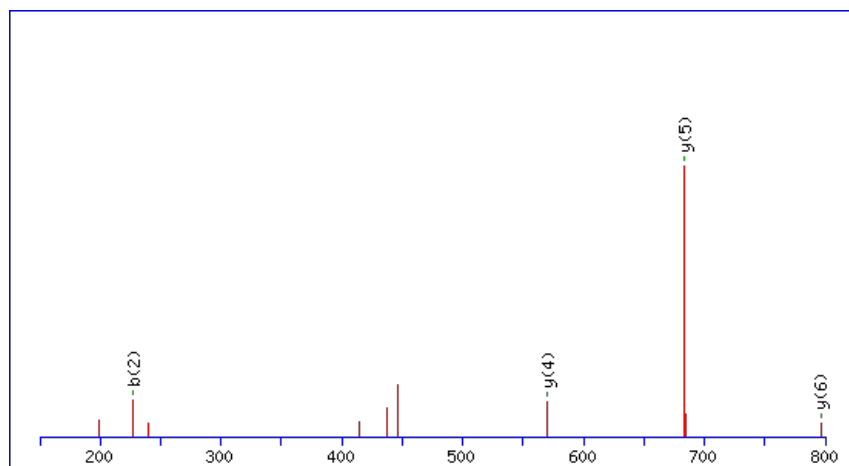

**Monoisotopic mass of neutral peptide Mr(calc):** 908.5735

**Fixed modifications:** Carbamidomethyl (C) (apply to specified residues or termini only)

**Ions Score:** 21 **Expect:** 0.0078

**Matches:** 4/36 fragment ions using 5 most intense peaks ([help](#))

| # | b        | b <sup>++</sup> | Seq. | y        | y <sup>++</sup> | y*       | y <sup>*++</sup> | # |
|---|----------|-----------------|------|----------|-----------------|----------|------------------|---|
| 1 | 114.0913 | 57.5493         | I    |          |                 |          |                  | 7 |
| 2 | 227.1754 | 114.0913        | L    | 796.4967 | 398.7520        | 779.4702 | 390.2387         | 6 |
| 3 | 340.2595 | 170.6334        | L    | 683.4127 | 342.2100        | 666.3861 | 333.6967         | 5 |
| 4 | 503.3228 | 252.1650        | Y    | 570.3286 | 285.6679        | 553.3021 | 277.1547         | 4 |
| 5 | 616.4069 | 308.7071        | I    | 407.2653 | 204.1363        | 390.2387 | 195.6230         | 3 |
| 6 | 763.4753 | 382.2413        | F    | 294.1812 | 147.5942        | 277.1547 | 139.0810         | 2 |
| 7 |          |                 | K    | 147.1128 | 74.0600         | 130.0863 | 65.5468          | 1 |

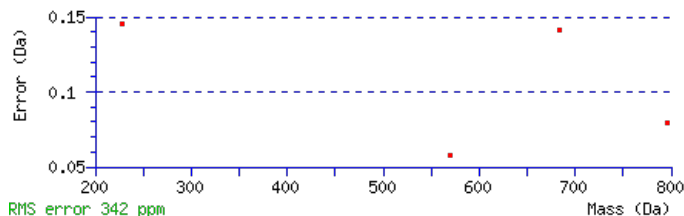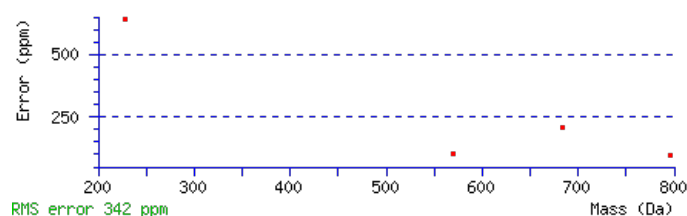

### NCBI BLAST search of **ILLYIFK**

(Parameters: blastp, nr protein database, expect=20000, no filter, PAM30)

Other BLAST [web gateways](#)

### All matches to this query

| Score | Mr(calc) | Delta  | Sequence       |
|-------|----------|--------|----------------|
| 21.1  | 908.5735 | 0.0001 | <b>ILLYIFK</b> |

AT5G25754.1

|      |          |        |                        |
|------|----------|--------|------------------------|
| 21.1 | 908.5735 | 0.0001 | <a href="#">LLFIYK</a> |
|------|----------|--------|------------------------|

**Mascot:** <http://www.matrixscience.com/>

## Peptide View

### MS/MS Fragmentation of **AYKETASPGNFK**

Found in **AT5G25770.1** in **TAIR\_Arabidopsis**, Symbols: | similar to unnamed protein product [Vitis vinifera] (GB:CAO44054.1); contains domain PTHR10992 (PTHR10992); contains domain SSF53474 (SSF53474); contains domain G3DSA:3.40.50.1820 (G3DSA:3.40.50.1820) | chr5:8969311-8971392 REVERSE

Match to Query 4343: 1311.644552 from(656.829552,2+) index(3676)

Title: Elution from: 37.978 to 37.978 scan no 4716 cid35.00 polarity:+

Data file D1d-2\_2.mgf

Click mouse within plot area to zoom in by factor of two about that point

Or,   to  Da

Label all possible matches  Label matches used for scoring

Show Y-axis

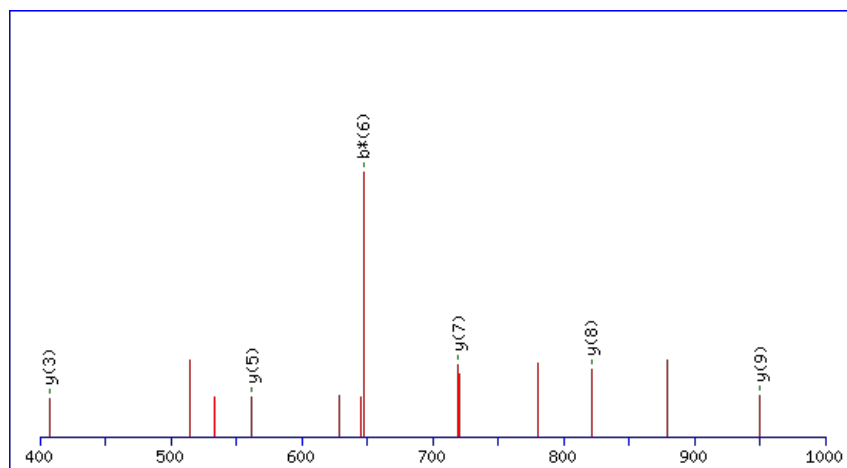

Monoisotopic mass of neutral peptide  $M_r(\text{calc})$ : 1311.6459

Fixed modifications: Carbamidomethyl (C) (apply to specified residues or termini only)

Ions Score: 33 Expect: 0.0022

Matches : 6/112 fragment ions using 10 most intense peaks ([help](#))

| #  | b         | b <sup>++</sup> | b*              | b <sup>+++</sup> | b <sup>0</sup> | b <sup>0++</sup> | Seq. | y               | y <sup>++</sup> | y*        | y <sup>+++</sup> | y <sup>0</sup> | y <sup>0++</sup> | #  |
|----|-----------|-----------------|-----------------|------------------|----------------|------------------|------|-----------------|-----------------|-----------|------------------|----------------|------------------|----|
| 1  | 72.0444   | 36.5258         |                 |                  |                |                  | A    |                 |                 |           |                  |                |                  | 12 |
| 2  | 235.1077  | 118.0575        |                 |                  |                |                  | Y    | 1241.6161       | 621.3117        | 1224.5895 | 612.7984         | 1223.6055      | 612.3064         | 11 |
| 3  | 363.2027  | 182.1050        | 346.1761        | 173.5917         |                |                  | K    | 1078.5528       | 539.7800        | 1061.5262 | 531.2667         | 1060.5422      | 530.7747         | 10 |
| 4  | 492.2453  | 246.6263        | 475.2187        | 238.1130         | 474.2347       | 237.6210         | E    | <b>950.4578</b> | 475.7325        | 933.4312  | 467.2193         | 932.4472       | 466.7272         | 9  |
| 5  | 593.2930  | 297.1501        | 576.2664        | 288.6368         | 575.2824       | 288.1448         | T    | <b>821.4152</b> | 411.2112        | 804.3886  | 402.6980         | 803.4046       | 402.2060         | 8  |
| 6  | 664.3301  | 332.6687        | <b>647.3035</b> | 324.1554         | 646.3195       | 323.6634         | A    | <b>720.3675</b> | 360.6874        | 703.3410  | 352.1741         | 702.3569       | 351.6821         | 7  |
| 7  | 751.3621  | 376.1847        | 734.3355        | 367.6714         | 733.3515       | 367.1794         | S    | 649.3304        | 325.1688        | 632.3039  | 316.6556         | 631.3198       | 316.1636         | 6  |
| 8  | 848.4149  | 424.7111        | 831.3883        | 416.1978         | 830.4043       | 415.7058         | P    | <b>562.2984</b> | 281.6528        | 545.2718  | 273.1396         |                |                  | 5  |
| 9  | 905.4363  | 453.2218        | 888.4098        | 444.7085         | 887.4258       | 444.2165         | G    | 465.2456        | 233.1264        | 448.2191  | 224.6132         |                |                  | 4  |
| 10 | 1019.4793 | 510.2433        | 1002.4527       | 501.7300         | 1001.4687      | 501.2380         | N    | <b>408.2241</b> | 204.6157        | 391.1976  | 196.1024         |                |                  | 3  |
| 11 | 1166.5477 | 583.7775        | 1149.5211       | 575.2642         | 1148.5371      | 574.7722         | F    | 294.1812        | 147.5942        | 277.1547  | 139.0810         |                |                  | 2  |
| 12 |           |                 |                 |                  |                |                  | K    | 147.1128        | 74.0600         | 130.0863  | 65.5468          |                |                  | 1  |

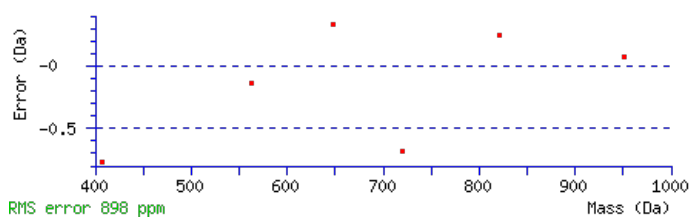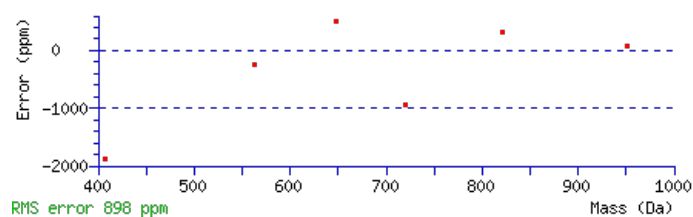

NCBI BLAST search of [AYKETASPGNFK](#)

(Parameters: blastp, nr protein database, expect=20000, no filter, PAM30)

Other BLAST [web gateways](#)

**AT5G25770.1**

All matches to this query

| Score | Mr(calc)  | Delta   | Sequence                      |
|-------|-----------|---------|-------------------------------|
| 33.0  | 1311.6459 | -0.0013 | <a href="#">AYKETASPGNFK</a>  |
| 17.9  | 1311.6459 | -0.0013 | <a href="#">SFGAAVIYNNEK</a>  |
| 3.5   | 1311.6414 | 0.0031  | <a href="#">MSSVVLMLGSEK</a>  |
| 2.6   | 1311.6459 | -0.0014 | <a href="#">ATEAGYWKTIGK</a>  |
| 2.5   | 1311.6419 | 0.0027  | <a href="#">TSSAANLFTGSTR</a> |
| 0.5   | 1311.6428 | 0.0018  | <a href="#">MMRDVFRPTK</a>    |
| 0.3   | 1311.6427 | 0.0018  | <a href="#">GHINPMLNLCK</a>   |

**Mascot:** <http://www.matrixscience.com/>


**Mascot Search Results**
**Peptide View**MS/MS Fragmentation of **IGPVMITR**

Found in **AT5G25980.1** in **TAIR\_Arabidopsis**, Symbols: TGG2 | TGG2 (GLUCOSIDE GLUCOHYDROLASE 2); hydrolase, hydrolyzing O-glycosyl compounds | chr5:9072733-9075146 FORWARD

Match to Query 1665: 912.472214 from(457.243383,2+) index(2609)

Title: Elution from: 26.627 to 26.627 scan no 3261 cid35.00 polarity:+

Data file D12h-3\_3.mgf

Click mouse within plot area to zoom in by factor of two about that point

Or,   to  Da

Label all possible matches  Label matches used for scoring

Show Y-axis

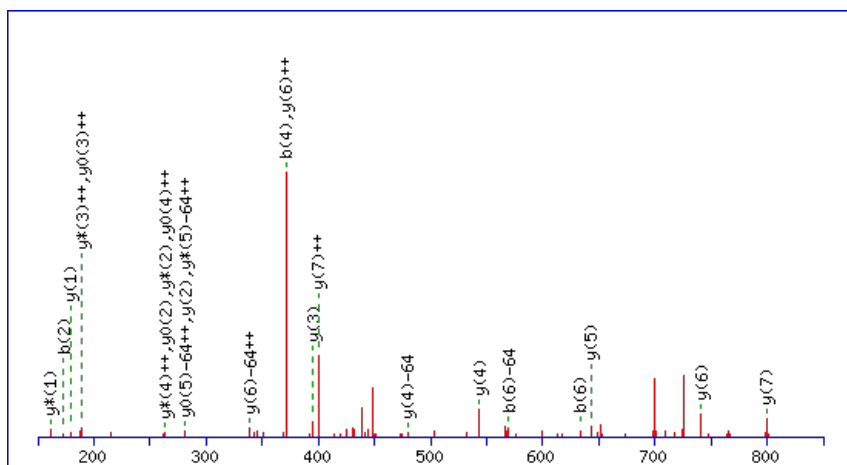

**Monoisotopic mass of neutral peptide Mr(calc):** 912.4729

**Fixed modifications:** Carbamidomethyl (C) (apply to specified residues or termini only)

**Variable modifications:**

**M5** : Oxidation (M), with neutral losses 0.0000 (shown in table), 63.9983

**Ions Score:** 41 **Expect:** 0.00054

**Matches** : 24/88 fragment ions using 42 most intense peaks ([help](#))

| # | b               | b <sup>++</sup> | b <sup>0</sup> | b <sup>0++</sup> | Seq. | y               | y <sup>++</sup> | y <sup>*</sup>  | y <sup>*++</sup> | y <sup>0</sup>  | y <sup>0++</sup> | # |
|---|-----------------|-----------------|----------------|------------------|------|-----------------|-----------------|-----------------|------------------|-----------------|------------------|---|
| 1 | 115.0884        | 58.0478         |                |                  | I    |                 |                 |                 |                  |                 |                  | 8 |
| 2 | <b>173.1069</b> | 87.0571         |                |                  | G    | <b>799.3991</b> | <b>400.2032</b> | 781.3755        | 391.1914         | 781.3885        | 391.1979         | 7 |
| 3 | 271.1567        | 136.0820        |                |                  | P    | <b>741.3806</b> | <b>371.1939</b> | 723.3570        | 362.1821         | 723.3700        | 362.1886         | 6 |
| 4 | <b>371.2221</b> | 186.1147        |                |                  | V    | <b>643.3308</b> | 322.1690        | 625.3072        | 313.1572         | 625.3202        | 313.1637         | 5 |
| 5 | 519.2546        | 260.1309        |                |                  | M    | <b>543.2653</b> | 272.1363        | 525.2418        | <b>263.1245</b>  | 525.2548        | <b>263.1310</b>  | 4 |
| 6 | <b>633.3357</b> | 317.1715        |                |                  | I    | <b>395.2329</b> | 198.1201        | 377.2093        | <b>189.1083</b>  | 377.2223        | <b>189.1148</b>  | 3 |
| 7 | 735.3804        | 368.1938        | 717.3698       | 359.1885         | T    | <b>281.1518</b> | 141.0795        | <b>263.1282</b> | 132.0677         | <b>263.1412</b> | 132.0743         | 2 |
| 8 |                 |                 |                |                  | R    | <b>179.1071</b> | 90.0572         | <b>161.0835</b> | 81.0454          |                 |                  | 1 |

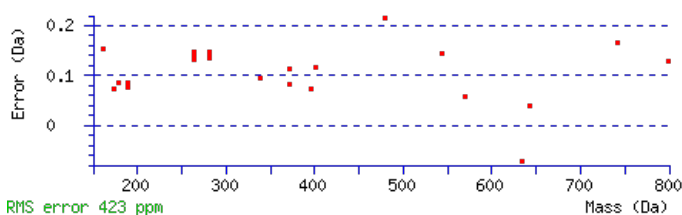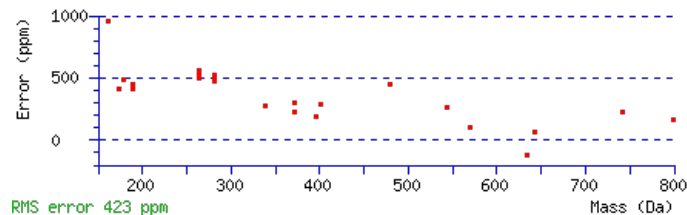

NCBI **BLAST** search of **IGPVMITR**

(Parameters: blastp, nr protein database, expect=20000, no filter, PAM30)

Other BLAST [web gateways](#)

All matches to this query

| Score | Mr(calc) | Delta | Sequence |
|-------|----------|-------|----------|
|       |          |       |          |



**AT5G25980.1**

|      |          |         |                          |
|------|----------|---------|--------------------------|
| 41.2 | 912.4729 | -0.0007 | <a href="#">IGPVMITR</a> |
| 9.8  | 912.4695 | 0.0027  | <a href="#">LVIWDTR</a>  |
| 7.6  | 912.4729 | -0.0007 | <a href="#">IVEICR</a>   |
| 5.9  | 912.4729 | -0.0007 | <a href="#">NAPTKLMK</a> |
| 5.3  | 912.4695 | 0.0027  | <a href="#">IAQWSGLK</a> |
| 2.6  | 912.4695 | 0.0027  | <a href="#">LLVDWTR</a>  |
| 2.5  | 912.4722 | 0.0000  | <a href="#">LAHFQKR</a>  |
| 2.3  | 912.4695 | 0.0027  | <a href="#">LFSHTLGK</a> |
| 2.2  | 912.4722 | 0.0000  | <a href="#">LFHAAGRK</a> |
| 1.8  | 912.4729 | -0.0007 | <a href="#">LDMAALLR</a> |

**Mascot:** <http://www.matrixscience.com/>

**Peptide View**MS/MS Fragmentation of **ASGLWYQSFLR**

Found in **AT5G25980.2** in **TAIR\_Arabidopsis**, Symbols: TGG2 | TGG2 (GLUCOSIDE GLUCOHYDROLASE 2); hydrolase, hydrolyzing O-glycosyl compounds | chr5:9072733-9075480 FORWARD

Match to Query 4859: 1326.669956 from(664.342254,2+) index(8957)

Title: Elution from: 81.104 to 81.104 scan no 12187 cid35.00 polarity:+

Data file 0-2\_2.mgf

Click mouse within plot area to zoom in by factor of two about that point

Or,   to  Da

Label all possible matches  Label matches used for scoring

Show Y-axis

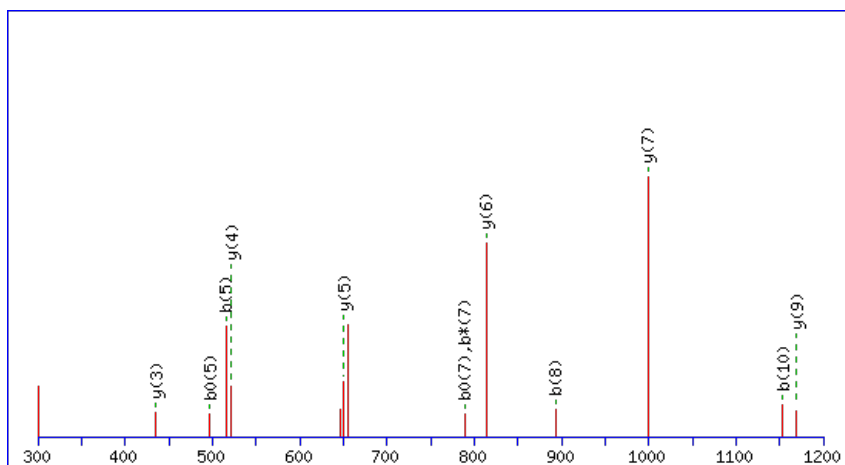

Monoisotopic mass of neutral peptide  $M_r(\text{calc})$ : 1326.6721

**Fixed modifications:** Carbamidomethyl (C) (apply to specified residues or termini only)

**Ions Score:** 58 **Expect:** 6.5e-006

**Matches:** 12/100 fragment ions using 14 most intense peaks ([help](#))

| #  | b                | b <sup>++</sup> | b*              | b <sup>*++</sup> | b <sup>0</sup>  | b <sup>0++</sup> | Seq. | y                | y <sup>++</sup> | y*        | y <sup>*++</sup> | y <sup>0</sup> | y <sup>0++</sup> | #  |
|----|------------------|-----------------|-----------------|------------------|-----------------|------------------|------|------------------|-----------------|-----------|------------------|----------------|------------------|----|
| 1  | 72.0444          | 36.5258         |                 |                  |                 |                  | A    |                  |                 |           |                  |                |                  | 11 |
| 2  | 159.0764         | 80.0418         |                 |                  | 141.0659        | 71.0366          | S    | 1256.6422        | 628.8248        | 1239.6157 | 620.3115         | 1238.6317      | 619.8195         | 10 |
| 3  | 216.0979         | 108.5526        |                 |                  | 198.0873        | 99.5473          | G    | <b>1169.6102</b> | 585.3087        | 1152.5837 | 576.7955         | 1151.5996      | 576.3035         | 9  |
| 4  | 329.1819         | 165.0946        |                 |                  | 311.1714        | 156.0893         | L    | 1112.5887        | 556.7980        | 1095.5622 | 548.2847         | 1094.5782      | 547.7927         | 8  |
| 5  | <b>515.2613</b>  | 258.1343        |                 |                  | <b>497.2507</b> | 249.1290         | W    | <b>999.5047</b>  | 500.2560        | 982.4781  | 491.7427         | 981.4941       | 491.2507         | 7  |
| 6  | 678.3246         | 339.6659        |                 |                  | 660.3140        | 330.6606         | Y    | <b>813.4254</b>  | 407.2163        | 796.3988  | 398.7030         | 795.4148       | 398.2110         | 6  |
| 7  | 806.3832         | 403.6952        | <b>789.3566</b> | 395.1819         | <b>788.3726</b> | 394.6899         | Q    | <b>650.3620</b>  | 325.6847        | 633.3355  | 317.1714         | 632.3515       | 316.6794         | 5  |
| 8  | <b>893.4152</b>  | 447.2112        | 876.3886        | 438.6980         | 875.4046        | 438.2060         | S    | <b>522.3035</b>  | 261.6554        | 505.2769  | 253.1421         | 504.2929       | 252.6501         | 4  |
| 9  | 1040.4836        | 520.7454        | 1023.4571       | 512.2322         | 1022.4730       | 511.7402         | F    | <b>435.2714</b>  | 218.1394        | 418.2449  | 209.6261         |                |                  | 3  |
| 10 | <b>1153.5677</b> | 577.2875        | 1136.5411       | 568.7742         | 1135.5571       | 568.2822         | L    | 288.2030         | 144.6051        | 271.1765  | 136.0919         |                |                  | 2  |
| 11 |                  |                 |                 |                  |                 |                  | R    | 175.1190         | 88.0631         | 158.0924  | 79.5498          |                |                  | 1  |

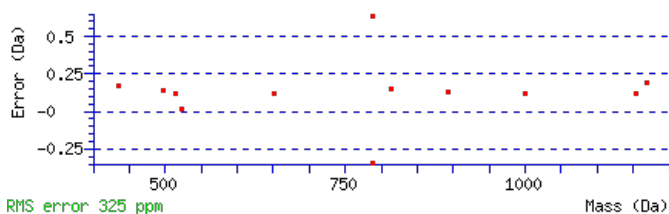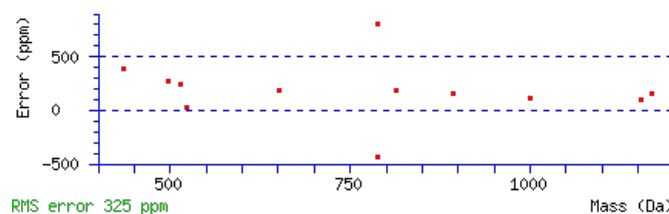

NCBI **BLAST** search of **ASGLWYQSFLR**

(Parameters: blastp, nr protein database, expect=20000, no filter, PAM30)

Other BLAST [web gateways](#)

All matches to this query

AT5G25980.2

| Score | Mr(calc)  | Delta   | Sequence                      |
|-------|-----------|---------|-------------------------------|
| 57.6  | 1326.6721 | -0.0021 | <a href="#">ASGLWYQSFLR</a>   |
| 3.9   | 1326.6714 | -0.0015 | <a href="#">ACGDQLVVVGGPR</a> |

Mascot: <http://www.matrixscience.com/>

**Peptide View**MS/MS Fragmentation of **GLNVWDSFTHR**

Found in **AT5G26000.1** in **TAIR\_Arabidopsis**, Symbols: TGG1 | TGG1 (THIOGLUCOSIDE GLUCOHYDROLASE 1); hydrolase, hydrolyzing O-glycosyl compounds | chr5:9079681-9082350 REVERSE

Match to Query 4999: 1330.641386 from(666.327969,2+) index(7190)

Title: Elution from: 64.284 to 64.284 scan no 9325 cid35.00 polarity:+

Data file 0-3\_1.mgf

Click mouse within plot area to zoom in by factor of two about that point

Or,   to  Da

Label all possible matches  Label matches used for scoring

Show Y-axis

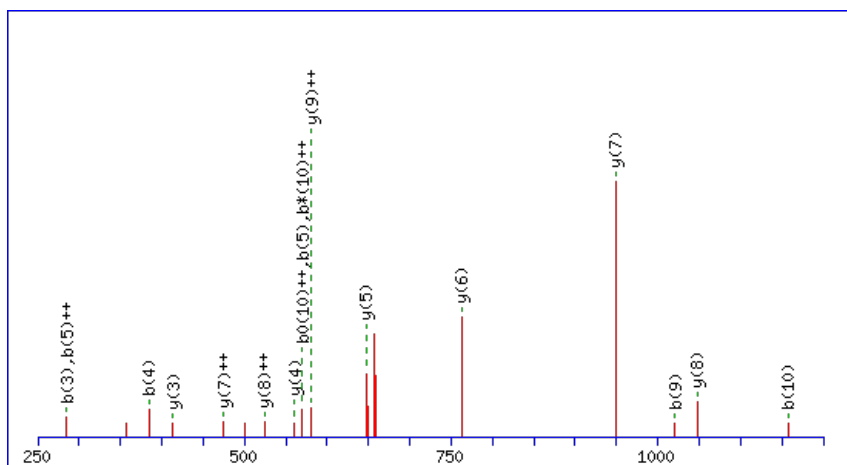

**Monoisotopic mass of neutral peptide Mr(calc):** 1330.6418

**Fixed modifications:** Carbamidomethyl (C) (apply to specified residues or termini only)

**Ions Score:** 62 **Expect:** 1.6e-006

**Matches:** 17/102 fragment ions using 19 most intense peaks ([help](#))

| #  | b                | b <sup>++</sup> | b*        | b <sup>*++</sup> | b <sup>0</sup> | b <sup>0++</sup> | Seq.     | y                | y <sup>++</sup> | y*        | y <sup>*++</sup> | y <sup>0</sup> | y <sup>0++</sup> | #         |
|----|------------------|-----------------|-----------|------------------|----------------|------------------|----------|------------------|-----------------|-----------|------------------|----------------|------------------|-----------|
| 1  | 58.0287          | 29.5180         |           |                  |                |                  | <b>G</b> |                  |                 |           |                  |                |                  | <b>11</b> |
| 2  | 171.1128         | 86.0600         |           |                  |                |                  | <b>L</b> | 1274.6276        | 637.8175        | 1257.6011 | 629.3042         | 1256.6171      | 628.8122         | <b>10</b> |
| 3  | <b>285.1557</b>  | 143.0815        | 268.1292  | 134.5682         |                |                  | <b>N</b> | 1161.5436        | <b>581.2754</b> | 1144.5170 | 572.7622         | 1143.5330      | 572.2701         | <b>9</b>  |
| 4  | <b>384.2241</b>  | 192.6157        | 367.1976  | 184.1024         |                |                  | <b>V</b> | <b>1047.5007</b> | <b>524.2540</b> | 1030.4741 | 515.7407         | 1029.4901      | 515.2487         | <b>8</b>  |
| 5  | <b>570.3035</b>  | <b>285.6554</b> | 553.2769  | 277.1421         |                |                  | <b>W</b> | <b>948.4322</b>  | <b>474.7198</b> | 931.4057  | 466.2065         | 930.4217       | 465.7145         | <b>7</b>  |
| 6  | 685.3304         | 343.1688        | 668.3039  | 334.6556         | 667.3198       | 334.1636         | <b>D</b> | <b>762.3529</b>  | 381.6801        | 745.3264  | 373.1668         | 744.3424       | 372.6748         | <b>6</b>  |
| 7  | 772.3624         | 386.6849        | 755.3359  | 378.1716         | 754.3519       | 377.6796         | <b>S</b> | <b>647.3260</b>  | 324.1666        | 630.2994  | 315.6534         | 629.3154       | 315.1613         | <b>5</b>  |
| 8  | 919.4308         | 460.2191        | 902.4043  | 451.7058         | 901.4203       | 451.2138         | <b>F</b> | <b>560.2940</b>  | 280.6506        | 543.2674  | 272.1373         | 542.2834       | 271.6453         | <b>4</b>  |
| 9  | <b>1020.4785</b> | 510.7429        | 1003.4520 | 502.2296         | 1002.4680      | 501.7376         | <b>T</b> | <b>413.2255</b>  | 207.1164        | 396.1990  | 198.6031         | 395.2150       | 198.1111         | <b>3</b>  |
| 10 | <b>1157.5374</b> | 579.2724        | 1140.5109 | <b>570.7591</b>  | 1139.5269      | <b>570.2671</b>  | <b>H</b> | 312.1779         | 156.5926        | 295.1513  | 148.0793         |                |                  | <b>2</b>  |
| 11 |                  |                 |           |                  |                |                  | <b>R</b> | 175.1190         | 88.0631         | 158.0924  | 79.5498          |                |                  | <b>1</b>  |

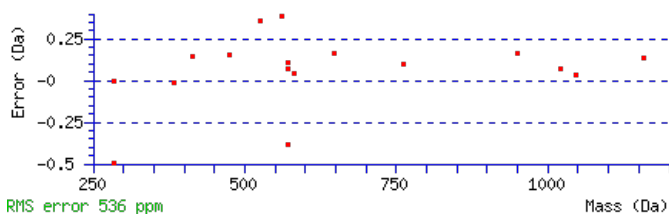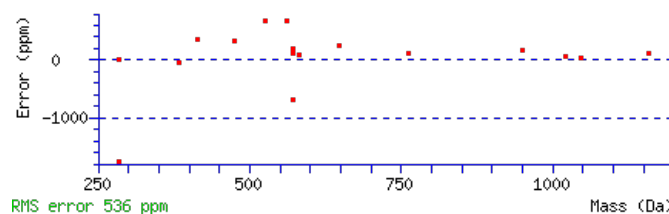

NCBI **BLAST** search of **GLNVWDSFTHR**

(Parameters: blastp, nr protein database, expect=20000, no filter, PAM30)

Other BLAST [web gateways](#)

**All matches to this query**

AT5G26000.1

| Score | Mr(calc)  | Delta   | Sequence                     |
|-------|-----------|---------|------------------------------|
| 62.3  | 1330.6418 | -0.0005 | <a href="#">GLNVWDSFTHR</a>  |
| 5.5   | 1330.6378 | 0.0036  | <a href="#">KRSYNGGSGSYR</a> |

Mascot: <http://www.matrixscience.com/>

**Peptide View**MS/MS Fragmentation of **TLAQNCGVNVIR**Found in **AT5G26360.1** in **TAIR\_Arabidopsis**, Symbols: | chaperonin, putative | chr5:9255564-9258894 REVERSE

Match to Query 4867: 1343.697050 from(672.855801,2+) index(2816)

Title: Elution from: 31.141 to 31.141 scan no 3622 cid35.00 polarity:+

Data file D1d-2\_1.mgf

Click mouse within plot area to zoom in by factor of two about that point

Or,   to  Da Label all possible matches  Label matches used for scoring Show Y-axis 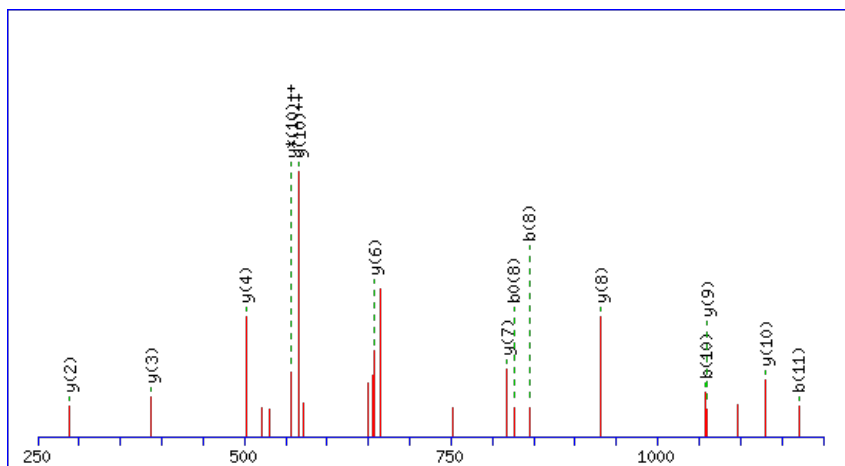**Monoisotopic mass of neutral peptide Mr(calc):** 1343.6980**Fixed modifications:** Carbamidomethyl (C) (apply to specified residues or termini only)**Ions Score:** 73 **Expect:** 2.9e-007**Matches:** 14/104 fragment ions using 18 most intense peaks ([help](#))

| #  | b                | b <sup>++</sup> | b <sup>*</sup> | b <sup>*++</sup> | b <sup>0</sup>  | b <sup>0++</sup> | Seq. | y                | y <sup>++</sup> | y <sup>*</sup> | y <sup>*++</sup> | #  |
|----|------------------|-----------------|----------------|------------------|-----------------|------------------|------|------------------|-----------------|----------------|------------------|----|
| 1  | 102.0550         | 51.5311         |                |                  | 84.0444         | 42.5258          | T    |                  |                 |                |                  | 12 |
| 2  | 215.1390         | 108.0731        |                |                  | 197.1285        | 99.0679          | L    | 1243.6576        | 622.3324        | 1226.6310      | 613.8191         | 11 |
| 3  | 286.1761         | 143.5917        |                |                  | 268.1656        | 134.5864         | A    | <b>1130.5735</b> | <b>565.7904</b> | 1113.5470      | <b>557.2771</b>  | 10 |
| 4  | 414.2347         | 207.6210        | 397.2082       | 199.1077         | 396.2241        | 198.6157         | Q    | <b>1059.5364</b> | 530.2718        | 1042.5098      | 521.7586         | 9  |
| 5  | 528.2776         | 264.6425        | 511.2511       | 256.1292         | 510.2671        | 255.6372         | N    | <b>931.4778</b>  | 466.2425        | 914.4513       | 457.7293         | 8  |
| 6  | 688.3083         | 344.6578        | 671.2817       | 336.1445         | 670.2977        | 335.6525         | C    | <b>817.4349</b>  | 409.2211        | 800.4083       | 400.7078         | 7  |
| 7  | 745.3298         | 373.1685        | 728.3032       | 364.6552         | 727.3192        | 364.1632         | G    | <b>657.4042</b>  | 329.2058        | 640.3777       | 320.6925         | 6  |
| 8  | <b>844.3982</b>  | 422.7027        | 827.3716       | 414.1894         | <b>826.3876</b> | 413.6974         | V    | 600.3828         | 300.6950        | 583.3562       | 292.1817         | 5  |
| 9  | 958.4411         | 479.7242        | 941.4145       | 471.2109         | 940.4305        | 470.7189         | N    | <b>501.3144</b>  | 251.1608        | 484.2878       | 242.6475         | 4  |
| 10 | <b>1057.5095</b> | 529.2584        | 1040.4830      | 520.7451         | 1039.4989       | 520.2531         | V    | <b>387.2714</b>  | 194.1394        | 370.2449       | 185.6261         | 3  |
| 11 | <b>1170.5936</b> | 585.8004        | 1153.5670      | 577.2871         | 1152.5830       | 576.7951         | I    | <b>288.2030</b>  | 144.6051        | 271.1765       | 136.0919         | 2  |
| 12 |                  |                 |                |                  |                 |                  | R    | 175.1190         | 88.0631         | 158.0924       | 79.5498          | 1  |

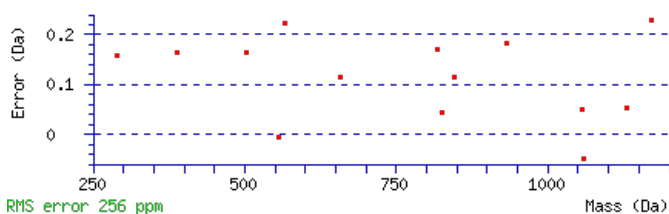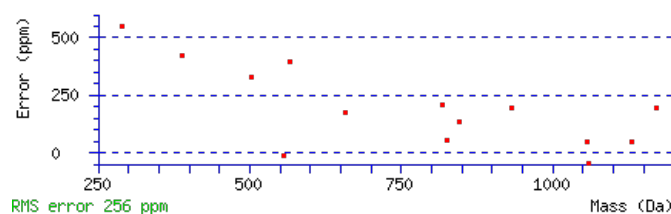NCBI **BLAST** search of **TLAQNCGVNVIR**

(Parameters: blastp, nr protein database, expect=20000, no filter, PAM30)

Other BLAST [web gateways](#)**All matches to this query**

## AT5G26360.1

| Score | Mr(calc)  | Delta   | Sequence                      |
|-------|-----------|---------|-------------------------------|
| 72.9  | 1343.6980 | -0.0009 | <a href="#">TLAQNCGVNVIR</a>  |
| 12.1  | 1343.6980 | -0.0009 | <a href="#">VMGKGGGNLENIR</a> |
| 9.0   | 1343.6946 | 0.0025  | <a href="#">ENVASHLQKYR</a>   |
| 8.5   | 1343.6979 | -0.0009 | <a href="#">SASRSAPMTAPLR</a> |
| 5.3   | 1343.6946 | 0.0024  | <a href="#">KSGHFQVTDLGR</a>  |
| 4.2   | 1343.6986 | -0.0015 | <a href="#">VKWSYTYNRK</a>    |
| 3.8   | 1343.6933 | 0.0038  | <a href="#">VSVEEDIDGLR</a>   |
| 3.3   | 1343.6946 | 0.0025  | <a href="#">YKHVAGTVAENR</a>  |
| 3.0   | 1343.6946 | 0.0025  | <a href="#">HQKVDSQAYLR</a>   |
| 0.8   | 1343.6932 | 0.0038  | <a href="#">EGAEIDDLIR</a>    |

Mascot: <http://www.matrixscience.com/>

**Peptide View**MS/MS Fragmentation of **LGDSHKPMLVKAK**

Found in **AT5G26730.1** in **TAIR\_Arabidopsis**, Symbols: | similar to unknown protein [Arabidopsis thaliana] (TAIR:AT5G16920.1); similar to hypothetical protein OsI\_036632 [Oryza sativa (indica cultivar-group)] (GB:EAY82673.1); similar to Os12g0233900 [Oryza sativa (japonica cultivar-group)] (G)

Match to Query 5692: 1440.744286 from(721.379419,2+) index(9070)

Title: Elution from: 81.791 to 81.791 scan no 12319 cid35.00 polarity:+

Data file 0-1\_3.mgf

Click mouse within plot area to zoom in by factor of two about that point

Or,   to  Da

Label all possible matches  Label matches used for scoring

Show Y-axis

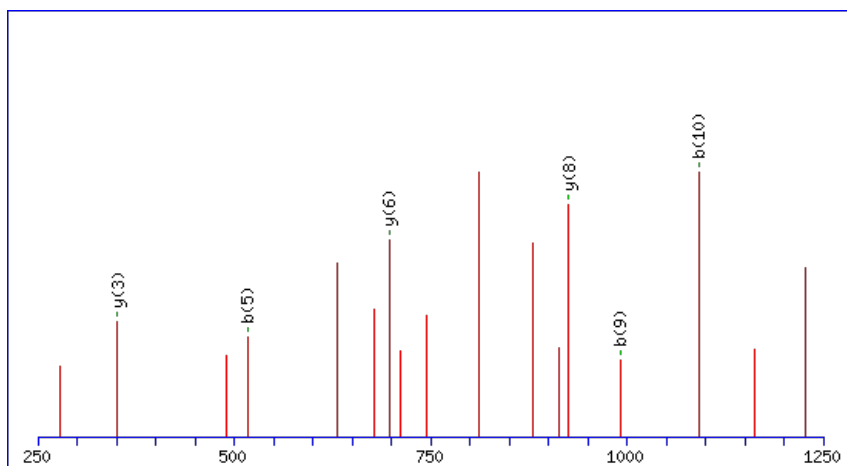

**Monoisotopic mass of neutral peptide Mr(calc):** 1440.7483

**Fixed modifications:** Carbamidomethyl (C) (apply to specified residues or termini only)

**Ions Score:** 19 **Expect:** 0.047

**Matches:** 6/112 fragment ions using 9 most intense peaks ([help](#))

| #  | b                | b <sup>++</sup> | b <sup>*</sup> | b <sup>*++</sup> | b <sup>0</sup> | b <sup>0++</sup> | Seq. | y               | y <sup>++</sup> | y <sup>*</sup> | y <sup>*++</sup> | y <sup>0</sup> | y <sup>0++</sup> | #  |
|----|------------------|-----------------|----------------|------------------|----------------|------------------|------|-----------------|-----------------|----------------|------------------|----------------|------------------|----|
| 1  | 115.0884         | 58.0478         |                |                  |                |                  | L    |                 |                 |                |                  |                |                  | 13 |
| 2  | 173.1069         | 87.0571         |                |                  |                |                  | G    | 1327.6745       | 664.3409        | 1309.6509      | 655.3291         | 1309.6639      | 655.3356         | 12 |
| 3  | 289.1309         | 145.0691        |                |                  | 271.1203       | 136.0638         | D    | 1269.6560       | 635.3316        | 1251.6324      | 626.3199         | 1251.6454      | 626.3264         | 11 |
| 4  | 377.1599         | 189.0836        |                |                  | 359.1493       | 180.0783         | S    | 1153.6320       | 577.3197        | 1135.6085      | 568.3079         | 1135.6215      | 568.3144         | 10 |
| 5  | <b>517.2099</b>  | 259.1086        |                |                  | 499.1994       | 250.1033         | H    | 1065.6030       | 533.3051        | 1047.5794      | 524.2933         |                |                  | 9  |
| 6  | 647.2990         | 324.1531        | 629.2754       | 315.1413         | 629.2884       | 315.1478         | K    | <b>925.5530</b> | 463.2801        | 907.5294       | 454.2683         |                |                  | 8  |
| 7  | 745.3488         | 373.1780        | 727.3252       | 364.1662         | 727.3382       | 364.1727         | P    | 795.4639        | 398.2356        | 777.4403       | 389.2238         |                |                  | 7  |
| 8  | 877.3863         | 439.1968        | 859.3627       | 430.1850         | 859.3757       | 430.1915         | M    | <b>697.4141</b> | 349.2107        | 679.3905       | 340.1989         |                |                  | 6  |
| 9  | <b>991.4674</b>  | 496.2373        | 973.4438       | 487.2255         | 973.4568       | 487.2320         | L    | 565.3766        | 283.1919        | 547.3530       | 274.1801         |                |                  | 5  |
| 10 | <b>1091.5328</b> | 546.2701        | 1073.5092      | 537.2583         | 1073.5223      | 537.2648         | V    | 451.2955        | 226.1514        | 433.2719       | 217.1396         |                |                  | 4  |
| 11 | 1221.6219        | 611.3146        | 1203.5983      | 602.3028         | 1203.6113      | 602.3093         | K    | <b>351.2301</b> | 176.1187        | 333.2065       | 167.1069         |                |                  | 3  |
| 12 | 1293.6560        | 647.3316        | 1275.6324      | 638.3199         | 1275.6454      | 638.3264         | A    | 221.1410        | 111.0741        | 203.1174       | 102.0624         |                |                  | 2  |
| 13 |                  |                 |                |                  |                |                  | K    | 149.1069        | 75.0571         | 131.0833       | 66.0453          |                |                  | 1  |

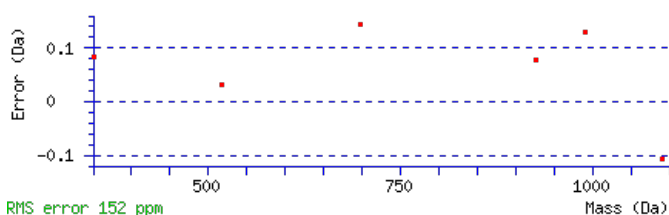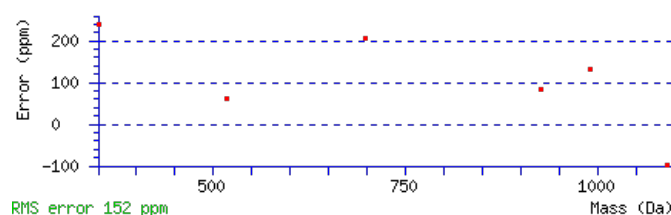

NCBI **BLAST** search of [LGDSHKPMLVKAK](#)



## AT5G26730.1

(Parameters: blastp, nr protein database, expect=20000, no filter, PAM30)

Other BLAST [web gateways](#)

### All matches to this query

| Score | Mr(calc)  | Delta   | Sequence                      |
|-------|-----------|---------|-------------------------------|
| 19.4  | 1440.7483 | -0.0041 | <a href="#">LGDSHKPMLVKAK</a> |
| 3.9   | 1440.7423 | 0.0020  | <a href="#">QFAEYKTVISLK</a>  |
| 2.5   | 1440.7445 | -0.0002 | <a href="#">LVYKSFLFGPEK</a>  |
| 0.7   | 1440.7483 | -0.0041 | <a href="#">RMALQSLPOPLVA</a> |
| 0.3   | 1440.7423 | 0.0020  | <a href="#">GYLQDLVYKLSK</a>  |

Mascot: <http://www.matrixscience.com/>

**Peptide View**MS/MS Fragmentation of **YLDNPLNIDLVDQDEK**

Found in **AT5G26742.1** in **TAIR\_Arabidopsis**, Symbols: EMB1138 | EMB1138 (EMBRYO DEFECTIVE 1138); ATP binding / ATP-dependent helicase | chr5:9285543-9288874 REVERSE

Match to Query 8738: 1980.880104 from(991.447328,2+) index(8468)

Title: Elution from: 77.894 to 77.894 scan no 11479 cid35.00 polarity:+

Data file D1d-1\_3.mgf

Click mouse within plot area to zoom in by factor of two about that point

Or,   to  Da

Label all possible matches  Label matches used for scoring

Show Y-axis

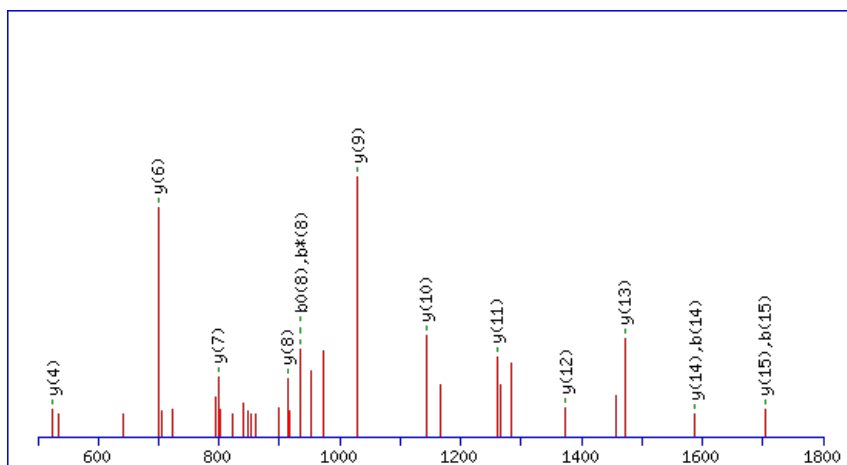

**Monoisotopic mass of neutral peptide Mr(calc):** 1980.8803

**Fixed modifications:** Carbamidomethyl (C) (apply to specified residues or termini only)

**Ions Score:** 117 **Expect:** 1.4e-011

**Matches:** 15/180 fragment ions using 12 most intense peaks ([help](#))

| #  | b                | b <sup>++</sup> | b*              | b <sup>*++</sup> | b <sup>0</sup>  | b <sup>0++</sup> | Seq. | y                | y <sup>++</sup> | y*        | y <sup>*++</sup> | y <sup>0</sup> | y <sup>0++</sup> | #  |
|----|------------------|-----------------|-----------------|------------------|-----------------|------------------|------|------------------|-----------------|-----------|------------------|----------------|------------------|----|
| 1  | 165.0676         | 83.0375         |                 |                  |                 |                  | Y    |                  |                 |           |                  |                |                  | 17 |
| 2  | 279.1487         | 140.0780        |                 |                  |                 |                  | L    | 1817.8272        | 909.4172        | 1799.8036 | 900.4054         | 1799.8166      | 900.4120         | 16 |
| 3  | 395.1727         | 198.0900        |                 |                  | 377.1622        | 189.0847         | D    | <b>1703.7461</b> | 852.3767        | 1685.7225 | 843.3649         | 1685.7355      | 843.3714         | 15 |
| 4  | 511.2097         | 256.1085        | 493.1861        | 247.0967         | 493.1991        | 247.1032         | N    | <b>1587.7221</b> | 794.3647        | 1569.6985 | 785.3529         | 1569.7116      | 785.3594         | 14 |
| 5  | 609.2595         | 305.1334        | 591.2359        | 296.1216         | 591.2489        | 296.1281         | P    | <b>1471.6851</b> | 736.3462        | 1453.6615 | 727.3344         | 1453.6746      | 727.3409         | 13 |
| 6  | 723.3406         | 362.1739        | 705.3170        | 353.1622         | 705.3300        | 353.1687         | L    | <b>1373.6353</b> | 687.3213        | 1355.6117 | 678.3095         | 1355.6248      | 678.3160         | 12 |
| 7  | 839.3776         | 420.1924        | 821.3540        | 411.1807         | 821.3670        | 411.1872         | N    | <b>1259.5542</b> | 630.2808        | 1241.5306 | 621.2690         | 1241.5437      | 621.2755         | 11 |
| 8  | 953.4587         | 477.2330        | <b>935.4351</b> | 468.2212         | <b>935.4481</b> | 468.2277         | I    | <b>1143.5172</b> | 572.2623        | 1125.4936 | 563.2505         | 1125.5067      | 563.2570         | 10 |
| 9  | 1069.4827        | 535.2450        | 1051.4591       | 526.2332         | 1051.4721       | 526.2397         | D    | <b>1029.4361</b> | 515.2217        | 1011.4125 | 506.2099         | 1011.4256      | 506.2164         | 9  |
| 10 | 1183.5638        | 592.2855        | 1165.5402       | 583.2737         | 1165.5532       | 583.2802         | L    | <b>913.4122</b>  | 457.2097        | 895.3886  | 448.1979         | 895.4016       | 448.2044         | 8  |
| 11 | 1283.6292        | 642.3183        | 1265.6057       | 633.3065         | 1265.6187       | 633.3130         | V    | <b>799.3311</b>  | 400.1692        | 781.3075  | 391.1574         | 781.3205       | 391.1639         | 7  |
| 12 | 1341.6477        | 671.3275        | 1323.6241       | 662.3157         | 1323.6372       | 662.3222         | G    | <b>699.2656</b>  | 350.1364        | 681.2420  | 341.1246         | 681.2550       | 341.1312         | 6  |
| 13 | 1457.6717        | 729.3395        | 1439.6481       | 720.3277         | 1439.6611       | 720.3342         | D    | 641.2471         | 321.1272        | 623.2235  | 312.1154         | 623.2365       | 312.1219         | 5  |
| 14 | <b>1587.7244</b> | 794.3658        | 1569.7008       | 785.3540         | 1569.7138       | 785.3605         | Q    | <b>525.2231</b>  | 263.1152        | 507.1995  | 254.1034         | 507.2126       | 254.1099         | 4  |
| 15 | <b>1703.7483</b> | 852.3778        | 1685.7248       | 843.3660         | 1685.7378       | 843.3725         | D    | 395.1705         | 198.0889        | 377.1469  | 189.0771         | 377.1599       | 189.0836         | 3  |
| 16 | 1833.7880        | 917.3976        | 1815.7644       | 908.3858         | 1815.7774       | 908.3923         | E    | 279.1465         | 140.0769        | 261.1229  | 131.0651         | 261.1359       | 131.0716         | 2  |
| 17 |                  |                 |                 |                  |                 |                  | K    | 149.1069         | 75.0571         | 131.0833  | 66.0453          |                |                  | 1  |

# AT5G26742.1

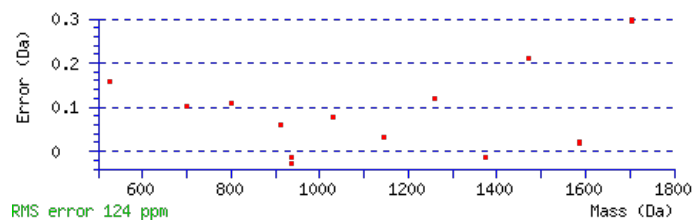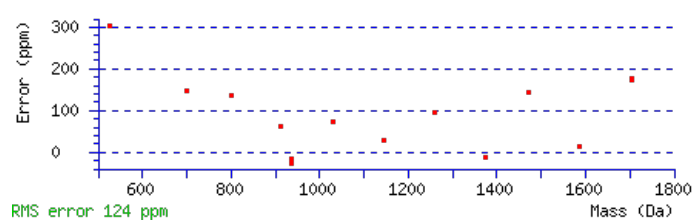

NCBI **BLAST** search of [YLDNPLNIDLVDQDEK](#)  
(Parameters: blastp, nr protein database, expect=20000, no filter, PAM30)  
Other BLAST [web gateways](#)

## All matches to this query

| Score | Mr(calc)  | Delta   | Sequence                           |
|-------|-----------|---------|------------------------------------|
| 117.1 | 1980.8803 | -0.0002 | <a href="#">YLDNPLNIDLVDQDEK</a>   |
| 20.1  | 1980.8755 | 0.0046  | <a href="#">MGEVEVVADLPGFPDNVR</a> |
| 0.4   | 1980.8766 | 0.0035  | <a href="#">YFFAFVFNLDFFDPVR</a>   |

Mascot: <http://www.matrixscience.com/>

**Peptide View**MS/MS Fragmentation of **IFLIADDR**

Found in **AT5G26742.2** in **TAIR\_Arabidopsis**, Symbols: EMB1138 | EMB1138 (EMBRYO DEFECTIVE 1138); ATP binding / ATP-dependent helicase | chr5:9285543-9288874 REVERSE

Match to Query 2286: 961.523632 from(481.769092,2+) index(6034)

Title: Elution from: 53.340 to 53.340 scan no 7606 cid35.00 polarity:+

Data file C7-2\_1.mgf

Click mouse within plot area to zoom in by factor of two about that point

Or,   to  Da

Label all possible matches  Label matches used for scoring

Show Y-axis

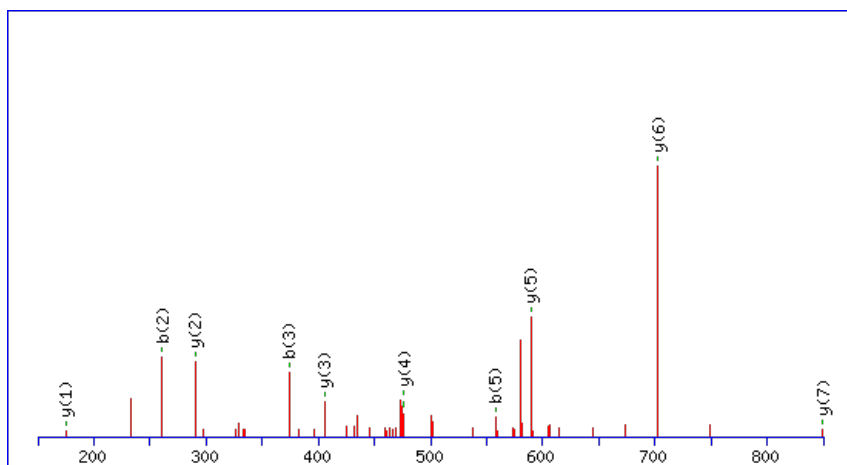

**Monoisotopic mass of neutral peptide Mr(calc):** 961.5233

**Fixed modifications:** Carbamidomethyl (C) (apply to specified residues or termini only)

**Ions Score:** 56 **Expect:** 8.4e-006

**Matches:** 10/58 fragment ions using 18 most intense peaks ([help](#))

| # | b               | b <sup>++</sup> | b <sup>0</sup> | b <sup>0++</sup> | Seq. | y               | y <sup>++</sup> | y*       | y <sup>*++</sup> | y <sup>0</sup> | y <sup>0++</sup> | # |
|---|-----------------|-----------------|----------------|------------------|------|-----------------|-----------------|----------|------------------|----------------|------------------|---|
| 1 | 114.0913        | 57.5493         |                |                  | I    |                 |                 |          |                  |                |                  | 8 |
| 2 | <b>261.1598</b> | 131.0835        |                |                  | F    | <b>849.4465</b> | 425.2269        | 832.4199 | 416.7136         | 831.4359       | 416.2216         | 7 |
| 3 | <b>374.2438</b> | 187.6255        |                |                  | L    | <b>702.3781</b> | 351.6927        | 685.3515 | 343.1794         | 684.3675       | 342.6874         | 6 |
| 4 | 487.3279        | 244.1676        |                |                  | I    | <b>589.2940</b> | 295.1506        | 572.2675 | 286.6374         | 571.2835       | 286.1454         | 5 |
| 5 | <b>558.3650</b> | 279.6861        |                |                  | A    | <b>476.2100</b> | 238.6086        | 459.1834 | 230.0953         | 458.1994       | 229.6033         | 4 |
| 6 | 673.3919        | 337.1996        | 655.3814       | 328.1943         | D    | <b>405.1728</b> | 203.0901        | 388.1463 | 194.5768         | 387.1623       | 194.0848         | 3 |
| 7 | 788.4189        | 394.7131        | 770.4083       | 385.7078         | D    | <b>290.1459</b> | 145.5766        | 273.1193 | 137.0633         | 272.1353       | 136.5713         | 2 |
| 8 |                 |                 |                |                  | R    | <b>175.1190</b> | 88.0631         | 158.0924 | 79.5498          |                |                  | 1 |

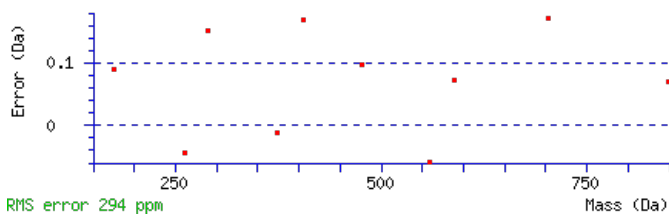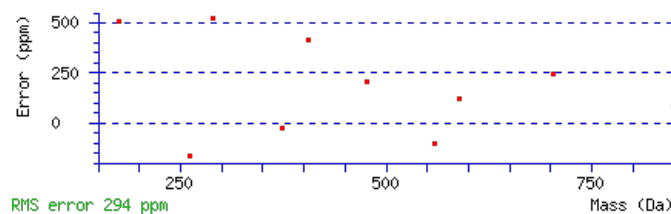

NCBI **BLAST** search of [IFLIADDR](#)

(Parameters: blastp, nr protein database, expect=20000, no filter, PAM30)

Other BLAST [web gateways](#)

**All matches to this query**

| Score | Mr(calc) | Delta  | Sequence                 |
|-------|----------|--------|--------------------------|
| 56.1  | 961.5233 | 0.0004 | <a href="#">IFLIADDR</a> |

## AT5G26742.2

|      |          |         |                           |
|------|----------|---------|---------------------------|
| 11.2 | 961.5233 | 0.0004  | <a href="#">SDSWLKVK</a>  |
| 8.9  | 961.5233 | 0.0004  | <a href="#">IPSSFGNLK</a> |
| 6.3  | 961.5233 | 0.0004  | <a href="#">FLVELADR</a>  |
| 5.6  | 961.5233 | 0.0004  | <a href="#">KEFSLPNK</a>  |
| 4.2  | 961.5233 | 0.0004  | <a href="#">KESPFLNK</a>  |
| 2.7  | 961.5233 | 0.0004  | <a href="#">LFDIIDAR</a>  |
| 2.7  | 961.5233 | 0.0004  | <a href="#">LFQNAIEK</a>  |
| 2.0  | 961.5233 | 0.0004  | <a href="#">YPPDSKKK</a>  |
| 1.5  | 961.5246 | -0.0010 | <a href="#">LRSFFHR</a>   |

Mascot: <http://www.matrixscience.com/>

**Peptide View**MS/MS Fragmentation of **MEQGTIKIK**Found in **AT5G27020.1** in **TAIR\_Arabidopsis**, Symbols: | unknown protein | chr5:9508190-9508684 FORWARD

Match to Query 2494: 1058.545550 from(530.280051,2+) index(5549)

Title: Elution from: 53.265 to 53.265 scan no 7214 cid35.00 polarity:+

Data file D1d-1-2.mgf

Click mouse within plot area to zoom in by factor of two about that point

Or,   to  Da Label all possible matches  Label matches used for scoring Show Y-axis 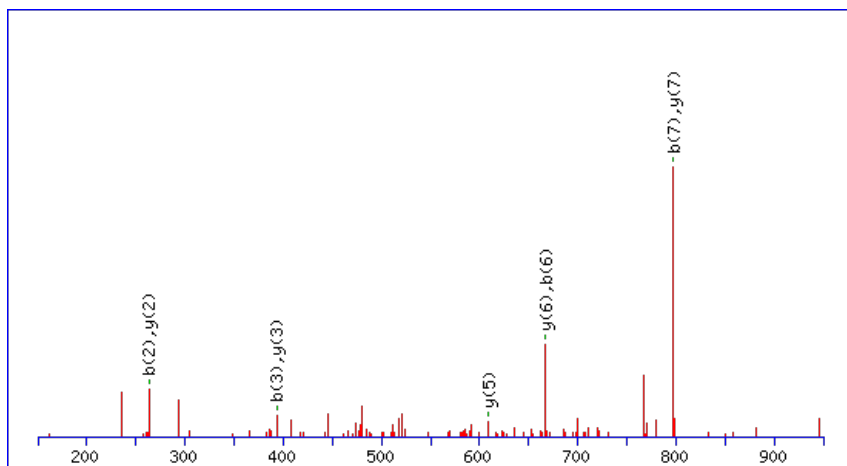Monoisotopic mass of neutral peptide **Mr(calc)**: 1058.5438**Fixed modifications**: Carbamidomethyl (C) (apply to specified residues or termini only)**Ions Score**: 23 **Expect**: 0.039**Matches**: 9/82 fragment ions using 16 most intense peaks ([help](#))

| # | b               | b <sup>++</sup> | b*       | b <sup>*++</sup> | b <sup>0</sup> | b <sup>0++</sup> | Seq.     | y               | y <sup>++</sup> | y*       | y <sup>*++</sup> | y <sup>0</sup> | y <sup>0++</sup> | # |
|---|-----------------|-----------------|----------|------------------|----------------|------------------|----------|-----------------|-----------------|----------|------------------|----------------|------------------|---|
| 1 | 133.0448        | 67.0260         |          |                  |                |                  | <b>M</b> |                 |                 |          |                  |                |                  | 9 |
| 2 | <b>263.0844</b> | 132.0458        |          |                  | 245.0739       | 123.0406         | <b>E</b> | 927.5136        | 464.2604        | 909.4900 | 455.2486         | 909.5030       | 455.2552         | 8 |
| 3 | <b>393.1371</b> | 197.0722        | 375.1135 | 188.0604         | 375.1265       | 188.0669         | <b>Q</b> | <b>797.4740</b> | 399.2406        | 779.4504 | 390.2288         | 779.4634       | 390.2353         | 7 |
| 4 | 451.1556        | 226.0814        | 433.1320 | 217.0696         | 433.1450       | 217.0761         | <b>G</b> | <b>667.4213</b> | 334.2143        | 649.3977 | 325.2025         | 649.4108       | 325.2090         | 6 |
| 5 | 553.2003        | 277.1038        | 535.1767 | 268.0920         | 535.1897       | 268.0985         | <b>T</b> | <b>609.4028</b> | 305.2050        | 591.3792 | 296.1933         | 591.3923       | 296.1998         | 5 |
| 6 | <b>667.2814</b> | 334.1443        | 649.2578 | 325.1325         | 649.2708       | 325.1390         | <b>I</b> | 507.3581        | 254.1827        | 489.3345 | 245.1709         |                |                  | 4 |
| 7 | <b>797.3704</b> | 399.1888        | 779.3468 | 390.1771         | 779.3598       | 390.1836         | <b>K</b> | <b>393.2770</b> | 197.1421        | 375.2534 | 188.1303         |                |                  | 3 |
| 8 | 911.4515        | 456.2294        | 893.4279 | 447.2176         | 893.4409       | 447.2241         | <b>I</b> | <b>263.1880</b> | 132.0976        | 245.1644 | 123.0858         |                |                  | 2 |
| 9 |                 |                 |          |                  |                |                  | <b>K</b> | 149.1069        | 75.0571         | 131.0833 | 66.0453          |                |                  | 1 |

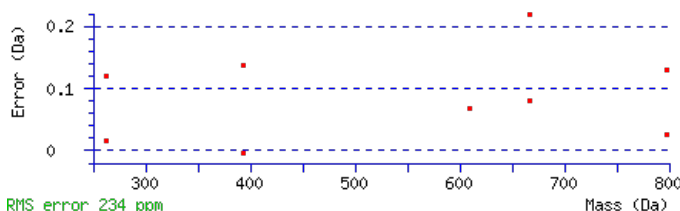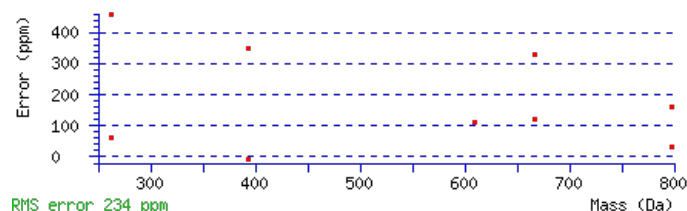NCBI **BLAST** search of [MEQGTIKIK](#)

(Parameters: blastp, nr protein database, expect=20000, no filter, PAM30)

Other BLAST [web gateways](#)**All matches to this query**

| Score | Mr(calc)  | Delta  | Sequence                  |
|-------|-----------|--------|---------------------------|
| 23.2  | 1058.5438 | 0.0017 | <a href="#">MEQGTIKIK</a> |

**AT5G27020.1**

|      |           |         |                            |
|------|-----------|---------|----------------------------|
| 14.2 | 1058.5438 | 0.0017  | <a href="#">KCLGLESIK</a>  |
| 13.0 | 1058.5438 | 0.0017  | <a href="#">LGTVMELLR</a>  |
| 11.1 | 1058.5438 | 0.0017  | <a href="#">LMAQNLLTK</a>  |
| 11.1 | 1058.5465 | -0.0009 | <a href="#">MQKPKVGTR</a>  |
| 9.9  | 1058.5465 | -0.0010 | <a href="#">KAGAMNALIR</a> |
| 9.4  | 1058.5431 | 0.0024  | <a href="#">RIHYSQLK</a>   |
| 9.2  | 1058.5438 | 0.0017  | <a href="#">KEMEA AKIK</a> |
| 9.0  | 1058.5465 | -0.0009 | <a href="#">EMRLVGALR</a>  |
| 7.8  | 1058.5438 | 0.0017  | <a href="#">LSEVTMLR</a>   |

**Mascot:** <http://www.matrixscience.com/>

**Peptide View**MS/MS Fragmentation of **SLSTTLMYSFAQR**Found in **AT5G27410.1** in **TAIR\_Arabidopsis**, Symbols: | aminotransferase class IV family protein | chr:5:9678824-9682471 FORWARD

Match to Query 6319: 1503.738369 from(502.253399,3+) index(4571)

Title: Elution from: 42.401 to 42.401 scan no 5766 cid35.00 polarity:+

Data file D6h-1\_2.mgf

Click mouse within plot area to zoom in by factor of two about that point

Or,   to  Da Label all possible matches  Label matches used for scoring Show Y-axis 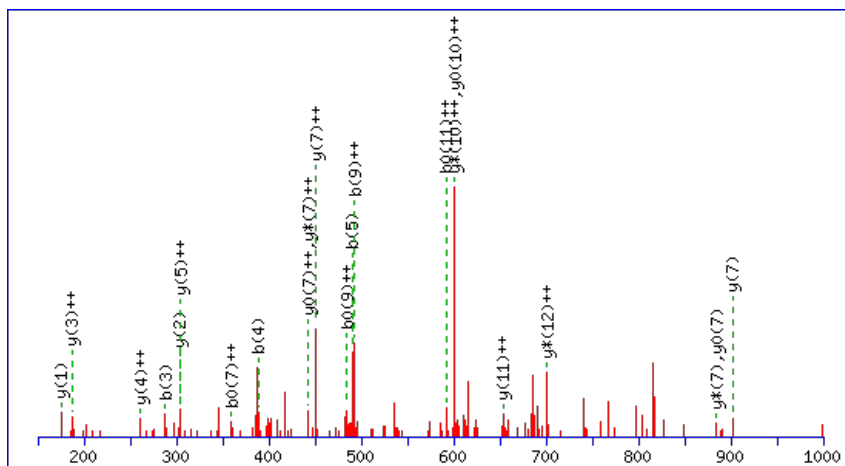Monoisotopic mass of neutral peptide  $M_r(\text{calc})$ : 1503.7392

Fixed modifications: Carbamidomethyl (C) (apply to specified residues or termini only)

Ions Score: 23 Expect: 0.018

Matches : 22/114 fragment ions using 40 most intense peaks ([help](#))

| #  | b         | b <sup>++</sup> | b <sup>*</sup> | b <sup>*++</sup> | b <sup>0</sup> | b <sup>0++</sup> | Seq. | y         | y <sup>++</sup> | y <sup>*</sup> | y <sup>*++</sup> | y <sup>0</sup> | y <sup>0++</sup> | #  |
|----|-----------|-----------------|----------------|------------------|----------------|------------------|------|-----------|-----------------|----------------|------------------|----------------|------------------|----|
| 1  | 88.0393   | 44.5233         |                |                  | 70.0287        | 35.5180          | S    |           |                 |                |                  |                |                  | 13 |
| 2  | 201.1234  | 101.0653        |                |                  | 183.1128       | 92.0600          | L    | 1417.7144 | 709.3608        | 1400.6879      | 700.8476         | 1399.7038      | 700.3556         | 12 |
| 3  | 288.1554  | 144.5813        |                |                  | 270.1448       | 135.5761         | S    | 1304.6303 | 652.8188        | 1287.6038      | 644.3055         | 1286.6198      | 643.8135         | 11 |
| 4  | 389.2031  | 195.1052        |                |                  | 371.1925       | 186.0999         | T    | 1217.5983 | 609.3028        | 1200.5718      | 600.7895         | 1199.5878      | 600.2975         | 10 |
| 5  | 490.2508  | 245.6290        |                |                  | 472.2402       | 236.6237         | T    | 1116.5506 | 558.7790        | 1099.5241      | 550.2657         | 1098.5401      | 549.7737         | 9  |
| 6  | 603.3348  | 302.1710        |                |                  | 585.3243       | 293.1658         | L    | 1015.5030 | 508.2551        | 998.4764       | 499.7418         | 997.4924       | 499.2498         | 8  |
| 7  | 734.3753  | 367.6913        |                |                  | 716.3647       | 358.6860         | M    | 902.4189  | 451.7131        | 885.3924       | 443.1998         | 884.4083       | 442.7078         | 7  |
| 8  | 897.4386  | 449.2230        |                |                  | 879.4281       | 440.2177         | Y    | 771.3784  | 386.1928        | 754.3519       | 377.6796         | 753.3678       | 377.1876         | 6  |
| 9  | 984.4707  | 492.7390        |                |                  | 966.4601       | 483.7337         | S    | 608.3151  | 304.6612        | 591.2885       | 296.1479         | 590.3045       | 295.6559         | 5  |
| 10 | 1131.5391 | 566.2732        |                |                  | 1113.5285      | 557.2679         | F    | 521.2831  | 261.1452        | 504.2565       | 252.6319         |                |                  | 4  |
| 11 | 1202.5762 | 601.7917        |                |                  | 1184.5656      | 592.7864         | A    | 374.2146  | 187.6110        | 357.1881       | 179.0977         |                |                  | 3  |
| 12 | 1330.6348 | 665.8210        | 1313.6082      | 657.3077         | 1312.6242      | 656.8157         | Q    | 303.1775  | 152.0924        | 286.1510       | 143.5791         |                |                  | 2  |
| 13 |           |                 |                |                  |                |                  | R    | 175.1190  | 88.0631         | 158.0924       | 79.5498          |                |                  | 1  |

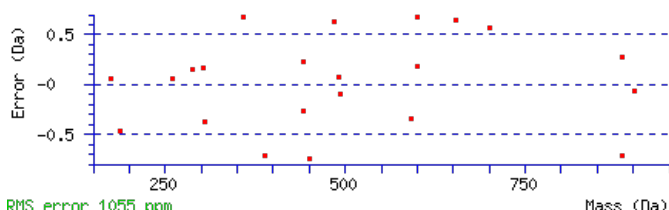

RMS error 1055 ppm

Mass (Da)

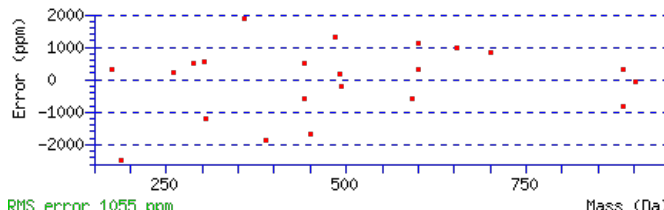

RMS error 1055 ppm

Mass (Da)

NCBI **BLAST** search of **SLSTTLMYSFAQR**

(Parameters: blastp, nr protein database, expect=20000, no filter, PAM30)

Other BLAST [web gateways](#)



AT5G27410.1

All matches to this query

| Score | Mr(calc)  | Delta   | Sequence                      |
|-------|-----------|---------|-------------------------------|
| 23.3  | 1503.7392 | -0.0008 | <a href="#">SLSTLMYSFAQR</a>  |
| 10.3  | 1503.7416 | -0.0033 | <a href="#">EISKDEISDALER</a> |
| 5.7   | 1503.7425 | -0.0042 | <a href="#">CDIVDILLEMQR</a>  |

Mascot: <http://www.matrixscience.com/>

## Peptide View

MS/MS Fragmentation of **CAQLAQFDEELYK**

Found in **AT5G27470.1** in **TAIR\_Arabidopsis**, Symbols: | seryl-tRNA synthetase / serine--tRNA ligase | chr5:9695090-9697157 FORWARD

Match to Query 7400: 1613.738950 from(807.876751,2+) index(6815)

Title: Elution from: 61.259 to 61.259 scan no 8786 cid35.00 polarity:+

Data file D6h-2\_1.mgf

Click mouse within plot area to zoom in by factor of two about that point

Or,   to  Da

Label all possible matches  Label matches used for scoring

Show Y-axis

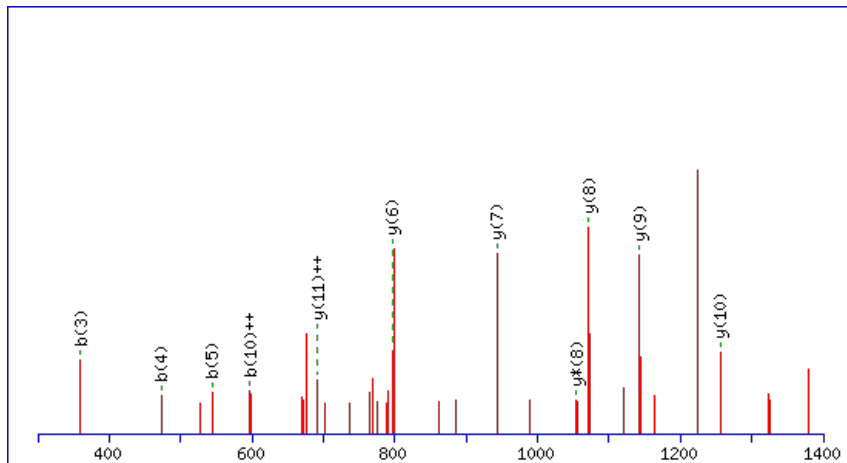

Monoisotopic mass of neutral peptide  $M_r(\text{calc})$ : 1613.7395

Fixed modifications: Carbamidomethyl (C) (apply to specified residues or termini only)

Ions Score: 22 Expect: 0.014

Matches : 11/120 fragment ions using 20 most intense peaks ([help](#))

| #  | b               | b <sup>++</sup> | b <sup>*</sup> | b <sup>*++</sup> | b <sup>0</sup> | b <sup>0++</sup> | Seq. | y                | y <sup>++</sup> | y <sup>*</sup>   | y <sup>*++</sup> | y <sup>0</sup> | y <sup>0++</sup> | #  |
|----|-----------------|-----------------|----------------|------------------|----------------|------------------|------|------------------|-----------------|------------------|------------------|----------------|------------------|----|
| 1  | 161.0379        | 81.0226         |                |                  |                |                  | C    |                  |                 |                  |                  |                |                  | 13 |
| 2  | 232.0750        | 116.5412        |                |                  |                |                  | A    | 1454.7162        | 727.8617        | 1437.6896        | 719.3485         | 1436.7056      | 718.8564         | 12 |
| 3  | <b>360.1336</b> | 180.5704        | 343.1071       | 172.0572         |                |                  | Q    | 1383.6791        | <b>692.3432</b> | 1366.6525        | 683.8299         | 1365.6685      | 683.3379         | 11 |
| 4  | <b>473.2177</b> | 237.1125        | 456.1911       | 228.5992         |                |                  | L    | <b>1255.6205</b> | 628.3139        | 1238.5939        | 619.8006         | 1237.6099      | 619.3086         | 10 |
| 5  | <b>544.2548</b> | 272.6310        | 527.2282       | 264.1178         |                |                  | A    | <b>1142.5364</b> | 571.7719        | 1125.5099        | 563.2586         | 1124.5259      | 562.7666         | 9  |
| 6  | 672.3134        | 336.6603        | 655.2868       | 328.1471         |                |                  | Q    | <b>1071.4993</b> | 536.2533        | <b>1054.4728</b> | 527.7400         | 1053.4888      | 527.2480         | 8  |
| 7  | 819.3818        | 410.1945        | 802.3552       | 401.6813         |                |                  | F    | <b>943.4407</b>  | 472.2240        | 926.4142         | 463.7107         | 925.4302       | 463.2187         | 7  |
| 8  | 934.4087        | 467.7080        | 917.3822       | 459.1947         | 916.3982       | 458.7027         | D    | <b>796.3723</b>  | 398.6898        | 779.3458         | 390.1765         | 778.3618       | 389.6845         | 6  |
| 9  | 1063.4513       | 532.2293        | 1046.4248      | 523.7160         | 1045.4408      | 523.2240         | E    | 681.3454         | 341.1763        | 664.3188         | 332.6631         | 663.3348       | 332.1710         | 5  |
| 10 | 1192.4939       | <b>596.7506</b> | 1175.4674      | 588.2373         | 1174.4834      | 587.7453         | E    | 552.3028         | 276.6550        | 535.2762         | 268.1418         | 534.2922       | 267.6498         | 4  |
| 11 | 1305.5780       | 653.2926        | 1288.5514      | 644.7794         | 1287.5674      | 644.2873         | L    | 423.2602         | 212.1337        | 406.2336         | 203.6205         |                |                  | 3  |
| 12 | 1468.6413       | 734.8243        | 1451.6148      | 726.3110         | 1450.6307      | 725.8190         | Y    | 310.1761         | 155.5917        | 293.1496         | 147.0784         |                |                  | 2  |
| 13 |                 |                 |                |                  |                |                  | K    | 147.1128         | 74.0600         | 130.0863         | 65.5468          |                |                  | 1  |

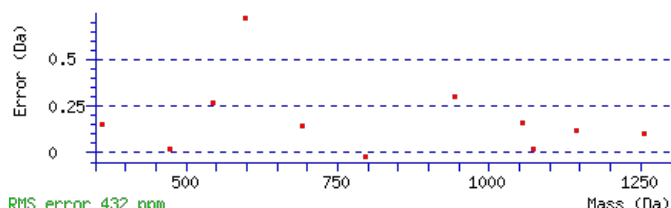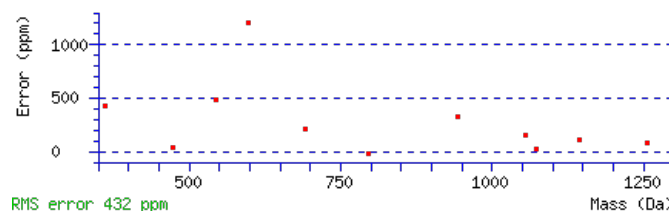

NCBI BLAST search of **CAQLAQFDEELYK**

(Parameters: blastp, nr protein database, expect=20000, no filter, PAM30)

Other BLAST [web gateways](#)

AT5G27470.1

All matches to this query

| Score | Mr(calc)  | Delta   | Sequence                      |
|-------|-----------|---------|-------------------------------|
| 21.9  | 1613.7395 | -0.0006 | <a href="#">CAQLAQFDEELYK</a> |

Mascot: <http://www.matrixscience.com/>

## Peptide View

MS/MS Fragmentation of **AVQMLEKCGTTQVEVDASGSLTYPKDK**

Found in **AT5G27620.1** in **TAIR\_Arabidopsis**, Symbols: CYCH;1 | CYCH;1 (CYCLIN H;1); cyclin-dependent protein kinase/ protein binding/ protein kinase | chr5:9771765-9774687 FORWARD

Match to Query 10738: 2970.425673 from(991.149167,3+) index(9935)

Title: Elution from: 90.268 to 90.268 scan no 13751 cid35.00 polarity:+

Data file D1d-3\_2.mgf

Click mouse within plot area to zoom in by factor of two about that point

Or, Plot from  to  Da

Label all possible matches  Label matches used for scoring

Show Y-axis

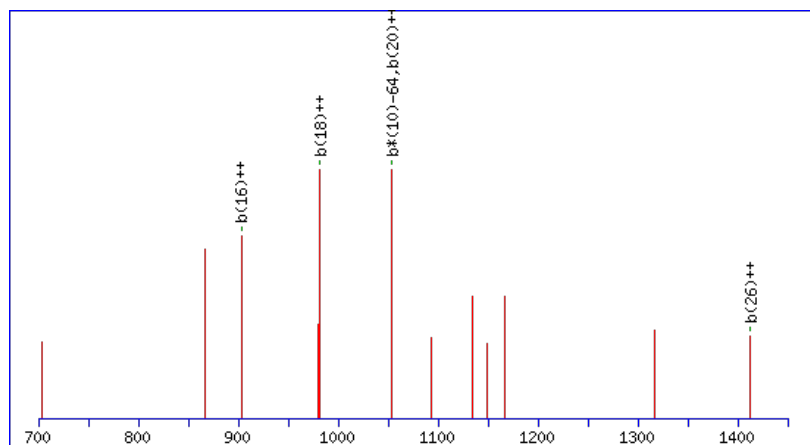

Monoisotopic mass of neutral peptide  $M_r(\text{calc})$ : 2970.4314

Fixed modifications: Carbamidomethyl (C) (apply to specified residues or termini only)

Variable modifications:

M4 : Oxidation (M), with neutral losses 0.0000 (shown in table), 63.9983

Ions Score: 19 Expect: 0.027

Matches : 5/448 fragment ions using 7 most intense peaks ([help](#))

| #  | b         | b <sup>++</sup>  | b*        | b <sup>*++</sup> | b <sup>0</sup> | b <sup>0++</sup> | Seq | y         | y <sup>++</sup> | y*        | y <sup>*++</sup> | y <sup>0</sup> | y <sup>0++</sup> | #  |
|----|-----------|------------------|-----------|------------------|----------------|------------------|-----|-----------|-----------------|-----------|------------------|----------------|------------------|----|
| 1  | 72.0444   | 36.5258          |           |                  |                |                  | A   |           |                 |           |                  |                |                  | 27 |
| 2  | 171.1128  | 86.0600          |           |                  |                |                  | V   | 2900.4016 | 1450.7044       | 2883.3751 | 1442.1912        | 2882.3910      | 1441.6992        | 26 |
| 3  | 299.1714  | 150.0893         | 282.1448  | 141.5761         |                |                  | Q   | 2801.3332 | 1401.1702       | 2784.3066 | 1392.6570        | 2783.3226      | 1392.1650        | 25 |
| 4  | 446.2068  | 223.6070         | 429.1802  | 215.0938         |                |                  | M   | 2673.2746 | 1337.1409       | 2656.2481 | 1328.6277        | 2655.2640      | 1328.1357        | 24 |
| 5  | 559.2908  | 280.1491         | 542.2643  | 271.6358         |                |                  | L   | 2526.2392 | 1263.6232       | 2509.2127 | 1255.1100        | 2508.2286      | 1254.6180        | 23 |
| 6  | 688.3334  | 344.6704         | 671.3069  | 336.1571         | 670.3229       | 335.6651         | E   | 2413.1551 | 1207.0812       | 2396.1286 | 1198.5679        | 2395.1446      | 1198.0759        | 22 |
| 7  | 816.4284  | 408.7178         | 799.4019  | 400.2046         | 798.4178       | 399.7126         | K   | 2284.1126 | 1142.5599       | 2267.0860 | 1134.0466        | 2266.1020      | 1133.5546        | 21 |
| 8  | 976.4591  | 488.7332         | 959.4325  | 480.2199         | 958.4485       | 479.7279         | C   | 2156.0176 | 1078.5124       | 2138.9910 | 1069.9992        | 2138.0070      | 1069.5072        | 20 |
| 9  | 1033.4805 | 517.2439         | 1016.4540 | 508.7306         | 1015.4699      | 508.2386         | G   | 1995.9869 | 998.4971        | 1978.9604 | 989.9838         | 1977.9764      | 989.4918         | 19 |
| 10 | 1134.5282 | 567.7677         | 1117.5016 | 559.2545         | 1116.5176      | 558.7625         | T   | 1938.9655 | 969.9864        | 1921.9389 | 961.4731         | 1920.9549      | 960.9811         | 18 |
| 11 | 1235.5759 | 618.2916         | 1218.5493 | 609.7783         | 1217.5653      | 609.2863         | T   | 1837.9178 | 919.4625        | 1820.8913 | 910.9493         | 1819.9072      | 910.4573         | 17 |
| 12 | 1363.6345 | 682.3209         | 1346.6079 | 673.8076         | 1345.6239      | 673.3156         | Q   | 1736.8701 | 868.9387        | 1719.8436 | 860.4254         | 1718.8596      | 859.9334         | 16 |
| 13 | 1462.7029 | 731.8551         | 1445.6763 | 723.3418         | 1444.6923      | 722.8498         | V   | 1608.8115 | 804.9094        | 1591.7850 | 796.3961         | 1590.8010      | 795.9041         | 15 |
| 14 | 1591.7455 | 796.3764         | 1574.7189 | 787.8631         | 1573.7349      | 787.3711         | E   | 1509.7431 | 755.3752        | 1492.7166 | 746.8619         | 1491.7326      | 746.3699         | 14 |
| 15 | 1690.8139 | 845.9106         | 1673.7873 | 837.3973         | 1672.8033      | 836.9053         | V   | 1380.7005 | 690.8539        | 1363.6740 | 682.3406         | 1362.6900      | 681.8486         | 13 |
| 16 | 1805.8408 | <b>903.4240</b>  | 1788.8143 | 894.9108         | 1787.8303      | 894.4188         | D   | 1281.6321 | 641.3197        | 1264.6056 | 632.8064         | 1263.6216      | 632.3144         | 12 |
| 17 | 1876.8779 | 938.9426         | 1859.8514 | 930.4293         | 1858.8674      | 929.9373         | A   | 1166.6052 | 583.8062        | 1149.5786 | 575.2930         | 1148.5946      | 574.8009         | 11 |
| 18 | 1963.9100 | <b>982.4586</b>  | 1946.8834 | 973.9453         | 1945.8994      | 973.4533         | S   | 1095.5681 | 548.2877        | 1078.5415 | 539.7744         | 1077.5575      | 539.2824         | 10 |
| 19 | 2020.9314 | 1010.9693        | 2003.9049 | 1002.4561        | 2002.9209      | 1001.9641        | G   | 1008.5360 | 504.7717        | 991.5095  | 496.2584         | 990.5255       | 495.7664         | 9  |
| 20 | 2107.9634 | <b>1054.4854</b> | 2090.9369 | 1045.9721        | 2089.9529      | 1045.4801        | S   | 951.5146  | 476.2609        | 934.4880  | 467.7477         | 933.5040       | 467.2556         | 8  |
| 21 | 2221.0475 | 1111.0274        | 2204.0210 | 1102.5141        | 2203.0369      | 1102.0221        | L   | 864.4825  | 432.7449        | 847.4560  | 424.2316         | 846.4720       | 423.7396         | 7  |
| 22 | 2322.0952 | 1161.5512        | 2305.0686 | 1153.0380        | 2304.0846      | 1152.5460        | T   | 751.3985  | 376.2029        | 734.3719  | 367.6896         | 733.3879       | 367.1976         | 6  |
| 23 | 2485.1585 | 1243.0829        | 2468.1320 | 1234.5696        | 2467.1480      | 1234.0776        | Y   | 650.3508  | 325.6790        | 633.3243  | 317.1658         | 632.3402       | 316.6738         | 5  |

# AT5G27620.1

|    |           |                  |           |           |           |           |   |          |          |          |          |          |          |   |
|----|-----------|------------------|-----------|-----------|-----------|-----------|---|----------|----------|----------|----------|----------|----------|---|
| 24 | 2582.2113 | 1291.6093        | 2565.1847 | 1283.0960 | 2564.2007 | 1282.6040 | P | 487.2875 | 244.1474 | 470.2609 | 235.6341 | 469.2769 | 235.1421 | 4 |
| 25 | 2710.3062 | 1355.6568        | 2693.2797 | 1347.1435 | 2692.2957 | 1346.6515 | K | 390.2347 | 195.6210 | 373.2082 | 187.1077 | 372.2241 | 186.6157 | 3 |
| 26 | 2825.3332 | <b>1413.1702</b> | 2808.3066 | 1404.6570 | 2807.3226 | 1404.1650 | D | 262.1397 | 131.5735 | 245.1132 | 123.0602 | 244.1292 | 122.5682 | 2 |
| 27 |           |                  |           |           |           |           | K | 147.1128 | 74.0600  | 130.0863 | 65.5468  |          |          | 1 |

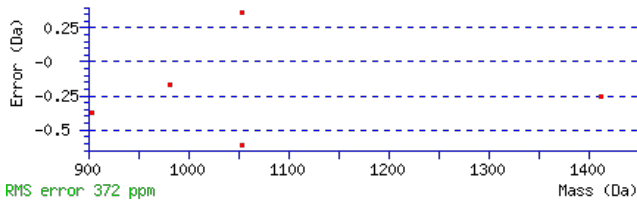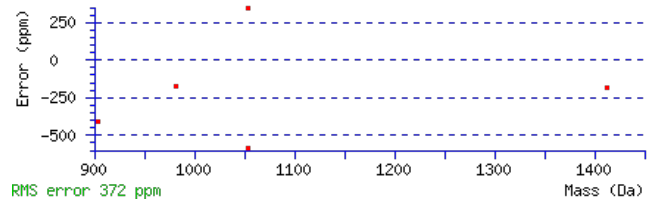

NCBI BLAST search of [AVQMLEKCGTTQVEVDASGSLTYPKDK](#)  
 (Parameters: blastp, nr protein database, expect=20000, no filter, PAM30)  
 Other BLAST [web gateways](#)

### All matches to this query

| Score | Mr(calc)  | Delta   | Sequence                                    |
|-------|-----------|---------|---------------------------------------------|
| 19.5  | 2970.4314 | -0.0058 | <a href="#">AVQMLEKCGTTQVEVDASGSLTYPKDK</a> |
| 2.0   | 2970.4201 | 0.0056  | <a href="#">YSRPESMELVEAEKVEEEKIMTAEK</a>   |
| 1.0   | 2970.4290 | -0.0033 | <a href="#">SVDGLFCLYSGVDMKQPIMVINPDTR</a>  |

Mascot: <http://www.matrixscience.com>

## Peptide View

MS/MS Fragmentation of **GVSFTIDCSKPVDDK**Found in **AT5G27770.1** in **TAIR\_Arabidopsis**, Symbols: | 60S ribosomal protein L22 (RPL22C) | chr5:9836170-9837117 FORWARD

Match to Query 8029: 1666.786623 from(556.602817,3+) index(4027)

Title: Elution from: 38.411 to 38.411 scan no 5048 cid35.00 polarity:+

Data file D12h-3\_1.mgf

Click mouse within plot area to zoom in by factor of two about that point

Or,   to  Da Label all possible matches  Label matches used for scoring Show Y-axis 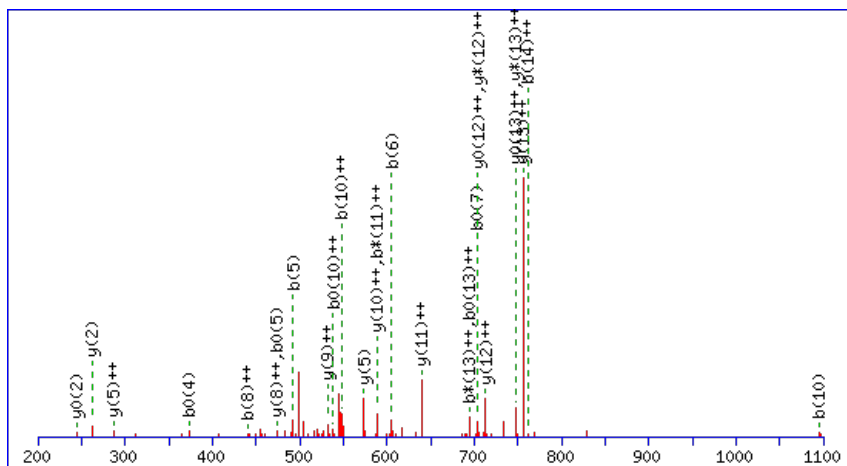Monoisotopic mass of neutral peptide  $M_r(\text{calc})$ : 1666.7873

Fixed modifications: Carbamidomethyl (C) (apply to specified residues or termini only)

Ions Score: 32 Expect: 0.002

Matches : 29/144 fragment ions using 47 most intense peaks ([help](#))

| #  | b                | b <sup>++</sup> | b <sup>*</sup> | b <sup>*++</sup> | b <sup>0</sup>  | b <sup>0++</sup> | Seq. | y               | y <sup>++</sup> | y <sup>*</sup> | y <sup>*++</sup> | y <sup>0</sup>  | y <sup>0++</sup> | #  |
|----|------------------|-----------------|----------------|------------------|-----------------|------------------|------|-----------------|-----------------|----------------|------------------|-----------------|------------------|----|
| 1  | 58.0287          | 29.5180         |                |                  |                 |                  | G    |                 |                 |                |                  |                 |                  | 15 |
| 2  | 157.0972         | 79.0522         |                |                  |                 |                  | V    | 1610.7731       | 805.8902        | 1593.7465      | 797.3769         | 1592.7625       | 796.8849         | 14 |
| 3  | <b>244.1292</b>  | 122.5682        |                |                  | 226.1186        | 113.5629         | S    | 1511.7046       | <b>756.3560</b> | 1494.6781      | <b>747.8427</b>  | 1493.6941       | <b>747.3507</b>  | 13 |
| 4  | 391.1976         | 196.1024        |                |                  | <b>373.1870</b> | 187.0972         | F    | 1424.6726       | <b>712.8399</b> | 1407.6461      | <b>704.3267</b>  | 1406.6620       | <b>703.8347</b>  | 12 |
| 5  | <b>492.2453</b>  | 246.6263        |                |                  | <b>474.2347</b> | 237.6210         | T    | 1277.6042       | <b>639.3057</b> | 1260.5776      | 630.7925         | 1259.5936       | 630.3005         | 11 |
| 6  | <b>605.3293</b>  | 303.1683        |                |                  | 587.3188        | 294.1630         | I    | 1176.5565       | <b>588.7819</b> | 1159.5300      | 580.2686         | 1158.5460       | 579.7766         | 10 |
| 7  | 720.3563         | 360.6818        |                |                  | <b>702.3457</b> | 351.6765         | D    | 1063.4725       | <b>532.2399</b> | 1046.4459      | 523.7266         | 1045.4619       | 523.2346         | 9  |
| 8  | 880.3869         | <b>440.6971</b> |                |                  | 862.3764        | 431.6918         | C    | 948.4455        | <b>474.7264</b> | 931.4190       | 466.2131         | 930.4349        | 465.7211         | 8  |
| 9  | 967.4190         | 484.2131        |                |                  | 949.4084        | 475.2078         | S    | 788.4149        | 394.7111        | 771.3883       | 386.1978         | 770.4043        | 385.7058         | 7  |
| 10 | <b>1095.5139</b> | <b>548.2606</b> | 1078.4874      | 539.7473         | 1077.5034       | <b>539.2553</b>  | K    | 701.3828        | 351.1951        | 684.3563       | 342.6818         | 683.3723        | 342.1898         | 6  |
| 11 | 1192.5667        | 596.7870        | 1175.5401      | <b>588.2737</b>  | 1174.5561       | 587.7817         | P    | <b>573.2879</b> | <b>287.1476</b> | 556.2613       | 278.6343         | 555.2773        | 278.1423         | 5  |
| 12 | 1291.6351        | 646.3212        | 1274.6086      | 637.8079         | 1273.6245       | 637.3159         | V    | 476.2351        | 238.6212        | 459.2086       | 230.1079         | 458.2245        | 229.6159         | 4  |
| 13 | 1406.6620        | <b>703.8347</b> | 1389.6355      | <b>695.3214</b>  | 1388.6515       | <b>694.8294</b>  | D    | 377.1667        | 189.0870        | 360.1401       | 180.5737         | 359.1561        | 180.0817         | 3  |
| 14 | 1521.6890        | <b>761.3481</b> | 1504.6624      | 752.8349         | 1503.6784       | 752.3428         | D    | <b>262.1397</b> | 131.5735        | 245.1132       | 123.0602         | <b>244.1292</b> | 122.5682         | 2  |
| 15 |                  |                 |                |                  |                 |                  | K    | 147.1128        | 74.0600         | 130.0863       | 65.5468          |                 |                  | 1  |

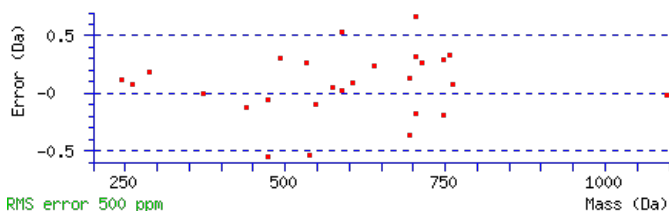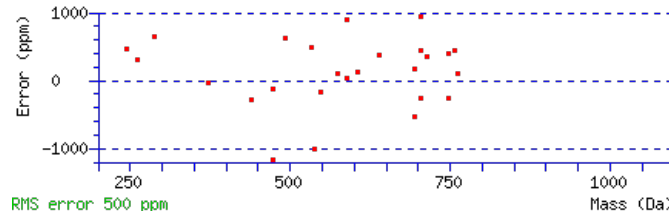NCBI BLAST search of [GVSFTIDCSKPVDDK](#)

## AT5G27770.1

(Parameters: blastp, nr protein database, expect=20000, no filter, PAM30)

Other BLAST [web gateways](#)

### All matches to this query

| Score | Mr(calc)  | Delta   | Sequence                         |
|-------|-----------|---------|----------------------------------|
| 31.9  | 1666.7873 | -0.0006 | <a href="#">GVSFITDCSKPVDDK</a>  |
| 10.6  | 1666.7841 | 0.0026  | <a href="#">QLMISSMNCTIPLR</a>   |
| 7.5   | 1666.7910 | -0.0044 | <a href="#">DDRSVTYEELRER</a>    |
| 2.6   | 1666.7832 | 0.0034  | <a href="#">GVQSTTSERMAEDLK</a>  |
| 2.1   | 1666.7881 | -0.0015 | <a href="#">EAMCFLMDPQIGKK</a>   |
| 1.2   | 1666.7886 | -0.0020 | <a href="#">VGPDSVGAHPGPVCYR</a> |

Mascot: <http://www.matrixscience.com/>

**Peptide View**MS/MS Fragmentation of **SSGYGLIYDTVENAK**Found in **AT5G28060.1** in **TAIR\_Arabidopsis**, Symbols: | 40S ribosomal protein S24 (RPS24B) | chr5:10069795-10070796 REVERSE

Match to Query 7497: 1632.721130 from(817.367841,2+) index(7515)

Title: Elution from: 66.386 to 66.386 scan no 9841 cid35.00 polarity:+

Data file C7-1\_2.mgf

Click mouse within plot area to zoom in by factor of two about that point

Or,   to  Da Label all possible matches  Label matches used for scoring Show Y-axis 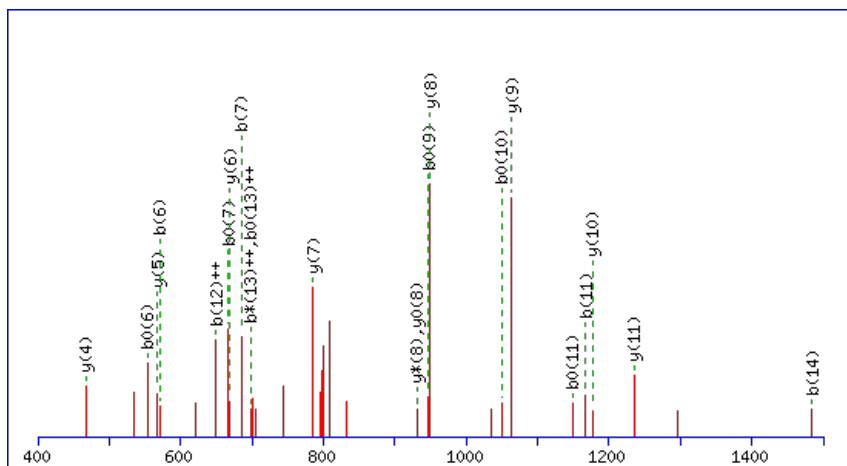Monoisotopic mass of neutral peptide  $M_r(\text{calc})$ : 1632.7225

Fixed modifications: Carbamidomethyl (C) (apply to specified residues or termini only)

Ions Score: 60 Expect: 7.2e-006

Matches : 22/138 fragment ions using 34 most intense peaks ([help](#))

| #  | b                | b <sup>++</sup> | b <sup>*</sup> | b <sup>*++</sup> | b <sup>0</sup>   | b <sup>0++</sup> | Seq. | y                | y <sup>++</sup> | y <sup>*</sup>  | y <sup>*++</sup> | y <sup>0</sup>  | y <sup>0++</sup> | #  |
|----|------------------|-----------------|----------------|------------------|------------------|------------------|------|------------------|-----------------|-----------------|------------------|-----------------|------------------|----|
| 1  | 89.0363          | 45.0218         |                |                  | 71.0258          | 36.0165          | S    |                  |                 |                 |                  |                 |                  | 15 |
| 2  | 177.0654         | 89.0363         |                |                  | 159.0548         | 80.0311          | S    | 1545.7008        | 773.3540        | 1527.6772       | 764.3422         | 1527.6902       | 764.3487         | 14 |
| 3  | 235.0839         | 118.0456        |                |                  | 217.0733         | 109.0403         | G    | 1457.6717        | 729.3395        | 1439.6481       | 720.3277         | 1439.6611       | 720.3342         | 13 |
| 4  | 399.1443         | 200.0758        |                |                  | 381.1337         | 191.0705         | Y    | 1399.6532        | 700.3302        | 1381.6296       | 691.3185         | 1381.6426       | 691.3250         | 12 |
| 5  | 457.1628         | 229.0850        |                |                  | 439.1522         | 220.0797         | G    | <b>1235.5928</b> | 618.3001        | 1217.5693       | 609.2883         | 1217.5823       | 609.2948         | 11 |
| 6  | <b>571.2439</b>  | 286.1256        |                |                  | <b>553.2333</b>  | 277.1203         | L    | <b>1177.5744</b> | 589.2908        | 1159.5508       | 580.2790         | 1159.5638       | 580.2855         | 10 |
| 7  | <b>685.3250</b>  | 343.1661        |                |                  | <b>667.3144</b>  | 334.1608         | I    | <b>1063.4933</b> | 532.2503        | 1045.4697       | 523.2385         | 1045.4827       | 523.2450         | 9  |
| 8  | 849.3853         | 425.1963        |                |                  | 831.3748         | 416.1910         | Y    | <b>949.4122</b>  | 475.2097        | <b>931.3886</b> | 466.1979         | <b>931.4016</b> | 466.2044         | 8  |
| 9  | 965.4093         | 483.2083        |                |                  | <b>947.3987</b>  | 474.2030         | D    | <b>785.3518</b>  | 393.1795        | 767.3282        | 384.1677         | 767.3412        | 384.1742         | 7  |
| 10 | 1067.4540        | 534.2306        |                |                  | <b>1049.4435</b> | 525.2254         | T    | <b>669.3278</b>  | 335.1675        | 651.3042        | 326.1558         | 651.3172        | 326.1623         | 6  |
| 11 | <b>1167.5195</b> | 584.2634        |                |                  | <b>1149.5089</b> | 575.2581         | V    | <b>567.2831</b>  | 284.1452        | 549.2595        | 275.1334         | 549.2725        | 275.1399         | 5  |
| 12 | 1297.5591        | <b>649.2832</b> |                |                  | 1279.5485        | 640.2779         | E    | <b>467.2176</b>  | 234.1125        | 449.1941        | 225.1007         | 449.2071        | 225.1072         | 4  |
| 13 | 1413.5961        | 707.3017        | 1395.5725      | <b>698.2899</b>  | 1395.5855        | <b>698.2964</b>  | N    | 337.1780         | 169.0926        | 319.1544        | 160.0809         |                 |                  | 3  |
| 14 | <b>1485.6302</b> | 743.3188        | 1467.6067      | 734.3070         | 1467.6197        | 734.3135         | A    | 221.1410         | 111.0741        | 203.1174        | 102.0624         |                 |                  | 2  |
| 15 |                  |                 |                |                  |                  |                  | K    | 149.1069         | 75.0571         | 131.0833        | 66.0453          |                 |                  | 1  |

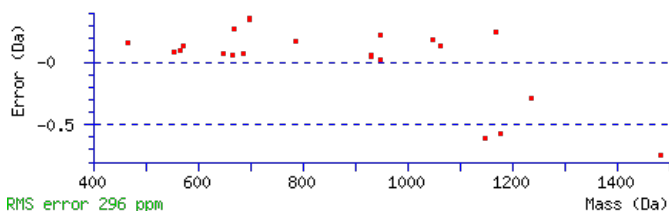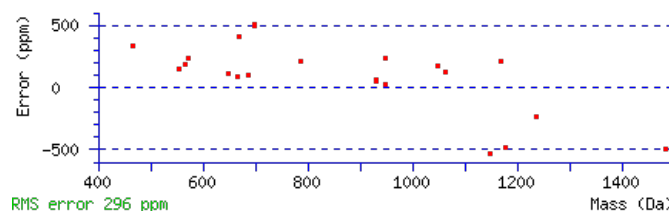NCBI BLAST search of [SSGYGLIYDTVENAK](#)



## AT5G28060.1

(Parameters: blastp, nr protein database, expect=20000, no filter, PAM30)

Other BLAST [web gateways](#)

### All matches to this query

| Score | Mr(calc)  | Delta   | Sequence                        |
|-------|-----------|---------|---------------------------------|
| 59.7  | 1632.7225 | -0.0014 | <a href="#">SSGYGLIYDTVENAK</a> |
| 18.4  | 1632.7239 | -0.0027 | <a href="#">LSCFGLMKNSRDGK</a>  |
| 8.4   | 1632.7183 | 0.0029  | <a href="#">YRDNRAASEMALK</a>   |
| 3.6   | 1632.7164 | 0.0047  | <a href="#">MSDMAADAFLRMKK</a>  |
| 2.4   | 1632.7209 | 0.0002  | <a href="#">QFVSQSRARMENR</a>   |

Mascot: <http://www.matrixscience.com/>

**Peptide View**MS/MS Fragmentation of **WVVLPGWDPVAVR**

Found in **AT5G28500.1** in **TAIR\_Arabidopsis**, Symbols: | similar to unknown protein [Arabidopsis thaliana] (TAIR:AT3G04550.1); similar to unnamed protein product [Vitis vinifera] (GB:CAO65032.1) | chr5:10477814-10479118 FORWARD

Match to Query 7139: 1610.830796 from(806.422674,2+) index(10080)

Title: Elution from: 95.816 to 95.816 scan no 14311 cid35.00 polarity:+

Data file D12h-3\_2.mgf

Click mouse within plot area to zoom in by factor of two about that point

Or,   to  Da Label all possible matches  Label matches used for scoring Show Y-axis 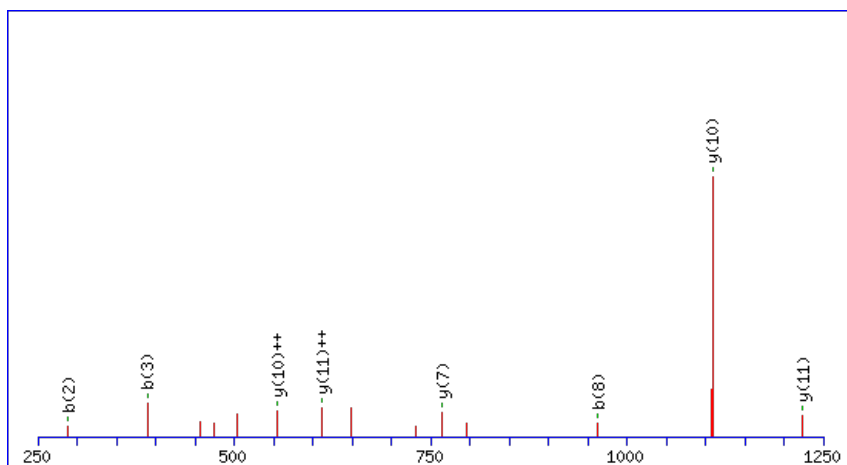Monoisotopic mass of neutral peptide  $M_r(\text{calc})$ : 1610.8311

Fixed modifications: Carbamidomethyl (C) (apply to specified residues or termini only)

Ions Score: 35 Expect: 0.0014

Matches : 8/104 fragment ions using 9 most intense peaks ([help](#))

| #  | b               | b <sup>++</sup> | b <sup>0</sup> | b <sup>0++</sup> | Seq. | y                | y <sup>++</sup> | y*        | y <sup>*++</sup> | y <sup>0</sup> | y <sup>0++</sup> | #  |
|----|-----------------|-----------------|----------------|------------------|------|------------------|-----------------|-----------|------------------|----------------|------------------|----|
| 1  | 189.0807        | 95.0440         |                |                  | W    |                  |                 |           |                  |                |                  | 14 |
| 2  | <b>289.1461</b> | 145.0767        |                |                  | V    | 1423.7650        | 712.3862        | 1405.7415 | 703.3744         | 1405.7545      | 703.3809         | 13 |
| 3  | <b>389.2116</b> | 195.1094        |                |                  | V    | 1323.6996        | 662.3534        | 1305.6760 | 653.3416         | 1305.6890      | 653.3482         | 12 |
| 4  | 503.2927        | 252.1500        |                |                  | L    | <b>1223.6341</b> | <b>612.3207</b> | 1205.6106 | 603.3089         | 1205.6236      | 603.3154         | 11 |
| 5  | 601.3425        | 301.1749        |                |                  | P    | <b>1109.5530</b> | <b>555.2802</b> | 1091.5295 | 546.2684         | 1091.5425      | 546.2749         | 10 |
| 6  | 659.3610        | 330.1841        |                |                  | G    | 1011.5032        | 506.2553        | 993.4797  | 497.2435         | 993.4927       | 497.2500         | 9  |
| 7  | 847.4343        | 424.2208        |                |                  | W    | 953.4847         | 477.2460        | 935.4612  | 468.2342         | 935.4742       | 468.2407         | 8  |
| 8  | <b>963.4583</b> | 482.2328        | 945.4478       | 473.2275         | D    | <b>765.4114</b>  | 383.2093        | 747.3878  | 374.1975         | 747.4008       | 374.2040         | 7  |
| 9  | 1061.5081       | 531.2577        | 1043.4975      | 522.2524         | P    | 649.3874         | 325.1973        | 631.3638  | 316.1855         |                |                  | 6  |
| 10 | 1161.5736       | 581.2904        | 1143.5630      | 572.2851         | V    | 551.3376         | 276.1724        | 533.3140  | 267.1606         |                |                  | 5  |
| 11 | 1261.6390       | 631.3231        | 1243.6284      | 622.3179         | V    | 451.2721         | 226.1397        | 433.2486  | 217.1279         |                |                  | 4  |
| 12 | 1333.6732       | 667.3402        | 1315.6626      | 658.3349         | A    | 351.2067         | 176.1070        | 333.1831  | 167.0952         |                |                  | 3  |
| 13 | 1433.7386       | 717.3729        | 1415.7280      | 708.3677         | V    | 279.1725         | 140.0899        | 261.1490  | 131.0781         |                |                  | 2  |
| 14 |                 |                 |                |                  | R    | 179.1071         | 90.0572         | 161.0835  | 81.0454          |                |                  | 1  |

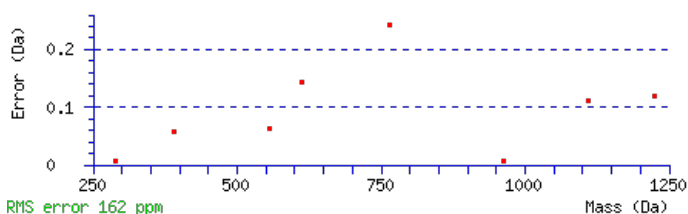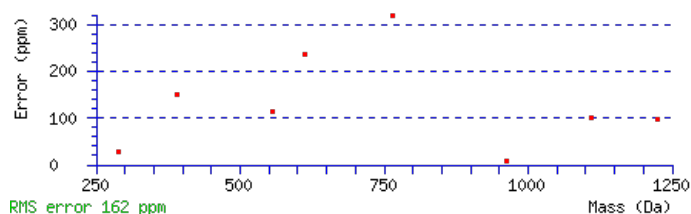NCBI BLAST search of [WVVLPGWDPVAVR](#)

## AT5G28500.1

(Parameters: blastp, nr protein database, expect=20000, no filter, PAM30)

Other BLAST [web gateways](#)

### All matches to this query

| Score | Mr(calc)  | Delta   | Sequence                       |
|-------|-----------|---------|--------------------------------|
| 35.0  | 1610.8311 | -0.0003 | <a href="#">WVVLPGWDPVVAVR</a> |

Mascot: <http://www.matrixscience.com/>

## Peptide View

MS/MS Fragmentation of **LSQEEIDR**

Found in **AT5G28540.1** in **TAIR\_Arabidopsis**, Symbols: BIP1 | BIP1; ATP binding | chr5:10540669-10543278 REVERSE

Match to Query 2485: 988.482484 from(495.248518,2+) index(808)

Title: Elution from: 14.211 to 14.211 scan no 1182 cid35.00 polarity:+

Data file 0-2\_1.mgf

Click mouse within plot area to zoom in by factor of two about that point

Or,   to  Da

Label all possible matches  Label matches used for scoring

Show Y-axis

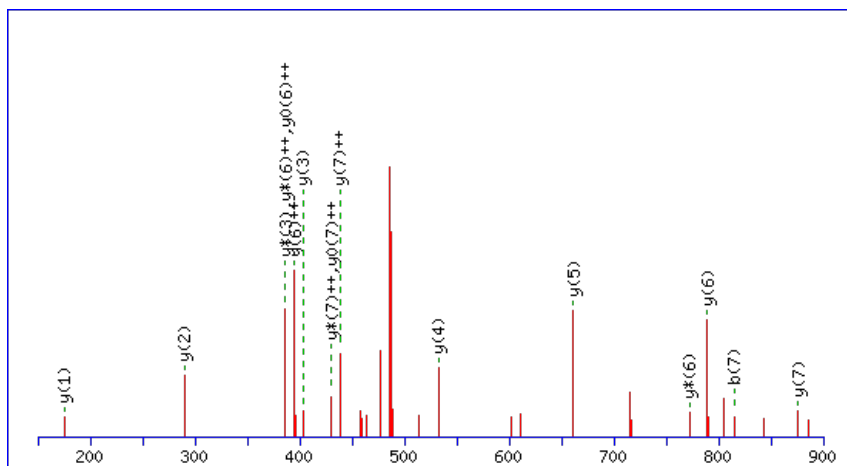

Monoisotopic mass of neutral peptide  $M_r(\text{calc})$ : 988.4825

Fixed modifications: Carbamidomethyl (C) (apply to specified residues or termini only)

Ions Score: 51 Expect: 3.6e-005

Matches : 16/76 fragment ions using 25 most intense peaks ([help](#))

| # | b        | b <sup>++</sup> | b*       | b <sup>*++</sup> | b <sup>0</sup> | b <sup>0++</sup> | Seq. | y        | y <sup>++</sup> | y*       | y <sup>*++</sup> | y <sup>0</sup> | y <sup>0++</sup> | # |
|---|----------|-----------------|----------|------------------|----------------|------------------|------|----------|-----------------|----------|------------------|----------------|------------------|---|
| 1 | 114.0913 | 57.5493         |          |                  |                |                  | L    |          |                 |          |                  |                |                  | 8 |
| 2 | 201.1234 | 101.0653        |          |                  | 183.1128       | 92.0600          | S    | 876.4058 | 438.7065        | 859.3792 | 430.1932         | 858.3952       | 429.7012         | 7 |
| 3 | 329.1819 | 165.0946        | 312.1554 | 156.5813         | 311.1714       | 156.0893         | Q    | 789.3737 | 395.1905        | 772.3472 | 386.6772         | 771.3632       | 386.1852         | 6 |
| 4 | 458.2245 | 229.6159        | 441.1980 | 221.1026         | 440.2140       | 220.6106         | E    | 661.3151 | 331.1612        | 644.2886 | 322.6479         | 643.3046       | 322.1559         | 5 |
| 5 | 587.2671 | 294.1372        | 570.2406 | 285.6239         | 569.2566       | 285.1319         | E    | 532.2726 | 266.6399        | 515.2460 | 258.1266         | 514.2620       | 257.6346         | 4 |
| 6 | 700.3512 | 350.6792        | 683.3246 | 342.1660         | 682.3406       | 341.6740         | I    | 403.2300 | 202.1186        | 386.2034 | 193.6053         | 385.2194       | 193.1133         | 3 |
| 7 | 815.3781 | 408.1927        | 798.3516 | 399.6794         | 797.3676       | 399.1874         | D    | 290.1459 | 145.5766        | 273.1193 | 137.0633         | 272.1353       | 136.5713         | 2 |
| 8 |          |                 |          |                  |                |                  | R    | 175.1190 | 88.0631         | 158.0924 | 79.5498          |                |                  | 1 |

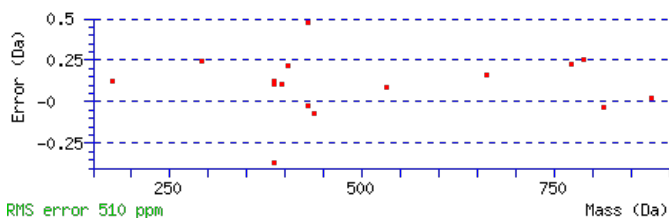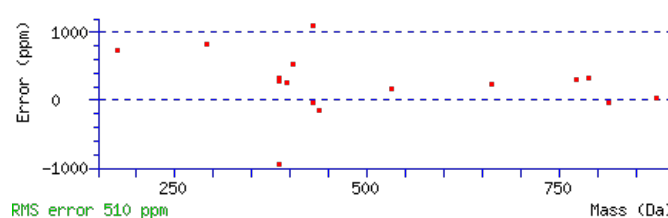

NCBI **BLAST** search of [LSQEEIDR](#)

(Parameters: blastp, nr protein database, expect=20000, no filter, PAM30)

Other BLAST [web gateways](#)

### All matches to this query

| Score | $M_r(\text{calc})$ | Delta   | Sequence                 |
|-------|--------------------|---------|--------------------------|
| 51.3  | 988.4825           | -0.0000 | <a href="#">LSQEEIDR</a> |
| 14.5  | 988.4825           | -0.0000 | <a href="#">AKEDEIER</a> |

**AT5G28540.1**

|      |          |         |                            |
|------|----------|---------|----------------------------|
| 13.8 | 988.4825 | -0.0000 | <a href="#">LSEDLEQR</a>   |
| 10.4 | 988.4825 | -0.0000 | <a href="#">EAEKQQEK</a>   |
| 9.9  | 988.4825 | -0.0000 | <a href="#">EAENGVVSGK</a> |
| 8.8  | 988.4825 | -0.0000 | <a href="#">AEQESQIGK</a>  |
| 6.3  | 988.4825 | -0.0000 | <a href="#">IDAEASDLR</a>  |
| 5.9  | 988.4825 | -0.0000 | <a href="#">EEVKDDVR</a>   |
| 5.5  | 988.4825 | -0.0000 | <a href="#">TQEVEDLR</a>   |
| 4.6  | 988.4825 | -0.0000 | <a href="#">IVGSEEEAR</a>  |

**Mascot:** <http://www.matrixscience.com/>

**MASCOT** Mascot Search Results

**Peptide View**

MS/MS Fragmentation of **FHNIYGPFGTWK**

Found in **AT5G28840.1** in **TAIR\_Arabidopsis**, Symbols: GME | GME (GDP-D-MANNOSE 3',5'-EPIMERASE); GDP-mannose 3,5-epimerase/ NAD binding / catalytic | chr5:10862476-10864028 REVERSE

Match to Query 5541: 1465.715637 from(489.579155,3+) index(6355)

Title: Elution from: 59.616 to 59.616 scan no 8350 cid35.00 polarity:+

Data file D1d-2\_2.mgf

Click mouse within plot area to zoom in by factor of two about that point

Or,  to  Da

Label all possible matches  Label matches used for scoring

Show Y-axis

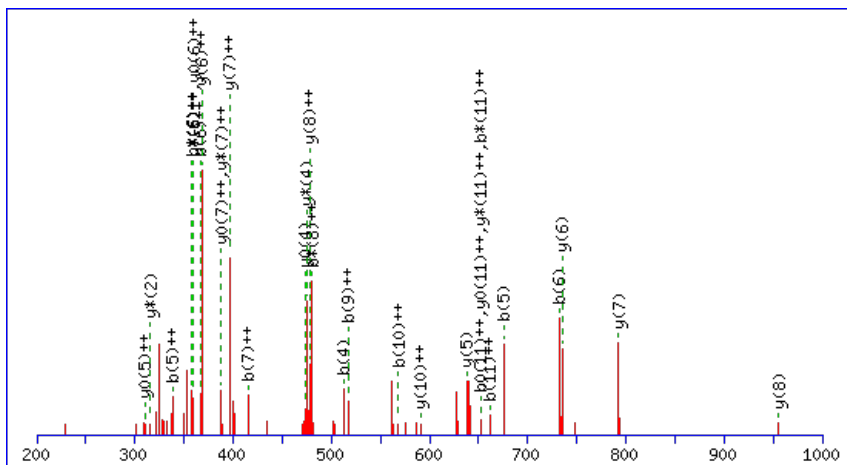

Monoisotopic mass of neutral peptide  $M_r(\text{calc})$ : 1465.7143

Fixed modifications: Carbamidomethyl (C) (apply to specified residues or termini only)

Ions Score: 30 Expect: 0.003

Matches : 31/106 fragment ions using 48 most intense peaks [\(help\)](#)

| #  | b         | b <sup>++</sup> | b*        | b <sup>*++</sup> | b <sup>0</sup> | b <sup>0++</sup> | Seq. | y         | y <sup>++</sup> | y*        | y <sup>*++</sup> | y <sup>0</sup> | y <sup>0++</sup> | #  |
|----|-----------|-----------------|-----------|------------------|----------------|------------------|------|-----------|-----------------|-----------|------------------|----------------|------------------|----|
| 1  | 148.0757  | 74.5415         |           |                  |                |                  | F    |           |                 |           |                  |                |                  | 12 |
| 2  | 285.1346  | 143.0709        |           |                  |                |                  | H    | 1319.6531 | 660.3302        | 1302.6266 | 651.8169         | 1301.6426      | 651.3249         | 11 |
| 3  | 399.1775  | 200.0924        | 382.1510  | 191.5791         |                |                  | N    | 1182.5942 | 591.8007        | 1165.5677 | 583.2875         | 1164.5837      | 582.7955         | 10 |
| 4  | 512.2616  | 256.6344        | 495.2350  | 248.1212         |                |                  | I    | 1068.5513 | 534.7793        | 1051.5247 | 526.2660         | 1050.5407      | 525.7740         | 9  |
| 5  | 675.3249  | 338.1661        | 658.2984  | 329.6528         |                |                  | Y    | 955.4672  | 478.2373        | 938.4407  | 469.7240         | 937.4567       | 469.2320         | 8  |
| 6  | 732.3464  | 366.6768        | 715.3198  | 358.1636         |                |                  | G    | 792.4039  | 396.7056        | 775.3774  | 388.1923         | 774.3933       | 387.7003         | 7  |
| 7  | 829.3992  | 415.2032        | 812.3726  | 406.6899         |                |                  | P    | 735.3824  | 368.1949        | 718.3559  | 359.6816         | 717.3719       | 359.1896         | 6  |
| 8  | 976.4676  | 488.7374        | 959.4410  | 480.2241         |                |                  | F    | 638.3297  | 319.6685        | 621.3031  | 311.1552         | 620.3191       | 310.6632         | 5  |
| 9  | 1033.4890 | 517.2482        | 1016.4625 | 508.7349         |                |                  | G    | 491.2613  | 246.1343        | 474.2347  | 237.6210         | 473.2507       | 237.1290         | 4  |
| 10 | 1134.5367 | 567.7720        | 1117.5102 | 559.2587         | 1116.5261      | 558.7667         | T    | 434.2398  | 217.6235        | 417.2132  | 209.1103         | 416.2292       | 208.6183         | 3  |
| 11 | 1320.6160 | 660.8116        | 1303.5895 | 652.2984         | 1302.6055      | 651.8064         | W    | 333.1921  | 167.0997        | 316.1656  | 158.5864         |                |                  | 2  |
| 12 |           |                 |           |                  |                |                  | K    | 147.1128  | 74.0600         | 130.0863  | 65.5468          |                |                  | 1  |

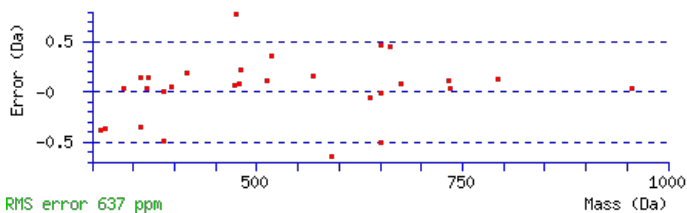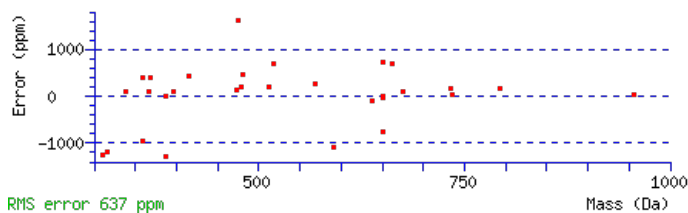

NCBI BLAST search of **FHNIYGPFGTWK**

(Parameters: blastp, nr protein database, expect=20000, no filter, PAM30)

Other BLAST [web gateways](#)

AT5G28840.1

All matches to this query

| Score | Mr(calc)  | Delta   | Sequence                       |
|-------|-----------|---------|--------------------------------|
| 30.5  | 1465.7143 | 0.0014  | <a href="#">FHNIYGPFGTWK</a>   |
| 4.0   | 1465.7195 | -0.0039 | <a href="#">CGDVATTGSTLRK</a>  |
| 0.5   | 1465.7161 | -0.0004 | <a href="#">EFSNDAKSAAASLR</a> |

Mascot: <http://www.matrixscience.com/>

**Peptide View**MS/MS Fragmentation of **TDANGALVDISAK**Found in **AT5G30510.1** in **TAIR\_Arabidopsis**, Symbols: ARRP1, RPS1 | RPS1 (ribosomal protein S1); RNA binding | chr5:11636492-11638453 REVERSE

Match to Query 4598: 1288.607174 from(645.310863,2+) index(3634)

Title: Elution from: 36.097 to 36.097 scan no 4559 cid35.00 polarity:+

Data file D6h-2\_2.mgf

Click mouse within plot area to zoom in by factor of two about that point

Or,  to  Da Label all possible matches  Label matches used for scoring Show Y-axis 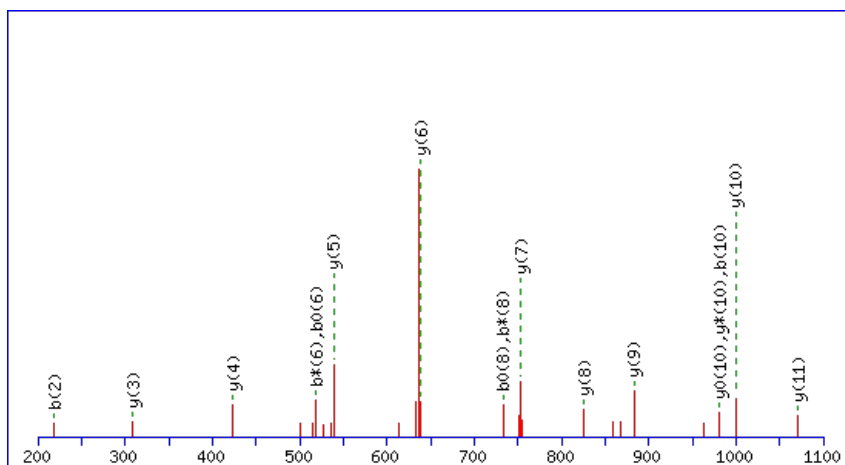Monoisotopic mass of neutral peptide  $M_r(\text{calc})$ : 1288.6069

Fixed modifications: Carbamidomethyl (C) (apply to specified residues or termini only)

Ions Score: 94 Expect: 2.5e-009

Matches : 17/134 fragment ions using 15 most intense peaks ([help](#))

| #  | b               | b <sup>++</sup> | b*              | b <sup>*++</sup> | b <sup>0</sup>  | b <sup>0++</sup> | Seq. | y                | y <sup>++</sup> | y*              | y <sup>*++</sup> | y <sup>0</sup>  | y <sup>0++</sup> | #  |
|----|-----------------|-----------------|-----------------|------------------|-----------------|------------------|------|------------------|-----------------|-----------------|------------------|-----------------|------------------|----|
| 1  | 103.0520        | 52.0296         |                 |                  | 85.0414         | 43.0244          | T    |                  |                 |                 |                  |                 |                  | 13 |
| 2  | <b>219.0760</b> | 110.0416        |                 |                  | 201.0654        | 101.0363         | D    | 1187.5695        | 594.2884        | 1169.5459       | 585.2766         | 1169.5589       | 585.2831         | 12 |
| 3  | 291.1101        | 146.0587        |                 |                  | 273.0996        | 137.0534         | A    | <b>1071.5455</b> | 536.2764        | 1053.5219       | 527.2646         | 1053.5349       | 527.2711         | 11 |
| 4  | 407.1471        | 204.0772        | 389.1235        | 195.0654         | 389.1365        | 195.0719         | N    | <b>999.5114</b>  | 500.2593        | <b>981.4878</b> | 491.2475         | <b>981.5008</b> | 491.2540         | 10 |
| 5  | 465.1656        | 233.0864        | 447.1420        | 224.0747         | 447.1550        | 224.0812         | G    | <b>883.4744</b>  | 442.2408        | 865.4508        | 433.2290         | 865.4638        | 433.2355         | 9  |
| 6  | 537.1998        | 269.1035        | <b>519.1762</b> | 260.0917         | <b>519.1892</b> | 260.0982         | A    | <b>825.4559</b>  | 413.2316        | 807.4323        | 404.2198         | 807.4453        | 404.2263         | 8  |
| 7  | 651.2809        | 326.1441        | 633.2573        | 317.1323         | 633.2703        | 317.1388         | L    | <b>753.4217</b>  | 377.2145        | 735.3981        | 368.2027         | 735.4111        | 368.2092         | 7  |
| 8  | 751.3463        | 376.1768        | <b>733.3227</b> | 367.1650         | <b>733.3357</b> | 367.1715         | V    | <b>639.3406</b>  | 320.1739        | 621.3170        | 311.1622         | 621.3300        | 311.1687         | 6  |
| 9  | 867.3703        | 434.1888        | 849.3467        | 425.1770         | 849.3597        | 425.1835         | D    | <b>539.2752</b>  | 270.1412        | 521.2516        | 261.1294         | 521.2646        | 261.1359         | 5  |
| 10 | <b>981.4514</b> | 491.2293        | 963.4278        | 482.2175         | 963.4408        | 482.2240         | I    | <b>423.2512</b>  | 212.1292        | 405.2276        | 203.1174         | 405.2406        | 203.1239         | 4  |
| 11 | 1069.4804       | 535.2439        | 1051.4569       | 526.2321         | 1051.4699       | 526.2386         | S    | <b>309.1701</b>  | 155.0887        | 291.1465        | 146.0769         | 291.1595        | 146.0834         | 3  |
| 12 | 1141.5146       | 571.2609        | 1123.4910       | 562.2491         | 1123.5040       | 562.2557         | A    | 221.1410         | 111.0741        | 203.1174        | 102.0624         |                 |                  | 2  |
| 13 |                 |                 |                 |                  |                 |                  | K    | 149.1069         | 75.0571         | 131.0833        | 66.0453          |                 |                  | 1  |

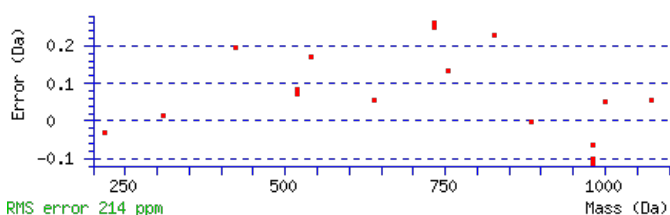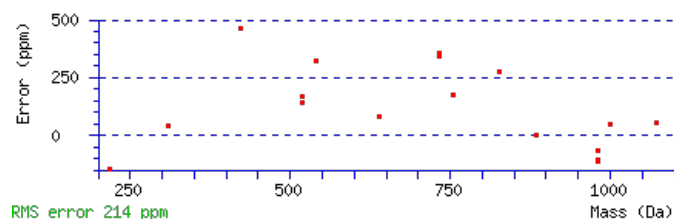NCBI **BLAST** search of **TDANGALVDISAK**

(Parameters: blastp, nr protein database, expect=20000, no filter, PAM30)



# AT5G30510.1

Other BLAST [web gateways](#)

## All matches to this query

| Score | Mr(calc)  | Delta   | Sequence                      |
|-------|-----------|---------|-------------------------------|
| 94.4  | 1288.6069 | 0.0003  | <a href="#">TDANGALVDISAK</a> |
| 14.3  | 1288.6096 | -0.0024 | <a href="#">DRGAELEVVQR</a>   |
| 13.8  | 1288.6096 | -0.0024 | <a href="#">RQEVLDNELR</a>    |
| 12.7  | 1288.6069 | 0.0003  | <a href="#">EDSVVDDVIKR</a>   |
| 12.1  | 1288.6048 | 0.0023  | <a href="#">GRILAGTCHSAK</a>  |
| 4.0   | 1288.6096 | -0.0024 | <a href="#">DAGRIAGLDVER</a>  |
| 3.8   | 1288.6069 | 0.0003  | <a href="#">ESVQVSDEILR</a>   |
| 3.0   | 1288.6096 | -0.0024 | <a href="#">NISSPDEVVRR</a>   |
| 2.9   | 1288.6069 | 0.0003  | <a href="#">SLGEVISGDEIR</a>  |
| 2.6   | 1288.6069 | 0.0003  | <a href="#">AISEEEAKLER</a>   |

Mascot: <http://www.matrixscience.com/>

**Peptide View**MS/MS Fragmentation of **FTEPQPDYSAFR**

Found in **AT5G34850.1** in **TAIR\_Arabidopsis**, Symbols: ATPAP26, PAP26 | ATPAP26/PAP26 (purple acid phosphatase 26); acid phosphatase/protein serine/threonine phosphatase | chr5:13125705-13128447 REVERSE

Match to Query 6029: 1472.611450 from(737.313001,2+) index(5235)

Title: Elution from: 47.209 to 47.209 scan no 6627 cid35.00 polarity:+

Data file 0-2\_2.mgf

Click mouse within plot area to zoom in by factor of two about that point

Or,   to  Da

Label all possible matches  Label matches used for scoring

Show Y-axis

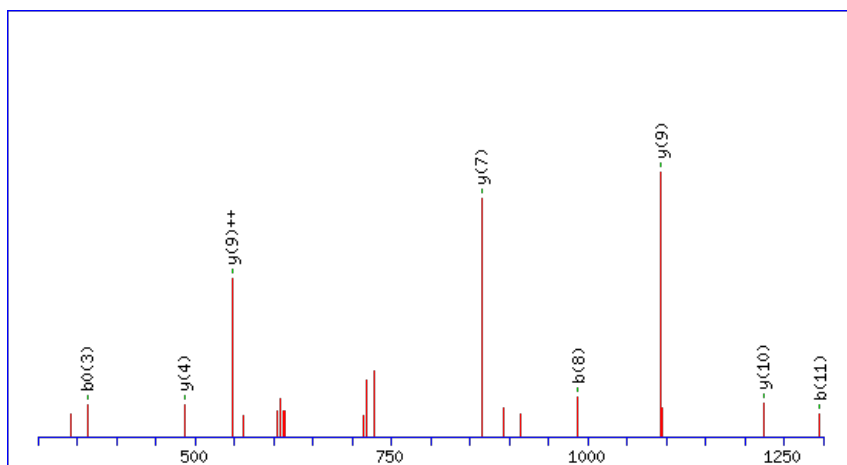

**Monoisotopic mass of neutral peptide Mr(calc):** 1472.6148

**Fixed modifications:** Carbamidomethyl (C) (apply to specified residues or termini only)

**Ions Score:** 31 **Expect:** 0.0033

**Matches:** 8/116 fragment ions using 9 most intense peaks ([help](#))

| #  | b         | b <sup>++</sup> | b*        | b <sup>*++</sup> | b <sup>0</sup> | b <sup>0++</sup> | Seq. | y         | y <sup>++</sup> | y*        | y <sup>*++</sup> | y <sup>0</sup> | y <sup>0++</sup> | #  |
|----|-----------|-----------------|-----------|------------------|----------------|------------------|------|-----------|-----------------|-----------|------------------|----------------|------------------|----|
| 1  | 149.0727  | 75.0400         |           |                  |                |                  | F    |           |                 |           |                  |                |                  | 12 |
| 2  | 251.1174  | 126.0624        |           |                  | 233.1069       | 117.0571         | T    | 1325.5567 | 663.2820        | 1307.5331 | 654.2702         | 1307.5461      | 654.2767         | 11 |
| 3  | 381.1571  | 191.0822        |           |                  | 363.1465       | 182.0769         | E    | 1223.5120 | 612.2596        | 1205.4884 | 603.2478         | 1205.5014      | 603.2543         | 10 |
| 4  | 479.2069  | 240.1071        |           |                  | 461.1963       | 231.1018         | P    | 1093.4723 | 547.2398        | 1075.4488 | 538.2280         | 1075.4618      | 538.2345         | 9  |
| 5  | 609.2595  | 305.1334        | 591.2359  | 296.1216         | 591.2489       | 296.1281         | Q    | 995.4225  | 498.2149        | 977.3990  | 489.2031         | 977.4120       | 489.2096         | 8  |
| 6  | 707.3093  | 354.1583        | 689.2857  | 345.1465         | 689.2987       | 345.1530         | P    | 865.3699  | 433.1886        | 847.3463  | 424.1768         | 847.3593       | 424.1833         | 7  |
| 7  | 823.3333  | 412.1703        | 805.3097  | 403.1585         | 805.3227       | 403.1650         | D    | 767.3201  | 384.1637        | 749.2965  | 375.1519         | 749.3095       | 375.1584         | 6  |
| 8  | 987.3937  | 494.2005        | 969.3701  | 485.1887         | 969.3831       | 485.1952         | Y    | 651.2961  | 326.1517        | 633.2725  | 317.1399         | 633.2856       | 317.1464         | 5  |
| 9  | 1075.4227 | 538.2150        | 1057.3991 | 529.2032         | 1057.4122      | 529.2097         | S    | 487.2358  | 244.1215        | 469.2122  | 235.1097         | 469.2252       | 235.1162         | 4  |
| 10 | 1147.4569 | 574.2321        | 1129.4333 | 565.2203         | 1129.4463      | 565.2268         | A    | 399.2067  | 200.1070        | 381.1831  | 191.0952         |                |                  | 3  |
| 11 | 1295.5223 | 648.2648        | 1277.4987 | 639.2530         | 1277.5117      | 639.2595         | F    | 327.1725  | 164.0899        | 309.1490  | 155.0781         |                |                  | 2  |
| 12 |           |                 |           |                  |                |                  | R    | 179.1071  | 90.0572         | 161.0835  | 81.0454          |                |                  | 1  |

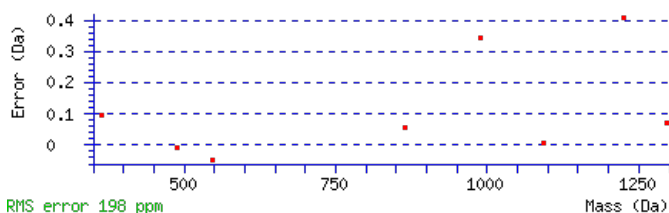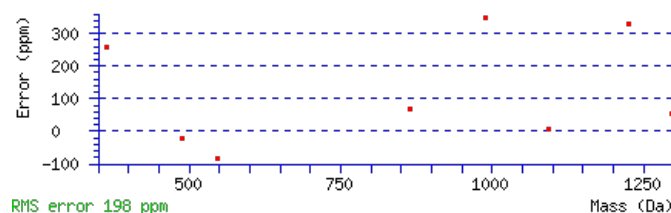

NCBI **BLAST** search of **FTEPQPDYSAFR**

(Parameters: blastp, nr protein database, expect=20000, no filter, PAM30)

Other BLAST [web gateways](#)

# AT5G34850.1

All matches to this query

| Score | Mr(calc)  | Delta   | Sequence                        |
|-------|-----------|---------|---------------------------------|
| 31.5  | 1472.6148 | -0.0034 | <a href="#">FTEPOPDYSAFR</a>    |
| 5.9   | 1472.6071 | 0.0043  | <a href="#">YTGGYWEARGHR</a>    |
| 2.3   | 1472.6104 | 0.0011  | <a href="#">NHEIESDLVDER</a>    |
| 2.0   | 1472.6079 | 0.0036  | <a href="#">AAHFEE SMK YAR</a>  |
| 1.7   | 1472.6126 | -0.0011 | <a href="#">SFGFD TAV EEAQR</a> |
| 1.5   | 1472.6099 | 0.0015  | <a href="#">FETQELAYDESK</a>    |

Mascot: <http://www.matrixscience.com/>

**Peptide View**MS/MS Fragmentation of **FGLVHISTGDLRL**Found in **AT5G35170.1** in **TAIR\_Arabidopsis**, Symbols: | adenylate kinase family protein | chr5:13436508-13440712 FORWARD

Match to Query 5578: 1426.792581 from(476.604803,3+) index(7700)

Title: Elution from: 68.254 to 68.254 scan no 10141 cid35.00 polarity:+

Data file 0-1\_3.mgf

Click mouse within plot area to zoom in by factor of two about that point

Or,   to  Da Label all possible matches  Label matches used for scoring Show Y-axis 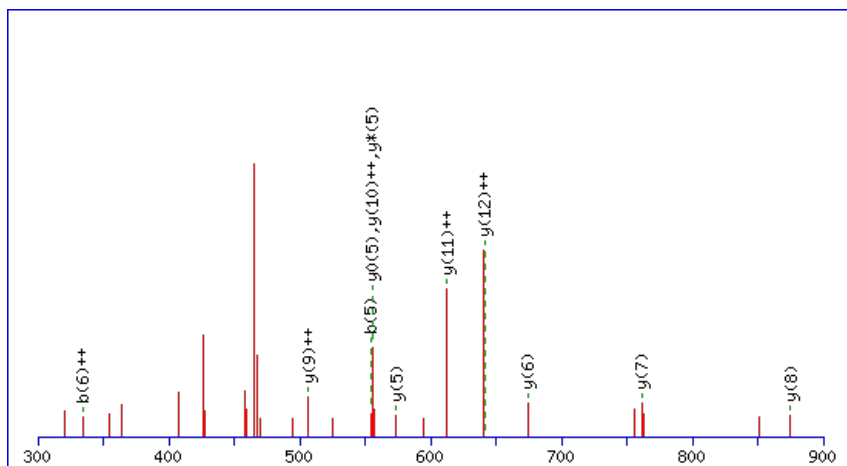Monoisotopic mass of neutral peptide  $M_r(\text{calc})$ : 1426.7933

Fixed modifications: Carbamidomethyl (C) (apply to specified residues or termini only)

Ions Score: 25 Expect: 0.015

Matches : 12/102 fragment ions using 22 most intense peaks ([help](#))

| #  | b         | b <sup>++</sup> | b <sup>0</sup> | b <sup>0++</sup> | Seq. | y         | y <sup>++</sup> | y*        | y <sup>*++</sup> | y <sup>0</sup> | y <sup>0++</sup> | #  |
|----|-----------|-----------------|----------------|------------------|------|-----------|-----------------|-----------|------------------|----------------|------------------|----|
| 1  | 148.0757  | 74.5415         |                |                  | F    |           |                 |           |                  |                |                  | 13 |
| 2  | 205.0972  | 103.0522        |                |                  | G    | 1280.7321 | 640.8697        | 1263.7056 | 632.3564         | 1262.7215      | 631.8644         | 12 |
| 3  | 318.1812  | 159.5942        |                |                  | L    | 1223.7106 | 612.3590        | 1206.6841 | 603.8457         | 1205.7001      | 603.3537         | 11 |
| 4  | 417.2496  | 209.1285        |                |                  | V    | 1110.6266 | 555.8169        | 1093.6000 | 547.3037         | 1092.6160      | 546.8116         | 10 |
| 5  | 554.3085  | 277.6579        |                |                  | H    | 1011.5582 | 506.2827        | 994.5316  | 497.7694         | 993.5476       | 497.2774         | 9  |
| 6  | 667.3926  | 334.1999        |                |                  | I    | 874.4993  | 437.7533        | 857.4727  | 429.2400         | 856.4887       | 428.7480         | 8  |
| 7  | 754.4246  | 377.7160        | 736.4141       | 368.7107         | S    | 761.4152  | 381.2112        | 744.3886  | 372.6980         | 743.4046       | 372.2060         | 7  |
| 8  | 855.4723  | 428.2398        | 837.4618       | 419.2345         | T    | 674.3832  | 337.6952        | 657.3566  | 329.1819         | 656.3726       | 328.6899         | 6  |
| 9  | 912.4938  | 456.7505        | 894.4832       | 447.7452         | G    | 573.3355  | 287.1714        | 556.3089  | 278.6581         | 555.3249       | 278.1661         | 5  |
| 10 | 1027.5207 | 514.2640        | 1009.5102      | 505.2587         | D    | 516.3140  | 258.6606        | 499.2875  | 250.1474         | 498.3035       | 249.6554         | 4  |
| 11 | 1140.6048 | 570.8060        | 1122.5942      | 561.8007         | L    | 401.2871  | 201.1472        | 384.2605  | 192.6339         |                |                  | 3  |
| 12 | 1253.6889 | 627.3481        | 1235.6783      | 618.3428         | L    | 288.2030  | 144.6051        | 271.1765  | 136.0919         |                |                  | 2  |
| 13 |           |                 |                |                  | R    | 175.1190  | 88.0631         | 158.0924  | 79.5498          |                |                  | 1  |

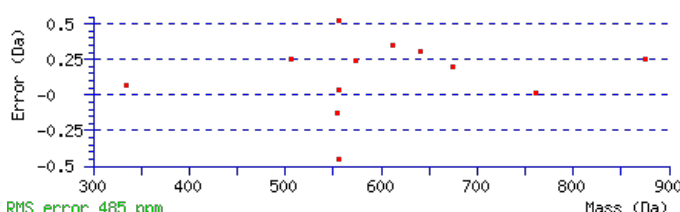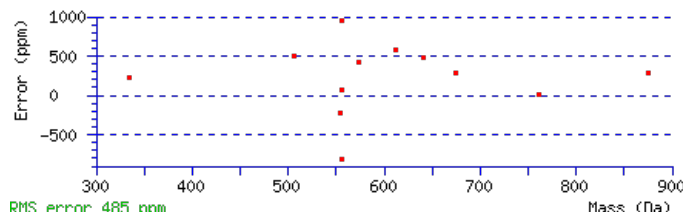NCBI BLAST search of **FGLVHISTGDLRL**

(Parameters: blastp, nr protein database, expect=20000, no filter, PAM30)

Other BLAST [web gateways](#)

# AT5G35170.1

All matches to this query

| Score | Mr(calc)  | Delta   | Sequence                      |
|-------|-----------|---------|-------------------------------|
| 24.6  | 1426.7933 | -0.0007 | <a href="#">FGLVHISTGDLLR</a> |
| 2.3   | 1426.7892 | 0.0034  | <a href="#">SERKLSLSPGTR</a>  |
| 0.9   | 1426.7894 | 0.0032  | <a href="#">IMSLLSGYFLVGK</a> |
| 0.2   | 1426.7932 | -0.0006 | <a href="#">EDAVSLLHLKFR</a>  |

Mascot: <http://www.matrixscience.com/>

## Peptide View

MS/MS Fragmentation of **SEAAAAFGNDGCYLEK**

Found in **AT5G35360.1** in **TAIR\_Arabidopsis**, Symbols: CAC2 | CAC2 (acetyl co-enzyme A carboxylase biotin carboxylase subunit) | chr5:13601530-13605498 FORWARD

Match to Query 7479: 1701.732410 from(851.873481,2+) index(4241)

Title: Elution from: 41.493 to 41.493 scan no 5458 cid35.00 polarity:+

Data file D1d-1\_3.mgf

Click mouse within plot area to zoom in by factor of two about that point

Or,  to  Da

Label all possible matches  Label matches used for scoring

Show Y-axis

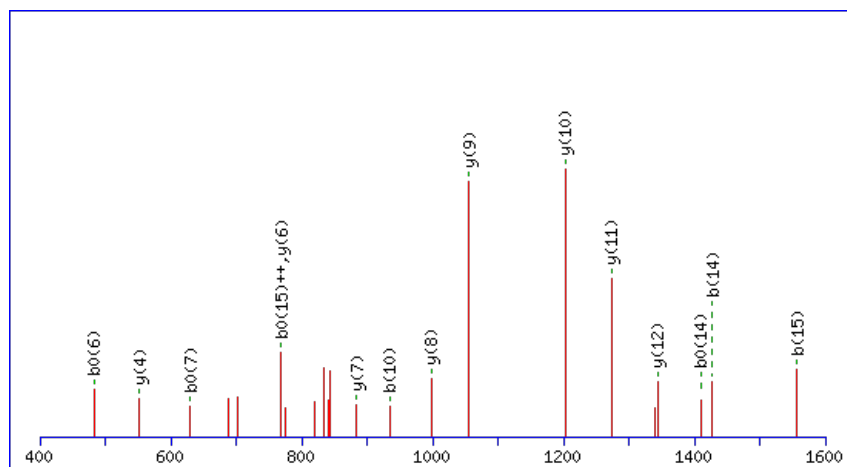

Monoisotopic mass of neutral peptide  $M_r(\text{calc})$ : 1701.7304

Fixed modifications: Carbamidomethyl (C) (apply to specified residues or termini only)

Ions Score: 72 Expect: 6e-008

Matches : 15/162 fragment ions using 18 most intense peaks ([help](#))

| #  | b                | b <sup>++</sup> | b*        | b <sup>*++</sup> | b <sup>0</sup>   | b <sup>0++</sup> | Seq. | y                | y <sup>++</sup> | y*        | y <sup>*++</sup> | y <sup>0</sup> | y <sup>0++</sup> | #  |
|----|------------------|-----------------|-----------|------------------|------------------|------------------|------|------------------|-----------------|-----------|------------------|----------------|------------------|----|
| 1  | 88.0393          | 44.5233         |           |                  | 70.0287          | 35.5180          | S    |                  |                 |           |                  |                |                  | 16 |
| 2  | 217.0819         | 109.0446        |           |                  | 199.0713         | 100.0393         | E    | 1615.7057        | 808.3565        | 1598.6792 | 799.8432         | 1597.6951      | 799.3512         | 15 |
| 3  | 288.1190         | 144.5631        |           |                  | 270.1084         | 135.5579         | A    | 1486.6631        | 743.8352        | 1469.6366 | 735.3219         | 1468.6525      | 734.8299         | 14 |
| 4  | 359.1561         | 180.0817        |           |                  | 341.1456         | 171.0764         | A    | 1415.6260        | 708.3166        | 1398.5994 | 699.8034         | 1397.6154      | 699.3114         | 13 |
| 5  | 430.1932         | 215.6003        |           |                  | 412.1827         | 206.5950         | A    | <b>1344.5889</b> | 672.7981        | 1327.5623 | 664.2848         | 1326.5783      | 663.7928         | 12 |
| 6  | 501.2304         | 251.1188        |           |                  | <b>483.2198</b>  | 242.1135         | A    | <b>1273.5518</b> | 637.2795        | 1256.5252 | 628.7662         | 1255.5412      | 628.2742         | 11 |
| 7  | 648.2988         | 324.6530        |           |                  | <b>630.2882</b>  | 315.6477         | F    | <b>1202.5147</b> | 601.7610        | 1185.4881 | 593.2477         | 1184.5041      | 592.7557         | 10 |
| 8  | 705.3202         | 353.1638        |           |                  | 687.3097         | 344.1585         | G    | <b>1055.4462</b> | 528.2268        | 1038.4197 | 519.7135         | 1037.4357      | 519.2215         | 9  |
| 9  | 819.3632         | 410.1852        | 802.3366  | 401.6719         | 801.3526         | 401.1799         | N    | <b>998.4248</b>  | 499.7160        | 981.3982  | 491.2027         | 980.4142       | 490.7107         | 8  |
| 10 | <b>934.3901</b>  | 467.6987        | 917.3636  | 459.1854         | 916.3795         | 458.6934         | D    | <b>884.3818</b>  | 442.6946        | 867.3553  | 434.1813         | 866.3713       | 433.6893         | 7  |
| 11 | 991.4116         | 496.2094        | 974.3850  | 487.6961         | 973.4010         | 487.2041         | G    | <b>769.3549</b>  | 385.1811        | 752.3284  | 376.6678         | 751.3443       | 376.1758         | 6  |
| 12 | 1151.4422        | 576.2247        | 1134.4157 | 567.7115         | 1133.4316        | 567.2195         | C    | 712.3334         | 356.6704        | 695.3069  | 348.1571         | 694.3229       | 347.6651         | 5  |
| 13 | 1314.5055        | 657.7564        | 1297.4790 | 649.2431         | 1296.4950        | 648.7511         | Y    | <b>552.3028</b>  | 276.6550        | 535.2762  | 268.1418         | 534.2922       | 267.6498         | 4  |
| 14 | <b>1427.5896</b> | 714.2984        | 1410.5631 | 705.7852         | <b>1409.5790</b> | 705.2932         | L    | 389.2395         | 195.1234        | 372.2129  | 186.6101         | 371.2289       | 186.1181         | 3  |
| 15 | <b>1556.6322</b> | 778.8197        | 1539.6057 | 770.3065         | 1538.6216        | <b>769.8145</b>  | E    | 276.1554         | 138.5813        | 259.1288  | 130.0681         | 258.1448       | 129.5761         | 2  |
| 16 |                  |                 |           |                  |                  |                  | K    | 147.1128         | 74.0600         | 130.0863  | 65.5468          |                |                  | 1  |

AT5G35360.1

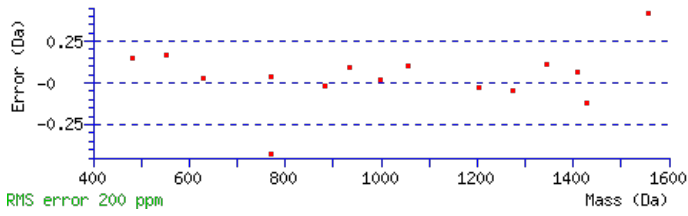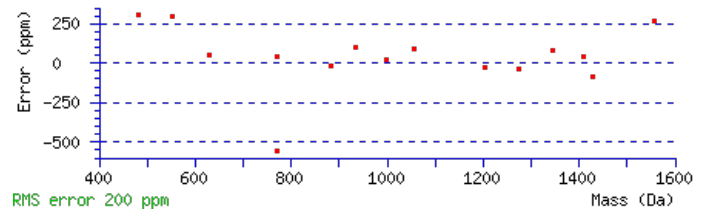

NCBI BLAST search of [SEAAAAFGNDGCYLEK](#)

(Parameters: blastp, nr protein database, expect=20000, no filter, PAM30)

Other BLAST [web gateways](#)

All matches to this query

| Score | Mr(calc)  | Delta  | Sequence                         |
|-------|-----------|--------|----------------------------------|
| 72.2  | 1701.7304 | 0.0020 | <a href="#">SEAAAAFGNDGCYLEK</a> |

Mascot: <http://www.matrixscience.com/>

**Peptide View**MS/MS Fragmentation of **FTYGYEMPVDILAK**Found in **AT5G35590.1** in **TAIR\_Arabidopsis**, Symbols: PAA1 | PAA1 (20S proteasome alpha subunit A1); peptidase | chr5:13782647-13784998  
REVERSE

Match to Query 8030: 1645.807868 from(823.911210,2+) index(9696)

Title: Elution from: 86.234 to 86.234 scan no 13084 cid35.00 polarity:+

Data file D6h-1\_1.mgf

Click mouse within plot area to zoom in by factor of two about that point

Or,   to  Da Label all possible matches  Label matches used for scoring Show Y-axis 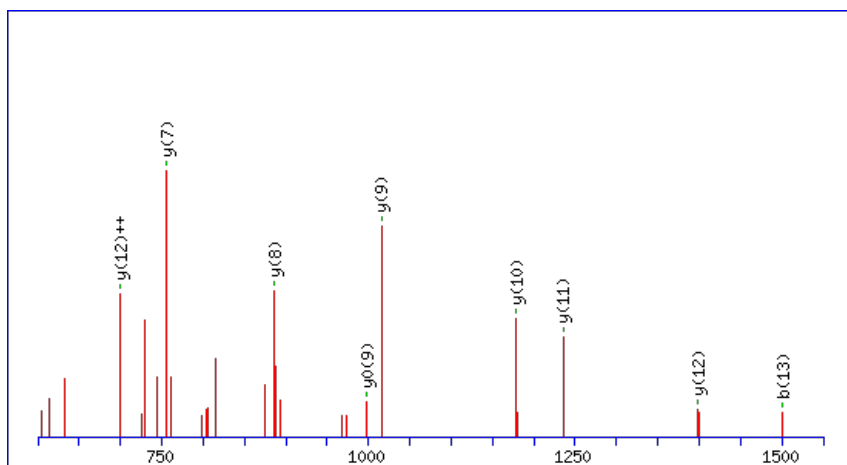Monoisotopic mass of neutral peptide  $M_r(\text{calc})$ : 1645.8062

Fixed modifications: Carbamidomethyl (C) (apply to specified residues or termini only)

Ions Score: 47 Expect: 6.9e-005

Matches : 9/120 fragment ions using 9 most intense peaks ([help](#))

| #  | b                | b <sup>++</sup> | b <sup>0</sup> | b <sup>0++</sup> | Seq. | y                | y <sup>++</sup> | y*        | y <sup>*++</sup> | y <sup>0</sup>  | y <sup>0++</sup> | #  |
|----|------------------|-----------------|----------------|------------------|------|------------------|-----------------|-----------|------------------|-----------------|------------------|----|
| 1  | 148.0757         | 74.5415         |                |                  | F    |                  |                 |           |                  |                 |                  | 14 |
| 2  | 249.1234         | 125.0653        | 231.1128       | 116.0600         | T    | 1499.7450        | 750.3762        | 1482.7185 | 741.8629         | 1481.7345       | 741.3709         | 13 |
| 3  | 412.1867         | 206.5970        | 394.1761       | 197.5917         | Y    | <b>1398.6974</b> | <b>699.8523</b> | 1381.6708 | 691.3390         | 1380.6868       | 690.8470         | 12 |
| 4  | 469.2082         | 235.1077        | 451.1976       | 226.1024         | G    | <b>1235.6340</b> | 618.3207        | 1218.6075 | 609.8074         | 1217.6235       | 609.3154         | 11 |
| 5  | 632.2715         | 316.6394        | 614.2609       | 307.6341         | Y    | <b>1178.6126</b> | 589.8099        | 1161.5860 | 581.2967         | 1160.6020       | 580.8046         | 10 |
| 6  | 761.3141         | 381.1607        | 743.3035       | 372.1554         | E    | <b>1015.5492</b> | 508.2783        | 998.5227  | 499.7650         | <b>997.5387</b> | 499.2730         | 9  |
| 7  | 892.3546         | 446.6809        | 874.3440       | 437.6756         | M    | <b>886.5067</b>  | 443.7570        | 869.4801  | 435.2437         | 868.4961        | 434.7517         | 8  |
| 8  | 989.4073         | 495.2073        | 971.3968       | 486.2020         | P    | <b>755.4662</b>  | 378.2367        | 738.4396  | 369.7234         | 737.4556        | 369.2314         | 7  |
| 9  | 1088.4757        | 544.7415        | 1070.4652      | 535.7362         | V    | 658.4134         | 329.7103        | 641.3869  | 321.1971         | 640.4028        | 320.7051         | 6  |
| 10 | 1203.5027        | 602.2550        | 1185.4921      | 593.2497         | D    | 559.3450         | 280.1761        | 542.3184  | 271.6629         | 541.3344        | 271.1708         | 5  |
| 11 | 1316.5868        | 658.7970        | 1298.5762      | 649.7917         | I    | 444.3180         | 222.6627        | 427.2915  | 214.1494         |                 |                  | 4  |
| 12 | 1429.6708        | 715.3390        | 1411.6603      | 706.3338         | L    | 331.2340         | 166.1206        | 314.2074  | 157.6074         |                 |                  | 3  |
| 13 | <b>1500.7079</b> | 750.8576        | 1482.6974      | 741.8523         | A    | 218.1499         | 109.5786        | 201.1234  | 101.0653         |                 |                  | 2  |
| 14 |                  |                 |                |                  | K    | 147.1128         | 74.0600         | 130.0863  | 65.5468          |                 |                  | 1  |

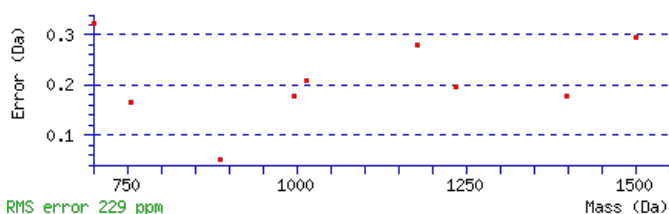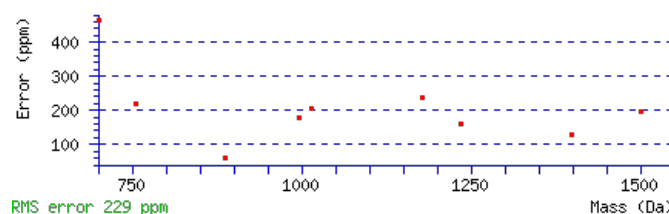NCBI BLAST search of [FTYGYEMPVDILAK](#)



## AT5G35590.1

(Parameters: blastp, nr protein database, expect=20000, no filter, PAM30)

Other BLAST [web gateways](#)

### All matches to this query

| Score | Mr(calc)  | Delta   | Sequence                       |
|-------|-----------|---------|--------------------------------|
| 46.7  | 1645.8062 | 0.0017  | <a href="#">FTYGYEMPVDILAK</a> |
| 0.1   | 1645.8107 | -0.0028 | <a href="#">MSRQIQESGWRPR</a>  |
| 0.1   | 1645.8107 | -0.0028 | <a href="#">MSRQLQESGWRPR</a>  |

Mascot: <http://www.matrixscience.com/>

## Peptide View

MS/MS Fragmentation of **SMREEGGFEVIK**Found in **AT5G35630.1** in **TAIR\_Arabidopsis**, Symbols: GLN2, ATGSL1, GS2 | GS2 (GLUTAMINE SYNTHETASE 2); glutamate-ammonia ligase | chr5:13848450-13850469 FORWARD

Match to Query 5361: 1396.625338 from(699.319945,2+) index(3103)

Title: Elution from: 31.145 to 31.145 scan no 3892 cid35.00 polarity:+

Data file 0-2\_2.mgf

Click mouse within plot area to zoom in by factor of two about that point

Or,   to  Da Label all possible matches  Label matches used for scoring Show Y-axis 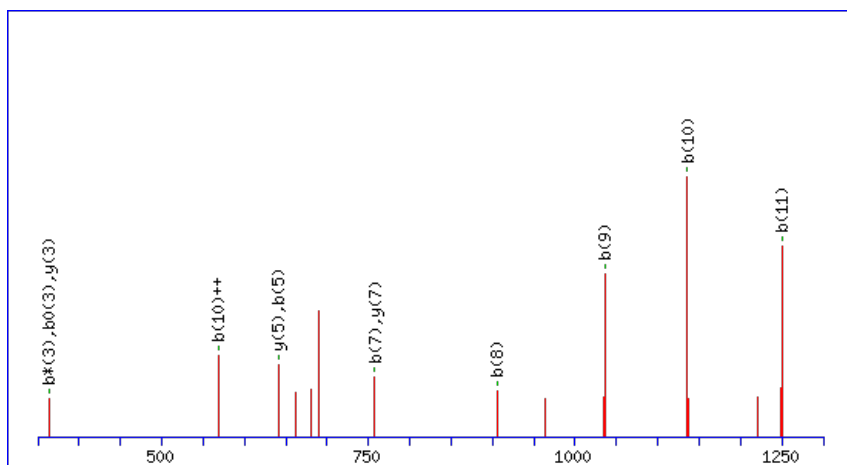Monoisotopic mass of neutral peptide  $M_r(\text{calc})$ : 1396.6233

Fixed modifications: Carbamidomethyl (C) (apply to specified residues or termini only)

Ions Score: 51 Expect: 6.5e-005

Matches : 12/122 fragment ions using 12 most intense peaks ([help](#))

| #  | b         | b <sup>++</sup> | b <sup>*</sup> | b <sup>*++</sup> | b <sup>0</sup> | b <sup>0++</sup> | Seq. | y         | y <sup>++</sup> | y <sup>*</sup> | y <sup>*++</sup> | y <sup>0</sup> | y <sup>0++</sup> | #  |
|----|-----------|-----------------|----------------|------------------|----------------|------------------|------|-----------|-----------------|----------------|------------------|----------------|------------------|----|
| 1  | 89.0363   | 45.0218         |                |                  | 71.0258        | 36.0165          | S    |           |                 |                |                  |                |                  | 12 |
| 2  | 221.0739  | 111.0406        |                |                  | 203.0633       | 102.0353         | M    | 1309.6015 | 655.3044        | 1291.5779      | 646.2926         | 1291.5910      | 646.2991         | 11 |
| 3  | 381.1631  | 191.0852        | 363.1395       | 182.0734         | 363.1525       | 182.0799         | R    | 1177.5640 | 589.2856        | 1159.5404      | 580.2738         | 1159.5534      | 580.2804         | 10 |
| 4  | 511.2027  | 256.1050        | 493.1792       | 247.0932         | 493.1922       | 247.0997         | E    | 1017.4748 | 509.2410        | 999.4512       | 500.2292         | 999.4642       | 500.2357         | 9  |
| 5  | 641.2424  | 321.1248        | 623.2188       | 312.1130         | 623.2318       | 312.1195         | E    | 887.4351  | 444.2212        | 869.4115       | 435.2094         | 869.4246       | 435.2159         | 8  |
| 6  | 699.2609  | 350.1341        | 681.2373       | 341.1223         | 681.2503       | 341.1288         | G    | 757.3955  | 379.2014        | 739.3719       | 370.1896         | 739.3849       | 370.1961         | 7  |
| 7  | 757.2794  | 379.1433        | 739.2558       | 370.1315         | 739.2688       | 370.1380         | G    | 699.3770  | 350.1921        | 681.3534       | 341.1803         | 681.3664       | 341.1869         | 6  |
| 8  | 905.3448  | 453.1760        | 887.3212       | 444.1643         | 887.3342       | 444.1708         | F    | 641.3585  | 321.1829        | 623.3349       | 312.1711         | 623.3479       | 312.1776         | 5  |
| 9  | 1035.3844 | 518.1959        | 1017.3609      | 509.1841         | 1017.3739      | 509.1906         | E    | 493.2930  | 247.1502        | 475.2695       | 238.1384         | 475.2825       | 238.1449         | 4  |
| 10 | 1135.4499 | 568.2286        | 1117.4263      | 559.2168         | 1117.4393      | 559.2233         | V    | 363.2534  | 182.1303        | 345.2298       | 173.1186         |                |                  | 3  |
| 11 | 1249.5310 | 625.2691        | 1231.5074      | 616.2573         | 1231.5204      | 616.2638         | I    | 263.1880  | 132.0976        | 245.1644       | 123.0858         |                |                  | 2  |
| 12 |           |                 |                |                  |                |                  | K    | 149.1069  | 75.0571         | 131.0833       | 66.0453          |                |                  | 1  |

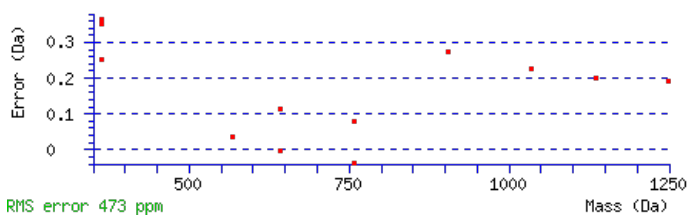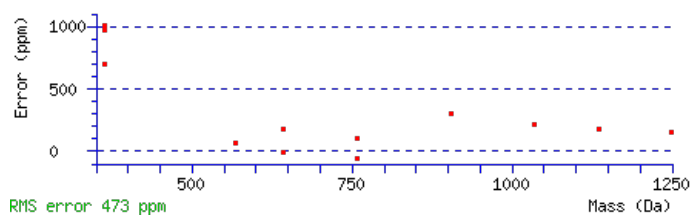NCBI BLAST search of **SMREEGGFEVIK**

(Parameters: blastp, nr protein database, expect=20000, no filter, PAM30)

Other BLAST [web gateways](#)

**AT5G35630.1**

All matches to this query

| Score | Mr(calc)  | Delta   | Sequence                      |
|-------|-----------|---------|-------------------------------|
| 51.3  | 1396.6233 | 0.0020  | <a href="#">SMREEGGFEVIK</a>  |
| 25.8  | 1396.6280 | -0.0027 | <a href="#">DAATPPLTQEDPK</a> |
| 15.1  | 1396.6233 | 0.0020  | <a href="#">TEERMTPQVYK</a>   |
| 14.3  | 1396.6233 | 0.0020  | <a href="#">QYKQADCELVK</a>   |
| 13.1  | 1396.6240 | 0.0013  | <a href="#">LESMSMSVDILK</a>  |
| 12.3  | 1396.6285 | -0.0031 | <a href="#">TEEESSSLGKRR</a>  |
| 8.3   | 1396.6237 | 0.0016  | <a href="#">ENGEGMRTSRLK</a>  |
| 5.1   | 1396.6220 | 0.0034  | <a href="#">MGLMRSMLPNAK</a>  |
| 3.7   | 1396.6237 | 0.0016  | <a href="#">RKASTAMGIDGDR</a> |
| 3.3   | 1396.6233 | 0.0020  | <a href="#">LMSSRETDWIK</a>   |

Mascot: <http://www.matrixscience.com/>

## Peptide View

MS/MS Fragmentation of **SLLNALK**

Found in **AT5G35730.1** in **TAIR\_Arabidopsis**, Symbols: | EXS family protein / ERD1/XPR1/SYG1 family protein | chr5:13911171-13914051  
FORWARD

Match to Query 1480: 854.474512 from(428.244532,2+) index(3103)

Title: Elution from: 30.553 to 30.553 scan no 3863 cid35.00 polarity:+

Data file D1d-3\_1.mgf

Click mouse within plot area to zoom in by factor of two about that point

Or,  to  Da

Label all possible matches  Label matches used for scoring

Show Y-axis

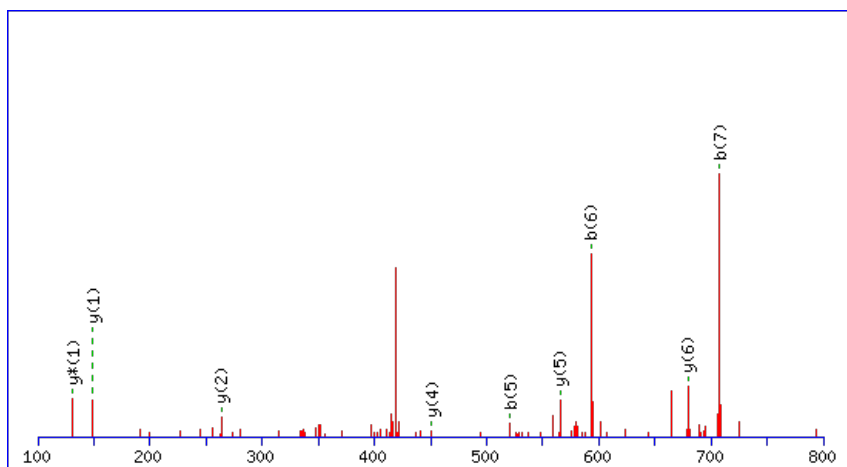

Monoisotopic mass of neutral peptide  $M_r(\text{calc})$ : 854.4722

Fixed modifications: Carbamidomethyl (C) (apply to specified residues or termini only)

Ions Score: 43 Expect: 0.00092

Matches : 9/64 fragment ions using 13 most intense peaks ([help](#))

| # | b               | b <sup>++</sup> | b*       | b <sup>*++</sup> | b <sup>0</sup> | b <sup>0++</sup> | Seq. | y               | y <sup>++</sup> | y*              | y <sup>*++</sup> | y <sup>0</sup> | y <sup>0++</sup> | # |
|---|-----------------|-----------------|----------|------------------|----------------|------------------|------|-----------------|-----------------|-----------------|------------------|----------------|------------------|---|
| 1 | 89.0363         | 45.0218         |          |                  | 71.0258        | 36.0165          | S    |                 |                 |                 |                  |                |                  | 8 |
| 2 | 177.0654        | 89.0363         |          |                  | 159.0548       | 80.0311          | S    | 767.4504        | 384.2288        | 749.4268        | 375.2170         | 749.4398       | 375.2235         | 7 |
| 3 | 291.1465        | 146.0769        |          |                  | 273.1359       | 137.0716         | L    | <b>679.4213</b> | 340.2143        | 661.3977        | 331.2025         |                |                  | 6 |
| 4 | 405.2276        | 203.1174        |          |                  | 387.2170       | 194.1122         | L    | <b>565.3402</b> | 283.1737        | 547.3166        | 274.1620         |                |                  | 5 |
| 5 | <b>521.2646</b> | 261.1359        | 503.2410 | 252.1241         | 503.2540       | 252.1307         | N    | <b>451.2591</b> | 226.1332        | 433.2355        | 217.1214         |                |                  | 4 |
| 6 | <b>593.2987</b> | 297.1530        | 575.2752 | 288.1412         | 575.2882       | 288.1477         | A    | 335.2221        | 168.1147        | 317.1985        | 159.1029         |                |                  | 3 |
| 7 | <b>707.3798</b> | 354.1936        | 689.3563 | 345.1818         | 689.3693       | 345.1883         | L    | <b>263.1880</b> | 132.0976        | 245.1644        | 123.0858         |                |                  | 2 |
| 8 |                 |                 |          |                  |                |                  | K    | <b>149.1069</b> | 75.0571         | <b>131.0833</b> | 66.0453          |                |                  | 1 |

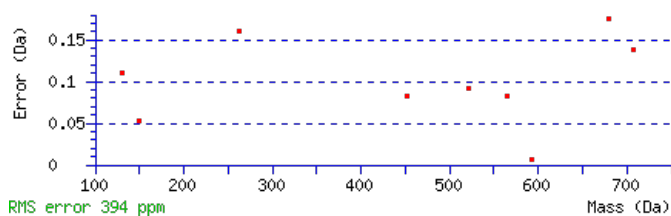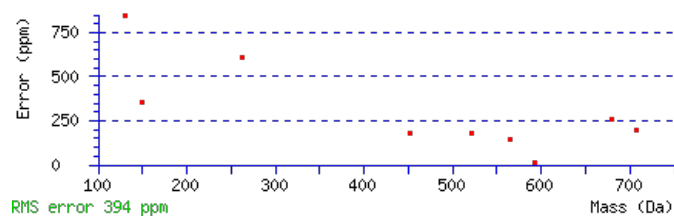

NCBI BLAST search of [SLLNALK](#)

(Parameters: blastp, nr protein database, expect=20000, no filter, PAM30)

Other BLAST [web gateways](#)

All matches to this query

| Score | $M_r(\text{calc})$ | Delta  | Sequence                |
|-------|--------------------|--------|-------------------------|
| 42.7  | 854.4722           | 0.0023 | <a href="#">SLLNALK</a> |

## AT5G35730.1

|      |          |         |                          |
|------|----------|---------|--------------------------|
| 28.1 | 854.4748 | -0.0003 | <a href="#">QRLOGLK</a>  |
| 28.0 | 854.4722 | 0.0023  | <a href="#">EKEKALK</a>  |
| 28.0 | 854.4722 | 0.0024  | <a href="#">TLAQTALK</a> |
| 20.9 | 854.4744 | 0.0001  | <a href="#">YPVLNLK</a>  |
| 19.2 | 854.4771 | -0.0026 | <a href="#">QIRWIK</a>   |
| 15.7 | 854.4748 | -0.0003 | <a href="#">AQRVGALK</a> |
| 15.7 | 854.4748 | -0.0003 | <a href="#">GNALRALK</a> |
| 15.7 | 854.4771 | -0.0026 | <a href="#">RGLWAIK</a>  |
| 15.6 | 854.4722 | 0.0023  | <a href="#">EAEKCLK</a>  |

Mascot: <http://www.matrixscience.com/>

## Peptide View

### MS/MS Fragmentation of **ELGEVGFKLEGLA<sup>R</sup>**

Found in **AT5G35753.1** in **TAIR\_Arabidopsis**, Symbols: | similar to DNAJ heat shock N-terminal domain-containing protein [Arabidopsis thaliana] (TAIR:AT2G05230.1); similar to DNAJ heat shock N-terminal domain-containing protein [Arabidopsis thaliana] (TAIR:AT2G05250.1); similar to hypotheticala

Match to Query 8193: 1778.918388 from(593.980072,3+) index(6354)

Title: Elution from: 55.693 to 55.693 scan no 8218 cid35.00 polarity:+

Data file 0-2\_3.mgf

Click mouse within plot area to zoom in by factor of two about that point

Or,   to  Da

Label all possible matches  Label matches used for scoring

Show Y-axis

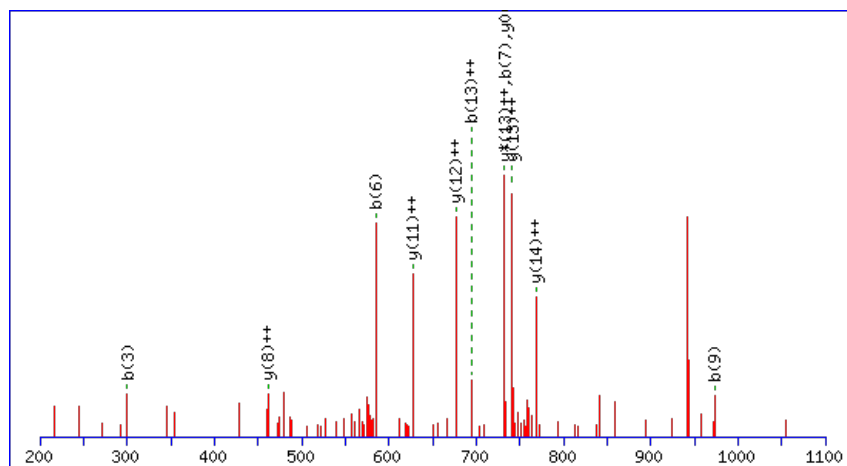

Monoisotopic mass of neutral peptide  $M_r(\text{calc})$ : 1778.9203

Fixed modifications: Carbamidomethyl (C) (apply to specified residues or termini only)

Ions Score: 24 Expect: 0.022

Matches : 12/158 fragment ions using 24 most intense peaks ([help](#))

| #  | b               | b <sup>++</sup> | b*        | b <sup>*++</sup> | b <sup>0</sup> | b <sup>0++</sup> | Seq. | y         | y <sup>++</sup> | y*        | y <sup>*++</sup> | y <sup>0</sup> | y <sup>0++</sup> | #  |
|----|-----------------|-----------------|-----------|------------------|----------------|------------------|------|-----------|-----------------|-----------|------------------|----------------|------------------|----|
| 1  | 130.0499        | 65.5286         |           |                  | 112.0393       | 56.5233          | E    |           |                 |           |                  |                |                  | 16 |
| 2  | 243.1339        | 122.0706        |           |                  | 225.1234       | 113.0653         | L    | 1650.8850 | 825.9461        | 1633.8584 | 817.4329         | 1632.8744      | 816.9408         | 15 |
| 3  | <b>300.1554</b> | 150.5813        |           |                  | 282.1448       | 141.5761         | G    | 1537.8009 | <b>769.4041</b> | 1520.7744 | 760.8908         | 1519.7904      | 760.3988         | 14 |
| 4  | 429.1980        | 215.1026        |           |                  | 411.1874       | 206.0974         | E    | 1480.7795 | <b>740.8934</b> | 1463.7529 | <b>732.3801</b>  | 1462.7689      | <b>731.8881</b>  | 13 |
| 5  | 528.2664        | 264.6368        |           |                  | 510.2558       | 255.6316         | V    | 1351.7369 | <b>676.3721</b> | 1334.7103 | 667.8588         | 1333.7263      | 667.3668         | 12 |
| 6  | <b>585.2879</b> | 293.1476        |           |                  | 567.2773       | 284.1423         | G    | 1252.6684 | <b>626.8379</b> | 1235.6419 | 618.3246         | 1234.6579      | 617.8326         | 11 |
| 7  | <b>732.3563</b> | 366.6818        |           |                  | 714.3457       | 357.6765         | F    | 1195.6470 | 598.3271        | 1178.6204 | 589.8139         | 1177.6364      | 589.3218         | 10 |
| 8  | 860.4512        | 430.7293        | 843.4247  | 422.2160         | 842.4407       | 421.7240         | K    | 1048.5786 | 524.7929        | 1031.5520 | 516.2796         | 1030.5680      | 515.7876         | 9  |
| 9  | <b>973.5353</b> | 487.2713        | 956.5088  | 478.7580         | 955.5247       | 478.2660         | L    | 920.4836  | <b>460.7454</b> | 903.4571  | 452.2322         | 902.4730       | 451.7402         | 8  |
| 10 | 1102.5779       | 551.7926        | 1085.5514 | 543.2793         | 1084.5673      | 542.7873         | E    | 807.3995  | 404.2034        | 790.3730  | 395.6901         | 789.3890       | 395.1981         | 7  |
| 11 | 1159.5994       | 580.3033        | 1142.5728 | 571.7900         | 1141.5888      | 571.2980         | G    | 678.3570  | 339.6821        | 661.3304  | 331.1688         | 660.3464       | 330.6768         | 6  |
| 12 | 1274.6263       | 637.8168        | 1257.5998 | 629.3035         | 1256.6157      | 628.8115         | D    | 621.3355  | 311.1714        | 604.3089  | 302.6581         | 603.3249       | 302.1661         | 5  |
| 13 | 1387.7104       | <b>694.3588</b> | 1370.6838 | 685.8456         | 1369.6998      | 685.3535         | L    | 506.3085  | 253.6579        | 489.2820  | 245.1446         |                |                  | 4  |
| 14 | 1458.7475       | 729.8774        | 1441.7209 | 721.3641         | 1440.7369      | 720.8721         | A    | 393.2245  | 197.1159        | 376.1979  | 188.6026         |                |                  | 3  |
| 15 | 1605.8159       | 803.4116        | 1588.7894 | 794.8983         | 1587.8053      | 794.4063         | F    | 322.1874  | 161.5973        | 305.1608  | 153.0840         |                |                  | 2  |
| 16 |                 |                 |           |                  |                |                  | R    | 175.1190  | 88.0631         | 158.0924  | 79.5498          |                |                  | 1  |

AT5G35753.1

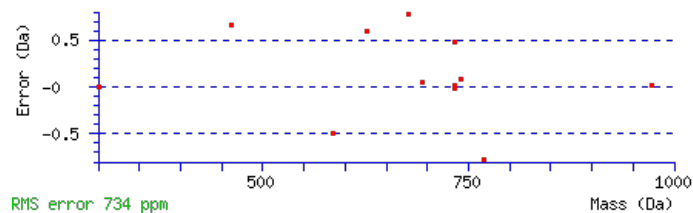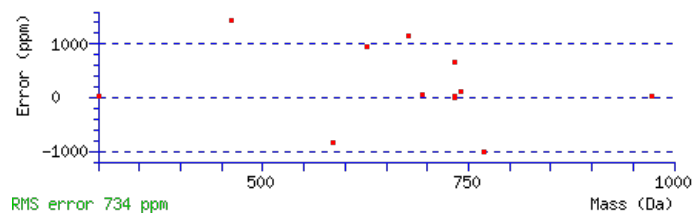

NCBI **BLAST** search of [ELGEVGFKLEGDLAFR](#)

(Parameters: blastp, nr protein database, expect=20000, no filter, PAM30)

Other BLAST [web gateways](#)

**All matches to this query**

| Score | Mr(calc)  | Delta   | Sequence                          |
|-------|-----------|---------|-----------------------------------|
| 23.9  | 1778.9203 | -0.0019 | <a href="#">ELGEVGFKLEGDLAFR</a>  |
| 11.3  | 1778.9236 | -0.0052 | <a href="#">LQGEKALLAMEASQYK</a>  |
| 5.8   | 1778.9236 | -0.0052 | <a href="#">VAEERLPTLKMYSKD</a>   |
| 1.9   | 1778.9209 | -0.0026 | <a href="#">IHLPSNTPNEMRKAR</a>   |
| 0.2   | 1778.9203 | -0.0019 | <a href="#">LWQVPETLHHEALSK</a>   |
| 0.1   | 1778.9163 | 0.0021  | <a href="#">GLEDIGKEQAGGIVEHK</a> |

Mascot: <http://www.matrixscience.com/>

**Peptide View**MS/MS Fragmentation of **LVQSNDIQR**

Found in **AT5G36000.1** in **TAIR\_Arabidopsis**, Symbols: | similar to unknown protein [Arabidopsis thaliana] (TAIR:AT3G61730.1); similar to unnamed protein product [Vitis vinifera] (GB:CAO39758.1); contains domain F-box domain (SSF81383) | chr5:14157226-14159122 FORWARD

Match to Query 2773: 1086.523638 from(544.269095,2+) index(2301)

Title: Elution from: 26.213 to 26.213 scan no 2961 cid35.00 polarity:+

Data file D12h-2\_3.mgf

Click mouse within plot area to zoom in by factor of two about that point

Or,   to  Da

Label all possible matches  Label matches used for scoring

Show Y-axis

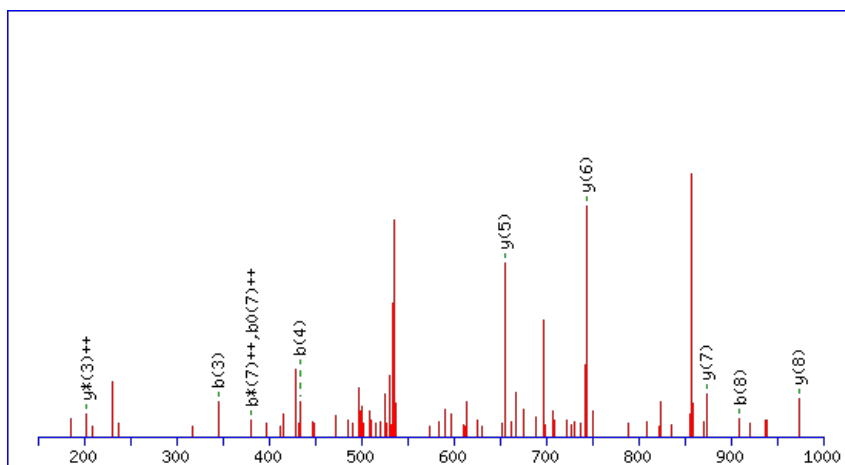

**Monoisotopic mass of neutral peptide Mr(calc):** 1086.5228

**Fixed modifications:** Carbamidomethyl (C) (apply to specified residues or termini only)

**Ions Score:** 25 **Expect:** 0.029

**Matches:** 10/80 fragment ions using 16 most intense peaks ([help](#))

| # | b        | b <sup>++</sup> | b*       | b <sup>*++</sup> | b <sup>0</sup> | b <sup>0++</sup> | Seq. | y        | y <sup>++</sup> | y*       | y <sup>*++</sup> | y <sup>0</sup> | y <sup>0++</sup> | # |
|---|----------|-----------------|----------|------------------|----------------|------------------|------|----------|-----------------|----------|------------------|----------------|------------------|---|
| 1 | 115.0884 | 58.0478         |          |                  |                |                  | L    |          |                 |          |                  |                |                  | 9 |
| 2 | 215.1538 | 108.0805        |          |                  |                |                  | V    | 973.4490 | 487.2281        | 955.4254 | 478.2163         | 955.4384       | 478.2228         | 8 |
| 3 | 345.2065 | 173.1069        | 327.1829 | 164.0951         |                |                  | Q    | 873.3835 | 437.1954        | 855.3599 | 428.1836         | 855.3730       | 428.1901         | 7 |
| 4 | 433.2355 | 217.1214        | 415.2120 | 208.1096         | 415.2250       | 208.1161         | S    | 743.3309 | 372.1691        | 725.3073 | 363.1573         | 725.3203       | 363.1638         | 6 |
| 5 | 549.2725 | 275.1399        | 531.2489 | 266.1281         | 531.2620       | 266.1346         | N    | 655.3018 | 328.1545        | 637.2782 | 319.1428         | 637.2912       | 319.1493         | 5 |
| 6 | 665.2965 | 333.1519        | 647.2729 | 324.1401         | 647.2859       | 324.1466         | D    | 539.2648 | 270.1360        | 521.2412 | 261.1243         | 521.2543       | 261.1308         | 4 |
| 7 | 779.3776 | 390.1924        | 761.3540 | 381.1807         | 761.3670       | 381.1872         | I    | 423.2408 | 212.1241        | 405.2173 | 203.1123         |                |                  | 3 |
| 8 | 909.4303 | 455.2188        | 891.4067 | 446.2070         | 891.4197       | 446.2135         | Q    | 309.1597 | 155.0835        | 291.1362 | 146.0717         |                |                  | 2 |
| 9 |          |                 |          |                  |                |                  | R    | 179.1071 | 90.0572         | 161.0835 | 81.0454          |                |                  | 1 |

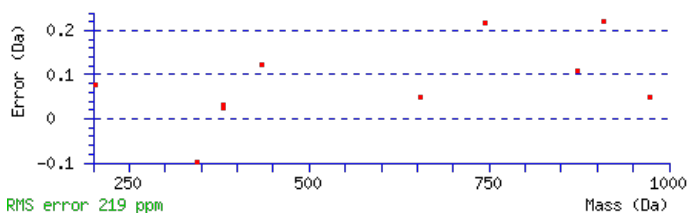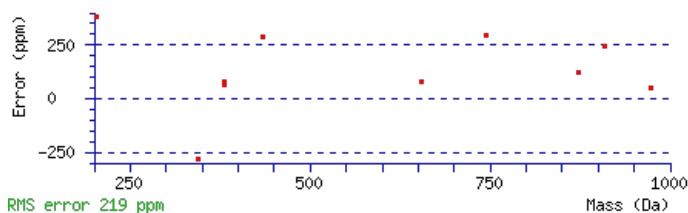

NCBI **BLAST** search of **LVQSNDIQR**

(Parameters: blastp, nr protein database, expect=20000, no filter, PAM30)

Other BLAST [web gateways](#)

All matches to this query

| Score | Mr(calc) | Delta | Sequence |
|-------|----------|-------|----------|
|       |          |       |          |



**AT5G36000.1**

|      |           |         |                             |
|------|-----------|---------|-----------------------------|
| 24.9 | 1086.5228 | 0.0009  | <a href="#">LVQSNDIQR</a>   |
| 10.6 | 1086.5257 | -0.0021 | <a href="#">VQLTEDLMK</a>   |
| 10.0 | 1086.5228 | 0.0008  | <a href="#">DLLRPSSR</a>    |
| 6.8  | 1086.5257 | -0.0021 | <a href="#">VLEGMGVVEK</a>  |
| 6.2  | 1086.5250 | -0.0014 | <a href="#">IVEYHREK</a>    |
| 5.5  | 1086.5228 | 0.0009  | <a href="#">EVARLEAER</a>   |
| 5.3  | 1086.5228 | 0.0008  | <a href="#">QVSSGAAPLSR</a> |
| 4.7  | 1086.5228 | 0.0008  | <a href="#">INNTKETPR</a>   |
| 4.7  | 1086.5250 | -0.0014 | <a href="#">LDHLYIGSR</a>   |
| 4.4  | 1086.5257 | -0.0021 | <a href="#">LSSTILMGGLP</a> |

**Mascot:** <http://www.matrixscience.com/>

**Peptide View**MS/MS Fragmentation of **GPISIEWFK**

Found in **AT5G36880.2** in **TAIR\_Arabidopsis**, Symbols: | acetyl-CoA synthetase, putative / acetate-CoA ligase, putative | chr5:14552191-14557526 REVERSE

Match to Query 3123: 1075.570082 from(538.792317,2+) index(8598)

Title: Elution from: 77.288 to 77.288 scan no 11445 cid35.00 polarity:+

Data file 0-3\_1.mgf

Click mouse within plot area to zoom in by factor of two about that point

Or,   to  Da

Label all possible matches  Label matches used for scoring

Show Y-axis

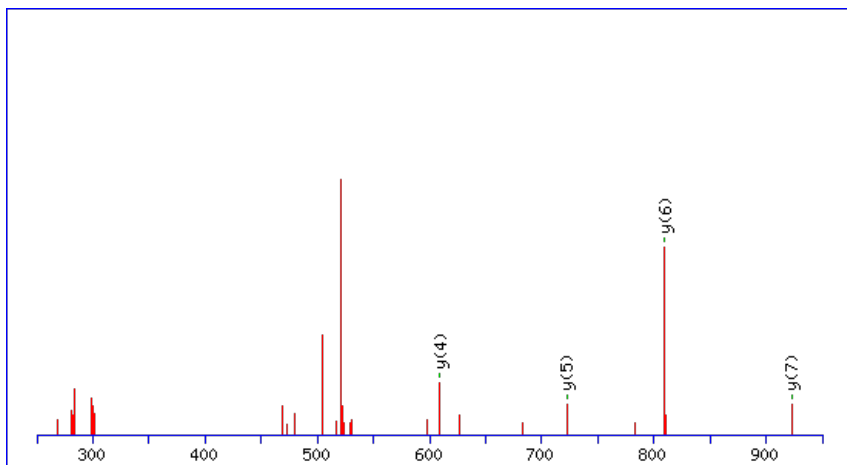

**Monoisotopic mass of neutral peptide Mr(calc):** 1075.5702

**Fixed modifications:** Carbamidomethyl (C) (apply to specified residues or termini only)

**Ions Score:** 29 **Expect:** 0.0072

**Matches:** 4/68 fragment ions using 6 most intense peaks ([help](#))

| # | b        | b <sup>++</sup> | b <sup>0</sup> | b <sup>0++</sup> | Seq.     | y               | y <sup>++</sup> | y*        | y <sup>*++</sup> | y <sup>0</sup> | y <sup>0++</sup> | # |
|---|----------|-----------------|----------------|------------------|----------|-----------------|-----------------|-----------|------------------|----------------|------------------|---|
| 1 | 58.0287  | 29.5180         |                |                  | <b>G</b> |                 |                 |           |                  |                |                  | 9 |
| 2 | 155.0815 | 78.0444         |                |                  | <b>P</b> | 1019.5560       | 510.2817        | 1002.5295 | 501.7684         | 1001.5455      | 501.2764         | 8 |
| 3 | 268.1656 | 134.5864        |                |                  | <b>I</b> | <b>922.5033</b> | 461.7553        | 905.4767  | 453.2420         | 904.4927       | 452.7500         | 7 |
| 4 | 355.1976 | 178.1024        | 337.1870       | 169.0972         | <b>S</b> | <b>809.4192</b> | 405.2132        | 792.3927  | 396.7000         | 791.4087       | 396.2080         | 6 |
| 5 | 468.2817 | 234.6445        | 450.2711       | 225.6392         | <b>I</b> | <b>722.3872</b> | 361.6972        | 705.3606  | 353.1840         | 704.3766       | 352.6919         | 5 |
| 6 | 597.3243 | 299.1658        | 579.3137       | 290.1605         | <b>E</b> | <b>609.3031</b> | 305.1552        | 592.2766  | 296.6419         | 591.2926       | 296.1499         | 4 |
| 7 | 783.4036 | 392.2054        | 765.3930       | 383.2001         | <b>W</b> | 480.2605        | 240.6339        | 463.2340  | 232.1206         |                |                  | 3 |
| 8 | 930.4720 | 465.7396        | 912.4614       | 456.7343         | <b>F</b> | 294.1812        | 147.5942        | 277.1547  | 139.0810         |                |                  | 2 |
| 9 |          |                 |                |                  | <b>K</b> | 147.1128        | 74.0600         | 130.0863  | 65.5468          |                |                  | 1 |

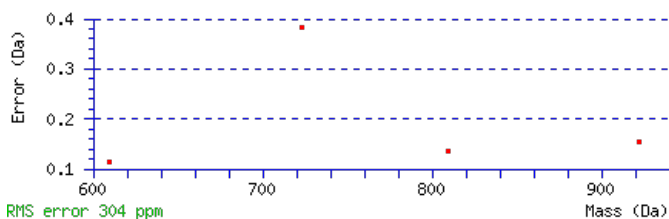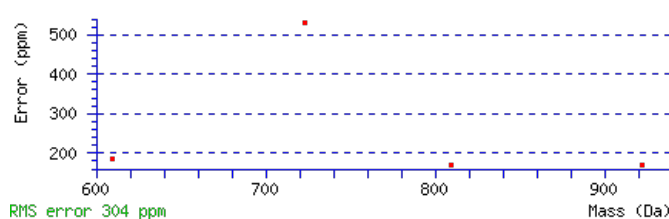

NCBI **BLAST** search of **GPISIEWFK**

(Parameters: blastp, nr protein database, expect=20000, no filter, PAM30)

Other BLAST [web gateways](#)

**All matches to this query**

| Score | Mr(calc) | Delta | Sequence |
|-------|----------|-------|----------|
|       |          |       |          |

AT5G36880.2

|      |           |         |                           |
|------|-----------|---------|---------------------------|
| 28.7 | 1075.5702 | -0.0001 | <a href="#">GPISIEWFK</a> |
|------|-----------|---------|---------------------------|

**Mascot:** <http://www.matrixscience.com/>

**Peptide View**MS/MS Fragmentation of **FVSVPATDK**

Found in **AT5G37010.1** in **TAIR\_Arabidopsis**, Symbols: | similar to unknown protein [Arabidopsis thaliana] (TAIR:AT1G65710.1); similar to hypothetical protein [Vitis vinifera] (GB:CAN76723.1) | chr5:14638083-14640109 REVERSE

Match to Query 1976: 972.477046 from(487.245799,2+) index(1112)

Title: Elution from: 19.421 to 19.421 scan no 1660 cid35.00 polarity:+

Data file D1d-2\_1.mgf

Click mouse within plot area to zoom in by factor of two about that point

Or,   to  Da

Label all possible matches  Label matches used for scoring

Show Y-axis

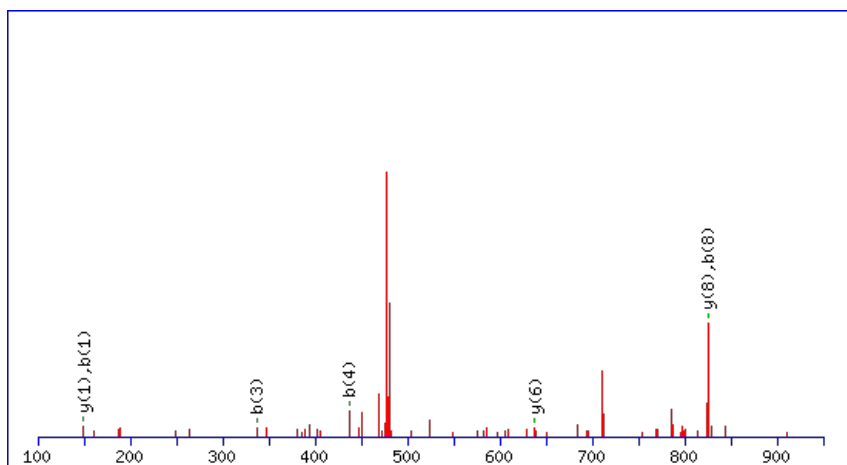

**Monoisotopic mass of neutral peptide Mr(calc):** 972.4776

**Fixed modifications:** Carbamidomethyl (C) (apply to specified residues or termini only)

**Ions Score:** 29 **Expect:** 0.015

**Matches:** 7/74 fragment ions using 8 most intense peaks ([help](#))

| # | b               | b <sup>++</sup> | b <sup>0</sup> | b <sup>0++</sup> | Seq.     | y               | y <sup>++</sup> | y*       | y <sup>*++</sup> | y <sup>0</sup> | y <sup>0++</sup> | # |
|---|-----------------|-----------------|----------------|------------------|----------|-----------------|-----------------|----------|------------------|----------------|------------------|---|
| 1 | <b>149.0727</b> | 75.0400         |                |                  | <b>F</b> |                 |                 |          |                  |                |                  | 9 |
| 2 | 249.1382        | 125.0727        |                |                  | <b>V</b> | <b>825.4195</b> | 413.2134        | 807.3959 | 404.2016         | 807.4089       | 404.2081         | 8 |
| 3 | <b>337.1672</b> | 169.0873        | 319.1567       | 160.0820         | <b>S</b> | 725.3540        | 363.1807        | 707.3304 | 354.1689         | 707.3435       | 354.1754         | 7 |
| 4 | <b>437.2327</b> | 219.1200        | 419.2221       | 210.1147         | <b>V</b> | <b>637.3250</b> | 319.1661        | 619.3014 | 310.1543         | 619.3144       | 310.1608         | 6 |
| 5 | 535.2825        | 268.1449        | 517.2719       | 259.1396         | <b>P</b> | 537.2595        | 269.1334        | 519.2359 | 260.1216         | 519.2489       | 260.1281         | 5 |
| 6 | 607.3166        | 304.1620        | 589.3061       | 295.1567         | <b>A</b> | 439.2097        | 220.1085        | 421.1861 | 211.0967         | 421.1991       | 211.1032         | 4 |
| 7 | 709.3613        | 355.1843        | 691.3508       | 346.1790         | <b>T</b> | 367.1756        | 184.0914        | 349.1520 | 175.0796         | 349.1650       | 175.0861         | 3 |
| 8 | <b>825.3853</b> | 413.1963        | 807.3748       | 404.1910         | <b>D</b> | 265.1309        | 133.0691        | 247.1073 | 124.0573         | 247.1203       | 124.0638         | 2 |
| 9 |                 |                 |                |                  | <b>K</b> | <b>149.1069</b> | 75.0571         | 131.0833 | 66.0453          |                |                  | 1 |

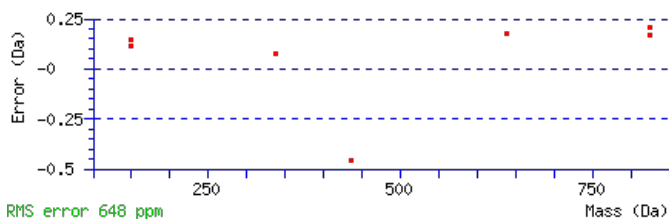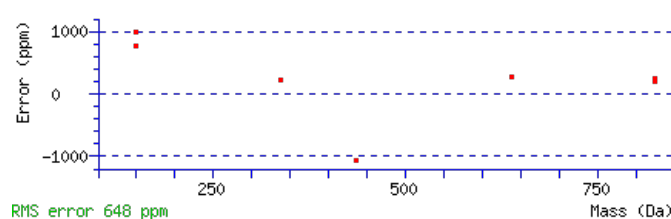

NCBI **BLAST** search of **FVSVPATDK**

(Parameters: blastp, nr protein database, expect=20000, no filter, PAM30)

Other BLAST [web gateways](#)

**All matches to this query**

| Score | Mr(calc) | Delta | Sequence |
|-------|----------|-------|----------|
|       |          |       |          |

## AT5G37010.1

|      |          |         |                            |
|------|----------|---------|----------------------------|
| 29.1 | 972.4776 | -0.0006 | <a href="#">FVSVPATDK</a>  |
| 20.8 | 972.4776 | -0.0006 | <a href="#">GFDIVVGEK</a>  |
| 19.2 | 972.4754 | 0.0016  | <a href="#">GSTSQEILK</a>  |
| 17.0 | 972.4799 | -0.0028 | <a href="#">LFEEWLK</a>    |
| 16.3 | 972.4754 | 0.0017  | <a href="#">EGTDSVVKK</a>  |
| 16.2 | 972.4781 | -0.0010 | <a href="#">GSLVNREGK</a>  |
| 14.4 | 972.4776 | -0.0006 | <a href="#">FLGLDVGDK</a>  |
| 14.3 | 972.4754 | 0.0016  | <a href="#">DSKDKELK</a>   |
| 12.6 | 972.4781 | -0.0010 | <a href="#">RREELEK</a>    |
| 12.3 | 972.4754 | 0.0016  | <a href="#">ASSISAAEVK</a> |

Mascot: <http://www.matrixscience.com/>

## Peptide View

MS/MS Fragmentation of **FASEVAGVQDLGILGR**

Found in **AT5G37510.1** in **TAIR\_Arabidopsis**, Symbols: EMB1467 | EMB1467 (EMBRYO DEFECTIVE 1467); NADH dehydrogenase | chr5:14914720-14917582 FORWARD

Match to Query 7467: 1630.867584 from(816.441068,2+) index(8475)

Title: Elution from: 75.938 to 75.938 scan no 11317 cid35.00 polarity:+

Data file D6h-1\_2.mgf

Click mouse within plot area to zoom in by factor of two about that point

Or,   to  Da

Label all possible matches  Label matches used for scoring

Show Y-axis

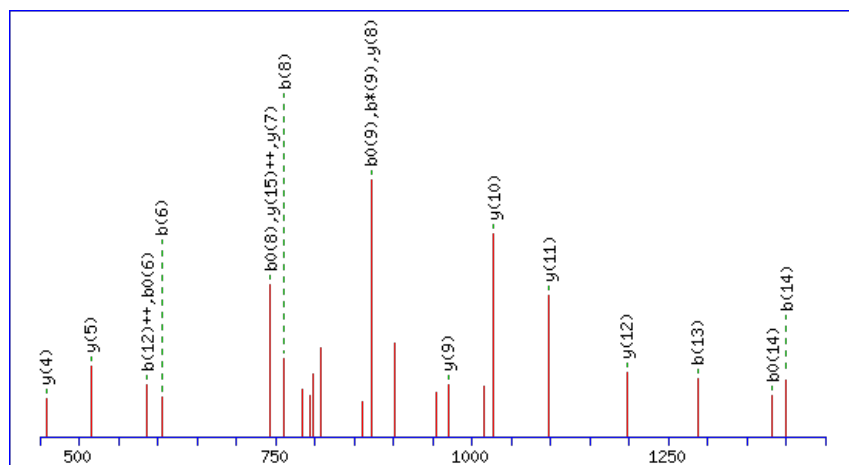

Monoisotopic mass of neutral peptide  $M_r(\text{calc})$ : 1630.8679

Fixed modifications: Carbamidomethyl (C) (apply to specified residues or termini only)

Ions Score: 76 Expect: 1.2e-007

Matches : 19/148 fragment ions using 16 most intense peaks ([help](#))

| #  | b         | b <sup>++</sup> | b*        | b <sup>*++</sup> | b <sup>0</sup> | b <sup>0++</sup> | Seq. | y         | y <sup>++</sup> | y*        | y <sup>*++</sup> | y <sup>0</sup> | y <sup>0++</sup> | #  |
|----|-----------|-----------------|-----------|------------------|----------------|------------------|------|-----------|-----------------|-----------|------------------|----------------|------------------|----|
| 1  | 148.0757  | 74.5415         |           |                  |                |                  | F    |           |                 |           |                  |                |                  | 16 |
| 2  | 219.1128  | 110.0600        |           |                  |                |                  | A    | 1484.8067 | 742.9070        | 1467.7802 | 734.3937         | 1466.7962      | 733.9017         | 15 |
| 3  | 306.1448  | 153.5761        |           |                  | 288.1343       | 144.5708         | S    | 1413.7696 | 707.3884        | 1396.7431 | 698.8752         | 1395.7591      | 698.3832         | 14 |
| 4  | 435.1874  | 218.0974        |           |                  | 417.1769       | 209.0921         | E    | 1326.7376 | 663.8724        | 1309.7110 | 655.3592         | 1308.7270      | 654.8672         | 13 |
| 5  | 534.2558  | 267.6316        |           |                  | 516.2453       | 258.6263         | V    | 1197.6950 | 599.3511        | 1180.6684 | 590.8379         | 1179.6844      | 590.3459         | 12 |
| 6  | 605.2930  | 303.1501        |           |                  | 587.2824       | 294.1448         | A    | 1098.6266 | 549.8169        | 1081.6000 | 541.3037         | 1080.6160      | 540.8116         | 11 |
| 7  | 662.3144  | 331.6608        |           |                  | 644.3039       | 322.6556         | G    | 1027.5895 | 514.2984        | 1010.5629 | 505.7851         | 1009.5789      | 505.2931         | 10 |
| 8  | 761.3828  | 381.1951        |           |                  | 743.3723       | 372.1898         | V    | 970.5680  | 485.7876        | 953.5415  | 477.2744         | 952.5574       | 476.7824         | 9  |
| 9  | 889.4414  | 445.2243        | 872.4149  | 436.7111         | 871.4308       | 436.2191         | Q    | 871.4996  | 436.2534        | 854.4730  | 427.7402         | 853.4890       | 427.2482         | 8  |
| 10 | 1004.4684 | 502.7378        | 987.4418  | 494.2245         | 986.4578       | 493.7325         | D    | 743.4410  | 372.2241        | 726.4145  | 363.7109         | 725.4304       | 363.2189         | 7  |
| 11 | 1117.5524 | 559.2798        | 1100.5259 | 550.7666         | 1099.5419      | 550.2746         | L    | 628.4141  | 314.7107        | 611.3875  | 306.1974         |                |                  | 6  |
| 12 | 1174.5739 | 587.7906        | 1157.5473 | 579.2773         | 1156.5633      | 578.7853         | G    | 515.3300  | 258.1686        | 498.3035  | 249.6554         |                |                  | 5  |
| 13 | 1287.6579 | 644.3326        | 1270.6314 | 635.8193         | 1269.6474      | 635.3273         | I    | 458.3085  | 229.6579        | 441.2820  | 221.1446         |                |                  | 4  |
| 14 | 1400.7420 | 700.8746        | 1383.7155 | 692.3614         | 1382.7314      | 691.8694         | L    | 345.2245  | 173.1159        | 328.1979  | 164.6026         |                |                  | 3  |
| 15 | 1457.7635 | 729.3854        | 1440.7369 | 720.8721         | 1439.7529      | 720.3801         | G    | 232.1404  | 116.5738        | 215.1139  | 108.0606         |                |                  | 2  |
| 16 |           |                 |           |                  |                |                  | R    | 175.1190  | 88.0631         | 158.0924  | 79.5498          |                |                  | 1  |

# AT5G37510.1

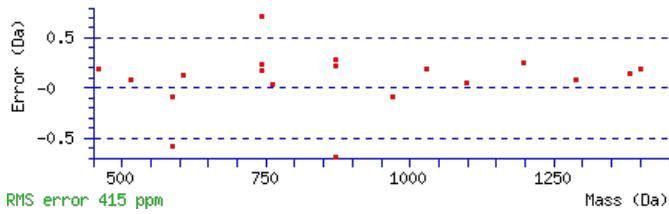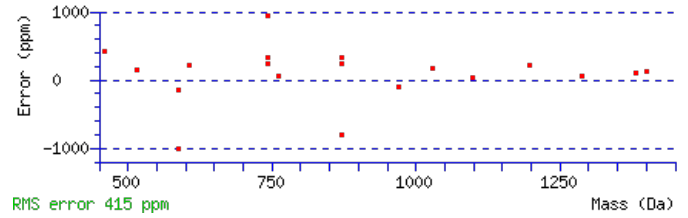

NCBI **BLAST** search of [FASEVAGVQDLGILGR](#)

(Parameters: blastp, nr protein database, expect=20000, no filter, PAM30)

Other BLAST [web gateways](#)

## All matches to this query

| Score | Mr(calc)  | Delta   | Sequence                         |
|-------|-----------|---------|----------------------------------|
| 75.9  | 1630.8679 | -0.0003 | <a href="#">FASEVAGVQDLGILGR</a> |
| 2.5   | 1630.8719 | -0.0043 | <a href="#">SAEDIAFHVALFIAK</a>  |
| 2.2   | 1630.8712 | -0.0036 | <a href="#">ISSGMEGIARIEIQK</a>  |
| 1.2   | 1630.8638 | 0.0038  | <a href="#">LNGNGVTERSSSIQVK</a> |

Mascot: <http://www.matrixscience.com/>

## Peptide View

### MS/MS Fragmentation of **VGLLAACVKR**

Found in **AT5G37530.1** in **TAIR\_Arabidopsis**, Symbols: | thiF family protein | chr5:14923735-14926250 FORWARD

Match to Query 3360: 1100.592732 from(551.303642,2+) index(6598)

Title: Elution from: 58.526 to 58.526 scan no 8526 cid35.00 polarity:+

Data file 0-2\_2.mgf

Click mouse within plot area to zoom in by factor of two about that point

Or,   to  Da

Label all possible matches  Label matches used for scoring

Show Y-axis

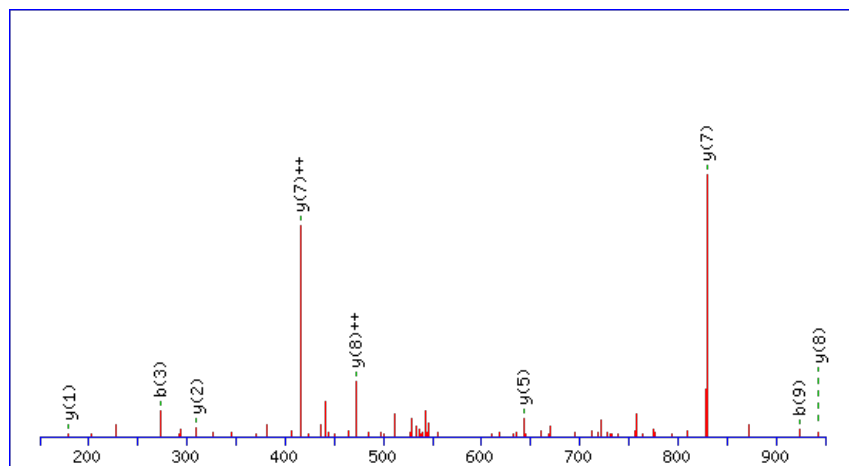

**Monoisotopic mass of neutral peptide Mr(calc):** 1100.5934

**Fixed modifications:** Carbamidomethyl (C) (apply to specified residues or termini only)

**Ions Score:** 26 **Expect:** 0.012

**Matches:** 9/56 fragment ions using 23 most intense peaks ([help](#))

| #  | b               | b <sup>++</sup> | b <sup>*</sup> | b <sup>*++</sup> | Seq. | y               | y <sup>++</sup> | y <sup>*</sup> | y <sup>*++</sup> | #  |
|----|-----------------|-----------------|----------------|------------------|------|-----------------|-----------------|----------------|------------------|----|
| 1  | 101.0727        | 51.0400         |                |                  | V    |                 |                 |                |                  | 10 |
| 2  | 159.0912        | 80.0492         |                |                  | G    | 1001.5353       | 501.2713        | 983.5117       | 492.2595         | 9  |
| 3  | <b>273.1723</b> | 137.0898        |                |                  | L    | <b>943.5168</b> | <b>472.2620</b> | 925.4932       | 463.2502         | 8  |
| 4  | 387.2534        | 194.1303        |                |                  | L    | <b>829.4357</b> | <b>415.2215</b> | 811.4121       | 406.2097         | 7  |
| 5  | 459.2876        | 230.1474        |                |                  | A    | 715.3546        | 358.1809        | 697.3310       | 349.1691         | 6  |
| 6  | 531.3217        | 266.1645        |                |                  | A    | <b>643.3204</b> | 322.1639        | 625.2969       | 313.1521         | 5  |
| 7  | 693.3464        | 347.1769        |                |                  | C    | 571.2863        | 286.1468        | 553.2627       | 277.1350         | 4  |
| 8  | 793.4119        | 397.2096        |                |                  | V    | 409.2616        | 205.1344        | 391.2380       | 196.1226         | 3  |
| 9  | <b>923.5009</b> | 462.2541        | 905.4773       | 453.2423         | K    | <b>309.1961</b> | 155.1017        | 291.1725       | 146.0899         | 2  |
| 10 |                 |                 |                |                  | R    | <b>179.1071</b> | 90.0572         | 161.0835       | 81.0454          | 1  |

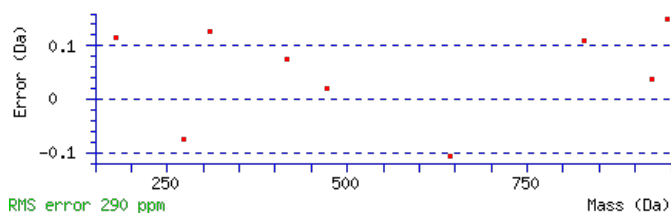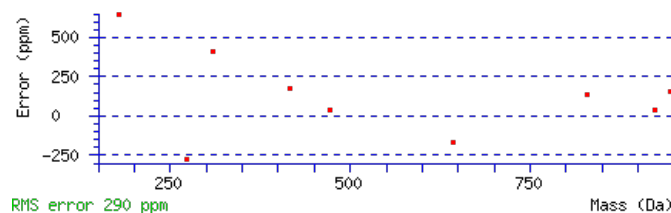

NCBI **BLAST** search of **VGLLAACVKR**

(Parameters: blastp, nr protein database, expect=20000, no filter, PAM30)

Other BLAST [web gateways](#)

All matches to this query

| Score | Mr(calc) | Delta | Sequence |
|-------|----------|-------|----------|
|       |          |       |          |



## AT5G37530.1

|      |           |         |                            |
|------|-----------|---------|----------------------------|
| 26.1 | 1100.5934 | -0.0007 | <a href="#">VGLLAACVKR</a> |
| 2.1  | 1100.5927 | -0.0000 | <a href="#">RKIHVFQR</a>   |

**Mascot:** <http://www.matrixscience.com/>

**Peptide View**MS/MS Fragmentation of **ISVDELK**

Found in **AT5G37770.1** in **TAIR\_Arabidopsis**, Symbols: CML24, TCH2 | TCH2 (TOUCH 2); calcium ion binding | chr5:15016305-15016790  
REVERSE

Match to Query 1143: 810.418238 from(406.216395,2+) index(2921)

Title: Elution from: 30.244 to 30.244 scan no 3644 cid35.00 polarity:+

Data file 0-1\_1.mgf

Click mouse within plot area to zoom in by factor of two about that point

Or,   to  Da

Label all possible matches  Label matches used for scoring

Show Y-axis

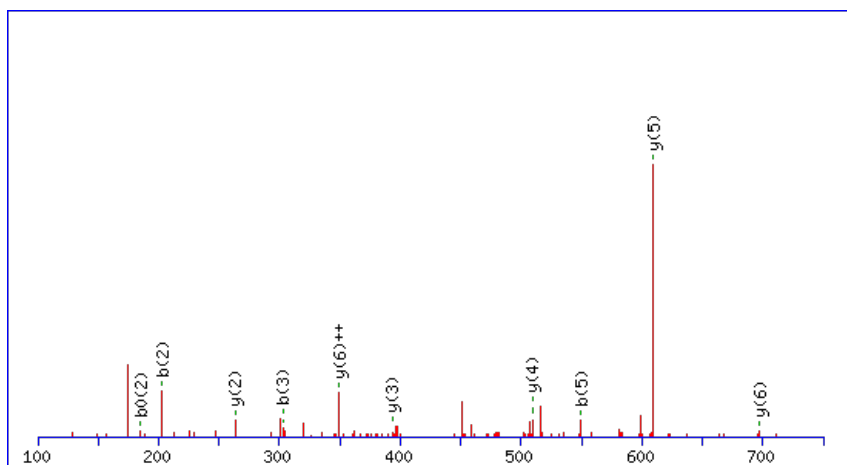

Monoisotopic mass of neutral peptide  $M_r(\text{calc})$ : 810.4199

Fixed modifications: Carbamidomethyl (C) (apply to specified residues or termini only)

Ions Score: 25 Expect: 0.012

Matches : 10/54 fragment ions using 30 most intense peaks ([help](#))

| # | b               | b <sup>++</sup> | b <sup>0</sup>  | b <sup>0++</sup> | Seq. | y               | y <sup>++</sup> | y*       | y <sup>*++</sup> | y <sup>0</sup> | y <sup>0++</sup> | # |
|---|-----------------|-----------------|-----------------|------------------|------|-----------------|-----------------|----------|------------------|----------------|------------------|---|
| 1 | 115.0884        | 58.0478         |                 |                  | I    |                 |                 |          |                  |                |                  | 7 |
| 2 | <b>203.1174</b> | 102.0624        | <b>185.1069</b> | 93.0571          | S    | <b>697.3461</b> | <b>349.1767</b> | 679.3225 | 340.1649         | 679.3355       | 340.1714         | 6 |
| 3 | <b>303.1829</b> | 152.0951        | 285.1723        | 143.0898         | V    | <b>609.3170</b> | 305.1622        | 591.2934 | 296.1504         | 591.3065       | 296.1569         | 5 |
| 4 | 419.2069        | 210.1071        | 401.1963        | 201.1018         | D    | <b>509.2516</b> | 255.1294        | 491.2280 | 246.1176         | 491.2410       | 246.1241         | 4 |
| 5 | <b>549.2465</b> | 275.1269        | 531.2359        | 266.1216         | E    | <b>393.2276</b> | 197.1174        | 375.2040 | 188.1056         | 375.2170       | 188.1122         | 3 |
| 6 | 663.3276        | 332.1674        | 645.3170        | 323.1622         | L    | <b>263.1880</b> | 132.0976        | 245.1644 | 123.0858         |                |                  | 2 |
| 7 |                 |                 |                 |                  | K    | 149.1069        | 75.0571         | 131.0833 | 66.0453          |                |                  | 1 |

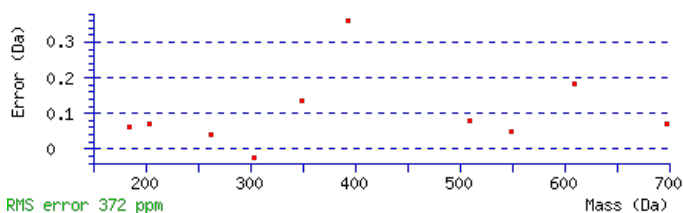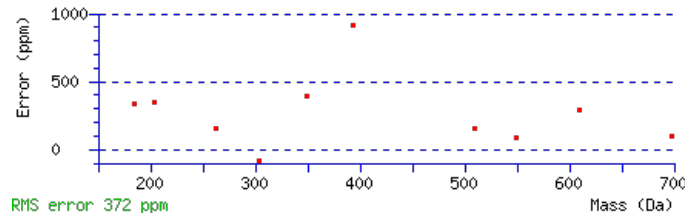

NCBI BLAST search of **ISVDELK**

(Parameters: blastp, nr protein database, expect=20000, no filter, PAM30)

Other BLAST [web gateways](#)

**All matches to this query**

| Score | $M_r(\text{calc})$ | Delta   | Sequence                |
|-------|--------------------|---------|-------------------------|
| 24.8  | 810.4199           | -0.0017 | <a href="#">ISVDELK</a> |
| 15.8  | 810.4199           | -0.0017 | <a href="#">SIVDEIK</a> |

# AT5G37770.1

|      |          |         |                         |
|------|----------|---------|-------------------------|
| 13.4 | 810.4199 | -0.0017 | <a href="#">SIVEDLK</a> |
| 10.4 | 810.4199 | -0.0017 | <a href="#">ATELELK</a> |
| 8.0  | 810.4199 | -0.0017 | <a href="#">DLEVSLK</a> |
| 4.5  | 810.4199 | -0.0017 | <a href="#">LDSIDLK</a> |
| 3.4  | 810.4199 | -0.0017 | <a href="#">ISEDLVK</a> |
| 2.4  | 810.4199 | -0.0017 | <a href="#">LLSDDIK</a> |
| 1.0  | 810.4199 | -0.0017 | <a href="#">VIDSELK</a> |
| 0.7  | 810.4199 | -0.0017 | <a href="#">SVLDELK</a> |

Mascot: <http://www.matrixscience.com/>

### Peptide View

 MS/MS Fragmentation of **AAAACVINEESRRPGMEEIVSILK**

 Found in **AT5G37790.1** in **TAIR\_Arabidopsis**, Symbols: | protein kinase family protein | chr5:15025663-15028255 REVERSE

Match to Query 10615: 2675.262111 from(892.761313,3+) index(10684)

Title: Elution from: 104.656 to 104.656 scan no 15424 cid35.00 polarity:+

Data file 0-1\_2.mgf

Click mouse within plot area to zoom in by factor of two about that point

 Or,   to  Da 

 Label all possible matches  Label matches used for scoring 

 Show Y-axis 
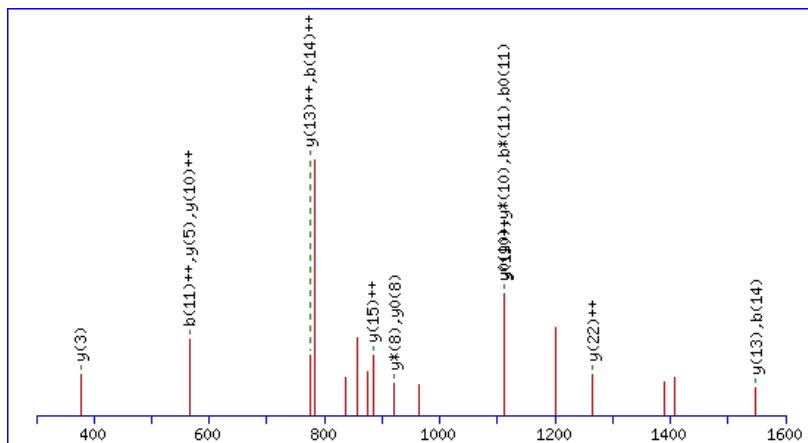
 Monoisotopic mass of neutral peptide **Mr(calc)**: 2675.2542

Fixed modifications: Carbamidomethyl (C) (apply to specified residues or termini only)

Ions Score: 24 Expect: 0.023

 Matches : 17/240 fragment ions using 14 most intense peaks ([help](#))

| #  | b         | b <sup>++</sup> | b <sup>*</sup> | b <sup>*++</sup> | b <sup>0</sup> | b <sup>0++</sup> | Seq. | y         | y <sup>++</sup> | y <sup>*</sup> | y <sup>*++</sup> | y <sup>0</sup> | y <sup>0++</sup> | #  |
|----|-----------|-----------------|----------------|------------------|----------------|------------------|------|-----------|-----------------|----------------|------------------|----------------|------------------|----|
| 1  | 73.0414   | 37.0244         |                |                  |                |                  | A    |           |                 |                |                  |                |                  | 24 |
| 2  | 145.0756  | 73.0414         |                |                  |                |                  | A    | 2604.2273 | 1302.6173       | 2586.2037      | 1293.6055        | 2586.2167      | 1293.6120        | 23 |
| 3  | 217.1097  | 109.0585        |                |                  |                |                  | A    | 2532.1931 | 1266.6002       | 2514.1696      | 1257.5884        | 2514.1826      | 1257.5949        | 22 |
| 4  | 289.1439  | 145.0756        |                |                  |                |                  | A    | 2460.1590 | 1230.5831       | 2442.1354      | 1221.5713        | 2442.1484      | 1221.5779        | 21 |
| 5  | 451.1686  | 226.0879        |                |                  |                |                  | C    | 2388.1248 | 1194.5661       | 2370.1013      | 1185.5543        | 2370.1143      | 1185.5608        | 20 |
| 6  | 551.2340  | 276.1207        |                |                  |                |                  | V    | 2226.1001 | 1113.5537       | 2208.0765      | 1104.5419        | 2208.0896      | 1104.5484        | 19 |
| 7  | 665.3151  | 333.1612        |                |                  |                |                  | I    | 2126.0347 | 1063.5210       | 2108.0111      | 1054.5092        | 2108.0241      | 1054.5157        | 18 |
| 8  | 781.3521  | 391.1797        | 763.3286       | 382.1679         |                |                  | N    | 2011.9536 | 1006.4804       | 1993.9300      | 997.4686         | 1993.9430      | 997.4751         | 17 |
| 9  | 911.3918  | 456.1995        | 893.3682       | 447.1877         | 893.3812       | 447.1942         | E    | 1895.9166 | 948.4619        | 1877.8930      | 939.4501         | 1877.9060      | 939.4566         | 16 |
| 10 | 1041.4314 | 521.2193        | 1023.4078      | 512.2075         | 1023.4208      | 512.2141         | E    | 1765.8770 | 883.4421        | 1747.8534      | 874.4303         | 1747.8664      | 874.4368         | 15 |
| 11 | 1129.4605 | 565.2339        | 1111.4369      | 556.2221         | 1111.4499      | 556.2286         | S    | 1635.8373 | 818.4223        | 1617.8137      | 809.4105         | 1617.8268      | 809.4170         | 14 |
| 12 | 1289.5497 | 645.2785        | 1271.5261      | 636.2667         | 1271.5391      | 636.2732         | R    | 1547.8083 | 774.4078        | 1529.7847      | 765.3960         | 1529.7977      | 765.4025         | 13 |
| 13 | 1449.6390 | 725.3231        | 1431.6154      | 716.3113         | 1431.6284      | 716.3178         | R    | 1387.7190 | 694.3631        | 1369.6954      | 685.3514         | 1369.7084      | 685.3579         | 12 |
| 14 | 1547.6888 | 774.3480        | 1529.6652      | 765.3362         | 1529.6782      | 765.3427         | P    | 1227.6298 | 614.3185        | 1209.6062      | 605.3067         | 1209.6192      | 605.3132         | 11 |
| 15 | 1605.7073 | 803.3573        | 1587.6837      | 794.3455         | 1587.6967      | 794.3520         | G    | 1129.5800 | 565.2936        | 1111.5564      | 556.2818         | 1111.5694      | 556.2883         | 10 |
| 16 | 1737.7448 | 869.3760        | 1719.7212      | 860.3642         | 1719.7342      | 860.3707         | M    | 1071.5615 | 536.2844        | 1053.5379      | 527.2726         | 1053.5509      | 527.2791         | 9  |
| 17 | 1867.7844 | 934.3958        | 1849.7608      | 925.3840         | 1849.7738      | 925.3906         | E    | 939.5239  | 470.2656        | 921.5004       | 461.2538         | 921.5134       | 461.2603         | 8  |
| 18 | 1997.8240 | 999.4157        | 1979.8004      | 990.4039         | 1979.8135      | 990.4104         | E    | 809.4843  | 405.2458        | 791.4607       | 396.2340         | 791.4737       | 396.2405         | 7  |
| 19 | 2111.9051 | 1056.4562       | 2093.8815      | 1047.4444        | 2093.8946      | 1047.4509        | I    | 679.4447  | 340.2260        | 661.4211       | 331.2142         | 661.4341       | 331.2207         | 6  |
| 20 | 2211.9706 | 1106.4889       | 2193.9470      | 1097.4771        | 2193.9600      | 1097.4836        | V    | 565.3636  | 283.1854        | 547.3400       | 274.1736         | 547.3530       | 274.1801         | 5  |
| 21 | 2299.9996 | 1150.5035       | 2281.9761      | 1141.4917        | 2281.9891      | 1141.4982        | S    | 465.2981  | 233.1527        | 447.2746       | 224.1409         | 447.2876       | 224.1474         | 4  |
| 22 | 2414.0807 | 1207.5440       | 2396.0572      | 1198.5322        | 2396.0702      | 1198.5387        | I    | 377.2691  | 189.1382        | 359.2455       | 180.1264         |                |                  | 3  |
| 23 | 2528.1618 | 1264.5846       | 2510.1383      | 1255.5728        | 2510.1513      | 1255.5793        | L    | 263.1880  | 132.0976        | 245.1644       | 123.0858         |                |                  | 2  |
| 24 |           |                 |                |                  |                |                  | K    | 149.1069  | 75.0571         | 131.0833       | 66.0453          |                |                  | 1  |

# AT5G37790.1

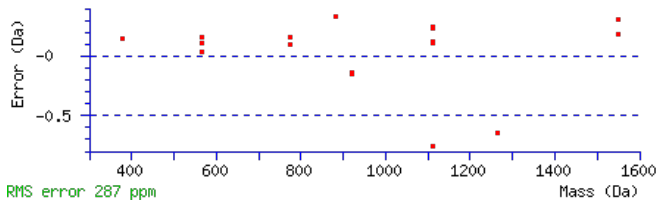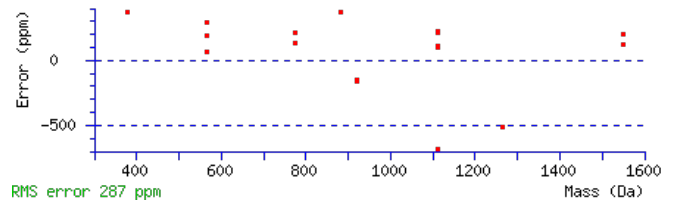

NCBI **BLAST** search of [AAAACVINEESRRPGMEEIVSILK](#)  
 (Parameters: blastp, nr protein database, expect=20000, no filter, PAM30)  
 Other BLAST [web gateways](#)

## All matches to this query

| Score | Mr(calc)  | Delta   | Sequence                                 |
|-------|-----------|---------|------------------------------------------|
| 24.5  | 2675.2542 | 0.0079  | <a href="#">AAAACVINEESRRPGMEEIVSILK</a> |
| 11.4  | 2675.2627 | -0.0005 | <a href="#">ENKWKQGGWLNQSAQDWLTIK</a>    |
| 3.1   | 2675.2645 | -0.0024 | <a href="#">DESEIMNPAILCAVRAGDKVSLK</a>  |
| 0.5   | 2675.2616 | 0.0005  | <a href="#">FWDNSGFKIVVMSMLMLVVVSK</a>   |
| 0.1   | 2675.2661 | -0.0040 | <a href="#">WAEHSGPIKLALMQSPSNHVAEK</a>  |

Mascot: <http://www.matrixscience.com/>

**Peptide View**MS/MS Fragmentation of **EHGNTPGYYDGR**

Found in **AT5G38410.1** in **TAIR\_Arabidopsis**, Symbols: | ribulose biphosphate carboxylase small chain 3B / RuBisCO small subunit 3B (RBCS-3B) (ATS3B) | chr5:15394731-15395536 REVERSE

Match to Query 5233: 1382.521124 from(692.267838,2+) index(436)

Title: Elution from: 10.496 to 10.496 scan no 719 cid35.00 polarity:+

Data file D6h-1\_2.mgf

Click mouse within plot area to zoom in by factor of two about that point

Or,   to  Da

Label all possible matches  Label matches used for scoring

Show Y-axis

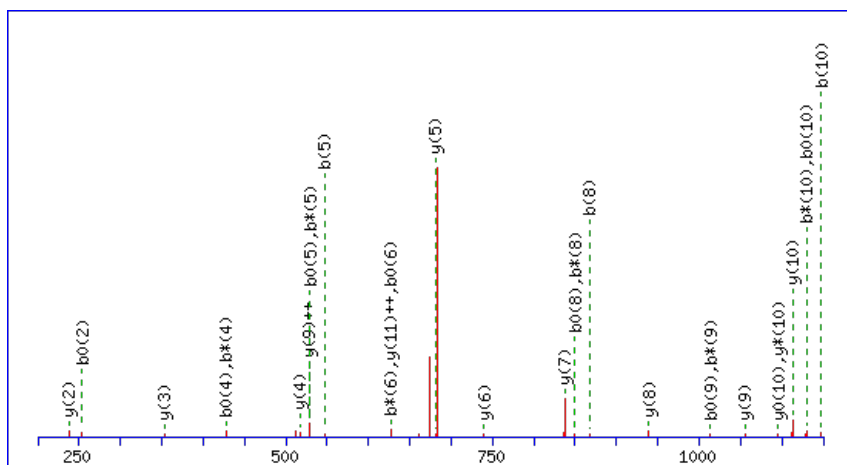

Monoisotopic mass of neutral peptide  $M_r(\text{calc})$ : 1382.5211

Fixed modifications: Carbamidomethyl (C) (apply to specified residues or termini only)

Ions Score: 80 Expect: 1.2e-008

Matches : 29/122 fragment ions using 34 most intense peaks ([help](#))

| #  | b         | b <sup>++</sup> | b*        | b <sup>*++</sup> | b <sup>0</sup> | b <sup>0++</sup> | Seq. | y         | y <sup>++</sup> | y*        | y <sup>*++</sup> | y <sup>0</sup> | y <sup>0++</sup> | #  |
|----|-----------|-----------------|-----------|------------------|----------------|------------------|------|-----------|-----------------|-----------|------------------|----------------|------------------|----|
| 1  | 131.0469  | 66.0271         |           |                  | 113.0363       | 57.0218          | E    |           |                 |           |                  |                |                  | 12 |
| 2  | 271.0969  | 136.0521        |           |                  | 253.0864       | 127.0468         | H    | 1253.4888 | 627.2480        | 1235.4652 | 618.2363         | 1235.4783      | 618.2428         | 11 |
| 3  | 329.1154  | 165.0613        |           |                  | 311.1049       | 156.0561         | G    | 1113.4388 | 557.2230        | 1095.4152 | 548.2112         | 1095.4282      | 548.2178         | 10 |
| 4  | 445.1524  | 223.0798        | 427.1288  | 214.0681         | 427.1419       | 214.0746         | N    | 1055.4203 | 528.2138        | 1037.3967 | 519.2020         | 1037.4097      | 519.2085         | 9  |
| 5  | 547.1971  | 274.1022        | 529.1735  | 265.0904         | 529.1866       | 265.0969         | T    | 939.3833  | 470.1953        | 921.3597  | 461.1835         | 921.3727       | 461.1900         | 8  |
| 6  | 645.2469  | 323.1271        | 627.2233  | 314.1153         | 627.2364       | 314.1218         | P    | 837.3386  | 419.1729        | 819.3150  | 410.1611         | 819.3280       | 410.1677         | 7  |
| 7  | 703.2654  | 352.1364        | 685.2418  | 343.1246         | 685.2549       | 343.1311         | G    | 739.2888  | 370.1480        | 721.2652  | 361.1362         | 721.2782       | 361.1428         | 6  |
| 8  | 867.3258  | 434.1665        | 849.3022  | 425.1547         | 849.3152       | 425.1613         | Y    | 681.2703  | 341.1388        | 663.2467  | 332.1270         | 663.2597       | 332.1335         | 5  |
| 9  | 1031.3862 | 516.1967        | 1013.3626 | 507.1849         | 1013.3756      | 507.1914         | Y    | 517.2099  | 259.1086        | 499.1863  | 250.0968         | 499.1994       | 250.1033         | 4  |
| 10 | 1147.4101 | 574.2087        | 1129.3865 | 565.1969         | 1129.3996      | 565.2034         | D    | 353.1496  | 177.0784        | 335.1260  | 168.0666         | 335.1390       | 168.0731         | 3  |
| 11 | 1205.4286 | 603.2180        | 1187.4050 | 594.2062         | 1187.4181      | 594.2127         | G    | 237.1256  | 119.0664        | 219.1020  | 110.0546         |                |                  | 2  |
| 12 |           |                 |           |                  |                |                  | R    | 179.1071  | 90.0572         | 161.0835  | 81.0454          |                |                  | 1  |

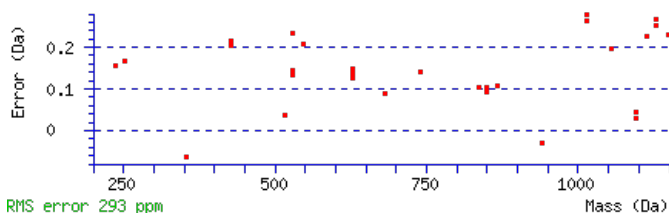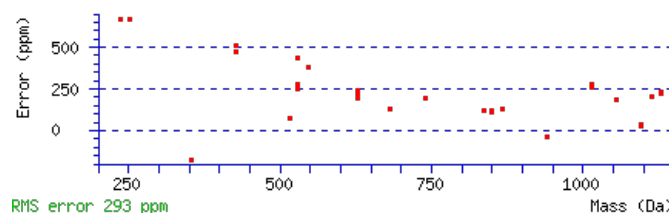

NCBI BLAST search of [EHGNTPGYYDGR](#)

(Parameters: blastp, nr protein database, expect=20000, no filter, PAM30)

Other BLAST [web gateways](#)

AT5G38410.1

All matches to this query

| Score | Mr(calc)  | Delta   | Sequence                     |
|-------|-----------|---------|------------------------------|
| 80.0  | 1382.5211 | -0.0000 | <a href="#">EHGNTPGYYDGR</a> |
| 0.9   | 1382.5219 | -0.0007 | <a href="#">YPGENCIEGDSK</a> |

Mascot: <http://www.matrixscience.com/>

## Peptide View

MS/MS Fragmentation of **FETLSYLPDLSDELAK**

Found in **AT5G38420.1** in **TAIR\_Arabidopsis**, Symbols: | ribulose biphosphate carboxylase small chain 2B / RuBisCO small subunit 2B (RBCS-2B) (ATS2B) | chr5:15398433-15399208 REVERSE

Match to Query 8822: 1956.929528 from(979.472040,2+) index(9878)

Title: Elution from: 96.101 to 96.101 scan no 14170 cid35.00 polarity:+

Data file D1d-2\_2.mgf

Click mouse within plot area to zoom in by factor of two about that point

Or,  to  Da

Label all possible matches  Label matches used for scoring

Show Y-axis

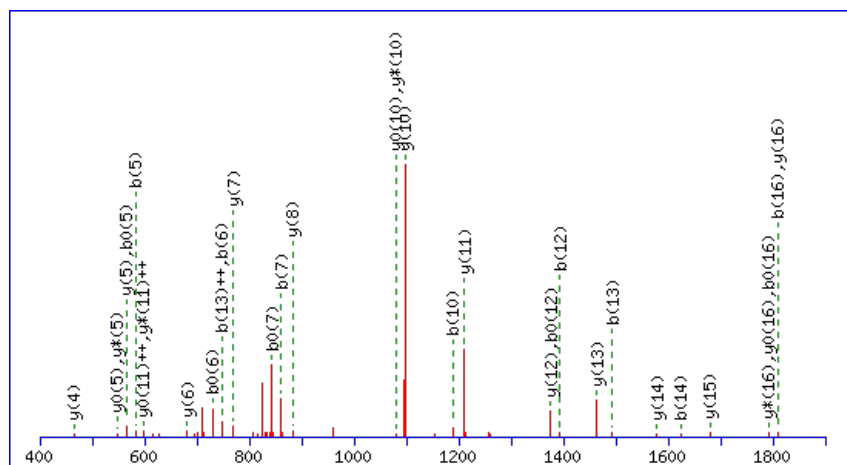

Monoisotopic mass of neutral peptide  $M_r(\text{calc})$ : 1956.9292

Fixed modifications: Carbamidomethyl (C) (apply to specified residues or termini only)

Ions Score: 110 Expect: 8.8e-011

Matches : 34/152 fragment ions using 35 most intense peaks ([help](#))

| #  | b                | b <sup>++</sup> | b <sup>0</sup>   | b <sup>0++</sup> | Seq. | y                | y <sup>++</sup> | y*               | y <sup>*++</sup> | y <sup>0</sup>   | y <sup>0++</sup> | #  |
|----|------------------|-----------------|------------------|------------------|------|------------------|-----------------|------------------|------------------|------------------|------------------|----|
| 1  | 149.0727         | 75.0400         |                  |                  | F    |                  |                 |                  |                  |                  |                  | 17 |
| 2  | 279.1124         | 140.0598        | 261.1018         | 131.0545         | E    | <b>1809.8711</b> | 905.4392        | <b>1791.8475</b> | 896.4274         | <b>1791.8605</b> | 896.4339         | 16 |
| 3  | 381.1571         | 191.0822        | 363.1465         | 182.0769         | T    | <b>1679.8315</b> | 840.4194        | 1661.8079        | 831.4076         | 1661.8209        | 831.4141         | 15 |
| 4  | 495.2382         | 248.1227        | 477.2276         | 239.1174         | L    | <b>1577.7867</b> | 789.3970        | 1559.7632        | 780.3852         | 1559.7762        | 780.3917         | 14 |
| 5  | <b>583.2672</b>  | 292.1373        | <b>565.2567</b>  | 283.1320         | S    | <b>1463.7056</b> | 732.3565        | 1445.6821        | 723.3447         | 1445.6951        | 723.3512         | 13 |
| 6  | <b>747.3276</b>  | 374.1674        | <b>729.3170</b>  | 365.1622         | Y    | <b>1375.6766</b> | 688.3419        | 1357.6530        | 679.3301         | 1357.6660        | 679.3366         | 12 |
| 7  | <b>861.4087</b>  | 431.2080        | <b>843.3981</b>  | 422.2027         | L    | <b>1211.6162</b> | 606.3117        | 1193.5926        | <b>597.3000</b>  | 1193.6057        | <b>597.3065</b>  | 11 |
| 8  | 959.4585         | 480.2329        | 941.4479         | 471.2276         | P    | <b>1097.5351</b> | 549.2712        | <b>1079.5115</b> | 540.2594         | <b>1079.5246</b> | 540.2659         | 10 |
| 9  | 1075.4825        | 538.2449        | 1057.4719        | 529.2396         | D    | 999.4853         | 500.2463        | 981.4617         | 491.2345         | 981.4748         | 491.2410         | 9  |
| 10 | <b>1189.5636</b> | 595.2854        | 1171.5530        | 586.2801         | L    | <b>883.4613</b>  | 442.2343        | 865.4378         | 433.2225         | 865.4508         | 433.2290         | 8  |
| 11 | 1277.5926        | 639.3000        | 1259.5821        | 630.2947         | S    | <b>769.3802</b>  | 385.1938        | 751.3567         | 376.1820         | 751.3697         | 376.1885         | 7  |
| 12 | <b>1393.6166</b> | 697.3119        | <b>1375.6060</b> | 688.3067         | D    | <b>681.3512</b>  | 341.1792        | 663.3276         | 332.1674         | 663.3406         | 332.1739         | 6  |
| 13 | <b>1493.6821</b> | <b>747.3447</b> | 1475.6715        | 738.3394         | V    | <b>565.3272</b>  | 283.1672        | <b>547.3036</b>  | 274.1554         | <b>547.3166</b>  | 274.1620         | 5  |
| 14 | <b>1623.7217</b> | 812.3645        | 1605.7111        | 803.3592         | E    | <b>465.2618</b>  | 233.1345        | 447.2382         | 224.1227         | 447.2512         | 224.1292         | 4  |
| 15 | 1737.8028        | 869.4050        | 1719.7922        | 860.3997         | L    | 335.2221         | 168.1147        | 317.1985         | 159.1029         |                  |                  | 3  |
| 16 | <b>1809.8369</b> | 905.4221        | <b>1791.8264</b> | 896.4168         | A    | 221.1410         | 111.0741        | 203.1174         | 102.0624         |                  |                  | 2  |
| 17 |                  |                 |                  |                  | K    | 149.1069         | 75.0571         | 131.0833         | 66.0453          |                  |                  | 1  |



# AT5G38420.1

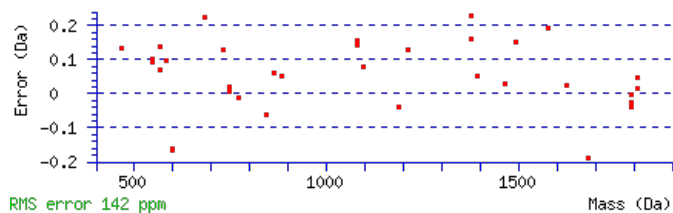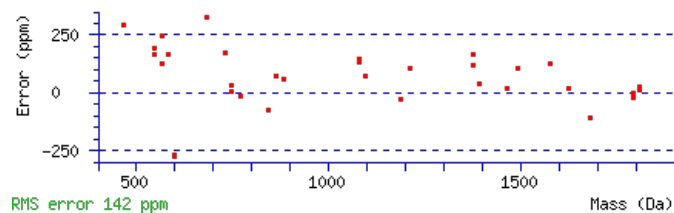

NCBI **BLAST** search of [FETLSYLPDLSDELAK](#)

(Parameters: blastp, nr protein database, expect=20000, no filter, PAM30)

Other BLAST [web gateways](#)

## All matches to this query

| Score | Mr(calc)  | Delta   | Sequence                           |
|-------|-----------|---------|------------------------------------|
| 110.3 | 1956.9292 | 0.0003  | <a href="#">FETLSYLPDLSDELAK</a>   |
| 21.6  | 1956.9332 | -0.0037 | <a href="#">MKIAVGAARGIEYLHCK</a>  |
| 16.7  | 1956.9346 | -0.0050 | <a href="#">GSQWFEVNRDLAATVK</a>   |
| 13.6  | 1956.9299 | -0.0003 | <a href="#">GFRPMNLEWEAIRGIK</a>   |
| 12.3  | 1956.9272 | 0.0023  | <a href="#">HGLMSGYLNKFVEALEK</a>  |
| 8.5   | 1956.9276 | 0.0019  | <a href="#">RGGGFNKICQLSPQLEK</a>  |
| 6.1   | 1956.9245 | 0.0050  | <a href="#">FNAFEMVEELGLAVEIK</a>  |
| 5.3   | 1956.9353 | -0.0058 | <a href="#">SSLTEPTDRPLIVYSMK</a>  |
| 4.5   | 1956.9353 | -0.0058 | <a href="#">LYDASVLGEPMAVGKDKK</a> |
| 1.6   | 1956.9346 | -0.0051 | <a href="#">EVPAYFTHRASGGSLTIK</a> |

Mascot: <http://www.matrixscience.com/>

### Peptide View

 MS/MS Fragmentation of **KKFETLSYLPDLTDVELAK**

 Found in **AT5G38430.1** in **TAIR Arabidopsis**, Symbols: | ribulose biphosphate carboxylase small chain 1B / RuBisCO small subunit 1B (RBCS-1B) (ATS1B) | chr5:15401580-15402385 REVERSE

Match to Query 10024: 2231.120676 from(558.787445,4+) index(8768)

Title: Elution from: 77.386 to 77.386 scan no 11622 cid35.00 polarity:+

Data file C7-2\_2.mgf

Click mouse within plot area to zoom in by factor of two about that point

 Or, Plot from  to  Da 

 Label all possible matches  Label matches used for scoring 

 Show Y-axis 
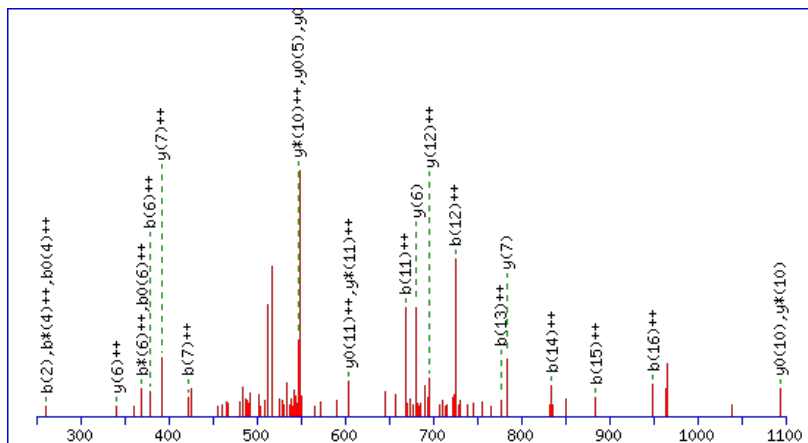
 Monoisotopic mass of neutral peptide  $M_r(\text{calc})$ : 2231.1230

Fixed modifications: Carbamidomethyl (C) (apply to specified residues or termini only)

Ions Score: 25 Expect: 0.011

 Matches : 26/204 fragment ions using 35 most intense peaks ([help](#))

| #  | b               | b <sup>++</sup> | b <sup>*</sup> | b <sup>*++</sup> | b <sup>0</sup> | b <sup>0++</sup> | Seq | y               | y <sup>++</sup> | y <sup>*</sup>   | y <sup>*++</sup> | y <sup>0</sup>   | y <sup>0++</sup> | #  |
|----|-----------------|-----------------|----------------|------------------|----------------|------------------|-----|-----------------|-----------------|------------------|------------------|------------------|------------------|----|
| 1  | 131.0963        | 66.0518         | 113.0727       | 57.0400          |                |                  | K   |                 |                 |                  |                  |                  |                  | 19 |
| 2  | <b>261.1853</b> | 131.0963        | 243.1618       | 122.0845         |                |                  | K   | 2102.0412       | 1051.5242       | 2084.0176        | 1042.5125        | 2084.0306        | 1042.5190        | 18 |
| 3  | 409.2508        | 205.1290        | 391.2272       | 196.1172         |                |                  | F   | 1971.9522       | 986.4797        | 1953.9286        | 977.4679         | 1953.9416        | 977.4744         | 17 |
| 4  | 539.2904        | 270.1488        | 521.2668       | <b>261.1371</b>  | 521.2799       | <b>261.1436</b>  | E   | 1823.8867       | 912.4470        | 1805.8631        | 903.4352         | 1805.8762        | 903.4417         | 16 |
| 5  | 641.3351        | 321.1712        | 623.3115       | 312.1594         | 623.3246       | 312.1659         | T   | 1693.8471       | 847.4272        | 1675.8235        | 838.4154         | 1675.8365        | 838.4219         | 15 |
| 6  | 755.4162        | <b>378.2118</b> | 737.3926       | <b>369.2000</b>  | 737.4057       | <b>369.2065</b>  | L   | 1591.8024       | 796.4048        | 1573.7788        | 787.3930         | 1573.7918        | 787.3996         | 14 |
| 7  | 843.4453        | <b>422.2263</b> | 825.4217       | 413.2145         | 825.4347       | 413.2210         | S   | 1477.7213       | 739.3643        | 1459.6977        | 730.3525         | 1459.7107        | 730.3590         | 13 |
| 8  | 1007.5057       | 504.2565        | 989.4821       | 495.2447         | 989.4951       | 495.2512         | Y   | 1389.6922       | <b>695.3498</b> | 1371.6686        | 686.3380         | 1371.6817        | 686.3445         | 12 |
| 9  | 1121.5868       | 561.2970        | 1103.5632      | 552.2852         | 1103.5762      | 552.2917         | L   | 1225.6319       | 613.3196        | 1207.6083        | <b>604.3078</b>  | 1207.6213        | <b>604.3143</b>  | 11 |
| 10 | 1219.6366       | 610.3219        | 1201.6130      | 601.3101         | 1201.6260      | 601.3166         | P   | 1111.5508       | 556.2790        | <b>1093.5272</b> | <b>547.2672</b>  | <b>1093.5402</b> | <b>547.2737</b>  | 10 |
| 11 | 1335.6605       | <b>668.3339</b> | 1317.6369      | 659.3221         | 1317.6500      | 659.3286         | D   | 1013.5010       | 507.2541        | 995.4774         | 498.2423         | 995.4904         | 498.2488         | 9  |
| 12 | 1449.7416       | <b>725.3745</b> | 1431.7180      | 716.3627         | 1431.7311      | 716.3692         | L   | 897.4770        | 449.2421        | 879.4534         | 440.2303         | 879.4664         | 440.2369         | 8  |
| 13 | 1551.7863       | <b>776.3968</b> | 1533.7628      | 767.3850         | 1533.7758      | 767.3915         | T   | <b>783.3959</b> | <b>392.2016</b> | 765.3723         | 383.1898         | 765.3853         | 383.1963         | 7  |
| 14 | 1667.8103       | <b>834.4088</b> | 1649.7867      | 825.3970         | 1649.7998      | 825.4035         | D   | <b>681.3512</b> | <b>341.1792</b> | 663.3276         | 332.1674         | 663.3406         | 332.1739         | 6  |
| 15 | 1767.8758       | <b>884.4415</b> | 1749.8522      | 875.4297         | 1749.8652      | 875.4362         | V   | 565.3272        | 283.1672        | <b>547.3036</b>  | 274.1554         | <b>547.3166</b>  | 274.1620         | 5  |
| 16 | 1897.9154       | <b>949.4613</b> | 1879.8918      | 940.4495         | 1879.9048      | 940.4561         | E   | 465.2618        | 233.1345        | 447.2382         | 224.1227         | 447.2512         | 224.1292         | 4  |
| 17 | 2011.9965       | 1006.5019       | 1993.9729      | 997.4901         | 1993.9859      | 997.4966         | L   | 335.2221        | 168.1147        | 317.1985         | 159.1029         |                  |                  | 3  |
| 18 | 2084.0306       | 1042.5190       | 2066.0071      | 1033.5072        | 2066.0201      | 1033.5137        | A   | 221.1410        | 111.0741        | 203.1174         | 102.0624         |                  |                  | 2  |
| 19 |                 |                 |                |                  |                |                  | K   | 149.1069        | 75.0571         | 131.0833         | 66.0453          |                  |                  | 1  |

# AT5G38430.1

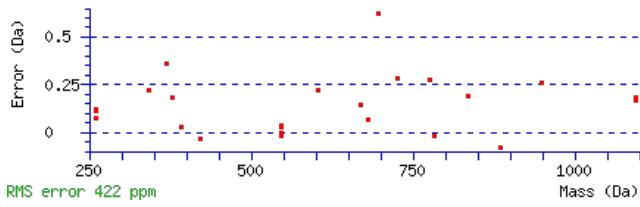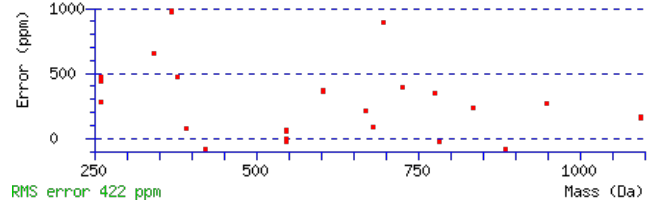

NCBI **BLAST** search of [KKFETLSYLPDLTDVELAK](#)  
(Parameters: blastp, nr protein database, expect=20000, no filter, PAM30)  
Other BLAST [web gateways](#)

## All matches to this query

| Score | Mr(calc)  | Delta   | Sequence                            |
|-------|-----------|---------|-------------------------------------|
| 25.0  | 2231.1230 | -0.0023 | <a href="#">KKFETLSYLPDLTDVELAK</a> |
| 0.1   | 2231.1160 | 0.0047  | <a href="#">IQLKYLAEEMQAISKGLEK</a> |

Mascot: <http://www.matrixscience.com/>

**Peptide View**MS/MS Fragmentation of **GNEDHVAIK**

Found in **AT5G38480.1** in **TAIR\_Arabidopsis**, Symbols: RC11, GRF3 | GRF3 (GENERAL REGULATORY FACTOR 3); protein phosphorylated amino acid binding | chr5:15427507-15428515 FORWARD

Match to Query 3434: 1108.532236 from(555.273394,2+) index(1073)

Title: Elution from: 18.136 to 18.136 scan no 1584 cid35.00 polarity:+

Data file 0-3\_1.mgf

Click mouse within plot area to zoom in by factor of two about that point

Or,   to  Da

Label all possible matches  Label matches used for scoring

Show Y-axis

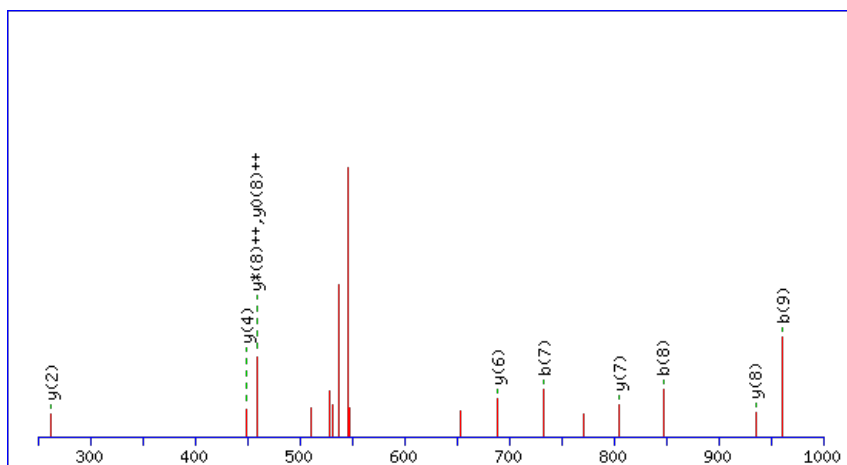

Monoisotopic mass of neutral peptide  $M_r(\text{calc})$ : 1108.5305

Fixed modifications: Carbamidomethyl (C) (apply to specified residues or termini only)

Ions Score: 51 Expect: 6.6e-005

Matches : 10/90 fragment ions using 12 most intense peaks ([help](#))

| #  | b               | b <sup>++</sup> | b*       | b <sup>*++</sup> | b <sup>0</sup> | b <sup>0++</sup> | Seq. | y               | y <sup>++</sup> | y*        | y <sup>*++</sup> | y <sup>0</sup> | y <sup>0++</sup> | #  |
|----|-----------------|-----------------|----------|------------------|----------------|------------------|------|-----------------|-----------------|-----------|------------------|----------------|------------------|----|
| 1  | 59.0258         | 30.0165         |          |                  |                |                  | G    |                 |                 |           |                  |                |                  | 10 |
| 2  | 175.0628        | 88.0350         | 157.0392 | 79.0232          |                |                  | N    | 1051.5193       | 526.2633        | 1033.4957 | 517.2515         | 1033.5087      | 517.2580         | 9  |
| 3  | 305.1024        | 153.0548        | 287.0788 | 144.0430         | 287.0918       | 144.0496         | E    | <b>935.4823</b> | 468.2448        | 917.4587  | <b>459.2330</b>  | 917.4717       | <b>459.2395</b>  | 8  |
| 4  | 421.1264        | 211.0668        | 403.1028 | 202.0550         | 403.1158       | 202.0615         | D    | <b>805.4427</b> | 403.2250        | 787.4191  | 394.2132         | 787.4321       | 394.2197         | 7  |
| 5  | 561.1764        | 281.0918        | 543.1528 | 272.0800         | 543.1658       | 272.0866         | H    | <b>689.4187</b> | 345.2130        | 671.3951  | 336.2012         |                |                  | 6  |
| 6  | 661.2418        | 331.1246        | 643.2183 | 322.1128         | 643.2313       | 322.1193         | V    | 549.3687        | 275.1880        | 531.3451  | 266.1762         |                |                  | 5  |
| 7  | <b>733.2760</b> | 367.1416        | 715.2524 | 358.1298         | 715.2654       | 358.1364         | A    | <b>449.3032</b> | 225.1552        | 431.2796  | 216.1435         |                |                  | 4  |
| 8  | <b>847.3571</b> | 424.1822        | 829.3335 | 415.1704         | 829.3465       | 415.1769         | I    | 377.2691        | 189.1382        | 359.2455  | 180.1264         |                |                  | 3  |
| 9  | <b>961.4382</b> | 481.2227        | 943.4146 | 472.2109         | 943.4276       | 472.2175         | I    | <b>263.1880</b> | 132.0976        | 245.1644  | 123.0858         |                |                  | 2  |
| 10 |                 |                 |          |                  |                |                  | K    | 149.1069        | 75.0571         | 131.0833  | 66.0453          |                |                  | 1  |

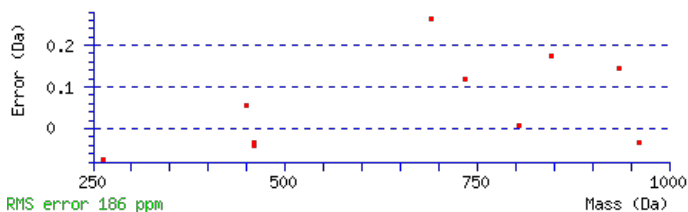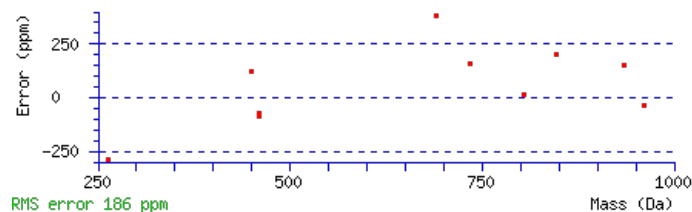

NCBI BLAST search of **GNEDHVAIK**

(Parameters: blastp, nr protein database, expect=20000, no filter, PAM30)

Other BLAST [web gateways](#)

All matches to this query

## AT5G38480.1

| Score | Mr(calc)  | Delta   | Sequence                   |
|-------|-----------|---------|----------------------------|
| 51.0  | 1108.5305 | 0.0017  | <a href="#">GNEDHVAIK</a>  |
| 15.8  | 1108.5332 | -0.0009 | <a href="#">SGDRFNRLK</a>  |
| 13.7  | 1108.5305 | 0.0017  | <a href="#">EHNDVQILK</a>  |
| 13.7  | 1108.5301 | 0.0022  | <a href="#">GLDYDILK</a>   |
| 11.3  | 1108.5339 | -0.0017 | <a href="#">MISSSSRSLK</a> |
| 9.9   | 1108.5305 | 0.0017  | <a href="#">NSVSERYIK</a>  |
| 9.4   | 1108.5305 | 0.0017  | <a href="#">FESRTQSLK</a>  |
| 5.9   | 1108.5332 | -0.0009 | <a href="#">DSGRLFRNK</a>  |
| 5.1   | 1108.5332 | -0.0009 | <a href="#">SDGVFRQRK</a>  |
| 4.1   | 1108.5354 | -0.0032 | <a href="#">AHFNLHNLK</a>  |

Mascot: <http://www.matrixscience.com/>

## Peptide View

MS/MS Fragmentation of **AFQLDANVVK**

Found in **AT5G39130.1** in **TAIR\_Arabidopsis**, Symbols: | gemin-like protein, putative | chr5:15682866-15683641 REVERSE

Match to Query 3532: 1116.556746 from(559.285649,2+) index(3192)

Title: Elution from: 33.204 to 33.204 scan no 4037 cid35.00 polarity:+

Data file D6h-2\_1.mgf

Click mouse within plot area to zoom in by factor of two about that point

Or,   to  Da

Label all possible matches  Label matches used for scoring

Show Y-axis

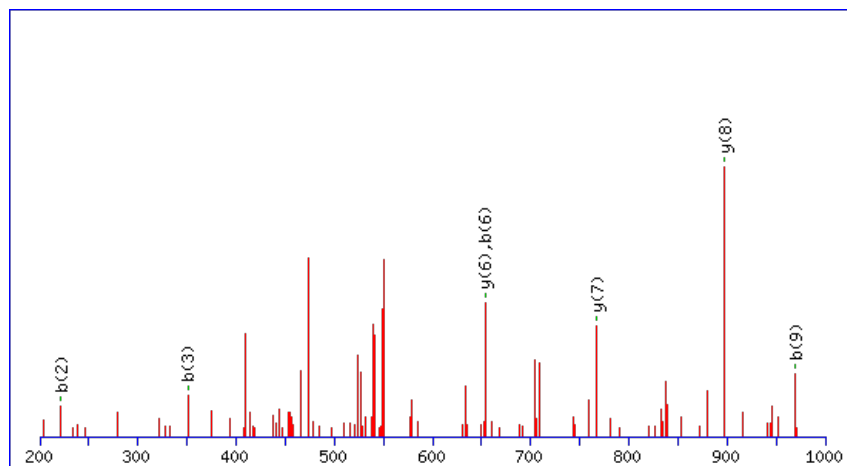

Monoisotopic mass of neutral peptide  $M_r(\text{calc})$ : 1116.5589

Fixed modifications: Carbamidomethyl (C) (apply to specified residues or termini only)

Ions Score: 30 Expect: 0.013

Matches : 7/86 fragment ions using 8 most intense peaks ([help](#))

| #  | b               | b <sup>++</sup> | b*       | b <sup>*++</sup> | b <sup>0</sup> | b <sup>0++</sup> | Seq. | y               | y <sup>++</sup> | y*        | y <sup>*++</sup> | y <sup>0</sup> | y <sup>0++</sup> | #  |
|----|-----------------|-----------------|----------|------------------|----------------|------------------|------|-----------------|-----------------|-----------|------------------|----------------|------------------|----|
| 1  | 73.0414         | 37.0244         |          |                  |                |                  | A    |                 |                 |           |                  |                |                  | 10 |
| 2  | <b>221.1069</b> | 111.0571        |          |                  |                |                  | F    | 1045.5321       | 523.2697        | 1027.5085 | 514.2579         | 1027.5215      | 514.2644         | 9  |
| 3  | <b>351.1595</b> | 176.0834        | 333.1359 | 167.0716         |                |                  | Q    | <b>897.4666</b> | 449.2370        | 879.4431  | 440.2252         | 879.4561       | 440.2317         | 8  |
| 4  | 465.2406        | 233.1239        | 447.2170 | 224.1122         |                |                  | L    | <b>767.4140</b> | 384.2106        | 749.3904  | 375.1988         | 749.4034       | 375.2054         | 7  |
| 5  | 581.2646        | 291.1359        | 563.2410 | 282.1241         | 563.2540       | 282.1307         | D    | <b>653.3329</b> | 327.1701        | 635.3093  | 318.1583         | 635.3223       | 318.1648         | 6  |
| 6  | <b>653.2987</b> | 327.1530        | 635.2752 | 318.1412         | 635.2882       | 318.1477         | A    | 537.3089        | 269.1581        | 519.2853  | 260.1463         |                |                  | 5  |
| 7  | 769.3357        | 385.1715        | 751.3122 | 376.1597         | 751.3252       | 376.1662         | N    | 465.2748        | 233.1410        | 447.2512  | 224.1292         |                |                  | 4  |
| 8  | 869.4012        | 435.2042        | 851.3776 | 426.1924         | 851.3906       | 426.1990         | V    | 349.2378        | 175.1225        | 331.2142  | 166.1107         |                |                  | 3  |
| 9  | <b>969.4666</b> | 485.2370        | 951.4431 | 476.2252         | 951.4561       | 476.2317         | V    | 249.1723        | 125.0898        | 231.1487  | 116.0780         |                |                  | 2  |
| 10 |                 |                 |          |                  |                |                  | K    | 149.1069        | 75.0571         | 131.0833  | 66.0453          |                |                  | 1  |

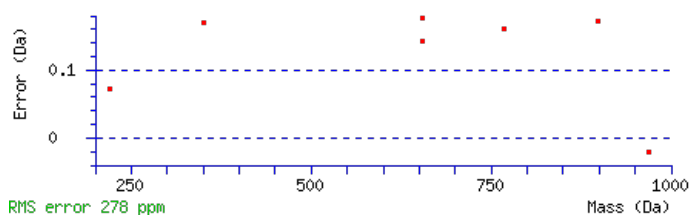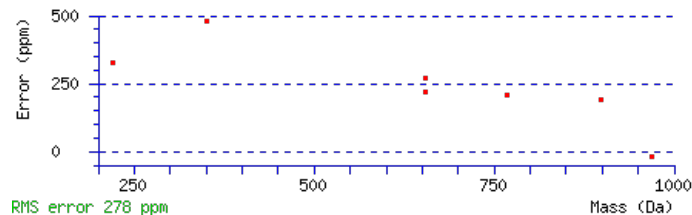

NCBI BLAST search of **AFQLDANVVK**

(Parameters: blastp, nr protein database, expect=20000, no filter, PAM30)

Other BLAST [web gateways](#)

All matches to this query

| Score | $M_r(\text{calc})$ | Delta | Sequence |
|-------|--------------------|-------|----------|
|       |                    |       |          |

**AT5G39130.1**

|      |           |         |                             |
|------|-----------|---------|-----------------------------|
| 29.6 | 1116.5589 | -0.0022 | <a href="#">AFQLDANVVK</a>  |
| 10.1 | 1116.5542 | 0.0025  | <a href="#">FLSLTMVHR</a>   |
| 9.8  | 1116.5567 | 0.0000  | <a href="#">GLSKDEKAQK</a>  |
| 8.0  | 1116.5590 | -0.0022 | <a href="#">HTTFASLLSK</a>  |
| 5.4  | 1116.5542 | 0.0025  | <a href="#">LSLMWKGKPR</a>  |
| 4.6  | 1116.5590 | -0.0022 | <a href="#">FSPEKLLDR</a>   |
| 3.1  | 1116.5594 | -0.0026 | <a href="#">LREEARAQK</a>   |
| 3.0  | 1116.5567 | 0.0000  | <a href="#">TEKNDLKAGK</a>  |
| 2.3  | 1116.5567 | 0.0000  | <a href="#">SDEVIRKEK</a>   |
| 2.3  | 1116.5567 | 0.0000  | <a href="#">SAVTVNSNLAK</a> |

**Mascot:** <http://www.matrixscience.com/>

**Peptide View**MS/MS Fragmentation of **FDDLDEAVDFLVK**Found in **AT5G39210.1** in **TAIR\_Arabidopsis**, Symbols: CRR7 | CRR7 (CHLORORESPIRATORY REDUCTION 7) | chr5:15720459-15721227  
FORWARD

Match to Query 6748: 1538.695222 from(770.354887,2+) index(10619)

Title: Elution from: 100.935 to 100.935 scan no 15070 cid35.00 polarity:+

Data file C7-2\_2.mgf

Click mouse within plot area to zoom in by factor of two about that point

Or,  to  Da Label all possible matches  Label matches used for scoring Show Y-axis 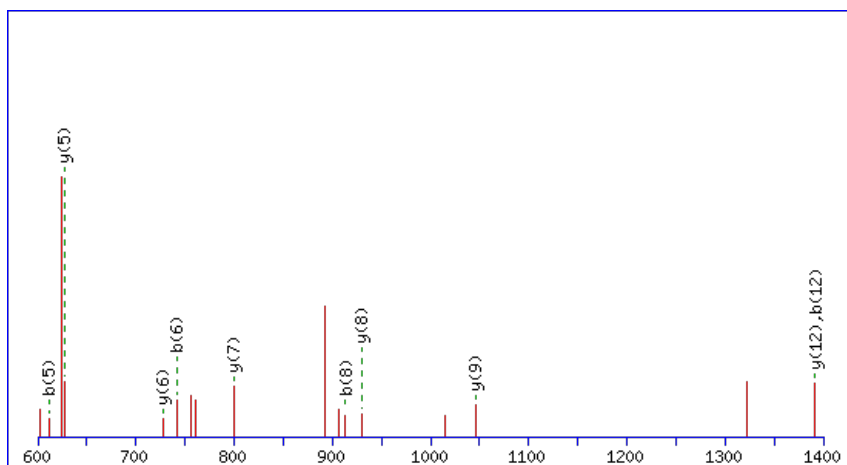Monoisotopic mass of neutral peptide  $M_r(\text{calc})$ : 1538.6932

Fixed modifications: Carbamidomethyl (C) (apply to specified residues or termini only)

Ions Score: 31 Expect: 0.0071

Matches : 10/110 fragment ions using 19 most intense peaks ([help](#))

| #  | b                | b <sup>++</sup> | b <sup>0</sup> | b <sup>0++</sup> | Seq. | y                | y <sup>++</sup> | y*        | y <sup>*++</sup> | y <sup>0</sup> | y <sup>0++</sup> | #  |
|----|------------------|-----------------|----------------|------------------|------|------------------|-----------------|-----------|------------------|----------------|------------------|----|
| 1  | 149.0727         | 75.0400         |                |                  | F    |                  |                 |           |                  |                |                  | 13 |
| 2  | 265.0967         | 133.0520        | 247.0861       | 124.0467         | D    | <b>1391.6351</b> | 696.3212        | 1373.6115 | 687.3094         | 1373.6245      | 687.3159         | 12 |
| 3  | 381.1207         | 191.0640        | 363.1101       | 182.0587         | D    | 1275.6111        | 638.3092        | 1257.5875 | 629.2974         | 1257.6006      | 629.3039         | 11 |
| 4  | 495.2018         | 248.1045        | 477.1912       | 239.0992         | L    | 1159.5872        | 580.2972        | 1141.5636 | 571.2854         | 1141.5766      | 571.2919         | 10 |
| 5  | <b>611.2258</b>  | 306.1165        | 593.2152       | 297.1112         | D    | <b>1045.5061</b> | 523.2567        | 1027.4825 | 514.2449         | 1027.4955      | 514.2514         | 9  |
| 6  | <b>741.2654</b>  | 371.1363        | 723.2548       | 362.1310         | E    | <b>929.4821</b>  | 465.2447        | 911.4585  | 456.2329         | 911.4715       | 456.2394         | 8  |
| 7  | 813.2995         | 407.1534        | 795.2890       | 398.1481         | A    | <b>799.4424</b>  | 400.2249        | 781.4189  | 391.2131         | 781.4319       | 391.2196         | 7  |
| 8  | <b>913.3650</b>  | 457.1861        | 895.3544       | 448.1808         | V    | <b>727.4083</b>  | 364.2078        | 709.3847  | 355.1960         | 709.3977       | 355.2025         | 6  |
| 9  | 1029.3890        | 515.1981        | 1011.3784      | 506.1928         | D    | <b>627.3428</b>  | 314.1751        | 609.3193  | 305.1633         | 609.3323       | 305.1698         | 5  |
| 10 | 1177.4544        | 589.2308        | 1159.4438      | 580.2256         | F    | 511.3189         | 256.1631        | 493.2953  | 247.1513         |                |                  | 4  |
| 11 | 1291.5355        | 646.2714        | 1273.5249      | 637.2661         | L    | 363.2534         | 182.1303        | 345.2298  | 173.1186         |                |                  | 3  |
| 12 | <b>1391.6010</b> | 696.3041        | 1373.5904      | 687.2988         | V    | 249.1723         | 125.0898        | 231.1487  | 116.0780         |                |                  | 2  |
| 13 |                  |                 |                |                  | K    | 149.1069         | 75.0571         | 131.0833  | 66.0453          |                |                  | 1  |

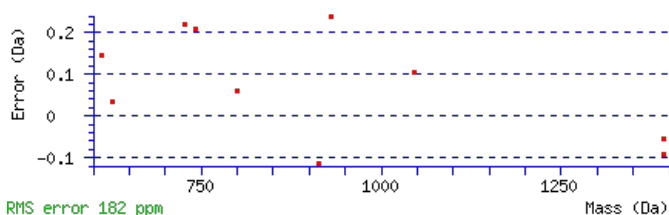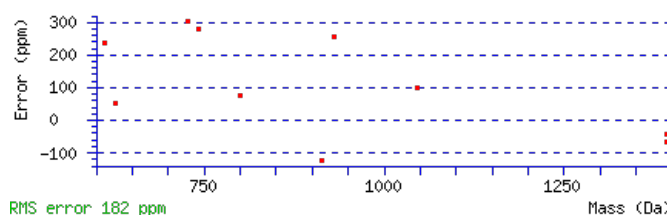NCBI **BLAST** search of **FDDLDEAVDFLVK**

(Parameters: blastp, nr protein database, expect=20000, no filter, PAM30)



# AT5G39210.1

Other BLAST [web gateways](#)

## All matches to this query

| Score | Mr(calc)  | Delta   | Sequence                        |
|-------|-----------|---------|---------------------------------|
| 31.2  | 1538.6932 | 0.0020  | <a href="#">FDDLDEAVDFLVK</a>   |
| 14.0  | 1538.6937 | 0.0015  | <a href="#">KVKDFEDGDNNIK</a>   |
| 3.9   | 1538.6998 | -0.0045 | <a href="#">MNVDELRRERAAK</a>   |
| 3.8   | 1538.6993 | -0.0041 | <a href="#">DTVSWNSMLGGLVK</a>  |
| 3.0   | 1538.6979 | -0.0027 | <a href="#">LMDMLMDREVIR</a>    |
| 1.6   | 1538.6937 | 0.0015  | <a href="#">ALEGNYEEKAAAQK</a>  |
| 1.5   | 1538.6915 | 0.0038  | <a href="#">DSGSEQSKSVGNVVK</a> |
| 1.1   | 1538.6993 | -0.0041 | <a href="#">FDNDVSLEIIAMR</a>   |
| 0.3   | 1538.6993 | -0.0041 | <a href="#">SDCLAKAEGTFVPK</a>  |
| 0.1   | 1538.6968 | -0.0016 | <a href="#">KNAGKDGNGRPSTR</a>  |

Mascot: <http://www.matrixscience.com/>

## Peptide View

### MS/MS Fragmentation of **RGRGLGEDK**

Found in **AT5G39380.1** in **TAIR\_Arabidopsis**, Symbols: | calmodulin-binding protein-related | chr5:15776391-15777914 REVERSE

Match to Query 2468: 1002.480164 from(502.247358,2+) index(5186)

Title: Elution from: 47.360 to 47.360 scan no 6587 cid35.00 polarity:+

Data file 0-1\_2.mgf

Click mouse within plot area to zoom in by factor of two about that point

Or,   to  Da

Label all possible matches  Label matches used for scoring

Show Y-axis

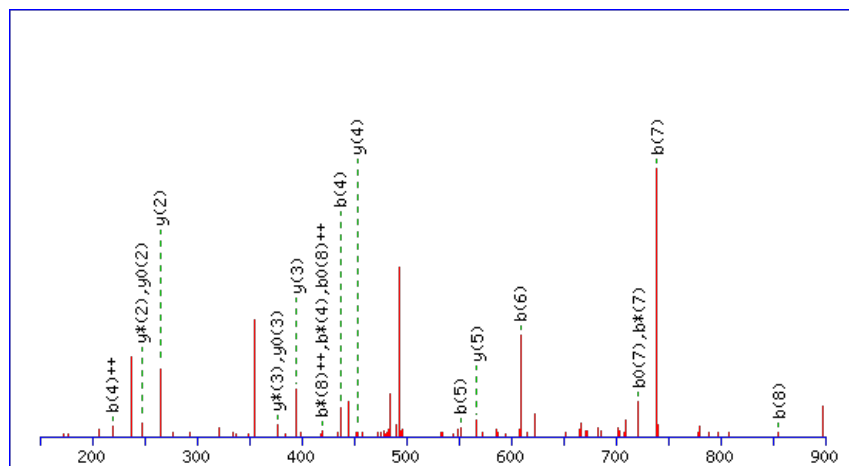

**Monoisotopic mass of neutral peptide Mr(calc):** 1002.4783

**Fixed modifications:** Carbamidomethyl (C) (apply to specified residues or termini only)

**Ions Score:** 27 **Expect:** 0.028

**Matches:** 20/82 fragment ions using 43 most intense peaks ([help](#))

| # | b               | b <sup>++</sup> | b*              | b <sup>*++</sup> | b <sup>0</sup>  | b <sup>0++</sup> | Seq. | y               | y <sup>++</sup> | y*              | y <sup>*++</sup> | y <sup>0</sup>  | y <sup>0++</sup> | # |
|---|-----------------|-----------------|-----------------|------------------|-----------------|------------------|------|-----------------|-----------------|-----------------|------------------|-----------------|------------------|---|
| 1 | 161.0965        | 81.0519         | 143.0729        | 72.0401          |                 |                  | R    |                 |                 |                 |                  |                 |                  | 9 |
| 2 | <b>219.1150</b> | 110.0612        | 201.0914        | 101.0494         |                 |                  | G    | 843.3963        | 422.2018        | 825.3727        | 413.1900         | 825.3858        | 413.1965         | 8 |
| 3 | 379.2043        | 190.1058        | 361.1807        | 181.0940         |                 |                  | R    | 785.3778        | 393.1926        | 767.3542        | 384.1808         | 767.3673        | 384.1873         | 7 |
| 4 | <b>437.2228</b> | <b>219.1150</b> | <b>419.1992</b> | 210.1032         |                 |                  | G    | 625.2886        | 313.1479        | 607.2650        | 304.1361         | 607.2780        | 304.1426         | 6 |
| 5 | <b>551.3039</b> | 276.1556        | 533.2803        | 267.1438         |                 |                  | L    | <b>567.2701</b> | 284.1387        | 549.2465        | 275.1269         | 549.2595        | 275.1334         | 5 |
| 6 | <b>609.3224</b> | 305.1648        | 591.2988        | 296.1530         |                 |                  | G    | <b>453.1890</b> | 227.0981        | 435.1654        | 218.0863         | 435.1784        | 218.0928         | 4 |
| 7 | <b>739.3620</b> | 370.1846        | <b>721.3384</b> | 361.1728         | <b>721.3514</b> | 361.1794         | E    | <b>395.1705</b> | 198.0889        | <b>377.1469</b> | 189.0771         | <b>377.1599</b> | 189.0836         | 3 |
| 8 | <b>855.3860</b> | 428.1966        | 837.3624        | <b>419.1848</b>  | 837.3754        | <b>419.1913</b>  | D    | <b>265.1309</b> | 133.0691        | <b>247.1073</b> | 124.0573         | <b>247.1203</b> | 124.0638         | 2 |
| 9 |                 |                 |                 |                  |                 |                  | K    | 149.1069        | 75.0571         | 131.0833        | 66.0453          |                 |                  | 1 |

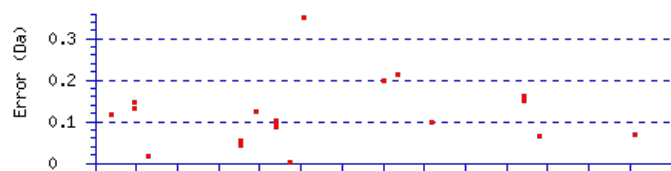

RMS error 354 ppm

Mass (Da)

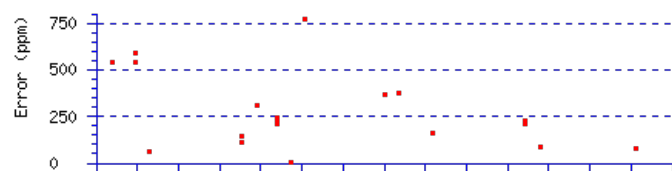

RMS error 354 ppm

Mass (Da)

NCBI **BLAST** search of [RGRGLGEDK](#)

(Parameters: blastp, nr protein database, expect=20000, no filter, PAM30)

Other BLAST [web gateways](#)

### All matches to this query

| Score | Mr(calc)  | Delta  | Sequence                  |
|-------|-----------|--------|---------------------------|
| 26.7  | 1002.4783 | 0.0019 | <a href="#">RGRGLGEDK</a> |

**AT5G39380.1**

|      |           |         |                             |
|------|-----------|---------|-----------------------------|
| 21.1 | 1002.4778 | 0.0023  | <a href="#">FQNLGDIGK</a>   |
| 20.4 | 1002.4812 | -0.0011 | <a href="#">KDIMGVSNK</a>   |
| 19.6 | 1002.4812 | -0.0011 | <a href="#">DMKNILNK</a>    |
| 11.6 | 1002.4778 | 0.0023  | <a href="#">DFKGQTPAK</a>   |
| 9.5  | 1002.4812 | -0.0011 | <a href="#">LEVKGGMGK</a>   |
| 9.0  | 1002.4778 | 0.0023  | <a href="#">VIQFQDNK</a>    |
| 7.5  | 1002.4812 | -0.0011 | <a href="#">VALGMASTGGK</a> |
| 7.4  | 1002.4778 | 0.0023  | <a href="#">LLFDDVNR</a>    |
| 5.9  | 1002.4812 | -0.0011 | <a href="#">TVMSKSPNK</a>   |

**Mascot:** <http://www.matrixscience.com/>

**Peptide View**MS/MS Fragmentation of **SPKPVLISSLPSLGAAAGGGR**

Found in **AT5G39650.1** in **TAIR\_Arabidopsis**, Symbols: | similar to unknown protein [Arabidopsis thaliana] (TAIR:AT1G09157.1); similar to 52O08\_3 [Brassica rapa subsp. pekinensis] (GB:AAZ67548.1); contains InterPro domain Protein of unknown function DUF679 (InterPro:IPR007770) | chr5:15892493

Match to Query 9729: 2118.174432 from(530.550884,4+) index(10323)

Title: Elution from: 96.583 to 96.583 scan no 14595 cid35.00 polarity:+

Data file C7-1\_2.mgf

Click mouse within plot area to zoom in by factor of two about that point

Or, Plot from  to  Da Label all possible matches  Label matches used for scoring Show Y-axis 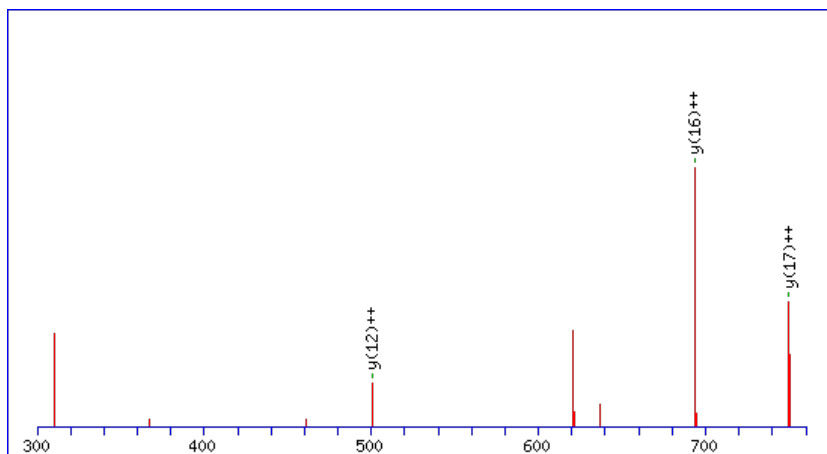

Monoisotopic mass of neutral peptide Mr(calc): 2118.1797

Fixed modifications: Carbamidomethyl (C) (apply to specified residues or termini only)

Ions Score: 18 Expect: 0.021

Matches: 3/244 fragment ions using 4 most intense peaks ([help](#))

| #  | b         | b <sup>++</sup> | b*        | b <sup>*++</sup> | b <sup>0</sup> | b <sup>0++</sup> | Seq. | y         | y <sup>++</sup> | y*        | y <sup>*++</sup> | y <sup>0</sup> | y <sup>0++</sup> | #  |
|----|-----------|-----------------|-----------|------------------|----------------|------------------|------|-----------|-----------------|-----------|------------------|----------------|------------------|----|
| 1  | 88.0393   | 44.5233         |           |                  | 70.0287        | 35.5180          | S    |           |                 |           |                  |                |                  | 23 |
| 2  | 185.0921  | 93.0497         |           |                  | 167.0815       | 84.0444          | P    | 2032.1550 | 1016.5811       | 2015.1284 | 1008.0678        | 2014.1444      | 1007.5758        | 22 |
| 3  | 313.1870  | 157.0972        | 296.1605  | 148.5839         | 295.1765       | 148.0919         | K    | 1935.1022 | 968.0547        | 1918.0756 | 959.5415         | 1917.0916      | 959.0494         | 21 |
| 4  | 410.2398  | 205.6235        | 393.2132  | 197.1103         | 392.2292       | 196.6183         | P    | 1807.0072 | 904.0072        | 1789.9807 | 895.4940         | 1788.9967      | 895.0020         | 20 |
| 5  | 509.3082  | 255.1577        | 492.2817  | 246.6445         | 491.2976       | 246.1525         | V    | 1709.9545 | 855.4809        | 1692.9279 | 846.9676         | 1691.9439      | 846.4756         | 19 |
| 6  | 622.3923  | 311.6998        | 605.3657  | 303.1865         | 604.3817       | 302.6945         | L    | 1610.8860 | 805.9467        | 1593.8595 | 797.4334         | 1592.8755      | 796.9414         | 18 |
| 7  | 735.4763  | 368.2418        | 718.4498  | 359.7285         | 717.4658       | 359.2365         | I    | 1497.8020 | 749.4046        | 1480.7754 | 740.8914         | 1479.7914      | 740.3993         | 17 |
| 8  | 822.5084  | 411.7578        | 805.4818  | 403.2445         | 804.4978       | 402.7525         | S    | 1384.7179 | 692.8626        | 1367.6914 | 684.3493         | 1366.7074      | 683.8573         | 16 |
| 9  | 909.5404  | 455.2738        | 892.5138  | 446.7606         | 891.5298       | 446.2686         | S    | 1297.6859 | 649.3466        | 1280.6593 | 640.8333         | 1279.6753      | 640.3413         | 15 |
| 10 | 1022.6245 | 511.8159        | 1005.5979 | 503.3026         | 1004.6139      | 502.8106         | L    | 1210.6539 | 605.8306        | 1193.6273 | 597.3173         | 1192.6433      | 596.8253         | 14 |
| 11 | 1119.6772 | 560.3422        | 1102.6507 | 551.8290         | 1101.6667      | 551.3370         | P    | 1097.5698 | 549.2885        | 1080.5432 | 540.7753         | 1079.5592      | 540.2833         | 13 |
| 12 | 1206.7092 | 603.8583        | 1189.6827 | 595.3450         | 1188.6987      | 594.8530         | S    | 1000.5170 | 500.7622        | 983.4905  | 492.2489         | 982.5065       | 491.7569         | 12 |
| 13 | 1319.7933 | 660.4003        | 1302.7668 | 651.8870         | 1301.7827      | 651.3950         | L    | 913.4850  | 457.2461        | 896.4585  | 448.7329         | 895.4744       | 448.2409         | 11 |
| 14 | 1416.8461 | 708.9267        | 1399.8195 | 700.4134         | 1398.8355      | 699.9214         | P    | 800.4009  | 400.7041        | 783.3744  | 392.1908         | 782.3904       | 391.6988         | 10 |
| 15 | 1503.8781 | 752.4427        | 1486.8516 | 743.9294         | 1485.8675      | 743.4374         | S    | 703.3482  | 352.1777        | 686.3216  | 343.6645         | 685.3376       | 343.1724         | 9  |
| 16 | 1560.8996 | 780.9534        | 1543.8730 | 772.4401         | 1542.8890      | 771.9481         | G    | 616.3161  | 308.6617        | 599.2896  | 300.1484         |                |                  | 8  |
| 17 | 1631.9367 | 816.4720        | 1614.9101 | 807.9587         | 1613.9261      | 807.4667         | A    | 559.2947  | 280.1510        | 542.2681  | 271.6377         |                |                  | 7  |
| 18 | 1702.9738 | 851.9905        | 1685.9472 | 843.4773         | 1684.9632      | 842.9853         | A    | 488.2576  | 244.6324        | 471.2310  | 236.1191         |                |                  | 6  |
| 19 | 1774.0109 | 887.5091        | 1756.9844 | 878.9958         | 1756.0003      | 878.5038         | A    | 417.2205  | 209.1139        | 400.1939  | 200.6006         |                |                  | 5  |
| 20 | 1831.0324 | 916.0198        | 1814.0058 | 907.5066         | 1813.0218      | 907.0145         | G    | 346.1833  | 173.5953        | 329.1568  | 165.0820         |                |                  | 4  |
| 21 | 1888.0538 | 944.5306        | 1871.0273 | 936.0173         | 1870.0433      | 935.5253         | G    | 289.1619  | 145.0846        | 272.1353  | 136.5713         |                |                  | 3  |
| 22 | 1945.0753 | 973.0413        | 1928.0488 | 964.5280         | 1927.0647      | 964.0360         | G    | 232.1404  | 116.5738        | 215.1139  | 108.0606         |                |                  | 2  |

|    |  |  |  |  |  |   |          |         |          |         |  |  |  |   |
|----|--|--|--|--|--|---|----------|---------|----------|---------|--|--|--|---|
| 23 |  |  |  |  |  | R | 175.1190 | 88.0631 | 158.0924 | 79.5498 |  |  |  | 1 |
|----|--|--|--|--|--|---|----------|---------|----------|---------|--|--|--|---|

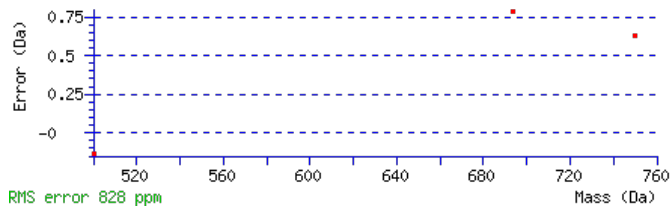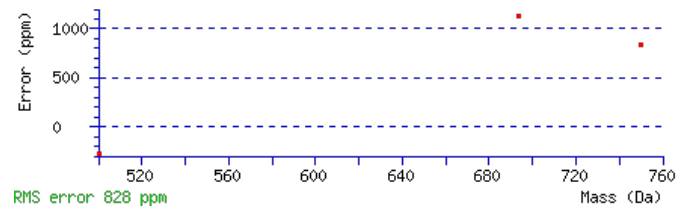

NCBI **BLAST** search of [SPKPVLISSLPSLPSGAAAGGGR](#)  
 (Parameters: blastp, nr protein database, expect=20000, no filter, PAM30)  
 Other BLAST [web gateways](#)

**All matches to this query**

| Score | Mr(calc)  | Delta   | Sequence                                |
|-------|-----------|---------|-----------------------------------------|
| 18.2  | 2118.1797 | -0.0053 | <a href="#">SPKPVLISSLPSLPSGAAAGGGR</a> |
| 6.3   | 2118.1698 | 0.0046  | <a href="#">FFKRNGGLLLQQQLNTNK</a>      |
| 2.7   | 2118.1806 | -0.0061 | <a href="#">VLREGLMLIVQCROFLK</a>       |

Mascot: <http://www.matrixscience.com/>

## Peptide View

MS/MS Fragmentation of **TFIEAFTEIMER**

Found in **AT5G39730.1** in **TAIR\_Arabidopsis**, Symbols: | avirulence-responsive protein-related / avirulence induced gene (AIG) protein-related | chr5:15918968-15919852 FORWARD

Match to Query 6078: 1485.714844 from(743.864698,2+) index(10526)

Title: Elution from: 105.057 to 105.057 scan no 15357 cid35.00 polarity:+

Data file D6h-1\_3.mgf

Click mouse within plot area to zoom in by factor of two about that point

Or,   to  Da

Label all possible matches  Label matches used for scoring

Show Y-axis

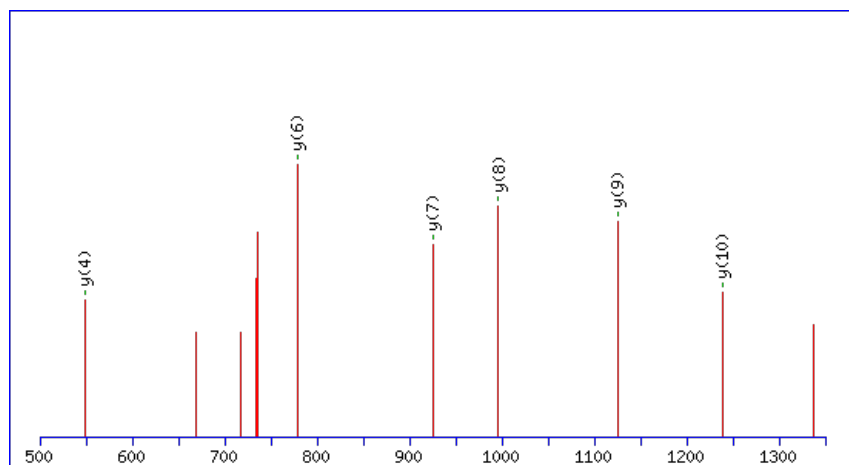

Monoisotopic mass of neutral peptide  $M_r(\text{calc})$ : 1485.7173

Fixed modifications: Carbamidomethyl (C) (apply to specified residues or termini only)

Ions Score: 54 Expect: 1e-005

Matches : 6/108 fragment ions using 8 most intense peaks ([help](#))

| #  | b         | b <sup>++</sup> | b <sup>0</sup> | b <sup>0++</sup> | Seq. | y                | y <sup>++</sup> | y*        | y <sup>*++</sup> | y <sup>0</sup> | y <sup>0++</sup> | #  |
|----|-----------|-----------------|----------------|------------------|------|------------------|-----------------|-----------|------------------|----------------|------------------|----|
| 1  | 102.0550  | 51.5311         | 84.0444        | 42.5258          | T    |                  |                 |           |                  |                |                  | 12 |
| 2  | 249.1234  | 125.0653        | 231.1128       | 116.0600         | F    | 1385.6770        | 693.3421        | 1368.6504 | 684.8288         | 1367.6664      | 684.3368         | 11 |
| 3  | 362.2074  | 181.6074        | 344.1969       | 172.6021         | I    | <b>1238.6086</b> | 619.8079        | 1221.5820 | 611.2946         | 1220.5980      | 610.8026         | 10 |
| 4  | 491.2500  | 246.1287        | 473.2395       | 237.1234         | E    | <b>1125.5245</b> | 563.2659        | 1108.4979 | 554.7526         | 1107.5139      | 554.2606         | 9  |
| 5  | 562.2871  | 281.6472        | 544.2766       | 272.6419         | A    | <b>996.4819</b>  | 498.7446        | 979.4553  | 490.2313         | 978.4713       | 489.7393         | 8  |
| 6  | 709.3556  | 355.1814        | 691.3450       | 346.1761         | F    | <b>925.4448</b>  | 463.2260        | 908.4182  | 454.7128         | 907.4342       | 454.2207         | 7  |
| 7  | 810.4032  | 405.7053        | 792.3927       | 396.7000         | T    | <b>778.3764</b>  | 389.6918        | 761.3498  | 381.1785         | 760.3658       | 380.6865         | 6  |
| 8  | 939.4458  | 470.2266        | 921.4353       | 461.2213         | E    | 677.3287         | 339.1680        | 660.3021  | 330.6547         | 659.3181       | 330.1627         | 5  |
| 9  | 1052.5299 | 526.7686        | 1034.5193      | 517.7633         | I    | <b>548.2861</b>  | 274.6467        | 531.2595  | 266.1334         | 530.2755       | 265.6414         | 4  |
| 10 | 1183.5704 | 592.2888        | 1165.5598      | 583.2835         | M    | 435.2020         | 218.1047        | 418.1755  | 209.5914         | 417.1915       | 209.0994         | 3  |
| 11 | 1312.6130 | 656.8101        | 1294.6024      | 647.8048         | E    | 304.1615         | 152.5844        | 287.1350  | 144.0711         | 286.1510       | 143.5791         | 2  |
| 12 |           |                 |                |                  | R    | 175.1190         | 88.0631         | 158.0924  | 79.5498          |                |                  | 1  |

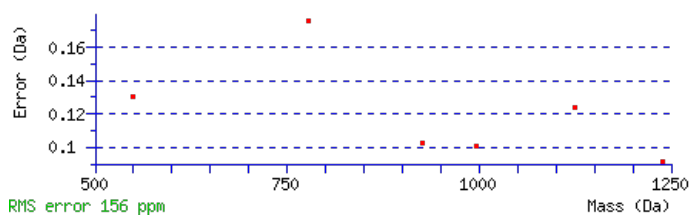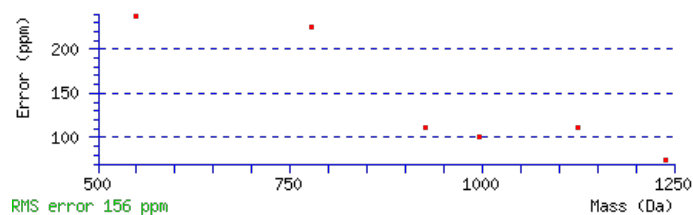

NCBI BLAST search of **TFIEAFTEIMER**

(Parameters: blastp, nr protein database, expect=20000, no filter, PAM30)

Other BLAST [web gateways](#)

AT5G39730.1

All matches to this query

| Score | Mr(calc)  | Delta   | Sequence                     |
|-------|-----------|---------|------------------------------|
| 53.6  | 1485.7173 | -0.0025 | <a href="#">TFIEAFTEIMER</a> |

Mascot: <http://www.matrixscience.com/>

## Peptide View

MS/MS Fragmentation of **NYIYGGHVSNYMK**Found in **AT5G39740.1** in **TAIR\_Arabidopsis**, Symbols: | 60S ribosomal protein L5 (RPL5B) | chr5:15920593-15922413 FORWARD

Match to Query 6285: 1544.707368 from(773.360960,2+) index(3105)

Title: Elution from: 33.517 to 33.517 scan no 3961 cid35.00 polarity:+

Data file D12h-2\_2.mgf

Click mouse within plot area to zoom in by factor of two about that point

Or,   to  Da Label all possible matches  Label matches used for scoring Show Y-axis 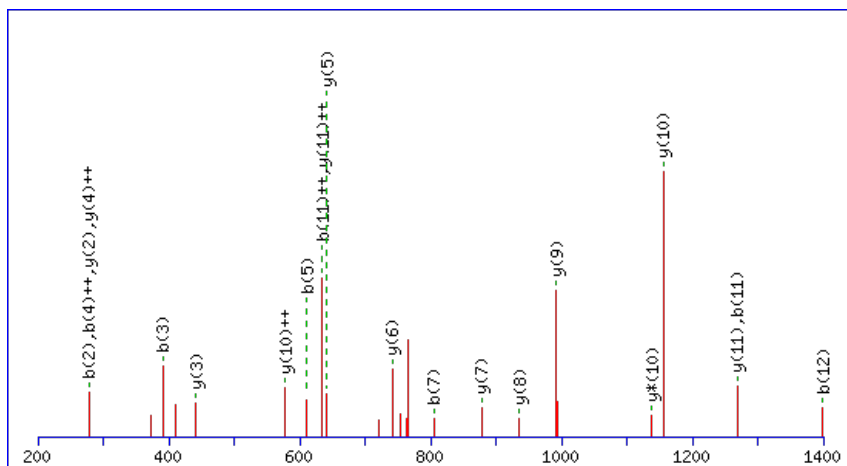Monoisotopic mass of neutral peptide  $M_r(\text{calc})$ : 1544.7082

Fixed modifications: Carbamidomethyl (C) (apply to specified residues or termini only)

Ions Score: 79 Expect: 2.4e-008

Matches : 21/120 fragment ions using 25 most intense peaks ([help](#))

| #  | b                | b <sup>++</sup> | b*        | b <sup>*++</sup> | b <sup>0</sup> | b <sup>0++</sup> | Seq. | y                | y <sup>++</sup> | y*               | y <sup>*++</sup> | y <sup>0</sup> | y <sup>0++</sup> | #  |
|----|------------------|-----------------|-----------|------------------|----------------|------------------|------|------------------|-----------------|------------------|------------------|----------------|------------------|----|
| 1  | 115.0502         | 58.0287         | 98.0237   | 49.5155          |                |                  | N    |                  |                 |                  |                  |                |                  | 13 |
| 2  | <b>278.1135</b>  | 139.5604        | 261.0870  | 131.0471         |                |                  | Y    | 1431.6725        | 716.3399        | 1414.6460        | 707.8266         | 1413.6620      | 707.3346         | 12 |
| 3  | <b>391.1976</b>  | 196.1024        | 374.1710  | 187.5892         |                |                  | I    | <b>1268.6092</b> | <b>634.8082</b> | 1251.5827        | 626.2950         | 1250.5987      | 625.8030         | 11 |
| 4  | 554.2609         | <b>277.6341</b> | 537.2344  | 269.1208         |                |                  | Y    | <b>1155.5252</b> | <b>578.2662</b> | <b>1138.4986</b> | 569.7529         | 1137.5146      | 569.2609         | 10 |
| 5  | <b>611.2824</b>  | 306.1448        | 594.2558  | 297.6316         |                |                  | G    | <b>992.4618</b>  | 496.7346        | 975.4353         | 488.2213         | 974.4513       | 487.7293         | 9  |
| 6  | 668.3039         | 334.6556        | 651.2773  | 326.1423         |                |                  | G    | <b>935.4404</b>  | 468.2238        | 918.4138         | 459.7105         | 917.4298       | 459.2185         | 8  |
| 7  | <b>805.3628</b>  | 403.1850        | 788.3362  | 394.6717         |                |                  | H    | <b>878.4189</b>  | 439.7131        | 861.3923         | 431.1998         | 860.4083       | 430.7078         | 7  |
| 8  | 904.4312         | 452.7192        | 887.4046  | 444.2060         |                |                  | V    | <b>741.3600</b>  | 371.1836        | 724.3334         | 362.6704         | 723.3494       | 362.1783         | 6  |
| 9  | 991.4632         | 496.2352        | 974.4367  | 487.7220         | 973.4526       | 487.2300         | S    | <b>642.2916</b>  | 321.6494        | 625.2650         | 313.1362         | 624.2810       | 312.6441         | 5  |
| 10 | 1105.5061        | 553.2567        | 1088.4796 | 544.7434         | 1087.4956      | 544.2514         | N    | 555.2595         | <b>278.1334</b> | 538.2330         | 269.6201         |                |                  | 4  |
| 11 | <b>1268.5695</b> | <b>634.7884</b> | 1251.5429 | 626.2751         | 1250.5589      | 625.7831         | Y    | <b>441.2166</b>  | 221.1119        | 424.1901         | 212.5987         |                |                  | 3  |
| 12 | <b>1399.6099</b> | 700.3086        | 1382.5834 | 691.7953         | 1381.5994      | 691.3033         | M    | <b>278.1533</b>  | 139.5803        | 261.1267         | 131.0670         |                |                  | 2  |
| 13 |                  |                 |           |                  |                |                  | K    | 147.1128         | 74.0600         | 130.0863         | 65.5468          |                |                  | 1  |

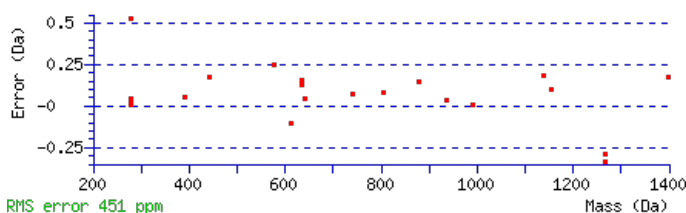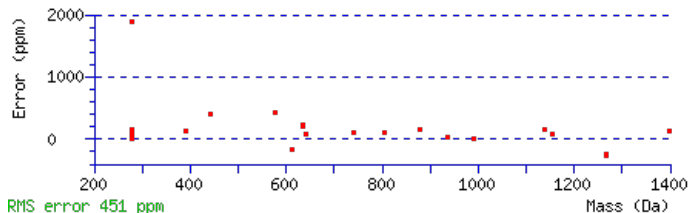NCBI BLAST search of **NYIYGGHVSNYMK**

(Parameters: blastp, nr protein database, expect=20000, no filter, PAM30)

Other BLAST [web gateways](#)



AT5G39740.1

All matches to this query

| Score | Mr(calc)  | Delta   | Sequence                      |
|-------|-----------|---------|-------------------------------|
| 78.8  | 1544.7082 | -0.0008 | <a href="#">NYIYGGHVSNYMK</a> |
| 10.9  | 1544.7075 | -0.0002 | <a href="#">CTEHNVALADLMR</a> |
| 6.5   | 1544.7050 | 0.0023  | <a href="#">MMQRNCFGFNLK</a>  |
| 6.4   | 1544.7107 | -0.0033 | <a href="#">DFRDTYKTEQDK</a>  |
| 1.7   | 1544.7107 | -0.0033 | <a href="#">FLSYSRSGOEDEK</a> |

Mascot: <http://www.matrixscience.com/>

**Peptide View**MS/MS Fragmentation of **TTSDKRTL**SAFound in **AT5G39960.1** in **TAIR\_Arabidopsis**, Symbols: | GTP-binding family protein | chr5:16011423-16014048 FORWARD

Match to Query 3198: 1092.517432 from(547.265992,2+) index(2509)

Title: Elution from: 26.384 to 26.384 scan no 3131 cid35.00 polarity:+

Data file D6h-2\_3.mgf

Click mouse within plot area to zoom in by factor of two about that point

Or,   to  Da Label all possible matches  Label matches used for scoring Show Y-axis 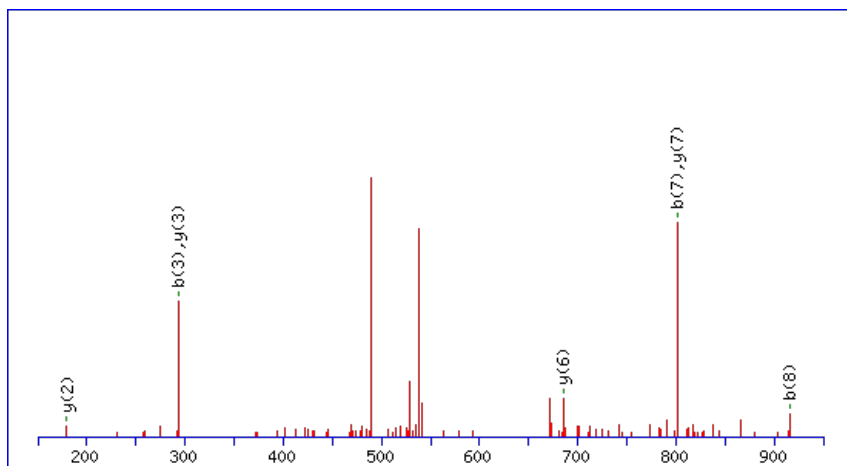Monoisotopic mass of neutral peptide **Mr(calc)**: 1092.5203**Fixed modifications**: Carbamidomethyl (C) (apply to specified residues or termini only)**Ions Score**: 23 **Expect**: 0.046**Matches** : 7/90 fragment ions using 8 most intense peaks ([help](#))

| #  | b               | b <sup>++</sup> | b*       | b <sup>*++</sup> | b <sup>0</sup> | b <sup>0++</sup> | Seq. | y               | y <sup>++</sup> | y*       | y <sup>*++</sup> | y <sup>0</sup> | y <sup>0++</sup> | #  |
|----|-----------------|-----------------|----------|------------------|----------------|------------------|------|-----------------|-----------------|----------|------------------|----------------|------------------|----|
| 1  | 103.0520        | 52.0296         |          |                  | 85.0414        | 43.0244          | T    |                 |                 |          |                  |                |                  | 10 |
| 2  | 205.0967        | 103.0520        |          |                  | 187.0861       | 94.0467          | T    | 991.4829        | 496.2451        | 973.4593 | 487.2333         | 973.4723       | 487.2398         | 9  |
| 3  | <b>293.1258</b> | 147.0665        |          |                  | 275.1152       | 138.0612         | S    | 889.4382        | 445.2227        | 871.4146 | 436.2109         | 871.4276       | 436.2175         | 8  |
| 4  | 409.1497        | 205.0785        |          |                  | 391.1392       | 196.0732         | D    | <b>801.4091</b> | 401.2082        | 783.3855 | 392.1964         | 783.3986       | 392.2029         | 7  |
| 5  | 539.2388        | 270.1230        | 521.2152 | 261.1112         | 521.2282       | 261.1177         | K    | <b>685.3851</b> | 343.1962        | 667.3616 | 334.1844         | 667.3746       | 334.1909         | 6  |
| 6  | 699.3280        | 350.1677        | 681.3044 | 341.1559         | 681.3175       | 341.1624         | R    | 555.2961        | 278.1517        | 537.2725 | 269.1399         | 537.2856       | 269.1464         | 5  |
| 7  | <b>801.3727</b> | 401.1900        | 783.3492 | 392.1782         | 783.3622       | 392.1847         | T    | 395.2069        | 198.1071        |          |                  | 377.1963       | 189.1018         | 4  |
| 8  | <b>915.4538</b> | 458.2306        | 897.4303 | 449.2188         | 897.4433       | 449.2253         | L    | <b>293.1622</b> | 147.0847        |          |                  | 275.1516       | 138.0794         | 3  |
| 9  | 1003.4829       | 502.2451        | 985.4593 | 493.2333         | 985.4723       | 493.2398         | S    | <b>179.0811</b> | 90.0442         |          |                  | 161.0705       | 81.0389          | 2  |
| 10 |                 |                 |          |                  |                |                  | A    | 91.0520         | 46.0296         |          |                  |                |                  | 1  |

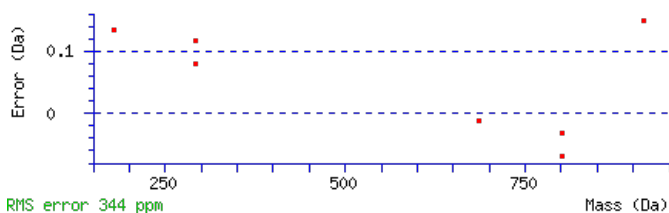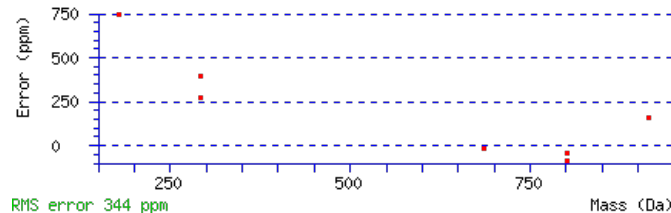NCBI **BLAST** search of [TTSDKRTL](#)SA

(Parameters: blastp, nr protein database, expect=20000, no filter, PAM30)

Other BLAST [web gateways](#)**All matches to this query**

| Score | Mr(calc) | Delta | Sequence |
|-------|----------|-------|----------|
|       |          |       |          |

**AT5G39960.1**

|      |           |         |                            |
|------|-----------|---------|----------------------------|
| 23.4 | 1092.5203 | -0.0029 | <a href="#">TTSDKRTLSA</a> |
| 22.0 | 1092.5178 | -0.0004 | <a href="#">RMELFIDR</a>   |
| 16.0 | 1092.5167 | 0.0007  | <a href="#">YYRYFLR</a>    |
| 14.2 | 1092.5183 | -0.0008 | <a href="#">TMERRNIR</a>   |
| 9.6  | 1092.5149 | 0.0025  | <a href="#">NHKSHSPLR</a>  |
| 8.2  | 1092.5156 | 0.0018  | <a href="#">SNNKSMLLR</a>  |
| 8.0  | 1092.5194 | -0.0019 | <a href="#">LRFYHWR</a>    |
| 5.7  | 1092.5178 | -0.0004 | <a href="#">DMERIFIR</a>   |
| 3.4  | 1092.5178 | -0.0004 | <a href="#">MLDERFIR</a>   |
| 3.4  | 1092.5178 | -0.0004 | <a href="#">TDMIPPHLR</a>  |

**Mascot:** <http://www.matrixscience.com/>

**Peptide View**MS/MS Fragmentation of **GLAMAANA VEELVK**Found in **AT5G40140.1** in **TAIR\_Arabidopsis**, Symbols: | armadillo/beta-catenin repeat family protein / U-box domain-containing protein | chr5:16074575-16076227 FORWARD

Match to Query 5644: 1430.701444 from(716.357998,2+) index(4113)

Title: Elution from: 39.415 to 39.415 scan no 5241 cid35.00 polarity:+

Data file 0-1\_2.mgf

Click mouse within plot area to zoom in by factor of two about that point

Or,   to  Da Label all possible matches  Label matches used for scoring Show Y-axis 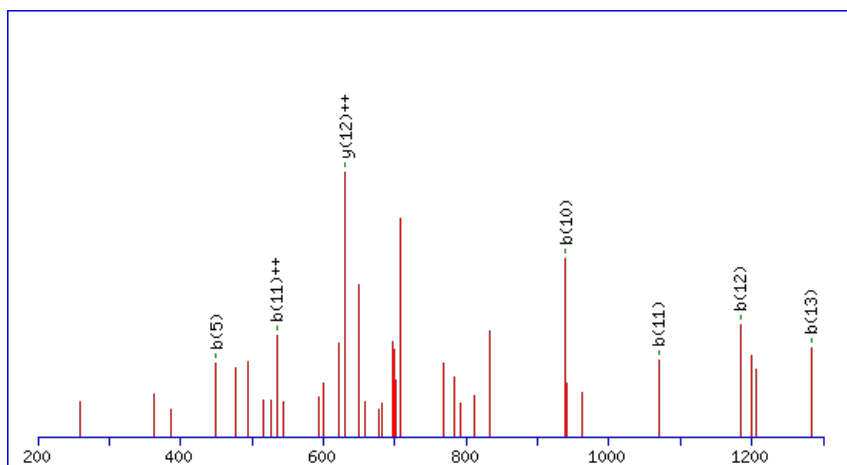Monoisotopic mass of neutral peptide  $M_r(\text{calc})$ : 1430.7016

Fixed modifications: Carbamidomethyl (C) (apply to specified residues or termini only)

Ions Score: 25 Expect: 0.022

Matches : 7/120 fragment ions using 11 most intense peaks ([help](#))

| #  | b         | b <sup>++</sup> | b*        | b <sup>*++</sup> | b <sup>0</sup> | b <sup>0++</sup> | Seq.     | y         | y <sup>++</sup> | y*        | y <sup>*++</sup> | y <sup>0</sup> | y <sup>0++</sup> | #  |
|----|-----------|-----------------|-----------|------------------|----------------|------------------|----------|-----------|-----------------|-----------|------------------|----------------|------------------|----|
| 1  | 59.0258   | 30.0165         |           |                  |                |                  | <b>G</b> |           |                 |           |                  |                |                  | 14 |
| 2  | 173.1069  | 87.0571         |           |                  |                |                  | <b>L</b> | 1373.6903 | 687.3488        | 1355.6668 | 678.3370         | 1355.6798      | 678.3435         | 13 |
| 3  | 245.1410  | 123.0741        |           |                  |                |                  | <b>A</b> | 1259.6092 | 630.3083        | 1241.5857 | 621.2965         | 1241.5987      | 621.3030         | 12 |
| 4  | 377.1785  | 189.0929        |           |                  |                |                  | <b>M</b> | 1187.5751 | 594.2912        | 1169.5515 | 585.2794         | 1169.5645      | 585.2859         | 11 |
| 5  | 449.2127  | 225.1100        |           |                  |                |                  | <b>A</b> | 1055.5376 | 528.2724        | 1037.5140 | 519.2606         | 1037.5270      | 519.2671         | 10 |
| 6  | 521.2468  | 261.1271        |           |                  |                |                  | <b>A</b> | 983.5034  | 492.2553        | 965.4798  | 483.2436         | 965.4929       | 483.2501         | 9  |
| 7  | 637.2838  | 319.1456        | 619.2603  | 310.1338         |                |                  | <b>N</b> | 911.4693  | 456.2383        | 893.4457  | 447.2265         | 893.4587       | 447.2330         | 8  |
| 8  | 709.3180  | 355.1626        | 691.2944  | 346.1508         |                |                  | <b>A</b> | 795.4323  | 398.2198        | 777.4087  | 389.2080         | 777.4217       | 389.2145         | 7  |
| 9  | 809.3834  | 405.1954        | 791.3599  | 396.1836         |                |                  | <b>V</b> | 723.3981  | 362.2027        | 705.3745  | 353.1909         | 705.3876       | 353.1974         | 6  |
| 10 | 939.4231  | 470.2152        | 921.3995  | 461.2034         | 921.4125       | 461.2099         | <b>E</b> | 623.3327  | 312.1700        | 605.3091  | 303.1582         | 605.3221       | 303.1647         | 5  |
| 11 | 1069.4627 | 535.2350        | 1051.4391 | 526.2232         | 1051.4521      | 526.2297         | <b>E</b> | 493.2930  | 247.1502        | 475.2695  | 238.1384         | 475.2825       | 238.1449         | 4  |
| 12 | 1183.5438 | 592.2755        | 1165.5202 | 583.2637         | 1165.5332      | 583.2703         | <b>L</b> | 363.2534  | 182.1303        | 345.2298  | 173.1186         |                |                  | 3  |
| 13 | 1283.6092 | 642.3083        | 1265.5857 | 633.2965         | 1265.5987      | 633.3030         | <b>V</b> | 249.1723  | 125.0898        | 231.1487  | 116.0780         |                |                  | 2  |
| 14 |           |                 |           |                  |                |                  | <b>K</b> | 149.1069  | 75.0571         | 131.0833  | 66.0453          |                |                  | 1  |

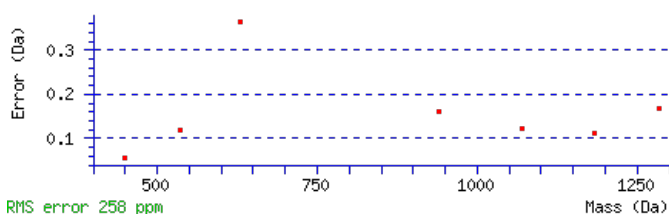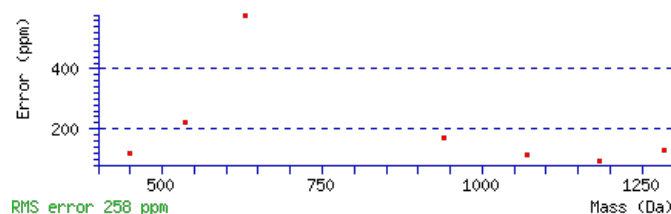NCBI **BLAST** search of [GLAMAANA VEELVK](#)

## AT5G40140.1

(Parameters: blastp, nr protein database, expect=20000, no filter, PAM30)

Other BLAST [web gateways](#)

### All matches to this query

| Score | Mr(calc)  | Delta   | Sequence                        |
|-------|-----------|---------|---------------------------------|
| 24.8  | 1430.7016 | -0.0001 | <a href="#">GLAMAANA VEELVK</a> |
| 9.7   | 1430.7016 | -0.0001 | <a href="#">MADPEVAAAGIVKK</a>  |
| 5.2   | 1430.7038 | -0.0023 | <a href="#">MDLATFHDILLK</a>    |
| 5.2   | 1430.6982 | 0.0033  | <a href="#">SHIFDDDKVIVK</a>    |
| 4.7   | 1430.6982 | 0.0032  | <a href="#">KSAISSSLFFNSK</a>   |
| 2.3   | 1430.7016 | -0.0001 | <a href="#">EKTQEMLPQIAK</a>    |
| 0.8   | 1430.7016 | -0.0001 | <a href="#">MAAEPKAATAEVVK</a>  |

Mascot: <http://www.matrixscience.com/>

**Peptide View**MS/MS Fragmentation of **EIVPENPNSYR**

Found in **AT5G40950.1** in **TAIR\_Arabidopsis**, Symbols: RPL27 | RPL27; structural constituent of ribosome | chr5:16428094-16429073  
FORWARD

Match to Query 5005: 1332.591008 from(667.302780,2+) index(2978)

Title: Elution from: 30.311 to 30.311 scan no 3736 cid35.00 polarity:+

Data file D6h-3\_1.mgf

Click mouse within plot area to zoom in by factor of two about that point

Or,   to  Da

Label all possible matches  Label matches used for scoring

Show Y-axis

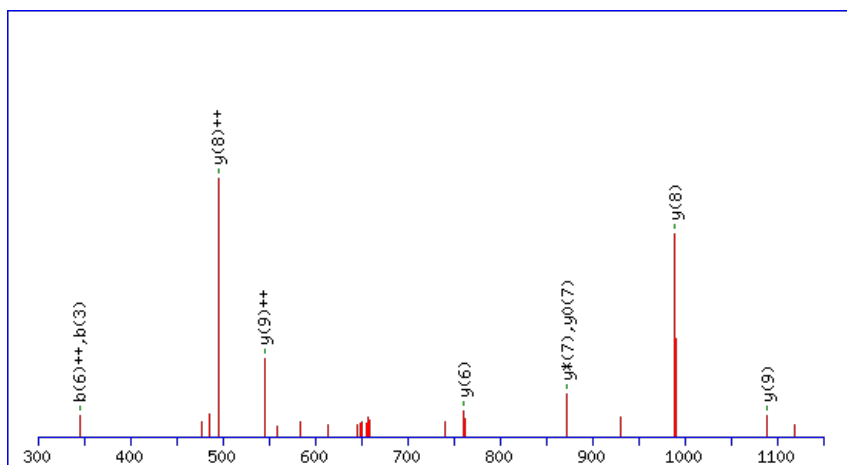

**Monoisotopic mass of neutral peptide Mr(calc):** 1332.5887

**Fixed modifications:** Carbamidomethyl (C) (apply to specified residues or termini only)

**Ions Score:** 22 **Expect:** 0.039

**Matches:** 9/106 fragment ions using 8 most intense peaks ([help](#))

| #  | b         | b <sup>++</sup> | b <sup>*</sup> | b <sup>*++</sup> | b <sup>0</sup> | b <sup>0++</sup> | Seq. | y         | y <sup>++</sup> | y <sup>*</sup> | y <sup>*++</sup> | y <sup>0</sup> | y <sup>0++</sup> | #  |
|----|-----------|-----------------|----------------|------------------|----------------|------------------|------|-----------|-----------------|----------------|------------------|----------------|------------------|----|
| 1  | 131.0469  | 66.0271         |                |                  | 113.0363       | 57.0218          | E    |           |                 |                |                  |                |                  | 11 |
| 2  | 245.1280  | 123.0676        |                |                  | 227.1174       | 114.0624         | I    | 1203.5563 | 602.2818        | 1185.5327      | 593.2700         | 1185.5457      | 593.2765         | 10 |
| 3  | 345.1935  | 173.1004        |                |                  | 327.1829       | 164.0951         | V    | 1089.4752 | 545.2412        | 1071.4516      | 536.2294         | 1071.4646      | 536.2359         | 9  |
| 4  | 443.2433  | 222.1253        |                |                  | 425.2327       | 213.1200         | P    | 989.4097  | 495.2085        | 971.3862       | 486.1967         | 971.3992       | 486.2032         | 8  |
| 5  | 573.2829  | 287.1451        |                |                  | 555.2723       | 278.1398         | E    | 891.3599  | 446.1836        | 873.3364       | 437.1718         | 873.3494       | 437.1783         | 7  |
| 6  | 689.3199  | 345.1636        | 671.2963       | 336.1518         | 671.3093       | 336.1583         | N    | 761.3203  | 381.1638        | 743.2967       | 372.1520         | 743.3097       | 372.1585         | 6  |
| 7  | 787.3697  | 394.1885        | 769.3461       | 385.1767         | 769.3591       | 385.1832         | P    | 645.2833  | 323.1453        | 627.2597       | 314.1335         | 627.2727       | 314.1400         | 5  |
| 8  | 903.4067  | 452.2070        | 885.3831       | 443.1952         | 885.3961       | 443.2017         | N    | 547.2335  | 274.1204        | 529.2099       | 265.1086         | 529.2230       | 265.1151         | 4  |
| 9  | 991.4357  | 496.2215        | 973.4122       | 487.2097         | 973.4252       | 487.2162         | S    | 431.1965  | 216.1019        | 413.1729       | 207.0901         | 413.1860       | 207.0966         | 3  |
| 10 | 1155.4961 | 578.2517        | 1137.4725      | 569.2399         | 1137.4855      | 569.2464         | Y    | 343.1675  | 172.0874        | 325.1439       | 163.0756         |                |                  | 2  |
| 11 |           |                 |                |                  |                |                  | R    | 179.1071  | 90.0572         | 161.0835       | 81.0454          |                |                  | 1  |

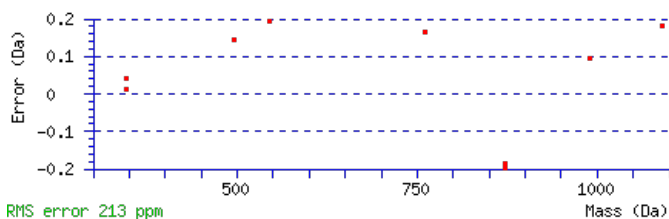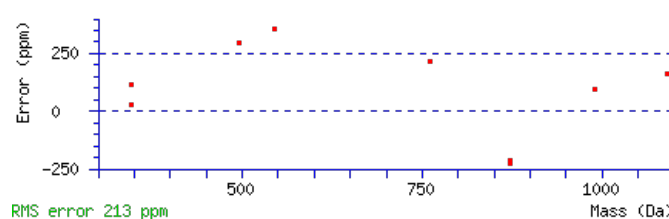NCBI **BLAST** search of **EIVPENPNSYR**

(Parameters: blastp, nr protein database, expect=20000, no filter, PAM30)

Other BLAST [web gateways](#)

**All matches to this query**

AT5G40950.1

| Score | Mr(calc)  | Delta  | Sequence                    |
|-------|-----------|--------|-----------------------------|
| 21.6  | 1332.5887 | 0.0024 | <a href="#">EIVPENPNSYR</a> |
| 1.8   | 1332.5909 | 0.0001 | <a href="#">NPEGTYPIGWK</a> |

Mascot: <http://www.matrixscience.com/>

**Peptide View**MS/MS Fragmentation of **EAVITALK**

Found in **AT5G41140.1** in **TAIR\_Arabidopsis**, Symbols: | similar to unknown protein [Arabidopsis thaliana] (TAIR:AT1G63300.1); similar to unnamed protein product [Vitis vinifera] (GB:CAO62788.1); contains domain PTHR23160 (PTHR23160) | chr5:16485954-16489774 FORWARD

Match to Query 1324: 852.478034 from(427.246293,2+) index(2062)

Title: Elution from: 25.503 to 25.503 scan no 2716 cid35.00 polarity:+

Data file D6h-2\_1.mgf

Click mouse within plot area to zoom in by factor of two about that point

Or,   to  Da

Label all possible matches  Label matches used for scoring

Show Y-axis

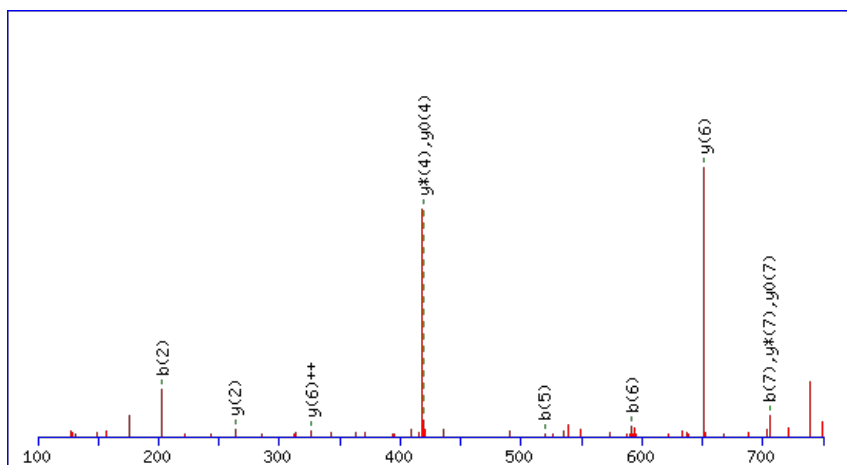

Monoisotopic mass of neutral peptide **Mr(calc)**: 852.4799

**Fixed modifications**: Carbamidomethyl (C) (apply to specified residues or termini only)

**Ions Score**: 21 **Expect**: 0.039

**Matches** : 11/64 fragment ions using 21 most intense peaks ([help](#))

| # | b               | b <sup>++</sup> | b <sup>0</sup> | b <sup>0++</sup> | Seq. | y               | y <sup>++</sup> | y*              | y <sup>*++</sup> | y <sup>0</sup>  | y <sup>0++</sup> | # |
|---|-----------------|-----------------|----------------|------------------|------|-----------------|-----------------|-----------------|------------------|-----------------|------------------|---|
| 1 | 131.0469        | 66.0271         | 113.0363       | 57.0218          | E    |                 |                 |                 |                  |                 |                  | 8 |
| 2 | <b>203.0811</b> | 102.0442        | 185.0705       | 93.0389          | A    | 723.4475        | 362.2274        | <b>705.4239</b> | 353.2156         | <b>705.4370</b> | 353.2221         | 7 |
| 3 | 303.1465        | 152.0769        | 285.1359       | 143.0716         | V    | <b>651.4134</b> | <b>326.2103</b> | 633.3898        | 317.1985         | 633.4028        | 317.2050         | 6 |
| 4 | 417.2276        | 209.1174        | 399.2170       | 200.1122         | I    | 551.3479        | 276.1776        | 533.3243        | 267.1658         | 533.3374        | 267.1723         | 5 |
| 5 | <b>519.2723</b> | 260.1398        | 501.2617       | 251.1345         | T    | 437.2668        | 219.1371        | <b>419.2433</b> | 210.1253         | <b>419.2563</b> | 210.1318         | 4 |
| 6 | <b>591.3065</b> | 296.1569        | 573.2959       | 287.1516         | A    | 335.2221        | 168.1147        | 317.1985        | 159.1029         |                 |                  | 3 |
| 7 | <b>705.3876</b> | 353.1974        | 687.3770       | 344.1921         | L    | <b>263.1880</b> | 132.0976        | 245.1644        | 123.0858         |                 |                  | 2 |
| 8 |                 |                 |                |                  | K    | 149.1069        | 75.0571         | 131.0833        | 66.0453          |                 |                  | 1 |

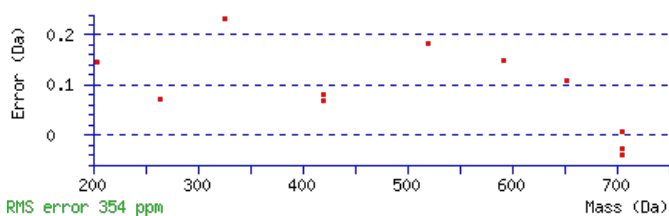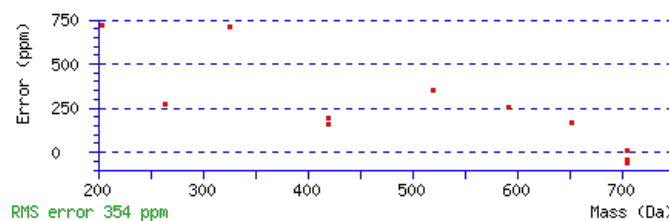NCBI **BLAST** search of **EAVITALK**

(Parameters: blastp, nr protein database, expect=20000, no filter, PAM30)

Other BLAST [web gateways](#)

**All matches to this query**

| Score | Mr(calc) | Delta   | Sequence                 |
|-------|----------|---------|--------------------------|
| 20.8  | 852.4799 | -0.0018 | <a href="#">EAVITALK</a> |



## AT5G41140.1

|      |          |         |                          |
|------|----------|---------|--------------------------|
| 19.3 | 852.4799 | -0.0019 | <a href="#">ISISSPLK</a> |
| 17.2 | 852.4799 | -0.0018 | <a href="#">EAVTIAK</a>  |
| 11.0 | 852.4799 | -0.0018 | <a href="#">VIESGVLK</a> |
| 9.7  | 852.4799 | -0.0018 | <a href="#">LSLVIDGK</a> |
| 9.2  | 852.4799 | -0.0018 | <a href="#">IVVKEEK</a>  |
| 8.4  | 852.4799 | -0.0018 | <a href="#">VSEAVVLK</a> |
| 8.3  | 852.4799 | -0.0018 | <a href="#">LLVDEKK</a>  |
| 7.5  | 852.4799 | -0.0018 | <a href="#">KVEEVLK</a>  |
| 7.3  | 852.4799 | -0.0018 | <a href="#">VTGVVIEK</a> |

Mascot: <http://www.matrixscience.com/>

**Peptide View**MS/MS Fragmentation of **SVIILVK**Found in **AT5G41670.1** in **TAIR\_Arabidopsis**, Symbols: | 6-phosphogluconate dehydrogenase family protein | chr5:16682875-16684338 REVERSE

Match to Query 885: 770.526564 from(386.270558,2+) index(4078)

Title: Elution from: 36.596 to 36.596 scan no 5045 cid35.00 polarity:+

Data file D1d-3\_3.mgf

Click mouse within plot area to zoom in by factor of two about that point

Or,   to  Da Label all possible matches  Label matches used for scoring Show Y-axis 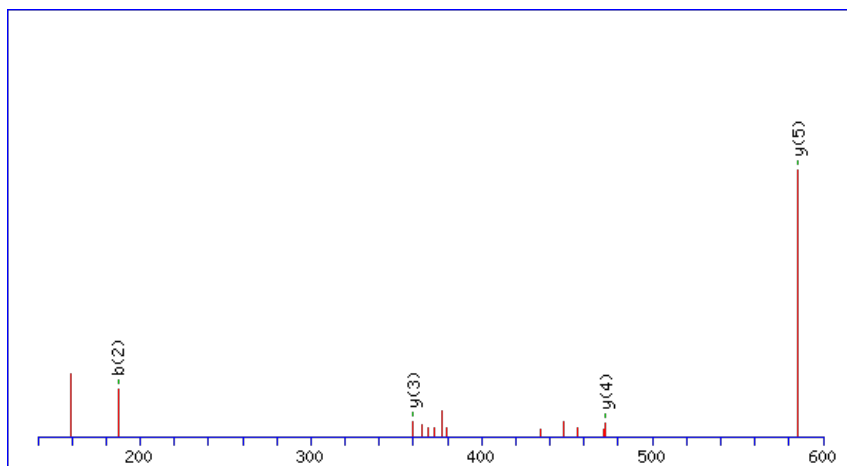Monoisotopic mass of neutral peptide **Mr(calc)**: 770.5266

Fixed modifications: Carbamidomethyl (C) (apply to specified residues or termini only)

Ions Score: 23 **Expect**: 0.0048Matches : 4/48 fragment ions using 7 most intense peaks ([help](#))

| # | b               | b <sup>++</sup> | b <sup>0</sup> | b <sup>0++</sup> | Seq. | y               | y <sup>++</sup> | y*       | y <sup>*++</sup> | # |
|---|-----------------|-----------------|----------------|------------------|------|-----------------|-----------------|----------|------------------|---|
| 1 | 88.0393         | 44.5233         | 70.0287        | 35.5180          | S    |                 |                 |          |                  | 7 |
| 2 | <b>187.1077</b> | 94.0575         | 169.0972       | 85.0522          | V    | 684.5018        | 342.7546        | 667.4753 | 334.2413         | 6 |
| 3 | 300.1918        | 150.5995        | 282.1812       | 141.5942         | I    | <b>585.4334</b> | 293.2203        | 568.4069 | 284.7071         | 5 |
| 4 | 413.2758        | 207.1416        | 395.2653       | 198.1363         | I    | <b>472.3493</b> | 236.6783        | 455.3228 | 228.1650         | 4 |
| 5 | 526.3599        | 263.6836        | 508.3493       | 254.6783         | L    | <b>359.2653</b> | 180.1363        | 342.2387 | 171.6230         | 3 |
| 6 | 625.4283        | 313.2178        | 607.4178       | 304.2125         | V    | 246.1812        | 123.5942        | 229.1547 | 115.0810         | 2 |
| 7 |                 |                 |                |                  | K    | 147.1128        | 74.0600         | 130.0863 | 65.5468          | 1 |

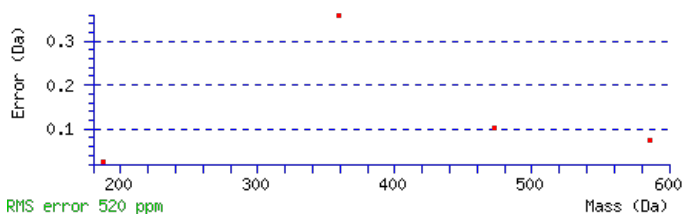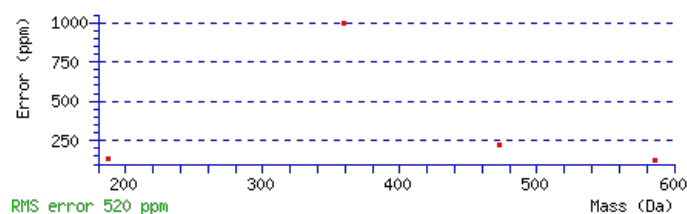NCBI **BLAST** search of **SVIILVK**

(Parameters: blastp, nr protein database, expect=20000, no filter, PAM30)

Other BLAST [web gateways](#)**All matches to this query**

| Score | Mr(calc) | Delta   | Sequence                |
|-------|----------|---------|-------------------------|
| 23.2  | 770.5266 | -0.0000 | <a href="#">SVIILVK</a> |
| 3.8   | 770.5266 | -0.0000 | <a href="#">VLSLIVK</a> |



**Peptide View**MS/MS Fragmentation of **EQWSPALTISK**

Found in **AT5G41700.1** in **TAIR\_Arabidopsis**, Symbols: ATUBC8, UBC8 | UBC8 (UBIQUITIN CONJUGATING ENZYME 8); ubiquitin-protein ligase | chr5:16693300-16694451 FORWARD

Match to Query 4368: 1258.653588 from(630.334070,2+) index(5456)

Title: Elution from: 48.584 to 48.584 scan no 6889 cid35.00 polarity:+

Data file 0-3\_2.mgf

Click mouse within plot area to zoom in by factor of two about that point

Or,   to  Da

Label all possible matches  Label matches used for scoring

Show Y-axis

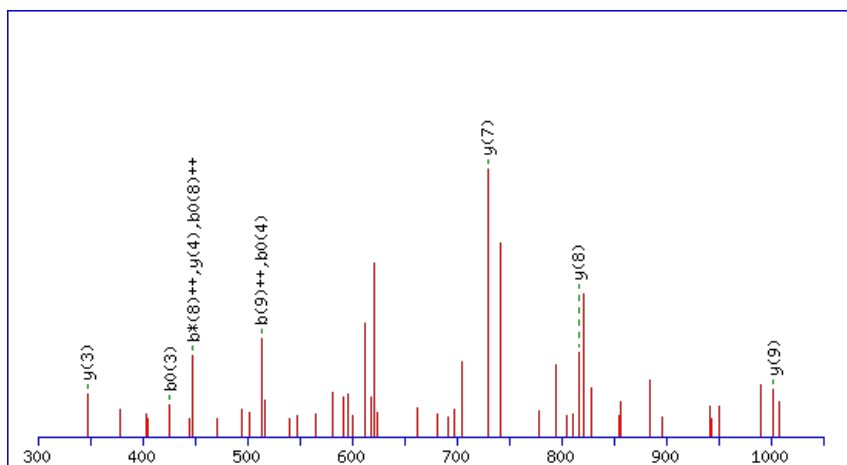

Monoisotopic mass of neutral peptide  $M_r(\text{calc})$ : 1258.6557

Fixed modifications: Carbamidomethyl (C) (apply to specified residues or termini only)

Ions Score: 26 Expect: 0.017

Matches : 10/116 fragment ions using 14 most intense peaks ([help](#))

| #  | b         | b <sup>++</sup> | b*        | b <sup>*++</sup> | b <sup>0</sup> | b <sup>0++</sup> | Seq. | y         | y <sup>++</sup> | y*        | y <sup>*++</sup> | y <sup>0</sup> | y <sup>0++</sup> | #  |
|----|-----------|-----------------|-----------|------------------|----------------|------------------|------|-----------|-----------------|-----------|------------------|----------------|------------------|----|
| 1  | 130.0499  | 65.5286         |           |                  | 112.0393       | 56.5233          | E    |           |                 |           |                  |                |                  | 11 |
| 2  | 258.1084  | 129.5579        | 241.0819  | 121.0446         | 240.0979       | 120.5526         | Q    | 1130.6204 | 565.8139        | 1113.5939 | 557.3006         | 1112.6099      | 556.8086         | 10 |
| 3  | 444.1878  | 222.5975        | 427.1612  | 214.0842         | 426.1772       | 213.5922         | W    | 1002.5619 | 501.7846        | 985.5353  | 493.2713         | 984.5513       | 492.7793         | 9  |
| 4  | 531.2198  | 266.1135        | 514.1932  | 257.6003         | 513.2092       | 257.1082         | S    | 816.4825  | 408.7449        | 799.4560  | 400.2316         | 798.4720       | 399.7396         | 8  |
| 5  | 628.2726  | 314.6399        | 611.2460  | 306.1266         | 610.2620       | 305.6346         | P    | 729.4505  | 365.2289        | 712.4240  | 356.7156         | 711.4400       | 356.2236         | 7  |
| 6  | 699.3097  | 350.1585        | 682.2831  | 341.6452         | 681.2991       | 341.1532         | A    | 632.3978  | 316.7025        | 615.3712  | 308.1892         | 614.3872       | 307.6972         | 6  |
| 7  | 812.3937  | 406.7005        | 795.3672  | 398.1872         | 794.3832       | 397.6952         | L    | 561.3606  | 281.1840        | 544.3341  | 272.6707         | 543.3501       | 272.1787         | 5  |
| 8  | 913.4414  | 457.2243        | 896.4149  | 448.7111         | 895.4308       | 448.2191         | T    | 448.2766  | 224.6419        | 431.2500  | 216.1287         | 430.2660       | 215.6366         | 4  |
| 9  | 1026.5255 | 513.7664        | 1009.4989 | 505.2531         | 1008.5149      | 504.7611         | I    | 347.2289  | 174.1181        | 330.2023  | 165.6048         | 329.2183       | 165.1128         | 3  |
| 10 | 1113.5575 | 557.2824        | 1096.5310 | 548.7691         | 1095.5469      | 548.2771         | S    | 234.1448  | 117.5761        | 217.1183  | 109.0628         | 216.1343       | 108.5708         | 2  |
| 11 |           |                 |           |                  |                |                  | K    | 147.1128  | 74.0600         | 130.0863  | 65.5468          |                |                  | 1  |

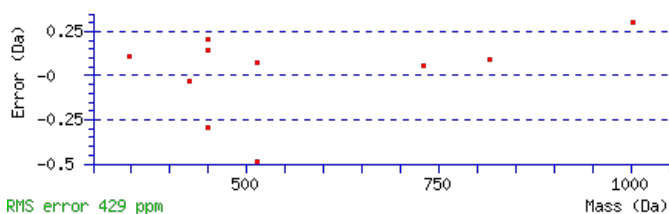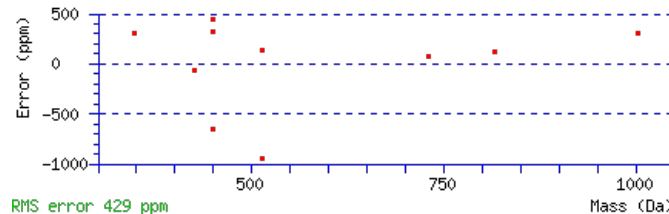

NCBI **BLAST** search of **EQWSPALTISK**

(Parameters: blastp, nr protein database, expect=20000, no filter, PAM30)

Other BLAST [web gateways](#)

All matches to this query

AT5G41700.1

| Score | Mr(calc)  | Delta   | Sequence                    |
|-------|-----------|---------|-----------------------------|
| 25.5  | 1258.6557 | -0.0021 | <a href="#">EQWSPALTISK</a> |

Mascot: <http://www.matrixscience.com/>

**Peptide View**MS/MS Fragmentation of **MPSSKLLK**

Found in **AT5G41750.1** in **TAIR\_Arabidopsis**, Symbols: | disease resistance protein (TIR-NBS-LRR class), putative | chr5:16711275-16714755  
FORWARD

Match to Query 2164: 944.500148 from(473.257350,2+) index(2246)

Title: Elution from: 24.779 to 24.779 scan no 2865 cid35.00 polarity:+

Data file D1d-3\_1.mgf

Click mouse within plot area to zoom in by factor of two about that point

Or,  to  Da

Label all possible matches  Label matches used for scoring

Show Y-axis

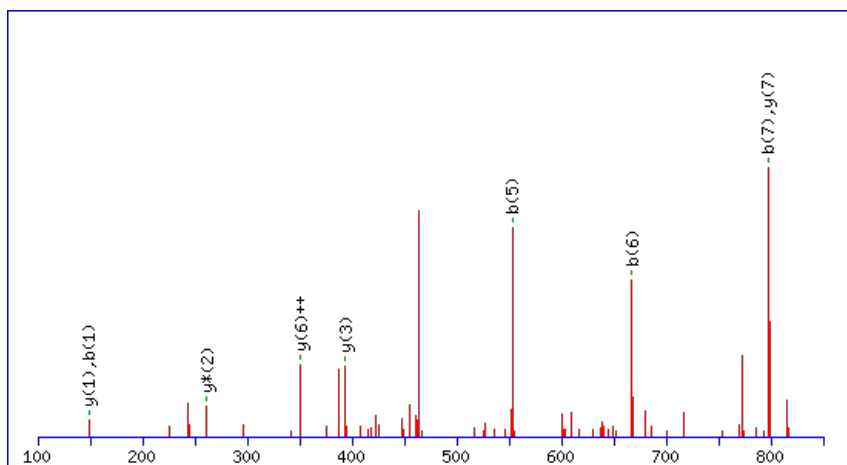

**Monoisotopic mass of neutral peptide Mr(calc):** 944.4991

**Fixed modifications:** Carbamidomethyl (C) (apply to specified residues or termini only)

**Variable modifications:**

**M1** : Oxidation (M), with neutral losses 0.0000 (shown in table), 63.9983

**Ions Score:** 24 **Expect:** 0.032

**Matches** : 9/94 fragment ions using 14 most intense peaks ([help](#))

| # | b               | b <sup>++</sup> | b*       | b <sup>*++</sup> | b <sup>0</sup> | b <sup>0++</sup> | Seq.     | y               | y <sup>++</sup> | y*              | y <sup>*++</sup> | y <sup>0</sup> | y <sup>0++</sup> | #        |
|---|-----------------|-----------------|----------|------------------|----------------|------------------|----------|-----------------|-----------------|-----------------|------------------|----------------|------------------|----------|
| 1 | <b>149.0397</b> | 75.0235         |          |                  |                |                  | <b>M</b> |                 |                 |                 |                  |                |                  | <b>8</b> |
| 2 | 247.0895        | 124.0484        |          |                  |                |                  | <b>P</b> | <b>797.4740</b> | 399.2406        | 779.4504        | 390.2288         | 779.4634       | 390.2353         | <b>7</b> |
| 3 | 335.1186        | 168.0629        |          |                  | 317.1080       | 159.0576         | <b>S</b> | 699.4242        | <b>350.2157</b> | 681.4006        | 341.2039         | 681.4136       | 341.2104         | <b>6</b> |
| 4 | 423.1476        | 212.0775        |          |                  | 405.1371       | 203.0722         | <b>S</b> | 611.3951        | 306.2012        | 593.3715        | 297.1894         | 593.3845       | 297.1959         | <b>5</b> |
| 5 | <b>553.2367</b> | 277.1220        | 535.2131 | 268.1102         | 535.2261       | 268.1167         | <b>K</b> | 523.3660        | 262.1867        | 505.3425        | 253.1749         |                |                  | <b>4</b> |
| 6 | <b>667.3178</b> | 334.1625        | 649.2942 | 325.1507         | 649.3072       | 325.1572         | <b>L</b> | <b>393.2770</b> | 197.1421        | 375.2534        | 188.1303         |                |                  | <b>3</b> |
| 7 | <b>797.4068</b> | 399.2070        | 779.3832 | 390.1952         | 779.3962       | 390.2018         | <b>K</b> | 279.1959        | 140.1016        | <b>261.1723</b> | 131.0898         |                |                  | <b>2</b> |
| 8 |                 |                 |          |                  |                |                  | <b>K</b> | <b>149.1069</b> | 75.0571         | 131.0833        | 66.0453          |                |                  | <b>1</b> |

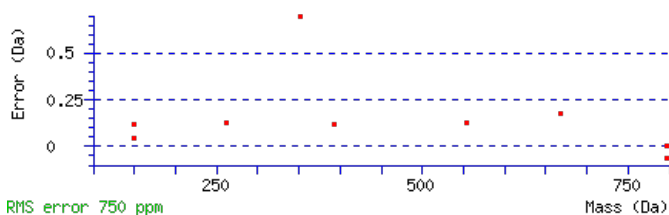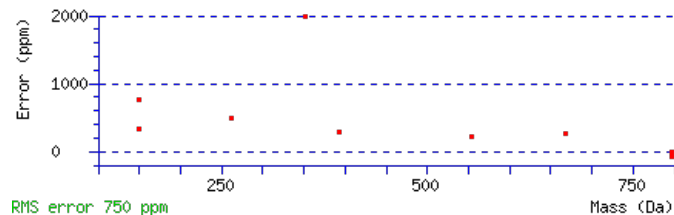

NCBI **BLAST** search of **MPSSKLLK**

(Parameters: blastp, nr protein database, expect=20000, no filter, PAM30)

Other BLAST [web gateways](#)

**All matches to this query**

| Score | Mr(calc) | Delta | Sequence |
|-------|----------|-------|----------|
|       |          |       |          |

## AT5G41750.1

|      |          |         |                           |
|------|----------|---------|---------------------------|
| 23.5 | 944.4991 | 0.0010  | <a href="#">MPSSKLLK</a>  |
| 20.3 | 944.4991 | 0.0010  | <a href="#">MKVVDACK</a>  |
| 14.7 | 944.4991 | 0.0010  | <a href="#">KMPSSKLLK</a> |
| 14.7 | 944.4984 | 0.0017  | <a href="#">SNRWLKK</a>   |
| 14.3 | 944.4991 | 0.0010  | <a href="#">SGVLVGMKK</a> |
| 12.2 | 944.5018 | -0.0016 | <a href="#">KCVRGALK</a>  |
| 10.6 | 944.4991 | 0.0010  | <a href="#">MKDKLGVK</a>  |
| 10.3 | 944.4991 | 0.0010  | <a href="#">KMKETGLK</a>  |
| 10.2 | 944.4991 | 0.0010  | <a href="#">QVITSMKK</a>  |
| 8.5  | 944.4991 | 0.0010  | <a href="#">MVKNSIK</a>   |

Mascot: <http://www.matrixscience.com/>

**Peptide View**MS/MS Fragmentation of **LEINVK**Found in **AT5G41780.1** in **TAIR\_Arabidopsis**, Symbols: | myosin heavy chain-related | chr5:16740303-16742061 FORWARD

Match to Query 553: 722.404310 from(362.209431,2+) index(1087)

Title: Elution from: 20.452 to 20.452 scan no 1645 cid35.00 polarity:+

Data file D1d-1-2.mgf

Click mouse within plot area to zoom in by factor of two about that point

Or,   to  Da Label all possible matches  Label matches used for scoring Show Y-axis 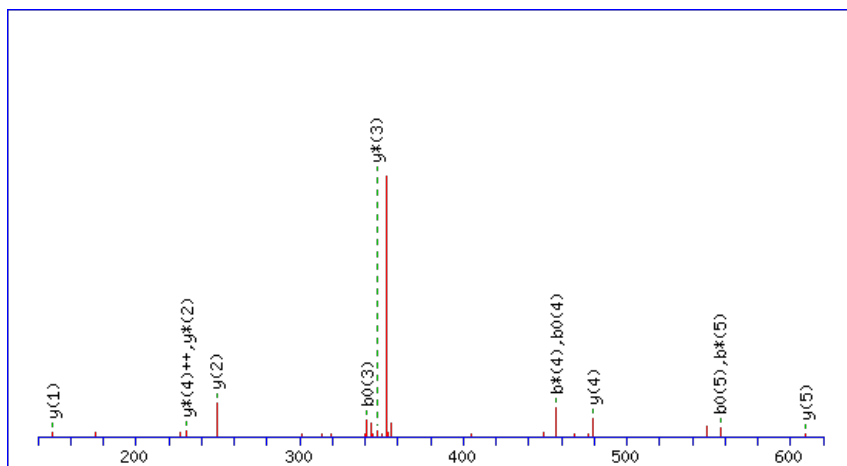Monoisotopic mass of neutral peptide **Mr(calc)**: 722.4039**Fixed modifications**: Carbamidomethyl (C) (apply to specified residues or termini only)**Ions Score**: 24 **Expect**: 0.043**Matches** : 12/44 fragment ions using 15 most intense peaks ([help](#))

| # | b        | b <sup>++</sup> | b*       | b <sup>+++</sup> | b <sup>0</sup> | b <sup>0++</sup> | Seq. | y        | y <sup>++</sup> | y*       | y <sup>+++</sup> | y <sup>0</sup> | y <sup>0++</sup> | # |
|---|----------|-----------------|----------|------------------|----------------|------------------|------|----------|-----------------|----------|------------------|----------------|------------------|---|
| 1 | 115.0884 | 58.0478         |          |                  |                |                  | L    |          |                 |          |                  |                |                  | 6 |
| 2 | 245.1280 | 123.0676        |          |                  | 227.1174       | 114.0624         | E    | 609.3300 | 305.1687        | 591.3065 | 296.1569         | 591.3195       | 296.1634         | 5 |
| 3 | 359.2091 | 180.1082        |          |                  | 341.1985       | 171.1029         | I    | 479.2904 | 240.1488        | 461.2668 | 231.1371         |                |                  | 4 |
| 4 | 475.2461 | 238.1267        | 457.2225 | 229.1149         | 457.2355       | 229.1214         | N    | 365.2093 | 183.1083        | 347.1857 | 174.0965         |                |                  | 3 |
| 5 | 575.3115 | 288.1594        | 557.2880 | 279.1476         | 557.3010       | 279.1541         | V    | 249.1723 | 125.0898        | 231.1487 | 116.0780         |                |                  | 2 |
| 6 |          |                 |          |                  |                |                  | K    | 149.1069 | 75.0571         | 131.0833 | 66.0453          |                |                  | 1 |

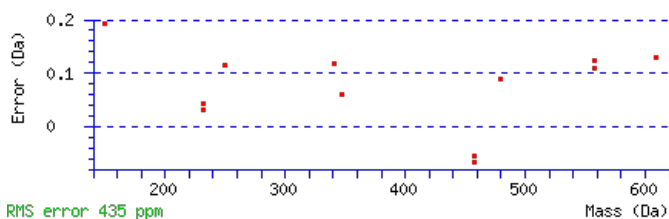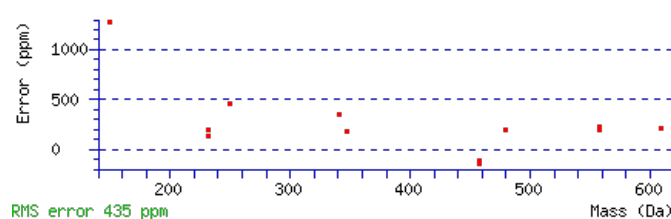NCBI **BLAST** search of **LEINVK**

(Parameters: blastp, nr protein database, expect=20000, no filter, PAM30)

Other BLAST [web gateways](#)**All matches to this query**

| Score | Mr(calc) | Delta  | Sequence               |
|-------|----------|--------|------------------------|
| 23.8  | 722.4039 | 0.0004 | <a href="#">LEINVK</a> |
| 16.7  | 722.4039 | 0.0005 | <a href="#">LDLQVK</a> |
| 13.9  | 722.4039 | 0.0004 | <a href="#">EIINVK</a> |
| 13.5  | 722.4039 | 0.0004 | <a href="#">LDNLLK</a> |



# AT5G41780.1

|      |          |        |                         |
|------|----------|--------|-------------------------|
| 13.4 | 722.4039 | 0.0005 | <a href="#">LGAIVDK</a> |
| 12.4 | 722.4039 | 0.0005 | <a href="#">AAVEVVK</a> |
| 12.2 | 722.4039 | 0.0005 | <a href="#">IDQIVK</a>  |
| 12.2 | 722.4039 | 0.0005 | <a href="#">IVEQVK</a>  |
| 12.2 | 722.4039 | 0.0005 | <a href="#">LDQLVK</a>  |
| 12.2 | 722.4039 | 0.0005 | <a href="#">LTPGTVK</a> |

Mascot: <http://www.matrixscience.com/>

**Peptide View**MS/MS Fragmentation of **LTTTVEEK**Found in **AT5G41790.1** in **TAIR\_Arabidopsis**, Symbols: CIP1 | CIP1 (COP1-INTERACTIVE PROTEIN 1) | chr5:16744758-16749619  
FORWARD

Match to Query 1945: 919.484142 from(460.749347,2+) index(5906)

Title: Elution from: 51.245 to 51.245 scan no 7387 cid35.00 polarity:+

Data file D1d-3\_1.mgf

Click mouse within plot area to zoom in by factor of two about that point

Or,   to  Da Label all possible matches  Label matches used for scoring Show Y-axis 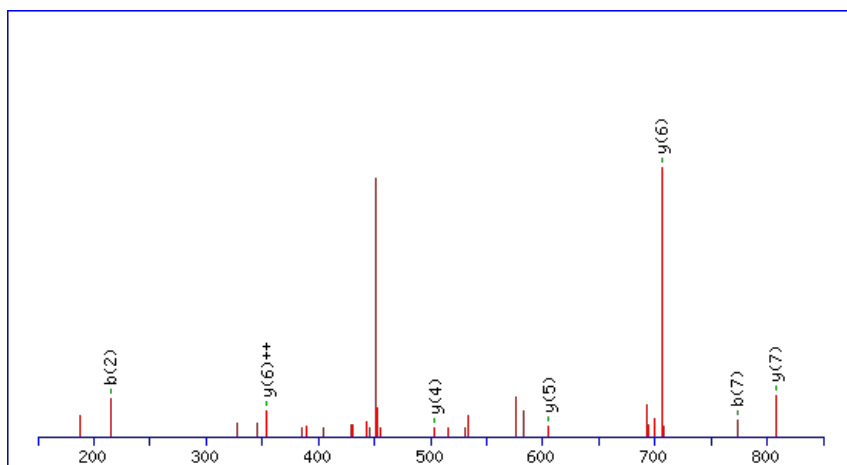Monoisotopic mass of neutral peptide  $M_r(\text{calc})$ : 919.4862

Fixed modifications: Carbamidomethyl (C) (apply to specified residues or termini only)

Ions Score: 19 Expect: 0.019

Matches : 7/66 fragment ions using 20 most intense peaks ([help](#))

| # | b               | b <sup>++</sup> | b <sup>0</sup> | b <sup>0++</sup> | Seq. | y               | y <sup>++</sup> | y*       | y <sup>*++</sup> | y <sup>0</sup> | y <sup>0++</sup> | # |
|---|-----------------|-----------------|----------------|------------------|------|-----------------|-----------------|----------|------------------|----------------|------------------|---|
| 1 | 114.0913        | 57.5493         |                |                  | L    |                 |                 |          |                  |                |                  | 8 |
| 2 | <b>215.1390</b> | 108.0731        | 197.1285       | 99.0679          | T    | <b>807.4094</b> | 404.2084        | 790.3829 | 395.6951         | 789.3989       | 395.2031         | 7 |
| 3 | 316.1867        | 158.5970        | 298.1761       | 149.5917         | T    | <b>706.3618</b> | <b>353.6845</b> | 689.3352 | 345.1712         | 688.3512       | 344.6792         | 6 |
| 4 | 417.2344        | 209.1208        | 399.2238       | 200.1155         | T    | <b>605.3141</b> | 303.1607        | 588.2875 | 294.6474         | 587.3035       | 294.1554         | 5 |
| 5 | 516.3028        | 258.6550        | 498.2922       | 249.6498         | V    | <b>504.2664</b> | 252.6368        | 487.2399 | 244.1236         | 486.2558       | 243.6316         | 4 |
| 6 | 645.3454        | 323.1763        | 627.3348       | 314.1710         | E    | 405.1980        | 203.1026        | 388.1714 | 194.5894         | 387.1874       | 194.0974         | 3 |
| 7 | <b>774.3880</b> | 387.6976        | 756.3774       | 378.6923         | E    | 276.1554        | 138.5813        | 259.1288 | 130.0681         | 258.1448       | 129.5761         | 2 |
| 8 |                 |                 |                |                  | K    | 147.1128        | 74.0600         | 130.0863 | 65.5468          |                |                  | 1 |

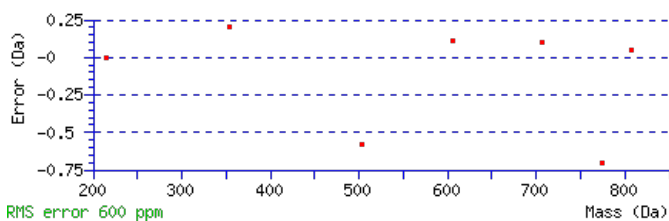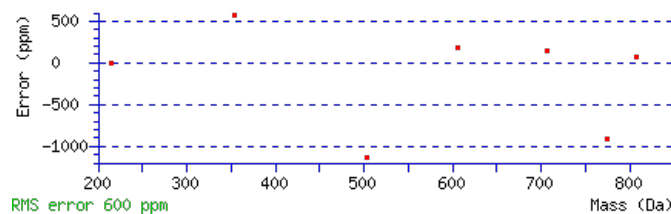NCBI BLAST search of [LTTTVEEK](#)

(Parameters: blastp, nr protein database, expect=20000, no filter, PAM30)

Other BLAST [web gateways](#)**All matches to this query**

| Score | $M_r(\text{calc})$ | Delta   | Sequence                 |
|-------|--------------------|---------|--------------------------|
| 19.4  | 919.4862           | -0.0021 | <a href="#">LTTTVEEK</a> |

## AT5G41790.1

|      |          |        |                           |
|------|----------|--------|---------------------------|
| 18.6 | 919.4837 | 0.0004 | <a href="#">ITMIWEK</a>   |
| 8.5  | 919.4835 | 0.0006 | <a href="#">SGNSGKSRK</a> |

**Mascot:** <http://www.matrixscience.com/>

**Peptide View**MS/MS Fragmentation of **YQDAYLVLRDLMK**Found in **AT5G41820.1** in **TAIR\_Arabidopsis**, Symbols: | geranylgeranyl transferase alpha subunit-related / RAB geranylgeranyltransferase alpha subunit-related | chr5:16758032-16760661 FORWARD

Match to Query 7808: 1626.840266 from(814.427409,2+) index(9359)

Title: Elution from: 82.914 to 82.914 scan no 12545 cid35.00 polarity:+

Data file D1d-3\_1.mgf

Click mouse within plot area to zoom in by factor of two about that point

Or,  to  Da Label all possible matches  Label matches used for scoring Show Y-axis 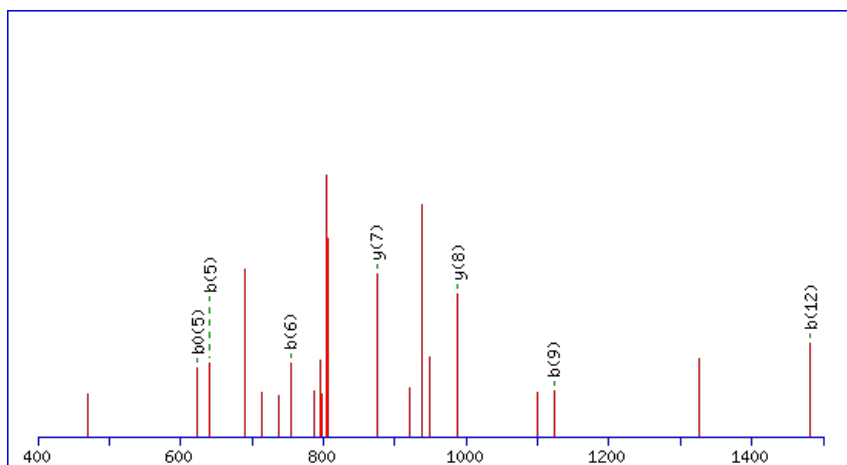Monoisotopic mass of neutral peptide  $M_r(\text{calc})$ : 1626.8439

Fixed modifications: Carbamidomethyl (C) (apply to specified residues or termini only)

Ions Score: 21 Expect: 0.028

Matches : 7/132 fragment ions using 14 most intense peaks ([help](#))

| #  | b                | b <sup>++</sup> | b*        | b <sup>*++</sup> | b <sup>0</sup>  | b <sup>0++</sup> | Seq. | y               | y <sup>++</sup> | y*        | y <sup>*++</sup> | y <sup>0</sup> | y <sup>0++</sup> | #  |
|----|------------------|-----------------|-----------|------------------|-----------------|------------------|------|-----------------|-----------------|-----------|------------------|----------------|------------------|----|
| 1  | 164.0706         | 82.5389         |           |                  |                 |                  | Y    |                 |                 |           |                  |                |                  | 13 |
| 2  | 292.1292         | 146.5682        | 275.1026  | 138.0550         |                 |                  | Q    | 1464.7879       | 732.8976        | 1447.7614 | 724.3843         | 1446.7773      | 723.8923         | 12 |
| 3  | 407.1561         | 204.0817        | 390.1296  | 195.5684         | 389.1456        | 195.0764         | D    | 1336.7293       | 668.8683        | 1319.7028 | 660.3550         | 1318.7188      | 659.8630         | 11 |
| 4  | 478.1932         | 239.6003        | 461.1667  | 231.0870         | 460.1827        | 230.5950         | A    | 1221.7024       | 611.3548        | 1204.6758 | 602.8416         | 1203.6918      | 602.3496         | 10 |
| 5  | <b>641.2566</b>  | 321.1319        | 624.2300  | 312.6186         | <b>623.2460</b> | 312.1266         | Y    | 1150.6653       | 575.8363        | 1133.6387 | 567.3230         | 1132.6547      | 566.8310         | 9  |
| 6  | <b>754.3406</b>  | 377.6740        | 737.3141  | 369.1607         | 736.3301        | 368.6687         | L    | <b>987.6019</b> | 494.3046        | 970.5754  | 485.7913         | 969.5914       | 485.2993         | 8  |
| 7  | 853.4090         | 427.2082        | 836.3825  | 418.6949         | 835.3985        | 418.2029         | V    | <b>874.5179</b> | 437.7626        | 857.4913  | 429.2493         | 856.5073       | 428.7573         | 7  |
| 8  | 966.4931         | 483.7502        | 949.4666  | 475.2369         | 948.4825        | 474.7449         | L    | 775.4495        | 388.2284        | 758.4229  | 379.7151         | 757.4389       | 379.2231         | 6  |
| 9  | <b>1122.5942</b> | 561.8007        | 1105.5677 | 553.2875         | 1104.5837       | 552.7955         | R    | 662.3654        | 331.6863        | 645.3389  | 323.1731         | 644.3548       | 322.6811         | 5  |
| 10 | 1237.6212        | 619.3142        | 1220.5946 | 610.8009         | 1219.6106       | 610.3089         | D    | 506.2643        | 253.6358        | 489.2377  | 245.1225         | 488.2537       | 244.6305         | 4  |
| 11 | 1350.7052        | 675.8563        | 1333.6787 | 667.3430         | 1332.6947       | 666.8510         | L    | 391.2374        | 196.1223        | 374.2108  | 187.6090         |                |                  | 3  |
| 12 | <b>1481.7457</b> | 741.3765        | 1464.7192 | 732.8632         | 1463.7351       | 732.3712         | M    | 278.1533        | 139.5803        | 261.1267  | 131.0670         |                |                  | 2  |
| 13 |                  |                 |           |                  |                 |                  | K    | 147.1128        | 74.0600         | 130.0863  | 65.5468          |                |                  | 1  |

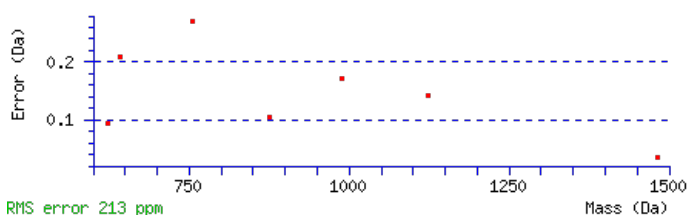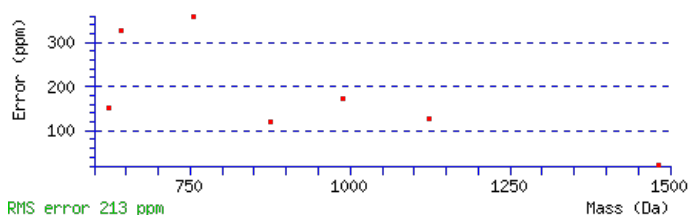NCBI **BLAST** search of **YQDAYLVLRDLMK**

(Parameters: blastp, nr protein database, expect=20000, no filter, PAM30)

AT5G41820.1

Other BLAST [web gateways](#)

**All matches to this query**

| Score | Mr(calc)  | Delta   | Sequence                        |
|-------|-----------|---------|---------------------------------|
| 20.9  | 1626.8439 | -0.0037 | <a href="#">YQDAYLVLRDLMK</a>   |
| 12.2  | 1626.8440 | -0.0037 | <a href="#">AMSSTFLFSGVVPLR</a> |
| 8.9   | 1626.8365 | 0.0037  | <a href="#">ALFSRESFENTKAK</a>  |
| 2.3   | 1626.8439 | -0.0037 | <a href="#">AEAGFTLFCDLKKK</a>  |
| 1.0   | 1626.8365 | 0.0037  | <a href="#">LLNFSSSGNEYRLK</a>  |

Mascot: <http://www.matrixscience.com/>

## Peptide View

### MS/MS Fragmentation of **RVAPKAEK**

Found in **AT5G41850.1** in **TAIR\_Arabidopsis**, Symbols: | similar to unnamed protein product [Vitis vinifera] (GB:CAO65820.1); contains domain PTHR13136 (PTHR13136); contains domain SSF53474 (SSF53474); contains domain G3DSA:3.40.50.1820 (G3DSA:3.40.50.1820) | chr5:16773926-16775019 REVERSE

Match to Query 1691: 910.498318 from(456.256435,2+) index(1576)

Title: Elution from: 19.444 to 19.444 scan no 2049 cid35.00 polarity:+

Data file C7-2\_3.mgf

Click mouse within plot area to zoom in by factor of two about that point

Or,  to  Da

Label all possible matches  Label matches used for scoring

Show Y-axis

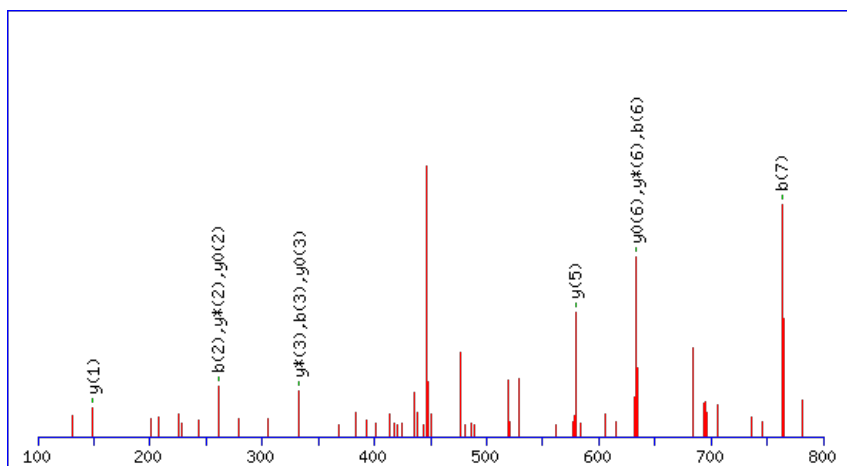

Monoisotopic mass of neutral peptide **Mr(calc)**: 910.5011

**Fixed modifications:** Carbamidomethyl (C) (apply to specified residues or termini only)

**Ions Score:** 38 **Expect:** 0.0014

**Matches** : 12/70 fragment ions using 7 most intense peaks ([help](#))

| # | b               | b <sup>++</sup> | b*       | b <sup>*++</sup> | b <sup>0</sup> | b <sup>0++</sup> | Seq. | y               | y <sup>++</sup> | y*              | y <sup>*++</sup> | y <sup>0</sup>  | y <sup>0++</sup> | # |
|---|-----------------|-----------------|----------|------------------|----------------|------------------|------|-----------------|-----------------|-----------------|------------------|-----------------|------------------|---|
| 1 | 161.0965        | 81.0519         | 143.0729 | 72.0401          |                |                  | R    |                 |                 |                 |                  |                 |                  | 8 |
| 2 | <b>261.1620</b> | 131.0846        | 243.1384 | 122.0728         |                |                  | V    | 751.4191        | 376.2132        | 733.3955        | 367.2014         | 733.4085        | 367.2079         | 7 |
| 3 | <b>333.1961</b> | 167.1017        | 315.1725 | 158.0899         |                |                  | A    | 651.3536        | 326.1805        | <b>633.3300</b> | 317.1687         | <b>633.3431</b> | 317.1752         | 6 |
| 4 | 431.2459        | 216.1266        | 413.2223 | 207.1148         |                |                  | P    | <b>579.3195</b> | 290.1634        | 561.2959        | 281.1516         | 561.3089        | 281.1581         | 5 |
| 5 | 561.3350        | 281.1711        | 543.3114 | 272.1593         |                |                  | K    | 481.2697        | 241.1385        | 463.2461        | 232.1267         | 463.2591        | 232.1332         | 4 |
| 6 | <b>633.3691</b> | 317.1882        | 615.3455 | 308.1764         |                |                  | A    | 351.1807        | 176.0940        | <b>333.1571</b> | 167.0822         | <b>333.1701</b> | 167.0887         | 3 |
| 7 | <b>763.4087</b> | 382.2080        | 745.3851 | 373.1962         | 745.3982       | 373.2027         | E    | 279.1465        | 140.0769        | <b>261.1229</b> | 131.0651         | <b>261.1359</b> | 131.0716         | 2 |
| 8 |                 |                 |          |                  |                |                  | K    | <b>149.1069</b> | 75.0571         | 131.0833        | 66.0453          |                 |                  | 1 |

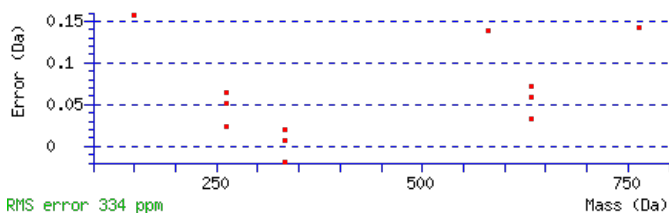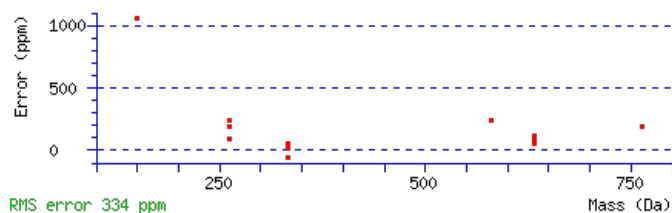

NCBI **BLAST** search of **RVAPKAEK**

(Parameters: blastp, nr protein database, expect=20000, no filter, PAM30)

Other BLAST [web gateways](#)

All matches to this query

| Score | Mr(calc) | Delta | Sequence |
|-------|----------|-------|----------|
|       |          |       |          |

**AT5G41850.1**

|      |          |         |                           |
|------|----------|---------|---------------------------|
| 37.6 | 910.5011 | -0.0027 | <a href="#">RVAPKAEK</a>  |
| 25.7 | 910.4984 | -0.0001 | <a href="#">AKEAILEK</a>  |
| 25.7 | 910.4984 | -0.0001 | <a href="#">EKAELALK</a>  |
| 25.7 | 910.4984 | -0.0001 | <a href="#">KEAAEIIK</a>  |
| 18.2 | 910.5011 | -0.0027 | <a href="#">KKGPNQK</a>   |
| 15.9 | 910.4984 | -0.0001 | <a href="#">AGLLSLAEK</a> |
| 15.6 | 910.4984 | -0.0000 | <a href="#">KVGEVIEK</a>  |
| 13.4 | 910.4984 | -0.0000 | <a href="#">TIADIIQK</a>  |
| 13.4 | 910.4984 | -0.0000 | <a href="#">LTVAQLEK</a>  |
| 10.3 | 910.4984 | -0.0001 | <a href="#">IKSESLPK</a>  |

**Mascot:** <http://www.matrixscience.com/>

**Peptide View**MS/MS Fragmentation of **MGIARWLN**RFound in **AT5G41900.1** in **TAIR\_Arabidopsis**, Symbols: | hydrolase, alpha/beta fold family protein | chr5:16786260-16788795 FORWARD

Match to Query 3433: 1115.602196 from(558.808374,2+) index(1870)

Title: Elution from: 22.639 to 22.639 scan no 2437 cid35.00 polarity:+

Data file C7-1\_2.mgf

Click mouse within plot area to zoom in by factor of two about that point

Or,   to  Da Label all possible matches  Label matches used for scoring Show Y-axis 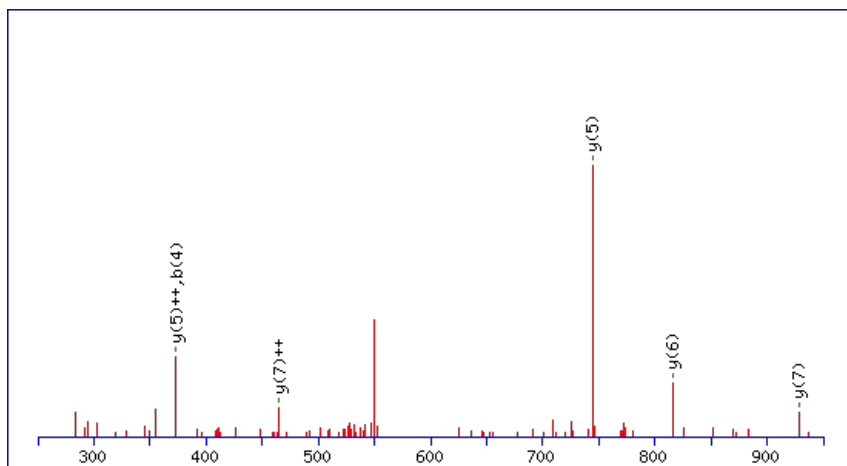Monoisotopic mass of neutral peptide **Mr(calc)**: 1115.6022**Fixed modifications**: Carbamidomethyl (C) (apply to specified residues or termini only)**Ions Score**: 22 **Expect**: 0.029**Matches**: 6/56 fragment ions using 7 most intense peaks ([help](#))

| # | b        | b <sup>++</sup> | b*       | b <sup>*++</sup> | Seq. | y        | y <sup>++</sup> | y*       | y <sup>*++</sup> | # |
|---|----------|-----------------|----------|------------------|------|----------|-----------------|----------|------------------|---|
| 1 | 132.0478 | 66.5275         |          |                  | M    |          |                 |          |                  | 9 |
| 2 | 189.0692 | 95.0383         |          |                  | G    | 985.5690 | 493.2881        | 968.5425 | 484.7749         | 8 |
| 3 | 302.1533 | 151.5803        |          |                  | I    | 928.5475 | 464.7774        | 911.5210 | 456.2641         | 7 |
| 4 | 373.1904 | 187.0988        |          |                  | A    | 815.4635 | 408.2354        | 798.4369 | 399.7221         | 6 |
| 5 | 529.2915 | 265.1494        | 512.2650 | 256.6361         | R    | 744.4264 | 372.7168        | 727.3998 | 364.2035         | 5 |
| 6 | 715.3708 | 358.1891        | 698.3443 | 349.6758         | W    | 588.3253 | 294.6663        | 571.2987 | 286.1530         | 4 |
| 7 | 828.4549 | 414.7311        | 811.4283 | 406.2178         | L    | 402.2459 | 201.6266        | 385.2194 | 193.1133         | 3 |
| 8 | 942.4978 | 471.7525        | 925.4713 | 463.2393         | N    | 289.1619 | 145.0846        | 272.1353 | 136.5713         | 2 |
| 9 |          |                 |          |                  | R    | 175.1190 | 88.0631         | 158.0924 | 79.5498          | 1 |

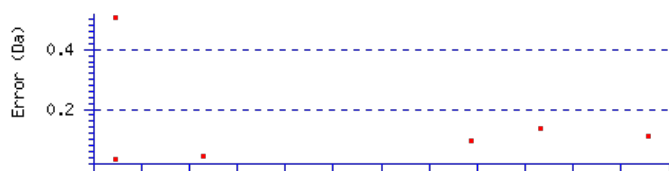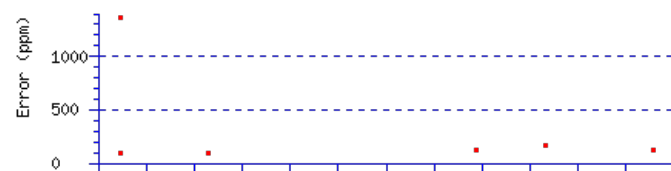NCBI **BLAST** search of [MGIARWLN](#)R

(Parameters: blastp, nr protein database, expect=20000, no filter, PAM30)

Other BLAST [web gateways](#)**All matches to this query**

| Score | Mr(calc)  | Delta  | Sequence                   |
|-------|-----------|--------|----------------------------|
| 22.1  | 1115.6022 | 0.0000 | <a href="#">MGIARWLN</a> R |



AT5G41900.1

|     |           |         |                            |
|-----|-----------|---------|----------------------------|
| 1.4 | 1115.6047 | -0.0025 | <a href="#">LGSDVREGKR</a> |
|-----|-----------|---------|----------------------------|

**Mascot:** <http://www.matrixscience.com/>

**Peptide View**MS/MS Fragmentation of **ETAEAYLGK**Found in **AT5G42020.1** in **TAIR\_Arabidopsis**, Symbols: BIP2, BIP | BIP (LUMINAL BINDING PROTEIN); ATP binding | chr5:16824925-16827708 REVERSE

Match to Query 1959: 980.478918 from(491.246735,2+) index(1642)

Title: Elution from: 23.930 to 23.930 scan no 2271 cid35.00 polarity:+

Data file D1d-1\_1.mgf

Click mouse within plot area to zoom in by factor of two about that point

Or,   to  Da Label all possible matches  Label matches used for scoring Show Y-axis 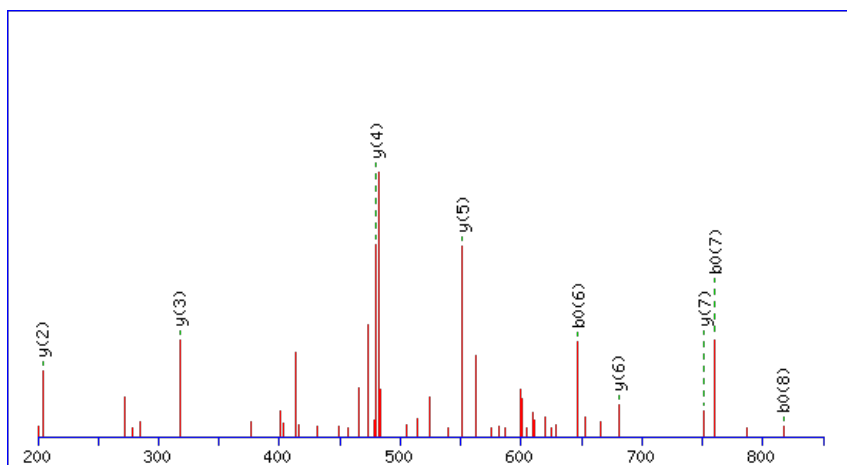Monoisotopic mass of neutral peptide  $M_r(\text{calc})$ : 980.4814

Fixed modifications: Carbamidomethyl (C) (apply to specified residues or termini only)

Ions Score: 42 Expect: 0.00026

Matches : 9/70 fragment ions using 13 most intense peaks ([help](#))

| # | b        | b <sup>++</sup> | b <sup>0</sup>  | b <sup>0++</sup> | Seq. | y               | y <sup>++</sup> | y*       | y <sup>*++</sup> | y <sup>0</sup> | y <sup>0++</sup> | # |
|---|----------|-----------------|-----------------|------------------|------|-----------------|-----------------|----------|------------------|----------------|------------------|---|
| 1 | 130.0499 | 65.5286         | 112.0393        | 56.5233          | E    |                 |                 |          |                  |                |                  | 9 |
| 2 | 231.0975 | 116.0524        | 213.0870        | 107.0471         | T    | 852.4462        | 426.7267        | 835.4196 | 418.2134         | 834.4356       | 417.7214         | 8 |
| 3 | 302.1347 | 151.5710        | 284.1241        | 142.5657         | A    | <b>751.3985</b> | 376.2029        | 734.3719 | 367.6896         | 733.3879       | 367.1976         | 7 |
| 4 | 431.1773 | 216.0923        | 413.1667        | 207.0870         | E    | <b>680.3614</b> | 340.6843        | 663.3348 | 332.1710         | 662.3508       | 331.6790         | 6 |
| 5 | 502.2144 | 251.6108        | 484.2038        | 242.6055         | A    | <b>551.3188</b> | 276.1630        | 534.2922 | 267.6498         |                |                  | 5 |
| 6 | 665.2777 | 333.1425        | <b>647.2671</b> | 324.1372         | Y    | <b>480.2817</b> | 240.6445        | 463.2551 | 232.1312         |                |                  | 4 |
| 7 | 778.3618 | 389.6845        | <b>760.3512</b> | 380.6792         | L    | <b>317.2183</b> | 159.1128        | 300.1918 | 150.5995         |                |                  | 3 |
| 8 | 835.3832 | 418.1953        | <b>817.3727</b> | 409.1900         | G    | <b>204.1343</b> | 102.5708        | 187.1077 | 94.0575          |                |                  | 2 |
| 9 |          |                 |                 |                  | K    | 147.1128        | 74.0600         | 130.0863 | 65.5468          |                |                  | 1 |

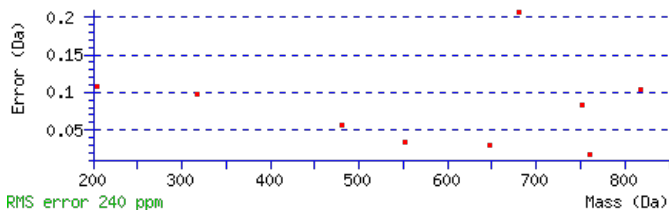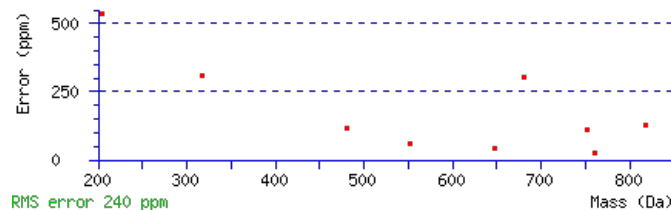NCBI **BLAST** search of [ETAEAYLGK](#)

(Parameters: blastp, nr protein database, expect=20000, no filter, PAM30)

Other BLAST [web gateways](#)

All matches to this query

| Score | $M_r(\text{calc})$ | Delta | Sequence |
|-------|--------------------|-------|----------|
|       |                    |       |          |

# AT5G42020.1

|      |          |         |                           |
|------|----------|---------|---------------------------|
| 42.4 | 980.4814 | -0.0025 | <a href="#">ETAEAYLGK</a> |
| 0.1  | 980.4815 | -0.0026 | <a href="#">GETTFEGK</a>  |

**Mascot:** <http://www.matrixscience.com/>



# Mascot Search Results

## Peptide View

MS/MS Fragmentation of **LELQEVVDFLK**

Found in **AT5G42270.1** in **TAIR\_Arabidopsis**, Symbols: FTSH5, VAR1 | VAR1 (VARIEGATED 1); ATP-dependent peptidase/ ATPase/ metallopeptidase | chr5:16919887-16922330 FORWARD

Match to Query 4983: 1344.697782 from(673.356167,2+) index(10304)

Title: Elution from: 98.850 to 98.850 scan no 14785 cid35.00 polarity:+

Data file 0-1\_3.mgf

Click mouse within plot area to zoom in by factor of two about that point

Or,   to  Da

Label all possible matches  Label matches used for scoring

Show Y-axis

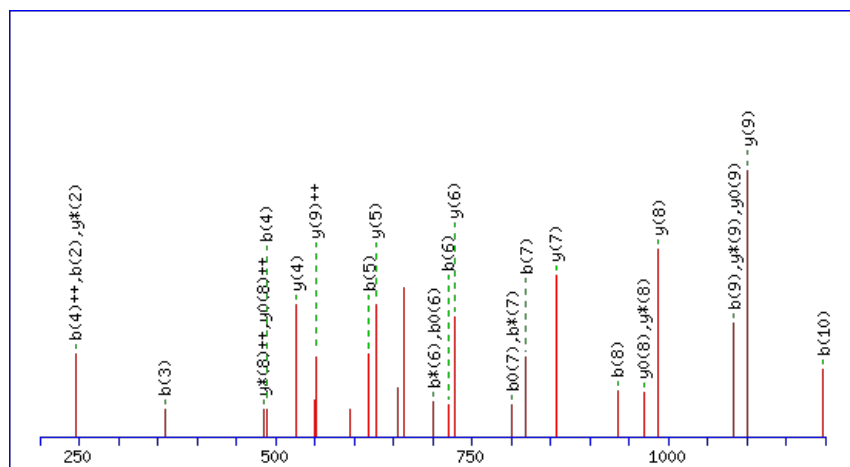

Monoisotopic mass of neutral peptide  $M_r(\text{calc})$ : 1344.6951

Fixed modifications: Carbamidomethyl (C) (apply to specified residues or termini only)

Ions Score: 85 Expect: 3e-008

Matches : 28/106 fragment ions using 26 most intense peaks [\(help\)](#)

| #  | b                | b <sup>++</sup> | b*              | b <sup>*++</sup> | b <sup>0</sup>  | b <sup>0++</sup> | Seq. | y                | y <sup>++</sup> | y*               | y <sup>*++</sup> | y <sup>0</sup>   | y <sup>0++</sup> | #  |
|----|------------------|-----------------|-----------------|------------------|-----------------|------------------|------|------------------|-----------------|------------------|------------------|------------------|------------------|----|
| 1  | 115.0884         | 58.0478         |                 |                  |                 |                  | L    |                  |                 |                  |                  |                  |                  | 11 |
| 2  | <b>245.1280</b>  | 123.0676        |                 |                  | 227.1174        | 114.0624         | E    | 1231.6213        | 616.3143        | 1213.5977        | 607.3025         | 1213.6107        | 607.3090         | 10 |
| 3  | <b>359.2091</b>  | 180.1082        |                 |                  | 341.1985        | 171.1029         | L    | <b>1101.5817</b> | <b>551.2945</b> | <b>1083.5581</b> | 542.2827         | <b>1083.5711</b> | 542.2892         | 9  |
| 4  | <b>489.2617</b>  | <b>245.1345</b> | 471.2382        | 236.1227         | 471.2512        | 236.1292         | Q    | <b>987.5006</b>  | 494.2539        | <b>969.4770</b>  | <b>485.2421</b>  | <b>969.4900</b>  | <b>485.2486</b>  | 8  |
| 5  | <b>619.3014</b>  | 310.1543        | 601.2778        | 301.1425         | 601.2908        | 301.1490         | E    | <b>857.4479</b>  | 429.2276        | 839.4243         | 420.2158         | 839.4374         | 420.2223         | 7  |
| 6  | <b>719.3668</b>  | 360.1871        | <b>701.3432</b> | 351.1753         | <b>701.3563</b> | 351.1818         | V    | <b>727.4083</b>  | 364.2078        | 709.3847         | 355.1960         | 709.3977         | 355.2025         | 6  |
| 7  | <b>819.4323</b>  | 410.2198        | <b>801.4087</b> | 401.2080         | <b>801.4217</b> | 401.2145         | V    | <b>627.3428</b>  | 314.1751        | 609.3193         | 305.1633         | 609.3323         | 305.1698         | 5  |
| 8  | <b>935.4563</b>  | 468.2318        | 917.4327        | 459.2200         | 917.4457        | 459.2265         | D    | <b>527.2774</b>  | 264.1423        | 509.2538         | 255.1305         | 509.2668         | 255.1371         | 4  |
| 9  | <b>1083.5217</b> | 542.2645        | 1065.4981       | 533.2527         | 1065.5111       | 533.2592         | F    | 411.2534         | 206.1303        | 393.2298         | 197.1186         |                  |                  | 3  |
| 10 | <b>1197.6028</b> | 599.3050        | 1179.5792       | 590.2932         | 1179.5922       | 590.2998         | L    | 263.1880         | 132.0976        | <b>245.1644</b>  | 123.0858         |                  |                  | 2  |
| 11 |                  |                 |                 |                  |                 |                  | K    | 149.1069         | 75.0571         | 131.0833         | 66.0453          |                  |                  | 1  |

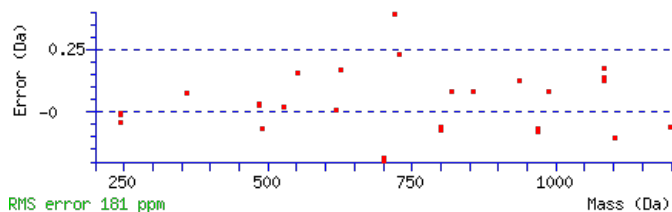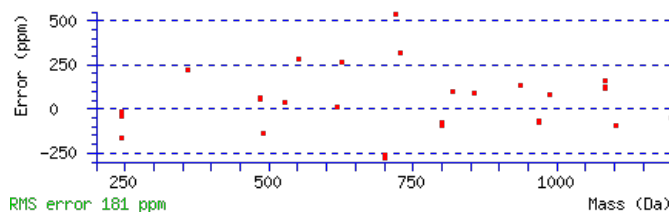

NCBI BLAST search of **LELQEVVDFLK**

(Parameters: blastp, nr protein database, expect=20000, no filter, PAM30)

Other BLAST [web gateways](#)

All matches to this query

## AT5G42270.1

| Score | Mr(calc)  | Delta   | Sequence                     |
|-------|-----------|---------|------------------------------|
| 84.6  | 1344.6951 | 0.0027  | <a href="#">LELQEVVDFLK</a>  |
| 20.4  | 1344.6955 | 0.0022  | <a href="#">EILKGILTGNDR</a> |
| 15.9  | 1344.6956 | 0.0022  | <a href="#">IHKEDINNNKK</a>  |
| 14.9  | 1344.7012 | -0.0034 | <a href="#">LKEINIKSCP</a>   |
| 13.3  | 1344.6955 | 0.0022  | <a href="#">AVALREAELQTK</a> |
| 13.3  | 1344.6956 | 0.0022  | <a href="#">ELRIPSLASQSK</a> |
| 7.5   | 1344.7012 | -0.0034 | <a href="#">ILRVEMSPLQK</a>  |
| 7.3   | 1344.6978 | -0.0000 | <a href="#">LKPNTQYIPOK</a>  |
| 4.4   | 1344.6978 | -0.0000 | <a href="#">LEANPLFREK</a>   |
| 3.2   | 1344.6955 | 0.0022  | <a href="#">QDEKRTTLPLK</a>  |

Mascot: <http://www.matrixscience.com/>

**Peptide View**MS/MS Fragmentation of **SGLLAPIEAEPELEVPK**Found in **AT5G42390.1** in **TAIR\_Arabidopsis**, Symbols: | metalloendopeptidase | chr5:16962536-16969875 FORWARD

Match to Query 8553: 1790.963486 from(896.489019,2+) index(8571)

Title: Elution from: 75.157 to 75.157 scan no 11382 cid35.00 polarity:+

Data file D1d-3\_2.mgf

Click mouse within plot area to zoom in by factor of two about that point

Or,   to  Da Label all possible matches  Label matches used for scoring Show Y-axis 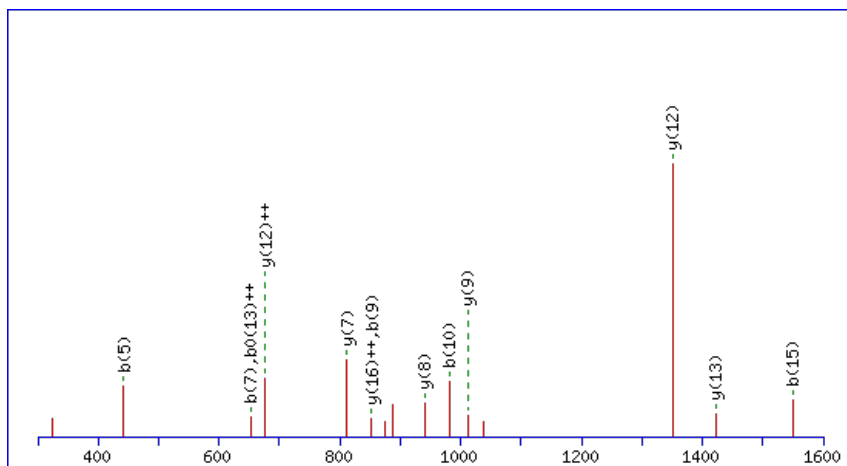Monoisotopic mass of neutral peptide  $M_r(\text{calc})$ : 1790.9665

Fixed modifications: Carbamidomethyl (C) (apply to specified residues or termini only)

Ions Score: 42 Expect: 0.00021

Matches : 13/154 fragment ions using 16 most intense peaks ([help](#))

| #  | b         | b <sup>++</sup> | b <sup>0</sup> | b <sup>0++</sup> | Seq. | y         | y <sup>++</sup> | y*        | y <sup>*++</sup> | y <sup>0</sup> | y <sup>0++</sup> | #  |
|----|-----------|-----------------|----------------|------------------|------|-----------|-----------------|-----------|------------------|----------------|------------------|----|
| 1  | 88.0393   | 44.5233         | 70.0287        | 35.5180          | S    |           |                 |           |                  |                |                  | 17 |
| 2  | 145.0608  | 73.0340         | 127.0502       | 64.0287          | G    | 1704.9418 | 852.9746        | 1687.9153 | 844.4613         | 1686.9313      | 843.9693         | 16 |
| 3  | 258.1448  | 129.5761        | 240.1343       | 120.5708         | L    | 1647.9204 | 824.4638        | 1630.8938 | 815.9505         | 1629.9098      | 815.4585         | 15 |
| 4  | 371.2289  | 186.1181        | 353.2183       | 177.1128         | L    | 1534.8363 | 767.9218        | 1517.8098 | 759.4085         | 1516.8257      | 758.9165         | 14 |
| 5  | 442.2660  | 221.6366        | 424.2554       | 212.6314         | A    | 1421.7522 | 711.3798        | 1404.7257 | 702.8665         | 1403.7417      | 702.3745         | 13 |
| 6  | 539.3188  | 270.1630        | 521.3082       | 261.1577         | P    | 1350.7151 | 675.8612        | 1333.6886 | 667.3479         | 1332.7046      | 666.8559         | 12 |
| 7  | 652.4028  | 326.7051        | 634.3923       | 317.6998         | I    | 1253.6624 | 627.3348        | 1236.6358 | 618.8215         | 1235.6518      | 618.3295         | 11 |
| 8  | 781.4454  | 391.2264        | 763.4349       | 382.2211         | E    | 1140.5783 | 570.7928        | 1123.5517 | 562.2795         | 1122.5677      | 561.7875         | 10 |
| 9  | 852.4825  | 426.7449        | 834.4720       | 417.7396         | A    | 1011.5357 | 506.2715        | 994.5092  | 497.7582         | 993.5251       | 497.2662         | 9  |
| 10 | 981.5251  | 491.2662        | 963.5146       | 482.2609         | E    | 940.4986  | 470.7529        | 923.4720  | 462.2397         | 922.4880       | 461.7476         | 8  |
| 11 | 1078.5779 | 539.7926        | 1060.5673      | 530.7873         | P    | 811.4560  | 406.2316        | 794.4294  | 397.7184         | 793.4454       | 397.2264         | 7  |
| 12 | 1207.6205 | 604.3139        | 1189.6099      | 595.3086         | E    | 714.4032  | 357.7053        | 697.3767  | 349.1920         | 696.3927       | 348.7000         | 6  |
| 13 | 1320.7046 | 660.8559        | 1302.6940      | 651.8506         | L    | 585.3606  | 293.1840        | 568.3341  | 284.6707         | 567.3501       | 284.1787         | 5  |
| 14 | 1449.7472 | 725.3772        | 1431.7366      | 716.3719         | E    | 472.2766  | 236.6419        | 455.2500  | 228.1287         | 454.2660       | 227.6366         | 4  |
| 15 | 1548.8156 | 774.9114        | 1530.8050      | 765.9061         | V    | 343.2340  | 172.1206        | 326.2074  | 163.6074         |                |                  | 3  |
| 16 | 1645.8683 | 823.4378        | 1627.8578      | 814.4325         | P    | 244.1656  | 122.5864        | 227.1390  | 114.0731         |                |                  | 2  |
| 17 |           |                 |                |                  | K    | 147.1128  | 74.0600         | 130.0863  | 65.5468          |                |                  | 1  |

AT5G42390.1

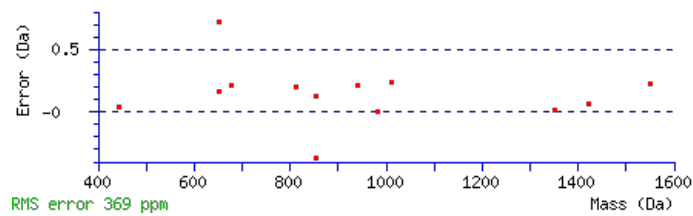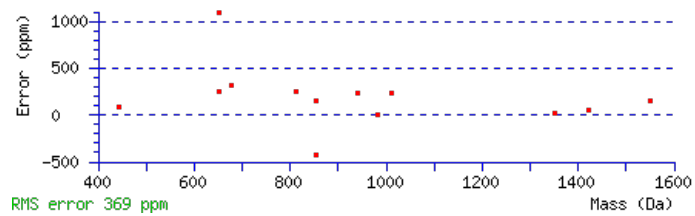

NCBI **BLAST** search of [SGLLAPIEAEPELEVPK](#)

(Parameters: blastp, nr protein database, expect=20000, no filter, PAM30)

Other BLAST [web gateways](#)

**All matches to this query**

| Score | Mr(calc)  | Delta   | Sequence                          |
|-------|-----------|---------|-----------------------------------|
| 41.8  | 1790.9665 | -0.0031 | <a href="#">SGLLAPIEAEPELEVPK</a> |
| 3.0   | 1790.9601 | 0.0034  | <a href="#">QDVVLVMALAFDVS</a>    |
| 1.2   | 1790.9666 | -0.0031 | <a href="#">SLKVDDIVGAEIYK</a>    |
| 0.5   | 1790.9634 | 0.0001  | <a href="#">MTKELNALVPSSMKVK</a>  |

Mascot: <http://www.matrixscience.com/>

## Peptide View

### MS/MS Fragmentation of **ALGEEIAALK**

Found in **AT5G42570.1** in **TAIR\_Arabidopsis**, Symbols: | similar to unknown protein [Arabidopsis thaliana] (TAIR:AT1G11905.1); similar to unnamed protein product [Vitis vinifera] (GB:CAO24012.1); contains InterPro domain B-cell receptor-associated 31-like; (InterPro:IPR008417) | chr5:17038687

Match to Query 2570: 1013.576636 from(507.795594,2+) index(5217)

Title: Elution from: 47.054 to 47.054 scan no 6586 cid35.00 polarity:+

Data file D6h-3\_1.mgf

Click mouse within plot area to zoom in by factor of two about that point

Or,   to  Da

Label all possible matches  Label matches used for scoring

Show Y-axis

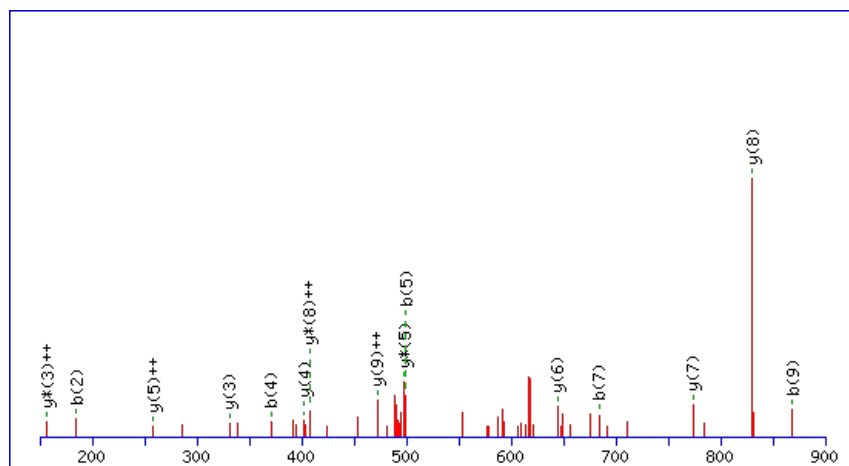

Monoisotopic mass of neutral peptide **Mr(calc)**: 1013.5757

**Fixed modifications:** Carbamidomethyl (C) (apply to specified residues or termini only)

**Ions Score:** 25 **Expect:** 0.013

**Matches** : 15/74 fragment ions using 40 most intense peaks ([help](#))

| #  | b               | b <sup>++</sup> | b <sup>0</sup> | b <sup>0++</sup> | Seq. | y               | y <sup>++</sup> | y <sup>*</sup>  | y <sup>*++</sup> | y <sup>0</sup> | y <sup>0++</sup> | #  |
|----|-----------------|-----------------|----------------|------------------|------|-----------------|-----------------|-----------------|------------------|----------------|------------------|----|
| 1  | 72.0444         | 36.5258         |                |                  | A    |                 |                 |                 |                  |                |                  | 10 |
| 2  | <b>185.1285</b> | 93.0679         |                |                  | L    | 943.5459        | <b>472.2766</b> | 926.5193        | 463.7633         | 925.5353       | 463.2713         | 9  |
| 3  | 242.1499        | 121.5786        |                |                  | G    | <b>830.4618</b> | 415.7345        | 813.4353        | <b>407.2213</b>  | 812.4512       | 406.7293         | 8  |
| 4  | <b>371.1925</b> | 186.0999        | 353.1819       | 177.0946         | E    | <b>773.4403</b> | 387.2238        | 756.4138        | 378.7105         | 755.4298       | 378.2185         | 7  |
| 5  | <b>500.2351</b> | 250.6212        | 482.2245       | 241.6159         | E    | <b>644.3978</b> | 322.7025        | 627.3712        | 314.1892         | 626.3872       | 313.6972         | 6  |
| 6  | 613.3192        | 307.1632        | 595.3086       | 298.1579         | I    | 515.3552        | <b>258.1812</b> | <b>498.3286</b> | 249.6679         |                |                  | 5  |
| 7  | <b>684.3563</b> | 342.6818        | 666.3457       | 333.6765         | A    | <b>402.2711</b> | 201.6392        | 385.2445        | 193.1259         |                |                  | 4  |
| 8  | 755.3934        | 378.2003        | 737.3828       | 369.1951         | A    | <b>331.2340</b> | 166.1206        | 314.2074        | <b>157.6074</b>  |                |                  | 3  |
| 9  | <b>868.4775</b> | 434.7424        | 850.4669       | 425.7371         | L    | 260.1969        | 130.6021        | 243.1703        | 122.0888         |                |                  | 2  |
| 10 |                 |                 |                |                  | K    | 147.1128        | 74.0600         | 130.0863        | 65.5468          |                |                  | 1  |

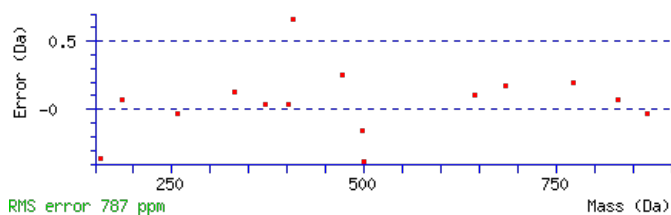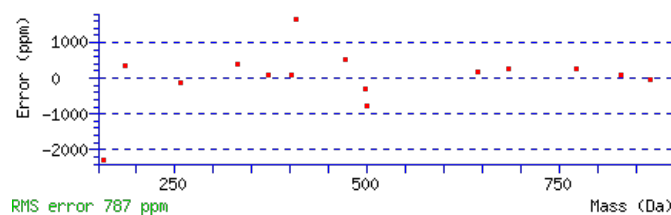

NCBI **BLAST** search of [ALGEEIAALK](#)

(Parameters: blastp, nr protein database, expect=20000, no filter, PAM30)

Other BLAST [web gateways](#)

All matches to this query



## AT5G42570.1

| Score | Mr(calc)  | Delta   | Sequence                   |
|-------|-----------|---------|----------------------------|
| 24.7  | 1013.5757 | 0.0010  | <a href="#">ALGEEIAALK</a> |
| 4.5   | 1013.5757 | 0.0010  | <a href="#">EKIPSEIAK</a>  |
| 4.3   | 1013.5757 | 0.0010  | <a href="#">LETKDPAIK</a>  |
| 1.0   | 1013.5757 | 0.0010  | <a href="#">ALAALAIEDK</a> |
| 1.0   | 1013.5770 | -0.0004 | <a href="#">ALKRDHFK</a>   |

Mascot: <http://www.matrixscience.com/>

## Peptide View

### MS/MS Fragmentation of **AGEMLYGYQLATR**

Found in **AT5G42650.1** in **TAIR\_Arabidopsis**, Symbols: CYP74A, AOS | AOS (ALLENE OXIDE SYNTHASE); hydro-lyase/ oxygen binding | chr5:17115031-17116587 REVERSE

Match to Query 7398: 1586.712800 from(794.363676,2+) index(6723)

Title: Elution from: 59.344 to 59.344 scan no 8613 cid35.00 polarity:+

Data file 0-2\_1.mgf

Click mouse within plot area to zoom in by factor of two about that point

Or,  to  Da

Label all possible matches  Label matches used for scoring

Show Y-axis

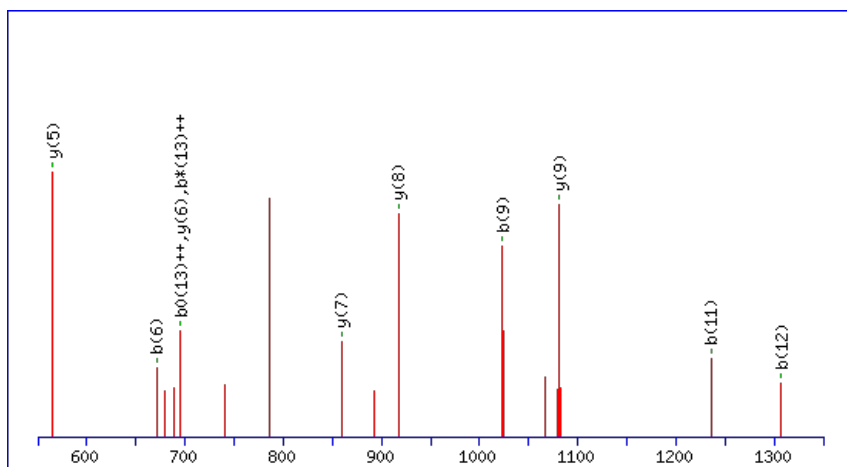

Monoisotopic mass of neutral peptide  $M_r(\text{calc})$ : 1586.7123

Fixed modifications: Carbamidomethyl (C) (apply to specified residues or termini only)

Ions Score: 46 Expect: 0.00018

Matches : 11/134 fragment ions using 13 most intense peaks ([help](#))

| #  | b                | b <sup>++</sup> | b*        | b <sup>*++</sup> | b <sup>0</sup> | b <sup>0++</sup> | Seq. | y                | y <sup>++</sup> | y*        | y <sup>*++</sup> | y <sup>0</sup> | y <sup>0++</sup> | #  |
|----|------------------|-----------------|-----------|------------------|----------------|------------------|------|------------------|-----------------|-----------|------------------|----------------|------------------|----|
| 1  | 73.0414          | 37.0244         |           |                  |                |                  | A    |                  |                 |           |                  |                |                  | 14 |
| 2  | 131.0599         | 66.0336         |           |                  |                |                  | G    | 1515.6855        | 758.3464        | 1497.6619 | 749.3346         | 1497.6749      | 749.3411         | 13 |
| 3  | 261.0996         | 131.0534        |           |                  | 243.0890       | 122.0481         | E    | 1457.6670        | 729.3371        | 1439.6434 | 720.3253         | 1439.6564      | 720.3318         | 12 |
| 4  | 393.1371         | 197.0722        |           |                  | 375.1265       | 188.0669         | M    | 1327.6273        | 664.3173        | 1309.6038 | 655.3055         | 1309.6168      | 655.3120         | 11 |
| 5  | 507.2182         | 254.1127        |           |                  | 489.2076       | 245.1074         | L    | 1195.5898        | 598.2986        | 1177.5662 | 589.2868         | 1177.5793      | 589.2933         | 10 |
| 6  | <b>671.2785</b>  | 336.1429        |           |                  | 653.2680       | 327.1376         | Y    | <b>1081.5087</b> | 541.2580        | 1063.4851 | 532.2462         | 1063.4982      | 532.2527         | 9  |
| 7  | 729.2970         | 365.1522        |           |                  | 711.2865       | 356.1469         | G    | <b>917.4484</b>  | 459.2278        | 899.4248  | 450.2160         | 899.4378       | 450.2225         | 8  |
| 8  | 893.3574         | 447.1823        |           |                  | 875.3468       | 438.1771         | Y    | <b>859.4299</b>  | 430.2186        | 841.4063  | 421.2068         | 841.4193       | 421.2133         | 7  |
| 9  | <b>1023.4100</b> | 512.2087        | 1005.3865 | 503.1969         | 1005.3995      | 503.2034         | Q    | <b>695.3695</b>  | 348.1884        | 677.3459  | 339.1766         | 677.3589       | 339.1831         | 6  |
| 10 | 1121.4598        | 561.2336        | 1103.4363 | 552.2218         | 1103.4493      | 552.2283         | P    | <b>565.3169</b>  | 283.1621        | 547.2933  | 274.1503         | 547.3063       | 274.1568         | 5  |
| 11 | <b>1235.5409</b> | 618.2741        | 1217.5174 | 609.2623         | 1217.5304      | 609.2688         | L    | 467.2671         | 234.1372        | 449.2435  | 225.1254         | 449.2565       | 225.1319         | 4  |
| 12 | <b>1307.5751</b> | 654.2912        | 1289.5515 | 645.2794         | 1289.5645      | 645.2859         | A    | 353.1860         | 177.0966        | 335.1624  | 168.0848         | 335.1754       | 168.0913         | 3  |
| 13 | 1409.6198        | 705.3135        | 1391.5962 | <b>696.3017</b>  | 1391.6092      | <b>696.3083</b>  | T    | 281.1518         | 141.0795        | 263.1282  | 132.0677         | 263.1412       | 132.0743         | 2  |
| 14 |                  |                 |           |                  |                |                  | R    | 179.1071         | 90.0572         | 161.0835  | 81.0454          |                |                  | 1  |

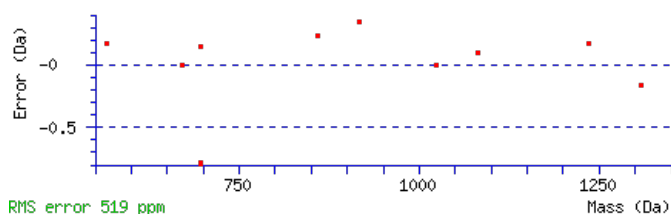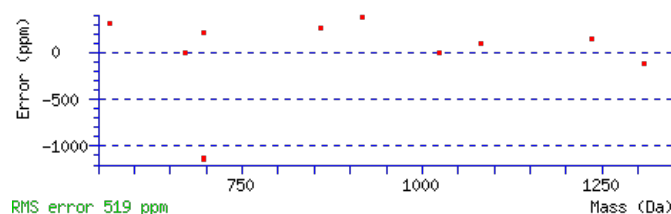

NCBI BLAST search of [AGEMLYGYQLATR](#)

## AT5G42650.1

(Parameters: blastp, nr protein database, expect=20000, no filter, PAM30)

Other BLAST [web gateways](#)

### All matches to this query

| Score | Mr(calc)  | Delta   | Sequence                        |
|-------|-----------|---------|---------------------------------|
| 45.7  | 1586.7123 | 0.0005  | <a href="#">AGEMLYGYQPLATR</a>  |
| 3.3   | 1586.7101 | 0.0027  | <a href="#">CGGNIGDDVNIPIPK</a> |
| 0.7   | 1586.7171 | -0.0043 | <a href="#">ERLVSTSPYYPTSA</a>  |

Mascot: <http://www.matrixscience.com/>

**Peptide View**MS/MS Fragmentation of **RSIPRTPEK**Found in **AT5G42700.1** in **TAIR\_Arabidopsis**, Symbols: | transcriptional factor B3 family protein | chr5:17139399-17141405 FORWARD

Match to Query 3356: 1098.574544 from(550.294548,2+) index(2623)

Title: Elution from: 27.711 to 27.711 scan no 3291 cid35.00 polarity:+

Data file D6h-3\_1.mgf

Click mouse within plot area to zoom in by factor of two about that point

Or,   to  Da Label all possible matches  Label matches used for scoring Show Y-axis 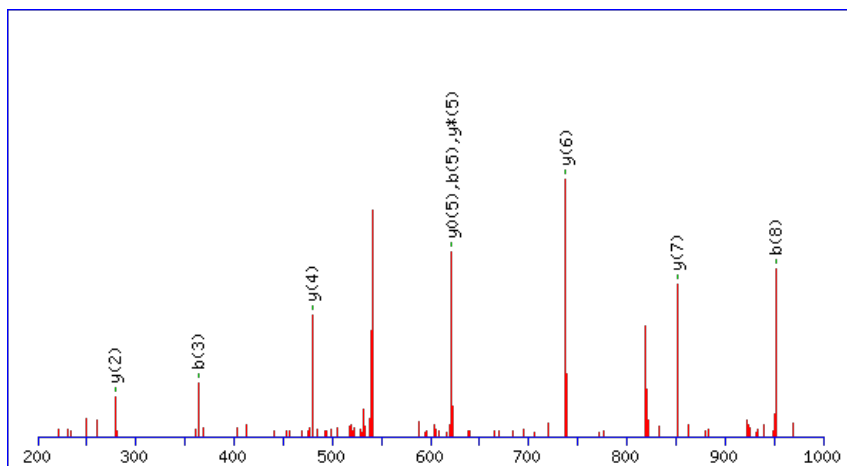Monoisotopic mass of neutral peptide **Mr(calc)**: 1098.5722**Fixed modifications**: Carbamidomethyl (C) (apply to specified residues or termini only)**Ions Score**: 41 **Expect**: 0.00052**Matches**: 9/92 fragment ions using 8 most intense peaks ([help](#))

| # | b               | b <sup>++</sup> | b*       | b <sup>*++</sup> | b <sup>0</sup> | b <sup>0++</sup> | Seq.     | y               | y <sup>++</sup> | y*              | y <sup>*++</sup> | y <sup>0</sup>  | y <sup>0++</sup> | #        |
|---|-----------------|-----------------|----------|------------------|----------------|------------------|----------|-----------------|-----------------|-----------------|------------------|-----------------|------------------|----------|
| 1 | 161.0965        | 81.0519         | 143.0729 | 72.0401          |                |                  | <b>R</b> |                 |                 |                 |                  |                 |                  | <b>9</b> |
| 2 | 249.1256        | 125.0664        | 231.1020 | 116.0546         | 231.1150       | 116.0612         | <b>S</b> | 939.4902        | 470.2488        | 921.4666        | 461.2370         | 921.4797        | 461.2435         | <b>8</b> |
| 3 | <b>363.2067</b> | 182.1070        | 345.1831 | 173.0952         | 345.1961       | 173.1017         | <b>I</b> | <b>851.4612</b> | 426.2342        | 833.4376        | 417.2224         | 833.4506        | 417.2289         | <b>7</b> |
| 4 | 461.2565        | 231.1319        | 443.2329 | 222.1201         | 443.2459       | 222.1266         | <b>P</b> | <b>737.3801</b> | 369.1937        | 719.3565        | 360.1819         | 719.3695        | 360.1884         | <b>6</b> |
| 5 | <b>621.3457</b> | 311.1765        | 603.3222 | 302.1647         | 603.3352       | 302.1712         | <b>R</b> | 639.3303        | 320.1688        | <b>621.3067</b> | 311.1570         | <b>621.3197</b> | 311.1635         | <b>5</b> |
| 6 | 723.3905        | 362.1989        | 705.3669 | 353.1871         | 705.3799       | 353.1936         | <b>T</b> | <b>479.2410</b> | 240.1241        | 461.2174        | 231.1124         | 461.2304        | 231.1189         | <b>4</b> |
| 7 | 821.4403        | 411.2238        | 803.4167 | 402.2120         | 803.4297       | 402.2185         | <b>P</b> | 377.1963        | 189.1018        | 359.1727        | 180.0900         | 359.1857        | 180.0965         | <b>3</b> |
| 8 | <b>951.4799</b> | 476.2436        | 933.4563 | 467.2318         | 933.4693       | 467.2383         | <b>E</b> | <b>279.1465</b> | 140.0769        | 261.1229        | 131.0651         | 261.1359        | 131.0716         | <b>2</b> |
| 9 |                 |                 |          |                  |                |                  | <b>K</b> | 149.1069        | 75.0571         | 131.0833        | 66.0453          |                 |                  | <b>1</b> |

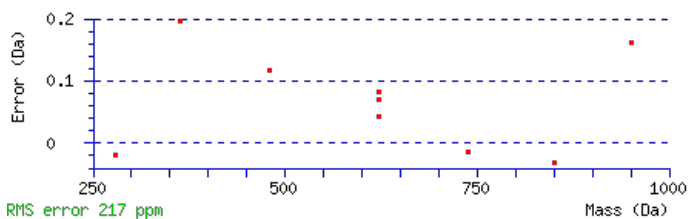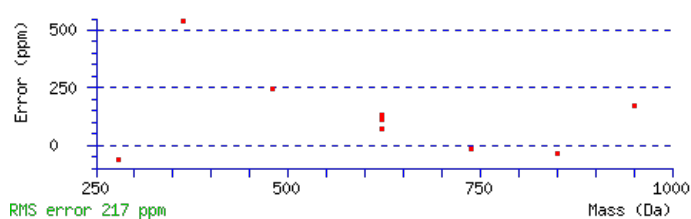NCBI **BLAST** search of [RSIPRTPEK](#)

(Parameters: blastp, nr protein database, expect=20000, no filter, PAM30)

Other BLAST [web gateways](#)**All matches to this query**

| Score | Mr(calc)  | Delta  | Sequence                  |
|-------|-----------|--------|---------------------------|
| 41.2  | 1098.5722 | 0.0023 | <a href="#">RSIPRTPEK</a> |

**AT5G42700.1**

|      |           |         |                             |
|------|-----------|---------|-----------------------------|
| 19.3 | 1098.5722 | 0.0023  | <a href="#">KTKDPNRPK</a>   |
| 9.8  | 1098.5740 | 0.0006  | <a href="#">FYFKGSVLK</a>   |
| 7.2  | 1098.5722 | 0.0023  | <a href="#">KVSPSGAPRGK</a> |
| 3.8  | 1098.5717 | 0.0028  | <a href="#">IDEIWGKVK</a>   |
| 3.3  | 1098.5722 | 0.0023  | <a href="#">NLLGLGNINR</a>  |
| 1.5  | 1098.5778 | -0.0033 | <a href="#">AQRLVPLCK</a>   |
| 1.5  | 1098.5774 | -0.0028 | <a href="#">KYMYKVIK</a>    |
| 1.5  | 1098.5774 | -0.0028 | <a href="#">MVKPFLEPK</a>   |
| 1.5  | 1098.5722 | 0.0023  | <a href="#">RADAALKNPK</a>  |

**Mascot:** <http://www.matrixscience.com/>

## Peptide View

### MS/MS Fragmentation of VEEMEKGVANEASVAVK

Found in **AT5G42880.1** in **TAIR\_Arabidopsis**, Symbols: | similar to unknown protein [Arabidopsis thaliana] (TAIR:AT1G45545.1); similar to unnamed protein product [Vitis vinifera] (GB:CAO61337.1); contains InterPro domain Protein of unknown function DUF827, plant (InterPro:IPR008545) | chr5:17

Match to Query 8116: 1824.823608 from(913.419080,2+) index(6578)

Title: Elution from: 60.737 to 60.737 scan no 8675 cid35.00 polarity:+

Data file D1d-1\_3.mgf

Click mouse within plot area to zoom in by factor of two about that point

Or,  to  Da

Label all possible matches  Label matches used for scoring

Show Y-axis

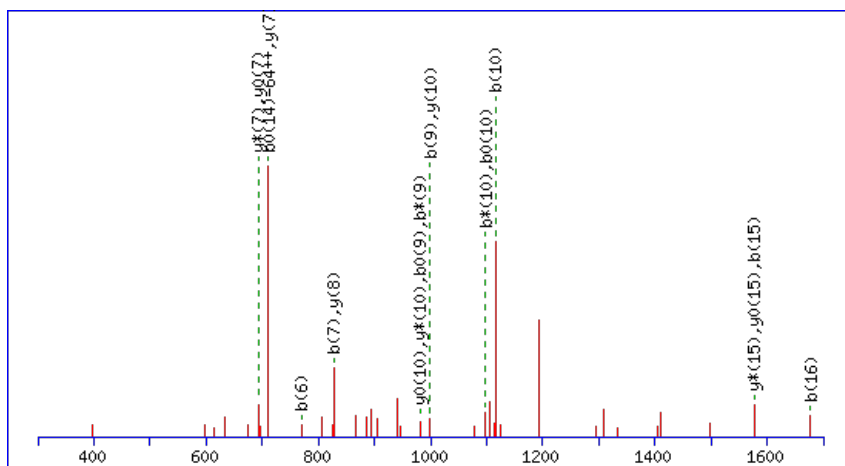

**Monoisotopic mass of neutral peptide Mr(calc):** 1824.8284

**Fixed modifications:** Carbamidomethyl (C) (apply to specified residues or termini only)

**Variable modifications:**

**M4** : Oxidation (M), with neutral losses 0.0000 (shown in table), 63.9983

**Ions Score:** 23 **Expect:** 0.044

**Matches :** 21/264 fragment ions using 29 most intense peaks ([help](#))

| #  | b         | b <sup>++</sup> | b <sup>*</sup> | b <sup>*++</sup> | b <sup>0</sup> | b <sup>0++</sup> | Seq. | y         | y <sup>++</sup> | y <sup>*</sup> | y <sup>*++</sup> | y <sup>0</sup> | y <sup>0++</sup> | #  |
|----|-----------|-----------------|----------------|------------------|----------------|------------------|------|-----------|-----------------|----------------|------------------|----------------|------------------|----|
| 1  | 101.0727  | 51.0400         |                |                  |                |                  | V    |           |                 |                |                  |                |                  | 17 |
| 2  | 231.1124  | 116.0598        |                |                  | 213.1018       | 107.0545         | E    | 1725.7702 | 863.3887        | 1707.7466      | 854.3769         | 1707.7596      | 854.3835         | 16 |
| 3  | 361.1520  | 181.0796        |                |                  | 343.1414       | 172.0743         | E    | 1595.7306 | 798.3689        | 1577.7070      | 789.3571         | 1577.7200      | 789.3636         | 15 |
| 4  | 509.1844  | 255.0958        |                |                  | 491.1739       | 246.0906         | M    | 1465.6910 | 733.3491        | 1447.6674      | 724.3373         | 1447.6804      | 724.3438         | 14 |
| 5  | 639.2240  | 320.1157        |                |                  | 621.2135       | 311.1104         | E    | 1317.6585 | 659.3329        | 1299.6349      | 650.3211         | 1299.6480      | 650.3276         | 13 |
| 6  | 769.3131  | 385.1602        | 751.2895       | 376.1484         | 751.3025       | 376.1549         | K    | 1187.6189 | 594.3131        | 1169.5953      | 585.3013         | 1169.6083      | 585.3078         | 12 |
| 7  | 827.3316  | 414.1694        | 809.3080       | 405.1576         | 809.3210       | 405.1641         | G    | 1057.5299 | 529.2686        | 1039.5063      | 520.2568         | 1039.5193      | 520.2633         | 11 |
| 8  | 927.3970  | 464.2022        | 909.3734       | 455.1904         | 909.3865       | 455.1969         | V    | 999.5114  | 500.2593        | 981.4878       | 491.2475         | 981.5008       | 491.2540         | 10 |
| 9  | 999.4312  | 500.2192        | 981.4076       | 491.2074         | 981.4206       | 491.2139         | A    | 899.4459  | 450.2266        | 881.4223       | 441.2148         | 881.4353       | 441.2213         | 9  |
| 10 | 1115.4682 | 558.2377        | 1097.4446      | 549.2259         | 1097.4576      | 549.2324         | N    | 827.4118  | 414.2095        | 809.3882       | 405.1977         | 809.4012       | 405.2042         | 8  |
| 11 | 1245.5078 | 623.2575        | 1227.4842      | 614.2457         | 1227.4972      | 614.2523         | E    | 711.3748  | 356.1910        | 693.3512       | 347.1792         | 693.3642       | 347.1857         | 7  |
| 12 | 1317.5419 | 659.2746        | 1299.5184      | 650.2628         | 1299.5314      | 650.2693         | A    | 581.3351  | 291.1712        | 563.3115       | 282.1594         | 563.3246       | 282.1659         | 6  |
| 13 | 1405.5710 | 703.2891        | 1387.5474      | 694.2774         | 1387.5604      | 694.2839         | S    | 509.3010  | 255.1541        | 491.2774       | 246.1423         | 491.2904       | 246.1488         | 5  |
| 14 | 1505.6365 | 753.3219        | 1487.6129      | 744.3101         | 1487.6259      | 744.3166         | V    | 421.2719  | 211.1396        | 403.2483       | 202.1278         |                |                  | 4  |
| 15 | 1577.6706 | 789.3389        | 1559.6470      | 780.3272         | 1559.6600      | 780.3337         | A    | 321.2065  | 161.1069        | 303.1829       | 152.0951         |                |                  | 3  |
| 16 | 1677.7361 | 839.3717        | 1659.7125      | 830.3599         | 1659.7255      | 830.3664         | V    | 249.1723  | 125.0898        | 231.1487       | 116.0780         |                |                  | 2  |
| 17 |           |                 |                |                  |                |                  | K    | 149.1069  | 75.0571         | 131.0833       | 66.0453          |                |                  | 1  |

# AT5G42880.1

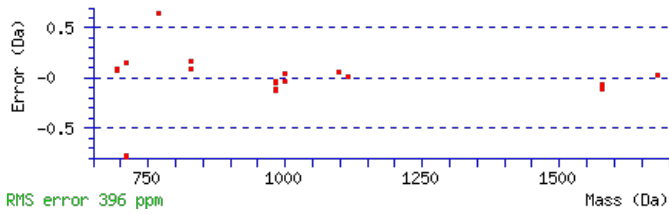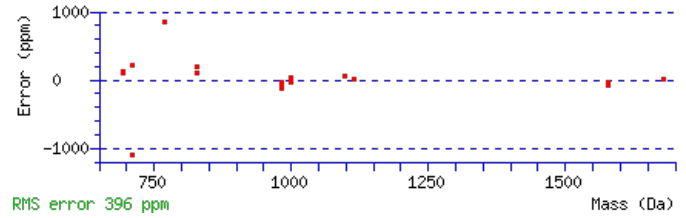

NCBI **BLAST** search of [VEEMKGVANEASVAVK](#)  
(Parameters: blastp, nr protein database, expect=20000, no filter, PAM30)  
Other BLAST [web gateways](#)

## All matches to this query

| Score | Mr(calc)  | Delta   | Sequence                          |
|-------|-----------|---------|-----------------------------------|
| 22.8  | 1824.8284 | -0.0048 | <a href="#">VEEMKGVANEASVAVK</a>  |
| 11.9  | 1824.8228 | 0.0009  | <a href="#">LEVSSSDQQOLETVK</a>   |
| 11.1  | 1824.8272 | -0.0036 | <a href="#">YYATKYADQGTDLGK</a>   |
| 6.5   | 1824.8284 | -0.0048 | <a href="#">LGNIESMIDLELSNNK</a>  |
| 4.4   | 1824.8272 | -0.0036 | <a href="#">EVPSSWDSAALAGFIEK</a> |
| 4.4   | 1824.8259 | -0.0023 | <a href="#">FHLNTVAELLMCDVK</a>   |
| 1.4   | 1824.8279 | -0.0043 | <a href="#">LHPFLSRYSICNHR</a>    |
| 1.1   | 1824.8225 | 0.0011  | <a href="#">GYNSMPLDLPGLFHK</a>   |
| 0.9   | 1824.8203 | 0.0034  | <a href="#">QAFQSEVVTLAHSEMK</a>  |

Mascot: <http://www.matrixscience.com/>

### Peptide View

 MS/MS Fragmentation of **AAQMLSGIDLDSGMRAVDDNFK**

 Found in **AT5G42970.1** in **TAIR Arabidopsis**, Symbols: FUS4, EMB134, COP14, CSN4, FUS8, COP8 | COP8 (CONSTITUTIVE PHOTOMORPHOGENIC 8) | chr5:17254698-17257877 REVERSE

Match to Query 10397: 2385.100464 from(796.040764,3+) index(7217)

Title: Elution from: 63.294 to 63.294 scan no 9257 cid35.00 polarity:+

Data file C7-3\_1.mgf

Click mouse within plot area to zoom in by factor of two about that point

 Or,   to  Da 

 Label all possible matches  Label matches used for scoring 

 Show Y-axis 
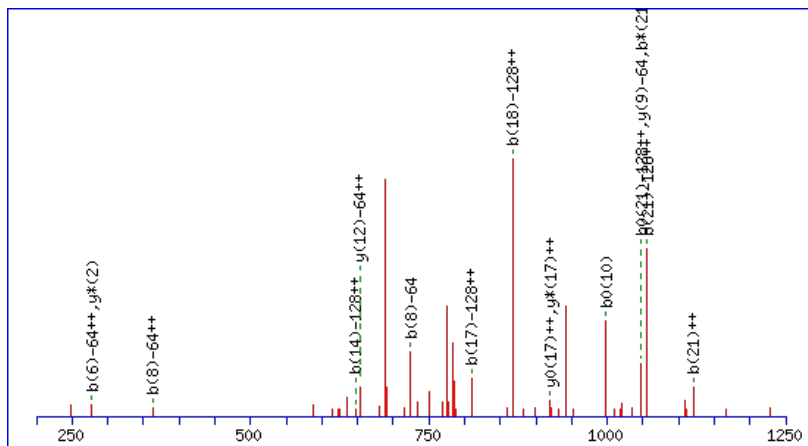
 Monoisotopic mass of neutral peptide  $M_r(\text{calc})$ : 2385.0941

Fixed modifications: Carbamidomethyl (C) (apply to specified residues or termini only)

Variable modifications:

M4 : Oxidation (M), with neutral losses 63.9983 (shown in table), 0.0000

M14 : Oxidation (M), with neutral losses 63.9983 (shown in table), 0.0000

Ions Score: 17 Expect: 0.046

 Matches : 17/414 fragment ions using 23 most intense peaks ([help](#))

| #  | b               | b <sup>++</sup>  | b <sup>*</sup> | b <sup>*++</sup> | b <sup>0</sup> | b <sup>0++</sup> | Seq | y                | y <sup>++</sup> | y <sup>*</sup>  | y <sup>*++</sup> | y <sup>0</sup> | y <sup>0++</sup> | #  |
|----|-----------------|------------------|----------------|------------------|----------------|------------------|-----|------------------|-----------------|-----------------|------------------|----------------|------------------|----|
| 1  | 72.0444         | 36.5258          |                |                  |                |                  | A   |                  |                 |                 |                  |                |                  | 22 |
| 2  | 143.0815        | 72.0444          |                |                  |                |                  | A   | 2187.0677        | 1094.0375       | 2170.0411       | 1085.5242        | 2169.0571      | 1085.0322        | 21 |
| 3  | 271.1401        | 136.0737         | 254.1135       | 127.5604         |                |                  | Q   | 2116.0305        | 1058.5189       | 2099.0040       | 1050.0056        | 2098.0200      | 1049.5136        | 20 |
| 4  | 354.1772        | 177.5922         | 337.1506       | 169.0790         |                |                  | M   | 1987.9720        | 994.4896        | 1970.9454       | 985.9763         | 1969.9614      | 985.4843         | 19 |
| 5  | 467.2613        | 234.1343         | 450.2347       | 225.6210         |                |                  | L   | 1904.9348        | 952.9711        | 1887.9083       | 944.4578         | 1886.9243      | 943.9658         | 18 |
| 6  | 554.2933        | <b>277.6503</b>  | 537.2667       | 269.1370         | 536.2827       | 268.6450         | S   | 1791.8508        | 896.4290        | 1774.8242       | 887.9158         | 1773.8402      | 887.4237         | 17 |
| 7  | 611.3148        | 306.1610         | 594.2882       | 297.6477         | 593.3042       | 297.1557         | G   | 1704.8188        | 852.9130        | 1687.7922       | 844.3997         | 1686.8082      | 843.9077         | 16 |
| 8  | <b>724.3988</b> | <b>362.7030</b>  | 707.3723       | 354.1898         | 706.3883       | 353.6978         | I   | 1647.7973        | 824.4023        | 1630.7707       | 815.8890         | 1629.7867      | 815.3970         | 15 |
| 9  | 839.4258        | 420.2165         | 822.3992       | 411.7032         | 821.4152       | 411.2112         | D   | 1534.7132        | 767.8603        | 1517.6867       | 759.3470         | 1516.7027      | 758.8550         | 14 |
| 10 | 952.5098        | 476.7586         | 935.4833       | 468.2453         | 934.4993       | 467.7533         | L   | 1419.6863        | 710.3468        | 1402.6597       | 701.8335         | 1401.6757      | 701.3415         | 13 |
| 11 | 1067.5368       | 534.2720         | 1050.5102      | 525.7587         | 1049.5262      | 525.2667         | D   | 1306.6022        | <b>653.8047</b> | 1289.5757       | 645.2915         | 1288.5917      | 644.7995         | 12 |
| 12 | 1154.5688       | 577.7880         | 1137.5422      | 569.2748         | 1136.5582      | 568.7828         | S   | 1191.5753        | 596.2913        | 1174.5487       | 587.7780         | 1173.5647      | 587.2860         | 11 |
| 13 | 1211.5903       | 606.2988         | 1194.5637      | 597.7855         | 1193.5797      | 597.2935         | G   | 1104.5432        | 552.7753        | 1087.5167       | 544.2620         | 1086.5327      | 543.7700         | 10 |
| 14 | 1294.6274       | <b>647.8173</b>  | 1277.6008      | 639.3041         | 1276.6168      | 638.8120         | M   | <b>1047.5218</b> | 524.2645        | 1030.4952       | 515.7513         | 1029.5112      | 515.2592         | 9  |
| 15 | 1450.7285       | 725.8679         | 1433.7019      | 717.3546         | 1432.7179      | 716.8626         | R   | 964.4847         | 482.7460        | 947.4581        | 474.2327         | 946.4741       | 473.7407         | 8  |
| 16 | 1521.7656       | 761.3864         | 1504.7390      | 752.8732         | 1503.7550      | 752.3812         | A   | 808.3836         | 404.6954        | 791.3570        | 396.1821         | 790.3730       | 395.6901         | 7  |
| 17 | 1620.8340       | <b>810.9206</b>  | 1603.8075      | 802.4074         | 1602.8234      | 801.9154         | V   | 737.3464         | 369.1769        | 720.3199        | 360.6636         | 719.3359       | 360.1716         | 6  |
| 18 | 1735.8610       | <b>868.4341</b>  | 1718.8344      | 859.9208         | 1717.8504      | 859.4288         | D   | 638.2780         | 319.6427        | 621.2515        | 311.1294         | 620.2675       | 310.6374         | 5  |
| 19 | 1850.8879       | 925.9476         | 1833.8614      | 917.4343         | 1832.8773      | 916.9423         | D   | 523.2511         | 262.1292        | 506.2245        | 253.6159         | 505.2405       | 253.1239         | 4  |
| 20 | 1964.9308       | 982.9691         | 1947.9043      | 974.4558         | 1946.9203      | 973.9638         | N   | 408.2241         | 204.6157        | 391.1976        | 196.1024         |                |                  | 3  |
| 21 | 2111.9992       | <b>1056.5033</b> | 2094.9727      | <b>1047.9900</b> | 2093.9887      | <b>1047.4980</b> | F   | 294.1812         | 147.5942        | <b>277.1547</b> | 139.0810         |                |                  | 2  |
| 22 |                 |                  |                |                  |                |                  | K   | 147.1128         | 74.0600         | 130.0863        | 65.5468          |                |                  | 1  |



# AT5G42970.1

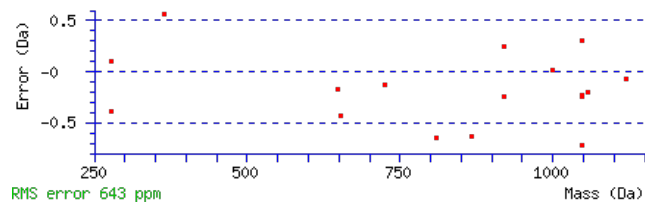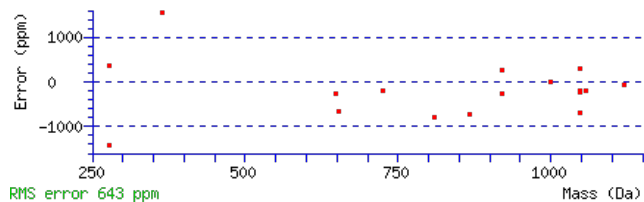

NCBI **BLAST** search of [AAQMLSGIDLDSGMRAVDDNFK](#)  
 (Parameters: blastp, nr protein database, expect=20000, no filter, PAM30)  
 Other BLAST [web gateways](#)

## All matches to this query

| Score | Mr(calc)  | Delta   | Sequence                               |
|-------|-----------|---------|----------------------------------------|
| 16.9  | 2385.0941 | 0.0064  | <a href="#">AAQMLSGIDLDSGMRAVDDNFK</a> |
| 2.5   | 2385.0981 | 0.0024  | <a href="#">SKMDGEYQDPSIHLYIMAQK</a>   |
| 1.9   | 2385.1006 | -0.0001 | <a href="#">MDYKVSRSGEIVEGEVEDSEK</a>  |
| 1.6   | 2385.1006 | -0.0001 | <a href="#">VEFDEEGKVSGVTSEGETAKCK</a> |
| 1.6   | 2385.1014 | -0.0010 | <a href="#">ICDDMEESLKTMKAVLWER</a>    |
| 0.6   | 2385.0988 | 0.0017  | <a href="#">MSLSTFSGGTTACAACKHQRK</a>  |
| 0.5   | 2385.0974 | 0.0031  | <a href="#">MSNSELMAPTNNLAMSTEKIR</a>  |

Mascot: <http://www.matrixscience.com/>

## Peptide View

### MS/MS Fragmentation of **HLDVVFFK**

Found in **AT5G42980.1** in **TAIR\_Arabidopsis**, Symbols: ATH3, ATTRXH3, TRXH3, ATTRX3 | ATTRX3 (thioredoxin H-type 3); thiol-disulfide exchange intermediate | chr5:17260000-17260946 FORWARD

Match to Query 2475: 1003.549202 from(502.781877,2+) index(5727)

Title: Elution from: 51.387 to 51.387 scan no 7311 cid35.00 polarity:+

Data file D6h-1\_3.mgf

Click mouse within plot area to zoom in by factor of two about that point

Or,   to  Da

Label all possible matches  Label matches used for scoring

Show Y-axis

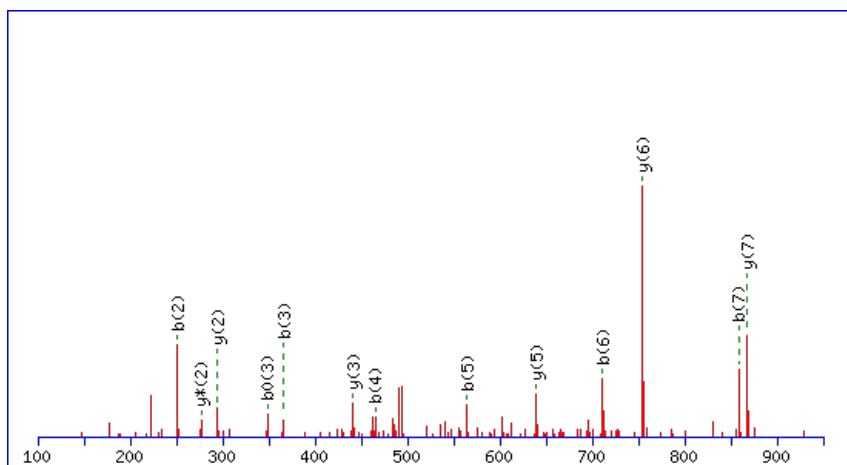

Monoisotopic mass of neutral peptide  $M_r(\text{calc})$ : 1003.5491

Fixed modifications: Carbamidomethyl (C) (apply to specified residues or termini only)

Ions Score: 39 Expect: 0.00055

Matches : 13/56 fragment ions using 24 most intense peaks ([help](#))

| # | b               | b <sup>++</sup> | b <sup>0</sup>  | b <sup>0++</sup> | Seq. | y               | y <sup>++</sup> | y*              | y <sup>*++</sup> | y <sup>0</sup> | y <sup>0++</sup> | # |
|---|-----------------|-----------------|-----------------|------------------|------|-----------------|-----------------|-----------------|------------------|----------------|------------------|---|
| 1 | 138.0662        | 69.5367         |                 |                  | H    |                 |                 |                 |                  |                |                  | 8 |
| 2 | <b>251.1503</b> | 126.0788        |                 |                  | L    | <b>867.4975</b> | 434.2524        | 850.4709        | 425.7391         | 849.4869       | 425.2471         | 7 |
| 3 | <b>366.1772</b> | 183.5922        | <b>348.1666</b> | 174.5870         | D    | <b>754.4134</b> | 377.7103        | 737.3869        | 369.1971         | 736.4028       | 368.7051         | 6 |
| 4 | <b>465.2456</b> | 233.1264        | 447.2350        | 224.1212         | V    | <b>639.3865</b> | 320.1969        | 622.3599        | 311.6836         |                |                  | 5 |
| 5 | <b>564.3140</b> | 282.6606        | 546.3035        | 273.6554         | V    | 540.3180        | 270.6627        | 523.2915        | 262.1494         |                |                  | 4 |
| 6 | <b>711.3824</b> | 356.1949        | 693.3719        | 347.1896         | F    | <b>441.2496</b> | 221.1285        | 424.2231        | 212.6152         |                |                  | 3 |
| 7 | <b>858.4509</b> | 429.7291        | 840.4403        | 420.7238         | F    | <b>294.1812</b> | 147.5942        | <b>277.1547</b> | 139.0810         |                |                  | 2 |
| 8 |                 |                 |                 |                  | K    | 147.1128        | 74.0600         | 130.0863        | 65.5468          |                |                  | 1 |

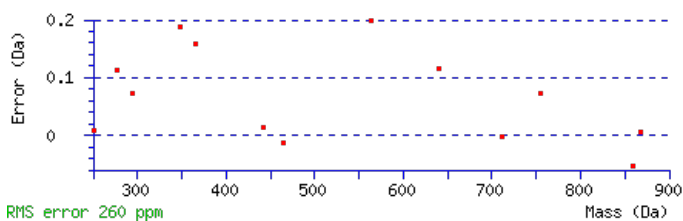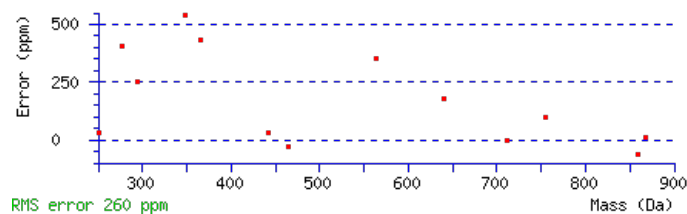

NCBI BLAST search of **HLDVVFFK**

(Parameters: blastp, nr protein database, expect=20000, no filter, PAM30)

Other BLAST [web gateways](#)

### All matches to this query

| Score | $M_r(\text{calc})$ | Delta  | Sequence                 |
|-------|--------------------|--------|--------------------------|
| 39.4  | 1003.5491          | 0.0001 | <a href="#">HLDVVFFK</a> |

**AT5G42980.1**

|     |           |        |                            |
|-----|-----------|--------|----------------------------|
| 3.2 | 1003.5484 | 0.0008 | <a href="#">KKPMTGQAK</a>  |
| 3.1 | 1003.5464 | 0.0028 | <a href="#">HRWLHQK</a>    |
| 2.7 | 1003.5484 | 0.0008 | <a href="#">MNRITIEK</a>   |
| 2.0 | 1003.5491 | 0.0001 | <a href="#">HLLSKYFP</a>   |
| 1.4 | 1003.5484 | 0.0008 | <a href="#">KAAMADAAKK</a> |

**Mascot:** <http://www.matrixscience.com/>

## Peptide View

MS/MS Fragmentation of **EAELLAQK**

Found in **AT5G43910.1** in **TAIR\_Arabidopsis**, Symbols: | pfkB-type carbohydrate kinase family protein | chr5:17685169-17687312 REVERSE

Match to Query 2674: 1024.543738 from(513.279145,2+) index(4026)

Title: Elution from: 38.877 to 38.877 scan no 5086 cid35.00 polarity:+

Data file 0-3\_1.mgf

Click mouse within plot area to zoom in by factor of two about that point

Or,   to  Da

Label all possible matches  Label matches used for scoring

Show Y-axis

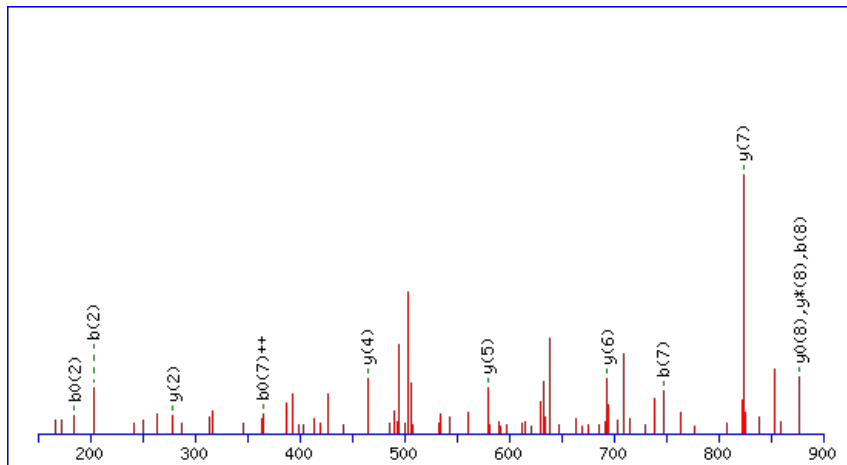

Monoisotopic mass of neutral peptide Mr(calc): 1024.5431

Fixed modifications: Carbamidomethyl (C) (apply to specified residues or termini only)

Ions Score: 28 Expect: 0.0065

Matches : 12/70 fragment ions using 22 most intense peaks ([help](#))

| # | b               | b <sup>++</sup> | b*       | b <sup>*++</sup> | b <sup>0</sup>  | b <sup>0++</sup> | Seq. | y               | y <sup>++</sup> | y*              | y <sup>*++</sup> | y <sup>0</sup>  | y <sup>0++</sup> | # |
|---|-----------------|-----------------|----------|------------------|-----------------|------------------|------|-----------------|-----------------|-----------------|------------------|-----------------|------------------|---|
| 1 | 131.0469        | 66.0271         |          |                  | 113.0363        | 57.0218          | E    |                 |                 |                 |                  |                 |                  | 9 |
| 2 | <b>203.0811</b> | 102.0442        |          |                  | <b>185.0705</b> | 93.0389          | A    | 895.5107        | 448.2590        | <b>877.4872</b> | 439.2472         | <b>877.5002</b> | 439.2537         | 8 |
| 3 | 333.1207        | 167.0640        |          |                  | 315.1101        | 158.0587         | E    | <b>823.4766</b> | 412.2419        | 805.4530        | 403.2301         | 805.4660        | 403.2367         | 7 |
| 4 | 447.2018        | 224.1045        |          |                  | 429.1912        | 215.0992         | L    | <b>693.4370</b> | 347.2221        | 675.4134        | 338.2103         |                 |                  | 6 |
| 5 | 561.2829        | 281.1451        |          |                  | 543.2723        | 272.1398         | L    | <b>579.3559</b> | 290.1816        | 561.3323        | 281.1698         |                 |                  | 5 |
| 6 | 675.3640        | 338.1856        |          |                  | 657.3534        | 329.1803         | L    | <b>465.2748</b> | 233.1410        | 447.2512        | 224.1292         |                 |                  | 4 |
| 7 | <b>747.3981</b> | 374.2027        |          |                  | 729.3876        | <b>365.1974</b>  | A    | 351.1937        | 176.1005        | 333.1701        | 167.0887         |                 |                  | 3 |
| 8 | <b>877.4508</b> | 439.2290        | 859.4272 | 430.2172         | 859.4402        | 430.2237         | Q    | <b>279.1595</b> | 140.0834        | 261.1359        | 131.0716         |                 |                  | 2 |
| 9 |                 |                 |          |                  |                 |                  | K    | 149.1069        | 75.0571         | 131.0833        | 66.0453          |                 |                  | 1 |

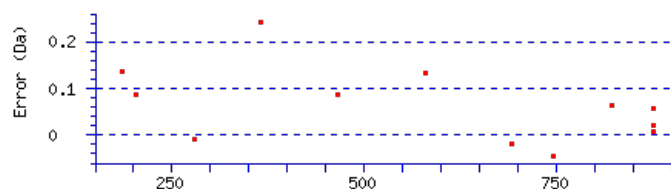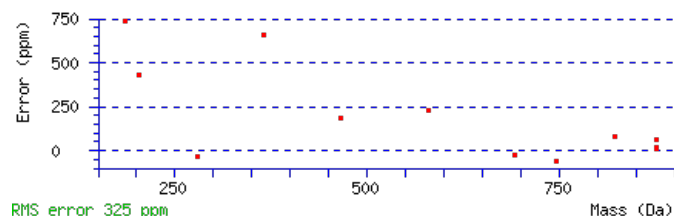

NCBI BLAST search of [EAELLAQK](#)

(Parameters: blastp, nr protein database, expect=20000, no filter, PAM30)

Other BLAST [web gateways](#)

All matches to this query

| Score | Mr(calc)  | Delta  | Sequence                 |
|-------|-----------|--------|--------------------------|
| 28.4  | 1024.5431 | 0.0006 | <a href="#">EAELLAQK</a> |

**AT5G43910.1**

|      |           |         |                            |
|------|-----------|---------|----------------------------|
| 12.8 | 1024.5458 | -0.0020 | <a href="#">TKKHQIEK</a>   |
| 11.5 | 1024.5431 | 0.0006  | <a href="#">SLPELSQLK</a>  |
| 10.9 | 1024.5431 | 0.0006  | <a href="#">AEETPKVLK</a>  |
| 9.3  | 1024.5458 | -0.0020 | <a href="#">LSHSVKVGGK</a> |
| 8.9  | 1024.5431 | 0.0006  | <a href="#">QSIPSIELK</a>  |
| 8.1  | 1024.5431 | 0.0006  | <a href="#">VDVKLESPK</a>  |
| 6.0  | 1024.5431 | 0.0006  | <a href="#">TDLPAIEKK</a>  |
| 5.1  | 1024.5431 | 0.0007  | <a href="#">TVVVGDPSTK</a> |
| 0.6  | 1024.5431 | 0.0006  | <a href="#">VLGEINELK</a>  |

**Mascot:** <http://www.matrixscience.com/>

## Peptide View

### MS/MS Fragmentation of **IIGIDISK**

Found in **AT5G43940.1** in **TAIR\_Arabidopsis**, Symbols: ADH2 | ADH2 (ALCOHOL DEHYDROGENASE 2); formaldehyde dehydrogenase (glutathione) | chr5:17701492-17703606 FORWARD

Match to Query 2456: 982.516778 from(492.265665,2+) index(5399)

Title: Elution from: 47.723 to 47.723 scan no 6753 cid35.00 polarity:+

Data file D6h-1\_1.mgf

Click mouse within plot area to zoom in by factor of two about that point

Or,   to  Da

Label all possible matches  Label matches used for scoring

Show Y-axis

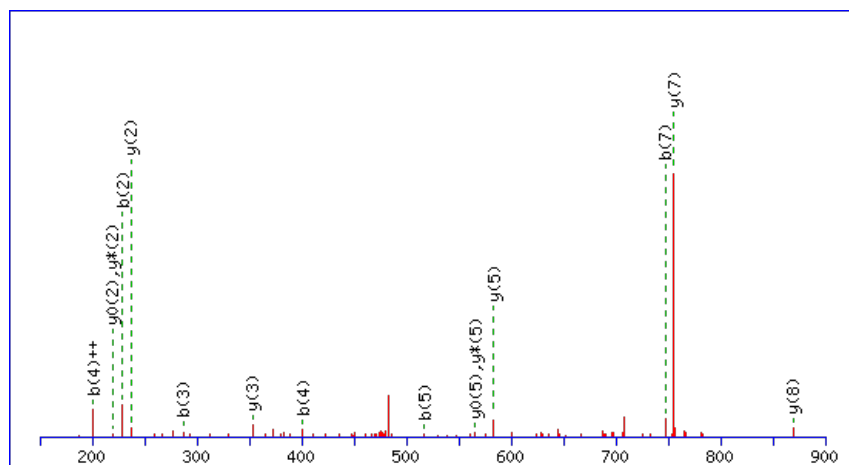

**Monoisotopic mass of neutral peptide Mr(calc):** 982.5195

**Fixed modifications:** Carbamidomethyl (C) (apply to specified residues or termini only)

**Ions Score:** 32 **Expect:** 0.0041

**Matches:** 15/70 fragment ions using 31 most intense peaks ([help](#))

| # | b               | b <sup>++</sup> | b <sup>0</sup> | b <sup>0++</sup> | Seq. | y               | y <sup>++</sup> | y*              | y <sup>*++</sup> | y <sup>0</sup>  | y <sup>0++</sup> | # |
|---|-----------------|-----------------|----------------|------------------|------|-----------------|-----------------|-----------------|------------------|-----------------|------------------|---|
| 1 | 115.0884        | 58.0478         |                |                  | I    |                 |                 |                 |                  |                 |                  | 9 |
| 2 | <b>229.1695</b> | 115.0884        |                |                  | I    | <b>869.4457</b> | 435.2265        | 851.4221        | 426.2147         | 851.4351        | 426.2212         | 8 |
| 3 | <b>287.1880</b> | 144.0976        |                |                  | G    | <b>755.3646</b> | 378.1859        | 737.3410        | 369.1741         | 737.3540        | 369.1807         | 7 |
| 4 | <b>401.2691</b> | <b>201.1382</b> |                |                  | I    | 697.3461        | 349.1767        | 679.3225        | 340.1649         | 679.3355        | 340.1714         | 6 |
| 5 | <b>517.2930</b> | 259.1502        | 499.2825       | 250.1449         | D    | <b>583.2650</b> | 292.1361        | <b>565.2414</b> | 283.1243         | <b>565.2544</b> | 283.1309         | 5 |
| 6 | 631.3741        | 316.1907        | 613.3636       | 307.1854         | I    | 467.2410        | 234.1241        | 449.2174        | 225.1124         | 449.2304        | 225.1189         | 4 |
| 7 | <b>747.3981</b> | 374.2027        | 729.3876       | 365.1974         | D    | <b>353.1599</b> | 177.0836        | 335.1363        | 168.0718         | 335.1493        | 168.0783         | 3 |
| 8 | 835.4272        | 418.2172        | 817.4166       | 409.2120         | S    | <b>237.1359</b> | 119.0716        | <b>219.1124</b> | 110.0598         | <b>219.1254</b> | 110.0663         | 2 |
| 9 |                 |                 |                |                  | K    | 149.1069        | 75.0571         | 131.0833        | 66.0453          |                 |                  | 1 |

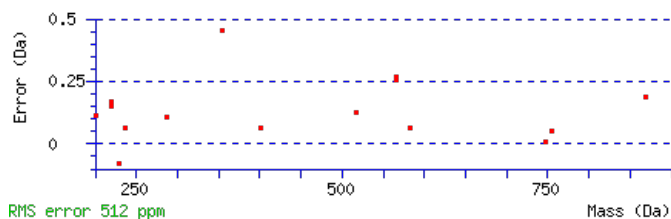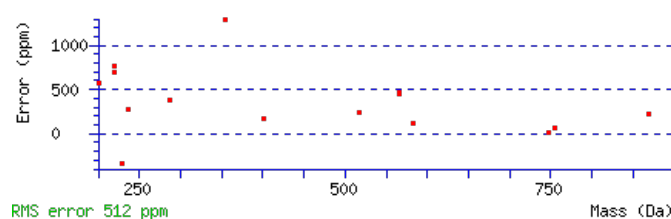

NCBI **BLAST** search of **IIGIDISK**

(Parameters: blastp, nr protein database, expect=20000, no filter, PAM30)

Other BLAST [web gateways](#)

All matches to this query

| Score | Mr(calc) | Delta | Sequence |
|-------|----------|-------|----------|
|       |          |       |          |

# AT5G43940.1

|      |          |         |                           |
|------|----------|---------|---------------------------|
| 31.6 | 982.5195 | -0.0027 | <a href="#">IIGIDIDSK</a> |
| 10.4 | 982.5195 | -0.0027 | <a href="#">LLEELAASK</a> |
| 4.8  | 982.5195 | -0.0027 | <a href="#">ILSVDLEGK</a> |
| 4.8  | 982.5148 | 0.0020  | <a href="#">LIACGTPK</a>  |
| 4.8  | 982.5148 | 0.0020  | <a href="#">LIPLMNQK</a>  |
| 4.8  | 982.5195 | -0.0027 | <a href="#">LLEVDKEK</a>  |
| 4.8  | 982.5195 | -0.0027 | <a href="#">LLQETIEK</a>  |
| 4.8  | 982.5175 | -0.0007 | <a href="#">LLRPAPMR</a>  |
| 3.9  | 982.5148 | 0.0020  | <a href="#">LPNAIMAVK</a> |

Mascot: <http://www.matrixscience.com/>

**Peptide View**MS/MS Fragmentation of **LILYHVSPK**

Found in **AT5G44130.1** in **TAIR\_Arabidopsis**, Symbols: FLA13 | FLA13 (FASCICLIN-LIKE ARABINOGLACTAN PROTEIN 13 PRECURSOR) | chr5:17778355-17779098 FORWARD

Match to Query 2885: 1068.633267 from(357.218365,3+) index(2793)

Title: Elution from: 27.778 to 27.778 scan no 3471 cid35.00 polarity:+

Data file D6h-3\_3.mgf

Click mouse within plot area to zoom in by factor of two about that point

Or,   to  Da

Label all possible matches  Label matches used for scoring

Show Y-axis

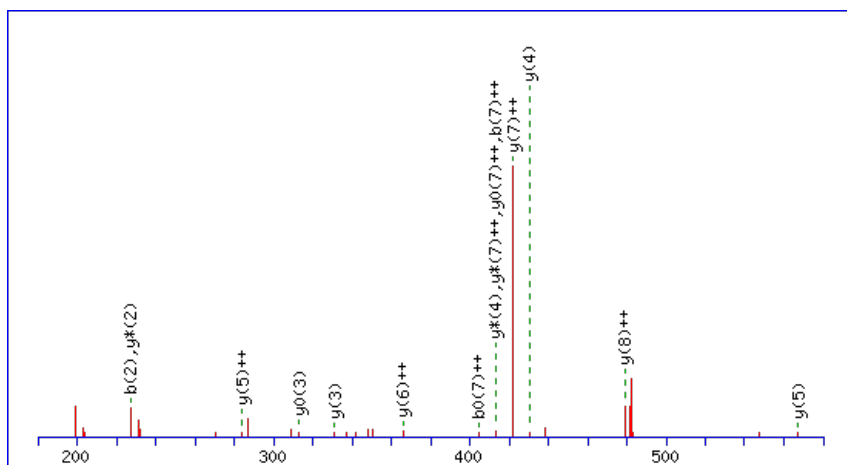

Monoisotopic mass of neutral peptide Mr(calc): 1068.6331

Fixed modifications: Carbamidomethyl (C) (apply to specified residues or termini only)

Ions Score: 19 Expect: 0.014

Matches : 15/64 fragment ions using 26 most intense peaks ([help](#))

| # | b        | b <sup>++</sup> | b <sup>0</sup> | b <sup>0++</sup> | Seq. | y        | y <sup>++</sup> | y*       | y <sup>*++</sup> | y <sup>0</sup> | y <sup>0++</sup> | # |
|---|----------|-----------------|----------------|------------------|------|----------|-----------------|----------|------------------|----------------|------------------|---|
| 1 | 114.0913 | 57.5493         |                |                  | L    |          |                 |          |                  |                |                  | 9 |
| 2 | 227.1754 | 114.0913        |                |                  | I    | 956.5564 | 478.7818        | 939.5298 | 470.2686         | 938.5458       | 469.7765         | 8 |
| 3 | 340.2595 | 170.6334        |                |                  | L    | 843.4723 | 422.2398        | 826.4458 | 413.7265         | 825.4617       | 413.2345         | 7 |
| 4 | 503.3228 | 252.1650        |                |                  | Y    | 730.3883 | 365.6978        | 713.3617 | 357.1845         | 712.3777       | 356.6925         | 6 |
| 5 | 640.3817 | 320.6945        |                |                  | H    | 567.3249 | 284.1661        | 550.2984 | 275.6528         | 549.3144       | 275.1608         | 5 |
| 6 | 739.4501 | 370.2287        |                |                  | V    | 430.2660 | 215.6366        | 413.2395 | 207.1234         | 412.2554       | 206.6314         | 4 |
| 7 | 826.4822 | 413.7447        | 808.4716       | 404.7394         | S    | 331.1976 | 166.1024        | 314.1710 | 157.5892         | 313.1870       | 157.0972         | 3 |
| 8 | 923.5349 | 462.2711        | 905.5243       | 453.2658         | P    | 244.1656 | 122.5864        | 227.1390 | 114.0731         |                |                  | 2 |
| 9 |          |                 |                |                  | K    | 147.1128 | 74.0600         | 130.0863 | 65.5468          |                |                  | 1 |

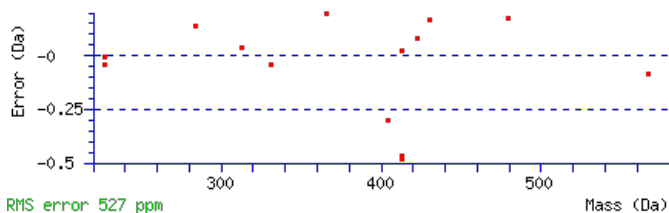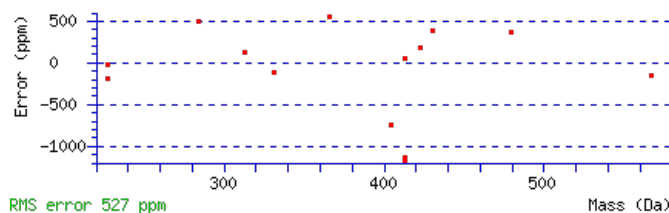

NCBI BLAST search of [LILYHVSPK](#)

(Parameters: blastp, nr protein database, expect=20000, no filter, PAM30)

Other BLAST [web gateways](#)

All matches to this query

| Score | Mr(calc) | Delta | Sequence |
|-------|----------|-------|----------|
|       |          |       |          |



AT5G44130.1

|      |           |        |                           |
|------|-----------|--------|---------------------------|
| 18.6 | 1068.6331 | 0.0001 | <a href="#">LILYHVSPK</a> |
|------|-----------|--------|---------------------------|

**Mascot:** <http://www.matrixscience.com/>


**Mascot Search Results**
**Peptide View**MS/MS Fragmentation of **EVDEQMMNIQNK**Found in **AT5G44340.1** in **TAIR\_Arabidopsis**, Symbols: TUB4 | TUB4 (tubulin beta-4 chain) | chr5:17876669-17878221 REVERSE

Match to Query 6590: 1494.604474 from(748.309513,2+) index(3692)

Title: Elution from: 34.650 to 34.650 scan no 4541 cid35.00 polarity:+

Data file C7-1\_1.mgf

Click mouse within plot area to zoom in by factor of two about that point

Or,   to  Da Label all possible matches  Label matches used for scoring Show Y-axis 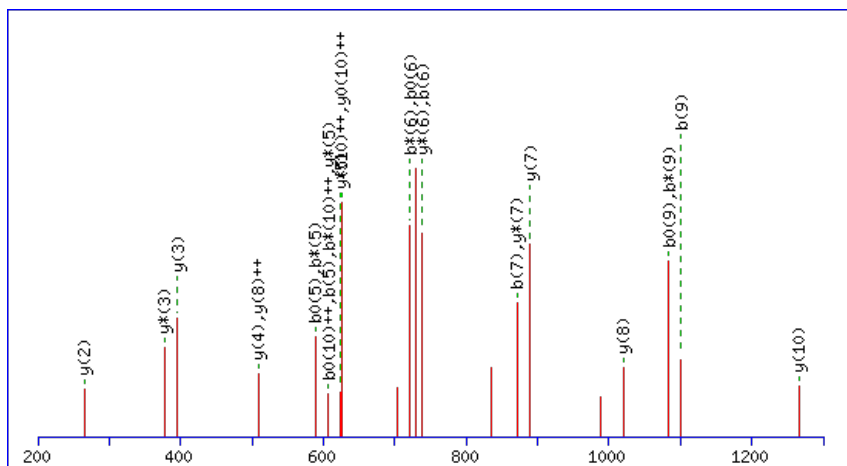Monoisotopic mass of neutral peptide  $M_r(\text{calc})$ : 1494.6037

Fixed modifications: Carbamidomethyl (C) (apply to specified residues or termini only)

Ions Score: 64 Expect: 1.6e-006

Matches : 26/108 fragment ions using 20 most intense peaks ([help](#))

| #  | b                | b <sup>++</sup> | b*               | b <sup>*++</sup> | b <sup>0</sup>   | b <sup>0++</sup> | Seq. | y                | y <sup>++</sup> | y*              | y <sup>*++</sup> | y <sup>0</sup> | y <sup>0++</sup> | #  |
|----|------------------|-----------------|------------------|------------------|------------------|------------------|------|------------------|-----------------|-----------------|------------------|----------------|------------------|----|
| 1  | 131.0469         | 66.0271         |                  |                  | 113.0363         | 57.0218          | E    |                  |                 |                 |                  |                |                  | 12 |
| 2  | 231.1124         | 116.0598        |                  |                  | 213.1018         | 107.0545         | V    | 1365.5714        | 683.2893        | 1347.5478       | 674.2775         | 1347.5608      | 674.2840         | 11 |
| 3  | 347.1363         | 174.0718        |                  |                  | 329.1258         | 165.0665         | D    | <b>1265.5059</b> | 633.2566        | 1247.4823       | <b>624.2448</b>  | 1247.4953      | <b>624.2513</b>  | 10 |
| 4  | 477.1760         | 239.0916        |                  |                  | 459.1654         | 230.0863         | E    | 1149.4819        | 575.2446        | 1131.4583       | 566.2328         | 1131.4714      | 566.2393         | 9  |
| 5  | <b>607.2286</b>  | 304.1179        | <b>589.2050</b>  | 295.1061         | <b>589.2180</b>  | 295.1127         | Q    | <b>1019.4423</b> | <b>510.2248</b> | 1001.4187       | 501.2130         |                |                  | 8  |
| 6  | <b>739.2661</b>  | 370.1367        | <b>721.2425</b>  | 361.1249         | <b>721.2556</b>  | 361.1314         | M    | <b>889.3897</b>  | 445.1985        | <b>871.3661</b> | 436.1867         |                |                  | 7  |
| 7  | <b>871.3036</b>  | 436.1555        | 853.2801         | 427.1437         | 853.2931         | 427.1502         | M    | 757.3521         | 379.1797        | <b>739.3285</b> | 370.1679         |                |                  | 6  |
| 8  | 987.3406         | 494.1740        | 969.3171         | 485.1622         | 969.3301         | 485.1687         | N    | <b>625.3146</b>  | 313.1609        | <b>607.2910</b> | 304.1492         |                |                  | 5  |
| 9  | <b>1101.4217</b> | 551.2145        | <b>1083.3982</b> | 542.2027         | <b>1083.4112</b> | 542.2092         | I    | <b>509.2776</b>  | 255.1424        | 491.2540        | 246.1307         |                |                  | 4  |
| 10 | 1231.4744        | 616.2408        | 1213.4508        | <b>607.2290</b>  | 1213.4638        | <b>607.2355</b>  | Q    | <b>395.1965</b>  | 198.1019        | <b>377.1729</b> | 189.0901         |                |                  | 3  |
| 11 | 1347.5114        | 674.2593        | 1329.4878        | 665.2475         | 1329.5008        | 665.2540         | N    | <b>265.1439</b>  | 133.0756        | 247.1203        | 124.0638         |                |                  | 2  |
| 12 |                  |                 |                  |                  |                  |                  | K    | 149.1069         | 75.0571         | 131.0833        | 66.0453          |                |                  | 1  |

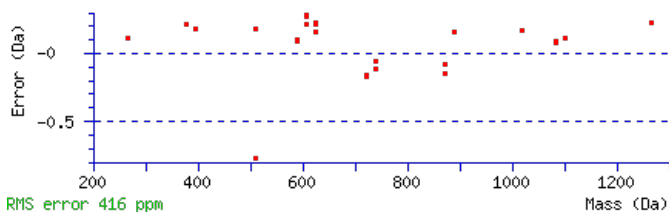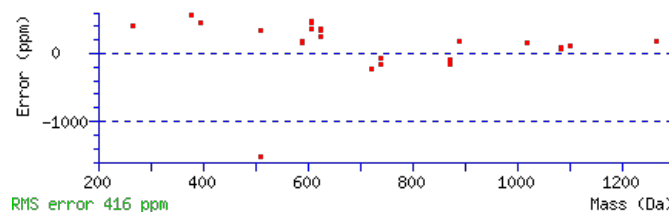NCBI **BLAST** search of **EVDEQMMNIQNK**

(Parameters: blastp, nr protein database, expect=20000, no filter, PAM30)

Other BLAST [web gateways](#)**All matches to this query**

AT5G44340.1

| Score | Mr(calc)  | Delta  | Sequence                     |
|-------|-----------|--------|------------------------------|
| 63.6  | 1494.6037 | 0.0008 | <a href="#">EVDEQMMNIQNK</a> |

Mascot: <http://www.matrixscience.com/>

**Peptide View**MS/MS Fragmentation of **DDLMSNKSFNREVK**

Found in **AT5G44700.1** in **TAIR\_Arabidopsis**, Symbols: EDA23, GSO2 | EDA23 (embryo sac development arrest 23); ATP binding / protein serine/threonine kinase | chr5:18050276-18054121 REVERSE

Match to Query 8439: 1702.743514 from(852.379033,2+) index(7985)

Title: Elution from: 70.111 to 70.111 scan no 10371 cid35.00 polarity:+

Data file C7-2\_1.mgf

Click mouse within plot area to zoom in by factor of two about that point

Or,   to  Da

Label all possible matches  Label matches used for scoring

Show Y-axis

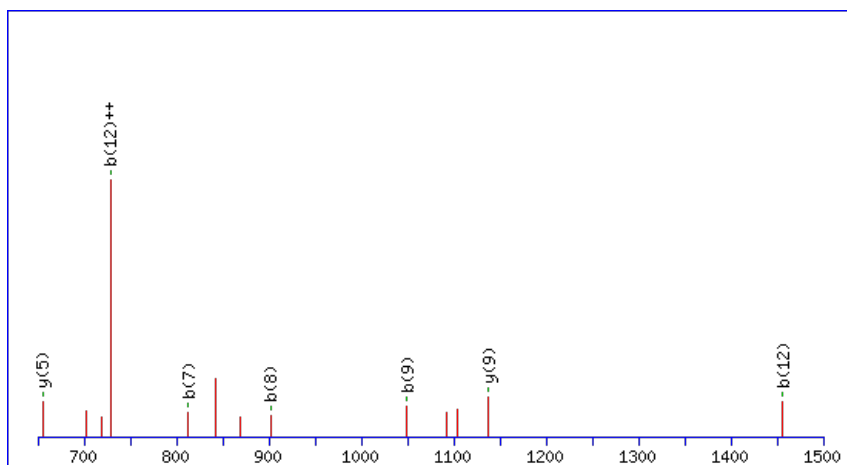

**Monoisotopic mass of neutral peptide Mr(calc):** 1702.7471

**Fixed modifications:** Carbamidomethyl (C) (apply to specified residues or termini only)

**Ions Score:** 23 **Expect:** 0.03

**Matches:** 7/142 fragment ions using 11 most intense peaks ([help](#))

| #  | b                | b <sup>++</sup> | b*        | b <sup>*++</sup> | b <sup>0</sup> | b <sup>0++</sup> | Seq. | y                | y <sup>++</sup> | y*        | y <sup>*++</sup> | y <sup>0</sup> | y <sup>0++</sup> | #  |
|----|------------------|-----------------|-----------|------------------|----------------|------------------|------|------------------|-----------------|-----------|------------------|----------------|------------------|----|
| 1  | 117.0313         | 59.0193         |           |                  | 99.0207        | 50.0140          | D    |                  |                 |           |                  |                |                  | 14 |
| 2  | 233.0552         | 117.0313        |           |                  | 215.0447       | 108.0260         | D    | 1587.7304        | 794.3688        | 1569.7068 | 785.3570         | 1569.7198      | 785.3636         | 13 |
| 3  | 347.1363         | 174.0718        |           |                  | 329.1258       | 165.0665         | L    | 1471.7064        | 736.3568        | 1453.6828 | 727.3451         | 1453.6959      | 727.3516         | 12 |
| 4  | 479.1739         | 240.0906        |           |                  | 461.1633       | 231.0853         | M    | 1357.6253        | 679.3163        | 1339.6017 | 670.3045         | 1339.6148      | 670.3110         | 11 |
| 5  | 567.2029         | 284.1051        |           |                  | 549.1923       | 275.0998         | S    | 1225.5878        | 613.2975        | 1207.5642 | 604.2857         | 1207.5772      | 604.2923         | 10 |
| 6  | 683.2399         | 342.1236        | 665.2163  | 333.1118         | 665.2293       | 333.1183         | N    | <b>1137.5587</b> | 569.2830        | 1119.5352 | 560.2712         | 1119.5482      | 560.2777         | 9  |
| 7  | <b>813.3289</b>  | 407.1681        | 795.3054  | 398.1563         | 795.3184       | 398.1628         | K    | 1021.5217        | 511.2645        | 1003.4982 | 502.2527         | 1003.5112      | 502.2592         | 8  |
| 8  | <b>901.3580</b>  | 451.1826        | 883.3344  | 442.1708         | 883.3474       | 442.1774         | S    | 891.4327         | 446.2200        | 873.4091  | 437.2082         | 873.4221       | 437.2147         | 7  |
| 9  | <b>1049.4235</b> | 525.2154        | 1031.3999 | 516.2036         | 1031.4129      | 516.2101         | F    | 803.4036         | 402.2055        | 785.3801  | 393.1937         | 785.3931       | 393.2002         | 6  |
| 10 | 1165.4605        | 583.2339        | 1147.4369 | 574.2221         | 1147.4499      | 574.2286         | N    | <b>655.3382</b>  | 328.1727        | 637.3146  | 319.1609         | 637.3276       | 319.1675         | 5  |
| 11 | 1325.5497        | 663.2785        | 1307.5261 | 654.2667         | 1307.5391      | 654.2732         | R    | 539.3012         | 270.1542        | 521.2776  | 261.1424         | 521.2906       | 261.1490         | 4  |
| 12 | <b>1455.5893</b> | <b>728.2983</b> | 1437.5657 | 719.2865         | 1437.5788      | 719.2930         | E    | 379.2120         | 190.1096        | 361.1884  | 181.0978         | 361.2014       | 181.1043         | 3  |
| 13 | 1555.6548        | 778.3310        | 1537.6312 | 769.3192         | 1537.6442      | 769.3257         | V    | 249.1723         | 125.0898        | 231.1487  | 116.0780         |                |                  | 2  |
| 14 |                  |                 |           |                  |                |                  | K    | 149.1069         | 75.0571         | 131.0833  | 66.0453          |                |                  | 1  |

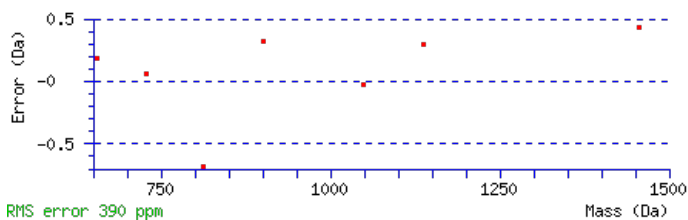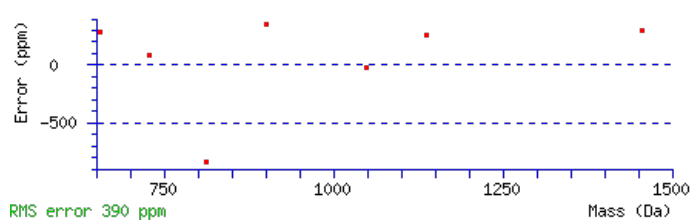

NCBI BLAST search of [DDLMSNKSFNREVK](#)

## AT5G44700.1

(Parameters: blastp, nr protein database, expect=20000, no filter, PAM30)

Other BLAST [web gateways](#)

### All matches to this query

| Score | Mr(calc)  | Delta   | Sequence                        |
|-------|-----------|---------|---------------------------------|
| 23.2  | 1702.7471 | -0.0036 | <a href="#">DDLMSNKSFNREVK</a>  |
| 22.0  | 1702.7442 | -0.0007 | <a href="#">MVPFAGWSMPIQYK</a>  |
| 2.8   | 1702.7393 | 0.0042  | <a href="#">SSASSSASDLLRREQ</a> |
| 2.8   | 1702.7401 | 0.0034  | <a href="#">TGSRSDVCIMKGDVR</a> |

Mascot: <http://www.matrixscience.com/>

**Peptide View**MS/MS Fragmentation of **FRSDNVLMPDK**Found in **AT5G44720.1** in **TAIR\_Arabidopsis**, Symbols: | molybdenum cofactor sulfurase family protein | chr5:18060313-18062502 FORWARD

Match to Query 5051: 1336.645502 from(669.330027,2+) index(1720)

Title: Elution from: 21.716 to 21.716 scan no 2258 cid35.00 polarity:+

Data file D6h-3\_1.mgf

Click mouse within plot area to zoom in by factor of two about that point

Or,   to  Da Label all possible matches  Label matches used for scoring Show Y-axis 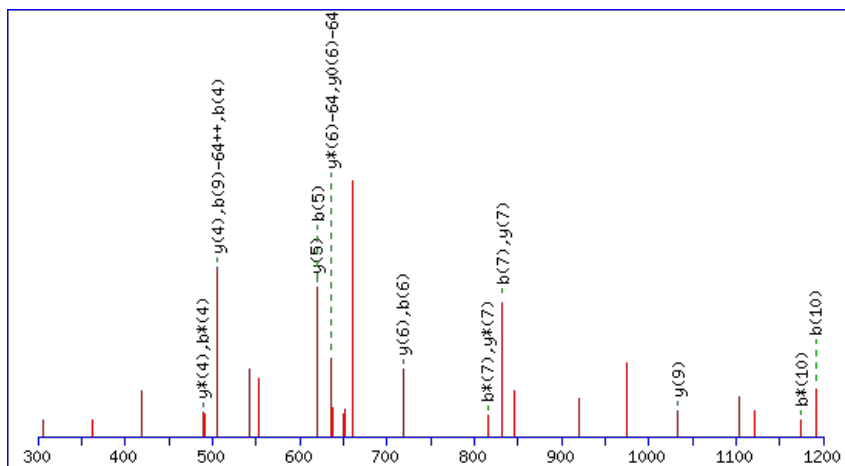Monoisotopic mass of neutral peptide **Mr(calc)**: 1336.6445**Fixed modifications:** Carbamidomethyl (C) (apply to specified residues or termini only)**Variable modifications:****M8** : Oxidation (M), with neutral losses 0.0000 (shown in table), 63.9983**Ions Score:** 30 **Expect:** 0.0045**Matches** : 18/172 fragment ions using 27 most intense peaks ([help](#))

| #  | b                | b <sup>++</sup> | b <sup>*</sup>   | b <sup>*++</sup> | b <sup>0</sup> | b <sup>0++</sup> | Seq. | y                | y <sup>++</sup> | y <sup>*</sup>  | y <sup>*++</sup> | y <sup>0</sup> | y <sup>0++</sup> | #  |
|----|------------------|-----------------|------------------|------------------|----------------|------------------|------|------------------|-----------------|-----------------|------------------|----------------|------------------|----|
| 1  | 148.0757         | 74.5415         |                  |                  |                |                  | F    |                  |                 |                 |                  |                |                  | 11 |
| 2  | 304.1768         | 152.5920        | 287.1503         | 144.0788         |                |                  | R    | 1190.5834        | 595.7953        | 1173.5568       | 587.2821         | 1172.5728      | 586.7901         | 10 |
| 3  | 391.2088         | 196.1081        | 374.1823         | 187.5948         | 373.1983       | 187.1028         | S    | <b>1034.4823</b> | 517.7448        | 1017.4557       | 509.2315         | 1016.4717      | 508.7395         | 9  |
| 4  | <b>506.2358</b>  | 253.6215        | <b>489.2092</b>  | 245.1082         | 488.2252       | 244.6162         | D    | 947.4503         | 474.2288        | 930.4237        | 465.7155         | 929.4397       | 465.2235         | 8  |
| 5  | <b>620.2787</b>  | 310.6430        | 603.2522         | 302.1297         | 602.2681       | 301.6377         | N    | <b>832.4233</b>  | 416.7153        | <b>815.3968</b> | 408.2020         | 814.4128       | 407.7100         | 7  |
| 6  | <b>719.3471</b>  | 360.1772        | 702.3206         | 351.6639         | 701.3365       | 351.1719         | V    | <b>718.3804</b>  | 359.6938        | 701.3538        | 351.1806         | 700.3698       | 350.6886         | 6  |
| 7  | <b>832.4312</b>  | 416.7192        | <b>815.4046</b>  | 408.2060         | 814.4206       | 407.7139         | L    | <b>619.3120</b>  | 310.1596        | 602.2854        | 301.6464         | 601.3014       | 301.1543         | 5  |
| 8  | 979.4666         | 490.2369        | 962.4400         | 481.7237         | 961.4560       | 481.2316         | M    | <b>506.2279</b>  | 253.6176        | <b>489.2014</b> | 245.1043         | 488.2173       | 244.6123         | 4  |
| 9  | 1076.5193        | 538.7633        | 1059.4928        | 530.2500         | 1058.5088      | 529.7580         | P    | 359.1925         | 180.0999        | 342.1660        | 171.5866         | 341.1819       | 171.0946         | 3  |
| 10 | <b>1191.5463</b> | 596.2768        | <b>1174.5197</b> | 587.7635         | 1173.5357      | 587.2715         | D    | 262.1397         | 131.5735        | 245.1132        | 123.0602         | 244.1292       | 122.5682         | 2  |
| 11 |                  |                 |                  |                  |                |                  | K    | 147.1128         | 74.0600         | 130.0863        | 65.5468          |                |                  | 1  |

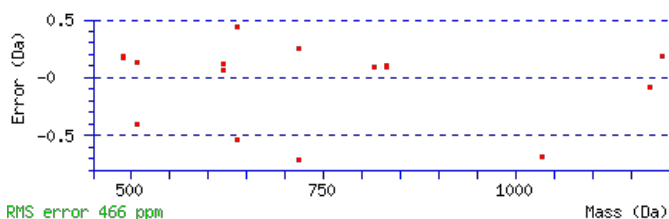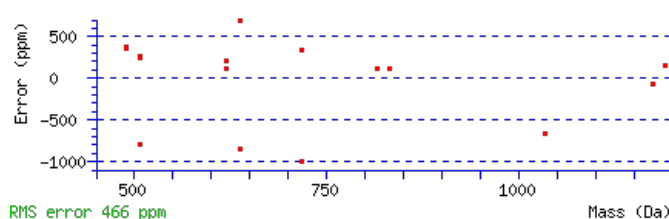NCBI **BLAST** search of **FRSDNVLMPDK**

(Parameters: blastp, nr protein database, expect=20000, no filter, PAM30)

Other BLAST [web gateways](#)

AT5G44720.1

All matches to this query

| Score | Mr(calc)  | Delta   | Sequence                       |
|-------|-----------|---------|--------------------------------|
| 30.1  | 1336.6445 | 0.0010  | <a href="#">FRSDNVLMPDK</a>    |
| 19.5  | 1336.6479 | -0.0024 | <a href="#">SMALAEMVNVTR</a>   |
| 5.9   | 1336.6470 | -0.0015 | <a href="#">SVASLSQSESGASK</a> |
| 2.0   | 1336.6445 | 0.0010  | <a href="#">TNCILEAFGNAK</a>   |
| 1.7   | 1336.6486 | -0.0031 | <a href="#">MFNPVDLPNEK</a>    |
| 1.7   | 1336.6445 | 0.0010  | <a href="#">RIGDDDCFVLK</a>    |
| 0.1   | 1336.6484 | -0.0029 | <a href="#">YGARGDGRADATK</a>  |

Mascot: <http://www.matrixscience.com/>

## Peptide View

MS/MS Fragmentation of **NNRHMLPITQKWK**

Found in **AT5G45080.1** in **TAIR\_Arabidopsis**, Symbols: ATPP2-A6 | ATPP2-A6 (Phloem protein 2-A6); transmembrane receptor | chr5:18208802-18210434 REVERSE

Match to Query 8114: 1704.814370 from(853.414461,2+) index(8014)

Title: Elution from: 70.458 to 70.458 scan no 10487 cid35.00 polarity:+

Data file D12h-1\_2.mgf

Click mouse within plot area to zoom in by factor of two about that point

Or,   to  Da

Label all possible matches  Label matches used for scoring

Show Y-axis

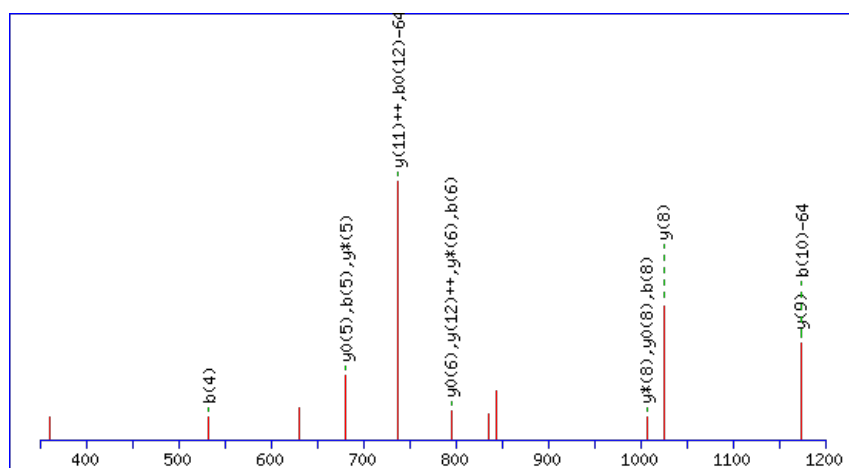

Monoisotopic mass of neutral peptide  $M_r(\text{calc})$ : 1704.8171

Fixed modifications: Carbamidomethyl (C) (apply to specified residues or termini only)

Variable modifications:

M5 : Oxidation (M), with neutral losses 0.0000 (shown in table), 63.9983

Ions Score: 31 Expect: 0.006

Matches : 17/184 fragment ions using 13 most intense peaks ([help](#))

| #  | b         | b <sup>++</sup> | b <sup>*</sup> | b <sup>*++</sup> | b <sup>0</sup> | b <sup>0++</sup> | Seq. | y         | y <sup>++</sup> | y <sup>*</sup> | y <sup>*++</sup> | y <sup>0</sup> | y <sup>0++</sup> | #  |
|----|-----------|-----------------|----------------|------------------|----------------|------------------|------|-----------|-----------------|----------------|------------------|----------------|------------------|----|
| 1  | 117.0443  | 59.0258         | 99.0207        | 50.0140          |                |                  | N    |           |                 |                |                  |                |                  | 13 |
| 2  | 233.0813  | 117.0443        | 215.0577       | 108.0325         |                |                  | N    | 1589.7873 | 795.3973        | 1571.7638      | 786.3855         | 1571.7768      | 786.3920         | 12 |
| 3  | 393.1705  | 197.0889        | 375.1469       | 188.0771         |                |                  | R    | 1473.7503 | 737.3788        | 1455.7268      | 728.3670         | 1455.7398      | 728.3735         | 11 |
| 4  | 533.2205  | 267.1139        | 515.1970       | 258.1021         |                |                  | H    | 1313.6611 | 657.3342        | 1295.6375      | 648.3224         | 1295.6505      | 648.3289         | 10 |
| 5  | 681.2530  | 341.1301        | 663.2294       | 332.1183         |                |                  | M    | 1173.6111 | 587.3092        | 1155.5875      | 578.2974         | 1155.6005      | 578.3039         | 9  |
| 6  | 795.3341  | 398.1707        | 777.3105       | 389.1589         |                |                  | L    | 1025.5786 | 513.2930        | 1007.5551      | 504.2812         | 1007.5681      | 504.2877         | 8  |
| 7  | 893.3839  | 447.1956        | 875.3603       | 438.1838         |                |                  | P    | 911.4975  | 456.2524        | 893.4740       | 447.2406         | 893.4870       | 447.2471         | 7  |
| 8  | 1007.4650 | 504.2361        | 989.4414       | 495.2243         |                |                  | I    | 813.4477  | 407.2275        | 795.4242       | 398.2157         | 795.4372       | 398.2222         | 6  |
| 9  | 1109.5097 | 555.2585        | 1091.4861      | 546.2467         | 1091.4991      | 546.2532         | T    | 699.3666  | 350.1870        | 681.3431       | 341.1752         | 681.3561       | 341.1817         | 5  |
| 10 | 1239.5623 | 620.2848        | 1221.5387      | 611.2730         | 1221.5518      | 611.2795         | Q    | 597.3219  | 299.1646        | 579.2984       | 290.1528         |                |                  | 4  |
| 11 | 1369.6514 | 685.3293        | 1351.6278      | 676.3175         | 1351.6408      | 676.3240         | K    | 467.2693  | 234.1383        | 449.2457       | 225.1265         |                |                  | 3  |
| 12 | 1557.7247 | 779.3660        | 1539.7012      | 770.3542         | 1539.7142      | 770.3607         | W    | 337.1803  | 169.0938        | 319.1567       | 160.0820         |                |                  | 2  |
| 13 |           |                 |                |                  |                |                  | K    | 149.1069  | 75.0571         | 131.0833       | 66.0453          |                |                  | 1  |

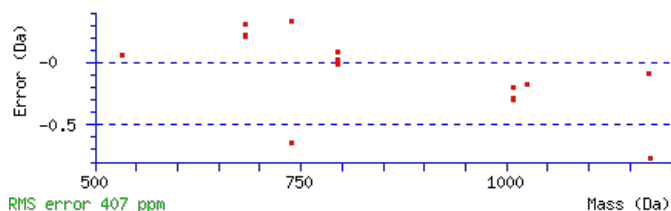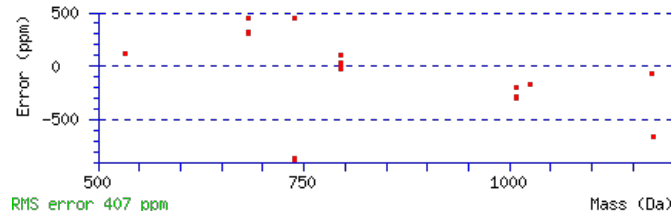

NCBI BLAST search of [NNRHMLPITQKWK](#)



## AT5G45080.1

(Parameters: blastp, nr protein database, expect=20000, no filter, PAM30)

Other BLAST [web gateways](#)

### All matches to this query

| Score | Mr(calc)  | Delta   | Sequence                          |
|-------|-----------|---------|-----------------------------------|
| 31.3  | 1704.8171 | -0.0027 | <a href="#">NNRHMLPITQKWK</a>     |
| 3.1   | 1704.8169 | -0.0025 | <a href="#">TEDPEIAQTARPCKT</a>   |
| 2.5   | 1704.8121 | 0.0022  | <a href="#">LTGSAKIRAGSYSGGMK</a> |
| 2.2   | 1704.8191 | -0.0048 | <a href="#">HDSVDGPSYNLLK</a>     |
| 1.7   | 1704.8169 | -0.0025 | <a href="#">NIQVVDSSNNLKEPK</a>   |
| 1.4   | 1704.8169 | -0.0025 | <a href="#">DITQLVEIRPESER</a>    |
| 1.3   | 1704.8117 | 0.0026  | <a href="#">LNQTSFSSLV MAYVK</a>  |
| 0.6   | 1704.8121 | 0.0022  | <a href="#">RILDEKHMDLAQAK</a>    |

Mascot: <http://www.matrixscience.com/>

**Peptide View**MS/MS Fragmentation of **IYLF<sup>+</sup>LHR**

Found in **AT5G45140.1** in **TAIR\_Arabidopsis**, Symbols: NRPC2 | NRPC2 (nuclear RNA polymerase C 2); DNA binding / DNA-directed RNA polymerase | chr5:18264643-18274940 REVERSE

Match to Query 2239: 972.521206 from(487.267879,2+) index(3493)

Title: Elution from: 34.937 to 34.937 scan no 4408 cid35.00 polarity:+

Data file 0-3\_1.mgf

Click mouse within plot area to zoom in by factor of two about that point

Or,   to  Da

Label all possible matches  Label matches used for scoring

Show Y-axis

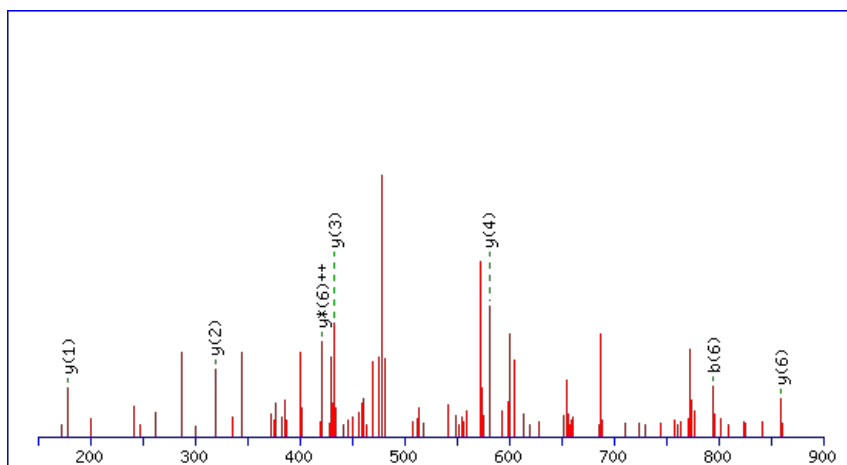

**Monoisotopic mass of neutral peptide Mr(calc):** 972.5189

**Fixed modifications:** Carbamidomethyl (C) (apply to specified residues or termini only)

**Ions Score:** 21 **Expect:** 0.027

**Matches:** 7/36 fragment ions using 21 most intense peaks ([help](#))

| # | b        | b <sup>++</sup> | Seq. | y        | y <sup>++</sup> | y*       | y <sup>*++</sup> | # |
|---|----------|-----------------|------|----------|-----------------|----------|------------------|---|
| 1 | 115.0884 | 58.0478         | I    |          |                 |          |                  | 7 |
| 2 | 279.1487 | 140.0780        | Y    | 859.4451 | 430.2262        | 841.4215 | 421.2144         | 6 |
| 3 | 393.2298 | 197.1186        | L    | 695.3848 | 348.1960        | 677.3612 | 339.1842         | 5 |
| 4 | 541.2953 | 271.1513        | F    | 581.3037 | 291.1555        | 563.2801 | 282.1437         | 4 |
| 5 | 655.3764 | 328.1918        | L    | 433.2382 | 217.1227        | 415.2146 | 208.1109         | 3 |
| 6 | 795.4264 | 398.2168        | H    | 319.1571 | 160.0822        | 301.1335 | 151.0704         | 2 |
| 7 |          |                 | R    | 179.1071 | 90.0572         | 161.0835 | 81.0454          | 1 |

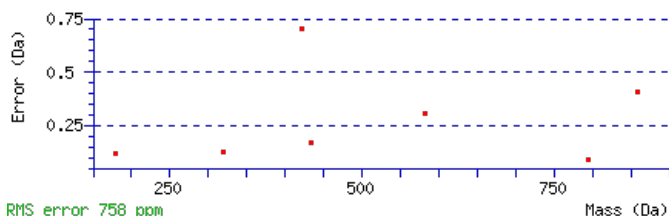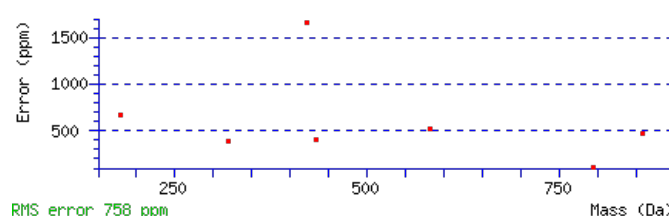NCBI **BLAST** search of **IYLF<sup>+</sup>LHR**

(Parameters: blastp, nr protein database, expect=20000, no filter, PAM30)

Other BLAST [web gateways](#)

**All matches to this query**

| Score | Mr(calc) | Delta  | Sequence                            |
|-------|----------|--------|-------------------------------------|
| 21.0  | 972.5189 | 0.0023 | <a href="#">IYLF<sup>+</sup>LHR</a> |
| 6.1   | 972.5201 | 0.0011 | <a href="#">KDALKVMR</a>            |



**Peptide View**MS/MS Fragmentation of **WGLTLPSRK**Found in **AT5G45360.1** in **TAIR\_Arabidopsis**, Symbols: | F-box family protein | chr5:18402010-18403897 REVERSE

Match to Query 2687: 1070.568342 from(536.291447,2+) index(7136)

Title: Elution from: 64.348 to 64.348 scan no 9419 cid35.00 polarity:+

Data file D1d-2\_3.mgf

Click mouse within plot area to zoom in by factor of two about that point

Or,  to  Da Label all possible matches  Label matches used for scoring Show Y-axis 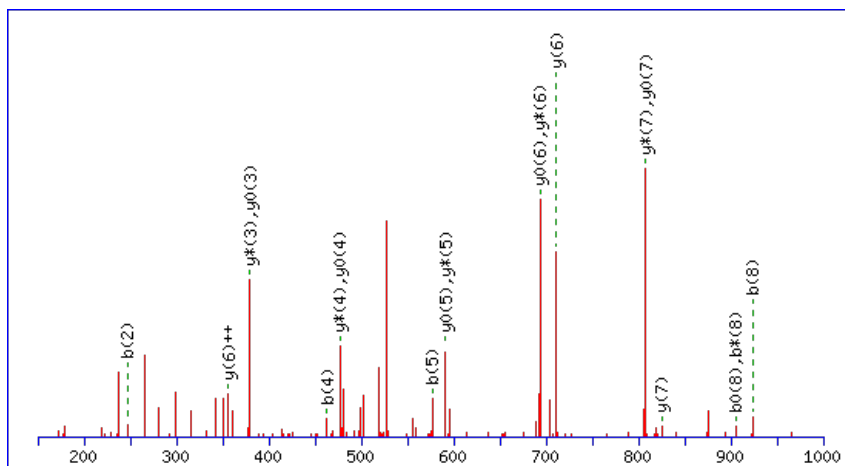Monoisotopic mass of neutral peptide  $M_r(\text{calc})$ : 1070.5665

Fixed modifications: Carbamidomethyl (C) (apply to specified residues or termini only)

Ions Score: 20 Expect: 0.043

Matches : 19/72 fragment ions using 24 most intense peaks ([help](#))

| # | b               | b <sup>++</sup> | b*              | b <sup>*++</sup> | b <sup>0</sup>  | b <sup>0++</sup> | Seq. | y               | y <sup>++</sup> | y*              | y <sup>*++</sup> | y <sup>0</sup>  | y <sup>0++</sup> | # |
|---|-----------------|-----------------|-----------------|------------------|-----------------|------------------|------|-----------------|-----------------|-----------------|------------------|-----------------|------------------|---|
| 1 | 189.0807        | 95.0440         |                 |                  |                 |                  | W    |                 |                 |                 |                  |                 |                  | 9 |
| 2 | <b>247.0992</b> | 124.0532        |                 |                  |                 |                  | G    | 883.5004        | 442.2538        | 865.4768        | 433.2420         | 865.4898        | 433.2486         | 8 |
| 3 | 361.1803        | 181.0938        |                 |                  |                 |                  | L    | <b>825.4819</b> | 413.2446        | <b>807.4583</b> | 404.2328         | <b>807.4713</b> | 404.2393         | 7 |
| 4 | <b>463.2250</b> | 232.1161        |                 |                  | 445.2144        | 223.1108         | T    | <b>711.4008</b> | <b>356.2040</b> | <b>693.3772</b> | 347.1922         | <b>693.3902</b> | 347.1988         | 6 |
| 5 | <b>577.3061</b> | 289.1567        |                 |                  | 559.2955        | 280.1514         | L    | 609.3561        | 305.1817        | <b>591.3325</b> | 296.1699         | <b>591.3455</b> | 296.1764         | 5 |
| 6 | 675.3559        | 338.1816        |                 |                  | 657.3453        | 329.1763         | P    | 495.2750        | 248.1411        | <b>477.2514</b> | 239.1293         | <b>477.2644</b> | 239.1358         | 4 |
| 7 | 763.3849        | 382.1961        |                 |                  | 745.3744        | 373.1908         | S    | 397.2252        | 199.1162        | <b>379.2016</b> | 190.1044         | <b>379.2146</b> | 190.1109         | 3 |
| 8 | <b>923.4742</b> | 462.2407        | <b>905.4506</b> | 453.2289         | <b>905.4636</b> | 453.2354         | R    | 309.1961        | 155.1017        | 291.1725        | 146.0899         |                 |                  | 2 |
| 9 |                 |                 |                 |                  |                 |                  | K    | 149.1069        | 75.0571         | 131.0833        | 66.0453          |                 |                  | 1 |

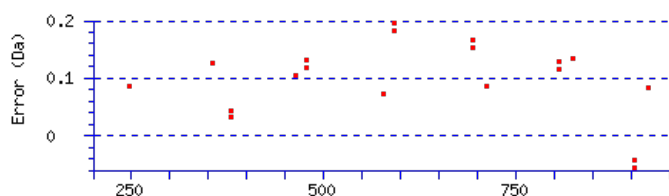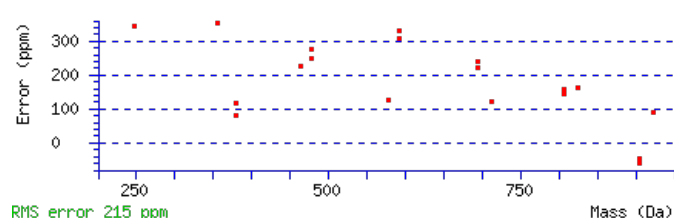NCBI **BLAST** search of [WGLTLPSRK](#)

(Parameters: blastp, nr protein database, expect=20000, no filter, PAM30)

Other BLAST [web gateways](#)**All matches to this query**

| Score | $M_r(\text{calc})$ | Delta  | Sequence                  |
|-------|--------------------|--------|---------------------------|
| 20.3  | 1070.5665          | 0.0018 | <a href="#">WGLTLPSRK</a> |

## AT5G45360.1

|     |           |         |                           |
|-----|-----------|---------|---------------------------|
| 9.9 | 1070.5672 | 0.0011  | <a href="#">KLTEMPLK</a>  |
| 6.8 | 1070.5672 | 0.0011  | <a href="#">LMVISEKPK</a> |
| 1.5 | 1070.5672 | 0.0011  | <a href="#">METNLLLVK</a> |
| 0.9 | 1070.5699 | -0.0015 | <a href="#">IMGRDKPIK</a> |
| 0.4 | 1070.5672 | 0.0011  | <a href="#">NLMLLIDTK</a> |

**Mascot:** <http://www.matrixscience.com/>

## Peptide View

### MS/MS Fragmentation of **RFAMPNTR**

Found in **AT5G45390.1** in **TAIR\_Arabidopsis**, Symbols: NCLPP3, NCLPP4, CLPP4 | CLPP4 (Clp protease proteolytic subunit 4); endopeptidase Clp | chr5:18413578-18414813 FORWARD

Match to Query 2466: 991.502676 from(496.758614,2+) index(1415)

Title: Elution from: 18.753 to 18.753 scan no 1896 cid35.00 polarity:+

Data file C7-3\_2.mgf

Click mouse within plot area to zoom in by factor of two about that point

Or,   to  Da

Label all possible matches  Label matches used for scoring

Show Y-axis

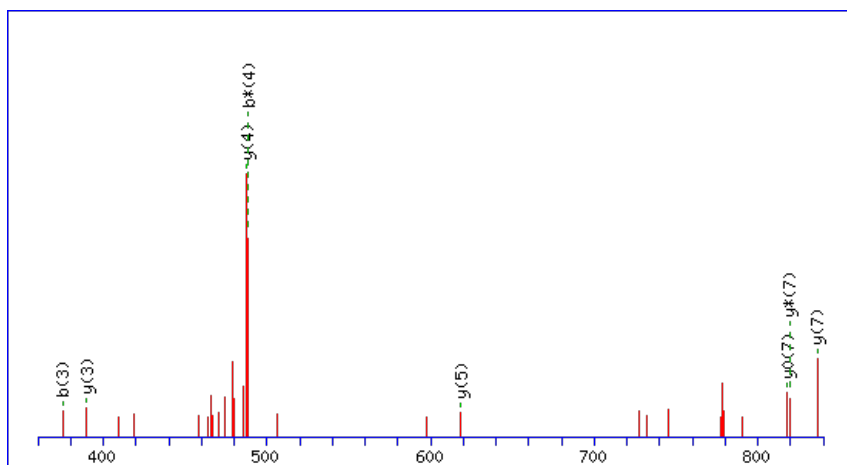

Monoisotopic mass of neutral peptide  $M_r(\text{calc})$ : 991.5022

Fixed modifications: Carbamidomethyl (C) (apply to specified residues or termini only)

Ions Score: 23 Expect: 0.025

Matches : 9/70 fragment ions using 17 most intense peaks ([help](#))

| # | b        | b <sup>++</sup> | b*       | b <sup>*++</sup> | b <sup>0</sup> | b <sup>0++</sup> | Seq. | y        | y <sup>++</sup> | y*       | y <sup>*++</sup> | y <sup>0</sup> | y <sup>0++</sup> | # |
|---|----------|-----------------|----------|------------------|----------------|------------------|------|----------|-----------------|----------|------------------|----------------|------------------|---|
| 1 | 157.1084 | 79.0578         | 140.0818 | 70.5446          |                |                  | R    |          |                 |          |                  |                |                  | 8 |
| 2 | 304.1768 | 152.5920        | 287.1503 | 144.0788         |                |                  | F    | 836.4083 | 418.7078        | 819.3818 | 410.1945         | 818.3978       | 409.7025         | 7 |
| 3 | 375.2139 | 188.1106        | 358.1874 | 179.5973         |                |                  | A    | 689.3399 | 345.1736        | 672.3134 | 336.6603         | 671.3294       | 336.1683         | 6 |
| 4 | 506.2544 | 253.6308        | 489.2279 | 245.1176         |                |                  | M    | 618.3028 | 309.6550        | 601.2763 | 301.1418         | 600.2922       | 300.6498         | 5 |
| 5 | 603.3072 | 302.1572        | 586.2806 | 293.6439         |                |                  | P    | 487.2623 | 244.1348        | 470.2358 | 235.6215         | 469.2518       | 235.1295         | 4 |
| 6 | 717.3501 | 359.1787        | 700.3235 | 350.6654         |                |                  | N    | 390.2096 | 195.6084        | 373.1830 | 187.0951         | 372.1990       | 186.6031         | 3 |
| 7 | 818.3978 | 409.7025        | 801.3712 | 401.1892         | 800.3872       | 400.6972         | T    | 276.1666 | 138.5870        | 259.1401 | 130.0737         | 258.1561       | 129.5817         | 2 |
| 8 |          |                 |          |                  |                |                  | R    | 175.1190 | 88.0631         | 158.0924 | 79.5498          |                |                  | 1 |

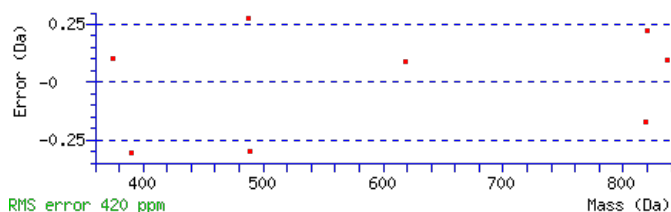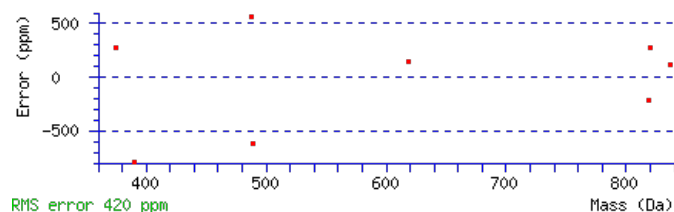

NCBI BLAST search of [RFAMPNTR](#)

(Parameters: blastp, nr protein database, expect=20000, no filter, PAM30)

Other BLAST [web gateways](#)

All matches to this query

| Score | $M_r(\text{calc})$ | Delta  | Sequence                 |
|-------|--------------------|--------|--------------------------|
| 23.4  | 991.5022           | 0.0005 | <a href="#">RFAMPNTR</a> |

## AT5G45390.1

|      |          |         |                            |
|------|----------|---------|----------------------------|
| 11.5 | 991.5008 | 0.0018  | <a href="#">MLVGGSGDIK</a> |
| 10.9 | 991.5047 | -0.0020 | <a href="#">SASESRVTR</a>  |
| 10.7 | 991.5055 | -0.0028 | <a href="#">RGKMPTMR</a>   |
| 7.6  | 991.5021 | 0.0005  | <a href="#">RAMWERK</a>    |
| 7.4  | 991.5008 | 0.0019  | <a href="#">MEVELLSR</a>   |
| 6.1  | 991.5055 | -0.0028 | <a href="#">MAARGAMLR</a>  |
| 5.4  | 991.5008 | 0.0018  | <a href="#">NVLVTGDMK</a>  |
| 2.9  | 991.5055 | -0.0028 | <a href="#">RGKMPTMR</a>   |
| 2.1  | 991.5008 | 0.0019  | <a href="#">VMANSLVDK</a>  |

Mascot: <http://www.matrixscience.com/>

**Peptide View**MS/MS Fragmentation of **FIFEELK**

Found in **AT5G45470.1** in **TAIR\_Arabidopsis**, Symbols: | similar to unknown protein [Arabidopsis thaliana] (TAIR:AT5G45530.1); similar to unknown protein [Arabidopsis thaliana] (TAIR:AT5G45540.1); similar to unknown protein [Arabidopsis thaliana] (TAIR:AT5G45460.1); similar to unnamed protein

Match to Query 2007: 932.473452 from(467.244002,2+) index(8171)

Title: Elution from: 71.749 to 71.749 scan no 10640 cid35.00 polarity:+

Data file C7-2\_1.mgf

Click mouse within plot area to zoom in by factor of two about that point

Or,   to  Da

Label all possible matches  Label matches used for scoring

Show Y-axis

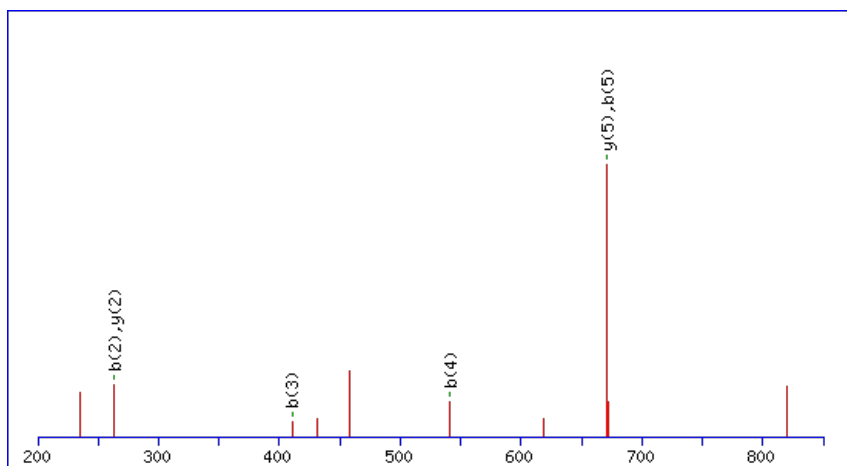

**Monoisotopic mass of neutral peptide Mr(calc):** 932.4719

**Fixed modifications:** Carbamidomethyl (C) (apply to specified residues or termini only)

**Ions Score:** 25 **Expect:** 0.045

**Matches:** 6/50 fragment ions using 10 most intense peaks ([help](#))

| # | b               | b <sup>++</sup> | b <sup>0</sup> | b <sup>0++</sup> | Seq. | y               | y <sup>++</sup> | y*       | y <sup>*++</sup> | y <sup>0</sup> | y <sup>0++</sup> | # |
|---|-----------------|-----------------|----------------|------------------|------|-----------------|-----------------|----------|------------------|----------------|------------------|---|
| 1 | 149.0727        | 75.0400         |                |                  | F    |                 |                 |          |                  |                |                  | 7 |
| 2 | <b>263.1538</b> | 132.0805        |                |                  | I    | 785.4138        | 393.2105        | 767.3902 | 384.1987         | 767.4032       | 384.2052         | 6 |
| 3 | <b>411.2193</b> | 206.1133        |                |                  | F    | <b>671.3327</b> | 336.1700        | 653.3091 | 327.1582         | 653.3221       | 327.1647         | 5 |
| 4 | <b>541.2589</b> | 271.1331        | 523.2483       | 262.1278         | E    | 523.2672        | 262.1373        | 505.2436 | 253.1255         | 505.2567       | 253.1320         | 4 |
| 5 | <b>671.2985</b> | 336.1529        | 653.2880       | 327.1476         | E    | 393.2276        | 197.1174        | 375.2040 | 188.1056         | 375.2170       | 188.1122         | 3 |
| 6 | 785.3796        | 393.1935        | 767.3691       | 384.1882         | L    | <b>263.1880</b> | 132.0976        | 245.1644 | 123.0858         |                |                  | 2 |
| 7 |                 |                 |                |                  | K    | 149.1069        | 75.0571         | 131.0833 | 66.0453          |                |                  | 1 |

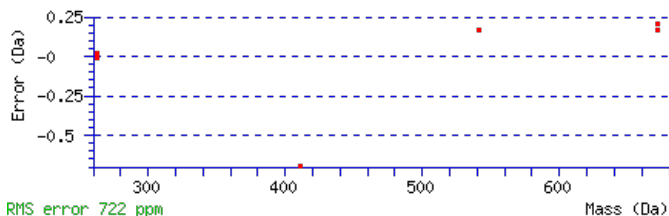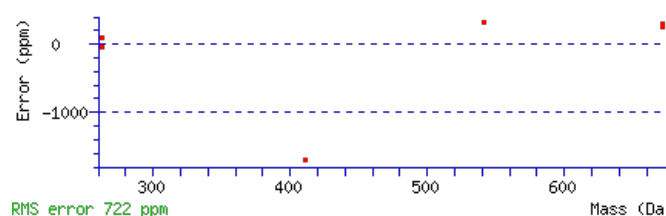NCBI **BLAST** search of **FIFEELK**

(Parameters: blastp, nr protein database, expect=20000, no filter, PAM30)

Other BLAST [web gateways](#)

**All matches to this query**

| Score | Mr(calc) | Delta  | Sequence                |
|-------|----------|--------|-------------------------|
| 24.7  | 932.4719 | 0.0015 | <a href="#">FIFEELK</a> |



## AT5G45470.1

|      |          |         |                          |
|------|----------|---------|--------------------------|
| 21.5 | 932.4724 | 0.0011  | <a href="#">LFKDDKR</a>  |
| 16.3 | 932.4724 | 0.0011  | <a href="#">FLKEQTR</a>  |
| 12.6 | 932.4719 | 0.0015  | <a href="#">FLFELEK</a>  |
| 12.6 | 932.4724 | 0.0011  | <a href="#">GSFNQKLK</a> |
| 10.5 | 932.4746 | -0.0012 | <a href="#">IFNIYPR</a>  |
| 10.5 | 932.4746 | -0.0012 | <a href="#">IFVGPFSR</a> |
| 10.5 | 932.4724 | 0.0011  | <a href="#">IPNHEAIK</a> |
| 10.5 | 932.4753 | -0.0019 | <a href="#">LYMELLK</a>  |
| 10.4 | 932.4746 | -0.0012 | <a href="#">FIQVYPR</a>  |

Mascot: <http://www.matrixscience.com/>

**Peptide View**MS/MS Fragmentation of **LSIEDVEHLLMK**Found in **AT5G45620.1** in **TAIR\_Arabidopsis**, Symbols: | 26S proteasome regulatory subunit, putative (RPN9) | chr5:18518817-18521095  
FORWARD

Match to Query 5496: 1425.755727 from(476.259185,3+) index(10719)

Title: Elution from: 103.581 to 103.581 scan no 15423 cid35.00 polarity:+

Data file D1d-2\_1.mgf

Click mouse within plot area to zoom in by factor of two about that point

Or,   to  Da Label all possible matches  Label matches used for scoring Show Y-axis 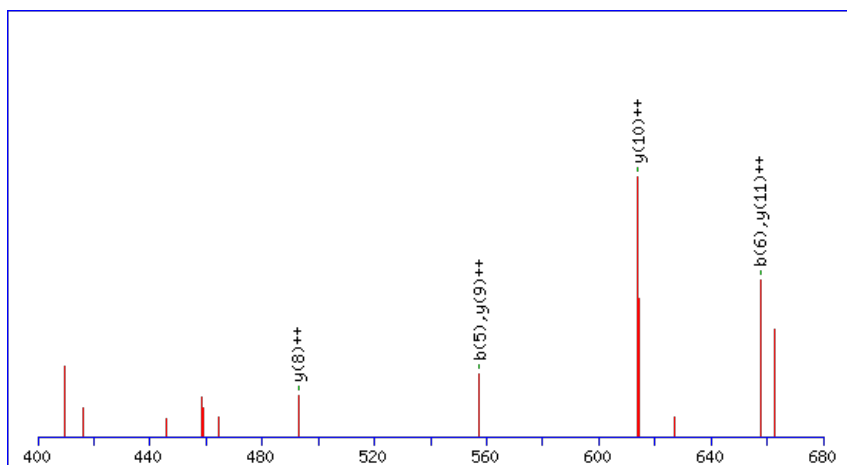Monoisotopic mass of neutral peptide  $M_r(\text{calc})$ : 1425.7537

Fixed modifications: Carbamidomethyl (C) (apply to specified residues or termini only)

Ions Score: 30 Expect: 0.0028

Matches : 6/98 fragment ions using 5 most intense peaks ([help](#))

| #  | b         | b <sup>++</sup> | b <sup>0</sup> | b <sup>0++</sup> | Seq. | y         | y <sup>++</sup> | y*        | y <sup>*++</sup> | y <sup>0</sup> | y <sup>0++</sup> | #  |
|----|-----------|-----------------|----------------|------------------|------|-----------|-----------------|-----------|------------------|----------------|------------------|----|
| 1  | 114.0913  | 57.5493         |                |                  | L    |           |                 |           |                  |                |                  | 12 |
| 2  | 201.1234  | 101.0653        | 183.1128       | 92.0600          | S    | 1313.6770 | 657.3421        | 1296.6504 | 648.8288         | 1295.6664      | 648.3368         | 11 |
| 3  | 314.2074  | 157.6074        | 296.1969       | 148.6021         | I    | 1226.6449 | 613.8261        | 1209.6184 | 605.3128         | 1208.6344      | 604.8208         | 10 |
| 4  | 443.2500  | 222.1287        | 425.2395       | 213.1234         | E    | 1113.5609 | 557.2841        | 1096.5343 | 548.7708         | 1095.5503      | 548.2788         | 9  |
| 5  | 558.2770  | 279.6421        | 540.2664       | 270.6368         | D    | 984.5183  | 492.7628        | 967.4917  | 484.2495         | 966.5077       | 483.7575         | 8  |
| 6  | 657.3454  | 329.1763        | 639.3348       | 320.1710         | V    | 869.4913  | 435.2493        | 852.4648  | 426.7360         | 851.4808       | 426.2440         | 7  |
| 7  | 786.3880  | 393.6976        | 768.3774       | 384.6923         | E    | 770.4229  | 385.7151        | 753.3964  | 377.2018         | 752.4124       | 376.7098         | 6  |
| 8  | 923.4469  | 462.2271        | 905.4363       | 453.2218         | H    | 641.3803  | 321.1938        | 624.3538  | 312.6805         |                |                  | 5  |
| 9  | 1036.5310 | 518.7691        | 1018.5204      | 509.7638         | L    | 504.3214  | 252.6643        | 487.2949  | 244.1511         |                |                  | 4  |
| 10 | 1149.6150 | 575.3111        | 1131.6044      | 566.3059         | L    | 391.2374  | 196.1223        | 374.2108  | 187.6090         |                |                  | 3  |
| 11 | 1280.6555 | 640.8314        | 1262.6449      | 631.8261         | M    | 278.1533  | 139.5803        | 261.1267  | 131.0670         |                |                  | 2  |
| 12 |           |                 |                |                  | K    | 147.1128  | 74.0600         | 130.0863  | 65.5468          |                |                  | 1  |

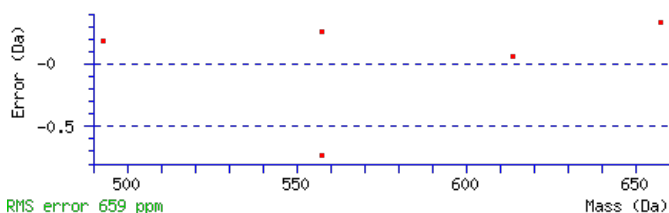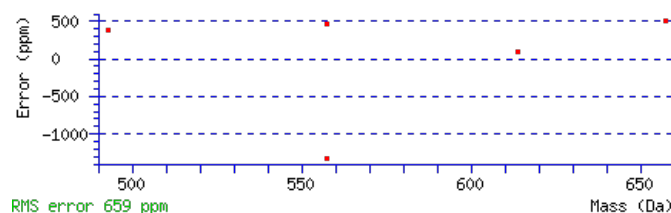NCBI BLAST search of **LSIEDVEHLLMK**

(Parameters: blastp, nr protein database, expect=20000, no filter, PAM30)

Other BLAST [web gateways](#)

AT5G45620.1

All matches to this query

| Score | Mr(calc)  | Delta   | Sequence                      |
|-------|-----------|---------|-------------------------------|
| 30.3  | 1425.7537 | 0.0020  | <a href="#">LSIEDVEHLLMK</a>  |
| 5.7   | 1425.7576 | -0.0018 | <a href="#">SILSGSYLTSSRR</a> |
| 1.4   | 1425.7537 | 0.0020  | <a href="#">TLPGEICELPGLK</a> |

Mascot: <http://www.matrixscience.com/>

**Peptide View**MS/MS Fragmentation of **GWDQILGSDGIPPMLTGGK**Found in **AT5G45680.1** in **TAIR\_Arabidopsis**, Symbols: | FK506-binding protein 1 (FKBP13) | chr5:18548121-18549355 FORWARD

Match to Query 9397: 1997.985738 from(1000.000145,2+) index(10195)

Title: Elution from: 96.018 to 96.018 scan no 14300 cid35.00 polarity:+

Data file D1d-2\_1.mgf

Click mouse within plot area to zoom in by factor of two about that point

Or,   to  Da Label all possible matches  Label matches used for scoring Show Y-axis 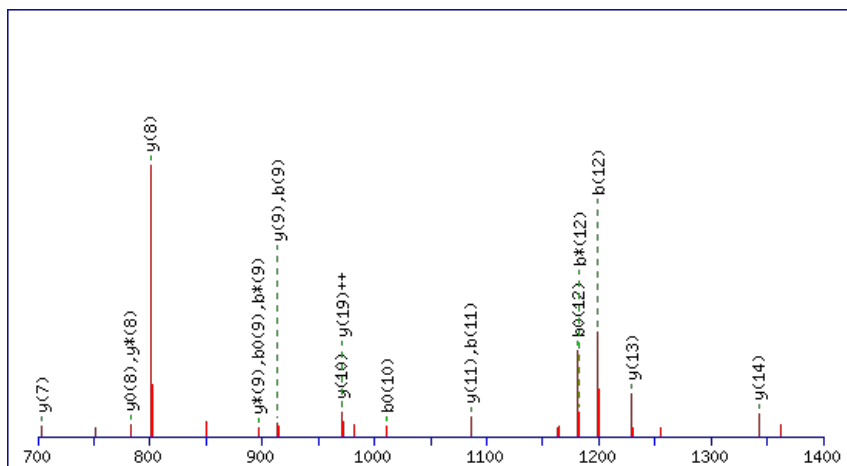**Monoisotopic mass of neutral peptide Mr(calc):** 1997.9881**Fixed modifications:** Carbamidomethyl (C) (apply to specified residues or termini only)**Ions Score:** 41 **Expect:** 0.00028**Matches:** 19/212 fragment ions using 21 most intense peaks ([help](#))

| #  | b         | b <sup>++</sup> | b*        | b <sup>++</sup> * | b <sup>0</sup> | b <sup>0++</sup> | Seq. | y         | y <sup>++</sup> | y*        | y <sup>++</sup> * | y <sup>0</sup> | y <sup>0++</sup> | #  |
|----|-----------|-----------------|-----------|-------------------|----------------|------------------|------|-----------|-----------------|-----------|-------------------|----------------|------------------|----|
| 1  | 58.0287   | 29.5180         |           |                   |                |                  | G    |           |                 |           |                   |                |                  | 20 |
| 2  | 244.1081  | 122.5577        |           |                   |                |                  | W    | 1941.9739 | 971.4906        | 1924.9473 | 962.9773          | 1923.9633      | 962.4853         | 19 |
| 3  | 359.1350  | 180.0711        |           |                   | 341.1244       | 171.0659         | D    | 1755.8946 | 878.4509        | 1738.8680 | 869.9376          | 1737.8840      | 869.4456         | 18 |
| 4  | 487.1936  | 244.1004        | 470.1670  | 235.5872          | 469.1830       | 235.0951         | Q    | 1640.8676 | 820.9374        | 1623.8411 | 812.4242          | 1622.8571      | 811.9322         | 17 |
| 5  | 544.2150  | 272.6112        | 527.1885  | 264.0979          | 526.2045       | 263.6059         | G    | 1512.8090 | 756.9082        | 1495.7825 | 748.3949          | 1494.7985      | 747.9029         | 16 |
| 6  | 657.2991  | 329.1532        | 640.2726  | 320.6399          | 639.2885       | 320.1479         | I    | 1455.7876 | 728.3974        | 1438.7610 | 719.8842          | 1437.7770      | 719.3921         | 15 |
| 7  | 770.3832  | 385.6952        | 753.3566  | 377.1819          | 752.3726       | 376.6899         | L    | 1342.7035 | 671.8554        | 1325.6770 | 663.3421          | 1324.6929      | 662.8501         | 14 |
| 8  | 827.4046  | 414.2060        | 810.3781  | 405.6927          | 809.3941       | 405.2007         | G    | 1229.6195 | 615.3134        | 1212.5929 | 606.8001          | 1211.6089      | 606.3081         | 13 |
| 9  | 914.4367  | 457.7220        | 897.4101  | 449.2087          | 896.4261       | 448.7167         | S    | 1172.5980 | 586.8026        | 1155.5714 | 578.2894          | 1154.5874      | 577.7973         | 12 |
| 10 | 1029.4636 | 515.2354        | 1012.4371 | 506.7222          | 1011.4530      | 506.2302         | D    | 1085.5660 | 543.2866        | 1068.5394 | 534.7733          | 1067.5554      | 534.2813         | 11 |
| 11 | 1086.4851 | 543.7462        | 1069.4585 | 535.2329          | 1068.4745      | 534.7409         | G    | 970.5390  | 485.7731        | 953.5125  | 477.2599          | 952.5285       | 476.7679         | 10 |
| 12 | 1199.5691 | 600.2882        | 1182.5426 | 591.7749          | 1181.5586      | 591.2829         | I    | 913.5176  | 457.2624        | 896.4910  | 448.7491          | 895.5070       | 448.2571         | 9  |
| 13 | 1296.6219 | 648.8146        | 1279.5953 | 640.3013          | 1278.6113      | 639.8093         | P    | 800.4335  | 400.7204        | 783.4069  | 392.2071          | 782.4229       | 391.7151         | 8  |
| 14 | 1393.6747 | 697.3410        | 1376.6481 | 688.8277          | 1375.6641      | 688.3357         | P    | 703.3807  | 352.1940        | 686.3542  | 343.6807          | 685.3702       | 343.1887         | 7  |
| 15 | 1524.7151 | 762.8612        | 1507.6886 | 754.3479          | 1506.7046      | 753.8559         | M    | 606.3280  | 303.6676        | 589.3014  | 295.1543          | 588.3174       | 294.6623         | 6  |
| 16 | 1637.7992 | 819.4032        | 1620.7727 | 810.8900          | 1619.7886      | 810.3980         | L    | 475.2875  | 238.1474        | 458.2609  | 229.6341          | 457.2769       | 229.1421         | 5  |
| 17 | 1738.8469 | 869.9271        | 1721.8203 | 861.4138          | 1720.8363      | 860.9218         | T    | 362.2034  | 181.6053        | 345.1769  | 173.0921          | 344.1928       | 172.6001         | 4  |
| 18 | 1795.8683 | 898.4378        | 1778.8418 | 889.9245          | 1777.8578      | 889.4325         | G    | 261.1557  | 131.0815        | 244.1292  | 122.5682          |                |                  | 3  |
| 19 | 1852.8898 | 926.9485        | 1835.8633 | 918.4353          | 1834.8792      | 917.9433         | G    | 204.1343  | 102.5708        | 187.1077  | 94.0575           |                |                  | 2  |
| 20 |           |                 |           |                   |                |                  | K    | 147.1128  | 74.0600         | 130.0863  | 65.5468           |                |                  | 1  |

# AT5G45680.1

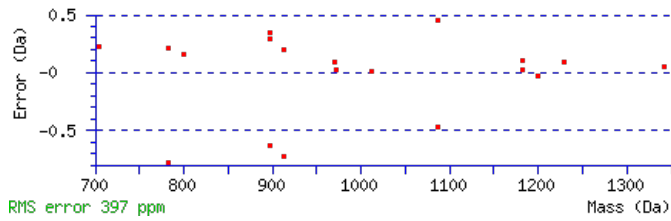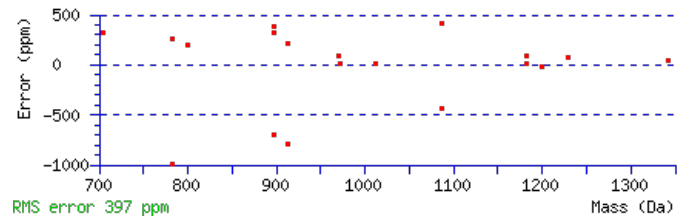

NCBI **BLAST** search of [GWDQGILGSDGIPPMLTGKK](#)  
(Parameters: blastp, nr protein database, expect=20000, no filter, PAM30)  
Other BLAST [web gateways](#)

## All matches to this query

| Score | Mr(calc)  | Delta   | Sequence                             |
|-------|-----------|---------|--------------------------------------|
| 41.3  | 1997.9881 | -0.0023 | <a href="#">GWDQGILGSDGIPPMLTGKK</a> |
| 3.5   | 1997.9914 | -0.0057 | <a href="#">LQELGPMTQMOPPLLR</a>     |

Mascot: <http://www.matrixscience.com/>

**Peptide View**MS/MS Fragmentation of **SNLSAVQIDQDLK**Found in **AT5G45930.1** in **TAIR\_Arabidopsis**, Symbols: CHL12, CHLI-2, CHLI2 | CHLI2; magnesium chelatase | chr5:18645322-18646792  
FORWARD

Match to Query 5708: 1429.741504 from(715.878028,2+) index(5135)

Title: Elution from: 45.940 to 45.940 scan no 6422 cid35.00 polarity:+

Data file D12h-1\_2.mgf

Click mouse within plot area to zoom in by factor of two about that point

Or,   to  Da Label all possible matches  Label matches used for scoring Show Y-axis 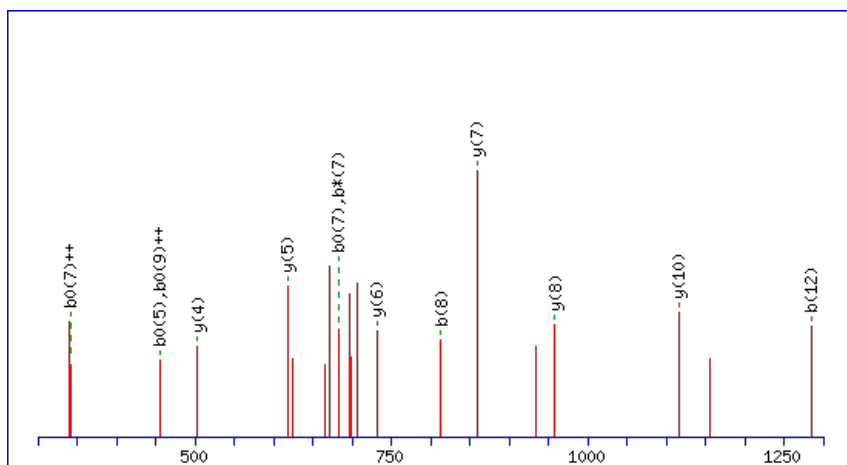Monoisotopic mass of neutral peptide  $M_r(\text{calc})$ : 1429.7413

Fixed modifications: Carbamidomethyl (C) (apply to specified residues or termini only)

Ions Score: 44 Expect: 0.00014

Matches : 13/138 fragment ions using 20 most intense peaks ([help](#))

| #  | b                | b <sup>++</sup> | b*              | b <sup>*++</sup> | b <sup>0</sup>  | b <sup>0++</sup> | Seq. | y                | y <sup>++</sup> | y*        | y <sup>*++</sup> | y <sup>0</sup> | y <sup>0++</sup> | #  |
|----|------------------|-----------------|-----------------|------------------|-----------------|------------------|------|------------------|-----------------|-----------|------------------|----------------|------------------|----|
| 1  | 88.0393          | 44.5233         |                 |                  | 70.0287         | 35.5180          | S    |                  |                 |           |                  |                |                  | 13 |
| 2  | 202.0822         | 101.5448        | 185.0557        | 93.0315          | 184.0717        | 92.5395          | N    | 1343.7165        | 672.3619        | 1326.6900 | 663.8486         | 1325.7060      | 663.3566         | 12 |
| 3  | 315.1663         | 158.0868        | 298.1397        | 149.5735         | 297.1557        | 149.0815         | L    | 1229.6736        | 615.3404        | 1212.6470 | 606.8272         | 1211.6630      | 606.3352         | 11 |
| 4  | 402.1983         | 201.6028        | 385.1718        | 193.0895         | 384.1878        | 192.5975         | S    | <b>1116.5895</b> | 558.7984        | 1099.5630 | 550.2851         | 1098.5790      | 549.7931         | 10 |
| 5  | 473.2354         | 237.1214        | 456.2089        | 228.6081         | <b>455.2249</b> | 228.1161         | A    | 1029.5575        | 515.2824        | 1012.5310 | 506.7691         | 1011.5469      | 506.2771         | 9  |
| 6  | 572.3039         | 286.6556        | 555.2773        | 278.1423         | 554.2933        | 277.6503         | V    | <b>958.5204</b>  | 479.7638        | 941.4938  | 471.2506         | 940.5098       | 470.7585         | 8  |
| 7  | 700.3624         | 350.6849        | <b>683.3359</b> | 342.1716         | <b>682.3519</b> | <b>341.6796</b>  | Q    | <b>859.4520</b>  | 430.2296        | 842.4254  | 421.7164         | 841.4414       | 421.2243         | 7  |
| 8  | <b>813.4465</b>  | 407.2269        | 796.4199        | 398.7136         | 795.4359        | 398.2216         | I    | <b>731.3934</b>  | 366.2003        | 714.3668  | 357.6871         | 713.3828       | 357.1951         | 6  |
| 9  | 928.4734         | 464.7404        | 911.4469        | 456.2271         | 910.4629        | <b>455.7351</b>  | D    | <b>618.3093</b>  | 309.6583        | 601.2828  | 301.1450         | 600.2988       | 300.6530         | 5  |
| 10 | 1056.5320        | 528.7696        | 1039.5055       | 520.2564         | 1038.5214       | 519.7644         | Q    | <b>503.2824</b>  | 252.1448        | 486.2558  | 243.6316         | 485.2718       | 243.1396         | 4  |
| 11 | 1171.5590        | 586.2831        | 1154.5324       | 577.7698         | 1153.5484       | 577.2778         | D    | 375.2238         | 188.1155        | 358.1973  | 179.6023         | 357.2132       | 179.1103         | 3  |
| 12 | <b>1284.6430</b> | 642.8251        | 1267.6165       | 634.3119         | 1266.6325       | 633.8199         | L    | 260.1969         | 130.6021        | 243.1703  | 122.0888         |                |                  | 2  |
| 13 |                  |                 |                 |                  |                 |                  | K    | 147.1128         | 74.0600         | 130.0863  | 65.5468          |                |                  | 1  |

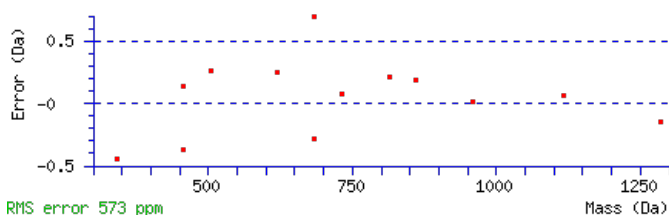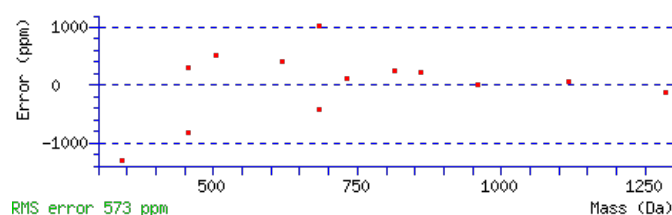NCBI **BLAST** search of **SNLSAVQIDQDLK**

(Parameters: blastp, nr protein database, expect=20000, no filter, PAM30)

AT5G45930.1

Other BLAST [web gateways](#)

**All matches to this query**

| Score | Mr(calc)  | Delta  | Sequence                     |
|-------|-----------|--------|------------------------------|
| 44.2  | 1429.7413 | 0.0002 | <a href="#">SNLSAVQIDQLK</a> |

Mascot: <http://www.matrixscience.com/>

**Peptide View**MS/MS Fragmentation of **LLNHGFADAIK**

Found in **AT5G46110.1** in **TAIR\_Arabidopsis**, Symbols: TPT, APE2 | APE2 (ACCLIMATION OF PHOTOSYNTHESIS TO ENVIRONMENT); antiporter/ triose-phosphate transmembrane transporter | chr5:18714833-18717439 FORWARD

Match to Query 4618: 1284.639819 from(429.220549,3+) index(3764)

Title: Elution from: 36.037 to 36.037 scan no 4728 cid35.00 polarity:+

Data file 0-2\_2.mgf

Click mouse within plot area to zoom in by factor of two about that point

Or,   to  Da

Label all possible matches  Label matches used for scoring

Show Y-axis

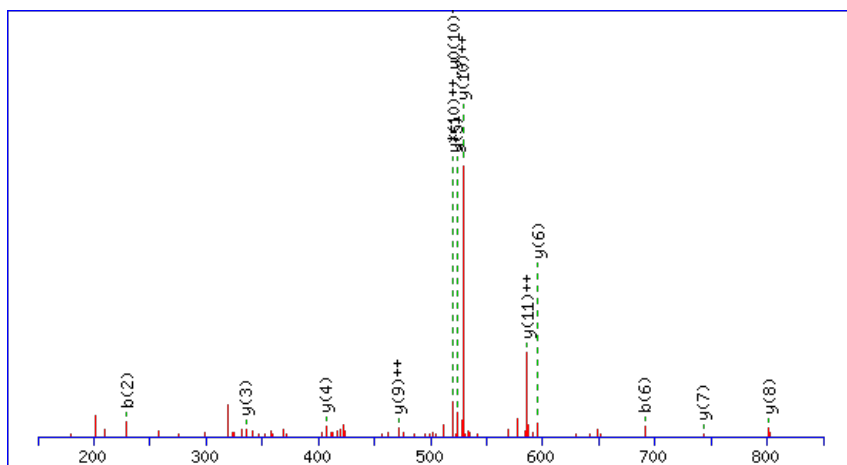

**Monoisotopic mass of neutral peptide Mr(calc):** 1284.6403

**Fixed modifications:** Carbamidomethyl (C) (apply to specified residues or termini only)

**Ions Score:** 47 **Expect:** 0.00011

**Matches:** 13/106 fragment ions using 19 most intense peaks ([help](#))

| #  | b               | b <sup>++</sup> | b*        | b <sup>*++</sup> | b <sup>0</sup> | b <sup>0++</sup> | Seq. | y               | y <sup>++</sup> | y*        | y <sup>*++</sup> | y <sup>0</sup> | y <sup>0++</sup> | #  |
|----|-----------------|-----------------|-----------|------------------|----------------|------------------|------|-----------------|-----------------|-----------|------------------|----------------|------------------|----|
| 1  | 115.0884        | 58.0478         |           |                  |                |                  | L    |                 |                 |           |                  |                |                  | 12 |
| 2  | <b>229.1695</b> | 115.0884        |           |                  |                |                  | L    | 1171.5665       | <b>586.2869</b> | 1153.5429 | 577.2751         | 1153.5559      | 577.2816         | 11 |
| 3  | 345.2065        | 173.1069        | 327.1829  | 164.0951         |                |                  | N    | 1057.4854       | <b>529.2463</b> | 1039.4618 | <b>520.2345</b>  | 1039.4748      | <b>520.2410</b>  | 10 |
| 4  | 485.2565        | 243.1319        | 467.2329  | 234.1201         |                |                  | H    | 941.4484        | <b>471.2278</b> | 923.4248  | 462.2160         | 923.4378       | 462.2225         | 9  |
| 5  | 543.2750        | 272.1411        | 525.2514  | 263.1293         |                |                  | G    | <b>801.3983</b> | 401.2028        | 783.3748  | 392.1910         | 783.3878       | 392.1975         | 8  |
| 6  | <b>691.3404</b> | 346.1739        | 673.3169  | 337.1621         |                |                  | F    | <b>743.3798</b> | 372.1936        | 725.3563  | 363.1818         | 725.3693       | 363.1883         | 7  |
| 7  | 763.3746        | 382.1909        | 745.3510  | 373.1791         |                |                  | A    | <b>595.3144</b> | 298.1608        | 577.2908  | 289.1490         | 577.3038       | 289.1556         | 6  |
| 8  | 879.3986        | 440.2029        | 861.3750  | 431.1911         | 861.3880       | 431.1976         | D    | <b>523.2802</b> | 262.1438        | 505.2567  | 253.1320         | 505.2697       | 253.1385         | 5  |
| 9  | 951.4327        | 476.2200        | 933.4091  | 467.2082         | 933.4221       | 467.2147         | A    | <b>407.2563</b> | 204.1318        | 389.2327  | 195.1200         |                |                  | 4  |
| 10 | 1065.5138       | 533.2605        | 1047.4902 | 524.2488         | 1047.5032      | 524.2553         | I    | <b>335.2221</b> | 168.1147        | 317.1985  | 159.1029         |                |                  | 3  |
| 11 | 1137.5480       | 569.2776        | 1119.5244 | 560.2658         | 1119.5374      | 560.2723         | A    | 221.1410        | 111.0741        | 203.1174  | 102.0624         |                |                  | 2  |
| 12 |                 |                 |           |                  |                |                  | K    | 149.1069        | 75.0571         | 131.0833  | 66.0453          |                |                  | 1  |

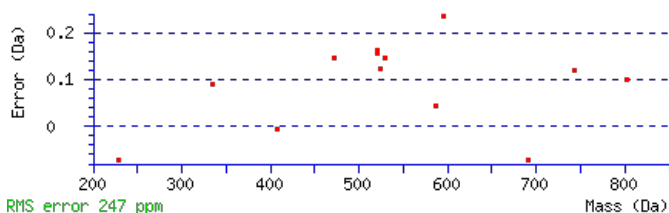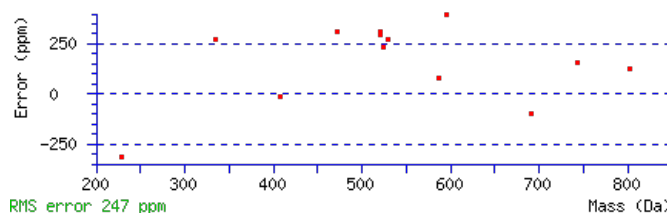

NCBI **BLAST** search of **LLNHGFADAIK**

(Parameters: blastp, nr protein database, expect=20000, no filter, PAM30)

Other BLAST [web gateways](#)



AT5G46110.1

All matches to this query

| Score | Mr(calc)  | Delta   | Sequence                     |
|-------|-----------|---------|------------------------------|
| 47.4  | 1284.6403 | -0.0005 | <a href="#">LLNHGFADAIK</a>  |
| 2.5   | 1284.6362 | 0.0036  | <a href="#">YMKLMNTVKK</a>   |
| 0.4   | 1284.6403 | -0.0005 | <a href="#">AATASLSAFERK</a> |

Mascot: <http://www.matrixscience.com/>

## Peptide View

MS/MS Fragmentation of **FDDNAVVLVDSKDK**

Found in **AT5G46160.1** in **TAIR\_Arabidopsis**, Symbols: | ribosomal protein L14 family protein / huellenlos paralog (HLP) | chr5:18728683-18729568 REVERSE

Match to Query 7017: 1580.729462 from(791.372007,2+) index(7215)

Title: Elution from: 66.569 to 66.569 scan no 9505 cid35.00 polarity:+

Data file D12h-2\_1.mgf

Click mouse within plot area to zoom in by factor of two about that point

Or,   to  Da

Label all possible matches  Label matches used for scoring

Show Y-axis

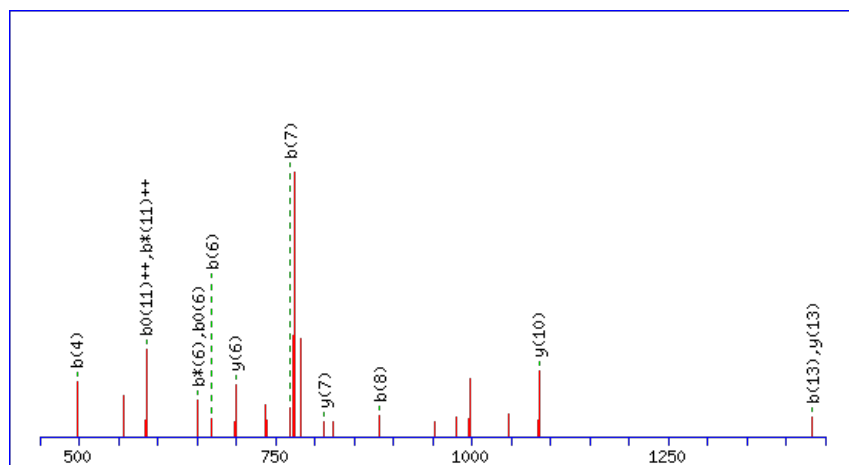

Monoisotopic mass of neutral peptide  $M_r(\text{calc})$ : 1580.7276

Fixed modifications: Carbamidomethyl (C) (apply to specified residues or termini only)

Ions Score: 26 Expect: 0.028

Matches : 13/146 fragment ions using 24 most intense peaks ([help](#))

| #  | b                | b <sup>++</sup> | b <sup>*</sup>  | b <sup>*++</sup> | b <sup>0</sup>  | b <sup>0++</sup> | Seq. | y                | y <sup>++</sup> | y <sup>*</sup> | y <sup>*++</sup> | y <sup>0</sup> | y <sup>0++</sup> | #  |
|----|------------------|-----------------|-----------------|------------------|-----------------|------------------|------|------------------|-----------------|----------------|------------------|----------------|------------------|----|
| 1  | 149.0727         | 75.0400         |                 |                  |                 |                  | F    |                  |                 |                |                  |                |                  | 14 |
| 2  | 265.0967         | 133.0520        |                 |                  | 247.0861        | 124.0467         | D    | <b>1433.6695</b> | 717.3384        | 1415.6459      | 708.3266         | 1415.6589      | 708.3331         | 13 |
| 3  | 381.1207         | 191.0640        |                 |                  | 363.1101        | 182.0587         | D    | 1317.6455        | 659.3264        | 1299.6219      | 650.3146         | 1299.6349      | 650.3211         | 12 |
| 4  | <b>497.1577</b>  | 249.0825        | 479.1341        | 240.0707         | 479.1471        | 240.0772         | N    | 1201.6215        | 601.3144        | 1183.5979      | 592.3026         | 1183.6110      | 592.3091         | 11 |
| 5  | 569.1918         | 285.0996        | 551.1682        | 276.0878         | 551.1813        | 276.0943         | A    | <b>1085.5845</b> | 543.2959        | 1067.5609      | 534.2841         | 1067.5740      | 534.2906         | 10 |
| 6  | <b>669.2573</b>  | 335.1323        | <b>651.2337</b> | 326.1205         | <b>651.2467</b> | 326.1270         | V    | 1013.5504        | 507.2788        | 995.5268       | 498.2670         | 995.5398       | 498.2735         | 9  |
| 7  | <b>769.3227</b>  | 385.1650        | 751.2991        | 376.1532         | 751.3122        | 376.1597         | V    | 913.4849         | 457.2461        | 895.4613       | 448.2343         | 895.4744       | 448.2408         | 8  |
| 8  | <b>883.4038</b>  | 442.2056        | 865.3802        | 433.1938         | 865.3933        | 433.2003         | L    | <b>813.4195</b>  | 407.2134        | 795.3959       | 398.2016         | 795.4089       | 398.2081         | 7  |
| 9  | 983.4693         | 492.2383        | 965.4457        | 483.2265         | 965.4587        | 483.2330         | V    | <b>699.3384</b>  | 350.1728        | 681.3148       | 341.1610         | 681.3278       | 341.1675         | 6  |
| 10 | 1099.4933        | 550.2503        | 1081.4697       | 541.2385         | 1081.4827       | 541.2450         | D    | 599.2729         | 300.1401        | 581.2493       | 291.1283         | 581.2624       | 291.1348         | 5  |
| 11 | 1187.5223        | 594.2648        | 1169.4987       | <b>585.2530</b>  | 1169.5117       | <b>585.2595</b>  | S    | 483.2489         | 242.1281        | 465.2254       | 233.1163         | 465.2384       | 233.1228         | 4  |
| 12 | 1317.6113        | 659.3093        | 1299.5878       | 650.2975         | 1299.6008       | 650.3040         | K    | 395.2199         | 198.1136        | 377.1963       | 189.1018         | 377.2093       | 189.1083         | 3  |
| 13 | <b>1433.6353</b> | 717.3213        | 1415.6117       | 708.3095         | 1415.6248       | 708.3160         | D    | 265.1309         | 133.0691        | 247.1073       | 124.0573         | 247.1203       | 124.0638         | 2  |
| 14 |                  |                 |                 |                  |                 |                  | K    | 149.1069         | 75.0571         | 131.0833       | 66.0453          |                |                  | 1  |

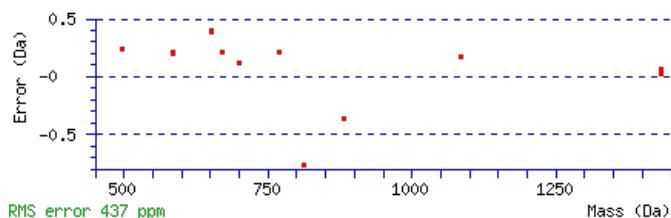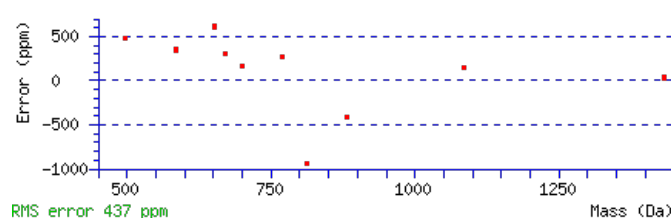

NCBI BLAST search of [FDDNAVVLVDSKDK](#)

## AT5G46160.1

(Parameters: blastp, nr protein database, expect=20000, no filter, PAM30)

Other BLAST [web gateways](#)

### All matches to this query

| Score | Mr(calc)  | Delta   | Sequence                        |
|-------|-----------|---------|---------------------------------|
| 25.7  | 1580.7276 | 0.0018  | <a href="#">FDDNAVVLVDSKDK</a>  |
| 16.6  | 1580.7281 | 0.0014  | <a href="#">VTGLDGDAEKSANRK</a> |
| 7.7   | 1580.7280 | 0.0014  | <a href="#">REIQDETDRTGK</a>    |
| 4.1   | 1580.7310 | -0.0016 | <a href="#">EASASVSKDAEVMK</a>  |
| 2.4   | 1580.7310 | -0.0015 | <a href="#">MDELKGAEKVTAEK</a>  |
| 2.1   | 1580.7281 | 0.0014  | <a href="#">QVEEVTVSNTNRGK</a>  |
| 1.7   | 1580.7289 | 0.0005  | <a href="#">MLQHLRTTMLER</a>    |
| 1.5   | 1580.7263 | 0.0032  | <a href="#">MLEVMSNAGQDIKK</a>  |
| 0.4   | 1580.7333 | -0.0038 | <a href="#">FPSMNSTAILLEK</a>   |
| 0.4   | 1580.7281 | 0.0014  | <a href="#">EALSSRRAEADDLK</a>  |

Mascot: <http://www.matrixscience.com/>

**Peptide View**MS/MS Fragmentation of **GFTMGRGK**Found in **AT5G46250.1** in **TAIR\_Arabidopsis**, Symbols: | RNA recognition motif (RRM)-containing protein | chr5:18772615-18775283  
FORWARD

Match to Query 1474: 880.386268 from(441.200410,2+) index(6519)

Title: Elution from: 57.810 to 57.810 scan no 8395 cid35.00 polarity:+

Data file D6h-3\_1.mgf

Click mouse within plot area to zoom in by factor of two about that point

Or,  to  Da Label all possible matches  Label matches used for scoring Show Y-axis 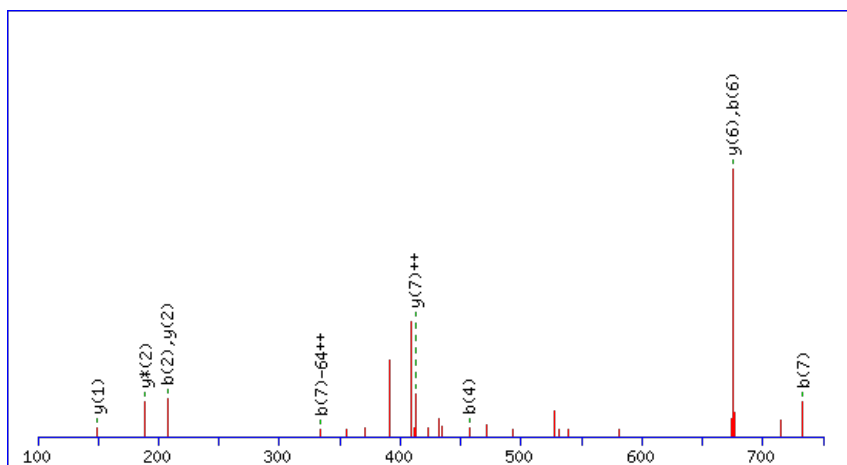Monoisotopic mass of neutral peptide  $M_r(\text{calc})$ : 880.3869

Fixed modifications: Carbamidomethyl (C) (apply to specified residues or termini only)

Variable modifications:

M4 : Oxidation (M), with neutral losses 0.0000 (shown in table), 63.9983

Ions Score: 25 Expect: 0.009

Matches : 10/96 fragment ions using 14 most intense peaks ([help](#))

| # | b               | b <sup>++</sup> | b*       | b <sup>*++</sup> | b <sup>0</sup> | b <sup>0++</sup> | Seq. | y               | y <sup>++</sup> | y*              | y <sup>*++</sup> | y <sup>0</sup> | y <sup>0++</sup> | # |
|---|-----------------|-----------------|----------|------------------|----------------|------------------|------|-----------------|-----------------|-----------------|------------------|----------------|------------------|---|
| 1 | 59.0258         | 30.0165         |          |                  |                |                  | G    |                 |                 |                 |                  |                |                  | 8 |
| 2 | <b>207.0912</b> | 104.0492        |          |                  |                |                  | F    | 823.3757        | <b>412.1915</b> | 805.3521        | 403.1797         | 805.3652       | 403.1862         | 7 |
| 3 | 309.1359        | 155.0716        |          |                  | 291.1254       | 146.0663         | T    | <b>675.3103</b> | 338.1588        | 657.2867        | 329.1470         | 657.2997       | 329.1535         | 6 |
| 4 | <b>457.1684</b> | 229.0878        |          |                  | 439.1578       | 220.0825         | M    | 573.2656        | 287.1364        | 555.2420        | 278.1246         |                |                  | 5 |
| 5 | 515.1869        | 258.0971        |          |                  | 497.1763       | 249.0918         | G    | 425.2331        | 213.1202        | 407.2095        | 204.1084         |                |                  | 4 |
| 6 | <b>675.2761</b> | 338.1417        | 657.2525 | 329.1299         | 657.2656       | 329.1364         | R    | 367.2146        | 184.1109        | 349.1910        | 175.0992         |                |                  | 3 |
| 7 | <b>733.2946</b> | 367.1509        | 715.2710 | 358.1392         | 715.2841       | 358.1457         | G    | <b>207.1254</b> | 104.0663        | <b>189.1018</b> | 95.0545          |                |                  | 2 |
| 8 |                 |                 |          |                  |                |                  | K    | <b>149.1069</b> | 75.0571         | 131.0833        | 66.0453          |                |                  | 1 |

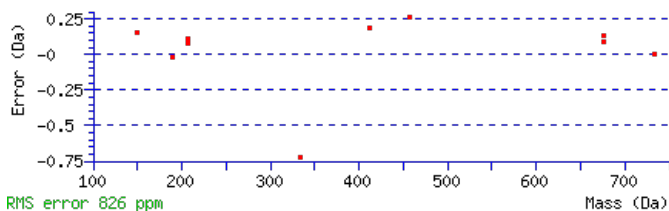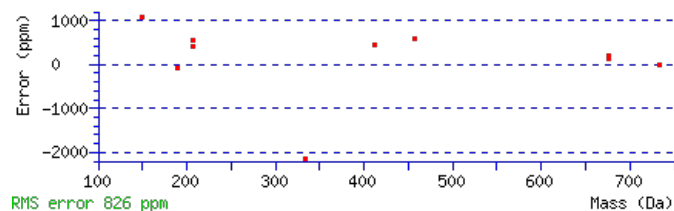NCBI BLAST search of **GFTMGRGK**

(Parameters: blastp, nr protein database, expect=20000, no filter, PAM30)

Other BLAST [web gateways](#)

All matches to this query

| Score | $M_r(\text{calc})$ | Delta | Sequence |
|-------|--------------------|-------|----------|
|       |                    |       |          |

# AT5G46250.1

|      |          |         |                          |
|------|----------|---------|--------------------------|
| 25.5 | 880.3869 | -0.0006 | <a href="#">GFTMGRGK</a> |
| 21.4 | 880.3865 | -0.0002 | <a href="#">GMFDFLK</a>  |
| 21.2 | 880.3869 | -0.0007 | <a href="#">MGAARGYK</a> |
| 14.9 | 880.3869 | -0.0007 | <a href="#">MTRNGFK</a>  |
| 9.6  | 880.3869 | -0.0007 | <a href="#">GFQMRSK</a>  |
| 8.6  | 880.3869 | -0.0007 | <a href="#">FGKNMTR</a>  |
| 8.4  | 880.3869 | -0.0007 | <a href="#">QAYMRGK</a>  |
| 8.4  | 880.3843 | 0.0020  | <a href="#">STMGLYGK</a> |
| 8.1  | 880.3843 | 0.0020  | <a href="#">MFSVASSK</a> |
| 2.4  | 880.3843 | 0.0020  | <a href="#">TYNSIMK</a>  |

Mascot: <http://www.matrixscience.com/>

**Peptide View**MS/MS Fragmentation of **ALESANLGGDK**

Found in **AT5G46290.1** in **TAIR\_Arabidopsis**, Symbols: KAS I | KAS I (3-KETOACYL-ACYL CARRIER PROTEIN SYNTHASE I); fatty-acid synthase | chr5:18791666-18793856 REVERSE

Match to Query 3473: 1086.498716 from(544.256634,2+) index(1336)

Title: Elution from: 18.921 to 18.921 scan no 1836 cid35.00 polarity:+

Data file D6h-1\_1.mgf

Click mouse within plot area to zoom in by factor of two about that point

Or,   to  Da

Label all possible matches  Label matches used for scoring

Show Y-axis

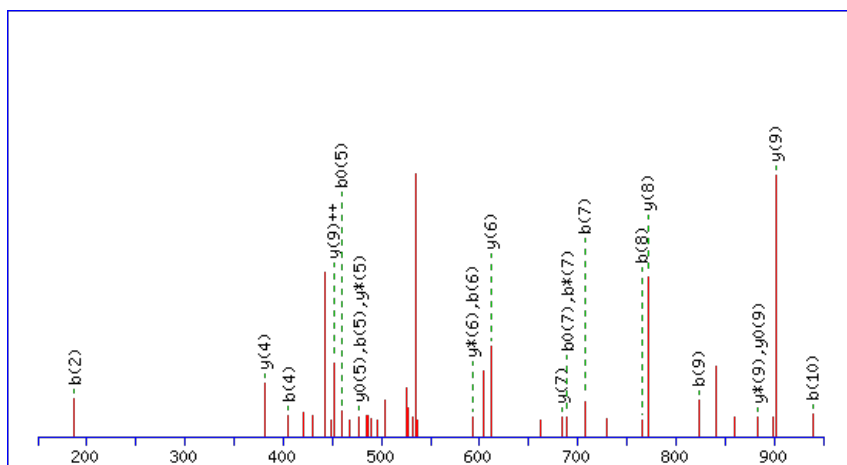

Monoisotopic mass of neutral peptide  $M_r(\text{calc})$ : 1086.4968

Fixed modifications: Carbamidomethyl (C) (apply to specified residues or termini only)

Ions Score: 52 Expect: 4.7e-005

Matches : 22/104 fragment ions using 38 most intense peaks ([help](#))

| #  | b               | b <sup>++</sup> | b*              | b <sup>*++</sup> | b <sup>0</sup>  | b <sup>0++</sup> | Seq. | y               | y <sup>++</sup> | y*              | y <sup>*++</sup> | y <sup>0</sup>  | y <sup>0++</sup> | #  |
|----|-----------------|-----------------|-----------------|------------------|-----------------|------------------|------|-----------------|-----------------|-----------------|------------------|-----------------|------------------|----|
| 1  | 73.0414         | 37.0244         |                 |                  |                 |                  | A    |                 |                 |                 |                  |                 |                  | 11 |
| 2  | <b>187.1225</b> | 94.0649         |                 |                  |                 |                  | L    | 1015.4699       | 508.2386        | 997.4463        | 499.2268         | 997.4593        | 499.2333         | 10 |
| 3  | 317.1622        | 159.0847        |                 |                  | 299.1516        | 150.0794         | E    | <b>901.3888</b> | <b>451.1980</b> | <b>883.3652</b> | 442.1862         | <b>883.3782</b> | 442.1927         | 9  |
| 4  | <b>405.1912</b> | 203.0992        |                 |                  | 387.1807        | 194.0940         | S    | <b>771.3492</b> | 386.1782        | 753.3256        | 377.1664         | 753.3386        | 377.1729         | 8  |
| 5  | <b>477.2254</b> | 239.1163        |                 |                  | <b>459.2148</b> | 230.1110         | A    | <b>683.3201</b> | 342.1637        | 665.2965        | 333.1519         | 665.3095        | 333.1584         | 7  |
| 6  | <b>593.2624</b> | 297.1348        | 575.2388        | 288.1230         | 575.2518        | 288.1295         | N    | <b>611.2859</b> | 306.1466        | <b>593.2624</b> | 297.1348         | 593.2754        | 297.1413         | 6  |
| 7  | <b>707.3435</b> | 354.1754        | <b>689.3199</b> | 345.1636         | <b>689.3329</b> | 345.1701         | L    | 495.2489        | 248.1281        | <b>477.2254</b> | 239.1163         | <b>477.2384</b> | 239.1228         | 5  |
| 8  | <b>765.3620</b> | 383.1846        | 747.3384        | 374.1728         | 747.3514        | 374.1793         | G    | <b>381.1678</b> | 191.0876        | 363.1443        | 182.0758         | 363.1573        | 182.0823         | 4  |
| 9  | <b>823.3805</b> | 412.1939        | 805.3569        | 403.1821         | 805.3699        | 403.1886         | G    | 323.1494        | 162.0783        | 305.1258        | 153.0665         | 305.1388        | 153.0730         | 3  |
| 10 | <b>939.4044</b> | 470.2059        | 921.3809        | 461.1941         | 921.3939        | 461.2006         | D    | 265.1309        | 133.0691        | 247.1073        | 124.0573         | 247.1203        | 124.0638         | 2  |
| 11 |                 |                 |                 |                  |                 |                  | K    | 149.1069        | 75.0571         | 131.0833        | 66.0453          |                 |                  | 1  |

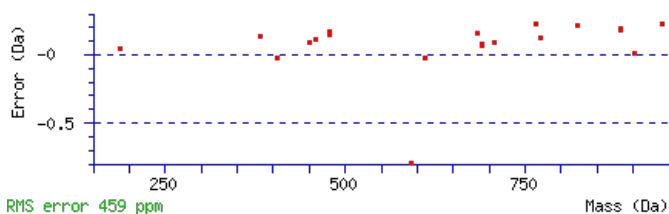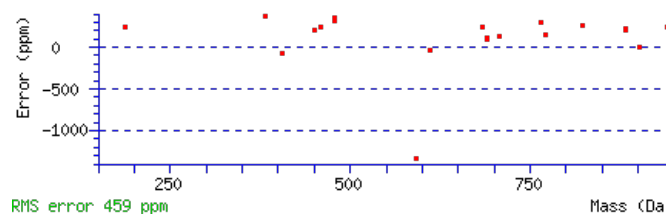

NCBI **BLAST** search of [ALESANLGGDK](#)

(Parameters: blastp, nr protein database, expect=20000, no filter, PAM30)

Other BLAST [web gateways](#)

All matches to this query

## AT5G46290.1

| Score | Mr(calc)  | Delta   | Sequence                    |
|-------|-----------|---------|-----------------------------|
| 52.2  | 1086.4968 | 0.0020  | <a href="#">ALESANLGGDK</a> |
| 9.7   | 1086.5012 | -0.0025 | <a href="#">FYKDFTAGK</a>   |
| 9.6   | 1086.4967 | 0.0020  | <a href="#">EQVNDLQTK</a>   |
| 8.8   | 1086.4967 | 0.0020  | <a href="#">QVGETALNDK</a>  |
| 6.0   | 1086.4967 | 0.0020  | <a href="#">GEEVDGLSIR</a>  |
| 5.7   | 1086.4976 | 0.0011  | <a href="#">EMGHVKMVK</a>   |
| 4.6   | 1086.4967 | 0.0020  | <a href="#">ATEDLVAAER</a>  |
| 2.1   | 1086.4990 | -0.0003 | <a href="#">VPGIFADNDK</a>  |
| 1.0   | 1086.4967 | 0.0020  | <a href="#">EDDLADRLK</a>   |
| 0.9   | 1086.4990 | -0.0003 | <a href="#">LAPFGEENAK</a>  |

Mascot: <http://www.matrixscience.com/>

**Peptide View**MS/MS Fragmentation of **DTAAWNSMVHGYLQFGK**Found in **AT5G46460.1** in **TAIR\_Arabidopsis**, Symbols: | pentatricopeptide (PPR) repeat-containing protein | chr5:18857532-18859625  
FORWARD

Match to Query 9234: 1946.823054 from(649.948294,3+) index(7946)

Title: Elution from: 72.116 to 72.116 scan no 10495 cid35.00 polarity:+

Data file D1d-2\_1.mgf

Click mouse within plot area to zoom in by factor of two about that point

Or,   to  Da Label all possible matches  Label matches used for scoring Show Y-axis 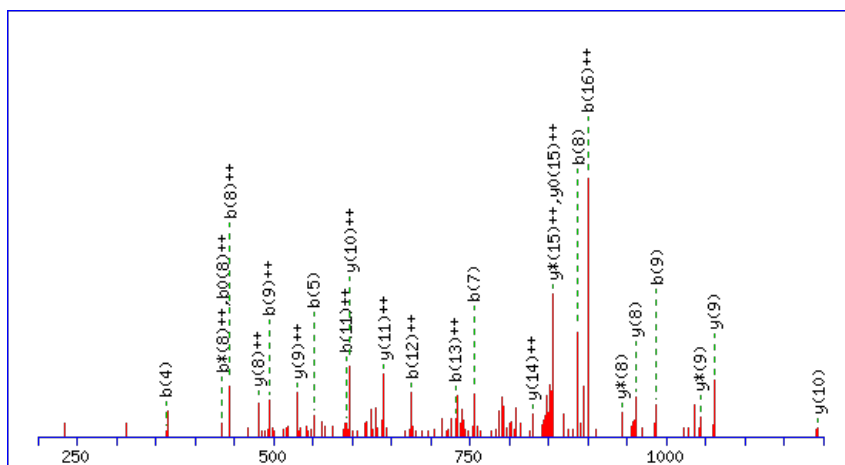Monoisotopic mass of neutral peptide  $M_r(\text{calc})$ : 1946.8255

Fixed modifications: Carbamidomethyl (C) (apply to specified residues or termini only)

Ions Score: 24 Expect: 0.025

Matches : 25/162 fragment ions using 63 most intense peaks ([help](#))

| #  | b               | b <sup>++</sup> | b*        | b <sup>*++</sup> | b <sup>0</sup> | b <sup>0++</sup> | Seq. | y                | y <sup>++</sup> | y*               | y <sup>*++</sup> | y <sup>0</sup> | y <sup>0++</sup> | #  |
|----|-----------------|-----------------|-----------|------------------|----------------|------------------|------|------------------|-----------------|------------------|------------------|----------------|------------------|----|
| 1  | 117.0313        | 59.0193         |           |                  | 99.0207        | 50.0140          | D    |                  |                 |                  |                  |                |                  | 17 |
| 2  | 219.0760        | 110.0416        |           |                  | 201.0654       | 101.0363         | T    | 1831.8089        | 916.4081        | 1813.7853        | 907.3963         | 1813.7983      | 907.4028         | 16 |
| 3  | 291.1101        | 146.0587        |           |                  | 273.0996       | 137.0534         | A    | 1729.7642        | 865.3857        | 1711.7406        | 856.3739         | 1711.7536      | 856.3804         | 15 |
| 4  | <b>363.1443</b> | 182.0758        |           |                  | 345.1337       | 173.0705         | A    | 1657.7300        | <b>829.3686</b> | 1639.7064        | 820.3569         | 1639.7194      | 820.3634         | 14 |
| 5  | <b>551.2176</b> | 276.1125        |           |                  | 533.2071       | 267.1072         | W    | 1585.6959        | 793.3516        | 1567.6723        | 784.3398         | 1567.6853      | 784.3463         | 13 |
| 6  | 667.2546        | 334.1310        | 649.2311  | 325.1192         | 649.2441       | 325.1257         | N    | 1397.6225        | 699.3149        | 1379.5989        | 690.3031         | 1379.6119      | 690.3096         | 12 |
| 7  | <b>755.2837</b> | 378.1455        | 737.2601  | 369.1337         | 737.2731       | 369.1402         | S    | 1281.5855        | <b>641.2964</b> | 1263.5619        | 632.2846         | 1263.5749      | 632.2911         | 11 |
| 8  | <b>887.3212</b> | <b>444.1643</b> | 869.2976  | <b>435.1525</b>  | 869.3107       | <b>435.1590</b>  | M    | <b>1193.5564</b> | <b>597.2818</b> | 1175.5328        | 588.2701         |                |                  | 10 |
| 9  | <b>987.3867</b> | <b>494.1970</b> | 969.3631  | 485.1852         | 969.3761       | 485.1917         | V    | <b>1061.5189</b> | <b>531.2631</b> | <b>1043.4953</b> | 522.2513         |                |                  | 9  |
| 10 | 1127.4367       | 564.2220        | 1109.4131 | 555.2102         | 1109.4261      | 555.2167         | H    | <b>961.4534</b>  | <b>481.2304</b> | <b>943.4299</b>  | 472.2186         |                |                  | 8  |
| 11 | 1185.4552       | <b>593.2312</b> | 1167.4316 | 584.2194         | 1167.4446      | 584.2260         | G    | 821.4034         | 411.2054        | 803.3798         | 402.1936         |                |                  | 7  |
| 12 | 1349.5156       | <b>675.2614</b> | 1331.4920 | 666.2496         | 1331.5050      | 666.2561         | Y    | 763.3849         | 382.1961        | 745.3613         | 373.1843         |                |                  | 6  |
| 13 | 1463.5967       | <b>732.3020</b> | 1445.5731 | 723.2902         | 1445.5861      | 723.2967         | L    | 599.3246         | 300.1659        | 581.3010         | 291.1541         |                |                  | 5  |
| 14 | 1593.6493       | 797.3283        | 1575.6257 | 788.3165         | 1575.6387      | 788.3230         | Q    | 485.2435         | 243.1254        | 467.2199         | 234.1136         |                |                  | 4  |
| 15 | 1741.7148       | 871.3610        | 1723.6912 | 862.3492         | 1723.7042      | 862.3557         | F    | 355.1908         | 178.0990        | 337.1672         | 169.0873         |                |                  | 3  |
| 16 | 1799.7333       | <b>900.3703</b> | 1781.7097 | 891.3585         | 1781.7227      | 891.3650         | G    | 207.1254         | 104.0663        | 189.1018         | 95.0545          |                |                  | 2  |
| 17 |                 |                 |           |                  |                |                  | K    | 149.1069         | 75.0571         | 131.0833         | 66.0453          |                |                  | 1  |



# AT5G46460.1

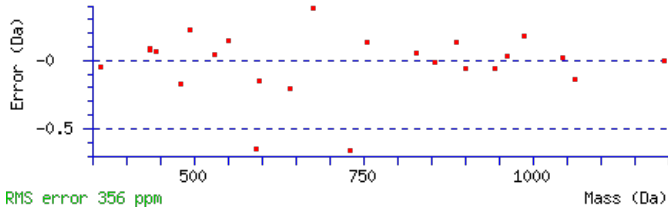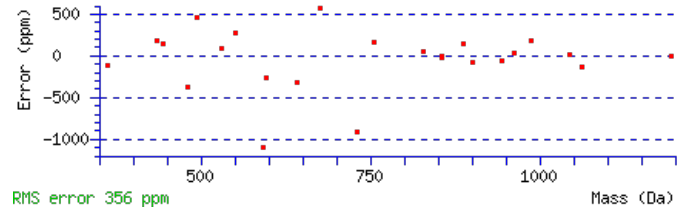

NCBI **BLAST** search of [DTAAWNSMVHGYLQFGK](#)  
 (Parameters: blastp, nr protein database, expect=20000, no filter, PAM30)  
 Other BLAST [web gateways](#)

## All matches to this query

| Score | Mr(calc)  | Delta   | Sequence                          |
|-------|-----------|---------|-----------------------------------|
| 23.7  | 1946.8255 | -0.0025 | <a href="#">DTAAWNSMVHGYLQFGK</a> |
| 8.7   | 1946.8245 | -0.0014 | <a href="#">EGNMAAASDLLDMQRR</a>  |
| 6.9   | 1946.8218 | 0.0012  | <a href="#">AGRSNEVSMILEEMSEK</a> |
| 3.2   | 1946.8218 | 0.0013  | <a href="#">MSTKEVDEQMINVQNK</a>  |
| 3.2   | 1946.8218 | 0.0013  | <a href="#">MSTKEVDEQMLNVQNK</a>  |
| 2.9   | 1946.8240 | -0.0010 | <a href="#">LMKSMGWEEGEGLGKDK</a> |
| 2.8   | 1946.8218 | 0.0012  | <a href="#">ESMIEMIEENNIRASK</a>  |
| 2.1   | 1946.8233 | -0.0002 | <a href="#">NOTGDFGIAFKETCAHK</a> |
| 0.2   | 1946.8265 | -0.0035 | <a href="#">LCKSQDLTESLSDESSK</a> |
| 0.1   | 1946.8288 | -0.0057 | <a href="#">SNLFQVGEDDVIMESTK</a> |

Mascot: <http://www.matrixscience.com/>

**Peptide View**MS/MS Fragmentation of **LQSQTPAPGQLPR**Found in **AT5G46800.1** in **TAIR\_Arabidopsis**, Symbols: BOU | BOU (A BOUT DE SOUFFLE); binding | chr5:19006006-19007037 REVERSE

Match to Query 6473: 1508.742386 from(755.378469,2+) index(2650)

Title: Elution from: 26.942 to 26.942 scan no 3295 cid35.00 polarity:+

Data file C7-3\_2.mgf

Click mouse within plot area to zoom in by factor of two about that point

Or,  to  Da Label all possible matches  Label matches used for scoring Show Y-axis 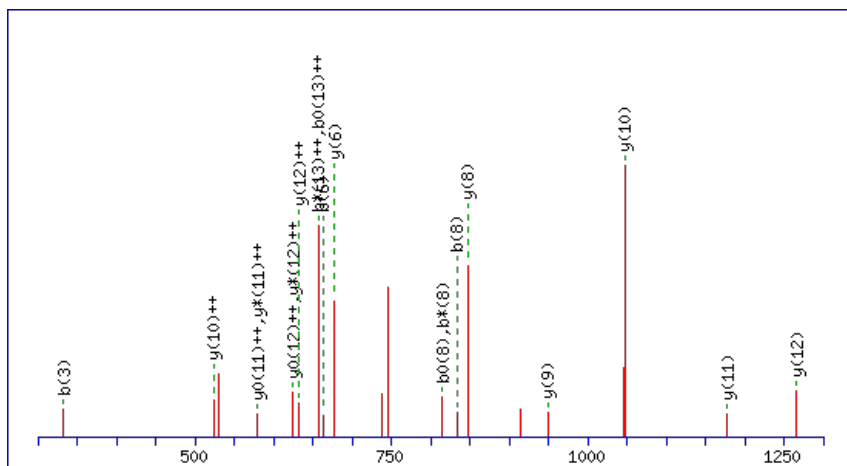**Monoisotopic mass of neutral peptide Mr(calc):** 1508.7456**Fixed modifications:** Carbamidomethyl (C) (apply to specified residues or termini only)**Ions Score:** 49 **Expect:** 0.00012**Matches:** 19/134 fragment ions using 22 most intense peaks ([help](#))

| #  | b               | b <sup>++</sup> | b*              | b <sup>*++</sup> | b <sup>0</sup>  | b <sup>0++</sup> | Seq. | y                | y <sup>++</sup> | y*        | y <sup>*++</sup> | y <sup>0</sup> | y <sup>0++</sup> | #  |
|----|-----------------|-----------------|-----------------|------------------|-----------------|------------------|------|------------------|-----------------|-----------|------------------|----------------|------------------|----|
| 1  | 115.0884        | 58.0478         |                 |                  |                 |                  | L    |                  |                 |           |                  |                |                  | 14 |
| 2  | 245.1410        | 123.0741        | 227.1174        | 114.0624         |                 |                  | Q    | 1395.6718        | 698.3395        | 1377.6482 | 689.3277         | 1377.6612      | 689.3342         | 13 |
| 3  | <b>333.1701</b> | 167.0887        | 315.1465        | 158.0769         | 315.1595        | 158.0834         | S    | <b>1265.6191</b> | <b>633.3132</b> | 1247.5955 | <b>624.3014</b>  | 1247.6085      | <b>624.3079</b>  | 12 |
| 4  | 463.2227        | 232.1150        | 445.1991        | 223.1032         | 445.2122        | 223.1097         | Q    | <b>1177.5900</b> | 589.2987        | 1159.5665 | <b>580.2869</b>  | 1159.5795      | <b>580.2934</b>  | 11 |
| 5  | 561.2725        | 281.1399        | 543.2489        | 272.1281         | 543.2620        | 272.1346         | P    | <b>1047.5374</b> | <b>524.2723</b> | 1029.5138 | 515.2605         | 1029.5268      | 515.2671         | 10 |
| 6  | <b>663.3172</b> | 332.1623        | 645.2937        | 323.1505         | 645.3067        | 323.1570         | T    | <b>949.4876</b>  | 475.2474        | 931.4640  | 466.2356         | 931.4770       | 466.2422         | 9  |
| 7  | 761.3670        | 381.1872        | 743.3435        | 372.1754         | 743.3565        | 372.1819         | P    | <b>847.4429</b>  | 424.2251        | 829.4193  | 415.2133         |                |                  | 8  |
| 8  | <b>833.4012</b> | 417.2042        | <b>815.3776</b> | 408.1924         | <b>815.3906</b> | 408.1990         | A    | 749.3931         | 375.2002        | 731.3695  | 366.1884         |                |                  | 7  |
| 9  | 931.4510        | 466.2291        | 913.4274        | 457.2173         | 913.4404        | 457.2239         | P    | <b>677.3589</b>  | 339.1831        | 659.3354  | 330.1713         |                |                  | 6  |
| 10 | 989.4695        | 495.2384        | 971.4459        | 486.2266         | 971.4589        | 486.2331         | G    | 579.3091         | 290.1582        | 561.2856  | 281.1464         |                |                  | 5  |
| 11 | 1119.5221       | 560.2647        | 1101.4986       | 551.2529         | 1101.5116       | 551.2594         | Q    | 521.2906         | 261.1490        | 503.2671  | 252.1372         |                |                  | 4  |
| 12 | 1233.6032       | 617.3053        | 1215.5797       | 608.2935         | 1215.5927       | 608.3000         | L    | 391.2380         | 196.1226        | 373.2144  | 187.1108         |                |                  | 3  |
| 13 | 1331.6530       | 666.3302        | 1313.6295       | <b>657.3184</b>  | 1313.6425       | <b>657.3249</b>  | P    | 277.1569         | 139.0821        | 259.1333  | 130.0703         |                |                  | 2  |
| 14 |                 |                 |                 |                  |                 |                  | R    | 179.1071         | 90.0572         | 161.0835  | 81.0454          |                |                  | 1  |

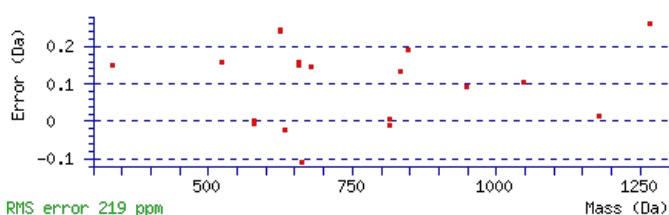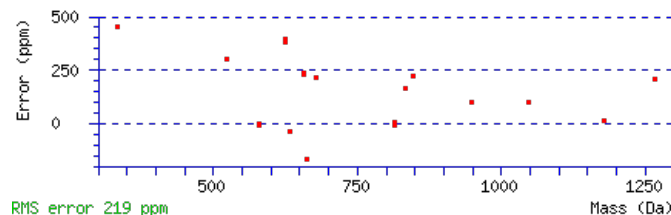NCBI BLAST search of **LQSQTPAPGQLPR**

(Parameters: blastp, nr protein database, expect=20000, no filter, PAM30)

AT5G46800.1

Other BLAST [web gateways](#)

**All matches to this query**

| Score | Mr(calc)  | Delta   | Sequence                      |
|-------|-----------|---------|-------------------------------|
| 49.1  | 1508.7456 | -0.0032 | <a href="#">LQSQTPAPGQLPR</a> |
| 24.6  | 1508.7429 | -0.0005 | <a href="#">EISEIVFTVSNVR</a> |
| 8.6   | 1508.7429 | -0.0005 | <a href="#">SELPKDQGYKSK</a>  |
| 4.8   | 1508.7456 | -0.0032 | <a href="#">GLRERPPSSYSLK</a> |
| 0.9   | 1508.7433 | -0.0009 | <a href="#">ELLRTTEESVRR</a>  |
| 0.6   | 1508.7429 | -0.0005 | <a href="#">SLKEQLENAFSVK</a> |
| 0.3   | 1508.7463 | -0.0039 | <a href="#">LKSTGMKEQDVLK</a> |

Mascot: <http://www.matrixscience.com/>

**Peptide View**MS/MS Fragmentation of **LASATTDLEK**Found in **AT5G47030.1** in **TAIR\_Arabidopsis**, Symbols: | ATP synthase delta' chain, mitochondrial | chr5:19107611-19109261 FORWARD

Match to Query 2859: 1047.545090 from(524.779821,2+) index(1139)

Title: Elution from: 15.666 to 15.666 scan no 1531 cid35.00 polarity:+

Data file 0-2\_3.mgf

Click mouse within plot area to zoom in by factor of two about that point

Or,   to  Da Label all possible matches  Label matches used for scoring Show Y-axis 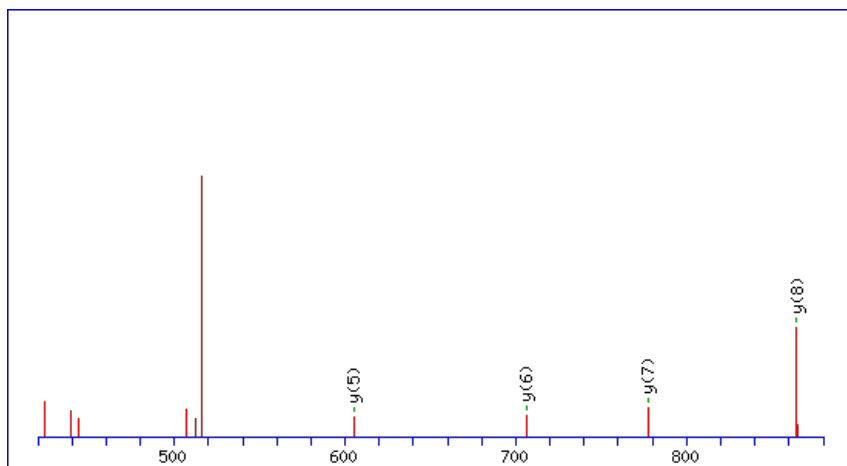Monoisotopic mass of neutral peptide **Mr(calc)**: 1047.5448

Fixed modifications: Carbamidomethyl (C) (apply to specified residues or termini only)

Ions Score: 39 Expect: 0.00057

Matches : 4/84 fragment ions using 5 most intense peaks ([help](#))

| #  | b        | b <sup>++</sup> | b <sup>0</sup> | b <sup>0++</sup> | Seq. | y               | y <sup>++</sup> | y*       | y* <sup>++</sup> | y <sup>0</sup> | y <sup>0++</sup> | #  |
|----|----------|-----------------|----------------|------------------|------|-----------------|-----------------|----------|------------------|----------------|------------------|----|
| 1  | 114.0913 | 57.5493         |                |                  | L    |                 |                 |          |                  |                |                  | 10 |
| 2  | 185.1285 | 93.0679         |                |                  | A    | 935.4680        | 468.2376        | 918.4415 | 459.7244         | 917.4575       | 459.2324         | 9  |
| 3  | 272.1605 | 136.5839        | 254.1499       | 127.5786         | S    | <b>864.4309</b> | 432.7191        | 847.4044 | 424.2058         | 846.4203       | 423.7138         | 8  |
| 4  | 343.1976 | 172.1024        | 325.1870       | 163.0972         | A    | <b>777.3989</b> | 389.2031        | 760.3723 | 380.6898         | 759.3883       | 380.1978         | 7  |
| 5  | 444.2453 | 222.6263        | 426.2347       | 213.6210         | T    | <b>706.3618</b> | 353.6845        | 689.3352 | 345.1712         | 688.3512       | 344.6792         | 6  |
| 6  | 545.2930 | 273.1501        | 527.2824       | 264.1448         | T    | <b>605.3141</b> | 303.1607        | 588.2875 | 294.6474         | 587.3035       | 294.1554         | 5  |
| 7  | 660.3199 | 330.6636        | 642.3093       | 321.6583         | D    | 504.2664        | 252.6368        | 487.2399 | 244.1236         | 486.2558       | 243.6316         | 4  |
| 8  | 773.4040 | 387.2056        | 755.3934       | 378.2003         | L    | 389.2395        | 195.1234        | 372.2129 | 186.6101         | 371.2289       | 186.1181         | 3  |
| 9  | 902.4466 | 451.7269        | 884.4360       | 442.7216         | E    | 276.1554        | 138.5813        | 259.1288 | 130.0681         | 258.1448       | 129.5761         | 2  |
| 10 |          |                 |                |                  | K    | 147.1128        | 74.0600         | 130.0863 | 65.5468          |                |                  | 1  |

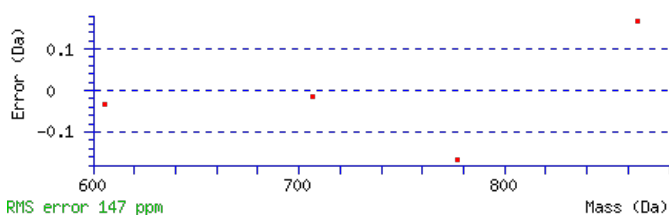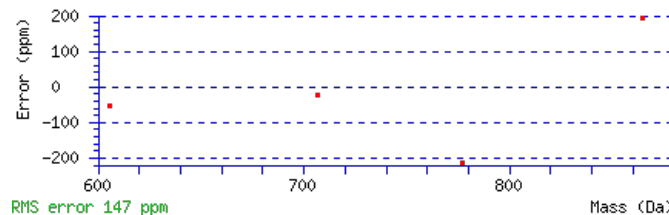NCBI **BLAST** search of **LASATTDLEK**

(Parameters: blastp, nr protein database, expect=20000, no filter, PAM30)

Other BLAST [web gateways](#)

All matches to this query

| Score | Mr(calc) | Delta | Sequence |
|-------|----------|-------|----------|
|       |          |       |          |

## AT5G47030.1

|      |           |         |                           |
|------|-----------|---------|---------------------------|
| 38.9 | 1047.5448 | 0.0003  | <a href="#">LASATDLEK</a> |
| 10.0 | 1047.5461 | -0.0011 | <a href="#">RDDGGLFLR</a> |
| 3.5  | 1047.5461 | -0.0011 | <a href="#">GDEFGVLR</a>  |

**Mascot:** <http://www.matrixscience.com/>

**Peptide View**MS/MS Fragmentation of **MMTQRISPSNK**Found in **AT5G47160.1** in **TAIR\_Arabidopsis**, Symbols: | YDG/SRA domain-containing protein | chr5:19173958-19175205 FORWARD

Match to Query 4810: 1324.582996 from(663.298774,2+) index(3626)

Title: Elution from: 35.068 to 35.068 scan no 4550 cid35.00 polarity:+

Data file D6h-1\_3.mgf

Click mouse within plot area to zoom in by factor of two about that point

Or,   to  Da Label all possible matches  Label matches used for scoring Show Y-axis 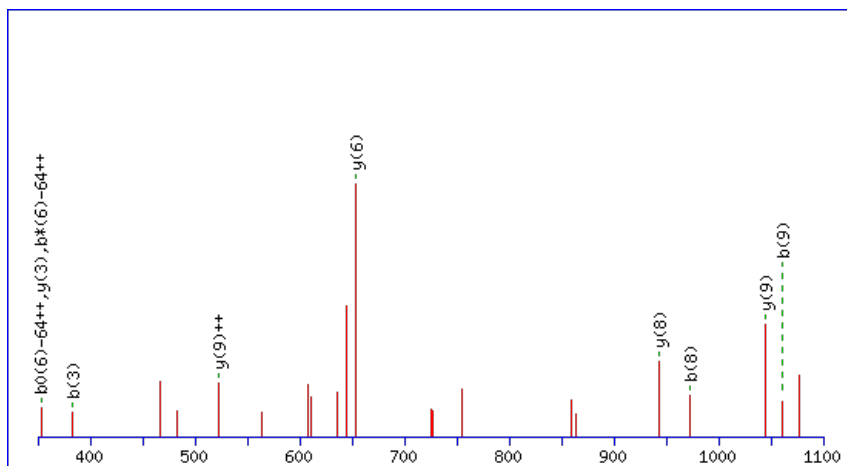**Monoisotopic mass of neutral peptide Mr(calc):** 1324.5822**Fixed modifications:** Carbamidomethyl (C) (apply to specified residues or termini only)**Variable modifications:****M2** : Oxidation (M), with neutral losses 0.0000 (shown in table), 63.9983**Ions Score:** 24 **Expect:** 0.036**Matches** : 10/160 fragment ions using 15 most intense peaks ([help](#))

| #  | b                | b <sup>++</sup> | b <sup>*</sup> | b <sup>*++</sup> | b <sup>0</sup> | b <sup>0++</sup> | Seq. | y                | y <sup>++</sup> | y <sup>*</sup> | y <sup>*++</sup> | y <sup>0</sup> | y <sup>0++</sup> | #  |
|----|------------------|-----------------|----------------|------------------|----------------|------------------|------|------------------|-----------------|----------------|------------------|----------------|------------------|----|
| 1  | 133.0448         | 67.0260         |                |                  |                |                  | M    |                  |                 |                |                  |                |                  | 11 |
| 2  | 281.0772         | 141.0423        |                |                  |                |                  | M    | 1193.5519        | 597.2796        | 1175.5284      | 588.2678         | 1175.5414      | 588.2743         | 10 |
| 3  | <b>383.1219</b>  | 192.0646        |                |                  | 365.1114       | 183.0593         | T    | <b>1045.5195</b> | <b>523.2634</b> | 1027.4959      | 514.2516         | 1027.5089      | 514.2581         | 9  |
| 4  | 513.1746         | 257.0909        | 495.1510       | 248.0791         | 495.1640       | 248.0857         | Q    | <b>943.4748</b>  | 472.2410        | 925.4512       | 463.2292         | 925.4642       | 463.2358         | 8  |
| 5  | 673.2638         | 337.1356        | 655.2403       | 328.1238         | 655.2533       | 328.1303         | R    | 813.4221         | 407.2147        | 795.3986       | 398.2029         | 795.4116       | 398.2094         | 7  |
| 6  | 787.3449         | 394.1761        | 769.3214       | 385.1643         | 769.3344       | 385.1708         | I    | <b>653.3329</b>  | 327.1701        | 635.3093       | 318.1583         | 635.3223       | 318.1648         | 6  |
| 7  | 875.3740         | 438.1906        | 857.3504       | 429.1788         | 857.3634       | 429.1854         | S    | 539.2518         | 270.1295        | 521.2282       | 261.1177         | 521.2412       | 261.1243         | 5  |
| 8  | <b>973.4238</b>  | 487.2155        | 955.4002       | 478.2037         | 955.4132       | 478.2103         | P    | 451.2227         | 226.1150        | 433.1991       | 217.1032         | 433.2122       | 217.1097         | 4  |
| 9  | <b>1061.4529</b> | 531.2301        | 1043.4293      | 522.2183         | 1043.4423      | 522.2248         | S    | <b>353.1729</b>  | 177.0901        | 335.1493       | 168.0783         | 335.1624       | 168.0848         | 3  |
| 10 | 1177.4899        | 589.2486        | 1159.4663      | 580.2368         | 1159.4793      | 580.2433         | N    | 265.1439         | 133.0756        | 247.1203       | 124.0638         |                |                  | 2  |
| 11 |                  |                 |                |                  |                |                  | K    | 149.1069         | 75.0571         | 131.0833       | 66.0453          |                |                  | 1  |

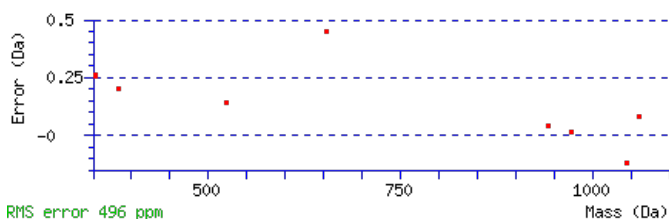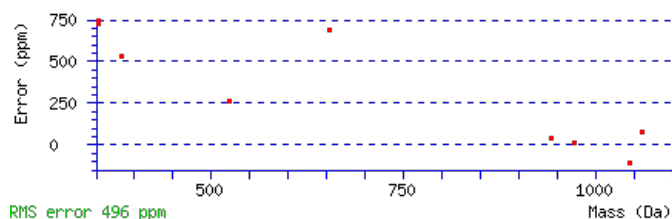NCBI **BLAST** search of [MMTQRISPSNK](#)

(Parameters: blastp, nr protein database, expect=20000, no filter, PAM30)

Other BLAST [web gateways](#)

## AT5G47160.1

All matches to this query

| Score | Mr(calc)  | Delta   | Sequence                        | Site Analysis       |
|-------|-----------|---------|---------------------------------|---------------------|
| 23.9  | 1324.5822 | 0.0008  | <a href="#">MMTQRISPSNK</a>     | Oxidation M2 50.00% |
| 23.9  | 1324.5822 | 0.0008  | <a href="#">MMTQRISPSNK</a>     | Oxidation M1 50.00% |
| 5.4   | 1324.5813 | 0.0017  | <a href="#">SVSSAASGNSINSK</a>  |                     |
| 3.7   | 1324.5835 | -0.0005 | <a href="#">ADFKEQVSETR</a>     |                     |
| 2.8   | 1324.5858 | -0.0028 | <a href="#">FISDPDARDFK</a>     |                     |
| 2.4   | 1324.5835 | -0.0005 | <a href="#">NYTQERLEK</a>       |                     |
| 1.9   | 1324.5865 | -0.0035 | <a href="#">FLEDLMSSEVK</a>     |                     |
| 1.7   | 1324.5813 | 0.0017  | <a href="#">TGSGGSGGSGSKLEK</a> |                     |
| 1.5   | 1324.5869 | -0.0039 | <a href="#">ETCTSVNGKSVK</a>    |                     |
| 1.5   | 1324.5862 | -0.0032 | <a href="#">WLAETRSSNSR</a>     |                     |

Mascot: <http://www.matrixscience.com/>

**Peptide View**MS/MS Fragmentation of **AIEVAETVRPVPGLR**Found in **AT5G47190.1** in **TAIR\_Arabidopsis**, Symbols: | ribosomal protein L19 family protein | chr5:19181659-19183291 REVERSE

Match to Query 7436: 1626.857841 from(543.293223,3+) index(5094)

Title: Elution from: 45.648 to 45.648 scan no 6372 cid35.00 polarity:+

Data file D12h-1\_2.mgf

Click mouse within plot area to zoom in by factor of two about that point

Or,   to  Da Label all possible matches  Label matches used for scoring Show Y-axis 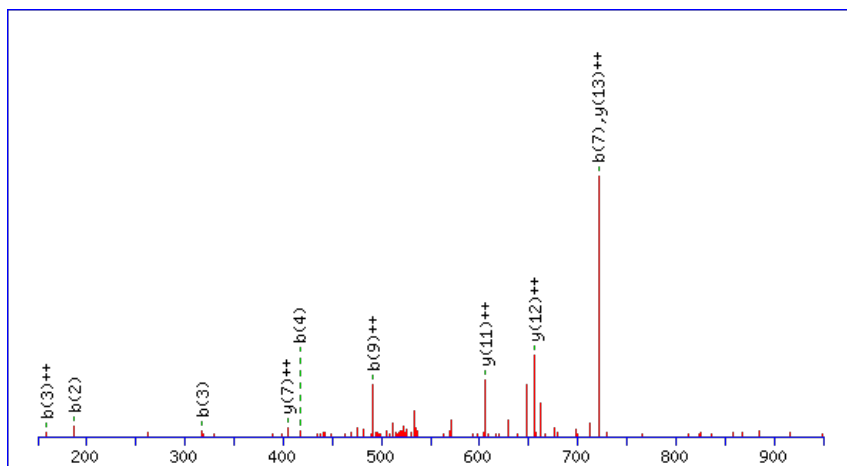Monoisotopic mass of neutral peptide **Mr(calc)**: 1626.8580

Fixed modifications: Carbamidomethyl (C) (apply to specified residues or termini only)

Ions Score: 25 **Expect**: 0.0088Matches : 10/132 fragment ions using 16 most intense peaks ([help](#))

| #  | b               | b <sup>++</sup> | b <sup>*</sup> | b <sup>*++</sup> | b <sup>0</sup> | b <sup>0++</sup> | Seq. | y         | y <sup>++</sup> | y <sup>*</sup> | y <sup>*++</sup> | y <sup>0</sup> | y <sup>0++</sup> | #  |
|----|-----------------|-----------------|----------------|------------------|----------------|------------------|------|-----------|-----------------|----------------|------------------|----------------|------------------|----|
| 1  | 73.0414         | 37.0244         |                |                  |                |                  | A    |           |                 |                |                  |                |                  | 15 |
| 2  | <b>187.1225</b> | 94.0649         |                |                  |                |                  | I    | 1555.8311 | 778.4192        | 1537.8075      | 769.4074         | 1537.8205      | 769.4139         | 14 |
| 3  | <b>317.1622</b> | <b>159.0847</b> |                |                  | 299.1516       | 150.0794         | E    | 1441.7500 | <b>721.3786</b> | 1423.7264      | 712.3668         | 1423.7394      | 712.3734         | 13 |
| 4  | <b>417.2276</b> | 209.1174        |                |                  | 399.2170       | 200.1122         | V    | 1311.7104 | <b>656.3588</b> | 1293.6868      | 647.3470         | 1293.6998      | 647.3535         | 12 |
| 5  | 489.2618        | 245.1345        |                |                  | 471.2512       | 236.1292         | A    | 1211.6449 | <b>606.3261</b> | 1193.6213      | 597.3143         | 1193.6344      | 597.3208         | 11 |
| 6  | 619.3014        | 310.1543        |                |                  | 601.2908       | 301.1490         | E    | 1139.6108 | 570.3090        | 1121.5872      | 561.2972         | 1121.6002      | 561.3037         | 10 |
| 7  | <b>721.3461</b> | 361.1767        |                |                  | 703.3355       | 352.1714         | T    | 1009.5711 | 505.2892        | 991.5476       | 496.2774         | 991.5606       | 496.2839         | 9  |
| 8  | 821.4115        | 411.2094        |                |                  | 803.4010       | 402.2041         | V    | 907.5264  | 454.2669        | 889.5029       | 445.2551         |                |                  | 8  |
| 9  | 981.5008        | <b>491.2540</b> | 963.4772       | 482.2422         | 963.4902       | 482.2488         | R    | 807.4610  | <b>404.2341</b> | 789.4374       | 395.2223         |                |                  | 7  |
| 10 | 1079.5506       | 540.2789        | 1061.5270      | 531.2671         | 1061.5400      | 531.2737         | P    | 647.3717  | 324.1895        | 629.3482       | 315.1777         |                |                  | 6  |
| 11 | 1179.6160       | 590.3117        | 1161.5925      | 581.2999         | 1161.6055      | 581.3064         | V    | 549.3219  | 275.1646        | 531.2984       | 266.1528         |                |                  | 5  |
| 12 | 1277.6658       | 639.3366        | 1259.6423      | 630.3248         | 1259.6553      | 630.3313         | P    | 449.2565  | 225.1319        | 431.2329       | 216.1201         |                |                  | 4  |
| 13 | 1335.6843       | 668.3458        | 1317.6608      | 659.3340         | 1317.6738      | 659.3405         | G    | 351.2067  | 176.1070        | 333.1831       | 167.0952         |                |                  | 3  |
| 14 | 1449.7654       | 725.3864        | 1431.7419      | 716.3746         | 1431.7549      | 716.3811         | L    | 293.1882  | 147.0977        | 275.1646       | 138.0859         |                |                  | 2  |
| 15 |                 |                 |                |                  |                |                  | R    | 179.1071  | 90.0572         | 161.0835       | 81.0454          |                |                  | 1  |

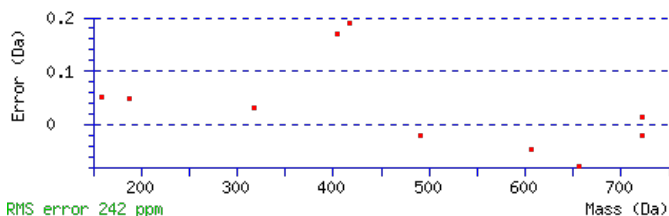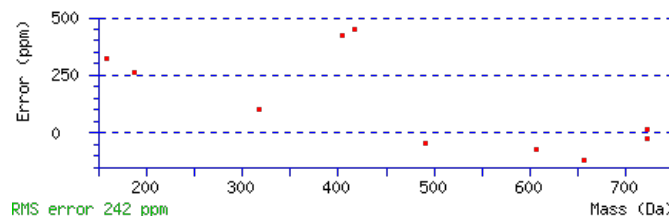NCBI **BLAST** search of [AIEVAETVRPVPGLR](#)



## AT5G47190.1

(Parameters: blastp, nr protein database, expect=20000, no filter, PAM30)

Other BLAST [web gateways](#)

### All matches to this query

| Score | Mr(calc)  | Delta   | Sequence                        |
|-------|-----------|---------|---------------------------------|
| 25.1  | 1626.8580 | -0.0001 | <a href="#">AIEVAETVRPVPGLR</a> |
| 3.5   | 1626.8602 | -0.0024 | <a href="#">LAFGPQNLLHSVIAK</a> |

Mascot: <http://www.matrixscience.com/>

### Peptide View

 MS/MS Fragmentation of **NNDAPGNENGFSGGYR**

 Found in **AT5G47210.1** in **TAIR\_Arabidopsis**, Symbols: | nuclear RNA-binding protein, putative | chr5:19186449-19188239 REVERSE

Match to Query 7836: 1667.692474 from(834.853513,2+) index(2071)

Title: Elution from: 24.718 to 24.718 scan no 2697 cid35.00 polarity:+

Data file 0-1\_2.mgf

Click mouse within plot area to zoom in by factor of two about that point

 Or,   to  Da 

 Label all possible matches  Label matches used for scoring 

 Show Y-axis 
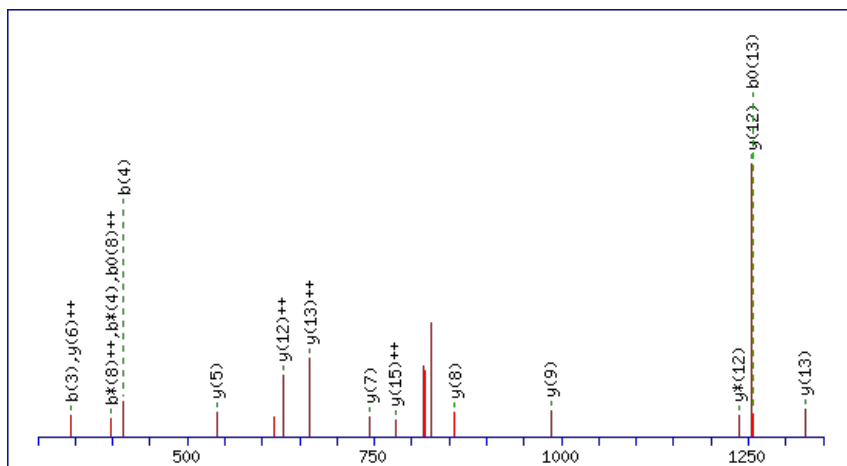
 Monoisotopic mass of neutral peptide  $M_r(\text{calc})$ : 1667.6924

Fixed modifications: Carbamidomethyl (C) (apply to specified residues or termini only)

Ions Score: 58 Expect: 1.5e-006

 Matches : 17/168 fragment ions using 19 most intense peaks ([help](#))

| #  | b               | b <sup>++</sup> | b <sup>*</sup>  | b <sup>*++</sup> | b <sup>0</sup>   | b <sup>0++</sup> | Seq. | y                | y <sup>++</sup> | y <sup>*</sup>   | y <sup>*++</sup> | y <sup>0</sup> | y <sup>0++</sup> | #  |
|----|-----------------|-----------------|-----------------|------------------|------------------|------------------|------|------------------|-----------------|------------------|------------------|----------------|------------------|----|
| 1  | 115.0502        | 58.0287         | 98.0237         | 49.5155          |                  |                  | N    |                  |                 |                  |                  |                |                  | 16 |
| 2  | 229.0931        | 115.0502        | 212.0666        | 106.5369         |                  |                  | N    | 1554.6568        | 777.8320        | 1537.6302        | 769.3188         | 1536.6462      | 768.8267         | 15 |
| 3  | <b>344.1201</b> | 172.5637        | 327.0935        | 164.0504         | 326.1095         | 163.5584         | D    | 1440.6138        | 720.8106        | 1423.5873        | 712.2973         | 1422.6033      | 711.8053         | 14 |
| 4  | <b>415.1572</b> | 208.0822        | <b>398.1306</b> | 199.5690         | 397.1466         | 199.0769         | A    | <b>1325.5869</b> | <b>663.2971</b> | 1308.5604        | 654.7838         | 1307.5763      | 654.2918         | 13 |
| 5  | 512.2100        | 256.6086        | 495.1834        | 248.0953         | 494.1994         | 247.6033         | P    | <b>1254.5498</b> | <b>627.7785</b> | <b>1237.5232</b> | 619.2653         | 1236.5392      | 618.7733         | 12 |
| 6  | 569.2314        | 285.1193        | 552.2049        | 276.6061         | 551.2209         | 276.1141         | G    | 1157.4970        | 579.2522        | 1140.4705        | 570.7389         | 1139.4865      | 570.2469         | 11 |
| 7  | 683.2743        | 342.1408        | 666.2478        | 333.6275         | 665.2638         | 333.1355         | N    | 1100.4756        | 550.7414        | 1083.4490        | 542.2281         | 1082.4650      | 541.7361         | 10 |
| 8  | 812.3169        | 406.6621        | 795.2904        | <b>398.1488</b>  | 794.3064         | <b>397.6568</b>  | E    | <b>986.4326</b>  | 493.7200        | 969.4061         | 485.2067         | 968.4221       | 484.7147         | 9  |
| 9  | 926.3599        | 463.6836        | 909.3333        | 455.1703         | 908.3493         | 454.6783         | N    | <b>857.3900</b>  | 429.1987        | 840.3635         | 420.6854         | 839.3795       | 420.1934         | 8  |
| 10 | 983.3813        | 492.1943        | 966.3548        | 483.6810         | 965.3708         | 483.1890         | G    | <b>743.3471</b>  | 372.1772        | 726.3206         | 363.6639         | 725.3365       | 363.1719         | 7  |
| 11 | 1130.4497       | 565.7285        | 1113.4232       | 557.2152         | 1112.4392        | 556.7232         | F    | 686.3257         | <b>343.6665</b> | 669.2991         | 335.1532         | 668.3151       | 334.6612         | 6  |
| 12 | 1217.4818       | 609.2445        | 1200.4552       | 600.7312         | 1199.4712        | 600.2392         | S    | <b>539.2572</b>  | 270.1323        | 522.2307         | 261.6190         | 521.2467       | 261.1270         | 5  |
| 13 | 1274.5032       | 637.7553        | 1257.4767       | 629.2420         | <b>1256.4927</b> | 628.7500         | G    | 452.2252         | 226.6162        | 435.1987         | 218.1030         |                |                  | 4  |
| 14 | 1331.5247       | 666.2660        | 1314.4981       | 657.7527         | 1313.5141        | 657.2607         | G    | 395.2037         | 198.1055        | 378.1772         | 189.5922         |                |                  | 3  |
| 15 | 1494.5880       | 747.7977        | 1477.5615       | 739.2844         | 1476.5775        | 738.7924         | Y    | 338.1823         | 169.5948        | 321.1557         | 161.0815         |                |                  | 2  |
| 16 |                 |                 |                 |                  |                  |                  | R    | 175.1190         | 88.0631         | 158.0924         | 79.5498          |                |                  | 1  |

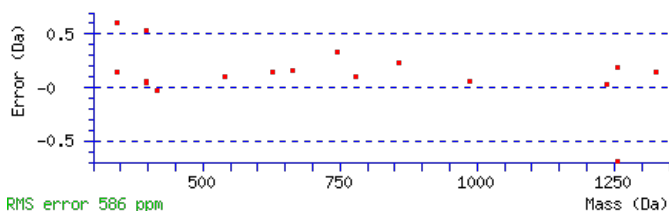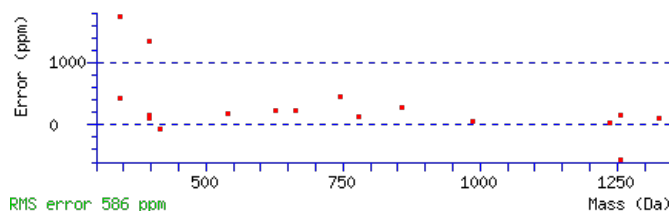

## AT5G47210.1

NCBI **BLAST** search of [NNDAPGNENGFSGGYR](#)

(Parameters: blastp, nr protein database, expect=20000, no filter, PAM30)

Other BLAST [web gateways](#)

### All matches to this query

| Score | Mr(calc)  | Delta  | Sequence                         |
|-------|-----------|--------|----------------------------------|
| 58.3  | 1667.6924 | 0.0001 | <a href="#">NNDAPGNENGFSGGYR</a> |
| 1.1   | 1667.6911 | 0.0014 | <a href="#">DVSIADDNQYEDER</a>   |

**Mascot:** <http://www.matrixscience.com/>

## Peptide View

MS/MS Fragmentation of **LLVASCVSEITR**

Found in **AT5G47690.1** in **TAIR\_Arabidopsis**, Symbols: | binding | chr5:19335125-19344240 FORWARD

Match to Query 5140: 1362.676146 from(682.345349,2+) index(4625)

Title: Elution from: 43.078 to 43.078 scan no 5866 cid35.00 polarity:+

Data file 0-1\_2.mgf

Click mouse within plot area to zoom in by factor of two about that point

Or,   to  Da

Label all possible matches  Label matches used for scoring

Show Y-axis

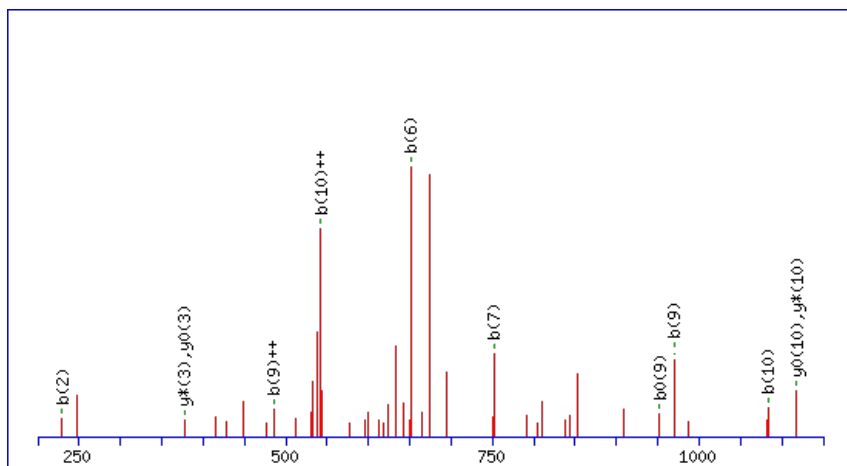

Monoisotopic mass of neutral peptide **Mr(calc)**: 1362.6753

**Fixed modifications**: Carbamidomethyl (C) (apply to specified residues or termini only)

**Ions Score**: 24 **Expect**: 0.036

**Matches**: 12/100 fragment ions using 18 most intense peaks ([help](#))

| #  | b                | b <sup>++</sup> | b <sup>0</sup>  | b <sup>0++</sup> | Seq. | y         | y <sup>++</sup> | y*               | y <sup>*++</sup> | y <sup>0</sup>   | y <sup>0++</sup> | #  |
|----|------------------|-----------------|-----------------|------------------|------|-----------|-----------------|------------------|------------------|------------------|------------------|----|
| 1  | 115.0884         | 58.0478         |                 |                  | L    |           |                 |                  |                  |                  |                  | 12 |
| 2  | <b>229.1695</b>  | 115.0884        |                 |                  | L    | 1249.6015 | 625.3044        | 1231.5779        | 616.2926         | 1231.5910        | 616.2991         | 11 |
| 3  | 329.2349         | 165.1211        |                 |                  | V    | 1135.5204 | 568.2638        | <b>1117.4968</b> | 559.2521         | <b>1117.5099</b> | 559.2586         | 10 |
| 4  | 401.2691         | 201.1382        |                 |                  | A    | 1035.4550 | 518.2311        | 1017.4314        | 509.2193         | 1017.4444        | 509.2258         | 9  |
| 5  | 489.2981         | 245.1527        | 471.2876        | 236.1474         | S    | 963.4208  | 482.2141        | 945.3972         | 473.2023         | 945.4103         | 473.2088         | 8  |
| 6  | <b>651.3229</b>  | 326.1651        | 633.3123        | 317.1598         | C    | 875.3918  | 438.1995        | 857.3682         | 429.1877         | 857.3812         | 429.1942         | 7  |
| 7  | <b>751.3883</b>  | 376.1978        | 733.3777        | 367.1925         | V    | 713.3670  | 357.1872        | 695.3435         | 348.1754         | 695.3565         | 348.1819         | 6  |
| 8  | 839.4174         | 420.2123        | 821.4068        | 411.2070         | S    | 613.3016  | 307.1544        | 595.2780         | 298.1426         | 595.2910         | 298.1492         | 5  |
| 9  | <b>969.4570</b>  | <b>485.2321</b> | <b>951.4464</b> | 476.2269         | E    | 525.2725  | 263.1399        | 507.2489         | 254.1281         | 507.2620         | 254.1346         | 4  |
| 10 | <b>1083.5381</b> | <b>542.2727</b> | 1065.5275       | 533.2674         | I    | 395.2329  | 198.1201        | <b>377.2093</b>  | 189.1083         | <b>377.2223</b>  | 189.1148         | 3  |
| 11 | 1185.5828        | 593.2950        | 1167.5722       | 584.2898         | T    | 281.1518  | 141.0795        | 263.1282         | 132.0677         | 263.1412         | 132.0743         | 2  |
| 12 |                  |                 |                 |                  | R    | 179.1071  | 90.0572         | 161.0835         | 81.0454          |                  |                  | 1  |

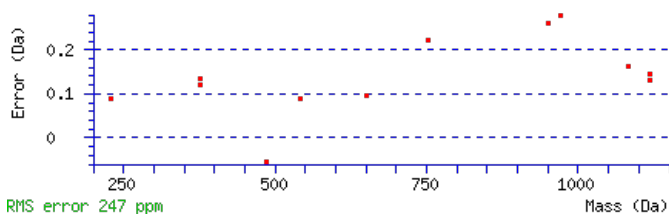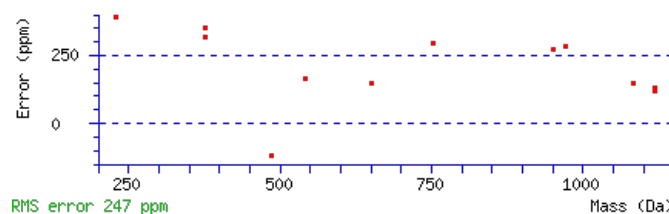

NCBI **BLAST** search of **LLVASCVSEITR**

(Parameters: blastp, nr protein database, expect=20000, no filter, PAM30)

Other BLAST [web gateways](#)

All matches to this query

## AT5G47690.1

| Score | Mr(calc)  | Delta   | Sequence                     |
|-------|-----------|---------|------------------------------|
| 24.3  | 1362.6753 | 0.0008  | <a href="#">LLVASCVSEITR</a> |
| 5.9   | 1362.6742 | 0.0020  | <a href="#">IFVFITNHIEK</a>  |
| 3.3   | 1362.6724 | 0.0038  | <a href="#">TAALQRAEEKAR</a> |
| 2.4   | 1362.6780 | -0.0019 | <a href="#">KNKLVVDNQMR</a>  |
| 0.8   | 1362.6773 | -0.0012 | <a href="#">ARFKLSHAQQR</a>  |

Mascot: <http://www.matrixscience.com/>

## Peptide View

MS/MS Fragmentation of **EKTGSEAGVAKR**

Found in **AT5G47790.1** in **TAIR\_Arabidopsis**, Symbols: | forkhead-associated domain-containing protein / FHA domain-containing protein | chr5:19368622-19369805 FORWARD

Match to Query 4213: 1248.604544 from(625.309548,2+) index(4095)

Title: Elution from: 37.451 to 37.451 scan no 5132 cid35.00 polarity:+

Data file D6h-3\_3.mgf

Click mouse within plot area to zoom in by factor of two about that point

Or,  to  Da

Label all possible matches  Label matches used for scoring

Show Y-axis

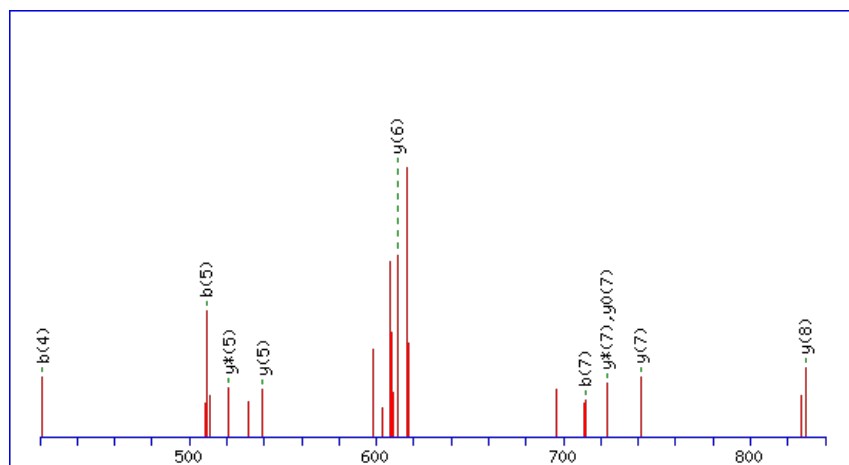

Monoisotopic mass of neutral peptide  $M_r(\text{calc})$ : 1248.6016

Fixed modifications: Carbamidomethyl (C) (apply to specified residues or termini only)

Ions Score: 26 Expect: 0.038

Matches : 10/118 fragment ions using 19 most intense peaks ([help](#))

| #  | b               | b <sup>++</sup> | b*        | b <sup>*++</sup> | b <sup>0</sup> | b <sup>0++</sup> | Seq. | y               | y <sup>++</sup> | y*              | y <sup>*++</sup> | y <sup>0</sup>  | y <sup>0++</sup> | #  |
|----|-----------------|-----------------|-----------|------------------|----------------|------------------|------|-----------------|-----------------|-----------------|------------------|-----------------|------------------|----|
| 1  | 131.0469        | 66.0271         |           |                  | 113.0363       | 57.0218          | E    |                 |                 |                 |                  |                 |                  | 12 |
| 2  | 261.1359        | 131.0716        | 243.1124  | 122.0598         | 243.1254       | 122.0663         | K    | 1119.5693       | 560.2883        | 1101.5457       | 551.2765         | 1101.5587       | 551.2830         | 11 |
| 3  | 363.1806        | 182.0940        | 345.1571  | 173.0822         | 345.1701       | 173.0887         | T    | 989.4803        | 495.2438        | 971.4567        | 486.2320         | 971.4697        | 486.2385         | 10 |
| 4  | <b>421.1991</b> | 211.1032        | 403.1756  | 202.0914         | 403.1886       | 202.0979         | G    | 887.4356        | 444.2214        | 869.4120        | 435.2096         | 869.4250        | 435.2161         | 9  |
| 5  | <b>509.2282</b> | 255.1177        | 491.2046  | 246.1060         | 491.2176       | 246.1125         | S    | <b>829.4171</b> | 415.2122        | 811.3935        | 406.2004         | 811.4065        | 406.2069         | 8  |
| 6  | 639.2678        | 320.1376        | 621.2443  | 311.1258         | 621.2573       | 311.1323         | E    | <b>741.3880</b> | 371.1976        | <b>723.3644</b> | 362.1858         | <b>723.3774</b> | 362.1924         | 7  |
| 7  | <b>711.3020</b> | 356.1546        | 693.2784  | 347.1428         | 693.2914       | 347.1493         | A    | <b>611.3484</b> | 306.1778        | 593.3248        | 297.1660         |                 |                  | 6  |
| 8  | 769.3205        | 385.1639        | 751.2969  | 376.1521         | 751.3099       | 376.1586         | G    | <b>539.3142</b> | 270.1607        | <b>521.2906</b> | 261.1490         |                 |                  | 5  |
| 9  | 869.3859        | 435.1966        | 851.3624  | 426.1848         | 851.3754       | 426.1913         | V    | 481.2957        | 241.1515        | 463.2721        | 232.1397         |                 |                  | 4  |
| 10 | 941.4201        | 471.2137        | 923.3965  | 462.2019         | 923.4095       | 462.2084         | A    | 381.2303        | 191.1188        | 363.2067        | 182.1070         |                 |                  | 3  |
| 11 | 1071.5091       | 536.2582        | 1053.4855 | 527.2464         | 1053.4986      | 527.2529         | K    | 309.1961        | 155.1017        | 291.1725        | 146.0899         |                 |                  | 2  |
| 12 |                 |                 |           |                  |                |                  | R    | 179.1071        | 90.0572         | 161.0835        | 81.0454          |                 |                  | 1  |

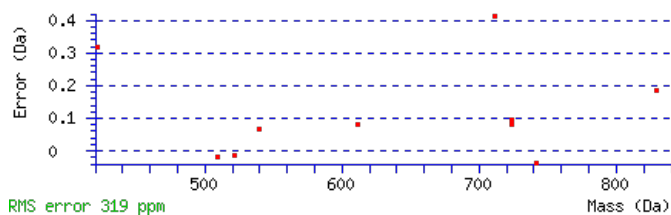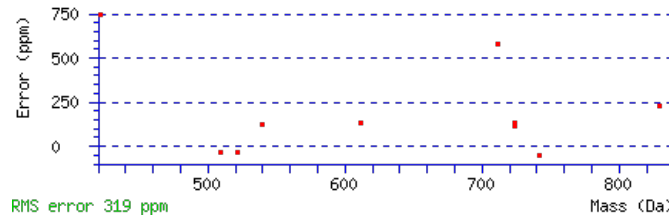

NCBI BLAST search of [EKTGSEAGVAKR](#)

(Parameters: blastp, nr protein database, expect=20000, no filter, PAM30)

Other BLAST [web gateways](#)

AT5G47790.1

All matches to this query

| Score | Mr(calc)  | Delta   | Sequence                     |
|-------|-----------|---------|------------------------------|
| 25.6  | 1248.6016 | 0.0029  | <a href="#">EKTGSEAGVAKR</a> |
| 17.9  | 1248.6039 | 0.0007  | <a href="#">KFNDVVNEIR</a>   |
| 13.9  | 1248.6073 | -0.0027 | <a href="#">VMKKAQDEIR</a>   |
| 10.2  | 1248.6073 | -0.0027 | <a href="#">KMVEEGQKLR</a>   |
| 10.2  | 1248.6039 | 0.0007  | <a href="#">NTTTWQNLKK</a>   |
| 7.3   | 1248.6073 | -0.0027 | <a href="#">NLSSMVLLSNR</a>  |
| 6.5   | 1248.6012 | 0.0033  | <a href="#">EFIDATGGSVLK</a> |
| 5.8   | 1248.6039 | 0.0006  | <a href="#">SLQSWKESLR</a>   |
| 5.6   | 1248.6016 | 0.0029  | <a href="#">SDTISAVIDRR</a>  |
| 3.8   | 1248.6012 | 0.0033  | <a href="#">LQDFVLSSEAK</a>  |

Mascot: <http://www.matrixscience.com/>

## Peptide View

### MS/MS Fragmentation of **SAPIYTQPR**

Found in **AT5G48300.1** in **TAIR\_Arabidopsis**, Symbols: APS1, ADG1 | ADG1 (ADP GLUCOSE PYROPHOSPHORYLASE SMALL SUBUNIT 1); glucose-1-phosphate adenylyltransferase | chr5:19587552-19589783 FORWARD

Match to Query 2876: 1044.500904 from(523.257728,2+) index(1120)

Title: Elution from: 18.871 to 18.871 scan no 1648 cid35.00 polarity:+

Data file D6h-2\_1.mgf

Click mouse within plot area to zoom in by factor of two about that point

Or,   to  Da

Label all possible matches  Label matches used for scoring

Show Y-axis

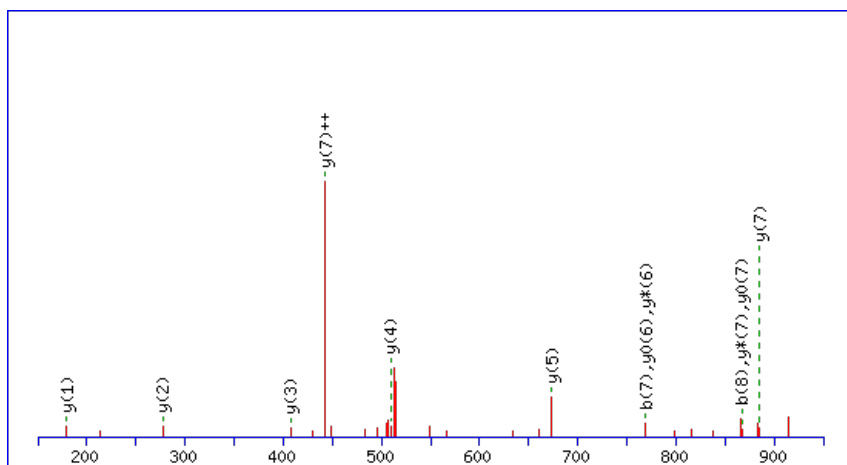

Monoisotopic mass of neutral peptide  $M_r(\text{calc})$ : 1044.5015

Fixed modifications: Carbamidomethyl (C) (apply to specified residues or termini only)

Ions Score: 34 Expect: 0.0049

Matches : 13/78 fragment ions using 24 most intense peaks ([help](#))

| # | b        | b <sup>++</sup> | b*       | b <sup>*++</sup> | b <sup>0</sup> | b <sup>0++</sup> | Seq. | y        | y <sup>++</sup> | y*       | y <sup>*++</sup> | y <sup>0</sup> | y <sup>0++</sup> | # |
|---|----------|-----------------|----------|------------------|----------------|------------------|------|----------|-----------------|----------|------------------|----------------|------------------|---|
| 1 | 89.0363  | 45.0218         |          |                  | 71.0258        | 36.0165          | S    |          |                 |          |                  |                |                  | 9 |
| 2 | 161.0705 | 81.0389         |          |                  | 143.0599       | 72.0336          | A    | 957.4797 | 479.2435        | 939.4561 | 470.2317         | 939.4691       | 470.2382         | 8 |
| 3 | 259.1203 | 130.0638        |          |                  | 241.1097       | 121.0585         | P    | 885.4455 | 443.2264        | 867.4219 | 434.2146         | 867.4349       | 434.2211         | 7 |
| 4 | 373.2014 | 187.1043        |          |                  | 355.1908       | 178.0990         | I    | 787.3957 | 394.2015        | 769.3721 | 385.1897         | 769.3851       | 385.1962         | 6 |
| 5 | 537.2618 | 269.1345        |          |                  | 519.2512       | 260.1292         | Y    | 673.3146 | 337.1609        | 655.2910 | 328.1492         | 655.3040       | 328.1557         | 5 |
| 6 | 639.3065 | 320.1569        |          |                  | 621.2959       | 311.1516         | T    | 509.2543 | 255.1308        | 491.2307 | 246.1190         | 491.2437       | 246.1255         | 4 |
| 7 | 769.3591 | 385.1832        | 751.3355 | 376.1714         | 751.3485       | 376.1779         | Q    | 407.2095 | 204.1084        | 389.1860 | 195.0966         |                |                  | 3 |
| 8 | 867.4089 | 434.2081        | 849.3853 | 425.1963         | 849.3983       | 425.2028         | P    | 277.1569 | 139.0821        | 259.1333 | 130.0703         |                |                  | 2 |
| 9 |          |                 |          |                  |                |                  | R    | 179.1071 | 90.0572         | 161.0835 | 81.0454          |                |                  | 1 |

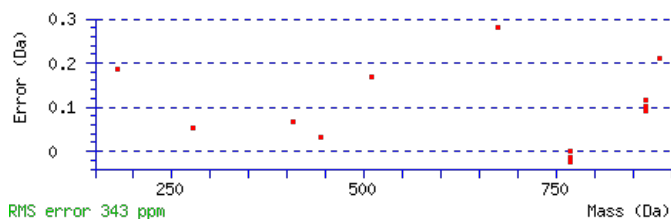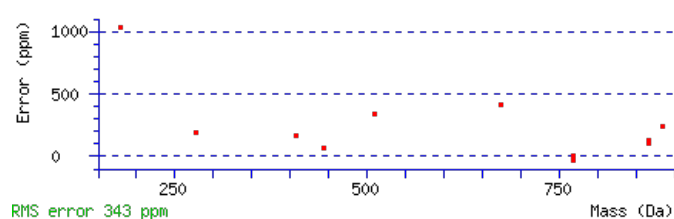

NCBI BLAST search of [SAPIYTQPR](#)

(Parameters: blastp, nr protein database, expect=20000, no filter, PAM30)

Other BLAST [web gateways](#)

All matches to this query

| Score | $M_r(\text{calc})$ | Delta | Sequence |
|-------|--------------------|-------|----------|
|       |                    |       |          |



**AT5G48300.1**

|      |           |         |                            |
|------|-----------|---------|----------------------------|
| 34.4 | 1044.5015 | -0.0005 | <a href="#">SAPIYTQPR</a>  |
| 18.7 | 1044.5019 | -0.0010 | <a href="#">RDQQIVNR</a>   |
| 14.9 | 1044.4992 | 0.0017  | <a href="#">QVGVASISDR</a> |
| 12.3 | 1044.4992 | 0.0017  | <a href="#">EGSGIAVKDR</a> |
| 9.5  | 1044.4992 | 0.0017  | <a href="#">GAVSDINLSR</a> |
| 9.5  | 1044.5014 | -0.0005 | <a href="#">QVEKPFER</a>   |
| 9.4  | 1044.5037 | -0.0028 | <a href="#">KYAYTYGR</a>   |
| 9.4  | 1044.4992 | 0.0017  | <a href="#">AGATGSITPR</a> |
| 9.3  | 1044.4992 | 0.0017  | <a href="#">RTDEELLR</a>   |
| 8.1  | 1044.4992 | 0.0017  | <a href="#">KNDGDLTLR</a>  |

**Mascot:** <http://www.matrixscience.com/>

## Peptide View

### MS/MS Fragmentation of **VTDPFGVTWIFAEK**

Found in **AT5G48480.1** in **TAIR\_Arabidopsis**, Symbols: | Identical to Uncharacterized protein At5g48480 [Arabidopsis Thaliana] (GB:Q9LV66); similar to unknown [Populus trichocarpa] (GB:ABK95611.1); contains domain SSF54593 (SSF54593) | chr5:19662040-19662884 FORWARD

Match to Query 7663: 1608.818102 from(805.416327,2+) index(10979)

Title: Elution from: 104.945 to 104.945 scan no 15537 cid35.00 polarity:+

Data file D12h-1\_1.mgf

Click mouse within plot area to zoom in by factor of two about that point

Or,   to  Da

Label all possible matches  Label matches used for scoring

Show Y-axis

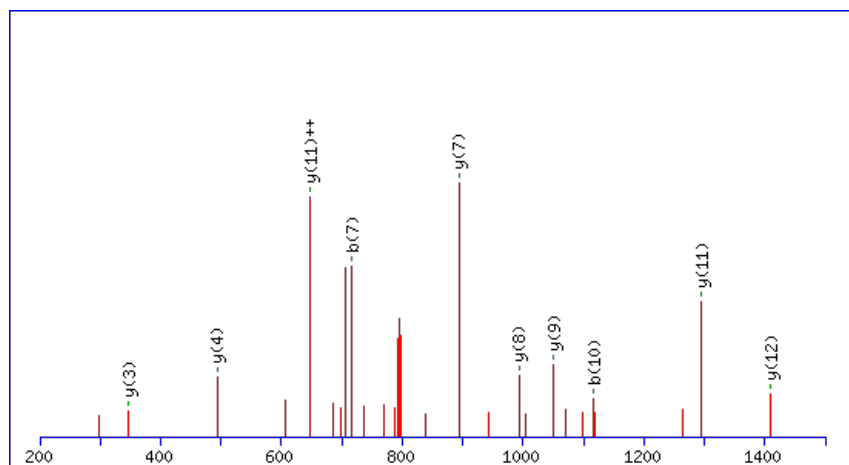

Monoisotopic mass of neutral peptide  $M_r(\text{calc})$ : 1608.8188

**Fixed modifications:** Carbamidomethyl (C) (apply to specified residues or termini only)

**Ions Score:** 63 **Expect:** 2.3e-006

**Matches:** 10/126 fragment ions using 10 most intense peaks ([help](#))

| #  | b                | b <sup>++</sup> | b <sup>0</sup> | b <sup>0++</sup> | Seq. | y                | y <sup>++</sup> | y*        | y <sup>*++</sup> | y <sup>0</sup> | y <sup>0++</sup> | #  |
|----|------------------|-----------------|----------------|------------------|------|------------------|-----------------|-----------|------------------|----------------|------------------|----|
| 1  | 100.0757         | 50.5415         |                |                  | V    |                  |                 |           |                  |                |                  | 14 |
| 2  | 201.1234         | 101.0653        | 183.1128       | 92.0600          | T    | 1510.7577        | 755.8825        | 1493.7311 | 747.3692         | 1492.7471      | 746.8772         | 13 |
| 3  | 316.1503         | 158.5788        | 298.1397       | 149.5735         | D    | <b>1409.7100</b> | 705.3586        | 1392.6834 | 696.8454         | 1391.6994      | 696.3533         | 12 |
| 4  | 413.2031         | 207.1052        | 395.1925       | 198.0999         | P    | <b>1294.6830</b> | <b>647.8452</b> | 1277.6565 | 639.3319         | 1276.6725      | 638.8399         | 11 |
| 5  | 560.2715         | 280.6394        | 542.2609       | 271.6341         | F    | 1197.6303        | 599.3188        | 1180.6037 | 590.8055         | 1179.6197      | 590.3135         | 10 |
| 6  | 617.2930         | 309.1501        | 599.2824       | 300.1448         | G    | <b>1050.5619</b> | 525.7846        | 1033.5353 | 517.2713         | 1032.5513      | 516.7793         | 9  |
| 7  | <b>716.3614</b>  | 358.6843        | 698.3508       | 349.6790         | V    | <b>993.5404</b>  | 497.2738        | 976.5138  | 488.7606         | 975.5298       | 488.2686         | 8  |
| 8  | 817.4090         | 409.2082        | 799.3985       | 400.2029         | T    | <b>894.4720</b>  | 447.7396        | 877.4454  | 439.2264         | 876.4614       | 438.7343         | 7  |
| 9  | 1003.4884        | 502.2478        | 985.4778       | 493.2425         | W    | 793.4243         | 397.2158        | 776.3978  | 388.7025         | 775.4137       | 388.2105         | 6  |
| 10 | <b>1116.5724</b> | 558.7899        | 1098.5619      | 549.7846         | I    | 607.3450         | 304.1761        | 590.3184  | 295.6629         | 589.3344       | 295.1708         | 5  |
| 11 | 1263.6408        | 632.3241        | 1245.6303      | 623.3188         | F    | <b>494.2609</b>  | 247.6341        | 477.2344  | 239.1208         | 476.2504       | 238.6288         | 4  |
| 12 | 1334.6780        | 667.8426        | 1316.6674      | 658.8373         | A    | <b>347.1925</b>  | 174.0999        | 330.1660  | 165.5866         | 329.1819       | 165.0946         | 3  |
| 13 | 1463.7205        | 732.3639        | 1445.7100      | 723.3586         | E    | 276.1554         | 138.5813        | 259.1288  | 130.0681         | 258.1448       | 129.5761         | 2  |
| 14 |                  |                 |                |                  | K    | 147.1128         | 74.0600         | 130.0863  | 65.5468          |                |                  | 1  |

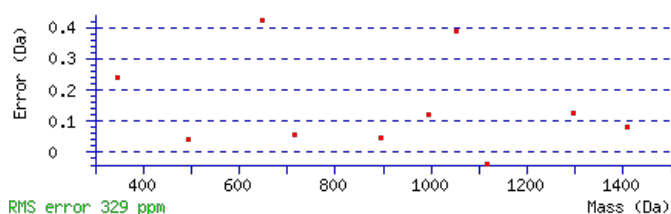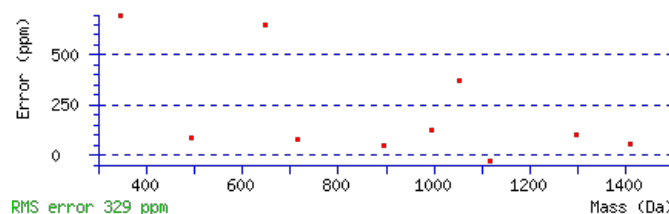

NCBI BLAST search of [VTDPFGVTWIFAEK](#)

## AT5G48480.1

(Parameters: blastp, nr protein database, expect=20000, no filter, PAM30)

Other BLAST [web gateways](#)

### All matches to this query

| Score | Mr(calc)  | Delta   | Sequence                       |
|-------|-----------|---------|--------------------------------|
| 62.6  | 1608.8188 | -0.0007 | <a href="#">VTDPFGVTWIFAEK</a> |

Mascot: <http://www.matrixscience.com/>

## Peptide View

MS/MS Fragmentation of **KCGRMEEQVELLK**Found in **AT5G48850.1** in **TAIR\_Arabidopsis**, Symbols: | male sterility MS5 family protein | chr5:19822802-19824925 REVERSE

Match to Query 8070: 1654.751240 from(828.382896,2+) index(11012)

Title: Elution from: 105.603 to 105.603 scan no 15610 cid35.00 polarity:+

Data file D12h-1\_1.mgf

Click mouse within plot area to zoom in by factor of two about that point

Or,  to  Da Label all possible matches  Label matches used for scoring Show Y-axis 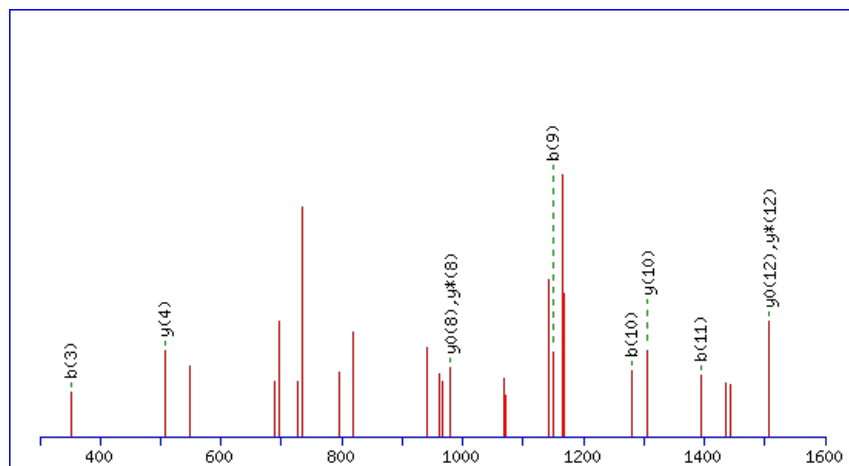Monoisotopic mass of neutral peptide  $M_r(\text{calc})$ : 1654.7527

Fixed modifications: Carbamidomethyl (C) (apply to specified residues or termini only)

Variable modifications:

M5 : Oxidation (M), with neutral losses 0.0000 (shown in table), 63.9983

Ions Score: 22 Expect: 0.049

Matches : 11/198 fragment ions using 20 most intense peaks ([help](#))

| #  | b         | b <sup>++</sup> | b <sup>*</sup> | b <sup>*++</sup> | b <sup>0</sup> | b <sup>0++</sup> | Seq. | y         | y <sup>++</sup> | y <sup>*</sup> | y <sup>*++</sup> | y <sup>0</sup> | y <sup>0++</sup> | #  |
|----|-----------|-----------------|----------------|------------------|----------------|------------------|------|-----------|-----------------|----------------|------------------|----------------|------------------|----|
| 1  | 131.0963  | 66.0518         | 113.0727       | 57.0400          |                |                  | K    |           |                 |                |                  |                |                  | 13 |
| 2  | 293.1210  | 147.0642        | 275.0974       | 138.0524         |                |                  | C    | 1525.6710 | 763.3391        | 1507.6474      | 754.3273         | 1507.6604      | 754.3338         | 12 |
| 3  | 351.1395  | 176.0734        | 333.1159       | 167.0616         |                |                  | G    | 1363.6462 | 682.3268        | 1345.6227      | 673.3150         | 1345.6357      | 673.3215         | 11 |
| 4  | 511.2288  | 256.1180        | 493.2052       | 247.1062         |                |                  | R    | 1305.6277 | 653.3175        | 1287.6042      | 644.3057         | 1287.6172      | 644.3122         | 10 |
| 5  | 659.2612  | 330.1342        | 641.2376       | 321.1225         |                |                  | M    | 1145.5385 | 573.2729        | 1127.5149      | 564.2611         | 1127.5279      | 564.2676         | 9  |
| 6  | 789.3008  | 395.1541        | 771.2773       | 386.1423         | 771.2903       | 386.1488         | E    | 997.5061  | 499.2567        | 979.4825       | 490.2449         | 979.4955       | 490.2514         | 8  |
| 7  | 919.3405  | 460.1739        | 901.3169       | 451.1621         | 901.3299       | 451.1686         | E    | 867.4664  | 434.2369        | 849.4428       | 425.2251         | 849.4559       | 425.2316         | 7  |
| 8  | 1049.3931 | 525.2002        | 1031.3695      | 516.1884         | 1031.3826      | 516.1949         | Q    | 737.4268  | 369.2170        | 719.4032       | 360.2052         | 719.4162       | 360.2118         | 6  |
| 9  | 1149.4586 | 575.2329        | 1131.4350      | 566.2211         | 1131.4480      | 566.2276         | V    | 607.3741  | 304.1907        | 589.3506       | 295.1789         | 589.3636       | 295.1854         | 5  |
| 10 | 1279.4982 | 640.2527        | 1261.4746      | 631.2409         | 1261.4876      | 631.2475         | E    | 507.3087  | 254.1580        | 489.2851       | 245.1462         | 489.2981       | 245.1527         | 4  |
| 11 | 1393.5793 | 697.2933        | 1375.5557      | 688.2815         | 1375.5687      | 688.2880         | L    | 377.2691  | 189.1382        | 359.2455       | 180.1264         |                |                  | 3  |
| 12 | 1507.6604 | 754.3338        | 1489.6368      | 745.3220         | 1489.6498      | 745.3286         | L    | 263.1880  | 132.0976        | 245.1644       | 123.0858         |                |                  | 2  |
| 13 |           |                 |                |                  |                |                  | K    | 149.1069  | 75.0571         | 131.0833       | 66.0453          |                |                  | 1  |

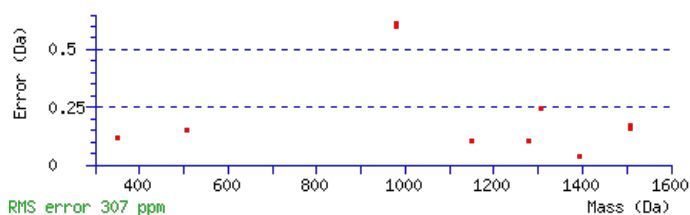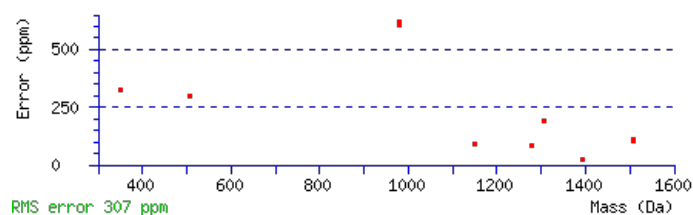NCBI BLAST search of **KCGRMEEQVELLK**

(Parameters: blastp, nr protein database, expect=20000, no filter, PAM30)

AT5G48850.1

Other BLAST [web gateways](#)

All matches to this query

| Score | Mr(calc)  | Delta   | Sequence                        |
|-------|-----------|---------|---------------------------------|
| 22.4  | 1654.7527 | -0.0015 | <a href="#">KCGRMEEQVELLK</a>   |
| 11.9  | 1654.7554 | -0.0041 | <a href="#">MAQQVLGCTSRPIR</a>  |
| 4.3   | 1654.7493 | 0.0019  | <a href="#">CGLRLVYASDEPQK</a>  |
| 3.5   | 1654.7515 | -0.0003 | <a href="#">MEAGDFVGAHKFVTK</a> |
| 3.4   | 1654.7467 | 0.0046  | <a href="#">DAYPNVMEDLKSLK</a>  |
| 3.1   | 1654.7527 | -0.0015 | <a href="#">KNQENVVMMKPSSK</a>  |
| 2.9   | 1654.7527 | -0.0015 | <a href="#">KNQENVVMMKPSSK</a>  |
| 0.8   | 1654.7467 | 0.0046  | <a href="#">VSDALEIFEEMLSR</a>  |
| 0.8   | 1654.7467 | 0.0046  | <a href="#">MADAILVAEEYER</a>   |
| 0.1   | 1654.7467 | 0.0046  | <a href="#">DATEEMINLAIGFAK</a> |

Mascot: <http://www.matrixscience.com/>

Peptide View

MS/MS Fragmentation of **IELSSLTQTNMSLPFITATADGPK**

Found in **AT5G49910.1** in **TAIR Arabidopsis**, Symbols: HSC70-7, cpHSC70-2 | cpHSC70-2 (HEAT SHOCK PROTEIN 70-7); ATP binding / unfolded protein binding | chr5:20320696-20323521 FORWARD

Match to Query 10423: 2534.289738 from(845.770522,3+) index(10433)  
 Title: Elution from: 100.294 to 100.294 scan no 14727 cid35.00 polarity:+  
 Data file D6h-2\_2.mgf

Click mouse within plot area to zoom in by factor of two about that point

Or, Plot from  to  Da

Label all possible matches  Label matches used for scoring

Show Y-axis

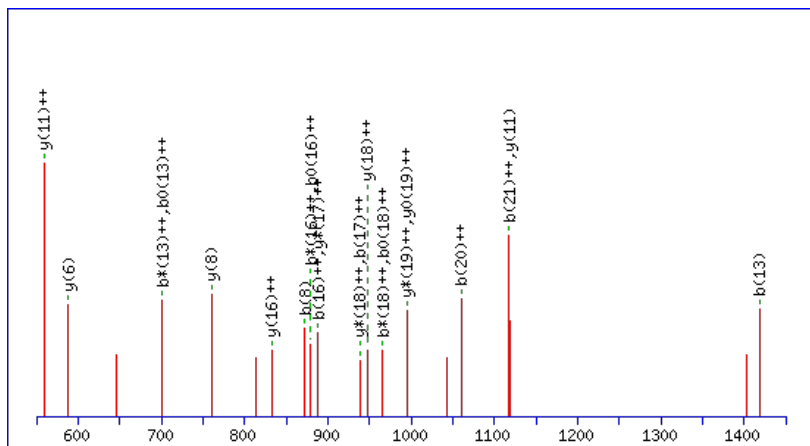

Monoisotopic mass of neutral peptide  $M_r(\text{calc})$ : 2534.2938

Fixed modifications: Carbamidomethyl (C) (apply to specified residues or termini only)

Ions Score: 30 Expect: 0.0037

Matches : 22/254 fragment ions using 20 most intense peaks ([help](#))

| #  | b         | b <sup>++</sup> | b*        | b* <sup>++</sup> | b <sup>0</sup> | b <sup>0</sup> ++ | Seq. | y         | y <sup>++</sup> | y*        | y* <sup>++</sup> | y <sup>0</sup> | y <sup>0</sup> ++ | #  |
|----|-----------|-----------------|-----------|------------------|----------------|-------------------|------|-----------|-----------------|-----------|------------------|----------------|-------------------|----|
| 1  | 114.0913  | 57.5493         |           |                  |                |                   | I    |           |                 |           |                  |                |                   | 24 |
| 2  | 243.1339  | 122.0706        |           |                  | 225.1234       | 113.0653          | E    | 2422.2170 | 1211.6121       | 2405.1905 | 1203.0989        | 2404.2065      | 1202.6069         | 23 |
| 3  | 356.2180  | 178.6126        |           |                  | 338.2074       | 169.6074          | L    | 2293.1744 | 1147.0909       | 2276.1479 | 1138.5776        | 2275.1639      | 1138.0856         | 22 |
| 4  | 443.2500  | 222.1287        |           |                  | 425.2395       | 213.1234          | S    | 2180.0904 | 1090.5488       | 2163.0638 | 1082.0355        | 2162.0798      | 1081.5435         | 21 |
| 5  | 530.2821  | 265.6447        |           |                  | 512.2715       | 256.6394          | S    | 2093.0583 | 1047.0328       | 2076.0318 | 1038.5195        | 2075.0478      | 1038.0275         | 20 |
| 6  | 643.3661  | 322.1867        |           |                  | 625.3556       | 313.1814          | L    | 2006.0263 | 1003.5168       | 1988.9998 | 995.0035         | 1988.0157      | 994.5115          | 19 |
| 7  | 744.4138  | 372.7105        |           |                  | 726.4032       | 363.7053          | T    | 1892.9422 | 946.9748        | 1875.9157 | 938.4615         | 1874.9317      | 937.9695          | 18 |
| 8  | 872.4724  | 436.7398        | 855.4458  | 428.2266         | 854.4618       | 427.7345          | Q    | 1791.8946 | 896.4509        | 1774.8680 | 887.9376         | 1773.8840      | 887.4456          | 17 |
| 9  | 973.5201  | 487.2637        | 956.4935  | 478.7504         | 955.5095       | 478.2584          | T    | 1663.8360 | 832.4216        | 1646.8094 | 823.9084         | 1645.8254      | 823.4163          | 16 |
| 10 | 1087.5630 | 544.2851        | 1070.5364 | 535.7719         | 1069.5524      | 535.2798          | N    | 1562.7883 | 781.8978        | 1545.7618 | 773.3845         | 1544.7777      | 772.8925          | 15 |
| 11 | 1218.6035 | 609.8054        | 1201.5769 | 601.2921         | 1200.5929      | 600.8001          | M    | 1448.7454 | 724.8763        | 1431.7188 | 716.3631         | 1430.7348      | 715.8710          | 14 |
| 12 | 1305.6355 | 653.3214        | 1288.6089 | 644.8081         | 1287.6249      | 644.3161          | S    | 1317.7049 | 659.3561        | 1300.6783 | 650.8428         | 1299.6943      | 650.3508          | 13 |
| 13 | 1418.7196 | 709.8634        | 1401.6930 | 701.3501         | 1400.7090      | 700.8581          | L    | 1230.6729 | 615.8401        | 1213.6463 | 607.3268         | 1212.6623      | 606.8348          | 12 |
| 14 | 1515.7723 | 758.3898        | 1498.7458 | 749.8765         | 1497.7618      | 749.3845          | P    | 1117.5888 | 559.2980        | 1100.5623 | 550.7848         | 1099.5782      | 550.2928          | 11 |
| 15 | 1662.8407 | 831.9240        | 1645.8142 | 823.4107         | 1644.8302      | 822.9187          | F    | 1020.5360 | 510.7717        | 1003.5095 | 502.2584         | 1002.5255      | 501.7664          | 10 |
| 16 | 1775.9248 | 888.4660        | 1758.8983 | 879.9528         | 1757.9142      | 879.4608          | I    | 873.4676  | 437.2375        | 856.4411  | 428.7242         | 855.4571       | 428.2322          | 9  |
| 17 | 1876.9725 | 938.9899        | 1859.9459 | 930.4766         | 1858.9619      | 929.9846          | T    | 760.3836  | 380.6954        | 743.3570  | 372.1821         | 742.3730       | 371.6901          | 8  |
| 18 | 1948.0096 | 974.5084        | 1930.9830 | 965.9952         | 1929.9990      | 965.5032          | A    | 659.3359  | 330.1716        | 642.3093  | 321.6583         | 641.3253       | 321.1663          | 7  |
| 19 | 2049.0573 | 1025.0323       | 2032.0307 | 1016.5190        | 2031.0467      | 1016.0270         | T    | 588.2988  | 294.6530        | 571.2722  | 286.1397         | 570.2882       | 285.6477          | 6  |
| 20 | 2120.0944 | 1060.5508       | 2103.0678 | 1052.0376        | 2102.0838      | 1051.5455         | A    | 487.2511  | 244.1292        | 470.2245  | 235.6159         | 469.2405       | 235.1239          | 5  |
| 21 | 2235.1213 | 1118.0643       | 2218.0948 | 1109.5510        | 2217.1108      | 1109.0590         | D    | 416.2140  | 208.6106        | 399.1874  | 200.0974         | 398.2034       | 199.6053          | 4  |
| 22 | 2292.1428 | 1146.5750       | 2275.1162 | 1138.0618        | 2274.1322      | 1137.5698         | G    | 301.1870  | 151.0972        | 284.1605  | 142.5839         |                |                   | 3  |
| 23 | 2389.1956 | 1195.1014       | 2372.1690 | 1186.5881        | 2371.1850      | 1186.0961         | P    | 244.1656  | 122.5864        | 227.1390  | 114.0731         |                |                   | 2  |
| 24 |           |                 |           |                  |                |                   | K    | 147.1128  | 74.0600         | 130.0863  | 65.5468          |                |                   | 1  |

# AT5G49910.1

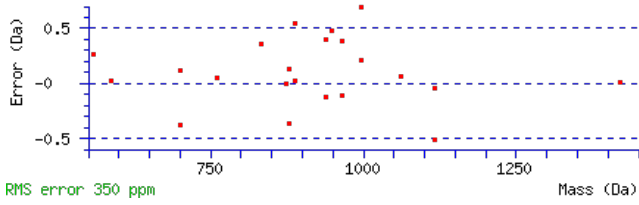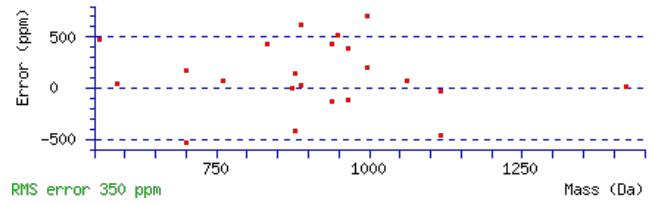

NCBI **BLAST** search of [IELSSLTQTNMSLPFITATADGPK](#)  
(Parameters: blastp, nr protein database, expect=20000, no filter, PAM30)  
Other BLAST [web gateways](#)

## All matches to this query

| Score | Mr(calc)  | Delta   | Sequence                                 |
|-------|-----------|---------|------------------------------------------|
| 30.1  | 2534.2938 | -0.0041 | <a href="#">IELSSLTQTNMSLPFITATADGPK</a> |
| 3.9   | 2534.2832 | 0.0065  | <a href="#">TDASGVSMLEHLMRTSSGLVTSK</a>  |

Mascot: <http://www.matrixscience.com/>

## Peptide View

### MS/MS Fragmentation of **GFGFVTMSTVEEAEK**

Found in **AT5G50250.1** in **TAIR\_Arabidopsis**, Symbols: | 31 kDa ribonucleoprotein, chloroplast, putative / RNA-binding protein RNP-T, putative / RNA-binding protein 1/2/3, putative / RNA-binding protein cp31, putative | chr5:20469903-20471191 REVERSE

Match to Query 7284: 1630.755194 from(816.384873,2+) index(7761)

Title: Elution from: 68.858 to 68.858 scan no 10228 cid35.00 polarity:+

Data file D12h-3\_2.mgf

Click mouse within plot area to zoom in by factor of two about that point

Or,  to  Da

Label all possible matches  Label matches used for scoring

Show Y-axis

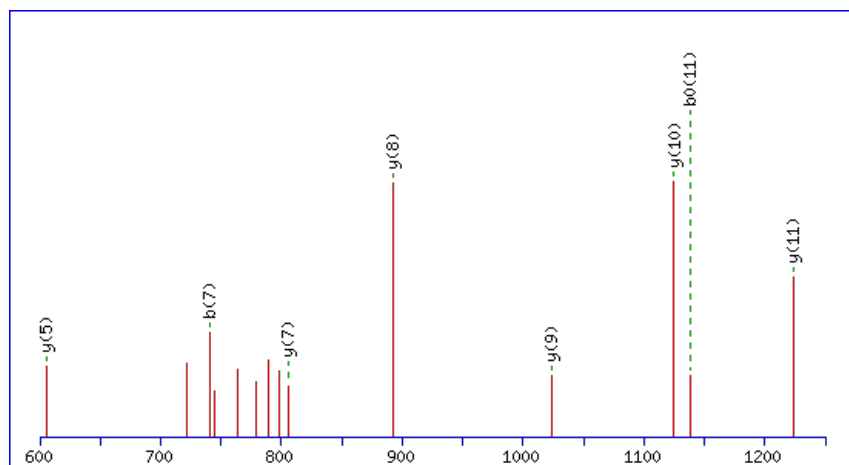

Monoisotopic mass of neutral peptide  $M_r(\text{calc})$ : 1630.7549

Fixed modifications: Carbamidomethyl (C) (apply to specified residues or termini only)

Ions Score: 44 Expect: 9e-005

Matches : 8/128 fragment ions using 9 most intense peaks ([help](#))

| #  | b               | b <sup>++</sup> | b <sup>0</sup>   | b <sup>0++</sup> | Seq. | y                | y <sup>++</sup> | y*        | y <sup>*++</sup> | y <sup>0</sup> | y <sup>0++</sup> | #  |
|----|-----------------|-----------------|------------------|------------------|------|------------------|-----------------|-----------|------------------|----------------|------------------|----|
| 1  | 58.0287         | 29.5180         |                  |                  | G    |                  |                 |           |                  |                |                  | 15 |
| 2  | 205.0972        | 103.0522        |                  |                  | F    | 1574.7407        | 787.8740        | 1557.7141 | 779.3607         | 1556.7301      | 778.8687         | 14 |
| 3  | 262.1186        | 131.5629        |                  |                  | G    | 1427.6723        | 714.3398        | 1410.6457 | 705.8265         | 1409.6617      | 705.3345         | 13 |
| 4  | 409.1870        | 205.0972        |                  |                  | F    | 1370.6508        | 685.8290        | 1353.6243 | 677.3158         | 1352.6402      | 676.8238         | 12 |
| 5  | 508.2554        | 254.6314        |                  |                  | V    | <b>1223.5824</b> | 612.2948        | 1206.5558 | 603.7816         | 1205.5718      | 603.2896         | 11 |
| 6  | 609.3031        | 305.1552        | 591.2926         | 296.1499         | T    | <b>1124.5140</b> | 562.7606        | 1107.4874 | 554.2474         | 1106.5034      | 553.7553         | 10 |
| 7  | <b>740.3436</b> | 370.6754        | 722.3330         | 361.6702         | M    | <b>1023.4663</b> | 512.2368        | 1006.4398 | 503.7235         | 1005.4557      | 503.2315         | 9  |
| 8  | 827.3756        | 414.1915        | 809.3651         | 405.1862         | S    | <b>892.4258</b>  | 446.7165        | 875.3993  | 438.2033         | 874.4153       | 437.7113         | 8  |
| 9  | 928.4233        | 464.7153        | 910.4128         | 455.7100         | T    | <b>805.3938</b>  | 403.2005        | 788.3672  | 394.6873         | 787.3832       | 394.1953         | 7  |
| 10 | 1027.4917       | 514.2495        | 1009.4812        | 505.2442         | V    | 704.3461         | 352.6767        | 687.3196  | 344.1634         | 686.3355       | 343.6714         | 6  |
| 11 | 1156.5343       | 578.7708        | <b>1138.5238</b> | 569.7655         | E    | <b>605.2777</b>  | 303.1425        | 588.2511  | 294.6292         | 587.2671       | 294.1372         | 5  |
| 12 | 1285.5769       | 643.2921        | 1267.5664        | 634.2868         | E    | 476.2351         | 238.6212        | 459.2086  | 230.1079         | 458.2245       | 229.6159         | 4  |
| 13 | 1356.6140       | 678.8107        | 1338.6035        | 669.8054         | A    | 347.1925         | 174.0999        | 330.1660  | 165.5866         | 329.1819       | 165.0946         | 3  |
| 14 | 1485.6566       | 743.3320        | 1467.6461        | 734.3267         | E    | 276.1554         | 138.5813        | 259.1288  | 130.0681         | 258.1448       | 129.5761         | 2  |
| 15 |                 |                 |                  |                  | K    | 147.1128         | 74.0600         | 130.0863  | 65.5468          |                |                  | 1  |

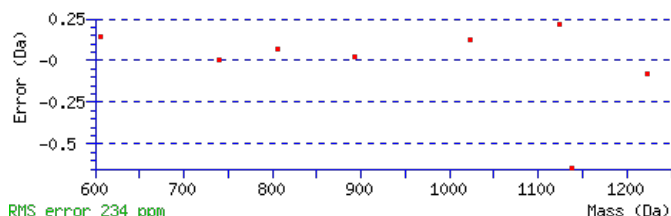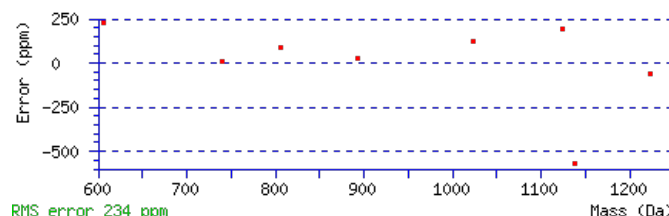



## AT5G50250.1

NCBI **BLAST** search of [GFGFVTMSTVEEAEK](#)

(Parameters: blastp, nr protein database, expect=20000, no filter, PAM30)

Other BLAST [web gateways](#)

### All matches to this query

| Score | Mr(calc)  | Delta  | Sequence                        |
|-------|-----------|--------|---------------------------------|
| 43.9  | 1630.7549 | 0.0003 | <a href="#">GFGFVTMSTVEEAEK</a> |

Mascot: <http://www.matrixscience.com/>

**Peptide View**MS/MS Fragmentation of **EEALVIQTEMEKK**Found in **AT5G50280.1** in **TAIR\_Arabidopsis**, Symbols: EMB1006 | EMB1006 (EMBRYO DEFECTIVE 1006) | chr5:20476464-20478730  
FORWARD

Match to Query 6941: 1562.785605 from(521.935811,3+) index(2346)

Title: Elution from: 24.924 to 24.924 scan no 2942 cid35.00 polarity:+

Data file C7-3\_2.mgf

Click mouse within plot area to zoom in by factor of two about that point

Or,   to  Da Label all possible matches  Label matches used for scoring Show Y-axis 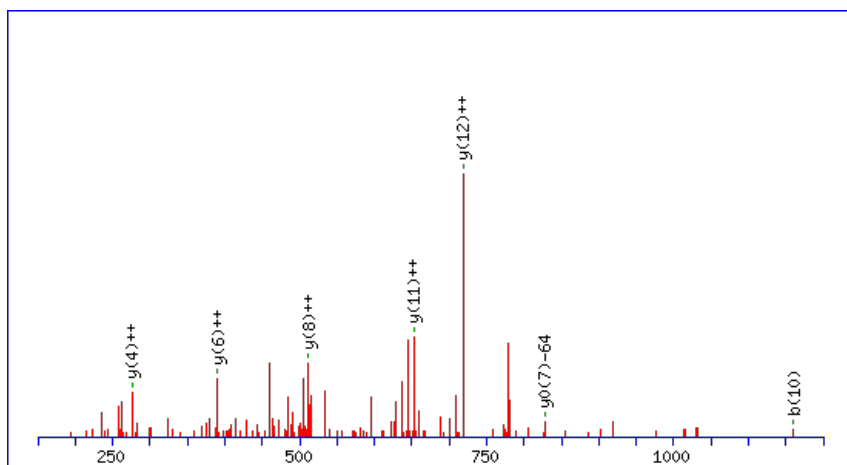Monoisotopic mass of neutral peptide  $M_r(\text{calc})$ : 1562.7861

Fixed modifications: Carbamidomethyl (C) (apply to specified residues or termini only)

Variable modifications:

M10 : Oxidation (M), with neutral losses 0.0000 (shown in table), 63.9983

Ions Score: 25 Expect: 0.013

Matches : 7/200 fragment ions using 10 most intense peaks ([help](#))

| #  | b         | b <sup>++</sup> | b <sup>*</sup> | b <sup>*++</sup> | b <sup>0</sup> | b <sup>0++</sup> | Seq. | y         | y <sup>++</sup> | y <sup>*</sup> | y <sup>*++</sup> | y <sup>0</sup> | y <sup>0++</sup> | #  |
|----|-----------|-----------------|----------------|------------------|----------------|------------------|------|-----------|-----------------|----------------|------------------|----------------|------------------|----|
| 1  | 130.0499  | 65.5286         |                |                  | 112.0393       | 56.5233          | E    |           |                 |                |                  |                |                  | 13 |
| 2  | 259.0925  | 130.0499        |                |                  | 241.0819       | 121.0446         | E    | 1434.7509 | 717.8791        | 1417.7243      | 709.3658         | 1416.7403      | 708.8738         | 12 |
| 3  | 330.1296  | 165.5684        |                |                  | 312.1190       | 156.5631         | A    | 1305.7083 | 653.3578        | 1288.6817      | 644.8445         | 1287.6977      | 644.3525         | 11 |
| 4  | 443.2136  | 222.1105        |                |                  | 425.2031       | 213.1052         | L    | 1234.6712 | 617.8392        | 1217.6446      | 609.3259         | 1216.6606      | 608.8339         | 10 |
| 5  | 542.2821  | 271.6447        |                |                  | 524.2715       | 262.6394         | V    | 1121.5871 | 561.2972        | 1104.5605      | 552.7839         | 1103.5765      | 552.2919         | 9  |
| 6  | 655.3661  | 328.1867        |                |                  | 637.3556       | 319.1814         | I    | 1022.5187 | 511.7630        | 1005.4921      | 503.2497         | 1004.5081      | 502.7577         | 8  |
| 7  | 783.4247  | 392.2160        | 766.3981       | 383.7027         | 765.4141       | 383.2107         | Q    | 909.4346  | 455.2209        | 892.4081       | 446.7077         | 891.4240       | 446.2157         | 7  |
| 8  | 884.4724  | 442.7398        | 867.4458       | 434.2266         | 866.4618       | 433.7345         | T    | 781.3760  | 391.1917        | 764.3495       | 382.6784         | 763.3655       | 382.1864         | 6  |
| 9  | 1013.5150 | 507.2611        | 996.4884       | 498.7478         | 995.5044       | 498.2558         | E    | 680.3284  | 340.6678        | 663.3018       | 332.1545         | 662.3178       | 331.6625         | 5  |
| 10 | 1160.5504 | 580.7788        | 1143.5238      | 572.2655         | 1142.5398      | 571.7735         | M    | 551.2858  | 276.1465        | 534.2592       | 267.6332         | 533.2752       | 267.1412         | 4  |
| 11 | 1289.5930 | 645.3001        | 1272.5664      | 636.7868         | 1271.5824      | 636.2948         | E    | 404.2504  | 202.6288        | 387.2238       | 194.1155         | 386.2398       | 193.6235         | 3  |
| 12 | 1417.6879 | 709.3476        | 1400.6614      | 700.8343         | 1399.6774      | 700.3423         | K    | 275.2078  | 138.1075        | 258.1812       | 129.5942         |                |                  | 2  |
| 13 |           |                 |                |                  |                |                  | K    | 147.1128  | 74.0600         | 130.0863       | 65.5468          |                |                  | 1  |

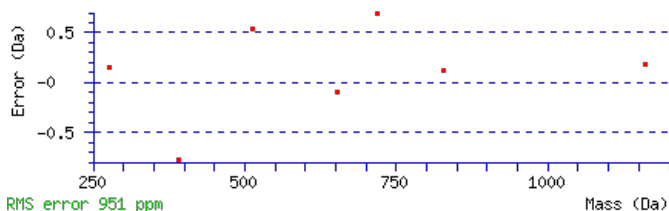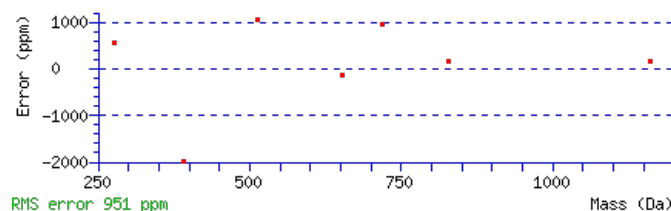NCBI **BLAST** search of [EEALVIQTEMEKK](#)

## AT5G50280.1

(Parameters: blastp, nr protein database, expect=20000, no filter, PAM30)

Other BLAST [web gateways](#)

### All matches to this query

| Score | Mr(calc)  | Delta   | Sequence                       |
|-------|-----------|---------|--------------------------------|
| 24.7  | 1562.7861 | -0.0005 | <a href="#">EEALVIQTEMEKK</a>  |
| 24.5  | 1562.7861 | -0.0005 | <a href="#">KMDLTAEELKEEK</a>  |
| 3.5   | 1562.7837 | 0.0019  | <a href="#">TYSMMINGFVKLK</a>  |
| 3.4   | 1562.7828 | 0.0028  | <a href="#">EESPLETLFITER</a>  |
| 0.2   | 1562.7875 | -0.0019 | <a href="#">QSGVRASVPCFDLK</a> |

Mascot: <http://www.matrixscience.com/>

**Peptide View**MS/MS Fragmentation of **RASLRR**

Found in **AT5G50330.2** in **TAIR\_Arabidopsis**, Symbols: | ATP binding / electron carrier / heme binding / iron ion binding / protein kinase |  
chr5:20502632-20505789 REVERSE

Match to Query 968: 772.423464 from(387.219008,2+) index(4463)

Title: Elution from: 40.407 to 40.407 scan no 5555 cid35.00 polarity:+

Data file D1d-3\_1.mgf

Click mouse within plot area to zoom in by factor of two about that point

Or,   to  Da

Label all possible matches  Label matches used for scoring

Show Y-axis

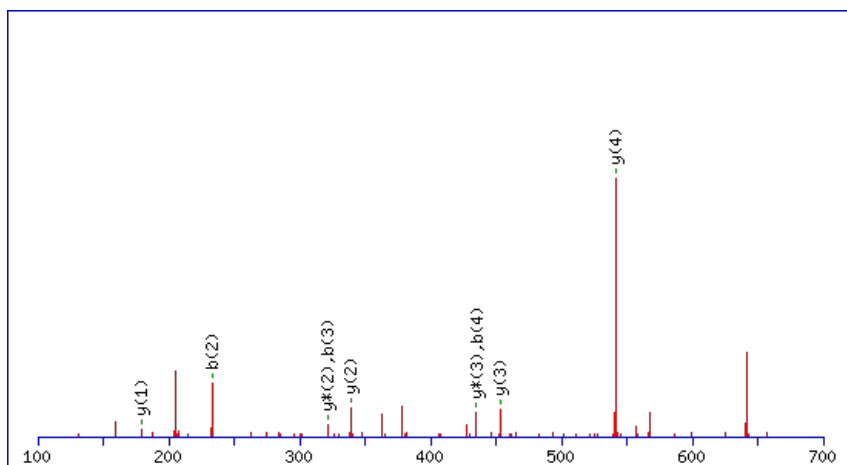

Monoisotopic mass of neutral peptide  $M_r(\text{calc})$ : 772.4226

Fixed modifications: Carbamidomethyl (C) (apply to specified residues or termini only)

Ions Score: 24 Expect: 0.034

Matches : 9/50 fragment ions using 18 most intense peaks ([help](#))

| # | b               | b <sup>++</sup> | b*       | b <sup>*++</sup> | b <sup>0</sup> | b <sup>0++</sup> | Seq. | y               | y <sup>++</sup> | y*              | y <sup>*++</sup> | y <sup>0</sup> | y <sup>0++</sup> | # |
|---|-----------------|-----------------|----------|------------------|----------------|------------------|------|-----------------|-----------------|-----------------|------------------|----------------|------------------|---|
| 1 | 161.0965        | 81.0519         | 143.0729 | 72.0401          |                |                  | R    |                 |                 |                 |                  |                |                  | 6 |
| 2 | <b>233.1307</b> | 117.0690        | 215.1071 | 108.0572         |                |                  | A    | 613.3407        | 307.1740        | 595.3171        | 298.1622         | 595.3301       | 298.1687         | 5 |
| 3 | <b>321.1597</b> | 161.0835        | 303.1362 | 152.0717         | 303.1492       | 152.0782         | S    | <b>541.3065</b> | 271.1569        | 523.2829        | 262.1451         | 523.2959       | 262.1516         | 4 |
| 4 | <b>435.2408</b> | 218.1241        | 417.2173 | 209.1123         | 417.2303       | 209.1188         | L    | <b>453.2774</b> | 227.1424        | <b>435.2539</b> | 218.1306         |                |                  | 3 |
| 5 | 595.3301        | 298.1687        | 577.3065 | 289.1569         | 577.3195       | 289.1634         | R    | <b>339.1963</b> | 170.1018        | <b>321.1728</b> | 161.0900         |                |                  | 2 |
| 6 |                 |                 |          |                  |                |                  | R    | <b>179.1071</b> | 90.0572         | 161.0835        | 81.0454          |                |                  | 1 |

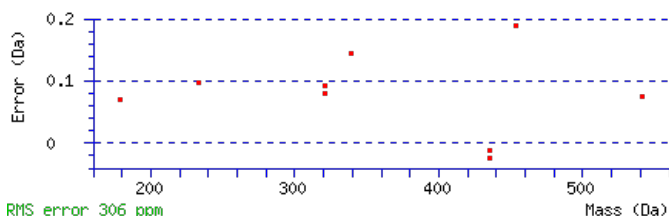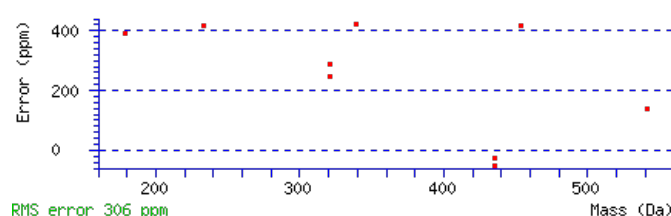NCBI BLAST search of **RASLRR**

(Parameters: blastp, nr protein database, expect=20000, no filter, PAM30)

Other BLAST [web gateways](#)

**All matches to this query**

| Score | $M_r(\text{calc})$ | Delta   | Sequence                |
|-------|--------------------|---------|-------------------------|
| 24.2  | 772.4226           | 0.0008  | <a href="#">RASLRR</a>  |
| 17.4  | 772.4251           | -0.0017 | <a href="#">MVLVLYK</a> |
| 14.6  | 772.4222           | 0.0013  | <a href="#">RAIFAGK</a> |

## AT5G50330.2

|     |          |         |                        |
|-----|----------|---------|------------------------|
| 9.8 | 772.4256 | -0.0021 | <a href="#">ARKMIK</a> |
| 9.7 | 772.4256 | -0.0021 | <a href="#">MVTRKK</a> |
| 7.7 | 772.4226 | 0.0008  | <a href="#">RAIRSR</a> |
| 7.5 | 772.4256 | -0.0021 | <a href="#">KTKMVR</a> |
| 7.3 | 772.4256 | -0.0021 | <a href="#">TKVMKR</a> |
| 7.2 | 772.4256 | -0.0021 | <a href="#">MKKSIR</a> |
| 6.5 | 772.4226 | 0.0009  | <a href="#">ARRVTR</a> |

**Mascot:** <http://www.matrixscience.com/>

**Peptide View**MS/MS Fragmentation of **MVGFALK**

Found in **AT5G50850.1** in **TAIR\_Arabidopsis**, Symbols: MAB1 | MAB1 (MACCI-BOU); pyruvate dehydrogenase (acetyl-transferring) | chr5:20706897-20710202 FORWARD

Match to Query 839: 764.425268 from(383.219910,2+) index(4528)

Title: Elution from: 42.125 to 42.125 scan no 5683 cid35.00 polarity:+

Data file D12h-3\_1.mgf

Click mouse within plot area to zoom in by factor of two about that point

Or,   to  Da

Label all possible matches  Label matches used for scoring

Show Y-axis

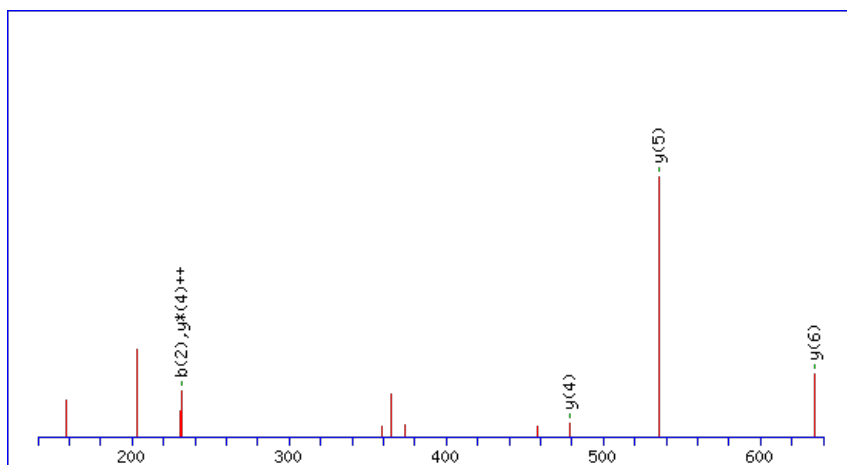

**Monoisotopic mass of neutral peptide Mr(calc):** 764.4255

**Fixed modifications:** Carbamidomethyl (C) (apply to specified residues or termini only)

**Ions Score:** 20 **Expect:** 0.018

**Matches:** 5/36 fragment ions using 7 most intense peaks ([help](#))

| # | b        | b <sup>++</sup> | Seq. | y        | y <sup>++</sup> | y*       | y <sup>*++</sup> | # |
|---|----------|-----------------|------|----------|-----------------|----------|------------------|---|
| 1 | 132.0478 | 66.5275         | M    |          |                 |          |                  | 7 |
| 2 | 231.1162 | 116.0617        | V    | 634.3923 | 317.6998        | 617.3657 | 309.1865         | 6 |
| 3 | 288.1376 | 144.5725        | G    | 535.3239 | 268.1656        | 518.2973 | 259.6523         | 5 |
| 4 | 435.2061 | 218.1067        | F    | 478.3024 | 239.6548        | 461.2758 | 231.1416         | 4 |
| 5 | 506.2432 | 253.6252        | A    | 331.2340 | 166.1206        | 314.2074 | 157.6074         | 3 |
| 6 | 619.3272 | 310.1673        | L    | 260.1969 | 130.6021        | 243.1703 | 122.0888         | 2 |
| 7 |          |                 | K    | 147.1128 | 74.0600         | 130.0863 | 65.5468          | 1 |

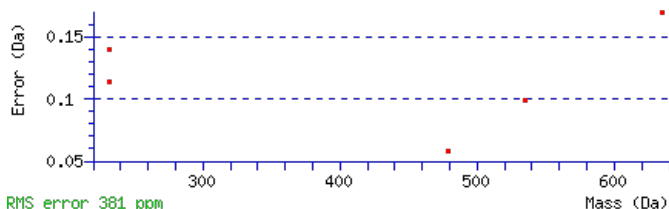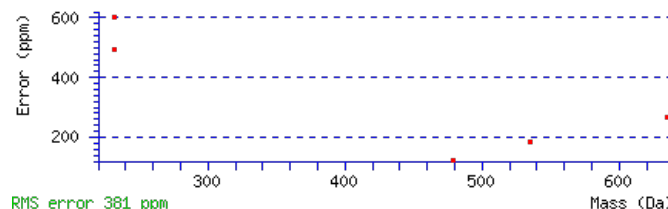

NCBI **BLAST** search of [MVGFALK](#)

(Parameters: blastp, nr protein database, expect=20000, no filter, PAM30)

Other BLAST [web gateways](#)

**All matches to this query**

| Score | Mr(calc) | Delta   | Sequence                |
|-------|----------|---------|-------------------------|
| 19.9  | 764.4255 | -0.0002 | <a href="#">MVGFALK</a> |



**Peptide View**MS/MS Fragmentation of **AEVSAIQAK**

Found in **AT5G50920.1** in **TAIR\_Arabidopsis**, Symbols: ATHSP93-V, HSP93-V, CLPC, DCA1, CLPC1 | CLPC (HEAT SHOCK PROTEIN 93-V); ATP binding / ATPase | chr5:20732936-20737026 REVERSE

Match to Query 1761: 926.471328 from(464.242940,2+) index(3005)

Title: Elution from: 29.908 to 29.908 scan no 3734 cid35.00 polarity:+

Data file D6h-2\_3.mgf

Click mouse within plot area to zoom in by factor of two about that point

Or,   to  Da

Label all possible matches  Label matches used for scoring

Show Y-axis

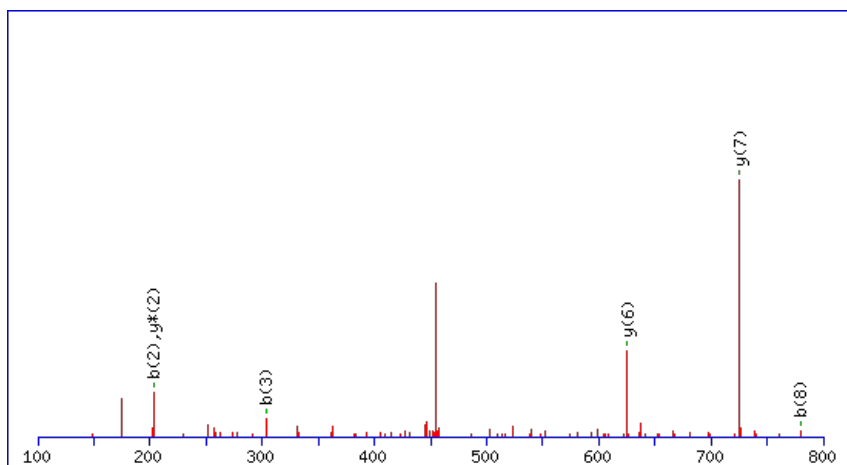

Monoisotopic mass of neutral peptide **Mr(calc)**: 926.4699

**Fixed modifications**: Carbamidomethyl (C) (apply to specified residues or termini only)

**Ions Score**: 28 **Expect**: 0.023

**Matches**: 6/72 fragment ions using 7 most intense peaks ([help](#))

| # | b               | b <sup>++</sup> | b*       | b <sup>*++</sup> | b <sup>0</sup> | b <sup>0++</sup> | Seq. | y               | y <sup>++</sup> | y*              | y <sup>*++</sup> | y <sup>0</sup> | y <sup>0++</sup> | # |
|---|-----------------|-----------------|----------|------------------|----------------|------------------|------|-----------------|-----------------|-----------------|------------------|----------------|------------------|---|
| 1 | 73.0414         | 37.0244         |          |                  |                |                  | A    |                 |                 |                 |                  |                |                  | 9 |
| 2 | <b>203.0811</b> | 102.0442        |          |                  | 185.0705       | 93.0389          | E    | 855.4431        | 428.2252        | 837.4195        | 419.2134         | 837.4325       | 419.2199         | 8 |
| 3 | <b>303.1465</b> | 152.0769        |          |                  | 285.1359       | 143.0716         | V    | <b>725.4034</b> | 363.2054        | 707.3798        | 354.1936         | 707.3929       | 354.2001         | 7 |
| 4 | 391.1756        | 196.0914        |          |                  | 373.1650       | 187.0861         | S    | <b>625.3380</b> | 313.1726        | 607.3144        | 304.1608         | 607.3274       | 304.1673         | 6 |
| 5 | 463.2097        | 232.1085        |          |                  | 445.1991       | 223.1032         | A    | 537.3089        | 269.1581        | 519.2853        | 260.1463         |                |                  | 5 |
| 6 | 577.2908        | 289.1490        |          |                  | 559.2802       | 280.1438         | I    | 465.2748        | 233.1410        | 447.2512        | 224.1292         |                |                  | 4 |
| 7 | 707.3435        | 354.1754        | 689.3199 | 345.1636         | 689.3329       | 345.1701         | Q    | 351.1937        | 176.1005        | 333.1701        | 167.0887         |                |                  | 3 |
| 8 | <b>779.3776</b> | 390.1924        | 761.3540 | 381.1807         | 761.3670       | 381.1872         | A    | 221.1410        | 111.0741        | <b>203.1174</b> | 102.0624         |                |                  | 2 |
| 9 |                 |                 |          |                  |                |                  | K    | 149.1069        | 75.0571         | 131.0833        | 66.0453          |                |                  | 1 |

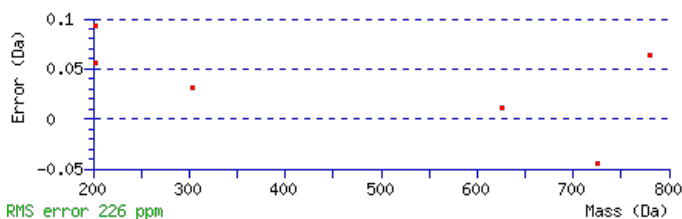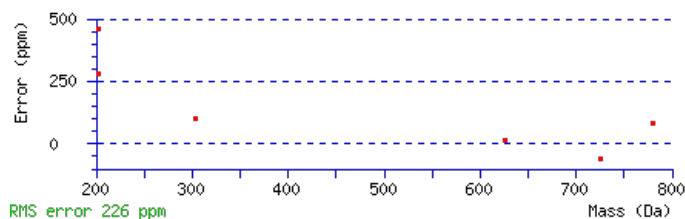

NCBI **BLAST** search of **AEVSAIQAK**

(Parameters: blastp, nr protein database, expect=20000, no filter, PAM30)

Other BLAST [web gateways](#)

All matches to this query

| Score | Mr(calc) | Delta | Sequence |
|-------|----------|-------|----------|
|       |          |       |          |



**AT5G50920.1**

|      |          |         |                           |
|------|----------|---------|---------------------------|
| 27.8 | 926.4699 | 0.0014  | <a href="#">AEVSAIQAK</a> |
| 21.0 | 926.4722 | -0.0008 | <a href="#">FLQGLDPK</a>  |
| 18.0 | 926.4699 | 0.0014  | <a href="#">NATIEQLK</a>  |
| 18.0 | 926.4699 | 0.0014  | <a href="#">NATLQEIK</a>  |
| 17.5 | 926.4699 | 0.0014  | <a href="#">QAEAEKLLK</a> |
| 15.8 | 926.4699 | 0.0014  | <a href="#">AEVEIISR</a>  |
| 15.8 | 926.4699 | 0.0014  | <a href="#">ISVEEALR</a>  |
| 15.8 | 926.4699 | 0.0014  | <a href="#">SLVDDVLR</a>  |
| 15.8 | 926.4699 | 0.0014  | <a href="#">VTVIEAER</a>  |
| 15.2 | 926.4726 | -0.0013 | <a href="#">KAKHSTNK</a>  |

**Mascot:** <http://www.matrixscience.com/>

**Peptide View**MS/MS Fragmentation of **SAAASNFGSGWTWLAYK**Found in **AT5G51100.1** in **TAIR\_Arabidopsis**, Symbols: FSD2 | FSD2 (FE SUPEROXIDE DISMUTASE 2); iron superoxide dismutase | chr5:20790583-20792861 REVERSE

Match to Query 8574: 1836.799740 from(919.407146,2+) index(9107)

Title: Elution from: 82.452 to 82.452 scan no 12463 cid35.00 polarity:+

Data file D12h-1\_3.mgf

Click mouse within plot area to zoom in by factor of two about that point

Or,  to  Da Label all possible matches  Label matches used for scoring Show Y-axis 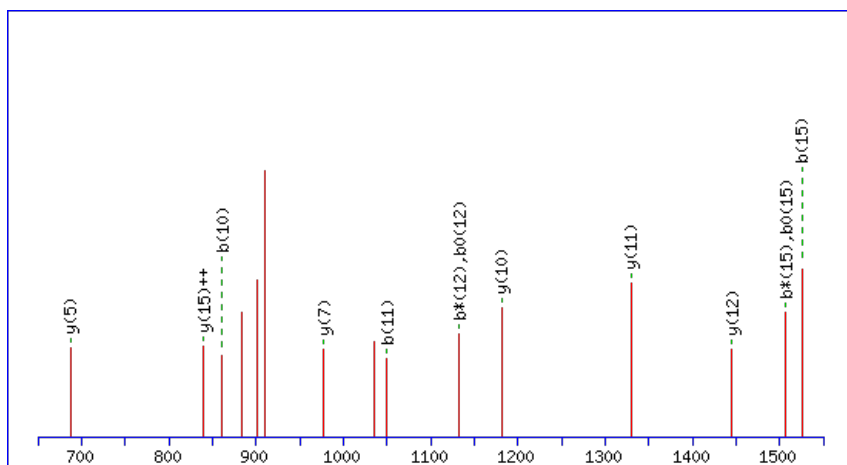**Monoisotopic mass of neutral peptide Mr(calc):** 1836.7958**Fixed modifications:** Carbamidomethyl (C) (apply to specified residues or termini only)**Ions Score:** 36 **Expect:** 0.0017**Matches:** 13/172 fragment ions using 16 most intense peaks ([help](#))

| #  | b         | b <sup>++</sup> | b <sup>*</sup> | b <sup>*++</sup> | b <sup>0</sup> | b <sup>0++</sup> | Seq. | y         | y <sup>++</sup> | y <sup>*</sup> | y <sup>*++</sup> | y <sup>0</sup> | y <sup>0++</sup> | #  |
|----|-----------|-----------------|----------------|------------------|----------------|------------------|------|-----------|-----------------|----------------|------------------|----------------|------------------|----|
| 1  | 89.0363   | 45.0218         |                |                  | 71.0258        | 36.0165          | S    |           |                 |                |                  |                |                  | 17 |
| 2  | 161.0705  | 81.0389         |                |                  | 143.0599       | 72.0336          | A    | 1749.7740 | 875.3906        | 1731.7504      | 866.3788         | 1731.7634      | 866.3853         | 16 |
| 3  | 233.1046  | 117.0560        |                |                  | 215.0941       | 108.0507         | A    | 1677.7398 | 839.3736        | 1659.7162      | 830.3618         | 1659.7293      | 830.3683         | 15 |
| 4  | 305.1388  | 153.0730        |                |                  | 287.1282       | 144.0677         | A    | 1605.7057 | 803.3565        | 1587.6821      | 794.3447         | 1587.6951      | 794.3512         | 14 |
| 5  | 393.1678  | 197.0876        |                |                  | 375.1573       | 188.0823         | S    | 1533.6715 | 767.3394        | 1515.6480      | 758.3276         | 1515.6610      | 758.3341         | 13 |
| 6  | 509.2048  | 255.1061        | 491.1813       | 246.0943         | 491.1943       | 246.1008         | N    | 1445.6425 | 723.3249        | 1427.6189      | 714.3131         | 1427.6319      | 714.3196         | 12 |
| 7  | 657.2703  | 329.1388        | 639.2467       | 320.1270         | 639.2597       | 320.1335         | F    | 1329.6055 | 665.3064        | 1311.5819      | 656.2946         | 1311.5949      | 656.3011         | 11 |
| 8  | 715.2888  | 358.1480        | 697.2652       | 349.1362         | 697.2782       | 349.1428         | G    | 1181.5400 | 591.2737        | 1163.5164      | 582.2619         | 1163.5295      | 582.2684         | 10 |
| 9  | 803.3179  | 402.1626        | 785.2943       | 393.1508         | 785.3073       | 393.1573         | S    | 1123.5215 | 562.2644        | 1105.4979      | 553.2526         | 1105.5110      | 553.2591         | 9  |
| 10 | 861.3364  | 431.1718        | 843.3128       | 422.1600         | 843.3258       | 422.1665         | G    | 1035.4925 | 518.2499        | 1017.4689      | 509.2381         | 1017.4819      | 509.2446         | 8  |
| 11 | 1049.4097 | 525.2085        | 1031.3862      | 516.1967         | 1031.3992      | 516.2032         | W    | 977.4740  | 489.2406        | 959.4504       | 480.2288         | 959.4634       | 480.2353         | 7  |
| 12 | 1151.4545 | 576.2309        | 1133.4309      | 567.2191         | 1133.4439      | 567.2256         | T    | 789.4006  | 395.2039        | 771.3770       | 386.1921         | 771.3900       | 386.1986         | 6  |
| 13 | 1339.5278 | 670.2676        | 1321.5043      | 661.2558         | 1321.5173      | 661.2623         | W    | 687.3559  | 344.1816        | 669.3323       | 335.1698         |                |                  | 5  |
| 14 | 1453.6089 | 727.3081        | 1435.5853      | 718.2963         | 1435.5984      | 718.3028         | L    | 499.2825  | 250.1449        | 481.2589       | 241.1331         |                |                  | 4  |
| 15 | 1525.6431 | 763.3252        | 1507.6195      | 754.3134         | 1507.6325      | 754.3199         | A    | 385.2014  | 193.1043        | 367.1778       | 184.0925         |                |                  | 3  |
| 16 | 1689.7034 | 845.3554        | 1671.6799      | 836.3436         | 1671.6929      | 836.3501         | Y    | 313.1672  | 157.0873        | 295.1437       | 148.0755         |                |                  | 2  |
| 17 |           |                 |                |                  |                |                  | K    | 149.1069  | 75.0571         | 131.0833       | 66.0453          |                |                  | 1  |

# AT5G51100.1

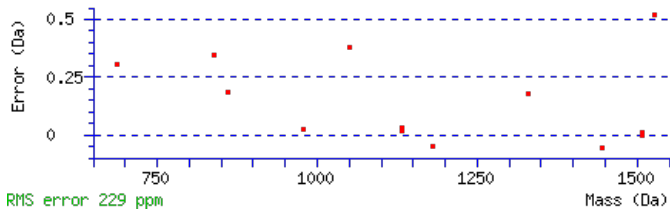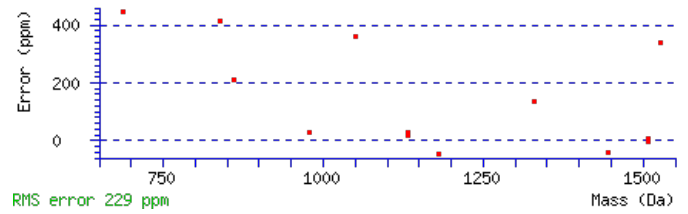

NCBI **BLAST** search of [SAAASNFGSGWTWLAYK](#)  
(Parameters: blastp, nr protein database, expect=20000, no filter, PAM30)  
Other BLAST [web gateways](#)

## All matches to this query

| Score | Mr(calc)  | Delta   | Sequence                           |
|-------|-----------|---------|------------------------------------|
| 35.6  | 1836.7958 | 0.0040  | <a href="#">SAAASNFGSGWTWLAYK</a>  |
| 9.4   | 1836.8000 | -0.0003 | <a href="#">HHSQTVSMVIGGNRR</a>    |
| 0.7   | 1836.8021 | -0.0023 | <a href="#">TFTAARLDSSSGVNGSSR</a> |
| 0.3   | 1836.7994 | 0.0003  | <a href="#">EQKSEADPNVQSNEK</a>    |
| 0.1   | 1836.7998 | -0.0001 | <a href="#">AEMLFDEMVKKGFDK</a>    |
| 0.1   | 1836.7998 | -0.0001 | <a href="#">FEMMDKLLYDGVAQK</a>    |

Mascot: <http://www.matrixscience.com/>

**Peptide View**MS/MS Fragmentation of **IDDIKTSDLSPR**

Found in **AT5G51110.1** in **TAIR\_Arabidopsis**, Symbols: | similar to dehydratase family [Arabidopsis thaliana] (TAIR:AT1G29810.1); similar to unnamed protein product [Vitis vinifera] (GB:CAO62291.1); contains InterPro domain Transcriptional coactivator/pterin dehydratase (InterPro:IPR001533) |

Match to Query 5093: 1358.700804 from(453.907544,3+) index(3429)

Title: Elution from: 33.783 to 33.783 scan no 4288 cid35.00 polarity:+

Data file D6h-1\_2.mgf

Click mouse within plot area to zoom in by factor of two about that point

Or,   to  Da

Label all possible matches  Label matches used for scoring

Show Y-axis

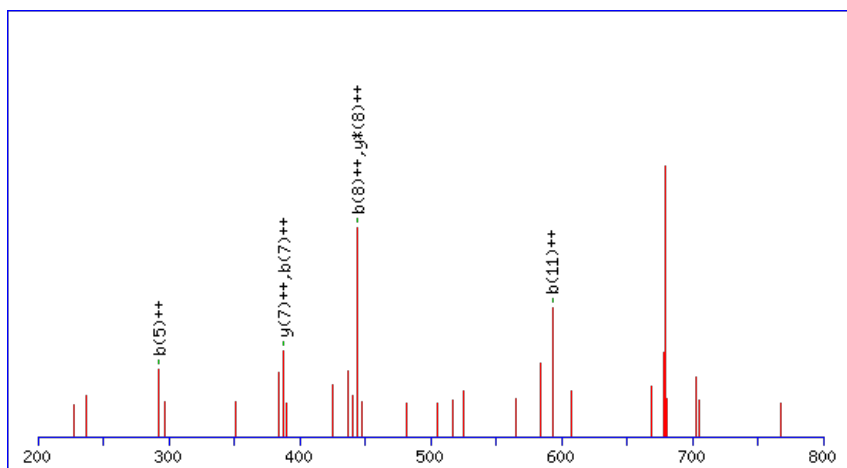

**Monoisotopic mass of neutral peptide Mr(calc):** 1358.7041

**Fixed modifications:** Carbamidomethyl (C) (apply to specified residues or termini only)

**Ions Score:** 24 **Expect:** 0.023

**Matches:** 6/118 fragment ions using 6 most intense peaks ([help](#))

| #  | b         | b <sup>++</sup> | b <sup>*</sup> | b <sup>*++</sup> | b <sup>0</sup> | b <sup>0++</sup> | Seq. | y         | y <sup>++</sup> | y <sup>*</sup> | y <sup>*++</sup> | y <sup>0</sup> | y <sup>0++</sup> | #  |
|----|-----------|-----------------|----------------|------------------|----------------|------------------|------|-----------|-----------------|----------------|------------------|----------------|------------------|----|
| 1  | 114.0913  | 57.5493         |                |                  |                |                  | I    |           |                 |                |                  |                |                  | 12 |
| 2  | 229.1183  | 115.0628        |                |                  | 211.1077       | 106.0575         | D    | 1246.6274 | 623.8173        | 1229.6008      | 615.3040         | 1228.6168      | 614.8120         | 11 |
| 3  | 344.1452  | 172.5763        |                |                  | 326.1347       | 163.5710         | D    | 1131.6004 | 566.3039        | 1114.5739      | 557.7906         | 1113.5899      | 557.2986         | 10 |
| 4  | 457.2293  | 229.1183        |                |                  | 439.2187       | 220.1130         | I    | 1016.5735 | 508.7904        | 999.5469       | 500.2771         | 998.5629       | 499.7851         | 9  |
| 5  | 585.3243  | <b>293.1658</b> | 568.2977       | 284.6525         | 567.3137       | 284.1605         | K    | 903.4894  | 452.2483        | 886.4629       | <b>443.7351</b>  | 885.4789       | 443.2431         | 8  |
| 6  | 686.3719  | 343.6896        | 669.3454       | 335.1763         | 668.3614       | 334.6843         | T    | 775.3945  | <b>388.2009</b> | 758.3679       | 379.6876         | 757.3839       | 379.1956         | 7  |
| 7  | 773.4040  | <b>387.2056</b> | 756.3774       | 378.6923         | 755.3934       | 378.2003         | S    | 674.3468  | 337.6770        | 657.3202       | 329.1638         | 656.3362       | 328.6717         | 6  |
| 8  | 888.4309  | <b>444.7191</b> | 871.4044       | 436.2058         | 870.4203       | 435.7138         | D    | 587.3148  | 294.1610        | 570.2882       | 285.6477         | 569.3042       | 285.1557         | 5  |
| 9  | 1001.5150 | 501.2611        | 984.4884       | 492.7478         | 983.5044       | 492.2558         | L    | 472.2878  | 236.6475        | 455.2613       | 228.1343         | 454.2772       | 227.6423         | 4  |
| 10 | 1088.5470 | 544.7771        | 1071.5204      | 536.2639         | 1070.5364      | 535.7719         | S    | 359.2037  | 180.1055        | 342.1772       | 171.5922         | 341.1932       | 171.1002         | 3  |
| 11 | 1185.5998 | <b>593.3035</b> | 1168.5732      | 584.7902         | 1167.5892      | 584.2982         | P    | 272.1717  | 136.5895        | 255.1452       | 128.0762         |                |                  | 2  |
| 12 |           |                 |                |                  |                |                  | R    | 175.1190  | 88.0631         | 158.0924       | 79.5498          |                |                  | 1  |

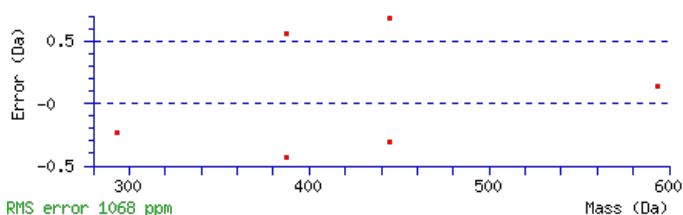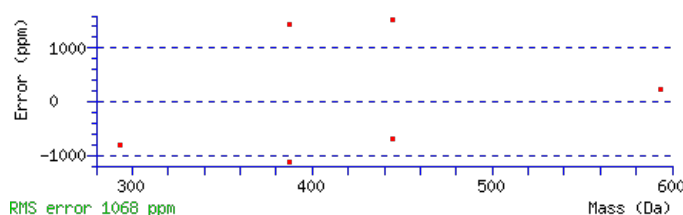NCBI **BLAST** search of **IDDIKTSDLSPR**

(Parameters: blastp, nr protein database, expect=20000, no filter, PAM30)

Other BLAST [web gateways](#)

AT5G51110.1

All matches to this query

| Score | Mr(calc)  | Delta   | Sequence                      |
|-------|-----------|---------|-------------------------------|
| 23.8  | 1358.7041 | -0.0033 | <a href="#">IDDIKTSDLSPR</a>  |
| 12.2  | 1358.6976 | 0.0032  | <a href="#">VDACSKINSIPR</a>  |
| 10.7  | 1358.7017 | -0.0009 | <a href="#">HVVFGQVIEGMK</a>  |
| 7.6   | 1358.7041 | -0.0033 | <a href="#">SAAKETAKVDDPK</a> |
| 0.1   | 1358.7015 | -0.0007 | <a href="#">GSGRVRGSEEVAR</a> |

Mascot: <http://www.matrixscience.com/>

### Peptide View

 MS/MS Fragmentation of **ADLAAPSEPMTVLAISGSIKSK**

 Found in **AT5G51270.1** in **TAIR\_Arabidopsis**, Symbols: | protein kinase family protein | chr5:20852363-20855488 REVERSE

Match to Query 9981: 2272.198761 from(758.406863,3+) index(10912)

Title: Elution from: 123.733 to 123.733 scan no 16311 cid35.00 polarity:+

Data file D1d-3\_2.mgf

Click mouse within plot area to zoom in by factor of two about that point

 Or, Plot from  to  Da 

 Label all possible matches  Label matches used for scoring 

 Show Y-axis 
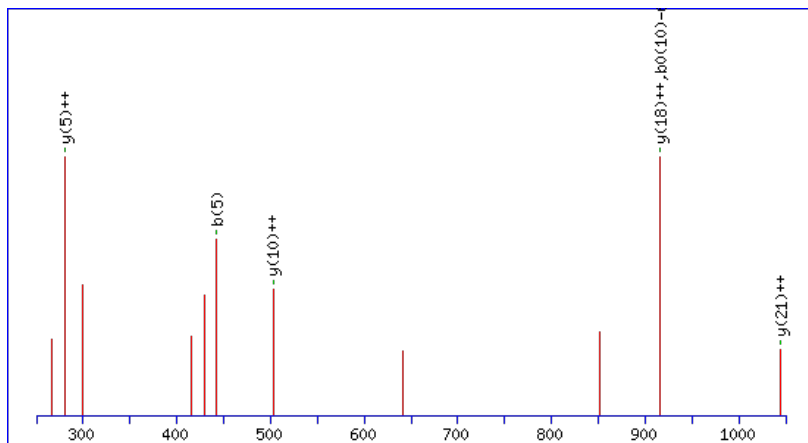
 Monoisotopic mass of neutral peptide **Mr(calc)**: 2272.1984

Fixed modifications: Carbamidomethyl (C) (apply to specified residues or termini only)

Variable modifications:

M10 : Oxidation (M), with neutral losses 0.0000(shown in table), 63.9983

Ions Score: 21 Expect: 0.029

 Matches : 6/330 fragment ions using 7 most intense peaks ([help](#))

| #  | b         | b <sup>++</sup> | b <sup>*</sup> | b <sup>*++</sup> | b <sup>0</sup> | b <sup>0++</sup> | Seq | y         | y <sup>++</sup> | y <sup>*</sup> | y <sup>*++</sup> | y <sup>0</sup> | y <sup>0++</sup> | #  |
|----|-----------|-----------------|----------------|------------------|----------------|------------------|-----|-----------|-----------------|----------------|------------------|----------------|------------------|----|
| 1  | 72.0444   | 36.5258         |                |                  |                |                  | A   |           |                 |                |                  |                |                  | 23 |
| 2  | 187.0713  | 94.0393         |                |                  | 169.0608       | 85.0340          | D   | 2202.1686 | 1101.5879       | 2185.1421      | 1093.0747        | 2184.1580      | 1092.5827        | 22 |
| 3  | 300.1554  | 150.5813        |                |                  | 282.1448       | 141.5761         | L   | 2087.1417 | 1044.0745       | 2070.1151      | 1035.5612        | 2069.1311      | 1035.0692        | 21 |
| 4  | 371.1925  | 186.0999        |                |                  | 353.1819       | 177.0946         | A   | 1974.0576 | 987.5324        | 1957.0311      | 979.0192         | 1956.0470      | 978.5272         | 20 |
| 5  | 442.2296  | 221.6185        |                |                  | 424.2191       | 212.6132         | A   | 1903.0205 | 952.0139        | 1885.9939      | 943.5006         | 1885.0099      | 943.0086         | 19 |
| 6  | 539.2824  | 270.1448        |                |                  | 521.2718       | 261.1396         | P   | 1831.9834 | 916.4953        | 1814.9568      | 907.9821         | 1813.9728      | 907.4900         | 18 |
| 7  | 626.3144  | 313.6608        |                |                  | 608.3039       | 304.6556         | S   | 1734.9306 | 867.9689        | 1717.9041      | 859.4557         | 1716.9200      | 858.9637         | 17 |
| 8  | 755.3570  | 378.1821        |                |                  | 737.3464       | 369.1769         | E   | 1647.8986 | 824.4529        | 1630.8720      | 815.9397         | 1629.8880      | 815.4476         | 16 |
| 9  | 852.4098  | 426.7085        |                |                  | 834.3992       | 417.7032         | P   | 1518.8560 | 759.9316        | 1501.8294      | 751.4184         | 1500.8454      | 750.9264         | 15 |
| 10 | 999.4452  | 500.2262        |                |                  | 981.4346       | 491.2209         | M   | 1421.8032 | 711.4053        | 1404.7767      | 702.8920         | 1403.7927      | 702.4000         | 14 |
| 11 | 1100.4929 | 550.7501        |                |                  | 1082.4823      | 541.7448         | T   | 1274.7678 | 637.8876        | 1257.7413      | 629.3743         | 1256.7573      | 628.8823         | 13 |
| 12 | 1199.5613 | 600.2843        |                |                  | 1181.5507      | 591.2790         | V   | 1173.7201 | 587.3637        | 1156.6936      | 578.8504         | 1155.7096      | 578.3584         | 12 |
| 13 | 1270.5984 | 635.8028        |                |                  | 1252.5878      | 626.7975         | A   | 1074.6517 | 537.8295        | 1057.6252      | 529.3162         | 1056.6412      | 528.8242         | 11 |
| 14 | 1383.6824 | 692.3449        |                |                  | 1365.6719      | 683.3396         | L   | 1003.6146 | 502.3109        | 986.5881       | 493.7977         | 985.6041       | 493.3057         | 10 |
| 15 | 1454.7196 | 727.8634        |                |                  | 1436.7090      | 718.8581         | A   | 890.5306  | 445.7689        | 873.5040       | 437.2556         | 872.5200       | 436.7636         | 9  |
| 16 | 1567.8036 | 784.4054        |                |                  | 1549.7931      | 775.4002         | I   | 819.4934  | 410.2504        | 802.4669       | 401.7371         | 801.4829       | 401.2451         | 8  |
| 17 | 1654.8357 | 827.9215        |                |                  | 1636.8251      | 818.9162         | S   | 706.4094  | 353.7083        | 689.3828       | 345.1951         | 688.3988       | 344.7030         | 7  |
| 18 | 1711.8571 | 856.4322        |                |                  | 1693.8465      | 847.4269         | G   | 619.3774  | 310.1923        | 602.3508       | 301.6790         | 601.3668       | 301.1870         | 6  |
| 19 | 1798.8891 | 899.9482        |                |                  | 1780.8786      | 890.9429         | S   | 562.3559  | 281.6816        | 545.3293       | 273.1683         | 544.3453       | 272.6763         | 5  |
| 20 | 1911.9732 | 956.4902        |                |                  | 1893.9626      | 947.4850         | I   | 475.3239  | 238.1656        | 458.2973       | 229.6523         | 457.3133       | 229.1603         | 4  |
| 21 | 2040.0682 | 1020.5377       | 2023.0416      | 1012.0244        | 2022.0576      | 1011.5324        | K   | 362.2398  | 181.6235        | 345.2132       | 173.1103         | 344.2292       | 172.6183         | 3  |
| 22 | 2127.1002 | 1064.0537       | 2110.0736      | 1055.5405        | 2109.0896      | 1055.0485        | S   | 234.1448  | 117.5761        | 217.1183       | 109.0628         | 216.1343       | 108.5708         | 2  |
| 23 |           |                 |                |                  |                |                  | K   | 147.1128  | 74.0600         | 130.0863       | 65.5468          |                |                  | 1  |

# AT5G51270.1

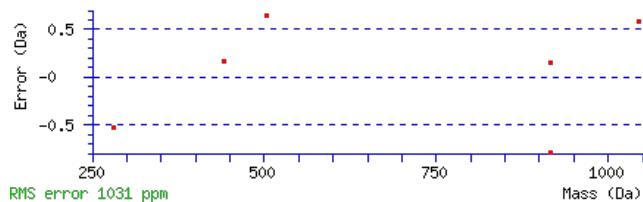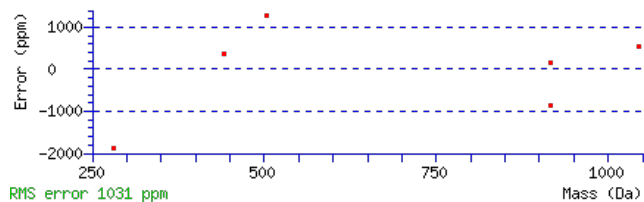

NCBI BLAST search of [ADLAAPSEPMTVALAISGSIKSK](#)  
(Parameters: blastp, nr protein database, expect=20000, no filter, PAM30)  
Other BLAST [web gateways](#)

## All matches to this query

| Score | Mr(calc)  | Delta   | Sequence                                |
|-------|-----------|---------|-----------------------------------------|
| 21.2  | 2272.1984 | 0.0004  | <a href="#">ADLAAPSEPMTVALAISGSIKSK</a> |
| 7.0   | 2272.1951 | 0.0037  | <a href="#">ALGVKPSPDQFETLIDKADTK</a>   |
| 2.2   | 2272.1984 | 0.0003  | <a href="#">ALQELVLSGCSKLESVPTDVK</a>   |
| 0.3   | 2272.2038 | -0.0051 | <a href="#">LFEVAHDQSRITCPVIIFLK</a>    |
| 0.2   | 2272.1998 | -0.0010 | <a href="#">VLLDHSVENLMEALNGLHLR</a>    |

Mascot: <http://www.matrixscience.com/>

## Peptide View

MS/MS Fragmentation of **ASDASAFSVGK**

Found in **AT5G51500.1** in **TAIR\_Arabidopsis**, Symbols: | pectinesterase family protein | chr5:20935155-20937064 REVERSE

Match to Query 2952: 1050.461228 from(526.237890,2+) index(4156)

Title: Elution from: 38.462 to 38.462 scan no 5154 cid35.00 polarity:+

Data file D12h-1\_2.mgf

Click mouse within plot area to zoom in by factor of two about that point

Or,   to  Da

Label all possible matches  Label matches used for scoring

Show Y-axis

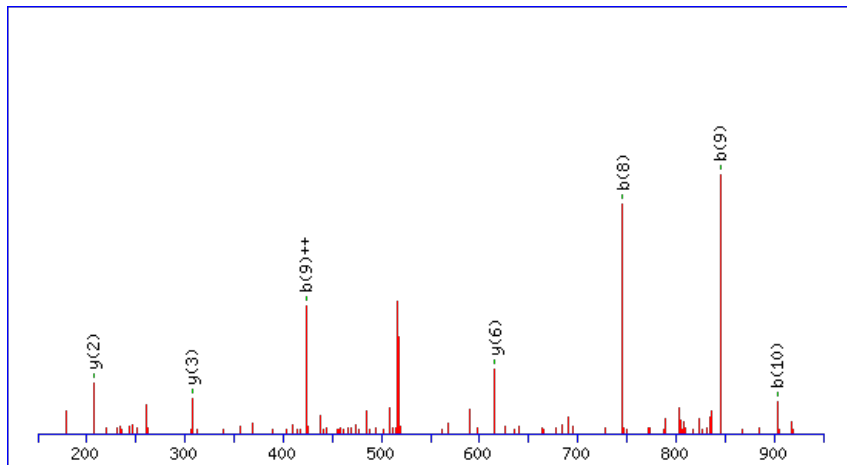

Monoisotopic mass of neutral peptide **Mr(calc)**: 1050.4626

**Fixed modifications:** Carbamidomethyl (C) (apply to specified residues or termini only)

**Ions Score:** 28 **Expect:** 0.0091

**Matches** : 7/92 fragment ions using 8 most intense peaks ([help](#))

| #  | b               | b <sup>++</sup> | b <sup>0</sup> | b <sup>0++</sup> | Seq. | y               | y <sup>++</sup> | y*       | y <sup>*++</sup> | y <sup>0</sup> | y <sup>0++</sup> | #  |
|----|-----------------|-----------------|----------------|------------------|------|-----------------|-----------------|----------|------------------|----------------|------------------|----|
| 1  | 73.0414         | 37.0244         |                |                  | A    |                 |                 |          |                  |                |                  | 11 |
| 2  | 161.0705        | 81.0389         | 143.0599       | 72.0336          | S    | 979.4357        | 490.2215        | 961.4122 | 481.2097         | 961.4252       | 481.2162         | 10 |
| 3  | 277.0945        | 139.0509        | 259.0839       | 130.0456         | D    | 891.4067        | 446.2070        | 873.3831 | 437.1952         | 873.3961       | 437.2017         | 9  |
| 4  | 349.1286        | 175.0679        | 331.1180       | 166.0627         | A    | 775.3827        | 388.1950        | 757.3591 | 379.1832         | 757.3721       | 379.1897         | 8  |
| 5  | 437.1577        | 219.0825        | 419.1471       | 210.0772         | S    | 703.3485        | 352.1779        | 685.3250 | 343.1661         | 685.3380       | 343.1726         | 7  |
| 6  | 509.1918        | 255.0996        | 491.1813       | 246.0943         | A    | <b>615.3195</b> | 308.1634        | 597.2959 | 299.1516         | 597.3089       | 299.1581         | 6  |
| 7  | 657.2573        | 329.1323        | 639.2467       | 320.1270         | F    | 543.2853        | 272.1463        | 525.2617 | 263.1345         | 525.2748       | 263.1410         | 5  |
| 8  | <b>745.2863</b> | 373.1468        | 727.2758       | 364.1415         | S    | 395.2199        | 198.1136        | 377.1963 | 189.1018         | 377.2093       | 189.1083         | 4  |
| 9  | <b>845.3518</b> | <b>423.1795</b> | 827.3412       | 414.1742         | V    | <b>307.1908</b> | 154.0990        | 289.1672 | 145.0873         |                |                  | 3  |
| 10 | <b>903.3703</b> | 452.1888        | 885.3597       | 443.1835         | G    | <b>207.1254</b> | 104.0663        | 189.1018 | 95.0545          |                |                  | 2  |
| 11 |                 |                 |                |                  | K    | 149.1069        | 75.0571         | 131.0833 | 66.0453          |                |                  | 1  |

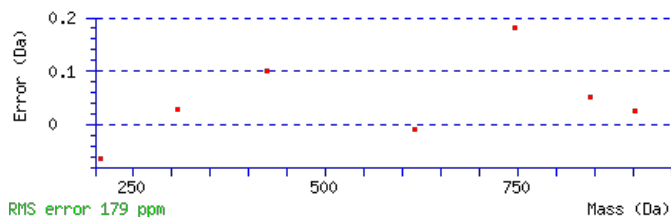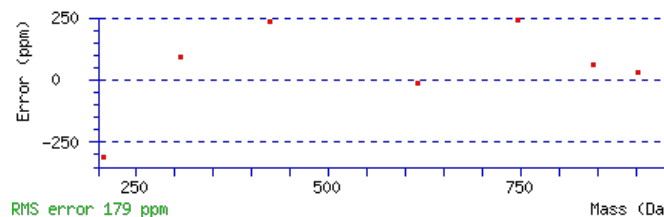

NCBI **BLAST** search of [ASDASAFSVGK](#)

(Parameters: blastp, nr protein database, expect=20000, no filter, PAM30)

Other BLAST [web gateways](#)

All matches to this query



## AT5G51500.1

| Score | Mr(calc)  | Delta   | Sequence                    |
|-------|-----------|---------|-----------------------------|
| 27.9  | 1050.4626 | -0.0014 | <a href="#">ASDASAFSVGK</a> |
| 11.6  | 1050.4612 | 0.0000  | <a href="#">MSGCLGKTKGK</a> |
| 2.8   | 1050.4635 | -0.0022 | <a href="#">MVQVMFPR</a>    |
| 2.3   | 1050.4604 | 0.0008  | <a href="#">AASSSSSSQVK</a> |
| 2.0   | 1050.4583 | 0.0029  | <a href="#">DNARMSRGK</a>   |
| 2.0   | 1050.4583 | 0.0029  | <a href="#">NNKGTCRGK</a>   |
| 2.0   | 1050.4626 | -0.0014 | <a href="#">NSVDGYISGK</a>  |
| 2.0   | 1050.4626 | -0.0014 | <a href="#">SDATVTFNGK</a>  |
| 1.0   | 1050.4612 | 0.0000  | <a href="#">TGTVVVMCR</a>   |
| 0.8   | 1050.4632 | -0.0020 | <a href="#">MNFHRRR</a>     |

Mascot: <http://www.matrixscience.com/>

## Peptide View

MS/MS Fragmentation of **VAEIPDIDLSQVGVTK**

Found in **AT5G51820.1** in **TAIR\_Arabidopsis**, Symbols: ATPGMP, PGM1, STF1, PGM | PGM (PHOSPHOGLUCOMUTASE) | chr5:21080757-21085159 REVERSE

Match to Query 7454: 1682.909568 from(561.977132,3+) index(7895)

Title: Elution from: 70.742 to 70.742 scan no 10465 cid35.00 polarity:+

Data file D1d-2\_3.mgf

Click mouse within plot area to zoom in by factor of two about that point

Or,   to  Da

Label all possible matches  Label matches used for scoring

Show Y-axis

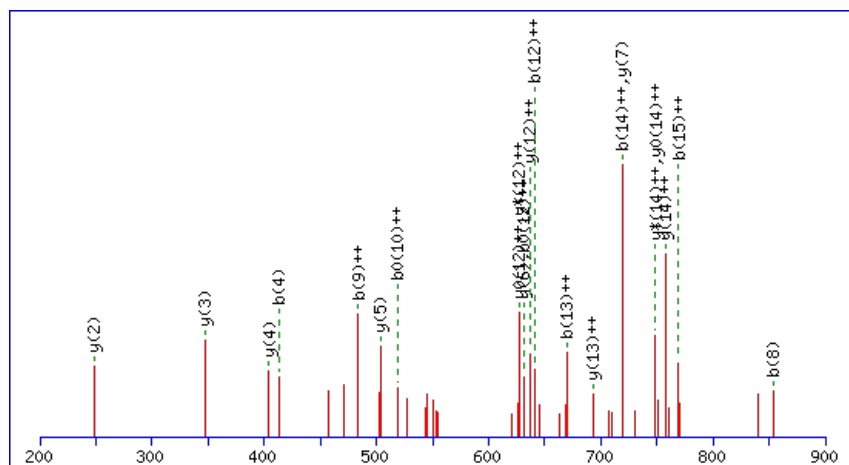

Monoisotopic mass of neutral peptide Mr(calc): 1682.9091

Fixed modifications: Carbamidomethyl (C) (apply to specified residues or termini only)

Ions Score: 56 Expect: 1e-005

Matches : 22/154 fragment ions using 21 most intense peaks ([help](#))

| #  | b         | b <sup>++</sup> | b*        | b <sup>*++</sup> | b <sup>0</sup> | b <sup>0++</sup> | Seq. | y         | y <sup>++</sup> | y*        | y <sup>*++</sup> | y <sup>0</sup> | y <sup>0++</sup> | #  |
|----|-----------|-----------------|-----------|------------------|----------------|------------------|------|-----------|-----------------|-----------|------------------|----------------|------------------|----|
| 1  | 100.0757  | 50.5415         |           |                  |                |                  | V    |           |                 |           |                  |                |                  | 16 |
| 2  | 171.1128  | 86.0600         |           |                  |                |                  | A    | 1584.8479 | 792.9276        | 1567.8214 | 784.4143         | 1566.8374      | 783.9223         | 15 |
| 3  | 300.1554  | 150.5813        |           |                  | 282.1448       | 141.5761         | E    | 1513.8108 | 757.4090        | 1496.7843 | 748.8958         | 1495.8003      | 748.4038         | 14 |
| 4  | 413.2395  | 207.1234        |           |                  | 395.2289       | 198.1181         | I    | 1384.7682 | 692.8877        | 1367.7417 | 684.3745         | 1366.7577      | 683.8825         | 13 |
| 5  | 510.2922  | 255.6498        |           |                  | 492.2817       | 246.6445         | P    | 1271.6842 | 636.3457        | 1254.6576 | 627.8324         | 1253.6736      | 627.3404         | 12 |
| 6  | 625.3192  | 313.1632        |           |                  | 607.3086       | 304.1579         | D    | 1174.6314 | 587.8193        | 1157.6048 | 579.3061         | 1156.6208      | 578.8141         | 11 |
| 7  | 738.4032  | 369.7053        |           |                  | 720.3927       | 360.7000         | I    | 1059.6045 | 530.3059        | 1042.5779 | 521.7926         | 1041.5939      | 521.3006         | 10 |
| 8  | 853.4302  | 427.2187        |           |                  | 835.4196       | 418.2134         | D    | 946.5204  | 473.7638        | 929.4938  | 465.2506         | 928.5098       | 464.7585         | 9  |
| 9  | 966.5142  | 483.7608        |           |                  | 948.5037       | 474.7555         | L    | 831.4934  | 416.2504        | 814.4669  | 407.7371         | 813.4829       | 407.2451         | 8  |
| 10 | 1053.5463 | 527.2768        |           |                  | 1035.5357      | 518.2715         | S    | 718.4094  | 359.7083        | 701.3828  | 351.1951         | 700.3988       | 350.7030         | 7  |
| 11 | 1181.6048 | 591.3061        | 1164.5783 | 582.7928         | 1163.5943      | 582.3008         | Q    | 631.3774  | 316.1923        | 614.3508  | 307.6790         | 613.3668       | 307.1870         | 6  |
| 12 | 1280.6733 | 640.8403        | 1263.6467 | 632.3270         | 1262.6627      | 631.8350         | V    | 503.3188  | 252.1630        | 486.2922  | 243.6498         | 485.3082       | 243.1577         | 5  |
| 13 | 1337.6947 | 669.3510        | 1320.6682 | 660.8377         | 1319.6842      | 660.3457         | G    | 404.2504  | 202.6288        | 387.2238  | 194.1155         | 386.2398       | 193.6235         | 4  |
| 14 | 1436.7631 | 718.8852        | 1419.7366 | 710.3719         | 1418.7526      | 709.8799         | V    | 347.2289  | 174.1181        | 330.2023  | 165.6048         | 329.2183       | 165.1128         | 3  |
| 15 | 1537.8108 | 769.4090        | 1520.7843 | 760.8958         | 1519.8003      | 760.4038         | T    | 248.1605  | 124.5839        | 231.1339  | 116.0706         | 230.1499       | 115.5786         | 2  |
| 16 |           |                 |           |                  |                |                  | K    | 147.1128  | 74.0600         | 130.0863  | 65.5468          |                |                  | 1  |

# AT5G51820.1

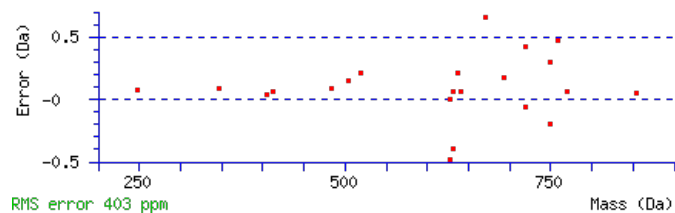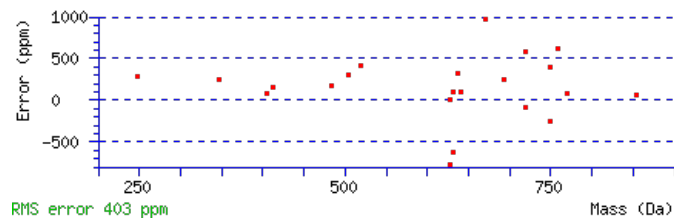

NCBI **BLAST** search of [VAEIPDIDLSQVGVTK](#)

(Parameters: blastp, nr protein database, expect=20000, no filter, PAM30)

Other BLAST [web gateways](#)

## All matches to this query

| Score | Mr(calc)  | Delta   | Sequence                         |
|-------|-----------|---------|----------------------------------|
| 56.1  | 1682.9091 | 0.0005  | <a href="#">VAEIPDIDLSQVGVTK</a> |
| 10.6  | 1682.9099 | -0.0004 | <a href="#">VMISEVPTMAIHLVK</a>  |
| 4.3   | 1682.9099 | -0.0004 | <a href="#">VMISEVPTMAIHLVK</a>  |
| 2.7   | 1682.9065 | 0.0030  | <a href="#">MVIPLWKANLEEPK</a>   |
| 2.3   | 1682.9079 | 0.0017  | <a href="#">WNNHKIMVKWLSK</a>    |
| 0.2   | 1682.9138 | -0.0042 | <a href="#">SEHVMVLGKGNKGISK</a> |

Mascot: <http://www.matrixscience.com/>

**Peptide View**MS/MS Fragmentation of **AKQSLSYTANGTGQTK**Found in **AT5G52290.1** in **TAIR\_Arabidopsis**, Symbols: | similar to unnamed protein product [Vitis vinifera] (GB:CAO17244.1) | chr5:21247579-21253780 REVERSE

Match to Query 7558: 1674.766322 from(838.390437,2+) index(10358)

Title: Elution from: 104.358 to 104.358 scan no 15195 cid35.00 polarity:+

Data file D6h-2\_3.mgf

Click mouse within plot area to zoom in by factor of two about that point

Or,   to  Da Label all possible matches  Label matches used for scoring Show Y-axis 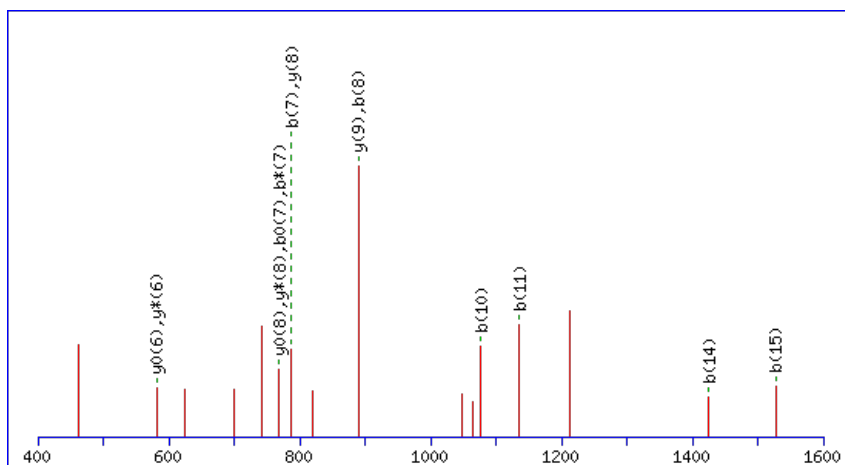Monoisotopic mass of neutral peptide  $M_r(\text{calc})$ : 1674.7699

Fixed modifications: Carbamidomethyl (C) (apply to specified residues or termini only)

Ions Score: 35 Expect: 0.0023

Matches : 14/170 fragment ions using 17 most intense peaks ([help](#))

| #  | b                | b <sup>++</sup> | b <sup>*</sup>  | b <sup>*++</sup> | b <sup>0</sup>  | b <sup>0++</sup> | Seq. | y               | y <sup>++</sup> | y <sup>*</sup>  | y <sup>*++</sup> | y <sup>0</sup>  | y <sup>0++</sup> | #  |
|----|------------------|-----------------|-----------------|------------------|-----------------|------------------|------|-----------------|-----------------|-----------------|------------------|-----------------|------------------|----|
| 1  | 73.0414          | 37.0244         |                 |                  |                 |                  | A    |                 |                 |                 |                  |                 |                  | 16 |
| 2  | 203.1305         | 102.0689        | 185.1069        | 93.0571          |                 |                  | K    | 1603.7431       | 802.3752        | 1585.7195       | 793.3634         | 1585.7325       | 793.3699         | 15 |
| 3  | 333.1831         | 167.0952        | 315.1595        | 158.0834         |                 |                  | Q    | 1473.6540       | 737.3307        | 1455.6305       | 728.3189         | 1455.6435       | 728.3254         | 14 |
| 4  | 421.2122         | 211.1097        | 403.1886        | 202.0979         | 403.2016        | 202.1044         | S    | 1343.6014       | 672.3043        | 1325.5778       | 663.2925         | 1325.5908       | 663.2991         | 13 |
| 5  | 535.2933         | 268.1503        | 517.2697        | 259.1385         | 517.2827        | 259.1450         | L    | 1255.5723       | 628.2898        | 1237.5487       | 619.2780         | 1237.5618       | 619.2845         | 12 |
| 6  | 623.3223         | 312.1648        | 605.2987        | 303.1530         | 605.3118        | 303.1595         | S    | 1141.4912       | 571.2493        | 1123.4676       | 562.2375         | 1123.4807       | 562.2440         | 11 |
| 7  | <b>787.3827</b>  | 394.1950        | <b>769.3591</b> | 385.1832         | <b>769.3721</b> | 385.1897         | Y    | 1053.4622       | 527.2347        | 1035.4386       | 518.2229         | 1035.4516       | 518.2294         | 10 |
| 8  | <b>889.4274</b>  | 445.2173        | 871.4038        | 436.2055         | 871.4168        | 436.2121         | T    | <b>889.4018</b> | 445.2045        | 871.3782        | 436.1927         | 871.3912        | 436.1993         | 9  |
| 9  | 961.4616         | 481.2344        | 943.4380        | 472.2226         | 943.4510        | 472.2291         | A    | <b>787.3571</b> | 394.1822        | <b>769.3335</b> | 385.1704         | <b>769.3465</b> | 385.1769         | 8  |
| 10 | <b>1077.4986</b> | 539.2529        | 1059.4750       | 530.2411         | 1059.4880       | 530.2476         | N    | 715.3229        | 358.1651        | 697.2994        | 349.1533         | 697.3124        | 349.1598         | 7  |
| 11 | <b>1135.5171</b> | 568.2622        | 1117.4935       | 559.2504         | 1117.5065       | 559.2569         | G    | 599.2859        | 300.1466        | <b>581.2624</b> | 291.1348         | <b>581.2754</b> | 291.1413         | 6  |
| 12 | 1237.5618        | 619.2845        | 1219.5382       | 610.2727         | 1219.5512       | 610.2792         | T    | 541.2674        | 271.1374        | 523.2439        | 262.1256         | 523.2569        | 262.1321         | 5  |
| 13 | 1295.5803        | 648.2938        | 1277.5567       | 639.2820         | 1277.5697       | 639.2885         | G    | 439.2227        | 220.1150        | 421.1991        | 211.1032         | 421.2122        | 211.1097         | 4  |
| 14 | <b>1425.6329</b> | 713.3201        | 1407.6093       | 704.3083         | 1407.6223       | 704.3148         | Q    | 381.2042        | 191.1058        | 363.1806        | 182.0940         | 363.1937        | 182.1005         | 3  |
| 15 | <b>1527.6776</b> | 764.3424        | 1509.6540       | 755.3307         | 1509.6671       | 755.3372         | T    | 251.1516        | 126.0794        | 233.1280        | 117.0676         | 233.1410        | 117.0741         | 2  |
| 16 |                  |                 |                 |                  |                 |                  | K    | 149.1069        | 75.0571         | 131.0833        | 66.0453          |                 |                  | 1  |

# AT5G52290.1

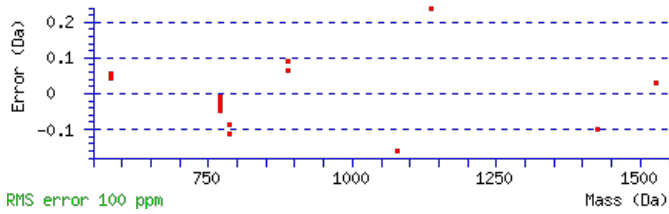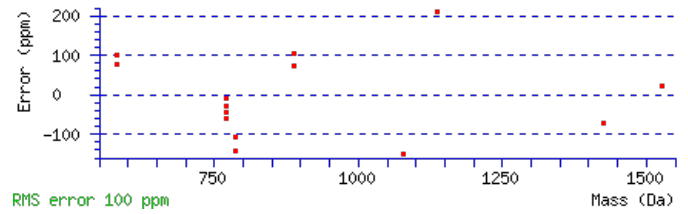

NCBI **BLAST** search of [AKQSLSYTANGTGQTK](#)  
 (Parameters: blastp, nr protein database, expect=20000, no filter, PAM30)  
 Other BLAST [web gateways](#)

## All matches to this query

| Score | Mr(calc)  | Delta   | Sequence                         |
|-------|-----------|---------|----------------------------------|
| 35.2  | 1674.7699 | -0.0036 | <a href="#">AKQSLSYTANGTGQTK</a> |
| 4.5   | 1674.7652 | 0.0011  | <a href="#">YGLSNGESGGMLGKRK</a> |
| 3.2   | 1674.7686 | -0.0023 | <a href="#">KRSTICMSLQQSSK</a>   |
| 2.5   | 1674.7614 | 0.0050  | <a href="#">FEGDIGENTIEFLR</a>   |
| 2.0   | 1674.7634 | 0.0029  | <a href="#">KMLNVEIFCIVMR</a>    |
| 1.6   | 1674.7681 | -0.0018 | <a href="#">IDKEFMSQMAKVAK</a>   |
| 1.4   | 1674.7652 | 0.0011  | <a href="#">DSRFLREVEMLSR</a>    |
| 0.1   | 1674.7708 | -0.0045 | <a href="#">RSSMSVEAFPMRLK</a>   |

Mascot: <http://www.matrixscience.com/>

### Peptide View

 MS/MS Fragmentation of **RDVPIHHPLSELSDREESR**

 Found in **AT5G52310.1** in **TAIR\_Arabidopsis**, Symbols: LTI78, RD29A, LTI140, COR78 | COR78 (COLD REGULATED 78) | chr5:21258155-21260552 FORWARD

Match to Query 10561: 2271.134985 from(455.234273,5+) index(2621)

Title: Elution from: 27.399 to 27.399 scan no 3277 cid35.00 polarity:+

Data file D6h-1\_1.mgf

Click mouse within plot area to zoom in by factor of two about that point

 Or, Plot from  to  Da 

 Label all possible matches  Label matches used for scoring 

 Show Y-axis 
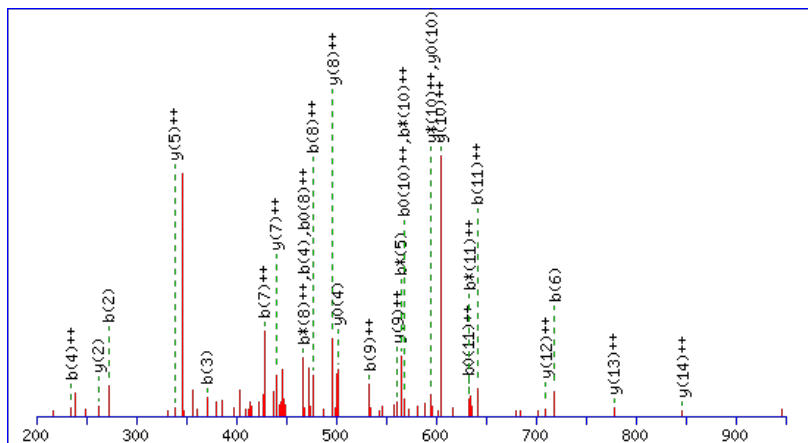
 Monoisotopic mass of neutral peptide  $M_r(\text{calc})$ : 2271.1356

Fixed modifications: Carbamidomethyl (C) (apply to specified residues or termini only)

Ions Score: 32 Expect: 0.002

 Matches : 28/212 fragment ions using 46 most intense peaks ([help](#))

| #  | b               | b <sup>++</sup> | b <sup>*</sup>  | b <sup>*++</sup> | b <sup>0</sup> | b <sup>0++</sup> | Seq | y               | y <sup>++</sup> | y <sup>*</sup> | y <sup>*++</sup> | y <sup>0</sup>  | y <sup>0++</sup> | #  |
|----|-----------------|-----------------|-----------------|------------------|----------------|------------------|-----|-----------------|-----------------|----------------|------------------|-----------------|------------------|----|
| 1  | 157.1084        | 79.0578         | 140.0818        | 70.5446          |                |                  | R   |                 |                 |                |                  |                 |                  | 19 |
| 2  | <b>272.1353</b> | 136.5713        | 255.1088        | 128.0580         | 254.1248       | 127.5660         | D   | 2116.0418       | 1058.5245       | 2099.0152      | 1050.0112        | 2098.0312       | 1049.5192        | 18 |
| 3  | <b>371.2037</b> | 186.1055        | 354.1772        | 177.5922         | 353.1932       | 177.1002         | V   | 2001.0148       | 1001.0111       | 1983.9883      | 992.4978         | 1983.0043       | 992.0058         | 17 |
| 4  | <b>468.2565</b> | <b>234.6319</b> | 451.2300        | 226.1186         | 450.2459       | 225.6266         | P   | 1901.9464       | 951.4768        | 1884.9199      | 942.9636         | 1883.9358       | 942.4716         | 16 |
| 5  | 581.3406        | 291.1739        | <b>564.3140</b> | 282.6606         | 563.3300       | 282.1686         | I   | 1804.8936       | 902.9505        | 1787.8671      | 894.4372         | 1786.8831       | 893.9452         | 15 |
| 6  | <b>718.3995</b> | 359.7034        | 701.3729        | 351.1901         | 700.3889       | 350.6981         | H   | 1691.8096       | <b>846.4084</b> | 1674.7830      | 837.8952         | 1673.7990       | 837.4031         | 14 |
| 7  | 855.4584        | <b>428.2328</b> | 838.4318        | 419.7196         | 837.4478       | 419.2276         | H   | 1554.7507       | <b>777.8790</b> | 1537.7241      | 769.3657         | 1536.7401       | 768.8737         | 13 |
| 8  | 952.5112        | <b>476.7592</b> | 935.4846        | <b>468.2459</b>  | 934.5006       | <b>467.7539</b>  | P   | 1417.6918       | <b>709.3495</b> | 1400.6652      | 700.8362         | 1399.6812       | 700.3442         | 12 |
| 9  | 1065.5952       | <b>533.3012</b> | 1048.5687       | 524.7880         | 1047.5847      | 524.2960         | L   | 1320.6390       | 660.8231        | 1303.6124      | 652.3099         | 1302.6284       | 651.8179         | 11 |
| 10 | 1152.6273       | 576.8173        | 1135.6007       | <b>568.3040</b>  | 1134.6167      | <b>567.8120</b>  | S   | 1207.5549       | <b>604.2811</b> | 1190.5284      | <b>595.7678</b>  | 1189.5444       | <b>595.2758</b>  | 10 |
| 11 | 1281.6698       | <b>641.3386</b> | 1264.6433       | <b>632.8253</b>  | 1263.6593      | <b>632.3333</b>  | E   | 1120.5229       | <b>560.7651</b> | 1103.4964      | 552.2518         | 1102.5123       | 551.7598         | 9  |
| 12 | 1394.7539       | 697.8806        | 1377.7274       | 689.3673         | 1376.7433      | 688.8753         | L   | 991.4803        | <b>496.2438</b> | 974.4538       | 487.7305         | 973.4697        | 487.2385         | 8  |
| 13 | 1481.7859       | 741.3966        | 1464.7594       | 732.8833         | 1463.7754      | 732.3913         | S   | 878.3962        | <b>439.7018</b> | 861.3697       | 431.1885         | 860.3857        | 430.6965         | 7  |
| 14 | 1596.8129       | 798.9101        | 1579.7863       | 790.3968         | 1578.8023      | 789.9048         | D   | 791.3642        | 396.1857        | 774.3377       | 387.6725         | 773.3537        | 387.1805         | 6  |
| 15 | 1752.9140       | 876.9606        | 1735.8874       | 868.4474         | 1734.9034      | 867.9554         | R   | 676.3373        | <b>338.6723</b> | 659.3107       | 330.1590         | 658.3267        | 329.6670         | 5  |
| 16 | 1881.9566       | 941.4819        | 1864.9300       | 932.9687         | 1863.9460      | 932.4766         | E   | 520.2362        | 260.6217        | 503.2096       | 252.1084         | <b>502.2256</b> | 251.6164         | 4  |
| 17 | 2010.9992       | 1006.0032       | 1993.9726       | 997.4900         | 1992.9886      | 996.9979         | E   | 391.1936        | 196.1004        | 374.1670       | 187.5872         | 373.1830        | 187.0951         | 3  |
| 18 | 2098.0312       | 1049.5192       | 2081.0047       | 1041.0060        | 2080.0206      | 1040.5140        | S   | <b>262.1510</b> | 131.5791        | 245.1244       | 123.0659         | 244.1404        | 122.5738         | 2  |
| 19 |                 |                 |                 |                  |                |                  | R   | 175.1190        | 88.0631         | 158.0924       | 79.5498          |                 |                  | 1  |

# AT5G52310.1

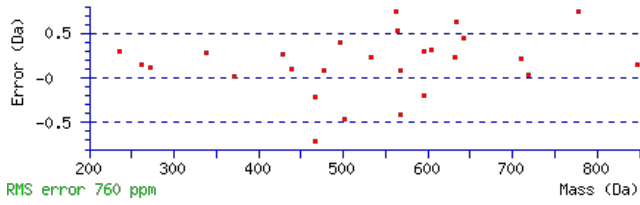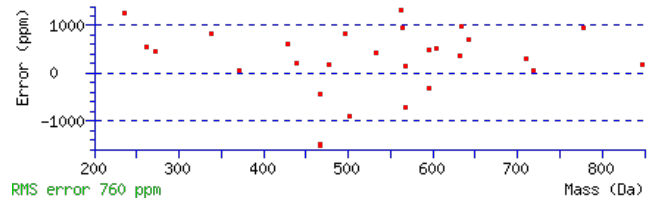

NCBI **BLAST** search of [RDVPIHHPLSELSDREESR](#)  
(Parameters: blastp, nr protein database, expect=20000, no filter, PAM30)  
Other BLAST [web gateways](#)

## All matches to this query

| Score | Mr(calc)  | Delta   | Sequence                              |
|-------|-----------|---------|---------------------------------------|
| 31.9  | 2271.1356 | -0.0006 | <a href="#">RDVPIHHPLSELSDREESR</a>   |
| 3.7   | 2271.1358 | -0.0008 | <a href="#">MTHDDVYLSFLPLAHILDR</a>   |
| 1.8   | 2271.1391 | -0.0042 | <a href="#">IDLGNGKSFSGMGISMFSKAK</a> |
| 0.3   | 2271.1405 | -0.0055 | <a href="#">RRITFFANSLFMNMPSPAPR</a>  |

Mascot: <http://www.matrixscience.com/>

**Peptide View**MS/MS Fragmentation of **HAGVFIAK**

Found in **AT5G52470.1** in **TAIR\_Arabidopsis**, Symbols: FBR1, ATFIB1, ATFBR1, SKIP7, FIB1 | FIB1 (FIBRILLARIN 1) | chr5:21311516-21313735 FORWARD

Match to Query 1400: 841.481128 from(421.747840,2+) index(844)

Title: Elution from: 14.885 to 14.885 scan no 1248 cid35.00 polarity:+

Data file D12h-1\_1.mgf

Click mouse within plot area to zoom in by factor of two about that point

Or,   to  Da

Label all possible matches  Label matches used for scoring

Show Y-axis

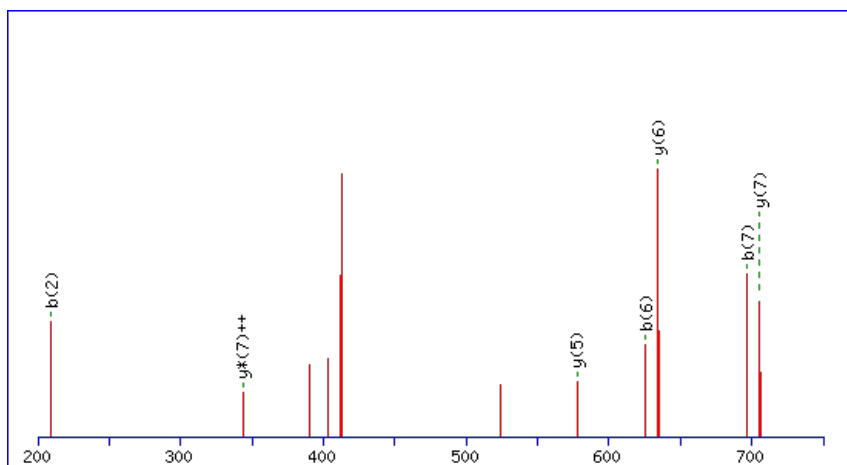

Monoisotopic mass of neutral peptide  $M_r(\text{calc})$ : 841.4810

Fixed modifications: Carbamidomethyl (C) (apply to specified residues or termini only)

Ions Score: 27 Expect: 0.0028

Matches : 7/42 fragment ions using 15 most intense peaks ([help](#))

| # | b               | b <sup>++</sup> | Seq. | y               | y <sup>++</sup> | y*       | y <sup>*++</sup> | # |
|---|-----------------|-----------------|------|-----------------|-----------------|----------|------------------|---|
| 1 | 138.0662        | 69.5367         | H    |                 |                 |          |                  | 8 |
| 2 | <b>209.1033</b> | 105.0553        | A    | <b>705.4294</b> | 353.2183        | 688.4028 | <b>344.7051</b>  | 7 |
| 3 | 266.1248        | 133.5660        | G    | <b>634.3923</b> | 317.6998        | 617.3657 | 309.1865         | 6 |
| 4 | 365.1932        | 183.1002        | V    | <b>577.3708</b> | 289.1890        | 560.3443 | 280.6758         | 5 |
| 5 | 512.2616        | 256.6344        | F    | 478.3024        | 239.6548        | 461.2758 | 231.1416         | 4 |
| 6 | <b>625.3457</b> | 313.1765        | I    | 331.2340        | 166.1206        | 314.2074 | 157.6074         | 3 |
| 7 | <b>696.3828</b> | 348.6950        | A    | 218.1499        | 109.5786        | 201.1234 | 101.0653         | 2 |
| 8 |                 |                 | K    | 147.1128        | 74.0600         | 130.0863 | 65.5468          | 1 |

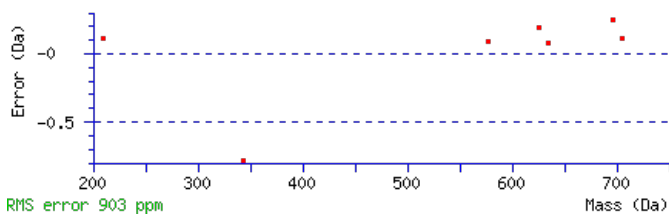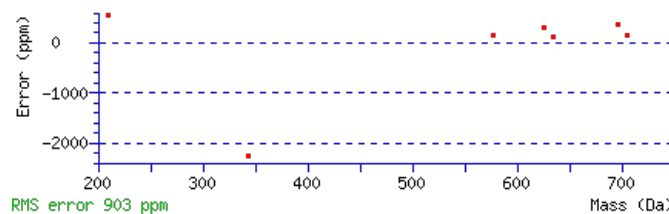

NCBI BLAST search of [HAGVFIAK](#)

(Parameters: blastp, nr protein database, expect=20000, no filter, PAM30)

Other BLAST [web gateways](#)

**All matches to this query**

| Score | $M_r(\text{calc})$ | Delta  | Sequence                 |
|-------|--------------------|--------|--------------------------|
| 26.8  | 841.4810           | 0.0001 | <a href="#">HAGVFIAK</a> |



# AT5G52470.1

|     |          |        |                          |
|-----|----------|--------|--------------------------|
| 2.3 | 841.4810 | 0.0001 | <a href="#">HQGFLIK</a>  |
| 1.6 | 841.4810 | 0.0001 | <a href="#">IFAGHLGK</a> |
| 1.6 | 841.4810 | 0.0001 | <a href="#">QFLHGLK</a>  |
| 1.5 | 841.4810 | 0.0001 | <a href="#">YTFKRK</a>   |
| 1.0 | 841.4810 | 0.0001 | <a href="#">FALHVGAK</a> |

**Mascot:** <http://www.matrixscience.com/>

**Peptide View**MS/MS Fragmentation of **LSADEPTEK**Found in **AT5G52530.1** in **TAIR\_Arabidopsis**, Symbols: | dentin sialophosphoprotein-related | chr5:21335441-21338108 FORWARD

Match to Query 2261: 988.469174 from(495.241863,2+) index(738)

Title: Elution from: 12.561 to 12.561 scan no 1050 cid35.00 polarity:+

Data file D12h-1\_3.mgf

Click mouse within plot area to zoom in by factor of two about that point

Or,   to  Da Label all possible matches  Label matches used for scoring Show Y-axis 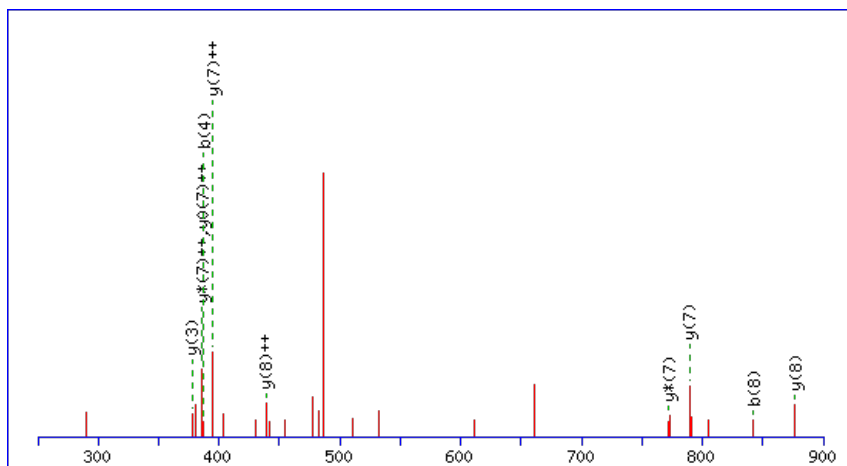

Monoisotopic mass of neutral peptide Mr(calc): 988.4713

Fixed modifications: Carbamidomethyl (C) (apply to specified residues or termini only)

Ions Score: 17 Expect: 0.038

Matches : 10/76 fragment ions using 21 most intense peaks ([help](#))

| # | b        | b <sup>++</sup> | b <sup>0</sup> | b <sup>0++</sup> | Seq. | y        | y <sup>++</sup> | y*       | y <sup>*++</sup> | y <sup>0</sup> | y <sup>0++</sup> | # |
|---|----------|-----------------|----------------|------------------|------|----------|-----------------|----------|------------------|----------------|------------------|---|
| 1 | 114.0913 | 57.5493         |                |                  | L    |          |                 |          |                  |                |                  | 9 |
| 2 | 201.1234 | 101.0653        | 183.1128       | 92.0600          | S    | 876.3945 | 438.7009        | 859.3680 | 430.1876         | 858.3840       | 429.6956         | 8 |
| 3 | 272.1605 | 136.5839        | 254.1499       | 127.5786         | A    | 789.3625 | 395.1849        | 772.3359 | 386.6716         | 771.3519       | 386.1796         | 7 |
| 4 | 387.1874 | 194.0974        | 369.1769       | 185.0921         | D    | 718.3254 | 359.6663        | 701.2988 | 351.1531         | 700.3148       | 350.6610         | 6 |
| 5 | 516.2300 | 258.6186        | 498.2195       | 249.6134         | E    | 603.2984 | 302.1529        | 586.2719 | 293.6396         | 585.2879       | 293.1476         | 5 |
| 6 | 613.2828 | 307.1450        | 595.2722       | 298.1397         | P    | 474.2558 | 237.6316        | 457.2293 | 229.1183         | 456.2453       | 228.6263         | 4 |
| 7 | 714.3305 | 357.6689        | 696.3199       | 348.6636         | T    | 377.2031 | 189.1052        | 360.1765 | 180.5919         | 359.1925       | 180.0999         | 3 |
| 8 | 843.3731 | 422.1902        | 825.3625       | 413.1849         | E    | 276.1554 | 138.5813        | 259.1288 | 130.0681         | 258.1448       | 129.5761         | 2 |
| 9 |          |                 |                |                  | K    | 147.1128 | 74.0600         | 130.0863 | 65.5468          |                |                  | 1 |

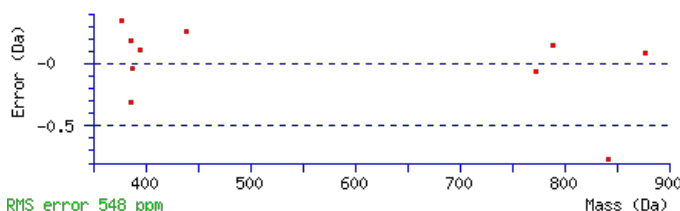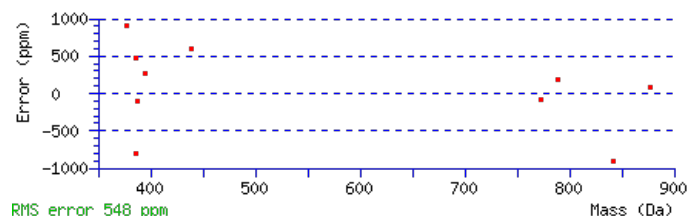NCBI BLAST search of [LSADEPTEK](#)

(Parameters: blastp, nr protein database, expect=20000, no filter, PAM30)

Other BLAST [web gateways](#)**All matches to this query**

| Score | Mr(calc) | Delta   | Sequence                  |
|-------|----------|---------|---------------------------|
| 17.3  | 988.4713 | -0.0021 | <a href="#">LSADEPTEK</a> |

## AT5G52530.1

|      |          |         |                           |
|------|----------|---------|---------------------------|
| 10.1 | 988.4686 | 0.0006  | <a href="#">ISDDNRNR</a>  |
| 5.7  | 988.4688 | 0.0004  | <a href="#">MFNISYAK</a>  |
| 1.7  | 988.4713 | -0.0021 | <a href="#">EAELAEKAK</a> |
| 0.5  | 988.4713 | -0.0021 | <a href="#">ETLEDPSAK</a> |
| 0.0  | 988.4686 | 0.0006  | <a href="#">SPASDGRGR</a> |

**Mascot:** <http://www.matrixscience.com/>

## Peptide View

### MS/MS Fragmentation of **LGGLIK**

Found in **AT5G52560.1** in **TAIR\_Arabidopsis**, Symbols: ATUSP | ATUSP (ARABIDOPSIS THALIANA UDP-SUGAR PYROPHOSPHORYLASE); UTP-monosaccharide-1-phosphate uridylyltransferase/ UTP:arabinose-1-phosphate uridylyltransferase/ UTP:galactose-1-phosphate uridylyltransferase/ UTP:glucose-1-phosphate uri

Match to Query 515: 599.400848 from(300.707700,2+) index(2560)

Title: Elution from: 26.025 to 26.025 scan no 3167 cid35.00 polarity:+

Data file D1d-3\_2.mgf

Click mouse within plot area to zoom in by factor of two about that point

Or,   to  Da

Label all possible matches  Label matches used for scoring

Show Y-axis

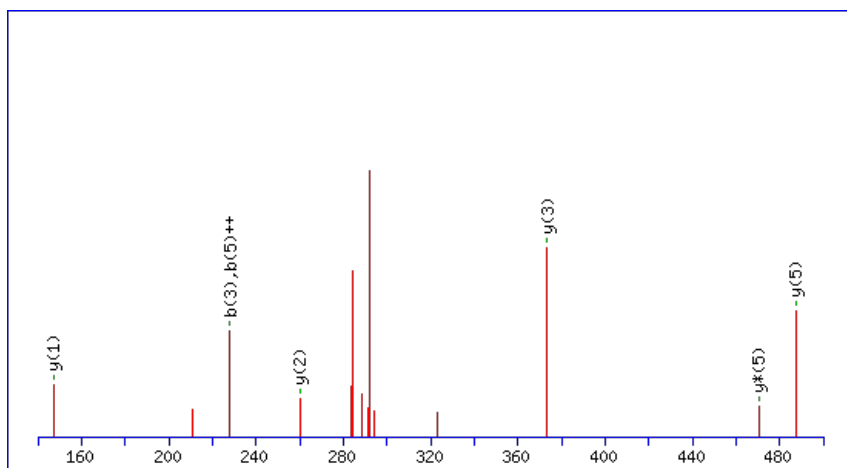

Monoisotopic mass of neutral peptide **Mr(calc)**: 599.4006

**Fixed modifications:** Carbamidomethyl (C) (apply to specified residues or termini only)

**Ions Score:** 29 **Expect:** 0.011

**Matches** : 7/30 fragment ions using 11 most intense peaks ([help](#))

| # | b               | b <sup>++</sup> | Seq. | y               | y <sup>++</sup> | y*              | y <sup>*++</sup> | # |
|---|-----------------|-----------------|------|-----------------|-----------------|-----------------|------------------|---|
| 1 | 114.0913        | 57.5493         | L    |                 |                 |                 |                  | 6 |
| 2 | 171.1128        | 86.0600         | G    | <b>487.3239</b> | 244.1656        | <b>470.2973</b> | 235.6523         | 5 |
| 3 | <b>228.1343</b> | 114.5708        | G    | 430.3024        | 215.6548        | 413.2758        | 207.1416         | 4 |
| 4 | 341.2183        | 171.1128        | L    | <b>373.2809</b> | 187.1441        | 356.2544        | 178.6308         | 3 |
| 5 | 454.3024        | <b>227.6548</b> | I    | <b>260.1969</b> | 130.6021        | 243.1703        | 122.0888         | 2 |
| 6 |                 |                 | K    | <b>147.1128</b> | 74.0600         | 130.0863        | 65.5468          | 1 |

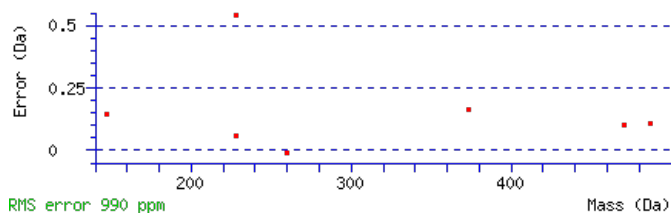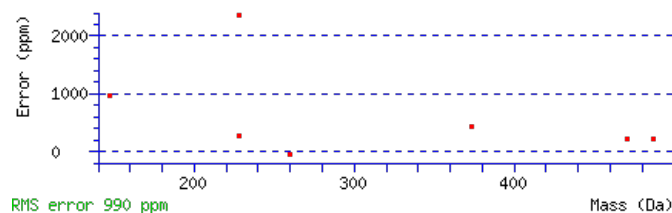

### NCBI BLAST search of **LGGLIK**

(Parameters: blastp, nr protein database, expect=20000, no filter, PAM30)

Other BLAST [web gateways](#)

### All matches to this query

| Score | Mr(calc) | Delta  | Sequence               |
|-------|----------|--------|------------------------|
| 29.1  | 599.4006 | 0.0002 | <a href="#">IGGILK</a> |
| 29.1  | 599.4006 | 0.0002 | <a href="#">IINIK</a>  |

# AT5G52560.1

|      |          |        |                        |
|------|----------|--------|------------------------|
| 29.1 | 599.4006 | 0.0002 | <a href="#">IINLK</a>  |
| 29.1 | 599.4006 | 0.0002 | <a href="#">ILNIK</a>  |
| 29.1 | 599.4006 | 0.0002 | <a href="#">ILNLK</a>  |
| 29.1 | 599.4006 | 0.0002 | <a href="#">INILK</a>  |
| 29.1 | 599.4006 | 0.0002 | <a href="#">INLLK</a>  |
| 29.1 | 599.4006 | 0.0002 | <a href="#">LGGLIK</a> |
| 29.1 | 599.4006 | 0.0002 | <a href="#">LGGLK</a>  |
| 29.1 | 599.4006 | 0.0002 | <a href="#">LINIK</a>  |

**Mascot:** <http://www.matrixscience.com/>

**Peptide View**MS/MS Fragmentation of **TYLNLPSDVVPATLK**Found in **AT5G52650.1** in **TAIR\_Arabidopsis**, Symbols: | 40S ribosomal protein S10 (RPS10C) | chr5:21373007-21374229 REVERSE

Match to Query 7340: 1629.895110 from(815.954831,2+) index(8367)

Title: Elution from: 74.540 to 74.540 scan no 11161 cid35.00 polarity:+

Data file 0-1\_3.mgf

Click mouse within plot area to zoom in by factor of two about that point

Or,   to  Da Label all possible matches  Label matches used for scoring Show Y-axis 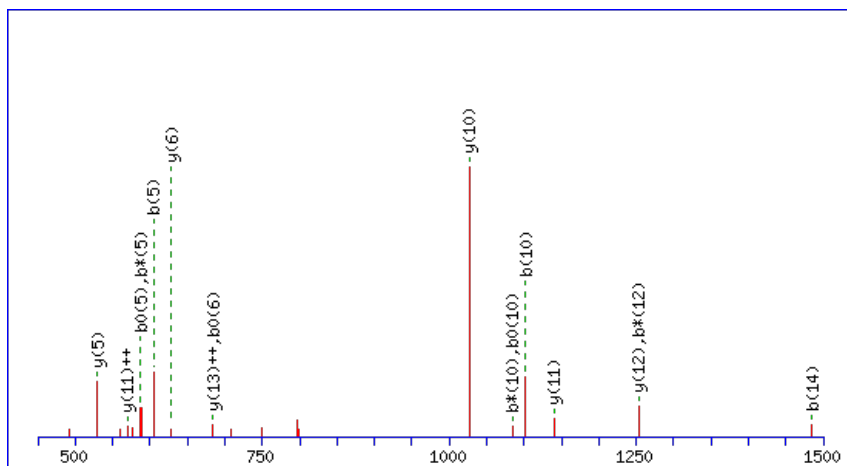Monoisotopic mass of neutral peptide  $M_r(\text{calc})$ : 1629.8978

Fixed modifications: Carbamidomethyl (C) (apply to specified residues or termini only)

Ions Score: 40 Expect: 0.00035

Matches : 16/158 fragment ions using 19 most intense peaks ([help](#))

| #  | b         | b <sup>++</sup> | b*        | b <sup>+++</sup> | b <sup>0</sup> | b <sup>0++</sup> | Seq. | y         | y <sup>++</sup> | y*        | y <sup>+++</sup> | y <sup>0</sup> | y <sup>0++</sup> | #  |
|----|-----------|-----------------|-----------|------------------|----------------|------------------|------|-----------|-----------------|-----------|------------------|----------------|------------------|----|
| 1  | 102.0550  | 51.5311         |           |                  | 84.0444        | 42.5258          | T    |           |                 |           |                  |                |                  | 15 |
| 2  | 265.1183  | 133.0628        |           |                  | 247.1077       | 124.0575         | Y    | 1529.8574 | 765.4323        | 1512.8308 | 756.9190         | 1511.8468      | 756.4270         | 14 |
| 3  | 378.2023  | 189.6048        |           |                  | 360.1918       | 180.5995         | L    | 1366.7940 | 683.9007        | 1349.7675 | 675.3874         | 1348.7835      | 674.8954         | 13 |
| 4  | 492.2453  | 246.6263        | 475.2187  | 238.1130         | 474.2347       | 237.6210         | N    | 1253.7100 | 627.3586        | 1236.6834 | 618.8454         | 1235.6994      | 618.3533         | 12 |
| 5  | 605.3293  | 303.1683        | 588.3028  | 294.6550         | 587.3188       | 294.1630         | L    | 1139.6671 | 570.3372        | 1122.6405 | 561.8239         | 1121.6565      | 561.3319         | 11 |
| 6  | 702.3821  | 351.6947        | 685.3556  | 343.1814         | 684.3715       | 342.6894         | P    | 1026.5830 | 513.7951        | 1009.5564 | 505.2819         | 1008.5724      | 504.7898         | 10 |
| 7  | 789.4141  | 395.2107        | 772.3876  | 386.6974         | 771.4036       | 386.2054         | S    | 929.5302  | 465.2687        | 912.5037  | 456.7555         | 911.5197       | 456.2635         | 9  |
| 8  | 904.4411  | 452.7242        | 887.4145  | 444.2109         | 886.4305       | 443.7189         | D    | 842.4982  | 421.7527        | 825.4716  | 413.2395         | 824.4876       | 412.7475         | 8  |
| 9  | 1003.5095 | 502.2584        | 986.4829  | 493.7451         | 985.4989       | 493.2531         | V    | 727.4713  | 364.2393        | 710.4447  | 355.7260         | 709.4607       | 355.2340         | 7  |
| 10 | 1102.5779 | 551.7926        | 1085.5514 | 543.2793         | 1084.5673      | 542.7873         | V    | 628.4028  | 314.7051        | 611.3763  | 306.1918         | 610.3923       | 305.6998         | 6  |
| 11 | 1199.6307 | 600.3190        | 1182.6041 | 591.8057         | 1181.6201      | 591.3137         | P    | 529.3344  | 265.1709        | 512.3079  | 256.6576         | 511.3239       | 256.1656         | 5  |
| 12 | 1270.6678 | 635.8375        | 1253.6412 | 627.3243         | 1252.6572      | 626.8322         | A    | 432.2817  | 216.6445        | 415.2551  | 208.1312         | 414.2711       | 207.6392         | 4  |
| 13 | 1371.7155 | 686.3614        | 1354.6889 | 677.8481         | 1353.7049      | 677.3561         | T    | 361.2445  | 181.1259        | 344.2180  | 172.6126         | 343.2340       | 172.1206         | 3  |
| 14 | 1484.7995 | 742.9034        | 1467.7730 | 734.3901         | 1466.7890      | 733.8981         | L    | 260.1969  | 130.6021        | 243.1703  | 122.0888         |                |                  | 2  |
| 15 |           |                 |           |                  |                |                  | K    | 147.1128  | 74.0600         | 130.0863  | 65.5468          |                |                  | 1  |

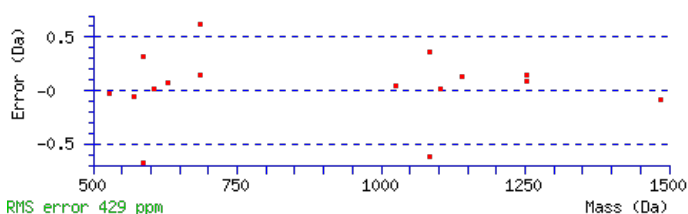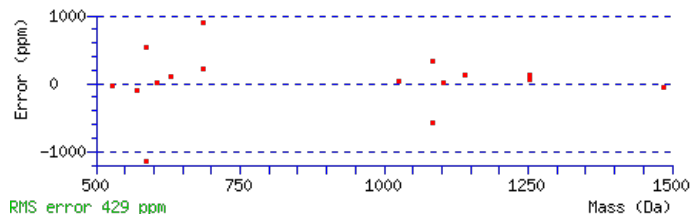NCBI BLAST search of [TYLNLPSDVVPATLK](#)

## AT5G52650.1

(Parameters: blastp, nr protein database, expect=20000, no filter, PAM30)

Other BLAST [web gateways](#)

### All matches to this query

| Score | Mr(calc)  | Delta   | Sequence                        |
|-------|-----------|---------|---------------------------------|
| 40.3  | 1629.8978 | -0.0027 | <a href="#">TYLNLPDVPATLK</a>   |
| 4.8   | 1629.8978 | -0.0027 | <a href="#">LGTDQLFIAVDPLTK</a> |

Mascot: <http://www.matrixscience.com/>

## Peptide View

MS/MS Fragmentation of **TLEGLIAESK**

Found in **AT5G52840.1** in **TAIR\_Arabidopsis**, Symbols: | NADH-ubiquinone oxidoreductase-related | chr5:21430944-21432020 FORWARD

Match to Query 3030: 1059.579562 from(530.797057,2+) index(4946)

Title: Elution from: 44.469 to 44.469 scan no 6200 cid35.00 polarity:+

Data file 0-1\_3.mgf

Click mouse within plot area to zoom in by factor of two about that point

Or,   to  Da

Label all possible matches  Label matches used for scoring

Show Y-axis

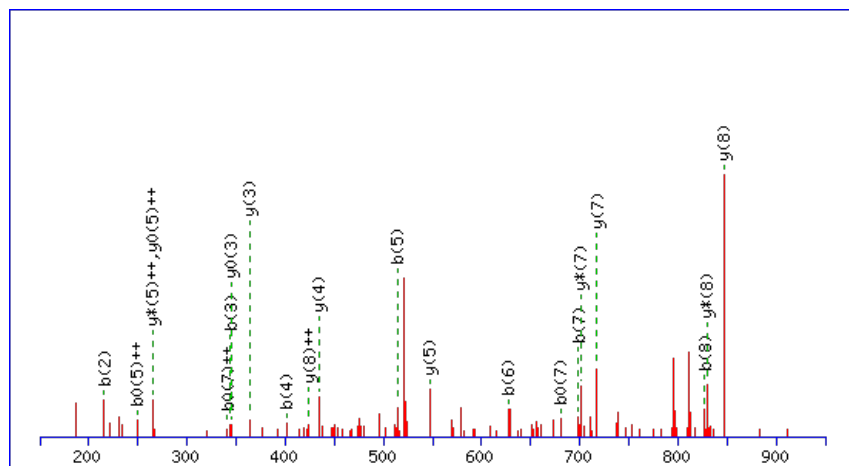

Monoisotopic mass of neutral peptide **Mr(calc)**: 1059.5812

**Fixed modifications**: Carbamidomethyl (C) (apply to specified residues or termini only)

**Ions Score**: 45 **Expect**: 0.00016

**Matches**: 21/88 fragment ions using 36 most intense peaks ([help](#))

| #  | b               | b <sup>++</sup> | b <sup>0</sup>  | b <sup>0++</sup> | Seq. | y               | y <sup>++</sup> | y*              | y <sup>*++</sup> | y <sup>0</sup>  | y <sup>0++</sup> | #  |
|----|-----------------|-----------------|-----------------|------------------|------|-----------------|-----------------|-----------------|------------------|-----------------|------------------|----|
| 1  | 102.0550        | 51.5311         | 84.0444         | 42.5258          | T    |                 |                 |                 |                  |                 |                  | 10 |
| 2  | <b>215.1390</b> | 108.0731        | 197.1285        | 99.0679          | L    | 959.5408        | 480.2740        | 942.5142        | 471.7608         | 941.5302        | 471.2687         | 9  |
| 3  | <b>344.1816</b> | 172.5944        | 326.1710        | 163.5892         | E    | <b>846.4567</b> | <b>423.7320</b> | <b>829.4302</b> | 415.2187         | 828.4462        | 414.7267         | 8  |
| 4  | <b>401.2031</b> | 201.1052        | 383.1925        | 192.0999         | G    | <b>717.4141</b> | 359.2107        | <b>700.3876</b> | 350.6974         | 699.4036        | 350.2054         | 7  |
| 5  | <b>514.2871</b> | 257.6472        | 496.2766        | <b>248.6419</b>  | L    | 660.3927        | 330.7000        | 643.3661        | 322.1867         | 642.3821        | 321.6947         | 6  |
| 6  | <b>627.3712</b> | 314.1892        | 609.3606        | 305.1840         | I    | <b>547.3086</b> | 274.1579        | 530.2821        | <b>265.6447</b>  | 529.2980        | <b>265.1527</b>  | 5  |
| 7  | <b>698.4083</b> | 349.7078        | <b>680.3978</b> | <b>340.7025</b>  | A    | <b>434.2245</b> | 217.6159        | 417.1980        | 209.1026         | 416.2140        | 208.6106         | 4  |
| 8  | <b>827.4509</b> | 414.2291        | 809.4403        | 405.2238         | E    | <b>363.1874</b> | 182.0974        | 346.1609        | 173.5841         | <b>345.1769</b> | 173.0921         | 3  |
| 9  | 914.4829        | 457.7451        | 896.4724        | 448.7398         | S    | 234.1448        | 117.5761        | 217.1183        | 109.0628         | 216.1343        | 108.5708         | 2  |
| 10 |                 |                 |                 |                  | K    | 147.1128        | 74.0600         | 130.0863        | 65.5468          |                 |                  | 1  |

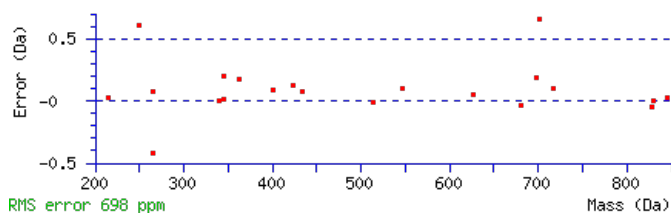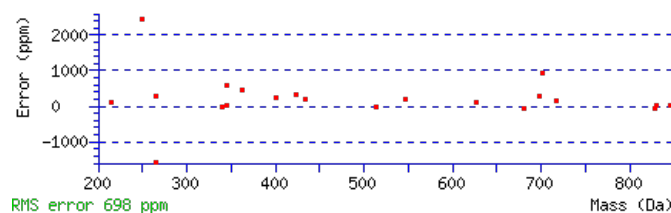

NCBI **BLAST** search of [TLEGLIAESK](#)

(Parameters: blastp, nr protein database, expect=20000, no filter, PAM30)

Other BLAST [web gateways](#)

All matches to this query

| Score | Mr(calc) | Delta | Sequence |
|-------|----------|-------|----------|
|       |          |       |          |



# AT5G52840.1

|      |           |         |                            |
|------|-----------|---------|----------------------------|
| 45.0 | 1059.5812 | -0.0016 | <a href="#">TLEGLIAESK</a> |
| 1.6  | 1059.5812 | -0.0016 | <a href="#">LTEASVALEK</a> |

**Mascot:** <http://www.matrixscience.com/>

**Peptide View**MS/MS Fragmentation of **EAWLSSINLAICK**Found in **AT5G53000.1** in **TAIR\_Arabidopsis**, Symbols: TAP46 | TAP46 (2A PHOSPHATASE ASSOCIATED PROTEIN OF 46 KD) | chr5:21502880-21505095 REVERSE

Match to Query 6224: 1520.722786 from(761.368669,2+) index(5711)

Title: Elution from: 50.800 to 50.800 scan no 7293 cid35.00 polarity:+

Data file D6h-2\_3.mgf

Click mouse within plot area to zoom in by factor of two about that point

Or,   to  Da Label all possible matches  Label matches used for scoring Show Y-axis 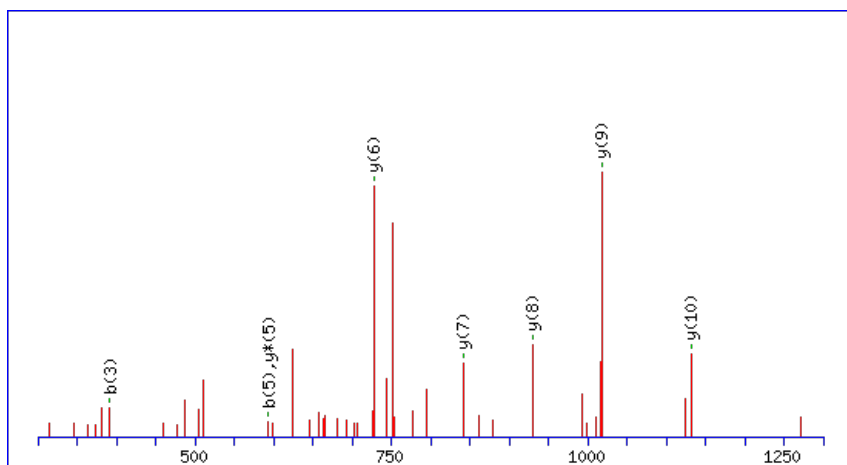Monoisotopic mass of neutral peptide  $M_r(\text{calc})$ : 1520.7252

Fixed modifications: Carbamidomethyl (C) (apply to specified residues or termini only)

Ions Score: 33 Expect: 0.0038

Matches : 8/116 fragment ions using 10 most intense peaks ([help](#))

| #  | b               | b <sup>++</sup> | b*        | b <sup>*++</sup> | b <sup>0</sup> | b <sup>0++</sup> | Seq. | y                | y <sup>++</sup> | y*              | y <sup>*++</sup> | y <sup>0</sup> | y <sup>0++</sup> | #  |
|----|-----------------|-----------------|-----------|------------------|----------------|------------------|------|------------------|-----------------|-----------------|------------------|----------------|------------------|----|
| 1  | 131.0469        | 66.0271         |           |                  | 113.0363       | 57.0218          | E    |                  |                 |                 |                  |                |                  | 13 |
| 2  | 203.0811        | 102.0442        |           |                  | 185.0705       | 93.0389          | A    | 1391.6928        | 696.3500        | 1373.6692       | 687.3382         | 1373.6822      | 687.3448         | 12 |
| 3  | <b>391.1544</b> | 196.0809        |           |                  | 373.1439       | 187.0756         | W    | 1319.6586        | 660.3330        | 1301.6351       | 651.3212         | 1301.6481      | 651.3277         | 11 |
| 4  | 505.2355        | 253.1214        |           |                  | 487.2250       | 244.1161         | L    | <b>1131.5853</b> | 566.2963        | 1113.5617       | 557.2845         | 1113.5747      | 557.2910         | 10 |
| 5  | <b>593.2646</b> | 297.1359        |           |                  | 575.2540       | 288.1307         | S    | <b>1017.5042</b> | 509.2557        | 999.4806        | 500.2439         | 999.4936       | 500.2504         | 9  |
| 6  | 681.2937        | 341.1505        |           |                  | 663.2831       | 332.1452         | S    | <b>929.4751</b>  | 465.2412        | 911.4515        | 456.2294         | 911.4645       | 456.2359         | 8  |
| 7  | 795.3748        | 398.1910        |           |                  | 777.3642       | 389.1857         | I    | <b>841.4460</b>  | 421.2267        | 823.4225        | 412.2149         |                |                  | 7  |
| 8  | 911.4118        | 456.2095        | 893.3882  | 447.1977         | 893.4012       | 447.2042         | N    | <b>727.3649</b>  | 364.1861        | 709.3414        | 355.1743         |                |                  | 6  |
| 9  | 1025.4929       | 513.2501        | 1007.4693 | 504.2383         | 1007.4823      | 504.2448         | L    | 611.3279         | 306.1676        | <b>593.3044</b> | 297.1558         |                |                  | 5  |
| 10 | 1097.5270       | 549.2671        | 1079.5034 | 540.2553         | 1079.5164      | 540.2619         | A    | 497.2468         | 249.1271        | 479.2233        | 240.1153         |                |                  | 4  |
| 11 | 1211.6081       | 606.3077        | 1193.5845 | 597.2959         | 1193.5975      | 597.3024         | I    | 425.2127         | 213.1100        | 407.1891        | 204.0982         |                |                  | 3  |
| 12 | 1373.6328       | 687.3200        | 1355.6092 | 678.3083         | 1355.6223      | 678.3148         | C    | 311.1316         | 156.0694        | 293.1080        | 147.0576         |                |                  | 2  |
| 13 |                 |                 |           |                  |                |                  | K    | 149.1069         | 75.0571         | 131.0833        | 66.0453          |                |                  | 1  |

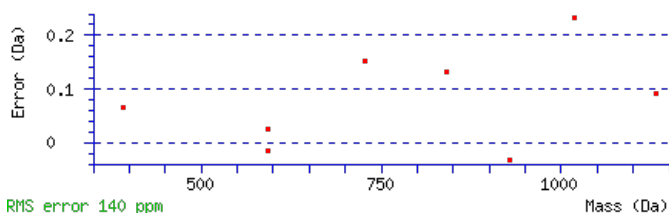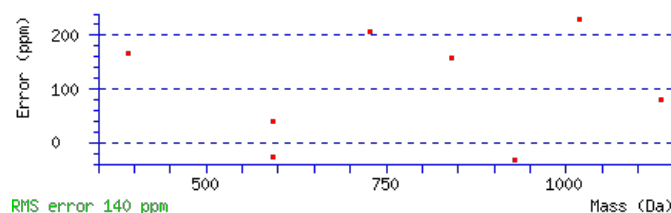NCBI **BLAST** search of **EAWLSSINLAICK**

(Parameters: blastp, nr protein database, expect=20000, no filter, PAM30)

# AT5G53000.1

Other BLAST [web gateways](#)

## All matches to this query

| Score | Mr(calc)  | Delta   | Sequence                        |
|-------|-----------|---------|---------------------------------|
| 33.1  | 1520.7252 | -0.0024 | <a href="#">EAWLSSINLAICK</a>   |
| 19.9  | 1520.7195 | 0.0032  | <a href="#">EEKLPPGSYEKAR</a>   |
| 19.3  | 1520.7240 | -0.0012 | <a href="#">FTHLSPVWYDLK</a>    |
| 8.3   | 1520.7195 | 0.0033  | <a href="#">RPDLNSTLFDPK</a>    |
| 6.6   | 1520.7218 | 0.0010  | <a href="#">YAEAFPLQLSHTK</a>   |
| 4.6   | 1520.7222 | 0.0006  | <a href="#">DGPTYLSHKKGAAR</a>  |
| 4.1   | 1520.7256 | -0.0028 | <a href="#">CSIREHLTKQK</a>     |
| 1.0   | 1520.7222 | 0.0006  | <a href="#">AVGAAGGYRLSPEPR</a> |

Mascot: <http://www.matrixscience.com/>

**Peptide View**MS/MS Fragmentation of **VFDFLGEQSDFLK**Found in **AT5G53400.1** in **TAIR\_Arabidopsis**, Symbols: | nuclear movement family protein | chr5:21678814-21680609 FORWARD

Match to Query 6814: 1558.712074 from(780.36313,2+) index(9999)

Title: Elution from: 93.420 to 93.420 scan no 14023 cid35.00 polarity:+

Data file 0-1\_2.mgf

Click mouse within plot area to zoom in by factor of two about that point

Or,   to  Da Label all possible matches  Label matches used for scoring Show Y-axis 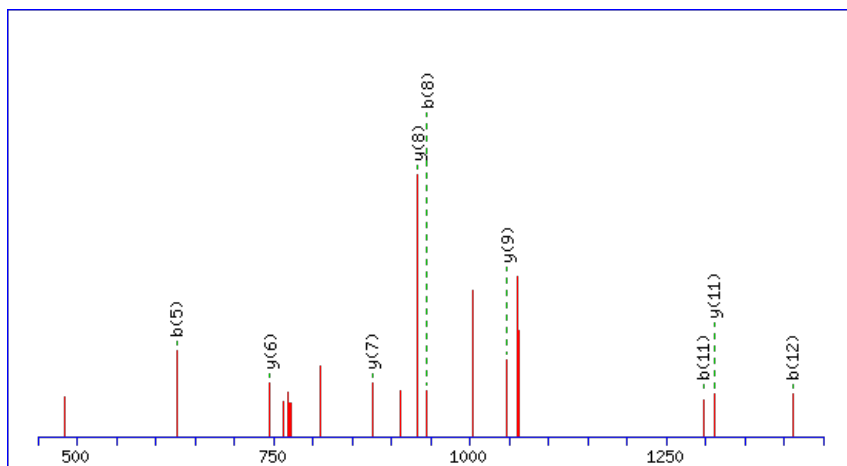Monoisotopic mass of neutral peptide  $M_r(\text{calc})$ : 1558.7113

Fixed modifications: Carbamidomethyl (C) (apply to specified residues or termini only)

Ions Score: 33 Expect: 0.0044

Matches : 9/120 fragment ions using 21 most intense peaks ([help](#))

| #  | b                | b <sup>++</sup> | b*        | b <sup>*++</sup> | b <sup>0</sup> | b <sup>0++</sup> | Seq. | y                | y <sup>++</sup> | y*        | y <sup>*++</sup> | y <sup>0</sup> | y <sup>0++</sup> | #  |
|----|------------------|-----------------|-----------|------------------|----------------|------------------|------|------------------|-----------------|-----------|------------------|----------------|------------------|----|
| 1  | 101.0727         | 51.0400         |           |                  |                |                  | V    |                  |                 |           |                  |                |                  | 13 |
| 2  | 249.1382         | 125.0727        |           |                  |                |                  | F    | 1459.6532        | 730.3302        | 1441.6296 | 721.3185         | 1441.6426      | 721.3250         | 12 |
| 3  | 365.1622         | 183.0847        |           |                  | 347.1516       | 174.0794         | D    | <b>1311.5878</b> | 656.2975        | 1293.5642 | 647.2857         | 1293.5772      | 647.2922         | 11 |
| 4  | 513.2276         | 257.1174        |           |                  | 495.2170       | 248.1122         | F    | 1195.5638        | 598.2855        | 1177.5402 | 589.2737         | 1177.5532      | 589.2802         | 10 |
| 5  | <b>627.3087</b>  | 314.1580        |           |                  | 609.2981       | 305.1527         | L    | <b>1047.4983</b> | 524.2528        | 1029.4748 | 515.2410         | 1029.4878      | 515.2475         | 9  |
| 6  | 685.3272         | 343.1672        |           |                  | 667.3166       | 334.1620         | G    | <b>933.4172</b>  | 467.2123        | 915.3937  | 458.2005         | 915.4067       | 458.2070         | 8  |
| 7  | 815.3668         | 408.1871        |           |                  | 797.3563       | 399.1818         | E    | <b>875.3987</b>  | 438.2030        | 857.3752  | 429.1912         | 857.3882       | 429.1977         | 7  |
| 8  | <b>945.4195</b>  | 473.2134        | 927.3959  | 464.2016         | 927.4089       | 464.2081         | Q    | <b>745.3591</b>  | 373.1832        | 727.3355  | 364.1714         | 727.3485       | 364.1779         | 6  |
| 9  | 1033.4485        | 517.2279        | 1015.4250 | 508.2161         | 1015.4380      | 508.2226         | S    | 615.3065         | 308.1569        | 597.2829  | 299.1451         | 597.2959       | 299.1516         | 5  |
| 10 | 1149.4725        | 575.2399        | 1131.4489 | 566.2281         | 1131.4619      | 566.2346         | D    | 527.2774         | 264.1423        | 509.2538  | 255.1305         | 509.2668       | 255.1371         | 4  |
| 11 | <b>1297.5380</b> | 649.2726        | 1279.5144 | 640.2608         | 1279.5274      | 640.2673         | F    | 411.2534         | 206.1303        | 393.2298  | 197.1186         |                |                  | 3  |
| 12 | <b>1411.6191</b> | 706.3132        | 1393.5955 | 697.3014         | 1393.6085      | 697.3079         | L    | 263.1880         | 132.0976        | 245.1644  | 123.0858         |                |                  | 2  |
| 13 |                  |                 |           |                  |                |                  | K    | 149.1069         | 75.0571         | 131.0833  | 66.0453          |                |                  | 1  |

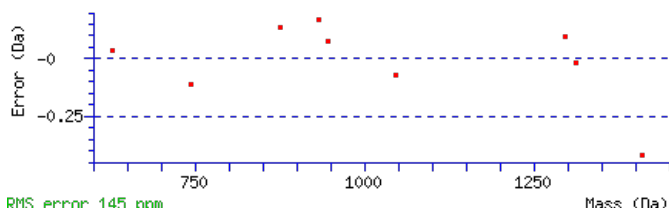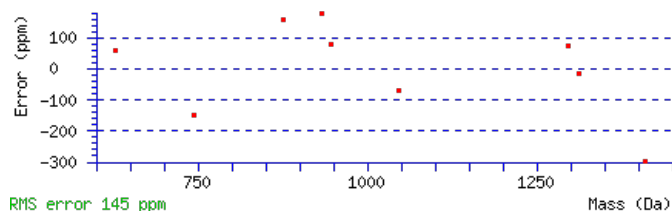NCBI BLAST search of [VFDFLGEQSDFLK](#)

(Parameters: blastp, nr protein database, expect=20000, no filter, PAM30)

Other BLAST [web gateways](#)

# AT5G53400.1

All matches to this query

| Score | Mr(calc)  | Delta   | Sequence                       |
|-------|-----------|---------|--------------------------------|
| 32.6  | 1558.7113 | 0.0007  | <a href="#">VFDFLGEQSDFLK</a>  |
| 22.1  | 1558.7148 | -0.0027 | <a href="#">MILFTQEPSFSIK</a>  |
| 7.4   | 1558.7152 | -0.0031 | <a href="#">SGKCDASVKLOYGK</a> |
| 3.2   | 1558.7096 | 0.0025  | <a href="#">HRKEAEEGVVEVK</a>  |
| 2.2   | 1558.7078 | 0.0043  | <a href="#">KKGADMEFLSAAMK</a> |
| 0.4   | 1558.7159 | -0.0038 | <a href="#">TTLSALTMSMNLK</a>  |
| 0.4   | 1558.7118 | 0.0003  | <a href="#">YELGRTLGEFNFGK</a> |
| 0.3   | 1558.7168 | -0.0047 | <a href="#">RRYSPPYYSPPR</a>   |
| 0.1   | 1558.7104 | 0.0016  | <a href="#">MARNLYDEMLRK</a>   |
| 0.1   | 1558.7114 | 0.0007  | <a href="#">IYIEGYAWSVSEK</a>  |

Mascot: <http://www.matrixscience.com/>

**Peptide View**MS/MS Fragmentation of **IPEFNELVYQNR**Found in **AT5G53460.1** in **TAIR\_Arabidopsis**, Symbols: GLT1 | GLT1 (NADH-dependent glutamate synthase 1 gene) | chr5:21717744-21726855  
FORWARD

Match to Query 6648: 1538.712282 from(770.363417,2+) index(7173)

Title: Elution from: 64.260 to 64.260 scan no 9393 cid35.00 polarity:+

Data file 0-1\_2.mgf

Click mouse within plot area to zoom in by factor of two about that point

Or,  to  Da Label all possible matches  Label matches used for scoring Show Y-axis 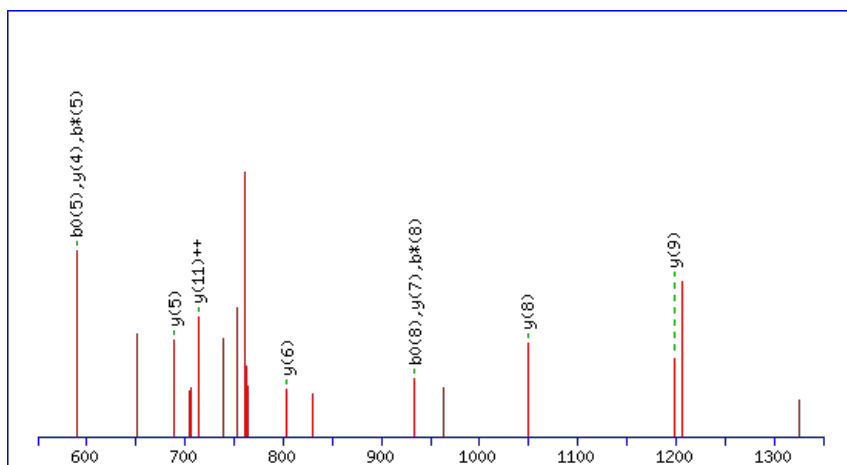Monoisotopic mass of neutral peptide  $M_r(\text{calc})$ : 1538.7090

Fixed modifications: Carbamidomethyl (C) (apply to specified residues or termini only)

Ions Score: 34 Expect: 0.0039

Matches : 11/108 fragment ions using 16 most intense peaks ([help](#))

| #  | b         | b <sup>++</sup> | b*        | b <sup>*++</sup> | b <sup>0</sup> | b <sup>0++</sup> | Seq. | y         | y <sup>++</sup> | y*        | y <sup>*++</sup> | y <sup>0</sup> | y <sup>0++</sup> | #  |
|----|-----------|-----------------|-----------|------------------|----------------|------------------|------|-----------|-----------------|-----------|------------------|----------------|------------------|----|
| 1  | 115.0884  | 58.0478         |           |                  |                |                  | I    |           |                 |           |                  |                |                  | 12 |
| 2  | 213.1382  | 107.0727        |           |                  |                |                  | P    | 1425.6351 | 713.3212        | 1407.6116 | 704.3094         | 1407.6246      | 704.3159         | 11 |
| 3  | 343.1778  | 172.0925        |           |                  | 325.1672       | 163.0873         | E    | 1327.5854 | 664.2963        | 1309.5618 | 655.2845         | 1309.5748      | 655.2910         | 10 |
| 4  | 491.2433  | 246.1253        |           |                  | 473.2327       | 237.1200         | F    | 1197.5457 | 599.2765        | 1179.5221 | 590.2647         | 1179.5352      | 590.2712         | 9  |
| 5  | 607.2802  | 304.1438        | 589.2567  | 295.1320         | 589.2697       | 295.1385         | N    | 1049.4803 | 525.2438        | 1031.4567 | 516.2320         | 1031.4697      | 516.2385         | 8  |
| 6  | 737.3199  | 369.1636        | 719.2963  | 360.1518         | 719.3093       | 360.1583         | E    | 933.4433  | 467.2253        | 915.4197  | 458.2135         | 915.4327       | 458.2200         | 7  |
| 7  | 851.4010  | 426.2041        | 833.3774  | 417.1923         | 833.3904       | 417.1988         | L    | 803.4036  | 402.2055        | 785.3801  | 393.1937         |                |                  | 6  |
| 8  | 951.4664  | 476.2369        | 933.4428  | 467.2251         | 933.4559       | 467.2316         | V    | 689.3225  | 345.1649        | 671.2990  | 336.1531         |                |                  | 5  |
| 9  | 1115.5268 | 558.2670        | 1097.5032 | 549.2552         | 1097.5162      | 549.2617         | Y    | 589.2571  | 295.1322        | 571.2335  | 286.1204         |                |                  | 4  |
| 10 | 1245.5794 | 623.2934        | 1227.5559 | 614.2816         | 1227.5689      | 614.2881         | Q    | 425.1967  | 213.1020        | 407.1732  | 204.0902         |                |                  | 3  |
| 11 | 1361.6164 | 681.3119        | 1343.5928 | 672.3001         | 1343.6059      | 672.3066         | N    | 295.1441  | 148.0757        | 277.1205  | 139.0639         |                |                  | 2  |
| 12 |           |                 |           |                  |                |                  | R    | 179.1071  | 90.0572         | 161.0835  | 81.0454          |                |                  | 1  |

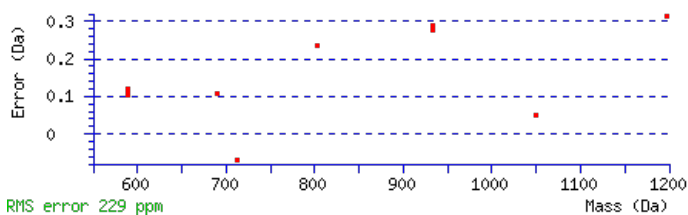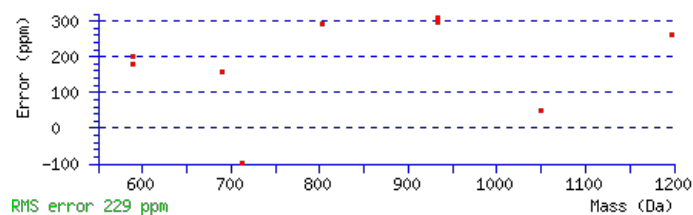NCBI BLAST search of **IPEFNELVYQNR**

(Parameters: blastp, nr protein database, expect=20000, no filter, PAM30)

Other BLAST [web gateways](#)

AT5G53460.1

All matches to this query

| Score | Mr(calc)  | Delta  | Sequence                        |
|-------|-----------|--------|---------------------------------|
| 33.6  | 1538.7090 | 0.0033 | <a href="#">IPEFNELVYQNR</a>    |
| 12.4  | 1538.7097 | 0.0026 | <a href="#">ILMEDEK FVSEGK</a>  |
| 6.7   | 1538.7101 | 0.0022 | <a href="#">INMLELEKSSSNR</a>   |
| 5.4   | 1538.7101 | 0.0022 | <a href="#">AATQLTASPVTMSAR</a> |

Mascot: <http://www.matrixscience.com/>

## Peptide View

MS/MS Fragmentation of **NGILEAYSGIFQGFK**Found in **AT5G53480.1** in **TAIR\_Arabidopsis**, Symbols: | importin beta-2, putative | chr5:21731242-21733935 FORWARD

Match to Query 7298: 1660.783728 from(831.399140,2+) index(10099)

Title: Elution from: 99.688 to 99.688 scan no 14670 cid35.00 polarity:+

Data file D1d-2\_2.mgf

Click mouse within plot area to zoom in by factor of two about that point

Or,  to  Da Label all possible matches  Label matches used for scoring Show Y-axis 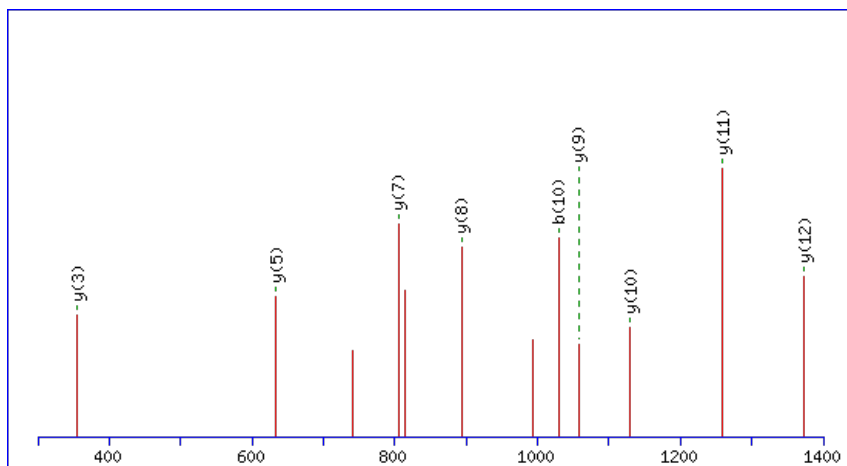Monoisotopic mass of neutral peptide  $M_r(\text{calc})$ : 1660.7821

Fixed modifications: Carbamidomethyl (C) (apply to specified residues or termini only)

Ions Score: 64 Expect: 2.8e-006

Matches : 9/146 fragment ions using 12 most intense peaks ([help](#))

| #  | b                | b <sup>++</sup> | b*        | b <sup>*++</sup> | b <sup>0</sup> | b <sup>0++</sup> | Seq. | y                | y <sup>++</sup> | y*        | y <sup>*++</sup> | y <sup>0</sup> | y <sup>0++</sup> | #  |
|----|------------------|-----------------|-----------|------------------|----------------|------------------|------|------------------|-----------------|-----------|------------------|----------------|------------------|----|
| 1  | 117.0443         | 59.0258         | 99.0207   | 50.0140          |                |                  | N    |                  |                 |           |                  |                |                  | 15 |
| 2  | 175.0628         | 88.0350         | 157.0392  | 79.0232          |                |                  | G    | 1545.7524        | 773.3798        | 1527.7288 | 764.3681         | 1527.7419      | 764.3746         | 14 |
| 3  | 289.1439         | 145.0756        | 271.1203  | 136.0638         |                |                  | I    | 1487.7339        | 744.3706        | 1469.7103 | 735.3588         | 1469.7234      | 735.3653         | 13 |
| 4  | 403.2250         | 202.1161        | 385.2014  | 193.1043         |                |                  | L    | <b>1373.6528</b> | 687.3300        | 1355.6292 | 678.3183         | 1355.6423      | 678.3248         | 12 |
| 5  | 533.2646         | 267.1359        | 515.2410  | 258.1241         | 515.2540       | 258.1307         | E    | <b>1259.5717</b> | 630.2895        | 1241.5481 | 621.2777         | 1241.5612      | 621.2842         | 11 |
| 6  | 605.2987         | 303.1530        | 587.2752  | 294.1412         | 587.2882       | 294.1477         | A    | <b>1129.5321</b> | 565.2697        | 1111.5085 | 556.2579         | 1111.5215      | 556.2644         | 10 |
| 7  | 769.3591         | 385.1832        | 751.3355  | 376.1714         | 751.3485       | 376.1779         | Y    | <b>1057.4979</b> | 529.2526        | 1039.4744 | 520.2408         | 1039.4874      | 520.2473         | 9  |
| 8  | 857.3882         | 429.1977        | 839.3646  | 420.1859         | 839.3776       | 420.1924         | S    | <b>893.4376</b>  | 447.2224        | 875.4140  | 438.2106         | 875.4270       | 438.2171         | 8  |
| 9  | 915.4067         | 458.2070        | 897.3831  | 449.1952         | 897.3961       | 449.2017         | G    | <b>805.4085</b>  | 403.2079        | 787.3849  | 394.1961         |                |                  | 7  |
| 10 | <b>1029.4878</b> | 515.2475        | 1011.4642 | 506.2357         | 1011.4772      | 506.2422         | I    | 747.3900         | 374.1986        | 729.3664  | 365.1869         |                |                  | 6  |
| 11 | 1177.5532        | 589.2802        | 1159.5296 | 580.2685         | 1159.5427      | 580.2750         | F    | <b>633.3089</b>  | 317.1581        | 615.2853  | 308.1463         |                |                  | 5  |
| 12 | 1307.6059        | 654.3066        | 1289.5823 | 645.2948         | 1289.5953      | 645.3013         | Q    | 485.2435         | 243.1254        | 467.2199  | 234.1136         |                |                  | 4  |
| 13 | 1365.6244        | 683.3158        | 1347.6008 | 674.3040         | 1347.6138      | 674.3105         | G    | <b>355.1908</b>  | 178.0990        | 337.1672  | 169.0873         |                |                  | 3  |
| 14 | 1513.6898        | 757.3485        | 1495.6662 | 748.3368         | 1495.6793      | 748.3433         | F    | 297.1723         | 149.0898        | 279.1487  | 140.0780         |                |                  | 2  |
| 15 |                  |                 |           |                  |                |                  | K    | 149.1069         | 75.0571         | 131.0833  | 66.0453          |                |                  | 1  |

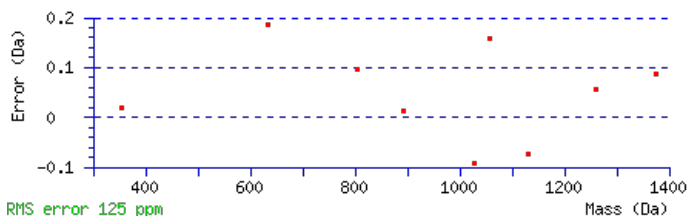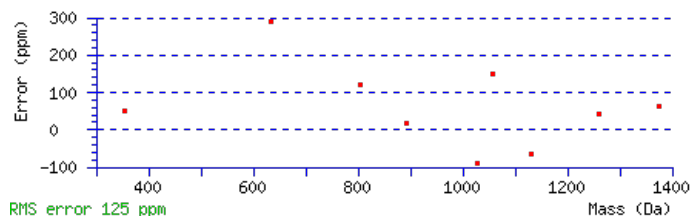NCBI BLAST search of [NGILEAYSGIFQGFK](#)



## AT5G53480.1

(Parameters: blastp, nr protein database, expect=20000, no filter, PAM30)

Other BLAST [web gateways](#)

### All matches to this query

| Score | Mr(calc)  | Delta   | Sequence                        |
|-------|-----------|---------|---------------------------------|
| 64.0  | 1660.7821 | 0.0016  | <a href="#">NGILEAYSGIFQGFK</a> |
| 8.6   | 1660.7855 | -0.0018 | <a href="#">LLDKGASYFVMDLR</a>  |
| 2.9   | 1660.7828 | 0.0009  | <a href="#">ETELKLMSYFLEK</a>   |
| 1.1   | 1660.7803 | 0.0034  | <a href="#">TNHKDLKAQLDNGGK</a> |

Mascot: <http://www.matrixscience.com/>

## Peptide View

MS/MS Fragmentation of **AFVGNITIGQANGVYDKPLDLR**

Found in **AT5G53490.1** in **TAIR\_Arabidopsis**, Symbols: | thylakoid luminal 17.4 kDa protein, chloroplast | chr5:21740714-21741847 REVERSE

Match to Query 9970: 2247.164028 from(750.061952,3+) index(6778)

Title: Elution from: 59.721 to 59.721 scan no 8767 cid35.00 polarity:+

Data file D6h-3\_2.mgf

Click mouse within plot area to zoom in by factor of two about that point

Or,   to  Da

Label all possible matches  Label matches used for scoring

Show Y-axis

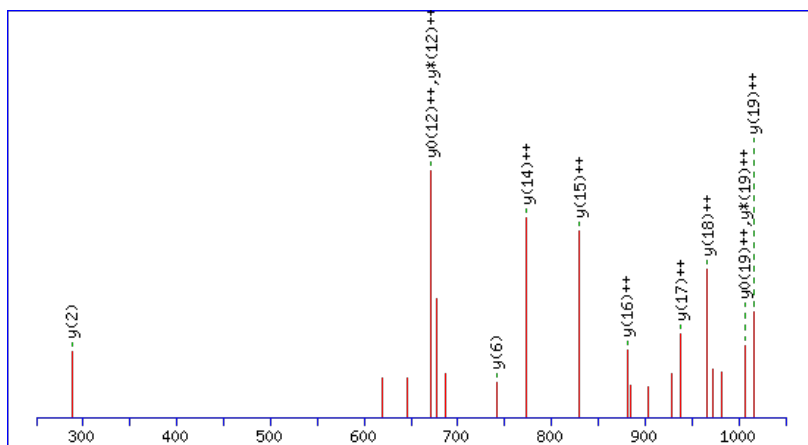

Monoisotopic mass of neutral peptide  $M_r(\text{calc})$ : 2247.1648

Fixed modifications: Carbamidomethyl (C) (apply to specified residues or termini only)

Ions Score: 49 Expect: 4.9e-005

Matches : 12/218 fragment ions using 11 most intense peaks ([help](#))

| #  | b         | b <sup>++</sup> | b*        | b <sup>*++</sup> | b <sup>0</sup> | b <sup>0++</sup> | Seq. | y         | y <sup>++</sup> | y*        | y <sup>*++</sup> | y <sup>0</sup> | y <sup>0++</sup> | #  |
|----|-----------|-----------------|-----------|------------------|----------------|------------------|------|-----------|-----------------|-----------|------------------|----------------|------------------|----|
| 1  | 72.0444   | 36.5258         |           |                  |                |                  | A    |           |                 |           |                  |                |                  | 21 |
| 2  | 219.1128  | 110.0600        |           |                  |                |                  | F    | 2177.1349 | 1089.0711       | 2160.1084 | 1080.5578        | 2159.1244      | 1080.0658        | 20 |
| 3  | 318.1812  | 159.5942        |           |                  |                |                  | V    | 2030.0665 | 1015.5369       | 2013.0400 | 1007.0236        | 2012.0560      | 1006.5316        | 19 |
| 4  | 375.2027  | 188.1050        |           |                  |                |                  | G    | 1930.9981 | 966.0027        | 1913.9716 | 957.4894         | 1912.9876      | 956.9974         | 18 |
| 5  | 489.2456  | 245.1264        | 472.2191  | 236.6132         |                |                  | N    | 1873.9767 | 937.4920        | 1856.9501 | 928.9787         | 1855.9661      | 928.4867         | 17 |
| 6  | 590.2933  | 295.6503        | 573.2667  | 287.1370         | 572.2827       | 286.6450         | T    | 1759.9337 | 880.4705        | 1742.9072 | 871.9572         | 1741.9232      | 871.4652         | 16 |
| 7  | 703.3774  | 352.1923        | 686.3508  | 343.6790         | 685.3668       | 343.1870         | I    | 1658.8860 | 829.9467        | 1641.8595 | 821.4334         | 1640.8755      | 820.9414         | 15 |
| 8  | 760.3988  | 380.7030        | 743.3723  | 372.1898         | 742.3883       | 371.6978         | G    | 1545.8020 | 773.4046        | 1528.7754 | 764.8914         | 1527.7914      | 764.3993         | 14 |
| 9  | 888.4574  | 444.7323        | 871.4308  | 436.2191         | 870.4468       | 435.7271         | Q    | 1488.7805 | 744.8939        | 1471.7540 | 736.3806         | 1470.7700      | 735.8886         | 13 |
| 10 | 959.4945  | 480.2509        | 942.4680  | 471.7376         | 941.4839       | 471.2456         | A    | 1360.7219 | 680.8646        | 1343.6954 | 672.3513         | 1342.7114      | 671.8593         | 12 |
| 11 | 1073.5374 | 537.2724        | 1056.5109 | 528.7591         | 1055.5269      | 528.2671         | N    | 1289.6848 | 645.3461        | 1272.6583 | 636.8328         | 1271.6743      | 636.3408         | 11 |
| 12 | 1130.5589 | 565.7831        | 1113.5324 | 557.2698         | 1112.5483      | 556.7778         | G    | 1175.6419 | 588.3246        | 1158.6154 | 579.8113         | 1157.6313      | 579.3193         | 10 |
| 13 | 1229.6273 | 615.3173        | 1212.6008 | 606.8040         | 1211.6167      | 606.3120         | V    | 1118.6204 | 559.8139        | 1101.5939 | 551.3006         | 1100.6099      | 550.8086         | 9  |
| 14 | 1392.6906 | 696.8490        | 1375.6641 | 688.3357         | 1374.6801      | 687.8437         | Y    | 1019.5520 | 510.2796        | 1002.5255 | 501.7664         | 1001.5415      | 501.2744         | 8  |
| 15 | 1507.7176 | 754.3624        | 1490.6910 | 745.8492         | 1489.7070      | 745.3571         | D    | 856.4887  | 428.7480        | 839.4621  | 420.2347         | 838.4781       | 419.7427         | 7  |
| 16 | 1635.8125 | 818.4099        | 1618.7860 | 809.8966         | 1617.8020      | 809.4046         | K    | 741.4617  | 371.2345        | 724.4352  | 362.7212         | 723.4512       | 362.2292         | 6  |
| 17 | 1732.8653 | 866.9363        | 1715.8388 | 858.4230         | 1714.8547      | 857.9310         | P    | 613.3668  | 307.1870        | 596.3402  | 298.6738         | 595.3562       | 298.1817         | 5  |
| 18 | 1845.9494 | 923.4783        | 1828.9228 | 914.9651         | 1827.9388      | 914.4730         | L    | 516.3140  | 258.6606        | 499.2875  | 250.1474         | 498.3035       | 249.6554         | 4  |
| 19 | 1960.9763 | 980.9918        | 1943.9498 | 972.4785         | 1942.9658      | 971.9865         | D    | 403.2300  | 202.1186        | 386.2034  | 193.6053         | 385.2194       | 193.1133         | 3  |
| 20 | 2074.0604 | 1037.5338       | 2057.0338 | 1029.0206        | 2056.0498      | 1028.5285        | L    | 288.2030  | 144.6051        | 271.1765  | 136.0919         |                |                  | 2  |
| 21 |           |                 |           |                  |                |                  | R    | 175.1190  | 88.0631         | 158.0924  | 79.5498          |                |                  | 1  |

# AT5G53490.1

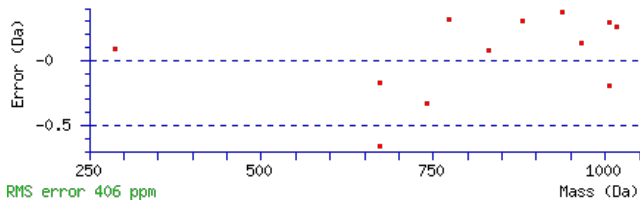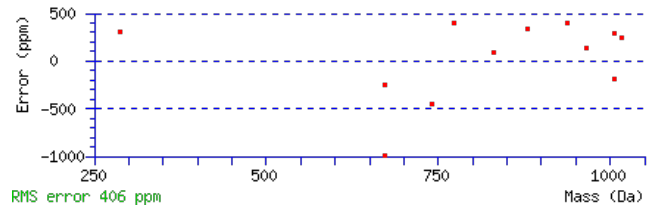

NCBI **BLAST** search of [AFVGNTIGOANGVYDKPLDLR](#)  
 (Parameters: blastp, nr protein database, expect=20000, no filter, PAM30)  
 Other BLAST [web gateways](#)

## All matches to this query

| Score | Mr(calc)  | Delta   | Sequence                                 |
|-------|-----------|---------|------------------------------------------|
| 48.6  | 2247.1648 | -0.0008 | <a href="#">AFVGNTIGOANGVYDKPLDLR</a>    |
| 2.6   | 2247.1582 | 0.0058  | <a href="#">RLKHINLSSPEISGCFER</a>       |
| 1.4   | 2247.1607 | 0.0033  | <a href="#">NDHLLSVDNAKIEQGPAGIR</a>     |
| 1.1   | 2247.1643 | -0.0002 | <a href="#">IMLYSPVMPSPLESLASSAVR</a>    |
| 0.6   | 2247.1603 | 0.0037  | <a href="#">AAVLGANDGLVSTASLMMGVGAVK</a> |

Mascot: <http://www.matrixscience.com/>

**Peptide View**MS/MS Fragmentation of **YFIGEIDSSVPATR**Found in **AT5G53560.1** in **TAIR\_Arabidopsis**, Symbols: B5 #2, ATB5-A | ATB5-A (Cytochrome b5 A) | chr5:21776854-21777579 FORWARD

Match to Query 7261: 1640.803422 from(821.408987,2+) index(6198)

Title: Elution from: 55.236 to 55.236 scan no 7931 cid35.00 polarity:+

Data file C7-1\_3.mgf

Click mouse within plot area to zoom in by factor of two about that point

Or,   to  Da Label all possible matches  Label matches used for scoring Show Y-axis 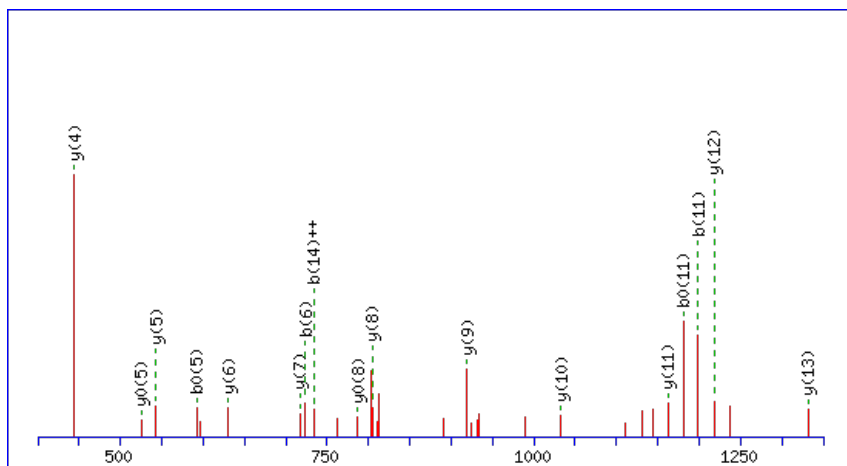Monoisotopic mass of neutral peptide  $M_r(\text{calc})$ : 1640.8046

Fixed modifications: Carbamidomethyl (C) (apply to specified residues or termini only)

Ions Score: 81 Expect: 2.9e-008

Matches : 17/130 fragment ions using 26 most intense peaks ([help](#))

| #  | b                | b <sup>++</sup> | b <sup>0</sup>   | b <sup>0++</sup> | Seq. | y                | y <sup>++</sup> | y*        | y <sup>*++</sup> | y <sup>0</sup>  | y <sup>0++</sup> | #  |
|----|------------------|-----------------|------------------|------------------|------|------------------|-----------------|-----------|------------------|-----------------|------------------|----|
| 1  | 164.0706         | 82.5389         |                  |                  | Y    |                  |                 |           |                  |                 |                  | 15 |
| 2  | 311.1390         | 156.0731        |                  |                  | F    | 1478.7485        | 739.8779        | 1461.7220 | 731.3646         | 1460.7380       | 730.8726         | 14 |
| 3  | 424.2231         | 212.6152        |                  |                  | I    | <b>1331.6801</b> | 666.3437        | 1314.6536 | 657.8304         | 1313.6696       | 657.3384         | 13 |
| 4  | 481.2445         | 241.1259        |                  |                  | G    | <b>1218.5961</b> | 609.8017        | 1201.5695 | 601.2884         | 1200.5855       | 600.7964         | 12 |
| 5  | 610.2871         | 305.6472        | <b>592.2766</b>  | 296.6419         | E    | <b>1161.5746</b> | 581.2909        | 1144.5481 | 572.7777         | 1143.5640       | 572.2857         | 11 |
| 6  | <b>723.3712</b>  | 362.1892        | 705.3606         | 353.1840         | I    | <b>1032.5320</b> | 516.7696        | 1015.5055 | 508.2564         | 1014.5214       | 507.7644         | 10 |
| 7  | 838.3981         | 419.7027        | 820.3876         | 410.6974         | D    | <b>919.4480</b>  | 460.2276        | 902.4214  | 451.7143         | 901.4374        | 451.2223         | 9  |
| 8  | 925.4302         | 463.2187        | 907.4196         | 454.2134         | S    | <b>804.4210</b>  | 402.7141        | 787.3945  | 394.2009         | <b>786.4104</b> | 393.7089         | 8  |
| 9  | 1012.4622        | 506.7347        | 994.4516         | 497.7295         | S    | <b>717.3890</b>  | 359.1981        | 700.3624  | 350.6849         | 699.3784        | 350.1928         | 7  |
| 10 | 1099.4942        | 550.2508        | 1081.4837        | 541.2455         | S    | <b>630.3570</b>  | 315.6821        | 613.3304  | 307.1688         | 612.3464        | 306.6768         | 6  |
| 11 | <b>1198.5626</b> | 599.7850        | <b>1180.5521</b> | 590.7797         | V    | <b>543.3249</b>  | 272.1661        | 526.2984  | 263.6528         | <b>525.3144</b> | 263.1608         | 5  |
| 12 | 1295.6154        | 648.3113        | 1277.6048        | 639.3061         | P    | <b>444.2565</b>  | 222.6319        | 427.2300  | 214.1186         | 426.2459        | 213.6266         | 4  |
| 13 | 1366.6525        | 683.8299        | 1348.6420        | 674.8246         | A    | 347.2037         | 174.1055        | 330.1772  | 165.5922         | 329.1932        | 165.1002         | 3  |
| 14 | 1467.7002        | <b>734.3537</b> | 1449.6896        | 725.3485         | T    | 276.1666         | 138.5870        | 259.1401  | 130.0737         | 258.1561        | 129.5817         | 2  |
| 15 |                  |                 |                  |                  | R    | 175.1190         | 88.0631         | 158.0924  | 79.5498          |                 |                  | 1  |

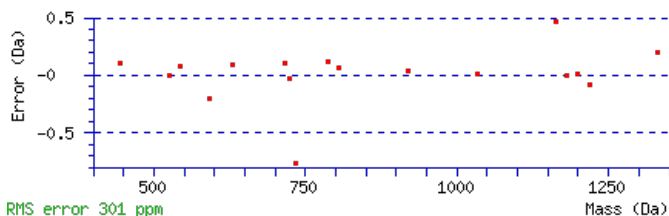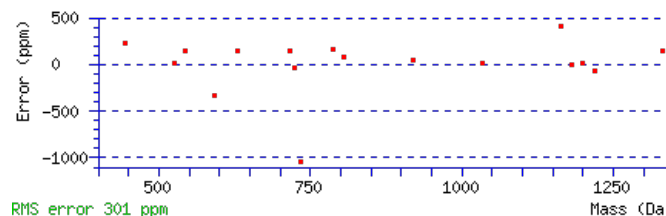NCBI **BLAST** search of [YFIGEIDSSVPATR](#)

## AT5G53560.1

(Parameters: blastp, nr protein database, expect=20000, no filter, PAM30)

Other BLAST [web gateways](#)

### All matches to this query

| Score | Mr(calc)  | Delta   | Sequence                        |
|-------|-----------|---------|---------------------------------|
| 80.5  | 1640.8046 | -0.0012 | <a href="#">YFIGEIDSSSVPATR</a> |
| 0.3   | 1640.8015 | 0.0020  | <a href="#">TITNGGFVEIKRCM</a>  |

Mascot: <http://www.matrixscience.com/>

**Peptide View**MS/MS Fragmentation of **ILSLAK**

Found in **AT5G53890.1** in **TAIR\_Arabidopsis**, Symbols: | leucine-rich repeat transmembrane protein kinase, putative | chr5:21894461-21897571  
FORWARD

Match to Query 444: 643.426814 from(322.720683,2+) index(691)

Title: Elution from: 15.743 to 15.743 scan no 1123 cid35.00 polarity:+

Data file D1d-1-2.mgf

Click mouse within plot area to zoom in by factor of two about that point

Or,   to  Da

Label all possible matches  Label matches used for scoring

Show Y-axis

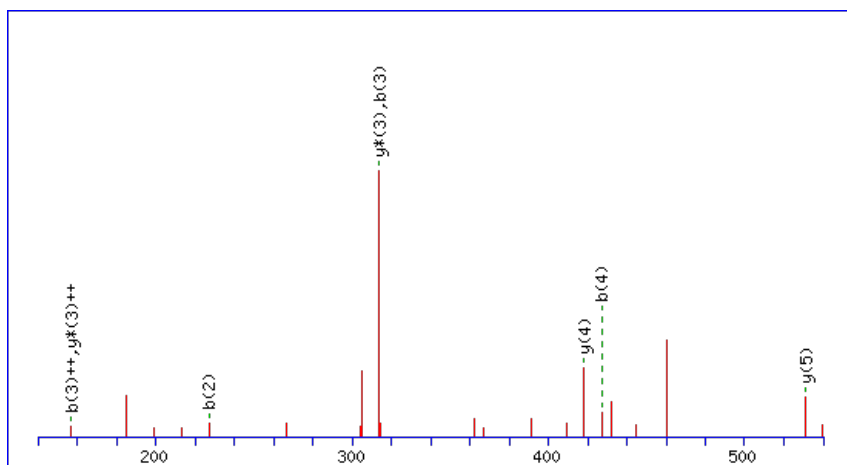

**Monoisotopic mass of neutral peptide Mr(calc):** 643.4268

**Fixed modifications:** Carbamidomethyl (C) (apply to specified residues or termini only)

**Ions Score:** 22 **Expect:** 0.032

**Matches:** 8/40 fragment ions using 12 most intense peaks ([help](#))

| # | b               | b <sup>++</sup> | b <sup>0</sup> | b <sup>0++</sup> | Seq. | y               | y <sup>++</sup> | y*              | y <sup>*++</sup> | y <sup>0</sup> | y <sup>0++</sup> | # |
|---|-----------------|-----------------|----------------|------------------|------|-----------------|-----------------|-----------------|------------------|----------------|------------------|---|
| 1 | 114.0913        | 57.5493         |                |                  | I    |                 |                 |                 |                  |                |                  | 6 |
| 2 | <b>227.1754</b> | 114.0913        |                |                  | L    | <b>531.3501</b> | 266.1787        | 514.3235        | 257.6654         | 513.3395       | 257.1734         | 5 |
| 3 | <b>314.2074</b> | <b>157.6074</b> | 296.1969       | 148.6021         | S    | <b>418.2660</b> | 209.6366        | 401.2395        | 201.1234         | 400.2554       | 200.6314         | 4 |
| 4 | <b>427.2915</b> | 214.1494        | 409.2809       | 205.1441         | L    | 331.2340        | 166.1206        | <b>314.2074</b> | <b>157.6074</b>  |                |                  | 3 |
| 5 | 498.3286        | 249.6679        | 480.3180       | 240.6627         | A    | 218.1499        | 109.5786        | 201.1234        | 101.0653         |                |                  | 2 |
| 6 |                 |                 |                |                  | K    | 147.1128        | 74.0600         | 130.0863        | 65.5468          |                |                  | 1 |

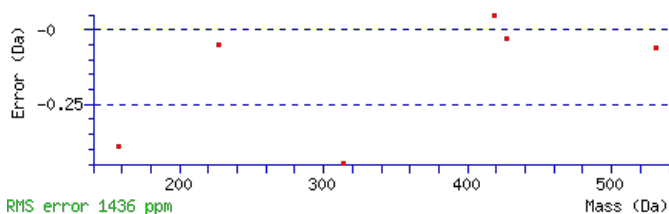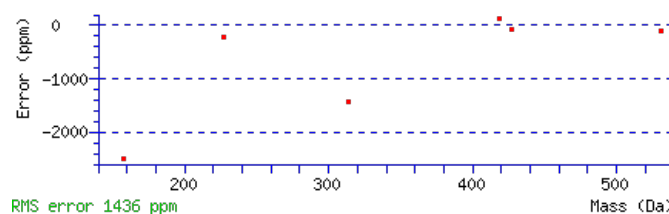NCBI **BLAST** search of **ILSLAK**

(Parameters: blastp, nr protein database, expect=20000, no filter, PAM30)

Other BLAST [web gateways](#)

**All matches to this query**

| Score | Mr(calc) | Delta   | Sequence               |
|-------|----------|---------|------------------------|
| 22.1  | 643.4268 | -0.0000 | <a href="#">ILSLAK</a> |
| 22.1  | 643.4268 | -0.0000 | <a href="#">ILSLAK</a> |
| 20.2  | 643.4268 | -0.0000 | <a href="#">LLLSAK</a> |

**AT5G53890.1**

|      |          |         |                        |
|------|----------|---------|------------------------|
| 18.5 | 643.4268 | -0.0000 | <a href="#">LLGTK</a>  |
| 13.6 | 643.4268 | -0.0000 | <a href="#">LLTVAK</a> |
| 13.4 | 643.4268 | -0.0000 | <a href="#">IISAIK</a> |
| 13.4 | 643.4268 | -0.0000 | <a href="#">IISALK</a> |
| 13.4 | 643.4268 | -0.0000 | <a href="#">LISALK</a> |
| 13.4 | 643.4268 | -0.0000 | <a href="#">LLSAIK</a> |
| 12.2 | 643.4268 | -0.0000 | <a href="#">LLGLTK</a> |

**Mascot:** <http://www.matrixscience.com/>

**Peptide View**MS/MS Fragmentation of **VLMESWYHLK**Found in **AT5G54160.1** in **TAIR\_Arabidopsis**, Symbols: OMT1, ATOMT1 | ATOMT1 (O-METHYLTRANSFERASE 1) | chr5:2199301-22001393 FORWARD

Match to Query 4608: 1304.658111 from(435.893313,3+) index(6141)

Title: Elution from: 56.579 to 56.579 scan no 7938 cid35.00 polarity:+

Data file D1d-2\_1.mgf

Click mouse within plot area to zoom in by factor of two about that point

Or,   to  Da Label all possible matches  Label matches used for scoring Show Y-axis 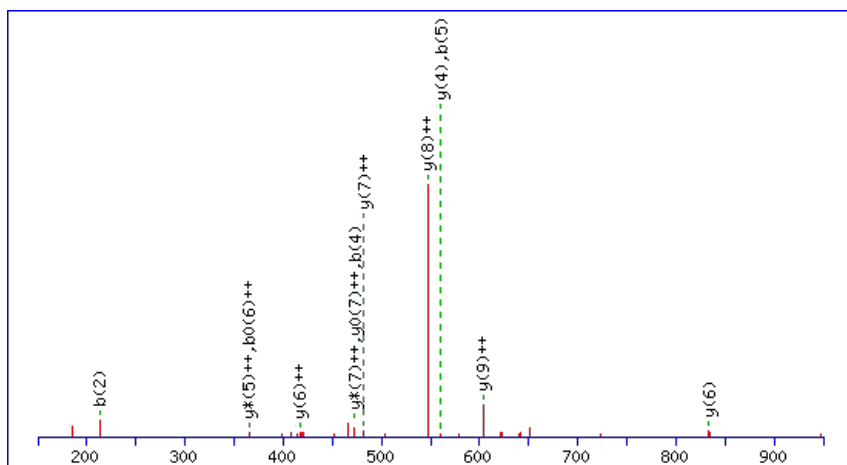Monoisotopic mass of neutral peptide **Mr(calc)**: 1304.6587**Fixed modifications**: Carbamidomethyl (C) (apply to specified residues or termini only)**Ions Score**: 21 **Expect**: 0.048**Matches**: 13/74 fragment ions using 19 most intense peaks ([help](#))

| #  | b               | b <sup>++</sup> | b <sup>0</sup> | b <sup>0++</sup> | Seq. | y               | y <sup>++</sup> | y*        | y* <sup>++</sup> | y <sup>0</sup> | y <sup>0++</sup> | #  |
|----|-----------------|-----------------|----------------|------------------|------|-----------------|-----------------|-----------|------------------|----------------|------------------|----|
| 1  | 100.0757        | 50.5415         |                |                  | V    |                 |                 |           |                  |                |                  | 10 |
| 2  | <b>213.1598</b> | 107.0835        |                |                  | L    | 1206.5976       | <b>603.8024</b> | 1189.5710 | 595.2892         | 1188.5870      | 594.7972         | 9  |
| 3  | 344.2002        | 172.6038        |                |                  | M    | 1093.5135       | <b>547.2604</b> | 1076.4870 | 538.7471         | 1075.5030      | 538.2551         | 8  |
| 4  | <b>473.2428</b> | 237.1251        | 455.2323       | 228.1198         | E    | 962.4730        | <b>481.7402</b> | 945.4465  | <b>473.2269</b>  | 944.4625       | <b>472.7349</b>  | 7  |
| 5  | <b>560.2749</b> | 280.6411        | 542.2643       | 271.6358         | S    | <b>833.4304</b> | <b>417.2189</b> | 816.4039  | 408.7056         | 815.4199       | 408.2136         | 6  |
| 6  | 746.3542        | 373.6807        | 728.3436       | <b>364.6754</b>  | W    | 746.3984        | 373.7028        | 729.3719  | <b>365.1896</b>  |                |                  | 5  |
| 7  | 909.4175        | 455.2124        | 891.4069       | 446.2071         | Y    | <b>560.3191</b> | 280.6632        | 543.2926  | 272.1499         |                |                  | 4  |
| 8  | 1046.4764       | 523.7418        | 1028.4658      | 514.7366         | H    | 397.2558        | 199.1315        | 380.2292  | 190.6183         |                |                  | 3  |
| 9  | 1159.5605       | 580.2839        | 1141.5499      | 571.2786         | L    | 260.1969        | 130.6021        | 243.1703  | 122.0888         |                |                  | 2  |
| 10 |                 |                 |                |                  | K    | 147.1128        | 74.0600         | 130.0863  | 65.5468          |                |                  | 1  |

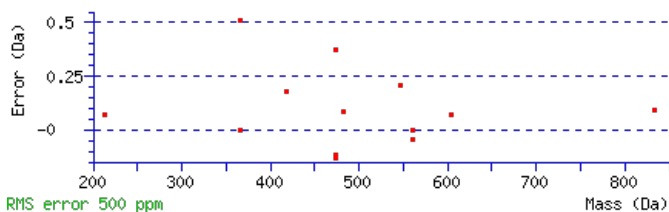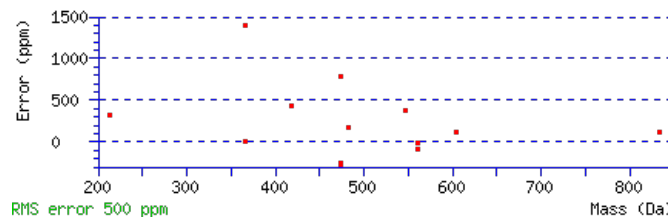NCBI **BLAST** search of **VLMESWYHLK**

(Parameters: blastp, nr protein database, expect=20000, no filter, PAM30)

Other BLAST [web gateways](#)**All matches to this query**



## AT5G54160.1

| Score | Mr(calc)  | Delta   | Sequence                       |
|-------|-----------|---------|--------------------------------|
| 21.3  | 1304.6587 | -0.0006 | <a href="#">VLMESWYHLK</a>     |
| 4.8   | 1304.6612 | -0.0031 | <a href="#">VIEDDAFLDR</a>     |
| 4.3   | 1304.6585 | -0.0004 | <a href="#">NPTDPKNNHLR</a>    |
| 3.1   | 1304.6572 | 0.0009  | <a href="#">SNSILVSGESGAGK</a> |
| 1.7   | 1304.6581 | 0.0001  | <a href="#">EGMVMTEKPKR</a>    |

Mascot: <http://www.matrixscience.com/>

**Peptide View**MS/MS Fragmentation of **TRVVDGVDLVHKFK**Found in **AT5G54200.1** in **TAIR\_Arabidopsis**, Symbols: | WD-40 repeat family protein | chr5:22010791-22014302 REVERSE

Match to Query 6695: 1611.907836 from(806.961194,2+) index(8823)

Title: Elution from: 82.227 to 82.227 scan no 12164 cid35.00 polarity:+

Data file D1d-1\_3.mgf

Click mouse within plot area to zoom in by factor of two about that point

Or,  to  Da Label all possible matches  Label matches used for scoring Show Y-axis 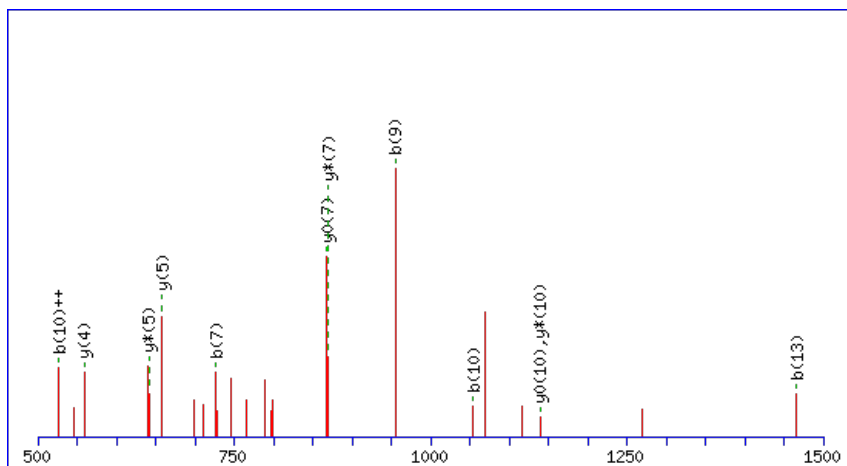Monoisotopic mass of neutral peptide  $M_r(\text{calc})$ : 1611.9097

Fixed modifications: Carbamidomethyl (C) (apply to specified residues or termini only)

Ions Score: 18 Expect: 0.038

Matches : 12/142 fragment ions using 19 most intense peaks ([help](#))

| #  | b                | b <sup>++</sup> | b <sup>*</sup> | b <sup>*++</sup> | b <sup>0</sup> | b <sup>0++</sup> | Seq. | y               | y <sup>++</sup> | y <sup>*</sup>   | y <sup>*++</sup> | y <sup>0</sup>   | y <sup>0++</sup> | #  |
|----|------------------|-----------------|----------------|------------------|----------------|------------------|------|-----------------|-----------------|------------------|------------------|------------------|------------------|----|
| 1  | 102.0550         | 51.5311         |                |                  | 84.0444        | 42.5258          | T    |                 |                 |                  |                  |                  |                  | 14 |
| 2  | 258.1561         | 129.5817        | 241.1295       | 121.0684         | 240.1455       | 120.5764         | R    | 1511.8693       | 756.4383        | 1494.8427        | 747.9250         | 1493.8587        | 747.4330         | 13 |
| 3  | 357.2245         | 179.1159        | 340.1979       | 170.6026         | 339.2139       | 170.1106         | V    | 1355.7682       | 678.3877        | 1338.7416        | 669.8744         | 1337.7576        | 669.3824         | 12 |
| 4  | 456.2929         | 228.6501        | 439.2663       | 220.1368         | 438.2823       | 219.6448         | V    | 1256.6997       | 628.8535        | 1239.6732        | 620.3402         | 1238.6892        | 619.8482         | 11 |
| 5  | 571.3198         | 286.1636        | 554.2933       | 277.6503         | 553.3093       | 277.1583         | D    | 1157.6313       | 579.3193        | <b>1140.6048</b> | 570.8060         | <b>1139.6208</b> | 570.3140         | 10 |
| 6  | 628.3413         | 314.6743        | 611.3148       | 306.1610         | 610.3307       | 305.6690         | G    | 1042.6044       | 521.8058        | 1025.5778        | 513.2926         | 1024.5938        | 512.8006         | 9  |
| 7  | <b>727.4097</b>  | 364.2085        | 710.3832       | 355.6952         | 709.3992       | 355.2032         | V    | 985.5829        | 493.2951        | 968.5564         | 484.7818         | 967.5724         | 484.2898         | 8  |
| 8  | 842.4367         | 421.7220        | 825.4101       | 413.2087         | 824.4261       | 412.7167         | D    | 886.5145        | 443.7609        | <b>869.4880</b>  | 435.2476         | <b>868.5039</b>  | 434.7556         | 7  |
| 9  | <b>955.5207</b>  | 478.2640        | 938.4942       | 469.7507         | 937.5102       | 469.2587         | L    | 771.4876        | 386.2474        | 754.4610         | 377.7341         |                  |                  | 6  |
| 10 | <b>1054.5891</b> | <b>527.7982</b> | 1037.5626      | 519.2849         | 1036.5786      | 518.7929         | V    | <b>658.4035</b> | 329.7054        | <b>641.3770</b>  | 321.1921         |                  |                  | 5  |
| 11 | 1191.6480        | 596.3277        | 1174.6215      | 587.8144         | 1173.6375      | 587.3224         | H    | <b>559.3351</b> | 280.1712        | 542.3085         | 271.6579         |                  |                  | 4  |
| 12 | 1319.7430        | 660.3751        | 1302.7165      | 651.8619         | 1301.7324      | 651.3699         | K    | 422.2762        | 211.6417        | 405.2496         | 203.1285         |                  |                  | 3  |
| 13 | <b>1466.8114</b> | 733.9094        | 1449.7849      | 725.3961         | 1448.8009      | 724.9041         | F    | 294.1812        | 147.5942        | 277.1547         | 139.0810         |                  |                  | 2  |
| 14 |                  |                 |                |                  |                |                  | K    | 147.1128        | 74.0600         | 130.0863         | 65.5468          |                  |                  | 1  |

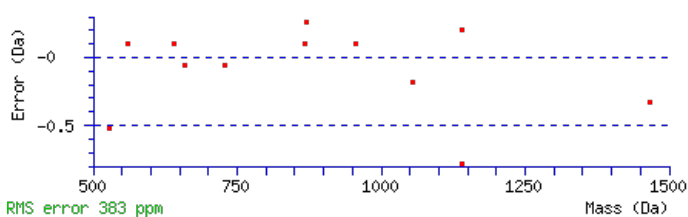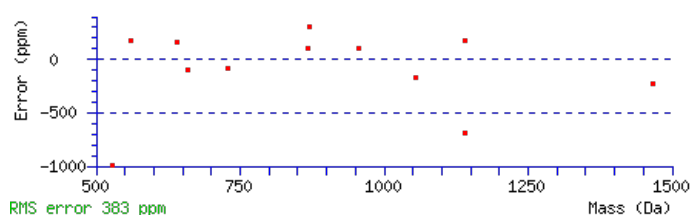NCBI BLAST search of **TRVVDGVDLVHKFK**

(Parameters: blastp, nr protein database, expect=20000, no filter, PAM30)

AT5G54200.1

Other BLAST [web gateways](#)

**All matches to this query**

| Score | Mr(calc)  | Delta   | Sequence                       |
|-------|-----------|---------|--------------------------------|
| 18.4  | 1611.9097 | -0.0019 | <a href="#">TRVVDGVDLVHKFK</a> |
| 10.7  | 1611.9056 | 0.0022  | <a href="#">KTLAEANNLRLQNK</a> |
| 9.3   | 1611.9097 | -0.0018 | <a href="#">FREPLGVRVSVEPK</a> |
| 9.1   | 1611.9083 | -0.0005 | <a href="#">EEVDKVLALDGLIK</a> |

**Mascot:** <http://www.matrixscience.com/>

## Peptide View

MS/MS Fragmentation of **WAMLGAFGCITPEVLQK**

Found in **AT5G54270.1** in **TAIR\_Arabidopsis**, Symbols: LHC3\*1, LHC3 | LHC3 (LIGHT-HARVESTING CHLOROPHYLL BINDING PROTEIN 3) | chr5:22055650-22056609 FORWARD

Match to Query 9191: 1919.965140 from(960.989846,2+) index(10625)

Title: Elution from: 103.078 to 103.078 scan no 15251 cid35.00 polarity:+

Data file D12h-2\_1.mgf

Click mouse within plot area to zoom in by factor of two about that point

Or,   to  Da

Label all possible matches  Label matches used for scoring

Show Y-axis

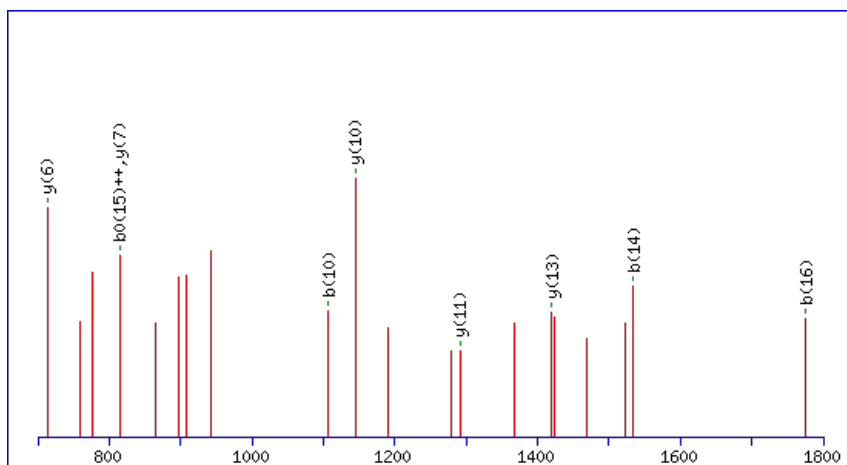

Monoisotopic mass of neutral peptide  $M_r(\text{calc})$ : 1919.9638

Fixed modifications: Carbamidomethyl (C) (apply to specified residues or termini only)

Ions Score: 42 Expect: 0.00033

Matches : 9/134 fragment ions using 10 most intense peaks ([help](#))

| #  | b                | b <sup>++</sup> | b*        | b <sup>*++</sup> | b <sup>0</sup> | b <sup>0++</sup> | Seq. | y                | y <sup>++</sup> | y*        | y <sup>*++</sup> | y <sup>0</sup> | y <sup>0++</sup> | #  |
|----|------------------|-----------------|-----------|------------------|----------------|------------------|------|------------------|-----------------|-----------|------------------|----------------|------------------|----|
| 1  | 187.0866         | 94.0469         |           |                  |                |                  | W    |                  |                 |           |                  |                |                  | 17 |
| 2  | 258.1237         | 129.5655        |           |                  |                |                  | A    | 1734.8917        | 867.9495        | 1717.8652 | 859.4362         | 1716.8812      | 858.9442         | 16 |
| 3  | 389.1642         | 195.0857        |           |                  |                |                  | M    | 1663.8546        | 832.4309        | 1646.8281 | 823.9177         | 1645.8440      | 823.4257         | 15 |
| 4  | 502.2483         | 251.6278        |           |                  |                |                  | L    | 1532.8141        | 766.9107        | 1515.7876 | 758.3974         | 1514.8036      | 757.9054         | 14 |
| 5  | 559.2697         | 280.1385        |           |                  |                |                  | G    | <b>1419.7301</b> | 710.3687        | 1402.7035 | 701.8554         | 1401.7195      | 701.3634         | 13 |
| 6  | 630.3068         | 315.6571        |           |                  |                |                  | A    | 1362.7086        | 681.8579        | 1345.6821 | 673.3447         | 1344.6980      | 672.8527         | 12 |
| 7  | 777.3752         | 389.1913        |           |                  |                |                  | F    | <b>1291.6715</b> | 646.3394        | 1274.6449 | 637.8261         | 1273.6609      | 637.3341         | 11 |
| 8  | 834.3967         | 417.7020        |           |                  |                |                  | G    | <b>1144.6031</b> | 572.8052        | 1127.5765 | 564.2919         | 1126.5925      | 563.7999         | 10 |
| 9  | 994.4274         | 497.7173        |           |                  |                |                  | C    | 1087.5816        | 544.2944        | 1070.5551 | 535.7812         | 1069.5710      | 535.2892         | 9  |
| 10 | <b>1107.5114</b> | 554.2593        |           |                  |                |                  | I    | 927.5510         | 464.2791        | 910.5244  | 455.7658         | 909.5404       | 455.2738         | 8  |
| 11 | 1208.5591        | 604.7832        |           |                  | 1190.5485      | 595.7779         | T    | <b>814.4669</b>  | 407.7371        | 797.4403  | 399.2238         | 796.4563       | 398.7318         | 7  |
| 12 | 1305.6119        | 653.3096        |           |                  | 1287.6013      | 644.3043         | P    | <b>713.4192</b>  | 357.2132        | 696.3927  | 348.7000         | 695.4087       | 348.2080         | 6  |
| 13 | 1434.6545        | 717.8309        |           |                  | 1416.6439      | 708.8256         | E    | 616.3665         | 308.6869        | 599.3399  | 300.1736         | 598.3559       | 299.6816         | 5  |
| 14 | <b>1533.7229</b> | 767.3651        |           |                  | 1515.7123      | 758.3598         | V    | 487.3239         | 244.1656        | 470.2973  | 235.6523         |                |                  | 4  |
| 15 | 1646.8069        | 823.9071        |           |                  | 1628.7964      | <b>814.9018</b>  | L    | 388.2554         | 194.6314        | 371.2289  | 186.1181         |                |                  | 3  |
| 16 | <b>1774.8655</b> | 887.9364        | 1757.8390 | 879.4231         | 1756.8549      | 878.9311         | Q    | 275.1714         | 138.0893        | 258.1448  | 129.5761         |                |                  | 2  |
| 17 |                  |                 |           |                  |                |                  | K    | 147.1128         | 74.0600         | 130.0863  | 65.5468          |                |                  | 1  |

AT5G54270.1

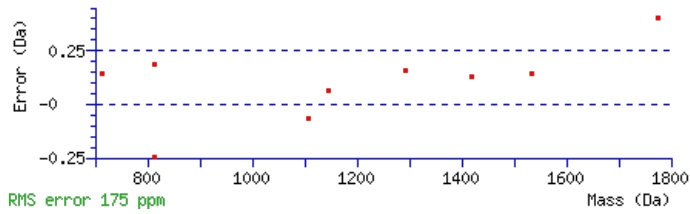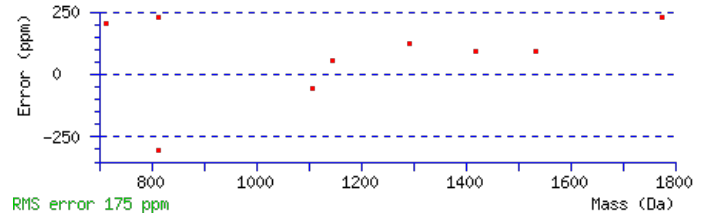

NCBI **BLAST** search of [WAMLGAFGCITPEVLQK](#)  
(Parameters: blastp, nr protein database, expect=20000, no filter, PAM30)  
Other BLAST [web gateways](#)

**All matches to this query**

| Score | Mr(calc)  | Delta   | Sequence                             |
|-------|-----------|---------|--------------------------------------|
| 41.6  | 1919.9638 | 0.0014  | <a href="#">WAMLGAFGCITPEVLQK</a>    |
| 6.1   | 1919.9622 | 0.0029  | <a href="#">SVDRVEQSNELLKEMK</a>     |
| 1.9   | 1919.9662 | -0.0011 | <a href="#">TLMELLNQLDGFNLGK</a>     |
| 1.5   | 1919.9701 | -0.0050 | <a href="#">AASQAWDATTATRTIQK</a>    |
| 1.4   | 1919.9604 | 0.0047  | <a href="#">FHVMFVFALVTDDHVK</a>     |
| 1.3   | 1919.9622 | 0.0029  | <a href="#">RKTGEMLDNTEADVVK</a>     |
| 0.3   | 1919.9661 | -0.0009 | <a href="#">NGGVLTSASRGSKSASAGEK</a> |

Mascot: <http://www.matrixscience.com/>

**Peptide View**MS/MS Fragmentation of **MEEIRVSKR**Found in **AT5G54400.1** in **TAIR\_Arabidopsis**, Symbols: | methyltransferase | chr5:22107906-22109224 FORWARD

Match to Query 4083: 1162.613214 from(582.313883,2+) index(3367)

Title: Elution from: 33.466 to 33.466 scan no 4195 cid35.00 polarity:+

Data file D12h-3\_1.mgf

Click mouse within plot area to zoom in by factor of two about that point

Or,   to  Da Label all possible matches  Label matches used for scoring Show Y-axis 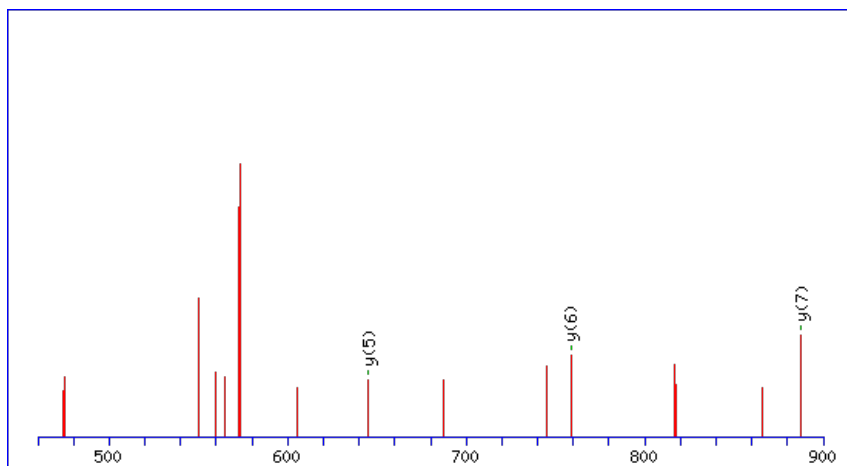**Monoisotopic mass of neutral peptide Mr(calc):** 1162.6128**Fixed modifications:** Carbamidomethyl (C) (apply to specified residues or termini only)**Variable modifications:****M1** : Oxidation (M), with neutral losses 0.0000 (shown in table), 63.9983**Ions Score:** 20 **Expect:** 0.032**Matches** : 3/120 fragment ions using 5 most intense peaks ([help](#))

| # | b        | b <sup>++</sup> | b*       | b <sup>*++</sup> | b <sup>0</sup> | b <sup>0++</sup> | Seq.     | y               | y <sup>++</sup> | y*       | y <sup>*++</sup> | y <sup>0</sup> | y <sup>0++</sup> | # |
|---|----------|-----------------|----------|------------------|----------------|------------------|----------|-----------------|-----------------|----------|------------------|----------------|------------------|---|
| 1 | 148.0427 | 74.5250         |          |                  |                |                  | <b>M</b> |                 |                 |          |                  |                |                  | 9 |
| 2 | 277.0853 | 139.0463        |          |                  | 259.0747       | 130.0410         | <b>E</b> | 1016.5847       | 508.7960        | 999.5582 | 500.2827         | 998.5742       | 499.7907         | 8 |
| 3 | 406.1279 | 203.5676        |          |                  | 388.1173       | 194.5623         | <b>E</b> | <b>887.5421</b> | 444.2747        | 870.5156 | 435.7614         | 869.5316       | 435.2694         | 7 |
| 4 | 519.2119 | 260.1096        |          |                  | 501.2014       | 251.1043         | <b>I</b> | <b>758.4995</b> | 379.7534        | 741.4730 | 371.2401         | 740.4890       | 370.7481         | 6 |
| 5 | 675.3130 | 338.1602        | 658.2865 | 329.6469         | 657.3025       | 329.1549         | <b>R</b> | <b>645.4155</b> | 323.2114        | 628.3889 | 314.6981         | 627.4049       | 314.2061         | 5 |
| 6 | 774.3815 | 387.6944        | 757.3549 | 379.1811         | 756.3709       | 378.6891         | <b>V</b> | 489.3144        | 245.1608        | 472.2878 | 236.6475         | 471.3038       | 236.1555         | 4 |
| 7 | 861.4135 | 431.2104        | 844.3869 | 422.6971         | 843.4029       | 422.2051         | <b>S</b> | 390.2459        | 195.6266        | 373.2194 | 187.1133         | 372.2354       | 186.6213         | 3 |
| 8 | 989.5084 | 495.2579        | 972.4819 | 486.7446         | 971.4979       | 486.2526         | <b>K</b> | 303.2139        | 152.1106        | 286.1874 | 143.5973         |                |                  | 2 |
| 9 |          |                 |          |                  |                |                  | <b>R</b> | 175.1190        | 88.0631         | 158.0924 | 79.5498          |                |                  | 1 |

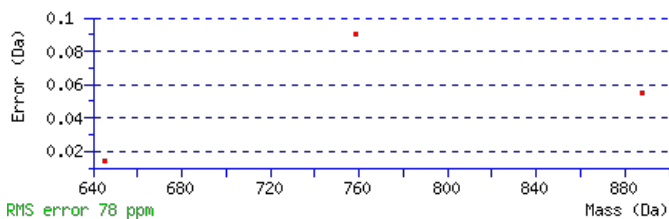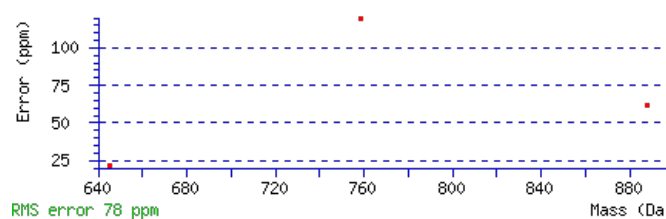NCBI **BLAST** search of **MEEIRVSKR**

(Parameters: blastp, nr protein database, expect=20000, no filter, PAM30)

Other BLAST [web gateways](#)**All matches to this query**

| Score | Mr(calc) | Delta | Sequence |
|-------|----------|-------|----------|
|-------|----------|-------|----------|

# AT5G54400.1

|      |           |        |                            |
|------|-----------|--------|----------------------------|
| 19.7 | 1162.6128 | 0.0004 | <a href="#">MEEIRVSKR</a>  |
| 1.9  | 1162.6128 | 0.0004 | <a href="#">ACSSASIARK</a> |

**Mascot:** <http://www.matrixscience.com/>

**Peptide View**MS/MS Fragmentation of **RVLEEILSR**

Found in **AT5G54510.1** in **TAIR\_Arabidopsis**, Symbols: GH3.6, DFL1 | DFL1/GH3.6 (DWARF IN LIGHT 1); indole-3-acetic acid amido synthetase | chr5:22148547-22150790 REVERSE

Match to Query 3201: 1128.603952 from(565.309252,2+) index(3111)

Title: Elution from: 34.018 to 34.018 scan no 3993 cid35.00 polarity:+

Data file D1d-1\_1.mgf

Click mouse within plot area to zoom in by factor of two about that point

Or,   to  Da

Label all possible matches  Label matches used for scoring

Show Y-axis

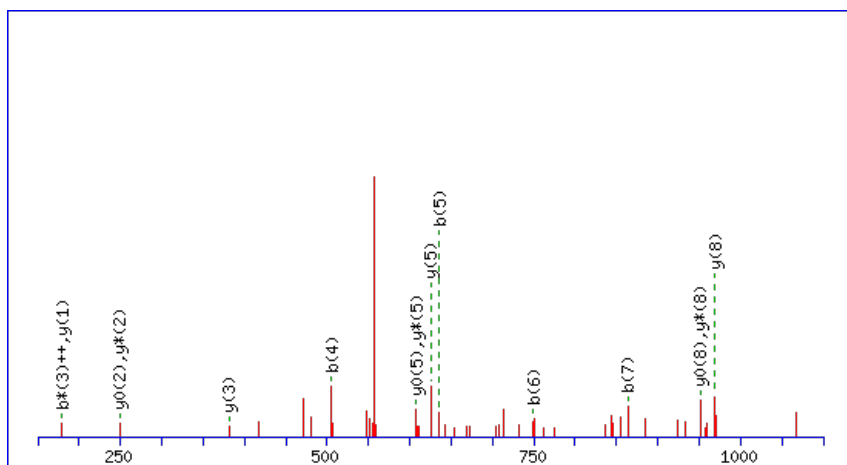

**Monoisotopic mass of neutral peptide Mr(calc):** 1128.6061

**Fixed modifications:** Carbamidomethyl (C) (apply to specified residues or termini only)

**Ions Score:** 31 **Expect:** 0.0047

**Matches:** 16/88 fragment ions using 21 most intense peaks ([help](#))

| # | b        | b <sup>++</sup> | b*       | b <sup>*++</sup> | b <sup>0</sup> | b <sup>0++</sup> | Seq. | y        | y <sup>++</sup> | y*       | y <sup>*++</sup> | y <sup>0</sup> | y <sup>0++</sup> | # |
|---|----------|-----------------|----------|------------------|----------------|------------------|------|----------|-----------------|----------|------------------|----------------|------------------|---|
| 1 | 161.0965 | 81.0519         | 143.0729 | 72.0401          |                |                  | R    |          |                 |          |                  |                |                  | 9 |
| 2 | 261.1620 | 131.0846        | 243.1384 | 122.0728         |                |                  | V    | 969.5242 | 485.2657        | 951.5006 | 476.2539         | 951.5136       | 476.2604         | 8 |
| 3 | 375.2431 | 188.1252        | 357.2195 | 179.1134         |                |                  | L    | 869.4587 | 435.2330        | 851.4351 | 426.2212         | 851.4481       | 426.2277         | 7 |
| 4 | 505.2827 | 253.1450        | 487.2591 | 244.1332         | 487.2721       | 244.1397         | E    | 755.3776 | 378.1924        | 737.3540 | 369.1807         | 737.3670       | 369.1872         | 6 |
| 5 | 635.3223 | 318.1648        | 617.2987 | 309.1530         | 617.3118       | 309.1595         | E    | 625.3380 | 313.1726        | 607.3144 | 304.1608         | 607.3274       | 304.1673         | 5 |
| 6 | 749.4034 | 375.2054        | 731.3798 | 366.1936         | 731.3929       | 366.2001         | I    | 495.2984 | 248.1528        | 477.2748 | 239.1410         | 477.2878       | 239.1475         | 4 |
| 7 | 863.4845 | 432.2459        | 845.4609 | 423.2341         | 845.4740       | 423.2406         | L    | 381.2173 | 191.1123        | 363.1937 | 182.1005         | 363.2067       | 182.1070         | 3 |
| 8 | 951.5136 | 476.2604        | 933.4900 | 467.2486         | 933.5030       | 467.2552         | S    | 267.1362 | 134.0717        | 249.1126 | 125.0599         | 249.1256       | 125.0664         | 2 |
| 9 |          |                 |          |                  |                |                  | R    | 179.1071 | 90.0572         | 161.0835 | 81.0454          |                |                  | 1 |

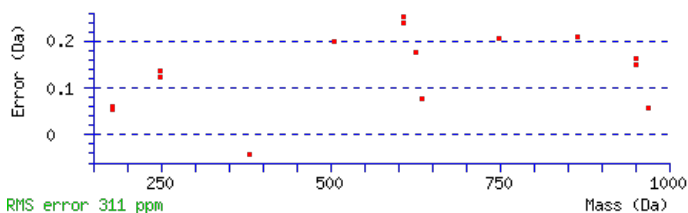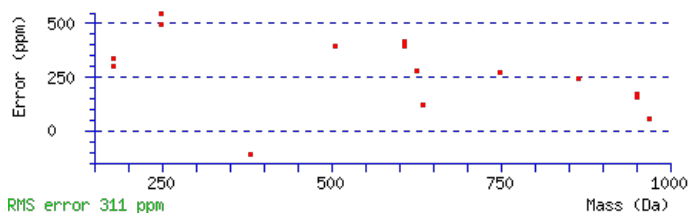

NCBI **BLAST** search of [RVLEEILSR](#)

(Parameters: blastp, nr protein database, expect=20000, no filter, PAM30)

Other BLAST [web gateways](#)

All matches to this query

| Score | Mr(calc) | Delta | Sequence |
|-------|----------|-------|----------|
|       |          |       |          |



## AT5G54510.1

|      |           |         |                             |
|------|-----------|---------|-----------------------------|
| 31.1 | 1128.6061 | -0.0022 | <a href="#">RVLEEILSR</a>   |
| 9.1  | 1128.6061 | -0.0022 | <a href="#">KKLENEVVR</a>   |
| 8.5  | 1128.6061 | -0.0022 | <a href="#">LAQSVKELAR</a>  |
| 7.7  | 1128.6061 | -0.0022 | <a href="#">LRVLEESLR</a>   |
| 5.8  | 1128.6036 | 0.0003  | <a href="#">VFLMAHLKR</a>   |
| 5.7  | 1128.6061 | -0.0022 | <a href="#">GEIPTKKVSR</a>  |
| 2.4  | 1128.6061 | -0.0022 | <a href="#">DRLISLIER</a>   |
| 1.5  | 1128.6061 | -0.0022 | <a href="#">LLKEQEAKR</a>   |
| 1.1  | 1128.6061 | -0.0022 | <a href="#">AVNVLSVGSIR</a> |
| 0.8  | 1128.6061 | -0.0022 | <a href="#">ASQGLKLEIR</a>  |

Mascot: <http://www.matrixscience.com/>

**Peptide View**MS/MS Fragmentation of **YATLEDSAK**

Found in **AT5G54580.1** in **TAIR\_Arabidopsis**, Symbols: | RNA recognition motif (RRM)-containing protein | chr5:22188558-22189882  
FORWARD

Match to Query 2158: 996.478538 from(499.246545,2+) index(3588)

Title: Elution from: 37.359 to 37.359 scan no 4610 cid35.00 polarity:+

Data file D12h-2\_1.mgf

Click mouse within plot area to zoom in by factor of two about that point

Or,   to  Da

Label all possible matches  Label matches used for scoring

Show Y-axis

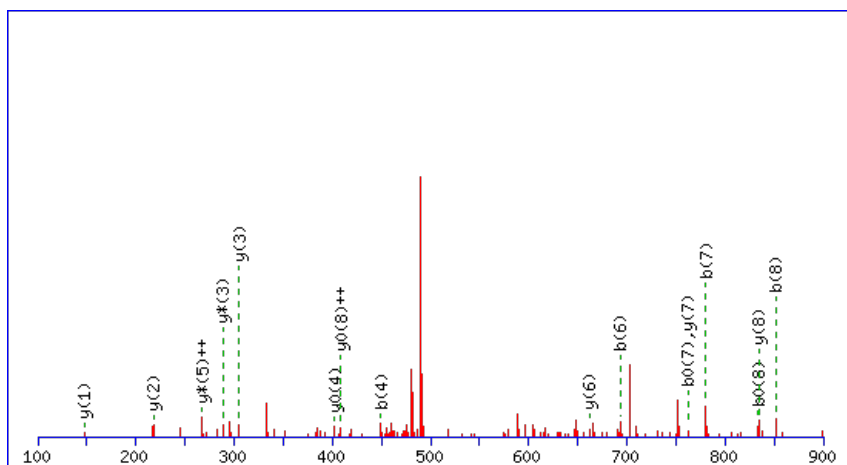

Monoisotopic mass of neutral peptide  $M_r(\text{calc})$ : 996.4764

Fixed modifications: Carbamidomethyl (C) (apply to specified residues or termini only)

Ions Score: 21 Expect: 0.019

Matches : 16/72 fragment ions using 56 most intense peaks ([help](#))

| # | b               | b <sup>++</sup> | b <sup>0</sup>  | b <sup>0++</sup> | Seq. | y               | y <sup>++</sup> | y*              | y <sup>*++</sup> | y <sup>0</sup>  | y <sup>0++</sup> | # |
|---|-----------------|-----------------|-----------------|------------------|------|-----------------|-----------------|-----------------|------------------|-----------------|------------------|---|
| 1 | 164.0706        | 82.5389         |                 |                  | Y    |                 |                 |                 |                  |                 |                  | 9 |
| 2 | 235.1077        | 118.0575        |                 |                  | A    | <b>834.4203</b> | 417.7138        | 817.3938        | 409.2005         | 816.4098        | <b>408.7085</b>  | 8 |
| 3 | 336.1554        | 168.5813        | 318.1448        | 159.5761         | T    | <b>763.3832</b> | 382.1953        | 746.3567        | 373.6820         | 745.3727        | 373.1900         | 7 |
| 4 | <b>449.2395</b> | 225.1234        | 431.2289        | 216.1181         | L    | <b>662.3355</b> | 331.6714        | 645.3090        | 323.1581         | 644.3250        | 322.6661         | 6 |
| 5 | 578.2821        | 289.6447        | 560.2715        | 280.6394         | E    | 549.2515        | 275.1294        | 532.2249        | <b>266.6161</b>  | 531.2409        | 266.1241         | 5 |
| 6 | <b>693.3090</b> | 347.1581        | 675.2984        | 338.1529         | D    | 420.2089        | 210.6081        | 403.1823        | 202.0948         | <b>402.1983</b> | 201.6028         | 4 |
| 7 | <b>780.3410</b> | 390.6742        | <b>762.3305</b> | 381.6689         | S    | <b>305.1819</b> | 153.0946        | <b>288.1554</b> | 144.5813         | 287.1714        | 144.0893         | 3 |
| 8 | <b>851.3781</b> | 426.1927        | <b>833.3676</b> | 417.1874         | A    | <b>218.1499</b> | 109.5786        | 201.1234        | 101.0653         |                 |                  | 2 |
| 9 |                 |                 |                 |                  | K    | <b>147.1128</b> | 74.0600         | 130.0863        | 65.5468          |                 |                  | 1 |

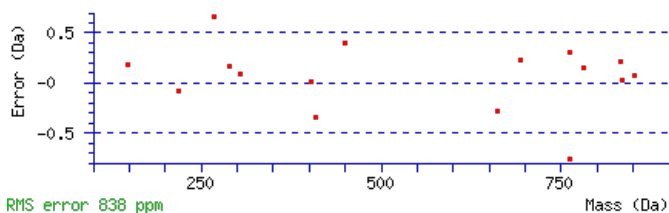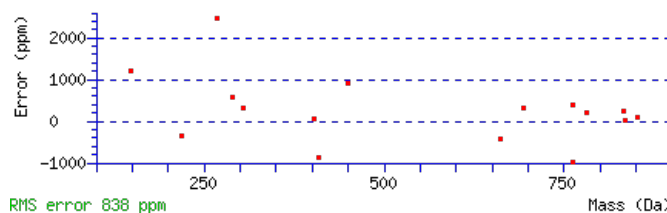

NCBI **BLAST** search of **YATLEDSAK**

(Parameters: blastp, nr protein database, expect=20000, no filter, PAM30)

Other BLAST [web gateways](#)

All matches to this query

| Score | $M_r(\text{calc})$ | Delta | Sequence |
|-------|--------------------|-------|----------|
|       |                    |       |          |

## AT5G54580.1

|      |          |         |                           |
|------|----------|---------|---------------------------|
| 20.8 | 996.4764 | 0.0022  | <a href="#">YATLEDSAK</a> |
| 8.6  | 996.4811 | -0.0026 | <a href="#">GSSCGFRVK</a> |
| 4.8  | 996.4811 | -0.0025 | <a href="#">RMREDFK</a>   |
| 1.7  | 996.4811 | -0.0025 | <a href="#">SHHKETMK</a>  |
| 0.2  | 996.4763 | 0.0022  | <a href="#">LAEESYAK</a>  |

**Mascot:** <http://www.matrixscience.com/>

**Peptide View**MS/MS Fragmentation of **TGELIDTIEK**Found in **AT5G54600.1** in **TAIR\_Arabidopsis**, Symbols: | 50S ribosomal protein L24, chloroplast (CL24) | chr5:22200272-22201629 FORWARD

Match to Query 3594: 1117.583920 from(559.799236,2+) index(4740)

Title: Elution from: 42.531 to 42.531 scan no 5900 cid35.00 polarity:+

Data file C7-1\_1.mgf

Click mouse within plot area to zoom in by factor of two about that point

Or,   to  Da Label all possible matches  Label matches used for scoring Show Y-axis 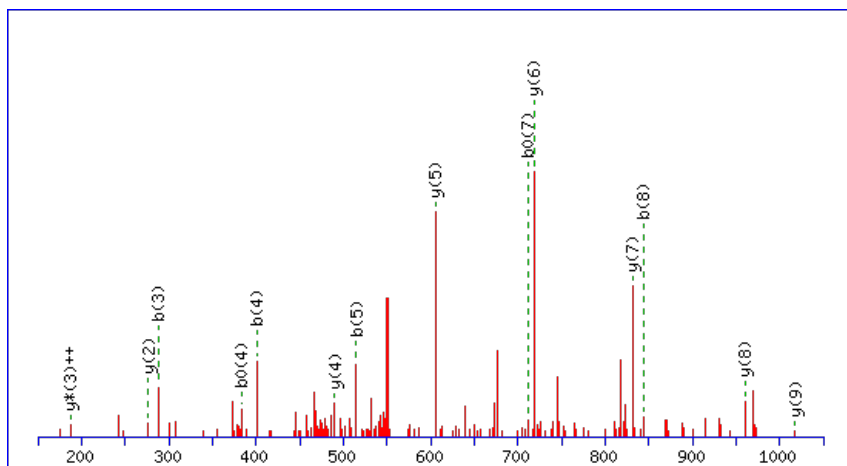Monoisotopic mass of neutral peptide **Mr(calc)**: 1117.5867**Fixed modifications**: Carbamidomethyl (C) (apply to specified residues or termini only)**Ions Score**: 32 **Expect**: 0.0015**Matches** : 14/88 fragment ions using 40 most intense peaks ([help](#))

| #  | b               | b <sup>++</sup> | b <sup>0</sup>  | b <sup>0++</sup> | Seq. | y                | y <sup>++</sup> | y <sup>*</sup> | y <sup>++*</sup> | y <sup>0</sup> | y <sup>0++</sup> | #  |
|----|-----------------|-----------------|-----------------|------------------|------|------------------|-----------------|----------------|------------------|----------------|------------------|----|
| 1  | 102.0550        | 51.5311         | 84.0444         | 42.5258          | T    |                  |                 |                |                  |                |                  | 10 |
| 2  | 159.0764        | 80.0418         | 141.0659        | 71.0366          | G    | <b>1017.5463</b> | 509.2768        | 1000.5197      | 500.7635         | 999.5357       | 500.2715         | 9  |
| 3  | <b>288.1190</b> | 144.5631        | 270.1084        | 135.5579         | E    | <b>960.5248</b>  | 480.7660        | 943.4983       | 472.2528         | 942.5142       | 471.7608         | 8  |
| 4  | <b>401.2031</b> | 201.1052        | <b>383.1925</b> | 192.0999         | L    | <b>831.4822</b>  | 416.2447        | 814.4557       | 407.7315         | 813.4716       | 407.2395         | 7  |
| 5  | <b>514.2871</b> | 257.6472        | 496.2766        | 248.6419         | I    | <b>718.3981</b>  | 359.7027        | 701.3716       | 351.1894         | 700.3876       | 350.6974         | 6  |
| 6  | 629.3141        | 315.1607        | 611.3035        | 306.1554         | D    | <b>605.3141</b>  | 303.1607        | 588.2875       | 294.6474         | 587.3035       | 294.1554         | 5  |
| 7  | 730.3618        | 365.6845        | <b>712.3512</b> | 356.6792         | T    | <b>490.2871</b>  | 245.6472        | 473.2606       | 237.1339         | 472.2766       | 236.6419         | 4  |
| 8  | <b>843.4458</b> | 422.2266        | 825.4353        | 413.2213         | I    | 389.2395         | 195.1234        | 372.2129       | <b>186.6101</b>  | 371.2289       | 186.1181         | 3  |
| 9  | 972.4884        | 486.7478        | 954.4779        | 477.7426         | E    | <b>276.1554</b>  | 138.5813        | 259.1288       | 130.0681         | 258.1448       | 129.5761         | 2  |
| 10 |                 |                 |                 |                  | K    | 147.1128         | 74.0600         | 130.0863       | 65.5468          |                |                  | 1  |

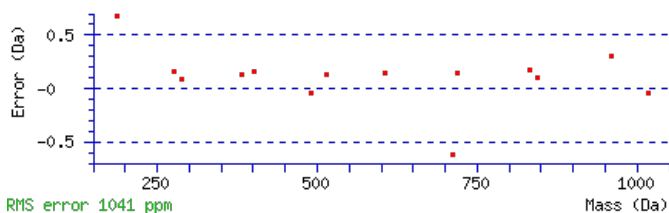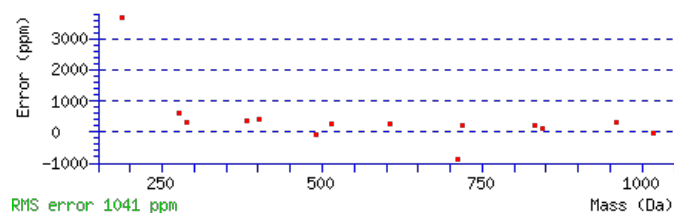NCBI **BLAST** search of **TGELIDTIEK**

(Parameters: blastp, nr protein database, expect=20000, no filter, PAM30)

Other BLAST [web gateways](#)**All matches to this query**

| Score | Mr(calc) | Delta | Sequence |
|-------|----------|-------|----------|
|       |          |       |          |

## AT5G54600.1

|      |           |         |                              |
|------|-----------|---------|------------------------------|
| 32.4 | 1117.5867 | -0.0027 | <a href="#">TGELIDTIEK</a>   |
| 2.7  | 1117.5840 | -0.0000 | <a href="#">ATKSGGANGSIR</a> |
| 2.3  | 1117.5840 | -0.0001 | <a href="#">SAVSGEGRVTR</a>  |

**Mascot:** <http://www.matrixscience.com/>

**Peptide View**MS/MS Fragmentation of **GGSSVIVANNK**Found in **AT5G54690.1** in **TAIR\_Arabidopsis**, Symbols: GAUT12, LGT6, IRX8 | GAUT12/IRX8/LGT6

(GALACTURONOSYLTRANSFERASE 12); polygalacturonate 4-alpha-galacturonosyltransferase/ transferase, transferring glycosyl groups / transférase, transferring hexosyl groups | chr5:22236661-22238995 REVERS

Match to Query 3179: 1058.516292 from(530.265422,2+) index(5177)

Title: Elution from: 46.668 to 46.668 scan no 6479 cid35.00 polarity:+

Data file C7-2\_1.mgf

Click mouse within plot area to zoom in by factor of two about that point

Or,   to  Da Label all possible matches  Label matches used for scoring Show Y-axis 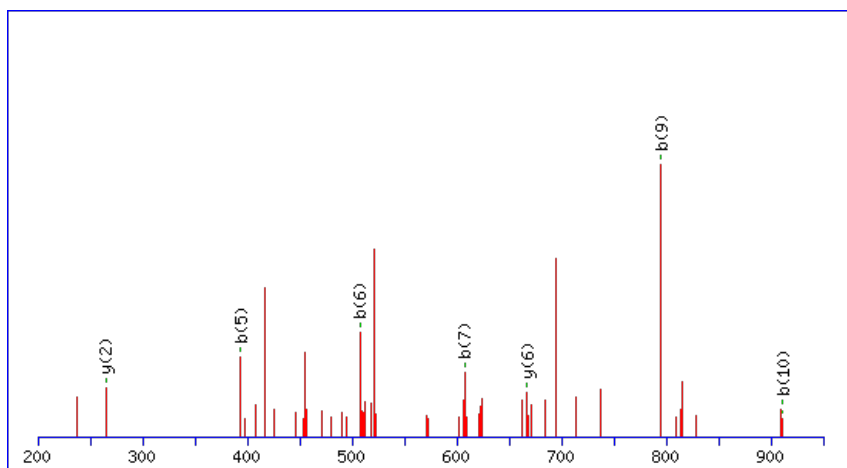Monoisotopic mass of neutral peptide  $M_r(\text{calc})$ : 1058.5149

Fixed modifications: Carbamidomethyl (C) (apply to specified residues or termini only)

Ions Score: 28 Expect: 0.019

Matches : 7/86 fragment ions using 19 most intense peaks ([help](#))

| #  | b               | b <sup>++</sup> | b*       | b <sup>*++</sup> | b <sup>0</sup> | b <sup>0++</sup> | Seq. | y               | y <sup>++</sup> | y*       | y <sup>*++</sup> | y <sup>0</sup> | y <sup>0++</sup> | #  |
|----|-----------------|-----------------|----------|------------------|----------------|------------------|------|-----------------|-----------------|----------|------------------|----------------|------------------|----|
| 1  | 59.0258         | 30.0165         |          |                  |                |                  | G    |                 |                 |          |                  |                |                  | 11 |
| 2  | 117.0443        | 59.0258         |          |                  |                |                  | G    | 1001.5036       | 501.2555        | 983.4801 | 492.2437         | 983.4931       | 492.2502         | 10 |
| 3  | 205.0733        | 103.0403        |          |                  | 187.0628       | 94.0350          | S    | 943.4851        | 472.2462        | 925.4616 | 463.2344         | 925.4746       | 463.2409         | 9  |
| 4  | 293.1024        | 147.0548        |          |                  | 275.0918       | 138.0496         | S    | 855.4561        | 428.2317        | 837.4325 | 419.2199         | 837.4455       | 419.2264         | 8  |
| 5  | <b>393.1678</b> | 197.0876        |          |                  | 375.1573       | 188.0823         | V    | 767.4270        | 384.2171        | 749.4034 | 375.2054         |                |                  | 7  |
| 6  | <b>507.2489</b> | 254.1281        |          |                  | 489.2384       | 245.1228         | I    | <b>667.3616</b> | 334.1844        | 649.3380 | 325.1726         |                |                  | 6  |
| 7  | <b>607.3144</b> | 304.1608        |          |                  | 589.3038       | 295.1556         | V    | 553.2805        | 277.1439        | 535.2569 | 268.1321         |                |                  | 5  |
| 8  | 679.3485        | 340.1779        |          |                  | 661.3380       | 331.1726         | A    | 453.2150        | 227.1111        | 435.1914 | 218.0994         |                |                  | 4  |
| 9  | <b>795.3855</b> | 398.1964        | 777.3620 | 389.1846         | 777.3750       | 389.1911         | N    | 381.1809        | 191.0941        | 363.1573 | 182.0823         |                |                  | 3  |
| 10 | <b>911.4225</b> | 456.2149        | 893.3990 | 447.2031         | 893.4120       | 447.2096         | N    | <b>265.1439</b> | 133.0756        | 247.1203 | 124.0638         |                |                  | 2  |
| 11 |                 |                 |          |                  |                |                  | K    | 149.1069        | 75.0571         | 131.0833 | 66.0453          |                |                  | 1  |

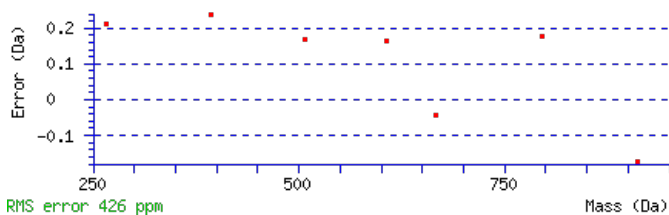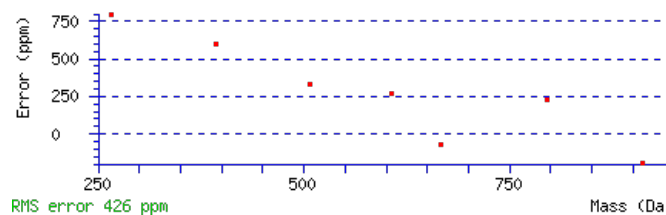NCBI **BLAST** search of **GGSSVIVANNK**

(Parameters: blastp, nr protein database, expect=20000, no filter, PAM30)

Other BLAST [web gateways](#)

AT5G54690.1

All matches to this query

| Score | Mr(calc)  | Delta   | Sequence                    |
|-------|-----------|---------|-----------------------------|
| 28.0  | 1058.5149 | 0.0014  | <a href="#">GGSSVIVANNK</a> |
| 23.3  | 1058.5171 | -0.0008 | <a href="#">VYGLDINPR</a>   |
| 12.7  | 1058.5171 | -0.0008 | <a href="#">YDGLVIPGGR</a>  |
| 10.4  | 1058.5178 | -0.0015 | <a href="#">IMEIASLEK</a>   |
| 7.4   | 1058.5148 | 0.0014  | <a href="#">ELEVQGRSK</a>   |
| 7.3   | 1058.5149 | 0.0014  | <a href="#">LENSLARDK</a>   |
| 6.2   | 1058.5149 | 0.0014  | <a href="#">KDKENLNGK</a>   |
| 4.0   | 1058.5149 | 0.0014  | <a href="#">ANRDSIIEK</a>   |
| 3.5   | 1058.5171 | -0.0008 | <a href="#">FGLGDKPANK</a>  |
| 1.9   | 1058.5149 | 0.0014  | <a href="#">ELSRNGIEK</a>   |

Mascot: <http://www.matrixscience.com/>

## Peptide View

MS/MS Fragmentation of **SIGMIDHVPGMK**Found in **AT5G54770.1** in **TAIR\_Arabidopsis**, Symbols: TZ, THI1 | THI1 (THIAZOLE REQUIRING) | chr5:22263860-22265117 FORWARD

Match to Query 5018: 1283.636322 from(642.825437,2+) index(5510)

Title: Elution from: 48.608 to 48.608 scan no 6904 cid35.00 polarity:+

Data file D6h-1\_1.mgf

Click mouse within plot area to zoom in by factor of two about that point

Or,  to  Da Label all possible matches  Label matches used for scoring Show Y-axis 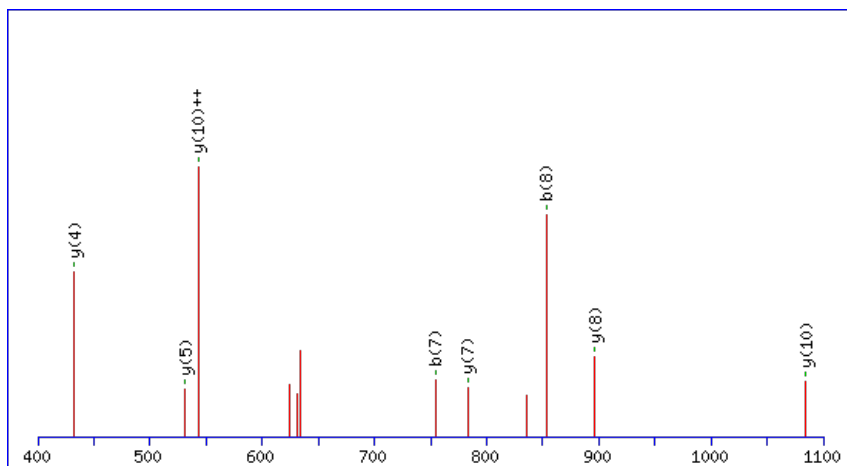Monoisotopic mass of neutral peptide  $M_r(\text{calc})$ : 1283.6366

Fixed modifications: Carbamidomethyl (C) (apply to specified residues or termini only)

Ions Score: 45 Expect: 0.0001

Matches : 8/98 fragment ions using 11 most intense peaks ([help](#))

| #  | b         | b <sup>++</sup> | b <sup>0</sup> | b <sup>0++</sup> | Seq. | y         | y <sup>++</sup> | y*        | y <sup>*++</sup> | y <sup>0</sup> | y <sup>0++</sup> | #  |
|----|-----------|-----------------|----------------|------------------|------|-----------|-----------------|-----------|------------------|----------------|------------------|----|
| 1  | 88.0393   | 44.5233         | 70.0287        | 35.5180          | S    |           |                 |           |                  |                |                  | 12 |
| 2  | 201.1234  | 101.0653        | 183.1128       | 92.0600          | I    | 1197.6119 | 599.3096        | 1180.5853 | 590.7963         | 1179.6013      | 590.3043         | 11 |
| 3  | 258.1448  | 129.5761        | 240.1343       | 120.5708         | G    | 1084.5278 | 542.7675        | 1067.5013 | 534.2543         | 1066.5172      | 533.7623         | 10 |
| 4  | 389.1853  | 195.0963        | 371.1748       | 186.0910         | M    | 1027.5063 | 514.2568        | 1010.4798 | 505.7435         | 1009.4958      | 505.2515         | 9  |
| 5  | 502.2694  | 251.6383        | 484.2588       | 242.6330         | I    | 896.4659  | 448.7366        | 879.4393  | 440.2233         | 878.4553       | 439.7313         | 8  |
| 6  | 617.2963  | 309.1518        | 599.2858       | 300.1465         | D    | 783.3818  | 392.1945        | 766.3552  | 383.6813         | 765.3712       | 383.1892         | 7  |
| 7  | 754.3552  | 377.6813        | 736.3447       | 368.6760         | H    | 668.3548  | 334.6811        | 651.3283  | 326.1678         |                |                  | 6  |
| 8  | 853.4236  | 427.2155        | 835.4131       | 418.2102         | V    | 531.2959  | 266.1516        | 514.2694  | 257.6383         |                |                  | 5  |
| 9  | 950.4764  | 475.7418        | 932.4658       | 466.7366         | P    | 432.2275  | 216.6174        | 415.2010  | 208.1041         |                |                  | 4  |
| 10 | 1007.4979 | 504.2526        | 989.4873       | 495.2473         | G    | 335.1748  | 168.0910        | 318.1482  | 159.5777         |                |                  | 3  |
| 11 | 1138.5384 | 569.7728        | 1120.5278      | 560.7675         | M    | 278.1533  | 139.5803        | 261.1267  | 131.0670         |                |                  | 2  |
| 12 |           |                 |                |                  | K    | 147.1128  | 74.0600         | 130.0863  | 65.5468          |                |                  | 1  |

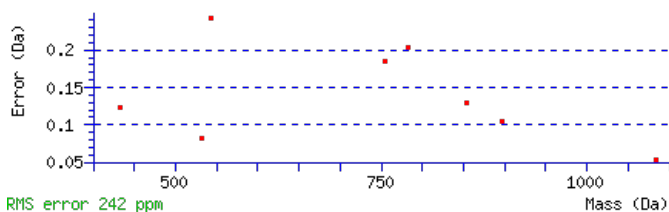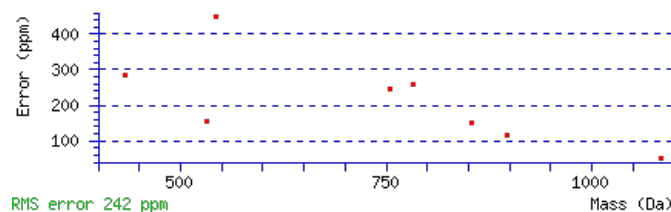NCBI BLAST search of **SIGMIDHVPGMK**

(Parameters: blastp, nr protein database, expect=20000, no filter, PAM30)

Other BLAST [web gateways](#)

All matches to this query



AT5G54770.1

| Score | Mr(calc)  | Delta   | Sequence                     |
|-------|-----------|---------|------------------------------|
| 45.5  | 1283.6366 | -0.0003 | <a href="#">SIGMIDHVPGMK</a> |
| 0.5   | 1283.6357 | 0.0006  | <a href="#">NSFTSNSTSVLK</a> |

Mascot: <http://www.matrixscience.com/>

**Peptide View**MS/MS Fragmentation of **MIGVEAAGFLDSGK**Found in **AT5G54810.1** in **TAIR Arabidopsis**, Symbols: TRPB, TRP2, TSB1 | TSB1 (TRYPTOPHAN SYNTHASE BETA-SUBUNIT) | chr5:22282031-22283964 REVERSE

Match to Query 5996: 1466.664412 from(734.339482,2+) index(7135)

Title: Elution from: 63.932 to 63.932 scan no 9339 cid35.00 polarity:+

Data file 0-1\_2.mgf

Click mouse within plot area to zoom in by factor of two about that point

Or,  to  Da Label all possible matches  Label matches used for scoring Show Y-axis 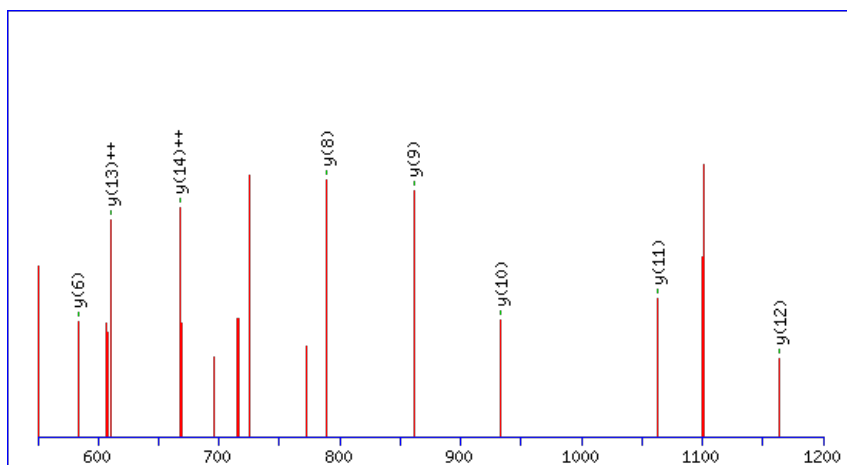

Monoisotopic mass of neutral peptide Mr(calc): 1466.6651

Fixed modifications: Carbamidomethyl (C) (apply to specified residues or termini only)

Ions Score: 39 Expect: 0.0012

Matches : 8/128 fragment ions using 14 most intense peaks ([help](#))

| #  | b         | b <sup>++</sup> | b <sup>0</sup> | b <sup>0++</sup> | Seq. | y         | y <sup>++</sup> | y*        | y <sup>*++</sup> | y <sup>0</sup> | y <sup>0++</sup> | #  |
|----|-----------|-----------------|----------------|------------------|------|-----------|-----------------|-----------|------------------|----------------|------------------|----|
| 1  | 133.0448  | 67.0260         |                |                  | M    |           |                 |           |                  |                |                  | 15 |
| 2  | 247.1259  | 124.0666        |                |                  | I    | 1335.6349 | 668.3211        | 1317.6113 | 659.3093         | 1317.6244      | 659.3158         | 14 |
| 3  | 305.1444  | 153.0758        |                |                  | G    | 1221.5538 | 611.2806        | 1203.5302 | 602.2688         | 1203.5433      | 602.2753         | 13 |
| 4  | 405.2098  | 203.1086        |                |                  | V    | 1163.5353 | 582.2713        | 1145.5118 | 573.2595         | 1145.5248      | 573.2660         | 12 |
| 5  | 535.2495  | 268.1284        | 517.2389       | 259.1231         | E    | 1063.4699 | 532.2386        | 1045.4463 | 523.2268         | 1045.4593      | 523.2333         | 11 |
| 6  | 607.2836  | 304.1454        | 589.2731       | 295.1402         | A    | 933.4303  | 467.2188        | 915.4067  | 458.2070         | 915.4197       | 458.2135         | 10 |
| 7  | 679.3178  | 340.1625        | 661.3072       | 331.1572         | A    | 861.3961  | 431.2017        | 843.3725  | 422.1899         | 843.3855       | 422.1964         | 9  |
| 8  | 737.3363  | 369.1718        | 719.3257       | 360.1665         | G    | 789.3620  | 395.1846        | 771.3384  | 386.1728         | 771.3514       | 386.1793         | 8  |
| 9  | 885.4017  | 443.2045        | 867.3912       | 434.1992         | F    | 731.3435  | 366.1754        | 713.3199  | 357.1636         | 713.3329       | 357.1701         | 7  |
| 10 | 943.4202  | 472.2137        | 925.4097       | 463.2085         | G    | 583.2780  | 292.1426        | 565.2544  | 283.1309         | 565.2674       | 283.1374         | 6  |
| 11 | 1057.5013 | 529.2543        | 1039.4907      | 520.2490         | L    | 525.2595  | 263.1334        | 507.2359  | 254.1216         | 507.2489       | 254.1281         | 5  |
| 12 | 1173.5253 | 587.2663        | 1155.5147      | 578.2610         | D    | 411.1784  | 206.0928        | 393.1548  | 197.0811         | 393.1678       | 197.0876         | 4  |
| 13 | 1261.5544 | 631.2808        | 1243.5438      | 622.2755         | S    | 295.1544  | 148.0809        | 277.1309  | 139.0691         | 277.1439       | 139.0756         | 3  |
| 14 | 1319.5729 | 660.2901        | 1301.5623      | 651.2848         | G    | 207.1254  | 104.0663        | 189.1018  | 95.0545          |                |                  | 2  |
| 15 |           |                 |                |                  | K    | 149.1069  | 75.0571         | 131.0833  | 66.0453          |                |                  | 1  |

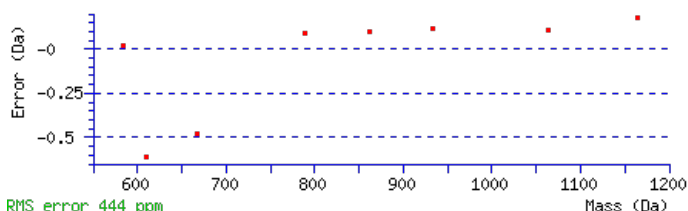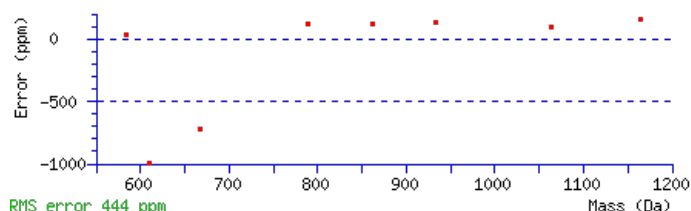

## AT5G54810.1

NCBI **BLAST** search of [MIGVEAAGFGLDSGK](#)

(Parameters: blastp, nr protein database, expect=20000, no filter, PAM30)

Other BLAST [web gateways](#)

### All matches to this query

| Score | Mr(calc)  | Delta   | Sequence                        |
|-------|-----------|---------|---------------------------------|
| 38.9  | 1466.6651 | -0.0007 | <a href="#">MIGVEAAGFGLDSGK</a> |
| 2.4   | 1466.6656 | -0.0012 | <a href="#">GOASAKDGVVVMNR</a>  |
| 0.9   | 1466.6671 | -0.0027 | <a href="#">YHKAVHRTYDR</a>     |
| 0.5   | 1466.6685 | -0.0041 | <a href="#">MGLSNMDVEALKK</a>   |

Mascot: <http://www.matrixscience.com/>

## Peptide View

MS/MS Fragmentation of **L** **T** **G** **S** **E** **G** **Y** **G** **F** **I** **E** **F** **V** **S** **H** **S** **V** **A** **E** **R**

Found in **AT5G54900.1** in **TAIR\_Arabidopsis**, Symbols: ATRBP45A | ATRBP45A (RNA-BINDING PROTEIN 45A); RNA binding | chr5:22312638-22315352 FORWARD

Match to Query 10164: 2312.101698 from(771.707842,3+) index(9724)

Title: Elution from: 88.019 to 88.019 scan no 13341 cid35.00 polarity:+

Data file D6h-3\_2.mgf

Click mouse within plot area to zoom in by factor of two about that point

Or,   to  Da

Label all possible matches  Label matches used for scoring

Show Y-axis

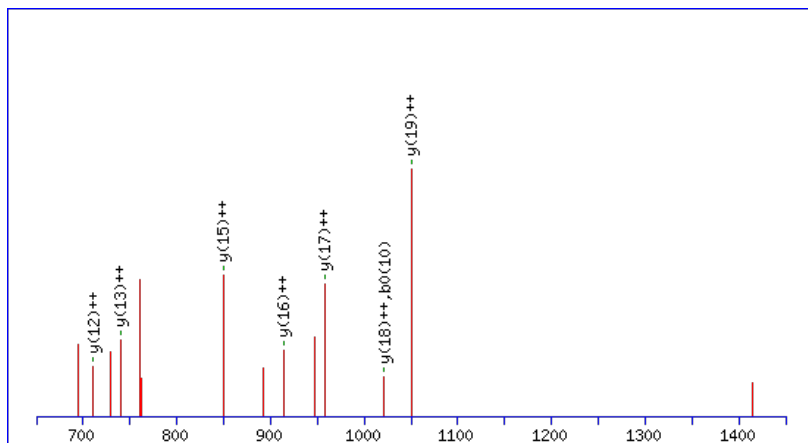

Monoisotopic mass of neutral peptide  $M_r(\text{calc})$ : 2312.1073

Fixed modifications: Carbamidomethyl (C) (apply to specified residues or termini only)

Ions Score: 36 Expect: 0.00079

Matches : 8/230 fragment ions using 15 most intense peaks ([help](#))

| #                  | b         | b <sup>++</sup> | b <sup>*</sup> | b <sup>*++</sup> | b <sup>0</sup>            | b <sup>0++</sup> | Seq      | y         | y <sup>++</sup>           | y <sup>*</sup> | y <sup>*++</sup> | y <sup>0</sup> | y <sup>0++</sup> | #                  |
|--------------------|-----------|-----------------|----------------|------------------|---------------------------|------------------|----------|-----------|---------------------------|----------------|------------------|----------------|------------------|--------------------|
| <a href="#">1</a>  | 114.0913  | 57.5493         |                |                  |                           |                  | <b>L</b> |           |                           |                |                  |                |                  | <a href="#">21</a> |
| <a href="#">2</a>  | 215.1390  | 108.0731        |                |                  | 197.1285                  | 99.0679          | <b>T</b> | 2200.0305 | 1100.5189                 | 2183.0040      | 1092.0056        | 2182.0200      | 1091.5136        | <a href="#">20</a> |
| <a href="#">3</a>  | 272.1605  | 136.5839        |                |                  | 254.1499                  | 127.5786         | <b>G</b> | 2098.9829 | <a href="#">1049.9951</a> | 2081.9563      | 1041.4818        | 2080.9723      | 1040.9898        | <a href="#">19</a> |
| <a href="#">4</a>  | 400.2191  | 200.6132        | 383.1925       | 192.0999         | 382.2085                  | 191.6079         | <b>Q</b> | 2041.9614 | <a href="#">1021.4843</a> | 2024.9348      | 1012.9711        | 2023.9508      | 1012.4791        | <a href="#">18</a> |
| <a href="#">5</a>  | 487.2511  | 244.1292        | 470.2245       | 235.6159         | 469.2405                  | 235.1239         | <b>S</b> | 1913.9028 | <a href="#">957.4550</a>  | 1896.8763      | 948.9418         | 1895.8923      | 948.4498         | <a href="#">17</a> |
| <a href="#">6</a>  | 616.2937  | 308.6505        | 599.2671       | 300.1372         | 598.2831                  | 299.6452         | <b>E</b> | 1826.8708 | <a href="#">913.9390</a>  | 1809.8442      | 905.4258         | 1808.8602      | 904.9338         | <a href="#">16</a> |
| <a href="#">7</a>  | 673.3151  | 337.1612        | 656.2886       | 328.6479         | 655.3046                  | 328.1559         | <b>G</b> | 1697.8282 | <a href="#">849.4177</a>  | 1680.8016      | 840.9045         | 1679.8176      | 840.4125         | <a href="#">15</a> |
| <a href="#">8</a>  | 836.3785  | 418.6929        | 819.3519       | 410.1796         | 818.3679                  | 409.6876         | <b>Y</b> | 1640.8067 | 820.9070                  | 1623.7802      | 812.3937         | 1622.7962      | 811.9017         | <a href="#">14</a> |
| <a href="#">9</a>  | 893.3999  | 447.2036        | 876.3734       | 438.6903         | 875.3894                  | 438.1983         | <b>G</b> | 1477.7434 | <a href="#">739.3753</a>  | 1460.7169      | 730.8621         | 1459.7328      | 730.3701         | <a href="#">13</a> |
| <a href="#">10</a> | 1040.4684 | 520.7378        | 1023.4418      | 512.2245         | <a href="#">1022.4578</a> | 511.7325         | <b>F</b> | 1420.7219 | <a href="#">710.8646</a>  | 1403.6954      | 702.3513         | 1402.7114      | 701.8593         | <a href="#">12</a> |
| <a href="#">11</a> | 1153.5524 | 577.2798        | 1136.5259      | 568.7666         | 1135.5419                 | 568.2746         | <b>I</b> | 1273.6535 | 637.3304                  | 1256.6270      | 628.8171         | 1255.6430      | 628.3251         | <a href="#">11</a> |
| <a href="#">12</a> | 1282.5950 | 641.8011        | 1265.5685      | 633.2879         | 1264.5844                 | 632.7959         | <b>E</b> | 1160.5695 | 580.7884                  | 1143.5429      | 572.2751         | 1142.5589      | 571.7831         | <a href="#">10</a> |
| <a href="#">13</a> | 1429.6634 | 715.3354        | 1412.6369      | 706.8221         | 1411.6529                 | 706.3301         | <b>F</b> | 1031.5269 | 516.2671                  | 1014.5003      | 507.7538         | 1013.5163      | 507.2618         | <a href="#">9</a>  |
| <a href="#">14</a> | 1528.7318 | 764.8696        | 1511.7053      | 756.3563         | 1510.7213                 | 755.8643         | <b>V</b> | 884.4585  | 442.7329                  | 867.4319       | 434.2196         | 866.4479       | 433.7276         | <a href="#">8</a>  |
| <a href="#">15</a> | 1615.7639 | 808.3856        | 1598.7373      | 799.8723         | 1597.7533                 | 799.3803         | <b>S</b> | 785.3900  | 393.1987                  | 768.3635       | 384.6854         | 767.3795       | 384.1934         | <a href="#">7</a>  |
| <a href="#">16</a> | 1752.8228 | 876.9150        | 1735.7962      | 868.4018         | 1734.8122                 | 867.9097         | <b>H</b> | 698.3580  | 349.6826                  | 681.3315       | 341.1694         | 680.3474       | 340.6774         | <a href="#">6</a>  |
| <a href="#">17</a> | 1839.8548 | 920.4310        | 1822.8283      | 911.9178         | 1821.8442                 | 911.4258         | <b>S</b> | 561.2991  | 281.1532                  | 544.2726       | 272.6399         | 543.2885       | 272.1479         | <a href="#">5</a>  |
| <a href="#">18</a> | 1938.9232 | 969.9652        | 1921.8967      | 961.4520         | 1920.9127                 | 960.9600         | <b>V</b> | 474.2671  | 237.6372                  | 457.2405       | 229.1239         | 456.2565       | 228.6319         | <a href="#">4</a>  |
| <a href="#">19</a> | 2009.9603 | 1005.4838       | 1992.9338      | 996.9705         | 1991.9498                 | 996.4785         | <b>A</b> | 375.1987  | 188.1030                  | 358.1721       | 179.5897         | 357.1881       | 179.0977         | <a href="#">3</a>  |
| <a href="#">20</a> | 2139.0029 | 1070.0051       | 2121.9764      | 1061.4918        | 2120.9924                 | 1060.9998        | <b>E</b> | 304.1615  | 152.5844                  | 287.1350       | 144.0711         | 286.1510       | 143.5791         | <a href="#">2</a>  |
| <a href="#">21</a> |           |                 |                |                  |                           |                  | <b>R</b> | 175.1190  | 88.0631                   | 158.0924       | 79.5498          |                |                  | <a href="#">1</a>  |

# AT5G54900.1

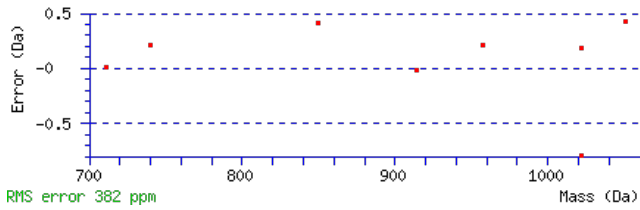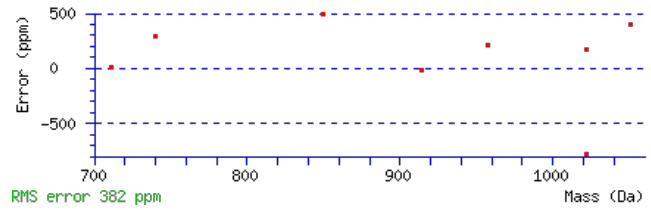

NCBI **BLAST** search of [LTGQSEGYGFIEFVSHSVAER](#)  
(Parameters: blastp, nr protein database, expect=20000, no filter, PAM30)  
Other BLAST [web gateways](#)

## All matches to this query

| Score | Mr(calc)  | Delta   | Sequence                              |
|-------|-----------|---------|---------------------------------------|
| 35.8  | 2312.1073 | -0.0056 | <a href="#">LTGQSEGYGFIEFVSHSVAER</a> |
| 5.2   | 2312.1075 | -0.0058 | <a href="#">MICRAMVQDSVQGIPSVYAR</a>  |
| 3.2   | 2312.1002 | 0.0015  | <a href="#">DRQVDKMNSQIFTLGCTOR</a>   |
| 2.9   | 2312.0995 | 0.0022  | <a href="#">VKEWGQEVFLTAEATSGMGEK</a> |
| 2.4   | 2312.0954 | 0.0063  | <a href="#">ADLHEKREVPTEDGMELAEK</a>  |

Mascot: <http://www.matrixscience.com/>

## Peptide View

MS/MS Fragmentation of **EAVYFLR**

Found in **AT5G55070.1** in **TAIR\_Arabidopsis**, Symbols: | 2-oxoacid dehydrogenase family protein | chr5:22364863-22367635 FORWARD

Match to Query 1666: 896.473890 from(449.244221,2+) index(5068)

Title: Elution from: 45.595 to 45.595 scan no 6324 cid35.00 polarity:+

Data file C7-3\_1.mgf

Click mouse within plot area to zoom in by factor of two about that point

Or,   to  Da

Label all possible matches  Label matches used for scoring

Show Y-axis

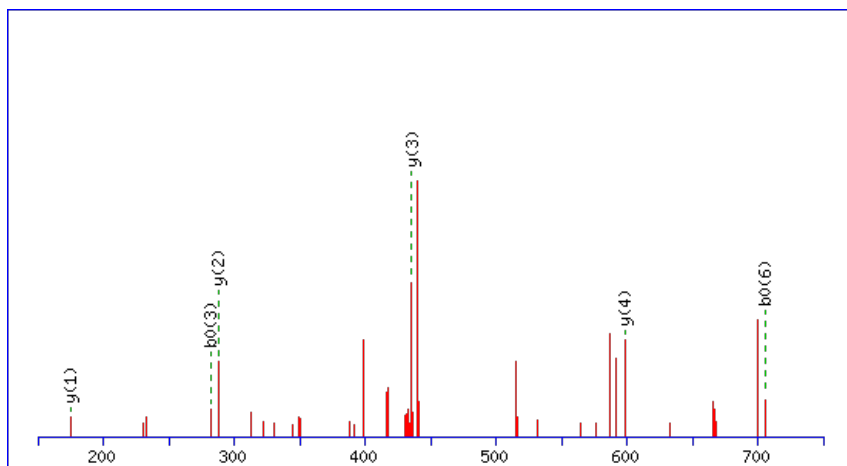

Monoisotopic mass of neutral peptide **Mr(calc)**: 896.4756

**Fixed modifications**: Carbamidomethyl (C) (apply to specified residues or termini only)

**Ions Score**: 19 **Expect**: 0.049

**Matches**: 6/48 fragment ions using 12 most intense peaks ([help](#))

| # | b        | b <sup>++</sup> | b <sup>0</sup> | b <sup>0++</sup> | Seq. | y        | y <sup>++</sup> | y*       | y <sup>*++</sup> | # |
|---|----------|-----------------|----------------|------------------|------|----------|-----------------|----------|------------------|---|
| 1 | 130.0499 | 65.5286         | 112.0393       | 56.5233          | E    |          |                 |          |                  | 7 |
| 2 | 201.0870 | 101.0471        | 183.0764       | 92.0418          | A    | 768.4403 | 384.7238        | 751.4137 | 376.2105         | 6 |
| 3 | 300.1554 | 150.5813        | 282.1448       | 141.5761         | V    | 697.4032 | 349.2052        | 680.3766 | 340.6920         | 5 |
| 4 | 463.2187 | 232.1130        | 445.2082       | 223.1077         | Y    | 598.3348 | 299.6710        | 581.3082 | 291.1577         | 4 |
| 5 | 610.2871 | 305.6472        | 592.2766       | 296.6419         | F    | 435.2714 | 218.1394        | 418.2449 | 209.6261         | 3 |
| 6 | 723.3712 | 362.1892        | 705.3606       | 353.1840         | L    | 288.2030 | 144.6051        | 271.1765 | 136.0919         | 2 |
| 7 |          |                 |                |                  | R    | 175.1190 | 88.0631         | 158.0924 | 79.5498          | 1 |

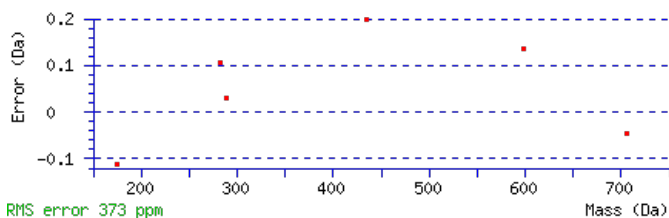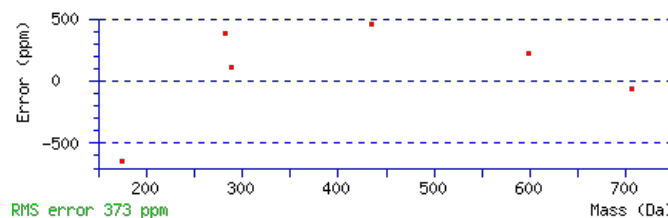

NCBI **BLAST** search of **EAVYFLR**

(Parameters: blastp, nr protein database, expect=20000, no filter, PAM30)

Other BLAST [web gateways](#)

## All matches to this query

| Score | Mr(calc) | Delta   | Sequence                |
|-------|----------|---------|-------------------------|
| 18.5  | 896.4756 | -0.0017 | <a href="#">EAVYFLR</a> |
| 5.3   | 896.4756 | -0.0017 | <a href="#">YIADLFR</a> |
| 5.2   | 896.4716 | 0.0023  | <a href="#">LTHEELR</a> |

AT5G55070.1

|     |          |         |                         |
|-----|----------|---------|-------------------------|
| 4.5 | 896.4756 | -0.0017 | <a href="#">TVYVYPR</a> |
|-----|----------|---------|-------------------------|

**Mascot:** <http://www.matrixscience.com/>

**Peptide View**MS/MS Fragmentation of **QDGNVEFFR**

Found in **AT5G55160.1** in **TAIR\_Arabidopsis**, Symbols: SUMO 2, SUMO2, SUM2 | SUM2 (SMALL UBIQUITIN-LIKE MODIFIER 2) | chr5:22400973-22401998 REVERSE

Match to Query 3369: 1167.532406 from(584.773479,2+) index(3497)

Title: Elution from: 35.786 to 35.786 scan no 4485 cid35.00 polarity:+

Data file D1d-1\_3.mgf

Click mouse within plot area to zoom in by factor of two about that point

Or,   to  Da

Label all possible matches  Label matches used for scoring

Show Y-axis

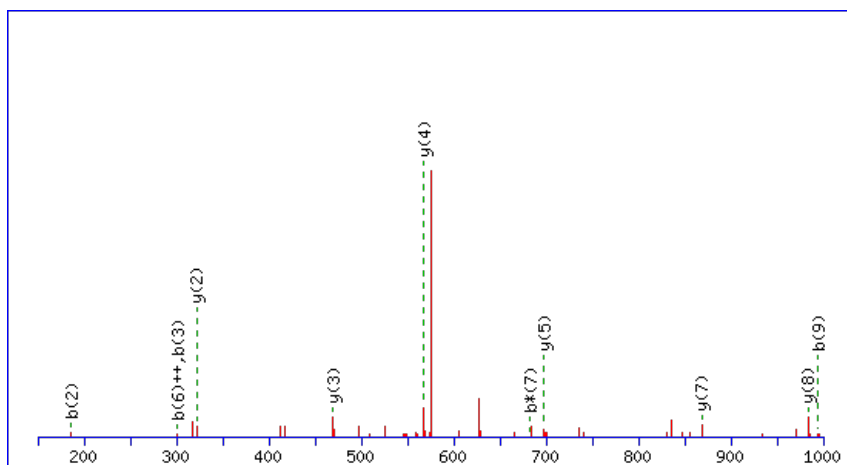

Monoisotopic mass of neutral peptide Mr(calc): 1167.5309

Fixed modifications: Carbamidomethyl (C) (apply to specified residues or termini only)

Ions Score: 34 Expect: 0.00085

Matches : 11/94 fragment ions using 24 most intense peaks ([help](#))

| #  | b               | b <sup>++</sup> | b*              | b <sup>*++</sup> | b <sup>0</sup> | b <sup>0++</sup> | Seq.     | y               | y <sup>++</sup> | y*        | y <sup>*++</sup> | y <sup>0</sup> | y <sup>0++</sup> | #         |
|----|-----------------|-----------------|-----------------|------------------|----------------|------------------|----------|-----------------|-----------------|-----------|------------------|----------------|------------------|-----------|
| 1  | 58.0287         | 29.5180         |                 |                  |                |                  | <b>G</b> |                 |                 |           |                  |                |                  | <b>10</b> |
| 2  | <b>186.0873</b> | 93.5473         | 169.0608        | 85.0340          |                |                  | <b>Q</b> | 1111.5167       | 556.2620        | 1094.4902 | 547.7487         | 1093.5061      | 547.2567         | <b>9</b>  |
| 3  | <b>301.1143</b> | 151.0608        | 284.0877        | 142.5475         | 283.1037       | 142.0555         | <b>D</b> | <b>983.4581</b> | 492.2327        | 966.4316  | 483.7194         | 965.4476       | 483.2274         | <b>8</b>  |
| 4  | 358.1357        | 179.5715        | 341.1092        | 171.0582         | 340.1252       | 170.5662         | <b>G</b> | <b>868.4312</b> | 434.7192        | 851.4046  | 426.2060         | 850.4206       | 425.7139         | <b>7</b>  |
| 5  | 472.1787        | 236.5930        | 455.1521        | 228.0797         | 454.1681       | 227.5877         | <b>N</b> | 811.4097        | 406.2085        | 794.3832  | 397.6952         | 793.3991       | 397.2032         | <b>6</b>  |
| 6  | 601.2212        | <b>301.1143</b> | 584.1947        | 292.6010         | 583.2107       | 292.1090         | <b>E</b> | <b>697.3668</b> | 349.1870        | 680.3402  | 340.6738         | 679.3562       | 340.1817         | <b>5</b>  |
| 7  | 700.2897        | 350.6485        | <b>683.2631</b> | 342.1352         | 682.2791       | 341.6432         | <b>V</b> | <b>568.3242</b> | 284.6657        | 551.2976  | 276.1525         |                |                  | <b>4</b>  |
| 8  | 847.3581        | 424.1827        | 830.3315        | 415.6694         | 829.3475       | 415.1774         | <b>F</b> | <b>469.2558</b> | 235.1315        | 452.2292  | 226.6183         |                |                  | <b>3</b>  |
| 9  | <b>994.4265</b> | 497.7169        | 977.3999        | 489.2036         | 976.4159       | 488.7116         | <b>F</b> | <b>322.1874</b> | 161.5973        | 305.1608  | 153.0840         |                |                  | <b>2</b>  |
| 10 |                 |                 |                 |                  |                |                  | <b>R</b> | 175.1190        | 88.0631         | 158.0924  | 79.5498          |                |                  | <b>1</b>  |

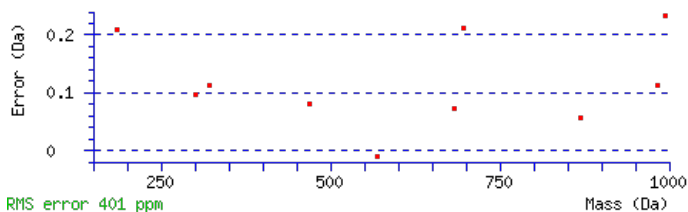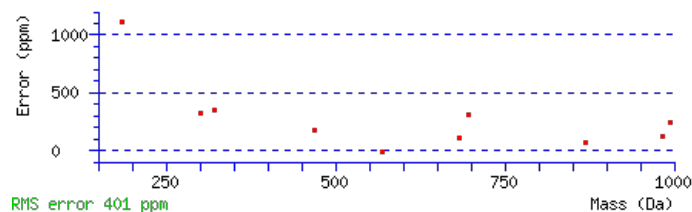NCBI BLAST search of **QDGNVEFFR**

(Parameters: blastp, nr protein database, expect=20000, no filter, PAM30)

Other BLAST [web gateways](#)

All matches to this query



AT5G55160.1

| Score | Mr(calc)  | Delta  | Sequence                   |
|-------|-----------|--------|----------------------------|
| 33.9  | 1167.5309 | 0.0015 | <a href="#">GQDGNEVFER</a> |

Mascot: <http://www.matrixscience.com/>

**Peptide View**MS/MS Fragmentation of **RTLPHAMESVTGR**Found in **AT5G55220.1** in **TAIR\_Arabidopsis**, Symbols: | trigger factor type chaperone family protein | chr5:22414903-22417904 FORWARD

Match to Query 6154: 1474.683447 from(492.568425,3+) index(1682)

Title: Elution from: 21.464 to 21.464 scan no 2215 cid35.00 polarity:+

Data file D6h-3\_1.mgf

Click mouse within plot area to zoom in by factor of two about that point

Or,   to  Da Label all possible matches  Label matches used for scoring Show Y-axis 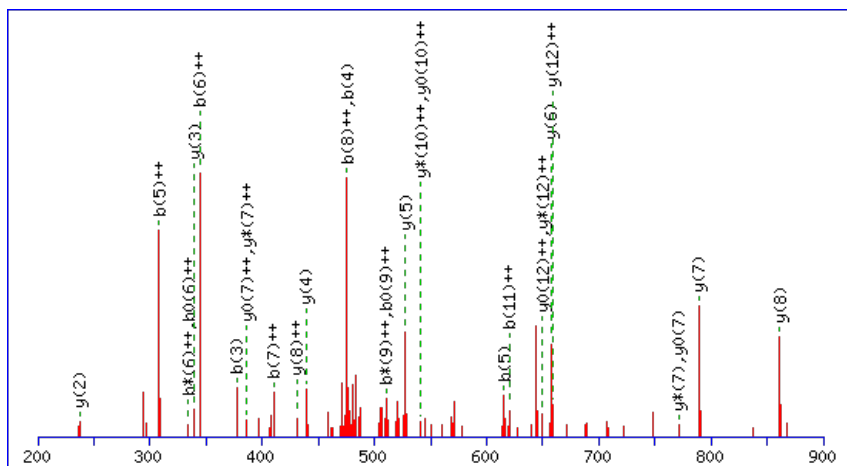Monoisotopic mass of neutral peptide  $M_r(\text{calc})$ : 1474.6837

Fixed modifications: Carbamidomethyl (C) (apply to specified residues or termini only)

Ions Score: 31 Expect: 0.0048

Matches : 30/138 fragment ions using 48 most intense peaks ([help](#))

| #  | b               | b <sup>++</sup> | b*        | b <sup>*++</sup> | b <sup>0</sup> | b <sup>0++</sup> | Seq.     | y               | y <sup>++</sup> | y*              | y <sup>*++</sup> | y <sup>0</sup>  | y <sup>0++</sup> | #         |
|----|-----------------|-----------------|-----------|------------------|----------------|------------------|----------|-----------------|-----------------|-----------------|------------------|-----------------|------------------|-----------|
| 1  | 161.0965        | 81.0519         | 143.0729  | 72.0401          |                |                  | <b>R</b> |                 |                 |                 |                  |                 |                  | <b>13</b> |
| 2  | 263.1412        | 132.0743        | 245.1177  | 123.0625         | 245.1307       | 123.0690         | <b>T</b> | 1315.6017       | <b>658.3045</b> | 1297.5782       | <b>649.2927</b>  | 1297.5912       | <b>649.2992</b>  | <b>12</b> |
| 3  | <b>377.2223</b> | 189.1148        | 359.1988  | 180.1030         | 359.2118       | 180.1095         | <b>L</b> | 1213.5570       | 607.2822        | 1195.5334       | 598.2704         | 1195.5465       | 598.2769         | <b>11</b> |
| 4  | <b>475.2721</b> | 238.1397        | 457.2486  | 229.1279         | 457.2616       | 229.1344         | <b>P</b> | 1099.4759       | 550.2416        | 1081.4523       | <b>541.2298</b>  | 1081.4654       | <b>541.2363</b>  | <b>10</b> |
| 5  | <b>615.3222</b> | <b>308.1647</b> | 597.2986  | 299.1529         | 597.3116       | 299.1594         | <b>H</b> | 1001.4261       | 501.2167        | 983.4025        | 492.2049         | 983.4156        | 492.2114         | <b>9</b>  |
| 6  | 687.3563        | <b>344.1818</b> | 669.3327  | <b>335.1700</b>  | 669.3457       | <b>335.1765</b>  | <b>A</b> | <b>861.3761</b> | <b>431.1917</b> | 843.3525        | 422.1799         | 843.3655        | 422.1864         | <b>8</b>  |
| 7  | 819.3938        | <b>410.2006</b> | 801.3702  | 401.1888         | 801.3833       | 401.1953         | <b>M</b> | <b>789.3420</b> | 395.1746        | <b>771.3184</b> | <b>386.1628</b>  | <b>771.3314</b> | <b>386.1693</b>  | <b>7</b>  |
| 8  | 949.4335        | <b>475.2204</b> | 931.4099  | 466.2086         | 931.4229       | 466.2151         | <b>E</b> | <b>657.3044</b> | 329.1559        | 639.2809        | 320.1441         | 639.2939        | 320.1506         | <b>6</b>  |
| 9  | 1037.4625       | 519.2349        | 1019.4389 | <b>510.2231</b>  | 1019.4519      | <b>510.2296</b>  | <b>S</b> | <b>527.2648</b> | 264.1360        | 509.2412        | 255.1243         | 509.2543        | 255.1308         | <b>5</b>  |
| 10 | 1137.5280       | 569.2676        | 1119.5044 | 560.2558         | 1119.5174      | 560.2623         | <b>V</b> | <b>439.2358</b> | 220.1215        | 421.2122        | 211.1097         | 421.2252        | 211.1162         | <b>4</b>  |
| 11 | 1239.5727       | <b>620.2900</b> | 1221.5491 | 611.2782         | 1221.5621      | 611.2847         | <b>T</b> | <b>339.1703</b> | 170.0888        | 321.1467        | 161.0770         | 321.1597        | 161.0835         | <b>3</b>  |
| 12 | 1297.5912       | <b>649.2992</b> | 1279.5676 | 640.2874         | 1279.5806      | 640.2939         | <b>G</b> | <b>237.1256</b> | 119.0664        | 219.1020        | 110.0546         |                 |                  | <b>2</b>  |
| 13 |                 |                 |           |                  |                |                  | <b>R</b> | 179.1071        | 90.0572         | 161.0835        | 81.0454          |                 |                  | <b>1</b>  |

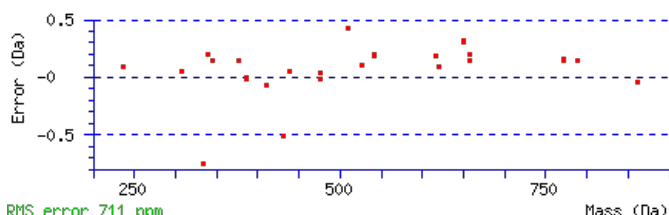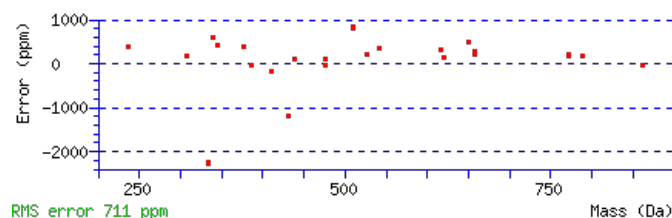NCBI **BLAST** search of [RTLPHAMESVTGR](#)

(Parameters: blastp, nr protein database, expect=20000, no filter, PAM30)

Other BLAST [web gateways](#)

AT5G55220.1

All matches to this query

| Score | Mr(calc)  | Delta   | Sequence                       |
|-------|-----------|---------|--------------------------------|
| 30.6  | 1474.6837 | -0.0003 | <a href="#">RTLPHAMESVTGR</a>  |
| 15.4  | 1474.6810 | 0.0024  | <a href="#">EIVQHAMTSAAATK</a> |

Mascot: <http://www.matrixscience.com/>

**Peptide View**MS/MS Fragmentation of **VGFGPDGGDLSSFFVK**Found in **AT5G55730.1** in **TAIR\_Arabidopsis**, Symbols: FLA1 | FLA1 | chr5:22575601-22577618 REVERSE

Match to Query 7524: 1627.786748 from(814.900650,2+) index(10091)

Title: Elution from: 94.017 to 94.017 scan no 14022 cid35.00 polarity:+

Data file D6h-2\_1.mgf

Click mouse within plot area to zoom in by factor of two about that point

Or,  to  Da Label all possible matches  Label matches used for scoring Show Y-axis 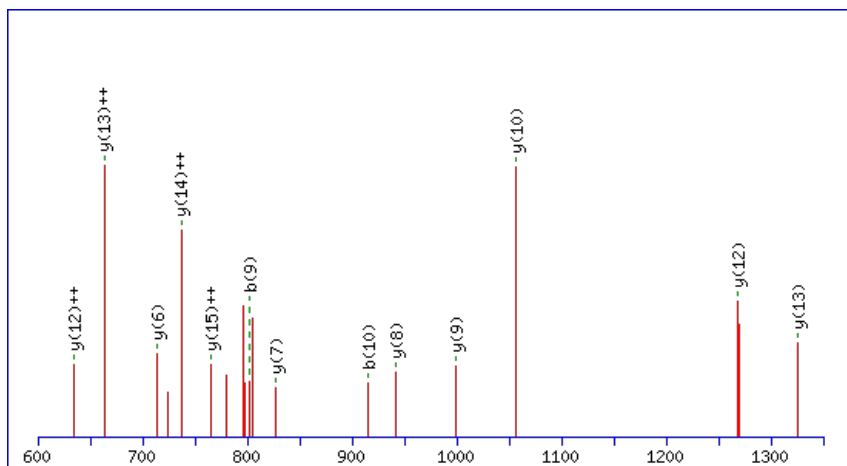Monoisotopic mass of neutral peptide  $M_r(\text{calc})$ : 1627.7883

Fixed modifications: Carbamidomethyl (C) (apply to specified residues or termini only)

Ions Score: 58 Expect: 4.3e-006

Matches : 13/132 fragment ions using 19 most intense peaks ([help](#))

| #  | b         | b <sup>++</sup> | b <sup>0</sup> | b <sup>0++</sup> | Seq. | y         | y <sup>++</sup> | y*        | y <sup>*++</sup> | y <sup>0</sup> | y <sup>0++</sup> | #  |
|----|-----------|-----------------|----------------|------------------|------|-----------|-----------------|-----------|------------------|----------------|------------------|----|
| 1  | 100.0757  | 50.5415         |                |                  | V    |           |                 |           |                  |                |                  | 16 |
| 2  | 157.0972  | 79.0522         |                |                  | G    | 1529.7271 | 765.3672        | 1512.7005 | 756.8539         | 1511.7165      | 756.3619         | 15 |
| 3  | 304.1656  | 152.5864        |                |                  | F    | 1472.7056 | 736.8564        | 1455.6791 | 728.3432         | 1454.6951      | 727.8512         | 14 |
| 4  | 361.1870  | 181.0972        |                |                  | G    | 1325.6372 | 663.3222        | 1308.6107 | 654.8090         | 1307.6266      | 654.3170         | 13 |
| 5  | 458.2398  | 229.6235        |                |                  | P    | 1268.6157 | 634.8115        | 1251.5892 | 626.2982         | 1250.6052      | 625.8062         | 12 |
| 6  | 573.2667  | 287.1370        | 555.2562       | 278.1317         | D    | 1171.5630 | 586.2851        | 1154.5364 | 577.7719         | 1153.5524      | 577.2798         | 11 |
| 7  | 630.2882  | 315.6477        | 612.2776       | 306.6425         | G    | 1056.5360 | 528.7717        | 1039.5095 | 520.2584         | 1038.5255      | 519.7664         | 10 |
| 8  | 687.3097  | 344.1585        | 669.2991       | 335.1532         | G    | 999.5146  | 500.2609        | 982.4880  | 491.7477         | 981.5040       | 491.2556         | 9  |
| 9  | 802.3366  | 401.6719        | 784.3260       | 392.6667         | D    | 942.4931  | 471.7502        | 925.4666  | 463.2369         | 924.4825       | 462.7449         | 8  |
| 10 | 915.4207  | 458.2140        | 897.4101       | 449.2087         | L    | 827.4662  | 414.2367        | 810.4396  | 405.7234         | 809.4556       | 405.2314         | 7  |
| 11 | 1002.4527 | 501.7300        | 984.4421       | 492.7247         | S    | 714.3821  | 357.6947        | 697.3556  | 349.1814         | 696.3715       | 348.6894         | 6  |
| 12 | 1089.4847 | 545.2460        | 1071.4742      | 536.2407         | S    | 627.3501  | 314.1787        | 610.3235  | 305.6654         | 609.3395       | 305.1734         | 5  |
| 13 | 1236.5531 | 618.7802        | 1218.5426      | 609.7749         | F    | 540.3180  | 270.6627        | 523.2915  | 262.1494         |                |                  | 4  |
| 14 | 1383.6216 | 692.3144        | 1365.6110      | 683.3091         | F    | 393.2496  | 197.1285        | 376.2231  | 188.6152         |                |                  | 3  |
| 15 | 1482.6900 | 741.8486        | 1464.6794      | 732.8433         | V    | 246.1812  | 123.5942        | 229.1547  | 115.0810         |                |                  | 2  |
| 16 |           |                 |                |                  | K    | 147.1128  | 74.0600         | 130.0863  | 65.5468          |                |                  | 1  |

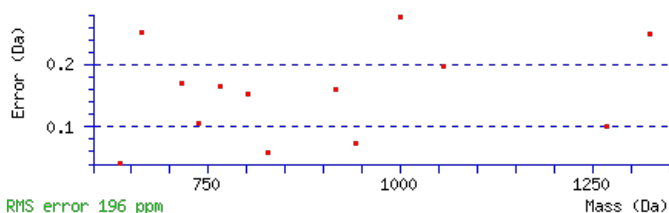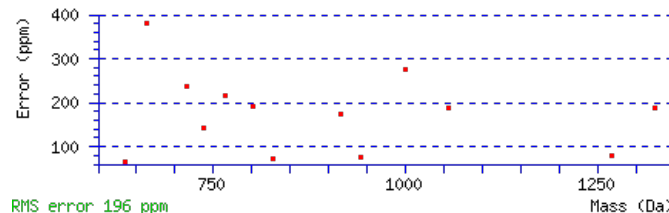

## AT5G55730.1

NCBI **BLAST** search of [VGFGPDGGDLSSFFVK](#)

(Parameters: blastp, nr protein database, expect=20000, no filter, PAM30)

Other BLAST [web gateways](#)

### All matches to this query

| Score | Mr(calc)  | Delta   | Sequence                         |
|-------|-----------|---------|----------------------------------|
| 58.4  | 1627.7883 | -0.0015 | <a href="#">VGFGPDGGDLSSFFVK</a> |
| 2.5   | 1627.7842 | 0.0025  | <a href="#">YAAFDDASASGTVVVR</a> |

**Mascot:** <http://www.matrixscience.com/>

## Peptide View

### MS/MS Fragmentation of **KTISSTK**

Found in **AT5G55950.1** in **TAIR\_Arabidopsis**, Symbols: | transporter-related | chr5:22675637-22677479 REVERSE

Match to Query 923: 772.419094 from(387.216823,2+) index(4279)

Title: Elution from: 39.780 to 39.780 scan no 5341 cid35.00 polarity:+

Data file C7-3\_1.mgf

Click mouse within plot area to zoom in by factor of two about that point

Or,   to  Da

Label all possible matches  Label matches used for scoring

Show Y-axis

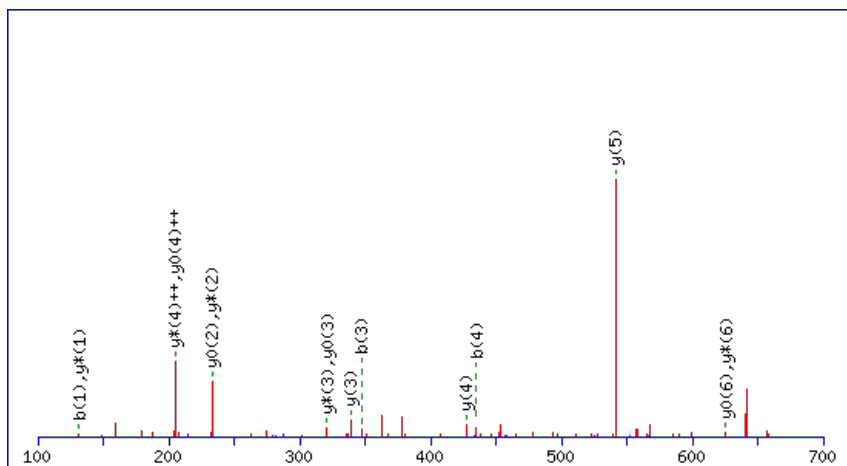

Monoisotopic mass of neutral peptide **Mr(calc)**: 772.4173

**Fixed modifications**: Carbamidomethyl (C) (apply to specified residues or termini only)

**Ions Score**: 22 **Expect**: 0.038

**Matches** : 17/68 fragment ions using 39 most intense peaks ([help](#))

| # | b               | b <sup>++</sup> | b*       | b <sup>*++</sup> | b <sup>0</sup> | b <sup>0++</sup> | Seq.     | y               | y <sup>++</sup> | y*              | y <sup>*++</sup> | y <sup>0</sup>  | y <sup>0++</sup> | #        |
|---|-----------------|-----------------|----------|------------------|----------------|------------------|----------|-----------------|-----------------|-----------------|------------------|-----------------|------------------|----------|
| 1 | <b>131.0963</b> | 66.0518         | 113.0727 | 57.0400          |                |                  | <b>K</b> |                 |                 |                 |                  |                 |                  | <b>7</b> |
| 2 | <b>233.1410</b> | 117.0741        | 215.1174 | 108.0624         | 215.1305       | 108.0689         | <b>T</b> | 643.3355        | 322.1714        | <b>625.3119</b> | 313.1596         | <b>625.3250</b> | 313.1661         | <b>6</b> |
| 3 | <b>347.2221</b> | 174.1147        | 329.1985 | 165.1029         | 329.2116       | 165.1094         | <b>I</b> | <b>541.2908</b> | 271.1490        | 523.2672        | 262.1373         | 523.2802        | 262.1438         | <b>5</b> |
| 4 | <b>435.2512</b> | 218.1292        | 417.2276 | 209.1174         | 417.2406       | 209.1239         | <b>S</b> | <b>427.2097</b> | 214.1085        | 409.1861        | <b>205.0967</b>  | 409.1991        | <b>205.1032</b>  | <b>4</b> |
| 5 | 523.2802        | 262.1438        | 505.2567 | 253.1320         | 505.2697       | 253.1385         | <b>S</b> | <b>339.1806</b> | 170.0940        | <b>321.1571</b> | 161.0822         | <b>321.1701</b> | 161.0887         | <b>3</b> |
| 6 | <b>625.3250</b> | 313.1661        | 607.3014 | 304.1543         | 607.3144       | 304.1608         | <b>T</b> | 251.1516        | 126.0794        | <b>233.1280</b> | 117.0676         | <b>233.1410</b> | 117.0741         | <b>2</b> |
| 7 |                 |                 |          |                  |                |                  | <b>K</b> | 149.1069        | 75.0571         | <b>131.0833</b> | 66.0453          |                 |                  | <b>1</b> |

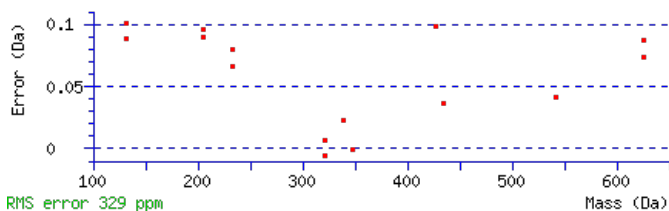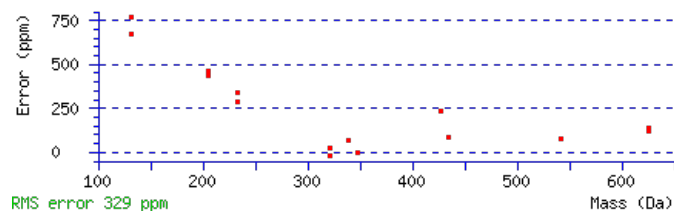

### NCBI BLAST search of **KTISSTK**

(Parameters: blastp, nr protein database, expect=20000, no filter, PAM30)

Other BLAST [web gateways](#)

### All matches to this query

| Score | Mr(calc) | Delta  | Sequence                |
|-------|----------|--------|-------------------------|
| 21.6  | 772.4173 | 0.0018 | <a href="#">KTISSTK</a> |
| 12.1  | 772.4182 | 0.0009 | <a href="#">MVMKKK</a>  |
| 10.3  | 772.4173 | 0.0018 | <a href="#">TKSTLSK</a> |

## AT5G55950.1

|     |          |         |                         |
|-----|----------|---------|-------------------------|
| 9.5 | 772.4195 | -0.0004 | <a href="#">TKEFLK</a>  |
| 9.3 | 772.4195 | -0.0004 | <a href="#">TSFILGK</a> |
| 5.9 | 772.4199 | -0.0008 | <a href="#">QTKRTK</a>  |
| 5.7 | 772.4200 | -0.0009 | <a href="#">ARASTKK</a> |
| 5.2 | 772.4195 | -0.0004 | <a href="#">SLAAYIK</a> |
| 5.1 | 772.4173 | 0.0018  | <a href="#">KTLSSK</a>  |
| 3.8 | 772.4195 | -0.0004 | <a href="#">FTEKIK</a>  |

**Mascot:** <http://www.matrixscience.com/>

**Peptide View**MS/MS Fragmentation of **LDGQPELFIHIIPDK**Found in **AT5G56000.1** in **TAIR\_Arabidopsis**, Symbols: | heat shock protein 81-4 (HSP81-4) | chr5:22694828-22697293 REVERSE

Match to Query 7886: 1752.875976 from(877.445264,2+) index(8245)

Title: Elution from: 77.573 to 77.573 scan no 11203 cid35.00 polarity:+

Data file D1d-1-2.mgf

Click mouse within plot area to zoom in by factor of two about that point

Or,   to  Da Label all possible matches  Label matches used for scoring Show Y-axis 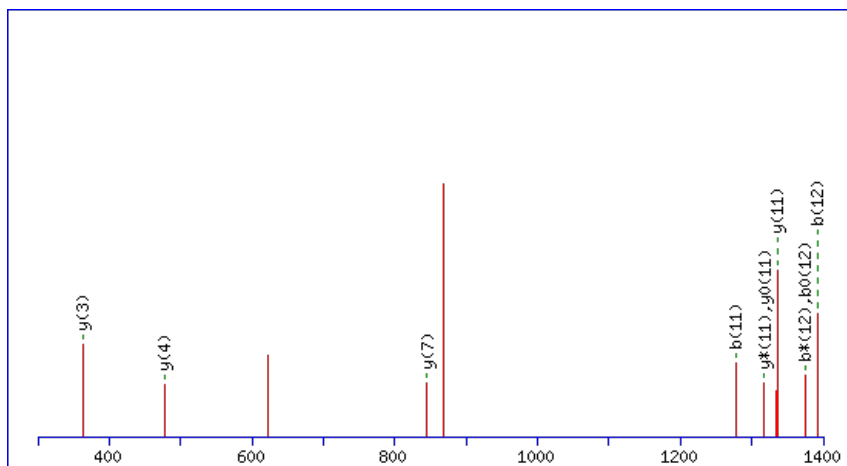Monoisotopic mass of neutral peptide  $M_r(\text{calc})$ : 1752.8789

Fixed modifications: Carbamidomethyl (C) (apply to specified residues or termini only)

Ions Score: 29 Expect: 0.0086

Matches : 10/158 fragment ions using 12 most intense peaks ([help](#))

| #  | b                | b <sup>++</sup> | b*               | b <sup>*++</sup> | b <sup>0</sup>   | b <sup>0++</sup> | Seq. | y                | y <sup>++</sup> | y*               | y <sup>*++</sup> | y <sup>0</sup>   | y <sup>0++</sup> | #  |
|----|------------------|-----------------|------------------|------------------|------------------|------------------|------|------------------|-----------------|------------------|------------------|------------------|------------------|----|
| 1  | 115.0884         | 58.0478         |                  |                  |                  |                  | L    |                  |                 |                  |                  |                  |                  | 15 |
| 2  | 231.1124         | 116.0598        |                  |                  | 213.1018         | 107.0545         | D    | 1639.8051        | 820.4062        | 1621.7815        | 811.3944         | 1621.7945        | 811.4009         | 14 |
| 3  | 289.1309         | 145.0691        |                  |                  | 271.1203         | 136.0638         | G    | 1523.7811        | 762.3942        | 1505.7575        | 753.3824         | 1505.7705        | 753.3889         | 13 |
| 4  | 419.1835         | 210.0954        | 401.1599         | 201.0836         | 401.1729         | 201.0901         | Q    | 1465.7626        | 733.3849        | 1447.7390        | 724.3731         | 1447.7520        | 724.3796         | 12 |
| 5  | 517.2333         | 259.1203        | 499.2097         | 250.1085         | 499.2227         | 250.1150         | P    | <b>1335.7099</b> | 668.3586        | <b>1317.6864</b> | 659.3468         | <b>1317.6994</b> | 659.3533         | 11 |
| 6  | 647.2729         | 324.1401        | 629.2493         | 315.1283         | 629.2624         | 315.1348         | E    | 1237.6601        | 619.3337        | 1219.6366        | 610.3219         | 1219.6496        | 610.3284         | 10 |
| 7  | 761.3540         | 381.1807        | 743.3304         | 372.1689         | 743.3435         | 372.1754         | L    | 1107.6205        | 554.3139        | 1089.5969        | 545.3021         | 1089.6099        | 545.3086         | 9  |
| 8  | 909.4195         | 455.2134        | 891.3959         | 446.2016         | 891.4089         | 446.2081         | F    | 993.5394         | 497.2733        | 975.5158         | 488.2616         | 975.5288         | 488.2681         | 8  |
| 9  | 1023.5006        | 512.2539        | 1005.4770        | 503.2421         | 1005.4900        | 503.2486         | I    | <b>845.4740</b>  | 423.2406        | 827.4504         | 414.2288         | 827.4634         | 414.2353         | 7  |
| 10 | 1163.5506        | 582.2789        | 1145.5270        | 573.2671         | 1145.5400        | 573.2737         | H    | 731.3929         | 366.2001        | 713.3693         | 357.1883         | 713.3823         | 357.1948         | 6  |
| 11 | <b>1277.6317</b> | 639.3195        | 1259.6081        | 630.3077         | 1259.6211        | 630.3142         | I    | 591.3428         | 296.1751        | 573.3193         | 287.1633         | 573.3323         | 287.1698         | 5  |
| 12 | <b>1391.7128</b> | 696.3600        | <b>1373.6892</b> | 687.3482         | <b>1373.7022</b> | 687.3547         | I    | <b>477.2617</b>  | 239.1345        | 459.2382         | 230.1227         | 459.2512         | 230.1292         | 4  |
| 13 | 1489.7626        | 745.3849        | 1471.7390        | 736.3731         | 1471.7520        | 736.3796         | P    | <b>363.1807</b>  | 182.0940        | 345.1571         | 173.0822         | 345.1701         | 173.0887         | 3  |
| 14 | 1605.7866        | 803.3969        | 1587.7630        | 794.3851         | 1587.7760        | 794.3916         | D    | 265.1309         | 133.0691        | 247.1073         | 124.0573         | 247.1203         | 124.0638         | 2  |
| 15 |                  |                 |                  |                  |                  |                  | K    | 149.1069         | 75.0571         | 131.0833         | 66.0453          |                  |                  | 1  |

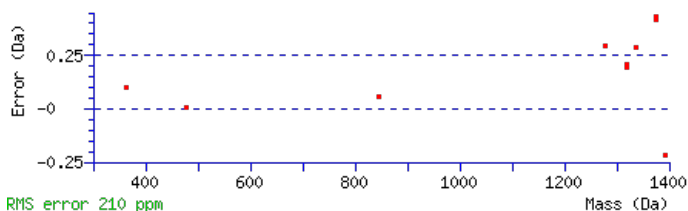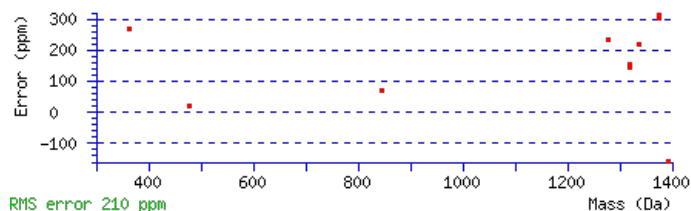NCBI BLAST search of [LDGQPELFIHIIPDK](#)



## AT5G56000.1

(Parameters: blastp, nr protein database, expect=20000, no filter, PAM30)

Other BLAST [web gateways](#)

### All matches to this query

| Score | Mr(calc)  | Delta   | Sequence                        |
|-------|-----------|---------|---------------------------------|
| 28.8  | 1752.8789 | -0.0029 | <a href="#">LDGQPELFIHIIPDK</a> |
| 10.6  | 1752.8712 | 0.0047  | <a href="#">RQAQPPPPPPPPPTR</a> |
| 2.3   | 1752.8739 | 0.0021  | <a href="#">HHVPPRRSWGASLVK</a> |
| 1.2   | 1752.8753 | 0.0007  | <a href="#">NMKLRMEAEIAGLLK</a> |

Mascot: <http://www.matrixscience.com/>

## Peptide View

### MS/MS Fragmentation of TMEINPENSIMDELRK

Found in **AT5G56010.1** in **TAIR\_Arabidopsis**, Symbols: HSP81-3 | HSP81-3 (Heat shock protein 81-3); ATP binding | chr5:22698636-22701137  
FORWARD

Match to Query 9061: 1940.851116 from(971.432834,2+) index(7753)

Title: Elution from: 68.378 to 68.378 scan no 10159 cid35.00 polarity:+

Data file 0-3\_2.mgf

Click mouse within plot area to zoom in by factor of two about that point

Or,   to  Da

Label all possible matches  Label matches used for scoring

Show Y-axis

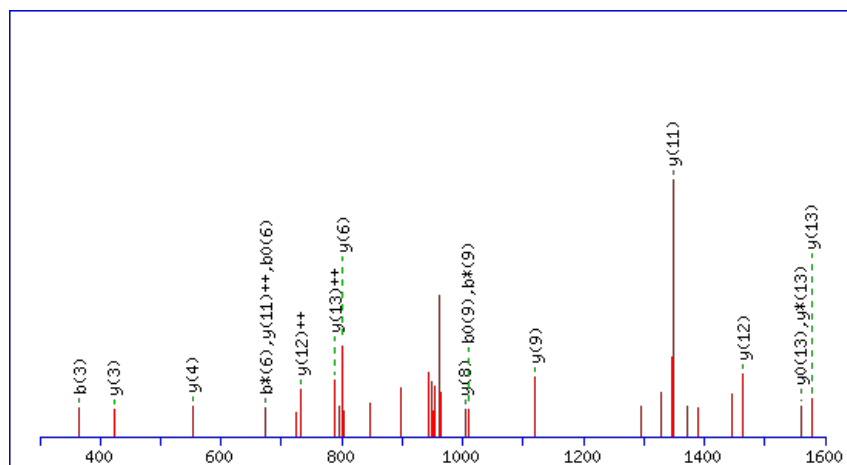

Monoisotopic mass of neutral peptide  $M_r(\text{calc})$ : 1940.8476

Fixed modifications: Carbamidomethyl (C) (apply to specified residues or termini only)

Ions Score: 61 Expect: 5.3e-006

Matches : 18/166 fragment ions using 18 most intense peaks ([help](#))

| #  | b         | b <sup>++</sup> | b*        | b <sup>*++</sup> | b <sup>0</sup> | b <sup>0++</sup> | Seq. | y         | y <sup>++</sup> | y*        | y <sup>*++</sup> | y <sup>0</sup> | y <sup>0++</sup> | #  |
|----|-----------|-----------------|-----------|------------------|----------------|------------------|------|-----------|-----------------|-----------|------------------|----------------|------------------|----|
| 1  | 103.0520  | 52.0296         |           |                  | 85.0414        | 43.0244          | T    |           |                 |           |                  |                |                  | 16 |
| 2  | 235.0895  | 118.0484        |           |                  | 217.0789       | 109.0431         | M    | 1839.8102 | 920.4087        | 1821.7866 | 911.3969         | 1821.7996      | 911.4034         | 15 |
| 3  | 365.1291  | 183.0682        |           |                  | 347.1186       | 174.0629         | E    | 1707.7727 | 854.3900        | 1689.7491 | 845.3782         | 1689.7621      | 845.3847         | 14 |
| 4  | 479.2102  | 240.1088        |           |                  | 461.1997       | 231.1035         | I    | 1577.7330 | 789.3702        | 1559.7094 | 780.3584         | 1559.7225      | 780.3649         | 13 |
| 5  | 595.2472  | 298.1273        | 577.2236  | 289.1155         | 577.2367       | 289.1220         | N    | 1463.6519 | 732.3296        | 1445.6283 | 723.3178         | 1445.6414      | 723.3243         | 12 |
| 6  | 693.2970  | 347.1522        | 675.2734  | 338.1404         | 675.2865       | 338.1469         | P    | 1347.6149 | 674.3111        | 1329.5914 | 665.2993         | 1329.6044      | 665.3058         | 11 |
| 7  | 823.3367  | 412.1720        | 805.3131  | 403.1602         | 805.3261       | 403.1667         | E    | 1249.5651 | 625.2862        | 1231.5416 | 616.2744         | 1231.5546      | 616.2809         | 10 |
| 8  | 939.3737  | 470.1905        | 921.3501  | 461.1787         | 921.3631       | 461.1852         | N    | 1119.5255 | 560.2664        | 1101.5019 | 551.2546         | 1101.5149      | 551.2611         | 9  |
| 9  | 1027.4027 | 514.2050        | 1009.3791 | 505.1932         | 1009.3922      | 505.1997         | S    | 1003.4885 | 502.2479        | 985.4649  | 493.2361         | 985.4779       | 493.2426         | 8  |
| 10 | 1141.4838 | 571.2455        | 1123.4602 | 562.2338         | 1123.4733      | 562.2403         | I    | 915.4594  | 458.2334        | 897.4359  | 449.2216         | 897.4489       | 449.2281         | 7  |
| 11 | 1273.5213 | 637.2643        | 1255.4978 | 628.2525         | 1255.5108      | 628.2590         | M    | 801.3784  | 401.1928        | 783.3548  | 392.1810         | 783.3678       | 392.1875         | 6  |
| 12 | 1389.5453 | 695.2763        | 1371.5217 | 686.2645         | 1371.5348      | 686.2710         | D    | 669.3408  | 335.1741        | 651.3172  | 326.1623         | 651.3303       | 326.1688         | 5  |
| 13 | 1519.5849 | 760.2961        | 1501.5614 | 751.2843         | 1501.5744      | 751.2908         | E    | 553.3169  | 277.1621        | 535.2933  | 268.1503         | 535.3063       | 268.1568         | 4  |
| 14 | 1633.6660 | 817.3367        | 1615.6425 | 808.3249         | 1615.6555      | 808.3314         | L    | 423.2772  | 212.1423        | 405.2536  | 203.1305         |                |                  | 3  |
| 15 | 1793.7553 | 897.3813        | 1775.7317 | 888.3695         | 1775.7447      | 888.3760         | R    | 309.1961  | 155.1017        | 291.1725  | 146.0899         |                |                  | 2  |
| 16 |           |                 |           |                  |                |                  | K    | 149.1069  | 75.0571         | 131.0833  | 66.0453          |                |                  | 1  |

# AT5G56010.1

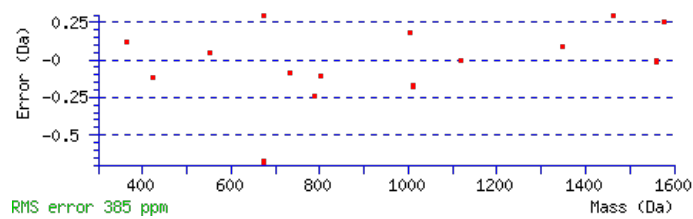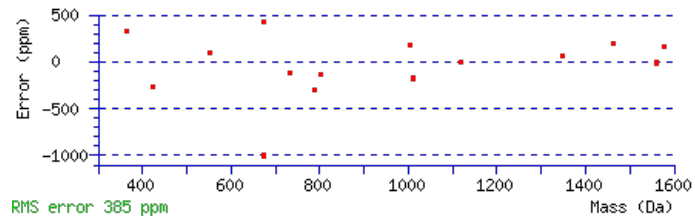

NCBI **BLAST** search of [TMEINPENSIMDELRK](#)

(Parameters: blastp, nr protein database, expect=20000, no filter, PAM30)

Other BLAST [web gateways](#)

## All matches to this query

| Score | Mr(calc)  | Delta   | Sequence                          |
|-------|-----------|---------|-----------------------------------|
| 61.1  | 1940.8476 | 0.0035  | <a href="#">TMEINPENSIMDELRK</a>  |
| 0.5   | 1940.8512 | -0.0001 | <a href="#">DEEGKNFWAEIEIVDK</a>  |
| 0.5   | 1940.8550 | -0.0039 | <a href="#">DVMIENIDNILDRGER</a>  |
| 0.4   | 1940.8476 | 0.0035  | <a href="#">KTMEINPENSIMDELR</a>  |
| 0.1   | 1940.8565 | -0.0054 | <a href="#">LFTWGDGDKNRLGHGDK</a> |

Mascot: <http://www.matrixscience.com/>

**Peptide View**MS/MS Fragmentation of **EDQLEYLEER**

Found in **AT5G56030.1** in **TAIR\_Arabidopsis**, Symbols: ERD8, HSP81-2 | HSP81-2 (EARLY-RESPONSIVE TO DEHYDRATION 8); ATP binding | chr5:22704149-22706659 FORWARD

Match to Query 4672: 1322.595942 from(662.305247,2+) index(4950)

Title: Elution from: 44.090 to 44.090 scan no 6218 cid35.00 polarity:+

Data file 0-3\_3.mgf

Click mouse within plot area to zoom in by factor of two about that point

Or,   to  Da

Label all possible matches  Label matches used for scoring

Show Y-axis

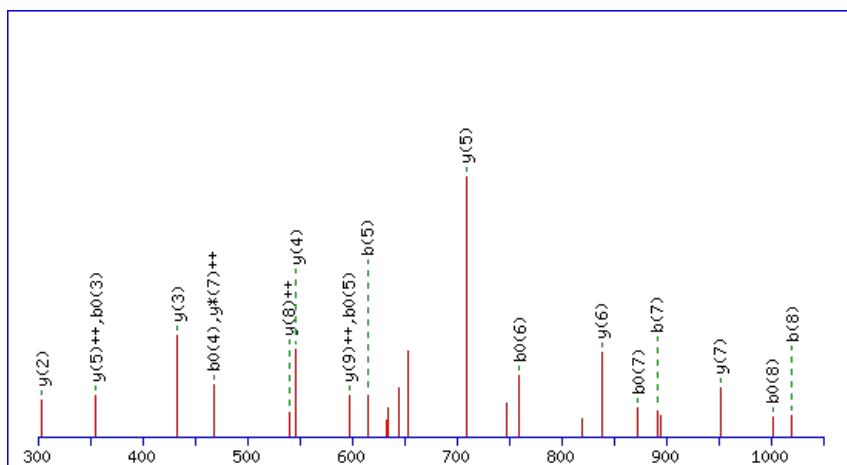

**Monoisotopic mass of neutral peptide Mr(calc):** 1322.5990

**Fixed modifications:** Carbamidomethyl (C) (apply to specified residues or termini only)

**Ions Score:** 58 **Expect:** 4.4e-006

**Matches:** 19/102 fragment ions using 19 most intense peaks ([help](#))

| #  | b         | b <sup>++</sup> | b <sup>*</sup> | b <sup>*++</sup> | b <sup>0</sup> | b <sup>0++</sup> | Seq. | y         | y <sup>++</sup> | y <sup>*</sup> | y <sup>*++</sup> | y <sup>0</sup> | y <sup>0++</sup> | #  |
|----|-----------|-----------------|----------------|------------------|----------------|------------------|------|-----------|-----------------|----------------|------------------|----------------|------------------|----|
| 1  | 130.0499  | 65.5286         |                |                  | 112.0393       | 56.5233          | E    |           |                 |                |                  |                |                  | 10 |
| 2  | 245.0768  | 123.0420        |                |                  | 227.0662       | 114.0368         | D    | 1194.5637 | 597.7855        | 1177.5372      | 589.2722         | 1176.5531      | 588.7802         | 9  |
| 3  | 373.1354  | 187.0713        | 356.1088       | 178.5581         | 355.1248       | 178.0661         | Q    | 1079.5368 | 540.2720        | 1062.5102      | 531.7587         | 1061.5262      | 531.2667         | 8  |
| 4  | 486.2195  | 243.6134        | 469.1929       | 235.1001         | 468.2089       | 234.6081         | L    | 951.4782  | 476.2427        | 934.4516       | 467.7295         | 933.4676       | 467.2374         | 7  |
| 5  | 615.2620  | 308.1347        | 598.2355       | 299.6214         | 597.2515       | 299.1294         | E    | 838.3941  | 419.7007        | 821.3676       | 411.1874         | 820.3836       | 410.6954         | 6  |
| 6  | 778.3254  | 389.6663        | 761.2988       | 381.1531         | 760.3148       | 380.6610         | Y    | 709.3515  | 355.1794        | 692.3250       | 346.6661         | 691.3410       | 346.1741         | 5  |
| 7  | 891.4094  | 446.2084        | 874.3829       | 437.6951         | 873.3989       | 437.2031         | L    | 546.2882  | 273.6477        | 529.2617       | 265.1345         | 528.2776       | 264.6425         | 4  |
| 8  | 1020.4520 | 510.7297        | 1003.4255      | 502.2164         | 1002.4415      | 501.7244         | E    | 433.2041  | 217.1057        | 416.1776       | 208.5924         | 415.1936       | 208.1004         | 3  |
| 9  | 1149.4946 | 575.2510        | 1132.4681      | 566.7377         | 1131.4841      | 566.2457         | E    | 304.1615  | 152.5844        | 287.1350       | 144.0711         | 286.1510       | 143.5791         | 2  |
| 10 |           |                 |                |                  |                |                  | R    | 175.1190  | 88.0631         | 158.0924       | 79.5498          |                |                  | 1  |

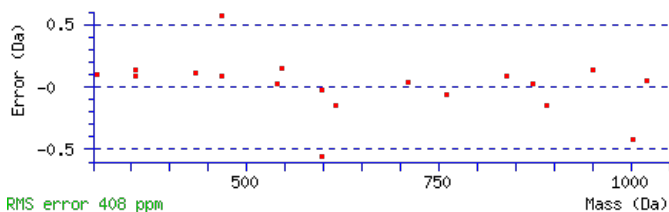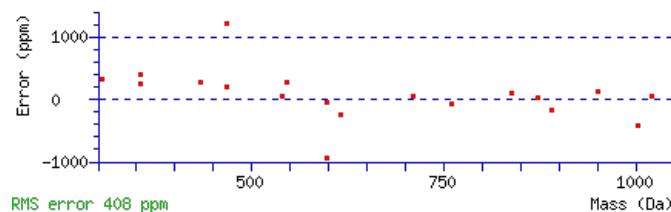

NCBI BLAST search of **EDQLEYLEER**

(Parameters: blastp, nr protein database, expect=20000, no filter, PAM30)

Other BLAST [web gateways](#)

All matches to this query

AT5G56030.1

| Score | Mr(calc)  | Delta   | Sequence                     |
|-------|-----------|---------|------------------------------|
| 58.4  | 1322.5990 | -0.0030 | <a href="#">EDQLEYLER</a>    |
| 1.8   | 1322.5925 | 0.0034  | <a href="#">SPSSFTPCLDGR</a> |

Mascot: <http://www.matrixscience.com/>

**Peptide View**MS/MS Fragmentation of **MSTVASISSESK**Found in **AT5G56090.1** in **TAIR\_Arabidopsis**, Symbols: COX15 | COX15 (CYTOCHROME C OXIDASE 15) | chr5:22731860-22733831  
FORWARD

Match to Query 4144: 1238.548258 from(620.281405,2+) index(2068)

Title: Elution from: 23.570 to 23.570 scan no 2644 cid35.00 polarity:+

Data file C7-3\_3.mgf

Click mouse within plot area to zoom in by factor of two about that point

Or,  to  Da Label all possible matches  Label matches used for scoring Show Y-axis 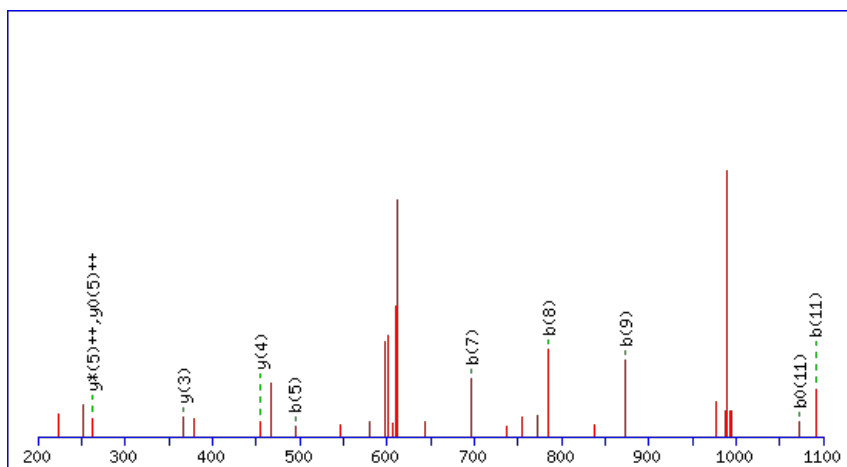Monoisotopic mass of neutral peptide  $M_r(\text{calc})$ : 1238.5475

Fixed modifications: Carbamidomethyl (C) (apply to specified residues or termini only)

Ions Score: 25 Expect: 0.022

Matches : 10/106 fragment ions using 23 most intense peaks ([help](#))

| #  | b                | b <sup>++</sup> | b <sup>0</sup>   | b <sup>0++</sup> | Seq. | y               | y <sup>++</sup> | y*        | y <sup>*++</sup> | y <sup>0</sup> | y <sup>0++</sup> | #  |
|----|------------------|-----------------|------------------|------------------|------|-----------------|-----------------|-----------|------------------|----------------|------------------|----|
| 1  | 133.0448         | 67.0260         |                  |                  | M    |                 |                 |           |                  |                |                  | 12 |
| 2  | 221.0739         | 111.0406        | 203.0633         | 102.0353         | S    | 1107.5172       | 554.2623        | 1089.4936 | 545.2505         | 1089.5067      | 545.2570         | 11 |
| 3  | 323.1186         | 162.0629        | 305.1080         | 153.0576         | T    | 1019.4882       | 510.2477        | 1001.4646 | 501.2359         | 1001.4776      | 501.2424         | 10 |
| 4  | 423.1840         | 212.0956        | 405.1735         | 203.0904         | V    | 917.4435        | 459.2254        | 899.4199  | 450.2136         | 899.4329       | 450.2201         | 9  |
| 5  | <b>495.2182</b>  | 248.1127        | 477.2076         | 239.1074         | A    | 817.3780        | 409.1926        | 799.3544  | 400.1808         | 799.3674       | 400.1874         | 8  |
| 6  | 583.2472         | 292.1273        | 565.2367         | 283.1220         | S    | 745.3439        | 373.1756        | 727.3203  | 364.1638         | 727.3333       | 364.1703         | 7  |
| 7  | <b>697.3283</b>  | 349.1678        | 679.3178         | 340.1625         | I    | 657.3148        | 329.1610        | 639.2912  | 320.1492         | 639.3042       | 320.1558         | 6  |
| 8  | <b>785.3574</b>  | 393.1823        | 767.3468         | 384.1771         | S    | 543.2337        | 272.1205        | 525.2101  | <b>263.1087</b>  | 525.2231       | <b>263.1152</b>  | 5  |
| 9  | <b>873.3865</b>  | 437.1969        | 855.3759         | 428.1916         | S    | <b>455.2046</b> | 228.1060        | 437.1810  | 219.0942         | 437.1941       | 219.1007         | 4  |
| 10 | 1003.4261        | 502.2167        | 985.4155         | 493.2114         | E    | <b>367.1756</b> | 184.0914        | 349.1520  | 175.0796         | 349.1650       | 175.0861         | 3  |
| 11 | <b>1091.4551</b> | 546.2312        | <b>1073.4446</b> | 537.2259         | S    | 237.1359        | 119.0716        | 219.1124  | 110.0598         | 219.1254       | 110.0663         | 2  |
| 12 |                  |                 |                  |                  | K    | 149.1069        | 75.0571         | 131.0833  | 66.0453          |                |                  | 1  |

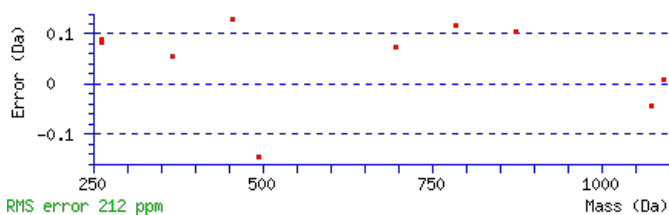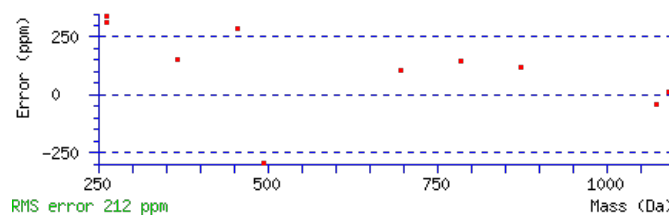NCBI BLAST search of **MSTVASISSESK**

(Parameters: blastp, nr protein database, expect=20000, no filter, PAM30)

Other BLAST [web gateways](#)

**AT5G56090.1**

All matches to this query

| Score | Mr(calc)  | Delta   | Sequence                     |
|-------|-----------|---------|------------------------------|
| 24.5  | 1238.5475 | 0.0008  | <a href="#">MSTVASISSESK</a> |
| 20.1  | 1238.5501 | -0.0019 | <a href="#">SEMVDRKASGK</a>  |
| 17.6  | 1238.5454 | 0.0028  | <a href="#">CSKCGQKNLK</a>   |
| 13.3  | 1238.5497 | -0.0014 | <a href="#">LYSVCTVEEK</a>   |
| 12.4  | 1238.5475 | 0.0008  | <a href="#">MESSISQTLK</a>   |
| 10.8  | 1238.5501 | -0.0019 | <a href="#">ETSRKCSVEK</a>   |
| 9.0   | 1238.5468 | 0.0015  | <a href="#">DDSRFNQTLK</a>   |
| 8.7   | 1238.5502 | -0.0019 | <a href="#">KMKGSQNAESK</a>  |
| 7.4   | 1238.5501 | -0.0019 | <a href="#">MVGSNTVTATSR</a> |
| 4.0   | 1238.5454 | 0.0028  | <a href="#">QLMINCRSGK</a>   |

Mascot: <http://www.matrixscience.com/>

**Peptide View**MS/MS Fragmentation of **GHDIMLKFK**Found in **AT5G56330.1** in **TAIR\_Arabidopsis**, Symbols: | carbonic anhydrase family protein | chr5:22830994-22833388 FORWARD

Match to Query 3746: 1116.541718 from(559.278135,2+) index(7815)

Title: Elution from: 68.193 to 68.193 scan no 10171 cid35.00 polarity:+

Data file D6h-1\_1.mgf

Click mouse within plot area to zoom in by factor of two about that point

Or,   to  Da Label all possible matches  Label matches used for scoring Show Y-axis 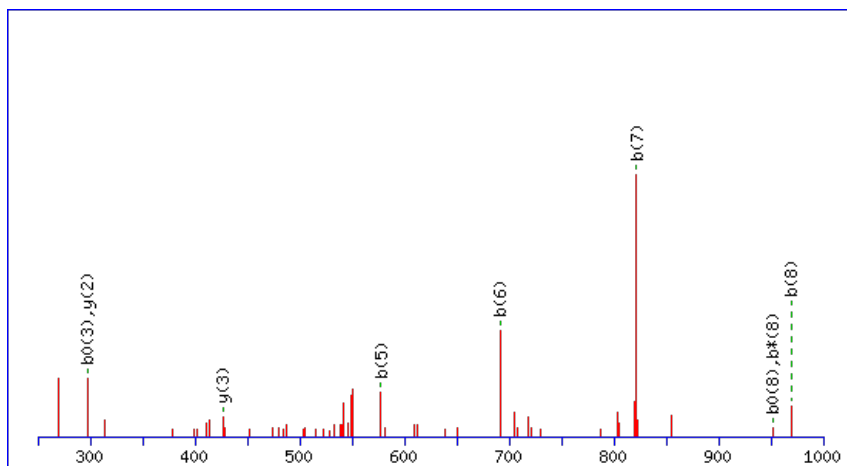Monoisotopic mass of neutral peptide **Mr(calc)**: 1116.5412**Fixed modifications:** Carbamidomethyl (C) (apply to specified residues or termini only)**Variable modifications:****M5** : Oxidation (M), with neutral losses 0.0000 (shown in table), 63.9983**Ions Score:** 37 **Expect:** 0.002**Matches** : 9/108 fragment ions using 8 most intense peaks ([help](#))

| # | b               | b <sup>++</sup> | b*              | b <sup>*++</sup> | b <sup>0</sup>  | b <sup>0++</sup> | Seq.     | y               | y <sup>++</sup> | y*        | y <sup>*++</sup> | y <sup>0</sup> | y <sup>0++</sup> | # |
|---|-----------------|-----------------|-----------------|------------------|-----------------|------------------|----------|-----------------|-----------------|-----------|------------------|----------------|------------------|---|
| 1 | 59.0258         | 30.0165         |                 |                  |                 |                  | <b>G</b> |                 |                 |           |                  |                |                  | 9 |
| 2 | 199.0758        | 100.0415        |                 |                  |                 |                  | <b>H</b> | 1059.5300       | 530.2686        | 1041.5064 | 521.2568         | 1041.5194      | 521.2633         | 8 |
| 3 | 315.0998        | 158.0535        |                 |                  | 297.0892        | 149.0482         | <b>D</b> | 919.4800        | 460.2436        | 901.4564  | 451.2318         | 901.4694       | 451.2383         | 7 |
| 4 | 429.1809        | 215.0941        |                 |                  | 411.1703        | 206.0888         | <b>I</b> | 803.4560        | 402.2316        | 785.4324  | 393.2198         |                |                  | 6 |
| 5 | <b>577.2133</b> | 289.1103        |                 |                  | 559.2027        | 280.1050         | <b>M</b> | 689.3749        | 345.1911        | 671.3513  | 336.1793         |                |                  | 5 |
| 6 | <b>691.2944</b> | 346.1508        |                 |                  | 673.2838        | 337.1456         | <b>L</b> | 541.3425        | 271.1749        | 523.3189  | 262.1631         |                |                  | 4 |
| 7 | <b>821.3834</b> | 411.1954        | 803.3599        | 402.1836         | 803.3729        | 402.1901         | <b>K</b> | <b>427.2614</b> | 214.1343        | 409.2378  | 205.1225         |                |                  | 3 |
| 8 | <b>969.4489</b> | 485.2281        | <b>951.4253</b> | 476.2163         | <b>951.4383</b> | 476.2228         | <b>F</b> | <b>297.1723</b> | 149.0898        | 279.1487  | 140.0780         |                |                  | 2 |
| 9 |                 |                 |                 |                  |                 |                  | <b>K</b> | 149.1069        | 75.0571         | 131.0833  | 66.0453          |                |                  | 1 |

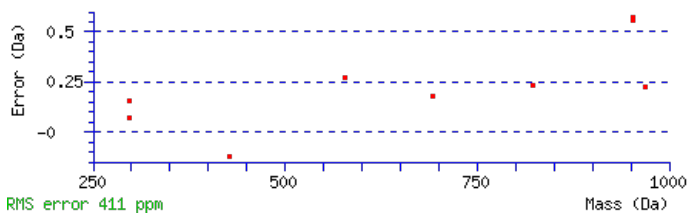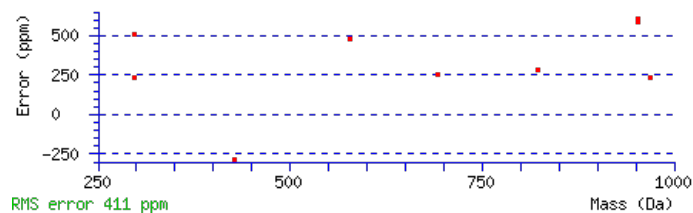NCBI **BLAST** search of **GHDIMLKFK**

(Parameters: blastp, nr protein database, expect=20000, no filter, PAM30)

Other BLAST [web gateways](#)**All matches to this query**

| Score | Mr(calc) | Delta | Sequence |
|-------|----------|-------|----------|
|-------|----------|-------|----------|



**AT5G56330.1**

|      |           |         |                             |
|------|-----------|---------|-----------------------------|
| 36.7 | 1116.5412 | 0.0005  | <a href="#">GHDIMLKFK</a>   |
| 13.0 | 1116.5412 | 0.0005  | <a href="#">MKVTHVDFK</a>   |
| 9.3  | 1116.5401 | 0.0017  | <a href="#">FFWIHLDK</a>    |
| 4.8  | 1116.5390 | 0.0027  | <a href="#">MIASPKQGAGK</a> |
| 3.8  | 1116.5419 | -0.0002 | <a href="#">LVMLLDMEK</a>   |
| 2.5  | 1116.5390 | 0.0027  | <a href="#">NANLVAAGVMK</a> |
| 1.8  | 1116.5437 | -0.0020 | <a href="#">GEGLSGTVKEK</a> |
| 0.8  | 1116.5419 | -0.0002 | <a href="#">VDEMMLLIK</a>   |
| 0.8  | 1116.5419 | -0.0002 | <a href="#">VDEMMLLIK</a>   |
| 0.1  | 1116.5437 | -0.0020 | <a href="#">SNGTEKDLIK</a>  |

**Mascot:** <http://www.matrixscience.com/>

## Peptide View

### MS/MS Fragmentation of **SRAKVK**

Found in **AT5G56600.1** in **TAIR\_Arabidopsis**, Symbols: PFN3, PRF3 | PFN3/PRF3 (PROFILIN 3); actin binding | chr5:22927108-22928047 REVERSE

Match to Query 638: 698.405542 from(350.210047,2+) index(2704)

Title: Elution from: 28.003 to 28.003 scan no 3393 cid35.00 polarity:+

Data file 0-1\_3.mgf

Click mouse within plot area to zoom in by factor of two about that point

Or,   to  Da

Label all possible matches  Label matches used for scoring

Show Y-axis

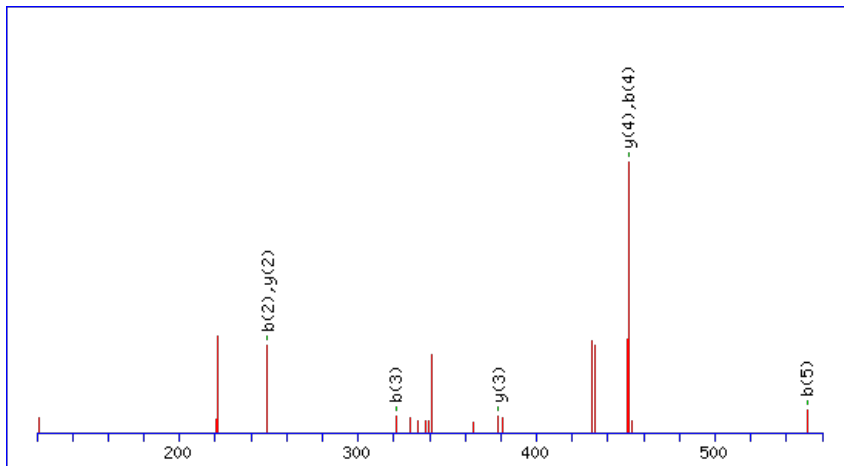

Monoisotopic mass of neutral peptide  $M_r(\text{calc})$ : 698.4065

Fixed modifications: Carbamidomethyl (C) (apply to specified residues or termini only)

Ions Score: 29 Expect: 0.0098

Matches : 7/48 fragment ions using 11 most intense peaks ([help](#))

| # | b               | b <sup>++</sup> | b*       | b <sup>*++</sup> | b <sup>0</sup> | b <sup>0++</sup> | Seq. | y               | y <sup>++</sup> | y*       | y <sup>*++</sup> | # |
|---|-----------------|-----------------|----------|------------------|----------------|------------------|------|-----------------|-----------------|----------|------------------|---|
| 1 | 89.0363         | 45.0218         |          |                  | 71.0258        | 36.0165          | S    |                 |                 |          |                  | 6 |
| 2 | <b>249.1256</b> | 125.0664        | 231.1020 | 116.0546         | 231.1150       | 116.0612         | R    | 611.3848        | 306.1960        | 593.3612 | 297.1842         | 5 |
| 3 | <b>321.1597</b> | 161.0835        | 303.1362 | 152.0717         | 303.1492       | 152.0782         | A    | <b>451.2955</b> | 226.1514        | 433.2719 | 217.1396         | 4 |
| 4 | <b>451.2488</b> | 226.1280        | 433.2252 | 217.1162         | 433.2382       | 217.1227         | K    | <b>379.2614</b> | 190.1343        | 361.2378 | 181.1225         | 3 |
| 5 | <b>551.3142</b> | 276.1607        | 533.2906 | 267.1490         | 533.3037       | 267.1555         | V    | <b>249.1723</b> | 125.0898        | 231.1487 | 116.0780         | 2 |
| 6 |                 |                 |          |                  |                |                  | K    | 149.1069        | 75.0571         | 131.0833 | 66.0453          | 1 |

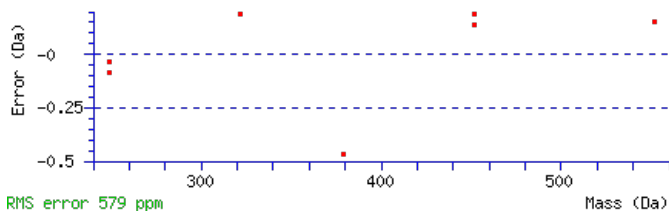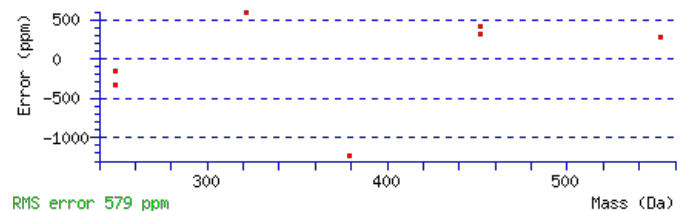

### NCBI BLAST search of **SRAKVK**

(Parameters: blastp, nr protein database, expect=20000, no filter, PAM30)

Other BLAST [web gateways](#)

### All matches to this query

| Score | $M_r(\text{calc})$ | Delta   | Sequence               |
|-------|--------------------|---------|------------------------|
| 29.2  | 698.4065           | -0.0010 | <a href="#">SRAKVK</a> |
| 23.7  | 698.4061           | -0.0006 | <a href="#">FVSLVK</a> |
| 22.6  | 698.4065           | -0.0010 | <a href="#">SRVKAK</a> |

## AT5G56600.1

|      |          |         |                        |
|------|----------|---------|------------------------|
| 19.1 | 698.4065 | -0.0010 | <a href="#">GTRKVK</a> |
| 19.1 | 698.4065 | -0.0010 | <a href="#">RSKLGK</a> |
| 14.7 | 698.4061 | -0.0006 | <a href="#">FVIVSK</a> |
| 8.6  | 698.4061 | -0.0006 | <a href="#">LAVYVK</a> |
| 8.6  | 698.4061 | -0.0006 | <a href="#">LVSFVK</a> |
| 8.6  | 698.4065 | -0.0010 | <a href="#">RKGTVK</a> |
| 8.6  | 698.4065 | -0.0010 | <a href="#">RKTGVK</a> |

**Mascot:** <http://www.matrixscience.com/>

## Peptide View

### MS/MS Fragmentation of **EAITAAVAELK**

Found in **AT5G56680.1** in **TAIR\_Arabidopsis**, Symbols: EMB2755, SYNC1 | SYNC1 (EMBRYO DEFECTIVE 2755); ATP binding / aminoacyl-tRNA ligase / asparagine-tRNA ligase / aspartate-tRNA ligase / nucleic acid binding / nucleotide binding | chr5:22953871-22956067 FORWARD

Match to Query 3602: 1126.587110 from(564.300831,2+) index(4331)

Title: Elution from: 40.437 to 40.437 scan no 5473 cid35.00 polarity:+

Data file D6h-3\_1.mgf

Click mouse within plot area to zoom in by factor of two about that point

Or,   to  Da

Label all possible matches  Label matches used for scoring

Show Y-axis

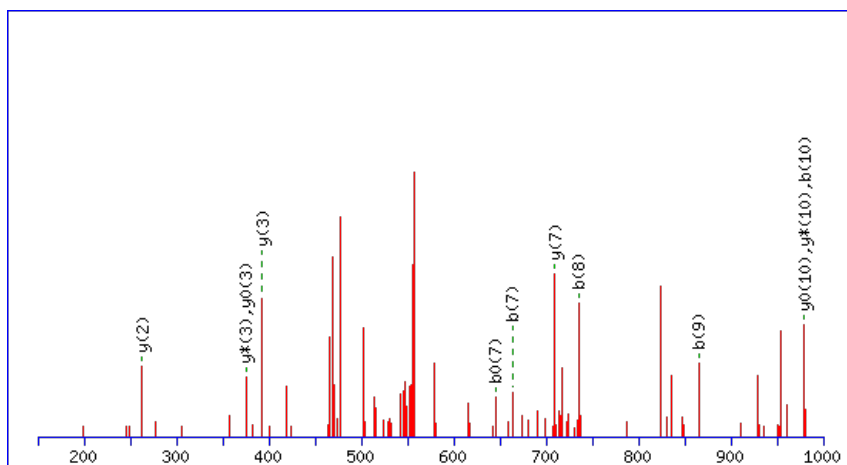

Monoisotopic mass of neutral peptide  $M_r(\text{calc})$ : 1126.5878

Fixed modifications: Carbamidomethyl (C) (apply to specified residues or termini only)

Ions Score: 21 Expect: 0.04

Matches : 12/96 fragment ions using 16 most intense peaks ([help](#))

| #  | b        | b <sup>++</sup> | b <sup>0</sup> | b <sup>0++</sup> | Seq. | y        | y <sup>++</sup> | y*       | y <sup>*++</sup> | y <sup>0</sup> | y <sup>0++</sup> | #  |
|----|----------|-----------------|----------------|------------------|------|----------|-----------------|----------|------------------|----------------|------------------|----|
| 1  | 131.0469 | 66.0271         | 113.0363       | 57.0218          | E    |          |                 |          |                  |                |                  | 11 |
| 2  | 203.0811 | 102.0442        | 185.0705       | 93.0389          | A    | 997.5555 | 499.2814        | 979.5319 | 490.2696         | 979.5449       | 490.2761         | 10 |
| 3  | 317.1622 | 159.0847        | 299.1516       | 150.0794         | I    | 925.5213 | 463.2643        | 907.4977 | 454.2525         | 907.5107       | 454.2590         | 9  |
| 4  | 419.2069 | 210.1071        | 401.1963       | 201.1018         | T    | 811.4402 | 406.2237        | 793.4166 | 397.2120         | 793.4296       | 397.2185         | 8  |
| 5  | 491.2410 | 246.1241        | 473.2304       | 237.1189         | A    | 709.3955 | 355.2014        | 691.3719 | 346.1896         | 691.3849       | 346.1961         | 7  |
| 6  | 563.2752 | 282.1412        | 545.2646       | 273.1359         | A    | 637.3613 | 319.1843        | 619.3378 | 310.1725         | 619.3508       | 310.1790         | 6  |
| 7  | 663.3406 | 332.1739        | 645.3300       | 323.1687         | V    | 565.3272 | 283.1672        | 547.3036 | 274.1554         | 547.3166       | 274.1620         | 5  |
| 8  | 735.3748 | 368.1910        | 717.3642       | 359.1857         | A    | 465.2618 | 233.1345        | 447.2382 | 224.1227         | 447.2512       | 224.1292         | 4  |
| 9  | 865.4144 | 433.2108        | 847.4038       | 424.2055         | E    | 393.2276 | 197.1174        | 375.2040 | 188.1056         | 375.2170       | 188.1122         | 3  |
| 10 | 979.4955 | 490.2514        | 961.4849       | 481.2461         | L    | 263.1880 | 132.0976        | 245.1644 | 123.0858         |                |                  | 2  |
| 11 |          |                 |                |                  | K    | 149.1069 | 75.0571         | 131.0833 | 66.0453          |                |                  | 1  |

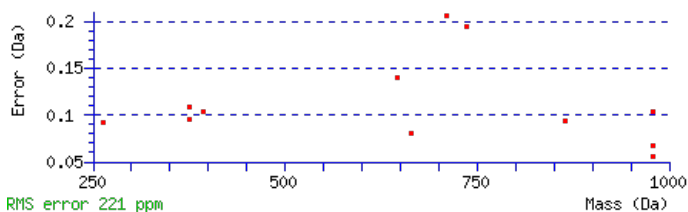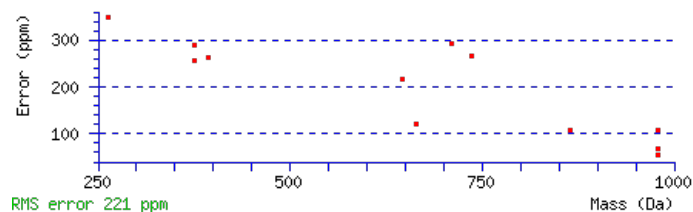

NCBI BLAST search of [EAITAAVAELK](#)

(Parameters: blastp, nr protein database, expect=20000, no filter, PAM30)

Other BLAST [web gateways](#)

All matches to this query

**AT5G56680.1**

| <b>Score</b> | <b>Mr(calc)</b> | <b>Delta</b> | <b>Sequence</b>             |
|--------------|-----------------|--------------|-----------------------------|
| 21.2         | 1126.5878       | -0.0007      | <a href="#">EAITAAVAELK</a> |
| 20.3         | 1126.5905       | -0.0034      | <a href="#">DRNSLLLP GK</a> |
| 19.3         | 1126.5878       | -0.0007      | <a href="#">ELASAAAIELK</a> |
| 12.5         | 1126.5905       | -0.0034      | <a href="#">ELTPORQLK</a>   |
| 8.2          | 1126.5900       | -0.0029      | <a href="#">FLIQPEIEK</a>   |
| 7.0          | 1126.5878       | -0.0007      | <a href="#">AELSNIVEIK</a>  |
| 3.8          | 1126.5878       | -0.0007      | <a href="#">LEKQLEDLK</a>   |

**Mascot:** <http://www.matrixscience.com/>

**Peptide View**MS/MS Fragmentation of **AALLWILTHVVQPGDR**Found in **AT5G56790.1** in **TAIR\_Arabidopsis**, Symbols: | protein kinase family protein | chr5:22985836-22988617 FORWARD

Match to Query 8726: 1798.901948 from(900.458250,2+) index(10202)

Title: Elution from: 94.308 to 94.308 scan no 14281 cid35.00 polarity:+

Data file D6h-3\_1.mgf

Click mouse within plot area to zoom in by factor of two about that point

Or,   to  Da Label all possible matches  Label matches used for scoring Show Y-axis 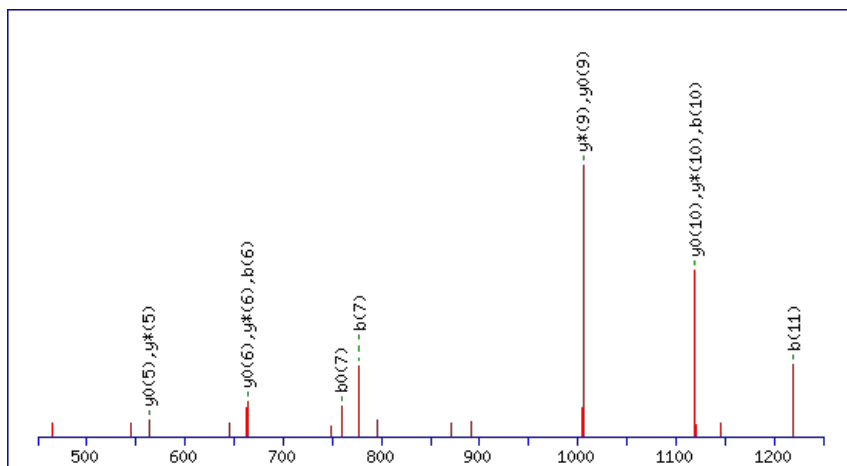**Monoisotopic mass of neutral peptide Mr(calc):** 1798.9000**Fixed modifications:** Carbamidomethyl (C) (apply to specified residues or termini only)**Ions Score:** 22 **Expect:** 0.035**Matches:** 13/146 fragment ions using 8 most intense peaks ([help](#))

| #  | b                | b <sup>++</sup> | b <sup>*</sup> | b <sup>*++</sup> | b <sup>0</sup>  | b <sup>0++</sup> | Seq. | y         | y <sup>++</sup> | y <sup>*</sup>   | y <sup>*++</sup> | y <sup>0</sup>   | y <sup>0++</sup> | #  |
|----|------------------|-----------------|----------------|------------------|-----------------|------------------|------|-----------|-----------------|------------------|------------------|------------------|------------------|----|
| 1  | 73.0414          | 37.0244         |                |                  |                 |                  | A    |           |                 |                  |                  |                  |                  | 16 |
| 2  | 145.0756         | 73.0414         |                |                  |                 |                  | A    | 1727.8732 | 864.4402        | 1709.8496        | 855.4284         | 1709.8626        | 855.4349         | 15 |
| 3  | 259.1567         | 130.0820        |                |                  |                 |                  | L    | 1655.8390 | 828.4232        | 1637.8155        | 819.4114         | 1637.8285        | 819.4179         | 14 |
| 4  | 373.2378         | 187.1225        |                |                  |                 |                  | L    | 1541.7579 | 771.3826        | 1523.7344        | 762.3708         | 1523.7474        | 762.3773         | 13 |
| 5  | 561.3112         | 281.1592        |                |                  |                 |                  | W    | 1427.6768 | 714.3421        | 1409.6533        | 705.3303         | 1409.6663        | 705.3368         | 12 |
| 6  | <b>663.3559</b>  | 332.1816        |                |                  | 645.3453        | 323.1763         | T    | 1239.6035 | 620.3054        | 1221.5799        | 611.2936         | 1221.5929        | 611.3001         | 11 |
| 7  | <b>777.4370</b>  | 389.2221        |                |                  | <b>759.4264</b> | 380.2168         | L    | 1137.5587 | 569.2830        | <b>1119.5352</b> | 560.2712         | <b>1119.5482</b> | 560.2777         | 10 |
| 8  | 879.4817         | 440.2445        |                |                  | 861.4711        | 431.2392         | T    | 1023.4776 | 512.2425        | <b>1005.4541</b> | 503.2307         | <b>1005.4671</b> | 503.2372         | 9  |
| 9  | 1019.5317        | 510.2695        |                |                  | 1001.5211       | 501.2642         | H    | 921.4329  | 461.2201        | 903.4093         | 452.2083         | 903.4224         | 452.2148         | 8  |
| 10 | <b>1119.5971</b> | 560.3022        |                |                  | 1101.5866       | 551.2969         | V    | 781.3829  | 391.1951        | 763.3593         | 382.1833         | 763.3723         | 382.1898         | 7  |
| 11 | <b>1219.6626</b> | 610.3349        |                |                  | 1201.6520       | 601.3297         | V    | 681.3175  | 341.1624        | <b>663.2939</b>  | 332.1506         | <b>663.3069</b>  | 332.1571         | 6  |
| 12 | 1349.7152        | 675.3613        | 1331.6917      | 666.3495         | 1331.7047       | 666.3560         | Q    | 581.2520  | 291.1296        | <b>563.2284</b>  | 282.1179         | <b>563.2414</b>  | 282.1244         | 5  |
| 13 | 1447.7650        | 724.3862        | 1429.7415      | 715.3744         | 1429.7545       | 715.3809         | P    | 451.1994  | 226.1033        | 433.1758         | 217.0915         | 433.1888         | 217.0980         | 4  |
| 14 | 1505.7835        | 753.3954        | 1487.7600      | 744.3836         | 1487.7730       | 744.3901         | G    | 353.1496  | 177.0784        | 335.1260         | 168.0666         | 335.1390         | 168.0731         | 3  |
| 15 | 1621.8075        | 811.4074        | 1603.7839      | 802.3956         | 1603.7970       | 802.4021         | D    | 295.1311  | 148.0692        | 277.1075         | 139.0574         | 277.1205         | 139.0639         | 2  |
| 16 |                  |                 |                |                  |                 |                  | R    | 179.1071  | 90.0572         | 161.0835         | 81.0454          |                  |                  | 1  |

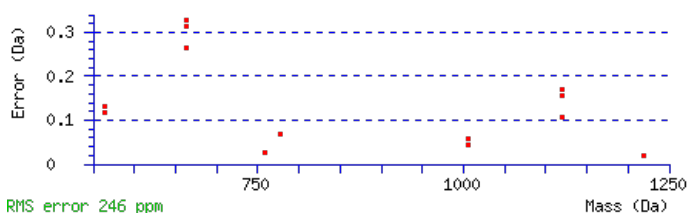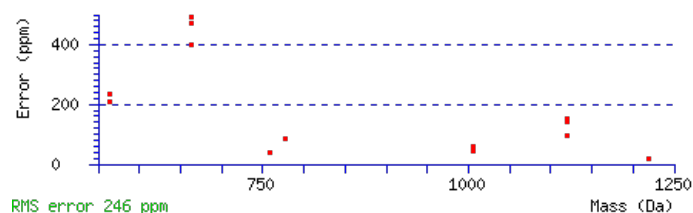

## AT5G56790.1

NCBI **BLAST** search of [AALLWTLTHVVQPGDR](#)

(Parameters: blastp, nr protein database, expect=20000, no filter, PAM30)

Other BLAST [web gateways](#)

### All matches to this query

| Score | Mr(calc)  | Delta   | Sequence                         |
|-------|-----------|---------|----------------------------------|
| 21.9  | 1798.9000 | 0.0019  | <a href="#">AALLWTLTHVVQPGDR</a> |
| 7.2   | 1798.9012 | 0.0007  | <a href="#">MSSEIRRNIITKPSK</a>  |
| 3.9   | 1798.9056 | -0.0037 | <a href="#">SWGRLALVIVTACFGK</a> |
| 1.4   | 1798.9068 | -0.0049 | <a href="#">NRKLATVLSIMLCNK</a>  |

**Mascot:** <http://www.matrixscience.com/>

**Peptide View**MS/MS Fragmentation of **QHEGDLEASASTYDLQR**Found in **AT5G57290.1** in **TAIR\_Arabidopsis**, Symbols: | 60S acidic ribosomal protein P3 (RPP3B) | chr5:23224275-23225061 REVERSE

Match to Query 9543: 2030.821191 from(677.947673,3+) index(3219)

Title: Elution from: 34.488 to 34.488 scan no 4112 cid35.00 polarity:+

Data file D12h-2\_1.mgf

Click mouse within plot area to zoom in by factor of two about that point

Or,   to  Da Label all possible matches  Label matches used for scoring Show Y-axis 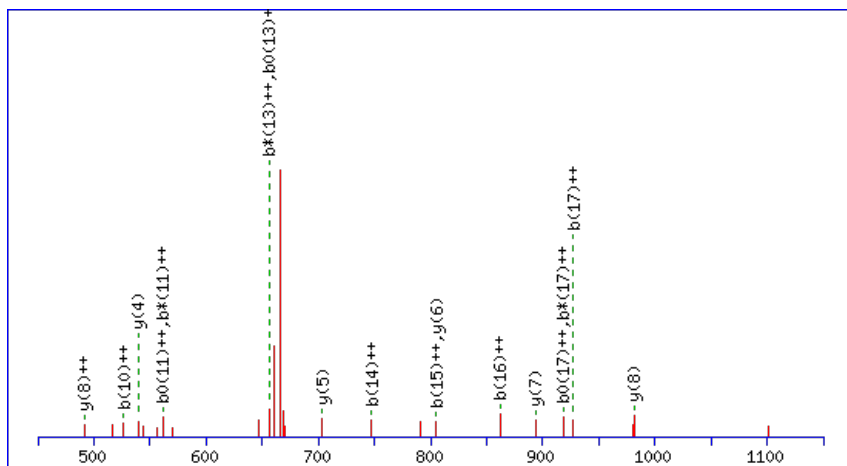Monoisotopic mass of neutral peptide **Mr(calc)**: 2030.8236

Fixed modifications: Carbamidomethyl (C) (apply to specified residues or termini only)

Ions Score: 25 **Expect**: 0.0062Matches : 17/194 fragment ions using 18 most intense peaks ([help](#))

| #  | b         | b <sup>++</sup> | b <sup>*</sup> | b <sup>*++</sup> | b <sup>0</sup> | b <sup>0++</sup> | Seq. | y               | y <sup>++</sup> | y <sup>*</sup> | y <sup>*++</sup> | y <sup>0</sup> | y <sup>0++</sup> | #  |
|----|-----------|-----------------|----------------|------------------|----------------|------------------|------|-----------------|-----------------|----------------|------------------|----------------|------------------|----|
| 1  | 131.0599  | 66.0336         | 113.0363       | 57.0218          |                |                  | Q    |                 |                 |                |                  |                |                  | 18 |
| 2  | 271.1099  | 136.0586        | 253.0864       | 127.0468         |                |                  | H    | 1901.7782       | 951.3928        | 1883.7546      | 942.3810         | 1883.7677      | 942.3875         | 17 |
| 3  | 401.1496  | 201.0784        | 383.1260       | 192.0666         | 383.1390       | 192.0731         | E    | 1761.7282       | 881.3677        | 1743.7046      | 872.3560         | 1743.7176      | 872.3625         | 16 |
| 4  | 459.1681  | 230.0877        | 441.1445       | 221.0759         | 441.1575       | 221.0824         | G    | 1631.6886       | 816.3479        | 1613.6650      | 807.3361         | 1613.6780      | 807.3426         | 15 |
| 5  | 575.1920  | 288.0997        | 557.1685       | 279.0879         | 557.1815       | 279.0944         | D    | 1573.6701       | 787.3387        | 1555.6465      | 778.3269         | 1555.6595      | 778.3334         | 14 |
| 6  | 689.2731  | 345.1402        | 671.2496       | 336.1284         | 671.2626       | 336.1349         | L    | 1457.6461       | 729.3267        | 1439.6225      | 720.3149         | 1439.6355      | 720.3214         | 13 |
| 7  | 819.3128  | 410.1600        | 801.2892       | 401.1482         | 801.3022       | 401.1547         | E    | 1343.5650       | 672.2861        | 1325.5414      | 663.2743         | 1325.5544      | 663.2809         | 12 |
| 8  | 891.3469  | 446.1771        | 873.3233       | 437.1653         | 873.3364       | 437.1718         | A    | 1213.5254       | 607.2663        | 1195.5018      | 598.2545         | 1195.5148      | 598.2610         | 11 |
| 9  | 979.3760  | 490.1916        | 961.3524       | 481.1798         | 961.3654       | 481.1863         | S    | 1141.4912       | 571.2493        | 1123.4676      | 562.2375         | 1123.4807      | 562.2440         | 10 |
| 10 | 1051.4101 | <b>526.2087</b> | 1033.3865      | 517.1969         | 1033.3996      | 517.2034         | A    | 1053.4622       | 527.2347        | 1035.4386      | 518.2229         | 1035.4516      | 518.2294         | 9  |
| 11 | 1139.4392 | 570.2232        | 1121.4156      | <b>561.2114</b>  | 1121.4286      | <b>561.2180</b>  | S    | <b>981.4280</b> | <b>491.2176</b> | 963.4044       | 482.2059         | 963.4175       | 482.2124         | 8  |
| 12 | 1227.4683 | 614.2378        | 1209.4447      | 605.2260         | 1209.4577      | 605.2325         | S    | <b>893.3990</b> | 447.2031        | 875.3754       | 438.1913         | 875.3884       | 438.1978         | 7  |
| 13 | 1329.5130 | 665.2601        | 1311.4894      | <b>656.2483</b>  | 1311.5024      | <b>656.2548</b>  | T    | <b>805.3699</b> | 403.1886        | 787.3463       | 394.1768         | 787.3593       | 394.1833         | 6  |
| 14 | 1493.5733 | <b>747.2903</b> | 1475.5498      | 738.2785         | 1475.5628      | 738.2850         | Y    | <b>703.3252</b> | 352.1662        | 685.3016       | 343.1544         | 685.3146       | 343.1609         | 5  |
| 15 | 1609.5973 | <b>805.3023</b> | 1591.5737      | 796.2905         | 1591.5867      | 796.2970         | D    | <b>539.2648</b> | 270.1360        | 521.2412       | 261.1243         | 521.2543       | 261.1308         | 4  |
| 16 | 1723.6784 | <b>862.3428</b> | 1705.6548      | 853.3311         | 1705.6678      | 853.3376         | L    | 423.2408        | 212.1241        | 405.2173       | 203.1123         |                |                  | 3  |
| 17 | 1853.7311 | <b>927.3692</b> | 1835.7075      | <b>918.3574</b>  | 1835.7205      | <b>918.3639</b>  | Q    | 309.1597        | 155.0835        | 291.1362       | 146.0717         |                |                  | 2  |
| 18 |           |                 |                |                  |                |                  | R    | 179.1071        | 90.0572         | 161.0835       | 81.0454          |                |                  | 1  |



AT5G57290.1

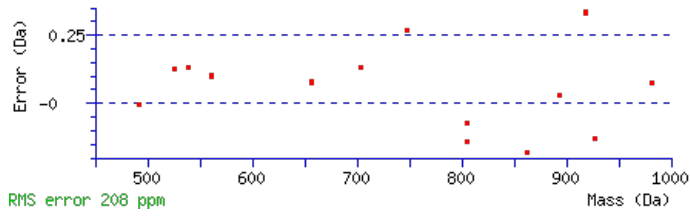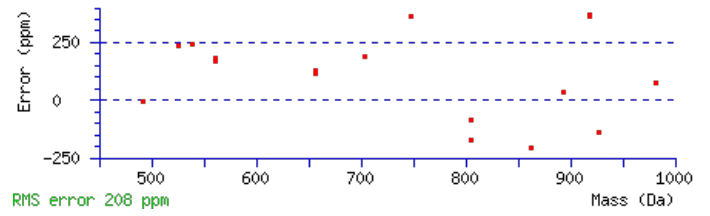

NCBI **BLAST** search of [QHEGDLEASASSTYDLQR](#)

(Parameters: blastp, nr protein database, expect=20000, no filter, PAM30)

Other BLAST [web gateways](#)

All matches to this query

| Score | Mr(calc)  | Delta   | Sequence                           |
|-------|-----------|---------|------------------------------------|
| 25.0  | 2030.8236 | -0.0024 | <a href="#">QHEGDLEASASSTYDLQR</a> |
| 2.8   | 2030.8226 | -0.0015 | <a href="#">DVFMFKTMCKECLER</a>    |

Mascot: <http://www.matrixscience.com/>

### Peptide View

#### MS/MS Fragmentation of **RFHQDNSTTQQR**

Found in **AT5G57420.1** in **TAIR\_Arabidopsis**, Symbols: IAA33 | IAA33 (indoleacetic acid-induced protein 33); transcription factor | chr5:23287250-23288185 FORWARD

Match to Query 7211: 1638.693756 from(820.354154,2+) index(6627)

Title: Elution from: 58.787 to 58.787 scan no 8612 cid35.00 polarity:+

Data file D6h-2\_3.mgf

Click mouse within plot area to zoom in by factor of two about that point

Or,   to  Da

Label all possible matches  Label matches used for scoring

Show Y-axis

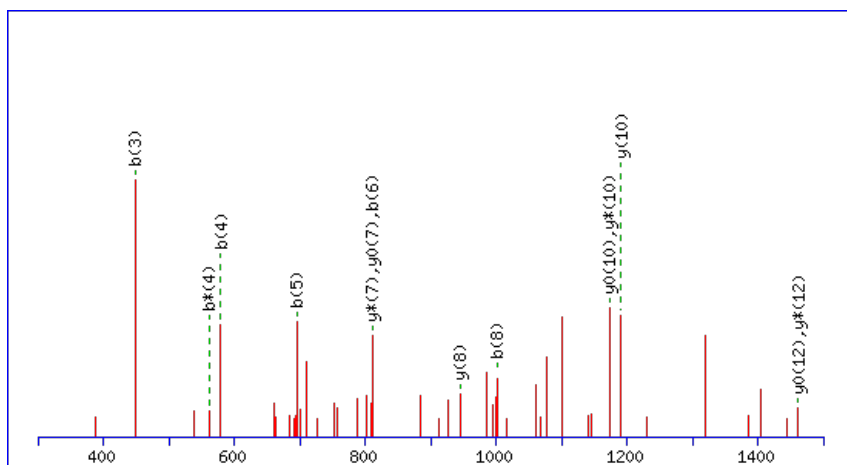

**Monoisotopic mass of neutral peptide Mr(calc):** 1638.6917

**Fixed modifications:** Carbamidomethyl (C) (apply to specified residues or termini only)

**Ions Score:** 29 **Expect:** 0.0079

**Matches:** 15/128 fragment ions using 22 most intense peaks ([help](#))

| #  | b                | b <sup>++</sup> | b*              | b <sup>*++</sup> | b <sup>0</sup> | b <sup>0++</sup> | Seq.     | y                | y <sup>++</sup> | y*               | y <sup>*++</sup> | y <sup>0</sup>   | y <sup>0++</sup> | #         |
|----|------------------|-----------------|-----------------|------------------|----------------|------------------|----------|------------------|-----------------|------------------|------------------|------------------|------------------|-----------|
| 1  | 161.0965         | 81.0519         | 143.0729        | 72.0401          |                |                  | <b>R</b> |                  |                 |                  |                  |                  |                  | <b>13</b> |
| 2  | 309.1620         | 155.0846        | 291.1384        | 146.0728         |                |                  | <b>F</b> | 1479.6098        | 740.3085        | <b>1461.5862</b> | 731.2967         | <b>1461.5992</b> | 731.3032         | <b>12</b> |
| 3  | <b>449.2120</b>  | 225.1096        | 431.1884        | 216.0978         |                |                  | <b>H</b> | 1331.5443        | 666.2758        | 1313.5207        | 657.2640         | 1313.5337        | 657.2705         | <b>11</b> |
| 4  | <b>579.2646</b>  | 290.1360        | <b>561.2411</b> | 281.1242         |                |                  | <b>Q</b> | <b>1191.4943</b> | 596.2508        | <b>1173.4707</b> | 587.2390         | <b>1173.4837</b> | 587.2455         | <b>10</b> |
| 5  | <b>695.2886</b>  | 348.1479        | 677.2650        | 339.1362         | 677.2781       | 339.1427         | <b>D</b> | 1061.4416        | 531.2245        | 1043.4181        | 522.2127         | 1043.4311        | 522.2192         | <b>9</b>  |
| 6  | <b>811.3256</b>  | 406.1664        | 793.3020        | 397.1547         | 793.3151       | 397.1612         | <b>N</b> | <b>945.4177</b>  | 473.2125        | 927.3941         | 464.2007         | 927.4071         | 464.2072         | <b>8</b>  |
| 7  | 899.3547         | 450.1810        | 881.3311        | 441.1692         | 881.3441       | 441.1757         | <b>S</b> | 829.3807         | 415.1940        | <b>811.3571</b>  | 406.1822         | <b>811.3701</b>  | 406.1887         | <b>7</b>  |
| 8  | <b>1001.3994</b> | 501.2033        | 983.3758        | 492.1915         | 983.3888       | 492.1981         | <b>T</b> | 741.3516         | 371.1794        | 723.3280         | 362.1677         | 723.3410         | 362.1742         | <b>6</b>  |
| 9  | 1103.4441        | 552.2257        | 1085.4205       | 543.2139         | 1085.4335      | 543.2204         | <b>T</b> | 639.3069         | 320.1571        | 621.2833         | 311.1453         | 621.2963         | 311.1518         | <b>5</b>  |
| 10 | 1233.4968        | 617.2520        | 1215.4732       | 608.2402         | 1215.4862      | 608.2467         | <b>Q</b> | 537.2622         | 269.1347        | 519.2386         | 260.1229         |                  |                  | <b>4</b>  |
| 11 | 1363.5494        | 682.2783        | 1345.5258       | 673.2665         | 1345.5388      | 673.2731         | <b>Q</b> | 407.2095         | 204.1084        | 389.1860         | 195.0966         |                  |                  | <b>3</b>  |
| 12 | <b>1461.5992</b> | 731.3032        | 1443.5756       | 722.2914         | 1443.5886      | 722.2980         | <b>P</b> | 277.1569         | 139.0821        | 259.1333         | 130.0703         |                  |                  | <b>2</b>  |
| 13 |                  |                 |                 |                  |                |                  | <b>R</b> | 179.1071         | 90.0572         | 161.0835         | 81.0454          |                  |                  | <b>1</b>  |

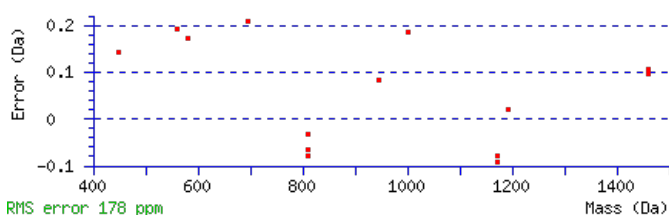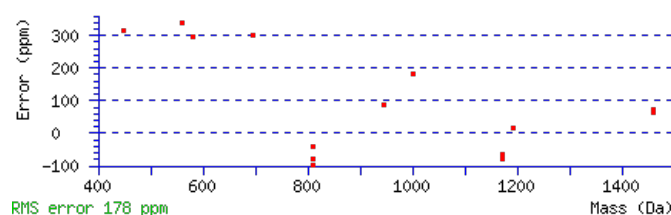

NCBI **BLAST** search of **RFHQDNSTTQQR**

(Parameters: blastp, nr protein database, expect=20000, no filter, PAM30)

AT5G57420.1

Other BLAST [web gateways](#)

**All matches to this query**

| Score | Mr(calc)  | Delta   | Sequence                       |
|-------|-----------|---------|--------------------------------|
| 29.0  | 1638.6917 | 0.0020  | <a href="#">RFHQDNSTTQQR</a>   |
| 5.0   | 1638.6920 | 0.0018  | <a href="#">VLTCSDFEHEVASK</a> |
| 1.0   | 1638.6969 | -0.0031 | <a href="#">LMNFTWEEKHER</a>   |
| 1.0   | 1638.6924 | 0.0013  | <a href="#">VDNNDPNAMKTLNR</a> |

**Mascot:** <http://www.matrixscience.com/>

**Peptide View**MS/MS Fragmentation of **YGLIDEFK**Found in **AT5G57655.2** in **TAIR\_Arabidopsis**, Symbols: | xylose isomerase family protein | chr5:23364256-23367031 FORWARD

Match to Query 2296: 983.495896 from(492.755224,2+) index(6672)

Title: Elution from: 59.051 to 59.051 scan no 8618 cid35.00 polarity:+

Data file D12h-3\_2.mgf

Click mouse within plot area to zoom in by factor of two about that point

Or,   to  Da Label all possible matches  Label matches used for scoring Show Y-axis 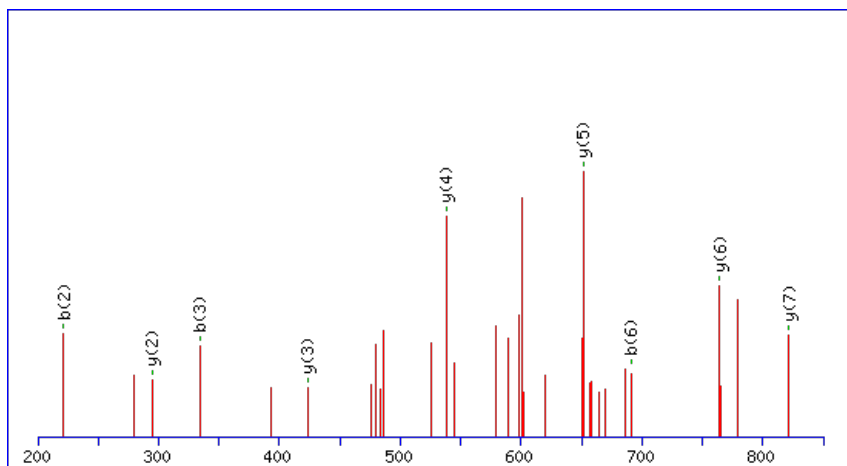Monoisotopic mass of neutral peptide  $M_r(\text{calc})$ : 983.4964

Fixed modifications: Carbamidomethyl (C) (apply to specified residues or termini only)

Ions Score: 33 Expect: 0.0011

Matches : 9/58 fragment ions using 21 most intense peaks ([help](#))

| # | b               | b <sup>++</sup> | b <sup>0</sup> | b <sup>0++</sup> | Seq. | y               | y <sup>++</sup> | y*       | y <sup>*++</sup> | y <sup>0</sup> | y <sup>0++</sup> | # |
|---|-----------------|-----------------|----------------|------------------|------|-----------------|-----------------|----------|------------------|----------------|------------------|---|
| 1 | 164.0706        | 82.5389         |                |                  | Y    |                 |                 |          |                  |                |                  | 8 |
| 2 | <b>221.0921</b> | 111.0497        |                |                  | G    | <b>821.4403</b> | 411.2238        | 804.4138 | 402.7105         | 803.4298       | 402.2185         | 7 |
| 3 | <b>334.1761</b> | 167.5917        |                |                  | L    | <b>764.4189</b> | 382.7131        | 747.3923 | 374.1998         | 746.4083       | 373.7078         | 6 |
| 4 | 447.2602        | 224.1337        |                |                  | I    | <b>651.3348</b> | 326.1710        | 634.3083 | 317.6578         | 633.3243       | 317.1658         | 5 |
| 5 | 562.2871        | 281.6472        | 544.2766       | 272.6419         | D    | <b>538.2508</b> | 269.6290        | 521.2242 | 261.1157         | 520.2402       | 260.6237         | 4 |
| 6 | <b>691.3297</b> | 346.1685        | 673.3192       | 337.1632         | E    | <b>423.2238</b> | 212.1155        | 406.1973 | 203.6023         | 405.2132       | 203.1103         | 3 |
| 7 | 838.3981        | 419.7027        | 820.3876       | 410.6974         | F    | <b>294.1812</b> | 147.5942        | 277.1547 | 139.0810         |                |                  | 2 |
| 8 |                 |                 |                |                  | K    | 147.1128        | 74.0600         | 130.0863 | 65.5468          |                |                  | 1 |

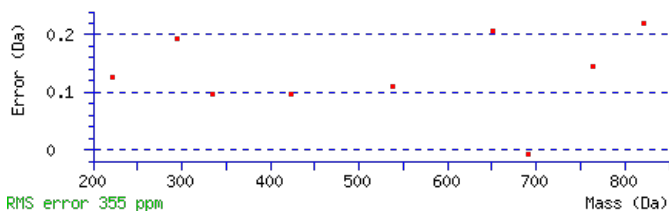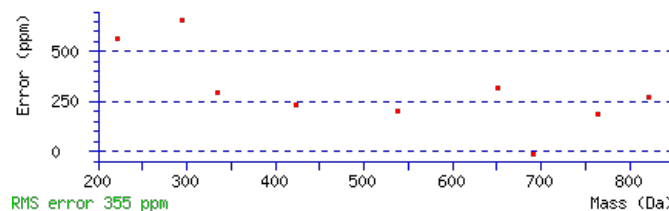NCBI **BLAST** search of **YGLIDEFK**

(Parameters: blastp, nr protein database, expect=20000, no filter, PAM30)

Other BLAST [web gateways](#)**All matches to this query**

| Score | $M_r(\text{calc})$ | Delta   | Sequence        |
|-------|--------------------|---------|-----------------|
| 33.0  | 983.4964           | -0.0005 | <b>YGLIDEFK</b> |



## Peptide View

MS/MS Fragmentation of **GMGEKQIEVDK**

Found in **AT5G57960.1** in **TAIR\_Arabidopsis**, Symbols: | GTP-binding family protein | chr5:23480359-23483707 REVERSE

Match to Query 4451: 1248.601298 from(625.307925,2+) index(1355)

Title: Elution from: 19.227 to 19.227 scan no 1859 cid35.00 polarity:+

Data file D12h-1\_2.mgf

Click mouse within plot area to zoom in by factor of two about that point

Or,   to  Da

Label all possible matches  Label matches used for scoring

Show Y-axis

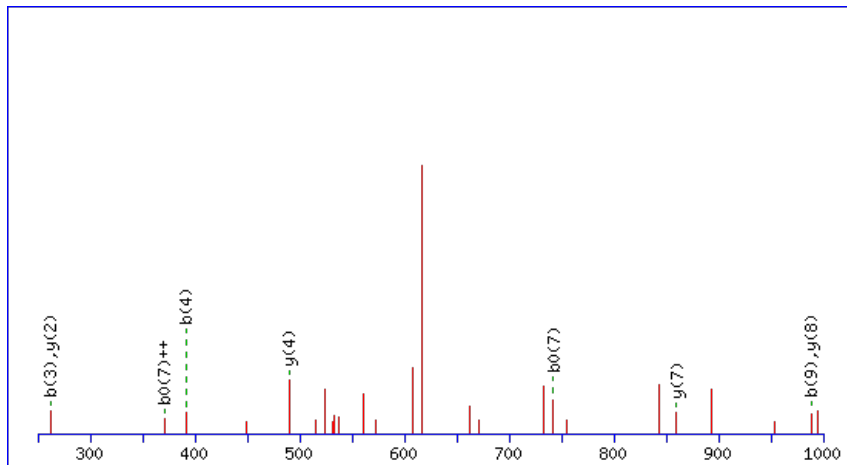

Monoisotopic mass of neutral peptide **Mr(calc)**: 1248.6020

**Fixed modifications:** Carbamidomethyl (C) (apply to specified residues or termini only)

**Variable modifications:**

**M2** : Oxidation (M), with neutral losses 0.0000 (shown in table), 63.9983

**Ions Score:** 22 **Expect:** 0.041

**Matches** : 9/154 fragment ions using 15 most intense peaks ([help](#))

| #  | b               | b <sup>++</sup> | b <sup>*</sup> | b <sup>*++</sup> | b <sup>0</sup>  | b <sup>0++</sup> | Seq. | y               | y <sup>++</sup> | y <sup>*</sup> | y <sup>*++</sup> | y <sup>0</sup> | y <sup>0++</sup> | #  |
|----|-----------------|-----------------|----------------|------------------|-----------------|------------------|------|-----------------|-----------------|----------------|------------------|----------------|------------------|----|
| 1  | 58.0287         | 29.5180         |                |                  |                 |                  | G    |                 |                 |                |                  |                |                  | 11 |
| 2  | 205.0641        | 103.0357        |                |                  |                 |                  | M    | 1192.5878       | 596.7975        | 1175.5613      | 588.2843         | 1174.5773      | 587.7923         | 10 |
| 3  | <b>262.0856</b> | 131.5464        |                |                  |                 |                  | G    | 1045.5524       | 523.2798        | 1028.5259      | 514.7666         | 1027.5419      | 514.2746         | 9  |
| 4  | <b>391.1282</b> | 196.0677        |                |                  | 373.1176        | 187.0625         | E    | <b>988.5310</b> | 494.7691        | 971.5044       | 486.2558         | 970.5204       | 485.7638         | 8  |
| 5  | 519.2232        | 260.1152        | 502.1966       | 251.6019         | 501.2126        | 251.1099         | K    | <b>859.4884</b> | 430.2478        | 842.4618       | 421.7345         | 841.4778       | 421.2425         | 7  |
| 6  | 647.2817        | 324.1445        | 630.2552       | 315.6312         | 629.2712        | 315.1392         | Q    | 731.3934        | 366.2003        | 714.3668       | 357.6871         | 713.3828       | 357.1951         | 6  |
| 7  | 760.3658        | 380.6865        | 743.3393       | 372.1733         | <b>742.3552</b> | <b>371.6813</b>  | I    | 603.3348        | 302.1710        | 586.3083       | 293.6578         | 585.3243       | 293.1658         | 5  |
| 8  | 889.4084        | 445.2078        | 872.3818       | 436.6946         | 871.3978        | 436.2026         | E    | <b>490.2508</b> | 245.6290        | 473.2242       | 237.1157         | 472.2402       | 236.6237         | 4  |
| 9  | <b>988.4768</b> | 494.7420        | 971.4503       | 486.2288         | 970.4662        | 485.7368         | V    | 361.2082        | 181.1077        | 344.1816       | 172.5944         | 343.1976       | 172.1024         | 3  |
| 10 | 1103.5038       | 552.2555        | 1086.4772      | 543.7422         | 1085.4932       | 543.2502         | D    | <b>262.1397</b> | 131.5735        | 245.1132       | 123.0602         | 244.1292       | 122.5682         | 2  |
| 11 |                 |                 |                |                  |                 |                  | K    | 147.1128        | 74.0600         | 130.0863       | 65.5468          |                |                  | 1  |

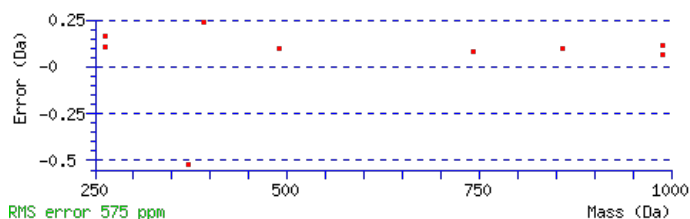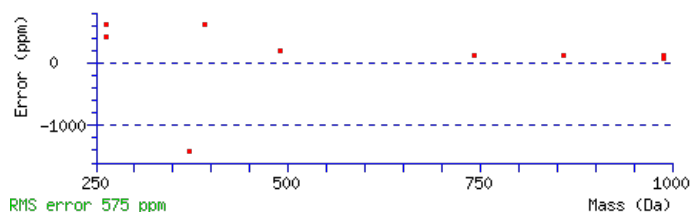

NCBI **BLAST** search of [GMGEKQIEVDK](#)

(Parameters: blastp, nr protein database, expect=20000, no filter, PAM30)

Other BLAST [web gateways](#)

# AT5G57960.1

All matches to this query

| Score | Mr(calc)  | Delta   | Sequence                     |
|-------|-----------|---------|------------------------------|
| 21.6  | 1248.6020 | -0.0007 | <a href="#">GMGEKQIEVDK</a>  |
| 3.4   | 1248.6000 | 0.0013  | <a href="#">FNRSAWPDIR</a>   |
| 2.4   | 1248.6033 | -0.0020 | <a href="#">AFQEMGARAPR</a>  |
| 2.4   | 1248.6020 | -0.0007 | <a href="#">ENIVASASSPMK</a> |
| 1.6   | 1248.6020 | -0.0007 | <a href="#">EELESMRLDK</a>   |
| 1.3   | 1248.6020 | -0.0007 | <a href="#">KIMQADEDVGK</a>  |
| 0.5   | 1248.6020 | -0.0007 | <a href="#">LLMQDENDKK</a>   |
| 0.2   | 1248.6019 | -0.0006 | <a href="#">EEEEAKQMKK</a>   |

Mascot: <http://www.matrixscience.com/>

**Peptide View**MS/MS Fragmentation of **QMAKLLDPK**

Found in **AT5G58003.1** in **TAIR\_Arabidopsis**, Symbols: CPL4 | CPL4 (C-TERMINAL DOMAIN PHOSPHATASE-LIKE 4); phosphoprotein phosphatase | chr5:23497292-23499150 FORWARD

Match to Query 3008: 1070.545996 from(536.280274,2+) index(7288)

Title: Elution from: 64.805 to 64.805 scan no 9597 cid35.00 polarity:+

Data file D6h-2\_3.mgf

Click mouse within plot area to zoom in by factor of two about that point

Or,   to  Da

Label all possible matches  Label matches used for scoring

Show Y-axis

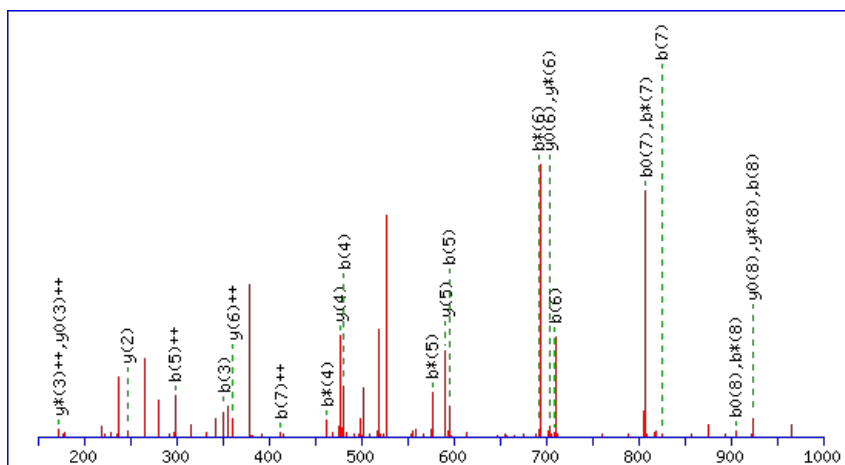

**Monoisotopic mass of neutral peptide Mr(calc):** 1070.5438

**Fixed modifications:** Carbamidomethyl (C) (apply to specified residues or termini only)

**Variable modifications:**

**M2** : Oxidation (M), with neutral losses 0.0000 (shown in table), 63.9983

**Ions Score:** 27 **Expect:** 0.013

**Matches** : 25/118 fragment ions using 48 most intense peaks ([help](#))

| # | b        | b <sup>++</sup> | b*       | b <sup>+++</sup> | b <sup>0</sup> | b <sup>0++</sup> | Seq. | y        | y <sup>++</sup> | y*       | y <sup>+++</sup> | y <sup>0</sup> | y <sup>0++</sup> | # |
|---|----------|-----------------|----------|------------------|----------------|------------------|------|----------|-----------------|----------|------------------|----------------|------------------|---|
| 1 | 131.0599 | 66.0336         | 113.0363 | 57.0218          |                |                  | Q    |          |                 |          |                  |                |                  | 9 |
| 2 | 279.0924 | 140.0498        | 261.0688 | 131.0380         |                |                  | M    | 941.4985 | 471.2529        | 923.4749 | 462.2411         | 923.4879       | 462.2476         | 8 |
| 3 | 351.1265 | 176.0669        | 333.1029 | 167.0551         |                |                  | A    | 793.4660 | 397.2367        | 775.4424 | 388.2249         | 775.4555       | 388.2314         | 7 |
| 4 | 481.2155 | 241.1114        | 463.1920 | 232.0996         |                |                  | K    | 721.4319 | 361.2196        | 703.4083 | 352.2078         | 703.4213       | 352.2143         | 6 |
| 5 | 595.2966 | 298.1520        | 577.2731 | 289.1402         |                |                  | L    | 591.3428 | 296.1751        | 573.3193 | 287.1633         | 573.3323       | 287.1698         | 5 |
| 6 | 709.3777 | 355.1925        | 691.3542 | 346.1807         |                |                  | L    | 477.2618 | 239.1345        | 459.2382 | 230.1227         | 459.2512       | 230.1292         | 4 |
| 7 | 825.4017 | 413.2045        | 807.3781 | 404.1927         | 807.3912       | 404.1992         | D    | 363.1807 | 182.0940        | 345.1571 | 173.0822         | 345.1701       | 173.0887         | 3 |
| 8 | 923.4515 | 462.2294        | 905.4279 | 453.2176         | 905.4410       | 453.2241         | P    | 247.1567 | 124.0820        | 229.1331 | 115.0702         |                |                  | 2 |
| 9 |          |                 |          |                  |                |                  | K    | 149.1069 | 75.0571         | 131.0833 | 66.0453          |                |                  | 1 |

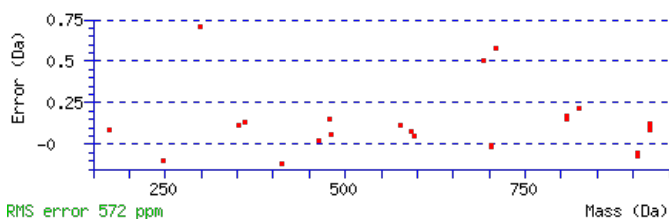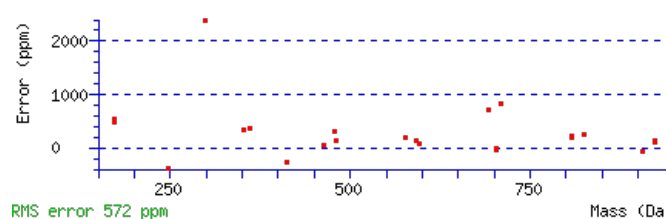

NCBI **BLAST** search of **QMAKLLDPK**

(Parameters: blastp, nr protein database, expect=20000, no filter, PAM30)

Other BLAST [web gateways](#)

**All matches to this query**



## AT5G58003.1

| Score | Mr(calc)  | Delta   | Sequence                   |
|-------|-----------|---------|----------------------------|
| 26.6  | 1070.5438 | 0.0022  | <a href="#">QMAKLLDPK</a>  |
| 23.0  | 1070.5486 | -0.0026 | <a href="#">DKLDTLVEK</a>  |
| 20.0  | 1070.5486 | -0.0026 | <a href="#">LDTKDLDK</a>   |
| 13.9  | 1070.5461 | -0.0001 | <a href="#">FMSSHLLIL</a>  |
| 11.7  | 1070.5487 | -0.0027 | <a href="#">KWHMTVKK</a>   |
| 11.0  | 1070.5438 | 0.0022  | <a href="#">EKALKDPMK</a>  |
| 10.8  | 1070.5486 | -0.0026 | <a href="#">IELETTNK</a>   |
| 9.1   | 1070.5438 | 0.0022  | <a href="#">MAASPLVVQK</a> |
| 8.6   | 1070.5486 | -0.0026 | <a href="#">EKVIDSELK</a>  |
| 7.8   | 1070.5486 | -0.0026 | <a href="#">KLSDDLK</a>    |

Mascot: <http://www.matrixscience.com/>

### Peptide View

MS/MS Fragmentation of **ATYTLNPDGTHVLTNETWSNGK**Found in **AT5G58070.1** in **TAIR\_Arabidopsis**, Symbols: | lipocalin, putative | chr5:23517738-23518382 REVERSE

Match to Query 10186: 2430.174612 from(811.065480,3+) index(7958)

Title: Elution from: 70.942 to 70.942 scan no 10528 cid35.00 polarity:+

Data file D6h-1\_3.mgf

Click mouse within plot area to zoom in by factor of two about that point

Or, Plot from  to  Da Label all possible matches  Label matches used for scoring Show Y-axis 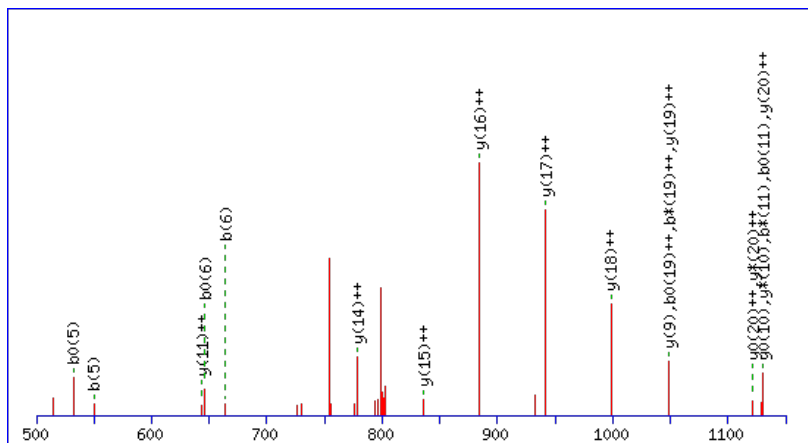

Monoisotopic mass of neutral peptide Mr(calc): 2430.1815

Fixed modifications: Carbamidomethyl (C) (apply to specified residues or termini only)

Ions Score: 58 Expect: 4.9e-006

Matches : 21/234 fragment ions using 19 most intense peaks ([help](#))

| #  | b               | b <sup>++</sup> | b <sup>*</sup>   | b <sup>*++</sup> | b <sup>0</sup>   | b <sup>0++</sup> | Seq. | y                | y <sup>++</sup>  | y <sup>*</sup>   | y <sup>*++</sup> | y <sup>0</sup>   | y <sup>0++</sup> | #  |
|----|-----------------|-----------------|------------------|------------------|------------------|------------------|------|------------------|------------------|------------------|------------------|------------------|------------------|----|
| 1  | 72.0444         | 36.5258         |                  |                  |                  |                  | A    |                  |                  |                  |                  |                  |                  | 22 |
| 2  | 173.0921        | 87.0497         |                  |                  | 155.0815         | 78.0444          | T    | 2360.1517        | 1180.5795        | 2343.1252        | 1172.0662        | 2342.1412        | 1171.5742        | 21 |
| 3  | 336.1554        | 168.5813        |                  |                  | 318.1448         | 159.5761         | Y    | 2259.1040        | <b>1130.0557</b> | 2242.0775        | <b>1121.5424</b> | 2241.0935        | <b>1121.0504</b> | 20 |
| 4  | 437.2031        | 219.1052        |                  |                  | 419.1925         | 210.0999         | T    | 2096.0407        | <b>1048.5240</b> | 2079.0142        | 1040.0107        | 2078.0301        | 1039.5187        | 19 |
| 5  | <b>550.2871</b> | 275.6472        |                  |                  | <b>532.2766</b>  | 266.6419         | L    | 1994.9930        | <b>998.0002</b>  | 1977.9665        | 989.4869         | 1976.9825        | 988.9949         | 18 |
| 6  | <b>664.3301</b> | 332.6687        | 647.3035         | 324.1554         | <b>646.3195</b>  | 323.6634         | N    | 1881.9090        | <b>941.4581</b>  | 1864.8824        | 932.9448         | 1863.8984        | 932.4528         | 17 |
| 7  | 761.3828        | 381.1951        | 744.3563         | 372.6818         | 743.3723         | 372.1898         | P    | 1767.8660        | <b>884.4367</b>  | 1750.8395        | 875.9234         | 1749.8555        | 875.4314         | 16 |
| 8  | 876.4098        | 438.7085        | 859.3832         | 430.1953         | 858.3992         | 429.7032         | D    | 1670.8133        | <b>835.9103</b>  | 1653.7867        | 827.3970         | 1652.8027        | 826.9050         | 15 |
| 9  | 933.4312        | 467.2193        | 916.4047         | 458.7060         | 915.4207         | 458.2140         | G    | 1555.7863        | <b>778.3968</b>  | 1538.7598        | 769.8835         | 1537.7758        | 769.3915         | 14 |
| 10 | 1034.4789       | 517.7431        | 1017.4524        | 509.2298         | 1016.4684        | 508.7378         | T    | 1498.7649        | 749.8861         | 1481.7383        | 741.3728         | 1480.7543        | 740.8808         | 13 |
| 11 | 1147.5630       | 574.2851        | <b>1130.5364</b> | 565.7719         | <b>1129.5524</b> | 565.2798         | I    | 1397.7172        | 699.3622         | 1380.6906        | 690.8490         | 1379.7066        | 690.3569         | 12 |
| 12 | 1284.6219       | 642.8146        | 1267.5953        | 634.3013         | 1266.6113        | 633.8093         | H    | 1284.6331        | <b>642.8202</b>  | 1267.6066        | 634.3069         | 1266.6226        | 633.8149         | 11 |
| 13 | 1383.6903       | 692.3488        | 1366.6638        | 683.8355         | 1365.6797        | 683.3435         | V    | 1147.5742        | 574.2907         | <b>1130.5477</b> | 565.7775         | <b>1129.5636</b> | 565.2855         | 10 |
| 14 | 1496.7744       | 748.8908        | 1479.7478        | 740.3775         | 1478.7638        | 739.8855         | L    | <b>1048.5058</b> | 524.7565         | 1031.4792        | 516.2433         | 1030.4952        | 515.7513         | 9  |
| 15 | 1610.8173       | 805.9123        | 1593.7907        | 797.3990         | 1592.8067        | 796.9070         | N    | 935.4217         | 468.2145         | 918.3952         | 459.7012         | 917.4112         | 459.2092         | 8  |
| 16 | 1739.8599       | 870.4336        | 1722.8333        | 861.9203         | 1721.8493        | 861.4283         | E    | 821.3788         | 411.1930         | 804.3523         | 402.6798         | 803.3682         | 402.1878         | 7  |
| 17 | 1840.9076       | 920.9574        | 1823.8810        | 912.4441         | 1822.8970        | 911.9521         | T    | 692.3362         | 346.6717         | 675.3097         | 338.1585         | 674.3257         | 337.6665         | 6  |
| 18 | 2026.9869       | 1013.9971       | 2009.9603        | 1005.4838        | 2008.9763        | 1004.9918        | W    | 591.2885         | 296.1479         | 574.2620         | 287.6346         | 573.2780         | 287.1426         | 5  |
| 19 | 2114.0189       | 1057.5131       | 2096.9924        | <b>1048.9998</b> | 2096.0083        | <b>1048.5078</b> | S    | 405.2092         | 203.1082         | 388.1827         | 194.5950         | 387.1987         | 194.1030         | 4  |
| 20 | 2228.0618       | 1114.5346       | 2211.0353        | 1106.0213        | 2210.0513        | 1105.5293        | N    | 318.1772         | 159.5922         | 301.1506         | 151.0790         |                  |                  | 3  |
| 21 | 2285.0833       | 1143.0453       | 2268.0568        | 1134.5320        | 2267.0727        | 1134.0400        | G    | 204.1343         | 102.5708         | 187.1077         | 94.0575          |                  |                  | 2  |
| 22 |                 |                 |                  |                  |                  |                  | K    | 147.1128         | 74.0600          | 130.0863         | 65.5468          |                  |                  | 1  |

# AT5G58070.1

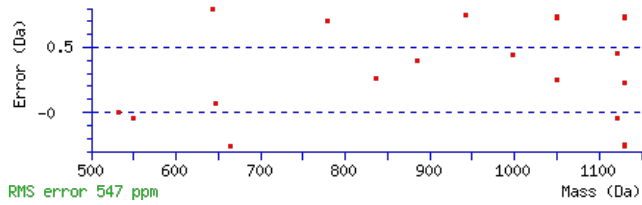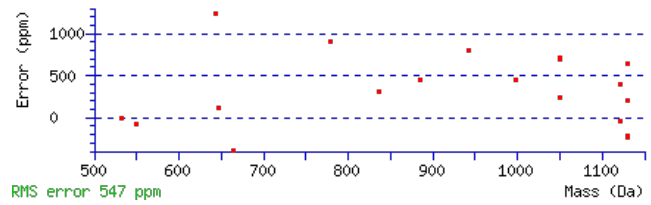

NCBI BLAST search of [ATYTLNPDGTHVLNETWSNGK](#)  
(Parameters: blastp, nr protein database, expect=20000, no filter, PAM30)  
Other BLAST [web gateways](#)

## All matches to this query

| Score | Mr(calc)  | Delta   | Sequence                                |
|-------|-----------|---------|-----------------------------------------|
| 58.5  | 2430.1815 | -0.0069 | <a href="#">ATYTLNPDGTHVLNETWSNGK</a>   |
| 8.8   | 2430.1703 | 0.0043  | <a href="#">SPLNESQAGGSIDAKTSEFAFFK</a> |
| 4.3   | 2430.1705 | 0.0041  | <a href="#">GLSGDSLRLKPCYIMSEMVR</a>    |
| 0.9   | 2430.1737 | 0.0010  | <a href="#">MEEDGSDWGGLAPEILINIISR</a>  |
| 0.2   | 2430.1696 | 0.0050  | <a href="#">VENQDAIDTSIVNMLGDPKEAR</a>  |
| 0.1   | 2430.1717 | 0.0030  | <a href="#">THTGRTGPGYAEHQLFPASFK</a>   |

Mascot: <http://www.matrixscience.com>

**Peptide View**MS/MS Fragmentation of **IKLDMK**

Found in **AT5G58110.1** in **TAIR\_Arabidopsis**, Symbols: | ATPase activator/ chaperone activator/ chaperone binding | chr5:23532501-23533705  
FORWARD

Match to Query 873: 770.408054 from(386.211303,2+) index(3723)

Title: Elution from: 36.078 to 36.078 scan no 4651 cid35.00 polarity:+

Data file D12h-3\_1.mgf

Click mouse within plot area to zoom in by factor of two about that point

Or,   to  Da

Label all possible matches  Label matches used for scoring

Show Y-axis

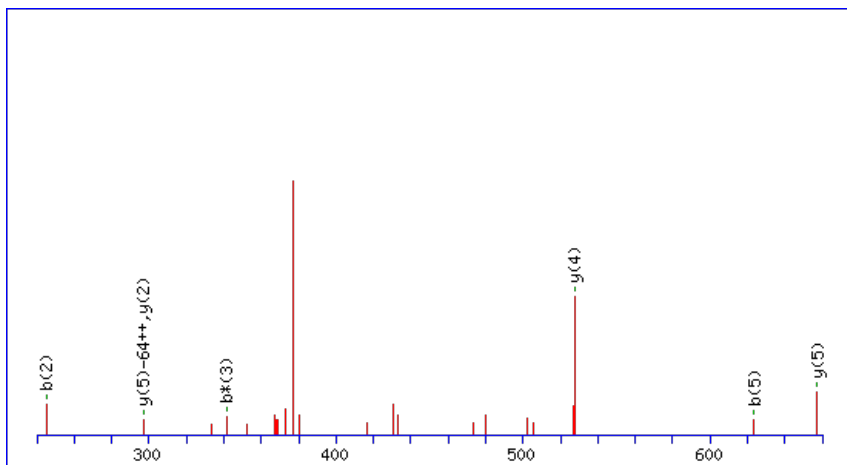

**Monoisotopic mass of neutral peptide Mr(calc):** 770.4072

**Fixed modifications:** Carbamidomethyl (C) (apply to specified residues or termini only)

**Variable modifications:**

**M5** : Oxidation (M), with neutral losses 0.0000 (shown in table), 63.9983

**Ions Score:** 23 **Expect:** 0.039

**Matches** : 7/76 fragment ions using 11 most intense peaks ([help](#))

| # | b               | b <sup>++</sup> | b*              | b <sup>*++</sup> | b <sup>0</sup> | b <sup>0++</sup> | Seq. | y               | y <sup>++</sup> | y*       | y <sup>*++</sup> | y <sup>0</sup> | y <sup>0++</sup> | # |
|---|-----------------|-----------------|-----------------|------------------|----------------|------------------|------|-----------------|-----------------|----------|------------------|----------------|------------------|---|
| 1 | 115.0884        | 58.0478         |                 |                  |                |                  | I    |                 |                 |          |                  |                |                  | 6 |
| 2 | <b>245.1774</b> | 123.0923        | 227.1538        | 114.0805         |                |                  | K    | <b>657.3334</b> | 329.1703        | 639.3098 | 320.1586         | 639.3229       | 320.1651         | 5 |
| 3 | 359.2585        | 180.1329        | <b>341.2349</b> | 171.1211         |                |                  | L    | <b>527.2444</b> | 264.1258        | 509.2208 | 255.1140         | 509.2338       | 255.1205         | 4 |
| 4 | 475.2825        | 238.1449        | 457.2589        | 229.1331         | 457.2719       | 229.1396         | D    | 413.1633        | 207.0853        | 395.1397 | 198.0735         | 395.1527       | 198.0800         | 3 |
| 5 | <b>623.3149</b> | 312.1611        | 605.2913        | 303.1493         | 605.3044       | 303.1558         | M    | <b>297.1393</b> | 149.0733        | 279.1157 | 140.0615         |                |                  | 2 |
| 6 |                 |                 |                 |                  |                |                  | K    | 149.1069        | 75.0571         | 131.0833 | 66.0453          |                |                  | 1 |

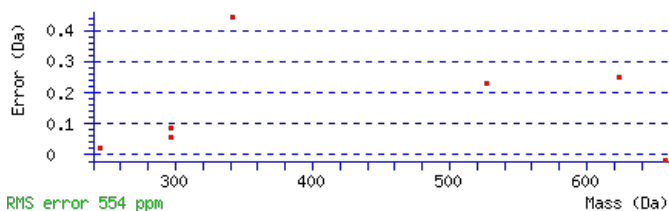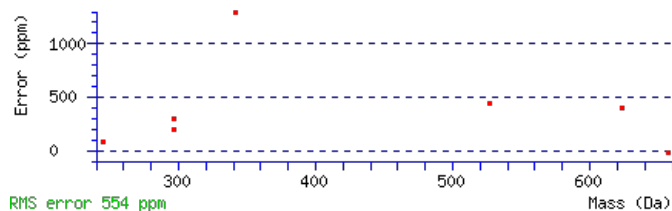

NCBI **BLAST** search of [IKLDMK](#)

(Parameters: blastp, nr protein database, expect=20000, no filter, PAM30)

Other BLAST [web gateways](#)

**All matches to this query**

| Score | Mr(calc) | Delta  | Sequence               |
|-------|----------|--------|------------------------|
| 23.1  | 770.4072 | 0.0008 | <a href="#">IKLDMK</a> |
| 23.0  | 770.4072 | 0.0008 | <a href="#">LEMVKK</a> |

## AT5G58110.1

|      |          |        |                        |
|------|----------|--------|------------------------|
| 23.0 | 770.4072 | 0.0008 | <a href="#">LKDLMK</a> |
| 23.0 | 770.4072 | 0.0008 | <a href="#">LKDMLK</a> |
| 23.0 | 770.4072 | 0.0008 | <a href="#">LKEMVK</a> |
| 12.6 | 770.4072 | 0.0008 | <a href="#">KLVEMK</a> |
| 10.6 | 770.4072 | 0.0008 | <a href="#">LMLKDK</a> |
| 10.0 | 770.4072 | 0.0008 | <a href="#">MGVSLK</a> |
| 10.0 | 770.4072 | 0.0008 | <a href="#">MKDLK</a>  |
| 9.4  | 770.4072 | 0.0008 | <a href="#">ELKMVK</a> |

Mascot: <http://www.matrixscience.com/>

### Peptide View

 MS/MS Fragmentation of **VLYDSFEATSLDEALASNPITLEFDKPK**

 Found in **AT5G58250.1** in **TAIR Arabidopsis**, Symbols: | similar to hypothetical protein [Vitis vinifera] (GB:CAN75840.1); contains domain PD020337 (PD020337) | chr5:23576784-23577598 FORWARD

Match to Query 10650: 3100.515846 from(1034.512558,3+) index(9685)

Title: Elution from: 93.469 to 93.469 scan no 13781 cid35.00 polarity:+

Data file D1d-2\_2.mgf

Click mouse within plot area to zoom in by factor of two about that point

 Or, Plot from  to  Da 

 Label all possible matches  Label matches used for scoring 

 Show Y-axis 
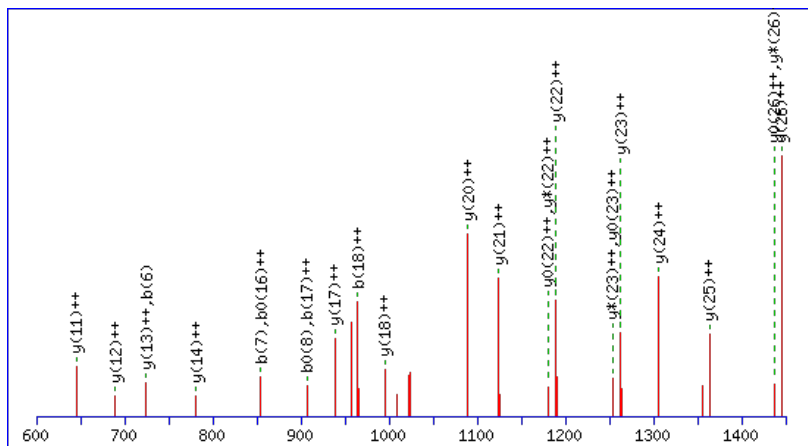
 Monoisotopic mass of neutral peptide  $M_r(\text{calc})$ : 3100.5128

Fixed modifications: Carbamidomethyl (C) (apply to specified residues or termini only)

Ions Score: 96 Expect: 8e-010

 Matches : 25/278 fragment ions using 24 most intense peaks ([help](#))

| #  | b               | b <sup>++</sup> | b <sup>*</sup> | b <sup>*++</sup> | b <sup>0</sup>  | b <sup>0++</sup> | Seq | y         | y <sup>++</sup> | y <sup>*</sup> | y <sup>*++</sup> | y <sup>0</sup> | y <sup>0++</sup> | #  |
|----|-----------------|-----------------|----------------|------------------|-----------------|------------------|-----|-----------|-----------------|----------------|------------------|----------------|------------------|----|
| 1  | 100.0757        | 50.5415         |                |                  |                 |                  | V   |           |                 |                |                  |                |                  | 28 |
| 2  | 213.1598        | 107.0835        |                |                  |                 |                  | L   | 3002.4517 | 1501.7295       | 2985.4252      | 1493.2162        | 2984.4411      | 1492.7242        | 27 |
| 3  | 376.2231        | 188.6152        |                |                  |                 |                  | Y   | 2889.3676 | 1445.1875       | 2872.3411      | 1436.6742        | 2871.3571      | 1436.1822        | 26 |
| 4  | 491.2500        | 246.1287        |                |                  | 473.2395        | 237.1234         | D   | 2726.3043 | 1363.6558       | 2709.2778      | 1355.1425        | 2708.2937      | 1354.6505        | 25 |
| 5  | 578.2821        | 289.6447        |                |                  | 560.2715        | 280.6394         | S   | 2611.2774 | 1306.1423       | 2594.2508      | 1297.6290        | 2593.2668      | 1297.1370        | 24 |
| 6  | <b>725.3505</b> | 363.1789        |                |                  | 707.3399        | 354.1736         | F   | 2524.2453 | 1262.6263       | 2507.2188      | 1254.1130        | 2506.2348      | 1253.6210        | 23 |
| 7  | <b>854.3931</b> | 427.7002        |                |                  | 836.3825        | 418.6949         | E   | 2377.1769 | 1189.0921       | 2360.1504      | 1180.5788        | 2359.1664      | 1180.0868        | 22 |
| 8  | 925.4302        | 463.2187        |                |                  | <b>907.4196</b> | 454.2134         | A   | 2248.1343 | 1124.5708       | 2231.1078      | 1116.0575        | 2230.1238      | 1115.5655        | 21 |
| 9  | 1026.4779       | 513.7426        |                |                  | 1008.4673       | 504.7373         | T   | 2177.0972 | 1089.0522       | 2160.0707      | 1080.5390        | 2159.0867      | 1080.0470        | 20 |
| 10 | 1113.5099       | 557.2586        |                |                  | 1095.4993       | 548.2533         | S   | 2076.0495 | 1038.5284       | 2059.0230      | 1030.0151        | 2058.0390      | 1029.5231        | 19 |
| 11 | 1226.5939       | 613.8006        |                |                  | 1208.5834       | 604.7953         | L   | 1989.0175 | 995.0124        | 1971.9910      | 986.4991         | 1971.0069      | 986.0071         | 18 |
| 12 | 1341.6209       | 671.3141        |                |                  | 1323.6103       | 662.3088         | D   | 1875.9335 | 938.4704        | 1858.9069      | 929.9571         | 1857.9229      | 929.4651         | 17 |
| 13 | 1470.6635       | 735.8354        |                |                  | 1452.6529       | 726.8301         | E   | 1760.9065 | 880.9569        | 1743.8800      | 872.4436         | 1742.8959      | 871.9516         | 16 |
| 14 | 1541.7006       | 771.3539        |                |                  | 1523.6900       | 762.3487         | A   | 1631.8639 | 816.4356        | 1614.8374      | 807.9223         | 1613.8533      | 807.4303         | 15 |
| 15 | 1654.7847       | 827.8960        |                |                  | 1636.7741       | 818.8907         | L   | 1560.8268 | 780.9170        | 1543.8003      | 772.4038         | 1542.8162      | 771.9118         | 14 |
| 16 | 1725.8218       | 863.4145        |                |                  | 1707.8112       | <b>854.4092</b>  | A   | 1447.7427 | 724.3750        | 1430.7162      | 715.8617         | 1429.7322      | 715.3697         | 13 |
| 17 | 1812.8538       | <b>906.9305</b> |                |                  | 1794.8432       | 897.9253         | S   | 1376.7056 | 688.8564        | 1359.6791      | 680.3432         | 1358.6951      | 679.8512         | 12 |
| 18 | 1926.8967       | <b>963.9520</b> | 1909.8702      | 955.4387         | 1908.8862       | 954.9467         | N   | 1289.6736 | 645.3404        | 1272.6470      | 636.8272         | 1271.6630      | 636.3352         | 11 |
| 19 | 2023.9495       | 1012.4784       | 2006.9229      | 1003.9651        | 2005.9389       | 1003.4731        | P   | 1175.6307 | 588.3190        | 1158.6041      | 579.8057         | 1157.6201      | 579.3137         | 10 |
| 20 | 2124.9972       | 1063.0022       | 2107.9706      | 1054.4889        | 2106.9866       | 1053.9969        | T   | 1078.5779 | 539.7926        | 1061.5514      | 531.2793         | 1060.5673      | 530.7873         | 9  |
| 21 | 2226.0449       | 1113.5261       | 2209.0183      | 1105.0128        | 2208.0343       | 1104.5208        | T   | 977.5302  | 489.2687        | 960.5037       | 480.7555         | 959.5197       | 480.2635         | 8  |
| 22 | 2339.1289       | 1170.0681       | 2322.1024      | 1161.5548        | 2321.1183       | 1161.0628        | L   | 876.4825  | 438.7449        | 859.4560       | 430.2316         | 858.4720       | 429.7396         | 7  |
| 23 | 2468.1715       | 1234.5894       | 2451.1450      | 1226.0761        | 2450.1609       | 1225.5841        | E   | 763.3985  | 382.2029        | 746.3719       | 373.6896         | 745.3879       | 373.1976         | 6  |
| 24 | 2615.2399       | 1308.1236       | 2598.2134      | 1299.6103        | 2597.2294       | 1299.1183        | F   | 634.3559  | 317.6816        | 617.3293       | 309.1683         | 616.3453       | 308.6763         | 5  |

# AT5G58250.1

|    |           |           |           |           |           |           |   |          |          |          |          |          |          |   |
|----|-----------|-----------|-----------|-----------|-----------|-----------|---|----------|----------|----------|----------|----------|----------|---|
| 25 | 2730.2669 | 1365.6371 | 2713.2403 | 1357.1238 | 2712.2563 | 1356.6318 | D | 487.2875 | 244.1474 | 470.2609 | 235.6341 | 469.2769 | 235.1421 | 4 |
| 26 | 2858.3618 | 1429.6846 | 2841.3353 | 1421.1713 | 2840.3513 | 1420.6793 | K | 372.2605 | 186.6339 | 355.2340 | 178.1206 |          |          | 3 |
| 27 | 2955.4146 | 1478.2109 | 2938.3880 | 1469.6977 | 2937.4040 | 1469.2057 | P | 244.1656 | 122.5864 | 227.1390 | 114.0731 |          |          | 2 |
| 28 |           |           |           |           |           |           | K | 147.1128 | 74.0600  | 130.0863 | 65.5468  |          |          | 1 |

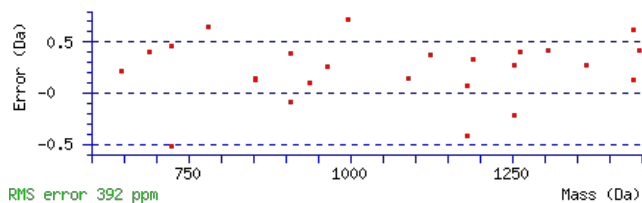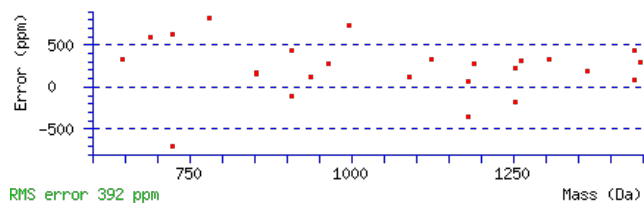

NCBI **BLAST** search of [VLYDSFEATSLDEALASNPTTLEFDKPK](#)  
 (Parameters: blastp, nr protein database, expect=20000, no filter, PAM30)  
 Other BLAST [web gateways](#)

## All matches to this query

| Score | Mr(calc)  | Delta   | Sequence                                     |
|-------|-----------|---------|----------------------------------------------|
| 96.5  | 3100.5128 | 0.0030  | <a href="#">VLYDSFEATSLDEALASNPTTLEFDKPK</a> |
| 2.4   | 3100.5070 | 0.0089  | <a href="#">WVQELQAQGNPNMVMALAGNKSDLLDAR</a> |
| 1.8   | 3100.5142 | 0.0017  | <a href="#">VLKPVGKGYLRYDFDGLPEDDEASR</a>    |
| 1.3   | 3100.5175 | -0.0017 | <a href="#">VALELTRSDYVEAEEALVDMKNWFTR</a>   |
| 0.3   | 3100.5070 | 0.0089  | <a href="#">NNMSMSLVDVSNPDKNNPRLWENIAVK</a>  |

Mascot: <http://www.matrixscience.com/>

## Peptide View

MS/MS Fragmentation of **VILVSHSVGGGSM TAAMCLFPSK**

Found in **AT5G58310.1** in **TAIR\_Arabidopsis**, Symbols: | hydrolase, alpha/beta fold family protein | chr5:23592353-23593233 REVERSE

Match to Query 10498: 2364.168969 from(789.063599,3+) index(8225)

Title: Elution from: 71.655 to 71.655 scan no 10745 cid35.00 polarity:+

Data file D1d-3\_1.mgf

Click mouse within plot area to zoom in by factor of two about that point

Or,  to  Da

Label all possible matches  Label matches used for scoring

Show Y-axis

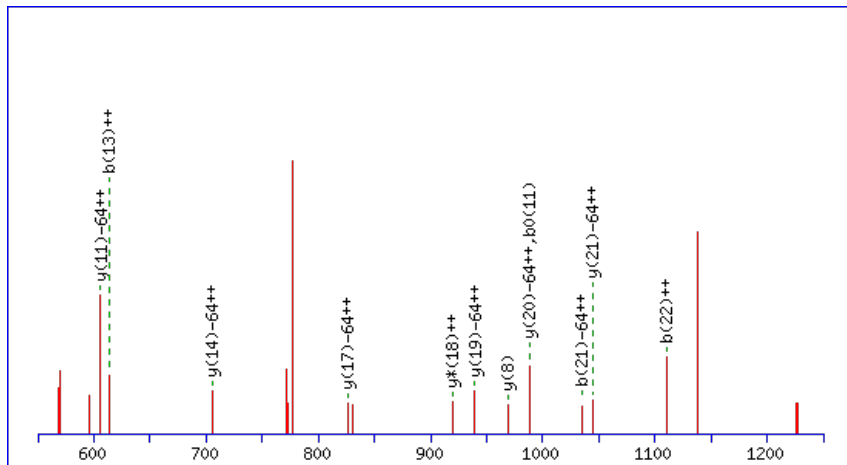

**Monoisotopic mass of neutral peptide Mr(calc):** 2364.1640

**Fixed modifications:** Carbamidomethyl (C) (apply to specified residues or termini only)

**Variable modifications:**

**M17** : Oxidation (M), with neutral losses 63.9983(shown in table), 0.0000

**Ions Score:** 24 **Expect:** 0.015

**Matches** : 12/330 fragment ions using 17 most intense peaks ([help](#))

| #  | b         | b <sup>++</sup> | b <sup>0</sup> | b <sup>0++</sup> | Seq. | y         | y <sup>++</sup> | y <sup>*</sup> | y <sup>***</sup> | y <sup>0</sup> | y <sup>0++</sup> | #  |
|----|-----------|-----------------|----------------|------------------|------|-----------|-----------------|----------------|------------------|----------------|------------------|----|
| 1  | 100.0757  | 50.5415         |                |                  | V    |           |                 |                |                  |                |                  | 23 |
| 2  | 213.1598  | 107.0835        |                |                  | I    | 2202.1046 | 1101.5559       | 2185.0780      | 1093.0427        | 2184.0940      | 1092.5506        | 22 |
| 3  | 326.2438  | 163.6255        |                |                  | L    | 2089.0205 | 1045.0139       | 2071.9940      | 1036.5006        | 2071.0099      | 1036.0086        | 21 |
| 4  | 425.3122  | 213.1598        |                |                  | V    | 1975.9364 | 988.4719        | 1958.9099      | 979.9586         | 1957.9259      | 979.4666         | 20 |
| 5  | 512.3443  | 256.6758        | 494.3337       | 247.6705         | S    | 1876.8680 | 938.9377        | 1859.8415      | 930.4244         | 1858.8575      | 929.9324         | 19 |
| 6  | 649.4032  | 325.2052        | 631.3926       | 316.1999         | H    | 1789.8360 | 895.4216        | 1772.8095      | 886.9084         | 1771.8254      | 886.4164         | 18 |
| 7  | 736.4352  | 368.7212        | 718.4246       | 359.7160         | S    | 1652.7771 | 826.8922        | 1635.7505      | 818.3789         | 1634.7665      | 817.8869         | 17 |
| 8  | 835.5036  | 418.2554        | 817.4930       | 409.2502         | V    | 1565.7451 | 783.3762        | 1548.7185      | 774.8629         | 1547.7345      | 774.3709         | 16 |
| 9  | 892.5251  | 446.7662        | 874.5145       | 437.7609         | G    | 1466.6767 | 733.8420        | 1449.6501      | 725.3287         | 1448.6661      | 724.8367         | 15 |
| 10 | 949.5465  | 475.2769        | 931.5360       | 466.2716         | G    | 1409.6552 | 705.3312        | 1392.6286      | 696.8180         | 1391.6446      | 696.3259         | 14 |
| 11 | 1006.5680 | 503.7876        | 988.5574       | 494.7824         | G    | 1352.6337 | 676.8205        | 1335.6072      | 668.3072         | 1334.6232      | 667.8152         | 13 |
| 12 | 1093.6000 | 547.3037        | 1075.5895      | 538.2984         | S    | 1295.6123 | 648.3098        | 1278.5857      | 639.7965         | 1277.6017      | 639.3045         | 12 |
| 13 | 1224.6405 | 612.8239        | 1206.6300      | 603.8186         | M    | 1208.5802 | 604.7938        | 1191.5537      | 596.2805         | 1190.5697      | 595.7885         | 11 |
| 14 | 1325.6882 | 663.3477        | 1307.6776      | 654.3425         | T    | 1077.5397 | 539.2735        | 1060.5132      | 530.7602         | 1059.5292      | 530.2682         | 10 |
| 15 | 1396.7253 | 698.8663        | 1378.7147      | 689.8610         | A    | 976.4921  | 488.7497        | 959.4655       | 480.2364         | 958.4815       | 479.7444         | 9  |
| 16 | 1467.7624 | 734.3849        | 1449.7519      | 725.3796         | A    | 905.4550  | 453.2311        | 888.4284       | 444.7178         | 887.4444       | 444.2258         | 8  |
| 17 | 1550.7995 | 775.9034        | 1532.7890      | 766.8981         | M    | 834.4178  | 417.7126        | 817.3913       | 409.1993         | 816.4073       | 408.7073         | 7  |
| 18 | 1710.8302 | 855.9187        | 1692.8196      | 846.9135         | C    | 751.3807  | 376.1940        | 734.3542       | 367.6807         | 733.3702       | 367.1887         | 6  |
| 19 | 1823.9143 | 912.4608        | 1805.9037      | 903.4555         | L    | 591.3501  | 296.1787        | 574.3235       | 287.6654         | 573.3395       | 287.1734         | 5  |
| 20 | 1970.9827 | 985.9950        | 1952.9721      | 976.9897         | F    | 478.2660  | 239.6366        | 461.2395       | 231.1234         | 460.2554       | 230.6314         | 4  |
| 21 | 2068.0354 | 1034.5214       | 2050.0249      | 1025.5161        | P    | 331.1976  | 166.1024        | 314.1710       | 157.5892         | 313.1870       | 157.0972         | 3  |



AT5G58310.1

|    |           |           |           |           |   |          |          |          |          |          |          |   |
|----|-----------|-----------|-----------|-----------|---|----------|----------|----------|----------|----------|----------|---|
| 22 | 2155.0675 | 1078.0374 | 2137.0569 | 1069.0321 | S | 234.1448 | 117.5761 | 217.1183 | 109.0628 | 216.1343 | 108.5708 | 2 |
| 23 |           |           |           |           | K | 147.1128 | 74.0600  | 130.0863 | 65.5468  |          |          | 1 |

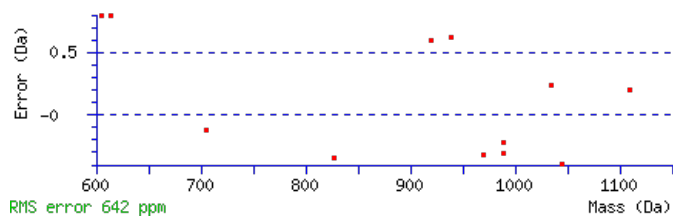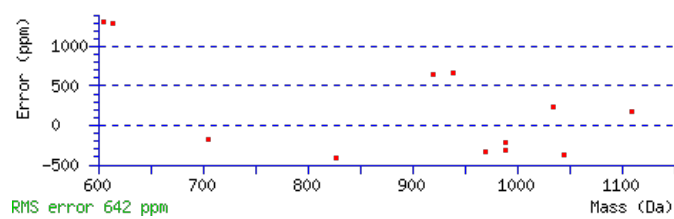

NCBI **BLAST** search of [VILVSHSVGGGSM TAAMCLFPSK](#)  
 (Parameters: blastp, nr protein database, expect=20000, no filter, PAM30)  
 Other BLAST [web gateways](#)

All matches to this query

| Score | Mr(calc)  | Delta   | Sequence                                 | Site Analysis        |
|-------|-----------|---------|------------------------------------------|----------------------|
| 24.0  | 2364.1640 | 0.0050  | <a href="#">VILVSHSVGGGSM TAAMCLFPSK</a> | Oxidation M17 73.94% |
| 23.7  | 2364.1671 | 0.0019  | <a href="#">KLTESPLINSSPYEDGWMIK</a>     |                      |
| 19.4  | 2364.1640 | 0.0050  | <a href="#">VILVSHSVGGGSM TAAMCLFPSK</a> | Oxidation M13 26.06% |
| 5.2   | 2364.1631 | 0.0059  | <a href="#">SKDIMSDIPTFSAENLQNNLK</a>    |                      |
| 3.1   | 2364.1752 | -0.0062 | <a href="#">HMMLLADVMTYRGEVLGIQR</a>     |                      |
| 3.1   | 2364.1752 | -0.0062 | <a href="#">HMMLLADVMTYRGEVLGIQR</a>     |                      |
| 2.7   | 2364.1672 | 0.0018  | <a href="#">VTDMAFFAEDVHLLASVSLDGK</a>   |                      |
| 2.7   | 2364.1752 | -0.0062 | <a href="#">HMMLLADVMTYRGEVLGIQR</a>     |                      |
| 0.8   | 2364.1710 | -0.0020 | <a href="#">EGDSYSSWLITEAPGSIAAVRR</a>   |                      |
| 0.4   | 2364.1671 | 0.0019  | <a href="#">LPNAPEMEIYSLYGVGIPTER</a>    |                      |

Mascot: <http://www.matrixscience.com/>

## Peptide View

MS/MS Fragmentation of **DVEIDDYLR**

Found in **AT5G58330.1** in **TAIR\_Arabidopsis**, Symbols: | malate dehydrogenase (NADP), chloroplast, putative | chr5:23597236-23599513  
REVERSE

Match to Query 3214: 1136.537068 from(569.275810,2+) index(6454)

Title: Elution from: 60.594 to 60.594 scan no 8508 cid35.00 polarity:+

Data file D1d-2\_2.mgf

Click mouse within plot area to zoom in by factor of two about that point

Or,   to  Da

Label all possible matches  Label matches used for scoring

Show Y-axis

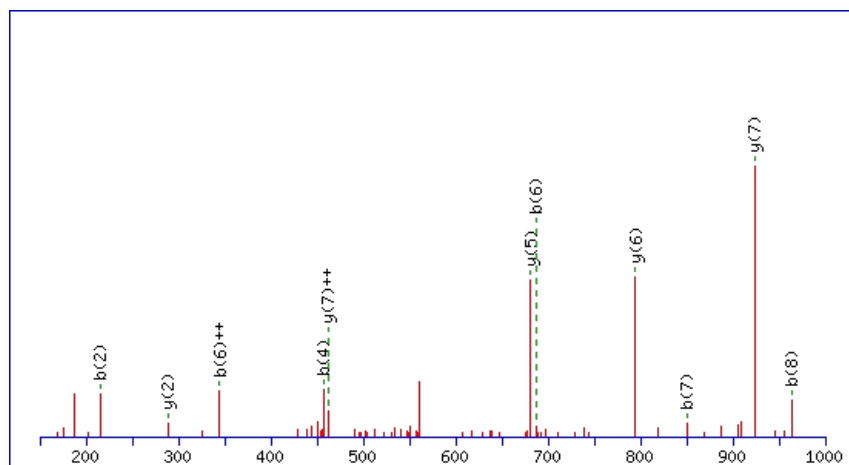

Monoisotopic mass of neutral peptide  $M_r(\text{calc})$ : 1136.5350

Fixed modifications: Carbamidomethyl (C) (apply to specified residues or termini only)

Ions Score: 48 Expect: 5.3e-005

Matches : 12/74 fragment ions using 16 most intense peaks ([help](#))

| # | b               | b <sup>++</sup> | b <sup>0</sup> | b <sup>0++</sup> | Seq. | y               | y <sup>++</sup> | y*        | y <sup>++</sup> * | y <sup>0</sup> | y <sup>0++</sup> | # |
|---|-----------------|-----------------|----------------|------------------|------|-----------------|-----------------|-----------|-------------------|----------------|------------------|---|
| 1 | 116.0342        | 58.5207         | 98.0237        | 49.5155          | D    |                 |                 |           |                   |                |                  | 9 |
| 2 | <b>215.1026</b> | 108.0550        | 197.0921       | 99.0497          | V    | 1022.5153       | 511.7613        | 1005.4888 | 503.2480          | 1004.5047      | 502.7560         | 8 |
| 3 | <b>344.1452</b> | 172.5763        | 326.1347       | 163.5710         | E    | <b>923.4469</b> | <b>462.2271</b> | 906.4203  | 453.7138          | 905.4363       | 453.2218         | 7 |
| 4 | <b>457.2293</b> | 229.1183        | 439.2187       | 220.1130         | I    | <b>794.4043</b> | 397.7058        | 777.3777  | 389.1925          | 776.3937       | 388.7005         | 6 |
| 5 | 572.2562        | 286.6318        | 554.2457       | 277.6265         | D    | <b>681.3202</b> | 341.1638        | 664.2937  | 332.6505          | 663.3097       | 332.1585         | 5 |
| 6 | <b>687.2832</b> | <b>344.1452</b> | 669.2726       | 335.1399         | D    | 566.2933        | 283.6503        | 549.2667  | 275.1370          | 548.2827       | 274.6450         | 4 |
| 7 | <b>850.3465</b> | 425.6769        | 832.3359       | 416.6716         | Y    | 451.2663        | 226.1368        | 434.2398  | 217.6235          |                |                  | 3 |
| 8 | <b>963.4306</b> | 482.2189        | 945.4200       | 473.2136         | L    | <b>288.2030</b> | 144.6051        | 271.1765  | 136.0919          |                |                  | 2 |
| 9 |                 |                 |                |                  | R    | 175.1190        | 88.0631         | 158.0924  | 79.5498           |                |                  | 1 |

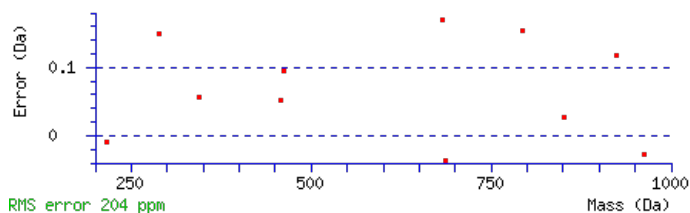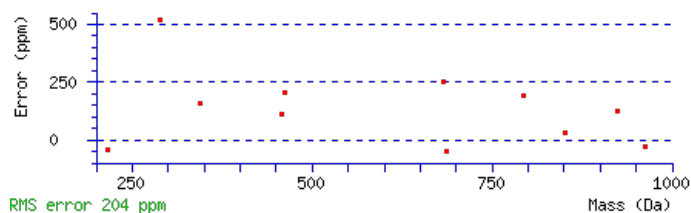

NCBI **BLAST** search of **DVEIDDYLR**

(Parameters: blastp, nr protein database, expect=20000, no filter, PAM30)

Other BLAST [web gateways](#)

All matches to this query

| Score | $M_r(\text{calc})$ | Delta | Sequence |
|-------|--------------------|-------|----------|
|       |                    |       |          |

## AT5G58330.1

|      |           |         |                           |
|------|-----------|---------|---------------------------|
| 48.3 | 1136.5350 | 0.0021  | <a href="#">DVEIDDYLR</a> |
| 9.6  | 1136.5383 | -0.0012 | <a href="#">ETIMEETLR</a> |
| 2.0  | 1136.5403 | -0.0032 | <a href="#">HEYFSWLR</a>  |

**Mascot:** <http://www.matrixscience.com/>

## Peptide View

MS/MS Fragmentation of **RNCPATSGSGDNKK**

Found in **AT5G58390.1** in **TAIR\_Arabidopsis**, Symbols: | peroxidase, putative | chr5:23616981-23618470 REVERSE

Match to Query 6496: 1512.620544 from(757.317548,2+) index(3060)

Title: Elution from: 29.836 to 29.836 scan no 3793 cid35.00 polarity:+

Data file C7-3\_2.mgf

Click mouse within plot area to zoom in by factor of two about that point

Or,   to  Da

Label all possible matches  Label matches used for scoring

Show Y-axis

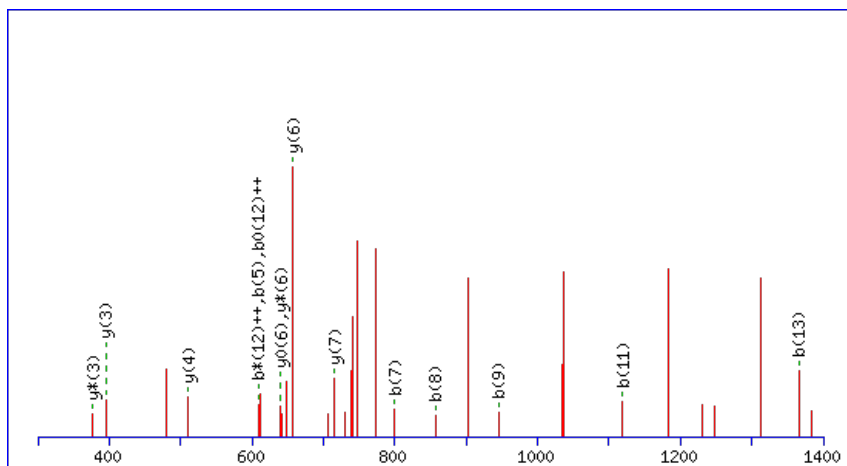

Monoisotopic mass of neutral peptide  $M_r(\text{calc})$ : 1512.6244

Fixed modifications: Carbamidomethyl (C) (apply to specified residues or termini only)

Ions Score: 26 Expect: 0.01

Matches : 15/140 fragment ions using 29 most intense peaks ([help](#))

| #  | b                | b <sup>++</sup> | b*        | b <sup>*++</sup> | b <sup>0</sup> | b <sup>0++</sup> | Seq. | y               | y <sup>++</sup> | y*              | y <sup>*++</sup> | y <sup>0</sup>  | y <sup>0++</sup> | #  |
|----|------------------|-----------------|-----------|------------------|----------------|------------------|------|-----------------|-----------------|-----------------|------------------|-----------------|------------------|----|
| 1  | 161.0965         | 81.0519         | 143.0729  | 72.0401          |                |                  | R    |                 |                 |                 |                  |                 |                  | 14 |
| 2  | 277.1335         | 139.0704        | 259.1099  | 130.0586         |                |                  | N    | 1353.5424       | 677.2748        | 1335.5188       | 668.2630         | 1335.5318       | 668.2695         | 13 |
| 3  | 439.1582         | 220.0828        | 421.1347  | 211.0710         |                |                  | C    | 1237.5054       | 619.2563        | 1219.4818       | 610.2445         | 1219.4948       | 610.2510         | 12 |
| 4  | 537.2080         | 269.1077        | 519.1845  | 260.0959         |                |                  | P    | 1075.4807       | 538.2440        | 1057.4571       | 529.2322         | 1057.4701       | 529.2387         | 11 |
| 5  | <b>609.2422</b>  | 305.1247        | 591.2186  | 296.1129         |                |                  | A    | 977.4309        | 489.2191        | 959.4073        | 480.2073         | 959.4203        | 480.2138         | 10 |
| 6  | 711.2869         | 356.1471        | 693.2633  | 347.1353         | 693.2763       | 347.1418         | T    | 905.3967        | 453.2020        | 887.3731        | 444.1902         | 887.3862        | 444.1967         | 9  |
| 7  | <b>799.3160</b>  | 400.1616        | 781.2924  | 391.1498         | 781.3054       | 391.1563         | S    | 803.3520        | 402.1796        | 785.3284        | 393.1678         | 785.3414        | 393.1744         | 8  |
| 8  | <b>857.3345</b>  | 429.1709        | 839.3109  | 420.1591         | 839.3239       | 420.1656         | G    | <b>715.3229</b> | 358.1651        | 697.2994        | 349.1533         | 697.3124        | 349.1598         | 7  |
| 9  | <b>945.3635</b>  | 473.1854        | 927.3399  | 464.1736         | 927.3530       | 464.1801         | S    | <b>657.3044</b> | 329.1559        | <b>639.2809</b> | 320.1441         | <b>639.2939</b> | 320.1506         | 6  |
| 10 | 1003.3820        | 502.1947        | 985.3584  | 493.1829         | 985.3715       | 493.1894         | G    | 569.2754        | 285.1413        | 551.2518        | 276.1295         | 551.2648        | 276.1360         | 5  |
| 11 | <b>1119.4060</b> | 560.2066        | 1101.3824 | 551.1948         | 1101.3954      | 551.2014         | D    | <b>511.2569</b> | 256.1321        | 493.2333        | 247.1203         | 493.2463        | 247.1268         | 4  |
| 12 | 1235.4430        | 618.2251        | 1217.4194 | <b>609.2133</b>  | 1217.4324      | <b>609.2199</b>  | N    | <b>395.2329</b> | 198.1201        | <b>377.2093</b> | 189.1083         |                 |                  | 3  |
| 13 | <b>1365.5320</b> | 683.2697        | 1347.5085 | 674.2579         | 1347.5215      | 674.2644         | K    | 279.1959        | 140.1016        | 261.1723        | 131.0898         |                 |                  | 2  |
| 14 |                  |                 |           |                  |                |                  | K    | 149.1069        | 75.0571         | 131.0833        | 66.0453          |                 |                  | 1  |

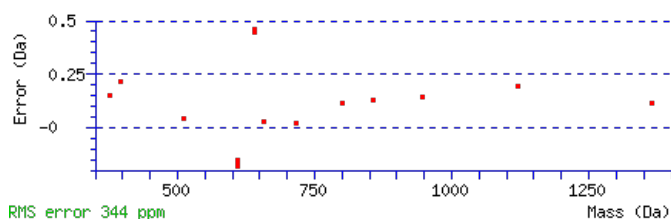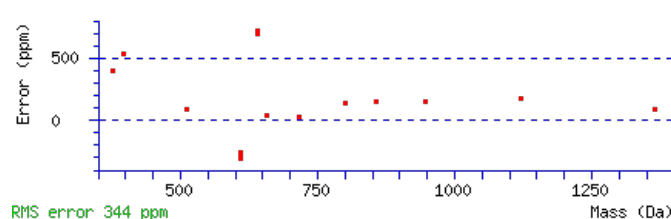

NCBI BLAST search of **RNCPATSGSGDNKK**

(Parameters: blastp, nr protein database, expect=20000, no filter, PAM30)

AT5G58390.1

Other BLAST [web gateways](#)

**All matches to this query**

| Score | Mr(calc)  | Delta   | Sequence                       |
|-------|-----------|---------|--------------------------------|
| 26.1  | 1512.6244 | -0.0038 | <a href="#">RNCPATSGSGDNKK</a> |
| 20.2  | 1512.6212 | -0.0007 | <a href="#">EESEQVMFGALDK</a>  |
| 6.0   | 1512.6217 | -0.0011 | <a href="#">EQTCSTGRDIAEK</a>  |
| 0.9   | 1512.6217 | -0.0011 | <a href="#">MAQEADSRSEGSVK</a> |

**Mascot:** <http://www.matrixscience.com/>

**Peptide View**MS/MS Fragmentation of **LFLMGLK**Found in **AT5G58900.1** in **TAIR\_Arabidopsis**, Symbols: | myb family transcription factor | chr5:23800501-23801893 REVERSE

Match to Query 1251: 844.459252 from(423.236902,2+) index(4999)

Title: Elution from: 46.198 to 46.198 scan no 6277 cid35.00 polarity:+

Data file D6h-2\_2.mgf

Click mouse within plot area to zoom in by factor of two about that point

Or,   to  Da Label all possible matches  Label matches used for scoring Show Y-axis 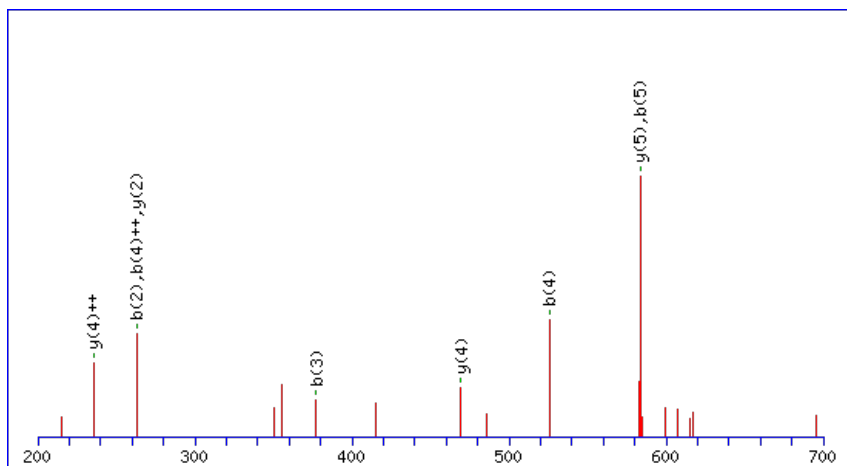Monoisotopic mass of neutral peptide **Mr(calc)**: 844.4593**Fixed modifications:** Carbamidomethyl (C) (apply to specified residues or termini only)**Variable modifications:****M4** : Oxidation (M), with neutral losses 0.0000 (shown in table), 63.9983**Ions Score:** 21 **Expect:** 0.033**Matches** : 9/54 fragment ions using 14 most intense peaks ([help](#))

| # | b               | b <sup>++</sup> | Seq. | y               | y <sup>++</sup> | y*       | y <sup>*++</sup> | # |
|---|-----------------|-----------------|------|-----------------|-----------------|----------|------------------|---|
| 1 | 115.0884        | 58.0478         | L    |                 |                 |          |                  | 7 |
| 2 | <b>263.1538</b> | 132.0805        | F    | 731.3855        | 366.1964        | 713.3619 | 357.1846         | 6 |
| 3 | <b>377.2349</b> | 189.1211        | L    | <b>583.3200</b> | 292.1636        | 565.2964 | 283.1518         | 5 |
| 4 | <b>525.2674</b> | <b>263.1373</b> | M    | <b>469.2389</b> | <b>235.1231</b> | 451.2153 | 226.1113         | 4 |
| 5 | <b>583.2859</b> | 292.1466        | G    | 321.2065        | 161.1069        | 303.1829 | 152.0951         | 3 |
| 6 | 697.3670        | 349.1871        | L    | <b>263.1880</b> | 132.0976        | 245.1644 | 123.0858         | 2 |
| 7 |                 |                 | K    | 149.1069        | 75.0571         | 131.0833 | 66.0453          | 1 |

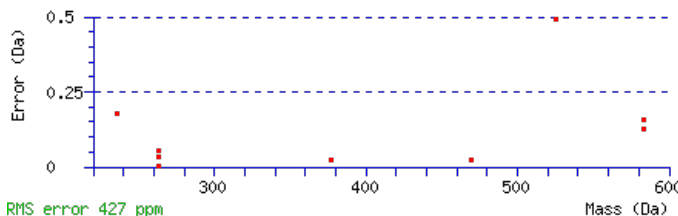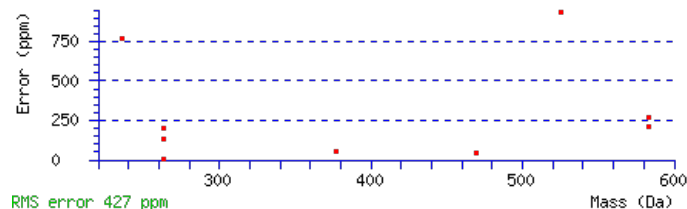NCBI **BLAST** search of [LFLMGLK](#)

(Parameters: blastp, nr protein database, expect=20000, no filter, PAM30)

Other BLAST [web gateways](#)**All matches to this query**

| Score | Mr(calc) | Delta   | Sequence                |
|-------|----------|---------|-------------------------|
| 21.2  | 844.4593 | -0.0000 | <a href="#">LFLMGLK</a> |
| 13.2  | 844.4593 | -0.0000 | <a href="#">MIGYLLK</a> |

## AT5G58900.1

|     |          |         |                         |
|-----|----------|---------|-------------------------|
| 6.5 | 844.4593 | -0.0000 | <a href="#">ILFMLGK</a> |
| 5.2 | 844.4568 | 0.0025  | <a href="#">RTLQR</a>   |
| 5.2 | 844.4570 | 0.0022  | <a href="#">SMTKILK</a> |
| 1.3 | 844.4570 | 0.0022  | <a href="#">STKIMLK</a> |
| 0.6 | 844.4593 | -0.0000 | <a href="#">VFLMSLK</a> |
| 0.5 | 844.4570 | 0.0022  | <a href="#">KVTMIK</a>  |
| 0.5 | 844.4597 | -0.0005 | <a href="#">KMSLAKR</a> |

**Mascot:** <http://www.matrixscience.com/>

**Peptide View**MS/MS Fragmentation of **FIIYK**

Found in **AT5G59880.1** in **TAIR\_Arabidopsis**, Symbols: ADF3 | ADF3 (ACTIN DEPOLYMERIZING FACTOR 3); actin binding | chr5:24137608-24138854 FORWARD

Match to Query 577: 688.387170 from(345.200861,2+) index(3217)

Title: Elution from: 30.932 to 30.932 scan no 3981 cid35.00 polarity:+

Data file C7-3\_2.mgf

Click mouse within plot area to zoom in by factor of two about that point

Or,   to  Da

Label all possible matches  Label matches used for scoring

Show Y-axis

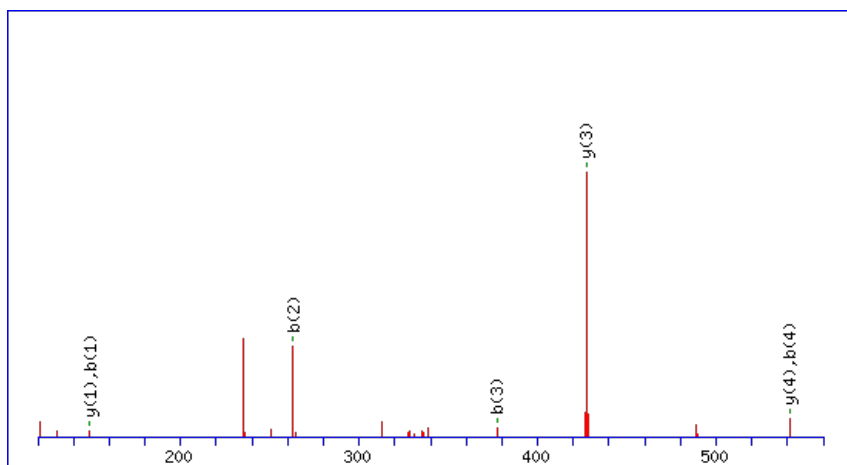

Monoisotopic mass of neutral peptide Mr(calc): 688.3876

Fixed modifications: Carbamidomethyl (C) (apply to specified residues or termini only)

Ions Score: 31 Expect: 0.0025

Matches : 7/24 fragment ions using 9 most intense peaks ([help](#))

| # | b        | b <sup>++</sup> | Seq. | y        | y <sup>++</sup> | y*       | y <sup>*++</sup> | # |
|---|----------|-----------------|------|----------|-----------------|----------|------------------|---|
| 1 | 149.0727 | 75.0400         | F    |          |                 |          |                  | 5 |
| 2 | 263.1538 | 132.0805        | I    | 541.3294 | 271.1684        | 523.3059 | 262.1566         | 4 |
| 3 | 377.2349 | 189.1211        | I    | 427.2483 | 214.1278        | 409.2248 | 205.1160         | 3 |
| 4 | 541.2953 | 271.1513        | Y    | 313.1672 | 157.0873        | 295.1437 | 148.0755         | 2 |
| 5 |          |                 | K    | 149.1069 | 75.0571         | 131.0833 | 66.0453          | 1 |

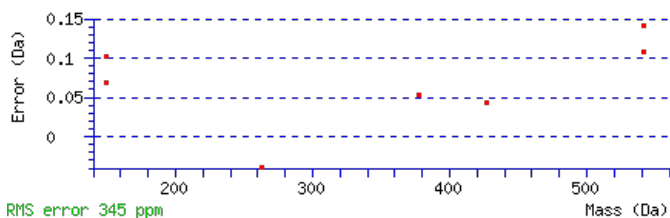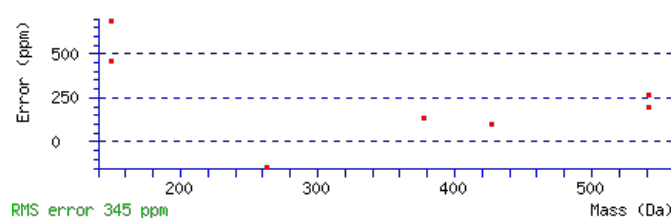NCBI BLAST search of [FIIYK](#)

(Parameters: blastp, nr protein database, expect=20000, no filter, PAM30)

Other BLAST [web gateways](#)

**All matches to this query**

| Score | Mr(calc) | Delta   | Sequence              |
|-------|----------|---------|-----------------------|
| 31.4  | 688.3876 | -0.0004 | <a href="#">FIIYK</a> |
| 31.4  | 688.3876 | -0.0004 | <a href="#">FLIYK</a> |
| 31.4  | 688.3876 | -0.0004 | <a href="#">FLLYK</a> |
| 31.4  | 688.3876 | -0.0004 | <a href="#">FYIIK</a> |



**AT5G59880.1**

|      |          |         |                        |
|------|----------|---------|------------------------|
| 29.6 | 688.3876 | -0.0004 | <a href="#">FLYLK</a>  |
| 20.9 | 688.3876 | -0.0004 | <a href="#">IFLYK</a>  |
| 20.9 | 688.3876 | -0.0004 | <a href="#">YFIK</a>   |
| 11.1 | 688.3854 | 0.0018  | <a href="#">IDPPIK</a> |
| 11.1 | 688.3880 | -0.0009 | <a href="#">RTFKK</a>  |
| 11.1 | 688.3880 | -0.0009 | <a href="#">TRKFK</a>  |

**Mascot:** <http://www.matrixscience.com/>

**Peptide View**MS/MS Fragmentation of **ELFAEVGELK**Found in **AT5G59950.1** in **TAIR\_Arabidopsis**, Symbols: | RNA and export factor-binding protein, putative | chr5:24157461-24158730 FORWARD

Match to Query 3940: 1133.595666 from(567.805109,2+) index(7088)

Title: Elution from: 61.484 to 61.484 scan no 9066 cid35.00 polarity:+

Data file D6h-1\_1.mgf

Click mouse within plot area to zoom in by factor of two about that point

Or,   to  Da Label all possible matches  Label matches used for scoring Show Y-axis 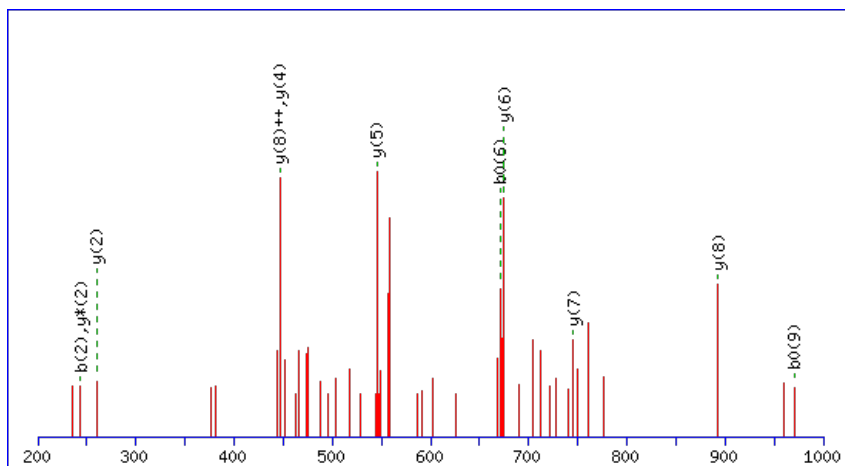**Monoisotopic mass of neutral peptide Mr(calc):** 1133.5968**Fixed modifications:** Carbamidomethyl (C) (apply to specified residues or termini only)**Ions Score:** 39 **Expect:** 0.00061**Matches:** 11/86 fragment ions using 15 most intense peaks ([help](#))

| #  | b               | b <sup>++</sup> | b <sup>0</sup>  | b <sup>0++</sup> | Seq. | y               | y <sup>++</sup> | y <sup>*</sup>  | y <sup>*++</sup> | y <sup>0</sup> | y <sup>0++</sup> | #  |
|----|-----------------|-----------------|-----------------|------------------|------|-----------------|-----------------|-----------------|------------------|----------------|------------------|----|
| 1  | 130.0499        | 65.5286         | 112.0393        | 56.5233          | E    |                 |                 |                 |                  |                |                  | 10 |
| 2  | <b>243.1339</b> | 122.0706        | 225.1234        | 113.0653         | L    | 1005.5615       | 503.2844        | 988.5350        | 494.7711         | 987.5510       | 494.2791         | 9  |
| 3  | 390.2023        | 195.6048        | 372.1918        | 186.5995         | F    | <b>892.4775</b> | <b>446.7424</b> | 875.4509        | 438.2291         | 874.4669       | 437.7371         | 8  |
| 4  | 461.2395        | 231.1234        | 443.2289        | 222.1181         | A    | <b>745.4090</b> | 373.2082        | 728.3825        | 364.6949         | 727.3985       | 364.2029         | 7  |
| 5  | 590.2821        | 295.6447        | 572.2715        | 286.6394         | E    | <b>674.3719</b> | 337.6896        | 657.3454        | 329.1763         | 656.3614       | 328.6843         | 6  |
| 6  | 689.3505        | 345.1789        | <b>671.3399</b> | 336.1736         | V    | <b>545.3293</b> | 273.1683        | 528.3028        | 264.6550         | 527.3188       | 264.1630         | 5  |
| 7  | 746.3719        | 373.6896        | 728.3614        | 364.6843         | G    | <b>446.2609</b> | 223.6341        | 429.2344        | 215.1208         | 428.2504       | 214.6288         | 4  |
| 8  | 875.4145        | 438.2109        | 857.4040        | 429.2056         | E    | 389.2395        | 195.1234        | 372.2129        | 186.6101         | 371.2289       | 186.1181         | 3  |
| 9  | 988.4986        | 494.7529        | <b>970.4880</b> | 485.7477         | L    | <b>260.1969</b> | 130.6021        | <b>243.1703</b> | 122.0888         |                |                  | 2  |
| 10 |                 |                 |                 |                  | K    | 147.1128        | 74.0600         | 130.0863        | 65.5468          |                |                  | 1  |

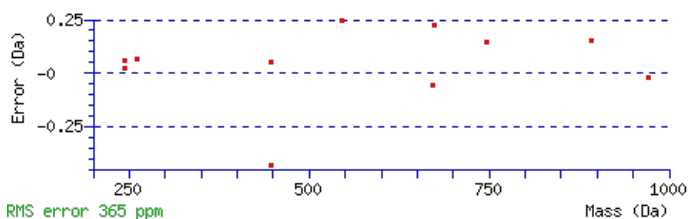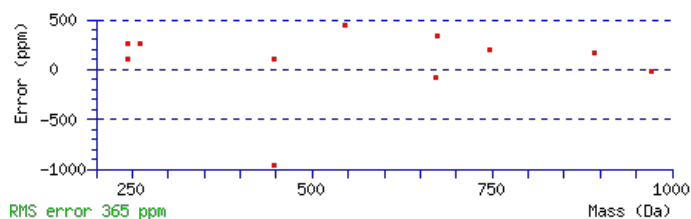NCBI **BLAST** search of **ELFAEVGELK**

(Parameters: blastp, nr protein database, expect=20000, no filter, PAM30)

Other BLAST [web gateways](#)**All matches to this query**

| Score | Mr(calc) | Delta | Sequence |
|-------|----------|-------|----------|
|       |          |       |          |

## AT5G59950.1

|      |           |         |                            |
|------|-----------|---------|----------------------------|
| 39.5 | 1133.5968 | -0.0012 | <a href="#">ELFAEVGELK</a> |
| 9.7  | 1133.5968 | -0.0012 | <a href="#">EIGFLEGEIK</a> |
| 1.2  | 1133.5968 | -0.0012 | <a href="#">YGLELSDPK</a>  |

**Mascot:** <http://www.matrixscience.com/>

**Peptide View**MS/MS Fragmentation of **MLFRLK**Found in **AT5G59980.1** in **TAIR\_Arabidopsis**, Symbols: | RNase P subunit p30 family protein | chr5:24164433-24166618 FORWARD

Match to Query 1200: 832.449744 from(417.232148,2+) index(6744)

Title: Elution from: 59.643 to 59.643 scan no 8726 cid35.00 polarity:+

Data file 0-1\_3.mgf

Click mouse within plot area to zoom in by factor of two about that point

Or,  to  Da Label all possible matches  Label matches used for scoring Show Y-axis 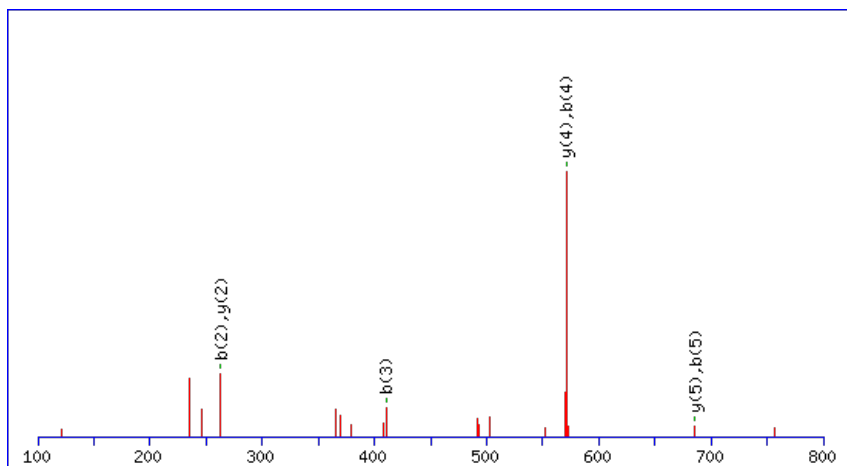Monoisotopic mass of neutral peptide **Mr(calc)**: 832.4489

Fixed modifications: Carbamidomethyl (C) (apply to specified residues or termini only)

## Variable modifications:

M1 : Oxidation (M), with neutral losses 0.0000 (shown in table), 63.9983

Ions Score: 28 Expect: 0.0017

Matches : 7/48 fragment ions using 7 most intense peaks ([help](#))

| # | b               | b <sup>++</sup> | b*       | b <sup>*++</sup> | Seq. | y               | y <sup>++</sup> | y*       | y <sup>*++</sup> | # |
|---|-----------------|-----------------|----------|------------------|------|-----------------|-----------------|----------|------------------|---|
| 1 | 149.0397        | 75.0235         |          |                  | M    |                 |                 |          |                  | 6 |
| 2 | <b>263.1208</b> | 132.0640        |          |                  | L    | <b>685.4238</b> | 343.2155        | 667.4002 | 334.2037         | 5 |
| 3 | <b>411.1863</b> | 206.0968        |          |                  | F    | <b>571.3427</b> | 286.1750        | 553.3191 | 277.1632         | 4 |
| 4 | <b>571.2755</b> | 286.1414        | 553.2519 | 277.1296         | R    | 423.2772        | 212.1422        | 405.2536 | 203.1305         | 3 |
| 5 | <b>685.3566</b> | 343.1819        | 667.3330 | 334.1702         | L    | <b>263.1880</b> | 132.0976        | 245.1644 | 123.0858         | 2 |
| 6 |                 |                 |          |                  | K    | 149.1069        | 75.0571         | 131.0833 | 66.0453          | 1 |

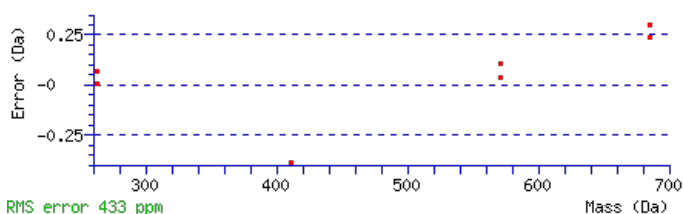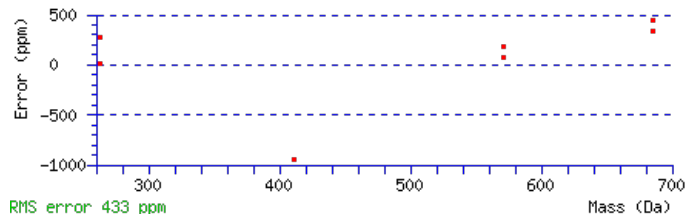NCBI **BLAST** search of **MLFRLK**

(Parameters: blastp, nr protein database, expect=20000, no filter, PAM30)

Other BLAST [web gateways](#)**All matches to this query**

| Score | Mr(calc) | Delta  | Sequence               |
|-------|----------|--------|------------------------|
| 28.2  | 832.4489 | 0.0008 | <a href="#">FLRMLK</a> |
| 28.2  | 832.4489 | 0.0008 | <a href="#">IMFRLK</a> |
| 28.2  | 832.4489 | 0.0008 | <a href="#">MLFRLK</a> |

# AT5G59980.1

|      |          |        |                        |
|------|----------|--------|------------------------|
| 15.8 | 832.4489 | 0.0008 | <a href="#">LMFLRK</a> |
| 9.9  | 832.4489 | 0.0008 | <a href="#">IMRYLK</a> |
| 3.9  | 832.4489 | 0.0008 | <a href="#">LRMYLK</a> |
| 0.3  | 832.4489 | 0.0008 | <a href="#">MLYIRK</a> |

**Mascot:** <http://www.matrixscience.com/>

**Peptide View**MS/MS Fragmentation of **DEDVVDEKVK**

Found in **AT5G60030.1** in **TAIR\_Arabidopsis**, Symbols: | similar to unknown protein [Arabidopsis thaliana] (TAIR:AT1G75335.1); similar to hypothetical protein [Vitis vinifera] (GB:CAN66187.1) | chr5:24189308-24190186 REVERSE

Match to Query 4084: 1186.537262 from(594.275907,2+) index(1343)

Title: Elution from: 20.815 to 20.815 scan no 1917 cid35.00 polarity:+

Data file D6h-2\_1.mgf

Click mouse within plot area to zoom in by factor of two about that point

Or,   to  Da

Label all possible matches  Label matches used for scoring

Show Y-axis

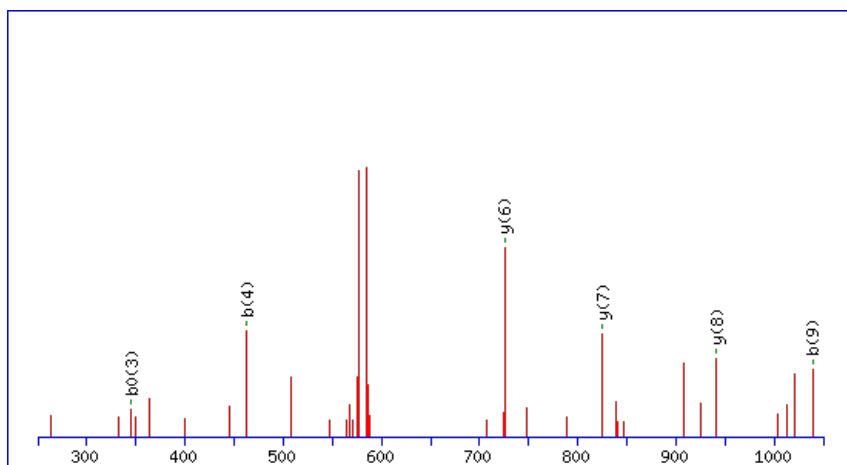

**Monoisotopic mass of neutral peptide Mr(calc):** 1186.5361

**Fixed modifications:** Carbamidomethyl (C) (apply to specified residues or termini only)

**Ions Score:** 23 **Expect:** 0.023

**Matches:** 6/88 fragment ions using 8 most intense peaks ([help](#))

| #  | b         | b <sup>++</sup> | b*        | b <sup>*++</sup> | b <sup>0</sup> | b <sup>0++</sup> | Seq. | y         | y <sup>++</sup> | y*        | y <sup>*++</sup> | y <sup>0</sup> | y <sup>0++</sup> | #  |
|----|-----------|-----------------|-----------|------------------|----------------|------------------|------|-----------|-----------------|-----------|------------------|----------------|------------------|----|
| 1  | 117.0313  | 59.0193         |           |                  | 99.0207        | 50.0140          | D    |           |                 |           |                  |                |                  | 10 |
| 2  | 247.0709  | 124.0391        |           |                  | 229.0603       | 115.0338         | E    | 1071.5195 | 536.2634        | 1053.4959 | 527.2516         | 1053.5089      | 527.2581         | 9  |
| 3  | 363.0949  | 182.0511        |           |                  | 345.0843       | 173.0458         | D    | 941.4798  | 471.2436        | 923.4563  | 462.2318         | 923.4693       | 462.2383         | 8  |
| 4  | 463.1603  | 232.0838        |           |                  | 445.1497       | 223.0785         | V    | 825.4559  | 413.2316        | 807.4323  | 404.2198         | 807.4453       | 404.2263         | 7  |
| 5  | 563.2258  | 282.1165        |           |                  | 545.2152       | 273.1112         | V    | 725.3904  | 363.1988        | 707.3668  | 354.1871         | 707.3798       | 354.1936         | 6  |
| 6  | 679.2497  | 340.1285        |           |                  | 661.2392       | 331.1232         | D    | 625.3250  | 313.1661        | 607.3014  | 304.1543         | 607.3144       | 304.1608         | 5  |
| 7  | 809.2894  | 405.1483        |           |                  | 791.2788       | 396.1430         | E    | 509.3010  | 255.1541        | 491.2774  | 246.1423         | 491.2904       | 246.1488         | 4  |
| 8  | 939.3784  | 470.1928        | 921.3548  | 461.1810         | 921.3678       | 461.1876         | K    | 379.2614  | 190.1343        | 361.2378  | 181.1225         |                |                  | 3  |
| 9  | 1039.4438 | 520.2256        | 1021.4203 | 511.2138         | 1021.4333      | 511.2203         | V    | 249.1723  | 125.0898        | 231.1487  | 116.0780         |                |                  | 2  |
| 10 |           |                 |           |                  |                |                  | K    | 149.1069  | 75.0571         | 131.0833  | 66.0453          |                |                  | 1  |

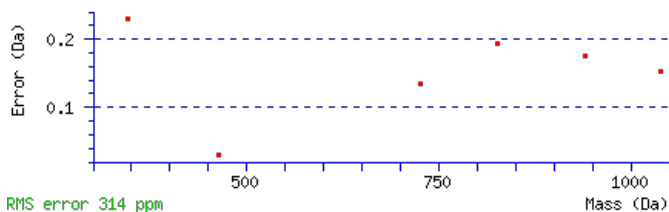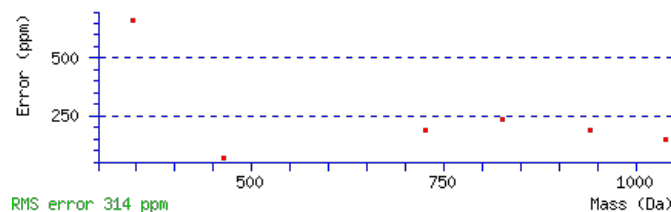NCBI BLAST search of **DEDVVDEKVK**

(Parameters: blastp, nr protein database, expect=20000, no filter, PAM30)

Other BLAST [web gateways](#)

**All matches to this query**

## AT5G60030.1

| Score | Mr(calc)  | Delta   | Sequence                    |
|-------|-----------|---------|-----------------------------|
| 22.9  | 1186.5361 | 0.0011  | <a href="#">DEDVVDEKVK</a>  |
| 9.8   | 1186.5388 | -0.0016 | <a href="#">NVENGDNVAIK</a> |
| 9.4   | 1186.5397 | -0.0024 | <a href="#">MVEQCHKLK</a>   |
| 9.2   | 1186.5370 | 0.0002  | <a href="#">ISASMPDVPMK</a> |
| 7.5   | 1186.5368 | 0.0005  | <a href="#">ESPRQHRMK</a>   |
| 7.5   | 1186.5341 | 0.0032  | <a href="#">EVISRDGHMK</a>  |
| 6.7   | 1186.5388 | -0.0016 | <a href="#">EDVDLAVNAAR</a> |
| 4.0   | 1186.5341 | 0.0032  | <a href="#">CTPVPRNLNT</a>  |
| 1.3   | 1186.5388 | -0.0016 | <a href="#">QKTSDIIEHVK</a> |
| 0.9   | 1186.5370 | 0.0002  | <a href="#">MSPVEPAGIMK</a> |

Mascot: <http://www.matrixscience.com/>

**Peptide View**MS/MS Fragmentation of **MEPLKK**

Found in **AT5G60040.1** in **TAIR\_Arabidopsis**, Symbols: NRPC1 | NRPC1 (nuclear RNA polymerase C 1); DNA binding / DNA-directed RNA polymerase | chr5:24190816-24200495 FORWARD

Match to Query 887: 768.393310 from(385.203931,2+) index(438)

Title: Elution from: 10.222 to 10.222 scan no 714 cid35.00 polarity:+

Data file C7-3\_1.mgf

Click mouse within plot area to zoom in by factor of two about that point

Or,   to  Da

Label all possible matches  Label matches used for scoring

Show Y-axis

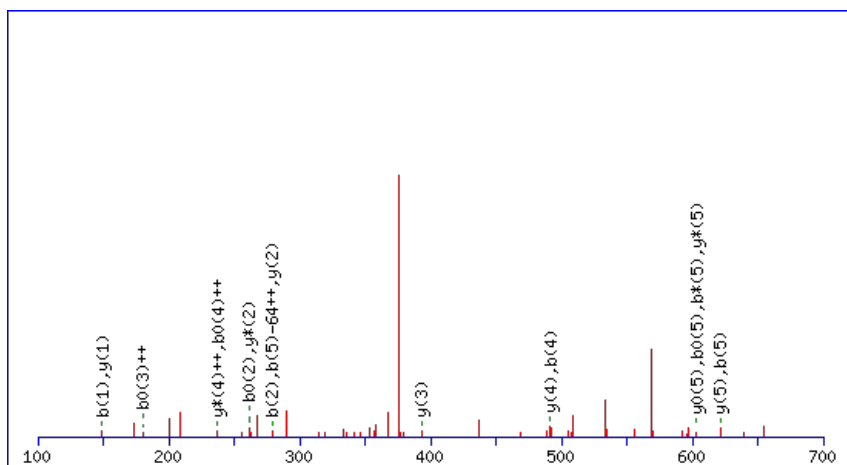

Monoisotopic mass of neutral peptide  $M_r(\text{calc})$ : 768.3916

Fixed modifications: Carbamidomethyl (C) (apply to specified residues or termini only)

Variable modifications:

M1 : Oxidation (M), with neutral losses 0.0000 (shown in table), 63.9983

Ions Score: 21 Expect: 0.04

Matches : 19/62 fragment ions using 36 most intense peaks ([help](#))

| # | b        | b <sup>++</sup> | b*       | b <sup>***</sup> | b <sup>0</sup> | b <sup>0++</sup> | Seq. | y        | y <sup>++</sup> | y*       | y <sup>***</sup> | y <sup>0</sup> | y <sup>0++</sup> | # |
|---|----------|-----------------|----------|------------------|----------------|------------------|------|----------|-----------------|----------|------------------|----------------|------------------|---|
| 1 | 149.0397 | 75.0235         |          |                  |                |                  | M    |          |                 |          |                  |                |                  | 6 |
| 2 | 279.0793 | 140.0433        |          |                  | 261.0688       | 131.0380         | E    | 621.3664 | 311.1869        | 603.3428 | 302.1751         | 603.3559       | 302.1816         | 5 |
| 3 | 377.1291 | 189.0682        |          |                  | 359.1186       | 180.0629         | P    | 491.3268 | 246.1670        | 473.3032 | 237.1552         |                |                  | 4 |
| 4 | 491.2102 | 246.1088        |          |                  | 473.1997       | 237.1035         | L    | 393.2770 | 197.1421        | 375.2534 | 188.1303         |                |                  | 3 |
| 5 | 621.2993 | 311.1533        | 603.2757 | 302.1415         | 603.2887       | 302.1480         | K    | 279.1959 | 140.1016        | 261.1723 | 131.0898         |                |                  | 2 |
| 6 |          |                 |          |                  |                |                  | K    | 149.1069 | 75.0571         | 131.0833 | 66.0453          |                |                  | 1 |

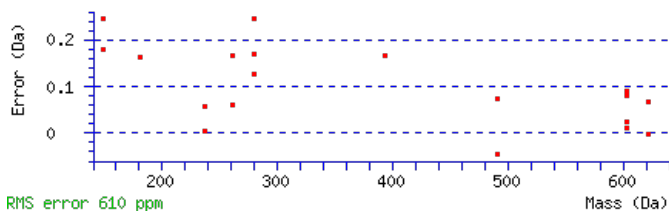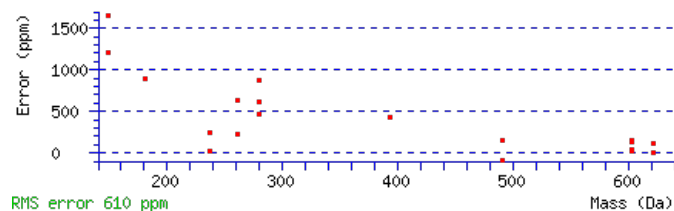

NCBI **BLAST** search of [MEPLKK](#)

(Parameters: blastp, nr protein database, expect=20000, no filter, PAM30)

Other BLAST [web gateways](#)

**All matches to this query**

| Score | $M_r(\text{calc})$ | Delta  | Sequence               |
|-------|--------------------|--------|------------------------|
| 20.5  | 768.3916           | 0.0017 | <a href="#">MEPLKK</a> |
| 19.6  | 768.3916           | 0.0017 | <a href="#">MLKPEK</a> |



# AT5G60040.1

|      |          |         |                         |
|------|----------|---------|-------------------------|
| 19.6 | 768.3916 | 0.0017  | <a href="#">EMILQK</a>  |
| 19.6 | 768.3916 | 0.0017  | <a href="#">EMLIQK</a>  |
| 18.6 | 768.3916 | 0.0017  | <a href="#">KMLPEK</a>  |
| 11.7 | 768.3916 | 0.0017  | <a href="#">EIMIAGK</a> |
| 11.7 | 768.3916 | 0.0017  | <a href="#">LLMPGSK</a> |
| 10.8 | 768.3943 | -0.0010 | <a href="#">MKKHSK</a>  |
| 10.3 | 768.3916 | 0.0017  | <a href="#">MLPEKK</a>  |
| 9.6  | 768.3943 | -0.0010 | <a href="#">MKHKAK</a>  |

Mascot: <http://www.matrixscience.com/>

**Peptide View**MS/MS Fragmentation of **QVLTEPDEPR**Found in **AT5G60050.1** in **TAIR\_Arabidopsis**, Symbols: | PRLI-interacting factor-related | chr5:24200906-24202490 REVERSE

Match to Query 4182: 1196.545964 from(599.280258,2+) index(4273)

Title: Elution from: 39.396 to 39.396 scan no 5352 cid35.00 polarity:+

Data file C7-2\_2.mgf

Click mouse within plot area to zoom in by factor of two about that point

Or,   to  Da Label all possible matches  Label matches used for scoring Show Y-axis 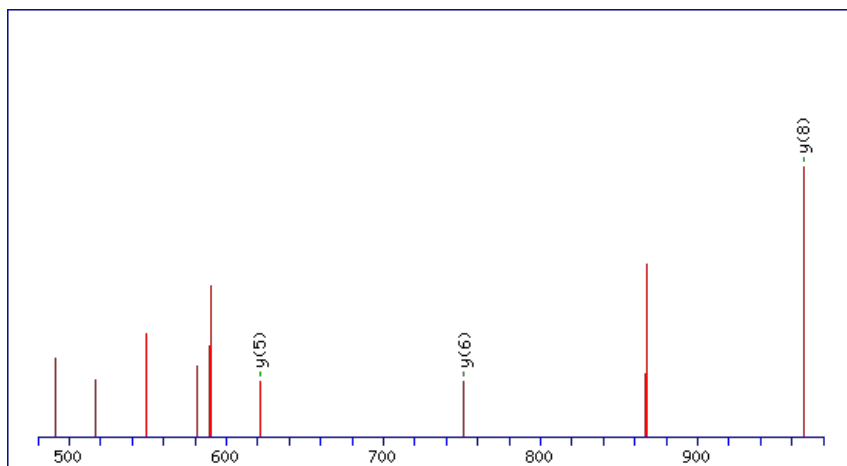Monoisotopic mass of neutral peptide **Mr(calc)**: 1196.5465**Fixed modifications**: Carbamidomethyl (C) (apply to specified residues or termini only)**Ions Score**: 21 **Expect**: 0.046**Matches**: 3/98 fragment ions using 5 most intense peaks ([help](#))

| #  | b         | b <sup>++</sup> | b*        | b <sup>*++</sup> | b <sup>0</sup> | b <sup>0++</sup> | Seq. | y               | y <sup>++</sup> | y*        | y <sup>*++</sup> | y <sup>0</sup> | y <sup>0++</sup> | #  |
|----|-----------|-----------------|-----------|------------------|----------------|------------------|------|-----------------|-----------------|-----------|------------------|----------------|------------------|----|
| 1  | 131.0599  | 66.0336         | 113.0363  | 57.0218          |                |                  | Q    |                 |                 |           |                  |                |                  | 10 |
| 2  | 231.1254  | 116.0663        | 213.1018  | 107.0545         |                |                  | V    | 1067.5012       | 534.2542        | 1049.4776 | 525.2424         | 1049.4906      | 525.2489         | 9  |
| 3  | 345.2065  | 173.1069        | 327.1829  | 164.0951         |                |                  | L    | <b>967.4357</b> | 484.2215        | 949.4122  | 475.2097         | 949.4252       | 475.2162         | 8  |
| 4  | 447.2512  | 224.1292        | 429.2276  | 215.1174         | 429.2406       | 215.1239         | T    | 853.3546        | 427.1810        | 835.3311  | 418.1692         | 835.3441       | 418.1757         | 7  |
| 5  | 577.2908  | 289.1490        | 559.2672  | 280.1373         | 559.2802       | 280.1438         | E    | <b>751.3099</b> | 376.1586        | 733.2863  | 367.1468         | 733.2994       | 367.1533         | 6  |
| 6  | 675.3406  | 338.1739        | 657.3170  | 329.1622         | 657.3300       | 329.1687         | P    | <b>621.2703</b> | 311.1388        | 603.2467  | 302.1270         | 603.2597       | 302.1335         | 5  |
| 7  | 791.3646  | 396.1859        | 773.3410  | 387.1741         | 773.3540       | 387.1807         | D    | 523.2205        | 262.1139        | 505.1969  | 253.1021         | 505.2099       | 253.1086         | 4  |
| 8  | 921.4042  | 461.2057        | 903.3806  | 452.1940         | 903.3937       | 452.2005         | E    | 407.1965        | 204.1019        | 389.1729  | 195.0901         | 389.1860       | 195.0966         | 3  |
| 9  | 1019.4540 | 510.2306        | 1001.4304 | 501.2189         | 1001.4435      | 501.2254         | P    | 277.1569        | 139.0821        | 259.1333  | 130.0703         |                |                  | 2  |
| 10 |           |                 |           |                  |                |                  | R    | 179.1071        | 90.0572         | 161.0835  | 81.0454          |                |                  | 1  |

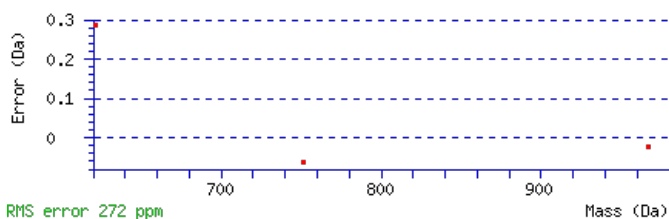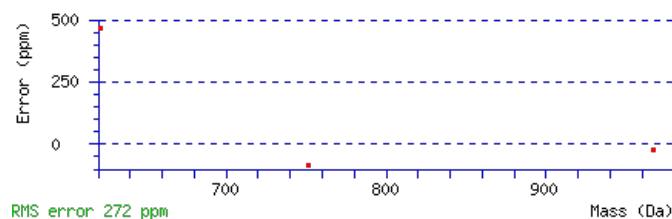NCBI **BLAST** search of **QVLTEPDEPR**

(Parameters: blastp, nr protein database, expect=20000, no filter, PAM30)

Other BLAST [web gateways](#)**All matches to this query**

| Score | Mr(calc) | Delta | Sequence |
|-------|----------|-------|----------|
|       |          |       |          |

# AT5G60050.1

|      |           |         |                            |
|------|-----------|---------|----------------------------|
| 20.8 | 1196.5465 | -0.0006 | <a href="#">QVLTEPDEPR</a> |
| 19.9 | 1196.5465 | -0.0006 | <a href="#">TLLDEHVNDK</a> |
| 0.7  | 1196.5441 | 0.0019  | <a href="#">GCHVFPPEIK</a> |

**Mascot:** <http://www.matrixscience.com/>

**Peptide View**MS/MS Fragmentation of **TLFDLQEISAEIR**

Found in **AT5G60600.1** in **TAIR\_Arabidopsis**, Symbols: ISPG, CSB3, CLB4, GcpE | GcpE (CHLOROPLAST BIOGENESIS 4); 4-hydroxy-3-methylbut-2-en-1-yl diphosphate synthase | chr5:24376673-24380500 FORWARD

Match to Query 6796: 1550.749302 from(776.381927,2+) index(10033)

Title: Elution from: 92.940 to 92.940 scan no 14016 cid35.00 polarity:+

Data file D12h-1\_2.mgf

Click mouse within plot area to zoom in by factor of two about that point

Or,   to  Da

Label all possible matches  Label matches used for scoring

Show Y-axis

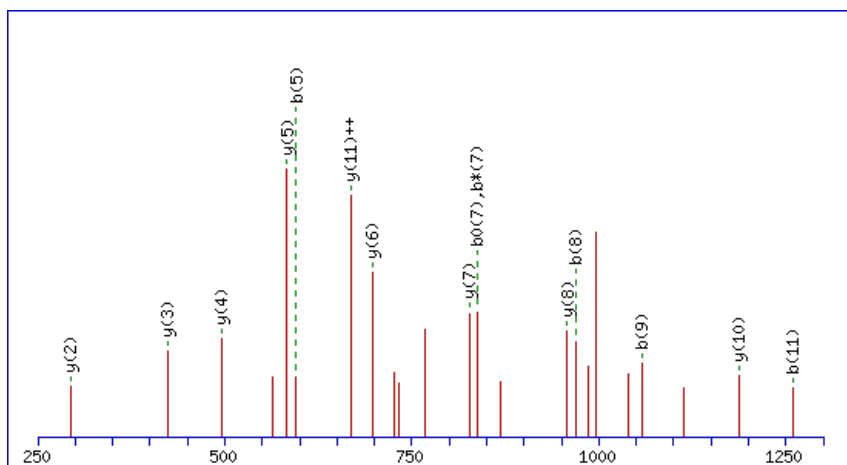

**Monoisotopic mass of neutral peptide Mr(calc):** 1550.7534

**Fixed modifications:** Carbamidomethyl (C) (apply to specified residues or termini only)

**Ions Score:** 71 **Expect:** 9e-007

**Matches:** 15/130 fragment ions using 17 most intense peaks ([help](#))

| #  | b         | b <sup>++</sup> | b*        | b <sup>*++</sup> | b <sup>0</sup> | b <sup>0++</sup> | Seq. | y         | y <sup>++</sup> | y*        | y <sup>*++</sup> | y <sup>0</sup> | y <sup>0++</sup> | #  |
|----|-----------|-----------------|-----------|------------------|----------------|------------------|------|-----------|-----------------|-----------|------------------|----------------|------------------|----|
| 1  | 103.0520  | 52.0296         |           |                  | 85.0414        | 43.0244          | T    |           |                 |           |                  |                |                  | 13 |
| 2  | 217.1331  | 109.0702        |           |                  | 199.1225       | 100.0649         | L    | 1449.7160 | 725.3617        | 1431.6924 | 716.3499         | 1431.7055      | 716.3564         | 12 |
| 3  | 365.1985  | 183.1029        |           |                  | 347.1880       | 174.0976         | F    | 1335.6349 | 668.3211        | 1317.6113 | 659.3093         | 1317.6244      | 659.3158         | 11 |
| 4  | 481.2225  | 241.1149        |           |                  | 463.2120       | 232.1096         | D    | 1187.5695 | 594.2884        | 1169.5459 | 585.2766         | 1169.5589      | 585.2831         | 10 |
| 5  | 595.3036  | 298.1554        |           |                  | 577.2930       | 289.1502         | L    | 1071.5455 | 536.2764        | 1053.5219 | 527.2646         | 1053.5349      | 527.2711         | 9  |
| 6  | 725.3563  | 363.1818        | 707.3327  | 354.1700         | 707.3457       | 354.1765         | Q    | 957.4644  | 479.2358        | 939.4408  | 470.2240         | 939.4538       | 470.2306         | 8  |
| 7  | 855.3959  | 428.2016        | 837.3723  | 419.1898         | 837.3853       | 419.1963         | E    | 827.4118  | 414.2095        | 809.3882  | 405.1977         | 809.4012       | 405.2042         | 7  |
| 8  | 969.4770  | 485.2421        | 951.4534  | 476.2303         | 951.4664       | 476.2368         | I    | 697.3721  | 349.1897        | 679.3485  | 340.1779         | 679.3616       | 340.1844         | 6  |
| 9  | 1057.5061 | 529.2567        | 1039.4825 | 520.2449         | 1039.4955      | 520.2514         | S    | 583.2910  | 292.1492        | 565.2674  | 283.1374         | 565.2805       | 283.1439         | 5  |
| 10 | 1129.5402 | 565.2737        | 1111.5166 | 556.2619         | 1111.5296      | 556.2685         | A    | 495.2620  | 248.1346        | 477.2384  | 239.1228         | 477.2514       | 239.1293         | 4  |
| 11 | 1259.5798 | 630.2936        | 1241.5562 | 621.2818         | 1241.5693      | 621.2883         | E    | 423.2278  | 212.1175        | 405.2042  | 203.1058         | 405.2173       | 203.1123         | 3  |
| 12 | 1373.6609 | 687.3341        | 1355.6373 | 678.3223         | 1355.6504      | 678.3288         | I    | 293.1882  | 147.0977        | 275.1646  | 138.0859         |                |                  | 2  |
| 13 |           |                 |           |                  |                |                  | R    | 179.1071  | 90.0572         | 161.0835  | 81.0454          |                |                  | 1  |

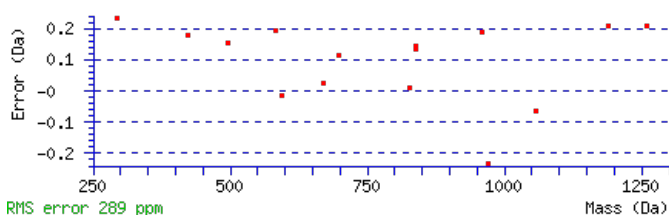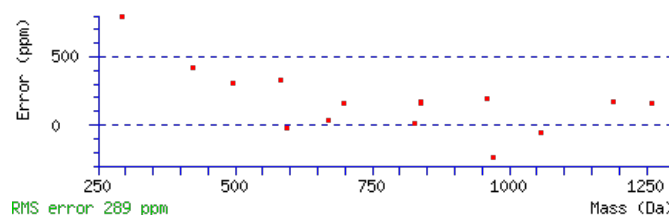

NCBI **BLAST** search of **TLFDLQEISAEIR**

(Parameters: blastp, nr protein database, expect=20000, no filter, PAM30)

# AT5G60600.1

Other BLAST [web gateways](#)

## All matches to this query

| Score | Mr(calc)  | Delta   | Sequence                         |
|-------|-----------|---------|----------------------------------|
| 70.6  | 1550.7534 | -0.0041 | <a href="#">TLFDLQEISAEIR</a>    |
| 7.6   | 1550.7465 | 0.0028  | <a href="#">EKIEAMELEIRR</a>     |
| 6.8   | 1550.7487 | 0.0006  | <a href="#">ALQKFPACSIAAK</a>    |
| 6.6   | 1550.7487 | 0.0006  | <a href="#">MDILFAQIQADLR</a>    |
| 5.0   | 1550.7465 | 0.0028  | <a href="#">MGKISPLTGSSGEIR</a>  |
| 1.2   | 1550.7487 | 0.0006  | <a href="#">LKPVVSFDCAEIR</a>    |
| 0.8   | 1550.7491 | 0.0002  | <a href="#">MSTAAAARPVAGTGLR</a> |
| 0.6   | 1550.7539 | -0.0046 | <a href="#">QNSRVSSQVLVDAK</a>   |
| 0.2   | 1550.7512 | -0.0019 | <a href="#">TDNSEALSKLEKAK</a>   |
| 0.2   | 1550.7521 | -0.0028 | <a href="#">SMVKMGNISPLTGAK</a>  |

Mascot: <http://www.matrixscience.com/>

**Peptide View**MS/MS Fragmentation of **ANGCKPGIK**Found in **AT5G60960.1** in **TAIR\_Arabidopsis**, Symbols: | pentatricopeptide (PPR) repeat-containing protein | chr5:24545649-24547214 REVERSE

Match to Query 2038: 956.455150 from(479.234851,2+) index(3002)

Title: Elution from: 30.037 to 30.037 scan no 3749 cid35.00 polarity:+

Data file D6h-3\_2.mgf

Click mouse within plot area to zoom in by factor of two about that point

Or,   to  Da Label all possible matches  Label matches used for scoring Show Y-axis 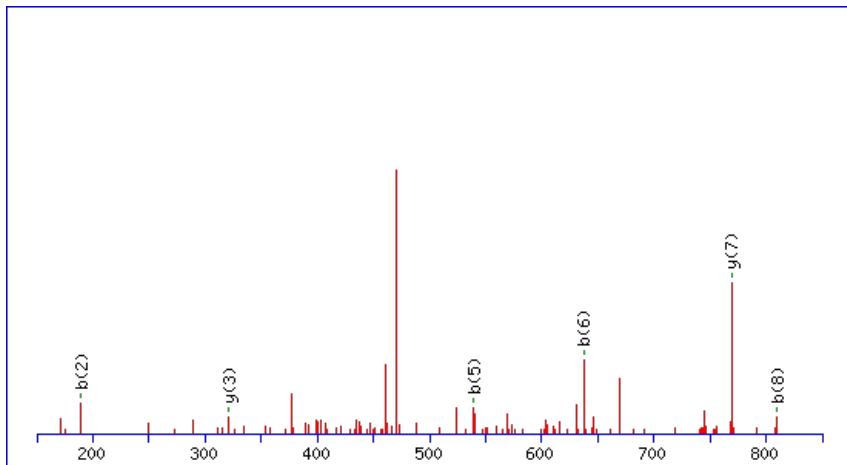Monoisotopic mass of neutral peptide **Mr(calc)**: 956.4524**Fixed modifications**: Carbamidomethyl (C) (apply to specified residues or termini only)**Ions Score**: 38 **Expect**: 0.0014**Matches** : 6/62 fragment ions using 7 most intense peaks ([help](#))

| # | b               | b <sup>++</sup> | b*       | b <sup>*++</sup> | Seq. | y               | y <sup>++</sup> | y*       | y <sup>*++</sup> | # |
|---|-----------------|-----------------|----------|------------------|------|-----------------|-----------------|----------|------------------|---|
| 1 | 73.0414         | 37.0244         |          |                  | A    |                 |                 |          |                  | 9 |
| 2 | <b>189.0784</b> | 95.0428         | 171.0548 | 86.0311          | N    | 885.4255        | 443.2164        | 867.4019 | 434.2046         | 8 |
| 3 | 247.0969        | 124.0521        | 229.0733 | 115.0403         | G    | <b>769.3885</b> | 385.1979        | 751.3649 | 376.1861         | 7 |
| 4 | 409.1216        | 205.0645        | 391.0981 | 196.0527         | C    | 711.3700        | 356.1886        | 693.3464 | 347.1769         | 6 |
| 5 | <b>539.2107</b> | 270.1090        | 521.1871 | 261.0972         | K    | 549.3453        | 275.1763        | 531.3217 | 266.1645         | 5 |
| 6 | <b>637.2605</b> | 319.1339        | 619.2369 | 310.1221         | P    | 419.2563        | 210.1318        | 401.2327 | 201.1200         | 4 |
| 7 | 695.2790        | 348.1431        | 677.2554 | 339.1313         | G    | <b>321.2065</b> | 161.1069        | 303.1829 | 152.0951         | 3 |
| 8 | <b>809.3601</b> | 405.1837        | 791.3365 | 396.1719         | I    | 263.1880        | 132.0976        | 245.1644 | 123.0858         | 2 |
| 9 |                 |                 |          |                  | K    | 149.1069        | 75.0571         | 131.0833 | 66.0453          | 1 |

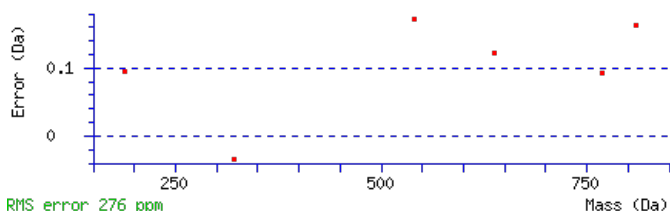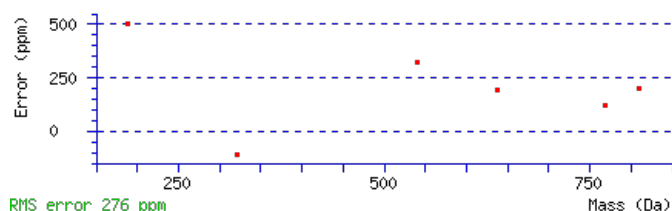NCBI **BLAST** search of [ANGCKPGIK](#)

(Parameters: blastp, nr protein database, expect=20000, no filter, PAM30)

Other BLAST [web gateways](#)**All matches to this query**

| Score | Mr(calc) | Delta  | Sequence                  |
|-------|----------|--------|---------------------------|
| 38.2  | 956.4524 | 0.0028 | <a href="#">ANGCKPGIK</a> |

## AT5G60960.1

|      |          |         |                           |
|------|----------|---------|---------------------------|
| 22.4 | 956.4571 | -0.0020 | <a href="#">QGDKEAVAK</a> |
| 9.3  | 956.4524 | 0.0028  | <a href="#">MVTKNSHK</a>  |
| 8.1  | 956.4545 | 0.0007  | <a href="#">ESTLEELK</a>  |
| 7.4  | 956.4571 | -0.0020 | <a href="#">GENALKDAK</a> |
| 5.8  | 956.4524 | 0.0028  | <a href="#">DMRLANPK</a>  |
| 4.8  | 956.4571 | -0.0020 | <a href="#">NDSEKKPK</a>  |
| 2.6  | 956.4571 | -0.0020 | <a href="#">ADEALKGNK</a> |
| 2.6  | 956.4571 | -0.0020 | <a href="#">DARVEVEK</a>  |
| 2.6  | 956.4571 | -0.0020 | <a href="#">GOTIDIGNK</a> |

Mascot: <http://www.matrixscience.com/>

## Peptide View

### MS/MS Fragmentation of **DLGMLDVMQIFGR**

Found in **AT5G61140.1** in **TAIR\_Arabidopsis**, Symbols: | DEAD box RNA helicase, putative | chr5:24607225-24620537 FORWARD

Match to Query 6889: 1509.736378 from(755.875465,2+) index(8167)

Title: Elution from: 70.920 to 70.920 scan no 10488 cid35.00 polarity:+

Data file 0-1\_1.mgf

Click mouse within plot area to zoom in by factor of two about that point

Or,  to  Da

Label all possible matches  Label matches used for scoring

Show Y-axis

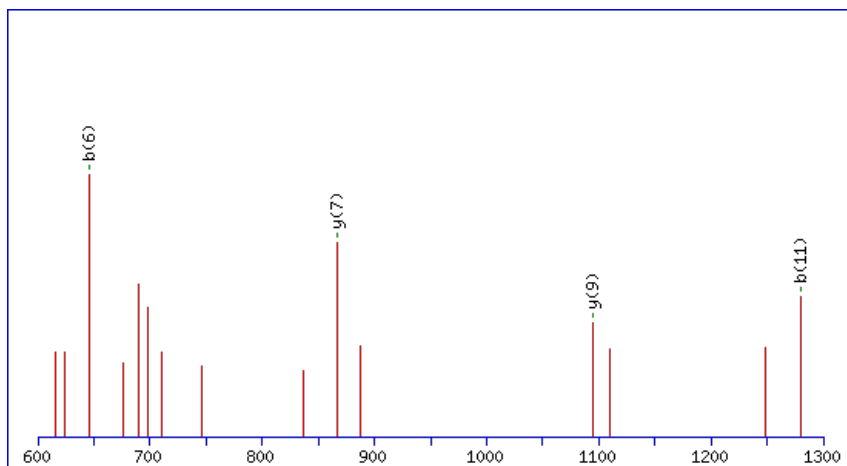

Monoisotopic mass of neutral peptide **Mr(calc)**: 1509.7320

**Fixed modifications:** Carbamidomethyl (C) (apply to specified residues or termini only)

**Variable modifications:**

**M8** : Oxidation (M), with neutral losses 0.0000 (shown in table), 63.9983

**Ions Score:** 19 **Expect:** 0.049

**Matches** : 4/180 fragment ions using 5 most intense peaks ([help](#))

| #  | b                | b <sup>++</sup> | b <sup>*</sup> | b <sup>*++</sup> | b <sup>0</sup> | b <sup>0++</sup> | Seq.     | y                | y <sup>++</sup> | y <sup>*</sup> | y <sup>*++</sup> | y <sup>0</sup> | y <sup>0++</sup> | #  |
|----|------------------|-----------------|----------------|------------------|----------------|------------------|----------|------------------|-----------------|----------------|------------------|----------------|------------------|----|
| 1  | 116.0342         | 58.5207         |                |                  | 98.0237        | 49.5155          | <b>D</b> |                  |                 |                |                  |                |                  | 13 |
| 2  | 229.1183         | 115.0628        |                |                  | 211.1077       | 106.0575         | <b>L</b> | 1395.7123        | 698.3598        | 1378.6858      | 689.8465         | 1377.7017      | 689.3545         | 12 |
| 3  | 286.1397         | 143.5735        |                |                  | 268.1292       | 134.5682         | <b>G</b> | 1282.6282        | 641.8178        | 1265.6017      | 633.3045         | 1264.6177      | 632.8125         | 11 |
| 4  | 417.1802         | 209.0938        |                |                  | 399.1697       | 200.0885         | <b>M</b> | 1225.6068        | 613.3070        | 1208.5802      | 604.7938         | 1207.5962      | 604.3017         | 10 |
| 5  | 530.2643         | 265.6358        |                |                  | 512.2537       | 256.6305         | <b>L</b> | <b>1094.5663</b> | 547.7868        | 1077.5397      | 539.2735         | 1076.5557      | 538.7815         | 9  |
| 6  | <b>645.2912</b>  | 323.1493        |                |                  | 627.2807       | 314.1440         | <b>D</b> | 981.4822         | 491.2448        | 964.4557       | 482.7315         | 963.4717       | 482.2395         | 8  |
| 7  | 744.3597         | 372.6835        |                |                  | 726.3491       | 363.6782         | <b>V</b> | <b>866.4553</b>  | 433.7313        | 849.4287       | 425.2180         |                |                  | 7  |
| 8  | 891.3951         | 446.2012        |                |                  | 873.3845       | 437.1959         | <b>M</b> | 767.3869         | 384.1971        | 750.3603       | 375.6838         |                |                  | 6  |
| 9  | 1019.4536        | 510.2305        | 1002.4271      | 501.7172         | 1001.4431      | 501.2252         | <b>Q</b> | 620.3515         | 310.6794        | 603.3249       | 302.1661         |                |                  | 5  |
| 10 | 1132.5377        | 566.7725        | 1115.5111      | 558.2592         | 1114.5271      | 557.7672         | <b>I</b> | 492.2929         | 246.6501        | 475.2663       | 238.1368         |                |                  | 4  |
| 11 | <b>1279.6061</b> | 640.3067        | 1262.5796      | 631.7934         | 1261.5955      | 631.3014         | <b>F</b> | 379.2088         | 190.1081        | 362.1823       | 181.5948         |                |                  | 3  |
| 12 | 1336.6276        | 668.8174        | 1319.6010      | 660.3042         | 1318.6170      | 659.8121         | <b>G</b> | 232.1404         | 116.5738        | 215.1139       | 108.0606         |                |                  | 2  |
| 13 |                  |                 |                |                  |                |                  | <b>R</b> | 175.1190         | 88.0631         | 158.0924       | 79.5498          |                |                  | 1  |

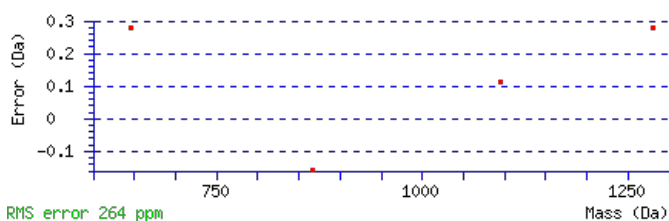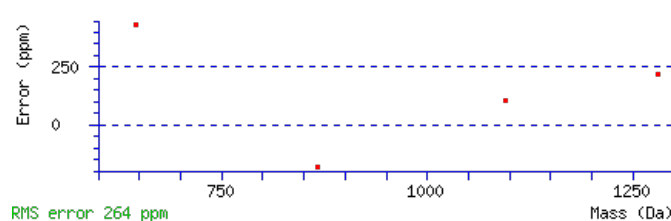

NCBI **BLAST** search of **DLGMLDVMQIFGR**

(Parameters: blastp, nr protein database, expect=20000, no filter, PAM30)



AT5G61140.1

Other BLAST [web gateways](#)

**All matches to this query**

| Score | Mr(calc)  | Delta   | Sequence                      |
|-------|-----------|---------|-------------------------------|
| 18.8  | 1509.7320 | 0.0044  | <a href="#">DLGMLDVMQIFGR</a> |
| 5.4   | 1509.7353 | 0.0011  | <a href="#">LSMEMKNPLKCK</a>  |
| 4.1   | 1509.7398 | -0.0035 | <a href="#">YFGQCPITTAQGR</a> |

Mascot: <http://www.matrixscience.com/>

## Peptide View

MS/MS Fragmentation of **GVNPWIEVDGGVTPANAYK**

Found in **AT5G61410.1** in **TAIR\_Arabidopsis**, Symbols: EMB2728, RPE | RPE (EMBRYO DEFECTIVE 2728); ribulose-phosphate 3-epimerase | chr5:24701311-24703062 REVERSE

Match to Query 8861: 1985.985452 from(994.000002,2+) index(7315)

Title: Elution from: 65.687 to 65.687 scan no 9641 cid35.00 polarity:+

Data file D1d-2\_3.mgf

Click mouse within plot area to zoom in by factor of two about that point

Or,   to  Da

Label all possible matches  Label matches used for scoring

Show Y-axis

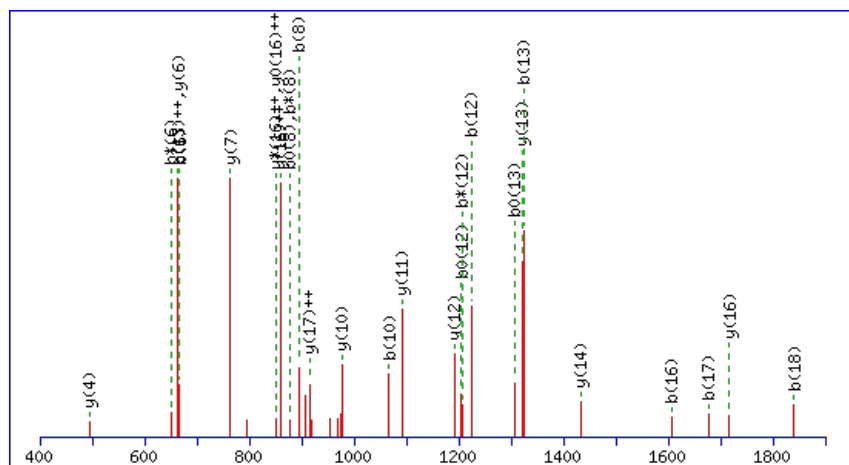

Monoisotopic mass of neutral peptide  $M_r(\text{calc})$ : 1985.9847

Fixed modifications: Carbamidomethyl (C) (apply to specified residues or termini only)

Ions Score: 114 Expect: 1.4e-011

Matches : 28/188 fragment ions using 25 most intense peaks ([help](#))

| #  | b         | b <sup>++</sup> | b*        | b <sup>*++</sup> | b <sup>0</sup> | b <sup>0++</sup> | Seq. | y         | y <sup>++</sup> | y*        | y <sup>*++</sup> | y <sup>0</sup> | y <sup>0++</sup> | #  |
|----|-----------|-----------------|-----------|------------------|----------------|------------------|------|-----------|-----------------|-----------|------------------|----------------|------------------|----|
| 1  | 58.0287   | 29.5180         |           |                  |                |                  | G    |           |                 |           |                  |                |                  | 19 |
| 2  | 157.0972  | 79.0522         |           |                  |                |                  | V    | 1929.9705 | 965.4889        | 1912.9440 | 956.9756         | 1911.9599      | 956.4836         | 18 |
| 3  | 271.1401  | 136.0737        | 254.1135  | 127.5604         |                |                  | N    | 1830.9021 | 915.9547        | 1813.8755 | 907.4414         | 1812.8915      | 906.9494         | 17 |
| 4  | 368.1928  | 184.6001        | 351.1663  | 176.0868         |                |                  | P    | 1716.8592 | 858.9332        | 1699.8326 | 850.4199         | 1698.8486      | 849.9279         | 16 |
| 5  | 554.2722  | 277.6397        | 537.2456  | 269.1264         |                |                  | W    | 1619.8064 | 810.4068        | 1602.7799 | 801.8936         | 1601.7958      | 801.4016         | 15 |
| 6  | 667.3562  | 334.1817        | 650.3297  | 325.6685         |                |                  | I    | 1433.7271 | 717.3672        | 1416.7005 | 708.8539         | 1415.7165      | 708.3619         | 14 |
| 7  | 796.3988  | 398.7030        | 779.3723  | 390.1898         | 778.3882       | 389.6978         | E    | 1320.6430 | 660.8251        | 1303.6165 | 652.3119         | 1302.6325      | 651.8199         | 13 |
| 8  | 895.4672  | 448.2373        | 878.4407  | 439.7240         | 877.4567       | 439.2320         | V    | 1191.6004 | 596.3039        | 1174.5739 | 587.7906         | 1173.5899      | 587.2986         | 12 |
| 9  | 1010.4942 | 505.7507        | 993.4676  | 497.2374         | 992.4836       | 496.7454         | D    | 1092.5320 | 546.7696        | 1075.5055 | 538.2564         | 1074.5215      | 537.7644         | 11 |
| 10 | 1067.5156 | 534.2615        | 1050.4891 | 525.7482         | 1049.5051      | 525.2562         | G    | 977.5051  | 489.2562        | 960.4785  | 480.7429         | 959.4945       | 480.2509         | 10 |
| 11 | 1124.5371 | 562.7722        | 1107.5106 | 554.2589         | 1106.5265      | 553.7669         | G    | 920.4836  | 460.7454        | 903.4571  | 452.2322         | 902.4730       | 451.7402         | 9  |
| 12 | 1223.6055 | 612.3064        | 1206.5790 | 603.7931         | 1205.5949      | 603.3011         | V    | 863.4621  | 432.2347        | 846.4356  | 423.7214         | 845.4516       | 423.2294         | 8  |
| 13 | 1324.6532 | 662.8302        | 1307.6266 | 654.3170         | 1306.6426      | 653.8250         | T    | 764.3937  | 382.7005        | 747.3672  | 374.1872         | 746.3832       | 373.6952         | 7  |
| 14 | 1421.7060 | 711.3566        | 1404.6794 | 702.8433         | 1403.6954      | 702.3513         | P    | 663.3461  | 332.1767        | 646.3195  | 323.6634         |                |                  | 6  |
| 15 | 1492.7431 | 746.8752        | 1475.7165 | 738.3619         | 1474.7325      | 737.8699         | A    | 566.2933  | 283.6503        | 549.2667  | 275.1370         |                |                  | 5  |
| 16 | 1606.7860 | 803.8966        | 1589.7594 | 795.3834         | 1588.7754      | 794.8914         | N    | 495.2562  | 248.1317        | 478.2296  | 239.6185         |                |                  | 4  |
| 17 | 1677.8231 | 839.4152        | 1660.7966 | 830.9019         | 1659.8125      | 830.4099         | A    | 381.2132  | 191.1103        | 364.1867  | 182.5970         |                |                  | 3  |
| 18 | 1840.8864 | 920.9469        | 1823.8599 | 912.4336         | 1822.8759      | 911.9416         | Y    | 310.1761  | 155.5917        | 293.1496  | 147.0784         |                |                  | 2  |
| 19 |           |                 |           |                  |                |                  | K    | 147.1128  | 74.0600         | 130.0863  | 65.5468          |                |                  | 1  |

AT5G61410.1

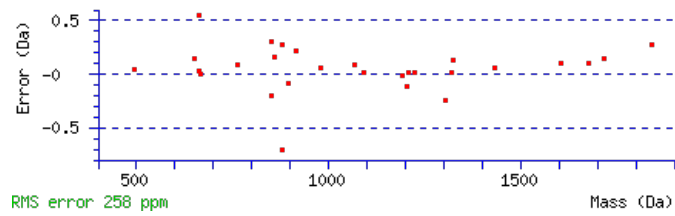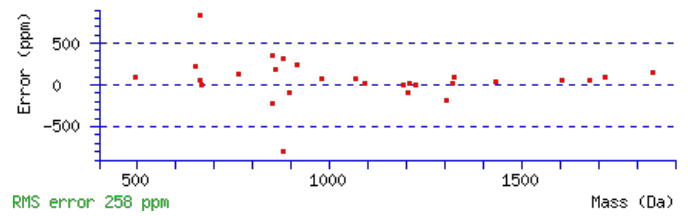

NCBI **BLAST** search of [GVNPWIEVDGGVTPANAYK](#)

(Parameters: blastp, nr protein database, expect=20000, no filter, PAM30)

Other BLAST [web gateways](#)

All matches to this query

| Score | Mr(calc)  | Delta  | Sequence                            |
|-------|-----------|--------|-------------------------------------|
| 113.7 | 1985.9847 | 0.0008 | <a href="#">GVNPWIEVDGGVTPANAYK</a> |

Mascot: <http://www.matrixscience.com/>

**Peptide View**MS/MS Fragmentation of **KMMINMK**Found in **AT5G61580.1** in **TAIR\_Arabidopsis**, Symbols: | phosphofructokinase family protein | chr5:24778376-24781053 FORWARD

Match to Query 1681: 904.417690 from(453.216121,2+) index(5038)

Title: Elution from: 45.911 to 45.911 scan no 6316 cid35.00 polarity:+

Data file D12h-3\_1.mgf

Click mouse within plot area to zoom in by factor of two about that point

Or,  to  Da Label all possible matches  Label matches used for scoring Show Y-axis 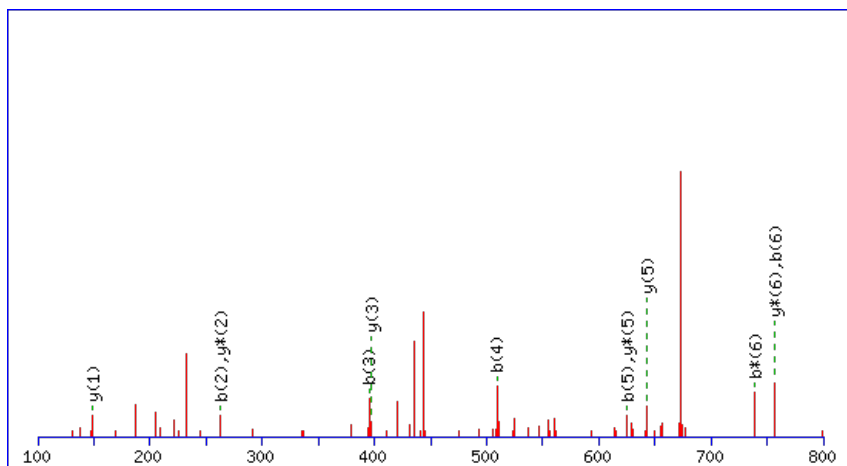Monoisotopic mass of neutral peptide **Mr(calc)**: 904.4193**Fixed modifications**: Carbamidomethyl (C) (apply to specified residues or termini only)**Ions Score**: 27 **Expect**: 0.02**Matches** : 12/48 fragment ions using 21 most intense peaks ([help](#))

| # | b               | b <sup>++</sup> | b*              | b <sup>*++</sup> | Seq.     | y               | y <sup>++</sup> | y*              | y <sup>*++</sup> | # |
|---|-----------------|-----------------|-----------------|------------------|----------|-----------------|-----------------|-----------------|------------------|---|
| 1 | 131.0963        | 66.0518         | 113.0727        | 57.0400          | <b>K</b> |                 |                 |                 |                  | 7 |
| 2 | <b>263.1338</b> | 132.0706        | 245.1102        | 123.0588         | <b>M</b> | 775.3375        | 388.1724        | <b>757.3139</b> | 379.1606         | 6 |
| 3 | <b>395.1713</b> | 198.0893        | 377.1478        | 189.0775         | <b>M</b> | <b>643.3000</b> | 322.1536        | <b>625.2764</b> | 313.1419         | 5 |
| 4 | <b>509.2524</b> | 255.1299        | 491.2289        | 246.1181         | <b>I</b> | 511.2625        | 256.1349        | 493.2389        | 247.1231         | 4 |
| 5 | <b>625.2894</b> | 313.1484        | 607.2659        | 304.1366         | <b>N</b> | <b>397.1814</b> | 199.0943        | 379.1578        | 190.0825         | 3 |
| 6 | <b>757.3270</b> | 379.1671        | <b>739.3034</b> | 370.1553         | <b>M</b> | 281.1444        | 141.0758        | <b>263.1208</b> | 132.0640         | 2 |
| 7 |                 |                 |                 |                  | <b>K</b> | <b>149.1069</b> | 75.0571         | 131.0833        | 66.0453          | 1 |

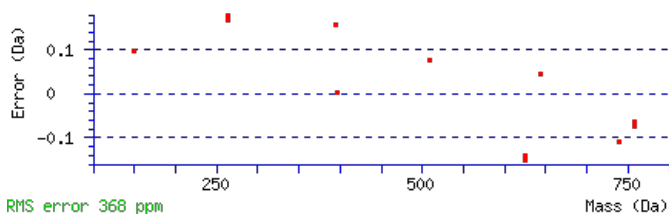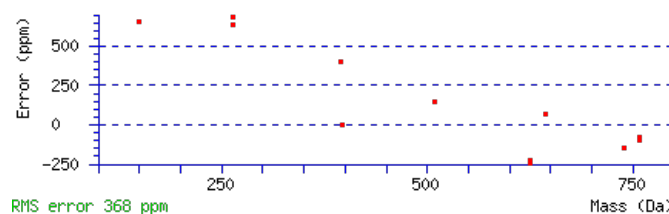NCBI **BLAST** search of **KMMINMK**

(Parameters: blastp, nr protein database, expect=20000, no filter, PAM30)

Other BLAST [web gateways](#)**All matches to this query**

| Score | Mr(calc) | Delta   | Sequence                  |
|-------|----------|---------|---------------------------|
| 27.2  | 904.4193 | -0.0016 | <a href="#">KMMINMK</a>   |
| 23.1  | 904.4184 | -0.0007 | <a href="#">MISAASTAK</a> |
| 16.8  | 904.4150 | 0.0027  | <a href="#">QTYELNK</a>   |

**AT5G61580.1**

|      |          |         |                           |
|------|----------|---------|---------------------------|
| 15.3 | 904.4155 | 0.0022  | <a href="#">REESSRK</a>   |
| 14.1 | 904.4150 | 0.0027  | <a href="#">TKQFDEK</a>   |
| 12.9 | 904.4184 | -0.0007 | <a href="#">MATSLQTK</a>  |
| 10.9 | 904.4150 | 0.0027  | <a href="#">TKFDEQK</a>   |
| 10.4 | 904.4151 | 0.0026  | <a href="#">SGGSYSPLK</a> |
| 10.0 | 904.4184 | -0.0007 | <a href="#">METKDKK</a>   |
| 9.9  | 904.4173 | 0.0004  | <a href="#">TFDWSLK</a>   |

**Mascot:** <http://www.matrixscience.com/>

## Peptide View

MS/MS Fragmentation of **VMDFGSVFLPSPTK**Found in **AT5G61780.1** in **TAIR\_Arabidopsis**, Symbols: | tudor domain-containing protein / nuclease family protein | chr5:24839238-24843867  
FORWARD

Match to Query 6374: 1523.771246 from(762.892899,2+) index(9069)

Title: Elution from: 82.034 to 82.034 scan no 12344 cid35.00 polarity:+

Data file D12h-3\_2.mgf

Click mouse within plot area to zoom in by factor of two about that point

Or,  to  Da Label all possible matches  Label matches used for scoring Show Y-axis 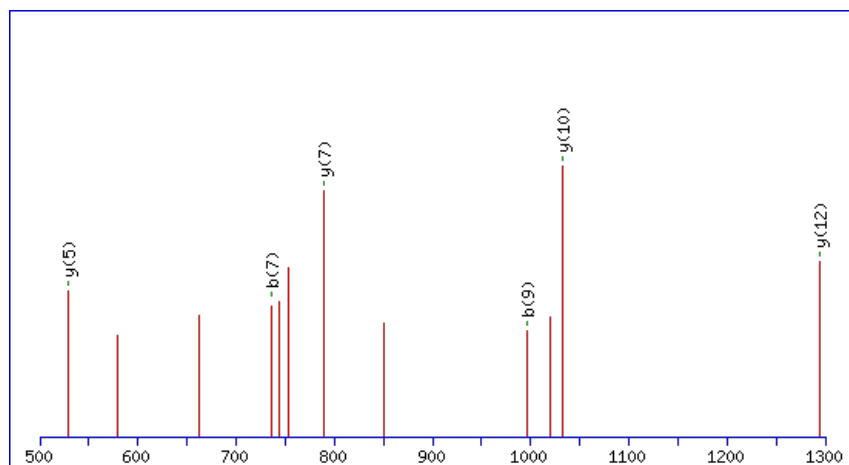Monoisotopic mass of neutral peptide  $M_r(\text{calc})$ : 1523.7694

Fixed modifications: Carbamidomethyl (C) (apply to specified residues or termini only)

Ions Score: 25 Expect: 0.012

Matches : 6/124 fragment ions using 12 most intense peaks ([help](#))

| #  | b               | b <sup>++</sup> | b <sup>0</sup> | b <sup>0++</sup> | Seq. | y                | y <sup>++</sup> | y*        | y <sup>*++</sup> | y <sup>0</sup> | y <sup>0++</sup> | #  |
|----|-----------------|-----------------|----------------|------------------|------|------------------|-----------------|-----------|------------------|----------------|------------------|----|
| 1  | 100.0757        | 50.5415         |                |                  | V    |                  |                 |           |                  |                |                  | 14 |
| 2  | 231.1162        | 116.0617        |                |                  | M    | 1425.7083        | 713.3578        | 1408.6817 | 704.8445         | 1407.6977      | 704.3525         | 13 |
| 3  | 346.1431        | 173.5752        | 328.1326       | 164.5699         | D    | <b>1294.6678</b> | 647.8375        | 1277.6412 | 639.3243         | 1276.6572      | 638.8322         | 12 |
| 4  | 493.2115        | 247.1094        | 475.2010       | 238.1041         | F    | 1179.6408        | 590.3241        | 1162.6143 | 581.8108         | 1161.6303      | 581.3188         | 11 |
| 5  | 550.2330        | 275.6201        | 532.2224       | 266.6149         | G    | <b>1032.5724</b> | 516.7898        | 1015.5459 | 508.2766         | 1014.5619      | 507.7846         | 10 |
| 6  | 637.2650        | 319.1362        | 619.2545       | 310.1309         | S    | 975.5510         | 488.2791        | 958.5244  | 479.7658         | 957.5404       | 479.2738         | 9  |
| 7  | <b>736.3334</b> | 368.6704        | 718.3229       | 359.6651         | V    | 888.5189         | 444.7631        | 871.4924  | 436.2498         | 870.5084       | 435.7578         | 8  |
| 8  | 883.4019        | 442.2046        | 865.3913       | 433.1993         | F    | <b>789.4505</b>  | 395.2289        | 772.4240  | 386.7156         | 771.4400       | 386.2236         | 7  |
| 9  | <b>996.4859</b> | 498.7466        | 978.4754       | 489.7413         | L    | 642.3821         | 321.6947        | 625.3556  | 313.1814         | 624.3715       | 312.6894         | 6  |
| 10 | 1093.5387       | 547.2730        | 1075.5281      | 538.2677         | P    | <b>529.2980</b>  | 265.1527        | 512.2715  | 256.6394         | 511.2875       | 256.1474         | 5  |
| 11 | 1180.5707       | 590.7890        | 1162.5601      | 581.7837         | S    | 432.2453         | 216.6263        | 415.2187  | 208.1130         | 414.2347       | 207.6210         | 4  |
| 12 | 1277.6235       | 639.3154        | 1259.6129      | 630.3101         | P    | 345.2132         | 173.1103        | 328.1867  | 164.5970         | 327.2027       | 164.1050         | 3  |
| 13 | 1378.6712       | 689.8392        | 1360.6606      | 680.8339         | T    | 248.1605         | 124.5839        | 231.1339  | 116.0706         | 230.1499       | 115.5786         | 2  |
| 14 |                 |                 |                |                  | K    | 147.1128         | 74.0600         | 130.0863  | 65.5468          |                |                  | 1  |

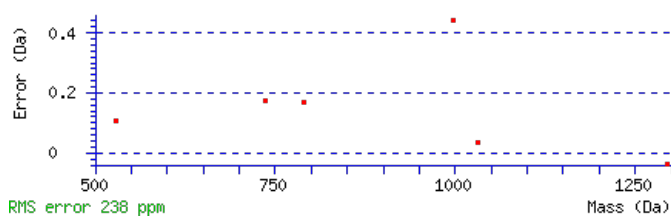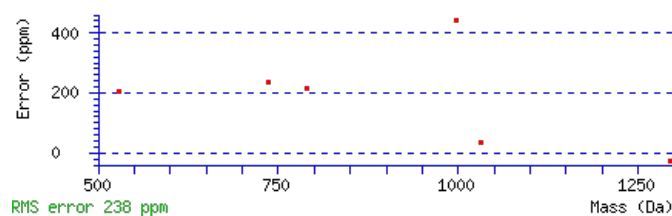NCBI BLAST search of [VMDFGSVFLPSPTK](#)

## AT5G61780.1

(Parameters: blastp, nr protein database, expect=20000, no filter, PAM30)

Other BLAST [web gateways](#)

### All matches to this query

| Score | M <sub>r</sub> (calc) | Delta  | Sequence                      |
|-------|-----------------------|--------|-------------------------------|
| 24.6  | 1523.7694             | 0.0018 | <a href="#">VMDFGSVFLPSTK</a> |

Mascot: <http://www.matrixscience.com/>

**Peptide View**MS/MS Fragmentation of **FQEGLECGGAYLK**Found in **AT5G61790.1** in **TAIR\_Arabidopsis**, Symbols: | calnexin 1 (CNX1) | chr5:24844620-24846868 REVERSE

Match to Query 6048: 1470.680522 from(736.347537,2+) index(4825)

Title: Elution from: 44.561 to 44.561 scan no 6118 cid35.00 polarity:+

Data file 0-1\_2.mgf

Click mouse within plot area to zoom in by factor of two about that point

Or,   to  Da Label all possible matches  Label matches used for scoring Show Y-axis 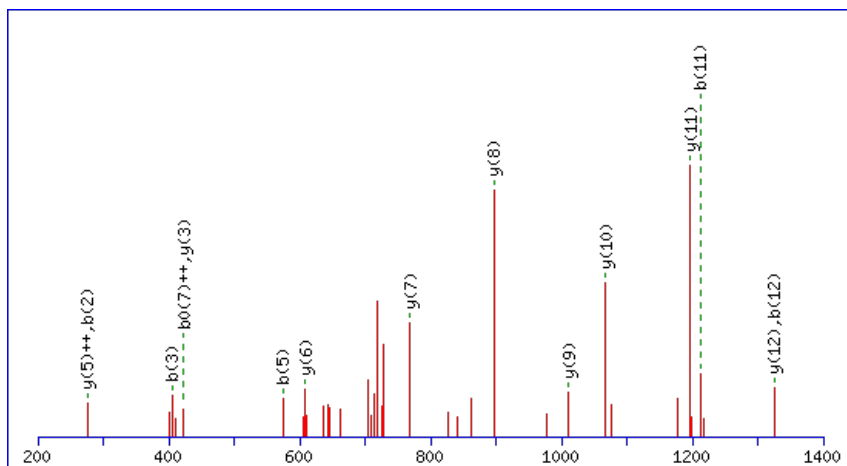Monoisotopic mass of neutral peptide  $M_r(\text{calc})$ : 1470.6813

Fixed modifications: Carbamidomethyl (C) (apply to specified residues or termini only)

Ions Score: 71 Expect: 1.7e-007

Matches : 15/124 fragment ions using 17 most intense peaks ([help](#))

| #  | b                | b <sup>++</sup> | b*        | b <sup>*++</sup> | b <sup>0</sup> | b <sup>0++</sup> | Seq. | y                | y <sup>++</sup> | y*        | y <sup>*++</sup> | y <sup>0</sup> | y <sup>0++</sup> | #  |
|----|------------------|-----------------|-----------|------------------|----------------|------------------|------|------------------|-----------------|-----------|------------------|----------------|------------------|----|
| 1  | 148.0757         | 74.5415         |           |                  |                |                  | F    |                  |                 |           |                  |                |                  | 13 |
| 2  | <b>276.1343</b>  | 138.5708        | 259.1077  | 130.0575         |                |                  | Q    | <b>1324.6202</b> | 662.8137        | 1307.5936 | 654.3005         | 1306.6096      | 653.8084         | 12 |
| 3  | <b>405.1769</b>  | 203.0921        | 388.1503  | 194.5788         | 387.1663       | 194.0868         | E    | <b>1196.5616</b> | 598.7844        | 1179.5351 | 590.2712         | 1178.5510      | 589.7792         | 11 |
| 4  | 462.1983         | 231.6028        | 445.1718  | 223.0895         | 444.1878       | 222.5975         | G    | <b>1067.5190</b> | 534.2631        | 1050.4925 | 525.7499         | 1049.5084      | 525.2579         | 10 |
| 5  | <b>575.2824</b>  | 288.1448        | 558.2558  | 279.6316         | 557.2718       | 279.1395         | L    | <b>1010.4975</b> | 505.7524        | 993.4710  | 497.2391         | 992.4870       | 496.7471         | 9  |
| 6  | 704.3250         | 352.6661        | 687.2984  | 344.1529         | 686.3144       | 343.6608         | E    | <b>897.4135</b>  | 449.2104        | 880.3869  | 440.6971         | 879.4029       | 440.2051         | 8  |
| 7  | 864.3556         | 432.6815        | 847.3291  | 424.1682         | 846.3451       | <b>423.6762</b>  | C    | <b>768.3709</b>  | 384.6891        | 751.3443  | 376.1758         |                |                  | 7  |
| 8  | 921.3771         | 461.1922        | 904.3505  | 452.6789         | 903.3665       | 452.1869         | G    | <b>608.3402</b>  | 304.6738        | 591.3137  | 296.1605         |                |                  | 6  |
| 9  | 978.3986         | 489.7029        | 961.3720  | 481.1896         | 960.3880       | 480.6976         | G    | 551.3188         | <b>276.1630</b> | 534.2922  | 267.6498         |                |                  | 5  |
| 10 | 1049.4357        | 525.2215        | 1032.4091 | 516.7082         | 1031.4251      | 516.2162         | A    | 494.2973         | 247.6523        | 477.2708  | 239.1390         |                |                  | 4  |
| 11 | <b>1212.4990</b> | 606.7531        | 1195.4725 | 598.2399         | 1194.4884      | 597.7479         | Y    | <b>423.2602</b>  | 212.1337        | 406.2336  | 203.6205         |                |                  | 3  |
| 12 | <b>1325.5831</b> | 663.2952        | 1308.5565 | 654.7819         | 1307.5725      | 654.2899         | L    | 260.1969         | 130.6021        | 243.1703  | 122.0888         |                |                  | 2  |
| 13 |                  |                 |           |                  |                |                  | K    | 147.1128         | 74.0600         | 130.0863  | 65.5468          |                |                  | 1  |

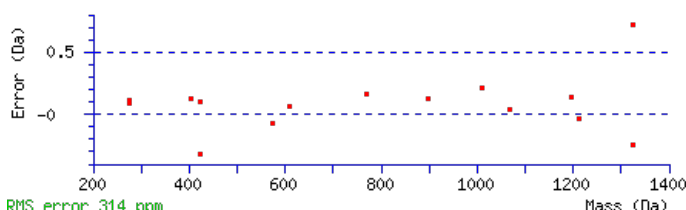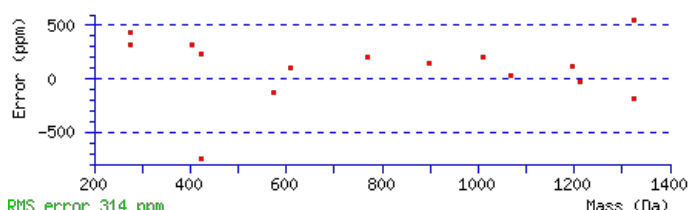NCBI **BLAST** search of **FQEGLECGGAYLK**

(Parameters: blastp, nr protein database, expect=20000, no filter, PAM30)

Other BLAST [web gateways](#)



**AT5G61790.1**

All matches to this query

| Score | Mr(calc)  | Delta   | Sequence                      |
|-------|-----------|---------|-------------------------------|
| 71.3  | 1470.6813 | -0.0008 | <a href="#">FOEGLECGGAYLK</a> |
| 23.1  | 1470.6847 | -0.0041 | <a href="#">GAFELMREMVEK</a>  |
| 19.7  | 1470.6847 | -0.0041 | <a href="#">FKESVMECANLK</a>  |
| 8.1   | 1470.6773 | 0.0032  | <a href="#">ADDHDDVMQGIKK</a> |
| 1.3   | 1470.6846 | -0.0041 | <a href="#">SNMEQIFKSMEK</a>  |
| 0.5   | 1470.6847 | -0.0042 | <a href="#">LCTVAYQSLCEK</a>  |
| 0.1   | 1470.6811 | -0.0006 | <a href="#">RHSDSRVEDNEK</a>  |

**Mascot:** <http://www.matrixscience.com/>

## Peptide View

### MS/MS Fragmentation of IIGAVK

Found in **AT5G61920.1** in **TAIR Arabidopsis**, Symbols: | similar to unknown protein [Arabidopsis thaliana] (TAIR:AT3G14750.1); similar to hypothetical protein [Vitis vinifera] (GB:CAN62085.1) | chr5:24882056-24882854 FORWARD

Match to Query 471: 599.400836 from(300.707694,2+) index(2738)

Title: Elution from: 28.029 to 28.029 scan no 3410 cid35.00 polarity:+

Data file C7-1\_1.mgf

Click mouse within plot area to zoom in by factor of two about that point

Or,   to  Da

Label all possible matches  Label matches used for scoring

Show Y-axis

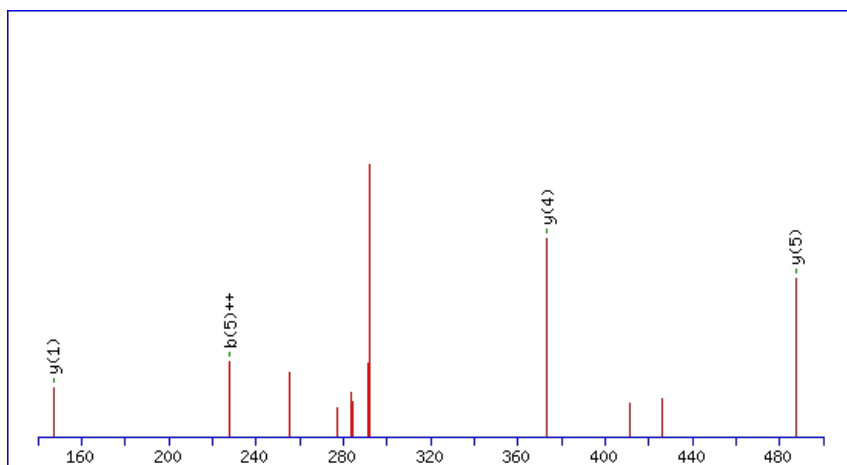

Monoisotopic mass of neutral peptide Mr(calc): 599.4006

Fixed modifications: Carbamidomethyl (C) (apply to specified residues or termini only)

Ions Score: 24 Expect: 0.031

Matches : 4/30 fragment ions using 7 most intense peaks ([help](#))

| # | b        | b <sup>++</sup> | Seq. | y               | y <sup>++</sup> | y*       | y <sup>*++</sup> | # |
|---|----------|-----------------|------|-----------------|-----------------|----------|------------------|---|
| 1 | 114.0913 | 57.5493         | I    |                 |                 |          |                  | 6 |
| 2 | 227.1754 | 114.0913        | I    | <b>487.3239</b> | 244.1656        | 470.2973 | 235.6523         | 5 |
| 3 | 284.1969 | 142.6021        | G    | <b>374.2398</b> | 187.6235        | 357.2132 | 179.1103         | 4 |
| 4 | 355.2340 | 178.1206        | A    | 317.2183        | 159.1128        | 300.1918 | 150.5995         | 3 |
| 5 | 454.3024 | <b>227.6548</b> | V    | 246.1812        | 123.5942        | 229.1547 | 115.0810         | 2 |
| 6 |          |                 | K    | <b>147.1128</b> | 74.0600         | 130.0863 | 65.5468          | 1 |

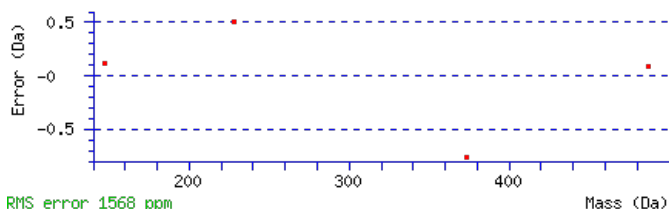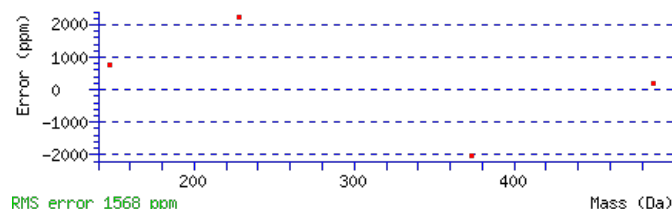

### NCBI BLAST search of IIGAVK

(Parameters: blastp, nr protein database, expect=20000, no filter, PAM30)

Other BLAST [web gateways](#)

### All matches to this query

| Score | Mr(calc) | Delta  | Sequence               |
|-------|----------|--------|------------------------|
| 24.4  | 599.4006 | 0.0002 | <a href="#">IGGILK</a> |
| 24.4  | 599.4006 | 0.0002 | <a href="#">IIGAVK</a> |
| 24.4  | 599.4006 | 0.0002 | <a href="#">IIIGGK</a> |

## AT5G61920.1

|      |          |        |                       |
|------|----------|--------|-----------------------|
| 24.4 | 599.4006 | 0.0002 | <a href="#">IILNK</a> |
| 24.4 | 599.4006 | 0.0002 | <a href="#">IINIK</a> |
| 24.4 | 599.4006 | 0.0002 | <a href="#">IINLK</a> |
| 24.4 | 599.4006 | 0.0002 | <a href="#">IIQVK</a> |
| 24.4 | 599.4006 | 0.0002 | <a href="#">ILINK</a> |
| 24.4 | 599.4006 | 0.0002 | <a href="#">ILNIK</a> |
| 24.4 | 599.4006 | 0.0002 | <a href="#">ILNLK</a> |

**Mascot:** <http://www.matrixscience.com/>



# Mascot Search Results

## Peptide View

MS/MS Fragmentation of **SGPYGQTFRPDNFVFGQSGAGNNWAK**

Found in **AT5G62690.1** in **TAIR\_Arabidopsis**, Symbols: TUB2 | TUB2 (Tubulin beta-2); structural molecule | chr5:25198786-25200727 FORWARD

Match to Query 10609: 2837.187474 from(946.736434,3+) index(7982)

Title: Elution from: 70.603 to 70.603 scan no 10515 cid35.00 polarity:+

Data file 0-3\_2.mgf

Click mouse within plot area to zoom in by factor of two about that point

Or,  to  Da

Label all possible matches  Label matches used for scoring

Show Y-axis

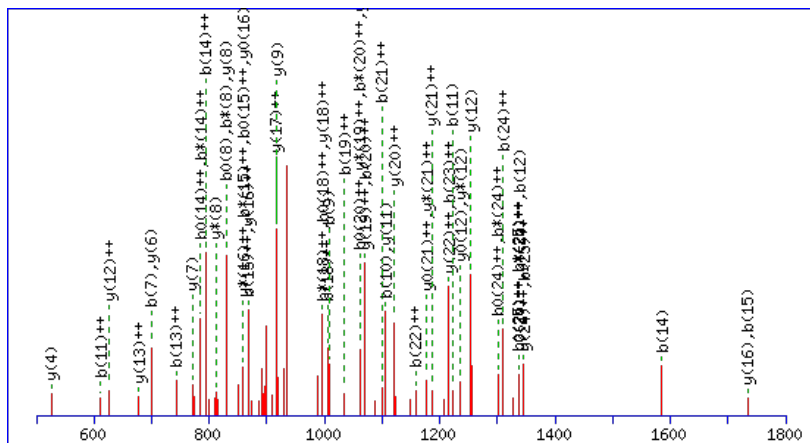

**Monoisotopic mass of neutral peptide Mr(calc):** 2837.1879

**Fixed modifications:** Carbamidomethyl (C) (apply to specified residues or termini only)

**Ions Score:** 117 **Expect:** 7.1e-012

**Matches :** 62/274 fragment ions using 48 most intense peaks ([help](#))

| #  | b         | b <sup>++</sup> | b <sup>*</sup> | b <sup>*++</sup> | b <sup>0</sup> | b <sup>0++</sup> | Seq. | y         | y <sup>++</sup> | y <sup>*</sup> | y <sup>*++</sup> | y <sup>0</sup> | y <sup>0++</sup> | #  |
|----|-----------|-----------------|----------------|------------------|----------------|------------------|------|-----------|-----------------|----------------|------------------|----------------|------------------|----|
| 1  | 89.0363   | 45.0218         |                |                  | 71.0258        | 36.0165          | S    |           |                 |                |                  |                |                  | 26 |
| 2  | 147.0548  | 74.0311         |                |                  | 129.0443       | 65.0258          | G    | 2750.1661 | 1375.5867       | 2732.1425      | 1366.5749        | 2732.1555      | 1366.5814        | 25 |
| 3  | 245.1046  | 123.0560        |                |                  | 227.0941       | 114.0507         | P    | 2692.1476 | 1346.5774       | 2674.1240      | 1337.5656        | 2674.1370      | 1337.5722        | 24 |
| 4  | 409.1650  | 205.0861        |                |                  | 391.1544       | 196.0809         | Y    | 2594.0978 | 1297.5525       | 2576.0742      | 1288.5407        | 2576.0872      | 1288.5473        | 23 |
| 5  | 467.1835  | 234.0954        |                |                  | 449.1729       | 225.0901         | G    | 2430.0374 | 1215.5224       | 2412.0139      | 1206.5106        | 2412.0269      | 1206.5171        | 22 |
| 6  | 597.2361  | 299.1217        | 579.2126       | 290.1099         | 579.2256       | 290.1164         | Q    | 2372.0189 | 1186.5131       | 2353.9954      | 1177.5013        | 2354.0084      | 1177.5078        | 21 |
| 7  | 699.2809  | 350.1441        | 681.2573       | 341.1323         | 681.2703       | 341.1388         | T    | 2241.9663 | 1121.4868       | 2223.9427      | 1112.4750        | 2223.9557      | 1112.4815        | 20 |
| 8  | 847.3463  | 424.1768        | 829.3227       | 415.1650         | 829.3357       | 415.1715         | F    | 2139.9216 | 1070.4644       | 2121.8980      | 1061.4526        | 2121.9110      | 1061.4591        | 19 |
| 9  | 1007.4356 | 504.2214        | 989.4120       | 495.2096         | 989.4250       | 495.2161         | R    | 1991.8561 | 996.4317        | 1973.8325      | 987.4199         | 1973.8456      | 987.4264         | 18 |
| 10 | 1105.4854 | 553.2463        | 1087.4618      | 544.2345         | 1087.4748      | 544.2410         | P    | 1831.7669 | 916.3871        | 1813.7433      | 907.3753         | 1813.7563      | 907.3818         | 17 |
| 11 | 1221.5093 | 611.2583        | 1203.4858      | 602.2465         | 1203.4988      | 602.2530         | D    | 1733.7171 | 867.3622        | 1715.6935      | 858.3504         | 1715.7065      | 858.3569         | 16 |
| 12 | 1337.5463 | 669.2768        | 1319.5227      | 660.2650         | 1319.5358      | 660.2715         | N    | 1617.6931 | 809.3502        | 1599.6695      | 800.3384         | 1599.6825      | 800.3449         | 15 |
| 13 | 1485.6118 | 743.3095        | 1467.5882      | 734.2977         | 1467.6012      | 734.3042         | F    | 1501.6561 | 751.3317        | 1483.6325      | 742.3199         | 1483.6455      | 742.3264         | 14 |
| 14 | 1585.6772 | 793.3423        | 1567.6536      | 784.3305         | 1567.6667      | 784.3370         | V    | 1353.5907 | 677.2990        | 1335.5671      | 668.2872         | 1335.5801      | 668.2937         | 13 |
| 15 | 1733.7427 | 867.3750        | 1715.7191      | 858.3632         | 1715.7321      | 858.3697         | F    | 1253.5252 | 627.2662        | 1235.5016      | 618.2544         | 1235.5146      | 618.2610         | 12 |
| 16 | 1791.7612 | 896.3842        | 1773.7376      | 887.3724         | 1773.7506      | 887.3789         | G    | 1105.4598 | 553.2335        | 1087.4362      | 544.2217         | 1087.4492      | 544.2282         | 11 |
| 17 | 1921.8138 | 961.4106        | 1903.7902      | 952.3988         | 1903.8033      | 952.4053         | Q    | 1047.4413 | 524.2243        | 1029.4177      | 515.2125         | 1029.4307      | 515.2190         | 10 |
| 18 | 2009.8429 | 1005.4251       | 1991.8193      | 996.4133         | 1991.8323      | 996.4198         | S    | 917.3886  | 459.1979        | 899.3650       | 450.1862         | 899.3780       | 450.1927         | 9  |
| 19 | 2067.8614 | 1034.4343       | 2049.8378      | 1025.4225        | 2049.8508      | 1025.4290        | G    | 829.3595  | 415.1834        | 811.3360       | 406.1716         |                |                  | 8  |
| 20 | 2139.8955 | 1070.4514       | 2121.8720      | 1061.4396        | 2121.8850      | 1061.4461        | A    | 771.3410  | 386.1742        | 753.3175       | 377.1624         |                |                  | 7  |
| 21 | 2197.9140 | 1099.4607       | 2179.8905      | 1090.4489        | 2179.9035      | 1090.4554        | G    | 699.3069  | 350.1571        | 681.2833       | 341.1453         |                |                  | 6  |
| 22 | 2313.9510 | 1157.4792       | 2295.9274      | 1148.4674        | 2295.9405      | 1148.4739        | N    | 641.2884  | 321.1478        | 623.2648       | 312.1360         |                |                  | 5  |
| 23 | 2429.9880 | 1215.4977       | 2411.9644      | 1206.4859        | 2411.9775      | 1206.4924        | N    | 525.2514  | 263.1293        | 507.2278       | 254.1175         |                |                  | 4  |
| 24 | 2618.0614 | 1309.5343       | 2600.0378      | 1300.5226        | 2600.0508      | 1300.5291        | W    | 409.2144  | 205.1108        | 391.1908       | 196.0990         |                |                  | 3  |
| 25 | 2690.0956 | 1345.5514       | 2672.0720      | 1336.5396        | 2672.0850      | 1336.5461        | A    | 221.1410  | 111.0741        | 203.1174       | 102.0624         |                |                  | 2  |



**Peptide View**MS/MS Fragmentation of **ISYLDIFK**

Found in **AT5G62790.1** in **TAIR\_Arabidopsis**, Symbols: PDE129, DXR | DXR (1-DEOXY-D-XYLULOSE 5-PHOSPHATE REDUCTOISOMERASE) | chr5:25231584-25234518 REVERSE

Match to Query 2072: 997.548760 from(499.781656,2+) index(8590)

Title: Elution from: 80.316 to 80.316 scan no 11723 cid35.00 polarity:+

Data file D1d-2\_2.mgf

Click mouse within plot area to zoom in by factor of two about that point

Or,   to  Da

Label all possible matches  Label matches used for scoring

Show Y-axis

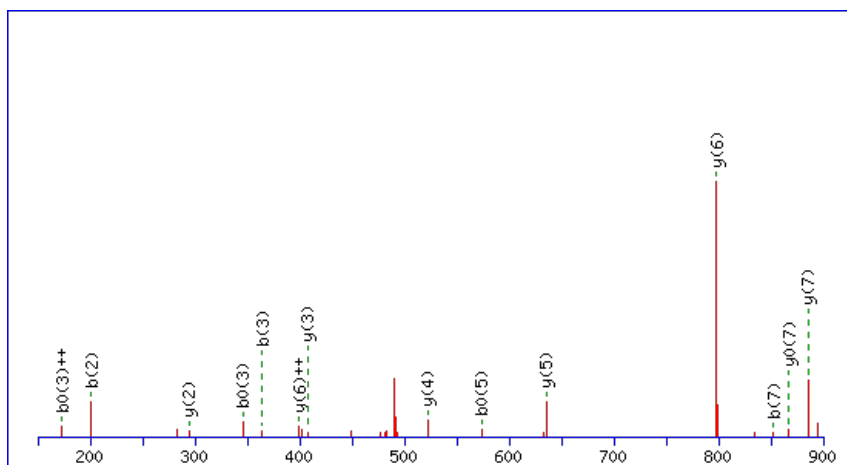

**Monoisotopic mass of neutral peptide Mr(calc):** 997.5484

**Fixed modifications:** Carbamidomethyl (C) (apply to specified residues or termini only)

**Ions Score:** 44 **Expect:** 4.9e-005

**Matches:** 14/62 fragment ions using 25 most intense peaks ([help](#))

| # | b               | b <sup>++</sup> | b <sup>0</sup>  | b <sup>0++</sup> | Seq. | y               | y <sup>++</sup> | y*       | y <sup>*++</sup> | y <sup>0</sup>  | y <sup>0++</sup> | # |
|---|-----------------|-----------------|-----------------|------------------|------|-----------------|-----------------|----------|------------------|-----------------|------------------|---|
| 1 | 114.0913        | 57.5493         |                 |                  | I    |                 |                 |          |                  |                 |                  | 8 |
| 2 | <b>201.1234</b> | 101.0653        | 183.1128        | 92.0600          | S    | <b>885.4716</b> | 443.2395        | 868.4451 | 434.7262         | <b>867.4611</b> | 434.2342         | 7 |
| 3 | <b>364.1867</b> | 182.5970        | <b>346.1761</b> | <b>173.5917</b>  | Y    | <b>798.4396</b> | <b>399.7234</b> | 781.4131 | 391.2102         | 780.4291        | 390.7182         | 6 |
| 4 | 477.2708        | 239.1390        | 459.2602        | 230.1337         | L    | <b>635.3763</b> | 318.1918        | 618.3497 | 309.6785         | 617.3657        | 309.1865         | 5 |
| 5 | 592.2977        | 296.6525        | <b>574.2871</b> | 287.6472         | D    | <b>522.2922</b> | 261.6498        | 505.2657 | 253.1365         | 504.2817        | 252.6445         | 4 |
| 6 | 705.3818        | 353.1945        | 687.3712        | 344.1892         | I    | <b>407.2653</b> | 204.1363        | 390.2387 | 195.6230         |                 |                  | 3 |
| 7 | <b>852.4502</b> | 426.7287        | 834.4396        | 417.7234         | F    | <b>294.1812</b> | 147.5942        | 277.1547 | 139.0810         |                 |                  | 2 |
| 8 |                 |                 |                 |                  | K    | 147.1128        | 74.0600         | 130.0863 | 65.5468          |                 |                  | 1 |

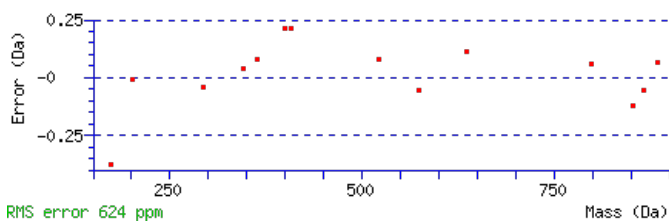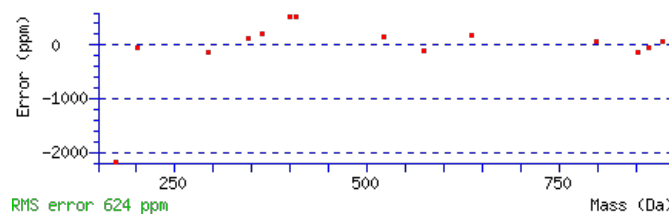

NCBI BLAST search of **ISYLDIFK**

(Parameters: blastp, nr protein database, expect=20000, no filter, PAM30)

Other BLAST [web gateways](#)

All matches to this query

| Score | Mr(calc) | Delta  | Sequence        |
|-------|----------|--------|-----------------|
| 43.9  | 997.5484 | 0.0003 | <b>ISYLDIFK</b> |

AT5G62790.1

|      |          |        |                          |
|------|----------|--------|--------------------------|
| 10.4 | 997.5484 | 0.0003 | <a href="#">ISIVEYFK</a> |
|------|----------|--------|--------------------------|

**Mascot:** <http://www.matrixscience.com/>

**Peptide View**MS/MS Fragmentation of **FASVPVYSGK**Found in **AT5G62860.1** in **TAIR\_Arabidopsis**, Symbols: | F-box family protein-related | chr5:25249858-25251793 FORWARD

Match to Query 3143: 1064.514454 from(533.264503,2+) index(5186)

Title: Elution from: 45.165 to 45.165 scan no 6505 cid35.00 polarity:+

Data file D1d-3\_3.mgf

Click mouse within plot area to zoom in by factor of two about that point

Or,   to  Da Label all possible matches  Label matches used for scoring Show Y-axis 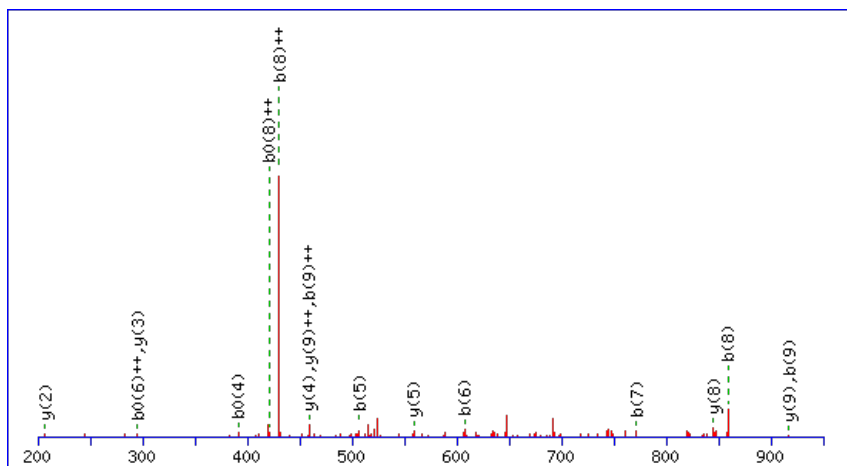

Monoisotopic mass of neutral peptide Mr(calc): 1064.5169

Fixed modifications: Carbamidomethyl (C) (apply to specified residues or termini only)

Ions Score: 29 Expect: 0.0096

Matches : 17/82 fragment ions using 38 most intense peaks ([help](#))

| #  | b        | b <sup>++</sup> | b <sup>0</sup> | b <sup>0++</sup> | Seq. | y        | y <sup>++</sup> | y <sup>*</sup> | y <sup>*++</sup> | y <sup>0</sup> | y <sup>0++</sup> | #  |
|----|----------|-----------------|----------------|------------------|------|----------|-----------------|----------------|------------------|----------------|------------------|----|
| 1  | 149.0727 | 75.0400         |                |                  | F    |          |                 |                |                  |                |                  | 10 |
| 2  | 221.1069 | 111.0571        |                |                  | A    | 917.4587 | 459.2330        | 899.4351       | 450.2212         | 899.4481       | 450.2277         | 9  |
| 3  | 309.1359 | 155.0716        | 291.1254       | 146.0663         | S    | 845.4246 | 423.2159        | 827.4010       | 414.2041         | 827.4140       | 414.2106         | 8  |
| 4  | 409.2014 | 205.1043        | 391.1908       | 196.0990         | V    | 757.3955 | 379.2014        | 739.3719       | 370.1896         | 739.3849       | 370.1961         | 7  |
| 5  | 507.2512 | 254.1292        | 489.2406       | 245.1239         | P    | 657.3300 | 329.1687        | 639.3065       | 320.1569         | 639.3195       | 320.1634         | 6  |
| 6  | 607.3166 | 304.1620        | 589.3061       | 295.1567         | V    | 559.2802 | 280.1438        | 541.2567       | 271.1320         | 541.2697       | 271.1385         | 5  |
| 7  | 771.3770 | 386.1921        | 753.3664       | 377.1869         | Y    | 459.2148 | 230.1110        | 441.1912       | 221.0992         | 441.2042       | 221.1058         | 4  |
| 8  | 859.4061 | 430.2067        | 841.3955       | 421.2014         | S    | 295.1544 | 148.0809        | 277.1309       | 139.0691         | 277.1439       | 139.0756         | 3  |
| 9  | 917.4246 | 459.2159        | 899.4140       | 450.2106         | G    | 207.1254 | 104.0663        | 189.1018       | 95.0545          |                |                  | 2  |
| 10 |          |                 |                |                  | K    | 149.1069 | 75.0571         | 131.0833       | 66.0453          |                |                  | 1  |

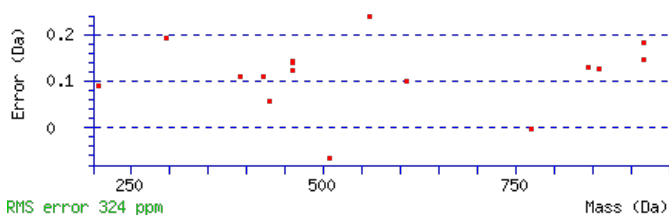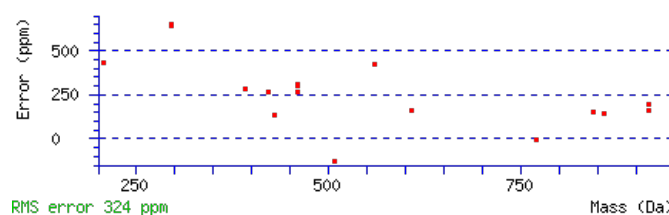NCBI **BLAST** search of **FASVPVYSGK**

(Parameters: blastp, nr protein database, expect=20000, no filter, PAM30)

Other BLAST [web gateways](#)

All matches to this query

| Score | Mr(calc) | Delta | Sequence |
|-------|----------|-------|----------|
|       |          |       |          |



**AT5G62860.1**

|      |           |         |                             |
|------|-----------|---------|-----------------------------|
| 29.5 | 1064.5169 | -0.0024 | <a href="#">FASVPVYSGK</a>  |
| 15.6 | 1064.5146 | -0.0002 | <a href="#">AFSSTGSQLGK</a> |
| 13.2 | 1064.5169 | -0.0024 | <a href="#">SVFPAVSYGK</a>  |
| 12.1 | 1064.5146 | -0.0002 | <a href="#">LGVVPGDDPGK</a> |
| 5.0  | 1064.5169 | -0.0024 | <a href="#">LYQFGIEGK</a>   |
| 4.9  | 1064.5146 | -0.0002 | <a href="#">EPPQSTPAVK</a>  |
| 4.6  | 1064.5146 | -0.0002 | <a href="#">KQLYSETGK</a>   |
| 4.6  | 1064.5169 | -0.0024 | <a href="#">YSDKPIFGK</a>   |
| 2.1  | 1064.5173 | -0.0028 | <a href="#">GFRLLDSR</a>    |
| 1.2  | 1064.5169 | -0.0024 | <a href="#">NDALLSFFK</a>   |

**Mascot:** <http://www.matrixscience.com/>

## Peptide View

### MS/MS Fragmentation of **TDPLQAEPGTIR**

Found in **AT5G63310.1** in **TAIR\_Arabidopsis**, Symbols: NDPK1A, NDPK IA IA, NDPK IA, NDPK2 | NDPK2 (NUCLEOSIDE DIPHOSPHATE KINASE 2); ATP binding / nucleoside diphosphate kinase | chr5:25389348-25391064 REVERSE

Match to Query 4885: 1296.666522 from(649.340537,2+) index(3306)

Title: Elution from: 31.132 to 31.132 scan no 4048 cid35.00 polarity:+

Data file D1d-3\_2.mgf

Click mouse within plot area to zoom in by factor of two about that point

Or,   to  Da

Label all possible matches  Label matches used for scoring

Show Y-axis

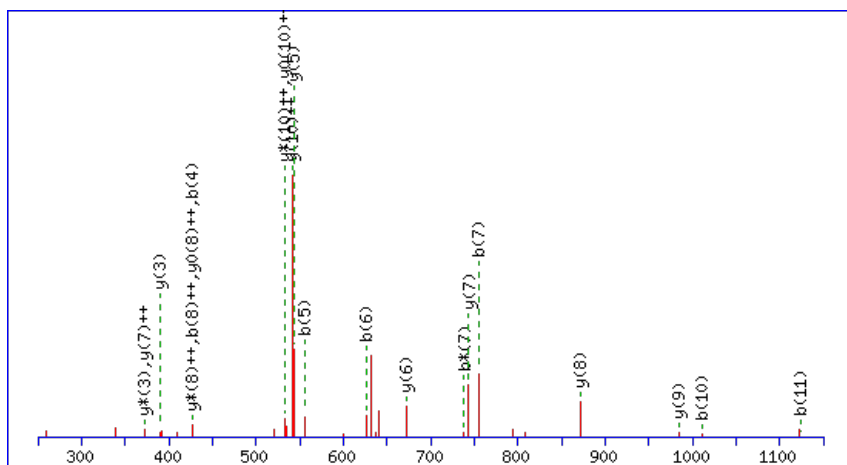

Monoisotopic mass of neutral peptide  $M_r(\text{calc})$ : 1296.6674

Fixed modifications: Carbamidomethyl (C) (apply to specified residues or termini only)

Ions Score: 57 Expect: 5.8e-006

Matches : 21/120 fragment ions using 24 most intense peaks ([help](#))

| #  | b         | b <sup>++</sup> | b*        | b <sup>*++</sup> | b <sup>0</sup> | b <sup>0++</sup> | Seq. | y         | y <sup>++</sup> | y*        | y <sup>*++</sup> | y <sup>0</sup> | y <sup>0++</sup> | #  |
|----|-----------|-----------------|-----------|------------------|----------------|------------------|------|-----------|-----------------|-----------|------------------|----------------|------------------|----|
| 1  | 102.0550  | 51.5311         |           |                  | 84.0444        | 42.5258          | T    |           |                 |           |                  |                |                  | 12 |
| 2  | 217.0819  | 109.0446        |           |                  | 199.0713       | 100.0393         | D    | 1196.6270 | 598.8171        | 1179.6004 | 590.3039         | 1178.6164      | 589.8118         | 11 |
| 3  | 314.1347  | 157.5710        |           |                  | 296.1241       | 148.5657         | P    | 1081.6000 | 541.3037        | 1064.5735 | 532.7904         | 1063.5895      | 532.2984         | 10 |
| 4  | 427.2187  | 214.1130        |           |                  | 409.2082       | 205.1077         | L    | 984.5473  | 492.7773        | 967.5207  | 484.2640         | 966.5367       | 483.7720         | 9  |
| 5  | 555.2773  | 278.1423        | 538.2508  | 269.6290         | 537.2667       | 269.1370         | Q    | 871.4632  | 436.2352        | 854.4367  | 427.7220         | 853.4526       | 427.2300         | 8  |
| 6  | 626.3144  | 313.6608        | 609.2879  | 305.1476         | 608.3039       | 304.6556         | A    | 743.4046  | 372.2060        | 726.3781  | 363.6927         | 725.3941       | 363.2007         | 7  |
| 7  | 755.3570  | 378.1821        | 738.3305  | 369.6689         | 737.3464       | 369.1769         | E    | 672.3675  | 336.6874        | 655.3410  | 328.1741         | 654.3570       | 327.6821         | 6  |
| 8  | 852.4098  | 426.7085        | 835.3832  | 418.1953         | 834.3992       | 417.7032         | P    | 543.3249  | 272.1661        | 526.2984  | 263.6528         | 525.3144       | 263.1608         | 5  |
| 9  | 909.4312  | 455.2193        | 892.4047  | 446.7060         | 891.4207       | 446.2140         | G    | 446.2722  | 223.6397        | 429.2456  | 215.1264         | 428.2616       | 214.6344         | 4  |
| 10 | 1010.4789 | 505.7431        | 993.4524  | 497.2298         | 992.4684       | 496.7378         | T    | 389.2507  | 195.1290        | 372.2241  | 186.6157         | 371.2401       | 186.1237         | 3  |
| 11 | 1123.5630 | 562.2851        | 1106.5364 | 553.7719         | 1105.5524      | 553.2798         | I    | 288.2030  | 144.6051        | 271.1765  | 136.0919         |                |                  | 2  |
| 12 |           |                 |           |                  |                |                  | R    | 175.1190  | 88.0631         | 158.0924  | 79.5498          |                |                  | 1  |

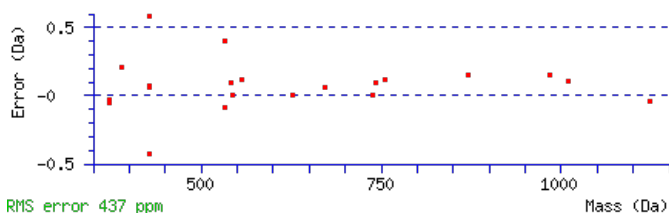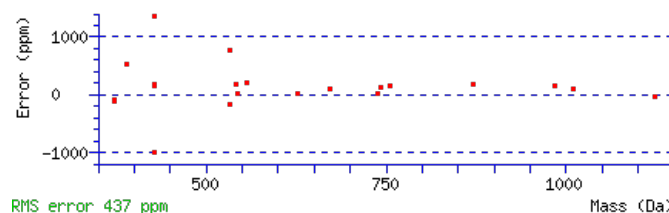

### NCBI BLAST search of **TDPLQAEPGTIR**

(Parameters: blastp, nr protein database, expect=20000, no filter, PAM30)

Other BLAST [web gateways](#)

AT5G63310.1

All matches to this query

| Score | Mr(calc)  | Delta   | Sequence                    |
|-------|-----------|---------|-----------------------------|
| 56.9  | 1296.6674 | -0.0009 | <a href="#">TDPLQAEPGTR</a> |

Mascot: <http://www.matrixscience.com/>



# Mascot Search Results

## Peptide View

MS/MS Fragmentation of **VLNFAIDDAILEER**

Found in **AT5G63400.1** in **TAIR\_Arabidopsis**, Symbols: ADK1 | ADK1 (ADENYLATE KINASE 1); adenylate kinase | chr5:25410500-25412043 REVERSE

Match to Query 7672: 1634.786680 from(818.400616,2+) index(9600)

Title: Elution from: 86.446 to 86.446 scan no 12968 cid35.00 polarity:+

Data file C7-3\_1.mgf

Click mouse within plot area to zoom in by factor of two about that point

Or,   to  Da

Label all possible matches  Label matches used for scoring

Show Y-axis

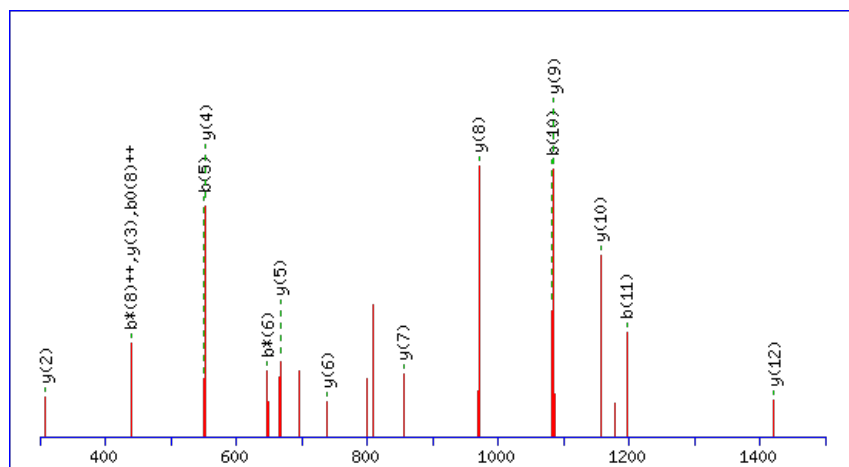

Monoisotopic mass of neutral peptide Mr(calc): 1634.7876

Fixed modifications: Carbamidomethyl (C) (apply to specified residues or termini only)

Ions Score: 104 Expect: 3.1e-010

Matches : 16/138 fragment ions using 17 most intense peaks [\(help\)](#)

| #  | b                | b <sup>++</sup> | b*              | b <sup>*++</sup> | b <sup>0</sup> | b <sup>0++</sup> | Seq. | y                | y <sup>++</sup> | y*        | y <sup>*++</sup> | y <sup>0</sup> | y <sup>0++</sup> | #  |
|----|------------------|-----------------|-----------------|------------------|----------------|------------------|------|------------------|-----------------|-----------|------------------|----------------|------------------|----|
| 1  | 101.0727         | 51.0400         |                 |                  |                |                  | V    |                  |                 |           |                  |                |                  | 14 |
| 2  | 215.1538         | 108.0805        |                 |                  |                |                  | L    | 1535.7294        | 768.3684        | 1517.7059 | 759.3566         | 1517.7189      | 759.3631         | 13 |
| 3  | 331.1908         | 166.0990        | 313.1672        | 157.0873         |                |                  | N    | <b>1421.6483</b> | 711.3278        | 1403.6248 | 702.3160         | 1403.6378      | 702.3225         | 12 |
| 4  | 479.2563         | 240.1318        | 461.2327        | 231.1200         |                |                  | F    | 1305.6113        | 653.3093        | 1287.5878 | 644.2975         | 1287.6008      | 644.3040         | 11 |
| 5  | <b>551.2904</b>  | 276.1488        | 533.2668        | 267.1371         |                |                  | A    | <b>1157.5459</b> | 579.2766        | 1139.5223 | 570.2648         | 1139.5353      | 570.2713         | 10 |
| 6  | 665.3715         | 333.1894        | <b>647.3479</b> | 324.1776         |                |                  | I    | <b>1085.5117</b> | 543.2595        | 1067.4882 | 534.2477         | 1067.5012      | 534.2542         | 9  |
| 7  | 781.3955         | 391.2014        | 763.3719        | 382.1896         | 763.3849       | 382.1961         | D    | <b>971.4307</b>  | 486.2190        | 953.4071  | 477.2072         | 953.4201       | 477.2137         | 8  |
| 8  | 897.4195         | 449.2134        | 879.3959        | <b>440.2016</b>  | 879.4089       | <b>440.2081</b>  | D    | <b>855.4067</b>  | 428.2070        | 837.3831  | 419.1952         | 837.3961       | 419.2017         | 7  |
| 9  | 969.4536         | 485.2304        | 951.4300        | 476.2187         | 951.4431       | 476.2252         | A    | <b>739.3827</b>  | 370.1950        | 721.3591  | 361.1832         | 721.3721       | 361.1897         | 6  |
| 10 | <b>1083.5347</b> | 542.2710        | 1065.5111       | 533.2592         | 1065.5242      | 533.2657         | I    | <b>667.3485</b>  | 334.1779        | 649.3250  | 325.1661         | 649.3380       | 325.1726         | 5  |
| 11 | <b>1197.6158</b> | 599.3115        | 1179.5922       | 590.2998         | 1179.6053      | 590.3063         | L    | <b>553.2674</b>  | 277.1374        | 535.2439  | 268.1256         | 535.2569       | 268.1321         | 4  |
| 12 | 1327.6554        | 664.3314        | 1309.6319       | 655.3196         | 1309.6449      | 655.3261         | E    | <b>439.1863</b>  | 220.0968        | 421.1628  | 211.0850         | 421.1758       | 211.0915         | 3  |
| 13 | 1457.6951        | 729.3512        | 1439.6715       | 720.3394         | 1439.6845      | 720.3459         | E    | <b>309.1467</b>  | 155.0770        | 291.1231  | 146.0652         | 291.1362       | 146.0717         | 2  |
| 14 |                  |                 |                 |                  |                |                  | R    | 179.1071         | 90.0572         | 161.0835  | 81.0454          |                |                  | 1  |

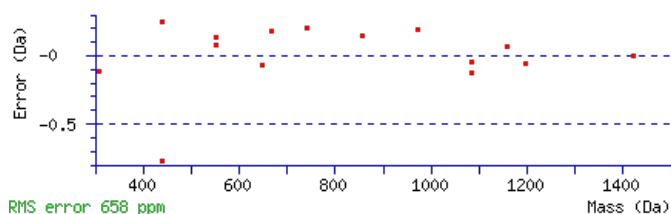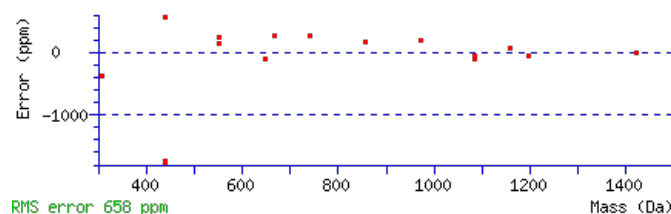

NCBI BLAST search of [VLNFAIDDAILEER](#)

## AT5G63400.1

(Parameters: blastp, nr protein database, expect=20000, no filter, PAM30)

Other BLAST [web gateways](#)

### All matches to this query

| Score | Mr(calc)  | Delta   | Sequence                        |
|-------|-----------|---------|---------------------------------|
| 104.0 | 1634.7876 | -0.0009 | <a href="#">VLNFAIDDAILEER</a>  |
| 7.8   | 1634.7903 | -0.0036 | <a href="#">VYGDIIPPNLSDRR</a>  |
| 7.5   | 1634.7880 | -0.0014 | <a href="#">INEIQQESQLQRK</a>   |
| 7.5   | 1634.7854 | 0.0013  | <a href="#">TKTVISNPETLEER</a>  |
| 4.9   | 1634.7903 | -0.0036 | <a href="#">IVKAQIWDTAGQER</a>  |
| 4.9   | 1634.7903 | -0.0036 | <a href="#">LVKAQIWDTAGQER</a>  |
| 4.9   | 1634.7903 | -0.0036 | <a href="#">VIKAQIWDTAGQER</a>  |
| 0.6   | 1634.7903 | -0.0036 | <a href="#">EDWGDVRTLIAALR</a>  |
| 0.1   | 1634.7829 | 0.0038  | <a href="#">VVPCGEFTASPALLR</a> |

Mascot: <http://www.matrixscience.com/>

## Peptide View

MS/MS Fragmentation of **GELVSDDLVVGIIDEAMNKPK**

Found in **AT5G63400.2** in **TAIR\_Arabidopsis**, Symbols: ADK1 | ADK1 (ADENYLATE KINASE 1); adenylate kinase | chr5:25410728-25412043  
REVERSE

Match to Query 10368: 2241.159234 from(748.060354,3+) index(11158)  
Title: Elution from: 110.708 to 110.708 scan no 15986 cid35.00 polarity:+  
Data file D12h-1\_1.mgf

Click mouse within plot area to zoom in by factor of two about that point

Or, Plot from  to  Da

Label all possible matches  Label matches used for scoring

Show Y-axis

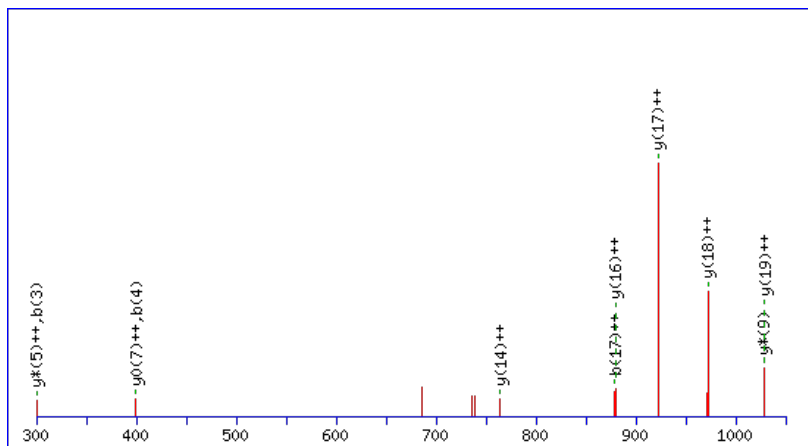

Monoisotopic mass of neutral peptide  $M_r(\text{calc})$ : 2241.1562

Fixed modifications: Carbamidomethyl (C) (apply to specified residues or termini only)

Ions Score: 31 Expect: 0.0028

Matches : 11/192 fragment ions using 14 most intense peaks ([help](#))

| #  | b               | b <sup>++</sup> | b*        | b <sup>*++</sup> | b <sup>0</sup> | b <sup>0++</sup> | Seq | y         | y <sup>++</sup>  | y*               | y <sup>*++</sup> | y <sup>0</sup> | y <sup>0++</sup> | #  |
|----|-----------------|-----------------|-----------|------------------|----------------|------------------|-----|-----------|------------------|------------------|------------------|----------------|------------------|----|
| 1  | 58.0287         | 29.5180         |           |                  |                |                  | G   |           |                  |                  |                  |                |                  | 21 |
| 2  | 187.0713        | 94.0393         |           |                  | 169.0608       | 85.0340          | E   | 2185.1421 | 1093.0747        | 2168.1155        | 1084.5614        | 2167.1315      | 1084.0694        | 20 |
| 3  | <b>300.1554</b> | 150.5813        |           |                  | 282.1448       | 141.5761         | L   | 2056.0995 | <b>1028.5534</b> | 2039.0729        | 1020.0401        | 2038.0889      | 1019.5481        | 19 |
| 4  | <b>399.2238</b> | 200.1155        |           |                  | 381.2132       | 191.1103         | V   | 1943.0154 | <b>972.0113</b>  | 1925.9889        | 963.4981         | 1925.0048      | 963.0061         | 18 |
| 5  | 486.2558        | 243.6316        |           |                  | 468.2453       | 234.6263         | S   | 1843.9470 | <b>922.4771</b>  | 1826.9204        | 913.9639         | 1825.9364      | 913.4719         | 17 |
| 6  | 601.2828        | 301.1450        |           |                  | 583.2722       | 292.1397         | D   | 1756.9150 | <b>878.9611</b>  | 1739.8884        | 870.4478         | 1738.9044      | 869.9558         | 16 |
| 7  | 716.3097        | 358.6585        |           |                  | 698.2992       | 349.6532         | D   | 1641.8880 | 821.4476         | 1624.8615        | 812.9344         | 1623.8775      | 812.4424         | 15 |
| 8  | 829.3938        | 415.2005        |           |                  | 811.3832       | 406.1952         | L   | 1526.8611 | <b>763.9342</b>  | 1509.8345        | 755.4209         | 1508.8505      | 754.9289         | 14 |
| 9  | 928.4622        | 464.7347        |           |                  | 910.4516       | 455.7295         | V   | 1413.7770 | 707.3921         | 1396.7505        | 698.8789         | 1395.7664      | 698.3869         | 13 |
| 10 | 1027.5306       | 514.2689        |           |                  | 1009.5201      | 505.2637         | V   | 1314.7086 | 657.8579         | 1297.6820        | 649.3447         | 1296.6980      | 648.8527         | 12 |
| 11 | 1084.5521       | 542.7797        |           |                  | 1066.5415      | 533.7744         | G   | 1215.6402 | 608.3237         | 1198.6136        | 599.8105         | 1197.6296      | 599.3184         | 11 |
| 12 | 1197.6361       | 599.3217        |           |                  | 1179.6256      | 590.3164         | I   | 1158.6187 | 579.8130         | 1141.5922        | 571.2997         | 1140.6082      | 570.8077         | 10 |
| 13 | 1310.7202       | 655.8637        |           |                  | 1292.7096      | 646.8585         | I   | 1045.5347 | 523.2710         | <b>1028.5081</b> | 514.7577         | 1027.5241      | 514.2657         | 9  |
| 14 | 1425.7472       | 713.3772        |           |                  | 1407.7366      | 704.3719         | D   | 932.4506  | 466.7289         | 915.4240         | 458.2157         | 914.4400       | 457.7237         | 8  |
| 15 | 1554.7897       | 777.8985        |           |                  | 1536.7792      | 768.8932         | E   | 817.4236  | 409.2155         | 800.3971         | 400.7022         | 799.4131       | <b>400.2102</b>  | 7  |
| 16 | 1625.8269       | 813.4171        |           |                  | 1607.8163      | 804.4118         | A   | 688.3811  | 344.6942         | 671.3545         | 336.1809         |                |                  | 6  |
| 17 | 1756.8673       | <b>878.9373</b> |           |                  | 1738.8568      | 869.9320         | M   | 617.3439  | 309.1756         | 600.3174         | <b>300.6623</b>  |                |                  | 5  |
| 18 | 1870.9103       | 935.9588        | 1853.8837 | 927.4455         | 1852.8997      | 926.9535         | N   | 486.3035  | 243.6554         | 469.2769         | 235.1421         |                |                  | 4  |
| 19 | 1999.0052       | 1000.0063       | 1981.9787 | 991.4930         | 1980.9947      | 991.0010         | K   | 372.2605  | 186.6339         | 355.2340         | 178.1206         |                |                  | 3  |
| 20 | 2096.0580       | 1048.5326       | 2079.0314 | 1040.0194        | 2078.0474      | 1039.5274        | P   | 244.1656  | 122.5864         | 227.1390         | 114.0731         |                |                  | 2  |
| 21 |                 |                 |           |                  |                |                  | K   | 147.1128  | 74.0600          | 130.0863         | 65.5468          |                |                  | 1  |

# AT5G63400.2

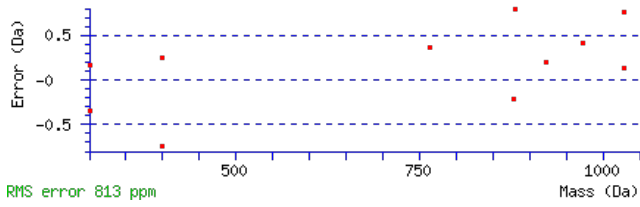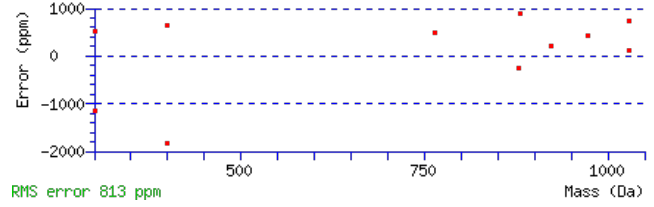

NCBI **BLAST** search of [GELVSDDL VVG IIDEAMNKPK](#)  
(Parameters: blastp, nr protein database, expect=20000, no filter, PAM30)  
Other BLAST [web gateways](#)

## All matches to this query

| Score | Mr(calc)  | Delta  | Sequence                                |
|-------|-----------|--------|-----------------------------------------|
| 30.7  | 2241.1562 | 0.0030 | <a href="#">GELVSDDL VVG IIDEAMNKPK</a> |
| 3.9   | 2241.1535 | 0.0057 | <a href="#">AIVDNAREENTQGIVNMVLR</a>    |

Mascot: <http://www.matrixscience.com/>

**Peptide View**MS/MS Fragmentation of **TYLEAAWRDGK**Found in **AT5G63420.1** in **TAIR\_Arabidopsis**, Symbols: EMB2746 | EMB2746 (EMBRYO DEFECTIVE 2746); catalytic | chr5:25417741-25423033 FORWARD

Match to Query 5151: 1324.598334 from(663.306443,2+) index(4768)

Title: Elution from: 43.615 to 43.615 scan no 5961 cid35.00 polarity:+

Data file C7-2\_1.mgf

Click mouse within plot area to zoom in by factor of two about that point

Or,   to  Da Label all possible matches  Label matches used for scoring Show Y-axis 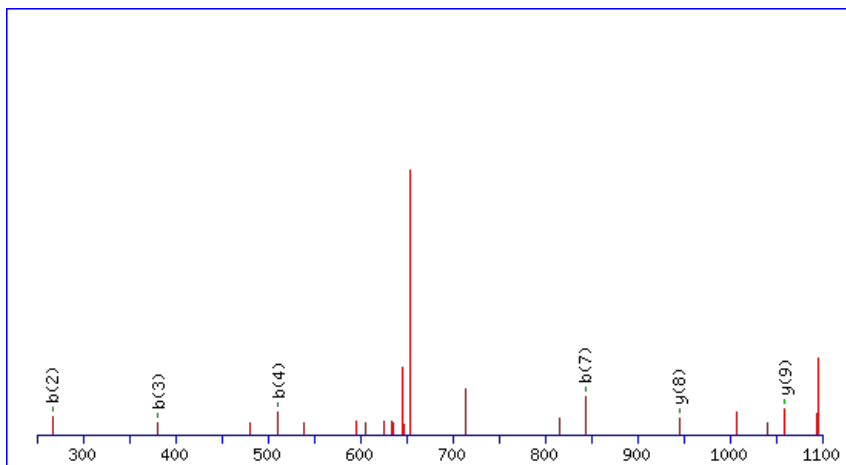Monoisotopic mass of neutral peptide  $M_r(\text{calc})$ : 1324.5988

Fixed modifications: Carbamidomethyl (C) (apply to specified residues or termini only)

Ions Score: 28 Expect: 0.016

Matches : 6/102 fragment ions using 9 most intense peaks ([help](#))

| #  | b               | b <sup>++</sup> | b*        | b <sup>*++</sup> | b <sup>0</sup> | b <sup>0++</sup> | Seq. | y                | y <sup>++</sup> | y*        | y <sup>*++</sup> | y <sup>0</sup> | y <sup>0++</sup> | #  |
|----|-----------------|-----------------|-----------|------------------|----------------|------------------|------|------------------|-----------------|-----------|------------------|----------------|------------------|----|
| 1  | 103.0520        | 52.0296         |           |                  | 85.0414        | 43.0244          | T    |                  |                 |           |                  |                |                  | 11 |
| 2  | <b>267.1124</b> | 134.0598        |           |                  | 249.1018       | 125.0545         | Y    | 1223.5614        | 612.2843        | 1205.5378 | 603.2725         | 1205.5508      | 603.2790         | 10 |
| 3  | <b>381.1935</b> | 191.1004        |           |                  | 363.1829       | 182.0951         | L    | <b>1059.5010</b> | 530.2541        | 1041.4774 | 521.2424         | 1041.4904      | 521.2489         | 9  |
| 4  | <b>511.2331</b> | 256.1202        |           |                  | 493.2225       | 247.1149         | E    | <b>945.4199</b>  | 473.2136        | 927.3963  | 464.2018         | 927.4093       | 464.2083         | 8  |
| 5  | 583.2672        | 292.1373        |           |                  | 565.2567       | 283.1320         | A    | 815.3803         | 408.1938        | 797.3567  | 399.1820         | 797.3697       | 399.1885         | 7  |
| 6  | 655.3014        | 328.1543        |           |                  | 637.2908       | 319.1490         | A    | 743.3461         | 372.1767        | 725.3226  | 363.1649         | 725.3356       | 363.1714         | 6  |
| 7  | <b>843.3748</b> | 422.1910        |           |                  | 825.3642       | 413.1857         | W    | 671.3120         | 336.1596        | 653.2884  | 327.1478         | 653.3014       | 327.1543         | 5  |
| 8  | 1003.4640       | 502.2356        | 985.4404  | 493.2239         | 985.4534       | 493.2304         | R    | 483.2386         | 242.1229        | 465.2150  | 233.1111         | 465.2280       | 233.1177         | 4  |
| 9  | 1119.4880       | 560.2476        | 1101.4644 | 551.2358         | 1101.4774      | 551.2424         | D    | 323.1494         | 162.0783        | 305.1258  | 153.0665         | 305.1388       | 153.0730         | 3  |
| 10 | 1177.5065       | 589.2569        | 1159.4829 | 580.2451         | 1159.4959      | 580.2516         | G    | 207.1254         | 104.0663        | 189.1018  | 95.0545          |                |                  | 2  |
| 11 |                 |                 |           |                  |                |                  | K    | 149.1069         | 75.0571         | 131.0833  | 66.0453          |                |                  | 1  |

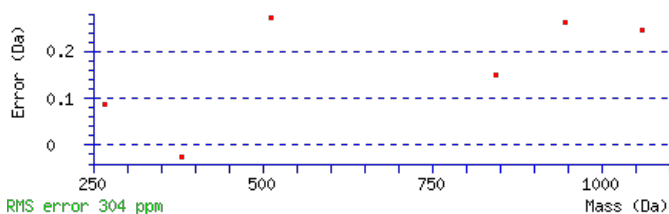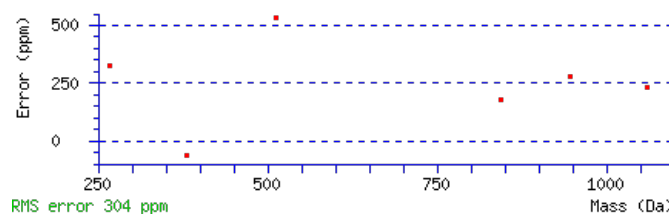NCBI **BLAST** search of **TYLEAAWRDGK**

(Parameters: blastp, nr protein database, expect=20000, no filter, PAM30)

Other BLAST [web gateways](#)**All matches to this query**



## AT5G63420.1

| Score | Mr(calc)  | Delta   | Sequence                     |
|-------|-----------|---------|------------------------------|
| 28.5  | 1324.5988 | -0.0005 | <a href="#">TYLEAAWRD GK</a> |
| 12.5  | 1324.5999 | -0.0016 | <a href="#">MSENTKVEAKR</a>  |
| 12.0  | 1324.5973 | 0.0011  | <a href="#">MVSATTSEKDVK</a> |
| 5.5   | 1324.5952 | 0.0031  | <a href="#">CTNIECRVKK</a>   |
| 4.1   | 1324.6022 | -0.0038 | <a href="#">LVMYPRGTGDGK</a> |
| 3.5   | 1324.6010 | -0.0027 | <a href="#">ESFPK SFDHAK</a> |
| 3.0   | 1324.6022 | -0.0038 | <a href="#">LMAFEREELR</a>   |
| 2.5   | 1324.6022 | -0.0038 | <a href="#">VLGFECTNLTR</a>  |
| 2.5   | 1324.5966 | 0.0018  | <a href="#">SLVTASFANENR</a> |
| 2.1   | 1324.5988 | -0.0005 | <a href="#">ESVAWDTISGAR</a> |

Mascot: <http://www.matrixscience.com/>

## Peptide View

### MS/MS Fragmentation of **TLTNEETLEIPK**

Found in **AT5G63510.1** in **TAIR\_Arabidopsis**, Symbols: GAMMA CAL1 | GAMMA CAL1 (GAMMA CARBONIC ANHYDRASE LIKE 1); carbonate dehydratase | chr5:25441280-25442838 FORWARD

Match to Query 4867: 1386.724330 from(694.369441,2+) index(4463)

Title: Elution from: 43.933 to 43.933 scan no 5731 cid35.00 polarity:+

Data file D1d-2\_2.mgf

Click mouse within plot area to zoom in by factor of two about that point

Or,   to  Da

Label all possible matches  Label matches used for scoring

Show Y-axis

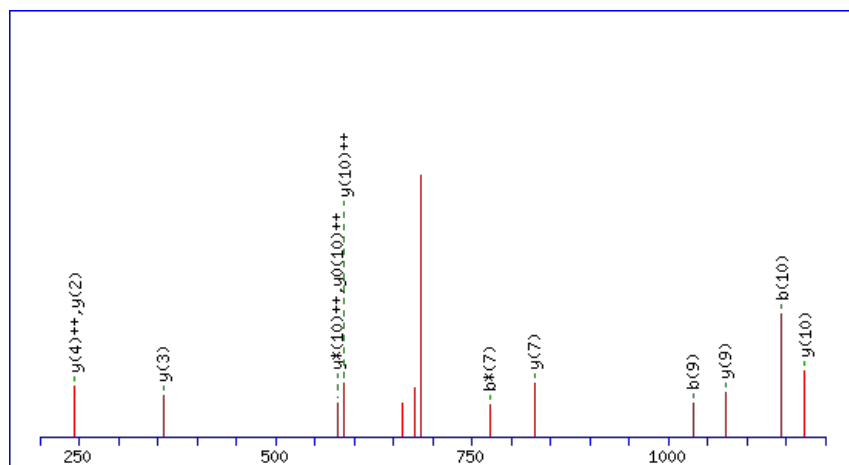

Monoisotopic mass of neutral peptide  $M_r(\text{calc})$ : 1386.7242

Fixed modifications: Carbamidomethyl (C) (apply to specified residues or termini only)

Ions Score: 49 Expect: 3.7e-005

Matches : 12/120 fragment ions using 12 most intense peaks ([help](#))

| #  | b                | b <sup>++</sup> | b*              | b <sup>*++</sup> | b <sup>0</sup> | b <sup>0++</sup> | Seq. | y                | y <sup>++</sup> | y*        | y <sup>*++</sup> | y <sup>0</sup> | y <sup>0++</sup> | #  |
|----|------------------|-----------------|-----------------|------------------|----------------|------------------|------|------------------|-----------------|-----------|------------------|----------------|------------------|----|
| 1  | 102.0550         | 51.5311         |                 |                  | 84.0444        | 42.5258          | T    |                  |                 |           |                  |                |                  | 12 |
| 2  | 215.1390         | 108.0731        |                 |                  | 197.1285       | 99.0679          | L    | 1286.6838        | 643.8456        | 1269.6573 | 635.3323         | 1268.6733      | 634.8403         | 11 |
| 3  | 316.1867         | 158.5970        |                 |                  | 298.1761       | 149.5917         | T    | <b>1173.5998</b> | <b>587.3035</b> | 1156.5732 | <b>578.7902</b>  | 1155.5892      | <b>578.2982</b>  | 10 |
| 4  | 430.2296         | 215.6185        | 413.2031        | 207.1052         | 412.2191       | 206.6132         | N    | <b>1072.5521</b> | 536.7797        | 1055.5255 | 528.2664         | 1054.5415      | 527.7744         | 9  |
| 5  | 559.2722         | 280.1397        | 542.2457        | 271.6265         | 541.2617       | 271.1345         | E    | 958.5092         | 479.7582        | 941.4826  | 471.2449         | 940.4986       | 470.7529         | 8  |
| 6  | 688.3148         | 344.6610        | 671.2883        | 336.1478         | 670.3042       | 335.6558         | E    | <b>829.4666</b>  | 415.2369        | 812.4400  | 406.7236         | 811.4560       | 406.2316         | 7  |
| 7  | 789.3625         | 395.1849        | <b>772.3359</b> | 386.6716         | 771.3519       | 386.1796         | T    | 700.4240         | 350.7156        | 683.3974  | 342.2023         | 682.4134       | 341.7103         | 6  |
| 8  | 902.4466         | 451.7269        | 885.4200        | 443.2136         | 884.4360       | 442.7216         | L    | 599.3763         | 300.1918        | 582.3497  | 291.6785         | 581.3657       | 291.1865         | 5  |
| 9  | <b>1031.4891</b> | 516.2482        | 1014.4626       | 507.7349         | 1013.4786      | 507.2429         | E    | 486.2922         | <b>243.6498</b> | 469.2657  | 235.1365         | 468.2817       | 234.6445         | 4  |
| 10 | <b>1144.5732</b> | 572.7902        | 1127.5467       | 564.2770         | 1126.5626      | 563.7850         | I    | <b>357.2496</b>  | 179.1285        | 340.2231  | 170.6152         |                |                  | 3  |
| 11 | 1241.6260        | 621.3166        | 1224.5994       | 612.8034         | 1223.6154      | 612.3113         | P    | <b>244.1656</b>  | 122.5864        | 227.1390  | 114.0731         |                |                  | 2  |
| 12 |                  |                 |                 |                  |                |                  | K    | 147.1128         | 74.0600         | 130.0863  | 65.5468          |                |                  | 1  |

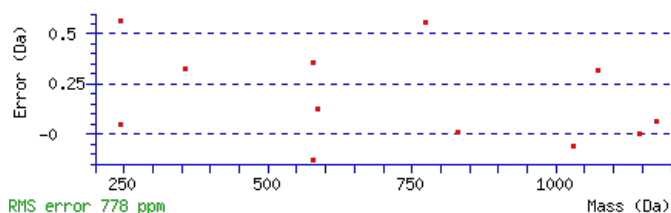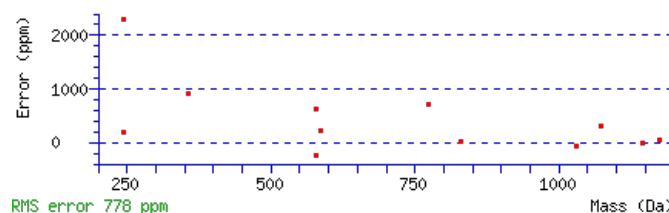

### NCBI BLAST search of **TLTNEETLEIPK**

(Parameters: blastp, nr protein database, expect=20000, no filter, PAM30)

Other BLAST [web gateways](#)

# AT5G63510.1

All matches to this query

| Score | Mr(calc)  | Delta   | Sequence                      |
|-------|-----------|---------|-------------------------------|
| 49.4  | 1386.7242 | 0.0001  | <a href="#">TLTNEETLEIPK</a>  |
| 3.7   | 1386.7255 | -0.0012 | <a href="#">RSHYEEVINLK</a>   |
| 3.4   | 1386.7215 | 0.0028  | <a href="#">AENTAVEAIRSAR</a> |
| 1.1   | 1386.7256 | -0.0012 | <a href="#">TDGNVSLIGLWGR</a> |

Mascot: <http://www.matrixscience.com/>

## Peptide View

MS/MS Fragmentation of **AATSDTLTAPYNDLEAVEK**

Found in **AT5G63570.1** in **TAIR\_Arabidopsis**, Symbols: GSA1 | GSA1 (GLUTAMATE-1-SEMIALDEHYDE-2,1-AMINOMUTASE); glutamate-1-semialdehyde 2,1-aminomutase | chr5:25469183-25470846 FORWARD

Match to Query 8877: 2007.963292 from(1004.988922,2+) index(6609)

Title: Elution from: 62.434 to 62.434 scan no 8734 cid35.00 polarity:+

Data file D1d-1-2.mgf

Click mouse within plot area to zoom in by factor of two about that point

Or,   to  Da

Label all possible matches  Label matches used for scoring

Show Y-axis

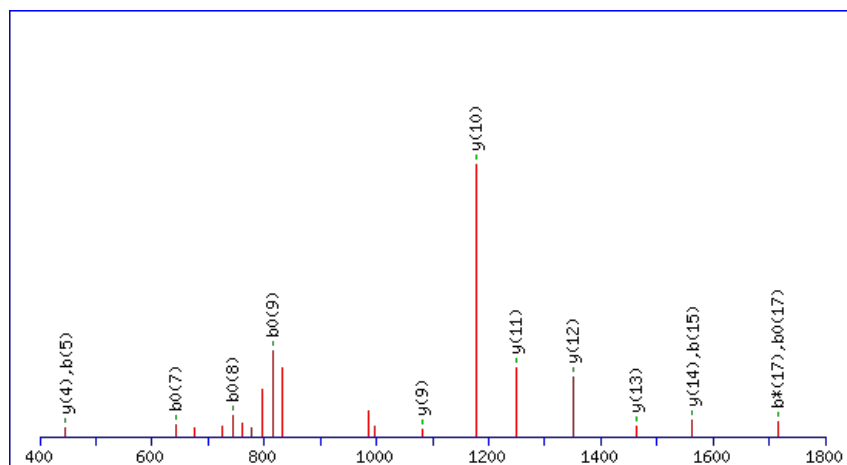

Monoisotopic mass of neutral peptide  $M_r(\text{calc})$ : 2007.9637

Fixed modifications: Carbamidomethyl (C) (apply to specified residues or termini only)

Ions Score: 66 Expect: 1e-006

Matches : 14/188 fragment ions using 12 most intense peaks ([help](#))

| #  | b                | b <sup>++</sup> | b <sup>*</sup>   | b <sup>*++</sup> | b <sup>0</sup>   | b <sup>0++</sup> | Seq. | y                | y <sup>++</sup> | y <sup>*</sup> | y <sup>*++</sup> | y <sup>0</sup> | y <sup>0++</sup> | #  |
|----|------------------|-----------------|------------------|------------------|------------------|------------------|------|------------------|-----------------|----------------|------------------|----------------|------------------|----|
| 1  | 72.0444          | 36.5258         |                  |                  |                  |                  | A    |                  |                 |                |                  |                |                  | 19 |
| 2  | 143.0815         | 72.0444         |                  |                  |                  |                  | A    | 1937.9338        | 969.4706        | 1920.9073      | 960.9573         | 1919.9233      | 960.4653         | 18 |
| 3  | 244.1292         | 122.5682        |                  |                  | 226.1186         | 113.5629         | T    | 1866.8967        | 933.9520        | 1849.8702      | 925.4387         | 1848.8862      | 924.9467         | 17 |
| 4  | 331.1612         | 166.0842        |                  |                  | 313.1506         | 157.0790         | S    | 1765.8491        | 883.4282        | 1748.8225      | 874.9149         | 1747.8385      | 874.4229         | 16 |
| 5  | <b>446.1882</b>  | 223.5977        |                  |                  | 428.1776         | 214.5924         | D    | 1678.8170        | 839.9122        | 1661.7905      | 831.3989         | 1660.8065      | 830.9069         | 15 |
| 6  | 547.2358         | 274.1216        |                  |                  | 529.2253         | 265.1163         | T    | <b>1563.7901</b> | 782.3987        | 1546.7635      | 773.8854         | 1545.7795      | 773.3934         | 14 |
| 7  | 660.3199         | 330.6636        |                  |                  | <b>642.3093</b>  | 321.6583         | L    | <b>1462.7424</b> | 731.8748        | 1445.7159      | 723.3616         | 1444.7318      | 722.8696         | 13 |
| 8  | 761.3676         | 381.1874        |                  |                  | <b>743.3570</b>  | 372.1821         | T    | <b>1349.6583</b> | 675.3328        | 1332.6318      | 666.8195         | 1331.6478      | 666.3275         | 12 |
| 9  | 832.4047         | 416.7060        |                  |                  | <b>814.3941</b>  | 407.7007         | A    | <b>1248.6107</b> | 624.8090        | 1231.5841      | 616.2957         | 1230.6001      | 615.8037         | 11 |
| 10 | 929.4575         | 465.2324        |                  |                  | 911.4469         | 456.2271         | P    | <b>1177.5735</b> | 589.2904        | 1160.5470      | 580.7771         | 1159.5630      | 580.2851         | 10 |
| 11 | 1092.5208        | 546.7640        |                  |                  | 1074.5102        | 537.7587         | Y    | <b>1080.5208</b> | 540.7640        | 1063.4942      | 532.2508         | 1062.5102      | 531.7587         | 9  |
| 12 | 1206.5637        | 603.7855        | 1189.5372        | 595.2722         | 1188.5531        | 594.7802         | N    | 917.4575         | 459.2324        | 900.4309       | 450.7191         | 899.4469       | 450.2271         | 8  |
| 13 | 1321.5907        | 661.2990        | 1304.5641        | 652.7857         | 1303.5801        | 652.2937         | D    | 803.4145         | 402.2109        | 786.3880       | 393.6976         | 785.4040       | 393.2056         | 7  |
| 14 | 1434.6747        | 717.8410        | 1417.6482        | 709.3277         | 1416.6642        | 708.8357         | L    | 688.3876         | 344.6974        | 671.3610       | 336.1842         | 670.3770       | 335.6921         | 6  |
| 15 | <b>1563.7173</b> | 782.3623        | 1546.6908        | 773.8490         | 1545.7067        | 773.3570         | E    | 575.3035         | 288.1554        | 558.2770       | 279.6421         | 557.2930       | 279.1501         | 5  |
| 16 | 1634.7544        | 817.8809        | 1617.7279        | 809.3676         | 1616.7439        | 808.8756         | A    | <b>446.2609</b>  | 223.6341        | 429.2344       | 215.1208         | 428.2504       | 214.6288         | 4  |
| 17 | 1733.8228        | 867.4151        | <b>1716.7963</b> | 858.9018         | <b>1715.8123</b> | 858.4098         | V    | 375.2238         | 188.1155        | 358.1973       | 179.6023         | 357.2132       | 179.1103         | 3  |
| 18 | 1862.8654        | 931.9364        | 1845.8389        | 923.4231         | 1844.8549        | 922.9311         | E    | 276.1554         | 138.5813        | 259.1288       | 130.0681         | 258.1448       | 129.5761         | 2  |
| 19 |                  |                 |                  |                  |                  |                  | K    | 147.1128         | 74.0600         | 130.0863       | 65.5468          |                |                  | 1  |

# AT5G63570.1

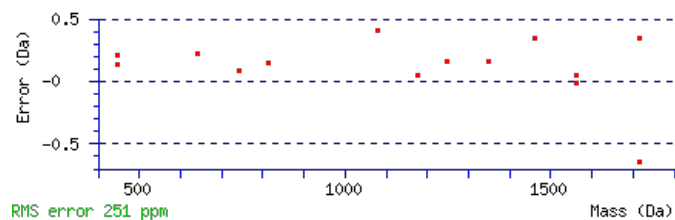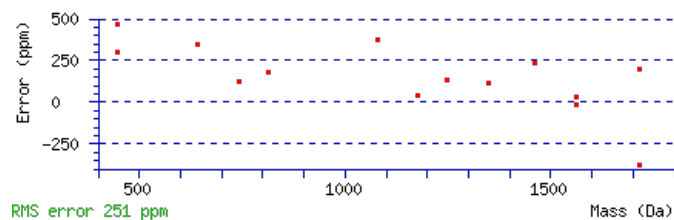

NCBI **BLAST** search of [AATSDTLTAPYNDLEAVEK](#)  
(Parameters: blastp, nr protein database, expect=20000, no filter, PAM30)  
Other BLAST [web gateways](#)

## All matches to this query

| Score | Mr(calc)  | Delta   | Sequence                            |
|-------|-----------|---------|-------------------------------------|
| 65.6  | 2007.9637 | -0.0004 | <a href="#">AATSDTLTAPYNDLEAVEK</a> |
| 2.9   | 2007.9610 | 0.0023  | <a href="#">QQADYIISQADSDKDRR</a>   |

Mascot: <http://www.matrixscience.com/>

## Peptide View

### MS/MS Fragmentation of IFPPLP

Found in **AT5G63690.1** in **TAIR\_Arabidopsis**, Symbols: | similar to hypothetical protein [Vitis vinifera] (GB:CAN67844.1); similar to unnamed protein product [Vitis vinifera] (GB:CAO22434.1); contains InterPro domain Nucleic acid-binding, OB-fold (InterPro:IPR012340); contains InterPro domain

Match to Query 553: 682.405236 from(342.209894,2+) index(3094)

Title: Elution from: 29.775 to 29.775 scan no 3828 cid35.00 polarity:+

Data file 0-2\_3.mgf

Click mouse within plot area to zoom in by factor of two about that point

Or,   to  Da

Label all possible matches  Label matches used for scoring

Show Y-axis

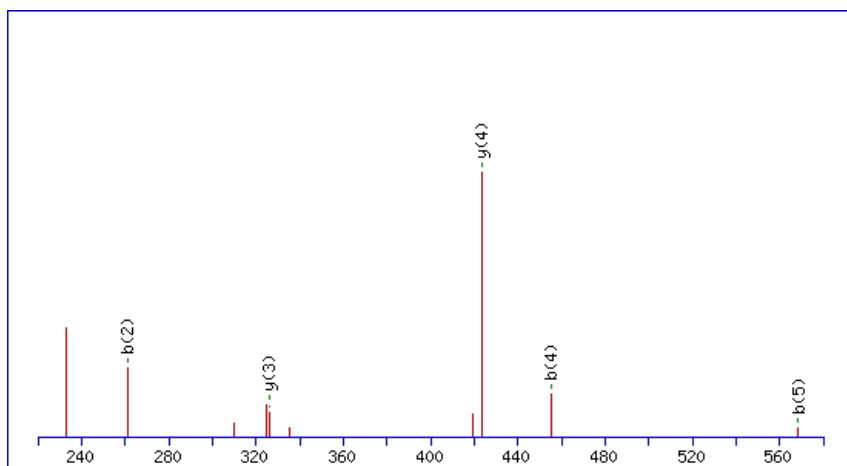

**Monoisotopic mass of neutral peptide Mr(calc):** 682.4054

**Fixed modifications:** Carbamidomethyl (C) (apply to specified residues or termini only)

**Ions Score:** 20 **Expect:** 0.011

**Matches:** 5/20 fragment ions using 9 most intense peaks ([help](#))

| # | b               | b <sup>++</sup> | Seq. | y               | y <sup>++</sup> | y <sup>+++</sup> | # |
|---|-----------------|-----------------|------|-----------------|-----------------|------------------|---|
| 1 | 114.0913        | 57.5493         | I    |                 |                 |                  | 6 |
| 2 | <b>261.1598</b> | 131.0835        | F    | 570.3286        | 285.6679        |                  | 5 |
| 3 | 358.2125        | 179.6099        | P    | <b>423.2602</b> | 212.1337        |                  | 4 |
| 4 | <b>455.2653</b> | 228.1363        | P    | <b>326.2074</b> | 163.6074        |                  | 3 |
| 5 | <b>568.3493</b> | 284.6783        | L    | 229.1547        | 115.0810        |                  | 2 |
| 6 |                 |                 | P    | 116.0706        | 58.5389         |                  | 1 |

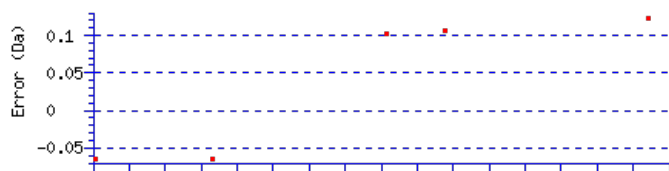

RMS error 226 ppm

Mass (Da)

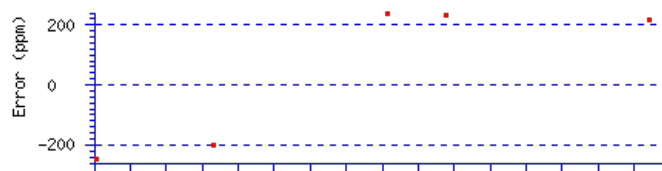

RMS error 226 ppm

Mass (Da)

### NCBI BLAST search of IFPPLP

(Parameters: blastp, nr protein database, expect=20000, no filter, PAM30)

Other BLAST [web gateways](#)

### All matches to this query

| Score | Mr(calc) | Delta   | Sequence               |
|-------|----------|---------|------------------------|
| 20.3  | 682.4054 | -0.0002 | <a href="#">IFPPLP</a> |
| 3.2   | 682.4054 | -0.0001 | <a href="#">FIYYK</a>  |

## AT5G63690.1

|     |          |         |                       |
|-----|----------|---------|-----------------------|
| 3.2 | 682.4054 | -0.0001 | <a href="#">FLIYK</a> |
| 3.2 | 682.4054 | -0.0001 | <a href="#">FLLYK</a> |
| 3.2 | 682.4054 | -0.0001 | <a href="#">IFLYK</a> |

**Mascot:** <http://www.matrixscience.com/>

**Peptide View**MS/MS Fragmentation of **FPENFTGCQDLAK**

Found in **AT5G64040.1** in **TAIR\_Arabidopsis**, Symbols: PSAN | PSAN (photosystem I reaction center subunit PSI-N); calmodulin binding | chr5:25645950-25646635 REVERSE

Match to Query 6466: 1525.688328 from(763.851440,2+) index(5159)

Title: Elution from: 48.547 to 48.547 scan no 6582 cid35.00 polarity:+

Data file D1d-2\_1.mgf

Click mouse within plot area to zoom in by factor of two about that point

Or,  to  Da

Label all possible matches  Label matches used for scoring

Show Y-axis

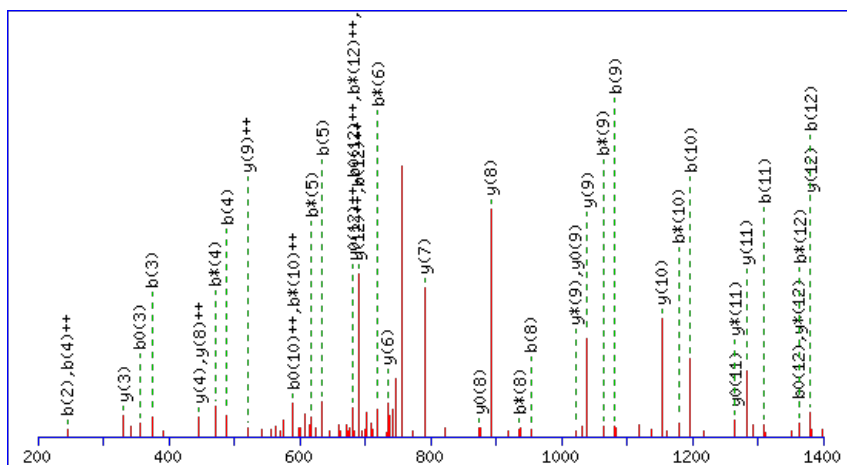

Monoisotopic mass of neutral peptide  $M_r(\text{calc})$ : 1525.6871

Fixed modifications: Carbamidomethyl (C) (apply to specified residues or termini only)

Ions Score: 87 Expect: 3.3e-009

Matches : 44/128 fragment ions using 46 most intense peaks ([help](#))

| #  | b                | b <sup>++</sup> | b*               | b <sup>*++</sup> | b <sup>0</sup>   | b <sup>0++</sup> | Seq. | y                | y <sup>++</sup> | y*               | y <sup>*++</sup> | y <sup>0</sup>   | y <sup>0++</sup> | #  |
|----|------------------|-----------------|------------------|------------------|------------------|------------------|------|------------------|-----------------|------------------|------------------|------------------|------------------|----|
| 1  | 148.0757         | 74.5415         |                  |                  |                  |                  | F    |                  |                 |                  |                  |                  |                  | 13 |
| 2  | <b>245.1285</b>  | 123.0679        |                  |                  |                  |                  | P    | <b>1379.6260</b> | 690.3166        | <b>1362.5994</b> | 681.8034         | 1361.6154        | <b>681.3114</b>  | 12 |
| 3  | <b>374.1710</b>  | 187.5892        |                  |                  | <b>356.1605</b>  | 178.5839         | E    | <b>1282.5732</b> | 641.7903        | <b>1265.5467</b> | 633.2770         | <b>1264.5627</b> | 632.7850         | 11 |
| 4  | <b>488.2140</b>  | <b>244.6106</b> | <b>471.1874</b>  | 236.0974         | 470.2034         | 235.6053         | N    | <b>1153.5306</b> | 577.2690        | 1136.5041        | 568.7557         | 1135.5201        | 568.2637         | 10 |
| 5  | <b>635.2824</b>  | 318.1448        | <b>618.2558</b>  | 309.6316         | 617.2718         | 309.1395         | F    | <b>1039.4877</b> | <b>520.2475</b> | <b>1022.4612</b> | 511.7342         | <b>1021.4771</b> | 511.2422         | 9  |
| 6  | 736.3301         | 368.6687        | <b>719.3035</b>  | 360.1554         | 718.3195         | 359.6634         | T    | <b>892.4193</b>  | <b>446.7133</b> | 875.3927         | 438.2000         | <b>874.4087</b>  | 437.7080         | 8  |
| 7  | 793.3515         | 397.1794        | 776.3250         | 388.6661         | 775.3410         | 388.1741         | G    | <b>791.3716</b>  | 396.1894        | 774.3451         | 387.6762         | 773.3611         | 387.1842         | 7  |
| 8  | <b>953.3822</b>  | 477.1947        | <b>936.3556</b>  | 468.6815         | 935.3716         | 468.1894         | C    | <b>734.3502</b>  | 367.6787        | 717.3236         | 359.1654         | 716.3396         | 358.6734         | 6  |
| 9  | <b>1081.4408</b> | 541.2240        | <b>1064.4142</b> | 532.7107         | 1063.4302        | 532.2187         | Q    | 574.3195         | 287.6634        | 557.2930         | 279.1501         | 556.3089         | 278.6581         | 5  |
| 10 | <b>1196.4677</b> | 598.7375        | <b>1179.4412</b> | <b>590.2242</b>  | 1178.4571        | <b>589.7322</b>  | D    | <b>446.2609</b>  | 223.6341        | 429.2344         | 215.1208         | 428.2504         | 214.6288         | 4  |
| 11 | <b>1309.5518</b> | 655.2795        | 1292.5252        | 646.7662         | 1291.5412        | 646.2742         | L    | <b>331.2340</b>  | 166.1206        | 314.2074         | 157.6074         |                  |                  | 3  |
| 12 | <b>1380.5889</b> | <b>690.7981</b> | <b>1363.5623</b> | <b>682.2848</b>  | <b>1362.5783</b> | <b>681.7928</b>  | A    | 218.1499         | 109.5786        | 201.1234         | 101.0653         |                  |                  | 2  |
| 13 |                  |                 |                  |                  |                  |                  | K    | 147.1128         | 74.0600         | 130.0863         | 65.5468          |                  |                  | 1  |

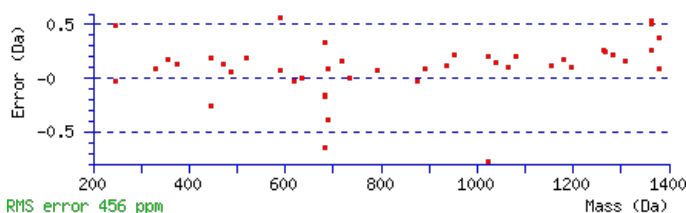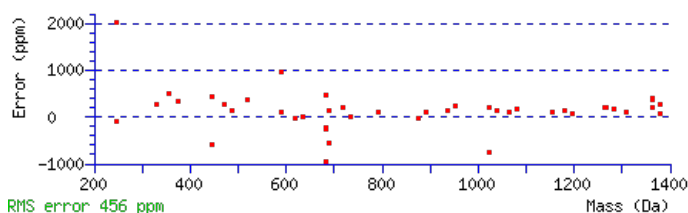

NCBI **BLAST** search of **FPENFTGCQDLAK**

(Parameters: blastp, nr protein database, expect=20000, no filter, PAM30)



# AT5G64040.1

Other BLAST [web gateways](#)

## All matches to this query

| Score | Mr(calc)  | Delta   | Sequence                       |
|-------|-----------|---------|--------------------------------|
| 87.4  | 1525.6871 | 0.0012  | <a href="#">FPENFTGCQDLAK</a>  |
| 13.1  | 1525.6871 | 0.0012  | <a href="#">MSRDSPPAFDPYK</a>  |
| 6.5   | 1525.6873 | 0.0010  | <a href="#">MACRGCLECLK</a>    |
| 4.5   | 1525.6905 | -0.0022 | <a href="#">VTDGCTIGGCYVPK</a> |

Mascot: <http://www.matrixscience.com/>

## Peptide View

### MS/MS Fragmentation of **AFTVQFGSCK**

Found in **AT5G64040.2** in **TAIR\_Arabidopsis**, Symbols: PSAN | PSAN (photosystem I reaction center subunit PSI-N); calmodulin binding | chr5:25645916-25646635 REVERSE

Match to Query 3814: 1143.538812 from(572.776682,2+) index(4525)

Title: Elution from: 40.168 to 40.168 scan no 5658 cid35.00 polarity:+

Data file D1d-3\_3.mgf

Click mouse within plot area to zoom in by factor of two about that point

Or,   to  Da

Label all possible matches  Label matches used for scoring

Show Y-axis

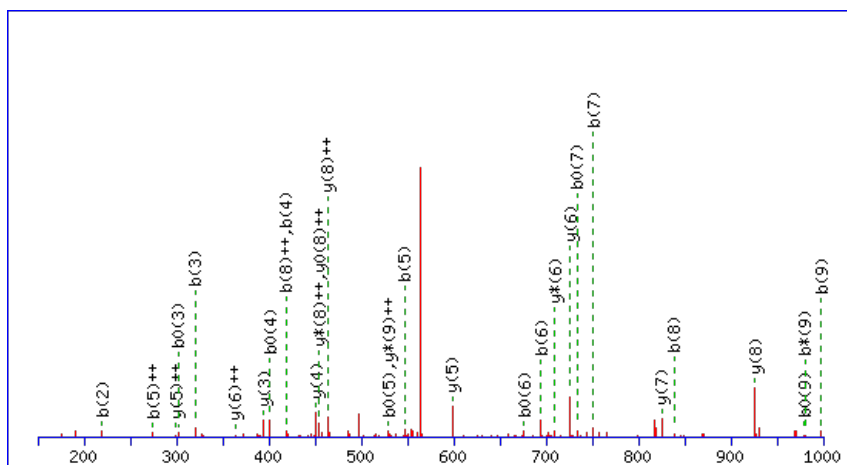

Monoisotopic mass of neutral peptide  $M_r(\text{calc})$ : 1143.5383

Fixed modifications: Carbamidomethyl (C) (apply to specified residues or termini only)

Ions Score: 52 Expect: 1.5e-005

Matches : 30/92 fragment ions using 49 most intense peaks ([help](#))

| #  | b               | b <sup>++</sup> | b*              | b <sup>*++</sup> | b <sup>0</sup>  | b <sup>0++</sup> | Seq. | y               | y <sup>++</sup> | y*              | y <sup>*++</sup> | y <sup>0</sup> | y <sup>0++</sup> | #  |
|----|-----------------|-----------------|-----------------|------------------|-----------------|------------------|------|-----------------|-----------------|-----------------|------------------|----------------|------------------|----|
| 1  | 72.0444         | 36.5258         |                 |                  |                 |                  | A    |                 |                 |                 |                  |                |                  | 10 |
| 2  | <b>219.1128</b> | 110.0600        |                 |                  |                 |                  | F    | 1073.5084       | 537.2579        | 1056.4819       | <b>528.7446</b>  | 1055.4979      | 528.2526         | 9  |
| 3  | <b>320.1605</b> | 160.5839        |                 |                  | 302.1499        | 151.5786         | T    | <b>926.4400</b> | <b>463.7237</b> | 909.4135        | <b>455.2104</b>  | 908.4295       | <b>454.7184</b>  | 8  |
| 4  | <b>419.2289</b> | 210.1181        |                 |                  | 401.2183        | 201.1128         | V    | <b>825.3924</b> | 413.1998        | 808.3658        | 404.6865         | 807.3818       | 404.1945         | 7  |
| 5  | <b>547.2875</b> | <b>274.1474</b> | 530.2609        | 265.6341         | <b>529.2769</b> | 265.1421         | Q    | <b>726.3239</b> | <b>363.6656</b> | <b>709.2974</b> | 355.1523         | 708.3134       | 354.6603         | 6  |
| 6  | <b>694.3559</b> | 347.6816        | 677.3293        | 339.1683         | <b>676.3453</b> | 338.6763         | F    | <b>598.2654</b> | <b>299.6363</b> | 581.2388        | 291.1230         | 580.2548       | 290.6310         | 5  |
| 7  | <b>751.3774</b> | 376.1923        | 734.3508        | 367.6790         | <b>733.3668</b> | 367.1870         | G    | <b>451.1969</b> | 226.1021        | 434.1704        | 217.5888         | 433.1864       | 217.0968         | 4  |
| 8  | <b>838.4094</b> | <b>419.7083</b> | 821.3828        | 411.1951         | 820.3988        | 410.7030         | S    | <b>394.1755</b> | 197.5914        | 377.1489        | 189.0781         | 376.1649       | 188.5861         | 3  |
| 9  | <b>998.4400</b> | 499.7237        | <b>981.4135</b> | 491.2104         | <b>980.4295</b> | 490.7184         | C    | 307.1435        | 154.0754        | 290.1169        | 145.5621         |                |                  | 2  |
| 10 |                 |                 |                 |                  |                 |                  | K    | 147.1128        | 74.0600         | 130.0863        | 65.5468          |                |                  | 1  |

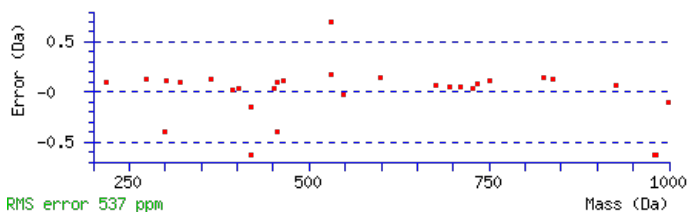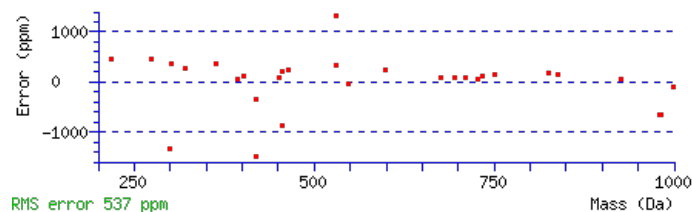

### NCBI BLAST search of **AFTVQFGSCK**

(Parameters: blastp, nr protein database, expect=20000, no filter, PAM30)

Other BLAST [web gateways](#)

All matches to this query

AT5G64040.2

| Score | Mr(calc)  | Delta  | Sequence                  |
|-------|-----------|--------|---------------------------|
| 52.0  | 1143.5383 | 0.0005 | <a href="#">AFTVQFGSK</a> |

Mascot: <http://www.matrixscience.com/>

## Peptide View

### MS/MS Fragmentation of **EGDVLTLLESER**

Found in **AT5G64140.1** in **TAIR\_Arabidopsis**, Symbols: RPS28 | RPS28 (RIBOSOMAL PROTEIN S28); structural constituent of ribosome | chr5:25684755-25684949 REVERSE

Match to Query 4762: 1359.686442 from(680.850497,2+) index(8312)

Title: Elution from: 74.946 to 74.946 scan no 11143 cid35.00 polarity:+

Data file D1d-2\_3.mgf

Click mouse within plot area to zoom in by factor of two about that point

Or,   to  Da

Label all possible matches  Label matches used for scoring

Show Y-axis

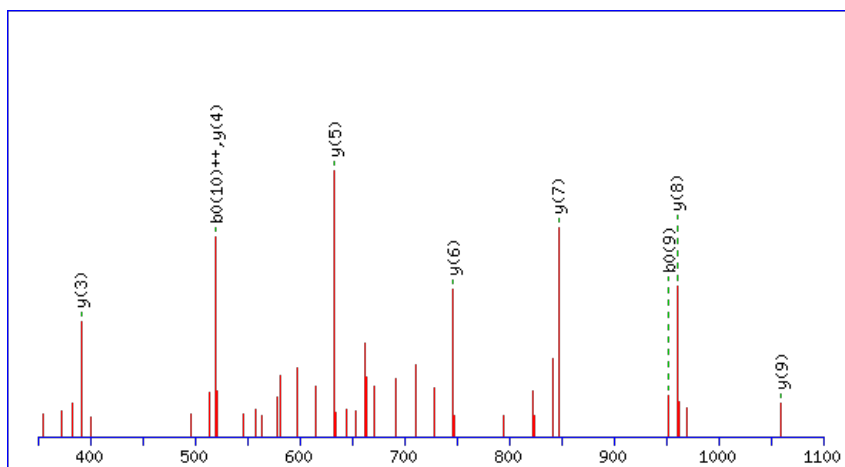

**Monoisotopic mass of neutral peptide Mr(calc):** 1359.6882

**Fixed modifications:** Carbamidomethyl (C) (apply to specified residues or termini only)

**Ions Score:** 65 **Expect:** 1.2e-006

**Matches:** 9/108 fragment ions using 8 most intense peaks ([help](#))

| #  | b         | b <sup>++</sup> | b <sup>0</sup>  | b <sup>0++</sup> | Seq. | y                | y <sup>++</sup> | y*        | y <sup>*++</sup> | y <sup>0</sup> | y <sup>0++</sup> | #  |
|----|-----------|-----------------|-----------------|------------------|------|------------------|-----------------|-----------|------------------|----------------|------------------|----|
| 1  | 130.0499  | 65.5286         | 112.0393        | 56.5233          | E    |                  |                 |           |                  |                |                  | 12 |
| 2  | 187.0713  | 94.0393         | 169.0608        | 85.0340          | G    | 1231.6529        | 616.3301        | 1214.6263 | 607.8168         | 1213.6423      | 607.3248         | 11 |
| 3  | 302.0983  | 151.5528        | 284.0877        | 142.5475         | D    | 1174.6314        | 587.8193        | 1157.6048 | 579.3061         | 1156.6208      | 578.8141         | 10 |
| 4  | 401.1667  | 201.0870        | 383.1561        | 192.0817         | V    | <b>1059.6045</b> | 530.3059        | 1042.5779 | 521.7926         | 1041.5939      | 521.3006         | 9  |
| 5  | 514.2508  | 257.6290        | 496.2402        | 248.6237         | L    | <b>960.5360</b>  | 480.7717        | 943.5095  | 472.2584         | 942.5255       | 471.7664         | 8  |
| 6  | 615.2984  | 308.1529        | 597.2879        | 299.1476         | T    | <b>847.4520</b>  | 424.2296        | 830.4254  | 415.7164         | 829.4414       | 415.2243         | 7  |
| 7  | 728.3825  | 364.6949        | 710.3719        | 355.6896         | L    | <b>746.4043</b>  | 373.7058        | 729.3777  | 365.1925         | 728.3937       | 364.7005         | 6  |
| 8  | 841.4666  | 421.2369        | 823.4560        | 412.2316         | L    | <b>633.3202</b>  | 317.1638        | 616.2937  | 308.6505         | 615.3097       | 308.1585         | 5  |
| 9  | 970.5092  | 485.7582        | <b>952.4986</b> | 476.7529         | E    | <b>520.2362</b>  | 260.6217        | 503.2096  | 252.1084         | 502.2256       | 251.6164         | 4  |
| 10 | 1057.5412 | 529.2742        | 1039.5306       | <b>520.2689</b>  | S    | <b>391.1936</b>  | 196.1004        | 374.1670  | 187.5872         | 373.1830       | 187.0951         | 3  |
| 11 | 1186.5838 | 593.7955        | 1168.5732       | 584.7902         | E    | 304.1615         | 152.5844        | 287.1350  | 144.0711         | 286.1510       | 143.5791         | 2  |
| 12 |           |                 |                 |                  | R    | 175.1190         | 88.0631         | 158.0924  | 79.5498          |                |                  | 1  |

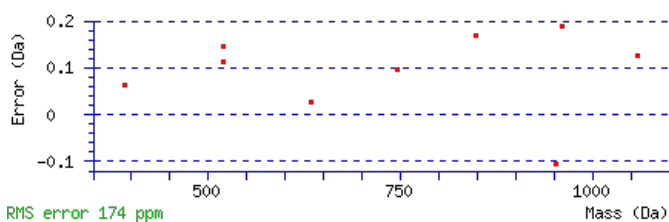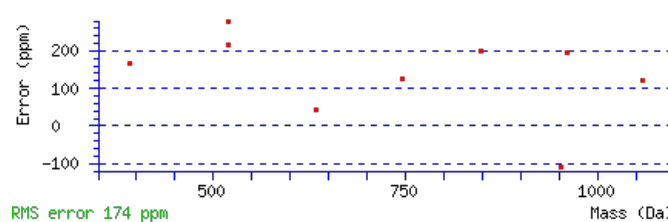

### NCBI BLAST search of **EGDVLTLLESER**

(Parameters: blastp, nr protein database, expect=20000, no filter, PAM30)

Other BLAST [web gateways](#)

AT5G64140.1

All matches to this query

| Score | Mr(calc)  | Delta   | Sequence                     |
|-------|-----------|---------|------------------------------|
| 64.9  | 1359.6882 | -0.0017 | <a href="#">EGDVLTLLESER</a> |
| 9.0   | 1359.6857 | 0.0008  | <a href="#">TPTEWLIDVMR</a>  |
| 7.0   | 1359.6881 | -0.0017 | <a href="#">GEDVLKAETAAK</a> |

Mascot: <http://www.matrixscience.com/>

**Peptide View**MS/MS Fragmentation of **SDQDKEIVLPK**Found in **AT5G64690.1** in **TAIR\_Arabidopsis**, Symbols: | neurofilament triplet H protein-related | chr5:25880195-25881747 FORWARD

Match to Query 4345: 1270.680660 from(636.347606,2+) index(7528)

Title: Elution from: 68.699 to 68.699 scan no 9932 cid35.00 polarity:+

Data file D1d-2\_1.mgf

Click mouse within plot area to zoom in by factor of two about that point

Or,   to  Da Label all possible matches  Label matches used for scoring Show Y-axis 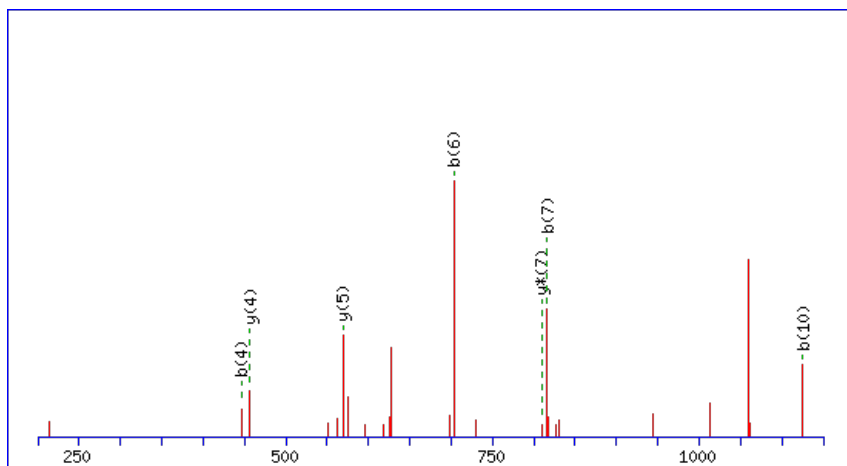Monoisotopic mass of neutral peptide **Mr(calc)**: 1270.6769**Fixed modifications**: Carbamidomethyl (C) (apply to specified residues or termini only)**Ions Score**: 19 **Expect**: 0.046**Matches** : 7/106 fragment ions using 16 most intense peaks ([help](#))

| #  | b                | b <sup>++</sup> | b*        | b <sup>*++</sup> | b <sup>0</sup> | b <sup>0++</sup> | Seq. | y               | y <sup>++</sup> | y*              | y <sup>*++</sup> | y <sup>0</sup> | y <sup>0++</sup> | #  |
|----|------------------|-----------------|-----------|------------------|----------------|------------------|------|-----------------|-----------------|-----------------|------------------|----------------|------------------|----|
| 1  | 88.0393          | 44.5233         |           |                  | 70.0287        | 35.5180          | S    |                 |                 |                 |                  |                |                  | 11 |
| 2  | 203.0662         | 102.0368        |           |                  | 185.0557       | 93.0315          | D    | 1184.6521       | 592.8297        | 1167.6256       | 584.3164         | 1166.6416      | 583.8244         | 10 |
| 3  | 331.1248         | 166.0661        | 314.0983  | 157.5528         | 313.1143       | 157.0608         | Q    | 1069.6252       | 535.3162        | 1052.5986       | 526.8030         | 1051.6146      | 526.3109         | 9  |
| 4  | <b>446.1518</b>  | 223.5795        | 429.1252  | 215.0662         | 428.1412       | 214.5742         | D    | 941.5666        | 471.2869        | 924.5401        | 462.7737         | 923.5560       | 462.2817         | 8  |
| 5  | 574.2467         | 287.6270        | 557.2202  | 279.1137         | 556.2362       | 278.6217         | K    | 826.5397        | 413.7735        | <b>809.5131</b> | 405.2602         | 808.5291       | 404.7682         | 7  |
| 6  | <b>703.2893</b>  | 352.1483        | 686.2628  | 343.6350         | 685.2788       | 343.1430         | E    | 698.4447        | 349.7260        | 681.4182        | 341.2127         | 680.4341       | 340.7207         | 6  |
| 7  | <b>816.3734</b>  | 408.6903        | 799.3468  | 400.1771         | 798.3628       | 399.6850         | I    | <b>569.4021</b> | 285.2047        | 552.3756        | 276.6914         |                |                  | 5  |
| 8  | 915.4418         | 458.2245        | 898.4153  | 449.7113         | 897.4312       | 449.2193         | V    | <b>456.3180</b> | 228.6627        | 439.2915        | 220.1494         |                |                  | 4  |
| 9  | 1028.5259        | 514.7666        | 1011.4993 | 506.2533         | 1010.5153      | 505.7613         | L    | 357.2496        | 179.1285        | 340.2231        | 170.6152         |                |                  | 3  |
| 10 | <b>1125.5786</b> | 563.2930        | 1108.5521 | 554.7797         | 1107.5681      | 554.2877         | P    | 244.1656        | 122.5864        | 227.1390        | 114.0731         |                |                  | 2  |
| 11 |                  |                 |           |                  |                |                  | K    | 147.1128        | 74.0600         | 130.0863        | 65.5468          |                |                  | 1  |

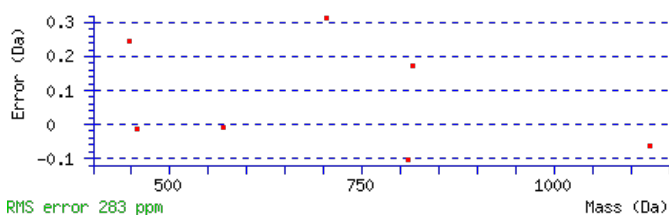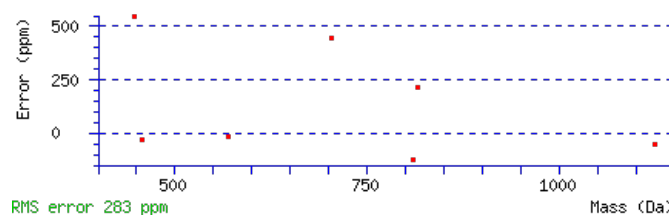NCBI **BLAST** search of **SDQDKEIVLPK**

(Parameters: blastp, nr protein database, expect=20000, no filter, PAM30)

Other BLAST [web gateways](#)**All matches to this query**

AT5G64690.1

| Score | Mr(calc)  | Delta   | Sequence                    |
|-------|-----------|---------|-----------------------------|
| 19.1  | 1270.6769 | 0.0038  | <a href="#">SDQDKEIVLPK</a> |
| 5.7   | 1270.6822 | -0.0016 | <a href="#">AAQALFHSWLK</a> |

Mascot: <http://www.matrixscience.com/>

## Peptide View

MS/MS Fragmentation of **KAATEILK**

Found in **AT5G64760.1** in **TAIR\_Arabidopsis**, Symbols: | 26S proteasome regulatory subunit, putative (RPN5) | chr5:25911253-25913671  
REVERSE

Match to Query 1465: 882.504570 from(442.259561,2+) index(1926)

Title: Elution from: 23.027 to 23.027 scan no 2504 cid35.00 polarity:+

Data file C7-1\_2.mgf

Click mouse within plot area to zoom in by factor of two about that point

Or,  to  Da

Label all possible matches  Label matches used for scoring

Show Y-axis

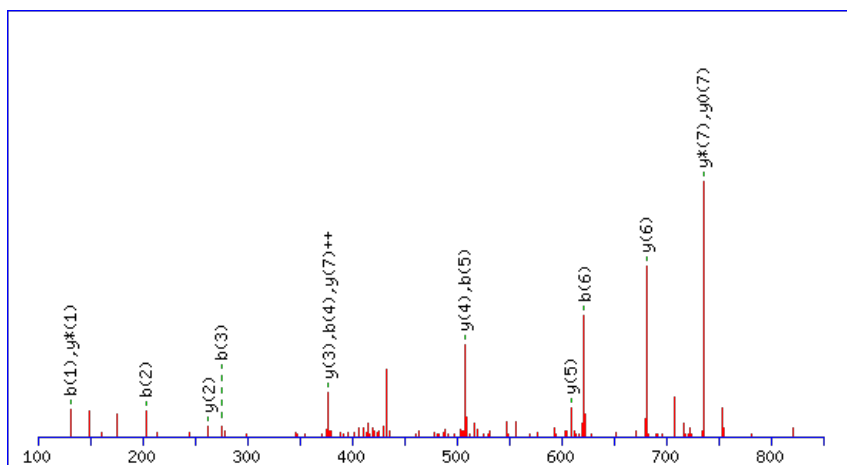

Monoisotopic mass of neutral peptide  $M_r(\text{calc})$ : 882.5035

Fixed modifications: Carbamidomethyl (C) (apply to specified residues or termini only)

Ions Score: 70 Expect: 1.2e-006

Matches : 16/72 fragment ions using 14 most intense peaks ([help](#))

| # | b               | b <sup>++</sup> | b*       | b <sup>*++</sup> | b <sup>0</sup> | b <sup>0++</sup> | Seq.     | y               | y <sup>++</sup> | y*              | y <sup>*++</sup> | y <sup>0</sup>  | y <sup>0++</sup> | #        |
|---|-----------------|-----------------|----------|------------------|----------------|------------------|----------|-----------------|-----------------|-----------------|------------------|-----------------|------------------|----------|
| 1 | <b>131.0963</b> | 66.0518         | 113.0727 | 57.0400          |                |                  | <b>K</b> |                 |                 |                 |                  |                 |                  | <b>8</b> |
| 2 | <b>203.1305</b> | 102.0689        | 185.1069 | 93.0571          |                |                  | <b>A</b> | 753.4217        | <b>377.2145</b> | <b>735.3981</b> | 368.2027         | <b>735.4111</b> | 368.2092         | <b>7</b> |
| 3 | <b>275.1646</b> | 138.0859        | 257.1410 | 129.0741         |                |                  | <b>A</b> | <b>681.3876</b> | 341.1974        | 663.3640        | 332.1856         | 663.3770        | 332.1921         | <b>6</b> |
| 4 | <b>377.2093</b> | 189.1083        | 359.1857 | 180.0965         | 359.1988       | 180.1030         | <b>T</b> | <b>609.3534</b> | 305.1803        | 591.3298        | 296.1686         | 591.3428        | 296.1751         | <b>5</b> |
| 5 | <b>507.2489</b> | 254.1281        | 489.2254 | 245.1163         | 489.2384       | 245.1228         | <b>E</b> | <b>507.3087</b> | 254.1580        | 489.2851        | 245.1462         | 489.2981        | 245.1527         | <b>4</b> |
| 6 | <b>621.3300</b> | 311.1687        | 603.3065 | 302.1569         | 603.3195       | 302.1634         | <b>I</b> | <b>377.2691</b> | 189.1382        | 359.2455        | 180.1264         |                 |                  | <b>3</b> |
| 7 | <b>735.4111</b> | 368.2092        | 717.3876 | 359.1974         | 717.4006       | 359.2039         | <b>L</b> | <b>263.1880</b> | 132.0976        | 245.1644        | 123.0858         |                 |                  | <b>2</b> |
| 8 |                 |                 |          |                  |                |                  | <b>K</b> | 149.1069        | 75.0571         | <b>131.0833</b> | 66.0453          |                 |                  | <b>1</b> |

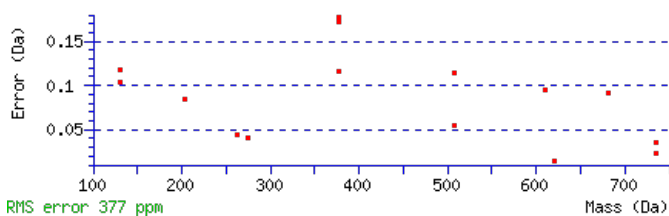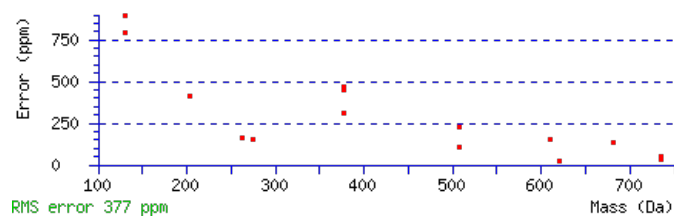

NCBI BLAST search of [KAATEILK](#)

(Parameters: blastp, nr protein database, expect=20000, no filter, PAM30)

Other BLAST [web gateways](#)

All matches to this query

| Score | $M_r(\text{calc})$ | Delta  | Sequence                 |
|-------|--------------------|--------|--------------------------|
| 69.6  | 882.5035           | 0.0011 | <a href="#">KAATEILK</a> |



## AT5G64760.1

|      |          |         |                          |
|------|----------|---------|--------------------------|
| 36.4 | 882.5034 | 0.0011  | <a href="#">GLTTQLLK</a> |
| 35.5 | 882.5061 | -0.0016 | <a href="#">GAAALARK</a> |
| 33.9 | 882.5035 | 0.0011  | <a href="#">DSGKLLK</a>  |
| 33.9 | 882.5034 | 0.0011  | <a href="#">GTVDKIHK</a> |
| 24.1 | 882.5035 | 0.0011  | <a href="#">ISVKDALK</a> |
| 22.4 | 882.5035 | 0.0011  | <a href="#">ATIQSLK</a>  |
| 22.4 | 882.5035 | 0.0011  | <a href="#">DVAKSILK</a> |
| 22.4 | 882.5035 | 0.0011  | <a href="#">GKSDLLK</a>  |
| 22.4 | 882.5061 | -0.0016 | <a href="#">RNGGLLK</a>  |

Mascot: <http://www.matrixscience.com/>

## Peptide View

### MS/MS Fragmentation of **LIKPDLGR**

Found in **AT5G65010.1** in **TAIR\_Arabidopsis**, Symbols: ASN2 | ASN2 (ASPARAGINE SYNTHETASE 2); asparagine synthase (glutamine-hydrolyzing) | chr5:25986450-25989504 FORWARD

Match to Query 1424: 922.524315 from(308.515381,3+) index(1456)

Title: Elution from: 21.195 to 21.195 scan no 1995 cid35.00 polarity:+

Data file D1d-1\_3.mgf

Click mouse within plot area to zoom in by factor of two about that point

Or,   to  Da

Label all possible matches  Label matches used for scoring

Show Y-axis

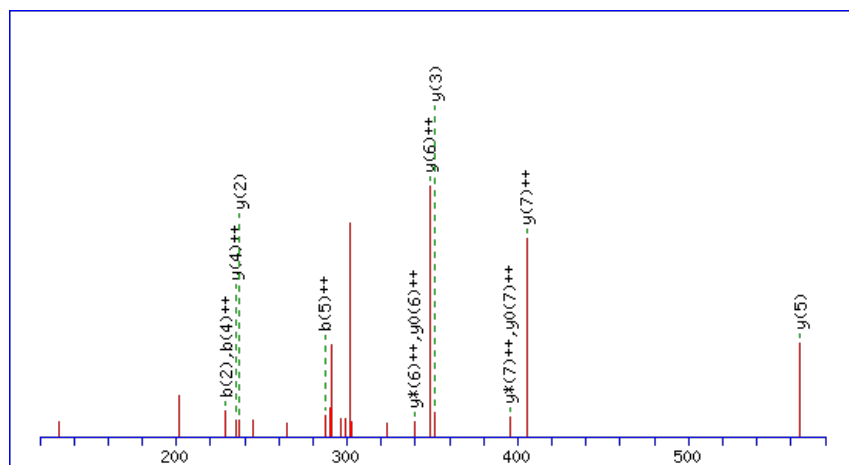

Monoisotopic mass of neutral peptide  $M_r(\text{calc})$ : 922.5244

Fixed modifications: Carbamidomethyl (C) (apply to specified residues or termini only)

Ions Score: 26 Expect: 0.0099

Matches : 13/66 fragment ions using 17 most intense peaks ([help](#))

| # | b        | b <sup>++</sup> | b*       | b <sup>*++</sup> | b <sup>0</sup> | b <sup>0++</sup> | Seq. | y        | y <sup>++</sup> | y*       | y <sup>*++</sup> | y <sup>0</sup> | y <sup>0++</sup> | # |
|---|----------|-----------------|----------|------------------|----------------|------------------|------|----------|-----------------|----------|------------------|----------------|------------------|---|
| 1 | 115.0884 | 58.0478         |          |                  |                |                  | L    |          |                 |          |                  |                |                  | 8 |
| 2 | 229.1695 | 115.0884        |          |                  |                |                  | I    | 809.4506 | 405.2289        | 791.4270 | 396.2171         | 791.4400       | 396.2237         | 7 |
| 3 | 359.2585 | 180.1329        | 341.2349 | 171.1211         |                |                  | K    | 695.3695 | 348.1884        | 677.3459 | 339.1766         | 677.3589       | 339.1831         | 6 |
| 4 | 457.3083 | 229.1578        | 439.2847 | 220.1460         |                |                  | P    | 565.2805 | 283.1439        | 547.2569 | 274.1321         | 547.2699       | 274.1386         | 5 |
| 5 | 573.3323 | 287.1698        | 555.3087 | 278.1580         | 555.3217       | 278.1645         | D    | 467.2307 | 234.1190        | 449.2071 | 225.1072         | 449.2201       | 225.1137         | 4 |
| 6 | 687.4134 | 344.2103        | 669.3898 | 335.1985         | 669.4028       | 335.2050         | L    | 351.2067 | 176.1070        | 333.1831 | 167.0952         |                |                  | 3 |
| 7 | 745.4319 | 373.2196        | 727.4083 | 364.2078         | 727.4213       | 364.2143         | G    | 237.1256 | 119.0664        | 219.1020 | 110.0546         |                |                  | 2 |
| 8 |          |                 |          |                  |                |                  | R    | 179.1071 | 90.0572         | 161.0835 | 81.0454          |                |                  | 1 |

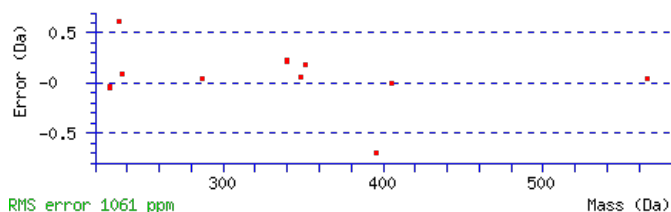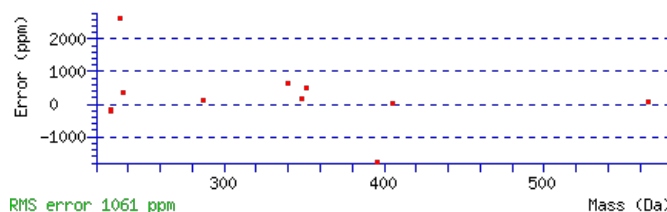

NCBI BLAST search of [LIKPDLGR](#)

(Parameters: blastp, nr protein database, expect=20000, no filter, PAM30)

Other BLAST [web gateways](#)

### All matches to this query

| Score | $M_r(\text{calc})$ | Delta   | Sequence                 |
|-------|--------------------|---------|--------------------------|
| 25.7  | 922.5244           | -0.0001 | <a href="#">LIKPDLGR</a> |

**AT5G65010.1**

|      |          |         |                          |
|------|----------|---------|--------------------------|
| 17.6 | 922.5217 | 0.0026  | <a href="#">LLILDAEK</a> |
| 17.6 | 922.5217 | 0.0026  | <a href="#">LLLIDAEK</a> |
| 13.6 | 922.5244 | -0.0001 | <a href="#">ILAKPVDR</a> |
| 7.8  | 922.5244 | -0.0001 | <a href="#">EPLGVRIK</a> |
| 7.6  | 922.5244 | -0.0001 | <a href="#">IKVVHTSK</a> |
| 6.9  | 922.5271 | -0.0028 | <a href="#">ILGKRGHK</a> |
| 6.9  | 922.5271 | -0.0028 | <a href="#">LLGKRGHK</a> |
| 3.7  | 922.5267 | -0.0023 | <a href="#">IIPPLGFR</a> |
| 3.0  | 922.5244 | -0.0001 | <a href="#">LLSQVVPR</a> |

**Mascot:** <http://www.matrixscience.com/>



# Mascot Search Results

## Peptide View

MS/MS Fragmentation of **KLQEEEAEEAAEAAK**

Found in **AT5G65220.1** in **TAIR\_Arabidopsis**, Symbols: | ribosomal protein L29 family protein | chr5:26078527-26079732 FORWARD

Match to Query 8491: 1715.819103 from(572.946977,3+) index(3675)

Title: Elution from: 35.350 to 35.350 scan no 4553 cid35.00 polarity:+

Data file 0-2\_1.mgf

Click mouse within plot area to zoom in by factor of two about that point

Or,   to  Da

Label all possible matches  Label matches used for scoring

Show Y-axis

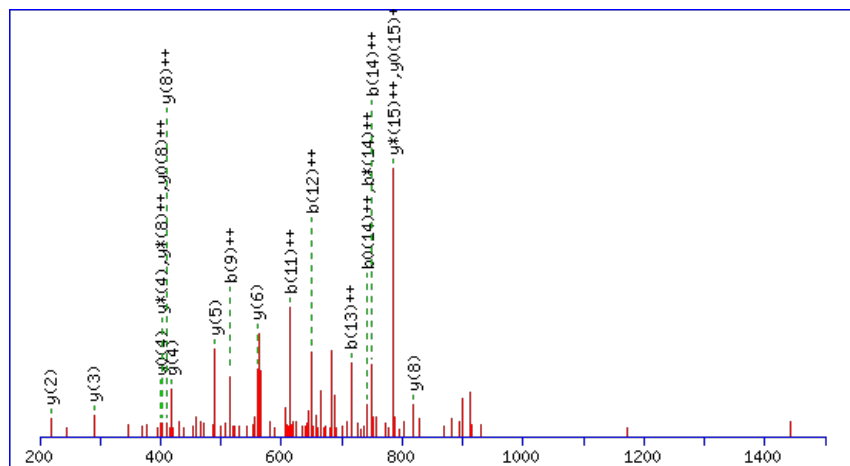

Monoisotopic mass of neutral peptide  $M_r(\text{calc})$ : 1715.8213

Fixed modifications: Carbamidomethyl (C) (apply to specified residues or termini only)

Ions Score: 39 Expect: 0.00039

Matches : 21/168 fragment ions using 24 most intense peaks [\(help\)](#)

| #  | b         | b <sup>++</sup> | b*        | b <sup>*++</sup> | b <sup>0</sup> | b <sup>0++</sup> | Seq. | y         | y <sup>++</sup> | y*        | y <sup>*++</sup> | y <sup>0</sup> | y <sup>0++</sup> | #  |
|----|-----------|-----------------|-----------|------------------|----------------|------------------|------|-----------|-----------------|-----------|------------------|----------------|------------------|----|
| 1  | 129.1022  | 65.0548         | 112.0757  | 56.5415          |                |                  | K    |           |                 |           |                  |                |                  | 16 |
| 2  | 242.1863  | 121.5968        | 225.1598  | 113.0835         |                |                  | L    | 1588.7337 | 794.8705        | 1571.7071 | 786.3572         | 1570.7231      | 785.8652         | 15 |
| 3  | 370.2449  | 185.6261        | 353.2183  | 177.1128         |                |                  | Q    | 1475.6496 | 738.3284        | 1458.6231 | 729.8152         | 1457.6391      | 729.3232         | 14 |
| 4  | 499.2875  | 250.1474        | 482.2609  | 241.6341         | 481.2769       | 241.1421         | E    | 1347.5910 | 674.2992        | 1330.5645 | 665.7859         | 1329.5805      | 665.2939         | 13 |
| 5  | 628.3301  | 314.6687        | 611.3035  | 306.1554         | 610.3195       | 305.6634         | E    | 1218.5485 | 609.7779        | 1201.5219 | 601.2646         | 1200.5379      | 600.7726         | 12 |
| 6  | 757.3727  | 379.1900        | 740.3461  | 370.6767         | 739.3621       | 370.1847         | E    | 1089.5059 | 545.2566        | 1072.4793 | 536.7433         | 1071.4953      | 536.2513         | 11 |
| 7  | 828.4098  | 414.7085        | 811.3832  | 406.1953         | 810.3992       | 405.7032         | A    | 960.4633  | 480.7353        | 943.4367  | 472.2220         | 942.4527       | 471.7300         | 10 |
| 8  | 899.4469  | 450.2271        | 882.4203  | 441.7138         | 881.4363       | 441.2218         | A    | 889.4262  | 445.2167        | 872.3996  | 436.7034         | 871.4156       | 436.2114         | 9  |
| 9  | 1028.4895 | 514.7484        | 1011.4629 | 506.2351         | 1010.4789      | 505.7431         | E    | 818.3890  | 409.6982        | 801.3625  | 401.1849         | 800.3785       | 400.6929         | 8  |
| 10 | 1157.5321 | 579.2697        | 1140.5055 | 570.7564         | 1139.5215      | 570.2644         | E    | 689.3464  | 345.1769        | 672.3199  | 336.6636         | 671.3359       | 336.1716         | 7  |
| 11 | 1228.5692 | 614.7882        | 1211.5426 | 606.2750         | 1210.5586      | 605.7829         | A    | 560.3039  | 280.6556        | 543.2773  | 272.1423         | 542.2933       | 271.6503         | 6  |
| 12 | 1299.6063 | 650.3068        | 1282.5798 | 641.7935         | 1281.5957      | 641.3015         | A    | 489.2667  | 245.1370        | 472.2402  | 236.6237         | 471.2562       | 236.1317         | 5  |
| 13 | 1428.6489 | 714.8281        | 1411.6223 | 706.3148         | 1410.6383      | 705.8228         | E    | 418.2296  | 209.6185        | 401.2031  | 201.1052         | 400.2191       | 200.6132         | 4  |
| 14 | 1499.6860 | 750.3466        | 1482.6595 | 741.8334         | 1481.6754      | 741.3414         | A    | 289.1870  | 145.0972        | 272.1605  | 136.5839         |                |                  | 3  |
| 15 | 1570.7231 | 785.8652        | 1553.6966 | 777.3519         | 1552.7126      | 776.8599         | A    | 218.1499  | 109.5786        | 201.1234  | 101.0653         |                |                  | 2  |
| 16 |           |                 |           |                  |                |                  | K    | 147.1128  | 74.0600         | 130.0863  | 65.5468          |                |                  | 1  |

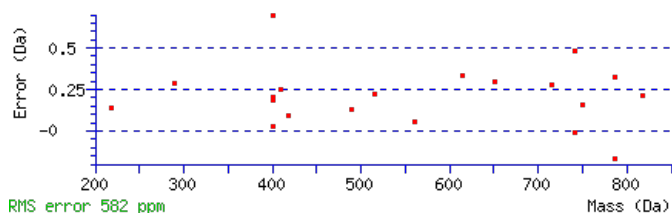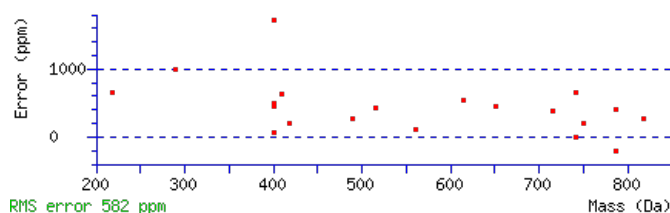

## AT5G65220.1

NCBI **BLAST** search of [KLQEEEAEEAAEAAK](#)

(Parameters: blastp, nr protein database, expect=20000, no filter, PAM30)

Other BLAST [web gateways](#)

### All matches to this query

| Score | Mr(calc)  | Delta   | Sequence                         |
|-------|-----------|---------|----------------------------------|
| 39.1  | 1715.8213 | -0.0022 | <a href="#">KLQEEEAEEAAEAAK</a>  |
| 7.2   | 1715.8209 | -0.0018 | <a href="#">HHRMHANCNIVVGR</a>   |
| 1.6   | 1715.8162 | 0.0029  | <a href="#">RHYCPELGTNADRK</a>   |
| 1.1   | 1715.8187 | 0.0004  | <a href="#">QKSNSSHSGVSESINR</a> |

**Mascot:** <http://www.matrixscience.com/>

**Peptide View**MS/MS Fragmentation of **TAAEDTMIAYK**

Found in **AT5G65430.1** in **TAIR\_Arabidopsis**, Symbols: GF14 KAPPA, GRF8 | GRF8 (GENERAL REGULATORY FACTOR 8); protein phosphorylated amino acid binding | chr5:26165772-26167481 REVERSE

Match to Query 4189: 1224.535882 from(613.275217,2+) index(3407)

Title: Elution from: 32.937 to 32.937 scan no 4238 cid35.00 polarity:+

Data file 0-1\_3.mgf

Click mouse within plot area to zoom in by factor of two about that point

Or,   to  Da

Label all possible matches  Label matches used for scoring

Show Y-axis

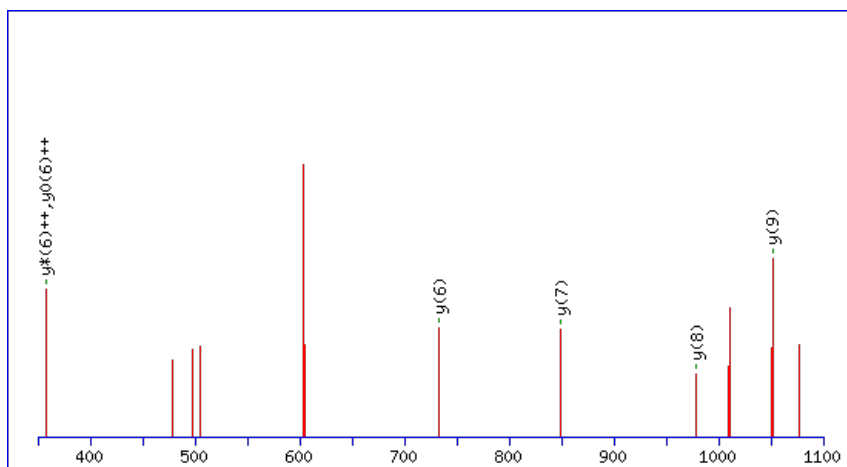

**Monoisotopic mass of neutral peptide Mr(calc):** 1224.5340

**Fixed modifications:** Carbamidomethyl (C) (apply to specified residues or termini only)

**Ions Score:** 22 **Expect:** 0.039

**Matches:** 6/90 fragment ions using 15 most intense peaks ([help](#))

| #  | b         | b <sup>++</sup> | b <sup>0</sup> | b <sup>0++</sup> | Seq. | y                | y <sup>++</sup> | y*        | y <sup>*++</sup> | y <sup>0</sup> | y <sup>0++</sup> | #  |
|----|-----------|-----------------|----------------|------------------|------|------------------|-----------------|-----------|------------------|----------------|------------------|----|
| 1  | 103.0520  | 52.0296         | 85.0414        | 43.0244          | T    |                  |                 |           |                  |                |                  | 11 |
| 2  | 175.0861  | 88.0467         | 157.0756       | 79.0414          | A    | 1123.4966        | 562.2519        | 1105.4730 | 553.2402         | 1105.4861      | 553.2467         | 10 |
| 3  | 247.1203  | 124.0638        | 229.1097       | 115.0585         | A    | <b>1051.4625</b> | 526.2349        | 1033.4389 | 517.2231         | 1033.4519      | 517.2296         | 9  |
| 4  | 377.1599  | 189.0836        | 359.1494       | 180.0783         | E    | <b>979.4283</b>  | 490.2178        | 961.4047  | 481.2060         | 961.4178       | 481.2125         | 8  |
| 5  | 493.1839  | 247.0956        | 475.1733       | 238.0903         | D    | <b>849.3887</b>  | 425.1980        | 831.3651  | 416.1862         | 831.3781       | 416.1927         | 7  |
| 6  | 595.2286  | 298.1179        | 577.2180       | 289.1127         | T    | <b>733.3647</b>  | 367.1860        | 715.3411  | <b>358.1742</b>  | 715.3542       | <b>358.1807</b>  | 6  |
| 7  | 727.2661  | 364.1367        | 709.2556       | 355.1314         | M    | 631.3200         | 316.1636        | 613.2964  | 307.1518         |                |                  | 5  |
| 8  | 841.3472  | 421.1773        | 823.3367       | 412.1720         | I    | 499.2825         | 250.1449        | 481.2589  | 241.1331         |                |                  | 4  |
| 9  | 913.3814  | 457.1943        | 895.3708       | 448.1890         | A    | 385.2014         | 193.1043        | 367.1778  | 184.0925         |                |                  | 3  |
| 10 | 1077.4417 | 539.2245        | 1059.4312      | 530.2192         | Y    | 313.1672         | 157.0873        | 295.1437  | 148.0755         |                |                  | 2  |
| 11 |           |                 |                |                  | K    | 149.1069         | 75.0571         | 131.0833  | 66.0453          |                |                  | 1  |

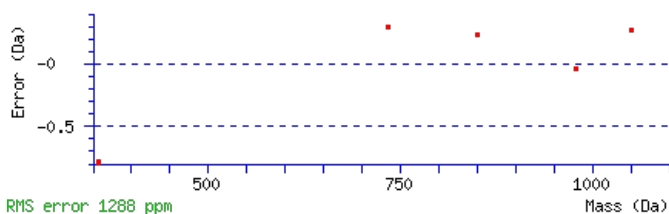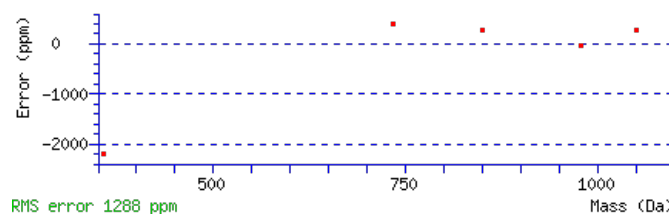

NCBI **BLAST** search of **TAAEDTMIAYK**

(Parameters: blastp, nr protein database, expect=20000, no filter, PAM30)

Other BLAST [web gateways](#)

**All matches to this query**

**AT5G65430.1**

| <b>Score</b> | <b>Mr(calc)</b> | <b>Delta</b> | <b>Sequence</b>             |
|--------------|-----------------|--------------|-----------------------------|
| 22.4         | 1224.5340       | 0.0018       | <a href="#">TAAEDTMIAVK</a> |
| 22.4         | 1224.5340       | 0.0018       | <a href="#">TAAEDTMLAYK</a> |
| 1.9          | 1224.5394       | -0.0035      | <a href="#">AGNMPVQYRR</a>  |
| 1.7          | 1224.5345       | 0.0014       | <a href="#">ETMKSQKADR</a>  |
| 1.3          | 1224.5390       | -0.0031      | <a href="#">GCAKSYGPFVK</a> |

**Mascot:** <http://www.matrixscience.com/>

### Peptide View

 MS/MS Fragmentation of **LMDSESKGVMMAWEKPLMEAHAK**

 Found in **AT5G65860.1** in **TAIR\_Arabidopsis**, Symbols: | ankyrin repeat family protein | chr5:26364932-26365972 REVERSE

Match to Query 10140: 2618.231700 from(873.751176,3+) index(7074)

Title: Elution from: 62.436 to 62.436 scan no 9274 cid35.00 polarity:+

Data file 0-3\_3.mgf

Click mouse within plot area to zoom in by factor of two about that point

 Or, Plot from  to  Da 

 Label all possible matches  Label matches used for scoring 

 Show Y-axis 
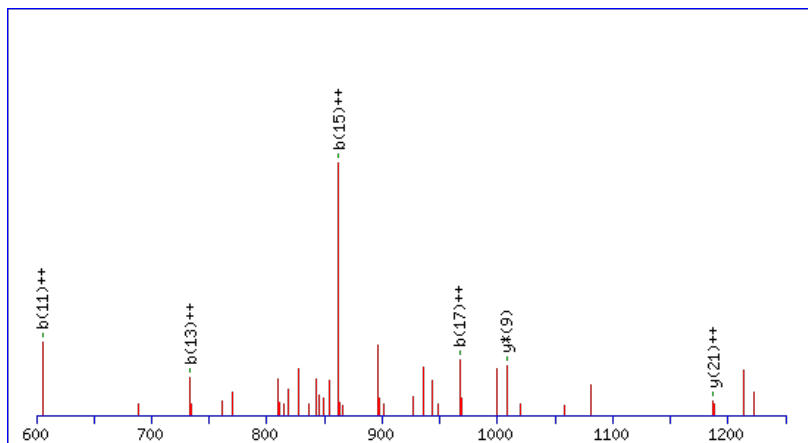
 Monoisotopic mass of neutral peptide **Mr(calc)**: 2618.2364

Fixed modifications: Carbamidomethyl (C) (apply to specified residues or termini only)

Ions Score: 19 Expect: 0.032

 Matches : 6/240 fragment ions using 7 most intense peaks ([help](#))

| #  | b         | b <sup>++</sup> | b <sup>*</sup> | b <sup>*++</sup> | b <sup>0</sup> | b <sup>0++</sup> | Seq. | y         | y <sup>++</sup> | y <sup>*</sup> | y <sup>*++</sup> | y <sup>0</sup> | y <sup>0++</sup> | #  |
|----|-----------|-----------------|----------------|------------------|----------------|------------------|------|-----------|-----------------|----------------|------------------|----------------|------------------|----|
| 1  | 114.0913  | 57.5493         |                |                  |                |                  | L    |           |                 |                |                  |                |                  | 23 |
| 2  | 245.1318  | 123.0696        |                |                  |                |                  | M    | 2506.1597 | 1253.5835       | 2489.1332      | 1245.0702        | 2488.1492      | 1244.5782        | 22 |
| 3  | 360.1588  | 180.5830        |                |                  | 342.1482       | 171.5777         | D    | 2375.1192 | 1188.0633       | 2358.0927      | 1179.5500        | 2357.1087      | 1179.0580        | 21 |
| 4  | 447.1908  | 224.0990        |                |                  | 429.1802       | 215.0938         | S    | 2260.0923 | 1130.5498       | 2243.0657      | 1122.0365        | 2242.0817      | 1121.5445        | 20 |
| 5  | 576.2334  | 288.6203        |                |                  | 558.2228       | 279.6151         | E    | 2173.0603 | 1087.0338       | 2156.0337      | 1078.5205        | 2155.0497      | 1078.0285        | 19 |
| 6  | 663.2654  | 332.1363        |                |                  | 645.2549       | 323.1311         | S    | 2044.0177 | 1022.5125       | 2026.9911      | 1013.9992        | 2026.0071      | 1013.5072        | 18 |
| 7  | 791.3604  | 396.1838        | 774.3338       | 387.6706         | 773.3498       | 387.1785         | K    | 1956.9856 | 978.9965        | 1939.9591      | 970.4832         | 1938.9751      | 969.9912         | 17 |
| 8  | 848.3818  | 424.6946        | 831.3553       | 416.1813         | 830.3713       | 415.6893         | G    | 1828.8907 | 914.9490        | 1811.8641      | 906.4357         | 1810.8801      | 905.9437         | 16 |
| 9  | 947.4503  | 474.2288        | 930.4237       | 465.7155         | 929.4397       | 465.2235         | V    | 1771.8692 | 886.4382        | 1754.8427      | 877.9250         | 1753.8587      | 877.4330         | 15 |
| 10 | 1078.4907 | 539.7490        | 1061.4642      | 531.2357         | 1060.4802      | 530.7437         | M    | 1672.8008 | 836.9040        | 1655.7743      | 828.3908         | 1654.7902      | 827.8988         | 14 |
| 11 | 1209.5312 | 605.2693        | 1192.5047      | 596.7560         | 1191.5207      | 596.2640         | M    | 1541.7603 | 771.3838        | 1524.7338      | 762.8705         | 1523.7498      | 762.3785         | 13 |
| 12 | 1280.5683 | 640.7878        | 1263.5418      | 632.2745         | 1262.5578      | 631.7825         | A    | 1410.7198 | 705.8636        | 1393.6933      | 697.3503         | 1392.7093      | 696.8583         | 12 |
| 13 | 1466.6477 | 733.8275        | 1449.6211      | 725.3142         | 1448.6371      | 724.8222         | W    | 1339.6827 | 670.3450        | 1322.6562      | 661.8317         | 1321.6722      | 661.3397         | 11 |
| 14 | 1595.6902 | 798.3488        | 1578.6637      | 789.8355         | 1577.6797      | 789.3435         | E    | 1153.6034 | 577.3053        | 1136.5769      | 568.7921         | 1135.5928      | 568.3001         | 10 |
| 15 | 1723.7852 | 862.3962        | 1706.7587      | 853.8830         | 1705.7746      | 853.3910         | K    | 1024.5608 | 512.7840        | 1007.5343      | 504.2708         | 1006.5502      | 503.7788         | 9  |
| 16 | 1820.8380 | 910.9226        | 1803.8114      | 902.4094         | 1802.8274      | 901.9173         | P    | 896.4659  | 448.7366        | 879.4393       | 440.2233         | 878.4553       | 439.7313         | 8  |
| 17 | 1933.9220 | 967.4647        | 1916.8955      | 958.9514         | 1915.9115      | 958.4594         | L    | 799.4131  | 400.2102        | 782.3865       | 391.6969         | 781.4025       | 391.2049         | 7  |
| 18 | 2064.9625 | 1032.9849       | 2047.9360      | 1024.4716        | 2046.9520      | 1023.9796        | M    | 686.3290  | 343.6681        | 669.3025       | 335.1549         | 668.3185       | 334.6629         | 6  |
| 19 | 2194.0051 | 1097.5062       | 2176.9786      | 1088.9929        | 2175.9946      | 1088.5009        | E    | 555.2885  | 278.1479        | 538.2620       | 269.6346         | 537.2780       | 269.1426         | 5  |
| 20 | 2265.0422 | 1133.0248       | 2248.0157      | 1124.5115        | 2247.0317      | 1124.0195        | A    | 426.2459  | 213.6266        | 409.2194       | 205.1133         |                |                  | 4  |
| 21 | 2402.1011 | 1201.5542       | 2385.0746      | 1193.0409        | 2384.0906      | 1192.5489        | H    | 355.2088  | 178.1081        | 338.1823       | 169.5948         |                |                  | 3  |
| 22 | 2473.1383 | 1237.0728       | 2456.1117      | 1228.5595        | 2455.1277      | 1228.0675        | A    | 218.1499  | 109.5786        | 201.1234       | 101.0653         |                |                  | 2  |
| 23 |           |                 |                |                  |                |                  | K    | 147.1128  | 74.0600         | 130.0863       | 65.5468          |                |                  | 1  |



# AT5G65860.1

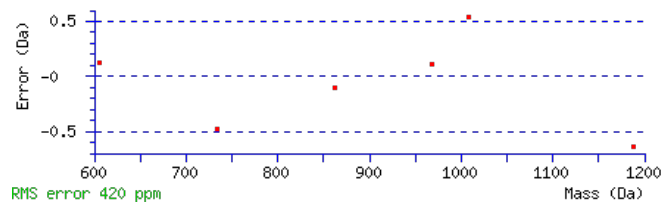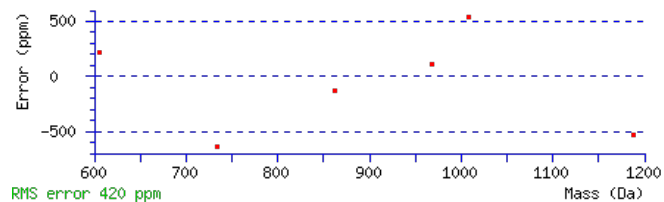

NCBI **BLAST** search of [LMDSESKGVMMAWEKPLMEAHAK](#)  
(Parameters: blastp, nr protein database, expect=20000, no filter, PAM30)  
Other BLAST [web gateways](#)

## All matches to this query

| Score | Mr(calc)  | Delta   | Sequence                                 |
|-------|-----------|---------|------------------------------------------|
| 18.7  | 2618.2364 | -0.0047 | <a href="#">LMDSESKGVMMAWEKPLMEAHAK</a>  |
| 8.4   | 2618.2395 | -0.0078 | <a href="#">AQQTLAGYSSSNLGMDFARTELSR</a> |
| 0.5   | 2618.2322 | -0.0005 | <a href="#">FWSESNELITADQLAEMKYTR</a>    |
| 0.3   | 2618.2262 | 0.0055  | <a href="#">GYQFWSKADENGFSINNVRSGR</a>   |

Mascot: <http://www.matrixscience.com/>

**Peptide View**MS/MS Fragmentation of **SISSPTVVEVDLGDR**Found in **AT5G66120.2** in **TAIR\_Arabidopsis**, Symbols: | 3-dehydroquinase synthase, putative | chr5:26448742-26450875 REVERSE

Match to Query 7112: 1590.746680 from(796.380616,2+) index(6047)

Title: Elution from: 53.890 to 53.890 scan no 7755 cid35.00 polarity:+

Data file 0-2\_2.mgf

Click mouse within plot area to zoom in by factor of two about that point

Or,   to  Da Label all possible matches  Label matches used for scoring Show Y-axis 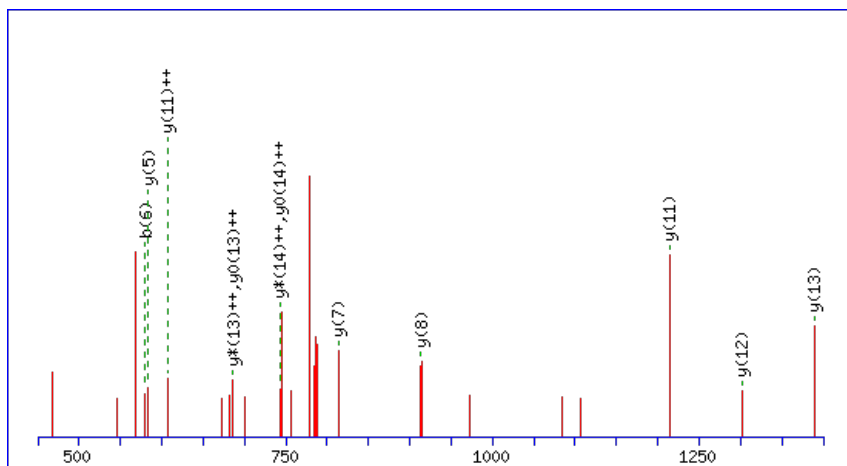Monoisotopic mass of neutral peptide  $M_r(\text{calc})$ : 1590.7461

Fixed modifications: Carbamidomethyl (C) (apply to specified residues or termini only)

Ions Score: 28 Expect: 0.012

Matches : 12/138 fragment ions using 23 most intense peaks ([help](#))

| #  | b         | b <sup>++</sup> | b <sup>0</sup> | b <sup>0++</sup> | Seq. | y         | y <sup>++</sup> | y*        | y <sup>*++</sup> | y <sup>0</sup> | y <sup>0++</sup> | #  |
|----|-----------|-----------------|----------------|------------------|------|-----------|-----------------|-----------|------------------|----------------|------------------|----|
| 1  | 89.0363   | 45.0218         | 71.0258        | 36.0165          | S    |           |                 |           |                  |                |                  | 15 |
| 2  | 203.1174  | 102.0624        | 185.1069       | 93.0571          | I    | 1503.7244 | 752.3658        | 1485.7008 | 743.3540         | 1485.7138      | 743.3605         | 14 |
| 3  | 291.1465  | 146.0769        | 273.1359       | 137.0716         | S    | 1389.6433 | 695.3253        | 1371.6197 | 686.3135         | 1371.6327      | 686.3200         | 13 |
| 4  | 379.1756  | 190.0914        | 361.1650       | 181.0861         | S    | 1301.6142 | 651.3107        | 1283.5906 | 642.2989         | 1283.6036      | 642.3055         | 12 |
| 5  | 477.2254  | 239.1163        | 459.2148       | 230.1110         | P    | 1213.5851 | 607.2962        | 1195.5615 | 598.2844         | 1195.5746      | 598.2909         | 11 |
| 6  | 579.2701  | 290.1387        | 561.2595       | 281.1334         | T    | 1115.5353 | 558.2713        | 1097.5117 | 549.2595         | 1097.5248      | 549.2660         | 10 |
| 7  | 679.3355  | 340.1714        | 661.3250       | 331.1661         | V    | 1013.4906 | 507.2489        | 995.4670  | 498.2372         | 995.4801       | 498.2437         | 9  |
| 8  | 779.4010  | 390.2041        | 761.3904       | 381.1988         | V    | 913.4252  | 457.2162        | 895.4016  | 448.2044         | 895.4146       | 448.2109         | 8  |
| 9  | 909.4406  | 455.2239        | 891.4300       | 446.2187         | E    | 813.3597  | 407.1835        | 795.3361  | 398.1717         | 795.3492       | 398.1782         | 7  |
| 10 | 1009.5061 | 505.2567        | 991.4955       | 496.2514         | V    | 683.3201  | 342.1637        | 665.2965  | 333.1519         | 665.3095       | 333.1584         | 6  |
| 11 | 1125.5300 | 563.2687        | 1107.5195      | 554.2634         | D    | 583.2546  | 292.1310        | 565.2311  | 283.1192         | 565.2441       | 283.1257         | 5  |
| 12 | 1239.6111 | 620.3092        | 1221.6006      | 611.3039         | L    | 467.2307  | 234.1190        | 449.2071  | 225.1072         | 449.2201       | 225.1137         | 4  |
| 13 | 1297.6296 | 649.3185        | 1279.6191      | 640.3132         | G    | 353.1496  | 177.0784        | 335.1260  | 168.0666         | 335.1390       | 168.0731         | 3  |
| 14 | 1413.6536 | 707.3304        | 1395.6430      | 698.3252         | D    | 295.1311  | 148.0692        | 277.1075  | 139.0574         | 277.1205       | 139.0639         | 2  |
| 15 |           |                 |                |                  | R    | 179.1071  | 90.0572         | 161.0835  | 81.0454          |                |                  | 1  |

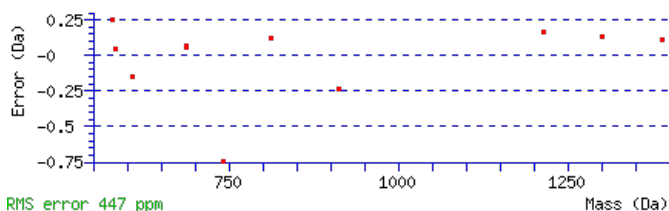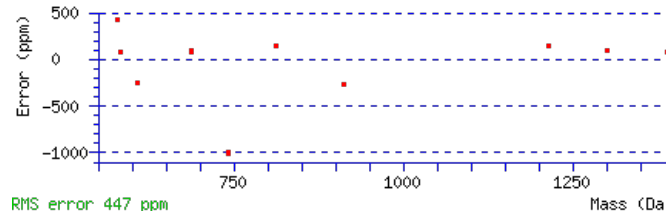NCBI BLAST search of [SISSPTVVEVDLGDR](#)

## AT5G66120.2

(Parameters: blastp, nr protein database, expect=20000, no filter, PAM30)

Other BLAST [web gateways](#)

### All matches to this query

| Score | Mr(calc)  | Delta   | Sequence                        |
|-------|-----------|---------|---------------------------------|
| 27.8  | 1590.7461 | 0.0006  | <a href="#">SISSPTVVEVDLGDR</a> |
| 1.1   | 1590.7506 | -0.0039 | <a href="#">SFIDDLVDPAGWLK</a>  |
| 0.1   | 1590.7461 | 0.0006  | <a href="#">KRDIDAEIEEVEK</a>   |

Mascot: <http://www.matrixscience.com/>

## Peptide View

### MS/MS Fragmentation of **MYIQTR**

Found in **AT5G66190.1** in **TAIR\_Arabidopsis**, Symbols: ATLFNR1 | ATLFNR1 (LEAF FNR 1); NADPH dehydrogenase/ electron transporter, transferring electrons within the cyclic electron transport pathway of photosynthesis/ electron transporter, transferring electrons within the noncyclic electron tr

Match to Query 1113: 820.376372 from(411.195462,2+) index(1032)

Title: Elution from: 16.021 to 16.021 scan no 1435 cid35.00 polarity:+

Data file 0-3\_2.mgf

Click mouse within plot area to zoom in by factor of two about that point

Or,   to  Da

Label all possible matches  Label matches used for scoring

Show Y-axis

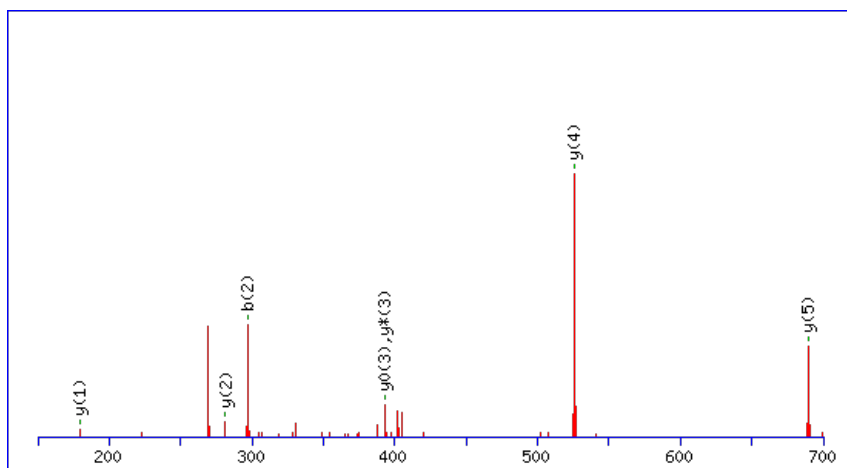

**Monoisotopic mass of neutral peptide Mr(calc):** 820.3761

**Fixed modifications:** Carbamidomethyl (C) (apply to specified residues or termini only)

**Ions Score:** 22 **Expect:** 0.04

**Matches:** 7/44 fragment ions using 15 most intense peaks ([help](#))

| # | b        | b <sup>++</sup> | b*       | b <sup>*++</sup> | b <sup>0</sup> | b <sup>0++</sup> | Seq. | y        | y <sup>++</sup> | y*       | y <sup>*++</sup> | y <sup>0</sup> | y <sup>0++</sup> | # |
|---|----------|-----------------|----------|------------------|----------------|------------------|------|----------|-----------------|----------|------------------|----------------|------------------|---|
| 1 | 133.0448 | 67.0260         |          |                  |                |                  | M    |          |                 |          |                  |                |                  | 6 |
| 2 | 297.1052 | 149.0562        |          |                  |                |                  | Y    | 689.3459 | 345.1766        | 671.3223 | 336.1648         | 671.3354       | 336.1713         | 5 |
| 3 | 411.1863 | 206.0968        |          |                  |                |                  | I    | 525.2856 | 263.1464        | 507.2620 | 254.1346         | 507.2750       | 254.1411         | 4 |
| 4 | 541.2389 | 271.1231        | 523.2153 | 262.1113         |                |                  | Q    | 411.2045 | 206.1059        | 393.1809 | 197.0941         | 393.1939       | 197.1006         | 3 |
| 5 | 643.2836 | 322.1454        | 625.2600 | 313.1337         | 625.2731       | 313.1402         | T    | 281.1518 | 141.0795        | 263.1282 | 132.0677         | 263.1412       | 132.0743         | 2 |
| 6 |          |                 |          |                  |                |                  | R    | 179.1071 | 90.0572         | 161.0835 | 81.0454          |                |                  | 1 |

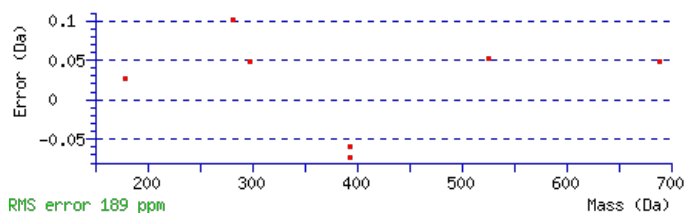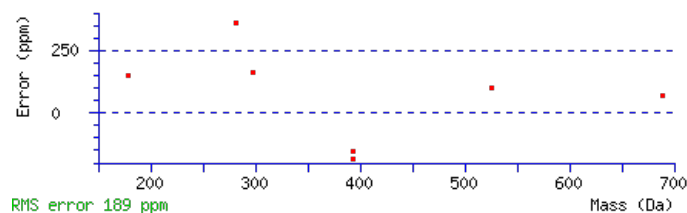

NCBI BLAST search of [MYIQTR](#)

(Parameters: blastp, nr protein database, expect=20000, no filter, PAM30)

Other BLAST [web gateways](#)

### All matches to this query

| Score | Mr(calc) | Delta  | Sequence               |
|-------|----------|--------|------------------------|
| 22.1  | 820.3761 | 0.0002 | <a href="#">MYIQTR</a> |
| 11.0  | 820.3761 | 0.0002 | <a href="#">MYKDVR</a> |

# AT5G66190.1

|     |          |        |                         |
|-----|----------|--------|-------------------------|
| 6.5 | 820.3762 | 0.0002 | <a href="#">MPVPDPR</a> |
| 4.9 | 820.3762 | 0.0002 | <a href="#">GSKNMFK</a> |
| 1.4 | 820.3762 | 0.0002 | <a href="#">KFNQMK</a>  |

**Mascot:** <http://www.matrixscience.com/>

## Peptide View

MS/MS Fragmentation of **KGMMDKIK**

Found in **AT5G66400.1** in **TAIR\_Arabidopsis**, Symbols: ATD18, RAB18 | RAB18 (RESPONSIVE TO ABA 18) | chr5:26535737-26536379  
REVERSE

Match to Query 2537: 992.466268 from(497.240410,2+) index(7003)

Title: Elution from: 61.362 to 61.362 scan no 8939 cid35.00 polarity:+

Data file C7-3\_1.mgf

Click mouse within plot area to zoom in by factor of two about that point

Or,   to  Da

Label all possible matches  Label matches used for scoring

Show Y-axis

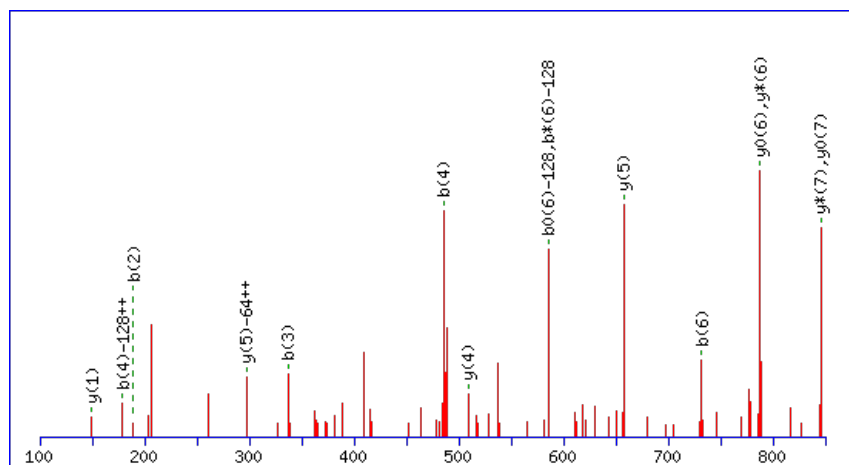

Monoisotopic mass of neutral peptide  $M_r(\text{calc})$ : 992.4661

Fixed modifications: Carbamidomethyl (C) (apply to specified residues or termini only)

Variable modifications:

M3 : Oxidation (M), with neutral losses 0.0000 (shown in table), 63.9983

M4 : Oxidation (M), with neutral losses 0.0000 (shown in table), 63.9983

Ions Score: 20 Expect: 0.031

Matches : 16/114 fragment ions using 35 most intense peaks [\(help\)](#)

| # | b               | b <sup>++</sup> | b*       | b <sup>*++</sup> | b <sup>0</sup> | b <sup>0++</sup> | Seq.     | y               | y <sup>++</sup> | y*              | y <sup>*++</sup> | y <sup>0</sup>  | y <sup>0++</sup> | #        |
|---|-----------------|-----------------|----------|------------------|----------------|------------------|----------|-----------------|-----------------|-----------------|------------------|-----------------|------------------|----------|
| 1 | 131.0963        | 66.0518         | 113.0727 | 57.0400          |                |                  | <b>K</b> |                 |                 |                 |                  |                 |                  | <b>8</b> |
| 2 | <b>189.1148</b> | 95.0610         | 171.0912 | 86.0492          |                |                  | <b>G</b> | 863.3844        | 432.1958        | <b>845.3608</b> | 423.1840         | <b>845.3738</b> | 423.1905         | <b>7</b> |
| 3 | <b>337.1472</b> | 169.0773        | 319.1237 | 160.0655         |                |                  | <b>M</b> | 805.3659        | 403.1866        | <b>787.3423</b> | 394.1748         | <b>787.3553</b> | 394.1813         | <b>6</b> |
| 4 | <b>485.1797</b> | 243.0935        | 467.1561 | 234.0817         |                |                  | <b>M</b> | <b>657.3334</b> | 329.1703        | 639.3098        | 320.1586         | 639.3229        | 320.1651         | <b>5</b> |
| 5 | 601.2037        | 301.1055        | 583.1801 | 292.0937         | 583.1931       | 292.1002         | <b>D</b> | <b>509.3010</b> | 255.1541        | 491.2774        | 246.1423         | 491.2904        | 246.1488         | <b>4</b> |
| 6 | <b>731.2927</b> | 366.1500        | 713.2691 | 357.1382         | 713.2821       | 357.1447         | <b>K</b> | 393.2770        | 197.1421        | 375.2534        | 188.1303         |                 |                  | <b>3</b> |
| 7 | <b>845.3738</b> | 423.1905        | 827.3502 | 414.1787         | 827.3632       | 414.1852         | <b>I</b> | 263.1880        | 132.0976        | 245.1644        | 123.0858         |                 |                  | <b>2</b> |
| 8 |                 |                 |          |                  |                |                  | <b>K</b> | <b>149.1069</b> | 75.0571         | 131.0833        | 66.0453          |                 |                  | <b>1</b> |

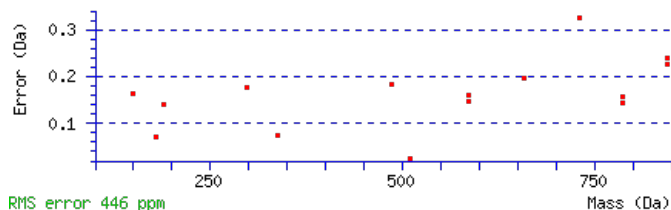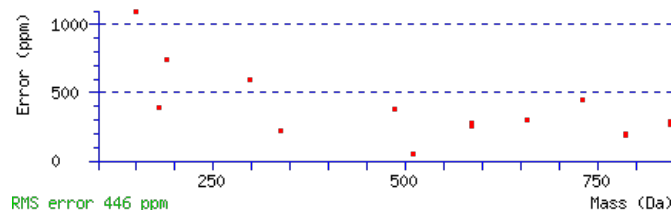

NCBI **BLAST** search of **KGMMDKIK**

(Parameters: blastp, nr protein database, expect=20000, no filter, PAM30)

Other BLAST [web gateways](#)

All matches to this query

## AT5G66400.1

| Score | Mr(calc) | Delta   | Sequence                   |
|-------|----------|---------|----------------------------|
| 20.1  | 992.4661 | 0.0002  | <a href="#">KGMMDKIK</a>   |
| 17.7  | 992.4661 | 0.0002  | <a href="#">AMLTSMK GK</a> |
| 17.1  | 992.4661 | 0.0002  | <a href="#">AMLTSMK GK</a> |
| 11.8  | 992.4650 | 0.0013  | <a href="#">FWMKVEK</a>    |
| 8.1   | 992.4675 | -0.0012 | <a href="#">KET YDTVK</a>  |
| 5.4   | 992.4654 | 0.0009  | <a href="#">FRCLDLR</a>    |
| 5.4   | 992.4654 | 0.0009  | <a href="#">FVRLCER</a>    |
| 2.6   | 992.4658 | 0.0004  | <a href="#">MVNQRRR</a>    |

Mascot: <http://www.matrixscience.com/>

**Peptide View**MS/MS Fragmentation of **LDIEDFLQK**Found in **AT5G66470.1** in **TAIR\_Arabidopsis**, Symbols: | GTP binding / RNA binding | chr5:26559212-26561528 REVERSE

Match to Query 3357: 1130.549196 from(566.281874,2+) index(5690)

Title: Elution from: 53.630 to 53.630 scan no 7355 cid35.00 polarity:+

Data file D12h-2\_1.mgf

Click mouse within plot area to zoom in by factor of two about that point

Or,   to  Da Label all possible matches  Label matches used for scoring Show Y-axis 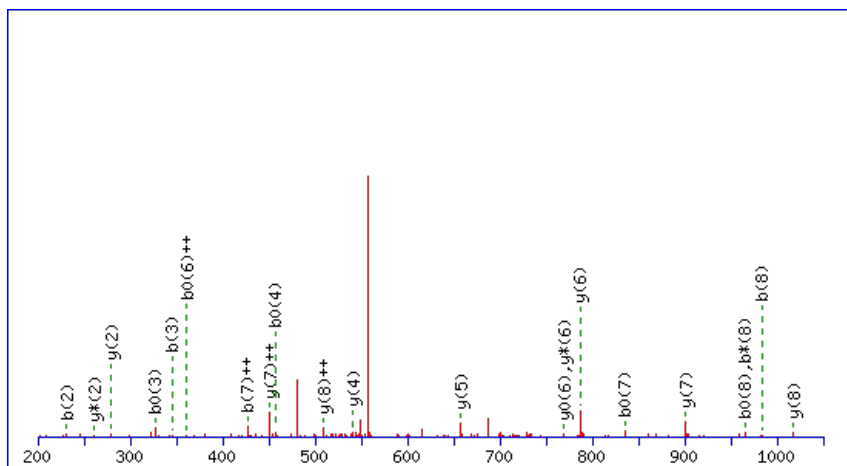**Monoisotopic mass of neutral peptide Mr(calc):** 1130.5486**Fixed modifications:** Carbamidomethyl (C) (apply to specified residues or termini only)**Ions Score:** 28 **Expect:** 0.019**Matches:** 21/72 fragment ions using 41 most intense peaks ([help](#))

| # | b               | b <sup>++</sup> | b*              | b <sup>*++</sup> | b <sup>0</sup>  | b <sup>0++</sup> | Seq. | y                | y <sup>++</sup> | y*              | y <sup>*++</sup> | y <sup>0</sup>  | y <sup>0++</sup> | # |
|---|-----------------|-----------------|-----------------|------------------|-----------------|------------------|------|------------------|-----------------|-----------------|------------------|-----------------|------------------|---|
| 1 | 115.0884        | 58.0478         |                 |                  |                 |                  | L    |                  |                 |                 |                  |                 |                  | 9 |
| 2 | <b>231.1124</b> | 116.0598        |                 |                  | 213.1018        | 107.0545         | D    | <b>1017.4748</b> | <b>509.2410</b> | 999.4512        | 500.2292         | 999.4642        | 500.2357         | 8 |
| 3 | <b>345.1935</b> | 173.1004        |                 |                  | <b>327.1829</b> | 164.0951         | I    | <b>901.4508</b>  | <b>451.2290</b> | 883.4272        | 442.2172         | 883.4402        | 442.2237         | 7 |
| 4 | 475.2331        | 238.1202        |                 |                  | <b>457.2225</b> | 229.1149         | E    | <b>787.3697</b>  | 394.1885        | <b>769.3461</b> | 385.1767         | <b>769.3591</b> | 385.1832         | 6 |
| 5 | 591.2571        | 296.1322        |                 |                  | 573.2465        | 287.1269         | D    | <b>657.3300</b>  | 329.1687        | 639.3065        | 320.1569         | 639.3195        | 320.1634         | 5 |
| 6 | 739.3225        | 370.1649        |                 |                  | 721.3119        | <b>361.1596</b>  | F    | <b>541.3061</b>  | 271.1567        | 523.2825        | 262.1449         |                 |                  | 4 |
| 7 | 853.4036        | <b>427.2054</b> |                 |                  | <b>835.3930</b> | 418.2002         | L    | 393.2406         | 197.1239        | 375.2170        | 188.1122         |                 |                  | 3 |
| 8 | <b>983.4563</b> | 492.2318        | <b>965.4327</b> | 483.2200         | <b>965.4457</b> | 483.2265         | Q    | <b>279.1595</b>  | 140.0834        | <b>261.1359</b> | 131.0716         |                 |                  | 2 |
| 9 |                 |                 |                 |                  |                 |                  | K    | 149.1069         | 75.0571         | 131.0833        | 66.0453          |                 |                  | 1 |

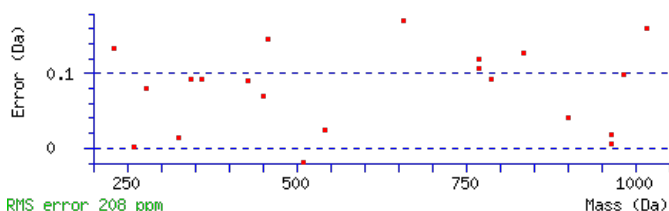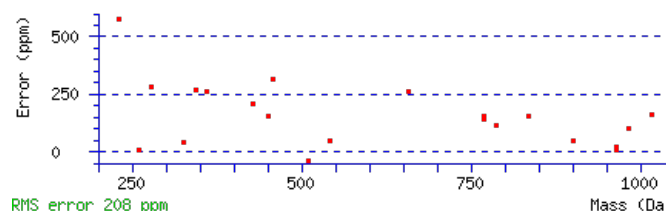NCBI **BLAST** search of **LDIEDFLQK**

(Parameters: blastp, nr protein database, expect=20000, no filter, PAM30)

Other BLAST [web gateways](#)**All matches to this query**

| Score | Mr(calc)  | Delta  | Sequence                  |
|-------|-----------|--------|---------------------------|
| 28.1  | 1130.5486 | 0.0006 | <a href="#">LDIEDFLQK</a> |



**AT5G66470.1**

|      |           |         |                            |
|------|-----------|---------|----------------------------|
| 18.7 | 1130.5463 | 0.0029  | <a href="#">LKIDDSEATK</a> |
| 13.7 | 1130.5486 | 0.0006  | <a href="#">DIEFLNEK</a>   |
| 13.5 | 1130.5519 | -0.0027 | <a href="#">LVKDIEEMK</a>  |
| 12.3 | 1130.5463 | 0.0029  | <a href="#">LPEETSSKTK</a> |
| 10.9 | 1130.5519 | -0.0027 | <a href="#">LIDEKEMVK</a>  |
| 10.4 | 1130.5463 | 0.0029  | <a href="#">LQAITSETK</a>  |
| 9.5  | 1130.5463 | 0.0029  | <a href="#">LDTTLAKDDK</a> |
| 9.1  | 1130.5513 | -0.0021 | <a href="#">IDYHSKNIK</a>  |
| 7.9  | 1130.5486 | 0.0006  | <a href="#">LPTDASFIEK</a> |

**Mascot:** <http://www.matrixscience.com/>

**Peptide View**MS/MS Fragmentation of **DLLFVRPDAVFNK**Found in **AT5G66530.1** in **TAIR\_Arabidopsis**, Symbols: | aldose 1-epimerase family protein | chr5:26571047-26572801 REVERSE

Match to Query 6264: 1550.785266 from(517.935698,3+) index(8314)

Title: Elution from: 78.300 to 78.300 scan no 11319 cid35.00 polarity:+

Data file D1d-1-2.mgf

Click mouse within plot area to zoom in by factor of two about that point

Or,   to  Da Label all possible matches  Label matches used for scoring Show Y-axis 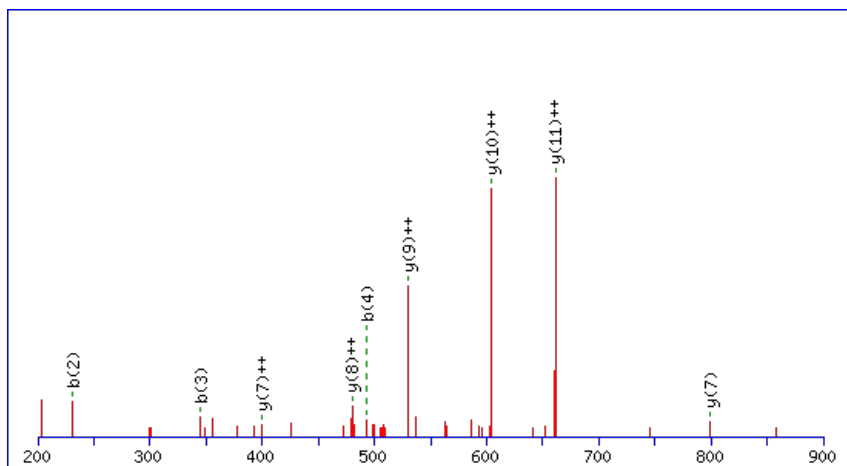Monoisotopic mass of neutral peptide  $M_r(\text{calc})$ : 1550.7817

Fixed modifications: Carbamidomethyl (C) (apply to specified residues or termini only)

Ions Score: 27 Expect: 0.015

Matches : 9/124 fragment ions using 18 most intense peaks ([help](#))

| #  | b               | b <sup>++</sup> | b <sup>*</sup> | b <sup>*++</sup> | b <sup>0</sup> | b <sup>0++</sup> | Seq. | y               | y <sup>++</sup> | y <sup>*</sup> | y <sup>*++</sup> | y <sup>0</sup> | y <sup>0++</sup> | #  |
|----|-----------------|-----------------|----------------|------------------|----------------|------------------|------|-----------------|-----------------|----------------|------------------|----------------|------------------|----|
| 1  | 117.0313        | 59.0193         |                |                  | 99.0207        | 50.0140          | D    |                 |                 |                |                  |                |                  | 13 |
| 2  | <b>231.1124</b> | 116.0598        |                |                  | 213.1018       | 107.0545         | L    | 1435.7650       | 718.3862        | 1417.7415      | 709.3744         | 1417.7545      | 709.3809         | 12 |
| 3  | <b>345.1935</b> | 173.1004        |                |                  | 327.1829       | 164.0951         | L    | 1321.6839       | <b>661.3456</b> | 1303.6604      | 652.3338         | 1303.6734      | 652.3403         | 11 |
| 4  | <b>493.2589</b> | 247.1331        |                |                  | 475.2483       | 238.1278         | F    | 1207.6028       | <b>604.3051</b> | 1189.5793      | 595.2933         | 1189.5923      | 595.2998         | 10 |
| 5  | 593.3244        | 297.1658        |                |                  | 575.3138       | 288.1605         | V    | 1059.5374       | <b>530.2723</b> | 1041.5138      | 521.2605         | 1041.5268      | 521.2671         | 9  |
| 6  | 753.4136        | 377.2104        | 735.3900       | 368.1986         | 735.4030       | 368.2052         | R    | 959.4719        | <b>480.2396</b> | 941.4484       | 471.2278         | 941.4614       | 471.2343         | 8  |
| 7  | 851.4634        | 426.2353        | 833.4398       | 417.2235         | 833.4528       | 417.2301         | P    | <b>799.3827</b> | <b>400.1950</b> | 781.3591       | 391.1832         | 781.3721       | 391.1897         | 7  |
| 8  | 967.4874        | 484.2473        | 949.4638       | 475.2355         | 949.4768       | 475.2420         | D    | 701.3329        | 351.1701        | 683.3093       | 342.1583         | 683.3223       | 342.1648         | 6  |
| 9  | 1039.5215       | 520.2644        | 1021.4979      | 511.2526         | 1021.5110      | 511.2591         | A    | 585.3089        | 293.1581        | 567.2853       | 284.1463         |                |                  | 5  |
| 10 | 1139.5870       | 570.2971        | 1121.5634      | 561.2853         | 1121.5764      | 561.2918         | V    | 513.2748        | 257.1410        | 495.2512       | 248.1292         |                |                  | 4  |
| 11 | 1287.6524       | 644.3299        | 1269.6288      | 635.3181         | 1269.6419      | 635.3246         | F    | 413.2093        | 207.1083        | 395.1857       | 198.0965         |                |                  | 3  |
| 12 | 1403.6894       | 702.3483        | 1385.6658      | 693.3366         | 1385.6789      | 693.3431         | N    | 265.1439        | 133.0756        | 247.1203       | 124.0638         |                |                  | 2  |
| 13 |                 |                 |                |                  |                |                  | K    | 149.1069        | 75.0571         | 131.0833       | 66.0453          |                |                  | 1  |

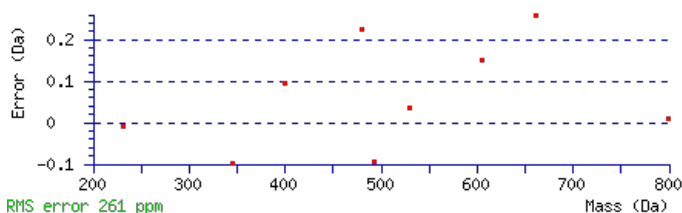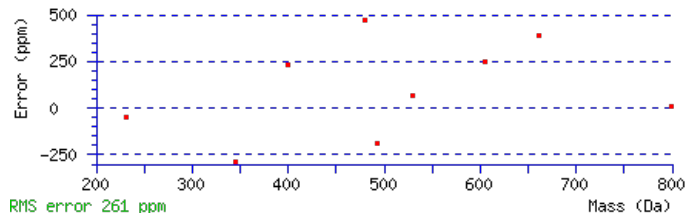NCBI **BLAST** search of [DLLFVRPDAVFNK](#)

(Parameters: blastp, nr protein database, expect=20000, no filter, PAM30)

Other BLAST [web gateways](#)

# AT5G66530.1

All matches to this query

| Score | Mr(calc)  | Delta   | Sequence                       |
|-------|-----------|---------|--------------------------------|
| 27.3  | 1550.7817 | 0.0035  | <a href="#">DLLFVRPDAVFNK</a>  |
| 12.5  | 1550.7898 | -0.0046 | <a href="#">INTVYQAALSVVEK</a> |
| 4.5   | 1550.7885 | -0.0032 | <a href="#">KVMLGVDRLDMIK</a>  |
| 3.7   | 1550.7898 | -0.0046 | <a href="#">DIIGDFLTVISSVR</a> |
| 2.8   | 1550.7851 | 0.0002  | <a href="#">TEMVKLYSKHIGK</a>  |
| 0.5   | 1550.7844 | 0.0009  | <a href="#">VKSPPFPTARGFAR</a> |
| 0.2   | 1550.7851 | 0.0001  | <a href="#">NLNVMLKLNPYAK</a>  |

Mascot: <http://www.matrixscience.com/>

**Peptide View**MS/MS Fragmentation of **YDDFFGGKK**

Found in **AT5G66540.1** in **TAIR\_Arabidopsis**, Symbols: | similar to hypothetical protein OsI\_036143 [Oryza sativa (indica cultivar-group)] (GB:EAY82184.1); similar to hypothetical protein OsJ\_031573 [Oryza sativa (japonica cultivar-group)] (GB:EAZ17364.1); similar to Os12g013390 [Oryza sativa]

Match to Query 3442: 1086.467122 from(544.240837,2+) index(3270)

Title: Elution from: 32.643 to 32.643 scan no 4056 cid35.00 polarity:+

Data file 0-1\_1.mgf

Click mouse within plot area to zoom in by factor of two about that point

Or,   to  Da

Label all possible matches  Label matches used for scoring

Show Y-axis

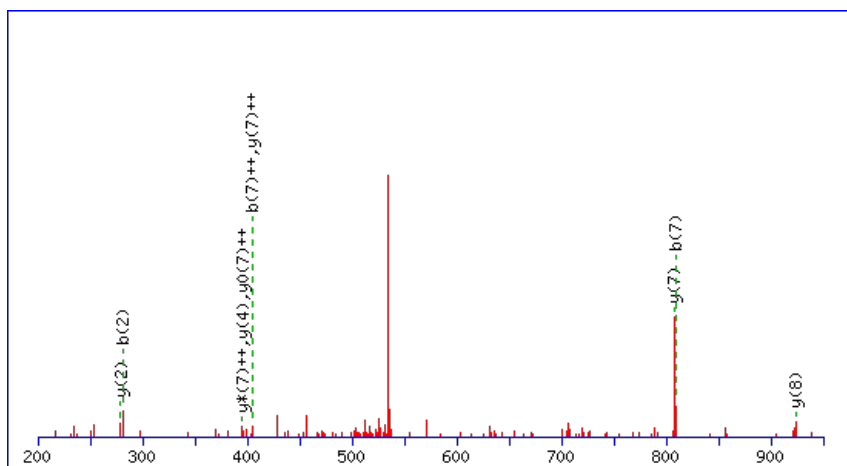

Monoisotopic mass of neutral peptide  $M_r(\text{calc})$ : 1086.4648

Fixed modifications: Carbamidomethyl (C) (apply to specified residues or termini only)

Ions Score: 22 Expect: 0.023

Matches : 10/68 fragment ions using 16 most intense peaks ([help](#))

| # | b               | b <sup>++</sup> | b*       | b <sup>*++</sup> | b <sup>0</sup> | b <sup>0++</sup> | Seq. | y               | y <sup>++</sup> | y*       | y <sup>*++</sup> | y <sup>0</sup> | y <sup>0++</sup> | # |
|---|-----------------|-----------------|----------|------------------|----------------|------------------|------|-----------------|-----------------|----------|------------------|----------------|------------------|---|
| 1 | 165.0676        | 83.0375         |          |                  |                |                  | Y    |                 |                 |          |                  |                |                  | 9 |
| 2 | <b>281.0916</b> | 141.0494        |          |                  | 263.0811       | 132.0442         | D    | <b>923.4118</b> | 462.2095        | 905.3882 | 453.1977         | 905.4012       | 453.2042         | 8 |
| 3 | 397.1156        | 199.0614        |          |                  | 379.1050       | 190.0562         | D    | <b>807.3878</b> | <b>404.1975</b> | 789.3642 | <b>395.1857</b>  | 789.3772       | <b>395.1922</b>  | 7 |
| 4 | 545.1810        | 273.0942        |          |                  | 527.1705       | 264.0889         | F    | 691.3638        | 346.1855        | 673.3402 | 337.1737         |                |                  | 6 |
| 5 | 693.2465        | 347.1269        |          |                  | 675.2359       | 338.1216         | F    | 543.2984        | 272.1528        | 525.2748 | 263.1410         |                |                  | 5 |
| 6 | 751.2650        | 376.1361        |          |                  | 733.2544       | 367.1309         | G    | <b>395.2329</b> | 198.1201        | 377.2093 | 189.1083         |                |                  | 4 |
| 7 | <b>809.2835</b> | <b>405.1454</b> |          |                  | 791.2729       | 396.1401         | G    | 337.2144        | 169.1108        | 319.1908 | 160.0990         |                |                  | 3 |
| 8 | 939.3725        | 470.1899        | 921.3489 | 461.1781         | 921.3620       | 461.1846         | K    | <b>279.1959</b> | 140.1016        | 261.1723 | 131.0898         |                |                  | 2 |
| 9 |                 |                 |          |                  |                |                  | K    | 149.1069        | 75.0571         | 131.0833 | 66.0453          |                |                  | 1 |

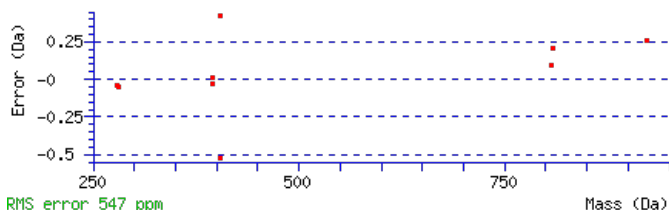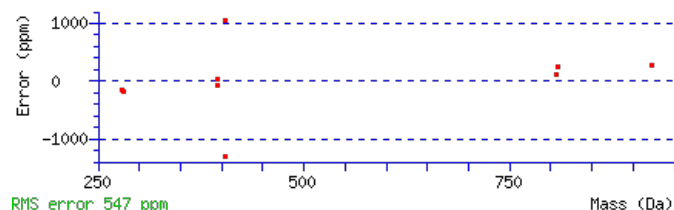

NCBI **BLAST** search of [YDDFFGGKK](#)

(Parameters: blastp, nr protein database, expect=20000, no filter, PAM30)

Other BLAST [web gateways](#)

All matches to this query

## AT5G66540.1

| Score | Mr(calc)  | Delta   | Sequence                    |
|-------|-----------|---------|-----------------------------|
| 21.6  | 1086.4648 | 0.0023  | <a href="#">YDDFFGGKK</a>   |
| 10.2  | 1086.4660 | 0.0011  | <a href="#">MQSDSGLPPK</a>  |
| 9.6   | 1086.4660 | 0.0012  | <a href="#">GGEPDLMTGAK</a> |
| 7.3   | 1086.4653 | 0.0019  | <a href="#">YGHPTEAAAR</a>  |
| 4.3   | 1086.4660 | 0.0011  | <a href="#">VSDPMVNDK</a>   |
| 3.9   | 1086.4639 | 0.0032  | <a href="#">MFRSKSCR</a>    |
| 3.1   | 1086.4653 | 0.0019  | <a href="#">HTSGEWVTR</a>   |
| 3.1   | 1086.4660 | 0.0011  | <a href="#">SGDINDPVMK</a>  |
| 2.6   | 1086.4687 | -0.0015 | <a href="#">MRFSSSSVR</a>   |
| 1.2   | 1086.4660 | 0.0012  | <a href="#">DVPDEIMTR</a>   |

Mascot: <http://www.matrixscience.com/>



# Mascot Search Results

## Peptide View

MS/MS Fragmentation of **QLDASGKPDSTGK**

Found in **AT5G66570.1** in **TAIR\_Arabidopsis**, Symbols: PSBO-1, OEE1, OEE33, OE33, PSBO1 | OE33/OEE1/OEE33/PSBO-1/PSBO1 (OXYGEN-EVOLVING ENHANCER 33); oxygen evolving/ poly(U) binding | chr5:26585970-26587350 FORWARD

Match to Query 6031: 1466.659720 from(734.337136,2+) index(1557)

Title: Elution from: 20.616 to 20.616 scan no 2092 cid35.00 polarity:+

Data file C7-1\_2.mgf

Click mouse within plot area to zoom in by factor of two about that point

Or,  to  Da

Label all possible matches  Label matches used for scoring

Show Y-axis

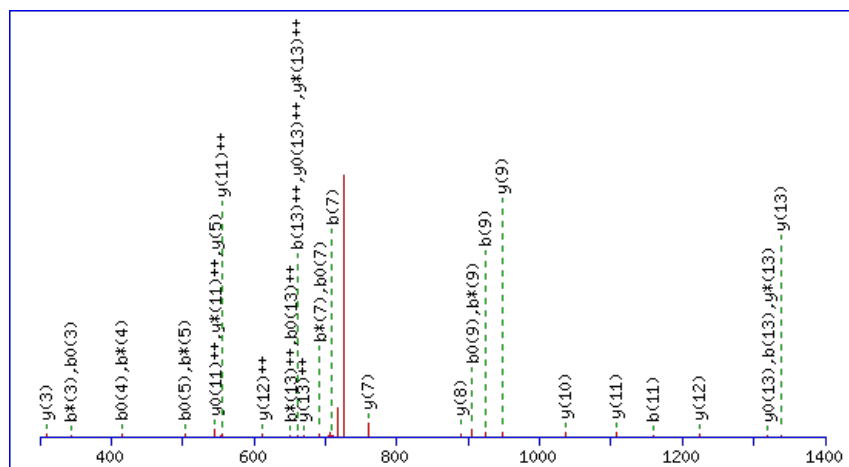

Monoisotopic mass of neutral peptide  $M_r(\text{calc})$ : 1466.6595

Fixed modifications: Carbamidomethyl (C) (apply to specified residues or termini only)

Ions Score: 94 Expect: 3e-009

Matches : 35/148 fragment ions using 29 most intense peaks [\(help\)](#)

| #  | b         | b <sup>++</sup> | b*        | b <sup>*++</sup> | b <sup>0</sup> | b <sup>0++</sup> | Seq. | y         | y <sup>++</sup> | y*        | y <sup>*++</sup> | y <sup>0</sup> | y <sup>0++</sup> | #  |
|----|-----------|-----------------|-----------|------------------|----------------|------------------|------|-----------|-----------------|-----------|------------------|----------------|------------------|----|
| 1  | 131.0599  | 66.0336         | 113.0363  | 57.0218          |                |                  | Q    |           |                 |           |                  |                |                  | 14 |
| 2  | 245.1410  | 123.0741        | 227.1174  | 114.0624         |                |                  | L    | 1337.6142 | 669.3107        | 1319.5906 | 660.2989         | 1319.6036      | 660.3055         | 13 |
| 3  | 361.1650  | 181.0861        | 343.1414  | 172.0743         | 343.1544       | 172.0809         | D    | 1223.5331 | 612.2702        | 1205.5095 | 603.2584         | 1205.5225      | 603.2649         | 12 |
| 4  | 433.1991  | 217.1032        | 415.1756  | 208.0914         | 415.1886       | 208.0979         | A    | 1107.5091 | 554.2582        | 1089.4855 | 545.2464         | 1089.4986      | 545.2529         | 11 |
| 5  | 521.2282  | 261.1177        | 503.2046  | 252.1060         | 503.2176       | 252.1125         | S    | 1035.4750 | 518.2411        | 1017.4514 | 509.2293         | 1017.4644      | 509.2358         | 10 |
| 6  | 579.2467  | 290.1270        | 561.2231  | 281.1152         | 561.2361       | 281.1217         | G    | 947.4459  | 474.2266        | 929.4223  | 465.2148         | 929.4353       | 465.2213         | 9  |
| 7  | 709.3357  | 355.1715        | 691.3122  | 346.1597         | 691.3252       | 346.1662         | K    | 889.4274  | 445.2173        | 871.4038  | 436.2055         | 871.4168       | 436.2121         | 8  |
| 8  | 807.3855  | 404.1964        | 789.3620  | 395.1846         | 789.3750       | 395.1911         | P    | 759.3384  | 380.1728        | 741.3148  | 371.1610         | 741.3278       | 371.1675         | 7  |
| 9  | 923.4095  | 462.2084        | 905.3859  | 453.1966         | 905.3990       | 453.2031         | D    | 661.2886  | 331.1479        | 643.2650  | 322.1361         | 643.2780       | 322.1426         | 6  |
| 10 | 1011.4386 | 506.2229        | 993.4150  | 497.2111         | 993.4280       | 497.2176         | S    | 545.2646  | 273.1359        | 527.2410  | 264.1241         | 527.2540       | 264.1307         | 5  |
| 11 | 1159.5040 | 580.2557        | 1141.4804 | 571.2439         | 1141.4935      | 571.2504         | F    | 457.2355  | 229.1214        | 439.2120  | 220.1096         | 439.2250       | 220.1161         | 4  |
| 12 | 1261.5487 | 631.2780        | 1243.5252 | 622.2662         | 1243.5382      | 622.2727         | T    | 309.1701  | 155.0887        | 291.1465  | 146.0769         | 291.1595       | 146.0834         | 3  |
| 13 | 1319.5672 | 660.2873        | 1301.5437 | 651.2755         | 1301.5567      | 651.2820         | G    | 207.1254  | 104.0663        | 189.1018  | 95.0545          |                |                  | 2  |
| 14 |           |                 |           |                  |                |                  | K    | 149.1069  | 75.0571         | 131.0833  | 66.0453          |                |                  | 1  |

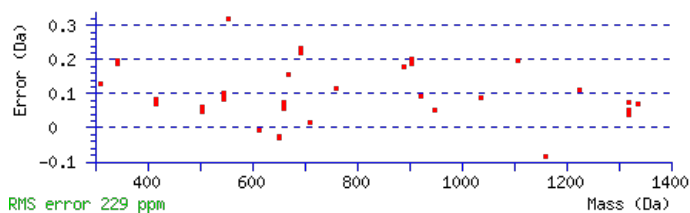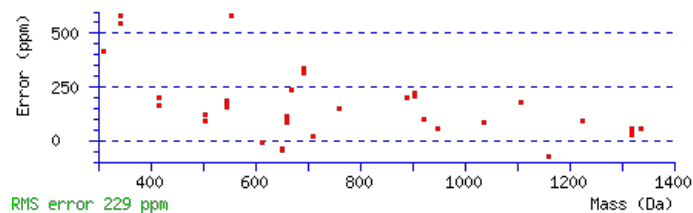

NCBI BLAST search of [QLDASGKPDSTGK](#)

## AT5G66570.1

(Parameters: blastp, nr protein database, expect=20000, no filter, PAM30)

Other BLAST [web gateways](#)

### All matches to this query

| Score | Mr(calc)  | Delta   | Sequence                         |
|-------|-----------|---------|----------------------------------|
| 94.0  | 1466.6595 | 0.0002  | <a href="#">QLDASGKPSFTGK</a>    |
| 20.4  | 1466.6573 | 0.0024  | <a href="#">KIDGSDNTGEKASK</a>   |
| 16.5  | 1466.6622 | -0.0025 | <a href="#">QNSAFENGLPRK</a>     |
| 16.3  | 1466.6573 | 0.0024  | <a href="#">TPTKTINGPSSSSGTK</a> |
| 14.9  | 1466.6573 | 0.0024  | <a href="#">EIKSNNQSLDSSK</a>    |
| 13.0  | 1466.6582 | 0.0015  | <a href="#">MLPOVEMTANKR</a>     |
| 12.1  | 1466.6555 | 0.0042  | <a href="#">ELCLIDESMKAK</a>     |
| 11.3  | 1466.6622 | -0.0025 | <a href="#">SIWEKGNQDSKR</a>     |
| 10.8  | 1466.6596 | 0.0001  | <a href="#">VEENSIESYPRK</a>     |
| 10.1  | 1466.6604 | -0.0007 | <a href="#">MLDMGFDPQIRK</a>     |

Mascot: <http://www.matrixscience.com/>

**Peptide View**MS/MS Fragmentation of **AFGGQSLDFGK**Found in **AT5G66760.1** in **TAIR\_Arabidopsis**, Symbols: SDH1-1 | SDH1-1 (Succinate dehydrogenase 1-1) | chr5:26671002-26674450  
FORWARD

Match to Query 3588: 1138.503858 from(570.259205,2+) index(4821)

Title: Elution from: 43.586 to 43.586 scan no 6048 cid35.00 polarity:+

Data file 0-3\_2.mgf

Click mouse within plot area to zoom in by factor of two about that point

Or,   to  Da Label all possible matches  Label matches used for scoring Show Y-axis 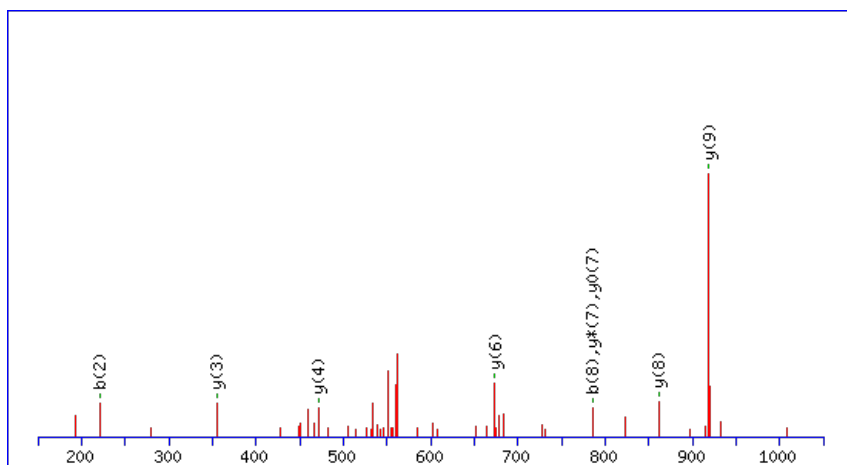Monoisotopic mass of neutral peptide  $M_r(\text{calc})$ : 1138.5069

Fixed modifications: Carbamidomethyl (C) (apply to specified residues or termini only)

Ions Score: 44 Expect: 0.00022

Matches : 9/96 fragment ions using 9 most intense peaks ([help](#))

| #  | b               | b <sup>++</sup> | b*       | b <sup>*++</sup> | b <sup>0</sup> | b <sup>0++</sup> | Seq. | y               | y <sup>++</sup> | y*              | y <sup>*++</sup> | y <sup>0</sup>  | y <sup>0++</sup> | #  |
|----|-----------------|-----------------|----------|------------------|----------------|------------------|------|-----------------|-----------------|-----------------|------------------|-----------------|------------------|----|
| 1  | 73.0414         | 37.0244         |          |                  |                |                  | A    |                 |                 |                 |                  |                 |                  | 11 |
| 2  | <b>221.1069</b> | 111.0571        |          |                  |                |                  | F    | 1067.4801       | 534.2437        | 1049.4565       | 525.2319         | 1049.4695       | 525.2384         | 10 |
| 3  | 279.1254        | 140.0663        |          |                  |                |                  | G    | <b>919.4146</b> | 460.2109        | 901.3910        | 451.1991         | 901.4040        | 451.2057         | 9  |
| 4  | 337.1439        | 169.0756        |          |                  |                |                  | G    | <b>861.3961</b> | 431.2017        | 843.3725        | 422.1899         | 843.3855        | 422.1964         | 8  |
| 5  | 467.1965        | 234.1019        | 449.1729 | 225.0901         |                |                  | Q    | 803.3776        | 402.1924        | <b>785.3540</b> | 393.1807         | <b>785.3670</b> | 393.1872         | 7  |
| 6  | 555.2256        | 278.1164        | 537.2020 | 269.1046         | 537.2150       | 269.1111         | S    | <b>673.3250</b> | 337.1661        | 655.3014        | 328.1543         | 655.3144        | 328.1608         | 6  |
| 7  | 669.3067        | 335.1570        | 651.2831 | 326.1452         | 651.2961       | 326.1517         | L    | 585.2959        | 293.1516        | 567.2723        | 284.1398         | 567.2853        | 284.1463         | 5  |
| 8  | <b>785.3307</b> | 393.1690        | 767.3071 | 384.1572         | 767.3201       | 384.1637         | D    | <b>471.2148</b> | 236.1110        | 453.1912        | 227.0992         | 453.2042        | 227.1058         | 4  |
| 9  | 933.3961        | 467.2017        | 915.3725 | 458.1899         | 915.3855       | 458.1964         | F    | <b>355.1908</b> | 178.0990        | 337.1672        | 169.0873         |                 |                  | 3  |
| 10 | 991.4146        | 496.2109        | 973.3910 | 487.1991         | 973.4040       | 487.2057         | G    | 207.1254        | 104.0663        | 189.1018        | 95.0545          |                 |                  | 2  |
| 11 |                 |                 |          |                  |                |                  | K    | 149.1069        | 75.0571         | 131.0833        | 66.0453          |                 |                  | 1  |

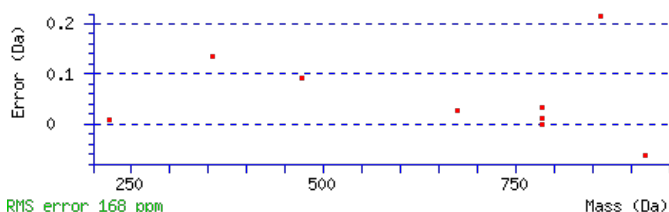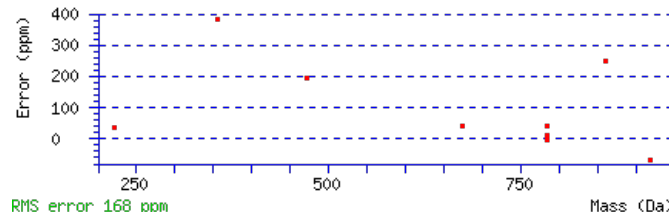NCBI **BLAST** search of **AFGGQSLDFGK**

(Parameters: blastp, nr protein database, expect=20000, no filter, PAM30)

Other BLAST [web gateways](#)**All matches to this query**



**AT5G66760.1**

| Score | Mr(calc)  | Delta   | Sequence                    |
|-------|-----------|---------|-----------------------------|
| 43.6  | 1138.5069 | -0.0030 | <a href="#">AFGGQSLDFGK</a> |
| 10.0  | 1138.5069 | -0.0031 | <a href="#">FQQYLNDK</a>    |
| 4.1   | 1138.5022 | 0.0017  | <a href="#">GYWCVANKK</a>   |
| 2.8   | 1138.5033 | 0.0005  | <a href="#">RVMTGNMTAK</a>  |
| 1.6   | 1138.5033 | 0.0005  | <a href="#">MSMTDRVLR</a>   |
| 0.2   | 1138.5033 | 0.0005  | <a href="#">RVMTGNMTAK</a>  |

**Mascot:** <http://www.matrixscience.com/>



# Mascot Search Results

## Peptide View

MS/MS Fragmentation of **GFDVLVFEK**

Found in **AT5G67030.1** in **TAIR\_Arabidopsis**, Symbols: LOS6, NPQ2, ATABA1, ZEP, IBS3, ATZEP, ABA1 | ABA1 (ABA DEFICIENT 1); zeaxanthin epoxidase | chr5:26770971-26774316 REVERSE

Match to Query 3108: 1052.555038 from(527.284795,2+) index(8394)

Title: Elution from: 73.911 to 73.911 scan no 10989 cid35.00 polarity:+

Data file C7-3\_1.mgf

Click mouse within plot area to zoom in by factor of two about that point

Or,   to  Da

Label all possible matches  Label matches used for scoring

Show Y-axis

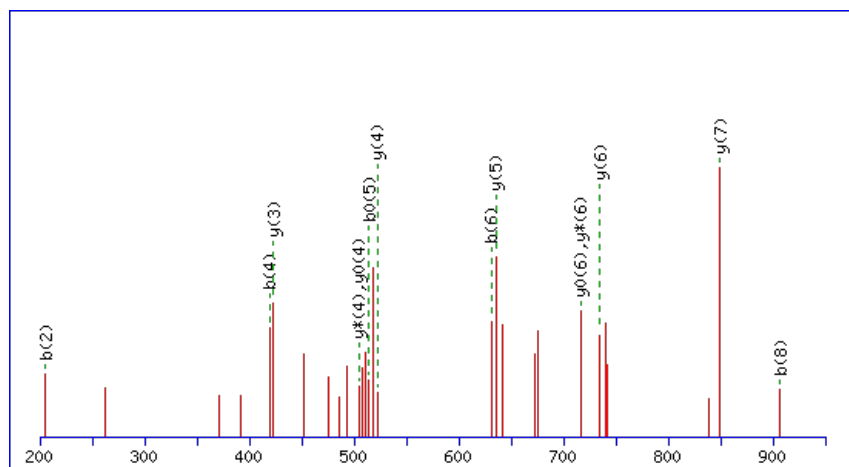

Monoisotopic mass of neutral peptide Mr(calc): 1052.5543

Fixed modifications: Carbamidomethyl (C) (apply to specified residues or termini only)

Ions Score: 27 Expect: 0.0056

Matches : 14/74 fragment ions using 31 most intense peaks ([help](#))

| # | b               | b <sup>++</sup> | b <sup>0</sup>  | b <sup>0++</sup> | Seq.     | y               | y <sup>++</sup> | y*              | y* <sup>++</sup> | y <sup>0</sup>  | y <sup>0++</sup> | # |
|---|-----------------|-----------------|-----------------|------------------|----------|-----------------|-----------------|-----------------|------------------|-----------------|------------------|---|
| 1 | 58.0287         | 29.5180         |                 |                  | <b>G</b> |                 |                 |                 |                  |                 |                  | 9 |
| 2 | <b>205.0972</b> | 103.0522        |                 |                  | <b>F</b> | 996.5401        | 498.7737        | 979.5135        | 490.2604         | 978.5295        | 489.7684         | 8 |
| 3 | 320.1241        | 160.5657        | 302.1135        | 151.5604         | <b>D</b> | <b>849.4716</b> | 425.2395        | 832.4451        | 416.7262         | 831.4611        | 416.2342         | 7 |
| 4 | <b>419.1925</b> | 210.0999        | 401.1819        | 201.0946         | <b>V</b> | <b>734.4447</b> | 367.7260        | <b>717.4182</b> | 359.2127         | <b>716.4341</b> | 358.7207         | 6 |
| 5 | 532.2766        | 266.6419        | <b>514.2660</b> | 257.6366         | <b>L</b> | <b>635.3763</b> | 318.1918        | 618.3497        | 309.6785         | 617.3657        | 309.1865         | 5 |
| 6 | <b>631.3450</b> | 316.1761        | 613.3344        | 307.1709         | <b>V</b> | <b>522.2922</b> | 261.6498        | <b>505.2657</b> | 253.1365         | <b>504.2817</b> | 252.6445         | 4 |
| 7 | 778.4134        | 389.7103        | 760.4028        | 380.7051         | <b>F</b> | <b>423.2238</b> | 212.1155        | 406.1973        | 203.6023         | 405.2132        | 203.1103         | 3 |
| 8 | <b>907.4560</b> | 454.2316        | 889.4454        | 445.2264         | <b>E</b> | 276.1554        | 138.5813        | 259.1288        | 130.0681         | 258.1448        | 129.5761         | 2 |
| 9 |                 |                 |                 |                  | <b>K</b> | 147.1128        | 74.0600         | 130.0863        | 65.5468          |                 |                  | 1 |

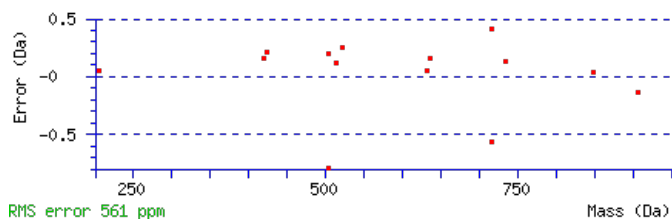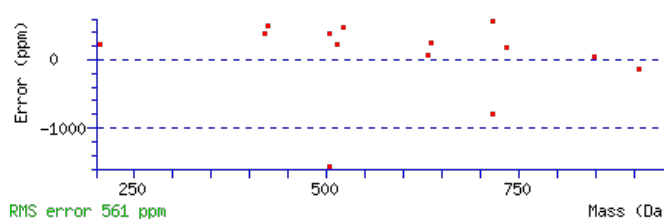

NCBI BLAST search of [GFDVLVFEK](#)

(Parameters: blastp, nr protein database, expect=20000, no filter, PAM30)

Other BLAST [web gateways](#)

All matches to this query

| Score | Mr(calc) | Delta | Sequence |
|-------|----------|-------|----------|
|       |          |       |          |

AT5G67030.1

|      |           |        |                           |
|------|-----------|--------|---------------------------|
| 26.8 | 1052.5543 | 0.0008 | <a href="#">GFDVLVFEK</a> |
|------|-----------|--------|---------------------------|

**Mascot:** <http://www.matrixscience.com/>

**Peptide View**MS/MS Fragmentation of **ADSKFPPGWIIK**Found in **AT5G67230.1** in **TAIR\_Arabidopsis**, Symbols: | glycosyl transferase family 43 protein | chr5:26839732-26841407 FORWARD

Match to Query 4715: 1372.690856 from(687.352704,2+) index(10124)

Title: Elution from: 101.553 to 101.553 scan no 14794 cid35.00 polarity:+

Data file D1d-1-2.mgf

Click mouse within plot area to zoom in by factor of two about that point

Or,   to  Da Label all possible matches  Label matches used for scoring Show Y-axis 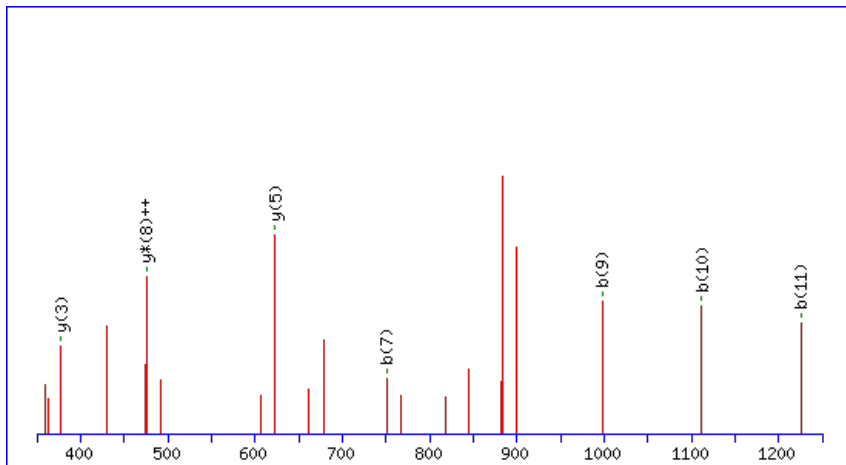Monoisotopic mass of neutral peptide  $M_r(\text{calc})$ : 1372.6949

Fixed modifications: Carbamidomethyl (C) (apply to specified residues or termini only)

Ions Score: 20 Expect: 0.042

Matches : 7/106 fragment ions using 15 most intense peaks ([help](#))

| #  | b         | b <sup>++</sup> | b*        | b <sup>*++</sup> | b <sup>0</sup> | b <sup>0++</sup> | Seq. | y         | y <sup>++</sup> | y*        | y <sup>*++</sup> | y <sup>0</sup> | y <sup>0++</sup> | #  |
|----|-----------|-----------------|-----------|------------------|----------------|------------------|------|-----------|-----------------|-----------|------------------|----------------|------------------|----|
| 1  | 73.0414   | 37.0244         |           |                  |                |                  | A    |           |                 |           |                  |                |                  | 12 |
| 2  | 189.0654  | 95.0363         |           |                  | 171.0548       | 86.0311          | D    | 1301.6681 | 651.3377        | 1283.6445 | 642.3259         | 1283.6575      | 642.3324         | 11 |
| 3  | 277.0945  | 139.0509        |           |                  | 259.0839       | 130.0456         | S    | 1185.6441 | 593.3257        | 1167.6205 | 584.3139         | 1167.6335      | 584.3204         | 10 |
| 4  | 407.1835  | 204.0954        | 389.1599  | 195.0836         | 389.1729       | 195.0901         | K    | 1097.6150 | 549.3112        | 1079.5915 | 540.2994         |                |                  | 9  |
| 5  | 555.2489  | 278.1281        | 537.2254  | 269.1163         | 537.2384       | 269.1228         | F    | 967.5260  | 484.2666        | 949.5024  | 475.2548         |                |                  | 8  |
| 6  | 653.2987  | 327.1530        | 635.2752  | 318.1412         | 635.2882       | 318.1477         | P    | 819.4606  | 410.2339        | 801.4370  | 401.2221         |                |                  | 7  |
| 7  | 751.3485  | 376.1779        | 733.3250  | 367.1661         | 733.3380       | 367.1726         | P    | 721.4108  | 361.2090        | 703.3872  | 352.1972         |                |                  | 6  |
| 8  | 809.3670  | 405.1872        | 791.3435  | 396.1754         | 791.3565       | 396.1819         | G    | 623.3610  | 312.1841        | 605.3374  | 303.1723         |                |                  | 5  |
| 9  | 997.4404  | 499.2239        | 979.4168  | 490.2121         | 979.4299       | 490.2186         | W    | 565.3425  | 283.1749        | 547.3189  | 274.1631         |                |                  | 4  |
| 10 | 1111.5215 | 556.2644        | 1093.4979 | 547.2526         | 1093.5110      | 547.2591         | I    | 377.2691  | 189.1382        | 359.2455  | 180.1264         |                |                  | 3  |
| 11 | 1225.6026 | 613.3050        | 1207.5790 | 604.2932         | 1207.5921      | 604.2997         | I    | 263.1880  | 132.0976        | 245.1644  | 123.0858         |                |                  | 2  |
| 12 |           |                 |           |                  |                |                  | K    | 149.1069  | 75.0571         | 131.0833  | 66.0453          |                |                  | 1  |

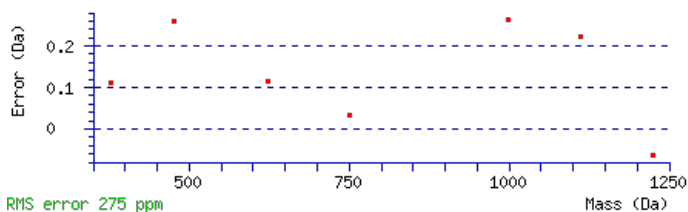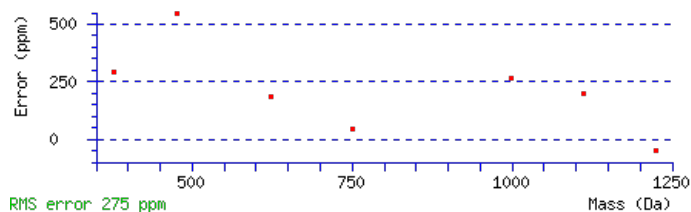NCBI BLAST search of [ADSKFPPGWIIK](#)

(Parameters: blastp, nr protein database, expect=20000, no filter, PAM30)

Other BLAST [web gateways](#)**All matches to this query**

## AT5G67230.1

| Score | Mr(calc)  | Delta   | Sequence                     |
|-------|-----------|---------|------------------------------|
| 20.5  | 1372.6949 | -0.0041 | <a href="#">ADSKFPPGWIK</a>  |
| 17.6  | 1372.6905 | 0.0004  | <a href="#">STAQEVDPRLK</a>  |
| 16.1  | 1372.6927 | -0.0018 | <a href="#">GSAIGFHLSLLK</a> |
| 7.8   | 1372.6931 | -0.0023 | <a href="#">VRNLPSRGETPK</a> |
| 5.6   | 1372.6931 | -0.0023 | <a href="#">QKLVHATASRDK</a> |
| 3.8   | 1372.6900 | 0.0008  | <a href="#">AYLPSETPELIK</a> |
| 3.8   | 1372.6880 | 0.0029  | <a href="#">MYGRKGYQLIK</a>  |
| 1.9   | 1372.6905 | 0.0004  | <a href="#">GLVNNKDLQK</a>   |
| 1.6   | 1372.6884 | 0.0024  | <a href="#">SLRLRMQHPSK</a>  |
| 0.9   | 1372.6905 | 0.0004  | <a href="#">NEIERLVNELK</a>  |

Mascot: <http://www.matrixscience.com/>

### Peptide View

 MS/MS Fragmentation of **FSTNENTITVGGLYAIDHSTAVK**

 Found in **AT5G67500.1** in **TAIR\_Arabidopsis**, Symbols: | porin, putative | chr5:26952449-26954349 FORWARD

Match to Query 10095: 2465.131254 from(822.717694,3+) index(7003)

Title: Elution from: 63.111 to 63.111 scan no 9205 cid35.00 polarity:+

Data file D12h-2\_3.mgf

Click mouse within plot area to zoom in by factor of two about that point

 Or, Plot from  to  Da 

 Label all possible matches  Label matches used for scoring 

 Show Y-axis 
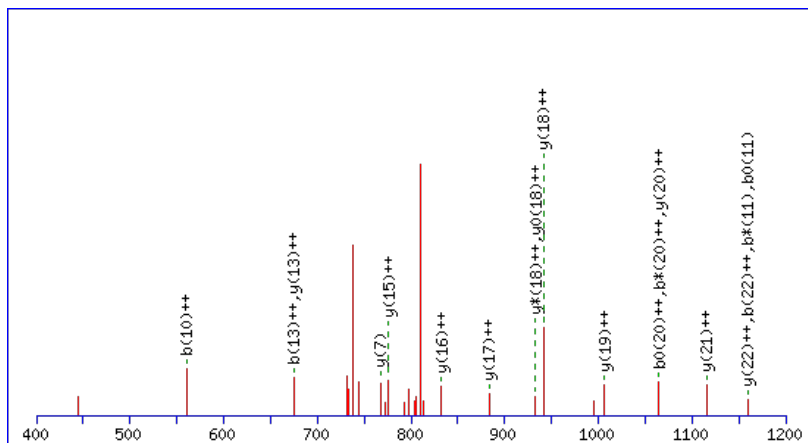

Monoisotopic mass of neutral peptide Mr(calc): 2465.1295

Fixed modifications: Carbamidomethyl (C) (apply to specified residues or termini only)

Ions Score: 50 Expect: 8.2e-005

 Matches : 19/250 fragment ions using 19 most intense peaks ([help](#))

| #  | b         | b <sup>++</sup> | b <sup>*</sup> | b <sup>*++</sup> | b <sup>0</sup> | b <sup>0++</sup> | Seq. | y         | y <sup>++</sup> | y <sup>*</sup> | y <sup>*++</sup> | y <sup>0</sup> | y <sup>0++</sup> | #  |
|----|-----------|-----------------|----------------|------------------|----------------|------------------|------|-----------|-----------------|----------------|------------------|----------------|------------------|----|
| 1  | 149.0727  | 75.0400         |                |                  |                |                  | F    |           |                 |                |                  |                |                  | 23 |
| 2  | 237.1018  | 119.0545        |                |                  | 219.0912       | 110.0492         | S    | 2318.0713 | 1159.5393       | 2300.0477      | 1150.5275        | 2300.0608      | 1150.5340        | 22 |
| 3  | 339.1465  | 170.0769        |                |                  | 321.1359       | 161.0716         | T    | 2230.0423 | 1115.5248       | 2212.0187      | 1106.5130        | 2212.0317      | 1106.5195        | 21 |
| 4  | 455.1835  | 228.0954        | 437.1599       | 219.0836         | 437.1729       | 219.0901         | N    | 2127.9975 | 1064.5024       | 2109.9740      | 1055.4906        | 2109.9870      | 1055.4971        | 20 |
| 5  | 585.2231  | 293.1152        | 567.1995       | 284.1034         | 567.2126       | 284.1099         | E    | 2011.9606 | 1006.4839       | 1993.9370      | 997.4721         | 1993.9500      | 997.4786         | 19 |
| 6  | 701.2601  | 351.1337        | 683.2365       | 342.1219         | 683.2496       | 342.1284         | N    | 1881.9209 | 941.4641        | 1863.8973      | 932.4523         | 1863.9104      | 932.4588         | 18 |
| 7  | 803.3048  | 402.1561        | 785.2813       | 393.1443         | 785.2943       | 393.1508         | T    | 1765.8839 | 883.4456        | 1747.8603      | 874.4338         | 1747.8734      | 874.4403         | 17 |
| 8  | 917.3859  | 459.1966        | 899.3624       | 450.1848         | 899.3754       | 450.1913         | I    | 1663.8392 | 832.4232        | 1645.8156      | 823.4115         | 1645.8286      | 823.4180         | 16 |
| 9  | 1019.4306 | 510.2190        | 1001.4071      | 501.2072         | 1001.4201      | 501.2137         | T    | 1549.7581 | 775.3827        | 1531.7345      | 766.3709         | 1531.7475      | 766.3774         | 15 |
| 10 | 1119.4961 | 560.2517        | 1101.4725      | 551.2399         | 1101.4855      | 551.2464         | V    | 1447.7134 | 724.3603        | 1429.6898      | 715.3485         | 1429.7028      | 715.3551         | 14 |
| 11 | 1177.5146 | 589.2609        | 1159.4910      | 580.2491         | 1159.5040      | 580.2557         | G    | 1347.6480 | 674.3276        | 1329.6244      | 665.3158         | 1329.6374      | 665.3223         | 13 |
| 12 | 1235.5331 | 618.2702        | 1217.5095      | 609.2584         | 1217.5225      | 609.2649         | G    | 1289.6295 | 645.3184        | 1271.6059      | 636.3066         | 1271.6189      | 636.3131         | 12 |
| 13 | 1349.6142 | 675.3107        | 1331.5906      | 666.2989         | 1331.6036      | 666.3055         | L    | 1231.6110 | 616.3091        | 1213.5874      | 607.2973         | 1213.6004      | 607.3038         | 11 |
| 14 | 1513.6746 | 757.3409        | 1495.6510      | 748.3291         | 1495.6640      | 748.3356         | Y    | 1117.5299 | 559.2686        | 1099.5063      | 550.2568         | 1099.5193      | 550.2633         | 10 |
| 15 | 1585.7087 | 793.3580        | 1567.6851      | 784.3462         | 1567.6981      | 784.3527         | A    | 953.4695  | 477.2384        | 935.4459       | 468.2266         | 935.4589       | 468.2331         | 9  |
| 16 | 1699.7898 | 850.3985        | 1681.7662      | 841.3867         | 1681.7792      | 841.3933         | I    | 881.4353  | 441.2213        | 863.4118       | 432.2095         | 863.4248       | 432.2160         | 8  |
| 17 | 1815.8138 | 908.4105        | 1797.7902      | 899.3987         | 1797.8032      | 899.4052         | D    | 767.3542  | 384.1808        | 749.3307       | 375.1690         | 749.3437       | 375.1755         | 7  |
| 18 | 1955.8638 | 978.4355        | 1937.8402      | 969.4237         | 1937.8532      | 969.4303         | H    | 651.3303  | 326.1688        | 633.3067       | 317.1570         | 633.3197       | 317.1635         | 6  |
| 19 | 2043.8929 | 1022.4501       | 2025.8693      | 1013.4383        | 2025.8823      | 1013.4448        | S    | 511.2802  | 256.1438        | 493.2567       | 247.1320         | 493.2697       | 247.1385         | 5  |
| 20 | 2145.9376 | 1073.4724       | 2127.9140      | 1064.4606        | 2127.9270      | 1064.4671        | T    | 423.2512  | 212.1292        | 405.2276       | 203.1174         | 405.2406       | 203.1239         | 4  |
| 21 | 2217.9717 | 1109.4895       | 2199.9481      | 1100.4777        | 2199.9612      | 1100.4842        | A    | 321.2065  | 161.1069        | 303.1829       | 152.0951         |                |                  | 3  |
| 22 | 2318.0372 | 1159.5222       | 2300.0136      | 1150.5104        | 2300.0266      | 1150.5169        | V    | 249.1723  | 125.0898        | 231.1487       | 116.0780         |                |                  | 2  |
| 23 |           |                 |                |                  |                |                  | K    | 149.1069  | 75.0571         | 131.0833       | 66.0453          |                |                  | 1  |

# AT5G67500.1

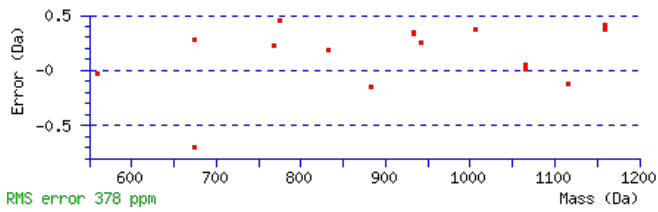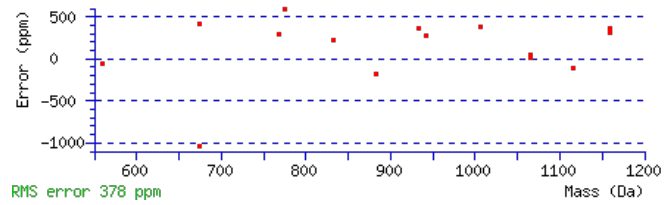

NCBI **BLAST** search of [FSTNENTITVGGLYAIDHSTAVK](#)  
 (Parameters: blastp, nr protein database, expect=20000, no filter, PAM30)  
 Other BLAST [web gateways](#)

## All matches to this query

| Score | Mr(calc)  | Delta   | Sequence                                |
|-------|-----------|---------|-----------------------------------------|
| 49.8  | 2465.1295 | 0.0018  | <a href="#">FSTNENTITVGGLYAIDHSTAVK</a> |
| 8.0   | 2465.1326 | -0.0013 | <a href="#">IYKAACEKPFPLDAVCGSVWK</a>   |
| 5.7   | 2465.1302 | 0.0011  | <a href="#">ELDVYDTCLLSSLPEVSKSGTK</a>  |
| 3.2   | 2465.1355 | -0.0043 | <a href="#">MKYENELALRQGVEADINGLR</a>   |
| 2.6   | 2465.1344 | -0.0031 | <a href="#">WTNYLRPDIKRGPFDADEEK</a>    |
| 1.0   | 2465.1281 | 0.0031  | <a href="#">AGKALEEHDILSHMLMNIGETK</a>  |
| 1.0   | 2465.1281 | 0.0031  | <a href="#">GMEKDSVSWAAMIKGLAQNGLAK</a> |
| 0.2   | 2465.1355 | -0.0043 | <a href="#">VEIGDLGNNFMVDAKSVGQSRK</a>  |

Mascot: <http://www.matrixscience.com/>

**Peptide View**MS/MS Fragmentation of **RSITSLDK**

Found in **AT5G67580.1** in **TAIR\_Arabidopsis**, Symbols: TRB2, ATTRB2 | ATTRB2/TRB2 (TELOMERE REPEAT BINDING FACTOR 2); DNA binding / transcription factor | chr5:26973069-26974299 REVERSE

Match to Query 1892: 930.477214 from(466.245883,2+) index(7635)

Title: Elution from: 67.646 to 67.646 scan no 10043 cid35.00 polarity:+

Data file 0-1\_3.mgf

Click mouse within plot area to zoom in by factor of two about that point

Or,   to  Da

Label all possible matches  Label matches used for scoring

Show Y-axis

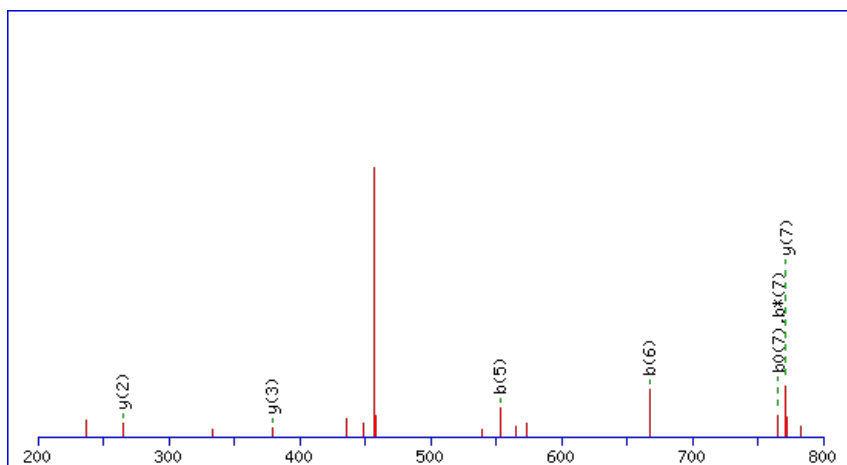

Monoisotopic mass of neutral peptide  $M_r(\text{calc})$ : 930.4779

Fixed modifications: Carbamidomethyl (C) (apply to specified residues or termini only)

Ions Score: 20 Expect: 0.024

Matches : 7/80 fragment ions using 11 most intense peaks ([help](#))

| # | b        | b <sup>++</sup> | b*       | b <sup>*++</sup> | b <sup>0</sup> | b <sup>0++</sup> | Seq. | y        | y <sup>++</sup> | y*       | y <sup>*++</sup> | y <sup>0</sup> | y <sup>0++</sup> | # |
|---|----------|-----------------|----------|------------------|----------------|------------------|------|----------|-----------------|----------|------------------|----------------|------------------|---|
| 1 | 161.0965 | 81.0519         | 143.0729 | 72.0401          |                |                  | R    |          |                 |          |                  |                |                  | 8 |
| 2 | 249.1256 | 125.0664        | 231.1020 | 116.0546         | 231.1150       | 116.0612         | S    | 771.3959 | 386.2016        | 753.3723 | 377.1898         | 753.3853       | 377.1963         | 7 |
| 3 | 363.2067 | 182.1070        | 345.1831 | 173.0952         | 345.1961       | 173.1017         | I    | 683.3668 | 342.1871        | 665.3432 | 333.1753         | 665.3563       | 333.1818         | 6 |
| 4 | 465.2514 | 233.1293        | 447.2278 | 224.1175         | 447.2408       | 224.1241         | T    | 569.2857 | 285.1465        | 551.2621 | 276.1347         | 551.2752       | 276.1412         | 5 |
| 5 | 553.2805 | 277.1439        | 535.2569 | 268.1321         | 535.2699       | 268.1386         | S    | 467.2410 | 234.1241        | 449.2174 | 225.1124         | 449.2304       | 225.1189         | 4 |
| 6 | 667.3616 | 334.1844        | 649.3380 | 325.1726         | 649.3510       | 325.1791         | L    | 379.2120 | 190.1096        | 361.1884 | 181.0978         | 361.2014       | 181.1043         | 3 |
| 7 | 783.3855 | 392.1964        | 765.3620 | 383.1846         | 765.3750       | 383.1911         | D    | 265.1309 | 133.0691        | 247.1073 | 124.0573         | 247.1203       | 124.0638         | 2 |
| 8 |          |                 |          |                  |                |                  | K    | 149.1069 | 75.0571         | 131.0833 | 66.0453          |                |                  | 1 |

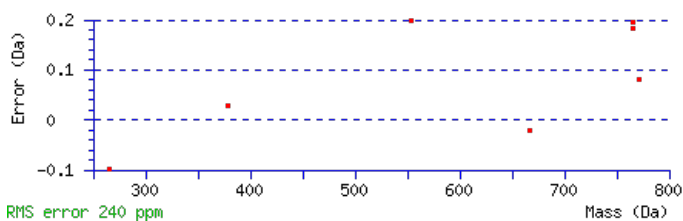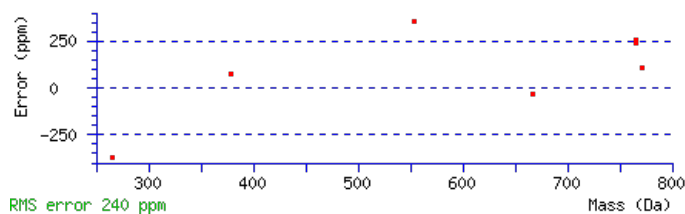

NCBI BLAST search of [RSITSLDK](#)

(Parameters: blastp, nr protein database, expect=20000, no filter, PAM30)

Other BLAST [web gateways](#)

**All matches to this query**

| Score | $M_r(\text{calc})$ | Delta   | Sequence                 |
|-------|--------------------|---------|--------------------------|
| 20.5  | 930.4779           | -0.0006 | <a href="#">RSITSLDK</a> |



# AT5G67580.1

|     |          |         |                           |
|-----|----------|---------|---------------------------|
| 8.9 | 930.4779 | -0.0006 | <a href="#">STKLTAGNK</a> |
| 8.8 | 930.4778 | -0.0006 | <a href="#">SLRTVIDK</a>  |
| 8.6 | 930.4779 | -0.0006 | <a href="#">VDTNKKSK</a>  |
| 2.1 | 930.4779 | -0.0006 | <a href="#">TKETAKNK</a>  |
| 1.9 | 930.4779 | -0.0007 | <a href="#">AESSKAKAK</a> |
| 1.9 | 930.4787 | -0.0015 | <a href="#">KRIMPMK</a>   |
| 1.9 | 930.4779 | -0.0007 | <a href="#">SKSKDNLK</a>  |
| 1.5 | 930.4779 | -0.0006 | <a href="#">KTQSSLQK</a>  |
| 1.5 | 930.4753 | 0.0019  | <a href="#">MVVWTRK</a>   |

Mascot: <http://www.matrixscience.com/>

## Peptide View

### MS/MS Fragmentation of **KILEIR**

Found in **AT5G67630.1** in **TAIR\_Arabidopsis**, Symbols: | DNA helicase, putative | chr5:26984761-26986532 REVERSE

Match to Query 915: 770.501454 from(386.258003,2+) index(1136)

Title: Elution from: 17.593 to 17.593 scan no 1607 cid35.00 polarity:+

Data file 0-2\_1.mgf

Click mouse within plot area to zoom in by factor of two about that point

Or,   to  Da

Label all possible matches  Label matches used for scoring

Show Y-axis

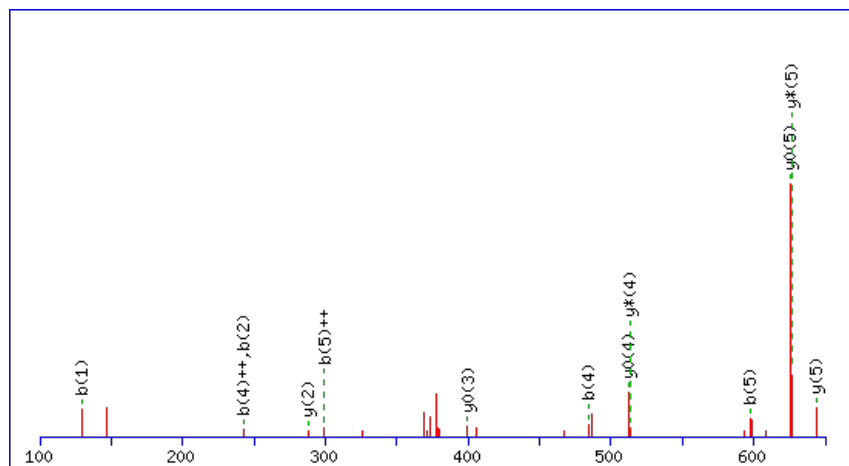

Monoisotopic mass of neutral peptide  $M_r(\text{calc})$ : 770.5014

Fixed modifications: Carbamidomethyl (C) (apply to specified residues or termini only)

Ions Score: 28 Expect: 0.017

Matches : 13/50 fragment ions using 21 most intense peaks ([help](#))

| # | b               | b <sup>++</sup> | b*       | b <sup>*++</sup> | b <sup>0</sup> | b <sup>0++</sup> | Seq.     | y               | y <sup>++</sup> | y*              | y <sup>*++</sup> | y <sup>0</sup>  | y <sup>0++</sup> | #        |
|---|-----------------|-----------------|----------|------------------|----------------|------------------|----------|-----------------|-----------------|-----------------|------------------|-----------------|------------------|----------|
| 1 | <b>129.1022</b> | 65.0548         | 112.0757 | 56.5415          |                |                  | <b>K</b> |                 |                 |                 |                  |                 |                  | <b>6</b> |
| 2 | <b>242.1863</b> | 121.5968        | 225.1598 | 113.0835         |                |                  | <b>I</b> | <b>643.4137</b> | 322.2105        | <b>626.3872</b> | 313.6972         | <b>625.4032</b> | 313.2052         | <b>5</b> |
| 3 | 355.2704        | 178.1388        | 338.2438 | 169.6255         |                |                  | <b>L</b> | 530.3297        | 265.6685        | <b>513.3031</b> | 257.1552         | <b>512.3191</b> | 256.6632         | <b>4</b> |
| 4 | <b>484.3130</b> | <b>242.6601</b> | 467.2864 | 234.1468         | 466.3024       | 233.6548         | <b>E</b> | 417.2456        | 209.1264        | 400.2191        | 200.6132         | <b>399.2350</b> | 200.1212         | <b>3</b> |
| 5 | <b>597.3970</b> | <b>299.2022</b> | 580.3705 | 290.6889         | 579.3865       | 290.1969         | <b>I</b> | <b>288.2030</b> | 144.6051        | 271.1765        | 136.0919         |                 |                  | <b>2</b> |
| 6 |                 |                 |          |                  |                |                  | <b>R</b> | 175.1190        | 88.0631         | 158.0924        | 79.5498          |                 |                  | <b>1</b> |

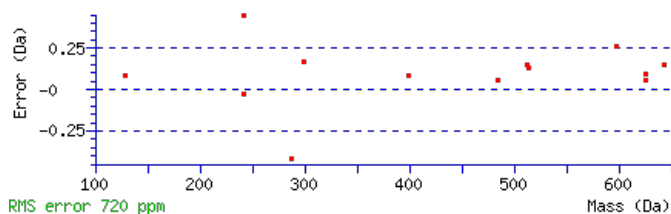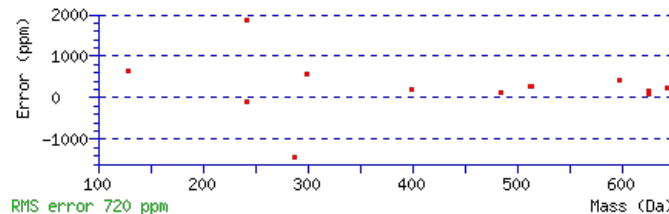

### NCBI BLAST search of **KILEIR**

(Parameters: blastp, nr protein database, expect=20000, no filter, PAM30)

Other BLAST [web gateways](#)

### All matches to this query

| Score | $M_r(\text{calc})$ | Delta  | Sequence               |
|-------|--------------------|--------|------------------------|
| 27.6  | 770.5014           | 0.0001 | <a href="#">KILEIR</a> |
| 22.8  | 770.5014           | 0.0001 | <a href="#">ELLRLK</a> |
| 20.4  | 770.5014           | 0.0001 | <a href="#">IERIIK</a> |
| 20.3  | 770.5014           | 0.0001 | <a href="#">RELLK</a>  |

## AT5G67630.1

|      |          |        |                          |
|------|----------|--------|--------------------------|
| 19.1 | 770.5014 | 0.0001 | <a href="#">KELLR</a>    |
| 18.8 | 770.5014 | 0.0001 | <a href="#">KVLNGLK</a>  |
| 18.8 | 770.5014 | 0.0001 | <a href="#">QAIKAIK</a>  |
| 18.3 | 770.5014 | 0.0001 | <a href="#">GKNIVIK</a>  |
| 17.5 | 770.5014 | 0.0000 | <a href="#">GGGKIVLK</a> |
| 16.8 | 770.5014 | 0.0001 | <a href="#">RIELK</a>    |

**Mascot:** <http://www.matrixscience.com/>
