# Supplementary material
Source: PubMed Central journal article supplement (PMC4256508)
Supplement: supp_M114.039081_mcp.M114.039081-9.pdf [file supp_M114.039081_mcp.M114.039081-9.pdf]

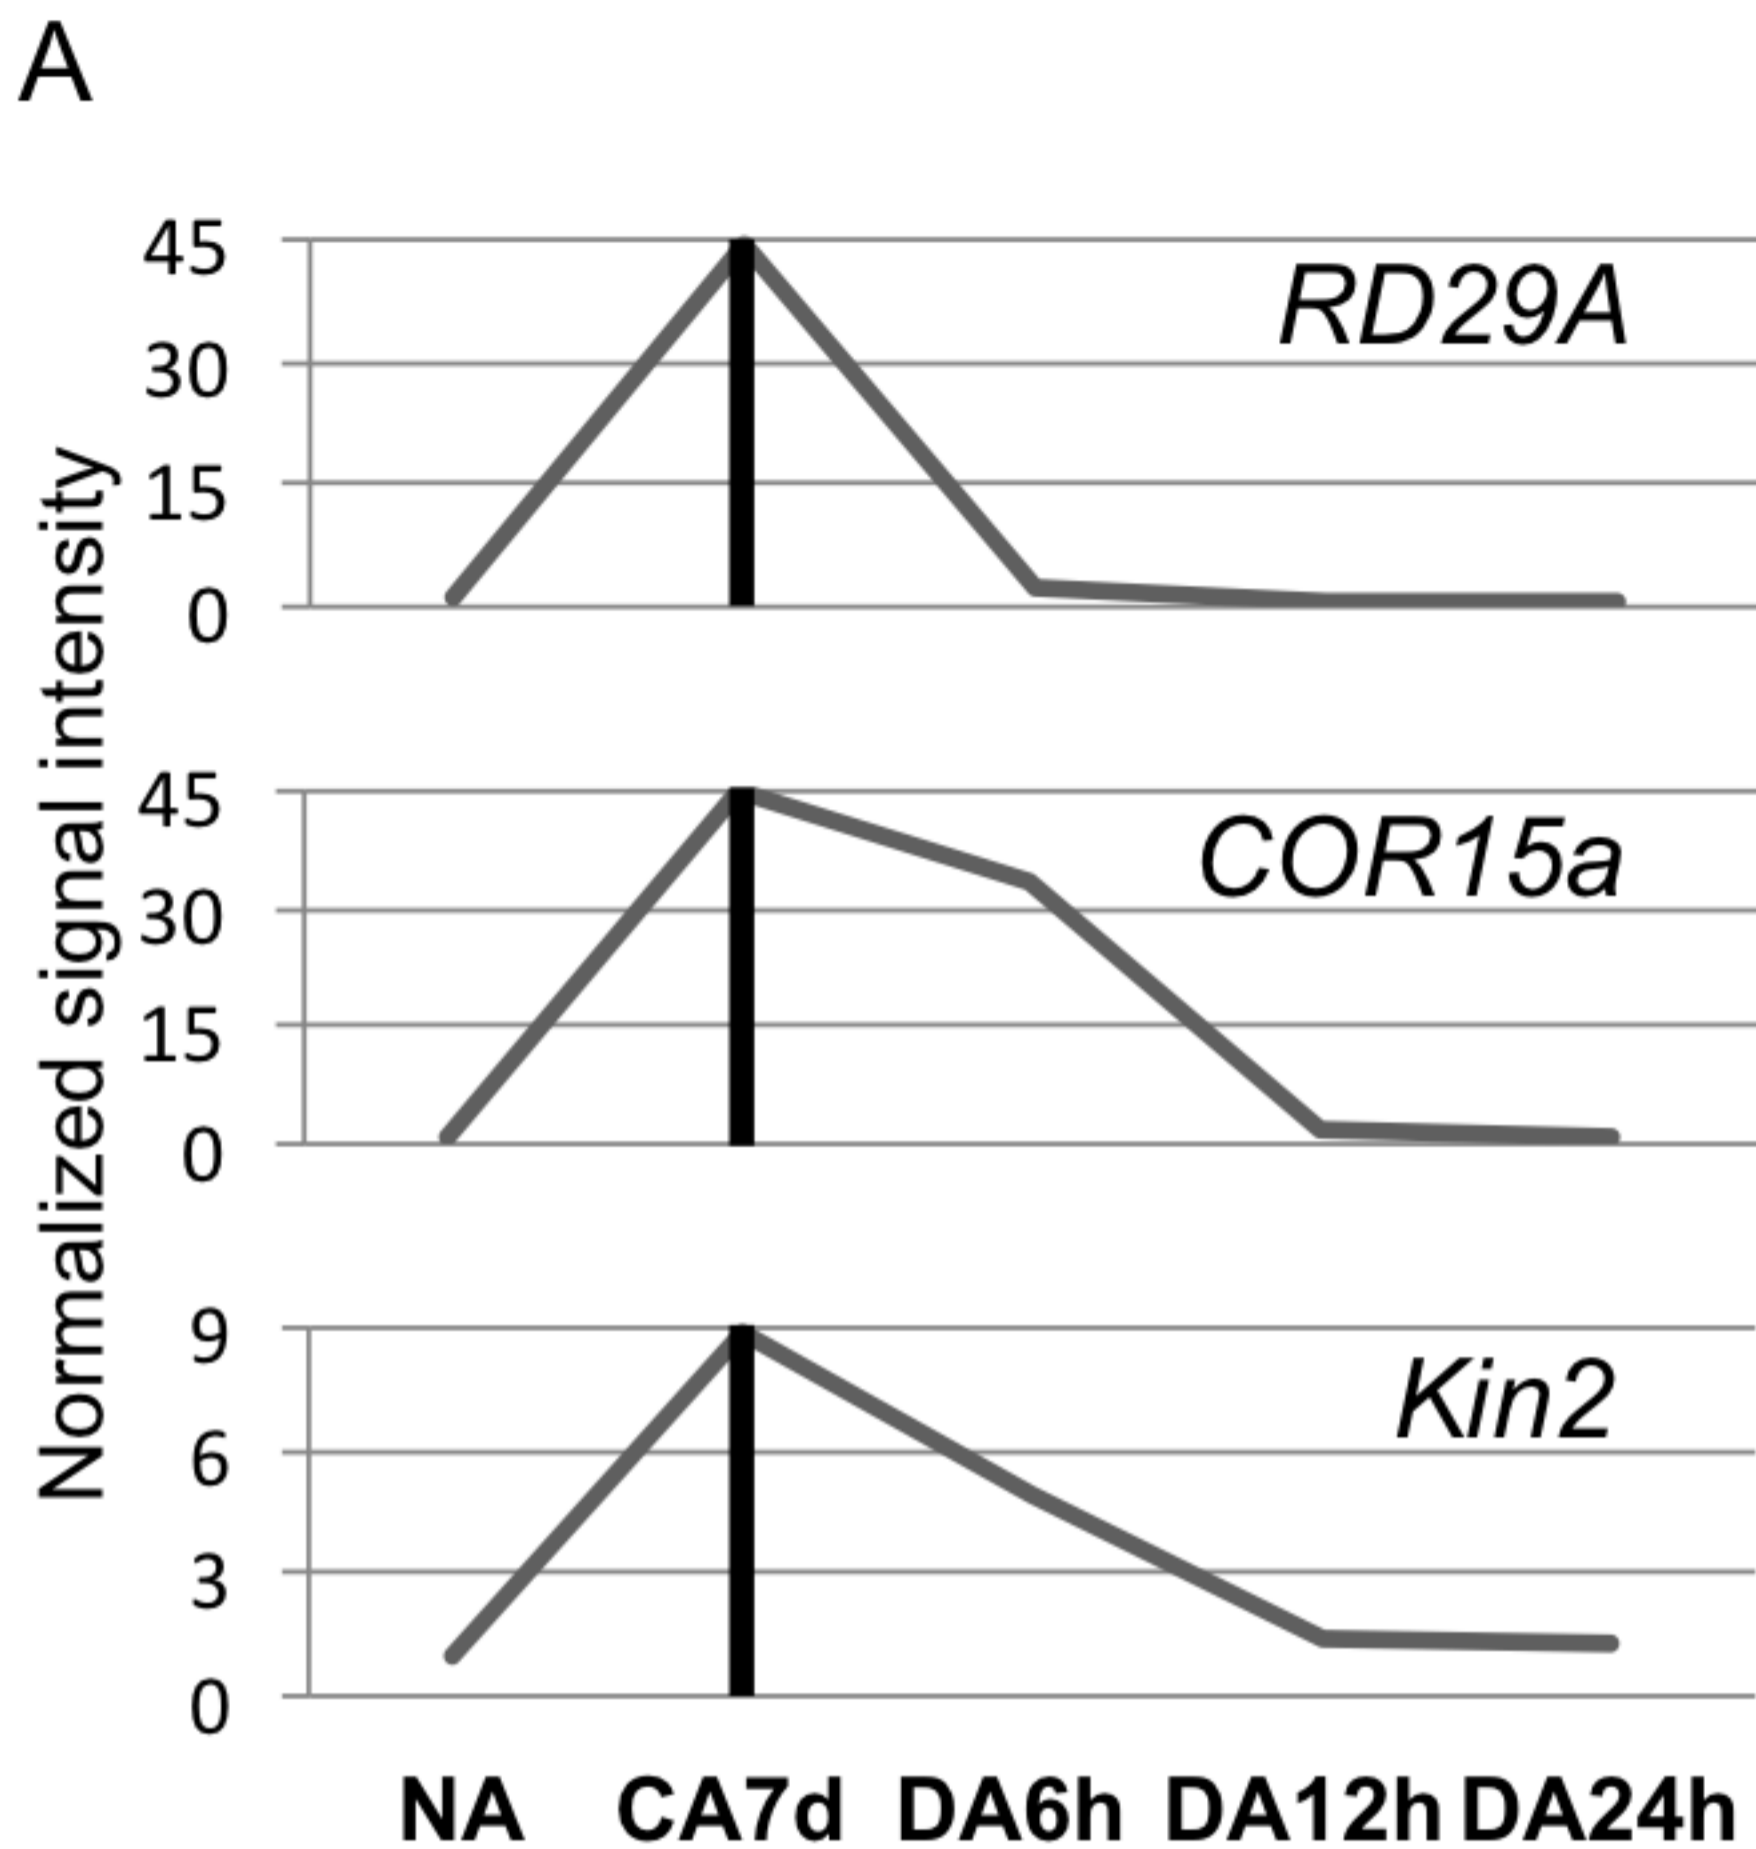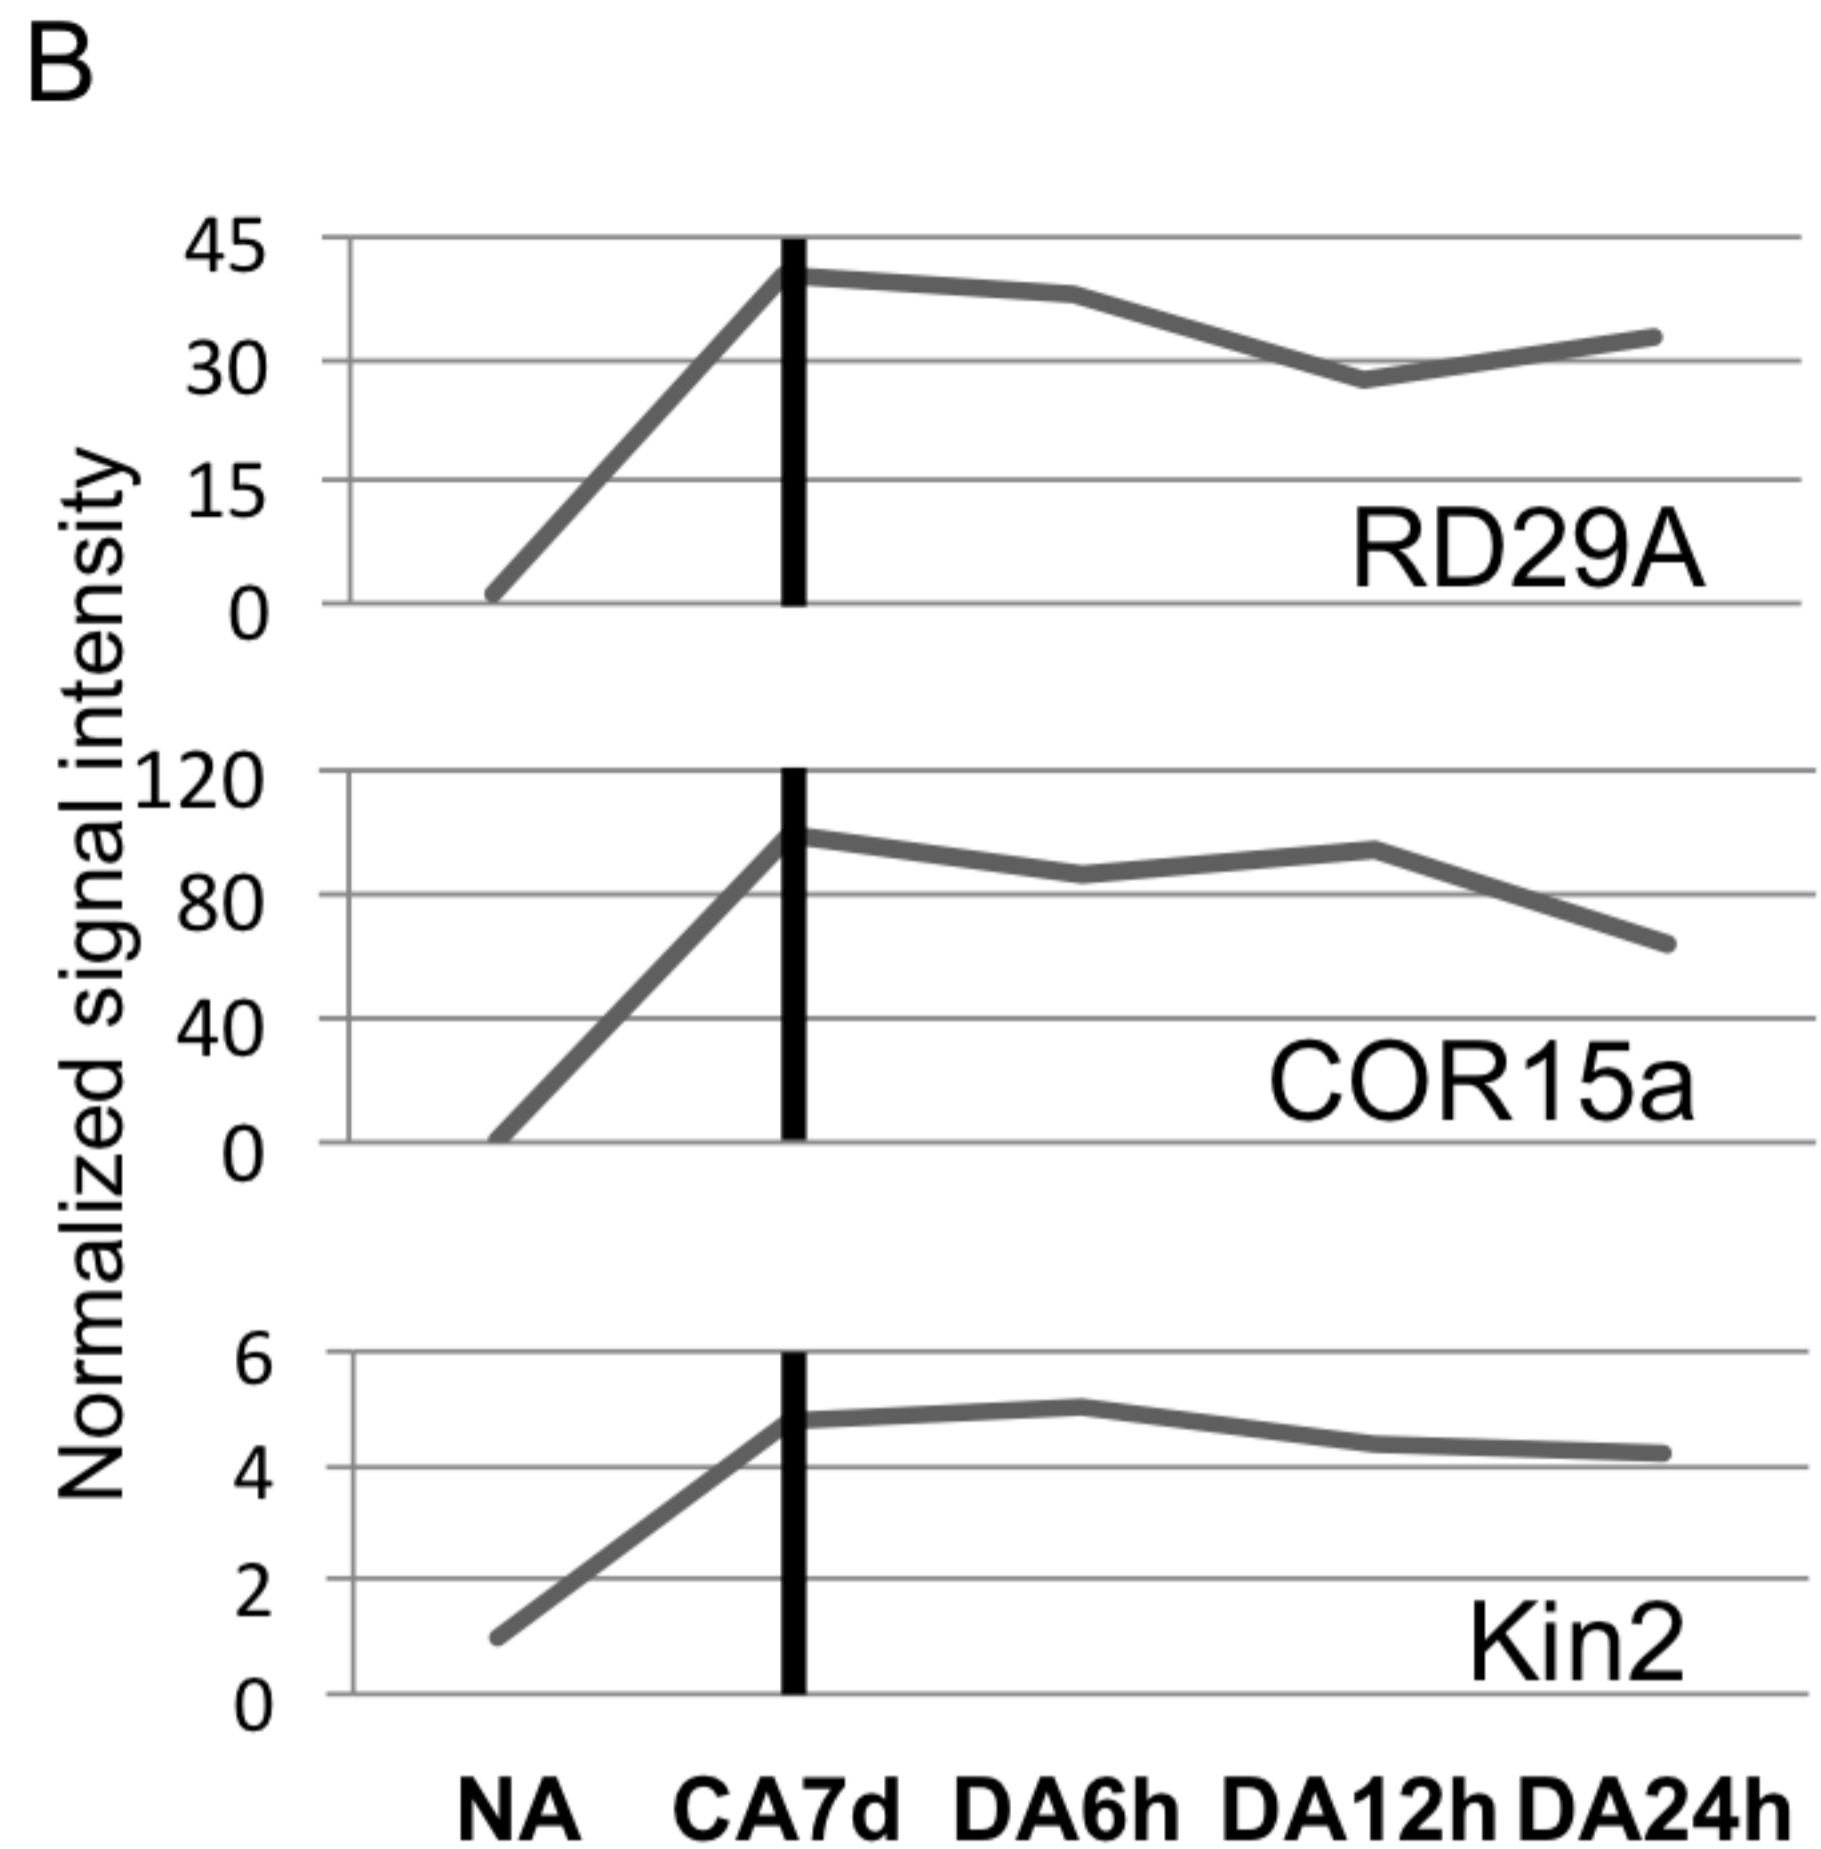

**Supplementary Figure S3.** mRNA and protein expression patterns of *RD29A*, *COR15a* and *Kin2* during CA and DA. mRNA expression pattern was analyzed using oligo DNA microarray data (A) and protein expression pattern was analyzed by shotgun proteomics (B). Both mRNAs and proteins showed cold-inducible expression patterns.
