# Supplementary material
Source: PubMed Central journal article supplement (PMC4256508)
Supplement: supp_M114.039081_mcp.M114.039081-11.pdf [file supp_M114.039081_mcp.M114.039081-11.pdf]

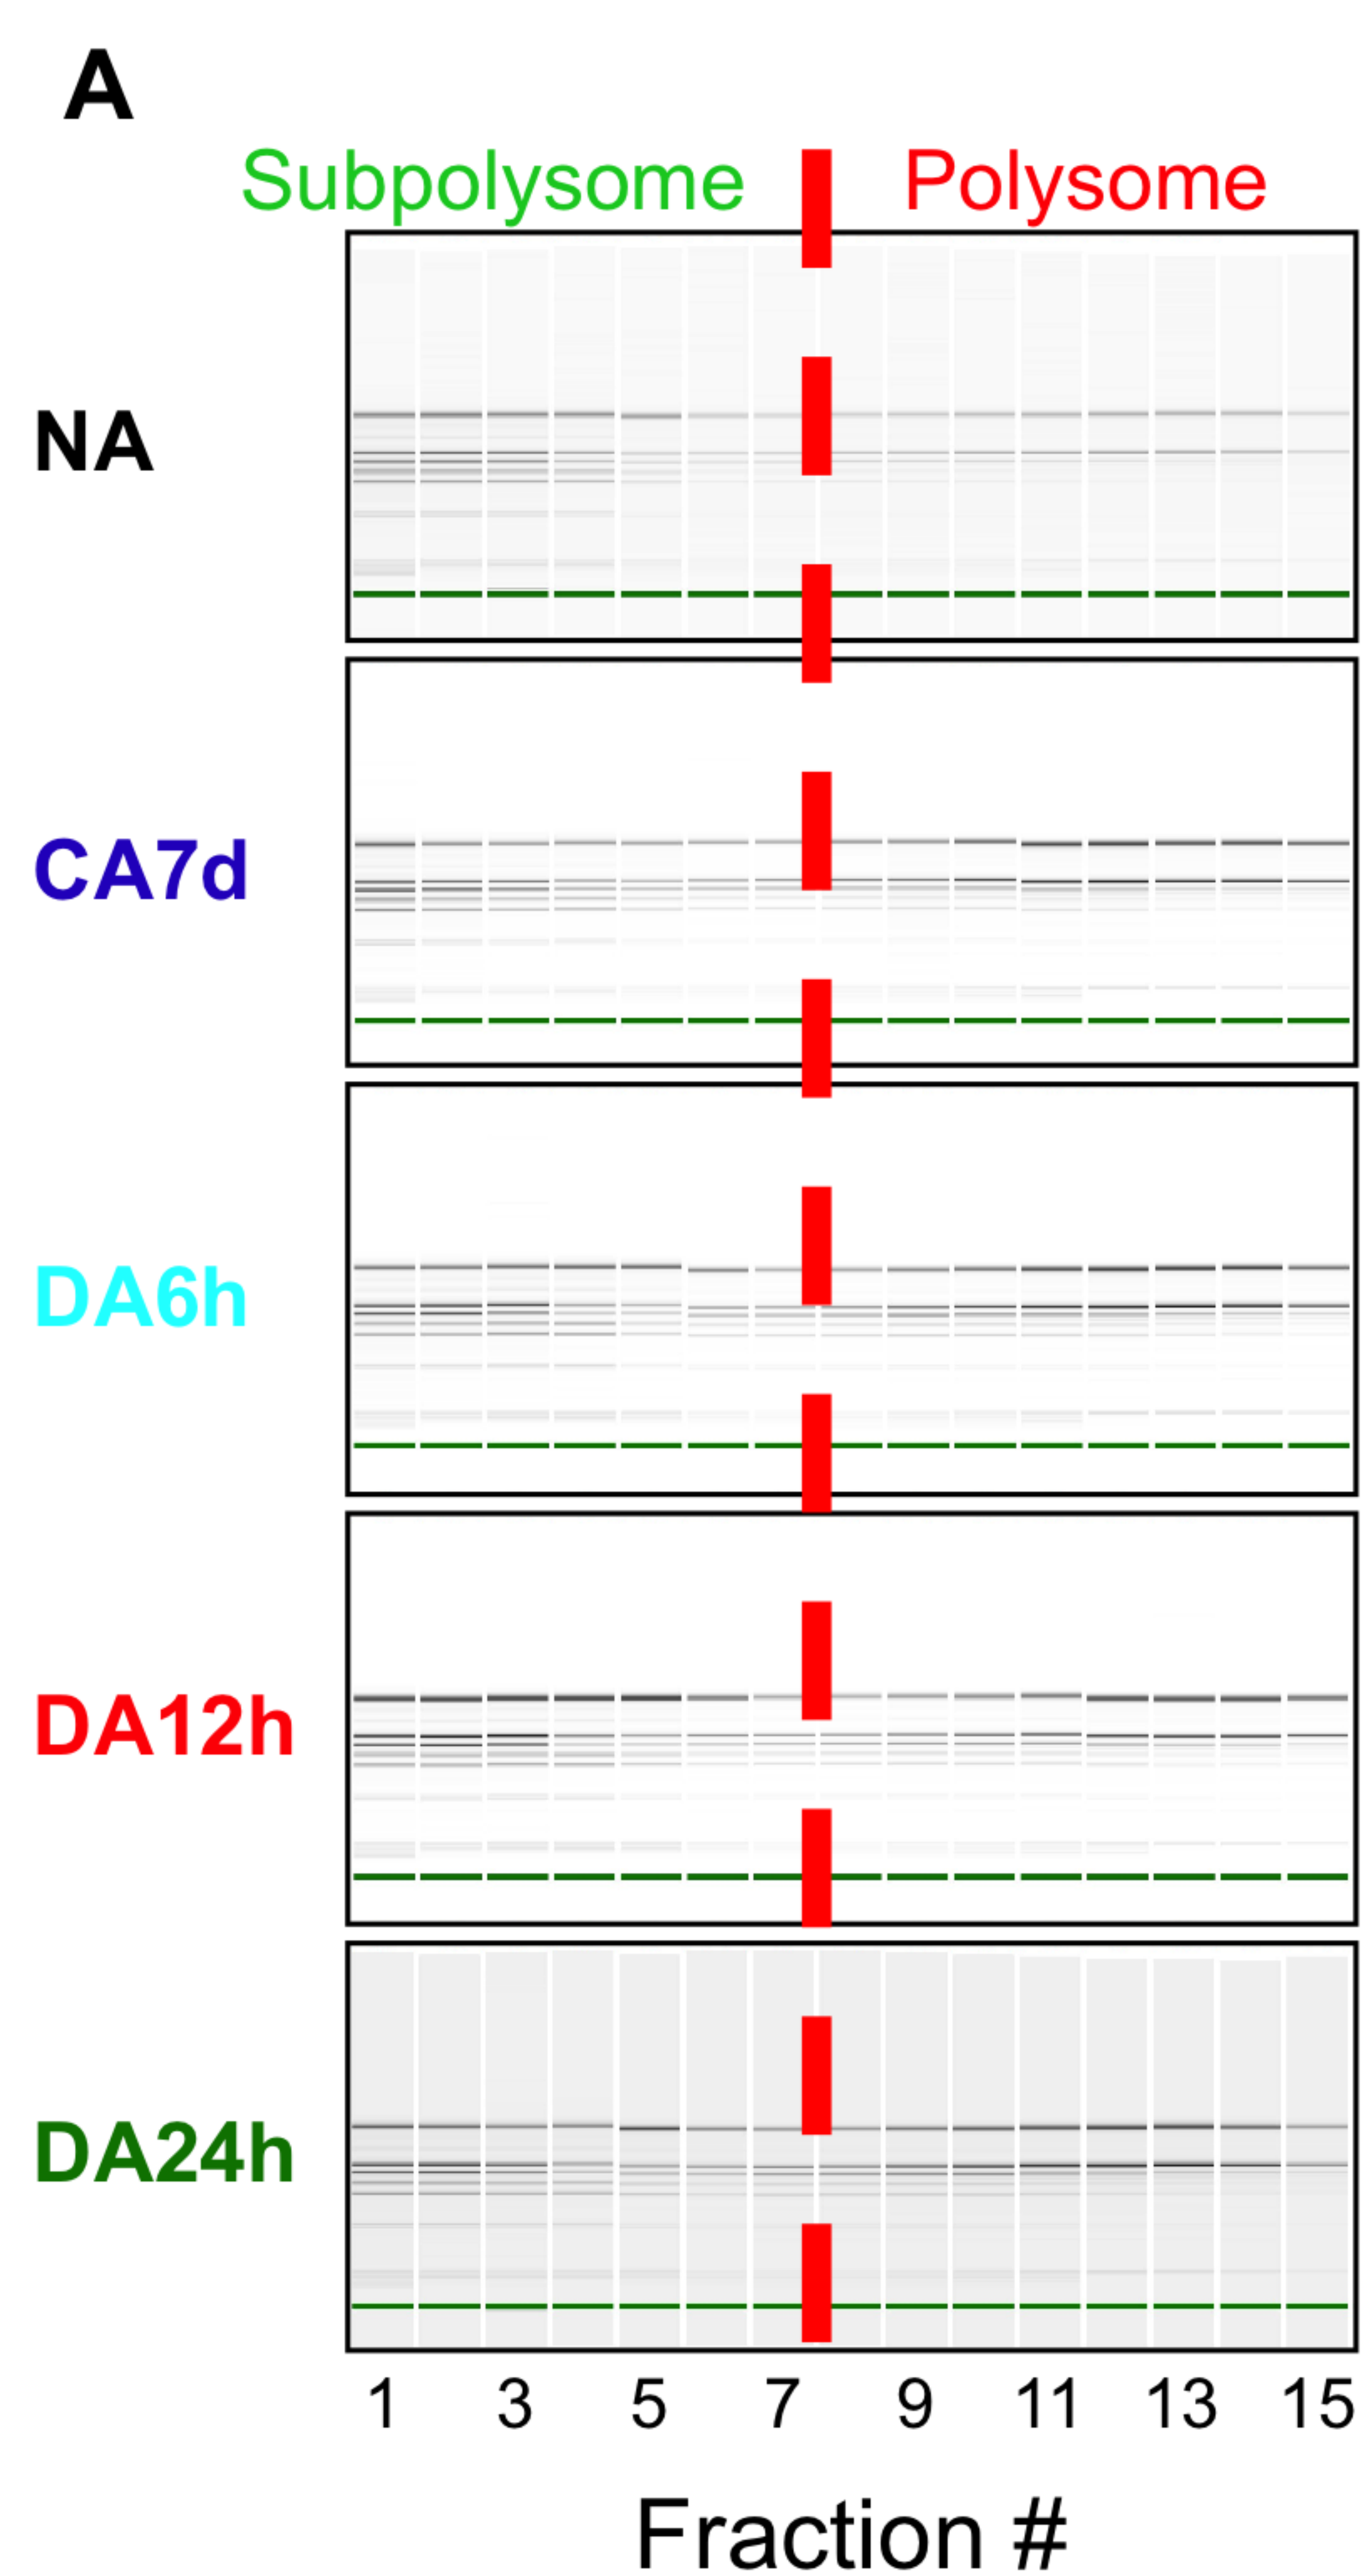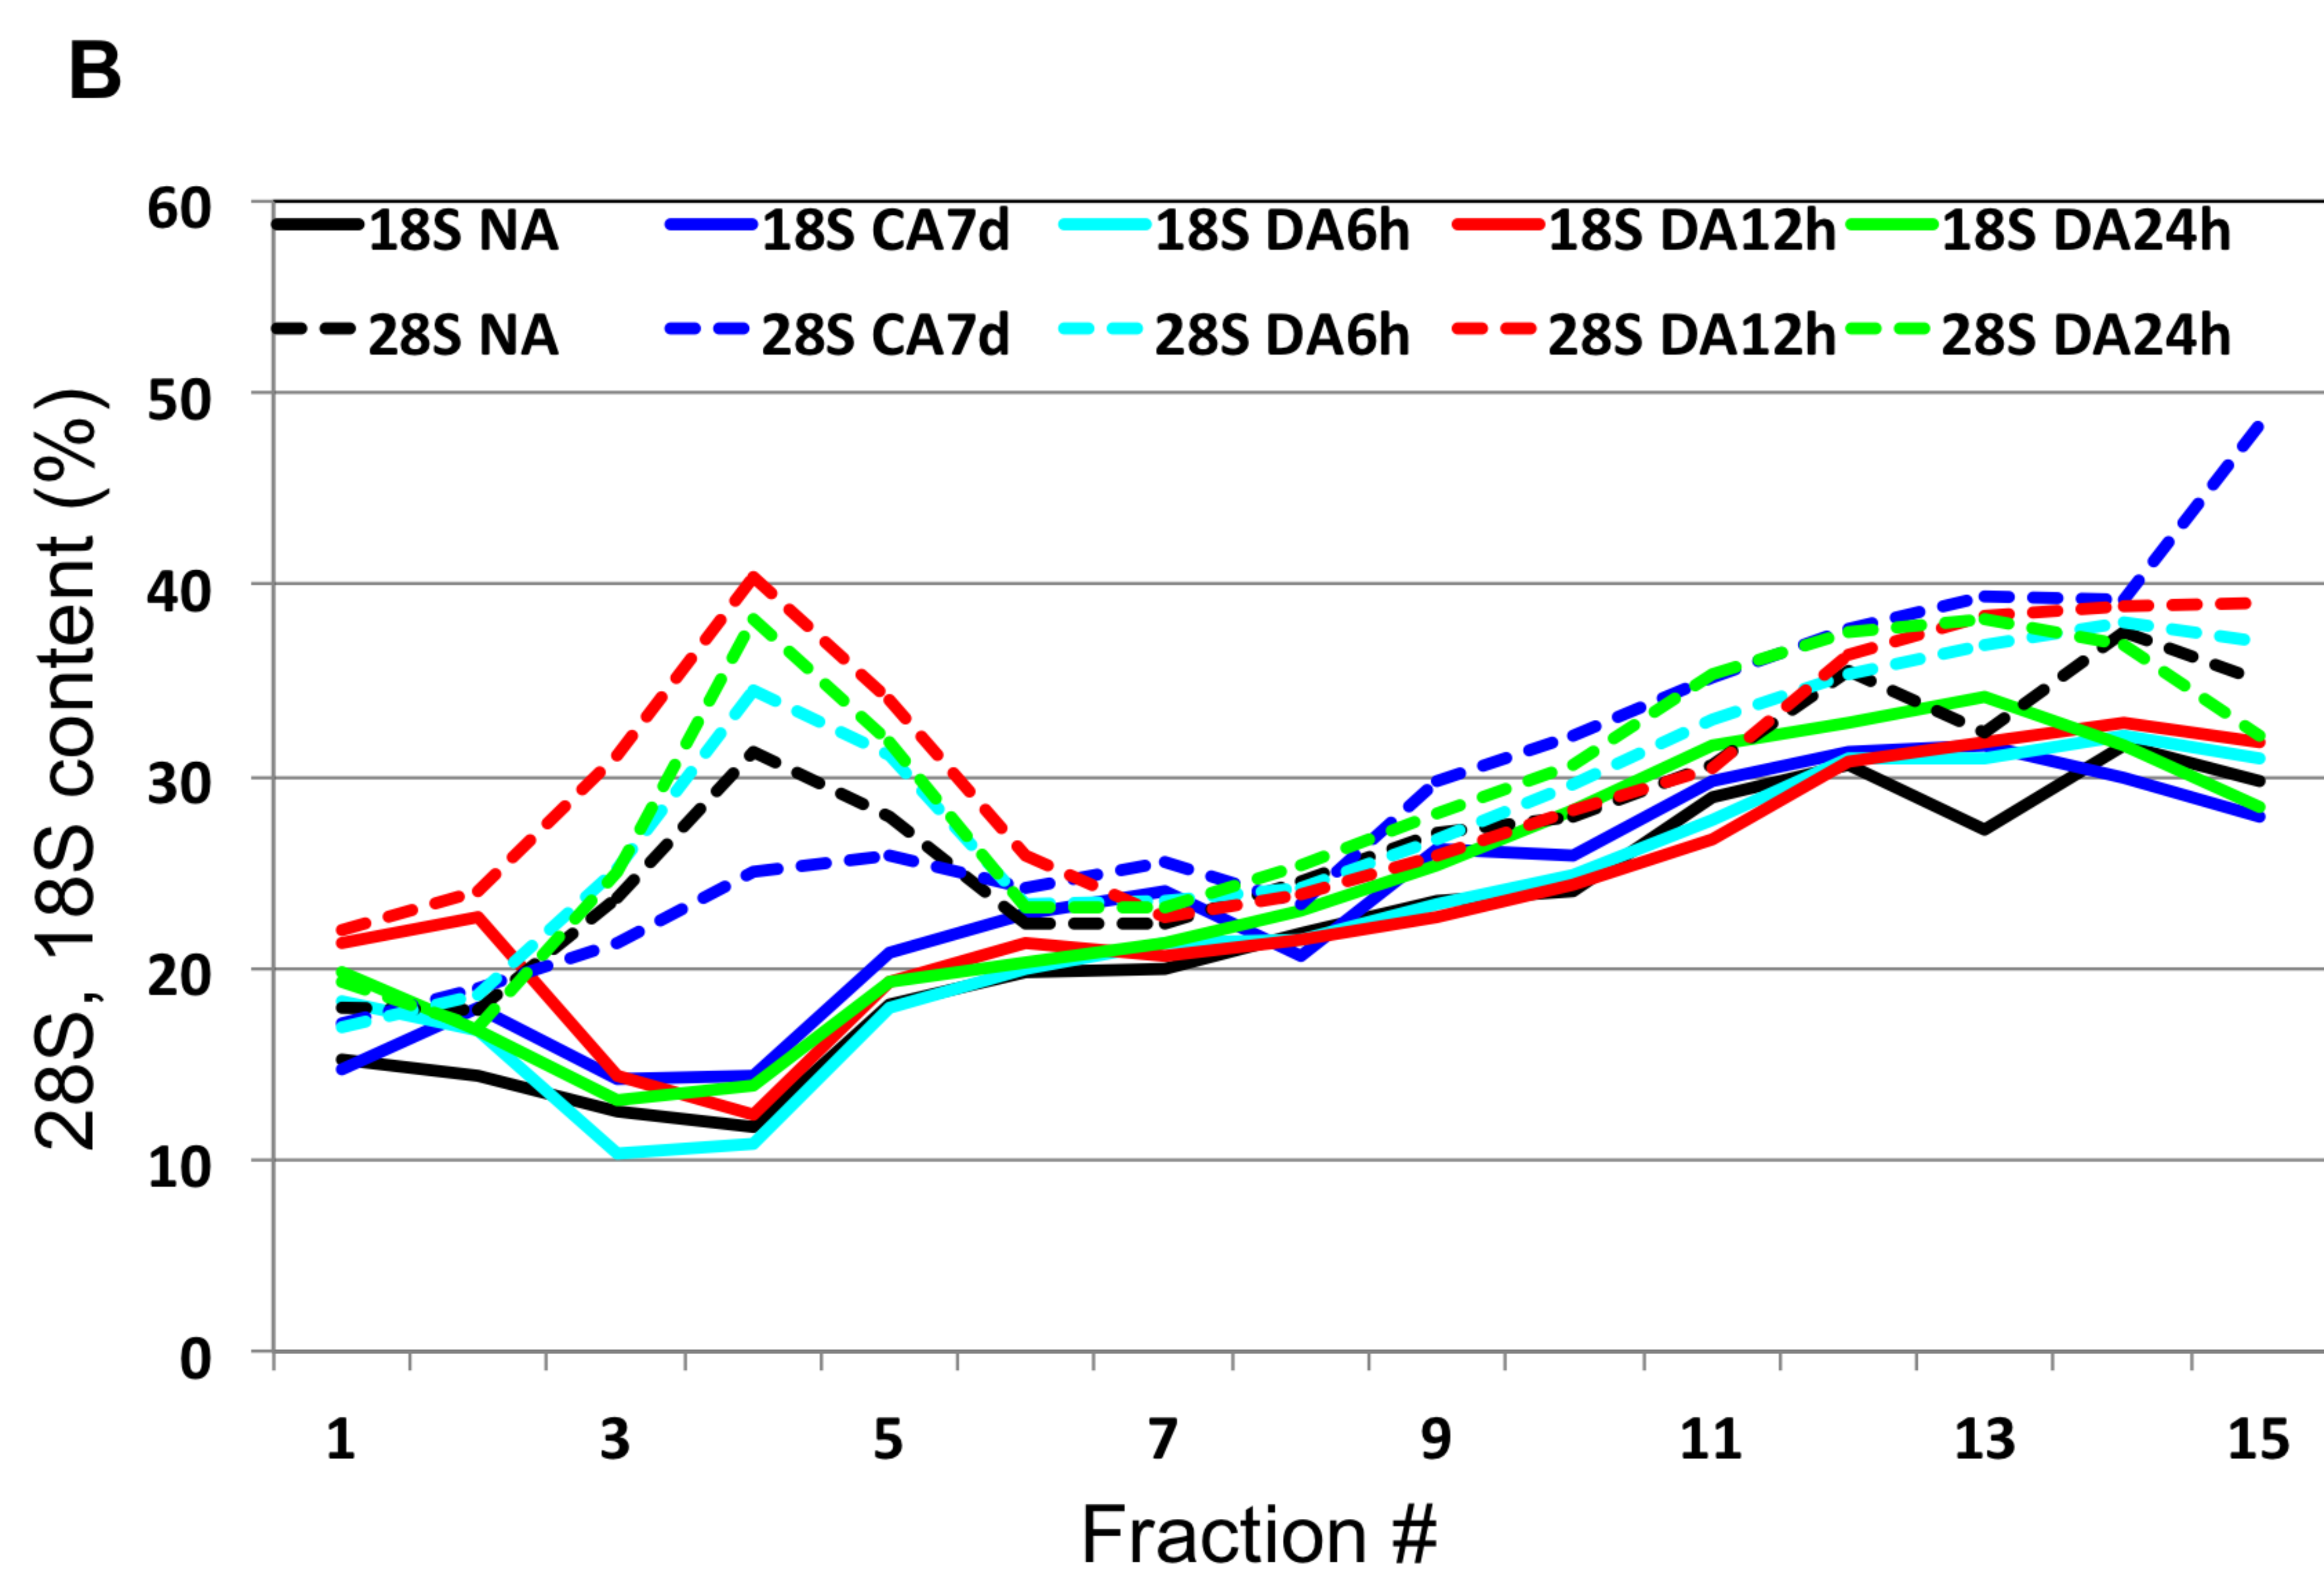

**1-7 : Subpolysome**  
**8-15 : Polysome**

**Supplementary Figure S5.** Polysomal profiling during cold stress response. Polysomal fractionation was analyzed using 2100 Bioanalyzer and RNA analysis kit (Agilent Technologies, Palo Alto, CA). (A) showed RNA gel image and (B) showed 28S and 18S rRNA contents of polysomal fractions analyzing using 2100 Expert software. #1-7 revealed subpolysome and #8-15 are polysome fraction, respectively.
